# Supplementary material for: Evaluation of a Cold-Mixed High-Performance Polyurethane Mixture
Source: Hindawi journal article supplement (doi:10.1155/2019/1507971), 2019-11-07
Supplement: f1 [file 1507971.f1.zip]

Archive with 140 entries (123 files):
- 1507971.f1/6.10 data.xlsx
- 1507971.f1/dynamic modulus data/
- 1507971.f1/dynamic modulus data/PUM/
- 1507971.f1/dynamic modulus data/PUM/specimen1/
- 1507971.f1/dynamic modulus data/PUM/specimen1/temp10/
- 1507971.f1/dynamic modulus data/PUM/specimen1/temp10/zhs-1-10.D006
- 1507971.f1/dynamic modulus data/PUM/specimen1/temp10/zhs-1-10_0.1Hz.csv
- 1507971.f1/dynamic modulus data/PUM/specimen1/temp10/zhs-1-10_0.2Hz.csv
- 1507971.f1/dynamic modulus data/PUM/specimen1/temp10/zhs-1-10_0.5Hz.csv
- 1507971.f1/dynamic modulus data/PUM/specimen1/temp10/zhs-1-10_10Hz.csv
- 1507971.f1/dynamic modulus data/PUM/specimen1/temp10/zhs-1-10_1Hz.csv
- 1507971.f1/dynamic modulus data/PUM/specimen1/temp10/zhs-1-10_20Hz.csv
- 1507971.f1/dynamic modulus data/PUM/specimen1/temp10/zhs-1-10_25Hz.csv
- 1507971.f1/dynamic modulus data/PUM/specimen1/temp10/zhs-1-10_2Hz.csv
- 1507971.f1/dynamic modulus data/PUM/specimen1/temp10/zhs-1-10_5Hz.csv
- 1507971.f1/dynamic modulus data/PUM/specimen1/temp10/zhs-1-10_Runtime.csv
- 1507971.f1/dynamic modulus data/PUM/specimen1/temp10/zhs-1-10_Sum.csv
- 1507971.f1/dynamic modulus data/PUM/specimen1/temp20/
- 1507971.f1/dynamic modulus data/PUM/specimen1/temp20/zhs-1-20.D006
- 1507971.f1/dynamic modulus data/PUM/specimen1/temp20/zhs-1-20_0.1Hz.csv
- 1507971.f1/dynamic modulus data/PUM/specimen1/temp20/zhs-1-20_0.2Hz.csv
- 1507971.f1/dynamic modulus data/PUM/specimen1/temp20/zhs-1-20_0.5Hz.csv
- 1507971.f1/dynamic modulus data/PUM/specimen1/temp20/zhs-1-20_10Hz.csv
- 1507971.f1/dynamic modulus data/PUM/specimen1/temp20/zhs-1-20_1Hz.csv
- 1507971.f1/dynamic modulus data/PUM/specimen1/temp20/zhs-1-20_20Hz.csv
- 1507971.f1/dynamic modulus data/PUM/specimen1/temp20/zhs-1-20_25Hz.csv
- 1507971.f1/dynamic modulus data/PUM/specimen1/temp20/zhs-1-20_2Hz.csv
- 1507971.f1/dynamic modulus data/PUM/specimen1/temp20/zhs-1-20_5Hz.csv
- 1507971.f1/dynamic modulus data/PUM/specimen1/temp20/zhs-1-20_Runtime.csv
- 1507971.f1/dynamic modulus data/PUM/specimen1/temp20/zhs-1-20_Sum.csv
- 1507971.f1/dynamic modulus data/PUM/specimen1/temp35/
- 1507971.f1/dynamic modulus data/PUM/specimen1/temp35/zhs-1-35.D006
- 1507971.f1/dynamic modulus data/PUM/specimen1/temp35/zhs-1-35_0.1Hz.csv
- 1507971.f1/dynamic modulus data/PUM/specimen1/temp35/zhs-1-35_0.2Hz.csv
- 1507971.f1/dynamic modulus data/PUM/specimen1/temp35/zhs-1-35_0.5Hz.csv
- 1507971.f1/dynamic modulus data/PUM/specimen1/temp35/zhs-1-35_10Hz.csv
- 1507971.f1/dynamic modulus data/PUM/specimen1/temp35/zhs-1-35_1Hz.csv
- 1507971.f1/dynamic modulus data/PUM/specimen1/temp35/zhs-1-35_20Hz.csv
- 1507971.f1/dynamic modulus data/PUM/specimen1/temp35/zhs-1-35_25Hz.csv
- 1507971.f1/dynamic modulus data/PUM/specimen1/temp35/zhs-1-35_2Hz.csv
- 1507971.f1/dynamic modulus data/PUM/specimen1/temp35/zhs-1-35_5Hz.csv
- 1507971.f1/dynamic modulus data/PUM/specimen1/temp35/zhs-1-35_Runtime.csv
- 1507971.f1/dynamic modulus data/PUM/specimen1/temp35/zhs-1-35_Sum.csv
- 1507971.f1/dynamic modulus data/PUM/specimen1/temp50/
- 1507971.f1/dynamic modulus data/PUM/specimen1/temp50/zhs-1-50.D006
- 1507971.f1/dynamic modulus data/PUM/specimen1/temp50/zhs-1-50_0.1Hz.csv
- 1507971.f1/dynamic modulus data/PUM/specimen1/temp50/zhs-1-50_0.2Hz.csv
- 1507971.f1/dynamic modulus data/PUM/specimen1/temp50/zhs-1-50_0.5Hz.csv
- 1507971.f1/dynamic modulus data/PUM/specimen1/temp50/zhs-1-50_10Hz.csv
- 1507971.f1/dynamic modulus data/PUM/specimen1/temp50/zhs-1-50_1Hz.csv
- 1507971.f1/dynamic modulus data/PUM/specimen1/temp50/zhs-1-50_20Hz.csv
- 1507971.f1/dynamic modulus data/PUM/specimen1/temp50/zhs-1-50_25Hz.csv
- 1507971.f1/dynamic modulus data/PUM/specimen1/temp50/zhs-1-50_2Hz.csv
- 1507971.f1/dynamic modulus data/PUM/specimen1/temp50/zhs-1-50_5Hz.csv
- 1507971.f1/dynamic modulus data/PUM/specimen1/temp50/zhs-1-50_Runtime.csv
- 1507971.f1/dynamic modulus data/PUM/specimen1/temp50/zhs-1-50_Sum.csv
- 1507971.f1/dynamic modulus data/PUM/specimen2/
- 1507971.f1/dynamic modulus data/PUM/specimen2/temp10/
- 1507971.f1/dynamic modulus data/PUM/specimen2/temp10/zhs-2-10.D006
- 1507971.f1/dynamic modulus data/PUM/specimen2/temp10/zhs-2-10_0.1Hz.csv
- 1507971.f1/dynamic modulus data/PUM/specimen2/temp10/zhs-2-10_0.2Hz.csv
- 1507971.f1/dynamic modulus data/PUM/specimen2/temp10/zhs-2-10_0.5Hz.csv
- 1507971.f1/dynamic modulus data/PUM/specimen2/temp10/zhs-2-10_10Hz.csv
- 1507971.f1/dynamic modulus data/PUM/specimen2/temp10/zhs-2-10_1Hz.csv
- 1507971.f1/dynamic modulus data/PUM/specimen2/temp10/zhs-2-10_20Hz.csv
- 1507971.f1/dynamic modulus data/PUM/specimen2/temp10/zhs-2-10_25Hz.csv
- 1507971.f1/dynamic modulus data/PUM/specimen2/temp10/zhs-2-10_2Hz.csv
- 1507971.f1/dynamic modulus data/PUM/specimen2/temp10/zhs-2-10_5Hz.csv
- 1507971.f1/dynamic modulus data/PUM/specimen2/temp10/zhs-2-10_Runtime.csv
- 1507971.f1/dynamic modulus data/PUM/specimen2/temp10/zhs-2-10_Sum.csv
- 1507971.f1/dynamic modulus data/PUM/specimen2/temp20/
- 1507971.f1/dynamic modulus data/PUM/specimen2/temp20/zhs-2-20.D006
- 1507971.f1/dynamic modulus data/PUM/specimen2/temp20/zhs-2-20_0.1Hz.csv
- 1507971.f1/dynamic modulus data/PUM/specimen2/temp20/zhs-2-20_0.2Hz.csv
- 1507971.f1/dynamic modulus data/PUM/specimen2/temp20/zhs-2-20_0.5Hz.csv
- 1507971.f1/dynamic modulus data/PUM/specimen2/temp20/zhs-2-20_10Hz.csv
- 1507971.f1/dynamic modulus data/PUM/specimen2/temp20/zhs-2-20_1Hz.csv
- 1507971.f1/dynamic modulus data/PUM/specimen2/temp20/zhs-2-20_20Hz.csv
- 1507971.f1/dynamic modulus data/PUM/specimen2/temp20/zhs-2-20_25Hz.csv
- 1507971.f1/dynamic modulus data/PUM/specimen2/temp20/zhs-2-20_2Hz.csv
- 1507971.f1/dynamic modulus data/PUM/specimen2/temp20/zhs-2-20_5Hz.csv
- 1507971.f1/dynamic modulus data/PUM/specimen2/temp20/zhs-2-20_Runtime.csv
- 1507971.f1/dynamic modulus data/PUM/specimen2/temp20/zhs-2-20_Sum.csv
- 1507971.f1/dynamic modulus data/PUM/specimen2/temp35/
- 1507971.f1/dynamic modulus data/PUM/specimen2/temp35/zhs-2-35.D006
- 1507971.f1/dynamic modulus data/PUM/specimen2/temp35/zhs-2-35_0.1Hz.csv
- 1507971.f1/dynamic modulus data/PUM/specimen2/temp35/zhs-2-35_0.2Hz.csv
- 1507971.f1/dynamic modulus data/PUM/specimen2/temp35/zhs-2-35_0.5Hz.csv
- 1507971.f1/dynamic modulus data/PUM/specimen2/temp35/zhs-2-35_10Hz.csv
- 1507971.f1/dynamic modulus data/PUM/specimen2/temp35/zhs-2-35_1Hz.csv
- 1507971.f1/dynamic modulus data/PUM/specimen2/temp35/zhs-2-35_20Hz.csv
- 1507971.f1/dynamic modulus data/PUM/specimen2/temp35/zhs-2-35_25Hz.csv
- 1507971.f1/dynamic modulus data/PUM/specimen2/temp35/zhs-2-35_2Hz.csv
- 1507971.f1/dynamic modulus data/PUM/specimen2/temp35/zhs-2-35_5Hz.csv
- 1507971.f1/dynamic modulus data/PUM/specimen2/temp35/zhs-2-35_Runtime.csv
- 1507971.f1/dynamic modulus data/PUM/specimen2/temp35/zhs-2-35_Sum.csv
- 1507971.f1/dynamic modulus data/PUM/specimen2/temp50/
- 1507971.f1/dynamic modulus data/PUM/specimen2/temp50/zhs-2-50.D006
- 1507971.f1/dynamic modulus data/PUM/specimen2/temp50/zhs-2-50_0.1Hz.csv
- 1507971.f1/dynamic modulus data/PUM/specimen2/temp50/zhs-2-50_0.2Hz.csv
- 1507971.f1/dynamic modulus data/PUM/specimen2/temp50/zhs-2-50_0.5Hz.csv
- 1507971.f1/dynamic modulus data/PUM/specimen2/temp50/zhs-2-50_10Hz.csv
- 1507971.f1/dynamic modulus data/PUM/specimen2/temp50/zhs-2-50_1Hz.csv
- 1507971.f1/dynamic modulus data/PUM/specimen2/temp50/zhs-2-50_20Hz.csv
- 1507971.f1/dynamic modulus data/PUM/specimen2/temp50/zhs-2-50_25Hz.csv
- 1507971.f1/dynamic modulus data/PUM/specimen2/temp50/zhs-2-50_2Hz.csv
- 1507971.f1/dynamic modulus data/PUM/specimen2/temp50/zhs-2-50_5Hz.csv
- 1507971.f1/dynamic modulus data/PUM/specimen2/temp50/zhs-2-50_Runtime.csv
- 1507971.f1/dynamic modulus data/PUM/specimen2/temp50/zhs-2-50_Sum.csv
- 1507971.f1/dynamic modulus data/PUM/volume index.xlsx
- 1507971.f1/dynamic modulus data/SMA/
- 1507971.f1/dynamic modulus data/SMA/106/
- 1507971.f1/dynamic modulus data/SMA/106/1.D006
- 1507971.f1/dynamic modulus data/SMA/106/1_Sum.xls
- 1507971.f1/dynamic modulus data/SMA/106/2.D006
- 1507971.f1/dynamic modulus data/SMA/106/2_Sum.xls
- 1507971.f1/dynamic modulus data/SMA/106/3.D006
- 1507971.f1/dynamic modulus data/SMA/106/3_Sum.xls
- 1507971.f1/dynamic modulus data/SMA/206/
- 1507971.f1/dynamic modulus data/SMA/206/1.D006
- 1507971.f1/dynamic modulus data/SMA/206/1_Sum.xls
- 1507971.f1/dynamic modulus data/SMA/206/2.D006
- 1507971.f1/dynamic modulus data/SMA/206/2_Sum.xls
- 1507971.f1/dynamic modulus data/SMA/206/6.D006
- 1507971.f1/dynamic modulus data/SMA/206/6_Sum.xls
- 1507971.f1/dynamic modulus data/SMA/356/
- 1507971.f1/dynamic modulus data/SMA/356/3.D006
- 1507971.f1/dynamic modulus data/SMA/356/3_Sum.xls
- 1507971.f1/dynamic modulus data/SMA/356/5.D006
- 1507971.f1/dynamic modulus data/SMA/356/5_Sum.xls
- 1507971.f1/dynamic modulus data/SMA/356/8.D006
- 1507971.f1/dynamic modulus data/SMA/356/8_Sum.xls
- 1507971.f1/dynamic modulus data/SMA/506/
- 1507971.f1/dynamic modulus data/SMA/506/10.D006
- 1507971.f1/dynamic modulus data/SMA/506/10_Sum.xls
- 1507971.f1/dynamic modulus data/SMA/506/11.D006
- 1507971.f1/dynamic modulus data/SMA/506/11_Sum.xls
- 1507971.f1/dynamic modulus data/SMA/506/7.D006
- 1507971.f1/dynamic modulus data/SMA/506/7_Sum.xls
- 1507971.f1/HWTD data.xls
