# Supplementary material for: Evaluation of a Cold-Mixed High-Performance Polyurethane Mixture
Source: Hindawi journal article supplement (doi:10.1155/2019/1507971), 2019-11-07
Supplement: f1 [file 1507971.f1.zip › 1507971.f1/6.10 data.xlsx]

## Sheet: Adhesion
		沥青种类	石灰岩		玄武岩
			水煮法	水浸法	水煮法	水浸法
			5	5	3	2
		SBS改性沥青	5	5	5	5
		PU胶结料	4	4	5	5
				70# base asphalt	SBS modified asphalt	Polyurethane
			Water Boiling	5	5	4
			Water immersion	5	5	4
			Water Boiling	3	5	5
			Water immersion	2	5	5
			Boiling method
			Water immersion method
			Adhesion level
			basalt		limestone

## Sheet: Aggregate gradation
				PUM		SMA		SMA-13 Lower limit	SMA-13 Upper Limit
				19	100		100	100	100
				16	100		99.1	100	100
				13.2	100		81.8	90	100
				9.5	97.7		61.2	50	75
				4.75	40.3		24.2	20	34
				2.36	25.3		19.9	15	26
				1.18	16.5		16.8	14	24
				0.6	10.3		14.5	12	20
				0.3	5.8		12.4	10	16
				0.15	3.9		10.9	9	15
				0.075	2		10.1	8	12

## Sheet: PU content
			PU content/%	VV			TSR		K		IFL
			3	22.4	18	25	60.4	80	-0.045	-0.025	24.5	20
			3.5	21.5	18	25	75.4	80	-0.032	-0.025	20.6	20
			4	19.3	18	25	81.8	80	-0.02	-0.025	14.4	20
			4.5	17.2	18	25	84.7	80	-0.015	-0.025	11.8	20
			5	16.5	18	25	86.7	80	-0.012	-0.025	9.8	20

## Sheet: Dynamic modulus
		25 Hz	20 Hz	10 Hz	5 Hz	2 Hz	1 Hz	0.5 Hz	0.2 Hz	0.1 Hz
10℃	Dynamic modulus (MPa)	12391	12273	11867	11555	11122	10832	10551	10214	9975
	Phase angle (Degrees)	5.69	5.26	5	5.06	5.01	4.85	4.78	4.79	4.68
20℃
	Dynamic modulus (MPa)	10321	10214	9881	9587	9231	8963	8721	8421	8220
	Phase angle (Degrees)	5.73	5.65	5.56	5.49	5.44	5.36	5.44	5.46	5.5
35℃
	Dynamic modulus (MPa)	8340	8246	7995	7745	7445	7239	7036	6773	6596
	Phase angle (Degrees)	5.72	5.64	5.54	5.51	5.52	5.5	5.52	5.69	5.84
50℃
	Dynamic modulus (MPa)	7378	7314	7101	6905	6664	6490	6324	6102	5939
	Phase angle (Degrees)	5.22	5.18	5.1	5.06	5.08	5.08	5.16	5.24	5.3
	PUM															SMA
	PUM 10℃			PUM 20℃				PUM 35℃				PUM 50℃					SMA 10℃			SMA 20℃			SMA 35℃		SMA 50℃
Load frequence（Hz）	Dynamic modulus (MPa)	Phase angle (Degrees)			Dynamic modulus (MPa)	Phase angle (Degrees)			Dynamic modulus (MPa)	Phase angle (Degrees)			Dynamic modulus (MPa)	Phase angle (Degrees)		Load frequence（Hz）	Dynamic modulus (MPa)	Phase angle (Degrees)	Load frequence（Hz）	Dynamic modulus (MPa)	Phase angle (Degrees)		Dynamic modulus (MPa)	Phase angle (Degrees)	Dynamic modulus (MPa)	Phase angle (Degrees)
25	12391	5.69			10321	5.73			8340	5.72			7378	5.22		25	11486	19.58	25	6381	28.71		2007	37.35	521.1	32.84
20	12273	5.26			10214	5.65			8246	5.64			7314	5.18		10	9372	22.03	20	5899	29.3		1799	36.81	472	32.17
10	11867	5			9881	5.56			7995	5.54			7101	5.1		5	7940	23.76	10	4635	31.61		1312	36	370.3	29.18
5	11555	5.06			9587	5.49			7745	5.51			6905	5.06		1	5063	27.95	5	3543	33.51		965.5	34.48	299.3	26.57
2	11122	5.01			9231	5.44			7445	5.52			6664	5.08		0.5	4045	29.69	2	2395	35.28		656.6	32.04	225.5	23.78
1	10832	4.85			8963	5.36			7239	5.5			6490	5.08		0.1	2303	30.99	1	1743	35.88		518.5	29.37	204.6	21.13
0.5	10551	4.78			8721	5.44			7036	5.52			6324	5.16					0.5	1271	35.65		426.1	26.6	182.1	20.26
0.2	10214	4.79			8421	5.46			6773	5.69			6102	5.24					0.2	854.4	34.28		344.6	23.46	166	17.25
0.1	9975	4.68			8220	5.5			6596	5.84			5939	5.3					0.1	649.3	32.55		302.5	21.19	158.1	15.46

## Sheet: TSR
	高度			空气中重	水中重	表干重	劈裂读数
加矿粉	63.54	63.76	63.8	1116	622.7	1129.7	19.78
聚氨酯含量4%	63.22	62.86	63.3	1064.3	619.9	1092.2	32.2
聚氨酯含量5%	64.22	64	63.94	1087.4	627.9	1108.1	18.06
	Freeze-thaw cycles	PUM	SMA
	1	88.7	95.5
	2	80.8	88.3
	3	74.4	70.8
	4	65.3	58.4

## Sheet: IFL
							IFL
					48, 72, 96, 120h,	Immersion time(h)	PUM	SMA
						48	14.4	13.1
						72	16.8	18.5
						96	19.4	23.6
						120	25.7	29.4

## Sheet: Natural gas required
							SMA	PUM		SMA	PUM
						Asphalt Heat	12525	0	Asphalt Heat	0.409314	0
						Aggregate Heat	117099	64310	Aggregate Heat	3.82676	2.10163
						Water Heat	8018	8808	Water Heat	0.262026	0.287843
						Water Evaporation Heat	56538	62101	Water Evaporation Heat	1.84765	2.02944
						Air Heat	71304	35652	Air Heat	2.3302	1.1651
							265484	135219		8.67595	4.41892
						天然气需求量	8.67595	4.41892

## Sheet: CO2 emission)
										CO2
							SMA	PUM		SMA	PUM
						Asphalt Heat	12525	0	Asphalt Heat	0.771556	0
						Aggregate Heat	117099	64310	Aggregate Heat	7.21345	3.96158
						Water Heat	8018	8808	Water Heat	0.493919	0.542584
						Water Evaporation Heat	56538	62101	Water Evaporation Heat	3.48281	3.8255
						Air Heat	71304	35652	Air Heat	4.39242	2.19621
							265484	135219		16.3542	8.32967
						天然气需求量	8.67595	4.41892

## Sheet: High- low-temperature stability
	Dynamic Stability/(times/mm）					Bending Strain/με
	SMA	9001				SMA	3102
	PUM	69997				PUM	7045

## Sheet: HWTD
PASSNUM	L3	L4	L8	L9	Depth/mm	R3	R4	R8	R9	Depth/mm	PASSNUM	GB5	L	R	PASSNUM	PUM 1-1	PUM 1-2	SMA 2-1	SMA 2-2
5	0	0	0	0	0	0	0	0	0		5		0	0	5	0	0	0	0
20	-0.229895	-0.273736	-0.125552	-0.122682	-0.187966	-0.244983	-0.216865	-0.251612	-0.271069	-0.246132	20		-0.332194	-0.328447	20	-0.187966	-0.246132	-0.507346	-0.47778
40	-0.295808	-0.350723	-0.18857	-0.194589	-0.257423	-0.255854	-0.267614	-0.31181	-0.357099	-0.298094	40		-0.473989	-0.470224	40	-0.257423	-0.298094	-0.778993	-0.708673
60	-0.328803	-0.40579	-0.230683	-0.184302	-0.287395	-0.244983	-0.277851	-0.342214	-0.367944	-0.308248	60		-0.560864	-0.546265	60	-0.287395	-0.308248	-0.951459	-0.877926
80	-0.339827	-0.427838	-0.230683	-0.194589	-0.298234	-0.255854	-0.277851	-0.342214	-0.367944	-0.310966	80		-0.62169	-0.584289	80	-0.298234	-0.310966	-1.06264	-0.996093
100	-0.350825	-0.44991	-0.241224	-0.204876	-0.311709	-0.255854	-0.277851	-0.372796	-0.389687	-0.324047	100		-0.659397	-0.629228	100	-0.311709	-0.324047	-1.16796	-1.09385
120	-0.361848	-0.44991	-0.251765	-0.215189	-0.319678	-0.299542	-0.277851	-0.393268	-0.444348	-0.353752	120		-0.697065	-0.663785	120	-0.319678	-0.353752	-1.23526	-1.17796
140	-0.38387	-0.44991	-0.262306	-0.204876	-0.325241	-0.255854	-0.267614	-0.413842	-0.444348	-0.345415	140		-0.73472	-0.681076	140	-0.325241	-0.345415	-1.29968	-1.2485
160	-0.394894	-0.494055	-0.262306	-0.215189	-0.341611	-0.299542	-0.277851	-0.403555	-0.45532	-0.359067	160		-0.772446	-0.725983	160	-0.341611	-0.359067	-1.367	-1.30553
180	-0.405917	-0.494055	-0.283413	-0.215189	-0.349644	-0.255854	-0.277851	-0.434492	-0.466319	-0.358629	180		-0.795668	-0.732898	180	-0.349644	-0.358629	-1.4168	-1.38936
200	-0.405917	-0.505104	-0.272847	-0.235788	-0.354914	-0.299542	-0.288061	-0.444856	-0.49944	-0.382975	200		-0.824687	-0.757085	200	-0.354914	-0.382975	-1.46954	-1.41613
220	-0.405917	-0.516153	-0.262306	-0.194589	-0.344742	-0.310515	-0.288061	-0.434492	-0.510515	-0.385896	220		-0.84789	-0.777799	220	-0.344742	-0.385896	-1.5135	-1.45964
240	-0.416941	-0.527202	-0.272847	-0.225501	-0.360623	-0.299542	-0.277851	-0.444856	-0.510515	-0.383191	240		-0.856602	-0.795084	240	-0.360623	-0.383191	-1.55157	-1.49306
260	-0.416941	-0.516153	-0.283413	-0.225501	-0.360502	-0.299542	-0.267614	-0.465633	-0.510515	-0.385826	260		-0.885615	-0.812336	260	-0.360502	-0.385826	-1.58671	-1.52985
280	-0.416941	-0.538251	-0.293954	-0.235788	-0.371234	-0.299542	-0.277851	-0.444856	-0.510515	-0.383191	280		-0.90304	-0.826154	280	-0.371234	-0.383191	-1.63071	-1.57656
300	-0.427965	-0.516153	-0.283413	-0.235788	-0.36583	-0.310515	-0.247269	-0.465633	-0.521614	-0.386258	300		-0.934974	-0.853789	300	-0.36583	-0.386258	-1.65416	-1.58991
320	-0.427965	-0.571424	-0.283413	-0.235788	-0.379647	-0.310515	-0.277851	-0.476047	-0.532714	-0.399282	320		-0.946588	-0.857244	320	-0.379647	-0.399282	-1.70397	-1.61661
340	-0.439014	-0.560375	-0.283413	-0.215189	-0.374498	-0.299542	-0.277851	-0.465633	-0.532714	-0.393935	340		-0.969823	-0.877964	340	-0.374498	-0.393935	-1.73624	-1.66992
360	-0.427965	-0.571424	-0.272847	-0.235788	-0.377006	-0.310515	-0.298323	-0.455244	-0.543839	-0.40198	360		-0.981443	-0.891775	360	-0.377006	-0.40198	-1.77143	-1.67991
380	-0.439014	-0.538251	-0.293954	-0.235788	-0.376752	-0.277647	-0.277851	-0.486486	-0.577317	-0.404825	380		-0.990143	-0.905605	380	-0.376752	-0.404825	-1.78022	-1.6999
400	-0.461061	-0.582498	-0.293954	-0.235788	-0.393325	-0.277647	-0.288061	-0.476047	-0.55499	-0.399186	400		-1.00466	-0.895236	400	-0.393325	-0.399186	-1.80957	-1.72981
420	-0.439014	-0.560375	-0.283413	-0.235788	-0.379647	-0.310515	-0.288061	-0.476047	-0.55499	-0.407403	420		-1.01919	-0.929754	420	-0.379647	-0.407403	-1.85065	-1.74642
440	-0.439014	-0.582498	-0.315087	-0.235788	-0.393097	-0.299542	-0.267614	-0.486486	-0.577317	-0.40774	440		-1.03952	-0.933196	440	-0.393097	-0.40774	-1.86239	-1.7897
460	-0.461061	-0.560375	-0.293954	-0.225501	-0.385223	-0.288595	-0.267614	-0.476047	-0.577317	-0.402393	460		-1.05113	-0.947007	460	-0.385223	-0.402393	-1.91228	-1.81961
480	-0.461061	-0.593547	-0.283413	-0.235788	-0.393452	-0.299542	-0.288061	-0.476047	-0.577317	-0.410242	480		-1.05985	-0.947026	480	-0.393452	-0.410242	-1.92695	-1.81953
500	-0.461061	-0.571424	-0.262306	-0.215189	-0.377495	-0.310515	-0.298323	-0.476047	-0.610946	-0.423958	500		-1.0773	-0.964279	500	-0.377495	-0.423958	-1.95631	-1.86273
520	-0.439014	-0.593547	-0.293954	-0.246101	-0.393154	-0.310515	-0.288061	-0.507416	-0.599719	-0.426428	520		-1.08309	-0.967734	520	-0.393154	-0.426428	-1.97389	-1.86604
540	-0.461061	-0.593547	-0.283413	-0.266751	-0.401193	-0.299542	-0.298323	-0.486486	-0.610946	-0.423824	540		-1.09473	-0.974636	540	-0.401193	-0.423824	-2.01206	-1.88595
560	-0.47211	-0.637845	-0.283413	-0.266751	-0.41503	-0.321488	-0.30861	-0.476047	-0.588518	-0.423666	560		-1.10926	-0.98498	560	-0.41503	-0.423666	-2.02087	-1.90915
580	-0.47211	-0.637845	-0.315087	-0.266751	-0.422948	-0.332486	-0.318897	-0.517906	-0.610946	-0.445059	580		-1.11216	-0.988441	580	-0.422948	-0.445059	-2.04433	-1.91248
600	-0.483159	-0.615696	-0.325653	-0.235788	-0.415074	-0.310515	-0.298323	-0.517906	-0.610946	-0.434423	600		-1.1383	-1.01257	600	-0.415074	-0.434423	-2.05608	-1.95226
620	-0.483159	-0.615696	-0.293954	-0.246101	-0.409727	-0.310515	-0.318897	-0.486486	-0.599719	-0.428904	620		-1.1354	-1.00915	620	-0.409727	-0.428904	-2.07956	-1.96218
640	-0.494208	-0.648945	-0.315087	-0.277089	-0.433832	-0.310515	-0.318897	-0.486486	-0.622198	-0.434524	640		-1.14994	-1.02639	640	-0.433832	-0.434524	-2.09718	-1.97542
660	-0.494208	-0.615696	-0.325653	-0.246101	-0.420414	-0.321488	-0.339547	-0.517906	-0.622198	-0.450285	660		-1.14412	-1.02983	660	-0.420414	-0.450285	-2.12359	-1.99861
680	-0.483159	-0.648945	-0.315087	-0.277089	-0.43107	-0.321488	-0.34991	-0.517906	-0.610946	-0.450063	680		-1.15865	-1.0471	680	-0.43107	-0.450063	-2.14416	-2.01508
700	-0.483159	-0.637845	-0.315087	-0.266751	-0.42571	-0.332486	-0.318897	-0.507416	-0.633451	-0.448062	700		-1.17028	-1.05399	700	-0.42571	-0.448062	-2.15294	-2.02169
720	-0.494208	-0.648945	-0.315087	-0.266751	-0.431248	-0.310515	-0.339547	-0.517906	-0.633451	-0.450355	720		-1.1848	-1.07124	720	-0.431248	-0.450355	-2.17938	-2.05814
740	-0.494208	-0.615696	-0.293954	-0.235788	-0.409912	-0.321488	-0.298323	-0.517906	-0.622198	-0.439979	740		-1.19644	-1.06434	740	-0.409912	-0.439979	-2.19114	-2.07793
760	-0.505257	-0.648945	-0.325653	-0.266751	-0.436651	-0.332486	-0.318897	-0.486486	-0.622198	-0.440017	760		-1.20226	-1.06434	760	-0.436651	-0.440017	-2.19406	-2.08784
780	-0.505257	-0.682193	-0.325653	-0.287401	-0.450126	-0.354559	-0.360299	-0.538963	-0.622198	-0.469005	780		-1.21389	-1.07469	780	-0.450126	-0.469005	-2.21757	-2.10434
800	-0.505257	-0.660019	-0.283413	-0.225501	-0.418548	-0.332486	-0.339547	-0.517906	-0.622198	-0.453034	800		-1.21097	-1.08159	800	-0.418548	-0.453034	-2.24401	-2.11757
820	-0.505257	-0.671093	-0.293954	-0.235788	-0.426523	-0.332486	-0.34991	-0.517906	-0.622198	-0.455625	820		-1.22844	-1.09539	820	-0.426523	-0.455625	-2.24987	-2.13737
840	-0.516306	-0.682193	-0.325653	-0.287401	-0.452888	-0.365608	-0.34991	-0.538963	-0.656031	-0.477628	840		-1.24296	-1.09539	840	-0.452888	-0.477628	-2.26456	-2.16376
860	-0.516306	-0.671093	-0.315087	-0.235788	-0.434569	-0.354559	-0.34991	-0.528447	-0.667334	-0.475063	860		-1.25458	-1.10918	860	-0.434569	-0.475063	-2.28514	-2.15713
880	-0.516306	-0.682193	-0.293954	-0.266751	-0.439801	-0.365608	-0.339547	-0.517906	-0.656031	-0.469773	880		-1.2575	-1.11608	880	-0.439801	-0.469773	-2.28807	-2.16042
900	-0.527355	-0.671093	-0.325653	-0.266751	-0.447713	-0.365608	-0.339547	-0.528447	-0.667334	-0.475234	900		-1.26622	-1.11952	900	-0.447713	-0.475234	-2.30275	-2.18351
920	-0.516306	-0.693293	-0.293954	-0.266751	-0.442576	-0.332486	-0.360299	-0.538963	-0.678663	-0.477603	920		-1.27205	-1.14019	920	-0.442576	-0.477603	-2.31745	-2.20659
940	-0.527355	-0.682193	-0.325653	-0.277089	-0.453073	-0.332486	-0.34991	-0.528447	-0.656031	-0.466719	940		-1.28659	-1.14022	940	-0.453073	-0.466719	-2.34095	-2.22962
960	-0.527355	-0.671093	-0.315087	-0.266751	-0.445071	-0.354559	-0.339547	-0.538963	-0.667334	-0.475101	960		-1.2924	-1.15743	960	-0.445071	-0.475101	-2.34095	-2.23622
980	-0.549478	-0.660019	-0.346812	-0.287401	-0.460927	-0.354559	-0.30861	-0.538963	-0.689991	-0.473031	980		-1.30695	-1.14367	980	-0.460927	-0.473031	-2.35563	-2.24281
1000	-0.527355	-0.682193	-0.325653	-0.246101	-0.445326	-0.332486	-0.34991	-0.549529	-0.667334	-0.474815	1000		-1.30985	-1.16781	1000	-0.445326	-0.474815	-2.37036	-2.25595
1020	-0.549478	-0.682193	-0.293954	-0.246101	-0.442932	-0.354559	-0.30861	-0.538963	-0.667334	-0.467366	1020		-1.31858	-1.16777	1020	-0.442932	-0.467366	-2.38797	-2.279
1040	-0.549478	-0.671093	-0.325653	-0.235788	-0.445503	-0.365608	-0.318897	-0.560095	-0.689991	-0.483648	1040		-1.32149	-1.17813	1040	-0.445503	-0.483648	-2.39091	-2.28229
1060	-0.549478	-0.693293	-0.357403	-0.266751	-0.466731	-0.365608	-0.34991	-0.560095	-0.70137	-0.494246	1060		-1.32731	-1.1747	1060	-0.466731	-0.494246	-2.41736	-2.28554
1080	-0.560527	-0.682193	-0.33622	-0.297739	-0.46917	-0.387782	-0.34991	-0.549529	-0.689991	-0.494303	1080		-1.33312	-1.17813	1080	-0.46917	-0.494303	-2.41148	-2.30854
1100	-0.549478	-0.682193	-0.33622	-0.277089	-0.461245	-0.365608	-0.318897	-0.549529	-0.667334	-0.475342	1100		-1.34185	-1.18157	1100	-0.461245	-0.475342	-2.42618	-2.31188
1120	-0.560527	-0.682193	-0.33622	-0.308102	-0.471761	-0.354559	-0.360299	-0.560095	-0.70137	-0.494081	1120		-1.35059	-1.19193	1120	-0.471761	-0.494081	-2.44088	-2.32832
1140	-0.560527	-0.693293	-0.33622	-0.266751	-0.464198	-0.354559	-0.34991	-0.560095	-0.678663	-0.485807	1140		-1.35933	-1.18158	1140	-0.464198	-0.485807	-2.44383	-2.34142
1160	-0.560527	-0.671093	-0.357403	-0.287401	-0.469106	-0.365608	-0.318897	-0.549529	-0.689991	-0.481006	1160		-1.36514	-1.19537	1160	-0.469106	-0.481006	-2.4585	-2.35459
1180	-0.571602	-0.704367	-0.325653	-0.235788	-0.459353	-0.354559	-0.34991	-0.591947	-0.689991	-0.496602	1180		-1.37677	-1.21949	1180	-0.459353	-0.496602	-2.47614	-2.36118
1200	-0.560527	-0.704367	-0.315087	-0.235788	-0.453942	-0.332486	-0.360299	-0.560095	-0.689991	-0.485718	1200		-1.38551	-1.20915	1200	-0.453942	-0.485718	-2.48791	-2.37426
1220	-0.571602	-0.693293	-0.293954	-0.235788	-0.448659	-0.365608	-0.318897	-0.560095	-0.689991	-0.483648	1220		-1.39424	-1.23328	1220	-0.448659	-0.483648	-2.48496	-2.38415
1240	-0.571602	-0.726567	-0.325653	-0.266751	-0.472643	-0.365608	-0.34991	-0.570687	-0.712724	-0.499732	1240		-1.40297	-1.22984	1240	-0.472643	-0.499732	-2.49965	-2.38744
1260	-0.582651	-0.693293	-0.33622	-0.225501	-0.459416	-0.354559	-0.318897	-0.591947	-0.689991	-0.488848	1260		-1.40587	-1.22983	1260	-0.459416	-0.488848	-2.51437	-2.40382
1280	-0.582651	-0.682193	-0.325653	-0.266751	-0.464312	-0.332486	-0.339547	-0.560095	-0.70137	-0.483375	1280		-1.4146	-1.23673	1280	-0.464312	-0.483375	-2.50848	-2.41693
1300	-0.593725	-0.737667	-0.346812	-0.266751	-0.486239	-0.365608	-0.370688	-0.591947	-0.724129	-0.513093	1300		-1.42625	-1.2505	1300	-0.486239	-0.513093	-2.52612	-2.42022
1320	-0.604799	-0.726567	-0.346812	-0.235788	-0.478492	-0.354559	-0.34991	-0.591947	-0.712724	-0.502285	1320		-1.43499	-1.25049	1320	-0.478492	-0.502285	-2.54672	-2.43662
1340	-0.582651	-0.693293	-0.325653	-0.266751	-0.467087	-0.354559	-0.318897	-0.570687	-0.724129	-0.492068	1340		-1.4408	-1.25049	1340	-0.467087	-0.492068	-2.54083	-2.44642
1360	-0.593725	-0.726567	-0.346812	-0.266751	-0.483464	-0.365608	-0.34991	-0.591947	-0.70137	-0.502209	1360		-1.42915	-1.25051	1360	-0.483464	-0.502209	-2.55848	-2.43989
1380	-0.582651	-0.693293	-0.389179	-0.297739	-0.490715	-0.365608	-0.34991	-0.591947	-0.712724	-0.505047	1380		-1.44661	-1.26081	1380	-0.490715	-0.505047	-2.57319	-2.45955
1400	-0.582651	-0.726567	-0.357403	-0.287401	-0.488505	-0.332486	-0.360299	-0.570687	-0.70137	-0.491211	1400		-1.44661	-1.26084	1400	-0.488505	-0.491211	-2.5673	-2.46284
1420	-0.593725	-0.737667	-0.36797	-0.31844	-0.50445	-0.354559	-0.34991	-0.591947	-0.724129	-0.505136	1420		-1.4466	-1.27119	1420	-0.50445	-0.505136	-2.57905	-2.48575
1440	-0.604799	-0.726567	-0.389179	-0.308102	-0.507162	-0.321488	-0.339547	-0.60259	-0.712724	-0.494087	1440		-1.44953	-1.26431	1440	-0.507162	-0.494087	-2.58787	-2.47924
1460	-0.604799	-0.737667	-0.357403	-0.287401	-0.496818	-0.365608	-0.339547	-0.591947	-0.724129	-0.505308	1460		-1.45825	-1.27116	1460	-0.496818	-0.505308	-2.59966	-2.49888
1480	-0.626948	-0.704367	-0.33622	-0.246101	-0.478409	-0.354559	-0.30861	-0.60259	-0.712724	-0.494621	1480		-1.46115	-1.2884	1480	-0.478409	-0.494621	-2.60259	-2.50866
1500	-0.604799	-0.737667	-0.36797	-0.297739	-0.502044	-0.365608	-0.34991	-0.613283	-0.724129	-0.513232	1500		-1.46699	-1.28494	1500	-0.502044	-0.513232	-2.61433	-2.53157
1520	-0.604799	-0.726567	-0.389179	-0.31844	-0.509746	-0.365608	-0.339547	-0.623951	-0.746963	-0.519017	1520		-1.49028	-1.29184	1520	-0.509746	-0.519017	-2.63202	-2.52831
1540	-0.626948	-0.748767	-0.389179	-0.308102	-0.518249	-0.376682	-0.339547	-0.613283	-0.746963	-0.519119	1540		-1.49029	-1.2953	1540	-0.518249	-0.519119	-2.63199	-2.54141
1560	-0.604799	-0.748767	-0.399771	-0.308102	-0.51536	-0.365608	-0.360299	-0.613283	-0.758393	-0.524396	1560		-1.49319	-1.30906	1560	-0.51536	-0.524396	-2.64376	-2.53811
1580	-0.604799	-0.737667	-0.389179	-0.297739	-0.507346	-0.332486	-0.360299	-0.613283	-0.758393	-0.516115	1580		-1.50193	-1.30907	1580	-0.507346	-0.516115	-2.64671	-2.54139
1600	-0.626948	-0.737667	-0.389179	-0.31844	-0.518058	-0.376682	-0.34991	-0.613283	-0.746963	-0.52171	1600		-1.51066	-1.31251	1600	-0.518058	-0.52171	-2.6673	-2.54793
1620	-0.626948	-0.748767	-0.389179	-0.31844	-0.520833	-0.365608	-0.360299	-0.613283	-0.758393	-0.524396	1620		-1.51066	-1.3194	1620	-0.520833	-0.524396	-2.67023	-2.55447
1640	-0.626948	-0.759892	-0.410362	-0.31844	-0.528911	-0.365608	-0.360299	-0.63467	-0.746963	-0.526885	1640		-1.51066	-1.31594	1640	-0.528911	-0.526885	-2.68789	-2.58717
1660	-0.604799	-0.704367	-0.399771	-0.31844	-0.506844	-0.332486	-0.34991	-0.623951	-0.758393	-0.516185	1660		-1.5194	-1.33661	1660	-0.506844	-0.516185	-2.68789	-2.58388
1680	-0.638048	-0.748767	-0.399771	-0.31844	-0.526256	-0.387782	-0.34991	-0.623951	-0.746963	-0.527152	1680		-1.5223	-1.32627	1680	-0.526256	-0.527152	-2.69084	-2.60678
1700	-0.638048	-0.737667	-0.410362	-0.339141	-0.531304	-0.365608	-0.34991	-0.645389	-0.769849	-0.532689	1700		-1.52813	-1.33662	1700	-0.531304	-0.532689	-2.70847	-2.59038
1720	-0.638048	-0.770992	-0.389179	-0.297739	-0.523989	-0.365608	-0.381102	-0.63467	-0.758393	-0.534943	1720		-1.53688	-1.32972	1720	-0.523989	-0.534943	-2.70847	-2.59688
1740	-0.638048	-0.759892	-0.389179	-0.349504	-0.534156	-0.387782	-0.360299	-0.63467	-0.781329	-0.54102	1740		-1.52522	-1.32628	1740	-0.534156	-0.54102	-2.71732	-2.60347
1760	-0.649122	-0.759892	-0.399771	-0.349504	-0.539572	-0.387782	-0.370688	-0.623951	-0.769849	-0.538067	1760		-1.54269	-1.33318	1760	-0.539572	-0.538067	-2.73494	-2.61329
1780	-0.649122	-0.726567	-0.399771	-0.31844	-0.523475	-0.365608	-0.34991	-0.63467	-0.769849	-0.530009	1780		-1.55434	-1.35383	1780	-0.523475	-0.530009	-2.74672	-2.63613
1800	-0.649122	-0.759892	-0.399771	-0.31844	-0.531806	-0.365608	-0.370688	-0.63467	-0.758393	-0.53234	1800		-1.54562	-1.33316	1800	-0.531806	-0.53234	-2.74968	-2.64914
1820	-0.649122	-0.782091	-0.410362	-0.349504	-0.54777	-0.387782	-0.370688	-0.645389	-0.79281	-0.549167	1820		-1.56016	-1.34694	1820	-0.54777	-0.549167	-2.75555	-2.64591
1840	-0.660197	-0.770992	-0.399771	-0.31844	-0.53735	-0.376682	-0.370688	-0.666902	-0.781329	-0.5489	1840		-1.56016	-1.34692	1840	-0.53735	-0.5489	-2.75848	-2.64593
1860	-0.649122	-0.782091	-0.410362	-0.339141	-0.545179	-0.387782	-0.381102	-0.666902	-0.781329	-0.554279	1860		-1.56016	-1.36071	1860	-0.545179	-0.554279	-2.75848	-2.64916
1880	-0.649122	-0.748767	-0.399771	-0.339141	-0.5342	-0.398882	-0.370688	-0.63467	-0.781329	-0.546392	1880		-1.57181	-1.36759	1880	-0.5342	-0.546392	-2.7732	-2.66874
1900	-0.660197	-0.782091	-0.410362	-0.359867	-0.553129	-0.387782	-0.381102	-0.666902	-0.804316	-0.560026	1900		-1.58055	-1.38135	1900	-0.553129	-0.560026	-2.77909	-2.66876
1920	-0.649122	-0.770992	-0.410362	-0.349504	-0.544995	-0.398882	-0.360299	-0.666902	-0.781329	-0.551853	1920		-1.59221	-1.37104	1920	-0.544995	-0.551853	-2.78203	-2.67855
1940	-0.649122	-0.759892	-0.410362	-0.349504	-0.54222	-0.387782	-0.370688	-0.63467	-0.79281	-0.546487	1940		-1.58347	-1.38136	1940	-0.54222	-0.546487	-2.79084	-2.67855
1960	-0.660197	-0.782091	-0.42098	-0.339141	-0.550602	-0.398882	-0.370688	-0.677697	-0.804316	-0.562896	1960		-1.60385	-1.39854	1960	-0.550602	-0.562896	-2.8085	-2.70135
1980	-0.660197	-0.770992	-0.36797	-0.287401	-0.52164	-0.398882	-0.391541	-0.677697	-0.804316	-0.568109	1980		-1.59511	-1.37791	1980	-0.52164	-0.568109	-2.81149	-2.72413
2000	-0.660197	-0.770992	-0.36797	-0.297739	-0.524224	-0.410007	-0.370688	-0.677697	-0.781329	-0.55993	2000		-1.60677	-1.40201	2000	-0.524224	-0.55993	-2.81734	-2.70457
2020	-0.660197	-0.782091	-0.410362	-0.339141	-0.547948	-0.410007	-0.391541	-0.677697	-0.804316	-0.57089	2020		-1.61258	-1.41577	2020	-0.547948	-0.57089	-2.82616	-2.73067
2040	-0.671297	-0.804342	-0.399771	-0.339141	-0.553637	-0.387782	-0.391541	-0.677697	-0.804316	-0.565334	2040		-1.63009	-1.40546	2040	-0.553637	-0.565334	-2.85559	-2.72413
2060	-0.660197	-0.782091	-0.410362	-0.31844	-0.542773	-0.410007	-0.381102	-0.677697	-0.79281	-0.565404	2060		-1.62718	-1.41234	2060	-0.542773	-0.565404	-2.84972	-2.72085
2080	-0.660197	-0.770992	-0.431597	-0.339141	-0.550481	-0.421157	-0.360299	-0.677697	-0.804316	-0.565868	2080		-1.61842	-1.42264	2080	-0.550481	-0.565868	-2.85558	-2.73392
2100	-0.682396	-0.804342	-0.42098	-0.31844	-0.556539	-0.443484	-0.391541	-0.677697	-0.804316	-0.57926	2100		-1.63882	-1.42952	2100	-0.556539	-0.57926	-2.86443	-2.7437
2120	-0.649122	-0.804342	-0.399771	-0.339141	-0.548094	-0.443484	-0.381102	-0.666902	-0.79281	-0.571075	2120		-1.63882	-1.42952	2120	-0.548094	-0.571075	-2.88796	-2.75997
2140	-0.682396	-0.782091	-0.42098	-0.31844	-0.550977	-0.443484	-0.391541	-0.666902	-0.79281	-0.573684	2140		-1.63882	-1.43297	2140	-0.550977	-0.573684	-2.86736	-2.7339
2160	-0.649122	-0.770992	-0.399771	-0.277089	-0.524243	-0.354559	-0.381102	-0.677697	-0.804316	-0.554419	2160		-1.62716	-1.42952	2160	-0.524243	-0.554419	-2.88795	-2.75996
2180	-0.671297	-0.804342	-0.399771	-0.31844	-0.548462	-0.421157	-0.391541	-0.677697	-0.804316	-0.573678	2180		-1.65337	-1.42951	2180	-0.548462	-0.573678	-2.89091	-2.76972
2200	-0.682396	-0.782091	-0.399771	-0.339141	-0.55085	-0.410007	-0.391541	-0.63467	-0.79281	-0.557257	2200		-1.65337	-1.45702	2200	-0.55085	-0.557257	-2.90563	-2.77298
2220	-0.682396	-0.804342	-0.410362	-0.31844	-0.553885	-0.410007	-0.381102	-0.688492	-0.781329	-0.565233	2220		-1.6592	-1.44327	2220	-0.553885	-0.565233	-2.90563	-2.77625
2240	-0.660197	-0.759892	-0.399771	-0.31844	-0.534575	-0.365608	-0.360299	-0.666902	-0.79281	-0.546405	2240		-1.66504	-1.45703	2240	-0.534575	-0.546405	-2.90855	-2.77946
2260	-0.682396	-0.804342	-0.389179	-0.31844	-0.548589	-0.421157	-0.391541	-0.63467	-0.769849	-0.554304	2260		-1.66794	-1.45016	2260	-0.548589	-0.554304	-2.91739	-2.79898
2280	-0.693471	-0.782091	-0.42098	-0.308102	-0.551161	-0.454685	-0.370688	-0.677697	-0.79281	-0.57397	2280		-1.66794	-1.4639	2280	-0.551161	-0.57397	-2.9439	-2.80875
2300	-0.682396	-0.804342	-0.399771	-0.308102	-0.548653	-0.398882	-0.370688	-0.63467	-0.781329	-0.546392	2300		-1.68252	-1.45703	2300	-0.548653	-0.546392	-2.94096	-2.80548
2320	-0.682396	-0.804342	-0.389179	-0.297739	-0.543414	-0.421157	-0.370688	-0.645389	-0.804316	-0.560387	2320		-1.68834	-1.47424	2320	-0.543414	-0.560387	-2.9498	-2.80222
2340	-0.682396	-0.782091	-0.410362	-0.297739	-0.543147	-0.398882	-0.370688	-0.63467	-0.781329	-0.546392	2340		-1.68834	-1.47766	2340	-0.543147	-0.546392	-2.96745	-2.83147
2360	-0.682396	-0.770992	-0.410362	-0.297739	-0.540372	-0.410007	-0.339547	-0.63467	-0.781329	-0.541388	2360		-1.69418	-1.49484	2360	-0.540372	-0.541388	-2.96745	-2.81525
2380	-0.682396	-0.770992	-0.410362	-0.297739	-0.540372	-0.410007	-0.318897	-0.666902	-0.781329	-0.544284	2380		-1.6971	-1.488	2380	-0.540372	-0.544284	-2.97922	-2.83148
2400	-0.638048	-0.737667	-0.399771	-0.308102	-0.520897	-0.332486	-0.298323	-0.645389	-0.804316	-0.520129	2400		-1.70583	-1.49485	2400	-0.520897	-0.520129	-2.98216	-2.83799
2420	-0.638048	-0.737667	-0.431597	-0.308102	-0.528853	-0.321488	-0.288061	-0.677697	-0.804316	-0.522891	2420		-1.70584	-1.50172	2420	-0.528853	-0.522891	-3.00277	-2.8445
2440	-0.593725	-0.682193	-0.431597	-0.349504	-0.514255	-0.244983	-0.226974	-0.688492	-0.804316	-0.491192	2440		-1.71459	-1.49142	2440	-0.514255	-0.491192	-2.98513	-2.84447
2460	-0.626948	-0.726567	-0.474066	-0.339141	-0.54168	-0.310515	-0.267614	-0.710159	-0.827354	-0.528911	2460		-1.72333	-1.51204	2460	-0.54168	-0.528911	-3.00572	-2.86397
2480	-0.626948	-0.693293	-0.431597	-0.359867	-0.527926	-0.299542	-0.247269	-0.677697	-0.804316	-0.507206	2480		-1.71748	-1.51204	2480	-0.527926	-0.507206	-3.02044	-2.86722
2500	-0.626948	-0.726567	-0.431597	-0.349504	-0.533654	-0.299542	-0.267614	-0.688492	-0.804316	-0.514991	2500		-1.72624	-1.51546	2500	-0.533654	-0.514991	-3.02929	-2.8737
2520	-0.582651	-0.693293	-0.484708	-0.391008	-0.537915	-0.212446	-0.216865	-0.72103	-0.862051	-0.503098	2520		-1.72624	-1.50861	2520	-0.537915	-0.503098	-3.00278	-2.88344
2540	-0.626948	-0.737667	-0.442214	-0.349504	-0.539083	-0.299542	-0.277851	-0.688492	-0.827354	-0.52331	2540		-1.73497	-1.52237	2540	-0.539083	-0.52331	-3.02926	-2.88019
2560	-0.582651	-0.704367	-0.474066	-0.391008	-0.538023	-0.234112	-0.206781	-0.710159	-0.862051	-0.503276	2560		-1.74372	-1.54638	2560	-0.538023	-0.503276	-3.05285	-2.88019
2580	-0.560527	-0.671093	-0.452831	-0.391008	-0.518865	-0.137236	-0.186665	-0.677697	-0.838911	-0.460127	2580		-1.72916	-1.51547	2580	-0.518865	-0.460127	-3.02929	-2.89637
2600	-0.593725	-0.704367	-0.410362	-0.359867	-0.517081	-0.234112	-0.226974	-0.623951	-0.827354	-0.478098	2600		-1.73205	-1.52234	2600	-0.517081	-0.478098	-3.03223	-2.88991
2620	-0.638048	-0.737667	-0.474066	-0.401396	-0.562794	-0.277647	-0.237109	-0.72103	-0.885266	-0.530263	2620		-1.74372	-1.53955	2620	-0.562794	-0.530263	-3.05578	-2.89963
2640	-0.560527	-0.682193	-0.431597	-0.380619	-0.513734	-0.137236	-0.206781	-0.677697	-0.838911	-0.465157	2640		-1.74663	-1.54638	2640	-0.513734	-0.465157	-3.06756	-2.91588
2660	-0.582651	-0.704367	-0.431597	-0.370256	-0.522218	-0.190856	-0.206781	-0.677697	-0.838911	-0.478561	2660		-1.74955	-1.53954	2660	-0.522218	-0.478561	-3.06461	-2.91584
2680	-0.560527	-0.693293	-0.442214	-0.370256	-0.516572	-0.137236	-0.216865	-0.688492	-0.838911	-0.470376	2680		-1.74954	-1.55327	2680	-0.516572	-0.470376	-3.06755	-2.90612
2700	-0.593725	-0.737667	-0.431597	-0.349504	-0.528123	-0.212446	-0.247269	-0.688492	-0.838911	-0.49678	2700		-1.75831	-1.55327	2700	-0.528123	-0.49678	-3.07936	-2.9418
2720	-0.604799	-0.737667	-0.42098	-0.349504	-0.528237	-0.234112	-0.247269	-0.688492	-0.838911	-0.502196	2720		-1.76412	-1.56358	2720	-0.528237	-0.502196	-3.08819	-2.93854
2740	-0.571602	-0.726567	-0.452831	-0.359867	-0.527717	-0.223266	-0.247269	-0.710159	-0.850494	-0.507797	2740		-1.75245	-1.56701	2740	-0.527717	-0.507797	-3.08227	-2.94178
2760	-0.571602	-0.759892	-0.431597	-0.31844	-0.520383	-0.169342	-0.277851	-0.677697	-0.827354	-0.488061	2760		-1.76995	-1.57044	2760	-0.520383	-0.488061	-3.09997	-2.94176
2780	-0.593725	-0.804342	-0.42098	-0.339141	-0.539547	-0.201651	-0.298323	-0.688492	-0.804316	-0.498196	2780		-1.76411	-1.56701	2780	-0.539547	-0.498196	-3.08818	-2.91586
2800	-0.593725	-0.737667	-0.452831	-0.370256	-0.53862	-0.212446	-0.237109	-0.710159	-0.862051	-0.505441	2800		-1.77579	-1.57388	2800	-0.53862	-0.505441	-3.10585	-2.94178
2820	-0.582651	-0.770992	-0.42098	-0.339141	-0.528441	-0.201651	-0.298323	-0.677697	-0.827354	-0.501256	2820		-1.77287	-1.57733	2820	-0.528441	-0.501256	-3.13236	-2.95801
2840	-0.593725	-0.770992	-0.410362	-0.339141	-0.528555	-0.201651	-0.298323	-0.688492	-0.827354	-0.503955	2840		-1.77577	-1.58077	2840	-0.528555	-0.503955	-3.1147	-2.96446
2860	-0.593725	-0.782091	-0.431597	-0.370256	-0.544417	-0.201651	-0.30861	-0.677697	-0.862051	-0.512502	2860		-1.77577	-1.58763	2860	-0.544417	-0.512502	-3.12353	-2.96769
2880	-0.582651	-0.759892	-0.442214	-0.359867	-0.536156	-0.158623	-0.298323	-0.699313	-0.862051	-0.504577	2880		-1.77288	-1.58421	2880	-0.536156	-0.504577	-3.13532	-2.96446
2900	-0.604799	-0.726567	-0.484708	-0.391008	-0.551771	-0.234112	-0.237109	-0.753694	-0.885266	-0.527545	2900		-1.7962	-1.59107	2900	-0.551771	-0.527545	-3.13237	-2.95474
2920	-0.593725	-0.770992	-0.442214	-0.370256	-0.544297	-0.201651	-0.298323	-0.699313	-0.862051	-0.515334	2920		-1.79328	-1.60137	2920	-0.544297	-0.515334	-3.15003	-2.97417
2940	-0.593725	-0.737667	-0.505993	-0.401396	-0.559695	-0.212446	-0.247269	-0.764642	-0.896899	-0.530314	2940		-1.80203	-1.59794	2940	-0.559695	-0.530314	-3.16772	-2.98712
2960	-0.604799	-0.770992	-0.442214	-0.349504	-0.541877	-0.223266	-0.298323	-0.710159	-0.862051	-0.52345	2960		-1.80785	-1.59452	2960	-0.541877	-0.52345	-3.16184	-2.99034
2980	-0.604799	-0.748767	-0.442214	-0.370256	-0.541509	-0.223266	-0.277851	-0.710159	-0.862051	-0.518331	2980		-1.79619	-1.60823	2980	-0.541509	-0.518331	-3.16478	-2.9871
3000	-0.626948	-0.737667	-0.505993	-0.380619	-0.562807	-0.244983	-0.247269	-0.731901	-0.885266	-0.527355	3000		-1.80493	-1.6048	3000	-0.562807	-0.527355	-3.1677	-2.99687
3020	-0.626948	-0.770992	-0.484708	-0.380619	-0.565817	-0.255854	-0.288061	-0.753694	-0.885266	-0.545719	3020		-1.8166	-1.62885	3020	-0.565817	-0.545719	-3.18538	-2.99683
3040	-0.626948	-0.770992	-0.431597	-0.359867	-0.547351	-0.244983	-0.298323	-0.710159	-0.838911	-0.523094	3040		-1.82533	-1.62197	3040	-0.547351	-0.523094	-3.17656	-3.00652
3060	-0.604799	-0.770992	-0.484708	-0.380619	-0.56028	-0.244983	-0.288061	-0.731901	-0.862051	-0.531749	3060		-1.81367	-1.61851	3060	-0.56028	-0.531749	-3.18538	-3.0033
3080	-0.604799	-0.770992	-0.452831	-0.370256	-0.54972	-0.201651	-0.288061	-0.710159	-0.862051	-0.51548	3080		-1.83118	-1.63911	3080	-0.54972	-0.51548	-3.2001	-3.02273
3100	-0.626948	-0.770992	-0.474066	-0.370256	-0.560565	-0.244983	-0.298323	-0.731901	-0.862051	-0.534314	3100		-1.82536	-1.60823	3100	-0.560565	-0.534314	-3.19717	-3.0033
3120	-0.604799	-0.770992	-0.442214	-0.359867	-0.544468	-0.223266	-0.298323	-0.688492	-0.850494	-0.515144	3120		-1.83117	-1.63915	3120	-0.544468	-0.515144	-3.19716	-3.00652
3140	-0.593725	-0.759892	-0.410362	-0.297739	-0.51543	-0.201651	-0.277851	-0.666902	-0.838911	-0.496329	3140		-1.83117	-1.622	3140	-0.51543	-0.496329	-3.21189	-3.02273
3160	-0.604799	-0.737667	-0.431597	-0.349504	-0.530892	-0.212446	-0.277851	-0.710159	-0.838911	-0.509841	3160		-1.83702	-1.63914	3160	-0.530892	-0.509841	-3.21191	-3.01947
3180	-0.626948	-0.804342	-0.442214	-0.359867	-0.558343	-0.212446	-0.298323	-0.699313	-0.850494	-0.515144	3180		-1.84284	-1.65287	3180	-0.558343	-0.515144	-3.20305	-3.01946
3200	-0.582651	-0.748767	-0.431597	-0.349504	-0.528129	-0.190856	-0.267614	-0.688492	-0.850494	-0.499364	3200		-1.84867	-1.65631	3200	-0.528129	-0.499364	-3.21485	-3.03889
3220	-0.604799	-0.726567	-0.452831	-0.359867	-0.536016	-0.234112	-0.226974	-0.72103	-0.873658	-0.513944	3220		-1.84576	-1.64942	3220	-0.536016	-0.513944	-3.22663	-3.03241
3240	-0.604799	-0.737667	-0.474066	-0.359867	-0.5441	-0.234112	-0.237109	-0.72103	-0.873658	-0.516477	3240		-1.84285	-1.63573	3240	-0.5441	-0.516477	-3.22661	-3.03566
3260	-0.604799	-0.759892	-0.484708	-0.370256	-0.554914	-0.212446	-0.267614	-0.731901	-0.873658	-0.521405	3260		-1.85159	-1.64943	3260	-0.554914	-0.521405	-3.22663	-3.03243
3280	-0.582651	-0.737667	-0.357403	-0.277089	-0.488702	-0.190856	-0.237109	-0.623951	-0.781329	-0.458311	3280		-1.85744	-1.64943	3280	-0.488702	-0.458311	-3.25018	-3.04211
3300	-0.638048	-0.759892	-0.505993	-0.380619	-0.571138	-0.244983	-0.247269	-0.753694	-0.885266	-0.532803	3300		-1.86619	-1.67003	3300	-0.571138	-0.532803	-3.23252	-3.04857
3320	-0.626948	-0.737667	-0.527279	-0.391008	-0.570725	-0.223266	-0.237109	-0.775589	-0.896899	-0.533216	3320		-1.85743	-1.65286	3320	-0.570725	-0.533216	-3.23839	-3.06153
3340	-0.593725	-0.737667	-0.559257	-0.422173	-0.578206	-0.201651	-0.226974	-0.797535	-0.943559	-0.54243	3340		-1.86033	-1.66315	3340	-0.578206	-0.54243	-3.25609	-3.05826
3360	-0.604799	-0.748767	-0.484708	-0.380619	-0.554723	-0.212446	-0.277851	-0.753694	-0.885266	-0.532314	3360		-1.87783	-1.67343	3360	-0.554723	-0.532314	-3.25904	-3.0712
3380	-0.604799	-0.704367	-0.410362	-0.31844	-0.509492	-0.190856	-0.206781	-0.666902	-0.804316	-0.467214	3380		-1.88075	-1.67691	3380	-0.509492	-0.467214	-3.25314	-3.06798
3400	-0.604799	-0.737667	-0.442214	-0.349504	-0.533546	-0.201651	-0.247269	-0.699313	-0.873658	-0.505473	3400		-1.88076	-1.68032	3400	-0.533546	-0.505473	-3.26198	-3.0841
3420	-0.626948	-0.748767	-0.452831	-0.370256	-0.5497	-0.234112	-0.247269	-0.72103	-0.873658	-0.519017	3420		-1.89826	-1.67343	3420	-0.5497	-0.519017	-3.27377	-3.06476
3440	-0.582651	-0.726567	-0.389179	-0.287401	-0.496449	-0.147904	-0.216865	-0.645389	-0.838911	-0.462267	3440		-1.87783	-1.69405	3440	-0.496449	-0.462267	-3.26787	-3.08091
3460	-0.560527	-0.748767	-0.357403	-0.308102	-0.4937	-0.137236	-0.226974	-0.623951	-0.804316	-0.44812	3460		-1.88658	-1.69406	3460	-0.4937	-0.44812	-3.27081	-3.07444
3480	-0.560527	-0.737667	-0.357403	-0.287401	-0.48575	-0.137236	-0.226974	-0.623951	-0.804316	-0.44812	3480		-1.88951	-1.70092	3480	-0.48575	-0.44812	-3.27671	-3.08736
3500	-0.582651	-0.759892	-0.389179	-0.297739	-0.507365	-0.169342	-0.267614	-0.63467	-0.838911	-0.477634	3500		-1.89825	-1.68716	3500	-0.507365	-0.477634	-3.27376	-3.08087
3520	-0.582651	-0.737667	-0.389179	-0.297739	-0.501809	-0.190856	-0.216865	-0.666902	-0.838911	-0.478384	3520		-1.89825	-1.69743	3520	-0.501809	-0.478384	-3.28261	-3.09054
3540	-0.560527	-0.726567	-0.346812	-0.215189	-0.462274	-0.126543	-0.196723	-0.60259	-0.758393	-0.421062	3540		-1.89826	-1.6906	3540	-0.462274	-0.421062	-3.2826	-3.0938
3560	-0.571602	-0.726567	-0.357403	-0.266751	-0.480581	-0.147904	-0.206781	-0.613283	-0.79281	-0.440195	3560		-1.907	-1.69747	3560	-0.480581	-0.440195	-3.28849	-3.07444
3580	-0.560527	-0.748767	-0.357403	-0.308102	-0.4937	-0.1159	-0.206781	-0.623951	-0.804316	-0.437737	3580		-1.88949	-1.7009	3580	-0.4937	-0.437737	-3.29437	-3.10024
3600	-0.571602	-0.770992	-0.410362	-0.349504	-0.525615	-0.158623	-0.267614	-0.666902	-0.850494	-0.485908	3600		-1.90699	-1.69748	3600	-0.525615	-0.485908	-3.30617	-3.11319
3620	-0.593725	-0.748767	-0.410362	-0.339141	-0.522999	-0.169342	-0.247269	-0.688492	-0.862051	-0.491788	3620		-1.90993	-1.6872	3620	-0.522999	-0.491788	-3.30029	-3.11319
3640	-0.582651	-0.748767	-0.36797	-0.31844	-0.504457	-0.137236	-0.216865	-0.63467	-0.850494	-0.459816	3640		-1.90991	-1.70433	3640	-0.504457	-0.459816	-3.30615	-3.10027
3660	-0.560527	-0.704367	-0.33622	-0.235788	-0.459226	-0.126543	-0.186665	-0.60259	-0.746963	-0.41569	3660		-1.91282	-1.71119	3660	-0.459226	-0.41569	-3.30321	-3.10993
3680	-0.571602	-0.704367	-0.389179	-0.31844	-0.495897	-0.1159	-0.156667	-0.666902	-0.850494	-0.447491	3680		-1.92742	-1.72146	3680	-0.495897	-0.447491	-3.30912	-3.12609
3700	-0.560527	-0.737667	-0.346812	-0.277089	-0.480524	-0.126543	-0.206781	-0.613283	-0.804316	-0.437731	3700		-1.93034	-1.72147	3700	-0.480524	-0.437731	-3.30617	-3.12607
3720	-0.582651	-0.770992	-0.357403	-0.297739	-0.502196	-0.158623	-0.247269	-0.623951	-0.804316	-0.45854	3720		-1.91867	-1.71461	3720	-0.502196	-0.45854	-3.31796	-3.12607
3740	-0.571602	-0.759892	-0.346812	-0.246101	-0.481101	-0.137236	-0.226974	-0.613283	-0.781329	-0.439706	3740		-1.93617	-1.71117	3740	-0.481101	-0.439706	-3.32091	-3.13252
3760	-0.593725	-0.737667	-0.389179	-0.349504	-0.517519	-0.158623	-0.196723	-0.677697	-0.850494	-0.470884	3760		-1.93035	-1.72831	3760	-0.517519	-0.470884	-3.32976	-3.139
3780	-0.560527	-0.737667	-0.346812	-0.297739	-0.485686	-0.1159	-0.186665	-0.613283	-0.804316	-0.430041	3780		-1.93617	-1.70778	3780	-0.485686	-0.430041	-3.32974	-3.12931
3800	-0.582651	-0.782091	-0.399771	-0.297739	-0.515563	-0.1159	-0.247269	-0.63467	-0.827354	-0.456298	3800		-1.94493	-1.7386	3800	-0.515563	-0.456298	-3.33564	-3.15189
3820	-0.582651	-0.748767	-0.325653	-0.277089	-0.48354	-0.137236	-0.226974	-0.613283	-0.804316	-0.445452	3820		-1.95367	-1.73859	3820	-0.48354	-0.445452	-3.33269	-3.15512
3840	-0.571602	-0.782091	-0.357403	-0.287401	-0.499624	-0.137236	-0.247269	-0.623951	-0.804316	-0.453193	3840		-1.94784	-1.72491	3840	-0.499624	-0.453193	-3.33858	-3.1422
3860	-0.571602	-0.737667	-0.33622	-0.246101	-0.472897	-0.126543	-0.206781	-0.613283	-0.79281	-0.434854	3860		-1.94784	-1.72146	3860	-0.472897	-0.434854	-3.34154	-3.16478
3880	-0.593725	-0.782091	-0.357403	-0.287401	-0.505155	-0.158623	-0.267614	-0.677697	-0.850494	-0.488607	3880		-1.94201	-1.71803	3880	-0.505155	-0.488607	-3.36217	-3.17122
3900	-0.593725	-0.748767	-0.389179	-0.308102	-0.509943	-0.137236	-0.206781	-0.666902	-0.838911	-0.462458	3900		-1.95659	-1.73861	3900	-0.509943	-0.462458	-3.34446	-3.17125
3920	-0.593725	-0.826567	-0.389179	-0.297739	-0.526802	-0.147904	-0.288061	-0.677697	-0.862051	-0.493928	3920		-1.94784	-1.72149	3920	-0.526802	-0.493928	-3.35921	-3.1648
3940	-0.604799	-0.759892	-0.389179	-0.308102	-0.515493	-0.169342	-0.226974	-0.677697	-0.873658	-0.486918	3940		-1.95367	-1.73519	3940	-0.515493	-0.486918	-3.3769	-3.18091
3960	-0.582651	-0.737667	-0.315087	-0.287401	-0.480701	-0.147904	-0.206781	-0.623951	-0.827354	-0.451498	3960		-1.96826	-1.74551	3960	-0.480701	-0.451498	-3.371	-3.17767
3980	-0.582651	-0.815442	-0.33622	-0.277089	-0.50285	-0.158623	-0.298323	-0.63467	-0.850494	-0.485527	3980		-1.9566	-1.75236	3980	-0.50285	-0.485527	-3.3828	-3.19378
4000	-0.560527	-0.826567	-0.315087	-0.235788	-0.484492	-0.0946404	-0.298323	-0.613283	-0.804316	-0.452641	4000		-1.96827	-1.74894	4000	-0.484492	-0.452641	-3.3828	-3.18412
4050	-0.582651	-0.748767	-0.410362	-0.339141	-0.52023	-0.147904	-0.237109	-0.677697	-0.850494	-0.478301	4050		-1.97702	-1.75236	4050	-0.52023	-0.478301	-3.40638	-3.197
4100	-0.582651	-0.804342	-0.357403	-0.31844	-0.515709	-0.147904	-0.277851	-0.688492	-0.885266	-0.499878	4100		-1.97993	-1.77291	4100	-0.515709	-0.499878	-3.40343	-3.20665
4150	-0.571602	-0.848817	-0.389179	-0.308102	-0.529425	-0.147904	-0.318897	-0.677697	-0.896899	-0.51035	4150		-1.99745	-1.78665	4150	-0.529425	-0.51035	-3.42702	-3.20665
4200	-0.593725	-0.859942	-0.42098	-0.359867	-0.558629	-0.158623	-0.360299	-0.731901	-0.920191	-0.542754	4200		-1.9887	-1.78325	4200	-0.558629	-0.542754	-3.43588	-3.20984
4250	-0.604799	-0.859942	-0.410362	-0.349504	-0.556152	-0.201651	-0.34991	-0.731901	-0.943559	-0.556755	4250		-2.0208	-1.80379	4250	-0.556152	-0.556755	-3.42701	-3.21953
4300	-0.593725	-0.826567	-0.346812	-0.308102	-0.518801	-0.147904	-0.298323	-0.677697	-0.850494	-0.493605	4300		-2.00327	-1.83122	4300	-0.518801	-0.493605	-3.45059	-3.23564
4350	-0.638048	-0.848817	-0.452831	-0.391008	-0.582676	-0.201651	-0.34991	-0.764642	-0.93185	-0.562013	4350		-2.04706	-1.83804	4350	-0.582676	-0.562013	-3.46831	-3.24524
4400	-0.649122	-0.859942	-0.410362	-0.349504	-0.567233	-0.244983	-0.34991	-0.731901	-0.920191	-0.561746	4400		-2.03536	-1.85173	4400	-0.567233	-0.561746	-3.4919	-3.27101
4450	-0.682396	-0.871093	-0.442214	-0.349504	-0.586302	-0.299542	-0.370688	-0.764642	-0.955243	-0.597529	4450		-2.07332	-1.85862	4450	-0.586302	-0.597529	-3.4801	-3.28709
4500	-0.649122	-0.848817	-0.442214	-0.380619	-0.580193	-0.223266	-0.30861	-0.764642	-0.93185	-0.557092	4500		-2.07332	-1.87228	4500	-0.580193	-0.557092	-3.49484	-3.27742
4550	-0.638048	-0.837692	-0.410362	-0.349504	-0.558902	-0.234112	-0.30861	-0.72103	-0.93185	-0.5489	4550		-2.09375	-1.88257	4550	-0.558902	-0.5489	-3.51254	-3.30956
4600	-0.649122	-0.837692	-0.410362	-0.349504	-0.56167	-0.255854	-0.30861	-0.72103	-0.896899	-0.545598	4600		-2.10252	-1.89629	4600	-0.56167	-0.545598	-3.51845	-3.30958
4650	-0.660197	-0.826567	-0.442214	-0.391008	-0.579996	-0.234112	-0.298323	-0.731901	-0.93185	-0.549046	4650		-2.11128	-1.88943	4650	-0.579996	-0.549046	-3.50958	-3.32562
4700	-0.671297	-0.804342	-0.484708	-0.391008	-0.587839	-0.288595	-0.277851	-0.786562	-0.943559	-0.574142	4700		-2.12004	-1.90995	4700	-0.587839	-0.574142	-3.52433	-3.3128
4750	-0.671297	-0.837692	-0.452831	-0.391008	-0.588207	-0.244983	-0.30861	-0.753694	-0.955243	-0.565633	4750		-2.14923	-1.93051	4750	-0.588207	-0.565633	-3.55091	-3.33205
4800	-0.693471	-0.815442	-0.484708	-0.422173	-0.603948	-0.288595	-0.298323	-0.797535	-0.966953	-0.587851	4800		-2.14631	-1.93051	4800	-0.603948	-0.587851	-3.56565	-3.33844
4850	-0.73787	-0.837692	-0.505993	-0.463804	-0.63634	-0.354559	-0.298323	-0.830605	-1.00221	-0.621424	4850		-2.16091	-1.93737	4850	-0.63634	-0.621424	-3.5745	-3.35451
4900	-0.72677	-0.837692	-0.452831	-0.380619	-0.599478	-0.310515	-0.339547	-0.797535	-0.966953	-0.603637	4900		-2.16675	-1.95447	4900	-0.599478	-0.603637	-3.5686	-3.37057
4950	-0.71567	-0.837692	-0.516636	-0.422173	-0.623043	-0.332486	-0.339547	-0.808533	-0.978687	-0.614813	4950		-2.16967	-1.96129	4950	-0.623043	-0.614813	-3.59515	-3.36734
5000	-0.748995	-0.848817	-0.505993	-0.432587	-0.634098	-0.365608	-0.34991	-0.797535	-1.00221	-0.628815	5000		-2.18427	-1.97839	5000	-0.634098	-0.628815	-3.58631	-3.38659
5050	-0.748995	-0.859942	-0.516636	-0.45339	-0.644741	-0.365608	-0.34991	-0.841654	-1.01397	-0.642785	5050		-2.18719	-1.97494	5050	-0.644741	-0.642785	-3.58629	-3.38017
5100	-0.748995	-0.837692	-0.527279	-0.442976	-0.639235	-0.376682	-0.30861	-0.830605	-1.01397	-0.632466	5100		-2.20763	-1.99206	5100	-0.639235	-0.632466	-3.60991	-3.41224
5150	-0.748995	-0.859942	-0.527279	-0.45339	-0.647402	-0.354559	-0.34991	-0.830605	-1.02575	-0.640207	5150		-2.21347	-2.00233	5150	-0.647402	-0.640207	-3.61875	-3.40581
5200	-0.760095	-0.859942	-0.516636	-0.442976	-0.644912	-0.376682	-0.360299	-0.830605	-1.00221	-0.642449	5200		-2.22808	-2.00576	5200	-0.644912	-0.642449	-3.6217	-3.4026
5250	-0.748995	-0.871093	-0.537921	-0.45339	-0.65285	-0.332486	-0.370688	-0.841654	-1.03756	-0.645598	5250		-2.23682	-2.02968	5250	-0.65285	-0.645598	-3.62169	-3.41542
5300	-0.748995	-0.871093	-0.527279	-0.463804	-0.652793	-0.354559	-0.370688	-0.841654	-1.02575	-0.648164	5300		-2.23682	-2.01256	5300	-0.652793	-0.648164	-3.64237	-3.40584
5350	-0.760095	-0.893343	-0.527279	-0.463804	-0.66113	-0.387782	-0.381102	-0.841654	-1.02575	-0.659073	5350		-2.24851	-2.02622	5350	-0.66113	-0.659073	-3.64826	-3.42824
5400	-0.760095	-0.871093	-0.505993	-0.442976	-0.645039	-0.365608	-0.370688	-0.830605	-1.01397	-0.645217	5400		-2.26896	-2.05017	5400	-0.645039	-0.645217	-3.64236	-3.42502
5450	-0.771195	-0.904494	-0.527279	-0.463804	-0.666693	-0.376682	-0.381102	-0.841654	-1.02575	-0.656298	5450		-2.29526	-2.07067	5450	-0.666693	-0.656298	-3.6394	-3.44426
5500	-0.771195	-0.904494	-0.559257	-0.463804	-0.674688	-0.354559	-0.381102	-0.852729	-1.01397	-0.650589	5500		-2.30402	-2.06727	5500	-0.674688	-0.650589	-3.67483	-3.45705
5550	-0.771195	-0.859942	-0.505993	-0.442976	-0.645027	-0.365608	-0.370688	-0.808533	-1.01397	-0.639699	5550		-2.30694	-2.07747	5550	-0.645027	-0.639699	-3.67483	-3.47626
5600	-0.771195	-0.904494	-0.516636	-0.463804	-0.664032	-0.387782	-0.370688	-0.830605	-1.01397	-0.650761	5600		-2.32447	-2.09116	5600	-0.664032	-0.650761	-3.68071	-3.47946
5650	-0.760095	-0.871093	-0.505993	-0.45339	-0.647643	-0.365608	-0.370688	-0.830605	-1.01397	-0.645217	5650		-2.33322	-2.1082	5650	-0.647643	-0.645217	-3.69842	-3.49226
5700	-0.771195	-0.904494	-0.527279	-0.45339	-0.664089	-0.376682	-0.381102	-0.852729	-1.02575	-0.659067	5700		-2.35076	-2.10478	5700	-0.664089	-0.659067	-3.71319	-3.50183
5750	-0.793445	-0.915619	-0.505993	-0.463804	-0.669715	-0.365608	-0.381102	-0.841654	-1.02575	-0.653529	5750		-2.35661	-2.11165	5750	-0.669715	-0.653529	-3.71319	-3.50504
5800	-0.771195	-0.871093	-0.505993	-0.432587	-0.645217	-0.365608	-0.370688	-0.808533	-1.00221	-0.636759	5800		-2.35075	-2.12531	5800	-0.645217	-0.636759	-3.72499	-3.51462
5850	-0.771195	-0.904494	-0.516636	-0.432587	-0.656228	-0.354559	-0.370688	-0.830605	-1.02575	-0.645401	5850		-2.35367	-2.12528	5850	-0.656228	-0.645401	-3.7368	-3.51783
5900	-0.771195	-0.904494	-0.516636	-0.432587	-0.656228	-0.354559	-0.381102	-0.808533	-0.978687	-0.63072	5900		-2.38291	-2.13211	5900	-0.656228	-0.63072	-3.74861	-3.54658
5950	-0.771195	-0.893343	-0.505993	-0.432587	-0.65078	-0.365608	-0.370688	-0.797535	-0.978687	-0.628129	5950		-2.40337	-2.15944	5950	-0.65078	-0.628129	-3.75157	-3.54339
6000	-0.793445	-0.893343	-0.516636	-0.432587	-0.659003	-0.365608	-0.360299	-0.797535	-1.00221	-0.631412	6000		-2.40629	-2.17302	6000	-0.659003	-0.631412	-3.75747	-3.54977
6050	-0.748995	-0.871093	-0.474066	-0.422173	-0.629082	-0.354559	-0.339547	-0.797535	-1.01397	-0.626402	6050		-2.39459	-2.17308	6050	-0.629082	-0.626402	-3.78109	-3.56256
6100	-0.760095	-0.904494	-0.505993	-0.432587	-0.650792	-0.332486	-0.370688	-0.808533	-1.00221	-0.628479	6100		-2.40628	-2.19352	6100	-0.650792	-0.628479	-3.7823	-3.56783
6150	-0.771195	-0.893343	-0.495351	-0.432587	-0.648119	-0.332486	-0.360299	-0.808533	-1.00221	-0.625881	6150		-2.4209	-2.20374	6150	-0.648119	-0.625881	-3.7988	-3.57534
6200	-0.760095	-0.871093	-0.505993	-0.422173	-0.639839	-0.332486	-0.34991	-0.797535	-1.01397	-0.623475	6200		-2.44721	-2.20034	6200	-0.639839	-0.623475	-3.7988	-3.58811
6250	-0.748995	-0.893343	-0.495351	-0.422173	-0.639966	-0.332486	-0.34991	-0.797535	-1.01397	-0.623475	6250		-2.43259	-2.2208	6250	-0.639966	-0.623475	-3.81653	-3.60724
6300	-0.73787	-0.871093	-0.474066	-0.422173	-0.6263	-0.332486	-0.34991	-0.797535	-1.00221	-0.620535	6300		-2.46182	-2.23442	6300	-0.6263	-0.620535	-3.82835	-3.6136
6350	-0.771195	-0.871093	-0.484708	-0.422173	-0.637292	-0.354559	-0.34991	-0.808533	-1.01397	-0.631742	6350		-2.46767	-2.23104	6350	-0.637292	-0.631742	-3.81947	-3.61681
6400	-0.760095	-0.893343	-0.484708	-0.432587	-0.642683	-0.365608	-0.34991	-0.808533	-1.01397	-0.634505	6400		-2.47351	-2.23784	6400	-0.642683	-0.634505	-3.8431	-3.61682
6450	-0.771195	-0.904494	-0.505993	-0.432587	-0.653567	-0.365608	-0.360299	-0.808533	-1.01397	-0.637102	6450		-2.47644	-2.24465	6450	-0.653567	-0.637102	-3.85197	-3.64548
6500	-0.748995	-0.871093	-0.484708	-0.401396	-0.626548	-0.365608	-0.370688	-0.797535	-0.978687	-0.628129	6500		-2.4969	-2.2685	6500	-0.626548	-0.628129	-3.85492	-3.63909
6550	-0.760095	-0.871093	-0.495351	-0.391008	-0.629387	-0.365608	-0.360299	-0.797535	-1.01397	-0.634352	6550		-2.49691	-2.27535	6550	-0.629387	-0.634352	-3.86083	-3.65821
6600	-0.760095	-0.859942	-0.505993	-0.401396	-0.631857	-0.354559	-0.360299	-0.808533	-1.00221	-0.6314	6600		-2.50861	-2.27529	6600	-0.631857	-0.6314	-3.88151	-3.67415
6650	-0.771195	-0.893343	-0.495351	-0.401396	-0.640321	-0.365608	-0.360299	-0.808533	-1.00221	-0.634162	6650		-2.53199	-2.29571	6650	-0.640321	-0.634162	-3.89332	-3.67737
6700	-0.760095	-0.848817	-0.484708	-0.370256	-0.615969	-0.354559	-0.339547	-0.797535	-1.00221	-0.623462	6700		-2.54077	-2.30595	6700	-0.615969	-0.623462	-3.89332	-3.69009
6750	-0.760095	-0.837692	-0.452831	-0.359867	-0.602621	-0.354559	-0.318897	-0.797535	-1.00221	-0.618299	6750		-2.54661	-2.30934	6750	-0.602621	-0.618299	-3.90218	-3.67732
6800	-0.760095	-0.893343	-0.495351	-0.401396	-0.637546	-0.376682	-0.370688	-0.830605	-1.00221	-0.645046	6800		-2.54954	-2.30256	6800	-0.637546	-0.645046	-3.914	-3.69645
6850	-0.748995	-0.871093	-0.474066	-0.391008	-0.62129	-0.354559	-0.360299	-0.797535	-1.00221	-0.62865	6850		-2.56417	-2.33663	6850	-0.62129	-0.62865	-3.93468	-3.70917
6900	-0.771195	-0.893343	-0.495351	-0.401396	-0.640321	-0.365608	-0.370688	-0.808533	-0.978687	-0.630879	6900		-2.58171	-2.33663	6900	-0.640321	-0.630879	-3.94059	-3.72507
6950	-0.771195	-0.871093	-0.495351	-0.391008	-0.632162	-0.365608	-0.339547	-0.830605	-1.01397	-0.637432	6950		-2.59049	-2.35701	6950	-0.632162	-0.637432	-3.94649	-3.71551
7000	-0.793445	-0.904494	-0.505993	-0.401396	-0.651332	-0.365608	-0.381102	-0.830605	-1.02575	-0.650767	7000		-2.61389	-2.36724	7000	-0.651332	-0.650767	-3.95241	-3.73141
7050	-0.793445	-0.893343	-0.516636	-0.422173	-0.6564	-0.387782	-0.360299	-0.841654	-1.00221	-0.647986	7050		-2.62559	-2.37402	7050	-0.6564	-0.647986	-3.96423	-3.73777
7100	-0.793445	-0.871093	-0.495351	-0.401396	-0.640321	-0.387782	-0.360299	-0.830605	-1.01397	-0.648164	7100		-2.61974	-2.374	7100	-0.640321	-0.648164	-3.97899	-3.77592
7150	-0.793445	-0.92677	-0.527279	-0.432587	-0.67002	-0.376682	-0.391541	-0.852729	-1.03756	-0.664629	7150		-2.63436	-2.38764	7150	-0.67002	-0.664629	-3.98784	-3.76957
7200	-0.793445	-0.915619	-0.527279	-0.432587	-0.667233	-0.387782	-0.391541	-0.841654	-1.03756	-0.664635	7200		-2.64606	-2.39779	7200	-0.667233	-0.664635	-4.00854	-3.77592
7250	-0.793445	-0.904494	-0.495351	-0.432587	-0.656469	-0.387782	-0.381102	-0.830605	-1.03756	-0.659263	7250		-2.64899	-2.40125	7250	-0.656469	-0.659263	-4.01741	-3.78219
7300	-0.804545	-0.904494	-0.505993	-0.432587	-0.661905	-0.410007	-0.381102	-0.841654	-1.02575	-0.664629	7300		-2.66654	-2.41824	7300	-0.661905	-0.664629	-4.00557	-3.78219
7350	-0.81567	-0.92677	-0.537921	-0.45339	-0.683438	-0.410007	-0.391541	-0.863829	-1.06121	-0.681647	7350		-2.69288	-2.43525	7350	-0.683438	-0.681647	-4.03218	-3.78539
7400	-0.804545	-0.92677	-0.505993	-0.422173	-0.66487	-0.398882	-0.412471	-0.863829	-1.03756	-0.678186	7400		-2.69288	-2.42842	7400	-0.66487	-0.678186	-4.02923	-3.79171
7450	-0.81567	-0.93792	-0.516636	-0.45339	-0.680904	-0.443484	-0.422961	-0.863829	-1.02575	-0.689007	7450		-2.70165	-2.45226	7450	-0.680904	-0.689007	-4.03513	-3.80126
7500	-0.81567	-0.93792	-0.527279	-0.463804	-0.686168	-0.443484	-0.412471	-0.863829	-1.04938	-0.69229	7500		-2.69873	-2.46241	7500	-0.686168	-0.69229	-4.03809	-3.79171
7550	-0.81567	-0.93792	-0.559257	-0.442976	-0.688956	-0.410007	-0.422961	-0.863829	-1.07305	-0.692461	7550		-2.71922	-2.45565	7550	-0.688956	-0.692461	-4.06173	-3.80761
7600	-0.826795	-0.93792	-0.527279	-0.432587	-0.681145	-0.443484	-0.412471	-0.863829	-1.06121	-0.695249	7600		-2.74263	-2.48618	7600	-0.681145	-0.695249	-4.07651	-3.82665
7650	-0.81567	-0.93792	-0.505993	-0.391008	-0.662648	-0.443484	-0.422961	-0.863829	-1.06121	-0.697871	7650		-2.74263	-2.48961	7650	-0.662648	-0.697871	-4.06469	-3.81391
7700	-0.826795	-0.92677	-0.484708	-0.391008	-0.65732	-0.421157	-0.412471	-0.852729	-1.04938	-0.683933	7700		-2.76019	-2.4862	7700	-0.65732	-0.683933	-4.08241	-3.80442
7750	-0.826795	-0.93792	-0.505993	-0.401396	-0.668026	-0.421157	-0.422961	-0.863829	-1.07305	-0.695249	7750		-2.76604	-2.50319	7750	-0.668026	-0.695249	-4.0972	-3.83614
7800	-0.826795	-0.93792	-0.505993	-0.380619	-0.662832	-0.443484	-0.422961	-0.874928	-1.04938	-0.697687	7800		-2.77774	-2.50655	7800	-0.662832	-0.697687	-4.11199	-3.84567
7850	-0.826795	-0.915619	-0.495351	-0.391008	-0.657193	-0.421157	-0.370688	-0.852729	-1.06121	-0.676446	7850		-2.78945	-2.53375	7850	-0.657193	-0.676446	-4.1179	-3.85832
7900	-0.837921	-0.92677	-0.516636	-0.432587	-0.678478	-0.443484	-0.391541	-0.874928	-1.06121	-0.692791	7900		-2.80408	-2.53707	7900	-0.678478	-0.692791	-4.12676	-3.85514
7950	-0.81567	-0.92677	-0.537921	-0.463804	-0.686041	-0.410007	-0.391541	-0.863829	-1.06121	-0.681647	7950		-2.82165	-2.5473	7950	-0.686041	-0.681647	-4.13563	-3.86785
8000	-0.826795	-0.949071	-0.527279	-0.45339	-0.689134	-0.421157	-0.422961	-0.874928	-1.04938	-0.692106	8000		-2.82458	-2.55406	8000	-0.689134	-0.692106	-4.14154	-3.87415
8050	-0.837921	-0.915619	-0.537921	-0.474243	-0.691426	-0.443484	-0.381102	-0.886054	-1.06121	-0.692963	8050		-2.84215	-2.57104	8050	-0.691426	-0.692963	-4.15632	-3.87413
8100	-0.837921	-0.93792	-0.559257	-0.463804	-0.699726	-0.421157	-0.381102	-0.874928	-1.0968	-0.693496	8100		-2.85972	-2.58122	8100	-0.699726	-0.693496	-4.16519	-3.87096
8150	-0.837921	-0.982523	-0.5699	-0.474243	-0.716147	-0.443484	-0.433502	-0.897204	-1.0968	-0.717747	8150		-2.8685	-2.59477	8150	-0.716147	-0.717747	-4.17998	-3.89318
8200	-0.826795	-0.93792	-0.516636	-0.45339	-0.683685	-0.421157	-0.412471	-0.863829	-1.06121	-0.689667	8200		-2.88606	-2.5948	8200	-0.683685	-0.689667	-4.18886	-3.8963
8250	-0.849046	-0.949071	-0.559257	-0.45339	-0.702691	-0.421157	-0.422961	-0.874928	-1.0968	-0.703961	8250		-2.90071	-2.62183	8250	-0.702691	-0.703961	-4.20068	-3.90582
8300	-0.849046	-0.949071	-0.559257	-0.474243	-0.707904	-0.454685	-0.412471	-0.897204	-1.0968	-0.715289	8300		-2.90949	-2.61169	8300	-0.707904	-0.715289	-4.20955	-3.90895
8350	-0.826795	-0.915619	-0.559257	-0.463804	-0.691369	-0.443484	-0.370688	-0.886054	-1.0968	-0.699256	8350		-2.92999	-2.63876	8350	-0.691369	-0.699256	-4.23026	-3.9248
8400	-0.837921	-0.949071	-0.527279	-0.463804	-0.694519	-0.454685	-0.422961	-0.886054	-1.07305	-0.709187	8400		-2.93292	-2.6625	8400	-0.694519	-0.709187	-4.23026	-3.93429
8450	-0.849046	-0.949071	-0.537921	-0.45339	-0.697357	-0.421157	-0.422961	-0.874928	-1.10868	-0.706933	8450		-2.95049	-2.66927	8450	-0.697357	-0.706933	-4.21842	-3.92476
8500	-0.826795	-0.92677	-0.537921	-0.45339	-0.686219	-0.443484	-0.370688	-0.886054	-1.07305	-0.693318	8500		-2.95634	-2.6659	8500	-0.686219	-0.693318	-4.248	-3.95009
8550	-0.837921	-0.93792	-0.559257	-0.442976	-0.694519	-0.410007	-0.422961	-0.874928	-1.0968	-0.701173	8550		-2.96807	-2.68617	8550	-0.694519	-0.701173	-4.26575	-3.95332
8600	-0.837921	-0.949071	-0.559257	-0.45339	-0.69991	-0.454685	-0.422961	-0.886054	-1.07305	-0.709187	8600		-2.98271	-2.70311	8600	-0.69991	-0.709187	-4.25686	-3.95327
8650	-0.849046	-0.971372	-0.559257	-0.45339	-0.708266	-0.443484	-0.422961	-0.886054	-1.0968	-0.712324	8650		-2.99443	-2.72004	8650	-0.708266	-0.712324	-4.28052	-3.95644
8700	-0.849046	-0.949071	-0.5699	-0.463804	-0.707955	-0.421157	-0.422961	-0.886054	-1.07305	-0.700805	8700		-3.00321	-2.72678	8700	-0.707955	-0.700805	-4.29236	-3.97861
8750	-0.837921	-0.971372	-0.537921	-0.45339	-0.700151	-0.454685	-0.422961	-0.886054	-1.0968	-0.715124	8750		-3.02372	-2.73696	8750	-0.700151	-0.715124	-4.28941	-3.9817
8800	-0.860196	-0.982523	-0.537921	-0.463804	-0.711111	-0.477114	-0.422961	-0.874928	-1.0968	-0.71795	8800		-3.03251	-2.74036	8800	-0.711111	-0.71795	-4.31898	-3.97849
8850	-0.860196	-0.982523	-0.537921	-0.474243	-0.713721	-0.465887	-0.422961	-0.886054	-1.10868	-0.720896	8850		-3.04715	-2.75046	8850	-0.713721	-0.720896	-4.31898	-3.9975
8900	-0.849046	-0.949071	-0.559257	-0.474243	-0.707904	-0.443484	-0.422961	-0.897204	-1.10868	-0.718083	8900		-3.07059	-2.76066	8900	-0.707904	-0.718083	-4.33083	-4.00061
8950	-0.849046	-0.949071	-0.537921	-0.45339	-0.697357	-0.454685	-0.422961	-0.886054	-1.10868	-0.718096	8950		-3.0911	-2.78428	8950	-0.697357	-0.718096	-4.33379	-4.00381
9000	-0.849046	-0.971372	-0.527279	-0.442976	-0.697668	-0.443484	-0.422961	-0.874928	-1.07305	-0.703605	9000		-3.09696	-2.78766	9000	-0.697668	-0.703605	-4.34562	-4.0133
9050	-0.860196	-0.971372	-0.559257	-0.45339	-0.711054	-0.443484	-0.422961	-0.897204	-1.10868	-0.718083	9050		-3.10575	-2.79444	9050	-0.711054	-0.718083	-4.36041	-4.0133
9100	-0.849046	-0.971372	-0.559257	-0.45339	-0.708266	-0.421157	-0.422961	-0.897204	-1.12057	-0.715474	9100		-3.11162	-2.8046	9100	-0.708266	-0.715474	-4.38408	-4.03541
9150	-0.860196	-0.949071	-0.537921	-0.45339	-0.700145	-0.465887	-0.422961	-0.886054	-1.10868	-0.720896	9150		-3.12626	-2.82823	9150	-0.700145	-0.720896	-4.39001	-4.0354
9200	-0.849046	-0.915619	-0.559257	-0.45339	-0.694328	-0.421157	-0.370688	-0.886054	-1.10868	-0.696646	9200		-3.12334	-2.82823	9200	-0.694328	-0.696646	-4.38706	-4.03534
9250	-0.849046	-0.982523	-0.580568	-0.463804	-0.718985	-0.465887	-0.454584	-0.919531	-1.10868	-0.737172	9250		-3.15557	-2.8485	9250	-0.718985	-0.737172	-4.41369	-4.05112
9300	-0.849046	-0.971372	-0.537921	-0.45339	-0.702932	-0.443484	-0.444017	-0.886054	-1.10868	-0.72056	9300		-3.17903	-2.85863	9300	-0.702932	-0.72056	-4.42257	-4.06377
9350	-0.837921	-0.971372	-0.495351	-0.401396	-0.67651	-0.443484	-0.444017	-0.886054	-1.10868	-0.72056	9350		-3.19661	-2.88564	9350	-0.67651	-0.72056	-4.41073	-4.06379
9400	-0.849046	-0.949071	-0.516636	-0.422173	-0.684232	-0.465887	-0.422961	-0.897204	-1.10868	-0.723684	9400		-3.18489	-2.889	9400	-0.684232	-0.723684	-4.42849	-4.06059
9450	-0.849046	-0.93792	-0.516636	-0.401396	-0.67625	-0.454685	-0.391541	-0.886054	-1.10868	-0.710241	9450		-3.21713	-2.90591	9450	-0.67625	-0.710241	-4.44329	-4.09531
9500	-0.849046	-0.971372	-0.527279	-0.401396	-0.687273	-0.443484	-0.433502	-0.919531	-1.10868	-0.7263	9500		-3.22885	-2.92612	9500	-0.687273	-0.7263	-4.45513	-4.09215
9550	-0.860196	-0.92677	-0.527279	-0.422173	-0.684105	-0.465887	-0.381102	-0.897204	-1.12057	-0.716191	9550		-3.23766	-2.91601	9550	-0.684105	-0.716191	-4.45512	-4.09526
9600	-0.860196	-0.971372	-0.559257	-0.463804	-0.713657	-0.443484	-0.422961	-0.919531	-1.0968	-0.720693	9600		-3.24645	-2.94292	9600	-0.713657	-0.720693	-4.46401	-4.09845
9650	-0.849046	-0.982523	-0.591261	-0.474243	-0.724268	-0.443484	-0.433502	-0.919531	-1.10868	-0.7263	9650		-3.27577	-2.96991	9650	-0.724268	-0.7263	-4.47584	-4.10162
9700	-0.849046	-0.982523	-0.537921	-0.442976	-0.703116	-0.454685	-0.422961	-0.897204	-1.10868	-0.720884	9700		-3.27577	-2.96986	9700	-0.703116	-0.720884	-4.48769	-4.11108
9750	-0.860196	-0.93792	-0.527279	-0.45339	-0.694696	-0.443484	-0.412471	-0.897204	-1.10868	-0.715461	9750		-3.2787	-2.99686	9750	-0.694696	-0.715461	-4.49064	-4.12369
9800	-0.860196	-0.982523	-0.527279	-0.432587	-0.700646	-0.488366	-0.433502	-0.919531	-1.14442	-0.746455	9800		-3.30509	-2.99681	9800	-0.700646	-0.746455	-4.50545	-4.13628
9850	-0.849046	-0.92677	-0.527279	-0.401396	-0.676123	-0.443484	-0.412471	-0.919531	-1.12057	-0.724014	9850		-3.33149	-3.01361	9850	-0.676123	-0.724014	-4.52026	-4.14572
9900	-0.849046	-0.982523	-0.516636	-0.391008	-0.684803	-0.454685	-0.454584	-0.919531	-1.10868	-0.734371	9900		-3.34909	-3.03381	9900	-0.684803	-0.734371	-4.52026	-4.13629
9950	-0.860196	-0.982523	-0.505993	-0.432587	-0.695325	-0.454685	-0.444017	-0.919531	-1.13248	-0.73768	9950		-3.36667	-3.04734	9950	-0.695325	-0.73768	-4.52617	-4.14261
10000	-0.849046	-0.982523	-0.580568	-0.484657	-0.724198	-0.465887	-0.444017	-0.919531	-1.13248	-0.74048	10000		-3.38721	-3.05739	10000	-0.724198	-0.74048	-4.55578	-4.15519
10050	-0.860196	-0.982523	-0.559257	-0.463804	-0.716445	-0.454685	-0.444017	-0.919531	-1.10868	-0.73173	10050		-3.40481	-3.07083	10050	-0.716445	-0.73173	-4.56467	-4.1772
10100	-0.860196	-0.982523	-0.537921	-0.45339	-0.708508	-0.477114	-0.444017	-0.919531	-1.10868	-0.737337	10100		-3.40775	-3.08091	10100	-0.708508	-0.737337	-4.56467	-4.1709
10150	-0.849046	-0.949071	-0.559257	-0.463804	-0.705295	-0.465887	-0.422961	-0.919531	-1.12057	-0.732238	10150		-3.42242	-3.09768	10150	-0.705295	-0.732238	-4.56465	-4.17405
10200	-0.860196	-0.993673	-0.580568	-0.474243	-0.72717	-0.454685	-0.444017	-0.930732	-1.13248	-0.74048	10200		-3.43415	-3.11452	10200	-0.72717	-0.74048	-4.58836	-4.18348
10250	-0.860196	-0.982523	-0.5699	-0.463804	-0.719106	-0.465887	-0.454584	-0.919531	-1.13248	-0.743121	10250		-3.45175	-3.12461	10250	-0.719106	-0.743121	-4.60021	-4.20237
10300	-0.860196	-0.982523	-0.559257	-0.45339	-0.713842	-0.465887	-0.454584	-0.919531	-1.13248	-0.743121	10300		-3.46349	-3.1447	10300	-0.713842	-0.743121	-4.60021	-4.20235
10350	-0.860196	-0.971372	-0.527279	-0.432587	-0.697859	-0.477114	-0.444017	-0.919531	-1.14442	-0.746271	10350		-3.47523	-3.16148	10350	-0.697859	-0.746271	-4.60613	-4.22439
10400	-0.860196	-0.982523	-0.516636	-0.401396	-0.690188	-0.477114	-0.454584	-0.919531	-1.13248	-0.745928	10400		-3.51337	-3.17151	10400	-0.690188	-0.745928	-4.63575	-4.22756
10450	-0.860196	-0.993673	-0.516636	-0.422173	-0.69817	-0.477114	-0.46515	-0.919531	-1.14442	-0.751554	10450		-3.52805	-3.1783	10450	-0.69817	-0.751554	-4.64169	-4.25263
10500	-0.849046	-0.982523	-0.516636	-0.401396	-0.6874	-0.488366	-0.444017	-0.919531	-1.13248	-0.7461	10500		-3.53391	-3.21182	10500	-0.6874	-0.7461	-4.63873	-4.24322
10550	-0.860196	-0.982523	-0.559257	-0.463804	-0.716445	-0.465887	-0.444017	-0.930732	-1.14442	-0.746265	10550		-3.54859	-3.22522	10550	-0.716445	-0.746265	-4.65352	-4.24639
10600	-0.882447	-0.993673	-0.580568	-0.474243	-0.732733	-0.477114	-0.444017	-0.930732	-1.10868	-0.740137	10600		-3.55152	-3.2419	10600	-0.732733	-0.740137	-4.68019	-4.26524
10650	-0.882447	-0.982523	-0.537921	-0.45339	-0.71407	-0.465887	-0.444017	-0.919531	-1.14442	-0.743464	10650		-3.5838	-3.26208	10650	-0.71407	-0.743464	-4.68612	-4.28718
10700	-0.849046	-0.949071	-0.516636	-0.401396	-0.679037	-0.465887	-0.444017	-0.897204	-1.13248	-0.734898	10700		-3.59555	-3.26203	10700	-0.679037	-0.734898	-4.68612	-4.26521
10750	-0.849046	-0.971372	-0.527279	-0.401396	-0.687273	-0.454685	-0.444017	-0.919531	-1.10868	-0.73173	10750		-3.61022	-3.29214	10750	-0.687273	-0.73173	-4.70389	-4.29032
10800	-0.860196	-0.949071	-0.516636	-0.401396	-0.681825	-0.454685	-0.433502	-0.919531	-1.13248	-0.735051	10800		-3.61316	-3.31232	10800	-0.681825	-0.735051	-4.72465	-4.30915
10850	-0.849046	-0.971372	-0.516636	-0.391008	-0.682015	-0.465887	-0.433502	-0.919531	-1.12057	-0.734873	10850		-3.62783	-3.31886	10850	-0.682015	-0.734873	-4.72465	-4.31229
10900	-0.849046	-0.949071	-0.527279	-0.401396	-0.681698	-0.454685	-0.422961	-0.897204	-1.13248	-0.726834	10900		-3.64545	-3.34237	10900	-0.681698	-0.726834	-4.71871	-4.30597
10950	-0.849046	-0.93792	-0.559257	-0.45339	-0.699903	-0.443484	-0.433502	-0.930732	-1.13248	-0.735051	10950		-3.65132	-3.35234	10950	-0.699903	-0.735051	-4.74538	-4.32796
11000	-0.849046	-0.949071	-0.537921	-0.45339	-0.697357	-0.465887	-0.422961	-0.897204	-1.13248	-0.729634	11000		-3.68362	-3.36572	11000	-0.697357	-0.729634	-4.76317	-4.32796
11050	-0.860196	-0.949071	-0.537921	-0.45339	-0.700145	-0.465887	-0.422961	-0.919531	-1.13248	-0.735216	11050		-3.69243	-3.36905	11050	-0.700145	-0.735216	-4.76019	-4.34674
11100	-0.860196	-0.982523	-0.559257	-0.474243	-0.719055	-0.465887	-0.422961	-0.930732	-1.14442	-0.741001	11100		-3.70418	-3.39911	11100	-0.719055	-0.741001	-4.77502	-4.36242
11150	-0.849046	-0.93792	-0.559257	-0.463804	-0.702507	-0.421157	-0.391541	-0.941934	-1.14442	-0.724764	11150		-3.72767	-3.40577	11150	-0.702507	-0.724764	-4.78984	-4.34988
11200	-0.849046	-0.971372	-0.527279	-0.45339	-0.700272	-0.465887	-0.444017	-0.919531	-1.18029	-0.752431	11200		-3.73354	-3.42589	11200	-0.700272	-0.752431	-4.80169	-4.37808
11250	-0.849046	-0.971372	-0.559257	-0.463804	-0.71087	-0.454685	-0.422961	-0.930732	-1.14442	-0.7382	11250		-3.73941	-3.43929	11250	-0.71087	-0.7382	-4.80169	-4.38746
11300	-0.849046	-0.971372	-0.559257	-0.45339	-0.708266	-0.477114	-0.433502	-0.930732	-1.15636	-0.749427	11300		-3.7629	-3.44931	11300	-0.708266	-0.749427	-4.80762	-4.39372
11350	-0.849046	-0.982523	-0.559257	-0.463804	-0.713657	-0.477114	-0.433502	-0.941934	-1.18029	-0.758209	11350		-3.78054	-3.46921	11350	-0.713657	-0.758209	-4.82837	-4.41253
11400	-0.849046	-0.93792	-0.559257	-0.45339	-0.699903	-0.465887	-0.412471	-0.941934	-1.14442	-0.741178	11400		-3.79816	-3.47589	11400	-0.699903	-0.741178	-4.84024	-4.42193
11450	-0.860196	-0.92677	-0.537921	-0.463804	-0.697173	-0.454685	-0.391541	-0.930732	-1.14442	-0.730345	11450		-3.81872	-3.49601	11450	-0.697173	-0.730345	-4.83727	-4.43123
11500	-0.849046	-0.915619	-0.580568	-0.474243	-0.704869	-0.454685	-0.381102	-0.930732	-1.15636	-0.73072	11500		-3.80698	-3.49591	11500	-0.704869	-0.73072	-4.85802	-4.42191
11550	-0.860196	-0.971372	-0.580568	-0.45339	-0.716382	-0.488366	-0.444017	-0.95316	-1.19228	-0.769455	11550		-3.83929	-3.51936	11550	-0.716382	-0.769455	-4.87284	-4.45632
11600	-0.882447	-0.993673	-0.559257	-0.45339	-0.722192	-0.488366	-0.454584	-0.95316	-1.14442	-0.760133	11600		-3.84808	-3.52602	11600	-0.722192	-0.760133	-4.87286	-4.44383
11650	-0.860196	-0.92677	-0.559257	-0.463804	-0.702507	-0.454685	-0.422961	-0.930732	-1.15636	-0.741185	11650		-3.85397	-3.53919	11650	-0.702507	-0.741185	-4.88471	-4.4563
11700	-0.860196	-0.982523	-0.5699	-0.484657	-0.724319	-0.454685	-0.444017	-0.941934	-1.15636	-0.749249	11700		-3.8716	-3.55923	11700	-0.724319	-0.749249	-4.89657	-4.46253
11750	-0.860196	-0.993673	-0.559257	-0.442976	-0.714026	-0.465887	-0.454584	-0.941934	-1.18029	-0.760673	11750		-3.90392	-3.58581	11750	-0.714026	-0.760673	-4.90844	-4.45945
11800	-0.860196	-0.982523	-0.537921	-0.45339	-0.708508	-0.477114	-0.454584	-0.930732	-1.15636	-0.754697	11800		-3.92449	-3.60256	11800	-0.708508	-0.754697	-4.92623	-4.47499
11850	-0.882447	-0.971372	-0.5699	-0.45339	-0.719277	-0.477114	-0.444017	-0.95316	-1.18029	-0.763645	11850		-3.93038	-3.61914	11850	-0.719277	-0.763645	-4.92028	-4.47505
11900	-0.860196	-0.982523	-0.5699	-0.474243	-0.721716	-0.488366	-0.444017	-0.95316	-1.18029	-0.766458	11900		-3.9245	-3.63573	11900	-0.721716	-0.766458	-4.93809	-4.50005
11950	-0.882447	-0.993673	-0.580568	-0.474243	-0.732733	-0.477114	-0.454584	-0.964413	-1.15636	-0.763118	11950		-3.95388	-3.65243	11950	-0.732733	-0.763118	-4.94996	-4.50625
12000	-0.882447	-0.993673	-0.537921	-0.45339	-0.716858	-0.488366	-0.444017	-0.941934	-1.18029	-0.763651	12000		-3.96269	-3.64907	12000	-0.716858	-0.763651	-4.94701	-4.49685
12050	-0.882447	-0.993673	-0.5699	-0.484657	-0.732669	-0.477114	-0.444017	-0.95316	-1.19228	-0.766642	12050		-3.9774	-3.67229	12050	-0.732669	-0.766642	-4.96776	-4.50314
12100	-0.860196	-0.971372	-0.559257	-0.463804	-0.713657	-0.477114	-0.433502	-0.941934	-1.18029	-0.758209	12100		-4.01562	-3.70227	12100	-0.713657	-0.758209	-4.98258	-4.5
12150	-0.893597	-0.993673	-0.5699	-0.474243	-0.732854	-0.488366	-0.46515	-0.95316	-1.19228	-0.774738	12150		-4.03032	-3.70883	12150	-0.732854	-0.774738	-4.99149	-4.53432
12200	-0.893597	-0.993673	-0.559257	-0.484657	-0.732796	-0.533502	-0.444017	-0.941934	-1.19228	-0.777932	12200		-4.03031	-3.71882	12200	-0.732796	-0.777932	-4.98555	-4.52813
12250	-0.882447	-0.971372	-0.559257	-0.45339	-0.716617	-0.499618	-0.433502	-0.964413	-1.18029	-0.769455	12250		-4.04501	-3.74866	12250	-0.716617	-0.769455	-5.01225	-4.54995
12300	-0.904723	-0.993673	-0.537921	-0.463804	-0.72503	-0.499618	-0.454584	-0.95316	-1.19228	-0.77491	12300		-4.05676	-3.75193	12300	-0.72503	-0.77491	-5.03006	-4.55618
12350	-0.893597	-0.971372	-0.559257	-0.463804	-0.722008	-0.477114	-0.454584	-0.941934	-1.19228	-0.766477	12350		-4.07148	-3.77513	12350	-0.722008	-0.766477	-5.03303	-4.55621
12400	-0.893597	-0.993673	-0.559257	-0.474243	-0.730193	-0.522199	-0.444017	-0.95316	-1.19228	-0.777913	12400		-4.08324	-3.78174	12400	-0.730193	-0.777913	-5.03896	-4.58111
12450	-0.893597	-0.993673	-0.5699	-0.463804	-0.730244	-0.499618	-0.46515	-0.95316	-1.19228	-0.777551	12450		-4.09794	-3.77513	12450	-0.730244	-0.777551	-5.04489	-4.58422
12500	-0.882447	-0.982523	-0.559257	-0.442976	-0.716801	-0.488366	-0.444017	-0.95316	-1.15636	-0.760476	12500		-4.11265	-3.80166	12500	-0.716801	-0.760476	-5.0716	-4.59668
12550	-0.882447	-0.971372	-0.559257	-0.432587	-0.711416	-0.522199	-0.444017	-0.95316	-1.15636	-0.768934	12550		-4.15381	-3.81819	12550	-0.711416	-0.768934	-5.06271	-4.59974
12600	-0.893597	-1.00485	-0.537921	-0.432587	-0.717239	-0.522199	-0.46515	-0.941934	-1.18029	-0.777392	12600		-4.15675	-3.83811	12600	-0.717239	-0.777392	-5.07456	-4.60602
12650	-0.860196	-0.971372	-0.5699	-0.442976	-0.711111	-0.499618	-0.433502	-0.95316	-1.18029	-0.766642	12650		-4.17733	-3.86123	12650	-0.711111	-0.766642	-5.0894	-4.61848
12700	-0.882447	-0.949071	-0.559257	-0.442976	-0.708438	-0.522199	-0.454584	-0.964413	-1.18029	-0.780371	12700		-4.17439	-3.8545	12700	-0.708438	-0.780371	-5.11019	-4.61218
12750	-0.882447	-0.949071	-0.537921	-0.442976	-0.703104	-0.522199	-0.433502	-0.941934	-1.18029	-0.76948	12750		-4.19498	-3.87106	12750	-0.703104	-0.76948	-5.10722	-4.62781
12800	-0.882447	-1.00485	-0.580568	-0.45339	-0.730314	-0.54483	-0.454584	-0.964413	-1.19228	-0.789026	12800		-4.21559	-3.88759	12800	-0.730314	-0.789026	-5.11019	-4.62469
12850	-0.893597	-0.982523	-0.537921	-0.45339	-0.716858	-0.522199	-0.454584	-0.95316	-1.21628	-0.786555	12850		-4.23912	-3.89423	12850	-0.716858	-0.786555	-5.14284	-4.64336
12900	-0.882447	-0.982523	-0.5699	-0.463804	-0.724668	-0.522199	-0.46515	-0.964413	-1.19228	-0.786009	12900		-4.23912	-3.91399	12900	-0.724668	-0.786009	-5.14283	-4.65893
12950	-0.882447	-0.93792	-0.559257	-0.45339	-0.708254	-0.488366	-0.433502	-0.964413	-1.19228	-0.769639	12950		-4.25383	-3.93722	12950	-0.708254	-0.769639	-5.14878	-4.66823
13000	-0.882447	-0.982523	-0.559257	-0.442976	-0.716801	-0.522199	-0.454584	-0.964413	-1.19228	-0.783368	13000		-4.27736	-3.94381	13000	-0.716801	-0.783368	-5.1547	-4.65893
13050	-0.893597	-1.016	-0.559257	-0.45339	-0.730561	-0.488366	-0.454584	-0.975665	-1.19228	-0.777723	13050		-4.28323	-3.94051	13050	-0.730561	-0.777723	-5.16955	-4.67758
13100	-0.893597	-0.971372	-0.559257	-0.45339	-0.719404	-0.522199	-0.433502	-0.95316	-1.18029	-0.772287	13100		-4.3215	-3.96688	13100	-0.719404	-0.772287	-5.17846	-4.68998
13150	-0.893597	-0.982523	-0.559257	-0.432587	-0.716991	-0.533502	-0.433502	-0.964413	-1.19228	-0.780923	13150		-4.31269	-3.98661	13150	-0.716991	-0.780923	-5.19034	-4.68681
13200	-0.893597	-0.993673	-0.559257	-0.442976	-0.722376	-0.533502	-0.444017	-0.964413	-1.21628	-0.789553	13200		-4.34505	-3.99658	13200	-0.722376	-0.789553	-5.20222	-4.69619
13250	-0.893597	-0.993673	-0.580568	-0.463804	-0.732911	-0.54483	-0.46515	-0.975665	-1.20426	-0.797477	13250		-4.37744	-4.00973	13250	-0.732911	-0.797477	-5.23489	-4.71172
13300	-0.893597	-1.00485	-0.537921	-0.442976	-0.719836	-0.54483	-0.46515	-0.964413	-1.19228	-0.791667	13300		-4.38037	-4.02951	13300	-0.719836	-0.791667	-5.22896	-4.72102
13350	-0.904723	-1.00485	-0.5699	-0.442976	-0.730612	-0.556158	-0.46515	-0.964413	-1.19228	-0.794499	13350		-4.40097	-4.04267	13350	-0.730612	-0.794499	-5.2349	-4.71477
13400	-0.893597	-1.00485	-0.580568	-0.463804	-0.735705	-0.54483	-0.454584	-0.975665	-1.20426	-0.794836	13400		-4.40689	-4.06232	13400	-0.735705	-0.794836	-5.2438	-4.73035
13450	-0.882447	-0.993673	-0.601929	-0.474243	-0.738073	-0.533502	-0.46515	-1.00955	-1.20426	-0.803116	13450		-4.42453	-4.08863	13450	-0.738073	-0.803116	-5.28241	-4.76137
13500	-0.893597	-1.00485	-0.5699	-0.442976	-0.727831	-0.522199	-0.46515	-0.95316	-1.20426	-0.786193	13500		-4.44808	-4.10834	13500	-0.727831	-0.786193	-5.27351	-4.76131
13550	-0.904723	-1.00485	-0.559257	-0.463804	-0.733158	-0.54483	-0.475742	-0.964413	-1.21628	-0.800316	13550		-4.45693	-4.12159	13550	-0.733158	-0.800316	-5.30023	-4.76445
13600	-0.882447	-0.949071	-0.591261	-0.463804	-0.721646	-0.488366	-0.412471	-0.964413	-1.21628	-0.770382	13600		-4.47458	-4.12812	13600	-0.721646	-0.770382	-5.31211	-4.77378
13650	-0.904723	-0.993673	-0.5699	-0.45339	-0.730421	-0.522199	-0.46515	-0.95316	-1.19228	-0.783196	13650		-4.48635	-4.15437	13650	-0.730421	-0.783196	-5.31806	-4.78309
13700	-0.893597	-0.993673	-0.5699	-0.45339	-0.72764	-0.533502	-0.475742	-0.95316	-1.18029	-0.785673	13700		-4.51581	-4.16427	13700	-0.72764	-0.785673	-5.32104	-4.77994
13750	-0.893597	-1.00485	-0.537921	-0.442976	-0.719836	-0.54483	-0.475742	-0.964413	-1.20426	-0.797312	13750		-4.53638	-4.18408	13750	-0.719836	-0.797312	-5.32402	-4.79233
13800	-0.893597	-1.00485	-0.5699	-0.45339	-0.730434	-0.533502	-0.46515	-0.964413	-1.21628	-0.794836	13800		-4.54816	-4.19386	13800	-0.730434	-0.794836	-5.35372	-4.81094
13850	-0.893597	-0.971372	-0.580568	-0.45339	-0.724732	-0.522199	-0.454584	-0.964413	-1.20426	-0.786365	13850		-4.57174	-4.20037	13850	-0.724732	-0.786365	-5.36857	-4.82336
13900	-0.904723	-1.00485	-0.559257	-0.463804	-0.733158	-0.556158	-0.475742	-0.964413	-1.20426	-0.800144	13900		-4.58647	-4.22663	13900	-0.733158	-0.800144	-5.36562	-4.81091
13950	-0.893597	-0.93792	-0.580568	-0.45339	-0.716369	-0.533502	-0.422961	-0.975665	-1.21628	-0.787102	13950		-4.61888	-4.25284	13950	-0.716369	-0.787102	-5.38045	-4.83569
14000	-0.882447	-0.93792	-0.559257	-0.422173	-0.700449	-0.522199	-0.444017	-0.964413	-1.20426	-0.783723	14000		-4.64834	-4.27233	14000	-0.700449	-0.783723	-5.40424	-4.82647
14050	-0.893597	-1.00485	-0.559257	-0.474243	-0.732987	-0.556158	-0.507644	-0.95316	-1.21628	-0.808311	14050		-4.67488	-4.30192	14050	-0.732987	-0.808311	-5.40721	-4.84808
14100	-0.904723	-1.00485	-0.559257	-0.45339	-0.730555	-0.567538	-0.475742	-0.964413	-1.19228	-0.799992	14100		-4.6955	-4.3249	14100	-0.730555	-0.799992	-5.41315	-4.83873
14150	-0.893597	-1.00485	-0.537921	-0.45339	-0.72244	-0.54483	-0.497002	-0.975665	-1.21628	-0.808444	14150		-4.71319	-4.3249	14150	-0.72244	-0.808444	-5.43098	-4.86356
14200	-0.904723	-1.016	-0.5699	-0.463804	-0.738607	-0.54483	-0.497002	-0.975665	-1.21628	-0.808444	14200		-4.7515	-4.36412	14200	-0.738607	-0.808444	-5.45179	-4.87907
14250	-0.882447	-0.993673	-0.537921	-0.442976	-0.714254	-0.54483	-0.475742	-0.975665	-1.21628	-0.803129	14250		-4.76625	-4.36736	14250	-0.714254	-0.803129	-5.45477	-4.88831
14300	-0.904723	-0.949071	-0.559257	-0.45339	-0.71661	-0.54483	-0.433502	-0.975665	-1.21628	-0.792569	14300		-4.78686	-4.39346	14300	-0.71661	-0.792569	-5.45774	-4.87593
14350	-0.893597	-1.00485	-0.591261	-0.463804	-0.738378	-0.567538	-0.497002	-1.00955	-1.21628	-0.822592	14350		-4.79864	-4.39999	14350	-0.738378	-0.822592	-5.47557	-4.87902
14400	-0.893597	-1.016	-0.5699	-0.463804	-0.735825	-0.556158	-0.507644	-0.998245	-1.21628	-0.819582	14400		-4.82813	-4.4229	14400	-0.735825	-0.819582	-5.49342	-4.89451
14450	-0.915873	-1.016	-0.537921	-0.442976	-0.728193	-0.522199	-0.475742	-0.964413	-1.21628	-0.794658	14450		-4.83405	-4.43278	14450	-0.728193	-0.794658	-5.4845	-4.90068
14500	-0.915873	-0.993673	-0.5699	-0.474243	-0.738422	-0.533502	-0.475742	-0.975665	-1.22829	-0.8033	14500		-4.84583	-4.45558	14500	-0.738422	-0.8033	-5.50233	-4.90684
14550	-0.893597	-1.00485	-0.580568	-0.474243	-0.738315	-0.54483	-0.475742	-1.00955	-1.22829	-0.814603	14550		-4.87237	-4.48172	14550	-0.738315	-0.814603	-5.53801	-4.9193
14600	-0.904723	-1.00485	-0.559257	-0.45339	-0.730555	-0.556158	-0.497002	-0.998245	-1.21628	-0.816921	14600		-4.88124	-4.47845	14600	-0.730555	-0.816921	-5.53802	-4.91614
14650	-0.904723	-0.993673	-0.559257	-0.463804	-0.730364	-0.54483	-0.46515	-0.998245	-1.22829	-0.80913	14650		-4.90187	-4.5078	14650	-0.730364	-0.80913	-5.5529	-4.92542
14700	-0.915873	-1.016	-0.5699	-0.474243	-0.744004	-0.567538	-0.475742	-0.998245	-1.21628	-0.814451	14700		-4.92546	-4.52393	14700	-0.744004	-0.814451	-5.57073	-4.93467
14750	-0.904723	-1.016	-0.5699	-0.463804	-0.738607	-0.522199	-0.475742	-1.00955	-1.22829	-0.808946	14750		-4.93135	-4.54675	14750	-0.738607	-0.808946	-5.60048	-4.944
14800	-0.893597	-1.016	-0.559257	-0.474243	-0.735775	-0.533502	-0.507644	-1.00955	-1.21628	-0.816743	14800		-4.952	-4.54668	14800	-0.735775	-0.816743	-5.59154	-4.96866
14850	-0.893597	-0.982523	-0.5699	-0.45339	-0.724853	-0.522199	-0.46515	-0.975665	-1.24033	-0.800837	14850		-4.97853	-4.5697	14850	-0.724853	-0.800837	-5.62727	-4.96863
14900	-0.893597	-1.00485	-0.5699	-0.45339	-0.730434	-0.556158	-0.497002	-0.975665	-1.22829	-0.81428	14900		-4.99036	-4.59563	14900	-0.730434	-0.81428	-5.65404	-4.97175
14950	-0.882447	-1.00485	-0.580568	-0.463804	-0.732917	-0.522199	-0.497002	-1.00955	-1.24033	-0.81727	14950		-5.011	-4.59232	14950	-0.732917	-0.81727	-5.6719	-4.99949
15000	-0.893597	-0.982523	-0.559257	-0.432587	-0.716991	-0.522199	-0.46515	-0.998245	-1.21628	-0.800468	15000		-5.0464	-4.5989	15000	-0.716991	-0.800468	-5.68383	-5.00257
15050	-0.904723	-0.971372	-0.537921	-0.45339	-0.716851	-0.54483	-0.444017	-0.975665	-1.22829	-0.798201	15050		-5.04937	-4.61843	15050	-0.716851	-0.798201	-5.69573	-5.00872
15100	-0.893597	-0.982523	-0.580568	-0.442976	-0.724916	-0.499618	-0.46515	-0.998245	-1.24033	-0.800837	15100		-5.08182	-4.63791	15100	-0.724916	-0.800837	-5.73143	-5.01182
15150	-0.904723	-0.949071	-0.5699	-0.45339	-0.719271	-0.522199	-0.454584	-1.00955	-1.21628	-0.800652	15150		-5.09069	-4.64766	15150	-0.719271	-0.800652	-5.74335	-5.02723
15200	-0.882447	-0.993673	-0.580568	-0.474243	-0.732733	-0.522199	-0.454584	-1.00955	-1.21628	-0.800652	15200		-5.11429	-4.67032	15200	-0.732733	-0.800652	-5.75228	-5.03963
15250	-0.893597	-1.00485	-0.580568	-0.45339	-0.733101	-0.54483	-0.475742	-1.00955	-1.22829	-0.814603	15250		-5.12313	-4.68012	15250	-0.733101	-0.814603	-5.7761	-5.04254
15300	-0.882447	-0.982523	-0.580568	-0.463804	-0.727335	-0.54483	-0.475742	-0.998245	-1.22829	-0.811778	15300		-5.1261	-4.69316	15300	-0.727335	-0.811778	-5.79397	-5.04876
15350	-0.882447	-0.993673	-0.527279	-0.432587	-0.708997	-0.522199	-0.497002	-1.02088	-1.2524	-0.823119	15350		-5.14678	-4.72566	15350	-0.708997	-0.823119	-5.80589	-5.08267
15400	-0.904723	-0.993673	-0.5699	-0.463804	-0.733025	-0.54483	-0.46515	-1.00955	-1.24033	-0.814965	15400		-5.17924	-4.73528	15400	-0.733025	-0.814965	-5.82078	-5.09494
15450	-0.893597	-1.00485	-0.591261	-0.474243	-0.740988	-0.54483	-0.475742	-1.02088	-1.22829	-0.817435	15450		-5.194	-4.74834	15450	-0.740988	-0.817435	-5.84758	-5.09801
15500	-0.893597	-0.949071	-0.591261	-0.474243	-0.727043	-0.54483	-0.433502	-1.02088	-1.2524	-0.812902	15500		-5.2117	-4.75791	15500	-0.727043	-0.812902	-5.86544	-5.09802
15550	-0.893597	-0.993673	-0.559257	-0.422173	-0.717175	-0.54483	-0.497002	-1.02088	-1.2524	-0.828777	15550		-5.24119	-4.7873	15550	-0.717175	-0.828777	-5.86546	-5.1103
15600	-0.893597	-1.00485	-0.559257	-0.463804	-0.730377	-0.54483	-0.46515	-1.02088	-1.27653	-0.826846	15600		-5.25007	-4.80354	15600	-0.730377	-0.826846	-5.88035	-5.12876
15650	-0.893597	-0.982523	-0.580568	-0.463804	-0.730123	-0.499618	-0.475742	-1.02088	-1.28862	-0.821214	15650		-5.26188	-4.80667	15650	-0.730123	-0.821214	-5.90419	-5.12874
15700	-0.893597	-0.971372	-0.580568	-0.45339	-0.724732	-0.522199	-0.46515	-1.02088	-1.2524	-0.815156	15700		-5.28552	-4.8227	15700	-0.724732	-0.815156	-5.91908	-5.15334
15750	-0.893597	-1.016	-0.5699	-0.432587	-0.728021	-0.556158	-0.497002	-1.02088	-1.2524	-0.831609	15750		-5.30617	-4.84544	15750	-0.728021	-0.831609	-5.92504	-5.14723
15800	-0.904723	-0.949071	-0.580568	-0.463804	-0.724541	-0.522199	-0.433502	-1.02088	-1.27653	-0.813276	15800		-5.31506	-4.85189	15800	-0.724541	-0.813276	-5.93399	-5.16563
15850	-0.904723	-0.92677	-0.580568	-0.432587	-0.711162	-0.54483	-0.422961	-1.03221	-1.24033	-0.810082	15850		-5.32981	-4.86161	15850	-0.711162	-0.810082	-5.96079	-5.16873
15900	-0.893597	-0.971372	-0.580568	-0.442976	-0.722128	-0.533502	-0.46515	-1.02088	-1.27653	-0.824014	15900		-5.32982	-4.87799	15900	-0.722128	-0.824014	-5.96378	-5.17797
15950	-0.893597	-1.00485	-0.580568	-0.45339	-0.733101	-0.54483	-0.46515	-1.03221	-1.2524	-0.823646	15950		-5.37115	-4.91017	15950	-0.733101	-0.823646	-5.98762	-5.19026
16000	-0.893597	-0.949071	-0.580568	-0.463804	-0.72176	-0.54483	-0.444017	-1.02088	-1.2524	-0.81553	16000		-5.39479	-4.92636	16000	-0.72176	-0.81553	-5.9906	-5.19023
16050	-0.904723	-1.00485	-0.591261	-0.463804	-0.741159	-0.54483	-0.475742	-1.03221	-1.2524	-0.826294	16050		-5.39184	-4.93606	16050	-0.741159	-0.826294	-6.0055	-5.19636
16100	-0.893597	-1.00485	-0.580568	-0.463804	-0.735705	-0.556158	-0.497002	-1.02088	-1.27653	-0.837641	16100		-5.43316	-4.94904	16100	-0.735705	-0.837641	-6.01444	-5.19023
16150	-0.893597	-1.00485	-0.5699	-0.45339	-0.730434	-0.556158	-0.475742	-1.02088	-1.2524	-0.826294	16150		-5.43617	-4.96183	16150	-0.730434	-0.826294	-6.02637	-5.20555
16200	-0.904723	-1.016	-0.580568	-0.474243	-0.743883	-0.578891	-0.497002	-1.02088	-1.2524	-0.837292	16200		-5.44798	-4.98438	16200	-0.743883	-0.837292	-6.05021	-5.20553
16250	-0.904723	-1.016	-0.580568	-0.463804	-0.741274	-0.54483	-0.497002	-1.03221	-1.28862	-0.840664	16250		-5.45685	-4.99405	16250	-0.741274	-0.840664	-6.05919	-5.21169
16300	-0.893597	-0.993673	-0.580568	-0.442976	-0.727704	-0.533502	-0.46515	-1.00955	-1.2524	-0.81515	16300		-5.47459	-5.00995	16300	-0.727704	-0.81515	-6.08301	-5.23629
16350	-0.893597	-1.00485	-0.580568	-0.463804	-0.735705	-0.556158	-0.507644	-1.02088	-1.2524	-0.834269	16350		-5.49818	-5.02944	16350	-0.735705	-0.834269	-6.09495	-5.2393
16400	-0.904723	-1.00485	-0.5699	-0.463804	-0.735819	-0.567538	-0.46515	-1.02088	-1.2524	-0.826491	16400		-5.50116	-5.04532	16400	-0.735819	-0.826491	-6.10986	-5.22702
16450	-0.893597	-1.016	-0.591261	-0.484657	-0.746379	-0.567538	-0.507644	-1.03221	-1.27653	-0.845979	16450		-5.53365	-5.06788	16450	-0.746379	-0.845979	-6.12478	-5.24542
16500	-0.915873	-0.971372	-0.559257	-0.45339	-0.724973	-0.54483	-0.475742	-1.02088	-1.2524	-0.823462	16500		-5.54251	-5.08418	16500	-0.724973	-0.823462	-6.13672	-5.24236
16550	-0.904723	-1.02718	-0.5699	-0.474243	-0.74401	-0.567538	-0.518338	-1.02088	-1.2524	-0.839787	16550		-5.55732	-5.11302	16550	-0.74401	-0.839787	-6.14268	-5.27299
16600	-0.893597	-0.982523	-0.5699	-0.45339	-0.724853	-0.54483	-0.46515	-1.02088	-1.2524	-0.820814	16600		-5.57207	-5.13551	16600	-0.724853	-0.820814	-6.15762	-5.2699
16650	-0.893597	-1.00485	-0.591261	-0.463804	-0.738378	-0.54483	-0.497002	-1.03221	-1.27653	-0.837641	16650		-5.59572	-5.12891	16650	-0.738378	-0.837641	-6.1755	-5.2791
16700	-0.893597	-0.993673	-0.5699	-0.45339	-0.72764	-0.533502	-0.475742	-1.00955	-1.24033	-0.814781	16700		-5.60458	-5.16124	16700	-0.72764	-0.814781	-6.18447	-5.28217
16750	-0.893597	-0.949071	-0.5699	-0.45339	-0.71649	-0.522199	-0.444017	-1.02088	-1.27653	-0.815905	16750		-5.60756	-5.16753	16750	-0.71649	-0.815905	-6.19938	-5.29443
16800	-0.904723	-0.993673	-0.580568	-0.45339	-0.733088	-0.556158	-0.475742	-1.03221	-1.27653	-0.835158	16800		-5.63123	-5.18968	16800	-0.733088	-0.835158	-6.2173	-5.30355
16850	-0.904723	-1.016	-0.5699	-0.474243	-0.741216	-0.533502	-0.497002	-1.03221	-1.27653	-0.834809	16850		-5.66666	-5.19937	16850	-0.741216	-0.834809	-6.22624	-5.31889
16900	-0.904723	-0.993673	-0.5699	-0.45339	-0.730421	-0.499618	-0.46515	-1.00955	-1.28862	-0.815734	16900		-5.65481	-5.21581	16900	-0.730421	-0.815734	-6.2173	-5.32194
16950	-0.904723	-0.982523	-0.5699	-0.45339	-0.727634	-0.556158	-0.46515	-1.02088	-1.27653	-0.829678	16950		-5.69034	-5.23798	16950	-0.727634	-0.829678	-6.25011	-5.33415
17000	-0.882447	-0.949071	-0.580568	-0.45339	-0.716369	-0.522199	-0.444017	-1.02088	-1.24033	-0.806856	17000		-5.71692	-5.25405	17000	-0.716369	-0.806856	-6.274	-5.34339
17050	-0.893597	-1.00485	-0.580568	-0.474243	-0.738315	-0.54483	-0.497002	-1.04358	-1.2524	-0.834453	17050		-5.74056	-5.28605	17050	-0.738315	-0.834453	-6.28296	-5.35567
17100	-0.893597	-1.00485	-0.5699	-0.45339	-0.730434	-0.567538	-0.497002	-1.02088	-1.2524	-0.834453	17100		-5.74062	-5.29874	17100	-0.730434	-0.834453	-6.29491	-5.35866
17150	-0.893597	-0.982523	-0.537921	-0.432587	-0.711657	-0.533502	-0.46515	-1.02088	-1.27653	-0.824014	17150		-5.75535	-5.32105	17150	-0.711657	-0.824014	-6.30983	-5.36174
17200	-0.882447	-1.00485	-0.591261	-0.463804	-0.73559	-0.54483	-0.497002	-1.05494	-1.28862	-0.846347	17200		-5.78199	-5.34638	17200	-0.73559	-0.846347	-6.34565	-5.37094
17250	-0.904723	-0.982523	-0.580568	-0.474243	-0.735514	-0.54483	-0.46515	-1.03221	-1.27653	-0.829678	17250		-5.79675	-5.36566	17250	-0.735514	-0.829678	-6.34268	-5.38617
17300	-0.904723	-0.982523	-0.559257	-0.474243	-0.730186	-0.54483	-0.475742	-1.02088	-1.24033	-0.820445	17300		-5.80858	-5.37526	17300	-0.730186	-0.820445	-6.36356	-5.39231
17350	-0.893597	-1.00485	-0.591261	-0.474243	-0.740988	-0.54483	-0.497002	-1.03221	-1.27653	-0.837641	17350		-5.8234	-5.41694	17350	-0.740988	-0.837641	-6.39045	-5.41064
17400	-0.904723	-0.971372	-0.580568	-0.442976	-0.72491	-0.499618	-0.46515	-1.03221	-1.27653	-0.818375	17400		-5.84113	-5.4388	17400	-0.72491	-0.818375	-6.39942	-5.40146
17450	-0.893597	-1.02718	-0.580568	-0.45339	-0.738683	-0.54483	-0.497002	-1.04358	-1.27653	-0.840486	17450		-5.89144	-5.45171	17450	-0.738683	-0.840486	-6.42929	-5.41673
17500	-0.904723	-0.982523	-0.580568	-0.474243	-0.735514	-0.522199	-0.46515	-1.03221	-1.27653	-0.82402	17500		-5.90626	-5.47724	17500	-0.735514	-0.82402	-6.43231	-5.42282
17550	-0.893597	-0.982523	-0.580568	-0.474243	-0.732733	-0.522199	-0.475742	-1.04358	-1.27653	-0.829513	17550		-5.93883	-5.49626	17550	-0.732733	-0.829513	-6.45022	-5.43201
17600	-0.904723	-1.016	-0.580568	-0.484657	-0.746487	-0.533502	-0.497002	-1.05494	-1.27653	-0.840492	17600		-5.9566	-5.50869	17600	-0.746487	-0.840492	-6.47114	-5.45036
17650	-0.904723	-1.00485	-0.5699	-0.463804	-0.735819	-0.54483	-0.497002	-1.03221	-1.24033	-0.828592	17650		-5.98324	-5.52152	17650	-0.735819	-0.828592	-6.48012	-5.4442
17700	-0.893597	-1.00485	-0.591261	-0.442976	-0.733171	-0.522199	-0.475742	-1.03221	-1.28862	-0.829691	17700		-5.9951	-5.53768	17700	-0.733171	-0.829691	-6.49806	-5.45029
17750	-0.904723	-1.016	-0.591261	-0.463804	-0.743947	-0.556158	-0.497002	-1.02088	-1.27653	-0.837641	17750		-6.03077	-5.57886	17750	-0.743947	-0.837641	-6.52792	-5.52041
17800	-0.904723	-1.016	-0.5699	-0.442976	-0.7334	-0.54483	-0.518338	-1.03221	-1.27653	-0.842975	17800		-6.08404	-5.58519	17800	-0.7334	-0.842975	-6.53392	-5.52649
17850	-0.904723	-1.00485	-0.5699	-0.463804	-0.735819	-0.522199	-0.518338	-1.02088	-1.27653	-0.834485	17850		-6.09002	-5.6044	17850	-0.735819	-0.834485	-6.54887	-5.52649
17900	-0.904723	-1.00485	-0.5699	-0.45339	-0.733215	-0.54483	-0.46515	-1.02088	-1.27653	-0.826846	17900		-6.1344	-5.64591	17900	-0.733215	-0.826846	-6.56081	-5.54482
17950	-0.915873	-1.016	-0.591261	-0.474243	-0.749344	-0.556158	-0.497002	-1.03221	-1.27653	-0.840473	17950		-6.12556	-5.65523	17950	-0.749344	-0.840473	-6.59073	-5.53868
18000	-0.904723	-0.993673	-0.591261	-0.484657	-0.743579	-0.54483	-0.475742	-1.05494	-1.28862	-0.841032	18000		-6.14041	-5.67141	18000	-0.743579	-0.841032	-6.62362	-5.55699
18050	-0.893597	-0.971372	-0.580568	-0.463804	-0.727335	-0.499618	-0.454584	-1.03221	-1.28862	-0.818756	18050		-6.17588	-5.68717	18050	-0.727335	-0.818756	-6.60867	-5.55689
18100	-0.904723	-0.993673	-0.580568	-0.474243	-0.738302	-0.54483	-0.46515	-1.04358	-1.27653	-0.832523	18100		-6.20554	-5.70281	18100	-0.738302	-0.832523	-6.63257	-5.56912
18150	-0.893597	-1.00485	-0.580568	-0.484657	-0.740918	-0.522199	-0.497002	-1.04358	-1.28862	-0.837851	18150		-6.22633	-5.72489	18150	-0.740918	-0.837851	-6.65952	-5.57221
18200	-0.904723	-0.971372	-0.580568	-0.45339	-0.727513	-0.522199	-0.444017	-1.03221	-1.27653	-0.818737	18200		-6.19952	-5.75652	18200	-0.727513	-0.818737	-6.68047	-5.58734
18250	-0.915873	-0.993673	-0.580568	-0.474243	-0.741089	-0.533502	-0.475742	-1.04358	-1.28862	-0.835362	18250		-6.2797	-5.7694	18250	-0.741089	-0.835362	-6.69245	-5.59947
18300	-0.904723	-1.00485	-0.591261	-0.484657	-0.746373	-0.54483	-0.497002	-1.04358	-1.27653	-0.840486	18300		-6.32417	-5.79126	18300	-0.746373	-0.840486	-6.71934	-5.60259
18350	-0.904723	-1.00485	-0.591261	-0.484657	-0.746373	-0.522199	-0.497002	-1.04358	-1.28862	-0.837851	18350		-6.33015	-5.81029	18350	-0.746373	-0.837851	-6.74032	-5.6147
18400	-0.904723	-1.016	-0.591261	-0.484657	-0.74916	-0.499618	-0.507644	-1.04358	-1.27653	-0.831844	18400		-6.37462	-5.83869	18400	-0.74916	-0.831844	-6.75227	-5.6359
18450	-0.904723	-1.016	-0.591261	-0.474243	-0.746557	-0.533502	-0.497002	-1.04358	-1.28862	-0.840676	18450		-6.39837	-5.8481	18450	-0.746557	-0.840676	-6.76424	-5.64505
18500	-0.904723	-0.971372	-0.601929	-0.505511	-0.745884	-0.499618	-0.454584	-1.05494	-1.28862	-0.82444	18500		-6.4074	-5.87645	18500	-0.745884	-0.82444	-6.77621	-5.64198
18550	-0.904723	-1.00485	-0.601929	-0.474243	-0.746436	-0.54483	-0.497002	-1.04358	-1.28862	-0.843509	18550		-6.4666	-5.87652	18550	-0.746436	-0.843509	-6.78817	-5.6512
18600	-0.915873	-1.016	-0.591261	-0.474243	-0.749344	-0.533502	-0.497002	-1.03221	-1.27653	-0.834809	18600		-6.46671	-5.91729	18600	-0.749344	-0.834809	-6.81808	-5.67857
18650	-0.904723	-1.02718	-0.601929	-0.505511	-0.759835	-0.533502	-0.497002	-1.04358	-1.28862	-0.840676	18650		-6.51122	-5.93323	18650	-0.759835	-0.840676	-6.82408	-5.65414
18700	-0.904723	-1.00485	-0.601929	-0.484657	-0.74904	-0.54483	-0.497002	-1.05494	-1.30073	-0.849376	18700		-6.52603	-5.94897	18700	-0.74904	-0.849376	-6.854	-5.67541
18750	-0.915873	-1.016	-0.601929	-0.484657	-0.754615	-0.522199	-0.497002	-1.04358	-1.27653	-0.834828	18750		-6.57653	-5.97394	18750	-0.754615	-0.834828	-6.87795	-5.69064
18800	-0.904723	-1.00485	-0.591261	-0.474243	-0.743769	-0.533502	-0.475742	-1.03221	-1.27653	-0.829494	18800		-6.61506	-5.99622	18800	-0.743769	-0.829494	-6.87798	-5.69961
18850	-0.904723	-0.982523	-0.601929	-0.484657	-0.743458	-0.533502	-0.444017	-1.05494	-1.30073	-0.833298	18850		-6.61222	-5.99312	18850	-0.743458	-0.833298	-6.88694	-5.70878
18900	-0.904723	-0.993673	-0.591261	-0.432587	-0.730561	-0.522199	-0.46515	-1.04358	-1.32497	-0.838975	18900		-6.62123	-6.02778	18900	-0.730561	-0.838975	-6.91688	-5.72696
18950	-0.915873	-1.02718	-0.591261	-0.463804	-0.749529	-0.533502	-0.507644	-1.03221	-1.30073	-0.843521	18950		-6.67167	-6.01784	18950	-0.749529	-0.843521	-6.92889	-5.74216
19000	-0.915873	-1.00485	-0.5699	-0.432587	-0.730802	-0.54483	-0.475742	-1.04358	-1.27653	-0.835171	19000		-6.71916	-6.0401	19000	-0.730802	-0.835171	-6.93485	-5.74518
19050	-0.904723	-0.993673	-0.591261	-0.474243	-0.740975	-0.522199	-0.46515	-1.04358	-1.30073	-0.832917	19050		-6.73407	-6.07789	19050	-0.740975	-0.832917	-6.95282	-5.7482
19100	-0.915873	-0.993673	-0.601929	-0.484657	-0.749033	-0.533502	-0.497002	-1.05494	-1.28862	-0.843515	19100		-6.77271	-6.05932	19100	-0.749033	-0.843515	-6.96481	-5.76334
19150	-0.915873	-0.993673	-0.580568	-0.45339	-0.735876	-0.533502	-0.475742	-1.04358	-1.32497	-0.844448	19150		-6.79943	-6.11221	19150	-0.735876	-0.844448	-6.98278	-5.77548
19200	-0.915873	-1.016	-0.591261	-0.474243	-0.749344	-0.533502	-0.497002	-1.03221	-1.27653	-0.834809	19200		-6.84096	-6.13771	19200	-0.749344	-0.834809	-7.00373	-5.7815
19250	-0.904723	-0.982523	-0.591261	-0.484657	-0.740791	-0.499618	-0.46515	-1.04358	-1.28862	-0.824243	19250		-6.85897	-6.14346	19250	-0.740791	-0.824243	-7.01869	-5.79962
19300	-0.915873	-1.016	-0.601929	-0.484657	-0.754615	-0.54483	-0.497002	-1.06634	-1.28862	-0.849198	19300		-6.89757	-6.16859	19300	-0.754615	-0.849198	-7.03664	-5.80873
19350	-0.915873	-1.00485	-0.591261	-0.463804	-0.743947	-0.499618	-0.507644	-1.04358	-1.28862	-0.834866	19350		-6.92729	-6.18739	19350	-0.743947	-0.834866	-7.04266	-5.81776
19400	-0.915873	-0.982523	-0.580568	-0.474243	-0.738302	-0.522199	-0.454584	-1.04358	-1.30073	-0.830275	19400		-6.95408	-6.16282	19400	-0.738302	-0.830275	-7.06663	-5.82379
19450	-0.915873	-1.00485	-0.601929	-0.463804	-0.746614	-0.499618	-0.475742	-1.04358	-1.30073	-0.82992	19450		-6.96892	-6.20899	19450	-0.746614	-0.82992	-7.09063	-5.85107
19500	-0.904723	-1.016	-0.601929	-0.474243	-0.749224	-0.499618	-0.497002	-1.05494	-1.30073	-0.838073	19500		-6.972	-6.23415	19500	-0.749224	-0.838073	-7.11759	-5.85408
19550	-0.915873	-1.016	-0.591261	-0.474243	-0.749344	-0.499618	-0.507644	-1.04358	-1.30073	-0.837895	19550		-6.98689	-6.2497	19550	-0.749344	-0.837895	-7.11759	-5.8601
19600	-0.904723	-0.993673	-0.591261	-0.484657	-0.743579	-0.522199	-0.454584	-1.05494	-1.31285	-0.836143	19600		-7.04926	-6.27162	19600	-0.743579	-0.836143	-7.11849	-5.8723
19650	-0.904723	-1.02718	-0.601929	-0.474243	-0.752018	-0.533502	-0.497002	-1.06634	-1.32497	-0.855453	19650		-7.05227	-6.31535	19650	-0.752018	-0.855453	-7.12661	-5.87818
19700	-0.904723	-0.993673	-0.591261	-0.463804	-0.738365	-0.522199	-0.46515	-1.04358	-1.30073	-0.832917	19700		-7.073	-6.34945	19700	-0.738365	-0.832917	-7.17159	-5.9115
19750	-0.915873	-0.982523	-0.591261	-0.474243	-0.740975	-0.522199	-0.475742	-1.04358	-1.30073	-0.835565	19750		-7.11479	-6.35881	19750	-0.740975	-0.835565	-7.19857	-5.91746
19800	-0.915873	-0.993673	-0.601929	-0.474243	-0.74643	-0.522199	-0.475742	-1.04358	-1.31285	-0.838594	19800		-7.13854	-6.39923	19800	-0.74643	-0.838594	-7.2046	-5.91741
19850	-0.893597	-0.993673	-0.591261	-0.463804	-0.735584	-0.488366	-0.475742	-1.04358	-1.32497	-0.833164	19850		-7.16831	-6.42375	19850	-0.735584	-0.833164	-7.24959	-5.93853
19900	-0.893597	-1.016	-0.612597	-0.484657	-0.751713	-0.522199	-0.507644	-1.08918	-1.30073	-0.854939	19900		-7.18916	-6.4702	19900	-0.751713	-0.854939	-7.25861	-5.95661
19950	-0.904723	-1.016	-0.5699	-0.45339	-0.736003	-0.533502	-0.497002	-1.04358	-1.33711	-0.852799	19950		-7.19811	-6.49507	19950	-0.736003	-0.852799	-7.2736	-5.96262
20000	-0.904723	-1.00485	-0.5699	-0.442976	-0.730612	-0.533502	-0.497002	-1.04358	-1.32497	-0.849763	20000		-7.22191	-6.51321	20000	-0.730612	-0.849763	-7.28561	-5.9718
