# Supplementary material for: Evaluation of a Cold-Mixed High-Performance Polyurethane Mixture
Source: Hindawi journal article supplement (doi:10.1155/2019/1507971), 2019-11-07
Supplement: f1 [file 1507971.f1.zip › 1507971.f1/dynamic modulus data/PUM/specimen1/temp10/zhs-1-10_0.1Hz.csv]

Test Information
****************
Project name	zhs
Operator name	1
Target test temperature	10
Target confining stress	0
Average dynamic strain range from 75 to 125 micro-strain
Contact stress	5
Initial modulus	4000
Axial gauge length	70
Comments	Run at High Pressure
Specimen information
********************
Identification	zhs-1-10
Dimensions	Point 1	Point 2	Point 3	Point 4	Point 5	Point 6	Average	Std Dev.
Diameter (mm)	49.2	49.2	49.3				49.23	0.058
Height (mm)	101.3	101.2	101.3				101.27	0.058
Cross-sectional area (mm�)	1903.7
Conditioning time
Properties/Comments
Test Data	0.1Hz
*********
Test date and time	Fri	Mar 29	2019	11:04 AM
Dynamic modulus (MPa)	10894
Phase angle (Degrees)	3.79
Average temperature (�C)	9.9
Average confining pressure (kPa)	-0.5
Average micro-strain	100
Load drift (%)	-0.1
Load standard error (%)	2.2
Average deformation drift (%)	-7.0
Average deformation standard error (%)	4.7
Deformation uniformity (%)	53.2
Phase uniformity (Degrees)	0.8
Conditioning Cycles
Time (sec)	Axial stress (kPa)	Axial micro-strain #1	Axial micro-strain #2	Axial micro-strain #3	Confining pressure (kPa)	Temperature (�C)	Load (N)	Displacement #1 (mm)	Displacement #2 (mm)	Displacement #3 (mm)
0.0000	35.031	40.022	13.265	0.752	-0.527	9.839	66.690	-0.002802	-0.000929	-0.000053
0.2000	65.764	44.679	15.536	0.278	-0.537	9.839	125.198	-0.003128	-0.001088	-0.000019
0.4000	78.974	47.147	16.321	0.515	-0.529	9.838	150.347	-0.003300	-0.001143	-0.000036
0.6000	103.410	50.846	17.959	0.904	-0.533	9.838	196.867	-0.003559	-0.001257	-0.000063
0.8000	134.098	56.182	19.871	1.238	-0.526	9.838	255.289	-0.003933	-0.001391	-0.000087
1.0000	153.726	60.424	22.112	1.238	-0.531	9.837	292.654	-0.004230	-0.001548	-0.000087
1.2000	194.047	66.591	24.507	2.251	-0.533	9.837	369.415	-0.004661	-0.001715	-0.000158
1.4000	235.946	71.788	27.976	3.363	-0.530	9.837	449.181	-0.005025	-0.001958	-0.000235
1.6000	278.221	79.638	31.705	4.393	-0.516	9.837	529.661	-0.005575	-0.002219	-0.000308
1.8000	335.554	89.674	35.777	6.781	-0.528	9.836	638.809	-0.006277	-0.002504	-0.000475
2.0000	378.085	96.856	39.561	8.160	-0.531	9.836	719.776	-0.006780	-0.002769	-0.000571
2.2000	449.049	107.001	44.831	10.618	-0.526	9.836	854.874	-0.007490	-0.003138	-0.000743
2.4000	483.659	112.989	48.230	11.634	-0.536	9.836	920.763	-0.007909	-0.003376	-0.000814
2.6000	545.291	122.442	53.472	13.147	-0.529	9.835	1038.094	-0.008571	-0.003743	-0.000920
2.8000	606.186	131.238	58.686	14.771	-0.551	9.834	1154.022	-0.009187	-0.004108	-0.001034
3.0000	662.302	139.938	64.138	16.497	-0.530	9.834	1260.853	-0.009796	-0.004490	-0.001155
3.2000	692.900	144.704	67.851	17.540	-0.521	9.834	1319.103	-0.010129	-0.004750	-0.001228
3.4000	725.136	150.888	71.471	18.734	-0.538	9.833	1380.472	-0.010562	-0.005003	-0.001311
3.6000	763.383	156.890	74.937	20.164	-0.530	9.831	1453.285	-0.010982	-0.005246	-0.001411
3.8000	791.636	161.214	78.240	21.150	-0.535	9.832	1507.072	-0.011285	-0.005477	-0.001481
4.0000	826.051	166.619	81.048	22.693	-0.522	9.831	1572.590	-0.011663	-0.005673	-0.001589
4.2000	850.728	170.496	82.976	23.457	-0.535	9.831	1619.568	-0.011935	-0.005808	-0.001642
4.4000	860.226	172.387	84.735	24.139	-0.537	9.831	1637.650	-0.012067	-0.005931	-0.001690
4.6000	867.259	174.191	86.234	24.457	-0.542	9.830	1651.039	-0.012193	-0.006036	-0.001712
4.8000	866.974	175.175	86.827	24.486	-0.533	9.830	1650.496	-0.012262	-0.006078	-0.001714
5.0000	876.442	176.260	87.101	24.805	-0.538	9.829	1668.520	-0.012338	-0.006097	-0.001736
5.2000	863.036	174.637	86.455	24.416	-0.533	9.829	1643.000	-0.012225	-0.006052	-0.001709
5.4000	845.724	172.970	84.899	23.903	-0.532	9.828	1610.041	-0.012108	-0.005943	-0.001673
5.6000	821.408	170.632	83.951	22.848	-0.529	9.828	1563.749	-0.011944	-0.005877	-0.001599
5.8000	789.021	165.937	81.365	21.570	-0.549	9.828	1502.094	-0.011616	-0.005696	-0.001510
6.0000	751.676	162.228	78.599	19.969	-0.538	9.827	1430.998	-0.011356	-0.005502	-0.001398
6.2000	710.273	156.043	74.610	18.583	-0.534	9.827	1352.177	-0.010923	-0.005223	-0.001301
6.4000	666.345	150.180	70.427	17.246	-0.546	9.827	1268.549	-0.010513	-0.004930	-0.001207
6.6000	615.278	143.159	66.202	15.622	-0.537	9.826	1171.331	-0.010021	-0.004634	-0.001094
6.8000	562.889	135.127	61.566	13.772	-0.543	9.826	1071.596	-0.009459	-0.004310	-0.000964
7.0000	522.402	129.471	57.490	13.301	-0.534	9.826	994.520	-0.009063	-0.004024	-0.000931
7.2000	475.108	121.109	53.171	12.160	-0.530	9.826	904.484	-0.008478	-0.003722	-0.000851
7.4000	408.517	112.420	47.707	10.576	-0.532	9.825	777.712	-0.007869	-0.003339	-0.000740
7.6000	372.118	104.765	44.047	9.631	-0.536	9.825	708.418	-0.007334	-0.003083	-0.000674
7.8000	330.204	98.068	40.030	8.214	-0.533	9.825	628.624	-0.006865	-0.002802	-0.000575
8.0000	263.403	86.784	34.938	5.811	-0.538	9.825	501.451	-0.006075	-0.002446	-0.000407
8.2000	213.629	77.599	30.906	4.435	-0.536	9.825	406.694	-0.005432	-0.002163	-0.000310
8.4000	183.812	70.845	28.046	3.794	-0.526	9.824	349.932	-0.004959	-0.001963	-0.000266
8.6000	136.248	63.408	24.395	2.210	-0.533	9.824	259.380	-0.004439	-0.001708	-0.000155
8.8000	107.769	57.768	21.935	1.182	-0.528	9.824	205.164	-0.004044	-0.001535	-0.000083
9.0000	100.931	54.210	19.913	0.933	-0.525	9.824	192.146	-0.003795	-0.001394	-0.000065
9.2000	67.508	50.015	16.940	0.723	-0.535	9.824	128.517	-0.003501	-0.001186	-0.000051
9.4000	47.580	44.232	14.406	0.559	-0.542	9.824	90.580	-0.003096	-0.001008	-0.000039
9.6000	41.283	40.824	13.403	0.668	-0.544	9.824	78.592	-0.002858	-0.000938	-0.000047
9.8000	43.567	40.324	13.443	0.654	-0.534	9.824	82.941	-0.002823	-0.000941	-0.000046
10.0000	45.281	40.380	13.622	0.613	-0.529	9.823	86.203	-0.002827	-0.000954	-0.000043
10.2000	61.331	42.897	14.298	0.112	-0.528	9.823	116.758	-0.003003	-0.001001	-0.000008
10.4000	70.123	45.689	14.821	0.210	-0.541	9.822	133.495	-0.003198	-0.001037	-0.000015
10.6000	94.529	48.653	16.419	0.014	-0.542	9.823	179.958	-0.003406	-0.001149	-0.000001
10.8000	116.846	52.248	18.344	0.432	-0.538	9.822	222.445	-0.003657	-0.001284	-0.000030
11.0000	167.897	62.157	21.853	1.391	-0.535	9.822	319.633	-0.004351	-0.001530	-0.000097
11.2000	196.827	66.717	24.314	2.224	-0.550	9.823	374.708	-0.004670	-0.001702	-0.000156
11.4000	245.835	74.052	28.320	3.684	-0.546	9.822	468.006	-0.005184	-0.001982	-0.000258
11.6000	283.977	80.974	31.249	5.058	-0.540	9.822	540.619	-0.005668	-0.002187	-0.000354
11.8000	353.047	91.994	36.217	6.850	-0.538	9.822	672.112	-0.006440	-0.002535	-0.000480
12.0000	389.131	98.345	39.452	8.297	-0.540	9.822	740.805	-0.006884	-0.002762	-0.000581
12.2000	434.501	105.265	43.165	10.075	-0.539	9.822	827.179	-0.007369	-0.003022	-0.000705
12.4000	497.260	115.199	48.781	12.230	-0.531	9.821	946.655	-0.008064	-0.003415	-0.000856
12.6000	543.908	121.427	52.689	13.299	-0.529	9.822	1035.461	-0.008500	-0.003688	-0.000931
12.8000	590.631	130.096	57.669	14.481	-0.542	9.820	1124.411	-0.009107	-0.004037	-0.001014
13.0000	643.727	137.560	62.704	16.052	-0.537	9.821	1225.491	-0.009629	-0.004389	-0.001124
13.2000	684.995	144.412	66.876	17.412	-0.532	9.821	1304.054	-0.010109	-0.004681	-0.001219
13.4000	729.749	151.832	70.976	19.177	-0.537	9.821	1389.256	-0.010628	-0.004968	-0.001342
13.6000	770.326	157.680	75.213	20.443	-0.532	9.821	1466.503	-0.011038	-0.005265	-0.001431
13.8000	793.695	161.504	77.499	21.333	-0.532	9.822	1510.992	-0.011305	-0.005425	-0.001493
14.0000	825.706	165.991	80.621	22.569	-0.529	9.822	1571.932	-0.011619	-0.005643	-0.001580
14.2000	846.806	169.842	82.991	23.457	-0.544	9.822	1612.101	-0.011889	-0.005809	-0.001642
14.4000	880.620	173.609	85.422	24.499	-0.531	9.822	1676.474	-0.012153	-0.005980	-0.001715
14.6000	880.695	175.193	86.043	24.652	-0.529	9.822	1676.617	-0.012263	-0.006023	-0.001726
14.8000	860.557	173.038	85.024	24.139	-0.527	9.822	1638.279	-0.012113	-0.005952	-0.001690
15.0000	868.627	174.315	85.726	24.389	-0.532	9.823	1653.643	-0.012202	-0.006001	-0.001707
15.2000	854.230	173.428	85.215	24.138	-0.534	9.823	1626.234	-0.012140	-0.005965	-0.001690
15.4000	833.205	171.649	84.185	23.292	-0.531	9.824	1586.208	-0.012015	-0.005893	-0.001630
15.6000	808.047	168.216	82.341	22.333	-0.520	9.824	1538.315	-0.011775	-0.005764	-0.001563
15.8000	791.411	166.578	80.387	21.485	-0.520	9.824	1506.643	-0.011660	-0.005627	-0.001504
16.0000	751.120	161.101	77.552	20.275	-0.518	9.824	1429.939	-0.011277	-0.005429	-0.001419
16.2000	707.402	155.876	73.782	18.344	-0.528	9.825	1346.712	-0.010911	-0.005165	-0.001284
16.4000	668.388	149.831	70.041	17.248	-0.532	9.825	1272.440	-0.010488	-0.004903	-0.001207
16.6000	629.796	143.954	66.020	15.940	-0.514	9.825	1198.969	-0.010077	-0.004621	-0.001116
16.8000	568.615	136.656	61.069	14.134	-0.531	9.825	1082.497	-0.009566	-0.004275	-0.000989
17.0000	517.458	128.029	56.086	13.159	-0.533	9.826	985.107	-0.008962	-0.003926	-0.000921
17.2000	466.527	120.425	51.861	12.298	-0.528	9.826	888.147	-0.008430	-0.003630	-0.000861
17.4000	425.680	112.935	47.666	10.909	-0.529	9.826	810.385	-0.007905	-0.003337	-0.000764
17.6000	378.100	106.156	43.277	9.520	-0.526	9.826	719.805	-0.007431	-0.003029	-0.000666
17.8000	306.459	94.830	38.021	7.479	-0.532	9.827	583.420	-0.006638	-0.002661	-0.000524
18.0000	272.435	87.880	34.649	6.533	-0.527	9.827	518.646	-0.006152	-0.002425	-0.000457
18.2000	220.076	77.944	30.519	4.836	-0.529	9.827	418.968	-0.005456	-0.002136	-0.000339
18.4000	173.082	70.342	26.629	3.153	-0.531	9.827	329.504	-0.004924	-0.001864	-0.000221
18.6000	159.872	66.104	24.588	2.571	-0.535	9.828	304.356	-0.004627	-0.001721	-0.000180
18.8000	120.152	60.188	21.617	1.585	-0.525	9.828	228.739	-0.004213	-0.001513	-0.000111
19.0000	77.036	50.252	18.025	0.849	-0.547	9.828	146.656	-0.003518	-0.001262	-0.000059
19.2000	64.337	47.232	16.528	0.668	-0.529	9.829	122.480	-0.003306	-0.001157	-0.000047
19.4000	60.204	45.885	15.329	0.682	-0.526	9.829	114.613	-0.003212	-0.001073	-0.000048
19.6000	34.009	41.519	12.810	0.738	-0.533	9.829	64.745	-0.002906	-0.000897	-0.000052
19.8000	35.587	38.760	12.151	0.766	-0.521	9.830	67.749	-0.002713	-0.000851	-0.000054
20.0000	56.973	42.440	13.443	0.628	-0.523	9.830	108.461	-0.002971	-0.000941	-0.000044
20.2000	57.108	42.869	13.183	0.682	-0.538	9.831	108.719	-0.003001	-0.000923	-0.000048
20.4000	72.813	45.346	14.724	0.447	-0.523	9.832	138.617	-0.003174	-0.001031	-0.000031
20.6000	93.341	49.513	16.333	0.530	-0.533	9.832	177.698	-0.003466	-0.001143	-0.000037
20.8000	117.973	54.181	18.053	0.486	-0.539	9.832	224.590	-0.003793	-0.001264	-0.000034
21.0000	164.726	60.810	21.563	1.432	-0.539	9.833	313.597	-0.004257	-0.001509	-0.000100
21.2000	211.495	68.286	25.167	2.917	-0.538	9.833	402.632	-0.004780	-0.001762	-0.000204
21.4000	238.997	73.609	27.467	3.420	-0.534	9.834	454.988	-0.005153	-0.001923	-0.000239
21.6000	299.621	82.879	31.856	5.559	-0.542	9.834	570.402	-0.005801	-0.002230	-0.000389
21.8000	340.514	91.146	35.130	6.671	-0.542	9.835	648.251	-0.006380	-0.002459	-0.000467
22.0000	387.252	97.455	39.067	8.531	-0.536	9.835	737.228	-0.006822	-0.002735	-0.000597
22.2000	445.487	106.932	43.757	10.383	-0.531	9.836	848.093	-0.007485	-0.003063	-0.000727
22.4000	502.294	115.408	48.823	12.327	-0.539	9.836	956.240	-0.008079	-0.003418	-0.000863
22.6000	551.242	122.763	53.074	13.647	-0.520	9.837	1049.423	-0.008593	-0.003715	-0.000955
22.8000	605.660	131.209	58.442	15.023	-0.536	9.837	1153.021	-0.009185	-0.004091	-0.001052
23.0000	647.559	138.534	62.951	16.442	-0.526	9.837	1232.786	-0.009697	-0.004407	-0.001151
23.2000	687.249	144.816	66.201	17.692	-0.532	9.837	1308.346	-0.010137	-0.004634	-0.001238
23.4000	724.850	150.665	70.398	18.636	-0.536	9.839	1379.929	-0.010547	-0.004928	-0.001305
23.6000	747.498	155.197	73.671	19.985	-0.538	9.839	1423.044	-0.010864	-0.005157	-0.001399
23.8000	801.375	162.034	77.663	21.610	-0.539	9.839	1525.612	-0.011342	-0.005436	-0.001513
24.0000	824.534	166.465	79.932	22.749	-0.540	9.840	1569.700	-0.011653	-0.005595	-0.001592
24.2000	846.205	169.926	82.563	23.763	-0.536	9.840	1610.956	-0.011895	-0.005779	-0.001663
24.4000	855.116	171.899	83.800	23.903	-0.521	9.840	1627.922	-0.012033	-0.005866	-0.001673
24.6000	870.896	174.232	85.228	24.833	-0.530	9.840	1657.963	-0.012196	-0.005966	-0.001738
24.8000	868.387	174.094	85.146	24.777	-0.527	9.841	1653.185	-0.012187	-0.005960	-0.001734
25.0000	875.585	175.607	85.988	24.999	-0.520	9.841	1666.889	-0.012293	-0.006019	-0.001750
25.2000	882.062	176.749	86.399	25.708	-0.527	9.842	1679.220	-0.012372	-0.006048	-0.001800
25.4000	849.616	172.594	84.460	24.166	-0.524	9.842	1617.451	-0.012082	-0.005912	-0.001692
25.6000	814.239	169.216	82.384	22.818	-0.532	9.843	1550.102	-0.011845	-0.005767	-0.001597
25.8000	784.708	165.492	79.989	21.665	-0.530	9.843	1493.883	-0.011584	-0.005599	-0.001517
26.0000	751.060	161.298	76.949	20.317	-0.534	9.843	1429.825	-0.011291	-0.005386	-0.001422
26.2000	724.429	157.043	73.864	19.415	-0.527	9.844	1379.128	-0.010993	-0.005170	-0.001359
26.4000	665.533	149.456	69.766	17.400	-0.518	9.844	1267.004	-0.010462	-0.004884	-0.001218
26.6000	613.595	142.354	65.003	15.857	-0.519	9.844	1168.127	-0.009965	-0.004550	-0.001110
26.8000	585.116	137.783	61.660	14.716	-0.528	9.844	1113.911	-0.009645	-0.004316	-0.001030
27.0000	515.850	128.250	55.813	13.243	-0.524	9.845	982.046	-0.008978	-0.003907	-0.000927
27.2000	457.931	119.397	51.243	12.063	-0.521	9.845	871.782	-0.008358	-0.003587	-0.000844
27.4000	407.255	111.213	46.756	10.480	-0.536	9.846	775.309	-0.007785	-0.003273	-0.000734
27.6000	355.813	103.039	42.479	9.450	-0.534	9.845	677.376	-0.007213	-0.002973	-0.000661
27.8000	312.426	95.066	38.201	8.047	-0.532	9.846	594.778	-0.006655	-0.002674	-0.000563
28.0000	277.184	88.729	34.387	6.671	-0.532	9.847	527.687	-0.006211	-0.002407	-0.000467
28.2000	216.033	79.083	30.328	4.532	-0.551	9.847	411.272	-0.005536	-0.002123	-0.000317
28.4000	172.391	70.592	26.475	3.670	-0.540	9.848	328.188	-0.004941	-0.001853	-0.000257
28.6000	136.548	64.355	23.737	2.613	-0.541	9.848	259.953	-0.004505	-0.001662	-0.000183
28.8000	106.236	57.612	20.683	1.460	-0.525	9.848	202.246	-0.004033	-0.001448	-0.000102
29.0000	78.463	52.204	18.233	0.820	-0.546	9.848	149.374	-0.003654	-0.001276	-0.000057
29.2000	57.258	47.329	16.474	0.960	-0.542	9.848	109.005	-0.003313	-0.001153	-0.000067
29.4000	42.230	43.343	14.145	1.196	-0.554	9.849	80.395	-0.003034	-0.000990	-0.000084
29.6000	36.579	40.796	12.866	0.974	-0.538	9.849	69.637	-0.002856	-0.000901	-0.000068
29.8000	35.798	40.867	12.453	0.960	-0.555	9.849	68.150	-0.002861	-0.000872	-0.000067
30.0000	24.421	37.993	11.077	1.293	-0.546	9.849	46.492	-0.002659	-0.000775	-0.000091
30.2000	53.907	42.788	13.278	0.932	-0.541	9.849	102.625	-0.002995	-0.000929	-0.000065
30.4000	72.061	46.104	14.560	0.862	-0.542	9.850	137.186	-0.003227	-0.001019	-0.000060
30.6000	111.330	52.735	17.573	1.293	-0.542	9.850	211.945	-0.003691	-0.001230	-0.000090
30.8000	125.562	54.975	18.659	1.362	-0.546	9.850	239.038	-0.003848	-0.001306	-0.000095
31.0000	140.891	58.115	20.503	1.334	-0.540	9.851	268.221	-0.004068	-0.001435	-0.000093
31.2000	185.661	65.217	23.792	2.169	-0.549	9.851	353.451	-0.004565	-0.001665	-0.000152
31.4000	240.259	74.026	27.702	4.185	-0.549	9.852	457.392	-0.005182	-0.001939	-0.000293
31.6000	301.064	83.754	31.923	6.144	-0.552	9.852	573.149	-0.005863	-0.002235	-0.000430
31.8000	340.649	90.743	35.378	7.574	-0.546	9.853	648.508	-0.006352	-0.002476	-0.000530
32.0000	381.286	97.037	38.282	8.729	-0.550	9.852	725.870	-0.006793	-0.002680	-0.000611
32.2000	448.237	107.835	43.908	10.896	-0.548	9.853	853.329	-0.007548	-0.003074	-0.000763
32.4000	509.643	116.747	49.263	12.993	-0.550	9.854	970.230	-0.008172	-0.003448	-0.000910
32.6000	540.031	122.746	53.059	13.758	-0.549	9.855	1028.080	-0.008592	-0.003714	-0.000963
32.8000	591.849	130.236	57.931	15.203	-0.539	9.854	1126.728	-0.009117	-0.004055	-0.001064
33.0000	650.339	138.674	62.404	16.594	-0.535	9.855	1238.079	-0.009707	-0.004368	-0.001162
33.2000	677.120	144.483	66.243	17.719	-0.545	9.855	1289.063	-0.010114	-0.004637	-0.001240
33.4000	730.816	151.552	70.758	19.512	-0.544	9.855	1391.287	-0.010609	-0.004953	-0.001366
33.6000	783.777	158.975	75.488	21.415	-0.551	9.856	1492.109	-0.011128	-0.005284	-0.001499
33.8000	787.504	160.519	76.436	21.735	-0.545	9.857	1499.205	-0.011236	-0.005351	-0.001521
34.0000	826.457	166.451	80.086	23.248	-0.556	9.856	1573.362	-0.011652	-0.005606	-0.001627
34.2000	847.843	170.300	82.797	24.236	-0.549	9.857	1614.075	-0.011921	-0.005796	-0.001697
34.4000	853.869	172.287	83.855	24.595	-0.558	9.857	1625.547	-0.012060	-0.005870	-0.001722
34.6000	867.590	173.914	84.679	24.820	-0.541	9.857	1651.669	-0.012174	-0.005928	-0.001737
34.8000	875.480	175.440	85.299	25.514	-0.549	9.858	1666.689	-0.012281	-0.005971	-0.001786
35.0000	866.072	175.164	85.381	25.235	-0.538	9.858	1648.779	-0.012261	-0.005977	-0.001766
35.2000	854.230	173.719	84.557	24.762	-0.533	9.859	1626.234	-0.012160	-0.005919	-0.001733
35.4000	824.954	170.565	83.002	23.890	-0.532	9.859	1570.501	-0.011940	-0.005810	-0.001672
35.6000	806.394	168.523	81.543	22.806	-0.538	9.859	1535.168	-0.011797	-0.005708	-0.001596
35.8000	779.869	165.757	80.003	22.013	-0.543	9.859	1484.671	-0.011603	-0.005600	-0.001541
36.0000	746.611	161.421	77.126	20.764	-0.541	9.859	1421.356	-0.011299	-0.005399	-0.001453
36.2000	734.318	158.473	74.374	20.139	-0.549	9.860	1397.953	-0.011093	-0.005206	-0.001410
36.4000	659.026	149.276	69.118	17.469	-0.536	9.860	1254.616	-0.010449	-0.004838	-0.001223
36.6000	604.473	141.908	64.356	15.815	-0.545	9.859	1150.761	-0.009934	-0.004505	-0.001107
36.8000	580.998	137.879	61.647	15.161	-0.536	9.860	1106.071	-0.009652	-0.004315	-0.001061
37.0000	490.347	125.677	54.313	13.024	-0.534	9.861	933.495	-0.008797	-0.003802	-0.000912
37.2000	481.435	122.637	52.233	12.967	-0.544	9.861	916.529	-0.008585	-0.003656	-0.000908
37.4000	415.175	113.044	46.797	11.174	-0.545	9.861	790.386	-0.007913	-0.003276	-0.000782
37.6000	352.581	102.553	41.432	9.326	-0.535	9.862	671.225	-0.007179	-0.002900	-0.000653
37.8000	312.606	95.359	37.731	8.449	-0.549	9.861	595.121	-0.006675	-0.002641	-0.000591
38.0000	266.649	87.964	34.414	6.728	-0.543	9.862	507.631	-0.006157	-0.002409	-0.000471
38.2000	230.355	80.792	30.934	5.506	-0.541	9.861	438.538	-0.005655	-0.002165	-0.000385
38.4000	198.570	73.955	27.289	4.517	-0.532	9.862	378.027	-0.005177	-0.001910	-0.000316
38.6000	134.895	63.410	22.775	2.557	-0.538	9.862	256.805	-0.004439	-0.001594	-0.000179
38.8000	132.310	61.465	21.811	2.417	-0.528	9.862	251.884	-0.004303	-0.001527	-0.000169
39.0000	102.539	55.460	19.059	1.599	-0.530	9.863	195.208	-0.003882	-0.001334	-0.000112
39.2000	63.600	47.914	15.716	1.113	-0.531	9.863	121.078	-0.003354	-0.001100	-0.000078
39.4000	49.954	44.609	13.967	1.045	-0.531	9.864	95.100	-0.003123	-0.000978	-0.000073
39.6000	40.757	42.773	12.867	1.058	-0.545	9.863	77.591	-0.002994	-0.000901	-0.000074
39.8000	34.280	40.673	11.958	0.835	-0.531	9.864	65.260	-0.002847	-0.000837	-0.000058
40.0000	33.949	39.730	11.766	1.072	-0.529	9.864	64.631	-0.002781	-0.000824	-0.000075
40.2000	57.424	43.413	13.293	1.044	-0.535	9.865	109.320	-0.003039	-0.000930	-0.000073
40.4000	75.398	46.633	14.613	0.640	-0.531	9.864	143.538	-0.003264	-0.001023	-0.000045
40.6000	86.113	48.958	15.742	0.806	-0.533	9.865	163.937	-0.003427	-0.001102	-0.000056
40.8000	114.817	53.946	17.752	0.806	-0.524	9.865	218.582	-0.003776	-0.001243	-0.000056
41.0000	155.123	61.103	21.219	1.403	-0.548	9.865	295.315	-0.004277	-0.001485	-0.000098
41.2000	194.994	66.759	23.530	2.792	-0.544	9.865	371.218	-0.004673	-0.001647	-0.000195
41.4000	253.274	75.803	27.908	4.615	-0.526	9.865	482.168	-0.005306	-0.001954	-0.000323
41.6000	301.816	83.877	31.622	5.728	-0.532	9.865	574.579	-0.005871	-0.002214	-0.000401
41.8000	337.147	90.173	34.732	7.089	-0.528	9.866	641.842	-0.006312	-0.002431	-0.000496
42.0000	388.334	98.122	38.241	9.131	-0.545	9.865	739.288	-0.006869	-0.002677	-0.000639
42.2000	435.929	106.198	42.381	10.536	-0.536	9.866	829.897	-0.007434	-0.002967	-0.000737
42.4000	487.507	114.074	47.347	12.215	-0.536	9.866	928.087	-0.007985	-0.003314	-0.000855
42.6000	540.346	121.525	51.877	13.938	-0.532	9.866	1028.681	-0.008507	-0.003631	-0.000976
42.8000	593.457	130.527	57.421	15.202	-0.538	9.866	1129.789	-0.009137	-0.004019	-0.001064
43.0000	635.702	137.074	61.482	16.318	-0.530	9.866	1210.213	-0.009595	-0.004304	-0.001142
43.2000	681.163	143.563	65.307	17.732	-0.533	9.866	1296.759	-0.010049	-0.004571	-0.001241
43.4000	722.596	150.348	69.640	18.720	-0.534	9.866	1375.637	-0.010524	-0.004875	-0.001310
43.6000	789.187	159.446	75.337	21.332	-0.536	9.866	1502.409	-0.011161	-0.005274	-0.001493
43.8000	830.996	165.951	79.699	23.125	-0.533	9.867	1582.003	-0.011617	-0.005579	-0.001619
44.0000	813.848	165.227	79.093	22.542	-0.532	9.866	1549.358	-0.011566	-0.005536	-0.001578
44.2000	850.803	170.605	82.272	23.930	-0.537	9.867	1619.711	-0.011942	-0.005759	-0.001675
44.4000	847.482	171.190	82.934	24.110	-0.540	9.866	1613.388	-0.011983	-0.005805	-0.001688
44.6000	858.678	173.249	83.979	24.736	-0.535	9.867	1634.703	-0.012127	-0.005879	-0.001732
44.8000	870.716	175.038	84.844	25.264	-0.528	9.867	1657.619	-0.012253	-0.005939	-0.001768
45.0000	854.515	173.344	84.171	24.943	-0.533	9.868	1626.778	-0.012134	-0.005892	-0.001746
45.2000	852.532	173.747	84.239	24.777	-0.521	9.867	1623.001	-0.012162	-0.005897	-0.001734
45.4000	827.028	170.898	82.688	23.779	-0.524	9.867	1574.450	-0.011963	-0.005788	-0.001665
45.6000	831.552	170.981	82.481	23.666	-0.533	9.868	1583.061	-0.011969	-0.005774	-0.001657
45.8000	804.816	167.813	79.920	22.790	-0.525	9.867	1532.164	-0.011747	-0.005594	-0.001595
46.0000	769.109	162.642	76.480	21.206	-0.530	9.867	1464.186	-0.011385	-0.005354	-0.001484
46.2000	678.503	152.234	70.124	18.345	-0.537	9.868	1291.695	-0.010656	-0.004909	-0.001284
46.4000	685.746	152.456	70.343	18.193	-0.550	9.868	1305.485	-0.010672	-0.004924	-0.001274
46.6000	627.451	144.913	65.513	16.358	-0.542	9.867	1194.506	-0.010144	-0.004586	-0.001145
46.8000	565.955	135.864	59.899	14.620	-0.526	9.868	1077.433	-0.009510	-0.004193	-0.001023
47.0000	514.708	128.432	55.371	13.271	-0.524	9.868	979.872	-0.008990	-0.003876	-0.000929
47.2000	453.783	119.118	50.184	12.467	-0.529	9.868	863.886	-0.008338	-0.003513	-0.000873
47.4000	420.765	113.488	47.074	11.467	-0.533	9.868	801.029	-0.007944	-0.003295	-0.000803
47.6000	383.149	107.180	42.973	10.435	-0.537	9.868	729.418	-0.007503	-0.003008	-0.000730
47.8000	310.096	95.426	37.787	8.144	-0.538	9.868	590.343	-0.006680	-0.002645	-0.000570
48.0000	272.976	88.590	34.538	7.074	-0.534	9.868	519.676	-0.006201	-0.002418	-0.000495
48.2000	225.907	80.763	30.300	5.461	-0.529	9.868	430.069	-0.005653	-0.002121	-0.000382
48.4000	181.077	72.929	26.931	4.045	-0.537	9.868	344.725	-0.005105	-0.001885	-0.000283
48.6000	154.537	67.190	24.095	3.335	-0.536	9.868	294.199	-0.004703	-0.001687	-0.000233
48.8000	118.694	60.046	20.847	2.113	-0.538	9.868	225.964	-0.004203	-0.001459	-0.000148
49.0000	81.469	52.901	17.806	1.459	-0.550	9.868	155.096	-0.003703	-0.001246	-0.000102
49.2000	65.073	48.359	15.373	0.989	-0.529	9.868	123.882	-0.003385	-0.001076	-0.000069
49.4000	46.483	44.608	13.429	1.251	-0.540	9.868	88.491	-0.003123	-0.000940	-0.000088
49.6000	39.900	42.341	12.797	1.349	-0.535	9.867	75.960	-0.002964	-0.000896	-0.000094
49.8000	42.996	42.369	11.985	1.155	-0.534	9.868	81.854	-0.002966	-0.000839	-0.000081
50.0000	59.798	44.664	13.581	0.959	-0.550	9.852	113.840	-0.003127	-0.000951	-0.000067
50.2000	76.269	46.857	14.326	0.793	-0.541	9.852	145.197	-0.003280	-0.001003	-0.000055
50.4000	98.872	50.208	15.976	1.336	-0.545	9.852	188.227	-0.003515	-0.001118	-0.000094
50.6000	133.257	56.030	18.203	1.446	-0.528	9.851	253.687	-0.003922	-0.001274	-0.000101
50.8000	179.259	64.437	22.402	2.405	-0.539	9.851	341.263	-0.004511	-0.001568	-0.000168
51.0000	217.176	69.758	24.686	3.865	-0.537	9.852	413.446	-0.004883	-0.001728	-0.000271
51.2000	254.581	76.222	27.894	4.977	-0.531	9.851	484.657	-0.005336	-0.001953	-0.000348
51.4000	309.029	84.863	31.607	6.532	-0.531	9.851	588.312	-0.005940	-0.002212	-0.000457
51.6000	357.646	93.371	35.792	8.340	-0.530	9.851	680.866	-0.006536	-0.002505	-0.000584
51.8000	422.328	104.069	41.901	10.577	-0.540	9.851	804.005	-0.007285	-0.002933	-0.000740
52.0000	481.405	113.239	46.908	12.548	-0.541	9.850	916.471	-0.007927	-0.003284	-0.000878
52.2000	589.670	128.390	55.605	15.218	-0.540	9.851	1122.580	-0.008987	-0.003892	-0.001065
52.4000	623.438	134.838	60.134	16.427	-0.531	9.851	1186.867	-0.009439	-0.004209	-0.001150
52.6000	699.347	146.343	66.698	18.581	-0.530	9.851	1331.377	-0.010244	-0.004669	-0.001301
52.8000	766.719	156.099	73.190	21.067	-0.535	9.851	1459.637	-0.010927	-0.005123	-0.001475
53.0000	827.284	165.116	78.653	23.444	-0.547	9.851	1574.936	-0.011558	-0.005506	-0.001641
53.2000	881.521	173.358	84.102	25.570	-0.548	9.851	1678.190	-0.012135	-0.005887	-0.001790
53.4000	964.478	184.766	91.243	29.127	-0.547	9.852	1836.119	-0.012934	-0.006387	-0.002039
53.6000	986.810	188.908	93.900	30.502	-0.555	9.851	1878.633	-0.013224	-0.006573	-0.002135
53.8000	1035.277	196.243	98.867	32.783	-0.541	9.851	1970.901	-0.013737	-0.006921	-0.002295
54.0000	1072.517	201.721	101.868	34.700	-0.551	9.852	2041.798	-0.014120	-0.007131	-0.002429
54.2000	1097.044	205.931	104.263	36.173	-0.536	9.851	2088.490	-0.014415	-0.007298	-0.002532
54.4000	1118.640	209.292	106.296	37.255	-0.540	9.852	2129.602	-0.014650	-0.007441	-0.002608
54.6000	1133.638	211.906	108.541	38.231	-0.551	9.852	2158.155	-0.014833	-0.007598	-0.002676
54.8000	1141.378	213.709	109.614	38.911	-0.548	9.852	2172.890	-0.014960	-0.007673	-0.002724
55.0000	1130.091	213.072	109.296	38.522	-0.536	9.852	2151.403	-0.014915	-0.007651	-0.002697
55.2000	1123.133	212.571	109.145	38.049	-0.533	9.851	2138.157	-0.014880	-0.007640	-0.002663
55.4000	1093.181	209.294	107.631	36.730	-0.552	9.852	2081.137	-0.014651	-0.007534	-0.002571
55.6000	1069.361	207.498	106.339	35.661	-0.532	9.853	2035.789	-0.014525	-0.007444	-0.002496
55.8000	1032.963	203.416	103.451	33.755	-0.542	9.852	1966.496	-0.014239	-0.007242	-0.002363
56.0000	992.070	198.634	99.597	32.003	-0.542	9.853	1888.647	-0.013904	-0.006972	-0.002240
56.2000	942.627	192.159	95.659	29.893	-0.533	9.853	1794.519	-0.013451	-0.006696	-0.002092
56.4000	861.083	181.765	88.933	26.389	-0.529	9.853	1639.280	-0.012724	-0.006225	-0.001847
56.6000	817.095	175.483	84.858	24.360	-0.530	9.853	1555.538	-0.012284	-0.005940	-0.001705
56.8000	747.994	166.633	79.272	21.917	-0.544	9.854	1423.988	-0.011664	-0.005549	-0.001534
57.0000	682.726	157.502	73.481	19.609	-0.532	9.854	1299.734	-0.011025	-0.005144	-0.001373
57.2000	613.700	147.567	67.317	17.609	-0.546	9.853	1168.327	-0.010330	-0.004712	-0.001233
57.4000	548.387	137.825	60.795	15.983	-0.541	9.854	1043.987	-0.009648	-0.004256	-0.001119
57.6000	485.688	127.959	54.889	14.425	-0.539	9.854	924.625	-0.008957	-0.003842	-0.001010
57.8000	416.753	116.744	48.602	13.272	-0.541	9.854	793.390	-0.008172	-0.003402	-0.000929
58.0000	343.504	104.947	42.161	10.995	-0.543	9.854	653.944	-0.007346	-0.002951	-0.000770
58.2000	306.940	97.468	38.435	9.882	-0.538	9.854	584.335	-0.006823	-0.002690	-0.000692
58.4000	240.785	86.213	33.054	7.519	-0.531	9.855	458.393	-0.006035	-0.002314	-0.000526
58.6000	190.846	76.652	28.568	5.963	-0.540	9.855	363.321	-0.005366	-0.002000	-0.000417
58.8000	156.070	69.605	25.581	4.533	-0.529	9.855	297.117	-0.004872	-0.001791	-0.000317
59.0000	109.662	61.228	21.536	3.112	-0.537	9.855	208.769	-0.004286	-0.001508	-0.000218
59.2000	94.454	56.864	19.389	2.808	-0.538	9.855	179.815	-0.003980	-0.001357	-0.000197
59.4000	64.427	50.942	16.941	2.043	-0.538	9.855	122.652	-0.003566	-0.001186	-0.000143
59.6000	50.000	47.386	14.861	2.265	-0.541	9.856	95.186	-0.003317	-0.001040	-0.000159
59.8000	57.484	47.313	14.172	2.098	-0.521	9.856	109.434	-0.003312	-0.000992	-0.000147
60.0000	55.184	46.105	14.213	1.835	-0.535	9.856	105.057	-0.003227	-0.000995	-0.000128
60.2000	76.465	49.612	15.548	2.044	-0.520	9.856	145.569	-0.003473	-0.001088	-0.000143
60.4000	92.094	52.164	16.431	2.169	-0.529	9.857	175.323	-0.003651	-0.001150	-0.000152
60.6000	119.235	57.155	18.881	2.308	-0.524	9.857	226.994	-0.004001	-0.001322	-0.000162
60.8000	157.092	63.006	21.093	2.960	-0.542	9.857	299.063	-0.004410	-0.001477	-0.000207
61.0000	215.868	71.999	25.385	4.477	-0.541	9.857	410.957	-0.005040	-0.001777	-0.000313
61.2000	260.022	79.276	28.828	6.019	-0.541	9.857	495.014	-0.005549	-0.002018	-0.000421
61.4000	318.497	88.521	33.205	7.853	-0.533	9.858	606.337	-0.006196	-0.002324	-0.000550
61.6000	369.038	96.997	37.800	9.449	-0.528	9.858	702.553	-0.006790	-0.002646	-0.000661
61.8000	429.767	106.542	42.423	11.730	-0.534	9.858	818.167	-0.007458	-0.002970	-0.000821
62.0000	516.376	119.507	49.854	13.954	-0.528	9.859	983.047	-0.008366	-0.003490	-0.000977
62.2000	589.820	130.139	56.363	15.914	-0.528	9.858	1122.866	-0.009110	-0.003945	-0.001114
62.4000	633.282	137.978	60.669	17.372	-0.535	9.859	1205.606	-0.009658	-0.004247	-0.001216
62.6000	712.407	149.095	67.811	19.512	-0.524	9.859	1356.239	-0.010437	-0.004747	-0.001366
62.8000	770.582	158.126	74.072	21.568	-0.533	9.859	1466.990	-0.011069	-0.005185	-0.001510
63.0000	860.391	171.260	82.053	24.875	-0.531	9.859	1637.964	-0.011988	-0.005744	-0.001741
63.2000	891.876	176.873	85.629	26.527	-0.538	9.860	1697.903	-0.012381	-0.005994	-0.001857
63.4000	951.013	185.015	90.915	29.031	-0.539	9.861	1810.484	-0.012951	-0.006364	-0.002032
63.6000	998.097	191.769	95.083	31.266	-0.521	9.861	1900.120	-0.013424	-0.006656	-0.002189
63.8000	1043.783	198.843	99.403	33.574	-0.535	9.861	1987.095	-0.013919	-0.006958	-0.002350
64.0000	1065.063	202.065	101.687	34.743	-0.520	9.861	2027.607	-0.014145	-0.007118	-0.002432
64.2000	1096.503	207.026	104.883	36.465	-0.523	9.861	2087.460	-0.014492	-0.007342	-0.002553
64.4000	1123.013	210.947	107.603	37.910	-0.540	9.861	2137.928	-0.014766	-0.007532	-0.002654
64.6000	1134.464	213.294	109.117	38.647	-0.522	9.861	2159.729	-0.014931	-0.007638	-0.002705
64.8000	1137.696	214.518	109.972	38.897	-0.527	9.861	2165.880	-0.015016	-0.007698	-0.002723
65.0000	1109.562	211.850	108.211	37.978	-0.537	9.861	2112.322	-0.014830	-0.007575	-0.002658
65.2000	1127.025	213.821	109.064	38.676	-0.522	9.862	2145.567	-0.014968	-0.007634	-0.002707
65.4000	1098.096	210.545	107.878	37.020	-0.513	9.861	2090.492	-0.014738	-0.007551	-0.002591
65.6000	1052.560	206.387	104.495	35.352	-0.523	9.862	2003.803	-0.014447	-0.007315	-0.002475
65.8000	1036.810	204.108	102.804	34.507	-0.521	9.862	1973.820	-0.014288	-0.007196	-0.002415
66.0000	976.741	197.619	98.538	31.711	-0.530	9.863	1859.465	-0.013833	-0.006898	-0.002220
66.2000	935.548	192.088	94.782	29.974	-0.519	9.862	1781.044	-0.013446	-0.006635	-0.002098
66.4000	874.488	184.405	90.528	27.266	-0.512	9.862	1664.801	-0.012908	-0.006337	-0.001909
66.6000	815.321	176.483	84.375	24.444	-0.513	9.863	1552.162	-0.012354	-0.005906	-0.001711
66.8000	736.813	165.479	77.086	21.597	-0.517	9.862	1402.702	-0.011584	-0.005396	-0.001512
67.0000	690.871	158.697	73.081	19.875	-0.510	9.862	1315.241	-0.011109	-0.005116	-0.001391
67.2000	610.905	147.661	66.382	17.733	-0.521	9.864	1163.006	-0.010336	-0.004647	-0.001241
67.4000	527.106	135.408	58.909	15.579	-0.515	9.863	1003.475	-0.009479	-0.004124	-0.001091
67.6000	465.565	125.553	53.003	14.465	-0.513	9.863	886.316	-0.008789	-0.003710	-0.001013
67.8000	418.932	117.553	48.520	13.341	-0.509	9.863	797.539	-0.008229	-0.003396	-0.000934
68.0000	337.914	104.625	41.872	11.272	-0.514	9.863	643.301	-0.007324	-0.002931	-0.000789
68.2000	285.284	95.067	36.755	9.477	-0.533	9.863	543.108	-0.006655	-0.002573	-0.000663
68.4000	239.042	86.379	32.490	7.491	-0.509	9.863	455.074	-0.006047	-0.002274	-0.000524
68.6000	189.208	77.039	28.291	5.837	-0.522	9.863	360.203	-0.005393	-0.001980	-0.000409
68.8000	147.038	69.064	24.770	4.350	-0.500	9.864	279.922	-0.004834	-0.001734	-0.000305
69.0000	122.466	63.130	21.729	3.740	-0.511	9.864	233.145	-0.004419	-0.001521	-0.000262
69.2000	75.999	54.656	18.203	2.391	-0.524	9.864	144.682	-0.003826	-0.001274	-0.000167
69.4000	49.413	48.748	15.439	2.252	-0.517	9.864	94.070	-0.003412	-0.001081	-0.000158
69.6000	56.822	49.334	15.054	2.196	-0.520	9.864	108.175	-0.003453	-0.001054	-0.000154
69.8000	51.668	47.135	14.188	2.142	-0.509	9.865	98.362	-0.003299	-0.000993	-0.000150
70.0000	64.096	48.513	14.448	1.990	-0.509	9.865	122.023	-0.003396	-0.001011	-0.000139
70.2000	61.361	48.122	14.421	2.196	-0.510	9.865	116.816	-0.003369	-0.001009	-0.000154
70.4000	94.619	52.888	16.265	2.281	-0.521	9.865	180.130	-0.003702	-0.001139	-0.000160
70.6000	128.267	58.294	18.782	3.086	-0.510	9.865	244.188	-0.004081	-0.001315	-0.000216
70.8000	190.590	68.298	23.230	4.281	-0.512	9.866	362.835	-0.004781	-0.001626	-0.000300
71.0000	220.752	73.790	25.870	5.129	-0.509	9.865	420.256	-0.005165	-0.001811	-0.000359
71.2000	268.347	81.071	28.954	6.395	-0.516	9.866	510.864	-0.005675	-0.002027	-0.000448
71.4000	323.787	89.564	33.439	8.408	-0.512	9.866	616.407	-0.006269	-0.002341	-0.000589
71.6000	365.326	97.468	37.855	9.991	-0.514	9.867	695.486	-0.006823	-0.002650	-0.000699
71.8000	440.047	108.974	43.690	12.203	-0.506	9.866	837.736	-0.007628	-0.003058	-0.000854
72.0000	505.796	118.744	48.891	13.827	-0.510	9.867	962.906	-0.008312	-0.003422	-0.000968
72.2000	583.237	130.373	55.441	15.869	-0.528	9.867	1110.334	-0.009126	-0.003881	-0.001111
72.4000	644.809	139.827	61.566	17.651	-0.529	9.867	1227.551	-0.009788	-0.004310	-0.001236
72.6000	716.104	150.512	68.925	20.108	-0.497	9.868	1363.277	-0.010536	-0.004825	-0.001408
72.8000	792.388	161.351	75.736	22.514	-0.518	9.868	1508.503	-0.011295	-0.005302	-0.001576
73.0000	825.240	167.537	79.464	24.001	-0.514	9.868	1571.045	-0.011728	-0.005562	-0.001680
73.2000	888.164	177.179	85.299	26.669	-0.509	9.868	1690.836	-0.012403	-0.005971	-0.001867
73.4000	939.411	184.516	90.404	28.473	-0.510	9.869	1788.397	-0.012916	-0.006328	-0.001993
73.6000	998.217	192.591	94.629	31.350	-0.504	9.869	1900.349	-0.013481	-0.006624	-0.002195
73.8000	1030.258	197.912	98.761	33.075	-0.517	9.868	1961.346	-0.013854	-0.006913	-0.002315
74.0000	1072.397	203.526	102.472	35.450	-0.527	9.869	2041.569	-0.014247	-0.007173	-0.002482
74.2000	1090.642	208.749	106.228	36.561	-0.520	9.869	2076.302	-0.014612	-0.007436	-0.002559
74.4000	1109.532	211.198	107.178	37.311	-0.523	9.869	2112.265	-0.014784	-0.007502	-0.002612
74.6000	1121.645	213.197	108.625	37.982	-0.512	9.870	2135.324	-0.014924	-0.007604	-0.002659
74.8000	1127.055	213.710	108.789	38.342	-0.521	9.870	2145.624	-0.014960	-0.007615	-0.002684
75.0000	1134.825	215.088	109.517	39.010	-0.511	9.870	2160.416	-0.015056	-0.007666	-0.002731
75.2000	1095.225	211.420	107.660	37.243	-0.522	9.870	2085.028	-0.014799	-0.007536	-0.002607
75.4000	1090.702	211.321	107.413	36.797	-0.521	9.870	2076.416	-0.014793	-0.007519	-0.002576
75.6000	1071.541	208.570	104.702	35.812	-0.522	9.870	2039.938	-0.014600	-0.007329	-0.002507
75.8000	1033.774	205.180	103.174	34.256	-0.512	9.871	1968.040	-0.014363	-0.007222	-0.002398
76.0000	974.262	197.801	98.442	31.544	-0.510	9.871	1854.744	-0.013846	-0.006891	-0.002208
76.2000	925.119	191.643	94.384	29.686	-0.510	9.870	1761.189	-0.013415	-0.006607	-0.002078
76.4000	839.727	180.790	87.418	25.739	-0.504	9.871	1598.625	-0.012655	-0.006119	-0.001802
76.6000	822.294	177.666	84.967	24.875	-0.515	9.871	1565.437	-0.012437	-0.005948	-0.001741
76.8000	756.139	169.062	79.355	22.124	-0.511	9.871	1439.495	-0.011834	-0.005555	-0.001549
77.0000	672.040	158.043	72.598	19.359	-0.510	9.871	1279.392	-0.011063	-0.005082	-0.001355
77.2000	610.213	148.288	66.200	17.594	-0.519	9.871	1161.690	-0.010380	-0.004634	-0.001232
77.4000	551.993	138.672	59.804	15.983	-0.520	9.871	1050.854	-0.009707	-0.004186	-0.001119
77.6000	459.554	125.565	52.729	14.037	-0.516	9.871	874.872	-0.008790	-0.003691	-0.000983
77.8000	392.993	114.408	46.303	12.674	-0.514	9.871	748.158	-0.008009	-0.003241	-0.000887
78.0000	351.214	106.376	42.065	11.493	-0.514	9.871	668.621	-0.007446	-0.002945	-0.000804
78.2000	288.230	95.096	36.480	9.561	-0.505	9.871	548.716	-0.006657	-0.002554	-0.000669
78.4000	231.903	86.129	32.504	7.629	-0.517	9.870	441.484	-0.006029	-0.002275	-0.000534
78.6000	194.362	78.528	28.677	6.075	-0.519	9.870	370.016	-0.005497	-0.002007	-0.000425
78.8000	150.795	70.578	24.836	4.727	-0.503	9.869	287.075	-0.004940	-0.001739	-0.000331
79.0000	107.378	61.618	20.409	3.294	-0.512	9.870	204.420	-0.004313	-0.001429	-0.000231
79.2000	75.443	55.739	18.000	2.543	-0.505	9.869	143.623	-0.003902	-0.001260	-0.000178
79.4000	70.573	52.945	16.762	2.503	-0.512	9.869	134.354	-0.003706	-0.001173	-0.000175
79.6000	55.680	49.222	14.750	2.389	-0.508	9.869	106.001	-0.003446	-0.001033	-0.000167
79.8000	58.671	48.652	14.516	2.460	-0.506	9.869	111.694	-0.003406	-0.001016	-0.000172
80.0000	61.256	49.138	14.653	2.405	-0.514	9.868	116.615	-0.003440	-0.001026	-0.000168
80.2000	84.415	52.429	15.770	2.528	-0.521	9.869	160.704	-0.003670	-0.001104	-0.000177
80.4000	106.867	55.864	17.133	2.308	-0.514	9.868	203.447	-0.003910	-0.001199	-0.000162
80.6000	121.490	58.614	18.822	2.725	-0.514	9.868	231.285	-0.004103	-0.001318	-0.000191
80.8000	162.607	65.229	21.355	3.142	-0.507	9.867	309.563	-0.004566	-0.001495	-0.000220
81.0000	222.766	73.539	25.402	5.353	-0.514	9.867	424.089	-0.005148	-0.001778	-0.000375
81.2000	300.463	86.212	31.688	7.684	-0.522	9.867	572.004	-0.006035	-0.002218	-0.000538
81.4000	304.626	88.505	32.351	7.715	-0.531	9.867	579.929	-0.006195	-0.002265	-0.000540
81.6000	357.120	96.898	36.659	9.674	-0.520	9.866	679.865	-0.006783	-0.002566	-0.000677
81.8000	441.595	109.405	43.247	12.410	-0.510	9.866	840.683	-0.007658	-0.003027	-0.000869
82.0000	512.965	120.271	49.428	14.313	-0.507	9.866	976.553	-0.008419	-0.003460	-0.001002
82.2000	564.407	128.655	54.242	15.815	-0.500	9.866	1074.486	-0.009006	-0.003797	-0.001107
82.4000	627.511	138.714	61.166	17.568	-0.504	9.866	1194.620	-0.009710	-0.004282	-0.001230
82.6000	707.222	150.513	67.920	19.718	-0.512	9.865	1346.369	-0.010536	-0.004754	-0.001380
82.8000	775.180	160.240	74.098	22.556	-0.508	9.865	1475.744	-0.011217	-0.005187	-0.001579
83.0000	837.383	169.021	80.098	24.459	-0.519	9.865	1594.162	-0.011831	-0.005607	-0.001712
83.2000	897.136	178.610	85.807	27.029	-0.505	9.865	1707.916	-0.012503	-0.006006	-0.001892
83.4000	963.231	187.574	91.313	29.726	-0.510	9.865	1833.744	-0.013130	-0.006392	-0.002081
83.6000	990.177	192.352	94.507	31.324	-0.511	9.865	1885.042	-0.013465	-0.006616	-0.002193
83.8000	1041.018	199.635	99.363	33.659	-0.522	9.865	1981.831	-0.013974	-0.006955	-0.002356
84.0000	1063.996	203.441	101.415	34.964	-0.521	9.864	2025.576	-0.014241	-0.007099	-0.002447
84.2000	1100.140	208.403	104.606	37.049	-0.518	9.864	2094.383	-0.014588	-0.007322	-0.002593
84.4000	1119.211	211.503	106.819	37.995	-0.514	9.864	2130.690	-0.014805	-0.007477	-0.002660
84.6000	1118.640	213.169	107.977	38.299	-0.513	9.864	2129.602	-0.014922	-0.007558	-0.002681
84.8000	1154.046	217.175	110.371	40.148	-0.522	9.863	2197.008	-0.015202	-0.007726	-0.002810
85.0000	1129.039	215.394	109.642	39.050	-0.524	9.864	2149.401	-0.015078	-0.007675	-0.002734
85.2000	1115.093	214.198	108.857	38.356	-0.521	9.863	2122.850	-0.014994	-0.007620	-0.002685
85.4000	1090.822	211.447	107.632	37.286	-0.516	9.862	2076.645	-0.014801	-0.007534	-0.002610
85.6000	1043.032	207.151	104.304	35.299	-0.519	9.862	1985.664	-0.014501	-0.007301	-0.002471
85.8000	1031.971	205.098	103.064	34.575	-0.516	9.862	1964.607	-0.014357	-0.007214	-0.002420
86.0000	975.208	198.675	98.526	31.796	-0.522	9.862	1856.546	-0.013907	-0.006897	-0.002226
86.2000	923.616	192.325	94.328	29.670	-0.532	9.862	1758.327	-0.013463	-0.006603	-0.002077
86.4000	874.368	185.097	90.062	27.252	-0.522	9.861	1664.572	-0.012957	-0.006304	-0.001908
86.6000	815.261	178.444	85.174	24.985	-0.520	9.861	1552.048	-0.012491	-0.005962	-0.001749
86.8000	726.819	166.535	77.456	21.903	-0.529	9.861	1383.677	-0.011657	-0.005422	-0.001533
87.0000	691.893	160.907	74.057	20.444	-0.529	9.861	1317.186	-0.011263	-0.005184	-0.001431
87.2000	614.256	149.860	66.780	18.205	-0.531	9.860	1169.386	-0.010490	-0.004675	-0.001274
87.4000	566.781	141.227	61.800	16.719	-0.523	9.860	1079.006	-0.009886	-0.004326	-0.001170
87.6000	470.269	127.711	53.348	14.717	-0.531	9.860	895.271	-0.008940	-0.003734	-0.001030
87.8000	414.649	118.396	47.791	13.592	-0.513	9.860	789.385	-0.008288	-0.003345	-0.000951
88.0000	341.821	106.668	42.410	11.579	-0.520	9.860	650.740	-0.007467	-0.002969	-0.000811
88.2000	277.500	95.038	36.355	9.770	-0.523	9.860	528.288	-0.006653	-0.002545	-0.000684
88.4000	240.109	87.671	32.696	8.075	-0.529	9.860	457.106	-0.006137	-0.002289	-0.000565
88.6000	198.570	80.058	28.843	6.643	-0.503	9.860	378.027	-0.005604	-0.002019	-0.000465
88.8000	138.291	69.231	23.970	4.880	-0.516	9.859	263.271	-0.004846	-0.001678	-0.000342
89.0000	110.068	62.992	21.219	3.906	-0.503	9.859	209.541	-0.004409	-0.001485	-0.000273
89.2000	103.801	60.674	19.292	3.724	-0.506	9.859	197.611	-0.004247	-0.001350	-0.000261
89.4000	65.193	52.402	16.128	2.806	-0.511	9.859	124.111	-0.003668	-0.001129	-0.000196
89.6000	56.296	50.265	15.288	2.474	-0.518	9.859	107.174	-0.003519	-0.001070	-0.000173
89.8000	50.180	48.665	14.406	2.488	-0.515	9.858	95.530	-0.003407	-0.001008	-0.000174
90.0000	60.985	49.763	14.516	2.583	-0.519	9.858	116.100	-0.003483	-0.001016	-0.000181
90.2000	71.625	51.012	15.604	2.489	-0.508	9.858	136.356	-0.003571	-0.001092	-0.000174
90.4000	89.464	54.390	16.516	2.694	-0.509	9.858	170.317	-0.003807	-0.001156	-0.000189
90.6000	128.298	60.186	18.783	3.237	-0.521	9.857	244.246	-0.004213	-0.001315	-0.000227
90.8000	171.369	66.273	21.356	4.254	-0.517	9.857	326.242	-0.004639	-0.001495	-0.000298
91.0000	205.123	72.540	24.477	5.213	-0.508	9.857	390.501	-0.005078	-0.001713	-0.000365
91.2000	252.432	80.167	28.238	6.616	-0.513	9.857	480.566	-0.005612	-0.001977	-0.000463
91.4000	300.613	88.173	32.049	7.990	-0.525	9.857	572.290	-0.006172	-0.002243	-0.000559
91.6000	369.594	99.164	37.139	10.562	-0.516	9.857	703.611	-0.006941	-0.002600	-0.000739
91.8000	424.988	107.750	41.638	12.313	-0.508	9.857	809.069	-0.007542	-0.002915	-0.000862
92.0000	502.760	119.742	48.547	14.243	-0.508	9.857	957.127	-0.008382	-0.003398	-0.000997
92.2000	565.564	129.180	54.422	15.996	-0.525	9.857	1076.689	-0.009043	-0.003810	-0.001120
92.4000	642.029	141.201	61.812	18.219	-0.516	9.857	1222.258	-0.009884	-0.004327	-0.001275
92.6000	718.493	151.638	67.868	20.541	-0.523	9.857	1367.826	-0.010615	-0.004751	-0.001438
92.8000	766.329	159.517	73.330	22.292	-0.518	9.857	1458.893	-0.011166	-0.005133	-0.001560
93.0000	822.505	168.329	79.369	24.444	-0.531	9.857	1565.838	-0.011783	-0.005556	-0.001711
93.2000	869.078	175.983	83.968	26.459	-0.532	9.857	1654.501	-0.012319	-0.005878	-0.001852
93.4000	947.451	186.795	91.134	29.419	-0.525	9.857	1803.703	-0.013076	-0.006379	-0.002059
93.6000	993.573	193.022	94.478	31.627	-0.524	9.857	1891.508	-0.013512	-0.006613	-0.002214
93.8000	1035.968	199.537	98.370	33.603	-0.516	9.857	1972.218	-0.013968	-0.006886	-0.002352
94.0000	1069.557	204.777	102.018	35.729	-0.516	9.856	2036.161	-0.014334	-0.007141	-0.002501
94.2000	1090.551	208.541	104.111	36.659	-0.518	9.856	2076.130	-0.014598	-0.007288	-0.002566
94.4000	1117.888	212.393	106.875	38.410	-0.519	9.856	2128.172	-0.014867	-0.007481	-0.002689
94.6000	1138.101	215.491	109.036	39.440	-0.515	9.857	2166.653	-0.015084	-0.007632	-0.002761
94.8000	1136.614	215.741	109.393	39.397	-0.513	9.857	2163.820	-0.015102	-0.007658	-0.002758
95.0000	1134.434	216.352	109.683	39.830	-0.505	9.856	2159.672	-0.015145	-0.007678	-0.002788
95.2000	1114.011	214.962	108.801	38.758	-0.516	9.856	2120.790	-0.015047	-0.007616	-0.002713
95.4000	1092.716	212.643	107.617	37.800	-0.509	9.856	2080.250	-0.014885	-0.007533	-0.002646
95.6000	1029.356	205.624	102.805	34.869	-0.517	9.856	1959.629	-0.014394	-0.007196	-0.002441
95.8000	1010.901	203.248	101.607	33.922	-0.515	9.856	1924.496	-0.014227	-0.007113	-0.002375
96.0000	976.681	199.550	98.688	32.659	-0.511	9.856	1859.350	-0.013968	-0.006908	-0.002286
96.2000	936.826	194.286	95.481	30.641	-0.509	9.856	1783.476	-0.013600	-0.006684	-0.002145
96.4000	862.360	185.017	89.470	27.226	-0.510	9.856	1641.712	-0.012951	-0.006263	-0.001906
96.6000	826.457	179.793	85.602	25.850	-0.497	9.856	1573.362	-0.012586	-0.005992	-0.001809
96.8000	754.772	170.384	79.741	23.014	-0.494	9.856	1436.892	-0.011927	-0.005582	-0.001611
97.0000	680.772	159.698	72.959	20.582	-0.511	9.856	1296.015	-0.011179	-0.005107	-0.001441
97.2000	630.577	152.192	68.168	18.748	-0.517	9.856	1200.457	-0.010653	-0.004772	-0.001312
97.4000	549.288	140.243	60.655	16.593	-0.514	9.856	1045.704	-0.009817	-0.004246	-0.001162
97.6000	475.739	128.835	53.129	14.855	-0.520	9.856	905.685	-0.009018	-0.003719	-0.001040
97.8000	404.625	117.648	47.460	13.662	-0.517	9.856	770.302	-0.008235	-0.003322	-0.000956
98.0000	364.319	109.363	43.042	12.564	-0.522	9.856	693.569	-0.007655	-0.003013	-0.000879
98.2000	271.158	95.235	36.162	9.869	-0.528	9.856	516.214	-0.006666	-0.002531	-0.000691
98.4000	245.294	89.188	33.149	8.950	-0.509	9.855	466.976	-0.006243	-0.002320	-0.000627
98.6000	187.344	79.123	28.499	6.671	-0.507	9.856	356.655	-0.005539	-0.001995	-0.000467
98.8000	150.810	71.538	24.714	5.672	-0.505	9.856	287.104	-0.005008	-0.001730	-0.000397
99.0000	105.034	62.478	19.938	4.045	-0.520	9.855	199.957	-0.004373	-0.001396	-0.000283
99.2000	81.514	57.920	18.288	3.586	-0.510	9.855	155.182	-0.004054	-0.001280	-0.000251
99.4000	58.551	51.595	15.479	3.128	-0.517	9.855	111.465	-0.003612	-0.001084	-0.000219
99.6000	47.054	49.154	13.829	3.031	-0.526	9.855	89.579	-0.003441	-0.000968	-0.000212
99.8000	51.547	49.611	13.982	3.059	-0.518	9.855	98.133	-0.003473	-0.000979	-0.000214
Test Cycles
Time (sec)	Axial stress (kPa)	Axial micro-strain #1	Axial micro-strain #2	Axial micro-strain #3	Confining pressure (kPa)	Temperature (�C)	Load (N)	Displacement #1 (mm)	Displacement #2 (mm)	Displacement #3 (mm)
0.0000	48.632	47.997	13.375	2.795	-0.512	9.855	92.583	-0.003360	-0.000936	-0.000196
0.2000	68.424	50.764	14.875	2.974	-0.513	9.855	130.262	-0.003553	-0.001041	-0.000208
0.4000	102.674	56.779	16.859	3.071	-0.502	9.855	195.465	-0.003975	-0.001180	-0.000215
0.6000	121.369	60.450	18.974	3.182	-0.521	9.855	231.056	-0.004232	-0.001328	-0.000223
0.8000	158.835	65.492	21.150	4.212	-0.509	9.855	302.382	-0.004584	-0.001481	-0.000295
1.0000	207.437	73.040	24.823	5.434	-0.511	9.856	394.907	-0.005113	-0.001738	-0.000380
1.2000	264.650	82.490	28.925	7.214	-0.505	9.855	503.826	-0.005774	-0.002025	-0.000505
1.4000	316.889	90.813	32.861	9.200	-0.509	9.856	603.275	-0.006357	-0.002300	-0.000644
1.6000	365.160	98.901	37.264	10.701	-0.516	9.856	695.171	-0.006923	-0.002608	-0.000749
1.8000	430.624	109.210	42.396	12.536	-0.522	9.856	819.798	-0.007645	-0.002968	-0.000877
2.0000	491.489	118.979	47.792	14.008	-0.512	9.856	935.669	-0.008329	-0.003345	-0.000981
2.2000	570.193	130.292	55.095	16.149	-0.504	9.856	1085.501	-0.009120	-0.003857	-0.001130
2.4000	624.265	139.452	60.380	18.152	-0.515	9.856	1188.440	-0.009762	-0.004227	-0.001271
2.6000	709.461	151.417	67.879	20.400	-0.518	9.856	1350.632	-0.010599	-0.004752	-0.001428
2.8000	779.328	161.742	74.469	23.070	-0.509	9.856	1483.641	-0.011322	-0.005213	-0.001615
3.0000	839.968	170.814	80.139	25.402	-0.506	9.857	1599.083	-0.011957	-0.005610	-0.001778
3.2000	875.194	177.164	84.610	27.113	-0.504	9.857	1666.145	-0.012401	-0.005923	-0.001898
3.4000	955.296	187.864	90.887	30.100	-0.504	9.857	1818.638	-0.013151	-0.006362	-0.002107
3.6000	982.828	193.285	94.508	31.837	-0.509	9.857	1871.052	-0.013530	-0.006616	-0.002229
3.8000	1041.018	200.846	99.183	34.715	-0.507	9.858	1981.831	-0.014059	-0.006943	-0.002430
4.0000	1070.954	205.278	101.840	36.186	-0.506	9.858	2038.822	-0.014369	-0.007129	-0.002533
4.2000	1118.159	211.670	106.118	38.510	-0.493	9.859	2128.687	-0.014817	-0.007428	-0.002696
4.4000	1127.386	214.183	107.740	39.204	-0.509	9.859	2146.254	-0.014993	-0.007542	-0.002744
4.6000	1165.198	218.866	110.702	41.091	-0.502	9.859	2218.237	-0.015321	-0.007749	-0.002876
4.8000	1119.947	215.312	109.228	39.147	-0.501	9.859	2132.092	-0.015072	-0.007646	-0.002740
5.0000	1137.019	217.258	110.082	40.136	-0.505	9.860	2164.593	-0.015208	-0.007706	-0.002810
5.2000	1102.274	213.684	107.384	38.759	-0.505	9.859	2098.446	-0.014958	-0.007517	-0.002713
5.4000	1081.309	212.210	106.147	37.758	-0.508	9.860	2058.535	-0.014855	-0.007430	-0.002643
5.6000	1050.095	208.387	104.265	36.146	-0.499	9.860	1999.111	-0.014587	-0.007299	-0.002530
5.8000	1040.537	207.332	103.396	35.492	-0.492	9.860	1980.915	-0.014513	-0.007238	-0.002484
6.0000	1000.561	202.455	99.802	33.604	-0.502	9.860	1904.812	-0.014172	-0.006986	-0.002352
6.2000	942.371	195.259	95.083	31.003	-0.492	9.860	1794.033	-0.013668	-0.006656	-0.002170
6.4000	884.843	187.378	90.501	28.614	-0.498	9.860	1684.513	-0.013116	-0.006335	-0.002003
6.6000	819.755	179.195	85.188	25.849	-0.502	9.860	1560.602	-0.012544	-0.005963	-0.001809
6.8000	737.955	169.006	78.889	22.971	-0.517	9.860	1404.877	-0.011830	-0.005522	-0.001608
7.0000	681.193	160.727	73.261	20.760	-0.494	9.861	1296.816	-0.011251	-0.005128	-0.001453
7.2000	637.340	152.831	67.399	19.511	-0.502	9.861	1213.331	-0.010698	-0.004718	-0.001366
7.4000	527.512	137.782	58.717	16.496	-0.501	9.861	1004.248	-0.009645	-0.004110	-0.001155
7.6000	466.061	128.100	53.155	15.048	-0.497	9.861	887.260	-0.008967	-0.003721	-0.001053
7.8000	412.906	119.300	48.175	14.077	-0.501	9.861	786.066	-0.008351	-0.003372	-0.000985
8.0000	349.997	108.724	42.657	12.675	-0.501	9.861	666.304	-0.007611	-0.002986	-0.000887
8.2000	304.175	100.471	38.174	11.369	-0.501	9.861	579.071	-0.007033	-0.002672	-0.000796
8.4000	244.693	89.757	32.766	9.047	-0.501	9.861	465.832	-0.006283	-0.002294	-0.000633
8.6000	192.228	80.153	28.293	7.464	-0.511	9.861	365.953	-0.005611	-0.001981	-0.000522
8.8000	157.212	72.734	24.699	6.366	-0.500	9.861	299.292	-0.005091	-0.001729	-0.000446
9.0000	118.379	65.368	21.355	4.962	-0.510	9.861	225.363	-0.004576	-0.001495	-0.000347
9.2000	93.537	60.185	18.905	4.030	-0.516	9.861	178.070	-0.004213	-0.001323	-0.000282
9.4000	83.032	56.599	16.995	3.794	-0.498	9.861	158.072	-0.003962	-0.001190	-0.000266
9.6000	49.744	50.666	14.819	3.572	-0.514	9.861	94.700	-0.003547	-0.001037	-0.000250
9.8000	43.162	48.584	13.594	3.267	-0.516	9.861	82.169	-0.003401	-0.000952	-0.000229
10.0000	55.470	49.984	14.200	3.574	-0.532	9.861	105.600	-0.003499	-0.000994	-0.000250
10.2000	71.340	52.248	14.973	3.406	-0.510	9.861	135.813	-0.003657	-0.001048	-0.000238
10.4000	90.862	55.600	16.032	3.294	-0.514	9.861	172.977	-0.003892	-0.001122	-0.000231
10.6000	119.716	59.978	18.176	3.948	-0.524	9.861	227.909	-0.004198	-0.001272	-0.000276
10.8000	152.012	65.144	20.737	4.183	-0.506	9.861	289.392	-0.004560	-0.001452	-0.000293
11.0000	217.191	75.067	25.401	6.421	-0.512	9.861	413.475	-0.005255	-0.001778	-0.000449
11.2000	258.143	82.140	28.609	7.741	-0.513	9.861	491.438	-0.005750	-0.002003	-0.000542
11.4000	308.338	90.339	32.474	9.214	-0.520	9.861	586.996	-0.006324	-0.002273	-0.000645
11.6000	367.941	100.554	37.702	11.146	-0.508	9.861	700.464	-0.007039	-0.002639	-0.000780
11.8000	454.068	112.879	43.938	13.841	-0.508	9.861	864.429	-0.007902	-0.003076	-0.000969
12.0000	503.271	120.160	48.962	14.801	-0.497	9.861	958.099	-0.008411	-0.003427	-0.001036
12.2000	564.151	130.610	54.560	16.636	-0.512	9.861	1073.999	-0.009143	-0.003819	-0.001164
12.4000	649.152	142.728	62.333	19.011	-0.505	9.860	1235.819	-0.009991	-0.004363	-0.001331
12.6000	699.602	151.124	67.344	20.761	-0.515	9.860	1331.863	-0.010579	-0.004714	-0.001453
12.8000	782.800	162.962	74.675	23.334	-0.505	9.860	1490.250	-0.011407	-0.005227	-0.001633
13.0000	842.943	171.538	80.238	26.056	-0.505	9.861	1604.748	-0.012008	-0.005617	-0.001824
13.2000	900.006	180.346	86.278	28.115	-0.499	9.860	1713.381	-0.012624	-0.006039	-0.001968
13.4000	950.487	187.309	90.198	30.322	-0.499	9.861	1809.483	-0.013112	-0.006314	-0.002123
13.6000	993.633	194.426	95.578	32.520	-0.519	9.860	1891.623	-0.013610	-0.006690	-0.002276
13.8000	1029.371	199.900	98.318	34.381	-0.532	9.860	1959.658	-0.013993	-0.006882	-0.002407
14.0000	1067.092	205.554	101.592	36.450	-0.520	9.860	2031.469	-0.014389	-0.007111	-0.002551
14.2000	1120.368	212.336	105.845	38.677	-0.498	9.860	2132.893	-0.014863	-0.007409	-0.002707
14.4000	1117.452	213.696	107.123	39.161	-0.522	9.859	2127.342	-0.014959	-0.007499	-0.002741
14.6000	1147.629	216.936	109.172	40.800	-0.518	9.859	2184.792	-0.015186	-0.007642	-0.002856
14.8000	1143.301	217.658	110.150	40.733	-0.522	9.860	2176.552	-0.015236	-0.007711	-0.002851
15.0000	1138.537	218.061	110.000	40.508	-0.518	9.860	2167.482	-0.015264	-0.007700	-0.002836
15.2000	1090.356	213.295	107.261	38.396	-0.521	9.859	2075.758	-0.014931	-0.007508	-0.002688
15.4000	1101.763	213.821	107.589	38.871	-0.499	9.860	2097.473	-0.014967	-0.007531	-0.002721
15.6000	1053.747	209.016	104.755	36.521	-0.518	9.859	2006.063	-0.014631	-0.007333	-0.002557
15.8000	1040.807	207.513	103.326	35.770	-0.508	9.859	1981.430	-0.014526	-0.007233	-0.002504
16.0000	990.748	201.803	98.855	33.729	-0.495	9.859	1886.129	-0.014126	-0.006920	-0.002361
16.2000	934.406	195.037	94.796	30.948	-0.516	9.859	1778.870	-0.013653	-0.006636	-0.002166
16.4000	859.580	185.227	88.947	27.906	-0.520	9.858	1636.419	-0.012966	-0.006226	-0.001953
16.6000	819.409	179.791	85.313	26.223	-0.525	9.858	1559.944	-0.012585	-0.005972	-0.001836
16.8000	751.360	171.107	79.398	23.305	-0.496	9.858	1430.397	-0.011977	-0.005558	-0.001631
17.0000	672.416	159.726	71.994	20.663	-0.505	9.857	1280.107	-0.011181	-0.005040	-0.001446
17.2000	611.791	150.724	66.435	18.816	-0.504	9.858	1164.694	-0.010551	-0.004650	-0.001317
17.4000	557.449	141.908	61.125	17.426	-0.521	9.858	1061.239	-0.009934	-0.004279	-0.001220
17.6000	480.037	131.002	54.324	15.690	-0.506	9.858	913.868	-0.009170	-0.003803	-0.001098
17.8000	417.113	120.286	48.340	14.522	-0.516	9.858	794.077	-0.008420	-0.003384	-0.001017
18.0000	346.390	108.336	41.806	12.829	-0.514	9.858	659.437	-0.007583	-0.002926	-0.000898
18.2000	289.643	98.553	37.263	11.272	-0.516	9.857	551.405	-0.006899	-0.002608	-0.000789
18.4000	232.474	88.812	32.379	9.172	-0.520	9.857	442.572	-0.006217	-0.002267	-0.000642
18.6000	177.726	79.277	27.837	7.365	-0.515	9.857	338.345	-0.005549	-0.001949	-0.000516
18.8000	144.408	71.331	23.558	6.059	-0.525	9.857	274.916	-0.004993	-0.001649	-0.000424
19.0000	126.028	66.355	20.943	5.269	-0.520	9.856	239.925	-0.004645	-0.001466	-0.000369
19.2000	96.197	60.798	18.797	4.406	-0.518	9.857	183.134	-0.004256	-0.001316	-0.000308
19.4000	55.906	53.168	15.880	3.865	-0.517	9.856	106.430	-0.003722	-0.001112	-0.000271
19.6000	86.428	56.697	16.762	4.102	-0.510	9.856	164.537	-0.003969	-0.001173	-0.000287
19.8000	73.399	53.864	15.550	3.835	-0.501	9.856	139.732	-0.003770	-0.001089	-0.000268
20.0000	52.840	50.057	14.077	3.641	-0.524	9.856	100.594	-0.003504	-0.000985	-0.000255
20.2000	76.164	53.640	15.287	3.585	-0.507	9.856	144.997	-0.003755	-0.001070	-0.000251
20.4000	104.838	57.627	16.859	4.113	-0.513	9.856	199.585	-0.004034	-0.001180	-0.000288
20.6000	132.445	62.449	19.128	4.267	-0.512	9.857	252.142	-0.004371	-0.001339	-0.000299
20.8000	145.610	65.257	20.793	4.587	-0.526	9.856	277.205	-0.004568	-0.001455	-0.000321
21.0000	217.747	76.639	25.925	6.533	-0.525	9.856	414.534	-0.005365	-0.001815	-0.000457
21.2000	253.619	81.864	28.140	8.242	-0.518	9.856	482.826	-0.005730	-0.001970	-0.000577
21.4000	311.629	91.978	33.176	9.743	-0.527	9.856	593.262	-0.006438	-0.002322	-0.000682
21.6000	390.483	103.999	39.329	12.423	-0.521	9.855	743.380	-0.007280	-0.002753	-0.000870
21.8000	444.240	112.350	43.827	13.884	-0.524	9.855	845.718	-0.007865	-0.003068	-0.000972
22.0000	533.223	124.678	51.148	16.499	-0.525	9.855	1015.120	-0.008727	-0.003580	-0.001155
22.2000	579.180	132.990	56.017	17.415	-0.516	9.855	1102.610	-0.009309	-0.003921	-0.001219
22.4000	636.107	142.201	61.798	18.983	-0.535	9.854	1210.985	-0.009954	-0.004326	-0.001329
22.6000	711.400	152.915	68.499	21.486	-0.526	9.854	1354.322	-0.010704	-0.004795	-0.001504
22.8000	783.130	163.406	75.214	24.318	-0.523	9.854	1490.879	-0.011438	-0.005265	-0.001702
23.0000	846.716	172.803	81.116	26.292	-0.533	9.854	1611.929	-0.012096	-0.005678	-0.001840
23.2000	895.723	180.430	85.630	28.571	-0.525	9.854	1705.227	-0.012630	-0.005994	-0.002000
23.4000	950.832	188.074	90.626	30.988	-0.520	9.855	1810.141	-0.013165	-0.006344	-0.002169
23.6000	1011.502	197.146	95.935	33.686	-0.517	9.854	1925.640	-0.013800	-0.006715	-0.002358
23.8000	1046.338	202.610	99.404	35.493	-0.516	9.854	1991.959	-0.014183	-0.006958	-0.002485
24.0000	1072.006	207.235	102.816	37.090	-0.524	9.854	2040.825	-0.014506	-0.007197	-0.002596
24.2000	1096.728	211.100	105.156	38.787	-0.520	9.855	2087.889	-0.014777	-0.007361	-0.002715
24.4000	1119.421	214.378	107.370	40.036	-0.528	9.854	2131.090	-0.015006	-0.007516	-0.002803
24.6000	1141.212	217.130	109.036	41.091	-0.522	9.855	2172.575	-0.015199	-0.007632	-0.002876
24.8000	1110.855	215.143	108.444	39.871	-0.529	9.854	2114.782	-0.015060	-0.007591	-0.002791
25.0000	1125.733	217.019	109.118	40.733	-0.528	9.855	2143.106	-0.015191	-0.007638	-0.002851
25.2000	1115.078	216.103	108.720	40.120	-0.537	9.855	2122.822	-0.015127	-0.007610	-0.002808
25.4000	1096.488	214.630	107.700	39.079	-0.538	9.855	2087.431	-0.015024	-0.007539	-0.002735
25.6000	1049.464	209.795	104.606	37.313	-0.522	9.855	1997.910	-0.014686	-0.007322	-0.002612
25.8000	1020.459	206.180	102.102	35.478	-0.528	9.856	1942.692	-0.014433	-0.007147	-0.002483
26.0000	934.917	196.104	95.427	32.324	-0.531	9.855	1779.842	-0.013727	-0.006680	-0.002263
26.2000	922.744	194.119	94.094	31.156	-0.521	9.855	1756.668	-0.013588	-0.006587	-0.002181
26.4000	890.884	189.491	91.092	29.781	-0.516	9.856	1696.014	-0.013264	-0.006376	-0.002085
26.6000	820.070	180.459	85.176	26.586	-0.523	9.855	1561.203	-0.012632	-0.005962	-0.001861
26.8000	735.130	169.896	78.653	23.610	-0.514	9.856	1399.498	-0.011893	-0.005506	-0.001653
27.0000	676.414	161.030	72.586	21.459	-0.526	9.857	1287.718	-0.011272	-0.005081	-0.001502
27.2000	633.973	154.015	67.496	20.052	-0.521	9.857	1206.923	-0.010781	-0.004725	-0.001404
27.4000	524.356	139.313	59.059	17.204	-0.526	9.858	998.240	-0.009752	-0.004134	-0.001204
27.6000	477.453	130.527	53.790	15.872	-0.510	9.858	908.947	-0.009137	-0.003765	-0.001111
27.8000	415.851	120.522	48.203	14.412	-0.525	9.859	791.674	-0.008437	-0.003374	-0.001009
28.0000	353.393	109.406	42.368	13.299	-0.513	9.859	672.770	-0.007658	-0.002966	-0.000931
28.2000	295.969	99.261	36.687	11.564	-0.524	9.859	563.450	-0.006948	-0.002568	-0.000809
28.4000	231.227	88.228	31.236	9.257	-0.510	9.860	440.197	-0.006176	-0.002187	-0.000648
28.6000	182.821	79.596	27.454	7.809	-0.515	9.860	348.043	-0.005572	-0.001922	-0.000547
28.8000	141.568	71.844	23.996	6.074	-0.520	9.860	269.508	-0.005029	-0.001680	-0.000425
29.0000	103.320	64.701	20.600	5.212	-0.524	9.861	196.695	-0.004529	-0.001442	-0.000365
29.2000	78.373	58.837	17.917	4.573	-0.536	9.861	149.202	-0.004119	-0.001254	-0.000320
29.4000	91.252	58.322	17.009	4.533	-0.518	9.861	173.721	-0.004083	-0.001191	-0.000317
29.6000	65.629	54.642	16.184	3.962	-0.533	9.861	124.941	-0.003825	-0.001133	-0.000277
29.8000	65.479	53.195	14.696	3.906	-0.527	9.862	124.655	-0.003724	-0.001029	-0.000273
30.0000	63.240	52.025	14.173	3.894	-0.521	9.862	120.392	-0.003642	-0.000992	-0.000273
30.2000	77.096	54.378	15.232	4.224	-0.528	9.863	146.770	-0.003806	-0.001066	-0.000296
30.4000	90.411	56.003	15.865	4.197	-0.528	9.863	172.119	-0.003920	-0.001111	-0.000294
30.6000	130.146	62.726	18.810	4.561	-0.534	9.863	247.765	-0.004391	-0.001317	-0.000319
30.8000	159.947	67.412	20.957	5.352	-0.535	9.864	304.499	-0.004719	-0.001467	-0.000375
31.0000	210.803	75.540	24.987	6.756	-0.525	9.864	401.316	-0.005288	-0.001749	-0.000473
31.2000	255.062	83.156	28.431	8.325	-0.538	9.865	485.573	-0.005821	-0.001990	-0.000583
31.4000	325.380	94.551	33.865	10.604	-0.536	9.865	619.440	-0.006619	-0.002371	-0.000742
31.6000	373.050	101.817	37.496	11.869	-0.544	9.865	710.192	-0.007127	-0.002625	-0.000831
31.8000	426.040	110.239	42.342	13.772	-0.536	9.866	811.071	-0.007717	-0.002964	-0.000964
32.0000	500.701	121.622	48.643	15.398	-0.533	9.867	953.207	-0.008514	-0.003405	-0.001078
32.2000	584.680	134.089	55.618	17.817	-0.530	9.868	1113.081	-0.009386	-0.003893	-0.001247
32.4000	630.697	142.366	61.867	19.330	-0.538	9.868	1200.686	-0.009966	-0.004331	-0.001353
32.6000	704.607	153.011	68.361	21.583	-0.538	9.868	1341.391	-0.010711	-0.004785	-0.001511
32.8000	759.190	161.073	73.342	23.570	-0.529	9.869	1445.303	-0.011275	-0.005134	-0.001650
33.0000	834.257	172.191	80.279	26.349	-0.526	9.869	1588.211	-0.012053	-0.005620	-0.001844
33.2000	909.309	182.250	86.636	29.254	-0.534	9.869	1731.091	-0.012757	-0.006065	-0.002048
33.4000	958.707	190.100	91.201	31.321	-0.527	9.871	1825.132	-0.013307	-0.006384	-0.002192
33.6000	1003.447	196.424	95.330	33.520	-0.530	9.871	1910.305	-0.013750	-0.006673	-0.002346
33.8000	1061.652	205.028	100.969	37.007	-0.525	9.871	2021.112	-0.014352	-0.007068	-0.002590
34.0000	1072.653	207.222	102.376	37.410	-0.528	9.872	2042.055	-0.014506	-0.007166	-0.002619
34.2000	1091.979	210.533	104.455	38.771	-0.526	9.872	2078.848	-0.014737	-0.007312	-0.002714
34.4000	1084.811	211.322	105.407	38.689	-0.520	9.872	2065.201	-0.014793	-0.007378	-0.002708
34.6000	1127.371	216.798	108.469	40.705	-0.520	9.873	2146.225	-0.015176	-0.007593	-0.002849
34.8000	1138.432	217.796	109.337	41.385	-0.514	9.873	2167.282	-0.015246	-0.007654	-0.002897
35.0000	1147.569	219.535	109.917	42.024	-0.520	9.874	2184.677	-0.015367	-0.007694	-0.002942
35.2000	1102.349	215.407	108.113	40.038	-0.526	9.874	2098.589	-0.015078	-0.007568	-0.002803
35.4000	1093.121	214.044	107.440	39.245	-0.526	9.875	2081.022	-0.014983	-0.007521	-0.002747
35.6000	1069.091	211.671	105.350	38.481	-0.510	9.876	2035.275	-0.014817	-0.007375	-0.002694
35.8000	1027.703	207.388	102.556	35.992	-0.527	9.876	1956.482	-0.014517	-0.007179	-0.002519
36.0000	979.161	201.871	98.703	34.103	-0.509	9.876	1864.071	-0.014131	-0.006909	-0.002387
36.2000	938.479	196.328	95.688	32.187	-0.520	9.876	1786.623	-0.013743	-0.006698	-0.002253
36.4000	888.254	189.587	90.803	29.934	-0.527	9.877	1691.008	-0.013271	-0.006356	-0.002095
36.6000	808.528	179.651	84.335	26.543	-0.515	9.878	1539.230	-0.012576	-0.005903	-0.001858
36.8000	755.343	172.093	80.029	24.694	-0.517	9.878	1437.979	-0.012047	-0.005602	-0.001729
37.0000	672.386	160.765	72.450	21.511	-0.525	9.879	1280.050	-0.011254	-0.005072	-0.001506
37.2000	603.496	151.167	66.050	19.664	-0.527	9.879	1148.901	-0.010582	-0.004623	-0.001377
37.4000	548.357	142.340	60.904	18.094	-0.532	9.879	1043.930	-0.009964	-0.004263	-0.001267
37.6000	481.555	131.947	54.630	16.568	-0.524	9.879	916.758	-0.009236	-0.003824	-0.001160
37.8000	409.209	119.758	47.485	15.024	-0.526	9.880	779.028	-0.008383	-0.003324	-0.001052
38.0000	350.162	110.073	42.465	13.856	-0.527	9.880	666.618	-0.007705	-0.002973	-0.000970
38.2000	298.209	100.803	37.993	12.327	-0.524	9.881	567.713	-0.007056	-0.002659	-0.000863
38.4000	236.472	90.201	32.641	10.382	-0.513	9.881	450.182	-0.006314	-0.002285	-0.000727
38.6000	179.169	79.222	26.973	8.699	-0.522	9.881	341.091	-0.005546	-0.001888	-0.000609
38.8000	147.849	73.677	25.001	7.130	-0.517	9.882	281.467	-0.005157	-0.001750	-0.000499
39.0000	77.126	61.588	19.375	5.614	-0.526	9.882	146.828	-0.004311	-0.001356	-0.000393
39.2000	75.623	59.268	18.454	5.422	-0.528	9.882	143.967	-0.004149	-0.001292	-0.000380
39.4000	75.052	57.100	17.092	5.227	-0.529	9.882	142.879	-0.003997	-0.001196	-0.000366
39.6000	52.614	52.736	14.819	4.836	-0.531	9.883	100.164	-0.003691	-0.001037	-0.000338
39.8000	57.469	52.484	14.792	4.683	-0.533	9.883	109.406	-0.003674	-0.001035	-0.000328
40.0000	56.973	52.457	15.012	4.670	-0.515	9.883	108.461	-0.003672	-0.001051	-0.000327
40.2000	70.889	54.084	15.451	5.020	-0.530	9.884	134.954	-0.003786	-0.001082	-0.000351
40.4000	103.696	59.491	17.725	4.893	-0.536	9.884	197.411	-0.004164	-0.001241	-0.000342
40.6000	126.043	62.601	18.822	5.628	-0.536	9.884	239.954	-0.004382	-0.001318	-0.000394
40.8000	161.796	68.327	21.069	6.309	-0.526	9.884	308.018	-0.004783	-0.001475	-0.000442
41.0000	197.639	74.565	23.901	7.575	-0.540	9.885	376.253	-0.005220	-0.001673	-0.000530
41.2000	261.584	84.502	28.762	9.064	-0.538	9.885	497.990	-0.005915	-0.002013	-0.000634
41.4000	311.193	92.996	32.929	10.951	-0.534	9.886	592.432	-0.006510	-0.002305	-0.000767
41.6000	387.252	104.376	39.108	13.217	-0.534	9.886	737.228	-0.007306	-0.002738	-0.000925
41.8000	443.428	113.491	43.717	14.842	-0.536	9.886	844.173	-0.007944	-0.003060	-0.001039
42.0000	490.632	120.745	48.258	15.801	-0.537	9.887	934.038	-0.008452	-0.003378	-0.001106
42.2000	567.893	132.726	55.207	18.025	-0.518	9.888	1081.123	-0.009291	-0.003864	-0.001262
42.4000	647.664	144.190	62.373	20.330	-0.518	9.888	1232.986	-0.010093	-0.004366	-0.001423
42.6000	698.596	153.026	67.564	21.861	-0.531	9.889	1329.947	-0.010712	-0.004729	-0.001530
42.8000	801.871	167.063	77.141	25.333	-0.532	9.889	1526.556	-0.011694	-0.005400	-0.001773
43.0000	836.256	173.121	80.264	26.904	-0.539	9.889	1592.016	-0.012118	-0.005618	-0.001883
43.2000	894.040	181.444	85.711	29.224	-0.528	9.890	1702.023	-0.012701	-0.006000	-0.002046
43.4000	961.803	190.699	91.864	31.936	-0.537	9.891	1831.026	-0.013349	-0.006430	-0.002236
43.6000	993.378	195.827	94.864	33.673	-0.537	9.890	1891.136	-0.013708	-0.006640	-0.002357
43.8000	1036.870	202.414	98.897	36.214	-0.533	9.891	1973.934	-0.014169	-0.006923	-0.002535
44.0000	1069.542	207.443	101.867	37.634	-0.520	9.891	2036.133	-0.014521	-0.007131	-0.002634
44.2000	1107.203	213.168	105.791	39.774	-0.522	9.892	2107.830	-0.014922	-0.007405	-0.002784
44.4000	1090.025	212.627	105.953	39.120	-0.521	9.892	2075.129	-0.014884	-0.007417	-0.002738
44.6000	1157.563	220.547	110.523	42.496	-0.535	9.892	2203.703	-0.015438	-0.007737	-0.002975
44.8000	1144.579	219.686	110.205	42.274	-0.537	9.893	2178.984	-0.015378	-0.007714	-0.002959
45.0000	1110.179	216.813	108.884	40.702	-0.534	9.893	2113.495	-0.015177	-0.007622	-0.002849
45.2000	1113.740	216.967	109.145	40.787	-0.524	9.893	2120.275	-0.015188	-0.007640	-0.002855
45.4000	1097.630	215.004	107.246	40.107	-0.522	9.893	2089.605	-0.015050	-0.007507	-0.002807
45.6000	1080.723	213.586	106.106	39.175	-0.516	9.894	2057.419	-0.014951	-0.007427	-0.002742
45.8000	1009.789	206.152	101.674	35.798	-0.538	9.893	1922.379	-0.014431	-0.007117	-0.002506
46.0000	989.185	203.428	99.004	34.811	-0.525	9.894	1883.154	-0.014240	-0.006930	-0.002437
46.2000	913.697	193.883	93.227	31.294	-0.538	9.894	1739.445	-0.013572	-0.006526	-0.002191
46.4000	856.724	187.060	88.933	28.934	-0.532	9.894	1630.983	-0.013094	-0.006225	-0.002025
46.6000	817.095	181.390	85.189	27.267	-0.531	9.894	1555.538	-0.012697	-0.005963	-0.001909
46.8000	714.210	168.106	77.071	23.555	-0.537	9.895	1359.673	-0.011767	-0.005395	-0.001649
47.0000	660.333	159.392	71.198	21.583	-0.529	9.896	1257.105	-0.011157	-0.004984	-0.001511
47.2000	600.295	151.167	65.786	19.680	-0.537	9.895	1142.807	-0.010582	-0.004605	-0.001378
47.4000	544.705	142.239	59.885	18.330	-0.541	9.896	1036.978	-0.009957	-0.004192	-0.001283
47.6000	473.620	131.318	53.611	16.705	-0.536	9.896	901.651	-0.009192	-0.003753	-0.001169
47.8000	416.873	121.678	48.809	15.218	-0.534	9.896	793.619	-0.008517	-0.003417	-0.001065
48.0000	317.355	106.598	40.360	13.592	-0.536	9.896	604.162	-0.007462	-0.002825	-0.000951
48.2000	249.487	93.761	33.506	11.287	-0.522	9.896	474.958	-0.006563	-0.002345	-0.000790
48.4000	234.052	90.062	31.870	10.439	-0.528	9.896	445.576	-0.006304	-0.002231	-0.000731
48.6000	181.618	80.542	27.660	8.618	-0.523	9.897	345.755	-0.005638	-0.001936	-0.000603
48.8000	141.598	72.680	23.982	6.894	-0.507	9.896	269.566	-0.005088	-0.001679	-0.000483
49.0000	115.103	66.953	20.737	6.117	-0.529	9.897	219.126	-0.004687	-0.001452	-0.000428
49.2000	93.507	62.531	18.658	5.338	-0.537	9.897	178.013	-0.004377	-0.001306	-0.000374
49.4000	80.357	58.504	17.119	5.239	-0.534	9.897	152.979	-0.004095	-0.001198	-0.000367
49.6000	40.306	51.693	14.159	4.643	-0.532	9.897	76.733	-0.003618	-0.000991	-0.000325
49.8000	57.153	52.986	14.337	4.462	-0.514	9.897	108.805	-0.003709	-0.001004	-0.000312
50.0000	56.943	51.567	13.827	4.672	-0.525	9.897	108.404	-0.003610	-0.000968	-0.000327
50.2000	73.444	54.892	14.570	4.588	-0.533	9.897	139.818	-0.003842	-0.001020	-0.000321
50.4000	93.958	57.794	16.184	4.752	-0.522	9.897	178.871	-0.004046	-0.001133	-0.000333
50.6000	141.808	65.174	19.871	5.631	-0.508	9.897	269.966	-0.004562	-0.001391	-0.000394
50.8000	170.392	69.259	21.316	6.144	-0.526	9.897	324.383	-0.004848	-0.001492	-0.000430
51.0000	219.024	77.375	25.083	7.921	-0.534	9.897	416.965	-0.005416	-0.001756	-0.000555
51.2000	231.573	81.334	27.053	7.992	-0.528	9.897	440.855	-0.005693	-0.001894	-0.000559
51.4000	305.843	93.160	32.943	10.937	-0.538	9.897	582.247	-0.006521	-0.002306	-0.000766
51.6000	371.607	102.901	37.359	12.800	-0.538	9.896	707.445	-0.007203	-0.002615	-0.000896
51.8000	446.103	114.282	43.622	14.828	-0.529	9.896	849.266	-0.008000	-0.003054	-0.001038
52.0000	489.746	121.524	48.893	15.940	-0.533	9.896	932.350	-0.008507	-0.003422	-0.001116
52.2000	575.558	133.504	55.508	18.136	-0.539	9.896	1095.715	-0.009345	-0.003886	-0.001270
52.4000	631.884	142.798	60.698	19.871	-0.536	9.896	1202.946	-0.009996	-0.004249	-0.001391
52.6000	717.441	155.140	68.760	22.582	-0.539	9.896	1365.824	-0.010860	-0.004813	-0.001581
52.8000	743.260	160.629	72.615	23.429	-0.529	9.896	1414.976	-0.011244	-0.005083	-0.001640
53.0000	835.940	173.110	80.691	26.877	-0.537	9.896	1591.415	-0.012118	-0.005648	-0.001881
53.2000	873.181	179.028	84.198	28.809	-0.525	9.895	1662.312	-0.012532	-0.005894	-0.002017
53.4000	939.095	188.533	90.309	31.337	-0.510	9.896	1787.796	-0.013197	-0.006322	-0.002194
53.6000	1035.953	200.736	97.422	35.655	-0.533	9.895	1972.189	-0.014051	-0.006820	-0.002496
53.8000	1036.795	202.747	98.731	36.242	-0.542	9.895	1973.791	-0.014192	-0.006911	-0.002537
54.0000	1086.494	209.750	103.203	38.884	-0.545	9.895	2068.405	-0.014683	-0.007224	-0.002722
54.2000	1097.239	212.099	105.364	39.566	-0.525	9.895	2088.861	-0.014847	-0.007375	-0.002770
54.4000	1111.877	214.309	106.269	40.607	-0.541	9.894	2116.728	-0.015002	-0.007439	-0.002842
54.6000	1130.557	217.797	108.487	41.647	-0.539	9.894	2152.290	-0.015246	-0.007594	-0.002915
54.8000	1144.624	219.727	109.696	42.705	-0.524	9.894	2179.070	-0.015381	-0.007679	-0.002989
55.0000	1133.503	218.812	109.501	42.203	-0.528	9.894	2157.898	-0.015317	-0.007665	-0.002954
55.2000	1110.554	217.103	108.238	41.370	-0.541	9.894	2114.210	-0.015197	-0.007577	-0.002896
55.4000	1114.146	217.326	108.017	41.011	-0.525	9.894	2121.048	-0.015213	-0.007561	-0.002871
55.6000	1057.985	211.516	104.784	38.606	-0.542	9.894	2014.132	-0.014806	-0.007335	-0.002702
55.8000	1018.325	207.567	102.225	36.672	-0.536	9.894	1938.629	-0.014530	-0.007156	-0.002567
56.0000	988.599	203.749	99.322	35.324	-0.537	9.894	1882.038	-0.014262	-0.006953	-0.002473
56.2000	928.440	196.035	94.769	32.365	-0.534	9.893	1767.511	-0.013722	-0.006634	-0.002266
56.4000	861.278	187.545	89.003	29.434	-0.534	9.893	1639.652	-0.013128	-0.006230	-0.002060
56.6000	813.878	180.819	84.759	27.614	-0.528	9.893	1549.416	-0.012657	-0.005933	-0.001933
56.8000	735.009	170.870	78.461	24.498	-0.528	9.893	1399.269	-0.011961	-0.005492	-0.001715
57.0000	686.888	163.879	73.301	22.721	-0.530	9.893	1307.659	-0.011472	-0.005131	-0.001590
57.2000	597.094	151.208	65.981	19.997	-0.529	9.892	1136.713	-0.010585	-0.004619	-0.001400
57.4000	555.029	144.218	61.635	18.914	-0.536	9.892	1056.633	-0.010095	-0.004314	-0.001324
57.6000	472.734	131.530	53.596	16.969	-0.526	9.892	899.963	-0.009207	-0.003752	-0.001188
57.8000	422.343	122.987	48.851	15.927	-0.521	9.892	804.033	-0.008609	-0.003420	-0.001115
58.0000	356.384	112.157	42.589	14.272	-0.535	9.892	678.463	-0.007851	-0.002981	-0.000999
58.2000	274.479	98.734	36.080	12.507	-0.530	9.892	522.537	-0.006911	-0.002526	-0.000875
58.4000	230.431	90.146	31.665	10.856	-0.533	9.891	438.681	-0.006310	-0.002217	-0.000760
58.6000	184.293	81.446	27.810	9.188	-0.532	9.891	350.847	-0.005701	-0.001947	-0.000643
58.8000	139.118	73.192	24.023	7.296	-0.525	9.891	264.845	-0.005123	-0.001682	-0.000511
59.0000	113.585	67.440	21.397	7.034	-0.530	9.891	216.236	-0.004721	-0.001498	-0.000492
59.2000	91.989	62.337	19.019	6.115	-0.534	9.891	175.123	-0.004364	-0.001331	-0.000428
59.4000	60.564	56.266	16.460	5.643	-0.537	9.890	115.299	-0.003939	-0.001152	-0.000395
59.6000	56.958	53.765	14.474	5.437	-0.537	9.890	108.433	-0.003764	-0.001013	-0.000381
59.8000	47.655	52.401	13.980	5.309	-0.534	9.889	90.723	-0.003668	-0.000979	-0.000372
60.0000	69.792	54.334	14.131	5.519	-0.522	9.889	132.866	-0.003803	-0.000989	-0.000386
60.2000	72.572	55.850	14.860	5.226	-0.525	9.889	138.159	-0.003910	-0.001040	-0.000366
60.4000	78.569	56.767	15.935	5.032	-0.537	9.889	149.574	-0.003974	-0.001115	-0.000352
60.6000	114.261	62.686	18.300	5.629	-0.553	9.889	217.524	-0.004388	-0.001281	-0.000394
60.8000	164.050	69.675	22.004	6.780	-0.538	9.890	312.309	-0.004877	-0.001540	-0.000475
61.0000	204.446	75.944	24.602	8.104	-0.529	9.889	389.214	-0.005316	-0.001722	-0.000567
61.2000	260.172	85.031	28.500	9.840	-0.538	9.889	495.300	-0.005952	-0.001995	-0.000689
61.4000	336.681	96.939	34.265	12.244	-0.530	9.889	640.955	-0.006786	-0.002399	-0.000857
61.6000	363.282	102.457	37.305	13.009	-0.535	9.889	691.595	-0.007172	-0.002611	-0.000911
61.8000	432.112	112.616	42.492	14.911	-0.530	9.889	822.630	-0.007883	-0.002974	-0.001044
62.0000	497.966	122.777	48.617	16.482	-0.534	9.889	948.000	-0.008594	-0.003403	-0.001154
62.2000	566.180	133.376	54.629	18.317	-0.544	9.889	1077.862	-0.009336	-0.003824	-0.001282
62.4000	620.959	142.701	61.057	19.900	-0.543	9.890	1182.146	-0.009989	-0.004274	-0.001393
62.6000	713.684	155.487	68.678	22.820	-0.528	9.890	1358.671	-0.010884	-0.004807	-0.001597
62.8000	766.148	163.490	73.670	24.624	-0.548	9.890	1458.549	-0.011444	-0.005157	-0.001724
63.0000	826.923	172.330	79.381	27.211	-0.537	9.890	1574.249	-0.012063	-0.005557	-0.001905
63.2000	887.007	181.444	85.038	29.571	-0.547	9.890	1688.633	-0.012701	-0.005953	-0.002070
63.4000	940.989	189.255	90.364	31.864	-0.544	9.890	1791.401	-0.013248	-0.006325	-0.002230
63.6000	985.698	196.216	94.409	34.005	-0.548	9.890	1876.516	-0.013735	-0.006609	-0.002380
63.8000	1041.288	204.334	99.569	36.647	-0.541	9.891	1982.346	-0.014303	-0.006970	-0.002565
64.0000	1076.244	208.623	102.155	38.870	-0.538	9.892	2048.893	-0.014604	-0.007151	-0.002721
64.2000	1091.123	212.046	104.415	39.619	-0.542	9.892	2077.217	-0.014843	-0.007309	-0.002773
64.4000	1119.932	215.755	106.738	41.327	-0.547	9.892	2132.063	-0.015103	-0.007472	-0.002893
64.6000	1126.289	217.522	108.033	41.787	-0.538	9.893	2144.165	-0.015227	-0.007562	-0.002925
64.8000	1120.593	217.772	108.624	41.829	-0.540	9.893	2133.322	-0.015244	-0.007604	-0.002928
65.0000	1129.806	218.992	109.366	42.093	-0.535	9.893	2150.860	-0.015329	-0.007656	-0.002946
65.2000	1109.938	217.216	108.747	41.246	-0.524	9.893	2113.037	-0.015205	-0.007612	-0.002887
65.4000	1079.220	214.588	106.626	40.300	-0.533	9.894	2054.558	-0.015021	-0.007464	-0.002821
65.6000	1054.829	211.866	104.950	38.704	-0.530	9.894	2008.123	-0.014831	-0.007347	-0.002709
65.8000	1038.162	209.504	102.913	37.938	-0.532	9.894	1976.395	-0.014665	-0.007204	-0.002656
66.0000	980.438	202.790	98.703	35.104	-0.546	9.896	1866.503	-0.014195	-0.006909	-0.002457
66.2000	934.647	197.327	95.029	33.035	-0.536	9.895	1779.327	-0.013813	-0.006652	-0.002312
66.4000	881.672	190.116	90.556	30.823	-0.533	9.895	1678.476	-0.013308	-0.006339	-0.002158
66.6000	796.070	178.971	82.699	27.156	-0.530	9.895	1515.512	-0.012528	-0.005789	-0.001901
66.8000	772.265	175.594	80.830	26.211	-0.528	9.896	1470.194	-0.012292	-0.005658	-0.001835
67.0000	688.587	164.521	73.934	22.777	-0.523	9.896	1310.892	-0.011516	-0.005175	-0.001594
67.2000	619.155	154.585	67.206	20.930	-0.529	9.897	1178.713	-0.010821	-0.004704	-0.001465
67.4000	524.837	141.060	58.951	18.428	-0.526	9.897	999.155	-0.009874	-0.004127	-0.001290
67.6000	483.058	133.755	54.837	17.428	-0.535	9.898	919.619	-0.009363	-0.003839	-0.001220
67.8000	410.050	121.927	47.845	15.607	-0.535	9.898	780.630	-0.008535	-0.003349	-0.001092
68.0000	355.752	112.463	42.892	14.743	-0.526	9.899	677.261	-0.007872	-0.003002	-0.001032
68.2000	287.163	100.429	36.493	12.828	-0.534	9.899	546.684	-0.007030	-0.002554	-0.000898
68.4000	226.012	90.507	31.772	10.995	-0.520	9.899	430.269	-0.006335	-0.002224	-0.000770
68.6000	192.364	83.419	28.528	9.714	-0.533	9.899	366.211	-0.005839	-0.001997	-0.000680
68.8000	154.793	75.663	24.755	8.408	-0.525	9.900	294.685	-0.005296	-0.001733	-0.000589
69.0000	105.755	66.633	20.737	6.935	-0.537	9.900	201.330	-0.004664	-0.001452	-0.000485
69.2000	77.486	61.062	18.053	5.893	-0.540	9.900	147.514	-0.004274	-0.001264	-0.000413
69.4000	63.420	57.251	16.391	5.283	-0.526	9.900	120.735	-0.004008	-0.001147	-0.000370
69.6000	67.117	56.432	15.411	5.603	-0.535	9.901	127.773	-0.003950	-0.001079	-0.000392
69.8000	46.197	52.305	13.211	5.560	-0.539	9.902	87.948	-0.003661	-0.000925	-0.000389
70.0000	55.124	52.682	13.609	5.186	-0.525	9.902	104.942	-0.003688	-0.000953	-0.000363
70.2000	72.377	55.599	14.516	5.211	-0.537	9.902	137.787	-0.003892	-0.001016	-0.000365
70.4000	88.187	57.975	15.840	5.325	-0.528	9.902	167.885	-0.004058	-0.001109	-0.000373
70.6000	118.424	62.769	18.408	5.977	-0.530	9.903	225.449	-0.004394	-0.001289	-0.000418
70.8000	156.371	69.494	21.109	6.270	-0.541	9.903	297.689	-0.004865	-0.001478	-0.000439
71.0000	189.899	74.775	23.804	7.672	-0.522	9.903	361.519	-0.005234	-0.001666	-0.000537
71.2000	266.153	86.797	28.884	10.216	-0.533	9.903	506.687	-0.006076	-0.002022	-0.000715
71.4000	315.146	93.898	32.255	11.924	-0.534	9.904	599.957	-0.006573	-0.002258	-0.000835
71.6000	368.797	102.861	36.989	13.354	-0.533	9.904	702.095	-0.007200	-0.002589	-0.000935
71.8000	443.143	114.283	43.372	15.037	-0.525	9.904	843.630	-0.008000	-0.003036	-0.001053
72.0000	512.679	124.982	49.279	16.776	-0.530	9.904	976.009	-0.008749	-0.003449	-0.001174
72.2000	577.587	134.963	55.288	18.927	-0.537	9.904	1099.577	-0.009447	-0.003870	-0.001325
72.4000	622.897	142.688	60.479	20.139	-0.528	9.905	1185.837	-0.009988	-0.004234	-0.001410
72.6000	701.451	153.874	67.166	22.694	-0.531	9.905	1335.382	-0.010771	-0.004702	-0.001589
72.8000	770.116	164.603	74.112	24.986	-0.542	9.905	1466.103	-0.011522	-0.005188	-0.001749
73.0000	807.041	170.827	78.103	26.530	-0.543	9.905	1536.398	-0.011958	-0.005467	-0.001857
73.2000	886.000	181.403	84.760	29.931	-0.549	9.905	1686.716	-0.012698	-0.005933	-0.002095
73.4000	947.646	190.129	90.118	32.713	-0.535	9.905	1804.075	-0.013309	-0.006308	-0.002290
73.6000	993.889	197.703	94.973	34.979	-0.548	9.905	1892.109	-0.013839	-0.006648	-0.002449
73.8000	1035.292	203.621	98.566	37.173	-0.550	9.905	1970.930	-0.014253	-0.006900	-0.002602
74.0000	1074.110	209.002	102.127	39.243	-0.542	9.905	2044.830	-0.014630	-0.007149	-0.002747
74.2000	1112.358	214.086	105.583	41.440	-0.542	9.905	2117.643	-0.014986	-0.007391	-0.002901
74.4000	1122.156	216.128	106.903	41.898	-0.539	9.905	2136.297	-0.015129	-0.007483	-0.002933
74.6000	1138.943	219.394	108.458	43.069	-0.542	9.905	2168.255	-0.015358	-0.007592	-0.003015
74.8000	1129.911	219.354	108.885	42.941	-0.538	9.905	2151.060	-0.015355	-0.007622	-0.003006
75.0000	1129.926	219.519	108.830	43.012	-0.548	9.906	2151.089	-0.015366	-0.007618	-0.003011
75.2000	1109.112	217.686	107.798	41.967	-0.556	9.906	2111.464	-0.015238	-0.007546	-0.002938
75.4000	1097.720	216.367	107.440	41.188	-0.541	9.906	2089.777	-0.015146	-0.007521	-0.002883
75.6000	1067.874	213.545	105.654	39.703	-0.534	9.906	2032.957	-0.014948	-0.007396	-0.002779
75.8000	1018.385	208.501	101.893	37.381	-0.546	9.906	1938.744	-0.014595	-0.007133	-0.002617
76.0000	990.898	204.375	98.647	36.201	-0.537	9.907	1886.415	-0.014306	-0.006905	-0.002534
76.2000	917.154	195.438	93.337	32.700	-0.541	9.907	1746.025	-0.013681	-0.006534	-0.002289
76.4000	895.813	191.936	90.708	31.198	-0.550	9.906	1705.399	-0.013436	-0.006350	-0.002184
76.6000	811.970	181.556	84.363	28.114	-0.552	9.906	1545.782	-0.012709	-0.005905	-0.001968
76.8000	732.409	170.674	77.552	24.750	-0.552	9.906	1394.320	-0.011947	-0.005429	-0.001732
77.0000	686.242	164.591	73.053	23.360	-0.540	9.905	1306.429	-0.011521	-0.005114	-0.001635
77.2000	604.878	153.250	66.298	20.803	-0.545	9.906	1151.533	-0.010727	-0.004641	-0.001456
77.4000	539.850	143.466	59.870	19.176	-0.546	9.906	1027.737	-0.010043	-0.004191	-0.001342
77.6000	477.407	133.057	53.693	17.372	-0.545	9.905	908.861	-0.009314	-0.003758	-0.001216
77.8000	412.304	121.998	47.527	15.871	-0.558	9.906	784.922	-0.008540	-0.003327	-0.001111
78.0000	358.382	112.753	41.762	14.801	-0.543	9.906	682.268	-0.007893	-0.002923	-0.001036
78.2000	298.164	102.693	37.112	13.231	-0.541	9.905	567.627	-0.007188	-0.002598	-0.000926
78.4000	234.894	91.269	31.374	11.287	-0.547	9.905	447.178	-0.006389	-0.002196	-0.000790
78.6000	186.217	81.766	26.890	9.852	-0.544	9.905	354.509	-0.005724	-0.001882	-0.000690
78.8000	150.600	75.052	23.968	8.589	-0.537	9.904	286.703	-0.005254	-0.001678	-0.000601
79.0000	116.395	68.436	21.080	7.296	-0.529	9.904	221.586	-0.004791	-0.001476	-0.000511
79.2000	91.478	62.796	18.232	6.600	-0.532	9.903	174.150	-0.004396	-0.001276	-0.000462
79.4000	65.644	57.864	15.989	5.909	-0.541	9.903	124.969	-0.004050	-0.001119	-0.000414
79.6000	62.022	55.737	14.434	5.699	-0.538	9.902	118.074	-0.003902	-0.001010	-0.000399
79.8000	53.426	53.779	13.458	5.436	-0.535	9.902	101.709	-0.003765	-0.000942	-0.000381
80.0000	74.676	56.196	14.323	5.546	-0.536	9.901	142.164	-0.003934	-0.001003	-0.000388
80.2000	79.786	57.236	15.260	5.074	-0.538	9.900	151.892	-0.004007	-0.001068	-0.000355
80.4000	80.282	57.641	15.496	5.519	-0.549	9.900	152.836	-0.004035	-0.001085	-0.000386
80.6000	132.761	65.050	18.423	6.657	-0.542	9.899	252.743	-0.004553	-0.001290	-0.000466
80.8000	177.546	71.956	21.383	7.629	-0.559	9.899	338.001	-0.005037	-0.001497	-0.000534
81.0000	199.788	76.041	23.257	8.144	-0.545	9.898	380.344	-0.005323	-0.001628	-0.000570
81.2000	250.749	84.433	27.275	9.869	-0.538	9.897	477.362	-0.005910	-0.001909	-0.000691
81.4000	305.948	93.175	31.470	11.577	-0.541	9.896	582.447	-0.006522	-0.002203	-0.000810
81.6000	358.052	102.497	36.564	12.938	-0.545	9.896	681.639	-0.007175	-0.002559	-0.000906
81.8000	437.552	114.574	42.960	15.231	-0.540	9.895	832.987	-0.008020	-0.003007	-0.001066
82.0000	493.999	123.067	47.472	16.969	-0.542	9.895	940.447	-0.008615	-0.003323	-0.001188
82.2000	582.561	135.377	55.015	18.956	-0.540	9.894	1109.047	-0.009476	-0.003851	-0.001327
82.4000	666.510	148.259	63.901	21.554	-0.547	9.893	1268.864	-0.010378	-0.004473	-0.001509
82.6000	713.158	155.626	67.852	23.041	-0.533	9.893	1357.670	-0.010894	-0.004750	-0.001613
82.8000	778.847	165.325	73.879	25.403	-0.549	9.893	1482.725	-0.011573	-0.005172	-0.001778
83.0000	793.816	169.425	77.072	25.976	-0.542	9.892	1511.221	-0.011860	-0.005395	-0.001818
83.2000	899.315	182.974	85.614	30.184	-0.544	9.891	1712.065	-0.012808	-0.005993	-0.002113
83.4000	915.876	186.752	88.121	31.072	-0.552	9.891	1743.593	-0.013073	-0.006168	-0.002175
83.6000	994.009	197.784	94.754	34.924	-0.536	9.890	1892.338	-0.013845	-0.006633	-0.002445
83.8000	1048.697	204.334	98.552	37.549	-0.545	9.890	1996.450	-0.014303	-0.006899	-0.002628
84.0000	1089.109	209.876	101.772	39.718	-0.538	9.889	2073.383	-0.014691	-0.007124	-0.002780
84.2000	1106.106	213.766	104.893	40.690	-0.540	9.888	2105.742	-0.014964	-0.007343	-0.002848
84.4000	1127.371	217.188	106.944	42.441	-0.547	9.887	2146.225	-0.015203	-0.007486	-0.002971
84.6000	1147.990	219.951	108.597	43.358	-0.547	9.887	2185.478	-0.015397	-0.007602	-0.003035
84.8000	1135.426	219.839	108.911	42.969	-0.550	9.887	2161.560	-0.015389	-0.007624	-0.003008
85.0000	1144.774	220.283	108.623	43.316	-0.540	9.885	2179.356	-0.015420	-0.007604	-0.003032
85.2000	1105.535	216.977	107.108	41.343	-0.545	9.885	2104.654	-0.015188	-0.007498	-0.002894
85.4000	1123.599	218.504	107.798	42.649	-0.550	9.884	2139.044	-0.015295	-0.007546	-0.002985
85.6000	1054.979	212.169	104.237	39.147	-0.544	9.884	2008.410	-0.014852	-0.007297	-0.002740
85.8000	1021.797	208.764	101.594	37.703	-0.548	9.884	1945.238	-0.014614	-0.007112	-0.002639
86.0000	988.388	204.194	98.219	35.867	-0.545	9.882	1881.638	-0.014294	-0.006875	-0.002511
86.2000	939.937	198.077	94.163	33.798	-0.547	9.882	1789.398	-0.013865	-0.006591	-0.002366
86.4000	855.552	187.308	87.666	29.767	-0.544	9.881	1628.752	-0.013112	-0.006137	-0.002084
86.6000	814.825	181.611	83.789	28.309	-0.548	9.880	1551.218	-0.012713	-0.005865	-0.001982
86.8000	761.234	174.788	79.411	26.153	-0.539	9.880	1449.194	-0.012235	-0.005559	-0.001831
87.0000	689.293	164.824	73.011	23.624	-0.541	9.880	1312.237	-0.011538	-0.005111	-0.001654
87.2000	601.452	152.957	65.443	21.040	-0.558	9.878	1145.010	-0.010707	-0.004581	-0.001473
87.4000	542.961	143.215	59.704	19.096	-0.557	9.878	1033.659	-0.010025	-0.004179	-0.001337
87.6000	483.779	134.242	54.147	17.887	-0.547	9.878	920.992	-0.009397	-0.003790	-0.001252
87.8000	414.183	123.235	47.903	16.428	-0.552	9.877	788.498	-0.008626	-0.003353	-0.001150
88.0000	345.308	111.673	41.239	15.162	-0.544	9.877	657.377	-0.007817	-0.002887	-0.001061
88.2000	281.557	100.776	36.231	13.326	-0.543	9.877	536.013	-0.007054	-0.002536	-0.000933
88.4000	237.314	92.148	31.786	11.981	-0.558	9.876	451.784	-0.006450	-0.002225	-0.000839
88.6000	182.204	82.668	26.959	9.853	-0.539	9.875	346.870	-0.005787	-0.001887	-0.000690
88.8000	139.253	73.275	22.610	8.352	-0.538	9.875	265.102	-0.005129	-0.001583	-0.000585
89.0000	124.420	70.632	21.081	7.463	-0.546	9.875	236.864	-0.004944	-0.001476	-0.000522
89.2000	72.482	60.434	16.735	6.213	-0.544	9.874	137.987	-0.004230	-0.001171	-0.000435
89.4000	55.440	56.712	15.220	5.714	-0.534	9.874	105.543	-0.003970	-0.001065	-0.000400
89.6000	61.015	56.433	14.420	5.797	-0.537	9.873	116.158	-0.003950	-0.001009	-0.000406
89.8000	57.108	54.515	13.361	5.504	-0.541	9.873	108.719	-0.003816	-0.000935	-0.000385
90.0000	62.729	54.626	13.332	5.768	-0.541	9.872	119.419	-0.003824	-0.000933	-0.000404
90.2000	64.697	54.490	13.460	5.614	-0.547	9.873	123.167	-0.003814	-0.000942	-0.000393
90.4000	101.938	60.575	16.017	6.242	-0.541	9.873	194.063	-0.004240	-0.001121	-0.000437
90.6000	132.806	65.689	18.123	6.547	-0.540	9.872	252.829	-0.004598	-0.001269	-0.000458
90.8000	149.999	69.148	20.490	6.740	-0.537	9.872	285.559	-0.004840	-0.001434	-0.000472
91.0000	209.616	78.250	23.789	8.631	-0.538	9.873	399.055	-0.005477	-0.001665	-0.000604
91.2000	262.366	85.838	27.536	10.369	-0.539	9.872	499.477	-0.006009	-0.001927	-0.000726
91.4000	318.677	94.873	31.815	12.244	-0.538	9.872	606.680	-0.006641	-0.002227	-0.000857
91.6000	394.391	107.694	38.408	14.064	-0.528	9.873	750.818	-0.007539	-0.002689	-0.000984
91.8000	439.220	114.478	42.299	15.149	-0.529	9.872	836.163	-0.008013	-0.002961	-0.001060
92.0000	504.429	124.454	48.107	16.858	-0.528	9.872	960.302	-0.008712	-0.003367	-0.001180
92.2000	569.186	134.462	54.231	18.899	-0.545	9.873	1083.584	-0.009412	-0.003796	-0.001323
92.4000	641.367	145.288	60.848	20.665	-0.539	9.873	1220.999	-0.010170	-0.004259	-0.001447
92.6000	706.966	155.765	67.921	23.055	-0.546	9.873	1345.882	-0.010904	-0.004754	-0.001614
92.8000	788.961	167.023	74.307	25.988	-0.538	9.873	1501.980	-0.011692	-0.005201	-0.001819
93.0000	828.366	174.152	79.645	27.462	-0.538	9.873	1576.996	-0.012191	-0.005575	-0.001922
93.2000	895.062	182.989	84.581	30.325	-0.544	9.872	1703.968	-0.012809	-0.005921	-0.002123
93.4000	983.158	194.716	92.179	34.186	-0.535	9.873	1871.681	-0.013630	-0.006453	-0.002393
93.6000	997.060	197.801	93.982	35.422	-0.549	9.873	1898.146	-0.013846	-0.006579	-0.002480
93.8000	1038.598	204.597	98.566	37.369	-0.545	9.873	1977.224	-0.014322	-0.006900	-0.002616
94.0000	1074.140	209.446	101.441	39.411	-0.545	9.873	2044.888	-0.014661	-0.007101	-0.002759
94.2000	1108.345	214.727	104.937	41.453	-0.541	9.874	2110.004	-0.015031	-0.007346	-0.002902
94.4000	1141.678	218.810	107.275	43.246	-0.548	9.874	2173.462	-0.015317	-0.007509	-0.003027
94.6000	1141.287	219.660	107.659	43.316	-0.542	9.875	2172.718	-0.015376	-0.007536	-0.003032
94.8000	1136.478	219.824	108.253	43.330	-0.552	9.874	2163.563	-0.015388	-0.007578	-0.003033
95.0000	1125.748	219.382	108.071	42.899	-0.537	9.874	2143.135	-0.015357	-0.007565	-0.003003
95.2000	1121.826	218.770	107.603	42.788	-0.541	9.875	2135.668	-0.015314	-0.007532	-0.002995
95.4000	1097.675	216.909	106.132	41.620	-0.538	9.875	2089.691	-0.015184	-0.007429	-0.002913
95.6000	1068.715	213.489	104.399	39.983	-0.534	9.875	2034.559	-0.014944	-0.007308	-0.002799
95.8000	1021.511	208.528	100.985	37.647	-0.532	9.876	1944.695	-0.014597	-0.007069	-0.002635
96.0000	986.901	204.206	98.001	35.951	-0.533	9.875	1878.805	-0.014294	-0.006860	-0.002517
96.2000	929.462	197.105	93.489	33.549	-0.532	9.876	1769.457	-0.013797	-0.006544	-0.002348
96.4000	870.911	189.116	88.298	30.877	-0.542	9.876	1657.991	-0.013238	-0.006181	-0.002161
96.6000	820.521	182.819	84.459	28.794	-0.529	9.876	1562.061	-0.012797	-0.005912	-0.002016
96.8000	743.561	172.594	77.690	25.653	-0.543	9.876	1415.548	-0.012082	-0.005438	-0.001796
97.0000	673.648	163.323	72.089	23.152	-0.537	9.876	1282.454	-0.011433	-0.005046	-0.001621
97.2000	600.265	152.165	64.425	21.054	-0.541	9.877	1142.750	-0.010652	-0.004510	-0.001474
97.4000	541.068	142.686	58.676	19.290	-0.534	9.876	1030.054	-0.009988	-0.004107	-0.001350
97.6000	505.841	137.199	54.960	18.233	-0.535	9.878	962.992	-0.009604	-0.003847	-0.001276
97.8000	402.912	121.469	46.274	16.429	-0.536	9.877	767.040	-0.008503	-0.003239	-0.001150
98.0000	310.096	106.667	38.444	14.521	-0.548	9.878	590.343	-0.007467	-0.002691	-0.001016
98.2000	304.100	103.847	36.700	14.216	-0.541	9.878	578.928	-0.007269	-0.002569	-0.000995
98.4000	255.799	94.914	32.241	12.759	-0.532	9.878	486.975	-0.006644	-0.002257	-0.000893
98.6000	186.698	82.488	26.532	9.964	-0.540	9.878	355.425	-0.005774	-0.001857	-0.000697
98.8000	170.753	79.207	25.153	9.159	-0.536	9.879	325.069	-0.005544	-0.001761	-0.000641
99.0000	120.152	69.620	20.048	7.852	-0.537	9.879	228.739	-0.004873	-0.001403	-0.000550
99.2000	85.166	62.769	17.466	6.711	-0.545	9.879	162.134	-0.004394	-0.001223	-0.000470
99.4000	56.567	57.266	15.082	6.394	-0.548	9.879	107.689	-0.004009	-0.001056	-0.000448
99.6000	55.380	55.769	14.062	6.225	-0.544	9.879	105.429	-0.003904	-0.000984	-0.000436
99.8000	30.628	50.445	11.187	6.186	-0.540	9.880	58.308	-0.003531	-0.000783	-0.000433
