# Supplementary material for: Evaluation of a Cold-Mixed High-Performance Polyurethane Mixture
Source: Hindawi journal article supplement (doi:10.1155/2019/1507971), 2019-11-07
Supplement: f1 [file 1507971.f1.zip › 1507971.f1/dynamic modulus data/PUM/specimen1/temp10/zhs-1-10_0.2Hz.csv]

Test Information
****************
Project name	zhs
Operator name	1
Target test temperature	10
Target confining stress	0
Average dynamic strain range from 75 to 125 micro-strain
Contact stress	5
Initial modulus	4000
Axial gauge length	70
Comments	Run at High Pressure
Specimen information
********************
Identification	zhs-1-10
Dimensions	Point 1	Point 2	Point 3	Point 4	Point 5	Point 6	Average	Std Dev.
Diameter (mm)	49.2	49.2	49.3				49.23	0.058
Height (mm)	101.3	101.2	101.3				101.27	0.058
Cross-sectional area (mm�)	1903.7
Conditioning time
Properties/Comments
Test Data	0.2Hz
*********
Test date and time	Fri	Mar 29	2019	11:04 AM
Dynamic modulus (MPa)	11082
Phase angle (Degrees)	4.04
Average temperature (�C)	9.9
Average confining pressure (kPa)	-0.5
Average micro-strain	100
Load drift (%)	0.2
Load standard error (%)	1.8
Average deformation drift (%)	-3.0
Average deformation standard error (%)	4.4
Deformation uniformity (%)	53.5
Phase uniformity (Degrees)	0.8
Conditioning Cycles
Time (sec)	Axial stress (kPa)	Axial micro-strain #1	Axial micro-strain #2	Axial micro-strain #3	Confining pressure (kPa)	Temperature (�C)	Load (N)	Displacement #1 (mm)	Displacement #2 (mm)	Displacement #3 (mm)
0.0000	66.471	39.451	18.715	-2.249	-0.518	9.848	126.543	-0.002762	-0.001310	0.000157
0.1000	50.796	36.728	16.130	-1.695	-0.518	9.848	96.703	-0.002571	-0.001129	0.000119
0.2000	70.558	40.035	17.367	-1.430	-0.520	9.847	134.325	-0.002802	-0.001216	0.000100
0.3000	81.063	41.659	19.500	-1.972	-0.519	9.848	154.324	-0.002916	-0.001365	0.000138
0.4000	125.698	49.500	22.428	-1.499	-0.520	9.848	239.296	-0.003465	-0.001570	0.000105
0.5000	159.361	54.571	24.135	-1.571	-0.518	9.847	303.383	-0.003820	-0.001689	0.000110
0.6000	189.087	59.921	27.936	-0.667	-0.524	9.847	359.974	-0.004194	-0.001956	0.000047
0.7000	234.654	68.023	31.814	-0.126	-0.513	9.847	446.720	-0.004762	-0.002227	0.000009
0.8000	278.807	74.830	33.107	0.904	-0.532	9.848	530.777	-0.005238	-0.002317	-0.000063
0.9000	318.392	81.654	37.663	2.475	-0.518	9.847	606.136	-0.005716	-0.002636	-0.000173
1.0000	402.476	94.052	43.096	5.171	-0.517	9.848	766.211	-0.006584	-0.003017	-0.000362
1.1000	450.837	102.374	46.854	6.685	-0.513	9.848	858.278	-0.007166	-0.003280	-0.000468
1.2000	502.851	111.198	52.620	8.132	-0.520	9.848	957.298	-0.007784	-0.003683	-0.000569
1.3000	556.216	118.662	56.323	10.186	-0.522	9.847	1058.893	-0.008306	-0.003943	-0.000713
1.4000	607.974	126.152	60.146	12.147	-0.503	9.848	1157.427	-0.008831	-0.004210	-0.000850
1.5000	624.265	130.028	63.682	13.064	-0.515	9.848	1188.440	-0.009102	-0.004458	-0.000914
1.6000	694.914	139.926	69.504	15.106	-0.521	9.848	1322.937	-0.009795	-0.004865	-0.001057
1.7000	761.535	149.136	74.512	17.385	-0.524	9.847	1449.766	-0.010440	-0.005216	-0.001217
1.8000	783.777	152.928	77.293	18.150	-0.537	9.848	1492.109	-0.010705	-0.005410	-0.001271
1.9000	818.552	158.682	80.182	19.096	-0.514	9.848	1558.313	-0.011108	-0.005613	-0.001337
2.0000	875.149	166.255	85.864	21.289	-0.519	9.848	1666.059	-0.011638	-0.006010	-0.001490
2.1000	897.361	169.981	87.145	22.151	-0.522	9.848	1708.345	-0.011899	-0.006100	-0.001551
2.2000	866.989	167.925	87.336	21.137	-0.508	9.848	1650.524	-0.011755	-0.006114	-0.001480
2.3000	900.637	172.288	89.374	22.638	-0.512	9.848	1714.582	-0.012060	-0.006256	-0.001585
2.4000	886.466	171.883	89.566	22.055	-0.515	9.848	1687.603	-0.012032	-0.006270	-0.001544
2.5000	906.048	173.691	90.268	22.875	-0.521	9.848	1724.882	-0.012158	-0.006319	-0.001601
2.6000	881.702	171.469	89.417	21.777	-0.524	9.848	1678.534	-0.012003	-0.006259	-0.001524
2.7000	881.672	171.246	88.160	22.319	-0.515	9.848	1678.476	-0.011987	-0.006171	-0.001562
2.8000	851.449	167.635	86.428	20.889	-0.520	9.848	1620.941	-0.011734	-0.006050	-0.001462
2.9000	773.587	159.226	81.159	18.595	-0.517	9.848	1472.712	-0.011146	-0.005681	-0.001302
3.0000	768.944	158.416	79.973	17.984	-0.509	9.848	1463.871	-0.011089	-0.005598	-0.001259
3.1000	730.726	152.815	76.632	16.829	-0.526	9.847	1391.115	-0.010697	-0.005364	-0.001178
3.2000	707.477	149.121	74.014	15.843	-0.513	9.848	1346.855	-0.010439	-0.005181	-0.001109
3.3000	640.811	140.606	69.216	13.703	-0.519	9.848	1219.940	-0.009842	-0.004845	-0.000959
3.4000	599.032	134.544	64.935	12.829	-0.513	9.848	1140.404	-0.009418	-0.004545	-0.000898
3.5000	526.475	124.469	59.775	10.270	-0.521	9.848	1002.274	-0.008713	-0.004184	-0.000719
3.6000	494.405	119.105	55.854	9.143	-0.530	9.848	941.219	-0.008337	-0.003910	-0.000640
3.7000	461.853	113.629	52.370	8.229	-0.508	9.848	879.250	-0.007954	-0.003666	-0.000576
3.8000	395.923	104.082	48.602	6.435	-0.518	9.848	753.736	-0.007286	-0.003402	-0.000450
3.9000	341.491	95.092	44.351	5.060	-0.524	9.848	650.110	-0.006656	-0.003105	-0.000354
4.0000	273.111	83.600	39.384	2.725	-0.517	9.848	519.934	-0.005852	-0.002757	-0.000191
4.1000	220.572	74.650	34.278	0.848	-0.532	9.848	419.912	-0.005225	-0.002399	-0.000059
4.2000	215.688	71.956	33.092	1.333	-0.517	9.848	410.614	-0.005037	-0.002316	-0.000093
4.3000	149.488	60.895	27.276	-0.818	-0.517	9.848	284.586	-0.004263	-0.001909	0.000057
4.4000	108.054	53.054	24.219	-1.736	-0.522	9.848	205.708	-0.003714	-0.001695	0.000122
4.5000	77.051	46.274	21.344	-2.417	-0.518	9.848	146.685	-0.003239	-0.001494	0.000169
4.6000	74.841	45.329	20.655	-2.110	-0.510	9.848	142.479	-0.003173	-0.001446	0.000148
4.7000	46.287	38.466	16.404	-1.485	-0.530	9.848	88.120	-0.002693	-0.001148	0.000104
4.8000	42.966	37.462	16.459	-1.861	-0.513	9.849	81.797	-0.002622	-0.001152	0.000130
4.9000	43.026	36.253	15.357	-1.487	-0.514	9.849	81.911	-0.002538	-0.001075	0.000104
5.0000	47.234	36.419	16.349	-1.666	-0.518	9.849	89.922	-0.002549	-0.001144	0.000117
5.1000	59.603	38.604	16.032	-2.083	-0.519	9.849	113.468	-0.002702	-0.001122	0.000146
5.2000	73.594	40.936	18.248	-2.151	-0.530	9.849	140.104	-0.002865	-0.001277	0.000151
5.3000	87.946	43.580	19.251	-2.139	-0.521	9.849	167.427	-0.003051	-0.001348	0.000150
5.4000	126.179	50.292	21.782	-2.082	-0.528	9.849	240.211	-0.003520	-0.001525	0.000146
5.5000	182.881	58.044	25.622	-1.124	-0.516	9.849	348.158	-0.004063	-0.001794	0.000079
5.6000	182.986	59.408	26.351	-1.918	-0.524	9.849	348.358	-0.004159	-0.001845	0.000134
5.7000	247.533	69.022	31.429	0.113	-0.526	9.849	471.239	-0.004832	-0.002200	-0.000008
5.8000	294.196	76.847	34.264	1.654	-0.532	9.849	560.074	-0.005379	-0.002398	-0.000116
5.9000	350.643	85.865	39.136	3.502	-0.527	9.850	667.534	-0.006011	-0.002739	-0.000245
6.0000	383.345	91.408	41.141	4.098	-0.526	9.850	729.790	-0.006399	-0.002880	-0.000287
6.1000	446.088	102.162	46.565	6.767	-0.525	9.850	849.237	-0.007151	-0.003260	-0.000474
6.2000	498.552	109.906	51.107	8.437	-0.526	9.851	949.116	-0.007693	-0.003577	-0.000591
6.3000	568.795	120.160	56.997	10.659	-0.518	9.850	1082.840	-0.008411	-0.003990	-0.000746
6.4000	614.737	126.845	60.999	12.631	-0.527	9.851	1170.301	-0.008879	-0.004270	-0.000884
6.5000	651.481	132.601	63.791	13.911	-0.535	9.850	1240.253	-0.009282	-0.004465	-0.000974
6.6000	701.857	140.077	69.433	15.247	-0.526	9.850	1336.155	-0.009805	-0.004860	-0.001067
6.7000	772.039	150.139	75.626	17.246	-0.520	9.850	1469.765	-0.010510	-0.005294	-0.001207
6.8000	789.818	153.332	77.416	17.873	-0.522	9.850	1503.611	-0.010733	-0.005419	-0.001251
6.9000	826.036	159.768	81.902	19.372	-0.521	9.851	1572.561	-0.011184	-0.005733	-0.001356
7.0000	849.691	163.253	83.073	20.013	-0.536	9.851	1617.594	-0.011428	-0.005815	-0.001401
7.1000	905.266	170.049	88.217	21.915	-0.528	9.851	1723.394	-0.011903	-0.006175	-0.001534
7.2000	883.490	169.173	87.571	21.805	-0.526	9.851	1681.938	-0.011842	-0.006130	-0.001526
7.3000	893.454	171.261	88.093	22.513	-0.530	9.851	1700.907	-0.011988	-0.006167	-0.001576
7.4000	907.175	173.691	90.528	22.305	-0.528	9.851	1727.028	-0.012158	-0.006337	-0.001561
7.5000	878.050	169.951	88.079	21.470	-0.513	9.852	1671.581	-0.011897	-0.006166	-0.001503
7.6000	908.603	174.524	90.283	22.806	-0.507	9.852	1729.746	-0.012217	-0.006320	-0.001596
7.7000	806.334	163.435	83.717	19.343	-0.537	9.851	1535.053	-0.011440	-0.005860	-0.001354
7.8000	837.203	166.411	85.492	20.776	-0.525	9.852	1593.819	-0.011649	-0.005984	-0.001454
7.9000	829.132	165.130	84.501	19.844	-0.524	9.852	1578.455	-0.011559	-0.005915	-0.001389
8.0000	753.074	156.377	79.052	17.887	-0.517	9.852	1433.659	-0.010946	-0.005534	-0.001252
8.1000	736.527	153.750	77.719	16.774	-0.514	9.853	1402.159	-0.010763	-0.005440	-0.001174
8.2000	683.808	146.205	72.751	15.398	-0.510	9.853	1301.794	-0.010234	-0.005093	-0.001078
8.3000	640.871	140.436	69.269	13.563	-0.513	9.853	1220.055	-0.009831	-0.004849	-0.000949
8.4000	616.195	135.990	65.802	12.868	-0.508	9.853	1173.077	-0.009519	-0.004606	-0.000901
8.5000	536.815	125.510	59.939	10.939	-0.518	9.853	1021.957	-0.008786	-0.004196	-0.000766
8.6000	481.255	117.204	54.973	8.893	-0.514	9.853	916.185	-0.008204	-0.003848	-0.000623
8.7000	419.428	108.572	50.598	6.810	-0.515	9.853	798.483	-0.007600	-0.003542	-0.000477
8.8000	376.582	101.011	46.785	5.684	-0.521	9.854	716.915	-0.007071	-0.003275	-0.000398
8.9000	329.122	92.924	42.808	4.435	-0.503	9.854	626.564	-0.006505	-0.002997	-0.000310
9.0000	263.223	82.446	37.950	2.474	-0.508	9.853	501.108	-0.005771	-0.002657	-0.000173
9.1000	219.099	73.982	34.113	1.264	-0.503	9.853	417.109	-0.005179	-0.002388	-0.000089
9.2000	200.178	70.300	32.255	0.224	-0.510	9.854	381.088	-0.004921	-0.002258	-0.000016
9.3000	148.195	60.269	27.328	-1.220	-0.519	9.854	282.125	-0.004219	-0.001913	0.000085
9.4000	112.187	52.694	24.425	-1.625	-0.512	9.854	213.575	-0.003689	-0.001710	0.000114
9.5000	74.285	46.050	20.874	-2.167	-0.517	9.854	141.420	-0.003223	-0.001461	0.000152
9.6000	49.669	40.410	18.206	-1.931	-0.501	9.854	94.557	-0.002829	-0.001274	0.000135
9.7000	36.684	37.032	16.005	-2.111	-0.512	9.855	69.838	-0.002592	-0.001120	0.000148
9.8000	52.088	38.353	16.996	-1.735	-0.513	9.854	99.163	-0.002685	-0.001190	0.000121
9.9000	37.466	35.560	15.536	-2.263	-0.512	9.855	71.325	-0.002489	-0.001087	0.000158
10.0000	40.697	35.156	15.025	-1.930	-0.507	9.855	77.477	-0.002461	-0.001052	0.000135
10.1000	66.952	39.245	16.430	-2.068	-0.506	9.855	127.459	-0.002747	-0.001150	0.000145
10.2000	85.391	42.689	18.865	-2.749	-0.504	9.855	162.563	-0.002988	-0.001321	0.000192
10.3000	98.406	45.231	19.402	-3.000	-0.522	9.855	187.340	-0.003166	-0.001358	0.000210
10.4000	144.378	52.317	23.104	-2.375	-0.517	9.855	274.858	-0.003662	-0.001617	0.000166
10.5000	174.886	56.294	24.659	-1.304	-0.504	9.855	332.937	-0.003941	-0.001726	0.000091
10.6000	202.042	62.713	27.577	-0.957	-0.514	9.854	384.636	-0.004390	-0.001930	0.000067
10.7000	244.678	68.202	30.231	0.070	-0.530	9.855	465.803	-0.004774	-0.002116	-0.000005
10.8000	278.446	74.066	33.012	1.402	-0.527	9.855	530.090	-0.005185	-0.002311	-0.000098
10.9000	343.444	85.405	38.049	2.641	-0.517	9.855	653.830	-0.005978	-0.002663	-0.000185
11.0000	390.739	93.038	41.623	4.336	-0.521	9.855	743.866	-0.006513	-0.002914	-0.000304
11.1000	467.504	104.209	47.072	6.852	-0.522	9.855	890.007	-0.007295	-0.003295	-0.000480
11.2000	498.432	109.934	50.515	8.242	-0.515	9.855	948.887	-0.007695	-0.003536	-0.000577
11.3000	566.857	119.492	56.652	10.867	-0.517	9.855	1079.149	-0.008364	-0.003966	-0.000761
11.4000	597.815	125.259	60.297	12.063	-0.518	9.855	1138.086	-0.008768	-0.004221	-0.000844
11.5000	674.565	135.641	66.050	14.148	-0.513	9.854	1284.199	-0.009495	-0.004624	-0.000990
11.6000	709.476	141.491	69.505	15.566	-0.513	9.854	1350.660	-0.009904	-0.004865	-0.001090
11.7000	744.026	146.356	72.778	16.469	-0.528	9.854	1416.435	-0.010245	-0.005094	-0.001153
11.8000	795.484	154.097	77.759	17.984	-0.526	9.855	1514.397	-0.010787	-0.005443	-0.001259
11.9000	813.683	157.613	80.056	19.192	-0.525	9.854	1549.044	-0.011033	-0.005604	-0.001343
12.0000	868.477	164.657	84.379	20.956	-0.505	9.854	1653.357	-0.011526	-0.005907	-0.001467
12.1000	869.559	166.633	85.849	21.527	-0.540	9.854	1655.416	-0.011664	-0.006009	-0.001507
12.2000	883.024	168.980	87.226	21.694	-0.528	9.854	1681.051	-0.011829	-0.006106	-0.001519
12.3000	889.111	170.383	87.845	22.525	-0.522	9.854	1692.638	-0.011927	-0.006149	-0.001577
12.4000	892.086	171.343	88.327	22.556	-0.521	9.854	1698.303	-0.011994	-0.006183	-0.001579
12.5000	896.595	172.023	88.989	22.846	-0.519	9.854	1706.886	-0.012042	-0.006229	-0.001599
12.6000	880.079	170.467	87.983	21.872	-0.526	9.854	1675.444	-0.011933	-0.006159	-0.001531
12.7000	869.048	169.493	87.804	21.665	-0.519	9.854	1654.444	-0.011865	-0.006146	-0.001517
12.8000	848.263	167.091	85.892	21.291	-0.523	9.854	1614.876	-0.011696	-0.006012	-0.001490
12.9000	806.469	162.242	83.320	19.261	-0.526	9.854	1535.311	-0.011357	-0.005832	-0.001348
13.0000	772.701	158.626	80.224	18.138	-0.526	9.854	1471.024	-0.011104	-0.005616	-0.001270
13.1000	725.466	152.289	76.508	16.454	-0.517	9.854	1381.102	-0.010660	-0.005356	-0.001152
13.2000	696.416	148.204	74.486	15.496	-0.518	9.854	1325.798	-0.010374	-0.005214	-0.001085
13.3000	650.790	141.533	69.284	14.242	-0.513	9.854	1238.937	-0.009907	-0.004850	-0.000997
13.4000	595.531	133.796	64.811	12.841	-0.522	9.853	1133.738	-0.009366	-0.004537	-0.000899
13.5000	545.832	126.805	60.395	11.242	-0.513	9.853	1039.124	-0.008876	-0.004228	-0.000787
13.6000	483.284	117.926	54.725	9.102	-0.515	9.853	920.048	-0.008255	-0.003831	-0.000637
13.7000	436.996	110.267	51.161	7.531	-0.518	9.854	831.928	-0.007719	-0.003581	-0.000527
13.8000	379.888	101.886	46.633	5.823	-0.524	9.853	723.209	-0.007132	-0.003264	-0.000408
13.9000	322.991	92.645	41.982	4.448	-0.529	9.853	614.891	-0.006485	-0.002939	-0.000311
14.0000	262.516	82.711	37.772	2.390	-0.515	9.853	499.763	-0.005790	-0.002644	-0.000167
14.1000	237.359	77.279	35.089	1.807	-0.516	9.853	451.870	-0.005410	-0.002456	-0.000126
14.2000	173.819	66.312	30.478	-0.290	-0.521	9.853	330.906	-0.004642	-0.002133	0.000020
14.3000	151.066	60.701	26.753	-0.887	-0.526	9.853	287.590	-0.004249	-0.001873	0.000062
14.4000	110.985	53.501	24.330	-1.791	-0.521	9.853	211.287	-0.003745	-0.001703	0.000125
14.5000	104.387	51.443	22.581	-1.902	-0.513	9.853	198.727	-0.003601	-0.001581	0.000133
14.6000	64.487	43.079	19.127	-2.237	-0.531	9.853	122.766	-0.003016	-0.001339	0.000157
14.7000	56.852	40.631	17.462	-1.817	-0.520	9.853	108.232	-0.002844	-0.001222	0.000127
14.8000	33.724	35.033	14.214	-1.750	-0.524	9.853	64.201	-0.002452	-0.000995	0.000122
14.9000	43.913	37.006	15.301	-1.832	-0.516	9.852	83.599	-0.002590	-0.001071	0.000128
15.0000	32.101	34.894	14.628	-1.861	-0.513	9.853	61.111	-0.002443	-0.001024	0.000130
15.1000	44.469	35.768	15.178	-1.972	-0.522	9.852	84.658	-0.002504	-0.001062	0.000138
15.2000	49.834	36.643	15.701	-1.958	-0.507	9.853	94.872	-0.002565	-0.001099	0.000137
15.3000	78.403	41.966	17.931	-2.251	-0.513	9.852	149.260	-0.002938	-0.001255	0.000158
15.4000	146.963	52.778	23.200	-1.942	-0.513	9.852	279.779	-0.003694	-0.001624	0.000136
15.5000	162.713	55.821	24.383	-1.585	-0.536	9.851	309.763	-0.003908	-0.001707	0.000111
15.6000	193.100	61.729	28.071	-1.127	-0.524	9.852	367.613	-0.004321	-0.001965	0.000079
15.7000	265.672	72.511	31.965	1.224	-0.534	9.851	505.772	-0.005076	-0.002238	-0.000086
15.8000	306.369	79.307	35.558	2.600	-0.532	9.851	583.248	-0.005551	-0.002489	-0.000182
15.9000	380.339	90.938	41.157	4.406	-0.518	9.851	724.068	-0.006366	-0.002881	-0.000308
16.0000	345.097	87.923	39.962	3.544	-0.528	9.852	656.977	-0.006155	-0.002797	-0.000248
16.1000	442.106	101.483	46.261	6.684	-0.521	9.851	841.656	-0.007104	-0.003238	-0.000468
16.2000	510.635	112.502	52.111	9.034	-0.513	9.851	972.118	-0.007875	-0.003648	-0.000632
16.3000	555.796	118.564	54.957	10.811	-0.533	9.851	1058.092	-0.008299	-0.003847	-0.000757
16.4000	607.719	125.540	59.870	12.423	-0.544	9.851	1156.940	-0.008788	-0.004191	-0.000870
16.5000	643.937	133.644	65.486	13.468	-0.537	9.851	1225.891	-0.009355	-0.004584	-0.000943
16.6000	714.135	142.103	69.891	16.134	-0.530	9.851	1359.529	-0.009947	-0.004892	-0.001129
16.7000	770.762	150.165	75.515	17.955	-0.532	9.851	1467.333	-0.010512	-0.005286	-0.001257
16.8000	803.689	155.335	78.349	18.999	-0.537	9.851	1530.018	-0.010873	-0.005484	-0.001330
16.9000	797.122	155.904	79.273	18.720	-0.542	9.851	1517.515	-0.010913	-0.005549	-0.001310
17.0000	836.391	161.559	82.382	19.819	-0.531	9.851	1592.274	-0.011309	-0.005767	-0.001387
17.1000	871.482	167.160	85.257	21.568	-0.530	9.851	1659.079	-0.011701	-0.005968	-0.001510
17.2000	881.642	168.677	86.869	22.291	-0.525	9.851	1678.419	-0.011807	-0.006081	-0.001560
17.3000	891.726	170.565	88.258	22.861	-0.535	9.851	1697.617	-0.011940	-0.006178	-0.001600
17.4000	922.339	175.206	90.736	23.596	-0.526	9.851	1755.896	-0.012264	-0.006352	-0.001652
17.5000	888.059	171.815	89.126	22.584	-0.509	9.851	1690.636	-0.012027	-0.006239	-0.001581
17.6000	888.179	171.746	89.014	22.861	-0.518	9.851	1690.865	-0.012022	-0.006231	-0.001600
17.7000	867.800	169.717	87.448	21.763	-0.524	9.851	1652.069	-0.011880	-0.006121	-0.001523
17.8000	847.257	167.174	85.258	21.166	-0.526	9.851	1612.959	-0.011702	-0.005968	-0.001482
17.9000	818.853	164.325	83.718	20.110	-0.528	9.852	1558.886	-0.011503	-0.005860	-0.001408
18.0000	778.306	159.265	80.154	18.498	-0.520	9.851	1481.695	-0.011149	-0.005611	-0.001295
18.1000	727.856	152.399	76.244	16.777	-0.528	9.852	1385.651	-0.010668	-0.005337	-0.001174
18.2000	699.467	148.524	73.561	15.537	-0.528	9.851	1331.606	-0.010397	-0.005149	-0.001088
18.3000	638.918	140.148	68.402	14.410	-0.521	9.851	1216.335	-0.009810	-0.004788	-0.001009
18.4000	572.703	130.334	62.815	12.328	-0.530	9.851	1090.279	-0.009123	-0.004397	-0.000863
18.5000	542.210	126.025	60.050	11.188	-0.520	9.852	1032.228	-0.008822	-0.004203	-0.000783
18.6000	486.064	118.592	55.275	9.548	-0.522	9.852	925.341	-0.008301	-0.003869	-0.000668
18.7000	412.214	107.167	48.849	7.214	-0.521	9.852	784.750	-0.007502	-0.003419	-0.000505
18.8000	392.151	103.165	47.100	6.824	-0.514	9.851	746.555	-0.007222	-0.003297	-0.000478
18.9000	324.343	92.786	42.038	4.767	-0.522	9.852	617.466	-0.006495	-0.002943	-0.000334
19.0000	288.335	85.366	38.625	3.460	-0.520	9.852	548.916	-0.005976	-0.002704	-0.000242
19.1000	215.522	73.997	33.728	1.530	-0.520	9.852	410.299	-0.005180	-0.002361	-0.000107
19.2000	195.294	69.036	31.444	0.945	-0.515	9.851	371.790	-0.004833	-0.002201	-0.000066
19.3000	128.643	58.182	26.212	-0.818	-0.521	9.852	244.904	-0.004073	-0.001835	0.000057
19.4000	103.350	52.653	23.213	-1.750	-0.524	9.852	196.753	-0.003686	-0.001625	0.000122
19.5000	77.817	46.857	20.750	-1.709	-0.525	9.852	148.144	-0.003280	-0.001453	0.000120
19.6000	50.871	40.825	18.001	-1.876	-0.533	9.851	96.846	-0.002858	-0.001260	0.000131
19.7000	98.015	46.870	19.856	-1.708	-0.526	9.852	186.596	-0.003281	-0.001390	0.000120
19.8000	40.637	37.144	15.770	-1.915	-0.523	9.851	77.362	-0.002600	-0.001104	0.000134
19.9000	49.489	37.754	15.522	-1.707	-0.532	9.852	94.213	-0.002643	-0.001087	0.000120
20.0000	63.435	40.367	16.308	-2.195	-0.515	9.851	120.764	-0.002826	-0.001142	0.000154
20.1000	74.436	41.324	17.091	-1.888	-0.514	9.852	141.706	-0.002893	-0.001196	0.000132
20.2000	93.477	44.288	18.659	-2.096	-0.521	9.852	177.956	-0.003100	-0.001306	0.000147
20.3000	103.215	46.120	19.416	-2.207	-0.520	9.852	196.495	-0.003228	-0.001359	0.000154
20.4000	118.920	48.527	20.696	-1.722	-0.530	9.851	226.393	-0.003397	-0.001449	0.000121
20.5000	151.020	54.182	23.202	-1.639	-0.527	9.851	287.504	-0.003793	-0.001624	0.000115
20.6000	195.625	61.435	26.503	-0.668	-0.521	9.852	372.419	-0.004300	-0.001855	0.000047
20.7000	260.187	71.007	30.823	0.765	-0.520	9.851	495.329	-0.004970	-0.002158	-0.000054
20.8000	284.368	75.568	33.177	1.251	-0.522	9.851	541.363	-0.005290	-0.002322	-0.000088
20.9000	354.039	86.573	38.464	3.684	-0.530	9.852	674.000	-0.006060	-0.002692	-0.000258
21.0000	384.832	92.522	41.418	4.782	-0.522	9.851	732.622	-0.006477	-0.002899	-0.000335
21.1000	437.342	100.956	45.575	6.422	-0.524	9.851	832.586	-0.007067	-0.003190	-0.000450
21.2000	492.346	108.891	49.761	8.562	-0.528	9.851	937.300	-0.007622	-0.003483	-0.000599
21.3000	592.600	123.152	58.731	11.631	-0.518	9.852	1128.159	-0.008621	-0.004111	-0.000814
21.4000	586.093	123.441	58.222	11.674	-0.533	9.852	1115.770	-0.008641	-0.004076	-0.000817
21.5000	656.576	133.656	65.072	14.301	-0.520	9.852	1249.952	-0.009356	-0.004555	-0.001001
21.6000	702.563	140.549	69.105	15.620	-0.516	9.852	1337.500	-0.009838	-0.004837	-0.001093
21.7000	745.950	147.134	72.860	16.829	-0.533	9.851	1420.097	-0.010299	-0.005100	-0.001178
21.8000	799.466	154.821	77.747	19.136	-0.516	9.852	1521.978	-0.010837	-0.005442	-0.001340
21.9000	820.611	158.293	80.402	19.818	-0.523	9.851	1562.233	-0.011081	-0.005628	-0.001387
22.0000	854.079	163.699	82.990	21.178	-0.522	9.852	1625.948	-0.011459	-0.005809	-0.001482
22.1000	874.142	166.994	85.107	21.706	-0.521	9.852	1664.143	-0.011690	-0.005957	-0.001519
22.2000	893.935	170.371	88.011	22.640	-0.524	9.852	1701.822	-0.011926	-0.006161	-0.001585
22.3000	874.187	168.689	86.704	21.972	-0.521	9.852	1664.228	-0.011808	-0.006069	-0.001538
22.4000	892.312	171.205	88.245	22.860	-0.517	9.852	1698.732	-0.011984	-0.006177	-0.001600
22.5000	897.962	172.246	88.369	23.082	-0.530	9.851	1709.490	-0.012057	-0.006186	-0.001616
22.6000	873.947	169.481	87.103	22.234	-0.527	9.852	1663.771	-0.011864	-0.006097	-0.001556
22.7000	866.418	169.048	87.184	22.123	-0.512	9.852	1649.437	-0.011833	-0.006103	-0.001549
22.8000	844.431	167.035	85.946	21.358	-0.517	9.852	1607.580	-0.011692	-0.006016	-0.001495
22.9000	808.183	162.406	82.824	19.985	-0.526	9.852	1538.572	-0.011368	-0.005798	-0.001399
23.0000	771.333	158.016	80.098	18.524	-0.505	9.852	1468.420	-0.011061	-0.005607	-0.001297
23.1000	739.984	154.097	77.292	17.427	-0.518	9.852	1408.739	-0.010787	-0.005410	-0.001220
23.2000	683.838	146.509	72.091	15.662	-0.514	9.851	1301.851	-0.010256	-0.005046	-0.001096
23.3000	633.598	139.855	68.333	14.106	-0.524	9.852	1206.207	-0.009790	-0.004783	-0.000987
23.4000	564.918	130.068	61.894	12.216	-0.506	9.852	1075.459	-0.009105	-0.004333	-0.000855
23.5000	527.437	124.885	58.894	10.715	-0.524	9.851	1004.105	-0.008742	-0.004123	-0.000750
23.6000	500.010	119.674	54.588	10.061	-0.509	9.852	951.891	-0.008377	-0.003821	-0.000704
23.7000	446.689	111.602	50.929	8.688	-0.515	9.853	850.382	-0.007812	-0.003565	-0.000608
23.8000	387.538	102.677	47.018	6.643	-0.513	9.852	737.772	-0.007187	-0.003291	-0.000465
23.9000	332.248	93.355	42.092	5.045	-0.524	9.852	632.515	-0.006535	-0.002946	-0.000353
24.0000	262.276	82.808	37.141	2.863	-0.518	9.852	499.306	-0.005797	-0.002600	-0.000200
24.1000	224.735	75.499	33.878	1.667	-0.527	9.852	427.837	-0.005285	-0.002371	-0.000117
24.2000	189.463	67.260	29.488	0.695	-0.532	9.852	360.689	-0.004708	-0.002064	-0.000049
24.3000	129.094	58.351	25.636	-1.138	-0.517	9.852	245.762	-0.004085	-0.001795	0.000080
24.4000	116.470	54.754	23.998	-1.346	-0.524	9.852	221.729	-0.003833	-0.001680	0.000094
24.5000	84.956	48.554	21.287	-2.027	-0.520	9.851	161.734	-0.003399	-0.001490	0.000142
24.6000	72.482	45.204	19.058	-1.873	-0.500	9.851	137.987	-0.003164	-0.001334	0.000131
24.7000	38.052	37.617	15.439	-1.681	-0.517	9.852	72.441	-0.002633	-0.001081	0.000118
24.8000	41.178	37.630	15.840	-1.277	-0.516	9.852	78.392	-0.002634	-0.001109	0.000089
24.9000	45.927	37.688	15.137	-1.668	-0.526	9.853	87.433	-0.002638	-0.001060	0.000117
25.0000	45.205	36.156	14.584	-2.126	-0.538	9.843	86.060	-0.002531	-0.001021	0.000149
25.1000	79.245	41.591	16.568	-2.333	-0.534	9.842	150.862	-0.002911	-0.001160	0.000163
25.2000	94.198	44.429	18.411	-2.446	-0.542	9.842	179.329	-0.003110	-0.001289	0.000171
25.3000	130.266	50.416	21.056	-2.000	-0.535	9.842	247.993	-0.003529	-0.001474	0.000140
25.4000	135.286	52.303	22.813	-2.263	-0.526	9.842	257.549	-0.003661	-0.001597	0.000158
25.5000	189.193	60.547	25.856	-1.236	-0.530	9.843	360.174	-0.004238	-0.001810	0.000086
25.6000	307.932	77.569	33.616	2.252	-0.525	9.843	586.224	-0.005430	-0.002353	-0.000158
25.7000	333.105	82.586	36.258	3.042	-0.540	9.843	634.146	-0.005781	-0.002538	-0.000213
25.8000	378.581	90.631	39.850	4.447	-0.522	9.843	720.720	-0.006344	-0.002789	-0.000311
25.9000	433.720	99.220	43.797	6.669	-0.528	9.843	825.691	-0.006945	-0.003066	-0.000467
26.0000	502.911	109.656	49.304	8.992	-0.527	9.843	957.413	-0.007676	-0.003451	-0.000629
26.1000	599.483	123.152	58.330	12.062	-0.526	9.844	1141.262	-0.008621	-0.004083	-0.000844
26.2000	650.986	131.556	63.090	13.925	-0.525	9.844	1239.309	-0.009209	-0.004416	-0.000975
26.3000	704.336	140.245	68.539	15.622	-0.520	9.843	1340.876	-0.009817	-0.004798	-0.001094
26.4000	774.564	150.486	75.392	17.761	-0.526	9.843	1474.571	-0.010534	-0.005277	-0.001243
26.5000	851.810	161.589	81.764	20.541	-0.526	9.843	1621.628	-0.011311	-0.005723	-0.001438
26.6000	899.180	168.465	86.002	22.526	-0.534	9.844	1711.807	-0.011793	-0.006020	-0.001577
26.7000	965.816	178.013	92.633	25.070	-0.532	9.845	1838.665	-0.012461	-0.006484	-0.001755
26.8000	1012.915	184.989	96.583	27.309	-0.534	9.844	1928.329	-0.012949	-0.006761	-0.001912
26.9000	1045.692	190.408	100.092	29.101	-0.537	9.845	1990.728	-0.013329	-0.007006	-0.002037
27.0000	1096.112	197.203	104.565	31.282	-0.534	9.844	2086.716	-0.013804	-0.007320	-0.002190
27.1000	1126.529	201.860	107.314	33.045	-0.533	9.845	2144.623	-0.014130	-0.007512	-0.002313
27.2000	1151.943	206.124	110.000	34.297	-0.536	9.845	2193.003	-0.014429	-0.007700	-0.002401
27.3000	1155.098	207.263	111.224	34.644	-0.523	9.845	2199.011	-0.014508	-0.007786	-0.002425
27.4000	1165.122	209.445	112.545	35.271	-0.527	9.845	2218.094	-0.014661	-0.007878	-0.002469
27.5000	1155.910	209.043	111.500	34.993	-0.528	9.846	2200.556	-0.014633	-0.007805	-0.002450
27.6000	1146.142	207.888	111.692	34.451	-0.536	9.846	2181.959	-0.014552	-0.007818	-0.002412
27.7000	1091.228	202.901	109.024	32.380	-0.530	9.845	2077.417	-0.014203	-0.007632	-0.002267
27.8000	1091.453	202.582	109.215	32.365	-0.535	9.845	2077.847	-0.014181	-0.007645	-0.002266
27.9000	1043.693	197.425	105.376	30.144	-0.541	9.845	1986.923	-0.013820	-0.007376	-0.002110
28.0000	996.549	191.895	101.689	28.155	-0.533	9.846	1897.173	-0.013433	-0.007118	-0.001971
28.1000	954.950	187.144	98.440	26.500	-0.536	9.846	1817.980	-0.013100	-0.006891	-0.001855
28.2000	874.744	177.320	91.381	23.278	-0.531	9.846	1665.287	-0.012412	-0.006397	-0.001629
28.3000	823.527	170.413	86.593	21.527	-0.534	9.846	1567.783	-0.011929	-0.006061	-0.001507
28.4000	770.251	162.975	82.134	18.944	-0.536	9.846	1466.360	-0.011408	-0.005749	-0.001326
28.5000	700.098	153.205	75.917	16.996	-0.532	9.847	1332.808	-0.010724	-0.005314	-0.001190
28.6000	621.425	142.019	68.899	14.983	-0.532	9.846	1183.033	-0.009941	-0.004823	-0.001049
28.7000	544.224	130.471	62.415	12.965	-0.529	9.846	1036.062	-0.009133	-0.004369	-0.000908
28.8000	498.056	122.971	57.037	11.424	-0.529	9.847	948.172	-0.008608	-0.003993	-0.000800
28.9000	412.319	110.422	50.296	9.171	-0.534	9.847	784.950	-0.007730	-0.003521	-0.000642
29.0000	365.671	102.454	45.959	7.532	-0.538	9.848	696.144	-0.007172	-0.003217	-0.000527
29.1000	316.318	92.883	41.184	5.906	-0.523	9.848	602.188	-0.006502	-0.002883	-0.000413
29.2000	243.250	81.362	36.616	3.501	-0.531	9.847	463.085	-0.005695	-0.002563	-0.000245
29.3000	192.243	71.371	31.745	1.766	-0.524	9.847	365.982	-0.004996	-0.002222	-0.000124
29.4000	149.127	63.728	27.990	0.598	-0.522	9.847	283.899	-0.004461	-0.001959	-0.000042
29.5000	105.274	54.739	23.421	-0.431	-0.534	9.848	200.415	-0.003832	-0.001639	0.000030
29.6000	90.291	50.946	22.704	-0.818	-0.533	9.848	171.890	-0.003566	-0.001589	0.000057
29.7000	67.117	45.663	19.264	-0.736	-0.529	9.848	127.773	-0.003196	-0.001348	0.000051
29.8000	55.560	42.633	17.903	-0.846	-0.531	9.848	105.772	-0.002984	-0.001253	0.000059
29.9000	50.691	40.479	16.471	-0.876	-0.524	9.848	96.502	-0.002834	-0.001153	0.000061
30.0000	55.034	40.605	16.981	-0.986	-0.529	9.848	104.771	-0.002842	-0.001189	0.000069
30.1000	78.403	45.095	18.673	-1.443	-0.538	9.849	149.260	-0.003157	-0.001307	0.000101
30.2000	89.885	46.634	19.016	-1.417	-0.533	9.848	171.118	-0.003264	-0.001331	0.000099
30.3000	129.019	52.471	21.673	-0.918	-0.521	9.848	245.619	-0.003673	-0.001517	0.000064
30.4000	177.741	59.991	25.429	-0.011	-0.529	9.849	338.373	-0.004199	-0.001780	0.000001
30.5000	199.292	63.685	27.427	0.390	-0.528	9.849	379.400	-0.004458	-0.001920	-0.000027
30.6000	265.822	75.233	32.762	1.958	-0.526	9.849	506.058	-0.005266	-0.002293	-0.000137
30.7000	320.706	82.838	36.464	3.503	-0.528	9.849	610.542	-0.005799	-0.002553	-0.000245
30.8000	369.488	91.271	40.456	5.212	-0.522	9.850	703.411	-0.006389	-0.002832	-0.000365
30.9000	433.164	101.595	45.381	7.531	-0.530	9.850	824.633	-0.007112	-0.003177	-0.000527
31.0000	504.654	112.491	51.326	9.951	-0.534	9.850	960.732	-0.007874	-0.003593	-0.000697
31.1000	577.016	122.220	57.119	12.481	-0.530	9.850	1098.490	-0.008555	-0.003998	-0.000874
31.2000	642.960	132.252	63.557	14.342	-0.535	9.850	1224.031	-0.009258	-0.004449	-0.001004
31.3000	713.263	143.062	70.124	16.149	-0.531	9.851	1357.870	-0.010014	-0.004909	-0.001130
31.4000	780.530	153.039	76.217	18.414	-0.527	9.851	1485.929	-0.010713	-0.005335	-0.001289
31.5000	849.676	162.950	81.998	21.028	-0.534	9.850	1617.565	-0.011406	-0.005740	-0.001472
31.6000	920.926	172.762	88.587	23.722	-0.522	9.851	1753.206	-0.012093	-0.006201	-0.001661
31.7000	956.588	179.250	93.172	25.404	-0.540	9.851	1821.098	-0.012547	-0.006522	-0.001778
31.8000	1018.460	187.420	98.042	28.127	-0.537	9.851	1938.887	-0.013119	-0.006863	-0.001969
31.9000	1066.446	194.551	102.569	30.281	-0.529	9.852	2030.239	-0.013619	-0.007180	-0.002120
32.0000	1095.646	198.816	105.156	31.810	-0.541	9.852	2085.829	-0.013917	-0.007361	-0.002227
32.1000	1123.208	203.164	108.071	33.631	-0.540	9.852	2138.300	-0.014221	-0.007565	-0.002354
32.2000	1138.793	206.151	110.220	34.199	-0.549	9.852	2167.969	-0.014431	-0.007715	-0.002394
32.3000	1152.919	208.638	111.666	35.100	-0.536	9.851	2194.862	-0.014605	-0.007817	-0.002457
32.4000	1155.144	209.737	111.776	35.312	-0.529	9.852	2199.097	-0.014682	-0.007824	-0.002472
32.5000	1138.056	208.403	111.238	34.950	-0.534	9.853	2166.567	-0.014588	-0.007787	-0.002447
32.6000	1136.749	208.529	111.624	34.825	-0.532	9.852	2164.078	-0.014597	-0.007814	-0.002438
32.7000	1120.593	206.970	111.032	34.048	-0.528	9.852	2133.322	-0.014488	-0.007772	-0.002383
32.8000	1097.059	204.694	108.748	32.909	-0.537	9.853	2088.518	-0.014329	-0.007612	-0.002304
32.9000	1043.302	198.578	105.885	30.601	-0.533	9.852	1986.179	-0.013900	-0.007412	-0.002142
33.0000	986.029	192.242	101.275	28.181	-0.539	9.853	1877.146	-0.013457	-0.007089	-0.001973
33.1000	951.418	188.046	98.139	26.807	-0.532	9.853	1811.256	-0.013163	-0.006870	-0.001876
33.2000	895.032	180.360	93.487	24.236	-0.528	9.853	1703.911	-0.012625	-0.006544	-0.001697
33.3000	815.051	170.216	86.622	21.344	-0.524	9.853	1551.647	-0.011915	-0.006064	-0.001494
33.4000	760.888	162.771	81.888	18.970	-0.537	9.853	1448.536	-0.011394	-0.005732	-0.001328
33.5000	690.285	153.264	76.135	17.245	-0.528	9.853	1314.125	-0.010728	-0.005329	-0.001207
33.6000	641.458	145.497	70.521	15.507	-0.538	9.853	1221.170	-0.010185	-0.004936	-0.001086
33.7000	547.004	131.723	62.937	13.371	-0.528	9.853	1041.355	-0.009221	-0.004406	-0.000936
33.8000	481.089	121.957	56.884	11.521	-0.534	9.854	915.871	-0.008537	-0.003982	-0.000806
33.9000	431.210	113.852	51.860	9.953	-0.525	9.854	820.913	-0.007970	-0.003630	-0.000697
34.0000	305.347	94.761	42.162	6.602	-0.540	9.854	581.303	-0.006633	-0.002951	-0.000462
34.1000	318.392	94.468	42.081	6.350	-0.535	9.854	606.136	-0.006613	-0.002946	-0.000445
34.2000	249.637	82.586	36.756	3.890	-0.538	9.854	475.245	-0.005781	-0.002573	-0.000272
34.3000	207.362	74.511	32.765	2.781	-0.546	9.854	394.764	-0.005216	-0.002294	-0.000195
34.4000	153.124	64.952	28.666	0.861	-0.530	9.854	291.510	-0.004547	-0.002007	-0.000060
34.5000	101.337	55.183	23.626	-0.111	-0.524	9.854	192.919	-0.003863	-0.001654	0.000008
34.6000	83.393	50.625	21.756	-0.777	-0.528	9.854	158.758	-0.003544	-0.001523	0.000054
34.7000	67.478	46.481	19.926	-0.834	-0.520	9.854	128.460	-0.003254	-0.001395	0.000058
34.8000	59.813	44.233	18.479	-0.819	-0.514	9.854	113.869	-0.003096	-0.001294	0.000057
34.9000	51.217	41.854	17.546	-0.748	-0.525	9.855	97.504	-0.002930	-0.001228	0.000052
35.0000	52.975	41.630	17.256	-0.916	-0.525	9.855	100.851	-0.002914	-0.001208	0.000064
35.1000	69.747	43.733	18.190	-1.001	-0.513	9.855	132.780	-0.003061	-0.001273	0.000070
35.2000	92.500	47.676	19.732	-1.083	-0.524	9.855	176.096	-0.003337	-0.001381	0.000076
35.3000	117.823	51.553	21.301	-1.153	-0.516	9.854	224.304	-0.003609	-0.001491	0.000081
35.4000	164.095	59.227	24.796	-0.067	-0.528	9.855	312.395	-0.004146	-0.001736	0.000005
35.5000	197.834	64.521	27.342	0.571	-0.511	9.855	376.625	-0.004516	-0.001914	-0.000040
35.6000	263.102	74.748	32.186	2.403	-0.528	9.855	500.879	-0.005232	-0.002253	-0.000168
35.7000	331.046	85.393	37.195	4.308	-0.519	9.855	630.226	-0.005978	-0.002604	-0.000302
35.8000	372.284	92.801	40.374	5.685	-0.526	9.855	708.733	-0.006496	-0.002826	-0.000398
35.9000	432.893	101.874	45.079	7.630	-0.528	9.856	824.118	-0.007131	-0.003156	-0.000534
36.0000	520.734	115.005	52.014	11.091	-0.514	9.855	991.344	-0.008050	-0.003641	-0.000776
36.1000	590.331	124.775	58.275	13.091	-0.529	9.855	1123.838	-0.008734	-0.004079	-0.000916
36.2000	653.135	134.363	64.440	14.871	-0.527	9.855	1243.401	-0.009405	-0.004511	-0.001041
36.3000	691.908	141.657	68.899	16.178	-0.533	9.855	1317.215	-0.009916	-0.004823	-0.001132
36.4000	792.283	155.195	77.071	19.054	-0.526	9.855	1508.303	-0.010864	-0.005395	-0.001334
36.5000	856.574	164.116	82.810	21.722	-0.525	9.856	1630.697	-0.011488	-0.005797	-0.001521
36.6000	881.657	169.298	86.097	22.887	-0.529	9.856	1678.448	-0.011851	-0.006027	-0.001602
36.7000	976.907	181.276	93.983	26.585	-0.521	9.856	1859.779	-0.012689	-0.006579	-0.001861
36.8000	996.594	186.003	97.355	27.349	-0.524	9.856	1897.259	-0.013020	-0.006815	-0.001914
36.9000	1065.950	195.410	103.119	30.781	-0.531	9.856	2029.295	-0.013679	-0.007218	-0.002155
37.0000	1075.403	198.189	104.536	31.338	-0.524	9.856	2047.291	-0.013873	-0.007318	-0.002194
37.1000	1125.523	204.292	108.484	33.714	-0.525	9.856	2142.706	-0.014300	-0.007594	-0.002360
37.2000	1133.954	205.903	109.489	34.087	-0.522	9.856	2158.756	-0.014413	-0.007664	-0.002386
37.3000	1154.031	209.125	111.830	35.254	-0.532	9.856	2196.980	-0.014639	-0.007828	-0.002468
37.4000	1156.541	210.155	112.683	35.644	-0.520	9.856	2201.757	-0.014711	-0.007888	-0.002495
37.5000	1176.319	213.127	114.430	36.533	-0.521	9.857	2239.408	-0.014919	-0.008010	-0.002557
37.6000	1155.850	211.559	113.095	35.770	-0.531	9.856	2200.441	-0.014809	-0.007917	-0.002504
37.7000	1107.323	206.708	111.210	33.409	-0.525	9.857	2108.059	-0.014470	-0.007785	-0.002339
37.8000	1092.400	204.930	109.284	32.688	-0.524	9.857	2079.649	-0.014345	-0.007650	-0.002288
37.9000	1014.448	195.925	103.684	29.600	-0.533	9.857	1931.248	-0.013715	-0.007258	-0.002072
38.0000	997.931	194.424	102.239	28.711	-0.527	9.856	1899.805	-0.013610	-0.007157	-0.002010
38.1000	948.834	188.019	98.194	26.461	-0.526	9.857	1806.335	-0.013161	-0.006874	-0.001852
38.2000	894.806	181.151	93.543	24.446	-0.528	9.857	1703.482	-0.012681	-0.006548	-0.001711
38.3000	818.958	171.357	87.335	21.485	-0.533	9.856	1559.086	-0.011995	-0.006113	-0.001504
38.4000	751.000	162.448	81.255	19.178	-0.533	9.856	1429.710	-0.011371	-0.005688	-0.001342
38.5000	671.815	151.665	74.237	16.665	-0.546	9.857	1278.963	-0.010617	-0.005197	-0.001167
38.6000	613.189	142.755	69.338	15.107	-0.536	9.856	1167.355	-0.009993	-0.004854	-0.001058
38.7000	556.352	134.184	63.957	13.676	-0.534	9.857	1059.151	-0.009393	-0.004477	-0.000957
38.8000	492.451	123.957	57.710	11.896	-0.534	9.857	937.500	-0.008677	-0.004040	-0.000833
38.9000	419.668	112.922	51.106	10.048	-0.522	9.857	798.941	-0.007905	-0.003577	-0.000703
39.0000	368.767	103.916	46.786	8.159	-0.537	9.857	702.038	-0.007274	-0.003275	-0.000571
39.1000	292.393	91.227	41.046	5.741	-0.534	9.857	556.641	-0.006386	-0.002873	-0.000402
39.2000	214.005	78.376	34.510	3.378	-0.534	9.857	407.410	-0.005486	-0.002416	-0.000236
39.3000	187.179	71.998	31.925	2.418	-0.518	9.857	356.340	-0.005040	-0.002235	-0.000169
39.4000	154.131	65.104	28.115	1.640	-0.525	9.857	293.427	-0.004557	-0.001968	-0.000115
39.5000	111.105	57.571	24.548	0.002	-0.535	9.857	211.515	-0.004030	-0.001718	-0.000000
39.6000	87.480	51.541	21.797	-0.444	-0.540	9.857	166.540	-0.003608	-0.001526	0.000031
39.7000	69.612	47.065	19.635	-0.346	-0.534	9.857	132.523	-0.003295	-0.001374	0.000024
39.8000	48.301	41.980	17.160	-0.168	-0.534	9.857	91.953	-0.002939	-0.001201	0.000012
39.9000	53.291	42.619	17.547	-0.444	-0.546	9.857	101.452	-0.002983	-0.001228	0.000031
40.0000	59.062	43.372	16.899	-0.695	-0.538	9.857	112.438	-0.003036	-0.001183	0.000049
40.1000	81.289	46.633	19.005	-1.236	-0.526	9.857	154.753	-0.003264	-0.001330	0.000086
40.2000	100.615	49.319	20.172	-0.957	-0.526	9.857	191.545	-0.003452	-0.001412	0.000067
40.3000	134.850	54.697	22.512	-0.610	-0.531	9.858	256.720	-0.003829	-0.001576	0.000043
40.4000	192.409	63.840	26.352	0.433	-0.529	9.858	366.297	-0.004469	-0.001845	-0.000030
40.5000	213.494	67.313	27.771	0.931	-0.542	9.858	406.437	-0.004712	-0.001944	-0.000065
40.6000	259.420	74.705	31.980	2.587	-0.534	9.858	493.870	-0.005229	-0.002239	-0.000181
40.7000	317.716	84.365	36.395	4.200	-0.536	9.858	604.849	-0.005906	-0.002548	-0.000294
40.8000	389.687	95.525	41.707	6.200	-0.537	9.858	741.863	-0.006687	-0.002919	-0.000434
40.9000	429.527	102.179	44.693	7.712	-0.534	9.858	817.709	-0.007152	-0.003129	-0.000540
41.0000	516.707	114.729	51.600	10.786	-0.542	9.858	983.677	-0.008031	-0.003612	-0.000755
41.1000	584.590	124.260	57.490	12.953	-0.543	9.857	1112.909	-0.008698	-0.004024	-0.000907
41.2000	658.815	135.418	64.838	15.121	-0.535	9.858	1254.215	-0.009479	-0.004539	-0.001058
41.3000	731.538	146.217	71.525	17.010	-0.530	9.858	1392.660	-0.010235	-0.005007	-0.001191
41.4000	787.909	155.030	77.002	19.275	-0.526	9.858	1499.977	-0.010852	-0.005390	-0.001349
41.5000	838.600	162.532	81.861	20.902	-0.529	9.858	1596.479	-0.011377	-0.005730	-0.001463
41.6000	905.807	172.275	87.955	23.764	-0.530	9.858	1724.424	-0.012059	-0.006157	-0.001664
41.7000	973.706	181.861	93.693	26.431	-0.535	9.858	1853.685	-0.012730	-0.006559	-0.001850
41.8000	1001.749	186.154	96.816	27.878	-0.543	9.858	1907.072	-0.013031	-0.006777	-0.001951
41.9000	1055.806	194.355	102.115	29.974	-0.537	9.858	2009.983	-0.013605	-0.007148	-0.002098
42.0000	1093.061	199.774	105.940	31.824	-0.532	9.858	2080.908	-0.013984	-0.007416	-0.002228
42.1000	1117.197	204.011	107.894	33.145	-0.530	9.858	2126.856	-0.014281	-0.007553	-0.002320
42.2000	1120.518	205.165	108.953	33.756	-0.533	9.858	2133.179	-0.014362	-0.007627	-0.002363
42.3000	1161.516	210.363	111.513	35.562	-0.521	9.858	2211.227	-0.014725	-0.007806	-0.002489
42.4000	1158.811	210.892	112.422	35.951	-0.511	9.858	2206.078	-0.014762	-0.007870	-0.002517
42.5000	1148.215	210.431	112.408	35.451	-0.526	9.858	2185.907	-0.014730	-0.007869	-0.002482
42.6000	1131.113	209.169	111.651	34.908	-0.521	9.859	2153.349	-0.014642	-0.007816	-0.002444
42.7000	1112.252	207.597	110.660	34.117	-0.519	9.859	2117.443	-0.014532	-0.007746	-0.002388
42.8000	1080.648	203.804	108.320	32.352	-0.520	9.859	2057.276	-0.014266	-0.007582	-0.002265
42.9000	1041.439	199.191	105.665	30.809	-0.528	9.858	1982.632	-0.013943	-0.007397	-0.002157
43.0000	993.769	193.826	101.703	28.740	-0.528	9.859	1891.880	-0.013568	-0.007119	-0.002012
43.1000	932.062	186.377	96.870	26.057	-0.516	9.859	1774.406	-0.013046	-0.006781	-0.001824
43.2000	880.439	180.348	92.662	23.820	-0.510	9.859	1676.130	-0.012624	-0.006486	-0.001667
43.3000	814.510	171.161	86.250	21.124	-0.521	9.858	1550.617	-0.011981	-0.006037	-0.001479
43.4000	775.962	165.646	82.990	19.734	-0.504	9.859	1477.232	-0.011595	-0.005809	-0.001381
43.5000	697.829	154.652	76.452	17.371	-0.516	9.859	1328.487	-0.010826	-0.005352	-0.001216
43.6000	616.571	143.982	69.697	15.246	-0.505	9.859	1173.792	-0.010079	-0.004879	-0.001067
43.7000	562.047	135.365	64.040	13.689	-0.520	9.859	1069.994	-0.009476	-0.004483	-0.000958
43.8000	474.582	121.914	55.701	11.632	-0.522	9.859	903.482	-0.008534	-0.003899	-0.000814
43.9000	424.252	113.630	51.794	10.036	-0.517	9.859	807.667	-0.007954	-0.003626	-0.000703
44.0000	354.400	102.331	45.656	7.769	-0.509	9.859	674.686	-0.007163	-0.003196	-0.000544
44.1000	306.399	94.135	41.626	6.393	-0.520	9.859	583.305	-0.006589	-0.002914	-0.000448
44.2000	229.409	81.237	35.627	3.838	-0.512	9.859	436.735	-0.005687	-0.002494	-0.000269
44.3000	198.465	74.315	32.132	2.919	-0.505	9.859	377.827	-0.005202	-0.002249	-0.000204
44.4000	138.772	64.033	27.564	0.806	-0.510	9.859	264.187	-0.004482	-0.001929	-0.000056
44.5000	116.395	59.156	25.596	0.015	-0.512	9.859	221.586	-0.004141	-0.001792	-0.000001
44.6000	73.053	50.181	21.454	-0.291	-0.513	9.859	139.074	-0.003513	-0.001502	0.000020
44.7000	65.328	48.150	19.623	-0.777	-0.508	9.860	124.369	-0.003371	-0.001374	0.000054
44.8000	68.424	46.160	19.154	-0.330	-0.505	9.860	130.262	-0.003231	-0.001341	0.000023
44.9000	57.183	43.746	18.054	-0.501	-0.528	9.860	108.862	-0.003062	-0.001264	0.000035
45.0000	51.307	42.521	17.050	-0.583	-0.500	9.860	97.675	-0.002976	-0.001194	0.000041
45.1000	73.895	45.884	18.234	-0.666	-0.520	9.860	140.676	-0.003212	-0.001276	0.000047
45.2000	91.989	48.331	18.798	-0.721	-0.529	9.860	175.123	-0.003383	-0.001316	0.000050
45.3000	136.533	55.601	22.582	-0.554	-0.513	9.860	259.924	-0.003892	-0.001581	0.000039
45.4000	172.241	60.782	25.139	0.388	-0.510	9.860	327.902	-0.004255	-0.001760	-0.000027
45.5000	208.564	67.077	28.002	1.223	-0.508	9.860	397.053	-0.004695	-0.001960	-0.000086
45.6000	277.770	77.556	32.681	3.016	-0.508	9.860	528.803	-0.005429	-0.002288	-0.000211
45.7000	295.203	81.421	34.651	3.725	-0.520	9.860	561.991	-0.005699	-0.002426	-0.000261
45.8000	372.494	93.898	40.373	5.976	-0.520	9.861	709.133	-0.006573	-0.002826	-0.000418
45.9000	445.878	104.598	45.905	8.506	-0.522	9.860	848.837	-0.007322	-0.003213	-0.000595
46.0000	523.845	116.064	52.564	11.105	-0.514	9.860	997.267	-0.008124	-0.003680	-0.000777
46.1000	561.386	122.889	56.856	12.521	-0.529	9.861	1068.735	-0.008602	-0.003980	-0.000876
46.2000	661.926	136.348	64.604	14.966	-0.512	9.861	1260.138	-0.009544	-0.004522	-0.001048
46.3000	723.633	145.885	70.769	17.344	-0.509	9.861	1377.611	-0.010212	-0.004954	-0.001214
46.4000	813.728	158.416	79.093	20.289	-0.516	9.861	1549.129	-0.011089	-0.005536	-0.001420
46.5000	865.050	166.424	83.882	22.373	-0.522	9.862	1646.833	-0.011650	-0.005872	-0.001566
46.6000	894.776	171.439	86.756	23.486	-0.510	9.861	1703.424	-0.012001	-0.006073	-0.001644
46.7000	953.688	180.233	92.993	25.751	-0.520	9.861	1815.577	-0.012616	-0.006509	-0.001803
46.8000	1010.165	188.075	97.642	28.168	-0.514	9.861	1923.094	-0.013165	-0.006835	-0.001972
46.9000	1062.058	195.479	102.362	30.601	-0.511	9.861	2021.885	-0.013683	-0.007165	-0.002142
47.0000	1085.532	199.634	105.116	32.104	-0.525	9.862	2066.574	-0.013974	-0.007358	-0.002247
47.1000	1113.064	204.137	108.099	33.324	-0.525	9.862	2118.988	-0.014290	-0.007567	-0.002333
47.2000	1138.868	207.416	110.015	34.825	-0.530	9.863	2168.112	-0.014519	-0.007701	-0.002438
47.3000	1163.079	211.045	112.530	35.911	-0.528	9.862	2214.203	-0.014773	-0.007877	-0.002514
47.4000	1148.651	211.116	112.641	35.869	-0.513	9.863	2186.737	-0.014778	-0.007885	-0.002511
47.5000	1150.936	211.573	112.972	35.991	-0.518	9.863	2191.086	-0.014810	-0.007908	-0.002519
47.6000	1117.437	207.830	111.075	34.367	-0.529	9.863	2127.314	-0.014548	-0.007775	-0.002406
47.7000	1106.872	207.776	111.059	34.006	-0.533	9.863	2107.201	-0.014544	-0.007774	-0.002380
47.8000	1068.881	203.611	108.278	32.533	-0.532	9.864	2034.874	-0.014253	-0.007579	-0.002277
47.9000	1028.770	198.844	104.538	30.491	-0.538	9.864	1958.513	-0.013919	-0.007318	-0.002134
48.0000	997.435	195.120	102.251	29.211	-0.532	9.864	1898.861	-0.013658	-0.007158	-0.002045
48.1000	952.951	189.587	98.607	27.448	-0.534	9.864	1814.175	-0.013271	-0.006902	-0.001921
48.2000	891.260	181.319	93.295	24.959	-0.530	9.865	1696.730	-0.012692	-0.006531	-0.001747
48.3000	841.531	174.968	88.904	23.070	-0.520	9.865	1602.058	-0.012248	-0.006223	-0.001615
48.4000	778.156	166.300	82.962	20.611	-0.525	9.865	1481.409	-0.011641	-0.005807	-0.001443
48.5000	695.199	155.002	75.834	17.734	-0.526	9.864	1323.481	-0.010850	-0.005308	-0.001241
48.6000	625.452	145.123	70.014	15.745	-0.521	9.865	1190.701	-0.010159	-0.004901	-0.001102
48.7000	571.019	137.185	65.196	14.286	-0.520	9.865	1087.074	-0.009603	-0.004564	-0.001000
48.8000	489.641	124.621	57.572	12.742	-0.525	9.866	932.150	-0.008723	-0.004030	-0.000892
48.9000	423.846	114.409	51.752	10.743	-0.529	9.866	806.894	-0.008009	-0.003623	-0.000752
49.0000	339.792	101.400	44.805	7.991	-0.524	9.866	646.877	-0.007098	-0.003136	-0.000559
49.1000	307.511	94.608	41.955	6.991	-0.526	9.866	585.423	-0.006623	-0.002937	-0.000489
49.2000	231.903	82.184	36.121	4.419	-0.520	9.866	441.484	-0.005753	-0.002528	-0.000309
49.3000	200.855	75.901	32.985	3.238	-0.507	9.866	382.376	-0.005313	-0.002309	-0.000227
49.4000	140.425	64.951	28.140	1.573	-0.518	9.867	267.334	-0.004547	-0.001970	-0.000110
49.5000	125.382	60.936	25.897	0.778	-0.517	9.867	238.695	-0.004266	-0.001813	-0.000054
49.6000	83.919	52.469	22.043	0.155	-0.522	9.868	159.760	-0.003673	-0.001543	-0.000011
49.7000	79.004	50.569	20.943	0.016	-0.513	9.867	150.404	-0.003540	-0.001466	-0.000001
49.8000	56.672	45.592	18.590	-0.165	-0.521	9.868	107.889	-0.003191	-0.001301	0.000012
49.9000	44.469	42.229	17.312	-0.096	-0.522	9.868	84.658	-0.002956	-0.001212	0.000007
Test Cycles
Time (sec)	Axial stress (kPa)	Axial micro-strain #1	Axial micro-strain #2	Axial micro-strain #3	Confining pressure (kPa)	Temperature (�C)	Load (N)	Displacement #1 (mm)	Displacement #2 (mm)	Displacement #3 (mm)
0.0000	60.369	45.108	18.207	-0.291	-0.505	9.869	114.927	-0.003158	-0.001274	0.000020
0.1000	77.832	47.260	18.536	-0.290	-0.517	9.869	148.172	-0.003308	-0.001298	0.000020
0.2000	101.757	50.499	20.326	-0.039	-0.514	9.869	193.720	-0.003535	-0.001423	0.000003
0.3000	128.282	55.153	22.044	0.360	-0.522	9.869	244.217	-0.003861	-0.001543	-0.000025
0.4000	159.632	59.658	24.327	0.752	-0.523	9.870	303.898	-0.004176	-0.001703	-0.000053
0.5000	206.806	67.231	28.279	1.489	-0.526	9.870	393.705	-0.004706	-0.001980	-0.000104
0.6000	250.103	74.399	31.361	2.906	-0.520	9.870	476.131	-0.005208	-0.002195	-0.000203
0.7000	312.065	84.185	35.529	4.710	-0.520	9.871	594.091	-0.005893	-0.002487	-0.000330
0.8000	379.332	94.761	41.145	7.130	-0.523	9.871	722.151	-0.006633	-0.002880	-0.000499
0.9000	450.116	105.917	46.962	8.993	-0.513	9.871	856.905	-0.007414	-0.003287	-0.000629
1.0000	507.630	114.757	51.327	11.035	-0.511	9.871	966.396	-0.008033	-0.003593	-0.000772
1.1000	561.657	122.971	56.529	12.980	-0.504	9.872	1069.250	-0.008608	-0.003957	-0.000909
1.2000	643.396	135.018	63.891	15.189	-0.510	9.872	1224.861	-0.009451	-0.004472	-0.001063
1.3000	697.108	143.313	69.062	16.900	-0.517	9.873	1327.114	-0.010032	-0.004834	-0.001183
1.4000	774.609	154.055	76.233	19.205	-0.508	9.872	1474.657	-0.010784	-0.005336	-0.001344
1.5000	847.422	164.603	82.810	21.873	-0.510	9.872	1613.274	-0.011522	-0.005797	-0.001531
1.6000	890.283	171.593	86.937	23.458	-0.510	9.873	1694.870	-0.012012	-0.006086	-0.001642
1.7000	950.547	180.274	92.565	26.195	-0.513	9.873	1809.597	-0.012619	-0.006480	-0.001834
1.8000	1007.730	188.781	98.028	28.587	-0.526	9.873	1918.459	-0.013215	-0.006862	-0.002001
1.9000	1051.207	195.216	102.101	30.476	-0.525	9.874	2001.228	-0.013665	-0.007147	-0.002133
2.0000	1086.839	200.081	105.292	32.323	-0.526	9.874	2069.063	-0.014006	-0.007370	-0.002263
2.1000	1141.212	207.095	109.558	34.824	-0.517	9.874	2172.575	-0.014497	-0.007669	-0.002438
2.2000	1145.014	208.737	110.496	35.200	-0.510	9.874	2179.813	-0.014612	-0.007735	-0.002464
2.3000	1165.558	211.975	112.532	36.173	-0.508	9.875	2218.924	-0.014838	-0.007877	-0.002532
2.4000	1166.265	212.878	113.164	36.366	-0.503	9.875	2220.268	-0.014901	-0.007921	-0.002546
2.5000	1151.041	211.462	112.213	36.201	-0.516	9.876	2191.286	-0.014802	-0.007855	-0.002534
2.6000	1129.866	209.973	111.762	35.522	-0.514	9.876	2150.974	-0.014698	-0.007823	-0.002487
2.7000	1118.369	208.904	111.360	34.893	-0.510	9.876	2129.087	-0.014623	-0.007795	-0.002443
2.8000	1088.523	205.487	109.243	33.353	-0.529	9.876	2072.268	-0.014384	-0.007647	-0.002335
2.9000	1027.778	198.941	105.487	30.503	-0.517	9.877	1956.625	-0.013926	-0.007384	-0.002135
3.0000	999.945	195.937	102.610	29.586	-0.515	9.876	1903.639	-0.013716	-0.007183	-0.002071
3.1000	951.704	189.547	98.481	27.155	-0.516	9.876	1811.800	-0.013268	-0.006894	-0.001901
3.2000	896.324	181.723	93.213	25.541	-0.514	9.877	1706.371	-0.012721	-0.006525	-0.001788
3.3000	829.388	174.177	88.314	22.542	-0.513	9.877	1578.941	-0.012192	-0.006182	-0.001578
3.4000	772.220	166.036	82.880	20.427	-0.518	9.877	1470.108	-0.011622	-0.005802	-0.001430
3.5000	697.949	155.585	76.492	17.984	-0.516	9.877	1328.716	-0.010891	-0.005354	-0.001259
3.6000	628.323	146.161	70.508	16.023	-0.518	9.877	1196.165	-0.010231	-0.004936	-0.001122
3.7000	559.898	136.155	64.109	14.481	-0.533	9.877	1065.903	-0.009531	-0.004488	-0.001014
3.8000	510.124	127.528	58.906	13.035	-0.530	9.879	971.146	-0.008927	-0.004123	-0.000912
3.9000	402.882	112.366	50.404	10.327	-0.537	9.878	766.983	-0.007866	-0.003528	-0.000723
4.0000	364.499	105.084	46.908	8.533	-0.532	9.878	693.913	-0.007356	-0.003284	-0.000597
4.1000	295.459	93.357	40.757	6.921	-0.533	9.879	562.477	-0.006535	-0.002853	-0.000484
4.2000	238.426	83.225	36.506	4.891	-0.533	9.879	453.901	-0.005826	-0.002555	-0.000342
4.3000	194.047	74.943	32.543	3.461	-0.523	9.879	369.415	-0.005246	-0.002278	-0.000242
4.4000	154.808	67.176	28.773	2.014	-0.528	9.880	294.714	-0.004702	-0.002014	-0.000141
4.5000	116.515	60.006	25.111	1.042	-0.534	9.879	221.815	-0.004200	-0.001758	-0.000073
4.6000	95.686	55.046	22.870	0.278	-0.523	9.879	182.161	-0.003853	-0.001601	-0.000019
4.7000	62.233	47.801	19.787	0.181	-0.509	9.880	118.475	-0.003346	-0.001385	-0.000013
4.8000	56.176	45.523	18.357	0.320	-0.534	9.880	106.945	-0.003187	-0.001285	-0.000022
4.9000	46.603	43.121	17.092	-0.098	-0.534	9.880	88.720	-0.003018	-0.001196	0.000007
5.0000	65.584	45.564	18.041	-0.193	-0.515	9.880	124.855	-0.003190	-0.001263	0.000014
5.1000	76.239	46.898	18.701	-0.152	-0.524	9.880	145.140	-0.003283	-0.001309	0.000011
5.2000	98.151	50.361	19.842	0.084	-0.524	9.880	186.853	-0.003525	-0.001389	-0.000006
5.3000	135.797	55.907	22.294	0.625	-0.520	9.880	258.522	-0.003913	-0.001561	-0.000044
5.4000	155.754	59.686	24.081	0.573	-0.509	9.881	296.516	-0.004178	-0.001686	-0.000040
5.5000	213.388	68.828	28.457	1.849	-0.514	9.881	406.237	-0.004818	-0.001992	-0.000129
5.6000	259.480	76.139	31.869	3.294	-0.524	9.881	493.984	-0.005330	-0.002231	-0.000231
5.7000	297.818	82.182	35.102	4.406	-0.520	9.881	566.969	-0.005753	-0.002457	-0.000308
5.8000	402.566	98.148	42.479	7.738	-0.514	9.882	766.382	-0.006870	-0.002973	-0.000542
5.9000	447.426	105.932	46.315	9.021	-0.517	9.882	851.784	-0.007415	-0.003242	-0.000631
6.0000	504.985	114.630	51.286	10.992	-0.528	9.882	961.361	-0.008024	-0.003590	-0.000769
6.1000	580.127	125.664	58.302	13.926	-0.522	9.882	1104.412	-0.008796	-0.004081	-0.000975
6.2000	642.269	135.267	63.724	15.203	-0.512	9.882	1222.715	-0.009469	-0.004461	-0.001064
6.3000	720.161	146.369	70.881	17.649	-0.517	9.882	1371.002	-0.010246	-0.004962	-0.001235
6.4000	777.961	155.097	76.521	19.497	-0.521	9.882	1481.037	-0.010857	-0.005356	-0.001365
6.5000	845.273	164.950	82.591	21.833	-0.519	9.882	1609.182	-0.011546	-0.005781	-0.001528
6.6000	918.747	175.121	88.892	24.916	-0.520	9.883	1749.058	-0.012258	-0.006222	-0.001744
6.7000	967.529	183.059	94.506	26.611	-0.523	9.883	1841.927	-0.012814	-0.006615	-0.001863
6.8000	1001.418	188.755	98.426	28.559	-0.521	9.883	1906.443	-0.013213	-0.006890	-0.001999
6.9000	1077.943	197.856	103.794	31.948	-0.536	9.883	2052.126	-0.013850	-0.007266	-0.002236
7.0000	1111.201	203.472	106.915	33.422	-0.523	9.883	2115.440	-0.014243	-0.007484	-0.002340
7.1000	1120.052	205.209	108.059	34.004	-0.517	9.883	2132.292	-0.014365	-0.007564	-0.002380
7.2000	1138.627	208.571	110.675	35.337	-0.522	9.883	2167.654	-0.014600	-0.007747	-0.002474
7.3000	1138.237	209.905	111.596	35.827	-0.540	9.883	2166.910	-0.014693	-0.007812	-0.002508
7.4000	1152.168	211.879	112.667	36.353	-0.528	9.883	2193.432	-0.014832	-0.007887	-0.002545
7.5000	1131.459	210.461	111.886	35.591	-0.535	9.883	2154.007	-0.014732	-0.007832	-0.002491
7.6000	1141.107	211.309	112.092	35.950	-0.524	9.883	2172.375	-0.014792	-0.007846	-0.002517
7.7000	1127.657	209.725	112.105	35.533	-0.526	9.883	2146.769	-0.014681	-0.007847	-0.002487
7.8000	1074.050	205.152	108.871	32.991	-0.523	9.883	2044.716	-0.014361	-0.007621	-0.002309
7.9000	1009.158	197.772	103.438	30.685	-0.539	9.883	1921.177	-0.013844	-0.007241	-0.002148
8.0000	994.355	195.675	102.583	29.670	-0.521	9.882	1892.996	-0.013697	-0.007181	-0.002077
8.1000	946.399	189.573	98.276	27.364	-0.526	9.883	1801.701	-0.013270	-0.006879	-0.001915
8.2000	886.135	181.404	93.047	25.139	-0.532	9.883	1686.974	-0.012698	-0.006513	-0.001760
8.3000	836.045	175.107	88.768	23.264	-0.538	9.883	1591.616	-0.012257	-0.006214	-0.001628
8.4000	759.911	165.021	81.956	20.333	-0.539	9.883	1446.676	-0.011551	-0.005737	-0.001423
8.5000	697.288	155.891	76.440	18.443	-0.527	9.883	1327.457	-0.010912	-0.005351	-0.001291
8.6000	618.795	145.149	69.723	16.204	-0.542	9.883	1178.026	-0.010160	-0.004881	-0.001134
8.7000	566.616	137.004	64.742	14.729	-0.532	9.883	1078.691	-0.009590	-0.004532	-0.001031
8.8000	491.444	125.288	57.988	12.744	-0.530	9.883	935.583	-0.008770	-0.004059	-0.000892
8.9000	398.012	111.629	49.731	10.271	-0.543	9.883	757.713	-0.007814	-0.003481	-0.000719
9.0000	357.856	104.389	46.178	8.951	-0.529	9.883	681.267	-0.007307	-0.003232	-0.000627
9.1000	276.508	91.478	40.236	6.547	-0.546	9.884	526.400	-0.006403	-0.002816	-0.000458
9.2000	230.987	82.156	35.432	5.073	-0.537	9.884	439.739	-0.005751	-0.002480	-0.000355
9.3000	147.143	68.328	29.475	2.213	-0.539	9.883	280.123	-0.004783	-0.002063	-0.000155
9.4000	148.451	66.299	28.114	1.918	-0.539	9.884	282.612	-0.004641	-0.001968	-0.000134
9.5000	127.787	61.685	25.732	1.307	-0.526	9.884	243.273	-0.004318	-0.001801	-0.000091
9.6000	78.644	52.248	21.769	0.557	-0.537	9.884	149.717	-0.003657	-0.001524	-0.000039
9.7000	54.102	47.468	19.235	0.420	-0.524	9.884	102.997	-0.003323	-0.001346	-0.000029
9.8000	47.385	44.720	17.946	0.195	-0.534	9.884	90.208	-0.003130	-0.001256	-0.000014
9.9000	50.300	44.205	17.600	0.515	-0.527	9.884	95.758	-0.003094	-0.001232	-0.000036
10.0000	54.824	44.345	17.409	-0.180	-0.508	9.884	104.370	-0.003104	-0.001219	0.000013
10.1000	87.601	50.042	19.705	-0.123	-0.524	9.885	166.769	-0.003503	-0.001379	0.000009
10.2000	101.246	51.333	20.038	0.321	-0.526	9.885	192.747	-0.003593	-0.001403	-0.000022
10.3000	130.311	56.252	22.527	0.181	-0.532	9.885	248.079	-0.003938	-0.001577	-0.000013
10.4000	162.247	60.756	24.494	1.057	-0.532	9.884	308.876	-0.004253	-0.001715	-0.000074
10.5000	211.795	68.424	27.936	2.168	-0.528	9.885	403.204	-0.004790	-0.001956	-0.000152
10.6000	261.194	77.347	32.118	3.182	-0.539	9.885	497.246	-0.005414	-0.002248	-0.000223
10.7000	299.471	83.738	35.281	4.293	-0.536	9.885	570.116	-0.005862	-0.002470	-0.000301
10.8000	363.462	93.412	40.016	6.698	-0.540	9.885	691.938	-0.006539	-0.002801	-0.000469
10.9000	449.244	106.766	46.589	9.548	-0.524	9.885	855.246	-0.007474	-0.003261	-0.000668
11.0000	517.383	116.410	51.932	11.536	-0.539	9.885	984.964	-0.008149	-0.003635	-0.000808
11.1000	586.829	126.638	58.386	13.954	-0.530	9.885	1117.172	-0.008865	-0.004087	-0.000977
11.2000	653.195	136.491	64.453	15.412	-0.526	9.885	1243.515	-0.009554	-0.004512	-0.001079
11.3000	728.262	148.428	71.885	17.955	-0.532	9.885	1386.423	-0.010390	-0.005032	-0.001257
11.4000	804.801	159.197	78.599	20.179	-0.526	9.885	1532.135	-0.011144	-0.005502	-0.001413
11.5000	843.650	164.908	82.397	22.056	-0.538	9.885	1606.092	-0.011544	-0.005768	-0.001544
11.6000	904.770	173.956	87.942	24.417	-0.534	9.885	1722.450	-0.012177	-0.006156	-0.001709
11.7000	977.267	183.530	94.341	27.155	-0.545	9.885	1860.466	-0.012847	-0.006604	-0.001901
11.8000	1022.803	191.006	99.101	29.434	-0.534	9.885	1947.155	-0.013370	-0.006937	-0.002060
11.9000	1049.945	195.370	101.342	30.448	-0.531	9.885	1998.825	-0.013676	-0.007094	-0.002131
12.0000	1116.370	203.970	107.578	34.033	-0.526	9.885	2125.282	-0.014278	-0.007530	-0.002382
12.1000	1118.504	206.083	108.527	34.520	-0.523	9.885	2129.345	-0.014426	-0.007597	-0.002416
12.2000	1145.661	209.558	110.577	35.604	-0.532	9.884	2181.044	-0.014669	-0.007740	-0.002492
12.3000	1149.673	211.448	111.994	36.132	-0.520	9.885	2188.683	-0.014801	-0.007840	-0.002529
12.4000	1180.496	214.838	113.798	37.453	-0.544	9.884	2247.362	-0.015039	-0.007966	-0.002622
12.5000	1150.665	212.336	113.039	36.492	-0.541	9.884	2190.571	-0.014864	-0.007913	-0.002554
12.6000	1133.908	211.294	112.297	35.704	-0.537	9.885	2158.670	-0.014791	-0.007861	-0.002499
12.7000	1068.054	204.458	107.783	33.160	-0.526	9.884	2033.300	-0.014312	-0.007545	-0.002321
12.8000	1079.521	205.528	108.583	33.492	-0.544	9.884	2055.130	-0.014387	-0.007601	-0.002344
12.9000	1018.911	199.108	104.209	30.616	-0.546	9.884	1939.745	-0.013938	-0.007295	-0.002143
13.0000	999.885	196.411	102.623	29.626	-0.522	9.884	1903.524	-0.013749	-0.007184	-0.002074
13.1000	933.099	187.655	96.265	26.599	-0.520	9.885	1776.381	-0.013136	-0.006739	-0.001862
13.2000	882.032	181.250	92.676	24.819	-0.520	9.884	1679.163	-0.012688	-0.006487	-0.001737
13.3000	835.595	174.912	87.913	22.514	-0.506	9.884	1590.757	-0.012244	-0.006154	-0.001576
13.4000	771.093	166.521	82.685	20.220	-0.516	9.884	1467.962	-0.011656	-0.005788	-0.001415
13.5000	701.616	157.169	76.299	17.955	-0.524	9.884	1335.697	-0.011002	-0.005341	-0.001257
13.6000	624.085	145.995	69.722	15.941	-0.529	9.884	1188.097	-0.010220	-0.004881	-0.001116
13.7000	534.786	133.724	62.100	13.605	-0.521	9.884	1018.095	-0.009361	-0.004347	-0.000952
13.8000	493.323	125.635	57.187	12.591	-0.517	9.883	939.159	-0.008794	-0.004003	-0.000881
13.9000	419.488	114.853	51.311	10.939	-0.525	9.883	798.597	-0.008040	-0.003592	-0.000766
14.0000	353.859	104.028	45.409	8.684	-0.523	9.884	673.656	-0.007282	-0.003179	-0.000608
14.1000	304.596	95.190	41.570	7.241	-0.501	9.884	579.872	-0.006663	-0.002910	-0.000507
14.2000	241.086	84.141	36.026	4.713	-0.509	9.883	458.965	-0.005890	-0.002522	-0.000330
14.3000	190.605	75.275	32.021	3.392	-0.516	9.883	362.864	-0.005269	-0.002241	-0.000237
14.4000	152.268	67.397	28.113	2.113	-0.527	9.883	289.879	-0.004718	-0.001968	-0.000148
14.5000	93.311	56.654	23.573	0.653	-0.514	9.883	177.641	-0.003966	-0.001650	-0.000046
14.6000	89.359	54.502	22.210	0.043	-0.506	9.882	170.116	-0.003815	-0.001555	-0.000003
14.7000	73.263	50.250	20.229	0.252	-0.521	9.883	139.475	-0.003518	-0.001416	-0.000018
14.8000	57.409	46.663	18.193	-0.027	-0.517	9.882	109.291	-0.003266	-0.001274	0.000002
14.9000	50.225	44.259	17.518	0.100	-0.516	9.882	95.615	-0.003098	-0.001226	-0.000007
15.0000	59.783	45.217	17.393	-0.025	-0.517	9.882	113.811	-0.003165	-0.001218	0.000002
15.1000	80.838	48.736	18.922	-0.152	-0.512	9.882	153.894	-0.003412	-0.001325	0.000011
15.2000	91.072	49.611	19.057	-0.137	-0.528	9.882	173.378	-0.003473	-0.001334	0.000010
15.3000	125.021	55.142	21.466	0.488	-0.514	9.881	238.008	-0.003860	-0.001503	-0.000034
15.4000	154.056	59.519	23.475	0.890	-0.516	9.881	293.283	-0.004166	-0.001643	-0.000062
15.5000	212.111	69.147	27.892	2.028	-0.505	9.881	403.805	-0.004840	-0.001952	-0.000142
15.6000	260.142	76.777	31.375	3.460	-0.510	9.880	495.243	-0.005374	-0.002196	-0.000242
15.7000	314.124	85.740	35.817	5.269	-0.518	9.880	598.011	-0.006002	-0.002507	-0.000369
15.8000	361.944	93.605	39.329	6.600	-0.518	9.880	689.049	-0.006552	-0.002753	-0.000462
15.9000	433.780	104.667	45.093	8.977	-0.528	9.880	825.806	-0.007327	-0.003156	-0.000628
16.0000	515.925	116.662	51.930	11.826	-0.516	9.880	982.189	-0.008166	-0.003635	-0.000828
16.1000	564.753	124.026	56.761	13.271	-0.520	9.880	1075.144	-0.008682	-0.003973	-0.000929
16.2000	654.111	136.489	64.026	15.760	-0.525	9.879	1245.260	-0.009554	-0.004482	-0.001103
16.3000	706.501	145.039	69.338	17.371	-0.532	9.879	1344.995	-0.010153	-0.004854	-0.001216
16.4000	785.009	156.667	76.619	19.665	-0.532	9.879	1494.455	-0.010967	-0.005363	-0.001377
16.5000	841.561	165.536	82.701	21.848	-0.528	9.879	1602.116	-0.011588	-0.005789	-0.001529
16.6000	958.692	180.014	91.382	26.030	-0.529	9.878	1825.104	-0.012601	-0.006397	-0.001822
16.7000	972.473	183.878	94.341	27.002	-0.533	9.879	1851.339	-0.012871	-0.006604	-0.001890
16.8000	994.340	187.948	96.542	28.239	-0.521	9.878	1892.967	-0.013156	-0.006758	-0.001977
16.9000	1051.463	195.605	101.632	30.851	-0.529	9.878	2001.715	-0.013692	-0.007114	-0.002160
17.0000	1085.201	200.637	104.578	32.422	-0.529	9.877	2065.945	-0.014045	-0.007320	-0.002270
17.1000	1119.992	205.749	107.838	34.186	-0.532	9.877	2132.177	-0.014402	-0.007549	-0.002393
17.2000	1138.853	209.336	110.054	35.174	-0.524	9.877	2168.083	-0.014654	-0.007704	-0.002462
17.3000	1153.460	211.170	111.473	36.395	-0.518	9.876	2195.892	-0.014782	-0.007803	-0.002548
17.4000	1152.949	212.100	111.802	36.144	-0.529	9.876	2194.920	-0.014847	-0.007826	-0.002530
17.5000	1144.834	211.698	112.310	36.021	-0.525	9.877	2179.470	-0.014819	-0.007862	-0.002521
17.6000	1145.616	212.253	112.779	36.047	-0.517	9.876	2180.958	-0.014858	-0.007895	-0.002523
17.7000	1088.402	206.277	108.830	33.394	-0.528	9.875	2072.039	-0.014439	-0.007618	-0.002338
17.8000	1081.595	205.805	109.065	33.242	-0.528	9.875	2059.078	-0.014406	-0.007635	-0.002327
17.9000	1036.013	200.874	105.308	31.476	-0.526	9.875	1972.303	-0.014061	-0.007372	-0.002203
18.0000	988.524	195.383	101.565	29.572	-0.528	9.875	1881.895	-0.013677	-0.007110	-0.002070
18.1000	955.852	191.087	98.373	27.585	-0.522	9.875	1819.696	-0.013376	-0.006886	-0.001931
18.2000	873.211	180.625	91.752	24.429	-0.518	9.874	1662.369	-0.012644	-0.006423	-0.001710
18.3000	830.846	175.206	88.174	22.681	-0.526	9.874	1581.717	-0.012264	-0.006172	-0.001588
18.4000	768.583	165.769	82.080	20.138	-0.520	9.874	1463.184	-0.011604	-0.005746	-0.001410
18.5000	697.784	156.765	76.314	17.663	-0.508	9.874	1328.402	-0.010974	-0.005342	-0.001236
18.6000	619.621	145.815	68.980	15.939	-0.533	9.873	1179.600	-0.010207	-0.004829	-0.001116
18.7000	544.855	134.518	62.650	14.077	-0.533	9.873	1037.264	-0.009416	-0.004386	-0.000985
18.8000	468.060	122.693	55.359	12.287	-0.531	9.873	891.066	-0.008588	-0.003875	-0.000860
18.9000	417.459	114.798	51.355	11.106	-0.535	9.872	794.735	-0.008036	-0.003595	-0.000777
19.0000	339.913	102.914	44.555	8.685	-0.538	9.872	647.106	-0.007204	-0.003119	-0.000608
19.1000	297.487	94.358	40.730	7.087	-0.540	9.872	566.339	-0.006605	-0.002851	-0.000496
19.2000	243.716	84.420	35.999	5.631	-0.533	9.872	463.972	-0.005909	-0.002520	-0.000394
19.3000	200.419	76.640	32.420	4.156	-0.533	9.872	381.546	-0.005365	-0.002269	-0.000291
19.4000	160.819	69.327	29.268	2.445	-0.534	9.871	306.158	-0.004853	-0.002049	-0.000171
19.5000	104.973	58.963	24.025	1.100	-0.532	9.871	199.842	-0.004127	-0.001682	-0.000077
19.6000	86.008	54.336	22.129	0.362	-0.525	9.871	163.736	-0.003803	-0.001549	-0.000025
19.7000	71.565	50.375	20.008	0.599	-0.525	9.870	136.242	-0.003526	-0.001401	-0.000042
19.8000	60.189	46.870	18.288	0.487	-0.533	9.870	114.584	-0.003281	-0.001280	-0.000034
19.9000	56.011	46.135	18.040	0.126	-0.530	9.870	106.630	-0.003229	-0.001263	-0.000009
20.0000	62.458	46.175	18.053	0.253	-0.536	9.869	118.904	-0.003232	-0.001264	-0.000018
20.1000	85.512	49.374	19.372	0.473	-0.530	9.869	162.792	-0.003456	-0.001356	-0.000033
20.2000	101.352	51.764	19.896	0.502	-0.530	9.869	192.947	-0.003623	-0.001393	-0.000035
20.3000	116.891	54.307	21.097	0.501	-0.530	9.868	222.530	-0.003802	-0.001477	-0.000035
20.4000	155.514	60.727	23.600	1.170	-0.524	9.869	296.059	-0.004251	-0.001652	-0.000082
20.5000	204.266	67.619	27.536	2.044	-0.536	9.868	388.870	-0.004733	-0.001927	-0.000143
20.6000	267.506	78.139	32.215	3.975	-0.521	9.868	509.262	-0.005470	-0.002255	-0.000278
20.7000	308.413	84.919	35.198	5.212	-0.519	9.868	587.139	-0.005944	-0.002464	-0.000365
20.8000	362.125	94.009	39.712	6.932	-0.520	9.868	689.392	-0.006581	-0.002780	-0.000485
20.9000	449.470	106.766	45.862	9.673	-0.536	9.867	855.675	-0.007474	-0.003210	-0.000677
21.0000	500.025	114.768	50.803	11.535	-0.521	9.867	951.920	-0.008034	-0.003556	-0.000807
21.1000	567.067	125.051	56.680	13.231	-0.535	9.867	1079.550	-0.008754	-0.003968	-0.000926
21.2000	645.921	135.990	63.765	15.523	-0.527	9.866	1229.668	-0.009519	-0.004464	-0.001087
21.3000	721.033	147.397	70.496	17.747	-0.528	9.866	1372.662	-0.010318	-0.004935	-0.001242
21.4000	783.326	155.960	76.371	19.819	-0.530	9.866	1491.251	-0.010917	-0.005346	-0.001387
21.5000	864.073	167.719	83.759	22.514	-0.520	9.866	1644.974	-0.011740	-0.005863	-0.001576
21.6000	897.692	172.845	86.855	23.791	-0.523	9.865	1708.975	-0.012099	-0.006080	-0.001665
21.7000	960.676	182.542	92.883	26.558	-0.516	9.865	1828.880	-0.012778	-0.006502	-0.001859
21.8000	1008.947	189.755	97.450	28.908	-0.537	9.865	1920.776	-0.013283	-0.006822	-0.002024
21.9000	1045.707	195.050	101.220	30.433	-0.537	9.865	1990.757	-0.013654	-0.007085	-0.002130
22.0000	1099.644	202.302	105.582	33.283	-0.528	9.865	2093.439	-0.014161	-0.007391	-0.002330
22.1000	1117.993	205.418	107.644	34.368	-0.529	9.864	2128.372	-0.014379	-0.007535	-0.002406
22.2000	1143.797	209.765	110.137	35.673	-0.523	9.864	2177.496	-0.014684	-0.007710	-0.002497
22.3000	1147.539	211.072	110.979	36.090	-0.526	9.864	2184.620	-0.014775	-0.007769	-0.002526
22.4000	1151.401	212.393	112.462	36.659	-0.526	9.864	2191.973	-0.014867	-0.007872	-0.002566
22.5000	1153.355	213.295	112.449	36.867	-0.521	9.863	2195.692	-0.014931	-0.007871	-0.002581
22.6000	1138.011	211.405	112.202	36.062	-0.523	9.863	2166.481	-0.014798	-0.007854	-0.002524
22.7000	1115.499	209.500	110.606	34.935	-0.532	9.863	2123.623	-0.014665	-0.007742	-0.002445
22.8000	1084.916	206.110	109.188	33.532	-0.522	9.863	2065.401	-0.014428	-0.007643	-0.002347
22.9000	1028.093	200.108	104.825	31.254	-0.512	9.862	1957.226	-0.014008	-0.007338	-0.002188
23.0000	1001.328	196.437	101.991	29.726	-0.518	9.863	1906.271	-0.013751	-0.007139	-0.002081
23.1000	949.570	190.198	97.889	27.642	-0.531	9.862	1807.737	-0.013314	-0.006852	-0.001935
23.2000	905.191	184.378	94.272	25.958	-0.529	9.862	1723.251	-0.012906	-0.006599	-0.001817
23.3000	830.755	175.356	88.242	22.721	-0.521	9.862	1581.545	-0.012275	-0.006177	-0.001590
23.4000	763.413	166.271	81.859	20.401	-0.525	9.860	1453.342	-0.011639	-0.005730	-0.001428
23.5000	703.134	157.487	76.796	17.971	-0.523	9.861	1338.587	-0.011024	-0.005376	-0.001258
23.6000	622.597	146.813	69.556	16.148	-0.536	9.861	1185.265	-0.010277	-0.004869	-0.001130
23.7000	563.475	137.170	63.875	14.326	-0.521	9.861	1072.712	-0.009602	-0.004471	-0.001003
23.8000	485.117	126.137	57.146	13.230	-0.524	9.861	923.538	-0.008830	-0.004000	-0.000926
23.9000	434.637	116.966	51.823	11.411	-0.533	9.861	827.436	-0.008188	-0.003628	-0.000799
24.0000	354.190	104.890	45.780	8.949	-0.529	9.860	674.286	-0.007342	-0.003205	-0.000626
24.1000	291.115	94.065	40.262	7.295	-0.527	9.860	554.209	-0.006585	-0.002818	-0.000511
24.2000	248.284	84.724	35.638	5.698	-0.532	9.860	472.670	-0.005931	-0.002495	-0.000399
24.3000	188.982	75.650	31.829	3.516	-0.524	9.860	359.774	-0.005296	-0.002228	-0.000246
24.4000	160.022	69.217	28.788	2.627	-0.528	9.859	304.642	-0.004845	-0.002015	-0.000184
24.5000	116.741	60.978	24.973	1.447	-0.529	9.859	222.244	-0.004268	-0.001748	-0.000101
24.6000	92.304	55.545	22.195	0.848	-0.533	9.859	175.724	-0.003888	-0.001554	-0.000059
24.7000	72.317	51.248	20.545	1.018	-0.529	9.858	137.672	-0.003587	-0.001438	-0.000071
24.8000	67.778	49.307	18.878	0.376	-0.538	9.858	129.032	-0.003451	-0.001321	-0.000026
24.9000	62.984	47.231	18.508	1.014	-0.539	9.858	119.905	-0.003306	-0.001296	-0.000071
25.0000	55.365	45.732	17.656	0.209	-0.535	9.858	105.400	-0.003201	-0.001236	-0.000015
25.1000	72.302	47.914	18.563	0.223	-0.537	9.857	137.644	-0.003354	-0.001299	-0.000016
25.2000	88.502	50.819	19.595	0.072	-0.544	9.857	168.486	-0.003557	-0.001372	-0.000005
25.3000	123.023	55.642	21.163	0.808	-0.536	9.856	234.203	-0.003895	-0.001481	-0.000057
25.4000	154.026	61.229	24.080	1.362	-0.538	9.856	293.226	-0.004286	-0.001686	-0.000095
25.5000	200.524	68.395	27.164	2.557	-0.534	9.856	381.746	-0.004788	-0.001901	-0.000179
25.6000	255.663	77.041	31.497	3.627	-0.537	9.856	486.717	-0.005393	-0.002205	-0.000254
25.7000	315.567	86.533	35.516	5.811	-0.524	9.855	600.758	-0.006057	-0.002486	-0.000407
25.8000	360.081	93.703	39.589	7.478	-0.529	9.856	685.501	-0.006559	-0.002771	-0.000523
25.9000	444.600	106.640	45.684	10.064	-0.540	9.856	846.405	-0.007465	-0.003198	-0.000704
26.0000	491.083	114.214	50.376	11.508	-0.535	9.855	934.896	-0.007995	-0.003526	-0.000806
26.1000	570.433	125.720	56.830	13.577	-0.537	9.855	1085.958	-0.008800	-0.003978	-0.000950
26.2000	648.806	137.018	64.165	15.855	-0.538	9.854	1235.161	-0.009591	-0.004492	-0.001110
26.3000	720.026	148.093	70.909	17.969	-0.537	9.854	1370.745	-0.010366	-0.004964	-0.001258
26.4000	774.474	155.989	75.915	20.025	-0.531	9.854	1474.400	-0.010919	-0.005314	-0.001402
26.5000	831.296	164.366	81.572	21.763	-0.532	9.854	1582.575	-0.011506	-0.005710	-0.001523
26.6000	899.225	173.954	87.128	24.667	-0.530	9.854	1711.893	-0.012177	-0.006099	-0.001727
26.7000	964.373	183.390	93.544	26.877	-0.528	9.854	1835.918	-0.012837	-0.006548	-0.001881
26.8000	1003.221	189.421	96.983	28.850	-0.545	9.854	1909.876	-0.013259	-0.006789	-0.002020
26.9000	1048.487	195.496	100.932	30.712	-0.528	9.853	1996.050	-0.013685	-0.007065	-0.002150
27.0000	1095.496	202.899	105.843	33.228	-0.526	9.854	2085.543	-0.014203	-0.007409	-0.002326
27.1000	1113.921	205.833	107.121	34.354	-0.523	9.854	2120.619	-0.014408	-0.007499	-0.002405
27.2000	1133.382	208.804	109.766	35.631	-0.518	9.853	2157.669	-0.014616	-0.007684	-0.002494
27.3000	1157.368	212.169	111.486	36.894	-0.518	9.853	2203.331	-0.014852	-0.007804	-0.002583
27.4000	1163.003	213.599	112.477	37.256	-0.520	9.854	2214.060	-0.014952	-0.007873	-0.002608
27.5000	1145.060	212.766	111.638	36.520	-0.528	9.853	2179.899	-0.014894	-0.007815	-0.002556
27.6000	1137.155	212.031	111.651	36.075	-0.532	9.853	2164.850	-0.014842	-0.007816	-0.002525
27.7000	1092.791	207.583	109.642	34.715	-0.534	9.853	2080.393	-0.014531	-0.007675	-0.002430
27.8000	1083.218	205.944	107.964	33.685	-0.529	9.852	2062.168	-0.014416	-0.007557	-0.002358
27.9000	1031.114	200.943	104.977	31.699	-0.540	9.853	1962.976	-0.014066	-0.007348	-0.002219
28.0000	1002.079	197.370	102.212	30.142	-0.530	9.852	1907.701	-0.013816	-0.007155	-0.002110
28.1000	944.731	189.880	97.408	27.768	-0.537	9.853	1798.525	-0.013292	-0.006819	-0.001944
28.2000	887.097	183.656	93.256	25.541	-0.533	9.852	1688.805	-0.012856	-0.006528	-0.001788
28.3000	826.788	174.428	87.185	22.500	-0.531	9.851	1573.992	-0.012210	-0.006103	-0.001575
28.4000	764.180	166.603	82.369	20.734	-0.532	9.852	1454.802	-0.011662	-0.005766	-0.001451
28.5000	671.349	154.667	74.277	17.720	-0.520	9.852	1278.076	-0.010827	-0.005199	-0.001240
28.6000	622.537	147.149	69.697	16.163	-0.533	9.852	1185.150	-0.010300	-0.004879	-0.001131
28.7000	561.642	138.061	64.332	14.802	-0.536	9.852	1069.221	-0.009664	-0.004503	-0.001036
28.8000	482.367	125.552	56.321	13.049	-0.528	9.852	918.303	-0.008789	-0.003942	-0.000913
28.9000	435.268	117.886	52.192	11.841	-0.537	9.852	828.638	-0.008252	-0.003653	-0.000829
29.0000	358.112	106.336	45.974	9.632	-0.526	9.851	681.753	-0.007443	-0.003218	-0.000674
29.1000	299.231	95.593	40.896	7.646	-0.535	9.852	569.658	-0.006692	-0.002863	-0.000535
29.2000	245.669	86.254	36.658	5.894	-0.532	9.851	467.691	-0.006038	-0.002566	-0.000413
29.3000	198.856	77.859	32.365	4.003	-0.545	9.852	378.571	-0.005450	-0.002266	-0.000280
29.4000	151.126	68.314	27.894	2.461	-0.542	9.852	287.704	-0.004782	-0.001953	-0.000172
29.5000	115.629	61.644	24.686	1.460	-0.541	9.851	220.127	-0.004315	-0.001728	-0.000102
29.6000	93.071	56.223	22.032	0.961	-0.533	9.851	177.183	-0.003936	-0.001542	-0.000067
29.7000	69.551	51.151	19.692	0.682	-0.533	9.852	132.408	-0.003581	-0.001378	-0.000048
29.8000	50.931	46.982	17.942	0.529	-0.522	9.852	96.960	-0.003289	-0.001256	-0.000037
29.9000	57.348	46.564	17.313	0.362	-0.532	9.852	109.177	-0.003259	-0.001212	-0.000025
30.0000	69.086	48.249	18.041	0.416	-0.531	9.852	131.521	-0.003377	-0.001263	-0.000029
30.1000	69.056	47.261	17.875	0.417	-0.523	9.852	131.464	-0.003308	-0.001251	-0.000029
30.2000	91.778	51.277	18.934	0.446	-0.519	9.852	174.723	-0.003589	-0.001325	-0.000031
30.3000	124.931	55.932	20.930	0.905	-0.518	9.852	237.837	-0.003915	-0.001465	-0.000063
30.4000	183.632	65.408	25.771	1.947	-0.523	9.852	349.588	-0.004579	-0.001804	-0.000136
30.5000	215.688	71.010	27.826	2.615	-0.528	9.852	410.614	-0.004971	-0.001948	-0.000183
30.6000	261.254	78.083	31.333	3.865	-0.520	9.852	497.360	-0.005466	-0.002193	-0.000271
30.7000	318.738	87.241	35.914	5.616	-0.511	9.853	606.794	-0.006107	-0.002514	-0.000393
30.8000	369.158	95.397	39.192	7.423	-0.540	9.852	702.782	-0.006678	-0.002743	-0.000520
30.9000	435.388	106.114	45.258	9.200	-0.537	9.852	828.867	-0.007428	-0.003168	-0.000644
31.0000	506.517	116.676	51.132	11.939	-0.537	9.853	964.279	-0.008167	-0.003579	-0.000836
31.1000	583.358	126.972	57.146	13.870	-0.532	9.853	1110.563	-0.008888	-0.004000	-0.000971
31.2000	643.441	136.616	63.531	15.509	-0.517	9.852	1224.947	-0.009563	-0.004447	-0.001086
31.3000	725.406	149.457	71.263	17.927	-0.516	9.852	1380.987	-0.010462	-0.004988	-0.001255
31.4000	789.172	157.960	76.852	20.262	-0.534	9.852	1502.380	-0.011057	-0.005380	-0.001418
31.5000	860.737	167.690	83.101	22.724	-0.534	9.852	1638.622	-0.011738	-0.005817	-0.001591
31.6000	899.465	174.815	87.598	24.387	-0.529	9.852	1712.351	-0.012237	-0.006132	-0.001707
31.7000	986.465	186.127	94.559	27.711	-0.534	9.852	1877.975	-0.013029	-0.006619	-0.001940
31.8000	1005.626	189.754	96.886	29.265	-0.530	9.853	1914.454	-0.013283	-0.006782	-0.002049
31.9000	1058.511	197.455	102.170	31.586	-0.534	9.853	2015.133	-0.013822	-0.007152	-0.002211
32.0000	1105.189	203.664	106.103	33.755	-0.537	9.852	2103.996	-0.014256	-0.007427	-0.002363
32.1000	1118.264	206.540	107.674	34.631	-0.537	9.853	2128.887	-0.014458	-0.007537	-0.002424
32.2000	1142.174	210.613	109.916	36.034	-0.536	9.853	2174.406	-0.014743	-0.007694	-0.002522
32.3000	1153.265	212.266	110.979	36.965	-0.534	9.853	2195.520	-0.014859	-0.007769	-0.002588
32.4000	1168.263	214.392	112.599	37.452	-0.528	9.853	2224.073	-0.015007	-0.007882	-0.002622
32.5000	1147.194	213.196	112.188	36.728	-0.534	9.854	2183.962	-0.014924	-0.007853	-0.002571
32.6000	1136.583	212.211	111.622	36.312	-0.517	9.854	2163.763	-0.014855	-0.007814	-0.002542
32.7000	1104.152	208.652	109.737	34.868	-0.535	9.854	2102.022	-0.014606	-0.007682	-0.002441
32.8000	1082.075	206.611	108.773	33.492	-0.544	9.853	2059.994	-0.014463	-0.007614	-0.002344
32.9000	1036.539	201.483	105.252	31.810	-0.533	9.854	1973.305	-0.014104	-0.007368	-0.002227
33.0000	982.197	194.897	100.105	29.198	-0.541	9.853	1869.850	-0.013643	-0.007007	-0.002044
33.1000	951.704	190.838	98.110	28.140	-0.528	9.854	1811.800	-0.013359	-0.006868	-0.001970
33.2000	876.021	181.807	91.944	25.042	-0.525	9.854	1667.719	-0.012726	-0.006436	-0.001753
33.3000	839.337	176.651	87.460	23.319	-0.533	9.854	1597.881	-0.012366	-0.006122	-0.001632
33.4000	760.723	165.646	81.625	20.387	-0.533	9.853	1448.221	-0.011595	-0.005714	-0.001427
33.5000	704.412	158.057	76.371	18.233	-0.523	9.854	1341.019	-0.011064	-0.005346	-0.001276
33.6000	622.507	147.037	69.557	15.857	-0.534	9.855	1185.093	-0.010293	-0.004869	-0.001110
33.7000	555.450	136.585	62.799	14.162	-0.522	9.854	1057.434	-0.009561	-0.004396	-0.000991
33.8000	493.623	127.070	57.696	13.340	-0.525	9.854	939.732	-0.008895	-0.004039	-0.000934
33.9000	420.405	115.797	51.011	11.215	-0.521	9.854	800.343	-0.008106	-0.003571	-0.000785
34.0000	347.246	104.057	44.558	9.089	-0.517	9.854	661.068	-0.007284	-0.003119	-0.000636
34.1000	295.398	94.733	40.441	7.517	-0.524	9.855	562.363	-0.006631	-0.002831	-0.000526
34.2000	246.225	86.532	36.302	5.753	-0.518	9.855	468.750	-0.006057	-0.002541	-0.000403
34.3000	192.724	77.197	31.595	4.018	-0.523	9.855	366.898	-0.005404	-0.002212	-0.000281
34.4000	150.960	67.994	27.646	2.640	-0.530	9.855	287.390	-0.004760	-0.001935	-0.000185
34.5000	116.004	61.450	25.125	1.585	-0.525	9.855	220.842	-0.004301	-0.001759	-0.000111
34.6000	92.755	56.920	22.238	1.016	-0.535	9.855	176.582	-0.003984	-0.001557	-0.000071
34.7000	73.023	51.624	19.980	0.294	-0.525	9.855	139.017	-0.003614	-0.001399	-0.000021
34.8000	56.973	47.540	18.316	0.975	-0.526	9.855	108.461	-0.003328	-0.001282	-0.000068
34.9000	53.621	46.578	17.808	0.432	-0.516	9.855	102.081	-0.003260	-0.001247	-0.000030
35.0000	54.177	46.231	17.203	0.737	-0.516	9.855	103.140	-0.003236	-0.001204	-0.000052
35.1000	68.770	47.609	17.835	0.502	-0.518	9.855	130.920	-0.003333	-0.001248	-0.000035
35.2000	104.042	53.111	20.106	1.029	-0.523	9.855	198.069	-0.003718	-0.001407	-0.000072
35.3000	142.439	59.115	22.170	1.682	-0.524	9.856	271.168	-0.004138	-0.001552	-0.000118
35.4000	162.607	62.977	24.010	1.683	-0.517	9.855	309.563	-0.004408	-0.001681	-0.000118
35.5000	209.301	69.829	27.343	2.917	-0.513	9.855	398.455	-0.004888	-0.001914	-0.000204
35.6000	260.998	78.292	31.387	4.101	-0.532	9.855	496.874	-0.005480	-0.002197	-0.000287
35.7000	318.302	87.490	35.460	5.839	-0.524	9.856	605.965	-0.006124	-0.002482	-0.000409
35.8000	373.321	96.302	39.670	7.658	-0.525	9.856	710.707	-0.006741	-0.002777	-0.000536
35.9000	439.340	106.154	45.120	9.869	-0.533	9.855	836.391	-0.007431	-0.003158	-0.000691
36.0000	509.899	116.577	51.149	11.937	-0.512	9.855	970.716	-0.008160	-0.003580	-0.000836
36.1000	581.870	128.501	57.504	13.883	-0.509	9.856	1107.731	-0.008995	-0.004025	-0.000972
36.2000	650.715	137.922	63.628	15.912	-0.517	9.856	1238.794	-0.009655	-0.004454	-0.001114
36.3000	732.455	149.414	71.541	18.359	-0.506	9.855	1394.405	-0.010459	-0.005008	-0.001285
36.4000	782.033	156.767	76.509	20.263	-0.522	9.856	1488.791	-0.010974	-0.005356	-0.001418
36.5000	846.084	167.203	81.929	22.280	-0.516	9.857	1610.727	-0.011704	-0.005735	-0.001560
36.6000	916.928	176.427	88.244	24.902	-0.511	9.856	1745.596	-0.012350	-0.006177	-0.001743
36.7000	960.886	184.335	92.428	27.098	-0.532	9.856	1829.281	-0.012903	-0.006470	-0.001897
36.8000	1011.081	190.589	97.533	29.406	-0.522	9.856	1924.839	-0.013341	-0.006827	-0.002058
36.9000	1066.656	197.841	102.404	31.935	-0.522	9.856	2030.640	-0.013849	-0.007168	-0.002235
37.0000	1098.697	203.164	105.748	33.935	-0.521	9.856	2091.637	-0.014221	-0.007402	-0.002375
37.1000	1121.270	208.221	107.976	35.048	-0.525	9.856	2134.609	-0.014575	-0.007558	-0.002453
37.2000	1136.088	208.653	109.133	35.811	-0.525	9.856	2162.819	-0.014606	-0.007639	-0.002507
37.3000	1150.800	212.462	110.881	37.202	-0.531	9.856	2190.828	-0.014872	-0.007762	-0.002604
37.4000	1151.026	213.821	112.338	37.062	-0.517	9.856	2191.257	-0.014967	-0.007864	-0.002594
37.5000	1156.707	213.794	112.516	37.533	-0.529	9.856	2202.072	-0.014966	-0.007876	-0.002627
37.6000	1141.738	212.088	111.969	36.562	-0.533	9.856	2173.576	-0.014846	-0.007838	-0.002559
37.7000	1109.623	209.514	110.013	35.314	-0.529	9.857	2112.436	-0.014666	-0.007701	-0.002472
37.8000	1087.681	207.806	108.816	34.547	-0.524	9.857	2070.665	-0.014546	-0.007617	-0.002418
37.9000	1045.121	202.162	105.708	32.186	-0.528	9.857	1989.641	-0.014151	-0.007400	-0.002253
38.0000	1005.355	198.634	102.335	30.575	-0.515	9.856	1913.939	-0.013904	-0.007163	-0.002140
38.1000	928.635	189.019	96.430	27.379	-0.526	9.857	1767.883	-0.013231	-0.006750	-0.001917
38.2000	881.927	182.599	91.878	25.319	-0.530	9.857	1678.963	-0.012782	-0.006431	-0.001772
38.3000	816.839	174.357	86.428	22.888	-0.533	9.857	1555.052	-0.012205	-0.006050	-0.001602
38.4000	755.042	165.271	81.049	20.497	-0.535	9.857	1437.407	-0.011569	-0.005673	-0.001435
38.5000	676.729	156.016	74.829	17.749	-0.524	9.857	1288.319	-0.010921	-0.005238	-0.001242
38.6000	647.709	151.388	71.183	16.955	-0.530	9.857	1233.072	-0.010597	-0.004983	-0.001187
38.7000	530.097	134.420	61.249	14.273	-0.516	9.858	1009.169	-0.009409	-0.004287	-0.000999
38.8000	482.893	126.859	56.458	13.051	-0.536	9.858	919.304	-0.008880	-0.003952	-0.000914
38.9000	412.740	115.367	50.254	11.078	-0.529	9.858	785.751	-0.008076	-0.003518	-0.000775
39.0000	358.277	106.029	45.493	9.826	-0.517	9.857	682.068	-0.007422	-0.003184	-0.000688
39.1000	297.187	95.732	40.317	7.714	-0.527	9.857	565.767	-0.006701	-0.002822	-0.000540
39.2000	239.538	85.197	35.831	6.075	-0.528	9.858	456.018	-0.005964	-0.002508	-0.000425
39.3000	181.303	75.151	31.143	3.989	-0.534	9.857	345.154	-0.005261	-0.002180	-0.000279
39.4000	147.248	68.204	27.633	2.807	-0.526	9.858	280.323	-0.004774	-0.001934	-0.000197
39.5000	92.725	58.628	22.789	1.419	-0.535	9.857	176.525	-0.004104	-0.001595	-0.000099
39.6000	85.572	55.517	21.522	1.266	-0.528	9.857	162.907	-0.003886	-0.001507	-0.000089
39.7000	64.261	50.500	19.334	0.931	-0.533	9.857	122.337	-0.003535	-0.001353	-0.000065
39.8000	57.258	48.177	18.382	0.944	-0.542	9.857	109.005	-0.003372	-0.001287	-0.000066
39.9000	52.629	47.692	17.546	0.878	-0.534	9.857	100.193	-0.003338	-0.001228	-0.000061
40.0000	48.497	45.787	16.585	0.572	-0.526	9.857	92.325	-0.003205	-0.001161	-0.000040
40.1000	77.276	49.680	18.330	0.780	-0.533	9.856	147.114	-0.003478	-0.001283	-0.000055
40.2000	94.724	51.858	19.222	1.056	-0.531	9.857	180.330	-0.003630	-0.001346	-0.000074
40.3000	132.521	58.407	21.866	1.750	-0.536	9.857	252.285	-0.004088	-0.001531	-0.000122
40.4000	160.158	63.046	24.024	2.210	-0.538	9.857	304.899	-0.004413	-0.001682	-0.000155
40.5000	218.513	73.151	28.829	3.572	-0.521	9.857	415.993	-0.005121	-0.002018	-0.000250
40.6000	251.050	77.264	31.058	4.171	-0.537	9.857	477.934	-0.005408	-0.002174	-0.000292
40.7000	326.357	89.203	36.520	6.547	-0.531	9.857	621.300	-0.006244	-0.002556	-0.000458
40.8000	376.161	96.536	39.824	8.352	-0.528	9.857	716.114	-0.006757	-0.002788	-0.000585
40.9000	452.641	108.486	46.056	10.576	-0.534	9.857	861.712	-0.007594	-0.003224	-0.000740
41.0000	516.030	118.147	51.215	12.785	-0.526	9.857	982.389	-0.008270	-0.003585	-0.000895
41.1000	573.995	126.430	57.272	14.161	-0.529	9.857	1092.739	-0.008850	-0.004009	-0.000991
41.2000	645.801	136.697	63.625	16.093	-0.545	9.857	1229.439	-0.009569	-0.004454	-0.001127
41.3000	720.642	149.580	70.757	18.359	-0.537	9.857	1371.918	-0.010471	-0.004953	-0.001285
41.4000	767.877	156.211	75.460	19.859	-0.532	9.858	1461.840	-0.010935	-0.005282	-0.001390
41.5000	842.312	167.745	81.736	22.888	-0.530	9.857	1603.546	-0.011742	-0.005722	-0.001602
41.6000	901.990	174.760	87.557	25.112	-0.532	9.858	1717.157	-0.012233	-0.006129	-0.001758
41.7000	940.673	181.888	91.959	26.487	-0.536	9.857	1790.800	-0.012732	-0.006437	-0.001854
41.8000	1000.366	190.934	97.328	29.337	-0.529	9.857	1904.440	-0.013365	-0.006813	-0.002054
41.9000	1050.666	196.591	101.357	31.934	-0.527	9.858	2000.198	-0.013761	-0.007095	-0.002235
42.0000	1104.152	205.570	106.049	34.033	-0.528	9.857	2102.022	-0.014390	-0.007423	-0.002382
42.1000	1123.554	208.111	108.196	35.173	-0.528	9.858	2138.958	-0.014568	-0.007574	-0.002462
42.2000	1164.551	213.375	111.746	37.467	-0.518	9.857	2217.007	-0.014936	-0.007822	-0.002623
42.3000	1161.696	214.350	111.596	37.270	-0.522	9.857	2211.571	-0.015005	-0.007812	-0.002609
42.4000	1158.345	213.724	112.009	37.257	-0.526	9.858	2205.191	-0.014961	-0.007841	-0.002608
42.5000	1141.167	213.781	111.141	36.618	-0.525	9.858	2172.489	-0.014965	-0.007780	-0.002563
42.6000	1125.958	210.975	111.060	35.977	-0.521	9.858	2143.536	-0.014768	-0.007774	-0.002518
42.7000	1115.544	210.489	110.702	35.658	-0.524	9.858	2123.709	-0.014734	-0.007749	-0.002496
42.8000	1085.878	207.958	108.732	34.532	-0.522	9.858	2067.232	-0.014557	-0.007611	-0.002417
42.9000	1049.554	203.914	105.431	32.395	-0.533	9.858	1998.081	-0.014274	-0.007380	-0.002268
43.0000	1001.779	197.550	101.716	30.587	-0.510	9.858	1907.129	-0.013829	-0.007120	-0.002141
43.1000	930.334	190.364	96.832	27.585	-0.527	9.857	1771.116	-0.013325	-0.006778	-0.001931
43.2000	897.181	185.739	93.724	26.071	-0.525	9.858	1708.002	-0.013002	-0.006561	-0.001825
43.3000	832.514	177.305	87.845	23.388	-0.530	9.857	1584.892	-0.012411	-0.006149	-0.001637
43.4000	768.538	168.895	81.861	21.000	-0.525	9.857	1463.099	-0.011823	-0.005730	-0.001470
43.5000	696.882	158.668	75.834	18.232	-0.538	9.857	1326.685	-0.011107	-0.005308	-0.001276
43.6000	636.769	148.691	70.245	16.816	-0.528	9.857	1212.244	-0.010408	-0.004917	-0.001177
43.7000	551.783	136.530	62.992	14.578	-0.541	9.857	1050.453	-0.009557	-0.004409	-0.001020
43.8000	472.298	125.566	55.909	12.828	-0.533	9.857	899.134	-0.008790	-0.003914	-0.000898
43.9000	400.026	114.296	49.538	11.036	-0.529	9.857	761.547	-0.008001	-0.003468	-0.000773
44.0000	375.845	109.087	46.716	10.270	-0.537	9.856	715.513	-0.007636	-0.003270	-0.000719
44.1000	303.935	97.343	40.812	8.116	-0.530	9.857	578.613	-0.006814	-0.002857	-0.000568
44.2000	238.801	85.365	35.376	5.767	-0.523	9.857	454.617	-0.005976	-0.002476	-0.000404
44.3000	199.592	77.390	31.745	4.447	-0.536	9.857	379.972	-0.005417	-0.002222	-0.000311
44.4000	152.929	69.370	27.645	3.043	-0.538	9.857	291.138	-0.004856	-0.001935	-0.000213
44.5000	114.411	62.349	24.589	1.753	-0.535	9.857	217.810	-0.004364	-0.001721	-0.000123
44.6000	87.014	55.640	21.852	1.195	-0.538	9.857	165.653	-0.003895	-0.001530	-0.000084
44.7000	63.555	50.110	19.044	0.918	-0.536	9.857	120.993	-0.003508	-0.001333	-0.000064
44.8000	70.423	50.403	18.822	0.903	-0.531	9.857	134.068	-0.003528	-0.001318	-0.000063
44.9000	56.281	47.482	17.560	0.890	-0.532	9.857	107.145	-0.003324	-0.001229	-0.000062
45.0000	58.130	48.220	17.271	0.571	-0.535	9.857	110.664	-0.003375	-0.001209	-0.000040
45.1000	71.776	48.498	17.847	0.737	-0.528	9.856	136.642	-0.003395	-0.001249	-0.000052
45.2000	91.553	52.207	18.919	0.390	-0.526	9.856	174.294	-0.003654	-0.001324	-0.000027
45.3000	133.963	57.863	21.700	1.265	-0.522	9.856	255.032	-0.004050	-0.001519	-0.000089
45.4000	148.676	60.464	22.800	1.515	-0.513	9.856	283.041	-0.004232	-0.001596	-0.000106
45.5000	215.342	70.356	27.564	2.835	-0.512	9.856	409.956	-0.004925	-0.001929	-0.000198
45.6000	255.438	78.527	31.278	4.002	-0.529	9.856	486.288	-0.005497	-0.002189	-0.000280
45.7000	318.707	87.755	35.764	6.018	-0.527	9.855	606.737	-0.006143	-0.002503	-0.000421
45.8000	361.493	95.219	39.245	7.615	-0.529	9.855	688.190	-0.006665	-0.002747	-0.000533
45.9000	435.944	107.503	45.369	10.228	-0.527	9.855	829.926	-0.007525	-0.003176	-0.000716
46.0000	496.749	116.675	49.869	11.924	-0.533	9.855	945.683	-0.008167	-0.003491	-0.000835
46.1000	554.188	124.288	55.701	13.368	-0.529	9.854	1055.031	-0.008700	-0.003899	-0.000936
46.2000	651.872	137.992	63.861	16.316	-0.521	9.855	1240.997	-0.009659	-0.004470	-0.001142
46.3000	720.492	148.330	70.094	18.206	-0.525	9.854	1371.632	-0.010383	-0.004907	-0.001274
46.4000	761.504	155.086	75.351	19.555	-0.520	9.854	1449.709	-0.010856	-0.005275	-0.001369
46.5000	833.806	165.492	81.268	22.374	-0.524	9.854	1587.353	-0.011584	-0.005689	-0.001566
46.6000	923.977	177.902	89.482	25.821	-0.518	9.854	1759.014	-0.012453	-0.006264	-0.001807
46.7000	957.099	184.448	92.553	26.654	-0.520	9.853	1822.071	-0.012911	-0.006479	-0.001866
46.8000	1010.210	190.587	97.353	29.712	-0.537	9.853	1923.180	-0.013341	-0.006815	-0.002080
46.9000	1045.211	197.646	100.655	31.185	-0.522	9.852	1989.813	-0.013835	-0.007046	-0.002183
47.0000	1077.642	202.383	103.725	32.824	-0.526	9.852	2051.554	-0.014167	-0.007261	-0.002298
47.1000	1132.015	209.113	108.429	35.758	-0.525	9.852	2155.066	-0.014638	-0.007590	-0.002503
47.2000	1142.339	211.406	109.697	36.395	-0.521	9.851	2174.721	-0.014798	-0.007679	-0.002548
47.3000	1158.014	212.501	111.142	37.381	-0.505	9.852	2204.561	-0.014875	-0.007780	-0.002617
47.4000	1157.293	214.017	112.052	37.480	-0.514	9.852	2203.188	-0.014981	-0.007844	-0.002624
47.5000	1137.125	213.668	111.582	36.742	-0.528	9.851	2164.793	-0.014957	-0.007811	-0.002572
47.6000	1146.983	212.916	111.705	37.381	-0.527	9.851	2183.561	-0.014904	-0.007819	-0.002617
47.7000	1114.116	210.169	110.397	35.577	-0.527	9.851	2120.991	-0.014712	-0.007728	-0.002490
47.8000	1093.407	207.484	108.293	34.838	-0.522	9.850	2081.566	-0.014524	-0.007581	-0.002439
47.9000	1043.392	203.135	104.330	32.615	-0.528	9.850	1986.351	-0.014219	-0.007303	-0.002283
48.0000	997.450	198.024	101.219	30.435	-0.512	9.850	1898.890	-0.013862	-0.007085	-0.002130
48.1000	966.672	192.534	98.303	29.280	-0.520	9.850	1840.296	-0.013477	-0.006881	-0.002050
48.2000	901.644	184.808	93.461	26.586	-0.528	9.849	1716.499	-0.012937	-0.006542	-0.001861
48.3000	831.837	175.705	87.625	23.277	-0.518	9.849	1583.605	-0.012299	-0.006134	-0.001629
48.4000	760.287	168.232	81.652	20.874	-0.529	9.849	1447.392	-0.011776	-0.005716	-0.001461
48.5000	706.485	159.601	76.933	19.039	-0.530	9.848	1344.967	-0.011172	-0.005385	-0.001333
48.6000	633.177	150.027	70.109	16.761	-0.530	9.848	1205.406	-0.010502	-0.004908	-0.001173
48.7000	566.000	138.756	64.095	15.036	-0.534	9.848	1077.518	-0.009713	-0.004487	-0.001052
48.8000	489.310	127.195	56.844	13.298	-0.537	9.848	931.520	-0.008904	-0.003979	-0.000931
48.9000	420.299	116.562	50.734	11.799	-0.526	9.848	800.142	-0.008159	-0.003551	-0.000826
49.0000	355.768	106.016	45.258	9.840	-0.527	9.848	677.290	-0.007421	-0.003168	-0.000689
49.1000	309.285	96.913	40.826	8.575	-0.530	9.847	588.799	-0.006784	-0.002858	-0.000600
49.2000	241.942	85.643	35.420	6.657	-0.536	9.847	460.596	-0.005995	-0.002479	-0.000466
49.3000	186.863	76.291	31.113	4.586	-0.528	9.847	355.740	-0.005340	-0.002178	-0.000321
49.4000	153.560	69.244	28.098	3.197	-0.538	9.846	292.339	-0.004847	-0.001967	-0.000224
49.5000	124.375	63.519	25.291	2.364	-0.541	9.846	236.778	-0.004446	-0.001770	-0.000165
49.6000	94.439	56.876	22.471	1.823	-0.528	9.846	179.787	-0.003981	-0.001573	-0.000128
49.7000	60.610	50.528	19.222	1.195	-0.544	9.846	115.385	-0.003537	-0.001346	-0.000084
49.8000	49.984	48.609	17.286	1.362	-0.539	9.846	95.158	-0.003403	-0.001210	-0.000095
49.9000	46.738	47.078	16.900	1.058	-0.533	9.845	88.978	-0.003295	-0.001183	-0.000074
