# Supplementary material for: Evaluation of a Cold-Mixed High-Performance Polyurethane Mixture
Source: Hindawi journal article supplement (doi:10.1155/2019/1507971), 2019-11-07
Supplement: f1 [file 1507971.f1.zip › 1507971.f1/dynamic modulus data/PUM/specimen1/temp10/zhs-1-10_0.5Hz.csv]

Test Information
****************
Project name	zhs
Operator name	1
Target test temperature	10
Target confining stress	0
Average dynamic strain range from 75 to 125 micro-strain
Contact stress	5
Initial modulus	4000
Axial gauge length	70
Comments	Run at High Pressure
Specimen information
********************
Identification	zhs-1-10
Dimensions	Point 1	Point 2	Point 3	Point 4	Point 5	Point 6	Average	Std Dev.
Diameter (mm)	49.2	49.2	49.3				49.23	0.058
Height (mm)	101.3	101.2	101.3				101.27	0.058
Cross-sectional area (mm�)	1903.7
Conditioning time
Properties/Comments
Test Data	0.5Hz
*********
Test date and time	Fri	Mar 29	2019	11:04 AM
Dynamic modulus (MPa)	11398
Phase angle (Degrees)	4.21
Average temperature (�C)	9.9
Average confining pressure (kPa)	-0.5
Average micro-strain	99
Load drift (%)	-0.6
Load standard error (%)	2.8
Average deformation drift (%)	-2.3
Average deformation standard error (%)	5.0
Deformation uniformity (%)	53.6
Phase uniformity (Degrees)	0.7
Conditioning Cycles
Time (sec)	Axial stress (kPa)	Axial micro-strain #1	Axial micro-strain #2	Axial micro-strain #3	Confining pressure (kPa)	Temperature (�C)	Load (N)	Displacement #1 (mm)	Displacement #2 (mm)	Displacement #3 (mm)
0.0000	48.376	32.420	16.252	-2.334	-0.513	9.870	92.096	-0.002269	-0.001138	0.000163
0.0400	63.089	34.698	17.779	-2.595	-0.508	9.870	120.106	-0.002429	-0.001245	0.000182
0.0800	64.517	35.086	18.013	-3.333	-0.519	9.869	122.824	-0.002456	-0.001261	0.000233
0.1200	95.671	40.506	20.998	-3.361	-0.513	9.870	182.133	-0.002835	-0.001470	0.000235
0.1600	136.112	46.439	24.136	-3.443	-0.506	9.870	259.123	-0.003251	-0.001690	0.000241
0.2000	158.835	50.485	25.691	-2.958	-0.509	9.870	302.382	-0.003534	-0.001798	0.000207
0.2400	207.076	58.419	29.530	-2.374	-0.521	9.870	394.220	-0.004089	-0.002067	0.000166
0.2800	241.717	64.339	32.376	-1.276	-0.513	9.869	460.167	-0.004504	-0.002266	0.000089
0.3200	293.580	72.900	36.175	-0.834	-0.528	9.870	558.901	-0.005103	-0.002532	0.000058
0.3600	359.404	82.935	41.749	1.446	-0.530	9.868	684.214	-0.005805	-0.002922	-0.000101
0.4000	402.716	90.201	44.790	1.890	-0.521	9.868	766.668	-0.006314	-0.003135	-0.000132
0.4400	459.178	99.096	49.331	4.670	-0.498	9.869	874.157	-0.006937	-0.003453	-0.000327
0.4800	540.376	111.211	55.139	6.560	-0.492	9.869	1028.738	-0.007785	-0.003860	-0.000459
0.5200	565.429	115.673	57.120	7.476	-0.495	9.869	1076.431	-0.008097	-0.003998	-0.000523
0.5600	605.149	122.178	60.971	9.772	-0.509	9.869	1152.048	-0.008552	-0.004268	-0.000684
0.6000	667.607	130.790	66.131	11.756	-0.503	9.868	1270.952	-0.009155	-0.004629	-0.000823
0.6400	731.373	139.409	71.925	13.801	-0.506	9.869	1392.345	-0.009759	-0.005035	-0.000966
0.6800	744.643	142.464	73.481	14.426	-0.510	9.869	1417.608	-0.009972	-0.005144	-0.001010
0.7200	799.662	149.552	78.187	16.456	-0.520	9.869	1522.350	-0.010469	-0.005473	-0.001152
0.7600	840.764	155.669	81.407	18.776	-0.508	9.869	1600.599	-0.010897	-0.005699	-0.001314
0.8000	866.989	160.198	83.868	19.026	-0.513	9.868	1650.524	-0.011214	-0.005871	-0.001332
0.8400	898.038	164.436	87.431	20.054	-0.501	9.868	1709.633	-0.011510	-0.006120	-0.001404
0.8800	946.639	170.995	91.355	22.540	-0.509	9.868	1802.158	-0.011970	-0.006395	-0.001578
0.9200	896.715	166.631	88.603	20.471	-0.500	9.868	1707.115	-0.011664	-0.006202	-0.001433
0.9600	958.136	173.651	93.393	23.318	-0.516	9.868	1824.045	-0.012156	-0.006537	-0.001632
1.0000	893.304	166.839	89.001	20.638	-0.512	9.868	1700.621	-0.011679	-0.006230	-0.001445
1.0400	894.356	167.938	89.702	21.305	-0.501	9.868	1702.623	-0.011756	-0.006279	-0.001491
1.0800	893.213	168.370	89.497	21.082	-0.508	9.868	1700.449	-0.011786	-0.006265	-0.001476
1.1200	870.280	165.841	87.377	19.708	-0.509	9.868	1656.790	-0.011609	-0.006116	-0.001380
1.1600	838.660	162.129	87.529	19.442	-0.506	9.868	1596.594	-0.011349	-0.006127	-0.001361
1.2000	793.275	157.084	82.492	17.108	-0.498	9.867	1510.191	-0.010996	-0.005774	-0.001198
1.2400	704.622	146.066	76.121	14.745	-0.498	9.867	1341.419	-0.010225	-0.005328	-0.001032
1.2800	711.475	145.566	74.951	13.842	-0.496	9.867	1354.465	-0.010190	-0.005247	-0.000969
1.3200	659.627	138.966	72.311	11.966	-0.498	9.868	1255.760	-0.009728	-0.005062	-0.000838
1.3600	612.438	133.351	67.442	10.366	-0.508	9.868	1165.924	-0.009335	-0.004721	-0.000726
1.4000	539.385	123.526	61.578	8.880	-0.505	9.866	1026.850	-0.008647	-0.004310	-0.000622
1.4400	490.963	116.425	58.191	6.728	-0.503	9.867	934.668	-0.008150	-0.004073	-0.000471
1.4800	472.283	113.045	55.370	6.683	-0.495	9.866	899.105	-0.007913	-0.003876	-0.000468
1.5200	427.303	105.682	52.315	4.544	-0.495	9.868	813.475	-0.007398	-0.003662	-0.000318
1.5600	340.454	92.409	46.383	2.434	-0.492	9.867	648.136	-0.006469	-0.003247	-0.000170
1.6000	283.376	82.878	40.812	0.724	-0.502	9.866	539.474	-0.005801	-0.002857	-0.000051
1.6400	230.025	74.262	37.015	-0.181	-0.505	9.867	437.908	-0.005198	-0.002591	0.000013
1.6800	191.492	66.438	33.961	-1.903	-0.499	9.866	364.552	-0.004651	-0.002377	0.000133
1.7200	153.034	59.338	29.941	-2.248	-0.511	9.867	291.338	-0.004154	-0.002096	0.000157
1.7600	139.434	56.113	28.801	-3.055	-0.508	9.867	265.446	-0.003928	-0.002016	0.000214
1.8000	90.531	46.607	24.148	-3.098	-0.498	9.866	172.348	-0.003262	-0.001690	0.000217
1.8400	75.848	42.800	22.059	-3.209	-0.505	9.866	144.396	-0.002996	-0.001544	0.000225
1.8800	55.921	38.380	19.581	-2.319	-0.492	9.866	106.459	-0.002687	-0.001371	0.000162
1.9200	40.231	34.561	17.655	-3.041	-0.493	9.867	76.590	-0.002419	-0.001236	0.000213
1.9600	31.274	31.836	16.625	-1.650	-0.510	9.866	59.538	-0.002228	-0.001164	0.000116
2.0000	32.867	31.865	16.363	-2.444	-0.504	9.866	62.571	-0.002231	-0.001145	0.000171
2.0400	57.844	35.698	18.027	-2.054	-0.518	9.867	110.121	-0.002499	-0.001262	0.000144
2.0800	85.993	39.855	19.607	-2.512	-0.507	9.865	163.708	-0.002790	-0.001373	0.000176
2.1200	88.247	40.617	20.270	-2.736	-0.507	9.866	167.999	-0.002843	-0.001419	0.000192
2.1600	124.060	46.202	22.307	-3.736	-0.507	9.865	236.177	-0.003234	-0.001562	0.000262
2.2000	164.877	53.334	26.778	-3.193	-0.508	9.866	313.883	-0.003733	-0.001874	0.000224
2.2400	182.715	56.515	27.978	-2.721	-0.506	9.866	347.843	-0.003956	-0.001958	0.000190
2.2800	248.269	66.285	33.356	-1.137	-0.493	9.866	472.641	-0.004640	-0.002335	0.000080
2.3200	285.389	73.000	36.175	-1.126	-0.490	9.866	543.308	-0.005110	-0.002532	0.000079
2.3600	341.085	81.503	40.071	1.085	-0.500	9.865	649.338	-0.005705	-0.002805	-0.000076
2.4000	401.228	91.049	44.543	2.657	-0.501	9.865	763.836	-0.006373	-0.003118	-0.000186
2.4400	465.926	100.941	49.676	5.088	-0.502	9.865	887.003	-0.007066	-0.003477	-0.000356
2.4800	478.760	104.084	50.391	5.238	-0.509	9.865	911.436	-0.007286	-0.003527	-0.000367
2.5200	553.091	114.755	56.679	7.784	-0.509	9.865	1052.942	-0.008033	-0.003968	-0.000545
2.5600	642.990	127.027	63.448	10.048	-0.509	9.865	1224.089	-0.008892	-0.004441	-0.000703
2.6000	679.525	132.809	67.699	12.175	-0.513	9.865	1293.640	-0.009297	-0.004739	-0.000852
2.6400	711.625	137.366	70.137	13.705	-0.515	9.865	1354.752	-0.009616	-0.004910	-0.000959
2.6800	766.644	144.955	74.647	15.662	-0.508	9.866	1459.494	-0.010147	-0.005225	-0.001096
2.7200	790.374	148.553	77.580	16.120	-0.516	9.865	1504.669	-0.010399	-0.005431	-0.001128
2.7600	822.189	153.777	80.592	17.607	-0.508	9.865	1565.237	-0.010764	-0.005641	-0.001233
2.8000	911.278	165.674	88.176	21.361	-0.510	9.865	1734.838	-0.011597	-0.006172	-0.001495
2.8400	841.861	158.919	84.390	18.719	-0.506	9.864	1602.688	-0.011124	-0.005907	-0.001310
2.8800	878.245	163.991	87.419	19.735	-0.507	9.866	1671.953	-0.011479	-0.006119	-0.001381
2.9200	918.161	168.495	89.621	21.763	-0.513	9.865	1747.942	-0.011795	-0.006273	-0.001523
2.9600	938.990	171.817	91.725	22.011	-0.504	9.864	1787.596	-0.012027	-0.006421	-0.001541
3.0000	900.788	168.508	90.046	21.957	-0.508	9.864	1714.869	-0.011796	-0.006303	-0.001537
3.0400	900.607	168.396	90.253	21.025	-0.514	9.864	1714.525	-0.011788	-0.006318	-0.001472
3.0800	865.726	164.158	87.143	19.220	-0.513	9.864	1648.121	-0.011491	-0.006100	-0.001345
3.1200	848.789	163.407	86.964	20.290	-0.510	9.864	1615.877	-0.011438	-0.006087	-0.001420
3.1600	845.258	162.173	85.243	18.958	-0.506	9.864	1609.154	-0.011352	-0.005967	-0.001327
3.2000	783.205	155.141	80.236	17.635	-0.518	9.864	1491.022	-0.010860	-0.005616	-0.001234
3.2400	749.407	150.972	78.406	15.455	-0.502	9.864	1426.678	-0.010568	-0.005488	-0.001082
3.2800	714.796	147.218	76.136	14.551	-0.514	9.864	1360.788	-0.010305	-0.005329	-0.001019
3.3200	667.066	140.646	73.066	12.841	-0.504	9.864	1269.922	-0.009845	-0.005115	-0.000899
3.3600	622.236	134.213	67.564	11.172	-0.508	9.864	1184.578	-0.009395	-0.004730	-0.000782
3.4000	553.992	125.386	61.949	8.437	-0.519	9.864	1054.659	-0.008777	-0.004336	-0.000591
3.4400	506.367	118.384	58.951	7.506	-0.510	9.863	963.993	-0.008287	-0.004127	-0.000525
3.4800	444.420	109.558	54.009	4.835	-0.514	9.863	846.062	-0.007669	-0.003781	-0.000338
3.5200	385.869	100.083	50.185	4.280	-0.516	9.863	734.596	-0.007006	-0.003513	-0.000300
3.5600	350.207	94.024	46.813	2.682	-0.519	9.863	666.704	-0.006582	-0.003277	-0.000188
3.6000	278.506	82.279	41.157	0.043	-0.517	9.863	530.205	-0.005760	-0.002881	-0.000003
3.6400	249.276	76.595	38.419	0.252	-0.518	9.863	474.558	-0.005362	-0.002689	-0.000018
3.6800	188.817	66.801	33.700	-1.221	-0.521	9.863	359.459	-0.004676	-0.002359	0.000085
3.7200	160.879	60.839	31.375	-2.236	-0.506	9.863	306.273	-0.004259	-0.002196	0.000157
3.7600	122.316	53.361	27.509	-2.888	-0.518	9.863	232.859	-0.003735	-0.001926	0.000202
3.8000	95.596	47.121	24.315	-3.584	-0.512	9.863	181.990	-0.003298	-0.001702	0.000251
3.8400	69.025	41.562	21.440	-2.235	-0.526	9.863	131.407	-0.002909	-0.001501	0.000156
3.8800	59.633	39.395	19.705	-2.319	-0.500	9.863	113.525	-0.002758	-0.001379	0.000162
3.9200	36.128	33.560	16.926	-2.374	-0.508	9.863	68.779	-0.002349	-0.001185	0.000166
3.9600	38.954	33.433	17.202	-2.346	-0.517	9.863	74.158	-0.002340	-0.001204	0.000164
4.0000	50.450	34.644	17.903	-3.333	-0.514	9.863	96.045	-0.002425	-0.001253	0.000233
4.0400	67.973	37.575	18.798	-3.542	-0.516	9.863	129.404	-0.002630	-0.001316	0.000248
4.0800	68.289	37.465	18.907	-3.291	-0.513	9.864	130.005	-0.002623	-0.001324	0.000230
4.1200	113.224	45.123	21.866	-3.223	-0.510	9.862	215.549	-0.003159	-0.001531	0.000226
4.1600	125.818	47.010	23.433	-3.638	-0.518	9.863	239.525	-0.003291	-0.001640	0.000255
4.2000	167.086	54.141	26.546	-3.000	-0.522	9.862	318.089	-0.003790	-0.001858	0.000210
4.2400	196.542	58.711	29.006	-2.542	-0.517	9.863	374.165	-0.004110	-0.002030	0.000178
4.2800	271.999	69.730	34.634	-1.124	-0.508	9.862	517.817	-0.004881	-0.002424	0.000079
4.3200	292.438	73.623	36.287	0.042	-0.514	9.862	556.726	-0.005154	-0.002540	-0.000003
4.3600	223.773	63.298	31.196	-2.722	-0.519	9.863	426.006	-0.004431	-0.002184	0.000191
4.4000	422.975	94.050	45.713	3.031	-0.521	9.862	805.235	-0.006584	-0.003200	-0.000212
4.4400	484.140	103.805	50.679	5.226	-0.504	9.862	921.679	-0.007266	-0.003548	-0.000366
4.4800	531.059	110.796	54.477	6.989	-0.500	9.862	1011.000	-0.007756	-0.003813	-0.000489
4.5200	610.048	121.817	60.695	9.172	-0.499	9.862	1161.375	-0.008527	-0.004249	-0.000642
4.5600	627.166	124.830	62.129	10.215	-0.505	9.862	1193.962	-0.008738	-0.004349	-0.000715
4.6000	660.829	130.568	65.594	12.577	-0.521	9.861	1258.049	-0.009140	-0.004592	-0.000880
4.6400	725.376	140.311	71.514	14.107	-0.511	9.861	1380.930	-0.009822	-0.005006	-0.000987
4.6800	783.942	148.052	77.043	16.010	-0.494	9.862	1492.424	-0.010364	-0.005393	-0.001121
4.7200	824.428	153.359	80.526	18.095	-0.524	9.862	1569.500	-0.010735	-0.005637	-0.001267
4.7600	809.250	153.318	80.716	16.955	-0.512	9.862	1540.604	-0.010732	-0.005650	-0.001187
4.8000	865.997	160.170	82.935	19.595	-0.530	9.862	1648.636	-0.011212	-0.005805	-0.001372
4.8400	883.866	163.851	86.510	20.123	-0.516	9.862	1682.653	-0.011470	-0.006056	-0.001409
4.8800	909.264	166.785	88.906	20.790	-0.506	9.862	1731.005	-0.011675	-0.006223	-0.001455
4.9200	908.046	167.815	89.029	21.777	-0.501	9.862	1728.687	-0.011747	-0.006232	-0.001524
4.9600	914.178	168.313	89.744	21.457	-0.509	9.862	1740.360	-0.011782	-0.006282	-0.001502
5.0000	907.836	170.009	91.919	20.874	-0.514	9.862	1728.287	-0.011901	-0.006434	-0.001461
5.0400	908.783	169.647	90.929	20.887	-0.518	9.862	1730.089	-0.011875	-0.006365	-0.001462
5.0800	872.489	165.799	89.003	20.235	-0.526	9.861	1660.995	-0.011606	-0.006230	-0.001416
5.1200	863.818	164.977	87.873	20.152	-0.517	9.861	1644.487	-0.011548	-0.006151	-0.001411
5.1600	826.142	160.422	84.957	18.804	-0.518	9.861	1572.762	-0.011230	-0.005947	-0.001316
5.2000	796.746	156.793	82.357	17.830	-0.521	9.861	1516.800	-0.010976	-0.005765	-0.001248
5.2400	744.598	151.179	78.803	15.163	-0.512	9.861	1417.522	-0.010583	-0.005516	-0.001061
5.2800	702.758	145.442	74.594	13.968	-0.510	9.861	1337.872	-0.010181	-0.005222	-0.000978
5.3200	603.240	132.627	66.767	10.048	-0.514	9.861	1148.415	-0.009284	-0.004674	-0.000703
5.3600	619.246	133.198	66.228	11.146	-0.509	9.861	1178.885	-0.009324	-0.004636	-0.000780
5.4000	533.569	122.913	60.779	7.451	-0.516	9.861	1015.778	-0.008604	-0.004255	-0.000522
5.4400	502.310	117.924	57.642	7.560	-0.511	9.861	956.268	-0.008255	-0.004035	-0.000529
5.4800	458.742	111.741	54.779	6.254	-0.500	9.861	873.327	-0.007822	-0.003835	-0.000438
5.5200	385.539	100.291	49.606	3.405	-0.510	9.861	733.967	-0.007020	-0.003472	-0.000238
5.5600	330.430	90.730	44.802	1.572	-0.501	9.861	629.053	-0.006351	-0.003136	-0.000110
5.6000	281.347	82.614	41.707	0.321	-0.509	9.861	535.612	-0.005783	-0.002919	-0.000022
5.6400	240.996	75.345	37.731	-0.529	-0.502	9.861	458.794	-0.005274	-0.002641	0.000037
5.6800	211.720	69.591	34.648	-1.264	-0.501	9.860	403.061	-0.004871	-0.002425	0.000088
5.7200	125.833	55.100	28.799	-3.472	-0.516	9.861	239.553	-0.003857	-0.002016	0.000243
5.7600	130.687	54.751	28.042	-2.958	-0.503	9.861	248.795	-0.003833	-0.001963	0.000207
5.8000	98.782	47.914	24.836	-2.540	-0.494	9.860	188.055	-0.003354	-0.001739	0.000178
5.8400	58.190	39.452	20.449	-3.124	-0.509	9.861	110.779	-0.002762	-0.001431	0.000219
5.8800	58.731	38.924	20.021	-2.569	-0.498	9.860	111.809	-0.002725	-0.001401	0.000180
5.9200	46.648	35.907	18.399	-2.944	-0.504	9.861	88.806	-0.002513	-0.001288	0.000206
5.9600	42.065	34.366	17.284	-2.056	-0.517	9.860	80.080	-0.002406	-0.001210	0.000144
6.0000	49.008	35.088	18.068	-3.555	-0.505	9.860	93.298	-0.002456	-0.001265	0.000249
6.0400	50.435	34.587	17.820	-2.277	-0.516	9.860	96.016	-0.002421	-0.001247	0.000159
6.0800	81.634	40.062	19.623	-2.973	-0.515	9.860	155.411	-0.002804	-0.001374	0.000208
6.1200	100.495	42.621	20.970	-2.819	-0.501	9.861	191.317	-0.002983	-0.001468	0.000197
6.1600	135.361	49.374	24.299	-2.388	-0.513	9.860	257.692	-0.003456	-0.001701	0.000167
6.2000	154.492	51.888	26.049	-3.389	-0.509	9.860	294.113	-0.003632	-0.001823	0.000237
6.2400	199.667	58.949	29.119	-2.457	-0.506	9.860	380.116	-0.004126	-0.002038	0.000172
6.2800	279.288	71.400	35.077	-0.402	-0.505	9.860	531.693	-0.004998	-0.002455	0.000028
6.3200	278.071	71.678	35.696	-1.069	-0.515	9.860	529.375	-0.005017	-0.002499	0.000075
6.3600	359.344	84.615	41.776	1.502	-0.520	9.860	684.099	-0.005923	-0.002924	-0.000105
6.4000	389.221	90.118	43.580	1.614	-0.512	9.860	740.976	-0.006308	-0.003051	-0.000113
6.4400	454.925	99.790	48.878	3.459	-0.521	9.860	866.060	-0.006985	-0.003421	-0.000242
6.4800	507.720	107.821	53.349	6.671	-0.501	9.860	966.568	-0.007547	-0.003734	-0.000467
6.5200	583.553	118.787	58.841	8.409	-0.499	9.860	1110.935	-0.008315	-0.004119	-0.000589
6.5600	614.136	123.636	61.275	9.047	-0.508	9.860	1169.157	-0.008655	-0.004289	-0.000633
6.6000	682.440	133.128	67.096	12.648	-0.512	9.859	1299.191	-0.009319	-0.004697	-0.000885
6.6400	724.595	139.354	72.076	14.108	-0.498	9.860	1379.442	-0.009755	-0.005045	-0.000988
6.6800	767.035	145.400	74.428	15.858	-0.496	9.860	1460.238	-0.010178	-0.005210	-0.001110
6.7200	775.225	147.427	76.218	16.651	-0.501	9.859	1475.830	-0.010320	-0.005335	-0.001166
6.7600	871.633	160.128	84.502	19.583	-0.512	9.860	1659.365	-0.011209	-0.005915	-0.001371
6.8000	865.336	160.226	84.336	19.458	-0.512	9.860	1647.377	-0.011216	-0.005904	-0.001362
6.8400	872.805	162.350	85.519	20.138	-0.510	9.860	1661.596	-0.011365	-0.005986	-0.001410
6.8800	936.600	170.230	90.611	22.136	-0.511	9.859	1783.047	-0.011916	-0.006343	-0.001550
6.9200	908.542	168.313	88.864	21.429	-0.513	9.860	1729.631	-0.011782	-0.006220	-0.001500
6.9600	920.926	169.563	90.226	21.680	-0.515	9.859	1753.206	-0.011869	-0.006316	-0.001518
7.0000	911.097	168.857	88.740	21.734	-0.508	9.860	1734.495	-0.011820	-0.006212	-0.001521
7.0400	916.192	171.219	91.905	22.457	-0.496	9.860	1744.194	-0.011985	-0.006433	-0.001572
7.0800	897.992	167.966	89.071	20.846	-0.506	9.859	1709.547	-0.011758	-0.006235	-0.001459
7.1200	883.235	166.799	89.677	20.359	-0.493	9.860	1681.452	-0.011676	-0.006277	-0.001425
7.1600	884.767	167.093	86.800	21.139	-0.496	9.859	1684.370	-0.011697	-0.006076	-0.001480
7.2000	779.734	154.750	80.883	16.940	-0.516	9.860	1484.413	-0.010832	-0.005662	-0.001186
7.2400	757.612	152.401	79.535	16.231	-0.509	9.859	1442.299	-0.010668	-0.005567	-0.001136
7.2800	683.973	143.382	74.141	14.036	-0.509	9.859	1302.109	-0.010037	-0.005190	-0.000983
7.3200	670.853	140.410	72.062	12.521	-0.502	9.859	1277.132	-0.009829	-0.005044	-0.000876
7.3600	619.651	133.962	66.819	10.493	-0.496	9.859	1179.657	-0.009377	-0.004677	-0.000735
7.4000	557.494	125.594	62.293	9.172	-0.513	9.859	1061.325	-0.008792	-0.004360	-0.000642
7.4400	507.539	118.967	59.072	7.381	-0.512	9.859	966.225	-0.008328	-0.004135	-0.000517
7.4800	453.888	110.521	53.651	6.226	-0.513	9.859	864.086	-0.007736	-0.003756	-0.000436
7.5200	378.040	98.497	48.573	4.072	-0.516	9.859	719.690	-0.006895	-0.003400	-0.000285
7.5600	334.532	92.007	44.707	2.476	-0.504	9.859	636.864	-0.006441	-0.003129	-0.000173
7.6000	278.987	83.142	40.856	0.612	-0.497	9.859	531.120	-0.005820	-0.002860	-0.000043
7.6400	217.191	71.996	35.404	-0.749	-0.509	9.859	413.475	-0.005040	-0.002478	0.000052
7.6800	171.670	64.145	32.915	-2.403	-0.497	9.859	326.815	-0.004490	-0.002304	0.000168
7.7200	182.325	62.701	31.579	-2.374	-0.508	9.859	347.099	-0.004389	-0.002211	0.000166
7.7600	121.430	53.445	27.012	-3.417	-0.509	9.859	231.171	-0.003741	-0.001891	0.000239
7.8000	98.000	48.971	25.002	-3.585	-0.508	9.859	186.567	-0.003428	-0.001750	0.000251
7.8400	72.257	42.787	22.016	-2.749	-0.512	9.859	137.558	-0.002995	-0.001541	0.000192
7.8800	42.230	36.045	18.605	-2.541	-0.492	9.858	80.395	-0.002523	-0.001302	0.000178
7.9200	42.185	34.808	17.244	-2.262	-0.493	9.859	80.309	-0.002437	-0.001207	0.000158
7.9600	46.242	35.351	17.642	-3.278	-0.505	9.859	88.034	-0.002475	-0.001235	0.000229
8.0000	46.152	34.850	17.712	-2.707	-0.498	9.858	87.862	-0.002439	-0.001240	0.000189
8.0400	49.383	34.101	17.573	-2.971	-0.502	9.859	94.013	-0.002387	-0.001230	0.000208
8.0800	75.803	38.979	18.907	-2.876	-0.502	9.859	144.310	-0.002729	-0.001324	0.000201
8.1200	91.778	41.604	19.899	-2.875	-0.502	9.859	174.723	-0.002912	-0.001393	0.000201
8.1600	127.877	47.789	23.844	-2.611	-0.523	9.859	243.444	-0.003345	-0.001669	0.000183
8.2000	161.330	52.944	26.009	-3.194	-0.504	9.858	307.131	-0.003706	-0.001821	0.000224
8.2400	206.791	60.032	29.351	-1.763	-0.496	9.859	393.677	-0.004202	-0.002055	0.000123
8.2800	254.100	67.884	33.312	-1.332	-0.494	9.859	483.742	-0.004752	-0.002332	0.000093
8.3200	290.078	73.595	35.901	-0.752	-0.493	9.859	552.235	-0.005152	-0.002513	0.000053
8.3600	353.603	84.143	41.309	1.072	-0.500	9.859	673.170	-0.005890	-0.002892	-0.000075
8.4000	408.382	92.801	44.778	2.058	-0.496	9.858	777.454	-0.006496	-0.003134	-0.000144
8.4400	454.399	99.402	48.987	3.558	-0.501	9.859	865.059	-0.006958	-0.003429	-0.000249
8.4800	528.699	110.752	52.949	6.059	-0.485	9.858	1006.508	-0.007753	-0.003706	-0.000424
8.5200	576.324	118.120	58.468	8.006	-0.497	9.858	1097.174	-0.008268	-0.004093	-0.000560
8.5600	602.744	122.499	61.108	10.132	-0.490	9.858	1147.470	-0.008575	-0.004278	-0.000709
8.6000	682.079	132.601	67.152	12.008	-0.487	9.858	1298.504	-0.009282	-0.004701	-0.000841
8.6400	717.411	138.532	70.054	13.370	-0.496	9.859	1365.767	-0.009697	-0.004904	-0.000936
8.6800	744.312	143.160	74.042	15.468	-0.488	9.858	1416.979	-0.010021	-0.005183	-0.001083
8.7200	791.396	149.748	78.859	16.148	-0.500	9.858	1506.615	-0.010482	-0.005520	-0.001130
8.7600	856.604	158.278	83.896	19.414	-0.493	9.858	1630.754	-0.011079	-0.005873	-0.001359
8.8000	842.117	157.363	81.584	17.996	-0.501	9.858	1603.174	-0.011015	-0.005711	-0.001260
8.8400	878.260	162.616	86.344	20.499	-0.498	9.858	1671.982	-0.011383	-0.006044	-0.001435
8.8800	916.357	168.245	87.901	21.221	-0.497	9.858	1744.509	-0.011777	-0.006153	-0.001485
8.9200	914.313	168.382	90.816	21.816	-0.499	9.858	1740.618	-0.011787	-0.006357	-0.001527
8.9600	906.964	167.909	90.638	20.776	-0.506	9.859	1726.627	-0.011754	-0.006345	-0.001454
9.0000	936.480	172.205	92.703	21.845	-0.509	9.859	1782.818	-0.012054	-0.006489	-0.001529
9.0400	881.987	166.521	87.652	20.790	-0.494	9.859	1679.077	-0.011656	-0.006136	-0.001455
9.0800	893.033	167.785	89.884	20.638	-0.493	9.858	1700.106	-0.011745	-0.006292	-0.001445
9.1200	867.034	165.283	87.970	19.374	-0.505	9.858	1650.610	-0.011570	-0.006158	-0.001356
9.1600	821.408	159.405	83.099	18.013	-0.493	9.858	1563.749	-0.011158	-0.005817	-0.001261
9.2000	804.606	157.626	83.181	17.649	-0.500	9.858	1531.763	-0.011034	-0.005823	-0.001235
9.2400	724.985	147.661	76.314	15.411	-0.491	9.859	1380.186	-0.010336	-0.005342	-0.001079
9.2800	727.676	147.883	76.920	14.826	-0.489	9.858	1385.307	-0.010352	-0.005384	-0.001038
9.3200	654.472	138.756	70.508	12.325	-0.503	9.858	1245.947	-0.009713	-0.004936	-0.000863
9.3600	616.150	133.421	67.579	11.270	-0.504	9.858	1172.991	-0.009339	-0.004731	-0.000789
9.4000	560.154	125.789	63.943	8.340	-0.501	9.858	1066.389	-0.008805	-0.004476	-0.000584
9.4400	497.876	117.371	57.918	7.589	-0.494	9.858	947.828	-0.008216	-0.004054	-0.000531
9.4800	429.782	107.278	52.964	4.976	-0.500	9.858	818.195	-0.007509	-0.003707	-0.000348
9.5200	411.899	103.862	51.314	5.170	-0.502	9.858	784.149	-0.007270	-0.003592	-0.000362
9.5600	329.558	91.047	44.020	2.740	-0.504	9.858	627.394	-0.006373	-0.003081	-0.000192
9.6000	292.393	83.865	40.565	1.196	-0.502	9.858	556.641	-0.005871	-0.002840	-0.000084
9.6400	237.900	74.831	36.205	-0.152	-0.502	9.858	452.900	-0.005238	-0.002534	0.000011
9.6800	199.367	68.092	33.301	-1.778	-0.500	9.858	379.543	-0.004766	-0.002331	0.000124
9.7200	140.230	57.613	29.063	-3.527	-0.505	9.858	266.962	-0.004033	-0.002034	0.000247
9.7600	125.833	54.238	26.960	-2.584	-0.509	9.858	239.553	-0.003797	-0.001887	0.000181
9.8000	66.801	42.565	22.776	-3.512	-0.518	9.858	127.172	-0.002980	-0.001594	0.000246
9.8400	67.162	41.214	21.150	-2.902	-0.489	9.858	127.859	-0.002885	-0.001481	0.000203
9.8800	59.948	39.701	19.582	-2.486	-0.505	9.858	114.126	-0.002779	-0.001371	0.000174
9.9200	53.276	37.283	18.398	-2.237	-0.510	9.858	101.423	-0.002610	-0.001288	0.000157
9.9600	22.708	30.473	16.803	-2.208	-0.500	9.858	43.230	-0.002133	-0.001176	0.000155
10.0000	70.318	44.053	22.664	-2.569	-0.505	9.847	133.867	-0.003084	-0.001586	0.000180
10.0400	70.228	41.367	20.572	-3.097	-0.505	9.846	133.696	-0.002896	-0.001440	0.000217
10.0800	78.103	41.229	19.608	-2.738	-0.503	9.846	148.687	-0.002886	-0.001373	0.000192
10.1200	112.578	46.635	22.018	-3.112	-0.508	9.846	214.319	-0.003264	-0.001541	0.000218
10.1600	152.072	53.432	27.053	-2.777	-0.501	9.846	289.507	-0.003740	-0.001894	0.000194
10.2000	199.607	60.198	28.512	-2.766	-0.509	9.845	380.001	-0.004214	-0.001996	0.000194
10.2400	237.870	65.925	31.512	-1.999	-0.510	9.845	452.843	-0.004615	-0.002206	0.000140
10.2800	309.735	77.375	36.480	-0.473	-0.513	9.846	589.657	-0.005416	-0.002554	0.000033
10.3200	374.012	87.547	42.491	1.614	-0.508	9.845	712.023	-0.006128	-0.002974	-0.000113
10.3600	467.609	101.247	49.538	4.461	-0.513	9.846	890.207	-0.007087	-0.003468	-0.000312
10.4000	555.525	113.324	54.834	7.061	-0.511	9.846	1057.577	-0.007933	-0.003838	-0.000494
10.4400	602.895	120.883	59.790	9.785	-0.507	9.845	1147.757	-0.008462	-0.004185	-0.000685
10.4800	658.124	128.749	63.366	11.342	-0.495	9.846	1252.899	-0.009012	-0.004436	-0.000794
10.5200	731.868	139.409	71.377	14.037	-0.508	9.845	1393.290	-0.009759	-0.004996	-0.000983
10.5600	799.211	148.663	75.612	17.039	-0.502	9.845	1521.492	-0.010406	-0.005293	-0.001193
10.6000	889.186	161.101	83.980	18.846	-0.494	9.846	1692.781	-0.011277	-0.005879	-0.001319
10.6400	937.352	168.993	90.585	22.206	-0.492	9.846	1784.477	-0.011829	-0.006341	-0.001554
10.6800	991.184	175.886	95.414	23.347	-0.498	9.845	1886.959	-0.012312	-0.006679	-0.001634
10.7200	1011.833	179.888	96.610	24.725	-0.510	9.845	1926.270	-0.012592	-0.006763	-0.001731
10.7600	1060.284	187.142	102.858	27.473	-0.514	9.845	2018.509	-0.013100	-0.007200	-0.001923
10.8000	1104.212	192.979	106.531	28.530	-0.512	9.845	2102.137	-0.013509	-0.007457	-0.001997
10.8400	1139.274	198.077	110.371	30.339	-0.509	9.845	2168.884	-0.013865	-0.007726	-0.002124
10.8800	1171.660	203.163	111.969	31.504	-0.512	9.846	2230.539	-0.014221	-0.007838	-0.002205
10.9200	1202.198	207.821	115.862	33.018	-0.506	9.845	2288.675	-0.014547	-0.008110	-0.002311
10.9600	1196.757	208.459	115.738	33.310	-0.499	9.846	2278.318	-0.014592	-0.008102	-0.002332
11.0000	1154.843	204.292	114.238	31.283	-0.502	9.845	2198.524	-0.014300	-0.007997	-0.002190
11.0400	1170.142	205.236	114.293	32.338	-0.510	9.844	2227.650	-0.014367	-0.008000	-0.002264
11.0800	1143.391	203.527	113.646	31.920	-0.506	9.845	2176.723	-0.014247	-0.007955	-0.002234
11.1200	1060.359	194.953	107.700	27.989	-0.494	9.845	2018.652	-0.013647	-0.007539	-0.001959
11.1600	1073.269	196.232	108.348	28.671	-0.501	9.845	2043.228	-0.013736	-0.007584	-0.002007
11.2000	1037.636	191.742	105.391	27.849	-0.501	9.845	1975.393	-0.013422	-0.007377	-0.001949
11.2400	1015.860	188.298	102.832	25.958	-0.502	9.845	1933.937	-0.013181	-0.007198	-0.001817
11.2800	916.598	177.999	95.029	22.486	-0.504	9.845	1744.967	-0.012460	-0.006652	-0.001574
11.3200	835.399	166.340	86.182	19.096	-0.499	9.844	1590.385	-0.011644	-0.006033	-0.001337
11.3600	805.553	163.101	86.717	18.969	-0.497	9.844	1533.566	-0.011417	-0.006070	-0.001328
11.4000	721.679	152.150	76.977	15.787	-0.508	9.844	1373.892	-0.010651	-0.005388	-0.001105
11.4400	651.106	142.256	72.312	12.980	-0.500	9.844	1239.538	-0.009958	-0.005062	-0.000909
11.4800	560.229	129.722	63.530	11.075	-0.505	9.844	1066.532	-0.009081	-0.004447	-0.000775
11.5200	515.174	122.582	61.976	9.798	-0.498	9.845	980.759	-0.008581	-0.004338	-0.000686
11.5600	431.390	110.226	52.467	7.061	-0.508	9.844	821.257	-0.007716	-0.003673	-0.000494
11.6000	361.508	99.651	50.197	4.516	-0.509	9.845	688.219	-0.006976	-0.003514	-0.000316
11.6400	298.690	88.853	44.638	1.764	-0.508	9.843	568.628	-0.006220	-0.003125	-0.000124
11.6800	260.803	81.377	41.665	1.125	-0.500	9.844	496.502	-0.005696	-0.002917	-0.000079
11.7200	199.217	70.413	35.655	-0.152	-0.508	9.844	379.257	-0.004929	-0.002496	0.000011
11.7600	163.133	63.812	32.144	-1.582	-0.496	9.844	310.564	-0.004467	-0.002250	0.000111
11.8000	135.256	56.864	27.907	-2.458	-0.509	9.844	257.492	-0.003980	-0.001953	0.000172
11.8400	89.299	48.790	25.209	-2.890	-0.512	9.844	170.002	-0.003415	-0.001765	0.000202
11.8800	57.469	41.602	20.187	-2.235	-0.516	9.844	109.406	-0.002912	-0.001413	0.000156
11.9200	52.464	38.494	18.811	-2.165	-0.508	9.844	99.878	-0.002695	-0.001317	0.000152
11.9600	89.629	45.329	23.735	-2.735	-0.513	9.844	170.631	-0.003173	-0.001661	0.000191
12.0000	51.337	37.868	18.947	-3.000	-0.504	9.844	97.733	-0.002651	-0.001326	0.000210
12.0400	60.339	38.550	18.411	-2.749	-0.508	9.845	114.870	-0.002698	-0.001289	0.000192
12.0800	89.013	43.552	21.631	-2.749	-0.508	9.844	169.458	-0.003049	-0.001514	0.000192
12.1200	129.350	49.915	23.861	-3.055	-0.514	9.844	246.248	-0.003494	-0.001670	0.000214
12.1600	175.081	56.461	26.173	-2.612	-0.508	9.844	333.309	-0.003952	-0.001832	0.000183
12.2000	202.808	61.354	30.767	-2.347	-0.501	9.844	386.095	-0.004295	-0.002154	0.000164
12.2400	257.467	70.523	35.805	-0.542	-0.521	9.844	490.150	-0.004937	-0.002506	0.000038
12.2800	311.359	78.083	38.558	1.182	-0.511	9.843	592.747	-0.005466	-0.002699	-0.000083
12.3200	380.549	89.410	43.511	2.644	-0.507	9.844	724.468	-0.006259	-0.003046	-0.000185
12.3600	446.073	99.387	47.898	4.422	-0.504	9.844	849.209	-0.006957	-0.003353	-0.000310
12.4000	505.300	109.252	54.560	6.519	-0.517	9.845	961.962	-0.007648	-0.003819	-0.000456
12.4400	584.244	120.077	58.771	9.271	-0.511	9.844	1112.251	-0.008405	-0.004114	-0.000649
12.4800	665.458	131.154	66.297	11.882	-0.504	9.844	1266.861	-0.009181	-0.004641	-0.000832
12.5200	724.024	139.743	71.501	15.108	-0.513	9.845	1378.355	-0.009782	-0.005005	-0.001058
12.5600	796.235	149.832	77.650	17.455	-0.509	9.844	1515.827	-0.010488	-0.005435	-0.001222
12.6000	897.121	163.087	84.513	20.610	-0.518	9.844	1707.888	-0.011416	-0.005916	-0.001443
12.6400	921.106	168.133	88.933	21.318	-0.521	9.845	1753.550	-0.011769	-0.006225	-0.001492
12.6800	1007.219	179.401	97.725	24.652	-0.509	9.844	1917.486	-0.012558	-0.006841	-0.001726
12.7200	1015.079	181.460	98.041	25.236	-0.522	9.844	1932.449	-0.012702	-0.006863	-0.001767
12.7600	1086.900	191.337	105.499	27.697	-0.513	9.844	2069.178	-0.013394	-0.007385	-0.001939
12.8000	1104.002	194.522	105.748	29.601	-0.505	9.845	2101.736	-0.013617	-0.007402	-0.002072
12.8400	1151.311	201.580	110.385	30.837	-0.510	9.844	2191.801	-0.014111	-0.007727	-0.002159
12.8800	1159.547	202.832	111.048	31.296	-0.517	9.845	2207.479	-0.014198	-0.007773	-0.002191
12.9200	1172.156	205.209	112.931	32.450	-0.507	9.845	2231.483	-0.014365	-0.007905	-0.002272
12.9600	1201.506	209.753	115.547	33.559	-0.497	9.845	2287.359	-0.014683	-0.008088	-0.002349
13.0000	1166.174	206.998	114.430	32.519	-0.518	9.844	2220.097	-0.014490	-0.008010	-0.002276
13.0400	1172.005	207.442	115.010	32.963	-0.508	9.845	2231.197	-0.014521	-0.008051	-0.002307
13.0800	1140.867	204.388	113.069	31.309	-0.509	9.844	2171.917	-0.014307	-0.007915	-0.002192
13.1200	1108.345	201.052	110.053	30.616	-0.507	9.844	2110.004	-0.014074	-0.007704	-0.002143
13.1600	1067.483	197.273	109.668	29.155	-0.520	9.845	2032.213	-0.013809	-0.007677	-0.002041
13.2000	1030.333	191.380	103.685	26.280	-0.510	9.845	1961.489	-0.013397	-0.007258	-0.001840
13.2400	952.140	182.056	97.268	24.543	-0.519	9.845	1812.630	-0.012744	-0.006809	-0.001718
13.2800	926.682	179.805	95.729	22.832	-0.506	9.844	1764.164	-0.012586	-0.006701	-0.001598
13.3200	867.770	172.164	90.900	21.416	-0.512	9.845	1652.012	-0.012051	-0.006363	-0.001499
13.3600	762.196	159.239	82.879	18.040	-0.519	9.845	1451.025	-0.011147	-0.005801	-0.001263
13.4000	702.232	150.401	77.236	15.523	-0.513	9.845	1336.870	-0.010528	-0.005406	-0.001087
13.4400	667.382	145.481	74.800	14.093	-0.516	9.845	1270.523	-0.010184	-0.005236	-0.000987
13.4800	570.974	132.752	67.066	11.215	-0.517	9.845	1086.988	-0.009293	-0.004695	-0.000785
13.5200	507.254	123.096	62.226	9.590	-0.509	9.845	965.681	-0.008617	-0.004356	-0.000671
13.5600	461.342	115.728	56.897	8.270	-0.505	9.845	878.277	-0.008101	-0.003983	-0.000579
13.6000	371.036	101.498	50.598	5.395	-0.519	9.845	706.358	-0.007105	-0.003542	-0.000378
13.6400	294.692	89.062	44.405	3.047	-0.521	9.845	561.018	-0.006234	-0.003108	-0.000213
13.6800	264.064	82.710	40.002	1.308	-0.512	9.845	502.710	-0.005790	-0.002800	-0.000092
13.7200	183.106	69.077	35.199	-1.221	-0.517	9.845	348.587	-0.004835	-0.002464	0.000085
13.7600	153.726	63.227	30.657	-1.764	-0.506	9.845	292.654	-0.004426	-0.002146	0.000124
13.8000	120.453	56.335	27.413	-1.638	-0.512	9.845	229.311	-0.003943	-0.001919	0.000115
13.8400	110.759	53.459	26.655	-1.817	-0.498	9.845	210.857	-0.003742	-0.001866	0.000127
13.8800	77.967	45.621	21.811	-1.361	-0.508	9.845	148.430	-0.003193	-0.001527	0.000095
13.9200	54.283	40.729	20.312	-1.540	-0.512	9.845	103.340	-0.002851	-0.001422	0.000108
13.9600	52.224	39.369	21.659	-1.680	-0.510	9.845	99.421	-0.002756	-0.001516	0.000118
14.0000	57.439	39.562	19.705	-1.526	-0.512	9.845	109.348	-0.002769	-0.001379	0.000107
14.0400	81.920	43.427	22.141	-1.721	-0.504	9.845	155.954	-0.003040	-0.001550	0.000120
14.0800	93.131	45.178	23.542	-1.861	-0.509	9.844	177.298	-0.003162	-0.001648	0.000130
14.1200	121.279	49.583	23.708	-1.958	-0.521	9.845	230.885	-0.003471	-0.001660	0.000137
14.1600	151.171	54.267	26.075	-1.638	-0.518	9.845	287.790	-0.003799	-0.001825	0.000115
14.2000	215.958	64.103	31.457	-0.999	-0.514	9.845	411.129	-0.004487	-0.002202	0.000070
14.2400	276.342	74.191	35.445	0.249	-0.504	9.845	526.085	-0.005193	-0.002481	-0.000017
14.2800	325.771	81.710	38.821	0.960	-0.502	9.845	620.184	-0.005720	-0.002717	-0.000067
14.3200	369.158	88.702	41.542	2.904	-0.505	9.845	702.782	-0.006209	-0.002908	-0.000203
14.3600	453.963	102.596	48.821	5.295	-0.508	9.845	864.229	-0.007182	-0.003417	-0.000371
14.4000	512.559	111.186	52.688	6.922	-0.514	9.845	975.780	-0.007783	-0.003688	-0.000485
14.4400	598.311	122.917	59.981	10.020	-0.527	9.845	1139.030	-0.008604	-0.004199	-0.000701
14.4800	669.966	132.461	67.879	12.661	-0.514	9.845	1275.444	-0.009272	-0.004752	-0.000886
14.5200	750.669	144.302	74.759	15.983	-0.514	9.845	1429.081	-0.010101	-0.005233	-0.001119
14.5600	806.680	152.458	80.169	17.148	-0.517	9.845	1535.711	-0.010672	-0.005612	-0.001200
14.6000	867.665	161.185	83.376	19.320	-0.525	9.846	1651.812	-0.011283	-0.005836	-0.001352
14.6400	930.379	169.923	90.968	21.553	-0.517	9.845	1771.202	-0.011895	-0.006368	-0.001509
14.6800	969.407	176.373	94.150	23.513	-0.518	9.845	1845.503	-0.012346	-0.006590	-0.001646
14.7200	1022.894	183.572	98.827	25.738	-0.517	9.846	1947.327	-0.012850	-0.006918	-0.001802
14.7600	1074.727	190.588	103.545	28.225	-0.526	9.846	2046.003	-0.013341	-0.007248	-0.001976
14.8000	1141.423	199.762	109.133	31.253	-0.507	9.846	2172.976	-0.013983	-0.007639	-0.002188
14.8400	1131.594	199.830	109.118	31.029	-0.521	9.846	2154.264	-0.013988	-0.007638	-0.002172
14.8800	1174.139	205.402	112.696	32.712	-0.518	9.846	2235.260	-0.014378	-0.007889	-0.002290
14.9200	1171.840	205.943	112.174	32.337	-0.518	9.846	2230.883	-0.014416	-0.007852	-0.002264
14.9600	1184.584	208.431	114.856	33.492	-0.517	9.846	2255.144	-0.014590	-0.008040	-0.002344
15.0000	1185.802	208.988	115.079	33.978	-0.512	9.846	2257.462	-0.014629	-0.008056	-0.002378
15.0400	1168.819	207.013	114.306	32.698	-0.509	9.846	2225.132	-0.014491	-0.008001	-0.002289
15.0800	1178.347	208.597	113.425	33.574	-0.505	9.846	2243.271	-0.014602	-0.007940	-0.002350
15.1200	1121.585	203.177	111.542	31.282	-0.516	9.846	2135.210	-0.014222	-0.007808	-0.002190
15.1600	1065.710	197.107	107.963	28.780	-0.512	9.846	2028.837	-0.013797	-0.007557	-0.002015
15.2000	1025.238	192.228	104.718	27.376	-0.504	9.846	1951.790	-0.013456	-0.007330	-0.001916
15.2400	971.572	185.877	100.132	25.474	-0.511	9.846	1849.623	-0.013011	-0.007009	-0.001783
15.2800	909.339	178.541	96.651	22.721	-0.524	9.846	1731.148	-0.012498	-0.006766	-0.001590
15.3200	858.047	171.331	90.708	20.831	-0.512	9.846	1633.501	-0.011993	-0.006350	-0.001458
15.3600	785.760	161.644	86.000	18.775	-0.515	9.846	1495.886	-0.011315	-0.006020	-0.001314
15.4000	687.399	149.332	75.364	15.620	-0.510	9.846	1308.632	-0.010453	-0.005275	-0.001093
15.4400	627.932	141.132	70.881	13.994	-0.520	9.846	1195.421	-0.009879	-0.004962	-0.000980
15.4800	570.538	132.379	67.757	11.951	-0.509	9.846	1086.159	-0.009266	-0.004743	-0.000837
15.5200	487.732	120.912	60.792	8.948	-0.520	9.846	928.516	-0.008464	-0.004255	-0.000626
15.5600	423.681	110.824	55.303	7.212	-0.520	9.846	806.580	-0.007758	-0.003871	-0.000505
15.6000	352.206	99.499	48.064	4.824	-0.522	9.847	670.509	-0.006965	-0.003365	-0.000338
15.6400	281.723	87.449	43.373	2.155	-0.525	9.846	536.327	-0.006121	-0.003036	-0.000151
15.6800	256.595	82.084	41.681	1.642	-0.511	9.846	488.491	-0.005746	-0.002918	-0.000115
15.7200	211.284	74.288	37.677	0.847	-0.512	9.845	402.231	-0.005200	-0.002637	-0.000059
15.7600	165.237	64.800	32.490	-0.777	-0.512	9.846	314.569	-0.004536	-0.002274	0.000054
15.8000	118.364	56.626	28.787	-2.263	-0.517	9.846	225.334	-0.003964	-0.002015	0.000158
15.8400	86.383	48.973	24.976	-1.513	-0.521	9.846	164.452	-0.003428	-0.001748	0.000106
15.8800	76.675	46.536	22.365	-1.498	-0.512	9.847	145.969	-0.003258	-0.001566	0.000105
15.9200	48.692	40.495	21.179	-2.055	-0.513	9.846	92.697	-0.002835	-0.001483	0.000144
15.9600	49.143	38.979	20.448	-1.193	-0.508	9.846	93.555	-0.002729	-0.001431	0.000084
16.0000	64.457	41.048	21.508	-2.056	-0.510	9.847	122.709	-0.002873	-0.001506	0.000144
16.0400	70.528	42.466	20.339	-1.513	-0.532	9.847	134.268	-0.002973	-0.001424	0.000106
16.0800	93.236	45.247	22.594	-1.888	-0.517	9.846	177.498	-0.003167	-0.001582	0.000132
16.1200	133.287	51.844	23.998	-2.332	-0.505	9.846	253.744	-0.003629	-0.001680	0.000163
16.1600	147.970	54.600	27.977	-1.681	-0.504	9.846	281.696	-0.003822	-0.001958	0.000118
16.2000	222.541	65.313	31.525	-0.374	-0.502	9.847	423.660	-0.004572	-0.002207	0.000026
16.2400	247.383	69.745	34.110	0.223	-0.513	9.847	470.953	-0.004882	-0.002388	-0.000016
16.2800	306.099	79.042	37.127	1.142	-0.517	9.847	582.733	-0.005533	-0.002599	-0.000080
16.3200	396.570	92.634	44.172	3.738	-0.507	9.847	754.967	-0.006484	-0.003092	-0.000262
16.3600	448.853	101.594	50.116	5.325	-0.518	9.847	854.502	-0.007112	-0.003508	-0.000373
16.4000	518.570	111.657	53.884	8.089	-0.519	9.847	987.225	-0.007816	-0.003772	-0.000566
16.4400	588.452	121.663	60.202	10.075	-0.517	9.847	1120.262	-0.008516	-0.004214	-0.000705
16.4800	657.297	131.487	65.774	12.675	-0.514	9.847	1251.326	-0.009204	-0.004604	-0.000887
16.5200	719.455	140.370	72.572	14.843	-0.531	9.847	1369.658	-0.009826	-0.005080	-0.001039
16.5600	795.078	151.096	79.685	17.316	-0.535	9.847	1513.624	-0.010577	-0.005578	-0.001212
16.6000	871.242	162.117	85.410	20.109	-0.526	9.847	1658.621	-0.011348	-0.005979	-0.001408
16.6400	928.635	169.883	90.103	22.040	-0.526	9.847	1767.883	-0.011892	-0.006307	-0.001543
16.6800	978.590	177.068	93.930	24.444	-0.520	9.847	1862.984	-0.012395	-0.006575	-0.001711
16.7200	1028.259	184.794	99.239	25.862	-0.534	9.847	1957.541	-0.012936	-0.006947	-0.001810
16.7600	1082.030	192.061	103.463	28.197	-0.525	9.847	2059.908	-0.013444	-0.007242	-0.001974
16.8000	1102.063	195.535	106.405	30.212	-0.517	9.847	2098.045	-0.013687	-0.007448	-0.002115
16.8400	1141.393	201.220	111.020	31.113	-0.526	9.847	2172.918	-0.014085	-0.007771	-0.002178
16.8800	1174.004	205.873	113.508	33.379	-0.523	9.848	2235.003	-0.014411	-0.007946	-0.002337
16.9200	1188.672	207.763	114.334	33.587	-0.529	9.847	2262.926	-0.014543	-0.008003	-0.002351
16.9600	1182.420	208.389	114.622	34.017	-0.522	9.848	2251.024	-0.014587	-0.008024	-0.002381
17.0000	1181.609	209.056	115.051	33.770	-0.517	9.848	2249.479	-0.014634	-0.008054	-0.002364
17.0400	1177.536	208.682	115.435	34.214	-0.524	9.847	2241.726	-0.014608	-0.008080	-0.002395
17.0800	1136.764	205.015	113.054	31.798	-0.520	9.848	2164.106	-0.014351	-0.007914	-0.002226
17.1200	1100.485	201.594	112.533	30.616	-0.511	9.848	2095.041	-0.014112	-0.007877	-0.002143
17.1600	1074.772	198.439	109.216	29.739	-0.512	9.848	2046.089	-0.013891	-0.007645	-0.002082
17.2000	1026.636	192.562	104.524	27.918	-0.517	9.848	1954.451	-0.013479	-0.007317	-0.001954
17.2400	971.031	186.602	100.984	25.318	-0.518	9.847	1848.593	-0.013062	-0.007069	-0.001772
17.2800	918.792	180.124	97.299	23.402	-0.521	9.848	1749.144	-0.012609	-0.006811	-0.001638
17.3200	833.040	169.161	89.540	20.582	-0.521	9.848	1585.894	-0.011841	-0.006268	-0.001441
17.3600	778.336	161.462	84.898	19.011	-0.518	9.848	1481.752	-0.011302	-0.005943	-0.001331
17.4000	730.336	154.554	80.594	16.969	-0.521	9.848	1390.371	-0.010819	-0.005642	-0.001188
17.4400	605.014	138.409	70.039	13.689	-0.509	9.848	1151.791	-0.009689	-0.004903	-0.000958
17.4800	560.169	131.237	64.343	11.633	-0.527	9.848	1066.418	-0.009187	-0.004504	-0.000814
17.5200	499.665	122.485	59.445	9.589	-0.530	9.849	951.233	-0.008574	-0.004161	-0.000671
17.5600	445.562	114.450	56.308	8.173	-0.519	9.849	848.236	-0.008012	-0.003942	-0.000572
17.6000	369.669	102.263	49.262	6.058	-0.518	9.848	703.754	-0.007158	-0.003448	-0.000424
17.6400	310.427	91.924	43.495	4.393	-0.522	9.848	590.973	-0.006435	-0.003045	-0.000308
17.6800	237.749	80.041	39.287	1.891	-0.530	9.848	452.614	-0.005603	-0.002750	-0.000132
17.7200	214.035	75.110	38.145	1.087	-0.516	9.849	407.467	-0.005258	-0.002670	-0.000076
17.7600	149.082	63.087	30.932	-0.513	-0.518	9.849	283.813	-0.004416	-0.002165	0.000036
17.8000	116.410	56.584	28.374	-1.389	-0.528	9.849	221.615	-0.003961	-0.001986	0.000097
17.8400	82.792	49.498	23.682	-1.512	-0.520	9.849	157.614	-0.003465	-0.001658	0.000106
17.8800	69.341	45.579	22.882	-1.678	-0.526	9.849	132.008	-0.003191	-0.001602	0.000117
17.9200	47.189	40.700	19.773	-1.207	-0.532	9.849	89.836	-0.002849	-0.001384	0.000085
17.9600	50.961	40.410	20.021	-2.028	-0.530	9.850	97.017	-0.002829	-0.001401	0.000142
18.0000	86.158	45.079	22.444	-1.376	-0.517	9.850	164.022	-0.003156	-0.001571	0.000096
18.0400	77.141	44.066	22.886	-1.971	-0.526	9.849	146.856	-0.003085	-0.001602	0.000138
18.0800	79.245	44.037	21.136	-0.943	-0.526	9.849	150.862	-0.003083	-0.001480	0.000066
18.1200	138.021	52.595	25.885	-1.319	-0.521	9.850	262.756	-0.003682	-0.001812	0.000092
18.1600	166.500	56.779	27.192	-1.053	-0.506	9.849	316.973	-0.003974	-0.001903	0.000074
18.2000	203.936	63.131	31.898	-0.374	-0.506	9.849	388.241	-0.004419	-0.002233	0.000026
18.2400	270.511	72.776	36.465	1.085	-0.513	9.850	514.984	-0.005094	-0.002553	-0.000076
18.2800	304.551	79.598	36.947	2.015	-0.513	9.849	579.786	-0.005572	-0.002586	-0.000141
18.3200	407.240	94.982	44.213	4.628	-0.510	9.850	775.280	-0.006649	-0.003095	-0.000324
18.3600	439.115	101.193	48.327	5.616	-0.521	9.850	835.962	-0.007083	-0.003383	-0.000393
18.4000	516.662	111.479	53.982	8.229	-0.520	9.850	983.591	-0.007803	-0.003779	-0.000576
18.4400	587.746	122.012	60.022	10.881	-0.527	9.850	1118.917	-0.008541	-0.004202	-0.000762
18.4800	634.995	128.402	64.286	12.465	-0.534	9.850	1208.868	-0.008988	-0.004500	-0.000873
18.5200	771.002	147.355	75.613	16.705	-0.520	9.850	1467.791	-0.010315	-0.005293	-0.001169
18.5600	798.910	151.693	78.969	18.121	-0.523	9.851	1520.920	-0.010619	-0.005528	-0.001268
18.6000	875.735	162.712	86.264	20.096	-0.517	9.851	1667.175	-0.011390	-0.006038	-0.001407
18.6400	906.408	167.438	89.855	21.040	-0.522	9.850	1725.569	-0.011721	-0.006290	-0.001473
18.6800	1018.806	182.291	98.467	25.460	-0.513	9.850	1939.545	-0.012760	-0.006893	-0.001782
18.7200	1027.778	184.461	99.623	26.725	-0.514	9.850	1956.625	-0.012912	-0.006974	-0.001871
18.7600	1072.292	190.700	104.248	27.794	-0.513	9.851	2041.368	-0.013349	-0.007297	-0.001946
18.8000	1115.589	197.300	107.219	30.530	-0.522	9.851	2123.795	-0.013811	-0.007505	-0.002137
18.8400	1129.806	200.151	109.091	31.211	-0.513	9.851	2150.860	-0.014011	-0.007636	-0.002185
18.8800	1159.502	204.180	111.978	32.395	-0.508	9.851	2207.394	-0.014293	-0.007838	-0.002268
18.9200	1186.147	207.972	113.384	33.352	-0.509	9.851	2258.120	-0.014558	-0.007937	-0.002335
18.9600	1197.689	210.516	115.958	34.741	-0.510	9.851	2280.092	-0.014736	-0.008117	-0.002432
19.0000	1175.537	208.764	115.134	33.838	-0.506	9.852	2237.921	-0.014613	-0.008059	-0.002369
19.0400	1178.377	209.307	115.050	33.852	-0.520	9.852	2243.328	-0.014651	-0.008053	-0.002370
19.0800	1137.380	205.764	114.512	31.657	-0.522	9.852	2165.279	-0.014403	-0.008016	-0.002216
19.1200	1105.655	201.649	111.049	31.103	-0.522	9.852	2104.883	-0.014115	-0.007773	-0.002177
19.1600	1089.995	200.373	108.912	29.932	-0.516	9.852	2075.071	-0.014026	-0.007624	-0.002095
19.2000	1034.661	194.356	104.084	28.265	-0.522	9.852	1969.728	-0.013605	-0.007286	-0.001979
19.2400	932.888	182.364	97.737	24.085	-0.517	9.852	1775.980	-0.012765	-0.006842	-0.001686
19.2800	923.270	179.928	95.894	23.583	-0.516	9.852	1757.669	-0.012595	-0.006713	-0.001651
19.3200	847.332	171.205	90.240	20.888	-0.520	9.852	1613.102	-0.011984	-0.006317	-0.001462
19.3600	775.316	161.978	82.974	18.248	-0.514	9.851	1476.002	-0.011338	-0.005808	-0.001277
19.4000	711.295	151.982	77.884	16.551	-0.511	9.853	1354.122	-0.010639	-0.005452	-0.001159
19.4400	645.771	143.996	72.396	13.926	-0.512	9.853	1229.382	-0.010080	-0.005068	-0.000975
19.4800	582.170	134.655	67.839	12.312	-0.502	9.852	1108.303	-0.009426	-0.004749	-0.000862
19.5200	516.451	124.649	61.427	9.727	-0.519	9.853	983.191	-0.008725	-0.004300	-0.000681
19.5600	432.007	112.254	55.853	7.700	-0.516	9.852	822.430	-0.007858	-0.003910	-0.000539
19.6000	378.100	103.515	49.552	5.794	-0.516	9.852	719.805	-0.007246	-0.003469	-0.000406
19.6400	311.975	92.827	45.808	3.351	-0.518	9.853	593.920	-0.006498	-0.003207	-0.000235
19.6800	242.048	79.791	38.557	1.629	-0.508	9.852	460.796	-0.005585	-0.002699	-0.000114
19.7200	207.813	74.011	37.482	0.542	-0.508	9.853	395.622	-0.005181	-0.002624	-0.000038
19.7600	166.890	64.674	30.754	-0.207	-0.513	9.853	317.717	-0.004527	-0.002153	0.000014
19.8000	124.300	57.516	29.587	-1.290	-0.511	9.853	236.635	-0.004026	-0.002071	0.000090
19.8400	110.459	54.224	28.569	-1.889	-0.517	9.853	210.285	-0.003796	-0.002000	0.000132
19.8800	59.573	44.512	21.619	-1.902	-0.508	9.853	113.411	-0.003116	-0.001513	0.000133
19.9200	46.874	40.465	19.004	-1.597	-0.512	9.853	89.235	-0.002833	-0.001330	0.000112
19.9600	37.000	37.172	18.769	-1.835	-0.517	9.853	70.438	-0.002602	-0.001314	0.000128
Test Cycles
Time (sec)	Axial stress (kPa)	Axial micro-strain #1	Axial micro-strain #2	Axial micro-strain #3	Confining pressure (kPa)	Temperature (�C)	Load (N)	Displacement #1 (mm)	Displacement #2 (mm)	Displacement #3 (mm)
0.0000	76.645	44.705	22.584	-2.500	-0.510	9.853	145.912	-0.003129	-0.001581	0.000175
0.0400	63.360	40.826	18.962	-1.803	-0.506	9.854	120.621	-0.002858	-0.001327	0.000126
0.0800	83.753	44.899	20.721	-2.264	-0.512	9.853	159.445	-0.003143	-0.001450	0.000158
0.1200	150.059	54.793	25.650	-1.971	-0.504	9.853	285.673	-0.003835	-0.001795	0.000138
0.1600	149.247	55.489	25.565	-2.153	-0.516	9.853	284.128	-0.003884	-0.001790	0.000151
0.2000	202.643	62.673	29.847	-0.485	-0.514	9.853	385.780	-0.004387	-0.002089	0.000034
0.2400	254.311	71.678	34.497	-0.360	-0.528	9.854	484.142	-0.005017	-0.002415	0.000025
0.2800	323.697	82.127	38.352	1.669	-0.510	9.853	616.236	-0.005749	-0.002685	-0.000117
0.3200	381.827	91.257	42.658	3.559	-0.510	9.853	726.900	-0.006388	-0.002986	-0.000249
0.3600	472.583	104.864	50.184	5.880	-0.500	9.854	899.677	-0.007340	-0.003513	-0.000412
0.4000	520.840	112.143	53.099	7.422	-0.501	9.854	991.545	-0.007850	-0.003717	-0.000520
0.4400	610.379	124.789	62.415	11.006	-0.504	9.854	1162.004	-0.008735	-0.004369	-0.000770
0.4800	667.923	132.792	67.689	13.369	-0.509	9.854	1271.553	-0.009295	-0.004738	-0.000936
0.5200	738.661	143.620	71.978	16.247	-0.498	9.854	1406.221	-0.010053	-0.005038	-0.001137
0.5600	784.934	150.347	77.167	17.287	-0.488	9.854	1494.312	-0.010524	-0.005402	-0.001210
0.6000	875.059	162.560	84.830	20.180	-0.500	9.855	1665.888	-0.011379	-0.005938	-0.001413
0.6400	947.782	172.357	91.409	22.539	-0.488	9.854	1804.333	-0.012065	-0.006399	-0.001578
0.6800	971.496	176.957	94.272	23.555	-0.510	9.854	1849.480	-0.012387	-0.006599	-0.001649
0.7200	1023.630	184.252	99.034	25.903	-0.509	9.854	1948.729	-0.012898	-0.006932	-0.001813
0.7600	1079.731	192.058	105.267	28.351	-0.509	9.855	2055.531	-0.013444	-0.007369	-0.001985
0.8000	1115.273	197.869	107.328	30.044	-0.513	9.855	2123.194	-0.013851	-0.007513	-0.002103
0.8400	1150.470	202.829	111.460	31.630	-0.501	9.855	2190.199	-0.014198	-0.007802	-0.002214
0.8800	1187.650	207.359	113.590	33.769	-0.506	9.855	2260.981	-0.014515	-0.007951	-0.002364
0.9200	1167.527	206.247	113.660	32.600	-0.518	9.855	2222.672	-0.014437	-0.007956	-0.002282
0.9600	1190.085	209.766	115.628	33.907	-0.523	9.856	2265.615	-0.014684	-0.008094	-0.002374
1.0000	1185.907	209.544	113.975	34.464	-0.520	9.855	2257.662	-0.014668	-0.007978	-0.002412
1.0400	1169.706	208.598	114.664	33.534	-0.513	9.856	2226.820	-0.014602	-0.008026	-0.002347
1.0800	1115.454	203.291	111.182	31.617	-0.518	9.856	2123.537	-0.014230	-0.007783	-0.002213
1.1200	1136.328	205.222	112.382	31.770	-0.510	9.856	2163.277	-0.014366	-0.007867	-0.002224
1.1600	1086.058	200.039	109.159	29.781	-0.508	9.855	2067.575	-0.014003	-0.007641	-0.002085
1.2000	1024.487	193.437	105.047	27.251	-0.506	9.856	1950.359	-0.013541	-0.007353	-0.001908
1.2400	955.040	184.419	98.747	24.933	-0.505	9.856	1818.151	-0.012909	-0.006912	-0.001745
1.2800	921.858	180.442	95.797	23.806	-0.505	9.856	1754.980	-0.012631	-0.006706	-0.001666
1.3200	867.365	172.942	90.927	21.165	-0.505	9.856	1651.239	-0.012106	-0.006365	-0.001482
1.3600	802.412	164.281	86.416	18.860	-0.514	9.855	1527.586	-0.011500	-0.006049	-0.001320
1.4000	721.619	154.221	79.370	16.994	-0.504	9.856	1373.777	-0.010795	-0.005556	-0.001190
1.4400	669.260	146.259	75.530	14.802	-0.511	9.855	1274.099	-0.010238	-0.005287	-0.001036
1.4800	569.186	132.906	65.181	12.313	-0.509	9.856	1083.584	-0.009303	-0.004563	-0.000862
1.5200	503.963	123.539	60.930	10.105	-0.522	9.856	959.415	-0.008648	-0.004265	-0.000707
1.5600	423.185	111.783	54.986	7.465	-0.510	9.856	805.635	-0.007825	-0.003849	-0.000523
1.6000	352.266	99.693	49.593	4.752	-0.501	9.856	670.624	-0.006979	-0.003471	-0.000333
1.6400	284.608	88.911	44.335	3.310	-0.510	9.856	541.821	-0.006224	-0.003103	-0.000232
1.6800	277.950	86.213	43.375	2.795	-0.506	9.856	529.146	-0.006035	-0.003036	-0.000196
1.7200	210.533	74.580	38.187	0.681	-0.511	9.856	400.801	-0.005221	-0.002673	-0.000048
1.7600	176.524	67.438	32.971	-0.444	-0.510	9.856	336.056	-0.004721	-0.002308	0.000031
1.8000	117.312	57.209	27.674	-1.777	-0.509	9.856	223.331	-0.004005	-0.001937	0.000124
1.8400	90.170	51.165	24.505	-1.346	-0.501	9.856	171.661	-0.003582	-0.001715	0.000094
1.8800	79.064	48.247	22.829	-1.459	-0.494	9.856	150.518	-0.003377	-0.001598	0.000102
1.9200	46.393	40.686	19.760	-1.236	-0.510	9.856	88.320	-0.002848	-0.001383	0.000087
1.9600	69.371	43.565	21.990	-1.053	-0.510	9.857	132.065	-0.003050	-0.001539	0.000074
2.0000	66.020	42.605	20.533	-1.485	-0.513	9.857	125.685	-0.002982	-0.001437	0.000104
2.0400	59.242	41.117	20.297	-2.180	-0.513	9.857	112.782	-0.002878	-0.001421	0.000153
2.0800	87.285	45.093	21.715	-1.986	-0.500	9.857	166.168	-0.003156	-0.001520	0.000139
2.1200	112.533	49.082	23.944	-1.874	-0.508	9.856	214.233	-0.003436	-0.001676	0.000131
2.1600	183.271	60.173	27.824	-1.263	-0.500	9.857	348.902	-0.004212	-0.001948	0.000088
2.2000	221.985	65.589	30.782	-0.206	-0.504	9.857	422.602	-0.004591	-0.002155	0.000014
2.2400	232.955	68.952	32.928	-0.514	-0.504	9.858	443.487	-0.004827	-0.002305	0.000036
2.2800	332.864	83.696	40.497	1.987	-0.500	9.857	633.688	-0.005859	-0.002835	-0.000139
2.3200	461.733	103.569	48.671	5.712	-0.504	9.857	879.021	-0.007250	-0.003407	-0.000400
2.3600	451.634	102.583	47.968	5.727	-0.517	9.857	859.795	-0.007181	-0.003358	-0.000401
2.4000	521.275	113.641	54.203	7.713	-0.510	9.858	992.374	-0.007955	-0.003794	-0.000540
2.4400	566.466	120.313	58.249	9.535	-0.502	9.857	1078.405	-0.008422	-0.004077	-0.000667
2.4800	624.911	128.681	64.838	11.881	-0.512	9.858	1189.671	-0.009008	-0.004539	-0.000832
2.5200	757.086	145.843	74.938	15.969	-0.500	9.857	1441.298	-0.010209	-0.005246	-0.001118
2.5600	798.685	152.331	79.356	17.525	-0.518	9.858	1520.491	-0.010663	-0.005555	-0.001227
2.6000	884.136	163.837	84.860	20.957	-0.505	9.857	1683.168	-0.011469	-0.005940	-0.001467
2.6400	917.199	169.771	88.809	22.027	-0.512	9.858	1746.111	-0.011884	-0.006217	-0.001542
2.6800	988.238	179.831	96.117	24.973	-0.513	9.858	1881.351	-0.012588	-0.006728	-0.001748
2.7200	1006.678	183.641	99.032	25.528	-0.516	9.858	1916.456	-0.012855	-0.006932	-0.001787
2.7600	1106.722	195.245	106.474	29.308	-0.517	9.858	2106.915	-0.013667	-0.007453	-0.002052
2.8000	1125.688	199.483	109.366	30.754	-0.508	9.858	2143.021	-0.013964	-0.007656	-0.002153
2.8400	1173.674	205.485	113.245	33.061	-0.509	9.858	2234.373	-0.014384	-0.007927	-0.002314
2.8800	1182.856	207.221	113.619	33.854	-0.509	9.858	2251.854	-0.014505	-0.007953	-0.002370
2.9200	1163.830	206.915	114.787	33.311	-0.520	9.858	2215.633	-0.014484	-0.008035	-0.002332
2.9600	1199.267	210.614	114.487	34.242	-0.524	9.858	2283.096	-0.014743	-0.008014	-0.002397
3.0000	1181.894	209.822	115.285	33.644	-0.508	9.858	2250.023	-0.014688	-0.008070	-0.002355
3.0400	1163.274	207.623	114.348	33.185	-0.519	9.858	2214.575	-0.014534	-0.008004	-0.002323
3.0800	1162.207	207.876	114.224	33.464	-0.509	9.858	2212.543	-0.014551	-0.007996	-0.002342
3.1200	1085.983	200.471	109.822	30.269	-0.502	9.858	2067.432	-0.014033	-0.007688	-0.002119
3.1600	1062.493	197.383	106.737	29.211	-0.517	9.859	2022.715	-0.013817	-0.007472	-0.002045
3.2000	1038.027	194.858	106.147	28.266	-0.519	9.859	1976.137	-0.013640	-0.007430	-0.001979
3.2400	975.088	187.588	100.791	25.418	-0.517	9.859	1856.318	-0.013131	-0.007055	-0.001779
3.2800	920.700	179.206	96.651	23.027	-0.512	9.859	1752.777	-0.012544	-0.006766	-0.001612
3.3200	858.272	172.816	90.942	21.344	-0.526	9.859	1633.930	-0.012097	-0.006366	-0.001494
3.3600	821.783	167.356	88.272	19.596	-0.513	9.859	1564.465	-0.011715	-0.006179	-0.001372
3.4000	726.037	154.570	79.975	16.662	-0.510	9.859	1382.189	-0.010820	-0.005598	-0.001166
3.4400	657.252	145.663	74.635	14.857	-0.516	9.859	1251.240	-0.010196	-0.005224	-0.001040
3.4800	584.380	135.365	68.952	12.799	-0.509	9.859	1112.509	-0.009476	-0.004827	-0.000896
3.5200	471.652	119.258	58.510	9.519	-0.510	9.859	897.903	-0.008348	-0.004096	-0.000666
3.5600	432.082	113.156	54.478	7.686	-0.520	9.859	822.573	-0.007921	-0.003813	-0.000538
3.6000	331.331	97.620	47.859	5.004	-0.506	9.860	630.770	-0.006833	-0.003350	-0.000350
3.6400	286.216	89.411	42.519	3.531	-0.510	9.859	544.882	-0.006259	-0.002976	-0.000247
3.6800	257.016	82.878	39.122	1.989	-0.509	9.859	489.292	-0.005801	-0.002739	-0.000139
3.7200	207.753	74.191	34.881	1.253	-0.523	9.859	395.508	-0.005193	-0.002442	-0.000088
3.7600	166.650	66.217	33.246	-0.818	-0.504	9.859	317.259	-0.004635	-0.002327	0.000057
3.8000	140.185	60.255	28.086	-0.569	-0.513	9.859	266.876	-0.004218	-0.001966	0.000040
3.8400	83.633	50.042	25.181	-1.569	-0.522	9.859	159.216	-0.003503	-0.001763	0.000110
3.8800	67.072	45.856	23.379	-1.541	-0.519	9.860	127.687	-0.003210	-0.001637	0.000108
3.9200	53.201	42.689	19.319	-1.567	-0.519	9.860	101.280	-0.002988	-0.001352	0.000110
3.9600	28.960	36.309	18.563	-0.943	-0.521	9.859	55.132	-0.002542	-0.001299	0.000066
4.0000	72.151	43.831	19.788	-1.902	-0.510	9.860	137.358	-0.003068	-0.001385	0.000133
4.0400	55.560	40.451	18.137	-1.027	-0.518	9.860	105.772	-0.002832	-0.001270	0.000072
4.0800	99.623	47.414	23.571	-2.013	-0.514	9.860	189.657	-0.003319	-0.001650	0.000141
4.1200	179.529	60.060	28.457	-1.292	-0.500	9.859	341.778	-0.004204	-0.001992	0.000090
4.1600	162.758	58.308	28.361	-1.844	-0.525	9.859	309.849	-0.004082	-0.001985	0.000129
4.2000	214.215	65.896	32.268	-0.652	-0.516	9.860	407.810	-0.004613	-0.002259	0.000046
4.2400	302.191	78.680	38.875	1.224	-0.512	9.860	575.294	-0.005508	-0.002721	-0.000086
4.2800	286.246	77.667	36.837	1.041	-0.510	9.860	544.939	-0.005437	-0.002579	-0.000073
4.3200	400.462	94.690	44.888	4.252	-0.508	9.860	762.377	-0.006628	-0.003142	-0.000298
4.3600	410.351	98.164	48.823	4.420	-0.514	9.860	781.202	-0.006871	-0.003418	-0.000309
4.4000	516.226	111.519	54.519	8.367	-0.512	9.860	982.761	-0.007806	-0.003816	-0.000586
4.4400	614.692	125.762	62.404	11.509	-0.498	9.860	1170.216	-0.008803	-0.004368	-0.000806
4.4800	626.294	129.207	64.923	12.244	-0.513	9.860	1192.303	-0.009044	-0.004545	-0.000857
4.5200	712.332	140.383	72.228	15.108	-0.505	9.860	1356.096	-0.009827	-0.005056	-0.001058
4.5600	796.415	152.288	78.281	17.815	-0.506	9.860	1516.171	-0.010660	-0.005480	-0.001247
4.6000	894.220	165.589	86.579	20.956	-0.502	9.860	1702.366	-0.011591	-0.006061	-0.001467
4.6400	895.633	167.312	87.954	21.179	-0.504	9.861	1705.055	-0.011712	-0.006157	-0.001483
4.6800	950.141	174.539	91.961	23.346	-0.499	9.860	1808.825	-0.012218	-0.006437	-0.001634
4.7200	1044.279	187.767	100.369	26.945	-0.501	9.860	1988.039	-0.013144	-0.007026	-0.001886
4.7600	1076.199	192.158	103.863	28.406	-0.510	9.861	2048.807	-0.013451	-0.007270	-0.001988
4.8000	1114.702	197.661	106.833	30.461	-0.500	9.861	2122.107	-0.013836	-0.007478	-0.002132
4.8400	1151.386	203.178	110.589	32.087	-0.508	9.861	2191.944	-0.014222	-0.007741	-0.002246
4.8800	1167.647	205.915	112.738	33.281	-0.504	9.861	2222.900	-0.014414	-0.007892	-0.002330
4.9200	1186.117	208.764	114.060	34.075	-0.505	9.861	2258.062	-0.014613	-0.007984	-0.002385
4.9600	1180.466	209.099	114.458	33.811	-0.498	9.861	2247.305	-0.014637	-0.008012	-0.002367
5.0000	1172.020	208.834	115.051	33.463	-0.511	9.861	2231.226	-0.014618	-0.008054	-0.002342
5.0400	1177.175	209.418	114.747	34.298	-0.502	9.861	2241.039	-0.014659	-0.008032	-0.002401
5.0800	1145.961	206.722	113.509	32.798	-0.504	9.861	2181.616	-0.014471	-0.007946	-0.002296
5.1200	1105.309	202.817	111.554	30.963	-0.520	9.861	2104.225	-0.014197	-0.007809	-0.002167
5.1600	1071.000	198.259	107.190	29.712	-0.510	9.861	2038.908	-0.013878	-0.007503	-0.002080
5.2000	1027.237	194.134	104.249	27.725	-0.501	9.861	1955.595	-0.013589	-0.007297	-0.001941
5.2400	967.739	186.739	100.204	25.349	-0.505	9.862	1842.327	-0.013072	-0.007014	-0.001774
5.2800	916.402	180.290	95.771	23.722	-0.508	9.862	1744.595	-0.012620	-0.006704	-0.001661
5.3200	860.542	173.123	91.051	21.206	-0.492	9.862	1638.250	-0.012119	-0.006374	-0.001484
5.3600	807.597	166.201	86.704	19.458	-0.502	9.861	1537.457	-0.011634	-0.006069	-0.001362
5.4000	752.397	158.195	81.585	17.651	-0.510	9.862	1432.371	-0.011074	-0.005711	-0.001236
5.4400	607.944	139.660	69.462	13.397	-0.526	9.862	1157.370	-0.009776	-0.004862	-0.000938
5.4800	579.766	134.197	65.872	12.467	-0.499	9.861	1103.725	-0.009394	-0.004611	-0.000873
5.5200	513.040	126.415	63.172	10.924	-0.521	9.861	976.696	-0.008849	-0.004422	-0.000765
5.5600	469.292	118.246	57.919	8.993	-0.509	9.862	893.412	-0.008277	-0.004054	-0.000629
5.6000	357.781	101.692	48.796	5.559	-0.512	9.862	681.124	-0.007118	-0.003416	-0.000389
5.6400	322.810	95.218	46.085	4.587	-0.498	9.862	614.548	-0.006665	-0.003226	-0.000321
5.6800	263.643	84.336	41.915	2.737	-0.504	9.862	501.909	-0.005904	-0.002934	-0.000192
5.7200	236.833	78.028	37.169	1.668	-0.514	9.862	450.869	-0.005462	-0.002602	-0.000117
5.7600	165.493	66.759	32.446	-0.139	-0.508	9.862	315.056	-0.004673	-0.002271	0.000010
5.8000	111.556	56.502	27.729	-1.374	-0.504	9.863	212.374	-0.003955	-0.001941	0.000096
5.8400	92.184	52.414	24.920	-1.458	-0.518	9.862	175.495	-0.003669	-0.001744	0.000102
5.8800	69.341	46.618	24.398	-1.819	-0.510	9.863	132.008	-0.003263	-0.001708	0.000127
5.9200	56.642	43.397	21.397	-1.471	-0.518	9.863	107.832	-0.003038	-0.001498	0.000103
5.9600	59.573	43.342	21.330	-1.457	-0.499	9.863	113.411	-0.003034	-0.001493	0.000102
6.0000	44.168	39.452	18.438	-1.514	-0.510	9.863	84.085	-0.002762	-0.001291	0.000106
6.0400	100.255	47.997	23.146	-1.736	-0.511	9.863	190.859	-0.003360	-0.001620	0.000122
6.0800	49.218	39.619	20.089	-1.513	-0.505	9.862	93.699	-0.002773	-0.001406	0.000106
6.1200	133.527	53.321	26.393	-1.624	-0.502	9.864	254.202	-0.003732	-0.001848	0.000114
6.1600	162.081	57.140	26.199	-1.027	-0.509	9.862	308.561	-0.004000	-0.001834	0.000072
6.2000	169.566	59.227	26.642	-1.277	-0.518	9.863	322.809	-0.004146	-0.001865	0.000089
6.2400	297.623	77.987	37.800	1.459	-0.513	9.863	566.597	-0.005459	-0.002646	-0.000102
6.2800	302.852	80.180	39.026	1.598	-0.518	9.863	576.553	-0.005613	-0.002732	-0.000112
6.3200	370.105	90.645	43.429	3.323	-0.520	9.863	704.584	-0.006345	-0.003040	-0.000233
6.3600	435.989	101.080	46.813	5.559	-0.512	9.864	830.011	-0.007076	-0.003277	-0.000389
6.4000	506.007	111.130	52.206	8.506	-0.522	9.863	963.306	-0.007779	-0.003654	-0.000595
6.4400	612.137	125.468	61.304	11.605	-0.514	9.864	1165.352	-0.008783	-0.004291	-0.000812
6.4800	674.490	134.891	67.783	13.966	-0.516	9.863	1284.056	-0.009442	-0.004745	-0.000978
6.5200	736.602	143.536	71.899	15.759	-0.510	9.864	1402.302	-0.010048	-0.005033	-0.001103
6.5600	813.007	154.167	79.232	18.302	-0.506	9.864	1547.756	-0.010792	-0.005546	-0.001281
6.6000	879.417	164.128	84.376	20.831	-0.508	9.864	1674.185	-0.011489	-0.005906	-0.001458
6.6400	924.908	170.870	90.693	22.278	-0.514	9.863	1760.788	-0.011961	-0.006348	-0.001559
6.6800	1030.633	184.029	99.088	26.195	-0.509	9.863	1962.061	-0.012882	-0.006936	-0.001834
6.7200	1043.678	188.059	99.568	26.975	-0.501	9.863	1986.895	-0.013164	-0.006970	-0.001888
6.7600	1084.209	193.897	106.133	29.002	-0.501	9.864	2064.056	-0.013573	-0.007429	-0.002030
6.8000	1136.719	200.150	107.591	31.239	-0.494	9.864	2164.021	-0.014010	-0.007531	-0.002187
6.8400	1146.743	202.984	111.156	32.032	-0.516	9.864	2183.104	-0.014209	-0.007781	-0.002242
6.8800	1179.580	207.874	114.045	33.850	-0.513	9.864	2245.617	-0.014551	-0.007983	-0.002370
6.9200	1174.696	207.887	112.682	33.643	-0.515	9.864	2236.319	-0.014552	-0.007888	-0.002355
6.9600	1214.055	213.016	116.565	35.310	-0.512	9.865	2311.249	-0.014911	-0.008160	-0.002472
7.0000	1182.585	210.140	115.423	34.116	-0.514	9.865	2251.339	-0.014710	-0.008080	-0.002388
7.0400	1165.107	209.126	113.453	33.783	-0.518	9.864	2218.065	-0.014639	-0.007942	-0.002365
7.0800	1134.765	206.430	113.012	32.351	-0.522	9.865	2160.301	-0.014450	-0.007911	-0.002265
7.1200	1126.620	205.250	112.201	32.060	-0.505	9.865	2144.794	-0.014368	-0.007854	-0.002244
7.1600	1083.744	200.026	109.806	30.002	-0.510	9.865	2063.169	-0.014002	-0.007686	-0.002100
7.2000	1020.083	193.467	104.139	27.531	-0.510	9.865	1941.977	-0.013543	-0.007290	-0.001927
7.2400	917.620	180.706	95.755	23.625	-0.501	9.865	1746.912	-0.012649	-0.006703	-0.001654
7.2800	905.296	179.043	94.355	23.099	-0.493	9.865	1723.452	-0.012533	-0.006605	-0.001617
7.3200	823.497	169.103	87.845	20.192	-0.511	9.865	1567.726	-0.011837	-0.006149	-0.001413
7.3600	755.749	160.840	83.279	18.260	-0.502	9.865	1438.751	-0.011259	-0.005830	-0.001278
7.4000	749.076	158.378	81.131	17.649	-0.505	9.865	1426.048	-0.011086	-0.005679	-0.001235
7.4400	671.244	147.119	73.989	15.622	-0.505	9.865	1277.876	-0.010298	-0.005179	-0.001094
7.4800	598.867	137.643	69.131	13.133	-0.516	9.865	1140.089	-0.009635	-0.004839	-0.000919
7.5200	506.127	124.149	60.645	10.229	-0.514	9.865	963.535	-0.008690	-0.004245	-0.000716
7.5600	446.915	115.798	54.340	8.782	-0.509	9.865	850.811	-0.008106	-0.003804	-0.000615
7.6000	366.032	103.277	50.280	6.115	-0.525	9.866	696.831	-0.007229	-0.003520	-0.000428
7.6400	306.895	92.119	45.424	4.335	-0.525	9.866	584.249	-0.006448	-0.003180	-0.000303
7.6800	231.513	79.722	39.189	1.878	-0.524	9.865	440.741	-0.005581	-0.002743	-0.000131
7.7200	196.526	73.205	34.400	0.792	-0.512	9.866	374.136	-0.005124	-0.002408	-0.000055
7.7600	160.864	65.800	32.105	-0.112	-0.509	9.865	306.244	-0.004606	-0.002247	0.000008
7.8000	119.100	58.308	29.144	-1.541	-0.525	9.866	226.736	-0.004082	-0.002040	0.000108
7.8400	85.842	51.332	23.462	-1.167	-0.515	9.865	163.422	-0.003593	-0.001642	0.000082
7.8800	58.010	45.094	22.570	-1.569	-0.517	9.866	110.435	-0.003157	-0.001580	0.000110
7.9200	45.897	41.242	18.576	-1.347	-0.511	9.865	87.376	-0.002887	-0.001300	0.000094
7.9600	56.417	42.244	21.149	-1.098	-0.504	9.866	107.403	-0.002957	-0.001480	0.000077
8.0000	70.408	43.760	20.451	-1.706	-0.502	9.866	134.039	-0.003063	-0.001432	0.000119
8.0400	67.658	43.413	21.824	-1.194	-0.513	9.866	128.803	-0.003039	-0.001528	0.000084
8.0800	74.496	44.248	21.109	-1.888	-0.512	9.865	141.821	-0.003097	-0.001478	0.000132
8.1200	115.088	50.154	22.444	-1.458	-0.498	9.865	219.097	-0.003511	-0.001571	0.000102
8.1600	163.013	58.393	26.296	-1.542	-0.511	9.865	310.335	-0.004088	-0.001841	0.000108
8.2000	212.306	65.981	31.662	-0.556	-0.502	9.866	404.177	-0.004619	-0.002216	0.000039
8.2400	271.578	75.122	34.058	0.737	-0.510	9.866	517.015	-0.005259	-0.002384	-0.000052
8.2800	323.742	83.406	40.261	2.210	-0.518	9.866	616.322	-0.005838	-0.002818	-0.000155
8.3200	371.923	91.631	43.192	3.974	-0.514	9.866	708.046	-0.006414	-0.003023	-0.000278
8.3600	487.191	106.987	51.794	7.047	-0.513	9.866	927.486	-0.007489	-0.003626	-0.000493
8.4000	505.661	111.352	53.046	7.672	-0.512	9.866	962.648	-0.007795	-0.003713	-0.000537
8.4400	624.506	127.654	62.318	12.050	-0.511	9.867	1188.898	-0.008936	-0.004362	-0.000844
8.4800	646.252	130.902	63.876	13.162	-0.507	9.867	1230.297	-0.009163	-0.004471	-0.000921
8.5200	777.344	148.554	75.654	16.898	-0.505	9.867	1479.864	-0.010399	-0.005296	-0.001183
8.5600	797.137	153.305	78.943	17.842	-0.512	9.867	1517.544	-0.010731	-0.005526	-0.001249
8.6000	840.058	159.309	83.442	19.137	-0.516	9.867	1599.255	-0.011152	-0.005841	-0.001340
8.6400	908.452	168.674	88.107	21.609	-0.514	9.867	1729.460	-0.011807	-0.006167	-0.001513
8.6800	1018.069	183.253	97.793	25.696	-0.516	9.867	1938.143	-0.012828	-0.006846	-0.001799
8.7200	1065.108	189.602	101.772	27.655	-0.525	9.867	2027.693	-0.013272	-0.007124	-0.001936
8.7600	1091.258	194.119	104.277	29.268	-0.532	9.867	2077.475	-0.013588	-0.007299	-0.002049
8.8000	1114.387	198.134	107.012	30.337	-0.528	9.867	2121.506	-0.013869	-0.007491	-0.002124
8.8400	1149.733	202.746	109.931	32.087	-0.518	9.868	2188.797	-0.014192	-0.007695	-0.002246
8.8800	1161.786	206.151	113.027	32.892	-0.522	9.867	2211.742	-0.014431	-0.007912	-0.002302
8.9200	1173.508	207.596	111.979	33.449	-0.519	9.867	2234.058	-0.014532	-0.007839	-0.002341
8.9600	1196.487	210.558	114.321	34.409	-0.520	9.867	2277.803	-0.014739	-0.008002	-0.002409
9.0000	1184.825	210.696	115.340	34.227	-0.519	9.867	2255.602	-0.014749	-0.008074	-0.002396
9.0400	1155.114	207.968	113.866	32.839	-0.523	9.867	2199.039	-0.014558	-0.007971	-0.002299
9.0800	1149.057	206.762	113.259	32.782	-0.516	9.868	2187.510	-0.014473	-0.007928	-0.002295
9.1200	1089.650	201.623	109.931	30.503	-0.520	9.868	2074.413	-0.014114	-0.007695	-0.002135
9.1600	1069.346	198.773	107.424	29.407	-0.510	9.867	2035.761	-0.013914	-0.007520	-0.002059
9.2000	1030.107	194.049	104.825	28.126	-0.517	9.867	1961.060	-0.013583	-0.007338	-0.001969
9.2400	977.628	188.323	100.245	25.780	-0.517	9.868	1861.153	-0.013183	-0.007017	-0.001805
9.2800	925.810	181.737	96.144	23.556	-0.524	9.867	1762.505	-0.012722	-0.006730	-0.001649
9.3200	863.502	173.430	90.611	21.428	-0.507	9.868	1643.887	-0.012140	-0.006343	-0.001500
9.3600	809.235	166.883	85.546	19.319	-0.522	9.868	1540.575	-0.011682	-0.005988	-0.001352
9.4000	710.799	153.554	78.968	16.302	-0.520	9.868	1353.178	-0.010749	-0.005528	-0.001141
9.4400	636.498	142.979	71.718	14.578	-0.513	9.867	1211.729	-0.010009	-0.005020	-0.001020
9.4800	564.692	133.448	67.086	12.174	-0.517	9.868	1075.029	-0.009341	-0.004696	-0.000852
9.5200	463.491	118.661	56.843	9.216	-0.521	9.868	882.368	-0.008306	-0.003979	-0.000645
9.5600	426.927	112.450	54.120	7.962	-0.518	9.868	812.759	-0.007872	-0.003788	-0.000557
9.6000	373.140	103.762	51.010	6.228	-0.513	9.868	710.363	-0.007263	-0.003571	-0.000436
9.6400	301.981	91.909	44.791	4.003	-0.518	9.868	574.894	-0.006434	-0.003135	-0.000280
9.6800	256.475	84.046	40.645	2.655	-0.510	9.868	488.262	-0.005883	-0.002845	-0.000186
9.7200	197.488	73.094	34.866	0.834	-0.524	9.867	375.967	-0.005117	-0.002441	-0.000058
9.7600	158.369	66.383	32.020	-0.485	-0.508	9.867	301.495	-0.004647	-0.002241	0.000034
9.8000	115.989	57.614	29.390	-1.236	-0.506	9.868	220.814	-0.004033	-0.002057	0.000087
9.8400	88.112	51.595	24.026	-1.541	-0.529	9.868	167.742	-0.003612	-0.001682	0.000108
9.8800	74.240	48.442	22.925	-1.666	-0.514	9.868	141.335	-0.003391	-0.001605	0.000117
9.9200	53.486	43.092	22.378	-1.417	-0.511	9.868	101.824	-0.003016	-0.001566	0.000099
9.9600	43.522	40.188	20.186	-1.222	-0.513	9.867	82.855	-0.002813	-0.001413	0.000086
10.0000	56.807	41.924	20.711	-1.361	-0.514	9.868	108.147	-0.002935	-0.001450	0.000095
10.0400	74.616	44.399	21.602	-1.652	-0.523	9.868	142.050	-0.003108	-0.001512	0.000116
10.0800	90.456	46.174	21.825	-1.653	-0.512	9.868	172.205	-0.003232	-0.001528	0.000116
10.1200	120.137	51.624	25.085	-1.693	-0.515	9.867	228.710	-0.003614	-0.001756	0.000118
10.1600	151.276	55.864	26.063	-1.182	-0.520	9.867	287.991	-0.003910	-0.001824	0.000083
10.2000	228.973	68.215	33.081	-0.055	-0.511	9.867	435.905	-0.004775	-0.002316	0.000004
10.2400	257.842	73.359	34.484	0.529	-0.504	9.867	490.866	-0.005135	-0.002414	-0.000037
10.2800	312.967	81.515	38.295	2.154	-0.514	9.868	595.808	-0.005706	-0.002681	-0.000151
10.3200	374.944	92.118	43.262	3.906	-0.518	9.868	713.797	-0.006448	-0.003028	-0.000273
10.3600	443.924	102.984	48.218	6.018	-0.522	9.867	845.118	-0.007209	-0.003375	-0.000421
10.4000	509.072	111.796	53.914	7.993	-0.514	9.868	969.143	-0.007826	-0.003774	-0.000560
10.4400	583.884	122.582	58.881	10.714	-0.519	9.868	1111.565	-0.008581	-0.004122	-0.000750
10.4800	668.929	134.324	65.595	13.882	-0.516	9.868	1273.470	-0.009403	-0.004592	-0.000972
10.5200	732.124	143.199	73.010	15.803	-0.516	9.867	1393.776	-0.010024	-0.005111	-0.001106
10.5600	796.415	152.553	77.525	17.649	-0.521	9.867	1516.171	-0.010679	-0.005427	-0.001235
10.6000	862.165	162.116	83.112	19.985	-0.505	9.867	1641.340	-0.011348	-0.005818	-0.001399
10.6400	941.575	172.916	90.723	22.902	-0.510	9.868	1792.517	-0.012104	-0.006351	-0.001603
10.6800	973.119	178.251	93.832	24.155	-0.523	9.868	1852.570	-0.012478	-0.006568	-0.001691
10.7200	1038.147	187.101	100.381	26.835	-0.522	9.867	1976.366	-0.013097	-0.007027	-0.001878
10.7600	1077.762	192.520	104.551	28.725	-0.526	9.867	2051.783	-0.013476	-0.007319	-0.002011
10.8000	1116.626	198.482	107.508	30.448	-0.520	9.868	2125.769	-0.013894	-0.007526	-0.002131
10.8400	1159.111	204.486	111.321	32.212	-0.515	9.867	2206.650	-0.014314	-0.007792	-0.002255
10.8800	1154.031	204.557	110.028	32.505	-0.516	9.868	2196.980	-0.014319	-0.007702	-0.002275
10.9200	1195.570	210.517	115.422	34.492	-0.512	9.867	2276.058	-0.014736	-0.008080	-0.002414
10.9600	1182.480	209.434	114.170	34.115	-0.507	9.868	2251.139	-0.014660	-0.007992	-0.002388
11.0000	1181.684	210.071	114.623	34.089	-0.515	9.867	2249.622	-0.014705	-0.008024	-0.002386
11.0400	1186.493	211.184	114.059	34.436	-0.526	9.868	2258.778	-0.014783	-0.007984	-0.002411
11.0800	1134.810	205.762	113.137	32.284	-0.520	9.867	2160.387	-0.014403	-0.007920	-0.002260
11.1200	1102.439	202.803	109.271	31.059	-0.518	9.867	2098.761	-0.014196	-0.007649	-0.002174
11.1600	1062.238	198.983	108.939	29.782	-0.512	9.867	2022.228	-0.013929	-0.007626	-0.002085
11.2000	1030.934	194.202	105.527	27.961	-0.521	9.867	1962.633	-0.013594	-0.007387	-0.001957
11.2400	964.914	186.961	98.979	25.805	-0.506	9.867	1836.948	-0.013087	-0.006929	-0.001806
11.2800	885.293	177.776	93.847	22.708	-0.522	9.867	1685.371	-0.012444	-0.006569	-0.001590
11.3200	855.612	173.123	90.763	21.512	-0.522	9.867	1628.866	-0.012119	-0.006353	-0.001506
11.3600	788.405	164.158	83.416	19.053	-0.515	9.867	1500.921	-0.011491	-0.005839	-0.001334
11.4000	701.706	153.387	77.498	16.664	-0.529	9.866	1335.869	-0.010737	-0.005425	-0.001166
11.4400	641.022	144.385	72.160	14.855	-0.509	9.867	1220.341	-0.010107	-0.005051	-0.001040
11.4800	565.399	133.543	65.310	12.078	-0.505	9.866	1076.374	-0.009348	-0.004572	-0.000845
11.5200	512.950	125.233	59.708	10.882	-0.515	9.866	976.524	-0.008766	-0.004180	-0.000762
11.5600	461.237	117.578	56.130	9.338	-0.524	9.866	878.077	-0.008230	-0.003929	-0.000654
11.6000	369.639	103.277	48.726	6.379	-0.505	9.866	703.697	-0.007229	-0.003411	-0.000447
11.6400	316.964	94.772	44.765	4.865	-0.516	9.867	603.418	-0.006634	-0.003134	-0.000341
11.6800	240.725	82.283	39.274	2.614	-0.524	9.866	458.279	-0.005760	-0.002749	-0.000183
11.7200	210.202	75.944	35.035	1.806	-0.520	9.866	400.171	-0.005316	-0.002452	-0.000126
11.7600	145.505	64.382	31.097	-0.125	-0.518	9.867	277.004	-0.004507	-0.002177	0.000009
11.8000	139.629	62.199	29.640	-0.458	-0.518	9.866	265.818	-0.004354	-0.002075	0.000032
11.8400	86.909	51.137	25.043	-1.057	-0.523	9.867	165.453	-0.003580	-0.001753	0.000074
11.8800	68.725	47.788	22.926	-1.221	-0.527	9.866	130.835	-0.003345	-0.001605	0.000085
11.9200	51.923	43.677	21.027	-1.221	-0.509	9.865	98.848	-0.003057	-0.001472	0.000085
11.9600	49.413	41.743	19.953	-1.361	-0.522	9.866	94.070	-0.002922	-0.001397	0.000095
12.0000	52.825	41.521	19.649	-1.180	-0.528	9.866	100.565	-0.002906	-0.001375	0.000083
12.0400	70.829	44.525	21.204	-1.541	-0.517	9.867	134.840	-0.003117	-0.001484	0.000108
12.0800	114.111	50.915	23.504	-1.388	-0.516	9.865	217.237	-0.003564	-0.001645	0.000097
12.1200	114.787	50.958	22.927	-1.486	-0.517	9.866	218.525	-0.003567	-0.001605	0.000104
12.1600	172.977	60.005	28.925	-0.791	-0.514	9.865	329.304	-0.004200	-0.002025	0.000055
12.2000	208.083	65.632	30.260	-0.262	-0.517	9.866	396.137	-0.004594	-0.002118	0.000018
12.2400	257.031	73.441	33.878	1.001	-0.512	9.866	489.321	-0.005141	-0.002371	-0.000070
12.2800	327.003	84.212	40.456	2.767	-0.510	9.866	622.530	-0.005895	-0.002832	-0.000194
12.3200	368.301	91.284	42.628	4.254	-0.507	9.865	701.151	-0.006390	-0.002984	-0.000298
12.3600	451.949	103.346	48.313	6.603	-0.520	9.866	860.395	-0.007234	-0.003382	-0.000462
12.4000	532.757	115.659	54.752	9.018	-0.519	9.866	1014.233	-0.008096	-0.003833	-0.000631
12.4400	585.898	123.316	58.799	11.035	-0.521	9.866	1115.398	-0.008632	-0.004116	-0.000772
12.4800	661.475	133.755	66.062	13.993	-0.531	9.866	1259.279	-0.009363	-0.004624	-0.000980
12.5200	726.338	143.398	71.718	15.983	-0.521	9.866	1382.761	-0.010038	-0.005020	-0.001119
12.5600	783.762	152.108	77.868	17.551	-0.527	9.866	1492.081	-0.010648	-0.005451	-0.001229
12.6000	860.452	162.309	83.855	20.319	-0.531	9.866	1638.079	-0.011362	-0.005870	-0.001422
12.6400	928.861	172.428	90.323	22.680	-0.530	9.865	1768.312	-0.012070	-0.006323	-0.001588
12.6800	1014.222	183.281	98.152	25.918	-0.524	9.865	1930.819	-0.012830	-0.006871	-0.001814
12.7200	1009.684	184.045	97.065	26.279	-0.536	9.866	1922.178	-0.012883	-0.006795	-0.001840
12.7600	1078.093	193.607	104.236	29.447	-0.534	9.866	2052.412	-0.013552	-0.007297	-0.002061
12.8000	1131.669	200.900	109.270	31.115	-0.525	9.865	2154.408	-0.014063	-0.007649	-0.002178
12.8400	1140.686	202.331	109.270	32.032	-0.526	9.866	2171.574	-0.014163	-0.007649	-0.002242
12.8800	1159.953	205.985	111.996	33.296	-0.525	9.866	2208.252	-0.014419	-0.007840	-0.002331
12.9200	1174.816	208.515	112.738	33.781	-0.531	9.865	2236.547	-0.014596	-0.007892	-0.002365
12.9600	1199.477	212.004	114.678	35.101	-0.532	9.866	2283.497	-0.014840	-0.008027	-0.002457
13.0000	1171.720	209.795	114.004	34.269	-0.539	9.866	2230.654	-0.014686	-0.007980	-0.002399
13.0400	1168.729	210.072	115.408	33.853	-0.533	9.865	2224.960	-0.014705	-0.008079	-0.002370
13.0800	1128.769	205.846	112.586	32.352	-0.525	9.866	2148.886	-0.014409	-0.007881	-0.002265
13.1200	1097.885	203.011	109.738	31.102	-0.525	9.865	2090.092	-0.014211	-0.007682	-0.002177
13.1600	1090.086	201.234	108.994	30.865	-0.523	9.865	2075.243	-0.014086	-0.007630	-0.002161
13.2000	1011.337	192.937	103.161	27.833	-0.532	9.865	1925.325	-0.013506	-0.007221	-0.001948
13.2400	994.520	190.769	101.593	27.070	-0.521	9.865	1893.311	-0.013354	-0.007111	-0.001895
13.2800	924.638	182.390	95.619	24.389	-0.525	9.865	1760.273	-0.012767	-0.006693	-0.001707
13.3200	857.145	173.956	91.230	21.471	-0.524	9.865	1631.784	-0.012177	-0.006386	-0.001503
13.3600	774.699	163.087	83.016	18.777	-0.524	9.865	1474.829	-0.011416	-0.005811	-0.001314
13.4000	694.974	152.580	76.164	16.496	-0.525	9.865	1323.051	-0.010681	-0.005331	-0.001155
13.4400	641.443	144.775	72.241	15.094	-0.506	9.865	1221.142	-0.010134	-0.005057	-0.001057
13.4800	547.320	131.652	64.935	12.174	-0.512	9.865	1041.956	-0.009216	-0.004545	-0.000852
13.5200	525.032	127.834	62.346	11.091	-0.518	9.865	999.527	-0.008948	-0.004364	-0.000776
13.5600	426.566	113.295	54.038	8.340	-0.510	9.865	812.073	-0.007931	-0.003783	-0.000584
13.6000	388.064	105.625	49.401	7.423	-0.524	9.865	738.773	-0.007394	-0.003458	-0.000520
13.6400	298.013	92.564	42.494	4.724	-0.534	9.864	567.341	-0.006480	-0.002975	-0.000331
13.6800	260.863	85.309	40.867	3.294	-0.526	9.865	496.616	-0.005972	-0.002861	-0.000231
13.7200	185.706	72.609	34.648	1.264	-0.524	9.865	353.537	-0.005083	-0.002425	-0.000089
13.7600	148.466	64.564	32.201	0.029	-0.522	9.864	282.640	-0.004519	-0.002254	-0.000002
13.8000	108.821	57.335	27.700	-0.929	-0.520	9.865	207.167	-0.004013	-0.001939	0.000065
13.8400	93.747	53.166	25.291	-1.220	-0.526	9.864	178.471	-0.003722	-0.001770	0.000085
13.8800	64.156	47.135	22.169	-1.096	-0.520	9.864	122.137	-0.003299	-0.001552	0.000077
13.9200	69.777	47.120	22.499	-1.236	-0.514	9.864	132.837	-0.003298	-0.001575	0.000087
13.9600	32.822	38.966	18.148	-0.374	-0.531	9.864	62.485	-0.002728	-0.001270	0.000026
14.0000	60.174	42.995	19.704	-1.069	-0.523	9.864	114.555	-0.003010	-0.001379	0.000075
14.0400	71.505	44.872	20.585	-1.377	-0.526	9.864	136.127	-0.003141	-0.001441	0.000096
14.0800	100.841	49.153	22.472	-1.345	-0.531	9.864	191.975	-0.003441	-0.001573	0.000094
14.1200	130.101	53.639	24.341	-1.152	-0.519	9.864	247.679	-0.003755	-0.001704	0.000081
14.1600	134.730	55.001	24.753	-0.986	-0.518	9.863	256.491	-0.003850	-0.001733	0.000069
14.2000	203.650	65.090	30.587	0.124	-0.524	9.864	387.697	-0.004556	-0.002141	-0.000009
14.2400	261.284	74.829	35.930	1.139	-0.535	9.863	497.417	-0.005238	-0.002515	-0.000080
14.2800	324.989	84.698	39.562	3.461	-0.519	9.863	618.696	-0.005929	-0.002769	-0.000242
14.3200	383.450	93.203	44.241	4.892	-0.522	9.863	729.990	-0.006524	-0.003097	-0.000342
14.3600	442.391	103.056	49.071	6.601	-0.529	9.863	842.199	-0.007214	-0.003435	-0.000462
14.4000	511.206	113.089	53.390	9.005	-0.525	9.863	973.206	-0.007916	-0.003737	-0.000630
14.4400	579.751	122.262	59.320	11.325	-0.527	9.863	1103.697	-0.008558	-0.004152	-0.000793
14.4800	642.134	131.320	64.549	13.341	-0.514	9.864	1222.458	-0.009192	-0.004518	-0.000934
14.5200	736.542	144.426	72.573	16.495	-0.530	9.863	1402.187	-0.010110	-0.005080	-0.001155
14.5600	803.298	153.749	78.295	18.804	-0.525	9.863	1529.274	-0.010762	-0.005481	-0.001316
14.6000	867.395	163.642	84.501	20.790	-0.526	9.863	1651.297	-0.011455	-0.005915	-0.001455
14.6400	930.153	172.163	89.140	22.833	-0.524	9.863	1770.773	-0.012051	-0.006240	-0.001598
14.6800	958.933	176.999	93.089	24.210	-0.518	9.863	1825.562	-0.012390	-0.006516	-0.001695
14.7200	1031.866	186.906	100.010	27.225	-0.522	9.863	1964.407	-0.013083	-0.007001	-0.001906
14.7600	1096.578	195.536	106.078	29.866	-0.525	9.863	2087.603	-0.013688	-0.007425	-0.002091
14.8000	1113.004	198.509	105.940	30.725	-0.528	9.863	2118.874	-0.013896	-0.007416	-0.002151
14.8400	1138.297	202.900	108.238	32.421	-0.525	9.863	2167.025	-0.014203	-0.007577	-0.002269
14.8800	1156.676	206.651	111.762	33.368	-0.528	9.863	2202.015	-0.014466	-0.007823	-0.002336
14.9200	1177.461	209.377	113.286	34.062	-0.522	9.863	2241.583	-0.014656	-0.007930	-0.002384
14.9600	1208.570	213.725	116.179	35.868	-0.522	9.863	2300.806	-0.014961	-0.008133	-0.002511
15.0000	1183.743	210.586	115.118	34.340	-0.518	9.863	2253.542	-0.014741	-0.008058	-0.002404
15.0400	1174.891	211.043	114.721	34.508	-0.521	9.862	2236.691	-0.014773	-0.008030	-0.002416
15.0800	1130.437	206.791	112.433	33.048	-0.526	9.863	2152.061	-0.014475	-0.007870	-0.002313
15.1200	1120.683	205.444	112.065	32.450	-0.528	9.862	2133.493	-0.014381	-0.007845	-0.002271
15.1600	1060.164	198.663	106.545	29.629	-0.521	9.863	2018.280	-0.013906	-0.007458	-0.002074
15.2000	1040.342	196.299	104.677	28.990	-0.522	9.863	1980.543	-0.013741	-0.007327	-0.002029
15.2400	976.125	189.115	101.578	26.349	-0.524	9.862	1858.292	-0.013238	-0.007110	-0.001844
15.2800	921.828	180.902	95.055	24.165	-0.524	9.863	1754.923	-0.012663	-0.006654	-0.001692
15.3200	862.525	174.692	91.009	22.193	-0.517	9.862	1642.027	-0.012228	-0.006371	-0.001554
15.3600	745.184	160.211	80.759	18.288	-0.515	9.862	1418.638	-0.011215	-0.005653	-0.001280
15.4000	725.797	156.544	79.973	17.525	-0.518	9.862	1381.731	-0.010958	-0.005598	-0.001227
15.4400	635.221	143.980	72.667	15.009	-0.521	9.862	1209.297	-0.010079	-0.005087	-0.001051
15.4800	585.341	136.212	67.935	13.383	-0.518	9.862	1114.340	-0.009535	-0.004755	-0.000937
15.5200	504.068	125.315	60.145	11.437	-0.518	9.862	959.616	-0.008772	-0.004210	-0.000801
15.5600	419.217	112.587	53.430	8.520	-0.519	9.862	798.082	-0.007881	-0.003740	-0.000596
15.6000	351.334	101.789	47.569	6.629	-0.524	9.862	668.850	-0.007125	-0.003330	-0.000464
15.6400	296.420	91.187	43.291	5.047	-0.525	9.862	564.308	-0.006383	-0.003030	-0.000353
15.6800	259.000	85.531	40.523	3.587	-0.515	9.862	493.069	-0.005987	-0.002837	-0.000251
15.7200	191.447	73.138	35.143	1.614	-0.524	9.861	364.466	-0.005120	-0.002460	-0.000113
15.7600	164.741	67.439	31.827	0.321	-0.513	9.861	313.625	-0.004721	-0.002228	-0.000022
15.8000	120.363	59.213	28.652	-0.153	-0.524	9.862	229.139	-0.004145	-0.002006	0.000011
15.8400	79.876	51.068	25.926	-0.932	-0.530	9.862	152.063	-0.003575	-0.001815	0.000065
15.8800	81.875	50.041	23.750	-1.180	-0.521	9.862	155.869	-0.003503	-0.001662	0.000083
15.9200	66.275	46.092	21.303	-0.749	-0.515	9.861	126.171	-0.003226	-0.001491	0.000052
15.9600	51.848	42.590	21.247	-0.721	-0.525	9.862	98.705	-0.002981	-0.001487	0.000050
16.0000	56.326	42.953	21.000	-0.652	-0.528	9.862	107.231	-0.003007	-0.001470	0.000046
16.0400	72.587	45.787	21.247	-1.320	-0.514	9.861	138.187	-0.003205	-0.001487	0.000092
16.0800	101.577	49.194	22.746	-1.069	-0.516	9.862	193.377	-0.003444	-0.001592	0.000075
16.1200	133.107	54.197	25.237	-0.692	-0.509	9.862	253.401	-0.003794	-0.001767	0.000048
16.1600	147.654	56.778	26.696	-0.584	-0.522	9.861	281.096	-0.003974	-0.001869	0.000041
16.2000	214.140	66.621	30.782	0.708	-0.506	9.861	407.667	-0.004663	-0.002155	-0.000050
16.2400	267.340	74.859	34.744	1.892	-0.518	9.861	508.947	-0.005240	-0.002432	-0.000132
16.2800	305.377	81.876	37.249	3.088	-0.530	9.861	581.360	-0.005731	-0.002607	-0.000216
16.3200	397.276	94.801	42.946	5.754	-0.519	9.862	756.311	-0.006636	-0.003006	-0.000403
16.3600	438.228	102.610	47.777	6.838	-0.527	9.861	834.274	-0.007183	-0.003344	-0.000479
16.4000	520.990	114.448	53.472	9.504	-0.511	9.861	991.831	-0.008011	-0.003743	-0.000665
16.4400	598.251	124.691	60.134	12.287	-0.524	9.861	1138.916	-0.008728	-0.004209	-0.000860
16.4800	683.552	136.323	67.646	14.576	-0.529	9.861	1301.308	-0.009543	-0.004735	-0.001020
16.5200	730.801	143.744	73.068	16.261	-0.517	9.861	1391.258	-0.010062	-0.005115	-0.001138
16.5600	793.770	152.971	77.909	18.191	-0.519	9.861	1511.135	-0.010708	-0.005454	-0.001273
16.6000	862.886	163.213	84.996	20.944	-0.525	9.861	1642.714	-0.011425	-0.005950	-0.001466
16.6400	924.953	171.317	89.991	23.194	-0.516	9.861	1760.874	-0.011992	-0.006299	-0.001624
16.6800	972.233	178.516	93.969	25.043	-0.512	9.861	1850.882	-0.012496	-0.006578	-0.001753
16.7200	1046.578	189.005	100.325	27.974	-0.502	9.861	1992.416	-0.013230	-0.007023	-0.001958
16.7600	1073.449	192.841	103.383	29.434	-0.525	9.861	2043.571	-0.013499	-0.007237	-0.002060
16.8000	1102.664	197.356	105.885	30.839	-0.515	9.861	2099.190	-0.013815	-0.007412	-0.002159
16.8400	1145.135	203.483	109.295	33.018	-0.522	9.862	2180.042	-0.014244	-0.007651	-0.002311
16.8800	1171.389	206.611	111.677	33.838	-0.520	9.861	2230.024	-0.014463	-0.007817	-0.002369
16.9200	1217.602	213.070	115.722	35.896	-0.525	9.861	2318.001	-0.014915	-0.008101	-0.002513
16.9600	1183.908	210.656	114.927	34.576	-0.512	9.861	2253.857	-0.014746	-0.008045	-0.002420
17.0000	1177.776	210.599	115.407	34.283	-0.517	9.861	2242.184	-0.014742	-0.008079	-0.002400
17.0400	1150.710	208.472	113.535	33.895	-0.520	9.861	2190.657	-0.014593	-0.007947	-0.002373
17.0800	1132.421	206.541	112.902	32.743	-0.520	9.861	2155.838	-0.014458	-0.007903	-0.002292
17.1200	1128.047	205.389	112.105	32.839	-0.527	9.861	2147.512	-0.014377	-0.007847	-0.002299
17.1600	1079.641	200.983	108.871	30.726	-0.521	9.861	2055.359	-0.014069	-0.007621	-0.002151
17.2000	1031.745	195.495	105.886	28.836	-0.519	9.861	1964.178	-0.013685	-0.007412	-0.002019
17.2400	958.782	186.934	99.912	25.473	-0.518	9.861	1825.275	-0.013085	-0.006994	-0.001783
17.2800	911.022	181.417	95.041	23.890	-0.513	9.861	1734.352	-0.012699	-0.006653	-0.001672
17.3200	855.763	173.401	90.750	21.637	-0.504	9.860	1629.152	-0.012138	-0.006352	-0.001515
17.3600	786.467	164.839	85.272	19.235	-0.520	9.861	1497.231	-0.011539	-0.005969	-0.001346
17.4000	721.529	156.030	79.162	17.038	-0.503	9.861	1373.606	-0.010922	-0.005541	-0.001193
17.4400	645.666	145.400	73.287	15.260	-0.509	9.861	1229.181	-0.010178	-0.005130	-0.001068
17.4800	575.618	135.086	66.297	13.425	-0.497	9.860	1095.829	-0.009456	-0.004641	-0.000940
17.5200	472.824	120.911	57.379	10.132	-0.522	9.861	900.135	-0.008464	-0.004017	-0.000709
17.5600	425.815	113.003	53.017	8.867	-0.513	9.861	810.642	-0.007910	-0.003711	-0.000621
17.6000	365.942	103.693	48.120	7.048	-0.515	9.861	696.659	-0.007259	-0.003368	-0.000493
17.6400	303.574	92.993	44.899	4.641	-0.518	9.861	577.927	-0.006510	-0.003143	-0.000325
17.6800	279.348	88.201	41.213	4.045	-0.514	9.861	531.807	-0.006174	-0.002885	-0.000283
17.7200	208.158	76.181	35.255	1.667	-0.516	9.861	396.280	-0.005333	-0.002468	-0.000117
17.7600	144.588	64.687	30.629	0.307	-0.506	9.860	275.259	-0.004528	-0.002144	-0.000021
17.8000	120.212	59.255	27.452	-0.639	-0.512	9.860	228.853	-0.004148	-0.001922	0.000045
17.8400	103.576	55.668	25.195	-0.958	-0.509	9.860	197.182	-0.003897	-0.001764	0.000067
17.8800	63.585	47.342	23.050	-1.167	-0.526	9.860	121.050	-0.003314	-0.001613	0.000082
17.9200	49.308	43.469	21.370	-1.125	-0.518	9.860	93.870	-0.003043	-0.001496	0.000079
17.9600	58.235	44.330	20.793	-1.041	-0.509	9.860	110.865	-0.003103	-0.001455	0.000073
18.0000	56.447	43.107	20.437	-1.262	-0.518	9.859	107.460	-0.003017	-0.001431	0.000088
18.0400	58.626	42.536	19.553	-0.999	-0.502	9.860	111.609	-0.002978	-0.001369	0.000070
18.0800	107.754	51.013	22.831	-1.195	-0.501	9.860	205.135	-0.003571	-0.001598	0.000084
18.1200	116.155	51.776	24.408	-1.430	-0.517	9.860	221.128	-0.003624	-0.001709	0.000100
18.1600	168.303	59.978	27.648	-0.874	-0.525	9.860	320.406	-0.004198	-0.001935	0.000061
18.2000	165.147	61.102	29.051	-0.972	-0.509	9.859	314.398	-0.004277	-0.002034	0.000068
18.2400	275.741	76.664	34.991	2.016	-0.504	9.860	524.940	-0.005367	-0.002449	-0.000141
18.2800	335.314	85.503	39.330	3.599	-0.508	9.860	638.351	-0.005985	-0.002753	-0.000252
18.3200	383.315	93.607	43.332	4.908	-0.505	9.860	729.733	-0.006552	-0.003033	-0.000344
18.3600	448.974	103.277	47.321	7.047	-0.527	9.860	854.731	-0.007229	-0.003312	-0.000493
18.4000	520.223	114.240	53.610	9.297	-0.512	9.860	990.372	-0.007997	-0.003753	-0.000651
18.4400	588.918	123.636	60.491	11.591	-0.511	9.859	1121.149	-0.008655	-0.004234	-0.000811
18.4800	649.588	132.794	63.957	13.829	-0.524	9.859	1236.649	-0.009296	-0.004477	-0.000968
18.5200	723.528	143.327	72.696	16.135	-0.505	9.860	1377.411	-0.010033	-0.005089	-0.001129
18.5600	794.221	153.054	78.103	18.206	-0.508	9.859	1511.993	-0.010714	-0.005467	-0.001274
18.6000	848.759	161.227	82.398	19.832	-0.512	9.859	1615.820	-0.011286	-0.005768	-0.001388
18.6400	910.045	170.105	87.900	22.193	-0.513	9.859	1732.492	-0.011907	-0.006153	-0.001554
18.6800	968.175	178.098	93.707	24.738	-0.516	9.859	1843.157	-0.012467	-0.006559	-0.001732
18.7200	1048.231	188.518	100.036	27.808	-0.518	9.859	1995.564	-0.013196	-0.007003	-0.001947
18.7600	1082.767	194.412	104.634	29.546	-0.519	9.859	2061.310	-0.013609	-0.007324	-0.002068
18.8000	1130.257	200.720	108.996	31.505	-0.504	9.859	2151.718	-0.014050	-0.007630	-0.002205
18.8400	1156.301	204.403	110.894	32.950	-0.513	9.859	2201.300	-0.014308	-0.007763	-0.002307
18.8800	1167.271	206.779	111.706	33.492	-0.509	9.859	2222.185	-0.014475	-0.007819	-0.002344
18.9200	1185.230	209.766	113.604	34.354	-0.528	9.860	2256.374	-0.014684	-0.007952	-0.002405
18.9600	1187.124	210.725	114.609	34.519	-0.522	9.859	2259.979	-0.014751	-0.008023	-0.002416
19.0000	1177.521	210.128	114.691	34.366	-0.520	9.859	2241.697	-0.014709	-0.008028	-0.002406
19.0400	1177.611	210.851	114.389	34.632	-0.528	9.859	2241.869	-0.014760	-0.008007	-0.002424
19.0800	1144.158	208.042	112.902	33.337	-0.527	9.858	2178.183	-0.014563	-0.007903	-0.002334
19.1200	1102.394	202.972	110.221	31.919	-0.537	9.859	2098.675	-0.014208	-0.007715	-0.002234
19.1600	1079.611	200.705	108.554	30.671	-0.532	9.858	2055.302	-0.014049	-0.007599	-0.002147
19.2000	1029.010	194.522	103.724	28.433	-0.527	9.859	1958.971	-0.013617	-0.007261	-0.001990
19.2400	972.113	188.144	99.914	26.487	-0.524	9.858	1850.653	-0.013170	-0.006994	-0.001854
19.2800	905.627	180.638	94.022	23.986	-0.522	9.859	1724.081	-0.012645	-0.006582	-0.001679
19.3200	880.950	175.830	91.148	22.582	-0.528	9.858	1677.103	-0.012308	-0.006380	-0.001581
19.3600	802.141	165.534	84.831	19.539	-0.522	9.858	1527.071	-0.011587	-0.005938	-0.001368
19.4000	728.322	156.781	79.052	17.552	-0.504	9.858	1386.538	-0.010975	-0.005534	-0.001229
19.4400	650.264	146.230	71.994	15.509	-0.519	9.858	1237.936	-0.010236	-0.005040	-0.001086
19.4800	567.518	134.838	65.665	12.882	-0.517	9.858	1080.408	-0.009439	-0.004597	-0.000902
19.5200	481.435	121.983	58.592	10.367	-0.514	9.858	916.529	-0.008539	-0.004101	-0.000726
19.5600	418.737	112.324	52.386	8.464	-0.511	9.858	797.167	-0.007863	-0.003667	-0.000592
19.6000	411.102	109.921	51.257	7.975	-0.520	9.857	782.633	-0.007694	-0.003588	-0.000558
19.6400	292.378	92.007	43.731	4.699	-0.513	9.858	556.612	-0.006441	-0.003061	-0.000329
19.6800	280.295	87.992	40.564	3.711	-0.521	9.857	533.609	-0.006159	-0.002840	-0.000260
19.7200	214.500	76.958	35.804	1.851	-0.525	9.857	408.354	-0.005387	-0.002506	-0.000130
19.7600	184.053	70.608	32.984	1.127	-0.520	9.857	350.389	-0.004943	-0.002309	-0.000079
19.8000	103.651	56.475	25.952	-0.708	-0.513	9.857	197.325	-0.003953	-0.001817	0.000050
19.8400	102.449	55.198	26.092	-0.498	-0.522	9.857	195.036	-0.003864	-0.001826	0.000035
19.8800	62.308	46.772	22.691	-0.818	-0.512	9.857	118.618	-0.003274	-0.001588	0.000057
19.9200	62.263	46.064	21.991	-0.930	-0.506	9.857	118.532	-0.003224	-0.001539	0.000065
19.9600	56.777	44.442	21.040	-0.720	-0.520	9.857	108.089	-0.003111	-0.001473	0.000050
