# Supplementary material for: Evaluation of a Cold-Mixed High-Performance Polyurethane Mixture
Source: Hindawi journal article supplement (doi:10.1155/2019/1507971), 2019-11-07
Supplement: f1 [file 1507971.f1.zip › 1507971.f1/dynamic modulus data/PUM/specimen1/temp10/zhs-1-10_1Hz.csv]

Test Information
****************
Project name	zhs
Operator name	1
Target test temperature	10
Target confining stress	0
Average dynamic strain range from 75 to 125 micro-strain
Contact stress	5
Initial modulus	4000
Axial gauge length	70
Comments	Run at High Pressure
Specimen information
********************
Identification	zhs-1-10
Dimensions	Point 1	Point 2	Point 3	Point 4	Point 5	Point 6	Average	Std Dev.
Diameter (mm)	49.2	49.2	49.3				49.23	0.058
Height (mm)	101.3	101.2	101.3				101.27	0.058
Cross-sectional area (mm�)	1903.7
Conditioning time
Properties/Comments
Test Data	1Hz
*********
Test date and time	Fri	Mar 29	2019	11:04 AM
Dynamic modulus (MPa)	11628
Phase angle (Degrees)	4.29
Average temperature (�C)	9.9
Average confining pressure (kPa)	-0.5
Average micro-strain	100
Load drift (%)	0.0
Load standard error (%)	3.0
Average deformation drift (%)	-3.5
Average deformation standard error (%)	6.0
Deformation uniformity (%)	53.7
Phase uniformity (Degrees)	0.9
Conditioning Cycles
Time (sec)	Axial stress (kPa)	Axial micro-strain #1	Axial micro-strain #2	Axial micro-strain #3	Confining pressure (kPa)	Temperature (�C)	Load (N)	Displacement #1 (mm)	Displacement #2 (mm)	Displacement #3 (mm)
0.0000	60.775	30.069	18.329	-3.821	-0.496	9.924	115.700	-0.002105	-0.001283	0.000267
0.0200	59.047	29.583	17.573	-3.987	-0.508	9.924	112.410	-0.002071	-0.001230	0.000279
0.0400	67.312	31.042	18.729	-4.391	-0.505	9.924	128.145	-0.002173	-0.001311	0.000307
0.0600	72.497	31.990	18.590	-4.028	-0.496	9.924	138.016	-0.002239	-0.001301	0.000282
0.0800	121.670	40.521	23.366	-4.448	-0.497	9.924	231.628	-0.002836	-0.001636	0.000311
0.1000	162.382	47.261	26.366	-4.460	-0.509	9.924	309.134	-0.003308	-0.001846	0.000312
0.1200	206.806	54.876	30.726	-4.418	-0.507	9.924	393.705	-0.003841	-0.002151	0.000309
0.1400	243.130	60.851	33.454	-4.167	-0.500	9.923	462.856	-0.004260	-0.002342	0.000292
0.1600	285.465	67.189	37.057	-3.486	-0.502	9.924	543.451	-0.004703	-0.002594	0.000244
0.1800	341.295	76.847	41.227	-1.889	-0.501	9.924	649.738	-0.005379	-0.002886	0.000132
0.2000	399.230	85.586	45.490	-0.834	-0.514	9.923	760.031	-0.005991	-0.003184	0.000058
0.2200	455.256	94.898	49.964	0.989	-0.509	9.924	866.690	-0.006643	-0.003497	-0.000069
0.2400	524.642	105.114	55.041	2.142	-0.502	9.923	998.783	-0.007358	-0.003853	-0.000150
0.2600	579.495	113.909	59.514	4.281	-0.497	9.924	1103.210	-0.007974	-0.004166	-0.000300
0.2800	622.266	120.022	62.965	6.476	-0.503	9.923	1184.635	-0.008402	-0.004408	-0.000453
0.3000	665.172	126.707	66.532	7.354	-0.504	9.923	1266.317	-0.008869	-0.004657	-0.000515
0.3200	728.307	135.003	71.364	10.200	-0.501	9.924	1386.509	-0.009450	-0.004995	-0.000714
0.3400	761.414	140.744	75.559	11.645	-0.501	9.923	1449.537	-0.009852	-0.005289	-0.000815
0.3600	818.192	148.359	79.177	13.563	-0.507	9.923	1557.627	-0.010385	-0.005542	-0.000949
0.3800	853.328	153.832	82.329	14.592	-0.494	9.923	1624.517	-0.010768	-0.005763	-0.001021
0.4000	877.193	157.529	84.789	16.482	-0.508	9.923	1669.950	-0.011027	-0.005935	-0.001154
0.4200	905.927	161.990	87.501	17.580	-0.505	9.923	1724.653	-0.011339	-0.006125	-0.001231
0.4400	913.757	163.366	88.423	18.358	-0.508	9.923	1739.559	-0.011436	-0.006190	-0.001285
0.4600	936.029	166.951	90.709	18.844	-0.504	9.922	1781.960	-0.011687	-0.006350	-0.001319
0.4800	933.670	166.911	90.350	19.150	-0.504	9.923	1777.468	-0.011684	-0.006324	-0.001341
0.5000	935.609	167.674	91.217	19.026	-0.505	9.923	1781.158	-0.011737	-0.006385	-0.001332
0.5200	948.758	169.925	92.303	19.844	-0.497	9.923	1806.192	-0.011895	-0.006461	-0.001389
0.5400	885.519	164.213	89.868	17.399	-0.506	9.922	1685.801	-0.011495	-0.006291	-0.001218
0.5600	855.417	160.268	87.254	16.052	-0.499	9.923	1628.494	-0.011219	-0.006108	-0.001124
0.5800	858.603	160.726	86.991	16.162	-0.493	9.922	1634.560	-0.011251	-0.006089	-0.001131
0.6000	848.203	159.503	86.648	15.634	-0.502	9.923	1614.761	-0.011165	-0.006065	-0.001094
0.6200	763.082	149.483	80.319	11.507	-0.497	9.923	1452.713	-0.010464	-0.005622	-0.000805
0.6400	759.881	149.357	79.645	11.493	-0.490	9.923	1446.619	-0.010455	-0.005575	-0.000805
0.6600	676.955	138.993	73.644	9.006	-0.518	9.922	1288.748	-0.009730	-0.005155	-0.000630
0.6800	630.081	133.141	69.945	7.393	-0.500	9.922	1199.512	-0.009320	-0.004896	-0.000517
0.7000	573.890	125.067	65.693	5.668	-0.494	9.922	1092.539	-0.008755	-0.004598	-0.000397
0.7200	507.615	116.396	60.339	3.935	-0.494	9.922	966.368	-0.008148	-0.004224	-0.000275
0.7400	464.754	109.447	57.037	2.560	-0.501	9.922	884.771	-0.007661	-0.003993	-0.000179
0.7600	399.410	99.986	52.318	0.514	-0.501	9.922	760.374	-0.006999	-0.003662	-0.000036
0.7800	352.401	91.674	48.753	-0.376	-0.497	9.922	670.881	-0.006417	-0.003413	0.000026
0.8000	294.467	82.515	44.350	-1.986	-0.499	9.922	560.589	-0.005776	-0.003105	0.000139
0.8200	245.339	73.678	39.948	-3.001	-0.509	9.922	467.062	-0.005157	-0.002796	0.000210
0.8400	217.702	68.023	37.854	-3.681	-0.505	9.922	414.448	-0.004762	-0.002650	0.000258
0.8600	164.621	59.130	32.680	-4.596	-0.500	9.922	313.396	-0.004139	-0.002288	0.000322
0.8800	107.198	48.345	27.605	-4.125	-0.504	9.921	204.077	-0.003384	-0.001932	0.000289
0.9000	100.540	45.413	25.719	-4.349	-0.502	9.922	191.402	-0.003179	-0.001800	0.000304
0.9200	73.233	39.936	23.379	-3.779	-0.512	9.921	139.418	-0.002796	-0.001637	0.000265
0.9400	50.886	34.906	20.186	-3.627	-0.504	9.921	96.874	-0.002443	-0.001413	0.000254
0.9600	40.321	31.405	18.948	-3.472	-0.504	9.921	76.761	-0.002198	-0.001326	0.000243
0.9800	35.182	29.807	17.422	-3.180	-0.504	9.921	66.977	-0.002086	-0.001220	0.000223
1.0000	37.751	29.751	17.861	-3.025	-0.515	9.921	71.869	-0.002083	-0.001250	0.000212
1.0200	50.015	30.682	18.013	-3.446	-0.496	9.921	95.215	-0.002148	-0.001261	0.000241
1.0400	93.131	39.147	21.975	-4.488	-0.504	9.921	177.298	-0.002740	-0.001538	0.000314
1.0600	86.519	38.034	21.563	-4.836	-0.496	9.921	164.709	-0.002662	-0.001509	0.000338
1.0800	101.938	39.953	22.387	-4.752	-0.495	9.921	194.063	-0.002797	-0.001567	0.000333
1.1000	153.380	48.066	26.516	-4.627	-0.506	9.921	291.996	-0.003365	-0.001856	0.000324
1.1200	199.848	55.946	31.015	-4.293	-0.502	9.921	380.459	-0.003916	-0.002171	0.000301
1.1400	232.354	61.240	33.121	-4.292	-0.497	9.921	442.343	-0.004287	-0.002318	0.000300
1.1600	290.935	70.204	38.061	-3.389	-0.491	9.920	553.865	-0.004914	-0.002664	0.000237
1.1800	353.483	80.431	42.492	-1.957	-0.492	9.921	672.941	-0.005630	-0.002974	0.000137
1.2000	398.478	87.338	46.040	-0.806	-0.497	9.921	758.600	-0.006114	-0.003223	0.000056
1.2200	452.686	96.468	50.185	0.513	-0.505	9.921	861.797	-0.006753	-0.003513	-0.000036
1.2400	520.479	106.237	54.905	2.836	-0.504	9.920	990.858	-0.007437	-0.003843	-0.000199
1.2600	541.549	110.240	57.162	3.337	-0.490	9.920	1030.970	-0.007717	-0.004001	-0.000234
1.2800	626.083	121.748	63.394	6.325	-0.493	9.920	1191.902	-0.008522	-0.004438	-0.000443
1.3000	698.100	131.486	69.684	8.922	-0.498	9.920	1329.002	-0.009204	-0.004878	-0.000625
1.3200	723.077	135.558	71.402	9.574	-0.492	9.920	1376.553	-0.009489	-0.004998	-0.000670
1.3400	796.731	146.218	77.883	13.021	-0.494	9.920	1516.771	-0.010235	-0.005452	-0.000911
1.3600	796.055	147.175	78.007	13.077	-0.491	9.920	1515.484	-0.010302	-0.005461	-0.000915
1.3800	855.718	155.098	82.713	15.106	-0.493	9.920	1629.066	-0.010857	-0.005790	-0.001057
1.4000	880.349	158.891	84.970	16.204	-0.491	9.920	1675.959	-0.011122	-0.005948	-0.001134
1.4200	902.050	162.253	87.488	17.107	-0.500	9.920	1717.272	-0.011358	-0.006124	-0.001197
1.4400	922.609	165.088	89.510	18.288	-0.498	9.920	1756.411	-0.011556	-0.006266	-0.001280
1.4600	923.045	165.882	90.006	18.525	-0.496	9.919	1757.240	-0.011612	-0.006300	-0.001297
1.4800	940.823	168.453	90.900	19.375	-0.501	9.919	1791.086	-0.011792	-0.006363	-0.001356
1.5000	934.121	168.438	91.466	19.179	-0.506	9.919	1778.326	-0.011791	-0.006403	-0.001343
1.5200	931.100	168.425	91.451	19.165	-0.510	9.920	1772.575	-0.011790	-0.006402	-0.001342
1.5400	898.954	165.617	90.184	17.608	-0.503	9.919	1711.378	-0.011593	-0.006313	-0.001233
1.5600	888.945	164.657	89.375	17.426	-0.504	9.919	1692.324	-0.011526	-0.006256	-0.001220
1.5800	850.443	160.297	87.295	15.773	-0.511	9.919	1619.024	-0.011221	-0.006111	-0.001104
1.6000	791.186	154.067	82.657	13.855	-0.493	9.919	1506.214	-0.010785	-0.005786	-0.000970
1.6200	767.696	150.250	80.483	12.690	-0.508	9.919	1461.496	-0.010517	-0.005634	-0.000888
1.6400	747.964	148.566	78.899	11.952	-0.493	9.919	1423.931	-0.010400	-0.005523	-0.000837
1.6600	675.767	139.104	73.233	8.812	-0.498	9.919	1286.488	-0.009737	-0.005126	-0.000617
1.6800	633.568	133.836	70.344	7.646	-0.490	9.919	1206.150	-0.009369	-0.004924	-0.000535
1.7000	571.906	125.137	65.526	5.908	-0.493	9.919	1088.762	-0.008760	-0.004587	-0.000414
1.7200	532.306	119.785	62.526	4.559	-0.493	9.918	1013.374	-0.008385	-0.004377	-0.000319
1.7400	479.902	112.296	58.014	3.420	-0.497	9.919	913.610	-0.007861	-0.004061	-0.000239
1.7600	401.379	99.912	52.507	0.835	-0.504	9.918	764.122	-0.006994	-0.003676	-0.000058
1.7800	356.098	92.911	49.237	-0.208	-0.497	9.918	677.919	-0.006504	-0.003447	0.000015
1.8000	309.074	85.101	45.148	-1.832	-0.502	9.918	588.398	-0.005957	-0.003160	0.000128
1.8200	234.293	72.581	39.274	-3.999	-0.497	9.918	446.033	-0.005081	-0.002749	0.000280
1.8400	199.247	66.438	36.520	-4.447	-0.502	9.918	379.314	-0.004651	-0.002556	0.000311
1.8600	153.365	57.306	31.566	-4.822	-0.496	9.918	291.967	-0.004011	-0.002210	0.000338
1.8800	129.304	52.139	29.737	-4.793	-0.495	9.918	246.162	-0.003650	-0.002082	0.000336
1.9000	101.562	46.595	26.392	-5.057	-0.499	9.918	193.348	-0.003262	-0.001847	0.000354
1.9200	80.477	41.731	24.068	-4.557	-0.505	9.918	153.208	-0.002921	-0.001685	0.000319
1.9400	61.015	36.907	21.427	-4.224	-0.502	9.918	116.158	-0.002584	-0.001500	0.000296
1.9600	37.436	31.432	18.675	-3.153	-0.513	9.918	71.268	-0.002200	-0.001307	0.000221
1.9800	13.736	26.752	14.916	-2.665	-0.517	9.918	26.150	-0.001873	-0.001044	0.000187
2.0000	14.397	25.595	14.545	-2.876	-0.518	9.917	27.409	-0.001792	-0.001018	0.000201
2.0200	31.169	28.208	15.536	-2.432	-0.506	9.918	59.338	-0.001975	-0.001088	0.000170
2.0400	69.927	34.600	19.180	-3.958	-0.505	9.918	133.123	-0.002422	-0.001343	0.000277
2.0600	109.497	41.520	22.772	-4.252	-0.512	9.917	208.454	-0.002906	-0.001594	0.000298
2.0800	135.301	45.635	25.236	-4.418	-0.500	9.917	257.578	-0.003194	-0.001767	0.000309
2.1000	152.463	49.471	27.550	-5.126	-0.516	9.917	290.251	-0.003463	-0.001929	0.000359
2.1200	192.168	55.071	30.013	-4.210	-0.509	9.917	365.839	-0.003855	-0.002101	0.000295
2.1400	249.351	64.298	34.896	-4.335	-0.516	9.917	474.701	-0.004501	-0.002443	0.000303
2.1600	277.980	68.440	36.631	-3.805	-0.508	9.917	529.203	-0.004791	-0.002564	0.000266
2.1800	344.722	79.611	42.301	-1.958	-0.508	9.917	656.261	-0.005573	-0.002961	0.000137
2.2000	396.795	87.338	45.573	-0.611	-0.509	9.917	755.396	-0.006114	-0.003190	0.000043
2.2200	459.088	97.482	50.171	0.848	-0.507	9.916	873.985	-0.006824	-0.003512	-0.000059
2.2400	509.373	105.112	54.091	3.072	-0.514	9.916	969.715	-0.007358	-0.003786	-0.000215
2.2600	565.519	113.741	58.784	4.670	-0.508	9.916	1076.603	-0.007962	-0.004115	-0.000327
2.2800	630.637	122.717	63.792	7.034	-0.510	9.916	1200.571	-0.008590	-0.004465	-0.000492
2.3000	670.477	128.666	67.879	8.491	-0.502	9.917	1276.417	-0.009007	-0.004752	-0.000594
2.3200	732.139	137.156	72.035	10.645	-0.497	9.917	1393.805	-0.009601	-0.005042	-0.000745
2.3400	762.451	142.103	75.432	11.257	-0.506	9.916	1451.511	-0.009947	-0.005280	-0.000788
2.3600	797.708	147.552	78.227	13.479	-0.502	9.916	1518.631	-0.010329	-0.005476	-0.000944
2.3800	838.946	153.263	81.612	15.373	-0.501	9.916	1597.137	-0.010728	-0.005713	-0.001076
2.4000	879.928	158.460	84.489	17.107	-0.509	9.916	1675.158	-0.011092	-0.005914	-0.001198
2.4200	906.198	162.296	87.420	17.553	-0.501	9.916	1725.168	-0.011361	-0.006119	-0.001229
2.4400	910.406	163.740	88.532	18.580	-0.498	9.916	1733.179	-0.011462	-0.006197	-0.001301
2.4600	934.121	167.008	90.693	19.762	-0.502	9.916	1778.326	-0.011691	-0.006348	-0.001383
2.4800	926.035	167.356	90.282	19.220	-0.506	9.917	1762.934	-0.011715	-0.006320	-0.001345
2.5000	935.173	167.923	91.355	19.318	-0.492	9.916	1780.329	-0.011755	-0.006395	-0.001352
2.5200	949.615	170.396	92.358	20.123	-0.505	9.916	1807.823	-0.011928	-0.006465	-0.001409
2.5400	926.546	168.342	91.699	19.707	-0.499	9.915	1763.906	-0.011784	-0.006419	-0.001379
2.5600	887.668	164.883	89.676	17.456	-0.499	9.915	1689.892	-0.011542	-0.006277	-0.001222
2.5800	852.066	160.171	86.812	16.441	-0.485	9.915	1622.114	-0.011212	-0.006077	-0.001151
2.6000	823.647	157.931	85.356	15.245	-0.497	9.915	1568.012	-0.011055	-0.005975	-0.001067
2.6200	786.181	153.111	81.956	13.676	-0.501	9.916	1496.687	-0.010718	-0.005737	-0.000957
2.6400	732.935	146.842	78.377	11.728	-0.498	9.915	1395.321	-0.010279	-0.005486	-0.000821
2.6600	683.853	139.993	73.962	8.894	-0.498	9.916	1301.880	-0.009800	-0.005177	-0.000623
2.6800	638.903	134.780	70.826	8.089	-0.497	9.915	1216.307	-0.009435	-0.004958	-0.000566
2.7000	578.834	126.610	65.720	6.407	-0.495	9.915	1101.952	-0.008863	-0.004600	-0.000448
2.7200	505.030	116.300	60.603	3.738	-0.506	9.915	961.447	-0.008141	-0.004242	-0.000262
2.7400	502.099	115.174	59.363	3.989	-0.497	9.914	955.868	-0.008062	-0.004155	-0.000279
2.7600	413.927	102.165	53.362	0.944	-0.498	9.915	788.012	-0.007152	-0.003735	-0.000066
2.7800	344.842	91.591	47.954	-0.679	-0.499	9.915	656.490	-0.006411	-0.003357	0.000048
2.8000	296.120	83.211	44.102	-1.556	-0.493	9.915	563.736	-0.005825	-0.003087	0.000109
2.8200	244.798	74.526	39.809	-2.763	-0.498	9.915	466.032	-0.005217	-0.002787	0.000193
2.8400	209.962	67.675	36.824	-3.736	-0.493	9.915	399.714	-0.004737	-0.002578	0.000262
2.8600	150.705	57.504	31.677	-4.404	-0.500	9.914	286.903	-0.004025	-0.002217	0.000308
2.8800	138.487	53.891	29.846	-4.418	-0.496	9.915	263.643	-0.003772	-0.002089	0.000309
2.9000	98.075	46.121	26.476	-3.972	-0.494	9.914	186.710	-0.003228	-0.001853	0.000278
2.9200	62.338	38.325	21.838	-4.723	-0.498	9.914	118.675	-0.002683	-0.001529	0.000331
2.9400	47.730	34.641	20.199	-3.667	-0.496	9.914	90.866	-0.002425	-0.001414	0.000257
2.9600	43.252	32.685	18.439	-3.391	-0.488	9.914	82.340	-0.002288	-0.001291	0.000237
2.9800	33.769	30.027	17.834	-2.778	-0.498	9.914	64.287	-0.002102	-0.001248	0.000194
3.0000	35.061	29.821	17.065	-2.929	-0.502	9.914	66.748	-0.002087	-0.001195	0.000205
3.0200	41.539	30.237	17.574	-3.667	-0.492	9.914	79.079	-0.002117	-0.001230	0.000257
3.0400	62.067	33.601	19.140	-3.541	-0.509	9.914	118.160	-0.002352	-0.001340	0.000248
3.0600	96.092	39.604	21.852	-4.794	-0.505	9.913	182.934	-0.002772	-0.001530	0.000336
3.0800	127.321	44.634	24.533	-4.349	-0.505	9.914	242.386	-0.003124	-0.001717	0.000304
3.1000	157.152	49.512	27.068	-4.877	-0.493	9.914	299.177	-0.003466	-0.001895	0.000341
3.1200	206.851	57.515	31.126	-3.627	-0.502	9.914	393.791	-0.004026	-0.002179	0.000254
3.1400	248.224	63.686	34.428	-3.250	-0.497	9.914	472.555	-0.004458	-0.002410	0.000228
3.1600	285.254	70.398	37.514	-2.751	-0.496	9.914	543.051	-0.004928	-0.002626	0.000193
3.1800	358.187	81.239	42.616	-1.930	-0.497	9.913	681.896	-0.005687	-0.002983	0.000135
3.2000	408.502	89.338	46.852	-0.209	-0.501	9.913	777.683	-0.006254	-0.003280	0.000015
3.2200	451.273	96.386	49.773	1.559	-0.506	9.913	859.108	-0.006747	-0.003484	-0.000109
3.2400	523.109	107.281	55.316	2.919	-0.498	9.913	995.865	-0.007510	-0.003872	-0.000204
3.2600	568.555	114.087	58.398	4.294	-0.502	9.913	1082.382	-0.007986	-0.004088	-0.000301
3.2800	634.214	123.305	64.138	7.170	-0.500	9.913	1207.380	-0.008631	-0.004490	-0.000502
3.3000	674.685	129.514	67.246	8.895	-0.506	9.913	1284.428	-0.009066	-0.004707	-0.000623
3.3200	728.021	136.866	72.064	10.671	-0.502	9.913	1385.965	-0.009581	-0.005044	-0.000747
3.3400	765.923	142.811	75.089	12.118	-0.501	9.913	1458.120	-0.009997	-0.005256	-0.000848
3.3600	819.229	149.289	79.698	14.970	-0.492	9.912	1559.601	-0.010450	-0.005579	-0.001048
3.3800	848.128	154.249	81.996	15.455	-0.498	9.913	1614.618	-0.010797	-0.005740	-0.001082
3.4000	875.014	158.085	85.092	16.620	-0.502	9.913	1665.802	-0.011066	-0.005956	-0.001163
3.4200	905.071	162.378	87.693	18.609	-0.519	9.912	1723.022	-0.011366	-0.006139	-0.001303
3.4400	921.918	164.977	89.098	18.527	-0.499	9.913	1755.095	-0.011548	-0.006237	-0.001297
3.4600	929.958	166.827	90.089	19.889	-0.506	9.912	1770.401	-0.011678	-0.006306	-0.001392
3.4800	948.308	168.966	91.781	19.916	-0.504	9.913	1805.334	-0.011828	-0.006425	-0.001394
3.5000	943.934	169.481	91.727	20.055	-0.503	9.913	1797.009	-0.011864	-0.006421	-0.001404
3.5200	933.880	168.800	91.325	20.333	-0.492	9.913	1777.868	-0.011816	-0.006393	-0.001423
3.5400	903.252	166.494	90.322	18.484	-0.493	9.912	1719.561	-0.011655	-0.006323	-0.001294
3.5600	884.016	163.729	89.235	18.425	-0.499	9.912	1682.940	-0.011461	-0.006246	-0.001290
3.5800	845.017	159.752	86.468	16.065	-0.504	9.912	1608.696	-0.011183	-0.006053	-0.001125
3.6000	843.244	159.294	85.836	15.994	-0.507	9.912	1605.320	-0.011151	-0.006009	-0.001120
3.6200	779.824	152.791	81.515	13.454	-0.512	9.912	1484.585	-0.010695	-0.005706	-0.000942
3.6400	732.064	146.717	77.428	11.965	-0.502	9.912	1393.661	-0.010270	-0.005420	-0.000838
3.6600	678.217	139.451	73.644	9.951	-0.512	9.912	1291.151	-0.009762	-0.005155	-0.000697
3.6800	625.723	133.072	69.517	7.199	-0.505	9.912	1191.216	-0.009315	-0.004866	-0.000504
3.7000	582.396	126.917	66.036	6.380	-0.514	9.912	1108.732	-0.008884	-0.004623	-0.000447
3.7200	505.315	116.771	60.133	4.532	-0.508	9.912	961.990	-0.008174	-0.004209	-0.000317
3.7400	477.678	111.838	57.600	3.004	-0.501	9.912	909.376	-0.007829	-0.004032	-0.000210
3.7600	411.538	102.152	53.033	1.514	-0.508	9.912	783.463	-0.007151	-0.003712	-0.000106
3.7800	347.652	91.853	48.299	-0.612	-0.496	9.911	661.840	-0.006430	-0.003381	0.000043
3.8000	290.619	82.767	43.607	-1.777	-0.506	9.911	553.265	-0.005794	-0.003052	0.000124
3.8200	259.541	76.417	41.062	-2.721	-0.505	9.911	494.099	-0.005349	-0.002874	0.000190
3.8400	198.420	66.578	36.204	-4.084	-0.511	9.911	377.741	-0.004660	-0.002534	0.000286
3.8600	167.957	60.116	33.176	-4.848	-0.505	9.912	319.748	-0.004208	-0.002322	0.000339
3.8800	120.152	51.402	29.048	-4.961	-0.507	9.911	228.739	-0.003598	-0.002033	0.000347
3.9000	92.650	45.204	25.238	-4.391	-0.501	9.912	176.382	-0.003164	-0.001767	0.000307
3.9200	76.059	41.368	23.599	-3.890	-0.505	9.911	144.796	-0.002896	-0.001652	0.000272
3.9400	55.139	36.004	20.545	-3.724	-0.506	9.910	104.971	-0.002520	-0.001438	0.000261
3.9600	52.179	34.811	20.215	-3.862	-0.506	9.910	99.335	-0.002437	-0.001415	0.000270
3.9800	48.121	33.574	18.620	-3.015	-0.508	9.910	91.610	-0.002350	-0.001303	0.000211
4.0000	40.997	31.544	18.234	-2.860	-0.499	9.910	78.049	-0.002208	-0.001276	0.000200
4.0200	38.157	30.808	17.835	-3.152	-0.510	9.910	72.641	-0.002157	-0.001248	0.000221
4.0400	38.473	29.709	17.587	-2.860	-0.505	9.910	73.242	-0.002080	-0.001231	0.000200
4.0600	66.786	34.879	19.456	-3.959	-0.508	9.910	127.144	-0.002442	-0.001362	0.000277
4.0800	109.512	41.883	22.816	-4.531	-0.509	9.910	208.483	-0.002932	-0.001597	0.000317
4.1000	142.845	47.163	25.430	-3.850	-0.517	9.911	271.940	-0.003301	-0.001780	0.000269
4.1200	199.923	56.486	30.934	-4.320	-0.506	9.910	380.602	-0.003954	-0.002165	0.000302
4.1400	248.450	64.479	34.222	-3.096	-0.518	9.910	472.984	-0.004514	-0.002396	0.000217
4.1600	290.153	70.593	37.815	-2.237	-0.503	9.910	552.378	-0.004942	-0.002647	0.000157
4.1800	337.403	78.791	41.501	-1.874	-0.516	9.910	642.328	-0.005515	-0.002905	0.000131
4.2000	409.945	89.866	46.634	0.070	-0.508	9.910	780.430	-0.006291	-0.003264	-0.000005
4.2200	459.013	97.733	50.282	1.127	-0.506	9.910	873.842	-0.006841	-0.003520	-0.000079
4.2400	504.429	104.291	53.458	2.587	-0.504	9.910	960.302	-0.007300	-0.003742	-0.000181
4.2600	561.687	113.464	58.714	4.906	-0.513	9.910	1069.307	-0.007942	-0.004110	-0.000343
4.2800	642.134	124.094	64.605	7.812	-0.498	9.910	1222.458	-0.008687	-0.004522	-0.000547
4.3000	655.930	126.818	66.297	8.477	-0.504	9.910	1248.722	-0.008877	-0.004641	-0.000593
4.3200	738.240	138.228	72.379	11.520	-0.508	9.910	1405.420	-0.009676	-0.005067	-0.000806
4.3400	782.589	144.413	76.771	12.980	-0.519	9.909	1489.849	-0.010109	-0.005374	-0.000909
4.3600	815.697	149.846	79.354	14.315	-0.515	9.909	1552.877	-0.010489	-0.005555	-0.001002
4.3800	849.511	154.069	82.217	15.690	-0.514	9.910	1617.250	-0.010785	-0.005755	-0.001098
4.4000	856.394	156.376	83.428	16.206	-0.518	9.909	1630.354	-0.010946	-0.005840	-0.001134
4.4200	902.065	161.754	87.076	18.440	-0.513	9.909	1717.300	-0.011323	-0.006095	-0.001291
4.4400	922.849	165.033	89.249	19.595	-0.515	9.909	1756.868	-0.011552	-0.006247	-0.001372
4.4600	954.800	169.218	91.933	21.304	-0.510	9.909	1817.694	-0.011845	-0.006435	-0.001491
4.4800	950.246	169.786	91.946	21.081	-0.519	9.909	1809.025	-0.011885	-0.006436	-0.001476
4.5000	939.681	169.119	91.602	20.570	-0.509	9.909	1788.912	-0.011838	-0.006412	-0.001440
4.5200	926.306	168.257	91.299	20.041	-0.516	9.909	1763.449	-0.011778	-0.006391	-0.001403
4.5400	894.551	165.227	89.375	18.024	-0.521	9.909	1702.995	-0.011566	-0.006256	-0.001262
4.5600	881.867	163.518	89.125	18.178	-0.510	9.909	1678.848	-0.011446	-0.006239	-0.001272
4.5800	841.320	159.461	85.711	16.149	-0.512	9.909	1601.658	-0.011162	-0.006000	-0.001130
4.6000	831.191	158.195	85.410	15.510	-0.514	9.909	1582.375	-0.011074	-0.005979	-0.001086
4.6200	784.829	152.917	81.696	13.981	-0.503	9.909	1494.112	-0.010704	-0.005719	-0.000979
4.6400	736.167	146.786	77.868	12.451	-0.508	9.908	1401.472	-0.010275	-0.005451	-0.000872
4.6600	691.427	141.730	74.579	10.646	-0.524	9.908	1316.299	-0.009921	-0.005221	-0.000745
4.6800	613.655	131.251	68.307	7.867	-0.506	9.908	1168.242	-0.009188	-0.004781	-0.000551
4.7000	586.123	127.179	65.938	6.711	-0.517	9.908	1115.828	-0.008903	-0.004616	-0.000470
4.7200	535.222	119.965	61.977	5.060	-0.504	9.908	1018.925	-0.008398	-0.004338	-0.000354
4.7400	466.858	110.448	57.050	3.531	-0.507	9.908	888.777	-0.007731	-0.003994	-0.000247
4.7600	409.118	101.416	52.413	1.295	-0.501	9.908	778.856	-0.007099	-0.003669	-0.000091
4.7800	357.270	93.160	48.837	-0.291	-0.517	9.908	680.151	-0.006521	-0.003419	0.000020
4.8000	276.463	80.600	42.794	-2.208	-0.521	9.908	526.314	-0.005642	-0.002996	0.000155
4.8200	264.545	77.195	41.280	-2.444	-0.521	9.908	503.626	-0.005404	-0.002890	0.000171
4.8400	210.458	68.034	36.837	-3.974	-0.509	9.908	400.658	-0.004762	-0.002579	0.000278
4.8600	180.221	62.437	34.291	-4.640	-0.511	9.908	343.094	-0.004371	-0.002400	0.000325
4.8800	123.218	52.527	28.871	-4.598	-0.510	9.907	234.575	-0.003677	-0.002021	0.000322
4.9000	96.858	46.136	25.746	-4.544	-0.519	9.908	184.393	-0.003229	-0.001802	0.000318
4.9200	82.100	42.564	24.162	-4.640	-0.516	9.907	156.298	-0.002979	-0.001691	0.000325
4.9400	52.254	36.184	20.489	-3.919	-0.518	9.907	99.478	-0.002533	-0.001434	0.000274
4.9600	45.957	33.700	19.498	-3.292	-0.517	9.907	87.490	-0.002359	-0.001365	0.000230
4.9800	43.853	32.615	18.838	-3.792	-0.508	9.907	83.485	-0.002283	-0.001319	0.000265
5.0000	179.274	66.759	36.217	-2.401	-0.514	9.896	341.291	-0.004673	-0.002535	0.000168
5.0200	107.273	52.444	29.021	-3.572	-0.520	9.896	204.220	-0.003671	-0.002031	0.000250
5.0400	71.490	43.440	24.464	-3.097	-0.506	9.896	136.099	-0.003041	-0.001713	0.000217
5.0600	65.058	40.104	22.775	-3.403	-0.510	9.896	123.854	-0.002807	-0.001594	0.000238
5.0800	127.291	49.359	26.447	-3.347	-0.518	9.896	242.329	-0.003455	-0.001851	0.000234
5.1000	180.506	56.710	30.684	-3.640	-0.511	9.897	343.637	-0.003970	-0.002148	0.000255
5.1200	274.208	71.818	38.159	-2.083	-0.513	9.896	522.022	-0.005027	-0.002671	0.000146
5.1400	265.928	71.080	37.249	-2.541	-0.513	9.896	506.258	-0.004976	-0.002607	0.000178
5.1600	396.615	90.119	46.632	0.307	-0.514	9.896	755.053	-0.006308	-0.003264	-0.000021
5.1800	455.075	98.888	50.500	2.044	-0.520	9.896	866.346	-0.006922	-0.003535	-0.000143
5.2000	535.237	111.047	56.887	4.351	-0.505	9.896	1018.953	-0.007773	-0.003982	-0.000305
5.2200	581.644	117.925	60.299	5.533	-0.519	9.896	1107.302	-0.008255	-0.004221	-0.000387
5.2400	647.830	127.138	65.267	7.880	-0.521	9.896	1233.301	-0.008900	-0.004569	-0.000552
5.2600	730.531	138.172	72.008	10.980	-0.504	9.896	1390.743	-0.009672	-0.005041	-0.000769
5.2800	798.204	147.718	78.365	13.648	-0.505	9.896	1519.575	-0.010340	-0.005486	-0.000955
5.3000	884.542	158.780	84.610	17.760	-0.509	9.896	1683.941	-0.011115	-0.005923	-0.001243
5.3200	944.205	166.688	90.144	20.375	-0.514	9.896	1797.523	-0.011668	-0.006310	-0.001426
5.3400	994.279	174.025	94.713	22.181	-0.503	9.896	1892.853	-0.012182	-0.006630	-0.001553
5.3600	1052.304	181.583	99.803	25.308	-0.528	9.896	2003.317	-0.012711	-0.006986	-0.001772
5.3800	1108.781	189.086	104.854	26.917	-0.512	9.896	2110.834	-0.013236	-0.007340	-0.001884
5.4000	1134.915	193.119	107.713	28.767	-0.517	9.896	2160.587	-0.013518	-0.007540	-0.002014
5.4200	1175.838	199.150	110.812	29.712	-0.515	9.895	2238.493	-0.013941	-0.007757	-0.002080
5.4400	1181.714	200.636	111.664	31.171	-0.521	9.896	2249.680	-0.014045	-0.007816	-0.002182
5.4600	1200.109	203.998	114.512	31.183	-0.518	9.895	2284.698	-0.014280	-0.008016	-0.002183
5.4800	1234.223	208.263	116.788	32.379	-0.498	9.896	2349.644	-0.014578	-0.008175	-0.002267
5.5000	1195.014	205.375	115.766	31.545	-0.504	9.895	2275.000	-0.014376	-0.008104	-0.002208
5.5200	1193.511	204.986	115.380	31.808	-0.502	9.896	2272.139	-0.014349	-0.008077	-0.002227
5.5400	1196.923	205.846	116.330	31.381	-0.514	9.896	2278.633	-0.014409	-0.008143	-0.002197
5.5600	1170.878	203.790	114.665	31.186	-0.512	9.896	2229.052	-0.014265	-0.008027	-0.002183
5.5800	1097.224	196.466	109.710	28.431	-0.501	9.895	2088.833	-0.013753	-0.007680	-0.001990
5.6000	1066.070	192.784	107.109	26.335	-0.512	9.895	2029.524	-0.013495	-0.007498	-0.001843
5.6200	1023.104	187.212	103.161	25.293	-0.504	9.896	1947.727	-0.013105	-0.007221	-0.001770
5.6400	936.916	177.458	96.294	21.484	-0.521	9.896	1783.648	-0.012422	-0.006741	-0.001504
5.6600	868.221	168.954	90.777	18.984	-0.519	9.896	1652.870	-0.011827	-0.006354	-0.001329
5.6800	803.058	161.142	85.726	16.262	-0.511	9.895	1528.816	-0.011280	-0.006001	-0.001138
5.7000	746.311	153.554	81.268	13.896	-0.517	9.895	1420.784	-0.010749	-0.005689	-0.000973
5.7200	682.756	145.163	75.586	11.243	-0.524	9.895	1299.791	-0.010161	-0.005291	-0.000787
5.7400	605.810	134.366	69.683	9.200	-0.520	9.895	1153.307	-0.009406	-0.004878	-0.000644
5.7600	504.158	120.092	62.030	6.031	-0.514	9.894	959.787	-0.008406	-0.004342	-0.000422
5.7800	502.264	118.659	60.752	5.726	-0.518	9.895	956.182	-0.008306	-0.004253	-0.000401
5.8000	380.099	101.609	52.208	2.685	-0.523	9.896	723.610	-0.007113	-0.003655	-0.000188
5.8200	312.621	89.731	46.853	0.099	-0.520	9.895	595.150	-0.006281	-0.003280	-0.000007
5.8400	246.556	78.668	41.997	-1.874	-0.515	9.895	469.379	-0.005507	-0.002940	0.000131
5.8600	219.219	72.512	38.763	-2.348	-0.516	9.895	417.337	-0.005076	-0.002713	0.000164
5.8800	169.250	63.688	34.662	-3.695	-0.512	9.894	322.208	-0.004458	-0.002426	0.000259
5.9000	98.887	50.500	27.440	-3.682	-0.517	9.895	188.255	-0.003535	-0.001921	0.000258
5.9200	88.232	46.177	25.898	-3.027	-0.516	9.894	167.971	-0.003232	-0.001813	0.000212
5.9400	79.200	43.636	23.888	-3.541	-0.512	9.894	150.776	-0.003054	-0.001672	0.000248
5.9600	89.629	44.302	24.670	-3.764	-0.512	9.894	170.631	-0.003101	-0.001727	0.000264
5.9800	81.018	42.814	23.779	-3.653	-0.513	9.895	154.238	-0.002997	-0.001665	0.000256
6.0000	44.529	35.003	20.311	-3.126	-0.522	9.895	84.772	-0.002450	-0.001422	0.000219
6.0200	47.730	34.601	19.802	-2.985	-0.520	9.894	90.866	-0.002422	-0.001386	0.000209
6.0400	83.603	40.312	22.101	-3.264	-0.512	9.894	159.159	-0.002822	-0.001547	0.000228
6.0600	123.654	46.899	25.457	-3.360	-0.528	9.894	235.405	-0.003283	-0.001782	0.000235
6.0800	164.366	53.515	28.953	-3.334	-0.520	9.895	312.910	-0.003746	-0.002027	0.000233
6.1000	207.572	60.325	31.924	-2.944	-0.516	9.895	395.164	-0.004223	-0.002235	0.000206
6.1200	263.253	68.162	36.190	-2.402	-0.520	9.894	501.165	-0.004771	-0.002533	0.000168
6.1400	322.089	78.236	40.746	-1.349	-0.522	9.894	613.174	-0.005477	-0.002852	0.000094
6.1600	393.489	88.895	45.834	0.152	-0.507	9.894	749.102	-0.006223	-0.003208	-0.000011
6.1800	447.351	97.913	50.184	2.030	-0.524	9.894	851.641	-0.006854	-0.003513	-0.000142
6.2000	497.831	105.252	53.073	3.724	-0.527	9.894	947.742	-0.007368	-0.003715	-0.000261
6.2200	597.830	119.439	61.604	6.392	-0.520	9.894	1138.115	-0.008361	-0.004312	-0.000447
6.2400	663.895	129.110	66.298	9.269	-0.520	9.894	1263.885	-0.009038	-0.004641	-0.000649
6.2600	738.075	139.534	72.737	12.174	-0.525	9.894	1405.106	-0.009767	-0.005092	-0.000852
6.2800	802.727	148.246	78.185	14.330	-0.525	9.894	1528.187	-0.010377	-0.005473	-0.001003
6.3000	873.752	158.098	84.542	16.969	-0.509	9.894	1663.399	-0.011067	-0.005918	-0.001188
6.3200	926.126	165.299	89.167	19.443	-0.516	9.894	1763.105	-0.011571	-0.006242	-0.001361
6.3400	999.600	174.706	95.262	22.318	-0.505	9.894	1902.981	-0.012229	-0.006668	-0.001562
6.3600	1076.290	184.766	101.535	25.446	-0.506	9.894	2048.979	-0.012934	-0.007107	-0.001781
6.3800	1123.404	191.282	106.532	27.599	-0.495	9.894	2138.672	-0.013390	-0.007457	-0.001932
6.4000	1116.971	191.854	107.121	27.170	-0.510	9.894	2126.427	-0.013430	-0.007499	-0.001902
6.4200	1169.090	198.551	110.687	30.433	-0.506	9.894	2225.647	-0.013899	-0.007748	-0.002130
6.4400	1200.680	203.109	113.852	30.893	-0.516	9.894	2285.786	-0.014218	-0.007970	-0.002163
6.4600	1193.271	203.624	114.224	31.657	-0.506	9.894	2271.681	-0.014254	-0.007996	-0.002216
6.4800	1189.619	204.097	114.431	31.171	-0.516	9.894	2264.729	-0.014287	-0.008010	-0.002182
6.5000	1211.620	206.485	115.366	32.825	-0.510	9.894	2306.614	-0.014454	-0.008076	-0.002298
6.5200	1206.330	207.194	116.428	32.408	-0.512	9.893	2296.543	-0.014504	-0.008150	-0.002269
6.5400	1208.269	207.388	115.850	31.920	-0.507	9.894	2300.234	-0.014517	-0.008110	-0.002234
6.5600	1170.488	204.248	114.994	31.115	-0.508	9.894	2228.308	-0.014297	-0.008050	-0.002178
6.5800	1104.137	197.204	109.849	28.030	-0.510	9.893	2101.994	-0.013804	-0.007689	-0.001962
6.6000	1054.889	191.714	106.559	27.169	-0.514	9.894	2008.238	-0.013420	-0.007459	-0.001902
6.6200	1013.516	187.045	102.706	24.861	-0.499	9.894	1929.474	-0.013093	-0.007189	-0.001740
6.6400	953.583	179.347	97.668	22.665	-0.521	9.893	1815.376	-0.012554	-0.006837	-0.001587
6.6600	880.845	171.315	92.578	19.526	-0.498	9.894	1676.903	-0.011992	-0.006480	-0.001367
6.6800	822.114	163.311	87.212	16.817	-0.506	9.893	1565.094	-0.011432	-0.006105	-0.001177
6.7000	746.296	154.124	81.021	14.399	-0.512	9.893	1420.755	-0.010789	-0.005672	-0.001008
6.7200	678.638	145.218	75.792	11.368	-0.503	9.893	1291.952	-0.010165	-0.005305	-0.000796
6.7400	592.375	133.295	69.271	8.659	-0.509	9.893	1127.729	-0.009331	-0.004849	-0.000606
6.7600	538.303	125.734	64.286	6.866	-0.507	9.894	1024.790	-0.008801	-0.004500	-0.000481
6.7800	457.224	113.213	58.634	5.087	-0.501	9.893	870.438	-0.007925	-0.004104	-0.000356
6.8000	387.282	102.374	52.399	2.600	-0.517	9.894	737.286	-0.007166	-0.003668	-0.000182
6.8200	321.788	91.061	47.294	0.486	-0.518	9.893	612.602	-0.006374	-0.003311	-0.000034
6.8400	278.567	83.226	43.276	-0.725	-0.505	9.893	530.319	-0.005826	-0.003029	0.000051
6.8600	219.610	72.941	39.109	-2.318	-0.515	9.893	418.081	-0.005106	-0.002738	0.000162
6.8800	169.009	64.062	34.344	-3.306	-0.505	9.893	321.751	-0.004484	-0.002404	0.000231
6.9000	133.948	57.042	30.823	-3.765	-0.504	9.893	255.003	-0.003993	-0.002158	0.000264
6.9200	95.250	48.999	26.917	-3.486	-0.521	9.893	181.332	-0.003430	-0.001884	0.000244
6.9400	63.300	41.647	23.091	-3.277	-0.513	9.893	120.506	-0.002915	-0.001616	0.000229
6.9600	44.153	37.074	20.791	-3.042	-0.507	9.893	84.057	-0.002595	-0.001455	0.000213
6.9800	43.522	35.601	19.762	-2.735	-0.493	9.893	82.855	-0.002492	-0.001383	0.000191
7.0000	50.781	36.295	20.105	-3.179	-0.510	9.893	96.674	-0.002541	-0.001407	0.000223
7.0200	51.668	35.699	19.802	-2.374	-0.517	9.893	98.362	-0.002499	-0.001386	0.000166
7.0400	72.437	38.895	21.509	-3.167	-0.518	9.893	137.901	-0.002723	-0.001506	0.000222
7.0600	112.097	45.399	23.875	-3.224	-0.514	9.893	213.404	-0.003178	-0.001671	0.000226
7.0800	146.046	50.737	27.109	-3.362	-0.500	9.892	278.034	-0.003552	-0.001898	0.000235
7.1000	200.749	59.213	31.361	-2.972	-0.513	9.893	382.175	-0.004145	-0.002195	0.000208
7.1200	251.365	66.800	35.694	-2.485	-0.508	9.893	478.535	-0.004676	-0.002499	0.000174
7.1400	327.499	79.500	41.086	-1.027	-0.516	9.892	623.474	-0.005565	-0.002876	0.000072
7.1600	371.577	86.516	44.337	0.154	-0.517	9.893	707.388	-0.006056	-0.003104	-0.000011
7.1800	441.850	97.122	49.346	1.183	-0.514	9.892	841.169	-0.006799	-0.003454	-0.000083
7.2000	534.185	110.477	56.583	4.810	-0.502	9.893	1016.951	-0.007733	-0.003961	-0.000337
7.2200	599.814	120.148	61.922	7.212	-0.518	9.892	1141.891	-0.008410	-0.004335	-0.000505
7.2400	679.645	131.153	68.129	9.951	-0.507	9.893	1293.869	-0.009181	-0.004769	-0.000697
7.2600	727.600	138.618	72.090	11.923	-0.525	9.893	1385.164	-0.009703	-0.005046	-0.000835
7.2800	810.121	149.595	78.790	14.496	-0.513	9.892	1542.263	-0.010472	-0.005515	-0.001015
7.3000	862.165	157.099	83.800	16.539	-0.500	9.892	1641.340	-0.010997	-0.005866	-0.001158
7.3200	959.894	169.232	91.232	20.873	-0.505	9.892	1827.393	-0.011846	-0.006386	-0.001461
7.3400	997.255	174.900	95.358	22.456	-0.516	9.892	1898.518	-0.012243	-0.006675	-0.001572
7.3600	1068.204	184.238	101.221	25.058	-0.509	9.892	2033.587	-0.012897	-0.007085	-0.001754
7.3800	1111.125	190.671	105.377	26.987	-0.512	9.892	2115.297	-0.013347	-0.007376	-0.001889
7.4000	1146.397	195.953	109.545	29.182	-0.521	9.892	2182.446	-0.013717	-0.007668	-0.002043
7.4200	1193.105	201.776	113.027	30.544	-0.504	9.892	2271.366	-0.014124	-0.007912	-0.002138
7.4400	1190.100	202.816	113.330	31.198	-0.505	9.892	2265.644	-0.014197	-0.007933	-0.002184
7.4600	1209.817	205.762	114.925	31.490	-0.510	9.892	2303.181	-0.014403	-0.008045	-0.002204
7.4800	1214.205	207.819	116.747	32.365	-0.501	9.892	2311.535	-0.014547	-0.008172	-0.002266
7.5000	1208.449	207.000	115.876	32.295	-0.513	9.892	2300.577	-0.014490	-0.008111	-0.002261
7.5200	1185.501	205.583	114.912	31.394	-0.505	9.892	2256.889	-0.014391	-0.008044	-0.002198
7.5400	1176.544	204.611	114.802	31.241	-0.505	9.892	2239.838	-0.014323	-0.008036	-0.002187
7.5600	1133.443	200.275	112.119	28.823	-0.508	9.892	2157.784	-0.014019	-0.007848	-0.002018
7.5800	1104.648	197.147	110.537	28.155	-0.504	9.892	2102.966	-0.013800	-0.007738	-0.001971
7.6000	1060.239	192.854	107.053	27.056	-0.508	9.891	2018.423	-0.013500	-0.007494	-0.001894
7.6200	1006.152	186.559	101.896	24.156	-0.502	9.892	1915.455	-0.013059	-0.007133	-0.001691
7.6400	938.494	178.388	96.886	22.472	-0.506	9.892	1786.652	-0.012487	-0.006782	-0.001573
7.6600	883.280	171.746	92.360	19.249	-0.511	9.891	1681.538	-0.012022	-0.006465	-0.001347
7.6800	810.918	162.241	86.165	16.872	-0.514	9.892	1543.779	-0.011357	-0.006032	-0.001181
7.7000	748.295	154.749	81.818	13.814	-0.510	9.892	1424.561	-0.010832	-0.005727	-0.000967
7.7200	649.603	141.783	74.003	10.645	-0.511	9.892	1236.677	-0.009925	-0.005180	-0.000745
7.7400	584.289	132.185	68.005	8.964	-0.503	9.892	1112.337	-0.009253	-0.004760	-0.000627
7.7600	525.483	123.663	63.091	6.573	-0.505	9.892	1000.385	-0.008656	-0.004416	-0.000460
7.7800	464.964	114.769	58.853	4.920	-0.520	9.892	885.172	-0.008034	-0.004120	-0.000344
7.8000	386.155	102.288	52.193	2.462	-0.504	9.891	735.140	-0.007160	-0.003654	-0.000172
7.8200	327.484	92.563	48.617	1.347	-0.506	9.891	623.446	-0.006479	-0.003403	-0.000094
7.8400	256.580	81.113	42.258	-0.376	-0.502	9.891	488.462	-0.005678	-0.002958	0.000026
7.8600	196.737	69.508	37.265	-2.264	-0.513	9.891	374.537	-0.004866	-0.002609	0.000158
7.8800	166.214	63.646	34.387	-3.070	-0.506	9.891	316.429	-0.004455	-0.002407	0.000215
7.9000	118.544	54.640	29.447	-3.180	-0.514	9.891	225.677	-0.003825	-0.002061	0.000223
7.9200	88.878	48.053	26.504	-3.737	-0.509	9.891	169.201	-0.003364	-0.001855	0.000262
7.9400	66.696	42.326	23.627	-2.708	-0.512	9.891	126.972	-0.002963	-0.001654	0.000190
7.9600	26.149	33.809	18.496	-2.153	-0.520	9.891	49.782	-0.002367	-0.001295	0.000151
7.9800	61.030	38.341	20.421	-2.916	-0.517	9.891	116.186	-0.002684	-0.001429	0.000204
8.0000	84.234	42.467	22.855	-3.361	-0.519	9.891	160.360	-0.002973	-0.001600	0.000235
8.0200	82.581	41.993	21.824	-3.152	-0.517	9.891	157.213	-0.002940	-0.001528	0.000221
8.0400	91.748	43.037	23.037	-3.084	-0.523	9.890	174.665	-0.003013	-0.001613	0.000216
8.0600	103.245	44.719	23.928	-3.822	-0.520	9.890	196.552	-0.003130	-0.001675	0.000268
8.0800	142.394	50.930	26.655	-3.640	-0.518	9.891	271.082	-0.003565	-0.001866	0.000255
8.1000	201.636	60.060	31.911	-2.514	-0.525	9.891	383.863	-0.004204	-0.002234	0.000176
8.1200	250.869	67.189	35.696	-2.124	-0.514	9.891	477.591	-0.004703	-0.002499	0.000149
8.1400	323.171	78.694	40.894	-1.723	-0.520	9.890	615.234	-0.005509	-0.002863	0.000121
8.1600	352.431	84.336	43.497	-0.639	-0.510	9.891	670.938	-0.005904	-0.003045	0.000045
8.1800	465.340	100.150	51.079	2.725	-0.502	9.891	885.887	-0.007011	-0.003576	-0.000191
8.2000	541.879	112.185	56.552	5.351	-0.502	9.891	1031.599	-0.007853	-0.003959	-0.000375
8.2200	528.865	111.990	57.919	4.434	-0.508	9.890	1006.823	-0.007839	-0.004054	-0.000310
8.2400	685.671	132.529	68.651	10.479	-0.520	9.891	1305.342	-0.009277	-0.004806	-0.000734
8.2600	732.981	139.549	73.136	11.519	-0.508	9.890	1395.407	-0.009768	-0.005120	-0.000806
8.2800	698.596	138.133	72.325	10.646	-0.517	9.891	1329.947	-0.009669	-0.005063	-0.000745
8.3000	934.917	165.310	89.537	18.999	-0.516	9.890	1779.842	-0.011572	-0.006268	-0.001330
8.3200	916.102	165.422	88.175	18.513	-0.508	9.890	1744.022	-0.011580	-0.006172	-0.001296
8.3400	993.243	175.176	95.606	22.582	-0.525	9.890	1890.879	-0.012262	-0.006692	-0.001581
8.3600	1008.511	177.541	96.638	23.055	-0.525	9.890	1919.947	-0.012428	-0.006765	-0.001614
8.3800	1060.044	184.516	102.019	25.752	-0.526	9.890	2018.051	-0.012916	-0.007141	-0.001803
8.4000	1139.920	195.342	108.540	28.170	-0.516	9.890	2170.115	-0.013674	-0.007598	-0.001972
8.4200	1182.706	201.109	111.994	30.879	-0.505	9.890	2251.568	-0.014078	-0.007840	-0.002162
8.4400	1180.421	202.122	112.752	30.780	-0.513	9.890	2247.219	-0.014149	-0.007893	-0.002155
8.4600	1208.059	206.361	115.119	32.283	-0.522	9.890	2299.833	-0.014445	-0.008058	-0.002260
8.4800	1193.646	205.041	114.237	31.853	-0.518	9.890	2272.396	-0.014353	-0.007997	-0.002230
8.5000	1229.579	209.670	117.937	33.156	-0.506	9.891	2340.803	-0.014677	-0.008256	-0.002321
8.5200	1187.575	206.347	116.124	31.478	-0.521	9.890	2260.838	-0.014444	-0.008129	-0.002203
8.5400	1187.440	206.123	115.559	31.824	-0.506	9.890	2260.580	-0.014429	-0.008089	-0.002228
8.5600	1123.148	200.027	112.574	29.142	-0.525	9.890	2138.186	-0.014002	-0.007880	-0.002040
8.5800	1097.074	196.924	109.724	27.863	-0.506	9.890	2088.547	-0.013785	-0.007681	-0.001950
8.6000	1063.230	193.078	107.193	26.877	-0.519	9.890	2024.117	-0.013515	-0.007504	-0.001881
8.6200	1002.710	186.586	102.046	25.056	-0.518	9.889	1908.903	-0.013061	-0.007143	-0.001754
8.6400	954.439	180.124	98.028	22.651	-0.506	9.890	1817.007	-0.012609	-0.006862	-0.001586
8.6600	899.330	173.690	93.431	20.847	-0.504	9.889	1712.093	-0.012158	-0.006540	-0.001459
8.6800	824.654	164.407	87.693	17.247	-0.512	9.890	1569.929	-0.011508	-0.006139	-0.001207
8.7000	757.597	155.933	82.244	14.606	-0.504	9.890	1442.270	-0.010915	-0.005757	-0.001022
8.7200	669.440	144.495	75.007	12.312	-0.515	9.890	1274.443	-0.010115	-0.005251	-0.000862
8.7400	603.060	135.157	69.972	9.283	-0.516	9.889	1148.071	-0.009461	-0.004898	-0.000650
8.7600	533.764	125.108	63.585	7.852	-0.520	9.889	1016.150	-0.008758	-0.004451	-0.000550
8.7800	439.340	112.035	57.119	4.102	-0.517	9.889	836.391	-0.007842	-0.003998	-0.000287
8.8000	388.575	103.206	52.646	3.545	-0.501	9.889	739.746	-0.007224	-0.003685	-0.000248
8.8200	323.772	92.479	47.763	1.444	-0.509	9.889	616.379	-0.006474	-0.003343	-0.000101
8.8400	266.844	82.488	42.727	-0.805	-0.524	9.889	508.003	-0.005774	-0.002991	0.000056
8.8600	210.082	72.263	38.090	-1.775	-0.521	9.890	399.942	-0.005058	-0.002666	0.000124
8.8800	175.652	66.020	35.420	-3.348	-0.502	9.889	334.396	-0.004621	-0.002479	0.000234
8.9000	124.766	56.348	30.452	-3.487	-0.519	9.889	237.522	-0.003944	-0.002132	0.000244
8.9200	87.931	48.137	26.654	-2.917	-0.511	9.889	167.398	-0.003370	-0.001866	0.000204
8.9400	71.791	43.984	24.164	-2.583	-0.514	9.889	136.671	-0.003079	-0.001691	0.000181
8.9600	64.607	41.646	23.640	-3.263	-0.518	9.889	122.995	-0.002915	-0.001655	0.000228
8.9800	48.181	37.158	20.312	-2.346	-0.507	9.889	91.724	-0.002601	-0.001422	0.000164
9.0000	48.391	36.631	20.393	-2.693	-0.522	9.889	92.125	-0.002564	-0.001428	0.000189
9.0200	57.950	37.382	20.586	-3.028	-0.510	9.889	110.321	-0.002617	-0.001441	0.000212
9.0400	82.611	41.366	22.319	-3.443	-0.517	9.889	157.270	-0.002896	-0.001562	0.000241
9.0600	125.592	48.734	25.733	-2.709	-0.514	9.889	239.096	-0.003411	-0.001801	0.000190
9.0800	164.381	54.404	29.393	-3.667	-0.499	9.889	312.939	-0.003808	-0.002057	0.000257
9.1000	206.130	60.656	32.267	-3.139	-0.497	9.889	392.418	-0.004246	-0.002259	0.000220
9.1200	275.651	71.637	37.334	-1.527	-0.506	9.889	524.769	-0.005015	-0.002613	0.000107
9.1400	339.131	81.990	42.174	-0.485	-0.506	9.889	645.618	-0.005739	-0.002952	0.000034
9.1600	377.408	87.922	44.913	0.042	-0.506	9.889	718.489	-0.006155	-0.003144	-0.000003
9.1800	442.196	98.635	50.060	2.294	-0.505	9.889	841.827	-0.006904	-0.003504	-0.000161
9.2000	551.197	113.601	57.713	5.142	-0.506	9.888	1049.337	-0.007952	-0.004040	-0.000360
9.2200	582.246	118.549	60.614	6.811	-0.508	9.888	1108.446	-0.008298	-0.004243	-0.000477
9.2400	658.154	129.236	66.269	9.631	-0.517	9.889	1252.956	-0.009046	-0.004639	-0.000674
9.2600	746.371	140.757	73.688	12.813	-0.514	9.889	1420.898	-0.009853	-0.005158	-0.000897
9.2800	807.927	149.762	79.301	14.885	-0.509	9.888	1538.086	-0.010483	-0.005551	-0.001042
9.3000	879.883	159.198	84.460	17.706	-0.514	9.888	1675.072	-0.011144	-0.005912	-0.001239
9.3200	965.906	170.798	92.456	21.818	-0.513	9.889	1838.837	-0.011956	-0.006472	-0.001527
9.3400	1007.670	176.609	96.445	23.402	-0.503	9.889	1918.344	-0.012363	-0.006751	-0.001638
9.3600	1055.145	183.503	101.013	24.973	-0.517	9.888	2008.724	-0.012845	-0.007071	-0.001748
9.3800	1111.516	191.183	105.458	26.795	-0.520	9.888	2116.041	-0.013383	-0.007382	-0.001876
9.4000	1146.127	196.619	108.966	29.155	-0.516	9.888	2181.931	-0.013763	-0.007628	-0.002041
9.4200	1176.995	201.290	111.718	30.616	-0.514	9.888	2240.696	-0.014090	-0.007820	-0.002143
9.4400	1176.815	202.095	112.339	30.019	-0.512	9.888	2240.353	-0.014147	-0.007864	-0.002101
9.4600	1209.426	206.264	115.200	31.658	-0.514	9.888	2302.437	-0.014438	-0.008064	-0.002216
9.4800	1219.089	208.068	116.110	32.339	-0.512	9.888	2320.833	-0.014565	-0.008128	-0.002264
9.5000	1208.269	208.069	116.305	32.629	-0.509	9.888	2300.234	-0.014565	-0.008141	-0.002284
9.5200	1181.669	205.542	114.651	31.337	-0.497	9.888	2249.594	-0.014388	-0.008026	-0.002194
9.5400	1170.803	205.067	115.187	31.060	-0.509	9.888	2228.909	-0.014355	-0.008063	-0.002174
9.5600	1125.838	199.607	110.922	29.463	-0.518	9.888	2143.307	-0.013972	-0.007765	-0.002062
9.5800	1151.086	203.082	113.313	30.713	-0.505	9.888	2191.372	-0.014216	-0.007932	-0.002150
9.6000	1069.121	194.328	108.127	27.361	-0.517	9.888	2035.332	-0.013603	-0.007569	-0.001915
9.6200	1018.535	188.323	103.794	25.446	-0.516	9.887	1939.030	-0.013183	-0.007266	-0.001781
9.6400	953.988	180.514	97.849	22.931	-0.512	9.887	1816.149	-0.012636	-0.006849	-0.001605
9.6600	864.900	169.813	91.244	19.679	-0.516	9.888	1646.547	-0.011887	-0.006387	-0.001378
9.6800	806.004	162.615	86.346	16.968	-0.517	9.887	1534.424	-0.011383	-0.006044	-0.001188
9.7000	736.422	153.123	80.649	13.827	-0.504	9.888	1401.958	-0.010719	-0.005645	-0.000968
9.7200	680.171	145.979	76.233	11.591	-0.513	9.888	1294.870	-0.010219	-0.005336	-0.000811
9.7400	602.684	135.130	69.571	10.131	-0.505	9.887	1147.356	-0.009459	-0.004870	-0.000709
9.7600	543.908	126.805	65.001	8.298	-0.510	9.888	1035.461	-0.008876	-0.004550	-0.000581
9.7800	427.588	110.309	55.894	4.532	-0.500	9.888	814.018	-0.007722	-0.003913	-0.000317
9.8000	396.795	104.460	53.044	3.279	-0.514	9.888	755.396	-0.007312	-0.003713	-0.000230
9.8200	338.590	94.507	48.383	1.682	-0.508	9.887	644.588	-0.006616	-0.003387	-0.000118
9.8400	261.119	82.084	42.823	-0.180	-0.510	9.888	497.103	-0.005746	-0.002998	0.000013
9.8600	247.338	77.888	40.965	-0.582	-0.506	9.887	470.867	-0.005452	-0.002868	0.000041
9.8800	162.547	64.686	34.677	-2.763	-0.507	9.887	309.448	-0.004528	-0.002427	0.000193
9.9000	112.623	54.279	29.557	-3.111	-0.498	9.887	214.405	-0.003800	-0.002069	0.000218
9.9200	88.397	48.289	26.558	-2.569	-0.509	9.887	168.285	-0.003380	-0.001859	0.000180
9.9400	90.170	48.081	25.910	-3.597	-0.501	9.887	171.661	-0.003366	-0.001814	0.000252
9.9600	17.328	32.963	16.803	-1.847	-0.518	9.887	32.988	-0.002307	-0.001176	0.000129
9.9800	25.007	33.614	17.627	-2.193	-0.506	9.887	47.607	-0.002353	-0.001234	0.000153
Test Cycles
Time (sec)	Axial stress (kPa)	Axial micro-strain #1	Axial micro-strain #2	Axial micro-strain #3	Confining pressure (kPa)	Temperature (�C)	Load (N)	Displacement #1 (mm)	Displacement #2 (mm)	Displacement #3 (mm)
0.0000	77.742	41.521	21.344	-2.930	-0.504	9.887	148.001	-0.002906	-0.001494	0.000205
0.0200	80.267	42.439	22.417	-3.263	-0.520	9.887	152.807	-0.002971	-0.001569	0.000228
0.0400	54.673	37.325	19.995	-2.762	-0.524	9.887	104.084	-0.002613	-0.001400	0.000193
0.0600	89.870	42.828	22.236	-2.956	-0.513	9.887	171.089	-0.002998	-0.001557	0.000207
0.0800	151.456	52.694	27.563	-2.916	-0.518	9.887	288.334	-0.003689	-0.001929	0.000204
0.1000	181.137	57.377	29.791	-3.180	-0.523	9.886	344.839	-0.004016	-0.002085	0.000223
0.1200	255.062	68.439	35.516	-1.527	-0.526	9.886	485.573	-0.004791	-0.002486	0.000107
0.1400	334.262	81.057	41.239	-0.055	-0.516	9.886	636.349	-0.005674	-0.002887	0.000004
0.1600	380.895	88.508	44.858	0.599	-0.522	9.887	725.126	-0.006196	-0.003140	-0.000042
0.1800	407.165	93.440	47.501	1.362	-0.511	9.886	775.137	-0.006541	-0.003325	-0.000095
0.2000	503.542	106.945	53.734	4.142	-0.518	9.886	958.614	-0.007486	-0.003761	-0.000290
0.2200	598.777	119.966	61.371	7.810	-0.512	9.886	1139.917	-0.008398	-0.004296	-0.000547
0.2400	727.345	137.671	71.678	11.536	-0.513	9.887	1384.678	-0.009637	-0.005017	-0.000808
0.2600	718.779	138.909	71.732	12.492	-0.528	9.887	1368.370	-0.009724	-0.005021	-0.000874
0.2800	880.469	157.875	84.157	18.205	-0.519	9.887	1676.188	-0.011051	-0.005891	-0.001274
0.3000	887.833	160.975	85.961	18.248	-0.523	9.886	1690.207	-0.011268	-0.006017	-0.001277
0.3200	936.646	167.355	90.157	21.248	-0.525	9.886	1783.133	-0.011715	-0.006311	-0.001487
0.3400	1005.205	176.609	96.156	22.791	-0.526	9.886	1913.652	-0.012363	-0.006731	-0.001595
0.3600	1043.528	181.877	99.446	25.238	-0.519	9.886	1986.609	-0.012731	-0.006961	-0.001767
0.3800	1117.152	192.102	106.421	27.778	-0.525	9.886	2126.770	-0.013447	-0.007449	-0.001944
0.4000	1128.393	194.148	107.591	28.781	-0.526	9.886	2148.170	-0.013590	-0.007531	-0.002015
0.4200	1161.936	199.025	110.769	29.948	-0.530	9.887	2212.029	-0.013932	-0.007754	-0.002096
0.4400	1213.093	205.860	115.134	31.711	-0.514	9.886	2309.418	-0.014410	-0.008059	-0.002220
0.4600	1242.594	210.406	118.505	33.587	-0.532	9.887	2365.580	-0.014728	-0.008295	-0.002351
0.4800	1232.660	210.644	118.159	33.727	-0.518	9.886	2346.668	-0.014745	-0.008271	-0.002361
0.5000	1214.942	209.376	117.591	32.463	-0.515	9.886	2312.937	-0.014656	-0.008231	-0.002272
0.5200	1196.802	208.098	116.441	32.297	-0.513	9.886	2278.404	-0.014567	-0.008151	-0.002261
0.5400	1185.952	206.792	116.083	31.547	-0.522	9.886	2257.748	-0.014475	-0.008126	-0.002208
0.5600	1111.065	199.023	111.017	29.503	-0.524	9.886	2115.183	-0.013932	-0.007771	-0.002065
0.5800	1115.138	199.303	111.294	28.683	-0.517	9.885	2122.936	-0.013951	-0.007791	-0.002008
0.6000	1066.160	194.285	107.742	27.626	-0.518	9.886	2029.696	-0.013600	-0.007542	-0.001934
0.6200	1007.580	187.655	102.872	24.903	-0.516	9.886	1918.173	-0.013136	-0.007201	-0.001743
0.6400	932.798	178.235	96.391	21.525	-0.521	9.886	1775.808	-0.012476	-0.006747	-0.001507
0.6600	880.409	172.567	92.261	20.765	-0.524	9.885	1676.073	-0.012080	-0.006458	-0.001454
0.6800	795.874	161.436	86.399	16.453	-0.518	9.886	1515.141	-0.011301	-0.006048	-0.001152
0.7000	767.861	156.794	82.700	15.649	-0.517	9.885	1461.811	-0.010976	-0.005789	-0.001095
0.7200	675.858	146.093	75.392	12.173	-0.518	9.886	1286.659	-0.010226	-0.005277	-0.000852
0.7400	598.431	135.391	69.201	9.951	-0.525	9.885	1139.259	-0.009477	-0.004844	-0.000697
0.7600	546.673	127.180	64.673	8.422	-0.526	9.885	1040.726	-0.008903	-0.004527	-0.000590
0.7800	457.540	115.185	58.288	5.018	-0.526	9.885	871.038	-0.008063	-0.004080	-0.000351
0.8000	398.704	105.488	53.210	3.837	-0.520	9.885	759.029	-0.007384	-0.003725	-0.000269
0.8200	340.649	95.260	48.700	2.252	-0.517	9.885	648.508	-0.006668	-0.003409	-0.000158
0.8400	268.963	84.599	42.947	0.446	-0.520	9.885	512.037	-0.005922	-0.003006	-0.000031
0.8600	204.386	71.928	37.800	-2.083	-0.520	9.885	389.099	-0.005035	-0.002646	0.000146
0.8800	169.040	65.743	34.923	-2.222	-0.517	9.885	321.808	-0.004602	-0.002445	0.000156
0.9000	116.140	55.225	29.669	-2.916	-0.514	9.885	221.100	-0.003866	-0.002077	0.000204
0.9200	102.223	51.554	28.003	-2.334	-0.531	9.886	194.607	-0.003609	-0.001960	0.000163
0.9400	77.847	45.885	24.371	-2.498	-0.522	9.885	148.201	-0.003212	-0.001706	0.000175
0.9600	74.841	44.524	24.123	-2.236	-0.520	9.885	142.479	-0.003117	-0.001689	0.000157
0.9800	52.675	39.800	21.218	-2.723	-0.508	9.885	100.279	-0.002786	-0.001485	0.000191
1.0000	44.259	36.936	20.283	-2.918	-0.509	9.885	84.257	-0.002586	-0.001420	0.000204
1.0200	53.020	37.701	20.503	-2.944	-0.510	9.885	100.937	-0.002639	-0.001435	0.000206
1.0400	81.409	41.896	22.389	-2.263	-0.519	9.885	154.982	-0.002933	-0.001567	0.000158
1.0600	109.677	46.691	24.561	-3.597	-0.515	9.885	208.797	-0.003268	-0.001719	0.000252
1.0800	161.090	54.322	28.444	-2.640	-0.522	9.884	306.673	-0.003803	-0.001991	0.000185
1.1000	200.795	60.602	31.525	-2.275	-0.517	9.885	382.261	-0.004242	-0.002207	0.000159
1.1200	253.514	68.633	35.583	-1.610	-0.520	9.885	482.626	-0.004804	-0.002491	0.000113
1.1400	341.731	82.642	42.148	0.473	-0.513	9.884	650.568	-0.005785	-0.002950	-0.000033
1.1600	354.370	85.795	43.648	-0.013	-0.506	9.885	674.629	-0.006006	-0.003055	0.000001
1.1800	453.091	99.566	50.501	3.043	-0.511	9.885	862.570	-0.006970	-0.003535	-0.000213
1.2000	537.491	112.296	56.377	6.072	-0.499	9.885	1023.245	-0.007861	-0.003946	-0.000425
1.2200	605.960	121.525	61.894	7.479	-0.500	9.884	1153.593	-0.008507	-0.004333	-0.000524
1.2400	667.652	130.779	67.427	10.354	-0.514	9.884	1271.038	-0.009154	-0.004720	-0.000725
1.2600	746.852	141.507	72.956	13.286	-0.509	9.885	1421.814	-0.009905	-0.005107	-0.000930
1.2800	826.172	152.388	80.498	15.801	-0.505	9.884	1572.819	-0.010667	-0.005635	-0.001106
1.3000	933.910	165.604	88.960	19.680	-0.521	9.885	1777.925	-0.011592	-0.006227	-0.001378
1.3200	965.951	172.066	93.281	22.067	-0.516	9.885	1838.923	-0.012045	-0.006530	-0.001545
1.3400	1058.571	183.320	100.519	25.016	-0.510	9.884	2015.247	-0.012832	-0.007036	-0.001751
1.3600	1055.280	184.531	101.250	26.057	-0.519	9.884	2008.982	-0.012917	-0.007087	-0.001824
1.3800	1083.007	188.934	104.043	26.557	-0.527	9.884	2061.768	-0.013225	-0.007283	-0.001859
1.4000	1149.643	197.094	109.214	29.032	-0.515	9.884	2188.625	-0.013797	-0.007645	-0.002032
1.4200	1168.729	200.997	111.527	31.102	-0.522	9.885	2224.960	-0.014070	-0.007807	-0.002177
1.4400	1195.946	204.443	113.729	31.700	-0.520	9.884	2276.773	-0.014311	-0.007961	-0.002219
1.4600	1220.307	208.584	116.097	33.254	-0.518	9.884	2323.151	-0.014601	-0.008127	-0.002328
1.4800	1211.034	208.263	115.739	32.059	-0.521	9.884	2305.498	-0.014578	-0.008102	-0.002244
1.5000	1170.878	204.527	114.569	31.323	-0.510	9.884	2229.052	-0.014317	-0.008020	-0.002193
1.5200	1204.016	208.236	115.890	31.934	-0.519	9.884	2292.137	-0.014577	-0.008112	-0.002235
1.5400	1178.317	206.082	115.559	31.782	-0.507	9.884	2243.214	-0.014426	-0.008089	-0.002225
1.5600	1113.124	199.774	111.650	28.963	-0.505	9.884	2119.102	-0.013984	-0.007815	-0.002027
1.5800	1091.363	196.133	108.842	28.752	-0.523	9.884	2077.675	-0.013729	-0.007619	-0.002013
1.6000	1070.173	194.618	108.044	27.350	-0.503	9.883	2037.334	-0.013623	-0.007563	-0.001915
1.6200	1013.892	187.686	102.569	25.850	-0.515	9.884	1930.189	-0.013138	-0.007180	-0.001809
1.6400	940.252	179.499	97.354	22.387	-0.511	9.884	1789.999	-0.012565	-0.006815	-0.001567
1.6600	873.481	171.190	91.546	19.943	-0.524	9.884	1662.884	-0.011983	-0.006408	-0.001396
1.6800	844.206	167.397	89.180	19.040	-0.510	9.884	1607.151	-0.011718	-0.006243	-0.001333
1.7000	761.880	157.113	83.016	15.398	-0.510	9.884	1450.424	-0.010998	-0.005811	-0.001078
1.7200	646.372	141.950	73.770	11.675	-0.510	9.884	1230.526	-0.009937	-0.005164	-0.000817
1.7400	581.269	133.226	67.783	9.966	-0.514	9.883	1106.586	-0.009326	-0.004745	-0.000698
1.7600	548.958	127.250	64.907	8.396	-0.500	9.883	1045.074	-0.008907	-0.004543	-0.000588
1.7800	455.992	114.588	58.234	5.418	-0.514	9.884	868.092	-0.008021	-0.004076	-0.000379
1.8000	390.408	104.168	52.590	3.906	-0.505	9.884	743.237	-0.007292	-0.003681	-0.000273
1.8200	358.322	98.176	50.074	3.002	-0.505	9.883	682.154	-0.006872	-0.003505	-0.000210
1.8400	270.707	83.850	43.332	-0.224	-0.505	9.883	515.356	-0.005870	-0.003033	0.000016
1.8600	213.629	74.096	38.710	-1.098	-0.515	9.883	406.694	-0.005187	-0.002710	0.000077
1.8800	157.979	63.936	33.603	-1.903	-0.518	9.883	300.751	-0.004476	-0.002352	0.000133
1.9000	124.210	56.531	30.605	-3.333	-0.519	9.884	236.464	-0.003957	-0.002142	0.000233
1.9200	99.338	51.291	27.136	-2.819	-0.521	9.883	189.114	-0.003590	-0.001900	0.000197
1.9400	72.091	45.370	24.232	-2.514	-0.522	9.883	137.243	-0.003176	-0.001696	0.000176
1.9600	50.120	40.021	21.717	-2.793	-0.537	9.883	95.415	-0.002801	-0.001520	0.000196
1.9800	49.458	38.536	21.427	-1.959	-0.520	9.883	94.156	-0.002698	-0.001500	0.000137
2.0000	52.103	38.396	21.439	-2.291	-0.500	9.883	99.192	-0.002688	-0.001501	0.000160
2.0200	100.149	45.552	23.873	-2.722	-0.501	9.883	190.659	-0.003189	-0.001671	0.000191
2.0400	101.802	46.537	24.687	-2.527	-0.509	9.883	193.806	-0.003258	-0.001728	0.000177
2.0600	126.960	49.693	25.581	-3.304	-0.515	9.883	241.699	-0.003479	-0.001791	0.000231
2.0800	164.050	55.906	29.257	-2.611	-0.512	9.883	312.309	-0.003913	-0.002048	0.000183
2.1000	196.316	60.451	31.430	-2.027	-0.516	9.883	373.735	-0.004232	-0.002200	0.000142
2.1200	229.063	65.606	34.111	-1.873	-0.493	9.883	436.077	-0.004592	-0.002388	0.000131
2.1400	288.681	74.708	37.869	-1.029	-0.506	9.883	549.574	-0.005230	-0.002651	0.000072
2.1600	378.896	88.522	44.791	1.168	-0.516	9.883	721.321	-0.006197	-0.003135	-0.000082
2.1800	491.309	105.946	53.571	4.893	-0.504	9.883	935.326	-0.007416	-0.003750	-0.000342
2.2000	538.122	112.811	56.721	5.907	-0.508	9.883	1024.446	-0.007897	-0.003971	-0.000413
2.2200	587.536	119.855	60.506	8.214	-0.509	9.883	1118.517	-0.008390	-0.004235	-0.000575
2.2400	680.682	132.168	67.716	10.228	-0.496	9.883	1295.843	-0.009252	-0.004740	-0.000716
2.2600	732.845	140.188	72.612	13.285	-0.518	9.883	1395.149	-0.009813	-0.005083	-0.000930
2.2800	835.189	153.594	81.062	16.177	-0.505	9.883	1589.985	-0.010752	-0.005674	-0.001132
2.3000	865.726	158.253	83.953	18.372	-0.506	9.882	1648.121	-0.011078	-0.005877	-0.001286
2.3200	941.109	168.397	90.006	20.581	-0.515	9.883	1791.630	-0.011788	-0.006300	-0.001441
2.3400	1033.819	180.165	98.675	24.766	-0.512	9.883	1968.126	-0.012612	-0.006907	-0.001734
2.3600	1052.545	184.503	100.778	24.891	-0.513	9.882	2003.775	-0.012915	-0.007054	-0.001742
2.3800	1128.633	193.827	106.724	27.682	-0.528	9.883	2148.628	-0.013568	-0.007471	-0.001938
2.4000	1136.794	196.189	108.167	28.891	-0.528	9.882	2164.164	-0.013733	-0.007572	-0.002022
2.4200	1190.836	203.512	112.889	32.074	-0.508	9.883	2267.046	-0.014246	-0.007902	-0.002245
2.4400	1187.966	204.109	113.894	31.935	-0.513	9.883	2261.581	-0.014288	-0.007973	-0.002235
2.4600	1210.373	207.417	115.766	32.603	-0.504	9.882	2304.239	-0.014519	-0.008104	-0.002282
2.4800	1206.811	207.624	115.613	32.657	-0.512	9.882	2297.459	-0.014534	-0.008093	-0.002286
2.5000	1200.063	207.903	115.380	32.978	-0.510	9.883	2284.613	-0.014553	-0.008077	-0.002308
2.5200	1202.498	207.944	115.613	33.350	-0.509	9.883	2289.248	-0.014556	-0.008093	-0.002334
2.5400	1205.083	209.070	116.594	32.809	-0.508	9.882	2294.168	-0.014635	-0.008162	-0.002297
2.5600	1111.937	199.191	110.220	28.753	-0.522	9.882	2116.842	-0.013943	-0.007715	-0.002013
2.5800	1119.256	200.275	111.045	29.364	-0.523	9.882	2130.775	-0.014019	-0.007773	-0.002055
2.6000	1063.049	194.246	107.495	27.530	-0.508	9.882	2023.773	-0.013597	-0.007525	-0.001927
2.6200	1010.675	188.226	103.050	25.486	-0.506	9.882	1924.067	-0.013176	-0.007214	-0.001784
2.6400	961.067	182.319	98.839	23.068	-0.511	9.882	1829.624	-0.012762	-0.006919	-0.001615
2.6600	880.544	172.081	92.357	20.929	-0.504	9.882	1676.331	-0.012046	-0.006465	-0.001465
2.6800	813.713	164.464	86.910	17.706	-0.507	9.882	1549.101	-0.011512	-0.006084	-0.001239
2.7000	742.944	154.821	81.172	14.816	-0.514	9.882	1414.375	-0.010837	-0.005682	-0.001037
2.7200	667.111	145.245	75.213	12.841	-0.509	9.882	1270.008	-0.010167	-0.005265	-0.000899
2.7400	602.970	135.852	69.268	9.906	-0.516	9.882	1147.900	-0.009510	-0.004849	-0.000693
2.7600	518.360	124.232	62.816	8.312	-0.506	9.882	986.824	-0.008696	-0.004397	-0.000582
2.7800	452.205	113.990	57.323	6.241	-0.519	9.882	860.882	-0.007979	-0.004013	-0.000437
2.8000	385.960	103.749	52.289	3.419	-0.529	9.882	734.768	-0.007262	-0.003660	-0.000239
2.8200	335.554	95.149	48.587	2.474	-0.508	9.882	638.809	-0.006660	-0.003401	-0.000173
2.8400	268.152	83.392	42.850	0.500	-0.523	9.882	510.492	-0.005837	-0.002999	-0.000035
2.8600	201.937	72.846	37.691	-1.416	-0.525	9.882	384.436	-0.005099	-0.002638	0.000099
2.8800	183.031	67.702	35.625	-1.652	-0.520	9.882	348.444	-0.004739	-0.002494	0.000116
2.9000	124.450	57.585	30.328	-2.526	-0.518	9.882	236.921	-0.004031	-0.002123	0.000177
2.9200	103.951	52.067	27.699	-2.972	-0.508	9.881	197.897	-0.003645	-0.001939	0.000208
2.9400	64.607	43.691	23.943	-2.124	-0.531	9.881	122.995	-0.003058	-0.001676	0.000149
2.9600	61.496	41.841	22.373	-2.096	-0.511	9.882	117.073	-0.002929	-0.001566	0.000147
2.9800	59.167	40.951	22.335	-2.972	-0.517	9.882	112.638	-0.002867	-0.001563	0.000208
3.0000	42.019	36.935	19.858	-2.083	-0.522	9.882	79.994	-0.002585	-0.001390	0.000146
3.0200	51.502	37.214	20.558	-2.040	-0.514	9.881	98.047	-0.002605	-0.001439	0.000143
3.0400	75.863	41.646	21.591	-2.973	-0.525	9.881	144.424	-0.002915	-0.001511	0.000208
3.0600	124.721	49.139	25.747	-2.736	-0.525	9.882	237.436	-0.003440	-0.001802	0.000192
3.0800	147.865	53.417	27.397	-2.264	-0.516	9.882	281.496	-0.003739	-0.001918	0.000158
3.1000	208.880	62.449	32.267	-1.457	-0.523	9.881	397.654	-0.004371	-0.002259	0.000102
3.1200	281.723	73.332	37.663	-0.929	-0.517	9.882	536.327	-0.005133	-0.002636	0.000065
3.1400	310.833	78.251	39.575	-0.568	-0.525	9.882	591.745	-0.005478	-0.002770	0.000040
3.1600	387.162	89.937	45.436	1.975	-0.512	9.882	737.057	-0.006296	-0.003181	-0.000138
3.1800	449.019	99.776	50.020	3.127	-0.520	9.882	854.816	-0.006984	-0.003501	-0.000219
3.2000	517.308	109.961	54.795	5.434	-0.527	9.882	984.821	-0.007697	-0.003836	-0.000380
3.2200	608.034	122.373	61.456	8.548	-0.506	9.881	1157.541	-0.008566	-0.004302	-0.000598
3.2400	660.664	130.139	66.612	10.449	-0.524	9.882	1257.734	-0.009110	-0.004663	-0.000731
3.2600	729.780	140.215	72.655	12.689	-0.527	9.882	1389.313	-0.009815	-0.005086	-0.000888
3.2800	808.468	150.234	79.273	16.135	-0.525	9.882	1539.116	-0.010516	-0.005549	-0.001129
3.3000	884.317	160.726	85.229	18.455	-0.526	9.881	1683.512	-0.011251	-0.005966	-0.001292
3.3200	957.099	170.049	91.257	22.149	-0.526	9.881	1822.071	-0.011903	-0.006388	-0.001550
3.3400	984.496	174.749	94.767	22.639	-0.505	9.881	1874.228	-0.012232	-0.006634	-0.001585
3.3600	1054.604	184.167	100.820	25.931	-0.508	9.881	2007.694	-0.012892	-0.007057	-0.001815
3.3800	1121.239	192.825	106.587	28.126	-0.517	9.880	2134.552	-0.013498	-0.007461	-0.001969
3.4000	1124.621	194.813	107.659	28.447	-0.509	9.881	2140.989	-0.013637	-0.007536	-0.001991
3.4200	1160.569	199.774	110.991	30.629	-0.512	9.881	2209.425	-0.013984	-0.007769	-0.002144
3.4400	1219.961	207.916	115.862	32.589	-0.502	9.882	2322.493	-0.014554	-0.008110	-0.002281
3.4600	1215.468	207.903	115.835	33.075	-0.502	9.881	2313.938	-0.014553	-0.008108	-0.002315
3.4800	1213.228	208.875	116.319	33.281	-0.510	9.881	2309.675	-0.014621	-0.008142	-0.002330
3.5000	1217.722	209.306	116.402	32.920	-0.512	9.881	2318.230	-0.014651	-0.008148	-0.002304
3.5200	1194.713	208.110	116.605	32.531	-0.520	9.882	2274.427	-0.014568	-0.008162	-0.002277
3.5400	1185.756	207.193	115.863	32.728	-0.518	9.882	2257.376	-0.014503	-0.008110	-0.002291
3.5600	1139.093	202.761	113.659	29.893	-0.526	9.882	2168.541	-0.014193	-0.007956	-0.002092
3.5800	1098.411	198.162	110.316	28.863	-0.518	9.881	2091.093	-0.013871	-0.007722	-0.002020
3.6000	1066.852	194.480	107.728	27.849	-0.518	9.881	2031.012	-0.013614	-0.007541	-0.001949
3.6200	1008.030	187.990	103.244	25.377	-0.515	9.882	1919.031	-0.013159	-0.007227	-0.001776
3.6400	946.309	180.514	97.850	22.750	-0.514	9.882	1801.529	-0.012636	-0.006850	-0.001593
3.6600	888.164	173.176	93.473	21.459	-0.502	9.881	1690.836	-0.012122	-0.006543	-0.001502
3.6800	817.455	164.240	86.980	18.371	-0.501	9.881	1556.225	-0.011497	-0.006089	-0.001286
3.7000	763.608	157.168	83.057	15.967	-0.508	9.881	1453.714	-0.011002	-0.005814	-0.001118
3.7200	671.574	145.675	75.225	13.340	-0.504	9.881	1278.505	-0.010197	-0.005266	-0.000934
3.7400	594.794	134.768	68.980	10.186	-0.503	9.881	1132.336	-0.009434	-0.004829	-0.000713
3.7600	522.688	124.829	63.144	8.353	-0.500	9.881	995.064	-0.008738	-0.004420	-0.000585
3.7800	451.739	114.325	57.724	5.893	-0.506	9.880	859.995	-0.008003	-0.004041	-0.000413
3.8000	403.212	106.723	53.528	4.810	-0.513	9.881	767.612	-0.007471	-0.003747	-0.000337
3.8200	330.820	94.552	47.860	2.153	-0.505	9.881	629.797	-0.006619	-0.003350	-0.000151
3.8400	269.550	84.364	43.758	1.029	-0.503	9.880	513.153	-0.005906	-0.003063	-0.000072
3.8600	212.742	73.873	38.255	-1.139	-0.497	9.880	405.006	-0.005171	-0.002678	0.000080
3.8800	192.920	69.746	36.231	-1.026	-0.496	9.880	367.270	-0.004882	-0.002536	0.000072
3.9000	119.160	56.779	29.846	-3.013	-0.508	9.881	226.851	-0.003975	-0.002089	0.000211
3.9200	107.709	53.138	28.361	-2.250	-0.507	9.880	205.050	-0.003720	-0.001985	0.000157
3.9400	77.592	46.842	25.167	-1.929	-0.502	9.880	147.715	-0.003279	-0.001762	0.000135
3.9600	72.392	44.956	24.343	-2.818	-0.513	9.880	137.815	-0.003147	-0.001704	0.000197
3.9800	65.689	43.330	22.871	-2.526	-0.508	9.880	125.055	-0.003033	-0.001601	0.000177
4.0000	41.418	37.118	19.664	-1.720	-0.506	9.880	78.850	-0.002598	-0.001377	0.000120
4.0200	48.407	37.493	20.325	-1.775	-0.511	9.881	92.154	-0.002625	-0.001423	0.000124
4.0400	88.412	44.052	22.746	-2.958	-0.508	9.881	168.314	-0.003084	-0.001592	0.000207
4.0600	113.885	48.372	25.113	-2.109	-0.502	9.880	216.808	-0.003386	-0.001758	0.000148
4.0800	127.486	50.404	25.774	-2.916	-0.510	9.880	242.701	-0.003528	-0.001804	0.000204
4.1000	187.254	59.101	30.658	-1.763	-0.506	9.880	356.483	-0.004137	-0.002146	0.000123
4.1200	245.444	68.230	35.240	-1.694	-0.516	9.880	467.262	-0.004776	-0.002467	0.000119
4.1400	286.231	74.927	38.104	-0.238	-0.512	9.880	544.910	-0.005245	-0.002667	0.000017
4.1600	401.364	92.718	46.057	1.878	-0.514	9.880	764.093	-0.006490	-0.003224	-0.000131
4.1800	432.142	98.010	48.230	3.615	-0.509	9.880	822.687	-0.006861	-0.003376	-0.000253
4.2000	516.541	109.851	55.248	6.129	-0.508	9.880	983.362	-0.007690	-0.003867	-0.000429
4.2200	595.952	121.190	61.248	8.770	-0.505	9.880	1134.539	-0.008483	-0.004287	-0.000614
4.2400	674.971	132.377	67.658	10.742	-0.505	9.879	1284.971	-0.009266	-0.004736	-0.000752
4.2600	690.811	135.211	69.132	11.604	-0.509	9.879	1315.126	-0.009465	-0.004839	-0.000812
4.2800	807.251	149.943	78.406	15.663	-0.502	9.880	1536.798	-0.010496	-0.005488	-0.001096
4.3000	868.537	159.017	84.129	18.830	-0.521	9.880	1653.471	-0.011131	-0.005889	-0.001318
4.3200	939.291	168.425	90.706	21.540	-0.513	9.879	1788.168	-0.011790	-0.006349	-0.001508
4.3400	1005.581	177.761	96.130	23.721	-0.508	9.879	1914.368	-0.012443	-0.006729	-0.001660
4.3600	1070.654	186.114	101.605	25.570	-0.512	9.880	2038.250	-0.013028	-0.007112	-0.001790
4.3800	1094.955	190.645	104.165	27.251	-0.510	9.880	2084.513	-0.013345	-0.007292	-0.001908
4.4000	1129.084	195.634	107.810	29.366	-0.518	9.879	2149.487	-0.013694	-0.007547	-0.002056
4.4200	1146.457	198.704	109.833	30.518	-0.510	9.879	2182.560	-0.013909	-0.007688	-0.002136
4.4400	1178.017	202.456	112.434	31.143	-0.524	9.879	2242.641	-0.014172	-0.007870	-0.002180
4.4600	1261.620	213.726	120.049	34.354	-0.510	9.879	2401.800	-0.014961	-0.008403	-0.002405
4.4800	1220.848	210.460	118.256	32.726	-0.512	9.879	2324.181	-0.014732	-0.008278	-0.002291
4.5000	1166.806	204.681	114.512	31.142	-0.517	9.879	2221.298	-0.014328	-0.008016	-0.002180
4.5200	1232.435	212.169	118.227	33.673	-0.515	9.880	2346.239	-0.014852	-0.008276	-0.002357
4.5400	1173.749	206.805	115.891	31.809	-0.517	9.879	2234.516	-0.014476	-0.008112	-0.002227
4.5600	1149.508	204.708	114.196	30.933	-0.514	9.880	2188.368	-0.014330	-0.007994	-0.002165
4.5800	1098.547	198.815	110.509	28.031	-0.518	9.879	2091.351	-0.013917	-0.007736	-0.001962
4.6000	1025.013	190.492	104.811	25.820	-0.519	9.880	1951.361	-0.013334	-0.007337	-0.001807
4.6200	1027.688	190.198	103.890	26.056	-0.510	9.880	1956.453	-0.013314	-0.007272	-0.001824
4.6400	970.234	183.988	100.148	23.764	-0.521	9.880	1847.076	-0.012879	-0.007010	-0.001664
4.6600	870.085	171.872	91.864	20.541	-0.513	9.879	1656.418	-0.012031	-0.006430	-0.001438
4.6800	764.315	157.792	82.219	16.245	-0.524	9.879	1455.059	-0.011045	-0.005755	-0.001137
4.7000	758.198	157.030	82.257	15.788	-0.509	9.879	1443.415	-0.010992	-0.005758	-0.001105
4.7200	676.293	146.522	75.915	13.036	-0.501	9.879	1287.489	-0.010257	-0.005314	-0.000913
4.7400	603.616	135.864	69.681	11.230	-0.513	9.879	1149.130	-0.009510	-0.004878	-0.000786
4.7600	538.017	127.110	63.971	8.604	-0.518	9.879	1024.246	-0.008898	-0.004478	-0.000602
4.7800	497.485	120.410	60.586	7.965	-0.507	9.879	947.084	-0.008429	-0.004241	-0.000558
4.8000	435.568	112.031	55.924	5.783	-0.513	9.879	829.210	-0.007842	-0.003915	-0.000405
4.8200	358.443	99.470	50.047	3.392	-0.516	9.879	682.383	-0.006963	-0.003503	-0.000237
4.8400	275.020	86.017	44.144	1.752	-0.524	9.879	523.567	-0.006021	-0.003090	-0.000123
4.8600	200.028	72.888	37.622	-1.264	-0.513	9.879	380.802	-0.005102	-0.002634	0.000089
4.8800	146.797	62.673	33.025	-1.902	-0.522	9.879	279.465	-0.004387	-0.002312	0.000133
4.9000	135.166	59.546	31.376	-2.319	-0.513	9.879	257.320	-0.004168	-0.002196	0.000162
4.9200	93.732	50.929	26.544	-2.750	-0.531	9.879	178.442	-0.003565	-0.001858	0.000193
4.9400	76.029	46.940	25.072	-1.832	-0.530	9.879	144.739	-0.003286	-0.001755	0.000128
4.9600	42.741	39.328	21.205	-1.429	-0.534	9.878	81.367	-0.002753	-0.001484	0.000100
4.9800	34.490	36.686	19.223	-1.901	-0.532	9.879	65.660	-0.002568	-0.001346	0.000133
5.0000	41.719	36.670	19.664	-1.373	-0.522	9.879	79.422	-0.002567	-0.001376	0.000096
5.0200	89.524	45.108	23.545	-2.193	-0.521	9.879	170.431	-0.003158	-0.001648	0.000154
5.0400	87.465	44.872	22.128	-2.292	-0.526	9.879	166.512	-0.003141	-0.001549	0.000160
5.0600	102.103	46.442	24.094	-2.472	-0.518	9.879	194.378	-0.003251	-0.001687	0.000173
5.0800	162.397	55.780	28.553	-2.735	-0.520	9.879	309.162	-0.003905	-0.001999	0.000191
5.1000	189.839	59.963	30.685	-1.791	-0.524	9.878	361.404	-0.004197	-0.002148	0.000125
5.1200	259.315	70.428	36.108	-1.514	-0.518	9.878	493.670	-0.004930	-0.002528	0.000106
5.1400	314.785	79.582	40.332	0.528	-0.496	9.878	599.270	-0.005571	-0.002823	-0.000037
5.1600	396.389	91.785	45.948	2.418	-0.498	9.878	754.623	-0.006425	-0.003216	-0.000169
5.1800	460.350	101.608	50.448	4.113	-0.510	9.879	876.389	-0.007113	-0.003531	-0.000288
5.2000	492.902	107.586	53.417	5.544	-0.504	9.878	938.358	-0.007531	-0.003739	-0.000388
5.2200	587.355	120.064	60.065	7.771	-0.512	9.878	1118.174	-0.008404	-0.004205	-0.000544
5.2400	658.755	130.112	66.422	10.743	-0.508	9.878	1254.101	-0.009108	-0.004650	-0.000752
5.2600	747.889	142.701	73.700	13.702	-0.506	9.878	1423.788	-0.009989	-0.005159	-0.000959
5.2800	824.113	152.402	80.207	17.009	-0.504	9.878	1568.899	-0.010668	-0.005615	-0.001191
5.3000	884.542	161.269	85.904	18.469	-0.517	9.878	1683.941	-0.011289	-0.006013	-0.001293
5.3200	945.272	169.410	90.846	21.915	-0.514	9.879	1799.555	-0.011859	-0.006359	-0.001534
5.3400	1025.028	179.722	97.904	23.861	-0.513	9.877	1951.389	-0.012581	-0.006853	-0.001670
5.3600	1068.790	186.571	101.896	26.321	-0.504	9.878	2034.702	-0.013060	-0.007133	-0.001842
5.3800	1103.566	192.007	105.556	27.333	-0.502	9.878	2100.906	-0.013440	-0.007389	-0.001913
5.4000	1141.257	197.800	109.269	29.129	-0.505	9.878	2172.661	-0.013846	-0.007649	-0.002039
5.4200	1184.404	202.899	112.781	31.392	-0.500	9.878	2254.801	-0.014203	-0.007895	-0.002197
5.4400	1180.211	203.818	112.640	31.046	-0.502	9.878	2246.819	-0.014267	-0.007885	-0.002173
5.4600	1226.228	209.792	116.649	33.102	-0.506	9.878	2334.423	-0.014685	-0.008165	-0.002317
5.4800	1226.033	210.822	117.313	33.477	-0.504	9.878	2334.051	-0.014758	-0.008212	-0.002343
5.5000	1220.217	210.905	117.078	33.367	-0.524	9.879	2322.979	-0.014763	-0.008195	-0.002336
5.5200	1213.649	210.488	117.464	33.492	-0.516	9.878	2310.476	-0.014734	-0.008222	-0.002344
5.5400	1167.557	206.348	114.692	31.381	-0.500	9.878	2222.729	-0.014444	-0.008028	-0.002197
5.5600	1136.538	202.775	113.506	30.421	-0.511	9.878	2163.677	-0.014194	-0.007945	-0.002129
5.5800	1121.946	201.262	112.382	30.071	-0.506	9.877	2135.897	-0.014088	-0.007867	-0.002105
5.6000	1029.626	191.757	105.170	26.281	-0.500	9.878	1960.144	-0.013423	-0.007362	-0.001840
5.6200	1011.923	189.089	103.617	25.752	-0.503	9.877	1926.441	-0.013236	-0.007253	-0.001803
5.6400	947.706	181.027	97.630	22.997	-0.506	9.878	1804.190	-0.012672	-0.006834	-0.001610
5.6600	889.141	174.054	93.473	21.540	-0.504	9.877	1692.696	-0.012184	-0.006543	-0.001508
5.6800	822.670	165.590	87.502	18.371	-0.510	9.877	1566.153	-0.011591	-0.006125	-0.001286
5.7000	768.718	158.126	82.795	16.233	-0.505	9.877	1463.442	-0.011069	-0.005796	-0.001136
5.7200	694.147	148.718	77.580	13.438	-0.506	9.877	1321.478	-0.010410	-0.005431	-0.000941
5.7400	594.253	135.226	69.158	11.132	-0.503	9.877	1131.306	-0.009466	-0.004841	-0.000779
5.7600	511.236	123.513	62.031	7.658	-0.511	9.877	973.263	-0.008646	-0.004342	-0.000536
5.7800	477.753	118.439	59.019	7.090	-0.506	9.877	909.519	-0.008291	-0.004131	-0.000496
5.8000	375.500	102.888	51.917	4.699	-0.511	9.877	714.855	-0.007202	-0.003634	-0.000329
5.8200	332.038	95.328	48.189	2.448	-0.508	9.877	632.114	-0.006673	-0.003373	-0.000171
5.8400	250.208	81.752	41.418	1.013	-0.506	9.877	476.332	-0.005723	-0.002899	-0.000071
5.8600	169.746	68.134	35.404	-1.556	-0.517	9.877	323.153	-0.004769	-0.002478	0.000109
5.8800	151.607	62.451	33.082	-1.984	-0.505	9.877	288.620	-0.004372	-0.002316	0.000139
5.9000	147.940	61.380	32.282	-1.986	-0.497	9.878	281.639	-0.004297	-0.002260	0.000139
5.9200	106.191	53.514	28.471	-2.694	-0.510	9.877	202.160	-0.003746	-0.001993	0.000189
5.9400	57.935	43.831	23.241	-2.247	-0.501	9.877	110.292	-0.003068	-0.001627	0.000157
5.9600	44.364	39.686	21.151	-1.459	-0.509	9.877	84.457	-0.002778	-0.001481	0.000102
5.9800	49.023	39.563	21.275	-2.181	-0.509	9.877	93.327	-0.002769	-0.001489	0.000153
6.0000	59.948	41.103	21.053	-3.042	-0.508	9.877	114.126	-0.002877	-0.001474	0.000213
6.0200	62.879	40.590	21.149	-2.055	-0.506	9.877	119.705	-0.002841	-0.001480	0.000144
6.0400	104.808	47.289	24.576	-2.804	-0.511	9.877	199.528	-0.003310	-0.001720	0.000196
6.0600	135.947	52.304	26.173	-2.583	-0.510	9.877	258.808	-0.003661	-0.001832	0.000181
6.0800	203.455	62.535	31.855	-1.319	-0.501	9.877	387.325	-0.004377	-0.002230	0.000092
6.1000	229.018	66.494	33.674	-1.513	-0.514	9.877	435.991	-0.004655	-0.002357	0.000106
6.1200	246.451	69.317	34.993	-1.458	-0.504	9.876	469.179	-0.004852	-0.002450	0.000102
6.1400	313.568	79.653	39.753	0.596	-0.502	9.877	596.952	-0.005576	-0.002783	-0.000042
6.1600	385.298	90.450	45.231	1.820	-0.520	9.877	733.509	-0.006332	-0.003166	-0.000127
6.1800	445.607	99.944	49.911	4.032	-0.520	9.876	848.322	-0.006996	-0.003494	-0.000282
6.2000	513.325	109.976	54.270	5.450	-0.518	9.876	977.240	-0.007698	-0.003799	-0.000381
6.2200	600.505	122.234	61.950	9.201	-0.515	9.876	1143.208	-0.008556	-0.004336	-0.000644
6.2400	658.064	130.154	65.885	10.423	-0.520	9.876	1252.785	-0.009111	-0.004612	-0.000730
6.2600	749.316	142.744	74.086	14.663	-0.517	9.877	1426.506	-0.009992	-0.005186	-0.001026
6.2800	810.046	150.734	79.135	16.121	-0.515	9.876	1542.120	-0.010551	-0.005539	-0.001128
6.3000	883.550	160.853	85.160	19.567	-0.512	9.876	1682.053	-0.011260	-0.005961	-0.001370
6.3200	875.254	161.993	85.849	19.263	-0.509	9.876	1666.260	-0.011339	-0.006009	-0.001348
6.3400	1001.523	176.664	95.854	23.696	-0.513	9.877	1906.643	-0.012366	-0.006710	-0.001659
6.3600	1047.751	184.126	100.148	26.014	-0.519	9.877	1994.648	-0.012889	-0.007010	-0.001821
6.3800	1115.724	192.660	106.105	28.446	-0.512	9.876	2124.052	-0.013486	-0.007427	-0.001991
6.4000	1127.296	195.564	108.058	28.378	-0.508	9.877	2146.082	-0.013689	-0.007564	-0.001986
6.4200	1223.147	207.168	115.160	33.601	-0.504	9.877	2328.558	-0.014502	-0.008061	-0.002352
6.4400	1270.622	215.685	121.491	35.353	-0.516	9.877	2418.938	-0.015098	-0.008504	-0.002475
6.4600	1238.236	212.655	119.561	33.518	-0.510	9.877	2357.283	-0.014886	-0.008369	-0.002346
6.4800	1235.921	212.973	120.297	34.243	-0.504	9.877	2352.877	-0.014908	-0.008421	-0.002397
6.5000	1234.088	213.500	120.422	33.477	-0.512	9.876	2349.386	-0.014945	-0.008430	-0.002343
6.5200	1216.219	212.100	119.464	33.616	-0.509	9.876	2315.369	-0.014847	-0.008362	-0.002353
6.5400	1163.950	206.679	116.318	30.891	-0.514	9.876	2215.862	-0.014468	-0.008142	-0.002162
6.5600	1152.469	205.318	114.182	30.684	-0.515	9.876	2194.004	-0.014372	-0.007993	-0.002148
6.5800	1113.755	201.442	112.077	28.892	-0.512	9.877	2120.304	-0.014101	-0.007845	-0.002022
6.6000	1025.358	191.354	104.882	26.043	-0.506	9.876	1952.019	-0.013395	-0.007342	-0.001823
6.6200	1023.044	190.433	104.235	26.057	-0.500	9.877	1947.613	-0.013330	-0.007296	-0.001824
6.6400	961.968	183.586	99.831	23.877	-0.508	9.877	1831.341	-0.012851	-0.006988	-0.001671
6.6600	899.826	175.703	94.022	20.845	-0.500	9.876	1713.037	-0.012299	-0.006582	-0.001459
6.6800	841.696	167.968	89.540	19.626	-0.494	9.876	1602.373	-0.011758	-0.006268	-0.001374
6.7000	776.307	160.057	83.732	16.482	-0.501	9.876	1477.890	-0.011204	-0.005861	-0.001154
6.7200	685.536	147.746	76.878	14.051	-0.501	9.876	1305.084	-0.010342	-0.005381	-0.000984
6.7400	604.488	137.213	69.846	11.465	-0.499	9.876	1150.789	-0.009605	-0.004889	-0.000803
6.7600	540.331	127.235	64.275	9.354	-0.512	9.876	1028.652	-0.008906	-0.004499	-0.000655
6.7800	442.406	113.935	56.776	6.087	-0.517	9.876	842.228	-0.007975	-0.003974	-0.000426
6.8000	387.222	104.375	52.371	5.213	-0.513	9.876	737.171	-0.007306	-0.003666	-0.000365
6.8200	322.765	94.467	47.652	2.808	-0.508	9.876	614.462	-0.006613	-0.003336	-0.000197
6.8400	252.718	82.364	41.858	0.445	-0.516	9.876	481.110	-0.005765	-0.002930	-0.000031
6.8600	212.186	74.332	38.365	-0.542	-0.504	9.876	403.948	-0.005203	-0.002686	0.000038
6.8800	166.410	66.593	34.456	-1.345	-0.496	9.876	316.801	-0.004662	-0.002412	0.000094
6.9000	134.504	59.976	31.649	-1.597	-0.510	9.875	256.062	-0.004198	-0.002215	0.000112
6.9200	104.778	53.961	28.002	-2.178	-0.506	9.875	199.471	-0.003777	-0.001960	0.000152
6.9400	76.705	47.287	24.947	-2.305	-0.504	9.875	146.027	-0.003310	-0.001746	0.000161
6.9600	79.741	47.315	24.948	-2.194	-0.517	9.875	151.806	-0.003312	-0.001746	0.000154
6.9800	56.867	41.674	21.838	-2.124	-0.517	9.876	108.261	-0.002917	-0.001529	0.000149
7.0000	49.383	39.771	21.495	-1.499	-0.500	9.876	94.013	-0.002784	-0.001505	0.000105
7.0200	44.710	37.894	20.133	-1.625	-0.507	9.875	85.115	-0.002653	-0.001409	0.000114
7.0400	53.516	38.590	20.558	-1.805	-0.516	9.876	101.881	-0.002701	-0.001439	0.000126
7.0600	105.890	47.079	24.383	-2.097	-0.512	9.876	201.588	-0.003296	-0.001707	0.000147
7.0800	148.060	53.596	27.590	-2.360	-0.517	9.875	281.868	-0.003752	-0.001931	0.000165
7.1000	202.418	62.172	31.912	-1.848	-0.508	9.875	385.351	-0.004352	-0.002234	0.000129
7.1200	259.420	70.523	35.474	-0.626	-0.509	9.876	493.870	-0.004937	-0.002483	0.000044
7.1400	317.129	80.276	40.002	0.835	-0.503	9.875	603.733	-0.005619	-0.002800	-0.000058
7.1600	378.941	89.908	44.239	2.503	-0.515	9.875	721.407	-0.006294	-0.003097	-0.000175
7.1800	459.749	101.566	50.761	4.253	-0.504	9.875	875.244	-0.007110	-0.003553	-0.000298
7.2000	527.858	112.322	55.922	6.796	-0.510	9.875	1004.906	-0.007863	-0.003915	-0.000476
7.2200	598.672	121.887	61.371	8.325	-0.505	9.876	1139.717	-0.008532	-0.004296	-0.000583
7.2400	684.845	133.949	68.376	12.175	-0.508	9.875	1303.768	-0.009376	-0.004786	-0.000852
7.2600	748.475	142.897	73.700	14.690	-0.506	9.875	1424.904	-0.010003	-0.005159	-0.001028
7.2800	804.606	151.068	79.273	16.357	-0.515	9.875	1531.763	-0.010575	-0.005549	-0.001145
7.3000	879.162	160.835	84.997	19.316	-0.524	9.875	1673.698	-0.011258	-0.005950	-0.001352
7.3200	937.547	168.885	90.804	21.249	-0.509	9.875	1784.849	-0.011822	-0.006356	-0.001487
7.3400	1022.172	180.126	98.068	24.738	-0.505	9.875	1945.953	-0.012609	-0.006865	-0.001732
7.3600	1073.900	187.061	102.087	26.112	-0.520	9.875	2044.430	-0.013094	-0.007146	-0.001828
7.3800	1099.148	191.435	104.866	27.848	-0.516	9.875	2092.495	-0.013400	-0.007341	-0.001949
7.4000	1163.815	199.830	110.510	30.183	-0.509	9.875	2215.605	-0.013988	-0.007736	-0.002113
7.4200	1167.677	202.052	111.458	31.045	-0.516	9.875	2222.958	-0.014144	-0.007802	-0.002173
7.4400	1194.743	205.779	114.375	32.394	-0.517	9.875	2274.485	-0.014405	-0.008006	-0.002268
7.4600	1211.996	208.695	116.221	32.530	-0.510	9.874	2307.329	-0.014609	-0.008135	-0.002277
7.4800	1217.587	210.014	116.318	33.838	-0.514	9.875	2317.972	-0.014701	-0.008142	-0.002369
7.5000	1207.127	209.125	116.911	33.365	-0.515	9.875	2298.059	-0.014639	-0.008184	-0.002336
7.5200	1190.009	208.375	115.928	32.045	-0.522	9.875	2265.472	-0.014586	-0.008115	-0.002243
7.5400	1166.610	205.081	113.524	31.367	-0.516	9.874	2220.926	-0.014356	-0.007947	-0.002196
7.5600	1171.164	206.957	115.241	32.365	-0.509	9.875	2229.595	-0.014487	-0.008067	-0.002266
7.5800	1085.667	197.439	108.843	28.350	-0.507	9.875	2066.832	-0.013821	-0.007619	-0.001984
7.6000	1075.418	196.634	109.228	28.655	-0.507	9.874	2047.319	-0.013764	-0.007646	-0.002006
7.6200	1016.011	190.102	103.050	25.611	-0.501	9.875	1934.223	-0.013307	-0.007213	-0.001793
7.6400	941.845	180.929	98.165	23.249	-0.498	9.875	1793.032	-0.012665	-0.006872	-0.001627
7.6600	904.440	175.578	94.066	22.304	-0.494	9.874	1721.821	-0.012290	-0.006585	-0.001561
7.6800	818.928	165.310	87.569	18.358	-0.501	9.874	1559.029	-0.011572	-0.006130	-0.001285
7.7000	736.572	154.654	80.761	15.870	-0.506	9.874	1402.245	-0.010826	-0.005653	-0.001111
7.7200	657.267	144.246	74.112	13.231	-0.502	9.873	1251.268	-0.010097	-0.005188	-0.000926
7.7400	601.046	136.351	69.544	10.909	-0.504	9.874	1144.238	-0.009545	-0.004868	-0.000764
7.7600	549.138	129.001	65.058	9.991	-0.501	9.874	1045.418	-0.009030	-0.004554	-0.000699
7.7800	463.461	116.856	58.688	6.920	-0.506	9.874	882.311	-0.008180	-0.004108	-0.000484
7.8000	386.801	105.137	52.852	4.961	-0.502	9.875	736.370	-0.007360	-0.003700	-0.000347
7.8200	324.824	94.094	47.418	3.392	-0.507	9.874	618.382	-0.006587	-0.003319	-0.000237
7.8400	252.567	82.476	42.023	1.320	-0.504	9.874	480.824	-0.005773	-0.002942	-0.000092
7.8600	199.111	72.652	36.947	-0.653	-0.513	9.874	379.057	-0.005086	-0.002586	0.000046
7.8800	173.638	67.036	34.881	-0.834	-0.499	9.874	330.563	-0.004693	-0.002442	0.000058
7.9000	154.507	63.089	32.805	-1.540	-0.500	9.873	294.142	-0.004416	-0.002296	0.000108
7.9200	109.106	55.211	29.200	-1.874	-0.506	9.874	207.710	-0.003865	-0.002044	0.000131
7.9400	72.647	47.009	24.714	-1.429	-0.504	9.873	138.302	-0.003291	-0.001730	0.000100
7.9600	72.572	45.356	24.356	-1.791	-0.511	9.874	138.159	-0.003175	-0.001705	0.000125
7.9800	50.631	41.020	21.550	-1.570	-0.506	9.874	96.388	-0.002871	-0.001509	0.000110
8.0000	53.892	40.395	21.109	-1.430	-0.506	9.874	102.596	-0.002828	-0.001478	0.000100
8.0200	54.658	40.048	21.274	-1.471	-0.514	9.874	104.055	-0.002803	-0.001489	0.000103
8.0400	70.799	41.828	22.003	-1.861	-0.520	9.873	134.783	-0.002928	-0.001540	0.000130
8.0600	101.908	46.788	24.051	-1.888	-0.502	9.873	194.006	-0.003275	-0.001684	0.000132
8.0800	138.832	52.860	26.738	-2.331	-0.515	9.873	264.301	-0.003700	-0.001872	0.000163
8.1000	219.520	64.393	32.488	-1.264	-0.510	9.874	417.910	-0.004508	-0.002274	0.000088
8.1200	270.917	73.193	36.478	-0.084	-0.514	9.874	515.757	-0.005123	-0.002553	0.000006
8.1400	320.977	80.807	40.208	1.390	-0.510	9.873	611.057	-0.005656	-0.002815	-0.000097
8.1600	413.792	95.009	47.033	3.086	-0.514	9.873	787.754	-0.006651	-0.003292	-0.000216
8.1800	426.882	97.789	47.955	4.032	-0.519	9.873	812.674	-0.006845	-0.003357	-0.000282
8.2000	540.016	113.630	56.526	6.782	-0.520	9.873	1028.051	-0.007954	-0.003957	-0.000475
8.2200	580.803	120.620	59.762	8.923	-0.526	9.873	1105.700	-0.008443	-0.004183	-0.000625
8.2400	671.620	132.154	66.848	12.451	-0.520	9.873	1278.591	-0.009251	-0.004679	-0.000872
8.2600	737.790	141.770	73.095	13.843	-0.517	9.874	1404.562	-0.009924	-0.005117	-0.000969
8.2800	815.231	151.833	79.617	17.385	-0.514	9.873	1551.991	-0.010628	-0.005573	-0.001217
8.3000	841.831	157.140	82.492	17.954	-0.516	9.874	1602.631	-0.011000	-0.005774	-0.001257
8.3200	966.191	171.998	92.385	22.485	-0.521	9.873	1839.380	-0.012040	-0.006467	-0.001574
8.3400	1000.742	177.637	96.196	23.390	-0.513	9.873	1905.155	-0.012435	-0.006734	-0.001637
8.3600	1039.846	183.961	99.748	25.932	-0.525	9.873	1979.599	-0.012877	-0.006982	-0.001815
8.3800	1118.053	193.908	106.519	29.028	-0.522	9.873	2128.487	-0.013574	-0.007456	-0.002032
8.4000	1156.120	199.985	110.275	29.907	-0.517	9.873	2200.956	-0.013999	-0.007719	-0.002093
8.4200	1191.377	204.235	112.943	32.422	-0.521	9.874	2268.076	-0.014296	-0.007906	-0.002270
8.4400	1180.121	204.388	113.660	31.838	-0.534	9.873	2246.647	-0.014307	-0.007956	-0.002229
8.4600	1235.936	211.197	117.271	33.435	-0.525	9.873	2352.905	-0.014784	-0.008209	-0.002340
8.4800	1225.687	210.960	117.214	34.088	-0.528	9.874	2333.393	-0.014767	-0.008205	-0.002386
8.5000	1223.448	211.307	116.926	34.354	-0.529	9.873	2329.130	-0.014791	-0.008185	-0.002405
8.5200	1213.334	210.655	117.354	33.782	-0.521	9.873	2309.875	-0.014746	-0.008215	-0.002365
8.5400	1197.884	210.030	116.525	32.685	-0.514	9.873	2280.464	-0.014702	-0.008157	-0.002288
8.5600	1138.492	203.581	113.440	30.295	-0.516	9.873	2167.397	-0.014251	-0.007941	-0.002121
8.5800	1057.474	195.564	107.097	28.041	-0.528	9.873	2013.159	-0.013689	-0.007497	-0.001963
8.6000	1041.033	192.575	105.281	27.516	-0.519	9.872	1981.859	-0.013480	-0.007370	-0.001926
8.6200	1037.050	192.589	105.527	26.570	-0.516	9.873	1974.277	-0.013481	-0.007387	-0.001860
8.6400	937.818	180.903	97.368	22.915	-0.515	9.873	1785.364	-0.012663	-0.006816	-0.001604
8.6600	893.559	174.831	93.638	21.622	-0.513	9.873	1701.107	-0.012238	-0.006555	-0.001514
8.6800	821.573	165.784	87.957	19.667	-0.512	9.873	1564.064	-0.011605	-0.006157	-0.001377
8.7000	751.015	156.862	82.575	16.412	-0.507	9.873	1429.739	-0.010980	-0.005780	-0.001149
8.7200	677.616	147.246	75.944	13.897	-0.513	9.873	1290.007	-0.010307	-0.005316	-0.000973
8.7400	603.872	137.003	69.805	11.425	-0.508	9.872	1149.616	-0.009590	-0.004886	-0.000800
8.7600	514.738	124.774	62.513	9.158	-0.516	9.873	979.929	-0.008734	-0.004376	-0.000641
8.7800	448.823	114.672	56.899	6.602	-0.504	9.873	854.445	-0.008027	-0.003983	-0.000462
8.8000	374.613	102.998	52.192	4.782	-0.509	9.873	713.167	-0.007210	-0.003653	-0.000335
8.8200	385.945	102.653	51.066	4.670	-0.509	9.873	734.739	-0.007186	-0.003575	-0.000327
8.8400	282.549	87.616	43.993	2.682	-0.512	9.872	537.901	-0.006133	-0.003080	-0.000188
8.8600	217.882	76.513	38.819	-0.083	-0.512	9.873	414.791	-0.005356	-0.002717	0.000006
8.8800	169.445	66.703	34.470	-0.568	-0.513	9.872	322.580	-0.004669	-0.002413	0.000040
8.9000	88.893	52.917	27.727	-1.708	-0.518	9.872	169.230	-0.003704	-0.001941	0.000120
8.9200	49.443	42.983	22.101	-0.861	-0.531	9.872	94.128	-0.003009	-0.001547	0.000060
8.9400	54.628	42.661	22.170	-1.179	-0.532	9.872	103.998	-0.002986	-0.001552	0.000083
8.9600	60.970	43.107	22.925	-1.513	-0.532	9.872	116.072	-0.003017	-0.001605	0.000106
8.9800	68.304	43.121	23.076	-1.221	-0.532	9.872	130.033	-0.003018	-0.001615	0.000085
9.0000	72.587	43.984	23.035	-2.054	-0.520	9.872	138.187	-0.003079	-0.001612	0.000144
9.0200	66.606	42.369	22.044	-1.680	-0.525	9.872	126.801	-0.002966	-0.001543	0.000118
9.0400	62.263	41.256	21.467	-1.763	-0.506	9.873	118.532	-0.002888	-0.001503	0.000123
9.0600	97.685	45.969	23.859	-2.207	-0.522	9.873	185.966	-0.003218	-0.001670	0.000154
9.0800	148.150	54.266	27.618	-1.457	-0.506	9.872	282.040	-0.003799	-0.001933	0.000102
9.1000	195.264	61.687	30.974	-1.918	-0.509	9.872	371.733	-0.004318	-0.002168	0.000134
9.1200	270.076	72.483	36.892	0.488	-0.506	9.872	514.154	-0.005074	-0.002582	-0.000034
9.1400	309.270	80.070	39.795	1.069	-0.510	9.872	588.770	-0.005605	-0.002786	-0.000075
9.1600	446.825	99.817	49.580	3.850	-0.496	9.872	850.639	-0.006987	-0.003471	-0.000270
9.1800	463.687	103.513	50.707	5.558	-0.506	9.872	882.740	-0.007246	-0.003550	-0.000389
9.2000	514.678	110.823	54.768	6.379	-0.509	9.872	979.815	-0.007758	-0.003834	-0.000446
9.2200	587.370	121.065	60.712	9.341	-0.519	9.872	1118.202	-0.008475	-0.004250	-0.000654
9.2400	646.627	129.568	65.128	10.564	-0.521	9.872	1231.012	-0.009070	-0.004559	-0.000739
9.2600	714.240	138.883	71.912	13.716	-0.509	9.872	1359.730	-0.009722	-0.005034	-0.000960
9.2800	817.575	152.137	79.259	17.163	-0.515	9.872	1556.454	-0.010650	-0.005548	-0.001201
9.3000	879.988	160.783	84.733	19.500	-0.514	9.872	1675.272	-0.011255	-0.005931	-0.001365
9.3200	970.670	173.011	92.760	22.580	-0.515	9.872	1847.906	-0.012111	-0.006493	-0.001581
9.3400	967.018	173.760	93.627	22.943	-0.513	9.872	1840.954	-0.012163	-0.006554	-0.001606
9.3600	1059.458	186.240	101.522	26.682	-0.507	9.872	2016.935	-0.013037	-0.007107	-0.001868
9.3800	1108.661	192.589	105.418	28.779	-0.501	9.871	2110.605	-0.013481	-0.007379	-0.002015
9.4000	1149.282	198.648	109.862	29.989	-0.501	9.872	2187.939	-0.013905	-0.007690	-0.002099
9.4200	1163.033	200.955	110.481	30.547	-0.518	9.872	2214.117	-0.014067	-0.007734	-0.002138
9.4400	1194.894	205.804	113.825	32.726	-0.505	9.871	2274.771	-0.014406	-0.007968	-0.002291
9.4600	1217.827	209.196	116.703	33.214	-0.502	9.872	2318.430	-0.014644	-0.008169	-0.002325
9.4800	1208.825	209.085	116.083	33.879	-0.510	9.872	2301.292	-0.014636	-0.008126	-0.002372
9.5000	1206.992	209.557	115.504	33.826	-0.512	9.872	2297.802	-0.014669	-0.008085	-0.002368
9.5200	1199.853	209.114	116.055	32.867	-0.500	9.872	2284.212	-0.014638	-0.008124	-0.002301
9.5400	1185.065	208.433	116.444	33.213	-0.504	9.871	2256.060	-0.014590	-0.008151	-0.002325
9.5600	1136.644	203.472	114.181	30.435	-0.510	9.872	2163.877	-0.014243	-0.007993	-0.002130
9.5800	1110.419	200.748	112.090	29.531	-0.504	9.871	2113.953	-0.014052	-0.007846	-0.002067
9.6000	1075.733	197.050	108.885	29.223	-0.508	9.871	2047.920	-0.013793	-0.007622	-0.002046
9.6200	1007.760	188.949	103.146	25.501	-0.502	9.871	1918.516	-0.013226	-0.007220	-0.001785
9.6400	951.013	182.502	98.910	24.461	-0.497	9.871	1810.484	-0.012775	-0.006924	-0.001712
9.6600	862.345	171.398	91.038	20.915	-0.507	9.871	1641.684	-0.011998	-0.006373	-0.001464
9.6800	821.513	165.798	88.273	19.152	-0.506	9.871	1563.950	-0.011606	-0.006179	-0.001341
9.7000	755.087	156.822	82.370	16.523	-0.505	9.872	1437.492	-0.010978	-0.005766	-0.001157
9.7200	679.525	147.189	76.094	14.591	-0.509	9.872	1293.640	-0.010303	-0.005327	-0.001021
9.7400	597.394	136.156	70.052	11.479	-0.501	9.871	1137.285	-0.009531	-0.004904	-0.000804
9.7600	532.321	126.639	64.166	9.284	-0.507	9.872	1013.403	-0.008865	-0.004492	-0.000650
9.7800	461.628	116.410	58.371	7.449	-0.506	9.872	878.820	-0.008149	-0.004086	-0.000521
9.8000	398.523	106.432	53.032	5.628	-0.505	9.872	758.686	-0.007450	-0.003712	-0.000394
9.8200	325.440	94.994	47.665	3.587	-0.491	9.871	619.555	-0.006650	-0.003337	-0.000251
9.8400	256.310	83.266	41.874	1.155	-0.512	9.871	487.947	-0.005829	-0.002931	-0.000081
9.8600	232.429	78.097	40.043	0.988	-0.501	9.872	442.486	-0.005467	-0.002803	-0.000069
9.8800	172.947	67.898	34.730	-1.056	-0.496	9.871	329.247	-0.004753	-0.002431	0.000074
9.9000	123.008	58.560	30.478	-2.346	-0.509	9.871	234.175	-0.004099	-0.002133	0.000164
9.9200	100.525	53.585	27.742	-2.025	-0.505	9.871	191.374	-0.003751	-0.001942	0.000142
9.9400	63.029	45.385	23.735	-2.208	-0.506	9.871	119.991	-0.003177	-0.001661	0.000155
9.9600	54.658	42.410	22.690	-1.806	-0.506	9.871	104.055	-0.002969	-0.001588	0.000126
9.9800	56.357	41.909	21.770	-1.958	-0.500	9.871	107.288	-0.002934	-0.001524	0.000137
