# Supplementary material for: Evaluation of a Cold-Mixed High-Performance Polyurethane Mixture
Source: Hindawi journal article supplement (doi:10.1155/2019/1507971), 2019-11-07
Supplement: f1 [file 1507971.f1.zip › 1507971.f1/dynamic modulus data/PUM/specimen1/temp10/zhs-1-10_2Hz.csv]

Test Information
****************
Project name	zhs
Operator name	1
Target test temperature	10
Target confining stress	0
Average dynamic strain range from 75 to 125 micro-strain
Contact stress	5
Initial modulus	4000
Axial gauge length	70
Comments	Run at High Pressure
Specimen information
********************
Identification	zhs-1-10
Dimensions	Point 1	Point 2	Point 3	Point 4	Point 5	Point 6	Average	Std Dev.
Diameter (mm)	49.2	49.2	49.3				49.23	0.058
Height (mm)	101.3	101.2	101.3				101.27	0.058
Cross-sectional area (mm�)	1903.7
Conditioning time
Properties/Comments
Test Data	2Hz
*********
Test date and time	Fri	Mar 29	2019	11:04 AM
Dynamic modulus (MPa)	11860
Phase angle (Degrees)	4.32
Average temperature (�C)	9.9
Average confining pressure (kPa)	-0.5
Average micro-strain	102
Load drift (%)	0.3
Load standard error (%)	2.2
Average deformation drift (%)	-3.1
Average deformation standard error (%)	7.3
Deformation uniformity (%)	54.5
Phase uniformity (Degrees)	1.0
Conditioning Cycles
Time (sec)	Axial stress (kPa)	Axial micro-strain #1	Axial micro-strain #2	Axial micro-strain #3	Confining pressure (kPa)	Temperature (�C)	Load (N)	Displacement #1 (mm)	Displacement #2 (mm)	Displacement #3 (mm)
0.0000	49.669	23.568	16.954	-4.336	-0.502	9.943	94.557	-0.001650	-0.001187	0.000304
0.0100	49.669	23.193	16.886	-4.432	-0.510	9.943	94.557	-0.001624	-0.001182	0.000310
0.0200	51.968	23.749	17.380	-4.140	-0.513	9.943	98.934	-0.001662	-0.001217	0.000290
0.0300	65.253	25.792	18.138	-4.641	-0.509	9.943	124.226	-0.001805	-0.001270	0.000325
0.0400	103.155	32.559	21.441	-5.406	-0.510	9.943	196.381	-0.002279	-0.001501	0.000378
0.0500	152.839	40.869	25.718	-6.046	-0.512	9.943	290.966	-0.002861	-0.001800	0.000423
0.0600	191.537	47.524	29.804	-5.851	-0.513	9.943	364.637	-0.003327	-0.002086	0.000410
0.0700	231.678	53.751	32.737	-5.530	-0.513	9.943	441.055	-0.003763	-0.002292	0.000387
0.0800	285.885	62.770	37.265	-5.293	-0.508	9.942	544.252	-0.004394	-0.002609	0.000371
0.0900	346.164	71.553	41.888	-4.403	-0.509	9.943	659.008	-0.005009	-0.002932	0.000308
0.1000	401.259	80.946	46.633	-3.374	-0.510	9.942	763.893	-0.005666	-0.003264	0.000236
0.1100	461.598	90.676	51.286	-2.388	-0.510	9.943	878.763	-0.006347	-0.003590	0.000167
0.1200	520.058	99.398	55.026	-0.737	-0.509	9.942	990.057	-0.006958	-0.003852	0.000052
0.1300	577.812	108.098	59.913	1.334	-0.504	9.943	1100.006	-0.007567	-0.004194	-0.000093
0.1400	648.897	118.787	65.374	3.281	-0.502	9.943	1235.332	-0.008315	-0.004576	-0.000230
0.1500	687.339	124.582	68.676	4.599	-0.504	9.943	1308.517	-0.008721	-0.004807	-0.000322
0.1600	754.997	133.712	73.864	6.560	-0.498	9.942	1437.321	-0.009360	-0.005170	-0.000459
0.1700	798.264	140.159	78.076	9.230	-0.498	9.943	1519.690	-0.009811	-0.005465	-0.000646
0.1800	836.647	146.220	81.242	10.315	-0.507	9.942	1592.760	-0.010235	-0.005687	-0.000722
0.1900	867.064	150.777	83.555	11.466	-0.506	9.943	1650.667	-0.010554	-0.005849	-0.000803
0.2000	922.639	158.113	87.462	13.941	-0.500	9.942	1756.468	-0.011068	-0.006122	-0.000976
0.2100	932.543	160.392	89.221	14.608	-0.508	9.943	1775.322	-0.011227	-0.006245	-0.001023
0.2200	968.897	165.631	92.674	16.024	-0.502	9.942	1844.530	-0.011594	-0.006487	-0.001122
0.2300	981.085	167.843	93.542	16.704	-0.508	9.943	1867.733	-0.011749	-0.006548	-0.001169
0.2400	983.970	169.329	94.230	17.510	-0.515	9.942	1873.226	-0.011853	-0.006596	-0.001226
0.2500	978.244	168.898	94.285	16.829	-0.507	9.943	1862.326	-0.011823	-0.006600	-0.001178
0.2600	972.353	168.885	94.505	16.234	-0.505	9.942	1851.110	-0.011822	-0.006615	-0.001136
0.2700	963.005	168.703	94.217	16.482	-0.498	9.943	1833.315	-0.011809	-0.006595	-0.001154
0.2800	941.485	166.563	93.005	15.691	-0.507	9.941	1792.345	-0.011659	-0.006510	-0.001098
0.2900	901.314	162.365	91.601	13.621	-0.505	9.942	1715.870	-0.011366	-0.006412	-0.000953
0.3000	866.072	158.906	88.699	11.966	-0.518	9.941	1648.779	-0.011123	-0.006209	-0.000838
0.3100	824.909	153.971	85.685	10.465	-0.514	9.942	1570.415	-0.010778	-0.005998	-0.000733
0.3200	771.904	147.843	81.736	8.741	-0.508	9.941	1469.507	-0.010349	-0.005722	-0.000612
0.3300	730.411	142.394	78.791	6.491	-0.504	9.942	1390.514	-0.009968	-0.005515	-0.000454
0.3400	665.488	134.753	74.457	4.891	-0.501	9.942	1266.918	-0.009433	-0.005212	-0.000342
0.3500	623.739	128.694	70.219	3.310	-0.500	9.943	1187.439	-0.009009	-0.004915	-0.000232
0.3600	564.783	120.327	66.312	1.823	-0.511	9.942	1075.201	-0.008423	-0.004642	-0.000128
0.3700	515.114	113.476	62.526	0.347	-0.509	9.943	980.644	-0.007943	-0.004377	-0.000024
0.3800	451.919	104.417	57.876	-1.112	-0.507	9.941	860.338	-0.007309	-0.004051	0.000078
0.3900	404.955	96.855	53.790	-2.082	-0.494	9.943	770.931	-0.006780	-0.003765	0.000146
0.4000	338.259	86.044	49.085	-3.681	-0.494	9.941	643.959	-0.006023	-0.003436	0.000258
0.4100	283.060	77.028	44.927	-5.390	-0.497	9.943	538.874	-0.005392	-0.003145	0.000377
0.4200	224.615	67.022	39.632	-5.806	-0.513	9.941	427.608	-0.004692	-0.002774	0.000406
0.4300	183.617	59.657	35.447	-5.697	-0.504	9.943	349.560	-0.004176	-0.002481	0.000399
0.4400	143.461	51.513	31.622	-5.696	-0.500	9.941	273.113	-0.003606	-0.002214	0.000399
0.4500	106.461	44.149	27.854	-6.073	-0.509	9.943	202.675	-0.003090	-0.001950	0.000425
0.4600	84.069	38.924	25.018	-5.056	-0.510	9.941	160.046	-0.002725	-0.001751	0.000354
0.4700	66.290	33.879	22.554	-4.766	-0.501	9.943	126.200	-0.002372	-0.001579	0.000334
0.4800	52.028	31.101	20.518	-4.822	-0.510	9.941	99.049	-0.002177	-0.001436	0.000338
0.4900	45.762	29.487	19.389	-4.403	-0.509	9.943	87.118	-0.002064	-0.001357	0.000308
0.5000	34.956	26.610	17.738	-3.778	-0.523	9.941	66.547	-0.001863	-0.001242	0.000264
0.5100	31.109	24.900	16.956	-3.791	-0.506	9.943	59.223	-0.001743	-0.001187	0.000265
0.5200	35.046	25.249	17.134	-3.833	-0.510	9.941	66.719	-0.001767	-0.001199	0.000268
0.5300	53.862	28.138	18.521	-4.627	-0.514	9.942	102.539	-0.001970	-0.001296	0.000324
0.5400	85.497	33.433	21.149	-4.877	-0.507	9.941	162.764	-0.002340	-0.001480	0.000341
0.5500	118.289	39.037	24.314	-5.488	-0.503	9.943	225.191	-0.002733	-0.001702	0.000384
0.5600	159.196	45.386	27.757	-5.419	-0.509	9.940	303.068	-0.003177	-0.001943	0.000379
0.5700	207.407	53.973	32.212	-5.934	-0.506	9.942	394.850	-0.003778	-0.002255	0.000415
0.5800	269.009	63.325	37.072	-5.348	-0.514	9.941	512.123	-0.004433	-0.002595	0.000374
0.5900	318.707	70.804	41.403	-4.739	-0.516	9.942	606.737	-0.004956	-0.002898	0.000332
0.6000	382.713	81.001	46.523	-3.626	-0.518	9.940	728.588	-0.005670	-0.003257	0.000254
0.6100	434.546	89.312	50.308	-2.874	-0.518	9.943	827.265	-0.006252	-0.003522	0.000201
0.6200	497.485	98.357	54.779	-1.319	-0.513	9.940	947.084	-0.006885	-0.003835	0.000092
0.6300	560.935	108.222	59.405	0.682	-0.505	9.943	1067.877	-0.007576	-0.004158	-0.000048
0.6400	621.455	117.480	64.412	2.795	-0.511	9.940	1183.090	-0.008224	-0.004509	-0.000196
0.6500	666.826	124.178	68.197	4.450	-0.507	9.943	1269.464	-0.008692	-0.004774	-0.000311
0.6600	737.324	133.504	73.164	6.657	-0.499	9.940	1403.675	-0.009345	-0.005121	-0.000466
0.6700	793.169	141.131	77.909	9.271	-0.512	9.943	1509.991	-0.009879	-0.005454	-0.000649
0.6800	834.032	147.302	81.269	10.437	-0.503	9.940	1587.782	-0.010311	-0.005689	-0.000731
0.6900	874.368	153.222	84.474	12.090	-0.498	9.943	1664.572	-0.010726	-0.005913	-0.000846
0.7000	888.224	155.959	86.056	13.148	-0.508	9.940	1690.950	-0.010917	-0.006024	-0.000920
0.7100	933.475	161.546	89.950	15.025	-0.510	9.943	1777.096	-0.011308	-0.006297	-0.001052
0.7200	958.256	165.451	92.083	16.176	-0.496	9.940	1824.274	-0.011582	-0.006446	-0.001132
0.7300	963.096	167.006	92.773	16.648	-0.502	9.943	1833.487	-0.011690	-0.006494	-0.001165
0.7400	980.408	169.424	94.381	17.010	-0.497	9.940	1866.446	-0.011860	-0.006607	-0.001191
0.7500	977.853	169.814	94.726	17.357	-0.502	9.943	1861.582	-0.011887	-0.006631	-0.001215
0.7600	971.662	169.702	94.712	17.274	-0.492	9.940	1849.794	-0.011879	-0.006630	-0.001209
0.7700	962.104	169.439	94.094	16.801	-0.490	9.943	1831.598	-0.011861	-0.006587	-0.001176
0.7800	933.354	166.869	92.621	15.647	-0.491	9.940	1776.867	-0.011681	-0.006483	-0.001095
0.7900	900.562	163.479	91.491	14.274	-0.495	9.943	1714.439	-0.011444	-0.006404	-0.000999
0.8000	857.521	158.890	88.436	12.356	-0.490	9.940	1632.500	-0.011122	-0.006191	-0.000865
0.8100	829.117	155.222	85.821	10.617	-0.496	9.943	1578.426	-0.010866	-0.006007	-0.000743
0.8200	786.857	150.249	82.728	9.423	-0.494	9.940	1497.974	-0.010517	-0.005791	-0.000660
0.8300	730.155	143.246	79.080	7.283	-0.487	9.943	1390.028	-0.010027	-0.005536	-0.000510
0.8400	680.652	137.477	75.338	5.435	-0.493	9.940	1295.786	-0.009623	-0.005274	-0.000380
0.8500	629.991	130.446	71.692	4.057	-0.484	9.943	1199.341	-0.009131	-0.005018	-0.000284
0.8600	569.892	121.927	66.738	2.211	-0.490	9.940	1084.929	-0.008535	-0.004672	-0.000155
0.8700	494.735	112.032	61.647	0.583	-0.493	9.943	941.849	-0.007842	-0.004315	-0.000041
0.8800	433.299	102.706	56.665	-1.333	-0.501	9.940	824.890	-0.007189	-0.003967	0.000093
0.8900	388.364	94.802	52.827	-2.665	-0.504	9.943	739.346	-0.006636	-0.003698	0.000187
0.9000	333.195	86.310	49.031	-3.695	-0.517	9.939	634.317	-0.006042	-0.003432	0.000259
0.9100	277.785	77.623	44.611	-4.849	-0.501	9.942	528.831	-0.005434	-0.003123	0.000339
0.9200	224.239	67.912	39.919	-5.725	-0.504	9.940	426.893	-0.004754	-0.002794	0.000401
0.9300	187.630	61.215	36.177	-5.863	-0.496	9.942	357.199	-0.004285	-0.002532	0.000410
0.9400	144.258	52.333	32.227	-5.877	-0.497	9.940	274.630	-0.003663	-0.002256	0.000411
0.9500	112.367	46.206	28.539	-6.029	-0.508	9.943	213.919	-0.003234	-0.001998	0.000422
0.9600	81.529	39.090	24.933	-5.252	-0.497	9.939	155.210	-0.002736	-0.001745	0.000368
0.9700	55.695	33.574	21.687	-4.988	-0.524	9.942	106.030	-0.002350	-0.001518	0.000349
0.9800	43.282	29.835	20.215	-4.266	-0.520	9.939	82.397	-0.002088	-0.001415	0.000299
0.9900	32.521	27.459	18.275	-4.223	-0.510	9.943	61.913	-0.001922	-0.001279	0.000296
1.0000	27.036	25.541	16.955	-3.168	-0.506	9.940	51.470	-0.001788	-0.001187	0.000222
1.0100	27.427	25.222	16.764	-3.680	-0.518	9.942	52.214	-0.001766	-0.001173	0.000258
1.0200	30.162	25.054	16.844	-3.723	-0.515	9.939	57.421	-0.001754	-0.001179	0.000261
1.0300	37.285	25.693	17.050	-3.736	-0.501	9.942	70.982	-0.001799	-0.001194	0.000262
1.0400	71.084	31.307	19.746	-4.835	-0.504	9.939	135.326	-0.002191	-0.001382	0.000338
1.0500	110.263	37.992	23.723	-5.447	-0.500	9.942	209.913	-0.002659	-0.001661	0.000381
1.0600	156.310	45.997	27.852	-6.029	-0.497	9.939	297.575	-0.003220	-0.001950	0.000422
1.0700	211.465	55.001	32.462	-5.641	-0.495	9.943	402.575	-0.003850	-0.002272	0.000395
1.0800	269.429	63.617	37.360	-5.363	-0.496	9.939	512.924	-0.004453	-0.002615	0.000375
1.0900	319.639	71.469	41.279	-4.920	-0.493	9.942	608.511	-0.005003	-0.002890	0.000344
1.1000	377.393	80.792	45.753	-3.444	-0.508	9.939	718.460	-0.005655	-0.003203	0.000241
1.1100	446.103	91.368	50.569	-2.207	-0.498	9.942	849.266	-0.006396	-0.003540	0.000154
1.1200	506.548	100.582	55.317	-0.667	-0.498	9.939	964.336	-0.007041	-0.003872	0.000047
1.1300	563.430	108.961	59.981	0.627	-0.500	9.942	1072.626	-0.007627	-0.004199	-0.000044
1.1400	621.695	118.176	64.467	3.058	-0.510	9.939	1183.548	-0.008272	-0.004513	-0.000214
1.1500	675.722	125.386	68.415	4.670	-0.508	9.942	1286.402	-0.008777	-0.004789	-0.000327
1.1600	745.965	134.893	74.055	7.046	-0.502	9.938	1420.126	-0.009443	-0.005184	-0.000493
1.1700	786.136	141.523	77.787	9.146	-0.495	9.942	1496.601	-0.009907	-0.005445	-0.000640
1.1800	828.306	147.509	81.034	10.657	-0.512	9.938	1576.881	-0.010326	-0.005672	-0.000746
1.1900	883.445	154.486	85.010	12.910	-0.508	9.942	1681.852	-0.010814	-0.005951	-0.000904
1.2000	899.736	157.488	86.799	13.898	-0.518	9.937	1712.866	-0.011024	-0.006076	-0.000973
1.2100	944.100	163.670	90.889	15.815	-0.496	9.942	1797.323	-0.011457	-0.006362	-0.001107
1.2200	963.997	167.231	92.443	16.801	-0.504	9.938	1835.203	-0.011706	-0.006471	-0.001176
1.2300	977.523	168.994	93.694	17.411	-0.505	9.942	1860.952	-0.011830	-0.006559	-0.001219
1.2400	978.830	169.939	94.175	17.650	-0.496	9.938	1863.441	-0.011896	-0.006592	-0.001235
1.2500	978.770	170.522	94.794	17.775	-0.500	9.942	1863.327	-0.011937	-0.006636	-0.001244
1.2600	974.532	170.675	94.712	17.815	-0.509	9.939	1855.259	-0.011947	-0.006630	-0.001247
1.2700	966.387	170.160	94.107	17.123	-0.502	9.942	1839.752	-0.011911	-0.006588	-0.001199
1.2800	948.563	168.648	93.832	16.621	-0.494	9.938	1805.820	-0.011805	-0.006568	-0.001163
1.2900	906.348	164.686	91.768	14.967	-0.494	9.943	1725.454	-0.011528	-0.006424	-0.001048
1.3000	875.750	161.160	89.703	13.482	-0.509	9.939	1667.204	-0.011281	-0.006279	-0.000944
1.3100	840.434	156.876	86.731	11.812	-0.508	9.942	1599.970	-0.010981	-0.006071	-0.000827
1.3200	793.921	151.429	83.772	10.022	-0.513	9.938	1511.421	-0.010600	-0.005864	-0.000702
1.3300	733.446	144.786	79.657	7.422	-0.500	9.943	1396.294	-0.010135	-0.005576	-0.000520
1.3400	684.003	137.853	75.446	5.894	-0.502	9.938	1302.166	-0.009650	-0.005281	-0.000413
1.3500	618.389	129.291	70.522	3.516	-0.493	9.942	1177.254	-0.009050	-0.004937	-0.000246
1.3600	573.634	122.941	67.495	2.322	-0.497	9.938	1092.052	-0.008606	-0.004725	-0.000163
1.3700	509.658	114.269	62.470	0.822	-0.493	9.942	970.259	-0.007999	-0.004373	-0.000058
1.3800	449.470	105.124	57.628	-0.570	-0.509	9.938	855.675	-0.007359	-0.004034	0.000040
1.3900	390.513	95.773	53.267	-2.222	-0.505	9.942	743.437	-0.006704	-0.003729	0.000156
1.4000	337.132	87.354	49.277	-2.944	-0.496	9.938	641.813	-0.006115	-0.003449	0.000206
1.4100	283.346	78.529	45.093	-4.530	-0.501	9.942	539.417	-0.005497	-0.003156	0.000317
1.4200	228.041	68.733	40.375	-5.613	-0.504	9.938	434.132	-0.004811	-0.002826	0.000393
1.4300	188.667	61.769	36.549	-5.821	-0.502	9.942	359.173	-0.004324	-0.002558	0.000407
1.4400	150.239	54.639	32.791	-5.669	-0.508	9.938	286.016	-0.003825	-0.002295	0.000397
1.4500	112.518	47.221	29.117	-5.656	-0.503	9.942	214.205	-0.003305	-0.002038	0.000396
1.4600	81.469	39.979	25.086	-5.378	-0.511	9.937	155.096	-0.002798	-0.001756	0.000376
1.4700	64.141	35.518	22.967	-4.779	-0.500	9.942	122.108	-0.002486	-0.001608	0.000335
1.4800	42.966	30.501	20.353	-4.334	-0.509	9.937	81.797	-0.002135	-0.001425	0.000303
1.4900	36.008	28.529	18.949	-4.308	-0.507	9.942	68.550	-0.001997	-0.001326	0.000302
1.5000	28.314	26.583	17.147	-3.874	-0.517	9.937	53.902	-0.001861	-0.001200	0.000271
1.5100	28.148	26.166	16.873	-3.388	-0.514	9.942	53.587	-0.001832	-0.001181	0.000237
1.5200	30.252	25.777	17.313	-3.515	-0.506	9.938	57.592	-0.001804	-0.001212	0.000246
1.5300	36.790	26.513	17.229	-3.598	-0.504	9.941	70.038	-0.001856	-0.001206	0.000252
1.5400	75.428	32.724	20.173	-4.710	-0.506	9.937	143.595	-0.002291	-0.001412	0.000330
1.5500	116.034	39.728	24.217	-5.253	-0.498	9.941	220.900	-0.002781	-0.001695	0.000368
1.5600	167.807	48.303	29.310	-5.613	-0.512	9.937	319.462	-0.003381	-0.002052	0.000393
1.5700	208.594	55.113	32.612	-5.459	-0.506	9.942	397.110	-0.003858	-0.002283	0.000382
1.5800	265.011	63.228	36.920	-4.974	-0.506	9.937	504.513	-0.004426	-0.002584	0.000348
1.5900	320.766	71.928	41.431	-4.641	-0.492	9.942	610.657	-0.005035	-0.002900	0.000325
1.6000	380.880	81.738	46.578	-3.362	-0.514	9.937	725.098	-0.005722	-0.003260	0.000235
1.6100	436.921	90.883	50.334	-2.568	-0.504	9.942	831.785	-0.006362	-0.003523	0.000180
1.6200	503.842	100.581	54.766	-0.694	-0.496	9.937	959.187	-0.007041	-0.003834	0.000049
1.6300	547.064	107.043	58.551	0.598	-0.500	9.941	1041.470	-0.007493	-0.004099	-0.000042
1.6400	624.536	118.256	64.382	3.141	-0.500	9.937	1188.955	-0.008278	-0.004507	-0.000220
1.6500	666.345	124.804	68.142	4.500	-0.502	9.942	1268.549	-0.008736	-0.004770	-0.000315
1.6600	738.210	134.655	73.412	7.159	-0.498	9.937	1405.363	-0.009426	-0.005139	-0.000501
1.6700	789.758	141.369	77.347	9.034	-0.506	9.942	1503.496	-0.009896	-0.005414	-0.000632
1.6800	837.112	148.734	81.460	11.619	-0.499	9.937	1593.647	-0.010411	-0.005702	-0.000813
1.6900	865.907	152.917	84.158	12.299	-0.507	9.942	1648.464	-0.010704	-0.005891	-0.000861
1.7000	906.724	158.474	87.145	14.023	-0.504	9.937	1726.170	-0.011093	-0.006100	-0.000982
1.7100	929.612	161.949	89.347	15.094	-0.510	9.942	1769.743	-0.011336	-0.006254	-0.001057
1.7200	948.263	165.298	91.382	16.176	-0.510	9.937	1805.248	-0.011571	-0.006397	-0.001132
1.7300	985.683	170.090	94.546	17.970	-0.501	9.942	1876.488	-0.011906	-0.006618	-0.001258
1.7400	980.934	170.118	94.573	17.968	-0.513	9.936	1867.447	-0.011908	-0.006620	-0.001258
1.7500	978.274	170.481	94.656	17.858	-0.508	9.942	1862.383	-0.011934	-0.006626	-0.001250
1.7600	973.540	170.760	94.794	18.093	-0.515	9.937	1853.371	-0.011953	-0.006636	-0.001267
1.7700	964.463	169.885	94.575	17.496	-0.516	9.942	1836.090	-0.011892	-0.006620	-0.001225
1.7800	938.193	167.732	93.238	15.884	-0.517	9.937	1786.079	-0.011741	-0.006527	-0.001112
1.7900	904.875	163.964	91.559	14.744	-0.505	9.942	1722.651	-0.011477	-0.006409	-0.001032
1.8000	868.296	160.420	89.374	13.341	-0.497	9.936	1653.013	-0.011229	-0.006256	-0.000934
1.8100	841.441	157.502	87.308	11.951	-0.507	9.942	1601.887	-0.011025	-0.006112	-0.000837
1.8200	786.737	151.081	82.822	9.675	-0.500	9.937	1497.746	-0.010576	-0.005798	-0.000677
1.8300	719.395	142.479	78.434	7.311	-0.506	9.942	1369.543	-0.009974	-0.005490	-0.000512
1.8400	668.869	136.405	74.386	5.390	-0.512	9.937	1273.355	-0.009548	-0.005207	-0.000377
1.8500	636.062	131.850	71.884	4.490	-0.504	9.941	1210.899	-0.009229	-0.005032	-0.000314
1.8600	562.453	121.927	66.131	2.308	-0.506	9.936	1070.766	-0.008535	-0.004629	-0.000162
1.8700	505.856	113.533	61.961	0.320	-0.492	9.941	963.020	-0.007947	-0.004337	-0.000022
1.8800	450.582	105.864	57.808	-0.514	-0.509	9.936	857.792	-0.007410	-0.004047	0.000036
1.8900	396.164	96.831	53.445	-2.153	-0.510	9.942	754.194	-0.006778	-0.003741	0.000151
1.9000	336.185	87.740	49.029	-3.641	-0.510	9.937	640.011	-0.006142	-0.003432	0.000255
1.9100	289.477	79.722	45.285	-4.613	-0.499	9.941	551.090	-0.005581	-0.003170	0.000323
1.9200	233.151	70.299	40.924	-5.364	-0.496	9.936	443.859	-0.004921	-0.002865	0.000376
1.9300	192.243	62.697	36.864	-5.753	-0.506	9.941	365.982	-0.004389	-0.002580	0.000403
1.9400	147.940	54.195	32.708	-6.058	-0.494	9.936	281.639	-0.003794	-0.002290	0.000424
1.9500	108.159	46.342	28.622	-5.490	-0.489	9.941	205.908	-0.003244	-0.002004	0.000384
1.9600	83.032	40.605	25.746	-5.238	-0.493	9.936	158.072	-0.002842	-0.001802	0.000367
1.9700	61.692	35.489	22.898	-5.253	-0.507	9.941	117.445	-0.002484	-0.001603	0.000368
1.9800	43.282	31.197	20.230	-4.655	-0.510	9.936	82.397	-0.002184	-0.001416	0.000326
1.9900	35.692	28.655	18.934	-3.988	-0.517	9.941	67.949	-0.002006	-0.001325	0.000279
2.0000	31.635	27.224	18.053	-3.709	-0.516	9.936	60.225	-0.001906	-0.001264	0.000260
2.0100	32.852	27.125	17.504	-3.639	-0.512	9.941	62.542	-0.001899	-0.001225	0.000255
2.0200	35.182	26.722	17.451	-3.988	-0.506	9.936	66.977	-0.001871	-0.001222	0.000279
2.0300	45.867	27.917	18.439	-4.014	-0.515	9.941	87.318	-0.001954	-0.001291	0.000281
2.0400	82.401	34.392	21.648	-4.655	-0.503	9.936	156.870	-0.002407	-0.001515	0.000326
2.0500	118.754	40.757	25.058	-6.253	-0.500	9.941	226.078	-0.002853	-0.001754	0.000438
2.0600	166.921	48.388	28.952	-5.323	-0.504	9.935	317.774	-0.003387	-0.002027	0.000373
2.0700	214.515	56.071	33.203	-5.695	-0.518	9.941	408.382	-0.003925	-0.002324	0.000399
2.0800	269.339	64.589	37.924	-4.931	-0.508	9.936	512.753	-0.004521	-0.002655	0.000345
2.0900	321.127	72.735	41.693	-4.404	-0.511	9.941	611.343	-0.005091	-0.002919	0.000308
2.1000	387.523	82.751	46.537	-3.404	-0.500	9.936	737.743	-0.005793	-0.003258	0.000238
2.1100	440.753	90.841	50.832	-1.958	-0.500	9.941	839.081	-0.006359	-0.003558	0.000137
2.1200	507.479	102.054	55.715	-0.611	-0.517	9.935	966.110	-0.007144	-0.003900	0.000043
2.1300	564.106	109.782	59.680	1.058	-0.505	9.941	1073.914	-0.007685	-0.004178	-0.000074
2.1400	626.294	118.787	64.823	3.780	-0.513	9.935	1192.303	-0.008315	-0.004538	-0.000265
2.1500	686.287	127.084	69.517	4.878	-0.505	9.941	1306.515	-0.008896	-0.004866	-0.000341
2.1600	729.704	133.976	73.149	7.061	-0.498	9.935	1389.170	-0.009378	-0.005120	-0.000494
2.1700	794.567	142.632	78.102	9.548	-0.496	9.941	1512.651	-0.009984	-0.005467	-0.000668
2.1800	824.323	147.274	80.648	11.130	-0.510	9.935	1569.300	-0.010309	-0.005645	-0.000779
2.1900	883.806	155.084	85.436	13.328	-0.496	9.941	1682.539	-0.010856	-0.005980	-0.000933
2.2000	913.261	159.769	88.079	14.704	-0.498	9.936	1738.615	-0.011184	-0.006166	-0.001029
2.2100	928.605	162.421	89.511	15.454	-0.506	9.941	1767.826	-0.011369	-0.006266	-0.001082
2.2200	965.846	167.119	92.511	17.079	-0.501	9.935	1838.722	-0.011698	-0.006476	-0.001196
2.2300	967.033	167.896	92.978	17.260	-0.485	9.941	1840.982	-0.011753	-0.006508	-0.001208
2.2400	967.003	168.937	93.653	17.802	-0.512	9.936	1840.925	-0.011826	-0.006556	-0.001246
2.2500	973.465	169.814	93.956	17.830	-0.498	9.941	1853.228	-0.011887	-0.006577	-0.001248
2.2600	971.827	170.190	94.259	18.345	-0.493	9.935	1850.109	-0.011913	-0.006598	-0.001284
2.2700	964.418	169.883	94.589	17.955	-0.501	9.941	1836.004	-0.011892	-0.006621	-0.001257
2.2800	943.784	168.606	93.544	16.800	-0.498	9.935	1796.722	-0.011802	-0.006548	-0.001176
2.2900	894.611	163.574	91.229	14.386	-0.492	9.941	1703.110	-0.011450	-0.006386	-0.001007
2.3000	863.232	159.850	88.573	13.231	-0.496	9.935	1643.372	-0.011190	-0.006200	-0.000926
2.3100	824.188	155.460	85.974	11.631	-0.504	9.941	1569.042	-0.010882	-0.006018	-0.000814
2.3200	774.429	149.652	82.340	9.688	-0.496	9.935	1474.314	-0.010476	-0.005764	-0.000678
2.3300	721.935	142.883	78.390	7.421	-0.506	9.941	1374.378	-0.010002	-0.005487	-0.000519
2.3400	678.112	137.489	74.868	6.006	-0.498	9.935	1290.951	-0.009624	-0.005241	-0.000420
2.3500	616.586	129.404	70.563	3.655	-0.496	9.941	1173.820	-0.009058	-0.004939	-0.000256
2.3600	561.251	121.622	66.066	2.503	-0.501	9.935	1068.478	-0.008514	-0.004625	-0.000175
2.3700	506.397	113.922	61.757	0.780	-0.496	9.941	964.050	-0.007975	-0.004323	-0.000055
2.3800	445.427	104.541	57.286	-0.404	-0.512	9.935	847.979	-0.007318	-0.004010	0.000028
2.3900	386.275	95.677	53.032	-2.345	-0.494	9.940	735.369	-0.006697	-0.003712	0.000164
2.4000	319.624	85.212	47.927	-3.515	-0.506	9.934	608.482	-0.005965	-0.003355	0.000246
2.4100	263.223	75.793	43.442	-4.877	-0.496	9.940	501.108	-0.005306	-0.003041	0.000341
2.4200	223.968	68.244	39.935	-6.085	-0.494	9.934	426.378	-0.004777	-0.002795	0.000426
2.4300	199.788	63.645	37.609	-5.932	-0.502	9.940	380.344	-0.004455	-0.002633	0.000415
2.4400	156.897	55.809	33.356	-6.156	-0.482	9.934	298.691	-0.003907	-0.002335	0.000431
2.4500	115.118	47.705	28.980	-5.670	-0.492	9.941	219.154	-0.003339	-0.002029	0.000397
2.4600	87.540	41.492	25.827	-5.180	-0.513	9.934	166.655	-0.002904	-0.001808	0.000363
2.4700	61.586	36.061	23.201	-5.126	-0.508	9.940	117.245	-0.002524	-0.001624	0.000359
2.4800	41.028	30.905	20.064	-4.280	-0.502	9.934	78.106	-0.002163	-0.001404	0.000300
2.4900	29.290	27.987	17.821	-3.222	-0.501	9.940	55.761	-0.001959	-0.001247	0.000226
2.5000	39.795	23.860	16.017	-4.293	-0.512	9.931	75.760	-0.001670	-0.001121	0.000301
2.5100	59.482	27.376	17.931	-4.821	-0.515	9.941	113.239	-0.001916	-0.001255	0.000337
2.5200	85.271	32.307	20.146	-5.016	-0.516	9.931	162.334	-0.002262	-0.001410	0.000351
2.5300	109.226	35.836	22.498	-5.822	-0.501	9.940	207.939	-0.002509	-0.001575	0.000408
2.5400	146.256	42.035	25.899	-6.183	-0.518	9.931	278.435	-0.002942	-0.001813	0.000433
2.5500	191.853	49.956	29.902	-5.807	-0.515	9.940	365.238	-0.003497	-0.002093	0.000407
2.5600	249.998	59.182	34.910	-5.448	-0.510	9.930	475.931	-0.004143	-0.002444	0.000381
2.5700	312.200	68.689	39.450	-4.695	-0.513	9.941	594.349	-0.004808	-0.002761	0.000329
2.5800	377.438	78.833	44.583	-3.401	-0.507	9.930	718.546	-0.005518	-0.003121	0.000238
2.5900	451.979	90.493	50.667	-1.762	-0.498	9.940	860.453	-0.006334	-0.003547	0.000123
2.6000	518.976	101.138	55.317	-0.083	-0.501	9.930	987.997	-0.007080	-0.003872	0.000006
2.6100	580.502	110.364	60.052	1.475	-0.516	9.940	1105.127	-0.007725	-0.004204	-0.000103
2.6200	665.082	121.969	66.299	4.448	-0.517	9.930	1266.146	-0.008538	-0.004641	-0.000311
2.6300	745.154	133.099	72.765	7.838	-0.505	9.940	1418.581	-0.009317	-0.005094	-0.000549
2.6400	796.656	141.216	77.334	9.380	-0.514	9.930	1516.628	-0.009885	-0.005413	-0.000657
2.6500	885.549	152.487	83.636	13.203	-0.505	9.940	1685.858	-0.010674	-0.005855	-0.000924
2.6600	943.333	160.589	88.686	16.037	-0.502	9.930	1795.864	-0.011241	-0.006208	-0.001123
2.6700	1029.822	172.051	95.811	19.540	-0.505	9.940	1960.516	-0.012044	-0.006707	-0.001368
2.6800	1062.358	177.108	99.334	21.428	-0.505	9.930	2022.457	-0.012398	-0.006953	-0.001500
2.6900	1126.319	184.905	104.358	24.280	-0.498	9.940	2144.222	-0.012943	-0.007305	-0.001700
2.7000	1141.257	187.962	106.532	25.472	-0.512	9.930	2172.661	-0.013157	-0.007457	-0.001783
2.7100	1207.277	196.245	111.556	28.167	-0.505	9.940	2298.346	-0.013737	-0.007809	-0.001972
2.7200	1224.485	199.441	113.453	29.102	-0.506	9.930	2331.104	-0.013961	-0.007942	-0.002037
2.7300	1234.494	201.373	115.091	30.129	-0.502	9.940	2350.159	-0.014096	-0.008056	-0.002109
2.7400	1234.584	202.317	115.655	30.476	-0.524	9.930	2350.330	-0.014162	-0.008096	-0.002133
2.7500	1242.925	203.873	116.897	30.379	-0.512	9.940	2366.209	-0.014271	-0.008183	-0.002127
2.7600	1238.356	204.067	116.731	30.101	-0.500	9.930	2357.512	-0.014285	-0.008171	-0.002107
2.7700	1232.991	203.816	116.650	30.060	-0.511	9.940	2347.298	-0.014267	-0.008165	-0.002104
2.7800	1216.610	202.901	115.945	29.713	-0.508	9.930	2316.113	-0.014203	-0.008116	-0.002080
2.7900	1156.541	197.537	112.834	27.001	-0.508	9.940	2201.757	-0.013828	-0.007898	-0.001890
2.8000	1106.437	192.340	109.215	24.736	-0.511	9.930	2106.371	-0.013464	-0.007645	-0.001732
2.8100	1058.721	187.113	105.595	22.889	-0.503	9.940	2015.533	-0.013098	-0.007392	-0.001602
2.8200	1000.186	180.944	101.124	19.846	-0.511	9.930	1904.097	-0.012666	-0.007079	-0.001389
2.8300	938.599	173.981	96.445	17.455	-0.513	9.940	1786.852	-0.012179	-0.006751	-0.001222
2.8400	853.523	163.519	89.841	14.258	-0.505	9.929	1624.889	-0.011446	-0.006289	-0.000998
2.8500	780.861	154.223	83.992	11.436	-0.503	9.940	1486.559	-0.010796	-0.005879	-0.000801
2.8600	724.114	146.787	79.712	9.521	-0.508	9.929	1378.527	-0.010275	-0.005580	-0.000666
2.8700	655.133	137.853	74.278	6.979	-0.496	9.940	1247.206	-0.009650	-0.005199	-0.000489
2.8800	561.266	124.735	67.192	3.657	-0.501	9.929	1068.506	-0.008731	-0.004703	-0.000256
2.8900	488.528	114.325	61.621	2.265	-0.517	9.940	930.033	-0.008003	-0.004313	-0.000159
2.9000	425.544	104.015	56.886	0.250	-0.506	9.929	810.127	-0.007281	-0.003982	-0.000018
2.9100	347.923	92.202	50.857	-2.042	-0.500	9.940	662.355	-0.006454	-0.003560	0.000143
2.9200	292.062	82.044	46.236	-3.417	-0.497	9.929	556.011	-0.005743	-0.003237	0.000239
2.9300	246.301	73.983	42.232	-4.125	-0.499	9.940	468.893	-0.005179	-0.002956	0.000289
2.9400	194.438	64.729	37.705	-5.418	-0.503	9.929	370.159	-0.004531	-0.002639	0.000379
2.9500	151.126	56.807	33.659	-5.184	-0.492	9.939	287.704	-0.003977	-0.002356	0.000363
2.9600	112.878	48.875	29.159	-5.071	-0.490	9.929	214.891	-0.003421	-0.002041	0.000355
2.9700	84.445	42.175	26.064	-4.613	-0.489	9.939	160.761	-0.002952	-0.001824	0.000323
2.9800	61.241	36.670	23.007	-4.169	-0.496	9.928	116.587	-0.002567	-0.001610	0.000292
2.9900	44.559	32.851	20.738	-4.125	-0.504	9.939	84.829	-0.002300	-0.001452	0.000289
3.0000	36.835	30.153	19.016	-3.642	-0.509	9.929	70.124	-0.002111	-0.001331	0.000255
3.0100	39.209	29.652	19.113	-3.498	-0.517	9.940	74.644	-0.002076	-0.001338	0.000245
3.0200	41.388	29.640	18.963	-3.584	-0.501	9.929	78.793	-0.002075	-0.001327	0.000251
3.0300	55.740	31.654	20.077	-4.223	-0.508	9.940	106.115	-0.002216	-0.001405	0.000296
3.0400	106.371	40.159	23.874	-4.973	-0.509	9.929	202.503	-0.002811	-0.001671	0.000348
3.0500	149.893	46.953	28.058	-4.891	-0.507	9.940	285.358	-0.003287	-0.001964	0.000342
3.0600	202.703	55.542	32.502	-4.907	-0.517	9.928	385.895	-0.003888	-0.002275	0.000344
3.0700	259.465	64.507	37.043	-4.668	-0.521	9.939	493.956	-0.004515	-0.002593	0.000327
3.0800	325.425	74.387	41.858	-3.751	-0.521	9.929	619.526	-0.005207	-0.002930	0.000263
3.0900	391.610	84.713	46.840	-2.137	-0.510	9.939	745.525	-0.005930	-0.003279	0.000150
3.1000	460.230	95.189	51.932	-0.805	-0.506	9.928	876.160	-0.006663	-0.003635	0.000056
3.1100	548.281	108.364	58.331	1.642	-0.525	9.940	1043.787	-0.007585	-0.004083	-0.000115
3.1200	630.893	119.912	64.617	4.253	-0.509	9.928	1201.057	-0.008394	-0.004523	-0.000298
3.1300	699.467	129.556	70.136	6.795	-0.512	9.939	1331.606	-0.009069	-0.004910	-0.000476
3.1400	786.437	141.340	77.099	9.630	-0.506	9.929	1497.173	-0.009894	-0.005397	-0.000674
3.1500	851.314	150.649	82.107	12.342	-0.504	9.939	1620.684	-0.010545	-0.005747	-0.000864
3.1600	919.769	159.641	87.210	15.272	-0.509	9.928	1751.003	-0.011175	-0.006105	-0.001069
3.1700	1003.627	170.481	94.478	18.704	-0.513	9.939	1910.648	-0.011934	-0.006613	-0.001309
3.1800	1058.902	178.193	99.293	21.248	-0.508	9.928	2015.877	-0.012474	-0.006950	-0.001487
3.1900	1088.718	183.405	102.417	23.303	-0.515	9.939	2072.639	-0.012838	-0.007169	-0.001631
3.2000	1146.367	189.839	107.328	25.556	-0.518	9.928	2182.388	-0.013289	-0.007513	-0.001789
3.2100	1179.805	194.674	110.770	28.030	-0.520	9.939	2246.046	-0.013627	-0.007754	-0.001962
3.2200	1209.351	198.869	113.124	29.128	-0.506	9.928	2302.294	-0.013921	-0.007919	-0.002039
3.2300	1229.504	202.386	115.105	29.810	-0.517	9.939	2340.660	-0.014167	-0.008057	-0.002087
3.2400	1242.970	204.527	116.330	31.046	-0.498	9.928	2366.295	-0.014317	-0.008143	-0.002173
3.2500	1242.879	205.291	117.559	30.919	-0.503	9.939	2366.123	-0.014370	-0.008229	-0.002164
3.2600	1230.496	204.692	117.077	30.560	-0.516	9.928	2342.548	-0.014328	-0.008195	-0.002139
3.2700	1211.680	203.609	116.275	30.129	-0.506	9.940	2306.728	-0.014253	-0.008139	-0.002109
3.2800	1185.005	200.815	114.555	28.808	-0.509	9.928	2255.945	-0.014057	-0.008019	-0.002017
3.2900	1144.203	196.940	112.489	27.125	-0.512	9.939	2178.268	-0.013786	-0.007874	-0.001899
3.3000	1096.398	192.646	109.463	24.640	-0.514	9.927	2087.259	-0.013485	-0.007662	-0.001725
3.3100	1054.498	187.920	105.487	22.875	-0.519	9.939	2007.494	-0.013154	-0.007384	-0.001601
3.3200	1001.298	182.000	101.152	20.625	-0.514	9.928	1906.214	-0.012740	-0.007081	-0.001444
3.3300	926.186	173.205	95.729	17.456	-0.511	9.939	1763.220	-0.012124	-0.006701	-0.001222
3.3400	856.755	165.060	90.790	14.466	-0.517	9.927	1631.041	-0.011554	-0.006355	-0.001013
3.3500	790.104	156.848	85.230	12.147	-0.515	9.939	1504.154	-0.010979	-0.005966	-0.000850
3.3600	724.144	147.953	79.972	9.854	-0.507	9.928	1378.584	-0.010357	-0.005598	-0.000690
3.3700	637.640	136.505	73.688	7.243	-0.510	9.939	1213.903	-0.009555	-0.005158	-0.000507
3.3800	559.778	125.579	67.964	4.683	-0.524	9.928	1065.674	-0.008791	-0.004757	-0.000328
3.3900	491.654	115.618	62.307	2.989	-0.508	9.939	935.984	-0.008093	-0.004362	-0.000209
3.4000	427.513	105.751	57.119	0.556	-0.502	9.927	813.875	-0.007403	-0.003998	-0.000039
3.4100	352.566	94.175	51.779	-1.361	-0.502	9.939	671.196	-0.006592	-0.003625	0.000095
3.4200	289.357	83.379	46.618	-3.099	-0.506	9.928	550.861	-0.005837	-0.003263	0.000217
3.4300	237.148	74.249	42.203	-3.988	-0.506	9.939	451.469	-0.005197	-0.002954	0.000279
3.4400	190.680	65.523	38.075	-4.723	-0.519	9.927	363.007	-0.004587	-0.002665	0.000331
3.4500	140.215	55.974	33.356	-4.516	-0.515	9.939	266.933	-0.003918	-0.002335	0.000316
3.4600	103.861	48.262	29.242	-4.557	-0.520	9.928	197.725	-0.003378	-0.002047	0.000319
3.4700	73.248	41.300	25.609	-4.211	-0.511	9.939	139.446	-0.002891	-0.001793	0.000295
3.4800	53.787	36.143	22.238	-3.460	-0.506	9.927	102.396	-0.002530	-0.001557	0.000242
3.4900	47.385	33.752	21.439	-3.445	-0.508	9.938	90.208	-0.002363	-0.001501	0.000241
3.5000	41.914	32.267	20.874	-3.473	-0.509	9.927	79.794	-0.002259	-0.001461	0.000243
3.5100	42.711	31.823	20.077	-3.500	-0.505	9.939	81.310	-0.002228	-0.001405	0.000245
3.5200	45.957	31.348	19.993	-3.404	-0.505	9.927	87.490	-0.002194	-0.001400	0.000238
3.5300	58.746	32.822	20.834	-3.777	-0.500	9.939	111.837	-0.002298	-0.001458	0.000264
3.5400	110.128	41.981	25.237	-4.642	-0.508	9.927	209.656	-0.002939	-0.001767	0.000325
3.5500	158.069	49.968	29.062	-4.864	-0.512	9.938	300.922	-0.003498	-0.002034	0.000340
3.5600	211.390	57.683	33.425	-4.739	-0.518	9.927	402.431	-0.004038	-0.002340	0.000332
3.5700	272.119	67.105	38.503	-3.763	-0.514	9.939	518.045	-0.004697	-0.002695	0.000263
3.5800	342.377	78.126	43.883	-2.833	-0.513	9.926	651.798	-0.005469	-0.003072	0.000198
3.5900	408.923	88.522	48.686	-2.111	-0.521	9.938	778.484	-0.006197	-0.003408	0.000148
3.6000	478.009	98.916	53.430	0.110	-0.511	9.927	910.006	-0.006924	-0.003740	-0.000008
3.6100	550.596	109.489	58.784	2.032	-0.497	9.938	1048.193	-0.007664	-0.004115	-0.000142
3.6200	636.062	121.748	65.623	5.029	-0.505	9.927	1210.899	-0.008522	-0.004594	-0.000352
3.6300	724.685	133.961	72.090	7.714	-0.499	9.938	1379.614	-0.009377	-0.005046	-0.000540
3.6400	767.967	140.673	75.984	9.504	-0.509	9.926	1462.011	-0.009847	-0.005319	-0.000665
3.6500	831.206	148.789	81.462	11.813	-0.515	9.938	1582.403	-0.010415	-0.005702	-0.000827
3.6600	928.290	161.839	88.548	16.107	-0.516	9.927	1767.225	-0.011329	-0.006198	-0.001127
3.6700	972.158	168.258	92.539	17.928	-0.517	9.939	1850.739	-0.011778	-0.006478	-0.001255
3.6800	1035.878	175.982	97.477	20.152	-0.504	9.927	1972.046	-0.012319	-0.006823	-0.001411
3.6900	1108.976	185.947	104.372	23.777	-0.517	9.938	2111.206	-0.013016	-0.007306	-0.001664
3.7000	1178.393	194.395	110.028	27.348	-0.502	9.926	2243.357	-0.013608	-0.007702	-0.001914
3.7100	1199.011	198.010	112.820	28.460	-0.494	9.938	2282.610	-0.013861	-0.007897	-0.001992
3.7200	1205.774	199.414	113.260	29.197	-0.505	9.927	2295.485	-0.013959	-0.007928	-0.002044
3.7300	1233.291	202.914	115.932	30.906	-0.513	9.938	2347.870	-0.014204	-0.008115	-0.002163
3.7400	1239.678	205.111	117.242	30.920	-0.502	9.926	2360.029	-0.014358	-0.008207	-0.002164
3.7500	1236.026	205.360	117.173	31.129	-0.502	9.938	2353.077	-0.014375	-0.008202	-0.002179
3.7600	1231.112	205.111	116.882	30.644	-0.521	9.927	2343.721	-0.014358	-0.008182	-0.002145
3.7700	1224.635	204.819	117.229	30.879	-0.509	9.938	2331.390	-0.014337	-0.008206	-0.002162
3.7800	1197.975	203.346	115.973	29.753	-0.521	9.926	2280.636	-0.014234	-0.008118	-0.002083
3.7900	1134.419	197.022	112.379	26.556	-0.528	9.938	2159.643	-0.013792	-0.007867	-0.001859
3.8000	1104.453	193.923	109.737	26.098	-0.518	9.926	2102.594	-0.013575	-0.007682	-0.001827
3.8100	1046.819	187.988	105.541	22.930	-0.515	9.937	1992.874	-0.013159	-0.007388	-0.001605
3.8200	982.467	180.653	100.671	19.971	-0.521	9.926	1870.365	-0.012646	-0.007047	-0.001398
3.8300	918.596	173.219	95.619	17.219	-0.510	9.937	1748.772	-0.012125	-0.006693	-0.001205
3.8400	870.235	167.035	91.562	15.313	-0.517	9.926	1656.704	-0.011692	-0.006409	-0.001072
3.8500	791.005	157.321	85.935	12.327	-0.509	9.937	1505.871	-0.011012	-0.006015	-0.000863
3.8600	715.247	147.816	79.905	9.951	-0.513	9.926	1361.647	-0.010347	-0.005593	-0.000697
3.8700	638.828	137.517	74.060	7.465	-0.502	9.938	1216.164	-0.009626	-0.005184	-0.000523
3.8800	563.355	126.860	67.784	5.251	-0.506	9.926	1072.483	-0.008880	-0.004745	-0.000368
3.8900	488.288	116.159	62.775	3.253	-0.529	9.937	929.575	-0.008131	-0.004394	-0.000228
3.9000	430.384	107.376	57.904	1.528	-0.518	9.926	819.340	-0.007516	-0.004053	-0.000107
3.9100	355.903	95.149	52.330	-0.959	-0.525	9.937	677.547	-0.006660	-0.003663	0.000067
3.9200	287.869	83.643	46.785	-2.778	-0.529	9.926	548.029	-0.005855	-0.003275	0.000194
3.9300	238.771	74.679	42.562	-3.988	-0.508	9.938	454.559	-0.005228	-0.002979	0.000279
3.9400	180.626	64.714	37.760	-4.348	-0.521	9.925	343.866	-0.004530	-0.002643	0.000304
3.9500	138.968	56.739	33.367	-4.487	-0.512	9.937	264.559	-0.003972	-0.002336	0.000314
3.9600	98.646	47.928	28.731	-4.306	-0.521	9.925	187.798	-0.003355	-0.002011	0.000301
3.9700	78.478	42.662	26.296	-3.278	-0.511	9.937	149.403	-0.002986	-0.001841	0.000229
3.9800	60.099	38.284	24.190	-3.916	-0.508	9.925	114.412	-0.002680	-0.001693	0.000274
3.9900	54.238	36.367	22.528	-3.571	-0.507	9.937	103.254	-0.002546	-0.001577	0.000250
4.0000	44.995	33.408	20.929	-3.375	-0.512	9.925	85.659	-0.002339	-0.001465	0.000236
4.0100	46.363	33.227	20.695	-3.444	-0.503	9.937	88.263	-0.002326	-0.001449	0.000241
4.0200	50.450	33.460	21.233	-3.417	-0.505	9.925	96.045	-0.002342	-0.001486	0.000239
4.0300	71.084	36.254	22.404	-3.918	-0.504	9.937	135.326	-0.002538	-0.001568	0.000274
4.0400	124.661	45.080	26.350	-4.447	-0.512	9.925	237.322	-0.003156	-0.001845	0.000311
4.0500	169.971	52.278	30.328	-4.196	-0.512	9.937	323.582	-0.003659	-0.002123	0.000294
4.0600	220.046	60.062	34.731	-4.309	-0.510	9.925	418.911	-0.004204	-0.002431	0.000302
4.0700	274.148	68.538	38.710	-3.654	-0.508	9.937	521.908	-0.004798	-0.002710	0.000256
4.0800	347.848	79.582	44.363	-2.596	-0.508	9.924	662.212	-0.005571	-0.003105	0.000182
4.0900	413.011	89.395	49.209	-1.222	-0.510	9.937	786.266	-0.006258	-0.003445	0.000086
4.1000	488.288	101.331	54.752	0.779	-0.518	9.925	929.575	-0.007093	-0.003833	-0.000055
4.1100	556.502	111.198	59.927	2.697	-0.516	9.937	1059.437	-0.007784	-0.004195	-0.000189
4.1200	636.769	122.663	65.677	5.100	-0.499	9.925	1212.244	-0.008586	-0.004597	-0.000357
4.1300	719.710	133.891	72.255	7.659	-0.509	9.937	1370.144	-0.009372	-0.005058	-0.000536
4.1400	793.605	144.411	78.324	10.783	-0.506	9.925	1510.820	-0.010109	-0.005483	-0.000755
4.1500	862.931	154.125	83.716	13.731	-0.498	9.937	1642.799	-0.010789	-0.005860	-0.000961
4.1600	927.358	162.226	88.561	15.828	-0.508	9.924	1765.451	-0.011356	-0.006199	-0.001108
4.1700	987.186	170.522	93.944	18.957	-0.500	9.937	1879.349	-0.011937	-0.006576	-0.001327
4.1800	1050.591	179.083	99.554	21.874	-0.522	9.925	2000.055	-0.012536	-0.006969	-0.001531
4.1900	1107.729	186.432	104.593	24.308	-0.513	9.937	2108.831	-0.013050	-0.007321	-0.001702
4.2000	1153.040	192.187	108.459	26.754	-0.521	9.924	2195.091	-0.013453	-0.007592	-0.001873
4.2100	1196.622	198.218	112.340	28.891	-0.513	9.937	2278.061	-0.013875	-0.007864	-0.002022
4.2200	1212.793	201.178	114.169	29.364	-0.516	9.924	2308.846	-0.014082	-0.007992	-0.002055
4.2300	1227.520	203.707	115.892	30.712	-0.517	9.937	2336.884	-0.014259	-0.008112	-0.002150
4.2400	1240.730	205.791	117.229	31.295	-0.509	9.924	2362.032	-0.014405	-0.008206	-0.002191
4.2500	1242.053	206.375	117.812	31.102	-0.512	9.937	2364.550	-0.014446	-0.008247	-0.002177
4.2600	1239.633	207.109	118.202	31.684	-0.522	9.925	2359.943	-0.014498	-0.008274	-0.002218
4.2700	1229.309	206.721	117.687	30.977	-0.513	9.938	2340.288	-0.014470	-0.008238	-0.002168
4.2800	1201.040	204.416	116.110	29.851	-0.522	9.925	2286.472	-0.014309	-0.008128	-0.002090
4.2900	1140.055	197.815	113.384	27.585	-0.506	9.937	2170.372	-0.013847	-0.007937	-0.001931
4.3000	1101.838	194.300	110.207	25.988	-0.513	9.923	2097.616	-0.013601	-0.007715	-0.001819
4.3100	1055.235	189.227	106.600	23.681	-0.508	9.936	2008.896	-0.013246	-0.007462	-0.001658
4.3200	995.046	182.906	101.632	21.553	-0.512	9.924	1894.312	-0.012803	-0.007114	-0.001509
4.3300	928.831	174.527	96.663	17.969	-0.505	9.937	1768.255	-0.012217	-0.006766	-0.001258
4.3400	863.968	167.273	91.713	15.593	-0.511	9.924	1644.773	-0.011709	-0.006420	-0.001091
4.3500	789.037	158.156	85.616	12.815	-0.505	9.936	1502.123	-0.011071	-0.005993	-0.000897
4.3600	707.372	147.262	79.396	10.116	-0.511	9.924	1346.655	-0.010308	-0.005558	-0.000708
4.3700	641.232	138.103	74.347	8.104	-0.513	9.936	1220.741	-0.009667	-0.005204	-0.000567
4.3800	571.110	128.750	68.718	5.879	-0.502	9.924	1087.246	-0.009013	-0.004810	-0.000412
4.3900	482.968	116.186	62.252	2.976	-0.505	9.936	919.447	-0.008133	-0.004358	-0.000208
4.4000	451.453	110.545	59.115	2.309	-0.513	9.923	859.451	-0.007738	-0.004138	-0.000162
4.4100	363.086	96.718	52.755	-0.346	-0.504	9.936	691.223	-0.006770	-0.003693	0.000024
4.4200	320.300	89.686	49.484	-1.472	-0.519	9.923	609.770	-0.006278	-0.003464	0.000103
4.4300	251.545	78.181	44.145	-2.943	-0.519	9.936	478.878	-0.005473	-0.003090	0.000206
4.4400	191.056	67.008	38.488	-4.558	-0.510	9.923	363.722	-0.004691	-0.002694	0.000319
4.4500	145.490	58.196	33.865	-4.196	-0.510	9.936	276.976	-0.004074	-0.002371	0.000294
4.4600	104.688	50.221	29.873	-4.139	-0.525	9.924	199.299	-0.003515	-0.002091	0.000290
4.4700	74.661	43.440	26.132	-4.154	-0.513	9.936	142.136	-0.003041	-0.001829	0.000291
4.4800	57.409	38.505	23.448	-3.390	-0.512	9.924	109.291	-0.002695	-0.001641	0.000237
4.4900	45.145	34.893	21.961	-2.917	-0.525	9.936	85.945	-0.002443	-0.001537	0.000204
4.5000	42.951	33.976	21.370	-3.221	-0.516	9.924	81.768	-0.002378	-0.001496	0.000225
4.5100	44.800	33.643	20.737	-3.528	-0.521	9.936	85.287	-0.002355	-0.001452	0.000247
4.5200	48.978	33.545	20.684	-3.068	-0.520	9.923	93.241	-0.002348	-0.001448	0.000215
4.5300	73.564	36.657	22.431	-3.557	-0.513	9.936	140.047	-0.002566	-0.001570	0.000249
4.5400	124.255	45.426	26.737	-4.197	-0.525	9.923	236.549	-0.003180	-0.001872	0.000294
4.5500	173.458	53.585	31.098	-3.931	-0.517	9.936	330.219	-0.003751	-0.002177	0.000275
4.5600	217.942	60.338	34.606	-4.097	-0.521	9.923	414.906	-0.004224	-0.002422	0.000287
4.5700	284.773	69.942	39.561	-3.458	-0.517	9.936	542.135	-0.004896	-0.002769	0.000242
4.5800	351.019	80.889	45.024	-2.111	-0.510	9.923	668.249	-0.005662	-0.003152	0.000148
4.5900	397.366	88.618	48.548	-1.652	-0.517	9.936	756.483	-0.006203	-0.003398	0.000116
4.6000	474.477	99.679	53.791	0.431	-0.526	9.923	903.282	-0.006977	-0.003765	-0.000030
4.6100	553.151	110.838	59.389	2.685	-0.522	9.936	1053.057	-0.007759	-0.004157	-0.000188
4.6200	640.871	123.610	66.491	6.003	-0.526	9.923	1220.055	-0.008653	-0.004654	-0.000420
4.6300	723.618	135.280	73.027	8.144	-0.521	9.936	1377.583	-0.009470	-0.005112	-0.000570
4.6400	782.995	143.244	77.484	10.854	-0.529	9.923	1490.622	-0.010027	-0.005424	-0.000760
4.6500	870.941	154.819	84.076	14.259	-0.521	9.936	1658.049	-0.010837	-0.005885	-0.000998
4.6600	913.772	161.865	88.575	15.719	-0.514	9.922	1739.588	-0.011331	-0.006200	-0.001100
4.6700	988.013	171.676	94.725	18.734	-0.515	9.936	1880.922	-0.012017	-0.006631	-0.001311
4.6800	1037.561	177.902	98.343	21.595	-0.526	9.923	1975.250	-0.012453	-0.006884	-0.001512
4.6900	1090.927	184.613	103.354	24.265	-0.521	9.936	2076.845	-0.012923	-0.007235	-0.001699
4.7000	1143.091	191.713	108.100	26.321	-0.517	9.922	2176.151	-0.013420	-0.007567	-0.001842
4.7100	1185.937	197.648	112.023	28.878	-0.510	9.936	2257.719	-0.013835	-0.007842	-0.002021
4.7200	1214.611	201.552	114.211	30.044	-0.514	9.923	2312.307	-0.014109	-0.007995	-0.002103
4.7300	1223.327	203.386	115.381	30.074	-0.514	9.936	2328.901	-0.014237	-0.008077	-0.002105
4.7400	1206.466	202.802	115.627	30.101	-0.526	9.922	2296.801	-0.014196	-0.008094	-0.002107
4.7500	1207.307	203.290	115.600	30.211	-0.522	9.936	2298.403	-0.014230	-0.008092	-0.002115
4.7600	1279.489	211.086	120.464	32.907	-0.505	9.923	2435.818	-0.014776	-0.008433	-0.002303
4.7700	1278.256	212.169	121.504	33.366	-0.517	9.936	2433.472	-0.014852	-0.008505	-0.002336
4.7800	1212.462	206.374	118.341	30.420	-0.512	9.923	2308.216	-0.014446	-0.008284	-0.002129
4.7900	1165.002	201.916	114.912	28.959	-0.520	9.936	2217.865	-0.014134	-0.008044	-0.002027
4.8000	1118.444	196.648	111.129	26.402	-0.525	9.922	2129.230	-0.013765	-0.007779	-0.001848
4.8100	1060.765	190.783	106.671	23.751	-0.516	9.936	2019.424	-0.013355	-0.007467	-0.001663
4.8200	1002.305	184.252	102.528	21.195	-0.523	9.923	1908.131	-0.012898	-0.007177	-0.001484
4.8300	936.871	176.958	97.616	18.163	-0.513	9.936	1783.562	-0.012387	-0.006833	-0.001271
4.8400	872.880	169.063	92.442	15.955	-0.501	9.922	1661.739	-0.011834	-0.006471	-0.001117
4.8500	801.089	159.823	86.674	13.677	-0.499	9.935	1525.068	-0.011188	-0.006067	-0.000957
4.8600	728.292	150.499	80.967	10.812	-0.507	9.922	1386.480	-0.010535	-0.005668	-0.000757
4.8700	591.007	132.977	71.182	6.615	-0.513	9.936	1125.126	-0.009308	-0.004983	-0.000463
4.8800	557.238	126.887	67.660	5.197	-0.509	9.922	1060.839	-0.008882	-0.004736	-0.000364
4.8900	490.617	117.189	62.320	3.476	-0.506	9.936	934.010	-0.008203	-0.004362	-0.000243
4.9000	422.734	106.571	57.669	1.502	-0.505	9.922	804.777	-0.007460	-0.004037	-0.000105
4.9100	379.152	99.443	53.900	0.180	-0.512	9.935	721.807	-0.006961	-0.003773	-0.000013
4.9200	321.082	90.425	49.593	-1.526	-0.517	9.922	611.258	-0.006330	-0.003471	0.000107
4.9300	268.467	80.987	45.078	-2.667	-0.505	9.935	511.093	-0.005669	-0.003155	0.000187
4.9400	207.106	70.162	40.331	-3.639	-0.515	9.922	394.278	-0.004911	-0.002823	0.000255
4.9500	157.783	61.354	35.764	-4.404	-0.517	9.935	300.379	-0.004295	-0.002503	0.000308
4.9600	140.966	56.599	33.134	-3.890	-0.504	9.922	268.364	-0.003962	-0.002319	0.000272
4.9700	142.770	56.099	32.474	-4.142	-0.516	9.935	271.797	-0.003927	-0.002273	0.000290
4.9800	98.752	47.873	28.622	-4.252	-0.509	9.922	187.998	-0.003351	-0.002004	0.000298
4.9900	65.013	40.451	24.782	-3.485	-0.510	9.935	123.768	-0.002832	-0.001735	0.000244
Test Cycles
Time (sec)	Axial stress (kPa)	Axial micro-strain #1	Axial micro-strain #2	Axial micro-strain #3	Confining pressure (kPa)	Temperature (�C)	Load (N)	Displacement #1 (mm)	Displacement #2 (mm)	Displacement #3 (mm)
0.0000	53.651	37.422	23.023	-3.294	-0.516	9.921	102.139	-0.002620	-0.001612	0.000231
0.0100	55.785	36.699	22.514	-3.361	-0.518	9.935	106.201	-0.002569	-0.001576	0.000235
0.0200	57.574	36.394	22.541	-3.333	-0.520	9.921	109.606	-0.002548	-0.001578	0.000233
0.0300	65.148	37.117	23.158	-3.708	-0.518	9.935	124.025	-0.002598	-0.001621	0.000260
0.0400	101.622	42.786	25.361	-4.099	-0.528	9.921	193.462	-0.002995	-0.001775	0.000287
0.0500	157.227	51.417	29.721	-4.128	-0.518	9.936	299.320	-0.003599	-0.002081	0.000289
0.0600	208.174	59.377	34.001	-4.308	-0.526	9.921	396.309	-0.004156	-0.002380	0.000302
0.0700	260.893	67.480	38.350	-3.028	-0.516	9.935	496.674	-0.004724	-0.002684	0.000212
0.0800	335.239	79.098	43.760	-2.514	-0.504	9.921	638.208	-0.005537	-0.003063	0.000176
0.0900	394.932	87.881	47.886	-1.333	-0.515	9.935	751.848	-0.006152	-0.003352	0.000093
0.1000	486.470	101.762	54.780	0.890	-0.517	9.921	926.113	-0.007123	-0.003835	-0.000062
0.1100	567.052	113.645	61.014	3.643	-0.514	9.935	1079.521	-0.007955	-0.004271	-0.000255
0.1200	637.776	123.929	66.394	5.823	-0.519	9.920	1214.161	-0.008675	-0.004648	-0.000408
0.1300	715.127	134.502	71.842	8.548	-0.519	9.935	1361.418	-0.009415	-0.005029	-0.000598
0.1400	775.676	142.993	77.277	10.771	-0.514	9.921	1476.688	-0.010010	-0.005409	-0.000754
0.1500	853.328	153.652	83.416	14.022	-0.519	9.935	1624.517	-0.010756	-0.005839	-0.000982
0.1600	932.317	164.144	89.605	16.482	-0.513	9.921	1774.893	-0.011490	-0.006272	-0.001154
0.1700	978.214	170.550	93.598	18.818	-0.512	9.935	1862.268	-0.011939	-0.006552	-0.001317
0.1800	1032.286	177.248	98.400	20.888	-0.513	9.921	1965.208	-0.012407	-0.006888	-0.001462
0.1900	1100.455	186.140	104.372	24.193	-0.522	9.935	2094.984	-0.013030	-0.007306	-0.001693
0.2000	1149.899	192.979	108.732	26.820	-0.528	9.920	2189.112	-0.013509	-0.007611	-0.001877
0.2100	1178.903	197.065	111.213	28.404	-0.524	9.935	2244.329	-0.013795	-0.007785	-0.001988
0.2200	1210.659	201.205	113.963	29.878	-0.520	9.921	2304.783	-0.014084	-0.007977	-0.002091
0.2300	1241.587	206.054	117.437	31.268	-0.499	9.935	2363.663	-0.014424	-0.008221	-0.002189
0.2400	1238.807	206.459	117.354	31.600	-0.523	9.921	2358.370	-0.014452	-0.008215	-0.002212
0.2500	1235.200	206.875	117.576	31.407	-0.507	9.935	2351.503	-0.014481	-0.008230	-0.002199
0.2600	1233.472	206.804	117.615	31.881	-0.505	9.920	2348.213	-0.014476	-0.008233	-0.002232
0.2700	1225.582	206.582	117.868	31.046	-0.514	9.934	2333.193	-0.014461	-0.008251	-0.002173
0.2800	1191.858	204.013	116.166	30.031	-0.506	9.920	2268.991	-0.014281	-0.008132	-0.002102
0.2900	1142.595	199.109	113.302	27.835	-0.504	9.934	2175.207	-0.013938	-0.007931	-0.001948
0.3000	1117.452	196.619	111.418	26.405	-0.505	9.921	2127.342	-0.013763	-0.007799	-0.001848
0.3100	1049.449	189.407	106.655	24.112	-0.515	9.935	1997.881	-0.013259	-0.007466	-0.001688
0.3200	987.487	182.737	101.468	21.166	-0.520	9.920	1879.921	-0.012792	-0.007103	-0.001482
0.3300	912.600	174.164	95.703	17.995	-0.515	9.935	1737.356	-0.012191	-0.006699	-0.001260
0.3400	856.274	166.840	91.106	15.427	-0.506	9.921	1630.125	-0.011679	-0.006377	-0.001080
0.3500	788.961	158.446	86.040	13.092	-0.508	9.934	1501.980	-0.011091	-0.006023	-0.000916
0.3600	705.494	148.147	79.906	10.327	-0.509	9.920	1343.079	-0.010370	-0.005593	-0.000723
0.3700	647.409	140.102	74.525	8.326	-0.513	9.935	1232.500	-0.009807	-0.005217	-0.000583
0.3800	554.278	126.720	67.741	5.668	-0.511	9.920	1055.202	-0.008870	-0.004742	-0.000397
0.3900	504.639	119.690	63.904	4.045	-0.512	9.934	960.703	-0.008378	-0.004473	-0.000283
0.4000	389.176	102.651	55.492	0.961	-0.523	9.919	740.891	-0.007186	-0.003884	-0.000067
0.4100	338.154	93.952	51.188	-0.722	-0.525	9.934	643.759	-0.006577	-0.003583	0.000051
0.4200	286.802	84.601	46.922	-2.416	-0.505	9.920	545.998	-0.005922	-0.003285	0.000169
0.4300	241.011	76.541	43.496	-3.054	-0.505	9.935	458.822	-0.005358	-0.003045	0.000214
0.4400	203.485	69.954	40.070	-3.863	-0.505	9.920	387.383	-0.004897	-0.002805	0.000270
0.4500	147.804	59.727	34.373	-4.335	-0.504	9.934	281.382	-0.004181	-0.002406	0.000303
0.4600	109.196	51.692	30.424	-3.850	-0.502	9.920	207.882	-0.003618	-0.002130	0.000269
0.4700	70.408	43.175	26.145	-3.264	-0.504	9.934	134.039	-0.003022	-0.001830	0.000228
0.4800	52.464	38.826	23.282	-3.290	-0.512	9.919	99.878	-0.002718	-0.001630	0.000230
0.4900	49.819	36.825	22.389	-3.027	-0.506	9.934	94.843	-0.002578	-0.001567	0.000212
0.5000	48.422	35.700	21.934	-2.903	-0.511	9.920	92.182	-0.002499	-0.001535	0.000203
0.5100	49.353	35.088	21.949	-2.960	-0.516	9.934	93.956	-0.002456	-0.001536	0.000207
0.5200	52.795	35.503	21.853	-3.209	-0.521	9.919	100.508	-0.002485	-0.001530	0.000225
0.5300	64.337	36.617	22.280	-3.306	-0.524	9.934	122.480	-0.002563	-0.001560	0.000231
0.5400	96.332	41.728	24.452	-3.291	-0.518	9.919	183.392	-0.002921	-0.001712	0.000230
0.5500	153.981	51.000	29.489	-3.612	-0.522	9.934	293.140	-0.003570	-0.002064	0.000253
0.5600	201.576	58.391	33.645	-3.625	-0.517	9.919	383.749	-0.004087	-0.002355	0.000254
0.5700	260.502	67.787	38.310	-3.390	-0.532	9.934	495.930	-0.004745	-0.002682	0.000237
0.5800	320.902	76.625	42.492	-2.444	-0.517	9.919	610.914	-0.005364	-0.002974	0.000171
0.5900	391.685	87.907	48.065	-1.442	-0.514	9.934	745.668	-0.006154	-0.003365	0.000101
0.6000	465.535	99.304	53.596	0.931	-0.521	9.919	886.259	-0.006951	-0.003752	-0.000065
0.6100	558.185	112.588	60.176	3.602	-0.521	9.933	1062.641	-0.007881	-0.004212	-0.000252
0.6200	633.237	123.024	65.995	5.726	-0.511	9.919	1205.521	-0.008612	-0.004620	-0.000401
0.6300	697.213	132.126	71.334	8.367	-0.510	9.934	1327.314	-0.009249	-0.004993	-0.000586
0.6400	785.234	144.550	78.240	10.951	-0.514	9.919	1494.884	-0.010118	-0.005477	-0.000767
0.6500	870.611	155.640	84.335	14.719	-0.512	9.934	1657.419	-0.010895	-0.005903	-0.001030
0.6600	910.331	161.783	87.792	16.343	-0.508	9.919	1733.036	-0.011325	-0.006145	-0.001144
0.6700	1004.664	173.495	95.427	19.415	-0.512	9.934	1912.622	-0.012145	-0.006680	-0.001359
0.6800	1048.307	179.777	99.815	22.304	-0.502	9.918	1995.707	-0.012584	-0.006987	-0.001561
0.6900	1096.112	186.210	104.113	24.543	-0.507	9.934	2086.716	-0.013035	-0.007288	-0.001718
0.7000	1152.679	193.259	108.980	27.473	-0.513	9.918	2194.405	-0.013528	-0.007629	-0.001923
0.7100	1170.412	196.382	110.976	28.127	-0.506	9.933	2228.165	-0.013747	-0.007768	-0.001969
0.7200	1206.315	201.344	114.099	30.100	-0.506	9.919	2296.515	-0.014094	-0.007987	-0.002107
0.7300	1229.955	205.054	116.399	31.366	-0.520	9.934	2341.518	-0.014354	-0.008148	-0.002196
0.7400	1228.963	205.679	116.496	31.768	-0.514	9.919	2339.630	-0.014398	-0.008155	-0.002224
0.7500	1249.838	208.375	118.409	32.089	-0.516	9.933	2379.370	-0.014586	-0.008289	-0.002246
0.7600	1256.796	210.445	120.006	32.894	-0.514	9.919	2392.616	-0.014731	-0.008400	-0.002303
0.7700	1241.572	209.668	118.950	32.032	-0.524	9.934	2363.634	-0.014677	-0.008326	-0.002242
0.7800	1182.059	203.624	116.140	30.296	-0.519	9.919	2250.338	-0.014254	-0.008130	-0.002121
0.7900	1165.949	201.818	114.954	29.476	-0.518	9.934	2219.667	-0.014127	-0.008047	-0.002063
0.8000	1106.662	196.064	110.398	26.974	-0.515	9.918	2106.800	-0.013724	-0.007728	-0.001888
0.8100	1055.415	190.783	106.806	24.737	-0.514	9.933	2009.239	-0.013355	-0.007476	-0.001732
0.8200	992.566	183.335	101.330	22.026	-0.525	9.919	1889.591	-0.012833	-0.007093	-0.001542
0.8300	937.622	176.761	97.466	19.039	-0.529	9.933	1784.992	-0.012373	-0.006823	-0.001333
0.8400	861.203	168.022	91.987	16.148	-0.523	9.918	1639.509	-0.011762	-0.006439	-0.001130
0.8500	795.905	160.254	86.744	14.288	-0.517	9.933	1515.198	-0.011218	-0.006072	-0.001000
0.8600	706.455	148.289	79.426	11.007	-0.506	9.918	1344.910	-0.010380	-0.005560	-0.000771
0.8700	640.270	139.242	74.456	8.519	-0.511	9.934	1218.910	-0.009747	-0.005212	-0.000596
0.8800	573.529	130.041	69.379	6.475	-0.511	9.918	1091.852	-0.009103	-0.004857	-0.000453
0.8900	502.159	119.841	63.779	4.211	-0.507	9.933	955.982	-0.008389	-0.004465	-0.000295
0.9000	418.571	107.293	56.856	1.920	-0.514	9.918	796.852	-0.007510	-0.003980	-0.000134
0.9100	352.972	96.330	52.302	0.001	-0.517	9.933	671.968	-0.006743	-0.003661	-0.000000
0.9200	294.933	86.700	47.871	-1.360	-0.520	9.918	561.476	-0.006069	-0.003351	0.000095
0.9300	241.026	77.582	43.260	-2.555	-0.518	9.934	458.851	-0.005431	-0.003028	0.000179
0.9400	183.076	66.744	38.035	-4.337	-0.516	9.918	348.530	-0.004672	-0.002662	0.000304
0.9500	146.392	59.548	34.319	-3.850	-0.516	9.933	278.692	-0.004168	-0.002402	0.000269
0.9600	109.196	51.903	30.508	-3.265	-0.513	9.918	207.882	-0.003633	-0.002136	0.000229
0.9700	81.499	45.676	27.192	-3.473	-0.521	9.933	155.153	-0.003197	-0.001903	0.000243
0.9800	71.565	42.410	25.290	-3.389	-0.508	9.917	136.242	-0.002969	-0.001770	0.000237
0.9900	72.001	41.283	24.849	-3.917	-0.519	9.933	137.072	-0.002890	-0.001739	0.000274
1.0000	49.383	36.670	22.498	-3.015	-0.522	9.918	94.013	-0.002567	-0.001575	0.000211
1.0100	44.574	35.089	21.522	-2.763	-0.525	9.934	84.858	-0.002456	-0.001507	0.000193
1.0200	35.978	32.740	20.132	-2.679	-0.526	9.918	68.493	-0.002292	-0.001409	0.000188
1.0300	40.727	32.949	20.270	-2.348	-0.522	9.933	77.534	-0.002306	-0.001419	0.000164
1.0400	71.986	37.534	22.539	-3.389	-0.525	9.917	137.043	-0.002627	-0.001578	0.000237
1.0500	131.258	47.441	27.494	-4.154	-0.522	9.933	249.882	-0.003321	-0.001925	0.000291
1.0600	201.501	58.530	33.040	-3.737	-0.517	9.917	383.606	-0.004097	-0.002313	0.000262
1.0700	249.952	65.966	37.141	-3.126	-0.516	9.933	475.845	-0.004618	-0.002600	0.000219
1.0800	373.155	84.255	46.398	-1.598	-0.525	9.917	710.392	-0.005898	-0.003248	0.000112
1.0900	439.656	95.523	51.588	0.333	-0.517	9.933	836.992	-0.006687	-0.003611	-0.000023
1.1000	484.020	102.972	54.434	1.779	-0.521	9.918	921.450	-0.007208	-0.003810	-0.000125
1.1100	533.313	109.683	58.248	2.546	-0.532	9.932	1015.291	-0.007678	-0.004077	-0.000178
1.1200	609.447	120.133	64.342	5.461	-0.520	9.918	1160.231	-0.008409	-0.004504	-0.000382
1.1300	682.139	130.987	70.040	7.728	-0.516	9.933	1298.618	-0.009169	-0.004903	-0.000541
1.1400	762.000	141.451	76.107	10.841	-0.524	9.917	1450.653	-0.009902	-0.005327	-0.000759
1.1500	850.893	152.957	82.452	13.967	-0.514	9.932	1619.883	-0.010707	-0.005772	-0.000978
1.1600	931.100	164.201	90.006	17.010	-0.523	9.917	1772.575	-0.011494	-0.006300	-0.001191
1.1700	970.640	170.023	93.157	19.095	-0.525	9.933	1847.849	-0.011902	-0.006521	-0.001337
1.1800	1022.187	176.930	97.822	20.931	-0.521	9.917	1945.982	-0.012385	-0.006848	-0.001465
1.1900	1079.566	183.905	102.666	23.834	-0.519	9.933	2055.216	-0.012873	-0.007187	-0.001668
1.2000	1142.249	192.506	108.308	26.877	-0.525	9.917	2174.549	-0.013475	-0.007582	-0.001881
1.2100	1177.942	197.231	111.582	28.907	-0.525	9.933	2242.498	-0.013806	-0.007811	-0.002023
1.2200	1231.533	204.194	115.738	31.102	-0.506	9.918	2344.522	-0.014294	-0.008102	-0.002177
1.2300	1237.109	205.874	116.759	31.865	-0.511	9.933	2355.137	-0.014411	-0.008173	-0.002231
1.2400	1236.207	206.585	117.341	31.576	-0.524	9.917	2353.420	-0.014461	-0.008214	-0.002210
1.2500	1236.793	207.416	118.117	32.060	-0.515	9.932	2354.536	-0.014519	-0.008268	-0.002244
1.2600	1242.368	208.554	118.382	31.947	-0.513	9.916	2365.150	-0.014599	-0.008287	-0.002236
1.2700	1220.096	206.778	117.521	31.559	-0.510	9.933	2322.750	-0.014474	-0.008226	-0.002209
1.2800	1165.107	201.358	114.885	29.170	-0.523	9.917	2218.065	-0.014095	-0.008042	-0.002042
1.2900	1136.809	199.164	113.054	28.573	-0.512	9.932	2164.192	-0.013941	-0.007914	-0.002000
1.3000	1079.596	193.047	108.541	25.862	-0.512	9.917	2055.273	-0.013513	-0.007598	-0.001810
1.3100	1052.500	189.767	106.532	24.750	-0.504	9.932	2003.689	-0.013284	-0.007457	-0.001733
1.3200	979.281	181.918	100.670	20.901	-0.514	9.917	1864.300	-0.012734	-0.007047	-0.001463
1.3300	914.193	174.094	95.964	18.540	-0.512	9.932	1740.389	-0.012187	-0.006718	-0.001298
1.3400	851.465	166.758	90.941	15.593	-0.508	9.917	1620.970	-0.011673	-0.006366	-0.001091
1.3500	765.953	156.376	83.841	12.981	-0.516	9.932	1458.178	-0.010946	-0.005869	-0.000909
1.3600	699.768	147.453	79.452	10.424	-0.518	9.916	1332.178	-0.010322	-0.005562	-0.000730
1.3700	628.909	137.949	73.836	8.533	-0.512	9.932	1197.281	-0.009656	-0.005168	-0.000597
1.3800	567.698	129.139	68.583	6.241	-0.516	9.917	1080.751	-0.009040	-0.004801	-0.000437
1.3900	487.852	118.050	62.705	4.184	-0.514	9.933	928.745	-0.008264	-0.004389	-0.000293
1.4000	402.010	104.846	56.459	2.071	-0.516	9.916	765.324	-0.007339	-0.003952	-0.000145
1.4100	338.049	94.078	51.119	-0.403	-0.511	9.932	643.559	-0.006585	-0.003578	0.000028
1.4200	289.808	85.643	47.224	-1.707	-0.521	9.916	551.720	-0.005995	-0.003306	0.000120
1.4300	212.562	72.303	40.936	-3.322	-0.519	9.932	404.663	-0.005061	-0.002865	0.000233
1.4400	152.929	61.811	35.529	-3.445	-0.513	9.916	291.138	-0.004327	-0.002487	0.000241
1.4500	131.619	56.864	33.012	-3.500	-0.524	9.932	250.568	-0.003980	-0.002311	0.000245
1.4600	104.117	51.013	29.654	-3.695	-0.527	9.916	198.212	-0.003571	-0.002076	0.000259
1.4700	69.131	43.036	25.746	-3.374	-0.508	9.932	131.607	-0.003013	-0.001802	0.000236
1.4800	61.286	40.271	24.465	-2.722	-0.520	9.916	116.673	-0.002819	-0.001713	0.000191
1.4900	47.234	36.783	22.403	-3.222	-0.529	9.932	89.922	-0.002575	-0.001568	0.000226
1.5000	30.928	33.156	20.036	-2.637	-0.521	9.916	58.880	-0.002321	-0.001402	0.000185
1.5100	27.247	31.432	19.113	-2.554	-0.518	9.932	51.870	-0.002200	-0.001338	0.000179
1.5200	31.289	31.501	19.127	-1.901	-0.517	9.916	59.566	-0.002205	-0.001339	0.000133
1.5300	52.103	34.532	20.683	-3.014	-0.529	9.932	99.192	-0.002417	-0.001448	0.000211
1.5400	105.800	43.370	25.389	-3.432	-0.524	9.916	201.416	-0.003036	-0.001777	0.000240
1.5500	163.224	52.556	29.777	-4.028	-0.529	9.932	310.736	-0.003679	-0.002084	0.000282
1.5600	222.270	61.909	34.964	-3.805	-0.532	9.916	423.145	-0.004334	-0.002447	0.000266
1.5700	270.136	69.480	38.763	-3.082	-0.531	9.932	514.269	-0.004864	-0.002713	0.000216
1.5800	330.294	78.722	43.360	-2.790	-0.522	9.916	628.796	-0.005511	-0.003035	0.000195
1.5900	399.425	89.352	48.327	-0.834	-0.527	9.932	760.403	-0.006255	-0.003383	0.000058
1.6000	497.846	103.416	55.220	1.683	-0.529	9.916	947.771	-0.007239	-0.003865	-0.000118
1.6100	561.627	113.894	60.491	3.477	-0.520	9.932	1069.193	-0.007973	-0.004234	-0.000243
1.6200	652.413	126.250	67.096	6.810	-0.522	9.916	1242.027	-0.008838	-0.004697	-0.000477
1.6300	706.440	134.322	71.622	8.548	-0.524	9.932	1344.881	-0.009403	-0.005014	-0.000598
1.6400	781.718	144.022	77.596	11.616	-0.517	9.916	1488.190	-0.010082	-0.005432	-0.000813
1.6500	851.194	154.126	83.498	14.384	-0.517	9.932	1620.455	-0.010789	-0.005845	-0.001007
1.6600	916.553	162.726	88.519	16.912	-0.526	9.916	1744.881	-0.011391	-0.006196	-0.001184
1.6700	1010.766	174.218	95.716	20.764	-0.518	9.932	1924.238	-0.012195	-0.006700	-0.001453
1.6800	1048.803	180.097	99.803	22.124	-0.522	9.916	1996.651	-0.012607	-0.006986	-0.001549
1.6900	1100.816	186.628	104.689	25.001	-0.519	9.932	2095.671	-0.013064	-0.007328	-0.001750
1.7000	1142.640	192.561	108.319	27.015	-0.519	9.916	2175.293	-0.013479	-0.007582	-0.001891
1.7100	1188.927	198.843	112.174	29.516	-0.519	9.932	2263.412	-0.013919	-0.007852	-0.002066
1.7200	1214.371	202.470	114.858	30.296	-0.525	9.916	2311.850	-0.014173	-0.008040	-0.002121
1.7300	1228.632	205.222	116.249	31.588	-0.518	9.932	2339.001	-0.014366	-0.008137	-0.002211
1.7400	1223.823	205.694	116.689	30.991	-0.520	9.916	2329.845	-0.014399	-0.008168	-0.002169
1.7500	1225.176	205.944	116.634	31.629	-0.518	9.932	2332.420	-0.014416	-0.008164	-0.002214
1.7600	1229.835	206.958	117.479	31.437	-0.515	9.916	2341.290	-0.014487	-0.008224	-0.002201
1.7700	1222.786	206.888	117.961	31.017	-0.518	9.932	2327.871	-0.014482	-0.008257	-0.002171
1.7800	1204.347	205.681	116.840	31.629	-0.506	9.916	2292.767	-0.014398	-0.008179	-0.002214
1.7900	1152.709	200.886	113.839	28.959	-0.514	9.932	2194.462	-0.014062	-0.007969	-0.002027
1.8000	1106.031	195.702	110.521	27.377	-0.516	9.916	2105.598	-0.013699	-0.007737	-0.001916
1.8100	1051.177	190.144	106.724	24.266	-0.514	9.932	2001.171	-0.013310	-0.007471	-0.001699
1.8200	992.566	183.947	101.772	22.165	-0.510	9.916	1889.591	-0.012876	-0.007124	-0.001552
1.8300	920.235	175.081	96.281	18.900	-0.504	9.932	1751.890	-0.012256	-0.006740	-0.001323
1.8400	881.221	169.967	93.254	17.677	-0.520	9.916	1677.618	-0.011898	-0.006528	-0.001237
1.8500	784.017	159.016	86.002	13.274	-0.516	9.931	1492.567	-0.011131	-0.006020	-0.000929
1.8600	738.857	152.791	81.833	11.908	-0.516	9.915	1406.593	-0.010695	-0.005728	-0.000834
1.8700	640.391	139.838	74.511	8.798	-0.517	9.932	1219.139	-0.009789	-0.005216	-0.000616
1.8800	555.179	127.946	68.046	6.462	-0.520	9.915	1056.919	-0.008956	-0.004763	-0.000452
1.8900	503.888	120.523	63.997	5.060	-0.514	9.932	959.272	-0.008437	-0.004480	-0.000354
1.9000	445.547	111.700	59.416	2.295	-0.513	9.916	848.207	-0.007819	-0.004159	-0.000161
1.9100	366.227	99.025	53.060	0.752	-0.513	9.932	697.203	-0.006932	-0.003714	-0.000053
1.9200	300.688	88.143	48.245	-1.222	-0.514	9.915	572.433	-0.006170	-0.003377	0.000086
1.9300	225.877	75.373	42.244	-2.986	-0.522	9.931	430.012	-0.005276	-0.002957	0.000209
1.9400	180.416	66.981	37.649	-3.569	-0.513	9.915	343.466	-0.004689	-0.002635	0.000250
1.9500	140.035	59.003	33.658	-3.500	-0.518	9.931	266.590	-0.004130	-0.002356	0.000245
1.9600	107.694	52.194	30.191	-3.905	-0.521	9.915	205.021	-0.003654	-0.002113	0.000273
1.9700	75.052	44.970	26.503	-2.626	-0.518	9.931	142.879	-0.003148	-0.001855	0.000184
1.9800	60.054	41.241	24.369	-3.319	-0.528	9.915	114.326	-0.002887	-0.001706	0.000232
1.9900	52.509	38.311	23.008	-2.944	-0.524	9.931	99.964	-0.002682	-0.001611	0.000206
2.0000	54.688	37.714	22.555	-2.708	-0.521	9.915	104.113	-0.002640	-0.001579	0.000190
2.0100	56.041	37.158	22.760	-3.292	-0.518	9.931	106.688	-0.002601	-0.001593	0.000230
2.0200	59.032	37.573	22.979	-2.709	-0.504	9.914	112.381	-0.002630	-0.001609	0.000190
2.0300	69.597	38.657	22.814	-3.320	-0.510	9.931	132.494	-0.002706	-0.001597	0.000232
2.0400	112.548	45.092	25.788	-3.556	-0.512	9.915	214.262	-0.003156	-0.001805	0.000249
2.0500	164.501	53.569	30.410	-3.555	-0.512	9.931	313.168	-0.003750	-0.002129	0.000249
2.0600	218.799	62.243	35.103	-3.445	-0.508	9.915	416.536	-0.004357	-0.002457	0.000241
2.0700	285.645	72.221	39.727	-2.458	-0.514	9.931	543.795	-0.005055	-0.002781	0.000172
2.0800	347.833	81.917	44.503	-1.638	-0.516	9.915	662.184	-0.005734	-0.003115	0.000115
2.0900	422.719	93.397	50.006	0.377	-0.513	9.931	804.749	-0.006538	-0.003500	-0.000026
2.1000	498.297	105.016	55.440	2.349	-0.520	9.915	948.629	-0.007351	-0.003881	-0.000164
2.1100	562.438	114.493	60.436	3.628	-0.518	9.931	1070.738	-0.008015	-0.004230	-0.000254
2.1200	637.114	124.873	65.830	6.768	-0.521	9.915	1212.902	-0.008741	-0.004608	-0.000474
2.1300	698.896	133.505	70.948	8.340	-0.523	9.931	1330.519	-0.009345	-0.004966	-0.000584
2.1400	801.465	147.358	79.410	12.313	-0.519	9.914	1525.784	-0.010315	-0.005559	-0.000862
2.1500	877.374	157.683	85.080	15.093	-0.525	9.931	1670.294	-0.011038	-0.005956	-0.001056
2.1600	938.509	165.286	90.103	18.081	-0.513	9.915	1786.680	-0.011570	-0.006307	-0.001266
2.1700	991.710	172.537	95.356	19.903	-0.512	9.931	1887.960	-0.012078	-0.006675	-0.001393
2.1800	1057.098	181.362	100.531	23.263	-0.510	9.915	2012.444	-0.012695	-0.007037	-0.001628
2.1900	1113.861	188.682	105.803	25.725	-0.518	9.931	2120.504	-0.013208	-0.007406	-0.001801
2.2000	1165.829	195.271	110.262	28.281	-0.507	9.914	2219.439	-0.013669	-0.007718	-0.001980
2.2100	1194.638	199.873	113.302	29.309	-0.508	9.931	2274.284	-0.013991	-0.007931	-0.002052
2.2200	1200.650	201.581	113.659	30.516	-0.505	9.915	2285.728	-0.014111	-0.007956	-0.002136
2.2300	1247.373	207.778	117.754	32.074	-0.503	9.931	2374.678	-0.014544	-0.008243	-0.002245
2.2400	1243.240	207.972	117.712	32.295	-0.500	9.914	2366.810	-0.014558	-0.008240	-0.002261
2.2500	1238.717	207.932	117.882	31.546	-0.512	9.931	2358.198	-0.014555	-0.008252	-0.002208
2.2600	1237.033	208.751	118.311	32.019	-0.512	9.915	2354.994	-0.014613	-0.008282	-0.002241
2.2700	1225.206	207.721	118.017	31.489	-0.506	9.931	2332.478	-0.014540	-0.008261	-0.002204
2.2800	1196.216	205.263	116.677	30.489	-0.516	9.915	2277.288	-0.014368	-0.008167	-0.002134
2.2900	1136.253	199.010	113.110	28.724	-0.509	9.931	2163.134	-0.013931	-0.007918	-0.002011
2.3000	1100.455	195.606	110.536	26.556	-0.512	9.914	2094.984	-0.013692	-0.007738	-0.001859
2.3100	1045.091	190.254	106.476	24.889	-0.510	9.931	1989.584	-0.013318	-0.007453	-0.001742
2.3200	970.474	181.416	99.983	21.068	-0.513	9.914	1847.534	-0.012699	-0.006999	-0.001475
2.3300	915.050	174.774	95.978	19.054	-0.517	9.931	1742.020	-0.012234	-0.006718	-0.001334
2.3400	824.143	163.854	89.153	14.996	-0.522	9.914	1568.956	-0.011470	-0.006241	-0.001050
2.3500	766.359	156.583	84.268	13.076	-0.512	9.931	1458.950	-0.010961	-0.005899	-0.000915
2.3600	700.820	147.523	79.079	10.576	-0.519	9.914	1334.181	-0.010327	-0.005536	-0.000740
2.3700	635.040	138.810	74.096	9.313	-0.502	9.931	1208.954	-0.009717	-0.005187	-0.000652
2.3800	552.008	127.624	67.715	6.058	-0.513	9.914	1050.882	-0.008934	-0.004740	-0.000424
2.3900	477.287	117.049	61.880	3.975	-0.505	9.931	908.632	-0.008193	-0.004332	-0.000278
2.4000	419.097	107.639	56.955	2.626	-0.511	9.914	797.853	-0.007535	-0.003987	-0.000184
2.4100	348.614	96.133	51.932	0.237	-0.510	9.930	663.671	-0.006729	-0.003635	-0.000017
2.4200	283.481	85.281	46.963	-1.124	-0.514	9.914	539.675	-0.005970	-0.003287	0.000079
2.4300	227.049	75.804	42.385	-3.180	-0.507	9.930	432.243	-0.005306	-0.002967	0.000223
2.4400	180.131	67.036	37.923	-3.195	-0.506	9.914	342.922	-0.004692	-0.002655	0.000224
2.4500	136.984	58.671	33.493	-3.822	-0.510	9.930	260.782	-0.004107	-0.002344	0.000268
2.4600	95.911	50.151	29.213	-3.529	-0.506	9.914	182.590	-0.003511	-0.002045	0.000247
2.4700	71.205	44.189	26.407	-2.790	-0.508	9.930	135.555	-0.003093	-0.001849	0.000195
2.4800	62.608	41.422	24.452	-3.222	-0.514	9.914	119.190	-0.002900	-0.001712	0.000226
2.4900	48.316	37.464	22.471	-2.818	-0.510	9.931	91.982	-0.002622	-0.001573	0.000197
2.5000	39.630	35.059	21.193	-2.194	-0.517	9.914	75.445	-0.002454	-0.001484	0.000154
2.5100	42.591	35.073	21.027	-2.943	-0.513	9.930	81.081	-0.002455	-0.001472	0.000206
2.5200	48.241	35.504	21.369	-2.290	-0.514	9.914	91.839	-0.002485	-0.001496	0.000160
2.5300	73.789	39.243	22.925	-3.472	-0.526	9.930	140.476	-0.002747	-0.001605	0.000243
2.5400	115.463	46.108	26.516	-3.666	-0.517	9.914	219.812	-0.003228	-0.001856	0.000257
2.5500	168.814	54.543	30.768	-3.860	-0.523	9.930	321.379	-0.003818	-0.002154	0.000270
2.5600	218.874	62.034	34.813	-3.444	-0.513	9.914	416.679	-0.004342	-0.002437	0.000241
2.5700	283.000	71.899	39.438	-2.652	-0.517	9.930	538.759	-0.005033	-0.002761	0.000186
2.5800	335.344	80.265	43.881	-1.653	-0.512	9.913	638.409	-0.005619	-0.003072	0.000116
2.5900	421.351	93.314	50.020	0.043	-0.516	9.930	802.145	-0.006532	-0.003501	-0.000003
2.6000	488.183	103.638	54.574	1.654	-0.516	9.914	929.375	-0.007255	-0.003820	-0.000116
2.6100	563.671	114.409	60.766	4.892	-0.519	9.930	1073.084	-0.008009	-0.004254	-0.000342
2.6200	630.427	123.873	65.569	6.629	-0.520	9.914	1200.171	-0.008671	-0.004590	-0.000464
2.6300	711.234	135.033	72.093	9.172	-0.532	9.930	1354.008	-0.009452	-0.005046	-0.000642
2.6400	781.552	144.869	77.456	11.843	-0.514	9.914	1487.875	-0.010141	-0.005422	-0.000829
2.6500	845.047	153.362	82.823	14.455	-0.518	9.930	1608.753	-0.010735	-0.005798	-0.001012
2.6600	931.280	164.869	89.399	17.995	-0.517	9.914	1772.919	-0.011541	-0.006258	-0.001260
2.6700	988.959	172.913	94.919	20.318	-0.513	9.930	1882.725	-0.012104	-0.006644	-0.001422
2.6800	1076.680	183.475	101.784	24.166	-0.516	9.914	2049.723	-0.012843	-0.007125	-0.001692
2.6900	1102.965	187.698	104.673	25.655	-0.536	9.930	2099.762	-0.013139	-0.007327	-0.001796
2.7000	1135.682	192.508	108.157	26.695	-0.520	9.913	2162.046	-0.013476	-0.007571	-0.001869
2.7100	1176.048	197.592	111.252	29.142	-0.531	9.930	2238.894	-0.013831	-0.007788	-0.002040
2.7200	1222.336	204.178	115.188	30.643	-0.530	9.914	2327.013	-0.014292	-0.008063	-0.002145
2.7300	1236.147	206.154	116.648	31.671	-0.524	9.930	2353.306	-0.014431	-0.008165	-0.002217
2.7400	1243.811	208.123	118.296	32.103	-0.525	9.914	2367.897	-0.014569	-0.008281	-0.002247
2.7500	1237.139	208.305	117.797	31.824	-0.524	9.930	2355.194	-0.014581	-0.008246	-0.002228
2.7600	1228.347	207.751	117.868	31.951	-0.517	9.914	2338.457	-0.014543	-0.008251	-0.002237
2.7700	1208.870	206.248	117.339	31.325	-0.523	9.931	2301.378	-0.014437	-0.008214	-0.002193
2.7800	1163.605	202.248	115.282	30.003	-0.516	9.913	2215.204	-0.014157	-0.008070	-0.002100
2.7900	1157.473	201.442	114.374	28.976	-0.512	9.930	2203.531	-0.014101	-0.008006	-0.002028
2.8000	1070.549	192.561	107.880	26.015	-0.529	9.913	2038.050	-0.013479	-0.007552	-0.001821
2.8100	1049.449	189.755	106.228	24.237	-0.515	9.930	1997.881	-0.013283	-0.007436	-0.001697
2.8200	977.162	182.489	100.877	21.957	-0.518	9.913	1860.266	-0.012774	-0.007061	-0.001537
2.8300	922.519	176.374	96.666	18.914	-0.518	9.930	1756.239	-0.012346	-0.006767	-0.001324
2.8400	834.272	165.492	89.262	15.983	-0.514	9.913	1588.240	-0.011584	-0.006248	-0.001119
2.8500	775.210	157.737	84.803	13.301	-0.501	9.930	1475.801	-0.011042	-0.005936	-0.000931
2.8600	697.949	147.785	78.777	10.993	-0.515	9.913	1328.716	-0.010345	-0.005514	-0.000769
2.8700	625.167	137.921	73.381	8.325	-0.508	9.930	1190.157	-0.009654	-0.005137	-0.000583
2.8800	555.495	128.640	67.383	6.755	-0.514	9.913	1057.520	-0.009005	-0.004717	-0.000473
2.8900	476.821	116.800	61.607	4.308	-0.516	9.930	907.745	-0.008176	-0.004312	-0.000302
2.9000	421.562	108.085	57.477	2.629	-0.514	9.913	802.546	-0.007566	-0.004023	-0.000184
2.9100	344.601	96.286	51.753	0.140	-0.517	9.930	656.033	-0.006740	-0.003623	-0.000010
2.9200	279.784	84.988	46.343	-1.749	-0.517	9.913	532.637	-0.005949	-0.003244	0.000122
2.9300	221.203	74.970	41.309	-2.222	-0.516	9.930	421.114	-0.005248	-0.002892	0.000156
2.9400	174.976	66.270	37.648	-3.736	-0.526	9.914	333.109	-0.004639	-0.002635	0.000262
2.9500	139.043	59.323	33.809	-3.388	-0.511	9.930	264.702	-0.004153	-0.002367	0.000237
2.9600	98.812	50.847	29.449	-3.751	-0.518	9.913	188.112	-0.003559	-0.002061	0.000263
2.9700	79.110	45.730	26.834	-3.015	-0.518	9.930	150.604	-0.003201	-0.001878	0.000211
2.9800	57.484	40.869	24.288	-2.765	-0.532	9.913	109.434	-0.002861	-0.001700	0.000194
2.9900	38.623	36.185	21.810	-2.332	-0.525	9.929	73.528	-0.002533	-0.001527	0.000163
3.0000	30.147	33.878	19.981	-2.459	-0.522	9.913	57.392	-0.002371	-0.001399	0.000172
3.0100	31.890	33.087	19.539	-1.929	-0.524	9.930	60.711	-0.002316	-0.001368	0.000135
3.0200	35.888	33.127	20.187	-2.888	-0.524	9.912	68.321	-0.002319	-0.001413	0.000202
3.0300	58.070	36.561	21.357	-2.498	-0.518	9.929	110.550	-0.002559	-0.001495	0.000175
3.0400	98.767	43.412	24.480	-3.763	-0.522	9.913	188.026	-0.003039	-0.001714	0.000263
3.0500	154.552	52.306	29.050	-3.403	-0.524	9.929	294.228	-0.003661	-0.002033	0.000238
3.0600	209.060	60.713	33.854	-3.739	-0.526	9.912	397.997	-0.004250	-0.002370	0.000262
3.0700	271.097	70.371	38.778	-2.777	-0.525	9.930	516.100	-0.004926	-0.002714	0.000194
3.0800	333.571	80.044	43.329	-1.957	-0.531	9.912	635.033	-0.005603	-0.003033	0.000137
3.0900	407.345	91.144	48.148	-0.110	-0.522	9.929	775.480	-0.006380	-0.003370	0.000008
3.1000	497.606	104.653	55.196	1.933	-0.524	9.913	947.313	-0.007326	-0.003864	-0.000135
3.1100	556.021	113.618	60.024	4.087	-0.526	9.929	1058.521	-0.007953	-0.004202	-0.000286
3.1200	630.502	124.138	65.582	6.546	-0.524	9.913	1200.314	-0.008690	-0.004591	-0.000458
3.1300	713.399	135.463	71.745	9.312	-0.521	9.929	1358.128	-0.009482	-0.005022	-0.000652
3.1400	805.342	147.481	79.341	12.883	-0.525	9.913	1533.165	-0.010324	-0.005554	-0.000902
3.1500	843.650	153.944	82.604	14.273	-0.516	9.930	1606.092	-0.010776	-0.005782	-0.000999
3.1600	918.401	163.575	88.630	17.886	-0.518	9.913	1748.400	-0.011450	-0.006204	-0.001252
3.1700	981.385	171.608	93.995	19.458	-0.510	9.929	1868.305	-0.012013	-0.006580	-0.001362
3.1800	1036.930	178.987	98.606	22.554	-0.528	9.912	1974.049	-0.012529	-0.006902	-0.001579
3.1900	1087.651	185.750	103.657	24.681	-0.528	9.929	2070.608	-0.013003	-0.007256	-0.001728
3.2000	1143.166	192.853	108.141	27.571	-0.517	9.912	2176.294	-0.013500	-0.007570	-0.001930
3.2100	1178.873	197.954	111.416	28.878	-0.516	9.929	2244.272	-0.013857	-0.007799	-0.002021
3.2200	1204.632	201.773	113.659	30.019	-0.527	9.913	2293.310	-0.014124	-0.007956	-0.002101
3.2300	1231.819	205.902	116.347	31.934	-0.522	9.929	2345.066	-0.014413	-0.008144	-0.002235
3.2400	1240.565	208.015	117.602	31.880	-0.526	9.912	2361.717	-0.014561	-0.008232	-0.002232
3.2500	1237.364	208.181	117.868	32.296	-0.519	9.929	2355.623	-0.014573	-0.008251	-0.002261
3.2600	1233.081	207.849	117.756	31.865	-0.517	9.912	2347.469	-0.014549	-0.008243	-0.002231
3.2700	1222.816	208.000	118.269	32.005	-0.513	9.929	2327.929	-0.014560	-0.008279	-0.002240
3.2800	1187.560	204.860	116.152	30.379	-0.518	9.912	2260.809	-0.014340	-0.008131	-0.002127
3.2900	1129.731	198.578	112.145	28.586	-0.517	9.929	2150.717	-0.013900	-0.007850	-0.002001
3.3000	1102.469	195.869	109.945	27.003	-0.514	9.912	2098.818	-0.013711	-0.007696	-0.001890
3.3100	1037.291	189.114	105.281	24.291	-0.522	9.929	1974.735	-0.013238	-0.007370	-0.001700
3.3200	980.769	183.071	100.943	22.181	-0.519	9.912	1867.132	-0.012815	-0.007066	-0.001553
3.3300	930.589	176.803	96.817	19.207	-0.513	9.929	1771.603	-0.012376	-0.006777	-0.001345
3.3400	840.328	166.215	89.526	16.345	-0.515	9.912	1599.770	-0.011635	-0.006267	-0.001144
3.3500	767.846	156.821	84.324	13.316	-0.502	9.929	1461.782	-0.010977	-0.005903	-0.000932
3.3600	694.207	147.454	78.626	10.340	-0.504	9.911	1321.592	-0.010322	-0.005504	-0.000724
3.3700	632.350	139.173	73.466	9.478	-0.506	9.928	1203.833	-0.009742	-0.005143	-0.000663
3.3800	554.684	128.098	67.137	6.783	-0.514	9.911	1055.975	-0.008967	-0.004700	-0.000475
3.3900	504.579	120.440	63.628	4.991	-0.524	9.929	960.588	-0.008431	-0.004454	-0.000349
3.4000	417.745	108.125	57.009	2.782	-0.514	9.912	795.279	-0.007569	-0.003991	-0.000195
3.4100	349.290	97.079	51.780	0.585	-0.513	9.928	664.959	-0.006796	-0.003625	-0.000041
3.4200	275.230	84.490	45.959	-1.418	-0.516	9.911	523.968	-0.005914	-0.003217	0.000099
3.4300	221.744	74.858	41.653	-3.041	-0.520	9.929	422.144	-0.005240	-0.002916	0.000213
3.4400	172.556	66.049	37.580	-2.847	-0.519	9.911	328.503	-0.004623	-0.002631	0.000199
3.4500	136.774	59.240	33.935	-3.988	-0.508	9.928	260.382	-0.004147	-0.002375	0.000279
3.4600	98.992	51.069	29.364	-2.985	-0.514	9.912	188.456	-0.003575	-0.002055	0.000209
3.4700	71.310	44.581	26.242	-3.277	-0.510	9.929	135.756	-0.003121	-0.001837	0.000229
3.4800	62.458	41.826	24.549	-2.540	-0.510	9.911	118.904	-0.002928	-0.001718	0.000178
3.4900	46.333	38.119	22.526	-2.902	-0.509	9.928	88.205	-0.002668	-0.001577	0.000203
3.5000	44.529	36.518	21.825	-2.932	-0.519	9.911	84.772	-0.002556	-0.001528	0.000205
3.5100	46.378	36.061	21.440	-2.793	-0.522	9.929	88.291	-0.002524	-0.001501	0.000196
3.5200	49.203	36.076	21.673	-2.681	-0.507	9.912	93.670	-0.002525	-0.001517	0.000188
3.5300	60.159	37.463	22.059	-3.027	-0.510	9.929	114.527	-0.002622	-0.001544	0.000212
3.5400	110.669	45.538	25.676	-3.139	-0.512	9.912	210.686	-0.003188	-0.001797	0.000220
3.5500	171.369	55.000	30.754	-3.278	-0.506	9.928	326.242	-0.003850	-0.002153	0.000229
3.5600	224.570	63.132	35.627	-3.027	-0.512	9.911	427.523	-0.004419	-0.002494	0.000212
3.5700	286.487	72.954	40.386	-1.846	-0.512	9.928	545.397	-0.005107	-0.002827	0.000129
3.5800	364.589	85.033	45.778	-1.278	-0.516	9.911	694.084	-0.005952	-0.003204	0.000089
3.5900	415.415	92.924	49.428	0.348	-0.505	9.928	790.844	-0.006505	-0.003460	-0.000024
3.6000	494.044	104.001	55.056	1.851	-0.513	9.911	940.533	-0.007280	-0.003854	-0.000130
3.6100	577.963	116.729	61.591	5.127	-0.506	9.928	1100.292	-0.008171	-0.004311	-0.000359
3.6200	628.984	124.442	65.817	6.826	-0.512	9.911	1197.424	-0.008711	-0.004607	-0.000478
3.6300	713.744	135.658	71.705	9.796	-0.513	9.928	1358.786	-0.009496	-0.005019	-0.000686
3.6400	793.004	146.341	78.349	11.939	-0.515	9.911	1509.676	-0.010244	-0.005484	-0.000836
3.6500	876.111	157.629	84.956	16.315	-0.521	9.928	1667.891	-0.011034	-0.005947	-0.001142
3.6600	923.676	164.785	89.291	17.552	-0.520	9.911	1758.442	-0.011535	-0.006250	-0.001229
3.6700	993.438	173.246	95.057	20.708	-0.517	9.928	1891.251	-0.012127	-0.006654	-0.001450
3.6800	1052.695	180.834	100.243	23.513	-0.517	9.911	2004.061	-0.012658	-0.007017	-0.001646
3.6900	1113.154	188.726	105.487	25.931	-0.527	9.928	2119.160	-0.013211	-0.007384	-0.001815
3.7000	1149.072	194.384	109.049	28.627	-0.514	9.911	2187.538	-0.013607	-0.007633	-0.002004
3.7100	1195.886	200.456	112.710	29.933	-0.511	9.928	2276.659	-0.014032	-0.007890	-0.002095
3.7200	1210.809	203.178	114.719	31.198	-0.516	9.911	2305.069	-0.014222	-0.008030	-0.002184
3.7300	1217.602	204.583	115.655	31.533	-0.522	9.928	2318.001	-0.014321	-0.008096	-0.002207
3.7400	1242.474	208.472	117.908	31.947	-0.524	9.911	2365.351	-0.014593	-0.008254	-0.002236
3.7500	1239.663	208.875	117.910	32.213	-0.516	9.928	2360.001	-0.014621	-0.008254	-0.002255
3.7600	1233.592	208.568	118.087	32.658	-0.511	9.911	2348.442	-0.014600	-0.008266	-0.002286
3.7700	1227.641	208.473	117.965	31.852	-0.518	9.928	2337.112	-0.014593	-0.008258	-0.002230
3.7800	1200.920	206.458	117.437	31.089	-0.516	9.910	2286.243	-0.014452	-0.008221	-0.002176
3.7900	1136.929	199.927	112.834	28.976	-0.511	9.928	2164.421	-0.013995	-0.007898	-0.002028
3.8000	1101.222	195.760	109.943	28.000	-0.511	9.911	2096.443	-0.013703	-0.007696	-0.001960
3.8100	1036.374	189.032	105.281	24.640	-0.518	9.928	1972.990	-0.013232	-0.007370	-0.001725
3.8200	991.063	183.878	101.772	22.415	-0.508	9.911	1886.730	-0.012871	-0.007124	-0.001569
3.8300	917.094	175.663	95.923	19.387	-0.512	9.928	1745.911	-0.012296	-0.006715	-0.001357
3.8400	841.005	166.355	89.868	16.273	-0.509	9.911	1601.057	-0.011645	-0.006291	-0.001139
3.8500	798.745	160.683	86.594	14.509	-0.508	9.928	1520.605	-0.011248	-0.006062	-0.001016
3.8600	698.460	147.844	78.709	10.853	-0.510	9.911	1329.689	-0.010349	-0.005510	-0.000760
3.8700	627.737	138.728	73.368	9.381	-0.526	9.928	1195.049	-0.009711	-0.005136	-0.000657
3.8800	549.589	127.833	66.697	6.448	-0.521	9.911	1046.276	-0.008948	-0.004669	-0.000451
3.8900	471.261	116.341	61.151	4.767	-0.509	9.928	897.160	-0.008144	-0.004281	-0.000334
3.9000	410.351	106.666	56.294	2.491	-0.506	9.911	781.202	-0.007467	-0.003941	-0.000174
3.9100	357.917	98.511	52.468	1.183	-0.516	9.928	681.381	-0.006896	-0.003673	-0.000083
3.9200	284.548	86.394	46.661	-0.473	-0.520	9.910	541.706	-0.006048	-0.003266	0.000033
3.9300	227.124	75.860	41.626	-2.456	-0.522	9.927	432.386	-0.005310	-0.002914	0.000172
3.9400	183.256	67.898	38.186	-2.833	-0.513	9.910	348.873	-0.004753	-0.002673	0.000198
3.9500	131.604	58.544	33.190	-2.875	-0.516	9.928	250.540	-0.004098	-0.002323	0.000201
3.9600	99.458	51.458	29.723	-2.984	-0.508	9.910	189.342	-0.003602	-0.002081	0.000209
3.9700	80.402	46.649	26.779	-2.792	-0.504	9.928	153.065	-0.003265	-0.001875	0.000195
3.9800	57.303	41.245	24.301	-2.959	-0.510	9.910	109.091	-0.002887	-0.001701	0.000207
3.9900	45.987	38.465	22.733	-2.235	-0.514	9.927	87.547	-0.002693	-0.001591	0.000156
4.0000	42.080	36.379	21.453	-2.582	-0.514	9.910	80.109	-0.002547	-0.001502	0.000181
4.0100	41.689	35.447	20.819	-2.667	-0.517	9.927	79.365	-0.002481	-0.001457	0.000187
4.0200	44.199	35.241	21.205	-2.681	-0.513	9.910	84.143	-0.002467	-0.001484	0.000188
4.0300	59.122	37.324	22.112	-2.708	-0.508	9.927	112.553	-0.002613	-0.001548	0.000190
4.0400	109.527	45.830	25.746	-3.500	-0.517	9.910	208.511	-0.003208	-0.001802	0.000245
4.0500	157.783	53.390	29.476	-3.348	-0.521	9.927	300.379	-0.003737	-0.002063	0.000234
4.0600	217.191	62.285	34.952	-3.082	-0.522	9.910	413.475	-0.004360	-0.002447	0.000216
4.0700	272.736	70.915	39.040	-2.236	-0.513	9.927	519.218	-0.004964	-0.002733	0.000157
4.0800	339.131	81.474	43.950	-1.223	-0.518	9.910	645.618	-0.005703	-0.003076	0.000086
4.0900	405.301	91.368	48.190	0.555	-0.516	9.927	771.589	-0.006396	-0.003373	-0.000039
4.1000	474.898	101.889	53.802	1.865	-0.525	9.910	904.083	-0.007132	-0.003766	-0.000131
4.1100	544.284	112.422	58.923	4.351	-0.525	9.927	1036.177	-0.007870	-0.004125	-0.000305
4.1200	624.836	123.302	64.714	6.782	-0.524	9.910	1189.528	-0.008631	-0.004530	-0.000475
4.1300	713.699	135.615	71.854	9.630	-0.521	9.927	1358.700	-0.009493	-0.005030	-0.000674
4.1400	785.580	145.231	77.703	12.673	-0.520	9.910	1495.543	-0.010166	-0.005439	-0.000887
4.1500	854.500	155.029	83.649	14.747	-0.518	9.927	1626.749	-0.010852	-0.005855	-0.001032
4.1600	912.495	163.186	88.617	17.747	-0.516	9.909	1737.156	-0.011423	-0.006203	-0.001242
4.1700	992.085	173.039	94.780	20.707	-0.508	9.927	1888.676	-0.012113	-0.006635	-0.001449
4.1800	1037.907	179.275	98.509	22.665	-0.512	9.910	1975.908	-0.012549	-0.006896	-0.001587
4.1900	1099.824	187.004	104.605	26.140	-0.515	9.927	2093.782	-0.013090	-0.007322	-0.001830
4.2000	1129.625	191.853	107.467	26.651	-0.514	9.910	2150.517	-0.013430	-0.007523	-0.001866
4.2100	1178.092	198.080	111.197	29.115	-0.518	9.927	2242.785	-0.013866	-0.007784	-0.002038
4.2200	1214.626	203.333	114.540	30.684	-0.513	9.910	2312.336	-0.014233	-0.008018	-0.002148
4.2300	1219.931	204.623	115.380	31.364	-0.515	9.927	2322.435	-0.014324	-0.008077	-0.002195
4.2400	1253.234	209.445	118.798	32.880	-0.511	9.910	2385.836	-0.014661	-0.008316	-0.002302
4.2500	1246.156	209.571	118.577	32.447	-0.515	9.927	2372.360	-0.014670	-0.008300	-0.002271
4.2600	1235.921	208.959	118.520	32.380	-0.510	9.910	2352.877	-0.014627	-0.008296	-0.002267
4.2700	1212.522	207.110	117.712	31.628	-0.516	9.926	2308.331	-0.014498	-0.008240	-0.002214
4.2800	1152.634	201.430	114.004	29.142	-0.512	9.909	2194.319	-0.014100	-0.007980	-0.002040
4.2900	1147.389	201.051	113.675	29.490	-0.514	9.927	2184.334	-0.014074	-0.007957	-0.002064
4.3000	1089.454	194.827	109.353	26.528	-0.515	9.910	2074.041	-0.013638	-0.007655	-0.001857
4.3100	1045.617	190.060	105.693	25.601	-0.513	9.927	1990.585	-0.013304	-0.007398	-0.001792
4.3200	990.613	184.240	101.799	22.722	-0.509	9.910	1885.872	-0.012897	-0.007126	-0.001591
4.3300	925.570	176.831	96.583	20.221	-0.505	9.927	1762.047	-0.012378	-0.006761	-0.001415
4.3400	856.259	168.204	91.065	16.982	-0.521	9.910	1630.096	-0.011774	-0.006375	-0.001189
4.3500	778.156	158.307	84.968	14.594	-0.513	9.927	1481.409	-0.011082	-0.005948	-0.001022
4.3600	711.640	150.069	79.851	11.619	-0.516	9.909	1354.780	-0.010505	-0.005590	-0.000813
4.3700	634.259	139.715	73.756	9.799	-0.504	9.927	1207.466	-0.009780	-0.005163	-0.000686
4.3800	567.082	130.182	68.223	6.991	-0.507	9.909	1079.578	-0.009113	-0.004776	-0.000489
4.3900	498.507	120.160	62.925	5.530	-0.504	9.926	949.030	-0.008411	-0.004405	-0.000387
4.4000	425.710	109.349	57.613	3.435	-0.512	9.909	810.442	-0.007654	-0.004033	-0.000240
4.4100	351.049	97.703	51.740	1.168	-0.514	9.926	668.306	-0.006839	-0.003622	-0.000082
4.4200	306.940	89.507	48.230	-0.000	-0.510	9.909	584.335	-0.006265	-0.003376	0.000000
4.4300	237.674	77.875	42.699	-2.126	-0.513	9.927	452.471	-0.005451	-0.002989	0.000149
4.4400	177.756	67.646	37.743	-2.319	-0.507	9.910	338.402	-0.004735	-0.002642	0.000162
4.4500	140.365	60.283	33.892	-3.473	-0.511	9.926	267.220	-0.004220	-0.002372	0.000243
4.4600	102.133	52.125	29.833	-3.197	-0.517	9.909	194.435	-0.003649	-0.002088	0.000224
4.4700	76.976	46.274	26.834	-3.027	-0.518	9.926	146.542	-0.003239	-0.001878	0.000212
4.4800	61.346	41.994	24.905	-2.902	-0.511	9.909	116.787	-0.002940	-0.001743	0.000203
4.4900	54.177	40.076	23.763	-2.526	-0.508	9.926	103.140	-0.002805	-0.001663	0.000177
4.5000	39.750	36.435	21.605	-3.027	-0.519	9.909	75.674	-0.002550	-0.001512	0.000212
4.5100	41.193	35.420	21.275	-2.527	-0.523	9.926	78.421	-0.002479	-0.001489	0.000177
4.5200	46.032	35.836	21.411	-2.263	-0.515	9.909	87.633	-0.002509	-0.001499	0.000158
4.5300	75.262	40.786	23.063	-3.208	-0.520	9.926	143.280	-0.002855	-0.001614	0.000225
4.5400	114.516	47.247	26.504	-3.459	-0.516	9.910	218.010	-0.003307	-0.001855	0.000242
4.5500	163.644	54.820	30.671	-2.807	-0.513	9.926	311.537	-0.003837	-0.002147	0.000196
4.5600	221.293	63.436	35.337	-2.915	-0.521	9.909	421.286	-0.004441	-0.002474	0.000204
4.5700	275.997	71.677	39.425	-1.790	-0.521	9.926	525.427	-0.005017	-0.002760	0.000125
4.5800	341.250	81.959	44.130	-1.485	-0.518	9.909	649.652	-0.005737	-0.003089	0.000104
4.5900	405.872	91.342	48.149	0.416	-0.519	9.926	772.676	-0.006394	-0.003370	-0.000029
4.6000	487.957	103.890	54.436	2.878	-0.516	9.909	928.946	-0.007272	-0.003811	-0.000201
4.6100	535.658	111.462	58.275	3.822	-0.509	9.926	1019.754	-0.007802	-0.004079	-0.000268
4.6200	624.430	123.497	65.058	6.921	-0.508	9.909	1188.755	-0.008645	-0.004554	-0.000484
4.6300	694.523	133.574	70.482	8.700	-0.516	9.927	1322.193	-0.009350	-0.004934	-0.000609
4.6400	783.882	144.898	77.607	12.633	-0.508	9.909	1492.310	-0.010143	-0.005432	-0.000884
4.6500	866.418	156.474	84.103	15.578	-0.509	9.926	1649.437	-0.010953	-0.005887	-0.001090
4.6600	924.352	164.713	89.001	17.870	-0.514	9.909	1759.729	-0.011530	-0.006230	-0.001251
4.6700	959.368	169.423	92.167	19.790	-0.514	9.926	1826.391	-0.011860	-0.006452	-0.001385
4.6800	1043.588	180.002	99.487	23.055	-0.496	9.908	1986.723	-0.012600	-0.006964	-0.001614
4.6900	1097.314	187.085	104.482	25.667	-0.506	9.926	2089.005	-0.013096	-0.007314	-0.001797
4.7000	1161.726	195.816	109.572	28.919	-0.499	9.909	2211.628	-0.013707	-0.007670	-0.002024
4.7100	1185.155	199.567	112.242	29.461	-0.510	9.926	2256.231	-0.013970	-0.007857	-0.002062
4.7200	1207.112	202.736	114.569	30.865	-0.508	9.909	2298.031	-0.014192	-0.008020	-0.002161
4.7300	1206.225	203.525	115.078	30.310	-0.520	9.926	2296.343	-0.014247	-0.008055	-0.002122
4.7400	1232.209	207.029	117.075	31.963	-0.523	9.908	2345.810	-0.014492	-0.008195	-0.002237
4.7500	1253.294	210.100	118.727	32.213	-0.525	9.926	2385.950	-0.014707	-0.008311	-0.002255
4.7600	1252.197	210.570	119.506	33.379	-0.516	9.909	2383.862	-0.014740	-0.008365	-0.002337
4.7700	1232.961	209.502	119.019	31.741	-0.521	9.926	2347.240	-0.014665	-0.008331	-0.002222
4.7800	1190.385	206.016	116.439	31.449	-0.514	9.909	2266.188	-0.014421	-0.008151	-0.002201
4.7900	1137.140	200.135	112.667	28.710	-0.521	9.926	2164.822	-0.014009	-0.007887	-0.002010
4.8000	1110.314	197.188	110.673	28.127	-0.522	9.908	2113.752	-0.013803	-0.007747	-0.001969
4.8100	1058.706	191.563	106.819	26.141	-0.529	9.926	2015.505	-0.013409	-0.007477	-0.001830
4.8200	993.693	184.463	102.018	22.707	-0.526	9.908	1891.737	-0.012912	-0.007141	-0.001589
4.8300	918.116	175.874	95.675	19.818	-0.520	9.926	1747.856	-0.012311	-0.006697	-0.001387
4.8400	868.026	169.510	91.781	18.080	-0.514	9.908	1652.498	-0.011866	-0.006425	-0.001266
4.8500	797.678	161.059	86.483	14.941	-0.518	9.926	1518.574	-0.011274	-0.006054	-0.001046
4.8600	723.633	151.763	80.883	12.731	-0.516	9.908	1377.611	-0.010623	-0.005662	-0.000891
4.8700	639.579	140.480	74.056	9.715	-0.509	9.925	1217.594	-0.009834	-0.005184	-0.000680
4.8800	562.754	129.667	68.033	7.672	-0.521	9.908	1071.339	-0.009077	-0.004762	-0.000537
4.8900	492.857	119.759	62.553	5.253	-0.509	9.926	938.272	-0.008383	-0.004379	-0.000368
4.9000	418.556	108.709	56.760	3.809	-0.504	9.908	796.824	-0.007610	-0.003973	-0.000267
4.9100	355.121	98.205	51.903	1.223	-0.516	9.926	676.060	-0.006874	-0.003633	-0.000086
4.9200	291.566	87.561	46.951	-0.209	-0.513	9.908	555.067	-0.006129	-0.003287	0.000015
4.9300	235.931	78.141	42.643	-1.862	-0.506	9.926	449.152	-0.005470	-0.002985	0.000130
4.9400	193.070	70.134	38.874	-2.931	-0.501	9.908	367.556	-0.004909	-0.002721	0.000205
4.9500	140.320	60.657	33.853	-3.179	-0.509	9.925	267.134	-0.004246	-0.002370	0.000223
4.9600	101.021	52.264	29.584	-3.487	-0.508	9.908	192.318	-0.003658	-0.002071	0.000244
4.9700	85.632	47.746	27.865	-2.932	-0.509	9.925	163.021	-0.003342	-0.001951	0.000205
4.9800	68.830	44.217	25.704	-2.902	-0.509	9.908	131.035	-0.003095	-0.001799	0.000203
4.9900	53.171	40.618	23.517	-2.737	-0.514	9.926	101.223	-0.002843	-0.001646	0.000192
