# Supplementary material for: Evaluation of a Cold-Mixed High-Performance Polyurethane Mixture
Source: Hindawi journal article supplement (doi:10.1155/2019/1507971), 2019-11-07
Supplement: f1 [file 1507971.f1.zip › 1507971.f1/dynamic modulus data/PUM/specimen1/temp10/zhs-1-10_5Hz.csv]

Test Information
****************
Project name	zhs
Operator name	1
Target test temperature	10
Target confining stress	0
Average dynamic strain range from 75 to 125 micro-strain
Contact stress	5
Initial modulus	4000
Axial gauge length	70
Comments	Run at High Pressure
Specimen information
********************
Identification	zhs-1-10
Dimensions	Point 1	Point 2	Point 3	Point 4	Point 5	Point 6	Average	Std Dev.
Diameter (mm)	49.2	49.2	49.3				49.23	0.058
Height (mm)	101.3	101.2	101.3				101.27	0.058
Cross-sectional area (mm�)	1903.7
Conditioning time
Properties/Comments
Test Data	5Hz
*********
Test date and time	Fri	Mar 29	2019	11:04 AM
Dynamic modulus (MPa)	12276
Phase angle (Degrees)	4.22
Average temperature (�C)	9.9
Average confining pressure (kPa)	-0.5
Average micro-strain	99
Load drift (%)	-1.3
Load standard error (%)	3.5
Average deformation drift (%)	-2.4
Average deformation standard error (%)	8.5
Deformation uniformity (%)	55.1
Phase uniformity (Degrees)	1.5
Conditioning Cycles
Time (sec)	Axial stress (kPa)	Axial micro-strain #1	Axial micro-strain #2	Axial micro-strain #3	Confining pressure (kPa)	Temperature (�C)	Load (N)	Displacement #1 (mm)	Displacement #2 (mm)	Displacement #3 (mm)
0.0000	16.862	14.632	10.403	-2.820	-0.507	9.963	32.101	-0.001024	-0.000728	0.000197
0.0040	19.552	14.549	10.705	-2.040	-0.500	9.959	37.222	-0.001018	-0.000749	0.000143
0.0080	23.294	14.826	11.052	-2.598	-0.508	9.949	44.346	-0.001038	-0.000774	0.000182
0.0120	31.184	16.271	11.739	-3.123	-0.514	9.946	59.366	-0.001139	-0.000822	0.000219
0.0160	44.123	17.492	13.580	-3.709	-0.504	9.954	84.000	-0.001224	-0.000951	0.000260
0.0200	61.166	20.399	15.289	-4.877	-0.504	9.962	116.444	-0.001428	-0.001070	0.000341
0.0240	99.278	27.237	19.458	-5.989	-0.498	9.959	188.999	-0.001907	-0.001362	0.000419
0.0280	153.335	35.949	24.838	-6.683	-0.505	9.949	291.910	-0.002516	-0.001739	0.000468
0.0320	222.360	47.623	31.292	-6.960	-0.511	9.945	423.317	-0.003334	-0.002190	0.000487
0.0360	292.859	58.532	37.264	-6.808	-0.500	9.953	557.528	-0.004097	-0.002608	0.000477
0.0400	339.311	65.826	41.102	-7.405	-0.505	9.962	645.962	-0.004608	-0.002877	0.000518
0.0440	404.700	75.666	46.168	-5.684	-0.498	9.959	770.445	-0.005297	-0.003232	0.000398
0.0480	458.877	84.267	50.888	-4.530	-0.509	9.949	873.585	-0.005899	-0.003562	0.000317
0.0520	507.119	91.756	54.410	-3.390	-0.515	9.945	965.424	-0.006423	-0.003809	0.000237
0.0560	554.864	99.108	58.040	-2.181	-0.503	9.954	1056.318	-0.006938	-0.004063	0.000153
0.0600	584.815	104.305	60.436	-1.653	-0.510	9.963	1113.338	-0.007301	-0.004230	0.000116
0.0640	667.276	115.896	66.821	0.559	-0.498	9.958	1270.323	-0.008113	-0.004677	-0.000039
0.0680	728.277	124.595	71.773	2.434	-0.507	9.949	1386.452	-0.008722	-0.005024	-0.000170
0.0720	763.548	129.695	75.089	3.488	-0.518	9.945	1453.600	-0.009079	-0.005256	-0.000244
0.0760	842.508	140.272	80.457	6.697	-0.515	9.954	1603.918	-0.009819	-0.005632	-0.000469
0.0800	872.324	145.428	82.837	8.421	-0.517	9.962	1660.681	-0.010180	-0.005799	-0.000589
0.0840	912.179	151.304	86.263	9.729	-0.501	9.959	1736.555	-0.010591	-0.006038	-0.000681
0.0880	962.284	157.128	89.857	11.701	-0.506	9.949	1831.942	-0.010999	-0.006290	-0.000819
0.0920	990.117	162.073	92.633	13.063	-0.504	9.945	1884.928	-0.011345	-0.006484	-0.000914
0.0960	1010.781	165.352	94.711	13.828	-0.502	9.953	1924.267	-0.011575	-0.006630	-0.000968
0.1000	1005.536	165.425	94.766	13.786	-0.512	9.962	1914.282	-0.011580	-0.006634	-0.000965
0.1040	1002.004	166.368	95.316	14.066	-0.504	9.959	1907.558	-0.011646	-0.006672	-0.000985
0.1080	990.447	165.951	94.946	13.327	-0.506	9.948	1885.557	-0.011617	-0.006646	-0.000933
0.1120	977.042	165.090	94.452	13.037	-0.512	9.945	1860.037	-0.011556	-0.006612	-0.000913
0.1160	968.250	164.046	93.722	12.452	-0.498	9.953	1843.300	-0.011483	-0.006561	-0.000872
0.1200	914.945	158.948	91.382	10.312	-0.509	9.962	1741.819	-0.011126	-0.006397	-0.000722
0.1240	870.130	153.416	88.492	8.089	-0.504	9.958	1656.504	-0.010739	-0.006194	-0.000566
0.1280	846.701	151.624	86.854	7.199	-0.514	9.949	1611.900	-0.010614	-0.006080	-0.000504
0.1320	794.567	145.189	83.304	5.183	-0.518	9.945	1512.651	-0.010163	-0.005831	-0.000363
0.1360	751.631	140.687	80.180	3.879	-0.506	9.953	1430.912	-0.009848	-0.005613	-0.000271
0.1400	691.187	133.293	76.108	1.698	-0.512	9.962	1315.842	-0.009331	-0.005328	-0.000119
0.1440	662.768	128.847	73.412	1.891	-0.500	9.959	1261.740	-0.009019	-0.005139	-0.000132
0.1480	622.717	124.025	70.851	-0.221	-0.507	9.949	1185.493	-0.008682	-0.004960	0.000015
0.1520	553.827	115.271	65.746	-1.457	-0.516	9.945	1054.344	-0.008069	-0.004602	0.000102
0.1560	502.490	107.503	61.537	-2.944	-0.508	9.954	956.612	-0.007525	-0.004308	0.000206
0.1600	433.690	97.315	56.664	-4.641	-0.514	9.962	825.634	-0.006812	-0.003967	0.000325
0.1640	381.601	89.298	52.441	-5.420	-0.501	9.959	726.471	-0.006251	-0.003671	0.000379
0.1680	327.589	80.666	48.617	-6.614	-0.504	9.949	623.646	-0.005647	-0.003403	0.000463
0.1720	278.867	72.886	44.584	-6.961	-0.515	9.946	530.891	-0.005102	-0.003121	0.000487
0.1760	239.974	65.910	40.965	-7.600	-0.516	9.953	456.848	-0.004614	-0.002868	0.000532
0.1800	195.520	58.310	36.852	-7.835	-0.515	9.962	372.219	-0.004082	-0.002580	0.000548
0.1840	164.381	51.959	33.534	-7.640	-0.514	9.959	312.939	-0.003637	-0.002347	0.000535
0.1880	129.860	45.522	30.150	-6.390	-0.521	9.949	247.221	-0.003187	-0.002110	0.000447
0.1920	102.809	40.021	26.848	-6.780	-0.521	9.945	195.723	-0.002801	-0.001879	0.000475
0.1960	84.565	35.297	24.658	-6.209	-0.517	9.953	160.990	-0.002471	-0.001726	0.000435
0.2000	66.290	31.309	22.099	-6.475	-0.511	9.962	126.200	-0.002192	-0.001547	0.000453
0.2040	59.768	29.072	21.300	-6.043	-0.505	9.958	113.783	-0.002035	-0.001491	0.000423
0.2080	56.236	27.570	20.159	-5.226	-0.521	9.949	107.059	-0.001930	-0.001411	0.000366
0.2120	56.011	27.293	20.530	-5.142	-0.524	9.945	106.630	-0.001911	-0.001437	0.000360
0.2160	58.686	27.500	20.049	-5.307	-0.521	9.953	111.723	-0.001925	-0.001403	0.000372
0.2200	62.353	27.764	20.324	-5.419	-0.527	9.962	118.704	-0.001943	-0.001423	0.000379
0.2240	81.950	30.403	21.550	-5.599	-0.517	9.959	156.012	-0.002128	-0.001508	0.000392
0.2280	128.914	38.450	25.621	-6.643	-0.523	9.949	245.419	-0.002692	-0.001794	0.000465
0.2320	180.386	45.856	30.122	-6.877	-0.521	9.945	343.409	-0.003210	-0.002109	0.000481
0.2360	242.228	55.932	35.048	-6.542	-0.509	9.953	461.140	-0.003915	-0.002453	0.000458
0.2400	297.397	64.270	39.781	-6.516	-0.509	9.962	566.168	-0.004499	-0.002785	0.000456
0.2440	372.795	75.139	45.726	-5.670	-0.501	9.959	709.705	-0.005260	-0.003201	0.000397
0.2480	434.682	84.614	50.694	-4.877	-0.500	9.949	827.522	-0.005923	-0.003549	0.000341
0.2520	492.225	93.842	55.013	-3.152	-0.503	9.945	937.071	-0.006569	-0.003851	0.000221
0.2560	565.354	104.251	60.698	-1.804	-0.498	9.953	1076.288	-0.007298	-0.004249	0.000126
0.2600	613.790	112.226	64.150	-0.013	-0.497	9.962	1168.499	-0.007856	-0.004490	0.000001
0.2640	674.941	120.399	68.774	1.225	-0.493	9.958	1284.914	-0.008428	-0.004814	-0.000086
0.2680	724.985	127.875	72.752	3.518	-0.499	9.949	1380.186	-0.008951	-0.005093	-0.000246
0.2720	779.388	135.643	76.921	5.074	-0.507	9.945	1483.755	-0.009495	-0.005384	-0.000355
0.2760	842.387	143.579	81.489	7.048	-0.510	9.953	1603.689	-0.010051	-0.005704	-0.000493
0.2800	874.894	148.413	84.336	8.299	-0.501	9.962	1665.573	-0.010389	-0.005904	-0.000581
0.2840	924.322	154.626	88.161	10.714	-0.497	9.959	1759.672	-0.010824	-0.006171	-0.000750
0.2880	943.108	158.264	89.980	12.216	-0.504	9.949	1795.435	-0.011078	-0.006299	-0.000855
0.2920	946.219	159.167	90.871	12.034	-0.513	9.945	1801.357	-0.011142	-0.006361	-0.000842
0.2960	966.853	162.617	92.550	12.743	-0.510	9.952	1840.639	-0.011383	-0.006478	-0.000892
0.3000	969.648	163.701	93.212	12.952	-0.501	9.962	1845.961	-0.011459	-0.006525	-0.000907
0.3040	976.110	164.881	93.613	13.438	-0.498	9.959	1858.263	-0.011542	-0.006553	-0.000941
0.3080	976.381	164.937	93.570	13.702	-0.504	9.949	1858.778	-0.011546	-0.006550	-0.000959
0.3120	969.768	165.465	93.985	13.300	-0.499	9.945	1846.189	-0.011583	-0.006579	-0.000931
0.3160	963.622	165.021	93.530	13.119	-0.497	9.953	1834.488	-0.011551	-0.006547	-0.000918
0.3200	946.820	163.380	93.087	12.119	-0.490	9.962	1802.502	-0.011437	-0.006516	-0.000848
0.3240	913.231	160.225	91.616	11.020	-0.492	9.958	1738.558	-0.011216	-0.006413	-0.000771
0.3280	842.958	152.804	87.364	7.853	-0.502	9.949	1604.776	-0.010696	-0.006115	-0.000550
0.3320	786.842	146.677	83.401	6.033	-0.514	9.945	1497.946	-0.010267	-0.005838	-0.000422
0.3360	757.026	143.078	81.487	4.085	-0.496	9.952	1441.183	-0.010015	-0.005704	-0.000286
0.3400	691.081	134.823	76.713	2.767	-0.497	9.962	1315.641	-0.009438	-0.005370	-0.000194
0.3440	636.739	128.095	72.586	1.141	-0.496	9.958	1212.187	-0.008967	-0.005081	-0.000080
0.3480	584.184	120.343	68.621	0.139	-0.504	9.949	1112.137	-0.008424	-0.004803	-0.000010
0.3520	521.245	111.835	64.039	-1.511	-0.505	9.945	992.317	-0.007828	-0.004483	0.000106
0.3560	476.310	105.069	60.090	-2.943	-0.505	9.953	906.773	-0.007355	-0.004206	0.000206
0.3600	411.553	95.758	55.385	-4.724	-0.498	9.962	783.491	-0.006703	-0.003877	0.000331
0.3640	368.316	88.241	51.916	-5.669	-0.492	9.959	701.180	-0.006177	-0.003634	0.000397
0.3680	317.430	80.640	48.423	-6.516	-0.496	9.949	604.305	-0.005645	-0.003390	0.000456
0.3720	269.399	72.886	44.680	-6.891	-0.501	9.945	512.867	-0.005102	-0.003128	0.000482
0.3760	228.552	65.396	40.647	-7.434	-0.496	9.952	435.104	-0.004578	-0.002845	0.000520
0.3800	178.913	56.904	35.764	-6.989	-0.498	9.962	340.605	-0.003983	-0.002503	0.000489
0.3840	150.840	51.332	32.971	-7.267	-0.496	9.958	287.161	-0.003593	-0.002308	0.000509
0.3880	123.008	45.675	30.081	-7.211	-0.511	9.948	234.175	-0.003197	-0.002106	0.000505
0.3920	98.105	40.230	27.152	-6.280	-0.510	9.944	186.768	-0.002816	-0.001901	0.000440
0.3960	84.069	36.797	25.125	-6.099	-0.501	9.952	160.046	-0.002576	-0.001759	0.000427
0.4000	66.997	32.698	22.567	-5.461	-0.500	9.962	127.544	-0.002289	-0.001580	0.000382
0.4040	60.008	30.278	21.701	-5.322	-0.497	9.958	114.241	-0.002119	-0.001519	0.000373
0.4080	59.422	29.916	21.413	-5.892	-0.504	9.949	113.125	-0.002094	-0.001499	0.000412
0.4120	60.249	29.393	21.315	-5.445	-0.513	9.945	114.698	-0.002057	-0.001492	0.000381
0.4160	62.323	29.280	21.315	-6.127	-0.506	9.952	118.647	-0.002050	-0.001492	0.000429
0.4200	65.344	29.348	21.328	-5.989	-0.504	9.962	124.397	-0.002054	-0.001493	0.000419
0.4240	80.252	31.639	22.072	-5.681	-0.504	9.959	152.779	-0.002215	-0.001545	0.000398
0.4280	118.845	37.978	25.085	-6.238	-0.499	9.949	226.250	-0.002658	-0.001756	0.000437
0.4320	169.520	45.926	29.543	-6.432	-0.505	9.945	322.723	-0.003215	-0.002068	0.000450
0.4360	239.388	56.614	35.172	-6.516	-0.500	9.952	455.732	-0.003963	-0.002462	0.000456
0.4400	299.095	65.242	40.443	-6.697	-0.507	9.962	569.401	-0.004567	-0.002831	0.000469
0.4440	365.296	75.470	45.738	-5.919	-0.493	9.958	695.429	-0.005283	-0.003202	0.000414
0.4480	416.302	83.587	49.785	-4.654	-0.498	9.949	792.532	-0.005851	-0.003485	0.000326
0.4520	471.486	91.617	53.900	-3.403	-0.506	9.945	897.589	-0.006413	-0.003773	0.000238
0.4560	556.577	104.084	60.064	-1.846	-0.502	9.952	1059.580	-0.007286	-0.004204	0.000129
0.4600	605.750	112.101	63.750	-0.626	-0.502	9.962	1153.193	-0.007847	-0.004462	0.000044
0.4640	662.648	119.996	67.852	1.029	-0.496	9.958	1261.511	-0.008400	-0.004750	-0.000072
0.4680	709.807	126.181	71.526	2.725	-0.506	9.949	1351.290	-0.008833	-0.005007	-0.000191
0.4720	760.798	133.768	75.833	4.670	-0.504	9.945	1448.364	-0.009364	-0.005308	-0.000327
0.4760	822.385	141.423	80.222	6.727	-0.500	9.952	1565.609	-0.009900	-0.005616	-0.000471
0.4800	855.793	146.398	83.141	8.326	-0.508	9.962	1629.210	-0.010248	-0.005820	-0.000583
0.4840	903.162	153.152	86.744	9.976	-0.508	9.958	1719.389	-0.010721	-0.006072	-0.000698
0.4880	930.830	156.932	89.180	11.131	-0.512	9.949	1772.060	-0.010985	-0.006243	-0.000779
0.4920	948.007	159.920	91.232	12.481	-0.510	9.945	1804.762	-0.011194	-0.006386	-0.000874
0.4960	972.879	163.992	93.005	13.383	-0.497	9.952	1852.112	-0.011479	-0.006510	-0.000937
0.5000	967.634	164.255	93.021	13.272	-0.496	9.961	1842.127	-0.011498	-0.006511	-0.000929
0.5040	968.265	164.588	93.240	13.160	-0.493	9.958	1843.328	-0.011521	-0.006527	-0.000921
0.5080	967.168	164.977	93.241	13.995	-0.500	9.949	1841.240	-0.011548	-0.006527	-0.000980
0.5120	963.216	164.896	93.515	14.133	-0.494	9.944	1833.715	-0.011543	-0.006546	-0.000989
0.5160	959.113	164.519	93.379	13.536	-0.494	9.952	1825.905	-0.011516	-0.006537	-0.000948
0.5200	946.685	163.325	92.825	12.743	-0.498	9.961	1802.244	-0.011433	-0.006498	-0.000892
0.5240	918.191	161.226	91.961	11.216	-0.500	9.958	1747.999	-0.011286	-0.006437	-0.000785
0.5280	844.371	153.500	87.847	8.076	-0.492	9.948	1607.466	-0.010745	-0.006149	-0.000565
0.5320	796.731	148.440	84.213	6.184	-0.498	9.944	1516.771	-0.010391	-0.005895	-0.000433
0.5360	761.985	144.147	81.724	5.185	-0.498	9.952	1450.624	-0.010090	-0.005721	-0.000363
0.5400	673.829	133.502	75.502	2.199	-0.492	9.961	1282.797	-0.009345	-0.005285	-0.000154
0.5440	622.341	126.331	71.444	0.722	-0.485	9.958	1184.778	-0.008843	-0.005001	-0.000051
0.5480	584.004	121.037	68.320	-0.833	-0.490	9.948	1111.794	-0.008473	-0.004782	0.000058
0.5520	521.351	112.601	63.985	-2.026	-0.496	9.944	992.517	-0.007882	-0.004479	0.000142
0.5560	467.383	104.820	60.093	-2.903	-0.500	9.952	889.778	-0.007337	-0.004206	0.000203
0.5600	402.431	94.843	54.875	-4.195	-0.504	9.961	766.125	-0.006639	-0.003841	0.000294
0.5640	355.722	87.409	51.545	-5.768	-0.494	9.958	677.204	-0.006119	-0.003608	0.000404
0.5680	293.279	77.527	46.963	-6.504	-0.495	9.948	558.329	-0.005427	-0.003287	0.000455
0.5720	242.093	68.953	42.656	-7.656	-0.500	9.945	460.882	-0.004827	-0.002986	0.000536
0.5760	212.817	63.517	39.575	-7.503	-0.494	9.952	405.149	-0.004446	-0.002770	0.000525
0.5800	182.851	57.613	35.970	-7.684	-0.500	9.962	348.101	-0.004033	-0.002518	0.000538
0.5840	158.460	53.002	33.822	-7.084	-0.504	9.958	301.666	-0.003710	-0.002368	0.000496
0.5880	129.425	47.149	30.686	-7.197	-0.502	9.949	246.391	-0.003300	-0.002148	0.000504
0.5920	107.017	42.605	28.183	-6.850	-0.506	9.944	203.733	-0.002982	-0.001973	0.000480
0.5960	90.832	38.478	26.241	-6.169	-0.501	9.952	172.920	-0.002693	-0.001837	0.000432
0.6000	70.002	33.712	23.585	-5.765	-0.494	9.961	133.266	-0.002360	-0.001651	0.000404
0.6040	61.060	31.530	22.211	-5.113	-0.485	9.958	116.243	-0.002207	-0.001555	0.000358
0.6080	57.859	30.070	21.658	-5.307	-0.497	9.949	110.149	-0.002105	-0.001516	0.000371
0.6120	55.335	29.682	21.742	-5.279	-0.496	9.944	105.343	-0.002078	-0.001522	0.000370
0.6160	57.424	29.210	21.095	-4.766	-0.497	9.952	109.320	-0.002045	-0.001477	0.000334
0.6200	61.090	29.571	21.081	-5.473	-0.492	9.962	116.301	-0.002070	-0.001476	0.000383
0.6240	76.029	31.363	22.088	-5.307	-0.500	9.958	144.739	-0.002195	-0.001546	0.000372
0.6280	112.412	37.173	24.933	-6.626	-0.509	9.948	214.005	-0.002602	-0.001745	0.000464
0.6320	163.254	45.497	29.186	-6.195	-0.511	9.944	310.793	-0.003185	-0.002043	0.000434
0.6360	229.273	55.279	34.636	-7.044	-0.499	9.952	436.478	-0.003870	-0.002425	0.000493
0.6400	284.052	64.077	39.285	-6.683	-0.498	9.961	540.762	-0.004485	-0.002750	0.000468
0.6440	358.067	74.860	45.586	-5.489	-0.488	9.958	681.667	-0.005240	-0.003191	0.000384
0.6480	414.874	84.170	50.035	-4.752	-0.502	9.948	789.814	-0.005892	-0.003502	0.000333
0.6520	472.929	92.993	54.201	-4.028	-0.505	9.944	900.335	-0.006509	-0.003794	0.000282
0.6560	547.831	103.612	59.651	-2.083	-0.498	9.951	1042.929	-0.007253	-0.004176	0.000146
0.6600	601.993	111.783	63.449	-1.154	-0.492	9.962	1146.040	-0.007825	-0.004441	0.000081
0.6640	673.288	121.216	68.693	1.766	-0.490	9.958	1281.767	-0.008485	-0.004808	-0.000124
0.6680	718.117	128.139	72.256	2.836	-0.493	9.948	1367.111	-0.008970	-0.005058	-0.000199
0.6720	762.030	134.225	75.723	5.030	-0.501	9.944	1450.710	-0.009396	-0.005301	-0.000352
0.6760	827.359	142.871	80.813	7.046	-0.500	9.952	1575.079	-0.010001	-0.005657	-0.000493
0.6800	851.465	147.078	83.140	7.977	-0.493	9.962	1620.970	-0.010295	-0.005820	-0.000558
0.6840	886.661	151.777	85.987	9.701	-0.488	9.958	1687.975	-0.010624	-0.006019	-0.000679
0.6880	921.151	156.363	88.987	11.035	-0.497	9.948	1753.635	-0.010945	-0.006229	-0.000772
0.6920	946.805	160.336	90.955	12.119	-0.498	9.944	1802.473	-0.011224	-0.006367	-0.000848
0.6960	974.171	164.004	93.199	13.578	-0.505	9.952	1854.572	-0.011480	-0.006524	-0.000950
0.7000	973.600	165.061	93.488	13.482	-0.494	9.961	1853.485	-0.011554	-0.006544	-0.000944
0.7040	971.166	165.285	93.445	13.967	-0.490	9.958	1848.850	-0.011570	-0.006541	-0.000978
0.7080	964.538	164.910	93.516	13.801	-0.495	9.949	1836.233	-0.011544	-0.006546	-0.000966
0.7120	961.322	164.729	93.585	13.897	-0.496	9.944	1830.111	-0.011531	-0.006551	-0.000973
0.7160	960.481	164.754	93.474	13.870	-0.503	9.952	1828.508	-0.011533	-0.006543	-0.000971
0.7200	952.771	164.617	93.475	13.078	-0.496	9.961	1813.831	-0.011523	-0.006543	-0.000915
0.7240	934.947	163.006	93.170	12.606	-0.502	9.958	1779.900	-0.011410	-0.006522	-0.000882
0.7280	873.947	157.587	89.827	9.939	-0.501	9.949	1663.771	-0.011031	-0.006288	-0.000696
0.7320	812.000	150.788	85.478	7.368	-0.506	9.944	1545.839	-0.010555	-0.005983	-0.000516
0.7360	766.659	145.035	82.012	5.211	-0.508	9.952	1459.522	-0.010152	-0.005741	-0.000365
0.7400	698.280	136.726	77.153	2.738	-0.500	9.961	1329.346	-0.009571	-0.005401	-0.000192
0.7440	647.529	130.320	73.259	1.627	-0.495	9.958	1232.729	-0.009122	-0.005128	-0.000114
0.7480	594.584	122.941	69.449	0.445	-0.491	9.948	1131.935	-0.008606	-0.004861	-0.000031
0.7520	536.349	114.629	65.306	-0.957	-0.500	9.944	1021.070	-0.008024	-0.004571	0.000067
0.7560	491.805	108.571	62.045	-2.373	-0.492	9.952	936.270	-0.007600	-0.004343	0.000166
0.7600	423.410	98.233	56.939	-4.251	-0.502	9.961	806.065	-0.006876	-0.003986	0.000298
0.7640	366.317	90.006	52.646	-5.238	-0.498	9.958	697.374	-0.006300	-0.003685	0.000367
0.7680	297.487	79.043	47.679	-6.933	-0.497	9.948	566.339	-0.005533	-0.003338	0.000485
0.7720	243.295	69.856	43.139	-7.014	-0.496	9.944	463.171	-0.004890	-0.003020	0.000491
0.7760	217.717	64.576	40.289	-7.377	-0.489	9.951	414.476	-0.004520	-0.002820	0.000516
0.7800	176.854	57.602	35.985	-7.184	-0.500	9.961	336.685	-0.004032	-0.002519	0.000503
0.7840	141.327	50.345	32.422	-6.920	-0.504	9.958	269.051	-0.003524	-0.002270	0.000484
0.7880	112.938	44.316	29.090	-7.306	-0.501	9.949	215.006	-0.003102	-0.002036	0.000511
0.7920	89.599	39.548	26.186	-6.530	-0.498	9.944	170.574	-0.002768	-0.001833	0.000457
0.7960	73.774	35.547	24.424	-5.765	-0.497	9.951	140.448	-0.002488	-0.001710	0.000404
0.8000	61.346	32.515	22.635	-5.542	-0.490	9.962	116.787	-0.002276	-0.001584	0.000388
0.8040	58.866	31.183	22.238	-5.224	-0.489	9.959	112.066	-0.002183	-0.001557	0.000366
0.8080	58.055	30.724	21.838	-5.349	-0.501	9.949	110.521	-0.002151	-0.001529	0.000374
0.8120	53.606	29.780	21.384	-5.183	-0.506	9.944	102.053	-0.002085	-0.001497	0.000363
0.8160	55.395	29.446	20.985	-4.891	-0.501	9.952	105.457	-0.002061	-0.001469	0.000342
0.8200	58.987	29.542	20.850	-5.530	-0.501	9.961	112.295	-0.002068	-0.001459	0.000387
0.8240	79.560	32.238	22.250	-5.531	-0.496	9.958	151.463	-0.002257	-0.001557	0.000387
0.8280	141.327	42.077	27.287	-6.849	-0.494	9.949	269.051	-0.002945	-0.001910	0.000479
0.8320	211.735	53.431	33.546	-6.362	-0.504	9.944	403.090	-0.003740	-0.002348	0.000445
0.8360	278.762	63.465	39.299	-6.709	-0.497	9.951	530.691	-0.004443	-0.002751	0.000470
0.8400	327.815	71.178	43.549	-5.891	-0.495	9.961	624.075	-0.004982	-0.003048	0.000412
0.8440	386.756	80.141	48.065	-5.448	-0.494	9.958	736.284	-0.005610	-0.003365	0.000381
0.8480	435.463	87.852	51.971	-4.766	-0.496	9.948	829.010	-0.006150	-0.003638	0.000334
0.8520	499.845	97.552	56.735	-3.167	-0.505	9.944	951.576	-0.006829	-0.003971	0.000222
0.8560	579.390	108.822	62.060	-1.542	-0.498	9.951	1103.010	-0.007618	-0.004344	0.000108
0.8600	615.519	114.575	64.548	-0.112	-0.496	9.961	1171.789	-0.008020	-0.004518	0.000008
0.8640	674.325	122.329	69.214	1.795	-0.495	9.958	1283.741	-0.008563	-0.004845	-0.000126
0.8680	726.128	129.695	73.110	3.850	-0.501	9.949	1382.360	-0.009079	-0.005118	-0.000270
0.8720	765.517	135.226	76.603	5.420	-0.503	9.944	1457.348	-0.009466	-0.005362	-0.000379
0.8760	828.170	143.745	81.022	7.505	-0.497	9.951	1576.624	-0.010062	-0.005672	-0.000525
0.8800	868.672	149.440	84.242	8.951	-0.498	9.961	1653.728	-0.010461	-0.005897	-0.000627
0.8840	912.435	154.875	88.079	10.466	-0.495	9.958	1737.041	-0.010841	-0.006166	-0.000733
0.8880	942.492	159.890	90.597	12.023	-0.497	9.949	1794.262	-0.011192	-0.006342	-0.000842
0.8920	960.420	162.975	92.056	13.328	-0.494	9.944	1828.394	-0.011408	-0.006444	-0.000933
0.8960	990.132	166.925	94.312	14.456	-0.500	9.951	1884.956	-0.011685	-0.006602	-0.001012
0.9000	990.402	167.410	94.654	13.997	-0.491	9.961	1885.471	-0.011719	-0.006626	-0.000980
0.9040	989.215	167.773	95.044	14.871	-0.492	9.958	1883.211	-0.011744	-0.006653	-0.001041
0.9080	987.171	167.924	94.727	15.372	-0.497	9.949	1879.320	-0.011755	-0.006631	-0.001076
0.9120	982.152	167.981	94.960	14.732	-0.496	9.944	1869.764	-0.011759	-0.006647	-0.001031
0.9160	977.914	167.953	95.029	14.788	-0.501	9.952	1861.696	-0.011757	-0.006652	-0.001035
0.9200	964.388	166.506	94.684	14.051	-0.495	9.961	1835.947	-0.011655	-0.006628	-0.000984
0.9240	936.766	164.310	93.665	12.621	-0.485	9.958	1783.361	-0.011502	-0.006557	-0.000883
0.9280	867.064	157.599	89.622	9.716	-0.489	9.948	1650.667	-0.011032	-0.006274	-0.000680
0.9320	794.672	149.442	84.380	6.588	-0.500	9.944	1512.852	-0.010461	-0.005907	-0.000461
0.9360	744.898	143.174	80.855	4.754	-0.493	9.951	1418.095	-0.010022	-0.005660	-0.000333
0.9400	696.732	136.936	77.168	2.962	-0.487	9.961	1326.399	-0.009585	-0.005402	-0.000207
0.9440	659.807	131.334	74.525	1.975	-0.489	9.958	1256.104	-0.009193	-0.005217	-0.000138
0.9480	596.988	123.912	69.971	0.961	-0.489	9.949	1136.513	-0.008674	-0.004898	-0.000067
0.9520	515.625	112.948	64.520	-1.236	-0.494	9.944	981.617	-0.007906	-0.004516	0.000086
0.9560	461.087	104.695	60.162	-2.888	-0.493	9.951	877.790	-0.007329	-0.004211	0.000202
0.9600	402.010	96.079	55.620	-4.599	-0.488	9.961	765.324	-0.006726	-0.003893	0.000322
0.9640	361.614	89.438	52.510	-6.046	-0.494	9.958	688.419	-0.006261	-0.003676	0.000423
0.9680	312.380	81.531	48.478	-6.211	-0.504	9.948	594.692	-0.005707	-0.003393	0.000435
0.9720	260.427	72.776	44.282	-6.933	-0.504	9.944	495.787	-0.005094	-0.003100	0.000485
0.9760	221.113	66.203	40.442	-7.349	-0.498	9.951	420.942	-0.004634	-0.002831	0.000514
0.9800	174.780	57.196	36.259	-7.571	-0.486	9.961	332.737	-0.004004	-0.002538	0.000530
0.9840	144.122	51.263	32.695	-7.544	-0.500	9.958	274.372	-0.003588	-0.002289	0.000528
0.9880	109.542	44.356	29.199	-6.530	-0.489	9.948	208.540	-0.003105	-0.002044	0.000457
0.9920	84.249	38.840	26.378	-6.098	-0.501	9.944	160.389	-0.002719	-0.001846	0.000427
0.9960	77.126	36.450	25.221	-5.948	-0.491	9.951	146.828	-0.002551	-0.001765	0.000416
1.0000	49.924	20.677	15.632	-5.280	-0.540	9.957	95.043	-0.001447	-0.001094	0.000370
1.0040	50.691	20.539	15.620	-5.086	-0.531	9.950	96.502	-0.001438	-0.001093	0.000356
1.0080	51.232	20.610	15.508	-5.003	-0.532	9.942	97.532	-0.001443	-0.001086	0.000350
1.0120	60.023	22.095	15.811	-5.393	-0.532	9.948	114.269	-0.001547	-0.001107	0.000377
1.0160	73.759	23.402	17.147	-5.642	-0.525	9.958	140.419	-0.001638	-0.001200	0.000395
1.0200	100.600	28.710	20.434	-6.072	-0.529	9.958	191.517	-0.002010	-0.001430	0.000425
1.0240	141.417	35.506	24.108	-7.351	-0.522	9.951	269.222	-0.002485	-0.001688	0.000515
1.0280	189.538	43.149	28.567	-7.197	-0.521	9.943	360.832	-0.003020	-0.002000	0.000504
1.0320	260.097	54.056	34.525	-6.474	-0.517	9.948	495.157	-0.003784	-0.002417	0.000453
1.0360	327.980	64.743	40.277	-6.766	-0.511	9.957	624.390	-0.004532	-0.002819	0.000474
1.0400	403.693	76.208	46.194	-5.559	-0.520	9.957	768.528	-0.005335	-0.003234	0.000389
1.0440	486.845	88.881	52.013	-4.389	-0.517	9.950	926.828	-0.006222	-0.003641	0.000307
1.0480	553.166	99.082	57.064	-2.681	-0.509	9.943	1053.085	-0.006936	-0.003994	0.000188
1.0520	636.694	111.311	63.297	0.071	-0.501	9.947	1212.101	-0.007792	-0.004431	-0.000005
1.0560	715.533	121.817	69.324	2.616	-0.516	9.958	1362.190	-0.008527	-0.004853	-0.000183
1.0600	800.503	133.684	76.191	5.713	-0.518	9.958	1523.952	-0.009358	-0.005333	-0.000400
1.0640	877.524	144.024	81.969	8.410	-0.509	9.951	1670.580	-0.010082	-0.005738	-0.000589
1.0680	927.223	151.111	86.290	10.520	-0.518	9.942	1765.194	-0.010578	-0.006040	-0.000736
1.0720	1014.207	162.950	92.991	14.163	-0.516	9.947	1930.790	-0.011406	-0.006509	-0.000991
1.0760	1070.233	170.802	97.890	16.788	-0.512	9.957	2037.449	-0.011956	-0.006852	-0.001175
1.0800	1133.683	178.735	103.313	20.082	-0.512	9.958	2158.241	-0.012511	-0.007232	-0.001406
1.0840	1193.241	186.586	107.714	22.777	-0.511	9.950	2271.624	-0.013061	-0.007540	-0.001594
1.0880	1208.464	189.934	109.572	23.764	-0.508	9.941	2300.606	-0.013295	-0.007670	-0.001663
1.0920	1242.188	194.411	111.996	25.793	-0.495	9.947	2364.807	-0.013609	-0.007840	-0.001805
1.0960	1250.454	196.343	113.440	25.862	-0.500	9.957	2380.543	-0.013744	-0.007941	-0.001810
1.1000	1246.862	196.648	114.323	26.040	-0.506	9.957	2373.705	-0.013765	-0.008003	-0.001823
1.1040	1251.250	197.619	114.856	26.390	-0.506	9.950	2382.059	-0.013833	-0.008040	-0.001847
1.1080	1251.957	199.372	115.267	26.446	-0.508	9.942	2383.404	-0.013956	-0.008069	-0.001851
1.1120	1252.392	199.704	115.228	26.640	-0.505	9.947	2384.233	-0.013979	-0.008066	-0.001865
1.1160	1243.736	199.401	115.326	26.474	-0.508	9.957	2367.754	-0.013958	-0.008073	-0.001853
1.1200	1229.715	198.636	115.353	26.211	-0.510	9.957	2341.061	-0.013905	-0.008075	-0.001835
1.1240	1192.279	195.452	113.094	24.668	-0.501	9.950	2269.793	-0.013682	-0.007917	-0.001727
1.1280	1098.952	185.919	107.358	19.945	-0.512	9.941	2092.123	-0.013014	-0.007515	-0.001396
1.1320	1052.259	181.225	103.642	18.373	-0.494	9.947	2003.231	-0.012686	-0.007255	-0.001286
1.1360	981.295	173.164	98.302	14.814	-0.498	9.957	1868.134	-0.012121	-0.006881	-0.001037
1.1400	901.704	164.019	92.868	11.896	-0.495	9.957	1716.614	-0.011481	-0.006501	-0.000833
1.1440	837.443	156.042	88.231	9.672	-0.497	9.950	1594.276	-0.010923	-0.006176	-0.000677
1.1480	755.749	145.981	82.246	6.809	-0.500	9.942	1438.751	-0.010219	-0.005757	-0.000477
1.1520	696.206	138.422	77.635	4.892	-0.498	9.947	1325.397	-0.009690	-0.005434	-0.000342
1.1560	603.330	126.151	70.949	1.947	-0.500	9.957	1148.586	-0.008831	-0.004966	-0.000136
1.1600	530.653	116.062	65.265	0.903	-0.512	9.957	1010.227	-0.008124	-0.004569	-0.000063
1.1640	477.107	106.987	60.683	-1.416	-0.497	9.950	908.289	-0.007489	-0.004248	0.000099
1.1680	405.361	96.330	55.398	-3.429	-0.493	9.942	771.704	-0.006743	-0.003878	0.000240
1.1720	351.695	87.586	51.120	-4.571	-0.489	9.947	669.537	-0.006131	-0.003578	0.000320
1.1760	289.808	77.430	46.194	-5.947	-0.496	9.957	551.720	-0.005420	-0.003234	0.000416
1.1800	239.372	69.107	42.326	-6.015	-0.501	9.957	455.704	-0.004838	-0.002963	0.000421
1.1840	195.835	61.003	37.800	-6.516	-0.497	9.950	372.820	-0.004270	-0.002646	0.000456
1.1880	152.538	52.875	33.615	-6.167	-0.506	9.942	290.394	-0.003701	-0.002353	0.000432
1.1920	130.582	47.608	31.002	-6.031	-0.505	9.947	248.594	-0.003333	-0.002170	0.000422
1.1960	107.213	43.274	28.155	-6.182	-0.509	9.956	204.105	-0.003029	-0.001971	0.000433
1.2000	94.003	39.659	26.723	-5.599	-0.506	9.957	178.957	-0.002776	-0.001871	0.000392
1.2040	92.320	38.506	25.704	-6.030	-0.496	9.950	175.753	-0.002695	-0.001799	0.000422
1.2080	87.240	36.617	24.712	-5.780	-0.497	9.941	166.082	-0.002563	-0.001730	0.000405
1.2120	87.450	36.103	24.383	-6.156	-0.502	9.947	166.483	-0.002527	-0.001707	0.000431
1.2160	89.795	35.505	24.436	-6.001	-0.502	9.957	170.946	-0.002485	-0.001711	0.000420
1.2200	95.551	36.058	24.906	-5.461	-0.502	9.957	181.904	-0.002524	-0.001743	0.000382
1.2240	118.183	39.423	26.241	-5.863	-0.507	9.950	224.991	-0.002760	-0.001837	0.000410
1.2280	176.839	48.526	30.561	-6.309	-0.502	9.942	336.657	-0.003397	-0.002139	0.000442
1.2320	261.239	60.922	37.428	-5.960	-0.500	9.947	497.332	-0.004265	-0.002620	0.000417
1.2360	329.137	71.565	42.891	-6.059	-0.498	9.957	626.593	-0.005010	-0.003002	0.000424
1.2400	410.035	83.573	49.043	-4.194	-0.508	9.957	780.602	-0.005850	-0.003433	0.000294
1.2440	493.127	95.176	54.738	-2.946	-0.500	9.950	938.787	-0.006662	-0.003832	0.000206
1.2480	561.116	105.404	59.830	-0.971	-0.501	9.941	1068.220	-0.007378	-0.004188	0.000068
1.2520	660.273	119.049	66.792	2.128	-0.494	9.947	1256.990	-0.008333	-0.004675	-0.000149
1.2560	731.974	129.001	72.654	4.143	-0.499	9.956	1393.490	-0.009030	-0.005086	-0.000290
1.2600	806.815	138.921	78.779	7.032	-0.510	9.957	1535.969	-0.009724	-0.005515	-0.000492
1.2640	892.718	150.777	84.857	10.576	-0.509	9.950	1699.505	-0.010554	-0.005940	-0.000740
1.2680	940.282	157.515	88.836	12.064	-0.504	9.941	1790.056	-0.011026	-0.006219	-0.000844
1.2720	1018.115	167.299	95.279	15.077	-0.504	9.947	1938.229	-0.011711	-0.006670	-0.001055
1.2760	1071.616	174.622	99.583	17.679	-0.501	9.956	2040.081	-0.012224	-0.006971	-0.001238
1.2800	1124.546	181.486	103.877	20.429	-0.518	9.957	2140.846	-0.012704	-0.007271	-0.001430
1.2840	1181.759	189.060	108.334	23.027	-0.510	9.950	2249.765	-0.013234	-0.007583	-0.001612
1.2880	1201.626	192.547	110.359	24.251	-0.511	9.941	2287.588	-0.013478	-0.007725	-0.001698
1.2920	1250.258	198.564	114.322	26.877	-0.486	9.947	2380.171	-0.013899	-0.008003	-0.001881
1.2960	1256.210	200.053	115.449	26.583	-0.494	9.956	2391.500	-0.014004	-0.008081	-0.001861
1.3000	1255.744	200.802	116.125	27.708	-0.490	9.957	2390.614	-0.014056	-0.008129	-0.001940
1.3040	1267.646	202.929	117.130	28.030	-0.494	9.950	2413.273	-0.014205	-0.008199	-0.001962
1.3080	1264.701	202.998	117.533	27.737	-0.498	9.941	2407.665	-0.014210	-0.008227	-0.001942
1.3120	1258.614	203.442	117.353	27.764	-0.492	9.947	2396.078	-0.014241	-0.008215	-0.001943
1.3160	1244.743	202.399	116.870	27.098	-0.493	9.956	2369.671	-0.014168	-0.008181	-0.001897
1.3200	1220.021	200.706	115.946	25.683	-0.497	9.957	2322.607	-0.014049	-0.008116	-0.001798
1.3240	1156.571	194.604	112.475	23.277	-0.485	9.950	2201.815	-0.013622	-0.007873	-0.001629
1.3280	1077.732	186.543	106.422	19.914	-0.492	9.941	2051.725	-0.013058	-0.007450	-0.001394
1.3320	1031.039	181.113	102.885	17.733	-0.499	9.946	1962.833	-0.012678	-0.007202	-0.001241
1.3360	955.762	172.634	97.656	14.497	-0.493	9.956	1819.525	-0.012084	-0.006836	-0.001015
1.3400	856.830	161.338	90.640	10.770	-0.495	9.957	1631.184	-0.011294	-0.006345	-0.000754
1.3440	791.125	153.055	85.588	8.352	-0.486	9.950	1506.100	-0.010714	-0.005991	-0.000585
1.3480	713.955	142.954	80.111	5.824	-0.490	9.941	1359.186	-0.010007	-0.005608	-0.000408
1.3520	663.053	136.075	75.915	4.602	-0.493	9.947	1262.283	-0.009525	-0.005314	-0.000322
1.3560	582.681	125.164	69.875	2.308	-0.490	9.956	1109.276	-0.008761	-0.004891	-0.000162
1.3600	515.835	115.798	64.867	0.474	-0.500	9.956	982.018	-0.008106	-0.004541	-0.000033
1.3640	479.241	109.366	61.799	-0.681	-0.493	9.950	912.352	-0.007656	-0.004326	0.000048
1.3680	412.410	99.400	56.705	-2.347	-0.498	9.941	785.122	-0.006958	-0.003969	0.000164
1.3720	357.030	90.743	52.249	-3.653	-0.493	9.946	679.693	-0.006352	-0.003657	0.000256
1.3760	295.293	80.765	47.667	-5.364	-0.494	9.956	562.162	-0.005654	-0.003337	0.000375
1.3800	233.857	70.580	43.029	-6.198	-0.499	9.956	445.204	-0.004941	-0.003012	0.000434
1.3840	193.010	62.702	38.791	-6.377	-0.488	9.950	367.441	-0.004389	-0.002715	0.000446
1.3880	150.795	54.792	34.400	-6.071	-0.493	9.941	287.075	-0.003835	-0.002408	0.000425
1.3920	129.635	49.818	31.401	-6.115	-0.492	9.946	246.792	-0.003487	-0.002198	0.000428
1.3960	105.935	44.676	28.814	-5.725	-0.492	9.955	201.674	-0.003127	-0.002017	0.000401
1.4000	87.556	40.354	26.806	-5.392	-0.504	9.956	166.683	-0.002825	-0.001876	0.000377
1.4040	82.130	38.590	25.386	-5.739	-0.492	9.950	156.355	-0.002701	-0.001777	0.000402
1.4080	76.765	36.630	24.369	-5.530	-0.494	9.941	146.141	-0.002564	-0.001706	0.000387
1.4120	77.502	35.782	24.492	-5.335	-0.494	9.946	147.543	-0.002505	-0.001714	0.000373
1.4160	80.958	36.032	24.492	-5.310	-0.496	9.956	154.123	-0.002522	-0.001714	0.000372
1.4200	91.448	37.629	25.277	-5.295	-0.505	9.957	174.093	-0.002634	-0.001769	0.000371
1.4240	135.661	43.760	27.852	-5.683	-0.500	9.950	258.265	-0.003063	-0.001950	0.000398
1.4280	185.285	51.555	31.953	-5.723	-0.506	9.942	352.736	-0.003609	-0.002237	0.000401
1.4320	241.221	60.156	36.740	-5.725	-0.503	9.947	459.223	-0.004211	-0.002572	0.000401
1.4360	316.934	70.884	42.656	-5.197	-0.501	9.956	603.361	-0.004962	-0.002986	0.000364
1.4400	420.089	86.394	50.018	-3.696	-0.509	9.957	799.742	-0.006048	-0.003501	0.000259
1.4440	505.646	98.997	56.335	-2.027	-0.500	9.950	962.620	-0.006930	-0.003943	0.000142
1.4480	572.823	108.861	61.384	-0.290	-0.497	9.942	1090.508	-0.007620	-0.004297	0.000020
1.4520	666.435	121.734	68.430	2.501	-0.492	9.946	1268.721	-0.008521	-0.004790	-0.000175
1.4560	741.201	132.140	74.182	4.878	-0.488	9.956	1411.057	-0.009250	-0.005193	-0.000341
1.4600	823.406	143.147	80.318	8.116	-0.502	9.956	1567.554	-0.010020	-0.005622	-0.000568
1.4640	898.804	153.416	86.192	10.409	-0.492	9.950	1711.092	-0.010739	-0.006033	-0.000729
1.4680	950.862	160.517	90.447	12.801	-0.498	9.941	1810.198	-0.011236	-0.006331	-0.000896
1.4720	1037.937	171.315	97.010	16.288	-0.493	9.946	1975.966	-0.011992	-0.006791	-0.001140
1.4760	1086.298	178.264	101.181	18.357	-0.493	9.955	2068.033	-0.012478	-0.007083	-0.001285
1.4800	1136.057	184.780	105.309	21.235	-0.509	9.956	2162.762	-0.012935	-0.007372	-0.001486
1.4840	1193.541	192.008	109.833	23.918	-0.497	9.949	2272.196	-0.013441	-0.007688	-0.001674
1.4880	1202.438	194.091	111.198	24.389	-0.510	9.940	2289.133	-0.013586	-0.007784	-0.001707
1.4920	1236.132	198.065	114.002	26.279	-0.504	9.946	2353.277	-0.013865	-0.007980	-0.001840
1.4960	1257.637	201.469	116.111	27.582	-0.500	9.955	2394.218	-0.014103	-0.008128	-0.001931
1.5000	1256.585	202.414	117.408	27.335	-0.511	9.956	2392.216	-0.014169	-0.008219	-0.001913
1.5040	1259.155	203.277	117.214	27.708	-0.502	9.949	2397.108	-0.014229	-0.008205	-0.001940
1.5080	1259.726	204.137	117.674	27.640	-0.508	9.941	2398.195	-0.014290	-0.008237	-0.001935
1.5120	1269.961	205.124	118.367	28.572	-0.508	9.945	2417.679	-0.014359	-0.008286	-0.002000
1.5160	1269.570	205.988	118.686	28.766	-0.494	9.955	2416.935	-0.014419	-0.008308	-0.002014
1.5200	1252.918	205.013	118.408	28.251	-0.497	9.956	2385.235	-0.014351	-0.008289	-0.001978
1.5240	1201.100	200.274	115.559	25.931	-0.490	9.949	2286.587	-0.014019	-0.008089	-0.001815
1.5280	1086.253	188.948	107.645	20.541	-0.500	9.941	2067.947	-0.013226	-0.007535	-0.001438
1.5320	1031.745	182.530	103.738	17.914	-0.495	9.946	1964.178	-0.012777	-0.007262	-0.001254
1.5360	965.320	175.164	98.892	15.149	-0.493	9.955	1837.721	-0.012262	-0.006922	-0.001060
1.5400	884.302	165.548	93.130	12.008	-0.498	9.956	1683.483	-0.011588	-0.006519	-0.000841
1.5440	820.235	157.585	88.366	10.090	-0.492	9.950	1561.518	-0.011031	-0.006186	-0.000706
1.5480	726.218	146.439	81.352	7.101	-0.497	9.941	1382.532	-0.010251	-0.005695	-0.000497
1.5520	664.090	137.144	76.563	5.086	-0.493	9.946	1264.257	-0.009600	-0.005359	-0.000356
1.5560	593.878	127.764	71.210	2.823	-0.493	9.956	1130.590	-0.008943	-0.004985	-0.000198
1.5600	522.357	117.703	65.734	0.875	-0.516	9.956	994.434	-0.008239	-0.004601	-0.000061
1.5640	460.816	109.003	61.098	-1.223	-0.494	9.950	877.275	-0.007630	-0.004277	0.000086
1.5680	381.827	96.287	55.274	-2.957	-0.495	9.941	726.900	-0.006740	-0.003869	0.000207
1.5720	323.096	86.476	50.678	-4.279	-0.497	9.946	615.091	-0.006053	-0.003547	0.000300
1.5760	263.463	76.473	45.960	-5.500	-0.492	9.955	501.566	-0.005353	-0.003217	0.000385
1.5800	215.522	68.355	41.637	-5.377	-0.502	9.956	410.299	-0.004785	-0.002915	0.000376
1.5840	181.378	61.809	37.651	-5.335	-0.494	9.950	345.297	-0.004327	-0.002636	0.000373
1.5880	138.231	53.709	33.272	-5.766	-0.508	9.940	263.157	-0.003760	-0.002329	0.000404
1.5920	116.140	48.567	30.783	-5.850	-0.493	9.946	221.100	-0.003400	-0.002155	0.000409
1.5960	93.462	43.327	28.059	-5.211	-0.504	9.955	177.927	-0.003033	-0.001964	0.000365
1.6000	78.493	39.327	25.954	-4.863	-0.510	9.956	149.431	-0.002753	-0.001817	0.000340
1.6040	75.458	37.838	25.182	-4.500	-0.494	9.949	143.652	-0.002649	-0.001763	0.000315
1.6080	73.294	36.908	24.672	-5.112	-0.506	9.941	139.532	-0.002584	-0.001727	0.000358
1.6120	76.104	36.503	24.617	-5.058	-0.500	9.946	144.882	-0.002555	-0.001723	0.000354
1.6160	80.748	36.893	24.671	-4.738	-0.502	9.955	153.723	-0.002582	-0.001727	0.000332
1.6200	97.895	39.604	25.994	-4.571	-0.512	9.957	186.367	-0.002772	-0.001820	0.000320
1.6240	143.206	46.401	29.185	-5.669	-0.499	9.949	272.627	-0.003248	-0.002043	0.000397
1.6280	198.751	54.878	33.562	-5.307	-0.503	9.941	378.370	-0.003841	-0.002349	0.000372
1.6320	272.014	65.452	39.589	-5.031	-0.496	9.946	517.845	-0.004582	-0.002771	0.000352
1.6360	337.298	75.097	44.542	-4.890	-0.496	9.955	642.128	-0.005257	-0.003118	0.000342
1.6400	414.784	86.840	50.487	-3.238	-0.503	9.957	789.642	-0.006079	-0.003534	0.000227
1.6440	500.025	99.274	56.473	-1.666	-0.502	9.950	951.920	-0.006949	-0.003953	0.000117
1.6480	560.289	107.890	60.848	-0.152	-0.505	9.941	1066.647	-0.007552	-0.004259	0.000011
1.6520	647.619	120.261	67.274	2.404	-0.493	9.946	1232.901	-0.008418	-0.004709	-0.000168
1.6560	724.174	130.807	73.095	4.627	-0.490	9.955	1378.641	-0.009156	-0.005117	-0.000324
1.6600	800.203	141.255	79.342	7.213	-0.500	9.956	1523.380	-0.009888	-0.005554	-0.000505
1.6640	882.107	151.999	85.080	10.410	-0.489	9.950	1679.306	-0.010640	-0.005956	-0.000729
1.6680	935.804	159.129	89.455	12.926	-0.502	9.941	1781.530	-0.011139	-0.006262	-0.000905
1.6720	1020.970	170.232	95.950	16.218	-0.499	9.946	1943.665	-0.011916	-0.006716	-0.001135
1.6760	1080.933	178.040	100.724	18.664	-0.504	9.955	2057.819	-0.012463	-0.007051	-0.001306
1.6800	1128.122	184.544	104.879	21.011	-0.517	9.956	2147.655	-0.012918	-0.007342	-0.001471
1.6840	1184.434	191.785	109.696	23.652	-0.503	9.950	2254.858	-0.013425	-0.007679	-0.001656
1.6880	1200.529	194.509	111.528	24.404	-0.505	9.940	2285.500	-0.013616	-0.007807	-0.001708
1.6920	1236.613	199.051	114.472	26.585	-0.496	9.945	2354.193	-0.013934	-0.008013	-0.001861
1.6960	1259.426	203.025	116.773	27.819	-0.499	9.955	2397.623	-0.014212	-0.008174	-0.001947
1.7000	1264.731	204.109	117.893	28.460	-0.500	9.956	2407.722	-0.014288	-0.008253	-0.001992
1.7040	1276.453	205.886	118.702	28.643	-0.488	9.949	2430.038	-0.014412	-0.008309	-0.002005
1.7080	1271.944	206.194	118.812	28.600	-0.501	9.940	2421.455	-0.014434	-0.008317	-0.002002
1.7120	1265.091	205.820	118.657	28.725	-0.492	9.945	2408.409	-0.014407	-0.008306	-0.002011
1.7160	1244.518	204.623	117.729	27.611	-0.500	9.954	2369.242	-0.014324	-0.008241	-0.001933
1.7200	1188.236	199.189	115.299	25.348	-0.505	9.956	2262.096	-0.013943	-0.008071	-0.001774
1.7240	1133.052	193.980	111.445	22.680	-0.500	9.949	2157.040	-0.013579	-0.007801	-0.001588
1.7280	1073.569	187.644	107.357	20.123	-0.499	9.940	2043.800	-0.013135	-0.007515	-0.001409
1.7320	1036.284	183.100	104.180	18.345	-0.500	9.945	1972.818	-0.012817	-0.007293	-0.001284
1.7360	961.908	175.485	98.963	15.288	-0.504	9.954	1831.226	-0.012284	-0.006927	-0.001070
1.7400	876.141	165.296	92.730	12.076	-0.499	9.956	1667.948	-0.011571	-0.006491	-0.000845
1.7440	814.660	157.515	87.902	9.825	-0.495	9.949	1550.903	-0.011026	-0.006153	-0.000688
1.7480	730.801	147.149	81.763	6.881	-0.502	9.940	1391.258	-0.010300	-0.005723	-0.000482
1.7520	671.048	138.894	76.892	5.585	-0.497	9.945	1277.504	-0.009723	-0.005382	-0.000391
1.7560	596.372	128.667	71.650	3.168	-0.504	9.954	1135.340	-0.009007	-0.005015	-0.000222
1.7600	521.846	118.202	66.174	0.890	-0.508	9.956	993.462	-0.008274	-0.004632	-0.000062
1.7640	461.973	109.209	61.412	-0.277	-0.503	9.949	879.478	-0.007645	-0.004299	0.000019
1.7680	386.906	97.456	55.908	-2.777	-0.497	9.941	736.570	-0.006822	-0.003914	0.000194
1.7720	337.959	89.576	52.040	-3.544	-0.512	9.945	643.387	-0.006270	-0.003643	0.000248
1.7760	279.303	79.958	47.364	-4.877	-0.504	9.954	531.721	-0.005597	-0.003315	0.000341
1.7800	227.485	71.052	42.918	-5.433	-0.508	9.956	433.073	-0.004974	-0.003004	0.000380
1.7840	192.830	64.463	39.340	-5.502	-0.510	9.949	367.098	-0.004512	-0.002754	0.000385
1.7880	148.000	55.808	35.020	-5.542	-0.510	9.940	281.754	-0.003907	-0.002451	0.000388
1.7920	122.406	50.470	31.855	-5.642	-0.502	9.945	233.030	-0.003533	-0.002230	0.000395
1.7960	101.863	45.386	29.075	-5.127	-0.508	9.954	193.920	-0.003177	-0.002035	0.000359
1.8000	87.390	42.106	27.507	-5.198	-0.516	9.955	166.368	-0.002947	-0.001925	0.000364
1.8040	81.514	40.021	26.324	-5.406	-0.501	9.950	155.182	-0.002801	-0.001843	0.000378
1.8080	70.438	37.352	24.794	-4.669	-0.504	9.940	134.096	-0.002615	-0.001736	0.000327
1.8120	68.454	36.436	24.520	-4.473	-0.502	9.945	130.320	-0.002551	-0.001716	0.000313
1.8160	72.212	36.297	24.258	-4.919	-0.502	9.954	137.472	-0.002541	-0.001698	0.000344
1.8200	80.748	37.174	24.698	-4.488	-0.509	9.957	153.723	-0.002602	-0.001729	0.000314
1.8240	123.398	43.579	27.784	-4.723	-0.502	9.950	234.919	-0.003051	-0.001945	0.000331
1.8280	193.416	54.209	33.080	-5.406	-0.509	9.941	368.214	-0.003795	-0.002316	0.000378
1.8320	283.872	67.648	40.772	-5.209	-0.501	9.945	540.419	-0.004735	-0.002854	0.000365
1.8360	352.822	78.154	45.946	-4.447	-0.498	9.954	671.682	-0.005471	-0.003216	0.000311
1.8400	426.010	89.020	51.271	-3.028	-0.510	9.956	811.014	-0.006231	-0.003589	0.000212
1.8440	505.465	100.887	56.802	-1.291	-0.495	9.950	962.276	-0.007062	-0.003976	0.000090
1.8480	570.283	110.670	61.934	0.348	-0.505	9.940	1085.672	-0.007747	-0.004335	-0.000024
1.8520	651.256	121.565	67.976	2.627	-0.498	9.945	1239.824	-0.008510	-0.004758	-0.000184
1.8560	734.904	132.807	74.361	5.183	-0.501	9.954	1399.069	-0.009296	-0.005205	-0.000363
1.8600	815.351	144.188	80.264	8.158	-0.517	9.956	1552.219	-0.010093	-0.005618	-0.000571
1.8640	892.868	154.151	86.044	10.726	-0.508	9.950	1699.791	-0.010791	-0.006023	-0.000751
1.8680	935.368	160.503	89.717	12.634	-0.502	9.940	1780.701	-0.011235	-0.006280	-0.000884
1.8720	1014.478	169.676	95.454	15.845	-0.500	9.945	1931.305	-0.011877	-0.006682	-0.001109
1.8760	1072.472	177.944	100.312	18.555	-0.506	9.953	2041.712	-0.012456	-0.007022	-0.001299
1.8800	1120.729	184.335	104.977	20.930	-0.518	9.955	2133.579	-0.012903	-0.007348	-0.001465
1.8840	1173.403	190.948	109.230	23.098	-0.502	9.949	2233.858	-0.013366	-0.007646	-0.001617
1.8880	1204.181	195.410	111.858	25.015	-0.498	9.940	2292.452	-0.013679	-0.007830	-0.001751
1.8920	1250.424	201.121	115.645	27.015	-0.505	9.944	2380.486	-0.014078	-0.008095	-0.001891
1.8960	1257.262	203.386	116.937	27.698	-0.501	9.953	2393.503	-0.014237	-0.008186	-0.001939
1.9000	1255.533	203.747	117.407	27.876	-0.514	9.956	2390.213	-0.014262	-0.008218	-0.001951
1.9040	1264.445	205.180	118.352	28.546	-0.502	9.949	2407.179	-0.014363	-0.008285	-0.001998
1.9080	1260.914	205.748	118.033	28.098	-0.496	9.940	2400.455	-0.014402	-0.008262	-0.001967
1.9120	1259.185	205.679	118.017	28.434	-0.499	9.945	2397.165	-0.014398	-0.008261	-0.001990
1.9160	1253.354	205.112	118.116	28.141	-0.505	9.953	2386.065	-0.014358	-0.008268	-0.001970
1.9200	1237.529	204.083	117.725	27.416	-0.521	9.956	2355.938	-0.014286	-0.008241	-0.001919
1.9240	1187.725	199.829	115.299	25.614	-0.514	9.949	2261.124	-0.013988	-0.008071	-0.001793
1.9280	1084.405	189.601	108.295	21.026	-0.514	9.940	2064.428	-0.013272	-0.007581	-0.001472
1.9320	1031.249	184.168	104.123	18.483	-0.504	9.945	1963.234	-0.012892	-0.007289	-0.001294
1.9360	964.749	176.832	99.515	15.857	-0.502	9.954	1836.634	-0.012378	-0.006966	-0.001110
1.9400	878.531	166.563	93.375	12.009	-0.503	9.956	1672.497	-0.011659	-0.006536	-0.000841
1.9440	816.944	158.668	88.092	9.840	-0.489	9.949	1555.252	-0.011107	-0.006166	-0.000689
1.9480	740.405	148.915	82.659	7.589	-0.492	9.940	1409.540	-0.010424	-0.005786	-0.000531
1.9520	681.689	140.617	78.117	5.754	-0.493	9.944	1297.760	-0.009843	-0.005468	-0.000403
1.9560	595.501	129.541	71.623	3.420	-0.494	9.953	1133.680	-0.009068	-0.005014	-0.000239
1.9600	516.617	118.216	65.913	1.349	-0.500	9.956	983.505	-0.008275	-0.004614	-0.000094
1.9640	461.853	109.696	61.893	-0.193	-0.500	9.950	879.250	-0.007679	-0.004333	0.000014
1.9680	390.243	98.749	56.196	-2.400	-0.505	9.940	742.922	-0.006912	-0.003934	0.000168
1.9720	334.623	90.022	52.042	-3.778	-0.511	9.944	637.035	-0.006302	-0.003643	0.000264
1.9760	276.433	80.446	47.569	-4.848	-0.511	9.953	526.257	-0.005631	-0.003330	0.000339
1.9800	226.673	71.691	42.932	-5.058	-0.505	9.955	431.528	-0.005018	-0.003005	0.000354
1.9840	193.491	65.256	39.354	-5.447	-0.494	9.949	368.357	-0.004568	-0.002755	0.000381
1.9880	150.179	57.238	34.758	-5.683	-0.507	9.940	285.902	-0.004007	-0.002433	0.000398
1.9920	128.914	52.195	32.572	-5.710	-0.504	9.944	245.419	-0.003654	-0.002280	0.000400
1.9960	107.573	47.261	29.889	-5.086	-0.493	9.953	204.792	-0.003308	-0.002092	0.000356
Test Cycles
Time (sec)	Axial stress (kPa)	Axial micro-strain #1	Axial micro-strain #2	Axial micro-strain #3	Confining pressure (kPa)	Temperature (�C)	Load (N)	Displacement #1 (mm)	Displacement #2 (mm)	Displacement #3 (mm)
0.0000	87.961	42.606	27.796	-4.779	-0.500	9.956	167.456	-0.002982	-0.001946	0.000335
0.0040	81.153	40.965	26.902	-4.724	-0.498	9.949	154.495	-0.002868	-0.001883	0.000331
0.0080	74.586	38.659	25.594	-4.722	-0.492	9.941	141.993	-0.002706	-0.001792	0.000331
0.0120	75.187	38.657	25.180	-4.807	-0.492	9.944	143.137	-0.002706	-0.001763	0.000336
0.0160	77.787	38.381	25.168	-4.711	-0.505	9.954	148.087	-0.002687	-0.001762	0.000330
0.0200	84.580	39.119	25.498	-4.169	-0.512	9.956	161.018	-0.002738	-0.001785	0.000292
0.0240	121.234	43.772	27.921	-5.252	-0.497	9.950	230.799	-0.003064	-0.001954	0.000368
0.0280	187.389	53.864	32.834	-5.279	-0.500	9.940	356.741	-0.003770	-0.002298	0.000370
0.0320	263.388	64.926	38.929	-5.197	-0.498	9.945	501.423	-0.004545	-0.002725	0.000364
0.0360	336.246	76.195	44.610	-4.529	-0.500	9.953	640.125	-0.005334	-0.003123	0.000317
0.0400	413.657	87.561	50.513	-2.653	-0.513	9.956	787.497	-0.006129	-0.003536	0.000186
0.0440	496.313	99.650	56.678	-1.457	-0.501	9.949	944.853	-0.006976	-0.003967	0.000102
0.0480	558.997	109.474	61.370	0.250	-0.496	9.940	1064.186	-0.007663	-0.004296	-0.000018
0.0520	644.103	120.899	67.591	2.613	-0.498	9.945	1226.206	-0.008463	-0.004731	-0.000183
0.0560	720.402	131.655	73.521	4.947	-0.498	9.953	1371.460	-0.009216	-0.005146	-0.000346
0.0600	798.399	142.050	79.357	7.492	-0.506	9.956	1519.947	-0.009943	-0.005555	-0.000524
0.0640	879.643	152.860	85.189	10.755	-0.494	9.950	1674.614	-0.010700	-0.005963	-0.000753
0.0680	932.738	159.781	89.593	12.952	-0.504	9.940	1775.694	-0.011185	-0.006271	-0.000907
0.0720	1014.463	170.328	95.635	16.010	-0.499	9.944	1931.276	-0.011923	-0.006694	-0.001121
0.0760	1066.852	177.485	100.270	18.678	-0.506	9.953	2031.012	-0.012424	-0.007019	-0.001307
0.0800	1111.636	183.752	104.249	20.526	-0.512	9.955	2116.270	-0.012863	-0.007297	-0.001437
0.0840	1168.849	190.506	108.787	23.362	-0.502	9.950	2225.189	-0.013335	-0.007615	-0.001635
0.0880	1196.817	195.064	111.513	24.487	-0.498	9.940	2278.433	-0.013654	-0.007806	-0.001714
0.0920	1242.879	200.636	115.175	26.919	-0.496	9.944	2366.123	-0.014045	-0.008062	-0.001884
0.0960	1257.878	203.431	117.007	27.987	-0.501	9.953	2394.676	-0.014240	-0.008191	-0.001959
0.1000	1255.188	203.734	117.022	28.002	-0.513	9.956	2389.555	-0.014261	-0.008192	-0.001960
0.1040	1259.336	204.833	117.426	28.376	-0.512	9.949	2397.451	-0.014338	-0.008220	-0.001986
0.1080	1256.856	204.735	117.547	28.600	-0.508	9.941	2392.731	-0.014331	-0.008228	-0.002002
0.1120	1253.535	204.873	117.853	28.086	-0.502	9.944	2386.408	-0.014341	-0.008250	-0.001966
0.1160	1242.759	204.333	117.766	27.571	-0.500	9.953	2365.894	-0.014303	-0.008244	-0.001930
0.1200	1219.330	202.831	117.147	26.946	-0.510	9.955	2321.291	-0.014198	-0.008200	-0.001886
0.1240	1155.564	196.594	113.523	24.542	-0.512	9.949	2199.898	-0.013762	-0.007947	-0.001718
0.1280	1068.009	188.047	106.902	19.998	-0.498	9.940	2033.215	-0.013163	-0.007483	-0.001400
0.1320	1025.013	183.196	103.434	18.374	-0.500	9.944	1951.361	-0.012824	-0.007240	-0.001286
0.1360	957.520	175.929	98.894	15.453	-0.501	9.953	1822.872	-0.012315	-0.006923	-0.001082
0.1400	883.836	167.313	93.599	12.952	-0.509	9.956	1682.596	-0.011712	-0.006552	-0.000907
0.1440	824.504	159.336	88.670	10.535	-0.496	9.949	1569.643	-0.011154	-0.006207	-0.000737
0.1480	733.507	148.482	82.122	7.783	-0.494	9.941	1396.408	-0.010394	-0.005749	-0.000545
0.1520	684.213	141.409	78.379	5.768	-0.485	9.944	1302.567	-0.009899	-0.005487	-0.000404
0.1560	616.150	132.641	73.357	3.976	-0.492	9.953	1172.991	-0.009285	-0.005135	-0.000278
0.1600	529.135	120.259	67.440	2.156	-0.502	9.956	1007.338	-0.008418	-0.004721	-0.000151
0.1640	482.412	113.297	63.667	-0.083	-0.490	9.949	918.388	-0.007931	-0.004457	0.000006
0.1680	413.221	103.000	57.917	-1.763	-0.499	9.941	786.667	-0.007210	-0.004054	0.000123
0.1720	355.332	93.343	53.748	-3.152	-0.489	9.944	676.460	-0.006534	-0.003762	0.000221
0.1760	291.551	83.322	48.631	-4.405	-0.492	9.953	555.038	-0.005833	-0.003404	0.000308
0.1800	235.029	73.251	43.935	-5.128	-0.495	9.955	447.435	-0.005128	-0.003075	0.000359
0.1840	202.252	67.134	40.607	-5.712	-0.493	9.949	385.036	-0.004699	-0.002842	0.000400
0.1880	164.426	59.686	36.603	-5.572	-0.502	9.940	313.025	-0.004178	-0.002562	0.000390
0.1920	140.035	54.863	33.906	-5.725	-0.498	9.943	266.590	-0.003840	-0.002373	0.000401
0.1960	113.329	49.123	31.224	-5.447	-0.502	9.953	215.750	-0.003439	-0.002186	0.000381
0.2000	92.154	44.537	28.608	-4.946	-0.504	9.956	175.438	-0.003118	-0.002003	0.000346
0.2040	83.272	41.673	27.398	-4.753	-0.502	9.950	158.529	-0.002917	-0.001918	0.000333
0.2080	79.425	40.535	26.119	-4.989	-0.494	9.940	151.205	-0.002837	-0.001828	0.000349
0.2120	81.033	40.214	25.897	-4.793	-0.502	9.944	154.266	-0.002815	-0.001813	0.000336
0.2160	84.971	39.784	25.993	-4.640	-0.501	9.953	161.762	-0.002785	-0.001819	0.000325
0.2200	97.068	41.606	26.986	-4.628	-0.518	9.956	184.793	-0.002912	-0.001889	0.000324
0.2240	145.836	48.345	29.737	-5.071	-0.496	9.949	277.634	-0.003384	-0.002082	0.000355
0.2280	204.191	56.906	34.456	-5.112	-0.500	9.940	388.727	-0.003983	-0.002412	0.000358
0.2320	276.207	67.994	40.332	-4.655	-0.498	9.944	525.827	-0.004760	-0.002823	0.000326
0.2360	343.174	77.458	45.546	-4.460	-0.493	9.953	653.315	-0.005422	-0.003188	0.000312
0.2400	420.450	89.410	51.463	-3.111	-0.501	9.955	800.428	-0.006259	-0.003602	0.000218
0.2440	507.284	102.376	57.752	-1.152	-0.496	9.949	965.738	-0.007166	-0.004043	0.000081
0.2480	568.495	111.532	62.114	0.557	-0.496	9.940	1082.268	-0.007807	-0.004348	-0.000039
0.2520	663.715	124.680	69.088	3.433	-0.496	9.944	1263.542	-0.008728	-0.004836	-0.000240
0.2560	737.459	134.655	74.485	5.851	-0.489	9.953	1403.933	-0.009426	-0.005214	-0.000410
0.2600	805.853	143.757	79.990	8.367	-0.508	9.956	1534.138	-0.010063	-0.005599	-0.000586
0.2640	899.014	155.001	86.731	11.686	-0.490	9.949	1711.493	-0.010850	-0.006071	-0.000818
0.2680	950.351	162.311	91.065	13.495	-0.496	9.940	1809.225	-0.011362	-0.006375	-0.000945
0.2720	1018.671	171.468	96.473	16.788	-0.497	9.944	1939.287	-0.012003	-0.006753	-0.001175
0.2760	1069.361	178.444	100.711	19.149	-0.490	9.953	2035.789	-0.012491	-0.007050	-0.001340
0.2800	1117.723	184.362	104.935	20.944	-0.506	9.955	2127.857	-0.012905	-0.007345	-0.001466
0.2840	1183.863	193.019	109.931	24.016	-0.498	9.949	2253.771	-0.013511	-0.007695	-0.001681
0.2880	1196.908	195.911	111.940	24.666	-0.502	9.940	2278.605	-0.013714	-0.007836	-0.001727
0.2920	1227.055	199.636	114.294	26.682	-0.498	9.944	2335.997	-0.013974	-0.008001	-0.001868
0.2960	1244.638	202.343	115.821	27.362	-0.513	9.953	2369.471	-0.014164	-0.008107	-0.001915
0.3000	1240.415	203.066	116.122	27.961	-0.512	9.955	2361.431	-0.014215	-0.008129	-0.001957
0.3040	1247.658	203.359	116.550	28.310	-0.502	9.949	2375.221	-0.014235	-0.008159	-0.001982
0.3080	1250.935	204.415	117.465	28.419	-0.502	9.940	2381.458	-0.014309	-0.008223	-0.001989
0.3120	1244.472	204.262	117.672	28.057	-0.503	9.944	2369.156	-0.014298	-0.008237	-0.001964
0.3160	1230.676	203.844	117.173	27.654	-0.502	9.953	2342.892	-0.014269	-0.008202	-0.001936
0.3200	1191.452	201.081	115.862	26.252	-0.506	9.956	2268.219	-0.014076	-0.008110	-0.001838
0.3240	1122.562	193.479	111.169	23.125	-0.493	9.949	2137.070	-0.013544	-0.007782	-0.001619
0.3280	1042.566	185.224	105.501	19.608	-0.493	9.940	1984.777	-0.012966	-0.007385	-0.001373
0.3320	1010.675	181.557	102.844	17.900	-0.499	9.944	1924.067	-0.012709	-0.007199	-0.001253
0.3360	981.430	178.581	100.379	16.564	-0.498	9.952	1868.391	-0.012501	-0.007027	-0.001159
0.3400	893.244	168.731	93.982	13.147	-0.513	9.956	1700.506	-0.011811	-0.006579	-0.000920
0.3440	826.036	160.211	88.767	10.714	-0.512	9.949	1572.561	-0.011215	-0.006214	-0.000750
0.3480	744.883	150.094	82.713	7.852	-0.515	9.940	1418.066	-0.010507	-0.005790	-0.000550
0.3520	683.943	141.993	78.873	5.838	-0.511	9.944	1302.052	-0.009939	-0.005521	-0.000409
0.3560	601.993	131.030	72.778	4.072	-0.505	9.953	1146.040	-0.009172	-0.005094	-0.000285
0.3600	518.706	119.717	66.627	1.628	-0.503	9.955	987.482	-0.008380	-0.004664	-0.000114
0.3640	461.237	110.698	62.141	0.070	-0.493	9.949	878.077	-0.007749	-0.004350	-0.000005
0.3680	382.668	98.567	55.952	-2.015	-0.502	9.940	728.502	-0.006900	-0.003917	0.000141
0.3720	322.585	88.687	51.106	-3.682	-0.502	9.944	614.119	-0.006208	-0.003577	0.000258
0.3760	256.430	78.278	45.945	-4.988	-0.511	9.952	488.176	-0.005479	-0.003216	0.000349
0.3800	205.814	68.815	41.281	-5.488	-0.505	9.955	391.817	-0.004817	-0.002890	0.000384
0.3840	182.159	63.688	38.763	-5.586	-0.507	9.949	346.785	-0.004458	-0.002713	0.000391
0.3880	154.627	57.864	35.585	-5.808	-0.513	9.940	294.371	-0.004050	-0.002491	0.000407
0.3920	134.760	53.707	33.438	-5.698	-0.510	9.943	256.548	-0.003760	-0.002341	0.000399
0.3960	115.133	49.429	31.195	-4.891	-0.501	9.952	219.183	-0.003460	-0.002184	0.000342
0.4000	98.677	46.080	29.419	-5.252	-0.508	9.956	187.855	-0.003226	-0.002059	0.000368
0.4040	91.418	43.563	28.333	-4.974	-0.510	9.949	174.036	-0.003049	-0.001983	0.000348
0.4080	86.293	42.023	27.507	-4.987	-0.506	9.940	164.280	-0.002942	-0.001925	0.000349
0.4120	85.572	41.190	26.917	-5.086	-0.511	9.944	162.907	-0.002883	-0.001884	0.000356
0.4160	88.232	41.339	26.544	-4.710	-0.504	9.952	167.971	-0.002894	-0.001858	0.000330
0.4200	94.484	41.439	26.957	-4.974	-0.511	9.955	179.873	-0.002901	-0.001887	0.000348
0.4240	127.982	46.023	28.718	-5.072	-0.512	9.949	243.645	-0.003222	-0.002010	0.000355
0.4280	189.538	55.265	33.286	-5.308	-0.518	9.940	360.832	-0.003869	-0.002330	0.000372
0.4320	273.562	67.883	40.332	-5.031	-0.518	9.943	520.792	-0.004752	-0.002823	0.000352
0.4360	344.346	78.487	45.973	-4.530	-0.517	9.952	655.546	-0.005494	-0.003218	0.000317
0.4400	409.239	88.367	50.649	-3.042	-0.525	9.955	779.085	-0.006186	-0.003545	0.000213
0.4440	493.022	100.553	56.611	-0.984	-0.517	9.949	938.587	-0.007039	-0.003963	0.000069
0.4480	559.748	110.073	61.330	0.364	-0.509	9.939	1065.617	-0.007705	-0.004293	-0.000026
0.4520	641.022	121.537	67.011	2.921	-0.498	9.943	1220.341	-0.008508	-0.004691	-0.000204
0.4560	721.349	132.488	73.151	5.238	-0.506	9.952	1373.262	-0.009274	-0.005121	-0.000367
0.4600	805.463	143.577	79.728	8.563	-0.514	9.955	1533.394	-0.010050	-0.005581	-0.000599
0.4640	893.905	154.694	86.399	11.451	-0.505	9.949	1701.765	-0.010829	-0.006048	-0.000802
0.4680	938.960	160.976	90.503	13.258	-0.509	9.940	1787.539	-0.011268	-0.006335	-0.000928
0.4720	1002.635	169.371	95.523	16.121	-0.506	9.943	1908.760	-0.011856	-0.006687	-0.001128
0.4760	1056.001	177.262	100.009	18.511	-0.515	9.951	2010.355	-0.012408	-0.007001	-0.001296
0.4800	1110.103	184.100	104.274	20.845	-0.524	9.955	2113.352	-0.012887	-0.007299	-0.001459
0.4840	1169.421	191.532	109.105	23.501	-0.518	9.949	2226.276	-0.013407	-0.007637	-0.001645
0.4880	1186.177	194.230	110.729	24.389	-0.511	9.940	2258.177	-0.013596	-0.007751	-0.001707
0.4920	1223.914	199.482	113.865	25.875	-0.509	9.942	2330.017	-0.013964	-0.007971	-0.001811
0.4960	1249.282	202.540	116.305	27.515	-0.513	9.952	2378.311	-0.014178	-0.008141	-0.001926
0.5000	1255.699	204.415	117.298	28.196	-0.519	9.955	2390.528	-0.014309	-0.008211	-0.001974
0.5040	1275.386	206.834	118.824	29.060	-0.518	9.949	2428.007	-0.014478	-0.008318	-0.002034
0.5080	1280.435	208.182	119.701	29.684	-0.520	9.939	2437.620	-0.014573	-0.008379	-0.002078
0.5120	1274.695	208.292	119.951	30.031	-0.513	9.943	2426.691	-0.014580	-0.008397	-0.002102
0.5160	1261.004	207.640	119.479	28.835	-0.509	9.952	2400.627	-0.014535	-0.008364	-0.002018
0.5200	1219.104	204.415	117.911	27.015	-0.508	9.955	2320.862	-0.014309	-0.008254	-0.001891
0.5240	1145.375	196.661	113.330	24.278	-0.493	9.949	2180.500	-0.013766	-0.007933	-0.001699
0.5280	1078.303	189.797	107.936	21.207	-0.493	9.940	2052.813	-0.013286	-0.007556	-0.001485
0.5320	1028.259	184.112	104.193	19.010	-0.489	9.943	1957.541	-0.012888	-0.007294	-0.001331
0.5360	955.491	175.915	98.744	15.759	-0.498	9.952	1819.010	-0.012314	-0.006912	-0.001103
0.5400	880.785	166.883	93.308	13.188	-0.497	9.955	1676.788	-0.011682	-0.006532	-0.000923
0.5440	817.876	159.266	88.615	10.423	-0.497	9.949	1557.026	-0.011149	-0.006203	-0.000730
0.5480	736.903	149.039	82.328	7.629	-0.503	9.939	1402.874	-0.010433	-0.005763	-0.000534
0.5520	683.041	141.923	78.544	6.657	-0.497	9.943	1300.335	-0.009935	-0.005498	-0.000466
0.5560	600.640	131.347	72.682	3.823	-0.497	9.951	1143.465	-0.009194	-0.005088	-0.000268
0.5600	516.271	119.926	66.449	1.809	-0.501	9.954	982.847	-0.008395	-0.004651	-0.000127
0.5640	463.687	111.642	62.087	-0.360	-0.493	9.949	882.740	-0.007815	-0.004346	0.000025
0.5680	383.029	98.942	56.224	-1.943	-0.493	9.939	729.189	-0.006926	-0.003936	0.000136
0.5720	328.942	89.994	51.726	-2.916	-0.495	9.942	626.221	-0.006300	-0.003621	0.000204
0.5760	279.543	81.668	47.789	-4.404	-0.498	9.951	532.179	-0.005717	-0.003345	0.000308
0.5800	232.399	73.555	43.936	-4.891	-0.498	9.955	442.429	-0.005149	-0.003076	0.000342
0.5840	196.091	65.978	39.905	-5.237	-0.485	9.949	373.306	-0.004618	-0.002793	0.000367
0.5880	151.787	58.017	35.793	-5.086	-0.489	9.939	288.963	-0.004061	-0.002505	0.000356
0.5920	123.323	51.971	32.915	-5.169	-0.486	9.942	234.776	-0.003638	-0.002304	0.000362
0.5960	99.954	47.303	30.244	-4.738	-0.494	9.951	190.287	-0.003311	-0.002117	0.000332
0.6000	84.385	43.705	28.182	-4.515	-0.497	9.955	160.646	-0.003059	-0.001973	0.000316
0.6040	80.507	42.037	27.067	-4.710	-0.504	9.949	153.265	-0.002943	-0.001895	0.000330
0.6080	75.578	39.965	25.980	-4.795	-0.496	9.940	143.881	-0.002798	-0.001819	0.000336
0.6120	75.187	39.231	25.897	-4.669	-0.506	9.942	143.137	-0.002746	-0.001813	0.000327
0.6160	78.779	39.439	25.705	-4.585	-0.508	9.952	149.975	-0.002761	-0.001799	0.000321
0.6200	87.961	40.703	26.228	-4.543	-0.510	9.955	167.456	-0.002849	-0.001836	0.000318
0.6240	128.117	46.192	28.939	-4.418	-0.497	9.949	243.902	-0.003233	-0.002026	0.000309
0.6280	191.462	55.418	33.700	-4.892	-0.506	9.939	364.494	-0.003879	-0.002359	0.000342
0.6320	266.364	66.899	40.291	-4.654	-0.508	9.942	507.088	-0.004683	-0.002820	0.000326
0.6360	335.118	77.666	45.285	-4.070	-0.506	9.951	637.980	-0.005437	-0.003170	0.000285
0.6400	411.929	88.881	51.285	-3.069	-0.513	9.954	784.206	-0.006222	-0.003590	0.000215
0.6440	501.799	101.805	57.312	-0.679	-0.505	9.949	955.296	-0.007126	-0.004012	0.000048
0.6480	571.395	112.227	61.990	0.347	-0.508	9.940	1087.790	-0.007856	-0.004339	-0.000024
0.6520	652.789	123.538	68.211	3.031	-0.510	9.942	1242.743	-0.008648	-0.004775	-0.000212
0.6560	731.117	133.476	74.375	5.850	-0.513	9.952	1391.859	-0.009343	-0.005206	-0.000409
0.6600	807.191	144.120	80.111	8.368	-0.512	9.955	1536.684	-0.010088	-0.005608	-0.000586
0.6640	892.342	154.584	86.552	11.492	-0.504	9.949	1698.790	-0.010821	-0.006059	-0.000804
0.6680	944.205	162.558	90.790	13.674	-0.496	9.939	1797.523	-0.011379	-0.006355	-0.000957
0.6720	1022.307	172.177	97.286	16.759	-0.497	9.942	1946.211	-0.012052	-0.006810	-0.001173
0.6760	1090.431	181.611	102.804	19.609	-0.502	9.951	2075.901	-0.012713	-0.007196	-0.001373
0.6800	1125.493	186.391	105.896	21.887	-0.506	9.955	2142.649	-0.013047	-0.007413	-0.001532
0.6840	1183.863	193.438	110.125	24.653	-0.510	9.949	2253.771	-0.013541	-0.007709	-0.001726
0.6880	1213.559	197.414	112.792	26.139	-0.512	9.940	2310.305	-0.013819	-0.007895	-0.001830
0.6920	1245.780	201.845	115.781	27.487	-0.512	9.941	2371.645	-0.014129	-0.008105	-0.001924
0.6960	1259.230	203.902	117.396	28.266	-0.506	9.951	2397.251	-0.014273	-0.008218	-0.001979
0.7000	1261.890	205.470	118.214	28.779	-0.510	9.954	2402.315	-0.014383	-0.008275	-0.002015
0.7040	1274.935	207.292	119.174	29.669	-0.494	9.949	2427.149	-0.014510	-0.008342	-0.002077
0.7080	1270.697	207.376	119.451	28.920	-0.495	9.939	2419.081	-0.014516	-0.008362	-0.002024
0.7120	1261.409	207.486	119.478	29.516	-0.492	9.942	2401.400	-0.014524	-0.008363	-0.002066
0.7160	1237.499	205.471	118.700	28.196	-0.501	9.950	2355.881	-0.014383	-0.008309	-0.001974
0.7200	1171.810	199.734	115.037	25.571	-0.501	9.954	2230.825	-0.013981	-0.008053	-0.001790
0.7240	1123.809	194.466	111.130	23.359	-0.501	9.948	2139.444	-0.013613	-0.007779	-0.001635
0.7280	1075.643	189.643	107.535	21.097	-0.500	9.939	2047.749	-0.013275	-0.007527	-0.001477
0.7320	1029.160	184.406	103.877	18.833	-0.500	9.942	1959.257	-0.012908	-0.007271	-0.001318
0.7360	953.312	176.108	98.647	16.092	-0.500	9.951	1814.861	-0.012328	-0.006905	-0.001126
0.7400	876.051	166.506	93.280	12.423	-0.509	9.955	1667.776	-0.011655	-0.006530	-0.000870
0.7440	822.775	159.935	88.905	11.272	-0.505	9.949	1566.353	-0.011195	-0.006223	-0.000789
0.7480	740.254	150.250	82.796	8.629	-0.493	9.940	1409.254	-0.010517	-0.005796	-0.000604
0.7520	675.812	141.409	78.405	6.462	-0.497	9.942	1286.573	-0.009899	-0.005488	-0.000452
0.7560	602.414	131.334	72.832	4.211	-0.494	9.951	1146.841	-0.009193	-0.005098	-0.000295
0.7600	515.519	119.274	66.188	1.851	-0.504	9.955	981.417	-0.008349	-0.004633	-0.000130
0.7640	456.278	110.682	61.618	0.472	-0.501	9.949	868.635	-0.007748	-0.004313	-0.000033
0.7680	387.417	100.039	56.293	-2.013	-0.498	9.940	737.543	-0.007003	-0.003941	0.000141
0.7720	330.219	90.533	51.806	-3.026	-0.502	9.942	628.653	-0.006337	-0.003626	0.000212
0.7760	274.584	80.752	47.473	-4.670	-0.500	9.951	522.738	-0.005653	-0.003323	0.000327
0.7800	217.025	71.176	42.645	-5.015	-0.501	9.954	413.160	-0.004982	-0.002985	0.000351
0.7840	183.377	64.881	39.175	-4.836	-0.492	9.948	349.102	-0.004542	-0.002742	0.000338
0.7880	143.551	57.490	35.323	-5.432	-0.489	9.939	273.285	-0.004024	-0.002473	0.000380
0.7920	120.633	52.263	32.487	-4.905	-0.493	9.942	229.654	-0.003658	-0.002274	0.000343
0.7960	96.197	46.997	29.778	-5.279	-0.500	9.950	183.134	-0.003290	-0.002084	0.000370
0.8000	77.471	42.981	27.122	-4.627	-0.504	9.955	147.486	-0.003009	-0.001899	0.000324
0.8040	72.903	40.701	26.007	-4.446	-0.498	9.949	138.788	-0.002849	-0.001821	0.000311
0.8080	67.372	38.826	25.042	-4.681	-0.492	9.939	128.260	-0.002718	-0.001753	0.000328
0.8120	67.252	38.132	24.920	-4.114	-0.501	9.942	128.031	-0.002669	-0.001744	0.000288
0.8160	71.175	38.132	25.031	-4.224	-0.495	9.951	135.498	-0.002669	-0.001752	0.000296
0.8200	81.995	38.993	25.375	-4.153	-0.501	9.955	156.097	-0.002729	-0.001776	0.000291
0.8240	127.110	45.955	28.620	-4.750	-0.503	9.949	241.985	-0.003217	-0.002003	0.000333
0.8280	181.964	55.057	33.300	-4.891	-0.500	9.939	346.413	-0.003854	-0.002331	0.000342
0.8320	251.275	64.646	38.821	-4.823	-0.508	9.942	478.363	-0.004525	-0.002717	0.000338
0.8360	321.157	75.596	43.951	-3.959	-0.513	9.950	611.401	-0.005292	-0.003077	0.000277
0.8400	392.497	86.434	49.563	-2.499	-0.511	9.954	747.213	-0.006050	-0.003469	0.000175
0.8440	478.024	98.373	55.317	-0.942	-0.516	9.949	910.034	-0.006886	-0.003872	0.000066
0.8480	550.851	109.046	60.407	0.054	-0.508	9.940	1048.679	-0.007633	-0.004228	-0.000004
0.8520	644.148	121.788	67.342	3.101	-0.503	9.941	1226.292	-0.008525	-0.004714	-0.000217
0.8560	718.298	132.545	73.328	5.364	-0.510	9.951	1367.455	-0.009278	-0.005133	-0.000375
0.8600	774.053	140.437	77.951	7.603	-0.513	9.955	1473.598	-0.009831	-0.005457	-0.000532
0.8640	856.274	150.804	84.268	10.297	-0.513	9.949	1630.125	-0.010556	-0.005899	-0.000721
0.8680	915.831	158.949	88.865	12.508	-0.498	9.940	1743.507	-0.011126	-0.006221	-0.000876
0.8720	994.400	169.036	94.834	15.816	-0.503	9.941	1893.082	-0.011833	-0.006638	-0.001107
0.8760	1057.895	177.389	99.582	18.359	-0.512	9.951	2013.960	-0.012417	-0.006971	-0.001285
0.8800	1105.069	183.723	104.013	20.929	-0.514	9.955	2103.767	-0.012861	-0.007281	-0.001465
0.8840	1164.747	190.882	108.486	23.889	-0.513	9.949	2217.379	-0.013362	-0.007594	-0.001672
0.8880	1192.474	195.023	111.004	25.057	-0.511	9.939	2270.164	-0.013652	-0.007770	-0.001754
0.8920	1232.089	200.026	114.485	27.030	-0.518	9.942	2345.581	-0.014002	-0.008014	-0.001892
0.8960	1259.125	204.123	117.078	28.377	-0.512	9.951	2397.051	-0.014289	-0.008195	-0.001986
0.9000	1260.974	205.263	118.187	28.683	-0.512	9.956	2400.570	-0.014368	-0.008273	-0.002008
0.9040	1274.514	207.193	119.255	29.575	-0.510	9.949	2426.348	-0.014504	-0.008348	-0.002070
0.9080	1272.020	207.639	119.493	29.586	-0.521	9.940	2421.598	-0.014535	-0.008364	-0.002071
0.9120	1264.054	207.694	119.492	29.142	-0.516	9.942	2406.435	-0.014539	-0.008364	-0.002040
0.9160	1247.223	206.624	118.936	28.862	-0.509	9.951	2374.392	-0.014464	-0.008326	-0.002020
0.9200	1200.589	202.275	116.634	26.959	-0.516	9.955	2285.614	-0.014159	-0.008164	-0.001887
0.9240	1142.760	196.176	112.614	24.042	-0.504	9.949	2175.522	-0.013732	-0.007883	-0.001683
0.9280	1078.363	190.183	108.017	21.512	-0.501	9.939	2052.927	-0.013313	-0.007561	-0.001506
0.9320	1035.923	185.462	104.703	19.527	-0.514	9.941	1972.132	-0.012982	-0.007329	-0.001367
0.9360	975.990	178.553	100.451	17.245	-0.512	9.950	1858.034	-0.012499	-0.007032	-0.001207
0.9400	897.677	169.898	95.015	14.412	-0.513	9.954	1708.946	-0.011893	-0.006651	-0.001009
0.9440	827.960	160.851	89.704	11.228	-0.503	9.949	1576.223	-0.011260	-0.006279	-0.000786
0.9480	737.354	150.012	82.823	8.380	-0.506	9.940	1403.732	-0.010501	-0.005798	-0.000587
0.9520	674.926	141.300	78.225	6.519	-0.512	9.941	1284.885	-0.009891	-0.005476	-0.000456
0.9560	605.269	132.154	72.642	4.420	-0.508	9.950	1152.277	-0.009251	-0.005085	-0.000309
0.9600	504.413	118.216	65.676	1.752	-0.497	9.954	960.274	-0.008275	-0.004597	-0.000123
0.9640	429.302	106.849	59.898	-0.165	-0.496	9.949	817.280	-0.007479	-0.004193	0.000012
0.9680	361.388	96.330	54.767	-2.068	-0.492	9.939	687.990	-0.006743	-0.003834	0.000145
0.9720	315.582	88.159	50.913	-3.362	-0.498	9.941	600.786	-0.006171	-0.003564	0.000235
0.9760	262.832	79.251	46.854	-4.154	-0.499	9.950	500.364	-0.005548	-0.003280	0.000291
0.9800	207.572	70.106	42.147	-4.989	-0.487	9.954	395.164	-0.004907	-0.002950	0.000349
0.9840	181.198	64.630	39.081	-4.849	-0.489	9.949	344.954	-0.004524	-0.002736	0.000339
0.9880	148.886	58.322	35.749	-5.209	-0.489	9.939	283.442	-0.004083	-0.002502	0.000365
0.9920	120.468	52.402	32.570	-4.766	-0.505	9.941	229.340	-0.003668	-0.002280	0.000334
0.9960	97.234	47.484	29.694	-4.767	-0.507	9.950	185.108	-0.003324	-0.002079	0.000334
1.0000	78.704	43.121	27.289	-4.238	-0.508	9.956	149.832	-0.003018	-0.001910	0.000297
1.0040	73.910	41.203	26.157	-4.265	-0.496	9.949	140.705	-0.002884	-0.001831	0.000299
1.0080	66.516	38.800	25.071	-4.418	-0.494	9.939	126.629	-0.002716	-0.001755	0.000309
1.0120	65.344	37.881	25.001	-3.959	-0.504	9.941	124.397	-0.002652	-0.001750	0.000277
1.0160	69.762	37.742	25.058	-4.404	-0.516	9.950	132.809	-0.002642	-0.001754	0.000308
1.0200	83.828	39.951	25.898	-4.376	-0.515	9.955	159.588	-0.002797	-0.001813	0.000306
1.0240	135.451	47.858	29.792	-4.683	-0.512	9.948	257.864	-0.003350	-0.002085	0.000328
1.0280	196.977	57.169	34.374	-5.239	-0.505	9.939	374.994	-0.004002	-0.002406	0.000367
1.0320	268.032	67.480	40.017	-4.474	-0.506	9.941	510.263	-0.004724	-0.002801	0.000313
1.0360	335.960	77.985	45.356	-3.488	-0.512	9.949	639.582	-0.005459	-0.003175	0.000244
1.0400	405.947	88.131	50.033	-2.944	-0.504	9.954	772.820	-0.006169	-0.003502	0.000206
1.0440	496.584	101.819	56.636	-0.847	-0.510	9.948	945.368	-0.007127	-0.003965	0.000059
1.0480	562.438	111.395	61.591	0.598	-0.506	9.938	1070.738	-0.007798	-0.004311	-0.000042
1.0520	645.230	122.719	68.183	2.933	-0.503	9.941	1228.352	-0.008590	-0.004773	-0.000205
1.0560	725.932	133.725	73.921	6.144	-0.514	9.950	1381.989	-0.009361	-0.005174	-0.000430
1.0600	789.337	142.535	79.192	8.158	-0.517	9.954	1502.695	-0.009977	-0.005543	-0.000571
1.0640	873.812	153.625	85.382	11.062	-0.519	9.949	1663.513	-0.010754	-0.005977	-0.000774
1.0680	929.011	160.684	89.609	13.383	-0.500	9.939	1768.599	-0.011248	-0.006273	-0.000937
1.0720	1003.687	170.286	95.401	16.397	-0.498	9.941	1910.763	-0.011920	-0.006678	-0.001148
1.0760	1064.432	178.277	100.244	18.691	-0.506	9.950	2026.405	-0.012479	-0.007017	-0.001308
1.0800	1110.013	184.253	104.000	21.652	-0.513	9.954	2113.180	-0.012898	-0.007280	-0.001516
1.0840	1167.302	191.908	108.968	24.125	-0.508	9.949	2222.242	-0.013434	-0.007628	-0.001689
1.0880	1183.637	194.328	110.756	24.752	-0.497	9.939	2253.342	-0.013603	-0.007753	-0.001733
1.0920	1220.878	199.135	113.800	26.472	-0.498	9.940	2324.238	-0.013939	-0.007966	-0.001853
1.0960	1260.568	204.665	117.559	28.752	-0.499	9.950	2399.797	-0.014327	-0.008229	-0.002013
1.1000	1269.525	206.415	118.463	28.795	-0.518	9.954	2416.849	-0.014449	-0.008292	-0.002016
1.1040	1285.305	208.805	119.992	29.893	-0.508	9.948	2446.890	-0.014616	-0.008399	-0.002092
1.1080	1280.556	208.778	119.977	29.963	-0.499	9.939	2437.849	-0.014614	-0.008398	-0.002097
1.1120	1272.771	209.042	120.020	29.989	-0.508	9.940	2423.029	-0.014633	-0.008401	-0.002099
1.1160	1256.886	207.751	119.493	29.128	-0.503	9.949	2392.788	-0.014543	-0.008364	-0.002039
1.1200	1207.292	203.358	117.136	27.487	-0.506	9.954	2298.374	-0.014235	-0.008200	-0.001924
1.1240	1140.611	196.897	112.654	24.155	-0.509	9.948	2171.431	-0.013783	-0.007886	-0.001691
1.1280	1068.745	189.156	106.972	20.971	-0.515	9.939	2034.616	-0.013241	-0.007488	-0.001468
1.1320	1016.206	183.752	103.381	18.888	-0.510	9.940	1934.595	-0.012863	-0.007237	-0.001322
1.1360	949.314	176.374	98.633	16.218	-0.505	9.949	1807.251	-0.012346	-0.006904	-0.001135
1.1400	876.637	167.383	93.239	13.202	-0.504	9.954	1668.892	-0.011717	-0.006527	-0.000924
1.1440	821.904	160.364	89.056	10.854	-0.508	9.949	1564.693	-0.011225	-0.006234	-0.000760
1.1480	728.171	148.621	82.178	8.087	-0.507	9.939	1386.251	-0.010403	-0.005752	-0.000566
1.1520	668.313	141.021	77.471	6.574	-0.503	9.940	1272.297	-0.009871	-0.005423	-0.000460
1.1560	587.355	129.709	70.907	4.434	-0.511	9.950	1118.174	-0.009080	-0.004964	-0.000310
1.1600	508.035	118.940	65.499	1.934	-0.509	9.954	967.169	-0.008326	-0.004585	-0.000135
1.1640	463.401	111.644	62.087	0.696	-0.501	9.949	882.196	-0.007815	-0.004346	-0.000049
1.1680	387.312	100.206	56.376	-1.611	-0.507	9.938	737.343	-0.007014	-0.003946	0.000113
1.1720	331.827	91.117	52.398	-2.888	-0.508	9.940	631.714	-0.006378	-0.003668	0.000202
1.1760	276.688	82.280	47.886	-3.808	-0.507	9.949	526.743	-0.005760	-0.003352	0.000267
1.1800	220.677	72.665	43.071	-4.474	-0.515	9.954	420.113	-0.005087	-0.003015	0.000313
1.1840	184.459	65.729	39.245	-5.210	-0.496	9.948	351.162	-0.004601	-0.002747	0.000365
1.1880	144.874	57.726	34.979	-5.043	-0.506	9.938	275.803	-0.004041	-0.002448	0.000353
1.1920	117.342	51.889	32.101	-4.863	-0.500	9.940	223.389	-0.003632	-0.002247	0.000340
1.1960	94.078	46.718	29.253	-4.723	-0.506	9.949	179.100	-0.003270	-0.002048	0.000331
1.2000	76.810	42.592	27.358	-4.321	-0.513	9.955	146.227	-0.002981	-0.001915	0.000302
1.2040	71.686	40.938	26.547	-4.085	-0.509	9.949	136.471	-0.002866	-0.001858	0.000286
1.2080	66.696	39.130	25.166	-4.500	-0.498	9.939	126.972	-0.002739	-0.001762	0.000315
1.2120	66.876	38.840	25.388	-3.973	-0.503	9.940	127.316	-0.002719	-0.001777	0.000278
1.2160	70.168	38.688	25.084	-4.085	-0.497	9.949	133.581	-0.002708	-0.001756	0.000286
1.2200	78.599	39.354	25.690	-4.125	-0.500	9.954	149.632	-0.002755	-0.001798	0.000289
1.2240	122.211	46.218	28.348	-4.905	-0.497	9.948	232.658	-0.003235	-0.001984	0.000343
1.2280	188.050	56.085	33.423	-4.933	-0.499	9.939	358.000	-0.003926	-0.002340	0.000345
1.2320	267.536	67.676	39.739	-4.473	-0.502	9.939	509.319	-0.004737	-0.002782	0.000313
1.2360	337.132	77.902	44.969	-3.430	-0.502	9.949	641.813	-0.005453	-0.003148	0.000240
1.2400	408.172	88.228	50.238	-2.709	-0.504	9.954	777.054	-0.006176	-0.003517	0.000190
1.2440	491.820	101.137	56.650	-0.821	-0.494	9.949	936.298	-0.007080	-0.003965	0.000057
1.2480	556.532	110.572	61.247	0.820	-0.496	9.939	1059.494	-0.007740	-0.004287	-0.000057
1.2520	629.390	120.925	66.753	2.973	-0.499	9.941	1198.196	-0.008465	-0.004673	-0.000208
1.2560	705.118	130.848	72.601	5.406	-0.495	9.949	1342.363	-0.009159	-0.005082	-0.000378
1.2600	795.018	143.244	79.328	8.103	-0.506	9.954	1513.510	-0.010027	-0.005553	-0.000567
1.2640	889.907	155.583	86.443	12.118	-0.494	9.949	1694.155	-0.010891	-0.006051	-0.000848
1.2680	934.602	162.060	90.199	13.702	-0.499	9.939	1779.242	-0.011344	-0.006314	-0.000959
1.2720	995.797	169.744	94.616	15.913	-0.510	9.940	1895.742	-0.011882	-0.006623	-0.001114
1.2760	1056.512	177.456	99.529	18.764	-0.499	9.949	2011.328	-0.012422	-0.006967	-0.001313
1.2800	1102.063	183.848	103.560	21.151	-0.506	9.954	2098.045	-0.012869	-0.007249	-0.001481
1.2840	1161.440	190.905	108.692	23.836	-0.499	9.948	2211.084	-0.013363	-0.007608	-0.001669
1.2880	1185.982	194.354	110.935	25.085	-0.489	9.938	2257.805	-0.013605	-0.007765	-0.001756
1.2920	1226.739	200.148	114.706	27.169	-0.503	9.940	2335.396	-0.014010	-0.008029	-0.001902
1.2960	1258.900	204.722	117.351	28.670	-0.501	9.949	2396.622	-0.014331	-0.008215	-0.002007
1.3000	1259.576	205.444	117.645	28.919	-0.498	9.954	2397.909	-0.014381	-0.008235	-0.002024
1.3040	1269.314	206.902	119.021	29.643	-0.490	9.948	2416.449	-0.014483	-0.008331	-0.002075
1.3080	1265.738	206.999	118.825	29.184	-0.483	9.938	2409.639	-0.014490	-0.008318	-0.002043
1.3120	1257.652	206.903	118.674	29.641	-0.499	9.940	2394.247	-0.014483	-0.008307	-0.002075
1.3160	1238.431	206.138	118.103	28.724	-0.498	9.949	2357.655	-0.014430	-0.008267	-0.002011
1.3200	1186.718	200.859	115.808	26.322	-0.500	9.953	2259.207	-0.014060	-0.008107	-0.001843
1.3240	1134.765	195.853	112.381	24.375	-0.501	9.948	2160.301	-0.013710	-0.007867	-0.001706
1.3280	1069.797	188.879	107.645	21.153	-0.498	9.938	2036.619	-0.013222	-0.007535	-0.001481
1.3320	1012.043	183.212	103.271	19.039	-0.498	9.939	1926.670	-0.012825	-0.007229	-0.001333
1.3360	937.367	174.665	97.793	15.939	-0.488	9.949	1784.506	-0.012227	-0.006846	-0.001116
1.3400	858.648	165.563	91.795	12.703	-0.489	9.954	1634.645	-0.011589	-0.006426	-0.000889
1.3440	803.659	158.307	87.130	10.536	-0.483	9.948	1529.961	-0.011082	-0.006099	-0.000737
1.3480	721.424	147.984	81.336	8.493	-0.492	9.939	1373.405	-0.010359	-0.005693	-0.000594
1.3520	651.557	138.978	76.081	6.407	-0.498	9.940	1240.396	-0.009728	-0.005326	-0.000449
1.3560	580.232	128.765	70.619	3.960	-0.496	9.949	1104.612	-0.009014	-0.004943	-0.000277
1.3600	505.481	117.981	65.308	1.807	-0.493	9.954	962.305	-0.008259	-0.004572	-0.000126
1.3640	448.162	109.656	60.768	0.611	-0.493	9.948	853.186	-0.007676	-0.004254	-0.000043
1.3680	370.886	97.968	55.055	-1.666	-0.493	9.938	706.072	-0.006858	-0.003854	0.000117
1.3720	315.927	89.147	51.010	-3.069	-0.508	9.939	601.444	-0.006240	-0.003571	0.000215
1.3760	259.691	79.654	46.415	-4.015	-0.503	9.949	494.385	-0.005576	-0.003249	0.000281
1.3800	210.864	70.442	42.298	-4.739	-0.504	9.954	401.430	-0.004931	-0.002961	0.000332
1.3840	182.415	64.771	39.094	-5.015	-0.496	9.948	347.271	-0.004534	-0.002737	0.000351
1.3880	141.087	56.724	34.635	-5.017	-0.497	9.939	268.593	-0.003971	-0.002424	0.000351
1.3920	111.300	51.390	31.510	-4.641	-0.501	9.939	211.887	-0.003597	-0.002206	0.000325
1.3960	89.900	46.179	28.816	-4.376	-0.502	9.949	171.146	-0.003233	-0.002017	0.000306
1.4000	72.888	42.202	26.889	-4.557	-0.506	9.954	138.760	-0.002954	-0.001882	0.000319
1.4040	65.193	39.589	25.678	-3.514	-0.504	9.949	124.111	-0.002771	-0.001797	0.000246
1.4080	56.777	37.214	24.136	-3.416	-0.500	9.939	108.089	-0.002605	-0.001690	0.000239
1.4120	55.259	36.743	23.874	-3.445	-0.500	9.940	105.200	-0.002572	-0.001671	0.000241
1.4160	57.874	36.420	23.558	-3.736	-0.506	9.949	110.178	-0.002549	-0.001649	0.000262
1.4200	62.939	36.812	23.682	-3.694	-0.512	9.954	119.820	-0.002577	-0.001658	0.000259
1.4240	95.866	41.396	25.856	-4.210	-0.514	9.949	182.505	-0.002898	-0.001810	0.000295
1.4280	162.728	51.514	31.207	-4.780	-0.517	9.939	309.792	-0.003606	-0.002185	0.000335
1.4320	247.548	64.271	38.296	-3.974	-0.514	9.939	471.268	-0.004499	-0.002681	0.000278
1.4360	319.113	75.500	43.924	-4.070	-0.509	9.949	607.510	-0.005285	-0.003075	0.000285
1.4400	385.764	85.752	49.069	-2.402	-0.510	9.954	734.396	-0.006003	-0.003435	0.000168
1.4440	476.025	98.985	55.248	-0.903	-0.500	9.948	906.229	-0.006929	-0.003867	0.000063
1.4480	546.703	109.100	60.490	0.471	-0.499	9.939	1040.783	-0.007637	-0.004234	-0.000033
1.4520	631.704	121.301	67.014	3.406	-0.509	9.939	1202.602	-0.008491	-0.004691	-0.000238
1.4560	708.514	131.711	72.532	5.242	-0.503	9.949	1348.829	-0.009220	-0.005077	-0.000367
1.4600	784.378	142.161	78.296	8.477	-0.515	9.954	1493.254	-0.009951	-0.005481	-0.000593
1.4640	873.677	153.553	84.873	11.645	-0.508	9.949	1663.256	-0.010749	-0.005941	-0.000815
1.4680	925.479	160.795	88.880	13.550	-0.506	9.939	1761.875	-0.011256	-0.006222	-0.000948
1.4720	995.121	169.176	94.437	16.413	-0.505	9.939	1894.455	-0.011842	-0.006611	-0.001149
1.4760	1058.090	177.623	99.983	18.998	-0.508	9.948	2014.332	-0.012434	-0.006999	-0.001330
1.4800	1108.390	184.099	104.181	21.068	-0.516	9.954	2110.090	-0.012887	-0.007293	-0.001475
1.4840	1174.921	192.824	109.656	24.681	-0.506	9.948	2236.748	-0.013498	-0.007676	-0.001728
1.4880	1195.976	196.312	111.857	25.834	-0.507	9.939	2276.831	-0.013742	-0.007830	-0.001808
1.4920	1216.745	199.580	113.922	26.848	-0.514	9.939	2316.370	-0.013971	-0.007975	-0.001879
1.4960	1238.566	202.416	115.726	28.141	-0.508	9.948	2357.912	-0.014169	-0.008101	-0.001970
1.5000	1243.105	203.749	116.524	28.432	-0.510	9.954	2366.552	-0.014262	-0.008157	-0.001990
1.5040	1253.535	205.261	117.671	29.196	-0.507	9.948	2386.408	-0.014368	-0.008237	-0.002044
1.5080	1250.649	205.375	117.576	29.294	-0.500	9.938	2380.915	-0.014376	-0.008230	-0.002051
1.5120	1248.094	205.806	117.618	29.086	-0.508	9.939	2376.051	-0.014406	-0.008233	-0.002036
1.5160	1242.353	205.514	117.866	29.364	-0.508	9.949	2365.122	-0.014386	-0.008251	-0.002055
1.5200	1224.650	204.651	117.549	27.765	-0.502	9.954	2331.419	-0.014326	-0.008228	-0.001944
1.5240	1169.571	199.899	114.595	25.681	-0.502	9.948	2226.563	-0.013993	-0.008022	-0.001798
1.5280	1075.373	189.812	107.922	21.888	-0.501	9.938	2047.234	-0.013287	-0.007555	-0.001532
1.5320	1022.217	184.794	103.821	19.373	-0.501	9.939	1946.039	-0.012936	-0.007267	-0.001356
1.5360	971.121	178.833	100.245	17.204	-0.503	9.948	1848.764	-0.012518	-0.007017	-0.001204
1.5400	900.637	170.522	94.740	14.606	-0.498	9.954	1714.582	-0.011937	-0.006632	-0.001022
1.5440	833.536	162.517	89.509	12.009	-0.496	9.948	1586.838	-0.011376	-0.006266	-0.000841
1.5480	745.364	151.180	82.863	8.700	-0.493	9.939	1418.982	-0.010583	-0.005800	-0.000609
1.5520	682.756	142.937	78.338	7.395	-0.496	9.939	1299.791	-0.010006	-0.005484	-0.000518
1.5560	618.058	134.046	73.618	5.100	-0.494	9.948	1176.624	-0.009383	-0.005153	-0.000357
1.5600	539.355	123.567	67.866	2.892	-0.508	9.954	1026.793	-0.008650	-0.004751	-0.000202
1.5640	475.003	114.355	63.215	1.545	-0.500	9.948	904.284	-0.008005	-0.004425	-0.000108
1.5680	394.901	101.692	57.106	-1.236	-0.502	9.939	751.791	-0.007118	-0.003997	0.000087
1.5720	344.361	94.009	53.430	-2.012	-0.500	9.939	655.575	-0.006581	-0.003740	0.000141
1.5760	291.762	84.739	48.753	-3.487	-0.499	9.948	555.439	-0.005932	-0.003413	0.000244
1.5800	231.543	74.594	43.908	-4.307	-0.501	9.953	440.798	-0.005222	-0.003074	0.000301
1.5840	194.423	67.439	40.317	-4.849	-0.497	9.948	370.131	-0.004721	-0.002822	0.000339
1.5880	147.895	59.393	35.917	-5.031	-0.497	9.938	281.553	-0.004157	-0.002514	0.000352
1.5920	115.644	52.404	32.463	-4.529	-0.502	9.938	220.156	-0.003668	-0.002272	0.000317
1.5960	95.791	47.914	30.217	-4.434	-0.501	9.948	182.362	-0.003354	-0.002115	0.000310
1.6000	81.514	44.271	28.236	-4.475	-0.512	9.954	155.182	-0.003099	-0.001977	0.000313
1.6040	77.862	42.467	27.370	-3.862	-0.507	9.948	148.230	-0.002973	-0.001916	0.000270
1.6080	72.136	41.214	26.229	-3.932	-0.503	9.938	137.329	-0.002885	-0.001836	0.000275
1.6120	71.655	40.341	25.828	-3.974	-0.509	9.938	136.414	-0.002824	-0.001808	0.000278
1.6160	74.811	40.631	25.456	-4.183	-0.509	9.948	142.422	-0.002844	-0.001782	0.000293
1.6200	83.047	41.189	26.202	-4.626	-0.498	9.953	158.100	-0.002883	-0.001834	0.000324
1.6240	124.044	46.997	28.513	-4.461	-0.496	9.948	236.149	-0.003290	-0.001996	0.000312
1.6280	185.916	55.947	33.368	-4.278	-0.501	9.938	353.937	-0.003916	-0.002336	0.000299
1.6320	257.076	66.314	39.329	-4.057	-0.505	9.939	489.407	-0.004642	-0.002753	0.000284
1.6360	324.734	76.319	44.667	-3.793	-0.518	9.948	618.210	-0.005342	-0.003127	0.000265
1.6400	405.061	88.963	50.447	-2.709	-0.510	9.953	771.132	-0.006227	-0.003531	0.000190
1.6440	493.924	101.957	56.749	-0.736	-0.503	9.948	940.304	-0.007137	-0.003972	0.000051
1.6480	560.349	111.671	61.453	0.500	-0.505	9.938	1066.761	-0.007817	-0.004302	-0.000035
1.6520	643.426	123.455	67.962	3.932	-0.505	9.938	1224.918	-0.008642	-0.004757	-0.000275
1.6560	725.887	134.405	74.196	6.574	-0.513	9.948	1381.903	-0.009408	-0.005194	-0.000460
1.6600	795.123	143.829	79.425	8.645	-0.513	9.953	1513.710	-0.010068	-0.005560	-0.000605
1.6640	881.086	155.001	85.383	12.049	-0.501	9.948	1677.361	-0.010850	-0.005977	-0.000843
1.6680	935.579	162.338	90.019	14.315	-0.504	9.938	1781.101	-0.011364	-0.006301	-0.001002
1.6720	1006.483	170.898	95.757	16.801	-0.508	9.938	1916.084	-0.011963	-0.006703	-0.001176
1.6760	1070.864	179.515	101.070	19.790	-0.510	9.947	2038.651	-0.012566	-0.007075	-0.001385
1.6800	1117.558	185.710	105.045	22.236	-0.514	9.953	2127.542	-0.013000	-0.007353	-0.001557
1.6840	1182.360	194.188	110.358	25.363	-0.502	9.948	2250.910	-0.013593	-0.007725	-0.001775
1.6880	1204.392	197.633	112.558	26.349	-0.498	9.938	2292.852	-0.013834	-0.007879	-0.001844
1.6920	1234.388	201.484	115.378	28.016	-0.509	9.938	2349.958	-0.014104	-0.008076	-0.001961
1.6960	1256.134	204.847	117.173	29.406	-0.502	9.947	2391.357	-0.014339	-0.008202	-0.002058
1.7000	1254.361	205.166	117.742	29.059	-0.512	9.952	2387.981	-0.014362	-0.008242	-0.002034
1.7040	1264.926	206.637	118.353	29.810	-0.500	9.948	2408.094	-0.014465	-0.008285	-0.002087
1.7080	1264.054	207.098	118.617	29.948	-0.500	9.938	2406.435	-0.014497	-0.008303	-0.002096
1.7120	1259.080	207.388	119.019	29.822	-0.505	9.938	2396.965	-0.014517	-0.008331	-0.002088
1.7160	1248.184	206.679	118.560	29.463	-0.501	9.948	2376.223	-0.014468	-0.008299	-0.002062
1.7200	1217.722	204.443	117.727	28.390	-0.502	9.953	2318.230	-0.014311	-0.008241	-0.001987
1.7240	1153.100	198.426	113.838	25.889	-0.489	9.948	2195.206	-0.013890	-0.007969	-0.001812
1.7280	1072.577	190.185	107.385	22.014	-0.492	9.938	2041.912	-0.013313	-0.007517	-0.001541
1.7320	1027.102	185.392	104.495	20.055	-0.502	9.938	1955.338	-0.012977	-0.007315	-0.001404
1.7360	968.371	178.527	99.788	17.304	-0.496	9.948	1843.529	-0.012497	-0.006985	-0.001211
1.7400	885.354	168.982	93.406	14.343	-0.509	9.953	1685.486	-0.011829	-0.006538	-0.001004
1.7440	826.953	161.572	89.139	12.256	-0.498	9.948	1574.306	-0.011310	-0.006240	-0.000858
1.7480	739.834	150.553	82.604	8.952	-0.493	9.938	1408.453	-0.010539	-0.005782	-0.000627
1.7520	670.868	141.855	77.621	7.271	-0.501	9.938	1277.161	-0.009930	-0.005433	-0.000509
1.7560	598.191	132.043	72.516	4.961	-0.496	9.948	1138.802	-0.009243	-0.005076	-0.000347
1.7600	516.887	120.606	66.420	2.794	-0.504	9.953	984.020	-0.008442	-0.004649	-0.000196
1.7640	452.039	111.392	61.357	0.849	-0.504	9.948	860.567	-0.007797	-0.004295	-0.000059
1.7680	387.703	101.318	56.446	-1.361	-0.502	9.938	738.087	-0.007092	-0.003951	0.000095
1.7720	330.400	91.996	52.179	-2.027	-0.507	9.938	628.996	-0.006440	-0.003653	0.000142
1.7760	277.019	82.947	47.748	-3.654	-0.504	9.948	527.372	-0.005806	-0.003342	0.000256
1.7800	226.283	74.235	43.249	-4.376	-0.512	9.953	430.784	-0.005196	-0.003027	0.000306
1.7840	186.848	66.327	39.135	-4.877	-0.497	9.948	355.711	-0.004643	-0.002739	0.000341
1.7880	147.128	59.088	35.364	-4.779	-0.499	9.938	280.094	-0.004136	-0.002476	0.000335
1.7920	122.121	53.919	33.066	-4.570	-0.505	9.938	232.487	-0.003774	-0.002315	0.000320
1.7960	97.970	48.457	30.190	-4.601	-0.505	9.947	186.510	-0.003392	-0.002113	0.000322
1.8000	73.699	42.995	27.561	-3.818	-0.514	9.953	140.305	-0.003010	-0.001929	0.000267
1.8040	64.352	40.314	26.284	-3.821	-0.502	9.948	122.509	-0.002822	-0.001840	0.000267
1.8080	57.769	38.425	24.658	-3.793	-0.497	9.938	109.978	-0.002690	-0.001726	0.000265
1.8120	58.115	38.256	24.505	-3.611	-0.507	9.938	110.636	-0.002678	-0.001715	0.000253
1.8160	61.481	37.520	24.438	-3.752	-0.506	9.947	117.044	-0.002626	-0.001711	0.000263
1.8200	73.143	38.673	24.795	-4.292	-0.512	9.953	139.246	-0.002707	-0.001736	0.000300
1.8240	123.999	46.607	28.237	-4.862	-0.500	9.948	236.063	-0.003263	-0.001977	0.000340
1.8280	188.591	56.781	33.505	-5.043	-0.500	9.938	359.030	-0.003975	-0.002345	0.000353
1.8320	255.273	66.801	39.201	-3.709	-0.505	9.938	485.973	-0.004676	-0.002744	0.000260
1.8360	328.957	77.513	44.610	-3.781	-0.500	9.948	626.249	-0.005426	-0.003123	0.000265
1.8400	405.466	89.090	50.281	-2.319	-0.508	9.953	771.904	-0.006236	-0.003520	0.000162
1.8440	494.735	102.275	56.638	-0.360	-0.505	9.948	941.849	-0.007159	-0.003965	0.000025
1.8480	563.370	111.864	62.253	1.433	-0.499	9.938	1072.512	-0.007831	-0.004358	-0.000100
1.8520	642.615	123.304	68.017	4.157	-0.506	9.938	1223.373	-0.008631	-0.004761	-0.000291
1.8560	724.354	134.280	74.029	6.379	-0.506	9.947	1378.984	-0.009400	-0.005182	-0.000447
1.8600	798.354	143.634	79.548	9.257	-0.516	9.953	1519.861	-0.010054	-0.005568	-0.000648
1.8640	885.564	155.194	85.754	12.382	-0.509	9.948	1685.886	-0.010864	-0.006003	-0.000867
1.8680	935.038	162.129	89.979	14.468	-0.509	9.938	1780.071	-0.011349	-0.006299	-0.001013
1.8720	1010.465	171.674	96.049	17.511	-0.508	9.937	1923.666	-0.012017	-0.006723	-0.001226
1.8760	1080.377	180.637	101.715	20.430	-0.509	9.947	2056.761	-0.012645	-0.007120	-0.001430
1.8800	1110.810	185.725	104.771	22.290	-0.513	9.953	2114.697	-0.013001	-0.007334	-0.001560
1.8840	1158.976	191.409	108.869	24.333	-0.506	9.947	2206.392	-0.013399	-0.007621	-0.001703
1.8880	1196.171	196.327	111.748	26.126	-0.502	9.938	2277.203	-0.013743	-0.007822	-0.001829
1.8920	1233.802	201.275	115.120	28.251	-0.510	9.937	2348.843	-0.014089	-0.008058	-0.001978
1.8960	1258.704	204.889	117.506	29.058	-0.502	9.947	2396.250	-0.014342	-0.008225	-0.002034
1.9000	1258.704	205.404	118.018	29.934	-0.516	9.952	2396.250	-0.014378	-0.008261	-0.002095
1.9040	1269.104	207.053	118.715	30.212	-0.507	9.948	2416.048	-0.014494	-0.008310	-0.002115
1.9080	1267.601	207.303	119.103	30.002	-0.497	9.937	2413.187	-0.014511	-0.008337	-0.002100
1.9120	1260.688	207.692	119.548	30.283	-0.497	9.937	2400.026	-0.014538	-0.008368	-0.002120
1.9160	1247.328	206.873	119.021	29.919	-0.500	9.947	2374.592	-0.014481	-0.008331	-0.002094
1.9200	1204.888	203.456	116.774	27.822	-0.500	9.953	2293.797	-0.014242	-0.008174	-0.001948
1.9240	1139.093	197.135	112.848	25.126	-0.493	9.948	2168.541	-0.013799	-0.007899	-0.001759
1.9280	1065.334	189.517	107.303	21.959	-0.501	9.938	2028.122	-0.013266	-0.007511	-0.001537
1.9320	1016.221	184.292	103.793	19.970	-0.502	9.937	1934.624	-0.012900	-0.007266	-0.001398
1.9360	961.653	178.236	99.306	17.509	-0.496	9.947	1830.740	-0.012477	-0.006951	-0.001226
1.9400	876.938	167.658	93.103	14.051	-0.502	9.953	1669.464	-0.011736	-0.006517	-0.000984
1.9440	819.409	160.906	88.671	12.090	-0.500	9.947	1559.944	-0.011263	-0.006207	-0.000846
1.9480	733.131	150.053	82.190	9.382	-0.500	9.938	1395.693	-0.010504	-0.005753	-0.000657
1.9520	663.685	140.521	77.358	6.990	-0.504	9.937	1263.485	-0.009836	-0.005415	-0.000489
1.9560	597.680	131.653	72.256	4.765	-0.506	9.947	1137.829	-0.009216	-0.005058	-0.000334
1.9600	514.152	120.105	66.351	2.866	-0.504	9.953	978.813	-0.008407	-0.004645	-0.000201
1.9640	456.428	112.061	61.607	1.251	-0.496	9.948	868.921	-0.007844	-0.004312	-0.000088
1.9680	383.826	100.636	56.045	-1.042	-0.498	9.938	730.705	-0.007045	-0.003923	0.000073
1.9720	314.815	89.658	51.024	-2.251	-0.509	9.937	599.327	-0.006276	-0.003572	0.000158
1.9760	259.075	80.293	46.440	-3.682	-0.502	9.946	493.212	-0.005621	-0.003251	0.000258
1.9800	199.427	69.744	41.200	-4.349	-0.501	9.952	379.658	-0.004882	-0.002884	0.000304
1.9840	171.369	63.784	38.060	-4.682	-0.493	9.948	326.242	-0.004465	-0.002664	0.000328
1.9880	132.881	56.306	34.001	-4.836	-0.494	9.938	252.972	-0.003941	-0.002380	0.000338
1.9920	105.560	50.347	31.222	-4.169	-0.499	9.937	200.958	-0.003524	-0.002186	0.000292
1.9960	90.546	46.525	29.337	-4.044	-0.494	9.947	172.377	-0.003257	-0.002054	0.000283
