# Supplementary material for: Evaluation of a Cold-Mixed High-Performance Polyurethane Mixture
Source: Hindawi journal article supplement (doi:10.1155/2019/1507971), 2019-11-07
Supplement: f1 [file 1507971.f1.zip › 1507971.f1/dynamic modulus data/PUM/specimen1/temp10/zhs-1-10_10Hz.csv]

Test Information
****************
Project name	zhs
Operator name	1
Target test temperature	10
Target confining stress	0
Average dynamic strain range from 75 to 125 micro-strain
Contact stress	5
Initial modulus	4000
Axial gauge length	70
Comments	Run at High Pressure
Specimen information
********************
Identification	zhs-1-10
Dimensions	Point 1	Point 2	Point 3	Point 4	Point 5	Point 6	Average	Std Dev.
Diameter (mm)	49.2	49.2	49.3				49.23	0.058
Height (mm)	101.3	101.2	101.3				101.27	0.058
Cross-sectional area (mm�)	1903.7
Conditioning time
Properties/Comments
Test Data	10Hz
*********
Test date and time	Fri	Mar 29	2019	11:04 AM
Dynamic modulus (MPa)	12560
Phase angle (Degrees)	4.00
Average temperature (�C)	10.0
Average confining pressure (kPa)	-0.5
Average micro-strain	99
Load drift (%)	1.0
Load standard error (%)	5.6
Average deformation drift (%)	-5.2
Average deformation standard error (%)	10.5
Deformation uniformity (%)	56.6
Phase uniformity (Degrees)	2.1
Conditioning Cycles
Time (sec)	Axial stress (kPa)	Axial micro-strain #1	Axial micro-strain #2	Axial micro-strain #3	Confining pressure (kPa)	Temperature (�C)	Load (N)	Displacement #1 (mm)	Displacement #2 (mm)	Displacement #3 (mm)
0.0000	51.577	17.049	15.592	-4.710	-0.504	9.950	98.190	-0.001193	-0.001091	0.000330
0.0020	52.299	16.978	15.674	-4.419	-0.505	9.951	99.564	-0.001188	-0.001097	0.000309
0.0040	52.945	17.118	15.936	-5.003	-0.504	9.957	100.794	-0.001198	-0.001116	0.000350
0.0060	52.945	17.328	15.619	-4.947	-0.507	9.961	100.794	-0.001213	-0.001093	0.000346
0.0080	53.381	16.898	15.536	-5.252	-0.504	9.967	101.624	-0.001183	-0.001087	0.000368
0.0100	54.974	17.315	15.756	-4.850	-0.512	9.968	104.656	-0.001212	-0.001103	0.000340
0.0120	60.775	17.967	16.281	-4.991	-0.510	9.965	115.700	-0.001258	-0.001140	0.000349
0.0140	74.105	19.941	16.997	-5.543	-0.509	9.962	141.077	-0.001396	-0.001190	0.000388
0.0160	96.482	23.456	19.018	-5.821	-0.514	9.957	183.678	-0.001642	-0.001331	0.000407
0.0180	128.703	28.569	22.196	-6.877	-0.512	9.953	245.018	-0.002000	-0.001554	0.000481
0.0200	174.976	36.045	26.282	-7.434	-0.515	9.950	333.109	-0.002523	-0.001840	0.000520
0.0220	238.050	45.788	31.980	-7.294	-0.510	9.952	453.186	-0.003205	-0.002239	0.000511
0.0240	305.618	55.945	37.497	-7.571	-0.513	9.957	581.818	-0.003916	-0.002625	0.000530
0.0260	370.029	65.548	43.180	-7.055	-0.513	9.961	704.441	-0.004588	-0.003023	0.000494
0.0280	434.561	75.180	48.506	-6.848	-0.510	9.967	827.293	-0.005263	-0.003395	0.000479
0.0300	510.305	86.755	54.671	-5.306	-0.510	9.967	971.489	-0.006073	-0.003827	0.000371
0.0320	597.169	99.650	61.016	-3.724	-0.514	9.965	1136.856	-0.006976	-0.004271	0.000261
0.0340	669.125	110.239	66.683	-1.597	-0.506	9.962	1273.842	-0.007717	-0.004668	0.000112
0.0360	715.713	117.175	70.729	-0.764	-0.510	9.957	1362.534	-0.008202	-0.004951	0.000053
0.0380	752.608	122.511	73.605	0.042	-0.506	9.952	1432.772	-0.008576	-0.005152	-0.000003
0.0400	797.933	129.194	77.264	2.032	-0.509	9.950	1519.060	-0.009044	-0.005408	-0.000142
0.0420	860.527	138.061	81.639	4.045	-0.515	9.952	1638.222	-0.009664	-0.005715	-0.000283
0.0440	919.183	145.954	86.194	6.379	-0.513	9.956	1749.887	-0.010217	-0.006034	-0.000447
0.0460	952.996	151.387	89.315	7.534	-0.509	9.961	1814.260	-0.010597	-0.006252	-0.000527
0.0480	966.567	154.041	91.010	7.644	-0.504	9.966	1840.096	-0.010783	-0.006371	-0.000535
0.0500	976.290	155.669	92.180	8.979	-0.508	9.967	1858.606	-0.010897	-0.006453	-0.000629
0.0520	996.549	158.725	93.831	9.799	-0.510	9.965	1897.173	-0.011111	-0.006568	-0.000686
0.0540	1014.177	161.463	94.891	10.549	-0.499	9.961	1930.733	-0.011302	-0.006642	-0.000738
0.0560	1016.537	162.575	95.387	10.616	-0.498	9.957	1935.225	-0.011380	-0.006677	-0.000743
0.0580	1011.532	162.602	95.497	10.547	-0.493	9.952	1925.697	-0.011382	-0.006685	-0.000738
0.0600	1004.814	162.394	95.759	10.173	-0.501	9.950	1912.909	-0.011368	-0.006703	-0.000712
0.0620	997.661	162.087	95.759	10.076	-0.503	9.952	1899.290	-0.011346	-0.006703	-0.000705
0.0640	982.482	160.781	95.290	9.687	-0.501	9.956	1870.394	-0.011255	-0.006670	-0.000678
0.0660	942.266	157.126	93.721	7.950	-0.497	9.960	1793.833	-0.010999	-0.006560	-0.000557
0.0680	871.603	149.942	89.345	4.281	-0.489	9.966	1659.307	-0.010496	-0.006254	-0.000300
0.0700	798.504	142.149	84.186	2.447	-0.505	9.967	1520.147	-0.009950	-0.005893	-0.000171
0.0720	743.591	135.379	80.540	0.375	-0.505	9.965	1415.606	-0.009477	-0.005638	-0.000026
0.0740	695.184	129.041	77.057	-0.056	-0.499	9.962	1323.452	-0.009033	-0.005394	0.000004
0.0760	640.871	122.315	72.873	-2.249	-0.503	9.957	1220.055	-0.008562	-0.005101	0.000157
0.0780	580.803	114.478	68.347	-3.890	-0.499	9.952	1105.700	-0.008013	-0.004784	0.000272
0.0800	522.808	106.515	64.260	-5.224	-0.512	9.950	995.293	-0.007456	-0.004498	0.000366
0.0820	478.009	99.818	61.082	-5.974	-0.513	9.951	910.006	-0.006987	-0.004276	0.000418
0.0840	432.082	93.203	57.381	-6.253	-0.508	9.955	822.573	-0.006524	-0.004017	0.000438
0.0860	375.395	84.335	52.784	-7.850	-0.514	9.961	714.655	-0.005903	-0.003695	0.000549
0.0880	318.918	75.206	48.342	-7.975	-0.504	9.967	607.138	-0.005264	-0.003384	0.000558
0.0900	273.742	67.898	44.420	-8.615	-0.506	9.967	521.135	-0.004753	-0.003109	0.000603
0.0920	241.957	62.160	41.171	-8.324	-0.506	9.964	460.625	-0.004351	-0.002882	0.000583
0.0940	210.924	56.473	37.925	-8.810	-0.504	9.962	401.545	-0.003953	-0.002655	0.000617
0.0960	176.599	50.318	34.388	-8.407	-0.514	9.958	336.199	-0.003522	-0.002407	0.000588
0.0980	143.191	43.648	30.714	-8.434	-0.512	9.952	272.598	-0.003055	-0.002150	0.000590
0.1000	117.718	38.285	28.442	-7.990	-0.510	9.950	224.104	-0.002680	-0.001991	0.000559
0.1020	103.125	35.603	26.626	-7.072	-0.509	9.952	196.323	-0.002492	-0.001864	0.000495
0.1040	93.867	33.199	25.197	-7.432	-0.505	9.957	178.699	-0.002324	-0.001764	0.000520
0.1060	86.579	31.252	24.329	-6.806	-0.502	9.962	164.824	-0.002188	-0.001703	0.000476
0.1080	81.649	29.444	23.490	-7.294	-0.496	9.967	155.439	-0.002061	-0.001644	0.000511
0.1100	80.688	29.167	23.049	-6.530	-0.504	9.967	153.608	-0.002042	-0.001613	0.000457
0.1120	82.371	29.279	23.159	-6.376	-0.505	9.965	156.813	-0.002050	-0.001621	0.000446
0.1140	86.744	29.558	23.159	-7.112	-0.505	9.963	165.138	-0.002069	-0.001621	0.000498
0.1160	95.295	30.211	23.612	-6.862	-0.506	9.958	181.417	-0.002115	-0.001653	0.000480
0.1180	121.520	33.990	25.237	-8.086	-0.497	9.953	231.342	-0.002379	-0.001767	0.000566
0.1200	172.962	42.146	29.244	-7.530	-0.508	9.950	329.275	-0.002950	-0.002047	0.000527
0.1220	243.235	52.666	35.667	-7.628	-0.511	9.952	463.057	-0.003687	-0.002497	0.000534
0.1240	311.689	62.449	40.867	-7.724	-0.513	9.957	593.376	-0.004371	-0.002861	0.000541
0.1260	368.902	71.205	46.154	-7.432	-0.504	9.962	702.295	-0.004984	-0.003231	0.000520
0.1280	422.208	78.877	49.787	-7.197	-0.509	9.967	803.776	-0.005521	-0.003485	0.000504
0.1300	484.576	88.452	54.726	-5.392	-0.518	9.968	922.508	-0.006192	-0.003831	0.000377
0.1320	563.881	99.777	60.600	-4.334	-0.517	9.965	1073.484	-0.006984	-0.004242	0.000303
0.1340	641.758	110.590	66.078	-1.568	-0.505	9.962	1221.743	-0.007741	-0.004625	0.000110
0.1360	704.607	119.328	71.044	-0.931	-0.508	9.957	1341.391	-0.008353	-0.004973	0.000065
0.1380	753.374	126.333	74.663	0.932	-0.507	9.953	1434.231	-0.008843	-0.005226	-0.000065
0.1400	800.203	132.544	78.600	2.157	-0.514	9.950	1523.380	-0.009278	-0.005502	-0.000151
0.1420	857.791	140.560	82.920	4.742	-0.517	9.951	1633.015	-0.009839	-0.005804	-0.000332
0.1440	910.361	147.982	86.979	6.421	-0.509	9.956	1733.093	-0.010359	-0.006088	-0.000449
0.1460	944.009	152.998	89.978	7.589	-0.512	9.961	1797.152	-0.010710	-0.006298	-0.000531
0.1480	960.375	155.958	91.726	8.269	-0.509	9.967	1828.308	-0.010917	-0.006421	-0.000579
0.1500	970.835	157.849	93.021	8.936	-0.519	9.967	1848.221	-0.011049	-0.006511	-0.000626
0.1520	989.320	160.698	94.273	10.341	-0.517	9.965	1883.411	-0.011249	-0.006599	-0.000724
0.1540	1007.234	163.230	95.826	10.478	-0.506	9.962	1917.515	-0.011426	-0.006708	-0.000733
0.1560	1010.976	164.452	96.307	11.161	-0.503	9.958	1924.639	-0.011512	-0.006741	-0.000781
0.1580	1007.114	164.507	96.416	10.646	-0.504	9.953	1917.286	-0.011515	-0.006749	-0.000745
0.1600	1001.238	164.549	96.554	10.605	-0.516	9.950	1906.099	-0.011518	-0.006759	-0.000742
0.1620	993.904	164.282	96.348	10.687	-0.515	9.952	1892.138	-0.011500	-0.006744	-0.000748
0.1640	980.574	163.102	95.662	10.133	-0.512	9.956	1866.760	-0.011417	-0.006696	-0.000709
0.1660	941.875	159.754	94.065	8.604	-0.509	9.960	1793.089	-0.011183	-0.006585	-0.000602
0.1680	867.830	151.943	89.538	5.198	-0.502	9.966	1652.126	-0.010636	-0.006268	-0.000364
0.1700	789.698	143.036	84.337	2.086	-0.505	9.967	1503.382	-0.010013	-0.005904	-0.000146
0.1720	734.063	136.128	80.553	0.987	-0.504	9.965	1397.467	-0.009529	-0.005639	-0.000069
0.1740	690.540	130.597	77.236	-0.569	-0.504	9.962	1314.611	-0.009142	-0.005406	0.000040
0.1760	638.677	123.985	73.424	-1.499	-0.508	9.957	1215.878	-0.008679	-0.005140	0.000105
0.1780	572.763	114.868	68.608	-3.306	-0.508	9.952	1090.393	-0.008041	-0.004803	0.000231
0.1800	504.534	105.403	63.614	-5.003	-0.512	9.949	960.503	-0.007378	-0.004453	0.000350
0.1820	449.905	97.704	59.610	-5.655	-0.508	9.951	856.504	-0.006839	-0.004173	0.000396
0.1840	401.694	90.116	55.947	-7.114	-0.503	9.956	764.723	-0.006308	-0.003916	0.000498
0.1860	352.506	82.321	52.053	-7.462	-0.509	9.960	671.082	-0.005762	-0.003644	0.000522
0.1880	304.430	74.858	47.954	-8.600	-0.508	9.966	579.557	-0.005240	-0.003357	0.000602
0.1900	261.975	67.925	44.129	-8.074	-0.507	9.966	498.734	-0.004755	-0.003089	0.000565
0.1920	229.814	62.519	40.938	-8.686	-0.514	9.964	437.508	-0.004376	-0.002866	0.000608
0.1940	199.307	57.016	38.006	-8.532	-0.504	9.962	379.429	-0.003991	-0.002660	0.000597
0.1960	167.957	50.971	34.648	-7.849	-0.512	9.957	319.748	-0.003568	-0.002425	0.000549
0.1980	138.261	44.996	31.524	-8.378	-0.509	9.952	263.214	-0.003150	-0.002207	0.000586
0.2000	114.922	40.284	29.118	-7.948	-0.506	9.949	218.782	-0.002820	-0.002038	0.000556
0.2020	100.495	37.089	27.316	-7.893	-0.506	9.951	191.317	-0.002596	-0.001912	0.000552
0.2040	90.561	34.324	25.540	-7.448	-0.501	9.956	172.405	-0.002403	-0.001788	0.000521
0.2060	83.363	32.336	24.479	-7.127	-0.512	9.960	158.701	-0.002263	-0.001714	0.000499
0.2080	78.193	30.861	23.613	-7.073	-0.509	9.966	148.859	-0.002160	-0.001653	0.000495
0.2100	76.855	30.236	23.229	-6.656	-0.513	9.967	146.313	-0.002117	-0.001626	0.000466
0.2120	78.073	29.918	23.160	-6.641	-0.513	9.965	148.630	-0.002094	-0.001621	0.000465
0.2140	82.115	29.820	23.049	-6.599	-0.508	9.962	156.326	-0.002087	-0.001613	0.000462
0.2160	89.810	30.529	23.091	-7.017	-0.508	9.957	170.975	-0.002137	-0.001616	0.000491
0.2180	112.367	33.657	25.045	-7.711	-0.501	9.952	213.919	-0.002356	-0.001753	0.000540
0.2200	159.722	40.909	29.091	-7.641	-0.510	9.950	304.070	-0.002864	-0.002036	0.000535
0.2220	229.634	51.640	35.268	-7.877	-0.508	9.951	437.164	-0.003615	-0.002469	0.000551
0.2240	307.346	62.993	41.694	-7.363	-0.506	9.956	585.108	-0.004409	-0.002919	0.000515
0.2260	381.331	74.289	47.542	-6.753	-0.516	9.961	725.956	-0.005200	-0.003328	0.000473
0.2280	450.477	84.490	52.936	-6.240	-0.515	9.966	857.592	-0.005914	-0.003706	0.000437
0.2300	518.225	94.662	58.151	-5.198	-0.511	9.967	986.567	-0.006626	-0.004071	0.000364
0.2320	591.954	105.139	63.462	-3.558	-0.505	9.965	1126.928	-0.007360	-0.004442	0.000249
0.2340	659.191	115.090	68.417	-1.458	-0.509	9.962	1254.930	-0.008056	-0.004789	0.000102
0.2360	712.918	122.705	72.792	-0.416	-0.513	9.957	1357.212	-0.008589	-0.005095	0.000029
0.2380	760.873	129.014	76.176	1.139	-0.508	9.952	1448.507	-0.009031	-0.005332	-0.000080
0.2400	811.579	136.449	80.223	2.990	-0.521	9.949	1545.038	-0.009551	-0.005616	-0.000209
0.2420	870.400	144.286	84.352	5.239	-0.517	9.951	1657.019	-0.010100	-0.005905	-0.000367
0.2440	916.733	150.498	87.722	6.921	-0.509	9.956	1745.224	-0.010535	-0.006141	-0.000484
0.2460	940.823	153.944	90.089	7.325	-0.519	9.960	1791.086	-0.010776	-0.006306	-0.000513
0.2480	953.973	155.558	91.273	8.701	-0.513	9.966	1816.120	-0.010889	-0.006389	-0.000609
0.2500	965.906	157.864	92.636	9.119	-0.516	9.967	1838.837	-0.011050	-0.006485	-0.000638
0.2520	983.955	160.754	94.178	10.299	-0.517	9.964	1873.198	-0.011253	-0.006592	-0.000721
0.2540	997.285	162.755	95.277	10.035	-0.516	9.961	1898.575	-0.011393	-0.006669	-0.000702
0.2560	998.548	163.519	95.922	11.035	-0.513	9.957	1900.978	-0.011446	-0.006715	-0.000772
0.2580	994.881	163.963	96.089	10.674	-0.512	9.952	1893.997	-0.011477	-0.006726	-0.000747
0.2600	990.928	164.072	96.061	10.633	-0.526	9.949	1886.473	-0.011485	-0.006724	-0.000744
0.2620	986.314	164.046	96.170	10.897	-0.520	9.951	1877.689	-0.011483	-0.006732	-0.000763
0.2640	976.997	163.340	95.935	9.672	-0.510	9.955	1859.951	-0.011434	-0.006715	-0.000677
0.2660	951.073	161.436	94.904	9.327	-0.504	9.960	1810.598	-0.011301	-0.006643	-0.000653
0.2680	888.164	155.028	91.424	6.339	-0.498	9.966	1690.836	-0.010852	-0.006400	-0.000444
0.2700	804.260	146.052	86.235	2.947	-0.501	9.967	1531.105	-0.010224	-0.006036	-0.000206
0.2720	730.937	137.603	80.908	1.293	-0.503	9.965	1391.516	-0.009632	-0.005664	-0.000091
0.2740	664.211	128.486	76.216	-1.224	-0.507	9.962	1264.486	-0.008994	-0.005335	0.000086
0.2760	598.341	119.758	71.567	-2.403	-0.504	9.957	1139.088	-0.008383	-0.005010	0.000168
0.2780	537.551	111.436	66.325	-4.084	-0.495	9.952	1023.359	-0.007801	-0.004643	0.000286
0.2800	484.651	103.792	62.458	-5.600	-0.514	9.949	922.651	-0.007265	-0.004372	0.000392
0.2820	447.591	98.261	59.569	-6.071	-0.519	9.951	852.098	-0.006878	-0.004170	0.000425
0.2840	414.769	92.897	56.870	-6.974	-0.513	9.955	789.614	-0.006503	-0.003981	0.000488
0.2860	369.323	85.922	53.213	-7.182	-0.506	9.960	703.096	-0.006015	-0.003725	0.000503
0.2880	315.025	77.460	48.809	-8.474	-0.508	9.966	599.728	-0.005422	-0.003417	0.000593
0.2900	264.861	69.121	44.749	-8.197	-0.519	9.967	504.227	-0.004838	-0.003132	0.000574
0.2920	228.777	62.937	41.225	-8.532	-0.514	9.964	435.534	-0.004406	-0.002886	0.000597
0.2940	196.451	56.974	38.337	-8.323	-0.505	9.962	373.993	-0.003988	-0.002684	0.000583
0.2960	160.158	50.333	34.565	-8.419	-0.510	9.957	304.899	-0.003523	-0.002420	0.000589
0.2980	124.180	43.565	30.741	-8.669	-0.499	9.952	236.406	-0.003050	-0.002152	0.000607
0.3000	96.302	37.839	27.467	-6.946	-0.500	9.949	183.334	-0.002649	-0.001923	0.000486
0.3020	79.996	34.391	25.497	-7.156	-0.505	9.951	152.292	-0.002407	-0.001785	0.000501
0.3040	69.236	31.681	23.914	-6.003	-0.499	9.955	131.807	-0.002218	-0.001674	0.000420
0.3060	62.037	29.487	22.540	-6.198	-0.498	9.960	118.103	-0.002064	-0.001578	0.000434
0.3080	56.958	27.835	21.302	-5.447	-0.494	9.965	108.433	-0.001948	-0.001491	0.000381
0.3100	55.184	27.140	21.123	-5.765	-0.506	9.966	105.057	-0.001900	-0.001479	0.000404
0.3120	56.552	27.141	21.053	-5.294	-0.505	9.964	107.660	-0.001900	-0.001474	0.000371
0.3140	60.054	26.863	20.806	-5.684	-0.496	9.962	114.326	-0.001880	-0.001456	0.000398
0.3160	70.603	27.876	21.440	-6.157	-0.493	9.958	134.411	-0.001951	-0.001501	0.000431
0.3180	98.151	31.974	23.298	-6.350	-0.490	9.952	186.853	-0.002238	-0.001631	0.000445
0.3200	148.526	39.950	27.961	-7.226	-0.501	9.950	282.755	-0.002797	-0.001957	0.000506
0.3220	220.587	50.958	33.974	-7.168	-0.497	9.951	419.941	-0.003567	-0.002378	0.000502
0.3240	298.299	62.088	40.580	-7.640	-0.496	9.956	567.884	-0.004346	-0.002841	0.000535
0.3260	369.999	72.969	46.401	-7.057	-0.503	9.960	704.384	-0.005108	-0.003248	0.000494
0.3280	436.500	82.918	51.794	-6.488	-0.501	9.966	830.984	-0.005804	-0.003626	0.000454
0.3300	504.353	93.354	57.121	-5.404	-0.513	9.967	960.159	-0.006535	-0.003998	0.000378
0.3320	581.960	104.417	63.147	-3.389	-0.511	9.964	1107.903	-0.007309	-0.004420	0.000237
0.3340	655.659	114.688	68.086	-1.845	-0.507	9.961	1248.207	-0.008028	-0.004766	0.000129
0.3360	715.698	122.983	72.971	-0.123	-0.512	9.957	1362.505	-0.008609	-0.005108	0.000009
0.3380	769.680	130.376	77.140	1.460	-0.501	9.952	1465.273	-0.009126	-0.005400	-0.000102
0.3400	822.084	138.019	81.159	3.070	-0.512	9.949	1565.037	-0.009661	-0.005681	-0.000215
0.3420	877.358	145.871	85.383	6.281	-0.510	9.950	1670.265	-0.010211	-0.005977	-0.000440
0.3440	926.637	152.500	89.138	7.339	-0.506	9.955	1764.078	-0.010675	-0.006240	-0.000514
0.3460	960.210	157.447	92.110	9.050	-0.502	9.960	1827.993	-0.011021	-0.006448	-0.000633
0.3480	979.477	160.351	93.613	9.452	-0.492	9.966	1864.672	-0.011225	-0.006553	-0.000662
0.3500	990.853	162.282	94.797	10.342	-0.501	9.967	1886.330	-0.011360	-0.006636	-0.000724
0.3520	1005.446	164.451	96.307	11.229	-0.504	9.965	1914.110	-0.011512	-0.006742	-0.000786
0.3540	1015.485	166.034	97.146	11.437	-0.497	9.962	1933.222	-0.011622	-0.006800	-0.000801
0.3560	1014.778	166.562	97.244	11.437	-0.498	9.957	1931.877	-0.011659	-0.006807	-0.000801
0.3580	1010.255	166.215	97.051	11.132	-0.496	9.952	1923.265	-0.011635	-0.006794	-0.000779
0.3600	1004.619	166.286	97.244	11.549	-0.502	9.950	1912.537	-0.011640	-0.006807	-0.000808
0.3620	998.187	166.160	97.202	11.313	-0.508	9.951	1900.291	-0.011631	-0.006804	-0.000792
0.3640	985.533	165.104	96.802	10.313	-0.500	9.955	1876.202	-0.011557	-0.006776	-0.000722
0.3660	949.570	161.964	95.096	8.965	-0.490	9.960	1807.737	-0.011337	-0.006657	-0.000628
0.3680	876.532	154.208	90.873	5.240	-0.485	9.965	1668.692	-0.010795	-0.006361	-0.000367
0.3700	794.537	145.051	85.505	2.907	-0.498	9.966	1512.594	-0.010154	-0.005985	-0.000203
0.3720	731.989	137.325	81.365	0.543	-0.498	9.964	1393.518	-0.009613	-0.005696	-0.000038
0.3740	683.267	131.099	77.484	-0.097	-0.494	9.961	1300.764	-0.009177	-0.005424	0.000007
0.3760	631.960	124.762	73.877	-1.806	-0.493	9.957	1203.089	-0.008733	-0.005171	0.000126
0.3780	574.792	117.230	69.598	-3.070	-0.489	9.952	1094.255	-0.008206	-0.004872	0.000215
0.3800	519.201	109.809	65.746	-4.182	-0.500	9.949	988.426	-0.007687	-0.004602	0.000293
0.3820	470.344	102.846	61.962	-4.960	-0.504	9.951	895.414	-0.007199	-0.004337	0.000347
0.3840	418.962	94.788	57.834	-6.625	-0.494	9.956	797.596	-0.006635	-0.004048	0.000464
0.3860	359.810	86.033	53.100	-8.099	-0.495	9.961	684.986	-0.006022	-0.003717	0.000567
0.3880	301.500	76.527	48.324	-8.129	-0.492	9.966	573.978	-0.005357	-0.003383	0.000569
0.3900	253.184	68.466	43.838	-8.391	-0.504	9.967	481.997	-0.004793	-0.003069	0.000587
0.3920	218.438	62.075	40.965	-8.572	-0.513	9.964	415.850	-0.004345	-0.002868	0.000600
0.3940	189.418	56.475	37.662	-8.002	-0.497	9.962	360.603	-0.003953	-0.002636	0.000560
0.3960	160.143	50.999	34.938	-8.753	-0.500	9.957	304.871	-0.003570	-0.002446	0.000613
0.3980	132.400	45.581	31.456	-7.821	-0.494	9.952	252.056	-0.003191	-0.002202	0.000547
0.4000	110.474	41.036	28.965	-8.379	-0.505	9.950	210.314	-0.002873	-0.002028	0.000587
0.4020	97.068	37.409	27.288	-7.365	-0.506	9.951	184.793	-0.002619	-0.001910	0.000516
0.4040	87.014	35.158	25.953	-7.518	-0.499	9.956	165.653	-0.002461	-0.001817	0.000526
0.4060	78.238	32.809	24.644	-6.822	-0.501	9.960	148.945	-0.002297	-0.001725	0.000478
0.4080	72.963	31.056	24.039	-6.461	-0.497	9.966	138.903	-0.002174	-0.001683	0.000452
0.4100	71.340	30.501	23.861	-6.782	-0.505	9.967	135.813	-0.002135	-0.001670	0.000475
0.4120	73.098	30.447	23.916	-6.307	-0.511	9.965	139.160	-0.002131	-0.001674	0.000441
0.4140	76.870	30.682	23.668	-7.044	-0.502	9.962	146.341	-0.002148	-0.001657	0.000493
0.4160	85.572	31.530	24.148	-6.807	-0.503	9.958	162.907	-0.002207	-0.001690	0.000476
0.4180	110.699	35.436	25.567	-7.974	-0.499	9.953	210.743	-0.002481	-0.001790	0.000558
0.4200	159.827	42.828	29.916	-7.531	-0.517	9.950	304.270	-0.002998	-0.002094	0.000527
0.4220	230.205	53.293	36.121	-7.614	-0.510	9.951	438.251	-0.003731	-0.002528	0.000533
0.4240	303.844	64.020	41.693	-7.809	-0.509	9.955	578.442	-0.004481	-0.002919	0.000547
0.4260	370.631	74.206	47.501	-6.919	-0.520	9.960	705.585	-0.005194	-0.003325	0.000484
0.4280	432.968	83.406	52.071	-6.877	-0.502	9.966	824.261	-0.005838	-0.003645	0.000481
0.4300	501.152	93.578	57.244	-5.140	-0.508	9.967	954.065	-0.006550	-0.004007	0.000360
0.4320	583.643	105.319	63.103	-3.848	-0.509	9.964	1111.107	-0.007372	-0.004417	0.000269
0.4340	662.452	116.325	68.457	-0.889	-0.496	9.962	1261.139	-0.008143	-0.004792	0.000062
0.4360	721.544	124.540	73.120	-0.015	-0.496	9.957	1373.634	-0.008718	-0.005118	0.000001
0.4380	765.577	130.808	76.657	1.557	-0.491	9.952	1457.462	-0.009157	-0.005366	-0.000109
0.4400	806.364	136.434	80.264	3.169	-0.508	9.950	1535.110	-0.009550	-0.005619	-0.000222
0.4420	857.281	143.357	84.173	4.822	-0.508	9.951	1632.042	-0.010035	-0.005892	-0.000338
0.4440	906.423	150.165	87.874	7.144	-0.500	9.955	1725.597	-0.010512	-0.006151	-0.000500
0.4460	936.646	154.528	90.418	8.311	-0.497	9.960	1783.133	-0.010817	-0.006329	-0.000582
0.4480	952.140	156.862	91.986	8.256	-0.497	9.966	1812.630	-0.010980	-0.006439	-0.000578
0.4500	965.260	158.878	93.458	9.341	-0.508	9.966	1837.606	-0.011121	-0.006542	-0.000654
0.4520	988.494	162.200	95.000	10.270	-0.505	9.964	1881.838	-0.011354	-0.006650	-0.000719
0.4540	1007.129	165.146	96.252	11.492	-0.495	9.962	1917.315	-0.011560	-0.006738	-0.000804
0.4560	1008.256	166.271	97.190	10.964	-0.490	9.957	1919.460	-0.011639	-0.006803	-0.000767
0.4580	1002.590	166.466	97.189	11.951	-0.490	9.952	1908.674	-0.011653	-0.006803	-0.000837
0.4600	994.580	166.118	97.049	10.949	-0.501	9.949	1893.425	-0.011628	-0.006793	-0.000766
0.4620	986.405	165.826	96.885	11.339	-0.502	9.951	1877.861	-0.011608	-0.006782	-0.000794
0.4640	971.151	164.589	96.253	10.118	-0.496	9.955	1848.822	-0.011521	-0.006738	-0.000708
0.4660	928.170	160.336	94.203	8.966	-0.500	9.960	1766.996	-0.011224	-0.006594	-0.000628
0.4680	856.108	152.556	89.578	4.657	-0.494	9.966	1629.810	-0.010679	-0.006270	-0.000326
0.4700	782.544	144.079	84.598	2.448	-0.498	9.967	1489.763	-0.010086	-0.005922	-0.000171
0.4720	730.005	137.436	80.871	0.724	-0.497	9.964	1389.742	-0.009620	-0.005661	-0.000051
0.4740	688.076	131.948	77.815	-0.306	-0.501	9.962	1309.919	-0.009236	-0.005447	0.000021
0.4760	638.332	125.749	74.140	-1.597	-0.497	9.957	1215.219	-0.008802	-0.005190	0.000112
0.4780	577.181	117.619	69.310	-3.375	-0.492	9.952	1098.804	-0.008233	-0.004852	0.000236
0.4800	512.409	108.933	64.921	-4.197	-0.498	9.949	975.494	-0.007625	-0.004544	0.000294
0.4820	459.373	101.011	61.276	-5.460	-0.499	9.951	874.529	-0.007071	-0.004289	0.000382
0.4840	416.182	93.840	57.600	-6.181	-0.494	9.955	792.303	-0.006569	-0.004032	0.000433
0.4860	370.751	87.367	54.298	-7.837	-0.493	9.959	705.814	-0.006116	-0.003801	0.000549
0.4880	319.895	79.821	50.088	-7.614	-0.484	9.965	608.997	-0.005587	-0.003506	0.000533
0.4900	269.700	71.760	46.001	-8.906	-0.498	9.967	513.439	-0.005023	-0.003220	0.000623
0.4920	228.507	64.729	42.106	-7.990	-0.501	9.964	435.019	-0.004531	-0.002947	0.000559
0.4940	191.056	57.753	38.241	-8.670	-0.493	9.961	363.722	-0.004043	-0.002677	0.000607
0.4960	154.943	51.332	34.636	-8.573	-0.494	9.957	294.971	-0.003593	-0.002425	0.000600
0.4980	123.158	44.984	31.100	-8.254	-0.494	9.952	234.461	-0.003149	-0.002177	0.000578
0.5000	41.073	15.383	13.483	-4.878	-0.520	9.949	78.192	-0.001077	-0.000944	0.000341
0.5020	42.170	15.507	13.815	-5.045	-0.526	9.949	80.280	-0.001086	-0.000967	0.000353
0.5040	42.831	15.438	13.774	-4.795	-0.514	9.952	81.539	-0.001081	-0.000964	0.000336
0.5060	44.529	15.384	13.787	-4.878	-0.520	9.956	84.772	-0.001077	-0.000965	0.000341
0.5080	46.874	15.966	13.952	-5.502	-0.525	9.962	89.235	-0.001118	-0.000977	0.000385
0.5100	52.539	16.187	14.228	-5.334	-0.518	9.966	100.021	-0.001133	-0.000996	0.000373
0.5120	69.897	18.897	16.444	-6.516	-0.515	9.964	133.066	-0.001323	-0.001151	0.000456
0.5140	98.692	23.693	19.128	-6.780	-0.510	9.962	187.883	-0.001658	-0.001339	0.000475
0.5160	140.275	30.697	23.351	-8.268	-0.510	9.959	267.048	-0.002149	-0.001635	0.000579
0.5180	192.784	39.076	27.811	-8.239	-0.503	9.954	367.012	-0.002735	-0.001947	0.000577
0.5200	256.084	48.539	33.505	-8.670	-0.501	9.950	487.518	-0.003398	-0.002345	0.000607
0.5220	333.090	60.531	40.126	-7.600	-0.506	9.949	634.117	-0.004237	-0.002809	0.000532
0.5240	421.938	73.566	47.335	-6.890	-0.495	9.952	803.261	-0.005150	-0.003313	0.000482
0.5260	512.694	87.060	54.118	-5.863	-0.497	9.956	976.038	-0.006094	-0.003788	0.000410
0.5280	600.144	100.110	61.040	-3.765	-0.501	9.961	1142.521	-0.007008	-0.004273	0.000264
0.5300	684.664	111.949	67.191	-2.597	-0.500	9.966	1303.425	-0.007836	-0.004703	0.000182
0.5320	773.362	124.135	74.141	1.044	-0.505	9.965	1472.282	-0.008689	-0.005190	-0.000073
0.5340	861.504	136.114	80.457	3.559	-0.507	9.962	1640.081	-0.009528	-0.005632	-0.000249
0.5360	929.687	145.427	86.098	6.436	-0.517	9.959	1769.886	-0.010180	-0.006027	-0.000450
0.5380	980.198	152.625	90.337	8.911	-0.513	9.954	1866.045	-0.010684	-0.006324	-0.000624
0.5400	1021.421	158.489	93.515	10.509	-0.512	9.950	1944.523	-0.011094	-0.006546	-0.000736
0.5420	1072.382	165.741	97.339	12.883	-0.523	9.948	2041.540	-0.011602	-0.006814	-0.000902
0.5440	1144.984	174.301	102.969	15.646	-0.522	9.953	2179.756	-0.012201	-0.007208	-0.001095
0.5460	1215.753	183.306	108.680	18.914	-0.520	9.957	2314.482	-0.012831	-0.007608	-0.001324
0.5480	1263.213	190.184	112.504	21.458	-0.518	9.962	2404.833	-0.013313	-0.007875	-0.001502
0.5500	1284.433	193.911	114.706	22.137	-0.520	9.966	2445.230	-0.013574	-0.008029	-0.001550
0.5520	1293.240	196.065	116.236	23.054	-0.522	9.965	2461.996	-0.013725	-0.008137	-0.001614
0.5540	1300.378	197.233	117.134	23.277	-0.515	9.963	2475.586	-0.013806	-0.008199	-0.001629
0.5560	1300.679	198.150	117.646	23.445	-0.513	9.959	2476.158	-0.013870	-0.008235	-0.001641
0.5580	1295.103	198.954	117.589	23.625	-0.511	9.953	2465.544	-0.013927	-0.008231	-0.001654
0.5600	1285.710	198.801	117.811	22.763	-0.509	9.949	2447.662	-0.013916	-0.008247	-0.001593
0.5620	1273.402	198.509	117.743	22.500	-0.516	9.948	2424.231	-0.013896	-0.008242	-0.001575
0.5640	1247.869	196.189	116.552	21.666	-0.514	9.952	2375.622	-0.013733	-0.008159	-0.001517
0.5660	1174.620	189.643	112.545	18.763	-0.517	9.956	2236.176	-0.013275	-0.007878	-0.001313
0.5680	1062.839	178.319	104.854	13.827	-0.519	9.961	2023.373	-0.012482	-0.007340	-0.000968
0.5700	958.677	166.409	97.491	9.479	-0.525	9.966	1825.075	-0.011649	-0.006824	-0.000664
0.5720	889.922	158.083	92.483	7.795	-0.523	9.964	1694.183	-0.011066	-0.006474	-0.000546
0.5740	847.542	152.471	89.083	5.445	-0.509	9.963	1613.503	-0.010673	-0.006236	-0.000381
0.5760	792.824	145.662	84.955	4.322	-0.510	9.958	1509.333	-0.010196	-0.005947	-0.000303
0.5780	711.430	135.796	78.957	1.766	-0.513	9.953	1354.380	-0.009506	-0.005527	-0.000124
0.5800	622.101	124.430	72.642	-0.553	-0.510	9.949	1184.320	-0.008710	-0.005085	0.000039
0.5820	550.385	114.673	67.427	-2.513	-0.511	9.949	1047.792	-0.008027	-0.004720	0.000176
0.5840	500.010	106.514	63.216	-3.792	-0.498	9.952	951.891	-0.007456	-0.004425	0.000265
0.5860	445.156	98.066	58.991	-4.516	-0.504	9.956	847.464	-0.006865	-0.004129	0.000316
0.5880	378.611	87.741	54.009	-6.518	-0.507	9.961	720.778	-0.006142	-0.003781	0.000456
0.5900	316.754	77.902	48.906	-7.101	-0.501	9.966	603.018	-0.005453	-0.003423	0.000497
0.5920	273.517	70.815	45.507	-7.738	-0.514	9.965	520.706	-0.004957	-0.003186	0.000542
0.5940	243.085	65.021	42.190	-7.877	-0.510	9.963	462.770	-0.004551	-0.002953	0.000551
0.5960	210.608	59.213	39.066	-7.794	-0.508	9.959	400.944	-0.004145	-0.002735	0.000546
0.5980	177.861	53.154	35.983	-8.405	-0.512	9.953	338.602	-0.003721	-0.002519	0.000588
0.6000	149.758	47.329	32.473	-7.961	-0.510	9.949	285.101	-0.003313	-0.002273	0.000557
0.6020	130.612	43.370	30.466	-7.448	-0.513	9.948	248.652	-0.003036	-0.002133	0.000521
0.6040	119.235	40.715	28.940	-7.405	-0.510	9.952	226.994	-0.002850	-0.002026	0.000518
0.6060	109.542	38.518	27.564	-7.153	-0.508	9.956	208.540	-0.002696	-0.001929	0.000501
0.6080	102.915	36.393	26.862	-7.266	-0.515	9.961	195.923	-0.002548	-0.001880	0.000509
0.6100	100.615	35.311	25.800	-6.863	-0.519	9.966	191.545	-0.002472	-0.001806	0.000480
0.6120	102.824	35.214	26.118	-7.503	-0.520	9.964	195.751	-0.002465	-0.001828	0.000525
0.6140	108.821	35.726	25.841	-6.918	-0.511	9.962	207.167	-0.002501	-0.001809	0.000484
0.6160	126.509	37.588	26.957	-7.863	-0.514	9.958	240.841	-0.002631	-0.001887	0.000550
0.6180	170.076	43.605	30.218	-7.390	-0.520	9.953	323.782	-0.003052	-0.002115	0.000517
0.6200	237.975	53.361	35.267	-8.070	-0.518	9.949	453.043	-0.003735	-0.002469	0.000565
0.6220	327.349	66.494	42.683	-6.670	-0.522	9.948	623.188	-0.004655	-0.002988	0.000467
0.6240	427.979	81.028	50.459	-5.934	-0.508	9.952	814.762	-0.005672	-0.003532	0.000415
0.6260	518.270	94.146	57.076	-4.043	-0.510	9.956	986.652	-0.006590	-0.003995	0.000283
0.6280	588.167	104.598	62.392	-2.944	-0.516	9.961	1119.719	-0.007322	-0.004367	0.000206
0.6300	655.569	114.006	67.799	-1.985	-0.511	9.966	1248.035	-0.007980	-0.004746	0.000139
0.6320	744.613	126.027	74.210	1.379	-0.525	9.964	1417.551	-0.008822	-0.005195	-0.000096
0.6340	849.436	139.783	81.597	4.351	-0.513	9.963	1617.107	-0.009785	-0.005712	-0.000305
0.6360	939.080	151.387	88.395	8.060	-0.513	9.959	1787.767	-0.010597	-0.006188	-0.000564
0.6380	1004.754	160.517	93.693	10.212	-0.512	9.953	1912.794	-0.011236	-0.006559	-0.000715
0.6400	1058.285	167.882	98.125	12.675	-0.515	9.949	2014.704	-0.011752	-0.006869	-0.000887
0.6420	1117.122	175.663	102.789	15.163	-0.529	9.948	2126.713	-0.012296	-0.007195	-0.001061
0.6440	1177.671	183.280	107.523	17.748	-0.520	9.952	2241.983	-0.012830	-0.007527	-0.001242
0.6460	1212.597	188.589	110.592	20.235	-0.519	9.956	2308.474	-0.013201	-0.007741	-0.001416
0.6480	1226.198	190.685	112.007	20.220	-0.514	9.961	2334.366	-0.013348	-0.007841	-0.001415
0.6500	1242.609	192.755	113.259	21.568	-0.520	9.965	2365.608	-0.013493	-0.007928	-0.001510
0.6520	1274.063	196.966	116.223	22.847	-0.526	9.964	2425.489	-0.013788	-0.008136	-0.001599
0.6540	1309.485	201.650	118.881	24.945	-0.522	9.962	2492.924	-0.014116	-0.008322	-0.001746
0.6560	1322.500	204.429	120.395	25.489	-0.517	9.958	2517.700	-0.014310	-0.008428	-0.001784
0.6580	1316.894	204.583	120.575	24.835	-0.522	9.953	2507.029	-0.014321	-0.008440	-0.001738
0.6600	1305.082	203.860	120.117	25.112	-0.521	9.949	2484.541	-0.014270	-0.008408	-0.001758
0.6620	1290.309	203.386	120.033	24.404	-0.528	9.948	2456.417	-0.014237	-0.008402	-0.001708
0.6640	1262.942	201.289	118.771	23.764	-0.526	9.952	2404.318	-0.014090	-0.008314	-0.001663
0.6660	1199.042	195.425	115.233	20.538	-0.524	9.956	2282.667	-0.013680	-0.008066	-0.001438
0.6680	1111.922	186.529	109.326	16.580	-0.524	9.961	2116.814	-0.013057	-0.007653	-0.001161
0.6700	1025.388	176.913	103.256	12.744	-0.513	9.966	1952.076	-0.012384	-0.007228	-0.000892
0.6720	943.393	167.562	97.696	9.756	-0.529	9.964	1795.979	-0.011729	-0.006839	-0.000683
0.6740	862.796	158.224	91.834	6.991	-0.518	9.962	1642.542	-0.011076	-0.006428	-0.000489
0.6760	781.688	147.997	86.181	4.684	-0.520	9.958	1488.132	-0.010360	-0.006033	-0.000328
0.6780	703.765	138.075	80.277	3.030	-0.514	9.953	1339.788	-0.009665	-0.005619	-0.000212
0.6800	631.268	128.720	74.731	0.542	-0.509	9.949	1201.773	-0.009010	-0.005231	-0.000038
0.6820	566.796	119.673	69.929	-1.639	-0.517	9.948	1079.035	-0.008377	-0.004895	0.000115
0.6840	503.842	110.392	65.210	-2.139	-0.509	9.951	959.187	-0.007727	-0.004565	0.000150
0.6860	427.724	99.414	59.279	-5.057	-0.506	9.956	814.276	-0.006959	-0.004149	0.000354
0.6880	350.387	87.103	53.293	-6.224	-0.505	9.961	667.048	-0.006097	-0.003731	0.000436
0.6900	289.011	76.735	48.287	-7.628	-0.500	9.965	550.203	-0.005371	-0.003380	0.000534
0.6920	247.984	69.662	43.912	-6.974	-0.514	9.964	472.097	-0.004876	-0.003074	0.000488
0.6940	219.084	63.549	41.090	-7.879	-0.506	9.963	417.080	-0.004448	-0.002876	0.000552
0.6960	187.479	57.614	37.855	-7.503	-0.502	9.959	356.913	-0.004033	-0.002650	0.000525
0.6980	152.373	51.056	34.346	-7.487	-0.500	9.953	290.079	-0.003574	-0.002404	0.000524
0.7000	121.625	44.606	30.659	-6.932	-0.502	9.949	231.543	-0.003122	-0.002146	0.000485
0.7020	102.283	40.478	28.829	-6.475	-0.506	9.948	194.721	-0.002833	-0.002018	0.000453
0.7040	94.168	37.880	27.385	-6.710	-0.510	9.952	179.272	-0.002652	-0.001917	0.000470
0.7060	89.254	36.183	26.559	-6.488	-0.516	9.956	169.916	-0.002533	-0.001859	0.000454
0.7080	85.542	34.849	25.759	-6.723	-0.513	9.961	162.849	-0.002439	-0.001803	0.000471
0.7100	84.700	34.350	25.182	-6.002	-0.510	9.965	161.247	-0.002405	-0.001763	0.000420
0.7120	86.443	34.629	25.305	-6.586	-0.522	9.965	164.566	-0.002424	-0.001771	0.000461
0.7140	93.191	34.657	25.304	-6.252	-0.513	9.962	177.412	-0.002426	-0.001771	0.000438
0.7160	116.786	37.756	26.956	-6.612	-0.515	9.958	222.330	-0.002643	-0.001887	0.000463
0.7180	170.092	45.634	30.673	-7.433	-0.513	9.953	323.811	-0.003194	-0.002147	0.000520
0.7200	246.511	56.920	37.029	-6.669	-0.509	9.949	469.294	-0.003984	-0.002592	0.000467
0.7220	339.311	70.482	44.956	-6.780	-0.513	9.948	645.962	-0.004934	-0.003147	0.000475
0.7240	439.371	84.698	52.152	-5.280	-0.504	9.951	836.449	-0.005929	-0.003651	0.000370
0.7260	531.825	98.081	58.854	-3.973	-0.509	9.955	1012.459	-0.006866	-0.004120	0.000278
0.7280	614.707	110.032	64.868	-1.542	-0.517	9.961	1170.244	-0.007702	-0.004541	0.000108
0.7300	692.780	120.788	70.631	-0.139	-0.516	9.965	1318.874	-0.008455	-0.004944	0.000010
0.7320	779.418	132.475	77.152	2.697	-0.517	9.964	1483.812	-0.009273	-0.005401	-0.000189
0.7340	877.058	144.899	84.100	6.254	-0.516	9.962	1669.693	-0.010143	-0.005887	-0.000438
0.7360	963.471	156.432	90.719	8.771	-0.512	9.958	1834.202	-0.010950	-0.006350	-0.000614
0.7380	1031.189	165.240	96.252	12.218	-0.525	9.953	1963.120	-0.011567	-0.006738	-0.000855
0.7400	1083.188	172.011	100.244	13.900	-0.532	9.949	2062.111	-0.012041	-0.007017	-0.000973
0.7420	1132.105	179.000	104.481	16.496	-0.536	9.948	2155.237	-0.012530	-0.007314	-0.001155
0.7440	1185.967	186.197	108.926	18.302	-0.525	9.951	2257.776	-0.013034	-0.007625	-0.001281
0.7460	1222.306	191.617	112.035	20.833	-0.522	9.955	2326.956	-0.013413	-0.007842	-0.001458
0.7480	1237.304	193.953	113.617	21.527	-0.524	9.961	2355.509	-0.013577	-0.007953	-0.001507
0.7500	1244.037	195.467	114.678	22.165	-0.515	9.966	2368.326	-0.013683	-0.008027	-0.001552
0.7520	1261.259	198.190	116.181	23.167	-0.529	9.964	2401.114	-0.013873	-0.008133	-0.001622
0.7540	1294.262	202.303	118.853	24.362	-0.521	9.962	2463.942	-0.014161	-0.008320	-0.001705
0.7560	1313.077	205.067	120.672	25.683	-0.512	9.959	2499.762	-0.014355	-0.008447	-0.001798
0.7580	1311.439	205.317	120.812	25.348	-0.512	9.953	2496.643	-0.014372	-0.008457	-0.001774
0.7600	1301.505	204.929	120.576	24.834	-0.504	9.949	2477.732	-0.014345	-0.008440	-0.001738
0.7620	1286.146	204.347	120.269	25.293	-0.518	9.948	2448.492	-0.014304	-0.008419	-0.001770
0.7640	1250.499	201.608	118.812	23.054	-0.521	9.952	2380.629	-0.014113	-0.008317	-0.001614
0.7660	1169.180	194.050	113.894	19.887	-0.517	9.956	2225.819	-0.013583	-0.007973	-0.001392
0.7680	1068.926	183.420	107.083	14.398	-0.521	9.961	2034.960	-0.012839	-0.007496	-0.001008
0.7700	981.325	173.203	100.629	11.563	-0.511	9.965	1868.191	-0.012124	-0.007044	-0.000809
0.7720	916.387	165.296	96.045	9.144	-0.522	9.964	1744.566	-0.011571	-0.006723	-0.000640
0.7740	866.057	159.056	92.331	8.019	-0.516	9.962	1648.750	-0.011134	-0.006463	-0.000561
0.7760	803.885	151.483	87.679	5.685	-0.509	9.958	1530.390	-0.010604	-0.006138	-0.000398
0.7780	727.390	141.951	82.465	3.781	-0.506	9.952	1384.764	-0.009937	-0.005773	-0.000265
0.7800	649.002	131.529	76.618	1.391	-0.502	9.949	1235.533	-0.009207	-0.005363	-0.000097
0.7820	579.195	122.247	71.787	-0.984	-0.511	9.947	1102.638	-0.008557	-0.005025	0.000069
0.7840	515.745	113.435	66.583	-1.706	-0.501	9.951	981.846	-0.007940	-0.004661	0.000119
0.7860	447.531	103.123	61.524	-4.406	-0.509	9.955	851.984	-0.007219	-0.004307	0.000308
0.7880	379.573	92.744	56.337	-5.267	-0.503	9.960	722.609	-0.006492	-0.003944	0.000369
0.7900	319.384	82.795	51.176	-6.654	-0.493	9.965	608.025	-0.005796	-0.003582	0.000466
0.7920	274.103	75.471	47.528	-7.322	-0.507	9.964	521.822	-0.005283	-0.003327	0.000513
0.7940	237.269	68.424	43.772	-6.668	-0.501	9.962	451.698	-0.004790	-0.003064	0.000467
0.7960	197.999	61.421	39.699	-7.391	-0.501	9.958	376.940	-0.004299	-0.002779	0.000517
0.7980	159.031	54.167	35.683	-6.530	-0.502	9.953	302.753	-0.003792	-0.002498	0.000457
0.8000	126.674	47.344	32.310	-7.505	-0.508	9.949	241.156	-0.003314	-0.002262	0.000525
0.8020	106.221	43.037	30.081	-6.087	-0.515	9.948	202.217	-0.003013	-0.002106	0.000426
0.8040	94.153	40.036	28.196	-7.030	-0.512	9.951	179.243	-0.002803	-0.001974	0.000492
0.8060	85.617	37.298	26.682	-5.877	-0.516	9.955	162.992	-0.002611	-0.001868	0.000411
0.8080	80.312	35.213	25.621	-6.239	-0.513	9.960	152.893	-0.002465	-0.001794	0.000437
0.8100	79.395	34.463	24.878	-5.558	-0.507	9.965	151.148	-0.002412	-0.001741	0.000389
0.8120	81.845	34.698	25.429	-5.891	-0.512	9.964	155.811	-0.002429	-0.001780	0.000412
0.8140	89.945	35.241	25.553	-6.127	-0.511	9.962	171.232	-0.002467	-0.001789	0.000429
0.8160	118.409	39.077	27.382	-6.252	-0.506	9.959	225.420	-0.002735	-0.001917	0.000438
0.8180	176.674	47.775	32.185	-7.322	-0.504	9.953	336.342	-0.003344	-0.002253	0.000513
0.8200	257.226	59.351	38.585	-6.236	-0.501	9.950	489.693	-0.004155	-0.002701	0.000437
0.8220	350.027	73.038	46.345	-6.446	-0.507	9.948	666.361	-0.005113	-0.003244	0.000451
0.8240	445.232	87.061	53.376	-4.378	-0.500	9.951	847.607	-0.006094	-0.003736	0.000306
0.8260	526.986	98.956	59.153	-4.016	-0.511	9.956	1003.246	-0.006927	-0.004141	0.000281
0.8280	599.904	109.794	64.798	-1.956	-0.518	9.961	1142.063	-0.007686	-0.004536	0.000137
0.8300	676.684	120.469	70.289	-0.180	-0.513	9.965	1288.233	-0.008433	-0.004920	0.000013
0.8320	768.838	132.336	77.251	2.752	-0.519	9.964	1463.671	-0.009264	-0.005408	-0.000193
0.8340	868.101	145.383	84.035	6.128	-0.510	9.962	1652.641	-0.010177	-0.005882	-0.000429
0.8360	949.375	155.931	90.472	9.214	-0.511	9.959	1807.365	-0.010915	-0.006333	-0.000645
0.8380	1010.585	164.465	95.194	12.064	-0.506	9.953	1923.895	-0.011513	-0.006664	-0.000844
0.8400	1063.335	171.037	99.032	13.148	-0.509	9.949	2024.317	-0.011973	-0.006932	-0.000920
0.8420	1123.088	179.015	104.165	16.023	-0.517	9.948	2138.071	-0.012531	-0.007292	-0.001122
0.8440	1185.802	186.698	108.926	19.287	-0.508	9.951	2257.462	-0.013069	-0.007625	-0.001350
0.8460	1223.583	191.851	112.230	20.719	-0.508	9.955	2329.388	-0.013430	-0.007856	-0.001450
0.8480	1237.995	194.633	113.840	22.234	-0.509	9.961	2356.825	-0.013624	-0.007969	-0.001556
0.8500	1245.044	196.189	114.651	21.791	-0.512	9.965	2370.243	-0.013733	-0.008026	-0.001525
0.8520	1258.329	198.467	116.194	23.194	-0.517	9.964	2395.535	-0.013893	-0.008134	-0.001624
0.8540	1278.106	201.441	117.880	23.638	-0.508	9.962	2433.186	-0.014101	-0.008252	-0.001655
0.8560	1286.507	202.942	118.907	24.654	-0.510	9.959	2449.179	-0.014206	-0.008323	-0.001726
0.8580	1282.900	202.998	119.521	24.515	-0.510	9.953	2442.312	-0.014210	-0.008366	-0.001716
0.8600	1274.755	202.846	119.437	24.669	-0.504	9.949	2426.805	-0.014199	-0.008361	-0.001727
0.8620	1263.273	202.706	118.976	24.377	-0.510	9.948	2404.947	-0.014189	-0.008328	-0.001706
0.8640	1241.873	200.788	118.367	23.015	-0.512	9.951	2364.206	-0.014055	-0.008286	-0.001611
0.8660	1182.465	195.536	115.124	21.305	-0.517	9.955	2251.110	-0.013687	-0.008059	-0.001491
0.8680	1090.491	186.669	108.760	16.745	-0.513	9.960	2076.015	-0.013067	-0.007613	-0.001172
0.8700	999.840	176.693	102.167	12.992	-0.505	9.965	1903.439	-0.012369	-0.007152	-0.000909
0.8720	929.552	168.036	97.489	10.353	-0.507	9.965	1769.629	-0.011762	-0.006824	-0.000725
0.8740	882.153	161.755	93.583	8.729	-0.498	9.963	1679.392	-0.011323	-0.006551	-0.000611
0.8760	826.743	154.765	89.331	6.740	-0.497	9.959	1573.906	-0.010834	-0.006253	-0.000472
0.8780	745.680	145.178	83.580	4.183	-0.499	9.953	1419.582	-0.010162	-0.005851	-0.000293
0.8800	650.820	132.754	76.549	1.710	-0.496	9.949	1238.995	-0.009293	-0.005358	-0.000120
0.8820	567.969	121.662	70.948	-0.737	-0.506	9.948	1081.266	-0.008516	-0.004966	0.000052
0.8840	505.465	112.782	66.022	-2.250	-0.504	9.951	962.276	-0.007895	-0.004622	0.000157
0.8860	441.520	102.944	60.999	-3.765	-0.504	9.955	840.540	-0.007206	-0.004270	0.000264
0.8880	371.292	92.064	55.688	-5.754	-0.508	9.960	706.844	-0.006445	-0.003898	0.000403
0.8900	305.482	81.516	50.474	-6.279	-0.508	9.965	581.560	-0.005706	-0.003533	0.000440
0.8920	256.745	73.625	46.152	-7.182	-0.516	9.964	488.777	-0.005154	-0.003231	0.000503
0.8940	223.307	66.993	43.125	-6.865	-0.502	9.962	425.119	-0.004690	-0.003019	0.000481
0.8960	192.664	61.142	39.713	-7.588	-0.501	9.958	366.783	-0.004280	-0.002780	0.000531
0.8980	162.592	55.348	36.561	-7.031	-0.512	9.953	309.534	-0.003874	-0.002559	0.000492
0.9000	134.895	49.816	33.192	-7.503	-0.503	9.949	256.805	-0.003487	-0.002323	0.000525
0.9020	115.974	45.759	31.223	-6.417	-0.516	9.948	220.785	-0.003203	-0.002186	0.000449
0.9040	105.529	43.172	29.902	-6.764	-0.511	9.951	200.901	-0.003022	-0.002093	0.000473
0.9060	98.226	40.951	28.514	-6.237	-0.506	9.955	186.996	-0.002867	-0.001996	0.000437
0.9080	92.996	39.437	27.646	-5.571	-0.509	9.960	177.040	-0.002761	-0.001935	0.000390
0.9100	90.862	38.200	27.081	-6.892	-0.514	9.965	172.977	-0.002674	-0.001896	0.000482
0.9120	92.966	37.813	26.696	-5.545	-0.521	9.964	176.983	-0.002647	-0.001869	0.000388
0.9140	98.662	38.035	26.957	-6.560	-0.508	9.962	187.826	-0.002662	-0.001887	0.000459
0.9160	118.319	40.592	27.879	-6.557	-0.521	9.959	225.248	-0.002841	-0.001952	0.000459
0.9180	163.719	47.080	31.179	-7.558	-0.513	9.953	311.680	-0.003296	-0.002183	0.000529
0.9200	231.933	56.641	36.714	-6.697	-0.505	9.949	441.542	-0.003965	-0.002570	0.000469
0.9220	317.490	69.387	43.940	-6.474	-0.509	9.947	604.420	-0.004857	-0.003076	0.000453
0.9240	412.575	82.780	50.886	-4.987	-0.501	9.951	785.437	-0.005795	-0.003562	0.000349
0.9260	504.639	96.315	57.971	-3.945	-0.504	9.955	960.703	-0.006742	-0.004058	0.000276
0.9280	589.414	108.767	64.399	-2.013	-0.501	9.960	1122.093	-0.007614	-0.004508	0.000141
0.9300	671.770	120.343	70.190	-0.263	-0.497	9.965	1278.877	-0.008424	-0.004913	0.000018
0.9320	761.850	132.294	76.946	3.071	-0.503	9.964	1450.367	-0.009261	-0.005386	-0.000215
0.9340	857.671	144.815	83.964	6.170	-0.505	9.962	1632.786	-0.010137	-0.005877	-0.000432
0.9360	936.059	155.418	89.977	8.742	-0.510	9.958	1782.017	-0.010879	-0.006298	-0.000612
0.9380	994.595	163.421	94.547	11.314	-0.506	9.953	1893.454	-0.011439	-0.006618	-0.000792
0.9400	1045.932	170.300	98.343	12.759	-0.506	9.949	1991.186	-0.011921	-0.006884	-0.000893
0.9420	1105.956	177.971	103.311	15.732	-0.518	9.948	2105.455	-0.012458	-0.007232	-0.001101
0.9440	1176.108	186.419	108.321	19.082	-0.516	9.951	2239.008	-0.013049	-0.007582	-0.001336
0.9460	1228.978	193.563	112.835	21.722	-0.517	9.955	2339.659	-0.013549	-0.007898	-0.001521
0.9480	1255.067	197.135	115.131	23.305	-0.512	9.960	2389.326	-0.013799	-0.008059	-0.001631
0.9500	1264.190	198.592	116.273	23.362	-0.504	9.965	2406.693	-0.013901	-0.008139	-0.001635
0.9520	1271.208	200.342	117.505	24.528	-0.512	9.964	2420.053	-0.014024	-0.008225	-0.001717
0.9540	1282.209	202.442	118.408	24.722	-0.507	9.962	2440.996	-0.014171	-0.008289	-0.001731
0.9560	1287.454	203.358	119.048	25.055	-0.509	9.958	2450.981	-0.014235	-0.008333	-0.001754
0.9580	1285.305	203.789	119.200	25.668	-0.515	9.953	2446.890	-0.014265	-0.008344	-0.001797
0.9600	1279.083	203.721	119.145	24.599	-0.505	9.949	2435.045	-0.014260	-0.008340	-0.001722
0.9620	1270.261	203.498	119.185	24.807	-0.512	9.948	2418.251	-0.014245	-0.008343	-0.001736
0.9640	1252.257	202.719	118.562	23.931	-0.505	9.951	2383.976	-0.014190	-0.008299	-0.001675
0.9660	1198.200	197.816	115.603	21.443	-0.505	9.955	2281.065	-0.013847	-0.008092	-0.001501
0.9680	1103.010	188.310	109.821	17.581	-0.503	9.960	2099.848	-0.013182	-0.007687	-0.001231
0.9700	1001.493	176.984	102.735	12.967	-0.504	9.965	1906.586	-0.012389	-0.007191	-0.000908
0.9720	921.076	167.869	97.162	9.868	-0.509	9.965	1753.492	-0.011751	-0.006801	-0.000691
0.9740	862.480	160.434	92.512	7.408	-0.508	9.962	1641.941	-0.011230	-0.006476	-0.000519
0.9760	798.219	152.429	87.872	6.060	-0.508	9.959	1519.604	-0.010670	-0.006151	-0.000424
0.9780	724.429	143.370	82.644	3.822	-0.508	9.953	1379.128	-0.010036	-0.005785	-0.000268
0.9800	647.349	133.450	76.838	1.168	-0.501	9.949	1232.386	-0.009341	-0.005379	-0.000082
0.9820	576.129	123.971	71.939	-0.027	-0.514	9.948	1096.802	-0.008678	-0.005036	0.000002
0.9840	515.219	114.812	67.040	-2.209	-0.507	9.951	980.844	-0.008037	-0.004693	0.000155
0.9860	449.966	105.264	62.155	-3.237	-0.509	9.955	856.619	-0.007369	-0.004351	0.000227
0.9880	379.392	94.731	56.486	-5.391	-0.507	9.960	722.265	-0.006631	-0.003954	0.000377
0.9900	313.808	83.976	51.189	-5.891	-0.502	9.965	597.410	-0.005878	-0.003583	0.000412
0.9920	264.530	75.277	47.157	-6.987	-0.515	9.964	503.597	-0.005269	-0.003301	0.000489
0.9940	230.250	68.592	43.429	-7.210	-0.510	9.962	438.337	-0.004801	-0.003040	0.000505
0.9960	196.782	62.813	39.824	-7.016	-0.513	9.958	374.622	-0.004397	-0.002788	0.000491
0.9980	161.616	56.211	36.246	-7.003	-0.512	9.953	307.674	-0.003935	-0.002537	0.000490
Test Cycles
Time (sec)	Axial stress (kPa)	Axial micro-strain #1	Axial micro-strain #2	Axial micro-strain #3	Confining pressure (kPa)	Temperature (�C)	Load (N)	Displacement #1 (mm)	Displacement #2 (mm)	Displacement #3 (mm)
0.0000	128.808	49.511	32.735	-6.545	-0.512	9.949	245.218	-0.003466	-0.002291	0.000458
0.0020	105.274	43.996	30.122	-6.546	-0.520	9.947	200.415	-0.003080	-0.002109	0.000458
0.0040	92.289	40.674	28.704	-5.405	-0.508	9.951	175.695	-0.002847	-0.002009	0.000378
0.0060	85.827	38.951	27.370	-6.281	-0.508	9.955	163.393	-0.002727	-0.001916	0.000440
0.0080	84.685	38.007	27.111	-5.684	-0.501	9.960	161.219	-0.002661	-0.001898	0.000398
0.0100	85.797	37.536	26.724	-6.143	-0.497	9.965	163.336	-0.002627	-0.001871	0.000430
0.0120	88.878	37.714	26.903	-5.684	-0.508	9.964	169.201	-0.002640	-0.001883	0.000398
0.0140	94.829	37.921	26.642	-5.656	-0.504	9.962	180.531	-0.002654	-0.001865	0.000396
0.0160	114.216	40.729	28.045	-6.698	-0.502	9.958	217.438	-0.002851	-0.001963	0.000469
0.0180	160.819	47.540	31.388	-6.472	-0.504	9.953	306.158	-0.003328	-0.002197	0.000453
0.0200	232.219	57.533	36.934	-6.767	-0.504	9.949	442.085	-0.004027	-0.002585	0.000474
0.0220	324.088	71.233	44.309	-5.809	-0.510	9.948	616.980	-0.004986	-0.003102	0.000407
0.0240	425.605	85.630	52.193	-5.072	-0.506	9.951	810.242	-0.005994	-0.003654	0.000355
0.0260	516.406	98.734	58.661	-3.597	-0.517	9.955	983.105	-0.006911	-0.004106	0.000252
0.0280	592.164	110.058	64.316	-1.304	-0.517	9.960	1127.329	-0.007704	-0.004502	0.000091
0.0300	665.172	119.787	69.944	-0.653	-0.512	9.965	1266.317	-0.008385	-0.004896	0.000046
0.0320	753.675	131.725	76.205	3.210	-0.518	9.964	1434.803	-0.009221	-0.005334	-0.000225
0.0340	853.884	144.718	83.152	5.672	-0.517	9.962	1625.576	-0.010130	-0.005821	-0.000397
0.0360	938.659	155.864	89.771	9.537	-0.516	9.958	1786.966	-0.010910	-0.006284	-0.000668
0.0380	1001.478	164.090	94.919	11.591	-0.520	9.953	1906.557	-0.011486	-0.006644	-0.000811
0.0400	1051.898	170.910	99.047	13.800	-0.524	9.949	2002.544	-0.011964	-0.006933	-0.000966
0.0420	1105.911	178.136	103.463	15.689	-0.530	9.948	2105.370	-0.012470	-0.007242	-0.001098
0.0440	1167.933	185.642	108.210	18.873	-0.519	9.951	2223.444	-0.012995	-0.007575	-0.001321
0.0460	1215.858	192.424	112.023	20.860	-0.517	9.955	2314.682	-0.013470	-0.007842	-0.001460
0.0480	1243.210	196.606	114.569	22.290	-0.519	9.960	2366.753	-0.013762	-0.008020	-0.001560
0.0500	1255.278	198.663	115.946	23.249	-0.514	9.965	2389.727	-0.013906	-0.008116	-0.001627
0.0520	1262.732	200.203	117.022	23.832	-0.519	9.964	2403.917	-0.014014	-0.008192	-0.001668
0.0540	1273.838	202.052	118.144	24.793	-0.517	9.962	2425.060	-0.014144	-0.008270	-0.001736
0.0560	1279.248	203.264	118.686	24.988	-0.517	9.959	2435.360	-0.014228	-0.008308	-0.001749
0.0580	1276.618	203.915	119.088	25.155	-0.521	9.953	2430.353	-0.014274	-0.008336	-0.001761
0.0600	1269.615	203.260	118.880	24.583	-0.518	9.949	2417.021	-0.014228	-0.008322	-0.001721
0.0620	1260.177	202.829	118.575	24.026	-0.526	9.948	2399.054	-0.014198	-0.008300	-0.001682
0.0640	1244.172	202.053	118.423	23.845	-0.516	9.951	2368.584	-0.014144	-0.008290	-0.001669
0.0660	1192.940	197.676	115.549	21.625	-0.517	9.955	2271.051	-0.013837	-0.008088	-0.001514
0.0680	1097.269	187.657	109.270	17.191	-0.521	9.960	2088.919	-0.013136	-0.007649	-0.001203
0.0700	993.017	176.748	101.785	13.160	-0.510	9.965	1890.450	-0.012372	-0.007125	-0.000921
0.0720	910.827	167.173	96.074	9.936	-0.513	9.964	1733.980	-0.011702	-0.006725	-0.000696
0.0740	855.252	159.778	91.986	8.672	-0.505	9.962	1628.180	-0.011184	-0.006439	-0.000607
0.0760	796.190	152.360	87.639	5.923	-0.507	9.958	1515.741	-0.010665	-0.006135	-0.000415
0.0780	719.215	142.911	82.260	4.171	-0.513	9.953	1369.200	-0.010004	-0.005758	-0.000292
0.0800	633.477	131.794	76.054	1.223	-0.512	9.949	1205.978	-0.009226	-0.005324	-0.000086
0.0820	558.876	121.788	70.661	-0.528	-0.517	9.948	1063.957	-0.008525	-0.004946	0.000037
0.0840	501.859	113.368	66.297	-1.861	-0.510	9.951	955.410	-0.007936	-0.004641	0.000130
0.0860	444.931	104.863	62.060	-3.668	-0.508	9.955	847.034	-0.007340	-0.004344	0.000257
0.0880	381.451	95.301	57.339	-4.321	-0.511	9.959	726.185	-0.006671	-0.004014	0.000302
0.0900	319.940	84.933	52.278	-6.031	-0.509	9.965	609.083	-0.005945	-0.003659	0.000422
0.0920	269.940	76.985	47.860	-6.448	-0.520	9.964	513.897	-0.005389	-0.003350	0.000451
0.0940	229.709	69.842	44.006	-7.018	-0.514	9.962	437.307	-0.004889	-0.003080	0.000491
0.0960	191.417	62.908	40.139	-7.254	-0.513	9.958	364.408	-0.004404	-0.002810	0.000508
0.0980	157.062	56.334	36.631	-6.461	-0.520	9.953	299.006	-0.003943	-0.002564	0.000452
0.1000	129.094	50.136	33.344	-7.738	-0.513	9.949	245.762	-0.003510	-0.002334	0.000542
0.1020	109.798	45.953	30.892	-6.266	-0.520	9.948	209.026	-0.003217	-0.002162	0.000439
0.1040	98.917	42.938	29.377	-6.446	-0.515	9.951	188.313	-0.003006	-0.002056	0.000451
0.1060	90.817	40.937	28.044	-5.933	-0.520	9.955	172.892	-0.002866	-0.001963	0.000415
0.1080	86.128	39.006	27.468	-6.031	-0.511	9.960	163.965	-0.002730	-0.001923	0.000422
0.1100	85.226	38.104	26.615	-5.850	-0.502	9.965	162.249	-0.002667	-0.001863	0.000409
0.1120	87.210	38.104	26.889	-5.988	-0.514	9.964	166.025	-0.002667	-0.001882	0.000419
0.1140	93.071	38.409	27.094	-6.362	-0.503	9.962	177.183	-0.002689	-0.001897	0.000445
0.1160	111.796	40.953	28.276	-5.517	-0.506	9.958	212.831	-0.002867	-0.001979	0.000386
0.1180	158.925	47.525	31.593	-7.130	-0.504	9.953	302.553	-0.003327	-0.002212	0.000499
0.1200	231.528	57.947	37.745	-5.904	-0.502	9.949	440.769	-0.004056	-0.002642	0.000413
0.1220	321.097	71.148	44.970	-6.350	-0.514	9.948	611.286	-0.004980	-0.003148	0.000444
0.1240	416.633	85.351	52.068	-4.682	-0.515	9.951	793.161	-0.005975	-0.003645	0.000328
0.1260	506.262	98.303	58.756	-3.710	-0.516	9.954	963.793	-0.006881	-0.004113	0.000260
0.1280	589.474	110.212	64.688	-1.876	-0.514	9.960	1122.208	-0.007715	-0.004528	0.000131
0.1300	671.379	121.318	70.551	-0.306	-0.512	9.965	1278.133	-0.008492	-0.004939	0.000021
0.1320	761.129	133.405	77.334	3.780	-0.518	9.964	1448.994	-0.009338	-0.005413	-0.000265
0.1340	856.995	145.983	84.296	5.891	-0.516	9.962	1631.498	-0.010219	-0.005901	-0.000412
0.1360	936.946	156.516	90.074	9.186	-0.513	9.959	1783.705	-0.010956	-0.006305	-0.000643
0.1380	995.286	164.616	94.725	11.436	-0.510	9.953	1894.770	-0.011523	-0.006631	-0.000801
0.1400	1042.295	171.080	98.317	12.801	-0.506	9.949	1984.262	-0.011976	-0.006882	-0.000896
0.1420	1093.617	177.902	102.637	15.746	-0.511	9.948	2081.966	-0.012453	-0.007185	-0.001102
0.1440	1156.120	185.309	107.316	18.289	-0.502	9.951	2200.956	-0.012972	-0.007512	-0.001280
0.1460	1211.380	191.964	111.609	21.361	-0.512	9.955	2306.156	-0.013438	-0.007813	-0.001495
0.1480	1247.989	197.204	114.787	22.944	-0.508	9.959	2375.851	-0.013804	-0.008035	-0.001606
0.1500	1266.369	200.205	116.304	23.556	-0.505	9.965	2410.841	-0.014014	-0.008141	-0.001649
0.1520	1274.454	202.108	117.786	24.918	-0.508	9.964	2426.233	-0.014148	-0.008245	-0.001744
0.1540	1280.826	203.165	118.936	25.335	-0.496	9.962	2438.364	-0.014222	-0.008326	-0.001773
0.1560	1280.661	203.707	119.311	25.433	-0.499	9.958	2438.049	-0.014259	-0.008352	-0.001780
0.1580	1275.521	203.762	119.326	25.253	-0.505	9.953	2428.265	-0.014263	-0.008353	-0.001768
0.1600	1268.488	203.791	119.173	24.945	-0.497	9.949	2414.875	-0.014265	-0.008342	-0.001746
0.1620	1257.592	203.651	119.283	25.265	-0.501	9.947	2394.133	-0.014256	-0.008350	-0.001769
0.1640	1234.313	201.539	118.285	23.488	-0.502	9.951	2349.815	-0.014108	-0.008280	-0.001644
0.1660	1170.277	195.757	114.611	20.833	-0.498	9.954	2227.907	-0.013703	-0.008023	-0.001458
0.1680	1074.576	186.293	108.361	16.928	-0.498	9.960	2045.717	-0.013041	-0.007585	-0.001185
0.1700	981.009	175.663	101.647	12.397	-0.496	9.964	1867.590	-0.012296	-0.007115	-0.000868
0.1720	908.723	167.340	96.789	10.369	-0.498	9.963	1729.975	-0.011714	-0.006775	-0.000726
0.1740	857.686	160.795	92.676	7.867	-0.499	9.962	1632.814	-0.011256	-0.006487	-0.000551
0.1760	796.461	153.109	87.873	6.323	-0.497	9.958	1516.256	-0.010718	-0.006151	-0.000443
0.1780	715.713	143.188	81.984	3.753	-0.496	9.953	1362.534	-0.010023	-0.005739	-0.000263
0.1800	629.480	131.918	75.806	2.086	-0.492	9.949	1198.368	-0.009234	-0.005306	-0.000146
0.1820	554.323	121.496	70.329	-1.013	-0.507	9.947	1055.288	-0.008505	-0.004923	0.000071
0.1840	495.652	112.687	65.567	-2.109	-0.497	9.950	943.594	-0.007888	-0.004590	0.000148
0.1860	436.741	103.806	61.013	-4.083	-0.497	9.954	831.442	-0.007266	-0.004271	0.000286
0.1880	370.646	93.883	56.059	-4.502	-0.504	9.959	705.614	-0.006572	-0.003924	0.000315
0.1900	306.174	83.059	51.299	-6.169	-0.501	9.965	582.876	-0.005814	-0.003591	0.000432
0.1920	255.919	74.403	46.882	-6.684	-0.509	9.964	487.204	-0.005208	-0.003282	0.000468
0.1940	219.129	67.717	43.125	-6.474	-0.499	9.962	417.166	-0.004740	-0.003019	0.000453
0.1960	183.918	61.587	39.423	-7.322	-0.497	9.958	350.132	-0.004311	-0.002760	0.000513
0.1980	148.255	54.737	36.163	-6.725	-0.498	9.953	282.240	-0.003832	-0.002531	0.000471
0.2000	116.350	47.928	32.364	-6.586	-0.496	9.948	221.500	-0.003355	-0.002266	0.000461
0.2020	95.055	43.578	30.108	-5.307	-0.499	9.947	180.960	-0.003050	-0.002108	0.000372
0.2040	83.618	40.146	28.320	-5.932	-0.498	9.950	159.187	-0.002810	-0.001982	0.000415
0.2060	77.502	38.354	27.288	-5.460	-0.501	9.954	147.543	-0.002685	-0.001910	0.000382
0.2080	74.300	37.270	26.546	-5.321	-0.502	9.959	141.449	-0.002609	-0.001858	0.000372
0.2100	73.925	36.573	25.815	-5.293	-0.507	9.965	140.734	-0.002560	-0.001807	0.000371
0.2120	76.014	36.461	25.718	-5.030	-0.515	9.964	144.711	-0.002552	-0.001800	0.000352
0.2140	81.950	36.754	25.925	-5.488	-0.513	9.961	156.012	-0.002573	-0.001815	0.000384
0.2160	102.975	39.646	26.915	-5.223	-0.519	9.958	196.037	-0.002775	-0.001884	0.000366
0.2180	150.404	46.025	30.727	-6.487	-0.514	9.953	286.331	-0.003222	-0.002151	0.000454
0.2200	222.135	56.934	36.107	-6.347	-0.509	9.949	422.888	-0.003985	-0.002527	0.000444
0.2220	312.065	70.288	43.911	-6.073	-0.522	9.947	594.091	-0.004920	-0.003074	0.000425
0.2240	410.787	84.199	51.411	-4.182	-0.513	9.950	782.032	-0.005894	-0.003599	0.000293
0.2260	502.851	97.539	57.848	-3.764	-0.506	9.954	957.298	-0.006828	-0.004049	0.000263
0.2280	585.492	109.379	64.095	-1.513	-0.505	9.960	1114.626	-0.007657	-0.004487	0.000106
0.2300	665.037	120.231	69.859	-0.042	-0.498	9.965	1266.060	-0.008416	-0.004890	0.000003
0.2320	752.743	132.098	76.549	2.627	-0.504	9.964	1433.029	-0.009247	-0.005358	-0.000184
0.2340	846.235	144.661	83.209	6.752	-0.505	9.962	1611.013	-0.010126	-0.005825	-0.000473
0.2360	922.789	154.707	89.194	8.810	-0.509	9.959	1756.754	-0.010830	-0.006244	-0.000617
0.2380	982.783	162.768	94.063	11.549	-0.506	9.954	1870.966	-0.011394	-0.006584	-0.000808
0.2400	1036.524	170.120	98.177	13.383	-0.505	9.949	1973.276	-0.011908	-0.006872	-0.000937
0.2420	1094.158	177.595	103.051	16.259	-0.513	9.947	2082.996	-0.012432	-0.007214	-0.001138
0.2440	1157.563	185.390	107.827	18.526	-0.504	9.950	2203.703	-0.012977	-0.007548	-0.001297
0.2460	1206.646	192.006	111.623	20.513	-0.502	9.954	2297.144	-0.013440	-0.007814	-0.001436
0.2480	1235.110	196.270	114.292	22.680	-0.498	9.959	2351.332	-0.013739	-0.008000	-0.001588
0.2500	1249.146	198.397	115.520	22.750	-0.499	9.964	2378.054	-0.013888	-0.008086	-0.001593
0.2520	1257.667	200.163	116.788	24.140	-0.508	9.964	2394.276	-0.014011	-0.008175	-0.001690
0.2540	1270.156	202.138	117.924	24.097	-0.505	9.962	2418.051	-0.014150	-0.008255	-0.001687
0.2560	1278.166	203.735	119.032	25.627	-0.496	9.958	2433.300	-0.014261	-0.008332	-0.001794
0.2580	1275.912	203.942	119.283	25.295	-0.496	9.953	2429.008	-0.014276	-0.008350	-0.001771
0.2600	1268.232	203.635	118.893	24.946	-0.493	9.949	2414.389	-0.014254	-0.008323	-0.001746
0.2620	1255.999	203.150	118.670	24.945	-0.502	9.947	2391.100	-0.014220	-0.008307	-0.001746
0.2640	1230.135	201.053	117.729	23.443	-0.502	9.950	2341.862	-0.014074	-0.008241	-0.001641
0.2660	1165.092	194.868	113.939	20.733	-0.498	9.954	2218.037	-0.013641	-0.007976	-0.001451
0.2680	1071.480	185.347	107.895	16.092	-0.494	9.959	2039.824	-0.012974	-0.007553	-0.001126
0.2700	980.889	175.371	101.345	12.855	-0.491	9.964	1867.361	-0.012276	-0.007094	-0.000900
0.2720	910.932	167.507	96.499	9.784	-0.498	9.964	1734.180	-0.011725	-0.006755	-0.000685
0.2740	863.668	161.558	92.882	8.507	-0.497	9.962	1644.201	-0.011309	-0.006502	-0.000596
0.2760	810.662	155.334	88.961	6.992	-0.493	9.959	1543.293	-0.010873	-0.006227	-0.000489
0.2780	737.970	146.330	84.157	4.240	-0.494	9.953	1404.905	-0.010243	-0.005891	-0.000297
0.2800	654.577	135.532	78.021	2.780	-0.501	9.949	1246.147	-0.009487	-0.005461	-0.000195
0.2820	577.316	125.512	72.340	0.197	-0.509	9.947	1099.062	-0.008786	-0.005064	-0.000014
0.2840	515.009	116.536	67.508	-1.096	-0.502	9.950	980.444	-0.008157	-0.004726	0.000077
0.2860	449.575	106.627	62.472	-3.029	-0.499	9.954	855.875	-0.007464	-0.004373	0.000212
0.2880	378.611	95.718	56.982	-4.640	-0.498	9.959	720.778	-0.006700	-0.003989	0.000325
0.2900	311.464	84.781	51.532	-6.069	-0.495	9.965	592.947	-0.005935	-0.003607	0.000425
0.2920	260.893	76.082	47.128	-6.683	-0.505	9.964	496.674	-0.005326	-0.003299	0.000468
0.2940	227.560	69.691	44.033	-6.181	-0.492	9.961	433.216	-0.004878	-0.003082	0.000433
0.2960	194.227	63.785	40.608	-6.903	-0.492	9.958	369.759	-0.004465	-0.002843	0.000483
0.2980	157.543	56.976	36.754	-6.320	-0.500	9.952	299.921	-0.003988	-0.002573	0.000442
0.3000	124.510	50.012	33.203	-7.322	-0.501	9.949	237.036	-0.003501	-0.002324	0.000513
0.3020	103.786	45.343	30.506	-5.946	-0.510	9.948	197.582	-0.003174	-0.002135	0.000416
0.3040	93.822	42.622	29.336	-6.058	-0.505	9.951	178.614	-0.002984	-0.002053	0.000424
0.3060	88.322	40.896	28.224	-5.530	-0.503	9.954	168.142	-0.002863	-0.001976	0.000387
0.3080	84.715	39.478	27.674	-6.321	-0.500	9.959	161.276	-0.002763	-0.001937	0.000442
0.3100	82.912	38.310	26.820	-5.764	-0.494	9.965	157.843	-0.002682	-0.001877	0.000403
0.3120	84.580	38.383	27.205	-5.654	-0.504	9.964	161.018	-0.002687	-0.001904	0.000396
0.3140	88.668	38.769	27.358	-5.628	-0.498	9.961	168.800	-0.002714	-0.001915	0.000394
0.3160	102.915	40.591	27.880	-5.433	-0.500	9.958	195.923	-0.002841	-0.001952	0.000380
0.3180	144.258	46.385	30.976	-6.601	-0.505	9.953	274.630	-0.003247	-0.002168	0.000462
0.3200	215.207	56.570	36.631	-6.335	-0.502	9.949	409.698	-0.003960	-0.002564	0.000443
0.3220	306.910	69.857	44.062	-6.280	-0.506	9.947	584.278	-0.004890	-0.003084	0.000440
0.3240	408.096	84.572	51.532	-4.696	-0.506	9.950	776.911	-0.005920	-0.003607	0.000329
0.3260	503.857	98.595	58.496	-3.251	-0.506	9.954	959.215	-0.006902	-0.004095	0.000228
0.3280	588.918	110.784	64.358	-1.901	-0.511	9.959	1121.149	-0.007755	-0.004505	0.000133
0.3300	669.696	121.374	70.315	0.778	-0.505	9.964	1274.929	-0.008496	-0.004922	-0.000054
0.3320	756.214	133.017	76.892	3.280	-0.517	9.964	1439.638	-0.009311	-0.005382	-0.000230
0.3340	849.315	145.163	83.482	6.199	-0.512	9.962	1616.879	-0.010161	-0.005844	-0.000434
0.3360	928.485	155.863	89.482	9.118	-0.510	9.958	1767.597	-0.010910	-0.006264	-0.000638
0.3380	989.410	164.173	94.369	11.367	-0.514	9.953	1883.583	-0.011492	-0.006606	-0.000796
0.3400	1043.528	171.495	98.524	14.342	-0.505	9.949	1986.609	-0.012005	-0.006897	-0.001004
0.3420	1103.476	179.471	103.245	15.898	-0.509	9.947	2100.735	-0.012563	-0.007227	-0.001113
0.3440	1166.174	187.059	108.416	19.874	-0.507	9.950	2220.097	-0.013094	-0.007589	-0.001391
0.3460	1209.757	192.813	111.992	21.583	-0.508	9.954	2303.066	-0.013497	-0.007839	-0.001511
0.3480	1234.884	196.037	114.237	23.000	-0.504	9.959	2350.903	-0.013723	-0.007997	-0.001610
0.3500	1248.876	198.468	115.697	23.236	-0.496	9.964	2377.539	-0.013893	-0.008099	-0.001627
0.3520	1262.056	200.926	117.385	24.473	-0.511	9.964	2402.630	-0.014065	-0.008217	-0.001713
0.3540	1280.841	203.983	118.936	25.363	-0.499	9.961	2438.393	-0.014279	-0.008326	-0.001775
0.3560	1289.918	205.833	119.950	25.902	-0.499	9.958	2455.673	-0.014408	-0.008397	-0.001813
0.3580	1286.597	206.180	120.171	26.167	-0.502	9.952	2449.350	-0.014433	-0.008412	-0.001832
0.3600	1277.114	205.373	120.034	25.336	-0.500	9.949	2431.297	-0.014376	-0.008402	-0.001774
0.3620	1262.146	205.054	119.798	25.307	-0.510	9.947	2402.802	-0.014354	-0.008386	-0.001772
0.3640	1230.180	202.526	118.438	23.681	-0.510	9.950	2341.948	-0.014177	-0.008291	-0.001658
0.3660	1159.412	195.634	114.352	20.415	-0.512	9.954	2207.222	-0.013694	-0.008005	-0.001429
0.3680	1066.476	186.127	107.580	16.510	-0.512	9.959	2030.296	-0.013029	-0.007531	-0.001156
0.3700	980.288	175.971	101.166	12.841	-0.510	9.965	1866.217	-0.012318	-0.007082	-0.000899
0.3720	914.945	168.259	96.460	10.492	-0.515	9.964	1741.819	-0.011778	-0.006752	-0.000734
0.3740	869.363	162.353	92.786	8.895	-0.513	9.962	1655.045	-0.011365	-0.006495	-0.000623
0.3760	811.880	155.321	88.670	7.352	-0.512	9.958	1545.610	-0.010872	-0.006207	-0.000515
0.3780	729.043	145.355	82.945	4.823	-0.518	9.953	1387.911	-0.010175	-0.005806	-0.000338
0.3800	637.926	133.502	76.836	2.279	-0.516	9.949	1214.447	-0.009345	-0.005379	-0.000160
0.3820	557.659	122.748	70.715	0.764	-0.510	9.947	1061.640	-0.008592	-0.004950	-0.000053
0.3840	495.817	113.687	66.023	-2.014	-0.505	9.949	943.909	-0.007958	-0.004622	0.000141
0.3860	434.742	104.250	61.331	-2.514	-0.508	9.953	827.637	-0.007298	-0.004293	0.000176
0.3880	368.737	93.994	56.308	-5.002	-0.512	9.959	701.981	-0.006580	-0.003942	0.000350
0.3900	306.324	84.085	51.382	-5.752	-0.495	9.964	583.162	-0.005886	-0.003597	0.000403
0.3920	257.301	76.138	47.321	-6.792	-0.504	9.964	489.836	-0.005330	-0.003312	0.000475
0.3940	220.812	69.314	43.951	-6.390	-0.506	9.962	420.370	-0.004852	-0.003077	0.000447
0.3960	184.804	62.629	40.070	-7.015	-0.506	9.958	351.820	-0.004384	-0.002805	0.000491
0.3980	149.082	55.780	36.685	-6.878	-0.512	9.953	283.813	-0.003905	-0.002568	0.000481
0.4000	118.274	49.611	32.860	-5.779	-0.508	9.949	225.163	-0.003473	-0.002300	0.000405
0.4020	97.610	45.219	30.300	-5.863	-0.516	9.947	185.823	-0.003165	-0.002121	0.000410
0.4040	87.014	42.342	28.815	-5.295	-0.515	9.950	165.653	-0.002964	-0.002017	0.000371
0.4060	80.162	39.826	27.425	-5.516	-0.520	9.954	152.607	-0.002788	-0.001920	0.000386
0.4080	76.855	38.494	26.943	-4.905	-0.525	9.959	146.313	-0.002695	-0.001886	0.000343
0.4100	76.179	37.507	26.256	-5.391	-0.509	9.964	145.025	-0.002625	-0.001838	0.000377
0.4120	78.493	37.282	26.216	-5.739	-0.509	9.964	149.431	-0.002610	-0.001835	0.000402
0.4140	84.911	38.214	26.229	-5.031	-0.512	9.962	161.648	-0.002675	-0.001836	0.000352
0.4160	107.769	41.062	27.687	-6.212	-0.510	9.958	205.164	-0.002874	-0.001938	0.000435
0.4180	157.949	48.358	31.636	-5.989	-0.507	9.953	300.694	-0.003385	-0.002215	0.000419
0.4200	230.731	58.921	37.759	-6.461	-0.512	9.949	439.253	-0.004124	-0.002643	0.000452
0.4220	320.706	72.123	44.708	-5.683	-0.517	9.947	610.542	-0.005049	-0.003130	0.000398
0.4240	420.435	86.728	52.385	-4.434	-0.517	9.950	800.400	-0.006071	-0.003667	0.000310
0.4260	512.859	100.027	59.115	-2.930	-0.516	9.954	976.353	-0.007002	-0.004138	0.000205
0.4280	591.969	111.519	65.307	-0.915	-0.514	9.959	1126.957	-0.007806	-0.004571	0.000064
0.4300	667.998	121.969	70.743	0.418	-0.513	9.964	1271.696	-0.008538	-0.004952	-0.000029
0.4320	753.735	133.681	77.169	3.558	-0.518	9.964	1434.917	-0.009358	-0.005402	-0.000249
0.4340	848.188	145.717	83.855	6.268	-0.518	9.962	1614.733	-0.010200	-0.005870	-0.000439
0.4360	931.160	156.696	90.184	9.479	-0.522	9.958	1772.690	-0.010969	-0.006313	-0.000664
0.4380	997.375	165.686	95.275	11.826	-0.517	9.953	1898.746	-0.011598	-0.006669	-0.000828
0.4400	1052.830	172.955	99.513	14.926	-0.513	9.949	2004.318	-0.012107	-0.006966	-0.001045
0.4420	1109.577	180.656	103.890	16.803	-0.523	9.947	2112.350	-0.012646	-0.007272	-0.001176
0.4440	1168.354	188.005	108.568	19.639	-0.520	9.950	2224.245	-0.013160	-0.007600	-0.001375
0.4460	1207.488	193.103	111.499	21.193	-0.523	9.954	2298.746	-0.013517	-0.007805	-0.001484
0.4480	1229.113	196.299	113.783	22.666	-0.515	9.959	2339.916	-0.013741	-0.007965	-0.001587
0.4500	1244.292	198.718	115.244	23.626	-0.504	9.965	2368.813	-0.013910	-0.008067	-0.001654
0.4520	1261.710	201.623	117.066	24.543	-0.517	9.964	2401.972	-0.014114	-0.008195	-0.001718
0.4540	1286.447	204.762	119.006	25.946	-0.510	9.961	2449.064	-0.014333	-0.008330	-0.001816
0.4560	1299.702	207.139	120.297	26.097	-0.497	9.958	2474.298	-0.014500	-0.008421	-0.001827
0.4580	1297.868	207.540	120.657	26.277	-0.511	9.953	2470.808	-0.014528	-0.008446	-0.001839
0.4600	1289.032	207.038	120.450	26.389	-0.507	9.949	2453.985	-0.014493	-0.008431	-0.001847
0.4620	1274.424	206.011	120.450	26.043	-0.516	9.947	2426.176	-0.014421	-0.008431	-0.001823
0.4640	1238.296	203.261	118.784	24.584	-0.509	9.950	2357.397	-0.014228	-0.008315	-0.001721
0.4660	1155.083	195.579	113.790	20.457	-0.512	9.954	2198.982	-0.013691	-0.007965	-0.001432
0.4680	1056.001	185.210	107.041	16.289	-0.517	9.959	2010.355	-0.012965	-0.007493	-0.001140
0.4700	976.020	175.692	101.440	12.858	-0.513	9.964	1858.091	-0.012298	-0.007101	-0.000900
0.4720	924.262	169.273	97.409	11.132	-0.523	9.964	1759.558	-0.011849	-0.006819	-0.000779
0.4740	891.290	165.493	95.056	9.978	-0.515	9.962	1696.787	-0.011585	-0.006654	-0.000698
0.4760	833.340	159.058	90.873	7.728	-0.502	9.959	1586.466	-0.011134	-0.006361	-0.000541
0.4780	734.979	147.149	84.048	5.130	-0.501	9.953	1399.212	-0.010300	-0.005883	-0.000359
0.4800	628.218	132.753	76.548	2.072	-0.501	9.949	1195.965	-0.009293	-0.005358	-0.000145
0.4820	546.854	121.524	70.275	-0.195	-0.500	9.947	1041.069	-0.008507	-0.004919	0.000014
0.4840	493.157	113.421	65.856	-1.556	-0.502	9.949	938.845	-0.007939	-0.004610	0.000109
0.4860	434.531	104.750	61.535	-2.930	-0.500	9.953	827.236	-0.007333	-0.004307	0.000205
0.4880	360.877	93.635	55.715	-4.209	-0.505	9.959	687.017	-0.006554	-0.003900	0.000295
0.4900	291.175	82.378	50.102	-5.918	-0.500	9.964	554.323	-0.005766	-0.003507	0.000414
0.4920	241.852	73.776	45.630	-6.169	-0.506	9.963	460.424	-0.005164	-0.003194	0.000432
0.4940	210.608	67.564	42.329	-6.711	-0.506	9.961	400.944	-0.004729	-0.002963	0.000470
0.4960	181.724	61.949	39.534	-6.584	-0.504	9.958	345.955	-0.004336	-0.002767	0.000461
0.4980	149.818	55.947	36.260	-6.044	-0.504	9.952	285.215	-0.003916	-0.002538	0.000423
0.5000	120.212	50.098	32.833	-6.321	-0.492	9.949	228.853	-0.003507	-0.002298	0.000443
0.5020	100.149	45.426	30.864	-5.696	-0.502	9.947	190.659	-0.003180	-0.002160	0.000399
0.5040	90.757	42.744	29.379	-6.029	-0.504	9.950	172.777	-0.002992	-0.002057	0.000422
0.5060	85.917	41.216	28.733	-5.015	-0.506	9.954	163.565	-0.002885	-0.002011	0.000351
0.5080	83.333	39.923	27.936	-5.600	-0.516	9.959	158.644	-0.002795	-0.001956	0.000392
0.5100	83.032	39.549	27.454	-5.128	-0.510	9.964	158.072	-0.002768	-0.001922	0.000359
0.5120	85.346	39.439	27.411	-5.796	-0.514	9.964	162.477	-0.002761	-0.001919	0.000406
0.5140	92.861	39.869	27.770	-5.073	-0.512	9.962	176.783	-0.002791	-0.001944	0.000355
0.5160	118.739	43.606	29.285	-5.835	-0.509	9.958	226.049	-0.003052	-0.002050	0.000408
0.5180	172.962	51.207	33.205	-5.919	-0.503	9.953	329.275	-0.003585	-0.002324	0.000414
0.5200	248.074	61.880	39.174	-5.989	-0.504	9.949	472.269	-0.004332	-0.002742	0.000419
0.5220	338.229	74.817	46.399	-5.751	-0.511	9.947	643.902	-0.005237	-0.003248	0.000403
0.5240	438.198	89.882	53.624	-3.737	-0.506	9.950	834.217	-0.006292	-0.003754	0.000262
0.5260	531.344	103.084	60.202	-2.917	-0.506	9.954	1011.543	-0.007216	-0.004214	0.000204
0.5280	613.129	114.701	66.477	-0.416	-0.505	9.959	1167.240	-0.008029	-0.004653	0.000029
0.5300	691.848	125.445	72.104	1.501	-0.509	9.965	1317.101	-0.008781	-0.005047	-0.000105
0.5320	776.307	136.908	78.474	4.366	-0.517	9.964	1477.890	-0.009584	-0.005493	-0.000306
0.5340	863.668	148.163	84.845	7.533	-0.509	9.962	1644.201	-0.010371	-0.005939	-0.000527
0.5360	936.736	157.448	90.582	9.881	-0.509	9.958	1783.304	-0.011021	-0.006341	-0.000692
0.5380	995.857	165.562	95.138	12.410	-0.505	9.953	1895.857	-0.011589	-0.006660	-0.000869
0.5400	1048.953	172.481	99.128	14.175	-0.498	9.949	1996.937	-0.012074	-0.006939	-0.000992
0.5420	1103.025	179.651	103.863	17.162	-0.506	9.947	2099.876	-0.012576	-0.007270	-0.001201
0.5440	1161.245	187.212	108.279	19.165	-0.510	9.950	2210.712	-0.013105	-0.007580	-0.001342
0.5460	1211.064	193.827	112.173	21.930	-0.505	9.954	2305.555	-0.013568	-0.007852	-0.001535
0.5480	1246.336	198.537	115.340	23.708	-0.504	9.959	2372.704	-0.013898	-0.008074	-0.001660
0.5500	1267.887	201.705	117.190	24.331	-0.501	9.964	2413.731	-0.014119	-0.008203	-0.001703
0.5520	1282.675	204.291	118.868	25.681	-0.507	9.964	2441.883	-0.014300	-0.008321	-0.001798
0.5540	1296.095	206.222	119.965	26.195	-0.504	9.962	2467.432	-0.014436	-0.008398	-0.001834
0.5560	1297.778	207.514	120.614	26.528	-0.496	9.958	2470.636	-0.014526	-0.008443	-0.001857
0.5580	1289.242	207.401	120.476	26.166	-0.504	9.953	2454.386	-0.014518	-0.008433	-0.001832
0.5600	1276.393	206.457	120.089	25.806	-0.499	9.949	2429.924	-0.014452	-0.008406	-0.001806
0.5620	1256.946	205.472	119.575	25.446	-0.501	9.947	2392.902	-0.014383	-0.008370	-0.001781
0.5640	1220.637	202.497	117.840	23.181	-0.499	9.950	2323.780	-0.014175	-0.008249	-0.001623
0.5660	1158.615	195.966	113.825	21.152	-0.501	9.954	2205.706	-0.013718	-0.007968	-0.001481
0.5680	1082.857	187.628	108.499	16.927	-0.505	9.959	2061.481	-0.013134	-0.007595	-0.001185
0.5700	1005.746	179.486	102.721	14.495	-0.493	9.964	1914.682	-0.012564	-0.007190	-0.001015
0.5720	935.864	171.536	98.056	11.535	-0.499	9.964	1781.645	-0.012008	-0.006864	-0.000807
0.5740	881.822	165.268	94.422	10.006	-0.498	9.962	1678.762	-0.011569	-0.006610	-0.000700
0.5760	820.506	157.571	89.978	8.143	-0.496	9.959	1562.033	-0.011030	-0.006298	-0.000570
0.5780	737.384	147.205	84.049	5.185	-0.493	9.953	1403.790	-0.010304	-0.005883	-0.000363
0.5800	645.425	135.364	77.444	3.016	-0.500	9.949	1228.724	-0.009475	-0.005421	-0.000211
0.5820	567.262	124.873	71.677	0.155	-0.507	9.947	1079.922	-0.008741	-0.005017	-0.000011
0.5840	510.425	116.939	67.673	-0.777	-0.508	9.949	971.718	-0.008186	-0.004737	0.000054
0.5860	453.392	108.432	63.092	-2.681	-0.502	9.953	863.142	-0.007590	-0.004416	0.000188
0.5880	388.259	98.286	58.013	-3.836	-0.501	9.958	739.145	-0.006880	-0.004061	0.000269
0.5900	324.208	87.462	52.977	-5.920	-0.496	9.964	617.208	-0.006122	-0.003708	0.000414
0.5920	273.397	79.390	48.769	-5.113	-0.497	9.964	520.477	-0.005557	-0.003414	0.000358
0.5940	235.796	72.929	45.162	-6.433	-0.491	9.962	448.895	-0.005105	-0.003161	0.000450
0.5960	199.187	66.176	41.131	-6.114	-0.486	9.959	379.200	-0.004632	-0.002879	0.000428
0.5980	163.419	59.491	37.746	-6.308	-0.492	9.953	311.108	-0.004164	-0.002642	0.000442
0.6000	132.596	52.946	34.401	-6.337	-0.488	9.949	252.428	-0.003706	-0.002408	0.000444
0.6020	111.330	48.290	31.799	-5.433	-0.489	9.947	211.945	-0.003380	-0.002226	0.000380
0.6040	99.668	45.009	30.438	-5.767	-0.490	9.949	189.743	-0.003151	-0.002131	0.000404
0.6060	93.657	43.022	29.077	-5.115	-0.495	9.954	178.299	-0.003012	-0.002035	0.000358
0.6080	91.042	41.854	28.540	-5.433	-0.501	9.959	173.321	-0.002930	-0.001998	0.000380
0.6100	90.922	41.077	28.225	-5.349	-0.495	9.964	173.092	-0.002875	-0.001976	0.000374
0.6120	93.191	40.660	28.471	-5.531	-0.501	9.964	177.412	-0.002846	-0.001993	0.000387
0.6140	99.127	40.936	28.815	-5.643	-0.502	9.961	188.713	-0.002866	-0.002017	0.000395
0.6160	118.409	43.717	29.571	-5.141	-0.505	9.958	225.420	-0.003060	-0.002070	0.000360
0.6180	163.359	50.654	33.161	-6.030	-0.498	9.953	310.993	-0.003546	-0.002321	0.000422
0.6200	231.918	60.519	38.323	-5.946	-0.495	9.949	441.513	-0.004236	-0.002683	0.000416
0.6220	318.677	72.957	45.175	-5.862	-0.498	9.947	606.680	-0.005107	-0.003162	0.000410
0.6240	417.805	87.466	52.688	-4.570	-0.490	9.949	795.393	-0.006123	-0.003688	0.000320
0.6260	510.229	100.735	59.170	-3.013	-0.499	9.953	971.346	-0.007051	-0.004142	0.000211
0.6280	592.134	112.519	65.362	-0.611	-0.504	9.958	1127.272	-0.007876	-0.004575	0.000043
0.6300	672.611	123.510	71.170	0.834	-0.502	9.964	1280.479	-0.008646	-0.004982	-0.000058
0.6320	758.424	134.920	77.526	3.712	-0.503	9.964	1443.844	-0.009444	-0.005427	-0.000260
0.6340	850.878	147.290	84.117	7.186	-0.512	9.961	1619.854	-0.010310	-0.005888	-0.000503
0.6360	932.137	157.974	90.034	9.533	-0.507	9.958	1774.549	-0.011058	-0.006302	-0.000667
0.6380	995.467	166.575	95.139	12.744	-0.503	9.952	1895.113	-0.011660	-0.006660	-0.000892
0.6400	1046.834	173.164	99.059	14.441	-0.499	9.949	1992.903	-0.012121	-0.006934	-0.001011
0.6420	1098.712	179.750	103.339	16.940	-0.502	9.947	2091.665	-0.012582	-0.007234	-0.001186
0.6440	1158.690	187.460	107.948	19.581	-0.511	9.949	2205.849	-0.013122	-0.007556	-0.001371
0.6460	1207.818	193.368	111.746	21.763	-0.510	9.954	2299.376	-0.013536	-0.007822	-0.001523
0.6480	1237.214	197.175	114.416	23.444	-0.506	9.959	2355.337	-0.013802	-0.008009	-0.001641
0.6500	1253.985	199.885	116.098	24.141	-0.505	9.964	2387.266	-0.013992	-0.008127	-0.001690
0.6520	1268.608	202.846	117.716	25.210	-0.504	9.964	2415.104	-0.014199	-0.008240	-0.001765
0.6540	1287.243	205.374	119.521	26.031	-0.501	9.961	2450.581	-0.014376	-0.008366	-0.001822
0.6560	1298.334	207.375	120.646	26.780	-0.494	9.958	2471.695	-0.014516	-0.008445	-0.001875
0.6580	1297.042	207.847	120.739	26.753	-0.496	9.953	2469.234	-0.014549	-0.008452	-0.001873
0.6600	1289.212	207.319	121.031	26.266	-0.497	9.949	2454.329	-0.014512	-0.008472	-0.001839
0.6620	1274.770	206.887	120.728	26.377	-0.510	9.947	2426.834	-0.014482	-0.008451	-0.001846
0.6640	1242.023	204.651	119.342	24.737	-0.506	9.949	2364.492	-0.014326	-0.008354	-0.001732
0.6660	1168.639	197.746	114.906	21.805	-0.510	9.953	2224.789	-0.013842	-0.008043	-0.001526
0.6680	1077.071	187.881	108.500	17.330	-0.505	9.959	2050.467	-0.013152	-0.007595	-0.001213
0.6700	994.745	178.890	102.845	13.912	-0.501	9.964	1893.740	-0.012522	-0.007199	-0.000974
0.6720	928.425	171.163	98.138	11.632	-0.510	9.964	1767.483	-0.011981	-0.006870	-0.000814
0.6740	875.811	164.645	94.119	9.728	-0.502	9.961	1667.318	-0.011525	-0.006588	-0.000681
0.6760	812.586	157.155	89.084	7.756	-0.498	9.958	1546.955	-0.011001	-0.006236	-0.000543
0.6780	731.929	147.178	83.705	5.129	-0.508	9.953	1393.404	-0.010302	-0.005859	-0.000359
0.6800	646.101	136.061	76.962	3.087	-0.501	9.949	1230.011	-0.009524	-0.005387	-0.000216
0.6820	572.026	125.761	71.692	1.001	-0.513	9.947	1088.991	-0.008803	-0.005018	-0.000070
0.6840	516.872	117.535	67.620	-0.932	-0.504	9.949	983.992	-0.008227	-0.004733	0.000065
0.6860	460.756	108.947	63.450	-2.096	-0.499	9.953	877.161	-0.007626	-0.004441	0.000147
0.6880	396.134	99.498	58.357	-3.793	-0.504	9.959	754.137	-0.006965	-0.004085	0.000265
0.6900	331.046	89.423	53.141	-5.140	-0.500	9.964	630.226	-0.006260	-0.003720	0.000360
0.6920	276.898	80.405	49.235	-5.932	-0.502	9.964	527.143	-0.005628	-0.003446	0.000415
0.6940	233.511	72.553	45.149	-6.280	-0.504	9.961	444.546	-0.005079	-0.003160	0.000440
0.6960	188.667	64.602	40.909	-5.752	-0.509	9.958	359.173	-0.004522	-0.002864	0.000403
0.6980	145.385	56.626	36.411	-6.378	-0.512	9.953	276.775	-0.003964	-0.002549	0.000446
0.7000	110.519	49.443	32.572	-5.710	-0.505	9.949	210.400	-0.003461	-0.002280	0.000400
0.7020	89.690	44.914	29.683	-5.891	-0.505	9.947	170.746	-0.003144	-0.002078	0.000412
0.7040	79.305	42.077	28.486	-4.849	-0.500	9.949	150.976	-0.002945	-0.001994	0.000339
0.7060	72.647	39.812	27.083	-5.224	-0.508	9.953	138.302	-0.002787	-0.001896	0.000366
0.7080	68.800	38.242	26.269	-4.684	-0.512	9.959	130.978	-0.002677	-0.001839	0.000328
0.7100	67.703	37.256	25.688	-5.296	-0.503	9.964	128.889	-0.002608	-0.001798	0.000371
0.7120	69.687	37.075	25.759	-4.350	-0.511	9.963	132.666	-0.002595	-0.001803	0.000305
0.7140	74.646	37.410	25.732	-5.057	-0.512	9.961	142.107	-0.002619	-0.001801	0.000354
0.7160	94.333	39.608	26.711	-5.112	-0.504	9.958	179.586	-0.002773	-0.001870	0.000358
0.7180	142.544	46.859	30.824	-5.835	-0.506	9.953	271.368	-0.003280	-0.002158	0.000408
0.7200	216.650	57.781	36.686	-6.459	-0.504	9.949	412.445	-0.004045	-0.002568	0.000452
0.7220	310.532	71.386	44.088	-4.931	-0.507	9.947	591.173	-0.004997	-0.003086	0.000345
0.7240	416.633	86.726	52.152	-4.363	-0.505	9.949	793.161	-0.006071	-0.003651	0.000305
0.7260	516.346	101.067	59.116	-2.362	-0.501	9.953	982.990	-0.007075	-0.004138	0.000165
0.7280	600.731	113.103	65.734	-0.779	-0.502	9.958	1143.637	-0.007917	-0.004601	0.000055
0.7300	679.194	123.916	71.500	1.252	-0.493	9.964	1293.011	-0.008674	-0.005005	-0.000088
0.7320	764.390	135.532	77.608	4.158	-0.502	9.964	1455.202	-0.009487	-0.005433	-0.000291
0.7340	858.212	147.636	84.846	7.214	-0.509	9.961	1633.816	-0.010334	-0.005939	-0.000505
0.7360	939.170	158.516	90.844	10.520	-0.503	9.958	1787.939	-0.011096	-0.006359	-0.000736
0.7380	1001.027	166.798	95.605	12.825	-0.498	9.952	1905.699	-0.011676	-0.006692	-0.000898
0.7400	1052.770	173.690	99.707	15.107	-0.498	9.949	2004.204	-0.012158	-0.006979	-0.001058
0.7420	1108.240	181.014	104.138	17.302	-0.509	9.947	2109.804	-0.012671	-0.007290	-0.001211
0.7440	1173.388	189.047	109.174	20.040	-0.509	9.949	2233.829	-0.013233	-0.007642	-0.001403
0.7460	1223.688	195.591	113.301	22.903	-0.508	9.953	2329.588	-0.013691	-0.007931	-0.001603
0.7480	1248.184	199.122	115.697	23.682	-0.511	9.958	2376.223	-0.013939	-0.008099	-0.001658
0.7500	1256.931	200.790	116.662	24.822	-0.505	9.964	2392.874	-0.014055	-0.008166	-0.001738
0.7520	1264.085	202.680	117.799	24.876	-0.511	9.964	2406.492	-0.014188	-0.008246	-0.001741
0.7540	1276.603	204.776	118.645	26.126	-0.503	9.961	2430.325	-0.014334	-0.008305	-0.001829
0.7560	1282.705	206.150	119.549	26.474	-0.503	9.958	2441.940	-0.014431	-0.008368	-0.001853
0.7580	1279.068	206.138	119.784	26.598	-0.503	9.953	2435.017	-0.014430	-0.008385	-0.001862
0.7600	1270.336	205.542	119.270	25.805	-0.496	9.949	2418.394	-0.014388	-0.008349	-0.001806
0.7620	1256.871	205.026	119.118	25.459	-0.509	9.947	2392.759	-0.014352	-0.008338	-0.001782
0.7640	1228.182	202.858	117.952	24.904	-0.502	9.949	2338.142	-0.014200	-0.008257	-0.001743
0.7660	1163.094	196.649	114.489	21.013	-0.496	9.953	2214.231	-0.013765	-0.008014	-0.001471
0.7680	1075.493	187.991	108.182	17.650	-0.495	9.958	2047.462	-0.013159	-0.007573	-0.001235
0.7700	989.125	178.208	102.391	13.411	-0.500	9.964	1883.039	-0.012475	-0.007167	-0.000939
0.7720	918.146	170.160	97.560	11.160	-0.502	9.964	1747.913	-0.011911	-0.006829	-0.000781
0.7740	869.604	164.061	93.735	9.604	-0.503	9.961	1655.502	-0.011484	-0.006561	-0.000672
0.7760	815.141	157.252	89.512	7.755	-0.504	9.959	1551.819	-0.011008	-0.006266	-0.000543
0.7780	733.537	147.550	83.636	5.408	-0.509	9.953	1396.465	-0.010329	-0.005854	-0.000379
0.7800	638.948	134.960	76.809	2.337	-0.502	9.949	1216.393	-0.009447	-0.005377	-0.000164
0.7820	557.359	124.164	71.306	0.683	-0.505	9.947	1061.068	-0.008691	-0.004991	-0.000048
0.7840	504.669	116.313	66.998	-1.222	-0.498	9.949	960.760	-0.008142	-0.004690	0.000086
0.7860	461.853	109.378	63.476	-1.929	-0.496	9.953	879.250	-0.007656	-0.004443	0.000135
0.7880	409.434	101.541	59.061	-3.862	-0.498	9.958	779.457	-0.007108	-0.004134	0.000270
0.7900	346.781	91.993	54.574	-4.907	-0.495	9.963	660.181	-0.006440	-0.003820	0.000344
0.7920	286.682	81.987	49.772	-5.640	-0.502	9.963	545.769	-0.005739	-0.003484	0.000395
0.7940	242.363	74.371	46.178	-6.404	-0.508	9.961	461.397	-0.005206	-0.003232	0.000448
0.7960	204.026	67.507	42.051	-5.766	-0.506	9.958	388.412	-0.004726	-0.002944	0.000404
0.7980	167.236	60.241	38.434	-6.600	-0.509	9.953	318.375	-0.004217	-0.002690	0.000462
0.8000	135.075	53.946	34.485	-5.919	-0.500	9.949	257.149	-0.003776	-0.002414	0.000414
0.8020	112.593	49.428	32.502	-6.044	-0.514	9.946	214.348	-0.003460	-0.002275	0.000423
0.8040	99.759	45.815	30.947	-5.376	-0.521	9.949	189.915	-0.003207	-0.002166	0.000376
0.8060	88.442	42.771	28.980	-5.183	-0.525	9.953	168.371	-0.002994	-0.002029	0.000363
0.8080	80.327	41.076	27.964	-5.211	-0.525	9.958	152.922	-0.002875	-0.001957	0.000365
0.8100	76.510	39.466	27.124	-5.100	-0.519	9.963	145.655	-0.002763	-0.001899	0.000357
0.8120	77.637	39.061	27.040	-4.946	-0.514	9.963	147.800	-0.002734	-0.001893	0.000346
0.8140	82.371	39.562	27.163	-4.669	-0.505	9.961	156.813	-0.002769	-0.001901	0.000327
0.8160	97.099	40.882	27.714	-5.418	-0.508	9.958	184.851	-0.002862	-0.001940	0.000379
0.8180	136.353	46.761	30.753	-5.321	-0.509	9.952	259.581	-0.003273	-0.002153	0.000372
0.8200	200.103	56.309	35.459	-6.141	-0.497	9.948	380.945	-0.003942	-0.002482	0.000430
0.8220	286.652	69.009	43.002	-5.322	-0.516	9.946	545.712	-0.004831	-0.003010	0.000373
0.8240	388.484	83.365	50.254	-4.780	-0.516	9.949	739.574	-0.005836	-0.003518	0.000335
0.8260	486.770	97.872	57.380	-2.752	-0.507	9.953	926.685	-0.006851	-0.004017	0.000193
0.8280	572.688	110.517	63.366	-1.849	-0.501	9.958	1090.250	-0.007736	-0.004436	0.000129
0.8300	654.953	121.246	69.669	1.000	-0.495	9.963	1246.862	-0.008487	-0.004877	-0.000070
0.8320	747.152	133.641	76.343	3.780	-0.506	9.963	1422.386	-0.009355	-0.005344	-0.000265
0.8340	851.600	147.482	83.842	7.351	-0.505	9.961	1621.227	-0.010324	-0.005869	-0.000515
0.8360	937.698	158.559	89.977	10.535	-0.500	9.958	1785.135	-0.011099	-0.006298	-0.000737
0.8380	996.188	166.563	94.959	12.606	-0.504	9.952	1896.486	-0.011659	-0.006647	-0.000882
0.8400	1045.271	173.150	99.130	14.913	-0.495	9.948	1989.927	-0.012120	-0.006939	-0.001044
0.8420	1102.018	179.974	103.902	17.136	-0.498	9.946	2097.960	-0.012598	-0.007273	-0.001200
0.8440	1169.090	188.408	109.007	20.818	-0.500	9.948	2225.647	-0.013189	-0.007630	-0.001457
0.8460	1217.737	195.146	112.614	21.999	-0.502	9.952	2318.258	-0.013660	-0.007883	-0.001540
0.8480	1236.522	198.523	114.555	23.723	-0.504	9.958	2354.021	-0.013897	-0.008019	-0.001661
0.8500	1241.031	199.649	115.367	24.071	-0.500	9.964	2362.604	-0.013975	-0.008076	-0.001685
0.8520	1248.410	201.274	116.622	24.876	-0.516	9.963	2376.652	-0.014089	-0.008164	-0.001741
0.8540	1267.827	203.944	118.227	25.681	-0.509	9.961	2413.616	-0.014276	-0.008276	-0.001798
0.8560	1280.946	205.597	119.255	26.212	-0.504	9.958	2438.593	-0.014392	-0.008348	-0.001835
0.8580	1279.924	206.415	119.534	26.516	-0.504	9.953	2436.647	-0.014449	-0.008367	-0.001856
0.8600	1271.689	206.304	119.575	26.223	-0.497	9.949	2420.969	-0.014441	-0.008370	-0.001836
0.8620	1259.155	205.374	119.295	25.196	-0.506	9.947	2397.108	-0.014376	-0.008351	-0.001764
0.8640	1236.477	203.790	118.313	25.113	-0.502	9.948	2353.935	-0.014265	-0.008282	-0.001758
0.8660	1177.220	198.343	115.010	22.306	-0.500	9.953	2241.125	-0.013884	-0.008051	-0.001561
0.8680	1084.194	188.963	108.841	18.163	-0.503	9.958	2064.028	-0.013227	-0.007619	-0.001271
0.8700	990.733	178.596	101.948	14.091	-0.502	9.963	1886.101	-0.012502	-0.007136	-0.000986
0.8720	916.583	169.884	96.939	10.910	-0.502	9.963	1744.938	-0.011892	-0.006786	-0.000764
0.8740	867.830	163.727	93.267	10.189	-0.493	9.961	1652.126	-0.011461	-0.006529	-0.000713
0.8760	816.899	157.640	89.415	7.756	-0.498	9.958	1555.166	-0.011035	-0.006259	-0.000543
0.8780	740.870	148.413	84.310	6.184	-0.500	9.953	1410.427	-0.010389	-0.005902	-0.000433
0.8800	647.980	136.296	77.568	2.696	-0.498	9.949	1233.587	-0.009541	-0.005430	-0.000189
0.8820	560.259	124.458	71.361	1.126	-0.506	9.947	1066.589	-0.008712	-0.004995	-0.000079
0.8840	494.074	114.951	66.271	-0.777	-0.507	9.948	940.590	-0.008047	-0.004639	0.000054
0.8860	435.884	105.806	61.579	-2.554	-0.505	9.953	829.811	-0.007406	-0.004311	0.000179
0.8880	374.177	96.675	57.106	-3.306	-0.506	9.958	712.337	-0.006767	-0.003997	0.000231
0.8900	314.650	87.016	52.373	-5.723	-0.498	9.964	599.012	-0.006091	-0.003666	0.000401
0.8920	267.235	78.901	48.273	-5.083	-0.512	9.964	508.747	-0.005523	-0.003379	0.000356
0.8940	233.015	73.122	45.107	-6.238	-0.510	9.961	443.602	-0.005119	-0.003157	0.000437
0.8960	198.856	66.423	41.598	-5.612	-0.499	9.958	378.571	-0.004650	-0.002912	0.000393
0.8980	163.178	59.963	38.117	-6.796	-0.504	9.952	310.650	-0.004197	-0.002668	0.000476
0.9000	132.956	53.987	34.814	-5.126	-0.500	9.949	253.115	-0.003779	-0.002437	0.000359
0.9020	113.344	49.860	32.405	-5.904	-0.496	9.947	215.778	-0.003490	-0.002268	0.000413
0.9040	105.469	47.277	31.125	-5.599	-0.508	9.949	200.787	-0.003309	-0.002179	0.000392
0.9060	102.494	45.456	30.604	-5.588	-0.508	9.953	195.122	-0.003182	-0.002142	0.000391
0.9080	101.006	44.497	29.999	-5.616	-0.506	9.957	192.289	-0.003115	-0.002100	0.000393
0.9100	100.886	44.136	29.490	-5.628	-0.508	9.963	192.060	-0.003090	-0.002064	0.000394
0.9120	102.464	43.953	29.502	-5.891	-0.512	9.963	195.065	-0.003077	-0.002065	0.000412
0.9140	109.377	44.302	29.654	-5.224	-0.512	9.961	208.225	-0.003101	-0.002076	0.000366
0.9160	137.720	47.832	31.388	-6.183	-0.506	9.958	262.184	-0.003348	-0.002197	0.000433
0.9180	201.321	56.656	36.217	-5.448	-0.504	9.952	383.263	-0.003966	-0.002535	0.000381
0.9200	283.255	68.412	42.603	-5.838	-0.498	9.948	539.246	-0.004789	-0.002982	0.000409
0.9220	366.047	81.030	49.125	-4.613	-0.505	9.946	696.859	-0.005672	-0.003439	0.000323
0.9240	442.647	92.382	54.657	-3.388	-0.507	9.948	842.686	-0.006467	-0.003826	0.000237
0.9260	508.381	101.944	59.720	-2.431	-0.512	9.952	967.827	-0.007136	-0.004180	0.000170
0.9280	572.943	111.448	64.207	-0.639	-0.510	9.958	1090.736	-0.007801	-0.004494	0.000045
0.9300	645.846	121.426	69.628	0.850	-0.498	9.963	1229.525	-0.008500	-0.004874	-0.000059
0.9320	735.701	133.044	75.832	4.128	-0.508	9.963	1400.585	-0.009313	-0.005308	-0.000289
0.9340	844.146	146.551	83.456	7.285	-0.508	9.961	1607.037	-0.010259	-0.005842	-0.000510
0.9360	941.364	159.252	90.984	11.008	-0.505	9.958	1792.116	-0.011148	-0.006369	-0.000771
0.9380	1010.375	169.021	96.184	13.175	-0.509	9.953	1923.494	-0.011831	-0.006733	-0.000922
0.9400	1059.924	175.511	100.299	15.453	-0.501	9.949	2017.822	-0.012286	-0.007021	-0.001082
0.9420	1108.766	181.541	104.055	18.304	-0.511	9.947	2110.806	-0.012708	-0.007284	-0.001281
0.9440	1168.895	188.963	108.830	20.345	-0.512	9.949	2225.275	-0.013227	-0.007618	-0.001424
0.9460	1220.036	195.453	112.862	23.150	-0.522	9.952	2322.636	-0.013682	-0.007900	-0.001621
0.9480	1247.568	199.594	115.243	24.015	-0.516	9.957	2375.050	-0.013972	-0.008067	-0.001681
0.9500	1260.403	201.413	116.607	24.724	-0.508	9.964	2399.483	-0.014099	-0.008162	-0.001731
0.9520	1270.727	203.680	117.924	25.639	-0.517	9.964	2419.138	-0.014258	-0.008255	-0.001795
0.9540	1287.784	206.055	119.423	26.710	-0.514	9.961	2451.611	-0.014424	-0.008360	-0.001870
0.9560	1299.041	207.875	120.379	27.987	-0.505	9.958	2473.040	-0.014551	-0.008427	-0.001959
0.9580	1296.681	208.363	120.920	27.250	-0.512	9.953	2468.548	-0.014585	-0.008464	-0.001908
0.9600	1288.731	208.070	120.837	27.043	-0.502	9.948	2453.413	-0.014565	-0.008459	-0.001893
0.9620	1276.227	207.486	120.797	26.377	-0.509	9.946	2429.609	-0.014524	-0.008456	-0.001846
0.9640	1248.786	205.457	119.852	26.223	-0.509	9.948	2377.367	-0.014382	-0.008390	-0.001836
0.9660	1175.146	198.745	115.426	22.376	-0.499	9.953	2237.177	-0.013912	-0.008080	-0.001566
0.9680	1071.180	188.338	108.401	18.358	-0.498	9.958	2039.251	-0.013184	-0.007588	-0.001285
0.9700	975.238	177.539	101.565	13.896	-0.504	9.963	1856.604	-0.012428	-0.007110	-0.000973
0.9720	903.328	169.230	96.142	11.049	-0.502	9.963	1719.704	-0.011846	-0.006730	-0.000773
0.9740	855.146	163.214	92.744	9.716	-0.505	9.961	1627.979	-0.011425	-0.006492	-0.000680
0.9760	800.533	156.376	88.643	7.576	-0.504	9.958	1524.010	-0.010946	-0.006205	-0.000530
0.9780	722.987	146.564	82.726	5.294	-0.501	9.952	1376.381	-0.010259	-0.005791	-0.000371
0.9800	636.303	134.837	76.466	3.113	-0.500	9.948	1211.357	-0.009439	-0.005353	-0.000218
0.9820	559.958	124.609	71.087	0.932	-0.511	9.946	1066.017	-0.008723	-0.004976	-0.000065
0.9840	498.192	116.007	66.464	-0.290	-0.506	9.949	948.429	-0.008120	-0.004653	0.000020
0.9860	437.492	106.723	61.564	-2.401	-0.498	9.953	832.872	-0.007471	-0.004309	0.000168
0.9880	374.162	96.747	56.692	-3.626	-0.504	9.957	712.309	-0.006772	-0.003968	0.000254
0.9900	314.394	87.227	51.946	-5.404	-0.497	9.963	598.526	-0.006106	-0.003636	0.000378
0.9920	265.086	78.930	47.970	-5.223	-0.504	9.963	504.656	-0.005525	-0.003358	0.000366
0.9940	226.568	71.857	44.378	-6.140	-0.507	9.961	431.328	-0.005030	-0.003106	0.000430
0.9960	188.396	64.813	40.843	-6.127	-0.497	9.958	358.658	-0.004537	-0.002859	0.000429
0.9980	150.074	57.905	36.989	-5.863	-0.502	9.952	285.702	-0.004053	-0.002589	0.000410
