# Supplementary material for: Evaluation of a Cold-Mixed High-Performance Polyurethane Mixture
Source: Hindawi journal article supplement (doi:10.1155/2019/1507971), 2019-11-07
Supplement: f1 [file 1507971.f1.zip › 1507971.f1/dynamic modulus data/PUM/specimen1/temp10/zhs-1-10_20Hz.csv]

Test Information
****************
Project name	zhs
Operator name	1
Target test temperature	10
Target confining stress	0
Average dynamic strain range from 75 to 125 micro-strain
Contact stress	5
Initial modulus	4000
Axial gauge length	70
Comments	Run at High Pressure
Specimen information
********************
Identification	zhs-1-10
Dimensions	Point 1	Point 2	Point 3	Point 4	Point 5	Point 6	Average	Std Dev.
Diameter (mm)	49.2	49.2	49.3				49.23	0.058
Height (mm)	101.3	101.2	101.3				101.27	0.058
Cross-sectional area (mm�)	1903.7
Conditioning time
Properties/Comments
Test Data	20Hz
*********
Test date and time	Fri	Mar 29	2019	11:04 AM
Dynamic modulus (MPa)	12905
Phase angle (Degrees)	3.95
Average temperature (�C)	10.0
Average confining pressure (kPa)	-0.5
Average micro-strain	98
Load drift (%)	-2.4
Load standard error (%)	8.9
Average deformation drift (%)	-1.7
Average deformation standard error (%)	12.0
Deformation uniformity (%)	56.2
Phase uniformity (Degrees)	2.6
Conditioning Cycles
Time (sec)	Axial stress (kPa)	Axial micro-strain #1	Axial micro-strain #2	Axial micro-strain #3	Confining pressure (kPa)	Temperature (�C)	Load (N)	Displacement #1 (mm)	Displacement #2 (mm)	Displacement #3 (mm)
0.0000	72.287	18.483	18.082	-5.892	-0.511	9.959	137.615	-0.001294	-0.001266	0.000412
0.0010	72.377	18.636	18.054	-5.766	-0.507	9.957	137.787	-0.001305	-0.001264	0.000404
0.0020	72.407	18.454	17.931	-5.613	-0.509	9.955	137.844	-0.001292	-0.001255	0.000393
0.0030	72.347	18.509	18.302	-5.433	-0.517	9.953	137.730	-0.001296	-0.001281	0.000380
0.0040	72.422	18.787	18.234	-5.765	-0.518	9.953	137.873	-0.001315	-0.001276	0.000404
0.0050	72.707	18.815	18.399	-5.364	-0.520	9.954	138.416	-0.001317	-0.001288	0.000375
0.0060	73.098	18.592	18.082	-5.016	-0.510	9.956	139.160	-0.001301	-0.001266	0.000351
0.0070	73.459	18.926	18.069	-5.239	-0.510	9.958	139.847	-0.001325	-0.001265	0.000367
0.0080	74.300	18.996	18.123	-5.364	-0.510	9.960	141.449	-0.001330	-0.001269	0.000376
0.0090	76.029	18.953	18.259	-5.961	-0.515	9.963	144.739	-0.001327	-0.001278	0.000417
0.0100	79.966	19.551	18.439	-5.614	-0.514	9.966	152.235	-0.001369	-0.001291	0.000393
0.0110	89.133	20.385	18.756	-5.711	-0.516	9.968	169.687	-0.001427	-0.001313	0.000400
0.0120	107.002	23.150	20.023	-5.822	-0.513	9.970	203.705	-0.001621	-0.001402	0.000408
0.0130	136.909	27.638	22.817	-6.099	-0.521	9.970	260.639	-0.001935	-0.001597	0.000427
0.0140	179.920	33.780	26.379	-6.668	-0.516	9.969	342.522	-0.002365	-0.001847	0.000467
0.0150	235.195	41.729	31.044	-6.278	-0.513	9.968	447.750	-0.002921	-0.002173	0.000439
0.0160	299.892	51.222	36.396	-6.348	-0.502	9.968	570.917	-0.003586	-0.002548	0.000444
0.0170	371.157	61.548	42.465	-6.015	-0.499	9.966	706.587	-0.004308	-0.002973	0.000421
0.0180	446.945	72.553	48.561	-5.628	-0.500	9.964	850.868	-0.005079	-0.003399	0.000394
0.0190	525.694	83.725	54.685	-4.919	-0.500	9.961	1000.786	-0.005861	-0.003828	0.000344
0.0200	605.089	94.870	61.068	-3.528	-0.499	9.958	1151.934	-0.006641	-0.004275	0.000247
0.0210	682.455	105.850	67.137	-2.416	-0.501	9.956	1299.219	-0.007410	-0.004700	0.000169
0.0220	755.253	116.119	72.667	-0.943	-0.503	9.955	1437.807	-0.008128	-0.005087	0.000066
0.0230	822.625	125.514	78.255	1.517	-0.512	9.953	1566.067	-0.008786	-0.005478	-0.000106
0.0240	883.520	134.281	83.113	3.045	-0.509	9.953	1681.995	-0.009400	-0.005818	-0.000213
0.0250	935.413	141.924	87.405	5.032	-0.515	9.954	1780.787	-0.009935	-0.006118	-0.000352
0.0260	974.728	147.496	90.516	6.491	-0.506	9.956	1855.631	-0.010325	-0.006336	-0.000454
0.0270	999.374	151.763	92.950	7.422	-0.508	9.958	1902.552	-0.010623	-0.006507	-0.000520
0.0280	1010.871	154.125	94.203	7.991	-0.510	9.960	1924.438	-0.010789	-0.006594	-0.000559
0.0290	1013.411	155.292	95.027	8.103	-0.508	9.962	1929.274	-0.010870	-0.006652	-0.000567
0.0300	1010.630	155.835	95.370	8.173	-0.510	9.965	1923.981	-0.010908	-0.006676	-0.000572
0.0310	1005.385	155.584	95.151	7.755	-0.506	9.968	1913.996	-0.010891	-0.006661	-0.000543
0.0320	998.698	155.348	95.247	7.366	-0.505	9.971	1901.264	-0.010874	-0.006667	-0.000516
0.0330	991.093	155.445	95.318	7.353	-0.509	9.971	1886.787	-0.010881	-0.006672	-0.000515
0.0340	982.212	154.861	95.579	7.395	-0.510	9.970	1869.879	-0.010840	-0.006691	-0.000518
0.0350	969.933	154.458	94.934	7.243	-0.506	9.968	1846.504	-0.010812	-0.006645	-0.000507
0.0360	949.179	152.416	94.176	6.297	-0.494	9.968	1806.993	-0.010669	-0.006592	-0.000441
0.0370	913.908	149.122	92.125	4.476	-0.490	9.966	1739.845	-0.010439	-0.006449	-0.000313
0.0380	861.504	143.981	89.001	2.725	-0.495	9.964	1640.081	-0.010079	-0.006230	-0.000191
0.0390	794.417	136.532	84.474	0.779	-0.492	9.961	1512.365	-0.009557	-0.005913	-0.000055
0.0400	719.245	127.930	79.095	-1.361	-0.494	9.959	1369.257	-0.008955	-0.005537	0.000095
0.0410	642.795	118.370	73.508	-3.251	-0.500	9.956	1223.717	-0.008286	-0.005146	0.000228
0.0420	570.193	108.559	68.183	-5.154	-0.505	9.954	1085.501	-0.007599	-0.004773	0.000361
0.0430	506.382	100.290	63.739	-5.765	-0.514	9.953	964.022	-0.007020	-0.004462	0.000404
0.0440	453.347	92.466	59.624	-6.669	-0.509	9.953	863.056	-0.006473	-0.004174	0.000467
0.0450	409.810	85.797	55.881	-7.266	-0.511	9.954	780.172	-0.006006	-0.003912	0.000509
0.0460	371.683	79.877	52.578	-7.974	-0.498	9.956	707.588	-0.005591	-0.003680	0.000558
0.0470	334.863	73.735	49.179	-8.306	-0.501	9.958	637.493	-0.005161	-0.003443	0.000581
0.0480	297.908	67.843	45.905	-8.403	-0.504	9.960	567.141	-0.004749	-0.003213	0.000588
0.0490	261.449	61.979	42.505	-8.432	-0.506	9.963	497.732	-0.004339	-0.002975	0.000590
0.0500	226.809	56.030	39.424	-8.334	-0.506	9.966	431.786	-0.003922	-0.002760	0.000583
0.0510	195.520	50.500	36.054	-8.211	-0.502	9.969	372.219	-0.003535	-0.002524	0.000575
0.0520	168.153	45.441	32.971	-8.170	-0.500	9.970	320.120	-0.003181	-0.002308	0.000572
0.0530	145.881	40.814	30.782	-8.142	-0.509	9.970	277.719	-0.002857	-0.002155	0.000570
0.0540	128.703	37.618	29.035	-7.738	-0.509	9.970	245.018	-0.002633	-0.002032	0.000542
0.0550	116.891	34.838	27.494	-7.404	-0.513	9.968	222.530	-0.002439	-0.001925	0.000518
0.0560	108.821	32.669	26.241	-7.029	-0.506	9.967	207.167	-0.002287	-0.001837	0.000492
0.0570	103.726	31.500	25.484	-7.015	-0.508	9.966	197.468	-0.002205	-0.001784	0.000491
0.0580	100.645	30.459	24.865	-7.433	-0.504	9.964	191.603	-0.002132	-0.001741	0.000520
0.0590	99.729	29.835	24.743	-7.210	-0.510	9.961	189.857	-0.002088	-0.001732	0.000505
0.0600	100.465	29.556	24.467	-7.279	-0.512	9.959	191.259	-0.002069	-0.001713	0.000510
0.0610	102.990	29.501	24.604	-7.098	-0.514	9.956	196.066	-0.002065	-0.001722	0.000497
0.0620	107.664	29.474	24.411	-7.072	-0.513	9.954	204.964	-0.002063	-0.001709	0.000495
0.0630	119.656	31.183	25.471	-7.002	-0.518	9.952	227.795	-0.002183	-0.001783	0.000490
0.0640	145.385	34.629	27.370	-7.543	-0.515	9.953	276.775	-0.002424	-0.001916	0.000528
0.0650	188.471	40.813	30.644	-7.876	-0.515	9.953	358.801	-0.002857	-0.002145	0.000551
0.0660	247.653	49.235	35.062	-7.682	-0.509	9.956	471.468	-0.003446	-0.002454	0.000538
0.0670	318.903	58.907	41.074	-7.210	-0.507	9.958	607.109	-0.004124	-0.002875	0.000505
0.0680	398.779	70.066	47.584	-6.488	-0.508	9.960	759.172	-0.004905	-0.003331	0.000454
0.0690	484.726	82.349	54.134	-4.905	-0.509	9.962	922.794	-0.005764	-0.003789	0.000343
0.0700	572.477	94.507	60.698	-3.654	-0.512	9.965	1089.849	-0.006616	-0.004249	0.000256
0.0710	657.042	106.570	67.330	-2.500	-0.506	9.968	1250.839	-0.007460	-0.004713	0.000175
0.0720	734.634	117.507	72.902	-0.832	-0.508	9.970	1398.554	-0.008226	-0.005103	0.000058
0.0730	803.734	126.987	78.819	1.280	-0.511	9.970	1530.104	-0.008889	-0.005517	-0.000090
0.0740	864.690	135.810	83.279	3.378	-0.513	9.969	1646.147	-0.009507	-0.005830	-0.000236
0.0750	916.628	143.134	87.586	5.241	-0.516	9.968	1745.024	-0.010019	-0.006131	-0.000367
0.0760	957.204	148.886	90.668	6.479	-0.508	9.967	1822.271	-0.010422	-0.006347	-0.000454
0.0770	984.721	153.346	92.854	7.549	-0.503	9.966	1874.657	-0.010734	-0.006500	-0.000528
0.0780	1000.276	155.804	94.491	7.966	-0.500	9.964	1904.268	-0.010906	-0.006614	-0.000558
0.0790	1007.009	157.361	95.083	8.284	-0.496	9.962	1917.086	-0.011015	-0.006656	-0.000580
0.0800	1007.820	158.377	95.772	8.630	-0.497	9.959	1918.631	-0.011086	-0.006704	-0.000604
0.0810	1005.295	158.490	96.005	9.005	-0.496	9.957	1913.824	-0.011094	-0.006720	-0.000630
0.0820	1001.072	158.560	96.074	8.173	-0.494	9.955	1905.785	-0.011099	-0.006725	-0.000572
0.0830	995.857	158.517	96.210	8.160	-0.502	9.953	1895.857	-0.011096	-0.006735	-0.000571
0.0840	989.485	158.237	96.348	8.090	-0.499	9.953	1883.726	-0.011077	-0.006744	-0.000566
0.0850	980.784	157.986	96.143	8.520	-0.501	9.954	1867.161	-0.011059	-0.006730	-0.000596
0.0860	964.223	156.472	95.304	7.921	-0.494	9.956	1835.632	-0.010953	-0.006671	-0.000555
0.0870	930.754	153.262	93.611	6.239	-0.497	9.958	1771.917	-0.010728	-0.006553	-0.000437
0.0880	874.849	147.899	90.363	4.071	-0.497	9.960	1665.487	-0.010353	-0.006325	-0.000285
0.0890	798.685	139.492	85.244	1.305	-0.498	9.963	1520.491	-0.009764	-0.005967	-0.000091
0.0900	712.422	129.375	79.548	-0.890	-0.496	9.965	1356.268	-0.009056	-0.005568	0.000062
0.0910	627.301	118.828	73.107	-2.946	-0.494	9.968	1194.220	-0.008318	-0.005117	0.000206
0.0920	550.686	108.308	67.522	-4.823	-0.493	9.970	1048.365	-0.007582	-0.004727	0.000338
0.0930	487.161	99.538	62.707	-5.768	-0.507	9.970	927.429	-0.006968	-0.004389	0.000404
0.0940	437.116	92.438	58.853	-6.837	-0.512	9.970	832.157	-0.006471	-0.004120	0.000479
0.0950	397.246	86.005	55.605	-7.113	-0.518	9.968	756.254	-0.006020	-0.003892	0.000498
0.0960	362.125	80.418	52.550	-7.847	-0.512	9.967	689.392	-0.005629	-0.003679	0.000549
0.0970	327.168	74.789	49.372	-8.793	-0.509	9.966	622.845	-0.005235	-0.003456	0.000616
0.0980	290.800	68.619	46.181	-8.265	-0.512	9.964	553.608	-0.004803	-0.003233	0.000579
0.0990	253.965	62.659	43.057	-8.294	-0.509	9.962	483.484	-0.004386	-0.003014	0.000581
0.1000	218.393	56.488	39.617	-8.185	-0.507	9.959	415.764	-0.003954	-0.002773	0.000573
0.1010	185.946	50.622	36.230	-8.170	-0.502	9.956	353.994	-0.003544	-0.002536	0.000572
0.1020	158.219	45.620	33.313	-8.477	-0.502	9.955	301.208	-0.003193	-0.002332	0.000593
0.1030	136.563	41.383	31.223	-7.766	-0.510	9.953	259.981	-0.002897	-0.002186	0.000544
0.1040	121.084	37.630	29.256	-7.586	-0.510	9.954	230.513	-0.002634	-0.002048	0.000531
0.1050	111.376	35.601	28.183	-6.945	-0.512	9.954	212.030	-0.002492	-0.001973	0.000486
0.1060	105.680	34.044	27.343	-7.155	-0.509	9.957	201.187	-0.002383	-0.001914	0.000501
0.1070	102.854	33.030	27.123	-7.392	-0.510	9.959	195.808	-0.002312	-0.001899	0.000517
0.1080	102.028	32.627	26.463	-7.016	-0.519	9.961	194.235	-0.002284	-0.001852	0.000491
0.1090	102.659	32.279	26.215	-7.127	-0.521	9.963	195.436	-0.002260	-0.001835	0.000499
0.1100	104.508	32.169	26.049	-7.433	-0.526	9.966	198.956	-0.002252	-0.001823	0.000520
0.1110	107.739	32.516	26.035	-7.363	-0.523	9.969	205.107	-0.002276	-0.001822	0.000515
0.1120	114.141	33.031	26.186	-6.934	-0.522	9.970	217.295	-0.002312	-0.001833	0.000485
0.1130	129.470	34.866	27.135	-7.295	-0.529	9.970	246.477	-0.002441	-0.001899	0.000511
0.1140	158.760	39.036	29.116	-7.880	-0.530	9.970	302.238	-0.002733	-0.002038	0.000552
0.1150	204.597	45.247	33.218	-7.670	-0.530	9.968	389.500	-0.003167	-0.002325	0.000537
0.1160	264.725	53.376	37.966	-7.684	-0.522	9.968	503.969	-0.003736	-0.002658	0.000538
0.1170	335.795	63.298	43.704	-7.128	-0.522	9.966	639.267	-0.004431	-0.003059	0.000499
0.1180	415.055	74.485	50.171	-6.309	-0.520	9.964	790.157	-0.005214	-0.003512	0.000442
0.1190	500.206	86.491	56.527	-5.210	-0.517	9.962	952.263	-0.006054	-0.003957	0.000365
0.1200	587.911	98.983	62.995	-3.862	-0.515	9.959	1119.232	-0.006929	-0.004410	0.000270
0.1210	674.099	111.017	69.132	-2.209	-0.512	9.957	1283.312	-0.007771	-0.004839	0.000155
0.1220	754.080	121.857	75.063	-0.013	-0.512	9.955	1435.575	-0.008530	-0.005254	0.000001
0.1230	824.549	131.390	80.442	1.988	-0.520	9.953	1569.729	-0.009197	-0.005631	-0.000139
0.1240	884.016	139.644	84.873	3.907	-0.521	9.953	1682.940	-0.009775	-0.005941	-0.000273
0.1250	931.476	146.300	89.098	6.269	-0.524	9.954	1773.291	-0.010241	-0.006237	-0.000439
0.1260	965.410	151.471	91.658	7.325	-0.520	9.956	1837.893	-0.010603	-0.006416	-0.000513
0.1270	986.104	154.639	93.584	7.518	-0.521	9.958	1877.289	-0.010825	-0.006551	-0.000526
0.1280	995.857	156.516	94.588	7.768	-0.519	9.960	1895.857	-0.010956	-0.006621	-0.000544
0.1290	998.818	157.752	95.523	8.659	-0.514	9.963	1901.493	-0.011043	-0.006687	-0.000606
0.1300	998.037	158.128	95.661	8.575	-0.510	9.965	1900.005	-0.011069	-0.006696	-0.000600
0.1310	995.166	158.447	95.717	8.380	-0.506	9.968	1894.541	-0.011091	-0.006700	-0.000587
0.1320	991.003	158.156	95.415	8.852	-0.504	9.970	1886.616	-0.011071	-0.006679	-0.000620
0.1330	986.104	157.905	95.716	8.797	-0.509	9.970	1877.289	-0.011053	-0.006700	-0.000616
0.1340	980.123	157.905	95.797	8.089	-0.508	9.970	1865.902	-0.011053	-0.006706	-0.000566
0.1350	971.962	157.433	95.660	7.784	-0.517	9.968	1850.367	-0.011020	-0.006696	-0.000545
0.1360	956.648	156.335	95.001	7.408	-0.510	9.967	1821.213	-0.010943	-0.006650	-0.000519
0.1370	926.096	153.639	93.502	6.296	-0.510	9.966	1763.048	-0.010755	-0.006545	-0.000441
0.1380	875.811	148.330	90.516	4.364	-0.509	9.964	1667.318	-0.010383	-0.006336	-0.000305
0.1390	806.785	141.326	86.580	2.196	-0.506	9.961	1535.912	-0.009893	-0.006061	-0.000154
0.1400	727.570	132.003	80.979	-0.066	-0.506	9.959	1385.107	-0.009240	-0.005669	0.000005
0.1410	647.243	121.970	75.434	-2.318	-0.509	9.957	1232.185	-0.008538	-0.005280	0.000162
0.1420	572.432	112.130	69.903	-3.971	-0.511	9.955	1089.764	-0.007849	-0.004893	0.000278
0.1430	507.930	103.388	65.417	-5.209	-0.510	9.953	966.969	-0.007237	-0.004579	0.000365
0.1440	455.346	95.940	61.440	-6.695	-0.500	9.953	866.861	-0.006716	-0.004301	0.000469
0.1450	412.440	89.645	57.737	-7.390	-0.499	9.953	785.179	-0.006275	-0.004042	0.000517
0.1460	374.568	83.545	54.393	-7.835	-0.496	9.956	713.081	-0.005848	-0.003808	0.000548
0.1470	337.192	77.680	51.105	-7.987	-0.496	9.958	641.928	-0.005438	-0.003577	0.000559
0.1480	298.690	71.704	48.092	-8.238	-0.496	9.960	568.628	-0.005019	-0.003366	0.000577
0.1490	259.886	65.133	44.460	-8.016	-0.491	9.962	494.757	-0.004559	-0.003112	0.000561
0.1500	222.285	59.115	40.827	-8.253	-0.499	9.965	423.174	-0.004138	-0.002858	0.000578
0.1510	188.066	52.862	37.193	-8.794	-0.498	9.968	358.028	-0.003700	-0.002604	0.000616
0.1520	158.805	47.234	34.070	-8.712	-0.498	9.970	302.324	-0.003306	-0.002385	0.000610
0.1530	136.097	42.954	31.828	-7.656	-0.498	9.970	259.094	-0.003007	-0.002228	0.000536
0.1540	119.957	39.354	29.985	-7.698	-0.497	9.970	228.367	-0.002755	-0.002099	0.000539
0.1550	110.203	36.908	28.665	-7.586	-0.504	9.968	209.799	-0.002584	-0.002007	0.000531
0.1560	105.244	35.546	27.798	-7.377	-0.502	9.968	200.357	-0.002488	-0.001946	0.000516
0.1570	103.666	34.587	27.425	-7.404	-0.501	9.966	197.353	-0.002421	-0.001920	0.000518
0.1580	104.192	34.170	26.820	-7.308	-0.500	9.964	198.355	-0.002392	-0.001877	0.000512
0.1590	106.146	34.198	26.738	-7.183	-0.506	9.962	202.074	-0.002394	-0.001872	0.000503
0.1600	109.302	34.268	26.876	-7.197	-0.509	9.959	208.082	-0.002399	-0.001881	0.000504
0.1610	115.313	34.490	26.876	-7.628	-0.509	9.956	219.526	-0.002414	-0.001881	0.000534
0.1620	128.688	36.115	27.260	-8.099	-0.505	9.954	244.989	-0.002528	-0.001908	0.000567
0.1630	154.387	39.520	29.171	-7.405	-0.514	9.952	293.913	-0.002766	-0.002042	0.000518
0.1640	194.438	44.856	32.488	-7.627	-0.514	9.952	370.159	-0.003140	-0.002274	0.000534
0.1650	248.119	52.597	36.809	-7.626	-0.521	9.953	472.355	-0.003682	-0.002577	0.000534
0.1660	312.065	61.325	41.762	-7.291	-0.516	9.956	594.091	-0.004293	-0.002923	0.000510
0.1670	383.525	71.136	47.583	-6.667	-0.514	9.958	730.133	-0.004979	-0.003331	0.000467
0.1680	460.035	82.308	53.404	-5.583	-0.516	9.960	875.788	-0.005762	-0.003738	0.000391
0.1690	538.798	93.342	59.239	-4.430	-0.516	9.963	1025.734	-0.006534	-0.004147	0.000310
0.1700	616.525	104.264	65.156	-3.069	-0.517	9.966	1173.706	-0.007298	-0.004561	0.000215
0.1710	689.729	114.562	70.963	-1.528	-0.515	9.968	1313.066	-0.008019	-0.004967	0.000107
0.1720	755.884	123.372	75.738	0.099	-0.509	9.971	1439.009	-0.008636	-0.005302	-0.000007
0.1730	815.066	131.515	80.608	2.669	-0.513	9.970	1551.676	-0.009206	-0.005643	-0.000187
0.1740	868.341	139.074	84.694	4.213	-0.509	9.970	1653.099	-0.009735	-0.005929	-0.000295
0.1750	914.704	145.411	88.588	5.754	-0.510	9.968	1741.362	-0.010179	-0.006201	-0.000403
0.1760	951.599	150.679	91.491	6.962	-0.501	9.968	1811.600	-0.010548	-0.006404	-0.000487
0.1770	976.786	154.626	93.734	7.948	-0.498	9.966	1859.550	-0.010824	-0.006561	-0.000556
0.1780	990.928	156.821	94.972	8.700	-0.501	9.964	1886.473	-0.010977	-0.006648	-0.000609
0.1790	996.940	158.349	95.784	8.965	-0.502	9.961	1897.917	-0.011084	-0.006705	-0.000628
0.1800	997.631	158.753	96.307	8.937	-0.501	9.959	1899.233	-0.011113	-0.006741	-0.000626
0.1810	995.271	159.238	96.431	8.493	-0.495	9.956	1894.741	-0.011147	-0.006750	-0.000594
0.1820	990.898	159.390	96.651	8.132	-0.491	9.954	1886.415	-0.011157	-0.006766	-0.000569
0.1830	985.277	159.322	96.651	8.689	-0.497	9.953	1875.715	-0.011153	-0.006766	-0.000608
0.1840	978.169	159.086	96.239	8.604	-0.500	9.953	1862.183	-0.011136	-0.006737	-0.000602
0.1850	968.476	158.600	96.239	8.533	-0.505	9.954	1843.729	-0.011102	-0.006737	-0.000597
0.1860	951.013	157.085	95.359	7.948	-0.502	9.956	1810.484	-0.010996	-0.006675	-0.000556
0.1870	919.528	154.180	93.806	6.503	-0.504	9.958	1750.546	-0.010793	-0.006566	-0.000455
0.1880	870.866	149.247	91.011	4.072	-0.505	9.960	1657.906	-0.010447	-0.006371	-0.000285
0.1890	806.469	142.189	86.676	1.946	-0.500	9.963	1535.311	-0.009953	-0.006067	-0.000136
0.1900	732.259	133.587	81.350	0.182	-0.497	9.965	1394.033	-0.009351	-0.005695	-0.000013
0.1910	653.841	123.998	75.874	-2.139	-0.497	9.968	1244.745	-0.008680	-0.005311	0.000150
0.1920	576.129	113.937	70.274	-4.084	-0.494	9.970	1096.802	-0.007976	-0.004919	0.000286
0.1930	504.789	104.154	64.921	-5.198	-0.506	9.970	960.989	-0.007291	-0.004544	0.000364
0.1940	443.714	95.232	60.380	-6.489	-0.503	9.969	844.717	-0.006666	-0.004227	0.000454
0.1950	393.880	87.978	56.500	-7.254	-0.505	9.968	749.846	-0.006158	-0.003955	0.000508
0.1960	352.581	81.253	52.881	-7.892	-0.496	9.967	671.225	-0.005688	-0.003702	0.000552
0.1970	315.852	75.319	49.552	-8.073	-0.498	9.966	601.301	-0.005272	-0.003469	0.000565
0.1980	281.302	69.580	46.510	-8.891	-0.500	9.963	535.526	-0.004871	-0.003256	0.000622
0.1990	248.465	63.729	43.152	-9.114	-0.501	9.961	473.013	-0.004461	-0.003021	0.000638
0.2000	217.671	58.463	40.180	-8.475	-0.508	9.958	414.391	-0.004092	-0.002813	0.000593
0.2010	189.493	53.461	37.193	-8.545	-0.510	9.956	360.746	-0.003742	-0.002604	0.000598
0.2020	164.877	48.541	34.509	-8.294	-0.509	9.954	313.883	-0.003398	-0.002416	0.000581
0.2030	145.024	44.608	32.445	-8.113	-0.512	9.953	276.089	-0.003123	-0.002271	0.000568
0.2040	130.507	41.730	31.043	-7.960	-0.508	9.953	248.451	-0.002921	-0.002173	0.000557
0.2050	120.934	39.353	29.971	-7.989	-0.509	9.954	230.227	-0.002755	-0.002098	0.000559
0.2060	115.283	37.768	28.871	-7.975	-0.506	9.957	219.469	-0.002644	-0.002021	0.000558
0.2070	112.848	36.865	28.485	-7.420	-0.510	9.959	214.834	-0.002581	-0.001994	0.000519
0.2080	112.758	36.019	28.348	-7.781	-0.510	9.961	214.663	-0.002521	-0.001984	0.000545
0.2090	114.126	36.020	28.403	-7.823	-0.506	9.963	217.266	-0.002521	-0.001988	0.000548
0.2100	116.440	36.186	28.184	-7.726	-0.509	9.965	221.672	-0.002533	-0.001973	0.000541
0.2110	119.987	36.087	28.293	-7.851	-0.509	9.968	228.424	-0.002526	-0.001980	0.000550
0.2120	127.666	36.823	28.305	-8.309	-0.513	9.970	243.044	-0.002578	-0.001981	0.000582
0.2130	145.220	39.241	29.764	-7.959	-0.521	9.970	276.461	-0.002747	-0.002083	0.000557
0.2140	177.110	43.341	32.379	-7.834	-0.521	9.970	337.172	-0.003034	-0.002267	0.000548
0.2150	225.065	50.248	36.149	-7.918	-0.518	9.968	428.467	-0.003517	-0.002530	0.000554
0.2160	286.832	58.837	40.730	-8.240	-0.516	9.968	546.055	-0.004119	-0.002851	0.000577
0.2170	359.119	68.676	46.496	-6.726	-0.512	9.966	683.670	-0.004807	-0.003255	0.000471
0.2180	439.175	80.100	52.633	-5.809	-0.516	9.964	836.077	-0.005607	-0.003684	0.000407
0.2190	523.770	92.190	58.743	-4.640	-0.516	9.962	997.124	-0.006453	-0.004112	0.000325
0.2200	608.696	103.973	65.073	-3.000	-0.516	9.959	1158.800	-0.007278	-0.004555	0.000210
0.2210	689.533	115.188	71.223	-1.179	-0.518	9.957	1312.695	-0.008063	-0.004986	0.000083
0.2220	762.587	125.221	76.618	0.238	-0.513	9.955	1451.769	-0.008765	-0.005363	-0.000017
0.2230	826.051	133.726	81.598	2.239	-0.521	9.953	1572.590	-0.009361	-0.005712	-0.000157
0.2240	880.575	141.507	85.865	4.392	-0.518	9.953	1676.388	-0.009905	-0.006011	-0.000307
0.2250	925.645	147.719	89.443	6.226	-0.528	9.954	1762.190	-0.010340	-0.006261	-0.000436
0.2260	960.165	152.528	92.180	6.991	-0.517	9.956	1827.908	-0.010677	-0.006453	-0.000489
0.2270	983.309	156.351	94.326	8.006	-0.513	9.958	1871.967	-0.010945	-0.006603	-0.000560
0.2280	995.963	158.267	95.756	8.742	-0.513	9.960	1896.057	-0.011079	-0.006703	-0.000612
0.2290	1001.253	159.614	96.238	8.908	-0.514	9.963	1906.128	-0.011173	-0.006737	-0.000624
0.2300	1001.809	160.183	96.526	9.034	-0.514	9.965	1907.187	-0.011213	-0.006757	-0.000632
0.2310	999.930	160.254	96.803	9.604	-0.506	9.968	1903.610	-0.011218	-0.006776	-0.000672
0.2320	996.519	160.532	96.447	9.369	-0.500	9.970	1897.116	-0.011237	-0.006751	-0.000656
0.2330	991.995	160.422	96.611	9.508	-0.509	9.970	1888.504	-0.011230	-0.006763	-0.000666
0.2340	986.059	160.142	96.403	9.563	-0.512	9.970	1877.203	-0.011210	-0.006748	-0.000669
0.2350	977.688	159.711	96.334	9.354	-0.513	9.968	1861.267	-0.011180	-0.006743	-0.000655
0.2360	961.427	158.001	95.647	8.188	-0.505	9.968	1830.311	-0.011060	-0.006695	-0.000573
0.2370	928.635	155.417	93.969	6.547	-0.506	9.966	1767.883	-0.010879	-0.006578	-0.000458
0.2380	874.563	149.998	91.107	4.533	-0.512	9.964	1664.944	-0.010500	-0.006378	-0.000317
0.2390	801.690	142.048	86.388	1.947	-0.508	9.961	1526.213	-0.009943	-0.006047	-0.000136
0.2400	719.365	132.640	80.883	-0.429	-0.506	9.959	1369.486	-0.009285	-0.005662	0.000030
0.2410	636.829	122.246	74.856	-2.403	-0.502	9.956	1212.358	-0.008557	-0.005240	0.000168
0.2420	559.928	111.825	69.117	-4.405	-0.502	9.954	1065.960	-0.007828	-0.004838	0.000308
0.2430	493.398	103.041	64.412	-5.907	-0.513	9.952	939.302	-0.007213	-0.004509	0.000413
0.2440	439.761	94.869	60.202	-6.683	-0.517	9.953	837.193	-0.006641	-0.004214	0.000468
0.2450	397.411	88.545	57.105	-7.279	-0.520	9.953	756.569	-0.006198	-0.003997	0.000510
0.2460	361.644	82.822	53.926	-8.099	-0.515	9.956	688.477	-0.005798	-0.003775	0.000567
0.2470	327.304	77.334	50.926	-8.378	-0.515	9.958	623.102	-0.005413	-0.003565	0.000586
0.2480	292.077	71.872	47.817	-8.031	-0.516	9.960	556.040	-0.005031	-0.003347	0.000562
0.2490	256.520	65.910	44.500	-8.380	-0.514	9.963	488.348	-0.004614	-0.003115	0.000587
0.2500	39.991	12.617	12.866	-3.586	-0.526	9.952	76.132	-0.000883	-0.000901	0.000251
0.2510	40.487	12.673	12.867	-3.989	-0.520	9.955	77.076	-0.000887	-0.000901	0.000279
0.2520	40.937	12.784	12.852	-4.419	-0.510	9.957	77.934	-0.000895	-0.000900	0.000309
0.2530	41.569	12.743	12.880	-4.169	-0.512	9.959	79.136	-0.000892	-0.000902	0.000292
0.2540	42.606	12.855	13.031	-4.376	-0.508	9.961	81.110	-0.000900	-0.000912	0.000306
0.2550	44.093	13.173	13.265	-4.917	-0.516	9.964	83.942	-0.000922	-0.000929	0.000344
0.2560	45.912	13.339	13.265	-5.029	-0.515	9.967	87.404	-0.000934	-0.000929	0.000352
0.2570	49.714	13.978	13.142	-4.320	-0.514	9.969	94.643	-0.000978	-0.000920	0.000302
0.2580	57.724	14.924	14.037	-4.669	-0.526	9.969	109.892	-0.001045	-0.000983	0.000327
0.2590	71.806	16.703	15.659	-5.877	-0.530	9.969	136.700	-0.001169	-0.001096	0.000411
0.2600	93.236	20.203	17.530	-6.419	-0.525	9.968	177.498	-0.001414	-0.001227	0.000449
0.2610	123.398	24.733	20.008	-6.723	-0.510	9.967	234.919	-0.001731	-0.001401	0.000471
0.2620	164.245	30.557	23.737	-7.598	-0.512	9.965	312.681	-0.002139	-0.001662	0.000532
0.2630	216.635	38.534	28.650	-8.252	-0.515	9.963	412.416	-0.002697	-0.002006	0.000578
0.2640	279.874	47.484	34.347	-8.030	-0.517	9.961	532.808	-0.003324	-0.002404	0.000562
0.2650	352.837	58.198	40.277	-7.975	-0.520	9.959	671.711	-0.004074	-0.002819	0.000558
0.2660	435.719	69.871	46.923	-7.600	-0.517	9.956	829.496	-0.004891	-0.003285	0.000532
0.2670	528.444	82.768	54.244	-6.266	-0.517	9.954	1006.021	-0.005794	-0.003797	0.000439
0.2680	630.321	97.163	62.237	-3.669	-0.527	9.952	1199.970	-0.006801	-0.004357	0.000257
0.2690	737.955	112.200	70.383	-1.125	-0.523	9.952	1404.877	-0.007854	-0.004927	0.000079
0.2700	846.490	126.722	78.570	2.128	-0.525	9.953	1611.500	-0.008871	-0.005500	-0.000149
0.2710	949.420	140.452	86.399	5.129	-0.521	9.955	1807.451	-0.009832	-0.006048	-0.000359
0.2720	1040.417	152.305	93.362	8.506	-0.519	9.958	1980.686	-0.010661	-0.006535	-0.000595
0.2730	1115.168	162.366	99.280	11.396	-0.523	9.959	2122.993	-0.011366	-0.006950	-0.000798
0.2740	1172.607	170.481	103.725	13.564	-0.526	9.962	2232.342	-0.011934	-0.007261	-0.000950
0.2750	1214.776	176.443	107.316	15.411	-0.529	9.964	2312.622	-0.012351	-0.007512	-0.001079
0.2760	1245.660	181.321	110.096	17.204	-0.522	9.967	2371.416	-0.012692	-0.007707	-0.001204
0.2770	1268.999	184.864	112.230	18.511	-0.521	9.970	2415.848	-0.012940	-0.007856	-0.001296
0.2780	1288.250	188.046	114.256	19.679	-0.526	9.970	2452.497	-0.013163	-0.007998	-0.001378
0.2790	1305.322	191.047	116.072	20.430	-0.521	9.969	2484.999	-0.013373	-0.008125	-0.001430
0.2800	1319.449	193.547	117.648	21.373	-0.524	9.968	2511.892	-0.013548	-0.008235	-0.001496
0.2810	1328.181	195.507	118.589	22.095	-0.523	9.967	2528.515	-0.013685	-0.008301	-0.001547
0.2820	1329.443	196.299	119.491	21.900	-0.521	9.966	2530.918	-0.013741	-0.008364	-0.001533
0.2830	1323.372	196.675	119.325	21.609	-0.527	9.964	2519.360	-0.013767	-0.008353	-0.001513
0.2840	1310.297	196.218	119.395	21.388	-0.521	9.961	2494.469	-0.013735	-0.008358	-0.001497
0.2850	1284.298	194.397	118.159	20.277	-0.518	9.959	2444.973	-0.013608	-0.008271	-0.001419
0.2860	1235.906	190.270	115.799	18.262	-0.514	9.956	2352.848	-0.013319	-0.008106	-0.001278
0.2870	1161.410	183.085	111.140	15.565	-0.511	9.954	2211.027	-0.012816	-0.007780	-0.001090
0.2880	1066.251	173.524	105.030	12.021	-0.518	9.952	2029.867	-0.012147	-0.007352	-0.000841
0.2890	965.876	162.741	98.331	8.061	-0.522	9.952	1838.779	-0.011392	-0.006883	-0.000564
0.2900	871.227	151.498	91.850	5.073	-0.531	9.952	1658.592	-0.010605	-0.006429	-0.000355
0.2910	787.053	140.978	85.988	2.600	-0.524	9.955	1498.346	-0.009868	-0.006019	-0.000182
0.2920	710.348	131.194	80.030	0.404	-0.521	9.957	1352.320	-0.009184	-0.005602	-0.000028
0.2930	637.295	121.718	74.539	-1.277	-0.522	9.959	1213.245	-0.008520	-0.005218	0.000089
0.2940	565.774	112.228	68.787	-2.931	-0.520	9.961	1077.089	-0.007856	-0.004815	0.000205
0.2950	496.569	102.209	63.764	-4.696	-0.520	9.964	945.339	-0.007155	-0.004463	0.000329
0.2960	431.330	92.510	58.605	-6.266	-0.523	9.967	821.142	-0.006476	-0.004102	0.000439
0.2970	371.592	83.309	53.582	-7.364	-0.525	9.969	707.417	-0.005832	-0.003751	0.000515
0.2980	319.233	74.805	49.317	-7.766	-0.524	9.969	607.738	-0.005236	-0.003452	0.000544
0.2990	275.215	67.620	45.079	-8.531	-0.521	9.969	523.939	-0.004733	-0.003156	0.000597
0.3000	239.508	61.005	41.694	-8.434	-0.522	9.968	455.961	-0.004270	-0.002919	0.000590
0.3010	210.052	55.391	38.694	-8.004	-0.516	9.967	399.885	-0.003877	-0.002709	0.000560
0.3020	185.285	50.429	35.858	-8.100	-0.514	9.966	352.736	-0.003530	-0.002510	0.000567
0.3030	164.125	46.190	33.203	-8.240	-0.513	9.963	312.452	-0.003233	-0.002324	0.000577
0.3040	146.948	42.647	31.265	-7.696	-0.514	9.961	279.751	-0.002985	-0.002189	0.000539
0.3050	133.708	39.979	29.820	-7.571	-0.514	9.958	254.545	-0.002799	-0.002087	0.000530
0.3060	124.555	37.478	28.692	-7.961	-0.518	9.955	237.122	-0.002623	-0.002008	0.000557
0.3070	119.220	36.172	27.976	-8.018	-0.520	9.953	226.965	-0.002532	-0.001958	0.000561
0.3080	117.477	35.172	27.742	-7.158	-0.529	9.952	223.646	-0.002462	-0.001942	0.000501
0.3090	118.709	34.741	27.274	-7.351	-0.527	9.952	225.992	-0.002432	-0.001909	0.000515
0.3100	123.113	35.117	27.370	-7.544	-0.526	9.953	234.375	-0.002458	-0.001916	0.000528
0.3110	134.579	35.936	27.605	-7.308	-0.517	9.955	256.205	-0.002516	-0.001932	0.000512
0.3120	159.466	39.147	28.939	-7.239	-0.521	9.958	303.583	-0.002740	-0.002026	0.000507
0.3130	202.523	44.772	32.200	-7.933	-0.521	9.960	385.551	-0.003134	-0.002254	0.000555
0.3140	263.974	53.012	37.470	-8.016	-0.517	9.962	502.539	-0.003711	-0.002623	0.000561
0.3150	340.408	63.602	43.511	-7.266	-0.522	9.965	648.050	-0.004452	-0.003046	0.000509
0.3160	428.325	75.790	50.309	-6.017	-0.521	9.967	815.420	-0.005305	-0.003522	0.000421
0.3170	525.423	89.535	57.216	-4.390	-0.514	9.970	1000.271	-0.006267	-0.004005	0.000307
0.3180	628.578	104.083	65.018	-2.195	-0.512	9.969	1196.651	-0.007286	-0.004551	0.000154
0.3190	734.348	118.202	72.640	0.071	-0.506	9.969	1398.010	-0.008274	-0.005085	-0.000005
0.3200	837.939	132.044	80.730	2.600	-0.509	9.968	1595.221	-0.009243	-0.005651	-0.000182
0.3210	933.805	144.384	87.708	5.670	-0.509	9.967	1777.725	-0.010107	-0.006140	-0.000397
0.3220	1017.543	155.417	93.997	8.936	-0.505	9.965	1937.141	-0.010879	-0.006580	-0.000625
0.3230	1087.170	164.838	99.460	11.367	-0.509	9.963	2069.693	-0.011539	-0.006962	-0.000796
0.3240	1143.301	172.550	103.862	13.368	-0.508	9.961	2176.552	-0.012079	-0.007270	-0.000936
0.3250	1187.500	178.679	107.454	15.732	-0.513	9.959	2260.695	-0.012508	-0.007522	-0.001101
0.3260	1221.765	183.599	110.590	17.149	-0.513	9.956	2325.926	-0.012852	-0.007741	-0.001200
0.3270	1247.929	187.018	112.917	18.483	-0.516	9.954	2375.736	-0.013091	-0.007904	-0.001294
0.3280	1268.007	190.298	114.941	19.539	-0.520	9.952	2413.960	-0.013321	-0.008046	-0.001368
0.3290	1283.546	192.938	116.444	20.372	-0.512	9.952	2443.542	-0.013506	-0.008151	-0.001426
0.3300	1294.788	194.925	117.463	21.415	-0.512	9.953	2464.943	-0.013645	-0.008222	-0.001499
0.3310	1301.069	196.189	118.310	21.705	-0.506	9.955	2476.902	-0.013733	-0.008282	-0.001519
0.3320	1301.806	196.730	118.977	21.957	-0.508	9.958	2478.304	-0.013771	-0.008328	-0.001537
0.3330	1297.222	197.160	119.185	21.637	-0.514	9.960	2469.578	-0.013801	-0.008343	-0.001515
0.3340	1287.664	196.701	118.866	21.374	-0.518	9.962	2451.382	-0.013769	-0.008321	-0.001496
0.3350	1268.623	195.521	118.117	20.346	-0.514	9.964	2415.133	-0.013686	-0.008268	-0.001424
0.3360	1229.549	192.256	115.936	18.538	-0.511	9.967	2340.746	-0.013458	-0.008116	-0.001298
0.3370	1164.777	185.877	112.161	15.565	-0.506	9.969	2217.436	-0.013011	-0.007851	-0.001090
0.3380	1076.485	177.261	106.573	12.911	-0.515	9.969	2049.351	-0.012408	-0.007460	-0.000904
0.3390	977.673	166.255	100.050	9.298	-0.512	9.969	1861.238	-0.011638	-0.007003	-0.000651
0.3400	879.252	154.804	93.087	5.795	-0.516	9.967	1673.870	-0.010836	-0.006516	-0.000406
0.3410	787.188	143.701	86.620	3.140	-0.510	9.967	1498.604	-0.010059	-0.006063	-0.000220
0.3420	703.465	132.764	80.456	1.042	-0.506	9.966	1339.216	-0.009293	-0.005632	-0.000073
0.3430	628.338	123.218	74.856	-1.166	-0.506	9.963	1196.194	-0.008625	-0.005240	0.000082
0.3440	560.995	113.934	69.682	-2.860	-0.506	9.961	1067.991	-0.007975	-0.004878	0.000200
0.3450	499.484	105.028	64.852	-3.777	-0.509	9.958	950.890	-0.007352	-0.004540	0.000264
0.3460	441.655	96.301	60.463	-5.182	-0.506	9.955	840.797	-0.006741	-0.004232	0.000363
0.3470	386.726	87.839	55.867	-6.545	-0.507	9.954	736.227	-0.006149	-0.003911	0.000458
0.3480	336.321	79.765	51.671	-7.044	-0.513	9.952	640.268	-0.005584	-0.003617	0.000493
0.3490	292.182	72.789	47.900	-7.377	-0.518	9.952	556.240	-0.005095	-0.003353	0.000516
0.3500	254.927	66.008	44.461	-7.877	-0.520	9.953	485.315	-0.004621	-0.003112	0.000551
0.3510	223.307	60.226	41.462	-8.196	-0.510	9.956	425.119	-0.004216	-0.002902	0.000574
0.3520	196.376	55.446	38.392	-8.030	-0.504	9.958	373.850	-0.003881	-0.002687	0.000562
0.3530	174.149	51.028	35.723	-8.086	-0.505	9.960	331.535	-0.003572	-0.002501	0.000566
0.3540	156.761	47.539	33.836	-7.933	-0.509	9.962	298.433	-0.003328	-0.002369	0.000555
0.3550	144.092	44.746	32.652	-7.585	-0.516	9.964	274.315	-0.003132	-0.002286	0.000531
0.3560	135.947	42.426	31.580	-7.641	-0.517	9.967	258.808	-0.002970	-0.002211	0.000535
0.3570	131.814	41.107	30.466	-8.170	-0.519	9.970	250.940	-0.002877	-0.002133	0.000572
0.3580	130.852	40.621	30.260	-7.822	-0.525	9.970	249.109	-0.002843	-0.002118	0.000548
0.3590	132.746	40.175	30.258	-7.349	-0.528	9.970	252.714	-0.002812	-0.002118	0.000514
0.3600	137.811	40.715	30.174	-7.432	-0.534	9.968	262.356	-0.002850	-0.002112	0.000520
0.3610	150.314	42.215	30.657	-7.752	-0.526	9.967	286.160	-0.002955	-0.002146	0.000543
0.3620	175.908	45.272	32.213	-7.266	-0.524	9.966	334.883	-0.003169	-0.002255	0.000509
0.3630	218.528	50.734	35.270	-7.434	-0.521	9.964	416.021	-0.003551	-0.002469	0.000520
0.3640	278.792	58.849	39.919	-7.907	-0.516	9.961	530.748	-0.004119	-0.002794	0.000553
0.3650	354.205	68.716	45.809	-7.184	-0.520	9.958	674.314	-0.004810	-0.003207	0.000503
0.3660	442.421	80.875	52.633	-5.086	-0.525	9.956	842.257	-0.005661	-0.003684	0.000356
0.3670	540.902	94.313	59.569	-3.682	-0.522	9.954	1029.739	-0.006602	-0.004170	0.000258
0.3680	646.372	108.767	67.535	-1.668	-0.526	9.952	1230.526	-0.007614	-0.004727	0.000117
0.3690	755.178	123.526	75.199	1.112	-0.522	9.953	1437.664	-0.008647	-0.005264	-0.000078
0.3700	862.480	137.519	83.125	4.532	-0.525	9.953	1641.941	-0.009626	-0.005819	-0.000317
0.3710	962.074	150.331	90.528	7.313	-0.521	9.955	1831.541	-0.010523	-0.006337	-0.000512
0.3720	1048.848	161.310	96.830	10.327	-0.523	9.957	1996.737	-0.011292	-0.006778	-0.000723
0.3730	1119.827	170.593	102.403	13.314	-0.528	9.959	2131.863	-0.011941	-0.007168	-0.000932
0.3740	1175.116	178.167	106.725	15.467	-0.522	9.962	2237.120	-0.012472	-0.007471	-0.001083
0.3750	1216.099	183.988	110.261	16.899	-0.525	9.965	2315.140	-0.012879	-0.007718	-0.001183
0.3760	1245.600	188.295	112.669	18.664	-0.521	9.967	2371.302	-0.013181	-0.007887	-0.001306
0.3770	1266.594	191.339	114.788	19.443	-0.514	9.970	2411.270	-0.013394	-0.008035	-0.001361
0.3780	1282.404	193.826	116.556	20.472	-0.516	9.969	2441.368	-0.013568	-0.008159	-0.001433
0.3790	1295.855	196.383	117.981	21.138	-0.509	9.969	2466.974	-0.013747	-0.008259	-0.001480
0.3800	1307.652	198.315	119.340	22.834	-0.512	9.967	2489.433	-0.013882	-0.008354	-0.001598
0.3810	1315.857	200.009	119.756	23.167	-0.511	9.967	2505.054	-0.014001	-0.008383	-0.001622
0.3820	1318.427	200.719	120.519	23.111	-0.508	9.966	2509.947	-0.014050	-0.008436	-0.001618
0.3830	1314.685	200.719	120.380	23.277	-0.509	9.964	2502.823	-0.014050	-0.008427	-0.001629
0.3840	1304.781	200.497	120.853	22.735	-0.506	9.961	2483.969	-0.014035	-0.008460	-0.001591
0.3850	1284.027	199.079	120.005	21.457	-0.508	9.959	2444.458	-0.013936	-0.008400	-0.001502
0.3860	1241.963	195.938	117.737	19.706	-0.504	9.956	2364.378	-0.013716	-0.008242	-0.001379
0.3870	1173.613	189.102	113.611	17.205	-0.500	9.954	2234.259	-0.013237	-0.007953	-0.001204
0.3880	1082.917	179.903	107.729	13.730	-0.507	9.952	2061.596	-0.012593	-0.007541	-0.000961
0.3890	984.090	169.009	101.304	9.978	-0.506	9.951	1873.455	-0.011831	-0.007091	-0.000698
0.3900	887.863	157.934	94.479	7.323	-0.509	9.952	1690.264	-0.011055	-0.006614	-0.000513
0.3910	799.346	147.441	88.205	4.516	-0.504	9.955	1521.749	-0.010321	-0.006174	-0.000316
0.3920	718.087	137.046	82.438	1.501	-0.501	9.957	1367.054	-0.009593	-0.005771	-0.000105
0.3930	643.471	127.235	77.003	-0.485	-0.505	9.959	1225.004	-0.008906	-0.005390	0.000034
0.3940	574.266	117.978	71.898	-2.027	-0.508	9.961	1093.254	-0.008258	-0.005033	0.000142
0.3950	509.899	108.696	66.780	-3.403	-0.510	9.964	970.716	-0.007609	-0.004675	0.000238
0.3960	449.785	99.900	62.253	-4.737	-0.501	9.967	856.276	-0.006993	-0.004358	0.000332
0.3970	394.015	91.411	57.629	-6.362	-0.496	9.969	750.103	-0.006399	-0.004034	0.000445
0.3980	343.895	83.100	53.749	-6.877	-0.497	9.969	654.688	-0.005817	-0.003762	0.000481
0.3990	300.072	76.054	49.718	-7.516	-0.497	9.969	571.260	-0.005324	-0.003480	0.000526
0.4000	262.095	69.620	46.361	-7.100	-0.502	9.968	498.962	-0.004873	-0.003245	0.000497
0.4010	228.176	63.574	42.949	-7.516	-0.500	9.967	434.389	-0.004450	-0.003006	0.000526
0.4020	197.804	58.058	39.577	-8.128	-0.497	9.966	376.568	-0.004064	-0.002770	0.000569
0.4030	171.204	53.028	36.591	-8.085	-0.502	9.964	325.928	-0.003712	-0.002561	0.000566
0.4040	149.788	48.304	34.154	-7.752	-0.501	9.962	285.158	-0.003381	-0.002391	0.000543
0.4050	133.753	44.858	32.406	-7.766	-0.500	9.959	254.631	-0.003140	-0.002268	0.000544
0.4060	123.443	42.191	31.029	-7.738	-0.500	9.956	235.004	-0.002953	-0.002172	0.000542
0.4070	118.063	40.634	30.067	-6.946	-0.501	9.954	224.762	-0.002844	-0.002105	0.000486
0.4080	116.545	40.174	29.655	-6.709	-0.517	9.952	221.872	-0.002812	-0.002076	0.000470
0.4090	118.033	39.507	29.476	-6.974	-0.521	9.952	224.705	-0.002765	-0.002063	0.000488
0.4100	123.008	39.590	29.434	-6.863	-0.529	9.952	234.175	-0.002771	-0.002060	0.000480
0.4110	135.857	40.896	29.819	-7.085	-0.526	9.955	258.636	-0.002863	-0.002087	0.000496
0.4120	162.157	43.897	31.346	-7.585	-0.531	9.957	308.704	-0.003073	-0.002194	0.000531
0.4130	205.559	49.789	34.483	-7.807	-0.530	9.959	391.331	-0.003485	-0.002414	0.000547
0.4140	266.424	58.086	39.258	-6.876	-0.528	9.962	507.202	-0.004066	-0.002748	0.000481
0.4150	342.648	68.356	45.395	-6.224	-0.524	9.964	652.313	-0.004785	-0.003178	0.000436
0.4160	431.992	80.723	52.096	-5.779	-0.522	9.967	822.401	-0.005651	-0.003647	0.000405
0.4170	532.036	94.702	59.347	-4.376	-0.519	9.969	1012.859	-0.006629	-0.004154	0.000306
0.4180	639.639	109.266	67.247	-1.555	-0.524	9.969	1217.709	-0.007649	-0.004707	0.000109
0.4190	751.000	124.287	75.407	0.960	-0.526	9.969	1429.710	-0.008700	-0.005278	-0.000067
0.4200	860.542	138.517	83.347	4.031	-0.522	9.967	1638.250	-0.009696	-0.005834	-0.000282
0.4210	961.307	151.218	90.859	7.643	-0.519	9.967	1830.082	-0.010585	-0.006360	-0.000535
0.4220	1047.690	162.601	97.312	10.867	-0.512	9.965	1994.534	-0.011382	-0.006812	-0.000761
0.4230	1117.452	171.787	102.748	13.549	-0.520	9.963	2127.342	-0.012025	-0.007192	-0.000948
0.4240	1171.224	179.389	107.056	15.926	-0.514	9.961	2229.710	-0.012557	-0.007494	-0.001115
0.4250	1211.410	185.003	110.440	17.636	-0.518	9.958	2306.213	-0.012950	-0.007731	-0.001235
0.4260	1240.565	188.990	113.245	18.858	-0.512	9.956	2361.717	-0.013229	-0.007927	-0.001320
0.4270	1261.620	192.159	115.117	20.012	-0.509	9.954	2401.800	-0.013451	-0.008058	-0.001401
0.4280	1277.595	194.772	116.775	21.318	-0.512	9.952	2432.213	-0.013634	-0.008174	-0.001492
0.4290	1290.910	197.163	117.857	22.110	-0.513	9.952	2457.561	-0.013801	-0.008250	-0.001548
0.4300	1301.716	199.178	119.408	22.470	-0.518	9.953	2478.132	-0.013942	-0.008359	-0.001573
0.4310	1308.448	200.221	120.102	23.082	-0.511	9.955	2490.950	-0.014015	-0.008407	-0.001616
0.4320	1309.530	201.095	120.656	23.262	-0.508	9.957	2493.010	-0.014077	-0.008446	-0.001628
0.4330	1304.902	200.983	120.823	23.167	-0.509	9.959	2484.198	-0.014069	-0.008458	-0.001622
0.4340	1294.757	200.816	120.533	22.957	-0.515	9.961	2464.886	-0.014057	-0.008437	-0.001607
0.4350	1273.267	199.302	119.783	22.097	-0.517	9.963	2423.973	-0.013951	-0.008385	-0.001547
0.4360	1230.195	195.453	117.406	20.082	-0.517	9.967	2341.976	-0.013682	-0.008218	-0.001406
0.4370	1161.305	188.894	113.530	17.052	-0.509	9.969	2210.827	-0.013223	-0.007947	-0.001194
0.4380	1070.699	179.625	107.689	13.661	-0.516	9.970	2038.336	-0.012574	-0.007538	-0.000956
0.4390	972.684	169.189	101.153	9.907	-0.516	9.969	1851.740	-0.011843	-0.007081	-0.000694
0.4400	877.133	157.960	94.520	6.754	-0.518	9.968	1669.836	-0.011057	-0.006616	-0.000473
0.4410	789.097	146.969	88.314	4.211	-0.512	9.967	1502.237	-0.010288	-0.006182	-0.000295
0.4420	708.589	136.742	82.163	1.835	-0.507	9.965	1348.972	-0.009572	-0.005751	-0.000128
0.4430	634.620	126.988	76.631	-0.096	-0.513	9.963	1208.153	-0.008889	-0.005364	0.000007
0.4440	566.406	117.897	71.652	-1.695	-0.517	9.961	1078.291	-0.008253	-0.005016	0.000119
0.4450	502.775	108.656	66.601	-3.083	-0.520	9.959	957.155	-0.007606	-0.004662	0.000216
0.4460	443.233	99.859	61.840	-4.974	-0.520	9.956	843.801	-0.006990	-0.004329	0.000348
0.4470	387.718	91.411	57.380	-6.391	-0.513	9.954	738.115	-0.006399	-0.004017	0.000447
0.4480	337.914	83.447	53.196	-6.461	-0.520	9.952	643.301	-0.005841	-0.003724	0.000452
0.4490	294.797	76.402	49.274	-7.239	-0.516	9.951	561.218	-0.005348	-0.003449	0.000507
0.4500	258.023	70.191	46.181	-7.350	-0.521	9.952	491.209	-0.004913	-0.003233	0.000515
0.4510	226.087	63.952	42.961	-7.225	-0.517	9.954	430.412	-0.004477	-0.003007	0.000506
0.4520	198.059	58.824	39.795	-7.113	-0.516	9.957	377.054	-0.004118	-0.002786	0.000498
0.4530	173.984	54.168	37.153	-7.432	-0.522	9.959	331.221	-0.003792	-0.002601	0.000520
0.4540	154.492	49.958	35.129	-7.444	-0.518	9.962	294.113	-0.003497	-0.002459	0.000521
0.4550	139.719	47.010	33.231	-7.388	-0.524	9.965	265.989	-0.003291	-0.002326	0.000517
0.4560	130.086	44.341	31.883	-7.235	-0.523	9.967	247.650	-0.003104	-0.002232	0.000506
0.4570	125.142	42.909	31.017	-7.389	-0.525	9.970	238.237	-0.003004	-0.002171	0.000517
0.4580	124.195	42.202	30.688	-6.820	-0.529	9.970	236.435	-0.002954	-0.002148	0.000477
0.4590	126.028	41.882	30.426	-6.738	-0.529	9.969	239.925	-0.002932	-0.002130	0.000472
0.4600	131.318	42.231	30.741	-6.725	-0.526	9.968	249.996	-0.002956	-0.002152	0.000471
0.4610	144.258	43.453	31.579	-6.767	-0.521	9.967	274.630	-0.003042	-0.002211	0.000474
0.4620	170.512	46.622	33.134	-7.211	-0.520	9.966	324.612	-0.003264	-0.002319	0.000505
0.4630	213.373	52.375	36.230	-7.531	-0.522	9.964	406.208	-0.003666	-0.002536	0.000527
0.4640	273.171	60.587	41.005	-7.308	-0.524	9.961	520.048	-0.004241	-0.002870	0.000512
0.4650	347.878	70.328	46.991	-6.558	-0.525	9.958	662.270	-0.004923	-0.003289	0.000459
0.4660	435.298	82.641	53.459	-5.251	-0.522	9.955	828.695	-0.005785	-0.003742	0.000368
0.4670	532.952	95.968	60.146	-3.848	-0.514	9.954	1014.605	-0.006718	-0.004210	0.000269
0.4680	637.715	110.421	67.686	-1.083	-0.514	9.952	1214.046	-0.007729	-0.004738	0.000076
0.4690	746.506	125.137	75.612	1.334	-0.509	9.952	1421.156	-0.008760	-0.005293	-0.000093
0.4700	854.651	138.908	83.773	3.988	-0.512	9.952	1627.035	-0.009724	-0.005864	-0.000279
0.4710	955.672	152.039	91.052	7.547	-0.506	9.955	1819.353	-0.010643	-0.006374	-0.000528
0.4720	1044.114	163.254	97.520	10.952	-0.508	9.957	1987.724	-0.011428	-0.006826	-0.000767
0.4730	1117.257	172.856	103.105	13.758	-0.515	9.959	2126.970	-0.012100	-0.007217	-0.000963
0.4740	1175.222	180.861	107.921	16.231	-0.518	9.961	2237.320	-0.012660	-0.007554	-0.001136
0.4750	1219.240	186.878	111.594	18.342	-0.517	9.964	2321.119	-0.013081	-0.007812	-0.001284
0.4760	1251.070	191.562	114.334	19.704	-0.512	9.967	2381.716	-0.013409	-0.008003	-0.001379
0.4770	1273.222	194.716	116.125	20.441	-0.508	9.969	2423.887	-0.013630	-0.008129	-0.001431
0.4780	1288.746	197.107	117.871	21.595	-0.512	9.969	2453.442	-0.013797	-0.008251	-0.001512
0.4790	1299.957	199.220	118.800	22.306	-0.517	9.969	2474.785	-0.013945	-0.008316	-0.001561
0.4800	1308.013	200.803	120.285	22.529	-0.522	9.967	2490.120	-0.014056	-0.008420	-0.001577
0.4810	1312.100	201.957	120.340	22.862	-0.516	9.966	2497.902	-0.014137	-0.008424	-0.001600
0.4820	1311.830	202.123	121.061	23.472	-0.513	9.965	2497.387	-0.014149	-0.008474	-0.001643
0.4830	1306.991	202.067	120.769	23.222	-0.514	9.963	2488.174	-0.014145	-0.008454	-0.001626
0.4840	1297.613	201.888	120.879	22.915	-0.514	9.961	2470.322	-0.014132	-0.008462	-0.001604
0.4850	1278.587	200.582	119.922	22.235	-0.509	9.958	2434.101	-0.014041	-0.008395	-0.001556
0.4860	1239.212	197.288	118.123	20.525	-0.507	9.955	2359.142	-0.013810	-0.008269	-0.001437
0.4870	1174.350	190.882	114.355	17.343	-0.501	9.954	2235.661	-0.013362	-0.008005	-0.001214
0.4880	1086.719	181.932	108.886	14.245	-0.509	9.952	2068.834	-0.012735	-0.007622	-0.000997
0.4890	989.951	171.468	102.237	10.966	-0.510	9.952	1884.613	-0.012003	-0.007157	-0.000768
0.4900	894.446	160.613	95.826	7.451	-0.516	9.952	1702.795	-0.011243	-0.006708	-0.000522
0.4910	805.778	150.025	89.469	4.533	-0.513	9.954	1533.995	-0.010502	-0.006263	-0.000317
0.4920	725.151	139.853	83.552	2.740	-0.505	9.957	1380.501	-0.009790	-0.005849	-0.000192
0.4930	652.639	130.085	78.269	0.587	-0.509	9.959	1242.456	-0.009106	-0.005479	-0.000041
0.4940	587.445	121.330	73.412	-1.402	-0.505	9.961	1118.345	-0.008493	-0.005139	0.000098
0.4950	527.542	112.797	68.843	-3.125	-0.513	9.964	1004.305	-0.007896	-0.004819	0.000219
0.4960	470.960	104.848	64.536	-4.446	-0.509	9.967	896.587	-0.007339	-0.004517	0.000311
0.4970	416.918	96.385	60.503	-5.836	-0.507	9.969	793.705	-0.006747	-0.004235	0.000409
0.4980	366.783	88.590	56.238	-6.419	-0.511	9.970	698.261	-0.006201	-0.003937	0.000449
0.4990	322.254	81.725	52.303	-6.544	-0.513	9.969	613.489	-0.005721	-0.003661	0.000458
Test Cycles
Time (sec)	Axial stress (kPa)	Axial micro-strain #1	Axial micro-strain #2	Axial micro-strain #3	Confining pressure (kPa)	Temperature (�C)	Load (N)	Displacement #1 (mm)	Displacement #2 (mm)	Displacement #3 (mm)
0.0000	283.421	75.096	49.193	-7.071	-0.521	9.968	539.560	-0.005257	-0.003444	0.000495
0.0010	248.840	69.162	45.862	-7.795	-0.514	9.967	473.728	-0.004841	-0.003210	0.000546
0.0020	217.596	63.172	42.600	-7.669	-0.513	9.966	414.248	-0.004422	-0.002982	0.000537
0.0030	190.094	57.878	39.505	-7.628	-0.514	9.964	361.891	-0.004051	-0.002765	0.000534
0.0040	167.552	53.639	37.236	-7.655	-0.514	9.961	318.975	-0.003755	-0.002607	0.000536
0.0050	150.089	49.997	35.061	-7.364	-0.511	9.958	285.730	-0.003500	-0.002454	0.000515
0.0060	138.171	47.468	33.768	-6.947	-0.508	9.955	263.042	-0.003323	-0.002364	0.000486
0.0070	131.544	45.774	32.556	-7.377	-0.504	9.954	250.425	-0.003204	-0.002279	0.000516
0.0080	129.440	44.787	32.089	-7.265	-0.517	9.952	246.420	-0.003135	-0.002246	0.000509
0.0090	130.507	44.286	31.854	-6.487	-0.518	9.952	248.451	-0.003100	-0.002230	0.000454
0.0100	134.895	44.592	31.965	-6.362	-0.525	9.952	256.805	-0.003121	-0.002238	0.000445
0.0110	146.647	45.163	32.117	-6.975	-0.518	9.955	279.179	-0.003161	-0.002248	0.000488
0.0120	171.549	48.526	33.576	-7.322	-0.521	9.958	326.586	-0.003397	-0.002350	0.000513
0.0130	213.448	53.861	36.865	-7.335	-0.522	9.959	406.351	-0.003770	-0.002581	0.000513
0.0140	272.495	61.572	41.434	-7.321	-0.526	9.962	518.761	-0.004310	-0.002900	0.000512
0.0150	346.615	71.634	46.826	-6.780	-0.522	9.964	659.866	-0.005014	-0.003278	0.000475
0.0160	433.014	83.098	53.265	-4.557	-0.520	9.967	824.347	-0.005817	-0.003729	0.000319
0.0170	528.624	96.606	59.953	-3.167	-0.513	9.970	1006.365	-0.006762	-0.004197	0.000222
0.0180	629.600	110.670	67.260	-1.708	-0.520	9.970	1198.597	-0.007747	-0.004708	0.000120
0.0190	732.635	124.427	74.746	0.806	-0.525	9.970	1394.749	-0.008710	-0.005232	-0.000056
0.0200	834.257	137.768	82.464	4.294	-0.528	9.968	1588.211	-0.009644	-0.005772	-0.000301
0.0210	929.146	149.595	89.303	7.296	-0.521	9.967	1768.856	-0.010472	-0.006251	-0.000511
0.0220	1012.900	160.100	95.400	9.672	-0.516	9.966	1928.301	-0.011207	-0.006678	-0.000677
0.0230	1083.052	169.494	100.837	12.578	-0.514	9.964	2061.853	-0.011865	-0.007059	-0.000880
0.0240	1140.686	177.108	105.252	15.038	-0.515	9.961	2171.574	-0.012398	-0.007368	-0.001053
0.0250	1187.755	183.501	109.312	16.969	-0.518	9.958	2261.181	-0.012845	-0.007652	-0.001188
0.0260	1225.507	188.572	112.477	18.804	-0.517	9.956	2333.050	-0.013200	-0.007873	-0.001316
0.0270	1254.917	192.283	114.760	20.346	-0.518	9.954	2389.040	-0.013460	-0.008033	-0.001424
0.0280	1277.565	195.926	117.122	21.638	-0.526	9.952	2432.156	-0.013715	-0.008199	-0.001515
0.0290	1295.629	198.720	118.629	22.359	-0.521	9.951	2466.545	-0.013910	-0.008304	-0.001565
0.0300	1309.711	201.067	120.378	23.333	-0.518	9.952	2493.353	-0.014075	-0.008426	-0.001633
0.0310	1318.788	202.817	121.003	23.818	-0.512	9.954	2510.633	-0.014197	-0.008470	-0.001667
0.0320	1321.583	203.218	121.810	23.818	-0.510	9.957	2515.955	-0.014225	-0.008527	-0.001667
0.0330	1318.427	203.760	122.046	23.693	-0.517	9.959	2509.947	-0.014263	-0.008543	-0.001658
0.0340	1310.132	203.566	121.977	23.277	-0.512	9.961	2494.154	-0.014250	-0.008538	-0.001629
0.0350	1293.285	202.456	121.559	22.625	-0.511	9.964	2462.082	-0.014172	-0.008509	-0.001584
0.0360	1257.382	199.761	119.617	21.458	-0.506	9.967	2393.732	-0.013983	-0.008373	-0.001502
0.0370	1195.405	193.689	116.261	19.095	-0.505	9.969	2275.743	-0.013558	-0.008138	-0.001337
0.0380	1109.006	185.588	110.607	15.579	-0.515	9.969	2111.263	-0.012991	-0.007742	-0.001091
0.0390	1010.841	175.111	104.468	11.605	-0.513	9.969	1924.381	-0.012258	-0.007313	-0.000812
0.0400	913.321	164.063	97.547	8.881	-0.514	9.968	1738.729	-0.011484	-0.006828	-0.000622
0.0410	822.445	153.139	91.176	6.143	-0.505	9.967	1565.723	-0.010720	-0.006382	-0.000430
0.0420	739.187	142.479	85.066	3.128	-0.501	9.965	1407.223	-0.009974	-0.005955	-0.000219
0.0430	662.783	132.669	79.492	1.058	-0.502	9.963	1261.768	-0.009287	-0.005564	-0.000074
0.0440	591.849	123.094	74.291	-0.290	-0.506	9.961	1126.728	-0.008617	-0.005200	0.000020
0.0450	524.942	113.686	69.077	-2.457	-0.512	9.959	999.355	-0.007958	-0.004835	0.000172
0.0460	461.763	104.541	64.192	-4.848	-0.511	9.956	879.078	-0.007318	-0.004493	0.000339
0.0470	402.867	95.469	59.141	-5.932	-0.504	9.954	766.954	-0.006683	-0.004140	0.000415
0.0480	350.793	87.199	55.234	-6.154	-0.511	9.952	667.820	-0.006104	-0.003866	0.000431
0.0490	306.655	80.195	51.491	-6.959	-0.510	9.952	583.792	-0.005614	-0.003604	0.000487
0.0500	270.015	73.734	48.202	-7.224	-0.516	9.952	514.040	-0.005161	-0.003374	0.000506
0.0510	238.666	68.258	44.983	-7.710	-0.512	9.955	454.359	-0.004778	-0.003149	0.000540
0.0520	211.104	62.770	42.094	-7.752	-0.509	9.957	401.888	-0.004394	-0.002947	0.000543
0.0530	187.104	58.169	39.384	-7.753	-0.510	9.959	356.197	-0.004072	-0.002757	0.000543
0.0540	167.371	54.334	37.237	-7.545	-0.507	9.961	318.632	-0.003803	-0.002607	0.000528
0.0550	152.042	50.914	35.461	-7.336	-0.510	9.964	289.450	-0.003564	-0.002482	0.000513
0.0560	141.417	48.497	33.862	-7.682	-0.507	9.967	269.222	-0.003395	-0.002370	0.000538
0.0570	135.676	46.789	33.105	-7.447	-0.508	9.969	258.293	-0.003275	-0.002317	0.000521
0.0580	134.038	45.733	32.817	-6.752	-0.518	9.969	255.175	-0.003201	-0.002297	0.000473
0.0590	135.451	45.608	32.488	-6.906	-0.520	9.969	257.864	-0.003193	-0.002274	0.000483
0.0600	139.899	45.844	32.433	-7.002	-0.517	9.967	266.333	-0.003209	-0.002270	0.000490
0.0610	151.396	46.412	32.723	-6.682	-0.511	9.967	288.219	-0.003249	-0.002291	0.000468
0.0620	176.163	49.594	34.278	-6.932	-0.506	9.965	335.369	-0.003472	-0.002399	0.000485
0.0630	218.363	55.014	37.278	-7.321	-0.508	9.963	415.707	-0.003851	-0.002609	0.000512
0.0640	278.056	63.089	42.066	-7.210	-0.509	9.961	529.346	-0.004416	-0.002945	0.000505
0.0650	352.927	73.052	47.514	-6.183	-0.513	9.958	671.883	-0.005114	-0.003326	0.000433
0.0660	440.693	84.920	54.023	-5.071	-0.514	9.956	838.966	-0.005944	-0.003782	0.000355
0.0670	539.249	98.205	61.137	-3.529	-0.511	9.954	1026.592	-0.006874	-0.004280	0.000247
0.0680	645.305	112.977	68.815	-0.888	-0.516	9.951	1228.495	-0.007908	-0.004817	0.000062
0.0690	754.907	127.569	76.632	1.764	-0.514	9.951	1437.149	-0.008930	-0.005364	-0.000124
0.0700	863.142	141.909	84.859	4.766	-0.517	9.952	1643.200	-0.009934	-0.005940	-0.000334
0.0710	964.042	154.722	92.277	8.254	-0.509	9.954	1835.289	-0.010831	-0.006459	-0.000578
0.0720	1052.019	165.742	98.894	11.883	-0.512	9.957	2002.773	-0.011602	-0.006923	-0.000832
0.0730	1124.350	175.400	104.316	14.037	-0.510	9.958	2140.474	-0.012278	-0.007302	-0.000983
0.0740	1180.707	182.836	108.952	16.302	-0.506	9.961	2247.763	-0.012798	-0.007627	-0.001141
0.0750	1222.576	188.713	112.407	18.649	-0.505	9.964	2327.471	-0.013210	-0.007868	-0.001305
0.0760	1252.107	192.869	114.981	20.067	-0.509	9.966	2383.690	-0.013501	-0.008049	-0.001405
0.0770	1272.050	195.912	116.983	20.762	-0.509	9.969	2421.656	-0.013714	-0.008189	-0.001453
0.0780	1285.485	198.636	117.910	21.763	-0.516	9.969	2447.233	-0.013905	-0.008254	-0.001523
0.0790	1295.223	200.163	119.228	22.721	-0.505	9.968	2465.773	-0.014011	-0.008346	-0.001590
0.0800	1302.347	201.622	120.062	23.179	-0.510	9.967	2479.334	-0.014114	-0.008404	-0.001622
0.0810	1306.164	202.580	120.811	23.500	-0.508	9.966	2486.601	-0.014181	-0.008457	-0.001645
0.0820	1305.894	202.844	120.991	23.833	-0.509	9.965	2486.086	-0.014199	-0.008469	-0.001668
0.0830	1301.130	203.066	121.060	23.570	-0.512	9.963	2477.016	-0.014215	-0.008474	-0.001650
0.0840	1291.692	202.554	121.129	23.153	-0.511	9.961	2459.049	-0.014179	-0.008479	-0.001621
0.0850	1271.749	201.235	120.407	22.250	-0.508	9.958	2421.083	-0.014086	-0.008429	-0.001557
0.0860	1230.511	197.732	118.303	20.554	-0.507	9.955	2342.577	-0.013841	-0.008281	-0.001439
0.0870	1163.139	191.213	114.177	17.205	-0.502	9.954	2214.317	-0.013385	-0.007992	-0.001204
0.0880	1073.194	182.096	108.419	13.842	-0.506	9.952	2043.085	-0.012747	-0.007589	-0.000969
0.0890	974.427	170.994	101.909	10.645	-0.509	9.952	1855.059	-0.011970	-0.007134	-0.000745
0.0900	876.697	159.850	94.988	7.211	-0.509	9.952	1669.006	-0.011190	-0.006649	-0.000505
0.0910	785.189	148.887	88.492	4.029	-0.505	9.954	1494.799	-0.010422	-0.006194	-0.000282
0.0920	700.624	138.089	82.053	2.194	-0.498	9.957	1333.809	-0.009666	-0.005744	-0.000154
0.0930	623.604	127.985	76.549	0.278	-0.501	9.959	1187.181	-0.008959	-0.005358	-0.000019
0.0940	554.067	118.034	71.237	-1.820	-0.502	9.961	1054.802	-0.008262	-0.004987	0.000127
0.0950	491.188	109.169	66.503	-3.489	-0.508	9.963	935.097	-0.007642	-0.004655	0.000244
0.0960	433.164	100.499	61.948	-4.184	-0.505	9.966	824.633	-0.007035	-0.004336	0.000293
0.0970	379.062	92.093	57.436	-5.616	-0.501	9.969	721.636	-0.006446	-0.004021	0.000393
0.0980	329.708	84.352	53.500	-6.615	-0.504	9.969	627.680	-0.005905	-0.003745	0.000463
0.0990	286.411	77.082	49.813	-6.683	-0.512	9.969	545.254	-0.005396	-0.003487	0.000468
0.1000	249.457	70.551	46.221	-6.960	-0.516	9.967	474.901	-0.004939	-0.003235	0.000487
0.1010	217.641	64.937	43.097	-7.474	-0.511	9.967	414.333	-0.004546	-0.003017	0.000523
0.1020	190.064	59.407	40.207	-7.585	-0.501	9.965	361.834	-0.004158	-0.002814	0.000531
0.1030	166.515	54.877	37.662	-7.070	-0.498	9.963	317.001	-0.003841	-0.002636	0.000495
0.1040	147.369	50.999	35.556	-7.029	-0.499	9.961	280.552	-0.003570	-0.002489	0.000492
0.1050	132.490	47.635	33.945	-7.113	-0.506	9.958	252.228	-0.003334	-0.002376	0.000498
0.1060	122.076	45.134	32.611	-6.447	-0.504	9.955	232.401	-0.003159	-0.002283	0.000451
0.1070	116.094	43.259	31.510	-6.419	-0.506	9.954	221.014	-0.003028	-0.002206	0.000449
0.1080	114.231	42.301	31.373	-6.197	-0.516	9.952	217.466	-0.002961	-0.002196	0.000434
0.1090	115.508	42.218	31.195	-6.141	-0.520	9.952	219.898	-0.002955	-0.002184	0.000430
0.1100	119.701	42.301	30.988	-6.197	-0.521	9.953	227.880	-0.002961	-0.002169	0.000434
0.1110	130.717	43.287	31.264	-6.281	-0.511	9.955	248.852	-0.003030	-0.002189	0.000440
0.1120	154.597	46.427	32.655	-6.767	-0.509	9.957	294.313	-0.003250	-0.002286	0.000474
0.1130	195.610	51.762	35.696	-6.836	-0.509	9.959	372.391	-0.003623	-0.002499	0.000479
0.1140	254.341	59.933	40.166	-7.004	-0.512	9.961	484.200	-0.004195	-0.002812	0.000490
0.1150	328.341	70.245	46.097	-6.976	-0.510	9.964	625.076	-0.004917	-0.003227	0.000488
0.1160	415.596	81.891	52.413	-5.100	-0.516	9.967	791.187	-0.005732	-0.003669	0.000357
0.1170	514.047	95.300	59.294	-3.500	-0.511	9.969	978.613	-0.006671	-0.004151	0.000245
0.1180	620.493	110.212	67.344	-1.652	-0.522	9.970	1181.259	-0.007715	-0.004714	0.000116
0.1190	731.568	124.957	75.075	0.989	-0.522	9.969	1392.717	-0.008747	-0.005255	-0.000069
0.1200	842.493	139.576	83.207	5.116	-0.526	9.968	1603.889	-0.009770	-0.005825	-0.000358
0.1210	946.775	152.806	90.734	8.575	-0.521	9.967	1802.416	-0.010696	-0.006351	-0.000600
0.1220	1037.802	164.395	97.326	11.117	-0.516	9.965	1975.708	-0.011508	-0.006813	-0.000778
0.1230	1111.486	174.123	102.873	14.035	-0.522	9.963	2115.984	-0.012189	-0.007201	-0.000982
0.1240	1167.828	181.655	107.620	16.857	-0.518	9.961	2223.244	-0.012716	-0.007533	-0.001180
0.1250	1208.930	187.325	111.114	18.456	-0.520	9.958	2301.493	-0.013113	-0.007778	-0.001292
0.1260	1238.176	191.548	113.838	19.526	-0.512	9.955	2357.168	-0.013408	-0.007969	-0.001367
0.1270	1258.795	194.340	115.518	20.846	-0.508	9.954	2396.421	-0.013604	-0.008086	-0.001459
0.1280	1274.093	197.050	117.301	21.902	-0.512	9.952	2425.547	-0.013793	-0.008211	-0.001533
0.1290	1286.191	199.065	118.549	22.416	-0.512	9.952	2448.578	-0.013935	-0.008298	-0.001569
0.1300	1295.509	201.081	119.506	23.250	-0.512	9.952	2466.316	-0.014076	-0.008365	-0.001628
0.1310	1300.904	202.082	120.326	23.263	-0.508	9.955	2476.587	-0.014146	-0.008423	-0.001628
0.1320	1301.475	202.387	120.311	23.735	-0.506	9.957	2477.674	-0.014167	-0.008422	-0.001661
0.1330	1296.997	202.622	121.020	23.597	-0.505	9.959	2469.149	-0.014184	-0.008471	-0.001652
0.1340	1287.499	202.204	120.421	23.265	-0.501	9.961	2451.067	-0.014154	-0.008429	-0.001629
0.1350	1268.007	201.023	119.909	22.555	-0.501	9.963	2413.960	-0.014072	-0.008394	-0.001579
0.1360	1228.317	197.563	117.750	20.748	-0.501	9.966	2338.400	-0.013829	-0.008242	-0.001452
0.1370	1163.379	191.365	113.973	18.135	-0.501	9.969	2214.775	-0.013396	-0.007978	-0.001269
0.1380	1075.809	182.722	108.348	14.607	-0.507	9.969	2048.063	-0.012791	-0.007584	-0.001022
0.1390	978.951	171.884	101.949	10.937	-0.505	9.969	1863.670	-0.012032	-0.007136	-0.000766
0.1400	882.859	160.727	95.564	7.978	-0.505	9.967	1680.737	-0.011251	-0.006689	-0.000558
0.1410	792.869	149.568	89.083	5.031	-0.493	9.967	1509.418	-0.010470	-0.006236	-0.000352
0.1420	709.596	139.409	82.974	2.459	-0.488	9.965	1350.889	-0.009759	-0.005808	-0.000172
0.1430	633.117	129.764	77.084	0.555	-0.494	9.963	1205.292	-0.009084	-0.005396	-0.000039
0.1440	563.655	120.246	72.254	-1.251	-0.501	9.961	1073.055	-0.008417	-0.005058	0.000088
0.1450	500.882	111.421	67.562	-2.946	-0.503	9.959	953.550	-0.007799	-0.004729	0.000206
0.1460	443.714	102.555	63.215	-4.280	-0.506	9.956	844.717	-0.007179	-0.004425	0.000300
0.1470	391.129	94.342	59.156	-4.976	-0.502	9.954	744.610	-0.006604	-0.004141	0.000348
0.1480	343.625	86.865	55.344	-5.630	-0.508	9.952	654.173	-0.006081	-0.003874	0.000394
0.1490	301.800	79.819	51.614	-6.726	-0.506	9.952	574.551	-0.005587	-0.003613	0.000471
0.1500	265.642	73.830	48.380	-6.601	-0.514	9.952	505.714	-0.005168	-0.003387	0.000462
0.1510	233.466	68.203	45.215	-6.821	-0.510	9.954	444.460	-0.004774	-0.003165	0.000477
0.1520	204.747	62.743	42.025	-7.517	-0.510	9.957	389.786	-0.004392	-0.002942	0.000526
0.1530	179.740	58.338	39.135	-7.572	-0.511	9.959	342.178	-0.004084	-0.002739	0.000530
0.1540	159.496	54.084	37.084	-7.030	-0.516	9.961	303.640	-0.003786	-0.002596	0.000492
0.1550	143.867	50.735	35.405	-6.920	-0.522	9.964	273.886	-0.003551	-0.002478	0.000484
0.1560	133.062	48.192	33.823	-6.962	-0.520	9.967	253.315	-0.003373	-0.002368	0.000487
0.1570	126.735	46.066	32.737	-6.768	-0.520	9.969	241.270	-0.003225	-0.002292	0.000474
0.1580	124.661	45.190	32.393	-6.393	-0.523	9.969	237.322	-0.003163	-0.002267	0.000448
0.1590	125.818	44.801	32.420	-6.755	-0.526	9.969	239.525	-0.003136	-0.002269	0.000473
0.1600	130.116	44.914	32.461	-6.574	-0.529	9.967	247.707	-0.003144	-0.002272	0.000460
0.1610	141.147	45.817	32.474	-5.794	-0.518	9.967	268.707	-0.003207	-0.002273	0.000406
0.1620	165.072	48.818	33.961	-6.348	-0.511	9.965	314.255	-0.003417	-0.002377	0.000444
0.1630	206.280	53.960	36.919	-7.502	-0.511	9.963	392.704	-0.003777	-0.002584	0.000525
0.1640	265.597	62.381	41.489	-7.295	-0.512	9.961	505.629	-0.004367	-0.002904	0.000511
0.1650	340.649	72.274	47.034	-5.614	-0.513	9.958	648.508	-0.005059	-0.003292	0.000393
0.1660	429.001	84.224	53.707	-4.446	-0.514	9.955	816.708	-0.005896	-0.003760	0.000311
0.1670	528.113	98.177	60.586	-3.681	-0.508	9.954	1005.392	-0.006872	-0.004241	0.000258
0.1680	634.274	112.727	68.182	-1.179	-0.509	9.951	1207.495	-0.007891	-0.004773	0.000083
0.1690	743.861	127.276	76.232	1.711	-0.509	9.951	1416.121	-0.008909	-0.005336	-0.000120
0.1700	852.592	141.493	83.897	4.962	-0.513	9.952	1623.116	-0.009905	-0.005873	-0.000347
0.1710	954.695	154.000	91.396	8.352	-0.510	9.954	1817.493	-0.010780	-0.006398	-0.000585
0.1720	1044.745	165.631	97.615	11.645	-0.505	9.956	1988.926	-0.011594	-0.006833	-0.000815
0.1730	1119.361	175.428	103.641	14.467	-0.509	9.959	2130.976	-0.012280	-0.007255	-0.001013
0.1740	1177.867	183.266	108.250	16.845	-0.513	9.961	2242.355	-0.012829	-0.007577	-0.001179
0.1750	1221.554	189.114	112.158	19.417	-0.520	9.963	2325.525	-0.013238	-0.007851	-0.001359
0.1760	1252.663	193.269	115.093	21.292	-0.523	9.966	2384.748	-0.013529	-0.008057	-0.001490
0.1770	1274.169	196.270	117.134	21.179	-0.517	9.968	2425.690	-0.013739	-0.008199	-0.001483
0.1780	1289.317	198.981	118.657	21.998	-0.516	9.968	2454.529	-0.013929	-0.008306	-0.001540
0.1790	1300.964	201.010	119.518	23.402	-0.517	9.968	2476.702	-0.014071	-0.008366	-0.001638
0.1800	1310.537	202.984	120.838	24.043	-0.521	9.967	2494.926	-0.014209	-0.008459	-0.001683
0.1810	1316.969	204.177	121.658	24.169	-0.515	9.967	2507.172	-0.014292	-0.008516	-0.001692
0.1820	1318.998	205.024	122.242	24.155	-0.505	9.965	2511.034	-0.014352	-0.008557	-0.001691
0.1830	1315.827	205.386	122.325	24.071	-0.504	9.963	2504.997	-0.014377	-0.008563	-0.001685
0.1840	1307.426	204.900	122.242	23.792	-0.506	9.960	2489.004	-0.014343	-0.008557	-0.001665
0.1850	1289.017	203.873	121.645	23.166	-0.508	9.958	2453.957	-0.014271	-0.008515	-0.001622
0.1860	1249.507	200.456	119.731	22.124	-0.509	9.955	2378.740	-0.014032	-0.008381	-0.001549
0.1870	1182.435	194.396	115.751	18.998	-0.500	9.953	2251.053	-0.013608	-0.008103	-0.001330
0.1880	1090.506	185.295	109.919	15.260	-0.509	9.951	2076.044	-0.012971	-0.007694	-0.001068
0.1890	987.787	174.149	103.062	11.312	-0.516	9.951	1880.493	-0.012190	-0.007214	-0.000792
0.1900	887.488	162.658	95.976	7.976	-0.525	9.952	1689.548	-0.011386	-0.006718	-0.000558
0.1910	796.100	151.347	89.592	5.100	-0.519	9.954	1515.570	-0.010594	-0.006271	-0.000357
0.1920	714.811	141.217	83.619	2.724	-0.516	9.956	1360.817	-0.009885	-0.005853	-0.000191
0.1930	642.209	131.739	78.501	0.822	-0.516	9.958	1222.601	-0.009222	-0.005495	-0.000058
0.1940	576.069	122.551	73.328	-1.638	-0.514	9.961	1096.687	-0.008579	-0.005133	0.000115
0.1950	514.452	113.836	68.637	-3.320	-0.518	9.963	979.385	-0.007969	-0.004805	0.000232
0.1960	455.481	104.860	64.234	-3.571	-0.516	9.966	867.119	-0.007340	-0.004496	0.000250
0.1970	399.155	96.327	59.611	-4.864	-0.510	9.969	759.888	-0.006743	-0.004173	0.000340
0.1980	347.156	88.281	55.263	-5.863	-0.516	9.969	660.896	-0.006180	-0.003868	0.000410
0.1990	301.650	80.750	51.480	-6.460	-0.516	9.969	574.265	-0.005652	-0.003604	0.000452
0.2000	262.817	74.261	48.024	-6.669	-0.513	9.968	500.336	-0.005198	-0.003362	0.000467
0.2010	228.808	68.079	44.709	-7.045	-0.504	9.967	435.591	-0.004766	-0.003130	0.000493
0.2020	198.180	62.520	41.599	-7.101	-0.503	9.965	377.283	-0.004376	-0.002912	0.000497
0.2030	171.053	57.461	38.752	-6.628	-0.511	9.963	325.642	-0.004022	-0.002713	0.000464
0.2040	148.856	52.514	36.205	-6.683	-0.517	9.961	283.384	-0.003676	-0.002534	0.000468
0.2050	132.220	48.832	34.044	-7.002	-0.522	9.958	251.713	-0.003418	-0.002383	0.000490
0.2060	120.979	46.177	32.749	-6.779	-0.524	9.955	230.312	-0.003232	-0.002292	0.000475
0.2070	114.622	44.176	31.745	-6.905	-0.519	9.953	218.210	-0.003092	-0.002222	0.000483
0.2080	112.292	43.274	31.030	-7.156	-0.524	9.952	213.776	-0.003029	-0.002172	0.000501
0.2090	113.254	42.913	30.823	-7.170	-0.526	9.952	215.607	-0.003004	-0.002158	0.000502
0.2100	117.161	42.800	30.974	-5.446	-0.526	9.952	223.045	-0.002996	-0.002168	0.000381
0.2110	126.930	43.869	31.319	-5.626	-0.518	9.954	241.642	-0.003071	-0.002192	0.000394
0.2120	148.240	46.496	32.173	-6.265	-0.518	9.957	282.211	-0.003255	-0.002252	0.000439
0.2130	186.037	51.499	35.064	-6.668	-0.520	9.959	354.166	-0.003605	-0.002454	0.000467
0.2140	241.657	59.351	39.508	-6.543	-0.519	9.961	460.052	-0.004155	-0.002766	0.000458
0.2150	313.192	68.897	45.068	-6.348	-0.516	9.964	596.237	-0.004823	-0.003155	0.000444
0.2160	398.463	80.610	51.327	-5.375	-0.513	9.967	758.572	-0.005643	-0.003593	0.000376
0.2170	495.983	94.034	58.220	-3.861	-0.510	9.969	944.223	-0.006582	-0.004075	0.000270
0.2180	603.090	108.695	66.050	-1.721	-0.515	9.969	1148.129	-0.007609	-0.004623	0.000120
0.2190	716.164	124.050	74.167	0.835	-0.520	9.969	1363.392	-0.008684	-0.005192	-0.000058
0.2200	829.493	138.754	82.629	4.462	-0.519	9.968	1579.142	-0.009713	-0.005784	-0.000312
0.2210	936.270	152.372	90.266	7.838	-0.510	9.967	1782.417	-0.010666	-0.006319	-0.000549
0.2220	1029.822	164.088	97.133	11.007	-0.504	9.966	1960.516	-0.011486	-0.006799	-0.000771
0.2230	1106.286	174.109	102.927	14.091	-0.505	9.964	2106.085	-0.012188	-0.007205	-0.000986
0.2240	1165.168	182.265	107.702	17.051	-0.512	9.961	2218.180	-0.012759	-0.007539	-0.001194
0.2250	1208.284	188.114	111.336	18.691	-0.509	9.958	2300.262	-0.013168	-0.007793	-0.001308
0.2260	1238.897	192.548	114.048	19.928	-0.504	9.956	2358.541	-0.013478	-0.007983	-0.001395
0.2270	1260.342	195.689	115.865	21.069	-0.497	9.954	2399.368	-0.013698	-0.008111	-0.001475
0.2280	1275.807	198.206	117.634	22.055	-0.501	9.952	2428.808	-0.013874	-0.008234	-0.001544
0.2290	1287.679	200.540	118.633	22.667	-0.501	9.952	2451.410	-0.014038	-0.008304	-0.001587
0.2300	1296.892	202.055	119.867	23.334	-0.507	9.952	2468.948	-0.014144	-0.008391	-0.001633
0.2310	1302.572	203.290	120.478	23.751	-0.506	9.954	2479.763	-0.014230	-0.008433	-0.001663
0.2320	1303.865	203.998	121.144	23.500	-0.498	9.956	2482.224	-0.014280	-0.008480	-0.001645
0.2330	1300.453	204.150	121.198	23.444	-0.502	9.958	2475.729	-0.014291	-0.008484	-0.001641
0.2340	1292.293	203.982	121.129	23.625	-0.506	9.960	2460.194	-0.014279	-0.008479	-0.001654
0.2350	1275.356	202.955	120.326	23.013	-0.514	9.964	2427.950	-0.014207	-0.008423	-0.001611
0.2360	1239.243	200.064	118.692	21.568	-0.510	9.966	2359.200	-0.014004	-0.008308	-0.001510
0.2370	1176.815	193.908	114.949	18.900	-0.504	9.969	2240.353	-0.013574	-0.008046	-0.001323
0.2380	1089.800	185.390	109.576	15.425	-0.498	9.969	2074.699	-0.012977	-0.007670	-0.001080
0.2390	991.018	174.552	103.052	11.506	-0.496	9.969	1886.644	-0.012219	-0.007214	-0.000805
0.2400	892.447	163.171	96.267	8.392	-0.500	9.967	1698.990	-0.011422	-0.006739	-0.000587
0.2410	800.067	152.040	89.787	5.530	-0.497	9.967	1523.123	-0.010643	-0.006285	-0.000387
0.2420	714.496	141.061	83.498	3.002	-0.496	9.966	1360.216	-0.009874	-0.005845	-0.000210
0.2430	636.498	131.000	77.870	0.780	-0.498	9.964	1211.729	-0.009170	-0.005451	-0.000055
0.2440	566.210	121.496	72.545	-1.083	-0.502	9.961	1077.919	-0.008505	-0.005078	0.000076
0.2450	503.166	112.297	67.852	-2.669	-0.504	9.958	957.899	-0.007861	-0.004750	0.000187
0.2460	445.577	103.624	63.423	-3.988	-0.504	9.955	848.265	-0.007254	-0.004440	0.000279
0.2470	392.211	95.398	58.867	-5.351	-0.502	9.954	746.670	-0.006678	-0.004121	0.000375
0.2480	343.910	87.477	55.167	-6.046	-0.507	9.952	654.716	-0.006123	-0.003862	0.000423
0.2490	301.846	80.878	51.560	-6.586	-0.509	9.952	574.636	-0.005661	-0.003609	0.000461
0.2500	265.747	74.637	48.077	-6.654	-0.514	9.952	505.915	-0.005225	-0.003365	0.000466
0.2510	234.082	68.926	45.160	-6.903	-0.510	9.954	445.633	-0.004825	-0.003161	0.000483
0.2520	205.649	63.769	42.216	-7.250	-0.503	9.956	391.502	-0.004464	-0.002955	0.000508
0.2530	180.852	58.795	39.851	-7.000	-0.511	9.959	344.296	-0.004116	-0.002790	0.000490
0.2540	160.488	54.765	37.333	-6.656	-0.512	9.961	305.529	-0.003834	-0.002613	0.000466
0.2550	144.934	51.513	35.929	-7.296	-0.517	9.963	275.917	-0.003606	-0.002515	0.000511
0.2560	134.279	48.818	34.580	-7.534	-0.514	9.966	255.632	-0.003417	-0.002421	0.000527
0.2570	128.162	47.387	33.396	-6.740	-0.516	9.968	243.988	-0.003317	-0.002338	0.000472
0.2580	125.923	46.652	32.926	-6.628	-0.523	9.969	239.725	-0.003266	-0.002305	0.000464
0.2590	126.750	45.886	32.747	-6.837	-0.519	9.969	241.299	-0.003212	-0.002292	0.000479
0.2600	130.537	46.052	32.872	-6.614	-0.518	9.967	248.508	-0.003224	-0.002301	0.000463
0.2610	139.734	46.941	32.982	-6.002	-0.512	9.966	266.018	-0.003286	-0.002309	0.000420
0.2620	160.368	49.388	33.919	-6.516	-0.511	9.965	305.300	-0.003457	-0.002374	0.000456
0.2630	197.624	54.279	36.479	-6.946	-0.516	9.963	376.225	-0.003800	-0.002554	0.000486
0.2640	253.529	61.727	40.965	-6.488	-0.512	9.961	482.655	-0.004321	-0.002868	0.000454
0.2650	326.778	71.539	46.702	-5.765	-0.517	9.958	622.101	-0.005008	-0.003269	0.000404
0.2660	415.130	83.754	53.032	-5.376	-0.511	9.956	790.300	-0.005863	-0.003712	0.000376
0.2670	515.865	97.734	60.077	-4.099	-0.507	9.954	982.075	-0.006841	-0.004205	0.000287
0.2680	624.671	112.532	68.086	-0.597	-0.508	9.951	1189.213	-0.007877	-0.004766	0.000042
0.2690	736.317	127.637	75.943	2.169	-0.509	9.951	1401.758	-0.008935	-0.005316	-0.000152
0.2700	845.558	141.645	84.035	5.073	-0.509	9.952	1609.726	-0.009915	-0.005882	-0.000355
0.2710	946.700	154.431	91.396	8.283	-0.509	9.954	1802.273	-0.010810	-0.006398	-0.000580
0.2720	1034.586	165.645	97.615	11.258	-0.505	9.956	1969.585	-0.011595	-0.006833	-0.000788
0.2730	1106.271	174.705	102.966	14.093	-0.506	9.959	2106.056	-0.012229	-0.007208	-0.000987
0.2740	1161.741	182.307	107.245	16.330	-0.505	9.961	2211.657	-0.012761	-0.007507	-0.001143
0.2750	1202.573	188.018	110.865	18.400	-0.510	9.963	2289.391	-0.013161	-0.007761	-0.001288
0.2760	1231.638	192.102	113.150	19.748	-0.513	9.966	2344.723	-0.013447	-0.007921	-0.001382
0.2770	1251.881	194.882	115.229	20.638	-0.514	9.968	2383.261	-0.013642	-0.008066	-0.001445
0.2780	1266.669	196.940	116.695	21.345	-0.522	9.969	2411.413	-0.013786	-0.008169	-0.001494
0.2790	1278.827	199.025	118.050	22.152	-0.518	9.969	2434.559	-0.013932	-0.008263	-0.001551
0.2800	1289.182	200.971	119.300	23.292	-0.521	9.967	2454.271	-0.014068	-0.008351	-0.001630
0.2810	1296.335	202.637	119.853	23.834	-0.514	9.967	2467.890	-0.014185	-0.008390	-0.001668
0.2820	1298.710	203.138	120.407	23.833	-0.508	9.965	2472.410	-0.014220	-0.008429	-0.001668
0.2830	1295.689	203.472	120.450	23.415	-0.510	9.963	2466.660	-0.014243	-0.008431	-0.001639
0.2840	1287.814	203.124	120.602	23.110	-0.505	9.960	2451.668	-0.014219	-0.008442	-0.001618
0.2850	1271.809	202.082	120.283	23.026	-0.502	9.958	2421.198	-0.014146	-0.008420	-0.001612
0.2860	1237.289	199.344	118.663	21.441	-0.500	9.955	2355.480	-0.013954	-0.008306	-0.001501
0.2870	1177.326	193.620	115.322	18.649	-0.497	9.953	2241.325	-0.013553	-0.008073	-0.001305
0.2880	1092.520	185.503	109.988	16.023	-0.499	9.951	2079.878	-0.012985	-0.007699	-0.001122
0.2890	995.286	175.248	103.780	12.035	-0.496	9.951	1894.770	-0.012267	-0.007265	-0.000842
0.2900	897.872	164.337	96.860	8.352	-0.497	9.951	1709.318	-0.011504	-0.006780	-0.000585
0.2910	806.650	153.402	90.723	5.295	-0.494	9.953	1535.654	-0.010738	-0.006351	-0.000371
0.2920	722.761	142.451	84.778	3.865	-0.492	9.956	1375.952	-0.009972	-0.005934	-0.000271
0.2930	645.440	132.488	78.969	1.558	-0.492	9.958	1228.752	-0.009274	-0.005528	-0.000109
0.2940	573.785	122.829	73.465	-1.110	-0.499	9.960	1092.339	-0.008598	-0.005143	0.000078
0.2950	506.968	113.226	68.580	-2.667	-0.504	9.963	965.137	-0.007926	-0.004801	0.000187
0.2960	444.570	104.374	63.806	-3.682	-0.508	9.966	846.348	-0.007306	-0.004466	0.000258
0.2970	387.102	95.370	59.363	-5.114	-0.499	9.968	736.942	-0.006676	-0.004155	0.000358
0.2980	336.125	87.339	54.974	-5.933	-0.506	9.969	639.896	-0.006114	-0.003848	0.000415
0.2990	292.979	80.363	51.300	-5.891	-0.507	9.968	557.756	-0.005625	-0.003591	0.000412
0.3000	257.151	73.804	48.039	-6.098	-0.510	9.967	489.550	-0.005166	-0.003363	0.000427
0.3010	226.613	68.330	44.942	-7.030	-0.507	9.966	431.414	-0.004783	-0.003146	0.000492
0.3020	199.788	63.341	42.175	-7.210	-0.498	9.965	380.344	-0.004434	-0.002952	0.000505
0.3030	176.073	58.615	39.726	-6.627	-0.501	9.963	335.197	-0.004103	-0.002781	0.000464
0.3040	156.025	54.821	37.387	-6.600	-0.496	9.961	297.031	-0.003837	-0.002617	0.000462
0.3050	140.080	51.138	35.378	-6.655	-0.502	9.958	266.676	-0.003580	-0.002476	0.000466
0.3060	128.628	48.194	33.864	-6.405	-0.505	9.956	244.875	-0.003374	-0.002370	0.000448
0.3070	121.580	46.568	32.627	-6.544	-0.507	9.954	231.457	-0.003260	-0.002284	0.000458
0.3080	118.439	45.498	31.773	-6.724	-0.509	9.952	225.477	-0.003185	-0.002224	0.000471
0.3090	118.364	44.802	31.635	-6.419	-0.511	9.952	225.334	-0.003136	-0.002214	0.000449
0.3100	121.445	44.911	32.033	-5.850	-0.521	9.952	231.199	-0.003144	-0.002242	0.000409
0.3110	129.770	45.232	32.171	-5.976	-0.524	9.954	247.049	-0.003166	-0.002252	0.000418
0.3120	149.488	47.664	33.010	-6.447	-0.524	9.956	284.586	-0.003336	-0.002311	0.000451
0.3130	185.631	52.335	35.583	-6.723	-0.525	9.958	353.394	-0.003663	-0.002491	0.000471
0.3140	240.409	59.393	39.973	-6.709	-0.521	9.960	457.678	-0.004157	-0.002798	0.000470
0.3150	312.140	69.427	45.353	-6.210	-0.523	9.963	594.234	-0.004860	-0.003175	0.000435
0.3160	398.403	81.322	51.848	-4.600	-0.525	9.966	758.457	-0.005693	-0.003629	0.000322
0.3170	497.110	94.885	58.659	-3.211	-0.517	9.969	946.369	-0.006642	-0.004106	0.000225
0.3180	604.382	109.712	66.228	-1.947	-0.521	9.969	1150.589	-0.007680	-0.004636	0.000136
0.3190	716.404	124.455	74.181	0.667	-0.519	9.969	1363.850	-0.008712	-0.005193	-0.000047
0.3200	828.020	139.284	82.285	4.613	-0.525	9.967	1576.338	-0.009750	-0.005760	-0.000323
0.3210	933.234	152.694	90.115	8.032	-0.519	9.966	1776.638	-0.010689	-0.006308	-0.000562
0.3220	1026.019	164.436	96.789	11.354	-0.516	9.965	1953.278	-0.011511	-0.006775	-0.000795
0.3230	1102.454	174.413	102.844	14.189	-0.514	9.963	2098.789	-0.012209	-0.007199	-0.000993
0.3240	1162.252	182.317	107.454	16.594	-0.515	9.961	2212.629	-0.012762	-0.007522	-0.001162
0.3250	1206.541	188.474	111.223	18.457	-0.516	9.958	2296.944	-0.013193	-0.007786	-0.001292
0.3260	1238.341	192.922	114.156	19.846	-0.518	9.955	2357.483	-0.013505	-0.007991	-0.001389
0.3270	1260.838	196.051	116.112	20.986	-0.510	9.953	2400.312	-0.013724	-0.008128	-0.001469
0.3280	1277.866	198.747	118.021	22.069	-0.508	9.952	2432.728	-0.013912	-0.008262	-0.001545
0.3290	1292.233	200.999	119.437	23.167	-0.508	9.951	2460.079	-0.014070	-0.008361	-0.001622
0.3300	1304.556	203.277	120.837	23.917	-0.512	9.952	2483.540	-0.014229	-0.008459	-0.001674
0.3310	1312.897	204.722	121.866	24.501	-0.507	9.954	2499.418	-0.014331	-0.008531	-0.001715
0.3320	1315.707	205.596	122.199	24.586	-0.500	9.956	2504.768	-0.014392	-0.008554	-0.001721
0.3330	1312.626	205.874	122.270	24.322	-0.501	9.958	2498.903	-0.014411	-0.008559	-0.001703
0.3340	1303.775	205.542	122.115	23.959	-0.507	9.960	2482.052	-0.014388	-0.008548	-0.001677
0.3350	1284.508	204.263	121.408	23.110	-0.513	9.963	2445.374	-0.014298	-0.008499	-0.001618
0.3360	1244.653	201.052	119.771	22.319	-0.509	9.966	2369.499	-0.014074	-0.008384	-0.001562
0.3370	1180.106	194.867	115.586	19.540	-0.498	9.969	2246.618	-0.013641	-0.008091	-0.001368
0.3380	1094.294	186.445	110.430	15.650	-0.499	9.968	2083.254	-0.013051	-0.007730	-0.001095
0.3390	1000.171	176.010	103.930	12.023	-0.506	9.968	1904.068	-0.012321	-0.007275	-0.000842
0.3400	907.025	165.825	97.697	8.924	-0.514	9.967	1726.742	-0.011608	-0.006839	-0.000625
0.3410	818.642	155.236	91.435	6.032	-0.513	9.966	1558.485	-0.010867	-0.006400	-0.000422
0.3420	735.024	144.702	85.258	3.501	-0.504	9.965	1399.298	-0.010129	-0.005968	-0.000245
0.3430	655.449	134.376	79.397	1.847	-0.502	9.963	1247.807	-0.009406	-0.005558	-0.000129
0.3440	579.781	124.260	73.784	-0.376	-0.501	9.961	1103.754	-0.008698	-0.005165	0.000026
0.3450	508.246	114.519	68.444	-2.542	-0.507	9.958	967.569	-0.008016	-0.004791	0.000178
0.3460	441.264	104.557	63.448	-3.874	-0.508	9.956	840.054	-0.007319	-0.004441	0.000271
0.3470	380.053	94.772	58.384	-4.653	-0.508	9.954	723.524	-0.006634	-0.004087	0.000326
0.3480	326.582	86.226	54.161	-5.848	-0.514	9.952	621.729	-0.006036	-0.003791	0.000409
0.3490	282.579	78.874	50.006	-6.557	-0.513	9.951	537.958	-0.005521	-0.003500	0.000459
0.3500	247.518	72.635	46.993	-6.820	-0.514	9.951	471.210	-0.005084	-0.003290	0.000477
0.3510	219.355	67.549	44.185	-7.100	-0.510	9.953	417.595	-0.004728	-0.003093	0.000497
0.3520	195.745	62.560	41.338	-7.266	-0.505	9.956	372.648	-0.004379	-0.002894	0.000509
0.3530	175.667	58.613	38.874	-6.835	-0.502	9.958	334.425	-0.004103	-0.002721	0.000478
0.3540	158.925	55.236	37.086	-6.487	-0.501	9.961	302.553	-0.003867	-0.002596	0.000454
0.3550	145.385	52.054	35.612	-6.974	-0.503	9.963	276.775	-0.003644	-0.002493	0.000488
0.3560	135.601	49.720	34.153	-7.071	-0.501	9.966	258.150	-0.003480	-0.002391	0.000495
0.3570	129.740	47.913	33.202	-6.794	-0.498	9.968	246.992	-0.003354	-0.002324	0.000476
0.3580	127.456	46.661	32.777	-6.419	-0.511	9.969	242.643	-0.003266	-0.002294	0.000449
0.3590	127.696	46.537	32.667	-6.642	-0.512	9.969	243.101	-0.003258	-0.002287	0.000465
0.3600	130.627	46.579	32.695	-6.253	-0.522	9.967	248.680	-0.003261	-0.002289	0.000438
0.3610	138.246	47.011	33.093	-6.335	-0.520	9.967	263.186	-0.003291	-0.002317	0.000443
0.3620	156.641	49.304	33.862	-7.016	-0.521	9.965	298.204	-0.003451	-0.002370	0.000491
0.3630	190.786	53.390	36.105	-7.183	-0.525	9.963	363.207	-0.003737	-0.002527	0.000503
0.3640	243.024	60.617	40.303	-6.892	-0.520	9.961	462.656	-0.004243	-0.002821	0.000482
0.3650	312.140	69.941	45.809	-6.086	-0.524	9.958	594.234	-0.004896	-0.003207	0.000426
0.3660	395.923	81.336	51.877	-4.945	-0.518	9.955	753.736	-0.005694	-0.003631	0.000346
0.3670	492.466	94.899	58.867	-3.291	-0.518	9.954	937.529	-0.006643	-0.004121	0.000230
0.3680	598.506	109.407	66.311	-1.151	-0.516	9.951	1139.402	-0.007658	-0.004642	0.000081
0.3690	710.363	124.386	74.334	1.058	-0.514	9.951	1352.348	-0.008707	-0.005203	-0.000074
0.3700	822.655	139.408	82.451	4.420	-0.513	9.951	1566.124	-0.009759	-0.005772	-0.000309
0.3710	929.237	152.791	90.115	7.755	-0.514	9.953	1769.028	-0.010695	-0.006308	-0.000543
0.3720	1023.585	164.895	96.955	10.715	-0.512	9.956	1948.643	-0.011543	-0.006787	-0.000750
0.3730	1102.018	174.886	102.804	13.730	-0.514	9.958	2097.960	-0.012242	-0.007196	-0.000961
0.3740	1163.860	182.946	107.799	16.954	-0.506	9.960	2215.691	-0.012806	-0.007546	-0.001187
0.3750	1209.922	189.325	111.528	18.970	-0.504	9.963	2303.381	-0.013253	-0.007807	-0.001328
0.3760	1242.504	193.939	114.640	20.221	-0.501	9.966	2365.408	-0.013576	-0.008025	-0.001415
0.3770	1264.069	197.023	116.540	21.346	-0.495	9.968	2406.464	-0.013792	-0.008158	-0.001494
0.3780	1278.301	199.510	117.883	22.374	-0.499	9.968	2433.558	-0.013966	-0.008252	-0.001566
0.3790	1288.370	200.996	119.103	22.706	-0.494	9.968	2452.726	-0.014070	-0.008337	-0.001589
0.3800	1295.870	202.928	120.088	23.138	-0.497	9.967	2467.003	-0.014205	-0.008406	-0.001620
0.3810	1300.393	203.860	120.588	23.971	-0.492	9.966	2475.615	-0.014270	-0.008441	-0.001678
0.3820	1301.024	204.388	120.837	24.028	-0.492	9.965	2476.816	-0.014307	-0.008459	-0.001682
0.3830	1297.448	204.360	121.116	23.973	-0.496	9.963	2470.007	-0.014305	-0.008478	-0.001678
0.3840	1289.543	203.707	120.866	23.765	-0.494	9.960	2454.958	-0.014259	-0.008461	-0.001664
0.3850	1273.372	202.789	120.643	23.236	-0.494	9.958	2424.173	-0.014195	-0.008445	-0.001626
0.3860	1238.807	199.831	118.746	21.776	-0.498	9.955	2358.370	-0.013988	-0.008312	-0.001524
0.3870	1179.054	194.494	115.363	19.204	-0.498	9.953	2244.616	-0.013615	-0.008075	-0.001344
0.3880	1095.225	186.351	109.808	16.426	-0.502	9.952	2085.028	-0.013045	-0.007687	-0.001150
0.3890	999.224	176.123	103.601	12.258	-0.499	9.951	1902.266	-0.012329	-0.007252	-0.000858
0.3900	903.027	165.520	97.133	8.520	-0.502	9.952	1719.131	-0.011586	-0.006799	-0.000596
0.3910	812.751	154.333	90.750	5.824	-0.502	9.954	1547.270	-0.010803	-0.006352	-0.000408
0.3920	729.584	143.938	84.708	3.476	-0.497	9.956	1388.941	-0.010076	-0.005930	-0.000243
0.3930	652.624	133.961	79.135	1.461	-0.493	9.958	1242.428	-0.009377	-0.005539	-0.000102
0.3940	581.134	124.275	73.851	-0.220	-0.495	9.960	1106.329	-0.008699	-0.005170	0.000015
0.3950	514.468	115.103	68.842	-1.846	-0.493	9.963	979.414	-0.008057	-0.004819	0.000129
0.3960	451.994	105.682	64.013	-3.862	-0.493	9.966	860.481	-0.007398	-0.004481	0.000270
0.3970	393.955	96.830	59.583	-5.278	-0.490	9.969	749.989	-0.006778	-0.004171	0.000369
0.3980	341.551	88.436	55.372	-5.459	-0.494	9.969	650.225	-0.006191	-0.003876	0.000382
0.3990	296.240	81.015	51.685	-5.960	-0.497	9.969	563.965	-0.005671	-0.003618	0.000417
0.4000	258.023	74.692	48.064	-6.657	-0.504	9.968	491.209	-0.005228	-0.003365	0.000466
0.4010	225.381	68.801	44.804	-6.866	-0.498	9.967	429.068	-0.004816	-0.003136	0.000481
0.4020	196.932	63.200	41.791	-6.490	-0.493	9.965	374.908	-0.004424	-0.002925	0.000454
0.4030	172.316	58.516	39.411	-6.753	-0.492	9.963	328.045	-0.004096	-0.002759	0.000473
0.4040	151.772	54.181	37.072	-6.600	-0.494	9.961	288.935	-0.003793	-0.002595	0.000462
0.4050	135.391	50.929	34.953	-6.335	-0.505	9.958	257.750	-0.003565	-0.002447	0.000443
0.4060	123.639	48.247	33.672	-6.321	-0.509	9.955	235.376	-0.003377	-0.002357	0.000442
0.4070	116.560	46.177	32.791	-7.016	-0.509	9.954	221.901	-0.003232	-0.002295	0.000491
0.4080	113.765	45.011	32.171	-6.711	-0.509	9.952	216.579	-0.003151	-0.002252	0.000470
0.4090	113.885	44.886	31.745	-6.379	-0.510	9.951	216.808	-0.003142	-0.002222	0.000446
0.4100	117.041	44.872	31.676	-5.905	-0.510	9.952	222.816	-0.003141	-0.002217	0.000413
0.4110	126.479	45.609	31.883	-5.960	-0.508	9.954	240.784	-0.003193	-0.002232	0.000417
0.4120	148.751	48.513	32.668	-6.155	-0.505	9.956	283.184	-0.003396	-0.002287	0.000431
0.4130	188.712	53.543	35.903	-6.557	-0.507	9.958	359.259	-0.003748	-0.002513	0.000459
0.4140	247.563	61.422	40.706	-6.501	-0.504	9.960	471.296	-0.004300	-0.002849	0.000455
0.4150	323.982	71.830	46.733	-6.307	-0.502	9.963	616.779	-0.005028	-0.003271	0.000441
0.4160	415.656	84.142	53.447	-4.833	-0.500	9.966	791.302	-0.005890	-0.003741	0.000338
0.4170	519.878	98.930	60.781	-3.208	-0.493	9.968	989.714	-0.006925	-0.004255	0.000225
0.4180	631.734	114.340	68.567	-0.277	-0.498	9.969	1202.660	-0.008004	-0.004800	0.000019
0.4190	745.965	129.489	76.534	2.390	-0.496	9.968	1420.126	-0.009064	-0.005357	-0.000167
0.4200	856.679	144.024	84.611	5.449	-0.499	9.967	1630.898	-0.010082	-0.005923	-0.000381
0.4210	957.430	156.461	92.015	8.924	-0.502	9.966	1822.701	-0.010952	-0.006441	-0.000625
0.4220	1042.400	167.342	98.207	12.107	-0.504	9.965	1984.463	-0.011714	-0.006875	-0.000847
0.4230	1109.322	176.026	103.449	14.565	-0.505	9.963	2111.864	-0.012322	-0.007241	-0.001020
0.4240	1160.058	182.959	107.507	16.621	-0.505	9.960	2208.452	-0.012807	-0.007526	-0.001163
0.4250	1198.110	188.518	110.451	18.288	-0.508	9.958	2280.893	-0.013196	-0.007732	-0.001280
0.4260	1227.475	192.254	113.190	19.665	-0.511	9.955	2336.798	-0.013458	-0.007923	-0.001377
0.4270	1250.799	195.507	114.966	20.527	-0.513	9.953	2381.201	-0.013686	-0.008048	-0.001437
0.4280	1270.592	198.259	117.330	22.111	-0.518	9.951	2418.880	-0.013878	-0.008213	-0.001548
0.4290	1288.446	200.927	118.703	23.056	-0.511	9.951	2452.869	-0.014065	-0.008309	-0.001614
0.4300	1303.880	203.497	120.603	23.556	-0.514	9.951	2482.252	-0.014245	-0.008442	-0.001649
0.4310	1314.595	205.290	121.367	24.169	-0.507	9.953	2502.651	-0.014370	-0.008496	-0.001692
0.4320	1318.713	206.346	122.074	24.947	-0.501	9.956	2510.490	-0.014444	-0.008545	-0.001746
0.4330	1316.203	206.444	122.227	24.877	-0.499	9.958	2505.713	-0.014451	-0.008556	-0.001741
0.4340	1307.922	206.179	122.505	24.113	-0.500	9.960	2489.948	-0.014433	-0.008575	-0.001688
0.4350	1290.144	205.289	121.838	23.930	-0.504	9.963	2456.102	-0.014370	-0.008529	-0.001675
0.4360	1252.047	202.092	120.034	23.000	-0.508	9.966	2383.575	-0.014146	-0.008402	-0.001610
0.4370	1187.244	196.174	116.221	19.483	-0.505	9.968	2260.208	-0.013732	-0.008135	-0.001364
0.4380	1098.021	186.976	110.719	15.702	-0.498	9.968	2090.349	-0.013088	-0.007750	-0.001099
0.4390	998.187	176.540	104.138	12.395	-0.492	9.968	1900.291	-0.012358	-0.007290	-0.000868
0.4400	900.096	165.493	97.477	9.102	-0.494	9.967	1713.552	-0.011585	-0.006823	-0.000637
0.4410	809.821	154.611	91.176	5.866	-0.495	9.966	1541.691	-0.010823	-0.006382	-0.000411
0.4420	727.660	144.299	85.299	3.268	-0.488	9.965	1385.279	-0.010101	-0.005971	-0.000229
0.4430	652.789	134.489	79.645	1.170	-0.494	9.963	1242.743	-0.009414	-0.005575	-0.000082
0.4440	583.989	125.303	74.541	-0.873	-0.492	9.961	1111.765	-0.008771	-0.005218	0.000061
0.4450	520.299	116.521	69.863	-2.542	-0.498	9.958	990.515	-0.008156	-0.004890	0.000178
0.4460	460.425	107.767	65.087	-3.084	-0.498	9.956	876.532	-0.007544	-0.004556	0.000216
0.4470	403.768	99.137	60.545	-4.405	-0.496	9.954	768.671	-0.006940	-0.004238	0.000308
0.4480	351.635	90.952	56.555	-5.711	-0.499	9.951	669.422	-0.006367	-0.003959	0.000400
0.4490	305.948	83.421	52.605	-6.238	-0.500	9.951	582.447	-0.005839	-0.003682	0.000437
0.4500	267.085	76.917	49.029	-5.821	-0.502	9.951	508.461	-0.005384	-0.003432	0.000407
0.4510	233.632	70.788	46.057	-6.432	-0.501	9.953	444.775	-0.004955	-0.003224	0.000450
0.4520	204.176	65.328	42.920	-6.905	-0.498	9.956	388.699	-0.004573	-0.003004	0.000483
0.4530	178.342	60.324	39.878	-7.044	-0.501	9.958	339.518	-0.004223	-0.002791	0.000493
0.4540	157.017	55.919	37.428	-6.973	-0.500	9.960	298.920	-0.003914	-0.002620	0.000488
0.4550	140.185	52.402	35.652	-6.751	-0.503	9.963	266.876	-0.003668	-0.002496	0.000473
0.4560	128.252	49.525	34.084	-6.349	-0.505	9.966	244.160	-0.003467	-0.002386	0.000444
0.4570	120.949	47.427	32.970	-5.946	-0.504	9.968	230.255	-0.003320	-0.002308	0.000416
0.4580	117.928	46.496	32.448	-6.447	-0.509	9.969	224.504	-0.003255	-0.002271	0.000451
0.4590	117.748	45.885	31.829	-6.362	-0.509	9.968	224.161	-0.003212	-0.002228	0.000445
0.4600	119.987	45.732	31.816	-5.585	-0.512	9.967	228.424	-0.003201	-0.002227	0.000391
0.4610	126.148	45.996	31.788	-5.765	-0.508	9.966	240.154	-0.003220	-0.002225	0.000404
0.4620	142.875	47.537	32.640	-6.643	-0.506	9.965	271.997	-0.003328	-0.002285	0.000465
0.4630	176.223	52.068	34.772	-7.058	-0.503	9.963	335.484	-0.003645	-0.002434	0.000494
0.4640	229.153	59.031	38.886	-6.335	-0.500	9.961	436.249	-0.004132	-0.002722	0.000443
0.4650	300.658	68.440	44.239	-6.044	-0.502	9.958	572.376	-0.004791	-0.003097	0.000423
0.4660	388.544	80.418	51.010	-4.989	-0.509	9.956	739.689	-0.005629	-0.003571	0.000349
0.4670	490.137	94.426	58.565	-3.348	-0.508	9.953	933.094	-0.006610	-0.004100	0.000234
0.4680	601.272	109.669	66.408	-1.292	-0.514	9.951	1144.667	-0.007677	-0.004649	0.000090
0.4690	716.825	125.540	74.622	0.932	-0.512	9.951	1364.651	-0.008788	-0.005224	-0.000065
0.4700	830.755	140.383	83.057	4.434	-0.516	9.952	1581.545	-0.009827	-0.005814	-0.000310
0.4710	936.961	153.862	90.777	8.491	-0.511	9.954	1783.733	-0.010770	-0.006354	-0.000594
0.4720	1029.206	165.520	97.766	11.631	-0.506	9.956	1959.343	-0.011586	-0.006844	-0.000814
0.4730	1104.603	175.122	103.256	14.383	-0.505	9.958	2102.880	-0.012259	-0.007228	-0.001007
0.4740	1163.454	183.433	108.030	17.218	-0.506	9.960	2214.918	-0.012840	-0.007562	-0.001205
0.4750	1208.119	189.421	111.731	19.026	-0.507	9.963	2299.948	-0.013259	-0.007821	-0.001332
0.4760	1241.181	194.075	114.691	19.777	-0.504	9.965	2362.890	-0.013585	-0.008028	-0.001384
0.4770	1264.776	197.424	116.928	20.764	-0.497	9.968	2407.808	-0.013820	-0.008185	-0.001453
0.4780	1281.202	200.302	118.464	22.806	-0.493	9.968	2439.079	-0.014021	-0.008292	-0.001596
0.4790	1293.134	202.595	119.977	23.570	-0.494	9.968	2461.796	-0.014182	-0.008398	-0.001650
0.4800	1301.881	204.137	120.768	23.848	-0.494	9.966	2478.447	-0.014290	-0.008454	-0.001669
0.4810	1307.246	205.290	121.742	24.211	-0.493	9.966	2488.661	-0.014370	-0.008522	-0.001695
0.4820	1308.163	205.819	121.673	24.252	-0.492	9.965	2490.406	-0.014407	-0.008517	-0.001698
0.4830	1304.496	205.985	122.131	24.196	-0.498	9.963	2483.425	-0.014419	-0.008549	-0.001694
0.4840	1296.230	205.457	121.825	23.903	-0.499	9.960	2467.690	-0.014382	-0.008528	-0.001673
0.4850	1278.963	204.109	121.255	23.555	-0.505	9.958	2434.816	-0.014288	-0.008488	-0.001649
0.4860	1241.587	201.081	119.341	22.277	-0.501	9.955	2363.663	-0.014076	-0.008354	-0.001559
0.4870	1177.867	195.135	115.461	19.637	-0.497	9.953	2242.355	-0.013659	-0.008082	-0.001375
0.4880	1089.920	186.907	109.822	15.510	-0.501	9.951	2074.928	-0.013083	-0.007688	-0.001086
0.4890	991.484	176.095	103.338	11.855	-0.504	9.951	1887.531	-0.012327	-0.007234	-0.000830
0.4900	894.265	164.977	96.652	8.561	-0.509	9.952	1702.452	-0.011548	-0.006766	-0.000599
0.4910	803.900	153.874	90.336	5.880	-0.508	9.954	1530.418	-0.010771	-0.006324	-0.000412
0.4920	720.883	143.382	84.255	3.407	-0.505	9.956	1372.375	-0.010037	-0.005898	-0.000238
0.4930	644.553	133.656	78.545	1.100	-0.505	9.958	1227.064	-0.009356	-0.005498	-0.000077
0.4940	574.235	123.915	73.522	-0.429	-0.505	9.960	1093.197	-0.008674	-0.005147	0.000030
0.4950	508.847	114.798	68.609	-2.140	-0.508	9.963	968.714	-0.008036	-0.004803	0.000150
0.4960	447.110	105.960	64.371	-3.543	-0.507	9.965	851.183	-0.007417	-0.004506	0.000248
0.4970	388.770	96.663	59.418	-4.918	-0.502	9.968	740.118	-0.006766	-0.004159	0.000344
0.4980	335.524	88.367	55.566	-4.889	-0.509	9.969	638.752	-0.006186	-0.003890	0.000342
0.4990	289.267	81.002	51.148	-5.890	-0.510	9.969	550.690	-0.005670	-0.003580	0.000412
