# Supplementary material for: Evaluation of a Cold-Mixed High-Performance Polyurethane Mixture
Source: Hindawi journal article supplement (doi:10.1155/2019/1507971), 2019-11-07
Supplement: f1 [file 1507971.f1.zip › 1507971.f1/dynamic modulus data/PUM/specimen1/temp10/zhs-1-10_25Hz.csv]

Test Information
****************
Project name	zhs
Operator name	1
Target test temperature	10
Target confining stress	0
Average dynamic strain range from 75 to 125 micro-strain
Contact stress	5
Initial modulus	4000
Axial gauge length	70
Comments	Run at High Pressure
Specimen information
********************
Identification	zhs-1-10
Dimensions	Point 1	Point 2	Point 3	Point 4	Point 5	Point 6	Average	Std Dev.
Diameter (mm)	49.2	49.2	49.3				49.23	0.058
Height (mm)	101.3	101.2	101.3				101.27	0.058
Cross-sectional area (mm�)	1903.7
Conditioning time
Properties/Comments
Test Data	25Hz
*********
Test date and time	Fri	Mar 29	2019	11:04 AM
Dynamic modulus (MPa)	13008
Phase angle (Degrees)	4.13
Average temperature (�C)	10.0
Average confining pressure (kPa)	-0.5
Average micro-strain	109
Load drift (%)	-1.0
Load standard error (%)	10.0
Average deformation drift (%)	-2.1
Average deformation standard error (%)	12.7
Deformation uniformity (%)	55.2
Phase uniformity (Degrees)	2.6
Conditioning Cycles
Time (sec)	Axial stress (kPa)	Axial micro-strain #1	Axial micro-strain #2	Axial micro-strain #3	Confining pressure (kPa)	Temperature (�C)	Load (N)	Displacement #1 (mm)	Displacement #2 (mm)	Displacement #3 (mm)
0.0000	21.476	-0.181	0.043	0.070	-0.522	9.967	40.884	0.000013	-0.000003	-0.000005
0.0008	21.385	-0.071	-0.012	-0.069	-0.523	9.969	40.712	0.000005	0.000001	0.000005
0.0016	21.355	-0.126	-0.453	-0.222	-0.517	9.971	40.655	0.000009	0.000032	0.000016
0.0024	21.340	0.083	-0.082	0.432	-0.520	9.972	40.627	-0.000006	0.000006	-0.000030
0.0032	21.265	0.360	-0.012	0.571	-0.525	9.972	40.483	-0.000025	0.000001	-0.000040
0.0040	21.235	0.208	-0.026	0.208	-0.524	9.971	40.426	-0.000015	0.000002	-0.000015
0.0048	21.370	0.027	0.525	0.278	-0.528	9.970	40.684	-0.000002	-0.000037	-0.000019
0.0056	21.596	-0.029	0.264	0.110	-0.522	9.969	41.113	0.000002	-0.000018	-0.000008
0.0064	21.881	-0.099	0.181	-0.043	-0.520	9.969	41.656	0.000007	-0.000013	0.000003
0.0072	22.227	0.040	0.290	0.319	-0.521	9.967	42.315	-0.000003	-0.000020	-0.000022
0.0080	22.693	0.374	0.181	0.375	-0.520	9.965	43.201	-0.000026	-0.000013	-0.000026
0.0088	23.414	0.388	0.401	0.096	-0.521	9.963	44.575	-0.000027	-0.000028	-0.000007
0.0096	24.647	0.459	0.318	0.125	-0.518	9.961	46.921	-0.000032	-0.000022	-0.000009
0.0104	26.931	0.625	0.470	0.112	-0.517	9.959	51.270	-0.000044	-0.000033	-0.000008
0.0112	30.538	0.874	0.456	0.057	-0.513	9.958	58.136	-0.000061	-0.000032	-0.000004
0.0120	36.444	1.444	0.593	0.169	-0.513	9.956	69.380	-0.000101	-0.000041	-0.000012
0.0128	45.521	2.193	1.528	0.432	-0.518	9.955	86.660	-0.000154	-0.000107	-0.000030
0.0136	57.919	3.279	2.147	0.473	-0.522	9.955	110.264	-0.000230	-0.000150	-0.000033
0.0144	74.255	4.683	3.647	0.736	-0.521	9.955	141.363	-0.000328	-0.000255	-0.000051
0.0152	93.822	6.394	5.284	1.223	-0.522	9.956	178.614	-0.000448	-0.000370	-0.000086
0.0160	115.283	8.284	6.786	1.265	-0.517	9.958	219.469	-0.000580	-0.000475	-0.000089
0.0168	137.780	10.298	8.988	1.460	-0.514	9.959	262.299	-0.000721	-0.000629	-0.000102
0.0176	160.007	12.326	10.557	1.851	-0.518	9.961	304.613	-0.000863	-0.000739	-0.000130
0.0184	181.543	14.355	12.703	2.185	-0.520	9.962	345.612	-0.001005	-0.000889	-0.000153
0.0192	202.342	16.328	14.657	2.560	-0.521	9.964	385.208	-0.001143	-0.001026	-0.000179
0.0200	222.405	18.413	16.500	2.961	-0.522	9.967	423.403	-0.001289	-0.001155	-0.000207
0.0208	241.522	20.469	18.551	3.100	-0.524	9.969	459.795	-0.001433	-0.001299	-0.000217
0.0216	259.465	22.331	19.996	3.433	-0.521	9.972	493.956	-0.001563	-0.001400	-0.000240
0.0224	276.478	24.305	21.811	3.863	-0.524	9.972	526.342	-0.001701	-0.001527	-0.000270
0.0232	292.423	26.251	23.366	3.850	-0.526	9.972	556.698	-0.001838	-0.001636	-0.000269
0.0240	307.151	28.127	25.031	4.085	-0.522	9.971	584.736	-0.001969	-0.001752	-0.000286
0.0248	320.255	30.059	26.378	4.529	-0.522	9.970	609.684	-0.002104	-0.001846	-0.000317
0.0256	330.971	31.517	27.467	4.918	-0.520	9.969	630.083	-0.002206	-0.001923	-0.000344
0.0264	338.830	32.461	28.318	5.057	-0.514	9.968	645.046	-0.002272	-0.001982	-0.000354
0.0272	343.910	33.212	28.772	5.140	-0.514	9.967	654.716	-0.002325	-0.002014	-0.000360
0.0280	346.224	33.656	29.419	5.169	-0.516	9.965	659.122	-0.002356	-0.002059	-0.000362
0.0288	346.149	34.102	29.528	5.099	-0.509	9.963	658.979	-0.002387	-0.002067	-0.000357
0.0296	344.256	34.479	29.708	5.169	-0.514	9.962	655.375	-0.002414	-0.002080	-0.000362
0.0304	340.980	34.423	29.598	5.087	-0.516	9.959	649.137	-0.002410	-0.002072	-0.000356
0.0312	336.817	34.186	29.433	4.962	-0.509	9.958	641.212	-0.002393	-0.002060	-0.000347
0.0320	332.248	33.698	29.378	5.129	-0.513	9.957	632.515	-0.002359	-0.002056	-0.000359
0.0328	327.229	33.391	29.227	5.169	-0.513	9.955	622.959	-0.002337	-0.002046	-0.000362
0.0336	321.488	33.252	29.240	4.892	-0.517	9.955	612.030	-0.002328	-0.002047	-0.000342
0.0344	314.469	32.961	28.966	4.989	-0.525	9.955	598.669	-0.002307	-0.002028	-0.000349
0.0352	304.821	32.418	28.390	5.072	-0.525	9.956	580.301	-0.002269	-0.001987	-0.000355
0.0360	291.446	31.154	27.455	4.490	-0.521	9.958	554.838	-0.002181	-0.001922	-0.000314
0.0368	273.472	29.222	25.913	4.045	-0.520	9.960	520.620	-0.002046	-0.001814	-0.000283
0.0376	251.065	27.124	24.233	3.448	-0.516	9.961	477.962	-0.001899	-0.001696	-0.000241
0.0384	225.516	24.623	22.003	2.642	-0.521	9.963	429.325	-0.001724	-0.001540	-0.000185
0.0392	198.676	22.024	19.691	2.295	-0.521	9.965	378.227	-0.001542	-0.001378	-0.000161
0.0400	172.466	19.591	17.284	1.892	-0.520	9.967	328.331	-0.001371	-0.001210	-0.000132
0.0408	148.300	16.979	14.903	1.587	-0.521	9.969	282.326	-0.001189	-0.001043	-0.000111
0.0416	127.005	14.589	13.251	1.281	-0.511	9.972	241.785	-0.001021	-0.000928	-0.000090
0.0424	109.091	12.588	11.434	1.016	-0.510	9.972	207.682	-0.000881	-0.000800	-0.000071
0.0432	94.634	11.185	10.333	0.709	-0.516	9.972	180.159	-0.000783	-0.000723	-0.000050
0.0440	83.513	10.060	9.218	0.472	-0.513	9.972	158.987	-0.000704	-0.000645	-0.000033
0.0448	75.578	9.254	8.036	0.806	-0.517	9.970	143.881	-0.000648	-0.000562	-0.000056
0.0456	70.002	8.712	7.458	0.555	-0.517	9.969	133.266	-0.000610	-0.000522	-0.000039
0.0464	66.290	7.920	6.881	0.263	-0.512	9.969	126.200	-0.000554	-0.000482	-0.000018
0.0472	63.886	7.572	6.428	0.237	-0.510	9.967	121.622	-0.000530	-0.000450	-0.000017
0.0480	62.278	7.447	6.359	0.487	-0.509	9.966	118.561	-0.000521	-0.000445	-0.000034
0.0488	61.466	7.252	6.098	0.626	-0.510	9.964	117.016	-0.000508	-0.000427	-0.000044
0.0496	61.271	7.308	5.877	0.891	-0.512	9.962	116.644	-0.000512	-0.000411	-0.000062
0.0504	61.722	7.211	6.055	0.988	-0.517	9.959	117.502	-0.000505	-0.000424	-0.000069
0.0512	62.834	7.058	5.876	0.473	-0.519	9.958	119.619	-0.000494	-0.000411	-0.000033
0.0520	64.562	7.058	5.821	0.321	-0.512	9.956	122.910	-0.000494	-0.000407	-0.000022
0.0528	67.267	7.336	6.165	0.459	-0.517	9.954	128.059	-0.000514	-0.000432	-0.000032
0.0536	71.836	7.531	6.248	0.556	-0.516	9.954	136.757	-0.000527	-0.000437	-0.000039
0.0544	79.590	8.171	6.648	0.806	-0.516	9.955	151.520	-0.000572	-0.000465	-0.000056
0.0552	91.628	8.991	7.583	0.972	-0.517	9.956	174.437	-0.000629	-0.000531	-0.000068
0.0560	108.235	10.060	8.601	1.056	-0.513	9.958	206.051	-0.000704	-0.000602	-0.000074
0.0568	128.884	11.950	10.072	1.195	-0.507	9.960	245.361	-0.000836	-0.000705	-0.000084
0.0576	152.704	14.159	12.246	1.292	-0.507	9.961	290.709	-0.000991	-0.000857	-0.000090
0.0584	178.553	16.715	14.269	1.792	-0.508	9.963	339.918	-0.001170	-0.000999	-0.000125
0.0592	205.559	19.327	16.705	1.987	-0.503	9.965	391.331	-0.001353	-0.001169	-0.000139
0.0600	232.820	21.927	19.223	2.529	-0.508	9.967	443.230	-0.001535	-0.001346	-0.000177
0.0608	259.120	24.693	21.397	3.808	-0.505	9.969	493.298	-0.001729	-0.001498	-0.000267
0.0616	283.586	27.224	23.557	4.252	-0.506	9.971	539.875	-0.001906	-0.001649	-0.000298
0.0624	305.798	29.949	25.415	4.697	-0.511	9.972	582.161	-0.002096	-0.001779	-0.000329
0.0632	325.861	32.574	27.466	5.392	-0.516	9.971	620.356	-0.002280	-0.001923	-0.000377
0.0640	343.504	34.645	29.103	5.698	-0.519	9.971	653.944	-0.002425	-0.002037	-0.000399
0.0648	358.247	36.562	30.754	6.352	-0.520	9.970	682.011	-0.002559	-0.002153	-0.000445
0.0656	369.413	38.062	31.993	6.784	-0.519	9.969	703.268	-0.002664	-0.002240	-0.000475
0.0664	376.341	39.049	32.654	6.895	-0.514	9.968	716.457	-0.002733	-0.002286	-0.000483
0.0672	379.272	39.812	33.438	6.769	-0.516	9.967	722.036	-0.002787	-0.002341	-0.000474
0.0680	379.107	40.242	33.480	6.700	-0.516	9.965	721.722	-0.002817	-0.002344	-0.000469
0.0688	376.837	40.283	33.742	6.713	-0.515	9.963	717.402	-0.002820	-0.002362	-0.000470
0.0696	373.185	40.075	33.563	6.476	-0.515	9.961	710.449	-0.002805	-0.002349	-0.000453
0.0704	368.542	39.840	33.345	6.394	-0.514	9.959	701.609	-0.002789	-0.002334	-0.000448
0.0712	362.921	39.520	33.220	6.032	-0.510	9.957	690.908	-0.002766	-0.002325	-0.000422
0.0720	356.158	39.257	32.779	5.754	-0.512	9.956	678.034	-0.002748	-0.002295	-0.000403
0.0728	347.908	38.841	32.834	5.811	-0.514	9.954	662.327	-0.002719	-0.002298	-0.000407
0.0736	337.553	38.035	32.172	5.727	-0.512	9.954	642.614	-0.002662	-0.002252	-0.000401
0.0744	324.388	36.813	31.580	5.575	-0.513	9.955	617.552	-0.002577	-0.002211	-0.000390
0.0752	307.662	35.048	30.218	5.269	-0.506	9.955	585.709	-0.002453	-0.002115	-0.000369
0.0760	287.163	32.920	28.540	4.532	-0.500	9.958	546.684	-0.002304	-0.001998	-0.000317
0.0768	263.598	30.600	26.545	3.739	-0.502	9.959	501.823	-0.002142	-0.001858	-0.000262
0.0776	238.215	27.960	24.453	3.113	-0.499	9.961	453.501	-0.001957	-0.001712	-0.000218
0.0784	212.547	25.209	22.362	2.434	-0.504	9.963	404.634	-0.001765	-0.001565	-0.000170
0.0792	187.720	22.471	19.954	2.016	-0.505	9.965	357.370	-0.001573	-0.001397	-0.000141
0.0800	164.486	19.802	18.013	2.003	-0.504	9.967	313.139	-0.001386	-0.001261	-0.000140
0.0808	143.266	17.592	15.673	1.628	-0.505	9.969	272.741	-0.001231	-0.001097	-0.000114
0.0816	124.285	15.673	13.940	1.210	-0.499	9.971	236.607	-0.001097	-0.000976	-0.000085
0.0824	108.039	13.978	12.371	1.071	-0.494	9.972	205.679	-0.000978	-0.000866	-0.000075
0.0832	94.469	12.380	11.091	0.987	-0.497	9.971	179.844	-0.000867	-0.000776	-0.000069
0.0840	83.528	11.046	10.128	0.987	-0.496	9.971	159.016	-0.000773	-0.000709	-0.000069
0.0848	75.082	10.033	9.068	1.182	-0.500	9.970	142.937	-0.000702	-0.000635	-0.000083
0.0856	68.530	9.158	8.242	1.112	-0.507	9.969	130.463	-0.000641	-0.000577	-0.000078
0.0864	63.600	8.477	7.308	1.015	-0.501	9.969	121.078	-0.000593	-0.000512	-0.000071
0.0872	60.054	7.921	7.005	1.570	-0.504	9.967	114.326	-0.000555	-0.000490	-0.000110
0.0880	57.694	7.296	6.757	1.292	-0.500	9.966	109.835	-0.000511	-0.000473	-0.000090
0.0888	56.402	7.073	6.579	0.750	-0.497	9.963	107.374	-0.000495	-0.000461	-0.000053
0.0896	56.026	7.100	6.593	0.904	-0.498	9.961	106.659	-0.000497	-0.000462	-0.000063
0.0904	56.296	7.073	6.277	0.682	-0.499	9.959	107.174	-0.000495	-0.000439	-0.000048
0.0912	57.273	7.114	6.182	0.543	-0.501	9.958	109.034	-0.000498	-0.000433	-0.000038
0.0920	59.002	7.129	5.989	0.641	-0.505	9.957	112.324	-0.000499	-0.000419	-0.000045
0.0928	61.977	7.087	6.427	0.822	-0.513	9.955	117.989	-0.000496	-0.000450	-0.000058
0.0936	67.162	7.379	6.591	0.753	-0.518	9.955	127.859	-0.000517	-0.000461	-0.000053
0.0944	75.518	8.102	7.224	0.947	-0.521	9.955	143.766	-0.000567	-0.000506	-0.000066
0.0952	88.247	9.200	8.283	1.183	-0.517	9.956	167.999	-0.000644	-0.000580	-0.000083
0.0960	105.499	10.632	9.178	0.960	-0.511	9.958	200.844	-0.000744	-0.000642	-0.000067
0.0968	126.930	12.633	11.228	1.016	-0.508	9.960	241.642	-0.000884	-0.000786	-0.000071
0.0976	151.592	14.841	12.976	1.517	-0.511	9.962	288.591	-0.001039	-0.000908	-0.000106
0.0984	178.267	17.425	15.329	2.058	-0.514	9.963	339.375	-0.001220	-0.001073	-0.000144
0.0992	206.085	20.524	17.861	2.516	-0.515	9.965	392.332	-0.001437	-0.001250	-0.000176
0.1000	233.947	23.414	19.912	3.265	-0.515	9.967	445.375	-0.001639	-0.001394	-0.000229
0.1008	261.058	26.402	22.650	3.558	-0.512	9.969	496.988	-0.001848	-0.001585	-0.000249
0.1016	286.261	29.238	24.481	3.850	-0.506	9.971	544.968	-0.002047	-0.001714	-0.000269
0.1024	308.894	31.753	26.545	4.628	-0.506	9.972	588.055	-0.002223	-0.001858	-0.000324
0.1032	328.807	34.267	28.581	5.129	-0.511	9.972	625.963	-0.002399	-0.002001	-0.000359
0.1040	345.623	36.407	30.081	5.783	-0.508	9.971	657.978	-0.002549	-0.002106	-0.000405
0.1048	359.179	38.368	31.787	6.298	-0.510	9.970	683.784	-0.002686	-0.002225	-0.000441
0.1056	369.293	39.825	32.502	6.547	-0.505	9.969	703.039	-0.002788	-0.002275	-0.000458
0.1064	375.665	40.856	33.314	6.811	-0.498	9.968	715.170	-0.002860	-0.002332	-0.000477
0.1072	378.475	41.508	33.548	6.894	-0.497	9.967	720.520	-0.002906	-0.002348	-0.000483
0.1080	378.611	41.561	33.740	7.004	-0.498	9.965	720.778	-0.002909	-0.002362	-0.000490
0.1088	376.762	41.508	33.906	6.921	-0.504	9.963	717.258	-0.002906	-0.002373	-0.000484
0.1096	373.666	41.534	33.946	6.962	-0.505	9.961	711.365	-0.002907	-0.002376	-0.000487
0.1104	369.684	41.396	33.809	6.740	-0.512	9.959	703.783	-0.002898	-0.002367	-0.000472
0.1112	364.589	41.273	33.739	6.310	-0.508	9.957	694.084	-0.002889	-0.002362	-0.000442
0.1120	358.172	40.994	33.422	6.086	-0.505	9.956	681.868	-0.002870	-0.002340	-0.000426
0.1128	349.681	40.328	33.149	5.643	-0.511	9.955	665.703	-0.002823	-0.002320	-0.000395
0.1136	338.410	39.452	32.748	5.434	-0.512	9.954	644.245	-0.002762	-0.002292	-0.000380
0.1144	323.787	38.104	31.772	4.891	-0.518	9.955	616.407	-0.002667	-0.002224	-0.000342
0.1152	305.137	36.310	30.644	4.517	-0.515	9.956	580.902	-0.002542	-0.002145	-0.000316
0.1160	282.624	33.767	28.539	4.573	-0.509	9.958	538.044	-0.002364	-0.001998	-0.000320
0.1168	257.061	30.862	26.475	3.865	-0.506	9.960	489.378	-0.002160	-0.001853	-0.000271
0.1176	229.965	27.665	23.998	3.226	-0.508	9.961	437.794	-0.001937	-0.001680	-0.000226
0.1184	202.944	24.678	21.837	2.656	-0.510	9.963	386.353	-0.001727	-0.001529	-0.000186
0.1192	177.440	21.969	19.635	2.586	-0.511	9.965	337.801	-0.001538	-0.001374	-0.000181
0.1200	154.282	19.482	17.518	2.099	-0.509	9.967	293.713	-0.001364	-0.001226	-0.000147
0.1208	133.678	17.343	15.687	1.459	-0.506	9.969	254.488	-0.001214	-0.001098	-0.000102
0.1216	115.659	15.189	13.664	1.001	-0.503	9.971	220.184	-0.001063	-0.000956	-0.000070
0.1224	100.465	13.494	12.109	0.653	-0.503	9.972	191.259	-0.000945	-0.000848	-0.000046
0.1232	88.172	12.077	10.911	0.806	-0.510	9.972	167.856	-0.000845	-0.000764	-0.000056
0.1240	78.614	10.882	10.100	0.737	-0.506	9.971	149.660	-0.000762	-0.000707	-0.000052
0.1248	71.731	10.007	9.274	0.722	-0.506	9.970	136.557	-0.000700	-0.000649	-0.000051
0.1256	66.531	9.117	8.779	0.847	-0.504	9.969	126.657	-0.000638	-0.000615	-0.000059
0.1264	62.308	8.408	7.982	0.819	-0.498	9.969	118.618	-0.000589	-0.000559	-0.000057
0.1272	59.062	7.948	7.363	0.750	-0.501	9.968	112.438	-0.000556	-0.000515	-0.000053
0.1280	56.507	7.643	7.144	0.557	-0.506	9.966	107.574	-0.000535	-0.000500	-0.000039
0.1288	54.809	7.448	6.827	0.584	-0.508	9.964	104.342	-0.000521	-0.000478	-0.000041
0.1296	54.147	7.211	7.020	0.639	-0.512	9.962	103.083	-0.000505	-0.000491	-0.000045
0.1304	54.192	7.073	6.772	0.654	-0.508	9.959	103.168	-0.000495	-0.000474	-0.000046
0.1312	54.914	6.863	6.744	0.792	-0.505	9.958	104.542	-0.000480	-0.000472	-0.000055
0.1320	56.582	6.821	6.704	0.668	-0.500	9.957	107.718	-0.000477	-0.000469	-0.000047
0.1328	59.573	7.183	6.786	0.778	-0.504	9.955	113.411	-0.000503	-0.000475	-0.000054
0.1336	64.742	7.502	7.268	0.820	-0.512	9.955	123.253	-0.000525	-0.000509	-0.000057
0.1344	73.294	8.237	7.749	0.681	-0.512	9.955	139.532	-0.000577	-0.000542	-0.000048
0.1352	85.978	9.334	8.658	0.667	-0.515	9.956	163.679	-0.000653	-0.000606	-0.000047
0.1360	103.065	10.710	9.760	0.625	-0.508	9.958	196.209	-0.000750	-0.000683	-0.000044
0.1368	124.270	12.795	11.272	0.874	-0.506	9.960	236.578	-0.000896	-0.000789	-0.000061
0.1376	148.901	15.395	13.418	1.153	-0.507	9.961	283.470	-0.001078	-0.000939	-0.000081
0.1384	175.802	18.343	15.645	1.710	-0.512	9.963	334.682	-0.001284	-0.001095	-0.000120
0.1392	203.951	21.317	18.204	2.349	-0.506	9.965	388.269	-0.001492	-0.001274	-0.000164
0.1400	232.174	24.333	20.696	2.752	-0.506	9.967	441.999	-0.001703	-0.001449	-0.000193
0.1408	259.195	27.126	22.897	3.002	-0.505	9.969	493.441	-0.001899	-0.001603	-0.000210
0.1416	284.097	29.724	25.319	3.529	-0.500	9.971	540.848	-0.002081	-0.001772	-0.000247
0.1424	306.279	32.544	27.066	4.891	-0.505	9.972	583.076	-0.002278	-0.001895	-0.000342
0.1432	325.425	35.115	29.090	5.530	-0.509	9.971	619.526	-0.002458	-0.002036	-0.000387
0.1440	341.235	37.213	30.424	5.782	-0.514	9.971	649.624	-0.002605	-0.002130	-0.000405
0.1448	353.633	38.895	31.539	6.199	-0.518	9.969	673.227	-0.002723	-0.002208	-0.000434
0.1456	362.485	39.938	32.530	6.393	-0.519	9.969	690.079	-0.002796	-0.002277	-0.000448
0.1464	367.880	40.730	32.859	6.435	-0.514	9.968	700.350	-0.002851	-0.002300	-0.000450
0.1472	370.240	41.383	33.618	6.407	-0.510	9.967	704.842	-0.002897	-0.002353	-0.000448
0.1480	370.210	41.536	33.659	6.379	-0.509	9.965	704.784	-0.002908	-0.002356	-0.000447
0.1488	368.527	41.688	33.933	6.392	-0.505	9.963	701.580	-0.002918	-0.002375	-0.000447
0.1496	365.491	41.452	33.712	6.406	-0.501	9.961	695.801	-0.002902	-0.002360	-0.000448
0.1504	361.478	41.146	33.533	6.267	-0.503	9.959	688.162	-0.002880	-0.002347	-0.000439
0.1512	356.534	40.867	33.149	5.808	-0.500	9.958	678.749	-0.002861	-0.002320	-0.000407
0.1520	350.192	40.562	32.847	5.670	-0.502	9.956	666.676	-0.002839	-0.002299	-0.000397
0.1528	341.806	40.243	32.738	6.018	-0.510	9.955	650.711	-0.002817	-0.002292	-0.000421
0.1536	330.640	39.216	31.844	5.670	-0.507	9.954	629.454	-0.002745	-0.002229	-0.000397
0.1544	316.032	37.868	31.280	4.989	-0.508	9.954	601.645	-0.002651	-0.002190	-0.000349
0.1552	297.773	35.964	29.917	4.600	-0.506	9.955	566.883	-0.002517	-0.002094	-0.000322
0.1560	276.463	33.309	28.046	4.154	-0.499	9.958	526.314	-0.002332	-0.001963	-0.000291
0.1568	252.853	30.779	26.436	3.489	-0.504	9.960	481.367	-0.002155	-0.001850	-0.000244
0.1576	228.251	28.264	24.220	3.016	-0.503	9.961	434.532	-0.001978	-0.001695	-0.000211
0.1584	203.785	25.540	22.018	2.529	-0.504	9.963	387.955	-0.001788	-0.001541	-0.000177
0.1592	180.431	22.996	20.037	2.141	-0.501	9.965	343.494	-0.001610	-0.001403	-0.000150
0.1600	158.940	20.633	18.193	1.877	-0.494	9.967	302.582	-0.001444	-0.001274	-0.000131
0.1608	139.539	18.340	16.390	1.459	-0.493	9.969	265.646	-0.001284	-0.001147	-0.000102
0.1616	122.482	16.242	14.698	1.058	-0.488	9.971	233.173	-0.001137	-0.001029	-0.000074
0.1624	107.919	14.687	13.487	0.987	-0.491	9.972	205.450	-0.001028	-0.000944	-0.000069
0.1632	95.776	13.311	12.070	0.917	-0.503	9.972	182.333	-0.000932	-0.000845	-0.000064
0.1640	85.947	11.978	10.996	0.487	-0.508	9.972	163.622	-0.000838	-0.000770	-0.000034
0.1648	78.373	10.991	10.364	0.571	-0.513	9.970	149.202	-0.000769	-0.000726	-0.000040
0.1656	72.497	10.129	9.580	0.599	-0.514	9.969	138.016	-0.000709	-0.000671	-0.000042
0.1664	67.898	9.310	9.002	0.306	-0.508	9.969	129.261	-0.000652	-0.000630	-0.000021
0.1672	64.337	8.879	8.851	0.625	-0.504	9.967	122.480	-0.000622	-0.000620	-0.000044
0.1680	61.586	8.490	8.396	0.582	-0.506	9.966	117.245	-0.000594	-0.000588	-0.000041
0.1688	59.783	8.018	8.105	0.249	-0.506	9.964	113.811	-0.000561	-0.000567	-0.000017
0.1696	58.971	7.795	8.091	0.319	-0.502	9.961	112.267	-0.000546	-0.000566	-0.000022
0.1704	59.122	7.754	7.760	0.292	-0.509	9.959	112.553	-0.000543	-0.000543	-0.000020
0.1712	60.099	7.740	7.554	0.154	-0.509	9.958	114.412	-0.000542	-0.000529	-0.000011
0.1720	61.812	7.921	7.569	0.654	-0.514	9.956	117.674	-0.000555	-0.000530	-0.000046
0.1728	64.442	8.268	7.776	1.113	-0.523	9.955	122.681	-0.000579	-0.000544	-0.000078
0.1736	69.025	8.476	7.914	0.765	-0.522	9.955	131.407	-0.000593	-0.000554	-0.000054
0.1744	76.825	9.087	8.698	0.766	-0.521	9.955	146.255	-0.000636	-0.000609	-0.000054
0.1752	88.923	10.185	9.414	0.863	-0.517	9.956	169.287	-0.000713	-0.000659	-0.000060
0.1760	105.710	11.728	10.514	1.267	-0.510	9.958	201.244	-0.000821	-0.000736	-0.000089
0.1768	126.599	13.812	12.193	1.462	-0.509	9.960	241.013	-0.000967	-0.000853	-0.000102
0.1776	150.750	16.216	14.146	1.309	-0.510	9.961	286.989	-0.001135	-0.000990	-0.000092
0.1784	177.410	18.899	16.580	1.629	-0.512	9.963	337.744	-0.001323	-0.001161	-0.000114
0.1792	205.769	21.858	18.947	1.532	-0.512	9.965	391.731	-0.001530	-0.001326	-0.000107
0.1800	234.834	25.221	21.686	2.087	-0.514	9.967	447.063	-0.001765	-0.001518	-0.000146
0.1808	263.523	28.515	23.764	3.157	-0.517	9.970	501.680	-0.001996	-0.001663	-0.000221
0.1816	290.394	31.571	25.938	3.783	-0.516	9.971	552.835	-0.002210	-0.001816	-0.000265
0.1824	314.980	34.281	28.196	4.590	-0.518	9.972	599.642	-0.002400	-0.001974	-0.000321
0.1832	336.922	36.783	30.054	5.298	-0.519	9.972	641.413	-0.002575	-0.002104	-0.000371
0.1840	355.452	39.174	32.049	5.659	-0.517	9.971	676.689	-0.002742	-0.002243	-0.000396
0.1848	370.180	41.259	33.507	6.201	-0.513	9.970	704.727	-0.002888	-0.002346	-0.000434
0.1856	380.264	42.969	34.113	6.936	-0.512	9.969	723.925	-0.003008	-0.002388	-0.000486
0.1864	385.674	43.859	34.910	6.965	-0.508	9.969	734.224	-0.003070	-0.002444	-0.000488
0.1872	387.117	44.108	34.938	6.715	-0.504	9.967	736.971	-0.003088	-0.002446	-0.000470
0.1880	385.584	44.052	35.157	6.604	-0.507	9.965	734.053	-0.003084	-0.002461	-0.000462
0.1888	382.233	43.912	35.088	6.909	-0.506	9.963	727.673	-0.003074	-0.002456	-0.000484
0.1896	377.544	43.689	34.800	6.644	-0.504	9.961	718.746	-0.003058	-0.002436	-0.000465
0.1904	371.668	43.439	34.704	6.102	-0.506	9.959	707.560	-0.003041	-0.002429	-0.000427
0.1912	364.244	42.855	34.194	5.656	-0.501	9.958	693.426	-0.003000	-0.002394	-0.000396
0.1920	354.430	41.911	34.044	5.392	-0.500	9.957	674.744	-0.002934	-0.002383	-0.000377
0.1928	342.107	40.896	33.259	5.391	-0.509	9.955	651.283	-0.002863	-0.002328	-0.000377
0.1936	327.199	39.452	32.777	4.862	-0.512	9.955	622.902	-0.002762	-0.002294	-0.000340
0.1944	310.096	37.910	31.554	4.070	-0.516	9.955	590.343	-0.002654	-0.002209	-0.000285
0.1952	291.220	35.950	30.163	3.584	-0.518	9.956	554.409	-0.002517	-0.002111	-0.000251
0.1960	270.376	33.616	28.485	2.890	-0.514	9.958	514.727	-0.002353	-0.001994	-0.000202
0.1968	247.849	31.044	26.270	2.530	-0.514	9.959	471.840	-0.002173	-0.001839	-0.000177
0.1976	223.968	28.139	24.577	2.474	-0.516	9.961	426.378	-0.001970	-0.001720	-0.000173
0.1984	199.487	25.237	22.154	2.169	-0.514	9.963	379.772	-0.001767	-0.001551	-0.000152
0.1992	175.321	22.470	20.214	1.932	-0.512	9.965	333.767	-0.001573	-0.001415	-0.000135
0.2000	24.526	1.807	1.557	0.083	-0.505	9.961	46.692	-0.000126	-0.000109	-0.000006
0.2008	24.466	1.779	1.529	-0.125	-0.506	9.963	46.577	-0.000125	-0.000107	0.000009
0.2016	24.406	1.695	1.706	-0.598	-0.510	9.965	46.463	-0.000119	-0.000119	0.000042
0.2024	24.316	1.639	1.570	-0.653	-0.513	9.967	46.291	-0.000115	-0.000110	0.000046
0.2032	24.226	1.431	1.639	-0.556	-0.509	9.969	46.120	-0.000100	-0.000115	0.000039
0.2040	24.451	1.264	1.501	-0.667	-0.504	9.971	46.549	-0.000088	-0.000105	0.000047
0.2048	25.037	1.583	1.447	-0.333	-0.509	9.971	47.665	-0.000111	-0.000101	0.000023
0.2056	26.074	1.709	1.749	-0.139	-0.514	9.971	49.639	-0.000120	-0.000122	0.000010
0.2064	28.223	1.876	1.913	-0.278	-0.517	9.970	53.730	-0.000131	-0.000134	0.000019
0.2072	32.446	2.209	2.257	-0.083	-0.522	9.969	61.769	-0.000155	-0.000158	0.000006
0.2080	40.246	2.571	2.754	-0.403	-0.513	9.969	76.618	-0.000180	-0.000193	0.000028
0.2088	53.411	3.807	3.799	-0.624	-0.506	9.968	101.681	-0.000266	-0.000266	0.000044
0.2096	73.188	6.002	5.422	-0.819	-0.510	9.966	139.332	-0.000420	-0.000380	0.000057
0.2104	100.946	8.990	7.926	-0.722	-0.509	9.964	192.175	-0.000629	-0.000555	0.000051
0.2112	137.795	12.992	11.172	-0.485	-0.509	9.962	262.327	-0.000909	-0.000782	0.000034
0.2120	185.240	17.940	14.928	0.181	-0.512	9.960	352.650	-0.001256	-0.001045	-0.000013
0.2128	244.587	24.179	20.061	1.696	-0.513	9.959	465.631	-0.001693	-0.001404	-0.000119
0.2136	315.762	31.976	25.993	3.197	-0.508	9.957	601.130	-0.002238	-0.001819	-0.000224
0.2144	396.810	41.510	32.750	5.240	-0.514	9.956	755.424	-0.002906	-0.002293	-0.000367
0.2152	485.132	52.433	40.690	7.575	-0.517	9.954	923.567	-0.003670	-0.002848	-0.000530
0.2160	577.752	64.468	48.506	9.326	-0.512	9.954	1099.892	-0.004513	-0.003395	-0.000653
0.2168	672.717	77.598	57.024	11.562	-0.516	9.954	1280.680	-0.005432	-0.003992	-0.000809
0.2176	769.244	91.091	65.458	13.800	-0.512	9.956	1464.443	-0.006376	-0.004582	-0.000966
0.2184	865.922	105.056	73.946	15.496	-0.509	9.958	1648.493	-0.007354	-0.005176	-0.001085
0.2192	961.337	119.063	82.231	16.928	-0.510	9.959	1830.139	-0.008334	-0.005756	-0.001185
0.2200	1053.386	132.599	90.280	18.526	-0.513	9.961	2005.377	-0.009282	-0.006320	-0.001297
0.2208	1139.890	145.758	97.835	19.915	-0.514	9.963	2170.057	-0.010203	-0.006848	-0.001394
0.2216	1218.729	157.848	104.730	21.610	-0.513	9.965	2320.147	-0.011049	-0.007331	-0.001513
0.2224	1287.574	168.410	111.064	23.945	-0.516	9.967	2451.210	-0.011789	-0.007774	-0.001676
0.2232	1344.066	177.607	116.003	25.279	-0.514	9.969	2558.756	-0.012433	-0.008120	-0.001770
0.2240	1386.476	184.515	120.440	26.265	-0.512	9.971	2639.494	-0.012916	-0.008431	-0.001839
0.2248	1414.414	189.711	123.199	27.168	-0.517	9.972	2692.680	-0.013280	-0.008624	-0.001902
0.2256	1429.096	193.575	125.576	27.432	-0.516	9.971	2720.633	-0.013550	-0.008790	-0.001920
0.2264	1433.380	195.758	126.660	27.681	-0.516	9.970	2728.786	-0.013703	-0.008866	-0.001938
0.2272	1430.088	196.896	127.411	27.877	-0.515	9.969	2722.521	-0.013783	-0.008919	-0.001951
0.2280	1420.981	197.314	127.522	27.280	-0.516	9.969	2705.183	-0.013812	-0.008927	-0.001910
0.2288	1406.028	196.812	127.188	26.502	-0.515	9.968	2676.716	-0.013777	-0.008903	-0.001855
0.2296	1382.058	195.255	126.633	25.544	-0.509	9.966	2631.083	-0.013668	-0.008864	-0.001788
0.2304	1344.456	192.547	124.701	24.070	-0.514	9.965	2559.500	-0.013478	-0.008729	-0.001685
0.2312	1288.641	187.711	121.458	21.986	-0.510	9.963	2453.241	-0.013140	-0.008502	-0.001539
0.2320	1213.258	180.556	116.521	19.624	-0.508	9.960	2309.732	-0.012639	-0.008156	-0.001374
0.2328	1120.774	171.204	109.870	16.330	-0.517	9.959	2133.665	-0.011984	-0.007691	-0.001143
0.2336	1016.867	159.753	102.045	12.745	-0.507	9.957	1935.854	-0.011183	-0.007143	-0.000892
0.2344	909.534	147.289	94.366	9.577	-0.508	9.956	1731.520	-0.010310	-0.006606	-0.000670
0.2352	806.124	134.740	86.523	6.534	-0.517	9.954	1534.653	-0.009432	-0.006057	-0.000457
0.2360	711.836	122.553	79.437	4.241	-0.513	9.954	1355.152	-0.008579	-0.005561	-0.000297
0.2368	629.059	111.548	72.901	2.420	-0.514	9.955	1197.567	-0.007808	-0.005103	-0.000169
0.2376	557.329	101.513	66.929	1.099	-0.515	9.956	1061.010	-0.007106	-0.004685	-0.000077
0.2384	494.209	92.147	61.177	0.418	-0.505	9.958	940.847	-0.006450	-0.004282	-0.000029
0.2392	437.432	83.544	56.196	-0.318	-0.510	9.960	832.758	-0.005848	-0.003934	0.000022
0.2400	385.749	75.637	51.464	-0.860	-0.512	9.961	734.367	-0.005295	-0.003602	0.000060
0.2408	338.770	68.273	46.977	-1.499	-0.510	9.963	644.932	-0.004779	-0.003288	0.000105
0.2416	296.345	61.283	43.222	-2.139	-0.510	9.965	564.165	-0.004290	-0.003026	0.000150
0.2424	258.654	55.071	39.328	-2.612	-0.504	9.967	492.411	-0.003855	-0.002753	0.000183
0.2432	226.072	49.053	35.970	-3.250	-0.501	9.970	430.384	-0.003434	-0.002518	0.000228
0.2440	198.856	44.022	33.163	-3.472	-0.497	9.971	378.571	-0.003082	-0.002321	0.000243
0.2448	177.846	40.200	30.713	-3.736	-0.497	9.971	338.573	-0.002814	-0.002150	0.000261
0.2456	163.133	37.240	29.269	-3.804	-0.506	9.971	310.564	-0.002607	-0.002049	0.000266
0.2464	154.297	35.434	28.320	-3.179	-0.507	9.970	293.741	-0.002480	-0.001982	0.000223
0.2472	150.344	34.101	27.564	-3.166	-0.514	9.969	286.217	-0.002387	-0.001929	0.000222
0.2480	149.923	33.199	27.301	-3.791	-0.516	9.969	285.416	-0.002324	-0.001911	0.000265
0.2488	152.343	32.768	26.985	-3.708	-0.514	9.968	290.022	-0.002294	-0.001889	0.000260
0.2496	158.054	32.782	26.970	-3.876	-0.521	9.966	300.894	-0.002295	-0.001888	0.000271
0.2504	170.993	33.796	27.658	-3.988	-0.518	9.964	325.527	-0.002366	-0.001936	0.000279
0.2512	195.490	36.797	28.979	-3.863	-0.518	9.962	372.162	-0.002576	-0.002029	0.000270
0.2520	235.285	41.744	31.814	-3.890	-0.517	9.960	447.922	-0.002922	-0.002227	0.000272
0.2528	292.017	48.914	36.260	-3.389	-0.520	9.958	555.925	-0.003424	-0.002538	0.000237
0.2536	365.205	58.155	41.860	-2.625	-0.520	9.957	695.257	-0.004071	-0.002930	0.000184
0.2544	453.242	69.299	49.113	-1.624	-0.523	9.955	862.856	-0.004851	-0.003438	0.000114
0.2552	554.097	82.391	57.382	0.529	-0.528	9.954	1054.859	-0.005767	-0.004017	-0.000037
0.2560	665.924	96.773	66.228	3.197	-0.521	9.954	1267.748	-0.006774	-0.004636	-0.000224
0.2568	784.874	112.365	75.448	6.073	-0.518	9.954	1494.198	-0.007866	-0.005281	-0.000425
0.2576	906.048	128.222	84.955	9.241	-0.512	9.956	1724.882	-0.008976	-0.005947	-0.000647
0.2584	1024.231	143.230	93.954	12.521	-0.507	9.958	1949.873	-0.010026	-0.006577	-0.000876
0.2592	1134.660	157.558	102.528	15.926	-0.508	9.959	2160.101	-0.011029	-0.007177	-0.001115
0.2600	1233.156	170.509	110.476	19.193	-0.509	9.961	2347.612	-0.011936	-0.007733	-0.001343
0.2608	1316.233	181.195	117.228	22.139	-0.514	9.963	2505.770	-0.012684	-0.008206	-0.001550
0.2616	1381.682	190.186	122.415	24.794	-0.510	9.965	2630.367	-0.013313	-0.008569	-0.001736
0.2624	1428.721	197.147	126.578	26.656	-0.513	9.967	2719.917	-0.013800	-0.008860	-0.001866
0.2632	1458.252	201.941	129.302	27.613	-0.512	9.970	2776.136	-0.014136	-0.009051	-0.001933
0.2640	1473.370	205.041	130.914	28.196	-0.505	9.971	2804.918	-0.014353	-0.009164	-0.001974
0.2648	1478.224	206.986	132.207	28.834	-0.511	9.971	2814.159	-0.014489	-0.009254	-0.002018
0.2656	1476.706	207.875	132.832	28.987	-0.512	9.971	2811.270	-0.014551	-0.009298	-0.002029
0.2664	1471.627	208.112	133.192	28.696	-0.517	9.970	2801.600	-0.014568	-0.009323	-0.002009
0.2672	1464.278	208.251	133.275	28.793	-0.524	9.970	2787.609	-0.014578	-0.009329	-0.002016
0.2680	1454.359	208.070	133.038	28.377	-0.525	9.969	2768.726	-0.014565	-0.009313	-0.001986
0.2688	1438.955	207.236	132.663	27.807	-0.521	9.968	2739.401	-0.014507	-0.009286	-0.001947
0.2696	1411.679	205.333	131.553	26.556	-0.519	9.967	2687.473	-0.014373	-0.009209	-0.001859
0.2704	1365.932	201.511	129.010	24.750	-0.516	9.965	2600.384	-0.014106	-0.009031	-0.001732
0.2712	1297.989	195.161	124.861	22.680	-0.516	9.963	2471.037	-0.013661	-0.008740	-0.001588
0.2720	1207.893	186.322	118.286	19.219	-0.517	9.960	2299.519	-0.013043	-0.008280	-0.001345
0.2728	1101.748	175.176	111.035	15.273	-0.521	9.958	2097.445	-0.012262	-0.007772	-0.001069
0.2736	987.622	162.379	102.708	11.591	-0.518	9.957	1880.178	-0.011367	-0.007190	-0.000811
0.2744	873.556	148.664	94.464	8.090	-0.512	9.955	1663.027	-0.010406	-0.006612	-0.000566
0.2752	766.990	135.407	87.076	5.435	-0.516	9.953	1460.152	-0.009479	-0.006095	-0.000380
0.2760	672.672	123.012	79.506	2.989	-0.512	9.954	1280.594	-0.008611	-0.005565	-0.000209
0.2768	592.360	112.033	73.177	1.237	-0.516	9.954	1127.701	-0.007842	-0.005122	-0.000087
0.2776	524.476	102.459	67.288	0.042	-0.518	9.955	998.468	-0.007172	-0.004710	-0.000003
0.2784	465.806	93.815	62.072	-1.208	-0.511	9.958	886.774	-0.006567	-0.004345	0.000085
0.2792	413.146	85.714	57.505	-2.055	-0.508	9.959	786.524	-0.006000	-0.004025	0.000144
0.2800	364.589	78.071	53.184	-2.805	-0.505	9.961	694.084	-0.005465	-0.003723	0.000196
0.2808	319.414	70.636	49.220	-3.584	-0.508	9.962	608.082	-0.004945	-0.003445	0.000251
0.2816	277.620	63.478	44.996	-3.944	-0.508	9.964	528.517	-0.004443	-0.003150	0.000276
0.2824	239.853	57.030	41.458	-4.042	-0.516	9.967	456.619	-0.003992	-0.002902	0.000283
0.2832	206.971	51.137	37.909	-4.320	-0.511	9.969	394.020	-0.003580	-0.002654	0.000302
0.2840	179.605	46.260	34.744	-4.514	-0.505	9.971	341.921	-0.003238	-0.002432	0.000316
0.2848	158.429	42.328	32.640	-4.446	-0.511	9.971	301.609	-0.002963	-0.002285	0.000311
0.2856	143.506	39.131	30.659	-4.140	-0.514	9.971	273.199	-0.002739	-0.002146	0.000290
0.2864	134.324	36.672	29.600	-4.085	-0.521	9.970	255.718	-0.002567	-0.002072	0.000286
0.2872	130.041	34.962	28.913	-4.279	-0.527	9.969	247.564	-0.002447	-0.002024	0.000300
0.2880	129.470	34.003	28.320	-4.306	-0.524	9.969	246.477	-0.002380	-0.001982	0.000301
0.2888	131.754	33.725	28.155	-3.944	-0.516	9.968	250.826	-0.002361	-0.001971	0.000276
0.2896	137.104	34.031	28.044	-4.028	-0.517	9.966	261.011	-0.002382	-0.001963	0.000282
0.2904	149.427	35.144	28.580	-4.361	-0.516	9.965	284.472	-0.002460	-0.002001	0.000305
0.2912	172.992	37.659	29.943	-4.710	-0.513	9.962	329.332	-0.002636	-0.002096	0.000330
0.2920	211.450	42.147	32.447	-4.502	-0.514	9.960	402.546	-0.002950	-0.002271	0.000315
0.2928	266.619	49.164	36.865	-3.973	-0.515	9.958	507.574	-0.003442	-0.002581	0.000278
0.2936	337.974	58.516	42.176	-3.569	-0.510	9.957	643.415	-0.004096	-0.002952	0.000250
0.2944	424.267	70.093	48.932	-2.416	-0.513	9.955	807.695	-0.004906	-0.003425	0.000169
0.2952	523.875	83.350	57.270	-0.735	-0.518	9.954	997.324	-0.005835	-0.004009	0.000051
0.2960	635.476	97.789	65.512	1.209	-0.514	9.954	1209.784	-0.006845	-0.004586	-0.000085
0.2968	755.343	113.437	75.075	3.878	-0.518	9.954	1437.979	-0.007941	-0.005255	-0.000271
0.2976	878.591	129.180	84.486	6.796	-0.512	9.956	1672.611	-0.009043	-0.005914	-0.000476
0.2984	999.780	144.688	93.418	10.270	-0.508	9.958	1903.324	-0.010128	-0.006539	-0.000719
0.2992	1113.680	159.543	102.403	14.259	-0.508	9.960	2120.161	-0.011168	-0.007168	-0.000998
0.3000	1215.438	172.619	110.493	17.760	-0.509	9.961	2313.881	-0.012083	-0.007734	-0.001243
0.3008	1301.099	183.515	117.366	20.873	-0.516	9.963	2476.959	-0.012846	-0.008216	-0.001461
0.3016	1368.231	192.465	122.941	23.583	-0.515	9.965	2604.761	-0.013473	-0.008606	-0.001651
0.3024	1415.871	199.134	126.966	25.653	-0.517	9.967	2695.456	-0.013939	-0.008888	-0.001796
0.3032	1445.312	203.622	129.537	26.820	-0.510	9.969	2751.503	-0.014254	-0.009068	-0.001877
0.3040	1459.814	206.666	131.219	27.405	-0.504	9.971	2779.112	-0.014467	-0.009185	-0.001918
0.3048	1463.857	208.362	132.137	27.904	-0.507	9.971	2786.808	-0.014585	-0.009250	-0.001953
0.3056	1461.693	209.128	132.553	27.947	-0.510	9.971	2782.688	-0.014639	-0.009279	-0.001956
0.3064	1456.042	209.572	132.886	27.989	-0.513	9.970	2771.931	-0.014670	-0.009302	-0.001959
0.3072	1448.213	209.557	132.859	28.266	-0.517	9.969	2757.025	-0.014669	-0.009300	-0.001979
0.3080	1437.302	209.070	132.594	27.822	-0.514	9.969	2736.254	-0.014635	-0.009282	-0.001948
0.3088	1419.373	207.984	131.817	27.445	-0.514	9.968	2702.122	-0.014559	-0.009227	-0.001921
0.3096	1388.114	205.636	130.400	26.459	-0.514	9.967	2642.612	-0.014395	-0.009128	-0.001852
0.3104	1338.490	201.301	127.497	23.915	-0.517	9.964	2548.141	-0.014091	-0.008925	-0.001674
0.3112	1267.947	194.715	123.195	21.094	-0.515	9.962	2413.845	-0.013630	-0.008624	-0.001477
0.3120	1178.212	185.656	117.343	17.760	-0.512	9.960	2243.013	-0.012996	-0.008214	-0.001243
0.3128	1076.079	174.525	110.202	14.230	-0.513	9.958	2048.578	-0.012217	-0.007714	-0.000996
0.3136	968.791	162.254	102.748	10.812	-0.507	9.957	1844.330	-0.011358	-0.007192	-0.000757
0.3144	863.157	149.677	94.890	7.755	-0.511	9.955	1643.229	-0.010477	-0.006642	-0.000543
0.3152	765.141	137.477	87.982	5.379	-0.514	9.953	1456.633	-0.009623	-0.006159	-0.000377
0.3160	678.202	126.208	81.117	2.877	-0.512	9.953	1291.122	-0.008835	-0.005678	-0.000201
0.3168	603.135	116.050	75.310	1.057	-0.512	9.954	1148.214	-0.008124	-0.005272	-0.000074
0.3176	538.844	106.879	69.999	-0.207	-0.510	9.955	1025.820	-0.007482	-0.004900	0.000014
0.3184	482.697	98.540	65.031	-1.193	-0.509	9.958	918.932	-0.006898	-0.004552	0.000084
0.3192	431.781	90.910	60.792	-1.970	-0.507	9.959	822.001	-0.006364	-0.004255	0.000138
0.3200	384.306	83.726	56.432	-2.595	-0.511	9.961	731.621	-0.005861	-0.003950	0.000182
0.3208	339.462	76.722	52.773	-3.319	-0.507	9.962	646.248	-0.005371	-0.003694	0.000232
0.3216	297.382	69.967	48.727	-3.723	-0.501	9.965	566.139	-0.004898	-0.003411	0.000261
0.3224	259.120	63.450	44.819	-4.001	-0.507	9.967	493.298	-0.004441	-0.003137	0.000280
0.3232	225.652	57.432	41.584	-4.586	-0.500	9.969	429.583	-0.004020	-0.002911	0.000321
0.3240	197.729	51.998	38.115	-4.864	-0.500	9.971	376.425	-0.003640	-0.002668	0.000340
0.3248	176.133	47.760	36.175	-5.031	-0.508	9.971	335.312	-0.003343	-0.002532	0.000352
0.3256	160.654	44.717	34.440	-5.128	-0.507	9.971	305.843	-0.003130	-0.002411	0.000359
0.3264	150.975	42.451	33.105	-4.918	-0.517	9.970	287.418	-0.002972	-0.002317	0.000344
0.3272	146.226	40.951	32.253	-4.655	-0.522	9.969	278.378	-0.002867	-0.002258	0.000326
0.3280	145.235	39.923	31.427	-4.516	-0.519	9.969	276.489	-0.002795	-0.002200	0.000316
0.3288	147.354	39.201	31.275	-4.447	-0.520	9.968	280.523	-0.002744	-0.002189	0.000311
0.3296	152.568	39.312	31.277	-4.641	-0.518	9.966	290.451	-0.002752	-0.002189	0.000325
0.3304	164.486	40.451	32.034	-4.974	-0.518	9.965	313.139	-0.002832	-0.002242	0.000348
0.3312	187.645	43.189	33.177	-5.029	-0.518	9.963	357.227	-0.003023	-0.002322	0.000352
0.3320	225.967	47.844	35.956	-5.057	-0.516	9.960	430.183	-0.003349	-0.002517	0.000354
0.3328	281.527	54.571	40.042	-4.807	-0.515	9.958	535.955	-0.003820	-0.002803	0.000336
0.3336	354.054	63.715	45.518	-4.389	-0.512	9.957	674.028	-0.004460	-0.003186	0.000307
0.3344	441.715	75.137	52.303	-3.222	-0.513	9.956	840.912	-0.005260	-0.003661	0.000226
0.3352	542.706	88.699	60.202	-0.874	-0.521	9.954	1033.173	-0.006209	-0.004214	0.000061
0.3360	655.133	103.638	68.623	1.265	-0.516	9.954	1247.206	-0.007255	-0.004804	-0.000089
0.3368	775.000	119.494	77.746	3.809	-0.520	9.955	1475.401	-0.008365	-0.005442	-0.000267
0.3376	897.346	135.239	87.019	6.851	-0.513	9.956	1708.317	-0.009467	-0.006091	-0.000480
0.3384	1016.296	150.331	95.715	10.395	-0.510	9.958	1934.767	-0.010523	-0.006700	-0.000728
0.3392	1127.161	164.492	104.399	13.981	-0.509	9.960	2145.824	-0.011514	-0.007308	-0.000979
0.3400	1225.807	176.943	111.744	17.607	-0.506	9.961	2333.622	-0.012386	-0.007822	-0.001233
0.3408	1309.080	187.588	118.540	21.138	-0.513	9.963	2492.151	-0.013131	-0.008298	-0.001480
0.3416	1375.716	196.132	123.718	23.779	-0.507	9.965	2619.009	-0.013729	-0.008660	-0.001665
0.3424	1424.843	202.829	127.856	25.891	-0.510	9.967	2712.536	-0.014198	-0.008950	-0.001812
0.3432	1457.410	207.832	131.177	27.572	-0.509	9.969	2774.534	-0.014548	-0.009182	-0.001930
0.3440	1475.715	210.987	132.677	28.224	-0.500	9.971	2809.381	-0.014769	-0.009287	-0.001976
0.3448	1483.139	213.127	134.109	28.181	-0.502	9.971	2823.515	-0.014919	-0.009388	-0.001973
0.3456	1483.469	214.129	134.499	28.626	-0.510	9.971	2824.144	-0.014989	-0.009415	-0.002004
0.3464	1479.487	214.435	134.819	28.876	-0.512	9.971	2816.563	-0.015010	-0.009437	-0.002021
0.3472	1472.859	214.574	134.987	28.655	-0.521	9.969	2803.946	-0.015020	-0.009449	-0.002006
0.3480	1463.286	214.045	134.889	28.294	-0.521	9.969	2785.721	-0.014983	-0.009442	-0.001981
0.3488	1447.070	213.114	134.415	27.878	-0.512	9.968	2754.850	-0.014918	-0.009409	-0.001951
0.3496	1417.179	210.863	133.012	26.919	-0.512	9.967	2697.945	-0.014760	-0.009311	-0.001884
0.3504	1367.886	206.527	130.372	25.127	-0.508	9.965	2604.103	-0.014457	-0.009126	-0.001759
0.3512	1296.591	200.192	125.857	22.457	-0.505	9.963	2468.376	-0.014013	-0.008810	-0.001572
0.3520	1205.233	191.131	119.915	18.913	-0.510	9.960	2294.455	-0.013379	-0.008394	-0.001324
0.3528	1100.876	180.068	112.507	15.134	-0.510	9.958	2095.785	-0.012605	-0.007876	-0.001059
0.3536	991.259	167.937	105.143	11.619	-0.510	9.957	1887.102	-0.011756	-0.007360	-0.000813
0.3544	883.024	154.860	97.229	8.229	-0.513	9.955	1681.051	-0.010840	-0.006806	-0.000576
0.3552	782.169	142.452	89.977	5.533	-0.516	9.953	1489.048	-0.009972	-0.006298	-0.000387
0.3560	692.719	130.862	83.523	3.170	-0.516	9.954	1318.760	-0.009160	-0.005847	-0.000222
0.3568	615.609	120.328	77.167	1.058	-0.520	9.954	1171.961	-0.008423	-0.005402	-0.000074
0.3576	549.318	111.115	71.952	-0.442	-0.519	9.955	1045.761	-0.007778	-0.005037	0.000031
0.3584	491.038	102.609	66.999	-1.721	-0.521	9.958	934.811	-0.007183	-0.004690	0.000120
0.3592	437.928	94.731	62.266	-2.790	-0.521	9.959	833.702	-0.006631	-0.004359	0.000195
0.3600	388.680	87.088	58.206	-3.443	-0.523	9.961	739.946	-0.006096	-0.004074	0.000241
0.3608	342.948	79.681	53.941	-3.986	-0.528	9.962	652.885	-0.005578	-0.003776	0.000279
0.3616	300.854	72.567	50.087	-4.305	-0.526	9.965	572.748	-0.005080	-0.003506	0.000301
0.3624	262.892	65.966	46.399	-4.487	-0.529	9.967	500.479	-0.004618	-0.003248	0.000314
0.3632	229.619	60.005	42.781	-5.002	-0.523	9.969	437.136	-0.004200	-0.002995	0.000350
0.3640	201.726	54.877	39.918	-5.210	-0.513	9.972	384.035	-0.003841	-0.002794	0.000365
0.3648	179.905	50.722	37.387	-5.127	-0.513	9.972	342.493	-0.003551	-0.002617	0.000359
0.3656	164.411	47.456	35.805	-5.030	-0.514	9.971	312.996	-0.003322	-0.002506	0.000352
0.3664	154.973	45.204	34.634	-5.224	-0.514	9.970	295.029	-0.003164	-0.002424	0.000366
0.3672	150.540	43.732	33.712	-5.169	-0.524	9.969	286.589	-0.003061	-0.002360	0.000362
0.3680	149.848	42.856	33.189	-5.154	-0.516	9.969	285.273	-0.003000	-0.002323	0.000361
0.3688	152.012	42.355	32.583	-5.140	-0.516	9.968	289.392	-0.002965	-0.002281	0.000360
0.3696	157.137	42.383	32.597	-4.613	-0.516	9.966	299.149	-0.002967	-0.002282	0.000323
0.3704	168.709	43.147	33.147	-4.682	-0.514	9.964	321.178	-0.003020	-0.002320	0.000328
0.3712	191.297	45.551	34.537	-5.058	-0.517	9.963	364.180	-0.003189	-0.002418	0.000354
0.3720	228.762	50.178	37.070	-5.266	-0.515	9.960	435.505	-0.003512	-0.002595	0.000369
0.3728	283.120	56.987	41.186	-5.127	-0.519	9.958	538.988	-0.003989	-0.002883	0.000359
0.3736	354.505	66.242	46.498	-4.530	-0.520	9.957	674.887	-0.004637	-0.003255	0.000317
0.3744	441.550	77.763	52.965	-3.543	-0.521	9.955	840.597	-0.005443	-0.003708	0.000248
0.3752	542.706	91.132	61.234	-1.695	-0.530	9.954	1033.173	-0.006379	-0.004286	0.000119
0.3760	656.110	105.960	69.448	0.696	-0.528	9.954	1249.065	-0.007417	-0.004861	-0.000049
0.3768	777.480	121.996	78.598	3.448	-0.530	9.954	1480.122	-0.008540	-0.005502	-0.000241
0.3776	901.449	137.713	87.832	6.894	-0.531	9.956	1716.127	-0.009640	-0.006148	-0.000483
0.3784	1021.917	152.804	96.542	10.355	-0.517	9.958	1945.467	-0.010696	-0.006758	-0.000725
0.3792	1133.969	167.145	105.200	13.954	-0.519	9.960	2158.785	-0.011700	-0.007364	-0.000977
0.3800	1232.825	179.568	113.019	17.692	-0.512	9.961	2346.983	-0.012570	-0.007911	-0.001238
0.3808	1314.520	190.199	119.483	20.887	-0.510	9.963	2502.508	-0.013314	-0.008364	-0.001462
0.3816	1377.008	198.663	124.609	23.569	-0.514	9.965	2621.469	-0.013906	-0.008723	-0.001650
0.3824	1419.478	204.596	128.082	25.332	-0.514	9.967	2702.322	-0.014322	-0.008966	-0.001773
0.3832	1443.975	208.473	130.471	26.319	-0.514	9.969	2748.957	-0.014593	-0.009133	-0.001842
0.3840	1454.720	210.571	131.777	26.986	-0.512	9.971	2769.413	-0.014740	-0.009224	-0.001889
0.3848	1456.418	211.849	132.679	27.278	-0.516	9.972	2772.646	-0.014829	-0.009288	-0.001909
0.3856	1453.232	212.336	133.122	27.347	-0.516	9.971	2766.581	-0.014864	-0.009319	-0.001914
0.3864	1447.702	212.503	133.192	27.361	-0.523	9.971	2756.052	-0.014875	-0.009323	-0.001915
0.3872	1440.743	212.657	133.414	27.333	-0.520	9.969	2742.805	-0.014886	-0.009339	-0.001913
0.3880	1431.741	212.296	133.193	27.208	-0.516	9.969	2725.668	-0.014861	-0.009323	-0.001905
0.3888	1417.104	211.447	132.942	26.653	-0.513	9.968	2697.802	-0.014801	-0.009306	-0.001866
0.3896	1390.053	209.474	131.664	25.652	-0.507	9.966	2646.303	-0.014663	-0.009216	-0.001796
0.3904	1344.261	205.444	129.302	23.707	-0.512	9.965	2559.128	-0.014381	-0.009051	-0.001660
0.3912	1276.167	199.079	124.955	20.929	-0.508	9.962	2429.495	-0.013936	-0.008747	-0.001465
0.3920	1186.838	190.352	119.182	17.497	-0.505	9.960	2259.436	-0.013325	-0.008343	-0.001225
0.3928	1082.737	179.194	112.121	13.940	-0.508	9.959	2061.253	-0.012544	-0.007849	-0.000976
0.3936	971.812	166.741	104.096	10.522	-0.501	9.957	1850.080	-0.011672	-0.007287	-0.000737
0.3944	861.549	153.763	96.072	7.242	-0.506	9.956	1640.167	-0.010763	-0.006725	-0.000507
0.3952	758.769	140.895	88.751	4.226	-0.515	9.954	1444.502	-0.009863	-0.006213	-0.000296
0.3960	667.577	129.153	82.024	1.822	-0.517	9.954	1270.895	-0.009041	-0.005742	-0.000128
0.3968	588.888	118.300	75.874	0.001	-0.525	9.954	1121.092	-0.008281	-0.005311	-0.000000
0.3976	521.305	108.448	70.838	-1.416	-0.526	9.956	992.432	-0.007591	-0.004959	0.000099
0.3984	461.868	99.540	65.431	-2.652	-0.521	9.958	879.278	-0.006968	-0.004580	0.000186
0.3992	408.142	91.353	60.710	-3.611	-0.514	9.959	776.997	-0.006395	-0.004250	0.000253
Test Cycles
Time (sec)	Axial stress (kPa)	Axial micro-strain #1	Axial micro-strain #2	Axial micro-strain #3	Confining pressure (kPa)	Temperature (�C)	Load (N)	Displacement #1 (mm)	Displacement #2 (mm)	Displacement #3 (mm)
0.0000	359.044	83.767	56.539	-4.403	-0.509	9.961	683.527	-0.005864	-0.003958	0.000308
0.0008	314.259	76.526	52.205	-4.905	-0.507	9.962	598.269	-0.005357	-0.003654	0.000343
0.0016	273.577	69.883	48.338	-4.821	-0.505	9.964	520.821	-0.004892	-0.003384	0.000337
0.0024	237.584	63.505	44.733	-5.030	-0.510	9.967	452.299	-0.004445	-0.003131	0.000352
0.0032	206.626	57.711	41.459	-5.169	-0.512	9.969	393.362	-0.004040	-0.002902	0.000362
0.0040	180.882	52.624	38.570	-5.460	-0.513	9.971	344.353	-0.003684	-0.002700	0.000382
0.0048	161.090	48.455	36.424	-5.446	-0.522	9.972	306.673	-0.003392	-0.002550	0.000381
0.0056	147.038	45.454	34.621	-5.392	-0.528	9.971	279.922	-0.003182	-0.002423	0.000377
0.0064	138.562	43.382	33.328	-5.392	-0.532	9.970	263.786	-0.003037	-0.002333	0.000377
0.0072	134.910	42.188	32.804	-5.184	-0.533	9.969	256.834	-0.002953	-0.002296	0.000363
0.0080	134.745	41.480	32.157	-5.031	-0.527	9.969	256.519	-0.002904	-0.002251	0.000352
0.0088	137.254	41.022	31.992	-4.947	-0.518	9.968	261.297	-0.002872	-0.002239	0.000346
0.0096	142.905	41.091	31.938	-5.059	-0.521	9.966	272.055	-0.002876	-0.002236	0.000354
0.0104	155.739	42.189	32.075	-5.210	-0.521	9.964	296.488	-0.002953	-0.002245	0.000365
0.0112	180.281	45.065	33.878	-5.725	-0.521	9.962	343.208	-0.003155	-0.002371	0.000401
0.0120	219.881	50.067	36.452	-5.905	-0.523	9.960	418.596	-0.003505	-0.002552	0.000413
0.0128	275.967	57.364	40.869	-5.752	-0.517	9.958	525.370	-0.004015	-0.002861	0.000403
0.0136	347.848	66.772	46.512	-5.112	-0.512	9.957	662.212	-0.004674	-0.003256	0.000358
0.0144	434.261	78.000	52.840	-3.415	-0.512	9.955	826.721	-0.005460	-0.003699	0.000239
0.0152	533.974	91.035	60.849	-1.470	-0.518	9.954	1016.550	-0.006372	-0.004259	0.000103
0.0160	645.410	105.640	68.952	0.642	-0.522	9.954	1228.695	-0.007395	-0.004827	-0.000045
0.0168	764.495	121.231	77.827	3.283	-0.525	9.954	1455.402	-0.008486	-0.005448	-0.000230
0.0176	886.120	137.058	86.826	6.228	-0.524	9.956	1686.945	-0.009594	-0.006078	-0.000436
0.0184	1004.694	152.345	95.564	9.465	-0.515	9.958	1912.680	-0.010664	-0.006689	-0.000663
0.0192	1115.634	166.492	104.014	13.120	-0.516	9.959	2123.880	-0.011654	-0.007281	-0.000918
0.0200	1215.107	179.069	111.914	16.634	-0.517	9.961	2313.251	-0.012535	-0.007834	-0.001164
0.0208	1300.047	189.742	118.569	20.081	-0.521	9.963	2474.957	-0.013282	-0.008300	-0.001406
0.0216	1368.532	198.565	123.969	23.207	-0.524	9.965	2605.333	-0.013900	-0.008678	-0.001625
0.0224	1419.328	205.331	128.300	25.375	-0.522	9.967	2702.036	-0.014373	-0.008981	-0.001776
0.0232	1452.886	210.209	131.218	26.821	-0.518	9.969	2765.923	-0.014715	-0.009185	-0.001877
0.0240	1471.522	213.265	133.095	27.752	-0.514	9.971	2801.399	-0.014929	-0.009317	-0.001943
0.0248	1479.036	215.213	134.527	28.224	-0.515	9.971	2815.704	-0.015065	-0.009417	-0.001976
0.0256	1479.276	216.325	135.431	28.488	-0.517	9.971	2816.162	-0.015143	-0.009480	-0.001994
0.0264	1475.354	216.963	135.668	28.614	-0.518	9.971	2808.695	-0.015187	-0.009497	-0.002003
0.0272	1468.591	217.103	135.945	28.614	-0.514	9.969	2795.820	-0.015197	-0.009516	-0.002003
0.0280	1458.657	216.699	135.667	28.407	-0.513	9.969	2776.909	-0.015169	-0.009497	-0.001988
0.0288	1442.021	215.825	134.971	27.892	-0.509	9.968	2745.237	-0.015108	-0.009448	-0.001952
0.0296	1412.099	213.380	133.720	26.781	-0.506	9.966	2688.274	-0.014937	-0.009360	-0.001875
0.0304	1363.723	209.363	131.106	24.794	-0.509	9.965	2596.178	-0.014655	-0.009177	-0.001736
0.0312	1293.675	202.998	126.675	21.903	-0.507	9.963	2462.826	-0.014210	-0.008867	-0.001533
0.0320	1203.445	193.937	120.457	18.692	-0.503	9.960	2291.050	-0.013576	-0.008432	-0.001308
0.0328	1099.884	182.931	113.255	15.273	-0.509	9.958	2093.897	-0.012805	-0.007928	-0.001069
0.0336	990.447	170.438	105.627	11.369	-0.506	9.957	1885.557	-0.011931	-0.007394	-0.000796
0.0344	882.423	157.653	97.807	7.978	-0.510	9.955	1679.907	-0.011036	-0.006846	-0.000558
0.0352	781.928	145.215	90.831	5.185	-0.520	9.954	1488.590	-0.010165	-0.006358	-0.000363
0.0360	692.374	133.626	84.295	2.710	-0.516	9.954	1318.102	-0.009354	-0.005901	-0.000190
0.0368	614.557	123.233	78.131	0.903	-0.518	9.954	1169.958	-0.008626	-0.005469	-0.000063
0.0376	547.214	113.547	72.971	-0.541	-0.516	9.955	1041.756	-0.007948	-0.005108	0.000038
0.0384	487.762	104.709	67.838	-1.943	-0.509	9.958	928.574	-0.007330	-0.004749	0.000136
0.0392	433.750	96.649	63.132	-2.957	-0.510	9.959	825.748	-0.006765	-0.004419	0.000207
0.0400	383.735	88.950	58.880	-3.764	-0.511	9.961	730.534	-0.006226	-0.004122	0.000264
0.0408	337.102	81.640	54.615	-4.488	-0.513	9.962	641.756	-0.005715	-0.003823	0.000314
0.0416	293.971	74.582	50.873	-5.017	-0.511	9.964	559.645	-0.005221	-0.003561	0.000351
0.0424	255.318	67.925	46.922	-5.447	-0.509	9.967	486.059	-0.004755	-0.003285	0.000381
0.0432	222.150	61.756	43.704	-5.419	-0.511	9.969	422.916	-0.004323	-0.003059	0.000379
0.0440	194.949	56.419	40.525	-5.419	-0.505	9.971	371.132	-0.003949	-0.002837	0.000379
0.0448	174.360	52.292	38.199	-5.419	-0.513	9.971	331.936	-0.003660	-0.002674	0.000379
0.0456	160.038	49.110	36.548	-5.392	-0.522	9.971	304.670	-0.003438	-0.002558	0.000377
0.0464	151.156	47.067	35.048	-5.281	-0.522	9.970	287.762	-0.003295	-0.002453	0.000370
0.0472	147.218	45.678	34.442	-4.780	-0.529	9.969	280.266	-0.003197	-0.002411	0.000335
0.0480	146.978	44.691	33.714	-4.822	-0.525	9.969	279.808	-0.003128	-0.002360	0.000338
0.0488	149.638	44.343	33.509	-5.474	-0.514	9.968	284.872	-0.003104	-0.002346	0.000383
0.0496	156.010	44.496	33.701	-5.515	-0.517	9.966	297.003	-0.003115	-0.002359	0.000386
0.0504	169.986	45.996	34.128	-5.349	-0.514	9.965	323.610	-0.003220	-0.002389	0.000374
0.0512	195.760	49.262	35.984	-5.640	-0.516	9.962	372.677	-0.003448	-0.002519	0.000395
0.0520	236.382	54.223	38.832	-5.628	-0.518	9.960	450.010	-0.003796	-0.002718	0.000394
0.0528	293.129	61.297	43.125	-5.224	-0.515	9.958	558.043	-0.004291	-0.003019	0.000366
0.0536	364.694	70.329	48.780	-4.237	-0.513	9.957	694.284	-0.004923	-0.003415	0.000297
0.0544	449.680	81.320	54.973	-3.084	-0.516	9.955	856.075	-0.005692	-0.003848	0.000216
0.0552	547.139	94.328	62.623	-1.555	-0.523	9.953	1041.613	-0.006603	-0.004384	0.000109
0.0560	655.524	108.864	70.494	0.266	-0.522	9.953	1247.950	-0.007620	-0.004935	-0.000019
0.0568	771.589	124.219	79.190	3.018	-0.525	9.954	1468.906	-0.008695	-0.005543	-0.000211
0.0576	890.583	139.478	87.969	6.339	-0.522	9.955	1695.442	-0.009763	-0.006158	-0.000444
0.0584	1007.249	154.250	96.445	9.758	-0.516	9.958	1917.543	-0.010798	-0.006751	-0.000683
0.0592	1116.926	168.008	104.773	13.398	-0.520	9.959	2126.341	-0.011761	-0.007334	-0.000938
0.0600	1215.407	180.251	112.092	16.928	-0.518	9.961	2313.824	-0.012618	-0.007846	-0.001185
0.0608	1299.567	191.020	118.958	20.235	-0.519	9.963	2474.041	-0.013371	-0.008327	-0.001416
0.0616	1367.360	199.676	124.166	23.028	-0.517	9.965	2603.102	-0.013977	-0.008692	-0.001612
0.0624	1417.630	206.568	128.579	25.363	-0.515	9.967	2698.803	-0.014460	-0.009001	-0.001775
0.0632	1450.948	211.529	131.567	26.586	-0.518	9.969	2762.232	-0.014807	-0.009210	-0.001861
0.0640	1469.478	214.754	133.416	27.281	-0.513	9.971	2797.508	-0.015033	-0.009339	-0.001910
0.0648	1476.706	216.797	134.750	28.128	-0.520	9.971	2811.270	-0.015176	-0.009432	-0.001969
0.0656	1476.661	217.757	135.349	28.517	-0.522	9.971	2811.184	-0.015243	-0.009474	-0.001996
0.0664	1472.438	217.978	135.724	28.586	-0.520	9.970	2803.144	-0.015258	-0.009501	-0.002001
0.0672	1465.540	217.756	135.668	28.586	-0.516	9.969	2790.012	-0.015243	-0.009497	-0.002001
0.0680	1455.592	217.589	135.417	28.446	-0.508	9.969	2771.072	-0.015231	-0.009479	-0.001991
0.0688	1438.113	216.533	134.762	27.891	-0.506	9.968	2737.799	-0.015157	-0.009433	-0.001952
0.0696	1405.592	214.211	133.220	26.459	-0.504	9.966	2675.886	-0.014995	-0.009325	-0.001852
0.0704	1353.083	209.821	130.482	24.652	-0.509	9.964	2575.922	-0.014687	-0.009134	-0.001726
0.0712	1278.226	202.581	125.693	22.039	-0.513	9.962	2433.414	-0.014181	-0.008798	-0.001543
0.0720	1184.028	193.090	119.627	18.259	-0.511	9.960	2254.086	-0.013516	-0.008374	-0.001278
0.0728	1078.318	181.641	112.219	14.075	-0.514	9.958	2052.841	-0.012715	-0.007855	-0.000985
0.0736	968.446	169.077	104.372	10.449	-0.508	9.957	1843.672	-0.011835	-0.007306	-0.000731
0.0744	861.549	156.210	96.886	7.421	-0.507	9.955	1640.167	-0.010935	-0.006782	-0.000519
0.0752	763.834	143.982	89.647	4.837	-0.515	9.954	1454.144	-0.010079	-0.006275	-0.000339
0.0760	679.194	132.948	83.731	2.198	-0.513	9.954	1293.011	-0.009306	-0.005861	-0.000154
0.0768	608.049	123.416	78.075	0.447	-0.516	9.954	1157.570	-0.008639	-0.005465	-0.000031
0.0776	547.785	114.799	73.438	-0.902	-0.514	9.956	1042.843	-0.008036	-0.005141	0.000063
0.0784	494.329	106.919	68.733	-2.139	-0.506	9.958	941.076	-0.007484	-0.004811	0.000150
0.0792	443.969	99.289	64.233	-2.848	-0.503	9.959	845.203	-0.006950	-0.004496	0.000199
0.0800	395.142	91.661	60.299	-3.612	-0.504	9.960	752.249	-0.006416	-0.004221	0.000253
0.0808	347.983	84.047	55.882	-4.321	-0.501	9.962	662.470	-0.005883	-0.003912	0.000302
0.0816	303.303	76.598	52.015	-4.878	-0.497	9.964	577.412	-0.005362	-0.003641	0.000341
0.0824	262.456	69.678	48.122	-5.239	-0.500	9.966	499.649	-0.004877	-0.003369	0.000367
0.0832	226.869	63.312	44.227	-5.574	-0.500	9.969	431.900	-0.004432	-0.003096	0.000390
0.0840	197.473	57.962	41.283	-5.726	-0.498	9.971	375.938	-0.004057	-0.002890	0.000401
0.0848	175.216	53.404	38.765	-5.656	-0.505	9.972	333.567	-0.003738	-0.002714	0.000396
0.0856	160.158	50.110	37.086	-5.531	-0.509	9.971	304.899	-0.003508	-0.002596	0.000387
0.0864	151.381	47.762	35.861	-5.448	-0.510	9.970	288.191	-0.003343	-0.002510	0.000381
0.0872	147.684	46.386	35.035	-5.254	-0.513	9.969	281.153	-0.003247	-0.002452	0.000368
0.0880	147.609	45.678	34.484	-5.532	-0.510	9.969	281.010	-0.003197	-0.002414	0.000387
0.0888	150.555	45.427	33.960	-5.616	-0.509	9.968	286.617	-0.003180	-0.002377	0.000393
0.0896	157.934	45.900	34.305	-5.365	-0.511	9.967	300.665	-0.003213	-0.002401	0.000376
0.0904	174.059	47.470	34.910	-5.573	-0.515	9.965	331.364	-0.003323	-0.002444	0.000390
0.0912	203.094	51.014	36.740	-6.058	-0.513	9.963	386.639	-0.003571	-0.002572	0.000424
0.0920	247.413	56.420	40.222	-5.931	-0.514	9.961	471.010	-0.003949	-0.002816	0.000415
0.0928	308.112	64.063	44.597	-5.513	-0.517	9.959	586.567	-0.004484	-0.003122	0.000386
0.0936	383.886	73.929	50.528	-4.735	-0.517	9.957	730.820	-0.005175	-0.003537	0.000331
0.0944	473.124	85.602	57.436	-3.138	-0.521	9.956	900.707	-0.005992	-0.004021	0.000220
0.0952	575.137	99.358	65.045	-1.318	-0.526	9.954	1094.913	-0.006955	-0.004553	0.000092
0.0960	687.249	114.256	73.521	0.668	-0.525	9.954	1308.346	-0.007998	-0.005146	-0.000047
0.0968	805.042	129.666	81.983	3.683	-0.526	9.954	1532.593	-0.009077	-0.005739	-0.000258
0.0976	923.285	144.883	90.899	7.212	-0.527	9.956	1757.698	-0.010142	-0.006363	-0.000505
0.0984	1036.254	159.058	99.100	10.603	-0.519	9.958	1972.761	-0.011134	-0.006937	-0.000742
0.0992	1139.815	172.134	106.892	14.203	-0.518	9.960	2169.914	-0.012049	-0.007482	-0.000994
0.1000	1230.646	183.723	114.061	17.358	-0.513	9.961	2342.834	-0.012861	-0.007984	-0.001215
0.1008	1306.374	193.325	119.936	20.526	-0.514	9.963	2487.001	-0.013533	-0.008396	-0.001437
0.1016	1365.977	201.052	124.813	23.389	-0.513	9.965	2600.470	-0.014074	-0.008737	-0.001637
0.1024	1409.139	206.986	128.467	25.222	-0.518	9.967	2682.638	-0.014489	-0.008993	-0.001766
0.1032	1437.016	211.142	130.885	26.292	-0.515	9.969	2735.710	-0.014780	-0.009162	-0.001840
0.1040	1452.255	213.824	132.593	26.960	-0.514	9.971	2764.721	-0.014968	-0.009282	-0.001887
0.1048	1458.101	215.630	133.539	27.627	-0.517	9.972	2775.850	-0.015094	-0.009348	-0.001934
0.1056	1457.801	216.493	134.360	27.712	-0.517	9.971	2775.278	-0.015154	-0.009405	-0.001940
0.1064	1453.998	216.826	134.791	27.726	-0.521	9.971	2768.040	-0.015178	-0.009435	-0.001941
0.1072	1447.702	217.089	134.847	27.851	-0.516	9.969	2756.052	-0.015196	-0.009439	-0.001950
0.1080	1438.339	216.714	134.582	27.364	-0.518	9.969	2738.228	-0.015170	-0.009421	-0.001915
0.1088	1421.883	215.740	133.998	26.889	-0.512	9.968	2706.900	-0.015102	-0.009380	-0.001882
0.1096	1390.534	213.503	132.331	25.957	-0.512	9.966	2647.219	-0.014945	-0.009263	-0.001817
0.1104	1338.806	208.862	129.398	23.873	-0.519	9.965	2548.742	-0.014620	-0.009058	-0.001671
0.1112	1264.415	201.859	124.805	21.026	-0.517	9.963	2407.122	-0.014130	-0.008736	-0.001472
0.1120	1169.796	192.410	118.312	17.692	-0.517	9.960	2226.992	-0.013469	-0.008282	-0.001238
0.1128	1063.365	180.582	111.103	13.926	-0.521	9.958	2024.374	-0.012641	-0.007777	-0.000975
0.1136	952.831	167.964	103.273	10.257	-0.510	9.957	1813.946	-0.011757	-0.007229	-0.000718
0.1144	844.672	154.930	95.634	7.032	-0.508	9.955	1608.038	-0.010845	-0.006694	-0.000492
0.1152	745.108	142.353	88.519	4.073	-0.514	9.954	1418.495	-0.009965	-0.006196	-0.000285
0.1160	657.373	131.111	81.996	1.557	-0.508	9.954	1251.469	-0.009178	-0.005740	-0.000109
0.1168	582.201	120.814	76.066	-0.262	-0.514	9.954	1108.360	-0.008457	-0.005325	0.000018
0.1176	518.119	111.615	71.113	-1.680	-0.516	9.955	986.366	-0.007813	-0.004978	0.000118
0.1184	462.139	103.111	66.188	-2.834	-0.512	9.958	879.793	-0.007218	-0.004633	0.000198
0.1192	411.643	95.176	62.072	-3.807	-0.514	9.959	783.663	-0.006662	-0.004345	0.000266
0.1200	365.175	87.728	57.848	-4.378	-0.517	9.960	695.200	-0.006141	-0.004049	0.000306
0.1208	322.164	80.654	53.968	-4.822	-0.514	9.962	613.317	-0.005646	-0.003778	0.000338
0.1216	282.489	73.802	50.294	-5.156	-0.513	9.964	537.786	-0.005166	-0.003521	0.000361
0.1224	246.331	67.243	46.469	-5.253	-0.509	9.967	468.950	-0.004707	-0.003253	0.000368
0.1232	214.440	61.616	43.317	-5.475	-0.502	9.969	408.239	-0.004313	-0.003032	0.000383
0.1240	187.179	56.516	40.097	-5.323	-0.500	9.971	356.340	-0.003956	-0.002807	0.000373
0.1248	165.463	52.334	37.675	-5.239	-0.501	9.971	314.999	-0.003663	-0.002637	0.000367
0.1256	149.773	49.152	35.997	-5.198	-0.509	9.971	285.130	-0.003441	-0.002520	0.000364
0.1264	139.779	46.511	34.552	-5.030	-0.511	9.970	266.104	-0.003256	-0.002419	0.000352
0.1272	135.105	44.802	34.016	-5.003	-0.515	9.969	257.206	-0.003136	-0.002381	0.000350
0.1280	134.174	43.884	33.465	-4.946	-0.517	9.969	255.432	-0.003072	-0.002343	0.000346
0.1288	136.187	43.509	33.246	-4.891	-0.516	9.968	259.266	-0.003046	-0.002327	0.000342
0.1296	141.748	43.662	33.466	-4.961	-0.522	9.966	269.852	-0.003056	-0.002343	0.000347
0.1304	154.898	44.857	33.837	-5.169	-0.527	9.964	294.886	-0.003140	-0.002369	0.000362
0.1312	179.905	47.914	35.570	-5.531	-0.522	9.962	342.493	-0.003354	-0.002490	0.000387
0.1320	219.775	52.847	38.102	-6.032	-0.519	9.960	418.396	-0.003699	-0.002667	0.000422
0.1328	275.937	60.032	42.409	-5.754	-0.518	9.958	525.312	-0.004202	-0.002969	0.000403
0.1336	347.682	69.579	48.025	-4.655	-0.511	9.957	661.898	-0.004871	-0.003362	0.000326
0.1344	434.156	80.918	54.547	-3.557	-0.516	9.956	826.521	-0.005664	-0.003818	0.000249
0.1352	534.846	94.301	62.734	-1.582	-0.523	9.954	1018.209	-0.006601	-0.004391	0.000111
0.1360	648.326	109.573	70.853	0.502	-0.522	9.954	1234.245	-0.007670	-0.004960	-0.000035
0.1368	770.491	125.777	79.741	3.448	-0.526	9.954	1466.818	-0.008804	-0.005582	-0.000241
0.1376	895.678	142.008	88.809	6.936	-0.521	9.955	1705.141	-0.009941	-0.006217	-0.000486
0.1384	1017.528	157.669	97.423	10.131	-0.518	9.958	1937.113	-0.011037	-0.006820	-0.000709
0.1392	1130.632	171.676	106.192	13.801	-0.521	9.959	2152.433	-0.012017	-0.007433	-0.000966
0.1400	1230.661	184.085	113.819	17.399	-0.522	9.961	2342.863	-0.012886	-0.007967	-0.001218
0.1408	1314.340	194.647	120.619	20.692	-0.526	9.963	2502.165	-0.013625	-0.008443	-0.001448
0.1416	1379.788	203.345	125.718	23.528	-0.525	9.965	2626.762	-0.014234	-0.008800	-0.001647
0.1424	1426.286	209.959	129.692	25.777	-0.522	9.967	2715.282	-0.014697	-0.009078	-0.001804
0.1432	1455.156	214.252	132.151	27.126	-0.524	9.969	2770.243	-0.014998	-0.009251	-0.001899
0.1440	1469.748	217.060	133.611	27.640	-0.520	9.971	2798.023	-0.015194	-0.009353	-0.001935
0.1448	1474.437	218.339	134.903	28.154	-0.525	9.971	2806.950	-0.015284	-0.009443	-0.001971
0.1456	1473.100	219.104	135.389	28.419	-0.529	9.971	2804.403	-0.015337	-0.009477	-0.001989
0.1464	1468.366	219.563	135.904	28.433	-0.526	9.970	2795.391	-0.015369	-0.009513	-0.001990
0.1472	1461.242	219.451	136.029	28.614	-0.525	9.969	2781.830	-0.015362	-0.009522	-0.002003
0.1480	1450.828	219.187	135.584	28.476	-0.520	9.969	2762.003	-0.015343	-0.009491	-0.001993
0.1488	1432.854	218.130	134.847	27.933	-0.515	9.968	2727.785	-0.015269	-0.009439	-0.001955
0.1496	1400.362	215.656	133.067	26.516	-0.510	9.966	2665.930	-0.015096	-0.009315	-0.001856
0.1504	1348.514	211.238	130.120	24.404	-0.512	9.964	2567.225	-0.014787	-0.009108	-0.001708
0.1512	1274.800	204.248	125.372	21.291	-0.508	9.963	2426.891	-0.014297	-0.008776	-0.001490
0.1520	1181.939	194.591	119.415	17.747	-0.508	9.960	2250.109	-0.013621	-0.008359	-0.001242
0.1528	1077.342	183.197	112.219	14.384	-0.512	9.959	2050.982	-0.012824	-0.007855	-0.001007
0.1536	968.130	170.621	104.399	10.729	-0.505	9.957	1843.071	-0.011943	-0.007308	-0.000751
0.1544	860.932	157.683	96.886	7.366	-0.505	9.956	1638.994	-0.011038	-0.006782	-0.000516
0.1552	761.249	145.510	89.496	4.475	-0.509	9.954	1449.223	-0.010186	-0.006265	-0.000313
0.1560	672.236	133.837	83.028	2.030	-0.510	9.954	1279.764	-0.009369	-0.005812	-0.000142
0.1568	594.584	123.191	77.057	0.516	-0.509	9.954	1131.935	-0.008623	-0.005394	-0.000036
0.1576	527.197	113.547	71.951	-1.249	-0.512	9.955	1003.647	-0.007948	-0.005037	0.000087
0.1584	467.879	104.501	66.792	-3.222	-0.503	9.958	890.722	-0.007315	-0.004675	0.000226
0.1592	414.378	96.386	62.293	-4.125	-0.500	9.959	788.870	-0.006747	-0.004360	0.000289
0.1600	365.461	88.591	58.122	-4.473	-0.506	9.961	695.744	-0.006201	-0.004069	0.000313
0.1608	320.526	81.253	53.803	-5.015	-0.504	9.963	610.199	-0.005688	-0.003766	0.000351
0.1616	279.453	74.401	50.115	-5.404	-0.506	9.965	532.007	-0.005208	-0.003508	0.000378
0.1624	242.694	68.035	46.440	-5.445	-0.506	9.967	462.027	-0.004762	-0.003251	0.000381
0.1632	210.849	62.352	43.290	-5.348	-0.498	9.970	401.402	-0.004365	-0.003030	0.000374
0.1640	184.308	57.183	40.331	-5.404	-0.494	9.971	350.876	-0.004003	-0.002823	0.000378
0.1648	163.735	53.013	38.115	-5.558	-0.500	9.972	311.708	-0.003711	-0.002668	0.000389
0.1656	149.037	49.637	36.464	-5.615	-0.505	9.971	283.728	-0.003475	-0.002552	0.000393
0.1664	139.719	47.302	34.896	-5.310	-0.509	9.970	265.989	-0.003311	-0.002443	0.000372
0.1672	135.256	45.718	34.374	-4.558	-0.513	9.969	257.492	-0.003200	-0.002406	0.000319
0.1680	134.384	44.732	33.700	-4.739	-0.506	9.969	255.833	-0.003131	-0.002359	0.000332
0.1688	136.308	44.232	33.302	-5.376	-0.506	9.968	259.495	-0.003096	-0.002331	0.000376
0.1696	140.936	44.371	33.631	-5.293	-0.508	9.967	268.307	-0.003106	-0.002354	0.000371
0.1704	151.637	45.427	33.919	-5.280	-0.506	9.965	288.677	-0.003180	-0.002374	0.000370
0.1712	173.082	48.067	35.336	-5.738	-0.509	9.963	329.504	-0.003365	-0.002474	0.000402
0.1720	209.736	52.695	38.226	-6.086	-0.501	9.961	399.284	-0.003689	-0.002676	0.000426
0.1728	263.583	59.365	42.080	-5.960	-0.504	9.958	501.795	-0.004156	-0.002946	0.000417
0.1736	334.803	68.689	47.653	-5.363	-0.507	9.957	637.379	-0.004808	-0.003336	0.000375
0.1744	422.418	80.168	54.149	-3.959	-0.509	9.956	804.176	-0.005612	-0.003790	0.000277
0.1752	525.017	94.079	61.965	-2.013	-0.522	9.954	999.498	-0.006586	-0.004338	0.000141
0.1760	641.112	109.629	70.441	0.154	-0.519	9.954	1220.512	-0.007674	-0.004931	-0.000011
0.1768	766.419	126.208	79.673	3.477	-0.518	9.954	1459.064	-0.008835	-0.005577	-0.000243
0.1776	894.837	142.855	88.892	6.866	-0.515	9.955	1703.539	-0.010000	-0.006222	-0.000481
0.1784	1019.287	158.461	97.959	10.202	-0.505	9.958	1940.460	-0.011092	-0.006857	-0.000714
0.1792	1133.954	172.870	106.411	14.051	-0.502	9.959	2158.756	-0.012101	-0.007449	-0.000984
0.1800	1234.028	185.377	114.054	17.511	-0.504	9.961	2349.272	-0.012976	-0.007984	-0.001226
0.1808	1316.443	195.716	120.561	20.708	-0.505	9.963	2506.170	-0.013700	-0.008439	-0.001450
0.1816	1379.999	204.151	125.427	23.471	-0.506	9.965	2627.163	-0.014291	-0.008780	-0.001643
0.1824	1425.084	210.447	129.496	25.459	-0.512	9.967	2712.994	-0.014731	-0.009065	-0.001782
0.1832	1453.457	214.741	131.581	27.056	-0.508	9.969	2767.010	-0.015032	-0.009211	-0.001894
0.1840	1468.185	217.520	133.569	27.903	-0.505	9.971	2795.048	-0.015226	-0.009350	-0.001953
0.1848	1473.490	218.937	134.402	28.362	-0.506	9.972	2805.147	-0.015326	-0.009408	-0.001985
0.1856	1472.754	219.701	135.179	28.556	-0.506	9.972	2803.745	-0.015379	-0.009463	-0.001999
0.1864	1468.726	220.187	135.624	28.431	-0.504	9.971	2796.078	-0.015413	-0.009494	-0.001990
0.1872	1462.685	220.159	135.721	28.335	-0.505	9.970	2784.576	-0.015411	-0.009500	-0.001983
0.1880	1453.698	219.798	135.624	28.072	-0.503	9.969	2767.467	-0.015386	-0.009494	-0.001965
0.1888	1438.023	218.923	134.972	27.531	-0.498	9.968	2737.627	-0.015325	-0.009448	-0.001927
0.1896	1407.861	216.476	133.526	26.655	-0.502	9.966	2680.206	-0.015153	-0.009347	-0.001866
0.1904	1357.276	212.251	130.636	24.932	-0.505	9.964	2583.904	-0.014858	-0.009145	-0.001745
0.1912	1283.997	205.497	125.999	21.889	-0.505	9.962	2444.401	-0.014385	-0.008820	-0.001532
0.1920	1190.370	196.048	119.709	17.858	-0.504	9.960	2266.159	-0.013723	-0.008380	-0.001250
0.1928	1084.510	184.752	112.482	13.967	-0.506	9.958	2064.629	-0.012933	-0.007874	-0.000978
0.1936	974.472	172.108	104.648	10.951	-0.502	9.957	1855.145	-0.012048	-0.007325	-0.000767
0.1944	866.914	159.129	96.968	7.616	-0.502	9.955	1650.381	-0.011139	-0.006788	-0.000533
0.1952	767.531	146.678	90.006	4.433	-0.510	9.954	1461.182	-0.010267	-0.006300	-0.000310
0.1960	679.960	135.225	83.718	1.959	-0.509	9.954	1294.470	-0.009466	-0.005860	-0.000137
0.1968	604.683	125.122	77.966	0.278	-0.508	9.954	1151.161	-0.008759	-0.005458	-0.000019
0.1976	539.850	115.979	72.916	-0.833	-0.507	9.955	1027.737	-0.008119	-0.005104	0.000058
0.1984	482.652	107.293	68.210	-2.208	-0.501	9.958	918.846	-0.007510	-0.004775	0.000155
0.1992	430.233	99.261	63.764	-3.820	-0.500	9.959	819.054	-0.006948	-0.004463	0.000267
0.2000	381.346	91.451	59.623	-4.626	-0.504	9.960	725.985	-0.006402	-0.004174	0.000324
0.2008	335.840	84.015	55.907	-5.016	-0.507	9.962	639.353	-0.005881	-0.003914	0.000351
0.2016	293.805	77.305	51.779	-5.571	-0.506	9.964	559.330	-0.005411	-0.003625	0.000390
0.2024	256.009	70.746	48.176	-5.989	-0.505	9.966	487.375	-0.004952	-0.003372	0.000419
0.2032	223.262	64.896	44.957	-6.002	-0.499	9.969	425.034	-0.004543	-0.003147	0.000420
0.2040	196.316	59.657	41.833	-5.697	-0.495	9.971	373.735	-0.004176	-0.002928	0.000399
0.2048	175.953	55.321	39.645	-5.628	-0.496	9.971	334.969	-0.003872	-0.002775	0.000394
0.2056	161.931	52.278	38.200	-5.670	-0.503	9.971	308.275	-0.003659	-0.002674	0.000397
0.2064	153.620	50.124	36.754	-5.767	-0.506	9.970	292.454	-0.003509	-0.002573	0.000404
0.2072	149.893	48.998	36.177	-5.530	-0.512	9.969	285.358	-0.003430	-0.002532	0.000387
0.2080	149.668	48.303	35.792	-5.155	-0.510	9.969	284.929	-0.003381	-0.002505	0.000361
0.2088	152.358	48.109	35.323	-5.294	-0.508	9.968	290.051	-0.003368	-0.002473	0.000371
0.2096	158.775	48.373	35.736	-5.877	-0.510	9.966	302.267	-0.003386	-0.002501	0.000411
0.2104	173.308	49.721	36.313	-5.974	-0.512	9.965	329.933	-0.003480	-0.002542	0.000418
0.2112	200.103	53.085	38.144	-5.974	-0.514	9.963	380.945	-0.003716	-0.002670	0.000418
0.2120	242.198	58.142	41.268	-6.210	-0.514	9.960	461.082	-0.004070	-0.002889	0.000435
0.2128	301.395	65.603	45.850	-5.973	-0.516	9.958	573.778	-0.004592	-0.003210	0.000418
0.2136	376.612	75.540	51.410	-5.154	-0.512	9.957	716.972	-0.005288	-0.003599	0.000361
0.2144	466.557	87.420	58.029	-3.667	-0.513	9.955	888.205	-0.006119	-0.004062	0.000257
0.2152	570.343	101.401	65.830	-1.513	-0.517	9.953	1085.787	-0.007098	-0.004608	0.000106
0.2160	685.416	116.800	73.823	1.001	-0.516	9.954	1304.855	-0.008176	-0.005168	-0.000070
0.2168	807.341	132.795	82.890	4.127	-0.517	9.954	1536.970	-0.009296	-0.005802	-0.000289
0.2176	930.349	148.513	91.559	7.686	-0.517	9.955	1771.145	-0.010396	-0.006409	-0.000538
0.2184	1048.126	163.312	100.242	11.284	-0.514	9.958	1995.363	-0.011432	-0.007017	-0.000790
0.2192	1155.895	176.764	108.382	14.982	-0.519	9.959	2200.527	-0.012373	-0.007587	-0.001049
0.2200	1249.657	188.463	115.670	18.332	-0.524	9.961	2379.026	-0.013192	-0.008097	-0.001283
0.2208	1326.918	198.385	121.711	21.027	-0.525	9.963	2526.112	-0.013887	-0.008520	-0.001472
0.2216	1386.852	206.320	126.371	23.709	-0.526	9.965	2640.209	-0.014442	-0.008846	-0.001660
0.2224	1429.427	212.184	129.901	26.085	-0.524	9.967	2721.262	-0.014853	-0.009093	-0.001826
0.2232	1456.313	216.201	132.470	27.349	-0.520	9.969	2772.446	-0.015134	-0.009273	-0.001914
0.2240	1470.455	218.646	134.026	27.641	-0.513	9.971	2799.368	-0.015305	-0.009382	-0.001935
0.2248	1475.279	220.118	135.153	28.142	-0.514	9.972	2808.552	-0.015408	-0.009461	-0.001970
0.2256	1474.422	220.966	135.486	28.544	-0.514	9.971	2806.921	-0.015468	-0.009484	-0.001998
0.2264	1470.334	221.244	135.668	28.613	-0.518	9.971	2799.139	-0.015487	-0.009497	-0.002003
0.2272	1464.158	221.314	135.723	29.141	-0.522	9.969	2787.380	-0.015492	-0.009501	-0.002040
0.2280	1455.066	220.980	135.404	28.835	-0.521	9.969	2770.071	-0.015469	-0.009478	-0.002018
0.2288	1438.429	220.048	134.904	27.766	-0.521	9.968	2738.400	-0.015403	-0.009443	-0.001944
0.2296	1406.163	217.645	133.291	26.724	-0.517	9.966	2676.973	-0.015235	-0.009330	-0.001871
0.2304	1352.271	212.892	130.498	24.945	-0.521	9.965	2574.377	-0.014902	-0.009135	-0.001746
0.2312	1274.319	205.375	125.374	21.734	-0.517	9.963	2425.976	-0.014376	-0.008776	-0.001521
0.2320	1175.462	195.106	119.046	18.094	-0.516	9.960	2237.778	-0.013657	-0.008333	-0.001267
0.2328	1064.432	183.112	111.307	14.175	-0.519	9.958	2026.405	-0.012818	-0.007792	-0.000992
0.2336	949.931	169.828	103.065	10.061	-0.513	9.957	1808.424	-0.011888	-0.007215	-0.000704
0.2344	839.562	156.654	95.386	6.713	-0.517	9.956	1598.310	-0.010966	-0.006677	-0.000470
0.2352	739.803	144.146	88.108	3.878	-0.519	9.954	1408.396	-0.010090	-0.006168	-0.000271
0.2360	654.307	132.862	81.875	1.210	-0.519	9.954	1245.632	-0.009300	-0.005731	-0.000085
0.2368	582.982	123.010	76.520	-0.234	-0.518	9.954	1109.848	-0.008611	-0.005356	0.000016
0.2376	523.184	114.172	71.883	-1.527	-0.514	9.955	996.008	-0.007992	-0.005032	0.000107
0.2384	470.645	106.155	67.589	-2.944	-0.516	9.958	895.987	-0.007431	-0.004731	0.000206
0.2392	422.148	98.470	63.351	-3.736	-0.507	9.959	803.661	-0.006893	-0.004435	0.000262
0.2400	376.402	91.396	59.595	-4.085	-0.510	9.960	716.572	-0.006398	-0.004172	0.000286
0.2408	333.330	84.447	55.426	-4.724	-0.514	9.963	634.575	-0.005911	-0.003880	0.000331
0.2416	293.249	77.817	51.891	-5.475	-0.504	9.965	558.271	-0.005447	-0.003632	0.000383
0.2424	256.700	71.578	48.382	-5.933	-0.513	9.967	488.691	-0.005010	-0.003387	0.000415
0.2432	224.389	65.687	44.997	-6.141	-0.512	9.969	427.179	-0.004598	-0.003150	0.000430
0.2440	196.887	60.477	42.438	-6.029	-0.502	9.971	374.823	-0.004233	-0.002971	0.000422
0.2448	175.066	56.239	39.920	-5.890	-0.510	9.971	333.281	-0.003937	-0.002794	0.000412
0.2456	159.256	52.847	38.365	-5.806	-0.513	9.971	303.183	-0.003699	-0.002686	0.000406
0.2464	149.187	50.388	37.084	-5.765	-0.516	9.971	284.014	-0.003527	-0.002596	0.000404
0.2472	144.107	48.818	36.217	-5.390	-0.522	9.969	274.343	-0.003417	-0.002535	0.000377
0.2480	142.725	47.622	35.804	-5.488	-0.519	9.969	271.711	-0.003334	-0.002506	0.000384
0.2488	144.213	47.303	35.254	-5.947	-0.509	9.968	274.544	-0.003311	-0.002468	0.000416
0.2496	148.706	47.302	35.295	-5.851	-0.511	9.966	283.098	-0.003311	-0.002471	0.000410
0.2504	159.872	48.316	35.543	-5.641	-0.509	9.964	304.356	-0.003382	-0.002488	0.000395
0.2512	181.769	51.234	36.892	-5.961	-0.512	9.962	346.041	-0.003586	-0.002582	0.000417
0.2520	218.032	55.654	39.342	-6.128	-0.514	9.960	415.077	-0.003896	-0.002754	0.000429
0.2528	270.647	62.490	43.345	-5.989	-0.512	9.958	515.242	-0.004374	-0.003034	0.000419
0.2536	339.582	71.330	48.436	-5.129	-0.516	9.957	646.477	-0.004993	-0.003390	0.000359
0.2544	424.357	82.281	54.848	-3.808	-0.515	9.955	807.867	-0.005760	-0.003839	0.000267
0.2552	523.815	95.719	62.319	-2.308	-0.523	9.954	997.210	-0.006700	-0.004362	0.000162
0.2560	636.213	110.854	70.329	-0.404	-0.522	9.954	1211.185	-0.007760	-0.004923	0.000028
0.2568	757.417	127.195	79.164	2.640	-0.522	9.954	1441.927	-0.008904	-0.005542	-0.000185
0.2576	881.957	143.481	87.957	5.851	-0.516	9.956	1679.020	-0.010044	-0.006157	-0.000410
0.2584	1003.823	158.725	96.736	9.353	-0.515	9.958	1911.020	-0.011111	-0.006772	-0.000655
0.2592	1118.144	172.745	105.185	13.174	-0.516	9.959	2128.658	-0.012092	-0.007363	-0.000922
0.2600	1220.562	185.335	112.934	16.732	-0.520	9.961	2323.637	-0.012973	-0.007905	-0.001171
0.2608	1307.351	196.147	119.636	20.220	-0.524	9.963	2488.861	-0.013730	-0.008375	-0.001415
0.2616	1376.076	204.986	125.023	23.417	-0.517	9.965	2619.696	-0.014349	-0.008752	-0.001639
0.2624	1425.264	211.768	129.164	25.848	-0.513	9.967	2713.337	-0.014824	-0.009041	-0.001809
0.2632	1455.742	216.228	131.790	27.168	-0.506	9.969	2771.358	-0.015136	-0.009225	-0.001902
0.2640	1470.936	218.895	133.596	27.835	-0.502	9.971	2800.283	-0.015323	-0.009352	-0.001948
0.2648	1475.399	220.547	134.597	28.322	-0.505	9.971	2808.781	-0.015438	-0.009422	-0.001983
0.2656	1473.520	221.270	135.236	28.573	-0.513	9.971	2805.204	-0.015489	-0.009467	-0.002000
0.2664	1468.321	221.536	135.542	28.546	-0.518	9.970	2795.305	-0.015508	-0.009488	-0.001998
0.2672	1460.821	221.453	135.681	28.435	-0.522	9.969	2781.029	-0.015502	-0.009498	-0.001990
0.2680	1449.806	220.952	135.390	28.058	-0.524	9.968	2760.057	-0.015467	-0.009477	-0.001964
0.2688	1430.359	219.590	134.681	27.392	-0.516	9.968	2723.036	-0.015371	-0.009428	-0.001917
0.2696	1395.628	216.852	132.929	26.293	-0.513	9.966	2656.918	-0.015180	-0.009305	-0.001841
0.2704	1341.015	212.072	129.663	24.235	-0.514	9.965	2552.948	-0.014845	-0.009076	-0.001696
0.2712	1265.317	204.651	124.984	21.275	-0.510	9.962	2408.838	-0.014326	-0.008749	-0.001489
0.2720	1172.381	195.049	118.669	17.759	-0.513	9.960	2231.913	-0.013653	-0.008307	-0.001243
0.2728	1069.512	183.724	111.915	13.952	-0.514	9.958	2036.076	-0.012861	-0.007834	-0.000977
0.2736	963.321	171.689	104.249	10.367	-0.512	9.957	1833.916	-0.012018	-0.007297	-0.000726
0.2744	859.384	159.351	96.984	7.060	-0.514	9.955	1636.047	-0.011155	-0.006789	-0.000494
0.2752	762.331	147.470	89.909	4.309	-0.523	9.954	1451.283	-0.010323	-0.006294	-0.000302
0.2760	675.407	136.296	83.524	2.030	-0.525	9.954	1285.801	-0.009541	-0.005847	-0.000142
0.2768	599.333	125.735	77.840	0.154	-0.525	9.954	1140.976	-0.008801	-0.005449	-0.000011
0.2776	533.118	116.159	72.969	-1.583	-0.524	9.955	1014.919	-0.008131	-0.005108	0.000111
0.2784	474.597	107.322	68.250	-2.987	-0.515	9.957	903.511	-0.007513	-0.004777	0.000209
0.2792	421.336	99.207	63.779	-3.931	-0.514	9.959	802.116	-0.006944	-0.004465	0.000275
0.2800	372.164	91.688	59.679	-4.598	-0.512	9.960	708.504	-0.006418	-0.004178	0.000322
0.2808	326.612	84.337	55.248	-5.126	-0.515	9.962	621.786	-0.005904	-0.003867	0.000359
0.2816	284.833	77.472	51.643	-5.876	-0.513	9.964	542.250	-0.005423	-0.003615	0.000411
0.2824	247.398	70.954	47.900	-6.099	-0.513	9.966	470.982	-0.004967	-0.003353	0.000427
0.2832	215.072	64.882	44.680	-6.071	-0.510	9.969	409.441	-0.004542	-0.003128	0.000425
0.2840	188.111	59.755	41.873	-6.183	-0.504	9.971	358.114	-0.004183	-0.002931	0.000433
0.2848	167.116	55.503	39.535	-6.614	-0.510	9.971	318.146	-0.003885	-0.002767	0.000463
0.2856	152.087	52.348	37.897	-6.475	-0.518	9.971	289.536	-0.003664	-0.002653	0.000453
0.2864	142.514	50.208	36.508	-5.378	-0.518	9.970	271.311	-0.003515	-0.002556	0.000376
0.2872	137.946	48.734	35.999	-5.100	-0.523	9.969	262.613	-0.003411	-0.002520	0.000357
0.2880	137.104	47.678	35.268	-5.225	-0.516	9.969	261.011	-0.003337	-0.002469	0.000366
0.2888	139.088	47.261	35.117	-5.308	-0.505	9.968	264.788	-0.003308	-0.002458	0.000372
0.2896	144.273	47.204	35.089	-5.295	-0.508	9.966	274.658	-0.003304	-0.002456	0.000371
0.2904	156.431	48.287	35.214	-5.476	-0.506	9.965	297.804	-0.003380	-0.002465	0.000383
0.2912	180.146	51.261	36.824	-5.782	-0.510	9.962	342.951	-0.003588	-0.002578	0.000405
0.2920	218.934	56.112	39.411	-6.142	-0.510	9.960	416.794	-0.003928	-0.002759	0.000430
0.2928	274.434	63.212	43.662	-6.016	-0.510	9.958	522.451	-0.004425	-0.003056	0.000421
0.2936	346.239	72.719	49.275	-5.418	-0.510	9.957	659.151	-0.005090	-0.003449	0.000379
0.2944	433.344	84.198	55.466	-4.098	-0.508	9.956	824.976	-0.005894	-0.003883	0.000287
0.2952	534.576	97.704	63.172	-2.474	-0.519	9.954	1017.694	-0.006839	-0.004422	0.000173
0.2960	648.025	112.907	71.237	-0.263	-0.519	9.954	1233.673	-0.007904	-0.004987	0.000018
0.2968	769.244	128.847	79.976	3.128	-0.521	9.954	1464.443	-0.009019	-0.005598	-0.000219
0.2976	892.492	144.869	89.017	6.394	-0.520	9.955	1699.076	-0.010141	-0.006231	-0.000448
0.2984	1011.622	159.864	97.409	9.855	-0.516	9.958	1925.869	-0.011190	-0.006819	-0.000690
0.2992	1122.006	173.802	105.779	13.621	-0.517	9.959	2136.011	-0.012166	-0.007405	-0.000953
0.3000	1219.751	186.045	113.099	17.206	-0.518	9.961	2322.092	-0.013023	-0.007917	-0.001204
0.3008	1301.926	196.425	119.732	20.431	-0.520	9.962	2478.533	-0.013750	-0.008381	-0.001430
0.3016	1367.345	204.805	124.969	23.181	-0.515	9.964	2603.073	-0.014336	-0.008748	-0.001623
0.3024	1415.330	211.267	128.858	25.321	-0.513	9.966	2694.426	-0.014789	-0.009020	-0.001772
0.3032	1446.755	215.783	131.679	26.446	-0.505	9.968	2754.250	-0.015105	-0.009218	-0.001851
0.3040	1464.308	218.577	133.139	27.265	-0.502	9.971	2787.666	-0.015300	-0.009320	-0.001909
0.3048	1471.386	220.549	134.460	28.391	-0.506	9.971	2801.142	-0.015438	-0.009412	-0.001987
0.3056	1471.687	221.508	135.195	28.557	-0.509	9.971	2801.714	-0.015506	-0.009464	-0.001999
0.3064	1468.185	221.980	135.515	28.182	-0.512	9.970	2795.048	-0.015539	-0.009486	-0.001973
0.3072	1462.219	222.049	135.668	28.503	-0.510	9.969	2783.689	-0.015543	-0.009497	-0.001995
0.3080	1453.623	221.633	135.584	28.336	-0.502	9.969	2767.324	-0.015514	-0.009491	-0.001984
0.3088	1439.000	220.604	134.861	27.864	-0.495	9.968	2739.487	-0.015442	-0.009440	-0.001951
0.3096	1410.762	218.340	133.764	27.017	-0.492	9.966	2685.728	-0.015284	-0.009363	-0.001891
0.3104	1362.536	214.227	131.094	24.973	-0.494	9.965	2593.918	-0.014996	-0.009177	-0.001748
0.3112	1291.586	207.640	126.773	21.944	-0.495	9.963	2458.849	-0.014535	-0.008874	-0.001536
0.3120	1199.237	198.635	120.748	18.373	-0.493	9.961	2283.039	-0.013904	-0.008452	-0.001286
0.3128	1092.971	187.378	113.654	14.661	-0.498	9.959	2080.736	-0.013116	-0.007956	-0.001026
0.3136	981.024	174.885	105.793	10.923	-0.492	9.957	1867.619	-0.012242	-0.007406	-0.000765
0.3144	870.506	161.837	97.848	7.616	-0.494	9.956	1657.219	-0.011329	-0.006849	-0.000533
0.3152	768.207	148.984	90.886	5.059	-0.506	9.954	1462.469	-0.010429	-0.006362	-0.000354
0.3160	678.202	137.325	84.048	2.628	-0.503	9.954	1291.122	-0.009613	-0.005883	-0.000184
0.3168	601.512	126.737	78.544	0.420	-0.511	9.954	1145.124	-0.008872	-0.005498	-0.000029
0.3176	536.184	117.286	73.522	-1.372	-0.510	9.956	1020.756	-0.008210	-0.005147	0.000096
0.3184	479.196	108.879	68.899	-2.900	-0.505	9.958	912.266	-0.007622	-0.004823	0.000203
0.3192	428.159	100.930	64.551	-3.623	-0.504	9.960	815.105	-0.007065	-0.004519	0.000254
0.3200	381.571	93.704	60.684	-4.361	-0.500	9.961	726.414	-0.006559	-0.004248	0.000305
0.3208	338.800	86.950	56.680	-5.419	-0.501	9.963	644.989	-0.006086	-0.003968	0.000379
0.3216	299.125	80.251	53.075	-5.837	-0.502	9.965	569.458	-0.005618	-0.003715	0.000409
0.3224	262.531	74.109	49.744	-5.656	-0.505	9.967	499.792	-0.005188	-0.003482	0.000396
0.3232	229.709	68.189	46.263	-5.933	-0.508	9.969	437.307	-0.004773	-0.003238	0.000415
0.3240	201.576	62.812	43.430	-6.322	-0.503	9.971	383.749	-0.004397	-0.003040	0.000443
0.3248	179.259	58.518	40.760	-6.308	-0.504	9.972	341.263	-0.004096	-0.002853	0.000442
0.3256	163.178	55.294	38.985	-5.960	-0.510	9.972	310.650	-0.003871	-0.002729	0.000417
0.3264	152.899	52.890	37.553	-5.683	-0.509	9.971	291.080	-0.003702	-0.002629	0.000398
0.3272	147.774	51.207	36.728	-5.433	-0.515	9.969	281.324	-0.003585	-0.002571	0.000380
0.3280	146.647	50.095	36.412	-5.446	-0.517	9.969	279.179	-0.003507	-0.002549	0.000381
0.3288	148.646	49.568	35.902	-5.543	-0.513	9.968	282.984	-0.003470	-0.002513	0.000388
0.3296	154.657	49.595	36.122	-5.530	-0.517	9.967	294.428	-0.003472	-0.002529	0.000387
0.3304	168.589	51.013	36.534	-5.809	-0.517	9.965	320.950	-0.003571	-0.002557	0.000407
0.3312	194.678	54.292	37.882	-6.143	-0.514	9.963	370.617	-0.003800	-0.002652	0.000430
0.3320	236.217	59.322	41.131	-6.060	-0.517	9.961	449.696	-0.004153	-0.002879	0.000424
0.3328	294.452	66.868	45.314	-5.544	-0.514	9.958	560.560	-0.004681	-0.003172	0.000388
0.3336	368.376	76.623	50.969	-4.862	-0.510	9.957	701.294	-0.005364	-0.003568	0.000340
0.3344	456.788	88.172	57.559	-3.903	-0.511	9.956	869.608	-0.006172	-0.004029	0.000273
0.3352	558.245	101.972	64.824	-2.096	-0.514	9.954	1062.756	-0.007138	-0.004538	0.000147
0.3360	670.913	116.883	73.026	0.530	-0.518	9.954	1277.246	-0.008182	-0.005112	-0.000037
0.3368	790.795	132.558	81.406	3.462	-0.524	9.954	1505.470	-0.009279	-0.005698	-0.000242
0.3376	912.194	148.234	90.337	6.700	-0.520	9.955	1736.584	-0.010376	-0.006324	-0.000469
0.3384	1029.190	162.700	98.772	10.272	-0.520	9.958	1959.314	-0.011389	-0.006914	-0.000719
0.3392	1136.208	176.345	106.754	13.899	-0.517	9.959	2163.048	-0.012344	-0.007473	-0.000973
0.3400	1228.422	188.116	113.951	17.371	-0.516	9.961	2338.600	-0.013168	-0.007977	-0.001216
0.3408	1303.158	197.606	119.922	20.762	-0.520	9.962	2480.879	-0.013832	-0.008395	-0.001453
0.3416	1359.259	205.220	124.424	23.291	-0.517	9.964	2587.681	-0.014365	-0.008710	-0.001630
0.3424	1397.687	210.293	127.801	24.917	-0.516	9.967	2660.837	-0.014720	-0.008946	-0.001744
0.3432	1421.056	213.615	129.968	25.960	-0.512	9.969	2705.326	-0.014953	-0.009098	-0.001817
0.3440	1432.718	215.866	131.274	26.307	-0.505	9.971	2727.528	-0.015111	-0.009189	-0.001841
0.3448	1436.551	217.200	132.178	26.738	-0.508	9.972	2734.823	-0.015204	-0.009252	-0.001872
0.3456	1435.754	218.132	132.692	27.141	-0.513	9.971	2733.307	-0.015269	-0.009288	-0.001900
0.3464	1432.538	218.591	133.095	27.170	-0.518	9.971	2727.184	-0.015301	-0.009317	-0.001902
0.3472	1427.909	218.618	133.221	26.934	-0.521	9.970	2718.372	-0.015303	-0.009326	-0.001885
0.3480	1421.537	218.325	133.055	26.572	-0.512	9.969	2706.242	-0.015283	-0.009314	-0.001860
0.3488	1411.333	217.769	132.652	26.459	-0.506	9.968	2686.815	-0.015244	-0.009286	-0.001852
0.3496	1391.495	216.573	131.903	25.904	-0.500	9.966	2649.050	-0.015160	-0.009233	-0.001813
0.3504	1354.330	213.696	129.817	24.611	-0.503	9.965	2578.297	-0.014959	-0.009087	-0.001723
0.3512	1294.983	208.180	126.677	22.374	-0.506	9.963	2465.315	-0.014573	-0.008867	-0.001566
0.3520	1211.711	200.037	121.246	19.289	-0.505	9.961	2306.786	-0.014003	-0.008487	-0.001350
0.3528	1108.781	189.017	114.484	15.426	-0.507	9.959	2110.834	-0.013231	-0.008014	-0.001080
0.3536	995.181	176.275	106.566	11.119	-0.497	9.957	1894.569	-0.012339	-0.007460	-0.000778
0.3544	879.207	162.990	98.290	7.408	-0.497	9.956	1673.784	-0.011409	-0.006880	-0.000519
0.3552	768.944	149.496	90.665	4.601	-0.502	9.954	1463.871	-0.010465	-0.006347	-0.000322
0.3560	670.357	136.948	83.469	2.031	-0.504	9.954	1276.188	-0.009586	-0.005843	-0.000142
0.3568	585.266	125.511	77.221	-0.123	-0.509	9.955	1114.197	-0.008786	-0.005405	0.000009
0.3576	513.250	115.020	71.717	-2.221	-0.510	9.956	977.097	-0.008051	-0.005020	0.000155
0.3584	451.829	105.530	66.834	-3.722	-0.503	9.958	860.167	-0.007387	-0.004678	0.000261
0.3592	398.508	97.179	62.252	-4.250	-0.499	9.959	758.657	-0.006803	-0.004358	0.000297
0.3600	351.770	89.481	58.331	-5.043	-0.504	9.960	669.680	-0.006264	-0.004083	0.000353
0.3608	310.457	82.630	54.478	-6.044	-0.500	9.962	591.030	-0.005784	-0.003813	0.000423
0.3616	273.742	76.514	51.051	-6.460	-0.505	9.964	521.135	-0.005356	-0.003574	0.000452
0.3624	241.056	70.802	47.748	-6.085	-0.506	9.967	458.908	-0.004956	-0.003342	0.000426
0.3632	212.442	65.646	44.694	-6.127	-0.501	9.969	404.434	-0.004595	-0.003129	0.000429
0.3640	188.216	60.935	42.149	-6.224	-0.502	9.971	358.315	-0.004265	-0.002950	0.000436
0.3648	169.325	57.155	39.878	-6.044	-0.500	9.971	322.351	-0.004001	-0.002791	0.000423
0.3656	156.025	54.043	38.654	-5.725	-0.508	9.971	297.031	-0.003783	-0.002706	0.000401
0.3664	147.865	52.027	37.594	-5.308	-0.512	9.971	281.496	-0.003642	-0.002632	0.000372
0.3672	144.243	50.721	36.657	-5.238	-0.517	9.969	274.601	-0.003550	-0.002566	0.000367
0.3680	143.672	49.887	36.299	-6.017	-0.518	9.969	273.514	-0.003492	-0.002541	0.000421
0.3688	145.505	49.582	35.748	-6.238	-0.510	9.968	277.004	-0.003471	-0.002502	0.000437
0.3696	149.908	49.540	35.541	-5.502	-0.509	9.966	285.387	-0.003468	-0.002488	0.000385
0.3704	159.902	50.249	36.148	-5.502	-0.508	9.964	304.413	-0.003517	-0.002530	0.000385
0.3712	180.161	52.668	37.002	-5.863	-0.503	9.962	342.979	-0.003687	-0.002590	0.000410
0.3720	214.816	56.766	39.520	-6.420	-0.505	9.960	408.955	-0.003974	-0.002766	0.000449
0.3728	266.153	63.298	43.387	-6.198	-0.507	9.958	506.687	-0.004431	-0.003037	0.000434
0.3736	334.848	72.177	48.451	-5.420	-0.503	9.957	637.465	-0.005052	-0.003392	0.000379
0.3744	420.104	83.322	54.835	-4.530	-0.506	9.955	799.770	-0.005833	-0.003838	0.000317
0.3752	520.449	96.899	62.444	-2.681	-0.512	9.953	990.801	-0.006783	-0.004371	0.000188
0.3760	634.529	112.033	70.425	-0.569	-0.514	9.953	1207.981	-0.007842	-0.004930	0.000040
0.3768	758.258	128.486	79.219	2.502	-0.520	9.954	1443.529	-0.008994	-0.005545	-0.000175
0.3776	885.895	145.009	88.328	6.004	-0.515	9.955	1686.516	-0.010151	-0.006183	-0.000420
0.3784	1011.307	160.573	97.205	9.450	-0.509	9.958	1925.268	-0.011240	-0.006804	-0.000661
0.3792	1128.964	175.150	106.043	13.578	-0.507	9.959	2149.258	-0.012260	-0.007423	-0.000950
0.3800	1233.983	188.197	114.057	17.803	-0.505	9.961	2349.186	-0.013174	-0.007984	-0.001246
0.3808	1322.485	199.134	120.855	21.457	-0.510	9.962	2517.672	-0.013939	-0.008460	-0.001502
0.3816	1391.555	208.222	126.330	24.305	-0.510	9.964	2649.164	-0.014576	-0.008843	-0.001701
0.3824	1440.202	214.878	130.248	26.652	-0.506	9.966	2741.776	-0.015041	-0.009117	-0.001866
0.3832	1470.004	219.340	133.138	28.249	-0.505	9.969	2798.510	-0.015354	-0.009320	-0.001977
0.3840	1484.596	221.911	134.903	28.750	-0.499	9.971	2826.290	-0.015534	-0.009443	-0.002012
0.3848	1489.075	223.216	135.973	29.056	-0.502	9.971	2834.816	-0.015625	-0.009518	-0.002034
0.3856	1487.782	224.050	136.792	29.252	-0.509	9.971	2832.355	-0.015683	-0.009575	-0.002048
0.3864	1483.619	224.480	137.069	29.004	-0.507	9.970	2824.430	-0.015714	-0.009595	-0.002030
0.3872	1477.909	224.662	137.153	29.087	-0.505	9.969	2813.559	-0.015726	-0.009601	-0.002036
0.3880	1469.899	224.523	137.028	28.879	-0.497	9.968	2798.309	-0.015717	-0.009592	-0.002022
0.3888	1456.779	223.871	136.625	28.281	-0.493	9.968	2773.333	-0.015671	-0.009564	-0.001980
0.3896	1431.997	222.106	135.332	27.794	-0.489	9.966	2726.154	-0.015547	-0.009473	-0.001946
0.3904	1388.655	218.519	133.247	26.182	-0.495	9.965	2643.642	-0.015296	-0.009327	-0.001833
0.3912	1323.417	212.628	128.982	23.722	-0.496	9.963	2519.445	-0.014884	-0.009029	-0.001661
0.3920	1236.057	203.956	123.446	20.289	-0.496	9.960	2353.134	-0.014277	-0.008641	-0.001420
0.3928	1132.210	192.950	116.322	16.105	-0.504	9.958	2155.437	-0.013507	-0.008143	-0.001127
0.3936	1020.369	180.431	108.658	12.131	-0.500	9.957	1942.520	-0.012630	-0.007606	-0.000849
0.3944	907.355	167.368	100.682	8.392	-0.501	9.955	1727.371	-0.011716	-0.007048	-0.000587
0.3952	799.962	154.250	93.183	5.447	-0.510	9.954	1522.923	-0.010798	-0.006523	-0.000381
0.3960	702.443	141.925	86.124	2.973	-0.507	9.954	1337.271	-0.009935	-0.006029	-0.000208
0.3968	616.270	130.613	79.727	0.681	-0.510	9.954	1173.220	-0.009143	-0.005581	-0.000048
0.3976	541.158	119.898	74.181	-1.207	-0.513	9.955	1030.226	-0.008393	-0.005193	0.000085
0.3984	475.168	110.004	68.952	-3.042	-0.505	9.957	904.598	-0.007700	-0.004827	0.000213
0.3992	416.648	100.943	64.178	-4.015	-0.506	9.959	793.190	-0.007066	-0.004492	0.000281
