# Supplementary material for: Evaluation of a Cold-Mixed High-Performance Polyurethane Mixture
Source: Hindawi journal article supplement (doi:10.1155/2019/1507971), 2019-11-07
Supplement: f1 [file 1507971.f1.zip › 1507971.f1/dynamic modulus data/PUM/specimen1/temp10/zhs-1-10_Runtime.csv]

Time (sec)	Load (kN)	Confining Pressure (kPa)	Axial LVDT #1 (mm)	Axial LVDT #2 (mm)	Axial LVDT #3 (mm)	Temperature (�C)
0.0008	0.040884	-0.522	0.15795767	0.20716566	0.18959534	9.97
0.0016	0.040712	-0.523	0.15794992	0.20716953	0.18960506	9.97
0.0024	0.040655	-0.517	0.15795380	0.20720041	0.18961579	9.97
0.0032	0.040627	-0.520	0.15793920	0.20717442	0.18957001	9.97
0.0040	0.040483	-0.525	0.15791976	0.20716953	0.18956029	9.97
0.0048	0.040426	-0.524	0.15793043	0.20717049	0.18958569	9.97
0.0056	0.040684	-0.528	0.15794307	0.20713198	0.18958080	9.97
0.0064	0.041113	-0.522	0.15794700	0.20715022	0.18959254	9.97
0.0072	0.041656	-0.520	0.15795189	0.20715606	0.18960321	9.97
0.0080	0.042315	-0.521	0.15794218	0.20714837	0.18957788	9.97
0.0088	0.043201	-0.520	0.15791881	0.20715600	0.18957400	9.97
0.0096	0.044575	-0.521	0.15791780	0.20714062	0.18959349	9.96
0.0104	0.046921	-0.518	0.15791285	0.20714641	0.18959147	9.96
0.0112	0.051270	-0.517	0.15790123	0.20713580	0.18959236	9.96
0.0120	0.058136	-0.513	0.15788376	0.20713681	0.18959624	9.96
0.0128	0.069380	-0.513	0.15784389	0.20712721	0.18958843	9.96
0.0136	0.086660	-0.518	0.15779144	0.20706177	0.18957001	9.95
0.0144	0.110264	-0.522	0.15771544	0.20701844	0.18956715	9.95
0.0152	0.141363	-0.521	0.15761715	0.20691341	0.18954873	9.95
0.0160	0.178614	-0.522	0.15749741	0.20679879	0.18951464	9.96
0.0168	0.219469	-0.517	0.15736508	0.20669371	0.18951166	9.96
0.0176	0.262299	-0.514	0.15722412	0.20653951	0.18949801	9.96
0.0184	0.304613	-0.518	0.15708214	0.20642972	0.18947065	9.96
0.0192	0.345612	-0.520	0.15694016	0.20627946	0.18944728	9.96
0.0200	0.385208	-0.521	0.15680200	0.20614272	0.18942106	9.96
0.0208	0.423403	-0.522	0.15665609	0.20601368	0.18939292	9.97
0.0216	0.459795	-0.524	0.15651214	0.20587015	0.18938321	9.97
0.0224	0.493956	-0.521	0.15638179	0.20576900	0.18935990	9.97
0.0232	0.526342	-0.524	0.15624362	0.20564193	0.18932980	9.97
0.0240	0.556698	-0.526	0.15610743	0.20553309	0.18933076	9.97
0.0248	0.584736	-0.522	0.15597606	0.20541656	0.18931425	9.97
0.0256	0.609684	-0.522	0.15584087	0.20532221	0.18928319	9.97
0.0264	0.630083	-0.520	0.15573877	0.20524603	0.18925595	9.97
0.0272	0.645046	-0.514	0.15567273	0.20518643	0.18924624	9.97
0.0280	0.654716	-0.514	0.15562016	0.20515466	0.18924046	9.97
0.0288	0.659122	-0.516	0.15558904	0.20510936	0.18923843	9.97
0.0296	0.658979	-0.509	0.15555787	0.20510173	0.18924332	9.96
0.0304	0.655375	-0.514	0.15553147	0.20508915	0.18923837	9.96
0.0312	0.649137	-0.516	0.15553540	0.20509684	0.18924415	9.96
0.0320	0.641212	-0.509	0.15555197	0.20510840	0.18925291	9.96
0.0328	0.632515	-0.513	0.15558612	0.20511222	0.18924117	9.96
0.0336	0.622959	-0.513	0.15560758	0.20512283	0.18923837	9.95
0.0344	0.612030	-0.517	0.15561736	0.20512187	0.18925780	9.95
0.0352	0.598669	-0.525	0.15563774	0.20514107	0.18925101	9.96
0.0360	0.580301	-0.525	0.15567571	0.20518142	0.18924516	9.96
0.0368	0.554838	-0.521	0.15576422	0.20524687	0.18928593	9.96
0.0376	0.520620	-0.520	0.15589941	0.20535481	0.18931705	9.96
0.0384	0.477962	-0.516	0.15604633	0.20547241	0.18935889	9.96
0.0392	0.429325	-0.521	0.15622139	0.20562851	0.18941528	9.96
0.0400	0.378227	-0.521	0.15640330	0.20579034	0.18943959	9.97
0.0408	0.328331	-0.520	0.15657359	0.20595884	0.18946779	9.97
0.0416	0.282326	-0.521	0.15675646	0.20612550	0.18948913	9.97
0.0424	0.241785	-0.511	0.15692377	0.20624113	0.18951058	9.97
0.0432	0.207682	-0.510	0.15706384	0.20636833	0.18952912	9.97
0.0440	0.180159	-0.516	0.15716201	0.20644540	0.18955058	9.97
0.0448	0.158987	-0.513	0.15724081	0.20652342	0.18956721	9.97
0.0456	0.143881	-0.517	0.15729719	0.20660621	0.18954384	9.97
0.0464	0.133266	-0.517	0.15733510	0.20664662	0.18956137	9.97
0.0472	0.126200	-0.512	0.15739059	0.20668703	0.18958181	9.97
0.0480	0.121622	-0.510	0.15741491	0.20671874	0.18958366	9.97
0.0488	0.118561	-0.509	0.15742368	0.20672357	0.18956614	9.97
0.0496	0.117016	-0.510	0.15743732	0.20674187	0.18955642	9.96
0.0504	0.116644	-0.512	0.15743339	0.20675731	0.18953788	9.96
0.0512	0.117502	-0.517	0.15744019	0.20674485	0.18953109	9.96
0.0520	0.119619	-0.519	0.15745091	0.20675737	0.18956709	9.96
0.0528	0.122910	-0.512	0.15745091	0.20676124	0.18957776	9.96
0.0536	0.128059	-0.517	0.15743142	0.20673716	0.18956810	9.95
0.0544	0.136757	-0.516	0.15741777	0.20673132	0.18956131	9.95
0.0552	0.151520	-0.516	0.15737301	0.20670336	0.18954384	9.95
0.0560	0.174437	-0.517	0.15731561	0.20663786	0.18953216	9.96
0.0568	0.206051	-0.513	0.15724075	0.20656663	0.18952632	9.96
0.0576	0.245361	-0.507	0.15710849	0.20646364	0.18951660	9.96
0.0584	0.290709	-0.507	0.15695387	0.20631146	0.18950981	9.96
0.0592	0.339918	-0.508	0.15677494	0.20616984	0.18947482	9.96
0.0600	0.391331	-0.503	0.15659207	0.20599931	0.18946117	9.96
0.0608	0.443230	-0.508	0.15641010	0.20582306	0.18942320	9.97
0.0616	0.493298	-0.505	0.15621644	0.20567089	0.18933368	9.97
0.0624	0.539875	-0.506	0.15603930	0.20551968	0.18930256	9.97
0.0632	0.582161	-0.511	0.15584856	0.20538968	0.18927145	9.97
0.0640	0.620356	-0.516	0.15566480	0.20524609	0.18922281	9.97
0.0648	0.653944	-0.519	0.15551984	0.20513147	0.18920136	9.97
0.0656	0.682011	-0.520	0.15538561	0.20501590	0.18915558	9.97
0.0664	0.703268	-0.519	0.15528065	0.20492917	0.18912536	9.97
0.0672	0.716457	-0.514	0.15521157	0.20488292	0.18911761	9.97
0.0680	0.722036	-0.516	0.15515816	0.20482802	0.18912643	9.97
0.0688	0.721722	-0.516	0.15512806	0.20482510	0.18913126	9.97
0.0696	0.717402	-0.515	0.15512514	0.20480675	0.18913031	9.96
0.0704	0.710449	-0.515	0.15513974	0.20481926	0.18914688	9.96
0.0712	0.701609	-0.514	0.15515620	0.20483458	0.18915266	9.96
0.0720	0.690908	-0.510	0.15517855	0.20484328	0.18917799	9.96
0.0728	0.678034	-0.512	0.15519696	0.20487416	0.18919748	9.96
0.0736	0.662327	-0.514	0.15522611	0.20487034	0.18919349	9.95
0.0744	0.642614	-0.512	0.15528250	0.20491666	0.18919933	9.95
0.0752	0.617552	-0.513	0.15536809	0.20495808	0.18921000	9.95
0.0760	0.585709	-0.506	0.15549165	0.20505345	0.18923140	9.96
0.0768	0.546684	-0.500	0.15564054	0.20517093	0.18928301	9.96
0.0776	0.501823	-0.502	0.15580297	0.20531052	0.18933851	9.96
0.0784	0.453501	-0.499	0.15598780	0.20545697	0.18938231	9.96
0.0792	0.404634	-0.504	0.15618038	0.20560336	0.18942988	9.96
0.0800	0.357370	-0.505	0.15637201	0.20577192	0.18945909	9.96
0.0808	0.313139	-0.504	0.15655887	0.20590782	0.18946004	9.97
0.0816	0.272741	-0.505	0.15671355	0.20607156	0.18948627	9.97
0.0824	0.236607	-0.499	0.15684789	0.20619291	0.18951553	9.97
0.0832	0.205679	-0.494	0.15696651	0.20630276	0.18952525	9.97
0.0840	0.179844	-0.497	0.15707839	0.20639235	0.18953115	9.97
0.0848	0.159016	-0.496	0.15717179	0.20645976	0.18953115	9.97
0.0856	0.142937	-0.500	0.15724266	0.20653397	0.18951750	9.97
0.0864	0.130463	-0.507	0.15730393	0.20659173	0.18952239	9.97
0.0872	0.121078	-0.501	0.15735155	0.20665717	0.18952918	9.97
0.0880	0.114326	-0.504	0.15739048	0.20667833	0.18949032	9.97
0.0888	0.109835	-0.500	0.15743428	0.20669568	0.18950981	9.97
0.0896	0.107374	-0.497	0.15744990	0.20670819	0.18954772	9.96
0.0904	0.106659	-0.498	0.15744799	0.20670718	0.18953693	9.96
0.0912	0.107174	-0.499	0.15744990	0.20672929	0.18955249	9.96
0.0920	0.109034	-0.501	0.15744698	0.20673597	0.18956220	9.96
0.0928	0.112324	-0.505	0.15744597	0.20674950	0.18955535	9.96
0.0936	0.117989	-0.513	0.15744889	0.20671880	0.18954271	9.95
0.0944	0.127859	-0.518	0.15742844	0.20670730	0.18954754	9.95
0.0952	0.143766	-0.521	0.15737784	0.20666301	0.18953395	9.95
0.0960	0.167999	-0.517	0.15730101	0.20658886	0.18951744	9.96
0.0968	0.200844	-0.511	0.15720075	0.20652622	0.18953300	9.96
0.0976	0.241642	-0.508	0.15706068	0.20638275	0.18952912	9.96
0.0984	0.288591	-0.511	0.15690613	0.20626038	0.18949407	9.96
0.0992	0.339375	-0.514	0.15672523	0.20609570	0.18945616	9.96
0.1000	0.392332	-0.515	0.15650833	0.20591843	0.18942410	9.97
0.1008	0.445375	-0.515	0.15630597	0.20577484	0.18937165	9.97
0.1016	0.496988	-0.512	0.15609682	0.20558321	0.18935120	9.97
0.1024	0.544968	-0.506	0.15589833	0.20545501	0.18933076	9.97
0.1032	0.588055	-0.506	0.15572226	0.20531058	0.18927628	9.97
0.1040	0.625963	-0.511	0.15554631	0.20516801	0.18924117	9.97
0.1048	0.657978	-0.508	0.15539646	0.20506305	0.18919545	9.97
0.1056	0.683784	-0.510	0.15525925	0.20494360	0.18915939	9.97
0.1064	0.703039	-0.505	0.15515721	0.20489353	0.18914193	9.97
0.1072	0.715170	-0.498	0.15508509	0.20483673	0.18912345	9.97
0.1080	0.720520	-0.497	0.15503943	0.20482033	0.18911767	9.97
0.1088	0.720778	-0.498	0.15503567	0.20480686	0.18910998	9.97
0.1096	0.717258	-0.504	0.15503943	0.20479530	0.18911576	9.96
0.1104	0.711365	-0.505	0.15503758	0.20479250	0.18911290	9.96
0.1112	0.703783	-0.512	0.15504724	0.20480210	0.18912846	9.96
0.1120	0.694084	-0.508	0.15505588	0.20480698	0.18915856	9.96
0.1128	0.681868	-0.505	0.15507537	0.20482916	0.18917418	9.96
0.1136	0.665703	-0.511	0.15512204	0.20484829	0.18920523	9.95
0.1144	0.644245	-0.512	0.15518332	0.20487630	0.18921983	9.95
0.1152	0.616407	-0.518	0.15527773	0.20494467	0.18925786	9.95
0.1160	0.580902	-0.515	0.15540326	0.20502359	0.18928403	9.96
0.1168	0.538044	-0.509	0.15558130	0.20517099	0.18928015	9.96
0.1176	0.489378	-0.506	0.15578467	0.20531547	0.18932968	9.96
0.1184	0.437794	-0.508	0.15600842	0.20548886	0.18937439	9.96
0.1192	0.386353	-0.510	0.15621752	0.20564008	0.18941432	9.96
0.1200	0.337801	-0.511	0.15640718	0.20579422	0.18941921	9.96
0.1208	0.293713	-0.509	0.15658122	0.20594245	0.18945330	9.97
0.1216	0.254488	-0.506	0.15673095	0.20607060	0.18949807	9.97
0.1224	0.220184	-0.503	0.15688175	0.20621222	0.18953019	9.97
0.1232	0.191259	-0.503	0.15700036	0.20632106	0.18955451	9.97
0.1240	0.167856	-0.510	0.15709960	0.20640492	0.18954378	9.97
0.1248	0.149660	-0.506	0.15718323	0.20646167	0.18954867	9.97
0.1256	0.136557	-0.506	0.15724450	0.20651948	0.18954968	9.97
0.1264	0.126657	-0.504	0.15730679	0.20655417	0.18954092	9.97
0.1272	0.118618	-0.498	0.15735644	0.20660996	0.18954289	9.97
0.1280	0.112438	-0.501	0.15738863	0.20665330	0.18954772	9.97
0.1288	0.107574	-0.506	0.15740997	0.20666862	0.18956125	9.97
0.1296	0.104342	-0.508	0.15742362	0.20669079	0.18955934	9.96
0.1304	0.103083	-0.512	0.15744019	0.20667732	0.18955547	9.96
0.1312	0.103168	-0.508	0.15744990	0.20669466	0.18955445	9.96
0.1320	0.104542	-0.505	0.15746456	0.20669663	0.18954480	9.96
0.1328	0.107718	-0.500	0.15746748	0.20669943	0.18955350	9.96
0.1336	0.113411	-0.504	0.15744215	0.20669371	0.18954575	9.95
0.1344	0.123253	-0.512	0.15741986	0.20665997	0.18954283	9.95
0.1352	0.139532	-0.512	0.15736836	0.20662624	0.18955255	9.95
0.1360	0.163679	-0.515	0.15729159	0.20656264	0.18955356	9.96
0.1368	0.196209	-0.508	0.15719527	0.20648551	0.18955648	9.96
0.1376	0.236578	-0.506	0.15704930	0.20637965	0.18953902	9.96
0.1384	0.283470	-0.507	0.15686733	0.20622945	0.18951952	9.96
0.1392	0.334682	-0.512	0.15666097	0.20607352	0.18948054	9.96
0.1400	0.388269	-0.506	0.15645278	0.20589441	0.18943578	9.96
0.1408	0.441999	-0.506	0.15624166	0.20572001	0.18940759	9.97
0.1416	0.493441	-0.505	0.15604615	0.20556593	0.18939012	9.97
0.1424	0.540848	-0.500	0.15586430	0.20539635	0.18935323	9.97
0.1432	0.583076	-0.505	0.15566689	0.20527405	0.18925786	9.97
0.1440	0.619526	-0.509	0.15548694	0.20513242	0.18921310	9.97
0.1448	0.649624	-0.514	0.15534008	0.20503902	0.18919551	9.97
0.1456	0.673227	-0.518	0.15522236	0.20496100	0.18916631	9.97
0.1464	0.690079	-0.519	0.15514934	0.20489162	0.18915272	9.97
0.1472	0.700350	-0.514	0.15509391	0.20486856	0.18914980	9.97
0.1480	0.704842	-0.510	0.15504819	0.20481545	0.18915176	9.97
0.1488	0.704784	-0.509	0.15503746	0.20481259	0.18915367	9.97
0.1496	0.701580	-0.505	0.15502679	0.20479339	0.18915278	9.96
0.1504	0.695801	-0.501	0.15504330	0.20480883	0.18915182	9.96
0.1512	0.688162	-0.503	0.15506476	0.20482141	0.18916154	9.96
0.1520	0.678749	-0.500	0.15508425	0.20484829	0.18919367	9.96
0.1528	0.666676	-0.502	0.15510565	0.20486939	0.18920332	9.96
0.1536	0.650711	-0.510	0.15512800	0.20487702	0.18917894	9.95
0.1544	0.629454	-0.507	0.15519989	0.20493960	0.18920332	9.95
0.1552	0.601645	-0.508	0.15529424	0.20497912	0.18925101	9.95
0.1560	0.566883	-0.506	0.15542752	0.20507449	0.18927825	9.96
0.1568	0.526314	-0.499	0.15561336	0.20520550	0.18930942	9.96
0.1576	0.481367	-0.504	0.15579045	0.20531821	0.18935603	9.96
0.1584	0.434532	-0.503	0.15596652	0.20547330	0.18938911	9.96
0.1592	0.387955	-0.504	0.15615720	0.20562744	0.18942320	9.96
0.1600	0.343494	-0.501	0.15633523	0.20576614	0.18945038	9.97
0.1608	0.302582	-0.494	0.15650064	0.20589519	0.18946886	9.97
0.1616	0.265646	-0.493	0.15666115	0.20602137	0.18949807	9.97
0.1624	0.233173	-0.488	0.15680802	0.20613986	0.18952620	9.97
0.1632	0.205450	-0.491	0.15691692	0.20622462	0.18953115	9.97
0.1640	0.182333	-0.503	0.15701318	0.20632380	0.18953604	9.97
0.1648	0.163622	-0.508	0.15710652	0.20639896	0.18956614	9.97
0.1656	0.149202	-0.513	0.15717560	0.20644319	0.18956029	9.97
0.1664	0.138016	-0.514	0.15723592	0.20649809	0.18955833	9.97
0.1672	0.129261	-0.508	0.15729326	0.20653856	0.18957883	9.97
0.1680	0.122480	-0.504	0.15732342	0.20654911	0.18955648	9.97
0.1688	0.117245	-0.506	0.15735066	0.20658100	0.18955946	9.97
0.1696	0.113811	-0.506	0.15738374	0.20660132	0.18958277	9.96
0.1704	0.112267	-0.502	0.15739930	0.20660234	0.18957788	9.96
0.1712	0.112553	-0.509	0.15740222	0.20662552	0.18957978	9.96
0.1720	0.114412	-0.509	0.15740317	0.20663989	0.18958944	9.96
0.1728	0.117674	-0.514	0.15739048	0.20663887	0.18955445	9.96
0.1736	0.122681	-0.523	0.15736622	0.20662439	0.18952233	9.95
0.1744	0.131407	-0.522	0.15735167	0.20661473	0.18954664	9.95
0.1752	0.146255	-0.521	0.15730888	0.20655984	0.18954659	9.96
0.1760	0.169287	-0.517	0.15723205	0.20650971	0.18953979	9.96
0.1768	0.201244	-0.510	0.15712404	0.20643270	0.18951154	9.96
0.1776	0.241013	-0.509	0.15697813	0.20631522	0.18949789	9.96
0.1784	0.286989	-0.510	0.15680987	0.20617849	0.18950862	9.96
0.1792	0.337744	-0.512	0.15662205	0.20600808	0.18948621	9.96
0.1800	0.391731	-0.512	0.15641493	0.20584238	0.18949300	9.96
0.1808	0.447063	-0.514	0.15617949	0.20565069	0.18945414	9.97
0.1816	0.501680	-0.517	0.15594894	0.20550525	0.18937922	9.97
0.1824	0.552835	-0.516	0.15573502	0.20535302	0.18933541	9.97
0.1832	0.599642	-0.518	0.15554529	0.20519501	0.18927896	9.97
0.1840	0.641413	-0.519	0.15537018	0.20506495	0.18922937	9.97
0.1848	0.676689	-0.517	0.15520281	0.20492530	0.18920410	9.97
0.1856	0.704727	-0.513	0.15505683	0.20482320	0.18916619	9.97
0.1864	0.723925	-0.512	0.15493715	0.20478082	0.18911469	9.97
0.1872	0.734224	-0.508	0.15487486	0.20472497	0.18911266	9.97
0.1880	0.736971	-0.504	0.15485740	0.20472306	0.18913019	9.97
0.1888	0.734053	-0.507	0.15486133	0.20470768	0.18913794	9.97
0.1896	0.727673	-0.506	0.15487111	0.20471251	0.18911660	9.96
0.1904	0.718746	-0.504	0.15488672	0.20473272	0.18913513	9.96
0.1912	0.707560	-0.506	0.15490425	0.20473945	0.18917310	9.96
0.1920	0.693426	-0.501	0.15494514	0.20477510	0.18920434	9.96
0.1928	0.674744	-0.500	0.15501124	0.20478565	0.18922281	9.96
0.1936	0.651283	-0.509	0.15508223	0.20484060	0.18922287	9.95
0.1944	0.622902	-0.512	0.15518332	0.20487434	0.18925989	9.95
0.1952	0.590343	-0.516	0.15529126	0.20495993	0.18931532	9.95
0.1960	0.554409	-0.518	0.15542847	0.20505726	0.18934935	9.96
0.1968	0.514727	-0.514	0.15559185	0.20517474	0.18939793	9.96
0.1976	0.471840	-0.514	0.15577191	0.20532978	0.18942314	9.96
0.1984	0.426378	-0.516	0.15597522	0.20544833	0.18942702	9.96
0.1992	0.379772	-0.514	0.15617841	0.20561790	0.18944842	9.96
0.2000	0.333767	-0.512	0.15637207	0.20575374	0.18946499	9.96
0.2008	0.046692	-0.505	0.15781850	0.20705968	0.18959439	9.96
0.2016	0.046577	-0.506	0.15782046	0.20706165	0.18960899	9.96
0.2024	0.046463	-0.510	0.15782630	0.20704925	0.18964207	9.96
0.2032	0.046291	-0.513	0.15783024	0.20705879	0.18964595	9.97
0.2040	0.046120	-0.509	0.15784484	0.20705396	0.18963915	9.97
0.2048	0.046549	-0.504	0.15785652	0.20706362	0.18964690	9.97
0.2056	0.047665	-0.509	0.15783417	0.20706743	0.18962353	9.97
0.2064	0.049639	-0.514	0.15782535	0.20704627	0.18960994	9.97
0.2072	0.053730	-0.517	0.15781367	0.20703477	0.18961966	9.97
0.2080	0.061769	-0.522	0.15779036	0.20701069	0.18960607	9.97
0.2088	0.076618	-0.513	0.15776503	0.20697594	0.18962842	9.97
0.2096	0.101681	-0.506	0.15767848	0.20690274	0.18964392	9.97
0.2104	0.139332	-0.510	0.15752482	0.20678914	0.18965757	9.97
0.2112	0.192175	-0.509	0.15731567	0.20661390	0.18965077	9.96
0.2120	0.262327	-0.509	0.15703553	0.20638669	0.18963420	9.96
0.2128	0.352650	-0.512	0.15668917	0.20612371	0.18958753	9.96
0.2136	0.465631	-0.513	0.15625244	0.20576441	0.18948150	9.96
0.2144	0.601130	-0.508	0.15570664	0.20534921	0.18937641	9.96
0.2152	0.755424	-0.514	0.15503931	0.20487618	0.18923342	9.96
0.2160	0.923567	-0.517	0.15427470	0.20432037	0.18906999	9.95
0.2168	1.099892	-0.512	0.15343225	0.20377326	0.18894744	9.95
0.2176	1.280680	-0.516	0.15251309	0.20317703	0.18879086	9.95
0.2184	1.464443	-0.512	0.15156859	0.20258665	0.18863422	9.96
0.2192	1.648493	-0.509	0.15059108	0.20199245	0.18851548	9.96
0.2200	1.830139	-0.510	0.14961058	0.20141256	0.18841529	9.96
0.2208	2.005377	-0.513	0.14866304	0.20084912	0.18830341	9.96
0.2216	2.170057	-0.514	0.14774191	0.20032024	0.18820620	9.96
0.2224	2.320147	-0.513	0.14689559	0.19983763	0.18808752	9.97
0.2232	2.451210	-0.516	0.14615631	0.19939423	0.18792409	9.97
0.2240	2.558756	-0.514	0.14551246	0.19904852	0.18783069	9.97
0.2248	2.639494	-0.512	0.14502895	0.19873792	0.18776166	9.97
0.2256	2.692680	-0.517	0.14466518	0.19854474	0.18769848	9.97
0.2264	2.720633	-0.516	0.14439470	0.19837838	0.18768001	9.97
0.2272	2.728786	-0.516	0.14424193	0.19830251	0.18766254	9.97
0.2280	2.722521	-0.515	0.14416224	0.19824994	0.18764883	9.97
0.2288	2.705183	-0.516	0.14413303	0.19824213	0.18769062	9.97
0.2296	2.676716	-0.515	0.14416814	0.19826555	0.18774509	9.97
0.2304	2.631083	-0.509	0.14427710	0.19830441	0.18781215	9.97
0.2312	2.559500	-0.514	0.14446670	0.19843966	0.18791533	9.96
0.2320	2.453241	-0.510	0.14480519	0.19866663	0.18806124	9.96
0.2328	2.309732	-0.508	0.14530605	0.19901222	0.18822658	9.96
0.2336	2.133665	-0.517	0.14596069	0.19947779	0.18845713	9.96
0.2344	1.935854	-0.507	0.14676225	0.20002556	0.18870807	9.96
0.2352	1.731520	-0.508	0.14763474	0.20056307	0.18892986	9.96
0.2360	1.534653	-0.517	0.14851320	0.20111209	0.18914288	9.95
0.2368	1.355152	-0.513	0.14936626	0.20160812	0.18930334	9.95
0.2376	1.197567	-0.514	0.15013665	0.20206565	0.18943083	9.95
0.2384	1.061010	-0.515	0.15083909	0.20248365	0.18952328	9.96
0.2392	0.940847	-0.505	0.15149468	0.20288628	0.18957096	9.96
0.2400	0.832758	-0.510	0.15209687	0.20323497	0.18962252	9.96
0.2408	0.734367	-0.512	0.15265036	0.20356625	0.18966043	9.96
0.2416	0.644932	-0.510	0.15316588	0.20388031	0.18970519	9.96
0.2424	0.564165	-0.510	0.15365517	0.20414317	0.18974996	9.97
0.2432	0.492411	-0.504	0.15408999	0.20441574	0.18978304	9.97
0.2440	0.430384	-0.501	0.15451127	0.20465082	0.18982774	9.97
0.2448	0.378571	-0.497	0.15486342	0.20484728	0.18984324	9.97
0.2456	0.338573	-0.497	0.15513098	0.20501876	0.18986171	9.97
0.2464	0.310564	-0.506	0.15533817	0.20511985	0.18986654	9.97
0.2472	0.293741	-0.507	0.15546459	0.20518631	0.18982279	9.97
0.2480	0.286217	-0.514	0.15555793	0.20523924	0.18982184	9.97
0.2488	0.285416	-0.516	0.15562105	0.20525759	0.18986559	9.97
0.2496	0.290022	-0.514	0.15565121	0.20527977	0.18985981	9.97
0.2504	0.300894	-0.521	0.15565026	0.20528078	0.18987155	9.97
0.2512	0.325527	-0.518	0.15557927	0.20523262	0.18987936	9.96
0.2520	0.372162	-0.518	0.15536916	0.20514017	0.18987066	9.96
0.2528	0.447922	-0.517	0.15502292	0.20494169	0.18987256	9.96
0.2536	0.555925	-0.520	0.15452099	0.20463049	0.18983746	9.96
0.2544	0.695257	-0.520	0.15387410	0.20423847	0.18978399	9.96
0.2552	0.862856	-0.523	0.15309405	0.20373076	0.18971390	9.96
0.2560	1.054859	-0.528	0.15217763	0.20315194	0.18956321	9.95
0.2568	1.267748	-0.521	0.15117085	0.20253271	0.18937647	9.95
0.2576	1.494198	-0.518	0.15007943	0.20188737	0.18917513	9.95
0.2584	1.724882	-0.512	0.14896947	0.20122182	0.18895334	9.96
0.2592	1.949873	-0.507	0.14791888	0.20059192	0.18872374	9.96
0.2600	2.160101	-0.508	0.14691591	0.19999176	0.18848544	9.96
0.2608	2.347612	-0.509	0.14600933	0.19943535	0.18825674	9.96
0.2616	2.505770	-0.514	0.14526135	0.19896275	0.18805051	9.96
0.2624	2.630367	-0.510	0.14463198	0.19859964	0.18786466	9.96
0.2632	2.719917	-0.513	0.14414465	0.19830823	0.18773431	9.97
0.2640	2.776136	-0.512	0.14380908	0.19811755	0.18766731	9.97
0.2648	2.804918	-0.505	0.14359212	0.19800472	0.18762648	9.97
0.2656	2.814159	-0.511	0.14345598	0.19791424	0.18758184	9.97
0.2664	2.811270	-0.512	0.14339370	0.19787043	0.18757111	9.97
0.2672	2.801600	-0.517	0.14337713	0.19784528	0.18759149	9.97
0.2680	2.787609	-0.524	0.14336741	0.19783944	0.18758470	9.97
0.2688	2.768726	-0.525	0.14338011	0.19785601	0.18761384	9.97
0.2696	2.739401	-0.521	0.14343846	0.19788229	0.18765372	9.97
0.2704	2.687473	-0.519	0.14357167	0.19796002	0.18774128	9.97
0.2712	2.600384	-0.516	0.14383918	0.19813800	0.18786776	9.96
0.2720	2.471037	-0.516	0.14428371	0.19842845	0.18801266	9.96
0.2728	2.299519	-0.517	0.14490241	0.19888866	0.18825489	9.96
0.2736	2.097445	-0.521	0.14568263	0.19939625	0.18853110	9.96
0.2744	1.880178	-0.518	0.14657843	0.19997913	0.18878883	9.96
0.2752	1.663027	-0.512	0.14753848	0.20055622	0.18903393	9.96
0.2760	1.460152	-0.516	0.14846647	0.20107341	0.18921977	9.95
0.2768	1.280594	-0.512	0.14933413	0.20160329	0.18939102	9.95
0.2776	1.127701	-0.516	0.15010267	0.20204633	0.18951362	9.95
0.2784	0.998468	-0.518	0.15077287	0.20245856	0.18959731	9.96
0.2792	0.886774	-0.511	0.15137792	0.20282364	0.18968481	9.96
0.2800	0.786524	-0.508	0.15194499	0.20314336	0.18974406	9.96
0.2808	0.694084	-0.505	0.15248001	0.20344585	0.18979657	9.96
0.2816	0.608082	-0.508	0.15300047	0.20372331	0.18985111	9.96
0.2824	0.528517	-0.508	0.15350151	0.20401901	0.18987632	9.96
0.2832	0.456619	-0.516	0.15395290	0.20426661	0.18988317	9.97
0.2840	0.394020	-0.511	0.15436536	0.20451510	0.18990260	9.97
0.2848	0.341921	-0.505	0.15470678	0.20473665	0.18991619	9.97
0.2856	0.301609	-0.511	0.15498203	0.20488393	0.18991143	9.97
0.2864	0.273199	-0.514	0.15520579	0.20502257	0.18989003	9.97
0.2872	0.255718	-0.521	0.15537792	0.20509672	0.18988615	9.97
0.2880	0.247564	-0.527	0.15549767	0.20514482	0.18989974	9.97
0.2888	0.246477	-0.524	0.15556479	0.20518631	0.18990165	9.97
0.2896	0.250826	-0.516	0.15558422	0.20519787	0.18987632	9.97
0.2904	0.261011	-0.517	0.15556282	0.20520562	0.18988216	9.97
0.2912	0.284472	-0.516	0.15548491	0.20516807	0.18990552	9.96
0.2920	0.329332	-0.513	0.15530884	0.20507270	0.18992990	9.96
0.2928	0.402546	-0.514	0.15499467	0.20489740	0.18991536	9.96
0.2936	0.507574	-0.515	0.15450346	0.20458817	0.18987834	9.96
0.2944	0.643415	-0.510	0.15384883	0.20421636	0.18985009	9.96
0.2952	0.807695	-0.513	0.15303850	0.20374346	0.18976933	9.96
0.2960	0.997324	-0.518	0.15211046	0.20315981	0.18965167	9.95
0.2968	1.209784	-0.514	0.15109974	0.20258284	0.18951559	9.95
0.2976	1.437979	-0.518	0.15000439	0.20191348	0.18932879	9.95
0.2984	1.672611	-0.512	0.14890236	0.20125467	0.18912452	9.96
0.2992	1.903324	-0.508	0.14781684	0.20062947	0.18888134	9.96
0.3000	2.120161	-0.508	0.14677697	0.20000046	0.18860209	9.96
0.3008	2.313881	-0.509	0.14586163	0.19943422	0.18835706	9.96
0.3016	2.476959	-0.516	0.14509892	0.19895309	0.18813914	9.96
0.3024	2.604761	-0.515	0.14447242	0.19856280	0.18794942	9.96
0.3032	2.695456	-0.517	0.14400560	0.19828111	0.18780452	9.97
0.3040	2.751503	-0.510	0.14369142	0.19810110	0.18772280	9.97
0.3048	2.779112	-0.504	0.14347833	0.19798338	0.18768191	9.97
0.3056	2.786808	-0.507	0.14335966	0.19791913	0.18764693	9.97
0.3064	2.782688	-0.510	0.14330602	0.19788998	0.18764395	9.97
0.3072	2.771931	-0.513	0.14327490	0.19786668	0.18764102	9.97
0.3080	2.757025	-0.517	0.14327598	0.19786859	0.18762159	9.97
0.3088	2.736254	-0.514	0.14331007	0.19788712	0.18765271	9.97
0.3096	2.702122	-0.514	0.14338607	0.19794148	0.18767905	9.97
0.3104	2.642612	-0.514	0.14355046	0.19804066	0.18774813	9.97
0.3112	2.548141	-0.517	0.14385390	0.19824392	0.18792617	9.96
0.3120	2.413845	-0.515	0.14431494	0.19854504	0.18812364	9.96
0.3128	2.243013	-0.512	0.14494908	0.19895470	0.18835706	9.96
0.3136	2.048578	-0.513	0.14572823	0.19945455	0.18860412	9.96
0.3144	1.844330	-0.507	0.14658719	0.19997633	0.18884337	9.96
0.3152	1.643229	-0.511	0.14746755	0.20052642	0.18905735	9.95
0.3160	1.456633	-0.514	0.14832157	0.20100993	0.18922371	9.95
0.3168	1.291122	-0.512	0.14911044	0.20149052	0.18939883	9.95
0.3176	1.148214	-0.512	0.14982146	0.20189697	0.18952626	9.95
0.3184	1.025820	-0.510	0.15046346	0.20226878	0.18961471	9.96
0.3192	0.918932	-0.509	0.15104717	0.20261651	0.18968374	9.96
0.3200	0.822001	-0.507	0.15158129	0.20291322	0.18973815	9.96
0.3208	0.731621	-0.511	0.15208417	0.20321846	0.18978190	9.96
0.3216	0.646248	-0.507	0.15257442	0.20347458	0.18983257	9.96
0.3224	0.566139	-0.501	0.15304726	0.20375782	0.18986082	9.96
0.3232	0.493298	-0.507	0.15350348	0.20403135	0.18988031	9.97
0.3240	0.429583	-0.500	0.15392470	0.20425785	0.18992126	9.97
0.3248	0.376425	-0.500	0.15430510	0.20450068	0.18994069	9.97
0.3256	0.335312	-0.508	0.15460175	0.20463645	0.18995237	9.97
0.3264	0.305843	-0.507	0.15481478	0.20475787	0.18995917	9.97
0.3272	0.287418	-0.517	0.15497339	0.20485133	0.18994451	9.97
0.3280	0.278378	-0.522	0.15507841	0.20491099	0.18992609	9.97
0.3288	0.276489	-0.519	0.15515035	0.20496881	0.18991637	9.97
0.3296	0.280523	-0.520	0.15520090	0.20497942	0.18991148	9.97
0.3304	0.290451	-0.518	0.15519315	0.20497930	0.18992507	9.97
0.3312	0.313139	-0.518	0.15511340	0.20492631	0.18994838	9.96
0.3320	0.357227	-0.518	0.15492177	0.20484632	0.18995225	9.96
0.3328	0.430183	-0.516	0.15459591	0.20465177	0.18995422	9.96
0.3336	0.535955	-0.515	0.15412503	0.20436573	0.18993670	9.96
0.3344	0.674028	-0.512	0.15348494	0.20398241	0.18990749	9.96
0.3352	0.840912	-0.513	0.15268540	0.20350748	0.18982577	9.96
0.3360	1.033173	-0.521	0.15173602	0.20295453	0.18966138	9.95
0.3368	1.247206	-0.516	0.15069032	0.20236510	0.18951166	9.95
0.3376	1.475401	-0.520	0.14958042	0.20172650	0.18933362	9.95
0.3384	1.708317	-0.513	0.14847827	0.20107740	0.18912065	9.96
0.3392	1.934767	-0.510	0.14742178	0.20046866	0.18887258	9.96
0.3400	2.145824	-0.509	0.14643055	0.19986075	0.18862158	9.96
0.3408	2.333622	-0.506	0.14555895	0.19934660	0.18836772	9.96
0.3416	2.492151	-0.513	0.14481384	0.19887090	0.18812054	9.96
0.3424	2.619009	-0.507	0.14421570	0.19850844	0.18793571	9.96
0.3432	2.712536	-0.510	0.14374691	0.19821876	0.18778789	9.97
0.3440	2.774534	-0.509	0.14339674	0.19798630	0.18767017	9.97
0.3448	2.809381	-0.500	0.14317590	0.19788128	0.18762457	9.97
0.3456	2.823515	-0.502	0.14302605	0.19778109	0.18762755	9.97
0.3464	2.824144	-0.510	0.14295596	0.19775379	0.18759638	9.97
0.3472	2.816563	-0.512	0.14293456	0.19773138	0.18757892	9.97
0.3480	2.803946	-0.521	0.14292479	0.19771963	0.18759441	9.97
0.3488	2.785721	-0.521	0.14296180	0.19772649	0.18761963	9.97
0.3496	2.754850	-0.512	0.14302701	0.19775963	0.18764877	9.97
0.3504	2.697945	-0.512	0.14318454	0.19785786	0.18771589	9.97
0.3512	2.604103	-0.508	0.14348811	0.19804269	0.18784136	9.96
0.3520	2.468376	-0.505	0.14393157	0.19835871	0.18802822	9.96
0.3528	2.294455	-0.510	0.14456582	0.19877464	0.18827629	9.96
0.3536	2.095785	-0.510	0.14534020	0.19929320	0.18854082	9.96
0.3544	1.887102	-0.510	0.14618939	0.19980872	0.18878686	9.96
0.3552	1.681051	-0.513	0.14710480	0.20036268	0.18902421	9.96
0.3560	1.489048	-0.516	0.14797336	0.20087028	0.18921292	9.95
0.3568	1.318760	-0.516	0.14878464	0.20132208	0.18937832	9.95
0.3576	1.171961	-0.520	0.14952201	0.20176703	0.18952620	9.95
0.3584	1.045761	-0.519	0.15016693	0.20213205	0.18963116	9.96
0.3592	0.934811	-0.521	0.15076232	0.20247877	0.18972069	9.96
0.3600	0.833702	-0.521	0.15131378	0.20281005	0.18979555	9.96
0.3608	0.739946	-0.523	0.15184879	0.20309424	0.18984127	9.96
0.3616	0.652885	-0.528	0.15236729	0.20339286	0.18987924	9.96
0.3624	0.572748	-0.526	0.15286529	0.20366257	0.18990159	9.96
0.3632	0.500479	-0.529	0.15332735	0.20392078	0.18991429	9.97
0.3640	0.437136	-0.523	0.15374464	0.20417404	0.18995035	9.97
0.3648	0.384035	-0.513	0.15410358	0.20437443	0.18996495	9.97
0.3656	0.342493	-0.513	0.15439445	0.20455164	0.18995911	9.97
0.3664	0.312996	-0.514	0.15462309	0.20466238	0.18995231	9.97
0.3672	0.295029	-0.514	0.15478069	0.20474434	0.18996590	9.97
0.3680	0.286589	-0.524	0.15488374	0.20480883	0.18996203	9.97
0.3688	0.285273	-0.516	0.15494508	0.20484549	0.18996102	9.97
0.3696	0.289392	-0.516	0.15498012	0.20488787	0.18996006	9.97
0.3704	0.299149	-0.516	0.15497816	0.20488691	0.18992311	9.97
0.3712	0.321178	-0.514	0.15492469	0.20484841	0.18992794	9.96
0.3720	0.364180	-0.517	0.15475643	0.20475107	0.18995428	9.96
0.3728	0.435505	-0.515	0.15443254	0.20457381	0.18996882	9.96
0.3736	0.538988	-0.519	0.15395588	0.20428568	0.18995911	9.96
0.3744	0.674887	-0.520	0.15330803	0.20391381	0.18991733	9.96
0.3752	0.840597	-0.521	0.15250158	0.20346117	0.18984824	9.96
0.3760	1.033173	-0.530	0.15156573	0.20288229	0.18971890	9.95
0.3768	1.249065	-0.528	0.15052778	0.20230734	0.18955153	9.95
0.3776	1.480122	-0.530	0.14940524	0.20166683	0.18935889	9.95
0.3784	1.716127	-0.531	0.14830506	0.20102048	0.18911767	9.96
0.3792	1.945467	-0.517	0.14724869	0.20041078	0.18887538	9.96
0.3800	2.158785	-0.519	0.14624482	0.19980466	0.18862343	9.96
0.3808	2.346983	-0.512	0.14537519	0.19925737	0.18836182	9.96
0.3816	2.502508	-0.510	0.14463103	0.19880486	0.18813813	9.96
0.3824	2.621469	-0.514	0.14403856	0.19844604	0.18795043	9.96
0.3832	2.702322	-0.514	0.14362323	0.19820297	0.18782699	9.97
0.3840	2.748957	-0.514	0.14335185	0.19803572	0.18775791	9.97
0.3848	2.769413	-0.512	0.14320499	0.19794434	0.18771118	9.97
0.3856	2.772646	-0.516	0.14311552	0.19788116	0.18769079	9.97
0.3864	2.766581	-0.516	0.14308143	0.19785017	0.18768591	9.97
0.3872	2.756052	-0.523	0.14306974	0.19784528	0.18768495	9.97
0.3880	2.742805	-0.520	0.14305902	0.19782972	0.18768692	9.97
0.3888	2.725668	-0.516	0.14308429	0.19784522	0.18769568	9.97
0.3896	2.697802	-0.513	0.14314365	0.19786274	0.18773454	9.97
0.3904	2.646303	-0.507	0.14328182	0.19795221	0.18780458	9.97
0.3912	2.559128	-0.512	0.14356387	0.19811755	0.18794072	9.96
0.3920	2.429495	-0.508	0.14400947	0.19842184	0.18813521	9.96
0.3928	2.259436	-0.505	0.14462036	0.19882596	0.18837547	9.96
0.3936	2.061253	-0.508	0.14540142	0.19932020	0.18862444	9.96
0.3944	1.850080	-0.501	0.14627308	0.19988197	0.18886369	9.96
0.3952	1.640167	-0.506	0.14718157	0.20044369	0.18909329	9.96
0.3960	1.444502	-0.515	0.14808232	0.20095611	0.18930441	9.95
0.3968	1.270895	-0.517	0.14890426	0.20142704	0.18947268	9.95
0.3976	1.121092	-0.525	0.14966398	0.20185751	0.18960017	9.95
0.3984	0.992432	-0.526	0.15035361	0.20221001	0.18969935	9.96
0.3992	0.879278	-0.521	0.15097719	0.20258856	0.18978590	9.96
0.4000	0.776997	-0.514	0.15155023	0.20291901	0.18985301	9.96
0.4008	0.683527	-0.509	0.15208131	0.20321095	0.18990844	9.96
0.4016	0.598269	-0.507	0.15258819	0.20351434	0.18994355	9.96
0.4024	0.520821	-0.505	0.15305316	0.20378506	0.18993771	9.96
0.4032	0.452299	-0.510	0.15349960	0.20403737	0.18995231	9.97
0.4040	0.393362	-0.512	0.15390521	0.20426655	0.18996203	9.97
0.4048	0.344353	-0.513	0.15426129	0.20446879	0.18998241	9.97
0.4056	0.306673	-0.522	0.15455312	0.20461899	0.18998146	9.97
0.4064	0.279922	-0.528	0.15476322	0.20474523	0.18997765	9.97
0.4072	0.263786	-0.532	0.15490824	0.20483577	0.18997765	9.97
0.4080	0.256834	-0.533	0.15499181	0.20487243	0.18996310	9.97
0.4088	0.256519	-0.527	0.15504140	0.20491773	0.18995237	9.97
0.4096	0.261297	-0.518	0.15507346	0.20492923	0.18994653	9.97
0.4104	0.272055	-0.521	0.15506858	0.20493305	0.18995434	9.97
0.4112	0.296488	-0.521	0.15499175	0.20492345	0.18996495	9.96
0.4120	0.343208	-0.521	0.15479040	0.20479721	0.19000101	9.96
0.4128	0.418596	-0.523	0.15444028	0.20461708	0.19001359	9.96
0.4136	0.525370	-0.517	0.15392953	0.20430785	0.19000286	9.96
0.4144	0.662212	-0.512	0.15327096	0.20391285	0.18995810	9.96
0.4152	0.826721	-0.512	0.15248495	0.20346987	0.18983930	9.96
0.4160	1.016550	-0.518	0.15157253	0.20290929	0.18970311	9.95
0.4168	1.228695	-0.522	0.15055019	0.20234203	0.18955529	9.95
0.4176	1.455402	-0.525	0.14945883	0.20172083	0.18937045	9.95
0.4184	1.686945	-0.524	0.14835089	0.20109087	0.18916428	9.96
0.4192	1.912680	-0.515	0.14728081	0.20047921	0.18893766	9.96
0.4200	2.123880	-0.516	0.14629054	0.19988775	0.18868184	9.96
0.4208	2.313251	-0.517	0.14541012	0.19933474	0.18843585	9.96
0.4216	2.474957	-0.521	0.14466304	0.19886887	0.18819457	9.96
0.4224	2.605333	-0.524	0.14404541	0.19849086	0.18797570	9.96
0.4232	2.702036	-0.522	0.14357179	0.19818771	0.18782395	9.97
0.4240	2.765923	-0.518	0.14323038	0.19798344	0.18772274	9.97
0.4248	2.801399	-0.514	0.14301640	0.19785208	0.18765759	9.97
0.4256	2.815704	-0.515	0.14288008	0.19775182	0.18762457	9.97
0.4264	2.816162	-0.517	0.14280224	0.19768852	0.18760604	9.97
0.4272	2.808695	-0.518	0.14275754	0.19767195	0.18759727	9.97
0.4280	2.795820	-0.514	0.14274776	0.19765252	0.18759727	9.97
0.4288	2.776909	-0.513	0.14277601	0.19767201	0.18761176	9.97
0.4296	2.745237	-0.509	0.14283723	0.19772071	0.18764776	9.97
0.4304	2.688274	-0.506	0.14300841	0.19780833	0.18772554	9.97
0.4312	2.596178	-0.509	0.14328957	0.19799125	0.18786466	9.96
0.4320	2.462826	-0.507	0.14373511	0.19830143	0.18806702	9.96
0.4328	2.291050	-0.503	0.14436936	0.19873673	0.18829179	9.96
0.4336	2.093897	-0.509	0.14513981	0.19924086	0.18853110	9.96
0.4344	1.885557	-0.506	0.14601433	0.19977480	0.18880439	9.96
0.4352	1.679907	-0.510	0.14690930	0.20032221	0.18904179	9.96
0.4360	1.488590	-0.520	0.14777994	0.20081055	0.18923730	9.95
0.4368	1.318102	-0.516	0.14859116	0.20126808	0.18941051	9.95
0.4376	1.169958	-0.518	0.14931870	0.20169955	0.18953699	9.95
0.4384	1.041756	-0.516	0.14999670	0.20206076	0.18963808	9.96
0.4392	0.928574	-0.509	0.15061533	0.20242006	0.18973625	9.96
0.4400	0.825748	-0.510	0.15117955	0.20274943	0.18980724	9.96
0.4408	0.730534	-0.511	0.15171850	0.20304710	0.18986374	9.96
0.4416	0.641756	-0.513	0.15223014	0.20334566	0.18991441	9.96
0.4424	0.559645	-0.511	0.15272427	0.20360762	0.18995142	9.96
0.4432	0.486059	-0.509	0.15319020	0.20388412	0.18998152	9.97
0.4440	0.422916	-0.511	0.15362209	0.20410943	0.18997955	9.97
0.4448	0.371132	-0.505	0.15399563	0.20433193	0.18997955	9.97
0.4456	0.331936	-0.513	0.15428454	0.20449477	0.18997955	9.97
0.4464	0.304670	-0.522	0.15450728	0.20461035	0.18997765	9.97
0.4472	0.287762	-0.522	0.15465027	0.20471537	0.18996990	9.97
0.4480	0.280266	-0.529	0.15474749	0.20475775	0.18993485	9.97
0.4488	0.279808	-0.525	0.15481663	0.20480871	0.18993777	9.97
0.4496	0.284872	-0.514	0.15484095	0.20482308	0.18998343	9.97
0.4504	0.297003	-0.517	0.15483028	0.20480961	0.18998629	9.97
0.4512	0.323610	-0.514	0.15472525	0.20477974	0.18997467	9.96
0.4520	0.372677	-0.516	0.15449661	0.20464981	0.18999505	9.96
0.4528	0.450010	-0.518	0.15414935	0.20445049	0.18999416	9.96
0.4536	0.558043	-0.515	0.15365422	0.20414996	0.18996590	9.96
0.4544	0.694284	-0.513	0.15302193	0.20375407	0.18989682	9.96
0.4552	0.856075	-0.516	0.15225255	0.20332056	0.18981612	9.96
0.4560	1.041613	-0.523	0.15134203	0.20278507	0.18970907	9.95
0.4568	1.247950	-0.522	0.15032452	0.20223409	0.18958163	9.95
0.4576	1.468906	-0.525	0.14924967	0.20162541	0.18938899	9.95
0.4584	1.695442	-0.522	0.14818150	0.20101088	0.18915647	9.96
0.4592	1.917543	-0.516	0.14714748	0.20041752	0.18891716	9.96
0.4600	2.126341	-0.520	0.14618444	0.19983459	0.18866235	9.96
0.4608	2.313824	-0.518	0.14532739	0.19932222	0.18841529	9.96
0.4616	2.474041	-0.519	0.14457357	0.19884163	0.18818378	9.96
0.4624	2.603102	-0.517	0.14396763	0.19847709	0.18798828	9.96
0.4632	2.698803	-0.515	0.14348519	0.19816816	0.18782485	9.97
0.4640	2.762232	-0.518	0.14313793	0.19795901	0.18773919	9.97
0.4648	2.797508	-0.513	0.14291221	0.19782960	0.18769056	9.97
0.4656	2.811270	-0.520	0.14276916	0.19773620	0.18763125	9.97
0.4664	2.811184	-0.522	0.14270198	0.19769430	0.18760407	9.97
0.4672	2.803144	-0.520	0.14268649	0.19766802	0.18759924	9.97
0.4680	2.790012	-0.516	0.14270204	0.19767195	0.18759924	9.97
0.4688	2.771072	-0.508	0.14271373	0.19768953	0.18760902	9.97
0.4696	2.737799	-0.506	0.14278769	0.19773537	0.18764788	9.97
0.4704	2.675886	-0.504	0.14295018	0.19784331	0.18774807	9.97
0.4712	2.575922	-0.509	0.14325750	0.19803494	0.18787462	9.96
0.4720	2.433414	-0.513	0.14376432	0.19837022	0.18805748	9.96
0.4728	2.254086	-0.511	0.14442867	0.19879484	0.18832213	9.96
0.4736	2.052841	-0.514	0.14523011	0.19931334	0.18861496	9.96
0.4744	1.843672	-0.508	0.14610958	0.19986266	0.18886882	9.96
0.4752	1.640167	-0.507	0.14701027	0.20038670	0.18908077	9.96
0.4760	1.454144	-0.515	0.14786625	0.20089340	0.18926162	9.95
0.4768	1.293011	-0.513	0.14863861	0.20130754	0.18944639	9.95
0.4776	1.157570	-0.516	0.14930588	0.20170343	0.18956894	9.95
0.4784	1.042843	-0.514	0.14990908	0.20202804	0.18966335	9.96
0.4792	0.941076	-0.506	0.15046066	0.20235741	0.18974996	9.96
0.4800	0.845203	-0.503	0.15099472	0.20267242	0.18979961	9.96
0.4808	0.752249	-0.504	0.15152872	0.20294780	0.18985307	9.96
0.4816	0.662470	-0.501	0.15206170	0.20325696	0.18990272	9.96
0.4824	0.577412	-0.497	0.15258312	0.20352763	0.18994170	9.96
0.4832	0.499649	-0.500	0.15306753	0.20380014	0.18996698	9.97
0.4840	0.431900	-0.500	0.15351313	0.20407277	0.18999040	9.97
0.4848	0.375938	-0.498	0.15388763	0.20427889	0.19000107	9.97
0.4856	0.333567	-0.505	0.15420669	0.20445514	0.18999618	9.97
0.4864	0.304899	-0.509	0.15443724	0.20457268	0.18998742	9.97
0.4872	0.288191	-0.510	0.15460163	0.20465845	0.18998158	9.97
0.4880	0.281153	-0.513	0.15469795	0.20471627	0.18996799	9.97
0.4888	0.281010	-0.510	0.15474755	0.20475483	0.18998748	9.97
0.4896	0.286617	-0.509	0.15476507	0.20479149	0.18999338	9.97
0.4904	0.300665	-0.511	0.15473199	0.20476735	0.18997580	9.97
0.4912	0.331364	-0.515	0.15462208	0.20472497	0.18999034	9.96
0.4920	0.386639	-0.513	0.15437400	0.20459688	0.19002426	9.96
0.4928	0.471010	-0.514	0.15399557	0.20435315	0.19001538	9.96
0.4936	0.586567	-0.517	0.15346056	0.20404691	0.18998617	9.96
0.4944	0.730820	-0.517	0.15276992	0.20363176	0.18993169	9.96
0.4952	0.900707	-0.521	0.15195280	0.20314819	0.18981987	9.96
0.4960	1.094913	-0.526	0.15098989	0.20261556	0.18969250	9.95
0.4968	1.308346	-0.525	0.14994705	0.20202225	0.18955350	9.95
0.4976	1.532593	-0.526	0.14886832	0.20142990	0.18934244	9.95
0.4984	1.757698	-0.527	0.14780319	0.20080578	0.18909538	9.96
0.4992	1.972761	-0.519	0.14681095	0.20023167	0.18885803	9.96
0.5000	2.169914	-0.518	0.14589560	0.19968629	0.18860602	9.96
0.5008	2.342834	-0.513	0.14508438	0.19918442	0.18838519	9.96
0.5016	2.487001	-0.514	0.14441222	0.19877315	0.18816340	9.96
0.5024	2.600470	-0.513	0.14387131	0.19843179	0.18796301	9.96
0.5032	2.682638	-0.518	0.14345598	0.19817603	0.18783468	9.97
0.5040	2.735710	-0.515	0.14316505	0.19800675	0.18775976	9.97
0.5048	2.764721	-0.514	0.14297730	0.19788718	0.18771303	9.97
0.5056	2.775850	-0.517	0.14285088	0.19782096	0.18766636	9.97
0.5064	2.775278	-0.517	0.14279050	0.19776350	0.18766040	9.97
0.5072	2.768040	-0.521	0.14276713	0.19773334	0.18765938	9.97
0.5080	2.756052	-0.516	0.14274871	0.19772941	0.18765068	9.97
0.5088	2.738228	-0.518	0.14277500	0.19774795	0.18768477	9.97
0.5096	2.706900	-0.512	0.14284319	0.19778883	0.18771797	9.97
0.5104	2.647219	-0.512	0.14299977	0.19790554	0.18778324	9.97
0.5112	2.548742	-0.519	0.14332461	0.19811082	0.18792909	9.96
0.5120	2.407122	-0.517	0.14381486	0.19843233	0.18812841	9.96
0.5128	2.226992	-0.517	0.14447629	0.19888687	0.18836182	9.96
0.5136	2.024374	-0.521	0.14530420	0.19939148	0.18862540	9.96
0.5144	1.813946	-0.510	0.14618748	0.19993961	0.18888223	9.96
0.5152	1.608038	-0.508	0.14709991	0.20047432	0.18910795	9.96
0.5160	1.418495	-0.514	0.14798027	0.20097238	0.18931514	9.95
0.5168	1.251469	-0.508	0.14876717	0.20142895	0.18949121	9.95
0.5176	1.108360	-0.514	0.14948803	0.20184410	0.18961859	9.95
0.5184	0.986366	-0.516	0.15013194	0.20219082	0.18971783	9.96
0.5192	0.879793	-0.512	0.15072721	0.20253557	0.18979859	9.96
0.5200	0.783663	-0.514	0.15128267	0.20282364	0.18986672	9.96
0.5208	0.695200	-0.517	0.15180403	0.20311934	0.18990672	9.96
0.5216	0.613317	-0.514	0.15229923	0.20339096	0.18993777	9.96
0.5224	0.537786	-0.513	0.15277886	0.20364815	0.18996114	9.96
0.5232	0.468950	-0.509	0.15323794	0.20391589	0.18996793	9.97
0.5240	0.408239	-0.502	0.15363187	0.20413649	0.18998349	9.97
0.5248	0.356340	-0.500	0.15398884	0.20436192	0.18997282	9.97
0.5256	0.314999	-0.501	0.15428162	0.20453143	0.18996698	9.97
0.5264	0.285130	-0.509	0.15450436	0.20464891	0.18996406	9.97
0.5272	0.266104	-0.511	0.15468919	0.20475006	0.18995231	9.97
0.5280	0.257206	-0.515	0.15480882	0.20478761	0.18995041	9.97
0.5288	0.255432	-0.517	0.15487307	0.20482612	0.18994647	9.97
0.5296	0.259266	-0.516	0.15489936	0.20484149	0.18994260	9.97
0.5304	0.269852	-0.522	0.15488863	0.20482606	0.18994749	9.97
0.5312	0.294886	-0.527	0.15480500	0.20480013	0.18996209	9.96
0.5320	0.342493	-0.522	0.15459096	0.20467877	0.18998742	9.96
0.5328	0.418396	-0.519	0.15424567	0.20450157	0.19002247	9.96
0.5336	0.525312	-0.518	0.15374273	0.20420009	0.19000298	9.96
0.5344	0.661898	-0.511	0.15307444	0.20380694	0.18992609	9.96
0.5352	0.826521	-0.516	0.15228069	0.20335042	0.18984920	9.96
0.5360	1.018209	-0.523	0.15134388	0.20277733	0.18971097	9.95
0.5368	1.234245	-0.522	0.15027487	0.20220900	0.18956512	9.95
0.5376	1.466818	-0.526	0.14914060	0.20158684	0.18935889	9.95
0.5384	1.705141	-0.521	0.14800441	0.20095205	0.18911469	9.96
0.5392	1.937113	-0.518	0.14690816	0.20034909	0.18889105	9.96
0.5400	2.152433	-0.521	0.14592767	0.19973522	0.18863416	9.96
0.5408	2.342863	-0.522	0.14505905	0.19920135	0.18838227	9.96
0.5416	2.502165	-0.526	0.14431971	0.19872534	0.18815178	9.96
0.5424	2.626762	-0.525	0.14371085	0.19836843	0.18795329	9.96
0.5432	2.715282	-0.522	0.14324784	0.19809026	0.18779582	9.97
0.5440	2.770243	-0.524	0.14294732	0.19791812	0.18770140	9.97
0.5448	2.798023	-0.520	0.14275080	0.19781595	0.18766546	9.97
0.5456	2.806950	-0.525	0.14266121	0.19772547	0.18762946	9.97
0.5464	2.804403	-0.529	0.14260769	0.19769150	0.18761086	9.97
0.5472	2.795391	-0.526	0.14257556	0.19765544	0.18760991	9.97
0.5480	2.781830	-0.525	0.14258343	0.19764668	0.18759722	9.97
0.5488	2.762003	-0.520	0.14260191	0.19767785	0.18760693	9.97
0.5496	2.727785	-0.515	0.14267588	0.19772941	0.18764490	9.97
0.5504	2.665930	-0.510	0.14284903	0.19785404	0.18774414	9.97
0.5512	2.567225	-0.512	0.14315832	0.19806027	0.18789196	9.96
0.5520	2.426891	-0.508	0.14364761	0.19839269	0.18810987	9.96
0.5528	2.250109	-0.508	0.14432359	0.19880962	0.18835795	9.96
0.5536	2.050982	-0.512	0.14512122	0.19931340	0.18859333	9.96
0.5544	1.843071	-0.505	0.14600152	0.19986075	0.18884921	9.96
0.5552	1.638994	-0.505	0.14690715	0.20038670	0.18908459	9.96
0.5560	1.449223	-0.509	0.14775926	0.20090401	0.18928695	9.95
0.5568	1.279764	-0.510	0.14857638	0.20135671	0.18945813	9.95
0.5576	1.131935	-0.509	0.14932162	0.20177472	0.18956411	9.95
0.5584	1.003647	-0.512	0.14999670	0.20213211	0.18968767	9.96
0.5592	0.890722	-0.503	0.15062994	0.20249325	0.18982577	9.96
0.5600	0.788870	-0.500	0.15119797	0.20280820	0.18988901	9.96
0.5608	0.695744	-0.506	0.15174359	0.20310014	0.18991333	9.96
0.5616	0.610199	-0.504	0.15225726	0.20340252	0.18995130	9.96
0.5624	0.532007	-0.506	0.15273690	0.20366067	0.18997854	9.96
0.5632	0.462027	-0.506	0.15318251	0.20391792	0.18998140	9.97
0.5640	0.401402	-0.498	0.15358037	0.20413840	0.18997461	9.97
0.5648	0.350876	-0.494	0.15394217	0.20434552	0.18997854	9.97
0.5656	0.311708	-0.500	0.15423405	0.20450068	0.18998927	9.97
0.5664	0.283728	-0.505	0.15447038	0.20461625	0.18999326	9.97
0.5672	0.265989	-0.509	0.15463382	0.20472598	0.18997192	9.97
0.5680	0.257492	-0.513	0.15474474	0.20476252	0.18991929	9.97
0.5688	0.255833	-0.506	0.15481371	0.20480967	0.18993193	9.97
0.5696	0.259495	-0.506	0.15484875	0.20483756	0.18997657	9.97
0.5704	0.268307	-0.508	0.15483904	0.20481455	0.18997073	9.97
0.5712	0.288677	-0.506	0.15476507	0.20479435	0.18996984	9.97
0.5720	0.329504	-0.509	0.15458030	0.20469517	0.19000191	9.96
0.5728	0.399284	-0.501	0.15425634	0.20449287	0.19002628	9.96
0.5736	0.501795	-0.504	0.15378940	0.20422310	0.19001746	9.96
0.5744	0.637379	-0.507	0.15313673	0.20383298	0.18997562	9.96
0.5752	0.804176	-0.509	0.15233320	0.20337826	0.18987733	9.96
0.5760	0.999498	-0.522	0.15135944	0.20283115	0.18974113	9.95
0.5768	1.220512	-0.519	0.15027094	0.20223784	0.18958944	9.95
0.5776	1.459064	-0.518	0.14911044	0.20159161	0.18935686	9.95
0.5784	1.703539	-0.515	0.14794511	0.20094627	0.18911958	9.96
0.5792	1.940460	-0.505	0.14685273	0.20031154	0.18888611	9.96
0.5800	2.158756	-0.502	0.14584404	0.19971991	0.18861663	9.96
0.5808	2.349272	-0.504	0.14496857	0.19918489	0.18837446	9.96
0.5816	2.506170	-0.505	0.14424485	0.19872946	0.18815070	9.96
0.5824	2.627163	-0.506	0.14365441	0.19838881	0.18795723	9.96
0.5832	2.712994	-0.512	0.14321369	0.19810396	0.18781811	9.97
0.5840	2.767010	-0.508	0.14291310	0.19795805	0.18770629	9.97
0.5848	2.795048	-0.505	0.14271855	0.19781888	0.18764704	9.97
0.5856	2.805147	-0.506	0.14261937	0.19776058	0.18761492	9.97
0.5864	2.803745	-0.506	0.14256591	0.19770616	0.18760133	9.97
0.5872	2.796078	-0.504	0.14253187	0.19767499	0.18761003	9.97
0.5880	2.784576	-0.505	0.14253384	0.19766825	0.18761677	9.97
0.5888	2.767467	-0.503	0.14255911	0.19767505	0.18763518	9.97
0.5896	2.737627	-0.498	0.14262038	0.19772065	0.18767309	9.97
0.5904	2.680206	-0.502	0.14279163	0.19782186	0.18773437	9.97
0.5912	2.583904	-0.505	0.14308739	0.19802415	0.18785501	9.96
0.5920	2.444401	-0.505	0.14356017	0.19834876	0.18806803	9.96
0.5928	2.266159	-0.504	0.14422160	0.19878906	0.18835014	9.96
0.5936	2.064629	-0.506	0.14501232	0.19929492	0.18862253	9.96
0.5944	1.855145	-0.502	0.14589745	0.19984335	0.18883365	9.96
0.5952	1.650381	-0.502	0.14680594	0.20038092	0.18906713	9.96
0.5960	1.461182	-0.510	0.14767754	0.20086831	0.18928993	9.95
0.5968	1.294470	-0.509	0.14847922	0.20130843	0.18946308	9.95
0.5976	1.151161	-0.508	0.14918643	0.20171106	0.18958074	9.95
0.5984	1.027737	-0.507	0.14982647	0.20206457	0.18965852	9.96
0.5992	0.918846	-0.501	0.15043449	0.20239401	0.18975478	9.96
0.6000	0.819054	-0.500	0.15099669	0.20270520	0.18986762	9.96
0.6008	0.725985	-0.504	0.15154344	0.20299512	0.18992406	9.96
0.6016	0.639353	-0.507	0.15206391	0.20325518	0.18995136	9.96
0.6024	0.559330	-0.506	0.15253365	0.20354414	0.18999022	9.96
0.6032	0.487375	-0.505	0.15299279	0.20379639	0.19001943	9.97
0.6040	0.425034	-0.499	0.15340227	0.20402169	0.19002038	9.97
0.6048	0.373735	-0.495	0.15376902	0.20424038	0.18999898	9.97
0.6056	0.334969	-0.496	0.15407252	0.20439357	0.18999422	9.97
0.6064	0.308275	-0.503	0.15428555	0.20449471	0.18999714	9.97
0.6072	0.292454	-0.506	0.15443629	0.20459592	0.19000393	9.97
0.6080	0.285358	-0.512	0.15451509	0.20463634	0.18998736	9.97
0.6088	0.284929	-0.510	0.15456378	0.20466328	0.18996108	9.97
0.6096	0.290051	-0.508	0.15457737	0.20469612	0.18997079	9.97
0.6104	0.302267	-0.510	0.15455890	0.20466721	0.19001162	9.97
0.6112	0.329933	-0.512	0.15446448	0.20462680	0.19001842	9.96
0.6120	0.380945	-0.514	0.15422904	0.20449865	0.19001842	9.96
0.6128	0.461082	-0.514	0.15387505	0.20427996	0.19003493	9.96
0.6136	0.573778	-0.516	0.15335274	0.20395917	0.19001836	9.96
0.6144	0.716972	-0.512	0.15265721	0.20357001	0.18996102	9.96
0.6152	0.888205	-0.513	0.15182555	0.20310670	0.18985695	9.96
0.6160	1.085787	-0.517	0.15084690	0.20256060	0.18970615	9.95
0.6168	1.304855	-0.516	0.14976901	0.20200109	0.18953019	9.95
0.6176	1.536970	-0.517	0.14864933	0.20136637	0.18931133	9.95
0.6184	1.771145	-0.517	0.14754909	0.20075959	0.18906224	9.96
0.6192	1.995363	-0.514	0.14651310	0.20015174	0.18881035	9.96
0.6200	2.200527	-0.519	0.14557153	0.19958198	0.18855149	9.96
0.6208	2.379026	-0.524	0.14475256	0.19907182	0.18831700	9.96
0.6216	2.526112	-0.525	0.14405805	0.19864893	0.18812835	9.96
0.6224	2.640209	-0.526	0.14350259	0.19832271	0.18794060	9.96
0.6232	2.721262	-0.524	0.14309210	0.19807565	0.18777430	9.97
0.6240	2.772446	-0.520	0.14281094	0.19789577	0.18768579	9.97
0.6248	2.799368	-0.513	0.14263976	0.19778687	0.18766534	9.97
0.6256	2.808552	-0.514	0.14253670	0.19770801	0.18763030	9.97
0.6264	2.806921	-0.514	0.14247733	0.19768465	0.18760216	9.97
0.6272	2.799139	-0.518	0.14245790	0.19767195	0.18759733	9.97
0.6280	2.787380	-0.522	0.14245301	0.19766808	0.18756038	9.97
0.6288	2.770071	-0.521	0.14247638	0.19769043	0.18758178	9.97
0.6296	2.738400	-0.521	0.14254159	0.19772542	0.18765664	9.97
0.6304	2.676973	-0.517	0.14270985	0.19783831	0.18772954	9.97
0.6312	2.574377	-0.521	0.14304256	0.19803387	0.18785405	9.96
0.6320	2.425976	-0.517	0.14356875	0.19839251	0.18807882	9.96
0.6328	2.237778	-0.516	0.14428759	0.19883549	0.18833363	9.96
0.6336	2.026405	-0.519	0.14512712	0.19937718	0.18860799	9.96
0.6344	1.808424	-0.513	0.14605701	0.19995415	0.18889594	9.96
0.6352	1.598310	-0.517	0.14697921	0.20049167	0.18913031	9.96
0.6360	1.408396	-0.519	0.14785475	0.20100117	0.18932879	9.95
0.6368	1.245632	-0.519	0.14864463	0.20143747	0.18951553	9.95
0.6376	1.109848	-0.518	0.14933431	0.20181227	0.18961662	9.95
0.6384	0.996008	-0.514	0.14995295	0.20213687	0.18970710	9.96
0.6392	0.895987	-0.516	0.15051413	0.20243746	0.18980628	9.96
0.6400	0.803661	-0.507	0.15105206	0.20273411	0.18986177	9.96
0.6408	0.716572	-0.510	0.15154725	0.20299703	0.18988615	9.96
0.6416	0.634575	-0.514	0.15203369	0.20328885	0.18993092	9.96
0.6424	0.558271	-0.504	0.15249777	0.20353633	0.18998349	9.96
0.6432	0.488691	-0.513	0.15293449	0.20378196	0.19001555	9.97
0.6440	0.427179	-0.512	0.15334690	0.20401889	0.19003010	9.97
0.6448	0.374823	-0.502	0.15371162	0.20419806	0.19002229	9.97
0.6456	0.333281	-0.510	0.15400827	0.20437431	0.19001251	9.97
0.6464	0.303183	-0.513	0.15424567	0.20448315	0.19000667	9.97
0.6472	0.284014	-0.516	0.15441781	0.20457280	0.19000375	9.97
0.6480	0.274343	-0.522	0.15452772	0.20463347	0.18997753	9.97
0.6488	0.271711	-0.519	0.15461141	0.20466244	0.18998438	9.97
0.6496	0.274544	-0.509	0.15463376	0.20470095	0.19001651	9.97
0.6504	0.283098	-0.511	0.15463382	0.20469803	0.19000977	9.97
0.6512	0.304356	-0.509	0.15456289	0.20468068	0.18999511	9.96
0.6520	0.346041	-0.512	0.15435857	0.20458627	0.19001752	9.96
0.6528	0.415077	-0.514	0.15404922	0.20441478	0.19002920	9.96
0.6536	0.515242	-0.512	0.15357065	0.20413452	0.19001943	9.96
0.6544	0.646477	-0.516	0.15295190	0.20377821	0.18995923	9.96
0.6552	0.807867	-0.515	0.15218532	0.20332932	0.18986678	9.96
0.6560	0.997210	-0.523	0.15124464	0.20280635	0.18976176	9.95
0.6568	1.211185	-0.522	0.15018523	0.20224565	0.18962848	9.95
0.6576	1.441927	-0.522	0.14904130	0.20162719	0.18941540	9.95
0.6584	1.679020	-0.516	0.14790130	0.20101172	0.18919069	9.96
0.6592	1.911020	-0.515	0.14683425	0.20039719	0.18894553	9.96
0.6600	2.128658	-0.516	0.14585280	0.19980574	0.18867803	9.96
0.6608	2.323637	-0.520	0.14497155	0.19926333	0.18842900	9.96
0.6616	2.488861	-0.524	0.14421469	0.19879419	0.18818480	9.96
0.6624	2.619696	-0.517	0.14359593	0.19841707	0.18796104	9.96
0.6632	2.713337	-0.513	0.14312124	0.19812721	0.18779087	9.97
0.6640	2.771358	-0.506	0.14280903	0.19794339	0.18769848	9.97
0.6648	2.800283	-0.502	0.14262235	0.19781697	0.18765181	9.97
0.6656	2.808781	-0.505	0.14250666	0.19774693	0.18761772	9.97
0.6664	2.805204	-0.513	0.14245605	0.19770217	0.18760014	9.97
0.6672	2.795305	-0.518	0.14243746	0.19768077	0.18760204	9.97
0.6680	2.781029	-0.522	0.14244330	0.19767100	0.18760979	9.97
0.6688	2.760057	-0.524	0.14247835	0.19769138	0.18763614	9.97
0.6696	2.723036	-0.516	0.14257365	0.19774103	0.18768281	9.97
0.6704	2.656918	-0.513	0.14276534	0.19786364	0.18775970	9.97
0.6712	2.552948	-0.514	0.14309996	0.19809228	0.18790376	9.96
0.6720	2.408838	-0.510	0.14361942	0.19841981	0.18811095	9.96
0.6728	2.231913	-0.513	0.14429158	0.19886184	0.18835711	9.96
0.6736	2.036076	-0.514	0.14508432	0.19933468	0.18862361	9.96
0.6744	1.833916	-0.512	0.14592671	0.19987124	0.18887454	9.96
0.6752	1.636047	-0.514	0.14679039	0.20037985	0.18910605	9.96
0.6760	1.451283	-0.523	0.14762211	0.20087504	0.18929857	9.95
0.6768	1.285801	-0.525	0.14840424	0.20132202	0.18945813	9.95
0.6776	1.140976	-0.525	0.14914352	0.20171988	0.18958944	9.95
0.6784	1.014919	-0.524	0.14981383	0.20206088	0.18971103	9.96
0.6792	0.903511	-0.515	0.15043247	0.20239121	0.18980932	9.96
0.6800	0.802116	-0.514	0.15100050	0.20270419	0.18987542	9.96
0.6808	0.708504	-0.512	0.15152681	0.20299119	0.18992209	9.96
0.6816	0.621786	-0.515	0.15204138	0.20330131	0.18995905	9.96
0.6824	0.542250	-0.513	0.15252191	0.20355368	0.19001156	9.96
0.6832	0.470982	-0.513	0.15297818	0.20381570	0.19002718	9.97
0.6840	0.409441	-0.510	0.15340322	0.20404106	0.19002521	9.97
0.6848	0.358114	-0.504	0.15376210	0.20423758	0.19003302	9.97
0.6856	0.318146	-0.510	0.15405977	0.20440125	0.19006318	9.97
0.6864	0.289536	-0.518	0.15428060	0.20451587	0.19005346	9.97
0.6872	0.271311	-0.518	0.15443039	0.20461315	0.18997669	9.97
0.6880	0.262613	-0.523	0.15453357	0.20464879	0.18995720	9.97
0.6888	0.261011	-0.516	0.15460753	0.20469993	0.18996596	9.97
0.6896	0.264788	-0.505	0.15463674	0.20471048	0.18997180	9.97
0.6904	0.274658	-0.508	0.15464067	0.20471245	0.18997085	9.97
0.6912	0.297804	-0.506	0.15456486	0.20470375	0.18998355	9.96
0.6920	0.342951	-0.510	0.15435672	0.20459104	0.19000494	9.96
0.6928	0.416794	-0.510	0.15401715	0.20440996	0.19003016	9.96
0.6936	0.522451	-0.510	0.15352011	0.20411235	0.19002134	9.96
0.6944	0.659151	-0.510	0.15285468	0.20371944	0.18997949	9.96
0.6952	0.824976	-0.508	0.15205115	0.20328605	0.18988711	9.96
0.6960	1.017694	-0.519	0.15110570	0.20274663	0.18977338	9.95
0.6968	1.233673	-0.519	0.15004146	0.20218211	0.18961865	9.95
0.6976	1.464443	-0.521	0.14892572	0.20157039	0.18938124	9.95
0.6984	1.699076	-0.520	0.14780414	0.20093751	0.18915266	9.96
0.6992	1.925869	-0.516	0.14675450	0.20035005	0.18891037	9.96
0.7000	2.136011	-0.517	0.14577883	0.19976419	0.18864679	9.96
0.7008	2.322092	-0.518	0.14492184	0.19925177	0.18839580	9.96
0.7016	2.478533	-0.520	0.14419520	0.19878745	0.18817008	9.96
0.7024	2.603073	-0.515	0.14360863	0.19842088	0.18797755	9.96
0.7032	2.694426	-0.513	0.14315629	0.19814867	0.18782777	9.97
0.7040	2.754250	-0.505	0.14284015	0.19795114	0.18774903	9.97
0.7048	2.787666	-0.502	0.14264458	0.19784898	0.18769169	9.97
0.7056	2.801142	-0.506	0.14250654	0.19775653	0.18761289	9.97
0.7064	2.801714	-0.509	0.14243943	0.19770503	0.18760127	9.97
0.7072	2.795048	-0.512	0.14240640	0.19768268	0.18762749	9.97
0.7080	2.783689	-0.510	0.14240158	0.19767195	0.18760502	9.97
0.7088	2.767324	-0.502	0.14243066	0.19767779	0.18761671	9.97
0.7096	2.739487	-0.495	0.14250267	0.19772840	0.18764973	9.97
0.7104	2.685728	-0.492	0.14266115	0.19780523	0.18770903	9.97
0.7112	2.593918	-0.494	0.14294910	0.19799209	0.18785214	9.96
0.7120	2.458849	-0.495	0.14341015	0.19829458	0.18806416	9.96
0.7128	2.283039	-0.493	0.14404052	0.19871634	0.18831414	9.96
0.7136	2.080736	-0.498	0.14482850	0.19921291	0.18857396	9.96
0.7144	1.867619	-0.492	0.14570302	0.19976318	0.18883562	9.96
0.7152	1.657219	-0.494	0.14661640	0.20031935	0.18906713	9.96
0.7160	1.462469	-0.506	0.14751613	0.20080668	0.18924612	9.95
0.7168	1.291122	-0.503	0.14833224	0.20128536	0.18941629	9.95
0.7176	1.145124	-0.511	0.14907342	0.20167059	0.18957084	9.95
0.7184	1.020756	-0.510	0.14973497	0.20202214	0.18969625	9.96
0.7192	0.912266	-0.505	0.15032345	0.20234579	0.18980324	9.96
0.7200	0.815105	-0.504	0.15087986	0.20265013	0.18985385	9.96
0.7208	0.726414	-0.500	0.15138572	0.20292079	0.18990552	9.96
0.7216	0.644989	-0.501	0.15185851	0.20320112	0.18997955	9.96
0.7224	0.569458	-0.502	0.15232742	0.20345348	0.19000882	9.96
0.7232	0.499792	-0.505	0.15275735	0.20368660	0.18999618	9.97
0.7240	0.437307	-0.508	0.15317172	0.20393026	0.19001555	9.97
0.7248	0.383749	-0.503	0.15354812	0.20412862	0.19004279	9.97
0.7256	0.341263	-0.504	0.15384871	0.20431548	0.19004178	9.97
0.7264	0.310650	-0.510	0.15407443	0.20443976	0.19001746	9.97
0.7272	0.291080	-0.509	0.15424269	0.20453995	0.18999803	9.97
0.7280	0.281324	-0.515	0.15436047	0.20459771	0.18998051	9.97
0.7288	0.279179	-0.517	0.15443832	0.20461982	0.18998146	9.97
0.7296	0.282984	-0.513	0.15447521	0.20465553	0.18998826	9.97
0.7304	0.294428	-0.517	0.15447330	0.20464015	0.18998736	9.97
0.7312	0.320950	-0.517	0.15437406	0.20461130	0.19000685	9.96
0.7320	0.370617	-0.514	0.15414453	0.20451695	0.19003022	9.96
0.7328	0.449696	-0.517	0.15379244	0.20428956	0.19002444	9.96
0.7336	0.560560	-0.514	0.15326422	0.20399672	0.18998832	9.96
0.7344	0.701294	-0.510	0.15258133	0.20360088	0.18994057	9.96
0.7352	0.869608	-0.511	0.15177292	0.20313954	0.18987346	9.96
0.7360	1.062756	-0.514	0.15080696	0.20263100	0.18974698	9.95
0.7368	1.277246	-0.518	0.14976317	0.20205688	0.18956316	9.95
0.7376	1.505470	-0.524	0.14866591	0.20147026	0.18935788	9.95
0.7384	1.736584	-0.520	0.14756858	0.20084512	0.18913120	9.96
0.7392	1.959314	-0.520	0.14655596	0.20025468	0.18888116	9.96
0.7400	2.163048	-0.517	0.14560080	0.19969589	0.18862730	9.96
0.7408	2.338600	-0.516	0.14477688	0.19919211	0.18838423	9.96
0.7416	2.480879	-0.520	0.14411259	0.19877416	0.18814689	9.96
0.7424	2.587681	-0.517	0.14357954	0.19845903	0.18796986	9.96
0.7432	2.660837	-0.516	0.14322448	0.19822264	0.18785602	9.97
0.7440	2.705326	-0.512	0.14299196	0.19807094	0.18778306	9.97
0.7448	2.727528	-0.505	0.14283437	0.19797951	0.18775874	9.97
0.7456	2.734823	-0.508	0.14274096	0.19791627	0.18772858	9.97
0.7464	2.733307	-0.513	0.14267576	0.19788027	0.18770033	9.97
0.7472	2.727184	-0.518	0.14264363	0.19785202	0.18769836	9.97
0.7480	2.718372	-0.521	0.14264172	0.19784319	0.18771487	9.97
0.7488	2.706242	-0.512	0.14266223	0.19785488	0.18774021	9.97
0.7496	2.686815	-0.506	0.14270115	0.19788307	0.18774807	9.97
0.7504	2.649050	-0.500	0.14278489	0.19793552	0.18778694	9.97
0.7512	2.578297	-0.503	0.14298624	0.19808149	0.18787748	9.96
0.7520	2.465315	-0.506	0.14337236	0.19830132	0.18803406	9.96
0.7528	2.306786	-0.505	0.14394242	0.19868147	0.18825001	9.96
0.7536	2.110834	-0.507	0.14471376	0.19915479	0.18852043	9.96
0.7544	1.894569	-0.497	0.14560574	0.19970906	0.18882191	9.96
0.7552	1.673784	-0.497	0.14653569	0.20028842	0.18908167	9.96
0.7560	1.463871	-0.502	0.14748025	0.20082211	0.18927813	9.95
0.7568	1.276188	-0.504	0.14835864	0.20132589	0.18945807	9.95
0.7576	1.114197	-0.509	0.14915919	0.20176321	0.18960881	9.95
0.7584	0.977097	-0.510	0.14989358	0.20214850	0.18975568	9.96
0.7592	0.860167	-0.503	0.15055788	0.20249033	0.18986076	9.96
0.7600	0.758657	-0.499	0.15114242	0.20281106	0.18989772	9.96
0.7608	0.669680	-0.504	0.15168130	0.20308554	0.18995327	9.96
0.7616	0.591030	-0.500	0.15216088	0.20335525	0.19002330	9.96
0.7624	0.521135	-0.505	0.15258896	0.20359516	0.19005245	9.96
0.7632	0.458908	-0.506	0.15298885	0.20382631	0.19002616	9.97
0.7640	0.404434	-0.501	0.15334976	0.20404011	0.19002908	9.97
0.7648	0.358315	-0.502	0.15367955	0.20421827	0.19003594	9.97
0.7656	0.322351	-0.500	0.15394413	0.20437723	0.19002330	9.97
0.7664	0.297031	-0.508	0.15416199	0.20446295	0.19000101	9.97
0.7672	0.281496	-0.512	0.15430307	0.20453715	0.18997180	9.97
0.7680	0.274601	-0.517	0.15439451	0.20460272	0.18996692	9.97
0.7688	0.273514	-0.518	0.15445286	0.20462775	0.19002140	9.97
0.7696	0.277004	-0.510	0.15447426	0.20466632	0.19003689	9.97
0.7704	0.285387	-0.509	0.15447718	0.20468080	0.18998533	9.97
0.7712	0.304413	-0.508	0.15442753	0.20463836	0.18998533	9.96
0.7720	0.342979	-0.503	0.15425825	0.20457858	0.19001067	9.96
0.7728	0.408955	-0.505	0.15397137	0.20440233	0.19004965	9.96
0.7736	0.506687	-0.507	0.15351415	0.20413160	0.19003409	9.96
0.7744	0.637465	-0.503	0.15289259	0.20377713	0.18997961	9.96
0.7752	0.799770	-0.506	0.15211242	0.20333022	0.18991733	9.95
0.7760	0.990801	-0.512	0.15116203	0.20279759	0.18978792	9.95
0.7768	1.207981	-0.514	0.15010267	0.20223892	0.18964005	9.95
0.7776	1.443529	-0.520	0.14895093	0.20162338	0.18942511	9.95
0.7784	1.686516	-0.515	0.14779437	0.20098573	0.18917996	9.96
0.7792	1.925268	-0.509	0.14670485	0.20036435	0.18893874	9.96
0.7800	2.149258	-0.507	0.14568448	0.19974571	0.18864977	9.96
0.7808	2.349186	-0.505	0.14477116	0.19918472	0.18835402	9.96
0.7816	2.517672	-0.510	0.14400560	0.19870883	0.18809825	9.96
0.7824	2.649164	-0.510	0.14336944	0.19832557	0.18789887	9.96
0.7832	2.741776	-0.506	0.14290351	0.19805133	0.18773460	9.97
0.7840	2.798510	-0.505	0.14259118	0.19784904	0.18762279	9.97
0.7848	2.826290	-0.499	0.14241123	0.19772547	0.18758774	9.97
0.7856	2.834816	-0.502	0.14231986	0.19765061	0.18756628	9.97
0.7864	2.832355	-0.509	0.14226151	0.19759327	0.18755257	9.97
0.7872	2.824430	-0.507	0.14223135	0.19757384	0.18756998	9.97
0.7880	2.813559	-0.505	0.14221865	0.19756800	0.18756413	9.97
0.7888	2.798309	-0.497	0.14222836	0.19757676	0.18757868	9.97
0.7896	2.773333	-0.493	0.14227402	0.19760495	0.18762058	9.97
0.7904	2.726154	-0.489	0.14239758	0.19769543	0.18765461	9.97
0.7912	2.643642	-0.495	0.14264864	0.19784141	0.18776751	9.96
0.7920	2.519445	-0.496	0.14306104	0.19813997	0.18793970	9.96
0.7928	2.353134	-0.496	0.14366806	0.19852746	0.18817997	9.96
0.7936	2.155437	-0.504	0.14443845	0.19902617	0.18847287	9.96
0.7944	1.942520	-0.500	0.14531481	0.19956261	0.18875104	9.96
0.7952	1.727371	-0.501	0.14622921	0.20012093	0.18901277	9.96
0.7960	1.522923	-0.510	0.14714748	0.20064586	0.18921894	9.95
0.7968	1.337271	-0.507	0.14801025	0.20113999	0.18939209	9.95
0.7976	1.173220	-0.510	0.14880210	0.20158780	0.18955255	9.95
0.7984	1.030226	-0.513	0.14955211	0.20197600	0.18968475	9.96
0.7992	0.904598	-0.505	0.15024471	0.20234203	0.18981314	9.96
0.8000	0.793190	-0.506	0.15087897	0.20267624	0.18988127	9.96
0.8010	0.137615	-0.511	0.15665120	0.20590293	0.19001269	9.96
0.8020	0.137787	-0.507	0.15664047	0.20590490	0.19000387	9.96
0.8030	0.137844	-0.509	0.15665323	0.20591354	0.18999314	9.95
0.8040	0.137730	-0.517	0.15664935	0.20588756	0.18998051	9.95
0.8050	0.137873	-0.518	0.15662992	0.20589232	0.19000381	9.95
0.8060	0.138416	-0.520	0.15662795	0.20588076	0.18997568	9.95
0.8070	0.139160	-0.510	0.15664351	0.20590293	0.18995136	9.96
0.8080	0.139847	-0.510	0.15662014	0.20590389	0.18996698	9.96
0.8090	0.141449	-0.510	0.15661526	0.20590007	0.18997574	9.96
0.8100	0.144739	-0.515	0.15661824	0.20589054	0.19001752	9.96
0.8110	0.152235	-0.514	0.15657640	0.20587796	0.18999320	9.97
0.8120	0.169687	-0.516	0.15651804	0.20585579	0.19000000	9.97
0.8130	0.203705	-0.513	0.15632445	0.20576710	0.19000775	9.97
0.8140	0.260639	-0.521	0.15601033	0.20557153	0.19002718	9.97
0.8150	0.342522	-0.516	0.15558040	0.20532215	0.19006699	9.97
0.8160	0.447750	-0.513	0.15502393	0.20499563	0.19003969	9.97
0.8170	0.570917	-0.502	0.15435946	0.20462096	0.19004458	9.97
0.8180	0.706587	-0.499	0.15363663	0.20419616	0.19002128	9.97
0.8190	0.850868	-0.500	0.15286624	0.20376945	0.18999416	9.96
0.8200	1.000786	-0.500	0.15208423	0.20334077	0.18994457	9.96
0.8210	1.151934	-0.499	0.15130407	0.20289391	0.18984717	9.96
0.8220	1.299219	-0.501	0.15053546	0.20246911	0.18976933	9.96
0.8230	1.437807	-0.503	0.14981663	0.20208198	0.18966621	9.95
0.8240	1.566067	-0.512	0.14915901	0.20169085	0.18949401	9.95
0.8250	1.681995	-0.509	0.14854532	0.20135081	0.18938708	9.95
0.8260	1.780787	-0.515	0.14801031	0.20105034	0.18924797	9.95
0.8270	1.855631	-0.506	0.14762026	0.20083261	0.18914586	9.96
0.8280	1.902552	-0.508	0.14732158	0.20066220	0.18908072	9.96
0.8290	1.924438	-0.510	0.14715624	0.20057452	0.18904084	9.96
0.8300	1.929274	-0.508	0.14707452	0.20051682	0.18903303	9.96
0.8310	1.923981	-0.510	0.14703655	0.20049280	0.18902814	9.97
0.8320	1.913996	-0.506	0.14705408	0.20050812	0.18905735	9.97
0.8330	1.901264	-0.505	0.14707059	0.20050138	0.18908459	9.97
0.8340	1.886787	-0.509	0.14706385	0.20049644	0.18908554	9.97
0.8350	1.869879	-0.510	0.14710468	0.20047814	0.18908256	9.97
0.8360	1.846504	-0.506	0.14713293	0.20052332	0.18909323	9.97
0.8370	1.806993	-0.494	0.14727587	0.20057637	0.18915945	9.97
0.8380	1.739845	-0.490	0.14750642	0.20071995	0.18928689	9.97
0.8390	1.640081	-0.495	0.14786631	0.20093864	0.18940949	9.96
0.8400	1.512365	-0.492	0.14838773	0.20125550	0.18954569	9.96
0.8410	1.369257	-0.494	0.14898986	0.20163208	0.18969548	9.96
0.8420	1.223717	-0.500	0.14965910	0.20202315	0.18982780	9.96
0.8430	1.085501	-0.505	0.15034586	0.20239592	0.18996102	9.95
0.8440	0.964022	-0.514	0.15092468	0.20270699	0.19000381	9.95
0.8450	0.863056	-0.509	0.15147233	0.20299500	0.19006705	9.95
0.8460	0.780172	-0.511	0.15193921	0.20325702	0.19010884	9.95
0.8470	0.707588	-0.498	0.15235358	0.20348823	0.19015843	9.96
0.8480	0.637493	-0.501	0.15278351	0.20372617	0.19018167	9.96
0.8490	0.567141	-0.504	0.15319598	0.20395535	0.19018847	9.96
0.8500	0.497732	-0.506	0.15360647	0.20419335	0.19019043	9.96
0.8510	0.431786	-0.506	0.15402287	0.20440900	0.19018364	9.97
0.8520	0.372219	-0.502	0.15441000	0.20464492	0.19017500	9.97
0.8530	0.320120	-0.500	0.15476412	0.20486075	0.19017214	9.97
0.8540	0.277719	-0.509	0.15508801	0.20501393	0.19017017	9.97
0.8550	0.245018	-0.509	0.15531170	0.20513624	0.19014192	9.97
0.8560	0.222530	-0.513	0.15550631	0.20524412	0.19011849	9.97
0.8570	0.207167	-0.506	0.15565813	0.20533186	0.19009227	9.97
0.8580	0.197468	-0.508	0.15573996	0.20538485	0.19009131	9.97
0.8590	0.191603	-0.504	0.15581286	0.20542812	0.19012052	9.96
0.8600	0.189857	-0.510	0.15585655	0.20543671	0.19010490	9.96
0.8610	0.191259	-0.512	0.15587604	0.20545602	0.19010979	9.96
0.8620	0.196066	-0.514	0.15587991	0.20544642	0.19009709	9.96
0.8630	0.204964	-0.513	0.15588182	0.20545995	0.19009525	9.95
0.8640	0.227795	-0.518	0.15576214	0.20538574	0.19009036	9.95
0.8650	0.276775	-0.515	0.15552092	0.20525283	0.19012827	9.95
0.8660	0.358801	-0.515	0.15508807	0.20502359	0.19015157	9.95
0.8670	0.471468	-0.509	0.15449852	0.20471436	0.19013798	9.96
0.8680	0.607109	-0.507	0.15382147	0.20429349	0.19010496	9.96
0.8690	0.759172	-0.508	0.15304035	0.20383781	0.19005442	9.96
0.8700	0.922794	-0.509	0.15218055	0.20337933	0.18994355	9.96
0.8710	1.089849	-0.512	0.15132946	0.20291984	0.18985599	9.97
0.8720	1.250839	-0.506	0.15048510	0.20245558	0.18977523	9.97
0.8730	1.398554	-0.508	0.14971948	0.20206553	0.18965846	9.97
0.8740	1.530104	-0.511	0.14905590	0.20165133	0.18951064	9.97
0.8750	1.646147	-0.513	0.14843827	0.20133919	0.18936378	9.97
0.8760	1.745024	-0.516	0.14792562	0.20103770	0.18923336	9.97
0.8770	1.822271	-0.508	0.14752299	0.20082194	0.18914670	9.97
0.8780	1.874657	-0.503	0.14721078	0.20066893	0.18907177	9.97
0.8790	1.904268	-0.500	0.14703870	0.20055431	0.18904263	9.96
0.8800	1.917086	-0.496	0.14692968	0.20051289	0.18902034	9.96
0.8810	1.918631	-0.497	0.14685857	0.20046467	0.18899614	9.96
0.8820	1.913824	-0.496	0.14685065	0.20044833	0.18896985	9.96
0.8830	1.905785	-0.494	0.14684576	0.20044351	0.18902814	9.95
0.8840	1.895857	-0.502	0.14684880	0.20043397	0.18902904	9.95
0.8850	1.883726	-0.499	0.14686841	0.20042431	0.18903393	9.95
0.8860	1.867161	-0.501	0.14688599	0.20043868	0.18900383	9.95
0.8870	1.835632	-0.494	0.14699197	0.20049745	0.18904573	9.96
0.8880	1.771917	-0.497	0.14721662	0.20061594	0.18916351	9.96
0.8890	1.665487	-0.497	0.14759207	0.20084327	0.18931526	9.96
0.8900	1.520491	-0.498	0.14818054	0.20120162	0.18950886	9.96
0.8910	1.356268	-0.496	0.14888871	0.20160037	0.18966252	9.97
0.8920	1.194220	-0.494	0.14962703	0.20205122	0.18980646	9.97
0.8930	1.048365	-0.493	0.15036345	0.20244217	0.18993783	9.97
0.8940	0.927429	-0.507	0.15097731	0.20277923	0.19000399	9.97
0.8950	0.832157	-0.512	0.15147430	0.20304900	0.19007880	9.97
0.8960	0.756254	-0.518	0.15192461	0.20327634	0.19009817	9.97
0.8970	0.689392	-0.512	0.15231574	0.20349020	0.19014955	9.97
0.8980	0.622845	-0.509	0.15270972	0.20371264	0.19021577	9.97
0.8990	0.553608	-0.512	0.15314162	0.20393604	0.19017875	9.96
0.9000	0.483484	-0.509	0.15355885	0.20415473	0.19018078	9.96
0.9010	0.415764	-0.507	0.15399081	0.20439553	0.19017315	9.96
0.9020	0.353994	-0.502	0.15440142	0.20463258	0.19017214	9.96
0.9030	0.301208	-0.502	0.15475160	0.20483679	0.19019359	9.95
0.9040	0.259981	-0.510	0.15504819	0.20498312	0.19014388	9.95
0.9050	0.230513	-0.510	0.15531087	0.20512080	0.19013125	9.95
0.9060	0.212030	-0.512	0.15545291	0.20519590	0.19008636	9.95
0.9070	0.201187	-0.509	0.15556186	0.20525467	0.19010109	9.96
0.9080	0.195808	-0.510	0.15563285	0.20527011	0.19011766	9.96
0.9090	0.194235	-0.519	0.15566111	0.20531631	0.19009137	9.96
0.9100	0.195436	-0.521	0.15568542	0.20533365	0.19009912	9.96
0.9110	0.198956	-0.526	0.15569317	0.20534527	0.19012052	9.97
0.9120	0.205107	-0.523	0.15566885	0.20534623	0.19011563	9.97
0.9130	0.217295	-0.522	0.15563279	0.20533568	0.19008559	9.97
0.9140	0.246477	-0.529	0.15550435	0.20526928	0.19011086	9.97
0.9150	0.302238	-0.530	0.15521246	0.20513058	0.19015181	9.97
0.9160	0.389500	-0.530	0.15477771	0.20484346	0.19013715	9.97
0.9170	0.503969	-0.522	0.15420866	0.20451111	0.19013810	9.97
0.9180	0.639267	-0.522	0.15351415	0.20410943	0.19009918	9.97
0.9190	0.790157	-0.520	0.15273106	0.20365673	0.19004184	9.96
0.9200	0.952263	-0.517	0.15189064	0.20321178	0.18996495	9.96
0.9210	1.119232	-0.515	0.15101618	0.20275903	0.18987060	9.96
0.9220	1.283312	-0.512	0.15017378	0.20232946	0.18975484	9.96
0.9230	1.435575	-0.512	0.14941502	0.20191431	0.18960112	9.96
0.9240	1.569729	-0.520	0.14874768	0.20153779	0.18946105	9.95
0.9250	1.682940	-0.521	0.14816988	0.20122761	0.18932676	9.95
0.9260	1.773291	-0.524	0.14770395	0.20093185	0.18916142	9.95
0.9270	1.837893	-0.520	0.14734203	0.20075262	0.18908751	9.96
0.9280	1.877289	-0.521	0.14712024	0.20061779	0.18907398	9.96
0.9290	1.895857	-0.519	0.14698887	0.20054752	0.18905646	9.96
0.9300	1.901493	-0.514	0.14690232	0.20048207	0.18899411	9.96
0.9310	1.900005	-0.510	0.14687604	0.20047241	0.18899995	9.97
0.9320	1.894541	-0.506	0.14685369	0.20046854	0.18901360	9.97
0.9330	1.886616	-0.504	0.14687407	0.20048964	0.18898058	9.97
0.9340	1.877289	-0.509	0.14689159	0.20046860	0.18898445	9.97
0.9350	1.865902	-0.508	0.14689159	0.20046294	0.18903399	9.97
0.9360	1.850367	-0.517	0.14692467	0.20047247	0.18905538	9.97
0.9370	1.821213	-0.510	0.14700150	0.20051861	0.18908167	9.97
0.9380	1.763048	-0.510	0.14719027	0.20062357	0.18915951	9.97
0.9390	1.667318	-0.509	0.14756191	0.20083255	0.18929476	9.96
0.9400	1.535912	-0.506	0.14805216	0.20110810	0.18944651	9.96
0.9410	1.385107	-0.506	0.14870477	0.20150018	0.18960488	9.96
0.9420	1.232185	-0.509	0.14940709	0.20188832	0.18976247	9.96
0.9430	1.089764	-0.511	0.15009588	0.20227551	0.18987817	9.95
0.9440	0.966969	-0.510	0.15070784	0.20258951	0.18996483	9.95
0.9450	0.866861	-0.500	0.15122920	0.20286787	0.19006890	9.95
0.9460	0.785179	-0.499	0.15166980	0.20312709	0.19011754	9.95
0.9470	0.713081	-0.496	0.15209681	0.20336115	0.19014865	9.96
0.9480	0.641928	-0.496	0.15250736	0.20359135	0.19015932	9.96
0.9490	0.568628	-0.496	0.15292567	0.20380223	0.19017690	9.96
0.9500	0.494757	-0.491	0.15338570	0.20405650	0.19016135	9.96
0.9510	0.423174	-0.499	0.15380692	0.20431083	0.19017792	9.96
0.9520	0.358028	-0.498	0.15424466	0.20456517	0.19021583	9.97
0.9530	0.302324	-0.498	0.15463859	0.20478380	0.19021004	9.97
0.9540	0.259094	-0.498	0.15493822	0.20494074	0.19013613	9.97
0.9550	0.228367	-0.497	0.15519017	0.20506972	0.19013911	9.97
0.9560	0.209799	-0.504	0.15536141	0.20516217	0.19013125	9.97
0.9570	0.200357	-0.502	0.15545678	0.20522285	0.19011658	9.97
0.9580	0.197353	-0.501	0.15552390	0.20524895	0.19011849	9.97
0.9590	0.198355	-0.500	0.15555310	0.20529133	0.19011176	9.96
0.9600	0.202074	-0.506	0.15555114	0.20529705	0.19010305	9.96
0.9610	0.208082	-0.509	0.15554625	0.20528740	0.19010401	9.96
0.9620	0.219526	-0.509	0.15553069	0.20528740	0.19013417	9.96
0.9630	0.244989	-0.505	0.15541691	0.20526052	0.19016719	9.95
0.9640	0.293913	-0.514	0.15517861	0.20512670	0.19011855	9.95
0.9650	0.370159	-0.514	0.15480506	0.20489454	0.19013411	9.95
0.9660	0.472355	-0.521	0.15426320	0.20459205	0.19013405	9.95
0.9670	0.594091	-0.516	0.15365225	0.20424533	0.19011062	9.96
0.9680	0.730133	-0.514	0.15296549	0.20383787	0.19006693	9.96
0.9690	0.875788	-0.516	0.15218341	0.20343041	0.18999106	9.96
0.9700	1.025734	-0.516	0.15141106	0.20302194	0.18991035	9.96
0.9710	1.173706	-0.517	0.15064651	0.20260781	0.18981504	9.97
0.9720	1.313066	-0.515	0.14992565	0.20220131	0.18970716	9.97
0.9730	1.439009	-0.509	0.14930892	0.20186704	0.18959332	9.97
0.9740	1.551676	-0.513	0.14873892	0.20152611	0.18941337	9.97
0.9750	1.653099	-0.509	0.14820981	0.20124012	0.18930531	9.97
0.9760	1.741362	-0.510	0.14776617	0.20096755	0.18919742	9.97
0.9770	1.811600	-0.501	0.14739746	0.20076430	0.18911290	9.97
0.9780	1.859550	-0.498	0.14712119	0.20060730	0.18904388	9.97
0.9790	1.886473	-0.501	0.14696753	0.20052063	0.18899125	9.96
0.9800	1.897917	-0.502	0.14686054	0.20046383	0.18897271	9.96
0.9810	1.899233	-0.501	0.14683229	0.20042723	0.18897462	9.96
0.9820	1.894741	-0.495	0.14679831	0.20041853	0.18900573	9.96
0.9830	1.886415	-0.491	0.14678764	0.20040315	0.18903100	9.95
0.9840	1.875715	-0.497	0.14679247	0.20040315	0.18899202	9.95
0.9850	1.862183	-0.500	0.14680892	0.20043200	0.18899798	9.95
0.9860	1.843729	-0.505	0.14684296	0.20043194	0.18900293	9.95
0.9870	1.810484	-0.502	0.14694899	0.20049357	0.18904388	9.96
0.9880	1.750546	-0.504	0.14715236	0.20060229	0.18914503	9.96
0.9890	1.657906	-0.505	0.14749765	0.20079792	0.18931520	9.96
0.9900	1.535311	-0.500	0.14799178	0.20110136	0.18946403	9.96
0.9910	1.394033	-0.497	0.14859390	0.20147419	0.18958747	9.97
0.9920	1.244745	-0.497	0.14926511	0.20185751	0.18974996	9.97
0.9930	1.096802	-0.494	0.14996940	0.20224953	0.18988609	9.97
0.9940	0.960989	-0.506	0.15065420	0.20262420	0.18996406	9.97
0.9950	0.844717	-0.503	0.15127873	0.20294207	0.19005448	9.97
0.9960	0.749846	-0.505	0.15178651	0.20321369	0.19010800	9.97
0.9970	0.671225	-0.496	0.15225726	0.20346701	0.19015265	9.97
0.9980	0.601301	-0.498	0.15267265	0.20370007	0.19016534	9.97
0.9990	0.535526	-0.500	0.15307438	0.20391297	0.19022262	9.96
1.0000	0.473013	-0.501	0.15348393	0.20414805	0.19023824	9.96
1.0010	0.414391	-0.508	0.15385258	0.20435607	0.19019347	9.96
1.0020	0.360746	-0.510	0.15420270	0.20456517	0.19019836	9.96
1.0030	0.313883	-0.509	0.15454710	0.20475304	0.19018084	9.95
1.0040	0.276089	-0.512	0.15482241	0.20489752	0.19016814	9.95
1.0050	0.248451	-0.508	0.15502387	0.20499569	0.19015741	9.95
1.0060	0.230227	-0.509	0.15519029	0.20507073	0.19015944	9.95
1.0070	0.219469	-0.506	0.15530121	0.20514774	0.19015849	9.96
1.0080	0.214834	-0.510	0.15536439	0.20517474	0.19011962	9.96
1.0090	0.214663	-0.510	0.15542364	0.20518434	0.19014490	9.96
1.0100	0.217266	-0.506	0.15542358	0.20518047	0.19014782	9.96
1.0110	0.221672	-0.509	0.15541196	0.20519584	0.19014102	9.97
1.0120	0.228424	-0.509	0.15541887	0.20518821	0.19014978	9.97
1.0130	0.243044	-0.513	0.15536737	0.20518732	0.19018185	9.97
1.0140	0.276461	-0.521	0.15519810	0.20508522	0.19015735	9.97
1.0150	0.337172	-0.521	0.15491110	0.20490217	0.19014859	9.97
1.0160	0.428467	-0.518	0.15442765	0.20463824	0.19015449	9.97
1.0170	0.546055	-0.516	0.15382642	0.20431757	0.19017702	9.97
1.0180	0.683670	-0.512	0.15313768	0.20391399	0.19007105	9.97
1.0190	0.836077	-0.516	0.15233797	0.20348442	0.19000685	9.96
1.0200	0.997124	-0.516	0.15149170	0.20305669	0.18992502	9.96
1.0210	1.158800	-0.516	0.15066683	0.20261359	0.18981022	9.96
1.0220	1.312695	-0.518	0.14988184	0.20218307	0.18968278	9.96
1.0230	1.451769	-0.513	0.14917952	0.20180547	0.18958354	9.95
1.0240	1.572590	-0.521	0.14858419	0.20145684	0.18944353	9.95
1.0250	1.676388	-0.518	0.14803952	0.20115817	0.18929279	9.95
1.0260	1.762190	-0.528	0.14760464	0.20090771	0.18916440	9.95
1.0270	1.827908	-0.517	0.14726800	0.20071608	0.18911088	9.96
1.0280	1.871967	-0.513	0.14700043	0.20056587	0.18903983	9.96
1.0290	1.896057	-0.513	0.14686626	0.20046580	0.18898827	9.96
1.0300	1.906128	-0.514	0.14677197	0.20043206	0.18897665	9.96
1.0310	1.907187	-0.514	0.14673215	0.20041186	0.18896788	9.97
1.0320	1.903610	-0.506	0.14672720	0.20039248	0.18892795	9.97
1.0330	1.897116	-0.500	0.14670771	0.20041740	0.18894440	9.97
1.0340	1.888504	-0.509	0.14671546	0.20040590	0.18893468	9.97
1.0350	1.877203	-0.512	0.14673501	0.20042050	0.18893081	9.97
1.0360	1.861267	-0.513	0.14676517	0.20042533	0.18894547	9.97
1.0370	1.830311	-0.505	0.14688492	0.20047343	0.18902707	9.97
1.0380	1.767883	-0.506	0.14706576	0.20059085	0.18914193	9.97
1.0390	1.664944	-0.512	0.14744514	0.20079118	0.18928289	9.96
1.0400	1.526213	-0.508	0.14800161	0.20112157	0.18946397	9.96
1.0410	1.369486	-0.506	0.14866018	0.20150691	0.18963027	9.96
1.0420	1.212358	-0.502	0.14938778	0.20192879	0.18976843	9.96
1.0430	1.065960	-0.502	0.15011722	0.20233053	0.18990856	9.95
1.0440	0.939302	-0.513	0.15073210	0.20265985	0.19001371	9.95
1.0450	0.837193	-0.517	0.15130413	0.20295459	0.19006807	9.95
1.0460	0.756569	-0.520	0.15174681	0.20317137	0.19010979	9.95
1.0470	0.688477	-0.515	0.15214747	0.20339388	0.19016713	9.96
1.0480	0.623102	-0.515	0.15253162	0.20360386	0.19018668	9.96
1.0490	0.556040	-0.516	0.15291393	0.20382154	0.19016242	9.96
1.0500	0.488348	-0.514	0.15333128	0.20405370	0.19018680	9.96
1.0510	0.076132	-0.526	0.15706176	0.20626807	0.18985122	9.95
1.0520	0.077076	-0.520	0.15705788	0.20626801	0.18987948	9.95
1.0530	0.077934	-0.510	0.15705007	0.20626903	0.18990958	9.96
1.0540	0.079136	-0.512	0.15705293	0.20626712	0.18989205	9.96
1.0550	0.081110	-0.508	0.15704513	0.20625651	0.18990654	9.96
1.0560	0.083942	-0.516	0.15702289	0.20624012	0.18994445	9.96
1.0570	0.087404	-0.515	0.15701127	0.20624012	0.18995225	9.97
1.0580	0.094643	-0.514	0.15696651	0.20624876	0.18990266	9.97
1.0590	0.109892	-0.526	0.15690029	0.20618612	0.18992704	9.97
1.0600	0.136700	-0.530	0.15677577	0.20607257	0.19001162	9.97
1.0610	0.177498	-0.525	0.15653074	0.20594162	0.19004953	9.97
1.0620	0.234919	-0.510	0.15621364	0.20576817	0.19007087	9.97
1.0630	0.312681	-0.512	0.15580601	0.20550710	0.19013208	9.97
1.0640	0.412416	-0.515	0.15524757	0.20516318	0.19017786	9.96
1.0650	0.532808	-0.517	0.15462112	0.20476443	0.19016236	9.96
1.0660	0.671711	-0.520	0.15387112	0.20434928	0.19015849	9.96
1.0670	0.829496	-0.517	0.15305400	0.20388407	0.19013226	9.96
1.0680	1.006021	-0.517	0.15215123	0.20337164	0.19003886	9.95
1.0690	1.199970	-0.527	0.15114355	0.20281214	0.18985707	9.95
1.0700	1.404877	-0.523	0.15009099	0.20224190	0.18967897	9.95
1.0710	1.611500	-0.525	0.14907444	0.20166880	0.18945128	9.95
1.0720	1.807451	-0.521	0.14811331	0.20112073	0.18924117	9.96
1.0730	1.980686	-0.519	0.14728361	0.20063335	0.18900484	9.96
1.0740	2.122993	-0.523	0.14657938	0.20021909	0.18880248	9.96
1.0750	2.232342	-0.526	0.14601129	0.19990796	0.18865073	9.96
1.0760	2.312622	-0.529	0.14559400	0.19965661	0.18852144	9.96
1.0770	2.371416	-0.522	0.14525253	0.19946200	0.18839598	9.97
1.0780	2.415848	-0.521	0.14500451	0.19931263	0.18830448	9.97
1.0790	2.452497	-0.526	0.14478177	0.19917077	0.18822271	9.97
1.0800	2.484999	-0.521	0.14457172	0.19904363	0.18817014	9.97
1.0810	2.511892	-0.524	0.14439666	0.19893330	0.18810409	9.97
1.0820	2.528515	-0.523	0.14425951	0.19886750	0.18805355	9.97
1.0830	2.530918	-0.521	0.14420402	0.19880432	0.18806720	9.97
1.0840	2.519360	-0.527	0.14417773	0.19881594	0.18808758	9.96
1.0850	2.494469	-0.521	0.14420974	0.19881105	0.18810308	9.96
1.0860	2.444973	-0.518	0.14433718	0.19889754	0.18818086	9.96
1.0870	2.352848	-0.514	0.14462608	0.19906276	0.18832189	9.96
1.0880	2.211027	-0.511	0.14512903	0.19938892	0.18851066	9.95
1.0890	2.029867	-0.518	0.14579833	0.19981658	0.18875873	9.95
1.0900	1.838779	-0.522	0.14655310	0.20028555	0.18903595	9.95
1.0910	1.658592	-0.531	0.14734012	0.20073920	0.18924510	9.95
1.0920	1.498346	-0.524	0.14807653	0.20114952	0.18941826	9.95
1.0930	1.352320	-0.521	0.14876139	0.20156658	0.18957192	9.96
1.0940	1.213245	-0.522	0.14942473	0.20195097	0.18968964	9.96
1.0950	1.077089	-0.520	0.15008903	0.20235360	0.18980539	9.96
1.0960	0.945339	-0.520	0.15079033	0.20270520	0.18992895	9.96
1.0970	0.821142	-0.523	0.15146929	0.20306635	0.19003886	9.97
1.0980	0.707417	-0.525	0.15211332	0.20341796	0.19011569	9.97
1.0990	0.607738	-0.524	0.15270865	0.20371652	0.19014388	9.97
1.1000	0.523939	-0.521	0.15321159	0.20401317	0.19019741	9.97
1.1010	0.455961	-0.522	0.15367460	0.20425010	0.19019061	9.97
1.1020	0.399885	-0.516	0.15406758	0.20446014	0.19016051	9.97
1.1030	0.352736	-0.514	0.15441495	0.20465863	0.19016725	9.97
1.1040	0.312452	-0.513	0.15471166	0.20484447	0.19017702	9.96
1.1050	0.279751	-0.514	0.15495968	0.20498014	0.19013894	9.96
1.1060	0.254545	-0.514	0.15514642	0.20508128	0.19013017	9.96
1.1070	0.237122	-0.518	0.15532154	0.20516026	0.19015753	9.96
1.1080	0.226965	-0.520	0.15541297	0.20521039	0.19016147	9.95
1.1090	0.223646	-0.529	0.15548295	0.20522678	0.19010127	9.95
1.1100	0.225992	-0.527	0.15551311	0.20525950	0.19011480	9.95
1.1110	0.234375	-0.526	0.15548682	0.20525277	0.19012833	9.95
1.1120	0.256205	-0.517	0.15542942	0.20523638	0.19011182	9.96
1.1130	0.303583	-0.521	0.15520471	0.20514297	0.19010693	9.96
1.1140	0.385551	-0.521	0.15481091	0.20491469	0.19015551	9.96
1.1150	0.502539	-0.517	0.15423411	0.20454580	0.19016135	9.96
1.1160	0.648050	-0.522	0.15349287	0.20412290	0.19010884	9.96
1.1170	0.815420	-0.521	0.15263969	0.20364708	0.19002140	9.97
1.1180	1.000271	-0.514	0.15167755	0.20316356	0.18990755	9.97
1.1190	1.196651	-0.512	0.15065914	0.20261747	0.18975389	9.97
1.1200	1.398010	-0.506	0.14967084	0.20208389	0.18959528	9.97
1.1210	1.595221	-0.509	0.14870191	0.20151758	0.18941826	9.97
1.1220	1.777725	-0.509	0.14783812	0.20102912	0.18920332	9.97
1.1230	1.937141	-0.505	0.14706576	0.20058894	0.18897474	9.97
1.1240	2.069693	-0.509	0.14640629	0.20020652	0.18880451	9.96
1.1250	2.176552	-0.508	0.14586645	0.19989836	0.18866444	9.96
1.1260	2.260695	-0.513	0.14543742	0.19964695	0.18849897	9.96
1.1270	2.325926	-0.513	0.14509302	0.19942737	0.18839979	9.96
1.1280	2.375736	-0.516	0.14485371	0.19926453	0.18830639	9.95
1.1290	2.413960	-0.520	0.14462411	0.19912285	0.18823248	9.95
1.1300	2.443542	-0.512	0.14443934	0.19901764	0.18817419	9.95
1.1310	2.464943	-0.512	0.14430022	0.19894630	0.18810117	9.95
1.1320	2.476902	-0.506	0.14421177	0.19888699	0.18808085	9.96
1.1330	2.478304	-0.508	0.14417386	0.19884032	0.18806326	9.96
1.1340	2.469578	-0.514	0.14414376	0.19882572	0.18808562	9.96
1.1350	2.451382	-0.518	0.14417589	0.19884807	0.18810403	9.96
1.1360	2.415133	-0.514	0.14425850	0.19890052	0.18817604	9.96
1.1370	2.340746	-0.511	0.14448708	0.19905317	0.18830258	9.97
1.1380	2.217436	-0.506	0.14493358	0.19931740	0.18851066	9.97
1.1390	2.049351	-0.515	0.14553672	0.19970858	0.18869644	9.97
1.1400	1.861238	-0.512	0.14630711	0.20016521	0.18894935	9.97
1.1410	1.673870	-0.516	0.14710867	0.20065260	0.18919456	9.97
1.1420	1.498604	-0.510	0.14788592	0.20110530	0.18938041	9.97
1.1430	1.339216	-0.506	0.14865148	0.20153677	0.18952727	9.97
1.1440	1.196194	-0.506	0.14931971	0.20192879	0.18968183	9.96
1.1450	1.067991	-0.506	0.14996958	0.20229095	0.18980044	9.96
1.1460	0.950890	-0.509	0.15059304	0.20262903	0.18986464	9.96
1.1470	0.840797	-0.506	0.15120393	0.20293629	0.18996298	9.96
1.1480	0.736227	-0.507	0.15179628	0.20325798	0.19005835	9.95
1.1490	0.640268	-0.513	0.15236145	0.20355171	0.19009334	9.95
1.1500	0.556240	-0.518	0.15284973	0.20381570	0.19011658	9.95
1.1510	0.485315	-0.520	0.15332443	0.20405644	0.19015163	9.95
1.1520	0.425119	-0.510	0.15372914	0.20426637	0.19017398	9.96
1.1530	0.373850	-0.504	0.15406376	0.20448124	0.19016236	9.96
1.1540	0.331535	-0.505	0.15437305	0.20466810	0.19016624	9.96
1.1550	0.298433	-0.509	0.15461725	0.20480019	0.19015551	9.96
1.1560	0.274315	-0.516	0.15481275	0.20488304	0.19013119	9.96
1.1570	0.258808	-0.517	0.15497518	0.20495808	0.19013512	9.97
1.1580	0.250940	-0.519	0.15506750	0.20503610	0.19017214	9.97
1.1590	0.249109	-0.525	0.15510148	0.20505053	0.19014776	9.97
1.1600	0.252714	-0.528	0.15513271	0.20505065	0.19011468	9.97
1.1610	0.262356	-0.534	0.15509492	0.20505649	0.19012046	9.97
1.1620	0.286160	-0.526	0.15498990	0.20502269	0.19014287	9.97
1.1630	0.334883	-0.524	0.15477592	0.20491380	0.19010884	9.97
1.1640	0.416021	-0.521	0.15439361	0.20469981	0.19012058	9.96
1.1650	0.530748	-0.516	0.15382552	0.20437437	0.19015372	9.96
1.1660	0.674314	-0.520	0.15313488	0.20396209	0.19010311	9.96
1.1670	0.842257	-0.525	0.15228373	0.20348436	0.18995625	9.96
1.1680	1.029739	-0.522	0.15134305	0.20299888	0.18985796	9.95
1.1690	1.230526	-0.526	0.15033126	0.20244122	0.18971699	9.95
1.1700	1.437664	-0.522	0.14929819	0.20190477	0.18952239	9.95
1.1710	1.641941	-0.525	0.14831865	0.20134997	0.18928301	9.95
1.1720	1.831541	-0.521	0.14742184	0.20083177	0.18908834	9.96
1.1730	1.996737	-0.523	0.14665329	0.20039058	0.18887734	9.96
1.1740	2.131863	-0.528	0.14600348	0.20000046	0.18866825	9.96
1.1750	2.237120	-0.522	0.14547330	0.19969797	0.18851757	9.96
1.1760	2.315140	-0.525	0.14506578	0.19945043	0.18841732	9.96
1.1770	2.371302	-0.521	0.14476430	0.19928187	0.18829376	9.97
1.1780	2.411270	-0.514	0.14455128	0.19913352	0.18823922	9.97
1.1790	2.441368	-0.516	0.14437717	0.19900978	0.18816721	9.97
1.1800	2.466974	-0.509	0.14419818	0.19891006	0.18812054	9.97
1.1810	2.489433	-0.512	0.14406294	0.19881487	0.18800187	9.97
1.1820	2.505054	-0.511	0.14394432	0.19878578	0.18797857	9.97
1.1830	2.509947	-0.508	0.14389461	0.19873238	0.18798244	9.97
1.1840	2.502823	-0.509	0.14389467	0.19874209	0.18797082	9.96
1.1850	2.483969	-0.506	0.14391017	0.19870901	0.18800879	9.96
1.1860	2.444458	-0.508	0.14400947	0.19876838	0.18809825	9.96
1.1870	2.364378	-0.504	0.14422929	0.19892710	0.18822080	9.96
1.1880	2.234259	-0.500	0.14470786	0.19921595	0.18839586	9.95
1.1890	2.061596	-0.507	0.14535177	0.19962764	0.18863910	9.95
1.1900	1.873455	-0.506	0.14611435	0.20007741	0.18890178	9.95
1.1910	1.690264	-0.509	0.14688963	0.20055515	0.18908763	9.95
1.1920	1.521749	-0.504	0.14762408	0.20099437	0.18928409	9.95
1.1930	1.367054	-0.501	0.14835179	0.20139802	0.18949515	9.96
1.1940	1.225004	-0.505	0.14903855	0.20177847	0.18963420	9.96
1.1950	1.093254	-0.508	0.14968652	0.20213586	0.18974215	9.96
1.1960	0.970716	-0.510	0.15033627	0.20249408	0.18983841	9.96
1.1970	0.856276	-0.501	0.15095198	0.20281100	0.18993181	9.97
1.1980	0.750103	-0.496	0.15154624	0.20313466	0.19004560	9.97
1.1990	0.654688	-0.497	0.15212798	0.20340627	0.19008160	9.97
1.2000	0.571260	-0.497	0.15262121	0.20368844	0.19012636	9.97
1.2010	0.498962	-0.502	0.15307158	0.20392340	0.19009721	9.97
1.2020	0.434389	-0.500	0.15349478	0.20416224	0.19012636	9.97
1.2030	0.376568	-0.497	0.15388089	0.20439827	0.19016916	9.97
1.2040	0.325928	-0.502	0.15423304	0.20460731	0.19016618	9.96
1.2050	0.285158	-0.501	0.15456373	0.20477790	0.19014287	9.96
1.2060	0.254631	-0.500	0.15480489	0.20490026	0.19014388	9.96
1.2070	0.235004	-0.500	0.15499163	0.20499665	0.19014192	9.96
1.2080	0.224762	-0.501	0.15510058	0.20506400	0.19008642	9.95
1.2090	0.221872	-0.517	0.15513277	0.20509285	0.19006985	9.95
1.2100	0.224705	-0.521	0.15517950	0.20510536	0.19008839	9.95
1.2110	0.234175	-0.529	0.15517366	0.20510834	0.19008064	9.95
1.2120	0.258636	-0.526	0.15508229	0.20508140	0.19009620	9.95
1.2130	0.308704	-0.531	0.15487218	0.20497447	0.19013119	9.96
1.2140	0.391331	-0.530	0.15445971	0.20475489	0.19014674	9.96
1.2150	0.507202	-0.528	0.15387893	0.20442063	0.19008154	9.96
1.2160	0.652313	-0.524	0.15316004	0.20399106	0.19003588	9.96
1.2170	0.822401	-0.522	0.15229440	0.20352197	0.19000477	9.97
1.2180	1.012859	-0.519	0.15131581	0.20301437	0.18990654	9.97
1.2190	1.217709	-0.524	0.15029639	0.20246142	0.18970907	9.97
1.2200	1.429710	-0.526	0.14924490	0.20189023	0.18953300	9.97
1.2210	1.638250	-0.522	0.14824879	0.20133442	0.18931806	9.97
1.2220	1.830082	-0.519	0.14735973	0.20080858	0.18906522	9.97
1.2230	1.994534	-0.512	0.14656293	0.20035684	0.18883955	9.97
1.2240	2.127342	-0.520	0.14591986	0.19997633	0.18865180	9.96
1.2250	2.229710	-0.514	0.14538777	0.19967479	0.18848544	9.96
1.2260	2.306213	-0.518	0.14499480	0.19943792	0.18836570	9.96
1.2270	2.361717	-0.512	0.14471567	0.19924152	0.18828017	9.96
1.2280	2.401800	-0.509	0.14449388	0.19911051	0.18819940	9.95
1.2290	2.432213	-0.512	0.14431095	0.19899446	0.18810797	9.95
1.2300	2.457561	-0.513	0.14414358	0.19891870	0.18805254	9.95
1.2310	2.478132	-0.518	0.14400250	0.19881016	0.18802732	9.95
1.2320	2.490950	-0.511	0.14392954	0.19876158	0.18798447	9.95
1.2330	2.493010	-0.508	0.14386833	0.19872278	0.18797189	9.96
1.2340	2.484198	-0.509	0.14387614	0.19871110	0.18797857	9.96
1.2350	2.464886	-0.515	0.14388788	0.19873142	0.18799323	9.96
1.2360	2.423973	-0.517	0.14399385	0.19878387	0.18805343	9.96
1.2370	2.341976	-0.517	0.14426327	0.19895029	0.18819451	9.97
1.2380	2.210827	-0.509	0.14472240	0.19922161	0.18840659	9.97
1.2390	2.038336	-0.516	0.14537126	0.19963044	0.18864399	9.97
1.2400	1.851740	-0.516	0.14610177	0.20008796	0.18890673	9.97
1.2410	1.669836	-0.518	0.14688778	0.20055228	0.18912745	9.97
1.2420	1.502237	-0.512	0.14765716	0.20098674	0.18930542	9.97
1.2430	1.348972	-0.507	0.14837301	0.20141727	0.18947178	9.97
1.2440	1.208153	-0.513	0.14905584	0.20180452	0.18960696	9.96
1.2450	1.078291	-0.517	0.14969218	0.20215309	0.18971890	9.96
1.2460	0.957155	-0.520	0.15033907	0.20250666	0.18981606	9.96
1.2470	0.843801	-0.520	0.15095484	0.20283991	0.18994844	9.96
1.2480	0.738115	-0.513	0.15154624	0.20315212	0.19004762	9.95
1.2490	0.643301	-0.520	0.15210366	0.20344496	0.19005251	9.95
1.2500	0.561218	-0.516	0.15259683	0.20371950	0.19010693	9.95
1.2510	0.491209	-0.521	0.15303159	0.20393604	0.19011474	9.95
1.2520	0.430412	-0.517	0.15346837	0.20416141	0.19010597	9.95
1.2530	0.377054	-0.516	0.15382731	0.20438302	0.19009817	9.96
1.2540	0.331221	-0.522	0.15415323	0.20456797	0.19012046	9.96
1.2550	0.294113	-0.518	0.15444791	0.20470965	0.19012129	9.96
1.2560	0.265989	-0.524	0.15465426	0.20484251	0.19011742	9.96
1.2570	0.247650	-0.523	0.15484113	0.20493686	0.19010669	9.97
1.2580	0.238237	-0.525	0.15494132	0.20499748	0.19011748	9.97
1.2590	0.236435	-0.529	0.15499085	0.20502055	0.19007760	9.97
1.2600	0.239925	-0.529	0.15501320	0.20503891	0.19007188	9.97
1.2610	0.249996	-0.526	0.15498883	0.20501685	0.19007099	9.97
1.2620	0.274630	-0.521	0.15490323	0.20495814	0.19007391	9.97
1.2630	0.324612	-0.520	0.15468144	0.20484930	0.19010502	9.97
1.2640	0.406208	-0.522	0.15427876	0.20463258	0.19012737	9.96
1.2650	0.520048	-0.524	0.15370387	0.20429832	0.19011182	9.96
1.2660	0.662270	-0.525	0.15302199	0.20387930	0.19005930	9.96
1.2670	0.828695	-0.522	0.15216011	0.20342660	0.18996781	9.96
1.2680	1.014605	-0.514	0.15122724	0.20295846	0.18986958	9.95
1.2690	1.214046	-0.514	0.15021551	0.20243067	0.18967605	9.95
1.2700	1.421156	-0.509	0.14918542	0.20187587	0.18950683	9.95
1.2710	1.627035	-0.512	0.14822143	0.20130455	0.18932110	9.95
1.2720	1.819353	-0.506	0.14730227	0.20079505	0.18907195	9.95
1.2730	1.987724	-0.508	0.14651722	0.20034230	0.18883359	9.96
1.2740	2.126970	-0.515	0.14584506	0.19995135	0.18863714	9.96
1.2750	2.237320	-0.518	0.14528471	0.19961423	0.18846405	9.96
1.2760	2.321119	-0.517	0.14486355	0.19935709	0.18831629	9.96
1.2770	2.381716	-0.512	0.14453566	0.19916528	0.18822098	9.97
1.2780	2.423887	-0.508	0.14431483	0.19903994	0.18816936	9.97
1.2790	2.453442	-0.512	0.14414752	0.19891775	0.18808860	9.97
1.2800	2.474785	-0.517	0.14399958	0.19885272	0.18803883	9.97
1.2810	2.490120	-0.522	0.14388877	0.19874877	0.18802321	9.97
1.2820	2.497902	-0.516	0.14380801	0.19874489	0.18799990	9.97
1.2830	2.497387	-0.513	0.14379638	0.19869441	0.18795717	9.96
1.2840	2.488174	-0.514	0.14380026	0.19871485	0.18797469	9.96
1.2850	2.470322	-0.514	0.14381284	0.19870716	0.18799615	9.96
1.2860	2.434101	-0.509	0.14390421	0.19877416	0.18804377	9.96
1.2870	2.359142	-0.507	0.14413482	0.19890010	0.18816346	9.96
1.2880	2.235661	-0.501	0.14458323	0.19916385	0.18838620	9.95
1.2890	2.068834	-0.509	0.14520973	0.19954669	0.18860310	9.95
1.2900	1.884613	-0.510	0.14594221	0.20001209	0.18883264	9.95
1.2910	1.702795	-0.516	0.14670205	0.20046085	0.18907869	9.95
1.2920	1.533995	-0.513	0.14744323	0.20090586	0.18928289	9.95
1.2930	1.380501	-0.505	0.14815527	0.20132005	0.18940842	9.96
1.2940	1.242456	-0.509	0.14883906	0.20168990	0.18955916	9.96
1.2950	1.118345	-0.505	0.14945191	0.20202988	0.18969834	9.96
1.2960	1.004305	-0.513	0.15004921	0.20234966	0.18981898	9.96
1.2970	0.896587	-0.509	0.15060562	0.20265120	0.18991143	9.97
1.2980	0.793705	-0.507	0.15119803	0.20293349	0.19000876	9.97
1.2990	0.698261	-0.511	0.15174371	0.20323205	0.19004953	9.97
1.3000	0.613489	-0.513	0.15222424	0.20350748	0.19005829	9.97
1.3010	0.539560	-0.521	0.15268826	0.20372516	0.19009519	9.97
1.3020	0.473728	-0.514	0.15310365	0.20395833	0.19014585	9.97
1.3030	0.414248	-0.513	0.15352291	0.20418668	0.19013709	9.97
1.3040	0.361891	-0.514	0.15389353	0.20440334	0.19013417	9.96
1.3050	0.318975	-0.514	0.15419024	0.20456219	0.19013608	9.96
1.3060	0.285730	-0.511	0.15444517	0.20471442	0.19011569	9.96
1.3070	0.263042	-0.508	0.15462220	0.20480496	0.19008654	9.96
1.3080	0.250425	-0.504	0.15474081	0.20488977	0.19011664	9.95
1.3090	0.246420	-0.517	0.15480989	0.20492244	0.19010878	9.95
1.3100	0.248451	-0.518	0.15484494	0.20493889	0.19005430	9.95
1.3110	0.256805	-0.525	0.15482354	0.20493114	0.19004560	9.95
1.3120	0.279179	-0.518	0.15478355	0.20492053	0.19008851	9.95
1.3130	0.326586	-0.521	0.15454817	0.20481837	0.19011277	9.96
1.3140	0.406351	-0.522	0.15417469	0.20458812	0.19011366	9.96
1.3150	0.518761	-0.526	0.15363491	0.20426834	0.19011271	9.96
1.3160	0.659866	-0.522	0.15293062	0.20389086	0.19007486	9.96
1.3170	0.824347	-0.520	0.15212810	0.20344013	0.18991923	9.97
1.3180	1.006365	-0.513	0.15118259	0.20297199	0.18982190	9.97
1.3190	1.198597	-0.520	0.15019810	0.20246047	0.18971980	9.97
1.3200	1.394749	-0.525	0.14923507	0.20193648	0.18954378	9.97
1.3210	1.588211	-0.528	0.14830118	0.20139623	0.18929964	9.97
1.3220	1.768856	-0.521	0.14747334	0.20091748	0.18908954	9.97
1.3230	1.928301	-0.516	0.14673799	0.20049071	0.18892318	9.97
1.3240	2.061853	-0.514	0.14608037	0.20011014	0.18871975	9.96
1.3250	2.171574	-0.515	0.14554739	0.19980103	0.18854755	9.96
1.3260	2.261181	-0.518	0.14509994	0.19951689	0.18841237	9.96
1.3270	2.333050	-0.517	0.14474493	0.19929534	0.18828398	9.96
1.3280	2.389040	-0.518	0.14448518	0.19913548	0.18817604	9.95
1.3290	2.432156	-0.526	0.14423019	0.19897014	0.18808556	9.95
1.3300	2.466545	-0.521	0.14403456	0.19886464	0.18803507	9.95
1.3310	2.493353	-0.518	0.14387029	0.19874221	0.18796694	9.95
1.3320	2.510633	-0.512	0.14374781	0.19869846	0.18793297	9.95
1.3330	2.515955	-0.510	0.14371973	0.19864202	0.18793297	9.96
1.3340	2.509947	-0.517	0.14368176	0.19862551	0.18794173	9.96
1.3350	2.494154	-0.512	0.14369535	0.19863027	0.18797082	9.96
1.3360	2.462082	-0.511	0.14377308	0.19865954	0.18801647	9.96
1.3370	2.393732	-0.506	0.14396173	0.19879550	0.18809819	9.97
1.3380	2.275743	-0.505	0.14438677	0.19903046	0.18826360	9.97
1.3390	2.111263	-0.515	0.14495379	0.19942623	0.18850970	9.97
1.3400	1.924381	-0.513	0.14568722	0.19985592	0.18878788	9.97
1.3410	1.738729	-0.514	0.14646059	0.20034039	0.18897855	9.97
1.3420	1.565723	-0.505	0.14722526	0.20078641	0.18917024	9.97
1.3430	1.407223	-0.501	0.14797145	0.20121408	0.18938130	9.97
1.3440	1.261768	-0.502	0.14865816	0.20160425	0.18952620	9.96
1.3450	1.126728	-0.506	0.14932841	0.20196831	0.18962049	9.96
1.3460	0.999355	-0.512	0.14998692	0.20233333	0.18977225	9.96
1.3470	0.879078	-0.511	0.15062708	0.20267528	0.18993962	9.96
1.3480	0.766954	-0.504	0.15126216	0.20302880	0.19001544	9.95
1.3490	0.667820	-0.511	0.15184104	0.20330232	0.19003099	9.95
1.3500	0.583792	-0.510	0.15233129	0.20356435	0.19008738	9.95
1.3510	0.514040	-0.516	0.15278357	0.20379454	0.19010592	9.95
1.3520	0.454359	-0.512	0.15316689	0.20401990	0.19013995	9.95
1.3530	0.401888	-0.509	0.15355110	0.20422214	0.19014287	9.96
1.3540	0.356197	-0.510	0.15387315	0.20441180	0.19014293	9.96
1.3550	0.318632	-0.507	0.15414160	0.20456213	0.19012839	9.96
1.3560	0.289450	-0.510	0.15438098	0.20468646	0.19011372	9.96
1.3570	0.269222	-0.507	0.15455019	0.20479834	0.19013798	9.97
1.3580	0.258293	-0.508	0.15466976	0.20485133	0.19012153	9.97
1.3590	0.255175	-0.518	0.15474367	0.20487154	0.19007289	9.97
1.3600	0.257864	-0.520	0.15475243	0.20489454	0.19008362	9.97
1.3610	0.266333	-0.517	0.15473592	0.20489836	0.19009036	9.97
1.3620	0.288219	-0.511	0.15469611	0.20487809	0.19006795	9.97
1.3630	0.335369	-0.506	0.15447336	0.20476925	0.19008547	9.97
1.3640	0.415707	-0.508	0.15409398	0.20455921	0.19011271	9.96
1.3650	0.529346	-0.509	0.15352875	0.20422405	0.19010496	9.96
1.3660	0.671883	-0.513	0.15283132	0.20384270	0.19003302	9.96
1.3670	0.838966	-0.514	0.15200061	0.20338708	0.18995517	9.96
1.3680	1.026592	-0.511	0.15107059	0.20288908	0.18984723	9.95
1.3690	1.228495	-0.516	0.15003657	0.20235163	0.18966240	9.95
1.3700	1.437149	-0.514	0.14901513	0.20180446	0.18947673	9.95
1.3710	1.643200	-0.517	0.14801133	0.20122856	0.18926662	9.95
1.3720	1.835289	-0.509	0.14711446	0.20070934	0.18902242	9.95
1.3730	2.002773	-0.512	0.14634305	0.20024610	0.18876845	9.96
1.3740	2.140474	-0.510	0.14566696	0.19986659	0.18861765	9.96
1.3750	2.247763	-0.506	0.14514649	0.19954205	0.18845910	9.96
1.3760	2.327471	-0.505	0.14473504	0.19930023	0.18829477	9.96
1.3770	2.383690	-0.509	0.14444417	0.19912004	0.18819553	9.97
1.3780	2.421656	-0.509	0.14423114	0.19897991	0.18814689	9.97
1.3790	2.447233	-0.516	0.14404047	0.19891500	0.18807685	9.97
1.3800	2.465773	-0.505	0.14393353	0.19882274	0.18800974	9.97
1.3810	2.479334	-0.510	0.14383143	0.19876438	0.18797773	9.97
1.3820	2.486601	-0.508	0.14376438	0.19871193	0.18795526	9.97
1.3830	2.486086	-0.509	0.14374590	0.19869936	0.18793190	9.97
1.3840	2.477016	-0.512	0.14373034	0.19869453	0.18795031	9.96
1.3850	2.459049	-0.511	0.14376622	0.19868964	0.18797952	9.96
1.3860	2.421083	-0.508	0.14385855	0.19874018	0.18804276	9.96
1.3870	2.342577	-0.507	0.14410371	0.19888747	0.18816143	9.96
1.3880	2.214317	-0.502	0.14456004	0.19917631	0.18839586	9.95
1.3890	2.043085	-0.506	0.14519823	0.19957936	0.18863130	9.95
1.3900	1.855059	-0.509	0.14597541	0.20003504	0.18885511	9.95
1.3910	1.669006	-0.509	0.14675546	0.20051956	0.18909544	9.95
1.3920	1.494799	-0.505	0.14752287	0.20097423	0.18931818	9.95
1.3930	1.333809	-0.498	0.14827877	0.20142502	0.18944663	9.96
1.3940	1.187181	-0.501	0.14898604	0.20181024	0.18958080	9.96
1.3950	1.054802	-0.502	0.14968258	0.20218211	0.18972766	9.96
1.3960	0.935097	-0.508	0.15030313	0.20251346	0.18984443	9.96
1.3970	0.824633	-0.505	0.15091002	0.20283234	0.18989313	9.97
1.3980	0.721636	-0.501	0.15149850	0.20314819	0.18999332	9.97
1.3990	0.627680	-0.504	0.15204036	0.20342368	0.19006330	9.97
1.4000	0.545254	-0.512	0.15254921	0.20368177	0.19006801	9.97
1.4010	0.474901	-0.516	0.15300643	0.20393324	0.19008744	9.97
1.4020	0.414333	-0.511	0.15339941	0.20415193	0.19012344	9.97
1.4030	0.361834	-0.501	0.15378648	0.20435423	0.19013119	9.97
1.4040	0.317001	-0.498	0.15410358	0.20453238	0.19009513	9.96
1.4050	0.280552	-0.499	0.15437508	0.20467979	0.19009227	9.96
1.4060	0.252228	-0.506	0.15461051	0.20479256	0.19009811	9.96
1.4070	0.232401	-0.504	0.15478557	0.20488596	0.19005150	9.96
1.4080	0.221014	-0.506	0.15491682	0.20496297	0.19004953	9.95
1.4090	0.217466	-0.516	0.15498388	0.20497257	0.19003403	9.95
1.4100	0.219898	-0.520	0.15498972	0.20498508	0.19003010	9.95
1.4110	0.227880	-0.521	0.15498394	0.20499951	0.19003403	9.95
1.4120	0.248852	-0.511	0.15491492	0.20498019	0.19003987	9.95
1.4130	0.294313	-0.509	0.15469509	0.20488286	0.19007391	9.96
1.4140	0.372391	-0.509	0.15432161	0.20467001	0.19007874	9.96
1.4150	0.484200	-0.512	0.15374964	0.20435709	0.19009048	9.96
1.4160	0.625076	-0.510	0.15302783	0.20394194	0.19008857	9.96
1.4170	0.791187	-0.516	0.15221262	0.20349979	0.18995720	9.97
1.4180	0.978613	-0.511	0.15127397	0.20301813	0.18984526	9.97
1.4190	1.181259	-0.522	0.15023017	0.20245463	0.18971586	9.97
1.4200	1.392717	-0.522	0.14919800	0.20191342	0.18953097	9.97
1.4210	1.603889	-0.526	0.14817464	0.20134419	0.18924212	9.97
1.4220	1.802416	-0.521	0.14724857	0.20081735	0.18900001	9.97
1.4230	1.975708	-0.516	0.14643735	0.20035589	0.18882203	9.97
1.4240	2.115984	-0.522	0.14575636	0.19996762	0.18861777	9.96
1.4250	2.223244	-0.518	0.14522910	0.19963527	0.18842024	9.96
1.4260	2.301493	-0.520	0.14483225	0.19939071	0.18830830	9.96
1.4270	2.357168	-0.512	0.14453661	0.19920003	0.18823338	9.96
1.4280	2.396421	-0.508	0.14434117	0.19908243	0.18814099	9.95
1.4290	2.425547	-0.512	0.14415151	0.19895762	0.18806708	9.95
1.4300	2.448578	-0.512	0.14401042	0.19887024	0.18803114	9.95
1.4310	2.466316	-0.512	0.14386934	0.19880331	0.18797272	9.95
1.4320	2.476587	-0.508	0.14379925	0.19874591	0.18797183	9.95
1.4330	2.477674	-0.506	0.14377791	0.19874692	0.18793875	9.96
1.4340	2.469149	-0.505	0.14376146	0.19869733	0.18794841	9.96
1.4350	2.451067	-0.501	0.14379066	0.19873923	0.18797171	9.96
1.4360	2.413960	-0.501	0.14387333	0.19877505	0.18802136	9.96
1.4370	2.338400	-0.501	0.14411557	0.19892621	0.18814784	9.97
1.4380	2.214775	-0.501	0.14454943	0.19919062	0.18833077	9.97
1.4390	2.048063	-0.507	0.14515442	0.19958431	0.18857777	9.97
1.4400	1.863670	-0.505	0.14591306	0.20003229	0.18883461	9.97
1.4410	1.680737	-0.505	0.14669406	0.20047921	0.18904179	9.97
1.4420	1.509418	-0.493	0.14747524	0.20093286	0.18924803	9.97
1.4430	1.350889	-0.488	0.14818633	0.20136052	0.18942809	9.97
1.4440	1.205292	-0.494	0.14886147	0.20177281	0.18956137	9.96
1.4450	1.073055	-0.501	0.14952779	0.20211089	0.18968779	9.96
1.4460	0.953550	-0.503	0.15014553	0.20243937	0.18980646	9.96
1.4470	0.844717	-0.506	0.15076613	0.20274365	0.18989986	9.96
1.4480	0.744610	-0.502	0.15134102	0.20302778	0.18994856	9.95
1.4490	0.654173	-0.508	0.15186441	0.20329463	0.18999434	9.95
1.4500	0.574551	-0.506	0.15235764	0.20355570	0.19007105	9.95
1.4510	0.505714	-0.514	0.15277690	0.20378208	0.19006228	9.95
1.4520	0.444460	-0.510	0.15317076	0.20400363	0.19007772	9.95
1.4530	0.389786	-0.510	0.15355295	0.20422697	0.19012642	9.96
1.4540	0.342178	-0.511	0.15386134	0.20442927	0.19013029	9.96
1.4550	0.303640	-0.516	0.15415907	0.20457280	0.19009233	9.96
1.4560	0.273886	-0.522	0.15439349	0.20469034	0.19008464	9.96
1.4570	0.253315	-0.520	0.15457153	0.20480108	0.19008756	9.97
1.4580	0.241270	-0.520	0.15472037	0.20487708	0.19007397	9.97
1.4590	0.237322	-0.523	0.15478170	0.20490122	0.19004774	9.97
1.4600	0.239525	-0.526	0.15480888	0.20489931	0.19007307	9.97
1.4610	0.247707	-0.529	0.15480101	0.20489645	0.19006038	9.97
1.4620	0.268707	-0.518	0.15473777	0.20489550	0.19000578	9.97
1.4630	0.314255	-0.511	0.15452772	0.20479143	0.19004458	9.97
1.4640	0.392704	-0.511	0.15416777	0.20458436	0.19012535	9.96
1.4650	0.505629	-0.512	0.15357834	0.20426446	0.19011086	9.96
1.4660	0.648508	-0.513	0.15288579	0.20387632	0.18999320	9.96
1.4670	0.816708	-0.514	0.15204930	0.20340919	0.18991143	9.96
1.4680	1.005392	-0.508	0.15107262	0.20292765	0.18985790	9.95
1.4690	1.207495	-0.509	0.15005410	0.20239598	0.18968278	9.95
1.4700	1.416121	-0.509	0.14903563	0.20183247	0.18948048	9.95
1.4710	1.623116	-0.513	0.14804047	0.20129591	0.18925291	9.95
1.4720	1.817493	-0.510	0.14716500	0.20077097	0.18901557	9.95
1.4730	1.988926	-0.505	0.14635080	0.20033568	0.18878508	9.96
1.4740	2.130976	-0.509	0.14566499	0.19991386	0.18858755	9.96
1.4750	2.242355	-0.513	0.14511639	0.19959122	0.18842107	9.96
1.4760	2.325525	-0.520	0.14470696	0.19931763	0.18824106	9.96
1.4770	2.384748	-0.523	0.14441615	0.19911218	0.18810982	9.97
1.4780	2.425690	-0.517	0.14420605	0.19896930	0.18811768	9.97
1.4790	2.454529	-0.516	0.14401633	0.19886273	0.18806034	9.97
1.4800	2.476702	-0.517	0.14387429	0.19880241	0.18796206	9.97
1.4810	2.494926	-0.521	0.14373612	0.19871002	0.18791723	9.97
1.4820	2.507172	-0.515	0.14365256	0.19865263	0.18790841	9.97
1.4830	2.511034	-0.505	0.14359331	0.19861174	0.18790936	9.97
1.4840	2.504997	-0.504	0.14356798	0.19860595	0.18791527	9.96
1.4850	2.489004	-0.506	0.14360195	0.19861174	0.18793482	9.96
1.4860	2.453957	-0.508	0.14367384	0.19865358	0.18797863	9.96
1.4870	2.378740	-0.509	0.14391309	0.19878751	0.18805152	9.95
1.4880	2.251053	-0.500	0.14433724	0.19906610	0.18827039	9.95
1.4890	2.076044	-0.509	0.14497435	0.19947439	0.18853205	9.95
1.4900	1.880493	-0.516	0.14575458	0.19995439	0.18880838	9.95
1.4910	1.689548	-0.525	0.14655894	0.20045036	0.18904191	9.95
1.4920	1.515570	-0.519	0.14735067	0.20089728	0.18924320	9.95
1.4930	1.360817	-0.516	0.14805979	0.20131534	0.18940955	9.96
1.4940	1.222601	-0.516	0.14872324	0.20167363	0.18954271	9.96
1.4950	1.096687	-0.514	0.14936638	0.20203573	0.18971491	9.96
1.4960	0.979385	-0.518	0.14997643	0.20236409	0.18983263	9.96
1.4970	0.867119	-0.516	0.15060478	0.20267230	0.18985021	9.97
1.4980	0.759888	-0.510	0.15120208	0.20299590	0.18994069	9.97
1.4990	0.660896	-0.516	0.15176529	0.20330030	0.19001067	9.97
1.5000	0.574265	-0.516	0.15229249	0.20356512	0.19005245	9.97
1.5010	0.500336	-0.513	0.15274668	0.20380700	0.19006705	9.97
1.5020	0.435591	-0.504	0.15317947	0.20403904	0.19009340	9.97
1.5030	0.377283	-0.503	0.15356857	0.20425677	0.19009727	9.97
1.5040	0.325642	-0.511	0.15392268	0.20445609	0.19006419	9.96
1.5050	0.283384	-0.517	0.15426898	0.20463437	0.19006801	9.96
1.5060	0.251713	-0.522	0.15452677	0.20478565	0.19009036	9.96
1.5070	0.230312	-0.524	0.15471256	0.20487624	0.19007474	9.96
1.5080	0.218210	-0.519	0.15485263	0.20494652	0.19008356	9.95
1.5090	0.213776	-0.524	0.15491581	0.20499659	0.19010115	9.95
1.5100	0.215607	-0.526	0.15494108	0.20501107	0.19010216	9.95
1.5110	0.223045	-0.526	0.15494901	0.20500052	0.18998146	9.95
1.5120	0.241642	-0.518	0.15487415	0.20497638	0.18999404	9.95
1.5130	0.282211	-0.518	0.15469027	0.20491660	0.19003880	9.96
1.5140	0.354166	-0.520	0.15434003	0.20471424	0.19006699	9.96
1.5150	0.460052	-0.519	0.15379041	0.20440316	0.19005823	9.96
1.5160	0.596237	-0.516	0.15312219	0.20401394	0.19004458	9.96
1.5170	0.758572	-0.513	0.15230227	0.20357579	0.18997651	9.97
1.5180	0.944223	-0.510	0.15136260	0.20309329	0.18987048	9.97
1.5190	1.148129	-0.515	0.15033633	0.20254523	0.18972069	9.97
1.5200	1.363392	-0.520	0.14926147	0.20197701	0.18954176	9.97
1.5210	1.579142	-0.519	0.14823222	0.20138466	0.18928790	9.97
1.5220	1.782417	-0.510	0.14727890	0.20085007	0.18905157	9.97
1.5230	1.960516	-0.504	0.14645880	0.20036936	0.18882972	9.97
1.5240	2.106085	-0.505	0.14575738	0.19996381	0.18861383	9.96
1.5250	2.218180	-0.512	0.14518642	0.19962955	0.18840665	9.96
1.5260	2.300262	-0.509	0.14477700	0.19937521	0.18829185	9.96
1.5270	2.358541	-0.504	0.14446664	0.19918531	0.18820524	9.96
1.5280	2.399368	-0.497	0.14424676	0.19905818	0.18812543	9.95
1.5290	2.428808	-0.501	0.14407057	0.19893432	0.18805635	9.95
1.5300	2.451410	-0.501	0.14390719	0.19886440	0.18801355	9.95
1.5310	2.468948	-0.507	0.14380115	0.19877797	0.18796688	9.95
1.5320	2.479763	-0.506	0.14371467	0.19873524	0.18793768	9.95
1.5330	2.482224	-0.498	0.14366513	0.19868863	0.18795520	9.96
1.5340	2.475729	-0.502	0.14365447	0.19868481	0.18795913	9.96
1.5350	2.460194	-0.506	0.14366621	0.19868964	0.18794650	9.96
1.5360	2.427950	-0.514	0.14373815	0.19874591	0.18798929	9.96
1.5370	2.359200	-0.510	0.14394051	0.19886029	0.18809050	9.97
1.5380	2.240353	-0.504	0.14437139	0.19912225	0.18827724	9.97
1.5390	2.074699	-0.498	0.14496768	0.19949836	0.18852049	9.97
1.5400	1.886644	-0.496	0.14572632	0.19995505	0.18879479	9.97
1.5410	1.698990	-0.500	0.14652300	0.20042998	0.18901277	9.97
1.5420	1.523123	-0.497	0.14730215	0.20088363	0.18921310	9.97
1.5430	1.360216	-0.496	0.14807069	0.20132387	0.18939006	9.97
1.5440	1.211729	-0.498	0.14877498	0.20171779	0.18954563	9.96
1.5450	1.077919	-0.502	0.14944029	0.20209056	0.18967605	9.96
1.5460	0.957899	-0.504	0.15008420	0.20241904	0.18978703	9.96
1.5470	0.848265	-0.504	0.15069127	0.20272911	0.18987942	9.96
1.5480	0.746670	-0.502	0.15126711	0.20304799	0.18997478	9.95
1.5490	0.654716	-0.507	0.15182155	0.20330703	0.19002342	9.95
1.5500	0.574636	-0.509	0.15228355	0.20355952	0.19006127	9.95
1.5510	0.505915	-0.514	0.15272039	0.20380330	0.19006604	9.95
1.5520	0.445633	-0.510	0.15312016	0.20400751	0.19008344	9.95
1.5530	0.391502	-0.503	0.15348113	0.20421356	0.19010776	9.96
1.5540	0.344296	-0.511	0.15382934	0.20437914	0.19009024	9.96
1.5550	0.305529	-0.512	0.15411144	0.20455539	0.19006616	9.96
1.5560	0.275917	-0.517	0.15433908	0.20465368	0.19011098	9.96
1.5570	0.255632	-0.514	0.15452772	0.20474809	0.19012761	9.97
1.5580	0.243988	-0.516	0.15462786	0.20483100	0.19007206	9.97
1.5590	0.239725	-0.523	0.15467936	0.20486385	0.19006419	9.97
1.5600	0.241299	-0.519	0.15473294	0.20487642	0.19007880	9.97
1.5610	0.248508	-0.518	0.15472132	0.20486766	0.19006324	9.97
1.5620	0.266018	-0.512	0.15465909	0.20485997	0.19002038	9.97
1.5630	0.305300	-0.511	0.15448785	0.20479435	0.19005638	9.97
1.5640	0.376225	-0.516	0.15414542	0.20461518	0.19008648	9.96
1.5650	0.482655	-0.512	0.15362406	0.20430118	0.19005436	9.96
1.5660	0.622101	-0.517	0.15293723	0.20389956	0.19000381	9.96
1.5670	0.790300	-0.511	0.15208220	0.20345646	0.18997657	9.96
1.5680	0.982075	-0.507	0.15110362	0.20296329	0.18988717	9.95
1.5690	1.189213	-0.508	0.15006775	0.20240265	0.18964201	9.95
1.5700	1.401758	-0.509	0.14901036	0.20185268	0.18944842	9.95
1.5710	1.609726	-0.509	0.14802980	0.20128626	0.18924510	9.95
1.5720	1.802273	-0.509	0.14713478	0.20077097	0.18902040	9.95
1.5730	1.969585	-0.505	0.14634985	0.20033562	0.18881220	9.96
1.5740	2.106056	-0.506	0.14571559	0.19996107	0.18861371	9.96
1.5750	2.211657	-0.505	0.14518350	0.19966155	0.18845713	9.96
1.5760	2.289391	-0.510	0.14478374	0.19940817	0.18831223	9.96
1.5770	2.344723	-0.513	0.14449781	0.19924819	0.18821788	9.97
1.5780	2.383261	-0.514	0.14430320	0.19910270	0.18815559	9.97
1.5790	2.411413	-0.522	0.14415920	0.19900006	0.18810606	9.97
1.5800	2.434559	-0.518	0.14401323	0.19890523	0.18804955	9.97
1.5810	2.454271	-0.521	0.14387703	0.19881773	0.18796980	9.97
1.5820	2.467890	-0.514	0.14376038	0.19877899	0.18793184	9.97
1.5830	2.472410	-0.508	0.14372534	0.19874018	0.18793190	9.97
1.5840	2.466660	-0.510	0.14370197	0.19873720	0.18796116	9.96
1.5850	2.451668	-0.505	0.14372629	0.19872653	0.18798256	9.96
1.5860	2.421198	-0.502	0.14379925	0.19874889	0.18798840	9.96
1.5870	2.355480	-0.500	0.14399087	0.19886225	0.18809932	9.96
1.5880	2.241325	-0.497	0.14439160	0.19909614	0.18829477	9.95
1.5890	2.079878	-0.499	0.14495975	0.19946957	0.18847859	9.95
1.5900	1.894770	-0.496	0.14567763	0.19990408	0.18875778	9.95
1.5910	1.709318	-0.497	0.14644140	0.20038849	0.18901557	9.95
1.5920	1.535654	-0.494	0.14720684	0.20081812	0.18922955	9.95
1.5930	1.375952	-0.492	0.14797342	0.20123422	0.18932968	9.96
1.5940	1.228752	-0.492	0.14867085	0.20164084	0.18949115	9.96
1.5950	1.092339	-0.499	0.14934695	0.20202613	0.18967795	9.96
1.5960	0.965137	-0.504	0.15001917	0.20236808	0.18978691	9.96
1.5970	0.846348	-0.508	0.15063882	0.20270228	0.18985796	9.97
1.5980	0.736942	-0.499	0.15126908	0.20301330	0.18995821	9.97
1.5990	0.639896	-0.506	0.15183127	0.20332050	0.19001555	9.97
1.6000	0.557756	-0.507	0.15231955	0.20357770	0.19001257	9.97
1.6010	0.489550	-0.510	0.15277869	0.20380598	0.19002712	9.97
1.6020	0.431414	-0.507	0.15316188	0.20402277	0.19009233	9.97
1.6030	0.380344	-0.498	0.15351111	0.20421642	0.19010496	9.97
1.6040	0.335197	-0.501	0.15384191	0.20438784	0.19006413	9.96
1.6050	0.297031	-0.496	0.15410751	0.20455164	0.19006222	9.96
1.6060	0.266676	-0.502	0.15436530	0.20469224	0.19006610	9.96
1.6070	0.244875	-0.505	0.15457141	0.20479822	0.19004858	9.96
1.6080	0.231457	-0.507	0.15468520	0.20488483	0.19005829	9.95
1.6090	0.225477	-0.509	0.15476012	0.20494461	0.19007093	9.95
1.6100	0.225334	-0.511	0.15480882	0.20495427	0.19004959	9.95
1.6110	0.231199	-0.521	0.15480119	0.20492637	0.19000971	9.95
1.6120	0.247049	-0.524	0.15477872	0.20491672	0.19001853	9.95
1.6130	0.284586	-0.524	0.15460849	0.20485801	0.19005150	9.96
1.6140	0.353394	-0.525	0.15428156	0.20467788	0.19007087	9.96
1.6150	0.457678	-0.521	0.15378749	0.20437062	0.19006985	9.96
1.6160	0.594234	-0.523	0.15308511	0.20399398	0.19003493	9.96
1.6170	0.758457	-0.525	0.15225244	0.20353931	0.18992221	9.97
1.6180	0.946369	-0.517	0.15130299	0.20306253	0.18982500	9.97
1.6190	1.150589	-0.521	0.15026516	0.20253277	0.18973649	9.97
1.6200	1.363850	-0.519	0.14923310	0.20197606	0.18955356	9.97
1.6210	1.576338	-0.525	0.14819509	0.20140874	0.18927729	9.97
1.6220	1.776638	-0.519	0.14725637	0.20086068	0.18903798	9.97
1.6230	1.953278	-0.516	0.14643443	0.20039350	0.18880546	9.97
1.6240	2.098789	-0.514	0.14573610	0.19996965	0.18860698	9.96
1.6250	2.212629	-0.515	0.14518279	0.19964689	0.18843865	9.96
1.6260	2.296944	-0.516	0.14475179	0.19938308	0.18830824	9.96
1.6270	2.357483	-0.518	0.14444047	0.19917780	0.18821102	9.96
1.6280	2.400312	-0.510	0.14422143	0.19904083	0.18813121	9.95
1.6290	2.432728	-0.508	0.14403272	0.19890720	0.18805540	9.95
1.6300	2.460079	-0.508	0.14387506	0.19880813	0.18797857	9.95
1.6310	2.483540	-0.512	0.14371562	0.19871008	0.18792605	9.95
1.6320	2.499418	-0.507	0.14361447	0.19863808	0.18788517	9.95
1.6330	2.504768	-0.500	0.14355326	0.19861478	0.18787920	9.96
1.6340	2.498903	-0.501	0.14353377	0.19860983	0.18789768	9.96
1.6350	2.482052	-0.507	0.14355707	0.19862062	0.18792307	9.96
1.6360	2.445374	-0.513	0.14364654	0.19867015	0.18798250	9.96
1.6370	2.369499	-0.509	0.14387131	0.19878471	0.18803793	9.97
1.6380	2.246618	-0.498	0.14430428	0.19907767	0.18823242	9.97
1.6390	2.083254	-0.499	0.14489383	0.19943863	0.18850476	9.97
1.6400	1.904068	-0.506	0.14562428	0.19989359	0.18875861	9.97
1.6410	1.726742	-0.514	0.14633721	0.20032990	0.18897557	9.97
1.6420	1.558485	-0.513	0.14707845	0.20076823	0.18917799	9.97
1.6430	1.399298	-0.504	0.14781582	0.20120066	0.18935514	9.97
1.6440	1.247807	-0.502	0.14853865	0.20161092	0.18947095	9.96
1.6450	1.103754	-0.501	0.14924675	0.20200384	0.18962651	9.96
1.6460	0.967569	-0.507	0.14992863	0.20237762	0.18977815	9.96
1.6470	0.840054	-0.508	0.15062600	0.20272732	0.18987143	9.96
1.6480	0.723524	-0.508	0.15131092	0.20308179	0.18992591	9.95
1.6490	0.621729	-0.514	0.15190917	0.20337743	0.19000959	9.95
1.6500	0.537958	-0.513	0.15242380	0.20366830	0.19005924	9.95
1.6510	0.471210	-0.514	0.15286052	0.20387918	0.19007766	9.95
1.6520	0.417595	-0.510	0.15321654	0.20407575	0.19009721	9.95
1.6530	0.372648	-0.505	0.15356576	0.20427507	0.19010884	9.96
1.6540	0.334425	-0.502	0.15384209	0.20444751	0.19007868	9.96
1.6550	0.302553	-0.501	0.15407842	0.20457268	0.19005430	9.96
1.6560	0.276775	-0.503	0.15430117	0.20467585	0.19008839	9.96
1.6570	0.258150	-0.501	0.15446460	0.20477802	0.19009519	9.97
1.6580	0.246992	-0.498	0.15459108	0.20484453	0.19007581	9.97
1.6590	0.242643	-0.511	0.15467870	0.20487434	0.19004959	9.97
1.6600	0.243101	-0.512	0.15468740	0.20488203	0.19006515	9.97
1.6610	0.248680	-0.522	0.15468442	0.20488006	0.19003791	9.97
1.6620	0.263186	-0.520	0.15465420	0.20485216	0.19004369	9.97
1.6630	0.298204	-0.521	0.15449369	0.20479834	0.19009137	9.97
1.6640	0.363207	-0.525	0.15420765	0.20464134	0.19010305	9.96
1.6650	0.462656	-0.520	0.15370178	0.20434749	0.19008267	9.96
1.6660	0.594234	-0.524	0.15304911	0.20396209	0.19002622	9.96
1.6670	0.753736	-0.518	0.15225142	0.20353729	0.18994641	9.96
1.6680	0.937529	-0.518	0.15130204	0.20304799	0.18983060	9.95
1.6690	1.139402	-0.516	0.15028650	0.20252693	0.18968081	9.95
1.6700	1.352348	-0.514	0.14923793	0.20196533	0.18952620	9.95
1.6710	1.566124	-0.513	0.14818639	0.20139712	0.18929082	9.95
1.6720	1.769028	-0.514	0.14724964	0.20086062	0.18905735	9.95
1.6730	1.948643	-0.512	0.14640236	0.20038188	0.18885016	9.96
1.6740	2.097960	-0.514	0.14570296	0.19997245	0.18863916	9.96
1.6750	2.215691	-0.506	0.14513874	0.19962275	0.18841344	9.96
1.6760	2.303381	-0.504	0.14469224	0.19936174	0.18827236	9.96
1.6770	2.365408	-0.501	0.14436924	0.19914389	0.18818474	9.97
1.6780	2.406464	-0.495	0.14415336	0.19901091	0.18810600	9.97
1.6790	2.433558	-0.499	0.14397925	0.19891691	0.18803406	9.97
1.6800	2.452726	-0.494	0.14387524	0.19883150	0.18801081	9.97
1.6810	2.467003	-0.497	0.14374000	0.19876254	0.18798059	9.97
1.6820	2.475615	-0.492	0.14367479	0.19872755	0.18792224	9.97
1.6830	2.476816	-0.492	0.14363784	0.19871008	0.18791825	9.96
1.6840	2.470007	-0.496	0.14363980	0.19869059	0.18792212	9.96
1.6850	2.454958	-0.494	0.14368552	0.19870806	0.18793666	9.96
1.6860	2.424173	-0.494	0.14374971	0.19872367	0.18797374	9.96
1.6870	2.358370	-0.498	0.14395684	0.19885647	0.18807590	9.95
1.6880	2.244616	-0.498	0.14433038	0.19909328	0.18825597	9.95
1.6890	2.085028	-0.502	0.14490038	0.19948214	0.18845040	9.95
1.6900	1.902266	-0.499	0.14561635	0.19991666	0.18874216	9.95
1.6910	1.719131	-0.502	0.14635861	0.20036936	0.18900383	9.95
1.6920	1.547270	-0.502	0.14714170	0.20081621	0.18919253	9.95
1.6930	1.388941	-0.497	0.14786935	0.20123911	0.18935692	9.96
1.6940	1.242428	-0.493	0.14856774	0.20162928	0.18949795	9.96
1.6950	1.106329	-0.495	0.14924574	0.20199913	0.18961561	9.96
1.6960	0.979414	-0.493	0.14988774	0.20234978	0.18972945	9.96
1.6970	0.860481	-0.493	0.15054727	0.20268780	0.18987054	9.97
1.6980	0.749989	-0.490	0.15116686	0.20299786	0.18996972	9.97
1.6990	0.650225	-0.494	0.15175444	0.20329267	0.18998235	9.97
1.7000	0.563965	-0.497	0.15227389	0.20355076	0.19001746	9.97
1.7010	0.491209	-0.504	0.15271652	0.20380419	0.19006622	9.97
1.7020	0.429068	-0.498	0.15312892	0.20403242	0.19008082	9.97
1.7030	0.374908	-0.493	0.15352100	0.20424336	0.19005454	9.97
1.7040	0.328045	-0.492	0.15384883	0.20440996	0.19007295	9.96
1.7050	0.288935	-0.494	0.15415233	0.20457369	0.19006222	9.96
1.7060	0.257750	-0.505	0.15437996	0.20472199	0.19004369	9.96
1.7070	0.235376	-0.509	0.15456766	0.20481163	0.19004267	9.96
1.7080	0.221901	-0.509	0.15471256	0.20487332	0.19009137	9.95
1.7090	0.216579	-0.509	0.15479422	0.20491672	0.19007003	9.95
1.7100	0.216808	-0.510	0.15480298	0.20494658	0.19004673	9.95
1.7110	0.222816	-0.510	0.15480393	0.20495141	0.19001359	9.95
1.7120	0.240784	-0.508	0.15475237	0.20493692	0.19001746	9.95
1.7130	0.283184	-0.505	0.15454906	0.20488197	0.19003105	9.96
1.7140	0.359259	-0.507	0.15419698	0.20465547	0.19005919	9.96
1.7150	0.471296	-0.504	0.15364546	0.20431930	0.19005531	9.96
1.7160	0.616779	-0.502	0.15291691	0.20389742	0.19004172	9.96
1.7170	0.791302	-0.500	0.15205503	0.20342743	0.18993855	9.97
1.7180	0.989714	-0.493	0.15101987	0.20291406	0.18982482	9.97
1.7190	1.202660	-0.498	0.14994115	0.20236903	0.18961960	9.97
1.7200	1.420126	-0.496	0.14888078	0.20181131	0.18943292	9.97
1.7210	1.630898	-0.499	0.14786333	0.20124590	0.18921882	9.97
1.7220	1.822701	-0.502	0.14699268	0.20072764	0.18897557	9.97
1.7230	1.984463	-0.504	0.14623106	0.20029420	0.18875277	9.97
1.7240	2.111864	-0.505	0.14562315	0.19992727	0.18858069	9.96
1.7250	2.208452	-0.505	0.14513785	0.19964319	0.18843675	9.96
1.7260	2.280893	-0.508	0.14474875	0.19943714	0.18832004	9.96
1.7270	2.336798	-0.511	0.14448720	0.19924539	0.18822366	9.95
1.7280	2.381201	-0.513	0.14425945	0.19912106	0.18816334	9.95
1.7290	2.418880	-0.518	0.14406687	0.19895560	0.18805248	9.95
1.7300	2.452869	-0.511	0.14388007	0.19885951	0.18798631	9.95
1.7310	2.482252	-0.514	0.14370018	0.19872648	0.18795133	9.95
1.7320	2.502651	-0.507	0.14357466	0.19867301	0.18790841	9.95
1.7330	2.510490	-0.501	0.14350075	0.19862354	0.18785393	9.96
1.7340	2.505713	-0.499	0.14349389	0.19861281	0.18785882	9.96
1.7350	2.489948	-0.500	0.14351243	0.19859338	0.18791234	9.96
1.7360	2.456102	-0.504	0.14357471	0.19864005	0.18792510	9.96
1.7370	2.383575	-0.508	0.14379853	0.19876635	0.18799025	9.97
1.7380	2.260208	-0.505	0.14421278	0.19903326	0.18823642	9.97
1.7390	2.090349	-0.498	0.14485663	0.19941837	0.18850106	9.97
1.7400	1.900291	-0.492	0.14558715	0.19987905	0.18873256	9.97
1.7410	1.713552	-0.494	0.14636046	0.20034528	0.18896312	9.97
1.7420	1.541691	-0.495	0.14712220	0.20078641	0.18918961	9.97
1.7430	1.385279	-0.488	0.14784402	0.20119774	0.18937147	9.97
1.7440	1.242743	-0.494	0.14853078	0.20159352	0.18951833	9.96
1.7450	1.111765	-0.492	0.14917374	0.20195085	0.18966132	9.96
1.7460	0.990515	-0.498	0.14978850	0.20227832	0.18977815	9.96
1.7470	0.876532	-0.498	0.15040129	0.20261264	0.18981612	9.96
1.7480	0.768671	-0.496	0.15100539	0.20293057	0.18990856	9.95
1.7490	0.669422	-0.499	0.15157831	0.20320988	0.19000000	9.95
1.7500	0.582447	-0.500	0.15210551	0.20348632	0.19003689	9.95
1.7510	0.508461	-0.502	0.15256077	0.20373666	0.19000769	9.95
1.7520	0.444775	-0.501	0.15298980	0.20394474	0.19005048	9.95
1.7530	0.388699	-0.498	0.15337205	0.20416427	0.19008356	9.96
1.7540	0.339518	-0.501	0.15372229	0.20437723	0.19009328	9.96
1.7550	0.298920	-0.500	0.15403068	0.20454872	0.19008833	9.96
1.7560	0.266876	-0.503	0.15427685	0.20467305	0.19007277	9.96
1.7570	0.244160	-0.505	0.15447825	0.20478284	0.19004464	9.97
1.7580	0.230255	-0.504	0.15462512	0.20486081	0.19001645	9.97
1.7590	0.224504	-0.509	0.15469027	0.20489734	0.19005150	9.97
1.7600	0.224161	-0.509	0.15473306	0.20494068	0.19004560	9.97
1.7610	0.228424	-0.512	0.15474373	0.20494157	0.18999118	9.97
1.7620	0.240154	-0.508	0.15472525	0.20494354	0.19000381	9.97
1.7630	0.271997	-0.506	0.15461737	0.20488387	0.19006521	9.97
1.7640	0.335484	-0.503	0.15430021	0.20473468	0.19009429	9.96
1.7650	0.436249	-0.500	0.15381283	0.20444667	0.19004369	9.96
1.7660	0.572376	-0.502	0.15315419	0.20407200	0.19002330	9.96
1.7670	0.739689	-0.509	0.15231574	0.20359802	0.18994945	9.96
1.7680	0.933094	-0.508	0.15133518	0.20306915	0.18983459	9.95
1.7690	1.144667	-0.514	0.15026814	0.20252013	0.18969065	9.95
1.7700	1.364651	-0.512	0.14915717	0.20194513	0.18953496	9.95
1.7710	1.581545	-0.516	0.14811820	0.20135468	0.18928987	9.95
1.7720	1.783733	-0.511	0.14717466	0.20081431	0.18900585	9.95
1.7730	1.959343	-0.506	0.14635855	0.20032507	0.18878603	9.96
1.7740	2.102880	-0.505	0.14568645	0.19994080	0.18859345	9.96
1.7750	2.214918	-0.506	0.14510465	0.19960660	0.18839496	9.96
1.7760	2.299948	-0.507	0.14468551	0.19934750	0.18826842	9.96
1.7770	2.362890	-0.504	0.14435971	0.19914031	0.18821585	9.97
1.7780	2.407808	-0.497	0.14412528	0.19898373	0.18814677	9.97
1.7790	2.439079	-0.493	0.14392382	0.19887620	0.18800384	9.97
1.7800	2.461796	-0.494	0.14376330	0.19877028	0.18795031	9.97
1.7810	2.478447	-0.494	0.14365542	0.19871491	0.18793088	9.97
1.7820	2.488661	-0.493	0.14357466	0.19864678	0.18790549	9.97
1.7830	2.490406	-0.492	0.14353764	0.19865161	0.18790257	9.96
1.7840	2.483425	-0.498	0.14352602	0.19861954	0.18790650	9.96
1.7850	2.467690	-0.499	0.14356297	0.19864094	0.18792701	9.96
1.7860	2.434816	-0.505	0.14365733	0.19868088	0.18795139	9.96
1.7870	2.363663	-0.501	0.14386928	0.19881481	0.18804085	9.96
1.7880	2.242355	-0.497	0.14428556	0.19908643	0.18822563	9.95
1.7890	2.074928	-0.501	0.14486152	0.19948119	0.18851453	9.95
1.7900	1.887531	-0.504	0.14561832	0.19993502	0.18877041	9.95
1.7910	1.702452	-0.509	0.14639658	0.20040303	0.18900096	9.95
1.7920	1.530418	-0.508	0.14717376	0.20084518	0.18918866	9.95
1.7930	1.372375	-0.505	0.14790821	0.20127088	0.18936175	9.96
1.7940	1.227064	-0.505	0.14858907	0.20167053	0.18952322	9.96
1.7950	1.093197	-0.505	0.14927095	0.20202214	0.18963027	9.96
1.7960	0.968714	-0.508	0.14990914	0.20236605	0.18975002	9.96
1.7970	0.851183	-0.507	0.15052778	0.20266271	0.18984824	9.97
1.7980	0.740118	-0.502	0.15117860	0.20300943	0.18994451	9.97
1.7990	0.638752	-0.509	0.15175927	0.20327908	0.18994248	9.97
[truncated: 7,001 more rows]
