# Supplementary material for: Evaluation of a Cold-Mixed High-Performance Polyurethane Mixture
Source: Hindawi journal article supplement (doi:10.1155/2019/1507971), 2019-11-07
Supplement: f1 [file 1507971.f1.zip › 1507971.f1/dynamic modulus data/PUM/specimen1/temp10/zhs-1-10_Sum.csv]

Test Information
****************
Project name	zhs
Operator name	1
Target test temperature	10
Target confining stress	0
Average dynamic strain range from 75 to 125 micro-strain
Contact stress	5
Initial modulus	4000
Axial gauge length	70
Comments	Run at High Pressure
Specimen information
********************
Identification	zhs-1-10
Dimensions	Point 1	Point 2	Point 3	Point 4	Point 5	Point 6	Average	Std Dev.
Diameter (mm)	49.2	49.2	49.3				49.23	0.058
Height (mm)	101.3	101.2	101.3				101.27	0.058
Cross-sectional area (mm�)	1903.7
Conditioning time
Properties/Comments
*********
Test date and time	Fri	Mar 29	2019	11:04 AM
Test results summary
	25 Hz	20 Hz	10 Hz	5 Hz	2 Hz	1 Hz	0.5 Hz	0.2 Hz	0.1 Hz
Dynamic modulus (MPa)	13008	12905	12560	12276	11860	11628	11398	11082	10894
Phase angle (Degrees)	4.13	3.95	4.00	4.22	4.32	4.29	4.21	4.04	3.79
Average temperature (�C)	10.0	10.0	10.0	9.9	9.9	9.9	9.9	9.9	9.9
Average confining pressure (kPa)	-0.5	-0.5	-0.5	-0.5	-0.5	-0.5	-0.5	-0.5	-0.5
Average micro-strain	109	98	99	99	102	100	99	100	100
Load drift (%)	-1.0	-2.4	1.0	-1.3	0.3	0.0	-0.6	0.2	-0.1
Load standard error (%)	10.0	8.9	5.6	3.5	2.2	3.0	2.8	1.8	2.2
Average deformation drift (%)	-2.1	-1.7	-5.2	-2.4	-3.1	-3.5	-2.3	-3.0	-7.0
Average deformation standard error (%)	12.7	12.0	10.5	8.5	7.3	6.0	5.0	4.4	4.7
Deformation uniformity (%)	55.2	56.2	56.6	55.1	54.5	53.7	53.6	53.5	53.2
Phase uniformity (Degrees)	2.6	2.6	2.1	1.5	1.0	0.9	0.7	0.8	0.8
