# Supplementary material for: Evaluation of a Cold-Mixed High-Performance Polyurethane Mixture
Source: Hindawi journal article supplement (doi:10.1155/2019/1507971), 2019-11-07
Supplement: f1 [file 1507971.f1.zip › 1507971.f1/dynamic modulus data/PUM/specimen1/temp20/zhs-1-20_0.1Hz.csv]

Test Information
****************
Project name	zhs
Operator name	1
Target test temperature	20
Target confining stress	0
Average dynamic strain range from 75 to 125 micro-strain
Contact stress	5
Initial modulus	1000
Axial gauge length	70
Comments
Specimen information
********************
Identification	zhs-1-20
Dimensions	Point 1	Point 2	Point 3	Point 4	Point 5	Point 6	Average	Std Dev.
Diameter (mm)	49.2	49.2	49.3				49.23	0.058
Height (mm)	101.3	101.2	101.3				101.27	0.058
Cross-sectional area (mm�)	1903.7
Conditioning time
Properties/Comments
Test Data	0.1Hz
*********
Test date and time	Mon	Apr 1	2019	2:22 PM
Dynamic modulus (MPa)	11680
Phase angle (Degrees)	3.78
Average temperature (�C)	20.3
Average confining pressure (kPa)	-0.6
Average micro-strain	98
Load drift (%)	0.8
Load standard error (%)	1.7
Average deformation drift (%)	-6.2
Average deformation standard error (%)	2.7
Deformation uniformity (%)	27.5
Phase uniformity (Degrees)	0.9
Conditioning Cycles
Time (sec)	Axial stress (kPa)	Axial micro-strain #1	Axial micro-strain #2	Axial micro-strain #3	Confining pressure (kPa)	Temperature (�C)	Load (N)	Displacement #1 (mm)	Displacement #2 (mm)	Displacement #3 (mm)
0.0000	202.177	-8.328	-0.123	6.491	-0.554	20.301	384.893	0.000583	0.000009	-0.000454
0.2000	199.532	-9.242	-0.848	5.739	-0.572	20.302	379.858	0.000647	0.000059	-0.000402
0.4000	220.647	-7.853	-0.222	8.116	-0.564	20.301	420.055	0.000550	0.000016	-0.000568
0.6000	247.593	-5.851	0.599	11.615	-0.572	20.302	471.354	0.000410	-0.000042	-0.000813
0.8000	276.282	-3.810	1.294	15.038	-0.586	20.302	525.970	0.000267	-0.000091	-0.001053
1.0000	304.430	-1.390	2.686	18.482	-0.579	20.302	579.557	0.000097	-0.000188	-0.001294
1.2000	355.813	2.416	4.823	24.707	-0.574	20.303	677.376	-0.000169	-0.000338	-0.001729
1.4000	390.213	4.626	6.535	28.723	-0.564	20.302	742.865	-0.000324	-0.000457	-0.002011
1.6000	399.711	6.098	8.883	30.976	-0.566	20.302	760.946	-0.000427	-0.000622	-0.002168
1.8000	482.141	12.072	11.896	40.369	-0.571	20.303	917.873	-0.000845	-0.000833	-0.002826
2.0000	548.883	16.756	14.874	48.082	-0.564	20.303	1044.931	-0.001173	-0.001041	-0.003366
2.2000	592.435	20.761	18.318	53.781	-0.575	20.303	1127.844	-0.001453	-0.001282	-0.003765
2.4000	651.211	25.096	21.485	60.757	-0.573	20.303	1239.738	-0.001757	-0.001504	-0.004253
2.6000	707.793	29.345	25.017	67.873	-0.571	20.303	1347.456	-0.002054	-0.001751	-0.004751
2.8000	780.801	35.073	29.712	75.832	-0.568	20.303	1486.444	-0.002455	-0.002080	-0.005308
3.0000	825.706	38.590	32.392	81.546	-0.554	20.303	1571.932	-0.002701	-0.002267	-0.005708
3.2000	868.221	41.423	34.797	86.715	-0.549	20.303	1652.870	-0.002900	-0.002436	-0.006070
3.4000	909.850	45.133	38.104	92.009	-0.557	20.303	1732.121	-0.003159	-0.002667	-0.006441
3.6000	960.240	49.122	41.023	97.680	-0.559	20.304	1828.051	-0.003439	-0.002872	-0.006838
3.8000	973.135	50.067	41.914	99.650	-0.564	20.304	1852.598	-0.003505	-0.002934	-0.006976
4.0000	1014.388	53.708	45.262	104.573	-0.549	20.304	1931.133	-0.003760	-0.003168	-0.007320
4.2000	1034.390	55.154	46.040	107.072	-0.567	20.303	1969.213	-0.003861	-0.003223	-0.007495
4.4000	1045.962	56.679	48.231	109.088	-0.554	20.304	1991.243	-0.003968	-0.003376	-0.007636
4.6000	1058.135	57.820	48.681	110.241	-0.566	20.304	2014.418	-0.004047	-0.003408	-0.007717
4.8000	1071.751	58.504	48.957	111.769	-0.565	20.303	2040.339	-0.004095	-0.003427	-0.007824
5.0000	1062.584	58.140	49.261	110.977	-0.569	20.303	2022.886	-0.004070	-0.003448	-0.007768
5.2000	1056.858	58.168	49.096	110.658	-0.582	20.303	2011.986	-0.004072	-0.003437	-0.007746
5.4000	1033.323	56.680	48.220	108.838	-0.556	20.304	1967.182	-0.003968	-0.003375	-0.007619
5.6000	1017.949	55.569	47.166	107.322	-0.573	20.303	1937.914	-0.003890	-0.003302	-0.007513
5.8000	988.629	53.598	46.360	104.364	-0.554	20.303	1882.095	-0.003752	-0.003245	-0.007306
6.0000	926.592	49.124	43.066	98.542	-0.558	20.303	1763.992	-0.003439	-0.003015	-0.006898
6.2000	888.645	46.410	40.578	94.106	-0.559	20.303	1691.751	-0.003249	-0.002840	-0.006587
6.4000	851.675	43.424	37.758	89.839	-0.568	20.302	1621.370	-0.003040	-0.002643	-0.006289
6.6000	821.528	40.782	35.965	86.437	-0.566	20.303	1563.978	-0.002855	-0.002518	-0.006051
6.8000	759.355	36.615	32.267	79.042	-0.566	20.303	1445.618	-0.002563	-0.002259	-0.005533
7.0000	707.087	33.031	29.114	73.330	-0.562	20.302	1346.111	-0.002312	-0.002038	-0.005133
7.2000	657.703	28.746	26.350	67.272	-0.573	20.302	1252.098	-0.002012	-0.001844	-0.004709
7.4000	602.910	24.941	23.390	60.618	-0.570	20.302	1147.785	-0.001746	-0.001637	-0.004243
7.6000	564.257	21.275	19.624	55.337	-0.565	20.302	1074.200	-0.001489	-0.001374	-0.003874
7.8000	492.706	15.633	16.317	47.275	-0.572	20.302	937.986	-0.001094	-0.001142	-0.003309
8.0000	454.234	12.920	13.774	41.717	-0.574	20.302	864.744	-0.000904	-0.000964	-0.002920
8.2000	382.428	7.614	10.077	33.309	-0.555	20.301	728.045	-0.000533	-0.000705	-0.002332
8.4000	352.972	4.627	7.644	28.515	-0.564	20.301	671.968	-0.000324	-0.000535	-0.001996
8.6000	283.511	-0.694	4.448	19.622	-0.565	20.301	539.732	0.000049	-0.000311	-0.001374
8.8000	266.920	-3.034	2.754	16.425	-0.569	20.301	508.146	0.000212	-0.000193	-0.001150
9.0000	244.227	-5.184	1.698	12.799	-0.564	20.301	464.945	0.000363	-0.000119	-0.000896
9.2000	222.901	-6.656	0.782	9.772	-0.564	20.301	424.347	0.000466	-0.000055	-0.000684
9.4000	203.785	-8.922	-0.680	6.656	-0.576	20.300	387.955	0.000625	0.000048	-0.000466
9.6000	199.637	-9.464	-0.904	5.447	-0.568	20.300	380.058	0.000663	0.000063	-0.000381
9.8000	202.282	-9.494	-1.237	5.279	-0.572	20.300	385.094	0.000665	0.000087	-0.000370
10.0000	198.781	-10.230	-1.902	4.448	-0.566	20.300	378.428	0.000716	0.000133	-0.000311
10.2000	210.864	-9.299	-1.083	5.708	-0.569	20.299	401.430	0.000651	0.000076	-0.000400
10.4000	222.811	-8.422	-1.359	6.988	-0.562	20.300	424.175	0.000590	0.000095	-0.000489
10.6000	246.947	-6.434	-0.553	10.241	-0.559	20.299	470.123	0.000450	0.000039	-0.000717
10.8000	289.748	-3.588	1.238	15.452	-0.558	20.299	551.605	0.000251	-0.000087	-0.001082
11.0000	319.895	-0.973	2.685	19.553	-0.554	20.298	608.997	0.000068	-0.000188	-0.001369
11.2000	347.081	0.708	3.796	22.886	-0.564	20.298	660.753	-0.000050	-0.000266	-0.001602
11.4000	390.528	4.528	6.464	28.166	-0.560	20.298	743.465	-0.000317	-0.000452	-0.001972
11.6000	434.862	8.058	9.146	34.198	-0.564	20.298	827.866	-0.000564	-0.000640	-0.002394
11.8000	492.481	12.238	11.312	40.648	-0.558	20.297	937.557	-0.000857	-0.000792	-0.002845
12.0000	562.904	17.714	16.162	49.681	-0.562	20.297	1071.625	-0.001240	-0.001131	-0.003478
12.2000	621.560	21.774	18.609	56.056	-0.556	20.297	1183.290	-0.001524	-0.001303	-0.003924
12.4000	660.724	24.761	21.664	60.935	-0.560	20.296	1257.849	-0.001733	-0.001516	-0.004265
12.6000	717.531	29.124	24.446	67.524	-0.554	20.296	1365.995	-0.002039	-0.001711	-0.004727
12.8000	781.252	34.139	28.585	75.406	-0.569	20.296	1487.303	-0.002390	-0.002001	-0.005278
13.0000	825.405	37.394	31.327	80.880	-0.555	20.295	1571.360	-0.002618	-0.002193	-0.005662
13.2000	873.151	41.603	34.881	86.339	-0.561	20.295	1662.254	-0.002912	-0.002442	-0.006044
13.4000	925.059	45.688	37.909	92.343	-0.552	20.295	1761.074	-0.003198	-0.002654	-0.006464
13.6000	951.208	47.664	40.009	95.675	-0.556	20.295	1810.856	-0.003336	-0.002801	-0.006697
13.8000	987.862	50.607	42.301	100.288	-0.560	20.294	1880.636	-0.003542	-0.002961	-0.007020
14.0000	1019.903	52.931	44.246	104.031	-0.557	20.295	1941.633	-0.003705	-0.003097	-0.007282
14.2000	1038.899	54.946	46.263	106.543	-0.559	20.294	1977.797	-0.003846	-0.003238	-0.007458
14.4000	1055.505	56.471	46.749	108.257	-0.548	20.294	2009.411	-0.003953	-0.003272	-0.007578
14.6000	1086.614	58.350	48.998	111.853	-0.550	20.294	2068.634	-0.004084	-0.003430	-0.007830
14.8000	1066.762	57.834	48.608	110.476	-0.557	20.293	2030.840	-0.004048	-0.003403	-0.007733
15.0000	1066.160	57.583	48.261	110.602	-0.549	20.293	2029.696	-0.004031	-0.003378	-0.007742
15.2000	1066.852	57.919	48.708	110.742	-0.564	20.293	2031.012	-0.004054	-0.003410	-0.007752
15.4000	1037.216	56.137	47.902	108.019	-0.561	20.292	1974.592	-0.003930	-0.003353	-0.007561
15.6000	992.266	52.776	45.707	103.725	-0.555	20.292	1889.019	-0.003694	-0.003200	-0.007261
15.8000	980.228	52.081	44.928	102.445	-0.553	20.291	1866.102	-0.003646	-0.003145	-0.007171
16.0000	912.239	47.399	40.844	95.802	-0.554	20.291	1736.670	-0.003318	-0.002859	-0.006706
16.2000	907.505	46.160	40.121	94.329	-0.554	20.290	1727.657	-0.003231	-0.002808	-0.006603
16.4000	841.140	41.896	36.191	87.521	-0.566	20.291	1601.315	-0.002933	-0.002533	-0.006126
16.6000	802.487	38.631	34.228	83.086	-0.559	20.290	1527.729	-0.002704	-0.002396	-0.005816
16.8000	751.901	35.338	30.757	77.265	-0.560	20.290	1431.427	-0.002474	-0.002153	-0.005409
17.0000	702.683	31.350	27.349	71.387	-0.550	20.290	1337.729	-0.002195	-0.001914	-0.004997
17.2000	641.938	26.998	24.738	64.494	-0.553	20.289	1222.086	-0.001890	-0.001732	-0.004515
17.4000	596.703	23.341	21.330	58.686	-0.552	20.289	1135.969	-0.001634	-0.001493	-0.004108
17.6000	542.841	18.924	18.332	52.375	-0.566	20.288	1033.430	-0.001325	-0.001283	-0.003666
17.8000	475.048	14.060	14.568	44.357	-0.558	20.288	904.369	-0.000984	-0.001020	-0.003105
18.0000	458.186	12.044	12.009	40.898	-0.558	20.288	872.269	-0.000843	-0.000841	-0.002863
18.2000	397.381	7.403	9.313	33.419	-0.566	20.287	756.512	-0.000518	-0.000652	-0.002339
18.4000	344.241	3.208	6.854	26.971	-0.554	20.287	655.346	-0.000225	-0.000480	-0.001888
18.6000	297.142	-1.016	4.337	20.760	-0.556	20.287	565.681	0.000071	-0.000304	-0.001453
18.8000	275.290	-2.809	3.324	17.330	-0.565	20.287	524.082	0.000197	-0.000233	-0.001213
19.0000	257.166	-5.087	1.169	13.800	-0.558	20.287	489.578	0.000356	-0.000082	-0.000966
19.2000	221.474	-7.589	-0.069	8.923	-0.566	20.286	421.629	0.000531	0.000005	-0.000625
19.4000	212.817	-9.312	-1.140	6.795	-0.564	20.286	405.149	0.000652	0.000080	-0.000476
19.6000	208.008	-9.911	-1.211	5.835	-0.570	20.286	395.994	0.000694	0.000085	-0.000408
19.8000	193.190	-10.662	-2.386	3.657	-0.572	20.285	367.785	0.000746	0.000167	-0.000256
20.0000	200.013	-10.717	-1.916	3.919	-0.565	20.286	380.774	0.000750	0.000134	-0.000274
20.2000	194.588	-10.787	-2.151	3.615	-0.564	20.285	370.445	0.000755	0.000151	-0.000253
20.4000	223.638	-9.174	-1.567	6.850	-0.554	20.285	425.749	0.000642	0.000110	-0.000480
20.6000	247.578	-6.740	-0.988	9.811	-0.561	20.285	471.325	0.000472	0.000069	-0.000687
20.8000	291.010	-3.936	0.250	15.327	-0.550	20.284	554.008	0.000275	-0.000018	-0.001073
21.0000	315.792	-2.072	1.922	18.398	-0.554	20.284	601.187	0.000145	-0.000135	-0.001288
21.2000	342.137	0.651	3.617	22.245	-0.557	20.284	651.340	-0.000046	-0.000253	-0.001557
21.4000	396.630	3.863	5.645	28.389	-0.551	20.284	755.081	-0.000270	-0.000395	-0.001987
21.6000	447.711	8.502	8.953	34.879	-0.556	20.284	852.327	-0.000595	-0.000627	-0.002442
21.8000	518.736	12.892	11.883	43.012	-0.560	20.284	987.539	-0.000902	-0.000832	-0.003011
22.0000	559.012	16.396	15.040	48.208	-0.556	20.284	1064.215	-0.001148	-0.001053	-0.003375
22.2000	605.570	20.092	17.135	54.100	-0.551	20.284	1152.849	-0.001406	-0.001199	-0.003787
22.4000	679.359	26.097	22.666	62.840	-0.537	20.283	1293.325	-0.001827	-0.001587	-0.004399
22.6000	743.951	30.543	25.404	70.026	-0.534	20.282	1416.292	-0.002138	-0.001778	-0.004902
22.8000	765.442	33.115	28.016	73.762	-0.545	20.283	1457.205	-0.002318	-0.001961	-0.005163
23.0000	813.383	36.935	31.117	79.556	-0.544	20.283	1548.471	-0.002585	-0.002178	-0.005569
23.2000	867.996	40.504	33.825	85.590	-0.540	20.282	1652.441	-0.002835	-0.002368	-0.005991
23.4000	913.983	44.619	36.785	91.036	-0.536	20.282	1739.988	-0.003123	-0.002575	-0.006373
23.6000	953.087	47.551	39.438	95.829	-0.536	20.282	1814.432	-0.003329	-0.002761	-0.006708
23.8000	984.526	50.138	41.927	99.611	-0.548	20.282	1874.285	-0.003510	-0.002935	-0.006973
24.0000	1007.279	52.164	44.207	102.821	-0.542	20.282	1917.601	-0.003651	-0.003094	-0.007197
24.2000	1047.991	55.087	45.945	107.031	-0.539	20.282	1995.106	-0.003856	-0.003216	-0.007492
24.4000	1053.987	55.999	46.722	108.156	-0.539	20.282	2006.521	-0.003920	-0.003271	-0.007571
24.6000	1069.076	57.152	47.610	109.851	-0.551	20.281	2035.246	-0.004001	-0.003333	-0.007690
24.8000	1064.627	57.765	48.357	110.199	-0.541	20.282	2026.777	-0.004044	-0.003385	-0.007714
25.0000	1064.447	57.125	48.332	110.324	-0.543	20.281	2026.434	-0.003999	-0.003383	-0.007723
25.2000	1056.076	57.431	48.109	109.550	-0.546	20.281	2010.498	-0.004020	-0.003368	-0.007668
25.4000	1035.187	55.416	47.428	107.796	-0.542	20.281	1970.730	-0.003879	-0.003320	-0.007546
25.6000	1015.981	54.225	46.596	105.794	-0.528	20.281	1934.166	-0.003796	-0.003262	-0.007406
25.8000	982.377	51.802	45.040	102.543	-0.536	20.280	1870.193	-0.003626	-0.003153	-0.007178
26.0000	945.137	48.958	42.802	98.652	-0.552	20.280	1799.297	-0.003427	-0.002996	-0.006906
26.2000	907.716	46.174	40.149	94.607	-0.540	20.280	1728.058	-0.003232	-0.002810	-0.006622
26.4000	858.934	42.840	37.464	89.272	-0.541	20.281	1635.189	-0.002999	-0.002622	-0.006249
26.6000	817.485	39.904	34.630	84.573	-0.546	20.280	1556.282	-0.002793	-0.002424	-0.005920
26.8000	752.472	34.820	31.338	77.639	-0.544	20.280	1432.514	-0.002437	-0.002194	-0.005435
27.0000	710.423	31.557	28.321	72.428	-0.537	20.280	1352.463	-0.002209	-0.001982	-0.005070
27.2000	658.184	27.818	25.489	66.176	-0.541	20.280	1253.014	-0.001947	-0.001784	-0.004632
27.4000	592.690	22.636	21.247	58.436	-0.553	20.280	1128.330	-0.001585	-0.001487	-0.004090
27.6000	546.268	19.189	18.721	52.668	-0.546	20.280	1039.953	-0.001343	-0.001310	-0.003687
27.8000	475.694	13.977	14.471	44.356	-0.537	20.279	905.600	-0.000978	-0.001013	-0.003105
28.0000	431.451	10.241	11.838	38.506	-0.542	20.279	821.371	-0.000717	-0.000829	-0.002695
28.2000	373.200	5.611	8.381	31.212	-0.550	20.280	710.478	-0.000393	-0.000587	-0.002185
28.4000	346.074	3.348	7.312	27.250	-0.539	20.279	658.836	-0.000234	-0.000512	-0.001908
28.6000	309.645	-0.362	4.475	21.872	-0.553	20.279	589.485	0.000025	-0.000313	-0.001531
28.8000	272.766	-3.059	3.005	17.023	-0.558	20.278	519.276	0.000214	-0.000210	-0.001192
29.0000	246.316	-5.518	1.322	13.201	-0.549	20.279	468.922	0.000386	-0.000093	-0.000924
29.2000	228.357	-7.115	0.378	10.089	-0.550	20.278	434.732	0.000498	-0.000026	-0.000706
29.4000	207.437	-9.340	-1.029	6.558	-0.538	20.278	394.907	0.000654	0.000072	-0.000459
29.6000	199.322	-10.036	-1.169	5.473	-0.549	20.279	379.457	0.000703	0.000082	-0.000383
29.8000	197.383	-10.676	-2.026	4.266	-0.528	20.278	375.767	0.000747	0.000142	-0.000299
30.0000	197.669	-10.800	-1.831	3.959	-0.545	20.279	376.310	0.000756	0.000128	-0.000277
30.2000	215.297	-9.340	-1.874	5.599	-0.552	20.279	409.870	0.000654	0.000131	-0.000392
30.4000	223.533	-9.159	-1.276	6.850	-0.540	20.279	425.549	0.000641	0.000089	-0.000480
30.6000	245.579	-7.464	-1.126	9.309	-0.543	20.279	467.520	0.000522	0.000079	-0.000652
30.8000	275.381	-5.281	0.153	12.813	-0.549	20.278	524.254	0.000370	-0.000011	-0.000897
31.0000	321.247	-1.709	1.739	18.759	-0.544	20.278	611.572	0.000120	-0.000122	-0.001313
31.2000	349.501	0.402	3.478	22.496	-0.553	20.279	665.359	-0.000028	-0.000243	-0.001575
31.4000	395.578	4.181	5.714	27.959	-0.550	20.279	753.078	-0.000293	-0.000400	-0.001957
31.6000	461.192	8.863	9.176	36.147	-0.546	20.279	877.991	-0.000620	-0.000642	-0.002530
31.8000	498.748	11.921	11.868	40.925	-0.541	20.279	949.488	-0.000834	-0.000831	-0.002865
32.0000	547.515	15.438	14.038	46.691	-0.548	20.279	1042.328	-0.001081	-0.000983	-0.003268
32.2000	612.062	20.427	18.068	54.710	-0.549	20.278	1165.209	-0.001430	-0.001265	-0.003830
32.4000	673.288	25.235	21.651	62.129	-0.561	20.278	1281.767	-0.001766	-0.001516	-0.004349
32.6000	711.159	28.065	23.861	67.023	-0.558	20.278	1353.865	-0.001965	-0.001670	-0.004692
32.8000	775.135	33.085	27.751	74.235	-0.554	20.278	1475.658	-0.002316	-0.001943	-0.005196
33.0000	818.808	36.879	30.867	79.849	-0.561	20.278	1558.800	-0.002582	-0.002161	-0.005589
33.2000	863.743	39.894	33.685	85.199	-0.561	20.277	1644.344	-0.002793	-0.002358	-0.005964
33.4000	918.341	44.577	37.269	91.315	-0.562	20.278	1748.285	-0.003120	-0.002609	-0.006392
33.6000	952.035	46.924	39.065	95.203	-0.556	20.277	1812.429	-0.003285	-0.002735	-0.006664
33.8000	987.517	49.901	41.761	99.650	-0.552	20.277	1879.978	-0.003493	-0.002923	-0.006976
34.0000	1014.192	52.108	43.579	102.808	-0.549	20.276	1930.761	-0.003648	-0.003051	-0.007197
34.2000	1040.747	54.084	45.317	106.085	-0.558	20.277	1981.316	-0.003786	-0.003172	-0.007426
34.4000	1058.466	55.944	46.528	108.113	-0.567	20.276	2015.047	-0.003916	-0.003257	-0.007568
34.6000	1065.845	56.596	47.180	109.547	-0.560	20.276	2029.095	-0.003962	-0.003303	-0.007668
34.8000	1071.541	57.390	48.192	110.435	-0.557	20.275	2039.938	-0.004017	-0.003373	-0.007730
35.0000	1074.411	57.709	48.179	110.451	-0.558	20.275	2045.403	-0.004040	-0.003373	-0.007732
35.2000	1042.491	55.403	47.374	108.031	-0.562	20.275	1984.634	-0.003878	-0.003316	-0.007562
35.4000	1035.638	55.014	47.458	107.474	-0.560	20.274	1971.588	-0.003851	-0.003322	-0.007523
35.6000	999.013	53.069	45.956	104.475	-0.565	20.273	1901.865	-0.003715	-0.003217	-0.007313
35.8000	976.967	51.065	44.468	101.957	-0.569	20.273	1859.894	-0.003575	-0.003113	-0.007137
36.0000	942.341	48.943	42.800	98.568	-0.554	20.273	1793.976	-0.003426	-0.002996	-0.006900
36.2000	911.368	46.300	39.966	94.706	-0.556	20.272	1735.010	-0.003241	-0.002798	-0.006629
36.4000	865.366	42.980	37.602	89.935	-0.554	20.272	1647.434	-0.003009	-0.002632	-0.006295
36.6000	820.777	40.213	34.354	85.005	-0.556	20.271	1562.548	-0.002815	-0.002405	-0.005950
36.8000	734.318	33.641	29.726	75.640	-0.552	20.271	1397.953	-0.002355	-0.002081	-0.005295
37.0000	709.747	31.252	28.237	72.096	-0.561	20.269	1351.175	-0.002188	-0.001977	-0.005047
37.2000	648.295	27.028	25.071	65.049	-0.559	20.269	1234.188	-0.001892	-0.001755	-0.004553
37.4000	590.196	22.788	20.998	58.561	-0.548	20.269	1123.581	-0.001595	-0.001470	-0.004099
37.6000	542.150	18.313	18.178	52.404	-0.554	20.269	1032.114	-0.001282	-0.001272	-0.003668
37.8000	484.200	14.493	14.943	44.955	-0.552	20.268	921.793	-0.001015	-0.001046	-0.003147
38.0000	435.478	10.379	11.605	38.449	-0.556	20.267	829.039	-0.000727	-0.000812	-0.002691
38.2000	374.358	5.072	8.356	30.908	-0.564	20.267	712.681	-0.000355	-0.000585	-0.002164
38.4000	347.637	2.973	6.366	26.876	-0.553	20.265	661.812	-0.000208	-0.000446	-0.001881
38.6000	312.891	-0.084	4.532	22.414	-0.556	20.265	595.665	0.000006	-0.000317	-0.001569
38.8000	277.920	-3.156	3.214	17.565	-0.555	20.265	529.089	0.000221	-0.000225	-0.001230
39.0000	230.401	-6.712	0.766	10.729	-0.546	20.264	438.623	0.000470	-0.000054	-0.000751
39.2000	218.784	-8.450	-0.765	8.672	-0.550	20.264	416.508	0.000592	0.000054	-0.000607
39.4000	205.318	-9.825	-1.265	6.112	-0.554	20.264	390.873	0.000688	0.000089	-0.000428
39.6000	200.659	-10.301	-1.776	5.043	-0.556	20.263	382.004	0.000721	0.000124	-0.000353
39.8000	186.488	-11.828	-2.665	2.530	-0.549	20.262	355.024	0.000828	0.000187	-0.000177
40.0000	189.508	-11.189	-2.359	2.835	-0.549	20.262	360.775	0.000783	0.000165	-0.000198
40.2000	241.101	-8.201	-1.831	8.687	-0.548	20.261	458.994	0.000574	0.000128	-0.000608
40.4000	230.611	-8.785	-1.706	7.839	-0.563	20.261	439.024	0.000615	0.000119	-0.000549
40.6000	262.306	-6.253	-1.000	11.298	-0.558	20.261	499.363	0.000438	0.000070	-0.000791
40.8000	287.629	-4.588	-0.304	14.647	-0.553	20.260	547.571	0.000321	0.000021	-0.001025
41.0000	317.220	-2.239	1.629	18.245	-0.552	20.260	603.905	0.000157	-0.000114	-0.001277
41.2000	348.253	0.401	3.005	22.513	-0.549	20.259	662.985	-0.000028	-0.000210	-0.001576
41.4000	404.745	4.349	6.143	29.459	-0.544	20.259	770.531	-0.000304	-0.000430	-0.002062
41.6000	454.519	8.001	9.133	35.590	-0.558	20.259	865.288	-0.000560	-0.000639	-0.002491
41.8000	499.379	11.571	11.604	40.787	-0.562	20.258	950.689	-0.000810	-0.000812	-0.002855
42.0000	557.719	15.952	14.400	47.914	-0.554	20.258	1061.754	-0.001117	-0.001008	-0.003354
42.2000	617.577	20.914	17.663	55.168	-0.557	20.258	1175.709	-0.001464	-0.001236	-0.003862
42.4000	657.222	23.831	20.734	60.312	-0.557	20.257	1251.183	-0.001668	-0.001451	-0.004222
42.6000	714.631	28.650	24.240	67.382	-0.555	20.257	1360.474	-0.002006	-0.001697	-0.004717
42.8000	769.019	32.571	27.236	73.456	-0.549	20.257	1464.014	-0.002280	-0.001907	-0.005142
43.0000	826.157	36.545	30.659	80.281	-0.546	20.256	1572.790	-0.002558	-0.002146	-0.005620
43.2000	867.515	40.201	33.643	85.379	-0.558	20.256	1651.525	-0.002814	-0.002355	-0.005977
43.4000	905.597	43.563	36.135	90.131	-0.548	20.256	1724.024	-0.003049	-0.002529	-0.006309
43.6000	956.693	47.106	39.398	96.079	-0.544	20.256	1821.299	-0.003297	-0.002758	-0.006726
43.8000	979.882	49.749	41.317	99.290	-0.546	20.255	1865.444	-0.003482	-0.002892	-0.006950
44.0000	1013.275	51.746	43.176	102.877	-0.542	20.255	1929.016	-0.003622	-0.003022	-0.007201
44.2000	1052.665	54.668	45.736	107.281	-0.538	20.255	2004.004	-0.003827	-0.003202	-0.007510
44.4000	1048.878	55.417	46.194	107.738	-0.544	20.255	1996.794	-0.003879	-0.003234	-0.007542
44.6000	1059.863	56.193	46.958	109.228	-0.546	20.254	2017.708	-0.003933	-0.003287	-0.007646
44.8000	1060.299	56.971	47.596	109.310	-0.515	20.254	2018.538	-0.003988	-0.003332	-0.007652
45.0000	1062.794	57.209	47.859	109.725	-0.531	20.253	2023.287	-0.004005	-0.003350	-0.007681
45.2000	1052.755	56.221	47.166	109.173	-0.525	20.254	2004.175	-0.003935	-0.003302	-0.007642
45.4000	1039.590	55.473	46.945	108.255	-0.531	20.253	1979.113	-0.003883	-0.003286	-0.007578
45.6000	1007.550	53.474	46.057	105.196	-0.540	20.253	1918.116	-0.003743	-0.003224	-0.007364
45.8000	976.050	51.288	44.496	101.930	-0.535	20.253	1858.149	-0.003590	-0.003115	-0.007135
46.0000	946.504	49.069	42.415	98.750	-0.521	20.252	1801.901	-0.003435	-0.002969	-0.006912
46.2000	909.955	46.176	40.105	94.674	-0.530	20.252	1732.321	-0.003232	-0.002807	-0.006627
46.4000	866.328	43.286	37.937	90.090	-0.532	20.252	1649.265	-0.003030	-0.002656	-0.006306
46.6000	803.449	38.754	34.034	83.379	-0.533	20.251	1529.560	-0.002713	-0.002382	-0.005837
46.8000	764.315	35.684	31.562	78.736	-0.538	20.251	1455.059	-0.002498	-0.002209	-0.005512
47.0000	706.005	31.406	27.863	71.831	-0.548	20.251	1344.051	-0.002198	-0.001950	-0.005028
47.2000	654.157	27.499	24.835	65.897	-0.542	20.251	1245.346	-0.001925	-0.001738	-0.004613
47.4000	597.004	23.147	21.581	59.131	-0.548	20.250	1136.541	-0.001620	-0.001511	-0.004139
47.6000	541.909	19.022	18.679	52.459	-0.547	20.250	1031.656	-0.001332	-0.001308	-0.003672
47.8000	489.671	14.796	14.581	45.705	-0.536	20.250	932.207	-0.001036	-0.001021	-0.003199
48.0000	428.760	9.853	11.755	38.506	-0.555	20.250	816.250	-0.000690	-0.000823	-0.002695
48.2000	389.536	7.099	9.217	32.920	-0.550	20.250	741.577	-0.000497	-0.000645	-0.002304
48.4000	338.395	2.749	6.464	26.429	-0.552	20.250	644.217	-0.000192	-0.000452	-0.001850
48.6000	294.963	-0.724	4.364	20.414	-0.550	20.249	561.533	0.000051	-0.000305	-0.001429
48.8000	279.183	-2.655	2.699	17.816	-0.545	20.250	531.492	0.000186	-0.000189	-0.001247
49.0000	251.816	-5.630	1.394	13.522	-0.541	20.250	479.393	0.000394	-0.000098	-0.000947
49.2000	203.169	-9.407	-0.722	6.738	-0.546	20.250	386.782	0.000659	0.000051	-0.000472
49.4000	215.237	-8.659	-1.001	7.753	-0.543	20.250	409.756	0.000606	0.000070	-0.000543
49.6000	185.616	-11.398	-1.820	3.392	-0.540	20.251	353.365	0.000798	0.000127	-0.000237
49.8000	194.182	-10.758	-1.983	4.335	-0.545	20.250	369.673	0.000753	0.000139	-0.000303
50.0000	214.485	-9.966	-2.124	5.822	-0.541	20.263	408.325	0.000698	0.000149	-0.000408
50.2000	222.676	-9.940	-1.803	6.698	-0.536	20.262	423.918	0.000696	0.000126	-0.000469
50.4000	257.361	-6.976	-0.944	10.338	-0.545	20.262	489.950	0.000488	0.000066	-0.000724
50.6000	280.235	-5.283	-0.264	13.482	-0.545	20.262	533.495	0.000370	0.000018	-0.000944
50.8000	309.375	-2.781	1.419	17.356	-0.550	20.262	588.970	0.000195	-0.000099	-0.001215
51.0000	360.381	1.249	3.340	23.708	-0.542	20.262	686.073	-0.000087	-0.000234	-0.001660
51.2000	417.414	5.125	6.130	30.476	-0.549	20.262	794.649	-0.000359	-0.000429	-0.002133
51.4000	477.107	10.185	9.938	38.006	-0.554	20.262	908.289	-0.000713	-0.000696	-0.002660
51.6000	540.722	15.146	13.094	46.066	-0.546	20.261	1029.396	-0.001060	-0.000917	-0.003225
51.8000	596.117	18.867	16.969	52.696	-0.558	20.261	1134.853	-0.001321	-0.001188	-0.003689
52.0000	668.118	24.609	21.219	61.393	-0.546	20.262	1271.925	-0.001723	-0.001485	-0.004297
52.2000	740.209	30.375	25.725	70.122	-0.538	20.261	1409.168	-0.002126	-0.001801	-0.004909
52.4000	806.605	35.394	29.920	78.166	-0.559	20.261	1535.568	-0.002478	-0.002094	-0.005472
52.6000	883.220	41.603	34.188	86.882	-0.552	20.261	1681.423	-0.002912	-0.002393	-0.006082
52.8000	951.388	46.854	38.840	95.120	-0.551	20.261	1811.199	-0.003280	-0.002719	-0.006658
53.0000	1026.200	52.720	43.564	103.641	-0.543	20.261	1953.621	-0.003690	-0.003049	-0.007255
53.2000	1079.791	56.985	47.456	109.561	-0.553	20.261	2055.645	-0.003989	-0.003322	-0.007669
53.4000	1145.601	62.002	51.670	116.813	-0.542	20.260	2180.929	-0.004340	-0.003617	-0.008177
53.6000	1196.006	66.353	55.322	122.690	-0.544	20.260	2276.888	-0.004645	-0.003873	-0.008588
53.8000	1243.766	69.980	58.659	128.417	-0.550	20.260	2367.811	-0.004899	-0.004106	-0.008989
54.0000	1283.246	73.525	62.047	132.822	-0.550	20.260	2442.970	-0.005147	-0.004343	-0.009298
54.2000	1309.245	75.955	64.121	135.907	-0.553	20.260	2492.466	-0.005317	-0.004488	-0.009513
54.4000	1340.294	77.885	65.843	139.201	-0.548	20.260	2551.575	-0.005452	-0.004609	-0.009744
54.6000	1352.947	79.487	67.761	141.007	-0.545	20.260	2575.665	-0.005564	-0.004743	-0.009870
54.8000	1351.144	79.582	67.704	141.492	-0.548	20.259	2572.231	-0.005571	-0.004739	-0.009904
55.0000	1349.776	79.554	67.593	141.312	-0.548	20.259	2569.628	-0.005569	-0.004732	-0.009892
55.2000	1335.635	79.374	67.398	140.589	-0.552	20.258	2542.706	-0.005556	-0.004718	-0.009841
55.4000	1309.591	77.790	66.633	138.560	-0.562	20.259	2493.124	-0.005445	-0.004664	-0.009699
55.6000	1283.351	75.748	65.339	136.130	-0.550	20.259	2443.171	-0.005302	-0.004574	-0.009529
55.8000	1237.139	72.149	62.841	131.627	-0.551	20.259	2355.194	-0.005050	-0.004399	-0.009214
56.0000	1193.301	69.328	60.351	127.611	-0.556	20.258	2271.738	-0.004853	-0.004225	-0.008933
56.2000	1140.416	65.327	56.574	122.206	-0.552	20.259	2171.059	-0.004573	-0.003960	-0.008554
56.4000	1071.135	60.421	52.698	115.576	-0.549	20.258	2039.165	-0.004229	-0.003689	-0.008090
56.6000	1002.756	55.363	48.387	108.171	-0.553	20.258	1908.989	-0.003875	-0.003387	-0.007572
56.8000	943.679	50.427	43.470	101.151	-0.561	20.258	1796.522	-0.003530	-0.003043	-0.007081
57.0000	880.184	45.743	40.160	94.579	-0.560	20.257	1675.644	-0.003202	-0.002811	-0.006621
57.2000	788.736	39.950	34.756	84.184	-0.557	20.257	1501.551	-0.002796	-0.002433	-0.005893
57.4000	738.827	35.475	30.881	77.736	-0.566	20.258	1406.536	-0.002483	-0.002162	-0.005442
57.6000	674.385	29.778	26.848	69.970	-0.567	20.257	1283.855	-0.002084	-0.001879	-0.004898
57.8000	603.045	25.123	23.016	61.423	-0.561	20.257	1148.043	-0.001759	-0.001611	-0.004300
58.0000	531.946	18.798	18.484	52.865	-0.572	20.256	1012.688	-0.001316	-0.001294	-0.003701
58.2000	470.615	13.909	14.177	44.692	-0.560	20.256	895.929	-0.000974	-0.000992	-0.003128
58.4000	418.466	9.893	10.856	37.467	-0.562	20.257	796.652	-0.000692	-0.000760	-0.002623
58.6000	355.737	4.529	7.939	30.016	-0.549	20.256	677.233	-0.000317	-0.000556	-0.002101
58.8000	320.511	1.525	6.046	24.695	-0.558	20.255	610.170	-0.000107	-0.000423	-0.001729
59.0000	254.130	-3.586	2.767	16.051	-0.553	20.255	483.799	0.000251	-0.000194	-0.001124
59.2000	249.081	-5.158	1.780	14.426	-0.532	20.255	474.186	0.000361	-0.000125	-0.001010
59.4000	224.825	-7.047	0.600	10.450	-0.552	20.255	428.009	0.000493	-0.000042	-0.000731
59.6000	207.693	-8.466	-0.624	8.017	-0.547	20.254	395.393	0.000593	0.000044	-0.000561
59.8000	208.519	-9.107	-0.805	7.212	-0.560	20.254	396.967	0.000637	0.000056	-0.000505
60.0000	209.301	-8.798	-0.904	7.158	-0.548	20.254	398.455	0.000616	0.000063	-0.000501
60.2000	233.481	-7.435	-0.501	9.673	-0.552	20.254	444.489	0.000520	0.000035	-0.000677
60.4000	254.130	-6.128	-0.193	12.130	-0.557	20.253	483.799	0.000429	0.000014	-0.000849
60.6000	281.106	-4.478	0.946	15.133	-0.556	20.253	535.154	0.000313	-0.000066	-0.001059
60.8000	319.264	-1.001	2.227	19.913	-0.544	20.253	607.796	0.000070	-0.000156	-0.001394
61.0000	365.852	2.096	4.601	25.777	-0.552	20.253	696.487	-0.000147	-0.000322	-0.001804
61.2000	422.118	6.653	7.463	32.450	-0.541	20.253	803.604	-0.000466	-0.000522	-0.002271
61.4000	480.518	10.781	10.507	39.439	-0.545	20.253	914.783	-0.000755	-0.000736	-0.002761
61.6000	532.637	14.994	13.900	46.137	-0.552	20.253	1014.004	-0.001050	-0.000973	-0.003230
61.8000	612.663	20.718	18.194	55.391	-0.540	20.253	1166.353	-0.001450	-0.001274	-0.003877
62.0000	685.927	26.540	22.709	64.175	-0.542	20.253	1305.828	-0.001858	-0.001590	-0.004492
62.2000	761.520	32.128	26.918	73.386	-0.553	20.252	1449.738	-0.002249	-0.001884	-0.005137
62.4000	817.921	36.488	30.503	80.044	-0.549	20.253	1557.112	-0.002554	-0.002135	-0.005603
62.6000	902.351	43.662	36.105	89.937	-0.526	20.253	1717.844	-0.003056	-0.002527	-0.006296
62.8000	973.104	48.817	40.661	98.304	-0.537	20.252	1852.541	-0.003417	-0.002846	-0.006881
63.0000	1036.479	53.569	44.357	105.515	-0.532	20.252	1973.190	-0.003750	-0.003105	-0.007386
63.2000	1092.595	58.336	49.193	112.157	-0.547	20.252	2080.021	-0.004084	-0.003444	-0.007851
63.4000	1154.122	63.254	53.171	118.704	-0.536	20.252	2197.151	-0.004428	-0.003722	-0.008309
63.6000	1200.665	67.394	56.462	124.235	-0.534	20.252	2285.757	-0.004718	-0.003952	-0.008696
63.8000	1242.819	70.454	58.783	128.875	-0.533	20.251	2366.009	-0.004932	-0.004115	-0.009021
64.0000	1287.649	73.955	62.284	133.683	-0.528	20.251	2451.353	-0.005177	-0.004360	-0.009358
64.2000	1325.566	77.331	64.645	137.837	-0.546	20.251	2523.537	-0.005413	-0.004525	-0.009649
64.4000	1331.231	78.125	66.190	139.506	-0.551	20.251	2534.323	-0.005469	-0.004633	-0.009765
64.6000	1349.341	79.568	67.455	141.203	-0.541	20.251	2568.798	-0.005570	-0.004722	-0.009884
64.8000	1352.196	80.265	68.122	142.007	-0.542	20.251	2574.234	-0.005619	-0.004769	-0.009941
65.0000	1345.989	80.249	68.343	142.009	-0.549	20.251	2562.418	-0.005617	-0.004784	-0.009941
65.2000	1342.518	79.804	67.677	141.714	-0.538	20.251	2555.809	-0.005586	-0.004737	-0.009920
65.4000	1308.058	77.665	66.995	138.825	-0.548	20.251	2490.206	-0.005437	-0.004690	-0.009718
65.6000	1278.422	75.899	65.619	136.367	-0.549	20.250	2433.786	-0.005313	-0.004593	-0.009546
65.8000	1240.550	73.148	63.287	132.573	-0.550	20.251	2361.689	-0.005120	-0.004430	-0.009280
66.0000	1193.211	69.690	60.616	128.055	-0.555	20.250	2271.566	-0.004878	-0.004243	-0.008964
66.2000	1137.365	65.145	57.006	122.190	-0.546	20.250	2165.251	-0.004560	-0.003990	-0.008553
66.4000	1077.041	61.377	53.336	116.367	-0.545	20.250	2050.409	-0.004296	-0.003734	-0.008146
66.6000	1012.103	56.402	49.069	109.574	-0.547	20.250	1926.785	-0.003948	-0.003435	-0.007670
66.8000	947.481	50.996	44.623	102.250	-0.551	20.251	1803.761	-0.003570	-0.003124	-0.007158
67.0000	874.278	45.884	40.329	93.982	-0.553	20.251	1664.400	-0.003212	-0.002823	-0.006579
67.2000	796.611	40.310	35.646	85.520	-0.548	20.250	1516.542	-0.002822	-0.002495	-0.005986
67.4000	737.639	34.961	31.366	78.124	-0.556	20.250	1404.276	-0.002447	-0.002196	-0.005469
67.6000	664.872	29.834	27.486	69.539	-0.552	20.250	1265.745	-0.002088	-0.001924	-0.004868
67.8000	585.221	23.690	21.943	59.840	-0.550	20.250	1114.111	-0.001658	-0.001536	-0.004189
68.0000	527.016	18.646	18.610	52.613	-0.546	20.250	1003.304	-0.001305	-0.001303	-0.003683
68.2000	453.227	13.351	14.441	43.537	-0.545	20.250	862.827	-0.000935	-0.001011	-0.003048
68.4000	412.154	9.393	11.522	37.645	-0.561	20.250	784.636	-0.000657	-0.000807	-0.002635
68.6000	351.319	4.251	7.785	29.614	-0.561	20.250	668.821	-0.000298	-0.000545	-0.002073
68.8000	316.513	1.622	6.159	24.515	-0.552	20.249	602.560	-0.000114	-0.000431	-0.001716
69.0000	276.402	-1.598	3.757	18.914	-0.568	20.250	526.199	0.000112	-0.000263	-0.001324
69.2000	246.706	-4.630	2.072	14.578	-0.553	20.249	469.666	0.000324	-0.000145	-0.001020
69.4000	227.260	-6.906	1.030	10.701	-0.562	20.249	432.644	0.000483	-0.000072	-0.000749
69.6000	218.077	-7.840	0.016	9.533	-0.548	20.249	415.163	0.000549	-0.000001	-0.000667
69.8000	215.327	-8.506	-0.403	7.866	-0.548	20.249	409.927	0.000595	0.000028	-0.000551
70.0000	247.383	-6.435	-0.028	11.464	-0.545	20.249	470.953	0.000450	0.000002	-0.000802
70.2000	233.917	-7.602	-0.583	9.660	-0.534	20.249	445.318	0.000532	0.000041	-0.000676
70.4000	252.733	-6.131	0.364	12.243	-0.547	20.249	481.138	0.000429	-0.000025	-0.000857
70.6000	277.244	-4.199	1.128	15.314	-0.551	20.248	527.802	0.000294	-0.000079	-0.001072
70.8000	314.364	-1.488	2.113	19.566	-0.553	20.248	598.469	0.000104	-0.000148	-0.001370
71.0000	351.124	1.485	3.990	24.432	-0.560	20.248	668.449	-0.000104	-0.000279	-0.001710
71.2000	410.230	6.084	7.394	31.503	-0.561	20.248	780.973	-0.000426	-0.000518	-0.002205
71.4000	507.780	12.602	11.757	42.956	-0.555	20.249	966.682	-0.000882	-0.000823	-0.003007
71.6000	535.778	15.175	14.551	46.942	-0.552	20.248	1019.983	-0.001062	-0.001019	-0.003286
71.8000	627.601	22.413	19.069	57.211	-0.556	20.248	1194.792	-0.001569	-0.001335	-0.004005
72.0000	674.730	25.804	22.291	63.688	-0.554	20.248	1284.513	-0.001806	-0.001560	-0.004458
72.2000	761.219	32.682	27.835	73.875	-0.553	20.248	1449.165	-0.002288	-0.001948	-0.005171
72.4000	825.360	37.673	31.618	81.600	-0.557	20.248	1571.274	-0.002637	-0.002213	-0.005712
72.6000	907.520	43.481	36.269	90.855	-0.552	20.247	1727.686	-0.003044	-0.002539	-0.006360
72.8000	967.379	48.555	40.566	97.763	-0.557	20.248	1841.640	-0.003399	-0.002840	-0.006843
73.0000	1043.888	54.487	45.191	106.295	-0.560	20.248	1987.295	-0.003814	-0.003163	-0.007441
73.2000	1082.902	57.736	48.527	111.643	-0.545	20.248	2061.567	-0.004042	-0.003397	-0.007815
73.4000	1153.265	63.018	53.071	118.926	-0.538	20.248	2195.520	-0.004411	-0.003715	-0.008325
73.6000	1211.816	68.007	57.004	125.292	-0.542	20.247	2306.986	-0.004761	-0.003990	-0.008770
73.8000	1268.127	71.830	60.380	131.212	-0.557	20.248	2414.188	-0.005028	-0.004227	-0.009185
74.0000	1275.596	73.384	62.048	133.015	-0.558	20.247	2428.408	-0.005137	-0.004343	-0.009311
74.2000	1305.954	76.486	64.855	136.991	-0.548	20.247	2486.200	-0.005354	-0.004540	-0.009589
74.4000	1336.852	78.249	66.870	140.382	-0.539	20.247	2545.023	-0.005477	-0.004681	-0.009827
74.6000	1352.136	79.846	67.970	141.841	-0.544	20.248	2574.120	-0.005589	-0.004758	-0.009929
74.8000	1355.082	80.597	68.678	143.134	-0.548	20.248	2579.727	-0.005642	-0.004807	-0.010019
75.0000	1344.126	80.361	68.275	142.285	-0.549	20.247	2558.870	-0.005625	-0.004779	-0.009960
75.2000	1333.531	79.416	67.998	141.786	-0.545	20.247	2538.700	-0.005559	-0.004760	-0.009925
75.4000	1302.076	77.403	67.538	138.922	-0.554	20.247	2478.819	-0.005418	-0.004728	-0.009725
75.6000	1269.660	75.623	65.632	136.199	-0.554	20.247	2417.107	-0.005294	-0.004594	-0.009534
75.8000	1239.678	72.913	63.759	133.114	-0.533	20.248	2360.029	-0.005104	-0.004463	-0.009318
76.0000	1191.001	69.342	60.491	127.903	-0.541	20.248	2267.361	-0.004854	-0.004234	-0.008953
76.2000	1141.242	66.090	57.602	123.386	-0.540	20.248	2172.632	-0.004626	-0.004032	-0.008637
76.4000	1079.836	61.057	53.349	116.798	-0.542	20.248	2055.731	-0.004274	-0.003734	-0.008176
76.6000	1009.804	55.890	48.903	109.768	-0.543	20.248	1922.407	-0.003912	-0.003423	-0.007684
76.8000	935.038	50.718	44.623	101.845	-0.541	20.248	1780.071	-0.003550	-0.003124	-0.007129
77.0000	855.417	44.593	39.106	92.482	-0.542	20.248	1628.494	-0.003121	-0.002737	-0.006474
77.2000	809.400	41.034	36.133	87.158	-0.537	20.247	1540.890	-0.002872	-0.002529	-0.006101
77.4000	729.118	34.823	31.338	77.904	-0.534	20.248	1388.054	-0.002438	-0.002194	-0.005453
77.6000	665.172	30.013	27.336	69.843	-0.544	20.248	1266.317	-0.002101	-0.001914	-0.004889
77.8000	595.290	24.219	22.904	61.547	-0.548	20.247	1133.280	-0.001695	-0.001603	-0.004308
78.0000	531.224	18.912	19.027	53.432	-0.538	20.248	1011.314	-0.001324	-0.001332	-0.003740
78.2000	460.996	13.533	14.693	44.456	-0.534	20.248	877.619	-0.000947	-0.001028	-0.003112
78.4000	410.456	9.253	11.576	37.729	-0.536	20.248	781.403	-0.000648	-0.000810	-0.002641
78.6000	361.478	5.375	8.634	31.254	-0.545	20.248	688.162	-0.000376	-0.000604	-0.002188
78.8000	305.092	0.803	5.517	23.500	-0.543	20.248	580.816	-0.000056	-0.000386	-0.001645
79.0000	272.961	-2.574	3.449	18.441	-0.542	20.248	519.648	0.000180	-0.000241	-0.001291
79.2000	240.785	-5.075	2.074	14.343	-0.521	20.248	458.393	0.000355	-0.000145	-0.001004
79.4000	217.115	-6.992	0.640	10.103	-0.550	20.248	413.332	0.000489	-0.000045	-0.000707
79.6000	195.790	-9.395	-0.944	6.725	-0.540	20.248	372.734	0.000658	0.000066	-0.000471
79.8000	209.090	-8.923	-0.930	7.812	-0.538	20.249	398.054	0.000625	0.000065	-0.000547
80.0000	216.259	-8.686	-0.737	8.449	-0.556	20.248	411.701	0.000608	0.000052	-0.000591
80.2000	235.134	-7.281	-0.222	10.366	-0.536	20.248	447.636	0.000510	0.000016	-0.000726
80.4000	257.963	-5.588	0.058	13.076	-0.534	20.248	491.095	0.000391	-0.000004	-0.000915
80.6000	282.324	-4.046	0.588	16.077	-0.544	20.248	537.472	0.000283	-0.000041	-0.001125
80.8000	317.911	-1.460	2.782	20.830	-0.544	20.248	605.221	0.000102	-0.000195	-0.001458
81.0000	381.962	3.515	5.672	28.085	-0.538	20.248	727.158	-0.000246	-0.000397	-0.001966
81.2000	424.793	6.848	7.659	33.322	-0.542	20.249	808.697	-0.000479	-0.000536	-0.002333
81.4000	468.977	10.117	9.783	38.842	-0.544	20.249	892.811	-0.000708	-0.000685	-0.002719
81.6000	540.497	15.409	14.095	47.276	-0.538	20.249	1028.967	-0.001079	-0.000987	-0.003309
81.8000	611.311	21.303	18.609	55.530	-0.545	20.249	1163.778	-0.001491	-0.001303	-0.003887
82.0000	677.120	25.972	22.221	63.939	-0.549	20.249	1289.063	-0.001818	-0.001555	-0.004476
82.2000	761.820	32.420	26.918	73.344	-0.538	20.249	1450.310	-0.002269	-0.001884	-0.005134
82.4000	820.266	37.184	31.213	81.059	-0.534	20.249	1561.575	-0.002603	-0.002185	-0.005674
82.6000	884.422	42.453	35.563	88.492	-0.550	20.249	1683.712	-0.002972	-0.002489	-0.006194
82.8000	971.211	48.819	40.609	97.943	-0.544	20.249	1848.936	-0.003417	-0.002843	-0.006856
83.0000	1028.755	53.166	44.318	104.918	-0.548	20.249	1958.485	-0.003722	-0.003102	-0.007344
83.2000	1086.689	57.989	48.860	111.687	-0.552	20.249	2068.777	-0.004059	-0.003420	-0.007818
83.4000	1161.245	63.602	53.279	119.455	-0.552	20.249	2210.712	-0.004452	-0.003730	-0.008362
83.6000	1199.823	66.729	56.448	124.873	-0.552	20.250	2284.155	-0.004671	-0.003951	-0.008741
83.8000	1241.918	70.439	60.186	129.640	-0.548	20.249	2364.292	-0.004931	-0.004213	-0.009075
84.0000	1281.037	73.843	62.354	133.641	-0.565	20.249	2438.765	-0.005169	-0.004365	-0.009355
84.2000	1319.329	76.902	64.952	138.060	-0.546	20.250	2511.663	-0.005383	-0.004547	-0.009664
84.4000	1334.432	77.888	66.065	140.049	-0.556	20.250	2540.417	-0.005452	-0.004625	-0.009803
84.6000	1347.552	79.359	67.551	141.562	-0.541	20.250	2565.393	-0.005555	-0.004729	-0.009909
84.8000	1350.964	80.082	67.736	142.328	-0.557	20.250	2571.888	-0.005606	-0.004741	-0.009963
85.0000	1348.589	80.249	67.803	142.201	-0.550	20.249	2567.368	-0.005617	-0.004746	-0.009954
85.2000	1331.878	79.361	67.524	141.146	-0.542	20.250	2535.553	-0.005555	-0.004727	-0.009880
85.4000	1304.962	77.664	67.010	138.922	-0.543	20.251	2484.312	-0.005436	-0.004691	-0.009725
85.6000	1278.587	75.650	65.535	136.492	-0.549	20.250	2434.101	-0.005296	-0.004587	-0.009554
85.8000	1236.643	72.411	63.259	132.892	-0.543	20.250	2354.250	-0.005069	-0.004428	-0.009302
86.0000	1196.502	69.675	60.893	128.693	-0.549	20.250	2277.832	-0.004877	-0.004263	-0.009009
86.2000	1144.894	66.260	57.519	123.538	-0.557	20.250	2179.585	-0.004638	-0.004026	-0.008648
86.4000	1077.958	61.017	52.989	116.562	-0.541	20.250	2052.155	-0.004271	-0.003709	-0.008159
86.6000	1015.304	56.332	49.250	110.158	-0.561	20.250	1932.878	-0.003943	-0.003447	-0.007711
86.8000	938.780	51.206	44.692	102.014	-0.551	20.250	1787.195	-0.003584	-0.003128	-0.007141
87.0000	876.517	46.273	40.510	94.536	-0.549	20.250	1668.663	-0.003239	-0.002836	-0.006618
87.2000	805.583	40.490	35.815	86.784	-0.544	20.250	1533.623	-0.002834	-0.002507	-0.006075
87.4000	735.430	35.018	31.477	78.320	-0.544	20.250	1400.070	-0.002451	-0.002203	-0.005482
87.6000	664.511	29.721	26.780	69.802	-0.550	20.250	1265.059	-0.002080	-0.001875	-0.004886
87.8000	593.998	24.427	22.403	61.105	-0.547	20.251	1130.819	-0.001710	-0.001568	-0.004277
88.0000	519.277	17.979	18.207	52.278	-0.535	20.250	988.569	-0.001259	-0.001274	-0.003659
88.2000	465.866	13.754	14.555	45.191	-0.545	20.250	886.889	-0.000963	-0.001019	-0.003163
88.4000	400.207	8.529	10.922	36.479	-0.549	20.250	761.890	-0.000597	-0.000765	-0.002554
88.6000	361.448	4.933	8.383	30.906	-0.541	20.250	688.105	-0.000345	-0.000587	-0.002163
88.8000	317.836	1.178	5.892	24.680	-0.548	20.249	605.078	-0.000082	-0.000412	-0.001728
89.0000	265.071	-2.906	3.018	18.037	-0.545	20.249	504.627	0.000203	-0.000211	-0.001263
89.2000	245.474	-4.978	1.671	14.535	-0.539	20.250	467.319	0.000348	-0.000117	-0.001017
89.4000	227.936	-7.199	0.684	11.465	-0.538	20.249	433.931	0.000504	-0.000048	-0.000803
89.6000	216.875	-8.118	-0.139	9.379	-0.537	20.249	412.874	0.000568	0.000010	-0.000657
89.8000	213.704	-8.518	-0.556	8.392	-0.537	20.249	406.837	0.000596	0.000039	-0.000587
90.0000	217.206	-8.867	-0.891	8.311	-0.542	20.248	413.504	0.000621	0.000062	-0.000582
90.2000	222.300	-8.590	-0.611	8.643	-0.545	20.248	423.203	0.000601	0.000043	-0.000605
90.4000	256.475	-6.071	0.182	13.037	-0.532	20.248	488.262	0.000425	-0.000013	-0.000913
90.6000	283.421	-3.755	0.725	16.066	-0.544	20.248	539.560	0.000263	-0.000051	-0.001125
90.8000	318.738	-1.515	2.253	20.608	-0.536	20.246	606.794	0.000106	-0.000158	-0.001443
91.0000	368.707	2.735	4.852	26.598	-0.548	20.246	701.923	-0.000191	-0.000340	-0.001862
91.2000	415.986	6.195	7.061	32.309	-0.553	20.246	791.931	-0.000434	-0.000494	-0.002262
91.4000	477.498	10.697	10.339	39.898	-0.546	20.245	909.033	-0.000749	-0.000724	-0.002793
91.6000	562.423	16.660	15.442	49.791	-0.537	20.245	1070.709	-0.001166	-0.001081	-0.003485
91.8000	615.579	21.274	18.623	56.406	-0.545	20.244	1171.904	-0.001489	-0.001304	-0.003948
92.0000	674.189	25.581	21.873	63.508	-0.536	20.244	1283.484	-0.001791	-0.001531	-0.004446
92.2000	744.056	30.918	26.197	71.957	-0.549	20.243	1416.492	-0.002164	-0.001834	-0.005037
92.4000	839.923	38.117	32.435	83.129	-0.544	20.243	1598.997	-0.002668	-0.002270	-0.005819
92.6000	883.550	42.229	35.507	88.715	-0.550	20.243	1682.053	-0.002956	-0.002486	-0.006210
92.8000	962.344	48.136	40.274	97.566	-0.543	20.243	1832.056	-0.003370	-0.002819	-0.006830
93.0000	1030.408	53.040	44.386	105.347	-0.549	20.242	1961.632	-0.003713	-0.003107	-0.007374
93.2000	1089.319	57.891	48.513	112.270	-0.552	20.242	2073.784	-0.004052	-0.003396	-0.007859
93.4000	1153.400	63.380	53.114	119.273	-0.538	20.242	2195.778	-0.004437	-0.003718	-0.008349
93.6000	1211.711	67.589	56.490	125.582	-0.536	20.241	2306.786	-0.004731	-0.003954	-0.008791
93.8000	1256.180	71.245	59.935	130.475	-0.535	20.241	2391.443	-0.004987	-0.004195	-0.009133
94.0000	1287.063	74.038	62.452	134.504	-0.538	20.240	2450.237	-0.005183	-0.004372	-0.009415
94.2000	1316.489	76.763	64.663	137.755	-0.538	20.240	2506.256	-0.005373	-0.004526	-0.009643
94.4000	1334.928	78.359	65.773	140.186	-0.544	20.240	2541.361	-0.005485	-0.004604	-0.009813
94.6000	1345.989	79.248	67.399	141.659	-0.540	20.239	2562.418	-0.005547	-0.004718	-0.009916
94.8000	1352.346	80.610	68.065	142.826	-0.542	20.238	2574.520	-0.005643	-0.004765	-0.009998
95.0000	1344.426	80.095	67.942	142.367	-0.554	20.238	2559.443	-0.005607	-0.004756	-0.009966
95.2000	1332.809	79.485	67.565	141.617	-0.551	20.237	2537.327	-0.005564	-0.004730	-0.009913
95.4000	1318.082	77.874	67.426	139.950	-0.545	20.237	2509.289	-0.005451	-0.004720	-0.009797
95.6000	1277.355	75.748	66.119	136.798	-0.546	20.237	2431.755	-0.005302	-0.004628	-0.009576
95.8000	1236.522	73.134	63.424	132.986	-0.544	20.236	2354.021	-0.005119	-0.004440	-0.009309
96.0000	1195.555	69.813	60.435	129.098	-0.554	20.236	2276.030	-0.004887	-0.004230	-0.009037
96.2000	1145.285	65.909	57.464	123.831	-0.557	20.235	2180.328	-0.004614	-0.004022	-0.008668
96.4000	1080.092	61.614	53.585	117.283	-0.543	20.235	2056.217	-0.004313	-0.003751	-0.008210
96.6000	1023.690	57.403	49.904	111.491	-0.548	20.234	1948.843	-0.004018	-0.003493	-0.007804
96.8000	946.324	51.567	45.053	103.181	-0.546	20.234	1801.558	-0.003610	-0.003154	-0.007223
97.0000	866.057	45.647	39.980	94.443	-0.553	20.234	1648.750	-0.003195	-0.002799	-0.006611
97.2000	817.861	41.561	36.939	88.076	-0.550	20.233	1556.997	-0.002909	-0.002586	-0.006165
97.4000	726.308	34.836	31.118	78.057	-0.542	20.233	1382.704	-0.002439	-0.002178	-0.005464
97.6000	662.197	29.652	27.030	69.995	-0.542	20.232	1260.653	-0.002076	-0.001892	-0.004900
97.8000	585.597	23.551	22.611	60.673	-0.537	20.232	1114.826	-0.001649	-0.001583	-0.004247
98.0000	522.688	18.454	18.722	52.834	-0.537	20.231	995.064	-0.001292	-0.001311	-0.003698
98.2000	463.206	13.924	14.873	45.164	-0.535	20.232	881.824	-0.000975	-0.001041	-0.003161
98.4000	409.013	9.115	11.147	37.759	-0.532	20.231	778.656	-0.000638	-0.000780	-0.002643
98.6000	360.276	5.001	8.007	31.016	-0.538	20.231	685.873	-0.000350	-0.000561	-0.002171
98.8000	298.404	0.095	5.421	23.236	-0.526	20.230	568.085	-0.000007	-0.000379	-0.001626
99.0000	270.602	-2.558	3.586	18.552	-0.532	20.229	515.156	0.000179	-0.000251	-0.001299
99.2000	249.487	-4.951	1.586	14.799	-0.525	20.229	474.958	0.000347	-0.000111	-0.001036
99.4000	219.941	-7.645	0.127	10.435	-0.530	20.229	418.711	0.000535	-0.000009	-0.000730
99.6000	206.671	-8.645	-0.360	8.839	-0.537	20.228	393.448	0.000605	0.000025	-0.000619
99.8000	208.128	-8.729	-0.819	8.172	-0.537	20.228	396.223	0.000611	0.000057	-0.000572
Test Cycles
Time (sec)	Axial stress (kPa)	Axial micro-strain #1	Axial micro-strain #2	Axial micro-strain #3	Confining pressure (kPa)	Temperature (�C)	Load (N)	Displacement #1 (mm)	Displacement #2 (mm)	Displacement #3 (mm)
0.0000	215.177	-8.952	-0.972	8.463	-0.537	20.227	409.641	0.000627	0.000068	-0.000592
0.2000	224.585	-8.520	-0.582	9.171	-0.537	20.226	427.551	0.000596	0.000041	-0.000642
0.4000	244.978	-6.545	-0.277	11.436	-0.556	20.227	466.375	0.000458	0.000019	-0.000801
0.6000	272.285	-4.728	0.626	15.133	-0.530	20.226	518.360	0.000331	-0.000044	-0.001059
0.8000	314.815	-1.989	1.947	20.137	-0.541	20.225	599.327	0.000139	-0.000136	-0.001410
1.0000	360.862	2.136	4.491	26.319	-0.533	20.225	686.989	-0.000150	-0.000314	-0.001842
1.2000	418.226	6.277	7.757	32.823	-0.527	20.225	796.194	-0.000439	-0.000543	-0.002298
1.4000	475.439	10.616	10.714	39.507	-0.544	20.224	905.113	-0.000743	-0.000750	-0.002765
1.6000	527.046	14.576	13.288	46.218	-0.531	20.224	1003.361	-0.001020	-0.000930	-0.003235
1.8000	613.264	20.608	18.416	56.462	-0.545	20.223	1167.498	-0.001443	-0.001289	-0.003952
2.0000	669.786	25.484	21.832	63.075	-0.557	20.223	1275.101	-0.001784	-0.001528	-0.004415
2.2000	759.851	32.515	27.321	73.831	-0.546	20.223	1446.562	-0.002276	-0.001912	-0.005168
2.4000	818.673	36.768	30.644	80.737	-0.542	20.223	1558.542	-0.002574	-0.002145	-0.005652
2.6000	890.689	42.230	36.076	89.537	-0.542	20.223	1695.642	-0.002956	-0.002525	-0.006268
2.8000	973.225	48.929	40.885	99.039	-0.542	20.223	1852.770	-0.003425	-0.002862	-0.006933
3.0000	1032.737	53.488	44.388	105.932	-0.540	20.222	1966.066	-0.003744	-0.003107	-0.007415
3.2000	1090.010	57.806	48.358	112.380	-0.546	20.222	2075.100	-0.004046	-0.003385	-0.007867
3.4000	1152.198	62.837	53.071	119.288	-0.537	20.222	2193.489	-0.004399	-0.003715	-0.008350
3.6000	1211.185	67.686	56.879	125.567	-0.536	20.221	2305.784	-0.004738	-0.003982	-0.008790
3.8000	1244.878	70.914	59.646	129.821	-0.542	20.221	2369.928	-0.004964	-0.004175	-0.009087
4.0000	1290.264	74.023	62.742	134.947	-0.545	20.221	2456.331	-0.005182	-0.004392	-0.009446
4.2000	1313.798	76.333	64.772	138.339	-0.553	20.221	2501.135	-0.005343	-0.004534	-0.009684
4.4000	1338.896	78.556	66.745	140.535	-0.548	20.221	2548.914	-0.005499	-0.004672	-0.009837
4.6000	1344.171	79.277	67.383	141.853	-0.554	20.221	2558.956	-0.005549	-0.004717	-0.009930
4.8000	1354.871	80.181	68.121	143.008	-0.552	20.221	2579.327	-0.005613	-0.004768	-0.010011
5.0000	1351.775	80.151	68.874	143.091	-0.533	20.220	2573.433	-0.005611	-0.004821	-0.010016
5.2000	1337.408	79.583	68.470	142.158	-0.548	20.221	2546.082	-0.005571	-0.004793	-0.009951
5.4000	1300.543	77.415	66.856	139.005	-0.545	20.221	2475.901	-0.005419	-0.004680	-0.009730
5.6000	1271.463	75.206	65.784	136.254	-0.547	20.221	2420.540	-0.005264	-0.004605	-0.009538
5.8000	1237.965	72.758	63.579	132.919	-0.545	20.221	2356.768	-0.005093	-0.004451	-0.009304
6.0000	1183.652	69.482	60.729	128.347	-0.536	20.220	2253.370	-0.004864	-0.004251	-0.008984
6.2000	1142.700	66.147	57.644	123.454	-0.530	20.220	2175.407	-0.004630	-0.004035	-0.008642
6.4000	1062.283	60.226	52.642	115.744	-0.545	20.220	2022.314	-0.004216	-0.003685	-0.008102
6.6000	1020.128	56.819	50.320	111.436	-0.555	20.220	1942.062	-0.003977	-0.003522	-0.007801
6.8000	951.854	51.954	45.205	103.861	-0.546	20.220	1812.086	-0.003637	-0.003164	-0.007270
7.0000	887.683	46.997	41.122	96.468	-0.552	20.220	1689.920	-0.003290	-0.002879	-0.006753
7.2000	801.660	40.533	35.981	87.478	-0.541	20.220	1526.155	-0.002837	-0.002519	-0.006123
7.4000	734.919	35.239	32.227	78.779	-0.548	20.220	1399.097	-0.002467	-0.002256	-0.005515
7.6000	660.994	29.792	27.502	70.190	-0.551	20.221	1258.364	-0.002085	-0.001925	-0.004913
7.8000	599.423	24.664	23.306	61.950	-0.544	20.220	1141.148	-0.001726	-0.001631	-0.004336
8.0000	518.781	18.451	18.707	52.878	-0.546	20.221	987.625	-0.001292	-0.001310	-0.003701
8.2000	483.900	15.105	15.845	47.498	-0.548	20.221	921.221	-0.001057	-0.001109	-0.003325
8.4000	410.321	9.406	11.897	38.659	-0.554	20.220	781.145	-0.000658	-0.000833	-0.002706
8.6000	353.483	4.973	8.563	30.529	-0.554	20.221	672.941	-0.000348	-0.000599	-0.002137
8.8000	307.181	0.859	6.060	24.766	-0.545	20.221	584.793	-0.000060	-0.000424	-0.001734
9.0000	276.402	-2.029	3.781	19.802	-0.549	20.221	526.199	0.000142	-0.000265	-0.001386
9.2000	243.731	-4.935	1.769	14.423	-0.547	20.221	464.001	0.000345	-0.000124	-0.001010
9.4000	226.493	-6.503	0.837	11.547	-0.553	20.222	431.185	0.000455	-0.000059	-0.000808
9.6000	210.834	-8.324	0.003	9.423	-0.543	20.222	401.373	0.000583	-0.000000	-0.000660
9.8000	204.537	-9.104	-0.432	7.795	-0.542	20.222	389.385	0.000637	0.000030	-0.000546
10.0000	213.313	-8.644	-0.277	8.976	-0.545	20.222	406.094	0.000605	0.000019	-0.000628
10.2000	225.561	-8.007	0.043	9.642	-0.557	20.222	429.411	0.000560	-0.000003	-0.000675
10.4000	248.224	-6.239	0.182	12.520	-0.546	20.222	472.555	0.000437	-0.000013	-0.000876
10.6000	280.445	-4.005	1.030	16.287	-0.535	20.222	533.895	0.000280	-0.000072	-0.001140
10.8000	320.736	-1.126	2.824	21.427	-0.548	20.223	610.600	0.000079	-0.000198	-0.001500
11.0000	367.820	2.555	4.907	26.960	-0.544	20.223	700.235	-0.000179	-0.000344	-0.001887
11.2000	412.605	6.207	7.575	32.811	-0.549	20.223	785.494	-0.000435	-0.000530	-0.002297
11.4000	468.826	10.434	10.424	39.438	-0.543	20.223	892.525	-0.000730	-0.000730	-0.002761
11.6000	548.582	16.311	14.619	48.957	-0.545	20.223	1044.359	-0.001142	-0.001023	-0.003427
11.8000	598.882	20.094	17.818	54.656	-0.545	20.224	1140.118	-0.001407	-0.001247	-0.003826
12.0000	676.744	26.082	22.542	64.078	-0.544	20.224	1288.347	-0.001826	-0.001578	-0.004485
12.2000	744.447	31.613	26.876	72.887	-0.541	20.224	1417.236	-0.002213	-0.001881	-0.005102
12.4000	816.298	37.185	31.672	81.254	-0.545	20.224	1554.022	-0.002603	-0.002217	-0.005688
12.6000	907.085	43.523	36.381	91.673	-0.554	20.224	1726.856	-0.003047	-0.002547	-0.006417
12.8000	959.985	47.942	40.163	98.109	-0.547	20.224	1827.564	-0.003356	-0.002811	-0.006868
13.0000	1018.520	53.040	45.277	105.196	-0.552	20.224	1939.001	-0.003713	-0.003169	-0.007364
13.2000	1084.931	58.363	48.873	112.354	-0.554	20.224	2065.430	-0.004085	-0.003421	-0.007865
13.4000	1151.657	63.631	53.293	119.648	-0.534	20.225	2192.459	-0.004454	-0.003730	-0.008375
13.6000	1200.950	67.339	56.796	125.276	-0.533	20.225	2286.301	-0.004714	-0.003976	-0.008769
13.8000	1246.892	70.689	59.743	130.015	-0.545	20.225	2373.762	-0.004948	-0.004182	-0.009101
14.0000	1278.392	73.802	62.494	133.975	-0.536	20.226	2433.729	-0.005166	-0.004375	-0.009378
14.2000	1299.972	75.901	65.242	137.074	-0.549	20.226	2474.813	-0.005313	-0.004567	-0.009595
14.4000	1334.718	78.567	66.786	140.311	-0.548	20.225	2540.960	-0.005500	-0.004675	-0.009822
14.6000	1346.636	79.458	67.552	142.314	-0.551	20.225	2563.648	-0.005562	-0.004729	-0.009962
14.8000	1349.250	80.362	68.553	142.438	-0.544	20.226	2568.626	-0.005625	-0.004799	-0.009971
15.0000	1347.041	79.971	68.583	142.882	-0.554	20.226	2564.421	-0.005598	-0.004801	-0.010002
15.2000	1327.039	79.667	68.360	141.353	-0.541	20.227	2526.340	-0.005577	-0.004785	-0.009895
15.4000	1309.966	78.069	67.733	140.159	-0.547	20.226	2493.839	-0.005465	-0.004741	-0.009811
15.6000	1277.279	75.803	66.396	137.213	-0.549	20.227	2431.612	-0.005306	-0.004648	-0.009605
15.8000	1233.953	72.552	63.718	133.224	-0.554	20.228	2349.129	-0.005079	-0.004460	-0.009326
16.0000	1187.830	69.702	61.075	128.042	-0.546	20.227	2261.324	-0.004879	-0.004275	-0.008963
16.2000	1142.820	66.230	58.366	123.984	-0.556	20.228	2175.636	-0.004636	-0.004086	-0.008679
16.4000	1077.011	61.475	53.975	117.189	-0.553	20.228	2050.352	-0.004303	-0.003778	-0.008203
16.6000	1019.091	57.293	49.723	110.965	-0.541	20.228	1940.088	-0.004010	-0.003481	-0.007768
16.8000	951.944	51.762	45.651	103.835	-0.557	20.228	1812.258	-0.003623	-0.003196	-0.007268
17.0000	871.197	45.773	40.344	94.914	-0.554	20.228	1658.535	-0.003204	-0.002824	-0.006644
17.2000	809.776	41.492	36.898	87.798	-0.544	20.228	1541.605	-0.002904	-0.002583	-0.006146
17.4000	745.093	36.393	32.741	80.099	-0.541	20.229	1418.467	-0.002548	-0.002292	-0.005607
17.6000	678.187	30.919	27.905	71.705	-0.544	20.229	1291.094	-0.002164	-0.001953	-0.005019
17.8000	600.520	24.887	23.625	62.674	-0.557	20.229	1143.236	-0.001742	-0.001654	-0.004387
18.0000	532.862	19.383	19.417	54.419	-0.548	20.229	1014.433	-0.001357	-0.001359	-0.003809
18.2000	459.749	14.020	15.233	45.357	-0.558	20.229	875.244	-0.000981	-0.001066	-0.003175
18.4000	409.975	9.754	11.703	38.299	-0.562	20.230	780.487	-0.000683	-0.000819	-0.002681
18.6000	348.298	4.738	8.591	30.587	-0.550	20.230	663.071	-0.000332	-0.000601	-0.002141
18.8000	311.073	1.304	5.990	25.180	-0.561	20.230	592.203	-0.000091	-0.000419	-0.001763
19.0000	273.712	-2.253	3.851	19.620	-0.538	20.230	521.078	0.000158	-0.000270	-0.001373
19.2000	247.458	-4.352	2.670	15.660	-0.550	20.231	471.096	0.000305	-0.000187	-0.001096
19.4000	230.491	-6.115	1.558	12.605	-0.545	20.231	438.795	0.000428	-0.000109	-0.000882
19.6000	214.561	-7.603	-0.039	10.018	-0.546	20.231	408.468	0.000532	0.000003	-0.000701
19.8000	223.262	-7.784	-0.139	10.187	-0.546	20.231	425.034	0.000545	0.000010	-0.000713
20.0000	219.144	-8.353	-0.124	9.671	-0.551	20.231	417.194	0.000585	0.000009	-0.000677
20.2000	240.800	-7.228	0.460	11.201	-0.555	20.231	458.422	0.000506	-0.000032	-0.000784
20.4000	257.256	-5.352	0.643	13.965	-0.549	20.232	489.750	0.000375	-0.000045	-0.000978
20.6000	277.680	-4.171	1.461	16.286	-0.553	20.232	528.631	0.000292	-0.000102	-0.001140
20.8000	306.114	-1.517	2.588	19.871	-0.556	20.232	582.762	0.000106	-0.000181	-0.001391
21.0000	377.604	3.306	5.714	28.167	-0.546	20.232	718.861	-0.000231	-0.000400	-0.001972
21.2000	418.150	6.585	8.076	33.658	-0.552	20.233	796.051	-0.000461	-0.000565	-0.002356
21.4000	490.392	12.060	12.021	42.010	-0.562	20.233	933.580	-0.000844	-0.000841	-0.002941
21.6000	541.218	15.977	14.371	48.262	-0.550	20.233	1030.340	-0.001118	-0.001006	-0.003378
21.8000	614.662	21.551	19.139	57.226	-0.547	20.233	1170.158	-0.001509	-0.001340	-0.004006
22.0000	673.919	25.763	22.250	63.952	-0.554	20.234	1282.969	-0.001803	-0.001557	-0.004477
22.2000	750.474	31.668	26.849	73.402	-0.560	20.234	1428.709	-0.002217	-0.001879	-0.005138
22.4000	833.791	38.339	32.255	82.753	-0.547	20.234	1587.324	-0.002684	-0.002258	-0.005793
22.6000	900.427	43.897	36.993	91.078	-0.550	20.235	1714.182	-0.003073	-0.002590	-0.006375
22.8000	963.486	48.651	40.928	98.456	-0.563	20.234	1834.230	-0.003406	-0.002865	-0.006892
23.0000	1039.079	54.181	45.443	107.127	-0.548	20.236	1978.140	-0.003793	-0.003181	-0.007499
23.2000	1090.642	58.448	49.526	112.811	-0.547	20.235	2076.302	-0.004091	-0.003467	-0.007897
23.4000	1160.013	64.005	54.030	120.705	-0.550	20.236	2208.366	-0.004480	-0.003782	-0.008449
23.6000	1209.005	68.061	57.712	126.221	-0.548	20.236	2301.636	-0.004764	-0.004040	-0.008835
23.8000	1256.240	71.899	60.770	131.515	-0.551	20.236	2391.558	-0.005033	-0.004254	-0.009206
24.0000	1287.664	74.148	63.229	135.115	-0.545	20.237	2451.382	-0.005190	-0.004426	-0.009458
24.2000	1310.673	76.431	64.995	138.462	-0.556	20.237	2495.184	-0.005350	-0.004550	-0.009692
24.4000	1340.489	78.818	66.855	141.118	-0.556	20.237	2551.947	-0.005517	-0.004680	-0.009878
24.6000	1342.262	80.193	67.802	142.229	-0.551	20.237	2555.323	-0.005614	-0.004746	-0.009956
24.8000	1347.312	80.278	68.289	143.064	-0.554	20.238	2564.936	-0.005619	-0.004780	-0.010014
25.0000	1344.787	80.139	68.719	142.993	-0.558	20.238	2560.129	-0.005610	-0.004810	-0.010010
25.2000	1332.524	79.638	68.413	142.341	-0.550	20.239	2536.783	-0.005575	-0.004789	-0.009964
25.4000	1310.132	78.193	68.011	140.520	-0.569	20.239	2494.154	-0.005473	-0.004761	-0.009836
25.6000	1271.749	75.986	66.203	137.006	-0.546	20.241	2421.083	-0.005319	-0.004634	-0.009590
25.8000	1244.217	73.717	64.731	134.280	-0.550	20.240	2368.670	-0.005160	-0.004531	-0.009400
26.0000	1186.403	69.565	61.383	128.864	-0.556	20.241	2258.606	-0.004870	-0.004297	-0.009020
26.2000	1146.337	66.588	58.352	124.428	-0.561	20.241	2182.331	-0.004661	-0.004085	-0.008710
26.4000	1085.292	61.863	53.863	118.287	-0.556	20.242	2066.116	-0.004330	-0.003770	-0.008280
26.6000	1014.643	56.848	49.764	110.963	-0.562	20.243	1931.620	-0.003979	-0.003483	-0.007767
26.8000	935.699	51.288	44.915	102.695	-0.558	20.243	1781.330	-0.003590	-0.003144	-0.007189
27.0000	875.254	46.243	41.275	95.524	-0.557	20.243	1666.260	-0.003237	-0.002889	-0.006687
27.2000	805.312	41.228	36.951	87.770	-0.558	20.243	1533.108	-0.002886	-0.002587	-0.006144
27.4000	725.541	35.141	32.353	78.431	-0.553	20.244	1381.245	-0.002460	-0.002265	-0.005490
27.6000	657.358	29.372	26.918	69.788	-0.575	20.245	1251.440	-0.002056	-0.001884	-0.004885
27.8000	592.119	24.428	24.196	62.340	-0.554	20.246	1127.243	-0.001710	-0.001694	-0.004364
28.0000	519.006	18.912	18.289	53.390	-0.560	20.246	988.054	-0.001324	-0.001280	-0.003737
28.2000	466.782	14.589	15.106	46.124	-0.560	20.246	888.634	-0.001021	-0.001057	-0.003229
28.4000	402.626	9.269	12.398	38.173	-0.545	20.247	766.497	-0.000649	-0.000868	-0.002672
28.6000	354.475	5.516	9.466	30.906	-0.536	20.248	674.829	-0.000386	-0.000663	-0.002163
28.8000	303.859	1.194	5.741	24.623	-0.552	20.247	578.470	-0.000084	-0.000402	-0.001724
29.0000	270.241	-1.932	4.116	20.039	-0.548	20.248	514.469	0.000135	-0.000288	-0.001403
29.2000	257.121	-3.893	2.531	16.982	-0.553	20.250	489.492	0.000273	-0.000177	-0.001189
29.4000	226.193	-6.602	2.088	11.937	-0.556	20.249	430.613	0.000462	-0.000146	-0.000836
29.6000	210.157	-7.507	1.406	9.560	-0.560	20.250	400.085	0.000525	-0.000098	-0.000669
29.8000	209.000	-7.994	0.781	9.270	-0.552	20.250	397.882	0.000560	-0.000055	-0.000649
30.0000	210.909	-8.200	0.725	8.976	-0.559	20.251	401.516	0.000574	-0.000051	-0.000628
30.2000	232.234	-6.837	-0.291	11.048	-0.554	20.252	442.114	0.000479	0.000020	-0.000773
30.4000	248.585	-5.725	1.115	12.922	-0.545	20.252	473.242	0.000401	-0.000078	-0.000905
30.6000	280.625	-3.657	1.476	17.038	-0.549	20.253	534.239	0.000256	-0.000103	-0.001193
30.8000	318.061	-0.376	2.365	21.344	-0.542	20.253	605.507	0.000026	-0.000166	-0.001494
31.0000	365.040	2.959	4.630	27.571	-0.553	20.254	694.942	-0.000207	-0.000324	-0.001930
31.2000	416.332	6.694	8.685	33.256	-0.548	20.254	792.589	-0.000469	-0.000608	-0.002328
31.4000	478.459	11.352	10.687	41.940	-0.557	20.254	910.864	-0.000795	-0.000748	-0.002936
31.6000	544.735	16.021	15.069	49.525	-0.553	20.255	1037.035	-0.001121	-0.001055	-0.003467
31.8000	598.386	21.302	19.055	55.824	-0.553	20.256	1139.174	-0.001491	-0.001334	-0.003908
32.0000	688.451	27.304	24.876	66.273	-0.570	20.256	1310.635	-0.001911	-0.001741	-0.004639
32.2000	759.476	32.821	27.948	74.250	-0.567	20.257	1445.847	-0.002297	-0.001956	-0.005197
32.4000	834.122	38.700	33.602	83.253	-0.561	20.258	1587.954	-0.002709	-0.002352	-0.005828
32.6000	895.904	43.689	35.925	90.952	-0.558	20.258	1705.570	-0.003058	-0.002515	-0.006367
32.8000	960.601	48.540	40.787	98.594	-0.577	20.258	1828.737	-0.003398	-0.002855	-0.006902
33.0000	1028.980	54.376	46.207	106.181	-0.564	20.258	1958.914	-0.003806	-0.003235	-0.007433
33.2000	1091.829	58.808	49.805	113.449	-0.568	20.259	2078.562	-0.004117	-0.003486	-0.007941
33.4000	1160.404	64.356	53.794	121.288	-0.560	20.259	2209.110	-0.004505	-0.003766	-0.008490
33.6000	1199.853	67.743	57.101	126.054	-0.564	20.260	2284.212	-0.004742	-0.003997	-0.008824
33.8000	1237.394	71.119	60.076	130.154	-0.570	20.260	2355.680	-0.004978	-0.004205	-0.009111
34.0000	1279.413	74.471	62.786	135.059	-0.569	20.261	2435.675	-0.005213	-0.004395	-0.009454
34.2000	1322.936	77.804	66.578	139.867	-0.568	20.261	2518.530	-0.005446	-0.004660	-0.009791
34.4000	1333.426	79.042	67.189	141.297	-0.583	20.262	2538.500	-0.005533	-0.004703	-0.009891
34.6000	1350.107	80.166	68.483	142.993	-0.568	20.262	2570.257	-0.005612	-0.004794	-0.010010
34.8000	1356.690	81.376	68.806	144.481	-0.560	20.262	2582.788	-0.005696	-0.004816	-0.010114
35.0000	1347.101	81.319	68.762	144.050	-0.573	20.263	2564.535	-0.005692	-0.004813	-0.010083
35.2000	1322.996	79.944	67.635	142.160	-0.558	20.263	2518.644	-0.005596	-0.004734	-0.009951
35.4000	1314.655	78.819	68.735	141.132	-0.571	20.263	2502.766	-0.005517	-0.004811	-0.009879
35.6000	1275.747	76.360	67.037	137.812	-0.558	20.264	2428.694	-0.005345	-0.004693	-0.009647
35.8000	1232.585	73.302	64.731	133.378	-0.562	20.265	2346.525	-0.005131	-0.004531	-0.009336
36.0000	1191.602	70.454	60.728	129.307	-0.567	20.265	2268.505	-0.004932	-0.004251	-0.009052
36.2000	1134.525	66.285	58.310	123.512	-0.563	20.266	2159.843	-0.004640	-0.004082	-0.008646
36.4000	1069.797	61.558	54.433	117.343	-0.569	20.267	2036.619	-0.004309	-0.003810	-0.008214
36.6000	1009.774	56.931	48.916	111.284	-0.560	20.267	1922.350	-0.003985	-0.003424	-0.007790
36.8000	946.384	52.081	46.429	104.057	-0.574	20.267	1801.672	-0.003646	-0.003250	-0.007284
37.0000	879.733	47.009	43.968	96.886	-0.562	20.267	1674.786	-0.003291	-0.003078	-0.006782
37.2000	803.073	41.604	38.508	88.437	-0.574	20.268	1528.845	-0.002912	-0.002696	-0.006191
37.4000	728.262	35.698	33.268	78.987	-0.561	20.267	1386.423	-0.002499	-0.002329	-0.005529
37.6000	652.789	29.932	27.877	69.706	-0.553	20.268	1242.743	-0.002095	-0.001951	-0.004879
37.8000	585.913	24.484	23.974	62.064	-0.561	20.269	1115.427	-0.001714	-0.001678	-0.004344
38.0000	532.622	20.065	21.276	55.017	-0.556	20.269	1013.975	-0.001405	-0.001489	-0.003851
38.2000	465.325	14.937	17.010	45.733	-0.555	20.269	885.859	-0.001046	-0.001191	-0.003201
38.4000	400.733	9.420	12.134	38.313	-0.552	20.269	762.892	-0.000659	-0.000849	-0.002682
38.6000	350.823	5.182	7.855	31.294	-0.558	20.269	667.877	-0.000363	-0.000550	-0.002191
38.8000	306.850	1.442	8.078	25.527	-0.557	20.269	584.164	-0.000101	-0.000565	-0.001787
39.0000	268.828	-1.501	4.782	19.081	-0.561	20.269	511.780	0.000105	-0.000335	-0.001336
39.2000	253.018	-3.741	4.420	16.899	-0.559	20.269	481.682	0.000262	-0.000309	-0.001183
39.4000	223.157	-6.186	2.963	12.646	-0.566	20.269	424.833	0.000433	-0.000207	-0.000885
39.6000	213.929	-7.491	0.223	9.865	-0.561	20.268	407.267	0.000524	-0.000016	-0.000691
39.8000	211.946	-8.033	1.545	8.935	-0.559	20.268	403.490	0.000562	-0.000108	-0.000625
40.0000	210.939	-8.091	1.502	10.020	-0.559	20.268	401.573	0.000566	-0.000105	-0.000701
40.2000	233.136	-6.589	0.183	11.717	-0.576	20.268	443.830	0.000461	-0.000013	-0.000820
40.4000	261.675	-4.866	2.435	14.785	-0.560	20.267	498.161	0.000341	-0.000170	-0.001035
40.6000	281.557	-3.461	1.767	17.497	-0.566	20.267	536.013	0.000242	-0.000124	-0.001225
40.8000	314.740	-0.529	5.489	22.514	-0.561	20.267	599.184	0.000037	-0.000384	-0.001576
41.0000	371.307	4.306	6.506	27.725	-0.565	20.266	706.873	-0.000301	-0.000455	-0.001941
41.2000	421.261	7.320	9.452	35.032	-0.565	20.266	801.973	-0.000512	-0.000662	-0.002452
41.4000	477.137	11.533	12.717	41.757	-0.567	20.266	908.346	-0.000807	-0.000890	-0.002923
41.6000	545.892	16.688	16.161	49.151	-0.555	20.265	1039.238	-0.001168	-0.001131	-0.003441
41.8000	617.622	22.233	20.097	58.142	-0.555	20.265	1175.795	-0.001556	-0.001407	-0.004070
42.0000	687.069	27.429	25.321	66.773	-0.561	20.265	1308.002	-0.001920	-0.001772	-0.004674
42.2000	750.924	32.127	27.182	73.513	-0.554	20.265	1429.567	-0.002249	-0.001903	-0.005146
42.4000	831.552	38.617	34.019	83.601	-0.571	20.264	1583.061	-0.002703	-0.002381	-0.005852
42.6000	890.989	43.412	36.258	90.534	-0.574	20.264	1696.215	-0.003039	-0.002538	-0.006337
42.8000	963.486	49.053	42.606	98.693	-0.562	20.264	1834.230	-0.003434	-0.002982	-0.006908
43.0000	1028.018	53.875	46.803	106.546	-0.562	20.264	1957.083	-0.003771	-0.003276	-0.007458
43.2000	1095.661	59.838	50.473	114.881	-0.565	20.264	2085.857	-0.004189	-0.003533	-0.008042
43.4000	1155.068	63.728	54.071	120.108	-0.553	20.264	2198.954	-0.004461	-0.003785	-0.008408
43.6000	1210.478	68.507	58.935	127.457	-0.570	20.263	2304.440	-0.004795	-0.004125	-0.008922
43.8000	1256.991	72.300	61.492	131.405	-0.569	20.263	2392.988	-0.005061	-0.004304	-0.009198
44.0000	1278.151	74.607	63.508	135.576	-0.570	20.262	2433.271	-0.005222	-0.004446	-0.009490
44.2000	1319.825	77.417	66.357	139.562	-0.559	20.262	2512.608	-0.005419	-0.004645	-0.009769
44.4000	1344.937	79.833	69.733	141.879	-0.565	20.262	2560.415	-0.005588	-0.004881	-0.009932
44.6000	1346.335	80.331	68.527	142.771	-0.560	20.262	2563.076	-0.005623	-0.004797	-0.009994
44.8000	1350.678	81.336	68.832	144.230	-0.550	20.261	2571.344	-0.005693	-0.004818	-0.010096
45.0000	1342.202	80.457	70.027	143.007	-0.554	20.261	2555.208	-0.005632	-0.004902	-0.010010
45.2000	1337.784	80.500	69.928	143.673	-0.555	20.261	2546.797	-0.005635	-0.004895	-0.010057
45.4000	1319.179	79.611	69.885	141.117	-0.564	20.261	2511.377	-0.005573	-0.004892	-0.009878
45.6000	1294.547	77.540	67.219	138.840	-0.556	20.260	2464.485	-0.005428	-0.004705	-0.009719
45.8000	1237.740	73.482	64.994	134.350	-0.560	20.260	2356.339	-0.005144	-0.004550	-0.009404
46.0000	1194.308	70.441	61.827	130.084	-0.565	20.260	2273.655	-0.004931	-0.004328	-0.009106
46.2000	1132.315	66.478	57.937	123.678	-0.559	20.260	2155.638	-0.004653	-0.004056	-0.008657
46.4000	1076.605	61.990	55.155	117.938	-0.561	20.259	2049.580	-0.004339	-0.003861	-0.008256
46.6000	1022.007	57.752	50.362	112.339	-0.566	20.259	1945.639	-0.004043	-0.003525	-0.007864
46.8000	947.421	51.887	45.956	103.570	-0.563	20.260	1803.646	-0.003632	-0.003217	-0.007250
47.0000	875.901	47.092	42.051	96.760	-0.568	20.259	1667.490	-0.003296	-0.002944	-0.006773
47.2000	807.942	41.939	37.532	88.313	-0.565	20.258	1538.115	-0.002936	-0.002627	-0.006182
47.4000	743.485	36.880	33.420	81.377	-0.564	20.258	1415.405	-0.002582	-0.002339	-0.005696
47.6000	665.789	30.820	27.891	71.983	-0.560	20.258	1267.490	-0.002157	-0.001952	-0.005039
47.8000	605.645	25.610	24.877	63.673	-0.569	20.258	1152.992	-0.001793	-0.001741	-0.004457
48.0000	520.779	19.453	19.872	53.724	-0.572	20.258	991.430	-0.001362	-0.001391	-0.003761
48.2000	469.097	15.090	16.205	46.777	-0.573	20.258	893.040	-0.001056	-0.001134	-0.003274
48.4000	418.676	11.017	12.981	39.786	-0.562	20.257	797.052	-0.000771	-0.000909	-0.002785
48.6000	365.190	6.585	9.743	33.587	-0.577	20.257	695.229	-0.000461	-0.000682	-0.002351
48.8000	289.868	0.499	6.131	23.248	-0.568	20.257	551.834	-0.000035	-0.000429	-0.001627
49.0000	285.900	-0.737	5.769	21.775	-0.585	20.257	544.281	0.000052	-0.000404	-0.001524
49.2000	246.812	-3.392	3.504	16.786	-0.576	20.256	469.866	0.000237	-0.000245	-0.001175
49.4000	226.944	-5.575	1.379	12.854	-0.581	20.256	432.043	0.000390	-0.000096	-0.000900
49.6000	217.882	-6.838	1.629	11.117	-0.576	20.256	414.791	0.000479	-0.000114	-0.000778
49.8000	219.730	-7.325	1.003	11.243	-0.569	20.255	418.310	0.000513	-0.000070	-0.000787
50.0000	217.476	-7.368	0.905	10.672	-0.564	20.256	414.019	0.000516	-0.000063	-0.000747
50.2000	237.404	-6.228	1.029	12.577	-0.570	20.255	451.956	0.000436	-0.000072	-0.000880
50.4000	255.799	-4.783	1.975	14.464	-0.569	20.255	486.975	0.000335	-0.000138	-0.001013
50.6000	282.038	-2.697	2.378	18.048	-0.581	20.255	536.928	0.000189	-0.000166	-0.001263
50.8000	319.279	-0.224	3.627	22.625	-0.580	20.255	607.824	0.000016	-0.000254	-0.001584
51.0000	369.594	3.627	6.685	28.808	-0.580	20.255	703.611	-0.000254	-0.000468	-0.002017
51.2000	415.701	7.323	9.383	34.686	-0.578	20.255	791.388	-0.000513	-0.000657	-0.002428
51.4000	489.160	12.643	12.537	42.607	-0.572	20.255	931.234	-0.000885	-0.000878	-0.002982
51.6000	552.504	17.229	15.969	50.362	-0.572	20.255	1051.826	-0.001206	-0.001118	-0.003525
51.8000	622.943	22.608	20.430	58.948	-0.572	20.255	1185.923	-0.001583	-0.001430	-0.004126
52.0000	681.583	27.402	24.045	66.009	-0.568	20.255	1297.560	-0.001918	-0.001683	-0.004621
52.2000	733.702	31.918	27.393	72.429	-0.571	20.254	1396.780	-0.002234	-0.001918	-0.005070
52.4000	830.154	38.909	33.101	84.073	-0.576	20.255	1580.400	-0.002724	-0.002317	-0.005885
52.6000	899.751	44.148	37.299	92.412	-0.574	20.255	1712.894	-0.003090	-0.002611	-0.006469
52.8000	971.271	49.595	41.912	100.069	-0.590	20.255	1849.051	-0.003472	-0.002934	-0.007005
53.0000	1029.431	54.250	46.652	106.698	-0.576	20.255	1959.772	-0.003797	-0.003266	-0.007469
53.2000	1109.097	60.629	51.487	115.630	-0.595	20.255	2111.435	-0.004244	-0.003604	-0.008094
53.4000	1154.197	64.562	54.600	120.912	-0.574	20.255	2197.294	-0.004519	-0.003822	-0.008464
53.6000	1182.435	67.075	57.838	124.927	-0.569	20.255	2251.053	-0.004695	-0.004049	-0.008745
53.8000	1238.070	71.385	60.896	130.916	-0.579	20.255	2356.968	-0.004997	-0.004263	-0.009164
54.0000	1283.336	75.151	64.676	135.601	-0.576	20.255	2443.142	-0.005261	-0.004527	-0.009492
54.2000	1306.014	77.527	66.551	139.118	-0.562	20.256	2486.315	-0.005427	-0.004659	-0.009738
54.4000	1341.030	79.833	69.722	142.828	-0.573	20.255	2552.977	-0.005588	-0.004881	-0.009998
54.6000	1354.014	80.803	69.607	143.829	-0.577	20.256	2577.696	-0.005656	-0.004873	-0.010068
54.8000	1337.994	80.041	69.360	143.313	-0.574	20.255	2547.197	-0.005603	-0.004855	-0.010032
55.0000	1352.632	81.516	70.872	144.370	-0.572	20.256	2575.064	-0.005706	-0.004961	-0.010106
55.2000	1337.634	81.070	69.942	143.591	-0.573	20.257	2546.511	-0.005675	-0.004896	-0.010051
55.4000	1311.169	79.138	68.942	141.633	-0.572	20.257	2496.128	-0.005540	-0.004826	-0.009914
55.6000	1282.840	76.845	66.981	138.394	-0.577	20.257	2442.198	-0.005379	-0.004689	-0.009688
55.8000	1212.642	72.289	63.314	132.599	-0.578	20.257	2308.559	-0.005060	-0.004432	-0.009282
56.0000	1203.054	71.939	63.217	131.196	-0.580	20.258	2290.306	-0.005036	-0.004425	-0.009184
56.2000	1135.336	66.910	58.407	124.554	-0.581	20.257	2161.388	-0.004684	-0.004089	-0.008719
56.4000	1054.769	60.392	52.903	116.798	-0.576	20.259	2008.009	-0.004227	-0.003703	-0.008176
56.6000	1008.091	57.111	50.753	111.423	-0.572	20.258	1919.146	-0.003998	-0.003553	-0.007800
56.8000	930.890	51.804	45.638	103.278	-0.572	20.259	1772.175	-0.003626	-0.003195	-0.007229
57.0000	878.516	47.566	42.469	97.164	-0.569	20.259	1672.468	-0.003330	-0.002973	-0.006801
57.2000	813.337	42.355	37.757	89.410	-0.561	20.259	1548.386	-0.002965	-0.002643	-0.006259
57.4000	732.710	36.407	32.865	80.113	-0.569	20.259	1394.892	-0.002548	-0.002301	-0.005608
57.6000	669.891	31.502	29.686	72.485	-0.569	20.259	1275.301	-0.002205	-0.002078	-0.005074
57.8000	601.677	25.960	24.681	64.020	-0.566	20.259	1145.439	-0.001817	-0.001728	-0.004481
58.0000	534.741	20.564	20.305	55.768	-0.572	20.260	1018.009	-0.001439	-0.001421	-0.003904
58.2000	479.602	15.978	17.220	48.681	-0.575	20.260	913.038	-0.001118	-0.001205	-0.003408
58.4000	413.251	10.713	13.176	39.994	-0.568	20.260	786.724	-0.000750	-0.000922	-0.002800
58.6000	365.250	6.792	10.326	34.102	-0.567	20.260	695.343	-0.000475	-0.000723	-0.002387
58.8000	298.119	1.332	6.504	24.554	-0.568	20.260	567.541	-0.000093	-0.000455	-0.001719
59.0000	270.827	-1.488	4.934	20.857	-0.563	20.261	515.585	0.000104	-0.000345	-0.001460
59.2000	248.134	-3.561	4.310	17.302	-0.560	20.261	472.383	0.000249	-0.000302	-0.001211
59.4000	224.885	-5.851	2.309	13.115	-0.556	20.261	428.123	0.000410	-0.000162	-0.000918
59.6000	213.403	-6.992	1.849	10.867	-0.556	20.261	406.265	0.000489	-0.000129	-0.000761
59.8000	212.592	-7.282	0.836	10.034	-0.549	20.261	404.720	0.000510	-0.000059	-0.000702
60.0000	222.150	-7.215	0.989	10.437	-0.561	20.261	422.916	0.000505	-0.000069	-0.000731
60.2000	240.935	-5.450	1.406	13.646	-0.553	20.262	458.679	0.000381	-0.000098	-0.000955
60.4000	257.812	-4.378	1.934	14.867	-0.557	20.262	490.808	0.000306	-0.000135	-0.001041
60.6000	272.690	-3.156	1.851	16.523	-0.565	20.262	519.133	0.000221	-0.000130	-0.001157
60.8000	316.889	-0.031	4.227	23.207	-0.565	20.262	603.275	0.000002	-0.000296	-0.001624
61.0000	364.259	3.318	6.296	27.794	-0.569	20.263	693.455	-0.000232	-0.000441	-0.001946
61.2000	417.805	7.654	9.381	34.380	-0.564	20.263	795.393	-0.000536	-0.000657	-0.002407
61.4000	480.909	12.533	12.523	42.576	-0.559	20.263	915.527	-0.000877	-0.000877	-0.002980
61.6000	543.337	16.951	15.787	50.293	-0.573	20.263	1034.374	-0.001187	-0.001105	-0.003520
61.8000	610.274	22.342	20.110	58.324	-0.560	20.263	1161.804	-0.001564	-0.001408	-0.004083
62.0000	674.926	27.165	23.862	65.216	-0.560	20.263	1284.885	-0.001902	-0.001670	-0.004565
62.2000	755.643	33.461	28.698	75.778	-0.554	20.264	1438.551	-0.002342	-0.002009	-0.005304
62.4000	829.358	39.048	32.840	83.964	-0.555	20.264	1578.884	-0.002733	-0.002299	-0.005877
62.6000	896.685	44.232	38.006	92.398	-0.569	20.265	1707.058	-0.003096	-0.002660	-0.006468
62.8000	977.643	50.234	43.246	101.279	-0.564	20.264	1861.181	-0.003516	-0.003027	-0.007090
63.0000	1029.040	54.749	46.473	107.310	-0.559	20.265	1959.028	-0.003832	-0.003253	-0.007512
63.2000	1091.649	59.617	50.279	114.589	-0.561	20.266	2078.218	-0.004173	-0.003520	-0.008021
63.4000	1156.361	64.366	54.738	120.939	-0.563	20.265	2201.414	-0.004506	-0.003832	-0.008466
63.6000	1223.478	69.480	59.450	128.640	-0.562	20.266	2329.187	-0.004864	-0.004161	-0.009005
63.8000	1267.316	73.732	62.746	133.658	-0.576	20.267	2412.643	-0.005161	-0.004392	-0.009356
64.0000	1278.331	75.094	63.953	135.433	-0.576	20.267	2433.615	-0.005257	-0.004477	-0.009480
64.2000	1321.147	78.193	67.024	140.870	-0.565	20.268	2515.125	-0.005473	-0.004692	-0.009861
64.4000	1339.287	79.847	68.719	141.826	-0.570	20.268	2549.658	-0.005589	-0.004810	-0.009928
64.6000	1346.726	81.043	69.568	144.536	-0.564	20.268	2563.820	-0.005673	-0.004870	-0.010118
64.8000	1356.705	82.043	70.748	145.176	-0.566	20.269	2582.817	-0.005743	-0.004952	-0.010162
65.0000	1355.247	81.961	71.121	145.274	-0.560	20.269	2580.042	-0.005737	-0.004978	-0.010169
65.2000	1328.842	80.304	70.316	143.689	-0.574	20.270	2529.774	-0.005621	-0.004922	-0.010058
65.4000	1307.186	79.026	69.790	140.977	-0.581	20.270	2488.546	-0.005532	-0.004885	-0.009868
65.6000	1284.147	77.610	67.065	138.852	-0.568	20.271	2444.687	-0.005433	-0.004695	-0.009720
65.8000	1241.752	74.164	65.507	134.586	-0.570	20.272	2363.977	-0.005191	-0.004586	-0.009421
66.0000	1178.648	69.881	61.853	129.251	-0.580	20.272	2243.843	-0.004892	-0.004330	-0.009048
66.2000	1144.654	67.713	59.977	125.567	-0.587	20.272	2179.127	-0.004740	-0.004198	-0.008790
66.4000	1076.545	62.433	54.530	119.745	-0.577	20.273	2049.465	-0.004370	-0.003817	-0.008382
66.6000	1014.703	57.780	51.320	111.755	-0.583	20.274	1931.734	-0.004045	-0.003592	-0.007823
66.8000	948.728	53.096	47.068	106.086	-0.588	20.274	1806.135	-0.003717	-0.003295	-0.007426
67.0000	885.293	48.499	43.538	98.956	-0.583	20.275	1685.371	-0.003395	-0.003048	-0.006927
67.2000	809.114	42.576	38.145	89.159	-0.585	20.275	1540.346	-0.002980	-0.002670	-0.006241
67.4000	730.922	36.530	33.992	82.294	-0.566	20.276	1391.487	-0.002557	-0.002379	-0.005761
67.6000	659.296	31.028	29.199	73.386	-0.579	20.276	1255.131	-0.002172	-0.002044	-0.005137
67.8000	599.032	26.444	25.418	63.726	-0.568	20.277	1140.404	-0.001851	-0.001779	-0.004461
68.0000	534.125	21.218	21.346	55.920	-0.577	20.277	1016.836	-0.001485	-0.001494	-0.003914
68.2000	459.839	15.550	16.815	48.903	-0.583	20.277	875.416	-0.001089	-0.001177	-0.003423
68.4000	423.260	11.797	13.763	41.050	-0.569	20.278	805.779	-0.000826	-0.000963	-0.002873
68.6000	366.453	7.224	10.966	33.018	-0.569	20.279	697.632	-0.000506	-0.000768	-0.002311
68.8000	308.037	2.792	7.618	27.778	-0.582	20.280	586.424	-0.000195	-0.000533	-0.001944
69.0000	273.096	-0.863	5.518	23.248	-0.570	20.280	519.905	0.000060	-0.000386	-0.001627
69.2000	250.178	-2.990	4.088	18.469	-0.574	20.281	476.274	0.000209	-0.000286	-0.001293
69.4000	230.866	-4.866	3.102	15.298	-0.573	20.282	439.510	0.000341	-0.000217	-0.001071
69.6000	217.867	-5.658	2.184	10.853	-0.564	20.283	414.762	0.000396	-0.000153	-0.000760
69.8000	213.433	-6.741	1.267	12.675	-0.573	20.283	406.322	0.000472	-0.000089	-0.000887
70.0000	218.303	-7.254	1.307	10.966	-0.568	20.284	415.592	0.000508	-0.000091	-0.000768
70.2000	232.144	-5.811	1.838	11.810	-0.567	20.285	441.942	0.000407	-0.000129	-0.000827
70.4000	253.589	-4.573	2.324	15.189	-0.564	20.286	482.769	0.000320	-0.000163	-0.001063
70.6000	282.609	-2.893	2.810	18.786	-0.563	20.286	538.015	0.000202	-0.000197	-0.001315
70.8000	317.340	0.416	4.475	21.066	-0.570	20.287	604.134	-0.000029	-0.000313	-0.001475
71.0000	362.891	3.763	6.575	28.753	-0.562	20.287	690.851	-0.000263	-0.000460	-0.002013
71.2000	434.111	8.713	10.161	36.158	-0.566	20.288	826.435	-0.000610	-0.000711	-0.002531
71.4000	484.651	12.684	13.288	43.092	-0.564	20.289	922.651	-0.000888	-0.000930	-0.003016
71.6000	546.568	17.759	16.957	48.750	-0.568	20.290	1040.525	-0.001243	-0.001187	-0.003412
71.8000	614.797	22.761	20.679	59.643	-0.562	20.289	1170.416	-0.001593	-0.001447	-0.004175
72.0000	668.434	26.693	24.028	66.801	-0.578	20.290	1272.526	-0.001868	-0.001682	-0.004676
72.2000	767.756	34.295	29.380	77.791	-0.569	20.291	1461.611	-0.002401	-0.002057	-0.005445
72.4000	812.811	38.295	33.227	81.572	-0.564	20.291	1547.384	-0.002681	-0.002326	-0.005710
72.6000	917.304	45.675	39.271	95.481	-0.574	20.293	1746.311	-0.003197	-0.002749	-0.006684
72.8000	965.650	49.887	42.912	100.084	-0.567	20.293	1838.350	-0.003492	-0.003004	-0.007006
73.0000	1026.260	54.762	46.319	106.184	-0.577	20.293	1953.735	-0.003833	-0.003242	-0.007433
73.2000	1091.543	59.765	50.209	113.033	-0.577	20.294	2078.018	-0.004184	-0.003515	-0.007912
73.4000	1149.929	64.533	55.295	122.844	-0.569	20.294	2189.169	-0.004517	-0.003871	-0.008599
73.6000	1199.177	68.577	58.546	128.848	-0.575	20.295	2282.925	-0.004800	-0.004098	-0.009019
73.8000	1250.318	72.497	61.674	133.850	-0.579	20.295	2380.285	-0.005075	-0.004317	-0.009369
74.0000	1299.672	76.527	65.438	137.756	-0.564	20.296	2474.241	-0.005357	-0.004581	-0.009643
74.2000	1320.005	78.374	67.442	139.255	-0.581	20.296	2512.951	-0.005486	-0.004721	-0.009748
74.4000	1333.230	79.984	68.636	143.173	-0.577	20.297	2538.128	-0.005599	-0.004805	-0.010022
74.6000	1353.684	81.028	69.748	143.147	-0.571	20.297	2577.066	-0.005672	-0.004882	-0.010020
74.8000	1361.123	82.212	70.829	147.014	-0.568	20.297	2591.228	-0.005755	-0.004958	-0.010291
75.0000	1347.627	81.877	70.594	144.400	-0.570	20.298	2565.536	-0.005731	-0.004942	-0.010108
75.2000	1314.460	80.053	69.664	141.104	-0.572	20.299	2502.394	-0.005604	-0.004876	-0.009877
75.4000	1309.065	79.360	69.331	140.727	-0.566	20.300	2492.123	-0.005555	-0.004853	-0.009851
75.6000	1285.440	78.068	68.553	137.659	-0.560	20.300	2447.147	-0.005465	-0.004799	-0.009636
75.8000	1233.021	74.303	64.912	136.546	-0.571	20.301	2347.355	-0.005201	-0.004544	-0.009558
76.0000	1202.137	71.939	62.551	131.848	-0.568	20.301	2288.561	-0.005036	-0.004379	-0.009229
76.2000	1147.194	67.618	59.520	127.791	-0.577	20.303	2183.962	-0.004733	-0.004166	-0.008945
76.4000	1090.146	63.532	56.434	118.732	-0.567	20.302	2075.357	-0.004447	-0.003950	-0.008311
76.6000	1025.388	58.946	51.556	114.603	-0.563	20.303	1952.076	-0.004126	-0.003609	-0.008022
76.8000	962.344	53.973	47.874	106.087	-0.564	20.304	1832.056	-0.003778	-0.003351	-0.007426
77.0000	865.591	46.578	41.249	94.247	-0.568	20.304	1647.863	-0.003260	-0.002887	-0.006597
77.2000	796.085	41.686	37.741	90.313	-0.574	20.305	1515.541	-0.002918	-0.002642	-0.006322
77.4000	731.989	37.102	34.046	82.489	-0.579	20.305	1393.518	-0.002597	-0.002383	-0.005774
77.6000	669.110	31.710	29.725	70.566	-0.568	20.306	1273.813	-0.002220	-0.002081	-0.004940
77.8000	599.032	26.082	25.168	62.128	-0.561	20.306	1140.404	-0.001826	-0.001762	-0.004349
78.0000	540.226	20.953	21.737	59.618	-0.566	20.306	1028.452	-0.001467	-0.001522	-0.004173
78.2000	469.563	15.715	17.634	48.484	-0.556	20.307	893.927	-0.001100	-0.001234	-0.003394
78.4000	415.881	12.004	13.693	38.992	-0.566	20.307	791.731	-0.000840	-0.000959	-0.002729
78.6000	367.670	7.251	10.785	34.923	-0.566	20.307	699.949	-0.000508	-0.000755	-0.002445
78.8000	311.028	2.638	7.882	24.791	-0.569	20.308	592.117	-0.000185	-0.000552	-0.001735
79.0000	277.875	-0.447	6.018	21.483	-0.562	20.308	529.003	0.000031	-0.000421	-0.001504
79.2000	250.884	-2.390	3.990	19.274	-0.549	20.309	477.619	0.000167	-0.000279	-0.001349
79.4000	235.044	-4.544	2.754	14.939	-0.568	20.309	447.464	0.000318	-0.000193	-0.001046
79.6000	218.769	-6.253	1.629	9.948	-0.573	20.309	416.479	0.000438	-0.000114	-0.000696
79.8000	214.020	-6.992	1.530	11.715	-0.556	20.310	407.438	0.000489	-0.000107	-0.000820
80.0000	218.874	-6.393	1.793	13.703	-0.572	20.310	416.679	0.000448	-0.000126	-0.000959
80.2000	229.454	-6.476	1.919	14.412	-0.566	20.310	436.821	0.000453	-0.000134	-0.001009
80.4000	249.832	-5.115	1.878	11.935	-0.570	20.310	475.616	0.000358	-0.000131	-0.000835
80.6000	280.896	-2.616	2.824	15.480	-0.574	20.310	534.754	0.000183	-0.000198	-0.001084
80.8000	313.628	-0.045	4.352	24.916	-0.564	20.311	597.067	0.000003	-0.000305	-0.001744
81.0000	356.414	2.999	6.324	26.069	-0.572	20.311	678.520	-0.000210	-0.000443	-0.001825
81.2000	427.333	8.366	9.202	38.339	-0.574	20.311	813.532	-0.000586	-0.000644	-0.002684
81.4000	482.697	12.796	12.912	45.371	-0.577	20.311	918.932	-0.000896	-0.000904	-0.003176
81.6000	535.898	16.536	15.996	47.052	-0.573	20.312	1020.212	-0.001158	-0.001120	-0.003294
81.8000	604.984	21.983	19.680	59.854	-0.582	20.312	1151.733	-0.001539	-0.001378	-0.004190
82.0000	668.929	26.832	23.764	67.870	-0.576	20.312	1273.470	-0.001878	-0.001664	-0.004751
82.2000	742.328	32.279	28.407	73.903	-0.568	20.311	1413.202	-0.002260	-0.001988	-0.005173
82.4000	834.332	39.143	33.769	84.784	-0.570	20.312	1588.354	-0.002740	-0.002364	-0.005935
82.6000	877.148	43.508	37.244	92.038	-0.575	20.312	1669.865	-0.003046	-0.002607	-0.006443
82.8000	961.938	49.331	41.970	97.540	-0.573	20.311	1831.284	-0.003453	-0.002938	-0.006828
83.0000	1021.105	54.348	46.153	108.476	-0.569	20.311	1943.922	-0.003804	-0.003231	-0.007593
83.2000	1083.428	59.391	50.849	111.296	-0.575	20.311	2062.569	-0.004157	-0.003559	-0.007791
83.4000	1169.075	65.395	56.016	125.194	-0.572	20.311	2225.618	-0.004578	-0.003921	-0.008764
83.6000	1201.822	68.271	58.659	129.179	-0.574	20.311	2287.960	-0.004779	-0.004106	-0.009043
83.8000	1250.394	72.273	61.771	130.154	-0.565	20.311	2380.428	-0.005059	-0.004324	-0.009111
84.0000	1292.007	76.011	65.105	136.266	-0.569	20.310	2459.650	-0.005321	-0.004557	-0.009539
84.2000	1310.733	77.887	66.980	141.550	-0.572	20.311	2495.298	-0.005452	-0.004689	-0.009908
84.4000	1335.590	80.057	68.540	140.436	-0.580	20.311	2542.620	-0.005604	-0.004798	-0.009831
84.6000	1372.019	82.557	70.885	147.717	-0.573	20.310	2611.971	-0.005779	-0.004962	-0.010340
84.8000	1353.729	81.279	70.206	146.372	-0.573	20.309	2577.152	-0.005690	-0.004914	-0.010246
85.0000	1344.592	81.210	70.523	146.428	-0.585	20.310	2559.757	-0.005685	-0.004937	-0.010250
85.2000	1332.464	80.653	70.110	145.855	-0.573	20.310	2536.669	-0.005646	-0.004908	-0.010210
85.4000	1313.468	79.901	69.857	140.535	-0.578	20.310	2500.505	-0.005593	-0.004890	-0.009837
85.6000	1279.744	77.513	67.704	137.268	-0.566	20.309	2436.304	-0.005426	-0.004739	-0.009609
85.8000	1226.408	73.469	64.995	136.726	-0.583	20.309	2334.766	-0.005143	-0.004550	-0.009571
86.0000	1184.945	70.620	62.604	127.931	-0.576	20.308	2255.831	-0.004943	-0.004382	-0.008955
86.2000	1146.202	67.564	59.867	127.401	-0.581	20.308	2182.074	-0.004729	-0.004191	-0.008918
86.4000	1068.279	62.087	54.782	121.039	-0.568	20.308	2033.730	-0.004346	-0.003835	-0.008473
86.6000	1021.887	58.279	51.919	111.085	-0.575	20.308	1945.410	-0.004080	-0.003634	-0.007776
86.8000	952.726	53.472	47.513	105.613	-0.581	20.307	1813.745	-0.003743	-0.003326	-0.007393
87.0000	884.707	48.399	43.301	100.385	-0.583	20.307	1684.256	-0.003388	-0.003031	-0.007027
87.2000	817.185	43.021	38.677	92.828	-0.574	20.307	1555.710	-0.003011	-0.002707	-0.006498
87.4000	726.548	36.366	33.198	82.659	-0.580	20.306	1383.162	-0.002546	-0.002324	-0.005786
87.6000	670.522	31.683	29.601	75.416	-0.576	20.306	1276.503	-0.002218	-0.002072	-0.005279
87.8000	602.218	26.374	25.529	67.326	-0.573	20.305	1146.469	-0.001846	-0.001787	-0.004713
88.0000	531.525	20.815	20.874	58.769	-0.568	20.305	1011.887	-0.001457	-0.001461	-0.004114
88.2000	463.671	14.981	16.911	50.262	-0.581	20.304	882.711	-0.001049	-0.001184	-0.003518
88.4000	411.673	10.922	13.775	43.316	-0.569	20.303	783.720	-0.000765	-0.000964	-0.003032
88.6000	365.265	6.710	10.771	36.675	-0.579	20.303	695.372	-0.000470	-0.000754	-0.002567
88.8000	320.571	3.125	7.798	30.379	-0.578	20.303	610.285	-0.000219	-0.000546	-0.002127
89.0000	272.420	-1.113	5.242	23.916	-0.572	20.302	518.618	0.000078	-0.000367	-0.001674
89.2000	235.089	-4.046	3.684	18.609	-0.570	20.302	447.550	0.000283	-0.000258	-0.001303
89.4000	234.639	-4.880	2.796	17.242	-0.570	20.301	446.692	0.000342	-0.000196	-0.001207
89.6000	217.281	-6.784	1.322	14.274	-0.571	20.301	413.647	0.000475	-0.000093	-0.000999
89.8000	236.788	-5.547	1.322	16.076	-0.565	20.300	450.783	0.000388	-0.000093	-0.001125
90.0000	209.286	-7.923	0.865	12.436	-0.566	20.299	398.426	0.000555	-0.000061	-0.000871
90.2000	230.295	-6.298	1.157	14.636	-0.565	20.299	438.423	0.000441	-0.000081	-0.001025
90.4000	256.505	-4.475	1.558	17.968	-0.561	20.298	488.319	0.000313	-0.000109	-0.001258
90.6000	261.089	-4.030	2.895	19.066	-0.566	20.297	497.046	0.000282	-0.000203	-0.001335
90.8000	314.499	0.025	4.046	25.361	-0.566	20.296	598.726	-0.000002	-0.000283	-0.001775
91.0000	367.039	3.971	6.728	31.673	-0.556	20.296	698.748	-0.000278	-0.000471	-0.002217
91.2000	425.063	8.043	9.271	38.504	-0.562	20.295	809.212	-0.000563	-0.000649	-0.002695
91.4000	474.928	11.963	12.091	44.663	-0.560	20.294	904.140	-0.000837	-0.000846	-0.003126
91.6000	556.923	18.049	16.579	54.016	-0.558	20.294	1060.238	-0.001263	-0.001161	-0.003781
91.8000	614.827	22.428	20.193	61.378	-0.566	20.293	1170.473	-0.001570	-0.001414	-0.004296
92.0000	675.196	27.098	23.819	68.469	-0.565	20.293	1285.400	-0.001897	-0.001667	-0.004793
92.2000	754.336	32.848	28.893	77.999	-0.573	20.293	1436.062	-0.002299	-0.002023	-0.005460
92.4000	852.111	40.546	34.813	89.284	-0.554	20.291	1622.200	-0.002838	-0.002437	-0.006250
92.6000	896.820	44.078	37.562	94.539	-0.550	20.290	1707.315	-0.003085	-0.002629	-0.006618
92.8000	960.481	49.275	42.484	102.516	-0.557	20.290	1828.508	-0.003449	-0.002974	-0.007176
93.0000	1026.230	54.404	46.862	109.909	-0.561	20.289	1953.678	-0.003808	-0.003280	-0.007694
93.2000	1094.233	59.378	50.793	117.465	-0.562	20.288	2083.139	-0.004156	-0.003556	-0.008223
93.4000	1156.466	64.548	54.946	124.317	-0.552	20.288	2201.614	-0.004518	-0.003846	-0.008702
93.6000	1207.097	69.061	58.948	130.210	-0.541	20.287	2298.002	-0.004834	-0.004126	-0.009115
93.8000	1255.158	72.551	61.882	135.102	-0.554	20.286	2389.498	-0.005079	-0.004332	-0.009457
94.0000	1283.862	75.679	64.663	139.101	-0.565	20.286	2444.143	-0.005298	-0.004526	-0.009737
94.2000	1319.434	77.885	66.522	142.481	-0.569	20.285	2511.864	-0.005452	-0.004657	-0.009974
94.4000	1348.469	80.167	68.763	145.883	-0.549	20.284	2567.139	-0.005612	-0.004813	-0.010212
94.6000	1347.793	80.763	69.459	146.662	-0.562	20.284	2565.851	-0.005653	-0.004862	-0.010266
94.8000	1348.394	81.251	70.482	147.051	-0.553	20.282	2566.996	-0.005688	-0.004934	-0.010294
95.0000	1348.319	81.721	70.399	147.260	-0.552	20.282	2566.853	-0.005720	-0.004928	-0.010308
95.2000	1327.519	80.333	69.831	145.911	-0.562	20.282	2527.256	-0.005623	-0.004888	-0.010214
95.4000	1294.878	78.249	68.625	143.094	-0.550	20.281	2465.115	-0.005477	-0.004804	-0.010017
95.6000	1285.199	77.429	67.426	142.051	-0.559	20.280	2446.690	-0.005420	-0.004720	-0.009944
95.8000	1241.407	74.510	65.603	138.295	-0.560	20.279	2363.319	-0.005216	-0.004592	-0.009681
96.0000	1190.310	70.718	62.396	133.304	-0.562	20.280	2266.045	-0.004950	-0.004368	-0.009331
96.2000	1132.466	66.423	59.198	127.512	-0.565	20.278	2155.924	-0.004650	-0.004144	-0.008926
96.4000	1081.399	62.752	55.712	122.275	-0.560	20.278	2058.706	-0.004393	-0.003900	-0.008559
96.6000	1018.746	58.321	51.669	115.534	-0.577	20.277	1939.430	-0.004083	-0.003617	-0.008087
96.8000	945.843	52.946	47.208	108.298	-0.572	20.277	1800.642	-0.003706	-0.003305	-0.007581
97.0000	878.546	47.943	42.648	100.277	-0.566	20.277	1672.525	-0.003356	-0.002985	-0.007019
97.2000	803.494	41.938	37.840	92.051	-0.558	20.276	1529.646	-0.002936	-0.002649	-0.006444
97.4000	733.176	36.476	33.422	77.792	-0.577	20.276	1395.779	-0.002553	-0.002340	-0.005445
97.6000	654.998	30.235	28.462	74.359	-0.564	20.275	1246.948	-0.002116	-0.001992	-0.005205
97.8000	584.891	24.540	24.058	60.298	-0.576	20.274	1113.482	-0.001718	-0.001684	-0.004221
98.0000	525.138	20.371	20.789	52.013	-0.574	20.274	999.727	-0.001426	-0.001455	-0.003641
98.2000	460.666	15.020	16.523	44.578	-0.556	20.274	876.989	-0.001051	-0.001157	-0.003120
98.4000	407.706	10.575	12.870	42.580	-0.566	20.274	776.167	-0.000740	-0.000901	-0.002981
98.6000	353.002	5.960	10.230	33.448	-0.568	20.274	672.026	-0.000417	-0.000716	-0.002341
98.8000	305.768	2.180	6.826	28.487	-0.584	20.274	582.104	-0.000153	-0.000478	-0.001994
99.0000	277.815	-0.557	5.630	19.245	-0.562	20.273	528.889	0.000039	-0.000394	-0.001347
99.2000	245.429	-3.684	3.628	19.399	-0.570	20.273	467.234	0.000258	-0.000254	-0.001358
99.4000	227.350	-5.572	2.474	16.729	-0.573	20.272	432.816	0.000390	-0.000173	-0.001171
99.6000	209.090	-6.839	1.866	9.533	-0.565	20.273	398.054	0.000479	-0.000131	-0.000667
99.8000	351.169	3.374	6.046	28.431	-0.557	20.272	668.535	-0.000236	-0.000423	-0.001990
