# Supplementary material for: Evaluation of a Cold-Mixed High-Performance Polyurethane Mixture
Source: Hindawi journal article supplement (doi:10.1155/2019/1507971), 2019-11-07
Supplement: f1 [file 1507971.f1.zip › 1507971.f1/dynamic modulus data/PUM/specimen1/temp20/zhs-1-20_0.2Hz.csv]

Test Information
****************
Project name	zhs
Operator name	1
Target test temperature	20
Target confining stress	0
Average dynamic strain range from 75 to 125 micro-strain
Contact stress	5
Initial modulus	1000
Axial gauge length	70
Comments
Specimen information
********************
Identification	zhs-1-20
Dimensions	Point 1	Point 2	Point 3	Point 4	Point 5	Point 6	Average	Std Dev.
Diameter (mm)	49.2	49.2	49.3				49.23	0.058
Height (mm)	101.3	101.2	101.3				101.27	0.058
Cross-sectional area (mm�)	1903.7
Conditioning time
Properties/Comments
Test Data	0.2Hz
*********
Test date and time	Mon	Apr 1	2019	2:22 PM
Dynamic modulus (MPa)	11864
Phase angle (Degrees)	3.85
Average temperature (�C)	20.3
Average confining pressure (kPa)	-0.6
Average micro-strain	98
Load drift (%)	-0.9
Load standard error (%)	2.1
Average deformation drift (%)	-0.6
Average deformation standard error (%)	2.8
Deformation uniformity (%)	27.7
Phase uniformity (Degrees)	0.8
Conditioning Cycles
Time (sec)	Axial stress (kPa)	Axial micro-strain #1	Axial micro-strain #2	Axial micro-strain #3	Confining pressure (kPa)	Temperature (�C)	Load (N)	Displacement #1 (mm)	Displacement #2 (mm)	Displacement #3 (mm)
0.0000	202.418	-8.422	-0.054	6.059	-0.593	20.294	385.351	0.000590	0.000004	-0.000424
0.1000	209.782	-8.394	-0.250	6.323	-0.604	20.295	399.370	0.000588	0.000018	-0.000443
0.2000	239.553	-6.186	0.321	9.242	-0.606	20.295	456.047	0.000433	-0.000022	-0.000647
0.3000	242.754	-6.018	0.404	9.880	-0.606	20.295	462.141	0.000421	-0.000028	-0.000692
0.4000	264.966	-4.714	0.835	12.463	-0.595	20.295	504.427	0.000330	-0.000058	-0.000872
0.5000	327.679	-0.112	2.867	20.094	-0.597	20.296	623.817	0.000008	-0.000201	-0.001407
0.6000	350.943	2.318	4.725	23.374	-0.603	20.296	668.106	-0.000162	-0.000331	-0.001636
0.7000	398.749	5.847	7.395	29.126	-0.598	20.296	759.115	-0.000409	-0.000518	-0.002039
0.8000	445.833	8.975	10.090	35.171	-0.578	20.296	848.751	-0.000628	-0.000706	-0.002462
0.9000	504.338	13.422	12.174	41.218	-0.583	20.296	960.131	-0.000940	-0.000852	-0.002885
1.0000	545.095	16.562	15.192	46.427	-0.600	20.296	1037.722	-0.001159	-0.001063	-0.003250
1.1000	613.039	21.373	18.429	54.448	-0.599	20.296	1167.068	-0.001496	-0.001290	-0.003811
1.2000	677.676	26.359	21.957	62.116	-0.590	20.297	1290.121	-0.001845	-0.001537	-0.004348
1.3000	721.454	30.222	24.863	67.298	-0.604	20.297	1373.463	-0.002116	-0.001740	-0.004711
1.4000	792.523	35.171	29.101	75.667	-0.596	20.297	1508.760	-0.002462	-0.002037	-0.005297
1.5000	825.646	37.992	31.105	79.779	-0.587	20.297	1571.817	-0.002659	-0.002177	-0.005585
1.6000	890.959	42.548	35.062	86.910	-0.583	20.297	1696.157	-0.002978	-0.002454	-0.006084
1.7000	927.568	45.968	38.132	91.772	-0.591	20.297	1765.852	-0.003218	-0.002669	-0.006424
1.8000	967.664	48.554	40.496	96.483	-0.588	20.297	1842.184	-0.003399	-0.002835	-0.006754
1.9000	1020.203	52.917	43.788	102.317	-0.588	20.297	1942.205	-0.003704	-0.003065	-0.007162
2.0000	1026.305	53.640	44.623	103.446	-0.597	20.298	1953.821	-0.003755	-0.003124	-0.007241
2.1000	1053.011	56.082	47.485	106.918	-0.599	20.298	2004.662	-0.003926	-0.003324	-0.007484
2.2000	1095.751	58.753	48.430	110.947	-0.590	20.298	2086.029	-0.004113	-0.003390	-0.007766
2.3000	1080.693	58.837	48.706	110.504	-0.585	20.298	2057.362	-0.004119	-0.003409	-0.007735
2.4000	1090.101	59.185	49.291	111.599	-0.595	20.298	2075.272	-0.004143	-0.003450	-0.007812
2.5000	1105.805	59.990	49.778	113.033	-0.599	20.298	2105.169	-0.004199	-0.003484	-0.007912
2.6000	1084.841	59.213	49.388	111.713	-0.592	20.299	2065.258	-0.004145	-0.003457	-0.007820
2.7000	1060.615	57.654	49.068	109.478	-0.587	20.298	2019.138	-0.004036	-0.003435	-0.007663
2.8000	1040.116	56.319	48.220	107.558	-0.605	20.298	1980.114	-0.003942	-0.003375	-0.007529
2.9000	1014.027	54.307	45.584	104.766	-0.587	20.298	1930.447	-0.003802	-0.003191	-0.007334
3.0000	952.831	50.538	43.635	98.765	-0.598	20.298	1813.946	-0.003538	-0.003054	-0.006914
3.1000	928.064	48.624	41.997	96.330	-0.599	20.298	1766.796	-0.003404	-0.002940	-0.006743
3.2000	874.293	44.452	38.701	90.465	-0.588	20.299	1664.429	-0.003112	-0.002709	-0.006333
3.3000	833.776	41.339	35.841	85.797	-0.578	20.298	1587.296	-0.002894	-0.002509	-0.006006
3.4000	785.400	37.992	33.367	80.739	-0.599	20.298	1495.199	-0.002659	-0.002336	-0.005652
3.5000	719.380	32.975	29.684	73.220	-0.592	20.299	1369.514	-0.002308	-0.002078	-0.005125
3.6000	669.981	29.153	26.198	67.063	-0.587	20.298	1275.473	-0.002041	-0.001834	-0.004694
3.7000	604.458	24.833	22.849	59.786	-0.587	20.299	1150.732	-0.001738	-0.001599	-0.004185
3.8000	537.416	19.633	19.042	51.875	-0.600	20.298	1023.102	-0.001374	-0.001333	-0.003631
3.9000	497.365	16.134	16.552	46.498	-0.587	20.298	946.856	-0.001129	-0.001159	-0.003255
4.0000	440.377	11.975	13.259	39.658	-0.588	20.299	838.366	-0.000838	-0.000928	-0.002776
4.1000	400.207	8.823	10.909	34.142	-0.591	20.299	761.890	-0.000618	-0.000764	-0.002390
4.2000	356.654	4.599	7.284	28.238	-0.588	20.299	678.978	-0.000322	-0.000510	-0.001977
4.3000	312.952	1.275	5.839	22.986	-0.596	20.299	595.779	-0.000089	-0.000409	-0.001609
4.4000	290.935	-1.086	4.350	18.635	-0.595	20.298	553.865	0.000076	-0.000305	-0.001304
4.5000	237.930	-5.060	2.155	11.964	-0.588	20.298	452.957	0.000354	-0.000151	-0.000837
4.6000	228.146	-6.700	1.475	9.907	-0.588	20.298	434.332	0.000469	-0.000103	-0.000694
4.7000	210.788	-8.173	-0.055	7.170	-0.595	20.298	401.287	0.000572	0.000004	-0.000502
4.8000	227.199	-7.601	-0.306	8.033	-0.588	20.298	432.529	0.000532	0.000021	-0.000562
4.9000	197.308	-9.687	-0.860	4.266	-0.588	20.298	375.624	0.000678	0.000060	-0.000299
5.0000	247.939	-6.654	-0.639	9.257	-0.602	20.299	472.012	0.000466	0.000045	-0.000648
5.1000	214.531	-8.424	-0.946	5.850	-0.588	20.298	408.411	0.000590	0.000066	-0.000409
5.2000	236.397	-7.325	-0.653	8.268	-0.588	20.298	450.039	0.000513	0.000046	-0.000579
5.3000	260.307	-5.520	-0.042	11.227	-0.589	20.298	495.558	0.000386	0.000003	-0.000786
5.4000	265.372	-4.588	0.322	11.949	-0.596	20.298	505.199	0.000321	-0.000023	-0.000836
5.5000	307.947	-1.641	2.379	17.272	-0.596	20.298	586.252	0.000115	-0.000167	-0.001209
5.6000	353.228	1.540	4.670	23.011	-0.592	20.298	672.455	-0.000108	-0.000327	-0.001611
5.7000	440.873	8.128	8.827	33.254	-0.599	20.298	839.310	-0.000569	-0.000618	-0.002328
5.8000	440.167	8.435	8.939	33.502	-0.596	20.298	837.965	-0.000590	-0.000626	-0.002345
5.9000	466.362	10.920	11.286	37.769	-0.583	20.298	887.833	-0.000764	-0.000790	-0.002644
6.0000	560.995	16.701	14.901	47.679	-0.585	20.298	1067.991	-0.001169	-0.001043	-0.003338
6.1000	612.513	21.332	18.511	54.268	-0.599	20.298	1166.067	-0.001493	-0.001296	-0.003799
6.2000	681.223	26.499	22.359	62.143	-0.601	20.298	1296.873	-0.001855	-0.001565	-0.004350
6.3000	711.971	28.832	24.432	65.911	-0.594	20.299	1355.410	-0.002018	-0.001710	-0.004614
6.4000	785.279	34.337	28.822	74.596	-0.584	20.298	1494.970	-0.002404	-0.002018	-0.005222
6.5000	838.871	38.784	32.101	80.921	-0.596	20.298	1596.994	-0.002715	-0.002247	-0.005664
6.6000	886.090	42.230	34.674	86.383	-0.591	20.298	1686.888	-0.002956	-0.002427	-0.006047
6.7000	922.384	45.368	37.924	91.146	-0.585	20.298	1755.981	-0.003176	-0.002655	-0.006380
6.8000	967.769	48.914	40.134	95.871	-0.583	20.298	1842.384	-0.003424	-0.002809	-0.006711
6.9000	998.713	51.428	42.303	99.971	-0.589	20.298	1901.293	-0.003600	-0.002961	-0.006998
7.0000	1042.866	54.932	46.000	105.348	-0.592	20.298	1985.350	-0.003845	-0.003220	-0.007374
7.1000	1054.062	55.612	46.109	106.682	-0.585	20.298	2006.664	-0.003893	-0.003228	-0.007468
7.2000	1086.133	58.573	48.649	110.505	-0.589	20.298	2067.719	-0.004100	-0.003405	-0.007735
7.3000	1076.500	58.044	48.454	109.824	-0.587	20.298	2049.379	-0.004063	-0.003392	-0.007688
7.4000	1066.401	57.362	48.775	109.394	-0.592	20.298	2030.153	-0.004015	-0.003414	-0.007658
7.5000	1094.068	59.450	50.265	112.159	-0.583	20.297	2082.825	-0.004161	-0.003519	-0.007851
7.6000	1072.337	58.517	49.775	110.740	-0.589	20.298	2041.454	-0.004096	-0.003484	-0.007752
7.7000	1044.805	56.845	48.776	108.045	-0.603	20.298	1989.040	-0.003979	-0.003414	-0.007563
7.8000	1031.054	55.471	47.360	106.542	-0.585	20.297	1962.862	-0.003883	-0.003315	-0.007458
7.9000	1001.117	53.639	46.153	103.629	-0.599	20.297	1905.870	-0.003755	-0.003231	-0.007254
8.0000	987.772	52.123	44.204	101.791	-0.592	20.298	1880.465	-0.003649	-0.003094	-0.007125
8.1000	916.853	47.244	40.858	94.868	-0.582	20.297	1745.453	-0.003307	-0.002860	-0.006641
8.2000	867.770	44.123	38.049	89.910	-0.590	20.297	1652.012	-0.003089	-0.002663	-0.006294
8.3000	812.120	40.450	34.617	83.461	-0.576	20.296	1546.068	-0.002832	-0.002423	-0.005842
8.4000	777.660	37.158	32.071	79.237	-0.596	20.297	1480.465	-0.002601	-0.002245	-0.005547
8.5000	721.920	32.836	29.310	73.165	-0.599	20.297	1374.350	-0.002299	-0.002052	-0.005122
8.6000	660.514	28.623	25.834	66.216	-0.593	20.297	1257.448	-0.002004	-0.001808	-0.004635
8.7000	589.895	23.662	21.596	58.032	-0.590	20.297	1123.009	-0.001656	-0.001512	-0.004062
8.8000	551.392	20.217	19.291	52.947	-0.597	20.296	1049.709	-0.001415	-0.001350	-0.003706
8.9000	474.236	14.589	14.594	44.036	-0.595	20.297	902.824	-0.001021	-0.001022	-0.003083
9.0000	463.446	13.395	13.995	42.025	-0.592	20.296	882.282	-0.000938	-0.000980	-0.002942
9.1000	390.889	7.488	9.756	32.127	-0.596	20.296	744.152	-0.000524	-0.000683	-0.002249
9.2000	337.493	3.182	7.034	26.057	-0.592	20.296	642.500	-0.000223	-0.000492	-0.001824
9.3000	320.255	1.444	5.645	23.124	-0.595	20.296	609.684	-0.000101	-0.000395	-0.001619
9.4000	331.346	1.859	4.558	23.262	-0.600	20.296	630.798	-0.000130	-0.000319	-0.001628
9.5000	263.779	-3.754	1.864	13.980	-0.596	20.296	502.167	0.000263	-0.000130	-0.000979
9.6000	225.652	-6.893	0.656	9.297	-0.596	20.296	429.583	0.000482	-0.000046	-0.000651
9.7000	210.999	-8.228	-0.055	6.684	-0.594	20.295	401.688	0.000576	0.000004	-0.000468
9.8000	191.131	-10.285	-0.932	3.585	-0.592	20.296	363.865	0.000720	0.000065	-0.000251
9.9000	186.382	-10.883	-1.499	2.584	-0.584	20.295	354.824	0.000762	0.000105	-0.000181
10.0000	196.016	-10.188	-1.251	3.545	-0.594	20.295	373.163	0.000713	0.000088	-0.000248
10.1000	211.299	-9.201	-1.001	5.085	-0.596	20.295	402.260	0.000644	0.000070	-0.000356
10.2000	223.217	-8.644	-0.932	6.155	-0.590	20.294	424.948	0.000605	0.000065	-0.000431
10.3000	254.882	-5.962	-0.152	9.853	-0.592	20.295	485.229	0.000417	0.000011	-0.000690
10.4000	278.657	-4.116	0.390	13.159	-0.592	20.295	530.491	0.000288	-0.000027	-0.000921
10.5000	296.390	-2.877	1.740	15.590	-0.589	20.294	564.251	0.000201	-0.000122	-0.001091
10.6000	363.207	1.915	4.198	23.483	-0.593	20.294	691.452	-0.000134	-0.000294	-0.001644
10.7000	379.813	3.583	4.934	25.711	-0.587	20.294	723.066	-0.000251	-0.000345	-0.001800
10.8000	451.498	9.213	9.673	35.088	-0.595	20.294	859.537	-0.000645	-0.000677	-0.002456
10.9000	501.768	12.602	11.660	40.451	-0.592	20.294	955.238	-0.000882	-0.000816	-0.002832
11.0000	574.536	17.758	15.261	48.779	-0.587	20.294	1093.769	-0.001243	-0.001068	-0.003415
11.1000	620.267	21.680	18.582	55.558	-0.599	20.294	1180.830	-0.001518	-0.001301	-0.003889
11.2000	693.441	27.041	22.318	63.216	-0.595	20.294	1320.133	-0.001893	-0.001562	-0.004425
11.3000	733.251	30.028	25.071	67.690	-0.599	20.293	1395.922	-0.002102	-0.001755	-0.004738
11.4000	760.828	32.558	27.709	71.720	-0.605	20.293	1448.421	-0.002279	-0.001940	-0.005020
11.5000	827.164	37.771	31.506	79.432	-0.583	20.293	1574.707	-0.002644	-0.002205	-0.005560
11.6000	877.404	41.479	34.311	84.963	-0.592	20.293	1670.351	-0.002904	-0.002402	-0.005947
11.7000	1008.556	50.483	41.566	98.307	-0.600	20.293	1920.033	-0.003534	-0.002910	-0.006881
11.8000	959.233	48.066	40.313	95.163	-0.604	20.292	1826.134	-0.003365	-0.002822	-0.006661
11.9000	1009.398	51.690	42.787	100.998	-0.590	20.292	1921.635	-0.003618	-0.002995	-0.007070
12.0000	1048.863	54.820	45.179	104.836	-0.593	20.292	1996.765	-0.003837	-0.003163	-0.007339
12.1000	1069.902	56.360	46.750	107.546	-0.592	20.292	2036.819	-0.003945	-0.003273	-0.007528
12.2000	1072.397	57.126	47.403	108.033	-0.587	20.292	2041.569	-0.003999	-0.003318	-0.007562
12.3000	1083.278	58.629	48.277	110.395	-0.580	20.292	2062.283	-0.004104	-0.003379	-0.007728
12.4000	1081.369	57.904	48.818	110.310	-0.589	20.292	2058.649	-0.004053	-0.003417	-0.007722
12.5000	1069.722	57.514	48.985	109.701	-0.586	20.292	2036.476	-0.004026	-0.003429	-0.007679
12.6000	1071.631	57.819	49.221	110.172	-0.595	20.292	2040.110	-0.004047	-0.003445	-0.007712
12.7000	1063.425	57.152	47.678	108.742	-0.584	20.291	2024.488	-0.004001	-0.003337	-0.007612
12.8000	1041.874	55.653	47.000	106.991	-0.594	20.291	1983.461	-0.003896	-0.003290	-0.007489
12.9000	984.436	52.039	44.428	101.805	-0.589	20.291	1874.113	-0.003643	-0.003110	-0.007126
13.0000	976.967	51.415	43.134	100.277	-0.597	20.290	1859.894	-0.003599	-0.003019	-0.007019
13.1000	904.199	46.370	40.091	93.426	-0.592	20.290	1721.363	-0.003246	-0.002806	-0.006540
13.2000	838.405	41.796	35.954	86.174	-0.595	20.290	1596.107	-0.002926	-0.002517	-0.006032
13.3000	831.687	41.019	35.800	85.297	-0.600	20.290	1583.319	-0.002871	-0.002506	-0.005971
13.4000	766.058	36.267	31.837	77.833	-0.597	20.289	1458.378	-0.002539	-0.002229	-0.005448
13.5000	730.290	33.252	29.171	73.831	-0.583	20.289	1390.285	-0.002328	-0.002042	-0.005168
13.6000	637.205	26.958	23.987	63.493	-0.590	20.289	1213.074	-0.001887	-0.001679	-0.004445
13.7000	611.791	25.082	22.399	60.532	-0.594	20.288	1164.694	-0.001756	-0.001568	-0.004237
13.8000	548.717	19.715	18.788	52.279	-0.583	20.288	1044.617	-0.001380	-0.001315	-0.003660
13.9000	511.657	16.675	16.120	47.833	-0.584	20.288	974.064	-0.001167	-0.001128	-0.003348
14.0000	464.904	13.408	12.661	41.273	-0.591	20.288	885.057	-0.000939	-0.000886	-0.002889
14.1000	394.977	8.000	9.743	32.920	-0.593	20.287	751.934	-0.000560	-0.000682	-0.002304
14.2000	323.697	1.803	6.409	23.930	-0.589	20.287	616.236	-0.000126	-0.000449	-0.001675
14.3000	311.599	0.456	4.948	21.400	-0.591	20.287	593.204	-0.000032	-0.000346	-0.001498
14.4000	278.567	-1.542	3.739	17.549	-0.599	20.286	530.319	0.000108	-0.000262	-0.001228
14.5000	262.997	-3.742	1.948	14.329	-0.588	20.286	500.679	0.000262	-0.000136	-0.001003
14.6000	200.344	-9.411	-1.042	5.127	-0.581	20.285	381.403	0.000659	0.000073	-0.000359
14.7000	200.163	-9.187	-1.124	5.445	-0.597	20.285	381.060	0.000643	0.000079	-0.000381
14.8000	190.665	-10.119	-1.084	4.018	-0.600	20.285	362.978	0.000708	0.000076	-0.000281
14.9000	184.849	-10.897	-1.361	2.696	-0.592	20.285	351.906	0.000763	0.000095	-0.000189
15.0000	192.980	-10.523	-2.124	3.127	-0.588	20.285	367.384	0.000737	0.000149	-0.000219
15.1000	204.507	-9.728	-1.680	4.432	-0.586	20.285	389.328	0.000681	0.000118	-0.000310
15.2000	221.444	-8.311	-0.916	6.029	-0.580	20.284	421.572	0.000582	0.000064	-0.000422
15.3000	243.866	-6.809	-0.821	9.091	-0.585	20.284	464.258	0.000477	0.000057	-0.000636
15.4000	270.647	-4.686	-0.110	12.088	-0.597	20.284	515.242	0.000328	0.000008	-0.000846
15.5000	336.005	0.040	2.906	20.193	-0.593	20.284	639.668	-0.000003	-0.000203	-0.001414
15.6000	359.029	1.998	4.171	23.374	-0.598	20.283	683.498	-0.000140	-0.000292	-0.001636
15.7000	392.527	4.224	5.311	26.820	-0.596	20.283	747.271	-0.000296	-0.000372	-0.001877
15.8000	460.290	9.518	9.080	34.629	-0.587	20.283	876.274	-0.000666	-0.000636	-0.002424
15.9000	480.593	11.281	10.759	37.799	-0.597	20.283	914.927	-0.000790	-0.000753	-0.002646
16.0000	562.453	17.035	14.595	47.916	-0.591	20.283	1070.766	-0.001192	-0.001022	-0.003354
16.1000	601.031	20.442	17.148	52.529	-0.596	20.282	1144.209	-0.001431	-0.001200	-0.003677
16.2000	657.703	24.596	21.165	59.116	-0.605	20.283	1252.098	-0.001722	-0.001482	-0.004138
16.3000	730.260	29.639	24.543	67.814	-0.596	20.282	1390.228	-0.002075	-0.001718	-0.004747
16.4000	786.016	34.016	27.726	73.693	-0.603	20.282	1496.372	-0.002381	-0.001941	-0.005159
16.5000	825.931	37.253	30.936	78.916	-0.605	20.282	1572.361	-0.002608	-0.002165	-0.005524
16.6000	883.084	41.951	35.258	86.159	-0.593	20.282	1681.166	-0.002937	-0.002468	-0.006031
16.7000	918.912	44.717	37.492	90.591	-0.600	20.282	1749.372	-0.003130	-0.002624	-0.006341
16.8000	955.130	47.845	39.452	94.565	-0.603	20.282	1818.323	-0.003349	-0.002762	-0.006620
16.9000	1007.670	51.761	42.341	100.484	-0.588	20.281	1918.344	-0.003623	-0.002964	-0.007034
17.0000	1033.068	54.141	44.526	103.405	-0.591	20.281	1966.696	-0.003790	-0.003117	-0.007238
17.1000	1053.326	55.638	45.999	106.294	-0.593	20.281	2005.262	-0.003895	-0.003220	-0.007441
17.2000	1076.154	57.709	47.306	108.421	-0.613	20.281	2048.721	-0.004040	-0.003311	-0.007589
17.3000	1080.077	58.171	48.248	109.366	-0.601	20.280	2056.189	-0.004072	-0.003377	-0.007656
17.4000	1078.965	57.904	48.362	109.588	-0.593	20.281	2054.071	-0.004053	-0.003385	-0.007671
17.5000	1083.097	58.935	48.292	110.659	-0.595	20.280	2061.939	-0.004125	-0.003380	-0.007746
17.6000	1088.808	58.836	48.664	110.671	-0.595	20.280	2072.811	-0.004119	-0.003406	-0.007747
17.7000	1068.520	57.696	48.179	109.522	-0.591	20.280	2034.187	-0.004039	-0.003373	-0.007667
17.8000	1043.017	55.527	46.986	106.668	-0.584	20.279	1985.636	-0.003887	-0.003289	-0.007467
17.9000	1006.092	53.223	45.096	103.224	-0.594	20.279	1915.340	-0.003726	-0.003157	-0.007226
18.0000	968.130	50.913	43.122	99.403	-0.595	20.279	1843.071	-0.003564	-0.003019	-0.006958
18.1000	925.720	47.703	40.926	95.023	-0.595	20.279	1762.333	-0.003339	-0.002865	-0.006652
18.2000	865.621	43.286	37.061	88.382	-0.589	20.279	1647.921	-0.003030	-0.002594	-0.006187
18.3000	828.832	41.021	35.021	84.365	-0.587	20.278	1577.883	-0.002871	-0.002451	-0.005906
18.4000	766.915	36.214	31.617	77.541	-0.592	20.279	1460.009	-0.002535	-0.002213	-0.005428
18.5000	727.796	32.893	28.264	72.622	-0.599	20.278	1385.536	-0.002303	-0.001978	-0.005084
18.6000	670.387	29.179	25.752	66.508	-0.578	20.278	1276.245	-0.002043	-0.001803	-0.004656
18.7000	608.350	24.150	21.790	58.433	-0.581	20.279	1158.142	-0.001691	-0.001525	-0.004090
18.8000	555.405	19.562	18.500	52.599	-0.585	20.278	1057.348	-0.001369	-0.001295	-0.003682
18.9000	489.911	15.422	15.203	45.343	-0.581	20.278	932.665	-0.001080	-0.001064	-0.003174
19.0000	447.140	11.726	12.564	39.006	-0.588	20.279	851.240	-0.000821	-0.000879	-0.002730
19.1000	386.531	6.779	9.091	31.407	-0.581	20.279	735.855	-0.000475	-0.000636	-0.002199
19.2000	349.711	3.681	6.631	26.431	-0.589	20.279	665.760	-0.000258	-0.000464	-0.001850
19.3000	309.059	0.358	4.626	20.748	-0.586	20.278	588.369	-0.000025	-0.000324	-0.001452
19.4000	274.885	-2.712	2.588	16.172	-0.594	20.278	523.310	0.000190	-0.000181	-0.001132
19.5000	262.336	-4.101	1.880	14.107	-0.593	20.278	499.420	0.000287	-0.000132	-0.000987
19.6000	214.455	-8.076	-0.514	7.017	-0.591	20.278	408.268	0.000565	0.000036	-0.000491
19.7000	185.225	-10.427	-1.720	2.904	-0.591	20.278	352.621	0.000730	0.000120	-0.000203
19.8000	226.673	-8.409	-1.281	7.196	-0.588	20.278	431.528	0.000589	0.000090	-0.000504
19.9000	192.123	-10.467	-2.347	2.223	-0.589	20.278	365.753	0.000733	0.000164	-0.000156
20.0000	197.473	-10.259	-1.898	2.864	-0.600	20.278	375.938	0.000718	0.000133	-0.000201
20.1000	178.072	-11.758	-2.595	1.140	-0.589	20.278	339.003	0.000823	0.000182	-0.000080
20.2000	223.578	-8.644	-2.387	6.029	-0.598	20.278	425.634	0.000605	0.000167	-0.000422
20.3000	255.107	-5.989	-0.696	9.618	-0.578	20.278	485.659	0.000419	0.000049	-0.000673
20.4000	281.136	-4.339	-0.028	12.813	-0.585	20.277	535.212	0.000304	0.000002	-0.000897
20.5000	305.317	-2.725	1.267	16.020	-0.583	20.277	581.245	0.000191	-0.000089	-0.001121
20.6000	356.053	1.262	3.879	22.595	-0.590	20.277	677.834	-0.000088	-0.000271	-0.001582
20.7000	407.390	5.500	6.617	28.362	-0.585	20.277	775.566	-0.000385	-0.000463	-0.001985
20.8000	466.016	8.990	8.913	35.380	-0.593	20.277	887.175	-0.000629	-0.000624	-0.002477
20.9000	516.496	13.435	11.773	41.762	-0.588	20.277	983.276	-0.000940	-0.000824	-0.002923
21.0000	558.185	16.605	14.150	46.607	-0.584	20.277	1062.641	-0.001162	-0.000991	-0.003263
21.1000	623.288	21.218	18.207	54.141	-0.583	20.276	1186.581	-0.001485	-0.001274	-0.003790
21.2000	662.843	24.318	20.471	59.646	-0.584	20.277	1261.883	-0.001702	-0.001433	-0.004175
21.3000	714.916	28.637	23.446	65.551	-0.578	20.277	1361.017	-0.002005	-0.001641	-0.004589
21.4000	769.815	32.807	27.432	72.635	-0.587	20.277	1465.530	-0.002297	-0.001920	-0.005084
21.5000	842.733	38.021	31.284	80.654	-0.583	20.277	1604.347	-0.002661	-0.002190	-0.005646
21.6000	894.927	42.270	34.033	86.118	-0.581	20.276	1703.711	-0.002959	-0.002382	-0.006028
21.7000	937.607	45.662	36.952	91.591	-0.578	20.277	1784.964	-0.003196	-0.002587	-0.006411
21.8000	961.037	47.705	39.146	94.759	-0.576	20.276	1829.567	-0.003339	-0.002740	-0.006633
21.9000	1004.183	51.137	42.634	100.081	-0.584	20.277	1911.707	-0.003580	-0.002984	-0.007006
22.0000	1027.267	53.013	43.161	102.639	-0.584	20.276	1955.652	-0.003711	-0.003021	-0.007185
22.1000	1076.515	56.999	46.570	107.752	-0.587	20.276	2049.408	-0.003990	-0.003260	-0.007543
22.2000	1073.614	56.680	46.694	107.573	-0.575	20.276	2043.886	-0.003968	-0.003269	-0.007530
22.3000	1080.963	57.319	47.582	109.589	-0.581	20.276	2057.877	-0.004012	-0.003331	-0.007671
22.4000	1099.899	59.242	48.262	111.562	-0.596	20.276	2093.925	-0.004147	-0.003378	-0.007809
22.5000	1093.482	59.102	48.706	111.058	-0.581	20.277	2081.709	-0.004137	-0.003409	-0.007774
22.6000	1083.714	57.920	48.234	110.338	-0.584	20.276	2063.112	-0.004054	-0.003376	-0.007724
22.7000	1051.102	56.055	46.958	107.683	-0.583	20.276	2001.028	-0.003924	-0.003287	-0.007538
22.8000	1026.200	54.767	46.054	105.210	-0.591	20.276	1953.621	-0.003834	-0.003224	-0.007365
22.9000	991.965	52.553	44.679	101.818	-0.593	20.276	1888.447	-0.003679	-0.003128	-0.007127
23.0000	970.204	50.247	42.760	99.249	-0.582	20.276	1847.019	-0.003517	-0.002993	-0.006947
23.1000	916.417	46.730	40.162	94.315	-0.574	20.276	1744.623	-0.003271	-0.002811	-0.006602
23.2000	888.209	45.175	38.340	91.021	-0.577	20.276	1690.922	-0.003162	-0.002684	-0.006371
23.3000	832.919	40.826	34.340	84.739	-0.588	20.276	1585.665	-0.002858	-0.002404	-0.005932
23.4000	758.063	34.934	29.878	76.364	-0.588	20.276	1443.157	-0.002445	-0.002091	-0.005345
23.5000	717.096	32.196	27.890	71.830	-0.583	20.276	1365.166	-0.002254	-0.001952	-0.005028
23.6000	668.148	28.622	25.140	66.256	-0.588	20.275	1271.982	-0.002004	-0.001760	-0.004638
23.7000	614.782	24.412	21.847	59.423	-0.585	20.276	1170.387	-0.001709	-0.001529	-0.004160
23.8000	548.011	19.090	18.388	51.848	-0.593	20.276	1043.272	-0.001336	-0.001287	-0.003629
23.9000	487.762	14.479	14.621	44.483	-0.573	20.275	928.574	-0.001014	-0.001023	-0.003114
24.0000	463.702	12.685	12.691	40.927	-0.576	20.276	882.769	-0.000888	-0.000888	-0.002865
24.1000	408.908	8.169	9.575	33.838	-0.591	20.276	778.456	-0.000572	-0.000670	-0.002369
24.2000	345.729	3.070	6.422	26.223	-0.585	20.275	658.178	-0.000215	-0.000450	-0.001836
24.3000	289.147	-1.305	3.782	18.982	-0.592	20.275	550.461	0.000091	-0.000265	-0.001329
24.4000	265.296	-3.323	2.503	15.370	-0.590	20.275	505.056	0.000233	-0.000175	-0.001076
24.5000	262.561	-4.171	1.850	14.038	-0.589	20.276	499.849	0.000292	-0.000130	-0.000983
24.6000	207.272	-8.270	-0.612	6.823	-0.584	20.276	394.592	0.000579	0.000043	-0.000478
24.7000	217.236	-8.157	-0.750	7.060	-0.580	20.276	413.561	0.000571	0.000053	-0.000494
24.8000	194.122	-10.370	-1.417	3.711	-0.595	20.275	369.558	0.000726	0.000099	-0.000260
24.9000	200.734	-10.732	-2.275	3.809	-0.572	20.275	382.147	0.000751	0.000159	-0.000267
25.0000	198.781	-10.328	-1.915	3.420	-0.595	20.275	378.428	0.000723	0.000134	-0.000239
25.1000	217.566	-9.549	-1.598	4.890	-0.593	20.274	414.190	0.000668	0.000112	-0.000342
25.2000	248.269	-7.406	-1.333	8.810	-0.595	20.274	472.641	0.000518	0.000093	-0.000617
25.3000	271.834	-5.325	-0.513	11.880	-0.577	20.274	517.502	0.000373	0.000036	-0.000832
25.4000	326.853	-1.306	1.976	18.425	-0.591	20.273	622.244	0.000091	-0.000138	-0.001290
25.5000	345.924	0.430	3.877	21.746	-0.583	20.274	658.550	-0.000030	-0.000271	-0.001522
25.6000	418.271	5.321	6.088	29.458	-0.580	20.273	796.280	-0.000372	-0.000426	-0.002062
25.7000	464.904	9.281	8.674	35.185	-0.579	20.273	885.057	-0.000650	-0.000607	-0.002463
25.8000	531.735	13.896	12.147	43.136	-0.589	20.273	1012.287	-0.000973	-0.000850	-0.003020
25.9000	594.313	18.856	15.872	50.833	-0.583	20.272	1131.420	-0.001320	-0.001111	-0.003558
26.0000	680.757	25.428	20.776	60.588	-0.587	20.273	1295.986	-0.001780	-0.001454	-0.004241
26.1000	731.072	29.833	24.363	67.439	-0.582	20.272	1391.773	-0.002088	-0.001705	-0.004721
26.2000	820.551	36.267	29.782	77.348	-0.573	20.273	1562.119	-0.002539	-0.002085	-0.005414
26.3000	894.626	41.770	34.062	86.063	-0.584	20.272	1703.138	-0.002924	-0.002384	-0.006024
26.4000	968.581	47.605	38.563	94.441	-0.583	20.272	1843.929	-0.003332	-0.002699	-0.006611
26.5000	1037.546	52.790	43.133	102.236	-0.586	20.272	1975.222	-0.003695	-0.003019	-0.007157
26.6000	1090.041	56.777	46.584	108.492	-0.581	20.272	2075.157	-0.003974	-0.003261	-0.007594
26.7000	1187.936	63.966	52.725	118.397	-0.578	20.272	2261.524	-0.004478	-0.003691	-0.008288
26.8000	1211.515	66.645	55.252	121.983	-0.577	20.271	2306.414	-0.004665	-0.003868	-0.008539
26.9000	1264.205	70.690	58.520	127.609	-0.581	20.271	2406.721	-0.004948	-0.004096	-0.008933
27.0000	1301.325	73.384	60.797	131.810	-0.583	20.271	2477.388	-0.005137	-0.004256	-0.009227
27.1000	1323.417	75.677	62.450	134.586	-0.587	20.271	2519.445	-0.005297	-0.004372	-0.009421
27.2000	1347.988	78.358	65.327	137.740	-0.585	20.270	2566.223	-0.005485	-0.004573	-0.009642
27.3000	1361.258	78.749	65.924	139.129	-0.580	20.271	2591.486	-0.005512	-0.004615	-0.009739
27.4000	1375.129	79.889	66.870	140.811	-0.594	20.270	2617.893	-0.005592	-0.004681	-0.009857
27.5000	1355.818	79.862	67.161	139.546	-0.577	20.270	2581.129	-0.005590	-0.004701	-0.009768
27.6000	1346.034	79.306	66.980	139.421	-0.584	20.271	2562.504	-0.005551	-0.004689	-0.009759
27.7000	1325.265	77.581	65.605	137.479	-0.574	20.270	2522.964	-0.005431	-0.004592	-0.009624
27.8000	1311.980	76.318	64.261	135.769	-0.592	20.270	2497.673	-0.005342	-0.004498	-0.009504
27.9000	1246.216	72.702	62.146	130.531	-0.597	20.270	2372.475	-0.005089	-0.004350	-0.009137
28.0000	1197.403	68.897	59.325	126.111	-0.591	20.270	2279.549	-0.004823	-0.004153	-0.008828
28.1000	1162.507	66.409	56.753	122.134	-0.584	20.269	2213.116	-0.004649	-0.003973	-0.008549
28.2000	1107.308	62.321	52.960	116.548	-0.578	20.270	2108.030	-0.004362	-0.003707	-0.008158
28.3000	1020.203	56.137	48.512	108.060	-0.590	20.269	1942.205	-0.003930	-0.003396	-0.007564
28.4000	960.826	51.039	43.733	101.234	-0.583	20.270	1829.166	-0.003573	-0.003061	-0.007086
28.5000	896.309	46.785	40.091	94.453	-0.583	20.270	1706.343	-0.003275	-0.002806	-0.006612
28.6000	822.520	41.338	35.954	85.924	-0.576	20.269	1565.866	-0.002894	-0.002517	-0.006015
28.7000	750.624	35.627	31.368	77.723	-0.575	20.269	1428.995	-0.002494	-0.002196	-0.005441
28.8000	670.628	29.889	26.252	68.315	-0.581	20.269	1276.703	-0.002092	-0.001838	-0.004782
28.9000	598.236	24.205	22.220	60.022	-0.572	20.269	1138.887	-0.001694	-0.001555	-0.004202
29.0000	561.942	20.845	19.612	54.709	-0.578	20.269	1069.794	-0.001459	-0.001373	-0.003830
29.1000	465.760	13.574	14.137	42.872	-0.581	20.269	886.688	-0.000950	-0.000990	-0.003001
29.2000	422.103	10.115	11.355	37.091	-0.592	20.268	803.576	-0.000708	-0.000795	-0.002596
29.3000	365.837	6.028	8.563	30.309	-0.588	20.269	696.459	-0.000422	-0.000599	-0.002122
29.4000	319.233	1.316	5.659	23.443	-0.573	20.268	607.738	-0.000092	-0.000396	-0.001641
29.5000	264.214	-2.975	2.713	16.105	-0.588	20.268	502.996	0.000208	-0.000190	-0.001127
29.6000	237.284	-5.769	1.226	11.631	-0.585	20.269	451.727	0.000404	-0.000086	-0.000814
29.7000	222.646	-7.491	0.096	9.077	-0.580	20.268	423.861	0.000524	-0.000007	-0.000635
29.8000	219.069	-7.909	-0.458	8.229	-0.590	20.268	417.051	0.000554	0.000032	-0.000576
29.9000	209.917	-8.575	-0.528	6.421	-0.577	20.268	399.628	0.000600	0.000037	-0.000449
30.0000	208.023	-9.006	-0.916	5.795	-0.572	20.269	396.023	0.000630	0.000064	-0.000406
30.1000	219.189	-8.549	-0.737	6.754	-0.573	20.268	417.280	0.000598	0.000052	-0.000473
30.2000	250.704	-6.100	-0.249	10.519	-0.592	20.268	477.276	0.000427	0.000017	-0.000736
30.3000	269.670	-4.741	0.489	12.771	-0.584	20.268	513.382	0.000332	-0.000034	-0.000894
30.4000	317.911	-1.209	2.212	18.580	-0.584	20.268	605.221	0.000085	-0.000155	-0.001301
30.5000	358.939	1.887	3.729	23.721	-0.595	20.267	683.327	-0.000132	-0.000261	-0.001660
30.6000	424.913	6.569	7.244	31.114	-0.578	20.267	808.926	-0.000460	-0.000507	-0.002178
30.7000	482.217	10.671	10.077	38.075	-0.575	20.268	918.016	-0.000747	-0.000705	-0.002665
30.8000	536.905	15.466	13.301	44.914	-0.581	20.268	1022.129	-0.001083	-0.000931	-0.003144
30.9000	598.702	20.203	16.982	52.322	-0.588	20.268	1139.774	-0.001414	-0.001189	-0.003663
31.0000	678.938	25.972	21.873	62.297	-0.584	20.268	1292.524	-0.001818	-0.001531	-0.004361
31.1000	745.890	30.917	25.350	69.901	-0.584	20.268	1419.983	-0.002164	-0.001774	-0.004893
31.2000	822.324	36.698	29.685	78.679	-0.585	20.268	1565.495	-0.002569	-0.002078	-0.005508
31.3000	890.133	42.077	35.466	86.686	-0.591	20.267	1694.584	-0.002945	-0.002483	-0.006068
31.4000	957.745	46.827	39.174	94.398	-0.588	20.267	1823.301	-0.003278	-0.002742	-0.006608
31.5000	1027.853	53.041	43.259	102.586	-0.594	20.268	1956.768	-0.003713	-0.003028	-0.007181
31.6000	1115.544	59.475	48.888	111.616	-0.574	20.268	2123.709	-0.004163	-0.003422	-0.007813
31.7000	1174.395	63.309	52.711	118.299	-0.586	20.268	2235.746	-0.004432	-0.003690	-0.008281
31.8000	1206.571	66.257	55.379	122.356	-0.582	20.268	2297.001	-0.004638	-0.003877	-0.008565
31.9000	1285.545	72.842	60.478	130.767	-0.593	20.268	2447.348	-0.005099	-0.004233	-0.009154
32.0000	1302.993	74.123	61.603	132.975	-0.585	20.268	2480.564	-0.005189	-0.004312	-0.009308
32.1000	1324.589	76.139	63.190	135.297	-0.577	20.268	2521.677	-0.005330	-0.004423	-0.009471
32.2000	1352.421	78.624	65.700	138.575	-0.579	20.268	2574.663	-0.005504	-0.004599	-0.009700
32.3000	1376.933	80.682	67.259	141.286	-0.591	20.267	2621.326	-0.005648	-0.004708	-0.009890
32.4000	1349.551	79.236	66.745	139.451	-0.608	20.267	2569.199	-0.005547	-0.004672	-0.009762
32.5000	1384.733	81.528	68.235	142.619	-0.587	20.267	2636.175	-0.005707	-0.004776	-0.009983
32.6000	1354.991	79.999	67.496	140.381	-0.588	20.267	2579.556	-0.005600	-0.004725	-0.009827
32.7000	1346.786	79.026	67.231	139.658	-0.591	20.267	2563.934	-0.005532	-0.004706	-0.009776
32.8000	1274.379	75.274	63.995	133.778	-0.592	20.267	2426.090	-0.005269	-0.004480	-0.009364
32.9000	1258.749	73.663	62.702	132.098	-0.587	20.268	2396.336	-0.005156	-0.004389	-0.009247
33.0000	1200.499	69.356	59.504	126.719	-0.577	20.267	2285.442	-0.004855	-0.004165	-0.008870
33.1000	1164.010	66.257	56.435	122.564	-0.586	20.268	2215.977	-0.004638	-0.003950	-0.008579
33.2000	1086.344	61.434	52.448	115.286	-0.585	20.268	2068.119	-0.004300	-0.003671	-0.008070
33.3000	991.935	54.710	46.905	105.652	-0.578	20.268	1888.390	-0.003830	-0.003283	-0.007396
33.4000	955.912	51.066	43.426	100.844	-0.566	20.268	1819.811	-0.003575	-0.003040	-0.007059
33.5000	881.897	46.300	39.662	93.273	-0.576	20.267	1678.905	-0.003241	-0.002776	-0.006529
33.6000	799.271	40.324	35.033	84.253	-0.574	20.267	1521.606	-0.002823	-0.002452	-0.005898
33.7000	763.909	37.003	32.281	79.545	-0.562	20.268	1454.287	-0.002590	-0.002260	-0.005568
33.8000	669.546	30.167	26.653	68.843	-0.585	20.267	1274.643	-0.002112	-0.001866	-0.004819
33.9000	590.677	24.485	22.043	58.980	-0.570	20.267	1124.496	-0.001714	-0.001543	-0.004129
34.0000	546.538	20.247	19.486	53.516	-0.580	20.267	1040.468	-0.001417	-0.001364	-0.003746
34.1000	477.002	14.978	14.860	44.954	-0.575	20.268	908.089	-0.001048	-0.001040	-0.003147
34.2000	429.888	11.058	11.119	38.128	-0.566	20.267	818.396	-0.000774	-0.000778	-0.002669
34.3000	363.958	5.765	8.536	30.017	-0.566	20.268	692.883	-0.000404	-0.000598	-0.002101
34.4000	313.252	1.414	5.283	23.471	-0.574	20.268	596.352	-0.000099	-0.000370	-0.001643
34.5000	276.974	-1.752	3.728	18.288	-0.577	20.268	527.287	0.000123	-0.000261	-0.001280
34.6000	245.895	-4.616	2.058	13.258	-0.572	20.268	468.121	0.000323	-0.000144	-0.000928
34.7000	215.072	-7.449	0.280	8.769	-0.573	20.268	409.441	0.000521	-0.000020	-0.000614
34.8000	200.840	-8.769	-0.793	6.070	-0.569	20.268	382.347	0.000614	0.000055	-0.000425
34.9000	211.991	-8.076	-0.584	7.434	-0.576	20.268	403.576	0.000565	0.000041	-0.000520
35.0000	195.024	-9.547	-1.152	4.362	-0.574	20.268	371.275	0.000668	0.000081	-0.000305
35.1000	224.885	-7.965	-0.819	8.087	-0.570	20.267	428.123	0.000558	0.000057	-0.000566
35.2000	265.627	-4.742	-0.307	12.729	-0.583	20.268	505.686	0.000332	0.000021	-0.000891
35.3000	204.221	-9.340	-1.097	5.598	-0.578	20.269	388.784	0.000654	0.000077	-0.000392
35.4000	321.518	-1.042	2.714	19.331	-0.568	20.268	612.087	0.000073	-0.000190	-0.001353
35.5000	364.649	3.013	5.283	25.292	-0.574	20.268	694.199	-0.000211	-0.000370	-0.001770
35.6000	421.021	6.723	7.548	31.587	-0.583	20.267	801.516	-0.000471	-0.000528	-0.002211
35.7000	494.104	11.906	11.021	40.245	-0.575	20.268	940.647	-0.000833	-0.000771	-0.002817
35.8000	523.665	14.619	13.386	43.912	-0.567	20.268	996.923	-0.001023	-0.000937	-0.003074
35.9000	595.891	20.495	17.663	52.834	-0.578	20.269	1134.424	-0.001435	-0.001236	-0.003698
36.0000	673.198	25.722	21.526	61.824	-0.577	20.268	1281.595	-0.001801	-0.001507	-0.004328
36.1000	751.045	31.696	25.793	70.790	-0.573	20.269	1429.796	-0.002219	-0.001806	-0.004955
36.2000	836.541	38.089	31.272	80.545	-0.581	20.269	1592.560	-0.002666	-0.002189	-0.005638
36.3000	904.575	42.955	35.409	88.351	-0.562	20.269	1722.078	-0.003007	-0.002479	-0.006185
36.4000	976.726	49.041	40.551	96.955	-0.570	20.269	1859.436	-0.003433	-0.002839	-0.006787
36.5000	1048.006	54.600	44.538	104.669	-0.582	20.269	1995.134	-0.003822	-0.003118	-0.007327
36.6000	1128.679	60.047	49.679	113.285	-0.564	20.269	2148.714	-0.004203	-0.003478	-0.007930
36.7000	1175.868	63.601	53.224	119.049	-0.572	20.269	2238.550	-0.004452	-0.003726	-0.008333
36.8000	1207.698	67.215	55.544	122.898	-0.586	20.269	2299.147	-0.004705	-0.003888	-0.008603
36.9000	1254.677	71.219	60.269	128.736	-0.579	20.269	2388.582	-0.004985	-0.004219	-0.009012
37.0000	1281.563	72.954	61.174	131.406	-0.591	20.269	2439.766	-0.005107	-0.004282	-0.009198
37.1000	1326.603	76.790	64.052	136.285	-0.573	20.270	2525.511	-0.005375	-0.004484	-0.009540
37.2000	1349.807	79.248	67.315	139.269	-0.583	20.269	2569.685	-0.005547	-0.004712	-0.009749
37.3000	1377.789	80.947	68.388	142.064	-0.580	20.270	2622.957	-0.005666	-0.004787	-0.009944
37.4000	1366.338	80.488	67.969	141.214	-0.578	20.271	2601.156	-0.005634	-0.004758	-0.009885
37.5000	1363.437	80.766	68.539	141.677	-0.568	20.271	2595.634	-0.005654	-0.004798	-0.009917
37.6000	1356.765	80.806	68.303	141.258	-0.577	20.271	2582.932	-0.005656	-0.004781	-0.009888
37.7000	1352.932	79.943	67.650	140.714	-0.556	20.271	2575.636	-0.005596	-0.004735	-0.009850
37.8000	1297.297	76.623	65.743	136.271	-0.581	20.272	2469.721	-0.005364	-0.004602	-0.009539
37.9000	1255.639	73.580	63.399	132.376	-0.578	20.271	2390.413	-0.005151	-0.004438	-0.009266
38.0000	1211.124	70.328	60.465	128.053	-0.571	20.272	2305.670	-0.004923	-0.004233	-0.008964
38.1000	1161.380	67.117	57.019	122.928	-0.567	20.272	2210.970	-0.004698	-0.003991	-0.008605
38.2000	1093.422	61.919	52.737	115.909	-0.573	20.272	2081.594	-0.004334	-0.003692	-0.008114
38.3000	1035.397	57.989	49.556	110.532	-0.563	20.272	1971.130	-0.004059	-0.003469	-0.007737
38.4000	970.715	52.903	45.206	103.225	-0.566	20.272	1847.992	-0.003703	-0.003164	-0.007226
38.5000	892.853	47.524	40.872	95.051	-0.572	20.273	1699.762	-0.003327	-0.002861	-0.006654
38.6000	808.093	41.158	35.952	85.602	-0.574	20.273	1538.401	-0.002881	-0.002517	-0.005992
38.7000	729.584	35.211	30.865	76.559	-0.574	20.274	1388.941	-0.002465	-0.002161	-0.005359
38.8000	665.578	30.294	27.238	68.622	-0.577	20.273	1267.090	-0.002121	-0.001907	-0.004804
38.9000	590.331	24.442	22.861	60.022	-0.574	20.275	1123.838	-0.001711	-0.001600	-0.004202
39.0000	532.201	19.258	18.638	52.223	-0.572	20.274	1013.174	-0.001348	-0.001305	-0.003656
39.1000	449.470	13.728	14.192	42.456	-0.574	20.275	855.675	-0.000961	-0.000993	-0.002972
39.2000	418.030	10.686	11.964	37.894	-0.572	20.275	795.822	-0.000748	-0.000838	-0.002653
39.3000	360.547	5.584	8.507	30.002	-0.570	20.275	686.388	-0.000391	-0.000596	-0.002100
39.4000	296.886	0.581	4.807	21.608	-0.569	20.275	565.195	-0.000041	-0.000336	-0.001513
39.5000	285.044	-1.044	4.032	19.038	-0.574	20.276	542.650	0.000073	-0.000282	-0.001333
39.6000	221.233	-5.713	1.505	11.060	-0.577	20.276	421.171	0.000400	-0.000105	-0.000774
39.7000	236.382	-5.504	0.642	11.631	-0.575	20.276	450.010	0.000385	-0.000045	-0.000814
39.8000	206.490	-7.561	-0.235	7.463	-0.576	20.276	393.105	0.000529	0.000016	-0.000522
39.9000	227.605	-6.809	-0.277	9.090	-0.576	20.277	433.302	0.000477	0.000019	-0.000636
40.0000	210.247	-8.520	-1.279	6.379	-0.584	20.277	400.257	0.000596	0.000090	-0.000446
40.1000	189.463	-9.562	-1.182	4.460	-0.574	20.277	360.689	0.000669	0.000083	-0.000312
40.2000	270.617	-4.242	0.529	13.341	-0.581	20.277	515.184	0.000297	-0.000037	-0.000934
40.3000	269.730	-4.422	0.237	13.523	-0.585	20.278	513.496	0.000310	-0.000017	-0.000947
40.4000	330.234	0.151	2.669	20.431	-0.588	20.278	628.681	-0.000011	-0.000187	-0.001430
40.5000	348.554	1.873	5.129	23.499	-0.577	20.278	663.557	-0.000131	-0.000359	-0.001645
40.6000	431.886	7.835	7.757	33.184	-0.585	20.279	822.201	-0.000548	-0.000543	-0.002323
40.7000	488.378	12.227	10.494	39.645	-0.573	20.278	929.747	-0.000856	-0.000735	-0.002775
40.8000	548.507	16.438	14.261	46.678	-0.588	20.279	1044.216	-0.001151	-0.000998	-0.003267
40.9000	601.888	20.650	17.399	53.363	-0.578	20.279	1145.840	-0.001445	-0.001218	-0.003735
41.0000	705.464	28.498	23.195	64.997	-0.581	20.279	1343.021	-0.001995	-0.001624	-0.004550
41.1000	760.152	32.517	26.680	71.830	-0.582	20.280	1447.134	-0.002276	-0.001868	-0.005028
41.2000	825.886	37.686	30.714	79.709	-0.573	20.280	1572.275	-0.002638	-0.002150	-0.005580
41.3000	910.962	43.981	35.743	89.353	-0.578	20.280	1734.238	-0.003079	-0.002502	-0.006255
41.4000	975.674	49.484	40.830	96.818	-0.573	20.281	1857.433	-0.003464	-0.002858	-0.006777
41.5000	1061.291	55.237	45.541	106.181	-0.585	20.281	2020.426	-0.003867	-0.003188	-0.007433
41.6000	1086.824	57.667	47.583	109.867	-0.583	20.281	2069.035	-0.004037	-0.003331	-0.007691
41.7000	1165.213	63.337	53.210	118.188	-0.572	20.282	2218.266	-0.004434	-0.003725	-0.008273
41.8000	1215.077	68.018	56.213	123.830	-0.578	20.285	2313.194	-0.004761	-0.003935	-0.008668
41.9000	1268.668	71.718	60.032	129.737	-0.574	20.282	2415.218	-0.005020	-0.004202	-0.009082
42.0000	1289.392	73.816	62.812	132.447	-0.588	20.282	2454.672	-0.005167	-0.004397	-0.009271
42.1000	1331.893	77.719	65.437	136.866	-0.578	20.282	2535.582	-0.005440	-0.004581	-0.009581
42.2000	1348.634	78.762	66.245	138.781	-0.581	20.283	2567.453	-0.005513	-0.004637	-0.009715
42.3000	1302.708	76.039	65.394	135.880	-0.584	20.283	2480.021	-0.005323	-0.004578	-0.009512
42.4000	1376.302	81.919	68.608	142.424	-0.580	20.283	2620.125	-0.005734	-0.004803	-0.009970
42.5000	1367.300	80.971	68.302	142.133	-0.570	20.283	2602.987	-0.005668	-0.004781	-0.009949
42.6000	1355.878	80.165	67.719	141.312	-0.572	20.284	2581.244	-0.005612	-0.004740	-0.009892
42.7000	1307.351	77.251	65.438	136.908	-0.574	20.284	2488.861	-0.005408	-0.004581	-0.009584
42.8000	1292.578	76.332	66.174	136.339	-0.581	20.284	2460.737	-0.005343	-0.004632	-0.009544
42.9000	1251.776	73.092	61.812	132.000	-0.577	20.283	2383.060	-0.005116	-0.004327	-0.009240
43.0000	1193.797	69.663	59.629	126.846	-0.589	20.284	2272.682	-0.004876	-0.004174	-0.008879
43.1000	1153.836	66.534	57.366	122.441	-0.587	20.284	2196.608	-0.004657	-0.004016	-0.008571
43.2000	1091.679	61.543	53.335	116.463	-0.583	20.285	2078.276	-0.004308	-0.003733	-0.008152
43.3000	967.273	53.808	46.276	104.363	-0.580	20.285	1841.440	-0.003767	-0.003239	-0.007305
43.4000	942.056	50.970	43.886	100.776	-0.582	20.285	1793.432	-0.003568	-0.003072	-0.007054
43.5000	889.832	46.954	41.232	94.898	-0.577	20.285	1694.012	-0.003287	-0.002886	-0.006643
43.6000	809.881	41.548	36.008	86.187	-0.580	20.286	1541.805	-0.002908	-0.002521	-0.006033
43.7000	771.183	38.090	32.421	80.615	-0.576	20.285	1468.134	-0.002666	-0.002269	-0.005643
43.8000	669.576	30.348	27.501	69.580	-0.566	20.285	1274.700	-0.002124	-0.001925	-0.004871
43.9000	613.354	25.845	23.890	62.270	-0.582	20.285	1167.669	-0.001809	-0.001672	-0.004359
44.0000	546.673	20.828	19.040	53.574	-0.592	20.286	1040.726	-0.001458	-0.001333	-0.003750
44.1000	471.877	15.243	15.234	45.052	-0.592	20.286	898.333	-0.001067	-0.001066	-0.003154
44.2000	425.890	11.003	12.149	38.589	-0.593	20.286	810.785	-0.000770	-0.000850	-0.002701
44.3000	369.954	6.708	8.368	31.295	-0.588	20.286	704.298	-0.000470	-0.000586	-0.002191
44.4000	310.472	2.124	5.575	23.402	-0.583	20.287	591.059	-0.000149	-0.000390	-0.001638
44.5000	265.552	-1.821	4.225	17.634	-0.603	20.286	505.543	0.000127	-0.000296	-0.001234
44.6000	261.149	-2.559	2.476	15.786	-0.589	20.287	497.160	0.000179	-0.000173	-0.001105
44.7000	217.702	-6.420	1.642	9.881	-0.593	20.287	414.448	0.000449	-0.000115	-0.000692
44.8000	201.366	-8.035	0.530	7.099	-0.586	20.287	383.348	0.000562	-0.000037	-0.000497
44.9000	235.345	-6.282	0.015	10.379	-0.591	20.287	448.036	0.000440	-0.000001	-0.000727
45.0000	214.741	-7.712	-0.681	7.602	-0.581	20.287	408.812	0.000540	0.000048	-0.000532
45.1000	226.012	-7.004	-0.083	8.770	-0.601	20.288	430.269	0.000490	0.000006	-0.000614
45.2000	243.340	-6.017	0.320	11.228	-0.595	20.288	463.257	0.000421	-0.000022	-0.000786
45.3000	286.441	-3.033	1.101	15.841	-0.600	20.288	545.311	0.000212	-0.000077	-0.001109
45.4000	310.081	-0.779	2.337	19.066	-0.596	20.288	590.315	0.000055	-0.000164	-0.001335
45.5000	368.572	3.309	5.226	25.972	-0.604	20.289	701.666	-0.000232	-0.000366	-0.001818
45.6000	413.356	6.459	6.880	31.365	-0.591	20.289	786.924	-0.000452	-0.000482	-0.002196
45.7000	499.634	13.519	12.301	41.621	-0.602	20.289	951.176	-0.000946	-0.000861	-0.002913
45.8000	540.166	16.452	15.316	46.762	-0.595	20.289	1028.337	-0.001152	-0.001072	-0.003273
45.9000	632.756	22.801	19.415	57.058	-0.595	20.289	1204.605	-0.001596	-0.001359	-0.003994
46.0000	670.703	26.585	22.526	62.088	-0.580	20.289	1276.846	-0.001861	-0.001577	-0.004346
46.1000	733.356	30.891	25.697	69.385	-0.591	20.290	1396.122	-0.002162	-0.001799	-0.004857
46.2000	844.461	39.199	32.559	82.436	-0.592	20.289	1607.637	-0.002744	-0.002279	-0.005771
46.3000	893.995	43.271	35.535	88.034	-0.593	20.290	1701.937	-0.003029	-0.002487	-0.006162
46.4000	965.064	48.789	40.174	96.400	-0.580	20.290	1837.234	-0.003415	-0.002812	-0.006748
46.5000	1038.959	54.001	44.663	104.558	-0.589	20.290	1977.911	-0.003780	-0.003126	-0.007319
46.6000	1112.373	59.546	49.652	112.395	-0.590	20.290	2117.672	-0.004168	-0.003476	-0.007868
46.7000	1158.856	63.711	52.821	117.980	-0.596	20.290	2206.163	-0.004460	-0.003697	-0.008259
46.8000	1201.236	67.021	55.795	122.843	-0.604	20.291	2286.844	-0.004691	-0.003906	-0.008599
46.9000	1254.496	71.484	60.144	129.042	-0.589	20.290	2388.239	-0.005004	-0.004210	-0.009033
47.0000	1293.180	74.413	62.507	133.335	-0.590	20.290	2461.882	-0.005209	-0.004376	-0.009333
47.1000	1320.847	77.041	64.703	136.255	-0.582	20.291	2514.553	-0.005393	-0.004529	-0.009538
47.2000	1349.070	79.291	67.260	139.672	-0.590	20.291	2568.283	-0.005550	-0.004708	-0.009777
47.3000	1356.374	80.193	67.009	140.578	-0.591	20.291	2582.188	-0.005614	-0.004691	-0.009840
47.4000	1372.439	81.807	69.027	142.453	-0.589	20.292	2612.772	-0.005727	-0.004832	-0.009972
47.5000	1367.270	81.334	68.970	142.312	-0.592	20.291	2602.930	-0.005693	-0.004828	-0.009962
47.6000	1359.725	81.336	68.665	142.011	-0.584	20.291	2588.568	-0.005693	-0.004807	-0.009941
47.7000	1327.580	79.318	67.774	139.575	-0.589	20.291	2527.370	-0.005552	-0.004744	-0.009770
47.8000	1303.744	77.804	66.911	137.547	-0.584	20.292	2481.995	-0.005446	-0.004684	-0.009628
47.9000	1244.247	73.911	63.508	132.043	-0.597	20.292	2368.727	-0.005174	-0.004446	-0.009243
48.0000	1193.917	70.383	60.755	127.275	-0.587	20.292	2272.911	-0.004927	-0.004253	-0.008909
48.1000	1155.429	67.451	58.492	123.511	-0.593	20.293	2199.640	-0.004722	-0.004094	-0.008646
48.2000	1096.773	62.699	54.322	117.645	-0.597	20.293	2087.975	-0.004389	-0.003803	-0.008235
48.3000	1024.637	57.499	49.986	109.950	-0.593	20.292	1950.645	-0.004025	-0.003499	-0.007697
48.4000	954.890	52.846	45.498	102.627	-0.610	20.293	1817.865	-0.003699	-0.003185	-0.007184
48.5000	896.820	48.080	41.387	95.939	-0.600	20.293	1707.315	-0.003366	-0.002897	-0.006716
48.6000	798.369	41.158	35.814	85.450	-0.597	20.293	1519.890	-0.002881	-0.002507	-0.005982
48.7000	725.647	35.823	31.852	77.070	-0.601	20.293	1381.445	-0.002508	-0.002230	-0.005395
48.8000	672.957	31.515	28.475	70.610	-0.591	20.293	1281.137	-0.002206	-0.001993	-0.004943
48.9000	614.632	26.373	23.041	62.686	-0.589	20.293	1170.101	-0.001846	-0.001613	-0.004388
49.0000	547.004	21.538	20.206	54.585	-0.597	20.294	1041.355	-0.001508	-0.001414	-0.003821
49.1000	480.654	16.050	16.358	46.360	-0.596	20.294	915.041	-0.001123	-0.001145	-0.003245
49.2000	409.239	10.490	12.121	37.812	-0.601	20.294	779.085	-0.000734	-0.000848	-0.002647
49.3000	367.625	7.099	9.674	32.032	-0.604	20.294	699.863	-0.000497	-0.000677	-0.002242
49.4000	310.998	2.084	6.504	24.376	-0.587	20.294	592.060	-0.000146	-0.000455	-0.001706
49.5000	289.222	0.037	5.004	20.705	-0.597	20.294	550.604	-0.000003	-0.000350	-0.001449
49.6000	247.323	-3.366	2.712	14.856	-0.603	20.294	470.839	0.000236	-0.000190	-0.001040
49.7000	229.198	-4.990	1.878	11.602	-0.589	20.294	436.335	0.000349	-0.000131	-0.000812
49.8000	217.671	-6.685	1.182	9.700	-0.594	20.294	414.391	0.000468	-0.000083	-0.000679
49.9000	205.979	-7.325	-0.000	7.755	-0.598	20.294	392.132	0.000513	0.000000	-0.000543
Test Cycles
Time (sec)	Axial stress (kPa)	Axial micro-strain #1	Axial micro-strain #2	Axial micro-strain #3	Confining pressure (kPa)	Temperature (�C)	Load (N)	Displacement #1 (mm)	Displacement #2 (mm)	Displacement #3 (mm)
0.0000	216.063	-7.031	0.418	8.353	-0.595	20.295	411.329	0.000492	-0.000029	-0.000585
0.1000	237.253	-6.643	0.558	10.700	-0.589	20.295	451.670	0.000465	-0.000039	-0.000749
0.2000	254.221	-5.242	1.087	12.185	-0.598	20.295	483.971	0.000367	-0.000076	-0.000853
0.3000	282.684	-2.379	1.837	15.925	-0.595	20.295	538.158	0.000167	-0.000129	-0.001115
0.4000	324.012	-0.084	3.323	20.708	-0.605	20.295	616.837	0.000006	-0.000233	-0.001450
0.5000	375.139	4.223	5.617	27.096	-0.601	20.296	714.169	-0.000296	-0.000393	-0.001897
0.6000	420.856	7.864	8.269	32.516	-0.591	20.296	801.201	-0.000551	-0.000579	-0.002276
0.7000	490.467	12.880	12.105	40.827	-0.599	20.296	933.723	-0.000902	-0.000847	-0.002858
0.8000	524.401	15.576	14.149	45.401	-0.595	20.296	998.325	-0.001090	-0.000990	-0.003178
0.9000	605.209	21.427	18.361	55.182	-0.601	20.296	1152.163	-0.001500	-0.001285	-0.003863
1.0000	665.488	26.000	22.055	61.880	-0.597	20.296	1266.918	-0.001820	-0.001544	-0.004332
1.1000	758.258	32.558	26.820	72.414	-0.601	20.296	1443.529	-0.002279	-0.001877	-0.005069
1.2000	812.947	37.544	31.435	79.807	-0.595	20.296	1547.642	-0.002628	-0.002200	-0.005587
1.3000	889.291	43.343	35.898	88.271	-0.604	20.296	1692.982	-0.003034	-0.002513	-0.006179
1.4000	991.514	50.150	41.649	98.888	-0.597	20.297	1887.589	-0.003510	-0.002915	-0.006922
1.5000	1031.430	53.738	45.498	104.489	-0.593	20.297	1963.577	-0.003762	-0.003185	-0.007314
1.6000	1098.366	59.307	49.140	111.699	-0.597	20.297	2091.007	-0.004152	-0.003440	-0.007819
1.7000	1157.743	63.337	52.920	117.909	-0.585	20.297	2204.046	-0.004434	-0.003704	-0.008254
1.8000	1214.085	68.189	56.644	124.429	-0.591	20.297	2311.306	-0.004773	-0.003965	-0.008710
1.9000	1256.931	72.271	60.993	129.599	-0.592	20.297	2392.874	-0.005059	-0.004270	-0.009072
2.0000	1306.765	75.583	63.552	134.573	-0.603	20.298	2487.745	-0.005291	-0.004449	-0.009420
2.1000	1320.065	76.569	64.549	136.563	-0.597	20.298	2513.065	-0.005360	-0.004518	-0.009559
2.2000	1353.489	79.665	66.842	140.199	-0.596	20.297	2576.694	-0.005577	-0.004679	-0.009814
2.3000	1371.282	81.348	68.471	142.315	-0.594	20.298	2610.569	-0.005694	-0.004793	-0.009962
2.4000	1371.928	81.445	68.608	142.523	-0.592	20.298	2611.799	-0.005701	-0.004803	-0.009977
2.5000	1361.183	80.903	68.304	142.050	-0.595	20.298	2591.343	-0.005663	-0.004781	-0.009943
2.6000	1337.168	80.195	68.179	140.507	-0.599	20.298	2545.624	-0.005614	-0.004773	-0.009835
2.7000	1332.539	79.026	67.802	140.103	-0.601	20.298	2536.812	-0.005532	-0.004746	-0.009807
2.8000	1288.551	76.681	65.576	136.228	-0.597	20.298	2453.070	-0.005368	-0.004590	-0.009536
2.9000	1251.025	74.080	63.856	132.707	-0.587	20.298	2381.630	-0.005186	-0.004470	-0.009290
3.0000	1204.572	70.897	61.075	128.428	-0.592	20.299	2293.196	-0.004963	-0.004275	-0.008990
3.1000	1154.918	66.744	57.144	123.065	-0.592	20.298	2198.668	-0.004672	-0.004000	-0.008615
3.2000	1078.514	61.711	53.238	116.062	-0.589	20.298	2053.213	-0.004320	-0.003727	-0.008124
3.3000	1020.699	57.558	49.165	109.700	-0.597	20.299	1943.150	-0.004029	-0.003442	-0.007679
3.4000	980.934	54.141	45.971	104.973	-0.591	20.299	1867.447	-0.003790	-0.003218	-0.007348
3.5000	880.214	47.274	40.829	94.523	-0.587	20.299	1675.701	-0.003309	-0.002858	-0.006617
3.6000	827.660	43.036	37.617	88.285	-0.583	20.299	1575.651	-0.003013	-0.002633	-0.006180
3.7000	752.773	36.630	32.032	79.208	-0.584	20.299	1433.086	-0.002564	-0.002242	-0.005545
3.8000	686.603	31.974	28.115	71.345	-0.591	20.299	1307.116	-0.002238	-0.001968	-0.004994
3.9000	609.056	26.304	24.016	62.631	-0.585	20.300	1159.487	-0.001841	-0.001681	-0.004384
4.0000	541.383	20.899	20.124	54.433	-0.590	20.299	1030.655	-0.001463	-0.001409	-0.003810
4.1000	459.433	14.576	14.997	44.273	-0.591	20.299	874.643	-0.001020	-0.001050	-0.003099
4.2000	425.815	11.739	12.732	39.285	-0.597	20.299	810.642	-0.000822	-0.000891	-0.002750
4.3000	368.527	6.987	9.716	31.893	-0.589	20.299	701.580	-0.000489	-0.000680	-0.002232
4.4000	310.893	1.608	6.075	24.194	-0.594	20.299	591.860	-0.000113	-0.000425	-0.001694
4.5000	289.026	-0.014	4.545	20.540	-0.584	20.299	550.232	0.000001	-0.000318	-0.001438
4.6000	240.049	-3.975	2.545	14.092	-0.587	20.300	456.991	0.000278	-0.000178	-0.000986
4.7000	217.341	-6.476	1.295	10.255	-0.584	20.300	413.761	0.000453	-0.000091	-0.000718
4.8000	211.855	-6.964	0.615	8.798	-0.577	20.299	403.318	0.000487	-0.000043	-0.000616
4.9000	206.926	-8.061	0.475	7.699	-0.592	20.300	393.934	0.000564	-0.000033	-0.000539
5.0000	212.787	-7.657	-0.138	7.893	-0.588	20.300	405.092	0.000536	0.000010	-0.000553
5.1000	225.712	-6.991	0.100	9.033	-0.577	20.300	429.697	0.000489	-0.000007	-0.000632
5.2000	244.798	-5.547	0.418	11.129	-0.583	20.300	466.032	0.000388	-0.000029	-0.000779
5.3000	279.979	-3.629	1.669	15.440	-0.578	20.299	533.009	0.000254	-0.000117	-0.001081
5.4000	325.891	0.290	3.310	21.275	-0.582	20.300	620.413	-0.000020	-0.000232	-0.001489
5.5000	377.649	4.153	5.478	27.181	-0.572	20.300	718.946	-0.000291	-0.000383	-0.001903
5.6000	408.863	6.446	7.589	30.851	-0.573	20.300	778.370	-0.000451	-0.000531	-0.002160
5.7000	479.061	11.863	11.061	39.797	-0.574	20.300	912.008	-0.000830	-0.000774	-0.002786
5.8000	553.301	16.964	15.053	48.125	-0.570	20.300	1053.343	-0.001188	-0.001054	-0.003369
5.9000	615.954	22.050	18.735	55.474	-0.576	20.300	1172.619	-0.001544	-0.001311	-0.003883
6.0000	682.275	26.681	22.540	63.885	-0.580	20.301	1298.876	-0.001868	-0.001578	-0.004472
6.1000	750.924	32.156	26.487	71.457	-0.575	20.300	1429.567	-0.002251	-0.001854	-0.005002
6.2000	820.837	38.046	31.715	80.171	-0.580	20.300	1562.662	-0.002663	-0.002220	-0.005612
6.3000	897.436	43.104	35.480	88.839	-0.584	20.300	1708.488	-0.003017	-0.002484	-0.006219
6.4000	960.405	48.566	39.717	95.912	-0.577	20.300	1828.365	-0.003400	-0.002780	-0.006714
6.5000	1021.000	53.293	44.399	103.417	-0.586	20.299	1943.722	-0.003731	-0.003108	-0.007239
6.6000	1098.471	58.825	49.709	111.768	-0.589	20.300	2091.208	-0.004118	-0.003480	-0.007824
6.7000	1202.182	66.574	55.086	122.203	-0.588	20.300	2288.647	-0.004660	-0.003856	-0.008554
6.8000	1216.670	68.118	56.727	124.442	-0.579	20.300	2316.227	-0.004768	-0.003971	-0.008711
6.9000	1268.999	72.232	60.660	130.196	-0.581	20.300	2415.848	-0.005056	-0.004246	-0.009114
7.0000	1290.429	74.387	62.550	133.013	-0.578	20.300	2456.646	-0.005207	-0.004378	-0.009311
7.1000	1322.800	77.041	65.243	136.729	-0.572	20.300	2518.272	-0.005393	-0.004567	-0.009571
7.2000	1342.142	78.650	66.301	139.157	-0.573	20.300	2555.094	-0.005506	-0.004641	-0.009741
7.3000	1356.990	80.292	67.816	141.104	-0.587	20.300	2583.361	-0.005620	-0.004747	-0.009877
7.4000	1368.171	81.320	68.458	142.300	-0.575	20.300	2604.647	-0.005692	-0.004792	-0.009961
7.5000	1365.692	80.903	68.512	142.328	-0.589	20.301	2599.926	-0.005663	-0.004796	-0.009963
7.6000	1345.508	80.459	68.220	141.466	-0.580	20.300	2561.502	-0.005632	-0.004775	-0.009903
7.7000	1327.189	79.055	67.856	139.437	-0.581	20.300	2526.627	-0.005534	-0.004750	-0.009761
7.8000	1285.500	76.068	65.508	135.934	-0.592	20.301	2447.262	-0.005325	-0.004586	-0.009515
7.9000	1254.572	74.359	63.928	133.096	-0.585	20.300	2388.382	-0.005205	-0.004475	-0.009317
8.0000	1192.038	70.022	60.546	127.234	-0.585	20.300	2269.335	-0.004902	-0.004238	-0.008906
8.1000	1127.311	65.326	56.395	120.941	-0.575	20.300	2146.111	-0.004573	-0.003948	-0.008466
8.2000	1092.490	62.195	53.294	116.590	-0.578	20.300	2079.821	-0.004354	-0.003731	-0.008161
8.3000	1038.177	58.474	50.433	111.156	-0.584	20.300	1976.423	-0.004093	-0.003530	-0.007781
8.4000	945.798	51.733	45.039	101.803	-0.577	20.300	1800.556	-0.003621	-0.003153	-0.007126
8.5000	886.300	47.551	40.901	94.953	-0.585	20.301	1687.288	-0.003329	-0.002863	-0.006647
8.6000	800.924	41.505	36.299	85.840	-0.582	20.300	1524.754	-0.002905	-0.002541	-0.006009
8.7000	753.149	37.087	32.976	79.851	-0.574	20.300	1433.802	-0.002596	-0.002308	-0.005590
8.8000	652.699	29.695	26.807	68.576	-0.580	20.300	1242.571	-0.002079	-0.001876	-0.004800
8.9000	576.460	23.969	22.235	58.854	-0.587	20.300	1097.431	-0.001678	-0.001556	-0.004120
9.0000	540.767	20.538	19.500	53.796	-0.567	20.300	1029.482	-0.001438	-0.001365	-0.003766
9.1000	466.933	15.255	15.371	45.080	-0.572	20.300	888.920	-0.001068	-0.001076	-0.003156
9.2000	397.607	9.767	11.675	36.242	-0.576	20.300	756.941	-0.000684	-0.000817	-0.002537
9.3000	374.598	7.126	9.466	32.283	-0.580	20.300	713.139	-0.000499	-0.000663	-0.002260
9.4000	302.597	1.970	5.978	23.456	-0.577	20.300	576.067	-0.000138	-0.000418	-0.001642
9.5000	282.760	-0.444	4.920	19.997	-0.586	20.300	538.301	0.000031	-0.000344	-0.001400
9.6000	250.163	-3.769	2.645	15.120	-0.584	20.300	476.246	0.000264	-0.000185	-0.001058
9.7000	226.493	-5.934	1.490	11.338	-0.589	20.299	431.185	0.000415	-0.000104	-0.000794
9.8000	200.629	-7.908	0.627	7.643	-0.587	20.300	381.947	0.000554	-0.000044	-0.000535
9.9000	209.180	-7.617	0.335	8.198	-0.604	20.300	398.226	0.000533	-0.000023	-0.000574
10.0000	212.201	-8.048	-0.335	8.030	-0.595	20.300	403.976	0.000563	0.000023	-0.000562
10.1000	219.836	-7.852	0.321	8.506	-0.580	20.300	418.510	0.000550	-0.000022	-0.000595
10.2000	246.421	-5.339	0.836	11.658	-0.580	20.300	469.122	0.000374	-0.000059	-0.000816
10.3000	276.192	-3.726	1.405	15.218	-0.591	20.300	525.799	0.000261	-0.000098	-0.001065
10.4000	326.101	0.776	3.504	21.150	-0.587	20.300	620.813	-0.000054	-0.000245	-0.001481
10.5000	360.637	2.668	5.380	25.529	-0.583	20.300	686.560	-0.000187	-0.000377	-0.001787
10.6000	438.589	8.475	9.065	34.975	-0.577	20.300	834.961	-0.000593	-0.000635	-0.002448
10.7000	486.890	12.213	11.313	40.300	-0.580	20.300	926.914	-0.000855	-0.000792	-0.002821
10.8000	602.489	20.748	17.817	53.392	-0.595	20.300	1146.984	-0.001452	-0.001247	-0.003737
10.9000	618.705	21.984	18.930	56.404	-0.581	20.300	1177.855	-0.001539	-0.001325	-0.003948
11.0000	700.985	28.262	23.654	65.857	-0.588	20.300	1334.496	-0.001978	-0.001656	-0.004610
11.1000	790.314	34.932	29.212	75.419	-0.580	20.300	1504.555	-0.002445	-0.002045	-0.005279
11.2000	843.379	39.130	32.462	82.421	-0.588	20.300	1605.577	-0.002739	-0.002272	-0.005769
11.3000	903.568	44.039	36.175	89.477	-0.565	20.300	1720.161	-0.003083	-0.002532	-0.006263
11.4000	961.503	48.706	40.202	96.680	-0.581	20.300	1830.454	-0.003409	-0.002814	-0.006768
11.5000	1050.666	54.959	45.512	105.958	-0.572	20.300	2000.198	-0.003847	-0.003186	-0.007417
11.6000	1106.031	59.227	49.084	112.311	-0.589	20.299	2105.598	-0.004146	-0.003436	-0.007862
11.7000	1166.655	64.200	53.599	119.122	-0.577	20.300	2221.012	-0.004494	-0.003752	-0.008339
11.8000	1219.240	68.188	56.796	124.764	-0.578	20.299	2321.119	-0.004773	-0.003976	-0.008734
11.9000	1262.446	71.843	59.976	129.487	-0.585	20.299	2403.374	-0.005029	-0.004198	-0.009064
12.0000	1297.628	74.733	62.757	133.598	-0.591	20.299	2470.350	-0.005231	-0.004393	-0.009352
12.1000	1322.470	76.665	64.786	136.771	-0.589	20.299	2517.643	-0.005367	-0.004535	-0.009574
12.2000	1348.559	79.513	67.036	140.021	-0.588	20.298	2567.310	-0.005566	-0.004692	-0.009801
12.3000	1357.636	80.431	67.690	140.881	-0.585	20.298	2584.591	-0.005630	-0.004738	-0.009862
12.4000	1390.173	82.143	69.598	144.425	-0.589	20.299	2646.532	-0.005750	-0.004872	-0.010110
12.5000	1362.340	81.112	68.847	142.204	-0.585	20.298	2593.546	-0.005678	-0.004819	-0.009954
12.6000	1344.772	80.694	68.791	141.216	-0.587	20.298	2560.101	-0.005649	-0.004815	-0.009885
12.7000	1324.769	78.858	67.941	139.436	-0.600	20.298	2522.020	-0.005520	-0.004756	-0.009760
12.8000	1291.586	77.042	66.079	136.688	-0.585	20.299	2458.849	-0.005393	-0.004625	-0.009568
12.9000	1245.254	73.536	63.717	132.348	-0.592	20.298	2370.644	-0.005148	-0.004460	-0.009264
13.0000	1199.703	69.704	60.242	127.539	-0.586	20.298	2283.926	-0.004879	-0.004217	-0.008928
13.1000	1151.371	66.463	57.365	122.952	-0.585	20.298	2191.916	-0.004652	-0.004016	-0.008607
13.2000	1090.852	62.753	54.029	117.090	-0.587	20.298	2076.702	-0.004393	-0.003782	-0.008196
13.3000	1009.052	56.442	49.233	108.629	-0.580	20.298	1920.977	-0.003951	-0.003446	-0.007604
13.4000	960.556	52.930	45.526	103.183	-0.579	20.298	1828.651	-0.003705	-0.003187	-0.007223
13.5000	885.384	47.565	41.260	95.009	-0.591	20.297	1685.543	-0.003330	-0.002888	-0.006651
13.6000	807.371	41.867	36.537	86.492	-0.577	20.297	1537.027	-0.002931	-0.002558	-0.006054
13.7000	751.706	36.866	33.020	79.599	-0.575	20.297	1431.055	-0.002581	-0.002311	-0.005572
13.8000	665.458	30.639	27.445	69.636	-0.577	20.297	1266.861	-0.002145	-0.001921	-0.004875
13.9000	579.631	24.929	22.776	59.300	-0.584	20.297	1103.468	-0.001745	-0.001594	-0.004151
14.0000	538.197	21.261	19.735	53.949	-0.579	20.297	1024.590	-0.001488	-0.001381	-0.003776
14.1000	477.287	16.217	15.898	46.315	-0.594	20.297	908.632	-0.001135	-0.001113	-0.003242
14.2000	409.599	10.976	12.467	37.673	-0.586	20.297	779.772	-0.000768	-0.000873	-0.002637
14.3000	356.804	5.777	9.257	30.561	-0.583	20.297	679.264	-0.000404	-0.000648	-0.002139
14.4000	306.354	1.651	6.463	23.736	-0.578	20.296	583.220	-0.000116	-0.000452	-0.001662
14.5000	281.587	0.555	4.684	20.094	-0.585	20.296	536.070	-0.000039	-0.000328	-0.001407
14.6000	247.999	-2.474	2.977	14.760	-0.576	20.296	472.126	0.000173	-0.000208	-0.001033
14.7000	226.689	-5.238	1.752	11.838	-0.578	20.296	431.557	0.000367	-0.000123	-0.000829
14.8000	219.054	-7.101	0.781	10.060	-0.581	20.296	417.023	0.000497	-0.000055	-0.000704
14.9000	207.031	-6.700	0.099	8.130	-0.591	20.296	394.135	0.000469	-0.000007	-0.000569
15.0000	224.389	-6.340	0.530	9.450	-0.588	20.296	427.179	0.000444	-0.000037	-0.000661
15.1000	216.695	-6.781	0.056	8.185	-0.591	20.296	412.531	0.000475	-0.000004	-0.000573
15.2000	262.231	-4.062	1.045	13.286	-0.593	20.296	499.220	0.000284	-0.000073	-0.000930
15.3000	278.867	-2.600	1.740	15.592	-0.585	20.295	530.891	0.000182	-0.000122	-0.001091
15.4000	310.036	-0.502	2.616	19.456	-0.580	20.296	590.229	0.000035	-0.000183	-0.001362
15.5000	364.890	3.361	5.240	26.002	-0.581	20.295	694.656	-0.000235	-0.000367	-0.001820
15.6000	435.523	7.627	8.674	33.836	-0.580	20.295	829.124	-0.000534	-0.000607	-0.002369
15.7000	478.204	12.101	10.786	39.423	-0.575	20.295	910.378	-0.000847	-0.000755	-0.002760
15.8000	556.487	17.077	14.888	48.737	-0.584	20.295	1059.408	-0.001195	-0.001042	-0.003412
15.9000	603.015	21.205	18.290	54.296	-0.581	20.295	1147.985	-0.001484	-0.001280	-0.003801
16.0000	672.191	25.513	22.109	62.491	-0.578	20.294	1279.678	-0.001786	-0.001548	-0.004374
16.1000	756.064	32.792	26.959	72.552	-0.578	20.294	1439.352	-0.002295	-0.001887	-0.005079
16.2000	822.580	37.563	31.228	79.891	-0.583	20.294	1565.981	-0.002629	-0.002186	-0.005592
16.3000	904.740	43.218	36.312	89.117	-0.591	20.294	1722.393	-0.003025	-0.002542	-0.006238
16.4000	958.362	48.343	39.940	95.926	-0.583	20.294	1824.474	-0.003384	-0.002796	-0.006715
16.5000	1035.442	54.250	44.316	104.336	-0.580	20.294	1971.216	-0.003798	-0.003102	-0.007304
16.6000	1084.931	57.945	48.470	110.380	-0.588	20.293	2065.430	-0.004056	-0.003393	-0.007727
16.7000	1153.145	63.310	52.612	117.689	-0.579	20.294	2195.292	-0.004432	-0.003683	-0.008238
16.8000	1216.955	68.326	56.435	124.235	-0.576	20.293	2316.771	-0.004783	-0.003950	-0.008696
16.9000	1258.900	71.676	60.364	129.556	-0.587	20.293	2396.622	-0.005017	-0.004225	-0.009069
17.0000	1314.370	76.832	63.829	135.254	-0.583	20.293	2502.222	-0.005378	-0.004468	-0.009468
17.1000	1321.012	76.319	64.550	136.577	-0.589	20.293	2514.868	-0.005342	-0.004519	-0.009560
17.2000	1354.586	79.221	66.826	140.186	-0.600	20.292	2578.783	-0.005545	-0.004678	-0.009813
17.3000	1359.109	80.528	67.162	141.048	-0.585	20.292	2587.395	-0.005637	-0.004701	-0.009873
17.4000	1362.686	80.903	68.525	141.897	-0.585	20.292	2594.204	-0.005663	-0.004797	-0.009933
17.5000	1368.276	81.029	68.540	142.481	-0.577	20.292	2604.847	-0.005672	-0.004798	-0.009974
17.6000	1343.239	80.973	68.537	140.674	-0.580	20.292	2557.182	-0.005668	-0.004798	-0.009847
17.7000	1327.955	78.972	67.719	139.588	-0.592	20.292	2528.086	-0.005528	-0.004740	-0.009771
17.8000	1292.143	76.861	65.743	136.519	-0.569	20.291	2459.908	-0.005380	-0.004602	-0.009556
17.9000	1250.875	74.707	63.800	132.751	-0.565	20.292	2381.344	-0.005229	-0.004466	-0.009293
18.0000	1195.179	70.662	60.477	127.052	-0.568	20.291	2275.314	-0.004946	-0.004233	-0.008894
18.1000	1150.124	67.048	57.713	122.648	-0.560	20.291	2189.541	-0.004693	-0.004040	-0.008585
18.2000	1072.172	61.115	52.433	114.937	-0.576	20.291	2041.140	-0.004278	-0.003670	-0.008046
18.3000	1042.506	59.198	50.779	111.989	-0.571	20.291	1984.663	-0.004144	-0.003555	-0.007839
18.4000	954.740	53.390	45.291	102.431	-0.580	20.291	1817.579	-0.003737	-0.003170	-0.007170
18.5000	869.769	45.774	40.343	93.357	-0.571	20.291	1655.817	-0.003204	-0.002824	-0.006535
18.6000	816.223	41.826	36.605	86.938	-0.573	20.290	1553.879	-0.002928	-0.002562	-0.006086
18.7000	740.780	35.767	32.117	78.277	-0.588	20.289	1410.255	-0.002504	-0.002248	-0.005479
18.8000	649.302	29.194	26.876	68.091	-0.573	20.289	1236.105	-0.002044	-0.001881	-0.004766
18.9000	593.577	24.443	22.904	60.880	-0.584	20.290	1130.018	-0.001711	-0.001603	-0.004262
19.0000	547.846	21.608	20.332	54.932	-0.576	20.289	1042.957	-0.001513	-0.001423	-0.003845
19.1000	462.695	14.423	15.385	44.468	-0.568	20.290	880.852	-0.001010	-0.001077	-0.003113
19.2000	423.005	11.684	12.299	38.923	-0.574	20.289	805.292	-0.000818	-0.000861	-0.002725
19.3000	360.306	6.873	8.883	30.727	-0.581	20.289	685.930	-0.000481	-0.000622	-0.002151
19.4000	309.660	1.289	6.534	24.222	-0.584	20.289	589.514	-0.000090	-0.000457	-0.001696
19.5000	276.553	-0.584	4.364	19.719	-0.583	20.289	526.485	0.000041	-0.000305	-0.001380
19.6000	241.461	-4.700	2.086	13.815	-0.572	20.289	459.681	0.000329	-0.000146	-0.000967
19.7000	212.757	-6.949	1.155	9.951	-0.572	20.288	405.035	0.000486	-0.000081	-0.000697
19.8000	213.358	-7.922	0.754	9.216	-0.578	20.288	406.179	0.000555	-0.000053	-0.000645
19.9000	210.488	-7.881	-0.082	8.104	-0.575	20.288	400.715	0.000552	0.000006	-0.000567
20.0000	211.705	-7.354	0.348	7.851	-0.579	20.288	403.032	0.000515	-0.000024	-0.000550
20.1000	225.742	-7.728	0.710	9.225	-0.580	20.288	429.754	0.000541	-0.000050	-0.000646
20.2000	254.626	-4.768	0.502	12.408	-0.580	20.288	484.743	0.000334	-0.000035	-0.000869
20.3000	272.630	-2.807	1.116	14.622	-0.581	20.288	519.018	0.000197	-0.000078	-0.001024
20.4000	323.667	0.816	3.604	20.901	-0.578	20.287	616.179	-0.000057	-0.000252	-0.001463
20.5000	367.024	2.529	5.128	26.110	-0.585	20.287	698.719	-0.000177	-0.000359	-0.001828
20.6000	418.391	7.752	7.464	32.227	-0.585	20.287	796.509	-0.000543	-0.000522	-0.002256
20.7000	488.844	11.946	11.452	40.536	-0.583	20.288	930.634	-0.000836	-0.000802	-0.002838
20.8000	548.928	17.591	14.469	47.943	-0.572	20.287	1045.017	-0.001231	-0.001013	-0.003356
20.9000	603.330	20.496	17.649	54.476	-0.581	20.287	1148.586	-0.001435	-0.001235	-0.003813
21.0000	684.048	26.697	22.612	63.702	-0.591	20.286	1302.252	-0.001869	-0.001583	-0.004459
21.1000	755.523	31.836	26.974	72.163	-0.581	20.287	1438.322	-0.002228	-0.001888	-0.005051
21.2000	836.692	38.949	31.519	81.198	-0.577	20.286	1592.846	-0.002726	-0.002206	-0.005684
21.3000	890.644	42.522	35.535	87.829	-0.582	20.286	1695.557	-0.002977	-0.002487	-0.006148
21.4000	983.865	50.013	41.594	98.473	-0.592	20.286	1873.026	-0.003501	-0.002912	-0.006893
21.5000	1019.858	52.596	43.482	102.820	-0.580	20.286	1941.547	-0.003682	-0.003044	-0.007197
21.6000	1107.534	58.963	49.026	112.409	-0.572	20.286	2108.459	-0.004127	-0.003432	-0.007869
21.7000	1155.008	63.200	52.794	117.842	-0.588	20.286	2198.839	-0.004424	-0.003696	-0.008249
21.8000	1213.664	68.145	56.462	124.192	-0.588	20.286	2310.505	-0.004770	-0.003952	-0.008693
21.9000	1256.630	71.383	59.600	129.209	-0.583	20.286	2392.302	-0.004997	-0.004172	-0.009045
22.0000	1286.627	75.122	62.188	132.597	-0.590	20.286	2449.408	-0.005259	-0.004353	-0.009282
22.1000	1318.232	75.859	64.646	136.478	-0.590	20.285	2509.575	-0.005310	-0.004525	-0.009553
22.2000	1356.344	78.971	66.591	140.687	-0.596	20.286	2582.130	-0.005528	-0.004661	-0.009848
22.3000	1393.750	83.238	69.375	143.995	-0.591	20.285	2653.341	-0.005827	-0.004856	-0.010080
22.4000	1366.218	80.361	68.956	142.426	-0.581	20.285	2600.927	-0.005625	-0.004827	-0.009970
22.5000	1362.881	81.292	68.832	142.355	-0.587	20.285	2594.576	-0.005690	-0.004818	-0.009965
22.6000	1350.468	80.179	68.624	141.690	-0.581	20.285	2570.944	-0.005613	-0.004804	-0.009918
22.7000	1326.648	79.890	68.080	139.755	-0.592	20.285	2525.597	-0.005592	-0.004766	-0.009783
22.8000	1292.849	76.428	66.006	136.715	-0.577	20.285	2461.252	-0.005350	-0.004620	-0.009570
22.9000	1255.353	74.886	64.286	133.181	-0.598	20.285	2389.870	-0.005242	-0.004500	-0.009323
23.0000	1197.554	69.412	60.825	127.443	-0.597	20.285	2279.835	-0.004859	-0.004258	-0.008921
23.1000	1165.588	67.256	58.548	124.485	-0.583	20.285	2218.981	-0.004708	-0.004098	-0.008714
23.2000	1099.974	64.089	54.488	118.091	-0.597	20.285	2094.069	-0.004486	-0.003814	-0.008266
23.3000	1013.681	58.350	49.623	109.438	-0.583	20.285	1929.789	-0.004085	-0.003474	-0.007661
23.4000	972.684	53.751	46.527	104.377	-0.584	20.284	1851.740	-0.003763	-0.003257	-0.007306
23.5000	887.758	47.538	40.898	95.119	-0.593	20.284	1690.063	-0.003328	-0.002863	-0.006658
23.6000	822.610	42.702	37.009	88.102	-0.590	20.284	1566.038	-0.002989	-0.002591	-0.006167
23.7000	732.184	36.433	32.045	77.806	-0.592	20.284	1393.890	-0.002550	-0.002243	-0.005446
23.8000	682.350	32.767	28.420	71.276	-0.585	20.284	1299.019	-0.002294	-0.001989	-0.004989
23.9000	599.062	25.666	23.390	62.033	-0.591	20.284	1140.461	-0.001797	-0.001637	-0.004342
24.0000	525.994	19.578	19.389	52.876	-0.593	20.285	1001.358	-0.001370	-0.001357	-0.003701
24.1000	461.507	14.561	15.358	44.857	-0.591	20.285	878.592	-0.001019	-0.001075	-0.003140
24.2000	411.808	10.448	12.453	38.228	-0.584	20.285	783.978	-0.000731	-0.000872	-0.002676
24.3000	356.985	5.459	9.229	30.895	-0.592	20.285	679.607	-0.000382	-0.000646	-0.002163
24.4000	310.727	1.721	6.659	24.652	-0.585	20.284	591.545	-0.000120	-0.000466	-0.001726
24.5000	288.981	-0.944	4.766	21.290	-0.588	20.285	550.146	0.000066	-0.000334	-0.001490
24.6000	243.355	-4.421	2.573	14.662	-0.584	20.285	463.285	0.000309	-0.000180	-0.001026
24.7000	222.646	-5.089	1.627	11.337	-0.591	20.284	423.861	0.000356	-0.000114	-0.000794
24.8000	210.969	-8.076	0.433	8.713	-0.589	20.284	401.630	0.000565	-0.000030	-0.000610
24.9000	211.224	-7.994	0.265	8.588	-0.592	20.284	402.117	0.000560	-0.000019	-0.000601
25.0000	212.111	-8.090	0.543	8.422	-0.593	20.284	403.805	0.000566	-0.000038	-0.000590
25.1000	224.134	-6.852	0.627	9.212	-0.596	20.284	426.693	0.000480	-0.000044	-0.000645
25.2000	250.749	-5.169	0.781	12.130	-0.588	20.284	477.362	0.000362	-0.000055	-0.000849
25.3000	284.773	-2.796	1.865	16.646	-0.589	20.284	542.135	0.000196	-0.000131	-0.001165
25.4000	315.927	-1.083	3.366	20.358	-0.603	20.283	601.444	0.000076	-0.000236	-0.001425
25.5000	366.798	3.723	5.058	26.141	-0.583	20.284	698.290	-0.000261	-0.000354	-0.001830
25.6000	417.850	6.614	7.910	32.420	-0.585	20.283	795.479	-0.000463	-0.000554	-0.002269
25.7000	484.666	11.919	11.438	40.620	-0.594	20.283	922.680	-0.000834	-0.000801	-0.002843
25.8000	548.477	15.980	14.817	47.930	-0.588	20.283	1044.159	-0.001119	-0.001037	-0.003355
25.9000	620.042	22.330	18.774	56.597	-0.584	20.284	1180.401	-0.001563	-0.001314	-0.003962
26.0000	672.131	27.761	22.346	62.798	-0.597	20.283	1279.564	-0.001943	-0.001564	-0.004396
26.1000	761.700	32.182	27.376	72.954	-0.584	20.283	1450.081	-0.002253	-0.001916	-0.005107
26.2000	838.285	38.367	32.198	82.130	-0.576	20.283	1595.879	-0.002686	-0.002254	-0.005749
26.3000	906.799	43.690	36.314	90.049	-0.586	20.283	1726.313	-0.003058	-0.002542	-0.006303
26.4000	976.050	49.345	40.942	98.055	-0.586	20.284	1858.149	-0.003454	-0.002866	-0.006864
26.5000	1010.570	51.956	45.096	103.196	-0.592	20.283	1923.866	-0.003637	-0.003157	-0.007224
26.6000	1099.584	58.544	48.901	111.978	-0.589	20.283	2093.325	-0.004098	-0.003423	-0.007838
26.7000	1152.664	63.183	52.751	118.187	-0.586	20.283	2194.376	-0.004423	-0.003693	-0.008273
26.8000	1222.230	69.146	57.267	125.389	-0.581	20.283	2326.813	-0.004840	-0.004009	-0.008777
26.9000	1254.316	72.438	59.839	129.502	-0.590	20.283	2387.896	-0.005071	-0.004189	-0.009065
27.0000	1306.149	75.637	63.592	134.893	-0.587	20.283	2486.572	-0.005295	-0.004451	-0.009443
27.1000	1323.492	76.444	64.452	137.158	-0.593	20.283	2519.588	-0.005351	-0.004512	-0.009601
27.2000	1343.374	78.914	65.882	139.463	-0.586	20.283	2557.440	-0.005524	-0.004612	-0.009762
27.3000	1367.811	80.293	68.316	142.202	-0.591	20.283	2603.960	-0.005621	-0.004782	-0.009954
27.4000	1362.160	81.905	68.246	141.925	-0.581	20.282	2593.203	-0.005733	-0.004777	-0.009935
27.5000	1355.487	80.346	68.609	142.021	-0.602	20.283	2580.500	-0.005624	-0.004803	-0.009941
27.6000	1350.588	80.431	68.664	141.787	-0.585	20.283	2571.173	-0.005630	-0.004806	-0.009925
27.7000	1289.347	76.428	66.549	136.839	-0.593	20.283	2454.586	-0.005350	-0.004658	-0.009579
27.8000	1293.856	76.458	66.242	136.994	-0.580	20.282	2463.169	-0.005352	-0.004637	-0.009590
27.9000	1253.324	73.969	64.022	133.378	-0.600	20.283	2386.007	-0.005178	-0.004482	-0.009336
28.0000	1198.711	71.552	61.033	128.221	-0.598	20.283	2282.038	-0.005009	-0.004272	-0.008975
28.1000	1148.621	66.423	57.657	123.095	-0.587	20.283	2186.680	-0.004650	-0.004036	-0.008617
28.2000	1111.381	64.548	54.973	119.287	-0.591	20.283	2115.784	-0.004518	-0.003848	-0.008350
28.3000	1025.478	57.529	49.624	110.516	-0.584	20.284	1952.248	-0.004027	-0.003474	-0.007736
28.4000	946.294	51.510	45.305	102.293	-0.584	20.283	1801.500	-0.003606	-0.003171	-0.007160
28.5000	898.188	48.942	41.802	96.469	-0.588	20.283	1709.919	-0.003426	-0.002926	-0.006753
28.6000	825.375	43.064	37.159	88.103	-0.584	20.284	1571.302	-0.003014	-0.002601	-0.006167
28.7000	741.922	35.949	32.421	79.084	-0.592	20.283	1412.430	-0.002516	-0.002269	-0.005536
28.8000	668.584	31.613	27.862	70.165	-0.584	20.283	1272.812	-0.002213	-0.001950	-0.004912
28.9000	594.584	24.899	23.542	61.240	-0.579	20.284	1131.935	-0.001743	-0.001648	-0.004287
29.0000	530.307	19.941	19.415	53.293	-0.584	20.284	1009.569	-0.001396	-0.001359	-0.003731
29.1000	460.275	15.284	15.581	44.745	-0.595	20.284	876.245	-0.001070	-0.001091	-0.003132
29.2000	427.799	12.198	12.970	40.092	-0.584	20.284	814.419	-0.000854	-0.000908	-0.002806
29.3000	355.302	5.195	9.120	30.739	-0.575	20.283	676.403	-0.000364	-0.000638	-0.002152
29.4000	294.842	0.679	5.921	23.024	-0.574	20.284	561.304	-0.000048	-0.000414	-0.001612
29.5000	281.257	-0.584	4.851	20.248	-0.591	20.284	535.440	0.000041	-0.000340	-0.001417
29.6000	245.745	-4.228	2.643	14.829	-0.576	20.284	467.834	0.000296	-0.000185	-0.001038
29.7000	222.511	-5.629	1.587	11.270	-0.586	20.284	423.603	0.000394	-0.000111	-0.000789
29.8000	209.827	-7.339	0.393	8.743	-0.581	20.284	399.456	0.000514	-0.000027	-0.000612
29.9000	202.673	-8.731	0.140	7.643	-0.582	20.284	385.838	0.000611	-0.000010	-0.000535
30.0000	211.119	-8.494	-0.208	8.395	-0.584	20.284	401.917	0.000595	0.000015	-0.000588
30.1000	221.699	-6.533	0.364	9.047	-0.590	20.284	422.058	0.000457	-0.000025	-0.000633
30.2000	237.479	-5.853	0.614	10.921	-0.586	20.284	452.099	0.000410	-0.000043	-0.000764
30.3000	288.245	-3.172	1.655	16.897	-0.588	20.284	548.744	0.000222	-0.000116	-0.001183
30.4000	311.900	-0.695	2.671	19.746	-0.589	20.284	593.777	0.000049	-0.000187	-0.001382
30.5000	371.472	3.516	5.824	26.984	-0.591	20.284	707.188	-0.000246	-0.000408	-0.001889
30.6000	407.796	6.806	7.103	31.561	-0.580	20.284	776.339	-0.000476	-0.000497	-0.002209
30.7000	487.687	12.101	11.299	40.828	-0.582	20.284	928.431	-0.000847	-0.000791	-0.002858
30.8000	538.693	17.118	14.943	47.444	-0.587	20.284	1025.534	-0.001198	-0.001046	-0.003321
30.9000	617.127	21.275	18.957	56.403	-0.583	20.284	1174.850	-0.001489	-0.001327	-0.003948
31.0000	671.018	26.292	22.291	63.006	-0.576	20.284	1277.447	-0.001840	-0.001560	-0.004410
31.1000	775.466	34.266	27.835	74.375	-0.582	20.283	1476.288	-0.002399	-0.001948	-0.005206
31.2000	831.883	39.060	31.673	81.436	-0.592	20.284	1583.691	-0.002734	-0.002217	-0.005701
31.3000	886.766	43.356	36.121	88.314	-0.585	20.284	1688.175	-0.003035	-0.002528	-0.006182
31.4000	963.591	48.902	40.231	97.317	-0.581	20.284	1834.431	-0.003423	-0.002816	-0.006812
31.5000	1039.981	54.434	45.095	105.347	-0.589	20.284	1979.856	-0.003810	-0.003157	-0.007374
31.6000	1127.551	60.322	50.626	114.730	-0.583	20.285	2146.568	-0.004223	-0.003544	-0.008031
31.7000	1155.985	63.771	52.781	118.577	-0.588	20.284	2200.699	-0.004464	-0.003695	-0.008300
31.8000	1214.521	67.811	56.908	124.914	-0.570	20.285	2312.136	-0.004747	-0.003984	-0.008744
31.9000	1257.562	71.815	60.282	129.609	-0.581	20.284	2394.075	-0.005027	-0.004220	-0.009073
32.0000	1293.465	74.496	62.883	133.710	-0.572	20.284	2462.425	-0.005215	-0.004402	-0.009360
32.1000	1328.496	77.513	64.563	137.436	-0.580	20.285	2529.116	-0.005426	-0.004519	-0.009621
32.2000	1361.709	80.125	67.384	141.077	-0.578	20.285	2592.344	-0.005609	-0.004717	-0.009875
32.3000	1370.501	81.697	68.178	142.341	-0.587	20.285	2609.081	-0.005719	-0.004772	-0.009964
32.4000	1359.921	80.278	68.288	141.926	-0.578	20.285	2588.940	-0.005619	-0.004780	-0.009935
32.5000	1358.553	80.904	68.332	142.202	-0.572	20.285	2586.336	-0.005663	-0.004783	-0.009954
32.6000	1346.575	80.485	68.011	141.256	-0.580	20.285	2563.534	-0.005634	-0.004761	-0.009888
32.7000	1319.043	79.403	67.244	139.394	-0.575	20.285	2511.120	-0.005558	-0.004707	-0.009758
32.8000	1291.737	76.944	65.717	136.908	-0.572	20.285	2459.135	-0.005386	-0.004600	-0.009584
32.9000	1232.089	73.038	63.246	131.502	-0.574	20.285	2345.581	-0.005113	-0.004427	-0.009205
33.0000	1215.633	71.482	62.077	129.779	-0.565	20.285	2314.253	-0.005004	-0.004345	-0.009085
33.1000	1138.432	66.173	56.893	122.316	-0.568	20.285	2167.282	-0.004632	-0.003983	-0.008562
33.2000	1088.222	62.018	53.750	116.992	-0.561	20.285	2071.695	-0.004341	-0.003762	-0.008189
33.3000	1025.959	57.653	50.166	110.614	-0.560	20.285	1953.163	-0.004036	-0.003512	-0.007743
33.4000	958.016	52.623	45.763	103.100	-0.544	20.286	1823.816	-0.003684	-0.003203	-0.007217
33.5000	892.733	47.524	41.527	95.843	-0.541	20.285	1699.533	-0.003327	-0.002907	-0.006709
33.6000	830.124	43.522	37.685	89.255	-0.572	20.286	1580.343	-0.003047	-0.002638	-0.006248
33.7000	735.881	36.685	32.156	78.430	-0.561	20.285	1400.928	-0.002568	-0.002251	-0.005490
33.8000	668.313	30.889	27.863	70.263	-0.566	20.285	1272.297	-0.002162	-0.001950	-0.004918
33.9000	590.827	25.094	23.487	61.059	-0.573	20.286	1124.783	-0.001757	-0.001644	-0.004274
34.0000	530.112	19.702	19.444	53.366	-0.584	20.285	1009.197	-0.001379	-0.001361	-0.003736
34.1000	466.241	14.798	15.317	45.372	-0.570	20.286	887.604	-0.001036	-0.001072	-0.003176
34.2000	403.513	10.380	11.967	37.507	-0.570	20.286	768.185	-0.000727	-0.000838	-0.002625
34.3000	356.038	6.375	9.398	30.990	-0.574	20.286	677.805	-0.000446	-0.000658	-0.002169
34.4000	318.963	2.513	6.867	26.030	-0.573	20.286	607.224	-0.000176	-0.000481	-0.001822
34.5000	272.721	-0.904	4.101	19.553	-0.572	20.287	519.190	0.000063	-0.000287	-0.001369
34.6000	241.732	-3.767	3.101	14.899	-0.572	20.286	460.196	0.000264	-0.000217	-0.001043
34.7000	215.372	-6.476	1.462	10.797	-0.556	20.286	410.013	0.000453	-0.000102	-0.000756
34.8000	217.461	-6.589	0.989	10.615	-0.579	20.287	413.990	0.000461	-0.000069	-0.000743
34.9000	200.524	-8.186	0.224	7.781	-0.571	20.287	381.746	0.000573	-0.000016	-0.000545
35.0000	197.984	-8.299	-0.111	6.782	-0.572	20.286	376.911	0.000581	0.000008	-0.000475
35.1000	225.216	-7.074	-0.097	10.076	-0.554	20.286	428.753	0.000495	0.000007	-0.000705
35.2000	238.516	-5.811	0.446	11.115	-0.584	20.287	454.073	0.000407	-0.000031	-0.000778
35.3000	275.125	-3.198	1.461	15.673	-0.569	20.286	523.767	0.000224	-0.000102	-0.001097
35.4000	316.408	-0.376	2.919	20.816	-0.582	20.287	602.360	0.000026	-0.000204	-0.001457
35.5000	365.806	3.291	4.907	26.305	-0.574	20.287	696.402	-0.000230	-0.000344	-0.001841
35.6000	407.195	6.655	7.798	31.906	-0.583	20.287	775.194	-0.000466	-0.000546	-0.002233
35.7000	478.910	11.588	11.507	40.272	-0.569	20.287	911.722	-0.000811	-0.000805	-0.002819
35.8000	545.982	16.715	14.609	47.890	-0.581	20.287	1039.410	-0.001170	-0.001023	-0.003352
35.9000	610.484	21.843	18.693	55.460	-0.572	20.287	1162.205	-0.001529	-0.001309	-0.003882
36.0000	685.401	27.305	22.821	64.301	-0.583	20.288	1304.827	-0.001911	-0.001597	-0.004501
36.1000	776.638	33.558	28.169	74.888	-0.569	20.287	1478.519	-0.002349	-0.001972	-0.005242
36.2000	819.499	37.560	31.034	80.265	-0.571	20.287	1560.116	-0.002629	-0.002172	-0.005619
36.3000	913.998	44.397	36.783	90.771	-0.569	20.287	1740.017	-0.003108	-0.002575	-0.006354
36.4000	963.997	48.386	40.162	97.053	-0.580	20.288	1835.203	-0.003387	-0.002811	-0.006794
36.5000	1050.215	55.085	45.414	106.210	-0.561	20.288	1999.340	-0.003856	-0.003179	-0.007435
36.6000	1093.467	58.820	48.831	111.615	-0.565	20.288	2081.680	-0.004117	-0.003418	-0.007813
36.7000	1165.483	64.018	53.528	119.218	-0.566	20.288	2218.781	-0.004481	-0.003747	-0.008345
36.8000	1208.164	67.702	56.739	124.373	-0.560	20.289	2300.034	-0.004739	-0.003972	-0.008706
36.9000	1267.331	72.593	60.715	130.656	-0.560	20.289	2412.672	-0.005082	-0.004250	-0.009146
37.0000	1298.139	75.274	63.189	134.532	-0.572	20.289	2471.323	-0.005269	-0.004423	-0.009417
37.1000	1320.817	76.805	64.634	137.075	-0.581	20.288	2514.496	-0.005376	-0.004524	-0.009595
37.2000	1352.647	80.333	67.243	140.589	-0.573	20.289	2575.092	-0.005623	-0.004707	-0.009841
37.3000	1355.427	80.320	67.564	141.272	-0.565	20.289	2580.385	-0.005622	-0.004730	-0.009889
37.4000	1375.851	81.600	69.111	143.509	-0.572	20.289	2619.267	-0.005712	-0.004838	-0.010046
37.5000	1359.154	81.725	68.636	142.773	-0.573	20.288	2587.481	-0.005721	-0.004805	-0.009994
37.6000	1343.915	80.236	68.523	141.424	-0.569	20.289	2558.470	-0.005617	-0.004797	-0.009900
37.7000	1323.462	78.944	67.885	139.604	-0.564	20.289	2519.531	-0.005526	-0.004752	-0.009772
37.8000	1305.458	77.194	65.855	137.588	-0.574	20.289	2485.256	-0.005404	-0.004610	-0.009631
37.9000	1246.847	74.512	63.814	132.750	-0.569	20.289	2373.676	-0.005216	-0.004467	-0.009292
38.0000	1216.760	71.857	62.131	129.848	-0.563	20.289	2316.399	-0.005030	-0.004349	-0.009089
38.1000	1156.691	67.088	57.962	123.774	-0.572	20.289	2202.044	-0.004696	-0.004057	-0.008664
38.2000	1087.636	62.308	53.626	117.356	-0.570	20.289	2070.580	-0.004362	-0.003754	-0.008215
38.3000	1026.606	57.822	49.847	110.447	-0.566	20.290	1954.393	-0.004048	-0.003489	-0.007731
38.4000	959.879	52.916	46.056	103.628	-0.562	20.290	1827.364	-0.003704	-0.003224	-0.007254
38.5000	893.920	47.914	41.497	96.358	-0.577	20.290	1701.794	-0.003354	-0.002905	-0.006745
38.6000	819.664	42.548	37.240	87.798	-0.570	20.290	1560.431	-0.002978	-0.002607	-0.006146
38.7000	753.074	37.254	33.394	80.310	-0.568	20.290	1433.659	-0.002608	-0.002338	-0.005622
38.8000	667.246	30.807	28.046	70.443	-0.569	20.290	1270.266	-0.002156	-0.001963	-0.004931
38.9000	589.820	25.289	23.181	60.894	-0.581	20.290	1122.866	-0.001770	-0.001623	-0.004263
39.0000	533.433	20.608	19.721	53.949	-0.575	20.290	1015.520	-0.001443	-0.001380	-0.003776
39.1000	450.341	14.046	15.067	44.190	-0.558	20.291	857.334	-0.000983	-0.001055	-0.003093
39.2000	394.992	9.768	11.451	36.605	-0.565	20.290	751.963	-0.000684	-0.000802	-0.002562
39.3000	362.034	6.666	9.742	31.601	-0.577	20.290	689.220	-0.000467	-0.000682	-0.002212
39.4000	304.130	1.555	6.393	24.528	-0.576	20.291	578.985	-0.000109	-0.000448	-0.001717
39.5000	268.017	-0.944	4.256	18.844	-0.578	20.291	510.235	0.000066	-0.000298	-0.001319
39.6000	252.733	-2.947	2.865	16.161	-0.556	20.291	481.138	0.000206	-0.000201	-0.001131
39.7000	222.556	-5.283	2.016	12.228	-0.573	20.291	423.689	0.000370	-0.000141	-0.000856
39.8000	214.966	-6.769	1.018	10.103	-0.572	20.292	409.241	0.000474	-0.000071	-0.000707
39.9000	203.094	-7.589	0.140	8.018	-0.577	20.291	386.639	0.000531	-0.000010	-0.000561
40.0000	213.013	-7.463	0.294	9.256	-0.569	20.292	405.521	0.000522	-0.000021	-0.000648
40.1000	216.169	-7.380	-0.027	8.839	-0.562	20.291	411.530	0.000517	0.000002	-0.000619
40.2000	250.539	-5.601	0.323	12.686	-0.564	20.291	476.961	0.000392	-0.000023	-0.000888
40.3000	263.749	-4.044	1.280	14.704	-0.586	20.292	502.110	0.000283	-0.000090	-0.001029
40.4000	310.066	-0.864	3.004	19.651	-0.571	20.292	590.286	0.000060	-0.000210	-0.001376
40.5000	347.382	2.889	5.101	25.279	-0.573	20.292	661.325	-0.000202	-0.000357	-0.001770
40.6000	405.451	7.168	9.232	32.184	-0.579	20.292	771.875	-0.000502	-0.000646	-0.002253
40.7000	471.576	11.839	11.411	39.466	-0.572	20.291	897.760	-0.000829	-0.000799	-0.002763
40.8000	536.123	16.160	14.860	46.956	-0.585	20.292	1020.641	-0.001131	-0.001040	-0.003287
40.9000	588.107	20.467	17.372	53.350	-0.560	20.293	1119.604	-0.001433	-0.001216	-0.003735
41.0000	670.703	26.875	22.485	63.119	-0.567	20.293	1276.846	-0.001881	-0.001574	-0.004418
41.1000	754.276	33.057	27.586	73.150	-0.579	20.293	1435.947	-0.002314	-0.001931	-0.005121
41.2000	837.759	38.394	31.991	82.103	-0.577	20.292	1594.877	-0.002688	-0.002239	-0.005747
41.3000	899.946	43.995	36.467	89.742	-0.574	20.293	1713.266	-0.003080	-0.002553	-0.006282
41.4000	970.189	49.692	41.024	98.028	-0.571	20.293	1846.991	-0.003478	-0.002872	-0.006862
41.5000	1039.966	54.486	45.554	105.584	-0.569	20.293	1979.828	-0.003814	-0.003189	-0.007391
41.6000	1090.071	58.559	48.902	111.170	-0.568	20.293	2075.214	-0.004099	-0.003423	-0.007782
41.7000	1156.767	64.131	53.569	118.772	-0.574	20.294	2202.187	-0.004489	-0.003750	-0.008314
41.8000	1200.680	67.478	57.448	124.027	-0.570	20.294	2285.786	-0.004723	-0.004021	-0.008682
41.9000	1245.945	71.218	60.423	129.376	-0.569	20.294	2371.960	-0.004985	-0.004230	-0.009056
42.0000	1327.069	76.944	64.440	136.936	-0.578	20.294	2526.398	-0.005386	-0.004511	-0.009585
42.1000	1312.987	76.721	64.967	136.742	-0.573	20.294	2499.590	-0.005370	-0.004548	-0.009572
42.2000	1352.046	79.611	67.370	140.798	-0.565	20.295	2573.948	-0.005573	-0.004716	-0.009856
42.3000	1365.286	80.571	68.121	142.023	-0.562	20.295	2599.154	-0.005640	-0.004768	-0.009942
42.4000	1329.774	79.096	68.108	139.798	-0.578	20.295	2531.548	-0.005537	-0.004768	-0.009786
42.5000	1348.800	80.514	69.251	142.009	-0.583	20.294	2567.768	-0.005636	-0.004848	-0.009941
42.6000	1326.903	79.457	68.583	140.352	-0.572	20.295	2526.083	-0.005562	-0.004801	-0.009825
42.7000	1307.186	78.569	67.844	138.894	-0.566	20.296	2488.546	-0.005500	-0.004749	-0.009723
42.8000	1291.872	77.374	67.231	137.476	-0.578	20.295	2459.393	-0.005416	-0.004706	-0.009623
42.9000	1253.850	74.400	64.188	133.514	-0.570	20.295	2387.009	-0.005208	-0.004493	-0.009346
43.0000	1173.238	68.674	59.267	126.391	-0.576	20.296	2233.543	-0.004807	-0.004149	-0.008847
43.1000	1166.580	68.174	58.661	125.194	-0.584	20.296	2220.869	-0.004772	-0.004106	-0.008764
43.2000	1082.977	61.517	52.975	116.479	-0.577	20.296	2061.710	-0.004306	-0.003708	-0.008153
43.3000	1014.388	57.375	49.735	109.991	-0.576	20.296	1931.133	-0.004016	-0.003481	-0.007699
43.4000	964.809	53.848	46.527	104.114	-0.574	20.297	1836.748	-0.003769	-0.003257	-0.007288
43.5000	896.895	48.386	42.316	96.927	-0.579	20.297	1707.458	-0.003387	-0.002962	-0.006785
43.6000	826.337	43.118	37.535	88.547	-0.583	20.297	1573.133	-0.003018	-0.002627	-0.006198
43.7000	739.533	36.546	32.740	78.945	-0.570	20.297	1407.881	-0.002558	-0.002292	-0.005526
43.8000	650.144	30.069	27.515	69.053	-0.587	20.297	1237.707	-0.002105	-0.001926	-0.004834
43.9000	615.008	26.874	24.767	63.980	-0.577	20.297	1170.816	-0.001881	-0.001734	-0.004479
44.0000	506.893	18.995	18.638	51.262	-0.581	20.297	964.994	-0.001330	-0.001305	-0.003588
44.1000	473.635	15.550	16.024	46.331	-0.581	20.298	901.680	-0.001089	-0.001122	-0.003243
44.2000	409.449	10.364	12.495	38.506	-0.575	20.298	779.486	-0.000725	-0.000875	-0.002695
44.3000	370.570	7.558	9.727	32.685	-0.576	20.298	705.471	-0.000529	-0.000681	-0.002288
44.4000	291.416	1.415	6.200	22.969	-0.586	20.298	554.781	-0.000099	-0.000434	-0.001608
44.5000	263.238	-1.390	4.573	18.566	-0.563	20.299	501.137	0.000097	-0.000320	-0.001300
44.6000	240.575	-3.810	2.796	15.508	-0.570	20.298	457.993	0.000267	-0.000196	-0.001086
44.7000	212.772	-5.908	1.866	10.575	-0.583	20.299	405.064	0.000414	-0.000131	-0.000740
44.8000	214.981	-6.824	1.641	10.270	-0.568	20.299	409.269	0.000478	-0.000115	-0.000719
44.9000	207.001	-7.533	0.572	9.047	-0.573	20.299	394.077	0.000527	-0.000040	-0.000633
45.0000	206.385	-7.729	0.071	7.852	-0.578	20.299	392.904	0.000541	-0.000005	-0.000550
45.1000	223.908	-7.199	0.294	9.728	-0.570	20.299	426.264	0.000504	-0.000021	-0.000681
45.2000	243.235	-5.158	0.754	12.659	-0.577	20.299	463.057	0.000361	-0.000053	-0.000886
45.3000	260.938	-3.990	1.308	14.190	-0.576	20.299	496.759	0.000279	-0.000092	-0.000993
45.4000	303.589	-0.364	4.031	19.914	-0.572	20.300	577.955	0.000025	-0.000282	-0.001394
45.5000	381.992	4.654	6.660	28.987	-0.577	20.300	727.215	-0.000326	-0.000466	-0.002029
45.6000	406.834	6.820	7.618	31.768	-0.575	20.301	774.508	-0.000477	-0.000533	-0.002224
45.7000	461.763	11.240	11.188	38.769	-0.573	20.300	879.078	-0.000787	-0.000783	-0.002714
45.8000	527.602	16.216	14.773	46.817	-0.561	20.300	1004.419	-0.001135	-0.001034	-0.003277
45.9000	588.512	20.412	17.915	53.447	-0.573	20.301	1120.377	-0.001429	-0.001254	-0.003741
46.0000	670.748	26.902	23.375	63.883	-0.564	20.301	1276.932	-0.001883	-0.001636	-0.004472
46.1000	758.980	32.778	27.806	73.553	-0.571	20.301	1444.902	-0.002294	-0.001946	-0.005149
46.2000	822.835	38.241	31.617	80.905	-0.571	20.302	1566.467	-0.002677	-0.002213	-0.005663
46.3000	894.701	43.801	36.368	89.255	-0.565	20.302	1703.281	-0.003066	-0.002546	-0.006248
46.4000	949.886	47.760	40.161	95.940	-0.558	20.302	1808.338	-0.003343	-0.002811	-0.006716
46.5000	1034.601	54.752	45.986	105.765	-0.560	20.303	1969.614	-0.003833	-0.003219	-0.007404
46.6000	1095.300	59.657	49.416	112.545	-0.563	20.302	2085.171	-0.004176	-0.003459	-0.007878
46.7000	1143.376	62.739	53.240	117.786	-0.574	20.302	2176.695	-0.004392	-0.003727	-0.008245
46.8000	1214.250	68.548	57.477	125.403	-0.558	20.302	2311.621	-0.004798	-0.004023	-0.008778
46.9000	1268.818	72.883	61.352	130.698	-0.559	20.303	2415.504	-0.005102	-0.004295	-0.009149
47.0000	1291.842	75.137	63.579	134.183	-0.570	20.302	2459.335	-0.005260	-0.004451	-0.009393
47.1000	1333.275	77.846	65.660	138.519	-0.561	20.303	2538.214	-0.005449	-0.004596	-0.009696
47.2000	1348.905	79.513	67.162	140.131	-0.553	20.303	2567.968	-0.005566	-0.004701	-0.009809
47.3000	1358.523	80.861	68.192	141.981	-0.561	20.303	2586.279	-0.005660	-0.004773	-0.009939
47.4000	1362.310	81.014	68.844	142.010	-0.569	20.303	2593.489	-0.005671	-0.004819	-0.009941
47.5000	1355.728	81.475	69.222	142.552	-0.562	20.303	2580.957	-0.005703	-0.004846	-0.009979
47.6000	1302.918	78.206	67.690	138.146	-0.566	20.303	2480.421	-0.005474	-0.004738	-0.009670
47.7000	1338.926	80.138	68.679	141.370	-0.572	20.303	2548.971	-0.005610	-0.004808	-0.009896
47.8000	1294.953	77.374	67.064	137.698	-0.562	20.303	2465.258	-0.005416	-0.004694	-0.009639
47.9000	1255.353	74.580	64.992	134.071	-0.561	20.303	2389.870	-0.005221	-0.004549	-0.009385
48.0000	1197.373	70.396	61.021	128.374	-0.552	20.304	2279.491	-0.004928	-0.004271	-0.008986
48.1000	1158.750	67.476	58.508	124.748	-0.557	20.304	2205.963	-0.004723	-0.004096	-0.008732
48.2000	1071.856	61.392	53.529	116.119	-0.570	20.304	2040.539	-0.004297	-0.003747	-0.008128
48.3000	1041.514	58.754	50.919	112.324	-0.544	20.305	1982.775	-0.004113	-0.003564	-0.007863
48.4000	969.392	53.207	46.584	104.737	-0.568	20.304	1845.474	-0.003725	-0.003261	-0.007332
48.5000	909.384	49.344	41.568	97.583	-0.569	20.304	1731.234	-0.003454	-0.002910	-0.006831
48.6000	814.885	42.242	36.909	87.312	-0.566	20.304	1551.332	-0.002957	-0.002584	-0.006112
48.7000	758.814	37.937	33.478	81.060	-0.564	20.304	1444.588	-0.002656	-0.002343	-0.005674
48.8000	670.492	31.613	28.212	70.930	-0.565	20.304	1276.445	-0.002213	-0.001975	-0.004965
48.9000	601.768	25.847	24.280	62.686	-0.579	20.304	1145.611	-0.001809	-0.001700	-0.004388
49.0000	538.708	20.872	20.207	54.781	-0.554	20.304	1025.562	-0.001461	-0.001414	-0.003835
49.1000	466.091	15.091	15.427	45.330	-0.569	20.305	887.318	-0.001056	-0.001080	-0.003173
49.2000	344.646	5.709	9.177	31.143	-0.563	20.305	656.118	-0.000400	-0.000642	-0.002180
49.3000	358.217	6.751	9.385	31.657	-0.566	20.305	681.953	-0.000473	-0.000657	-0.002216
49.4000	319.654	3.334	7.171	26.054	-0.574	20.305	608.540	-0.000233	-0.000502	-0.001824
49.5000	273.171	-0.849	4.922	19.843	-0.562	20.304	520.048	0.000059	-0.000345	-0.001389
49.6000	228.522	-4.408	2.448	13.550	-0.568	20.305	435.047	0.000309	-0.000171	-0.000948
49.7000	213.088	-6.254	1.574	10.714	-0.554	20.305	405.664	0.000438	-0.000110	-0.000750
49.8000	214.110	-6.379	0.643	10.117	-0.560	20.305	407.610	0.000446	-0.000045	-0.000708
49.9000	317.445	0.138	3.851	20.943	-0.566	20.305	604.334	-0.000010	-0.000270	-0.001466
