# Supplementary material for: Evaluation of a Cold-Mixed High-Performance Polyurethane Mixture
Source: Hindawi journal article supplement (doi:10.1155/2019/1507971), 2019-11-07
Supplement: f1 [file 1507971.f1.zip › 1507971.f1/dynamic modulus data/PUM/specimen1/temp20/zhs-1-20_0.5Hz.csv]

Test Information
****************
Project name	zhs
Operator name	1
Target test temperature	20
Target confining stress	0
Average dynamic strain range from 75 to 125 micro-strain
Contact stress	5
Initial modulus	1000
Axial gauge length	70
Comments
Specimen information
********************
Identification	zhs-1-20
Dimensions	Point 1	Point 2	Point 3	Point 4	Point 5	Point 6	Average	Std Dev.
Diameter (mm)	49.2	49.2	49.3				49.23	0.058
Height (mm)	101.3	101.2	101.3				101.27	0.058
Cross-sectional area (mm�)	1903.7
Conditioning time
Properties/Comments
Test Data	0.5Hz
*********
Test date and time	Mon	Apr 1	2019	2:22 PM
Dynamic modulus (MPa)	12170
Phase angle (Degrees)	3.99
Average temperature (�C)	20.3
Average confining pressure (kPa)	-0.6
Average micro-strain	98
Load drift (%)	0.2
Load standard error (%)	2.2
Average deformation drift (%)	-2.1
Average deformation standard error (%)	3.0
Deformation uniformity (%)	27.9
Phase uniformity (Degrees)	0.9
Conditioning Cycles
Time (sec)	Axial stress (kPa)	Axial micro-strain #1	Axial micro-strain #2	Axial micro-strain #3	Confining pressure (kPa)	Temperature (�C)	Load (N)	Displacement #1 (mm)	Displacement #2 (mm)	Displacement #3 (mm)
0.0000	187.840	-7.657	0.031	4.085	-0.617	20.285	357.599	0.000536	-0.000002	-0.000286
0.0400	209.150	-6.574	0.293	5.944	-0.613	20.285	398.169	0.000460	-0.000021	-0.000416
0.0800	213.869	-6.310	0.405	6.002	-0.620	20.285	407.152	0.000442	-0.000028	-0.000420
0.1200	247.623	-3.810	1.073	9.865	-0.603	20.284	471.411	0.000267	-0.000075	-0.000691
0.1600	272.751	-2.308	1.463	12.966	-0.608	20.285	519.247	0.000162	-0.000102	-0.000908
0.2000	329.287	2.390	4.269	20.331	-0.625	20.284	626.879	-0.000167	-0.000299	-0.001423
0.2400	334.187	2.305	4.225	20.859	-0.613	20.285	636.206	-0.000161	-0.000296	-0.001460
0.2800	392.647	6.402	6.687	27.263	-0.607	20.286	747.499	-0.000448	-0.000468	-0.001908
0.3200	432.668	9.615	8.896	32.297	-0.604	20.285	823.689	-0.000673	-0.000623	-0.002261
0.3600	500.386	14.438	12.065	40.049	-0.607	20.284	952.606	-0.001011	-0.000845	-0.002803
0.4000	560.575	19.119	15.565	47.317	-0.603	20.285	1067.190	-0.001338	-0.001090	-0.003312
0.4400	599.814	22.509	17.815	52.167	-0.612	20.284	1141.891	-0.001576	-0.001247	-0.003652
0.4800	683.297	28.040	22.069	61.102	-0.604	20.284	1300.821	-0.001963	-0.001545	-0.004277
0.5200	728.517	31.670	24.752	67.062	-0.607	20.285	1386.909	-0.002217	-0.001733	-0.004694
0.5600	778.201	35.170	27.726	72.536	-0.606	20.284	1481.495	-0.002462	-0.001941	-0.005078
0.6000	820.882	38.547	30.757	78.055	-0.618	20.284	1562.748	-0.002698	-0.002153	-0.005464
0.6400	876.066	42.982	34.088	84.168	-0.609	20.284	1667.805	-0.003009	-0.002386	-0.005892
0.6800	942.672	47.578	37.716	91.050	-0.603	20.284	1794.605	-0.003330	-0.002640	-0.006373
0.7200	998.713	52.346	41.372	97.511	-0.602	20.284	1901.293	-0.003664	-0.002896	-0.006826
0.7600	1042.491	55.322	44.123	102.403	-0.596	20.284	1984.634	-0.003873	-0.003089	-0.007168
0.8000	1051.883	56.041	44.677	103.836	-0.601	20.285	2002.516	-0.003923	-0.003127	-0.007269
0.8400	1072.983	58.099	46.612	106.905	-0.601	20.284	2042.685	-0.004067	-0.003263	-0.007483
0.8800	1105.415	60.282	48.361	110.269	-0.594	20.284	2104.425	-0.004220	-0.003385	-0.007719
0.9200	1098.021	60.214	48.638	110.186	-0.605	20.284	2090.349	-0.004215	-0.003405	-0.007713
0.9600	1098.276	60.463	48.596	110.340	-0.609	20.284	2090.836	-0.004232	-0.003402	-0.007724
1.0000	1111.170	61.599	50.040	111.963	-0.611	20.284	2115.383	-0.004312	-0.003503	-0.007837
1.0400	1086.719	60.728	49.234	110.048	-0.608	20.284	2068.834	-0.004251	-0.003446	-0.007703
1.0800	1087.441	60.878	49.304	110.325	-0.623	20.284	2070.208	-0.004261	-0.003451	-0.007723
1.1200	1046.338	57.903	48.038	106.822	-0.613	20.285	1991.959	-0.004053	-0.003363	-0.007478
1.1600	1020.354	55.874	46.054	104.142	-0.601	20.284	1942.492	-0.003911	-0.003224	-0.007290
1.2000	997.766	54.376	45.345	102.001	-0.607	20.283	1899.490	-0.003806	-0.003174	-0.007140
1.2400	949.946	50.872	42.691	97.207	-0.619	20.284	1808.453	-0.003561	-0.002988	-0.006804
1.2800	899.871	47.509	39.744	92.022	-0.610	20.284	1713.123	-0.003326	-0.002782	-0.006442
1.3200	836.541	43.440	36.577	85.227	-0.607	20.283	1592.560	-0.003041	-0.002560	-0.005966
1.3600	778.457	39.214	33.062	78.930	-0.605	20.283	1481.981	-0.002745	-0.002314	-0.005525
1.4000	720.838	35.321	29.616	72.484	-0.611	20.283	1372.290	-0.002472	-0.002073	-0.005074
1.4400	710.122	34.059	28.767	70.955	-0.617	20.283	1351.891	-0.002384	-0.002014	-0.004967
1.4800	640.841	28.791	24.239	62.825	-0.631	20.283	1219.997	-0.002015	-0.001697	-0.004398
1.5200	591.789	24.887	21.845	57.224	-0.615	20.283	1126.614	-0.001742	-0.001529	-0.004006
1.5600	511.552	18.869	17.289	47.985	-0.612	20.283	973.864	-0.001321	-0.001210	-0.003359
1.6000	439.791	13.991	13.706	39.478	-0.615	20.283	837.250	-0.000979	-0.000959	-0.002763
1.6400	413.732	11.322	11.897	35.617	-0.607	20.283	787.640	-0.000793	-0.000833	-0.002493
1.6800	345.714	6.403	8.327	26.775	-0.604	20.283	658.150	-0.000448	-0.000583	-0.001874
1.7200	309.961	3.265	6.352	22.176	-0.609	20.283	590.086	-0.000229	-0.000445	-0.001552
1.7600	286.892	1.038	4.893	18.733	-0.608	20.283	546.169	-0.000073	-0.000342	-0.001311
1.8000	262.712	-1.000	3.726	15.245	-0.597	20.282	500.135	0.000070	-0.000261	-0.001067
1.8400	222.300	-4.394	1.809	9.159	-0.595	20.283	423.203	0.000308	-0.000127	-0.000641
1.8800	250.944	-3.116	2.142	11.893	-0.606	20.283	477.734	0.000218	-0.000150	-0.000832
1.9200	184.414	-7.992	-0.513	3.253	-0.617	20.283	351.076	0.000559	0.000036	-0.000228
1.9600	196.436	-7.560	-0.026	4.183	-0.618	20.282	373.964	0.000529	0.000002	-0.000293
2.0000	205.108	-7.157	-0.095	4.682	-0.608	20.282	390.472	0.000501	0.000007	-0.000328
2.0400	201.245	-7.171	-0.055	4.504	-0.617	20.283	383.120	0.000502	0.000004	-0.000315
2.0800	223.037	-6.184	0.002	6.588	-0.611	20.282	424.604	0.000433	-0.000000	-0.000461
2.1200	276.342	-2.282	1.100	13.107	-0.612	20.283	526.085	0.000160	-0.000077	-0.000917
2.1600	281.151	-2.268	1.517	13.576	-0.629	20.283	535.240	0.000159	-0.000106	-0.000950
2.2000	354.460	3.696	4.670	22.763	-0.616	20.283	674.801	-0.000259	-0.000327	-0.001593
2.2400	377.484	5.128	6.103	25.390	-0.610	20.283	718.632	-0.000359	-0.000427	-0.001777
2.2800	377.694	4.738	6.104	25.153	-0.604	20.283	719.032	-0.000332	-0.000427	-0.001761
2.3200	467.519	12.016	10.174	35.936	-0.611	20.282	890.036	-0.000841	-0.000712	-0.002516
2.3600	539.054	17.353	14.039	44.192	-0.613	20.283	1026.220	-0.001215	-0.000983	-0.003093
2.4000	552.084	18.328	14.749	45.859	-0.607	20.282	1051.025	-0.001283	-0.001032	-0.003210
2.4400	618.629	23.190	18.526	53.880	-0.603	20.283	1177.711	-0.001623	-0.001297	-0.003772
2.4800	657.192	26.193	20.621	58.533	-0.619	20.282	1251.125	-0.001833	-0.001443	-0.004097
2.5200	723.933	30.736	23.766	65.829	-0.608	20.282	1378.183	-0.002152	-0.001664	-0.004608
2.5600	795.318	35.988	28.616	73.999	-0.612	20.282	1514.082	-0.002519	-0.002003	-0.005180
2.6000	858.603	40.631	32.212	80.797	-0.614	20.282	1634.560	-0.002844	-0.002255	-0.005656
2.6400	888.705	43.522	34.560	85.172	-0.598	20.282	1691.866	-0.003047	-0.002419	-0.005962
2.6800	927.568	46.148	36.840	89.214	-0.612	20.282	1765.852	-0.003230	-0.002579	-0.006245
2.7200	995.016	51.748	41.051	96.998	-0.604	20.282	1894.255	-0.003622	-0.002874	-0.006790
2.7600	1030.994	54.239	43.552	101.374	-0.596	20.282	1962.748	-0.003797	-0.003049	-0.007096
2.8000	1060.675	56.291	44.858	104.518	-0.601	20.282	2019.253	-0.003940	-0.003140	-0.007316
2.8400	1072.262	57.209	46.208	106.042	-0.598	20.282	2041.311	-0.004005	-0.003235	-0.007423
2.8800	1089.830	58.934	47.873	108.297	-0.606	20.283	2074.757	-0.004125	-0.003351	-0.007581
2.9200	1086.043	59.532	47.998	108.492	-0.601	20.282	2067.547	-0.004167	-0.003360	-0.007594
2.9600	1093.768	60.642	50.305	110.156	-0.611	20.282	2082.253	-0.004245	-0.003521	-0.007711
3.0000	1126.695	62.406	50.724	113.091	-0.593	20.282	2144.938	-0.004368	-0.003551	-0.007916
3.0400	1096.112	60.726	49.945	110.822	-0.608	20.282	2086.716	-0.004251	-0.003496	-0.007758
3.0800	1089.785	60.086	49.947	110.366	-0.616	20.282	2074.671	-0.004206	-0.003496	-0.007726
3.1200	1043.828	57.334	47.736	105.904	-0.614	20.282	1987.181	-0.004013	-0.003341	-0.007413
3.1600	1010.766	55.139	45.764	102.874	-0.616	20.282	1924.238	-0.003860	-0.003204	-0.007201
3.2000	989.786	53.444	44.343	100.692	-0.613	20.282	1884.298	-0.003741	-0.003104	-0.007048
3.2400	959.564	51.594	43.037	97.555	-0.607	20.282	1826.763	-0.003612	-0.003013	-0.006829
3.2800	911.999	48.457	40.483	92.635	-0.595	20.281	1736.212	-0.003392	-0.002834	-0.006484
3.3200	850.398	43.926	36.797	86.146	-0.599	20.282	1618.938	-0.003075	-0.002576	-0.006030
3.3600	790.599	39.808	33.201	79.655	-0.604	20.282	1505.098	-0.002787	-0.002324	-0.005576
3.4000	741.411	36.103	30.296	74.096	-0.598	20.282	1411.457	-0.002527	-0.002121	-0.005187
3.4400	667.156	30.583	25.835	65.952	-0.600	20.282	1270.094	-0.002141	-0.001808	-0.004617
3.4800	649.242	28.665	24.835	63.383	-0.590	20.282	1235.991	-0.002007	-0.001738	-0.004437
3.5200	557.268	22.413	19.570	52.972	-0.600	20.281	1060.896	-0.001569	-0.001370	-0.003708
3.5600	512.424	19.564	17.313	47.721	-0.609	20.281	975.523	-0.001369	-0.001212	-0.003340
3.6000	463.897	15.480	14.540	41.316	-0.596	20.281	883.141	-0.001084	-0.001018	-0.002892
3.6400	419.458	11.724	11.940	35.686	-0.590	20.282	798.540	-0.000821	-0.000836	-0.002498
3.6800	353.709	6.834	8.258	27.387	-0.593	20.281	673.370	-0.000478	-0.000578	-0.001917
3.7200	322.434	3.818	6.827	23.680	-0.599	20.281	613.832	-0.000267	-0.000478	-0.001658
3.7600	285.885	0.651	4.488	18.357	-0.592	20.281	544.252	-0.000046	-0.000314	-0.001285
3.8000	252.056	-2.364	2.962	13.118	-0.593	20.281	479.851	0.000165	-0.000207	-0.000918
3.8400	232.474	-4.129	2.227	10.365	-0.597	20.281	442.572	0.000289	-0.000156	-0.000726
3.8800	208.865	-6.115	0.863	6.851	-0.603	20.281	397.625	0.000428	-0.000060	-0.000480
3.9200	194.678	-7.061	0.196	4.501	-0.607	20.280	370.617	0.000494	-0.000014	-0.000315
3.9600	200.945	-7.033	-0.179	4.600	-0.606	20.280	382.547	0.000492	0.000013	-0.000322
4.0000	200.284	-7.699	-0.138	4.486	-0.599	20.281	381.289	0.000539	0.000010	-0.000314
4.0400	204.071	-7.825	-0.664	4.210	-0.608	20.281	388.498	0.000548	0.000046	-0.000295
4.0800	221.955	-6.893	-0.320	6.282	-0.608	20.280	422.544	0.000482	0.000022	-0.000440
4.1200	230.746	-5.810	-0.166	7.478	-0.603	20.280	439.281	0.000407	0.000012	-0.000523
4.1600	279.078	-1.807	1.671	13.538	-0.600	20.281	531.292	0.000126	-0.000117	-0.000948
4.2000	321.398	0.789	3.060	18.050	-0.598	20.280	611.858	-0.000055	-0.000214	-0.001263
4.2400	351.890	3.349	4.337	21.843	-0.596	20.280	669.909	-0.000234	-0.000304	-0.001529
4.2800	395.307	6.946	6.297	27.278	-0.603	20.280	752.563	-0.000486	-0.000441	-0.001909
4.3200	451.408	10.711	9.272	34.004	-0.614	20.280	859.365	-0.000750	-0.000649	-0.002380
4.3600	497.591	13.840	11.342	39.173	-0.592	20.280	947.285	-0.000969	-0.000794	-0.002742
4.4000	558.696	18.855	15.607	46.941	-0.593	20.280	1063.614	-0.001320	-0.001092	-0.003286
4.4400	612.107	22.606	18.333	53.379	-0.602	20.280	1165.295	-0.001582	-0.001283	-0.003736
4.4800	668.028	26.693	21.720	59.603	-0.597	20.280	1271.753	-0.001868	-0.001520	-0.004172
4.5200	732.334	31.751	25.001	66.755	-0.600	20.280	1394.176	-0.002223	-0.001750	-0.004673
4.5600	801.119	36.754	28.866	74.611	-0.584	20.280	1525.126	-0.002573	-0.002021	-0.005223
4.6000	847.557	40.591	32.531	80.475	-0.596	20.279	1613.531	-0.002841	-0.002277	-0.005633
4.6400	894.566	43.718	34.478	85.421	-0.601	20.279	1703.024	-0.003060	-0.002413	-0.005979
4.6800	933.490	46.494	36.896	89.937	-0.602	20.280	1777.124	-0.003255	-0.002583	-0.006296
4.7200	996.654	51.135	41.108	97.094	-0.603	20.279	1897.373	-0.003579	-0.002878	-0.006797
4.7600	1009.654	52.554	41.997	98.752	-0.612	20.279	1922.121	-0.003679	-0.002940	-0.006913
4.8000	1058.150	56.876	45.831	104.294	-0.609	20.280	2014.446	-0.003981	-0.003208	-0.007301
4.8400	1074.396	57.903	46.334	106.083	-0.615	20.279	2045.374	-0.004053	-0.003243	-0.007426
4.8800	1107.008	60.615	48.527	109.797	-0.612	20.279	2107.458	-0.004243	-0.003397	-0.007686
4.9200	1095.556	60.281	48.539	109.436	-0.609	20.280	2085.657	-0.004220	-0.003398	-0.007661
4.9600	1149.072	63.699	51.362	114.773	-0.613	20.280	2187.538	-0.004459	-0.003595	-0.008034
5.0000	1110.855	60.960	50.125	111.795	-0.609	20.279	2114.782	-0.004267	-0.003509	-0.007826
5.0400	1103.852	60.947	49.847	111.213	-0.606	20.279	2101.450	-0.004266	-0.003489	-0.007785
5.0800	1092.310	60.201	49.875	110.143	-0.612	20.278	2079.477	-0.004214	-0.003491	-0.007710
5.1200	1071.721	58.809	48.025	108.212	-0.600	20.279	2040.281	-0.004117	-0.003362	-0.007575
5.1600	1019.106	55.666	46.457	103.557	-0.601	20.279	1940.117	-0.003897	-0.003252	-0.007249
5.2000	993.288	53.821	44.942	100.805	-0.609	20.278	1890.965	-0.003767	-0.003146	-0.007056
5.2400	954.860	51.329	42.536	97.263	-0.609	20.279	1817.808	-0.003593	-0.002978	-0.006808
5.2800	898.308	47.301	39.147	91.256	-0.606	20.278	1710.148	-0.003311	-0.002740	-0.006388
5.3200	820.055	41.631	34.659	83.185	-0.596	20.278	1561.174	-0.002914	-0.002426	-0.005823
5.3600	780.380	38.575	32.200	78.417	-0.605	20.278	1485.643	-0.002700	-0.002254	-0.005489
5.4000	742.929	35.461	30.587	73.888	-0.605	20.278	1414.347	-0.002482	-0.002141	-0.005172
5.4400	684.033	31.767	26.889	67.676	-0.609	20.278	1302.223	-0.002224	-0.001882	-0.004737
5.4800	606.772	26.110	22.804	58.839	-0.603	20.278	1155.138	-0.001828	-0.001596	-0.004119
5.5200	571.245	22.955	19.721	53.698	-0.612	20.278	1087.503	-0.001607	-0.001381	-0.003759
5.5600	497.065	17.937	15.982	45.831	-0.608	20.278	946.283	-0.001256	-0.001119	-0.003208
5.6000	460.591	15.117	13.941	41.010	-0.611	20.278	876.846	-0.001058	-0.000976	-0.002871
5.6400	388.965	9.629	10.383	32.461	-0.617	20.278	740.490	-0.000674	-0.000727	-0.002272
5.6800	336.020	4.931	7.478	25.403	-0.603	20.278	639.696	-0.000345	-0.000523	-0.001778
5.7200	344.271	5.318	7.604	25.806	-0.605	20.278	655.403	-0.000372	-0.000532	-0.001806
5.7600	285.750	0.415	4.727	17.871	-0.606	20.277	543.995	-0.000029	-0.000331	-0.001251
5.8000	249.817	-1.918	3.238	13.371	-0.609	20.277	475.588	0.000134	-0.000227	-0.000936
5.8400	228.672	-3.879	1.977	10.075	-0.615	20.278	435.333	0.000272	-0.000138	-0.000705
5.8800	211.089	-5.658	0.920	7.003	-0.614	20.278	401.859	0.000396	-0.000064	-0.000490
5.9200	210.608	-6.866	0.405	6.183	-0.612	20.278	400.944	0.000481	-0.000028	-0.000433
5.9600	200.825	-7.185	-0.193	4.961	-0.608	20.278	382.318	0.000503	0.000014	-0.000347
6.0000	194.588	-8.160	-0.625	3.932	-0.614	20.278	370.445	0.000571	0.000044	-0.000275
6.0400	224.885	-6.102	-0.026	6.684	-0.613	20.277	428.123	0.000427	0.000002	-0.000468
6.0800	221.909	-6.393	0.294	6.392	-0.597	20.277	422.459	0.000448	-0.000021	-0.000447
6.1200	254.942	-4.089	0.932	10.103	-0.605	20.277	485.344	0.000286	-0.000065	-0.000707
6.1600	301.485	-0.267	2.351	15.841	-0.596	20.277	573.950	0.000019	-0.000165	-0.001109
6.2000	306.955	0.012	2.365	16.969	-0.617	20.277	584.364	-0.000001	-0.000166	-0.001188
6.2400	295.459	-0.237	3.632	16.326	-0.613	20.277	562.477	0.000017	-0.000254	-0.001143
6.2800	406.969	7.042	6.782	28.529	-0.607	20.277	774.765	-0.000493	-0.000475	-0.001997
6.3200	468.616	11.447	9.882	35.908	-0.610	20.278	892.124	-0.000801	-0.000692	-0.002514
6.3600	516.211	14.924	12.439	41.330	-0.605	20.278	982.733	-0.001045	-0.000871	-0.002893
6.4000	561.491	18.840	14.943	46.858	-0.602	20.278	1068.935	-0.001319	-0.001046	-0.003280
6.4400	610.394	22.467	17.984	52.850	-0.600	20.277	1162.033	-0.001573	-0.001259	-0.003699
6.4800	694.117	28.942	22.456	62.020	-0.603	20.277	1321.421	-0.002026	-0.001572	-0.004341
6.5200	715.713	30.876	23.987	65.205	-0.601	20.278	1362.534	-0.002161	-0.001679	-0.004564
6.5600	786.572	35.279	27.890	72.801	-0.605	20.277	1497.431	-0.002470	-0.001952	-0.005096
6.6000	864.584	41.436	32.853	82.007	-0.598	20.277	1645.947	-0.002901	-0.002300	-0.005740
6.6400	900.637	44.023	34.534	86.147	-0.601	20.278	1714.582	-0.003082	-0.002417	-0.006030
6.6800	948.533	47.370	37.408	91.523	-0.585	20.278	1805.763	-0.003316	-0.002619	-0.006407
6.7200	977.117	50.706	40.093	95.455	-0.596	20.278	1860.180	-0.003549	-0.002806	-0.006682
6.7600	1027.718	54.405	43.428	100.984	-0.597	20.278	1956.511	-0.003808	-0.003040	-0.007069
6.8000	1046.188	55.597	44.276	103.097	-0.601	20.278	1991.673	-0.003892	-0.003099	-0.007217
6.8400	1076.680	57.948	46.485	106.625	-0.590	20.277	2049.723	-0.004056	-0.003254	-0.007464
6.8800	1105.520	60.489	48.290	109.702	-0.595	20.278	2104.626	-0.004234	-0.003380	-0.007679
6.9200	1097.750	60.047	48.068	109.755	-0.603	20.277	2089.834	-0.004203	-0.003365	-0.007683
6.9600	1074.321	58.837	48.096	108.325	-0.600	20.278	2045.231	-0.004119	-0.003367	-0.007583
7.0000	1098.246	60.225	48.734	110.172	-0.607	20.277	2090.778	-0.004216	-0.003411	-0.007712
7.0400	1099.253	60.363	48.887	110.367	-0.607	20.278	2092.695	-0.004225	-0.003422	-0.007726
7.0800	1092.610	60.101	48.874	110.103	-0.619	20.277	2080.050	-0.004207	-0.003421	-0.007707
7.1200	1077.822	59.560	48.638	109.158	-0.604	20.277	2051.897	-0.004169	-0.003405	-0.007641
7.1600	985.082	54.196	44.594	100.261	-0.608	20.277	1875.343	-0.003794	-0.003122	-0.007018
7.2000	974.156	52.359	43.370	98.752	-0.609	20.277	1854.544	-0.003665	-0.003036	-0.006913
7.2400	941.680	50.206	41.858	95.857	-0.609	20.277	1792.717	-0.003514	-0.002930	-0.006710
7.2800	947.165	49.942	40.719	95.469	-0.611	20.277	1803.160	-0.003496	-0.002850	-0.006683
7.3200	830.395	42.381	35.214	83.727	-0.613	20.277	1580.858	-0.002967	-0.002465	-0.005861
7.3600	828.666	41.965	35.188	83.601	-0.599	20.277	1577.568	-0.002938	-0.002463	-0.005852
7.4000	721.709	34.322	29.085	72.220	-0.614	20.277	1373.949	-0.002403	-0.002036	-0.005055
7.4400	661.581	29.750	25.391	64.605	-0.619	20.277	1259.480	-0.002082	-0.001777	-0.004522
7.4800	594.900	25.387	22.026	57.504	-0.600	20.277	1132.536	-0.001777	-0.001542	-0.004025
7.5200	560.905	22.302	20.291	53.545	-0.613	20.277	1067.820	-0.001561	-0.001420	-0.003748
7.5600	530.503	19.509	17.302	48.904	-0.608	20.277	1009.941	-0.001366	-0.001211	-0.003423
7.6000	403.468	10.699	10.939	34.505	-0.607	20.277	768.099	-0.000749	-0.000766	-0.002415
7.6400	399.996	9.613	10.271	33.157	-0.604	20.277	761.490	-0.000673	-0.000719	-0.002321
7.6800	358.307	6.485	8.426	28.251	-0.600	20.277	682.125	-0.000454	-0.000590	-0.001978
7.7200	315.161	2.679	6.088	21.885	-0.596	20.277	599.985	-0.000188	-0.000426	-0.001532
7.7600	295.323	1.388	5.239	19.413	-0.599	20.277	562.220	-0.000097	-0.000367	-0.001359
7.8000	238.681	-3.144	2.726	11.908	-0.608	20.277	454.388	0.000220	-0.000191	-0.000834
7.8400	233.136	-3.794	2.115	10.533	-0.605	20.277	443.830	0.000266	-0.000148	-0.000737
7.8800	188.712	-7.617	-0.278	3.960	-0.605	20.277	359.259	0.000533	0.000019	-0.000277
7.9200	170.437	-9.311	-1.248	1.487	-0.604	20.277	324.469	0.000652	0.000087	-0.000104
7.9600	205.078	-7.545	-0.806	5.112	-0.606	20.277	390.415	0.000528	0.000056	-0.000358
8.0000	221.278	-6.796	-0.501	6.294	-0.603	20.276	421.257	0.000476	0.000035	-0.000441
8.0400	178.507	-9.883	-1.278	0.999	-0.597	20.277	339.832	0.000692	0.000089	-0.000070
8.0800	231.272	-5.533	0.014	7.893	-0.599	20.276	440.283	0.000387	-0.000001	-0.000553
8.1200	277.124	-2.446	1.309	12.480	-0.596	20.276	527.573	0.000171	-0.000092	-0.000874
8.1600	293.881	-0.473	2.058	14.997	-0.597	20.276	559.473	0.000033	-0.000144	-0.001050
8.2000	297.893	-1.155	1.905	15.577	-0.595	20.276	567.112	0.000081	-0.000133	-0.001090
8.2400	366.257	4.280	5.114	23.526	-0.609	20.276	697.260	-0.000300	-0.000358	-0.001647
8.2800	412.244	7.531	7.019	28.806	-0.615	20.276	784.807	-0.000527	-0.000491	-0.002016
8.3200	446.223	10.142	8.912	33.281	-0.609	20.277	849.495	-0.000710	-0.000624	-0.002330
8.3600	509.208	14.617	12.202	40.606	-0.608	20.276	969.400	-0.001023	-0.000854	-0.002842
8.4000	563.761	18.466	15.108	47.053	-0.606	20.277	1073.256	-0.001293	-0.001058	-0.003294
8.4400	622.762	23.537	18.861	54.199	-0.612	20.276	1185.579	-0.001648	-0.001320	-0.003794
8.4800	652.609	25.846	20.569	57.698	-0.605	20.276	1242.399	-0.001809	-0.001440	-0.004039
8.5200	724.159	31.293	24.405	65.786	-0.607	20.276	1378.613	-0.002191	-0.001708	-0.004605
8.5600	794.462	36.017	28.586	73.901	-0.604	20.276	1512.451	-0.002521	-0.002001	-0.005173
8.6000	844.161	39.991	31.396	79.724	-0.608	20.276	1607.065	-0.002799	-0.002198	-0.005581
8.6400	888.720	43.231	34.214	85.005	-0.608	20.276	1691.895	-0.003026	-0.002395	-0.005950
8.6800	936.315	46.856	37.088	90.271	-0.598	20.276	1782.503	-0.003280	-0.002596	-0.006319
8.7200	994.625	51.150	40.665	96.998	-0.602	20.276	1893.511	-0.003581	-0.002847	-0.006790
8.7600	1019.678	53.667	43.010	100.066	-0.605	20.276	1941.204	-0.003757	-0.003011	-0.007005
8.8000	1044.625	55.986	44.942	103.447	-0.596	20.276	1988.697	-0.003919	-0.003146	-0.007241
8.8400	1076.199	58.655	46.959	106.766	-0.606	20.276	2048.807	-0.004106	-0.003287	-0.007474
8.8800	1098.471	59.823	48.109	109.227	-0.605	20.276	2091.208	-0.004188	-0.003368	-0.007646
8.9200	1103.731	60.213	48.247	109.783	-0.601	20.276	2101.221	-0.004215	-0.003377	-0.007685
8.9600	1115.258	61.406	49.389	111.933	-0.605	20.276	2123.165	-0.004298	-0.003457	-0.007835
9.0000	1103.792	60.976	49.445	111.100	-0.599	20.276	2101.336	-0.004268	-0.003461	-0.007777
9.0400	1106.512	60.767	49.444	111.450	-0.617	20.276	2106.514	-0.004254	-0.003461	-0.007802
9.0800	1047.570	57.068	47.845	106.502	-0.611	20.276	1994.305	-0.003995	-0.003349	-0.007455
9.1200	1050.561	57.320	48.040	106.570	-0.614	20.276	1999.998	-0.004012	-0.003363	-0.007460
9.1600	1023.420	55.890	46.222	103.936	-0.612	20.276	1948.328	-0.003912	-0.003236	-0.007276
9.2000	983.234	53.430	44.456	100.499	-0.604	20.276	1871.824	-0.003740	-0.003112	-0.007035
9.2400	945.377	50.566	41.901	95.981	-0.606	20.276	1799.755	-0.003540	-0.002933	-0.006719
9.2800	893.800	46.995	38.981	90.896	-0.608	20.276	1701.565	-0.003290	-0.002729	-0.006363
9.3200	859.339	44.411	36.756	87.020	-0.609	20.276	1635.962	-0.003109	-0.002573	-0.006091
9.3600	813.758	40.922	34.187	81.657	-0.593	20.276	1549.187	-0.002865	-0.002393	-0.005716
9.4000	729.284	34.933	29.490	72.928	-0.595	20.276	1388.369	-0.002445	-0.002064	-0.005105
9.4400	677.691	31.349	26.930	67.257	-0.596	20.276	1290.150	-0.002194	-0.001885	-0.004708
9.4800	626.129	27.305	23.694	61.240	-0.599	20.276	1191.988	-0.001911	-0.001659	-0.004287
9.5200	549.634	21.634	19.429	52.252	-0.593	20.276	1046.362	-0.001514	-0.001360	-0.003658
9.5600	513.701	18.798	17.332	47.721	-0.597	20.275	977.955	-0.001316	-0.001213	-0.003340
9.6000	473.725	16.147	14.581	42.607	-0.607	20.276	901.852	-0.001130	-0.001021	-0.002982
9.6400	402.476	10.141	10.605	33.893	-0.617	20.276	766.211	-0.000710	-0.000742	-0.002373
9.6800	340.439	4.723	7.311	26.045	-0.604	20.276	648.108	-0.000331	-0.000512	-0.001823
9.7200	308.864	2.553	5.797	21.858	-0.613	20.276	587.997	-0.000179	-0.000406	-0.001530
9.7600	284.307	0.082	4.502	18.300	-0.610	20.276	541.248	-0.000006	-0.000315	-0.001281
9.8000	254.341	-2.336	2.864	13.953	-0.604	20.276	484.200	0.000163	-0.000201	-0.000977
9.8400	235.044	-3.838	2.018	10.894	-0.606	20.275	447.464	0.000269	-0.000141	-0.000763
9.8800	219.775	-5.630	1.489	8.602	-0.600	20.275	418.396	0.000394	-0.000104	-0.000602
9.9200	200.509	-7.130	0.181	5.530	-0.608	20.276	381.718	0.000499	-0.000013	-0.000387
9.9600	200.975	-7.031	-0.123	4.973	-0.609	20.275	382.605	0.000492	0.000009	-0.000348
10.0000	178.477	-9.423	-1.319	3.961	-0.606	20.290	339.775	0.000660	0.000092	-0.000277
10.0400	217.566	-7.785	-1.111	6.740	-0.622	20.290	414.190	0.000545	0.000078	-0.000472
10.0800	276.192	-4.117	0.655	13.008	-0.611	20.290	525.799	0.000288	-0.000046	-0.000911
10.1200	274.299	-4.059	0.838	13.106	-0.605	20.290	522.194	0.000284	-0.000059	-0.000917
10.1600	313.147	-1.543	2.351	17.675	-0.617	20.289	596.151	0.000108	-0.000165	-0.001237
10.2000	361.148	2.469	4.600	23.554	-0.618	20.290	687.532	-0.000173	-0.000322	-0.001649
10.2400	423.921	6.681	7.187	30.616	-0.623	20.289	807.037	-0.000468	-0.000503	-0.002143
10.2800	511.281	13.298	11.688	40.271	-0.616	20.290	973.349	-0.000931	-0.000818	-0.002819
10.3200	542.766	15.869	13.426	44.095	-0.614	20.290	1033.287	-0.001111	-0.000940	-0.003087
10.3600	626.234	21.884	17.803	53.949	-0.604	20.289	1192.188	-0.001532	-0.001246	-0.003776
10.4000	677.646	25.262	20.567	60.089	-0.605	20.289	1290.064	-0.001768	-0.001440	-0.004206
10.4400	760.663	31.196	25.390	69.496	-0.616	20.289	1448.107	-0.002184	-0.001777	-0.004865
10.4800	810.858	35.390	28.683	75.597	-0.604	20.289	1543.665	-0.002477	-0.002008	-0.005292
10.5200	913.021	42.869	34.702	86.772	-0.598	20.288	1738.157	-0.003001	-0.002429	-0.006074
10.5600	972.052	47.399	38.591	93.912	-0.599	20.289	1850.538	-0.003318	-0.002701	-0.006574
10.6000	1043.798	53.057	43.315	101.875	-0.604	20.289	1987.123	-0.003714	-0.003032	-0.007131
10.6400	1099.779	57.597	47.652	108.588	-0.605	20.288	2093.697	-0.004032	-0.003336	-0.007601
10.6800	1190.581	64.243	52.725	117.882	-0.606	20.289	2266.560	-0.004497	-0.003691	-0.008252
10.7200	1211.260	66.339	54.222	120.412	-0.611	20.289	2305.927	-0.004644	-0.003796	-0.008429
10.7600	1295.494	71.719	59.171	128.847	-0.609	20.289	2466.288	-0.005020	-0.004142	-0.009019
10.8000	1328.226	74.386	61.562	132.487	-0.607	20.288	2528.601	-0.005207	-0.004309	-0.009274
10.8400	1332.148	75.332	62.186	133.586	-0.608	20.288	2536.068	-0.005273	-0.004353	-0.009351
10.8800	1387.919	79.499	66.119	139.423	-0.605	20.288	2642.241	-0.005565	-0.004628	-0.009760
10.9200	1385.950	79.499	66.509	139.408	-0.605	20.288	2638.493	-0.005565	-0.004656	-0.009759
10.9600	1394.321	81.501	68.096	141.270	-0.621	20.288	2654.428	-0.005705	-0.004767	-0.009889
11.0000	1390.879	80.974	68.079	141.241	-0.613	20.288	2647.877	-0.005668	-0.004766	-0.009887
11.0400	1390.774	81.530	68.053	141.397	-0.601	20.288	2647.676	-0.005707	-0.004764	-0.009898
11.0800	1367.720	80.319	67.426	139.866	-0.624	20.288	2603.788	-0.005622	-0.004720	-0.009791
11.1200	1334.898	78.027	65.828	136.921	-0.601	20.288	2541.304	-0.005462	-0.004608	-0.009584
11.1600	1291.586	74.998	63.913	133.306	-0.604	20.288	2458.849	-0.005250	-0.004474	-0.009331
11.2000	1227.716	70.660	60.380	127.331	-0.607	20.287	2337.255	-0.004946	-0.004227	-0.008913
11.2400	1182.029	67.714	57.587	122.871	-0.600	20.288	2250.280	-0.004740	-0.004031	-0.008601
11.2800	1123.509	63.159	54.000	117.159	-0.603	20.288	2138.872	-0.004421	-0.003780	-0.008201
11.3200	1051.913	58.490	49.862	110.074	-0.606	20.287	2002.573	-0.004094	-0.003490	-0.007705
11.3600	972.774	52.790	45.359	102.138	-0.602	20.287	1851.912	-0.003695	-0.003175	-0.007150
11.4000	914.809	48.360	40.844	95.063	-0.603	20.287	1741.562	-0.003385	-0.002859	-0.006654
11.4400	853.689	43.786	37.297	88.368	-0.599	20.286	1625.204	-0.003065	-0.002611	-0.006186
11.4800	746.717	35.808	31.160	77.016	-0.583	20.287	1421.556	-0.002507	-0.002181	-0.005391
11.5200	714.045	32.821	28.821	72.580	-0.604	20.287	1359.358	-0.002297	-0.002017	-0.005081
11.5600	612.423	25.514	23.180	60.949	-0.608	20.287	1165.895	-0.001786	-0.001623	-0.004266
11.6000	502.625	17.966	17.636	48.666	-0.596	20.286	956.869	-0.001258	-0.001235	-0.003407
11.6400	511.672	17.950	17.023	48.320	-0.596	20.287	974.092	-0.001257	-0.001192	-0.003382
11.6800	439.821	12.100	13.146	39.130	-0.597	20.286	837.307	-0.000847	-0.000920	-0.002739
11.7200	354.716	5.473	8.871	28.877	-0.607	20.287	675.287	-0.000383	-0.000621	-0.002021
11.7600	359.254	5.863	8.787	28.736	-0.599	20.287	683.928	-0.000410	-0.000615	-0.002012
11.8000	250.118	-1.944	3.393	14.966	-0.602	20.286	476.160	0.000136	-0.000238	-0.001048
11.8400	259.105	-2.975	2.769	14.733	-0.601	20.286	493.269	0.000208	-0.000194	-0.001031
11.8800	233.797	-5.603	1.990	11.464	-0.593	20.286	445.089	0.000392	-0.000139	-0.000802
11.9200	217.852	-7.338	0.974	8.755	-0.601	20.286	414.734	0.000514	-0.000068	-0.000613
11.9600	201.997	-8.895	0.155	6.072	-0.591	20.286	384.550	0.000623	-0.000011	-0.000425
12.0000	221.774	-8.199	0.029	7.393	-0.599	20.286	422.201	0.000574	-0.000002	-0.000517
12.0400	229.213	-7.281	0.364	8.353	-0.611	20.286	436.363	0.000510	-0.000025	-0.000585
12.0800	244.257	-5.851	0.557	10.130	-0.609	20.286	465.002	0.000410	-0.000039	-0.000709
12.1200	279.333	-3.503	1.238	14.038	-0.599	20.286	531.778	0.000245	-0.000087	-0.000983
12.1600	324.148	-0.321	2.879	19.372	-0.604	20.286	617.094	0.000022	-0.000202	-0.001356
12.2000	376.266	4.819	5.490	25.919	-0.600	20.285	716.314	-0.000337	-0.000384	-0.001814
12.2400	418.616	7.056	7.004	30.392	-0.585	20.285	796.938	-0.000494	-0.000490	-0.002127
12.2800	473.079	10.434	9.882	37.049	-0.611	20.285	900.621	-0.000730	-0.000692	-0.002593
12.3200	542.766	15.784	13.678	45.317	-0.600	20.285	1033.287	-0.001105	-0.000957	-0.003172
12.3600	592.720	18.870	16.064	51.069	-0.610	20.285	1128.387	-0.001321	-0.001125	-0.003575
12.4000	677.871	26.152	21.401	60.796	-0.599	20.285	1290.493	-0.001831	-0.001498	-0.004256
12.4400	766.915	32.447	26.363	70.567	-0.604	20.285	1460.009	-0.002271	-0.001845	-0.004940
12.4800	848.309	38.310	31.022	80.058	-0.596	20.285	1614.962	-0.002682	-0.002172	-0.005604
12.5200	898.804	42.411	34.339	86.160	-0.592	20.285	1711.092	-0.002969	-0.002404	-0.006031
12.5600	988.043	48.568	39.521	95.787	-0.594	20.285	1880.980	-0.003400	-0.002766	-0.006705
12.6000	1092.069	56.512	45.833	106.850	-0.594	20.285	2079.020	-0.003956	-0.003208	-0.007479
12.6400	1131.789	60.045	48.666	111.475	-0.597	20.285	2154.636	-0.004203	-0.003407	-0.007803
12.6800	1182.841	63.616	52.627	117.632	-0.590	20.285	2251.825	-0.004453	-0.003684	-0.008234
12.7200	1217.271	67.242	54.947	121.773	-0.600	20.285	2317.371	-0.004707	-0.003846	-0.008524
12.7600	1292.233	71.457	59.491	128.970	-0.609	20.285	2460.079	-0.005002	-0.004164	-0.009028
12.8000	1323.762	74.817	61.992	132.806	-0.592	20.284	2520.103	-0.005237	-0.004339	-0.009296
12.8400	1363.512	77.943	64.662	137.063	-0.587	20.284	2595.778	-0.005456	-0.004526	-0.009594
12.8800	1375.295	79.318	65.784	138.893	-0.610	20.284	2618.208	-0.005552	-0.004605	-0.009723
12.9200	1396.425	81.500	68.232	141.675	-0.593	20.285	2658.434	-0.005705	-0.004776	-0.009917
12.9600	1401.865	82.530	69.138	143.147	-0.599	20.284	2668.791	-0.005777	-0.004840	-0.010020
13.0000	1394.501	81.767	68.775	142.132	-0.596	20.284	2654.772	-0.005724	-0.004814	-0.009949
13.0400	1378.391	80.944	68.413	141.257	-0.608	20.284	2624.102	-0.005666	-0.004789	-0.009888
13.0800	1376.467	80.708	67.899	141.158	-0.608	20.284	2620.440	-0.005650	-0.004753	-0.009881
13.1200	1318.397	76.942	65.867	136.325	-0.605	20.284	2509.890	-0.005386	-0.004611	-0.009543
13.1600	1258.990	72.926	62.381	130.865	-0.597	20.284	2396.793	-0.005105	-0.004367	-0.009161
13.2000	1237.875	72.078	61.326	129.166	-0.603	20.283	2356.596	-0.005045	-0.004293	-0.009042
13.2400	1206.962	69.035	59.085	125.291	-0.608	20.284	2297.745	-0.004832	-0.004136	-0.008770
13.2800	1130.557	63.951	54.392	118.284	-0.597	20.284	2152.290	-0.004477	-0.003807	-0.008280
13.3200	1073.990	60.364	51.320	112.700	-0.601	20.284	2044.601	-0.004225	-0.003592	-0.007889
13.3600	967.228	51.888	44.677	101.694	-0.600	20.284	1841.354	-0.003632	-0.003127	-0.007119
13.4000	940.087	50.830	42.634	98.389	-0.594	20.283	1789.684	-0.003558	-0.002984	-0.006887
13.4400	815.742	41.507	35.661	85.269	-0.596	20.283	1552.963	-0.002905	-0.002496	-0.005969
13.4800	768.493	37.685	32.406	79.806	-0.596	20.284	1463.013	-0.002638	-0.002268	-0.005586
13.5200	670.793	29.985	27.056	68.676	-0.602	20.283	1277.018	-0.002099	-0.001894	-0.004807
13.5600	603.811	24.691	22.526	60.049	-0.607	20.283	1149.502	-0.001728	-0.001577	-0.004203
13.6000	539.670	20.036	19.250	52.586	-0.596	20.283	1027.393	-0.001402	-0.001347	-0.003681
13.6400	461.087	15.076	14.831	43.218	-0.595	20.282	877.790	-0.001055	-0.001038	-0.003025
13.6800	412.004	10.338	11.771	36.884	-0.599	20.282	784.349	-0.000724	-0.000824	-0.002582
13.7200	368.662	6.390	9.395	31.018	-0.595	20.283	701.838	-0.000447	-0.000658	-0.002171
13.7600	339.296	3.780	7.242	26.378	-0.602	20.283	645.933	-0.000265	-0.000507	-0.001846
13.8000	268.107	-1.960	3.758	17.299	-0.591	20.282	510.406	0.000137	-0.000263	-0.001211
13.8400	203.079	-6.754	1.213	8.659	-0.593	20.282	386.610	0.000473	-0.000085	-0.000606
13.8800	222.405	-6.560	1.198	9.880	-0.606	20.282	423.403	0.000459	-0.000084	-0.000692
13.9200	215.628	-7.742	1.225	8.534	-0.594	20.282	410.500	0.000542	-0.000086	-0.000597
13.9600	209.556	-7.409	0.516	7.239	-0.593	20.282	398.941	0.000519	-0.000036	-0.000507
14.0000	219.219	-6.641	0.794	8.059	-0.584	20.282	417.337	0.000465	-0.000056	-0.000564
14.0400	219.189	-7.923	0.544	7.600	-0.584	20.282	417.280	0.000555	-0.000038	-0.000532
14.0800	241.972	-5.867	0.908	9.837	-0.590	20.282	460.653	0.000411	-0.000064	-0.000689
14.1200	275.456	-4.547	1.253	13.621	-0.583	20.281	524.397	0.000318	-0.000088	-0.000953
14.1600	317.986	-0.387	2.462	18.970	-0.595	20.281	605.364	0.000027	-0.000172	-0.001328
14.2000	362.696	2.554	4.449	24.527	-0.587	20.281	690.479	-0.000179	-0.000311	-0.001717
14.2400	423.951	7.224	7.185	31.032	-0.594	20.282	807.095	-0.000506	-0.000503	-0.002172
14.2800	503.437	12.783	11.242	40.103	-0.589	20.281	958.414	-0.000895	-0.000787	-0.002807
14.3200	551.332	16.534	14.010	46.373	-0.595	20.280	1049.595	-0.001157	-0.000981	-0.003246
14.3600	609.763	21.344	17.371	53.238	-0.596	20.281	1160.831	-0.001494	-0.001216	-0.003727
14.4000	650.535	23.634	20.014	58.338	-0.584	20.281	1238.451	-0.001654	-0.001401	-0.004084
14.4400	799.662	34.071	27.976	74.541	-0.604	20.280	1522.350	-0.002385	-0.001958	-0.005218
14.4800	826.397	37.033	30.199	78.153	-0.597	20.280	1573.248	-0.002592	-0.002114	-0.005471
14.5200	938.088	44.604	36.244	90.270	-0.595	20.280	1785.879	-0.003122	-0.002537	-0.006319
14.5600	985.773	48.970	39.189	95.872	-0.593	20.280	1876.659	-0.003428	-0.002743	-0.006711
14.6000	1053.852	53.932	43.482	103.294	-0.596	20.280	2006.264	-0.003775	-0.003044	-0.007231
14.6400	1112.298	57.767	47.622	110.214	-0.589	20.280	2117.529	-0.004044	-0.003334	-0.007715
14.6800	1195.360	64.548	52.920	118.896	-0.594	20.280	2275.658	-0.004518	-0.003704	-0.008323
14.7200	1258.779	68.980	57.005	125.292	-0.593	20.280	2396.393	-0.004829	-0.003990	-0.008770
14.7600	1280.721	70.356	58.963	128.095	-0.595	20.280	2438.164	-0.004925	-0.004127	-0.008967
14.8000	1328.857	75.386	63.117	133.570	-0.585	20.280	2529.802	-0.005277	-0.004418	-0.009350
14.8400	1357.471	77.277	64.135	136.644	-0.584	20.280	2584.276	-0.005409	-0.004489	-0.009565
14.8800	1382.599	79.944	66.328	139.701	-0.583	20.280	2632.113	-0.005596	-0.004643	-0.009779
14.9200	1374.483	79.707	66.397	139.547	-0.587	20.279	2616.663	-0.005579	-0.004648	-0.009768
14.9600	1402.166	81.724	68.136	142.189	-0.581	20.279	2669.363	-0.005721	-0.004770	-0.009953
15.0000	1384.327	80.236	67.705	141.203	-0.576	20.279	2635.403	-0.005617	-0.004739	-0.009884
15.0400	1396.425	81.514	68.177	142.495	-0.587	20.279	2658.434	-0.005706	-0.004772	-0.009975
15.0800	1353.038	79.082	67.300	139.116	-0.587	20.279	2575.836	-0.005536	-0.004711	-0.009738
15.1200	1326.197	77.501	66.397	136.979	-0.580	20.279	2524.738	-0.005425	-0.004648	-0.009589
15.1600	1301.565	75.137	63.538	134.001	-0.584	20.279	2477.846	-0.005260	-0.004448	-0.009380
15.2000	1224.049	70.927	60.547	127.610	-0.587	20.278	2330.275	-0.004965	-0.004238	-0.008933
15.2400	1173.493	67.839	57.352	122.551	-0.587	20.278	2234.030	-0.004749	-0.004015	-0.008579
15.2800	1134.344	64.076	54.836	118.801	-0.583	20.278	2159.500	-0.004485	-0.003839	-0.008316
15.3200	1065.063	59.099	49.972	111.588	-0.583	20.278	2027.607	-0.004137	-0.003498	-0.007811
15.3600	965.996	53.013	44.718	101.720	-0.584	20.278	1839.008	-0.003711	-0.003130	-0.007120
15.4000	915.215	47.748	41.164	95.843	-0.584	20.278	1742.334	-0.003342	-0.002881	-0.006709
15.4400	831.552	41.646	36.701	87.022	-0.587	20.278	1583.061	-0.002915	-0.002569	-0.006092
15.4800	770.236	36.712	33.201	79.989	-0.599	20.278	1466.331	-0.002570	-0.002324	-0.005599
15.5200	658.500	29.750	26.682	67.702	-0.591	20.278	1253.614	-0.002082	-0.001868	-0.004739
15.5600	612.798	25.402	23.640	61.572	-0.597	20.278	1166.611	-0.001778	-0.001655	-0.004310
15.6000	539.760	20.581	19.320	52.668	-0.590	20.277	1027.565	-0.001441	-0.001352	-0.003687
15.6400	476.130	15.980	15.511	44.953	-0.589	20.277	906.429	-0.001119	-0.001086	-0.003147
15.6800	420.014	11.433	12.176	37.617	-0.591	20.277	799.599	-0.000800	-0.000852	-0.002633
15.7200	382.233	7.430	9.937	32.518	-0.587	20.277	727.673	-0.000520	-0.000696	-0.002276
15.7600	323.907	3.670	6.895	25.012	-0.584	20.277	616.636	-0.000257	-0.000483	-0.001751
15.8000	271.173	-1.292	3.964	17.718	-0.575	20.276	516.243	0.000090	-0.000277	-0.001240
15.8400	224.660	-5.365	1.907	11.253	-0.595	20.276	427.694	0.000376	-0.000134	-0.000788
15.8800	237.464	-4.978	2.155	11.992	-0.595	20.277	452.070	0.000348	-0.000151	-0.000839
15.9200	223.983	-7.200	1.337	9.575	-0.584	20.276	426.407	0.000504	-0.000094	-0.000670
15.9600	206.100	-8.061	0.628	7.308	-0.589	20.276	392.361	0.000564	-0.000044	-0.000512
16.0000	248.525	-5.797	1.308	11.241	-0.585	20.276	473.127	0.000406	-0.000092	-0.000787
16.0400	214.425	-7.381	0.252	7.881	-0.581	20.276	408.211	0.000517	-0.000018	-0.000552
16.0800	249.772	-6.100	1.100	11.256	-0.601	20.276	475.502	0.000427	-0.000077	-0.000788
16.1200	270.526	-4.114	1.405	13.551	-0.591	20.276	515.013	0.000288	-0.000098	-0.000949
16.1600	325.666	-0.335	3.059	20.067	-0.597	20.276	619.984	0.000023	-0.000214	-0.001405
16.2000	336.696	-0.070	3.116	21.425	-0.586	20.276	640.984	0.000005	-0.000218	-0.001500
16.2400	431.706	6.946	7.451	32.169	-0.589	20.276	821.857	-0.000486	-0.000522	-0.002252
16.2800	511.056	13.782	11.967	41.189	-0.593	20.276	972.919	-0.000965	-0.000838	-0.002883
16.3200	552.730	17.201	14.443	47.011	-0.588	20.276	1052.256	-0.001204	-0.001011	-0.003291
16.3600	591.548	19.424	16.788	51.611	-0.584	20.276	1126.156	-0.001360	-0.001175	-0.003613
16.4000	679.990	26.681	21.998	61.615	-0.589	20.276	1294.527	-0.001868	-0.001540	-0.004313
16.4400	786.752	35.211	28.795	73.984	-0.594	20.275	1497.774	-0.002465	-0.002016	-0.005179
16.4800	829.794	37.909	30.393	78.762	-0.593	20.275	1579.714	-0.002654	-0.002128	-0.005513
16.5200	904.981	43.301	35.410	87.523	-0.597	20.275	1722.851	-0.003031	-0.002479	-0.006127
16.5600	983.519	49.361	39.480	95.608	-0.593	20.276	1872.368	-0.003455	-0.002764	-0.006693
16.6000	1024.983	52.651	42.385	101.082	-0.592	20.275	1951.303	-0.003686	-0.002967	-0.007076
16.6400	1107.804	58.865	48.373	110.229	-0.590	20.275	2108.974	-0.004121	-0.003386	-0.007716
16.6800	1188.101	63.922	52.838	118.160	-0.589	20.275	2261.839	-0.004475	-0.003699	-0.008271
16.7200	1255.909	68.214	57.128	125.376	-0.578	20.275	2390.928	-0.004775	-0.003999	-0.008776
16.7600	1268.157	70.635	58.522	127.178	-0.583	20.275	2414.246	-0.004944	-0.004097	-0.008902
16.8000	1301.701	74.595	61.951	131.546	-0.591	20.275	2478.104	-0.005222	-0.004337	-0.009208
16.8400	1374.438	79.625	66.160	138.643	-0.592	20.274	2616.577	-0.005574	-0.004631	-0.009705
16.8800	1329.428	77.125	64.620	135.200	-0.594	20.275	2530.890	-0.005399	-0.004523	-0.009464
16.9200	1395.117	81.113	68.178	141.576	-0.589	20.274	2655.945	-0.005678	-0.004772	-0.009910
16.9600	1406.945	82.822	68.555	143.118	-0.587	20.274	2678.461	-0.005798	-0.004799	-0.010018
17.0000	1416.803	82.850	69.083	144.048	-0.597	20.274	2697.229	-0.005800	-0.004836	-0.010083
17.0400	1319.299	76.805	65.841	136.604	-0.591	20.275	2511.606	-0.005376	-0.004609	-0.009562
17.0800	1359.936	79.428	66.980	139.158	-0.588	20.274	2588.968	-0.005560	-0.004689	-0.009741
17.1200	1331.607	76.304	66.383	137.242	-0.592	20.274	2535.038	-0.005341	-0.004647	-0.009607
17.1600	1270.998	73.940	63.134	132.126	-0.596	20.274	2419.653	-0.005176	-0.004419	-0.009249
17.2000	1247.989	72.535	61.271	129.599	-0.596	20.274	2375.851	-0.005077	-0.004289	-0.009072
17.2400	1174.395	67.076	57.853	123.316	-0.599	20.274	2235.746	-0.004695	-0.004050	-0.008632
17.2800	1107.338	62.572	53.307	116.381	-0.596	20.274	2108.088	-0.004380	-0.003731	-0.008147
17.3200	1050.140	58.808	50.085	110.367	-0.596	20.274	1999.197	-0.004117	-0.003506	-0.007726
17.3600	991.965	53.961	46.500	104.544	-0.595	20.274	1888.447	-0.003777	-0.003255	-0.007318
17.4000	911.849	49.082	41.485	95.886	-0.599	20.273	1735.926	-0.003436	-0.002904	-0.006712
17.4400	822.490	42.577	36.217	86.172	-0.597	20.274	1565.809	-0.002980	-0.002535	-0.006032
17.4800	775.706	37.602	33.339	80.546	-0.597	20.274	1476.746	-0.002632	-0.002334	-0.005638
17.5200	707.537	32.238	29.296	72.567	-0.597	20.273	1346.970	-0.002257	-0.002051	-0.005080
17.5600	636.739	27.761	25.140	64.301	-0.599	20.273	1212.187	-0.001943	-0.001760	-0.004501
17.6000	517.563	19.384	18.583	50.764	-0.593	20.274	985.308	-0.001357	-0.001301	-0.003553
17.6400	469.037	14.812	15.151	44.302	-0.596	20.273	892.925	-0.001037	-0.001061	-0.003101
17.6800	420.480	11.725	12.676	38.103	-0.589	20.273	800.486	-0.000821	-0.000887	-0.002667
17.7200	395.412	8.462	10.868	34.768	-0.589	20.273	752.764	-0.000592	-0.000761	-0.002434
17.7600	330.249	3.739	7.048	25.851	-0.605	20.273	628.710	-0.000262	-0.000493	-0.001810
17.8000	281.136	-0.363	4.573	19.038	-0.590	20.273	535.212	0.000025	-0.000320	-0.001333
17.8400	251.606	-3.977	3.409	15.174	-0.601	20.273	478.992	0.000278	-0.000239	-0.001062
17.8800	242.739	-5.479	2.448	13.104	-0.604	20.272	462.112	0.000383	-0.000171	-0.000917
17.9200	210.037	-6.433	0.932	8.157	-0.591	20.272	399.857	0.000450	-0.000065	-0.000571
17.9600	211.074	-6.630	1.059	8.018	-0.592	20.273	401.831	0.000464	-0.000074	-0.000561
18.0000	208.654	-7.938	0.377	7.128	-0.600	20.272	397.224	0.000556	-0.000026	-0.000499
18.0400	228.101	-6.894	0.741	8.993	-0.589	20.273	434.246	0.000483	-0.000052	-0.000630
18.0800	247.803	-5.838	1.238	11.270	-0.588	20.272	471.754	0.000409	-0.000087	-0.000789
18.1200	283.045	-2.710	1.504	15.161	-0.594	20.273	538.845	0.000190	-0.000105	-0.001061
18.1600	313.538	-0.459	2.852	19.150	-0.589	20.272	596.895	0.000032	-0.000200	-0.001341
18.2000	366.302	2.721	4.725	25.070	-0.595	20.272	697.346	-0.000190	-0.000331	-0.001755
18.2400	404.700	5.084	6.991	29.697	-0.581	20.272	770.445	-0.000356	-0.000489	-0.002079
18.2800	491.639	12.101	11.188	39.798	-0.591	20.272	935.955	-0.000847	-0.000783	-0.002786
18.3200	530.037	15.494	13.677	44.743	-0.586	20.271	1009.054	-0.001085	-0.000957	-0.003132
18.3600	632.921	22.205	19.025	56.417	-0.593	20.272	1204.920	-0.001554	-0.001332	-0.003949
18.4000	676.880	26.596	21.790	61.518	-0.599	20.272	1288.605	-0.001862	-0.001525	-0.004306
18.4400	757.868	31.432	26.418	70.818	-0.601	20.272	1442.785	-0.002200	-0.001849	-0.004957
18.4800	839.667	38.741	30.937	79.764	-0.597	20.271	1598.511	-0.002712	-0.002166	-0.005583
18.5200	868.296	41.630	34.006	84.294	-0.591	20.271	1653.013	-0.002914	-0.002380	-0.005901
18.5600	968.190	47.399	38.827	94.620	-0.593	20.271	1843.185	-0.003318	-0.002718	-0.006623
18.6000	1065.875	55.197	44.761	105.167	-0.581	20.271	2029.152	-0.003864	-0.003133	-0.007362
18.6400	1128.739	59.018	49.014	112.352	-0.593	20.271	2148.829	-0.004131	-0.003431	-0.007865
18.6800	1204.301	64.451	53.447	119.901	-0.577	20.271	2292.681	-0.004512	-0.003741	-0.008393
18.7200	1248.079	68.437	57.490	125.043	-0.586	20.271	2376.022	-0.004791	-0.004024	-0.008753
18.7600	1286.086	71.956	59.686	129.321	-0.591	20.271	2448.378	-0.005037	-0.004178	-0.009052
18.8000	1310.132	74.315	61.687	131.849	-0.589	20.271	2494.154	-0.005202	-0.004318	-0.009229
18.8400	1353.443	78.055	65.173	137.186	-0.595	20.271	2576.609	-0.005464	-0.004562	-0.009603
18.8800	1382.689	80.640	66.815	139.867	-0.584	20.271	2632.284	-0.005645	-0.004677	-0.009791
18.9200	1376.317	80.387	66.647	140.021	-0.584	20.271	2620.153	-0.005627	-0.004665	-0.009801
18.9600	1412.144	81.586	68.776	143.301	-0.576	20.271	2688.360	-0.005711	-0.004814	-0.010031
19.0000	1393.058	81.503	68.428	142.315	-0.573	20.271	2652.025	-0.005705	-0.004790	-0.009962
19.0400	1378.766	81.308	68.136	141.284	-0.581	20.270	2624.817	-0.005692	-0.004770	-0.009890
19.0800	1304.887	76.081	65.661	135.561	-0.578	20.271	2484.169	-0.005326	-0.004596	-0.009489
19.1200	1335.154	77.971	66.536	138.129	-0.572	20.270	2541.790	-0.005458	-0.004658	-0.009669
19.1600	1288.911	74.941	64.675	133.879	-0.581	20.270	2453.756	-0.005246	-0.004527	-0.009372
19.2000	1252.573	73.038	62.550	130.612	-0.586	20.270	2384.577	-0.005113	-0.004378	-0.009143
19.2400	1165.724	66.174	57.128	122.259	-0.591	20.270	2219.238	-0.004632	-0.003999	-0.008558
19.2800	1118.414	62.893	53.876	117.563	-0.588	20.270	2129.173	-0.004403	-0.003771	-0.008229
19.3200	1054.573	58.990	50.292	111.322	-0.583	20.270	2007.637	-0.004129	-0.003520	-0.007793
19.3600	969.257	52.915	45.346	102.627	-0.581	20.270	1845.217	-0.003704	-0.003174	-0.007184
19.4000	922.804	48.164	41.594	96.955	-0.588	20.270	1756.783	-0.003371	-0.002912	-0.006787
19.4400	833.806	43.343	36.811	87.606	-0.586	20.270	1587.353	-0.003034	-0.002577	-0.006132
19.4800	754.501	36.476	32.158	78.569	-0.592	20.270	1436.377	-0.002553	-0.002251	-0.005500
19.5200	671.154	30.862	27.405	69.385	-0.593	20.270	1277.704	-0.002160	-0.001918	-0.004857
19.5600	623.198	27.512	24.462	63.217	-0.587	20.270	1186.409	-0.001926	-0.001712	-0.004425
19.6000	551.588	21.330	20.444	54.560	-0.584	20.269	1050.081	-0.001493	-0.001431	-0.003819
19.6400	467.504	15.548	15.718	44.592	-0.583	20.269	890.007	-0.001088	-0.001100	-0.003121
19.6800	417.144	10.005	12.119	37.591	-0.585	20.270	794.134	-0.000700	-0.000848	-0.002631
19.7200	371.863	7.515	9.756	31.659	-0.578	20.269	707.932	-0.000526	-0.000683	-0.002216
19.7600	328.040	3.347	7.325	25.948	-0.595	20.269	624.504	-0.000234	-0.000513	-0.001816
19.8000	267.250	-1.517	4.335	17.620	-0.595	20.269	508.776	0.000106	-0.000303	-0.001233
19.8400	260.878	-3.449	3.575	16.176	-0.596	20.269	496.645	0.000241	-0.000250	-0.001132
19.8800	195.354	-7.686	0.419	7.392	-0.593	20.269	371.904	0.000538	-0.000029	-0.000517
19.9200	207.227	-7.769	0.892	7.838	-0.592	20.269	394.506	0.000544	-0.000062	-0.000549
19.9600	207.106	-7.798	0.628	7.502	-0.589	20.269	394.278	0.000546	-0.000044	-0.000525
Test Cycles
Time (sec)	Axial stress (kPa)	Axial micro-strain #1	Axial micro-strain #2	Axial micro-strain #3	Confining pressure (kPa)	Temperature (�C)	Load (N)	Displacement #1 (mm)	Displacement #2 (mm)	Displacement #3 (mm)
0.0000	218.799	-7.130	0.920	8.284	-0.592	20.269	416.536	0.000499	-0.000064	-0.000580
0.0400	224.855	-6.422	0.795	8.910	-0.578	20.269	428.066	0.000450	-0.000056	-0.000624
0.0800	258.278	-4.212	1.490	12.493	-0.579	20.269	491.695	0.000295	-0.000104	-0.000875
0.1200	266.303	-4.547	1.460	13.521	-0.582	20.269	506.973	0.000318	-0.000102	-0.000946
0.1600	328.551	0.277	3.423	20.914	-0.585	20.268	625.477	-0.000019	-0.000240	-0.001464
0.2000	344.406	1.804	4.005	22.706	-0.595	20.269	655.661	-0.000126	-0.000280	-0.001589
0.2400	430.519	7.669	8.022	32.516	-0.579	20.268	819.597	-0.000537	-0.000562	-0.002276
0.2800	485.312	11.934	11.091	39.575	-0.579	20.269	923.910	-0.000835	-0.000776	-0.002770
0.3200	550.430	16.950	14.372	46.414	-0.568	20.268	1047.878	-0.001186	-0.001006	-0.003249
0.3600	617.127	21.636	18.458	54.767	-0.576	20.268	1174.850	-0.001515	-0.001292	-0.003834
0.4000	674.400	27.042	21.914	61.739	-0.580	20.268	1283.884	-0.001893	-0.001534	-0.004322
0.4400	759.431	32.058	26.765	70.956	-0.580	20.268	1445.761	-0.002244	-0.001874	-0.004967
0.4800	852.111	39.214	31.659	81.101	-0.573	20.268	1622.200	-0.002745	-0.002216	-0.005677
0.5200	901.750	42.953	34.826	87.035	-0.570	20.268	1716.700	-0.003007	-0.002438	-0.006092
0.5600	1018.445	50.136	41.482	99.304	-0.575	20.268	1938.858	-0.003510	-0.002904	-0.006951
0.6000	1057.264	55.018	44.468	104.392	-0.590	20.268	2012.758	-0.003851	-0.003113	-0.007307
0.6400	1123.313	59.645	49.027	111.767	-0.587	20.268	2138.500	-0.004175	-0.003432	-0.007824
0.6800	1170.157	63.241	52.350	116.896	-0.585	20.268	2227.678	-0.004427	-0.003664	-0.008183
0.7200	1238.777	68.604	56.504	123.913	-0.578	20.268	2358.313	-0.004802	-0.003955	-0.008674
0.7600	1281.923	71.954	59.602	129.000	-0.579	20.267	2440.453	-0.005037	-0.004172	-0.009030
0.8000	1329.233	75.818	63.007	134.156	-0.577	20.267	2530.518	-0.005307	-0.004411	-0.009391
0.8400	1355.983	78.263	64.605	137.061	-0.581	20.267	2581.444	-0.005478	-0.004522	-0.009594
0.8800	1380.014	79.193	66.190	139.574	-0.591	20.267	2627.192	-0.005544	-0.004633	-0.009770
0.9200	1401.655	81.514	68.093	142.133	-0.586	20.267	2668.390	-0.005706	-0.004767	-0.009949
0.9600	1392.172	81.724	67.970	142.132	-0.584	20.267	2650.337	-0.005721	-0.004758	-0.009949
1.0000	1417.975	82.324	69.682	144.439	-0.577	20.267	2699.461	-0.005763	-0.004878	-0.010111
1.0400	1373.416	80.514	68.567	141.468	-0.592	20.267	2614.632	-0.005636	-0.004800	-0.009903
1.0800	1361.078	79.290	68.275	140.146	-0.580	20.267	2591.143	-0.005550	-0.004779	-0.009810
1.1200	1316.038	76.302	66.384	136.951	-0.586	20.267	2505.398	-0.005341	-0.004647	-0.009587
1.1600	1271.043	74.524	63.579	132.598	-0.589	20.267	2419.739	-0.005217	-0.004451	-0.009282
1.2000	1233.126	71.483	61.367	128.971	-0.575	20.267	2347.555	-0.005004	-0.004296	-0.009028
1.2400	1201.131	69.246	58.811	125.682	-0.578	20.266	2286.644	-0.004847	-0.004117	-0.008798
1.2800	1134.975	64.756	55.421	119.300	-0.580	20.267	2160.702	-0.004533	-0.003879	-0.008351
1.3200	1056.662	58.431	50.598	112.004	-0.565	20.267	2011.614	-0.004090	-0.003542	-0.007840
1.3600	991.815	53.612	45.943	104.862	-0.577	20.267	1888.161	-0.003753	-0.003216	-0.007340
1.4000	913.111	48.610	41.456	96.288	-0.581	20.267	1738.329	-0.003403	-0.002902	-0.006740
1.4400	849.691	43.927	38.034	89.298	-0.581	20.267	1617.594	-0.003075	-0.002662	-0.006251
1.4800	769.500	37.381	33.449	80.363	-0.580	20.266	1464.930	-0.002617	-0.002341	-0.005625
1.5200	709.882	33.100	29.198	73.137	-0.589	20.266	1351.433	-0.002317	-0.002044	-0.005120
1.5600	574.190	23.705	22.126	58.365	-0.588	20.266	1093.111	-0.001659	-0.001549	-0.004086
1.6000	536.619	20.135	19.555	53.377	-0.587	20.266	1021.585	-0.001409	-0.001369	-0.003736
1.6400	484.351	17.102	16.384	46.761	-0.588	20.267	922.079	-0.001197	-0.001147	-0.003273
1.6800	427.754	12.072	13.121	39.187	-0.583	20.266	814.333	-0.000845	-0.000918	-0.002743
1.7200	358.052	6.153	8.882	30.378	-0.580	20.266	681.639	-0.000431	-0.000622	-0.002126
1.7600	340.995	4.487	8.005	27.346	-0.584	20.267	649.166	-0.000314	-0.000560	-0.001914
1.8000	283.451	-0.501	4.949	19.898	-0.583	20.267	539.618	0.000035	-0.000346	-0.001393
1.8400	248.495	-3.923	3.242	15.052	-0.587	20.266	473.070	0.000275	-0.000227	-0.001054
1.8800	218.483	-5.742	1.864	10.645	-0.588	20.266	415.936	0.000402	-0.000130	-0.000745
1.9200	219.400	-6.281	1.782	9.950	-0.581	20.266	417.681	0.000440	-0.000125	-0.000696
1.9600	194.513	-7.756	0.392	6.349	-0.594	20.266	370.302	0.000543	-0.000027	-0.000444
2.0000	210.623	-8.283	0.544	7.560	-0.588	20.265	400.972	0.000580	-0.000038	-0.000529
2.0400	258.564	-4.824	1.433	12.659	-0.573	20.266	492.239	0.000338	-0.000100	-0.000886
2.0800	287.734	-2.585	2.073	16.298	-0.581	20.266	547.771	0.000181	-0.000145	-0.001141
2.1200	261.690	-4.938	1.627	13.202	-0.590	20.265	498.190	0.000346	-0.000114	-0.000924
2.1600	322.104	0.277	3.617	20.594	-0.583	20.266	613.203	-0.000019	-0.000253	-0.001442
2.2000	352.311	2.348	4.366	23.775	-0.598	20.266	670.710	-0.000164	-0.000306	-0.001664
2.2400	404.940	5.943	7.535	30.295	-0.583	20.265	770.903	-0.000416	-0.000527	-0.002121
2.2800	470.900	11.184	11.218	38.381	-0.590	20.265	896.473	-0.000783	-0.000785	-0.002687
2.3200	524.777	15.520	14.206	44.815	-0.588	20.265	999.041	-0.001086	-0.000994	-0.003137
2.3600	606.517	21.149	17.760	53.586	-0.581	20.266	1154.652	-0.001480	-0.001243	-0.003751
2.4000	672.717	25.764	21.455	61.254	-0.593	20.266	1280.680	-0.001803	-0.001502	-0.004288
2.4400	786.497	34.430	28.029	74.192	-0.589	20.265	1497.288	-0.002410	-0.001962	-0.005193
2.4800	826.442	37.686	30.184	79.014	-0.584	20.265	1573.334	-0.002638	-0.002113	-0.005531
2.5200	904.064	42.812	35.075	87.978	-0.592	20.265	1721.106	-0.002997	-0.002455	-0.006158
2.5600	956.017	46.732	38.660	93.914	-0.592	20.266	1820.011	-0.003271	-0.002706	-0.006574
2.6000	1050.997	54.181	44.652	104.447	-0.591	20.265	2000.828	-0.003793	-0.003126	-0.007311
2.6400	1136.719	60.116	49.667	112.798	-0.584	20.265	2164.021	-0.004208	-0.003477	-0.007896
2.6800	1157.984	63.158	52.279	116.616	-0.591	20.265	2204.504	-0.004421	-0.003660	-0.008163
2.7200	1251.340	69.411	57.811	125.458	-0.583	20.265	2382.231	-0.004859	-0.004047	-0.008782
2.7600	1317.045	74.496	61.396	132.016	-0.587	20.265	2507.315	-0.005215	-0.004298	-0.009241
2.8000	1324.243	75.206	62.535	133.861	-0.593	20.265	2521.019	-0.005264	-0.004377	-0.009370
2.8400	1345.944	77.501	65.437	137.006	-0.588	20.265	2562.332	-0.005425	-0.004581	-0.009590
2.8800	1362.491	78.207	65.844	138.367	-0.584	20.265	2593.832	-0.005475	-0.004609	-0.009686
2.9200	1401.715	81.725	68.415	142.510	-0.586	20.265	2668.505	-0.005721	-0.004789	-0.009976
2.9600	1408.688	81.947	68.844	143.354	-0.576	20.265	2681.780	-0.005736	-0.004819	-0.010035
3.0000	1388.670	81.737	69.013	142.288	-0.584	20.265	2643.671	-0.005722	-0.004831	-0.009960
3.0400	1346.260	79.249	67.982	139.269	-0.582	20.265	2562.933	-0.005547	-0.004759	-0.009749
3.0800	1355.743	79.526	68.164	139.838	-0.580	20.265	2580.986	-0.005567	-0.004771	-0.009789
3.1200	1340.744	78.623	67.609	138.978	-0.591	20.264	2552.433	-0.005504	-0.004733	-0.009728
3.1600	1262.897	73.037	62.340	131.627	-0.580	20.264	2404.232	-0.005113	-0.004364	-0.009214
3.2000	1223.147	71.023	60.561	128.319	-0.585	20.264	2328.558	-0.004972	-0.004239	-0.008982
3.2400	1172.336	66.729	57.018	123.122	-0.578	20.265	2231.827	-0.004671	-0.003991	-0.008619
3.2800	1091.303	61.364	52.349	115.271	-0.589	20.265	2077.560	-0.004295	-0.003664	-0.008069
3.3200	1049.163	58.377	50.194	111.379	-0.591	20.265	1997.337	-0.004086	-0.003514	-0.007797
3.3600	1011.186	55.403	47.071	106.723	-0.583	20.264	1925.039	-0.003878	-0.003295	-0.007471
3.4000	916.072	48.790	42.411	97.013	-0.591	20.265	1743.965	-0.003415	-0.002969	-0.006791
3.4400	853.012	44.716	38.284	90.006	-0.583	20.265	1623.917	-0.003130	-0.002680	-0.006300
3.4800	780.921	39.113	33.979	81.616	-0.585	20.264	1486.673	-0.002738	-0.002379	-0.005713
3.5200	691.457	31.613	28.809	71.470	-0.587	20.264	1316.357	-0.002213	-0.002017	-0.005003
3.5600	626.955	26.958	24.670	63.551	-0.588	20.265	1193.562	-0.001887	-0.001727	-0.004449
3.6000	568.720	22.441	21.095	56.669	-0.594	20.264	1082.697	-0.001571	-0.001477	-0.003967
3.6400	471.516	15.258	15.939	45.316	-0.592	20.264	897.646	-0.001068	-0.001116	-0.003172
3.6800	429.602	12.365	13.317	39.574	-0.591	20.264	817.852	-0.000866	-0.000932	-0.002770
3.7200	369.534	7.543	9.853	31.588	-0.591	20.265	703.497	-0.000528	-0.000690	-0.002211
3.7600	327.003	3.987	7.686	26.154	-0.595	20.264	622.530	-0.000279	-0.000538	-0.001831
3.8000	289.432	0.456	5.365	20.622	-0.580	20.264	551.004	-0.000032	-0.000376	-0.001444
3.8400	256.911	-2.418	3.644	16.133	-0.584	20.264	489.092	0.000169	-0.000255	-0.001129
3.8800	233.301	-4.588	2.296	12.576	-0.581	20.264	444.145	0.000321	-0.000161	-0.000880
3.9200	215.943	-6.087	1.586	9.658	-0.589	20.265	411.100	0.000426	-0.000111	-0.000676
3.9600	213.298	-7.074	0.837	8.687	-0.590	20.265	406.065	0.000495	-0.000059	-0.000608
4.0000	214.305	-7.506	0.907	8.577	-0.584	20.264	407.982	0.000525	-0.000063	-0.000600
4.0400	223.382	-7.185	1.059	9.021	-0.584	20.264	425.262	0.000503	-0.000074	-0.000631
4.0800	237.464	-5.673	1.419	10.753	-0.586	20.264	452.070	0.000397	-0.000099	-0.000753
4.1200	275.170	-3.099	2.129	14.985	-0.593	20.264	523.853	0.000217	-0.000149	-0.001049
4.1600	328.055	0.776	3.702	21.372	-0.588	20.264	624.533	-0.000054	-0.000259	-0.001496
4.2000	369.458	3.751	5.506	25.947	-0.604	20.264	703.354	-0.000263	-0.000385	-0.001816
4.2400	427.378	8.115	7.967	32.502	-0.592	20.264	813.618	-0.000568	-0.000558	-0.002275
4.2800	476.416	11.655	10.438	38.394	-0.585	20.264	906.973	-0.000816	-0.000731	-0.002688
4.3200	536.319	15.852	13.720	45.662	-0.599	20.264	1021.013	-0.001110	-0.000960	-0.003196
4.3600	623.378	22.259	18.471	55.403	-0.592	20.264	1186.752	-0.001558	-0.001293	-0.003878
4.4000	686.062	26.986	22.331	62.924	-0.595	20.264	1306.086	-0.001889	-0.001563	-0.004405
4.4400	751.586	32.113	26.239	70.706	-0.587	20.264	1430.826	-0.002248	-0.001837	-0.004949
4.4800	828.862	37.435	30.742	79.209	-0.585	20.264	1577.940	-0.002620	-0.002152	-0.005545
4.5200	918.867	44.480	36.064	89.283	-0.578	20.264	1749.287	-0.003114	-0.002524	-0.006250
4.5600	991.935	49.720	40.510	97.443	-0.584	20.264	1888.390	-0.003480	-0.002836	-0.006821
4.6000	1057.865	54.198	44.538	104.740	-0.581	20.264	2013.903	-0.003794	-0.003118	-0.007332
4.6400	1131.474	60.213	49.234	112.979	-0.585	20.263	2154.036	-0.004215	-0.003446	-0.007909
4.6800	1197.614	64.883	53.459	119.552	-0.593	20.264	2279.949	-0.004542	-0.003742	-0.008369
4.7200	1223.177	67.520	55.767	122.844	-0.583	20.264	2328.615	-0.004726	-0.003904	-0.008599
4.7600	1271.494	71.232	58.868	127.984	-0.584	20.264	2420.597	-0.004986	-0.004121	-0.008959
4.8000	1335.665	76.080	63.593	134.989	-0.595	20.264	2542.763	-0.005326	-0.004452	-0.009449
4.8400	1345.073	77.275	64.204	136.466	-0.583	20.264	2560.673	-0.005409	-0.004494	-0.009553
4.8800	1368.216	79.416	66.092	139.019	-0.596	20.264	2604.733	-0.005559	-0.004626	-0.009731
4.9200	1396.289	81.308	68.539	142.203	-0.587	20.264	2658.176	-0.005692	-0.004798	-0.009954
4.9600	1399.265	81.669	68.400	142.898	-0.588	20.264	2663.841	-0.005717	-0.004788	-0.010003
5.0000	1399.566	81.767	68.680	143.079	-0.580	20.263	2664.413	-0.005724	-0.004808	-0.010016
5.0400	1369.704	80.693	68.055	141.145	-0.590	20.264	2607.565	-0.005648	-0.004764	-0.009880
5.0800	1354.495	79.778	67.704	140.158	-0.584	20.264	2578.611	-0.005584	-0.004739	-0.009811
5.1200	1333.020	78.235	67.119	138.170	-0.594	20.264	2537.727	-0.005476	-0.004698	-0.009672
5.1600	1304.225	76.416	65.843	135.936	-0.590	20.263	2482.910	-0.005349	-0.004609	-0.009516
5.2000	1246.111	72.426	62.201	130.320	-0.600	20.264	2372.274	-0.005070	-0.004354	-0.009122
5.2400	1191.437	68.731	58.991	125.027	-0.599	20.264	2268.190	-0.004811	-0.004129	-0.008752
5.2800	1130.196	64.757	55.447	119.370	-0.591	20.264	2151.604	-0.004533	-0.003881	-0.008356
5.3200	1075.553	60.422	51.780	113.659	-0.595	20.264	2047.577	-0.004230	-0.003625	-0.007956
5.3600	981.355	53.960	46.123	103.823	-0.603	20.264	1868.248	-0.003777	-0.003229	-0.007268
5.4000	918.491	48.665	42.053	97.597	-0.600	20.264	1748.571	-0.003407	-0.002944	-0.006832
5.4400	852.607	44.592	38.230	89.798	-0.582	20.264	1623.144	-0.003121	-0.002676	-0.006286
5.4800	776.338	38.547	33.922	81.352	-0.581	20.264	1477.947	-0.002698	-0.002375	-0.005695
5.5200	685.836	31.765	28.600	71.053	-0.584	20.264	1305.656	-0.002224	-0.002002	-0.004974
5.5600	612.618	26.180	24.223	62.617	-0.586	20.263	1166.267	-0.001833	-0.001696	-0.004383
5.6000	561.657	22.537	21.219	56.210	-0.585	20.264	1069.250	-0.001578	-0.001485	-0.003935
5.6400	474.447	16.271	16.427	46.068	-0.586	20.263	903.225	-0.001139	-0.001150	-0.003225
5.6800	436.726	13.005	13.788	40.494	-0.588	20.264	831.413	-0.000910	-0.000965	-0.002835
5.7200	376.687	8.211	10.396	33.044	-0.601	20.264	717.115	-0.000575	-0.000728	-0.002313
5.7600	331.512	4.140	7.354	26.749	-0.599	20.264	631.113	-0.000290	-0.000515	-0.001872
5.8000	285.435	0.388	5.381	20.748	-0.582	20.264	543.394	-0.000027	-0.000377	-0.001452
5.8400	249.216	-3.601	3.226	15.507	-0.588	20.264	474.443	0.000252	-0.000226	-0.001086
5.8800	229.694	-4.573	2.561	12.659	-0.594	20.264	437.279	0.000320	-0.000179	-0.000886
5.9200	214.636	-6.325	1.893	9.422	-0.592	20.264	408.611	0.000443	-0.000133	-0.000660
5.9600	206.310	-7.100	1.196	8.353	-0.584	20.264	392.761	0.000497	-0.000084	-0.000585
6.0000	201.561	-7.771	0.614	7.085	-0.579	20.264	383.720	0.000544	-0.000043	-0.000496
6.0400	238.290	-5.517	1.169	10.672	-0.587	20.264	453.644	0.000386	-0.000082	-0.000747
6.0800	239.898	-5.547	1.237	11.187	-0.576	20.264	456.705	0.000388	-0.000087	-0.000783
6.1200	291.777	-2.155	2.046	17.049	-0.587	20.264	555.468	0.000151	-0.000143	-0.001193
6.1600	320.466	0.096	3.156	20.637	-0.577	20.264	610.085	-0.000007	-0.000221	-0.001445
6.2000	370.871	3.348	5.185	26.445	-0.581	20.264	706.043	-0.000234	-0.000363	-0.001851
6.2400	423.380	7.321	7.885	32.169	-0.587	20.264	806.007	-0.000512	-0.000552	-0.002252
6.2800	500.762	13.172	12.230	41.497	-0.578	20.264	953.321	-0.000922	-0.000856	-0.002905
6.3200	540.316	16.508	14.344	46.274	-0.585	20.264	1028.624	-0.001156	-0.001004	-0.003239
6.3600	621.740	22.594	18.833	55.309	-0.595	20.264	1183.634	-0.001582	-0.001318	-0.003872
6.4000	723.588	29.541	24.404	66.950	-0.589	20.264	1377.525	-0.002068	-0.001708	-0.004687
6.4400	793.410	34.377	28.517	75.222	-0.578	20.264	1510.448	-0.002406	-0.001996	-0.005266
6.4800	827.284	37.977	31.034	79.529	-0.585	20.265	1574.936	-0.002658	-0.002172	-0.005567
6.5200	923.466	44.508	36.092	89.799	-0.583	20.264	1758.041	-0.003116	-0.002526	-0.006286
6.5600	1002.395	50.498	41.498	98.570	-0.580	20.264	1908.302	-0.003535	-0.002905	-0.006900
6.6000	1055.054	54.057	44.665	104.571	-0.578	20.264	2008.553	-0.003784	-0.003127	-0.007320
6.6400	1110.404	59.225	48.845	111.016	-0.580	20.264	2113.924	-0.004146	-0.003419	-0.007771
6.6800	1171.134	63.476	53.017	117.896	-0.580	20.265	2229.538	-0.004443	-0.003711	-0.008253
6.7200	1235.846	68.327	56.656	124.429	-0.574	20.264	2352.734	-0.004783	-0.003966	-0.008710
6.7600	1297.823	73.482	60.632	130.558	-0.577	20.264	2470.722	-0.005144	-0.004244	-0.009139
6.8000	1342.247	76.945	63.872	135.618	-0.585	20.264	2555.294	-0.005386	-0.004471	-0.009493
6.8400	1353.143	77.626	64.924	137.090	-0.572	20.264	2576.036	-0.005434	-0.004545	-0.009596
6.8800	1406.749	81.945	68.357	142.787	-0.580	20.264	2678.089	-0.005736	-0.004785	-0.009995
6.9200	1386.972	80.777	67.830	141.646	-0.591	20.264	2640.438	-0.005654	-0.004748	-0.009915
6.9600	1400.437	82.141	68.611	143.149	-0.577	20.264	2666.073	-0.005750	-0.004803	-0.010020
7.0000	1378.736	80.638	68.413	141.913	-0.579	20.264	2624.760	-0.005645	-0.004789	-0.009934
7.0400	1381.712	81.541	68.525	142.147	-0.578	20.264	2630.425	-0.005708	-0.004797	-0.009950
7.0800	1338.670	78.860	67.441	138.949	-0.584	20.264	2548.485	-0.005520	-0.004721	-0.009726
7.1200	1306.976	76.652	66.259	136.283	-0.585	20.264	2488.146	-0.005366	-0.004638	-0.009540
7.1600	1263.138	74.135	63.745	132.237	-0.578	20.264	2404.690	-0.005189	-0.004462	-0.009257
7.2000	1240.475	72.372	62.492	130.029	-0.572	20.264	2361.546	-0.005066	-0.004374	-0.009102
7.2400	1175.116	67.814	58.395	124.012	-0.572	20.264	2237.120	-0.004747	-0.004088	-0.008681
7.2800	1118.790	63.659	54.431	118.077	-0.581	20.265	2129.889	-0.004456	-0.003810	-0.008265
7.3200	1072.547	60.351	51.571	113.537	-0.597	20.265	2041.855	-0.004225	-0.003610	-0.007948
7.3600	996.383	54.862	46.807	105.626	-0.597	20.264	1896.858	-0.003840	-0.003276	-0.007394
7.4000	901.644	47.593	41.178	95.496	-0.588	20.264	1716.499	-0.003331	-0.002882	-0.006685
7.4400	859.099	44.257	38.619	90.841	-0.584	20.264	1635.504	-0.003098	-0.002703	-0.006359
7.4800	737.684	36.088	32.141	77.707	-0.593	20.264	1404.362	-0.002526	-0.002250	-0.005440
7.5200	684.769	32.238	28.962	71.055	-0.596	20.265	1303.625	-0.002257	-0.002027	-0.004974
7.5600	606.246	26.235	24.279	61.852	-0.597	20.265	1154.137	-0.001836	-0.001700	-0.004330
7.6000	555.029	21.746	21.152	55.432	-0.583	20.264	1056.633	-0.001522	-0.001481	-0.003880
7.6400	469.518	16.051	16.482	45.510	-0.584	20.264	893.841	-0.001124	-0.001154	-0.003186
7.6800	450.281	13.533	14.733	41.970	-0.593	20.264	857.220	-0.000947	-0.001031	-0.002938
7.7200	371.202	7.475	10.341	32.531	-0.586	20.265	706.673	-0.000523	-0.000724	-0.002277
7.7600	321.172	3.655	7.325	25.834	-0.581	20.265	611.429	-0.000256	-0.000513	-0.001808
7.8000	251.621	-2.462	4.045	16.647	-0.585	20.265	479.021	0.000172	-0.000283	-0.001165
7.8400	262.231	-2.447	3.935	16.869	-0.581	20.265	499.220	0.000171	-0.000275	-0.001181
7.8800	227.184	-4.894	2.380	11.964	-0.589	20.264	432.501	0.000343	-0.000167	-0.000837
7.9200	211.390	-6.699	1.795	9.229	-0.579	20.265	402.431	0.000469	-0.000126	-0.000646
7.9600	214.726	-6.949	1.432	9.381	-0.589	20.265	408.783	0.000486	-0.000100	-0.000657
8.0000	207.437	-7.241	1.210	8.394	-0.585	20.265	394.907	0.000507	-0.000085	-0.000588
8.0400	226.238	-6.032	1.433	9.716	-0.577	20.265	430.698	0.000422	-0.000100	-0.000680
8.0800	256.370	-3.574	2.031	13.383	-0.587	20.265	488.062	0.000250	-0.000142	-0.000937
8.1200	264.154	-3.879	2.047	13.702	-0.573	20.265	502.882	0.000271	-0.000143	-0.000959
8.1600	311.870	-0.432	3.156	19.607	-0.580	20.265	593.719	0.000030	-0.000221	-0.001372
8.2000	337.794	1.847	4.432	23.191	-0.578	20.265	643.072	-0.000129	-0.000310	-0.001623
8.2400	421.532	7.349	7.840	32.433	-0.578	20.265	802.488	-0.000514	-0.000549	-0.002270
8.2800	486.485	12.267	11.521	39.992	-0.574	20.265	926.142	-0.000859	-0.000806	-0.002799
8.3200	513.310	15.215	15.012	44.413	-0.574	20.265	977.211	-0.001065	-0.001051	-0.003109
8.3600	622.086	22.927	19.849	56.377	-0.581	20.265	1184.292	-0.001605	-0.001389	-0.003946
8.4000	681.418	27.110	22.846	62.952	-0.583	20.265	1297.245	-0.001898	-0.001599	-0.004407
8.4400	815.517	36.518	29.671	77.153	-0.592	20.265	1552.534	-0.002556	-0.002077	-0.005401
8.4800	827.990	37.923	31.283	79.891	-0.572	20.266	1576.281	-0.002655	-0.002190	-0.005592
8.5200	910.030	44.176	36.037	88.853	-0.572	20.266	1732.464	-0.003092	-0.002523	-0.006220
8.5600	976.155	48.958	39.758	96.050	-0.573	20.266	1858.349	-0.003427	-0.002783	-0.006724
8.6000	1055.280	54.783	44.692	104.780	-0.583	20.266	2008.982	-0.003835	-0.003128	-0.007335
8.6400	1109.517	58.475	48.414	111.016	-0.577	20.266	2112.236	-0.004093	-0.003389	-0.007771
8.6800	1176.830	63.923	52.960	118.370	-0.589	20.266	2240.381	-0.004475	-0.003707	-0.008286
8.7200	1259.005	70.078	58.715	127.080	-0.590	20.265	2396.822	-0.004905	-0.004110	-0.008896
8.7600	1276.979	72.092	60.185	129.445	-0.585	20.265	2431.040	-0.005046	-0.004213	-0.009061
8.8000	1295.900	74.315	63.775	132.665	-0.578	20.266	2467.060	-0.005202	-0.004464	-0.009287
8.8400	1336.521	77.234	65.133	136.117	-0.593	20.266	2544.394	-0.005406	-0.004559	-0.009528
8.8800	1388.144	81.070	68.080	141.270	-0.581	20.266	2642.670	-0.005675	-0.004766	-0.009889
8.9200	1389.361	81.461	68.221	141.577	-0.584	20.266	2644.987	-0.005702	-0.004775	-0.009910
8.9600	1374.213	80.917	68.051	141.074	-0.584	20.266	2616.148	-0.005664	-0.004764	-0.009875
9.0000	1399.671	82.156	68.902	143.577	-0.583	20.266	2664.614	-0.005751	-0.004823	-0.010050
9.0400	1359.545	80.070	67.816	140.506	-0.585	20.266	2588.224	-0.005605	-0.004747	-0.009835
9.0800	1380.795	81.376	68.511	142.356	-0.588	20.266	2628.679	-0.005696	-0.004796	-0.009965
9.1200	1328.586	78.150	67.077	138.282	-0.589	20.266	2529.287	-0.005471	-0.004695	-0.009680
9.1600	1262.597	73.678	63.468	132.322	-0.580	20.266	2403.660	-0.005157	-0.004443	-0.009263
9.2000	1248.680	72.913	62.842	130.517	-0.600	20.267	2377.167	-0.005104	-0.004399	-0.009136
9.2400	1188.011	68.493	58.810	125.097	-0.595	20.266	2261.667	-0.004795	-0.004117	-0.008757
9.2800	1117.407	64.061	54.850	118.676	-0.593	20.267	2127.256	-0.004484	-0.003839	-0.008307
9.3200	1069.647	60.365	51.892	113.606	-0.581	20.267	2036.333	-0.004226	-0.003632	-0.007952
9.3600	995.677	54.945	47.347	105.666	-0.593	20.267	1895.514	-0.003846	-0.003314	-0.007397
9.4000	931.942	50.135	43.092	98.792	-0.593	20.267	1774.178	-0.003509	-0.003016	-0.006915
9.4400	834.377	43.079	37.605	88.673	-0.587	20.267	1588.440	-0.003016	-0.002632	-0.006207
9.4800	782.484	39.075	34.270	82.366	-0.588	20.267	1489.649	-0.002735	-0.002399	-0.005766
9.5200	700.053	32.920	29.589	72.718	-0.590	20.267	1332.722	-0.002304	-0.002071	-0.005090
9.5600	629.104	27.680	25.501	64.621	-0.593	20.267	1197.653	-0.001938	-0.001785	-0.004523
9.6000	539.219	21.122	20.318	54.018	-0.590	20.267	1026.535	-0.001479	-0.001422	-0.003781
9.6400	466.211	15.883	16.190	45.218	-0.593	20.267	887.547	-0.001112	-0.001133	-0.003165
9.6800	422.899	11.574	13.483	39.021	-0.581	20.267	805.092	-0.000810	-0.000944	-0.002731
9.7200	373.035	8.254	10.744	32.977	-0.583	20.266	710.163	-0.000578	-0.000752	-0.002308
9.7600	303.153	2.096	6.811	24.193	-0.590	20.267	577.126	-0.000147	-0.000477	-0.001693
9.8000	296.180	1.247	6.214	22.246	-0.595	20.267	563.850	-0.000087	-0.000435	-0.001557
9.8400	234.188	-3.754	3.325	14.037	-0.597	20.267	445.833	0.000263	-0.000233	-0.000983
9.8800	232.294	-4.436	2.421	12.965	-0.591	20.267	442.228	0.000311	-0.000169	-0.000908
9.9200	208.775	-6.769	1.338	9.159	-0.599	20.267	397.453	0.000474	-0.000094	-0.000641
9.9600	211.720	-6.782	1.253	9.034	-0.592	20.267	403.061	0.000475	-0.000088	-0.000632
10.0000	213.479	-6.850	1.574	8.852	-0.590	20.267	406.408	0.000480	-0.000110	-0.000620
10.0400	227.004	-6.323	1.614	10.062	-0.592	20.267	432.158	0.000443	-0.000113	-0.000704
10.0800	247.728	-4.936	1.992	12.200	-0.594	20.267	471.611	0.000346	-0.000139	-0.000854
10.1200	268.422	-2.809	2.211	14.857	-0.600	20.267	511.007	0.000197	-0.000155	-0.001040
10.1600	334.938	1.567	4.281	22.163	-0.581	20.267	637.636	-0.000110	-0.000300	-0.001551
10.2000	367.249	3.945	5.492	26.212	-0.586	20.267	699.148	-0.000276	-0.000384	-0.001835
10.2400	416.587	7.642	7.772	31.811	-0.585	20.268	793.076	-0.000535	-0.000544	-0.002227
10.2800	470.810	11.641	11.023	38.631	-0.588	20.268	896.301	-0.000815	-0.000772	-0.002704
10.3200	527.978	15.772	13.898	45.162	-0.583	20.267	1005.135	-0.001104	-0.000973	-0.003161
10.3600	623.168	22.329	18.777	56.127	-0.592	20.268	1186.352	-0.001563	-0.001314	-0.003929
10.4000	684.198	27.164	22.610	63.312	-0.595	20.268	1302.538	-0.001902	-0.001583	-0.004432
10.4400	758.664	32.376	27.028	71.708	-0.600	20.268	1444.302	-0.002266	-0.001892	-0.005020
10.4800	881.341	41.826	34.145	85.269	-0.600	20.269	1677.847	-0.002928	-0.002390	-0.005969
10.5200	914.343	44.106	36.412	89.436	-0.616	20.268	1740.675	-0.003087	-0.002549	-0.006261
10.5600	987.336	49.386	40.789	97.208	-0.599	20.268	1879.635	-0.003457	-0.002855	-0.006805
10.6000	1043.422	54.571	45.024	104.266	-0.583	20.268	1986.408	-0.003820	-0.003152	-0.007299
10.6400	1089.830	57.849	47.635	109.283	-0.604	20.268	2074.757	-0.004049	-0.003334	-0.007650
10.6800	1200.650	65.784	54.154	120.512	-0.597	20.269	2285.728	-0.004605	-0.003791	-0.008436
10.7200	1239.648	68.883	57.017	124.944	-0.602	20.268	2359.972	-0.004822	-0.003991	-0.008746
10.7600	1268.172	71.053	58.715	128.123	-0.599	20.268	2414.274	-0.004974	-0.004110	-0.008969
10.8000	1310.327	74.859	62.773	133.374	-0.596	20.268	2494.526	-0.005240	-0.004394	-0.009336
10.8400	1355.968	78.387	66.231	138.100	-0.600	20.269	2581.415	-0.005487	-0.004636	-0.009667
10.8800	1363.032	79.097	66.757	138.990	-0.586	20.269	2594.862	-0.005537	-0.004673	-0.009729
10.9200	1405.983	82.627	69.486	143.577	-0.592	20.269	2676.630	-0.005784	-0.004864	-0.010050
10.9600	1385.198	81.780	68.999	142.036	-0.592	20.268	2637.062	-0.005725	-0.004830	-0.009943
11.0000	1397.988	82.669	69.347	143.369	-0.584	20.269	2661.409	-0.005787	-0.004854	-0.010036
11.0400	1338.475	78.901	67.705	139.046	-0.595	20.269	2548.113	-0.005523	-0.004739	-0.009733
11.0800	1359.680	80.153	68.178	140.671	-0.596	20.269	2588.482	-0.005611	-0.004772	-0.009847
11.1200	1340.083	79.153	67.678	139.244	-0.599	20.269	2551.174	-0.005541	-0.004737	-0.009747
11.1600	1289.948	75.651	65.243	134.754	-0.603	20.269	2455.730	-0.005296	-0.004567	-0.009433
11.2000	1241.286	71.844	61.521	129.780	-0.602	20.269	2363.091	-0.005029	-0.004306	-0.009085
11.2400	1190.671	68.089	58.755	125.347	-0.591	20.269	2266.731	-0.004766	-0.004113	-0.008774
11.2800	1109.397	63.296	54.474	117.799	-0.590	20.270	2112.007	-0.004431	-0.003813	-0.008246
11.3200	1038.027	57.834	50.070	110.200	-0.601	20.270	1976.137	-0.004048	-0.003505	-0.007714
11.3600	969.362	53.543	46.054	103.211	-0.595	20.270	1845.417	-0.003748	-0.003224	-0.007225
11.4000	915.395	49.040	42.276	97.081	-0.596	20.269	1742.678	-0.003433	-0.002959	-0.006796
11.4400	843.124	44.245	38.368	89.437	-0.607	20.270	1605.091	-0.003097	-0.002686	-0.006261
11.4800	758.739	37.950	33.381	80.252	-0.588	20.270	1444.445	-0.002657	-0.002337	-0.005618
11.5200	722.521	34.683	30.476	75.252	-0.604	20.270	1375.494	-0.002428	-0.002133	-0.005268
11.5600	589.264	25.040	23.126	60.506	-0.600	20.270	1121.807	-0.001753	-0.001619	-0.004235
11.6000	539.114	21.387	20.054	54.380	-0.583	20.271	1026.335	-0.001497	-0.001404	-0.003807
11.6400	492.406	16.951	17.176	48.000	-0.598	20.270	937.414	-0.001187	-0.001202	-0.003360
11.6800	408.247	10.838	12.912	37.702	-0.593	20.270	777.197	-0.000759	-0.000904	-0.002639
11.7200	366.107	7.266	10.299	32.268	-0.594	20.270	696.974	-0.000509	-0.000721	-0.002259
11.7600	312.561	2.888	7.646	25.320	-0.597	20.270	595.036	-0.000202	-0.000535	-0.001772
11.8000	315.176	2.457	6.505	24.221	-0.604	20.271	600.014	-0.000172	-0.000455	-0.001695
11.8400	250.448	-2.365	4.059	15.909	-0.588	20.270	476.789	0.000166	-0.000284	-0.001114
11.8800	228.372	-4.214	2.686	12.826	-0.591	20.270	434.761	0.000295	-0.000188	-0.000898
11.9200	204.822	-6.935	1.058	8.365	-0.598	20.271	389.929	0.000485	-0.000074	-0.000586
11.9600	209.541	-6.864	1.212	8.688	-0.607	20.271	398.912	0.000480	-0.000085	-0.000608
12.0000	207.648	-7.338	1.031	8.198	-0.586	20.271	395.308	0.000514	-0.000072	-0.000574
12.0400	225.967	-6.297	1.087	9.577	-0.584	20.271	430.183	0.000441	-0.000076	-0.000670
12.0800	238.982	-5.436	1.420	11.298	-0.597	20.271	454.960	0.000381	-0.000099	-0.000791
12.1200	277.289	-2.960	1.991	15.329	-0.600	20.271	527.887	0.000207	-0.000139	-0.001073
12.1600	318.362	0.831	4.254	20.995	-0.596	20.271	606.079	-0.000058	-0.000298	-0.001470
12.2000	354.280	2.903	5.409	24.931	-0.588	20.271	674.458	-0.000203	-0.000379	-0.001745
12.2400	402.010	6.584	7.492	30.546	-0.584	20.271	765.324	-0.000461	-0.000524	-0.002138
12.2800	478.129	12.015	11.173	39.173	-0.587	20.271	910.234	-0.000841	-0.000782	-0.002742
12.3200	576.249	18.924	16.525	50.791	-0.579	20.272	1097.031	-0.001325	-0.001157	-0.003555
12.3600	623.228	22.858	19.180	56.100	-0.599	20.271	1186.466	-0.001600	-0.001343	-0.003927
12.4000	687.324	27.901	22.569	63.424	-0.585	20.272	1308.489	-0.001953	-0.001580	-0.004440
12.4400	761.760	33.087	26.833	72.136	-0.594	20.272	1450.195	-0.002316	-0.001878	-0.005050
12.4800	821.693	37.855	30.685	79.153	-0.604	20.272	1564.293	-0.002650	-0.002148	-0.005541
12.5200	907.866	43.495	35.519	88.840	-0.596	20.272	1728.344	-0.003045	-0.002486	-0.006219
12.5600	992.987	49.623	40.789	98.042	-0.591	20.272	1890.392	-0.003474	-0.002855	-0.006863
12.6000	1072.082	55.626	45.666	106.375	-0.588	20.272	2040.968	-0.003894	-0.003197	-0.007446
12.6400	1135.637	60.947	49.944	113.593	-0.593	20.272	2161.961	-0.004266	-0.003496	-0.007951
12.6800	1166.896	63.367	52.586	117.660	-0.590	20.272	2221.470	-0.004436	-0.003681	-0.008236
12.7200	1220.051	67.813	56.087	123.302	-0.587	20.272	2322.664	-0.004747	-0.003926	-0.008631
12.7600	1291.526	73.286	60.743	130.544	-0.585	20.272	2458.735	-0.005130	-0.004252	-0.009138
12.8000	1313.062	75.191	62.450	133.195	-0.583	20.272	2499.733	-0.005263	-0.004372	-0.009324
12.8400	1356.855	78.137	65.328	138.047	-0.587	20.272	2583.103	-0.005470	-0.004573	-0.009663
12.8800	1379.803	80.207	67.495	140.867	-0.588	20.272	2626.791	-0.005615	-0.004725	-0.009861
12.9200	1372.845	80.805	67.495	140.687	-0.588	20.273	2613.544	-0.005656	-0.004725	-0.009848
12.9600	1394.336	82.239	68.971	142.980	-0.593	20.273	2654.457	-0.005757	-0.004828	-0.010009
13.0000	1393.509	82.420	69.152	143.077	-0.601	20.273	2652.884	-0.005769	-0.004841	-0.010015
13.0400	1395.237	82.473	69.237	143.659	-0.586	20.273	2656.174	-0.005773	-0.004847	-0.010056
13.0800	1361.559	80.959	68.526	141.049	-0.607	20.273	2592.058	-0.005667	-0.004797	-0.009873
13.1200	1329.007	77.513	66.910	138.100	-0.604	20.273	2530.088	-0.005426	-0.004684	-0.009667
13.1600	1272.050	74.748	64.454	133.405	-0.609	20.273	2421.656	-0.005232	-0.004512	-0.009338
13.2000	1234.659	72.551	62.383	129.793	-0.614	20.273	2350.473	-0.005079	-0.004367	-0.009085
13.2400	1202.483	70.009	60.102	126.567	-0.599	20.273	2289.219	-0.004901	-0.004207	-0.008860
13.2800	1125.523	64.480	55.489	119.121	-0.605	20.274	2142.706	-0.004514	-0.003884	-0.008338
13.3200	1056.046	59.768	51.266	112.519	-0.605	20.273	2010.441	-0.004184	-0.003589	-0.007876
13.3600	997.992	55.155	47.387	106.375	-0.600	20.273	1899.920	-0.003861	-0.003317	-0.007446
13.4000	912.179	49.041	42.220	97.097	-0.601	20.274	1736.555	-0.003433	-0.002955	-0.006797
13.4400	827.825	42.882	37.396	87.953	-0.596	20.273	1575.966	-0.003002	-0.002618	-0.006157
13.4800	764.751	38.202	33.562	80.643	-0.590	20.274	1455.889	-0.002674	-0.002349	-0.005645
13.5200	689.293	32.433	28.935	71.747	-0.592	20.273	1312.237	-0.002270	-0.002025	-0.005022
13.5600	603.736	26.278	24.447	62.141	-0.595	20.274	1149.359	-0.001839	-0.001711	-0.004350
13.6000	550.626	21.942	21.318	55.292	-0.588	20.274	1048.250	-0.001536	-0.001492	-0.003870
13.6400	463.326	15.633	16.064	45.037	-0.587	20.274	882.053	-0.001094	-0.001125	-0.003153
13.6800	428.475	12.616	13.678	40.133	-0.595	20.274	815.706	-0.000883	-0.000957	-0.002809
13.7200	366.543	7.738	10.425	32.252	-0.589	20.274	697.803	-0.000542	-0.000730	-0.002258
13.7600	319.880	3.877	7.367	26.002	-0.588	20.274	608.969	-0.000271	-0.000516	-0.001820
13.8000	296.120	1.430	6.421	22.399	-0.584	20.275	563.736	-0.000100	-0.000449	-0.001568
13.8400	253.169	-2.001	4.058	16.550	-0.589	20.274	481.968	0.000140	-0.000284	-0.001158
13.8800	233.947	-4.353	2.838	13.604	-0.595	20.275	445.375	0.000305	-0.000199	-0.000952
13.9200	219.430	-5.712	2.143	11.241	-0.593	20.274	417.738	0.000400	-0.000150	-0.000787
13.9600	198.886	-8.063	0.642	7.531	-0.596	20.275	378.628	0.000564	-0.000045	-0.000527
14.0000	209.571	-7.339	1.004	8.381	-0.596	20.275	398.970	0.000514	-0.000070	-0.000587
14.0400	229.364	-6.309	1.434	10.185	-0.592	20.275	436.649	0.000442	-0.000100	-0.000713
14.0800	247.668	-4.853	1.864	12.409	-0.585	20.275	471.497	0.000340	-0.000130	-0.000869
14.1200	278.762	-2.378	2.532	16.244	-0.587	20.275	530.691	0.000166	-0.000177	-0.001137
14.1600	307.947	-0.209	3.338	19.510	-0.592	20.275	586.252	0.000015	-0.000234	-0.001366
14.2000	362.380	3.681	5.450	25.819	-0.588	20.276	689.878	-0.000258	-0.000381	-0.001807
14.2400	419.142	7.683	8.509	32.781	-0.597	20.275	797.939	-0.000538	-0.000596	-0.002295
14.2800	477.979	11.992	11.090	39.061	-0.597	20.275	909.948	-0.000839	-0.000776	-0.002734
14.3200	556.712	17.771	15.317	48.167	-0.587	20.275	1059.837	-0.001244	-0.001072	-0.003372
14.3600	610.800	21.568	18.249	54.767	-0.590	20.275	1162.806	-0.001510	-0.001277	-0.003834
14.4000	692.058	27.442	22.917	64.121	-0.585	20.276	1317.501	-0.001921	-0.001604	-0.004488
14.4400	750.143	32.238	26.418	70.887	-0.585	20.275	1428.080	-0.002257	-0.001849	-0.004962
14.4800	848.895	39.324	32.198	81.532	-0.594	20.275	1616.077	-0.002753	-0.002254	-0.005707
14.5200	893.484	42.787	35.117	87.285	-0.588	20.275	1700.964	-0.002995	-0.002458	-0.006110
14.5600	980.093	49.358	40.412	96.817	-0.589	20.276	1865.845	-0.003455	-0.002829	-0.006777
14.6000	1053.476	55.000	44.804	104.808	-0.601	20.276	2005.548	-0.003850	-0.003136	-0.007337
14.6400	1132.526	60.489	50.195	113.327	-0.596	20.275	2156.038	-0.004234	-0.003514	-0.007933
14.6800	1194.037	65.756	53.946	119.789	-0.592	20.276	2273.140	-0.004603	-0.003776	-0.008385
14.7200	1232.525	68.605	56.713	124.568	-0.584	20.276	2346.411	-0.004802	-0.003970	-0.008720
14.7600	1292.488	73.065	60.534	130.574	-0.592	20.276	2460.566	-0.005115	-0.004237	-0.009140
14.8000	1324.995	75.471	62.436	134.335	-0.587	20.276	2522.449	-0.005283	-0.004371	-0.009403
14.8400	1357.501	78.067	65.368	137.920	-0.592	20.276	2584.333	-0.005465	-0.004576	-0.009654
14.8800	1363.212	79.650	66.522	139.004	-0.590	20.276	2595.205	-0.005575	-0.004657	-0.009730
14.9200	1398.273	81.794	68.497	142.441	-0.591	20.276	2661.953	-0.005726	-0.004795	-0.009971
14.9600	1394.396	81.974	68.858	142.690	-0.581	20.276	2654.572	-0.005738	-0.004820	-0.009988
15.0000	1391.150	82.017	68.860	142.745	-0.583	20.276	2648.392	-0.005741	-0.004820	-0.009992
15.0400	1382.373	81.697	68.746	142.523	-0.583	20.276	2631.683	-0.005719	-0.004812	-0.009977
15.0800	1358.779	80.987	68.177	140.674	-0.581	20.276	2586.765	-0.005669	-0.004772	-0.009847
15.1200	1345.569	79.135	67.412	139.310	-0.581	20.276	2561.617	-0.005539	-0.004719	-0.009752
15.1600	1277.445	75.232	64.537	133.501	-0.588	20.276	2431.927	-0.005266	-0.004518	-0.009345
15.2000	1252.633	73.300	62.689	131.295	-0.594	20.276	2384.691	-0.005131	-0.004388	-0.009191
15.2400	1194.097	69.160	59.073	125.584	-0.589	20.276	2273.254	-0.004841	-0.004135	-0.008791
15.2800	1130.963	64.395	55.127	119.371	-0.584	20.276	2153.063	-0.004508	-0.003859	-0.008356
15.3200	1054.814	59.130	50.850	112.226	-0.592	20.277	2008.095	-0.004139	-0.003559	-0.007856
15.3600	999.885	54.556	45.999	105.597	-0.583	20.277	1903.524	-0.003819	-0.003220	-0.007392
15.4000	926.216	49.887	43.203	98.138	-0.587	20.277	1763.277	-0.003492	-0.003024	-0.006870
15.4400	805.448	41.353	36.162	85.561	-0.587	20.276	1533.365	-0.002895	-0.002531	-0.005989
15.4800	759.476	38.158	33.435	80.377	-0.580	20.277	1445.847	-0.002671	-0.002340	-0.005626
15.5200	686.903	32.781	29.240	71.859	-0.588	20.277	1307.688	-0.002295	-0.002047	-0.005030
15.5600	611.611	27.055	24.850	62.616	-0.587	20.277	1164.351	-0.001894	-0.001740	-0.004383
15.6000	560.845	22.579	21.179	56.210	-0.593	20.277	1067.705	-0.001581	-0.001483	-0.003935
15.6400	502.370	18.173	18.081	49.292	-0.596	20.277	956.383	-0.001272	-0.001266	-0.003450
15.6800	421.367	12.489	13.733	39.339	-0.592	20.277	802.174	-0.000874	-0.000961	-0.002754
15.7200	370.616	7.640	10.201	32.573	-0.584	20.277	705.557	-0.000535	-0.000714	-0.002280
15.7600	312.365	2.986	7.298	25.445	-0.578	20.278	594.664	-0.000209	-0.000511	-0.001781
15.8000	280.911	0.125	5.464	20.609	-0.581	20.278	534.782	-0.000009	-0.000382	-0.001443
15.8400	235.044	-3.658	3.380	14.496	-0.590	20.277	447.464	0.000256	-0.000237	-0.001015
15.8800	232.009	-4.409	2.589	13.367	-0.581	20.277	441.685	0.000309	-0.000181	-0.000936
15.9200	229.980	-5.214	2.295	11.894	-0.588	20.277	437.822	0.000365	-0.000161	-0.000833
15.9600	213.043	-6.336	1.557	9.756	-0.586	20.278	405.579	0.000444	-0.000109	-0.000683
16.0000	207.512	-7.630	0.990	8.061	-0.582	20.277	395.050	0.000534	-0.000069	-0.000564
16.0400	225.486	-5.853	1.363	9.894	-0.588	20.278	429.268	0.000410	-0.000095	-0.000693
16.0800	240.470	-5.559	1.641	11.352	-0.596	20.277	457.792	0.000389	-0.000115	-0.000795
16.1200	286.276	-1.640	2.532	16.812	-0.592	20.277	544.996	0.000115	-0.000177	-0.001177
16.1600	340.228	1.608	4.544	23.096	-0.591	20.278	647.707	-0.000113	-0.000318	-0.001617
16.2000	342.392	2.415	4.934	23.721	-0.596	20.278	651.827	-0.000169	-0.000345	-0.001660
16.2400	430.384	8.379	8.659	33.267	-0.601	20.278	819.340	-0.000587	-0.000606	-0.002329
16.2800	474.973	11.602	10.979	39.088	-0.593	20.278	904.226	-0.000812	-0.000769	-0.002736
16.3200	551.708	17.520	15.318	48.180	-0.596	20.278	1050.310	-0.001226	-0.001072	-0.003373
16.3600	607.614	21.399	18.220	54.183	-0.592	20.278	1156.740	-0.001498	-0.001275	-0.003793
16.4000	714.150	28.582	23.819	66.314	-0.592	20.278	1359.558	-0.002001	-0.001667	-0.004642
16.4400	792.343	34.794	28.990	75.403	-0.595	20.278	1508.417	-0.002436	-0.002029	-0.005278
16.4800	820.311	37.393	30.575	79.013	-0.588	20.278	1561.661	-0.002618	-0.002140	-0.005531
16.5200	895.272	43.329	35.814	87.467	-0.584	20.278	1704.369	-0.003033	-0.002507	-0.006123
16.5600	964.193	48.430	39.606	95.327	-0.595	20.278	1835.575	-0.003390	-0.002772	-0.006673
16.6000	1060.735	55.513	45.694	105.736	-0.582	20.279	2019.367	-0.003886	-0.003199	-0.007402
16.6400	1136.283	60.989	50.346	113.731	-0.587	20.278	2163.191	-0.004269	-0.003524	-0.007961
16.6800	1185.486	65.063	53.860	119.649	-0.580	20.279	2256.861	-0.004554	-0.003770	-0.008375
16.7200	1229.579	68.132	56.672	123.956	-0.587	20.279	2340.803	-0.004769	-0.003967	-0.008677
16.7600	1283.952	72.689	60.074	129.793	-0.587	20.279	2444.315	-0.005088	-0.004205	-0.009086
16.8000	1321.989	75.597	63.051	134.293	-0.584	20.279	2516.727	-0.005292	-0.004414	-0.009400
16.8400	1357.847	78.290	65.409	138.198	-0.585	20.279	2584.991	-0.005480	-0.004579	-0.009674
16.8800	1369.283	79.347	66.424	139.449	-0.585	20.279	2606.764	-0.005554	-0.004650	-0.009761
16.9200	1407.621	82.128	68.888	143.326	-0.589	20.279	2679.749	-0.005749	-0.004822	-0.010033
16.9600	1405.171	82.781	69.846	144.202	-0.591	20.279	2675.085	-0.005795	-0.004889	-0.010094
17.0000	1395.718	82.124	69.582	143.714	-0.577	20.279	2657.089	-0.005749	-0.004871	-0.010060
17.0400	1371.553	81.320	69.361	141.924	-0.577	20.279	2611.084	-0.005692	-0.004855	-0.009935
17.0800	1355.157	79.972	68.470	140.354	-0.589	20.279	2579.870	-0.005598	-0.004793	-0.009825
17.1200	1326.798	78.596	67.593	138.281	-0.595	20.279	2525.883	-0.005502	-0.004732	-0.009680
17.1600	1274.093	75.150	64.660	133.780	-0.589	20.280	2425.547	-0.005260	-0.004526	-0.009365
17.2000	1226.063	71.691	61.561	129.234	-0.594	20.279	2334.108	-0.005018	-0.004309	-0.009046
17.2400	1193.752	69.439	59.589	125.808	-0.584	20.280	2272.596	-0.004861	-0.004171	-0.008807
17.2800	1113.154	63.951	54.668	118.633	-0.584	20.280	2119.160	-0.004477	-0.003827	-0.008304
17.3200	1046.007	58.516	50.389	111.392	-0.597	20.280	1991.329	-0.004096	-0.003527	-0.007797
17.3600	974.502	53.556	46.066	103.865	-0.596	20.280	1855.202	-0.003749	-0.003225	-0.007271
17.4000	931.821	50.205	43.385	98.834	-0.586	20.280	1773.949	-0.003514	-0.003037	-0.006918
17.4400	833.055	43.439	37.938	88.618	-0.580	20.280	1585.922	-0.003041	-0.002656	-0.006203
17.4800	775.135	39.060	34.174	82.102	-0.588	20.280	1475.658	-0.002734	-0.002392	-0.005747
17.5200	701.376	33.389	30.115	73.554	-0.598	20.280	1335.239	-0.002337	-0.002108	-0.005149
17.5600	631.569	28.136	25.698	64.995	-0.594	20.281	1202.345	-0.001970	-0.001799	-0.004550
17.6000	572.357	23.647	22.124	57.851	-0.592	20.280	1089.621	-0.001655	-0.001549	-0.004050
17.6400	483.689	16.964	17.079	47.708	-0.599	20.280	920.820	-0.001188	-0.001196	-0.003340
17.6800	412.740	11.463	12.955	38.699	-0.583	20.280	785.751	-0.000802	-0.000907	-0.002709
17.7200	381.451	8.655	10.786	34.156	-0.588	20.281	726.185	-0.000606	-0.000755	-0.002391
17.7600	327.409	4.558	8.020	27.014	-0.589	20.281	623.302	-0.000319	-0.000561	-0.001891
17.8000	282.609	0.470	5.589	20.983	-0.588	20.280	538.015	-0.000033	-0.000391	-0.001469
17.8400	255.844	-2.015	4.032	16.854	-0.593	20.281	487.061	0.000141	-0.000282	-0.001180
17.8800	223.112	-5.102	2.491	12.115	-0.604	20.281	424.747	0.000357	-0.000174	-0.000848
17.9200	227.139	-5.420	2.268	12.130	-0.604	20.280	432.415	0.000379	-0.000159	-0.000849
17.9600	206.085	-7.255	1.517	8.686	-0.597	20.281	392.332	0.000508	-0.000106	-0.000608
18.0000	212.171	-6.977	1.477	8.909	-0.592	20.281	403.919	0.000488	-0.000103	-0.000624
18.0400	216.905	-6.781	1.517	9.327	-0.588	20.281	412.931	0.000475	-0.000106	-0.000653
18.0800	244.377	-4.435	2.113	12.659	-0.596	20.281	465.231	0.000310	-0.000148	-0.000886
18.1200	258.639	-3.601	2.073	13.787	-0.588	20.281	492.382	0.000252	-0.000145	-0.000965
18.1600	320.240	0.955	3.950	21.205	-0.593	20.281	609.655	-0.000067	-0.000277	-0.001484
18.2000	351.590	3.293	5.198	25.054	-0.597	20.281	669.336	-0.000230	-0.000364	-0.001754
18.2400	421.321	8.115	8.592	33.128	-0.602	20.281	802.088	-0.000568	-0.000601	-0.002319
18.2800	479.316	12.143	11.425	39.658	-0.596	20.281	912.495	-0.000850	-0.000800	-0.002776
18.3200	552.610	17.465	15.080	48.152	-0.600	20.281	1052.027	-0.001223	-0.001056	-0.003371
18.3600	624.370	22.886	19.236	56.542	-0.590	20.282	1188.641	-0.001602	-0.001347	-0.003958
18.4000	692.193	27.706	22.846	64.342	-0.596	20.281	1317.759	-0.001939	-0.001599	-0.004504
18.4400	757.612	32.712	27.376	71.761	-0.587	20.282	1442.299	-0.002290	-0.001916	-0.005023
18.4800	828.155	37.796	31.186	79.904	-0.574	20.282	1576.595	-0.002646	-0.002183	-0.005593
18.5200	915.997	44.413	36.563	89.588	-0.591	20.282	1743.822	-0.003109	-0.002559	-0.006271
18.5600	957.851	47.981	39.467	94.746	-0.589	20.282	1823.502	-0.003359	-0.002763	-0.006632
18.6000	1051.387	54.809	45.180	105.028	-0.588	20.282	2001.572	-0.003837	-0.003163	-0.007352
18.6400	1102.755	59.351	49.374	111.462	-0.597	20.282	2099.361	-0.004155	-0.003456	-0.007802
18.6800	1194.728	65.911	54.782	120.470	-0.596	20.282	2274.456	-0.004614	-0.003835	-0.008433
18.7200	1245.329	69.953	58.215	126.153	-0.598	20.282	2370.787	-0.004897	-0.004075	-0.008831
18.7600	1289.242	73.231	61.022	130.796	-0.598	20.283	2454.386	-0.005126	-0.004272	-0.009156
18.8000	1321.523	75.608	62.953	134.294	-0.597	20.282	2515.841	-0.005293	-0.004407	-0.009401
18.8400	1354.225	78.235	65.368	137.839	-0.591	20.282	2578.096	-0.005476	-0.004576	-0.009649
18.8800	1387.633	80.735	67.872	141.564	-0.593	20.283	2641.697	-0.005651	-0.004751	-0.009909
18.9200	1403.999	82.542	69.431	143.756	-0.597	20.283	2672.853	-0.005778	-0.004860	-0.010063
18.9600	1400.963	82.266	69.513	143.812	-0.594	20.282	2667.074	-0.005759	-0.004866	-0.010067
19.0000	1388.460	82.070	69.194	143.271	-0.595	20.283	2643.270	-0.005745	-0.004844	-0.010029
19.0400	1393.464	82.753	69.889	143.881	-0.584	20.283	2652.798	-0.005793	-0.004892	-0.010072
19.0800	1358.042	80.402	68.819	140.838	-0.583	20.283	2585.363	-0.005628	-0.004817	-0.009859
19.1200	1324.559	78.764	67.577	138.379	-0.579	20.283	2521.620	-0.005513	-0.004730	-0.009687
19.1600	1284.147	75.860	65.217	134.601	-0.585	20.283	2444.687	-0.005310	-0.004565	-0.009422
19.2000	1238.446	72.468	62.731	130.405	-0.588	20.283	2357.683	-0.005073	-0.004391	-0.009128
19.2400	1191.107	68.869	59.504	125.597	-0.585	20.283	2267.561	-0.004821	-0.004165	-0.008792
19.2800	1128.062	64.227	55.421	119.581	-0.591	20.283	2147.541	-0.004496	-0.003879	-0.008371
19.3200	1070.609	60.366	51.961	113.993	-0.591	20.283	2038.164	-0.004226	-0.003637	-0.007980
19.3600	1008.947	55.861	48.498	107.726	-0.586	20.283	1920.776	-0.003910	-0.003395	-0.007541
19.4000	940.282	50.552	43.844	99.955	-0.583	20.283	1790.056	-0.003539	-0.003069	-0.006997
19.4400	825.375	42.982	37.784	88.257	-0.585	20.283	1571.302	-0.003009	-0.002645	-0.006178
19.4800	765.983	38.880	33.979	81.366	-0.591	20.284	1458.235	-0.002722	-0.002379	-0.005696
19.5200	707.087	34.308	30.088	74.541	-0.584	20.284	1346.111	-0.002402	-0.002106	-0.005218
19.5600	611.506	26.986	25.182	63.827	-0.588	20.283	1164.150	-0.001889	-0.001763	-0.004468
19.6000	513.536	20.010	19.265	52.014	-0.590	20.284	977.640	-0.001401	-0.001349	-0.003641
19.6400	488.258	16.837	16.857	47.748	-0.589	20.284	929.518	-0.001179	-0.001180	-0.003342
19.6800	451.949	13.951	14.776	43.151	-0.592	20.284	860.395	-0.000977	-0.001034	-0.003021
19.7200	378.175	8.141	10.700	34.072	-0.592	20.285	719.948	-0.000570	-0.000749	-0.002385
19.7600	329.047	4.321	8.480	27.682	-0.592	20.284	626.421	-0.000302	-0.000594	-0.001938
19.8000	283.902	0.110	5.923	21.232	-0.597	20.284	540.476	-0.000008	-0.000415	-0.001486
19.8400	277.650	-0.319	5.380	20.262	-0.581	20.284	528.574	0.000022	-0.000377	-0.001418
19.8800	236.051	-3.935	3.159	13.606	-0.583	20.285	449.381	0.000275	-0.000221	-0.000952
19.9200	212.396	-6.463	1.753	10.228	-0.585	20.285	404.348	0.000452	-0.000123	-0.000716
19.9600	242.168	-4.781	2.030	12.548	-0.585	20.284	461.025	0.000335	-0.000142	-0.000878
