# Supplementary material for: Evaluation of a Cold-Mixed High-Performance Polyurethane Mixture
Source: Hindawi journal article supplement (doi:10.1155/2019/1507971), 2019-11-07
Supplement: f1 [file 1507971.f1.zip › 1507971.f1/dynamic modulus data/PUM/specimen1/temp20/zhs-1-20_1Hz.csv]

Test Information
****************
Project name	zhs
Operator name	1
Target test temperature	20
Target confining stress	0
Average dynamic strain range from 75 to 125 micro-strain
Contact stress	5
Initial modulus	1000
Axial gauge length	70
Comments
Specimen information
********************
Identification	zhs-1-20
Dimensions	Point 1	Point 2	Point 3	Point 4	Point 5	Point 6	Average	Std Dev.
Diameter (mm)	49.2	49.2	49.3				49.23	0.058
Height (mm)	101.3	101.2	101.3				101.27	0.058
Cross-sectional area (mm�)	1903.7
Conditioning time
Properties/Comments
Test Data	1Hz
*********
Test date and time	Mon	Apr 1	2019	2:22 PM
Dynamic modulus (MPa)	12403
Phase angle (Degrees)	4.13
Average temperature (�C)	20.3
Average confining pressure (kPa)	-0.6
Average micro-strain	98
Load drift (%)	-0.2
Load standard error (%)	2.7
Average deformation drift (%)	-1.1
Average deformation standard error (%)	3.3
Deformation uniformity (%)	28.0
Phase uniformity (Degrees)	0.9
Conditioning Cycles
Time (sec)	Axial stress (kPa)	Axial micro-strain #1	Axial micro-strain #2	Axial micro-strain #3	Confining pressure (kPa)	Temperature (�C)	Load (N)	Displacement #1 (mm)	Displacement #2 (mm)	Displacement #3 (mm)
0.0000	194.377	-4.116	0.823	4.333	-0.607	20.293	370.045	0.000288	-0.000058	-0.000303
0.0200	199.878	-4.338	0.447	4.074	-0.603	20.292	380.516	0.000304	-0.000031	-0.000285
0.0400	233.376	-2.529	1.099	7.128	-0.598	20.293	444.288	0.000177	-0.000077	-0.000499
0.0600	225.141	-3.074	0.543	6.448	-0.604	20.293	428.610	0.000215	-0.000038	-0.000451
0.0800	292.633	1.707	2.308	14.108	-0.601	20.293	557.098	-0.000120	-0.000162	-0.000988
0.1000	310.066	2.737	2.797	15.828	-0.602	20.293	590.286	-0.000192	-0.000196	-0.001108
0.1200	366.934	7.364	5.770	23.125	-0.599	20.293	698.547	-0.000515	-0.000404	-0.001619
0.1400	394.030	8.990	6.588	26.390	-0.606	20.293	750.132	-0.000629	-0.000461	-0.001847
0.1600	448.884	12.991	9.341	32.419	-0.607	20.292	854.559	-0.000909	-0.000654	-0.002269
0.1800	494.645	16.688	12.035	38.253	-0.593	20.293	941.677	-0.001168	-0.000842	-0.002678
0.2000	557.359	21.040	14.816	45.079	-0.609	20.293	1061.068	-0.001473	-0.001037	-0.003156
0.2200	633.117	26.889	19.220	54.018	-0.600	20.293	1205.292	-0.001882	-0.001345	-0.003781
0.2400	661.716	28.846	20.693	57.642	-0.587	20.293	1259.737	-0.002019	-0.001449	-0.004035
0.2600	736.963	34.363	24.931	65.771	-0.600	20.293	1402.988	-0.002405	-0.001745	-0.004604
0.2800	762.406	36.100	26.447	68.884	-0.599	20.293	1451.426	-0.002527	-0.001851	-0.004822
0.3000	912.209	47.078	34.617	84.685	-0.600	20.293	1736.612	-0.003295	-0.002423	-0.005928
0.3200	889.967	45.982	35.034	83.961	-0.599	20.292	1694.269	-0.003219	-0.002452	-0.005877
0.3400	956.152	50.775	37.811	90.883	-0.596	20.292	1820.269	-0.003554	-0.002647	-0.006362
0.3600	1007.099	54.405	41.415	96.496	-0.593	20.292	1917.257	-0.003808	-0.002899	-0.006755
0.3800	1033.474	56.319	42.620	99.444	-0.599	20.293	1967.468	-0.003942	-0.002983	-0.006961
0.4000	1062.238	59.117	44.997	102.751	-0.599	20.293	2022.228	-0.004138	-0.003150	-0.007193
0.4200	1097.254	61.544	46.833	107.001	-0.603	20.293	2088.890	-0.004308	-0.003278	-0.007490
0.4400	1096.367	61.905	47.264	107.141	-0.603	20.293	2087.202	-0.004333	-0.003308	-0.007500
0.4600	1117.317	63.685	48.804	109.687	-0.598	20.293	2127.085	-0.004458	-0.003416	-0.007678
0.4800	1142.550	65.354	50.001	112.323	-0.612	20.293	2175.121	-0.004575	-0.003500	-0.007863
0.5000	1133.999	65.479	50.667	112.396	-0.604	20.293	2158.842	-0.004584	-0.003547	-0.007868
0.5200	1136.073	65.771	50.485	112.644	-0.600	20.293	2162.790	-0.004604	-0.003534	-0.007885
0.5400	1117.001	65.021	50.208	111.281	-0.613	20.293	2126.484	-0.004551	-0.003515	-0.007790
0.5600	1068.835	61.114	48.567	107.085	-0.611	20.292	2034.788	-0.004278	-0.003400	-0.007496
0.5800	1036.645	59.781	47.278	104.031	-0.608	20.293	1973.505	-0.004185	-0.003309	-0.007282
0.6000	1010.104	57.570	45.626	101.289	-0.590	20.293	1922.979	-0.004030	-0.003194	-0.007090
0.6200	952.651	54.042	42.497	96.080	-0.604	20.293	1813.602	-0.003783	-0.002975	-0.006726
0.6400	955.236	53.737	42.509	95.746	-0.599	20.293	1818.523	-0.003762	-0.002976	-0.006702
0.6600	897.857	50.065	38.925	90.144	-0.609	20.292	1709.290	-0.003505	-0.002725	-0.006310
0.6800	831.357	45.466	35.590	83.337	-0.596	20.292	1582.689	-0.003183	-0.002491	-0.005834
0.7000	772.821	40.563	31.659	76.432	-0.600	20.292	1471.252	-0.002839	-0.002216	-0.005350
0.7200	695.169	35.586	27.947	68.287	-0.610	20.291	1323.423	-0.002491	-0.001956	-0.004780
0.7400	633.402	30.793	24.432	61.297	-0.604	20.293	1205.835	-0.002155	-0.001710	-0.004291
0.7600	575.453	26.764	21.149	54.268	-0.616	20.293	1095.514	-0.001873	-0.001480	-0.003799
0.7800	535.943	23.734	19.137	49.819	-0.603	20.293	1020.298	-0.001661	-0.001340	-0.003487
0.8000	474.507	19.229	15.483	42.635	-0.612	20.292	903.339	-0.001346	-0.001084	-0.002984
0.8200	429.181	16.091	13.274	36.826	-0.598	20.292	817.051	-0.001126	-0.000929	-0.002578
0.8400	371.607	11.115	9.826	29.750	-0.613	20.292	707.445	-0.000778	-0.000688	-0.002083
0.8600	343.895	8.963	8.619	25.946	-0.598	20.291	654.688	-0.000627	-0.000603	-0.001816
0.8800	288.891	4.403	5.964	19.024	-0.605	20.292	549.974	-0.000308	-0.000417	-0.001332
0.9000	243.265	0.666	3.423	12.200	-0.613	20.292	463.114	-0.000047	-0.000240	-0.000854
0.9200	217.521	-1.543	2.503	8.409	-0.607	20.292	414.104	0.000108	-0.000175	-0.000589
0.9400	216.830	-2.267	1.878	7.880	-0.611	20.292	412.788	0.000159	-0.000131	-0.000552
0.9600	182.791	-4.630	0.571	3.267	-0.604	20.292	347.986	0.000324	-0.000040	-0.000229
0.9800	197.473	-4.602	0.404	4.253	-0.601	20.292	375.938	0.000322	-0.000028	-0.000298
1.0000	194.708	-4.364	0.364	3.781	-0.618	20.292	370.674	0.000305	-0.000025	-0.000265
1.0200	207.407	-4.171	0.657	4.696	-0.603	20.292	394.850	0.000292	-0.000046	-0.000329
1.0400	227.771	-2.767	0.795	6.975	-0.616	20.292	433.617	0.000194	-0.000056	-0.000488
1.0600	236.517	-2.572	1.282	7.616	-0.607	20.292	450.268	0.000180	-0.000090	-0.000533
1.0800	250.133	-1.209	1.267	9.564	-0.606	20.292	476.189	0.000085	-0.000089	-0.000669
1.1000	361.088	6.848	5.434	22.387	-0.617	20.292	687.418	-0.000479	-0.000380	-0.001567
1.1200	356.985	6.557	5.519	22.318	-0.604	20.292	679.607	-0.000459	-0.000386	-0.001562
1.1400	372.689	8.154	5.962	24.081	-0.604	20.292	709.505	-0.000571	-0.000417	-0.001686
1.1600	419.232	11.033	7.659	29.280	-0.601	20.292	798.111	-0.000772	-0.000536	-0.002050
1.1800	523.169	18.481	13.036	41.331	-0.591	20.292	995.979	-0.001294	-0.000912	-0.002893
1.2000	531.840	19.813	14.177	43.011	-0.597	20.292	1012.487	-0.001387	-0.000992	-0.003011
1.2200	589.519	23.511	16.565	49.277	-0.596	20.292	1122.293	-0.001646	-0.001160	-0.003449
1.2400	677.210	30.486	21.790	59.271	-0.595	20.292	1289.234	-0.002134	-0.001525	-0.004149
1.2600	736.167	34.168	24.821	65.828	-0.593	20.292	1401.472	-0.002392	-0.001737	-0.004608
1.2800	794.807	39.074	28.585	72.776	-0.604	20.292	1513.109	-0.002735	-0.002001	-0.005094
1.3000	851.570	42.729	31.506	79.014	-0.594	20.292	1621.170	-0.002991	-0.002205	-0.005531
1.3200	897.557	46.521	34.382	84.307	-0.603	20.291	1708.717	-0.003256	-0.002407	-0.005902
1.3400	966.372	51.636	38.423	92.121	-0.608	20.292	1839.724	-0.003614	-0.002690	-0.006448
1.3600	998.998	53.862	40.496	95.733	-0.597	20.292	1901.836	-0.003770	-0.002835	-0.006701
1.3800	1015.064	55.735	42.013	98.055	-0.594	20.292	1932.421	-0.003901	-0.002941	-0.006864
1.4000	1038.298	57.166	43.303	100.665	-0.599	20.292	1976.652	-0.004002	-0.003031	-0.007047
1.4200	1075.959	60.336	45.957	104.780	-0.594	20.292	2048.349	-0.004224	-0.003217	-0.007335
1.4400	1092.445	61.433	46.861	107.141	-0.596	20.292	2079.735	-0.004300	-0.003280	-0.007500
1.4600	1123.013	63.867	48.637	110.241	-0.593	20.292	2137.928	-0.004471	-0.003405	-0.007717
1.4800	1121.916	64.577	49.122	110.380	-0.597	20.292	2135.839	-0.004520	-0.003439	-0.007727
1.5000	1141.964	65.480	50.778	112.993	-0.605	20.292	2174.006	-0.004584	-0.003554	-0.007910
1.5200	1108.586	64.215	50.070	110.699	-0.597	20.292	2110.462	-0.004495	-0.003505	-0.007749
1.5400	1099.553	63.185	49.639	109.840	-0.604	20.292	2093.267	-0.004423	-0.003475	-0.007689
1.5600	1079.761	62.601	49.332	108.449	-0.609	20.292	2055.588	-0.004382	-0.003453	-0.007591
1.5800	1061.021	60.657	48.331	106.474	-0.613	20.291	2019.911	-0.004246	-0.003383	-0.007453
1.6000	1022.443	58.391	46.292	102.653	-0.603	20.292	1946.468	-0.004087	-0.003240	-0.007186
1.6200	969.528	54.961	43.717	97.764	-0.607	20.292	1845.732	-0.003847	-0.003060	-0.006843
1.6400	931.040	51.816	40.844	93.385	-0.609	20.292	1772.461	-0.003627	-0.002859	-0.006537
1.6600	842.883	46.551	36.495	84.949	-0.607	20.291	1604.633	-0.003259	-0.002555	-0.005946
1.6800	808.649	43.329	34.243	81.061	-0.619	20.291	1539.459	-0.003033	-0.002397	-0.005674
1.7000	784.964	41.882	32.671	77.930	-0.612	20.292	1494.370	-0.002932	-0.002287	-0.005455
1.7200	693.200	35.045	27.740	68.121	-0.612	20.292	1319.675	-0.002453	-0.001942	-0.004768
1.7400	636.137	31.236	24.308	61.727	-0.600	20.291	1211.042	-0.002187	-0.001702	-0.004321
1.7600	595.937	28.025	22.210	56.586	-0.616	20.292	1134.510	-0.001962	-0.001555	-0.003961
1.7800	539.745	23.927	18.749	50.193	-0.613	20.292	1027.536	-0.001675	-0.001312	-0.003514
1.8000	470.269	18.896	15.261	42.150	-0.605	20.292	895.271	-0.001323	-0.001068	-0.002950
1.8200	415.746	14.381	12.120	34.933	-0.601	20.292	791.473	-0.001007	-0.000848	-0.002445
1.8400	368.091	10.823	9.756	29.127	-0.603	20.292	700.750	-0.000758	-0.000683	-0.002039
1.8600	322.885	7.127	7.507	23.207	-0.604	20.292	614.691	-0.000499	-0.000525	-0.001624
1.8800	285.299	3.988	5.447	18.149	-0.604	20.292	543.137	-0.000279	-0.000381	-0.001270
1.9000	290.214	3.888	5.643	18.370	-0.599	20.292	552.492	-0.000272	-0.000395	-0.001286
1.9200	235.645	-0.655	2.783	10.657	-0.607	20.292	448.608	0.000046	-0.000195	-0.000746
1.9400	209.917	-2.489	2.089	7.142	-0.605	20.291	399.628	0.000174	-0.000146	-0.000500
1.9600	209.165	-3.324	1.517	6.253	-0.604	20.291	398.197	0.000233	-0.000106	-0.000438
1.9800	193.205	-4.047	0.838	4.336	-0.607	20.292	367.813	0.000283	-0.000059	-0.000304
2.0000	195.475	-4.840	0.614	3.919	-0.600	20.291	372.133	0.000339	-0.000043	-0.000274
2.0200	203.920	-4.339	0.127	4.348	-0.599	20.292	388.212	0.000304	-0.000009	-0.000304
2.0400	220.542	-3.323	0.989	6.099	-0.612	20.292	419.855	0.000233	-0.000069	-0.000427
2.0600	261.705	-0.765	1.517	10.558	-0.607	20.291	498.219	0.000054	-0.000106	-0.000739
2.0800	285.254	1.136	2.309	13.437	-0.601	20.291	543.051	-0.000080	-0.000162	-0.000941
2.1000	311.434	3.001	3.380	16.716	-0.606	20.292	592.890	-0.000210	-0.000237	-0.001170
2.1200	357.826	6.792	5.130	22.609	-0.613	20.292	681.210	-0.000475	-0.000359	-0.001583
2.1400	392.241	9.463	6.868	26.513	-0.606	20.291	746.727	-0.000662	-0.000481	-0.001856
2.1600	439.551	12.783	8.773	31.687	-0.596	20.292	836.792	-0.000895	-0.000614	-0.002218
2.1800	510.034	17.506	12.175	39.687	-0.592	20.292	970.974	-0.001225	-0.000852	-0.002778
2.2000	551.918	20.703	14.511	45.038	-0.595	20.292	1050.711	-0.001449	-0.001016	-0.003153
2.2200	621.620	26.124	18.694	53.058	-0.601	20.292	1183.405	-0.001829	-0.001309	-0.003714
2.2400	692.163	30.488	22.234	60.852	-0.612	20.292	1317.701	-0.002134	-0.001556	-0.004260
2.2600	720.507	33.515	24.184	64.357	-0.595	20.291	1371.660	-0.002346	-0.001693	-0.004505
2.2800	780.440	37.504	27.697	71.206	-0.604	20.291	1485.758	-0.002625	-0.001939	-0.004984
2.3000	885.714	44.910	33.284	82.559	-0.599	20.292	1686.172	-0.003144	-0.002330	-0.005779
2.3200	886.917	45.742	34.020	83.293	-0.613	20.291	1688.461	-0.003202	-0.002381	-0.005831
2.3400	948.097	50.259	37.410	90.063	-0.601	20.292	1804.934	-0.003518	-0.002619	-0.006304
2.3600	1004.739	54.528	41.150	96.606	-0.598	20.292	1912.766	-0.003817	-0.002881	-0.006762
2.3800	1038.568	56.790	43.040	100.068	-0.605	20.292	1977.167	-0.003975	-0.003013	-0.007005
2.4000	1063.065	59.143	44.583	103.016	-0.600	20.292	2023.802	-0.004140	-0.003121	-0.007211
2.4200	1084.164	60.186	46.292	105.430	-0.604	20.292	2063.971	-0.004213	-0.003240	-0.007380
2.4400	1101.537	62.475	47.679	108.059	-0.599	20.293	2097.044	-0.004373	-0.003338	-0.007564
2.4600	1112.117	63.213	48.333	108.882	-0.602	20.292	2117.186	-0.004425	-0.003383	-0.007622
2.4800	1125.027	64.019	49.237	110.891	-0.603	20.292	2141.762	-0.004481	-0.003447	-0.007762
2.5000	1166.235	67.368	52.017	114.981	-0.604	20.292	2220.211	-0.004716	-0.003641	-0.008049
2.5200	1129.430	65.162	51.377	112.950	-0.593	20.292	2150.145	-0.004561	-0.003596	-0.007906
2.5400	1090.597	62.963	49.736	109.254	-0.606	20.292	2076.216	-0.004407	-0.003482	-0.007648
2.5600	1085.472	62.657	49.651	108.840	-0.617	20.292	2066.460	-0.004386	-0.003476	-0.007619
2.5800	1038.268	59.240	46.860	104.489	-0.617	20.292	1976.595	-0.004147	-0.003280	-0.007314
2.6000	997.045	56.526	45.080	100.359	-0.617	20.292	1898.117	-0.003957	-0.003156	-0.007025
2.6200	955.897	53.390	42.109	96.385	-0.613	20.292	1819.782	-0.003737	-0.002948	-0.006747
2.6400	906.634	50.564	39.967	90.729	-0.600	20.291	1725.998	-0.003540	-0.002798	-0.006351
2.6600	860.331	47.203	36.977	86.118	-0.606	20.292	1637.850	-0.003304	-0.002588	-0.006028
2.6800	815.321	43.883	34.242	81.240	-0.612	20.292	1552.162	-0.003072	-0.002397	-0.005687
2.7000	751.496	39.268	31.215	74.874	-0.602	20.292	1430.655	-0.002749	-0.002185	-0.005241
2.7200	694.703	35.516	27.377	68.023	-0.608	20.292	1322.536	-0.002486	-0.001916	-0.004762
2.7400	638.888	31.181	24.766	61.922	-0.590	20.292	1216.278	-0.002183	-0.001734	-0.004335
2.7600	601.948	28.025	22.123	57.072	-0.602	20.292	1145.954	-0.001962	-0.001549	-0.003995
2.7800	518.315	22.330	17.913	47.887	-0.596	20.292	986.738	-0.001563	-0.001254	-0.003352
2.8000	461.102	17.757	14.539	40.606	-0.600	20.291	877.819	-0.001243	-0.001018	-0.002842
2.8200	417.850	14.967	12.327	35.352	-0.596	20.292	795.479	-0.001048	-0.000863	-0.002475
2.8400	380.640	11.295	10.160	30.434	-0.594	20.292	724.640	-0.000791	-0.000711	-0.002130
2.8600	335.810	8.142	7.827	25.001	-0.593	20.292	639.296	-0.000570	-0.000548	-0.001750
2.8800	276.989	3.500	5.269	17.382	-0.593	20.292	527.315	-0.000245	-0.000369	-0.001217
2.9000	248.044	0.845	3.492	13.020	-0.599	20.291	472.212	-0.000059	-0.000244	-0.000911
2.9200	253.334	0.790	3.742	12.910	-0.591	20.291	482.283	-0.000055	-0.000262	-0.000904
2.9400	215.057	-2.531	1.890	7.781	-0.593	20.291	409.412	0.000177	-0.000132	-0.000545
2.9600	213.448	-2.796	1.796	6.906	-0.597	20.292	406.351	0.000196	-0.000126	-0.000483
2.9800	189.794	-5.145	0.612	3.768	-0.599	20.291	361.319	0.000360	-0.000043	-0.000264
3.0000	204.582	-4.339	0.307	4.653	-0.595	20.291	389.471	0.000304	-0.000021	-0.000326
3.0200	204.026	-4.019	0.865	4.264	-0.595	20.291	388.412	0.000281	-0.000061	-0.000299
3.0400	212.081	-3.839	0.350	5.417	-0.585	20.291	403.748	0.000269	-0.000024	-0.000379
3.0600	253.123	-0.750	1.700	9.660	-0.589	20.291	481.882	0.000053	-0.000119	-0.000676
3.0800	254.025	-1.474	1.545	9.937	-0.589	20.291	483.599	0.000103	-0.000108	-0.000696
3.1000	312.020	3.431	3.198	16.480	-0.599	20.291	594.006	-0.000240	-0.000224	-0.001154
3.1200	345.112	5.458	4.528	20.733	-0.594	20.291	657.005	-0.000382	-0.000317	-0.001451
3.1400	388.815	8.865	6.144	25.792	-0.593	20.291	740.204	-0.000621	-0.000430	-0.001805
3.1600	457.179	14.062	9.713	33.517	-0.595	20.292	870.352	-0.000984	-0.000680	-0.002346
3.1800	492.646	16.174	11.425	38.158	-0.597	20.291	937.872	-0.001132	-0.000800	-0.002671
3.2000	562.183	21.581	15.275	46.108	-0.596	20.291	1070.251	-0.001511	-0.001069	-0.003228
3.2200	610.078	24.900	17.830	51.595	-0.591	20.291	1161.432	-0.001743	-0.001248	-0.003612
3.2400	671.274	29.444	21.081	58.768	-0.593	20.291	1277.933	-0.002061	-0.001476	-0.004114
3.2600	733.492	34.016	24.752	65.774	-0.608	20.292	1396.379	-0.002381	-0.001733	-0.004604
3.2800	811.534	39.337	28.936	74.068	-0.591	20.291	1544.952	-0.002754	-0.002025	-0.005185
3.3000	853.869	43.065	31.812	79.585	-0.596	20.291	1625.547	-0.003015	-0.002227	-0.005571
3.3200	901.584	46.217	34.354	84.572	-0.594	20.291	1716.385	-0.003235	-0.002405	-0.005920
3.3400	942.792	49.650	37.048	89.283	-0.593	20.291	1794.834	-0.003475	-0.002593	-0.006250
3.3600	988.148	52.858	40.105	94.730	-0.598	20.291	1881.180	-0.003700	-0.002807	-0.006631
3.3800	1044.489	57.334	43.425	100.693	-0.592	20.291	1988.440	-0.004013	-0.003040	-0.007048
3.4000	1044.174	57.792	43.732	101.123	-0.595	20.292	1987.839	-0.004045	-0.003061	-0.007079
3.4200	1111.065	62.267	47.651	108.130	-0.602	20.291	2115.183	-0.004359	-0.003336	-0.007569
3.4400	1105.039	62.641	48.025	108.061	-0.594	20.291	2103.710	-0.004385	-0.003362	-0.007564
3.4600	1109.773	62.684	48.040	108.950	-0.590	20.291	2112.722	-0.004388	-0.003363	-0.007626
3.4800	1129.385	65.076	49.541	111.364	-0.591	20.291	2150.059	-0.004555	-0.003468	-0.007796
3.5000	1154.077	65.993	51.335	113.549	-0.594	20.291	2197.065	-0.004620	-0.003593	-0.007948
3.5200	1117.467	64.548	50.168	111.212	-0.591	20.292	2127.371	-0.004518	-0.003512	-0.007785
3.5400	1101.898	63.492	50.001	109.896	-0.591	20.291	2097.731	-0.004444	-0.003500	-0.007693
3.5600	1072.036	61.351	48.499	107.282	-0.600	20.291	2040.882	-0.004295	-0.003395	-0.007510
3.5800	1066.521	61.058	48.569	106.737	-0.587	20.291	2030.382	-0.004274	-0.003400	-0.007472
3.6000	1008.812	57.111	45.443	101.165	-0.603	20.291	1920.519	-0.003998	-0.003181	-0.007082
3.6200	949.330	53.514	42.303	95.328	-0.601	20.291	1807.280	-0.003746	-0.002961	-0.006673
3.6400	936.931	52.498	41.538	94.148	-0.594	20.290	1783.676	-0.003675	-0.002908	-0.006590
3.6600	890.523	48.985	38.564	89.255	-0.603	20.292	1695.328	-0.003429	-0.002699	-0.006248
3.6800	807.687	43.441	34.132	80.630	-0.588	20.291	1537.628	-0.003041	-0.002389	-0.005644
3.7000	762.647	39.963	31.464	75.528	-0.599	20.291	1451.883	-0.002797	-0.002202	-0.005287
3.7200	705.884	36.116	28.557	69.260	-0.588	20.291	1343.822	-0.002528	-0.001999	-0.004848
3.7400	658.560	32.155	25.698	63.800	-0.591	20.291	1253.729	-0.002251	-0.001799	-0.004466
3.7600	579.315	26.678	21.373	54.697	-0.596	20.291	1102.867	-0.001867	-0.001496	-0.003829
3.7800	531.359	23.092	18.664	49.097	-0.585	20.291	1011.572	-0.001616	-0.001306	-0.003437
3.8000	460.200	17.882	14.165	40.760	-0.596	20.291	876.102	-0.001252	-0.000992	-0.002853
3.8200	434.396	16.049	13.162	37.479	-0.601	20.291	826.979	-0.001123	-0.000921	-0.002624
3.8400	372.855	10.963	9.673	29.430	-0.591	20.291	709.820	-0.000767	-0.000677	-0.002060
3.8600	338.064	8.391	8.049	25.236	-0.590	20.291	643.587	-0.000587	-0.000563	-0.001767
3.8800	297.893	4.710	5.894	19.593	-0.596	20.291	567.112	-0.000330	-0.000413	-0.001372
3.9000	234.759	-0.016	3.061	11.881	-0.598	20.291	446.920	0.000001	-0.000214	-0.000832
3.9200	237.945	-0.390	3.173	11.144	-0.595	20.292	452.986	0.000027	-0.000222	-0.000780
3.9400	217.386	-2.628	1.614	8.074	-0.587	20.291	413.847	0.000184	-0.000113	-0.000565
3.9600	217.251	-2.338	1.752	7.755	-0.596	20.290	413.589	0.000164	-0.000123	-0.000543
3.9800	206.430	-3.505	1.336	5.891	-0.606	20.291	392.990	0.000245	-0.000094	-0.000412
4.0000	205.453	-3.642	0.766	5.209	-0.592	20.291	391.130	0.000255	-0.000054	-0.000365
4.0200	207.527	-4.187	0.850	5.515	-0.596	20.290	395.079	0.000293	-0.000059	-0.000386
4.0400	215.643	-3.657	0.711	5.738	-0.609	20.290	410.528	0.000256	-0.000050	-0.000402
4.0600	242.874	-1.752	1.559	8.616	-0.604	20.290	462.370	0.000123	-0.000109	-0.000603
4.0800	257.707	-0.932	1.627	10.408	-0.600	20.290	490.608	0.000065	-0.000114	-0.000729
4.1000	314.950	3.403	3.282	16.854	-0.600	20.291	599.585	-0.000238	-0.000230	-0.001180
4.1200	356.068	6.279	4.668	21.940	-0.600	20.290	677.862	-0.000440	-0.000327	-0.001536
4.1400	384.893	8.696	6.241	25.598	-0.606	20.290	732.737	-0.000609	-0.000437	-0.001792
4.1600	441.384	12.754	9.189	32.045	-0.599	20.291	840.282	-0.000893	-0.000643	-0.002243
4.1800	508.366	17.699	12.287	39.825	-0.610	20.290	967.798	-0.001239	-0.000860	-0.002788
4.2000	569.802	22.176	15.800	47.123	-0.605	20.291	1084.757	-0.001552	-0.001106	-0.003299
4.2200	629.360	26.279	18.456	53.598	-0.599	20.291	1198.139	-0.001840	-0.001292	-0.003752
4.2400	681.328	30.375	21.859	59.813	-0.600	20.291	1297.073	-0.002126	-0.001530	-0.004187
4.2600	732.770	33.890	24.670	65.855	-0.599	20.290	1395.006	-0.002372	-0.001727	-0.004610
4.2800	801.961	39.199	28.516	73.553	-0.603	20.290	1526.728	-0.002744	-0.001996	-0.005149
4.3000	863.247	43.147	31.949	80.155	-0.606	20.291	1643.400	-0.003020	-0.002236	-0.005611
4.3200	892.222	45.885	33.951	83.725	-0.599	20.290	1698.561	-0.003212	-0.002377	-0.005861
4.3400	953.387	50.647	37.813	90.548	-0.598	20.290	1815.004	-0.003545	-0.002647	-0.006338
4.3600	987.577	52.846	39.854	94.552	-0.599	20.291	1880.093	-0.003699	-0.002790	-0.006619
4.3800	1033.714	56.874	42.775	99.429	-0.597	20.291	1967.926	-0.003981	-0.002994	-0.006960
4.4000	1054.814	58.196	44.110	102.125	-0.596	20.291	2008.095	-0.004074	-0.003088	-0.007149
4.4200	1094.218	61.431	46.736	106.668	-0.599	20.291	2083.111	-0.004300	-0.003272	-0.007467
4.4400	1125.838	63.686	48.860	110.061	-0.603	20.291	2143.307	-0.004458	-0.003420	-0.007704
4.4600	1119.556	63.533	48.930	109.893	-0.604	20.290	2131.348	-0.004447	-0.003425	-0.007693
4.4800	1134.089	65.075	49.777	111.600	-0.601	20.290	2159.014	-0.004555	-0.003484	-0.007812
4.5000	1119.511	64.244	49.306	110.614	-0.596	20.291	2131.262	-0.004497	-0.003451	-0.007743
4.5200	1109.397	63.964	49.430	109.966	-0.596	20.290	2112.007	-0.004478	-0.003460	-0.007698
4.5400	1094.083	62.602	48.957	109.060	-0.598	20.291	2082.853	-0.004382	-0.003427	-0.007634
4.5600	1083.368	62.266	48.734	108.199	-0.593	20.290	2062.454	-0.004359	-0.003411	-0.007574
4.5800	1041.499	59.878	47.042	104.266	-0.596	20.291	1982.746	-0.004191	-0.003293	-0.007299
4.6000	1006.407	57.445	45.095	101.054	-0.589	20.290	1915.941	-0.004021	-0.003157	-0.007074
4.6200	965.320	54.641	43.023	97.080	-0.588	20.290	1837.721	-0.003825	-0.003012	-0.006796
4.6400	930.108	51.734	40.816	93.068	-0.598	20.290	1770.687	-0.003621	-0.002857	-0.006515
4.6600	850.893	47.119	36.481	85.241	-0.596	20.290	1619.883	-0.003298	-0.002554	-0.005967
4.6800	815.351	43.729	34.311	81.365	-0.598	20.290	1552.219	-0.003061	-0.002402	-0.005696
4.7000	781.612	41.410	32.212	77.515	-0.599	20.290	1487.989	-0.002899	-0.002255	-0.005426
4.7200	712.918	36.603	28.824	69.956	-0.596	20.290	1357.212	-0.002562	-0.002018	-0.004897
4.7400	639.744	31.070	24.211	61.865	-0.593	20.291	1217.909	-0.002175	-0.001695	-0.004331
4.7600	579.090	26.887	21.359	54.809	-0.603	20.290	1102.438	-0.001882	-0.001495	-0.003837
4.7800	523.860	22.580	17.901	48.293	-0.617	20.290	997.295	-0.001581	-0.001253	-0.003380
4.8000	469.172	18.675	14.903	41.635	-0.608	20.290	893.183	-0.001307	-0.001043	-0.002914
4.8200	426.356	15.230	12.887	36.272	-0.597	20.290	811.672	-0.001066	-0.000902	-0.002539
4.8400	384.772	11.850	10.271	30.991	-0.596	20.290	732.508	-0.000830	-0.000719	-0.002169
4.8600	321.503	7.071	7.507	23.402	-0.592	20.290	612.059	-0.000495	-0.000525	-0.001638
4.8800	306.820	5.291	6.310	20.858	-0.595	20.290	584.106	-0.000370	-0.000442	-0.001460
4.9000	259.601	1.791	4.128	14.245	-0.596	20.290	494.213	-0.000125	-0.000289	-0.000997
4.9200	244.828	-0.098	3.311	12.020	-0.600	20.290	466.089	0.000007	-0.000232	-0.000841
4.9400	214.470	-2.423	1.865	7.727	-0.592	20.290	408.297	0.000170	-0.000131	-0.000541
4.9600	208.639	-3.098	1.600	6.267	-0.596	20.290	397.196	0.000217	-0.000112	-0.000439
4.9800	204.927	-3.810	1.059	5.765	-0.592	20.290	390.129	0.000267	-0.000074	-0.000404
5.0000	229.860	0.582	5.964	15.622	-0.608	20.295	437.593	-0.000041	-0.000417	-0.001094
5.0200	183.812	-6.461	0.473	5.139	-0.607	20.295	349.932	0.000452	-0.000033	-0.000360
5.0400	221.338	-3.936	1.226	9.018	-0.607	20.296	421.371	0.000275	-0.000086	-0.000631
5.0600	265.116	-1.750	2.031	13.621	-0.601	20.296	504.713	0.000122	-0.000142	-0.000953
5.0800	321.172	2.457	4.391	20.052	-0.609	20.296	611.429	-0.000172	-0.000307	-0.001404
5.1000	377.664	6.082	6.548	26.238	-0.609	20.295	718.975	-0.000426	-0.000458	-0.001837
5.1200	417.399	9.254	8.508	30.614	-0.596	20.296	794.621	-0.000648	-0.000596	-0.002143
5.1400	484.756	14.048	11.801	38.272	-0.602	20.295	922.852	-0.000983	-0.000826	-0.002679
5.1600	531.825	17.508	13.872	44.205	-0.604	20.296	1012.459	-0.001226	-0.000971	-0.003094
5.1800	614.752	23.523	18.205	53.364	-0.597	20.296	1170.330	-0.001647	-0.001274	-0.003735
5.2000	736.768	31.627	24.474	66.327	-0.608	20.295	1402.617	-0.002214	-0.001713	-0.004643
5.2200	745.214	33.141	25.851	68.106	-0.609	20.296	1418.695	-0.002320	-0.001810	-0.004767
5.2400	816.148	37.964	29.837	75.293	-0.609	20.295	1553.736	-0.002657	-0.002089	-0.005270
5.2600	906.363	44.551	34.573	85.841	-0.605	20.296	1725.483	-0.003119	-0.002420	-0.006009
5.2800	985.909	50.121	39.619	94.455	-0.600	20.295	1876.917	-0.003508	-0.002773	-0.006612
5.3000	1053.176	55.096	43.178	101.418	-0.600	20.295	2004.976	-0.003857	-0.003022	-0.007099
5.3200	1104.438	59.518	46.997	107.474	-0.593	20.295	2102.566	-0.004166	-0.003290	-0.007523
5.3400	1179.715	64.743	51.793	115.300	-0.593	20.295	2245.874	-0.004532	-0.003626	-0.008071
5.3600	1271.734	71.467	57.266	124.637	-0.597	20.295	2421.055	-0.005003	-0.004009	-0.008725
5.3800	1336.131	75.873	61.688	131.197	-0.596	20.295	2543.650	-0.005311	-0.004318	-0.009184
5.4000	1343.164	77.069	62.186	132.682	-0.603	20.295	2557.039	-0.005395	-0.004353	-0.009288
5.4200	1378.045	80.236	65.299	136.797	-0.608	20.295	2623.444	-0.005616	-0.004571	-0.009576
5.4400	1413.722	82.585	67.148	140.395	-0.600	20.296	2691.364	-0.005781	-0.004700	-0.009828
5.4600	1378.436	81.710	66.829	138.003	-0.603	20.295	2624.187	-0.005720	-0.004678	-0.009660
5.4800	1403.218	82.198	67.245	140.326	-0.612	20.295	2671.366	-0.005754	-0.004707	-0.009823
5.5000	1446.559	86.155	70.206	144.647	-0.601	20.295	2753.878	-0.006031	-0.004914	-0.010125
5.5200	1424.979	84.834	69.679	143.537	-0.602	20.295	2712.793	-0.005938	-0.004878	-0.010048
5.5400	1393.614	83.599	68.831	141.090	-0.606	20.295	2653.084	-0.005852	-0.004818	-0.009876
5.5600	1373.086	81.572	67.912	138.977	-0.603	20.295	2614.002	-0.005710	-0.004754	-0.009728
5.5800	1308.779	77.555	65.035	133.961	-0.591	20.295	2491.579	-0.005429	-0.004552	-0.009377
5.6000	1268.127	75.053	62.814	129.919	-0.601	20.295	2414.188	-0.005254	-0.004397	-0.009094
5.6200	1182.210	68.743	57.018	121.731	-0.600	20.295	2250.624	-0.004812	-0.003991	-0.008521
5.6400	1175.116	68.424	57.086	121.037	-0.603	20.295	2237.120	-0.004790	-0.003996	-0.008473
5.6600	1074.757	61.501	51.307	111.502	-0.600	20.295	2046.061	-0.004305	-0.003591	-0.007805
5.6800	1008.662	57.180	47.028	104.806	-0.602	20.295	1920.233	-0.004003	-0.003292	-0.007336
5.7000	920.295	50.884	42.207	95.787	-0.592	20.295	1752.005	-0.003562	-0.002954	-0.006705
5.7200	870.040	46.565	38.689	89.922	-0.598	20.295	1656.332	-0.003260	-0.002708	-0.006295
5.7400	819.259	43.107	36.063	84.185	-0.597	20.295	1559.658	-0.003017	-0.002524	-0.005893
5.7600	710.528	35.309	29.864	72.512	-0.601	20.295	1352.663	-0.002472	-0.002091	-0.005076
5.7800	620.809	28.915	24.570	62.086	-0.604	20.295	1181.860	-0.002024	-0.001720	-0.004346
5.8000	553.496	23.259	20.832	53.671	-0.602	20.295	1053.715	-0.001628	-0.001458	-0.003757
5.8200	509.839	20.065	17.818	48.403	-0.598	20.295	970.602	-0.001405	-0.001247	-0.003388
5.8400	444.615	15.328	14.635	40.466	-0.597	20.295	846.434	-0.001073	-0.001024	-0.002833
5.8600	403.483	11.741	12.232	35.436	-0.608	20.295	768.127	-0.000822	-0.000856	-0.002481
5.8800	311.900	4.836	7.616	23.705	-0.615	20.295	593.777	-0.000339	-0.000533	-0.001659
5.9000	291.115	2.612	6.423	20.330	-0.607	20.295	554.209	-0.000183	-0.000450	-0.001423
5.9200	252.267	-0.347	4.601	14.856	-0.604	20.295	480.251	0.000024	-0.000322	-0.001040
5.9400	231.032	-2.698	3.716	11.685	-0.611	20.295	439.825	0.000189	-0.000260	-0.000818
5.9600	223.923	-3.476	2.573	9.922	-0.617	20.295	426.292	0.000243	-0.000180	-0.000695
5.9800	215.658	-4.549	2.351	8.656	-0.614	20.295	410.557	0.000318	-0.000165	-0.000606
6.0000	220.993	-4.755	2.143	8.839	-0.614	20.295	420.713	0.000333	-0.000150	-0.000619
6.0200	224.389	-4.296	2.255	8.616	-0.607	20.295	427.179	0.000301	-0.000158	-0.000603
6.0400	231.392	-4.796	2.142	9.270	-0.613	20.295	440.512	0.000336	-0.000150	-0.000649
6.0600	258.038	-2.712	2.408	11.838	-0.610	20.295	491.238	0.000190	-0.000169	-0.000829
6.0800	344.631	3.599	4.907	21.928	-0.600	20.295	656.090	-0.000252	-0.000344	-0.001535
6.1000	364.529	4.875	5.450	24.320	-0.605	20.295	693.970	-0.000341	-0.000382	-0.001702
6.1200	417.159	9.255	8.242	30.364	-0.605	20.295	794.163	-0.000648	-0.000577	-0.002126
6.1400	479.286	13.214	11.214	37.479	-0.603	20.295	912.437	-0.000925	-0.000785	-0.002623
6.1600	519.307	16.480	13.259	42.122	-0.607	20.295	988.626	-0.001154	-0.000928	-0.002949
6.1800	607.012	22.702	17.985	52.446	-0.611	20.295	1155.596	-0.001589	-0.001259	-0.003671
6.2000	671.274	27.124	21.235	59.548	-0.612	20.295	1277.933	-0.001899	-0.001486	-0.004168
6.2200	753.720	33.310	25.931	68.913	-0.611	20.295	1434.889	-0.002332	-0.001815	-0.004824
6.2400	833.325	38.838	30.337	77.708	-0.608	20.295	1586.437	-0.002719	-0.002124	-0.005440
6.2600	895.964	43.913	34.492	84.768	-0.609	20.295	1705.685	-0.003074	-0.002414	-0.005934
6.2800	993.874	50.469	40.273	95.134	-0.597	20.295	1892.080	-0.003533	-0.002819	-0.006659
6.3000	1057.955	55.541	44.052	102.472	-0.599	20.295	2014.074	-0.003888	-0.003084	-0.007173
6.3200	1127.281	60.643	48.485	109.990	-0.618	20.294	2146.053	-0.004245	-0.003394	-0.007699
6.3400	1190.581	65.450	52.335	116.770	-0.616	20.294	2266.560	-0.004582	-0.003663	-0.008174
6.3600	1235.756	69.315	55.655	121.662	-0.599	20.295	2352.562	-0.004852	-0.003896	-0.008516
6.3800	1301.550	74.191	59.726	128.542	-0.608	20.295	2477.818	-0.005193	-0.004181	-0.008998
6.4000	1341.451	77.735	62.828	132.889	-0.621	20.295	2553.778	-0.005441	-0.004398	-0.009302
6.4200	1353.654	78.234	63.481	134.488	-0.615	20.294	2577.009	-0.005476	-0.004444	-0.009414
6.4400	1384.372	80.736	65.884	137.990	-0.619	20.295	2635.489	-0.005652	-0.004612	-0.009659
6.4600	1437.963	84.960	69.250	143.147	-0.602	20.295	2737.513	-0.005947	-0.004847	-0.010020
6.4800	1431.366	84.765	69.221	143.412	-0.611	20.294	2724.953	-0.005934	-0.004845	-0.010039
6.5000	1409.605	84.336	69.194	142.092	-0.606	20.295	2683.525	-0.005904	-0.004844	-0.009946
6.5200	1415.556	84.112	68.944	142.648	-0.613	20.294	2694.855	-0.005888	-0.004826	-0.009985
6.5400	1393.674	83.781	68.860	141.339	-0.604	20.294	2653.198	-0.005865	-0.004820	-0.009894
6.5600	1379.112	82.294	68.375	140.285	-0.611	20.294	2625.475	-0.005761	-0.004786	-0.009820
6.5800	1297.267	77.136	64.482	133.263	-0.607	20.295	2469.664	-0.005400	-0.004514	-0.009328
6.6000	1273.357	75.304	63.218	131.239	-0.607	20.295	2424.145	-0.005271	-0.004425	-0.009187
6.6200	1213.349	71.456	59.464	125.514	-0.610	20.294	2309.904	-0.005002	-0.004162	-0.008786
6.6400	1153.130	67.367	56.170	119.828	-0.622	20.295	2195.263	-0.004716	-0.003932	-0.008388
6.6600	1090.281	62.601	51.751	113.369	-0.611	20.295	2075.615	-0.004382	-0.003623	-0.007936
6.6800	1016.672	57.932	48.193	106.223	-0.625	20.295	1935.482	-0.004055	-0.003374	-0.007436
6.7000	954.469	53.098	44.220	99.693	-0.607	20.294	1817.064	-0.003717	-0.003095	-0.006979
6.7200	872.640	47.773	39.244	90.633	-0.609	20.294	1661.282	-0.003344	-0.002747	-0.006344
6.7400	780.410	41.187	34.326	80.545	-0.609	20.294	1485.701	-0.002883	-0.002403	-0.005638
6.7600	727.946	36.642	30.742	74.639	-0.595	20.294	1385.822	-0.002565	-0.002152	-0.005225
6.7800	644.088	30.723	26.378	65.164	-0.605	20.294	1226.177	-0.002151	-0.001846	-0.004561
6.8000	570.208	25.290	21.804	56.045	-0.606	20.294	1085.529	-0.001770	-0.001526	-0.003923
6.8200	510.515	20.788	18.556	48.943	-0.604	20.294	971.889	-0.001455	-0.001299	-0.003426
6.8400	456.067	15.979	15.248	42.232	-0.604	20.294	868.235	-0.001119	-0.001067	-0.002956
6.8600	393.008	11.545	11.770	34.044	-0.604	20.294	748.186	-0.000808	-0.000824	-0.002383
6.8800	348.043	7.613	9.675	28.403	-0.615	20.294	662.584	-0.000533	-0.000677	-0.001988
6.9000	297.021	3.431	6.740	21.883	-0.604	20.294	565.453	-0.000240	-0.000472	-0.001532
6.9200	265.913	0.957	5.477	16.854	-0.608	20.294	506.229	-0.000067	-0.000383	-0.001180
6.9400	238.846	-1.987	3.741	12.881	-0.604	20.294	454.702	0.000139	-0.000262	-0.000902
6.9600	223.533	-3.016	2.950	10.559	-0.601	20.294	425.549	0.000211	-0.000206	-0.000739
6.9800	212.847	-4.673	2.128	8.630	-0.604	20.294	405.207	0.000327	-0.000149	-0.000604
7.0000	211.660	-4.795	1.794	7.767	-0.601	20.294	402.946	0.000336	-0.000126	-0.000544
7.0200	217.702	-4.881	1.934	8.102	-0.601	20.294	414.448	0.000342	-0.000135	-0.000567
7.0400	246.000	-3.545	1.990	10.867	-0.602	20.295	468.321	0.000248	-0.000139	-0.000761
7.0600	287.659	-0.376	2.978	15.604	-0.613	20.294	547.628	0.000026	-0.000208	-0.001092
7.0800	293.054	-0.140	3.269	16.367	-0.600	20.294	557.899	0.000010	-0.000229	-0.001146
7.1000	356.083	4.558	5.560	23.820	-0.599	20.294	677.891	-0.000319	-0.000389	-0.001667
7.1200	404.249	8.238	7.506	29.320	-0.604	20.294	769.587	-0.000577	-0.000525	-0.002052
7.1400	472.478	13.045	10.660	37.410	-0.603	20.294	899.477	-0.000913	-0.000746	-0.002619
7.1600	524.236	16.727	13.775	43.399	-0.592	20.295	998.011	-0.001171	-0.000964	-0.003038
7.1800	621.470	23.454	18.597	53.877	-0.601	20.294	1183.119	-0.001642	-0.001302	-0.003771
7.2000	683.943	28.678	22.388	61.324	-0.596	20.294	1302.052	-0.002007	-0.001567	-0.004293
7.2200	744.387	32.669	25.960	68.205	-0.608	20.294	1417.122	-0.002287	-0.001817	-0.004774
7.2400	823.677	38.353	30.087	76.919	-0.607	20.295	1568.069	-0.002685	-0.002106	-0.005384
7.2600	918.416	44.951	35.854	87.231	-0.601	20.294	1748.428	-0.003147	-0.002510	-0.006106
7.2800	1029.236	53.304	42.136	99.249	-0.591	20.294	1959.400	-0.003731	-0.002950	-0.006947
7.3000	1036.900	55.042	44.010	101.497	-0.606	20.294	1973.991	-0.003853	-0.003081	-0.007105
7.3200	1127.341	60.838	49.014	110.614	-0.600	20.294	2146.168	-0.004259	-0.003431	-0.007743
7.3400	1201.476	66.507	53.668	118.203	-0.603	20.294	2287.302	-0.004655	-0.003757	-0.008274
7.3600	1268.307	71.164	57.518	124.791	-0.612	20.294	2414.532	-0.004981	-0.004026	-0.008735
7.3800	1288.446	73.356	59.061	127.567	-0.601	20.294	2452.869	-0.005135	-0.004134	-0.008930
7.4000	1340.549	76.903	62.535	133.099	-0.601	20.294	2552.061	-0.005383	-0.004377	-0.009317
7.4200	1363.738	79.179	64.853	136.215	-0.599	20.294	2596.207	-0.005543	-0.004540	-0.009535
7.4400	1393.584	81.751	66.578	139.044	-0.604	20.294	2653.027	-0.005723	-0.004660	-0.009733
7.4600	1424.813	84.210	68.569	142.148	-0.614	20.294	2712.479	-0.005895	-0.004800	-0.009950
7.4800	1399.085	83.406	68.291	141.021	-0.603	20.293	2663.498	-0.005838	-0.004780	-0.009871
7.5000	1405.742	83.266	68.457	141.409	-0.604	20.294	2676.172	-0.005829	-0.004792	-0.009899
7.5200	1423.401	84.723	69.374	143.330	-0.605	20.294	2709.789	-0.005931	-0.004856	-0.010033
7.5400	1409.935	84.668	69.429	142.566	-0.604	20.294	2684.155	-0.005927	-0.004860	-0.009980
7.5600	1370.200	81.210	66.814	138.866	-0.598	20.294	2608.509	-0.005685	-0.004677	-0.009721
7.5800	1320.140	78.734	66.036	135.309	-0.604	20.294	2513.208	-0.005511	-0.004623	-0.009472
7.6000	1247.433	73.177	61.299	128.303	-0.602	20.294	2374.792	-0.005122	-0.004291	-0.008981
7.6200	1238.566	72.994	61.312	128.010	-0.612	20.294	2357.912	-0.005110	-0.004292	-0.008961
7.6400	1144.549	66.245	55.587	118.842	-0.599	20.294	2178.926	-0.004637	-0.003891	-0.008319
7.6600	1067.092	61.087	50.751	111.602	-0.601	20.294	2031.469	-0.004276	-0.003553	-0.007812
7.6800	1002.725	56.458	47.526	104.810	-0.603	20.293	1908.932	-0.003952	-0.003327	-0.007337
7.7000	941.289	52.164	43.440	98.250	-0.591	20.294	1791.973	-0.003651	-0.003041	-0.006877
7.7200	858.483	46.634	39.036	89.464	-0.608	20.294	1634.331	-0.003264	-0.002733	-0.006262
7.7400	778.637	40.450	34.171	80.391	-0.605	20.294	1482.325	-0.002832	-0.002392	-0.005627
7.7600	700.474	35.142	29.572	71.553	-0.603	20.293	1333.523	-0.002460	-0.002070	-0.005009
7.7800	667.021	31.877	27.124	67.480	-0.605	20.293	1269.836	-0.002231	-0.001899	-0.004724
7.8000	589.895	26.041	22.138	58.269	-0.595	20.293	1123.009	-0.001823	-0.001550	-0.004079
7.8200	506.172	20.551	18.498	49.099	-0.593	20.294	963.621	-0.001439	-0.001295	-0.003437
7.8400	445.111	15.146	14.733	41.495	-0.603	20.294	847.378	-0.001060	-0.001031	-0.002905
7.8600	410.591	12.504	12.869	36.188	-0.599	20.293	781.660	-0.000875	-0.000901	-0.002533
7.8800	310.111	4.723	7.715	24.292	-0.596	20.293	590.372	-0.000331	-0.000540	-0.001700
7.9000	315.822	4.696	7.479	23.805	-0.598	20.294	601.244	-0.000329	-0.000524	-0.001666
7.9200	254.296	-0.168	4.751	16.062	-0.603	20.293	484.114	0.000012	-0.000333	-0.001124
7.9400	239.508	-1.892	3.478	13.576	-0.610	20.293	455.961	0.000132	-0.000243	-0.000950
7.9600	226.057	-3.115	3.046	10.851	-0.612	20.294	430.355	0.000218	-0.000213	-0.000760
7.9800	192.198	-6.115	1.446	5.906	-0.604	20.293	365.896	0.000428	-0.000101	-0.000413
8.0000	209.466	-5.628	1.683	7.449	-0.596	20.293	398.769	0.000394	-0.000118	-0.000521
8.0200	216.559	-5.062	1.531	8.187	-0.612	20.294	412.273	0.000354	-0.000107	-0.000573
8.0400	222.225	-5.186	1.545	7.962	-0.615	20.293	423.059	0.000363	-0.000108	-0.000557
8.0600	268.452	-1.864	2.240	13.494	-0.608	20.294	511.065	0.000130	-0.000157	-0.000945
8.0800	360.682	4.640	5.476	23.625	-0.597	20.293	686.646	-0.000325	-0.000383	-0.001654
8.1000	357.330	4.848	6.034	24.320	-0.589	20.293	680.265	-0.000339	-0.000422	-0.001702
8.1200	355.076	4.433	5.811	24.290	-0.595	20.293	675.974	-0.000310	-0.000407	-0.001700
8.1400	492.421	14.325	11.870	39.006	-0.592	20.293	937.443	-0.001003	-0.000831	-0.002730
8.1600	559.613	19.105	15.302	47.206	-0.591	20.293	1065.359	-0.001337	-0.001071	-0.003304
8.1800	605.014	22.606	18.067	52.139	-0.591	20.293	1151.791	-0.001582	-0.001265	-0.003650
8.2000	694.147	28.873	22.749	62.493	-0.596	20.293	1321.478	-0.002021	-0.001592	-0.004375
8.2200	770.386	34.114	26.848	70.775	-0.588	20.294	1466.618	-0.002388	-0.001879	-0.004954
8.2400	821.318	38.019	29.990	77.278	-0.586	20.293	1563.578	-0.002661	-0.002099	-0.005409
8.2600	911.278	44.632	35.270	86.772	-0.591	20.293	1734.838	-0.003124	-0.002469	-0.006074
8.2800	980.964	50.566	40.705	95.315	-0.591	20.294	1867.504	-0.003540	-0.002849	-0.006672
8.3000	1045.962	54.752	43.899	101.846	-0.593	20.294	1991.243	-0.003833	-0.003073	-0.007129
8.3200	1162.808	63.269	50.585	113.883	-0.593	20.294	2213.688	-0.004429	-0.003541	-0.007972
8.3400	1143.872	62.878	50.682	113.202	-0.597	20.293	2177.639	-0.004401	-0.003548	-0.007924
8.3600	1271.794	71.649	57.911	125.473	-0.593	20.293	2421.169	-0.005015	-0.004054	-0.008783
8.3800	1288.656	73.094	59.504	127.651	-0.593	20.293	2453.270	-0.005117	-0.004165	-0.008936
8.4000	1335.304	76.720	62.022	132.708	-0.597	20.293	2542.076	-0.005370	-0.004342	-0.009290
8.4200	1365.977	79.528	64.799	136.242	-0.596	20.294	2600.470	-0.005567	-0.004536	-0.009537
8.4400	1371.643	80.152	65.563	137.396	-0.596	20.293	2611.256	-0.005611	-0.004589	-0.009618
8.4600	1425.429	84.502	69.180	142.857	-0.605	20.293	2713.652	-0.005915	-0.004843	-0.010000
8.4800	1420.170	83.905	69.221	142.633	-0.593	20.293	2703.638	-0.005873	-0.004845	-0.009984
8.5000	1409.289	83.988	68.943	142.076	-0.597	20.293	2682.924	-0.005879	-0.004826	-0.009945
8.5200	1397.522	83.502	68.929	141.576	-0.590	20.293	2660.522	-0.005845	-0.004825	-0.009910
8.5400	1392.592	83.016	68.510	141.495	-0.600	20.293	2651.138	-0.005811	-0.004796	-0.009905
8.5600	1359.139	81.043	67.942	138.617	-0.607	20.293	2587.452	-0.005673	-0.004756	-0.009703
8.5800	1322.109	78.623	65.813	135.381	-0.604	20.293	2516.956	-0.005504	-0.004607	-0.009477
8.6000	1243.751	73.703	61.605	128.763	-0.596	20.294	2367.783	-0.005159	-0.004312	-0.009013
8.6200	1223.808	71.509	60.062	126.624	-0.598	20.293	2329.817	-0.005006	-0.004204	-0.008864
8.6400	1149.222	67.131	55.712	119.455	-0.591	20.294	2187.824	-0.004699	-0.003900	-0.008362
8.6600	1095.150	62.766	52.474	114.076	-0.585	20.293	2084.885	-0.004394	-0.003673	-0.007985
8.6800	1010.014	57.069	47.403	105.487	-0.585	20.293	1922.808	-0.003995	-0.003318	-0.007384
8.7000	924.833	51.332	42.705	96.984	-0.602	20.293	1760.645	-0.003593	-0.002989	-0.006789
8.7200	868.732	47.009	38.940	90.590	-0.597	20.294	1653.843	-0.003291	-0.002726	-0.006341
8.7400	763.338	39.448	33.184	78.665	-0.600	20.294	1453.199	-0.002761	-0.002323	-0.005507
8.7600	704.036	35.071	29.544	71.774	-0.605	20.293	1340.303	-0.002455	-0.002068	-0.005024
8.7800	630.111	29.584	25.376	63.465	-0.605	20.293	1199.570	-0.002071	-0.001776	-0.004443
8.8000	568.044	24.608	22.026	56.029	-0.608	20.293	1081.409	-0.001723	-0.001542	-0.003922
8.8200	538.002	22.245	19.596	52.541	-0.596	20.293	1024.218	-0.001557	-0.001372	-0.003678
8.8400	467.143	16.883	16.106	43.497	-0.600	20.293	889.320	-0.001182	-0.001127	-0.003045
8.8600	400.507	11.559	12.049	35.393	-0.595	20.293	762.463	-0.000809	-0.000843	-0.002478
8.8800	334.397	6.625	8.952	26.722	-0.613	20.293	636.606	-0.000464	-0.000627	-0.001871
8.9000	283.270	2.084	6.298	19.843	-0.605	20.293	539.274	-0.000146	-0.000441	-0.001389
8.9200	235.435	-1.446	3.839	13.634	-0.599	20.293	448.208	0.000101	-0.000269	-0.000954
8.9400	233.256	-2.600	3.601	12.589	-0.607	20.293	444.059	0.000182	-0.000252	-0.000881
8.9600	212.381	-4.213	2.018	9.272	-0.603	20.293	404.320	0.000295	-0.000141	-0.000649
8.9800	209.721	-4.796	2.073	8.116	-0.608	20.293	399.256	0.000336	-0.000145	-0.000568
9.0000	208.459	-5.240	1.654	7.254	-0.602	20.293	396.852	0.000367	-0.000116	-0.000508
9.0200	216.619	-5.060	1.919	8.380	-0.599	20.293	412.388	0.000354	-0.000134	-0.000587
9.0400	250.719	-3.309	2.170	11.256	-0.590	20.293	477.304	0.000232	-0.000152	-0.000788
9.0600	277.875	-0.764	2.671	14.817	-0.596	20.293	529.003	0.000053	-0.000187	-0.001037
9.0800	327.679	2.040	4.197	20.666	-0.582	20.292	623.817	-0.000143	-0.000294	-0.001447
9.1000	429.422	9.615	8.535	32.113	-0.606	20.293	817.509	-0.000673	-0.000597	-0.002248
9.1200	342.527	4.503	7.005	23.930	-0.589	20.292	652.084	-0.000315	-0.000490	-0.001675
9.1400	473.996	13.144	11.076	37.410	-0.587	20.293	902.367	-0.000920	-0.000775	-0.002619
9.1600	524.912	16.909	13.817	43.275	-0.595	20.292	999.298	-0.001184	-0.000967	-0.003029
9.1800	617.127	23.024	18.484	53.684	-0.604	20.292	1174.850	-0.001612	-0.001294	-0.003758
9.2000	665.383	27.178	21.388	59.186	-0.599	20.293	1266.718	-0.001902	-0.001497	-0.004143
9.2200	752.833	33.014	26.417	69.343	-0.607	20.293	1433.201	-0.002311	-0.001849	-0.004854
9.2400	860.361	41.020	32.003	81.101	-0.598	20.293	1637.907	-0.002871	-0.002240	-0.005677
9.2600	899.510	44.038	34.631	85.604	-0.604	20.292	1712.437	-0.003083	-0.002424	-0.005992
9.2800	987.442	50.317	39.495	95.093	-0.595	20.292	1879.835	-0.003522	-0.002765	-0.006657
9.3000	1091.168	58.167	46.166	106.167	-0.592	20.292	2077.303	-0.004072	-0.003232	-0.007432
9.3200	1116.701	60.157	47.901	109.687	-0.598	20.292	2125.912	-0.004211	-0.003353	-0.007678
9.3400	1178.197	65.271	52.389	116.464	-0.601	20.291	2242.985	-0.004569	-0.003667	-0.008152
9.3600	1250.574	70.121	56.561	123.328	-0.606	20.292	2380.772	-0.004908	-0.003959	-0.008633
9.3800	1302.482	74.121	59.852	129.070	-0.596	20.292	2479.591	-0.005188	-0.004190	-0.009035
9.4000	1314.324	75.611	61.285	130.864	-0.597	20.292	2502.136	-0.005293	-0.004290	-0.009160
9.4200	1366.894	79.430	64.329	136.105	-0.594	20.292	2602.215	-0.005560	-0.004503	-0.009527
9.4400	1415.330	83.196	68.025	141.145	-0.592	20.292	2694.426	-0.005824	-0.004762	-0.009880
9.4600	1430.930	84.390	68.747	143.118	-0.595	20.292	2724.123	-0.005907	-0.004812	-0.010018
9.4800	1428.946	84.905	69.403	143.811	-0.593	20.292	2720.346	-0.005943	-0.004858	-0.010067
9.5000	1400.302	83.350	68.944	141.815	-0.596	20.292	2665.815	-0.005835	-0.004826	-0.009927
9.5200	1401.144	83.322	68.845	142.189	-0.592	20.292	2667.418	-0.005833	-0.004819	-0.009953
9.5400	1367.765	81.683	68.039	139.282	-0.600	20.291	2603.874	-0.005718	-0.004763	-0.009750
9.5600	1371.447	81.669	68.040	139.839	-0.601	20.291	2610.884	-0.005717	-0.004763	-0.009789
9.5800	1306.254	77.387	65.050	133.932	-0.592	20.291	2486.773	-0.005417	-0.004553	-0.009375
9.6000	1287.379	75.943	63.843	132.541	-0.587	20.292	2450.838	-0.005316	-0.004469	-0.009278
9.6200	1214.581	71.634	59.961	125.808	-0.593	20.292	2312.250	-0.005014	-0.004197	-0.008807
9.6400	1170.458	68.090	57.143	121.508	-0.600	20.292	2228.251	-0.004766	-0.004000	-0.008506
9.6600	1089.935	62.810	52.197	113.854	-0.593	20.291	2074.957	-0.004397	-0.003654	-0.007970
9.6800	1009.503	57.123	47.526	105.418	-0.600	20.292	1921.835	-0.003999	-0.003327	-0.007379
9.7000	915.891	50.467	41.915	96.010	-0.591	20.292	1743.622	-0.003533	-0.002934	-0.006721
9.7200	849.120	45.702	38.090	88.520	-0.588	20.291	1616.507	-0.003199	-0.002666	-0.006196
9.7400	802.367	41.714	34.715	82.712	-0.602	20.291	1527.500	-0.002920	-0.002430	-0.005790
9.7600	726.323	36.837	31.074	75.041	-0.597	20.292	1382.732	-0.002579	-0.002175	-0.005253
9.7800	596.793	26.860	23.417	60.062	-0.601	20.292	1136.141	-0.001880	-0.001639	-0.004204
9.8000	549.378	23.606	20.610	54.098	-0.600	20.292	1045.876	-0.001652	-0.001443	-0.003787
9.8200	518.781	20.955	18.845	49.818	-0.596	20.291	987.625	-0.001467	-0.001319	-0.003487
9.8400	421.081	13.645	13.300	37.907	-0.601	20.291	801.630	-0.000955	-0.000931	-0.002653
9.8600	346.209	8.198	9.756	29.156	-0.601	20.292	659.094	-0.000574	-0.000683	-0.002041
9.8800	342.317	6.751	8.994	27.737	-0.611	20.291	651.684	-0.000473	-0.000630	-0.001942
9.9000	294.241	3.350	6.589	21.300	-0.595	20.291	560.160	-0.000234	-0.000461	-0.001491
9.9200	249.787	-0.863	4.378	15.662	-0.596	20.291	475.531	0.000060	-0.000306	-0.001096
9.9400	239.282	-1.724	3.699	13.203	-0.600	20.291	455.532	0.000121	-0.000259	-0.000924
9.9600	204.762	-4.797	2.001	8.533	-0.592	20.292	389.814	0.000336	-0.000140	-0.000597
9.9800	220.842	-4.350	1.837	8.950	-0.595	20.291	420.427	0.000305	-0.000129	-0.000627
Test Cycles
Time (sec)	Axial stress (kPa)	Axial micro-strain #1	Axial micro-strain #2	Axial micro-strain #3	Confining pressure (kPa)	Temperature (�C)	Load (N)	Displacement #1 (mm)	Displacement #2 (mm)	Displacement #3 (mm)
0.0000	217.566	-4.740	2.100	8.564	-0.589	20.291	414.190	0.000332	-0.000147	-0.000600
0.0200	254.371	-2.782	2.255	12.063	-0.595	20.291	484.257	0.000195	-0.000158	-0.000844
0.0400	250.463	-2.517	2.475	12.339	-0.584	20.291	476.818	0.000176	-0.000173	-0.000864
0.0600	277.094	-1.114	2.698	14.913	-0.583	20.291	527.515	0.000078	-0.000189	-0.001044
0.0800	339.717	3.933	4.725	22.177	-0.601	20.291	646.734	-0.000275	-0.000331	-0.001552
0.1000	394.646	7.098	7.062	28.347	-0.594	20.291	751.305	-0.000497	-0.000494	-0.001984
0.1200	411.162	9.115	7.896	30.461	-0.588	20.291	782.747	-0.000638	-0.000553	-0.002132
0.1400	475.649	13.786	11.300	37.826	-0.593	20.291	905.514	-0.000965	-0.000791	-0.002648
0.1600	524.657	16.688	13.594	43.692	-0.604	20.291	998.812	-0.001168	-0.000952	-0.003058
0.1800	599.664	22.758	17.707	52.139	-0.604	20.291	1141.605	-0.001593	-0.001239	-0.003650
0.2000	673.408	27.484	21.679	60.202	-0.595	20.291	1281.996	-0.001924	-0.001518	-0.004214
0.2200	793.320	36.088	28.295	73.123	-0.599	20.291	1510.277	-0.002526	-0.001981	-0.005119
0.2400	808.093	37.351	29.504	75.471	-0.603	20.290	1538.401	-0.002615	-0.002065	-0.005283
0.2600	917.139	45.329	35.283	87.133	-0.600	20.290	1745.996	-0.003173	-0.002470	-0.006099
0.2800	975.840	49.484	39.425	93.828	-0.597	20.291	1857.748	-0.003464	-0.002760	-0.006568
0.3000	1054.513	55.680	44.051	102.639	-0.594	20.291	2007.523	-0.003898	-0.003084	-0.007185
0.3200	1118.474	60.365	48.207	109.449	-0.594	20.291	2129.288	-0.004226	-0.003374	-0.007661
0.3400	1200.980	66.383	53.377	118.021	-0.604	20.291	2286.358	-0.004647	-0.003736	-0.008262
0.3600	1263.483	71.108	57.214	124.470	-0.587	20.291	2405.348	-0.004978	-0.004005	-0.008713
0.3800	1306.194	74.441	60.436	129.349	-0.593	20.290	2486.658	-0.005211	-0.004230	-0.009054
0.4000	1344.066	77.569	62.996	133.597	-0.593	20.290	2558.756	-0.005430	-0.004410	-0.009352
0.4200	1403.157	82.336	67.621	139.782	-0.595	20.290	2671.251	-0.005764	-0.004733	-0.009785
0.4400	1372.755	81.224	66.564	137.920	-0.600	20.290	2613.373	-0.005686	-0.004659	-0.009654
0.4600	1439.947	85.336	69.915	144.048	-0.581	20.291	2741.289	-0.005974	-0.004894	-0.010083
0.4800	1440.383	85.626	70.469	144.619	-0.593	20.291	2742.119	-0.005994	-0.004933	-0.010123
0.5000	1419.704	84.960	70.067	143.784	-0.591	20.290	2702.751	-0.005947	-0.004905	-0.010065
0.5200	1402.286	83.585	69.471	142.232	-0.588	20.290	2669.592	-0.005851	-0.004863	-0.009956
0.5400	1399.475	83.877	69.585	142.315	-0.595	20.290	2664.242	-0.005871	-0.004871	-0.009962
0.5600	1353.804	80.111	66.953	137.713	-0.596	20.290	2577.295	-0.005608	-0.004687	-0.009640
0.5800	1319.359	78.595	65.465	134.923	-0.595	20.290	2511.721	-0.005502	-0.004583	-0.009445
0.6000	1278.767	75.608	63.118	131.643	-0.602	20.290	2434.444	-0.005293	-0.004418	-0.009215
0.6200	1209.381	70.830	59.256	125.222	-0.598	20.290	2302.351	-0.004958	-0.004148	-0.008766
0.6400	1212.282	71.262	59.366	125.098	-0.604	20.290	2307.873	-0.004988	-0.004156	-0.008757
0.6600	1109.863	64.159	53.543	115.881	-0.610	20.290	2112.894	-0.004491	-0.003748	-0.008112
0.6800	971.542	54.223	44.721	101.539	-0.609	20.290	1849.566	-0.003796	-0.003130	-0.007108
0.7000	966.357	54.100	44.749	100.831	-0.603	20.290	1839.695	-0.003787	-0.003132	-0.007058
0.7200	878.681	47.677	39.201	91.508	-0.621	20.290	1672.783	-0.003337	-0.002744	-0.006406
0.7400	791.682	41.395	34.644	82.019	-0.609	20.290	1507.158	-0.002898	-0.002425	-0.005741
0.7600	674.054	33.017	28.128	69.370	-0.593	20.290	1283.226	-0.002311	-0.001969	-0.004856
0.7800	673.874	32.321	27.586	68.231	-0.601	20.290	1282.883	-0.002262	-0.001931	-0.004776
0.8000	580.232	25.415	22.011	57.419	-0.606	20.290	1104.612	-0.001779	-0.001541	-0.004019
0.8200	509.794	20.788	18.026	48.903	-0.596	20.290	970.516	-0.001455	-0.001262	-0.003423
0.8400	458.412	16.246	15.289	42.914	-0.607	20.290	872.698	-0.001137	-0.001070	-0.003004
0.8600	400.582	11.919	12.009	35.562	-0.604	20.290	762.606	-0.000834	-0.000841	-0.002489
0.8800	322.675	6.014	8.467	26.099	-0.610	20.290	614.290	-0.000421	-0.000593	-0.001827
0.9000	297.728	3.487	6.477	21.608	-0.602	20.289	566.797	-0.000244	-0.000453	-0.001513
0.9200	284.473	2.303	5.851	19.774	-0.613	20.290	541.563	-0.000161	-0.000410	-0.001384
0.9400	245.023	-1.390	4.088	14.330	-0.604	20.290	466.461	0.000097	-0.000286	-0.001003
0.9600	213.794	-3.615	2.670	9.964	-0.599	20.290	407.009	0.000253	-0.000187	-0.000697
0.9800	196.797	-6.029	1.656	7.212	-0.606	20.289	374.651	0.000422	-0.000116	-0.000505
1.0000	206.024	-5.838	1.420	7.671	-0.608	20.289	392.218	0.000409	-0.000099	-0.000537
1.0200	236.637	-3.670	2.074	10.547	-0.594	20.289	450.497	0.000257	-0.000145	-0.000738
1.0400	237.148	-3.727	1.769	10.532	-0.603	20.290	451.469	0.000261	-0.000124	-0.000737
1.0600	269.054	-1.361	2.518	14.231	-0.597	20.289	512.209	0.000095	-0.000176	-0.000996
1.0800	328.792	2.374	4.142	20.931	-0.589	20.289	625.935	-0.000166	-0.000290	-0.001465
1.1000	394.436	7.710	7.422	28.598	-0.597	20.289	750.904	-0.000540	-0.000520	-0.002002
1.1200	372.269	6.236	7.047	26.390	-0.592	20.289	708.704	-0.000437	-0.000493	-0.001847
1.1400	456.969	11.906	9.896	35.714	-0.601	20.289	869.951	-0.000833	-0.000693	-0.002500
1.1600	551.152	18.840	14.859	46.053	-0.615	20.289	1049.252	-0.001319	-0.001040	-0.003224
1.1800	542.781	18.618	15.274	46.054	-0.597	20.289	1033.316	-0.001303	-0.001069	-0.003224
1.2000	669.981	27.360	21.914	59.616	-0.604	20.289	1275.473	-0.001915	-0.001534	-0.004173
1.2200	787.398	35.726	28.002	73.206	-0.597	20.289	1499.004	-0.002501	-0.001960	-0.005124
1.2400	877.644	42.661	33.700	83.337	-0.592	20.289	1670.809	-0.002986	-0.002359	-0.005834
1.2600	891.019	43.606	34.478	84.976	-0.598	20.289	1696.272	-0.003052	-0.002413	-0.005948
1.2800	987.532	50.649	39.828	95.427	-0.592	20.289	1880.007	-0.003545	-0.002788	-0.006680
1.3000	1090.777	58.126	46.457	106.360	-0.603	20.289	2076.559	-0.004069	-0.003252	-0.007445
1.3200	1134.570	62.002	50.196	112.422	-0.592	20.289	2159.929	-0.004340	-0.003514	-0.007870
1.3400	1206.676	67.006	54.238	119.176	-0.600	20.289	2297.201	-0.004690	-0.003797	-0.008342
1.3600	1243.571	69.871	56.159	123.066	-0.599	20.289	2367.439	-0.004891	-0.003931	-0.008615
1.3800	1271.463	72.910	59.129	126.874	-0.594	20.288	2420.540	-0.005104	-0.004139	-0.008881
1.4000	1307.577	74.969	60.896	130.142	-0.592	20.288	2489.290	-0.005248	-0.004263	-0.009110
1.4200	1387.633	81.306	66.439	138.572	-0.589	20.288	2641.697	-0.005691	-0.004651	-0.009700
1.4400	1401.985	82.184	67.203	140.199	-0.593	20.288	2669.020	-0.005753	-0.004704	-0.009814
1.4600	1437.077	85.849	70.816	144.688	-0.583	20.288	2735.825	-0.006009	-0.004957	-0.010128
1.4800	1380.419	81.542	68.387	139.451	-0.593	20.289	2627.964	-0.005708	-0.004787	-0.009762
1.5000	1414.549	84.127	69.584	143.023	-0.589	20.288	2692.938	-0.005889	-0.004871	-0.010012
1.5200	1359.575	80.915	67.969	138.714	-0.588	20.288	2588.282	-0.005664	-0.004758	-0.009710
1.5400	1436.701	85.571	70.564	144.732	-0.593	20.288	2735.109	-0.005990	-0.004939	-0.010131
1.5600	1366.774	82.015	68.611	139.712	-0.593	20.288	2601.986	-0.005741	-0.004803	-0.009780
1.5800	1308.238	77.608	65.450	134.462	-0.584	20.289	2490.549	-0.005433	-0.004582	-0.009412
1.6000	1295.329	77.388	64.605	133.558	-0.574	20.288	2465.973	-0.005417	-0.004522	-0.009349
1.6200	1203.084	70.884	59.225	124.971	-0.577	20.288	2290.363	-0.004962	-0.004146	-0.008748
1.6400	1181.954	68.899	57.280	122.511	-0.584	20.288	2250.137	-0.004823	-0.004010	-0.008576
1.6600	1103.446	63.728	53.170	114.910	-0.581	20.288	2100.677	-0.004461	-0.003722	-0.008044
1.6800	1002.245	56.332	47.125	105.362	-0.575	20.288	1908.016	-0.003943	-0.003299	-0.007375
1.7000	944.881	52.650	43.535	98.570	-0.585	20.288	1798.811	-0.003685	-0.003047	-0.006900
1.7200	874.142	47.899	40.025	91.774	-0.581	20.288	1664.143	-0.003353	-0.002802	-0.006424
1.7400	775.781	40.450	33.826	80.559	-0.585	20.288	1476.889	-0.002832	-0.002368	-0.005639
1.7600	732.184	37.215	31.450	75.682	-0.598	20.288	1393.890	-0.002605	-0.002201	-0.005298
1.7800	660.739	31.557	26.515	66.910	-0.585	20.287	1257.877	-0.002209	-0.001856	-0.004684
1.8000	545.531	24.011	21.039	54.796	-0.584	20.288	1038.551	-0.001681	-0.001473	-0.003836
1.8200	472.914	17.563	16.245	44.592	-0.584	20.288	900.307	-0.001229	-0.001137	-0.003121
1.8400	455.481	16.465	15.373	42.720	-0.597	20.288	867.119	-0.001153	-0.001076	-0.002990
1.8600	382.819	9.976	11.243	33.460	-0.598	20.288	728.788	-0.000698	-0.000787	-0.002342
1.8800	318.933	5.429	8.120	25.321	-0.599	20.288	607.166	-0.000380	-0.000568	-0.001772
1.9000	303.318	4.042	7.131	22.983	-0.589	20.288	577.440	-0.000283	-0.000499	-0.001609
1.9200	249.457	-0.557	4.240	15.536	-0.594	20.288	474.901	0.000039	-0.000297	-0.001087
1.9400	236.051	-1.906	3.935	13.175	-0.597	20.287	449.381	0.000133	-0.000275	-0.000922
1.9600	228.402	-3.144	2.909	11.715	-0.595	20.288	434.818	0.000220	-0.000204	-0.000820
1.9800	217.371	-3.893	2.560	9.423	-0.596	20.288	413.818	0.000273	-0.000179	-0.000660
2.0000	220.903	-4.240	2.338	9.796	-0.588	20.288	420.542	0.000297	-0.000164	-0.000686
2.0200	195.159	-6.213	1.379	6.601	-0.592	20.288	371.532	0.000435	-0.000096	-0.000462
2.0400	209.721	-5.671	1.641	7.420	-0.600	20.288	399.256	0.000397	-0.000115	-0.000519
2.0600	257.301	-2.294	1.977	12.909	-0.583	20.287	489.836	0.000161	-0.000138	-0.000904
2.0800	329.904	2.723	4.516	21.235	-0.596	20.287	628.052	-0.000191	-0.000316	-0.001486
2.1000	361.148	5.112	6.046	25.055	-0.593	20.287	687.532	-0.000358	-0.000423	-0.001754
2.1200	403.528	8.392	7.924	29.905	-0.598	20.287	768.213	-0.000587	-0.000555	-0.002093
2.1400	450.206	11.628	9.811	35.311	-0.592	20.288	857.077	-0.000814	-0.000687	-0.002472
2.1600	531.750	17.786	14.136	44.468	-0.594	20.287	1012.316	-0.001245	-0.000989	-0.003113
2.1800	620.463	23.497	18.901	54.392	-0.592	20.288	1181.202	-0.001645	-0.001323	-0.003807
2.2000	727.225	31.669	24.655	66.301	-0.593	20.287	1384.449	-0.002217	-0.001726	-0.004641
2.2200	764.360	34.253	27.170	71.039	-0.596	20.287	1455.145	-0.002398	-0.001902	-0.004973
2.2400	854.921	40.519	31.713	80.752	-0.596	20.287	1627.550	-0.002836	-0.002220	-0.005653
2.2600	917.514	45.563	35.937	88.048	-0.592	20.287	1746.712	-0.003189	-0.002516	-0.006163
2.2800	981.626	50.052	39.593	95.036	-0.591	20.287	1868.763	-0.003504	-0.002771	-0.006653
2.3000	1056.813	55.846	44.316	102.945	-0.597	20.288	2011.900	-0.003909	-0.003102	-0.007206
2.3200	1093.302	58.573	46.848	107.419	-0.595	20.287	2081.366	-0.004100	-0.003279	-0.007519
2.3400	1198.305	66.659	53.348	118.411	-0.596	20.287	2281.265	-0.004666	-0.003734	-0.008289
2.3600	1225.552	68.993	56.226	121.744	-0.587	20.287	2333.136	-0.004830	-0.003936	-0.008522
2.3800	1281.187	72.734	58.477	126.792	-0.592	20.287	2439.051	-0.005091	-0.004093	-0.008875
2.4000	1353.083	78.304	63.746	135.060	-0.589	20.288	2575.922	-0.005481	-0.004462	-0.009454
2.4200	1378.315	79.777	65.411	137.463	-0.597	20.287	2623.959	-0.005584	-0.004579	-0.009622
2.4400	1447.702	85.224	70.052	144.146	-0.586	20.287	2756.052	-0.005966	-0.004904	-0.010090
2.4600	1431.110	84.710	69.749	143.662	-0.592	20.287	2724.466	-0.005930	-0.004882	-0.010056
2.4800	1423.100	84.891	69.681	143.646	-0.588	20.287	2709.217	-0.005942	-0.004878	-0.010055
2.5000	1391.931	82.974	68.888	141.593	-0.596	20.287	2649.879	-0.005808	-0.004822	-0.009912
2.5200	1389.857	83.223	68.916	141.590	-0.599	20.287	2645.931	-0.005826	-0.004824	-0.009911
2.5400	1389.692	82.920	69.334	141.563	-0.597	20.287	2645.617	-0.005804	-0.004853	-0.009909
2.5600	1368.186	81.557	67.913	139.618	-0.597	20.286	2604.675	-0.005709	-0.004754	-0.009773
2.5800	1311.695	77.955	65.577	134.879	-0.597	20.287	2497.129	-0.005457	-0.004590	-0.009442
2.6000	1249.387	74.178	62.061	129.849	-0.593	20.286	2378.511	-0.005192	-0.004344	-0.009089
2.6200	1211.200	71.538	59.921	125.625	-0.598	20.287	2305.813	-0.005008	-0.004194	-0.008794
2.6400	1155.970	67.325	56.601	120.470	-0.593	20.287	2200.670	-0.004713	-0.003962	-0.008433
2.6600	1107.774	64.130	53.529	115.605	-0.593	20.287	2108.917	-0.004489	-0.003747	-0.008092
2.6800	1022.052	58.293	48.554	107.377	-0.598	20.286	1945.724	-0.004081	-0.003399	-0.007516
2.7000	944.040	52.498	43.845	99.014	-0.600	20.287	1797.209	-0.003675	-0.003069	-0.006931
2.7200	873.481	47.607	39.910	91.466	-0.599	20.287	1662.884	-0.003332	-0.002794	-0.006403
2.7400	771.288	40.158	33.935	80.711	-0.600	20.286	1468.334	-0.002811	-0.002375	-0.005650
2.7600	712.602	36.017	30.532	73.401	-0.599	20.287	1356.611	-0.002521	-0.002137	-0.005138
2.7800	633.132	29.916	25.794	64.580	-0.600	20.287	1205.320	-0.002094	-0.001806	-0.004521
2.8000	567.337	25.277	21.803	56.865	-0.594	20.286	1080.065	-0.001769	-0.001526	-0.003981
2.8200	491.775	19.578	17.900	47.610	-0.597	20.286	936.213	-0.001370	-0.001253	-0.003333
2.8400	436.019	15.146	14.205	40.717	-0.594	20.286	830.069	-0.001060	-0.000994	-0.002850
2.8600	385.358	10.989	11.745	33.699	-0.599	20.286	733.624	-0.000769	-0.000822	-0.002359
2.8800	341.205	7.210	8.951	28.500	-0.589	20.286	649.567	-0.000505	-0.000627	-0.001995
2.9000	281.467	2.444	6.493	20.816	-0.607	20.286	535.841	-0.000171	-0.000454	-0.001457
2.9200	255.543	-0.319	4.685	16.619	-0.601	20.286	486.488	0.000022	-0.000328	-0.001163
2.9400	242.243	-1.334	4.033	14.176	-0.604	20.286	461.168	0.000093	-0.000282	-0.000992
2.9600	217.506	-3.658	2.741	10.740	-0.607	20.286	414.076	0.000256	-0.000192	-0.000752
2.9800	207.422	-5.131	1.963	8.603	-0.597	20.286	394.878	0.000359	-0.000137	-0.000602
3.0000	211.450	-4.589	1.893	8.758	-0.596	20.287	402.546	0.000321	-0.000133	-0.000613
3.0200	223.037	-4.533	2.046	9.284	-0.601	20.286	424.604	0.000317	-0.000143	-0.000650
3.0400	252.087	-2.225	2.547	12.840	-0.597	20.286	479.908	0.000156	-0.000178	-0.000899
3.0600	261.028	-2.251	2.504	13.493	-0.604	20.286	496.931	0.000158	-0.000175	-0.000944
3.0800	297.367	0.704	3.462	17.659	-0.593	20.286	566.111	-0.000049	-0.000242	-0.001236
3.1000	372.765	5.945	6.423	25.916	-0.589	20.286	709.648	-0.000416	-0.000450	-0.001814
3.1200	414.784	8.990	8.021	31.103	-0.592	20.286	789.642	-0.000629	-0.000561	-0.002177
3.1400	474.477	13.796	11.786	38.671	-0.599	20.286	903.282	-0.000966	-0.000825	-0.002707
3.1600	530.337	17.382	14.165	44.371	-0.595	20.286	1009.626	-0.001217	-0.000992	-0.003106
3.1800	602.263	23.065	18.333	52.891	-0.589	20.286	1146.555	-0.001615	-0.001283	-0.003702
3.2000	686.137	28.540	22.540	62.144	-0.583	20.286	1306.229	-0.001998	-0.001578	-0.004350
3.2200	751.450	33.542	26.337	69.484	-0.589	20.286	1430.569	-0.002348	-0.001844	-0.004864
3.2400	819.319	38.272	30.602	77.902	-0.586	20.285	1559.772	-0.002679	-0.002142	-0.005453
3.2600	893.995	44.549	35.048	85.671	-0.575	20.285	1701.937	-0.003118	-0.002453	-0.005997
3.2800	995.782	52.053	41.289	97.318	-0.580	20.285	1895.714	-0.003644	-0.002890	-0.006812
3.3000	1105.445	58.878	46.917	107.572	-0.593	20.285	2104.483	-0.004121	-0.003284	-0.007530
3.3200	1142.460	62.642	49.973	112.269	-0.578	20.286	2174.950	-0.004385	-0.003498	-0.007859
3.3400	1193.917	66.076	53.322	118.244	-0.588	20.285	2272.911	-0.004625	-0.003733	-0.008277
3.3600	1260.598	71.400	57.393	124.624	-0.587	20.285	2399.855	-0.004998	-0.004018	-0.008724
3.3800	1285.380	73.273	59.309	128.164	-0.581	20.285	2447.033	-0.005129	-0.004152	-0.008972
3.4000	1338.039	77.264	62.925	133.125	-0.576	20.285	2547.283	-0.005408	-0.004405	-0.009319
3.4200	1367.315	79.943	65.422	136.714	-0.591	20.285	2603.016	-0.005596	-0.004580	-0.009570
3.4400	1397.973	82.169	66.801	139.770	-0.577	20.285	2661.381	-0.005752	-0.004676	-0.009784
3.4600	1410.055	83.155	68.569	141.770	-0.585	20.285	2684.383	-0.005821	-0.004800	-0.009924
3.4800	1426.887	84.680	69.389	143.826	-0.587	20.285	2716.427	-0.005928	-0.004857	-0.010068
3.5000	1415.556	84.514	69.570	143.701	-0.587	20.285	2694.855	-0.005916	-0.004870	-0.010059
3.5200	1424.152	84.614	69.652	144.189	-0.585	20.285	2711.220	-0.005923	-0.004876	-0.010093
3.5400	1388.339	83.655	68.984	141.619	-0.570	20.284	2643.042	-0.005856	-0.004829	-0.009913
3.5600	1349.100	80.694	67.734	138.530	-0.585	20.285	2568.340	-0.005649	-0.004741	-0.009697
3.5800	1329.759	79.416	66.662	136.826	-0.592	20.284	2531.519	-0.005559	-0.004666	-0.009578
3.6000	1247.298	73.815	62.144	129.208	-0.594	20.285	2374.535	-0.005167	-0.004350	-0.009045
3.6200	1237.785	72.772	60.936	128.137	-0.585	20.285	2356.424	-0.005094	-0.004265	-0.008970
3.6400	1117.978	65.174	54.459	117.368	-0.588	20.285	2128.344	-0.004562	-0.003812	-0.008216
3.6600	1108.901	64.436	53.431	115.991	-0.588	20.285	2111.063	-0.004511	-0.003740	-0.008119
3.6800	1033.128	59.073	49.139	108.423	-0.590	20.285	1966.810	-0.004135	-0.003440	-0.007590
3.7000	961.022	53.681	44.747	100.831	-0.588	20.285	1829.538	-0.003758	-0.003132	-0.007058
3.7200	874.638	47.815	39.869	91.536	-0.583	20.285	1665.087	-0.003347	-0.002791	-0.006407
3.7400	745.785	38.522	32.603	77.873	-0.584	20.285	1419.783	-0.002697	-0.002282	-0.005451
3.7600	754.396	38.824	32.002	78.028	-0.585	20.285	1436.176	-0.002718	-0.002240	-0.005462
3.7800	645.395	31.212	26.670	66.089	-0.587	20.285	1228.666	-0.002185	-0.001867	-0.004626
3.8000	573.439	25.290	22.135	57.961	-0.582	20.284	1091.681	-0.001770	-0.001549	-0.004057
3.8200	494.870	19.941	18.166	48.291	-0.581	20.285	942.106	-0.001396	-0.001272	-0.003380
3.8400	448.252	15.882	15.054	42.565	-0.585	20.284	853.357	-0.001112	-0.001054	-0.002980
3.8600	388.514	11.324	11.786	34.866	-0.586	20.285	739.632	-0.000793	-0.000825	-0.002441
3.8800	333.931	6.833	9.368	27.651	-0.589	20.284	635.719	-0.000478	-0.000656	-0.001936
3.9000	287.629	3.042	6.562	21.358	-0.585	20.284	547.571	-0.000213	-0.000459	-0.001495
3.9200	269.159	0.901	5.672	18.496	-0.591	20.285	512.409	-0.000063	-0.000397	-0.001295
3.9400	226.719	-2.263	3.449	12.715	-0.583	20.284	431.614	0.000158	-0.000241	-0.000890
3.9600	209.676	-3.684	2.379	9.784	-0.583	20.284	399.170	0.000258	-0.000167	-0.000685
3.9800	219.715	-3.935	2.198	10.089	-0.593	20.285	418.282	0.000275	-0.000154	-0.000706
4.0000	220.151	-3.810	2.406	9.548	-0.588	20.284	419.111	0.000267	-0.000168	-0.000668
4.0200	214.696	-4.797	2.127	8.881	-0.597	20.284	408.726	0.000336	-0.000149	-0.000622
4.0400	230.175	-3.976	2.268	10.005	-0.594	20.284	438.194	0.000278	-0.000159	-0.000700
4.0600	267.821	-1.725	3.033	14.079	-0.591	20.284	509.863	0.000121	-0.000212	-0.000986
4.0800	313.538	1.665	3.827	19.483	-0.594	20.285	596.895	-0.000117	-0.000268	-0.001364
4.1000	356.474	5.058	6.185	24.777	-0.594	20.284	678.635	-0.000354	-0.000433	-0.001734
4.1200	411.568	8.920	8.369	30.977	-0.593	20.284	783.520	-0.000624	-0.000586	-0.002168
4.1400	482.863	14.172	11.911	39.269	-0.600	20.284	919.247	-0.000992	-0.000834	-0.002749
4.1600	534.831	17.852	14.400	45.358	-0.593	20.284	1018.181	-0.001250	-0.001008	-0.003175
4.1800	611.175	23.414	18.652	53.894	-0.597	20.284	1163.521	-0.001639	-0.001306	-0.003773
4.2000	687.595	28.747	22.721	62.618	-0.592	20.284	1309.004	-0.002012	-0.001590	-0.004383
4.2200	782.710	35.728	28.071	73.123	-0.608	20.284	1490.078	-0.002501	-0.001965	-0.005119
4.2400	841.891	40.202	31.631	79.891	-0.604	20.284	1602.745	-0.002814	-0.002214	-0.005592
4.2600	896.790	43.926	34.743	85.839	-0.600	20.284	1707.258	-0.003075	-0.002432	-0.006009
4.2800	996.248	51.358	41.066	96.859	-0.595	20.284	1896.601	-0.003595	-0.002875	-0.006780
4.3000	1060.134	55.985	44.399	103.683	-0.599	20.284	2018.223	-0.003919	-0.003108	-0.007258
4.3200	1107.203	60.227	47.748	109.352	-0.594	20.284	2107.830	-0.004216	-0.003342	-0.007655
4.3400	1212.657	67.406	54.295	119.984	-0.593	20.284	2308.588	-0.004718	-0.003801	-0.008399
4.3600	1205.729	67.698	54.279	119.969	-0.599	20.284	2295.399	-0.004739	-0.003800	-0.008398
4.3800	1291.226	73.302	59.908	128.762	-0.587	20.284	2458.162	-0.005131	-0.004194	-0.009013
4.4000	1313.678	75.486	61.117	130.990	-0.593	20.284	2500.906	-0.005284	-0.004278	-0.009169
4.4200	1385.138	81.084	66.452	138.670	-0.591	20.284	2636.948	-0.005676	-0.004652	-0.009707
4.4400	1413.302	83.016	67.859	141.368	-0.586	20.283	2690.563	-0.005811	-0.004750	-0.009896
4.4600	1409.830	83.489	68.361	141.884	-0.583	20.283	2683.954	-0.005844	-0.004785	-0.009932
4.4800	1424.828	84.584	69.417	143.744	-0.588	20.283	2712.507	-0.005921	-0.004859	-0.010062
4.5000	1425.144	85.086	69.709	144.132	-0.585	20.283	2713.108	-0.005956	-0.004880	-0.010089
4.5200	1412.310	84.306	69.583	143.465	-0.597	20.283	2688.675	-0.005901	-0.004871	-0.010043
4.5400	1389.707	83.529	68.803	141.744	-0.592	20.283	2645.645	-0.005847	-0.004816	-0.009922
4.5600	1353.173	81.098	67.940	138.686	-0.591	20.283	2576.094	-0.005677	-0.004756	-0.009708
4.5800	1315.948	78.860	65.855	135.728	-0.594	20.284	2505.226	-0.005520	-0.004610	-0.009501
4.6000	1250.213	74.122	62.369	129.153	-0.596	20.283	2380.085	-0.005189	-0.004366	-0.009041
4.6200	1208.014	71.051	59.418	125.250	-0.587	20.284	2299.747	-0.004974	-0.004159	-0.008767
4.6400	1193.737	70.315	58.810	124.039	-0.594	20.283	2272.568	-0.004922	-0.004117	-0.008683
4.6600	1113.575	64.269	53.751	116.466	-0.596	20.283	2119.961	-0.004499	-0.003763	-0.008153
4.6800	1025.854	58.628	48.625	107.978	-0.591	20.284	1952.963	-0.004104	-0.003404	-0.007558
4.7000	934.241	51.982	43.315	98.361	-0.591	20.284	1778.555	-0.003639	-0.003032	-0.006885
4.7200	854.726	46.493	38.550	89.951	-0.590	20.283	1627.178	-0.003255	-0.002698	-0.006297
4.7400	781.011	40.713	33.965	81.046	-0.604	20.283	1486.845	-0.002850	-0.002378	-0.005673
4.7600	735.490	37.575	31.366	76.402	-0.605	20.283	1400.185	-0.002630	-0.002196	-0.005348
4.7800	631.569	30.014	25.822	64.802	-0.600	20.283	1202.345	-0.002101	-0.001808	-0.004536
4.8000	548.973	23.551	20.969	55.129	-0.598	20.283	1045.103	-0.001649	-0.001468	-0.003859
4.8200	499.649	20.079	18.402	48.638	-0.593	20.283	951.204	-0.001406	-0.001288	-0.003405
4.8400	446.960	15.689	14.747	42.038	-0.592	20.283	850.897	-0.001098	-0.001032	-0.002943
4.8600	386.260	11.156	11.715	34.517	-0.598	20.283	735.340	-0.000781	-0.000820	-0.002416
4.8800	327.980	6.362	8.661	26.582	-0.604	20.283	624.390	-0.000445	-0.000606	-0.001861
4.9000	309.946	4.586	7.241	24.083	-0.592	20.283	590.057	-0.000321	-0.000507	-0.001686
4.9200	274.193	1.693	6.047	18.927	-0.594	20.283	521.994	-0.000118	-0.000423	-0.001325
4.9400	237.404	-1.863	3.754	13.856	-0.604	20.283	451.956	0.000130	-0.000263	-0.000970
4.9600	221.113	-3.197	2.825	11.212	-0.593	20.283	420.942	0.000224	-0.000198	-0.000785
4.9800	203.770	-5.324	1.808	8.492	-0.596	20.283	387.926	0.000373	-0.000127	-0.000594
5.0000	208.805	-4.687	1.697	8.589	-0.599	20.283	397.511	0.000328	-0.000119	-0.000601
5.0200	214.185	-5.076	1.879	8.743	-0.596	20.282	407.753	0.000355	-0.000132	-0.000612
5.0400	259.736	-2.125	2.450	13.563	-0.605	20.282	494.471	0.000149	-0.000171	-0.000949
5.0600	269.009	-1.404	2.935	14.344	-0.591	20.282	512.123	0.000098	-0.000205	-0.001004
5.0800	300.027	0.553	3.199	18.203	-0.596	20.282	571.175	-0.000039	-0.000224	-0.001274
5.1000	376.101	6.598	6.728	26.750	-0.585	20.282	716.000	-0.000462	-0.000471	-0.001872
5.1200	397.411	7.751	7.506	29.376	-0.601	20.282	756.569	-0.000543	-0.000525	-0.002056
5.1400	487.837	14.644	11.855	39.784	-0.607	20.282	928.717	-0.001025	-0.000830	-0.002785
5.1600	540.091	17.964	14.776	45.995	-0.595	20.282	1028.194	-0.001257	-0.001034	-0.003220
5.1800	625.467	24.400	19.320	55.280	-0.584	20.282	1190.729	-0.001708	-0.001352	-0.003870
5.2000	658.410	27.111	21.400	59.577	-0.589	20.282	1253.443	-0.001898	-0.001498	-0.004170
5.2200	733.582	32.544	25.251	67.787	-0.588	20.282	1396.551	-0.002278	-0.001768	-0.004745
5.2400	862.961	41.743	32.809	81.796	-0.585	20.282	1642.857	-0.002922	-0.002297	-0.005726
5.2600	909.309	45.038	35.535	87.397	-0.590	20.282	1731.091	-0.003153	-0.002487	-0.006118
5.2800	970.805	49.984	39.466	94.524	-0.591	20.282	1848.164	-0.003499	-0.002763	-0.006617
5.3000	1048.066	55.113	43.982	102.571	-0.588	20.282	1995.249	-0.003858	-0.003079	-0.007180
5.3200	1124.801	61.599	49.250	111.044	-0.594	20.282	2141.333	-0.004312	-0.003447	-0.007773
5.3400	1189.739	65.689	53.100	117.590	-0.587	20.282	2264.957	-0.004598	-0.003717	-0.008231
5.3600	1233.021	69.426	56.129	122.469	-0.585	20.282	2347.355	-0.004860	-0.003929	-0.008573
5.3800	1296.065	73.927	60.367	128.818	-0.586	20.282	2467.375	-0.005175	-0.004226	-0.009017
5.4000	1358.403	78.583	63.998	135.798	-0.584	20.282	2586.050	-0.005501	-0.004480	-0.009506
5.4200	1381.532	81.028	65.827	138.476	-0.582	20.282	2630.081	-0.005672	-0.004608	-0.009693
5.4400	1398.033	82.156	67.358	140.117	-0.588	20.282	2661.495	-0.005751	-0.004715	-0.009808
5.4600	1398.859	83.129	68.219	141.299	-0.589	20.282	2663.069	-0.005819	-0.004775	-0.009891
5.4800	1434.206	85.349	70.093	144.645	-0.599	20.282	2730.360	-0.005974	-0.004907	-0.010125
5.5000	1425.309	85.000	69.887	144.339	-0.587	20.281	2713.423	-0.005950	-0.004892	-0.010104
5.5200	1397.928	83.861	69.152	142.397	-0.596	20.282	2661.295	-0.005870	-0.004841	-0.009968
5.5400	1391.841	83.363	69.082	141.925	-0.592	20.281	2649.708	-0.005835	-0.004836	-0.009935
5.5600	1346.981	80.805	67.703	138.309	-0.591	20.281	2564.306	-0.005656	-0.004739	-0.009682
5.5800	1300.694	77.652	65.162	134.474	-0.593	20.281	2476.187	-0.005436	-0.004561	-0.009413
5.6000	1278.933	76.417	63.843	132.057	-0.587	20.282	2434.759	-0.005349	-0.004469	-0.009244
5.6200	1209.456	71.621	59.921	126.195	-0.594	20.282	2302.494	-0.005013	-0.004194	-0.008834
5.6400	1175.101	68.952	57.702	122.343	-0.583	20.281	2237.091	-0.004827	-0.004039	-0.008564
5.6600	1092.024	63.226	53.072	114.826	-0.596	20.282	2078.934	-0.004426	-0.003715	-0.008038
5.6800	1013.546	57.765	47.901	106.946	-0.587	20.282	1929.531	-0.004044	-0.003353	-0.007486
5.7000	943.874	52.959	44.095	99.719	-0.584	20.282	1796.894	-0.003707	-0.003087	-0.006980
5.7200	885.985	48.539	40.315	93.190	-0.592	20.282	1686.687	-0.003398	-0.002822	-0.006523
5.7400	805.538	43.133	35.951	84.086	-0.580	20.281	1533.537	-0.003019	-0.002517	-0.005886
5.7600	708.439	35.698	30.519	73.805	-0.584	20.281	1348.686	-0.002499	-0.002136	-0.005166
5.7800	649.378	31.418	26.917	66.716	-0.592	20.281	1236.248	-0.002199	-0.001884	-0.004670
5.8000	570.178	25.331	22.319	57.225	-0.582	20.282	1085.472	-0.001773	-0.001562	-0.004006
5.8200	509.072	20.719	18.485	50.166	-0.590	20.282	969.143	-0.001450	-0.001294	-0.003512
5.8400	424.447	14.645	14.290	39.853	-0.595	20.282	808.039	-0.001025	-0.001000	-0.002790
5.8600	386.846	11.114	11.589	34.795	-0.588	20.282	736.456	-0.000778	-0.000811	-0.002436
5.8800	335.434	7.016	9.176	27.804	-0.599	20.282	638.580	-0.000491	-0.000642	-0.001946
5.9000	278.582	2.193	6.367	20.471	-0.583	20.281	530.348	-0.000154	-0.000446	-0.001433
5.9200	265.717	1.346	5.490	18.454	-0.580	20.281	505.857	-0.000094	-0.000384	-0.001292
5.9400	227.064	-2.474	3.494	12.828	-0.591	20.281	432.272	0.000173	-0.000245	-0.000898
5.9600	207.813	-4.045	2.285	9.672	-0.590	20.281	395.622	0.000283	-0.000160	-0.000677
5.9800	211.600	-4.671	2.281	9.380	-0.591	20.281	402.832	0.000327	-0.000160	-0.000657
6.0000	209.496	-4.533	1.782	8.811	-0.592	20.282	398.827	0.000317	-0.000125	-0.000617
6.0200	247.608	-2.462	2.880	12.422	-0.596	20.281	471.382	0.000172	-0.000202	-0.000870
6.0400	264.425	-1.153	2.963	14.662	-0.596	20.281	503.397	0.000081	-0.000207	-0.001026
6.0600	260.397	-1.320	2.768	13.882	-0.594	20.281	495.729	0.000092	-0.000194	-0.000972
6.0800	300.703	0.651	3.713	18.426	-0.598	20.281	572.462	-0.000046	-0.000260	-0.001290
6.1000	366.453	5.944	6.308	25.988	-0.596	20.281	697.632	-0.000416	-0.000442	-0.001819
6.1200	418.466	9.741	8.799	31.906	-0.600	20.281	796.652	-0.000682	-0.000616	-0.002233
6.1400	471.832	13.229	11.173	38.213	-0.587	20.281	898.247	-0.000926	-0.000782	-0.002675
6.1600	527.783	17.744	14.317	44.884	-0.587	20.281	1004.763	-0.001242	-0.001002	-0.003142
6.1800	620.343	23.621	19.028	54.974	-0.597	20.281	1180.973	-0.001653	-0.001332	-0.003848
6.2000	678.728	28.345	22.376	61.671	-0.600	20.281	1292.124	-0.001984	-0.001566	-0.004317
6.2200	761.384	34.265	26.848	70.998	-0.591	20.280	1449.480	-0.002399	-0.001879	-0.004970
6.2400	836.166	39.880	31.270	79.641	-0.593	20.282	1591.845	-0.002792	-0.002189	-0.005575
6.2600	913.908	45.369	36.078	88.186	-0.600	20.281	1739.845	-0.003176	-0.002525	-0.006173
6.2800	985.563	50.995	40.231	95.884	-0.593	20.281	1876.259	-0.003570	-0.002816	-0.006712
6.3000	1064.883	56.637	45.483	104.530	-0.598	20.281	2027.264	-0.003965	-0.003184	-0.007317
6.3200	1110.149	60.100	48.248	109.435	-0.605	20.281	2113.438	-0.004207	-0.003377	-0.007660
6.3400	1149.598	63.254	51.016	114.256	-0.591	20.281	2188.540	-0.004428	-0.003571	-0.007998
6.3600	1275.130	71.773	58.270	126.473	-0.601	20.281	2427.521	-0.005024	-0.004079	-0.008853
6.3800	1268.398	72.231	58.603	126.567	-0.602	20.281	2414.703	-0.005056	-0.004102	-0.008860
6.4000	1367.360	79.527	65.051	136.450	-0.596	20.280	2603.102	-0.005567	-0.004554	-0.009552
6.4200	1369.088	79.790	65.216	137.672	-0.590	20.281	2606.392	-0.005585	-0.004565	-0.009637
6.4400	1388.670	81.725	66.744	139.810	-0.601	20.280	2643.671	-0.005721	-0.004672	-0.009787
6.4600	1418.682	84.028	68.734	142.925	-0.599	20.281	2700.806	-0.005882	-0.004811	-0.010005
6.4800	1407.651	83.986	69.153	142.632	-0.587	20.281	2679.806	-0.005879	-0.004841	-0.009984
6.5000	1413.828	84.002	69.096	143.188	-0.592	20.280	2691.565	-0.005880	-0.004837	-0.010023
6.5200	1415.751	84.738	69.598	143.548	-0.601	20.280	2695.227	-0.005932	-0.004872	-0.010048
6.5400	1397.341	83.945	69.332	142.453	-0.596	20.281	2660.179	-0.005876	-0.004853	-0.009972
6.5600	1357.907	81.349	68.095	139.615	-0.600	20.280	2585.106	-0.005694	-0.004767	-0.009773
6.5800	1297.553	77.403	65.465	134.266	-0.594	20.281	2470.207	-0.005418	-0.004583	-0.009399
6.6000	1255.744	74.663	62.563	130.628	-0.592	20.281	2390.614	-0.005226	-0.004379	-0.009144
6.6200	1198.410	70.913	59.851	125.097	-0.599	20.280	2281.466	-0.004964	-0.004190	-0.008757
6.6400	1128.273	65.980	55.252	118.592	-0.602	20.281	2147.942	-0.004619	-0.003868	-0.008301
6.6600	1085.607	62.836	52.739	114.176	-0.596	20.280	2066.717	-0.004399	-0.003692	-0.007992
6.6800	979.386	55.513	46.389	103.545	-0.601	20.280	1864.500	-0.003886	-0.003247	-0.007248
6.7000	945.377	53.028	44.302	99.679	-0.596	20.280	1799.755	-0.003712	-0.003101	-0.006977
6.7200	854.966	46.689	38.966	89.922	-0.600	20.281	1627.636	-0.003268	-0.002728	-0.006295
6.7400	794.702	41.618	35.228	83.170	-0.596	20.280	1512.909	-0.002913	-0.002466	-0.005822
6.7600	702.007	35.629	30.170	73.039	-0.602	20.281	1336.441	-0.002494	-0.002112	-0.005113
6.7800	653.661	31.377	26.929	66.939	-0.591	20.280	1244.402	-0.002196	-0.001885	-0.004686
6.8000	562.709	24.692	21.832	56.210	-0.607	20.280	1071.253	-0.001728	-0.001528	-0.003935
6.8200	477.287	18.519	17.079	46.290	-0.604	20.280	908.632	-0.001296	-0.001196	-0.003240
6.8400	449.259	16.119	14.901	42.651	-0.590	20.280	855.274	-0.001128	-0.001043	-0.002986
6.8600	393.188	11.781	12.286	35.645	-0.604	20.280	748.529	-0.000825	-0.000860	-0.002495
6.8800	336.937	7.461	9.274	28.277	-0.593	20.280	641.441	-0.000522	-0.000649	-0.001979
6.9000	291.716	3.558	6.978	22.121	-0.596	20.280	555.353	-0.000249	-0.000488	-0.001548
6.9200	248.870	-0.110	4.795	16.188	-0.586	20.280	473.785	0.000008	-0.000336	-0.001133
6.9400	233.647	-1.640	4.087	13.966	-0.591	20.280	444.803	0.000115	-0.000286	-0.000978
6.9600	214.696	-3.937	2.698	10.296	-0.603	20.280	408.726	0.000276	-0.000189	-0.000721
6.9800	214.741	-4.075	2.560	9.880	-0.589	20.280	408.812	0.000285	-0.000179	-0.000692
7.0000	227.440	-3.853	2.642	10.795	-0.604	20.280	432.987	0.000270	-0.000185	-0.000756
7.0200	229.153	-3.587	2.614	10.643	-0.583	20.280	436.249	0.000251	-0.000183	-0.000745
7.0400	233.421	-3.529	2.546	11.155	-0.588	20.280	444.374	0.000247	-0.000178	-0.000781
7.0600	282.669	-0.417	3.242	16.201	-0.583	20.280	538.130	0.000029	-0.000227	-0.001134
7.0800	321.833	2.791	4.461	20.870	-0.590	20.280	612.688	-0.000195	-0.000312	-0.001461
7.1000	367.069	5.459	6.201	26.097	-0.600	20.280	698.805	-0.000382	-0.000434	-0.001827
7.1200	450.657	11.712	10.174	35.699	-0.590	20.280	857.935	-0.000820	-0.000712	-0.002499
7.1400	450.191	12.353	10.673	36.118	-0.589	20.280	857.048	-0.000865	-0.000747	-0.002528
7.1600	532.667	17.520	14.343	45.039	-0.580	20.280	1014.061	-0.001226	-0.001004	-0.003153
7.1800	611.145	23.746	18.973	54.256	-0.595	20.280	1163.464	-0.001662	-0.001328	-0.003798
7.2000	689.729	28.805	22.903	63.103	-0.589	20.280	1313.066	-0.002016	-0.001603	-0.004417
7.2200	771.709	35.031	27.892	72.137	-0.600	20.280	1469.135	-0.002452	-0.001952	-0.005050
7.2400	843.905	39.979	31.602	80.086	-0.600	20.280	1606.579	-0.002798	-0.002212	-0.005606
7.2600	913.908	45.453	35.939	88.229	-0.593	20.280	1739.845	-0.003182	-0.002516	-0.006176
7.2800	928.545	46.802	37.173	90.188	-0.613	20.280	1767.712	-0.003276	-0.002602	-0.006313
7.3000	1089.680	58.280	46.458	106.973	-0.604	20.280	2074.471	-0.004080	-0.003252	-0.007488
7.3200	1132.977	61.767	49.652	111.920	-0.596	20.280	2156.897	-0.004324	-0.003476	-0.007834
7.3400	1182.796	65.421	52.781	117.494	-0.602	20.280	2251.740	-0.004579	-0.003695	-0.008225
7.3600	1240.475	69.981	56.614	122.786	-0.604	20.280	2361.546	-0.004899	-0.003963	-0.008595
7.3800	1299.777	74.064	60.227	129.556	-0.608	20.280	2474.442	-0.005184	-0.004216	-0.009069
7.4000	1335.635	77.500	63.217	133.695	-0.609	20.280	2542.706	-0.005425	-0.004425	-0.009359
7.4200	1368.307	79.777	65.175	137.116	-0.611	20.280	2604.904	-0.005584	-0.004562	-0.009598
7.4400	1395.778	82.294	66.743	139.909	-0.589	20.280	2657.204	-0.005761	-0.004672	-0.009794
7.4600	1418.396	83.919	68.998	142.813	-0.597	20.280	2700.262	-0.005874	-0.004830	-0.009997
7.4800	1421.552	84.432	68.986	143.561	-0.595	20.280	2706.270	-0.005910	-0.004829	-0.010049
7.5000	1440.533	86.320	71.247	145.773	-0.596	20.280	2742.405	-0.006042	-0.004987	-0.010204
7.5200	1405.712	84.473	70.122	143.147	-0.595	20.280	2676.115	-0.005913	-0.004909	-0.010020
7.5400	1384.116	83.336	69.803	141.982	-0.601	20.280	2635.002	-0.005834	-0.004886	-0.009939
7.5600	1343.119	80.182	67.914	138.142	-0.606	20.279	2556.953	-0.005613	-0.004754	-0.009670
7.5800	1324.469	79.416	66.632	136.647	-0.596	20.280	2521.448	-0.005559	-0.004664	-0.009565
7.6000	1278.903	76.247	64.064	132.544	-0.595	20.279	2434.702	-0.005337	-0.004484	-0.009278
7.6200	1219.014	72.022	60.326	126.860	-0.601	20.280	2320.690	-0.005042	-0.004223	-0.008880
7.6400	1129.565	66.035	55.407	118.549	-0.601	20.280	2150.402	-0.004622	-0.003878	-0.008298
7.6600	1091.859	63.115	52.822	114.743	-0.606	20.280	2078.619	-0.004418	-0.003698	-0.008032
7.6800	989.155	56.304	47.054	104.656	-0.597	20.280	1883.097	-0.003941	-0.003294	-0.007326
7.7000	946.624	52.595	44.205	99.845	-0.598	20.280	1802.130	-0.003682	-0.003094	-0.006989
7.7200	860.978	46.369	38.520	89.924	-0.597	20.280	1639.080	-0.003246	-0.002696	-0.006295
7.7400	804.065	42.453	36.035	84.186	-0.600	20.280	1530.733	-0.002972	-0.002522	-0.005893
7.7600	734.679	37.575	31.657	76.514	-0.601	20.280	1398.640	-0.002630	-0.002216	-0.005356
7.7800	645.170	31.305	26.836	66.299	-0.595	20.280	1228.237	-0.002191	-0.001878	-0.004641
7.8000	591.939	26.970	23.377	59.881	-0.601	20.280	1126.900	-0.001888	-0.001636	-0.004192
7.8200	516.136	21.538	19.111	51.013	-0.599	20.280	982.590	-0.001508	-0.001338	-0.003571
7.8400	444.751	15.773	14.971	42.178	-0.600	20.279	846.691	-0.001104	-0.001048	-0.002952
7.8600	383.149	11.254	11.855	34.309	-0.605	20.280	729.418	-0.000788	-0.000830	-0.002402
7.8800	328.927	6.374	9.051	27.194	-0.609	20.280	626.192	-0.000446	-0.000634	-0.001904
7.9000	294.662	3.904	7.090	22.594	-0.612	20.279	560.961	-0.000273	-0.000496	-0.001582
7.9200	253.469	-0.125	5.031	16.688	-0.617	20.279	482.540	0.000009	-0.000352	-0.001168
7.9400	239.703	-1.251	3.823	14.622	-0.612	20.280	456.333	0.000088	-0.000268	-0.001024
7.9600	224.539	-2.726	3.369	11.950	-0.604	20.280	427.465	0.000191	-0.000236	-0.000836
7.9800	203.214	-5.171	1.767	8.520	-0.601	20.279	386.868	0.000362	-0.000124	-0.000596
8.0000	203.304	-5.173	1.614	8.046	-0.597	20.279	387.039	0.000362	-0.000113	-0.000563
8.0200	237.960	-3.781	1.878	11.310	-0.598	20.280	453.014	0.000265	-0.000131	-0.000792
8.0400	244.587	-2.503	2.281	12.117	-0.598	20.280	465.631	0.000175	-0.000160	-0.000848
8.0600	266.890	-1.600	2.726	14.217	-0.607	20.279	508.089	0.000112	-0.000191	-0.000995
8.0800	323.637	2.485	4.142	21.067	-0.606	20.279	616.121	-0.000174	-0.000290	-0.001475
8.1000	371.592	6.252	6.882	26.598	-0.599	20.279	707.417	-0.000438	-0.000482	-0.001862
8.1200	421.051	9.435	8.578	32.030	-0.604	20.279	801.573	-0.000660	-0.000600	-0.002242
8.1400	469.668	13.616	11.576	37.840	-0.601	20.279	894.127	-0.000953	-0.000810	-0.002649
8.1600	525.874	17.326	14.386	44.746	-0.603	20.279	1001.129	-0.001213	-0.001007	-0.003132
8.1800	620.613	24.246	19.236	55.169	-0.604	20.280	1181.488	-0.001697	-0.001347	-0.003862
8.2000	680.111	28.219	22.221	61.796	-0.604	20.280	1294.756	-0.001975	-0.001556	-0.004326
8.2200	747.528	33.639	26.321	69.635	-0.599	20.279	1423.101	-0.002355	-0.001842	-0.004874
8.2400	884.166	42.981	34.117	83.961	-0.593	20.280	1683.226	-0.003009	-0.002388	-0.005877
8.2600	935.263	46.967	37.159	90.354	-0.598	20.279	1780.500	-0.003288	-0.002601	-0.006325
8.2800	991.063	51.523	41.040	96.705	-0.589	20.279	1886.730	-0.003607	-0.002873	-0.006769
8.3000	1054.032	55.348	44.331	103.170	-0.581	20.279	2006.607	-0.003874	-0.003103	-0.007222
8.3200	1109.938	60.505	48.623	109.687	-0.587	20.279	2113.037	-0.004235	-0.003404	-0.007678
8.3400	1206.781	67.144	54.333	119.564	-0.601	20.279	2297.401	-0.004700	-0.003803	-0.008370
8.3600	1255.413	71.094	57.645	124.776	-0.585	20.279	2389.984	-0.004977	-0.004035	-0.008734
8.3800	1279.879	73.121	59.781	127.719	-0.593	20.279	2436.562	-0.005118	-0.004185	-0.008940
8.4000	1336.161	77.541	62.995	133.834	-0.594	20.279	2543.707	-0.005428	-0.004410	-0.009368
8.4200	1383.260	80.958	66.314	138.519	-0.596	20.279	2633.371	-0.005667	-0.004642	-0.009696
8.4400	1382.944	80.916	66.440	139.019	-0.597	20.279	2632.771	-0.005664	-0.004651	-0.009731
8.4600	1416.683	84.086	69.069	142.384	-0.605	20.279	2697.001	-0.005886	-0.004835	-0.009967
8.4800	1423.461	84.419	69.568	143.952	-0.599	20.279	2709.904	-0.005909	-0.004870	-0.010077
8.5000	1423.265	85.183	69.859	143.842	-0.599	20.279	2709.532	-0.005963	-0.004890	-0.010069
8.5200	1412.595	84.640	69.776	143.244	-0.596	20.279	2689.219	-0.005925	-0.004884	-0.010027
8.5400	1400.978	84.278	69.193	142.954	-0.600	20.279	2667.103	-0.005899	-0.004844	-0.010007
8.5600	1343.525	80.443	67.746	138.075	-0.599	20.279	2557.726	-0.005631	-0.004742	-0.009665
8.5800	1323.146	79.165	66.396	136.535	-0.593	20.280	2518.930	-0.005542	-0.004648	-0.009557
8.6000	1238.085	73.774	61.979	128.999	-0.609	20.279	2356.997	-0.005164	-0.004339	-0.009030
8.6200	1214.175	71.579	60.533	126.678	-0.603	20.279	2311.478	-0.005011	-0.004237	-0.008867
8.6400	1156.842	67.492	56.880	120.871	-0.601	20.279	2202.330	-0.004724	-0.003982	-0.008461
8.6600	1087.501	62.741	52.685	114.368	-0.593	20.280	2070.322	-0.004392	-0.003688	-0.008006
8.6800	1023.284	58.502	48.498	107.337	-0.609	20.280	1948.071	-0.004095	-0.003395	-0.007514
8.7000	944.686	52.930	44.248	99.346	-0.595	20.279	1798.439	-0.003705	-0.003097	-0.006954
8.7200	849.436	46.119	38.437	89.644	-0.601	20.279	1617.107	-0.003228	-0.002691	-0.006275
8.7400	799.000	42.284	35.771	83.780	-0.595	20.279	1521.091	-0.002960	-0.002504	-0.005865
8.7600	700.294	35.072	29.698	72.788	-0.607	20.280	1333.179	-0.002455	-0.002079	-0.005095
8.7800	643.907	30.891	26.322	66.103	-0.599	20.279	1225.834	-0.002162	-0.001843	-0.004627
8.8000	568.825	25.290	22.234	57.490	-0.605	20.279	1082.897	-0.001770	-0.001556	-0.004024
8.8200	507.194	20.524	18.555	49.763	-0.610	20.279	965.567	-0.001437	-0.001299	-0.003483
8.8400	453.978	16.228	15.302	43.122	-0.598	20.279	864.258	-0.001136	-0.001071	-0.003019
8.8600	385.674	11.697	11.812	34.824	-0.617	20.279	734.224	-0.000819	-0.000827	-0.002438
8.8800	346.705	7.961	9.796	29.516	-0.601	20.280	660.038	-0.000557	-0.000686	-0.002066
8.9000	300.328	3.806	7.241	23.303	-0.597	20.279	571.747	-0.000266	-0.000507	-0.001631
8.9200	250.614	0.140	5.214	16.213	-0.593	20.279	477.104	-0.000010	-0.000365	-0.001135
8.9400	214.756	-3.657	2.600	11.074	-0.592	20.279	408.840	0.000256	-0.000182	-0.000775
8.9600	226.824	-2.934	2.880	11.701	-0.607	20.279	431.814	0.000205	-0.000202	-0.000819
8.9800	220.226	-3.711	2.754	10.797	-0.607	20.279	419.254	0.000260	-0.000193	-0.000756
9.0000	210.458	-4.394	2.073	9.213	-0.606	20.279	400.658	0.000308	-0.000145	-0.000645
9.0200	206.641	-5.130	1.975	8.212	-0.611	20.279	393.391	0.000359	-0.000138	-0.000575
9.0400	259.060	-2.337	2.394	13.495	-0.610	20.279	493.183	0.000164	-0.000168	-0.000945
9.0600	281.422	-0.224	3.198	16.120	-0.619	20.279	535.755	0.000016	-0.000224	-0.001128
9.0800	315.506	2.081	4.489	20.636	-0.609	20.279	600.643	-0.000146	-0.000314	-0.001445
9.1000	335.254	3.709	4.991	22.873	-0.604	20.279	638.237	-0.000260	-0.000349	-0.001601
9.1200	397.742	8.225	8.105	29.822	-0.608	20.280	757.198	-0.000576	-0.000567	-0.002088
9.1400	460.741	13.159	10.855	37.342	-0.600	20.279	877.132	-0.000921	-0.000760	-0.002614
9.1600	562.002	19.787	15.885	48.305	-0.607	20.279	1069.908	-0.001385	-0.001112	-0.003381
9.1800	580.277	21.581	17.481	51.305	-0.602	20.279	1104.698	-0.001511	-0.001224	-0.003591
9.2000	717.426	30.960	24.585	65.663	-0.603	20.279	1365.795	-0.002167	-0.001721	-0.004596
9.2200	765.502	34.641	27.348	71.721	-0.601	20.279	1457.319	-0.002425	-0.001914	-0.005020
9.2400	840.118	40.157	31.782	79.919	-0.603	20.279	1599.369	-0.002811	-0.002225	-0.005594
9.2600	924.382	46.078	36.688	89.006	-0.601	20.279	1759.787	-0.003225	-0.002568	-0.006230
9.2800	991.364	51.483	40.553	96.789	-0.597	20.279	1887.302	-0.003604	-0.002839	-0.006775
9.3000	1067.287	56.651	45.666	104.738	-0.616	20.279	2031.841	-0.003966	-0.003197	-0.007332
9.3200	1104.648	59.795	48.108	109.451	-0.612	20.279	2102.966	-0.004186	-0.003368	-0.007662
9.3400	1184.644	65.924	53.032	117.523	-0.603	20.279	2255.259	-0.004615	-0.003712	-0.008227
9.3600	1255.954	70.953	57.728	125.109	-0.604	20.279	2391.014	-0.004967	-0.004041	-0.008758
9.3800	1280.826	73.204	59.755	127.650	-0.615	20.279	2438.364	-0.005124	-0.004183	-0.008936
9.4000	1342.893	77.472	63.566	134.628	-0.607	20.279	2556.524	-0.005423	-0.004450	-0.009424
9.4200	1362.611	79.749	64.813	136.868	-0.606	20.279	2594.061	-0.005582	-0.004537	-0.009581
9.4400	1407.275	82.697	68.291	141.605	-0.608	20.279	2679.091	-0.005789	-0.004780	-0.009912
9.4600	1431.666	84.570	69.583	143.868	-0.613	20.279	2725.525	-0.005920	-0.004871	-0.010071
9.4800	1433.199	85.795	70.762	145.176	-0.601	20.279	2728.443	-0.006006	-0.004953	-0.010162
9.5000	1422.439	85.237	70.495	144.368	-0.608	20.279	2707.958	-0.005967	-0.004935	-0.010106
9.5200	1402.120	84.333	70.276	143.215	-0.600	20.279	2669.277	-0.005903	-0.004919	-0.010025
9.5400	1370.365	82.030	68.887	140.617	-0.610	20.279	2608.824	-0.005742	-0.004822	-0.009843
9.5600	1365.662	82.156	68.902	140.172	-0.612	20.279	2599.869	-0.005751	-0.004823	-0.009812
9.5800	1321.253	78.944	66.829	136.507	-0.601	20.279	2515.326	-0.005526	-0.004678	-0.009555
9.6000	1275.822	75.917	64.036	132.390	-0.595	20.280	2428.837	-0.005314	-0.004483	-0.009267
9.6200	1214.972	71.844	60.909	126.636	-0.601	20.279	2312.994	-0.005029	-0.004264	-0.008865
9.6400	1156.226	67.520	56.740	121.188	-0.600	20.279	2201.157	-0.004726	-0.003972	-0.008483
9.6600	1093.166	63.728	53.543	115.009	-0.600	20.279	2081.108	-0.004461	-0.003748	-0.008051
9.6800	1029.732	58.613	49.123	108.435	-0.601	20.279	1960.344	-0.004103	-0.003439	-0.007590
9.7000	957.806	54.130	45.176	101.013	-0.593	20.279	1823.416	-0.003789	-0.003162	-0.007071
9.7200	869.213	47.244	40.077	91.883	-0.603	20.279	1654.758	-0.003307	-0.002805	-0.006432
9.7400	790.209	42.077	35.298	83.265	-0.601	20.279	1504.354	-0.002945	-0.002471	-0.005829
9.7600	720.928	36.587	31.339	75.194	-0.609	20.279	1372.461	-0.002561	-0.002194	-0.005264
9.7800	650.715	31.364	26.640	66.812	-0.600	20.279	1238.794	-0.002195	-0.001865	-0.004677
9.8000	561.807	24.704	22.108	56.558	-0.608	20.279	1069.536	-0.001729	-0.001548	-0.003959
9.8200	507.028	20.260	18.555	50.124	-0.607	20.279	965.252	-0.001418	-0.001299	-0.003509
9.8400	449.214	16.424	15.496	43.066	-0.598	20.279	855.188	-0.001150	-0.001085	-0.003015
9.8600	376.447	10.284	11.771	33.461	-0.603	20.279	716.658	-0.000720	-0.000824	-0.002342
9.8800	353.047	8.363	9.937	30.532	-0.613	20.279	672.112	-0.000585	-0.000696	-0.002137
9.9000	288.500	3.279	7.034	22.137	-0.611	20.279	549.231	-0.000230	-0.000492	-0.001550
9.9200	263.373	1.084	5.309	18.259	-0.622	20.279	501.394	-0.000076	-0.000372	-0.001278
9.9400	229.454	-1.710	4.016	13.300	-0.617	20.279	436.821	0.000120	-0.000281	-0.000931
9.9600	223.487	-3.003	3.242	11.644	-0.611	20.279	425.463	0.000210	-0.000227	-0.000815
9.9800	219.520	-3.462	2.811	10.700	-0.609	20.279	417.910	0.000242	-0.000197	-0.000749
