# Supplementary material for: Evaluation of a Cold-Mixed High-Performance Polyurethane Mixture
Source: Hindawi journal article supplement (doi:10.1155/2019/1507971), 2019-11-07
Supplement: f1 [file 1507971.f1.zip › 1507971.f1/dynamic modulus data/PUM/specimen1/temp20/zhs-1-20_2Hz.csv]

Test Information
****************
Project name	zhs
Operator name	1
Target test temperature	20
Target confining stress	0
Average dynamic strain range from 75 to 125 micro-strain
Contact stress	5
Initial modulus	1000
Axial gauge length	70
Comments
Specimen information
********************
Identification	zhs-1-20
Dimensions	Point 1	Point 2	Point 3	Point 4	Point 5	Point 6	Average	Std Dev.
Diameter (mm)	49.2	49.2	49.3				49.23	0.058
Height (mm)	101.3	101.2	101.3				101.27	0.058
Cross-sectional area (mm�)	1903.7
Conditioning time
Properties/Comments
Test Data	2Hz
*********
Test date and time	Mon	Apr 1	2019	2:22 PM
Dynamic modulus (MPa)	12652
Phase angle (Degrees)	4.27
Average temperature (�C)	20.3
Average confining pressure (kPa)	-0.6
Average micro-strain	98
Load drift (%)	0.7
Load standard error (%)	2.6
Average deformation drift (%)	-2.5
Average deformation standard error (%)	3.3
Deformation uniformity (%)	28.2
Phase uniformity (Degrees)	0.8
Conditioning Cycles
Time (sec)	Axial stress (kPa)	Axial micro-strain #1	Axial micro-strain #2	Axial micro-strain #3	Confining pressure (kPa)	Temperature (�C)	Load (N)	Displacement #1 (mm)	Displacement #2 (mm)	Displacement #3 (mm)
0.0000	217.115	-2.672	1.419	5.726	-0.587	20.291	413.332	0.000187	-0.000099	-0.000401
0.0100	201.321	-4.156	-0.167	2.544	-0.587	20.303	383.263	0.000291	0.000012	-0.000178
0.0200	209.165	-4.534	-0.054	3.126	-0.593	20.291	398.197	0.000317	0.000004	-0.000219
0.0300	214.561	-4.227	0.225	3.392	-0.584	20.303	408.468	0.000296	-0.000016	-0.000237
0.0400	237.133	-2.880	0.531	5.655	-0.577	20.291	451.441	0.000202	-0.000037	-0.000396
0.0500	283.090	0.192	1.350	11.032	-0.595	20.303	538.931	-0.000013	-0.000094	-0.000772
0.0600	332.158	3.599	3.367	16.689	-0.581	20.291	632.343	-0.000252	-0.000236	-0.001168
0.0700	397.051	8.420	6.257	23.945	-0.589	20.303	755.882	-0.000589	-0.000438	-0.001676
0.0800	403.708	8.851	6.393	25.221	-0.585	20.291	768.557	-0.000620	-0.000448	-0.001765
0.0900	500.491	15.688	10.840	36.034	-0.595	20.303	952.806	-0.001098	-0.000759	-0.002522
0.1000	540.392	19.034	13.051	40.508	-0.597	20.291	1028.767	-0.001332	-0.000914	-0.002836
0.1100	613.610	24.330	17.107	49.084	-0.592	20.304	1168.156	-0.001703	-0.001198	-0.003436
0.1200	706.741	30.014	21.345	58.659	-0.583	20.290	1345.453	-0.002101	-0.001494	-0.004106
0.1300	752.638	33.834	24.738	65.105	-0.589	20.303	1432.829	-0.002368	-0.001732	-0.004557
0.1400	758.273	35.184	25.335	65.926	-0.588	20.290	1443.558	-0.002463	-0.001773	-0.004615
0.1500	819.394	38.989	28.322	72.164	-0.588	20.303	1559.916	-0.002729	-0.001983	-0.005051
0.1600	918.146	45.965	33.755	82.587	-0.593	20.290	1747.913	-0.003218	-0.002363	-0.005781
0.1700	994.445	51.733	38.451	90.952	-0.603	20.304	1893.167	-0.003621	-0.002692	-0.006367
0.1800	1003.236	52.750	39.201	92.928	-0.595	20.290	1909.904	-0.003693	-0.002744	-0.006505
0.1900	1026.966	54.099	40.565	95.634	-0.597	20.304	1955.080	-0.003787	-0.002840	-0.006694
0.2000	1098.652	59.533	44.830	103.251	-0.599	20.291	2091.551	-0.004167	-0.003138	-0.007228
0.2100	1099.388	60.492	45.529	103.684	-0.592	20.303	2092.953	-0.004234	-0.003187	-0.007258
0.2200	1118.730	62.002	46.638	106.097	-0.591	20.290	2129.774	-0.004340	-0.003265	-0.007427
0.2300	1116.806	61.878	46.611	106.112	-0.600	20.303	2126.112	-0.004331	-0.003263	-0.007428
0.2400	1149.403	64.298	48.887	109.714	-0.605	20.290	2188.168	-0.004501	-0.003422	-0.007680
0.2500	1166.761	65.687	49.889	111.864	-0.601	20.303	2221.212	-0.004598	-0.003492	-0.007831
0.2600	1156.992	65.521	49.723	111.281	-0.601	20.290	2202.616	-0.004586	-0.003481	-0.007790
0.2700	1143.482	64.533	49.444	110.491	-0.603	20.303	2176.895	-0.004517	-0.003461	-0.007734
0.2800	1121.119	63.520	49.237	108.991	-0.605	20.291	2134.323	-0.004446	-0.003447	-0.007629
0.2900	1059.518	59.922	46.834	103.475	-0.597	20.303	2017.050	-0.004195	-0.003278	-0.007243
0.3000	1022.142	56.916	44.638	100.025	-0.599	20.290	1945.896	-0.003984	-0.003125	-0.007002
0.3100	991.785	54.848	43.037	96.942	-0.597	20.303	1888.103	-0.003839	-0.003013	-0.006786
0.3200	937.637	51.454	40.049	91.355	-0.594	20.291	1785.021	-0.003602	-0.002803	-0.006395
0.3300	930.033	51.275	39.285	90.423	-0.604	20.303	1770.544	-0.003589	-0.002750	-0.006330
0.3400	848.564	45.260	35.326	82.421	-0.592	20.290	1615.448	-0.003168	-0.002473	-0.005769
0.3500	783.296	41.159	31.865	75.264	-0.592	20.303	1491.194	-0.002881	-0.002231	-0.005268
0.3600	730.952	37.366	28.934	69.691	-0.593	20.290	1391.544	-0.002616	-0.002025	-0.004878
0.3700	640.977	31.139	24.113	60.074	-0.593	20.303	1220.255	-0.002180	-0.001688	-0.004205
0.3800	628.984	29.096	22.874	57.850	-0.596	20.290	1197.424	-0.002037	-0.001601	-0.004049
0.3900	548.071	24.484	18.693	49.124	-0.591	20.303	1043.386	-0.001714	-0.001309	-0.003439
0.4000	510.710	21.150	16.566	44.442	-0.596	20.290	972.261	-0.001481	-0.001160	-0.003111
0.4100	463.040	17.311	13.955	38.852	-0.581	20.303	881.510	-0.001212	-0.000977	-0.002720
0.4200	411.523	13.547	11.521	32.391	-0.589	20.289	783.434	-0.000948	-0.000806	-0.002267
0.4300	341.100	8.754	7.938	24.304	-0.591	20.303	649.366	-0.000613	-0.000556	-0.001701
0.4400	320.060	6.404	6.769	20.888	-0.594	20.289	609.312	-0.000448	-0.000474	-0.001462
0.4500	282.098	3.362	5.130	15.843	-0.599	20.304	537.043	-0.000235	-0.000359	-0.001109
0.4600	244.362	0.068	3.519	10.767	-0.600	20.289	465.202	-0.000005	-0.000246	-0.000754
0.4700	216.003	-2.336	1.558	6.463	-0.607	20.303	411.215	0.000163	-0.000109	-0.000452
0.4800	197.007	-4.090	1.005	3.781	-0.608	20.290	375.051	0.000286	-0.000070	-0.000265
0.4900	201.816	-3.810	0.725	3.628	-0.608	20.303	384.207	0.000267	-0.000051	-0.000254
0.5000	204.446	-3.863	0.851	3.531	-0.604	20.290	389.214	0.000270	-0.000060	-0.000247
0.5100	204.431	-4.018	0.712	3.518	-0.598	20.303	389.185	0.000281	-0.000050	-0.000246
0.5200	211.510	-3.880	0.961	3.962	-0.607	20.289	402.660	0.000272	-0.000067	-0.000277
0.5300	223.683	-3.076	1.170	5.098	-0.611	20.303	425.835	0.000215	-0.000082	-0.000357
0.5400	283.346	0.580	1.934	11.561	-0.605	20.290	539.417	-0.000041	-0.000135	-0.000809
0.5500	302.477	1.442	2.477	13.884	-0.592	20.303	575.838	-0.000101	-0.000173	-0.000972
0.5600	328.506	3.752	3.437	16.743	-0.604	20.289	625.391	-0.000263	-0.000241	-0.001172
0.5700	426.146	11.004	7.716	28.306	-0.604	20.303	811.272	-0.000770	-0.000540	-0.001981
0.5800	422.884	10.866	7.520	28.181	-0.601	20.290	805.063	-0.000761	-0.000526	-0.001973
0.5900	497.711	16.161	11.271	36.508	-0.597	20.303	947.514	-0.001131	-0.000789	-0.002556
0.6000	551.873	19.871	13.940	42.358	-0.602	20.289	1050.625	-0.001391	-0.000976	-0.002965
0.6100	636.814	26.373	18.345	52.332	-0.599	20.303	1212.330	-0.001846	-0.001284	-0.003663
0.6200	690.570	29.401	21.193	58.271	-0.592	20.289	1314.669	-0.002058	-0.001484	-0.004079
0.6300	740.931	33.627	24.308	64.121	-0.591	20.303	1410.542	-0.002354	-0.001702	-0.004488
0.6400	798.129	37.698	27.432	70.554	-0.597	20.289	1519.432	-0.002639	-0.001920	-0.004939
0.6500	856.454	42.480	30.380	77.099	-0.614	20.304	1630.468	-0.002974	-0.002127	-0.005397
0.6600	886.796	44.368	32.628	80.586	-0.600	20.290	1688.232	-0.003106	-0.002284	-0.005641
0.6700	924.262	47.509	34.923	84.963	-0.602	20.303	1759.558	-0.003326	-0.002445	-0.005947
0.6800	986.074	52.054	38.549	91.605	-0.589	20.289	1877.232	-0.003644	-0.002698	-0.006412
0.6900	1043.858	55.707	41.636	97.679	-0.600	20.303	1987.238	-0.003900	-0.002915	-0.006838
0.7000	1045.767	56.068	42.717	98.694	-0.597	20.289	1990.871	-0.003925	-0.002990	-0.006909
0.7100	1098.562	60.198	45.525	103.795	-0.604	20.303	2091.379	-0.004214	-0.003187	-0.007266
0.7200	1152.303	64.491	48.874	109.632	-0.604	20.289	2193.689	-0.004514	-0.003421	-0.007674
0.7300	1148.321	64.117	49.012	109.894	-0.599	20.303	2186.108	-0.004488	-0.003431	-0.007693
0.7400	1139.995	64.243	48.998	109.702	-0.593	20.289	2170.258	-0.004497	-0.003430	-0.007679
0.7500	1141.408	64.397	48.887	109.895	-0.602	20.303	2172.947	-0.004508	-0.003422	-0.007693
0.7600	1150.410	65.007	49.180	110.864	-0.600	20.289	2190.084	-0.004550	-0.003443	-0.007760
0.7700	1144.744	64.645	49.514	110.574	-0.598	20.303	2179.298	-0.004525	-0.003466	-0.007740
0.7800	1143.542	65.118	49.694	110.573	-0.604	20.289	2177.010	-0.004558	-0.003479	-0.007740
0.7900	1109.367	63.408	48.568	108.226	-0.604	20.304	2111.950	-0.004439	-0.003400	-0.007576
0.8000	1012.584	56.764	44.511	99.110	-0.599	20.289	1927.700	-0.003973	-0.003116	-0.006938
0.8100	999.134	55.709	43.718	98.028	-0.599	20.303	1902.094	-0.003900	-0.003060	-0.006862
0.8200	947.902	51.914	40.787	92.592	-0.593	20.288	1804.562	-0.003634	-0.002855	-0.006481
0.8300	879.958	47.454	37.259	86.214	-0.588	20.302	1675.215	-0.003322	-0.002608	-0.006035
0.8400	860.572	46.397	35.939	83.752	-0.597	20.288	1638.308	-0.003248	-0.002516	-0.005863
0.8500	781.628	40.839	31.659	75.876	-0.594	20.302	1488.018	-0.002859	-0.002216	-0.005311
0.8600	708.499	36.005	27.571	67.620	-0.592	20.289	1348.801	-0.002520	-0.001930	-0.004733
0.8700	711.821	35.308	27.140	67.409	-0.597	20.303	1355.124	-0.002472	-0.001900	-0.004719
0.8800	611.476	28.873	22.498	56.850	-0.591	20.289	1164.093	-0.002021	-0.001575	-0.003980
0.8900	550.265	24.498	18.972	49.709	-0.593	20.303	1047.564	-0.001715	-0.001328	-0.003480
0.9000	508.817	20.872	16.216	44.550	-0.583	20.289	968.657	-0.001461	-0.001135	-0.003119
0.9100	429.377	14.699	12.705	35.449	-0.594	20.303	817.423	-0.001029	-0.000889	-0.002481
0.9200	352.281	9.657	9.021	26.028	-0.588	20.288	670.652	-0.000676	-0.000631	-0.001822
0.9300	358.908	8.948	8.356	25.864	-0.605	20.303	683.270	-0.000626	-0.000585	-0.001810
0.9400	309.675	5.777	6.451	19.997	-0.589	20.288	589.542	-0.000404	-0.000452	-0.001400
0.9500	290.123	4.502	5.603	17.050	-0.604	20.304	552.320	-0.000315	-0.000392	-0.001194
0.9600	268.498	2.444	4.225	13.940	-0.603	20.288	511.150	-0.000171	-0.000296	-0.000976
0.9700	229.935	-1.585	2.267	8.659	-0.596	20.303	437.737	0.000111	-0.000159	-0.000606
0.9800	214.636	-2.616	1.754	6.475	-0.604	20.288	408.611	0.000183	-0.000123	-0.000453
0.9900	189.328	-4.226	0.780	2.697	-0.601	20.303	360.432	0.000296	-0.000055	-0.000189
1.0000	179.003	-6.254	-0.404	0.832	-0.598	20.289	340.776	0.000438	0.000028	-0.000058
1.0100	187.750	-6.197	-0.293	1.361	-0.603	20.302	357.428	0.000434	0.000021	-0.000095
1.0200	209.421	-4.324	0.209	3.559	-0.597	20.287	398.684	0.000303	-0.000015	-0.000249
1.0300	235.285	-2.808	0.405	6.293	-0.591	20.302	447.922	0.000197	-0.000028	-0.000440
1.0400	270.316	-0.972	1.086	10.006	-0.588	20.288	514.612	0.000068	-0.000076	-0.000700
1.0500	305.287	2.055	2.587	14.343	-0.592	20.302	581.188	-0.000144	-0.000181	-0.001004
1.0600	329.979	4.294	3.520	17.425	-0.580	20.288	628.195	-0.000301	-0.000246	-0.001220
1.0700	369.714	6.945	4.963	21.913	-0.582	20.302	703.840	-0.000486	-0.000347	-0.001534
1.0800	437.717	11.337	8.161	29.461	-0.583	20.288	833.302	-0.000794	-0.000571	-0.002062
1.0900	525.754	18.492	12.758	39.838	-0.589	20.302	1000.900	-0.001294	-0.000893	-0.002789
1.1000	534.621	19.440	13.108	41.260	-0.598	20.288	1017.780	-0.001361	-0.000918	-0.002888
1.1100	648.596	26.221	18.692	53.435	-0.601	20.303	1234.760	-0.001835	-0.001308	-0.003740
1.1200	664.256	28.012	20.069	55.781	-0.599	20.288	1264.572	-0.001961	-0.001405	-0.003905
1.1300	726.578	32.768	23.540	62.687	-0.596	20.303	1383.219	-0.002294	-0.001648	-0.004388
1.1400	800.473	38.117	27.210	70.720	-0.600	20.288	1523.895	-0.002668	-0.001905	-0.004950
1.1500	826.097	39.520	28.879	73.569	-0.601	20.303	1572.676	-0.002766	-0.002022	-0.005150
1.1600	908.873	45.563	34.048	82.768	-0.605	20.287	1730.261	-0.003189	-0.002383	-0.005794
1.1700	939.681	48.454	35.813	86.452	-0.596	20.303	1788.912	-0.003392	-0.002507	-0.006052
1.1800	988.238	51.136	38.230	91.869	-0.603	20.288	1881.351	-0.003579	-0.002676	-0.006431
1.1900	1023.825	54.098	40.732	95.636	-0.595	20.303	1949.100	-0.003787	-0.002851	-0.006694
1.2000	1084.285	59.156	44.482	102.082	-0.608	20.288	2064.199	-0.004141	-0.003114	-0.007146
1.2100	1099.689	60.532	45.720	104.392	-0.604	20.302	2093.525	-0.004237	-0.003200	-0.007307
1.2200	1144.564	63.156	48.138	108.657	-0.596	20.287	2178.955	-0.004421	-0.003370	-0.007606
1.2300	1186.403	67.519	51.599	113.618	-0.595	20.302	2258.606	-0.004726	-0.003612	-0.007953
1.2400	1160.554	66.729	50.821	112.297	-0.604	20.287	2209.396	-0.004671	-0.003557	-0.007861
1.2500	1128.513	64.215	49.651	109.548	-0.600	20.302	2148.399	-0.004495	-0.003476	-0.007668
1.2600	1138.748	64.742	50.250	110.463	-0.601	20.288	2167.883	-0.004532	-0.003518	-0.007732
1.2700	1144.879	65.019	50.626	111.015	-0.610	20.302	2179.556	-0.004551	-0.003544	-0.007771
1.2800	1138.402	64.536	50.208	110.574	-0.601	20.288	2167.225	-0.004517	-0.003515	-0.007740
1.2900	1072.833	61.030	47.983	105.405	-0.598	20.303	2042.398	-0.004272	-0.003359	-0.007378
1.3000	1064.101	59.893	47.193	104.211	-0.599	20.287	2025.776	-0.004193	-0.003304	-0.007295
1.3100	962.464	53.847	41.898	94.884	-0.605	20.302	1832.285	-0.003769	-0.002933	-0.006642
1.3200	961.653	52.274	40.941	93.899	-0.600	20.288	1830.740	-0.003659	-0.002866	-0.006573
1.3300	928.906	50.899	40.079	91.301	-0.606	20.302	1768.398	-0.003563	-0.002806	-0.006391
1.3400	846.430	45.466	35.522	82.740	-0.609	20.287	1611.385	-0.003183	-0.002487	-0.005792
1.3500	790.464	41.212	32.131	76.613	-0.604	20.303	1504.841	-0.002885	-0.002249	-0.005363
1.3600	739.954	37.811	29.324	70.803	-0.604	20.287	1408.682	-0.002647	-0.002053	-0.004956
1.3700	654.337	32.003	24.543	61.658	-0.609	20.303	1245.689	-0.002240	-0.001718	-0.004316
1.3800	611.942	28.918	22.374	56.991	-0.611	20.287	1164.980	-0.002024	-0.001566	-0.003989
1.3900	577.136	25.624	20.166	52.306	-0.598	20.303	1098.719	-0.001794	-0.001412	-0.003661
1.4000	492.812	19.716	16.094	43.274	-0.603	20.287	938.187	-0.001380	-0.001127	-0.003029
1.4100	432.217	15.994	12.772	35.715	-0.601	20.302	822.830	-0.001120	-0.000894	-0.002500
1.4200	391.791	12.547	10.297	30.599	-0.601	20.287	745.869	-0.000878	-0.000721	-0.002142
1.4300	343.369	8.419	8.034	24.667	-0.607	20.302	653.687	-0.000589	-0.000562	-0.001727
1.4400	344.166	7.947	7.995	23.957	-0.606	20.287	655.203	-0.000556	-0.000560	-0.001677
1.4500	302.522	4.917	6.270	19.052	-0.593	20.303	575.924	-0.000344	-0.000439	-0.001334
1.4600	291.205	3.251	4.724	16.854	-0.595	20.287	554.380	-0.000228	-0.000331	-0.001180
1.4700	222.901	-1.642	2.423	8.546	-0.615	20.302	424.347	0.000115	-0.000170	-0.000598
1.4800	179.229	-5.020	0.628	2.181	-0.615	20.287	341.206	0.000351	-0.000044	-0.000153
1.4900	171.955	-6.226	-0.543	0.651	-0.605	20.303	327.358	0.000436	0.000038	-0.000046
1.5000	175.021	-6.225	-0.332	0.553	-0.595	20.287	333.195	0.000436	0.000023	-0.000039
1.5100	179.018	-6.197	-0.444	0.570	-0.598	20.302	340.805	0.000434	0.000031	-0.000040
1.5200	192.048	-5.284	-0.209	1.250	-0.603	20.287	365.610	0.000370	0.000015	-0.000087
1.5300	235.029	-2.905	0.196	6.086	-0.599	20.302	447.435	0.000203	-0.000014	-0.000426
1.5400	267.025	-0.903	1.448	9.896	-0.595	20.286	508.347	0.000063	-0.000101	-0.000693
1.5500	286.892	1.261	1.976	12.311	-0.591	20.303	546.169	-0.000088	-0.000138	-0.000862
1.5600	344.151	4.918	4.114	19.026	-0.593	20.287	655.174	-0.000344	-0.000288	-0.001332
1.5700	399.485	9.102	6.325	25.458	-0.598	20.302	760.517	-0.000637	-0.000443	-0.001782
1.5800	442.737	12.603	8.675	30.616	-0.600	20.287	842.857	-0.000882	-0.000607	-0.002143
1.5900	489.190	15.911	10.785	35.686	-0.593	20.302	931.292	-0.001114	-0.000755	-0.002498
1.6000	587.611	22.051	15.580	46.847	-0.593	20.287	1118.660	-0.001544	-0.001091	-0.003279
1.6100	584.906	23.149	15.663	46.941	-0.596	20.302	1113.510	-0.001620	-0.001096	-0.003286
1.6200	680.456	29.639	20.694	57.225	-0.589	20.287	1295.414	-0.002075	-0.001449	-0.004006
1.6300	690.120	30.514	21.442	59.007	-0.579	20.302	1313.810	-0.002136	-0.001501	-0.004130
1.6400	795.183	37.381	26.972	70.136	-0.582	20.286	1513.824	-0.002617	-0.001888	-0.004910
1.6500	851.600	41.643	30.477	76.572	-0.595	20.302	1621.227	-0.002915	-0.002133	-0.005360
1.6600	919.618	46.773	34.214	84.046	-0.595	20.287	1750.717	-0.003274	-0.002395	-0.005883
1.6700	975.028	50.164	37.604	90.064	-0.598	20.302	1856.203	-0.003511	-0.002632	-0.006305
1.6800	1007.595	53.153	39.882	93.939	-0.600	20.287	1918.201	-0.003721	-0.002792	-0.006576
1.6900	1012.013	54.336	40.690	95.063	-0.597	20.302	1926.613	-0.003803	-0.002848	-0.006654
1.7000	1045.166	56.650	42.358	98.625	-0.593	20.287	1989.727	-0.003965	-0.002965	-0.006904
1.7100	1108.030	60.686	45.820	105.113	-0.597	20.303	2109.404	-0.004248	-0.003207	-0.007358
1.7200	1101.357	61.072	46.470	105.154	-0.601	20.287	2096.701	-0.004275	-0.003253	-0.007361
1.7300	1136.839	63.450	48.207	108.337	-0.596	20.301	2164.249	-0.004441	-0.003374	-0.007584
1.7400	1163.529	66.311	51.155	112.379	-0.600	20.286	2215.061	-0.004642	-0.003581	-0.007867
1.7500	1144.549	64.339	50.529	110.864	-0.600	20.302	2178.926	-0.004504	-0.003537	-0.007760
1.7600	1157.954	65.423	50.945	111.962	-0.605	20.287	2204.447	-0.004580	-0.003566	-0.007837
1.7700	1131.218	64.562	50.695	110.336	-0.594	20.303	2153.549	-0.004519	-0.003549	-0.007724
1.7800	1108.495	62.962	49.095	108.269	-0.588	20.287	2110.291	-0.004407	-0.003437	-0.007579
1.7900	1088.568	61.361	48.499	106.388	-0.593	20.302	2072.353	-0.004295	-0.003395	-0.007447
1.8000	1088.117	61.836	48.485	106.417	-0.597	20.287	2071.495	-0.004329	-0.003394	-0.007449
1.8100	1005.731	56.056	43.898	99.014	-0.593	20.302	1914.654	-0.003924	-0.003073	-0.006931
1.8200	973.826	54.167	42.385	95.650	-0.600	20.286	1853.914	-0.003792	-0.002967	-0.006696
1.8300	921.347	51.219	39.968	90.536	-0.599	20.302	1754.007	-0.003585	-0.002798	-0.006338
1.8400	860.091	46.328	35.981	84.087	-0.596	20.287	1637.392	-0.003243	-0.002519	-0.005886
1.8500	764.240	39.561	30.630	73.900	-0.593	20.302	1454.916	-0.002769	-0.002144	-0.005173
1.8600	707.823	36.017	27.779	67.982	-0.597	20.286	1347.513	-0.002521	-0.001945	-0.004759
1.8700	667.111	32.822	25.587	62.895	-0.596	20.302	1270.008	-0.002298	-0.001791	-0.004403
1.8800	614.962	28.790	22.445	57.448	-0.601	20.286	1170.731	-0.002015	-0.001571	-0.004021
1.8900	567.773	24.874	19.859	51.612	-0.597	20.302	1080.894	-0.001741	-0.001390	-0.003613
1.9000	494.870	20.146	16.245	43.496	-0.599	20.286	942.106	-0.001410	-0.001137	-0.003045
1.9100	429.737	15.520	12.606	35.369	-0.600	20.302	818.110	-0.001086	-0.000882	-0.002476
1.9200	404.039	12.809	10.813	32.211	-0.591	20.286	769.186	-0.000897	-0.000757	-0.002255
1.9300	347.156	8.350	8.356	25.069	-0.589	20.302	660.896	-0.000584	-0.000585	-0.001755
1.9400	311.178	6.111	6.618	20.179	-0.591	20.286	592.403	-0.000428	-0.000463	-0.001413
1.9500	274.434	2.486	4.447	15.259	-0.597	20.302	522.451	-0.000174	-0.000311	-0.001068
1.9600	258.729	1.179	3.684	12.896	-0.598	20.286	492.554	-0.000083	-0.000258	-0.000903
1.9700	229.108	-1.155	2.546	8.784	-0.584	20.302	436.163	0.000081	-0.000178	-0.000615
1.9800	175.953	-5.340	0.072	1.556	-0.586	20.285	334.969	0.000374	-0.000005	-0.000109
1.9900	185.150	-5.381	-0.221	1.682	-0.597	20.302	352.478	0.000377	0.000015	-0.000118
2.0000	193.356	-5.341	0.072	2.292	-0.599	20.286	368.099	0.000374	-0.000005	-0.000160
2.0100	217.897	-3.504	0.753	4.904	-0.589	20.302	414.820	0.000245	-0.000053	-0.000343
2.0200	216.935	-3.991	0.294	4.668	-0.598	20.286	412.989	0.000279	-0.000021	-0.000327
2.0300	241.251	-2.629	0.587	7.017	-0.600	20.302	459.280	0.000184	-0.000041	-0.000491
2.0400	265.206	-0.625	1.558	9.990	-0.600	20.285	504.885	0.000044	-0.000109	-0.000699
2.0500	296.586	1.775	2.211	13.563	-0.599	20.301	564.623	-0.000124	-0.000155	-0.000949
2.0600	328.671	4.239	3.423	17.273	-0.605	20.285	625.706	-0.000297	-0.000240	-0.001209
2.0700	393.594	8.392	6.283	24.987	-0.602	20.301	749.302	-0.000587	-0.000440	-0.001749
2.0800	424.613	11.532	7.771	28.556	-0.592	20.285	808.353	-0.000807	-0.000544	-0.001999
2.0900	471.622	15.118	9.853	34.072	-0.594	20.302	897.846	-0.001058	-0.000690	-0.002385
2.1000	534.816	18.827	12.982	40.969	-0.601	20.285	1018.152	-0.001318	-0.000909	-0.002868
2.1100	618.434	24.775	17.468	50.749	-0.592	20.302	1177.340	-0.001734	-0.001223	-0.003552
2.1200	684.243	30.111	21.095	57.878	-0.591	20.286	1302.624	-0.002108	-0.001477	-0.004051
2.1300	713.774	32.101	22.501	61.614	-0.600	20.302	1358.843	-0.002247	-0.001575	-0.004313
2.1400	750.804	34.655	25.072	65.689	-0.593	20.286	1429.338	-0.002426	-0.001755	-0.004598
2.1500	852.441	41.687	30.588	76.750	-0.591	20.302	1622.829	-0.002918	-0.002141	-0.005373
2.1600	909.159	45.689	33.630	83.086	-0.588	20.285	1730.804	-0.003198	-0.002354	-0.005816
2.1700	953.598	49.124	36.315	87.732	-0.582	20.302	1815.405	-0.003439	-0.002542	-0.006141
2.1800	1009.804	53.445	39.953	93.899	-0.593	20.286	1922.407	-0.003741	-0.002797	-0.006573
2.1900	1036.554	55.901	41.596	97.456	-0.597	20.302	1973.333	-0.003913	-0.002912	-0.006822
2.2000	1072.247	58.182	43.856	101.234	-0.608	20.286	2041.283	-0.004073	-0.003070	-0.007086
2.2100	1094.023	59.880	45.554	103.656	-0.595	20.301	2082.739	-0.004192	-0.003189	-0.007256
2.2200	1180.031	66.436	51.016	112.448	-0.593	20.286	2246.475	-0.004651	-0.003571	-0.007871
2.2300	1154.227	65.326	50.196	111.185	-0.596	20.302	2197.351	-0.004573	-0.003514	-0.007783
2.2400	1150.334	65.089	49.916	110.920	-0.594	20.285	2189.941	-0.004556	-0.003494	-0.007764
2.2500	1154.723	65.228	50.641	111.449	-0.594	20.302	2198.296	-0.004566	-0.003545	-0.007801
2.2600	1159.006	65.993	50.724	112.213	-0.599	20.285	2206.450	-0.004619	-0.003551	-0.007855
2.2700	1130.482	64.187	49.778	110.240	-0.597	20.301	2152.147	-0.004493	-0.003484	-0.007717
2.2800	1089.770	61.641	48.720	106.835	-0.597	20.286	2074.642	-0.004315	-0.003410	-0.007478
2.2900	1032.452	58.086	45.889	101.331	-0.610	20.302	1965.523	-0.004066	-0.003212	-0.007093
2.3000	1017.634	57.126	44.536	99.748	-0.601	20.285	1937.313	-0.003999	-0.003118	-0.006982
2.3100	1021.571	56.666	44.372	99.943	-0.600	20.302	1944.809	-0.003967	-0.003106	-0.006996
2.3200	967.319	53.793	42.024	95.051	-0.604	20.285	1841.526	-0.003766	-0.002942	-0.006654
2.3300	920.851	50.718	39.327	90.257	-0.594	20.301	1753.063	-0.003550	-0.002753	-0.006318
2.3400	853.929	45.701	35.814	83.377	-0.598	20.285	1625.662	-0.003199	-0.002507	-0.005836
2.3500	805.808	42.146	33.228	78.418	-0.602	20.301	1534.052	-0.002950	-0.002326	-0.005489
2.3600	745.785	38.006	29.837	71.791	-0.594	20.285	1419.783	-0.002660	-0.002089	-0.005025
2.3700	676.819	33.626	25.849	64.189	-0.610	20.302	1288.490	-0.002354	-0.001809	-0.004493
2.3800	613.475	29.096	22.108	57.100	-0.592	20.285	1167.898	-0.002037	-0.001548	-0.003997
2.3900	568.224	25.762	20.207	51.819	-0.589	20.301	1081.753	-0.001803	-0.001414	-0.003627
2.4000	496.463	20.664	16.204	43.580	-0.587	20.285	945.139	-0.001446	-0.001134	-0.003051
2.4100	448.583	16.368	13.411	37.632	-0.593	20.300	853.987	-0.001146	-0.000939	-0.002634
2.4200	392.858	12.018	10.536	30.796	-0.604	20.285	747.900	-0.000841	-0.000737	-0.002156
2.4300	353.558	9.587	9.078	25.861	-0.603	20.301	673.084	-0.000671	-0.000635	-0.001810
2.4400	310.742	6.029	6.561	20.413	-0.593	20.285	591.574	-0.000422	-0.000459	-0.001429
2.4500	277.454	3.280	4.905	15.536	-0.595	20.301	528.202	-0.000230	-0.000343	-0.001088
2.4600	258.684	1.485	3.992	12.784	-0.597	20.285	492.468	-0.000104	-0.000279	-0.000895
2.4700	238.200	-0.387	2.934	9.908	-0.610	20.301	453.472	0.000027	-0.000205	-0.000694
2.4800	204.041	-3.394	1.224	5.156	-0.606	20.284	388.441	0.000238	-0.000086	-0.000361
2.4900	202.117	-3.672	0.877	4.515	-0.606	20.301	384.779	0.000257	-0.000061	-0.000316
2.5000	205.934	-5.699	-0.499	1.833	-0.598	20.294	392.046	0.000399	0.000035	-0.000128
2.5100	207.798	-5.506	-0.332	1.849	-0.596	20.288	395.594	0.000385	0.000023	-0.000129
2.5200	223.893	-4.602	0.001	3.602	-0.599	20.294	426.235	0.000322	-0.000000	-0.000252
2.5300	240.394	-3.615	0.196	5.376	-0.592	20.288	457.649	0.000253	-0.000014	-0.000376
2.5400	295.849	0.513	1.572	11.824	-0.601	20.294	563.221	-0.000036	-0.000110	-0.000828
2.5500	340.273	4.086	3.464	17.216	-0.605	20.288	647.793	-0.000286	-0.000242	-0.001205
2.5600	400.387	8.378	6.354	24.486	-0.604	20.293	762.234	-0.000586	-0.000445	-0.001714
2.5700	471.171	13.157	9.105	32.309	-0.603	20.288	896.988	-0.000921	-0.000637	-0.002262
2.5800	511.973	16.646	11.439	37.590	-0.590	20.294	974.665	-0.001165	-0.000801	-0.002631
2.5900	578.789	21.691	14.719	45.024	-0.596	20.288	1101.866	-0.001518	-0.001030	-0.003152
2.6000	668.268	28.150	19.639	54.933	-0.608	20.294	1272.211	-0.001971	-0.001375	-0.003845
2.6100	751.661	33.862	24.084	64.357	-0.595	20.288	1430.969	-0.002370	-0.001686	-0.004505
2.6200	797.362	36.700	26.933	69.565	-0.607	20.294	1517.973	-0.002569	-0.001885	-0.004870
2.6300	886.180	43.786	32.045	79.307	-0.608	20.288	1687.059	-0.003065	-0.002243	-0.005551
2.6400	979.101	50.359	37.020	89.491	-0.612	20.295	1863.956	-0.003525	-0.002591	-0.006264
2.6500	1030.062	53.808	40.343	94.996	-0.596	20.289	1960.974	-0.003767	-0.002824	-0.006650
2.6600	1127.506	60.655	46.387	105.391	-0.606	20.294	2146.482	-0.004246	-0.003247	-0.007377
2.6700	1189.033	66.020	50.125	111.962	-0.608	20.288	2263.613	-0.004621	-0.003509	-0.007837
2.6800	1263.363	71.066	54.516	119.802	-0.599	20.294	2405.119	-0.004975	-0.003816	-0.008386
2.6900	1286.822	73.080	56.712	122.649	-0.597	20.288	2449.780	-0.005116	-0.003970	-0.008585
2.7000	1329.533	76.778	59.586	126.874	-0.603	20.294	2531.090	-0.005374	-0.004171	-0.008881
2.7100	1368.547	79.721	61.894	131.545	-0.598	20.288	2605.362	-0.005580	-0.004333	-0.009208
2.7200	1415.345	82.850	65.063	136.450	-0.599	20.294	2694.454	-0.005800	-0.004554	-0.009551
2.7300	1422.920	83.808	66.188	137.782	-0.595	20.287	2708.874	-0.005867	-0.004633	-0.009645
2.7400	1438.234	85.531	67.092	139.338	-0.610	20.294	2738.028	-0.005987	-0.004696	-0.009754
2.7500	1435.994	85.584	67.329	139.741	-0.615	20.288	2733.765	-0.005991	-0.004713	-0.009782
2.7600	1441.465	85.894	67.957	140.382	-0.619	20.294	2744.179	-0.006013	-0.004757	-0.009827
2.7700	1429.668	86.225	68.136	139.951	-0.607	20.288	2721.720	-0.006036	-0.004770	-0.009797
2.7800	1408.778	85.099	67.314	138.631	-0.599	20.294	2681.952	-0.005957	-0.004712	-0.009704
2.7900	1352.346	81.723	65.410	134.530	-0.593	20.288	2574.520	-0.005721	-0.004579	-0.009417
2.8000	1311.304	78.416	63.077	130.684	-0.607	20.294	2496.386	-0.005489	-0.004415	-0.009148
2.8100	1256.255	75.163	60.365	125.639	-0.601	20.288	2391.586	-0.005261	-0.004226	-0.008795
2.8200	1204.196	71.470	57.060	120.845	-0.600	20.294	2292.480	-0.005003	-0.003994	-0.008459
2.8300	1127.657	66.172	52.684	113.633	-0.599	20.287	2146.769	-0.004632	-0.003688	-0.007954
2.8400	1057.775	62.019	48.817	106.946	-0.598	20.294	2013.731	-0.004341	-0.003417	-0.007486
2.8500	992.732	57.028	44.720	100.124	-0.608	20.288	1889.906	-0.003992	-0.003130	-0.007009
2.8600	920.851	51.968	40.578	92.579	-0.610	20.295	1753.063	-0.003638	-0.002840	-0.006481
2.8700	829.042	45.799	35.785	82.976	-0.600	20.288	1578.283	-0.003206	-0.002505	-0.005808
2.8800	762.917	40.879	31.741	75.542	-0.607	20.294	1452.398	-0.002862	-0.002222	-0.005288
2.8900	680.622	35.087	27.057	66.536	-0.601	20.288	1295.729	-0.002456	-0.001894	-0.004658
2.9000	608.771	29.125	23.001	58.312	-0.595	20.294	1158.943	-0.002039	-0.001610	-0.004082
2.9100	547.876	25.082	19.819	50.887	-0.590	20.287	1043.015	-0.001756	-0.001387	-0.003562
2.9200	459.854	18.411	15.067	40.746	-0.586	20.294	875.444	-0.001289	-0.001055	-0.002852
2.9300	417.234	14.979	12.411	35.117	-0.590	20.287	794.306	-0.001049	-0.000869	-0.002458
2.9400	367.445	11.100	10.146	28.764	-0.602	20.294	699.520	-0.000777	-0.000710	-0.002014
2.9500	310.547	6.987	7.255	21.678	-0.601	20.287	591.202	-0.000489	-0.000508	-0.001517
2.9600	274.734	3.403	5.226	16.715	-0.605	20.294	523.024	-0.000238	-0.000366	-0.001170
2.9700	239.929	0.442	3.798	11.491	-0.615	20.288	456.762	-0.000031	-0.000266	-0.000804
2.9800	226.057	-1.045	2.921	8.993	-0.611	20.294	430.355	0.000073	-0.000205	-0.000630
2.9900	209.962	-2.087	1.921	6.808	-0.605	20.287	399.714	0.000146	-0.000134	-0.000477
3.0000	207.858	-3.171	1.324	6.003	-0.602	20.294	395.708	0.000222	-0.000093	-0.000420
3.0100	208.805	-3.380	1.614	5.585	-0.606	20.288	397.511	0.000237	-0.000113	-0.000391
3.0200	215.703	-3.156	1.769	5.877	-0.607	20.294	410.643	0.000221	-0.000124	-0.000411
3.0300	236.201	-1.947	1.614	7.823	-0.618	20.287	449.667	0.000136	-0.000113	-0.000548
3.0400	297.517	1.789	2.893	14.509	-0.607	20.294	566.397	-0.000125	-0.000203	-0.001016
3.0500	356.985	6.709	5.198	21.609	-0.603	20.287	679.607	-0.000470	-0.000364	-0.001513
3.0600	399.650	9.406	7.004	26.431	-0.608	20.294	760.832	-0.000658	-0.000490	-0.001850
3.0700	455.030	13.713	9.452	32.905	-0.613	20.287	866.261	-0.000960	-0.000662	-0.002303
3.0800	520.659	17.993	12.898	40.160	-0.605	20.294	991.201	-0.001260	-0.000903	-0.002811
3.0900	625.963	26.097	18.554	51.889	-0.598	20.287	1191.673	-0.001827	-0.001299	-0.003632
3.1000	630.772	26.597	18.626	53.029	-0.603	20.294	1200.829	-0.001862	-0.001304	-0.003712
3.1100	732.094	33.279	24.000	63.897	-0.603	20.287	1393.719	-0.002330	-0.001680	-0.004473
3.1200	815.652	39.103	28.739	72.858	-0.606	20.294	1552.792	-0.002737	-0.002012	-0.005100
3.1300	883.039	44.369	32.490	80.738	-0.611	20.287	1681.080	-0.003106	-0.002274	-0.005652
3.1400	970.790	50.386	37.839	90.132	-0.609	20.294	1848.135	-0.003527	-0.002649	-0.006309
3.1500	1055.069	56.653	42.775	98.595	-0.607	20.287	2008.581	-0.003966	-0.002994	-0.006902
3.1600	1129.610	62.420	47.221	106.986	-0.609	20.294	2150.488	-0.004369	-0.003305	-0.007489
3.1700	1183.307	66.032	50.472	112.714	-0.603	20.286	2252.712	-0.004622	-0.003533	-0.007890
3.1800	1254.166	71.427	54.974	120.289	-0.597	20.293	2387.609	-0.005000	-0.003848	-0.008420
3.1900	1303.880	75.526	58.591	125.514	-0.592	20.287	2482.252	-0.005287	-0.004101	-0.008786
3.2000	1315.286	76.417	59.645	126.998	-0.597	20.294	2503.967	-0.005349	-0.004175	-0.008890
3.2100	1383.064	81.586	63.703	133.612	-0.607	20.287	2632.999	-0.005711	-0.004459	-0.009353
3.2200	1412.460	83.115	65.701	137.063	-0.610	20.294	2688.961	-0.005818	-0.004599	-0.009594
3.2300	1421.537	84.514	66.912	138.698	-0.605	20.287	2706.242	-0.005916	-0.004684	-0.009709
3.2400	1470.410	88.588	70.052	143.577	-0.605	20.294	2799.282	-0.006201	-0.004904	-0.010050
3.2500	1465.315	88.433	69.873	143.605	-0.601	20.286	2789.583	-0.006190	-0.004891	-0.010052
3.2600	1451.053	88.241	69.792	142.564	-0.596	20.294	2762.432	-0.006177	-0.004885	-0.009979
3.2700	1411.588	85.738	68.705	139.950	-0.604	20.286	2687.302	-0.006002	-0.004809	-0.009797
3.2800	1378.015	84.001	67.315	137.189	-0.607	20.293	2623.386	-0.005880	-0.004712	-0.009603
3.2900	1356.449	81.973	66.285	135.757	-0.603	20.286	2582.331	-0.005738	-0.004640	-0.009503
3.3000	1273.943	76.834	61.937	128.137	-0.603	20.294	2425.261	-0.005378	-0.004336	-0.008970
3.3100	1251.866	75.456	60.393	125.931	-0.592	20.287	2383.232	-0.005282	-0.004228	-0.008815
3.3200	1209.141	72.606	57.771	122.121	-0.599	20.294	2301.893	-0.005082	-0.004044	-0.008548
3.3300	1109.638	65.742	52.279	112.729	-0.599	20.287	2112.465	-0.004602	-0.003660	-0.007891
3.3400	1048.247	61.406	48.581	106.639	-0.599	20.294	1995.592	-0.004298	-0.003401	-0.007465
3.3500	990.192	57.138	45.041	100.692	-0.592	20.286	1885.071	-0.004000	-0.003153	-0.007048
3.3600	901.674	51.400	40.425	91.618	-0.603	20.294	1716.557	-0.003598	-0.002830	-0.006413
3.3700	813.969	45.480	35.340	81.879	-0.601	20.286	1549.587	-0.003184	-0.002474	-0.005732
3.3800	738.361	39.589	30.560	73.552	-0.603	20.294	1405.649	-0.002771	-0.002139	-0.005149
3.3900	694.117	35.852	28.211	68.565	-0.594	20.286	1321.421	-0.002510	-0.001975	-0.004800
3.4000	629.029	31.183	24.195	60.892	-0.593	20.294	1197.510	-0.002183	-0.001694	-0.004262
3.4100	534.290	24.400	19.374	49.985	-0.592	20.286	1017.151	-0.001708	-0.001356	-0.003499
3.4200	495.216	21.567	16.802	45.217	-0.596	20.294	942.764	-0.001510	-0.001176	-0.003165
3.4300	439.987	16.619	14.066	38.187	-0.595	20.286	837.622	-0.001163	-0.000985	-0.002673
3.4400	350.523	10.879	9.673	27.708	-0.600	20.294	667.305	-0.000762	-0.000677	-0.001940
3.4500	325.981	8.655	7.798	24.110	-0.605	20.286	620.584	-0.000606	-0.000546	-0.001688
3.4600	295.368	4.848	6.200	19.830	-0.599	20.293	562.305	-0.000339	-0.000434	-0.001388
3.4700	240.710	1.178	3.975	12.493	-0.604	20.286	458.250	-0.000082	-0.000278	-0.000875
3.4800	230.385	0.179	3.394	10.576	-0.609	20.293	438.595	-0.000013	-0.000238	-0.000740
3.4900	219.535	-1.083	2.323	8.645	-0.603	20.286	417.938	0.000076	-0.000163	-0.000605
3.5000	206.716	-3.213	1.878	6.585	-0.613	20.294	393.534	0.000225	-0.000131	-0.000461
3.5100	214.500	-2.322	2.087	6.808	-0.600	20.286	408.354	0.000163	-0.000146	-0.000477
3.5200	221.925	-1.821	1.991	7.211	-0.607	20.294	422.487	0.000127	-0.000139	-0.000505
3.5300	240.139	-1.251	1.975	8.867	-0.605	20.286	457.163	0.000088	-0.000138	-0.000621
3.5400	305.362	3.680	3.575	16.132	-0.607	20.294	581.331	-0.000258	-0.000250	-0.001129
3.5500	341.521	5.916	5.046	20.525	-0.600	20.286	650.167	-0.000414	-0.000353	-0.001437
3.5600	396.765	9.879	6.965	26.927	-0.608	20.294	755.339	-0.000692	-0.000488	-0.001885
3.5700	457.209	13.799	9.883	33.837	-0.605	20.286	870.409	-0.000966	-0.000692	-0.002369
3.5800	516.466	18.535	13.122	40.312	-0.601	20.293	983.219	-0.001297	-0.000919	-0.002822
3.5900	583.748	23.440	16.066	47.942	-0.597	20.286	1111.307	-0.001641	-0.001125	-0.003356
3.6000	648.912	27.483	19.721	55.335	-0.604	20.294	1235.361	-0.001924	-0.001381	-0.003873
3.6100	744.988	34.446	25.323	65.841	-0.595	20.285	1418.266	-0.002411	-0.001773	-0.004609
3.6200	822.370	40.520	29.740	74.250	-0.606	20.293	1565.580	-0.002836	-0.002082	-0.005197
3.6300	917.620	46.826	34.520	85.032	-0.595	20.285	1746.912	-0.003278	-0.002416	-0.005952
3.6400	1054.573	56.487	42.274	98.706	-0.596	20.294	2007.637	-0.003954	-0.002959	-0.006909
3.6500	1058.706	57.989	43.856	100.580	-0.601	20.286	2015.505	-0.004059	-0.003070	-0.007041
3.6600	1093.046	60.212	45.735	104.070	-0.604	20.294	2080.879	-0.004215	-0.003201	-0.007285
3.6700	1153.265	64.410	49.222	110.560	-0.590	20.286	2195.520	-0.004509	-0.003446	-0.007739
3.6800	1246.561	70.801	55.018	119.829	-0.597	20.294	2373.133	-0.004956	-0.003851	-0.008388
3.6900	1288.626	74.691	57.685	124.402	-0.604	20.286	2453.213	-0.005228	-0.004038	-0.008708
3.7000	1344.456	78.458	61.130	130.198	-0.600	20.293	2559.500	-0.005492	-0.004279	-0.009114
3.7100	1353.143	79.498	62.076	131.547	-0.604	20.285	2576.036	-0.005565	-0.004345	-0.009208
3.7200	1456.223	87.408	68.567	141.522	-0.596	20.293	2772.274	-0.006119	-0.004800	-0.009907
3.7300	1432.688	86.336	68.385	140.380	-0.601	20.286	2727.470	-0.006044	-0.004787	-0.009827
3.7400	1430.674	86.072	68.177	140.880	-0.596	20.293	2723.637	-0.006025	-0.004772	-0.009862
3.7500	1438.519	86.350	68.803	141.647	-0.599	20.285	2738.571	-0.006045	-0.004816	-0.009915
3.7600	1433.875	87.004	68.845	141.495	-0.598	20.294	2729.731	-0.006090	-0.004819	-0.009905
3.7700	1430.795	86.905	68.428	141.635	-0.602	20.285	2723.866	-0.006083	-0.004790	-0.009914
3.7800	1405.727	85.237	68.039	139.840	-0.596	20.293	2676.144	-0.005967	-0.004763	-0.009789
3.7900	1349.837	82.100	66.203	135.395	-0.593	20.285	2569.742	-0.005747	-0.004634	-0.009478
3.8000	1339.091	81.767	65.758	134.765	-0.600	20.294	2549.286	-0.005724	-0.004603	-0.009434
3.8100	1249.101	75.305	60.560	126.223	-0.595	20.285	2377.968	-0.005271	-0.004239	-0.008836
3.8200	1183.262	71.314	57.060	120.136	-0.598	20.294	2252.626	-0.004992	-0.003994	-0.008410
3.8300	1134.870	67.535	53.752	115.591	-0.598	20.285	2160.501	-0.004727	-0.003763	-0.008091
3.8400	1071.751	62.948	49.932	109.283	-0.590	20.294	2040.339	-0.004406	-0.003495	-0.007650
3.8500	999.134	57.904	45.902	102.057	-0.591	20.285	1902.094	-0.004053	-0.003213	-0.007144
3.8600	907.776	51.887	40.913	92.578	-0.598	20.294	1728.172	-0.003632	-0.002864	-0.006480
3.8700	823.106	46.467	35.785	83.377	-0.602	20.285	1566.982	-0.003253	-0.002505	-0.005836
3.8800	744.733	40.520	31.228	74.931	-0.597	20.294	1417.780	-0.002836	-0.002186	-0.005245
3.8900	683.507	35.838	27.849	67.816	-0.602	20.286	1301.222	-0.002509	-0.001949	-0.004747
3.9000	602.609	29.959	23.179	58.421	-0.600	20.294	1147.213	-0.002097	-0.001623	-0.004089
3.9100	533.869	24.539	19.500	50.513	-0.593	20.285	1016.350	-0.001718	-0.001365	-0.003536
3.9200	460.275	18.872	15.316	41.940	-0.599	20.294	876.245	-0.001321	-0.001072	-0.002936
3.9300	413.687	15.467	13.065	35.643	-0.608	20.285	787.554	-0.001083	-0.000915	-0.002495
3.9400	366.678	11.600	10.438	29.698	-0.602	20.294	698.061	-0.000812	-0.000731	-0.002079
3.9500	292.438	5.887	6.756	20.495	-0.588	20.285	556.726	-0.000412	-0.000473	-0.001435
3.9600	279.423	4.016	5.880	18.106	-0.599	20.294	531.950	-0.000281	-0.000412	-0.001267
3.9700	259.781	2.499	5.226	14.899	-0.611	20.285	494.556	-0.000175	-0.000366	-0.001043
3.9800	226.884	-0.596	3.239	10.450	-0.600	20.294	431.929	0.000042	-0.000227	-0.000732
3.9900	220.121	-1.350	2.574	8.965	-0.607	20.285	419.054	0.000094	-0.000180	-0.000628
4.0000	218.633	-1.793	2.794	8.410	-0.608	20.294	416.222	0.000126	-0.000196	-0.000589
4.0100	217.747	-1.418	2.449	7.880	-0.597	20.285	414.534	0.000099	-0.000171	-0.000552
4.0200	226.178	-1.209	2.223	8.575	-0.607	20.294	430.584	0.000085	-0.000156	-0.000600
4.0300	241.401	-1.293	2.504	9.550	-0.594	20.284	459.566	0.000090	-0.000175	-0.000668
4.0400	297.638	2.916	3.935	15.759	-0.596	20.294	566.626	-0.000204	-0.000275	-0.001103
4.0500	344.827	6.472	5.102	21.123	-0.588	20.285	656.462	-0.000453	-0.000357	-0.001479
4.0600	393.429	9.378	7.006	26.930	-0.604	20.293	748.987	-0.000656	-0.000490	-0.001885
4.0700	445.698	13.895	9.630	32.808	-0.593	20.285	848.494	-0.000973	-0.000674	-0.002297
4.0800	506.878	18.118	12.758	39.938	-0.595	20.294	964.966	-0.001268	-0.000893	-0.002796
4.0900	608.380	24.859	17.510	50.878	-0.605	20.285	1158.199	-0.001740	-0.001226	-0.003561
4.1000	660.168	28.652	20.816	56.794	-0.595	20.294	1256.790	-0.002006	-0.001457	-0.003976
4.1100	741.411	34.683	25.031	65.784	-0.604	20.285	1411.457	-0.002428	-0.001752	-0.004605
4.1200	810.542	39.769	28.684	73.455	-0.597	20.294	1543.064	-0.002784	-0.002008	-0.005142
4.1300	882.017	44.469	33.075	81.518	-0.600	20.285	1679.134	-0.003113	-0.002315	-0.005706
4.1400	977.342	51.079	38.520	91.468	-0.605	20.294	1860.609	-0.003576	-0.002696	-0.006403
4.1500	1044.474	56.582	42.442	98.706	-0.604	20.284	1988.411	-0.003961	-0.002971	-0.006909
4.1600	1103.025	60.574	46.084	105.209	-0.600	20.294	2099.876	-0.004240	-0.003226	-0.007365
4.1700	1192.219	66.964	51.558	114.175	-0.599	20.284	2269.678	-0.004687	-0.003609	-0.007992
4.1800	1223.418	70.203	53.792	117.980	-0.609	20.294	2329.073	-0.004914	-0.003765	-0.008259
4.1900	1282.269	74.497	57.463	124.081	-0.603	20.284	2441.111	-0.005215	-0.004022	-0.008686
4.2000	1345.734	78.832	61.466	130.588	-0.609	20.294	2561.932	-0.005518	-0.004303	-0.009141
4.2100	1387.287	81.974	64.633	134.669	-0.608	20.284	2641.039	-0.005738	-0.004524	-0.009427
4.2200	1416.473	84.626	66.328	138.170	-0.603	20.294	2696.600	-0.005924	-0.004643	-0.009672
4.2300	1444.425	87.019	68.261	141.369	-0.615	20.284	2749.815	-0.006091	-0.004778	-0.009896
4.2400	1452.360	87.535	69.067	142.411	-0.606	20.294	2764.921	-0.006127	-0.004835	-0.009969
4.2500	1447.161	88.046	69.430	142.231	-0.608	20.284	2755.022	-0.006163	-0.004860	-0.009956
4.2600	1438.219	87.242	69.209	142.119	-0.597	20.294	2737.999	-0.006107	-0.004845	-0.009948
4.2700	1427.939	86.949	68.803	141.507	-0.609	20.284	2718.430	-0.006086	-0.004816	-0.009905
4.2800	1370.546	83.710	67.594	137.229	-0.610	20.293	2609.167	-0.005860	-0.004732	-0.009606
4.2900	1350.648	82.043	66.536	135.825	-0.603	20.284	2571.287	-0.005743	-0.004658	-0.009508
4.3000	1316.143	79.957	64.399	132.735	-0.606	20.294	2505.598	-0.005597	-0.004508	-0.009291
4.3100	1228.858	74.428	59.810	125.084	-0.590	20.284	2339.430	-0.005210	-0.004187	-0.008756
4.3200	1201.897	72.037	58.117	122.037	-0.613	20.294	2288.103	-0.005043	-0.004068	-0.008543
4.3300	1122.547	67.091	53.489	114.868	-0.603	20.284	2137.041	-0.004696	-0.003744	-0.008041
4.3400	1087.546	63.657	50.793	110.906	-0.604	20.294	2070.408	-0.004456	-0.003555	-0.007763
4.3500	971.331	55.986	45.024	100.039	-0.595	20.284	1849.165	-0.003919	-0.003152	-0.007003
4.3600	894.010	51.051	40.344	91.731	-0.609	20.294	1701.965	-0.003574	-0.002824	-0.006421
4.3700	857.070	48.108	37.255	86.703	-0.602	20.283	1631.641	-0.003368	-0.002608	-0.006069
4.3800	755.147	40.826	32.296	76.474	-0.597	20.294	1437.607	-0.002858	-0.002261	-0.005353
4.3900	656.997	34.557	27.029	65.479	-0.593	20.284	1250.753	-0.002419	-0.001892	-0.004584
4.4000	600.731	29.847	23.447	58.952	-0.599	20.294	1143.637	-0.002089	-0.001641	-0.004127
4.4100	546.824	25.487	20.180	52.209	-0.595	20.283	1041.012	-0.001784	-0.001413	-0.003655
4.4200	476.401	20.398	17.052	43.928	-0.593	20.294	906.944	-0.001428	-0.001194	-0.003075
4.4300	420.194	16.175	13.566	36.865	-0.590	20.283	799.942	-0.001132	-0.000950	-0.002581
4.4400	366.663	12.004	10.494	30.099	-0.595	20.294	698.032	-0.000840	-0.000735	-0.002107
4.4500	263.944	3.739	5.894	17.272	-0.596	20.283	502.481	-0.000262	-0.000413	-0.001209
4.4600	261.554	3.209	5.324	16.089	-0.600	20.293	497.932	-0.000225	-0.000373	-0.001126
4.4700	234.639	0.887	3.728	12.032	-0.595	20.283	446.692	-0.000062	-0.000261	-0.000842
4.4800	217.852	-0.915	2.824	9.145	-0.605	20.293	414.734	0.000064	-0.000198	-0.000640
4.4900	222.691	-0.890	2.964	9.229	-0.593	20.283	423.946	0.000062	-0.000207	-0.000646
4.5000	211.525	-1.975	2.504	7.712	-0.597	20.294	402.689	0.000138	-0.000175	-0.000540
4.5100	221.579	-1.807	2.268	8.230	-0.600	20.284	421.829	0.000126	-0.000159	-0.000576
4.5200	227.831	-1.795	2.280	8.435	-0.594	20.294	433.731	0.000126	-0.000160	-0.000590
4.5300	235.540	-1.210	2.546	9.035	-0.592	20.283	448.408	0.000085	-0.000178	-0.000632
4.5400	289.462	2.347	3.270	14.578	-0.593	20.294	551.062	-0.000164	-0.000229	-0.001020
4.5500	338.229	6.069	4.601	20.594	-0.597	20.283	643.902	-0.000425	-0.000322	-0.001442
4.5600	380.068	8.948	6.813	25.320	-0.603	20.294	723.553	-0.000626	-0.000477	-0.001772
4.5700	509.102	18.035	12.661	39.647	-0.605	20.283	969.200	-0.001262	-0.000886	-0.002775
4.5800	514.122	18.633	13.468	41.065	-0.596	20.294	978.756	-0.001304	-0.000943	-0.002875
4.5900	608.365	24.969	17.801	51.221	-0.601	20.283	1158.171	-0.001748	-0.001246	-0.003585
4.6000	675.136	30.098	21.512	58.588	-0.602	20.294	1285.286	-0.002107	-0.001506	-0.004101
4.6100	728.682	34.239	24.515	64.883	-0.607	20.283	1387.224	-0.002397	-0.001716	-0.004542
4.6200	828.727	40.575	29.935	75.694	-0.607	20.294	1577.682	-0.002840	-0.002095	-0.005299
4.6300	889.005	45.119	33.825	82.490	-0.593	20.283	1692.438	-0.003158	-0.002368	-0.005774
4.6400	959.910	50.830	37.647	90.034	-0.600	20.294	1827.421	-0.003558	-0.002635	-0.006302
4.6500	1033.909	55.986	42.025	97.960	-0.616	20.283	1968.298	-0.003919	-0.002942	-0.006857
4.6600	1119.541	61.796	47.193	106.835	-0.600	20.294	2131.319	-0.004326	-0.003304	-0.007478
4.6700	1163.424	65.576	50.376	112.156	-0.608	20.283	2214.861	-0.004590	-0.003526	-0.007851
4.6800	1228.948	69.996	54.196	118.605	-0.603	20.294	2339.602	-0.004900	-0.003794	-0.008302
4.6900	1281.578	73.744	57.255	124.219	-0.601	20.283	2439.795	-0.005162	-0.004008	-0.008695
4.7000	1327.309	77.332	60.796	129.082	-0.608	20.294	2526.855	-0.005413	-0.004256	-0.009036
4.7100	1389.707	82.658	64.663	135.282	-0.601	20.283	2645.645	-0.005786	-0.004526	-0.009470
4.7200	1404.029	83.515	65.689	137.271	-0.605	20.294	2672.911	-0.005846	-0.004598	-0.009609
4.7300	1411.633	84.432	66.494	138.532	-0.595	20.283	2687.387	-0.005910	-0.004655	-0.009697
4.7400	1461.783	88.588	69.915	143.521	-0.607	20.294	2782.860	-0.006201	-0.004894	-0.010046
4.7500	1447.957	87.796	69.611	142.857	-0.604	20.283	2756.538	-0.006146	-0.004873	-0.010000
4.7600	1437.708	87.408	69.236	142.330	-0.616	20.294	2737.026	-0.006119	-0.004847	-0.009963
4.7700	1427.368	87.130	69.403	141.981	-0.618	20.283	2717.342	-0.006099	-0.004858	-0.009939
4.7800	1398.649	85.489	68.761	139.769	-0.615	20.294	2662.668	-0.005984	-0.004813	-0.009784
4.7900	1334.883	81.613	65.396	134.418	-0.610	20.283	2541.275	-0.005713	-0.004578	-0.009409
4.8000	1297.072	78.845	63.246	131.060	-0.595	20.294	2469.292	-0.005519	-0.004427	-0.009174
4.8100	1276.167	77.582	62.395	129.054	-0.606	20.283	2429.495	-0.005431	-0.004368	-0.009034
4.8200	1204.362	73.120	58.160	122.441	-0.612	20.294	2292.795	-0.005118	-0.004071	-0.008571
4.8300	1143.602	68.410	54.251	116.755	-0.600	20.283	2177.124	-0.004789	-0.003798	-0.008173
4.8400	1062.584	62.780	50.070	109.254	-0.596	20.294	2022.886	-0.004395	-0.003505	-0.007648
4.8500	975.314	56.889	44.886	100.498	-0.607	20.283	1856.747	-0.003982	-0.003142	-0.007035
4.8600	897.466	51.511	40.315	91.801	-0.607	20.294	1708.546	-0.003606	-0.002822	-0.006426
4.8700	819.694	45.854	35.883	83.725	-0.607	20.283	1560.488	-0.003210	-0.002512	-0.005861
4.8800	747.062	40.604	31.938	75.654	-0.604	20.294	1422.215	-0.002842	-0.002236	-0.005296
4.8900	674.189	35.473	27.558	67.105	-0.610	20.282	1283.484	-0.002483	-0.001929	-0.004697
4.9000	603.180	30.044	23.599	59.243	-0.599	20.294	1148.300	-0.002103	-0.001652	-0.004147
4.9100	545.982	25.970	20.375	52.419	-0.610	20.283	1039.410	-0.001818	-0.001426	-0.003669
4.9200	476.806	20.790	16.677	43.787	-0.607	20.294	907.717	-0.001455	-0.001167	-0.003065
4.9300	422.253	16.161	13.246	37.423	-0.596	20.283	803.862	-0.001131	-0.000927	-0.002620
4.9400	347.081	10.725	9.700	28.182	-0.601	20.294	660.753	-0.000751	-0.000679	-0.001973
4.9500	322.465	8.449	8.537	24.430	-0.605	20.283	613.890	-0.000591	-0.000598	-0.001710
4.9600	262.050	3.736	5.672	16.758	-0.614	20.293	498.877	-0.000261	-0.000397	-0.001173
4.9700	248.931	2.025	4.557	14.176	-0.609	20.282	473.900	-0.000142	-0.000319	-0.000992
4.9800	225.261	0.235	3.560	10.893	-0.614	20.293	428.839	-0.000016	-0.000249	-0.000763
4.9900	212.817	-1.308	2.698	8.477	-0.615	20.282	405.149	0.000092	-0.000189	-0.000593
Test Cycles
Time (sec)	Axial stress (kPa)	Axial micro-strain #1	Axial micro-strain #2	Axial micro-strain #3	Confining pressure (kPa)	Temperature (�C)	Load (N)	Displacement #1 (mm)	Displacement #2 (mm)	Displacement #3 (mm)
0.0000	216.304	-1.306	2.392	8.520	-0.600	20.295	411.787	0.000091	-0.000167	-0.000596
0.0100	220.632	-1.377	2.476	8.715	-0.607	20.282	420.027	0.000096	-0.000173	-0.000610
0.0200	231.122	-0.683	2.686	9.297	-0.615	20.294	439.997	0.000048	-0.000188	-0.000651
0.0300	299.035	4.097	3.853	16.578	-0.604	20.282	569.286	-0.000287	-0.000270	-0.001160
0.0400	294.376	3.111	3.685	16.286	-0.620	20.294	560.417	-0.000218	-0.000258	-0.001140
0.0500	353.603	6.933	5.949	22.691	-0.608	20.282	673.170	-0.000485	-0.000416	-0.001588
0.0600	407.811	11.252	8.285	29.057	-0.608	20.294	776.367	-0.000788	-0.000580	-0.002034
0.0700	459.448	14.979	10.619	35.076	-0.599	20.282	874.672	-0.001049	-0.000743	-0.002455
0.0800	508.110	18.202	12.828	40.118	-0.605	20.294	967.312	-0.001274	-0.000898	-0.002808
0.0900	574.491	23.217	16.705	47.846	-0.606	20.282	1093.683	-0.001625	-0.001169	-0.003349
0.1000	641.202	28.122	19.986	55.139	-0.601	20.294	1220.684	-0.001969	-0.001399	-0.003860
0.1100	737.865	34.378	25.016	65.827	-0.605	20.282	1404.705	-0.002406	-0.001751	-0.004608
0.1200	817.651	40.283	29.421	74.527	-0.593	20.294	1556.597	-0.002820	-0.002059	-0.005217
0.1300	889.712	45.451	33.797	82.724	-0.604	20.282	1693.783	-0.003182	-0.002366	-0.005791
0.1400	970.399	51.261	38.202	91.562	-0.593	20.294	1847.391	-0.003588	-0.002674	-0.006409
0.1500	1046.308	56.693	42.914	99.470	-0.596	20.282	1991.901	-0.003968	-0.003004	-0.006963
0.1600	1135.607	63.367	48.637	108.769	-0.595	20.294	2161.903	-0.004436	-0.003405	-0.007614
0.1700	1174.425	66.256	51.016	113.257	-0.601	20.282	2235.804	-0.004638	-0.003571	-0.007928
0.1800	1221.254	69.828	53.723	118.411	-0.613	20.294	2324.953	-0.004888	-0.003761	-0.008289
0.1900	1283.276	74.692	57.908	124.639	-0.604	20.282	2443.027	-0.005228	-0.004054	-0.008725
0.2000	1336.371	78.582	61.438	130.044	-0.604	20.294	2544.107	-0.005501	-0.004301	-0.009103
0.2100	1390.519	82.476	64.757	135.630	-0.612	20.282	2647.190	-0.005773	-0.004533	-0.009494
0.2200	1419.163	84.390	66.842	138.866	-0.620	20.294	2701.721	-0.005907	-0.004679	-0.009721
0.2300	1455.171	87.879	69.180	142.579	-0.613	20.282	2770.271	-0.006152	-0.004843	-0.009980
0.2400	1453.172	87.781	69.501	142.967	-0.612	20.294	2766.466	-0.006145	-0.004865	-0.010008
0.2500	1445.147	87.575	69.320	142.760	-0.600	20.282	2751.188	-0.006130	-0.004852	-0.009993
0.2600	1431.982	86.935	69.389	142.162	-0.598	20.294	2726.126	-0.006085	-0.004857	-0.009951
0.2700	1416.307	86.545	69.154	141.257	-0.597	20.282	2696.285	-0.006058	-0.004841	-0.009888
0.2800	1388.415	84.652	68.081	138.895	-0.613	20.294	2643.185	-0.005926	-0.004766	-0.009723
0.2900	1367.330	82.850	67.662	137.408	-0.608	20.282	2603.045	-0.005800	-0.004736	-0.009619
0.3000	1307.216	79.694	64.398	132.349	-0.600	20.294	2488.604	-0.005579	-0.004508	-0.009264
0.3100	1227.265	74.594	59.755	125.068	-0.589	20.282	2336.397	-0.005222	-0.004183	-0.008755
0.3200	1198.996	71.899	57.963	122.191	-0.588	20.295	2282.581	-0.005033	-0.004057	-0.008553
0.3300	1126.905	67.422	53.682	115.257	-0.584	20.282	2145.338	-0.004720	-0.003758	-0.008068
0.3400	1064.808	63.267	50.195	109.241	-0.599	20.295	2027.121	-0.004429	-0.003514	-0.007647
0.3500	973.691	56.957	44.678	100.108	-0.588	20.282	1853.657	-0.003987	-0.003127	-0.007008
0.3600	913.592	52.720	41.359	93.730	-0.595	20.294	1739.244	-0.003690	-0.002895	-0.006561
0.3700	839.592	47.468	37.201	85.574	-0.599	20.282	1598.368	-0.003323	-0.002604	-0.005990
0.3800	731.448	39.782	31.104	74.095	-0.600	20.294	1392.488	-0.002785	-0.002177	-0.005187
0.3900	668.674	34.780	27.182	67.079	-0.589	20.282	1272.984	-0.002435	-0.001903	-0.004696
0.4000	613.099	30.514	24.167	60.299	-0.597	20.295	1167.183	-0.002136	-0.001692	-0.004221
0.4100	525.649	24.845	19.584	50.624	-0.587	20.281	1000.700	-0.001739	-0.001371	-0.003544
0.4200	461.868	19.883	15.649	42.540	-0.599	20.294	879.278	-0.001392	-0.001095	-0.002978
0.4300	414.378	15.758	13.053	36.270	-0.593	20.281	788.870	-0.001103	-0.000914	-0.002539
0.4400	362.410	11.780	10.687	29.906	-0.589	20.294	689.936	-0.000825	-0.000748	-0.002093
0.4500	298.735	7.319	7.369	21.845	-0.595	20.281	568.714	-0.000512	-0.000516	-0.001529
0.4600	278.987	4.793	6.172	18.635	-0.589	20.294	531.120	-0.000336	-0.000432	-0.001304
0.4700	259.706	2.598	5.226	15.786	-0.592	20.282	494.413	-0.000182	-0.000366	-0.001105
0.4800	230.370	0.553	3.796	11.477	-0.594	20.294	438.566	-0.000039	-0.000266	-0.000803
0.4900	225.381	0.055	3.409	10.324	-0.603	20.282	429.068	-0.000004	-0.000239	-0.000723
0.5000	220.903	-0.820	2.671	9.368	-0.595	20.295	420.542	0.000057	-0.000187	-0.000656
0.5100	226.643	-1.084	3.171	9.573	-0.592	20.282	431.471	0.000076	-0.000222	-0.000670
0.5200	234.098	-0.653	2.852	10.131	-0.598	20.294	445.662	0.000046	-0.000200	-0.000709
0.5300	242.483	-0.625	2.531	10.965	-0.588	20.282	461.626	0.000044	-0.000177	-0.000768
0.5400	320.736	5.140	4.600	19.205	-0.587	20.294	610.600	-0.000360	-0.000322	-0.001344
0.5500	346.705	7.335	6.088	22.262	-0.590	20.282	660.038	-0.000513	-0.000426	-0.001558
0.5600	400.973	10.767	7.617	28.306	-0.591	20.294	763.350	-0.000754	-0.000533	-0.001981
0.5700	471.576	15.633	10.895	36.340	-0.598	20.281	897.760	-0.001094	-0.000763	-0.002544
0.5800	529.105	20.147	13.984	42.914	-0.608	20.294	1007.280	-0.001410	-0.000979	-0.003004
0.5900	604.187	24.969	18.053	51.083	-0.603	20.281	1150.217	-0.001748	-0.001264	-0.003576
0.6000	703.690	31.835	23.179	62.242	-0.601	20.295	1339.645	-0.002228	-0.001622	-0.004357
0.6100	744.432	34.935	26.031	66.992	-0.606	20.281	1417.208	-0.002445	-0.001822	-0.004689
0.6200	818.357	40.144	29.587	74.931	-0.604	20.295	1557.941	-0.002810	-0.002071	-0.005245
0.6300	907.310	47.203	34.700	84.726	-0.607	20.281	1727.285	-0.003304	-0.002429	-0.005931
0.6400	989.546	52.053	39.257	93.315	-0.592	20.294	1883.841	-0.003644	-0.002748	-0.006532
0.6500	1052.920	57.305	43.592	100.469	-0.600	20.281	2004.490	-0.004011	-0.003051	-0.007033
0.6600	1097.419	60.851	46.194	105.321	-0.597	20.295	2089.205	-0.004260	-0.003234	-0.007372
0.6700	1183.066	66.922	51.293	114.091	-0.596	20.281	2252.254	-0.004685	-0.003591	-0.007986
0.6800	1272.891	73.300	57.212	123.038	-0.595	20.295	2423.258	-0.005131	-0.004005	-0.008613
0.6900	1278.437	74.414	57.977	124.317	-0.601	20.281	2433.815	-0.005209	-0.004058	-0.008702
0.7000	1321.403	77.833	60.548	129.180	-0.597	20.294	2515.612	-0.005448	-0.004238	-0.009043
0.7100	1390.293	82.460	65.092	135.881	-0.582	20.281	2646.761	-0.005772	-0.004556	-0.009512
0.7200	1396.500	83.488	65.799	136.868	-0.599	20.295	2658.577	-0.005844	-0.004606	-0.009581
0.7300	1461.483	88.394	69.764	143.481	-0.597	20.281	2782.288	-0.006188	-0.004883	-0.010044
0.7400	1454.705	87.866	69.693	143.270	-0.601	20.295	2769.384	-0.006151	-0.004879	-0.010029
0.7500	1451.849	87.962	69.984	143.578	-0.594	20.281	2763.948	-0.006157	-0.004899	-0.010050
0.7600	1429.487	87.296	69.598	141.911	-0.596	20.294	2721.376	-0.006111	-0.004872	-0.009934
0.7700	1416.698	86.684	69.068	141.369	-0.590	20.281	2697.029	-0.006068	-0.004835	-0.009896
0.7800	1391.375	84.779	68.454	139.352	-0.597	20.294	2648.821	-0.005935	-0.004792	-0.009755
0.7900	1357.591	83.002	67.260	136.839	-0.587	20.281	2584.505	-0.005810	-0.004708	-0.009579
0.8000	1307.907	80.109	64.607	132.696	-0.597	20.295	2489.920	-0.005608	-0.004523	-0.009289
0.8100	1239.107	75.358	60.298	126.110	-0.605	20.280	2358.942	-0.005275	-0.004221	-0.008828
0.8200	1173.463	70.677	56.531	120.094	-0.586	20.295	2233.973	-0.004947	-0.003957	-0.008407
0.8300	1110.810	66.841	52.989	114.133	-0.593	20.282	2114.697	-0.004679	-0.003709	-0.007989
0.8400	1046.188	61.835	48.889	107.503	-0.596	20.295	1991.673	-0.004328	-0.003422	-0.007525
0.8500	964.523	56.612	44.373	99.360	-0.601	20.281	1836.205	-0.003963	-0.003106	-0.006955
0.8600	931.100	53.695	42.316	95.092	-0.590	20.295	1772.575	-0.003759	-0.002962	-0.006656
0.8700	820.205	46.342	36.258	84.032	-0.595	20.281	1561.460	-0.003244	-0.002538	-0.005882
0.8800	725.361	39.339	30.727	73.609	-0.591	20.294	1380.901	-0.002754	-0.002151	-0.005153
0.8900	683.883	35.878	28.405	68.343	-0.589	20.281	1301.937	-0.002511	-0.001988	-0.004784
0.9000	603.135	30.182	23.765	59.340	-0.595	20.295	1148.214	-0.002113	-0.001664	-0.004154
0.9100	516.211	23.746	18.762	49.250	-0.595	20.281	982.733	-0.001662	-0.001313	-0.003448
0.9200	469.668	20.106	16.190	43.676	-0.595	20.295	894.127	-0.001407	-0.001133	-0.003057
0.9300	403.378	14.839	13.134	35.505	-0.608	20.281	767.927	-0.001039	-0.000919	-0.002485
0.9400	362.485	11.779	10.716	30.043	-0.595	20.295	690.079	-0.000825	-0.000750	-0.002103
0.9500	300.313	7.124	7.159	21.926	-0.593	20.281	571.718	-0.000499	-0.000501	-0.001535
0.9600	273.262	4.667	5.963	17.996	-0.601	20.295	520.220	-0.000327	-0.000417	-0.001260
0.9700	259.961	3.112	5.352	15.729	-0.603	20.281	494.900	-0.000218	-0.000375	-0.001101
0.9800	236.352	0.763	3.866	12.451	-0.599	20.295	449.953	-0.000053	-0.000271	-0.000872
0.9900	205.814	-2.016	2.449	7.963	-0.597	20.281	391.817	0.000141	-0.000171	-0.000557
1.0000	211.495	-1.250	2.505	8.089	-0.600	20.296	402.632	0.000087	-0.000175	-0.000566
1.0100	214.891	-1.306	2.407	8.019	-0.600	20.281	409.098	0.000091	-0.000169	-0.000561
1.0200	221.669	-1.642	2.392	8.575	-0.606	20.295	422.001	0.000115	-0.000167	-0.000600
1.0300	254.822	-0.002	2.950	11.672	-0.600	20.280	485.115	0.000000	-0.000206	-0.000817
1.0400	328.190	5.695	4.963	19.693	-0.595	20.295	624.790	-0.000399	-0.000347	-0.001378
1.0500	371.006	9.004	6.520	25.152	-0.593	20.281	706.301	-0.000630	-0.000456	-0.001761
1.0600	385.494	9.629	7.227	26.707	-0.593	20.295	733.881	-0.000674	-0.000506	-0.001869
1.0700	482.081	16.577	11.784	37.562	-0.594	20.281	917.759	-0.001160	-0.000825	-0.002629
1.0800	506.878	18.590	13.136	40.577	-0.598	20.295	964.966	-0.001301	-0.000920	-0.002840
1.0900	591.984	24.274	17.038	49.666	-0.612	20.281	1126.986	-0.001699	-0.001193	-0.003477
1.1000	690.285	31.294	22.567	60.808	-0.593	20.295	1314.125	-0.002191	-0.001580	-0.004257
1.1100	741.697	35.335	25.670	66.759	-0.589	20.280	1412.001	-0.002473	-0.001797	-0.004673
1.1200	822.204	40.506	29.698	75.235	-0.583	20.295	1565.266	-0.002835	-0.002079	-0.005266
1.1300	880.094	45.283	33.437	81.950	-0.585	20.280	1675.472	-0.003170	-0.002341	-0.005736
1.1400	965.410	51.148	38.382	90.909	-0.591	20.295	1837.893	-0.003580	-0.002687	-0.006364
1.1500	1043.708	57.111	42.774	99.262	-0.593	20.281	1986.952	-0.003998	-0.002994	-0.006948
1.1600	1115.048	62.252	46.917	106.850	-0.589	20.295	2122.765	-0.004358	-0.003284	-0.007479
1.1700	1186.808	66.908	51.682	114.356	-0.586	20.281	2259.378	-0.004684	-0.003618	-0.008005
1.1800	1259.606	72.592	56.226	122.260	-0.588	20.295	2397.966	-0.005081	-0.003936	-0.008558
1.1900	1314.039	76.931	59.630	127.665	-0.592	20.280	2501.593	-0.005385	-0.004174	-0.008937
1.2000	1386.701	82.073	64.204	134.989	-0.588	20.296	2639.923	-0.005745	-0.004494	-0.009449
1.2100	1392.397	82.975	65.259	136.450	-0.591	20.280	2650.766	-0.005808	-0.004568	-0.009552
1.2200	1431.711	86.474	68.246	140.422	-0.594	20.295	2725.611	-0.006053	-0.004777	-0.009830
1.2300	1431.501	86.004	68.066	140.882	-0.593	20.280	2725.210	-0.006020	-0.004765	-0.009862
1.2400	1444.576	87.531	69.235	142.327	-0.597	20.295	2750.101	-0.006127	-0.004846	-0.009963
1.2500	1456.974	88.587	70.246	143.869	-0.589	20.280	2773.705	-0.006201	-0.004917	-0.010071
1.2600	1465.691	89.671	71.010	145.285	-0.593	20.295	2790.298	-0.006277	-0.004971	-0.010170
1.2700	1454.104	89.129	70.927	144.509	-0.596	20.280	2768.240	-0.006239	-0.004965	-0.010116
1.2800	1358.268	83.336	67.552	137.061	-0.587	20.294	2585.793	-0.005834	-0.004729	-0.009594
1.2900	1341.346	82.500	66.341	135.630	-0.582	20.280	2553.577	-0.005775	-0.004644	-0.009494
1.3000	1326.843	81.224	65.230	134.113	-0.591	20.295	2525.969	-0.005686	-0.004566	-0.009388
1.3100	1236.958	74.998	60.365	126.098	-0.600	20.280	2354.851	-0.005250	-0.004226	-0.008827
1.3200	1228.091	73.871	59.657	124.748	-0.588	20.295	2337.971	-0.005171	-0.004176	-0.008732
1.3300	1116.941	67.576	53.266	115.148	-0.592	20.280	2126.369	-0.004730	-0.003729	-0.008060
1.3400	1012.359	59.963	47.458	104.765	-0.595	20.295	1927.271	-0.004197	-0.003322	-0.007334
1.3500	966.131	56.584	44.778	99.680	-0.587	20.280	1839.266	-0.003961	-0.003134	-0.006978
1.3600	874.293	50.204	39.201	89.936	-0.593	20.296	1664.429	-0.003514	-0.002744	-0.006296
1.3700	841.005	47.273	37.144	85.883	-0.592	20.280	1601.057	-0.003309	-0.002600	-0.006012
1.3800	749.617	40.951	32.296	76.294	-0.601	20.294	1427.078	-0.002867	-0.002261	-0.005341
1.3900	654.622	34.279	26.822	65.662	-0.582	20.280	1246.233	-0.002400	-0.001878	-0.004596
1.4000	613.054	31.182	24.002	60.506	-0.601	20.296	1167.097	-0.002183	-0.001680	-0.004235
1.4100	527.091	24.219	19.473	50.861	-0.589	20.281	1003.447	-0.001695	-0.001363	-0.003560
1.4200	472.493	20.428	16.594	44.245	-0.585	20.295	899.506	-0.001430	-0.001162	-0.003097
1.4300	394.751	15.243	12.315	34.616	-0.588	20.280	751.505	-0.001067	-0.000862	-0.002423
1.4400	346.089	10.740	9.590	28.139	-0.591	20.295	658.865	-0.000752	-0.000671	-0.001970
1.4500	336.997	9.754	8.953	26.429	-0.603	20.280	641.556	-0.000683	-0.000627	-0.001850
1.4600	265.026	4.335	5.726	17.423	-0.596	20.295	504.541	-0.000303	-0.000401	-0.001220
1.4700	249.802	2.500	4.615	14.952	-0.595	20.280	475.559	-0.000175	-0.000323	-0.001047
1.4800	216.499	-0.349	3.170	10.102	-0.589	20.295	412.159	0.000024	-0.000222	-0.000707
1.4900	199.713	-1.989	2.338	7.113	-0.601	20.281	380.201	0.000139	-0.000164	-0.000498
1.5000	205.438	-2.239	2.114	7.251	-0.600	20.296	391.102	0.000157	-0.000148	-0.000508
1.5100	213.959	-1.974	2.059	7.808	-0.601	20.280	407.324	0.000138	-0.000144	-0.000547
1.5200	230.340	-1.363	2.337	9.187	-0.600	20.295	438.509	0.000095	-0.000164	-0.000643
1.5300	253.319	0.400	2.644	11.465	-0.598	20.279	482.254	-0.000028	-0.000185	-0.000803
1.5400	287.689	2.388	3.325	15.521	-0.594	20.295	547.686	-0.000167	-0.000233	-0.001086
1.5500	351.890	6.906	5.603	22.608	-0.604	20.280	669.909	-0.000483	-0.000392	-0.001583
1.5600	381.376	9.546	7.118	26.280	-0.604	20.295	726.042	-0.000668	-0.000498	-0.001840
1.5700	450.702	14.436	10.353	34.086	-0.604	20.280	858.021	-0.001011	-0.000725	-0.002386
1.5800	529.796	19.759	13.791	43.012	-0.603	20.296	1008.596	-0.001383	-0.000965	-0.003011
1.5900	626.895	26.514	18.972	53.642	-0.596	20.280	1193.447	-0.001856	-0.001328	-0.003755
1.6000	684.799	31.628	22.221	60.408	-0.593	20.296	1303.682	-0.002214	-0.001556	-0.004229
1.6100	736.317	34.919	24.974	66.245	-0.593	20.280	1401.758	-0.002444	-0.001748	-0.004637
1.6200	851.119	43.050	31.464	78.486	-0.593	20.296	1620.312	-0.003013	-0.002202	-0.005494
1.6300	891.500	45.730	33.966	83.100	-0.588	20.279	1697.187	-0.003201	-0.002378	-0.005817
1.6400	959.429	51.051	38.008	90.480	-0.596	20.296	1826.506	-0.003574	-0.002661	-0.006334
1.6500	1041.078	56.513	42.415	99.290	-0.601	20.280	1981.945	-0.003956	-0.002969	-0.006950
1.6600	1097.044	60.672	46.318	105.402	-0.598	20.295	2088.490	-0.004247	-0.003242	-0.007378
1.6700	1208.359	68.952	52.947	116.994	-0.599	20.280	2300.406	-0.004827	-0.003706	-0.008190
1.6800	1271.869	73.288	56.656	123.177	-0.604	20.295	2421.312	-0.005130	-0.003966	-0.008622
1.6900	1305.563	76.067	59.117	127.124	-0.600	20.280	2485.456	-0.005325	-0.004138	-0.008899
1.7000	1364.670	80.708	63.313	132.943	-0.603	20.295	2597.980	-0.005650	-0.004432	-0.009306
1.7100	1393.164	83.322	65.342	136.381	-0.604	20.280	2652.225	-0.005833	-0.004574	-0.009547
1.7200	1457.485	87.130	68.860	142.564	-0.596	20.295	2774.677	-0.006099	-0.004820	-0.009979
1.7300	1444.305	87.269	69.222	142.288	-0.603	20.280	2749.586	-0.006109	-0.004846	-0.009960
1.7400	1430.103	86.823	69.053	141.645	-0.606	20.295	2722.549	-0.006078	-0.004834	-0.009915
1.7500	1417.735	86.279	68.789	141.145	-0.604	20.280	2699.003	-0.006040	-0.004815	-0.009880
1.7600	1431.065	86.812	69.236	142.092	-0.617	20.295	2724.380	-0.006077	-0.004847	-0.009946
1.7700	1432.793	87.477	69.485	142.300	-0.609	20.279	2727.671	-0.006123	-0.004864	-0.009961
1.7800	1409.559	86.365	68.621	141.077	-0.600	20.295	2683.439	-0.006046	-0.004803	-0.009875
1.7900	1344.096	82.573	66.161	136.087	-0.604	20.279	2558.813	-0.005780	-0.004631	-0.009526
1.8000	1302.257	79.429	64.009	132.307	-0.593	20.296	2479.162	-0.005560	-0.004481	-0.009261
1.8100	1210.403	73.842	59.061	123.761	-0.589	20.280	2304.296	-0.005169	-0.004134	-0.008663
1.8200	1205.384	72.315	57.854	122.843	-0.594	20.295	2294.741	-0.005062	-0.004050	-0.008599
1.8300	1101.056	65.604	52.363	113.397	-0.586	20.280	2096.128	-0.004592	-0.003665	-0.007938
1.8400	1046.278	62.279	49.277	107.711	-0.595	20.295	1991.844	-0.004360	-0.003449	-0.007540
1.8500	954.650	56.000	43.969	98.526	-0.587	20.279	1817.408	-0.003920	-0.003078	-0.006897
1.8600	897.451	51.275	40.301	92.261	-0.590	20.295	1708.517	-0.003589	-0.002821	-0.006458
1.8700	794.522	44.342	34.952	81.433	-0.601	20.279	1512.566	-0.003104	-0.002447	-0.005700
1.8800	764.706	41.936	32.769	77.570	-0.597	20.296	1455.803	-0.002936	-0.002294	-0.005430
1.8900	669.861	35.405	27.515	67.689	-0.603	20.279	1275.244	-0.002478	-0.001926	-0.004738
1.9000	606.577	30.555	23.876	60.018	-0.608	20.295	1154.766	-0.002139	-0.001671	-0.004201
1.9100	521.501	24.553	19.429	50.402	-0.596	20.279	992.804	-0.001719	-0.001360	-0.003528
1.9200	509.538	22.816	18.193	48.264	-0.583	20.295	970.030	-0.001597	-0.001274	-0.003379
1.9300	419.864	16.272	13.470	37.785	-0.602	20.279	799.313	-0.001139	-0.000943	-0.002645
1.9400	347.276	10.868	9.908	28.723	-0.596	20.296	661.125	-0.000761	-0.000694	-0.002011
1.9500	312.681	8.267	8.204	23.789	-0.598	20.279	595.264	-0.000579	-0.000574	-0.001665
1.9600	274.629	4.862	6.075	18.621	-0.600	20.295	522.823	-0.000340	-0.000425	-0.001303
1.9700	256.520	2.709	4.725	15.828	-0.599	20.279	488.348	-0.000190	-0.000331	-0.001108
1.9800	232.219	0.803	3.839	12.422	-0.596	20.296	442.085	-0.000056	-0.000269	-0.000870
1.9900	223.668	0.013	3.409	10.740	-0.585	20.279	425.806	-0.000001	-0.000239	-0.000752
2.0000	220.392	-0.709	2.742	9.561	-0.595	20.296	419.569	0.000050	-0.000192	-0.000669
2.0100	222.676	-1.070	2.767	9.325	-0.603	20.279	423.918	0.000075	-0.000194	-0.000653
2.0200	228.883	-0.749	2.839	10.047	-0.603	20.295	435.734	0.000052	-0.000199	-0.000703
2.0300	254.431	0.538	3.116	12.227	-0.583	20.279	484.371	-0.000038	-0.000218	-0.000856
2.0400	271.278	1.177	3.353	14.119	-0.601	20.295	516.443	-0.000082	-0.000235	-0.000988
2.0500	326.823	5.471	4.906	20.164	-0.597	20.279	622.187	-0.000383	-0.000343	-0.001411
2.0600	406.999	11.294	8.106	29.057	-0.595	20.295	774.822	-0.000791	-0.000567	-0.002034
2.0700	445.788	13.867	9.714	33.557	-0.593	20.279	848.665	-0.000971	-0.000680	-0.002349
2.0800	539.249	20.761	14.553	44.358	-0.602	20.295	1026.592	-0.001453	-0.001019	-0.003105
2.0900	609.432	26.013	18.401	52.152	-0.604	20.279	1160.202	-0.001821	-0.001288	-0.003651
2.1000	666.420	29.596	21.262	58.936	-0.599	20.295	1268.692	-0.002072	-0.001488	-0.004126
2.1100	752.683	35.850	26.141	67.718	-0.605	20.279	1432.915	-0.002510	-0.001830	-0.004740
2.1200	846.054	42.716	31.451	78.221	-0.597	20.295	1610.670	-0.002990	-0.002202	-0.005475
2.1300	904.004	47.261	34.742	84.838	-0.605	20.279	1720.991	-0.003308	-0.002432	-0.005939
2.1400	954.845	50.565	37.562	90.549	-0.604	20.296	1817.780	-0.003540	-0.002629	-0.006338
2.1500	1076.350	59.267	45.386	103.071	-0.611	20.279	2049.093	-0.004149	-0.003177	-0.007215
2.1600	1112.944	62.280	47.401	107.184	-0.608	20.295	2118.759	-0.004360	-0.003318	-0.007503
2.1700	1185.291	67.243	51.503	114.980	-0.596	20.278	2256.489	-0.004707	-0.003605	-0.008049
2.1800	1266.940	72.954	56.756	122.802	-0.597	20.296	2411.928	-0.005107	-0.003973	-0.008596
2.1900	1303.940	76.262	59.547	127.344	-0.603	20.278	2482.367	-0.005338	-0.004168	-0.008914
2.2000	1368.968	80.916	63.622	133.807	-0.593	20.295	2606.163	-0.005664	-0.004454	-0.009367
2.2100	1364.805	81.377	63.606	133.973	-0.596	20.278	2598.238	-0.005696	-0.004452	-0.009378
2.2200	1424.573	85.377	67.578	139.880	-0.603	20.295	2712.021	-0.005976	-0.004730	-0.009792
2.2300	1424.438	85.613	68.178	140.617	-0.591	20.279	2711.763	-0.005993	-0.004772	-0.009843
2.2400	1458.146	88.491	69.860	144.103	-0.592	20.296	2775.936	-0.006194	-0.004890	-0.010087
2.2500	1452.586	88.475	70.039	144.103	-0.596	20.279	2765.350	-0.006193	-0.004903	-0.010087
2.2600	1441.660	88.253	70.164	143.356	-0.585	20.295	2744.551	-0.006178	-0.004911	-0.010035
2.2700	1400.903	86.239	68.972	140.742	-0.584	20.279	2666.960	-0.006037	-0.004828	-0.009852
2.2800	1370.125	83.585	67.732	138.084	-0.587	20.295	2608.366	-0.005851	-0.004741	-0.009666
2.2900	1333.952	81.431	66.148	135.129	-0.596	20.278	2539.501	-0.005700	-0.004630	-0.009459
2.3000	1310.958	80.320	64.745	132.986	-0.595	20.296	2495.728	-0.005622	-0.004532	-0.009309
2.3100	1235.305	75.332	60.352	126.333	-0.601	20.279	2351.704	-0.005273	-0.004225	-0.008843
2.3200	1198.365	72.438	58.172	122.802	-0.594	20.296	2281.380	-0.005071	-0.004072	-0.008596
2.3300	1138.237	68.187	54.474	117.062	-0.595	20.279	2166.910	-0.004773	-0.003813	-0.008194
2.3400	1059.473	63.463	50.084	109.213	-0.599	20.296	2016.964	-0.004442	-0.003506	-0.007645
2.3500	1034.556	61.031	48.319	106.544	-0.595	20.279	1969.528	-0.004272	-0.003382	-0.007458
2.3600	900.547	52.472	41.052	93.342	-0.595	20.296	1714.411	-0.003673	-0.002874	-0.006534
2.3700	849.330	48.358	38.104	87.382	-0.586	20.278	1616.907	-0.003385	-0.002667	-0.006117
2.3800	746.145	41.241	31.991	76.416	-0.599	20.296	1420.469	-0.002887	-0.002239	-0.005349
2.3900	688.076	36.296	28.529	69.706	-0.603	20.278	1309.919	-0.002541	-0.001997	-0.004879
2.4000	589.023	29.876	23.375	58.616	-0.596	20.296	1121.349	-0.002091	-0.001636	-0.004103
2.4100	512.574	23.942	18.817	49.623	-0.592	20.279	975.809	-0.001676	-0.001317	-0.003474
2.4200	464.844	20.022	15.983	43.759	-0.599	20.295	884.943	-0.001402	-0.001119	-0.003063
2.4300	416.557	16.188	13.593	37.296	-0.592	20.278	793.018	-0.001133	-0.000952	-0.002611
2.4400	374.147	12.824	11.453	31.907	-0.602	20.296	712.280	-0.000898	-0.000802	-0.002234
2.4500	314.875	8.226	8.132	24.334	-0.609	20.278	599.442	-0.000576	-0.000569	-0.001703
2.4600	285.480	5.417	6.590	20.025	-0.603	20.295	543.480	-0.000379	-0.000461	-0.001402
2.4700	254.236	2.820	5.073	15.771	-0.612	20.278	483.999	-0.000197	-0.000355	-0.001104
2.4800	201.606	-1.306	2.519	8.465	-0.598	20.295	383.806	0.000091	-0.000176	-0.000593
2.4900	192.334	-2.713	1.531	6.699	-0.601	20.278	366.154	0.000190	-0.000107	-0.000469
2.5000	198.570	-3.101	1.977	6.377	-0.604	20.296	378.027	0.000217	-0.000138	-0.000446
2.5100	218.378	-1.752	2.239	8.520	-0.604	20.279	415.735	0.000123	-0.000157	-0.000596
2.5200	222.992	-1.557	1.976	8.700	-0.596	20.295	424.519	0.000109	-0.000138	-0.000609
2.5300	248.284	-0.249	2.311	11.005	-0.606	20.278	472.670	0.000017	-0.000162	-0.000770
2.5400	305.678	4.196	4.072	17.813	-0.599	20.295	581.932	-0.000294	-0.000285	-0.001247
2.5500	351.139	7.738	5.894	23.150	-0.611	20.278	668.478	-0.000542	-0.000413	-0.001620
2.5600	382.263	9.615	6.769	26.459	-0.607	20.295	727.730	-0.000673	-0.000474	-0.001852
2.5700	464.693	15.230	10.978	36.131	-0.614	20.278	884.657	-0.001066	-0.000768	-0.002529
2.5800	526.671	20.133	14.093	43.109	-0.608	20.296	1002.645	-0.001409	-0.000987	-0.003018
2.5900	605.600	25.623	17.915	51.777	-0.591	20.277	1152.906	-0.001794	-0.001254	-0.003624
2.6000	684.604	30.848	22.193	60.728	-0.599	20.296	1303.310	-0.002159	-0.001554	-0.004251
2.6100	749.903	35.560	26.211	67.994	-0.601	20.278	1427.622	-0.002489	-0.001835	-0.004760
2.6200	825.150	41.353	30.200	76.434	-0.591	20.295	1570.873	-0.002895	-0.002114	-0.005350
2.6300	931.145	48.288	35.952	87.688	-0.599	20.278	1772.661	-0.003380	-0.002517	-0.006138
2.6400	983.579	52.651	39.354	93.288	-0.596	20.296	1872.482	-0.003686	-0.002755	-0.006530
2.6500	1059.848	58.335	43.995	101.608	-0.596	20.278	2017.679	-0.004083	-0.003080	-0.007113
2.6600	1107.774	61.877	46.861	106.821	-0.592	20.295	2108.917	-0.004331	-0.003280	-0.007477
2.6700	1211.966	68.871	53.072	117.396	-0.589	20.278	2307.272	-0.004821	-0.003715	-0.008218
2.6800	1222.591	70.454	54.306	119.105	-0.601	20.296	2327.499	-0.004932	-0.003801	-0.008337
2.6900	1303.023	76.289	59.186	126.887	-0.598	20.278	2480.621	-0.005340	-0.004143	-0.008882
2.7000	1359.815	79.972	62.744	132.807	-0.601	20.295	2588.739	-0.005598	-0.004392	-0.009296
2.7100	1378.856	81.572	64.440	135.420	-0.596	20.278	2624.989	-0.005710	-0.004511	-0.009479
2.7200	1421.026	85.931	67.859	139.881	-0.592	20.295	2705.269	-0.006015	-0.004750	-0.009792
2.7300	1426.076	86.085	67.942	140.560	-0.596	20.278	2714.882	-0.006026	-0.004756	-0.009839
2.7400	1429.066	86.573	68.401	141.410	-0.588	20.295	2720.575	-0.006060	-0.004788	-0.009899
2.7500	1450.527	88.089	69.986	143.674	-0.593	20.278	2761.431	-0.006166	-0.004899	-0.010057
2.7600	1444.576	88.851	69.999	143.660	-0.593	20.295	2750.101	-0.006220	-0.004900	-0.010056
2.7700	1441.074	88.407	69.819	143.702	-0.601	20.277	2743.435	-0.006189	-0.004887	-0.010059
2.7800	1431.922	87.351	70.096	143.216	-0.594	20.295	2726.011	-0.006115	-0.004907	-0.010025
2.7900	1343.029	83.071	66.856	136.336	-0.589	20.278	2556.782	-0.005815	-0.004680	-0.009544
2.8000	1310.673	79.971	64.496	133.126	-0.603	20.296	2495.184	-0.005598	-0.004515	-0.009319
2.8100	1254.541	76.401	61.464	128.123	-0.606	20.278	2388.325	-0.005348	-0.004303	-0.008969
2.8200	1180.151	71.429	57.336	121.161	-0.607	20.296	2246.704	-0.005000	-0.004014	-0.008481
2.8300	1111.576	67.005	53.278	114.855	-0.600	20.278	2116.156	-0.004690	-0.003729	-0.008040
2.8400	1034.541	61.461	48.457	106.794	-0.600	20.295	1969.500	-0.004302	-0.003392	-0.007476
2.8500	989.380	58.237	45.945	102.153	-0.608	20.278	1883.526	-0.004077	-0.003216	-0.007151
2.8600	931.371	54.626	42.746	96.249	-0.595	20.295	1773.090	-0.003824	-0.002992	-0.006737
2.8700	859.956	49.054	38.328	88.366	-0.607	20.278	1637.135	-0.003434	-0.002683	-0.006186
2.8800	759.626	41.785	32.823	78.057	-0.606	20.295	1446.133	-0.002925	-0.002298	-0.005464
2.8900	664.045	35.449	27.626	67.190	-0.603	20.278	1264.172	-0.002481	-0.001934	-0.004703
2.9000	579.345	29.110	22.708	57.295	-0.611	20.296	1102.924	-0.002038	-0.001590	-0.004011
2.9100	525.649	24.773	19.431	50.832	-0.592	20.278	1000.700	-0.001734	-0.001360	-0.003558
2.9200	459.569	19.968	16.164	43.232	-0.599	20.295	874.901	-0.001398	-0.001131	-0.003026
2.9300	422.118	16.771	13.942	37.950	-0.605	20.278	803.604	-0.001174	-0.000976	-0.002657
2.9400	381.631	13.449	11.465	32.907	-0.600	20.295	726.528	-0.000941	-0.000803	-0.002303
2.9500	292.919	6.583	7.118	22.024	-0.607	20.278	557.642	-0.000461	-0.000498	-0.001542
2.9600	245.624	2.681	4.991	15.260	-0.607	20.295	467.606	-0.000188	-0.000349	-0.001068
2.9700	253.199	3.042	4.796	15.120	-0.608	20.277	482.025	-0.000213	-0.000336	-0.001058
2.9800	248.675	1.706	4.364	14.471	-0.607	20.295	473.413	-0.000119	-0.000305	-0.001013
2.9900	227.710	-0.140	3.547	11.409	-0.592	20.278	433.502	0.000010	-0.000248	-0.000799
3.0000	223.788	0.069	3.310	10.589	-0.599	20.296	426.035	-0.000005	-0.000232	-0.000741
3.0100	215.988	-1.335	2.240	8.979	-0.587	20.278	411.186	0.000093	-0.000157	-0.000629
3.0200	227.215	-1.069	2.644	9.743	-0.592	20.295	432.558	0.000075	-0.000185	-0.000682
3.0300	239.598	-0.194	2.809	10.921	-0.596	20.278	456.133	0.000014	-0.000197	-0.000764
3.0400	292.603	3.485	3.782	16.272	-0.593	20.295	557.041	-0.000244	-0.000265	-0.001139
3.0500	339.131	6.555	5.506	21.955	-0.598	20.277	645.618	-0.000459	-0.000385	-0.001537
3.0600	384.126	9.836	7.660	26.764	-0.611	20.295	731.277	-0.000688	-0.000536	-0.001873
3.0700	453.061	15.104	10.605	34.783	-0.607	20.278	862.513	-0.001057	-0.000742	-0.002435
3.0800	508.802	18.688	13.052	41.103	-0.600	20.295	968.628	-0.001308	-0.000914	-0.002877
3.0900	585.928	23.829	17.108	49.791	-0.601	20.278	1115.456	-0.001668	-0.001198	-0.003485
3.1000	674.099	30.445	21.902	59.589	-0.596	20.295	1283.312	-0.002131	-0.001533	-0.004171
3.1100	746.191	35.766	25.864	67.815	-0.595	20.277	1420.555	-0.002504	-0.001810	-0.004747
3.1200	831.792	41.298	30.615	76.904	-0.599	20.295	1583.519	-0.002891	-0.002143	-0.005383
3.1300	939.170	48.763	36.853	88.174	-0.595	20.278	1787.939	-0.003413	-0.002580	-0.006172
3.1400	968.987	51.871	38.647	92.299	-0.598	20.295	1844.702	-0.003631	-0.002705	-0.006461
3.1500	1033.398	56.333	42.427	99.346	-0.599	20.277	1967.325	-0.003943	-0.002970	-0.006954
3.1600	1119.451	62.225	47.874	108.074	-0.585	20.295	2131.147	-0.004356	-0.003351	-0.007565
3.1700	1214.596	69.439	53.462	117.786	-0.593	20.277	2312.279	-0.004861	-0.003742	-0.008245
3.1800	1258.524	73.344	56.475	122.591	-0.586	20.295	2395.906	-0.005134	-0.003953	-0.008581
3.1900	1328.586	77.942	60.992	129.681	-0.582	20.277	2529.287	-0.005456	-0.004269	-0.009078
3.2000	1329.233	78.582	61.311	130.391	-0.587	20.296	2530.518	-0.005501	-0.004292	-0.009127
3.2100	1393.720	83.240	65.534	136.966	-0.591	20.277	2653.284	-0.005827	-0.004587	-0.009588
3.2200	1400.467	83.754	65.898	138.060	-0.590	20.295	2666.130	-0.005863	-0.004613	-0.009664
3.2300	1415.661	85.363	67.495	139.629	-0.605	20.277	2695.055	-0.005975	-0.004725	-0.009774
3.2400	1465.676	89.255	70.969	144.688	-0.592	20.295	2790.270	-0.006248	-0.004968	-0.010128
3.2500	1453.608	89.030	70.635	144.356	-0.599	20.277	2767.296	-0.006232	-0.004944	-0.010105
3.2600	1436.460	87.589	70.095	143.273	-0.603	20.294	2734.652	-0.006131	-0.004907	-0.010029
3.2700	1415.796	87.367	69.943	142.175	-0.600	20.277	2695.313	-0.006116	-0.004896	-0.009952
3.2800	1386.070	85.614	68.902	139.990	-0.591	20.295	2638.721	-0.005993	-0.004823	-0.009799
3.2900	1365.316	83.710	67.759	137.866	-0.595	20.277	2599.211	-0.005860	-0.004743	-0.009651
3.3000	1298.349	79.610	64.050	132.141	-0.599	20.295	2471.724	-0.005573	-0.004484	-0.009250
3.3100	1260.448	77.040	62.312	129.070	-0.592	20.277	2399.569	-0.005393	-0.004362	-0.009035
3.3200	1189.363	72.342	57.421	121.746	-0.593	20.295	2264.242	-0.005064	-0.004019	-0.008522
3.3300	1144.579	68.728	55.030	117.965	-0.605	20.278	2178.984	-0.004811	-0.003852	-0.008258
3.3400	1083.488	64.535	51.529	111.796	-0.607	20.295	2062.683	-0.004517	-0.003607	-0.007826
3.3500	984.060	58.142	45.999	102.139	-0.611	20.278	1873.398	-0.004070	-0.003220	-0.007150
3.3600	924.458	53.999	42.402	95.816	-0.609	20.295	1759.930	-0.003780	-0.002968	-0.006707
3.3700	824.353	46.454	36.744	85.185	-0.608	20.277	1569.357	-0.003252	-0.002572	-0.005963
3.3800	731.523	40.309	31.521	74.875	-0.607	20.295	1392.632	-0.002822	-0.002206	-0.005241
3.3900	666.735	35.169	27.641	67.271	-0.609	20.277	1269.293	-0.002462	-0.001935	-0.004709
3.4000	670.282	35.141	27.237	66.910	-0.606	20.295	1276.045	-0.002460	-0.001907	-0.004684
3.4100	500.025	23.356	18.721	48.861	-0.609	20.277	951.920	-0.001635	-0.001310	-0.003420
3.4200	462.484	20.315	16.440	43.761	-0.609	20.295	880.451	-0.001422	-0.001151	-0.003063
3.4300	408.607	16.020	13.327	37.103	-0.607	20.277	777.884	-0.001121	-0.000933	-0.002597
3.4400	351.860	11.336	10.298	29.655	-0.614	20.295	669.851	-0.000794	-0.000721	-0.002076
3.4500	309.931	8.141	8.522	23.692	-0.612	20.277	590.029	-0.000570	-0.000597	-0.001658
3.4600	275.381	5.391	6.407	19.218	-0.612	20.295	524.254	-0.000377	-0.000449	-0.001345
3.4700	249.547	2.805	4.768	15.467	-0.607	20.277	475.073	-0.000196	-0.000334	-0.001083
3.4800	241.687	1.528	4.642	13.913	-0.615	20.295	460.110	-0.000107	-0.000325	-0.000974
3.4900	211.314	-0.528	3.409	9.548	-0.616	20.276	402.288	0.000037	-0.000239	-0.000668
3.5000	189.448	-2.879	1.976	6.265	-0.600	20.295	360.661	0.000202	-0.000138	-0.000439
3.5100	197.609	-2.948	1.837	6.766	-0.613	20.277	376.196	0.000206	-0.000129	-0.000474
3.5200	210.383	-2.058	2.253	7.490	-0.609	20.295	400.515	0.000144	-0.000158	-0.000524
3.5300	249.141	0.567	2.755	11.783	-0.603	20.277	474.300	-0.000040	-0.000193	-0.000825
3.5400	303.514	3.739	3.839	17.745	-0.608	20.295	577.812	-0.000262	-0.000269	-0.001242
3.5500	338.229	6.557	5.268	21.983	-0.619	20.277	643.902	-0.000459	-0.000369	-0.001539
3.5600	414.589	12.434	8.784	30.378	-0.616	20.295	789.270	-0.000870	-0.000615	-0.002126
3.5700	469.082	15.856	10.938	36.799	-0.616	20.277	893.011	-0.001110	-0.000766	-0.002576
3.5800	539.460	20.718	14.760	44.703	-0.609	20.295	1026.993	-0.001450	-0.001033	-0.003129
3.5900	587.265	24.303	17.442	50.305	-0.611	20.276	1118.002	-0.001701	-0.001221	-0.003521
3.6000	658.936	29.345	20.984	58.157	-0.615	20.295	1254.444	-0.002054	-0.001469	-0.004071
3.6100	732.409	34.474	25.141	66.524	-0.600	20.277	1394.320	-0.002413	-0.001760	-0.004657
3.6200	809.881	40.187	29.572	74.958	-0.595	20.295	1541.805	-0.002813	-0.002070	-0.005247
3.6300	946.143	49.538	37.202	89.051	-0.615	20.277	1801.214	-0.003468	-0.002604	-0.006234
3.6400	972.999	52.178	38.856	92.859	-0.599	20.295	1852.341	-0.003652	-0.002720	-0.006500
3.6500	1073.930	58.573	45.013	103.323	-0.601	20.277	2044.487	-0.004100	-0.003151	-0.007233
3.6600	1137.996	63.921	49.040	110.172	-0.601	20.295	2166.452	-0.004474	-0.003433	-0.007712
3.6700	1213.875	69.466	53.532	117.827	-0.608	20.277	2310.905	-0.004863	-0.003747	-0.008248
3.6800	1234.028	71.314	55.171	120.608	-0.604	20.295	2349.272	-0.004992	-0.003862	-0.008443
3.6900	1289.978	75.205	58.950	126.140	-0.605	20.277	2455.788	-0.005264	-0.004126	-0.008830
3.7000	1348.574	79.734	62.717	132.211	-0.599	20.295	2567.339	-0.005581	-0.004390	-0.009255
3.7100	1374.979	81.976	64.414	135.283	-0.601	20.277	2617.607	-0.005738	-0.004509	-0.009470
3.7200	1404.735	84.612	66.495	138.561	-0.604	20.295	2674.255	-0.005923	-0.004655	-0.009699
3.7300	1473.941	89.754	71.176	145.204	-0.606	20.277	2806.005	-0.006283	-0.004982	-0.010164
3.7400	1474.107	89.949	71.289	146.050	-0.596	20.295	2806.320	-0.006296	-0.004990	-0.010224
3.7500	1463.061	89.684	71.274	145.717	-0.606	20.276	2785.292	-0.006278	-0.004989	-0.010200
3.7600	1434.191	87.781	70.704	143.924	-0.599	20.295	2730.331	-0.006145	-0.004949	-0.010075
3.7700	1410.296	86.976	70.302	142.051	-0.596	20.277	2684.841	-0.006088	-0.004921	-0.009944
3.7800	1393.900	86.044	69.222	140.728	-0.604	20.295	2653.627	-0.006023	-0.004846	-0.009851
3.7900	1331.066	81.612	66.161	135.353	-0.597	20.276	2534.008	-0.005713	-0.004631	-0.009475
3.8000	1297.718	79.597	64.467	132.195	-0.612	20.295	2470.522	-0.005572	-0.004513	-0.009254
3.8100	1258.614	77.334	61.895	128.776	-0.601	20.277	2396.078	-0.005413	-0.004333	-0.009014
3.8200	1168.053	71.233	56.601	120.428	-0.599	20.294	2223.673	-0.004986	-0.003962	-0.008430
3.8300	1100.605	66.145	52.905	113.911	-0.615	20.277	2095.270	-0.004630	-0.003703	-0.007974
3.8400	1057.820	63.045	50.375	109.421	-0.607	20.295	2013.817	-0.004413	-0.003526	-0.007659
3.8500	969.212	57.335	44.831	100.597	-0.609	20.277	1845.131	-0.004013	-0.003138	-0.007042
3.8600	920.700	53.248	42.106	95.300	-0.603	20.295	1752.777	-0.003727	-0.002947	-0.006671
3.8700	820.611	46.621	36.799	84.948	-0.613	20.276	1562.233	-0.003263	-0.002576	-0.005946
3.8800	731.342	40.283	31.590	75.264	-0.604	20.295	1392.288	-0.002820	-0.002211	-0.005269
3.8900	662.362	35.073	27.364	67.355	-0.605	20.276	1260.967	-0.002455	-0.001915	-0.004715
3.9000	592.480	30.263	23.791	59.131	-0.603	20.294	1127.930	-0.002118	-0.001665	-0.004139
3.9100	533.689	25.514	20.360	52.196	-0.604	20.276	1016.006	-0.001786	-0.001425	-0.003654
3.9200	474.462	21.192	16.787	45.080	-0.602	20.294	903.254	-0.001483	-0.001175	-0.003156
3.9300	418.090	16.576	13.775	38.187	-0.607	20.276	795.937	-0.001160	-0.000964	-0.002673
3.9400	373.907	13.255	11.591	32.268	-0.605	20.294	711.823	-0.000928	-0.000811	-0.002259
3.9500	338.921	10.561	9.590	27.640	-0.600	20.276	645.218	-0.000739	-0.000671	-0.001935
3.9600	277.860	5.249	6.450	19.815	-0.610	20.295	528.975	-0.000367	-0.000452	-0.001387
3.9700	233.496	1.818	4.530	13.647	-0.606	20.276	444.517	-0.000127	-0.000317	-0.000955
3.9800	202.418	-1.169	3.021	8.741	-0.608	20.295	385.351	0.000082	-0.000211	-0.000612
3.9900	212.246	-0.806	2.699	9.269	-0.608	20.277	404.062	0.000056	-0.000189	-0.000649
4.0000	219.610	-1.125	2.933	9.768	-0.611	20.295	418.081	0.000079	-0.000205	-0.000684
4.0100	219.129	-0.961	2.851	9.576	-0.604	20.276	417.166	0.000067	-0.000200	-0.000670
4.0200	223.893	-0.752	2.823	9.701	-0.611	20.295	426.235	0.000053	-0.000198	-0.000679
4.0300	252.071	0.387	2.949	12.299	-0.604	20.276	479.879	-0.000027	-0.000206	-0.000861
4.0400	308.022	4.502	4.627	18.580	-0.597	20.295	586.395	-0.000315	-0.000324	-0.001301
4.0500	357.361	8.113	6.659	24.348	-0.597	20.276	680.323	-0.000568	-0.000466	-0.001704
4.0600	385.358	10.350	7.535	27.625	-0.607	20.294	733.624	-0.000724	-0.000527	-0.001934
4.0700	468.435	16.035	11.311	36.757	-0.605	20.276	891.781	-0.001122	-0.000792	-0.002573
4.0800	560.214	22.358	16.176	46.901	-0.611	20.294	1066.504	-0.001565	-0.001132	-0.003283
4.0900	571.816	23.718	16.774	48.805	-0.596	20.277	1088.591	-0.001660	-0.001174	-0.003416
4.1000	683.838	31.197	22.319	61.132	-0.614	20.295	1301.851	-0.002184	-0.001562	-0.004279
4.1100	698.550	32.404	23.751	63.172	-0.599	20.277	1329.861	-0.002268	-0.001663	-0.004422
4.1200	817.711	41.005	30.005	75.736	-0.607	20.295	1556.711	-0.002870	-0.002100	-0.005302
4.1300	930.364	48.624	36.132	87.742	-0.607	20.276	1771.173	-0.003404	-0.002529	-0.006142
4.1400	958.843	50.926	38.326	91.675	-0.608	20.294	1825.390	-0.003565	-0.002683	-0.006417
4.1500	1045.166	57.682	43.830	100.734	-0.612	20.276	1989.727	-0.004038	-0.003068	-0.007051
4.1600	1137.350	63.825	49.053	110.130	-0.614	20.295	2165.222	-0.004468	-0.003434	-0.007709
4.1700	1209.982	69.273	53.168	117.773	-0.607	20.276	2303.495	-0.004849	-0.003722	-0.008244
4.1800	1227.791	71.094	55.072	120.108	-0.607	20.295	2337.399	-0.004977	-0.003855	-0.008408
4.1900	1293.675	75.941	59.130	126.484	-0.608	20.276	2462.826	-0.005316	-0.004139	-0.008854
4.2000	1339.542	79.137	61.868	131.420	-0.609	20.295	2550.144	-0.005540	-0.004331	-0.009199
4.2100	1399.986	83.598	65.785	137.380	-0.607	20.277	2665.215	-0.005852	-0.004605	-0.009617
4.2200	1400.903	83.905	66.438	138.283	-0.603	20.295	2666.960	-0.005873	-0.004651	-0.009680
4.2300	1439.436	87.185	68.847	142.189	-0.605	20.276	2740.316	-0.006103	-0.004819	-0.009953
4.2400	1433.455	87.142	69.054	142.412	-0.602	20.294	2728.930	-0.006100	-0.004834	-0.009969
4.2500	1470.470	89.712	71.205	145.814	-0.607	20.277	2799.397	-0.006280	-0.004984	-0.010207
4.2600	1450.828	89.280	71.079	144.716	-0.605	20.295	2762.003	-0.006250	-0.004976	-0.010130
4.2700	1435.949	88.018	70.593	143.895	-0.607	20.276	2733.679	-0.006161	-0.004942	-0.010073
4.2800	1394.185	85.793	69.471	140.741	-0.600	20.294	2654.171	-0.006006	-0.004863	-0.009852
4.2900	1375.069	84.639	68.693	139.156	-0.594	20.276	2617.779	-0.005925	-0.004808	-0.009741
4.3000	1290.730	79.401	64.079	131.934	-0.596	20.295	2457.218	-0.005558	-0.004486	-0.009235
4.3100	1253.414	76.346	61.549	128.680	-0.601	20.276	2386.179	-0.005344	-0.004308	-0.009008
4.3200	1205.233	73.550	58.907	123.817	-0.605	20.294	2294.455	-0.005149	-0.004124	-0.008667
4.3300	1142.685	69.036	55.280	117.924	-0.609	20.277	2175.379	-0.004833	-0.003870	-0.008255
4.3400	1062.013	63.338	50.404	110.284	-0.607	20.294	2021.799	-0.004434	-0.003528	-0.007720
4.3500	976.816	57.654	45.638	101.428	-0.605	20.276	1859.608	-0.004036	-0.003195	-0.007100
4.3600	906.514	52.582	41.676	94.274	-0.619	20.295	1725.769	-0.003681	-0.002917	-0.006599
4.3700	838.615	47.982	37.617	86.910	-0.620	20.276	1596.508	-0.003359	-0.002633	-0.006084
4.3800	749.903	41.450	32.393	77.154	-0.606	20.295	1427.622	-0.002901	-0.002268	-0.005401
4.3900	676.474	36.282	28.587	68.870	-0.612	20.276	1287.832	-0.002540	-0.002001	-0.004821
4.4000	604.923	31.140	24.542	60.629	-0.604	20.294	1151.619	-0.002180	-0.001718	-0.004244
4.4100	524.431	24.945	19.653	51.249	-0.599	20.276	998.383	-0.001746	-0.001376	-0.003587
4.4200	459.133	19.716	16.149	43.413	-0.601	20.294	874.071	-0.001380	-0.001130	-0.003039
4.4300	450.777	18.911	15.609	41.829	-0.604	20.276	858.164	-0.001324	-0.001093	-0.002928
4.4400	374.989	13.713	11.480	32.740	-0.595	20.294	713.882	-0.000960	-0.000804	-0.002292
4.4500	330.385	9.421	9.175	26.791	-0.591	20.277	628.967	-0.000659	-0.000642	-0.001875
4.4600	274.118	5.169	6.587	19.802	-0.603	20.294	521.851	-0.000362	-0.000461	-0.001386
4.4700	240.981	2.485	4.947	14.662	-0.607	20.276	458.765	-0.000174	-0.000346	-0.001026
4.4800	219.655	0.193	3.575	11.741	-0.612	20.295	418.167	-0.000014	-0.000250	-0.000822
4.4900	193.701	-2.308	2.169	7.574	-0.613	20.276	368.757	0.000162	-0.000152	-0.000530
4.5000	201.546	-2.171	2.239	8.047	-0.615	20.295	383.692	0.000152	-0.000157	-0.000563
4.5100	214.515	-1.223	2.279	8.534	-0.606	20.276	408.382	0.000086	-0.000160	-0.000597
4.5200	231.062	-0.889	2.325	9.963	-0.607	20.294	439.882	0.000062	-0.000163	-0.000697
4.5300	252.718	0.804	3.059	12.242	-0.620	20.276	481.110	-0.000056	-0.000214	-0.000857
4.5400	317.821	5.584	4.782	19.899	-0.608	20.294	605.049	-0.000391	-0.000335	-0.001393
4.5500	339.898	7.126	5.549	22.441	-0.621	20.276	647.078	-0.000499	-0.000388	-0.001571
4.5600	392.016	10.282	7.701	28.554	-0.619	20.295	746.298	-0.000720	-0.000539	-0.001999
4.5700	452.205	14.968	10.951	35.311	-0.621	20.276	860.882	-0.001048	-0.000767	-0.002472
4.5800	534.966	21.023	14.704	44.316	-0.614	20.295	1018.438	-0.001472	-0.001029	-0.003102
4.5900	580.457	23.901	17.107	49.999	-0.605	20.276	1105.042	-0.001673	-0.001197	-0.003500
4.6000	668.629	29.916	21.859	59.478	-0.610	20.294	1272.898	-0.002094	-0.001530	-0.004163
4.6100	735.941	35.350	25.697	67.134	-0.614	20.276	1401.043	-0.002474	-0.001799	-0.004699
4.6200	827.134	41.449	30.533	76.709	-0.607	20.294	1574.650	-0.002901	-0.002137	-0.005370
4.6300	917.274	47.649	35.604	86.493	-0.618	20.276	1746.254	-0.003335	-0.002492	-0.006055
4.6400	973.195	52.430	39.299	92.761	-0.617	20.294	1852.713	-0.003670	-0.002751	-0.006493
4.6500	1054.078	58.516	43.995	101.610	-0.615	20.276	2006.693	-0.004096	-0.003080	-0.007113
4.6600	1118.610	62.654	47.735	108.434	-0.611	20.295	2129.545	-0.004386	-0.003341	-0.007590
4.6700	1214.340	69.230	53.695	118.228	-0.615	20.276	2311.792	-0.004846	-0.003759	-0.008276
4.6800	1255.413	73.080	56.963	122.857	-0.611	20.294	2389.984	-0.005116	-0.003987	-0.008600
4.6900	1296.396	76.137	59.560	127.207	-0.609	20.275	2468.004	-0.005330	-0.004169	-0.008904
4.7000	1347.026	79.638	62.424	132.268	-0.612	20.294	2564.392	-0.005575	-0.004370	-0.009259
4.7100	1389.016	82.848	65.479	136.825	-0.615	20.276	2644.329	-0.005799	-0.004584	-0.009578
4.7200	1416.412	85.598	67.606	140.215	-0.621	20.294	2696.486	-0.005992	-0.004732	-0.009815
4.7300	1433.906	86.656	68.484	141.952	-0.620	20.276	2729.788	-0.006066	-0.004794	-0.009937
4.7400	1455.592	88.505	70.316	144.465	-0.617	20.294	2771.072	-0.006195	-0.004922	-0.010113
4.7500	1455.306	89.184	70.677	144.563	-0.610	20.276	2770.529	-0.006243	-0.004947	-0.010119
4.7600	1453.728	89.224	70.496	144.978	-0.606	20.295	2767.525	-0.006246	-0.004935	-0.010148
4.7700	1438.730	88.296	70.386	144.423	-0.609	20.276	2738.972	-0.006181	-0.004927	-0.010110
4.7800	1393.629	86.003	69.347	140.938	-0.613	20.295	2653.112	-0.006020	-0.004854	-0.009866
4.7900	1340.534	82.879	66.954	136.770	-0.607	20.276	2552.032	-0.005801	-0.004687	-0.009574
4.8000	1317.240	80.875	65.243	134.391	-0.613	20.294	2507.687	-0.005661	-0.004567	-0.009407
4.8100	1268.338	77.403	62.589	129.683	-0.607	20.276	2414.589	-0.005418	-0.004381	-0.009078
4.8200	1212.372	73.997	59.560	124.915	-0.611	20.294	2308.044	-0.005180	-0.004169	-0.008744
4.8300	1115.318	67.616	53.614	115.825	-0.612	20.277	2123.280	-0.004733	-0.003753	-0.008108
4.8400	1066.266	63.394	50.569	110.642	-0.613	20.295	2029.896	-0.004438	-0.003540	-0.007745
4.8500	983.474	58.198	46.320	102.431	-0.611	20.277	1872.282	-0.004074	-0.003242	-0.007170
4.8600	926.832	54.294	42.869	96.496	-0.595	20.295	1764.450	-0.003801	-0.003001	-0.006755
4.8700	823.978	47.121	36.867	85.602	-0.603	20.276	1568.642	-0.003298	-0.002581	-0.005992
4.8800	756.605	42.188	32.978	77.930	-0.609	20.295	1440.382	-0.002953	-0.002308	-0.005455
4.8900	685.085	37.088	29.102	70.164	-0.601	20.277	1304.226	-0.002596	-0.002037	-0.004911
4.9000	602.098	30.975	24.335	60.810	-0.600	20.295	1146.240	-0.002168	-0.001703	-0.004257
4.9100	544.945	26.443	20.984	53.935	-0.616	20.276	1037.436	-0.001851	-0.001469	-0.003775
4.9200	472.238	21.218	17.092	45.065	-0.606	20.294	899.019	-0.001485	-0.001196	-0.003155
4.9300	416.693	16.685	13.859	38.421	-0.606	20.276	793.276	-0.001168	-0.000970	-0.002689
4.9400	365.987	12.753	11.160	31.808	-0.611	20.294	696.745	-0.000893	-0.000781	-0.002227
4.9500	313.117	8.488	8.618	24.985	-0.607	20.276	596.094	-0.000594	-0.000603	-0.001749
4.9600	280.580	5.639	6.854	20.372	-0.602	20.294	534.153	-0.000395	-0.000480	-0.001426
4.9700	245.609	3.153	4.991	15.565	-0.610	20.276	467.577	-0.000221	-0.000349	-0.001090
4.9800	221.383	0.262	3.644	11.895	-0.593	20.294	421.457	-0.000018	-0.000255	-0.000833
4.9900	204.026	-1.528	2.950	8.993	-0.601	20.276	388.412	0.000107	-0.000206	-0.000629
