# Supplementary material for: Evaluation of a Cold-Mixed High-Performance Polyurethane Mixture
Source: Hindawi journal article supplement (doi:10.1155/2019/1507971), 2019-11-07
Supplement: f1 [file 1507971.f1.zip › 1507971.f1/dynamic modulus data/PUM/specimen1/temp20/zhs-1-20_5Hz.csv]

Test Information
****************
Project name	zhs
Operator name	1
Target test temperature	20
Target confining stress	0
Average dynamic strain range from 75 to 125 micro-strain
Contact stress	5
Initial modulus	1000
Axial gauge length	70
Comments
Specimen information
********************
Identification	zhs-1-20
Dimensions	Point 1	Point 2	Point 3	Point 4	Point 5	Point 6	Average	Std Dev.
Diameter (mm)	49.2	49.2	49.3				49.23	0.058
Height (mm)	101.3	101.2	101.3				101.27	0.058
Cross-sectional area (mm�)	1903.7
Conditioning time
Properties/Comments
Test Data	5Hz
*********
Test date and time	Mon	Apr 1	2019	2:22 PM
Dynamic modulus (MPa)	13016
Phase angle (Degrees)	4.38
Average temperature (�C)	20.3
Average confining pressure (kPa)	-0.6
Average micro-strain	99
Load drift (%)	-0.1
Load standard error (%)	2.9
Average deformation drift (%)	-1.7
Average deformation standard error (%)	3.7
Deformation uniformity (%)	28.3
Phase uniformity (Degrees)	0.8
Conditioning Cycles
Time (sec)	Axial stress (kPa)	Axial micro-strain #1	Axial micro-strain #2	Axial micro-strain #3	Confining pressure (kPa)	Temperature (�C)	Load (N)	Displacement #1 (mm)	Displacement #2 (mm)	Displacement #3 (mm)
0.0000	391.655	8.239	6.282	22.957	-0.604	20.298	745.611	-0.000577	-0.000440	-0.001607
0.0040	339.296	5.222	5.434	18.105	-0.594	20.300	645.933	-0.000366	-0.000380	-0.001267
0.0080	252.643	-0.850	2.156	8.073	-0.600	20.310	480.967	0.000059	-0.000151	-0.000565
0.0120	239.598	-1.835	1.754	6.226	-0.601	20.314	456.133	0.000128	-0.000123	-0.000436
0.0160	242.213	-2.350	1.601	5.947	-0.597	20.308	461.111	0.000165	-0.000112	-0.000416
0.0200	247.037	-2.348	1.586	6.379	-0.593	20.297	470.295	0.000164	-0.000111	-0.000446
0.0240	259.781	-1.626	2.059	7.600	-0.593	20.300	494.556	0.000114	-0.000144	-0.000532
0.0280	311.118	1.804	2.713	12.786	-0.599	20.309	592.289	-0.000126	-0.000190	-0.000895
0.0320	391.941	7.447	5.547	22.095	-0.596	20.314	746.155	-0.000521	-0.000388	-0.001547
0.0360	446.749	11.352	7.770	28.001	-0.596	20.308	850.496	-0.000795	-0.000544	-0.001960
0.0400	503.707	15.270	10.300	34.129	-0.590	20.298	958.929	-0.001069	-0.000721	-0.002389
0.0440	570.103	19.982	13.775	41.828	-0.600	20.301	1085.329	-0.001399	-0.000964	-0.002928
0.0480	633.808	24.275	17.290	48.847	-0.592	20.310	1206.608	-0.001699	-0.001210	-0.003419
0.0520	705.449	29.569	20.888	56.616	-0.604	20.314	1342.993	-0.002070	-0.001462	-0.003963
0.0560	754.141	33.001	23.738	62.381	-0.598	20.308	1435.690	-0.002310	-0.001662	-0.004367
0.0600	781.387	35.294	25.141	65.121	-0.594	20.298	1487.560	-0.002471	-0.001760	-0.004558
0.0640	849.856	40.088	29.031	72.484	-0.595	20.300	1617.908	-0.002806	-0.002032	-0.005074
0.0680	916.507	44.897	32.560	79.724	-0.593	20.310	1744.795	-0.003143	-0.002279	-0.005581
0.0720	965.440	48.248	35.425	85.423	-0.605	20.314	1837.950	-0.003377	-0.002480	-0.005980
0.0760	1015.500	51.720	38.230	90.562	-0.596	20.308	1933.250	-0.003620	-0.002676	-0.006339
0.0800	1071.721	55.529	41.399	96.524	-0.596	20.298	2040.281	-0.003887	-0.002898	-0.006757
0.0840	1114.372	58.766	44.165	101.417	-0.604	20.300	2121.477	-0.004114	-0.003092	-0.007099
0.0880	1164.206	62.254	47.457	106.531	-0.606	20.310	2216.349	-0.004358	-0.003322	-0.007457
0.0920	1174.320	63.909	48.651	108.548	-0.599	20.314	2235.603	-0.004474	-0.003406	-0.007598
0.0960	1168.834	64.089	48.581	108.379	-0.595	20.308	2225.161	-0.004486	-0.003401	-0.007587
0.1000	1193.466	65.521	49.612	110.781	-0.593	20.298	2272.053	-0.004586	-0.003473	-0.007755
0.1040	1204.512	66.852	50.695	112.436	-0.598	20.301	2293.081	-0.004680	-0.003549	-0.007871
0.1080	1195.345	66.310	50.363	112.156	-0.604	20.310	2275.629	-0.004642	-0.003525	-0.007851
0.1120	1179.850	65.619	50.473	110.976	-0.605	20.314	2246.132	-0.004593	-0.003533	-0.007768
0.1160	1163.064	64.673	50.098	110.186	-0.592	20.307	2214.174	-0.004527	-0.003507	-0.007713
0.1200	1139.123	63.407	49.056	107.878	-0.592	20.298	2168.598	-0.004439	-0.003434	-0.007551
0.1240	1078.093	59.586	46.681	103.000	-0.589	20.301	2052.412	-0.004171	-0.003268	-0.007210
0.1280	1014.538	55.585	43.622	96.582	-0.590	20.310	1931.419	-0.003891	-0.003054	-0.006761
0.1320	964.403	52.471	40.971	91.565	-0.593	20.314	1835.976	-0.003673	-0.002868	-0.006410
0.1360	927.358	49.607	38.839	88.228	-0.592	20.308	1765.451	-0.003473	-0.002719	-0.006176
0.1400	861.488	45.287	35.048	81.363	-0.588	20.298	1640.053	-0.003170	-0.002453	-0.005695
0.1440	790.765	40.368	31.491	74.164	-0.585	20.300	1505.413	-0.002826	-0.002204	-0.005192
0.1480	735.265	36.462	28.087	68.274	-0.588	20.310	1399.755	-0.002552	-0.001966	-0.004779
0.1520	668.088	31.698	24.723	60.936	-0.586	20.313	1271.868	-0.002219	-0.001731	-0.004266
0.1560	623.964	28.652	22.332	55.991	-0.581	20.307	1187.868	-0.002006	-0.001563	-0.003919
0.1600	553.091	23.706	18.540	47.902	-0.583	20.298	1052.942	-0.001659	-0.001298	-0.003353
0.1640	500.506	20.301	16.149	41.761	-0.588	20.300	952.835	-0.001421	-0.001130	-0.002923
0.1680	451.544	16.340	13.567	36.117	-0.589	20.310	859.623	-0.001144	-0.000950	-0.002528
0.1720	396.014	12.520	10.911	29.573	-0.594	20.313	753.908	-0.000876	-0.000764	-0.002070
0.1760	353.062	8.990	8.646	24.207	-0.585	20.307	672.140	-0.000629	-0.000605	-0.001695
0.1800	312.215	5.445	6.229	19.094	-0.596	20.298	594.378	-0.000381	-0.000436	-0.001337
0.1840	288.606	3.709	5.143	15.787	-0.589	20.300	549.431	-0.000260	-0.000360	-0.001105
0.1880	259.240	0.873	3.908	12.007	-0.587	20.309	493.526	-0.000061	-0.000274	-0.000840
0.1920	245.549	-0.099	3.254	9.355	-0.593	20.313	467.463	0.000007	-0.000228	-0.000655
0.1960	247.112	-0.278	3.088	9.395	-0.589	20.308	470.438	0.000019	-0.000216	-0.000658
0.2000	224.464	-2.100	2.033	6.349	-0.603	20.298	427.322	0.000147	-0.000142	-0.000444
0.2040	214.470	-2.950	1.642	4.863	-0.600	20.301	408.297	0.000206	-0.000115	-0.000340
0.2080	217.882	-3.101	1.657	4.666	-0.591	20.310	414.791	0.000217	-0.000116	-0.000327
0.2120	225.757	-2.613	1.654	5.530	-0.595	20.314	429.783	0.000183	-0.000116	-0.000387
0.2160	237.389	-2.420	1.419	6.279	-0.589	20.308	451.927	0.000169	-0.000099	-0.000440
0.2200	263.884	-1.141	1.920	8.658	-0.593	20.298	502.367	0.000080	-0.000134	-0.000606
0.2240	306.715	1.790	3.047	13.397	-0.593	20.300	583.906	-0.000125	-0.000213	-0.000938
0.2280	368.451	6.237	5.338	20.719	-0.598	20.310	701.437	-0.000437	-0.000374	-0.001450
0.2320	391.565	8.504	6.561	23.749	-0.601	20.314	745.440	-0.000595	-0.000459	-0.001662
0.2360	421.487	10.379	7.646	26.791	-0.592	20.307	802.402	-0.000727	-0.000535	-0.001875
0.2400	498.237	15.786	11.103	35.089	-0.591	20.298	948.515	-0.001105	-0.000777	-0.002456
0.2440	558.891	20.066	14.094	41.912	-0.599	20.301	1063.986	-0.001405	-0.000987	-0.002934
0.2480	612.092	23.911	16.745	47.694	-0.603	20.310	1165.266	-0.001674	-0.001172	-0.003339
0.2520	684.709	28.847	20.262	55.671	-0.603	20.313	1303.511	-0.002019	-0.001418	-0.003897
0.2560	778.141	35.112	25.100	65.536	-0.592	20.307	1481.380	-0.002458	-0.001757	-0.004588
0.2600	832.093	38.907	28.127	71.554	-0.587	20.297	1584.091	-0.002723	-0.001969	-0.005009
0.2640	876.291	42.160	30.795	76.583	-0.591	20.300	1668.234	-0.002951	-0.002156	-0.005361
0.2680	939.862	46.578	34.658	83.657	-0.589	20.310	1789.255	-0.003260	-0.002426	-0.005856
0.2720	964.238	49.222	36.507	86.771	-0.581	20.312	1835.661	-0.003446	-0.002555	-0.006074
0.2760	977.252	50.330	37.299	88.258	-0.582	20.307	1860.437	-0.003523	-0.002611	-0.006178
0.2800	1014.237	52.763	39.119	91.856	-0.585	20.297	1930.847	-0.003693	-0.002738	-0.006430
0.2840	1088.237	57.473	43.109	99.428	-0.594	20.300	2071.724	-0.004023	-0.003018	-0.006960
0.2880	1159.321	62.698	47.803	106.989	-0.596	20.309	2207.050	-0.004389	-0.003346	-0.007489
0.2920	1167.497	63.659	48.221	108.560	-0.596	20.313	2222.614	-0.004456	-0.003375	-0.007599
0.2960	1184.960	64.898	49.374	110.379	-0.591	20.307	2255.859	-0.004543	-0.003456	-0.007727
0.3000	1190.956	65.717	50.109	111.433	-0.586	20.298	2267.275	-0.004600	-0.003508	-0.007800
0.3040	1184.990	65.787	50.390	111.350	-0.590	20.301	2255.917	-0.004605	-0.003527	-0.007794
0.3080	1181.473	66.048	50.305	111.503	-0.587	20.310	2249.222	-0.004623	-0.003521	-0.007805
0.3120	1171.059	65.633	50.349	110.894	-0.591	20.313	2229.395	-0.004594	-0.003524	-0.007763
0.3160	1160.824	65.188	49.790	110.103	-0.583	20.307	2209.911	-0.004563	-0.003485	-0.007707
0.3200	1103.341	61.712	47.929	105.335	-0.579	20.297	2100.477	-0.004320	-0.003355	-0.007373
0.3240	1057.414	58.448	45.818	101.637	-0.586	20.300	2013.044	-0.004091	-0.003207	-0.007115
0.3280	1033.879	57.030	44.582	99.179	-0.588	20.310	1968.241	-0.003992	-0.003121	-0.006943
0.3320	952.425	51.846	40.426	91.563	-0.592	20.313	1813.173	-0.003629	-0.002830	-0.006409
0.3360	915.320	48.901	38.398	87.368	-0.595	20.307	1742.535	-0.003423	-0.002688	-0.006116
0.3400	888.675	47.509	36.687	84.433	-0.589	20.297	1691.809	-0.003326	-0.002568	-0.005910
0.3440	839.246	44.285	34.492	79.667	-0.592	20.300	1597.710	-0.003100	-0.002414	-0.005577
0.3480	761.444	39.116	30.033	71.635	-0.588	20.310	1449.594	-0.002738	-0.002102	-0.005014
0.3520	681.959	33.517	25.960	63.467	-0.598	20.314	1298.275	-0.002346	-0.001817	-0.004443
0.3560	614.271	28.985	22.166	55.641	-0.593	20.307	1169.415	-0.002029	-0.001552	-0.003895
0.3600	563.535	24.566	19.083	49.876	-0.593	20.297	1072.826	-0.001720	-0.001336	-0.003491
0.3640	524.416	21.801	17.189	45.567	-0.596	20.300	998.354	-0.001526	-0.001203	-0.003190
0.3680	457.014	17.074	14.038	37.561	-0.590	20.310	870.037	-0.001195	-0.000983	-0.002629
0.3720	399.801	13.115	11.271	30.530	-0.599	20.314	761.118	-0.000918	-0.000789	-0.002137
0.3760	375.845	10.961	10.075	27.084	-0.592	20.307	715.513	-0.000767	-0.000705	-0.001896
0.3800	313.448	6.654	7.397	19.676	-0.584	20.297	596.724	-0.000466	-0.000518	-0.001377
0.3840	272.345	3.111	5.045	14.328	-0.595	20.300	518.475	-0.000218	-0.000353	-0.001003
0.3880	273.216	2.668	4.712	13.982	-0.596	20.309	520.134	-0.000187	-0.000330	-0.000979
0.3920	254.461	0.984	3.850	11.214	-0.601	20.313	484.428	-0.000069	-0.000269	-0.000785
0.3960	220.347	-1.934	2.351	6.988	-0.597	20.306	419.483	0.000135	-0.000165	-0.000489
0.4000	210.713	-3.144	1.671	4.836	-0.591	20.297	401.144	0.000220	-0.000117	-0.000338
0.4040	201.501	-3.532	1.448	3.612	-0.592	20.301	383.606	0.000247	-0.000101	-0.000253
0.4080	200.749	-3.782	1.281	3.030	-0.597	20.310	382.175	0.000265	-0.000090	-0.000212
0.4120	204.912	-3.560	1.462	3.087	-0.608	20.313	390.100	0.000249	-0.000102	-0.000216
0.4160	214.125	-3.392	1.435	3.754	-0.598	20.307	407.639	0.000237	-0.000100	-0.000263
0.4200	231.843	-2.628	1.614	5.349	-0.590	20.297	441.370	0.000184	-0.000113	-0.000374
0.4240	312.245	2.722	3.267	14.229	-0.602	20.300	594.435	-0.000191	-0.000229	-0.000996
0.4280	386.140	7.990	6.005	22.970	-0.595	20.309	735.111	-0.000559	-0.000420	-0.001608
0.4320	412.635	9.907	7.325	26.070	-0.605	20.313	785.551	-0.000694	-0.000513	-0.001825
0.4360	445.698	12.157	8.718	29.599	-0.596	20.307	848.494	-0.000851	-0.000610	-0.002072
0.4400	486.920	14.895	10.660	33.920	-0.595	20.297	926.971	-0.001043	-0.000746	-0.002374
0.4440	544.599	19.328	13.426	40.510	-0.599	20.300	1036.777	-0.001353	-0.000940	-0.002836
0.4480	615.999	24.400	16.885	48.473	-0.595	20.309	1172.705	-0.001708	-0.001182	-0.003393
0.4520	669.230	28.249	19.956	54.681	-0.607	20.312	1274.042	-0.001977	-0.001397	-0.003828
0.4560	741.126	32.947	23.472	62.535	-0.592	20.306	1410.913	-0.002306	-0.001643	-0.004377
0.4600	793.335	37.310	26.472	67.924	-0.597	20.297	1510.305	-0.002612	-0.001853	-0.004755
0.4640	869.799	42.215	30.295	76.043	-0.603	20.300	1655.874	-0.002955	-0.002121	-0.005323
0.4680	953.042	48.165	35.157	84.823	-0.597	20.309	1814.346	-0.003372	-0.002461	-0.005938
0.4720	964.133	49.053	36.243	86.771	-0.610	20.313	1835.461	-0.003434	-0.002537	-0.006074
0.4760	1018.821	52.666	39.187	92.286	-0.588	20.307	1939.573	-0.003687	-0.002743	-0.006460
0.4800	1092.160	57.682	43.482	99.610	-0.592	20.297	2079.191	-0.004038	-0.003044	-0.006973
0.4840	1137.260	61.502	46.389	104.834	-0.593	20.300	2165.051	-0.004305	-0.003247	-0.007338
0.4880	1144.819	62.490	47.526	106.221	-0.597	20.310	2179.441	-0.004374	-0.003327	-0.007436
0.4920	1147.975	62.946	47.692	107.212	-0.599	20.313	2185.450	-0.004406	-0.003338	-0.007505
0.4960	1160.073	64.049	48.415	108.547	-0.588	20.307	2208.481	-0.004483	-0.003389	-0.007598
0.5000	1153.250	63.700	48.192	108.073	-0.591	20.297	2195.492	-0.004459	-0.003373	-0.007565
0.5040	1145.120	63.394	48.346	107.627	-0.600	20.300	2180.014	-0.004438	-0.003384	-0.007534
0.5080	1139.679	62.977	48.402	107.433	-0.600	20.309	2169.657	-0.004408	-0.003388	-0.007520
0.5120	1138.642	63.410	48.401	107.850	-0.606	20.313	2167.683	-0.004439	-0.003388	-0.007550
0.5160	1135.922	63.046	48.456	107.712	-0.596	20.307	2162.504	-0.004413	-0.003392	-0.007540
0.5200	1122.938	62.865	48.205	106.571	-0.605	20.297	2137.785	-0.004401	-0.003374	-0.007460
0.5240	1076.560	60.101	46.999	102.999	-0.603	20.300	2049.494	-0.004207	-0.003290	-0.007210
0.5280	1021.751	56.778	44.179	98.262	-0.600	20.309	1945.152	-0.003974	-0.003093	-0.006878
0.5320	985.097	54.529	42.147	94.636	-0.611	20.313	1875.372	-0.003817	-0.002950	-0.006625
0.5360	935.022	50.637	39.467	89.647	-0.600	20.307	1780.043	-0.003545	-0.002763	-0.006275
0.5400	838.510	44.078	34.047	79.751	-0.615	20.297	1596.308	-0.003085	-0.002383	-0.005583
0.5440	795.093	40.782	32.005	75.155	-0.613	20.299	1513.653	-0.002855	-0.002240	-0.005261
0.5480	753.675	38.157	29.838	70.762	-0.610	20.309	1434.803	-0.002671	-0.002089	-0.004953
0.5520	705.058	34.850	27.208	65.744	-0.621	20.313	1342.249	-0.002439	-0.001905	-0.004602
0.5560	660.889	31.835	24.892	60.757	-0.604	20.307	1258.163	-0.002228	-0.001742	-0.004253
0.5600	602.278	27.901	21.402	53.974	-0.610	20.296	1146.584	-0.001953	-0.001498	-0.003778
0.5640	545.441	23.926	18.443	47.831	-0.603	20.300	1038.380	-0.001675	-0.001291	-0.003348
0.5680	470.434	18.396	14.830	39.411	-0.608	20.309	895.586	-0.001288	-0.001038	-0.002759
0.5720	392.617	12.950	10.937	30.223	-0.609	20.313	747.442	-0.000906	-0.000766	-0.002116
0.5760	358.863	9.614	9.134	25.737	-0.599	20.306	683.184	-0.000673	-0.000639	-0.001802
0.5800	353.528	8.963	8.897	24.374	-0.595	20.296	673.027	-0.000627	-0.000623	-0.001706
0.5840	308.293	5.514	7.088	19.205	-0.597	20.299	586.910	-0.000386	-0.000496	-0.001344
0.5880	263.313	2.235	4.851	13.063	-0.596	20.309	501.280	-0.000156	-0.000340	-0.000914
0.5920	237.674	0.290	3.684	9.545	-0.603	20.313	452.471	-0.000020	-0.000258	-0.000668
0.5960	212.186	-2.225	2.392	6.005	-0.601	20.306	403.948	0.000156	-0.000167	-0.000420
0.6000	200.975	-3.115	1.683	3.907	-0.607	20.297	382.605	0.000218	-0.000118	-0.000273
0.6040	204.416	-3.448	1.545	4.004	-0.611	20.300	389.156	0.000241	-0.000108	-0.000280
0.6080	204.326	-3.615	1.212	3.740	-0.603	20.309	388.985	0.000253	-0.000085	-0.000262
0.6120	208.008	-3.532	1.364	3.862	-0.612	20.312	395.994	0.000247	-0.000095	-0.000270
0.6160	222.766	-2.975	1.587	4.891	-0.593	20.306	424.089	0.000208	-0.000111	-0.000342
0.6200	270.030	-0.169	2.224	9.615	-0.593	20.297	514.069	0.000012	-0.000156	-0.000673
0.6240	332.338	4.391	4.101	17.037	-0.604	20.299	632.687	-0.000307	-0.000287	-0.001193
0.6280	370.721	7.543	5.769	21.664	-0.603	20.309	705.757	-0.000528	-0.000404	-0.001516
0.6320	389.070	8.934	6.812	23.859	-0.613	20.312	740.690	-0.000625	-0.000477	-0.001670
0.6360	428.430	11.199	8.118	27.932	-0.597	20.306	815.620	-0.000784	-0.000568	-0.001955
0.6400	505.045	16.299	11.327	36.173	-0.603	20.297	961.475	-0.001141	-0.000793	-0.002532
0.6440	573.890	21.009	14.857	44.413	-0.600	20.299	1092.539	-0.001471	-0.001040	-0.003109
0.6480	624.866	24.845	17.318	49.694	-0.599	20.309	1189.585	-0.001739	-0.001212	-0.003479
0.6520	692.990	29.736	21.277	57.587	-0.613	20.312	1319.275	-0.002082	-0.001489	-0.004031
0.6560	732.139	32.626	23.488	61.853	-0.609	20.306	1393.805	-0.002284	-0.001644	-0.004330
0.6600	792.688	36.795	26.780	68.105	-0.611	20.296	1509.075	-0.002576	-0.001875	-0.004767
0.6640	836.812	40.048	29.379	73.026	-0.616	20.299	1593.075	-0.002803	-0.002057	-0.005112
0.6680	913.502	45.314	33.534	81.086	-0.617	20.309	1739.073	-0.003172	-0.002347	-0.005676
0.6720	958.602	49.179	36.034	86.047	-0.619	20.312	1824.932	-0.003443	-0.002522	-0.006023
0.6760	1058.872	55.221	41.288	96.178	-0.600	20.306	2015.820	-0.003865	-0.002890	-0.006732
0.6800	1146.442	61.750	46.444	105.113	-0.601	20.296	2182.531	-0.004322	-0.003251	-0.007358
0.6840	1129.851	61.627	46.471	104.960	-0.611	20.299	2150.946	-0.004314	-0.003253	-0.007347
0.6880	1126.424	61.474	46.667	105.083	-0.611	20.309	2144.423	-0.004303	-0.003267	-0.007356
0.6920	1132.165	62.170	47.234	105.570	-0.619	20.312	2155.352	-0.004352	-0.003306	-0.007390
0.6960	1155.174	63.365	48.289	108.171	-0.610	20.306	2199.154	-0.004436	-0.003380	-0.007572
0.7000	1190.055	66.118	50.418	111.448	-0.599	20.296	2265.558	-0.004628	-0.003529	-0.007801
0.7040	1183.307	66.104	50.473	111.407	-0.616	20.299	2252.712	-0.004627	-0.003533	-0.007798
0.7080	1172.577	65.798	50.126	111.045	-0.615	20.309	2232.285	-0.004606	-0.003509	-0.007773
0.7120	1161.681	65.465	50.014	110.394	-0.617	20.312	2211.542	-0.004583	-0.003501	-0.007728
0.7160	1139.679	64.074	49.234	109.089	-0.616	20.306	2169.657	-0.004485	-0.003446	-0.007636
0.7200	1087.411	60.657	47.638	104.210	-0.607	20.296	2070.150	-0.004246	-0.003335	-0.007295
0.7240	1057.264	58.335	46.319	101.625	-0.605	20.299	2012.758	-0.004083	-0.003242	-0.007114
0.7280	1034.420	57.319	45.082	99.180	-0.605	20.310	1969.271	-0.004012	-0.003156	-0.006943
0.7320	983.204	54.403	42.456	94.524	-0.619	20.312	1871.767	-0.003808	-0.002972	-0.006617
0.7360	918.161	49.914	38.688	88.380	-0.606	20.306	1747.942	-0.003494	-0.002708	-0.006187
0.7400	857.070	45.688	35.411	81.726	-0.607	20.296	1631.641	-0.003198	-0.002479	-0.005721
0.7440	815.096	42.633	32.963	77.375	-0.604	20.300	1551.733	-0.002984	-0.002307	-0.005416
0.7480	813.563	42.187	32.573	77.249	-0.612	20.309	1548.815	-0.002953	-0.002280	-0.005407
0.7520	746.191	37.920	29.559	70.622	-0.615	20.312	1420.555	-0.002654	-0.002069	-0.004944
0.7560	623.303	29.333	23.124	57.283	-0.599	20.306	1186.609	-0.002053	-0.001619	-0.004010
0.7600	573.379	25.790	19.931	51.263	-0.603	20.297	1091.566	-0.001805	-0.001395	-0.003588
0.7640	520.704	22.399	17.441	45.580	-0.603	20.299	991.287	-0.001568	-0.001221	-0.003191
0.7680	442.992	16.728	13.775	36.550	-0.605	20.309	843.344	-0.001171	-0.000964	-0.002558
0.7720	385.975	12.949	10.868	29.767	-0.605	20.312	734.797	-0.000906	-0.000761	-0.002084
0.7760	359.825	10.365	9.382	25.917	-0.610	20.306	685.015	-0.000726	-0.000657	-0.001814
0.7800	332.173	7.904	7.643	22.221	-0.606	20.296	632.372	-0.000553	-0.000535	-0.001556
0.7840	302.131	5.026	6.006	18.218	-0.611	20.299	575.180	-0.000352	-0.000420	-0.001275
0.7880	260.653	1.872	4.544	13.117	-0.605	20.309	496.216	-0.000131	-0.000318	-0.000918
0.7920	226.147	-0.944	3.156	8.532	-0.608	20.312	430.527	0.000066	-0.000221	-0.000597
0.7960	212.457	-2.252	2.142	6.282	-0.602	20.306	404.463	0.000158	-0.000150	-0.000440
0.8000	211.495	-2.628	2.155	5.599	-0.605	20.296	402.632	0.000184	-0.000151	-0.000392
0.8040	213.343	-2.254	2.044	5.209	-0.614	20.300	406.151	0.000158	-0.000143	-0.000365
0.8080	215.147	-2.434	1.976	5.211	-0.608	20.310	409.584	0.000170	-0.000138	-0.000365
0.8120	219.730	-2.544	2.058	5.697	-0.614	20.312	418.310	0.000178	-0.000144	-0.000399
0.8160	226.929	-2.390	1.823	5.949	-0.606	20.306	432.014	0.000167	-0.000128	-0.000416
0.8200	244.287	-1.946	1.864	7.520	-0.616	20.296	465.059	0.000136	-0.000130	-0.000526
0.8240	314.875	2.778	3.668	15.313	-0.612	20.299	599.442	-0.000194	-0.000257	-0.001072
0.8280	372.524	7.253	5.811	22.039	-0.616	20.309	709.190	-0.000508	-0.000407	-0.001543
0.8320	389.266	8.755	6.839	24.320	-0.625	20.312	741.062	-0.000613	-0.000479	-0.001702
0.8360	425.109	11.352	8.050	27.805	-0.613	20.306	809.298	-0.000795	-0.000564	-0.001946
0.8400	482.217	14.963	10.605	33.921	-0.615	20.296	918.016	-0.001047	-0.000742	-0.002374
0.8440	562.934	20.871	14.746	43.288	-0.613	20.299	1071.682	-0.001461	-0.001032	-0.003030
0.8480	628.954	25.457	17.846	50.055	-0.617	20.309	1197.367	-0.001782	-0.001249	-0.003504
0.8520	691.758	29.861	21.096	57.518	-0.621	20.311	1316.929	-0.002090	-0.001477	-0.004026
0.8560	761.369	34.446	24.726	64.840	-0.612	20.305	1449.451	-0.002411	-0.001731	-0.004539
0.8600	818.507	38.380	27.918	71.124	-0.612	20.296	1558.228	-0.002687	-0.001954	-0.004979
0.8640	846.355	40.589	29.811	74.234	-0.614	20.299	1611.242	-0.002841	-0.002087	-0.005196
0.8680	932.753	46.773	34.631	83.310	-0.611	20.309	1775.723	-0.003274	-0.002424	-0.005832
0.8720	1001.403	52.108	38.368	90.647	-0.613	20.312	1906.414	-0.003648	-0.002686	-0.006345
0.8760	1038.358	54.612	40.969	94.816	-0.601	20.306	1976.767	-0.003823	-0.002868	-0.006637
0.8800	1053.071	56.084	41.804	96.634	-0.604	20.296	2004.776	-0.003926	-0.002926	-0.006764
0.8840	1077.402	57.639	43.107	99.554	-0.604	20.299	2051.096	-0.004035	-0.003017	-0.006969
0.8880	1132.195	61.629	46.264	105.237	-0.598	20.309	2155.409	-0.004314	-0.003238	-0.007367
0.8920	1161.035	63.590	48.524	108.533	-0.605	20.312	2210.312	-0.004451	-0.003397	-0.007597
0.8960	1156.451	63.646	48.539	108.742	-0.608	20.306	2201.586	-0.004455	-0.003398	-0.007612
0.9000	1156.150	63.881	48.552	108.546	-0.619	20.296	2201.014	-0.004472	-0.003399	-0.007598
0.9040	1178.347	65.506	49.917	111.198	-0.617	20.299	2243.271	-0.004585	-0.003494	-0.007784
0.9080	1189.393	66.853	50.902	112.490	-0.623	20.309	2264.299	-0.004680	-0.003563	-0.007874
0.9120	1179.655	66.561	50.863	112.115	-0.615	20.312	2245.760	-0.004659	-0.003560	-0.007848
0.9160	1170.503	66.133	50.363	111.198	-0.603	20.306	2228.336	-0.004629	-0.003525	-0.007784
0.9200	1138.417	64.202	49.594	108.949	-0.609	20.296	2167.253	-0.004494	-0.003472	-0.007626
0.9240	1079.430	60.352	47.111	104.059	-0.608	20.300	2054.958	-0.004225	-0.003298	-0.007284
0.9280	1045.827	57.973	45.387	100.860	-0.603	20.310	1990.986	-0.004058	-0.003177	-0.007060
0.9320	994.821	54.958	42.899	96.191	-0.608	20.312	1893.883	-0.003847	-0.003003	-0.006733
0.9360	934.632	50.651	39.844	89.909	-0.604	20.305	1779.299	-0.003546	-0.002789	-0.006294
0.9400	880.590	46.981	36.992	84.155	-0.612	20.296	1676.416	-0.003289	-0.002589	-0.005891
0.9440	821.257	42.938	33.643	78.418	-0.611	20.300	1563.463	-0.003006	-0.002355	-0.005489
0.9480	754.351	38.741	29.962	71.526	-0.619	20.309	1436.090	-0.002712	-0.002097	-0.005007
0.9520	684.950	34.280	26.212	64.105	-0.616	20.312	1303.968	-0.002400	-0.001835	-0.004487
0.9560	630.847	29.875	23.278	58.003	-0.601	20.305	1200.972	-0.002091	-0.001629	-0.004060
0.9600	544.359	23.955	18.608	48.332	-0.602	20.296	1036.320	-0.001677	-0.001303	-0.003383
0.9640	491.684	19.731	15.691	42.218	-0.600	20.299	936.041	-0.001381	-0.001098	-0.002955
0.9680	457.194	17.146	14.192	37.965	-0.605	20.309	870.380	-0.001200	-0.000993	-0.002658
0.9720	405.572	13.936	11.856	31.796	-0.625	20.312	772.104	-0.000975	-0.000830	-0.002226
0.9760	371.457	11.058	9.952	27.554	-0.616	20.306	707.159	-0.000774	-0.000697	-0.001929
0.9800	341.956	8.546	8.592	23.498	-0.620	20.296	650.997	-0.000598	-0.000601	-0.001645
0.9840	309.255	5.805	6.990	19.648	-0.618	20.299	588.741	-0.000406	-0.000489	-0.001375
0.9880	279.363	3.431	5.407	15.608	-0.609	20.309	531.836	-0.000240	-0.000378	-0.001093
0.9920	256.430	1.818	4.365	12.436	-0.608	20.311	488.176	-0.000127	-0.000306	-0.000871
0.9960	226.403	-0.849	2.573	8.353	-0.600	20.305	431.013	0.000059	-0.000180	-0.000585
1.0000	201.801	-7.326	-1.001	-1.306	-0.596	20.311	384.178	0.000513	0.000070	0.000091
1.0040	205.153	-7.449	-0.987	-1.142	-0.597	20.305	390.558	0.000521	0.000069	0.000080
1.0080	208.624	-6.907	-0.930	-1.195	-0.591	20.295	397.167	0.000484	0.000065	0.000084
1.0120	215.522	-6.254	-0.529	-0.168	-0.599	20.297	410.299	0.000438	0.000037	0.000012
1.0160	247.803	-4.199	-0.026	3.223	-0.604	20.307	471.754	0.000294	0.000002	-0.000226
1.0200	300.613	-0.100	1.155	9.366	-0.601	20.311	572.290	0.000007	-0.000081	-0.000656
1.0240	347.291	3.155	2.601	14.854	-0.592	20.305	661.154	-0.000221	-0.000182	-0.001040
1.0280	404.024	6.709	5.060	21.471	-0.592	20.295	769.157	-0.000470	-0.000354	-0.001503
1.0320	496.914	13.562	9.535	31.864	-0.609	20.297	945.997	-0.000949	-0.000667	-0.002230
1.0360	567.593	18.536	12.732	40.036	-0.603	20.307	1080.551	-0.001298	-0.000891	-0.002802
1.0400	588.182	20.497	14.400	42.775	-0.602	20.312	1119.747	-0.001435	-0.001008	-0.002994
1.0440	670.673	25.983	18.248	51.530	-0.603	20.305	1276.789	-0.001819	-0.001277	-0.003607
1.0480	805.673	35.128	25.252	65.729	-0.597	20.296	1533.794	-0.002459	-0.001768	-0.004601
1.0520	872.264	40.158	29.226	73.678	-0.607	20.297	1660.566	-0.002811	-0.002046	-0.005157
1.0560	966.282	46.813	34.087	83.504	-0.605	20.307	1839.552	-0.003277	-0.002386	-0.005845
1.0600	1017.183	50.415	37.535	89.492	-0.613	20.312	1936.455	-0.003529	-0.002627	-0.006264
1.0640	1056.091	53.775	39.979	93.857	-0.603	20.306	2010.527	-0.003764	-0.002799	-0.006570
1.0680	1178.858	61.713	46.734	105.934	-0.599	20.296	2244.244	-0.004320	-0.003271	-0.007415
1.0720	1248.861	67.311	51.532	113.882	-0.609	20.297	2377.510	-0.004712	-0.003607	-0.007972
1.0760	1270.276	69.385	53.390	116.451	-0.601	20.307	2418.280	-0.004857	-0.003737	-0.008152
1.0800	1338.145	74.261	57.381	123.414	-0.602	20.312	2547.483	-0.005198	-0.004017	-0.008639
1.0840	1376.437	77.041	60.130	127.165	-0.585	20.305	2620.382	-0.005393	-0.004209	-0.008902
1.0880	1403.052	79.264	61.631	130.030	-0.593	20.295	2671.051	-0.005548	-0.004314	-0.009102
1.0920	1437.107	82.182	64.050	134.043	-0.603	20.297	2735.882	-0.005753	-0.004484	-0.009383
1.0960	1480.674	85.266	66.855	138.214	-0.601	20.307	2818.823	-0.005969	-0.004680	-0.009675
1.1000	1483.845	85.822	67.482	139.491	-0.607	20.311	2824.860	-0.006008	-0.004724	-0.009764
1.1040	1478.901	85.988	67.636	139.283	-0.603	20.305	2815.447	-0.006019	-0.004735	-0.009750
1.1080	1478.825	85.934	67.650	139.477	-0.595	20.295	2815.304	-0.006015	-0.004735	-0.009763
1.1120	1475.279	86.113	68.165	140.173	-0.605	20.296	2808.552	-0.006028	-0.004772	-0.009812
1.1160	1467.704	86.268	68.011	139.660	-0.601	20.306	2794.132	-0.006039	-0.004761	-0.009776
1.1200	1448.333	85.641	67.424	138.601	-0.591	20.311	2757.254	-0.005995	-0.004720	-0.009702
1.1240	1376.377	81.486	65.106	133.240	-0.596	20.305	2620.268	-0.005704	-0.004557	-0.009327
1.1280	1273.117	74.468	59.352	123.858	-0.604	20.296	2423.687	-0.005213	-0.004155	-0.008670
1.1320	1218.759	70.773	56.323	118.842	-0.604	20.297	2320.204	-0.004954	-0.003943	-0.008319
1.1360	1171.029	67.256	53.584	114.563	-0.601	20.306	2229.338	-0.004708	-0.003751	-0.008019
1.1400	1077.883	61.297	48.555	105.711	-0.599	20.311	2052.011	-0.004291	-0.003399	-0.007400
1.1440	992.341	55.417	43.497	97.232	-0.595	20.305	1889.162	-0.003879	-0.003045	-0.006806
1.1480	939.321	51.457	40.592	91.634	-0.594	20.295	1788.225	-0.003602	-0.002841	-0.006414
1.1520	867.304	47.050	36.633	84.158	-0.595	20.297	1651.125	-0.003294	-0.002564	-0.005891
1.1560	778.787	40.853	32.006	74.886	-0.600	20.307	1482.611	-0.002860	-0.002240	-0.005242
1.1600	673.648	33.780	26.335	63.937	-0.613	20.311	1282.454	-0.002365	-0.001843	-0.004476
1.1640	589.985	27.499	21.459	53.960	-0.602	20.305	1123.180	-0.001925	-0.001502	-0.003777
1.1680	536.815	23.261	18.012	47.192	-0.593	20.295	1021.957	-0.001628	-0.001261	-0.003303
1.1720	495.021	20.359	16.012	42.427	-0.600	20.297	942.392	-0.001425	-0.001121	-0.002970
1.1760	447.817	16.492	13.512	36.727	-0.597	20.307	852.528	-0.001154	-0.000946	-0.002571
1.1800	375.620	11.253	10.243	28.152	-0.591	20.311	715.084	-0.000788	-0.000717	-0.001971
1.1840	320.030	6.834	7.271	21.095	-0.594	20.305	609.255	-0.000478	-0.000509	-0.001477
1.1880	305.227	4.973	6.449	18.163	-0.596	20.295	581.074	-0.000348	-0.000451	-0.001271
1.1920	271.744	2.722	5.323	14.425	-0.603	20.296	517.330	-0.000191	-0.000373	-0.001010
1.1960	230.070	-0.849	3.157	8.769	-0.600	20.306	437.994	0.000059	-0.000221	-0.000614
1.2000	204.537	-2.740	1.878	4.891	-0.603	20.312	389.385	0.000192	-0.000131	-0.000342
1.2040	197.353	-4.312	1.170	3.558	-0.593	20.305	375.710	0.000302	-0.000082	-0.000249
1.2080	199.066	-4.755	0.543	3.278	-0.604	20.296	378.971	0.000333	-0.000038	-0.000229
1.2120	206.986	-3.989	1.169	3.656	-0.595	20.297	394.049	0.000279	-0.000082	-0.000256
1.2160	227.154	-3.420	1.642	5.516	-0.600	20.307	432.444	0.000239	-0.000115	-0.000386
1.2200	287.959	0.874	2.783	11.981	-0.608	20.311	548.201	-0.000061	-0.000195	-0.000839
1.2240	354.069	5.834	5.380	19.567	-0.597	20.305	674.057	-0.000408	-0.000377	-0.001370
1.2280	408.126	9.656	7.285	25.571	-0.604	20.295	776.968	-0.000676	-0.000510	-0.001790
1.2320	462.274	13.631	9.731	31.587	-0.600	20.297	880.051	-0.000954	-0.000681	-0.002211
1.2360	584.891	21.663	15.317	44.984	-0.601	20.306	1113.482	-0.001516	-0.001072	-0.003149
1.2400	640.932	26.304	18.471	51.583	-0.601	20.311	1220.169	-0.001841	-0.001293	-0.003611
1.2440	683.552	28.777	20.319	56.531	-0.604	20.305	1301.308	-0.002014	-0.001422	-0.003957
1.2480	811.399	37.185	26.833	69.470	-0.599	20.296	1544.695	-0.002603	-0.001878	-0.004863
1.2520	867.199	41.590	30.755	76.070	-0.604	20.297	1650.925	-0.002911	-0.002153	-0.005325
1.2560	965.365	48.442	36.200	85.935	-0.597	20.306	1837.807	-0.003391	-0.002534	-0.006015
1.2600	1071.676	56.111	42.288	97.179	-0.593	20.311	2040.195	-0.003928	-0.002960	-0.006802
1.2640	1093.783	57.946	43.914	100.401	-0.587	20.305	2082.281	-0.004056	-0.003074	-0.007028
1.2680	1126.364	60.183	45.566	103.405	-0.594	20.296	2144.308	-0.004213	-0.003190	-0.007238
1.2720	1227.505	67.397	51.392	113.450	-0.602	20.297	2336.855	-0.004718	-0.003597	-0.007941
1.2760	1293.495	72.093	55.391	120.565	-0.601	20.307	2462.482	-0.005046	-0.003877	-0.008440
1.2800	1304.631	73.440	56.740	122.400	-0.601	20.310	2483.683	-0.005141	-0.003972	-0.008568
1.2840	1380.164	78.345	61.089	129.362	-0.592	20.305	2627.478	-0.005484	-0.004276	-0.009055
1.2880	1439.150	82.697	64.994	135.297	-0.596	20.295	2739.773	-0.005789	-0.004550	-0.009471
1.2920	1439.120	83.376	65.464	136.089	-0.605	20.297	2739.716	-0.005836	-0.004582	-0.009526
1.2960	1469.478	85.669	67.482	139.076	-0.611	20.306	2797.508	-0.005997	-0.004724	-0.009735
1.3000	1508.732	88.851	70.066	143.231	-0.602	20.311	2872.238	-0.006220	-0.004905	-0.010026
1.3040	1527.578	90.447	71.302	145.354	-0.602	20.305	2908.115	-0.006331	-0.004991	-0.010175
1.3080	1519.011	89.949	71.150	145.189	-0.600	20.295	2891.808	-0.006296	-0.004981	-0.010163
1.3120	1501.654	89.392	71.051	144.437	-0.599	20.297	2858.763	-0.006257	-0.004974	-0.010111
1.3160	1446.950	86.449	69.347	140.354	-0.603	20.305	2754.622	-0.006051	-0.004854	-0.009825
1.3200	1377.684	81.767	65.993	134.322	-0.594	20.311	2622.757	-0.005724	-0.004619	-0.009403
1.3240	1323.191	78.418	63.007	129.848	-0.607	20.305	2519.016	-0.005489	-0.004411	-0.009089
1.3280	1248.124	73.623	58.841	122.803	-0.598	20.296	2376.108	-0.005154	-0.004119	-0.008596
1.3320	1198.501	70.370	56.128	118.424	-0.601	20.297	2281.637	-0.004926	-0.003929	-0.008290
1.3360	1175.672	68.688	54.586	116.146	-0.609	20.307	2238.178	-0.004808	-0.003821	-0.008130
1.3400	1098.051	63.795	50.251	109.031	-0.612	20.311	2090.406	-0.004466	-0.003518	-0.007632
1.3440	988.058	56.391	44.010	98.331	-0.607	20.305	1881.008	-0.003947	-0.003081	-0.006883
1.3480	902.756	49.899	38.843	89.215	-0.603	20.295	1718.616	-0.003493	-0.002719	-0.006245
1.3520	831.417	45.341	35.340	81.934	-0.606	20.297	1582.804	-0.003174	-0.002474	-0.005735
1.3560	746.476	39.338	30.616	72.639	-0.601	20.306	1421.099	-0.002754	-0.002143	-0.005085
1.3600	656.561	33.085	25.864	62.492	-0.607	20.311	1249.924	-0.002316	-0.001810	-0.004374
1.3640	597.364	28.861	22.442	55.919	-0.596	20.305	1137.228	-0.002020	-0.001571	-0.003914
1.3680	521.005	23.332	18.178	46.887	-0.601	20.295	991.859	-0.001633	-0.001272	-0.003282
1.3720	464.122	18.994	15.275	40.285	-0.603	20.296	883.570	-0.001330	-0.001069	-0.002820
1.3760	414.739	14.923	12.690	34.018	-0.606	20.307	789.557	-0.001045	-0.000888	-0.002381
1.3800	359.600	10.768	9.744	27.291	-0.605	20.311	684.586	-0.000754	-0.000682	-0.001910
1.3840	322.194	7.336	7.716	22.315	-0.603	20.305	613.375	-0.000514	-0.000540	-0.001562
1.3880	296.571	5.252	6.338	18.580	-0.603	20.295	564.594	-0.000368	-0.000444	-0.001301
1.3920	264.560	2.541	5.100	14.619	-0.609	20.297	503.654	-0.000178	-0.000357	-0.001023
1.3960	235.375	0.026	4.005	10.352	-0.605	20.306	448.093	-0.000002	-0.000280	-0.000725
1.4000	222.976	-1.098	3.086	8.353	-0.612	20.311	424.490	0.000077	-0.000216	-0.000585
1.4040	227.635	-0.890	2.879	8.241	-0.601	20.305	433.359	0.000062	-0.000202	-0.000577
1.4080	232.805	-1.140	2.672	8.380	-0.611	20.295	443.201	0.000080	-0.000187	-0.000587
1.4120	240.349	-0.652	2.727	8.729	-0.600	20.297	457.563	0.000046	-0.000191	-0.000611
1.4160	253.800	-0.084	2.950	9.756	-0.606	20.306	483.170	0.000006	-0.000206	-0.000683
1.4200	280.986	1.413	3.531	12.520	-0.596	20.311	534.925	-0.000099	-0.000247	-0.000876
1.4240	340.514	5.501	4.947	19.177	-0.592	20.305	648.251	-0.000385	-0.000346	-0.001342
1.4280	407.225	9.628	7.520	26.665	-0.593	20.295	775.251	-0.000674	-0.000526	-0.001867
1.4320	450.927	13.254	9.675	31.600	-0.597	20.297	858.450	-0.000928	-0.000677	-0.002212
1.4360	524.702	18.286	13.189	39.840	-0.600	20.306	998.898	-0.001280	-0.000923	-0.002789
1.4400	633.147	26.026	18.416	51.391	-0.607	20.311	1205.349	-0.001822	-0.001289	-0.003597
1.4440	710.558	31.113	22.445	59.795	-0.600	20.305	1352.720	-0.002178	-0.001571	-0.004186
1.4480	779.193	36.016	25.766	67.190	-0.601	20.295	1483.383	-0.002521	-0.001804	-0.004703
1.4520	873.646	42.437	31.118	77.474	-0.601	20.297	1663.198	-0.002971	-0.002178	-0.005423
1.4560	968.205	48.970	36.424	87.549	-0.608	20.307	1843.214	-0.003428	-0.002550	-0.006128
1.4600	1018.054	52.861	39.551	92.718	-0.608	20.310	1938.114	-0.003700	-0.002769	-0.006490
1.4640	1090.597	57.849	43.652	100.625	-0.602	20.305	2076.216	-0.004049	-0.003056	-0.007044
1.4680	1149.553	62.185	47.319	106.517	-0.604	20.295	2188.454	-0.004353	-0.003312	-0.007456
1.4720	1206.962	66.423	50.917	112.631	-0.606	20.297	2297.745	-0.004650	-0.003564	-0.007884
1.4760	1305.217	73.455	56.295	122.121	-0.604	20.307	2484.798	-0.005142	-0.003941	-0.008548
1.4800	1345.974	76.958	59.476	126.720	-0.606	20.311	2562.389	-0.005387	-0.004163	-0.008870
1.4840	1349.551	77.486	59.920	127.623	-0.601	20.304	2569.199	-0.005424	-0.004194	-0.008934
1.4880	1393.945	80.042	62.339	132.112	-0.611	20.295	2653.713	-0.005603	-0.004364	-0.009248
1.4920	1467.659	85.474	67.037	139.172	-0.600	20.297	2794.046	-0.005983	-0.004693	-0.009742
1.4960	1485.799	87.158	68.637	141.353	-0.603	20.306	2828.579	-0.006101	-0.004805	-0.009895
1.5000	1480.524	87.409	69.041	141.522	-0.609	20.310	2818.537	-0.006119	-0.004833	-0.009907
1.5040	1476.706	87.366	69.081	141.703	-0.599	20.304	2811.270	-0.006116	-0.004836	-0.009919
1.5080	1471.672	87.463	68.929	141.216	-0.602	20.295	2801.685	-0.006122	-0.004825	-0.009885
1.5120	1459.875	87.324	68.678	141.312	-0.604	20.296	2779.226	-0.006113	-0.004807	-0.009892
1.5160	1443.283	86.366	68.290	140.005	-0.609	20.306	2747.641	-0.006046	-0.004780	-0.009800
1.5200	1409.124	84.446	67.149	137.562	-0.599	20.310	2682.610	-0.005911	-0.004700	-0.009629
1.5240	1346.711	80.097	64.455	132.419	-0.600	20.305	2563.791	-0.005607	-0.004512	-0.009269
1.5280	1299.837	76.902	61.771	128.055	-0.605	20.295	2474.556	-0.005383	-0.004324	-0.008964
1.5320	1237.289	72.967	58.367	123.010	-0.603	20.297	2355.480	-0.005108	-0.004086	-0.008611
1.5360	1170.022	68.814	54.684	116.355	-0.600	20.306	2227.421	-0.004817	-0.003828	-0.008145
1.5400	1095.691	63.824	50.807	109.323	-0.604	20.311	2085.915	-0.004468	-0.003556	-0.007653
1.5440	1000.216	57.516	45.332	99.956	-0.599	20.305	1904.154	-0.004026	-0.003173	-0.006997
1.5480	922.308	52.082	40.606	91.856	-0.594	20.295	1755.838	-0.003646	-0.002842	-0.006430
1.5520	843.845	46.676	36.080	83.741	-0.594	20.296	1606.464	-0.003267	-0.002526	-0.005862
1.5560	766.314	41.187	31.561	75.305	-0.596	20.306	1458.864	-0.002883	-0.002209	-0.005271
1.5600	687.850	35.698	27.738	66.761	-0.593	20.310	1309.490	-0.002499	-0.001942	-0.004673
1.5640	623.574	30.807	23.918	59.450	-0.595	20.304	1187.124	-0.002156	-0.001674	-0.004161
1.5680	563.355	25.919	20.708	52.182	-0.588	20.294	1072.483	-0.001814	-0.001450	-0.003653
1.5720	486.695	20.941	16.914	43.746	-0.589	20.297	926.542	-0.001466	-0.001184	-0.003062
1.5760	418.706	15.953	13.509	35.547	-0.596	20.306	797.110	-0.001117	-0.000946	-0.002488
1.5800	383.811	13.254	11.620	31.004	-0.610	20.310	730.677	-0.000928	-0.000813	-0.002170
1.5840	353.979	10.574	9.604	27.290	-0.596	20.305	673.885	-0.000740	-0.000672	-0.001910
1.5880	289.056	5.209	6.476	18.899	-0.601	20.295	550.289	-0.000365	-0.000453	-0.001323
1.5920	258.368	2.708	5.060	14.399	-0.593	20.297	491.867	-0.000190	-0.000354	-0.001008
1.5960	247.623	1.192	4.129	12.479	-0.603	20.306	471.411	-0.000083	-0.000289	-0.000874
1.6000	217.386	-1.167	2.963	8.547	-0.607	20.310	413.847	0.000082	-0.000207	-0.000598
1.6040	213.313	-1.918	2.729	7.309	-0.600	20.305	406.094	0.000134	-0.000191	-0.000512
1.6080	216.665	-2.114	2.405	7.296	-0.598	20.295	412.474	0.000148	-0.000168	-0.000511
1.6120	222.556	-1.459	2.558	7.641	-0.599	20.296	423.689	0.000102	-0.000179	-0.000535
1.6160	231.362	-1.307	2.656	8.298	-0.603	20.306	440.454	0.000091	-0.000186	-0.000581
1.6200	264.831	0.553	3.156	11.286	-0.605	20.310	504.169	-0.000039	-0.000221	-0.000790
1.6240	348.343	6.295	5.393	20.621	-0.600	20.304	663.157	-0.000441	-0.000378	-0.001443
1.6280	411.974	10.907	7.742	27.528	-0.600	20.294	784.292	-0.000763	-0.000542	-0.001927
1.6320	459.268	14.243	9.923	33.283	-0.605	20.297	874.329	-0.000997	-0.000695	-0.002330
1.6360	520.268	18.285	12.952	39.717	-0.600	20.307	990.458	-0.001280	-0.000907	-0.002780
1.6400	621.966	25.179	18.039	50.973	-0.600	20.310	1184.063	-0.001763	-0.001263	-0.003568
1.6440	694.252	30.154	21.876	58.698	-0.593	20.304	1321.678	-0.002111	-0.001531	-0.004109
1.6480	765.788	35.475	25.712	66.606	-0.603	20.294	1457.863	-0.002483	-0.001800	-0.004662
1.6520	849.541	41.298	30.185	75.180	-0.597	20.296	1617.308	-0.002891	-0.002113	-0.005263
1.6560	935.819	47.454	35.034	84.532	-0.600	20.307	1781.559	-0.003322	-0.002452	-0.005917
1.6600	1019.903	53.224	39.927	93.495	-0.600	20.310	1941.633	-0.003726	-0.002795	-0.006545
1.6640	1115.604	59.990	45.094	103.097	-0.594	20.304	2123.823	-0.004199	-0.003157	-0.007217
1.6680	1203.941	66.131	50.334	112.226	-0.598	20.294	2291.994	-0.004629	-0.003523	-0.007856
1.6720	1263.979	70.425	54.309	118.771	-0.596	20.296	2406.292	-0.004930	-0.003802	-0.008314
1.6760	1309.004	74.010	57.310	123.384	-0.599	20.305	2492.008	-0.005181	-0.004012	-0.008637
1.6800	1333.861	76.094	59.256	126.277	-0.592	20.310	2539.330	-0.005327	-0.004148	-0.008839
1.6840	1401.474	80.723	63.369	132.711	-0.598	20.304	2668.047	-0.005651	-0.004436	-0.009290
1.6880	1443.884	84.347	65.911	137.171	-0.592	20.294	2748.785	-0.005904	-0.004614	-0.009602
1.6920	1472.213	86.531	68.137	140.256	-0.595	20.296	2802.715	-0.006057	-0.004770	-0.009818
1.6960	1472.363	87.200	68.316	140.993	-0.599	20.306	2803.001	-0.006104	-0.004782	-0.009870
1.7000	1474.783	87.562	68.430	141.633	-0.607	20.310	2807.608	-0.006129	-0.004790	-0.009914
1.7040	1505.892	89.531	70.426	144.604	-0.594	20.304	2866.831	-0.006267	-0.004930	-0.010122
1.7080	1505.125	89.616	70.872	144.492	-0.596	20.295	2865.372	-0.006273	-0.004961	-0.010114
1.7120	1496.754	89.601	71.010	144.952	-0.602	20.296	2849.436	-0.006272	-0.004971	-0.010147
1.7160	1480.749	89.347	70.786	143.689	-0.597	20.305	2818.966	-0.006254	-0.004955	-0.010058
1.7200	1433.590	86.739	69.594	140.562	-0.593	20.310	2729.187	-0.006072	-0.004872	-0.009839
1.7240	1347.056	81.336	65.161	133.280	-0.593	20.303	2564.449	-0.005693	-0.004561	-0.009330
1.7280	1266.354	75.915	60.185	125.663	-0.595	20.294	2410.812	-0.005314	-0.004213	-0.008796
1.7320	1204.812	71.415	56.922	120.136	-0.597	20.296	2293.653	-0.004999	-0.003985	-0.008410
1.7360	1143.587	67.409	53.210	114.479	-0.599	20.305	2177.095	-0.004719	-0.003725	-0.008014
1.7400	1049.283	61.101	47.886	105.628	-0.599	20.310	1997.566	-0.004277	-0.003352	-0.007394
1.7440	976.546	55.722	43.912	97.886	-0.596	20.304	1859.093	-0.003901	-0.003074	-0.006852
1.7480	919.363	51.859	40.357	91.953	-0.589	20.295	1750.231	-0.003630	-0.002825	-0.006437
1.7520	832.604	46.063	36.118	83.004	-0.582	20.296	1585.064	-0.003224	-0.002528	-0.005810
1.7560	770.311	41.687	32.574	75.918	-0.601	20.306	1466.475	-0.002918	-0.002280	-0.005314
1.7600	699.407	36.824	28.599	68.690	-0.607	20.309	1331.491	-0.002578	-0.002002	-0.004808
1.7640	584.815	28.805	22.195	55.907	-0.605	20.304	1113.338	-0.002016	-0.001554	-0.003914
1.7680	530.788	24.498	19.108	49.263	-0.605	20.294	1010.485	-0.001715	-0.001338	-0.003448
1.7720	485.974	20.802	16.496	44.148	-0.601	20.296	925.169	-0.001456	-0.001155	-0.003090
1.7760	421.697	16.147	13.538	36.324	-0.602	20.306	802.803	-0.001130	-0.000948	-0.002543
1.7800	366.077	12.018	10.828	29.251	-0.604	20.310	696.917	-0.000841	-0.000758	-0.002048
1.7840	323.877	8.477	8.564	24.012	-0.598	20.303	616.579	-0.000593	-0.000600	-0.001681
1.7880	276.763	5.100	6.268	17.467	-0.602	20.294	526.886	-0.000357	-0.000439	-0.001223
1.7920	243.310	2.221	4.641	13.036	-0.598	20.296	463.200	-0.000155	-0.000325	-0.000912
1.7960	229.258	0.665	3.881	10.755	-0.596	20.306	436.449	-0.000047	-0.000272	-0.000753
1.8000	228.221	0.153	3.477	9.966	-0.603	20.310	434.475	-0.000011	-0.000243	-0.000698
1.8040	228.477	-0.571	2.978	9.518	-0.608	20.304	434.961	0.000040	-0.000208	-0.000666
1.8080	227.425	-0.695	2.684	8.811	-0.597	20.295	432.959	0.000049	-0.000188	-0.000617
1.8120	229.123	-1.141	2.770	8.828	-0.597	20.297	436.192	0.000080	-0.000194	-0.000618
1.8160	236.382	-0.681	3.116	9.338	-0.603	20.306	450.010	0.000048	-0.000218	-0.000654
1.8200	250.914	-0.001	3.506	10.408	-0.610	20.310	477.676	0.000000	-0.000245	-0.000729
1.8240	312.350	3.959	4.658	16.954	-0.607	20.304	594.635	-0.000277	-0.000326	-0.001187
1.8280	396.990	9.642	7.494	26.114	-0.611	20.294	755.768	-0.000675	-0.000525	-0.001828
1.8320	462.800	15.020	10.522	33.753	-0.618	20.296	881.052	-0.001051	-0.000737	-0.002363
1.8360	534.741	19.534	13.843	41.619	-0.612	20.306	1018.009	-0.001367	-0.000969	-0.002913
1.8400	609.913	24.805	17.747	49.930	-0.606	20.310	1161.118	-0.001736	-0.001242	-0.003495
1.8440	682.395	29.526	21.178	57.851	-0.608	20.303	1299.105	-0.002067	-0.001482	-0.004050
1.8480	768.357	35.518	25.781	66.758	-0.605	20.293	1462.755	-0.002486	-0.001805	-0.004673
1.8520	868.071	42.634	31.269	77.736	-0.609	20.296	1652.584	-0.002984	-0.002189	-0.005442
1.8560	939.456	47.813	35.479	85.448	-0.608	20.305	1788.483	-0.003347	-0.002484	-0.005981
1.8600	1025.193	53.960	40.440	94.370	-0.612	20.310	1951.704	-0.003777	-0.002831	-0.006606
1.8640	1079.250	58.212	43.734	100.416	-0.605	20.303	2054.615	-0.004075	-0.003061	-0.007029
1.8680	1133.097	61.669	46.762	105.739	-0.606	20.294	2157.125	-0.004317	-0.003273	-0.007402
1.8720	1213.559	67.547	51.723	113.950	-0.607	20.296	2310.305	-0.004728	-0.003621	-0.007977
1.8760	1279.368	72.134	55.391	120.578	-0.601	20.306	2435.589	-0.005049	-0.003877	-0.008440
1.8800	1342.232	76.777	59.407	127.166	-0.613	20.310	2555.265	-0.005374	-0.004158	-0.008902
1.8840	1397.161	80.544	62.870	132.461	-0.591	20.303	2659.836	-0.005638	-0.004401	-0.009272
1.8880	1434.041	83.307	65.396	136.283	-0.613	20.294	2730.045	-0.005831	-0.004578	-0.009540
1.8920	1452.225	85.307	67.176	138.782	-0.611	20.296	2764.664	-0.005971	-0.004702	-0.009715
1.8960	1465.360	86.600	68.207	140.422	-0.605	20.306	2789.669	-0.006062	-0.004775	-0.009830
1.9000	1478.916	88.129	69.290	142.189	-0.603	20.309	2815.475	-0.006169	-0.004850	-0.009953
1.9040	1482.913	88.658	69.640	142.883	-0.597	20.303	2823.086	-0.006206	-0.004875	-0.010002
1.9080	1484.747	88.630	69.875	143.146	-0.600	20.294	2826.576	-0.006204	-0.004891	-0.010020
1.9120	1481.080	88.561	69.762	143.370	-0.601	20.296	2819.595	-0.006199	-0.004883	-0.010036
1.9160	1473.024	87.977	69.805	142.731	-0.608	20.306	2804.260	-0.006158	-0.004886	-0.009991
1.9200	1454.855	87.450	69.584	142.160	-0.617	20.310	2769.670	-0.006122	-0.004871	-0.009951
1.9240	1390.714	83.641	67.509	137.073	-0.602	20.303	2647.562	-0.005855	-0.004726	-0.009595
1.9280	1280.270	76.761	61.464	127.416	-0.605	20.294	2437.305	-0.005373	-0.004303	-0.008919
1.9320	1220.713	72.747	58.145	121.898	-0.609	20.296	2323.923	-0.005092	-0.004070	-0.008533
1.9360	1163.995	69.022	54.947	116.840	-0.610	20.305	2215.948	-0.004832	-0.003846	-0.008179
1.9400	1085.006	63.741	50.319	109.365	-0.609	20.310	2065.573	-0.004462	-0.003522	-0.007656
1.9440	1008.782	58.501	45.776	101.582	-0.605	20.303	1920.462	-0.004095	-0.003204	-0.007111
1.9480	932.212	53.081	41.356	93.703	-0.595	20.294	1774.693	-0.003716	-0.002895	-0.006559
1.9520	853.974	47.480	37.159	85.728	-0.600	20.296	1625.748	-0.003324	-0.002601	-0.006001
1.9560	765.186	41.269	32.325	75.918	-0.604	20.306	1456.718	-0.002889	-0.002263	-0.005314
1.9600	693.170	36.197	28.656	68.551	-0.603	20.309	1319.618	-0.002534	-0.002006	-0.004799
1.9640	626.504	31.599	24.739	60.533	-0.608	20.303	1192.703	-0.002212	-0.001732	-0.004237
1.9680	550.866	26.180	20.555	52.015	-0.605	20.294	1048.708	-0.001833	-0.001439	-0.003641
1.9720	483.674	21.483	16.981	44.067	-0.596	20.297	920.792	-0.001504	-0.001189	-0.003085
1.9760	427.423	16.702	14.148	37.159	-0.604	20.306	813.704	-0.001169	-0.000990	-0.002601
1.9800	378.761	13.116	11.452	31.223	-0.604	20.309	721.064	-0.000918	-0.000802	-0.002186
1.9840	336.231	9.977	9.229	25.429	-0.598	20.303	640.097	-0.000698	-0.000646	-0.001780
1.9880	302.732	6.709	7.105	21.232	-0.606	20.293	576.324	-0.000470	-0.000497	-0.001486
1.9920	266.619	3.541	5.894	16.396	-0.608	20.296	507.574	-0.000248	-0.000413	-0.001148
1.9960	230.160	0.598	4.309	11.367	-0.609	20.306	438.166	-0.000042	-0.000302	-0.000796
Test Cycles
Time (sec)	Axial stress (kPa)	Axial micro-strain #1	Axial micro-strain #2	Axial micro-strain #3	Confining pressure (kPa)	Temperature (�C)	Load (N)	Displacement #1 (mm)	Displacement #2 (mm)	Displacement #3 (mm)
0.0000	211.209	-1.097	3.449	8.476	-0.608	20.310	402.088	0.000077	-0.000241	-0.000593
0.0040	209.872	-1.279	3.002	7.253	-0.601	20.303	399.542	0.000090	-0.000210	-0.000508
0.0080	211.765	-1.570	2.601	7.129	-0.607	20.294	403.147	0.000110	-0.000182	-0.000499
0.0120	217.762	-1.528	2.659	7.656	-0.603	20.296	414.562	0.000107	-0.000186	-0.000536
0.0160	234.158	-0.847	2.393	8.966	-0.608	20.306	445.776	0.000059	-0.000167	-0.000628
0.0200	283.766	2.139	3.630	14.146	-0.603	20.309	540.218	-0.000150	-0.000254	-0.000990
0.0240	354.851	7.084	5.782	22.136	-0.600	20.303	675.545	-0.000496	-0.000405	-0.001550
0.0280	417.624	11.436	8.480	28.766	-0.596	20.294	795.050	-0.000801	-0.000594	-0.002014
0.0320	477.738	15.548	11.341	35.726	-0.599	20.296	909.491	-0.001088	-0.000794	-0.002501
0.0360	539.745	20.191	14.401	42.552	-0.612	20.306	1027.536	-0.001413	-0.001008	-0.002979
0.0400	615.413	25.610	18.581	51.154	-0.608	20.309	1171.589	-0.001793	-0.001301	-0.003581
0.0440	703.840	31.822	22.696	60.559	-0.598	20.303	1339.931	-0.002228	-0.001589	-0.004239
0.0480	776.187	36.449	26.488	68.342	-0.600	20.294	1477.661	-0.002551	-0.001854	-0.004784
0.0520	856.544	41.923	30.714	77.014	-0.603	20.297	1630.640	-0.002935	-0.002150	-0.005391
0.0560	944.115	48.149	35.494	86.242	-0.604	20.307	1797.352	-0.003370	-0.002485	-0.006037
0.0600	1025.178	53.765	40.482	94.828	-0.609	20.310	1951.675	-0.003764	-0.002834	-0.006638
0.0640	1103.386	59.336	44.858	102.708	-0.601	20.304	2100.563	-0.004153	-0.003140	-0.007190
0.0680	1168.143	64.132	48.917	109.226	-0.600	20.294	2223.845	-0.004489	-0.003424	-0.007646
0.0720	1247.418	70.007	53.852	117.341	-0.601	20.296	2374.763	-0.004900	-0.003770	-0.008214
0.0760	1326.107	75.303	58.588	125.513	-0.600	20.306	2524.567	-0.005271	-0.004101	-0.008786
0.0800	1373.116	79.525	61.784	130.599	-0.600	20.309	2614.059	-0.005567	-0.004325	-0.009142
0.0840	1414.098	82.279	64.328	134.893	-0.595	20.303	2692.080	-0.005760	-0.004503	-0.009443
0.0880	1452.706	85.043	66.578	138.727	-0.595	20.293	2765.579	-0.005953	-0.004660	-0.009711
0.0920	1461.903	86.059	67.565	140.312	-0.601	20.296	2783.089	-0.006024	-0.004730	-0.009822
0.0960	1462.009	86.323	68.260	140.618	-0.601	20.305	2783.289	-0.006043	-0.004778	-0.009843
0.1000	1479.907	87.893	69.667	142.857	-0.600	20.309	2817.364	-0.006153	-0.004877	-0.010000
0.1040	1480.253	88.117	70.164	142.969	-0.589	20.302	2818.022	-0.006168	-0.004911	-0.010008
0.1080	1475.579	88.325	69.915	142.757	-0.594	20.293	2809.124	-0.006183	-0.004894	-0.009993
0.1120	1463.692	88.047	69.874	142.396	-0.601	20.296	2786.493	-0.006163	-0.004891	-0.009968
0.1160	1448.107	87.547	69.334	141.507	-0.602	20.306	2756.824	-0.006128	-0.004853	-0.009905
0.1200	1403.789	85.306	67.954	138.379	-0.603	20.309	2672.453	-0.005971	-0.004757	-0.009687
0.1240	1336.356	80.444	64.537	132.504	-0.585	20.302	2544.079	-0.005631	-0.004518	-0.009275
0.1280	1274.244	76.095	60.951	127.057	-0.592	20.293	2425.833	-0.005327	-0.004267	-0.008894
0.1320	1210.704	71.802	57.367	121.134	-0.601	20.296	2304.869	-0.005026	-0.004016	-0.008479
0.1360	1139.574	67.090	53.642	114.660	-0.605	20.306	2169.456	-0.004696	-0.003755	-0.008026
0.1400	1066.341	62.325	49.612	107.795	-0.604	20.310	2030.039	-0.004363	-0.003473	-0.007546
0.1440	991.169	57.390	44.983	100.151	-0.596	20.303	1886.930	-0.004017	-0.003149	-0.007011
0.1480	918.732	52.610	40.747	92.411	-0.593	20.294	1749.029	-0.003683	-0.002852	-0.006469
0.1520	839.066	46.689	36.688	84.422	-0.595	20.296	1597.366	-0.003268	-0.002568	-0.005910
0.1560	746.040	40.271	31.392	74.487	-0.595	20.306	1420.269	-0.002819	-0.002197	-0.005214
0.1600	675.121	35.461	27.571	66.747	-0.593	20.309	1285.257	-0.002482	-0.001930	-0.004672
0.1640	620.162	30.805	24.028	59.894	-0.593	20.302	1180.630	-0.002156	-0.001682	-0.004193
0.1680	548.537	25.705	20.191	52.014	-0.597	20.293	1044.273	-0.001799	-0.001413	-0.003641
0.1720	472.117	20.622	16.441	43.094	-0.597	20.296	898.790	-0.001444	-0.001151	-0.003017
0.1760	425.740	16.745	13.999	37.284	-0.596	20.305	810.499	-0.001172	-0.000980	-0.002610
0.1800	353.408	11.809	10.633	28.696	-0.599	20.309	672.798	-0.000827	-0.000744	-0.002009
0.1840	306.414	7.668	8.230	22.358	-0.593	20.302	583.334	-0.000537	-0.000576	-0.001565
0.1880	278.852	5.098	6.339	18.092	-0.593	20.293	530.863	-0.000357	-0.000444	-0.001266
0.1920	264.229	3.611	5.534	16.034	-0.587	20.296	503.025	-0.000253	-0.000387	-0.001122
0.1960	239.914	1.567	4.351	12.701	-0.595	20.306	456.734	-0.000110	-0.000305	-0.000889
0.2000	222.691	-0.127	3.243	9.950	-0.606	20.309	423.946	0.000009	-0.000227	-0.000696
0.2040	220.226	-1.072	3.365	9.257	-0.597	20.303	419.254	0.000075	-0.000236	-0.000648
0.2080	218.423	-1.224	2.908	8.297	-0.603	20.293	415.821	0.000086	-0.000204	-0.000581
0.2120	231.047	-0.639	3.227	9.146	-0.613	20.296	439.854	0.000045	-0.000226	-0.000640
0.2160	263.809	0.984	3.935	12.285	-0.607	20.306	502.224	-0.000069	-0.000275	-0.000860
0.2200	316.453	4.987	5.089	18.317	-0.615	20.309	602.446	-0.000349	-0.000356	-0.001282
0.2240	359.870	7.920	6.465	22.970	-0.600	20.302	685.101	-0.000554	-0.000453	-0.001608
0.2280	407.781	11.060	8.131	28.210	-0.603	20.293	776.310	-0.000774	-0.000569	-0.001975
0.2320	481.676	16.479	11.245	36.644	-0.599	20.295	916.986	-0.001154	-0.000787	-0.002565
0.2360	527.392	19.328	13.621	41.453	-0.600	20.306	1004.019	-0.001353	-0.000953	-0.002902
0.2400	585.627	23.428	16.566	48.319	-0.597	20.308	1114.883	-0.001640	-0.001160	-0.003382
0.2440	701.301	30.988	22.666	60.283	-0.601	20.302	1335.096	-0.002169	-0.001587	-0.004220
0.2480	799.617	38.214	28.017	70.733	-0.604	20.293	1522.264	-0.002675	-0.001961	-0.004951
0.2520	852.607	42.244	31.256	76.987	-0.605	20.296	1623.144	-0.002957	-0.002188	-0.005389
0.2560	904.951	45.759	33.923	82.184	-0.602	20.306	1722.794	-0.003203	-0.002375	-0.005753
0.2600	1011.637	53.264	39.843	93.815	-0.601	20.309	1925.898	-0.003728	-0.002789	-0.006567
0.2640	1088.583	58.558	44.260	101.457	-0.595	20.302	2072.382	-0.004099	-0.003098	-0.007102
0.2680	1157.518	63.268	48.153	108.491	-0.603	20.293	2203.617	-0.004429	-0.003371	-0.007594
0.2720	1244.247	69.382	53.029	117.440	-0.608	20.296	2368.727	-0.004857	-0.003712	-0.008221
0.2760	1309.560	74.344	57.533	124.164	-0.615	20.305	2493.067	-0.005204	-0.004027	-0.008691
0.2800	1348.709	77.734	60.479	128.222	-0.616	20.309	2567.596	-0.005441	-0.004234	-0.008976
0.2840	1367.345	79.331	62.063	130.530	-0.609	20.302	2603.073	-0.005553	-0.004344	-0.009137
0.2880	1415.015	82.569	64.675	134.976	-0.612	20.293	2693.825	-0.005780	-0.004527	-0.009448
0.2920	1446.605	85.307	66.939	138.712	-0.614	20.296	2753.963	-0.005971	-0.004686	-0.009710
0.2960	1453.833	86.084	67.734	139.659	-0.612	20.305	2767.725	-0.006026	-0.004741	-0.009776
0.3000	1488.023	88.657	69.361	143.397	-0.612	20.309	2832.813	-0.006206	-0.004855	-0.010038
0.3040	1504.464	89.601	70.886	145.257	-0.601	20.302	2864.113	-0.006272	-0.004962	-0.010168
0.3080	1495.868	89.364	70.774	144.798	-0.609	20.293	2847.748	-0.006256	-0.004954	-0.010136
0.3120	1482.087	89.211	70.775	144.271	-0.605	20.295	2821.512	-0.006245	-0.004954	-0.010099
0.3160	1456.523	87.729	70.453	142.399	-0.611	20.305	2772.846	-0.006141	-0.004932	-0.009968
0.3200	1409.169	85.265	68.985	139.229	-0.607	20.309	2682.695	-0.005969	-0.004829	-0.009746
0.3240	1336.657	80.543	64.994	132.962	-0.601	20.302	2544.651	-0.005638	-0.004550	-0.009307
0.3280	1301.911	78.275	62.772	129.458	-0.596	20.293	2478.504	-0.005479	-0.004394	-0.009062
0.3320	1233.862	74.204	58.923	123.732	-0.599	20.296	2348.957	-0.005194	-0.004125	-0.008661
0.3360	1133.142	67.047	53.279	114.508	-0.602	20.306	2157.211	-0.004693	-0.003730	-0.008016
0.3400	1088.117	63.809	50.460	109.906	-0.603	20.309	2071.495	-0.004467	-0.003532	-0.007693
0.3440	1002.545	57.987	45.858	101.569	-0.598	20.302	1908.588	-0.004059	-0.003210	-0.007110
0.3480	909.715	51.552	40.663	91.923	-0.595	20.293	1731.863	-0.003609	-0.002846	-0.006435
0.3520	854.365	47.719	37.660	85.895	-0.593	20.296	1626.492	-0.003340	-0.002636	-0.006013
0.3560	777.825	42.536	33.490	77.959	-0.596	20.306	1480.780	-0.002977	-0.002344	-0.005457
0.3600	704.547	37.907	29.365	70.066	-0.599	20.309	1341.276	-0.002653	-0.002056	-0.004905
0.3640	638.767	32.710	25.626	62.535	-0.589	20.302	1216.049	-0.002290	-0.001794	-0.004377
0.3680	571.170	27.679	21.443	54.501	-0.592	20.293	1087.360	-0.001938	-0.001501	-0.003815
0.3720	482.953	21.109	16.900	44.692	-0.587	20.296	919.418	-0.001478	-0.001183	-0.003128
0.3760	426.852	16.715	14.052	37.855	-0.595	20.305	812.616	-0.001170	-0.000984	-0.002650
0.3800	356.369	11.655	10.714	29.101	-0.597	20.308	678.434	-0.000816	-0.000750	-0.002037
0.3840	310.397	7.836	8.438	23.234	-0.603	20.301	590.916	-0.000549	-0.000591	-0.001626
0.3880	293.099	6.181	7.256	20.330	-0.599	20.292	557.985	-0.000433	-0.000508	-0.001423
0.3920	258.609	3.514	6.006	15.577	-0.603	20.295	492.325	-0.000246	-0.000420	-0.001090
0.3960	245.910	2.237	5.046	13.523	-0.601	20.305	468.149	-0.000157	-0.000353	-0.000947
0.4000	231.888	0.929	4.434	11.505	-0.612	20.309	441.456	-0.000065	-0.000310	-0.000805
0.4040	227.245	-0.084	3.588	9.949	-0.599	20.302	432.615	0.000006	-0.000251	-0.000696
0.4080	235.600	-0.181	3.462	10.462	-0.596	20.293	448.523	0.000013	-0.000242	-0.000732
0.4120	239.673	-0.362	3.754	10.657	-0.597	20.296	456.276	0.000025	-0.000263	-0.000746
0.4160	258.353	1.151	4.032	12.104	-0.598	20.305	491.838	-0.000081	-0.000282	-0.000847
0.4200	317.280	4.888	5.214	18.689	-0.609	20.309	604.019	-0.000342	-0.000365	-0.001308
0.4240	338.304	6.665	6.032	21.218	-0.596	20.302	644.045	-0.000467	-0.000422	-0.001485
0.4280	389.777	10.072	7.630	26.347	-0.609	20.293	742.035	-0.000705	-0.000534	-0.001844
0.4320	483.524	16.647	11.785	36.756	-0.608	20.295	920.506	-0.001165	-0.000825	-0.002573
0.4360	544.750	20.954	14.748	43.607	-0.612	20.305	1037.064	-0.001467	-0.001032	-0.003052
0.4400	604.863	25.260	17.623	50.376	-0.613	20.308	1151.505	-0.001768	-0.001234	-0.003526
0.4440	688.617	30.543	21.750	59.213	-0.599	20.302	1310.949	-0.002138	-0.001522	-0.004145
0.4480	767.155	35.934	26.045	67.843	-0.599	20.293	1460.466	-0.002515	-0.001823	-0.004749
0.4520	859.430	42.229	31.172	77.696	-0.591	20.296	1636.133	-0.002956	-0.002182	-0.005439
0.4560	934.181	48.121	35.701	85.602	-0.607	20.305	1778.440	-0.003368	-0.002499	-0.005992
0.4600	1002.710	53.000	39.744	93.022	-0.601	20.308	1908.903	-0.003710	-0.002782	-0.006512
0.4640	1078.409	58.086	43.941	100.791	-0.593	20.302	2053.013	-0.004066	-0.003076	-0.007055
0.4680	1155.730	63.547	48.416	108.601	-0.601	20.292	2200.212	-0.004448	-0.003389	-0.007602
0.4720	1235.395	69.370	53.265	116.772	-0.593	20.296	2351.875	-0.004856	-0.003729	-0.008174
0.4760	1297.853	73.636	56.783	123.051	-0.595	20.305	2470.779	-0.005154	-0.003975	-0.008614
0.4800	1343.945	77.234	60.048	127.929	-0.605	20.308	2558.527	-0.005406	-0.004203	-0.008955
0.4840	1398.123	81.043	63.439	133.433	-0.593	20.301	2661.667	-0.005673	-0.004441	-0.009340
0.4880	1448.363	84.737	66.690	138.560	-0.597	20.292	2757.311	-0.005932	-0.004668	-0.009699
0.4920	1491.750	88.101	69.582	143.187	-0.588	20.295	2839.909	-0.006167	-0.004871	-0.010023
0.4960	1506.282	89.779	70.691	144.771	-0.595	20.305	2867.575	-0.006285	-0.004948	-0.010134
0.5000	1503.893	90.324	71.079	145.468	-0.605	20.308	2863.026	-0.006323	-0.004975	-0.010183
0.5040	1490.097	89.767	70.941	144.577	-0.584	20.301	2836.761	-0.006284	-0.004966	-0.010120
0.5080	1471.852	88.989	70.522	143.565	-0.597	20.292	2802.029	-0.006229	-0.004937	-0.010050
0.5120	1458.327	88.074	70.163	142.703	-0.592	20.295	2776.279	-0.006165	-0.004911	-0.009989
0.5160	1451.113	87.408	70.052	142.257	-0.593	20.305	2762.547	-0.006119	-0.004904	-0.009958
0.5200	1415.210	85.306	69.110	139.810	-0.607	20.308	2694.197	-0.005971	-0.004838	-0.009787
0.5240	1365.662	82.281	66.731	135.462	-0.594	20.302	2599.869	-0.005760	-0.004671	-0.009482
0.5280	1273.823	76.526	61.298	127.544	-0.601	20.293	2425.032	-0.005357	-0.004291	-0.008928
0.5320	1195.495	71.606	56.893	120.177	-0.600	20.296	2275.915	-0.005012	-0.003982	-0.008412
0.5360	1179.730	70.081	55.739	118.368	-0.604	20.306	2245.903	-0.004906	-0.003902	-0.008286
0.5400	1099.133	65.172	51.764	111.354	-0.601	20.309	2092.466	-0.004562	-0.003623	-0.007795
0.5440	967.559	56.390	43.997	98.289	-0.595	20.302	1841.984	-0.003947	-0.003080	-0.006880
0.5480	871.618	49.374	38.271	88.243	-0.601	20.292	1659.336	-0.003456	-0.002679	-0.006177
0.5520	778.396	42.772	33.242	78.361	-0.591	20.295	1481.867	-0.002994	-0.002327	-0.005485
0.5560	714.075	38.186	29.781	71.261	-0.589	20.305	1359.415	-0.002673	-0.002085	-0.004988
0.5600	687.039	36.213	28.113	67.718	-0.600	20.308	1307.945	-0.002535	-0.001968	-0.004740
0.5640	631.058	31.863	25.253	61.341	-0.580	20.302	1201.372	-0.002230	-0.001768	-0.004294
0.5680	547.034	26.206	20.526	52.322	-0.595	20.292	1041.412	-0.001834	-0.001437	-0.003663
0.5720	492.992	22.038	17.567	45.593	-0.593	20.295	938.530	-0.001543	-0.001230	-0.003192
0.5760	440.408	18.478	14.719	39.327	-0.597	20.305	838.423	-0.001293	-0.001030	-0.002753
0.5800	376.341	13.116	11.633	31.782	-0.595	20.308	716.457	-0.000918	-0.000814	-0.002225
0.5840	336.802	9.838	9.175	26.320	-0.588	20.301	641.184	-0.000689	-0.000642	-0.001842
0.5880	292.438	6.029	7.270	20.482	-0.599	20.292	556.726	-0.000422	-0.000509	-0.001434
0.5920	255.152	3.224	5.616	15.578	-0.595	20.295	485.744	-0.000226	-0.000393	-0.001090
0.5960	228.357	1.012	4.296	11.686	-0.593	20.305	434.732	-0.000071	-0.000301	-0.000818
0.6000	211.810	-0.056	3.589	8.784	-0.597	20.308	403.233	0.000004	-0.000251	-0.000615
0.6040	207.031	-1.264	2.964	7.755	-0.587	20.302	394.135	0.000089	-0.000207	-0.000543
0.6080	210.924	-1.306	2.783	7.546	-0.589	20.292	401.545	0.000091	-0.000195	-0.000528
0.6120	219.280	-1.111	2.754	8.381	-0.590	20.296	417.452	0.000078	-0.000193	-0.000587
0.6160	228.462	-0.892	2.866	8.923	-0.595	20.305	434.933	0.000062	-0.000201	-0.000625
0.6200	251.561	0.151	3.227	10.949	-0.597	20.308	478.907	-0.000011	-0.000226	-0.000766
0.6240	308.759	3.707	4.420	17.176	-0.595	20.301	587.797	-0.000259	-0.000309	-0.001202
0.6280	390.258	9.545	7.270	25.946	-0.597	20.292	742.950	-0.000668	-0.000509	-0.001816
0.6320	457.495	14.574	10.673	33.837	-0.595	20.295	870.953	-0.001020	-0.000747	-0.002369
0.6360	518.210	18.842	13.623	40.606	-0.596	20.305	986.538	-0.001319	-0.000954	-0.002842
0.6400	591.683	24.540	17.387	48.735	-0.595	20.308	1126.413	-0.001718	-0.001217	-0.003411
0.6440	674.730	29.694	21.513	57.823	-0.598	20.301	1284.513	-0.002079	-0.001506	-0.004048
0.6480	758.469	35.490	25.530	66.524	-0.596	20.292	1443.930	-0.002484	-0.001787	-0.004657
0.6520	835.835	40.936	29.543	74.900	-0.595	20.295	1591.215	-0.002866	-0.002068	-0.005243
0.6560	929.597	47.161	34.909	84.964	-0.591	20.305	1769.714	-0.003301	-0.002444	-0.005947
0.6600	1020.910	53.667	40.509	94.677	-0.597	20.308	1943.550	-0.003757	-0.002836	-0.006627
0.6640	1102.604	59.546	45.220	103.139	-0.595	20.300	2099.075	-0.004168	-0.003165	-0.007220
0.6680	1167.737	64.173	49.206	110.019	-0.598	20.292	2223.072	-0.004492	-0.003444	-0.007701
0.6720	1232.871	69.063	53.155	116.702	-0.595	20.295	2347.069	-0.004834	-0.003721	-0.008169
0.6760	1296.035	73.343	57.143	123.038	-0.600	20.305	2467.318	-0.005134	-0.004000	-0.008613
0.6800	1357.862	78.555	60.979	129.432	-0.603	20.308	2585.020	-0.005499	-0.004269	-0.009060
0.6840	1398.949	81.376	63.551	133.862	-0.599	20.301	2663.240	-0.005696	-0.004449	-0.009370
0.6880	1422.514	83.046	65.187	136.215	-0.596	20.292	2708.101	-0.005813	-0.004563	-0.009535
0.6920	1449.144	85.419	66.925	139.283	-0.594	20.295	2758.799	-0.005979	-0.004685	-0.009750
0.6960	1473.415	87.019	68.819	141.815	-0.598	20.305	2805.004	-0.006091	-0.004817	-0.009927
0.7000	1486.715	88.600	70.247	143.620	-0.601	20.308	2830.324	-0.006202	-0.004917	-0.010053
0.7040	1494.575	89.574	70.928	144.506	-0.601	20.301	2845.287	-0.006270	-0.004965	-0.010115
0.7080	1489.225	89.740	70.787	144.272	-0.608	20.292	2835.102	-0.006282	-0.004955	-0.010099
0.7120	1481.741	89.504	70.649	144.368	-0.595	20.295	2820.854	-0.006265	-0.004945	-0.010106
0.7160	1468.200	89.017	70.385	143.590	-0.603	20.305	2795.076	-0.006231	-0.004927	-0.010051
0.7200	1417.705	86.325	69.025	140.203	-0.607	20.308	2698.946	-0.006043	-0.004832	-0.009814
0.7240	1321.343	79.553	63.954	131.683	-0.608	20.301	2515.497	-0.005569	-0.004477	-0.009218
0.7280	1276.182	76.236	61.131	127.291	-0.595	20.292	2429.523	-0.005337	-0.004279	-0.008910
0.7320	1226.589	73.092	58.381	123.012	-0.591	20.295	2335.110	-0.005116	-0.004087	-0.008611
0.7360	1141.077	67.535	53.877	115.423	-0.588	20.305	2172.318	-0.004727	-0.003771	-0.008080
0.7400	1094.684	64.422	51.322	110.768	-0.601	20.307	2083.998	-0.004510	-0.003593	-0.007754
0.7440	1029.581	60.101	47.598	104.057	-0.593	20.301	1960.058	-0.004207	-0.003332	-0.007284
0.7480	950.877	54.640	42.692	96.246	-0.593	20.292	1810.226	-0.003825	-0.002988	-0.006737
0.7520	869.003	49.428	38.617	87.798	-0.591	20.295	1654.358	-0.003460	-0.002703	-0.006146
0.7560	782.634	43.270	33.519	78.642	-0.589	20.305	1489.935	-0.003029	-0.002346	-0.005505
0.7600	698.566	37.143	28.947	70.052	-0.583	20.308	1329.889	-0.002600	-0.002026	-0.004904
0.7640	624.566	31.571	25.030	61.340	-0.587	20.301	1189.013	-0.002210	-0.001752	-0.004294
0.7680	548.477	25.888	20.750	52.640	-0.593	20.292	1044.159	-0.001812	-0.001453	-0.003685
0.7720	485.703	21.662	17.498	45.109	-0.594	20.295	924.654	-0.001516	-0.001225	-0.003158
0.7760	424.012	17.145	14.205	37.630	-0.595	20.305	807.209	-0.001200	-0.000994	-0.002634
0.7800	362.846	12.686	11.173	30.309	-0.595	20.308	690.765	-0.000888	-0.000782	-0.002122
0.7840	311.839	8.265	8.523	23.484	-0.589	20.301	593.662	-0.000579	-0.000597	-0.001644
0.7880	262.231	4.530	6.033	16.841	-0.596	20.292	499.220	-0.000317	-0.000422	-0.001179
0.7920	240.920	2.084	4.755	13.730	-0.596	20.296	458.651	-0.000146	-0.000333	-0.000961
0.7960	232.249	1.276	4.031	12.032	-0.590	20.305	442.142	-0.000089	-0.000282	-0.000842
0.8000	228.312	0.678	3.950	11.407	-0.601	20.308	434.647	-0.000047	-0.000277	-0.000798
0.8040	218.889	-0.448	3.409	9.659	-0.593	20.302	416.708	0.000031	-0.000239	-0.000676
0.8080	201.982	-2.239	2.740	6.920	-0.602	20.292	384.521	0.000157	-0.000192	-0.000484
0.8120	210.187	-1.919	2.643	7.421	-0.595	20.296	400.143	0.000134	-0.000185	-0.000519
0.8160	239.012	-0.349	3.159	9.978	-0.596	20.305	455.017	0.000024	-0.000221	-0.000698
0.8200	314.860	4.957	5.032	18.427	-0.602	20.307	599.413	-0.000347	-0.000352	-0.001290
0.8240	374.117	9.142	6.813	25.153	-0.593	20.301	712.223	-0.000640	-0.000477	-0.001761
0.8280	423.155	12.451	9.078	30.377	-0.591	20.292	805.578	-0.000872	-0.000635	-0.002126
0.8320	479.031	16.270	11.340	36.881	-0.598	20.295	911.951	-0.001139	-0.000794	-0.002582
0.8360	532.351	20.148	14.149	42.775	-0.590	20.305	1013.460	-0.001410	-0.000990	-0.002994
0.8400	615.519	25.818	18.483	51.583	-0.594	20.308	1171.789	-0.001807	-0.001294	-0.003611
0.8440	679.915	30.335	21.958	59.102	-0.588	20.301	1294.384	-0.002123	-0.001537	-0.004137
0.8480	733.131	33.961	24.807	64.396	-0.595	20.292	1395.693	-0.002377	-0.001737	-0.004508
0.8520	865.035	43.133	31.421	78.266	-0.591	20.295	1646.805	-0.003019	-0.002199	-0.005479
0.8560	938.659	48.373	35.800	86.060	-0.587	20.305	1786.966	-0.003386	-0.002506	-0.006024
0.8600	1031.189	54.971	40.869	95.788	-0.584	20.308	1963.120	-0.003848	-0.002861	-0.006705
0.8640	1117.317	60.599	46.000	105.001	-0.589	20.301	2127.085	-0.004242	-0.003220	-0.007350
0.8680	1145.360	63.074	47.930	108.073	-0.592	20.292	2180.471	-0.004415	-0.003355	-0.007565
0.8720	1234.914	69.148	53.293	116.994	-0.589	20.296	2350.960	-0.004840	-0.003730	-0.008190
0.8760	1321.959	75.610	58.507	125.580	-0.585	20.305	2516.670	-0.005293	-0.004095	-0.008791
0.8800	1348.153	78.012	60.838	129.001	-0.587	20.308	2566.538	-0.005461	-0.004259	-0.009030
0.8840	1373.086	79.791	62.495	131.516	-0.579	20.301	2614.002	-0.005585	-0.004375	-0.009206
0.8880	1437.798	84.544	66.105	137.548	-0.594	20.292	2737.198	-0.005918	-0.004627	-0.009628
0.8920	1459.243	86.448	67.732	140.464	-0.589	20.295	2778.025	-0.006051	-0.004741	-0.009833
0.8960	1468.606	87.214	68.511	141.618	-0.588	20.305	2795.849	-0.006105	-0.004796	-0.009913
0.9000	1515.149	90.270	71.513	145.979	-0.592	20.307	2884.455	-0.006319	-0.005006	-0.010219
0.9040	1519.477	91.171	72.149	147.066	-0.593	20.300	2892.694	-0.006382	-0.005050	-0.010295
0.9080	1512.639	91.228	72.136	146.830	-0.595	20.291	2879.677	-0.006386	-0.005050	-0.010278
0.9120	1497.491	90.783	72.122	145.884	-0.596	20.295	2850.838	-0.006355	-0.005049	-0.010212
0.9160	1443.464	87.839	70.623	142.328	-0.597	20.305	2747.984	-0.006149	-0.004944	-0.009963
0.9200	1374.002	83.793	67.524	136.686	-0.594	20.308	2615.747	-0.005866	-0.004727	-0.009568
0.9240	1346.786	81.531	65.660	133.932	-0.577	20.301	2563.934	-0.005707	-0.004596	-0.009375
0.9280	1285.004	77.846	62.145	128.749	-0.585	20.292	2446.318	-0.005449	-0.004350	-0.009012
0.9320	1188.973	71.036	56.475	119.885	-0.596	20.295	2263.498	-0.004973	-0.003953	-0.008392
0.9360	1134.434	67.130	53.293	114.855	-0.598	20.305	2159.672	-0.004699	-0.003731	-0.008040
0.9400	1073.855	63.309	50.097	108.934	-0.596	20.307	2044.344	-0.004432	-0.003507	-0.007625
0.9440	989.320	57.446	45.151	100.569	-0.589	20.301	1883.411	-0.004021	-0.003161	-0.007040
0.9480	904.019	51.469	40.620	91.938	-0.607	20.292	1721.020	-0.003603	-0.002843	-0.006436
0.9520	853.854	47.957	37.588	86.369	-0.600	20.295	1625.519	-0.003357	-0.002631	-0.006046
0.9560	788.691	43.898	33.964	79.238	-0.600	20.305	1501.465	-0.003073	-0.002377	-0.005547
0.9600	720.687	39.074	30.421	71.942	-0.600	20.307	1372.004	-0.002735	-0.002129	-0.005036
0.9640	641.488	33.392	25.738	63.257	-0.596	20.301	1221.228	-0.002337	-0.001802	-0.004428
0.9680	558.561	27.416	21.026	53.920	-0.599	20.291	1063.356	-0.001919	-0.001472	-0.003774
0.9720	486.650	21.883	17.302	45.318	-0.596	20.295	926.456	-0.001532	-0.001211	-0.003172
0.9760	419.293	16.800	13.830	37.535	-0.604	20.305	798.225	-0.001176	-0.000968	-0.002627
0.9800	363.447	12.726	11.242	30.697	-0.603	20.308	691.910	-0.000891	-0.000787	-0.002149
0.9840	322.705	9.156	8.939	25.042	-0.588	20.300	614.347	-0.000641	-0.000626	-0.001753
0.9880	301.891	7.434	7.937	21.745	-0.597	20.292	574.722	-0.000520	-0.000556	-0.001522
0.9920	283.000	5.666	6.906	19.164	-0.589	20.295	538.759	-0.000397	-0.000483	-0.001341
0.9960	238.937	2.109	5.059	13.506	-0.600	20.305	454.874	-0.000148	-0.000354	-0.000945
1.0000	217.491	0.234	3.826	10.229	-0.605	20.308	414.047	-0.000016	-0.000268	-0.000716
1.0040	210.127	-0.778	3.202	8.658	-0.592	20.302	400.028	0.000054	-0.000224	-0.000606
1.0080	208.369	-1.237	2.824	7.824	-0.608	20.292	396.681	0.000087	-0.000198	-0.000548
1.0120	212.607	-1.501	2.616	8.295	-0.608	20.295	404.749	0.000105	-0.000183	-0.000581
1.0160	219.565	-1.112	2.936	8.423	-0.605	20.306	417.995	0.000078	-0.000206	-0.000590
1.0200	261.960	1.095	3.781	12.758	-0.610	20.307	498.705	-0.000077	-0.000265	-0.000893
1.0240	377.003	8.919	7.213	25.249	-0.600	20.300	717.716	-0.000624	-0.000505	-0.001767
1.0280	459.178	15.117	10.897	34.504	-0.600	20.291	874.157	-0.001058	-0.000763	-0.002415
1.0320	482.878	17.103	12.175	37.562	-0.595	20.295	919.275	-0.001197	-0.000852	-0.002629
1.0360	544.660	21.274	14.690	43.953	-0.595	20.305	1036.892	-0.001489	-0.001028	-0.003077
1.0400	620.448	26.416	18.831	52.655	-0.597	20.307	1181.173	-0.001849	-0.001318	-0.003686
1.0440	674.655	29.820	21.484	58.517	-0.592	20.301	1284.370	-0.002087	-0.001504	-0.004096
1.0480	780.050	37.087	26.988	69.608	-0.596	20.292	1485.014	-0.002596	-0.001889	-0.004873
1.0520	844.957	41.940	30.684	76.820	-0.599	20.295	1608.582	-0.002936	-0.002148	-0.005377
1.0560	934.286	47.746	35.602	86.102	-0.606	20.305	1778.641	-0.003342	-0.002492	-0.006027
1.0600	1039.981	55.361	41.747	97.416	-0.598	20.307	1979.856	-0.003875	-0.002922	-0.006819
1.0640	1106.647	60.517	45.788	104.280	-0.591	20.300	2106.771	-0.004236	-0.003205	-0.007300
1.0680	1151.492	63.826	48.581	108.809	-0.592	20.291	2192.144	-0.004468	-0.003401	-0.007617
1.0720	1220.682	68.550	52.585	116.102	-0.596	20.295	2323.866	-0.004798	-0.003681	-0.008127
1.0760	1291.677	73.384	56.561	122.817	-0.600	20.305	2459.021	-0.005137	-0.003959	-0.008597
1.0800	1355.773	78.374	60.964	129.500	-0.600	20.307	2581.043	-0.005486	-0.004268	-0.009065
1.0840	1397.281	81.210	63.550	133.849	-0.597	20.300	2660.065	-0.005685	-0.004449	-0.009369
1.0880	1415.300	82.905	65.410	135.837	-0.599	20.291	2694.368	-0.005803	-0.004579	-0.009509
1.0920	1473.175	87.045	68.636	141.688	-0.593	20.295	2804.546	-0.006093	-0.004805	-0.009918
1.0960	1506.237	89.906	71.177	145.270	-0.603	20.305	2867.489	-0.006293	-0.004982	-0.010169
1.1000	1505.110	90.379	71.428	145.911	-0.606	20.307	2865.343	-0.006327	-0.005000	-0.010214
1.1040	1518.155	91.269	72.471	147.248	-0.599	20.300	2890.177	-0.006389	-0.005073	-0.010307
1.1080	1506.868	90.852	72.094	146.650	-0.598	20.291	2868.690	-0.006360	-0.005047	-0.010265
1.1120	1492.321	90.268	71.857	145.996	-0.597	20.295	2840.996	-0.006319	-0.005030	-0.010220
1.1160	1476.842	89.880	71.788	145.064	-0.603	20.305	2811.527	-0.006292	-0.005025	-0.010154
1.1200	1413.572	86.043	69.552	140.174	-0.609	20.307	2691.078	-0.006023	-0.004869	-0.009812
1.1240	1346.455	81.432	66.038	134.307	-0.605	20.300	2563.305	-0.005700	-0.004623	-0.009402
1.1280	1313.032	79.402	63.940	131.016	-0.612	20.290	2499.676	-0.005558	-0.004476	-0.009171
1.1320	1251.671	75.414	60.533	125.748	-0.597	20.295	2382.860	-0.005279	-0.004237	-0.008802
1.1360	1159.682	69.869	55.225	117.578	-0.595	20.305	2207.737	-0.004891	-0.003866	-0.008230
1.1400	1078.995	64.491	50.473	109.948	-0.595	20.308	2054.129	-0.004514	-0.003533	-0.007696
1.1440	1012.374	59.324	46.680	103.194	-0.590	20.300	1927.299	-0.004153	-0.003268	-0.007224
1.1480	915.801	52.608	40.953	93.135	-0.599	20.291	1743.450	-0.003683	-0.002867	-0.006519
1.1520	838.720	47.231	36.896	84.849	-0.588	20.295	1596.708	-0.003306	-0.002583	-0.005939
1.1560	787.804	43.037	33.700	79.321	-0.596	20.305	1499.777	-0.003013	-0.002359	-0.005552
1.1600	721.634	39.240	30.437	72.164	-0.599	20.307	1373.806	-0.002747	-0.002131	-0.005051
1.1640	611.731	31.252	24.667	60.449	-0.605	20.300	1164.579	-0.002188	-0.001727	-0.004231
1.1680	543.247	26.262	20.763	52.266	-0.606	20.291	1034.203	-0.001838	-0.001453	-0.003659
1.1720	479.572	21.872	17.234	44.649	-0.604	20.295	912.981	-0.001531	-0.001206	-0.003125
1.1760	398.283	15.688	13.203	35.128	-0.610	20.305	758.228	-0.001098	-0.000924	-0.002459
1.1800	338.800	11.102	9.938	27.708	-0.610	20.307	644.989	-0.000777	-0.000696	-0.001940
1.1840	300.839	7.835	7.814	22.484	-0.608	20.300	572.720	-0.000548	-0.000547	-0.001574
1.1880	261.615	4.293	6.089	17.036	-0.607	20.291	498.047	-0.000301	-0.000426	-0.001193
1.1920	229.559	1.442	4.530	12.632	-0.609	20.295	437.021	-0.000101	-0.000317	-0.000884
1.1960	207.753	-0.195	3.617	9.144	-0.611	20.305	395.508	0.000014	-0.000253	-0.000640
1.2000	203.425	-1.224	3.354	8.214	-0.621	20.307	387.268	0.000086	-0.000235	-0.000575
1.2040	204.582	-1.223	2.949	7.766	-0.599	20.301	389.471	0.000086	-0.000206	-0.000544
1.2080	212.607	-1.167	2.894	8.031	-0.602	20.292	404.749	0.000082	-0.000203	-0.000562
1.2120	226.568	-0.292	2.741	9.034	-0.599	20.295	431.328	0.000020	-0.000192	-0.000632
1.2160	254.236	0.997	3.254	11.821	-0.595	20.305	483.999	-0.000070	-0.000228	-0.000827
1.2200	306.865	4.821	4.711	17.857	-0.613	20.307	584.192	-0.000337	-0.000330	-0.001250
1.2240	366.077	8.460	6.535	24.319	-0.605	20.300	696.917	-0.000592	-0.000457	-0.001702
1.2280	413.416	11.627	8.604	29.695	-0.617	20.291	787.039	-0.000814	-0.000602	-0.002079
1.2320	459.869	15.298	10.965	34.950	-0.612	20.295	875.473	-0.001071	-0.000768	-0.002446
1.2360	518.570	19.246	13.830	41.660	-0.611	20.305	987.225	-0.001347	-0.000968	-0.002916
1.2400	606.276	25.624	18.220	51.042	-0.612	20.307	1154.194	-0.001794	-0.001275	-0.003573
1.2440	687.054	30.974	22.081	59.699	-0.596	20.300	1307.974	-0.002168	-0.001546	-0.004179
1.2480	764.495	36.378	26.169	68.051	-0.610	20.291	1455.402	-0.002546	-0.001832	-0.004764
1.2520	847.227	41.783	30.713	76.988	-0.601	20.295	1612.902	-0.002925	-0.002150	-0.005389
1.2560	915.876	46.538	34.507	84.450	-0.605	20.305	1743.593	-0.003258	-0.002415	-0.005911
1.2600	1018.325	53.875	40.509	95.010	-0.613	20.307	1938.629	-0.003771	-0.002836	-0.006651
1.2640	1101.672	59.990	45.222	103.543	-0.597	20.299	2097.301	-0.004199	-0.003166	-0.007248
1.2680	1146.382	63.130	48.193	108.767	-0.605	20.291	2182.417	-0.004419	-0.003374	-0.007614
1.2720	1229.504	69.022	53.115	116.952	-0.603	20.295	2340.660	-0.004832	-0.003718	-0.008187
1.2760	1300.904	74.594	57.589	123.816	-0.610	20.305	2476.587	-0.005222	-0.004031	-0.008667
1.2800	1363.918	79.234	61.810	130.486	-0.618	20.307	2596.550	-0.005546	-0.004327	-0.009134
1.2840	1400.107	81.974	63.746	134.337	-0.603	20.300	2665.443	-0.005738	-0.004462	-0.009404
1.2880	1411.724	82.933	64.705	135.882	-0.613	20.290	2687.559	-0.005805	-0.004529	-0.009512
1.2920	1457.154	85.946	67.608	140.257	-0.603	20.295	2774.048	-0.006016	-0.004733	-0.009818
1.2960	1491.645	88.765	69.887	143.981	-0.611	20.305	2839.708	-0.006214	-0.004892	-0.010079
1.3000	1492.216	89.519	70.690	144.632	-0.623	20.307	2840.796	-0.006266	-0.004948	-0.010124
1.3040	1498.047	89.905	71.177	145.313	-0.617	20.300	2851.896	-0.006293	-0.004982	-0.010172
1.3080	1498.017	90.296	71.386	145.870	-0.613	20.291	2851.839	-0.006321	-0.004997	-0.010211
1.3120	1485.137	89.960	71.231	145.159	-0.612	20.295	2827.320	-0.006297	-0.004986	-0.010161
1.3160	1453.758	88.406	70.511	142.896	-0.612	20.305	2767.582	-0.006188	-0.004936	-0.010003
1.3200	1377.188	83.667	67.384	137.215	-0.611	20.307	2621.813	-0.005857	-0.004717	-0.009605
1.3240	1343.089	81.182	65.132	133.822	-0.600	20.299	2556.896	-0.005683	-0.004559	-0.009368
1.3280	1301.069	78.722	62.759	130.334	-0.602	20.291	2476.902	-0.005511	-0.004393	-0.009123
1.3320	1195.931	71.537	57.117	120.913	-0.606	20.295	2276.745	-0.005008	-0.003998	-0.008464
1.3360	1139.950	67.576	53.934	115.799	-0.596	20.305	2170.172	-0.004730	-0.003775	-0.008106
1.3400	1063.666	62.948	49.831	108.392	-0.604	20.307	2024.946	-0.004406	-0.003488	-0.007587
1.3440	993.573	57.891	45.860	101.166	-0.598	20.300	1891.508	-0.004052	-0.003210	-0.007082
1.3480	933.339	53.709	42.276	95.023	-0.606	20.290	1776.838	-0.003760	-0.002959	-0.006652
1.3520	853.298	48.497	37.591	86.783	-0.603	20.295	1624.460	-0.003395	-0.002631	-0.006075
1.3560	776.292	42.910	33.299	78.403	-0.592	20.305	1477.861	-0.003004	-0.002331	-0.005488
1.3600	694.433	37.255	28.907	69.650	-0.597	20.307	1322.021	-0.002608	-0.002023	-0.004875
1.3640	624.776	32.016	24.959	61.618	-0.594	20.300	1189.413	-0.002241	-0.001747	-0.004313
1.3680	576.865	28.222	22.180	55.752	-0.597	20.290	1098.204	-0.001976	-0.001553	-0.003903
1.3720	499.905	22.776	18.345	47.232	-0.602	20.295	951.691	-0.001594	-0.001284	-0.003306
1.3760	428.851	17.508	14.620	38.702	-0.610	20.305	816.422	-0.001226	-0.001023	-0.002709
1.3800	380.114	14.242	12.146	32.714	-0.615	20.306	723.639	-0.000997	-0.000850	-0.002290
1.3840	337.012	10.753	10.035	27.152	-0.612	20.299	641.584	-0.000753	-0.000702	-0.001901
1.3880	276.613	5.960	6.908	19.372	-0.617	20.290	526.600	-0.000417	-0.000484	-0.001356
1.3920	262.967	3.724	6.215	17.202	-0.607	20.295	500.622	-0.000261	-0.000435	-0.001204
1.3960	261.089	3.472	5.700	16.312	-0.614	20.305	497.046	-0.000243	-0.000399	-0.001142
1.4000	227.109	0.984	4.158	11.797	-0.616	20.307	432.358	-0.000069	-0.000291	-0.000826
1.4040	222.526	0.138	3.756	10.365	-0.610	20.299	423.632	-0.000010	-0.000263	-0.000726
1.4080	227.801	-0.182	3.811	10.504	-0.605	20.290	433.674	0.000013	-0.000267	-0.000735
1.4120	231.407	-0.139	3.797	10.823	-0.601	20.295	440.540	0.000010	-0.000266	-0.000758
1.4160	240.965	0.817	3.992	11.409	-0.604	20.305	458.736	-0.000057	-0.000279	-0.000799
1.4200	284.037	3.598	4.836	15.536	-0.613	20.306	540.733	-0.000252	-0.000338	-0.001087
1.4240	342.963	7.031	6.075	21.915	-0.593	20.300	652.914	-0.000492	-0.000425	-0.001534
1.4280	397.832	10.976	8.215	28.001	-0.591	20.290	757.370	-0.000768	-0.000575	-0.001960
1.4320	470.374	16.076	11.186	36.075	-0.595	20.295	895.472	-0.001125	-0.000783	-0.002525
1.4360	551.573	21.093	15.316	45.051	-0.597	20.305	1050.053	-0.001477	-0.001072	-0.003154
1.4400	613.114	26.069	18.595	52.113	-0.603	20.306	1167.212	-0.001825	-0.001302	-0.003648
1.4440	676.714	30.123	21.694	59.185	-0.592	20.299	1288.290	-0.002109	-0.001519	-0.004143
1.4480	762.166	36.338	26.350	68.106	-0.600	20.290	1450.968	-0.002544	-0.001844	-0.004767
1.4520	850.818	42.439	31.019	77.431	-0.598	20.295	1619.740	-0.002971	-0.002171	-0.005420
1.4560	911.278	46.968	34.616	84.252	-0.609	20.305	1734.838	-0.003288	-0.002423	-0.005898
1.4600	968.085	51.110	38.036	90.007	-0.615	20.306	1842.985	-0.003578	-0.002663	-0.006301
1.4640	1096.908	59.629	44.776	103.042	-0.597	20.299	2088.232	-0.004174	-0.003134	-0.007213
1.4680	1162.147	64.674	48.958	110.285	-0.600	20.290	2212.429	-0.004527	-0.003427	-0.007720
1.4720	1200.319	67.077	51.418	114.256	-0.600	20.295	2285.099	-0.004695	-0.003599	-0.007998
1.4760	1296.591	73.413	57.114	123.192	-0.597	20.305	2468.376	-0.005139	-0.003998	-0.008623
1.4800	1353.609	78.079	61.185	129.472	-0.605	20.306	2576.923	-0.005466	-0.004283	-0.009063
1.4840	1360.056	79.263	61.618	130.724	-0.607	20.299	2589.197	-0.005548	-0.004313	-0.009151
1.4880	1424.783	83.488	65.689	136.728	-0.609	20.290	2712.421	-0.005844	-0.004598	-0.009571
1.4920	1461.633	86.865	68.149	140.687	-0.601	20.294	2782.574	-0.006081	-0.004770	-0.009848
1.4960	1477.578	88.115	69.082	142.534	-0.598	20.305	2812.929	-0.006168	-0.004836	-0.009977
1.5000	1492.832	89.408	70.274	144.660	-0.609	20.307	2841.969	-0.006259	-0.004919	-0.010126
1.5040	1498.994	89.892	71.095	145.425	-0.597	20.298	2853.699	-0.006292	-0.004977	-0.010180
1.5080	1493.643	89.977	70.859	145.383	-0.605	20.290	2843.513	-0.006298	-0.004960	-0.010177
1.5120	1484.551	89.766	70.997	144.968	-0.607	20.295	2826.204	-0.006284	-0.004970	-0.010148
1.5160	1467.855	89.197	70.886	144.270	-0.597	20.305	2794.418	-0.006244	-0.004962	-0.010099
1.5200	1420.470	86.644	69.443	140.938	-0.602	20.306	2704.210	-0.006065	-0.004861	-0.009866
1.5240	1326.873	80.458	64.898	132.780	-0.598	20.298	2526.026	-0.005632	-0.004543	-0.009295
1.5280	1264.986	76.360	61.074	126.779	-0.608	20.290	2408.209	-0.005345	-0.004275	-0.008875
1.5320	1232.675	74.484	59.034	123.970	-0.593	20.295	2346.697	-0.005214	-0.004132	-0.008678
1.5360	1163.484	69.439	54.823	117.603	-0.594	20.305	2214.975	-0.004861	-0.003838	-0.008232
1.5400	1064.372	62.754	49.720	108.809	-0.596	20.307	2026.291	-0.004393	-0.003480	-0.007617
1.5440	1002.214	58.294	45.930	102.014	-0.593	20.299	1907.959	-0.004081	-0.003215	-0.007141
1.5480	935.338	53.680	42.440	95.193	-0.602	20.290	1780.643	-0.003758	-0.002971	-0.006664
1.5520	852.862	48.133	37.744	86.907	-0.585	20.295	1623.631	-0.003369	-0.002642	-0.006083
1.5560	775.721	43.106	33.519	78.292	-0.591	20.305	1476.774	-0.003017	-0.002346	-0.005480
1.5600	694.102	37.224	29.170	69.789	-0.593	20.306	1321.392	-0.002606	-0.002042	-0.004885
1.5640	611.957	31.571	24.376	60.159	-0.581	20.299	1165.009	-0.002210	-0.001706	-0.004211
1.5680	544.209	26.221	20.347	52.723	-0.590	20.290	1036.034	-0.001835	-0.001424	-0.003691
1.5720	466.677	20.469	16.301	43.511	-0.590	20.295	888.433	-0.001433	-0.001141	-0.003046
1.5760	424.492	17.077	14.120	38.242	-0.592	20.305	808.125	-0.001195	-0.000988	-0.002677
1.5800	385.193	13.965	12.261	33.211	-0.602	20.306	733.309	-0.000978	-0.000858	-0.002325
1.5840	337.538	10.309	9.744	27.014	-0.591	20.298	642.586	-0.000722	-0.000682	-0.001891
1.5880	281.136	6.417	7.255	19.817	-0.600	20.290	535.212	-0.000449	-0.000508	-0.001387
1.5920	254.446	3.459	5.992	15.980	-0.596	20.295	484.400	-0.000242	-0.000419	-0.001119
1.5960	230.972	1.610	4.418	12.604	-0.608	20.305	439.711	-0.000113	-0.000309	-0.000882
1.6000	212.291	0.456	3.420	10.005	-0.602	20.306	404.148	-0.000032	-0.000239	-0.000700
1.6040	214.606	-0.598	3.103	9.493	-0.595	20.299	408.554	0.000042	-0.000217	-0.000665
1.6080	221.113	-0.848	3.048	9.521	-0.606	20.290	420.942	0.000059	-0.000213	-0.000666
1.6120	224.104	-0.472	3.105	9.853	-0.605	20.295	426.636	0.000033	-0.000217	-0.000690
1.6160	234.894	-0.113	3.254	10.283	-0.599	20.305	447.178	0.000008	-0.000228	-0.000720
1.6200	280.310	2.443	4.268	15.329	-0.606	20.306	533.638	-0.000171	-0.000299	-0.001073
1.6240	346.270	7.196	6.241	22.400	-0.605	20.298	659.208	-0.000504	-0.000437	-0.001568
1.6280	424.372	12.436	9.411	30.808	-0.609	20.290	807.896	-0.000871	-0.000659	-0.002157
1.6320	496.899	17.868	12.606	39.187	-0.608	20.295	945.969	-0.001251	-0.000882	-0.002743
1.6360	543.352	20.885	14.816	44.456	-0.605	20.304	1034.403	-0.001462	-0.001037	-0.003112
1.6400	649.317	28.458	20.373	55.808	-0.614	20.306	1236.134	-0.001992	-0.001426	-0.003907
1.6440	762.436	36.171	26.044	67.842	-0.605	20.298	1451.483	-0.002532	-0.001823	-0.004749
1.6480	784.273	37.741	27.569	70.817	-0.612	20.290	1493.053	-0.002642	-0.001930	-0.004957
1.6520	835.414	41.187	30.336	76.139	-0.604	20.294	1590.414	-0.002883	-0.002124	-0.005330
1.6560	965.485	49.968	37.577	88.951	-0.597	20.305	1838.036	-0.003498	-0.002630	-0.006227
1.6600	1063.380	57.167	43.329	99.943	-0.609	20.306	2024.403	-0.004002	-0.003033	-0.006996
1.6640	1100.636	60.297	45.693	103.905	-0.607	20.298	2095.327	-0.004221	-0.003199	-0.007273
1.6680	1159.336	64.381	49.139	109.949	-0.611	20.289	2207.079	-0.004507	-0.003440	-0.007696
1.6720	1244.007	69.942	54.002	118.382	-0.610	20.294	2368.269	-0.004896	-0.003780	-0.008287
1.6760	1313.333	75.151	58.158	124.997	-0.617	20.305	2500.248	-0.005261	-0.004071	-0.008750
1.6800	1348.980	78.110	60.713	129.488	-0.618	20.306	2568.111	-0.005468	-0.004250	-0.009064
1.6840	1384.687	80.945	63.105	133.141	-0.608	20.298	2636.089	-0.005666	-0.004417	-0.009320
1.6880	1443.929	84.696	66.815	138.588	-0.614	20.290	2748.871	-0.005929	-0.004677	-0.009701
1.6920	1469.658	87.117	68.791	141.857	-0.612	20.295	2797.852	-0.006098	-0.004815	-0.009930
1.6960	1475.519	88.269	69.666	142.494	-0.624	20.304	2809.010	-0.006179	-0.004877	-0.009975
1.7000	1474.076	88.877	70.106	143.107	-0.611	20.306	2806.263	-0.006221	-0.004907	-0.010018
1.7040	1471.642	88.781	69.970	143.189	-0.605	20.298	2801.628	-0.006215	-0.004898	-0.010023
1.7080	1470.650	88.726	70.053	143.689	-0.615	20.289	2799.740	-0.006211	-0.004904	-0.010058
1.7120	1462.264	88.240	69.557	143.023	-0.609	20.295	2783.775	-0.006177	-0.004869	-0.010012
1.7160	1443.449	87.005	69.334	142.023	-0.610	20.304	2747.955	-0.006090	-0.004853	-0.009942
1.7200	1399.145	85.127	68.428	139.004	-0.611	20.306	2663.612	-0.005959	-0.004790	-0.009730
1.7240	1335.710	80.918	65.244	133.572	-0.596	20.298	2542.849	-0.005664	-0.004567	-0.009350
1.7280	1266.128	76.610	61.506	127.389	-0.608	20.289	2410.383	-0.005363	-0.004305	-0.008917
1.7320	1207.472	72.577	57.951	121.911	-0.596	20.294	2298.717	-0.005080	-0.004057	-0.008534
1.7360	1157.834	69.094	55.086	117.217	-0.601	20.305	2204.218	-0.004837	-0.003856	-0.008205
1.7400	1071.225	63.838	50.153	109.128	-0.608	20.306	2039.337	-0.004469	-0.003511	-0.007639
1.7440	1000.576	58.588	45.790	102.097	-0.601	20.298	1904.840	-0.004101	-0.003205	-0.007147
1.7480	895.708	51.331	40.217	91.632	-0.616	20.289	1705.198	-0.003593	-0.002815	-0.006414
1.7520	847.317	47.679	37.145	85.979	-0.604	20.294	1613.073	-0.003338	-0.002600	-0.006019
1.7560	769.980	42.227	33.047	78.278	-0.604	20.304	1465.845	-0.002956	-0.002313	-0.005479
1.7600	668.884	35.572	28.085	67.065	-0.612	20.305	1273.384	-0.002490	-0.001966	-0.004695
1.7640	622.417	31.793	25.168	61.547	-0.600	20.298	1184.921	-0.002226	-0.001762	-0.004308
1.7680	541.669	26.456	20.971	52.210	-0.604	20.289	1031.199	-0.001852	-0.001468	-0.003655
1.7720	484.456	22.038	17.650	45.289	-0.602	20.295	922.279	-0.001543	-0.001235	-0.003170
1.7760	434.922	18.007	14.968	39.147	-0.593	20.304	827.980	-0.001260	-0.001048	-0.002740
1.7800	372.374	13.923	11.759	32.031	-0.610	20.306	708.904	-0.000975	-0.000823	-0.002242
1.7840	324.644	9.406	9.244	25.598	-0.597	20.297	618.038	-0.000658	-0.000647	-0.001792
1.7880	307.361	7.738	7.910	23.094	-0.605	20.289	585.136	-0.000542	-0.000554	-0.001617
1.7920	269.339	4.709	6.311	18.327	-0.607	20.294	512.753	-0.000330	-0.000442	-0.001283
1.7960	236.382	1.998	4.739	13.230	-0.608	20.304	450.010	-0.000140	-0.000332	-0.000926
1.8000	235.330	1.958	4.962	12.964	-0.608	20.306	448.008	-0.000137	-0.000347	-0.000907
1.8040	230.446	0.859	4.269	11.866	-0.611	20.298	438.709	-0.000060	-0.000299	-0.000831
1.8080	215.868	-0.127	3.436	9.381	-0.615	20.290	410.957	0.000009	-0.000241	-0.000657
1.8120	222.646	-0.001	3.341	9.452	-0.606	20.295	423.861	0.000000	-0.000234	-0.000662
1.8160	237.900	0.485	3.297	10.767	-0.603	20.305	452.900	-0.000034	-0.000231	-0.000754
1.8200	273.367	2.400	4.143	14.578	-0.608	20.306	520.420	-0.000168	-0.000290	-0.001020
1.8240	335.224	6.500	5.713	21.455	-0.597	20.298	638.180	-0.000455	-0.000400	-0.001502
1.8280	410.155	11.614	8.673	29.460	-0.610	20.289	780.830	-0.000813	-0.000607	-0.002062
1.8320	490.257	17.270	12.453	38.410	-0.601	20.294	933.323	-0.001209	-0.000872	-0.002689
1.8360	554.894	22.357	15.690	45.497	-0.599	20.304	1056.376	-0.001565	-0.001098	-0.003185
1.8400	618.960	26.652	19.277	52.696	-0.609	20.305	1178.341	-0.001866	-0.001349	-0.003689
1.8440	693.486	31.821	22.846	60.810	-0.605	20.298	1320.219	-0.002227	-0.001599	-0.004257
1.8480	763.022	36.947	26.656	68.190	-0.606	20.289	1452.599	-0.002586	-0.001866	-0.004773
1.8520	839.096	41.632	30.504	76.625	-0.602	20.294	1597.424	-0.002914	-0.002135	-0.005364
1.8560	923.796	47.469	34.992	85.201	-0.604	20.304	1758.671	-0.003323	-0.002449	-0.005964
1.8600	1014.538	53.528	40.538	95.217	-0.607	20.306	1931.419	-0.003747	-0.002838	-0.006665
1.8640	1088.673	59.004	44.844	102.431	-0.608	20.298	2072.554	-0.004130	-0.003139	-0.007170
1.8680	1168.564	64.868	49.721	110.630	-0.614	20.289	2224.646	-0.004541	-0.003480	-0.007744
1.8720	1212.507	68.201	52.447	115.578	-0.605	20.294	2308.302	-0.004774	-0.003671	-0.008090
1.8760	1280.090	73.176	56.656	121.983	-0.607	20.304	2436.962	-0.005122	-0.003966	-0.008539
1.8800	1344.982	78.261	60.701	128.931	-0.611	20.305	2560.501	-0.005478	-0.004249	-0.009025
1.8840	1394.140	81.487	63.620	133.892	-0.594	20.297	2654.085	-0.005704	-0.004453	-0.009372
1.8880	1417.885	83.253	65.161	136.228	-0.601	20.289	2699.289	-0.005828	-0.004561	-0.009536
1.8920	1455.381	86.143	67.692	140.269	-0.599	20.294	2770.672	-0.006030	-0.004738	-0.009819
1.8960	1465.435	87.200	68.525	141.730	-0.602	20.305	2789.812	-0.006104	-0.004797	-0.009921
1.9000	1473.565	88.143	69.734	142.982	-0.600	20.305	2805.290	-0.006170	-0.004881	-0.010009
1.9040	1491.134	89.641	70.872	144.494	-0.603	20.298	2838.736	-0.006275	-0.004961	-0.010115
1.9080	1488.173	90.017	71.162	145.035	-0.606	20.289	2833.099	-0.006301	-0.004981	-0.010152
1.9120	1476.917	89.477	71.193	144.672	-0.603	20.294	2811.670	-0.006263	-0.004983	-0.010127
1.9160	1461.964	89.197	70.525	143.703	-0.597	20.305	2783.203	-0.006244	-0.004937	-0.010059
1.9200	1393.975	85.045	68.165	138.896	-0.615	20.305	2653.770	-0.005953	-0.004772	-0.009723
1.9240	1300.348	78.610	62.938	130.349	-0.597	20.298	2475.529	-0.005503	-0.004406	-0.009124
1.9280	1289.918	77.583	62.271	129.294	-0.604	20.288	2455.673	-0.005431	-0.004359	-0.009051
1.9320	1231.473	74.261	59.171	124.343	-0.604	20.294	2344.408	-0.005198	-0.004142	-0.008704
1.9360	1126.755	66.660	53.321	114.450	-0.608	20.305	2145.052	-0.004666	-0.003732	-0.008012
1.9400	1103.942	65.480	52.031	112.005	-0.605	20.306	2101.622	-0.004584	-0.003642	-0.007840
1.9440	1011.667	59.239	46.929	103.044	-0.599	20.298	1925.955	-0.004147	-0.003285	-0.007213
1.9480	921.001	53.193	41.956	93.899	-0.596	20.289	1753.349	-0.003724	-0.002937	-0.006573
1.9520	875.390	50.108	38.785	89.033	-0.593	20.295	1666.517	-0.003508	-0.002715	-0.006232
1.9560	767.140	42.312	33.102	77.752	-0.589	20.305	1460.438	-0.002962	-0.002317	-0.005443
1.9600	669.290	35.977	27.821	67.523	-0.610	20.305	1274.157	-0.002518	-0.001947	-0.004727
1.9640	640.060	32.709	25.587	63.283	-0.600	20.298	1218.510	-0.002290	-0.001791	-0.004430
1.9680	566.526	27.903	21.997	55.155	-0.595	20.289	1078.520	-0.001953	-0.001540	-0.003861
1.9720	458.742	20.218	16.425	43.204	-0.599	20.295	873.327	-0.001415	-0.001150	-0.003024
1.9760	392.061	14.992	12.829	34.880	-0.610	20.304	746.384	-0.001049	-0.000898	-0.002442
1.9800	334.322	11.020	10.174	27.793	-0.612	20.305	636.463	-0.000771	-0.000712	-0.001945
1.9840	290.319	7.333	7.715	21.722	-0.600	20.297	552.692	-0.000513	-0.000540	-0.001521
1.9880	252.222	3.988	6.046	16.229	-0.598	20.289	480.165	-0.000279	-0.000423	-0.001136
1.9920	232.114	1.581	4.711	13.160	-0.593	20.294	441.885	-0.000111	-0.000330	-0.000921
1.9960	223.157	0.580	4.141	11.422	-0.598	20.304	424.833	-0.000041	-0.000290	-0.000800
