# Supplementary material for: Evaluation of a Cold-Mixed High-Performance Polyurethane Mixture
Source: Hindawi journal article supplement (doi:10.1155/2019/1507971), 2019-11-07
Supplement: f1 [file 1507971.f1.zip › 1507971.f1/dynamic modulus data/PUM/specimen1/temp20/zhs-1-20_10Hz.csv]

Test Information
****************
Project name	zhs
Operator name	1
Target test temperature	20
Target confining stress	0
Average dynamic strain range from 75 to 125 micro-strain
Contact stress	5
Initial modulus	1000
Axial gauge length	70
Comments
Specimen information
********************
Identification	zhs-1-20
Dimensions	Point 1	Point 2	Point 3	Point 4	Point 5	Point 6	Average	Std Dev.
Diameter (mm)	49.2	49.2	49.3				49.23	0.058
Height (mm)	101.3	101.2	101.3				101.27	0.058
Cross-sectional area (mm�)	1903.7
Conditioning time
Properties/Comments
Test Data	10Hz
*********
Test date and time	Mon	Apr 1	2019	2:22 PM
Dynamic modulus (MPa)	13308
Phase angle (Degrees)	4.43
Average temperature (�C)	20.3
Average confining pressure (kPa)	-0.6
Average micro-strain	100
Load drift (%)	-0.3
Load standard error (%)	4.5
Average deformation drift (%)	-2.1
Average deformation standard error (%)	5.0
Deformation uniformity (%)	28.8
Phase uniformity (Degrees)	0.7
Conditioning Cycles
Time (sec)	Axial stress (kPa)	Axial micro-strain #1	Axial micro-strain #2	Axial micro-strain #3	Confining pressure (kPa)	Temperature (�C)	Load (N)	Displacement #1 (mm)	Displacement #2 (mm)	Displacement #3 (mm)
0.0000	357.421	6.041	6.102	18.690	-0.605	20.307	680.437	-0.000423	-0.000427	-0.001308
0.0020	355.452	5.915	6.115	18.386	-0.601	20.311	676.689	-0.000414	-0.000428	-0.001287
0.0040	332.128	4.473	5.282	15.828	-0.608	20.316	632.286	-0.000313	-0.000370	-0.001108
0.0060	282.820	0.903	3.198	9.909	-0.604	20.322	538.416	-0.000063	-0.000224	-0.000694
0.0080	246.676	-1.751	1.600	5.601	-0.604	20.322	469.608	0.000123	-0.000112	-0.000392
0.0100	237.644	-2.683	1.086	4.447	-0.599	20.319	452.414	0.000188	-0.000076	-0.000311
0.0120	240.740	-2.698	0.962	4.474	-0.595	20.316	458.307	0.000189	-0.000067	-0.000313
0.0140	247.894	-2.474	1.016	5.265	-0.598	20.311	471.926	0.000173	-0.000071	-0.000369
0.0160	264.425	-1.987	1.114	6.294	-0.604	20.306	503.397	0.000139	-0.000078	-0.000441
0.0180	314.109	1.459	2.393	11.548	-0.620	20.304	597.982	-0.000102	-0.000167	-0.000808
0.0200	394.721	6.876	5.130	20.427	-0.610	20.306	751.448	-0.000481	-0.000359	-0.001430
0.0220	465.520	11.726	7.938	28.057	-0.606	20.311	886.230	-0.000821	-0.000556	-0.001964
0.0240	519.712	15.603	10.522	33.838	-0.611	20.316	989.399	-0.001092	-0.000737	-0.002369
0.0260	571.275	18.953	12.996	39.342	-0.611	20.321	1087.561	-0.001327	-0.000910	-0.002754
0.0280	635.461	23.651	16.248	46.664	-0.621	20.322	1209.755	-0.001656	-0.001137	-0.003266
0.0300	712.377	28.945	20.277	55.003	-0.616	20.319	1356.182	-0.002026	-0.001419	-0.003850
0.0320	787.459	33.946	24.043	62.853	-0.609	20.316	1499.119	-0.002376	-0.001683	-0.004400
0.0340	848.985	38.420	27.337	69.509	-0.608	20.311	1616.249	-0.002689	-0.001914	-0.004866
0.0360	896.084	41.728	29.879	74.720	-0.603	20.307	1705.914	-0.002921	-0.002092	-0.005230
0.0380	939.005	45.065	32.477	79.655	-0.602	20.305	1787.624	-0.003155	-0.002273	-0.005576
0.0400	986.916	48.398	35.369	84.922	-0.600	20.307	1878.834	-0.003388	-0.002476	-0.005945
0.0420	1038.027	51.790	38.132	90.230	-0.595	20.311	1976.137	-0.003625	-0.002669	-0.006316
0.0440	1085.307	55.223	40.744	95.094	-0.597	20.316	2066.145	-0.003866	-0.002852	-0.006657
0.0460	1125.342	57.696	43.204	99.276	-0.593	20.321	2142.363	-0.004039	-0.003024	-0.006949
0.0480	1155.640	60.281	45.068	102.722	-0.599	20.321	2200.041	-0.004220	-0.003155	-0.007191
0.0500	1173.568	61.808	46.194	105.265	-0.600	20.319	2234.173	-0.004327	-0.003234	-0.007369
0.0520	1182.105	62.574	46.763	106.432	-0.594	20.316	2250.423	-0.004380	-0.003273	-0.007450
0.0540	1184.704	62.906	47.290	107.030	-0.591	20.311	2255.373	-0.004403	-0.003310	-0.007492
0.0560	1183.863	63.211	47.319	107.142	-0.598	20.307	2253.771	-0.004425	-0.003312	-0.007500
0.0580	1180.496	63.505	47.499	107.169	-0.603	20.305	2247.362	-0.004445	-0.003325	-0.007502
0.0600	1173.809	63.129	47.831	107.154	-0.606	20.307	2234.631	-0.004419	-0.003348	-0.007501
0.0620	1164.025	63.088	47.861	106.640	-0.604	20.311	2216.005	-0.004416	-0.003350	-0.007465
0.0640	1148.741	62.476	47.471	105.639	-0.617	20.316	2186.909	-0.004373	-0.003323	-0.007395
0.0660	1116.250	60.515	46.485	103.044	-0.615	20.322	2125.053	-0.004236	-0.003254	-0.007213
0.0680	1051.312	56.681	43.985	97.595	-0.616	20.322	2001.429	-0.003968	-0.003079	-0.006832
0.0700	968.957	51.499	39.967	89.882	-0.612	20.319	1844.645	-0.003605	-0.002798	-0.006292
0.0720	894.205	46.424	35.853	82.169	-0.607	20.316	1702.337	-0.003250	-0.002510	-0.005752
0.0740	834.528	42.575	32.645	75.901	-0.608	20.311	1588.726	-0.002980	-0.002285	-0.005313
0.0760	782.770	38.770	29.657	70.454	-0.607	20.307	1490.192	-0.002714	-0.002076	-0.004932
0.0780	727.931	35.310	26.792	64.910	-0.609	20.304	1385.794	-0.002472	-0.001875	-0.004544
0.0800	669.365	31.071	23.667	58.879	-0.605	20.307	1274.300	-0.002175	-0.001657	-0.004122
0.0820	611.656	27.042	20.456	52.668	-0.597	20.310	1164.436	-0.001893	-0.001432	-0.003687
0.0840	558.365	23.261	17.984	46.843	-0.597	20.316	1062.984	-0.001628	-0.001259	-0.003279
0.0860	508.065	19.579	15.345	40.590	-0.599	20.322	967.226	-0.001371	-0.001074	-0.002841
0.0880	451.934	15.772	12.578	34.378	-0.605	20.322	860.367	-0.001104	-0.000880	-0.002406
0.0900	392.798	11.477	10.021	27.555	-0.603	20.319	747.786	-0.000803	-0.000701	-0.001929
0.0920	342.753	7.615	7.534	21.469	-0.600	20.316	652.514	-0.000533	-0.000527	-0.001503
0.0940	307.616	4.667	5.825	16.870	-0.603	20.311	585.623	-0.000327	-0.000408	-0.001181
0.0960	282.218	2.484	4.697	13.271	-0.600	20.307	537.271	-0.000174	-0.000329	-0.000929
0.0980	259.556	0.832	3.962	10.519	-0.609	20.304	494.127	-0.000058	-0.000277	-0.000736
0.1000	237.659	-0.877	2.767	7.642	-0.614	20.306	452.442	0.000061	-0.000194	-0.000535
0.1020	217.747	-2.603	1.780	4.641	-0.606	20.310	414.534	0.000182	-0.000125	-0.000325
0.1040	204.236	-3.506	1.072	2.363	-0.602	20.316	388.813	0.000245	-0.000075	-0.000165
0.1060	198.991	-4.576	0.543	1.376	-0.604	20.322	378.828	0.000320	-0.000038	-0.000096
0.1080	199.622	-4.769	0.599	1.516	-0.613	20.322	380.030	0.000334	-0.000042	-0.000106
0.1100	203.500	-4.478	0.697	1.667	-0.615	20.319	387.411	0.000313	-0.000049	-0.000117
0.1120	209.992	-4.338	0.447	1.626	-0.608	20.316	399.771	0.000304	-0.000031	-0.000114
0.1140	222.285	-3.741	0.599	2.543	-0.607	20.311	423.174	0.000262	-0.000042	-0.000178
0.1160	255.844	-2.059	0.960	6.004	-0.615	20.306	487.061	0.000144	-0.000067	-0.000420
0.1180	322.224	2.666	2.795	13.536	-0.622	20.304	613.432	-0.000187	-0.000196	-0.000948
0.1200	399.831	7.890	5.810	22.416	-0.610	20.306	761.175	-0.000552	-0.000407	-0.001569
0.1220	470.479	12.726	8.770	30.043	-0.611	20.310	895.672	-0.000891	-0.000614	-0.002103
0.1240	530.443	16.841	11.479	36.685	-0.613	20.316	1009.827	-0.001179	-0.000804	-0.002568
0.1260	583.839	20.551	14.051	42.135	-0.611	20.322	1111.479	-0.001439	-0.000984	-0.002949
0.1280	642.314	24.805	16.983	48.693	-0.613	20.322	1222.801	-0.001736	-0.001189	-0.003408
0.1300	712.196	29.251	20.776	56.377	-0.604	20.319	1355.839	-0.002048	-0.001454	-0.003946
0.1320	784.904	34.377	24.555	63.949	-0.598	20.316	1494.255	-0.002406	-0.001719	-0.004476
0.1340	848.369	39.007	27.975	70.897	-0.596	20.310	1615.076	-0.002730	-0.001958	-0.004963
0.1360	897.812	42.536	30.643	76.014	-0.596	20.306	1709.204	-0.002977	-0.002145	-0.005321
0.1380	941.830	45.675	33.394	81.017	-0.607	20.304	1793.003	-0.003197	-0.002338	-0.005671
0.1400	993.228	49.622	36.230	86.548	-0.603	20.306	1890.850	-0.003474	-0.002536	-0.006058
0.1420	1050.771	53.345	39.273	92.439	-0.603	20.311	2000.399	-0.003734	-0.002749	-0.006471
0.1440	1100.981	57.014	42.538	97.678	-0.604	20.316	2095.985	-0.003991	-0.002978	-0.006837
0.1460	1136.989	59.613	44.358	101.474	-0.602	20.322	2164.536	-0.004173	-0.003105	-0.007103
0.1480	1161.606	61.684	46.013	104.863	-0.607	20.322	2211.399	-0.004318	-0.003221	-0.007340
0.1500	1179.775	63.450	47.679	107.058	-0.600	20.319	2245.989	-0.004441	-0.003338	-0.007494
0.1520	1190.746	64.215	48.178	108.199	-0.593	20.316	2266.874	-0.004495	-0.003372	-0.007574
0.1540	1194.894	64.783	48.651	109.188	-0.603	20.311	2274.771	-0.004535	-0.003406	-0.007643
0.1560	1195.780	64.922	48.734	109.395	-0.605	20.306	2276.459	-0.004545	-0.003411	-0.007658
0.1580	1194.232	65.341	48.917	109.630	-0.601	20.304	2273.512	-0.004574	-0.003424	-0.007674
0.1600	1189.589	65.063	48.915	109.395	-0.612	20.306	2264.671	-0.004554	-0.003424	-0.007658
0.1620	1180.271	64.701	48.775	108.897	-0.607	20.311	2246.933	-0.004529	-0.003414	-0.007623
0.1640	1164.040	63.908	48.624	107.950	-0.605	20.316	2216.034	-0.004474	-0.003404	-0.007556
0.1660	1126.049	61.726	47.402	104.919	-0.604	20.322	2143.707	-0.004321	-0.003318	-0.007344
0.1680	1049.584	57.098	44.249	98.276	-0.607	20.322	1998.138	-0.003997	-0.003097	-0.006879
0.1700	961.863	51.513	39.983	90.201	-0.597	20.319	1831.141	-0.003606	-0.002799	-0.006314
0.1720	892.432	47.024	36.063	82.933	-0.597	20.316	1698.961	-0.003292	-0.002524	-0.005805
0.1740	837.909	43.382	33.186	77.360	-0.595	20.311	1595.163	-0.003037	-0.002323	-0.005415
0.1760	783.281	39.422	30.212	71.497	-0.592	20.306	1491.165	-0.002760	-0.002115	-0.005005
0.1780	718.433	35.323	26.932	64.967	-0.599	20.304	1367.712	-0.002473	-0.001885	-0.004548
0.1800	650.129	30.683	23.487	58.048	-0.596	20.306	1237.679	-0.002148	-0.001644	-0.004063
0.1820	590.166	26.457	20.095	51.251	-0.587	20.311	1123.524	-0.001852	-0.001407	-0.003588
0.1840	537.266	22.497	17.274	45.066	-0.585	20.316	1022.816	-0.001575	-0.001209	-0.003155
0.1860	484.847	18.454	14.537	38.840	-0.585	20.321	923.023	-0.001292	-0.001018	-0.002719
0.1880	429.542	14.548	11.979	32.767	-0.591	20.322	817.738	-0.001018	-0.000839	-0.002294
0.1900	377.033	11.075	9.423	26.681	-0.596	20.319	717.773	-0.000775	-0.000660	-0.001868
0.1920	331.827	7.281	7.173	20.748	-0.591	20.315	631.714	-0.000510	-0.000502	-0.001452
0.1940	296.841	4.196	5.547	16.344	-0.596	20.310	565.109	-0.000294	-0.000388	-0.001144
0.1960	272.826	2.292	4.226	12.840	-0.588	20.306	519.390	-0.000160	-0.000296	-0.000899
0.1980	252.703	0.638	3.547	10.393	-0.601	20.304	481.081	-0.000045	-0.000248	-0.000728
0.2000	232.354	-0.904	2.906	7.544	-0.604	20.306	442.343	0.000063	-0.000203	-0.000528
0.2020	213.614	-3.018	1.628	4.515	-0.599	20.311	406.666	0.000211	-0.000114	-0.000316
0.2040	200.855	-3.976	1.128	2.599	-0.594	20.316	382.376	0.000278	-0.000079	-0.000182
0.2060	195.550	-4.768	0.863	1.501	-0.589	20.321	372.276	0.000334	-0.000060	-0.000105
0.2080	195.369	-4.768	0.698	1.071	-0.599	20.322	371.933	0.000334	-0.000049	-0.000075
0.2100	198.826	-4.589	0.685	1.377	-0.597	20.319	378.513	0.000321	-0.000048	-0.000096
0.2120	205.589	-4.561	0.822	1.765	-0.589	20.316	391.388	0.000319	-0.000058	-0.000124
0.2140	218.288	-3.852	0.723	2.697	-0.599	20.311	415.564	0.000270	-0.000051	-0.000189
0.2160	255.738	-1.600	1.419	6.366	-0.604	20.307	486.860	0.000112	-0.000099	-0.000446
0.2180	328.190	3.638	3.628	14.563	-0.615	20.305	624.790	-0.000255	-0.000254	-0.001019
0.2200	408.292	9.143	6.658	23.790	-0.609	20.306	777.283	-0.000640	-0.000466	-0.001665
0.2220	476.401	13.770	9.327	31.366	-0.604	20.310	906.944	-0.000964	-0.000653	-0.002196
0.2240	534.290	17.966	11.925	37.661	-0.604	20.315	1017.151	-0.001258	-0.000835	-0.002636
0.2260	590.616	21.579	14.370	43.692	-0.607	20.321	1124.382	-0.001511	-0.001006	-0.003058
0.2280	653.570	26.067	17.762	50.860	-0.610	20.321	1244.230	-0.001825	-0.001243	-0.003560
0.2300	721.063	30.584	21.083	58.058	-0.602	20.319	1372.719	-0.002141	-0.001476	-0.004064
0.2320	788.706	35.269	24.710	64.980	-0.601	20.316	1501.493	-0.002469	-0.001730	-0.004549
0.2340	854.245	39.645	28.266	72.207	-0.595	20.311	1626.263	-0.002775	-0.001979	-0.005054
0.2360	913.592	43.495	31.574	78.517	-0.591	20.306	1739.244	-0.003045	-0.002210	-0.005496
0.2380	968.731	47.816	34.798	84.659	-0.604	20.304	1844.215	-0.003347	-0.002436	-0.005926
0.2400	1023.750	51.804	38.174	90.355	-0.607	20.306	1948.957	-0.003626	-0.002672	-0.006325
0.2420	1075.177	55.486	41.260	95.400	-0.603	20.310	2046.862	-0.003884	-0.002888	-0.006678
0.2440	1118.835	58.766	43.790	100.152	-0.600	20.315	2129.974	-0.004114	-0.003065	-0.007011
0.2460	1155.189	61.558	45.944	103.945	-0.593	20.321	2199.183	-0.004309	-0.003216	-0.007276
0.2480	1183.442	63.602	47.931	107.435	-0.602	20.321	2252.970	-0.004452	-0.003355	-0.007520
0.2500	1204.963	65.465	49.388	109.881	-0.604	20.319	2293.940	-0.004583	-0.003457	-0.007692
0.2520	1218.849	66.755	50.279	111.350	-0.593	20.316	2320.375	-0.004673	-0.003520	-0.007794
0.2540	1221.945	67.074	50.528	112.129	-0.596	20.310	2326.269	-0.004695	-0.003537	-0.007849
0.2560	1217.511	66.811	50.278	111.920	-0.600	20.306	2317.829	-0.004677	-0.003519	-0.007834
0.2580	1209.426	66.756	50.515	111.810	-0.600	20.304	2302.437	-0.004673	-0.003536	-0.007827
0.2600	1198.425	66.160	50.292	111.324	-0.603	20.306	2281.494	-0.004631	-0.003520	-0.007793
0.2620	1182.270	65.454	49.499	110.172	-0.599	20.310	2250.738	-0.004582	-0.003465	-0.007712
0.2640	1150.876	63.659	48.874	107.781	-0.601	20.315	2190.971	-0.004456	-0.003421	-0.007545
0.2660	1095.917	59.962	46.472	102.805	-0.598	20.321	2086.344	-0.004197	-0.003253	-0.007196
0.2680	1036.344	56.321	43.747	97.317	-0.598	20.321	1972.933	-0.003942	-0.003062	-0.006812
0.2700	983.805	52.985	41.080	92.439	-0.600	20.319	1872.911	-0.003709	-0.002876	-0.006471
0.2720	925.194	48.886	38.076	86.838	-0.590	20.315	1761.332	-0.003422	-0.002665	-0.006079
0.2740	857.341	44.356	34.631	80.083	-0.593	20.310	1632.156	-0.003105	-0.002424	-0.005606
0.2760	785.775	39.853	30.588	72.622	-0.594	20.306	1495.914	-0.002790	-0.002141	-0.005084
0.2780	714.856	35.462	26.974	65.287	-0.607	20.304	1360.903	-0.002482	-0.001888	-0.004570
0.2800	649.332	31.002	23.819	58.226	-0.603	20.306	1236.162	-0.002170	-0.001667	-0.004076
0.2820	590.977	26.694	20.541	51.722	-0.598	20.310	1125.069	-0.001869	-0.001438	-0.003621
0.2840	538.408	22.706	17.721	46.026	-0.596	20.315	1024.990	-0.001589	-0.001240	-0.003222
0.2860	488.453	19.188	14.886	39.954	-0.595	20.321	929.890	-0.001343	-0.001042	-0.002797
0.2880	438.484	15.784	12.675	34.228	-0.601	20.321	834.761	-0.001105	-0.000887	-0.002396
0.2900	388.064	12.047	10.354	28.531	-0.608	20.319	738.773	-0.000843	-0.000725	-0.001997
0.2920	338.921	8.405	7.979	22.290	-0.600	20.315	645.218	-0.000588	-0.000558	-0.001560
0.2940	294.286	4.638	5.867	16.647	-0.599	20.310	560.246	-0.000325	-0.000411	-0.001165
0.2960	260.683	1.750	4.339	12.007	-0.593	20.306	496.273	-0.000122	-0.000304	-0.000840
0.2980	239.463	-0.195	3.255	9.102	-0.604	20.304	455.875	0.000014	-0.000228	-0.000637
0.3000	225.411	-1.361	2.462	7.016	-0.603	20.306	429.125	0.000095	-0.000172	-0.000491
0.3020	214.335	-2.696	1.699	4.808	-0.598	20.311	408.039	0.000189	-0.000119	-0.000337
0.3040	206.190	-3.462	1.253	3.489	-0.605	20.316	392.532	0.000242	-0.000088	-0.000244
0.3060	201.636	-3.783	0.920	2.487	-0.603	20.321	383.863	0.000265	-0.000064	-0.000174
0.3080	201.155	-4.088	1.099	2.529	-0.611	20.321	382.948	0.000286	-0.000077	-0.000177
0.3100	204.131	-4.171	1.267	2.361	-0.608	20.319	388.613	0.000292	-0.000089	-0.000165
0.3120	210.217	-3.993	1.268	2.599	-0.597	20.315	400.200	0.000279	-0.000089	-0.000182
0.3140	221.218	-3.575	1.449	3.322	-0.599	20.310	421.143	0.000250	-0.000101	-0.000233
0.3160	253.875	-1.602	1.573	6.436	-0.605	20.306	483.313	0.000112	-0.000110	-0.000450
0.3180	324.208	3.138	3.754	14.634	-0.613	20.304	617.208	-0.000220	-0.000263	-0.001024
0.3200	407.210	9.225	7.021	23.833	-0.607	20.306	775.223	-0.000646	-0.000491	-0.001668
0.3220	477.257	14.410	9.660	31.391	-0.613	20.310	908.575	-0.001009	-0.000676	-0.002197
0.3240	533.073	18.092	12.384	37.561	-0.608	20.315	1014.833	-0.001266	-0.000867	-0.002629
0.3260	583.192	21.315	14.691	43.342	-0.613	20.321	1110.249	-0.001492	-0.001028	-0.003034
0.3280	641.127	25.512	17.538	49.875	-0.624	20.321	1220.541	-0.001786	-0.001228	-0.003491
0.3300	711.730	30.153	21.124	57.435	-0.615	20.319	1354.952	-0.002111	-0.001479	-0.004020
0.3320	785.580	35.141	24.792	65.008	-0.601	20.315	1495.543	-0.002460	-0.001735	-0.004551
0.3340	854.019	39.977	28.461	72.179	-0.599	20.310	1625.834	-0.002798	-0.001992	-0.005053
0.3360	912.600	43.953	31.767	78.251	-0.600	20.306	1737.356	-0.003077	-0.002224	-0.005478
0.3380	964.478	47.941	34.811	84.213	-0.611	20.304	1836.119	-0.003356	-0.002437	-0.005895
0.3400	1014.913	51.178	37.760	89.758	-0.610	20.306	1932.135	-0.003582	-0.002643	-0.006283
0.3420	1063.260	54.458	40.495	94.691	-0.603	20.310	2024.174	-0.003812	-0.002835	-0.006628
0.3440	1103.506	57.696	42.843	98.818	-0.596	20.315	2100.792	-0.004039	-0.002999	-0.006917
0.3460	1133.818	60.044	44.900	102.041	-0.593	20.321	2158.499	-0.004203	-0.003143	-0.007143
0.3480	1155.429	61.961	46.360	104.681	-0.605	20.322	2199.640	-0.004337	-0.003245	-0.007328
0.3500	1169.901	63.255	47.582	106.584	-0.604	20.319	2227.192	-0.004428	-0.003331	-0.007461
0.3520	1177.987	64.020	48.149	107.475	-0.599	20.316	2242.584	-0.004481	-0.003370	-0.007523
0.3540	1180.917	64.409	48.664	108.407	-0.598	20.311	2248.163	-0.004509	-0.003406	-0.007589
0.3560	1181.458	64.520	48.637	108.616	-0.597	20.306	2249.193	-0.004516	-0.003405	-0.007603
0.3580	1180.707	64.674	48.539	108.797	-0.600	20.304	2247.763	-0.004527	-0.003398	-0.007616
0.3600	1178.302	64.672	48.735	109.007	-0.606	20.306	2243.185	-0.004527	-0.003411	-0.007630
0.3620	1172.682	64.589	48.651	108.673	-0.601	20.311	2232.485	-0.004521	-0.003406	-0.007607
0.3640	1161.410	64.313	48.261	107.907	-0.598	20.316	2211.027	-0.004502	-0.003378	-0.007553
0.3660	1137.801	62.963	47.777	106.015	-0.597	20.321	2166.080	-0.004407	-0.003344	-0.007421
0.3680	1078.844	59.294	45.667	101.346	-0.602	20.321	2053.843	-0.004151	-0.003197	-0.007094
0.3700	987.712	53.763	41.163	93.106	-0.597	20.319	1880.350	-0.003763	-0.002881	-0.006517
0.3720	900.111	47.856	36.521	84.645	-0.583	20.315	1713.581	-0.003350	-0.002557	-0.005925
0.3740	833.971	43.216	33.213	77.919	-0.586	20.310	1587.667	-0.003025	-0.002325	-0.005454
0.3760	786.166	39.658	30.507	72.429	-0.588	20.306	1496.658	-0.002776	-0.002135	-0.005070
0.3780	735.986	36.586	27.864	67.398	-0.600	20.304	1401.129	-0.002561	-0.001951	-0.004718
0.3800	671.003	32.209	24.710	60.685	-0.599	20.306	1277.418	-0.002255	-0.001730	-0.004248
0.3820	594.569	26.860	20.804	52.294	-0.593	20.310	1131.907	-0.001880	-0.001456	-0.003661
0.3840	521.952	21.884	17.245	44.317	-0.596	20.315	993.662	-0.001532	-0.001207	-0.003102
0.3860	466.001	17.479	14.287	37.716	-0.592	20.321	887.146	-0.001224	-0.001000	-0.002640
0.3880	423.726	14.852	12.216	32.698	-0.599	20.321	806.665	-0.001040	-0.000855	-0.002289
0.3900	387.853	12.045	10.438	28.446	-0.593	20.319	738.373	-0.000843	-0.000731	-0.001991
0.3920	350.538	9.294	8.549	23.692	-0.592	20.315	667.334	-0.000651	-0.000598	-0.001658
0.3940	309.675	6.098	6.576	18.661	-0.590	20.310	589.542	-0.000427	-0.000460	-0.001306
0.3960	270.887	2.818	4.628	13.409	-0.581	20.306	515.699	-0.000197	-0.000324	-0.000939
0.3980	239.222	0.581	3.684	9.074	-0.590	20.304	455.418	-0.000041	-0.000258	-0.000635
0.4000	220.151	-1.293	2.573	6.515	-0.599	20.306	419.111	0.000091	-0.000180	-0.000456
0.4020	213.539	-2.240	1.976	5.167	-0.600	20.310	406.523	0.000157	-0.000138	-0.000362
0.4040	212.532	-2.893	1.683	4.640	-0.604	20.315	404.606	0.000203	-0.000118	-0.000325
0.4060	213.388	-3.128	1.546	4.128	-0.602	20.322	406.237	0.000219	-0.000108	-0.000289
0.4080	215.327	-2.931	1.739	4.321	-0.607	20.321	409.927	0.000205	-0.000122	-0.000302
0.4100	218.543	-2.989	1.807	4.612	-0.603	20.319	416.050	0.000209	-0.000126	-0.000323
0.4120	223.833	-2.809	1.655	4.835	-0.597	20.315	426.121	0.000197	-0.000116	-0.000338
0.4140	232.339	-2.462	1.823	5.405	-0.599	20.310	442.314	0.000172	-0.000128	-0.000378
0.4160	255.167	-1.322	2.004	6.975	-0.596	20.306	485.773	0.000093	-0.000140	-0.000488
0.4180	311.419	2.417	3.366	13.452	-0.611	20.303	592.861	-0.000169	-0.000236	-0.000942
0.4200	392.918	8.184	6.492	22.569	-0.610	20.306	748.014	-0.000573	-0.000454	-0.001580
0.4220	476.370	14.504	9.869	31.670	-0.600	20.310	906.887	-0.001015	-0.000691	-0.002217
0.4240	551.422	19.340	13.370	39.841	-0.609	20.315	1049.767	-0.001354	-0.000936	-0.002789
0.4260	616.270	23.498	16.401	46.888	-0.600	20.321	1173.220	-0.001645	-0.001148	-0.003282
0.4280	672.356	27.748	19.458	53.475	-0.604	20.321	1279.993	-0.001942	-0.001362	-0.003743
0.4300	725.992	31.583	22.251	59.074	-0.607	20.318	1382.103	-0.002211	-0.001558	-0.004135
0.4320	784.062	35.461	25.210	65.091	-0.596	20.315	1492.653	-0.002482	-0.001765	-0.004556
0.4340	849.571	40.076	28.642	72.357	-0.592	20.310	1617.365	-0.002805	-0.002005	-0.005065
0.4360	915.350	44.619	31.978	79.028	-0.588	20.305	1742.592	-0.003123	-0.002238	-0.005532
0.4380	974.517	48.565	35.506	85.310	-0.599	20.303	1855.230	-0.003400	-0.002485	-0.005972
0.4400	1032.542	52.567	38.785	91.757	-0.601	20.306	1965.694	-0.003680	-0.002715	-0.006423
0.4420	1083.293	56.138	41.455	96.955	-0.591	20.310	2062.311	-0.003930	-0.002902	-0.006787
0.4440	1122.577	58.961	43.885	101.125	-0.591	20.315	2137.098	-0.004127	-0.003072	-0.007079
0.4460	1155.609	61.114	45.956	104.377	-0.595	20.321	2199.984	-0.004278	-0.003217	-0.007306
0.4480	1186.102	63.951	47.999	108.018	-0.603	20.321	2258.034	-0.004477	-0.003360	-0.007561
0.4500	1204.286	65.466	49.291	110.282	-0.611	20.318	2292.652	-0.004583	-0.003450	-0.007720
0.4520	1206.060	65.854	49.793	110.781	-0.608	20.315	2296.028	-0.004610	-0.003486	-0.007755
0.4540	1200.695	65.562	49.794	110.658	-0.603	20.310	2285.814	-0.004589	-0.003486	-0.007746
0.4560	1194.743	65.646	49.863	110.285	-0.595	20.306	2274.485	-0.004595	-0.003490	-0.007720
0.4580	1188.672	65.730	50.015	110.339	-0.604	20.304	2262.926	-0.004601	-0.003501	-0.007724
0.4600	1180.241	65.493	49.666	110.087	-0.612	20.306	2246.876	-0.004584	-0.003477	-0.007706
0.4620	1166.099	65.006	49.347	108.865	-0.607	20.310	2219.954	-0.004550	-0.003454	-0.007621
0.4640	1130.918	62.937	48.400	106.169	-0.606	20.315	2152.977	-0.004406	-0.003388	-0.007432
0.4660	1063.275	58.518	45.428	100.152	-0.604	20.321	2024.202	-0.004096	-0.003180	-0.007011
0.4680	987.457	53.737	41.678	93.204	-0.608	20.321	1879.864	-0.003762	-0.002917	-0.006524
0.4700	924.458	49.456	38.396	86.868	-0.608	20.318	1759.930	-0.003462	-0.002688	-0.006081
0.4720	874.368	45.828	35.214	81.476	-0.608	20.315	1664.572	-0.003208	-0.002465	-0.005703
0.4740	828.561	42.812	32.796	77.083	-0.609	20.310	1577.368	-0.002997	-0.002296	-0.005396
0.4760	776.202	39.184	29.783	71.707	-0.606	20.306	1477.690	-0.002743	-0.002085	-0.005019
0.4780	717.050	35.335	26.989	65.704	-0.612	20.304	1365.080	-0.002473	-0.001889	-0.004599
0.4800	661.851	31.153	24.098	59.700	-0.605	20.306	1259.995	-0.002181	-0.001687	-0.004179
0.4820	613.775	27.831	21.319	54.406	-0.600	20.310	1168.470	-0.001948	-0.001492	-0.003808
0.4840	564.136	24.538	19.027	48.889	-0.603	20.315	1073.971	-0.001718	-0.001332	-0.003422
0.4860	504.894	20.385	15.997	42.010	-0.607	20.320	961.189	-0.001427	-0.001120	-0.002941
0.4880	442.136	16.188	13.246	35.006	-0.607	20.321	841.713	-0.001133	-0.000927	-0.002450
0.4900	386.245	12.032	10.521	28.586	-0.604	20.318	735.312	-0.000842	-0.000736	-0.002001
0.4920	337.343	8.250	8.104	22.707	-0.600	20.315	642.214	-0.000578	-0.000567	-0.001589
0.4940	295.504	5.264	6.324	16.981	-0.607	20.310	562.563	-0.000368	-0.000443	-0.001189
0.4960	261.690	2.248	4.533	12.424	-0.605	20.305	498.190	-0.000157	-0.000317	-0.000870
0.4980	234.263	0.318	3.518	8.560	-0.613	20.303	445.976	-0.000022	-0.000246	-0.000599
0.5000	179.815	-9.507	-1.941	-6.033	-0.595	20.312	342.321	0.000665	0.000136	0.000422
0.5020	182.310	-9.300	-1.886	-5.921	-0.591	20.306	347.071	0.000651	0.000132	0.000414
0.5040	185.045	-9.424	-1.999	-6.086	-0.583	20.302	352.278	0.000660	0.000140	0.000426
0.5060	188.081	-8.741	-1.860	-5.461	-0.598	20.301	358.057	0.000612	0.000130	0.000382
0.5080	192.574	-8.826	-1.970	-4.892	-0.592	20.305	366.611	0.000618	0.000138	0.000342
0.5100	202.237	-8.479	-1.694	-4.154	-0.595	20.309	385.008	0.000594	0.000119	0.000291
0.5120	231.888	-6.517	-1.376	-1.013	-0.592	20.315	441.456	0.000456	0.000096	0.000071
0.5140	293.279	-2.503	0.015	5.697	-0.586	20.319	558.329	0.000175	-0.000001	-0.000399
0.5160	370.375	2.666	3.170	14.660	-0.594	20.318	705.099	-0.000187	-0.000222	-0.001026
0.5180	445.698	8.281	6.284	23.220	-0.588	20.316	848.494	-0.000580	-0.000440	-0.001625
0.5200	515.745	13.533	9.270	31.196	-0.592	20.312	981.846	-0.000947	-0.000649	-0.002184
0.5220	584.410	18.425	12.619	38.979	-0.599	20.306	1112.566	-0.001290	-0.000883	-0.002729
0.5240	656.877	23.219	16.469	46.623	-0.604	20.302	1250.525	-0.001625	-0.001153	-0.003264
0.5260	737.053	28.988	20.581	55.587	-0.607	20.301	1403.160	-0.002029	-0.001441	-0.003891
0.5280	822.790	34.698	24.834	64.815	-0.607	20.305	1566.381	-0.002429	-0.001738	-0.004537
0.5300	905.687	40.436	29.504	73.791	-0.610	20.309	1724.195	-0.002831	-0.002065	-0.005165
0.5320	983.745	46.232	33.979	81.935	-0.612	20.315	1872.797	-0.003236	-0.002379	-0.005735
0.5340	1060.134	51.818	38.384	89.771	-0.605	20.319	2018.223	-0.003627	-0.002687	-0.006284
0.5360	1139.063	57.737	43.205	98.274	-0.608	20.318	2168.484	-0.004042	-0.003024	-0.006879
0.5380	1215.453	62.905	47.513	106.224	-0.600	20.316	2313.910	-0.004403	-0.003326	-0.007436
0.5400	1286.357	68.202	51.862	113.617	-0.591	20.312	2448.893	-0.004774	-0.003630	-0.007953
0.5420	1356.254	72.970	56.115	120.535	-0.590	20.307	2581.959	-0.005108	-0.003928	-0.008437
0.5440	1415.631	77.290	59.534	126.484	-0.588	20.304	2694.998	-0.005410	-0.004167	-0.008854
0.5460	1455.261	80.458	62.424	131.225	-0.597	20.302	2770.443	-0.005632	-0.004370	-0.009186
0.5480	1480.013	82.558	64.245	134.058	-0.591	20.306	2817.564	-0.005779	-0.004497	-0.009384
0.5500	1491.750	83.710	65.093	135.809	-0.594	20.310	2839.909	-0.005860	-0.004556	-0.009507
0.5520	1494.590	84.293	65.620	136.700	-0.595	20.315	2845.316	-0.005901	-0.004593	-0.009569
0.5540	1495.251	84.724	65.883	136.908	-0.588	20.320	2846.575	-0.005931	-0.004612	-0.009584
0.5560	1497.596	85.183	66.537	137.698	-0.601	20.318	2851.038	-0.005963	-0.004658	-0.009639
0.5580	1497.806	85.476	66.704	138.084	-0.593	20.316	2851.439	-0.005983	-0.004669	-0.009666
0.5600	1491.915	85.516	66.731	137.768	-0.595	20.312	2840.223	-0.005986	-0.004671	-0.009644
0.5620	1478.871	84.903	66.648	137.297	-0.591	20.307	2815.390	-0.005943	-0.004665	-0.009611
0.5640	1450.302	83.723	65.969	135.504	-0.595	20.303	2761.002	-0.005861	-0.004618	-0.009485
0.5660	1379.157	79.624	63.439	130.113	-0.603	20.302	2625.561	-0.005574	-0.004441	-0.009108
0.5680	1274.950	72.926	58.005	120.899	-0.593	20.306	2427.177	-0.005105	-0.004060	-0.008463
0.5700	1179.625	66.702	52.709	112.270	-0.596	20.309	2245.703	-0.004669	-0.003690	-0.007859
0.5720	1104.393	61.658	48.499	105.223	-0.597	20.315	2102.480	-0.004316	-0.003395	-0.007366
0.5740	1040.236	57.405	44.773	98.692	-0.592	20.320	1980.343	-0.004018	-0.003134	-0.006908
0.5760	966.823	52.569	40.828	91.800	-0.599	20.318	1840.582	-0.003680	-0.002858	-0.006426
0.5780	879.222	46.524	36.022	82.850	-0.587	20.316	1673.813	-0.003257	-0.002522	-0.005800
0.5800	790.344	40.632	31.380	73.539	-0.592	20.312	1504.612	-0.002844	-0.002197	-0.005148
0.5820	711.670	34.962	27.003	65.147	-0.588	20.307	1354.837	-0.002447	-0.001890	-0.004560
0.5840	648.506	30.306	23.347	57.895	-0.584	20.303	1234.589	-0.002121	-0.001634	-0.004053
0.5860	592.991	26.344	20.373	51.723	-0.597	20.302	1128.902	-0.001844	-0.001426	-0.003621
0.5880	534.576	22.009	16.927	44.984	-0.597	20.306	1017.694	-0.001541	-0.001185	-0.003149
0.5900	470.554	17.507	13.939	37.674	-0.598	20.309	895.815	-0.001225	-0.000976	-0.002637
0.5920	408.292	12.783	11.117	30.253	-0.592	20.315	777.283	-0.000895	-0.000778	-0.002118
0.5940	356.038	8.695	8.548	23.526	-0.587	20.319	677.805	-0.000609	-0.000598	-0.001647
0.5960	316.017	5.749	6.841	18.412	-0.596	20.318	601.616	-0.000402	-0.000479	-0.001289
0.5980	288.861	3.417	5.408	14.618	-0.586	20.316	549.917	-0.000239	-0.000379	-0.001023
0.6000	268.723	1.484	4.295	11.729	-0.588	20.312	511.580	-0.000104	-0.000301	-0.000821
0.6020	249.532	-0.015	3.574	8.977	-0.586	20.307	475.044	0.000001	-0.000250	-0.000628
0.6040	232.339	-1.780	2.838	6.212	-0.588	20.304	442.314	0.000125	-0.000199	-0.000435
0.6060	222.871	-2.434	2.199	5.030	-0.587	20.302	424.290	0.000170	-0.000154	-0.000352
0.6080	223.608	-2.795	1.863	4.446	-0.589	20.306	425.692	0.000196	-0.000130	-0.000311
0.6100	230.551	-2.642	1.850	5.211	-0.592	20.310	438.910	0.000185	-0.000130	-0.000365
0.6120	241.702	-2.142	1.975	5.960	-0.591	20.315	460.138	0.000150	-0.000138	-0.000417
0.6140	266.048	-1.238	2.101	7.865	-0.596	20.319	506.487	0.000087	-0.000147	-0.000551
0.6160	322.179	2.819	3.420	13.953	-0.609	20.318	613.346	-0.000197	-0.000239	-0.000977
0.6180	405.947	8.433	6.394	23.221	-0.601	20.316	772.820	-0.000590	-0.000448	-0.001625
0.6200	499.710	14.645	10.301	33.448	-0.602	20.312	951.319	-0.001025	-0.000721	-0.002341
0.6220	590.105	21.023	14.565	43.356	-0.601	20.307	1123.409	-0.001472	-0.001020	-0.003035
0.6240	669.681	26.372	18.678	51.973	-0.601	20.303	1274.900	-0.001846	-0.001307	-0.003638
0.6260	744.147	31.723	22.737	60.254	-0.615	20.301	1416.664	-0.002221	-0.001592	-0.004218
0.6280	825.000	37.073	26.893	68.676	-0.611	20.305	1570.587	-0.002595	-0.001882	-0.004807
0.6300	910.331	42.856	31.380	77.557	-0.612	20.309	1733.036	-0.003000	-0.002197	-0.005429
0.6320	990.943	48.524	35.799	86.159	-0.607	20.315	1886.501	-0.003397	-0.002506	-0.006031
0.6340	1066.506	53.748	40.189	93.552	-0.605	20.320	2030.354	-0.003762	-0.002813	-0.006549
0.6360	1144.353	59.502	45.053	101.737	-0.605	20.318	2178.555	-0.004165	-0.003154	-0.007122
0.6380	1227.806	65.200	49.585	110.269	-0.597	20.316	2337.427	-0.004564	-0.003471	-0.007719
0.6400	1302.888	70.855	54.129	117.732	-0.596	20.312	2480.364	-0.004960	-0.003789	-0.008241
0.6420	1356.509	74.775	57.395	123.122	-0.596	20.306	2582.445	-0.005234	-0.004018	-0.008619
0.6440	1395.162	77.667	59.674	127.095	-0.595	20.303	2656.031	-0.005437	-0.004177	-0.008897
0.6460	1433.500	80.820	62.313	131.390	-0.600	20.302	2729.015	-0.005657	-0.004362	-0.009197
0.6480	1475.474	84.002	65.091	135.573	-0.595	20.306	2808.924	-0.005880	-0.004556	-0.009490
0.6500	1510.385	86.434	67.495	139.312	-0.593	20.310	2875.385	-0.006050	-0.004725	-0.009752
0.6520	1525.624	87.713	68.512	141.229	-0.595	20.315	2904.396	-0.006140	-0.004796	-0.009886
0.6540	1525.534	87.893	68.596	141.688	-0.588	20.320	2904.224	-0.006153	-0.004802	-0.009918
0.6560	1519.628	88.171	69.013	141.786	-0.592	20.319	2892.981	-0.006172	-0.004831	-0.009925
0.6580	1511.106	87.603	68.804	141.257	-0.587	20.316	2876.759	-0.006132	-0.004816	-0.009888
0.6600	1499.505	87.311	68.692	140.659	-0.589	20.312	2854.671	-0.006112	-0.004808	-0.009846
0.6620	1481.260	86.463	68.470	139.617	-0.589	20.306	2819.939	-0.006052	-0.004793	-0.009773
0.6640	1437.813	83.961	66.982	136.589	-0.586	20.302	2737.226	-0.005877	-0.004689	-0.009561
0.6660	1356.614	79.347	63.285	130.154	-0.595	20.301	2582.645	-0.005554	-0.004430	-0.009111
0.6680	1264.069	73.218	58.046	121.565	-0.587	20.305	2406.464	-0.005125	-0.004063	-0.008510
0.6700	1182.420	67.744	53.725	114.145	-0.586	20.309	2251.024	-0.004742	-0.003761	-0.007990
0.6720	1112.643	63.310	49.985	107.532	-0.582	20.315	2118.187	-0.004432	-0.003499	-0.007527
0.6740	1047.225	59.029	45.901	101.014	-0.585	20.320	1993.647	-0.004132	-0.003213	-0.007071
0.6760	973.495	54.179	41.928	93.815	-0.598	20.318	1853.285	-0.003793	-0.002935	-0.006567
0.6780	887.999	48.329	37.355	85.198	-0.588	20.316	1690.521	-0.003383	-0.002615	-0.005964
0.6800	801.841	42.535	32.810	76.084	-0.592	20.312	1526.499	-0.002977	-0.002297	-0.005326
0.6820	722.205	36.699	28.085	67.690	-0.598	20.306	1374.893	-0.002569	-0.001966	-0.004738
0.6840	650.009	31.610	24.265	59.768	-0.591	20.302	1237.450	-0.002213	-0.001699	-0.004184
0.6860	582.696	26.954	20.944	52.681	-0.596	20.301	1109.304	-0.001887	-0.001466	-0.003688
0.6880	518.300	22.314	17.234	45.233	-0.588	20.305	986.710	-0.001562	-0.001206	-0.003166
0.6900	458.051	17.841	14.191	37.783	-0.595	20.309	872.011	-0.001249	-0.000993	-0.002645
0.6920	400.101	13.463	11.383	30.530	-0.597	20.315	761.690	-0.000942	-0.000797	-0.002137
0.6940	349.846	9.296	8.936	24.388	-0.599	20.319	666.018	-0.000651	-0.000626	-0.001707
0.6960	310.968	6.142	7.227	19.552	-0.611	20.318	592.003	-0.000430	-0.000506	-0.001369
0.6980	278.687	3.431	5.558	15.106	-0.592	20.315	530.548	-0.000240	-0.000389	-0.001057
0.7000	249.396	0.901	4.113	11.159	-0.593	20.311	474.787	-0.000063	-0.000288	-0.000781
0.7020	228.312	-0.989	3.156	7.864	-0.600	20.307	434.647	0.000069	-0.000221	-0.000551
0.7040	220.407	-1.723	2.658	6.182	-0.591	20.303	419.598	0.000121	-0.000186	-0.000433
0.7060	220.737	-1.710	2.615	6.183	-0.603	20.302	420.227	0.000120	-0.000183	-0.000433
0.7080	223.833	-2.086	2.504	5.974	-0.589	20.306	426.121	0.000146	-0.000175	-0.000418
0.7100	229.018	-2.072	2.505	6.169	-0.596	20.310	435.991	0.000145	-0.000175	-0.000432
0.7120	237.629	-1.280	2.449	6.684	-0.608	20.315	452.385	0.000090	-0.000171	-0.000468
0.7140	259.631	-0.376	2.698	8.323	-0.608	20.319	494.270	0.000026	-0.000189	-0.000583
0.7160	316.679	3.265	4.073	14.618	-0.612	20.318	602.875	-0.000229	-0.000285	-0.001023
0.7180	404.715	9.280	6.924	24.276	-0.605	20.315	770.473	-0.000650	-0.000485	-0.001699
0.7200	500.206	15.908	11.092	34.713	-0.603	20.311	952.263	-0.001114	-0.000776	-0.002430
0.7220	586.980	21.814	15.067	44.122	-0.599	20.306	1117.458	-0.001527	-0.001055	-0.003089
0.7240	662.618	26.761	18.719	52.362	-0.604	20.302	1261.454	-0.001873	-0.001310	-0.003665
0.7260	735.866	32.027	22.541	60.326	-0.619	20.301	1400.900	-0.002242	-0.001578	-0.004223
0.7280	815.937	37.157	26.654	68.803	-0.612	20.305	1553.335	-0.002601	-0.001866	-0.004816
0.7300	907.355	43.340	31.755	78.280	-0.617	20.309	1727.371	-0.003034	-0.002223	-0.005480
0.7320	994.851	49.316	36.478	87.186	-0.616	20.314	1893.940	-0.003452	-0.002553	-0.006103
0.7340	1063.891	53.944	40.550	94.329	-0.612	20.319	2025.375	-0.003776	-0.002838	-0.006603
0.7360	1128.258	58.891	44.720	101.194	-0.617	20.318	2147.913	-0.004122	-0.003130	-0.007084
0.7380	1210.223	64.714	49.194	109.308	-0.611	20.315	2303.953	-0.004530	-0.003444	-0.007652
0.7400	1302.437	71.216	54.477	118.495	-0.609	20.311	2479.506	-0.004985	-0.003813	-0.008295
0.7420	1378.766	76.775	59.076	126.250	-0.611	20.306	2624.817	-0.005374	-0.004135	-0.008838
0.7440	1422.319	80.069	61.936	130.739	-0.607	20.302	2707.729	-0.005605	-0.004336	-0.009152
0.7460	1440.819	81.835	63.716	133.350	-0.608	20.301	2742.949	-0.005728	-0.004460	-0.009335
0.7480	1456.508	83.169	65.104	135.101	-0.601	20.306	2772.818	-0.005822	-0.004557	-0.009457
0.7500	1482.402	85.476	66.690	137.713	-0.600	20.309	2822.113	-0.005983	-0.004668	-0.009640
0.7520	1512.188	87.406	68.527	140.604	-0.597	20.314	2878.819	-0.006118	-0.004797	-0.009842
0.7540	1532.477	89.086	69.984	142.799	-0.590	20.319	2917.442	-0.006236	-0.004899	-0.009996
0.7560	1537.541	90.006	70.678	144.008	-0.591	20.317	2927.084	-0.006300	-0.004947	-0.010081
0.7580	1532.898	89.879	70.512	144.161	-0.584	20.315	2918.243	-0.006292	-0.004936	-0.010091
0.7600	1521.251	89.573	70.150	143.634	-0.585	20.311	2896.070	-0.006270	-0.004911	-0.010054
0.7620	1498.317	88.560	69.762	142.092	-0.585	20.306	2852.411	-0.006199	-0.004883	-0.009946
0.7640	1444.906	85.308	67.650	138.143	-0.588	20.301	2750.731	-0.005972	-0.004735	-0.009670
0.7660	1354.571	79.832	63.521	130.711	-0.603	20.301	2578.754	-0.005588	-0.004446	-0.009150
0.7680	1258.855	73.412	58.378	122.123	-0.599	20.305	2396.536	-0.005139	-0.004086	-0.008549
0.7700	1175.252	67.840	53.544	114.646	-0.605	20.309	2237.377	-0.004749	-0.003748	-0.008025
0.7720	1103.566	63.269	49.652	107.628	-0.604	20.314	2100.906	-0.004429	-0.003476	-0.007534
0.7740	1035.608	58.543	45.913	100.959	-0.603	20.319	1971.531	-0.004098	-0.003214	-0.007067
0.7760	961.893	53.901	41.954	93.802	-0.612	20.318	1831.198	-0.003773	-0.002937	-0.006566
0.7780	879.733	48.190	37.369	85.159	-0.603	20.315	1674.786	-0.003373	-0.002616	-0.005961
0.7800	789.142	42.089	32.659	75.652	-0.603	20.311	1502.323	-0.002946	-0.002286	-0.005296
0.7820	698.145	35.862	27.754	65.855	-0.593	20.306	1329.088	-0.002510	-0.001943	-0.004610
0.7840	621.560	30.359	23.709	57.544	-0.592	20.302	1183.290	-0.002125	-0.001660	-0.004028
0.7860	557.073	25.942	20.333	50.166	-0.604	20.301	1060.524	-0.001816	-0.001423	-0.003512
0.7880	497.245	21.440	16.679	43.302	-0.597	20.305	946.627	-0.001501	-0.001168	-0.003031
0.7900	442.031	17.411	14.039	36.603	-0.600	20.309	841.513	-0.001219	-0.000983	-0.002562
0.7920	390.228	13.548	11.383	30.154	-0.607	20.314	742.893	-0.000948	-0.000797	-0.002111
0.7940	345.218	9.934	8.867	24.622	-0.605	20.319	657.206	-0.000695	-0.000621	-0.001724
0.7960	309.811	6.836	7.465	20.077	-0.606	20.317	589.800	-0.000479	-0.000523	-0.001405
0.7980	279.348	4.125	5.825	15.979	-0.592	20.315	531.807	-0.000289	-0.000408	-0.001119
0.8000	251.215	1.583	4.546	12.116	-0.603	20.311	478.249	-0.000111	-0.000318	-0.000848
0.8020	230.175	-0.153	3.588	8.976	-0.609	20.306	438.194	0.000011	-0.000251	-0.000628
0.8040	220.031	-1.350	2.810	6.850	-0.600	20.302	418.882	0.000094	-0.000197	-0.000480
0.8060	218.393	-1.793	2.725	6.573	-0.609	20.302	415.764	0.000126	-0.000191	-0.000460
0.8080	220.963	-1.889	2.487	6.379	-0.605	20.305	420.656	0.000132	-0.000174	-0.000446
0.8100	225.967	-1.488	2.352	6.489	-0.605	20.309	430.183	0.000104	-0.000165	-0.000454
0.8120	234.443	-1.404	2.546	6.962	-0.600	20.315	446.320	0.000098	-0.000178	-0.000487
0.8140	255.558	-0.419	2.741	8.741	-0.613	20.319	486.517	0.000029	-0.000192	-0.000612
0.8160	313.448	3.471	4.309	15.035	-0.619	20.318	596.724	-0.000243	-0.000302	-0.001052
0.8180	404.955	9.641	7.617	24.609	-0.605	20.316	770.931	-0.000675	-0.000533	-0.001723
0.8200	503.196	16.298	11.912	35.589	-0.604	20.311	957.956	-0.001141	-0.000834	-0.002491
0.8220	591.939	22.720	15.914	45.470	-0.609	20.306	1126.900	-0.001590	-0.001114	-0.003183
0.8240	669.230	27.832	19.722	53.641	-0.603	20.302	1274.042	-0.001948	-0.001381	-0.003755
0.8260	745.424	33.321	23.735	61.811	-0.613	20.301	1419.096	-0.002332	-0.001661	-0.004327
0.8280	826.953	38.742	27.863	70.343	-0.607	20.305	1574.306	-0.002712	-0.001950	-0.004924
0.8300	909.850	44.148	32.172	79.224	-0.605	20.309	1732.121	-0.003090	-0.002252	-0.005546
0.8320	989.546	49.777	36.438	87.686	-0.594	20.315	1883.841	-0.003484	-0.002551	-0.006138
0.8340	1066.431	54.805	40.661	95.453	-0.592	20.319	2030.210	-0.003836	-0.002846	-0.006682
0.8360	1147.269	60.586	45.512	103.765	-0.596	20.318	2184.105	-0.004241	-0.003186	-0.007264
0.8380	1232.705	66.340	50.529	112.424	-0.591	20.315	2346.754	-0.004644	-0.003537	-0.007870
0.8400	1312.882	72.246	55.365	120.302	-0.593	20.311	2499.390	-0.005057	-0.003876	-0.008421
0.8420	1372.560	76.692	59.311	126.388	-0.594	20.305	2613.001	-0.005368	-0.004152	-0.008847
0.8440	1409.830	79.668	61.728	130.446	-0.593	20.302	2683.954	-0.005577	-0.004321	-0.009131
0.8460	1437.347	82.003	63.784	133.642	-0.605	20.301	2736.340	-0.005740	-0.004465	-0.009355
0.8480	1467.539	84.238	65.965	136.435	-0.599	20.305	2793.818	-0.005897	-0.004618	-0.009550
0.8500	1499.760	86.655	67.954	139.755	-0.592	20.309	2855.158	-0.006066	-0.004757	-0.009783
0.8520	1519.477	88.406	69.359	142.188	-0.588	20.315	2892.694	-0.006188	-0.004855	-0.009953
0.8540	1523.655	89.016	69.929	142.662	-0.591	20.319	2900.648	-0.006231	-0.004895	-0.009986
0.8560	1521.641	89.295	69.998	143.244	-0.600	20.317	2896.814	-0.006251	-0.004900	-0.010027
0.8580	1518.591	89.323	69.969	143.258	-0.589	20.315	2891.006	-0.006253	-0.004898	-0.010028
0.8600	1512.624	89.337	69.955	143.189	-0.590	20.311	2879.648	-0.006254	-0.004897	-0.010023
0.8620	1498.453	88.780	69.513	142.342	-0.596	20.305	2852.669	-0.006215	-0.004866	-0.009964
0.8640	1462.835	86.685	68.415	140.076	-0.595	20.301	2784.863	-0.006068	-0.004789	-0.009805
0.8660	1377.594	81.782	64.967	133.600	-0.603	20.301	2622.585	-0.005725	-0.004548	-0.009352
0.8680	1263.333	74.387	58.656	123.261	-0.596	20.306	2405.062	-0.005207	-0.004106	-0.008628
0.8700	1165.423	67.799	53.377	114.409	-0.596	20.309	2218.666	-0.004746	-0.003736	-0.008009
0.8720	1095.766	62.880	49.583	107.615	-0.596	20.315	2086.058	-0.004402	-0.003471	-0.007533
0.8740	1038.613	58.794	46.261	101.625	-0.594	20.319	1977.253	-0.004116	-0.003238	-0.007114
0.8760	973.991	54.526	42.830	95.205	-0.597	20.318	1854.229	-0.003817	-0.002998	-0.006664
0.8780	893.394	49.051	38.272	87.242	-0.589	20.315	1700.792	-0.003434	-0.002679	-0.006107
0.8800	806.394	43.216	33.603	78.333	-0.592	20.311	1535.168	-0.003025	-0.002352	-0.005483
0.8820	728.442	37.811	29.447	69.691	-0.593	20.306	1386.766	-0.002647	-0.002061	-0.004878
0.8840	659.927	33.170	25.765	62.035	-0.592	20.302	1256.332	-0.002322	-0.001804	-0.004342
0.8860	593.652	28.625	22.277	54.766	-0.592	20.301	1130.161	-0.002004	-0.001559	-0.003834
0.8880	526.821	24.024	18.694	47.318	-0.589	20.306	1002.932	-0.001682	-0.001309	-0.003312
0.8900	458.532	19.175	15.525	39.396	-0.592	20.309	872.927	-0.001342	-0.001087	-0.002758
0.8920	393.955	14.310	11.981	31.627	-0.595	20.314	749.989	-0.001002	-0.000839	-0.002214
0.8940	339.341	9.905	9.257	24.611	-0.590	20.319	646.019	-0.000693	-0.000648	-0.001723
0.8960	297.623	6.778	7.686	19.317	-0.598	20.317	566.597	-0.000474	-0.000538	-0.001352
0.8980	268.227	3.876	5.797	15.177	-0.588	20.315	510.635	-0.000271	-0.000406	-0.001062
0.9000	247.232	1.930	4.475	12.090	-0.591	20.311	470.667	-0.000135	-0.000313	-0.000846
0.9020	230.325	0.096	3.616	9.477	-0.594	20.306	438.480	-0.000007	-0.000253	-0.000663
0.9040	216.439	-1.293	2.712	6.974	-0.591	20.302	412.045	0.000091	-0.000190	-0.000488
0.9060	208.174	-2.045	2.405	5.738	-0.593	20.302	396.309	0.000143	-0.000168	-0.000402
0.9080	206.986	-2.795	2.044	5.324	-0.589	20.306	394.049	0.000196	-0.000143	-0.000373
0.9100	211.420	-2.669	1.990	5.308	-0.593	20.309	402.489	0.000187	-0.000139	-0.000372
0.9120	220.121	-2.253	2.253	6.017	-0.593	20.315	419.054	0.000158	-0.000158	-0.000421
0.9140	242.844	-1.113	2.616	7.754	-0.599	20.319	462.313	0.000078	-0.000183	-0.000543
0.9160	303.589	2.932	4.269	14.369	-0.605	20.318	577.955	-0.000205	-0.000299	-0.001006
0.9180	395.412	9.057	7.410	24.247	-0.603	20.316	752.764	-0.000634	-0.000519	-0.001697
0.9200	492.361	15.963	11.399	34.904	-0.599	20.311	937.328	-0.001117	-0.000798	-0.002443
0.9220	582.020	22.064	15.594	44.649	-0.599	20.306	1108.017	-0.001544	-0.001092	-0.003125
0.9240	664.767	27.636	19.666	53.529	-0.597	20.302	1265.545	-0.001935	-0.001377	-0.003747
0.9260	744.552	33.432	23.764	62.382	-0.608	20.302	1417.437	-0.002340	-0.001663	-0.004367
0.9280	824.098	38.740	27.920	70.749	-0.601	20.306	1568.871	-0.002712	-0.001954	-0.004952
0.9300	903.929	44.021	32.049	79.336	-0.600	20.309	1720.848	-0.003082	-0.002243	-0.005554
0.9320	983.068	49.496	36.579	87.410	-0.595	20.314	1871.510	-0.003465	-0.002560	-0.006119
0.9340	1063.425	54.931	41.134	95.706	-0.593	20.319	2024.488	-0.003845	-0.002879	-0.006699
0.9360	1146.818	60.947	46.123	104.557	-0.597	20.317	2183.247	-0.004266	-0.003229	-0.007319
0.9380	1227.295	66.368	50.389	112.393	-0.588	20.315	2336.454	-0.004646	-0.003527	-0.007868
0.9400	1293.705	71.177	54.418	119.051	-0.591	20.311	2462.883	-0.004982	-0.003809	-0.008334
0.9420	1344.502	74.970	57.782	124.027	-0.590	20.305	2559.586	-0.005248	-0.004045	-0.008682
0.9440	1385.138	77.957	60.172	128.209	-0.583	20.301	2636.948	-0.005457	-0.004212	-0.008975
0.9460	1421.387	81.154	62.896	132.431	-0.589	20.300	2705.956	-0.005681	-0.004403	-0.009270
0.9480	1460.882	83.754	65.550	136.240	-0.591	20.305	2781.143	-0.005863	-0.004588	-0.009537
0.9500	1498.888	86.503	67.998	139.867	-0.597	20.309	2853.498	-0.006055	-0.004760	-0.009791
0.9520	1520.454	88.295	69.568	142.605	-0.589	20.314	2894.554	-0.006181	-0.004870	-0.009982
0.9540	1523.625	89.086	69.983	143.327	-0.594	20.318	2900.591	-0.006236	-0.004899	-0.010033
0.9560	1518.140	89.336	70.206	143.259	-0.600	20.317	2890.148	-0.006254	-0.004914	-0.010028
0.9580	1509.724	89.113	70.013	142.828	-0.591	20.315	2874.126	-0.006238	-0.004901	-0.009998
0.9600	1497.972	88.864	69.859	142.384	-0.591	20.310	2851.753	-0.006220	-0.004890	-0.009967
0.9620	1472.258	87.671	69.152	140.772	-0.597	20.305	2802.801	-0.006137	-0.004841	-0.009854
0.9640	1412.550	84.085	67.094	135.991	-0.596	20.301	2689.133	-0.005886	-0.004697	-0.009519
0.9660	1331.006	78.790	63.189	129.154	-0.602	20.300	2533.894	-0.005515	-0.004423	-0.009041
0.9680	1258.208	73.942	58.797	122.401	-0.590	20.305	2395.306	-0.005176	-0.004116	-0.008568
0.9700	1195.134	69.592	55.059	116.897	-0.590	20.309	2275.229	-0.004871	-0.003854	-0.008183
0.9720	1132.781	65.714	51.779	111.354	-0.595	20.314	2156.525	-0.004600	-0.003625	-0.007795
0.9740	1063.936	60.976	47.860	104.530	-0.594	20.318	2025.461	-0.004268	-0.003350	-0.007317
0.9760	980.243	55.513	43.373	96.468	-0.596	20.317	1866.131	-0.003886	-0.003036	-0.006753
0.9780	884.692	48.886	38.037	86.895	-0.592	20.315	1684.227	-0.003422	-0.002663	-0.006083
0.9800	790.119	42.397	32.922	77.086	-0.593	20.310	1504.183	-0.002968	-0.002305	-0.005396
0.9820	704.381	36.422	28.322	67.870	-0.595	20.305	1340.961	-0.002550	-0.001983	-0.004751
0.9840	626.640	31.098	24.002	59.296	-0.596	20.301	1192.961	-0.002177	-0.001680	-0.004151
0.9860	556.277	26.316	20.291	51.472	-0.602	20.300	1059.008	-0.001842	-0.001420	-0.003603
0.9880	496.103	21.900	17.067	44.233	-0.592	20.305	944.452	-0.001533	-0.001195	-0.003096
0.9900	443.999	17.981	14.497	38.006	-0.594	20.309	845.261	-0.001259	-0.001015	-0.002660
0.9920	393.759	14.173	11.994	31.670	-0.584	20.314	749.617	-0.000992	-0.000840	-0.002217
0.9940	346.946	10.505	9.647	25.818	-0.580	20.318	660.496	-0.000735	-0.000675	-0.001807
0.9960	307.196	7.558	7.772	20.745	-0.588	20.317	584.822	-0.000529	-0.000544	-0.001452
0.9980	274.193	4.707	6.061	16.327	-0.581	20.315	521.994	-0.000329	-0.000424	-0.001143
Test Cycles
Time (sec)	Axial stress (kPa)	Axial micro-strain #1	Axial micro-strain #2	Axial micro-strain #3	Confining pressure (kPa)	Temperature (�C)	Load (N)	Displacement #1 (mm)	Displacement #2 (mm)	Displacement #3 (mm)
0.0000	247.247	2.276	4.865	12.703	-0.589	20.310	470.695	-0.000159	-0.000341	-0.000889
0.0020	225.456	0.179	3.658	9.243	-0.596	20.305	429.211	-0.000013	-0.000256	-0.000647
0.0040	210.127	-1.334	2.797	6.698	-0.603	20.302	400.028	0.000093	-0.000196	-0.000469
0.0060	204.507	-1.904	2.475	5.725	-0.610	20.302	389.328	0.000133	-0.000173	-0.000401
0.0080	206.716	-2.336	2.101	5.544	-0.599	20.305	393.534	0.000163	-0.000147	-0.000388
0.0100	213.313	-2.223	2.100	5.823	-0.609	20.309	406.094	0.000156	-0.000147	-0.000408
0.0120	225.561	-1.889	2.211	6.516	-0.608	20.314	429.411	0.000132	-0.000155	-0.000456
0.0140	260.548	-0.028	2.713	9.894	-0.609	20.319	496.016	0.000002	-0.000190	-0.000693
0.0160	332.368	4.904	5.173	18.192	-0.605	20.317	632.744	-0.000343	-0.000362	-0.001273
0.0180	420.510	11.003	8.395	27.627	-0.600	20.315	800.543	-0.000770	-0.000588	-0.001934
0.0200	510.966	17.118	12.426	37.424	-0.599	20.311	972.748	-0.001198	-0.000870	-0.002620
0.0220	596.823	23.246	16.595	46.693	-0.596	20.305	1136.198	-0.001627	-0.001162	-0.003269
0.0240	672.641	28.305	20.235	55.044	-0.599	20.301	1280.537	-0.001981	-0.001416	-0.003853
0.0260	746.972	33.475	24.527	63.091	-0.605	20.300	1422.043	-0.002343	-0.001717	-0.004416
0.0280	829.553	39.076	28.711	71.596	-0.603	20.305	1579.256	-0.002735	-0.002010	-0.005012
0.0300	917.424	45.272	33.327	80.768	-0.602	20.309	1746.540	-0.003169	-0.002333	-0.005654
0.0320	1003.687	51.095	37.953	89.648	-0.609	20.314	1910.763	-0.003577	-0.002657	-0.006275
0.0340	1085.096	56.556	42.496	97.735	-0.608	20.319	2065.744	-0.003959	-0.002975	-0.006841
0.0360	1159.036	62.226	46.819	105.696	-0.616	20.317	2206.507	-0.004356	-0.003277	-0.007399
0.0380	1228.482	66.896	50.945	112.352	-0.605	20.315	2338.715	-0.004683	-0.003566	-0.007865
0.0400	1300.363	72.052	55.113	119.787	-0.599	20.311	2475.557	-0.005044	-0.003858	-0.008385
0.0420	1369.283	77.082	59.143	126.430	-0.599	20.305	2606.764	-0.005396	-0.004140	-0.008850
0.0440	1422.980	80.904	62.478	131.906	-0.603	20.302	2708.988	-0.005663	-0.004373	-0.009233
0.0460	1459.920	83.529	65.147	136.157	-0.605	20.301	2779.312	-0.005847	-0.004560	-0.009531
0.0480	1487.587	85.698	67.009	139.298	-0.598	20.305	2831.984	-0.005999	-0.004691	-0.009751
0.0500	1509.634	87.490	68.625	141.924	-0.608	20.309	2873.955	-0.006124	-0.004804	-0.009935
0.0520	1523.775	89.003	69.763	143.203	-0.604	20.314	2900.877	-0.006230	-0.004883	-0.010024
0.0540	1526.330	89.378	70.136	143.703	-0.600	20.318	2905.741	-0.006256	-0.004910	-0.010059
0.0560	1520.800	89.530	70.621	144.230	-0.612	20.317	2895.212	-0.006267	-0.004943	-0.010096
0.0580	1512.038	89.405	70.537	143.757	-0.599	20.314	2878.532	-0.006258	-0.004938	-0.010063
0.0600	1500.211	88.933	70.095	143.147	-0.603	20.310	2856.016	-0.006225	-0.004907	-0.010020
0.0620	1478.329	87.990	69.694	141.591	-0.607	20.305	2814.360	-0.006159	-0.004879	-0.009911
0.0640	1419.193	84.711	67.428	137.115	-0.608	20.300	2701.778	-0.005930	-0.004720	-0.009598
0.0660	1323.462	78.763	62.799	129.361	-0.610	20.300	2519.531	-0.005513	-0.004396	-0.009055
0.0680	1234.944	72.705	57.796	121.106	-0.595	20.305	2351.017	-0.005089	-0.004046	-0.008477
0.0700	1171.630	68.507	54.225	115.229	-0.600	20.309	2230.482	-0.004795	-0.003796	-0.008066
0.0720	1119.827	65.061	51.071	110.338	-0.599	20.314	2131.863	-0.004554	-0.003575	-0.007724
0.0740	1059.428	60.851	47.748	104.113	-0.595	20.318	2016.878	-0.004260	-0.003342	-0.007288
0.0760	978.845	55.584	43.496	96.608	-0.601	20.317	1863.470	-0.003891	-0.003045	-0.006763
0.0780	884.662	49.288	38.091	87.298	-0.597	20.314	1684.170	-0.003450	-0.002666	-0.006111
0.0800	795.754	43.187	33.408	77.750	-0.601	20.310	1514.912	-0.003023	-0.002339	-0.005443
0.0820	720.838	37.851	29.294	69.481	-0.595	20.305	1372.290	-0.002650	-0.002051	-0.004864
0.0840	656.065	33.252	25.614	62.312	-0.593	20.301	1248.980	-0.002328	-0.001793	-0.004362
0.0860	592.345	28.639	22.611	55.558	-0.609	20.301	1127.672	-0.002005	-0.001583	-0.003889
0.0880	525.934	23.984	19.054	47.957	-0.600	20.305	1001.244	-0.001679	-0.001334	-0.003357
0.0900	460.200	19.440	15.526	40.271	-0.597	20.308	876.102	-0.001361	-0.001087	-0.002819
0.0920	398.433	14.340	12.594	32.461	-0.603	20.313	758.514	-0.001004	-0.000882	-0.002272
0.0940	345.999	10.072	9.687	25.874	-0.596	20.318	658.693	-0.000705	-0.000678	-0.001811
0.0960	304.761	7.334	7.701	21.067	-0.604	20.317	580.187	-0.000513	-0.000539	-0.001475
0.0980	273.757	4.724	6.310	16.522	-0.601	20.314	521.164	-0.000331	-0.000442	-0.001157
0.1000	253.800	2.918	5.450	13.494	-0.606	20.310	483.170	-0.000204	-0.000381	-0.000945
0.1020	243.595	1.735	4.823	11.631	-0.607	20.305	463.743	-0.000121	-0.000338	-0.000814
0.1040	238.110	1.247	4.322	10.298	-0.604	20.302	453.300	-0.000087	-0.000303	-0.000721
0.1060	232.580	0.693	4.017	9.507	-0.610	20.301	442.772	-0.000049	-0.000281	-0.000665
0.1080	226.959	-0.112	3.463	8.561	-0.596	20.305	432.072	0.000008	-0.000242	-0.000599
0.1100	224.524	-0.737	3.255	8.004	-0.601	20.309	427.437	0.000052	-0.000228	-0.000560
0.1120	227.124	-0.778	3.034	8.101	-0.609	20.314	432.386	0.000054	-0.000212	-0.000567
0.1140	235.901	-0.570	2.907	8.462	-0.611	20.318	449.095	0.000040	-0.000203	-0.000592
0.1160	263.463	0.999	3.739	10.811	-0.612	20.317	501.566	-0.000070	-0.000262	-0.000757
0.1180	342.573	5.738	5.421	19.234	-0.605	20.315	652.170	-0.000402	-0.000379	-0.001346
0.1200	457.585	13.603	9.854	32.017	-0.612	20.310	871.124	-0.000952	-0.000690	-0.002241
0.1220	560.875	20.633	14.663	43.259	-0.622	20.305	1067.762	-0.001444	-0.001026	-0.003028
0.1240	635.566	25.858	18.483	51.236	-0.623	20.301	1209.955	-0.001810	-0.001294	-0.003587
0.1260	702.488	30.611	22.195	58.531	-0.625	20.301	1337.357	-0.002143	-0.001554	-0.004097
0.1280	787.699	36.434	26.420	67.231	-0.624	20.305	1499.577	-0.002550	-0.001849	-0.004706
0.1300	896.595	43.646	32.019	78.487	-0.619	20.309	1706.886	-0.003055	-0.002241	-0.005494
0.1320	1007.580	51.219	38.120	90.410	-0.620	20.314	1918.173	-0.003585	-0.002668	-0.006329
0.1340	1102.394	57.808	43.567	99.971	-0.623	20.319	2098.675	-0.004047	-0.003050	-0.006998
0.1360	1180.662	63.562	48.376	108.227	-0.618	20.317	2247.677	-0.004449	-0.003386	-0.007576
0.1380	1247.839	68.382	52.335	115.034	-0.609	20.314	2375.565	-0.004787	-0.003663	-0.008052
0.1400	1306.930	72.967	55.989	120.925	-0.607	20.310	2488.060	-0.005108	-0.003919	-0.008465
0.1420	1359.560	76.595	59.214	126.163	-0.613	20.305	2588.253	-0.005362	-0.004145	-0.008831
0.1440	1408.703	80.224	62.175	130.904	-0.602	20.301	2681.808	-0.005616	-0.004352	-0.009163
0.1460	1453.037	83.779	65.035	135.711	-0.604	20.301	2766.209	-0.005865	-0.004552	-0.009500
0.1480	1486.460	85.975	67.260	139.061	-0.599	20.305	2829.838	-0.006018	-0.004708	-0.009734
0.1500	1501.624	87.339	68.483	140.979	-0.601	20.309	2858.706	-0.006114	-0.004794	-0.009869
0.1520	1503.667	87.797	68.887	141.897	-0.599	20.314	2862.597	-0.006146	-0.004822	-0.009933
0.1540	1503.878	87.976	69.151	142.077	-0.597	20.318	2862.997	-0.006158	-0.004841	-0.009945
0.1560	1507.680	88.323	69.776	143.065	-0.599	20.316	2870.235	-0.006183	-0.004884	-0.010015
0.1580	1509.739	88.641	69.888	143.330	-0.588	20.314	2874.155	-0.006205	-0.004892	-0.010033
0.1600	1503.156	88.766	69.944	142.968	-0.595	20.310	2861.624	-0.006214	-0.004896	-0.010008
0.1620	1487.933	88.323	69.777	142.161	-0.597	20.305	2832.642	-0.006183	-0.004884	-0.009951
0.1640	1453.052	86.614	68.706	139.839	-0.596	20.301	2766.237	-0.006063	-0.004809	-0.009789
0.1660	1371.478	81.875	65.467	133.544	-0.603	20.300	2610.941	-0.005731	-0.004583	-0.009348
0.1680	1263.168	74.622	59.701	124.137	-0.591	20.305	2404.747	-0.005224	-0.004179	-0.008690
0.1700	1173.478	69.049	54.531	115.868	-0.598	20.309	2234.001	-0.004833	-0.003817	-0.008111
0.1720	1111.817	64.851	50.918	109.933	-0.594	20.314	2116.613	-0.004540	-0.003564	-0.007695
0.1740	1054.859	60.697	47.720	104.152	-0.591	20.318	2008.181	-0.004249	-0.003340	-0.007291
0.1760	978.996	56.126	43.621	96.927	-0.606	20.317	1863.756	-0.003929	-0.003053	-0.006785
0.1780	889.051	49.704	38.605	87.826	-0.603	20.315	1692.524	-0.003479	-0.002702	-0.006148
0.1800	803.344	43.938	34.090	78.835	-0.599	20.310	1529.360	-0.003076	-0.002386	-0.005518
0.1820	730.381	38.879	29.824	71.165	-0.599	20.305	1390.457	-0.002722	-0.002088	-0.004982
0.1840	663.820	34.114	26.308	63.549	-0.592	20.301	1263.742	-0.002388	-0.001842	-0.004448
0.1860	596.823	29.473	22.737	56.127	-0.602	20.300	1136.198	-0.002063	-0.001592	-0.003929
0.1880	530.217	24.374	18.847	48.485	-0.605	20.304	1009.398	-0.001706	-0.001319	-0.003394
0.1900	465.505	19.593	15.580	41.092	-0.596	20.308	886.202	-0.001372	-0.001091	-0.002876
0.1920	405.857	15.117	12.620	33.879	-0.599	20.314	772.648	-0.001058	-0.000883	-0.002372
0.1940	356.038	11.282	10.381	27.683	-0.593	20.318	677.805	-0.000790	-0.000727	-0.001938
0.1960	317.640	8.253	8.714	23.082	-0.607	20.317	604.706	-0.000578	-0.000610	-0.001616
0.1980	285.615	5.417	7.048	18.398	-0.604	20.315	543.737	-0.000379	-0.000493	-0.001288
0.2000	256.445	3.014	5.644	14.286	-0.605	20.310	488.205	-0.000211	-0.000395	-0.001000
0.2020	232.249	0.708	4.475	11.075	-0.606	20.305	442.142	-0.000050	-0.000313	-0.000775
0.2040	218.453	-0.306	3.672	8.560	-0.605	20.301	415.878	0.000021	-0.000257	-0.000599
0.2060	215.733	-0.391	3.520	7.852	-0.610	20.301	410.700	0.000027	-0.000246	-0.000550
0.2080	219.159	-0.820	3.257	7.669	-0.608	20.305	417.223	0.000057	-0.000228	-0.000537
0.2100	224.975	-1.029	3.199	7.950	-0.608	20.309	428.295	0.000072	-0.000224	-0.000556
0.2120	234.969	-0.056	3.617	8.422	-0.601	20.314	447.321	0.000004	-0.000253	-0.000590
0.2140	265.913	1.292	3.809	11.549	-0.610	20.318	506.229	-0.000090	-0.000267	-0.000808
0.2160	340.393	6.321	5.823	19.845	-0.618	20.317	648.022	-0.000442	-0.000408	-0.001389
0.2180	437.146	12.645	9.395	30.030	-0.600	20.314	832.214	-0.000885	-0.000658	-0.002102
0.2200	523.815	18.467	13.162	39.701	-0.604	20.310	997.210	-0.001293	-0.000921	-0.002779
0.2220	593.171	23.330	16.621	47.235	-0.605	20.304	1129.246	-0.001633	-0.001163	-0.003306
0.2240	655.840	27.513	19.707	53.837	-0.611	20.300	1248.550	-0.001926	-0.001379	-0.003769
0.2260	727.540	32.653	23.389	61.658	-0.616	20.301	1385.050	-0.002286	-0.001637	-0.004316
0.2280	812.060	38.143	27.613	70.428	-0.612	20.305	1545.954	-0.002670	-0.001933	-0.004930
0.2300	900.532	44.092	32.602	79.418	-0.608	20.309	1714.382	-0.003086	-0.002282	-0.005559
0.2320	987.351	49.997	37.285	88.616	-0.604	20.314	1879.663	-0.003500	-0.002610	-0.006203
0.2340	1070.609	55.874	41.871	97.233	-0.598	20.319	2038.164	-0.003911	-0.002931	-0.006806
0.2360	1146.157	61.209	46.541	105.210	-0.607	20.317	2181.988	-0.004285	-0.003258	-0.007365
0.2380	1212.282	66.116	50.236	111.950	-0.600	20.314	2307.873	-0.004628	-0.003517	-0.007837
0.2400	1273.492	70.591	54.003	118.023	-0.597	20.310	2424.402	-0.004941	-0.003780	-0.008262
0.2420	1333.110	74.774	57.783	123.860	-0.602	20.305	2537.899	-0.005234	-0.004045	-0.008670
0.2440	1389.301	78.708	61.102	129.333	-0.604	20.301	2644.873	-0.005510	-0.004277	-0.009053
0.2460	1434.882	82.529	64.203	134.379	-0.612	20.301	2731.647	-0.005777	-0.004494	-0.009407
0.2480	1466.352	84.974	66.384	137.561	-0.599	20.305	2791.557	-0.005948	-0.004647	-0.009629
0.2500	1488.173	86.698	67.872	140.022	-0.597	20.308	2833.099	-0.006069	-0.004751	-0.009802
0.2520	1506.808	88.116	69.068	142.064	-0.597	20.314	2868.576	-0.006168	-0.004835	-0.009944
0.2540	1521.191	89.685	70.165	143.605	-0.589	20.318	2895.956	-0.006278	-0.004912	-0.010052
0.2560	1526.360	90.338	70.663	144.744	-0.593	20.317	2905.798	-0.006324	-0.004946	-0.010132
0.2580	1522.799	89.933	70.453	144.659	-0.594	20.314	2899.017	-0.006295	-0.004932	-0.010126
0.2600	1512.339	89.502	70.481	144.160	-0.597	20.310	2879.105	-0.006265	-0.004934	-0.010091
0.2620	1493.117	88.808	70.219	143.077	-0.598	20.304	2842.512	-0.006217	-0.004915	-0.010015
0.2640	1448.633	86.433	68.678	139.688	-0.601	20.300	2757.826	-0.006050	-0.004807	-0.009778
0.2660	1364.534	81.568	65.008	133.157	-0.607	20.300	2597.723	-0.005710	-0.004551	-0.009321
0.2680	1264.400	74.913	59.451	124.457	-0.604	20.305	2407.093	-0.005244	-0.004162	-0.008712
0.2700	1174.139	68.827	54.294	116.105	-0.596	20.309	2235.260	-0.004818	-0.003801	-0.008127
0.2720	1103.957	64.115	50.610	109.254	-0.596	20.314	2101.650	-0.004488	-0.003543	-0.007648
0.2740	1042.581	59.987	47.123	103.403	-0.594	20.318	1984.806	-0.004199	-0.003299	-0.007238
0.2760	969.002	55.249	43.248	96.496	-0.603	20.317	1844.730	-0.003867	-0.003027	-0.006755
0.2780	878.275	49.037	38.190	86.909	-0.593	20.314	1672.010	-0.003433	-0.002673	-0.006084
0.2800	788.285	43.091	33.327	77.209	-0.589	20.310	1500.692	-0.003016	-0.002333	-0.005405
0.2820	712.422	37.783	29.060	69.108	-0.589	20.305	1356.268	-0.002645	-0.002034	-0.004838
0.2840	647.243	32.989	25.473	61.813	-0.594	20.300	1232.185	-0.002309	-0.001783	-0.004327
0.2860	585.627	29.070	22.276	54.919	-0.597	20.300	1114.883	-0.002035	-0.001559	-0.003844
0.2880	520.719	24.164	18.790	47.748	-0.592	20.305	991.316	-0.001691	-0.001315	-0.003342
0.2900	454.008	19.217	15.206	39.939	-0.600	20.308	864.315	-0.001345	-0.001064	-0.002796
0.2920	390.558	14.285	11.968	32.408	-0.605	20.314	743.523	-0.001000	-0.000838	-0.002269
0.2940	336.155	10.100	9.410	25.571	-0.605	20.319	639.954	-0.000707	-0.000659	-0.001790
0.2960	295.443	6.890	7.451	20.621	-0.611	20.317	562.449	-0.000482	-0.000522	-0.001443
0.2980	266.318	4.194	5.920	16.120	-0.602	20.314	507.002	-0.000294	-0.000414	-0.001128
0.3000	245.609	2.011	5.058	13.105	-0.604	20.310	467.577	-0.000141	-0.000354	-0.000917
0.3020	230.476	0.761	4.196	10.783	-0.607	20.305	438.766	-0.000053	-0.000294	-0.000755
0.3040	221.143	-0.280	3.659	8.854	-0.607	20.301	421.000	0.000020	-0.000256	-0.000620
0.3060	218.964	-0.710	3.451	8.603	-0.611	20.301	416.851	0.000050	-0.000242	-0.000602
0.3080	222.285	-0.945	3.394	8.214	-0.605	20.305	423.174	0.000066	-0.000238	-0.000575
0.3100	228.687	-0.653	3.367	8.255	-0.605	20.309	435.362	0.000046	-0.000236	-0.000578
0.3120	238.245	-0.238	3.658	8.910	-0.599	20.314	453.558	0.000017	-0.000256	-0.000624
0.3140	262.997	1.264	4.046	11.022	-0.607	20.318	500.679	-0.000088	-0.000283	-0.000772
0.3160	323.381	5.348	5.575	17.953	-0.620	20.317	615.635	-0.000374	-0.000390	-0.001257
0.3180	410.200	11.227	8.479	27.388	-0.615	20.315	780.916	-0.000786	-0.000594	-0.001917
0.3200	502.550	17.634	12.302	37.271	-0.608	20.310	956.726	-0.001234	-0.000861	-0.002609
0.3220	589.429	23.443	16.373	46.720	-0.609	20.304	1122.122	-0.001641	-0.001146	-0.003270
0.3240	668.524	28.610	20.264	55.210	-0.607	20.300	1272.697	-0.002003	-0.001418	-0.003865
0.3260	742.809	33.975	24.294	63.188	-0.618	20.300	1414.118	-0.002378	-0.001701	-0.004423
0.3280	816.238	39.061	28.031	71.137	-0.609	20.305	1553.907	-0.002734	-0.001962	-0.004980
0.3300	890.403	43.871	31.894	78.835	-0.601	20.308	1695.099	-0.003071	-0.002233	-0.005518
0.3320	974.517	49.374	36.326	87.325	-0.605	20.314	1855.230	-0.003456	-0.002543	-0.006113
0.3340	1072.562	56.001	41.759	97.443	-0.599	20.318	2041.883	-0.003920	-0.002923	-0.006821
0.3360	1170.488	62.837	47.664	107.629	-0.600	20.316	2228.308	-0.004399	-0.003336	-0.007534
0.3380	1247.283	68.450	52.291	115.340	-0.600	20.314	2374.506	-0.004791	-0.003660	-0.008074
0.3400	1301.866	72.551	55.696	120.842	-0.604	20.310	2478.418	-0.005079	-0.003899	-0.008459
0.3420	1351.189	76.080	58.949	125.804	-0.603	20.305	2572.317	-0.005326	-0.004126	-0.008806
0.3440	1401.083	79.819	62.117	130.751	-0.597	20.300	2667.303	-0.005587	-0.004348	-0.009153
0.3460	1448.423	83.418	65.120	135.670	-0.609	20.300	2757.425	-0.005839	-0.004558	-0.009497
0.3480	1488.158	86.087	67.635	139.672	-0.597	20.304	2833.071	-0.006026	-0.004734	-0.009777
0.3500	1514.668	88.519	69.567	142.464	-0.600	20.308	2883.539	-0.006196	-0.004870	-0.009972
0.3520	1526.105	89.839	70.718	143.994	-0.602	20.314	2905.312	-0.006289	-0.004950	-0.010080
0.3540	1526.541	90.338	71.036	144.397	-0.596	20.318	2906.141	-0.006324	-0.004973	-0.010108
0.3560	1521.822	90.558	71.234	144.771	-0.604	20.316	2897.158	-0.006339	-0.004986	-0.010134
0.3580	1514.578	90.308	70.914	144.285	-0.591	20.314	2883.368	-0.006322	-0.004964	-0.010100
0.3600	1503.502	89.879	70.677	143.980	-0.595	20.309	2862.282	-0.006292	-0.004947	-0.010079
0.3620	1483.124	88.781	70.290	142.798	-0.588	20.304	2823.486	-0.006215	-0.004920	-0.009996
0.3640	1430.434	85.545	68.372	138.422	-0.588	20.300	2723.179	-0.005988	-0.004786	-0.009690
0.3660	1339.151	80.098	63.910	131.209	-0.598	20.300	2549.400	-0.005607	-0.004474	-0.009185
0.3680	1243.646	73.818	58.365	122.580	-0.597	20.304	2367.582	-0.005167	-0.004086	-0.008581
0.3700	1157.052	67.911	53.529	114.520	-0.608	20.309	2202.730	-0.004754	-0.003747	-0.008016
0.3720	1080.107	62.573	49.292	107.265	-0.603	20.314	2056.246	-0.004380	-0.003450	-0.007509
0.3740	1010.165	58.056	45.207	100.277	-0.600	20.318	1923.094	-0.004064	-0.003164	-0.007019
0.3760	937.803	53.234	41.522	93.205	-0.606	20.317	1785.336	-0.003726	-0.002907	-0.006524
0.3780	858.949	47.621	37.298	84.851	-0.595	20.314	1635.218	-0.003333	-0.002611	-0.005940
0.3800	774.910	42.008	32.657	76.263	-0.602	20.310	1475.229	-0.002941	-0.002286	-0.005338
0.3820	696.296	36.547	28.322	67.592	-0.603	20.305	1325.569	-0.002558	-0.001983	-0.004731
0.3840	630.156	31.598	24.820	60.103	-0.607	20.301	1199.656	-0.002212	-0.001737	-0.004207
0.3860	574.145	27.971	21.971	54.030	-0.615	20.301	1093.025	-0.001958	-0.001538	-0.003782
0.3880	521.982	24.358	18.915	47.763	-0.605	20.305	993.719	-0.001705	-0.001324	-0.003343
0.3900	467.624	20.507	16.149	41.329	-0.611	20.308	890.236	-0.001436	-0.001130	-0.002893
0.3920	411.072	16.296	13.341	34.504	-0.611	20.314	782.576	-0.001141	-0.000934	-0.002415
0.3940	357.811	12.088	10.548	27.960	-0.600	20.318	681.181	-0.000846	-0.000738	-0.001957
0.3960	317.069	8.934	8.604	23.276	-0.608	20.316	603.619	-0.000625	-0.000602	-0.001629
0.3980	289.703	6.030	7.174	19.205	-0.607	20.314	551.519	-0.000422	-0.000502	-0.001344
0.4000	271.834	4.628	6.255	16.565	-0.608	20.310	517.502	-0.000324	-0.000438	-0.001160
0.4020	260.517	3.235	5.464	14.662	-0.611	20.305	495.958	-0.000226	-0.000382	-0.001026
0.4040	250.343	2.023	4.754	12.701	-0.603	20.300	476.589	-0.000142	-0.000333	-0.000889
0.4060	240.620	1.262	4.143	11.393	-0.607	20.300	458.078	-0.000088	-0.000290	-0.000798
0.4080	234.924	0.556	3.850	10.267	-0.603	20.305	447.235	-0.000039	-0.000269	-0.000719
0.4100	235.420	0.331	3.989	9.686	-0.611	20.308	448.179	-0.000023	-0.000279	-0.000678
0.4120	240.680	0.400	3.713	10.034	-0.617	20.313	458.193	-0.000028	-0.000260	-0.000702
0.4140	252.132	0.776	3.920	10.617	-0.617	20.318	479.994	-0.000054	-0.000274	-0.000743
0.4160	288.320	2.958	4.725	14.563	-0.629	20.316	548.887	-0.000207	-0.000331	-0.001019
0.4180	371.427	8.448	7.061	23.164	-0.617	20.314	707.102	-0.000591	-0.000494	-0.001621
0.4200	484.711	16.091	11.607	35.476	-0.608	20.309	922.766	-0.001126	-0.000812	-0.002483
0.4220	603.631	24.179	17.178	48.485	-0.608	20.304	1149.158	-0.001693	-0.001202	-0.003394
0.4240	704.968	31.210	22.166	59.101	-0.607	20.300	1342.077	-0.002185	-0.001552	-0.004137
0.4260	785.099	36.894	26.682	68.078	-0.609	20.300	1494.627	-0.002583	-0.001868	-0.004765
0.4280	859.475	41.868	30.670	75.835	-0.597	20.305	1636.219	-0.002931	-0.002147	-0.005308
0.4300	937.247	47.037	34.867	84.087	-0.603	20.309	1784.277	-0.003293	-0.002441	-0.005886
0.4320	1013.080	52.375	39.189	91.925	-0.595	20.314	1928.644	-0.003666	-0.002743	-0.006435
0.4340	1086.133	57.474	43.095	99.167	-0.600	20.318	2067.719	-0.004023	-0.003017	-0.006942
0.4360	1156.030	62.532	47.249	106.616	-0.609	20.317	2200.785	-0.004377	-0.003307	-0.007463
0.4380	1220.637	66.924	51.183	113.089	-0.593	20.314	2323.780	-0.004685	-0.003583	-0.007916
0.4400	1276.423	71.023	54.279	118.980	-0.597	20.309	2429.981	-0.004972	-0.003800	-0.008329
0.4420	1325.746	74.775	57.449	123.553	-0.593	20.304	2523.880	-0.005234	-0.004021	-0.008649
0.4440	1378.030	78.292	60.742	128.611	-0.590	20.300	2623.415	-0.005480	-0.004252	-0.009003
0.4460	1431.696	82.209	64.022	134.226	-0.599	20.300	2725.582	-0.005755	-0.004482	-0.009396
0.4480	1471.762	84.961	66.744	138.394	-0.591	20.304	2801.857	-0.005947	-0.004672	-0.009688
0.4500	1492.622	86.853	68.484	140.772	-0.595	20.309	2841.568	-0.006080	-0.004794	-0.009854
0.4520	1503.923	88.019	69.431	142.078	-0.596	20.314	2863.083	-0.006161	-0.004860	-0.009945
0.4540	1511.121	89.004	70.069	143.105	-0.600	20.318	2876.787	-0.006230	-0.004905	-0.010017
0.4560	1511.978	89.516	70.677	143.966	-0.606	20.316	2878.418	-0.006266	-0.004947	-0.010078
0.4580	1506.463	89.640	70.413	143.854	-0.593	20.314	2867.918	-0.006275	-0.004929	-0.010070
0.4600	1496.574	89.600	70.150	142.995	-0.595	20.309	2849.092	-0.006272	-0.004910	-0.010010
0.4620	1480.103	88.532	69.956	142.203	-0.596	20.304	2817.736	-0.006197	-0.004897	-0.009954
0.4640	1441.059	86.280	68.582	139.506	-0.586	20.300	2743.406	-0.006040	-0.004801	-0.009765
0.4660	1363.167	81.833	65.219	133.322	-0.597	20.300	2595.119	-0.005728	-0.004565	-0.009333
0.4680	1273.342	76.081	60.103	125.275	-0.591	20.305	2424.116	-0.005326	-0.004207	-0.008769
0.4700	1191.753	70.550	55.447	117.980	-0.593	20.308	2268.791	-0.004938	-0.003881	-0.008259
0.4720	1114.627	64.935	51.223	110.670	-0.592	20.314	2121.964	-0.004545	-0.003586	-0.007747
0.4740	1027.988	58.934	46.387	102.320	-0.594	20.318	1957.026	-0.004125	-0.003247	-0.007162
0.4760	931.310	52.764	41.190	92.926	-0.594	20.316	1772.976	-0.003693	-0.002883	-0.006505
0.4780	854.260	47.467	36.812	84.491	-0.581	20.314	1626.291	-0.003323	-0.002577	-0.005914
0.4800	800.729	43.729	33.895	78.877	-0.588	20.310	1524.382	-0.003061	-0.002373	-0.005521
0.4820	740.735	39.338	30.421	72.637	-0.589	20.305	1410.170	-0.002754	-0.002129	-0.005085
0.4840	651.076	33.211	25.821	63.160	-0.578	20.300	1239.481	-0.002325	-0.001807	-0.004421
0.4860	549.829	26.722	20.930	52.182	-0.592	20.300	1046.734	-0.001871	-0.001465	-0.003653
0.4880	474.732	20.997	16.817	42.983	-0.584	20.304	903.769	-0.001470	-0.001177	-0.003009
0.4900	428.475	17.383	14.303	37.173	-0.587	20.308	815.706	-0.001217	-0.001001	-0.002602
0.4920	387.943	14.507	12.383	32.046	-0.586	20.313	738.544	-0.001015	-0.000867	-0.002243
0.4940	336.967	10.587	9.939	25.639	-0.591	20.317	641.499	-0.000741	-0.000696	-0.001795
0.4960	281.031	6.487	7.618	19.024	-0.599	20.316	535.011	-0.000454	-0.000533	-0.001332
0.4980	235.691	2.680	5.241	12.633	-0.595	20.313	448.694	-0.000188	-0.000367	-0.000884
0.5000	208.339	-0.072	3.866	8.451	-0.600	20.310	396.624	0.000005	-0.000271	-0.000592
0.5020	197.173	-1.292	3.034	6.392	-0.602	20.305	375.366	0.000090	-0.000212	-0.000447
0.5040	196.106	-1.849	2.630	5.627	-0.599	20.301	373.335	0.000129	-0.000184	-0.000394
0.5060	197.578	-1.960	2.616	5.572	-0.599	20.300	376.139	0.000137	-0.000183	-0.000390
0.5080	199.728	-2.320	2.308	5.768	-0.587	20.305	380.230	0.000162	-0.000162	-0.000404
0.5100	204.041	-2.169	2.280	5.767	-0.590	20.308	388.441	0.000152	-0.000160	-0.000404
0.5120	212.291	-2.348	2.617	6.112	-0.591	20.314	404.148	0.000164	-0.000183	-0.000428
0.5140	235.781	-1.085	2.699	8.225	-0.594	20.317	448.866	0.000076	-0.000189	-0.000576
0.5160	306.249	3.862	4.755	16.120	-0.611	20.316	583.019	-0.000270	-0.000333	-0.001128
0.5180	413.958	10.934	8.673	27.890	-0.605	20.314	788.069	-0.000765	-0.000607	-0.001952
0.5200	517.488	17.911	12.941	39.119	-0.599	20.309	985.165	-0.001254	-0.000906	-0.002738
0.5220	601.211	23.970	17.081	48.264	-0.601	20.304	1144.552	-0.001678	-0.001196	-0.003379
0.5240	675.542	29.027	21.041	55.990	-0.604	20.300	1286.058	-0.002032	-0.001473	-0.003919
0.5260	754.020	34.835	25.156	64.882	-0.605	20.300	1435.461	-0.002438	-0.001761	-0.004542
0.5280	839.307	40.548	29.645	73.609	-0.596	20.304	1597.824	-0.002838	-0.002075	-0.005153
0.5300	927.358	46.621	34.242	82.907	-0.592	20.308	1765.451	-0.003263	-0.002397	-0.005803
0.5320	1010.029	52.179	38.689	91.411	-0.599	20.313	1922.836	-0.003653	-0.002708	-0.006399
0.5340	1089.049	57.597	43.178	99.347	-0.596	20.317	2073.269	-0.004032	-0.003022	-0.006954
0.5360	1168.444	63.324	48.027	107.976	-0.601	20.316	2224.417	-0.004433	-0.003362	-0.007558
0.5380	1232.029	67.952	51.641	114.382	-0.594	20.313	2345.467	-0.004757	-0.003615	-0.008007
0.5400	1275.942	71.245	54.224	118.982	-0.596	20.309	2429.066	-0.004987	-0.003796	-0.008329
0.5420	1324.138	74.776	57.130	123.594	-0.597	20.304	2520.819	-0.005234	-0.003999	-0.008652
0.5440	1395.914	79.584	61.257	130.474	-0.592	20.299	2657.461	-0.005571	-0.004288	-0.009133
0.5460	1465.766	84.668	65.940	137.686	-0.603	20.299	2790.442	-0.005927	-0.004616	-0.009638
0.5480	1498.377	87.019	68.149	140.687	-0.599	20.304	2852.526	-0.006091	-0.004770	-0.009848
0.5500	1500.211	87.588	68.539	141.479	-0.604	20.308	2856.016	-0.006131	-0.004798	-0.009904
0.5520	1495.026	87.364	68.944	141.787	-0.602	20.313	2846.146	-0.006115	-0.004826	-0.009925
0.5540	1491.509	87.351	68.985	141.703	-0.600	20.317	2839.451	-0.006115	-0.004829	-0.009919
0.5560	1490.082	87.851	69.194	142.038	-0.602	20.315	2836.733	-0.006150	-0.004844	-0.009943
0.5580	1487.888	87.741	69.250	141.841	-0.590	20.313	2832.556	-0.006142	-0.004848	-0.009929
0.5600	1480.554	87.853	69.292	141.745	-0.592	20.309	2818.594	-0.006150	-0.004850	-0.009922
0.5620	1463.707	87.254	68.985	141.020	-0.589	20.303	2786.522	-0.006108	-0.004829	-0.009871
0.5640	1420.530	84.794	67.718	137.866	-0.589	20.299	2704.325	-0.005936	-0.004740	-0.009651
0.5660	1339.452	80.029	64.313	131.238	-0.595	20.299	2549.973	-0.005602	-0.004502	-0.009187
0.5680	1255.188	74.539	59.491	123.706	-0.590	20.304	2389.555	-0.005218	-0.004164	-0.008659
0.5700	1189.574	70.188	55.766	117.634	-0.592	20.308	2264.643	-0.004913	-0.003904	-0.008234
0.5720	1135.637	66.658	52.432	112.577	-0.591	20.313	2161.961	-0.004666	-0.003670	-0.007880
0.5740	1071.706	62.406	48.804	106.268	-0.589	20.317	2040.253	-0.004368	-0.003416	-0.007439
0.5760	992.085	57.141	44.707	98.693	-0.596	20.316	1888.676	-0.004000	-0.003129	-0.006909
0.5780	910.601	51.486	39.995	90.535	-0.583	20.313	1733.551	-0.003604	-0.002800	-0.006337
0.5800	832.784	45.899	35.632	82.573	-0.589	20.309	1585.407	-0.003213	-0.002494	-0.005780
0.5820	761.910	41.035	31.728	74.805	-0.592	20.303	1450.481	-0.002872	-0.002221	-0.005236
0.5840	697.153	36.643	28.405	67.648	-0.592	20.299	1327.200	-0.002565	-0.001988	-0.004735
0.5860	625.212	31.793	24.751	60.269	-0.604	20.299	1190.243	-0.002226	-0.001733	-0.004219
0.5880	541.759	25.624	20.346	50.820	-0.592	20.304	1031.370	-0.001794	-0.001424	-0.003557
0.5900	458.276	19.771	15.996	41.023	-0.590	20.308	872.440	-0.001384	-0.001120	-0.002872
0.5920	387.628	14.211	12.509	32.545	-0.590	20.313	737.944	-0.000995	-0.000876	-0.002278
0.5940	336.501	10.169	9.924	26.013	-0.588	20.317	640.612	-0.000712	-0.000695	-0.001821
0.5960	300.718	7.781	8.328	21.665	-0.591	20.315	572.491	-0.000545	-0.000583	-0.001517
0.5980	275.125	5.432	6.977	17.578	-0.581	20.313	523.767	-0.000380	-0.000488	-0.001230
0.6000	258.864	3.862	6.034	15.299	-0.584	20.308	492.811	-0.000270	-0.000422	-0.001071
0.6020	249.877	3.043	5.367	13.800	-0.588	20.304	475.702	-0.000213	-0.000376	-0.000966
0.6040	245.068	2.084	4.962	12.479	-0.586	20.300	466.547	-0.000146	-0.000347	-0.000874
0.6060	242.483	1.959	4.683	12.103	-0.591	20.299	461.626	-0.000137	-0.000328	-0.000847
0.6080	242.017	1.372	4.628	11.631	-0.580	20.304	460.739	-0.000096	-0.000324	-0.000814
0.6100	244.001	1.332	4.435	11.381	-0.585	20.308	464.516	-0.000093	-0.000310	-0.000797
0.6120	249.306	1.471	4.240	11.631	-0.584	20.313	474.615	-0.000103	-0.000297	-0.000814
0.6140	259.345	1.653	4.267	12.131	-0.589	20.317	493.727	-0.000116	-0.000299	-0.000849
0.6160	289.447	3.111	4.850	15.301	-0.601	20.316	551.033	-0.000218	-0.000340	-0.001071
0.6180	366.678	8.057	6.714	23.318	-0.592	20.313	698.061	-0.000564	-0.000470	-0.001632
0.6200	476.731	15.604	11.148	35.034	-0.588	20.309	907.574	-0.001092	-0.000780	-0.002452
0.6220	584.395	22.623	16.137	46.539	-0.595	20.304	1112.537	-0.001584	-0.001130	-0.003258
0.6240	670.748	28.666	20.530	55.892	-0.603	20.299	1276.932	-0.002007	-0.001437	-0.003912
0.6260	741.096	34.018	24.586	63.771	-0.609	20.299	1410.856	-0.002381	-0.001721	-0.004464
0.6280	813.352	38.701	28.294	71.372	-0.603	20.304	1548.414	-0.002709	-0.001981	-0.004996
0.6300	895.182	44.176	32.742	79.863	-0.603	20.308	1704.197	-0.003092	-0.002292	-0.005590
0.6320	981.295	50.249	37.341	88.631	-0.605	20.314	1868.134	-0.003517	-0.002614	-0.006204
0.6340	1064.718	56.141	42.109	97.191	-0.597	20.318	2026.949	-0.003930	-0.002948	-0.006803
0.6360	1145.150	61.879	47.012	105.861	-0.601	20.316	2180.071	-0.004332	-0.003291	-0.007410
0.6380	1222.561	67.021	51.418	113.409	-0.594	20.313	2327.442	-0.004691	-0.003599	-0.007939
0.6400	1283.306	71.773	55.073	119.343	-0.591	20.309	2443.085	-0.005024	-0.003855	-0.008354
0.6420	1329.383	75.232	57.949	123.968	-0.593	20.303	2530.804	-0.005266	-0.004056	-0.008678
0.6440	1382.659	79.012	61.312	129.236	-0.599	20.299	2632.227	-0.005531	-0.004292	-0.009047
0.6460	1440.443	83.002	64.855	135.559	-0.601	20.299	2742.233	-0.005810	-0.004540	-0.009489
0.6480	1474.001	85.657	66.967	139.087	-0.595	20.304	2806.120	-0.005996	-0.004688	-0.009736
0.6500	1478.901	86.377	67.706	139.922	-0.597	20.308	2815.447	-0.006046	-0.004739	-0.009795
0.6520	1476.526	86.573	68.024	139.979	-0.595	20.313	2810.926	-0.006060	-0.004762	-0.009799
0.6540	1479.276	86.907	68.149	140.215	-0.585	20.317	2816.162	-0.006083	-0.004770	-0.009815
0.6560	1493.268	88.323	69.221	142.035	-0.592	20.315	2842.798	-0.006183	-0.004845	-0.009942
0.6580	1511.678	89.307	70.247	143.911	-0.584	20.313	2877.846	-0.006252	-0.004917	-0.010074
0.6600	1514.984	89.669	70.884	144.398	-0.581	20.309	2884.140	-0.006277	-0.004962	-0.010108
0.6620	1501.879	89.364	70.885	143.856	-0.592	20.304	2859.192	-0.006255	-0.004962	-0.010070
0.6640	1461.197	87.489	69.566	141.298	-0.597	20.299	2781.744	-0.006124	-0.004870	-0.009891
0.6660	1364.504	81.959	65.633	133.849	-0.603	20.299	2597.666	-0.005737	-0.004594	-0.009369
0.6680	1246.787	74.024	59.118	123.247	-0.588	20.304	2373.562	-0.005182	-0.004138	-0.008627
0.6700	1157.308	68.160	53.934	114.978	-0.593	20.308	2203.217	-0.004771	-0.003775	-0.008048
0.6720	1099.448	64.505	50.764	109.573	-0.597	20.313	2093.067	-0.004515	-0.003554	-0.007670
0.6740	1045.391	60.824	47.668	103.876	-0.590	20.317	1990.156	-0.004258	-0.003337	-0.007271
0.6760	971.917	56.056	43.791	96.829	-0.595	20.315	1850.281	-0.003924	-0.003065	-0.006778
0.6780	883.881	49.872	38.856	88.062	-0.589	20.313	1682.682	-0.003491	-0.002720	-0.006164
0.6800	798.189	44.063	34.131	79.141	-0.588	20.308	1519.547	-0.003084	-0.002389	-0.005540
0.6820	725.256	38.854	29.976	71.138	-0.585	20.303	1380.701	-0.002720	-0.002098	-0.004980
0.6840	664.887	34.657	26.669	64.215	-0.585	20.299	1265.774	-0.002426	-0.001867	-0.004495
0.6860	603.556	30.445	23.391	57.685	-0.592	20.299	1149.015	-0.002131	-0.001637	-0.004038
0.6880	531.600	24.871	19.429	49.764	-0.581	20.304	1012.030	-0.001741	-0.001360	-0.003483
0.6900	452.550	19.273	15.678	40.718	-0.587	20.308	861.540	-0.001349	-0.001097	-0.002850
0.6920	382.623	14.256	12.162	32.283	-0.588	20.314	728.416	-0.000998	-0.000851	-0.002260
0.6940	335.765	10.392	9.813	25.958	-0.584	20.318	639.210	-0.000727	-0.000687	-0.001817
0.6960	308.067	8.100	8.494	22.610	-0.593	20.316	586.481	-0.000567	-0.000595	-0.001583
0.6980	287.073	6.264	7.353	19.440	-0.585	20.313	546.513	-0.000438	-0.000515	-0.001361
0.7000	262.636	4.194	6.214	16.010	-0.589	20.309	499.992	-0.000294	-0.000435	-0.001121
0.7020	239.327	1.874	5.101	12.715	-0.592	20.304	455.618	-0.000131	-0.000357	-0.000890
0.7040	225.832	0.803	4.323	10.450	-0.585	20.300	429.926	-0.000056	-0.000303	-0.000732
0.7060	222.045	0.483	4.100	9.687	-0.589	20.300	422.716	-0.000034	-0.000287	-0.000678
0.7080	224.570	0.110	3.838	9.230	-0.586	20.305	427.523	-0.000008	-0.000269	-0.000646
0.7100	229.739	0.138	3.796	9.549	-0.592	20.308	437.365	-0.000010	-0.000266	-0.000668
0.7120	236.141	0.415	3.866	10.021	-0.593	20.314	449.553	-0.000029	-0.000271	-0.000701
0.7140	252.432	1.014	3.740	11.380	-0.597	20.317	480.566	-0.000071	-0.000262	-0.000797
0.7160	307.286	4.600	4.990	16.940	-0.600	20.315	584.993	-0.000322	-0.000349	-0.001186
0.7180	405.962	11.144	8.590	27.391	-0.598	20.313	772.848	-0.000780	-0.000601	-0.001917
0.7200	514.993	18.508	13.091	39.342	-0.599	20.309	980.415	-0.001296	-0.000916	-0.002754
0.7220	601.332	24.373	17.288	49.013	-0.596	20.303	1144.781	-0.001706	-0.001210	-0.003431
0.7240	659.507	28.500	20.150	55.238	-0.599	20.299	1255.531	-0.001995	-0.001410	-0.003867
0.7260	721.769	32.948	23.639	61.881	-0.608	20.299	1374.063	-0.002306	-0.001655	-0.004332
0.7280	814.750	38.741	28.087	71.664	-0.604	20.304	1551.075	-0.002712	-0.001966	-0.005017
0.7300	931.596	46.536	34.297	83.770	-0.606	20.308	1773.520	-0.003258	-0.002401	-0.005864
0.7320	1041.559	54.026	40.536	94.998	-0.603	20.313	1982.861	-0.003782	-0.002838	-0.006650
0.7340	1124.801	59.724	45.483	103.320	-0.598	20.317	2141.333	-0.004181	-0.003184	-0.007232
0.7360	1193.706	65.158	49.793	110.463	-0.602	20.315	2272.511	-0.004561	-0.003486	-0.007732
0.7380	1260.267	69.938	53.585	117.341	-0.593	20.313	2399.225	-0.004896	-0.003751	-0.008214
0.7400	1319.810	74.316	57.197	123.415	-0.586	20.309	2512.579	-0.005202	-0.004004	-0.008639
0.7420	1368.367	77.915	60.283	128.223	-0.587	20.304	2605.019	-0.005454	-0.004220	-0.008976
0.7440	1409.484	81.084	62.869	132.086	-0.585	20.299	2683.296	-0.005676	-0.004401	-0.009246
0.7460	1447.070	84.114	65.551	136.532	-0.596	20.299	2754.850	-0.005888	-0.004589	-0.009557
0.7480	1478.510	86.211	67.552	139.769	-0.591	20.304	2814.703	-0.006035	-0.004729	-0.009784
0.7500	1495.747	87.769	68.747	141.604	-0.591	20.308	2847.519	-0.006144	-0.004812	-0.009912
0.7520	1499.955	88.435	69.598	142.535	-0.590	20.313	2855.530	-0.006190	-0.004872	-0.009977
0.7540	1499.850	88.781	69.486	142.940	-0.591	20.317	2855.330	-0.006215	-0.004864	-0.010006
0.7560	1498.182	89.043	69.597	143.095	-0.604	20.315	2852.154	-0.006233	-0.004872	-0.010017
0.7580	1494.545	89.060	69.556	142.843	-0.596	20.313	2845.230	-0.006234	-0.004869	-0.009999
0.7600	1487.121	88.380	69.443	142.814	-0.595	20.309	2831.097	-0.006187	-0.004861	-0.009997
0.7620	1473.250	87.880	69.068	142.230	-0.593	20.303	2804.689	-0.006152	-0.004835	-0.009956
0.7640	1442.622	86.448	68.567	140.035	-0.603	20.299	2746.382	-0.006051	-0.004800	-0.009802
0.7660	1370.290	82.029	65.801	134.463	-0.607	20.299	2608.681	-0.005742	-0.004606	-0.009412
0.7680	1271.959	75.860	60.185	125.762	-0.597	20.305	2421.484	-0.005310	-0.004213	-0.008803
0.7700	1182.691	70.106	55.338	117.841	-0.595	20.308	2251.539	-0.004907	-0.003874	-0.008249
0.7720	1111.606	65.158	51.517	110.936	-0.595	20.313	2116.213	-0.004561	-0.003606	-0.007766
0.7740	1049.749	61.075	48.028	104.822	-0.596	20.317	1998.453	-0.004275	-0.003362	-0.007338
0.7760	980.859	56.670	44.388	98.387	-0.604	20.315	1867.304	-0.003967	-0.003107	-0.006887
0.7780	897.962	50.916	39.745	89.687	-0.591	20.313	1709.490	-0.003564	-0.002782	-0.006278
0.7800	813.127	45.217	35.006	80.809	-0.596	20.308	1547.985	-0.003165	-0.002450	-0.005657
0.7820	735.415	39.882	30.853	72.555	-0.597	20.303	1400.042	-0.002792	-0.002160	-0.005079
0.7840	662.798	34.726	26.824	64.814	-0.598	20.299	1261.797	-0.002431	-0.001878	-0.004537
0.7860	592.014	29.847	23.362	57.197	-0.600	20.299	1127.043	-0.002089	-0.001635	-0.004004
0.7880	523.274	24.664	19.385	49.014	-0.594	20.304	996.180	-0.001726	-0.001357	-0.003431
0.7900	457.254	20.105	15.719	41.275	-0.599	20.308	870.495	-0.001407	-0.001100	-0.002889
0.7920	395.908	15.186	12.817	34.074	-0.600	20.313	753.708	-0.001063	-0.000897	-0.002385
0.7940	342.227	10.934	10.106	27.166	-0.595	20.317	651.512	-0.000765	-0.000707	-0.001902
0.7960	293.475	7.364	7.938	21.302	-0.591	20.316	558.701	-0.000515	-0.000556	-0.001491
0.7980	250.478	3.695	5.713	15.396	-0.589	20.313	476.847	-0.000259	-0.000400	-0.001078
0.8000	221.669	0.972	4.171	11.228	-0.594	20.309	422.001	-0.000068	-0.000292	-0.000786
0.8020	211.660	-0.238	3.535	9.340	-0.600	20.304	402.946	0.000017	-0.000247	-0.000654
0.8040	212.472	-0.473	3.451	8.672	-0.598	20.299	404.491	0.000033	-0.000242	-0.000607
0.8060	215.507	-0.473	3.576	8.756	-0.608	20.299	410.271	0.000033	-0.000250	-0.000613
0.8080	219.475	-0.681	3.563	8.785	-0.589	20.304	417.824	0.000048	-0.000249	-0.000615
0.8100	225.516	-0.348	3.561	9.187	-0.586	20.308	429.325	0.000024	-0.000249	-0.000643
0.8120	236.547	0.679	3.602	9.865	-0.587	20.314	450.325	-0.000048	-0.000252	-0.000691
0.8140	269.414	2.389	4.252	12.813	-0.598	20.317	512.896	-0.000167	-0.000298	-0.000897
0.8160	337.598	7.141	6.212	20.484	-0.600	20.316	642.700	-0.000500	-0.000435	-0.001434
0.8180	422.449	12.436	9.410	29.544	-0.595	20.313	804.234	-0.000871	-0.000659	-0.002068
0.8200	505.871	18.300	13.053	38.619	-0.593	20.308	963.049	-0.001281	-0.000914	-0.002703
0.8220	579.631	23.316	16.344	46.526	-0.597	20.303	1103.468	-0.001632	-0.001144	-0.003257
0.8240	647.409	27.804	19.638	53.987	-0.591	20.299	1232.500	-0.001946	-0.001375	-0.003779
0.8260	720.928	33.002	23.502	62.019	-0.598	20.299	1372.461	-0.002310	-0.001645	-0.004341
0.8280	807.506	38.700	27.808	70.720	-0.599	20.304	1537.285	-0.002709	-0.001947	-0.004950
0.8300	905.417	45.175	32.880	81.101	-0.601	20.308	1723.680	-0.003162	-0.002302	-0.005677
0.8320	1003.567	51.693	38.327	91.383	-0.603	20.313	1910.534	-0.003619	-0.002683	-0.006397
0.8340	1088.478	57.432	43.386	100.208	-0.595	20.317	2072.182	-0.004020	-0.003037	-0.007015
0.8360	1153.731	62.198	47.582	107.310	-0.596	20.315	2196.407	-0.004354	-0.003331	-0.007512
0.8380	1202.363	65.880	50.487	112.061	-0.587	20.312	2288.990	-0.004612	-0.003534	-0.007844
0.8400	1250.243	69.840	53.377	117.037	-0.597	20.308	2380.142	-0.004889	-0.003736	-0.008193
0.8420	1313.062	74.220	57.059	123.038	-0.596	20.302	2499.733	-0.005195	-0.003994	-0.008613
0.8440	1380.660	78.820	61.202	129.529	-0.601	20.299	2628.422	-0.005517	-0.004284	-0.009067
0.8460	1441.510	83.392	65.258	135.658	-0.603	20.299	2744.265	-0.005837	-0.004568	-0.009496
0.8480	1491.374	86.864	68.163	140.632	-0.595	20.304	2839.193	-0.006081	-0.004771	-0.009844
0.8500	1525.068	89.628	70.469	144.202	-0.596	20.308	2903.337	-0.006274	-0.004933	-0.010094
0.8520	1538.293	90.879	71.537	145.757	-0.593	20.313	2928.514	-0.006362	-0.005008	-0.010203
0.8540	1535.963	91.103	71.746	145.911	-0.595	20.317	2924.080	-0.006377	-0.005022	-0.010214
0.8560	1529.186	90.934	71.968	145.980	-0.600	20.315	2911.177	-0.006365	-0.005038	-0.010219
0.8580	1520.665	90.796	71.606	145.841	-0.591	20.313	2894.955	-0.006356	-0.005012	-0.010209
0.8600	1509.183	90.476	71.537	145.300	-0.592	20.309	2873.096	-0.006333	-0.005008	-0.010171
0.8620	1482.042	89.088	70.830	143.230	-0.596	20.303	2821.426	-0.006236	-0.004958	-0.010026
0.8640	1412.039	85.031	67.927	137.519	-0.596	20.299	2688.160	-0.005952	-0.004755	-0.009626
0.8660	1318.427	78.986	63.174	129.959	-0.596	20.299	2509.947	-0.005529	-0.004422	-0.009097
0.8680	1244.172	73.789	58.825	123.273	-0.585	20.303	2368.584	-0.005165	-0.004118	-0.008629
0.8700	1184.990	69.785	55.322	117.909	-0.588	20.308	2255.917	-0.004885	-0.003873	-0.008254
0.8720	1119.752	65.298	51.779	111.963	-0.589	20.314	2131.720	-0.004571	-0.003625	-0.007837
0.8740	1036.840	59.683	47.346	104.071	-0.585	20.317	1973.877	-0.004178	-0.003314	-0.007285
0.8760	947.737	54.304	42.733	95.510	-0.591	20.315	1804.247	-0.003801	-0.002991	-0.006686
0.8780	869.694	48.954	38.287	86.978	-0.586	20.312	1655.674	-0.003427	-0.002680	-0.006088
0.8800	798.069	44.078	34.300	79.293	-0.594	20.308	1519.318	-0.003085	-0.002401	-0.005551
0.8820	731.282	39.395	30.713	72.150	-0.596	20.303	1392.174	-0.002758	-0.002150	-0.005050
0.8840	667.397	34.795	27.267	65.050	-0.591	20.299	1270.552	-0.002436	-0.001909	-0.004553
0.8860	601.272	30.541	23.889	57.712	-0.603	20.299	1144.667	-0.002138	-0.001672	-0.004040
0.8880	532.306	25.524	19.997	49.890	-0.597	20.303	1013.374	-0.001787	-0.001400	-0.003492
0.8900	464.378	20.508	16.510	42.051	-0.604	20.308	884.056	-0.001436	-0.001156	-0.002944
0.8920	405.241	16.119	13.509	34.950	-0.604	20.313	771.475	-0.001128	-0.000946	-0.002446
0.8940	353.453	12.187	10.742	28.475	-0.601	20.317	672.884	-0.000853	-0.000752	-0.001993
0.8960	307.286	8.602	8.521	22.972	-0.607	20.315	584.993	-0.000602	-0.000596	-0.001608
0.8980	270.902	5.127	6.769	17.995	-0.592	20.313	515.728	-0.000359	-0.000474	-0.001260
0.9000	245.775	3.057	5.658	14.395	-0.593	20.308	467.892	-0.000214	-0.000396	-0.001008
0.9020	223.502	0.819	4.517	10.852	-0.595	20.303	425.491	-0.000057	-0.000316	-0.000760
0.9040	203.936	-0.848	3.436	7.810	-0.596	20.299	388.241	0.000059	-0.000241	-0.000547
0.9060	194.332	-1.460	2.921	6.560	-0.596	20.299	369.959	0.000102	-0.000204	-0.000459
0.9080	194.332	-2.141	2.505	5.879	-0.587	20.304	369.959	0.000150	-0.000175	-0.000412
0.9100	199.577	-2.029	2.672	5.961	-0.597	20.308	379.944	0.000142	-0.000187	-0.000417
0.9120	209.150	-1.557	2.824	6.599	-0.597	20.313	398.169	0.000109	-0.000198	-0.000462
0.9140	236.983	-0.321	3.157	8.879	-0.592	20.317	451.155	0.000022	-0.000221	-0.000621
0.9160	305.528	4.402	5.088	16.872	-0.600	20.315	581.646	-0.000308	-0.000356	-0.001181
0.9180	398.238	10.616	8.298	27.085	-0.593	20.312	758.142	-0.000743	-0.000581	-0.001896
0.9200	487.717	16.939	11.993	36.840	-0.590	20.308	928.488	-0.001186	-0.000840	-0.002579
0.9220	568.705	22.247	15.954	45.594	-0.595	20.303	1082.668	-0.001557	-0.001117	-0.003192
0.9240	657.448	28.386	20.140	55.017	-0.597	20.298	1251.612	-0.001987	-0.001410	-0.003851
0.9260	769.214	35.906	25.976	67.022	-0.599	20.299	1464.386	-0.002513	-0.001818	-0.004692
0.9280	882.799	43.285	31.728	78.791	-0.599	20.304	1680.622	-0.003030	-0.002221	-0.005515
0.9300	964.433	49.232	36.146	87.463	-0.611	20.308	1836.033	-0.003446	-0.002530	-0.006122
0.9320	1015.755	53.041	39.314	92.911	-0.602	20.313	1933.737	-0.003713	-0.002752	-0.006504
0.9340	1061.502	56.406	42.095	97.690	-0.601	20.316	2020.826	-0.003948	-0.002947	-0.006838
0.9360	1120.879	60.506	45.498	103.807	-0.609	20.315	2133.865	-0.004235	-0.003185	-0.007266
0.9380	1198.891	65.717	50.058	111.408	-0.596	20.313	2282.381	-0.004600	-0.003504	-0.007799
0.9400	1279.549	71.245	54.935	119.649	-0.595	20.308	2435.932	-0.004987	-0.003845	-0.008375
0.9420	1347.898	76.180	59.116	126.235	-0.600	20.302	2566.051	-0.005333	-0.004138	-0.008836
0.9440	1394.155	79.195	61.952	131.252	-0.605	20.299	2654.114	-0.005544	-0.004337	-0.009188
0.9460	1427.398	82.070	64.591	134.893	-0.604	20.299	2717.400	-0.005745	-0.004521	-0.009443
0.9480	1467.013	85.100	66.870	138.548	-0.596	20.304	2792.816	-0.005957	-0.004681	-0.009698
0.9500	1506.868	88.046	69.511	142.494	-0.595	20.308	2868.690	-0.006163	-0.004866	-0.009975
0.9520	1529.667	90.129	71.191	144.911	-0.591	20.314	2912.092	-0.006309	-0.004983	-0.010144
0.9540	1532.387	90.798	71.650	145.701	-0.593	20.317	2917.271	-0.006356	-0.005015	-0.010199
0.9560	1525.489	91.032	71.969	145.895	-0.600	20.315	2904.139	-0.006372	-0.005038	-0.010213
0.9580	1514.713	90.390	71.635	145.312	-0.588	20.312	2883.625	-0.006327	-0.005014	-0.010172
0.9600	1497.446	89.920	71.094	144.173	-0.591	20.308	2850.752	-0.006294	-0.004977	-0.010092
0.9620	1460.100	87.823	70.109	141.632	-0.597	20.302	2779.655	-0.006148	-0.004908	-0.009914
0.9640	1391.210	83.613	66.982	136.336	-0.601	20.298	2648.506	-0.005853	-0.004689	-0.009544
0.9660	1312.596	78.765	62.785	129.516	-0.601	20.299	2498.846	-0.005514	-0.004395	-0.009066
0.9680	1243.886	74.055	58.756	123.081	-0.593	20.303	2368.040	-0.005184	-0.004113	-0.008616
0.9700	1181.984	69.829	55.336	117.453	-0.593	20.307	2250.195	-0.004888	-0.003874	-0.008222
0.9720	1114.717	65.269	51.544	111.284	-0.586	20.313	2122.135	-0.004569	-0.003608	-0.007790
0.9740	1036.013	60.211	47.236	103.627	-0.588	20.317	1972.303	-0.004215	-0.003307	-0.007254
0.9760	946.309	54.431	42.273	94.954	-0.595	20.315	1801.529	-0.003810	-0.002959	-0.006647
0.9780	862.165	48.370	37.661	86.159	-0.587	20.312	1641.340	-0.003386	-0.002636	-0.006031
0.9800	796.566	43.729	34.200	79.364	-0.592	20.308	1516.457	-0.003061	-0.002394	-0.005556
0.9820	739.623	39.922	30.990	73.152	-0.591	20.302	1408.052	-0.002795	-0.002169	-0.005121
0.9840	669.230	35.142	27.141	65.425	-0.595	20.298	1274.042	-0.002460	-0.001900	-0.004580
0.9860	581.389	29.137	22.846	56.086	-0.599	20.298	1106.815	-0.002040	-0.001599	-0.003926
0.9880	502.911	23.442	18.705	46.928	-0.591	20.303	957.413	-0.001641	-0.001309	-0.003285
0.9900	446.945	19.399	15.913	40.258	-0.590	20.308	850.868	-0.001358	-0.001114	-0.002818
0.9920	398.944	15.702	13.343	34.325	-0.589	20.313	759.487	-0.001099	-0.000934	-0.002403
0.9940	350.387	11.810	10.729	28.140	-0.584	20.316	667.048	-0.000827	-0.000751	-0.001970
0.9960	303.318	8.169	8.743	22.331	-0.600	20.314	577.440	-0.000572	-0.000612	-0.001563
0.9980	264.740	4.958	6.660	17.037	-0.586	20.312	503.998	-0.000347	-0.000466	-0.001193
