# Supplementary material for: Evaluation of a Cold-Mixed High-Performance Polyurethane Mixture
Source: Hindawi journal article supplement (doi:10.1155/2019/1507971), 2019-11-07
Supplement: f1 [file 1507971.f1.zip › 1507971.f1/dynamic modulus data/PUM/specimen1/temp20/zhs-1-20_20Hz.csv]

Test Information
****************
Project name	zhs
Operator name	1
Target test temperature	20
Target confining stress	0
Average dynamic strain range from 75 to 125 micro-strain
Contact stress	5
Initial modulus	1000
Axial gauge length	70
Comments
Specimen information
********************
Identification	zhs-1-20
Dimensions	Point 1	Point 2	Point 3	Point 4	Point 5	Point 6	Average	Std Dev.
Diameter (mm)	49.2	49.2	49.3				49.23	0.058
Height (mm)	101.3	101.2	101.3				101.27	0.058
Cross-sectional area (mm�)	1903.7
Conditioning time
Properties/Comments
Test Data	20Hz
*********
Test date and time	Mon	Apr 1	2019	2:22 PM
Dynamic modulus (MPa)	13612
Phase angle (Degrees)	4.60
Average temperature (�C)	20.3
Average confining pressure (kPa)	-0.6
Average micro-strain	100
Load drift (%)	-0.3
Load standard error (%)	5.8
Average deformation drift (%)	-3.0
Average deformation standard error (%)	6.0
Deformation uniformity (%)	28.9
Phase uniformity (Degrees)	0.7
Conditioning Cycles
Time (sec)	Axial stress (kPa)	Axial micro-strain #1	Axial micro-strain #2	Axial micro-strain #3	Confining pressure (kPa)	Temperature (�C)	Load (N)	Displacement #1 (mm)	Displacement #2 (mm)	Displacement #3 (mm)
0.0000	375.274	7.627	6.075	18.885	-0.613	20.324	714.426	-0.000534	-0.000425	-0.001322
0.0010	375.560	7.782	6.131	18.872	-0.612	20.322	714.970	-0.000545	-0.000429	-0.001321
0.0020	375.049	7.531	6.061	18.815	-0.611	20.319	713.997	-0.000527	-0.000424	-0.001317
0.0030	372.254	7.421	5.964	18.620	-0.615	20.317	708.675	-0.000519	-0.000417	-0.001303
0.0040	365.055	6.960	5.852	17.870	-0.611	20.314	694.971	-0.000487	-0.000410	-0.001251
0.0050	351.214	6.071	5.214	16.300	-0.604	20.312	668.621	-0.000425	-0.000365	-0.001141
0.0060	331.437	4.694	4.699	14.286	-0.608	20.311	630.970	-0.000329	-0.000329	-0.001000
0.0070	309.029	3.096	3.810	11.839	-0.606	20.310	588.312	-0.000217	-0.000267	-0.000829
0.0080	289.883	1.706	3.005	9.768	-0.609	20.311	551.863	-0.000119	-0.000210	-0.000684
0.0090	277.560	0.554	2.353	8.156	-0.609	20.313	528.402	-0.000039	-0.000165	-0.000571
0.0100	273.337	-0.125	1.894	7.406	-0.612	20.315	520.363	0.000009	-0.000133	-0.000518
0.0110	275.982	-0.139	1.935	7.616	-0.619	20.317	525.398	0.000010	-0.000135	-0.000533
0.0120	286.066	0.387	1.906	8.311	-0.615	20.320	544.596	-0.000027	-0.000133	-0.000582
0.0130	311.854	2.026	2.380	10.689	-0.613	20.323	593.691	-0.000142	-0.000167	-0.000748
0.0140	362.696	5.125	3.784	15.691	-0.611	20.326	690.479	-0.000359	-0.000265	-0.001098
0.0150	441.369	9.948	6.383	23.626	-0.600	20.328	840.254	-0.000696	-0.000447	-0.001654
0.0160	541.428	16.660	10.703	34.520	-0.608	20.328	1030.741	-0.001166	-0.000749	-0.002416
0.0170	649.167	23.678	15.803	45.914	-0.610	20.328	1235.847	-0.001657	-0.001106	-0.003214
0.0180	754.381	30.820	21.152	56.989	-0.621	20.327	1436.148	-0.002157	-0.001481	-0.003989
0.0190	847.873	36.879	25.751	66.675	-0.609	20.326	1614.132	-0.002582	-0.001803	-0.004667
0.0200	924.803	42.104	29.612	74.513	-0.601	20.324	1760.588	-0.002947	-0.002073	-0.005216
0.0210	983.609	46.384	32.865	81.002	-0.597	20.322	1872.540	-0.003247	-0.002301	-0.005670
0.0220	1026.636	49.663	35.338	85.727	-0.596	20.319	1954.451	-0.003476	-0.002474	-0.006001
0.0230	1058.346	52.097	37.408	89.228	-0.603	20.317	2014.818	-0.003647	-0.002619	-0.006246
0.0240	1083.473	53.986	39.089	92.202	-0.611	20.314	2062.654	-0.003779	-0.002736	-0.006454
0.0250	1106.091	55.653	40.424	94.453	-0.610	20.312	2105.713	-0.003896	-0.002830	-0.006612
0.0260	1128.889	57.666	42.037	97.317	-0.616	20.311	2149.115	-0.004037	-0.002943	-0.006812
0.0270	1152.393	59.570	43.526	99.859	-0.605	20.311	2193.861	-0.004170	-0.003047	-0.006990
0.0280	1175.297	61.432	45.041	102.598	-0.608	20.312	2237.463	-0.004300	-0.003153	-0.007182
0.0290	1194.804	62.892	46.125	104.765	-0.605	20.314	2274.599	-0.004402	-0.003229	-0.007334
0.0300	1208.164	64.103	46.999	106.364	-0.604	20.316	2300.034	-0.004487	-0.003290	-0.007445
0.0310	1214.175	64.686	47.638	107.406	-0.607	20.318	2311.478	-0.004528	-0.003335	-0.007518
0.0320	1213.529	64.909	47.984	107.685	-0.601	20.320	2310.247	-0.004544	-0.003359	-0.007538
0.0330	1207.758	64.922	47.874	107.546	-0.598	20.323	2299.261	-0.004545	-0.003351	-0.007528
0.0340	1197.584	64.548	47.694	107.101	-0.599	20.326	2279.892	-0.004518	-0.003339	-0.007497
0.0350	1180.902	63.908	47.041	105.947	-0.592	20.329	2248.135	-0.004474	-0.003293	-0.007416
0.0360	1150.906	62.323	46.389	103.778	-0.592	20.329	2191.029	-0.004363	-0.003247	-0.007264
0.0370	1100.500	59.266	44.415	99.526	-0.592	20.328	2095.070	-0.004149	-0.003109	-0.006967
0.0380	1028.634	54.958	41.413	93.162	-0.597	20.327	1958.256	-0.003847	-0.002899	-0.006521
0.0390	941.800	49.344	37.036	84.950	-0.593	20.326	1792.946	-0.003454	-0.002593	-0.005947
0.0400	850.939	43.466	32.380	76.113	-0.587	20.324	1619.968	-0.003043	-0.002267	-0.005328
0.0410	764.225	37.741	27.862	67.288	-0.587	20.322	1454.887	-0.002642	-0.001950	-0.004710
0.0420	687.069	32.391	23.694	59.103	-0.593	20.320	1308.002	-0.002267	-0.001659	-0.004137
0.0430	621.921	27.777	20.247	52.070	-0.601	20.317	1183.977	-0.001944	-0.001417	-0.003645
0.0440	568.660	23.900	17.398	46.108	-0.603	20.314	1082.582	-0.001673	-0.001218	-0.003228
0.0450	524.386	20.536	15.022	41.022	-0.599	20.313	998.297	-0.001438	-0.001052	-0.002872
0.0460	485.883	17.951	13.313	36.700	-0.601	20.311	924.997	-0.001257	-0.000932	-0.002569
0.0470	449.560	15.394	11.606	32.475	-0.603	20.311	855.846	-0.001078	-0.000812	-0.002273
0.0480	413.492	12.783	10.036	28.500	-0.608	20.312	787.182	-0.000895	-0.000703	-0.001995
0.0490	376.371	9.933	8.298	24.068	-0.601	20.314	716.515	-0.000695	-0.000581	-0.001685
0.0500	339.837	7.055	6.630	19.469	-0.596	20.316	646.963	-0.000494	-0.000464	-0.001363
0.0510	305.858	4.595	5.308	15.243	-0.596	20.318	582.275	-0.000322	-0.000372	-0.001067
0.0520	277.124	2.249	3.947	11.505	-0.600	20.321	527.573	-0.000157	-0.000276	-0.000805
0.0530	254.641	0.249	2.905	8.461	-0.604	20.324	484.772	-0.000017	-0.000203	-0.000592
0.0540	238.907	-1.195	2.142	6.197	-0.602	20.327	454.817	0.000084	-0.000150	-0.000434
0.0550	229.198	-2.226	1.586	4.308	-0.595	20.329	436.335	0.000156	-0.000111	-0.000302
0.0560	224.404	-2.669	1.476	3.696	-0.603	20.330	427.208	0.000187	-0.000103	-0.000259
0.0570	223.172	-2.990	1.197	3.281	-0.606	20.329	424.862	0.000209	-0.000084	-0.000230
0.0580	224.765	-3.002	1.350	3.615	-0.613	20.328	427.895	0.000210	-0.000095	-0.000253
0.0590	228.522	-2.864	1.211	3.684	-0.606	20.327	435.047	0.000200	-0.000085	-0.000258
0.0600	235.134	-2.669	1.364	3.879	-0.607	20.325	447.636	0.000187	-0.000095	-0.000271
0.0610	247.413	-1.906	1.503	4.782	-0.605	20.323	471.010	0.000133	-0.000105	-0.000335
0.0620	273.547	-0.405	1.823	7.018	-0.605	20.320	520.763	0.000028	-0.000128	-0.000491
0.0630	320.631	2.583	2.920	12.035	-0.606	20.317	610.399	-0.000181	-0.000204	-0.000842
0.0640	389.957	7.294	5.213	19.385	-0.605	20.314	742.378	-0.000511	-0.000365	-0.001357
0.0650	475.318	12.894	8.535	28.502	-0.602	20.313	904.884	-0.000903	-0.000597	-0.001995
0.0660	567.758	19.174	12.801	38.689	-0.609	20.311	1080.866	-0.001342	-0.000896	-0.002708
0.0670	660.453	25.441	17.164	48.611	-0.610	20.311	1257.334	-0.001781	-0.001202	-0.003403
0.0680	749.241	31.611	21.625	58.075	-0.612	20.312	1426.363	-0.002213	-0.001514	-0.004065
0.0690	830.530	37.115	25.696	66.454	-0.606	20.314	1581.116	-0.002598	-0.001799	-0.004652
0.0700	902.050	41.993	29.448	73.986	-0.600	20.316	1717.272	-0.002940	-0.002061	-0.005179
0.0710	962.089	46.162	32.769	80.517	-0.600	20.318	1831.570	-0.003231	-0.002294	-0.005636
0.0720	1010.781	49.789	35.464	85.797	-0.600	20.320	1924.267	-0.003485	-0.002482	-0.006006
0.0730	1050.020	52.610	37.757	89.896	-0.606	20.323	1998.968	-0.003683	-0.002643	-0.006293
0.0740	1082.496	54.860	39.494	93.314	-0.605	20.326	2060.795	-0.003840	-0.002765	-0.006532
0.0750	1110.329	56.847	41.134	96.261	-0.599	20.329	2113.781	-0.003979	-0.002879	-0.006738
0.0760	1134.750	58.764	42.760	99.249	-0.603	20.329	2160.273	-0.004113	-0.002993	-0.006947
0.0770	1156.015	60.668	44.079	101.696	-0.599	20.328	2200.756	-0.004247	-0.003086	-0.007119
0.0780	1174.290	62.281	45.372	103.891	-0.603	20.327	2235.546	-0.004360	-0.003176	-0.007272
0.0790	1188.777	63.380	46.193	105.572	-0.594	20.326	2263.126	-0.004437	-0.003233	-0.007390
0.0800	1198.395	64.173	46.750	106.794	-0.592	20.324	2281.437	-0.004492	-0.003272	-0.007476
0.0810	1202.663	64.520	47.083	107.419	-0.595	20.322	2289.562	-0.004516	-0.003296	-0.007519
0.0820	1201.942	64.603	47.278	107.559	-0.599	20.320	2288.189	-0.004522	-0.003309	-0.007529
0.0830	1197.373	64.491	47.333	107.489	-0.599	20.317	2279.491	-0.004514	-0.003313	-0.007524
0.0840	1189.183	64.340	47.054	107.211	-0.600	20.314	2263.899	-0.004504	-0.003294	-0.007505
0.0850	1175.838	63.826	46.693	106.238	-0.593	20.313	2238.493	-0.004468	-0.003268	-0.007437
0.0860	1151.116	62.602	46.319	104.655	-0.597	20.311	2191.429	-0.004382	-0.003242	-0.007326
0.0870	1106.421	59.807	44.860	100.945	-0.597	20.311	2106.342	-0.004187	-0.003140	-0.007066
0.0880	1038.523	55.582	42.234	95.178	-0.599	20.311	1977.081	-0.003891	-0.002956	-0.006662
0.0890	952.531	49.996	37.926	86.979	-0.600	20.314	1813.374	-0.003500	-0.002655	-0.006088
0.0900	860.076	43.869	33.297	77.848	-0.593	20.316	1637.363	-0.003071	-0.002331	-0.005449
0.0910	771.363	38.116	28.697	68.941	-0.592	20.318	1468.477	-0.002668	-0.002009	-0.004826
0.0920	692.719	32.876	24.819	60.534	-0.588	20.320	1318.760	-0.002301	-0.001737	-0.004237
0.0930	626.730	28.540	21.500	53.573	-0.593	20.323	1193.132	-0.001998	-0.001505	-0.003750
0.0940	572.703	24.789	18.720	47.596	-0.589	20.326	1090.279	-0.001735	-0.001310	-0.003332
0.0950	527.512	21.509	16.387	42.455	-0.587	20.328	1004.248	-0.001506	-0.001147	-0.002972
0.0960	487.416	18.759	14.525	37.840	-0.592	20.329	927.916	-0.001313	-0.001017	-0.002649
0.0970	449.455	16.063	12.662	33.253	-0.594	20.328	855.646	-0.001124	-0.000886	-0.002328
0.0980	412.004	13.424	10.855	28.904	-0.602	20.327	784.349	-0.000940	-0.000760	-0.002023
0.0990	374.388	10.698	8.923	24.373	-0.592	20.326	712.738	-0.000749	-0.000625	-0.001706
0.1000	337.809	7.961	7.340	19.899	-0.588	20.325	643.101	-0.000557	-0.000514	-0.001393
0.1010	303.920	5.361	5.811	15.688	-0.587	20.322	578.585	-0.000375	-0.000407	-0.001098
0.1020	274.509	3.068	4.491	11.854	-0.588	20.320	522.594	-0.000215	-0.000314	-0.000830
0.1030	250.569	0.999	3.268	8.615	-0.588	20.317	477.018	-0.000070	-0.000229	-0.000603
0.1040	232.565	-0.614	2.255	6.086	-0.587	20.315	442.743	0.000043	-0.000158	-0.000426
0.1050	220.812	-1.933	1.628	3.988	-0.585	20.313	420.370	0.000135	-0.000114	-0.000279
0.1060	214.756	-2.503	1.379	3.197	-0.593	20.311	408.840	0.000175	-0.000096	-0.000224
0.1070	213.193	-2.962	1.310	2.766	-0.593	20.311	405.865	0.000207	-0.000092	-0.000194
0.1080	214.966	-2.961	1.295	3.072	-0.602	20.312	409.241	0.000207	-0.000091	-0.000215
0.1090	219.280	-3.045	1.309	3.100	-0.599	20.314	417.452	0.000213	-0.000092	-0.000217
0.1100	226.538	-2.709	1.350	3.462	-0.600	20.316	431.271	0.000190	-0.000094	-0.000242
0.1110	240.379	-2.057	1.447	4.490	-0.601	20.318	457.621	0.000144	-0.000101	-0.000314
0.1120	268.828	-0.292	1.837	7.157	-0.599	20.320	511.780	0.000020	-0.000129	-0.000501
0.1130	318.287	2.834	3.031	12.548	-0.600	20.323	605.936	-0.000198	-0.000212	-0.000878
0.1140	389.236	7.572	5.380	20.052	-0.599	20.326	741.005	-0.000530	-0.000377	-0.001404
0.1150	475.364	13.213	8.770	29.182	-0.596	20.328	904.970	-0.000925	-0.000614	-0.002043
0.1160	568.540	19.286	12.898	39.271	-0.599	20.329	1082.354	-0.001350	-0.000903	-0.002749
0.1170	662.392	25.358	17.331	49.402	-0.597	20.328	1261.024	-0.001775	-0.001213	-0.003458
0.1180	751.556	31.585	21.694	59.101	-0.600	20.327	1430.769	-0.002211	-0.001519	-0.004137
0.1190	831.462	37.170	25.696	67.343	-0.604	20.326	1582.890	-0.002602	-0.001799	-0.004714
0.1200	899.751	41.993	29.337	74.402	-0.601	20.324	1712.894	-0.002940	-0.002054	-0.005208
0.1210	955.702	45.815	32.548	80.309	-0.603	20.322	1819.410	-0.003207	-0.002278	-0.005622
0.1220	1001.403	49.177	35.215	85.116	-0.600	20.319	1906.414	-0.003442	-0.002465	-0.005958
0.1230	1040.537	52.109	37.536	89.313	-0.597	20.316	1980.915	-0.003648	-0.002627	-0.006252
0.1240	1076.199	54.804	39.594	93.038	-0.598	20.314	2048.807	-0.003836	-0.002772	-0.006513
0.1250	1110.073	56.958	41.401	96.693	-0.593	20.312	2113.295	-0.003987	-0.002898	-0.006769
0.1260	1141.994	59.363	43.389	100.362	-0.605	20.311	2174.063	-0.004155	-0.003037	-0.007025
0.1270	1170.458	61.434	45.139	103.600	-0.606	20.311	2228.251	-0.004300	-0.003160	-0.007252
0.1280	1193.511	63.365	46.861	106.226	-0.617	20.312	2272.139	-0.004436	-0.003280	-0.007436
0.1290	1209.156	64.463	47.888	107.907	-0.607	20.314	2301.922	-0.004512	-0.003352	-0.007554
0.1300	1217.001	65.075	48.484	109.019	-0.604	20.316	2316.856	-0.004555	-0.003394	-0.007631
0.1310	1218.323	65.507	48.679	109.659	-0.600	20.318	2319.374	-0.004586	-0.003408	-0.007676
0.1320	1215.047	65.730	48.721	109.603	-0.601	20.320	2313.137	-0.004601	-0.003410	-0.007672
0.1330	1208.419	65.786	48.735	109.296	-0.604	20.323	2300.520	-0.004605	-0.003411	-0.007651
0.1340	1197.990	65.382	48.596	108.671	-0.603	20.326	2280.664	-0.004577	-0.003402	-0.007607
0.1350	1180.421	64.534	48.262	107.449	-0.600	20.329	2247.219	-0.004517	-0.003378	-0.007521
0.1360	1148.456	62.991	47.387	105.184	-0.600	20.329	2186.365	-0.004409	-0.003317	-0.007363
0.1370	1096.292	60.142	45.346	100.709	-0.596	20.328	2087.059	-0.004210	-0.003174	-0.007050
0.1380	1024.637	55.834	42.107	94.497	-0.599	20.327	1950.645	-0.003908	-0.002948	-0.006615
0.1390	941.319	50.373	37.785	86.437	-0.593	20.325	1792.030	-0.003526	-0.002645	-0.006051
0.1400	856.138	44.606	33.337	78.071	-0.590	20.324	1629.868	-0.003122	-0.002334	-0.005465
0.1410	776.112	39.338	29.127	69.941	-0.592	20.322	1477.518	-0.002754	-0.002039	-0.004896
0.1420	704.877	34.572	25.541	62.339	-0.595	20.320	1341.906	-0.002420	-0.001788	-0.004364
0.1430	643.471	30.208	22.388	55.808	-0.599	20.317	1225.004	-0.002115	-0.001567	-0.003907
0.1440	589.715	26.318	19.526	50.014	-0.597	20.314	1122.665	-0.001842	-0.001367	-0.003501
0.1450	540.497	22.773	16.900	44.581	-0.592	20.313	1028.967	-0.001594	-0.001183	-0.003121
0.1460	493.353	19.647	14.567	39.285	-0.600	20.311	939.217	-0.001375	-0.001020	-0.002750
0.1470	446.885	16.353	12.567	33.781	-0.598	20.310	850.754	-0.001145	-0.000880	-0.002365
0.1480	401.394	12.949	10.524	28.418	-0.603	20.311	764.151	-0.000906	-0.000737	-0.001989
0.1490	357.796	9.487	8.411	23.178	-0.600	20.313	681.152	-0.000664	-0.000589	-0.001622
0.1500	317.836	6.445	6.409	18.301	-0.600	20.316	605.078	-0.000451	-0.000449	-0.001281
0.1510	283.180	3.692	4.756	13.798	-0.601	20.318	539.103	-0.000258	-0.000333	-0.000966
0.1520	254.822	1.401	3.534	10.018	-0.597	20.320	485.115	-0.000098	-0.000247	-0.000701
0.1530	233.151	-0.404	2.560	6.905	-0.596	20.323	443.859	0.000028	-0.000179	-0.000483
0.1540	218.197	-1.682	1.810	4.627	-0.592	20.326	415.392	0.000118	-0.000127	-0.000324
0.1550	209.421	-2.696	1.295	3.113	-0.586	20.329	398.684	0.000189	-0.000091	-0.000218
0.1560	206.070	-3.197	1.087	2.405	-0.600	20.329	392.303	0.000224	-0.000076	-0.000168
0.1570	206.550	-3.351	0.919	2.348	-0.604	20.329	393.219	0.000235	-0.000064	-0.000164
0.1580	209.977	-3.365	0.892	2.570	-0.612	20.327	399.742	0.000236	-0.000062	-0.000180
0.1590	215.823	-3.407	0.766	2.862	-0.608	20.326	410.872	0.000238	-0.000054	-0.000200
0.1600	225.697	-2.990	0.989	3.473	-0.604	20.324	429.668	0.000209	-0.000069	-0.000243
0.1610	244.933	-1.906	1.322	5.099	-0.607	20.322	466.290	0.000133	-0.000093	-0.000357
0.1620	280.460	0.374	2.254	8.670	-0.605	20.319	533.924	-0.000026	-0.000158	-0.000607
0.1630	335.690	4.195	3.713	14.645	-0.611	20.317	639.067	-0.000294	-0.000260	-0.001025
0.1640	407.856	8.891	6.215	22.484	-0.612	20.314	776.453	-0.000622	-0.000435	-0.001574
0.1650	490.257	14.283	9.549	31.267	-0.610	20.312	933.323	-0.001000	-0.000668	-0.002189
0.1660	576.715	20.021	13.523	40.717	-0.616	20.310	1097.918	-0.001401	-0.000947	-0.002850
0.1670	662.377	25.845	17.608	49.860	-0.616	20.311	1260.996	-0.001809	-0.001233	-0.003490
0.1680	743.861	31.487	21.706	58.795	-0.625	20.311	1416.121	-0.002204	-0.001519	-0.004116
0.1690	818.101	36.504	25.501	66.480	-0.616	20.314	1557.455	-0.002555	-0.001785	-0.004654
0.1700	883.761	41.062	28.933	73.220	-0.617	20.316	1682.453	-0.002874	-0.002025	-0.005125
0.1710	940.252	45.259	32.006	79.015	-0.615	20.318	1789.999	-0.003168	-0.002240	-0.005531
0.1720	989.576	48.830	34.881	84.198	-0.610	20.320	1883.898	-0.003418	-0.002442	-0.005894
0.1730	1033.970	52.053	37.340	88.922	-0.603	20.323	1968.412	-0.003644	-0.002614	-0.006225
0.1740	1075.658	54.971	39.715	93.119	-0.599	20.326	2047.777	-0.003848	-0.002780	-0.006518
0.1750	1114.943	57.654	41.773	97.024	-0.597	20.329	2122.564	-0.004036	-0.002924	-0.006792
0.1760	1151.326	60.419	44.192	101.152	-0.608	20.328	2191.830	-0.004229	-0.003093	-0.007081
0.1770	1183.036	62.558	46.136	104.877	-0.611	20.328	2252.197	-0.004379	-0.003229	-0.007341
0.1780	1208.690	64.559	47.691	107.879	-0.613	20.327	2301.035	-0.004519	-0.003338	-0.007552
0.1790	1226.348	65.977	48.774	109.866	-0.598	20.326	2334.652	-0.004618	-0.003414	-0.007691
0.1800	1235.636	66.839	49.401	110.963	-0.591	20.324	2352.333	-0.004679	-0.003458	-0.007767
0.1810	1237.169	67.354	49.749	111.588	-0.594	20.322	2355.251	-0.004715	-0.003482	-0.007811
0.1820	1233.066	67.312	49.889	111.406	-0.597	20.319	2347.441	-0.004712	-0.003492	-0.007798
0.1830	1224.740	67.145	49.778	111.060	-0.601	20.317	2331.591	-0.004700	-0.003484	-0.007774
0.1840	1211.545	66.687	49.570	110.157	-0.604	20.314	2306.471	-0.004668	-0.003470	-0.007711
0.1850	1188.462	65.449	48.749	108.559	-0.601	20.312	2262.526	-0.004581	-0.003412	-0.007599
0.1860	1148.065	63.143	47.318	105.584	-0.608	20.310	2185.621	-0.004420	-0.003312	-0.007391
0.1870	1086.854	59.461	44.761	100.456	-0.607	20.310	2069.092	-0.004162	-0.003133	-0.007032
0.1880	1008.421	54.569	41.189	93.453	-0.612	20.311	1919.775	-0.003820	-0.002883	-0.006542
0.1890	921.722	48.941	36.936	84.949	-0.607	20.312	1754.723	-0.003426	-0.002586	-0.005946
0.1900	835.204	43.146	32.448	76.376	-0.602	20.315	1590.014	-0.003020	-0.002271	-0.005346
0.1910	754.531	37.449	28.280	68.135	-0.605	20.317	1436.434	-0.002621	-0.001980	-0.004769
0.1920	682.996	32.765	24.555	60.701	-0.600	20.320	1300.249	-0.002294	-0.001719	-0.004249
0.1930	621.575	28.623	21.304	53.905	-0.604	20.323	1183.319	-0.002004	-0.001491	-0.003773
0.1940	568.795	25.135	18.524	47.901	-0.601	20.326	1082.840	-0.001759	-0.001297	-0.003353
0.1950	521.771	21.634	16.037	42.453	-0.596	20.328	993.319	-0.001514	-0.001123	-0.002972
0.1960	478.084	18.535	14.093	37.757	-0.604	20.328	910.149	-0.001297	-0.000987	-0.002643
0.1970	435.493	15.632	12.216	32.935	-0.603	20.328	829.067	-0.001094	-0.000855	-0.002305
0.1980	394.105	12.657	10.423	28.322	-0.608	20.327	750.275	-0.000886	-0.000730	-0.001983
0.1990	354.024	9.515	8.548	23.194	-0.599	20.326	673.971	-0.000666	-0.000598	-0.001624
0.2000	316.603	6.487	6.769	18.468	-0.596	20.324	602.732	-0.000454	-0.000474	-0.001293
0.2010	283.090	3.971	5.048	13.953	-0.599	20.322	538.931	-0.000278	-0.000353	-0.000977
0.2020	254.852	1.749	3.754	10.297	-0.599	20.320	485.172	-0.000122	-0.000263	-0.000721
0.2030	233.166	-0.141	2.754	7.157	-0.600	20.317	443.888	0.000010	-0.000193	-0.000501
0.2040	218.558	-1.669	2.101	4.974	-0.599	20.314	416.079	0.000117	-0.000147	-0.000348
0.2050	210.698	-2.532	1.559	3.571	-0.596	20.312	401.115	0.000177	-0.000109	-0.000250
0.2060	208.399	-2.781	1.601	3.156	-0.603	20.310	396.738	0.000195	-0.000112	-0.000221
0.2070	209.721	-2.893	1.530	3.156	-0.605	20.311	399.256	0.000203	-0.000107	-0.000221
0.2080	213.704	-2.822	1.654	3.241	-0.608	20.311	406.837	0.000198	-0.000116	-0.000227
0.2090	219.535	-2.684	1.529	3.461	-0.605	20.314	417.938	0.000188	-0.000107	-0.000242
0.2100	228.928	-2.293	1.600	3.946	-0.604	20.316	435.820	0.000161	-0.000112	-0.000276
0.2110	247.187	-1.307	1.782	5.571	-0.603	20.318	470.581	0.000091	-0.000125	-0.000390
0.2120	282.203	0.972	2.463	9.129	-0.605	20.320	537.243	-0.000068	-0.000172	-0.000639
0.2130	338.380	4.682	3.922	15.231	-0.604	20.323	644.188	-0.000328	-0.000275	-0.001066
0.2140	413.777	9.796	6.547	23.332	-0.606	20.326	787.725	-0.000686	-0.000458	-0.001633
0.2150	500.206	15.369	10.020	32.588	-0.600	20.328	952.263	-0.001076	-0.000701	-0.002281
0.2160	589.444	21.552	14.176	42.203	-0.609	20.328	1122.150	-0.001509	-0.000992	-0.002954
0.2170	674.640	27.320	18.276	51.570	-0.604	20.328	1284.342	-0.001912	-0.001279	-0.003610
0.2180	751.916	32.517	22.250	59.908	-0.604	20.326	1431.456	-0.002276	-0.001558	-0.004194
0.2190	819.574	36.894	25.586	66.996	-0.593	20.326	1560.259	-0.002583	-0.001791	-0.004690
0.2200	878.441	40.758	28.741	73.180	-0.593	20.324	1672.325	-0.002853	-0.002012	-0.005123
0.2210	929.732	44.482	31.561	78.516	-0.593	20.322	1769.972	-0.003114	-0.002209	-0.005496
0.2220	976.260	47.928	34.313	83.463	-0.593	20.319	1858.549	-0.003355	-0.002402	-0.005842
0.2230	1020.654	51.083	36.799	87.825	-0.597	20.316	1943.064	-0.003576	-0.002576	-0.006148
0.2240	1064.958	54.168	39.203	92.368	-0.598	20.314	2027.407	-0.003792	-0.002744	-0.006466
0.2250	1108.766	57.044	41.440	96.580	-0.597	20.312	2110.806	-0.003993	-0.002901	-0.006761
0.2260	1149.974	60.212	43.831	101.152	-0.604	20.310	2189.255	-0.004215	-0.003068	-0.007081
0.2270	1184.930	62.893	46.040	105.059	-0.599	20.310	2255.802	-0.004403	-0.003223	-0.007354
0.2280	1210.764	64.894	47.639	108.254	-0.605	20.311	2304.983	-0.004543	-0.003335	-0.007578
0.2290	1225.627	66.158	48.665	109.852	-0.605	20.314	2333.279	-0.004631	-0.003407	-0.007690
0.2300	1230.767	66.561	49.262	110.838	-0.605	20.316	2343.063	-0.004659	-0.003448	-0.007759
0.2310	1228.753	66.810	49.692	111.032	-0.605	20.318	2339.230	-0.004677	-0.003478	-0.007772
0.2320	1222.366	66.603	49.762	110.907	-0.608	20.320	2327.070	-0.004662	-0.003483	-0.007764
0.2330	1212.898	66.229	49.458	110.241	-0.608	20.323	2309.046	-0.004636	-0.003462	-0.007717
0.2340	1198.516	65.703	49.166	109.367	-0.607	20.326	2281.666	-0.004599	-0.003442	-0.007656
0.2350	1172.967	64.382	48.319	107.477	-0.598	20.328	2233.028	-0.004507	-0.003382	-0.007523
0.2360	1129.205	61.865	46.969	104.001	-0.603	20.328	2149.715	-0.004331	-0.003288	-0.007280
0.2370	1064.673	57.778	44.135	98.525	-0.600	20.328	2026.863	-0.004044	-0.003089	-0.006897
0.2380	984.451	52.859	40.341	91.313	-0.605	20.326	1874.142	-0.003700	-0.002824	-0.006392
0.2390	898.894	47.440	35.909	82.948	-0.598	20.325	1711.264	-0.003321	-0.002514	-0.005806
0.2400	817.500	42.326	31.755	74.806	-0.590	20.323	1556.311	-0.002963	-0.002223	-0.005236
0.2410	745.800	37.476	28.128	67.231	-0.593	20.321	1419.811	-0.002623	-0.001969	-0.004706
0.2420	685.356	33.305	25.099	60.950	-0.592	20.319	1304.741	-0.002331	-0.001757	-0.004267
0.2430	634.364	29.734	22.279	55.322	-0.597	20.316	1207.666	-0.002081	-0.001559	-0.003873
0.2440	588.678	26.579	19.888	50.319	-0.596	20.313	1120.691	-0.001861	-0.001392	-0.003522
0.2450	544.254	23.397	17.470	45.301	-0.593	20.312	1036.119	-0.001638	-0.001223	-0.003171
0.2460	498.056	20.076	15.399	40.339	-0.603	20.310	948.172	-0.001405	-0.001078	-0.002824
0.2470	448.914	16.783	13.162	34.614	-0.599	20.310	854.616	-0.001175	-0.000921	-0.002423
0.2480	398.027	13.449	10.939	28.820	-0.607	20.311	757.742	-0.000941	-0.000766	-0.002017
0.2490	347.878	9.697	8.548	22.623	-0.599	20.313	662.270	-0.000679	-0.000598	-0.001584
0.2500	194.798	-9.201	-2.122	-6.323	-0.602	20.326	370.846	0.000644	0.000149	0.000443
0.2510	194.663	-9.368	-2.094	-6.268	-0.601	20.326	370.588	0.000656	0.000147	0.000439
0.2520	194.753	-9.243	-2.053	-5.935	-0.606	20.324	370.760	0.000647	0.000144	0.000415
0.2530	194.813	-9.367	-2.083	-5.977	-0.593	20.323	370.874	0.000656	0.000146	0.000418
0.2540	195.264	-9.075	-2.069	-5.880	-0.591	20.321	371.733	0.000635	0.000145	0.000412
0.2550	195.835	-8.936	-2.014	-5.769	-0.590	20.319	372.820	0.000626	0.000141	0.000404
0.2560	196.917	-8.755	-2.012	-5.852	-0.593	20.316	374.880	0.000613	0.000141	0.000410
0.2570	199.111	-8.770	-2.039	-5.769	-0.600	20.313	379.057	0.000614	0.000143	0.000404
0.2580	203.981	-8.715	-1.984	-5.560	-0.604	20.311	388.327	0.000610	0.000139	0.000389
0.2590	216.785	-8.119	-1.872	-4.586	-0.604	20.309	412.703	0.000568	0.000131	0.000321
0.2600	246.331	-5.992	-1.247	-1.362	-0.608	20.308	468.950	0.000419	0.000087	0.000095
0.2610	299.967	-2.267	0.226	4.433	-0.604	20.308	571.060	0.000159	-0.000016	-0.000310
0.2620	379.302	3.348	3.116	13.354	-0.605	20.309	722.094	-0.000234	-0.000218	-0.000935
0.2630	477.392	9.879	6.728	23.944	-0.596	20.311	908.833	-0.000692	-0.000471	-0.001676
0.2640	584.079	17.105	11.369	35.589	-0.592	20.313	1111.937	-0.001197	-0.000796	-0.002491
0.2650	689.969	24.054	16.121	47.123	-0.592	20.316	1313.524	-0.001684	-0.001128	-0.003299
0.2660	788.691	30.919	21.083	57.559	-0.592	20.318	1501.465	-0.002164	-0.001476	-0.004029
0.2670	877.404	37.032	25.793	67.050	-0.597	20.321	1670.351	-0.002592	-0.001806	-0.004694
0.2680	956.408	42.758	30.128	75.333	-0.596	20.325	1820.755	-0.002993	-0.002109	-0.005273
0.2690	1028.078	47.579	34.032	82.948	-0.596	20.327	1957.197	-0.003331	-0.002382	-0.005806
0.2700	1095.811	52.443	37.826	90.118	-0.603	20.327	2086.143	-0.003671	-0.002648	-0.006308
0.2710	1162.958	57.293	41.829	97.080	-0.601	20.326	2213.974	-0.004010	-0.002928	-0.006796
0.2720	1231.428	62.268	45.958	104.140	-0.603	20.325	2344.322	-0.004359	-0.003217	-0.007290
0.2730	1301.295	67.160	50.083	111.157	-0.592	20.324	2477.331	-0.004701	-0.003506	-0.007781
0.2740	1370.290	71.954	54.126	118.300	-0.591	20.322	2608.681	-0.005037	-0.003789	-0.008281
0.2750	1434.206	76.401	57.961	124.762	-0.592	20.320	2730.360	-0.005348	-0.004057	-0.008733
0.2760	1488.293	80.251	61.325	130.515	-0.595	20.317	2833.328	-0.005618	-0.004293	-0.009136
0.2770	1528.434	83.364	64.104	134.794	-0.596	20.314	2909.746	-0.005835	-0.004487	-0.009436
0.2780	1553.021	85.254	65.966	137.559	-0.595	20.311	2956.553	-0.005968	-0.004618	-0.009629
0.2790	1563.886	86.296	66.925	139.032	-0.594	20.310	2977.238	-0.006041	-0.004685	-0.009732
0.2800	1565.434	87.032	67.537	139.783	-0.600	20.308	2980.185	-0.006092	-0.004728	-0.009785
0.2810	1561.692	87.476	67.829	140.102	-0.597	20.309	2973.061	-0.006123	-0.004748	-0.009807
0.2820	1555.365	87.505	67.983	140.159	-0.603	20.309	2961.016	-0.006125	-0.004759	-0.009811
0.2830	1546.528	87.227	67.816	139.672	-0.595	20.311	2944.193	-0.006106	-0.004747	-0.009777
0.2840	1533.559	86.657	67.538	138.977	-0.592	20.314	2919.502	-0.006066	-0.004728	-0.009728
0.2850	1509.228	85.572	66.927	137.337	-0.593	20.316	2873.182	-0.005990	-0.004685	-0.009614
0.2860	1462.204	82.919	65.246	133.864	-0.597	20.318	2783.661	-0.005804	-0.004567	-0.009371
0.2870	1385.800	78.471	61.758	127.862	-0.598	20.321	2638.206	-0.005493	-0.004323	-0.008950
0.2880	1282.584	71.842	56.560	119.039	-0.593	20.325	2441.711	-0.005029	-0.003959	-0.008333
0.2890	1165.408	64.519	50.195	108.283	-0.591	20.327	2218.637	-0.004516	-0.003514	-0.007580
0.2900	1047.540	57.223	44.067	97.109	-0.599	20.327	1994.247	-0.004006	-0.003085	-0.006798
0.2910	938.329	50.053	38.231	86.255	-0.595	20.326	1786.337	-0.003504	-0.002676	-0.006038
0.2920	842.297	43.438	33.173	76.736	-0.603	20.324	1603.518	-0.003041	-0.002322	-0.005372
0.2930	760.528	37.727	28.684	67.995	-0.591	20.323	1447.849	-0.002641	-0.002008	-0.004760
0.2940	691.667	33.058	24.945	60.491	-0.587	20.321	1316.757	-0.002314	-0.001746	-0.004234
0.2950	632.425	28.930	21.777	53.931	-0.583	20.319	1203.976	-0.002025	-0.001524	-0.003775
0.2960	578.218	25.109	19.012	47.914	-0.585	20.316	1100.779	-0.001758	-0.001331	-0.003354
0.2970	525.378	21.178	16.220	41.996	-0.585	20.314	1000.185	-0.001482	-0.001135	-0.002940
0.2980	472.658	17.301	13.551	35.548	-0.583	20.311	899.820	-0.001211	-0.000949	-0.002488
0.2990	421.442	13.410	10.939	29.266	-0.583	20.310	802.317	-0.000939	-0.000766	-0.002049
0.3000	374.027	10.031	8.812	23.721	-0.592	20.308	712.051	-0.000702	-0.000617	-0.001660
0.3010	331.857	6.641	6.853	18.634	-0.594	20.308	631.771	-0.000465	-0.000480	-0.001304
0.3020	296.225	3.750	5.311	14.131	-0.602	20.310	563.936	-0.000262	-0.000372	-0.000989
0.3030	267.791	1.152	3.852	10.171	-0.589	20.312	509.806	-0.000081	-0.000270	-0.000712
0.3040	247.157	-0.682	2.908	7.199	-0.587	20.315	470.524	0.000048	-0.000204	-0.000504
0.3050	233.842	-1.961	2.114	5.143	-0.587	20.317	445.175	0.000137	-0.000148	-0.000360
0.3060	226.944	-2.794	1.822	4.017	-0.589	20.319	432.043	0.000196	-0.000128	-0.000281
0.3070	225.186	-3.197	1.573	3.295	-0.588	20.322	428.696	0.000224	-0.000110	-0.000231
0.3080	227.560	-3.420	1.407	3.254	-0.586	20.325	433.216	0.000239	-0.000098	-0.000228
0.3090	233.602	-3.380	1.365	3.379	-0.584	20.327	444.717	0.000237	-0.000096	-0.000237
0.3100	245.805	-2.795	1.490	4.254	-0.596	20.327	467.949	0.000196	-0.000104	-0.000298
0.3110	273.021	-1.030	1.907	6.824	-0.592	20.326	519.762	0.000072	-0.000134	-0.000478
0.3120	325.155	2.318	3.297	12.341	-0.592	20.325	619.011	-0.000162	-0.000231	-0.000864
0.3130	405.466	7.556	5.812	20.887	-0.583	20.324	771.904	-0.000529	-0.000407	-0.001462
0.3140	508.667	14.296	9.924	31.977	-0.587	20.322	968.370	-0.001001	-0.000695	-0.002238
0.3150	624.085	21.952	14.968	44.164	-0.591	20.320	1188.097	-0.001537	-0.001048	-0.003091
0.3160	743.275	29.595	20.776	56.865	-0.591	20.317	1415.005	-0.002072	-0.001454	-0.003981
0.3170	858.543	37.392	26.487	68.704	-0.589	20.314	1634.445	-0.002617	-0.001854	-0.004809
0.3180	963.847	44.591	32.171	79.446	-0.589	20.311	1834.917	-0.003121	-0.002252	-0.005561
0.3190	1055.791	50.887	37.201	88.882	-0.588	20.310	2009.954	-0.003562	-0.002604	-0.006222
0.3200	1134.840	56.417	41.940	97.067	-0.593	20.308	2160.444	-0.003949	-0.002936	-0.006795
0.3210	1203.896	61.350	46.052	104.224	-0.596	20.309	2291.908	-0.004295	-0.003224	-0.007296
0.3220	1266.654	66.047	50.054	110.630	-0.601	20.309	2411.385	-0.004623	-0.003504	-0.007744
0.3230	1325.100	70.314	53.361	116.467	-0.591	20.312	2522.650	-0.004922	-0.003735	-0.008153
0.3240	1380.194	74.330	56.530	122.025	-0.587	20.314	2627.535	-0.005203	-0.003957	-0.008542
0.3250	1431.651	78.153	59.600	127.153	-0.583	20.317	2725.496	-0.005471	-0.004172	-0.008901
0.3260	1478.224	81.543	62.533	131.781	-0.584	20.319	2814.159	-0.005708	-0.004377	-0.009225
0.3270	1517.403	84.433	65.077	135.825	-0.585	20.322	2888.746	-0.005910	-0.004555	-0.009508
0.3280	1546.754	86.600	67.107	138.937	-0.588	20.325	2944.622	-0.006062	-0.004698	-0.009726
0.3290	1564.923	88.171	68.248	141.174	-0.585	20.327	2979.212	-0.006172	-0.004777	-0.009882
0.3300	1573.039	89.478	69.249	142.771	-0.593	20.327	2994.661	-0.006263	-0.004847	-0.009994
0.3310	1573.114	89.922	69.542	143.215	-0.585	20.326	2994.804	-0.006295	-0.004868	-0.010025
0.3320	1567.884	90.102	69.875	143.492	-0.587	20.325	2984.848	-0.006307	-0.004891	-0.010044
0.3330	1558.070	89.461	69.556	142.924	-0.576	20.324	2966.166	-0.006262	-0.004869	-0.010005
0.3340	1541.689	88.796	69.291	142.063	-0.577	20.322	2934.980	-0.006216	-0.004850	-0.009944
0.3350	1509.093	86.990	68.193	139.770	-0.582	20.320	2872.925	-0.006089	-0.004773	-0.009784
0.3360	1450.377	83.669	65.786	135.129	-0.586	20.317	2761.145	-0.005857	-0.004605	-0.009459
0.3370	1362.400	78.388	61.491	127.792	-0.587	20.314	2593.660	-0.005487	-0.004304	-0.008945
0.3380	1253.054	71.384	55.724	118.190	-0.584	20.311	2385.492	-0.004997	-0.003901	-0.008273
0.3390	1137.500	63.894	49.512	107.503	-0.583	20.310	2165.508	-0.004473	-0.003466	-0.007525
0.3400	1028.289	56.876	43.997	97.136	-0.590	20.308	1957.598	-0.003981	-0.003080	-0.006800
0.3410	932.693	50.497	38.884	87.506	-0.585	20.308	1775.608	-0.003535	-0.002722	-0.006125
0.3420	853.058	45.092	34.577	79.266	-0.589	20.309	1624.002	-0.003156	-0.002420	-0.005549
0.3430	785.986	40.228	30.671	72.207	-0.582	20.311	1496.315	-0.002816	-0.002147	-0.005054
0.3440	726.248	35.991	27.267	65.828	-0.579	20.314	1382.589	-0.002519	-0.001909	-0.004608
0.3450	667.231	31.892	24.097	59.546	-0.580	20.316	1270.237	-0.002232	-0.001687	-0.004168
0.3460	605.089	27.681	20.930	52.611	-0.577	20.318	1151.934	-0.001938	-0.001465	-0.003683
0.3470	539.355	23.178	17.720	45.275	-0.579	20.321	1026.793	-0.001622	-0.001240	-0.003169
0.3480	472.673	18.244	14.511	37.620	-0.579	20.324	899.849	-0.001277	-0.001016	-0.002633
0.3490	408.803	13.422	11.413	30.047	-0.578	20.326	778.255	-0.000940	-0.000799	-0.002103
0.3500	351.545	9.198	8.870	23.236	-0.587	20.326	669.250	-0.000644	-0.000621	-0.001627
0.3510	303.363	5.417	6.701	17.176	-0.586	20.325	577.526	-0.000379	-0.000469	-0.001202
0.3520	266.063	2.514	5.060	12.325	-0.589	20.324	506.516	-0.000176	-0.000354	-0.000863
0.3530	239.478	-0.099	3.755	8.420	-0.578	20.324	455.904	0.000007	-0.000263	-0.000589
0.3540	222.706	-1.503	2.810	5.809	-0.581	20.322	423.975	0.000105	-0.000197	-0.000407
0.3550	213.779	-2.531	2.295	4.267	-0.588	20.320	406.981	0.000177	-0.000161	-0.000299
0.3560	210.698	-3.002	1.934	3.530	-0.591	20.317	401.115	0.000210	-0.000135	-0.000247
0.3570	211.660	-3.238	1.725	3.280	-0.597	20.314	402.946	0.000227	-0.000121	-0.000230
0.3580	215.387	-3.335	1.628	3.405	-0.598	20.312	410.042	0.000233	-0.000114	-0.000238
0.3590	221.894	-3.225	1.670	3.530	-0.602	20.310	422.430	0.000226	-0.000117	-0.000247
0.3600	235.570	-2.390	1.935	4.643	-0.607	20.308	448.465	0.000167	-0.000135	-0.000325
0.3610	266.694	-0.375	2.394	7.463	-0.604	20.309	507.717	0.000026	-0.000168	-0.000522
0.3620	324.719	3.460	4.005	13.591	-0.605	20.309	618.181	-0.000242	-0.000280	-0.000951
0.3630	410.621	8.920	6.799	22.581	-0.597	20.312	781.717	-0.000624	-0.000476	-0.001581
0.3640	515.985	15.825	10.953	33.850	-0.599	20.314	982.304	-0.001108	-0.000767	-0.002370
0.3650	629.194	23.399	16.178	45.900	-0.599	20.316	1197.824	-0.001638	-0.001132	-0.003213
0.3660	742.028	30.835	21.554	57.822	-0.599	20.318	1412.630	-0.002158	-0.001509	-0.004048
0.3670	849.285	38.006	27.070	68.969	-0.601	20.321	1616.821	-0.002660	-0.001895	-0.004828
0.3680	947.466	44.494	32.198	79.043	-0.603	20.324	1803.732	-0.003115	-0.002254	-0.005533
0.3690	1035.232	50.636	36.854	87.923	-0.603	20.326	1970.816	-0.003545	-0.002580	-0.006155
0.3700	1112.778	56.194	41.357	96.176	-0.606	20.326	2118.444	-0.003934	-0.002895	-0.006732
0.3710	1181.819	61.157	45.261	103.207	-0.603	20.326	2249.880	-0.004281	-0.003168	-0.007225
0.3720	1245.404	65.715	49.069	109.863	-0.602	20.324	2370.930	-0.004600	-0.003435	-0.007690
0.3730	1306.510	69.898	52.515	115.812	-0.594	20.323	2487.259	-0.004893	-0.003676	-0.008107
0.3740	1366.954	74.121	56.046	121.857	-0.596	20.322	2602.329	-0.005188	-0.003923	-0.008530
0.3750	1425.910	78.221	59.785	127.721	-0.599	20.319	2714.567	-0.005475	-0.004185	-0.008940
0.3760	1480.208	82.013	63.092	133.113	-0.601	20.316	2817.936	-0.005741	-0.004416	-0.009318
0.3770	1525.849	85.237	65.982	137.728	-0.605	20.313	2904.825	-0.005967	-0.004619	-0.009641
0.3780	1559.002	87.877	68.109	141.175	-0.600	20.311	2967.939	-0.006151	-0.004768	-0.009882
0.3790	1578.629	89.531	69.442	143.467	-0.596	20.309	3005.304	-0.006267	-0.004861	-0.010043
0.3800	1586.354	90.713	70.455	145.009	-0.599	20.308	3020.010	-0.006350	-0.004932	-0.010151
0.3810	1585.452	90.978	70.815	145.509	-0.594	20.309	3018.293	-0.006368	-0.004957	-0.010186
0.3820	1578.945	91.006	70.941	145.468	-0.599	20.309	3005.905	-0.006370	-0.004966	-0.010183
0.3830	1567.328	90.546	70.608	144.676	-0.591	20.311	2983.789	-0.006338	-0.004943	-0.010127
0.3840	1546.468	89.686	69.984	143.425	-0.595	20.313	2944.078	-0.006278	-0.004899	-0.010040
0.3850	1505.952	87.352	68.734	140.632	-0.597	20.316	2866.945	-0.006115	-0.004811	-0.009844
0.3860	1439.646	83.295	66.025	135.435	-0.593	20.318	2740.717	-0.005831	-0.004622	-0.009480
0.3870	1348.890	77.541	61.730	127.723	-0.592	20.321	2567.940	-0.005428	-0.004321	-0.008941
0.3880	1245.329	70.981	56.102	118.565	-0.590	20.324	2370.787	-0.004969	-0.003927	-0.008300
0.3890	1141.363	64.365	50.195	108.796	-0.588	20.326	2172.861	-0.004506	-0.003514	-0.007616
0.3900	1045.376	58.308	45.151	99.722	-0.594	20.326	1990.128	-0.004082	-0.003161	-0.006981
0.3910	960.631	52.693	40.759	91.328	-0.588	20.326	1828.794	-0.003689	-0.002853	-0.006393
0.3920	887.217	47.733	37.007	83.768	-0.591	20.324	1689.034	-0.003341	-0.002590	-0.005864
0.3930	821.738	43.091	33.379	76.846	-0.578	20.323	1564.379	-0.003016	-0.002337	-0.005379
0.3940	759.987	38.894	29.922	70.259	-0.576	20.321	1446.819	-0.002723	-0.002095	-0.004918
0.3950	697.198	34.641	26.600	63.645	-0.579	20.319	1327.286	-0.002425	-0.001862	-0.004455
0.3960	630.712	30.221	23.168	56.462	-0.587	20.317	1200.714	-0.002115	-0.001622	-0.003952
0.3970	561.191	25.455	19.540	48.694	-0.589	20.314	1068.363	-0.001782	-0.001368	-0.003409
0.3980	491.594	20.620	16.163	40.703	-0.587	20.311	935.869	-0.001443	-0.001131	-0.002849
0.3990	425.770	15.673	12.884	32.934	-0.584	20.309	810.556	-0.001097	-0.000902	-0.002305
0.4000	366.979	11.491	10.259	25.944	-0.594	20.308	698.633	-0.000804	-0.000718	-0.001816
0.4010	317.054	7.489	7.979	19.648	-0.598	20.309	603.590	-0.000524	-0.000559	-0.001375
0.4020	277.439	4.515	6.146	14.508	-0.604	20.309	528.173	-0.000316	-0.000430	-0.001016
0.4030	248.375	1.792	4.547	10.450	-0.595	20.312	472.841	-0.000125	-0.000318	-0.000732
0.4040	229.709	0.054	3.449	7.559	-0.589	20.314	437.307	-0.000004	-0.000241	-0.000529
0.4050	219.956	-1.112	2.879	5.877	-0.592	20.317	418.739	0.000078	-0.000202	-0.000411
0.4060	217.176	-1.668	2.447	5.043	-0.597	20.319	413.446	0.000117	-0.000171	-0.000353
0.4070	219.355	-1.808	2.281	4.889	-0.603	20.321	417.595	0.000127	-0.000160	-0.000342
0.4080	224.990	-1.739	2.227	5.139	-0.600	20.324	428.324	0.000122	-0.000156	-0.000360
0.4090	235.195	-1.517	2.199	5.722	-0.596	20.327	447.750	0.000106	-0.000154	-0.000401
0.4100	256.520	-0.432	2.741	7.780	-0.601	20.326	488.348	0.000030	-0.000192	-0.000545
0.4110	297.322	1.874	3.644	11.977	-0.604	20.326	566.025	-0.000131	-0.000255	-0.000838
0.4120	361.899	6.236	5.685	18.982	-0.608	20.324	688.963	-0.000437	-0.000398	-0.001329
0.4130	447.200	11.879	8.617	28.014	-0.596	20.323	851.355	-0.000832	-0.000603	-0.001961
0.4140	545.381	18.202	12.758	38.298	-0.594	20.321	1038.265	-0.001274	-0.000893	-0.002681
0.4150	649.678	25.151	17.497	49.388	-0.593	20.319	1236.820	-0.001761	-0.001225	-0.003457
0.4160	755.012	32.099	22.402	60.436	-0.599	20.317	1437.349	-0.002247	-0.001568	-0.004230
0.4170	857.912	39.061	27.600	71.193	-0.603	20.314	1633.244	-0.002734	-0.001932	-0.004983
0.4180	955.867	45.523	32.798	81.211	-0.595	20.312	1819.725	-0.003187	-0.002296	-0.005685
0.4190	1047.570	51.568	37.786	90.329	-0.600	20.310	1994.305	-0.003610	-0.002645	-0.006323
0.4200	1132.345	57.669	42.926	99.123	-0.607	20.309	2155.695	-0.004037	-0.003005	-0.006939
0.4210	1209.682	63.074	47.415	106.807	-0.612	20.309	2302.923	-0.004415	-0.003319	-0.007477
0.4220	1280.225	68.313	51.653	113.838	-0.611	20.309	2437.220	-0.004782	-0.003616	-0.007969
0.4230	1344.066	72.593	55.282	120.063	-0.601	20.312	2558.756	-0.005082	-0.003870	-0.008404
0.4240	1401.444	76.749	58.686	125.650	-0.603	20.314	2667.990	-0.005372	-0.004108	-0.008795
0.4250	1450.632	80.182	61.910	130.806	-0.606	20.316	2761.631	-0.005613	-0.004334	-0.009156
0.4260	1490.322	83.406	64.605	135.003	-0.605	20.319	2837.191	-0.005838	-0.004522	-0.009450
0.4270	1519.582	85.671	66.774	138.060	-0.603	20.321	2892.895	-0.005997	-0.004674	-0.009664
0.4280	1538.894	87.449	67.998	140.242	-0.599	20.325	2929.659	-0.006121	-0.004760	-0.009817
0.4290	1549.504	88.255	68.707	141.480	-0.592	20.327	2949.858	-0.006178	-0.004809	-0.009904
0.4300	1553.321	88.906	69.303	142.675	-0.601	20.326	2957.125	-0.006223	-0.004851	-0.009987
0.4310	1552.134	89.087	69.679	142.940	-0.602	20.326	2954.865	-0.006236	-0.004878	-0.010006
0.4320	1547.460	89.335	69.930	143.134	-0.606	20.324	2945.967	-0.006253	-0.004895	-0.010019
0.4330	1539.225	89.169	69.765	142.620	-0.595	20.323	2930.288	-0.006242	-0.004884	-0.009983
0.4340	1524.752	88.752	69.529	141.911	-0.593	20.321	2902.737	-0.006213	-0.004867	-0.009934
0.4350	1493.869	87.142	68.609	139.840	-0.591	20.319	2843.943	-0.006100	-0.004803	-0.009789
0.4360	1435.484	83.765	66.164	135.324	-0.586	20.316	2732.792	-0.005864	-0.004631	-0.009473
0.4370	1345.764	78.387	61.785	127.861	-0.590	20.313	2561.989	-0.005487	-0.004325	-0.008950
0.4380	1232.765	71.202	55.798	117.717	-0.593	20.311	2346.869	-0.004984	-0.003906	-0.008240
0.4390	1112.763	63.519	49.294	106.474	-0.595	20.310	2118.416	-0.004446	-0.003451	-0.007453
0.4400	999.885	56.251	43.499	95.900	-0.603	20.309	1903.524	-0.003938	-0.003045	-0.006713
0.4410	902.651	49.957	38.106	86.270	-0.599	20.309	1718.416	-0.003497	-0.002667	-0.006039
0.4420	823.376	44.690	33.812	78.224	-0.600	20.309	1567.497	-0.003128	-0.002367	-0.005476
0.4430	758.213	39.798	29.948	71.108	-0.592	20.312	1443.443	-0.002786	-0.002096	-0.004978
0.4440	700.609	35.615	26.836	64.840	-0.589	20.313	1333.780	-0.002493	-0.001878	-0.004539
0.4450	645.155	31.599	23.875	58.824	-0.594	20.316	1228.209	-0.002212	-0.001671	-0.004118
0.4460	588.678	27.596	20.945	52.363	-0.595	20.318	1120.691	-0.001932	-0.001466	-0.003665
0.4470	531.209	23.510	18.082	45.763	-0.599	20.321	1011.286	-0.001646	-0.001266	-0.003203
0.4480	473.695	19.217	15.079	38.968	-0.593	20.324	901.794	-0.001345	-0.001056	-0.002728
0.4490	418.421	15.063	12.369	32.284	-0.589	20.326	796.566	-0.001054	-0.000866	-0.002260
0.4500	368.316	11.463	10.020	26.473	-0.593	20.326	701.180	-0.000802	-0.000701	-0.001853
0.4510	325.365	8.114	8.131	21.206	-0.593	20.326	619.411	-0.000568	-0.000569	-0.001484
0.4520	291.070	5.474	6.616	16.911	-0.597	20.324	554.123	-0.000383	-0.000463	-0.001184
0.4530	265.191	2.751	5.268	13.228	-0.588	20.324	504.856	-0.000193	-0.000369	-0.000926
0.4540	246.992	1.057	4.200	10.421	-0.584	20.322	470.209	-0.000074	-0.000294	-0.000730
0.4550	235.856	-0.181	3.451	8.712	-0.585	20.320	449.009	0.000013	-0.000242	-0.000610
0.4560	230.806	-0.529	2.923	7.656	-0.587	20.317	439.396	0.000037	-0.000205	-0.000536
0.4570	230.611	-0.807	2.867	7.141	-0.591	20.314	439.024	0.000057	-0.000201	-0.000500
0.4580	233.977	-0.946	2.810	6.989	-0.592	20.311	445.433	0.000066	-0.000197	-0.000489
0.4590	240.635	-0.945	2.768	7.212	-0.597	20.310	458.107	0.000066	-0.000194	-0.000505
0.4600	254.431	-0.209	3.172	8.296	-0.602	20.308	484.371	0.000015	-0.000222	-0.000581
0.4610	284.728	1.652	3.672	11.201	-0.603	20.308	542.049	-0.000116	-0.000257	-0.000784
0.4620	340.378	5.237	5.257	17.064	-0.604	20.309	647.993	-0.000367	-0.000368	-0.001194
0.4630	423.681	10.628	7.910	25.666	-0.597	20.312	806.580	-0.000744	-0.000554	-0.001797
0.4640	528.459	17.521	12.273	36.769	-0.600	20.314	1006.050	-0.001226	-0.000859	-0.002574
0.4650	644.674	25.109	17.609	49.068	-0.599	20.316	1227.293	-0.001758	-0.001233	-0.003435
0.4660	763.759	33.058	23.431	61.645	-0.597	20.318	1454.000	-0.002314	-0.001640	-0.004315
0.4670	878.035	40.644	29.323	73.498	-0.598	20.321	1671.553	-0.002845	-0.002053	-0.005145
0.4680	981.505	47.788	34.617	84.086	-0.596	20.324	1868.534	-0.003345	-0.002423	-0.005886
0.4690	1071.075	53.832	39.660	93.230	-0.592	20.327	2039.051	-0.003768	-0.002776	-0.006526
0.4700	1147.674	59.252	44.233	101.082	-0.595	20.327	2184.877	-0.004148	-0.003096	-0.007076
0.4710	1214.250	64.130	48.180	108.033	-0.595	20.326	2311.621	-0.004489	-0.003373	-0.007562
0.4720	1275.236	68.688	51.850	114.313	-0.600	20.325	2427.721	-0.004808	-0.003630	-0.008002
0.4730	1332.945	72.774	55.074	119.873	-0.592	20.323	2537.584	-0.005094	-0.003855	-0.008391
0.4740	1388.339	76.707	58.367	125.234	-0.588	20.321	2643.042	-0.005369	-0.004086	-0.008766
0.4750	1440.293	80.277	61.479	130.335	-0.587	20.319	2741.947	-0.005619	-0.004304	-0.009123
0.4760	1486.234	83.779	64.369	135.017	-0.585	20.316	2829.409	-0.005865	-0.004506	-0.009451
0.4770	1522.708	86.544	66.746	138.950	-0.587	20.313	2898.846	-0.006058	-0.004672	-0.009727
0.4780	1546.453	88.461	68.345	141.564	-0.583	20.311	2944.050	-0.006192	-0.004784	-0.009909
0.4790	1557.274	89.406	69.278	142.869	-0.579	20.309	2964.649	-0.006258	-0.004849	-0.010001
0.4800	1557.815	89.851	69.805	143.549	-0.587	20.308	2965.679	-0.006290	-0.004886	-0.010048
0.4810	1551.518	89.990	69.971	143.439	-0.584	20.308	2953.691	-0.006299	-0.004898	-0.010041
0.4820	1541.329	89.628	70.068	143.342	-0.592	20.309	2934.294	-0.006274	-0.004905	-0.010034
0.4830	1525.955	88.796	69.610	142.343	-0.585	20.311	2905.025	-0.006216	-0.004873	-0.009964
0.4840	1499.414	87.489	68.706	140.591	-0.587	20.314	2854.500	-0.006124	-0.004809	-0.009841
0.4850	1452.496	84.766	66.843	137.158	-0.590	20.316	2765.179	-0.005934	-0.004679	-0.009601
0.4860	1380.975	80.459	63.521	131.278	-0.593	20.318	2629.023	-0.005632	-0.004446	-0.009189
0.4870	1288.115	74.554	58.906	123.427	-0.593	20.321	2452.240	-0.005219	-0.004123	-0.008640
0.4880	1185.170	67.954	53.321	113.936	-0.592	20.324	2256.260	-0.004757	-0.003732	-0.007976
0.4890	1082.947	61.394	47.637	104.196	-0.592	20.326	2061.653	-0.004298	-0.003335	-0.007294
0.4900	989.906	55.348	42.733	95.331	-0.602	20.326	1884.527	-0.003874	-0.002991	-0.006673
0.4910	909.023	49.941	38.342	86.924	-0.595	20.325	1730.547	-0.003496	-0.002684	-0.006085
0.4920	839.337	45.105	34.730	79.989	-0.593	20.323	1597.881	-0.003157	-0.002431	-0.005599
0.4930	776.803	40.687	31.200	73.082	-0.578	20.323	1478.834	-0.002848	-0.002184	-0.005116
0.4940	717.081	36.490	28.226	66.842	-0.575	20.321	1365.137	-0.002554	-0.001976	-0.004679
0.4950	656.771	32.321	25.029	60.394	-0.577	20.319	1250.324	-0.002262	-0.001752	-0.004228
0.4960	594.854	27.944	21.846	53.363	-0.583	20.316	1132.450	-0.001956	-0.001529	-0.003735
0.4970	531.780	23.510	18.636	46.318	-0.583	20.313	1012.373	-0.001646	-0.001305	-0.003242
0.4980	469.938	19.050	15.455	39.174	-0.581	20.311	894.642	-0.001333	-0.001082	-0.002742
0.4990	411.643	14.825	12.661	32.170	-0.580	20.309	783.663	-0.001038	-0.000886	-0.002252
Test Cycles
Time (sec)	Axial stress (kPa)	Axial micro-strain #1	Axial micro-strain #2	Axial micro-strain #3	Confining pressure (kPa)	Temperature (�C)	Load (N)	Displacement #1 (mm)	Displacement #2 (mm)	Displacement #3 (mm)
0.0000	359.540	11.212	10.425	26.111	-0.589	20.307	684.471	-0.000785	-0.000730	-0.001828
0.0010	315.161	7.975	8.228	20.484	-0.589	20.308	599.985	-0.000558	-0.000576	-0.001434
0.0020	279.739	4.986	6.395	15.981	-0.595	20.309	532.551	-0.000349	-0.000448	-0.001119
0.0030	253.184	2.540	4.796	12.159	-0.588	20.312	481.997	-0.000178	-0.000336	-0.000851
0.0040	235.435	0.735	3.949	9.548	-0.588	20.314	448.208	-0.000051	-0.000276	-0.000668
0.0050	225.546	-0.223	3.547	7.672	-0.587	20.316	429.382	0.000016	-0.000248	-0.000537
0.0060	222.270	-0.778	3.380	6.809	-0.587	20.319	423.145	0.000054	-0.000237	-0.000477
0.0070	223.683	-0.891	3.283	6.448	-0.587	20.321	425.835	0.000062	-0.000230	-0.000451
0.0080	228.447	-0.960	3.006	6.599	-0.584	20.324	434.904	0.000067	-0.000210	-0.000462
0.0090	237.299	-0.823	2.853	7.044	-0.585	20.327	451.756	0.000058	-0.000200	-0.000493
0.0100	256.430	0.345	3.172	8.699	-0.591	20.326	488.176	-0.000024	-0.000222	-0.000609
0.0110	295.263	2.804	4.004	12.562	-0.593	20.326	562.105	-0.000196	-0.000280	-0.000879
0.0120	359.344	7.127	5.920	19.413	-0.595	20.324	684.099	-0.000499	-0.000414	-0.001359
0.0130	446.554	12.671	9.061	28.695	-0.584	20.323	850.124	-0.000887	-0.000634	-0.002009
0.0140	547.846	19.313	13.467	39.549	-0.581	20.321	1042.957	-0.001352	-0.000943	-0.002768
0.0150	653.691	26.206	18.288	50.778	-0.577	20.319	1244.459	-0.001834	-0.001280	-0.003554
0.0160	757.477	33.085	23.139	61.631	-0.578	20.316	1442.041	-0.002316	-0.001620	-0.004314
0.0170	854.861	39.575	28.071	71.818	-0.580	20.313	1627.436	-0.002770	-0.001965	-0.005027
0.0180	944.400	45.606	32.714	80.974	-0.581	20.311	1797.895	-0.003192	-0.002290	-0.005668
0.0190	1026.996	51.318	37.270	89.465	-0.584	20.309	1955.137	-0.003592	-0.002609	-0.006263
0.0200	1104.483	56.835	41.829	97.538	-0.594	20.308	2102.652	-0.003978	-0.002928	-0.006828
0.0210	1179.114	61.991	46.163	105.069	-0.592	20.308	2244.730	-0.004339	-0.003231	-0.007355
0.0220	1251.776	66.853	50.499	112.338	-0.595	20.309	2383.060	-0.004680	-0.003535	-0.007864
0.0230	1321.207	71.593	54.348	118.744	-0.583	20.312	2515.240	-0.005011	-0.003804	-0.008312
0.0240	1384.808	76.136	58.241	124.957	-0.588	20.314	2636.318	-0.005330	-0.004077	-0.008747
0.0250	1439.030	80.125	61.520	130.418	-0.589	20.316	2739.544	-0.005609	-0.004306	-0.009129
0.0260	1481.275	83.252	64.174	134.837	-0.591	20.319	2819.967	-0.005828	-0.004492	-0.009439
0.0270	1510.776	85.559	66.188	138.130	-0.591	20.322	2876.129	-0.005989	-0.004633	-0.009669
0.0280	1528.509	87.019	67.440	140.074	-0.585	20.324	2909.889	-0.006091	-0.004721	-0.009805
0.0290	1537.241	87.769	68.234	141.158	-0.588	20.326	2926.512	-0.006144	-0.004776	-0.009881
0.0300	1539.615	88.393	68.903	142.076	-0.596	20.326	2931.032	-0.006187	-0.004823	-0.009945
0.0310	1537.722	88.406	69.153	142.327	-0.597	20.325	2927.427	-0.006188	-0.004841	-0.009963
0.0320	1532.747	88.823	69.335	142.509	-0.597	20.323	2917.957	-0.006218	-0.004853	-0.009976
0.0330	1523.986	88.394	69.070	141.911	-0.589	20.323	2901.278	-0.006188	-0.004835	-0.009934
0.0340	1507.875	87.852	68.791	140.841	-0.587	20.321	2870.607	-0.006150	-0.004815	-0.009859
0.0350	1473.791	85.838	67.706	138.645	-0.586	20.319	2805.719	-0.006009	-0.004739	-0.009705
0.0360	1412.535	82.306	65.065	133.892	-0.584	20.316	2689.104	-0.005761	-0.004555	-0.009372
0.0370	1323.883	77.011	61.008	126.610	-0.583	20.313	2520.332	-0.005391	-0.004271	-0.008863
0.0380	1219.014	70.438	55.421	117.119	-0.584	20.311	2320.690	-0.004931	-0.003879	-0.008198
0.0390	1114.236	63.630	49.807	107.280	-0.583	20.309	2121.220	-0.004454	-0.003487	-0.007510
0.0400	1020.158	57.834	44.888	98.483	-0.593	20.308	1942.120	-0.004048	-0.003142	-0.006894
0.0410	940.177	52.499	40.607	90.756	-0.592	20.308	1789.856	-0.003675	-0.002842	-0.006353
0.0420	871.392	48.037	36.966	83.780	-0.597	20.309	1658.907	-0.003363	-0.002588	-0.005865
0.0430	806.815	43.368	33.186	76.916	-0.589	20.311	1535.969	-0.003036	-0.002323	-0.005384
0.0440	740.149	38.811	29.616	69.885	-0.589	20.313	1409.054	-0.002717	-0.002073	-0.004892
0.0450	668.178	33.961	25.878	62.340	-0.590	20.315	1272.039	-0.002377	-0.001811	-0.004364
0.0460	592.164	28.805	22.071	54.044	-0.593	20.318	1127.329	-0.002016	-0.001545	-0.003783
0.0470	516.466	23.454	18.194	45.413	-0.595	20.321	983.219	-0.001642	-0.001274	-0.003179
0.0480	446.524	18.312	14.595	37.186	-0.594	20.324	850.067	-0.001282	-0.001022	-0.002603
0.0490	387.222	13.853	11.538	30.099	-0.592	20.326	737.171	-0.000970	-0.000808	-0.002107
0.0500	341.280	10.310	9.314	24.486	-0.595	20.326	649.710	-0.000722	-0.000652	-0.001714
0.0510	308.593	7.434	7.729	20.165	-0.592	20.325	587.482	-0.000520	-0.000541	-0.001412
0.0520	286.742	5.404	6.686	17.079	-0.596	20.323	545.883	-0.000378	-0.000468	-0.001196
0.0530	272.119	3.737	5.725	14.452	-0.589	20.323	518.045	-0.000262	-0.000401	-0.001012
0.0540	262.441	2.583	5.030	12.853	-0.594	20.321	499.620	-0.000181	-0.000352	-0.000900
0.0550	256.099	1.791	4.473	11.547	-0.595	20.319	487.547	-0.000125	-0.000313	-0.000808
0.0560	252.898	1.345	4.293	10.852	-0.596	20.316	481.453	-0.000094	-0.000301	-0.000760
0.0570	252.552	1.206	4.155	10.491	-0.597	20.313	480.795	-0.000084	-0.000291	-0.000734
0.0580	255.077	1.191	4.017	10.478	-0.601	20.311	485.601	-0.000083	-0.000281	-0.000733
0.0590	260.908	1.247	3.851	10.867	-0.606	20.309	496.702	-0.000087	-0.000270	-0.000761
0.0600	273.171	1.804	4.075	12.007	-0.612	20.308	520.048	-0.000126	-0.000285	-0.000840
0.0610	300.703	3.555	4.506	14.439	-0.612	20.308	572.462	-0.000249	-0.000315	-0.001011
0.0620	352.642	7.029	6.075	19.733	-0.612	20.309	671.339	-0.000492	-0.000425	-0.001381
0.0630	431.360	11.866	8.466	27.557	-0.601	20.312	821.199	-0.000831	-0.000593	-0.001929
0.0640	530.292	18.231	12.579	38.173	-0.598	20.314	1009.541	-0.001276	-0.000881	-0.002672
0.0650	638.482	25.192	17.609	49.527	-0.592	20.316	1215.506	-0.001763	-0.001233	-0.003467
0.0660	746.717	32.447	23.001	60.894	-0.592	20.318	1421.556	-0.002271	-0.001610	-0.004263
0.0670	847.993	39.075	28.046	71.497	-0.591	20.320	1614.361	-0.002735	-0.001963	-0.005005
0.0680	938.103	45.051	32.632	80.723	-0.592	20.324	1785.908	-0.003154	-0.002284	-0.005651
0.0690	1018.069	50.400	37.064	88.756	-0.596	20.326	1938.143	-0.003528	-0.002594	-0.006213
0.0700	1092.550	55.666	41.399	96.456	-0.611	20.326	2079.935	-0.003897	-0.002898	-0.006752
0.0710	1166.159	60.850	45.691	103.807	-0.608	20.325	2220.068	-0.004259	-0.003198	-0.007267
0.0720	1241.437	66.269	50.179	111.450	-0.610	20.323	2363.377	-0.004639	-0.003513	-0.007802
0.0730	1317.045	71.314	54.459	118.677	-0.600	20.322	2507.315	-0.004992	-0.003812	-0.008307
0.0740	1388.941	76.400	58.683	125.667	-0.597	20.320	2644.186	-0.005348	-0.004108	-0.008797
0.0750	1451.218	81.110	62.311	131.891	-0.600	20.318	2762.747	-0.005678	-0.004362	-0.009232
0.0760	1498.979	84.655	65.312	136.559	-0.597	20.316	2853.670	-0.005926	-0.004572	-0.009559
0.0770	1530.087	87.032	67.482	139.908	-0.595	20.313	2912.893	-0.006092	-0.004724	-0.009794
0.0780	1546.123	88.380	68.928	141.659	-0.596	20.311	2943.420	-0.006187	-0.004825	-0.009916
0.0790	1551.202	89.269	69.651	142.811	-0.595	20.309	2953.091	-0.006249	-0.004876	-0.009997
0.0800	1549.880	89.866	69.942	143.283	-0.603	20.307	2950.573	-0.006291	-0.004896	-0.010030
0.0810	1545.116	89.824	69.998	143.520	-0.598	20.308	2941.504	-0.006288	-0.004900	-0.010046
0.0820	1538.278	89.865	69.902	143.286	-0.601	20.309	2928.486	-0.006291	-0.004893	-0.010030
0.0830	1528.825	89.309	69.584	142.703	-0.599	20.311	2910.490	-0.006252	-0.004871	-0.009989
0.0840	1513.481	88.518	69.348	141.897	-0.598	20.313	2881.279	-0.006196	-0.004854	-0.009933
0.0850	1481.380	86.837	68.360	139.838	-0.600	20.315	2820.168	-0.006079	-0.004785	-0.009789
0.0860	1421.552	83.363	65.857	135.393	-0.598	20.318	2706.270	-0.005835	-0.004610	-0.009477
0.0870	1332.103	77.860	61.451	127.889	-0.599	20.320	2535.982	-0.005450	-0.004302	-0.008952
0.0880	1224.274	70.940	55.643	118.190	-0.593	20.324	2330.704	-0.004966	-0.003895	-0.008273
0.0890	1115.649	63.978	49.764	107.935	-0.594	20.326	2123.909	-0.004478	-0.003483	-0.007555
0.0900	1019.016	57.738	44.595	98.693	-0.600	20.326	1939.945	-0.004042	-0.003122	-0.006908
0.0910	938.449	52.249	40.426	90.772	-0.599	20.325	1786.566	-0.003657	-0.002830	-0.006354
0.0920	871.497	47.607	37.007	84.240	-0.599	20.323	1659.107	-0.003332	-0.002590	-0.005897
0.0930	810.948	43.175	33.533	78.016	-0.590	20.322	1543.837	-0.003022	-0.002347	-0.005461
0.0940	750.444	39.033	30.157	71.652	-0.589	20.321	1428.652	-0.002732	-0.002111	-0.005016
0.0950	685.701	34.740	26.682	64.731	-0.592	20.318	1305.399	-0.002432	-0.001868	-0.004531
0.0960	616.931	30.168	23.110	56.991	-0.594	20.316	1174.479	-0.002112	-0.001618	-0.003989
0.0970	546.944	25.332	19.485	49.055	-0.595	20.313	1041.241	-0.001773	-0.001364	-0.003434
0.0980	480.248	20.440	16.233	41.108	-0.592	20.311	914.268	-0.001431	-0.001136	-0.002878
0.0990	421.216	16.117	13.287	34.118	-0.592	20.309	801.888	-0.001128	-0.000930	-0.002388
0.1000	372.569	12.490	10.979	28.309	-0.600	20.308	709.276	-0.000874	-0.000769	-0.001982
0.1010	334.893	9.571	9.104	23.722	-0.604	20.308	637.550	-0.000670	-0.000637	-0.001661
0.1020	307.121	7.238	7.701	19.887	-0.610	20.309	584.679	-0.000507	-0.000539	-0.001392
0.1030	287.133	5.404	6.589	16.690	-0.599	20.311	546.627	-0.000378	-0.000461	-0.001168
0.1040	273.081	3.875	5.837	14.605	-0.597	20.313	519.876	-0.000271	-0.000409	-0.001022
0.1050	263.613	2.931	5.350	13.215	-0.596	20.315	501.852	-0.000205	-0.000374	-0.000925
0.1060	258.504	2.291	5.003	12.353	-0.598	20.318	492.125	-0.000160	-0.000350	-0.000865
0.1070	257.256	1.929	4.628	11.728	-0.598	20.321	489.750	-0.000135	-0.000324	-0.000821
0.1080	259.345	1.804	4.490	11.451	-0.596	20.324	493.727	-0.000126	-0.000314	-0.000802
0.1090	264.425	1.777	4.518	11.674	-0.597	20.326	503.397	-0.000124	-0.000316	-0.000817
0.1100	274.043	2.528	4.809	12.466	-0.608	20.325	521.708	-0.000177	-0.000337	-0.000873
0.1110	296.240	3.667	5.365	14.412	-0.607	20.325	563.965	-0.000257	-0.000376	-0.001009
0.1120	341.956	6.795	6.380	19.121	-0.609	20.323	650.997	-0.000476	-0.000447	-0.001338
0.1130	416.738	11.393	8.506	26.778	-0.603	20.323	793.362	-0.000798	-0.000595	-0.001874
0.1140	516.887	17.938	12.397	37.381	-0.602	20.321	984.020	-0.001256	-0.000868	-0.002617
0.1150	631.013	25.233	17.594	49.403	-0.601	20.319	1201.286	-0.001766	-0.001232	-0.003458
0.1160	748.039	32.988	23.334	61.507	-0.599	20.316	1424.074	-0.002309	-0.001633	-0.004305
0.1170	859.745	40.339	28.935	73.026	-0.599	20.313	1636.734	-0.002824	-0.002025	-0.005112
0.1180	959.684	47.149	34.103	83.322	-0.597	20.311	1826.992	-0.003300	-0.002387	-0.005833
0.1190	1045.060	52.888	38.702	91.937	-0.599	20.309	1989.527	-0.003702	-0.002709	-0.006436
0.1200	1116.896	58.085	42.983	99.484	-0.607	20.308	2126.284	-0.004066	-0.003009	-0.006964
0.1210	1179.339	62.308	46.624	105.862	-0.607	20.308	2245.159	-0.004362	-0.003264	-0.007410
0.1220	1237.950	66.687	50.082	111.866	-0.609	20.309	2356.739	-0.004668	-0.003506	-0.007831
0.1230	1296.741	70.718	53.417	117.605	-0.602	20.311	2468.662	-0.004950	-0.003739	-0.008232
0.1240	1357.110	74.927	56.974	123.387	-0.605	20.313	2583.590	-0.005245	-0.003988	-0.008637
0.1250	1417.404	79.166	60.574	129.294	-0.608	20.315	2698.374	-0.005542	-0.004240	-0.009051
0.1260	1473.205	83.085	64.034	134.781	-0.605	20.318	2804.604	-0.005816	-0.004482	-0.009435
0.1270	1518.846	86.378	66.787	139.395	-0.600	20.320	2891.493	-0.006046	-0.004675	-0.009758
0.1280	1550.015	88.586	68.871	142.619	-0.599	20.323	2950.830	-0.006201	-0.004821	-0.009983
0.1290	1566.020	90.129	69.969	144.454	-0.591	20.325	2981.300	-0.006309	-0.004898	-0.010112
0.1300	1570.168	90.866	70.788	145.398	-0.601	20.325	2989.197	-0.006361	-0.004955	-0.010178
0.1310	1566.501	91.020	71.150	145.772	-0.601	20.324	2982.216	-0.006371	-0.004981	-0.010204
0.1320	1558.266	90.895	71.261	145.590	-0.605	20.323	2966.537	-0.006363	-0.004988	-0.010191
0.1330	1545.461	90.338	70.926	144.965	-0.593	20.322	2942.162	-0.006324	-0.004965	-0.010148
0.1340	1523.430	89.283	70.414	143.521	-0.591	20.320	2900.219	-0.006250	-0.004929	-0.010046
0.1350	1482.402	87.072	69.052	140.549	-0.597	20.318	2822.113	-0.006095	-0.004834	-0.009838
0.1360	1417.194	83.195	66.246	135.491	-0.601	20.316	2697.973	-0.005824	-0.004637	-0.009484
0.1370	1329.578	77.595	61.854	127.986	-0.601	20.313	2531.176	-0.005432	-0.004330	-0.008959
0.1380	1229.865	71.216	56.630	118.980	-0.599	20.310	2341.347	-0.004985	-0.003964	-0.008329
0.1390	1127.957	64.600	51.029	109.392	-0.599	20.309	2147.341	-0.004522	-0.003572	-0.007657
0.1400	1032.377	58.763	46.068	100.374	-0.607	20.307	1965.380	-0.004113	-0.003225	-0.007026
0.1410	947.872	53.247	41.385	92.064	-0.604	20.308	1804.504	-0.003727	-0.002897	-0.006445
0.1420	875.405	48.468	37.481	84.824	-0.608	20.308	1666.546	-0.003393	-0.002624	-0.005938
0.1430	811.835	43.924	33.909	78.015	-0.597	20.310	1545.525	-0.003075	-0.002374	-0.005461
0.1440	752.322	39.839	30.768	71.678	-0.596	20.312	1432.228	-0.002789	-0.002154	-0.005017
0.1450	691.923	35.642	27.683	65.189	-0.593	20.314	1317.244	-0.002495	-0.001938	-0.004563
0.1460	627.526	30.960	24.306	58.198	-0.592	20.317	1194.649	-0.002167	-0.001701	-0.004074
0.1470	558.426	26.235	20.610	50.458	-0.592	20.320	1063.099	-0.001836	-0.001443	-0.003532
0.1480	487.642	21.357	17.053	42.425	-0.590	20.323	928.345	-0.001495	-0.001194	-0.002970
0.1490	420.119	16.702	13.563	34.434	-0.591	20.325	799.799	-0.001169	-0.000949	-0.002410
0.1500	361.463	12.422	11.035	27.680	-0.603	20.325	688.133	-0.000870	-0.000772	-0.001938
0.1510	314.800	8.684	8.685	21.816	-0.602	20.324	599.298	-0.000608	-0.000608	-0.001527
0.1520	281.377	6.002	7.228	17.412	-0.605	20.322	535.669	-0.000420	-0.000506	-0.001219
0.1530	259.240	3.847	5.866	14.007	-0.593	20.322	493.526	-0.000269	-0.000411	-0.000980
0.1540	246.075	2.402	4.977	11.840	-0.591	20.320	468.464	-0.000168	-0.000348	-0.000829
0.1550	239.102	1.498	4.490	10.561	-0.595	20.318	455.189	-0.000105	-0.000314	-0.000739
0.1560	236.968	0.984	4.157	9.728	-0.595	20.316	451.126	-0.000069	-0.000291	-0.000681
0.1570	238.125	0.942	4.018	9.298	-0.598	20.313	453.329	-0.000066	-0.000281	-0.000651
0.1580	242.213	0.788	3.921	9.187	-0.596	20.311	461.111	-0.000055	-0.000274	-0.000643
0.1590	249.156	0.843	3.657	9.521	-0.597	20.309	474.329	-0.000059	-0.000256	-0.000666
0.1600	263.538	1.567	3.908	11.050	-0.603	20.307	501.709	-0.000110	-0.000274	-0.000773
0.1610	295.428	3.626	4.574	14.287	-0.601	20.307	562.420	-0.000254	-0.000320	-0.001000
0.1620	353.964	7.406	6.284	20.151	-0.602	20.308	673.857	-0.000518	-0.000440	-0.001411
0.1630	440.783	12.853	9.188	29.183	-0.595	20.311	839.138	-0.000900	-0.000643	-0.002043
0.1640	547.019	19.662	13.565	40.328	-0.597	20.313	1041.384	-0.001376	-0.000950	-0.002823
0.1650	660.529	27.054	18.873	52.515	-0.597	20.315	1257.477	-0.001894	-0.001321	-0.003676
0.1660	772.084	34.503	24.362	64.160	-0.599	20.318	1469.851	-0.002415	-0.001705	-0.004491
0.1670	875.645	41.436	29.726	74.888	-0.600	20.321	1667.004	-0.002901	-0.002081	-0.005242
0.1680	968.160	47.593	34.630	84.241	-0.600	20.324	1843.128	-0.003332	-0.002424	-0.005897
0.1690	1049.344	53.110	39.147	92.496	-0.595	20.326	1997.681	-0.003718	-0.002740	-0.006475
0.1700	1122.111	58.280	43.567	99.958	-0.604	20.326	2136.211	-0.004080	-0.003050	-0.006997
0.1710	1190.115	63.199	47.654	107.059	-0.606	20.325	2265.673	-0.004424	-0.003336	-0.007494
0.1720	1256.330	67.896	51.641	113.604	-0.611	20.323	2391.729	-0.004753	-0.003615	-0.007952
0.1730	1321.177	72.204	55.240	119.954	-0.600	20.322	2515.182	-0.005054	-0.003867	-0.008397
0.1740	1382.914	76.486	58.811	125.957	-0.600	20.320	2632.713	-0.005354	-0.004117	-0.008817
0.1750	1437.753	80.488	62.326	131.431	-0.599	20.318	2737.112	-0.005634	-0.004363	-0.009200
0.1760	1481.831	83.808	65.104	135.990	-0.599	20.316	2821.026	-0.005867	-0.004557	-0.009519
0.1770	1512.609	86.266	67.203	139.173	-0.597	20.313	2879.620	-0.006039	-0.004704	-0.009742
0.1780	1530.448	87.724	68.595	141.300	-0.591	20.310	2913.580	-0.006141	-0.004802	-0.009891
0.1790	1538.052	88.601	69.305	142.356	-0.591	20.309	2928.057	-0.006202	-0.004851	-0.009965
0.1800	1538.954	89.018	69.860	143.038	-0.600	20.307	2929.773	-0.006231	-0.004890	-0.010013
0.1810	1535.648	89.324	69.943	143.176	-0.603	20.307	2923.479	-0.006253	-0.004896	-0.010022
0.1820	1529.471	89.267	70.013	143.107	-0.608	20.308	2911.720	-0.006249	-0.004901	-0.010018
0.1830	1519.838	89.003	69.792	142.425	-0.599	20.311	2893.381	-0.006230	-0.004885	-0.009970
0.1840	1503.562	88.323	69.444	141.535	-0.599	20.313	2862.396	-0.006183	-0.004861	-0.009907
0.1850	1470.485	86.641	68.429	139.339	-0.597	20.315	2799.425	-0.006065	-0.004790	-0.009754
0.1860	1412.129	83.349	65.954	134.768	-0.598	20.318	2688.332	-0.005834	-0.004617	-0.009434
0.1870	1327.519	78.068	61.744	127.917	-0.597	20.321	2527.256	-0.005465	-0.004322	-0.008954
0.1880	1225.416	71.371	56.366	118.828	-0.596	20.324	2332.878	-0.004996	-0.003946	-0.008318
0.1890	1119.406	64.547	50.418	109.043	-0.594	20.326	2131.062	-0.004518	-0.003529	-0.007633
0.1900	1019.768	58.294	45.374	99.636	-0.601	20.326	1941.376	-0.004081	-0.003176	-0.006975
0.1910	932.332	52.623	40.524	90.840	-0.597	20.325	1774.921	-0.003684	-0.002837	-0.006359
0.1920	858.032	47.649	36.592	83.309	-0.600	20.323	1633.472	-0.003335	-0.002561	-0.005832
0.1930	792.343	42.841	32.659	76.319	-0.587	20.322	1508.417	-0.002999	-0.002286	-0.005342
0.1940	729.960	38.491	29.185	69.593	-0.585	20.320	1389.656	-0.002694	-0.002043	-0.004871
0.1950	666.029	34.142	25.850	62.936	-0.584	20.318	1267.948	-0.002390	-0.001809	-0.004405
0.1960	598.657	29.360	22.347	55.569	-0.586	20.316	1139.688	-0.002055	-0.001564	-0.003890
0.1970	528.955	24.399	18.859	47.845	-0.591	20.313	1006.994	-0.001708	-0.001320	-0.003349
0.1980	460.395	19.424	15.454	39.882	-0.589	20.311	876.474	-0.001360	-0.001082	-0.002792
0.1990	397.607	14.727	12.327	32.157	-0.587	20.309	756.941	-0.001031	-0.000863	-0.002251
0.2000	344.466	10.934	10.034	25.874	-0.591	20.307	655.775	-0.000765	-0.000702	-0.001811
0.2010	302.988	7.544	8.047	20.511	-0.591	20.308	576.811	-0.000528	-0.000563	-0.001436
0.2020	273.727	5.057	6.741	16.606	-0.595	20.309	521.107	-0.000354	-0.000472	-0.001162
0.2030	254.972	3.014	5.601	13.550	-0.585	20.311	485.401	-0.000211	-0.000392	-0.000948
0.2040	244.753	1.776	4.865	11.660	-0.584	20.314	465.946	-0.000124	-0.000341	-0.000816
0.2050	240.470	1.081	4.462	10.880	-0.589	20.316	457.792	-0.000076	-0.000312	-0.000762
0.2060	240.139	0.872	4.240	10.477	-0.591	20.318	457.163	-0.000061	-0.000297	-0.000733
0.2070	242.739	0.857	4.225	10.421	-0.595	20.321	462.112	-0.000060	-0.000296	-0.000730
0.2080	247.593	0.872	4.253	10.381	-0.589	20.324	471.354	-0.000061	-0.000298	-0.000727
0.2090	255.994	1.192	4.212	10.603	-0.593	20.326	487.347	-0.000083	-0.000295	-0.000742
0.2100	273.757	2.180	4.506	12.326	-0.600	20.326	521.164	-0.000153	-0.000315	-0.000863
0.2110	310.427	4.514	5.117	16.009	-0.601	20.325	590.973	-0.000316	-0.000358	-0.001121
0.2120	372.224	8.572	6.992	22.513	-0.601	20.323	708.618	-0.000600	-0.000489	-0.001576
0.2130	457.750	14.172	10.035	31.434	-0.592	20.323	871.439	-0.000992	-0.000702	-0.002200
0.2140	557.674	20.593	14.468	41.745	-0.589	20.321	1061.668	-0.001442	-0.001013	-0.002922
0.2150	661.926	27.404	19.568	52.819	-0.595	20.319	1260.138	-0.001918	-0.001370	-0.003697
0.2160	763.113	34.253	24.598	63.521	-0.595	20.316	1452.770	-0.002398	-0.001722	-0.004446
0.2170	856.860	40.742	29.406	73.303	-0.594	20.313	1631.241	-0.002852	-0.002058	-0.005131
0.2180	941.545	46.426	33.713	81.990	-0.589	20.311	1792.459	-0.003250	-0.002360	-0.005739
0.2190	1018.746	51.652	37.744	89.771	-0.587	20.309	1939.430	-0.003616	-0.002642	-0.006284
0.2200	1091.468	56.835	42.052	97.414	-0.591	20.308	2077.875	-0.003978	-0.002944	-0.006819
0.2210	1162.733	61.906	46.096	104.474	-0.593	20.308	2213.545	-0.004333	-0.003227	-0.007313
0.2220	1234.028	66.882	50.513	111.574	-0.595	20.309	2349.272	-0.004682	-0.003536	-0.007810
0.2230	1304.466	71.552	54.321	118.162	-0.588	20.311	2483.368	-0.005009	-0.003802	-0.008271
0.2240	1371.853	76.250	58.325	124.955	-0.590	20.313	2611.656	-0.005337	-0.004083	-0.008747
0.2250	1432.568	80.446	61.898	130.987	-0.584	20.315	2727.242	-0.005631	-0.004333	-0.009169
0.2260	1482.913	84.059	65.039	136.031	-0.586	20.318	2823.086	-0.005884	-0.004553	-0.009522
0.2270	1519.973	86.740	67.429	140.006	-0.586	20.321	2893.639	-0.006072	-0.004720	-0.009800
0.2280	1543.042	88.671	69.082	142.452	-0.584	20.324	2937.555	-0.006207	-0.004836	-0.009972
0.2290	1554.088	89.587	69.956	143.897	-0.585	20.326	2958.584	-0.006271	-0.004897	-0.010073
0.2300	1556.492	90.324	70.497	144.758	-0.595	20.326	2963.161	-0.006323	-0.004935	-0.010133
0.2310	1553.261	90.408	70.677	144.924	-0.599	20.325	2957.010	-0.006329	-0.004947	-0.010145
0.2320	1546.183	90.408	70.775	145.050	-0.605	20.323	2943.535	-0.006329	-0.004954	-0.010153
0.2330	1534.911	89.768	70.358	144.355	-0.592	20.323	2922.077	-0.006284	-0.004925	-0.010105
0.2340	1514.638	89.060	69.831	143.189	-0.589	20.320	2883.482	-0.006234	-0.004888	-0.010023
0.2350	1474.918	87.017	68.483	140.313	-0.588	20.318	2807.865	-0.006091	-0.004794	-0.009822
0.2360	1409.605	83.168	65.564	135.130	-0.588	20.316	2683.525	-0.005822	-0.004589	-0.009459
0.2370	1320.276	77.386	61.325	127.723	-0.587	20.313	2513.466	-0.005417	-0.004293	-0.008941
0.2380	1218.999	70.799	55.919	118.606	-0.580	20.311	2320.662	-0.004956	-0.003914	-0.008302
0.2390	1117.873	64.227	50.569	109.100	-0.580	20.309	2128.143	-0.004496	-0.003540	-0.007637
0.2400	1025.028	58.293	45.650	100.442	-0.586	20.307	1951.389	-0.004081	-0.003196	-0.007031
0.2410	942.927	52.944	41.203	92.244	-0.586	20.308	1795.092	-0.003706	-0.002884	-0.006457
0.2420	870.701	48.011	37.479	85.075	-0.590	20.309	1657.591	-0.003361	-0.002624	-0.005955
0.2430	804.290	43.425	33.769	77.918	-0.581	20.311	1531.162	-0.003040	-0.002364	-0.005454
0.2440	739.954	39.046	30.311	70.955	-0.581	20.312	1408.682	-0.002733	-0.002122	-0.004967
0.2450	674.866	34.669	26.795	64.118	-0.584	20.314	1284.771	-0.002427	-0.001876	-0.004488
0.2460	608.245	30.153	23.293	56.766	-0.584	20.317	1157.942	-0.002111	-0.001631	-0.003974
0.2470	541.489	25.498	19.819	49.554	-0.584	20.320	1030.855	-0.001785	-0.001387	-0.003469
0.2480	476.912	20.983	16.553	41.968	-0.581	20.324	907.917	-0.001469	-0.001159	-0.002938
0.2490	417.279	16.521	13.746	34.729	-0.581	20.326	794.392	-0.001156	-0.000962	-0.002431
0.2500	365.100	12.672	11.369	28.530	-0.593	20.326	695.057	-0.000887	-0.000796	-0.001997
0.2510	321.878	9.225	9.257	23.040	-0.590	20.325	612.774	-0.000646	-0.000648	-0.001613
0.2520	288.711	6.544	7.701	18.802	-0.594	20.323	549.631	-0.000458	-0.000539	-0.001316
0.2530	265.342	4.431	6.254	15.120	-0.585	20.323	505.142	-0.000310	-0.000438	-0.001058
0.2540	250.659	3.028	5.448	12.801	-0.584	20.321	477.190	-0.000212	-0.000381	-0.000896
0.2550	242.979	2.111	4.836	11.493	-0.587	20.319	462.570	-0.000148	-0.000338	-0.000804
0.2560	240.485	1.707	4.516	10.936	-0.591	20.316	457.821	-0.000120	-0.000316	-0.000766
0.2570	241.672	1.554	4.406	10.628	-0.595	20.313	460.081	-0.000109	-0.000308	-0.000744
0.2580	245.684	1.442	4.253	10.462	-0.595	20.311	467.720	-0.000101	-0.000298	-0.000732
0.2590	252.567	1.734	4.225	10.561	-0.595	20.309	480.824	-0.000121	-0.000296	-0.000739
0.2600	266.288	2.332	4.531	11.826	-0.604	20.308	506.945	-0.000163	-0.000317	-0.000828
0.2610	295.924	4.209	5.073	14.688	-0.601	20.308	563.364	-0.000295	-0.000355	-0.001028
0.2620	350.117	7.587	6.672	20.386	-0.603	20.309	666.533	-0.000531	-0.000467	-0.001427
0.2630	430.819	12.714	9.286	28.613	-0.593	20.311	820.169	-0.000890	-0.000650	-0.002003
0.2640	531.014	19.260	13.413	39.272	-0.595	20.313	1010.914	-0.001348	-0.000939	-0.002749
0.2650	639.850	26.166	18.346	50.999	-0.595	20.315	1218.109	-0.001832	-0.001284	-0.003570
0.2660	748.475	33.253	23.571	62.478	-0.594	20.318	1424.904	-0.002328	-0.001650	-0.004373
0.2670	850.984	40.091	28.947	73.011	-0.594	20.320	1620.054	-0.002806	-0.002026	-0.005111
0.2680	944.265	46.483	33.810	82.337	-0.597	20.324	1797.638	-0.003254	-0.002367	-0.005764
0.2690	1027.387	52.000	38.299	90.674	-0.599	20.326	1955.881	-0.003640	-0.002681	-0.006347
0.2700	1101.778	57.279	42.565	98.457	-0.604	20.326	2097.502	-0.004010	-0.002980	-0.006892
0.2710	1170.172	62.046	46.415	105.503	-0.599	20.325	2227.707	-0.004343	-0.003249	-0.007385
0.2720	1236.552	66.813	50.417	112.284	-0.600	20.323	2354.078	-0.004677	-0.003529	-0.007860
0.2730	1303.399	71.385	54.251	118.481	-0.592	20.322	2481.337	-0.004997	-0.003798	-0.008294
0.2740	1370.681	75.845	58.269	124.998	-0.594	20.320	2609.425	-0.005309	-0.004079	-0.008750
0.2750	1435.048	80.374	62.145	131.321	-0.592	20.318	2731.962	-0.005626	-0.004350	-0.009192
0.2760	1491.374	84.362	65.592	136.824	-0.592	20.316	2839.193	-0.005905	-0.004591	-0.009578
0.2770	1533.844	87.614	68.453	141.369	-0.589	20.313	2920.046	-0.006133	-0.004792	-0.009896
0.2780	1559.363	89.601	70.148	143.925	-0.589	20.310	2968.626	-0.006272	-0.004910	-0.010075
0.2790	1569.402	90.574	71.092	145.314	-0.589	20.309	2987.738	-0.006340	-0.004976	-0.010172
0.2800	1568.906	91.172	71.621	145.828	-0.597	20.307	2986.794	-0.006382	-0.005013	-0.010208
0.2810	1562.819	91.227	71.775	145.814	-0.597	20.307	2975.206	-0.006386	-0.005024	-0.010207
0.2820	1553.697	91.185	71.831	145.689	-0.603	20.308	2957.840	-0.006383	-0.005028	-0.010198
0.2830	1540.382	90.503	71.400	144.952	-0.595	20.311	2932.491	-0.006335	-0.004998	-0.010147
0.2840	1516.983	89.378	70.858	143.465	-0.593	20.313	2887.945	-0.006256	-0.004960	-0.010043
0.2850	1473.190	86.948	69.204	140.421	-0.595	20.315	2804.575	-0.006086	-0.004844	-0.009829
0.2860	1404.134	82.808	66.148	134.793	-0.592	20.317	2673.111	-0.005797	-0.004630	-0.009436
0.2870	1312.506	77.165	61.493	126.998	-0.592	20.320	2498.674	-0.005402	-0.004305	-0.008890
0.2880	1209.922	70.729	55.935	117.661	-0.587	20.323	2303.381	-0.004951	-0.003915	-0.008236
0.2890	1107.398	64.379	50.348	108.170	-0.585	20.325	2108.202	-0.004507	-0.003524	-0.007572
0.2900	1013.140	58.474	45.290	99.262	-0.596	20.325	1928.759	-0.004093	-0.003170	-0.006948
0.2910	930.905	53.193	40.885	91.118	-0.596	20.324	1772.203	-0.003724	-0.002862	-0.006378
0.2920	860.527	48.231	37.132	84.072	-0.601	20.323	1638.222	-0.003376	-0.002599	-0.005885
0.2930	797.993	43.673	33.589	77.347	-0.586	20.322	1519.175	-0.003057	-0.002351	-0.005414
0.2940	738.346	39.367	30.322	71.011	-0.583	20.320	1405.621	-0.002756	-0.002123	-0.004971
0.2950	677.135	35.046	26.959	64.397	-0.584	20.318	1289.091	-0.002453	-0.001887	-0.004508
0.2960	612.393	30.544	23.569	57.282	-0.587	20.315	1165.838	-0.002138	-0.001650	-0.004010
0.2970	544.344	25.915	19.969	49.736	-0.584	20.312	1036.291	-0.001814	-0.001398	-0.003482
0.2980	476.145	21.038	16.315	41.801	-0.587	20.310	906.458	-0.001473	-0.001142	-0.002926
0.2990	412.244	16.410	13.202	34.254	-0.587	20.308	784.807	-0.001149	-0.000924	-0.002398
0.3000	357.376	12.240	10.689	27.651	-0.604	20.307	680.351	-0.000857	-0.000748	-0.001936
0.3010	313.763	8.752	8.632	22.190	-0.601	20.308	597.324	-0.000613	-0.000604	-0.001553
0.3020	281.783	6.098	7.215	18.064	-0.607	20.309	536.442	-0.000427	-0.000505	-0.001265
0.3030	259.691	3.902	5.810	14.660	-0.594	20.311	494.385	-0.000273	-0.000407	-0.001026
0.3040	245.519	2.484	5.072	12.548	-0.589	20.314	467.405	-0.000174	-0.000355	-0.000878
0.3050	237.569	1.524	4.447	11.075	-0.590	20.316	452.271	-0.000107	-0.000311	-0.000775
0.3060	234.353	1.066	4.088	10.171	-0.592	20.319	446.148	-0.000075	-0.000286	-0.000712
0.3070	234.834	0.872	3.894	9.838	-0.596	20.321	447.063	-0.000061	-0.000273	-0.000689
0.3080	238.426	0.706	3.728	9.672	-0.591	20.324	453.901	-0.000049	-0.000261	-0.000677
0.3090	245.609	0.941	3.852	9.978	-0.595	20.326	467.577	-0.000066	-0.000270	-0.000698
0.3100	262.231	1.858	4.144	11.437	-0.600	20.325	499.220	-0.000130	-0.000290	-0.000801
0.3110	298.960	4.068	4.894	15.176	-0.605	20.324	569.143	-0.000285	-0.000343	-0.001062
0.3120	363.387	8.294	6.881	22.138	-0.603	20.323	691.795	-0.000581	-0.000482	-0.001550
0.3130	454.639	14.160	10.259	31.477	-0.596	20.322	865.517	-0.000991	-0.000718	-0.002203
0.3140	561.762	21.163	15.010	42.747	-0.596	20.320	1069.450	-0.001481	-0.001051	-0.002992
0.3150	671.650	28.250	20.194	54.350	-0.597	20.318	1278.648	-0.001978	-0.001414	-0.003805
0.3160	775.045	34.989	25.279	65.146	-0.601	20.315	1475.487	-0.002449	-0.001770	-0.004560
0.3170	866.553	41.270	29.976	74.734	-0.601	20.312	1649.694	-0.002889	-0.002098	-0.005231
0.3180	945.377	46.717	34.102	82.752	-0.601	20.310	1799.755	-0.003270	-0.002387	-0.005793
0.3190	1014.433	51.414	38.048	89.964	-0.603	20.309	1931.219	-0.003599	-0.002663	-0.006297
0.3200	1079.130	56.125	41.883	96.884	-0.611	20.307	2054.386	-0.003929	-0.002932	-0.006782
0.3210	1145.916	60.767	45.913	103.555	-0.610	20.308	2181.530	-0.004254	-0.003214	-0.007249
0.3220	1218.744	65.936	50.070	110.795	-0.612	20.308	2320.175	-0.004616	-0.003505	-0.007756
0.3230	1296.786	71.079	54.336	117.994	-0.598	20.311	2468.748	-0.004975	-0.003803	-0.008260
0.3240	1375.415	76.387	58.797	125.652	-0.598	20.313	2618.437	-0.005347	-0.004116	-0.008796
0.3250	1447.281	81.335	63.147	132.587	-0.599	20.315	2755.251	-0.005693	-0.004420	-0.009281
0.3260	1505.801	85.503	66.816	138.438	-0.599	20.318	2866.659	-0.005985	-0.004677	-0.009691
0.3270	1546.258	88.518	69.485	142.481	-0.596	20.321	2943.678	-0.006196	-0.004864	-0.009974
0.3280	1568.064	90.463	70.929	144.968	-0.589	20.324	2985.191	-0.006332	-0.004965	-0.010148
0.3290	1575.203	91.325	71.510	146.010	-0.587	20.326	2998.781	-0.006393	-0.005006	-0.010221
0.3300	1573.489	91.757	71.913	146.650	-0.597	20.325	2995.520	-0.006423	-0.005034	-0.010265
0.3310	1567.628	91.729	71.996	146.621	-0.594	20.324	2984.362	-0.006421	-0.005040	-0.010264
0.3320	1559.603	91.618	72.135	146.539	-0.599	20.323	2969.084	-0.006413	-0.005049	-0.010258
0.3330	1548.061	91.131	71.745	145.899	-0.588	20.322	2947.111	-0.006379	-0.005022	-0.010213
0.3340	1526.435	90.019	71.217	144.746	-0.588	20.320	2905.941	-0.006301	-0.004985	-0.010132
0.3350	1482.613	87.726	69.619	141.451	-0.591	20.318	2822.514	-0.006141	-0.004873	-0.009902
0.3360	1409.695	83.460	66.258	135.504	-0.591	20.315	2683.697	-0.005842	-0.004638	-0.009485
0.3370	1311.199	77.361	61.187	127.138	-0.596	20.312	2496.185	-0.005415	-0.004283	-0.008900
0.3380	1201.251	70.107	55.240	117.092	-0.591	20.310	2286.873	-0.004907	-0.003867	-0.008196
0.3390	1095.331	63.311	49.527	107.114	-0.596	20.308	2085.228	-0.004432	-0.003467	-0.007498
0.3400	1003.071	57.391	44.650	98.319	-0.605	20.307	1909.590	-0.004017	-0.003125	-0.006882
0.3410	927.313	52.388	40.661	90.634	-0.607	20.307	1765.366	-0.003667	-0.002846	-0.006344
0.3420	864.644	48.052	37.229	84.478	-0.603	20.308	1646.061	-0.003364	-0.002606	-0.005913
0.3430	806.575	43.702	33.867	78.140	-0.594	20.310	1535.511	-0.003059	-0.002371	-0.005470
0.3440	745.740	39.463	30.490	71.928	-0.596	20.313	1419.697	-0.002762	-0.002134	-0.005035
0.3450	677.992	34.919	26.906	64.675	-0.604	20.315	1290.722	-0.002444	-0.001883	-0.004527
0.3460	604.247	30.029	23.196	56.630	-0.604	20.318	1150.331	-0.002102	-0.001624	-0.003964
0.3470	528.639	24.610	19.402	48.347	-0.598	20.320	1006.393	-0.001723	-0.001358	-0.003384
0.3480	456.909	19.398	15.887	39.939	-0.594	20.323	869.837	-0.001358	-0.001112	-0.002796
0.3490	394.616	14.853	12.732	32.574	-0.586	20.325	751.247	-0.001040	-0.000891	-0.002280
0.3500	345.188	11.434	10.369	26.528	-0.593	20.325	657.148	-0.000800	-0.000726	-0.001857
0.3510	309.270	8.515	8.645	22.011	-0.593	20.324	588.770	-0.000596	-0.000605	-0.001541
0.3520	285.104	6.321	7.617	18.816	-0.595	20.323	542.765	-0.000442	-0.000533	-0.001317
0.3530	269.775	4.612	6.657	16.080	-0.588	20.323	513.582	-0.000323	-0.000466	-0.001126
0.3540	260.758	3.639	6.213	14.469	-0.588	20.321	496.416	-0.000255	-0.000435	-0.001013
0.3550	255.573	3.055	5.698	13.203	-0.592	20.319	486.546	-0.000214	-0.000399	-0.000924
0.3560	253.319	2.624	5.266	12.548	-0.593	20.316	482.254	-0.000184	-0.000369	-0.000878
0.3570	253.394	2.318	4.931	12.172	-0.607	20.313	482.397	-0.000162	-0.000345	-0.000852
0.3580	255.919	2.233	4.807	12.033	-0.604	20.311	487.204	-0.000156	-0.000336	-0.000842
0.3590	261.299	2.233	4.765	12.187	-0.611	20.309	497.446	-0.000156	-0.000334	-0.000853
0.3600	272.240	3.012	5.072	13.242	-0.616	20.308	518.274	-0.000211	-0.000355	-0.000927
0.3610	297.803	4.444	5.490	15.605	-0.616	20.308	566.940	-0.000311	-0.000384	-0.001092
0.3620	347.141	7.808	6.854	20.622	-0.613	20.309	660.868	-0.000547	-0.000480	-0.001444
0.3630	423.470	12.617	9.230	28.460	-0.608	20.312	806.179	-0.000883	-0.000646	-0.001992
0.3640	520.404	18.898	13.191	38.716	-0.614	20.314	990.715	-0.001323	-0.000923	-0.002710
0.3650	626.775	25.888	18.151	50.013	-0.608	20.316	1193.218	-0.001812	-0.001271	-0.003501
0.3660	733.807	32.780	23.418	61.213	-0.607	20.319	1396.980	-0.002295	-0.001639	-0.004285
0.3670	835.625	39.493	28.544	71.830	-0.609	20.321	1590.815	-0.002765	-0.001998	-0.005028
0.3680	928.846	45.830	33.352	81.294	-0.605	20.324	1768.284	-0.003208	-0.002335	-0.005691
0.3690	1013.245	51.486	37.743	89.897	-0.602	20.326	1928.959	-0.003604	-0.002642	-0.006293
0.3700	1089.890	56.904	42.094	97.833	-0.607	20.326	2074.871	-0.003983	-0.002947	-0.006848
0.3710	1160.945	61.698	46.192	105.267	-0.612	20.325	2210.140	-0.004319	-0.003233	-0.007369
0.3720	1229.174	66.463	50.111	112.019	-0.617	20.323	2340.031	-0.004652	-0.003508	-0.007841
0.3730	1295.840	71.119	53.891	118.314	-0.608	20.322	2466.946	-0.004978	-0.003772	-0.008282
0.3740	1360.928	75.663	57.895	124.581	-0.601	20.320	2590.857	-0.005296	-0.004053	-0.008721
0.3750	1420.365	79.736	61.536	130.528	-0.600	20.318	2704.010	-0.005581	-0.004308	-0.009137
0.3760	1469.838	83.239	64.703	135.613	-0.600	20.315	2798.195	-0.005827	-0.004529	-0.009493
0.3770	1505.771	85.671	66.927	139.380	-0.604	20.312	2866.602	-0.005997	-0.004685	-0.009757
0.3780	1527.848	87.380	68.470	141.507	-0.600	20.310	2908.630	-0.006117	-0.004793	-0.009905
0.3790	1538.082	88.422	69.277	142.952	-0.598	20.309	2928.114	-0.006190	-0.004849	-0.010007
0.3800	1540.111	88.991	69.887	143.757	-0.600	20.307	2931.976	-0.006229	-0.004892	-0.010063
0.3810	1536.640	89.185	70.122	144.160	-0.594	20.307	2925.367	-0.006243	-0.004909	-0.010091
0.3820	1529.997	89.281	70.136	143.995	-0.596	20.308	2912.722	-0.006250	-0.004910	-0.010080
0.3830	1520.003	88.990	69.804	143.287	-0.587	20.310	2893.696	-0.006229	-0.004886	-0.010030
0.3840	1504.013	88.394	69.472	142.342	-0.588	20.313	2863.255	-0.006188	-0.004863	-0.009964
0.3850	1473.445	86.573	68.623	140.243	-0.590	20.315	2805.061	-0.006060	-0.004804	-0.009817
0.3860	1420.801	83.364	66.593	136.392	-0.595	20.318	2704.840	-0.005835	-0.004662	-0.009547
0.3870	1343.735	78.832	62.965	130.015	-0.593	20.320	2558.126	-0.005518	-0.004408	-0.009101
0.3880	1249.086	72.968	58.019	121.720	-0.593	20.323	2377.939	-0.005108	-0.004061	-0.008520
0.3890	1147.479	66.630	52.433	112.354	-0.588	20.325	2184.505	-0.004664	-0.003670	-0.007865
0.3900	1048.472	60.391	47.096	103.029	-0.600	20.325	1996.021	-0.004227	-0.003297	-0.007212
0.3910	957.670	54.555	42.468	94.178	-0.600	20.325	1823.158	-0.003819	-0.002973	-0.006592
0.3920	877.223	49.372	38.383	86.230	-0.601	20.323	1670.008	-0.003456	-0.002687	-0.006036
0.3930	805.493	44.271	34.409	78.614	-0.591	20.323	1533.451	-0.003099	-0.002409	-0.005503
0.3940	740.089	39.769	30.770	71.748	-0.586	20.320	1408.939	-0.002784	-0.002154	-0.005022
0.3950	678.127	35.392	27.267	64.910	-0.588	20.318	1290.979	-0.002477	-0.001909	-0.004544
0.3960	617.382	31.126	24.002	58.241	-0.592	20.315	1175.337	-0.002179	-0.001680	-0.004077
0.3970	556.682	26.831	20.776	51.389	-0.596	20.312	1059.780	-0.001878	-0.001454	-0.003597
0.3980	496.794	22.356	17.720	44.483	-0.588	20.310	945.768	-0.001565	-0.001240	-0.003114
0.3990	439.776	18.299	14.900	37.743	-0.585	20.308	837.221	-0.001281	-0.001043	-0.002642
0.4000	388.124	14.867	12.497	31.642	-0.593	20.307	738.888	-0.001041	-0.000875	-0.002215
0.4010	343.474	11.590	10.398	26.151	-0.596	20.307	653.887	-0.000811	-0.000728	-0.001831
0.4020	307.181	8.533	8.549	21.482	-0.601	20.308	584.793	-0.000597	-0.000598	-0.001504
0.4030	279.874	5.865	7.132	17.647	-0.593	20.310	532.808	-0.000411	-0.000499	-0.001235
0.4040	261.284	4.085	6.048	14.994	-0.593	20.313	497.417	-0.000286	-0.000423	-0.001050
0.4050	250.133	3.166	5.505	12.993	-0.595	20.315	476.189	-0.000222	-0.000385	-0.000910
0.4060	245.158	2.302	5.017	11.992	-0.597	20.318	466.719	-0.000161	-0.000351	-0.000839
0.4070	244.858	1.872	4.710	11.575	-0.596	20.321	466.146	-0.000131	-0.000330	-0.000810
0.4080	248.074	1.637	4.530	11.700	-0.595	20.324	472.269	-0.000115	-0.000317	-0.000819
0.4090	254.641	1.943	4.447	11.935	-0.599	20.326	484.772	-0.000136	-0.000311	-0.000835
0.4100	267.836	2.709	4.822	12.921	-0.605	20.326	509.892	-0.000190	-0.000338	-0.000905
0.4110	295.969	4.431	5.517	15.576	-0.610	20.325	563.450	-0.000310	-0.000386	-0.001090
0.4120	346.660	7.808	6.838	20.830	-0.618	20.323	659.952	-0.000547	-0.000479	-0.001458
0.4130	421.862	12.531	9.202	28.446	-0.603	20.322	803.118	-0.000877	-0.000644	-0.001991
0.4140	515.730	18.576	12.858	38.397	-0.601	20.320	981.817	-0.001300	-0.000900	-0.002688
0.4150	619.020	25.151	17.456	49.278	-0.599	20.318	1178.455	-0.001761	-0.001222	-0.003449
0.4160	724.054	32.002	22.542	60.339	-0.606	20.315	1378.412	-0.002240	-0.001578	-0.004224
0.4170	824.519	38.756	27.628	70.803	-0.604	20.312	1569.672	-0.002713	-0.001934	-0.004956
0.4180	916.553	44.772	32.505	80.182	-0.604	20.310	1744.881	-0.003134	-0.002275	-0.005613
0.4190	999.494	50.372	37.145	88.674	-0.599	20.309	1902.781	-0.003526	-0.002600	-0.006207
0.4200	1075.839	55.556	41.578	96.485	-0.604	20.307	2048.120	-0.003889	-0.002910	-0.006754
0.4210	1149.012	60.822	45.804	103.962	-0.604	20.308	2187.424	-0.004258	-0.003206	-0.007277
0.4220	1221.915	66.020	49.988	111.061	-0.607	20.308	2326.212	-0.004621	-0.003499	-0.007774
0.4230	1294.397	71.036	54.198	117.966	-0.600	20.311	2464.199	-0.004973	-0.003794	-0.008258
0.4240	1363.903	75.775	58.423	124.692	-0.598	20.312	2596.521	-0.005304	-0.004090	-0.008728
0.4250	1426.316	80.041	62.146	130.932	-0.598	20.315	2715.340	-0.005603	-0.004350	-0.009165
0.4260	1477.518	83.682	65.327	136.227	-0.597	20.318	2812.815	-0.005858	-0.004573	-0.009536
0.4270	1515.014	86.586	67.690	140.174	-0.601	20.320	2884.197	-0.006061	-0.004738	-0.009812
0.4280	1538.503	88.573	69.427	142.646	-0.596	20.323	2928.915	-0.006200	-0.004860	-0.009985
0.4290	1550.060	89.907	70.331	144.160	-0.593	20.326	2950.916	-0.006293	-0.004923	-0.010091
0.4300	1553.051	90.546	71.024	144.951	-0.597	20.325	2956.610	-0.006338	-0.004972	-0.010147
0.4310	1550.781	90.825	71.219	145.147	-0.603	20.325	2952.290	-0.006358	-0.004985	-0.010160
0.4320	1545.416	90.978	71.302	145.037	-0.604	20.323	2942.076	-0.006368	-0.004991	-0.010153
0.4330	1537.331	90.602	71.052	144.674	-0.595	20.322	2926.683	-0.006342	-0.004974	-0.010127
0.4340	1524.331	90.018	70.789	144.105	-0.593	20.320	2901.936	-0.006301	-0.004955	-0.010087
0.4350	1497.401	88.683	69.886	142.507	-0.591	20.318	2850.666	-0.006208	-0.004892	-0.009975
0.4360	1445.417	85.627	67.705	138.438	-0.599	20.315	2751.703	-0.005994	-0.004739	-0.009691
0.4370	1363.467	80.792	63.994	131.531	-0.604	20.312	2595.692	-0.005655	-0.004480	-0.009207
0.4380	1257.953	74.191	58.631	122.276	-0.607	20.310	2394.819	-0.005193	-0.004104	-0.008559
0.4390	1144.053	66.950	52.391	111.936	-0.605	20.309	2177.982	-0.004686	-0.003667	-0.007836
0.4400	1035.983	60.058	46.720	102.028	-0.612	20.307	1972.246	-0.004204	-0.003270	-0.007142
0.4410	942.056	53.653	41.550	92.787	-0.605	20.308	1793.432	-0.003756	-0.002908	-0.006495
0.4420	863.998	48.387	37.381	84.741	-0.606	20.308	1644.831	-0.003387	-0.002617	-0.005932
0.4430	797.768	43.829	33.422	77.667	-0.595	20.311	1518.745	-0.003068	-0.002340	-0.005437
0.4440	737.354	39.674	30.101	71.399	-0.592	20.313	1403.732	-0.002777	-0.002107	-0.004998
0.4450	677.255	35.462	26.890	64.979	-0.595	20.315	1289.320	-0.002482	-0.001882	-0.004549
0.4460	614.632	30.849	23.721	58.156	-0.595	20.317	1170.101	-0.002159	-0.001660	-0.004071
0.4470	549.243	26.222	20.275	50.694	-0.595	20.320	1045.618	-0.001836	-0.001419	-0.003549
0.4480	483.554	21.482	16.886	43.177	-0.590	20.323	920.563	-0.001504	-0.001182	-0.003022
0.4490	421.412	16.688	13.662	35.811	-0.585	20.325	802.259	-0.001168	-0.000956	-0.002507
0.4500	366.393	12.670	11.273	29.391	-0.590	20.325	697.517	-0.000887	-0.000789	-0.002057
0.4510	320.857	9.210	9.173	23.735	-0.593	20.324	610.828	-0.000645	-0.000642	-0.001661
0.4520	285.900	6.613	7.687	19.192	-0.600	20.322	544.281	-0.000463	-0.000538	-0.001343
0.4530	261.449	4.320	6.160	15.690	-0.597	20.322	497.732	-0.000302	-0.000431	-0.001098
0.4540	246.331	2.778	5.256	13.313	-0.596	20.320	468.950	-0.000194	-0.000368	-0.000932
0.4550	238.756	1.706	4.741	11.923	-0.595	20.318	454.531	-0.000119	-0.000332	-0.000835
0.4560	236.547	1.400	4.476	11.060	-0.593	20.315	450.325	-0.000098	-0.000313	-0.000774
0.4570	238.080	1.247	4.573	10.685	-0.597	20.312	453.243	-0.000087	-0.000320	-0.000748
0.4580	242.063	1.163	4.448	10.796	-0.596	20.310	460.825	-0.000081	-0.000311	-0.000756
0.4590	248.991	1.511	4.336	11.103	-0.601	20.308	474.014	-0.000106	-0.000304	-0.000777
0.4600	262.952	2.333	4.642	12.270	-0.607	20.307	500.593	-0.000163	-0.000325	-0.000859
0.4610	293.475	4.308	5.129	15.091	-0.607	20.307	558.701	-0.000302	-0.000359	-0.001056
0.4620	348.599	7.503	6.713	20.859	-0.608	20.308	663.643	-0.000525	-0.000470	-0.001460
0.4630	429.767	12.783	9.395	29.294	-0.600	20.310	818.167	-0.000895	-0.000658	-0.002051
0.4640	530.142	19.383	13.717	40.023	-0.604	20.312	1009.254	-0.001357	-0.000960	-0.002802
0.4650	640.000	26.679	18.747	51.640	-0.604	20.315	1218.395	-0.001868	-0.001312	-0.003615
0.4660	751.841	34.252	24.264	63.326	-0.600	20.317	1431.313	-0.002398	-0.001698	-0.004433
0.4670	858.919	41.214	29.781	74.471	-0.602	20.320	1635.160	-0.002885	-0.002085	-0.005213
0.4680	956.243	47.773	34.950	84.434	-0.601	20.323	1820.440	-0.003344	-0.002447	-0.005910
0.4690	1041.709	53.346	39.564	93.245	-0.602	20.325	1983.147	-0.003734	-0.002769	-0.006527
0.4700	1116.746	58.711	43.802	101.055	-0.610	20.324	2125.998	-0.004110	-0.003066	-0.007074
0.4710	1185.636	63.658	47.694	108.004	-0.612	20.324	2257.147	-0.004456	-0.003339	-0.007560
0.4720	1252.723	68.646	51.584	114.632	-0.611	20.322	2384.863	-0.004805	-0.003611	-0.008024
0.4730	1319.945	73.079	55.377	120.885	-0.602	20.322	2512.836	-0.005116	-0.003876	-0.008462
0.4740	1386.386	77.679	59.433	127.082	-0.601	20.320	2639.322	-0.005438	-0.004160	-0.008896
0.4750	1448.633	81.918	63.270	133.349	-0.603	20.317	2757.826	-0.005734	-0.004429	-0.009334
0.4760	1502.150	85.698	66.718	138.698	-0.600	20.314	2859.707	-0.005999	-0.004670	-0.009709
0.4770	1542.260	88.865	69.261	143.049	-0.604	20.312	2936.068	-0.006221	-0.004848	-0.010013
0.4780	1566.772	90.630	70.803	145.566	-0.606	20.309	2982.731	-0.006344	-0.004956	-0.010190
0.4790	1577.096	91.770	71.664	146.791	-0.603	20.308	3002.386	-0.006424	-0.005017	-0.010275
0.4800	1577.622	92.188	72.235	147.610	-0.606	20.307	3003.387	-0.006453	-0.005056	-0.010333
0.4810	1572.242	92.230	72.291	147.804	-0.601	20.308	2993.145	-0.006456	-0.005060	-0.010346
0.4820	1563.285	92.077	72.415	147.693	-0.603	20.308	2976.093	-0.006445	-0.005069	-0.010338
0.4830	1549.579	91.312	72.094	146.872	-0.594	20.311	2950.001	-0.006392	-0.005047	-0.010281
0.4840	1523.941	90.089	71.537	145.038	-0.592	20.312	2901.192	-0.006306	-0.005008	-0.010153
0.4850	1475.143	87.268	69.578	141.479	-0.596	20.314	2808.294	-0.006109	-0.004870	-0.009904
0.4860	1397.928	82.779	65.772	135.156	-0.599	20.317	2661.295	-0.005795	-0.004604	-0.009461
0.4870	1297.312	76.498	60.617	126.637	-0.602	20.320	2469.749	-0.005355	-0.004243	-0.008865
0.4880	1187.334	69.439	54.643	116.604	-0.599	20.323	2260.380	-0.004861	-0.003825	-0.008162
0.4890	1081.504	62.560	49.000	106.640	-0.598	20.325	2058.907	-0.004379	-0.003430	-0.007465
0.4900	988.539	56.514	44.151	97.637	-0.599	20.324	1881.924	-0.003956	-0.003091	-0.006835
0.4910	911.759	51.315	40.051	89.856	-0.594	20.323	1735.754	-0.003592	-0.002804	-0.006290
0.4920	848.970	47.037	36.605	83.463	-0.595	20.322	1616.220	-0.003293	-0.002562	-0.005842
0.4930	793.921	43.064	33.311	77.473	-0.591	20.321	1511.421	-0.003014	-0.002332	-0.005423
0.4940	739.698	39.437	30.296	71.761	-0.595	20.320	1408.195	-0.002761	-0.002121	-0.005023
0.4950	680.607	35.352	27.239	65.383	-0.596	20.318	1295.700	-0.002475	-0.001907	-0.004577
0.4960	615.564	30.960	23.932	58.281	-0.595	20.315	1171.875	-0.002167	-0.001675	-0.004080
0.4970	547.004	26.376	20.541	50.443	-0.594	20.312	1041.355	-0.001846	-0.001438	-0.003531
0.4980	480.218	21.665	17.122	42.787	-0.592	20.310	914.211	-0.001517	-0.001199	-0.002995
0.4990	420.044	17.329	14.119	35.574	-0.595	20.308	799.656	-0.001213	-0.000988	-0.002490
