# Supplementary material for: Evaluation of a Cold-Mixed High-Performance Polyurethane Mixture
Source: Hindawi journal article supplement (doi:10.1155/2019/1507971), 2019-11-07
Supplement: f1 [file 1507971.f1.zip › 1507971.f1/dynamic modulus data/PUM/specimen1/temp20/zhs-1-20_25Hz.csv]

Test Information
****************
Project name	zhs
Operator name	1
Target test temperature	20
Target confining stress	0
Average dynamic strain range from 75 to 125 micro-strain
Contact stress	5
Initial modulus	1000
Axial gauge length	70
Comments
Specimen information
********************
Identification	zhs-1-20
Dimensions	Point 1	Point 2	Point 3	Point 4	Point 5	Point 6	Average	Std Dev.
Diameter (mm)	49.2	49.2	49.3				49.23	0.058
Height (mm)	101.3	101.2	101.3				101.27	0.058
Cross-sectional area (mm�)	1903.7
Conditioning time
Properties/Comments
Test Data	25Hz
*********
Test date and time	Mon	Apr 1	2019	2:22 PM
Dynamic modulus (MPa)	13733
Phase angle (Degrees)	4.55
Average temperature (�C)	20.3
Average confining pressure (kPa)	-0.6
Average micro-strain	111
Load drift (%)	-0.2
Load standard error (%)	6.6
Average deformation drift (%)	-5.0
Average deformation standard error (%)	6.9
Deformation uniformity (%)	27.9
Phase uniformity (Degrees)	0.5
Conditioning Cycles
Time (sec)	Axial stress (kPa)	Axial micro-strain #1	Axial micro-strain #2	Axial micro-strain #3	Confining pressure (kPa)	Temperature (�C)	Load (N)	Displacement #1 (mm)	Displacement #2 (mm)	Displacement #3 (mm)
0.0000	301.755	-2.808	-0.417	-2.792	-0.623	20.317	574.465	0.000197	0.000029	0.000195
0.0008	301.996	-2.836	-0.347	-2.792	-0.618	20.318	574.923	0.000199	0.000024	0.000195
0.0016	302.071	-2.865	-0.417	-2.807	-0.611	20.320	575.066	0.000201	0.000029	0.000197
0.0024	301.770	-2.852	-0.556	-2.863	-0.611	20.322	574.493	0.000200	0.000039	0.000200
0.0032	300.598	-2.936	-0.723	-2.904	-0.608	20.324	572.262	0.000206	0.000051	0.000203
0.0040	298.194	-3.088	-0.848	-3.099	-0.612	20.326	567.684	0.000216	0.000059	0.000217
0.0048	294.376	-3.478	-1.043	-3.362	-0.613	20.328	560.417	0.000243	0.000073	0.000235
0.0056	288.786	-3.798	-1.029	-3.835	-0.612	20.330	549.774	0.000266	0.000072	0.000268
0.0064	280.746	-4.311	-1.126	-4.711	-0.608	20.332	534.468	0.000302	0.000079	0.000330
0.0072	269.550	-5.145	-1.375	-5.893	-0.601	20.334	513.153	0.000360	0.000096	0.000413
0.0080	254.942	-6.047	-1.625	-7.269	-0.606	20.334	485.344	0.000423	0.000114	0.000509
0.0088	237.629	-7.243	-2.207	-8.951	-0.605	20.333	452.385	0.000507	0.000154	0.000627
0.0096	219.430	-8.577	-2.859	-10.632	-0.611	20.333	417.738	0.000600	0.000200	0.000744
0.0104	202.312	-9.689	-3.596	-12.480	-0.613	20.331	385.151	0.000678	0.000252	0.000874
0.0112	187.840	-10.926	-4.319	-14.189	-0.603	20.331	357.599	0.000765	0.000302	0.000993
0.0120	176.914	-11.758	-4.833	-15.425	-0.601	20.330	336.800	0.000823	0.000338	0.001080
0.0128	169.566	-12.258	-5.195	-16.398	-0.599	20.328	322.809	0.000858	0.000364	0.001148
0.0136	165.523	-12.744	-5.307	-16.969	-0.598	20.326	315.113	0.000892	0.000371	0.001188
0.0144	164.065	-12.925	-5.320	-17.220	-0.603	20.324	312.338	0.000905	0.000372	0.001205
0.0152	164.561	-13.162	-5.348	-17.401	-0.604	20.322	313.282	0.000921	0.000374	0.001218
0.0160	166.274	-13.271	-5.294	-17.497	-0.602	20.320	316.544	0.000929	0.000371	0.001225
0.0168	168.829	-13.091	-5.307	-17.428	-0.599	20.319	321.407	0.000916	0.000371	0.001220
0.0176	172.060	-12.980	-5.307	-17.177	-0.598	20.318	327.559	0.000909	0.000372	0.001202
0.0184	175.502	-12.799	-5.155	-16.802	-0.603	20.316	334.110	0.000896	0.000361	0.001176
0.0192	179.048	-12.605	-5.154	-16.358	-0.604	20.317	340.862	0.000882	0.000361	0.001145
0.0200	182.926	-12.451	-5.072	-15.746	-0.608	20.317	348.244	0.000872	0.000355	0.001102
0.0208	186.953	-12.187	-4.960	-15.536	-0.604	20.318	355.911	0.000853	0.000347	0.001088
0.0216	191.537	-11.855	-4.904	-15.314	-0.595	20.320	364.637	0.000830	0.000343	0.001072
0.0224	196.572	-11.508	-4.723	-14.757	-0.595	20.322	374.222	0.000806	0.000331	0.001033
0.0232	201.771	-11.078	-4.598	-14.423	-0.601	20.324	384.121	0.000775	0.000322	0.001010
0.0240	207.287	-10.702	-4.458	-13.881	-0.601	20.326	394.621	0.000749	0.000312	0.000972
0.0248	212.817	-10.257	-4.361	-13.297	-0.607	20.328	405.149	0.000718	0.000305	0.000931
0.0256	218.363	-9.895	-4.291	-12.784	-0.606	20.330	415.707	0.000693	0.000300	0.000895
0.0264	223.698	-9.687	-4.109	-12.244	-0.596	20.332	425.863	0.000678	0.000288	0.000857
0.0272	228.477	-9.284	-4.110	-11.758	-0.596	20.334	434.961	0.000650	0.000288	0.000823
0.0280	232.625	-8.895	-3.902	-11.203	-0.601	20.334	442.858	0.000623	0.000273	0.000784
0.0288	235.675	-8.506	-3.721	-10.855	-0.603	20.334	448.666	0.000595	0.000260	0.000760
0.0296	237.644	-8.075	-3.638	-10.645	-0.605	20.333	452.414	0.000565	0.000255	0.000745
0.0304	238.576	-7.991	-3.541	-10.465	-0.605	20.331	454.187	0.000559	0.000248	0.000733
0.0312	238.516	-8.033	-3.694	-10.464	-0.597	20.331	454.073	0.000562	0.000259	0.000732
0.0320	237.825	-8.130	-3.708	-10.604	-0.596	20.330	452.757	0.000569	0.000260	0.000742
0.0328	236.697	-8.380	-3.833	-10.562	-0.599	20.328	450.611	0.000587	0.000268	0.000739
0.0336	235.285	-8.339	-3.776	-10.590	-0.602	20.327	447.922	0.000584	0.000264	0.000741
0.0344	233.632	-8.436	-3.860	-10.814	-0.604	20.324	444.775	0.000591	0.000270	0.000757
0.0352	231.843	-8.423	-3.984	-10.868	-0.605	20.322	441.370	0.000590	0.000279	0.000761
0.0360	229.724	-8.396	-4.012	-11.174	-0.603	20.320	437.336	0.000588	0.000281	0.000782
0.0368	227.305	-8.549	-4.208	-11.536	-0.602	20.318	432.730	0.000598	0.000295	0.000808
0.0376	224.675	-8.619	-4.263	-11.688	-0.603	20.317	427.723	0.000603	0.000298	0.000818
0.0384	221.729	-8.701	-4.222	-11.896	-0.605	20.316	422.115	0.000609	0.000296	0.000833
0.0392	218.393	-8.993	-4.320	-12.077	-0.608	20.316	415.764	0.000630	0.000302	0.000845
0.0400	214.666	-9.326	-4.418	-12.382	-0.608	20.316	408.669	0.000653	0.000309	0.000867
0.0408	210.097	-9.813	-4.502	-12.841	-0.609	20.318	399.971	0.000687	0.000315	0.000899
0.0416	204.792	-10.355	-4.795	-13.409	-0.605	20.320	389.872	0.000725	0.000336	0.000939
0.0424	198.721	-10.633	-4.934	-14.202	-0.603	20.322	378.313	0.000744	0.000345	0.000994
0.0432	191.988	-10.980	-4.975	-14.855	-0.603	20.324	365.496	0.000769	0.000348	0.001040
0.0440	184.925	-11.451	-4.975	-15.551	-0.600	20.326	352.049	0.000802	0.000348	0.001089
0.0448	177.921	-11.979	-5.114	-16.218	-0.601	20.328	338.717	0.000839	0.000358	0.001135
0.0456	171.369	-12.563	-5.266	-16.829	-0.598	20.330	326.242	0.000879	0.000369	0.001178
0.0464	165.538	-13.118	-5.502	-17.607	-0.593	20.333	315.142	0.000918	0.000385	0.001233
0.0472	161.029	-13.452	-5.836	-18.204	-0.592	20.335	306.559	0.000942	0.000409	0.001274
0.0480	157.648	-13.592	-5.766	-18.648	-0.595	20.335	300.121	0.000951	0.000404	0.001305
0.0488	155.469	-13.813	-5.711	-18.745	-0.597	20.335	295.973	0.000967	0.000400	0.001312
0.0496	154.387	-13.953	-5.628	-18.703	-0.604	20.333	293.913	0.000977	0.000394	0.001309
0.0504	153.936	-14.106	-5.530	-18.896	-0.607	20.332	293.055	0.000987	0.000387	0.001323
0.0512	154.237	-14.272	-5.641	-19.008	-0.600	20.331	293.627	0.000999	0.000395	0.001331
0.0520	155.003	-14.314	-5.711	-19.134	-0.600	20.330	295.086	0.001002	0.000400	0.001339
0.0528	156.085	-14.300	-5.725	-19.175	-0.600	20.329	297.146	0.001001	0.000401	0.001342
0.0536	157.483	-14.370	-5.697	-18.981	-0.600	20.327	299.807	0.001006	0.000399	0.001329
0.0544	159.136	-14.217	-5.668	-18.787	-0.608	20.325	302.954	0.000995	0.000397	0.001315
0.0552	161.014	-14.190	-5.780	-18.605	-0.610	20.322	306.530	0.000993	0.000405	0.001302
0.0560	163.209	-14.134	-5.738	-18.411	-0.611	20.320	310.707	0.000989	0.000402	0.001289
0.0568	165.748	-13.870	-5.807	-18.356	-0.608	20.319	315.542	0.000971	0.000407	0.001285
0.0576	168.754	-13.856	-5.683	-18.177	-0.609	20.317	321.264	0.000970	0.000398	0.001272
0.0584	172.331	-13.536	-5.335	-17.802	-0.611	20.316	328.074	0.000948	0.000373	0.001246
0.0592	176.479	-13.202	-5.209	-17.428	-0.609	20.317	335.970	0.000924	0.000365	0.001220
0.0600	181.483	-12.883	-5.057	-16.900	-0.615	20.317	345.497	0.000902	0.000354	0.001183
0.0608	187.404	-12.494	-5.056	-16.496	-0.607	20.319	356.770	0.000875	0.000354	0.001155
0.0616	194.362	-11.968	-5.112	-15.870	-0.604	20.320	370.016	0.000838	0.000358	0.001111
0.0624	202.207	-11.441	-5.086	-15.104	-0.607	20.322	384.951	0.000801	0.000356	0.001057
0.0632	210.262	-10.886	-4.904	-14.242	-0.607	20.324	400.286	0.000762	0.000343	0.000997
0.0640	217.942	-10.330	-4.613	-13.228	-0.609	20.326	414.906	0.000723	0.000323	0.000926
0.0648	224.945	-9.842	-4.348	-12.451	-0.611	20.328	428.238	0.000689	0.000304	0.000872
0.0656	230.851	-9.369	-4.180	-11.827	-0.607	20.330	439.482	0.000656	0.000293	0.000828
0.0664	235.751	-8.951	-4.055	-11.397	-0.601	20.332	448.809	0.000627	0.000284	0.000798
0.0672	239.523	-8.519	-4.138	-11.217	-0.600	20.334	455.990	0.000596	0.000290	0.000785
0.0680	242.033	-8.214	-3.986	-10.897	-0.601	20.334	460.768	0.000575	0.000279	0.000763
0.0688	243.340	-7.950	-3.861	-10.743	-0.602	20.334	463.257	0.000556	0.000270	0.000752
0.0696	243.686	-7.796	-3.874	-10.465	-0.601	20.333	463.915	0.000546	0.000271	0.000733
0.0704	243.370	-7.796	-3.707	-10.243	-0.599	20.331	463.314	0.000546	0.000260	0.000717
0.0712	242.528	-7.949	-3.749	-10.354	-0.591	20.331	461.712	0.000556	0.000262	0.000725
0.0720	241.356	-8.087	-3.776	-10.410	-0.588	20.330	459.480	0.000566	0.000264	0.000729
0.0728	239.748	-8.074	-3.776	-10.618	-0.588	20.328	456.419	0.000565	0.000264	0.000743
0.0736	237.749	-8.102	-3.902	-10.771	-0.587	20.326	452.614	0.000567	0.000273	0.000754
0.0744	235.645	-8.185	-4.124	-10.937	-0.591	20.324	448.608	0.000573	0.000289	0.000766
0.0752	233.511	-8.269	-4.235	-11.035	-0.591	20.322	444.546	0.000579	0.000296	0.000772
0.0760	231.212	-8.352	-4.375	-11.189	-0.596	20.320	440.168	0.000585	0.000306	0.000783
0.0768	228.853	-8.644	-4.555	-11.411	-0.593	20.318	435.677	0.000605	0.000319	0.000799
0.0776	226.223	-8.659	-4.597	-11.577	-0.595	20.317	430.670	0.000606	0.000322	0.000810
0.0784	223.232	-8.729	-4.473	-11.647	-0.604	20.316	424.976	0.000611	0.000313	0.000815
0.0792	220.106	-9.034	-4.402	-11.882	-0.599	20.316	419.025	0.000632	0.000308	0.000832
0.0800	216.665	-9.215	-4.320	-12.297	-0.605	20.317	412.474	0.000645	0.000302	0.000861
0.0808	212.802	-9.576	-4.333	-12.825	-0.605	20.318	405.121	0.000670	0.000303	0.000898
0.0816	208.324	-10.049	-4.612	-13.408	-0.599	20.320	396.595	0.000703	0.000323	0.000939
0.0824	203.034	-10.508	-4.808	-13.895	-0.605	20.322	386.524	0.000736	0.000337	0.000973
0.0832	197.113	-10.995	-4.988	-14.340	-0.605	20.324	375.252	0.000770	0.000349	0.001004
0.0840	190.771	-11.620	-5.128	-14.882	-0.609	20.326	363.178	0.000813	0.000359	0.001042
0.0848	184.519	-12.078	-5.238	-15.548	-0.613	20.328	351.276	0.000845	0.000367	0.001088
0.0856	178.988	-12.606	-5.321	-16.356	-0.609	20.330	340.748	0.000882	0.000372	0.001145
0.0864	174.284	-12.996	-5.488	-17.023	-0.607	20.333	331.793	0.000910	0.000384	0.001192
0.0872	170.482	-13.275	-5.612	-17.553	-0.601	20.334	324.554	0.000929	0.000393	0.001229
0.0880	167.552	-13.387	-5.502	-17.887	-0.605	20.334	318.975	0.000937	0.000385	0.001252
0.0888	165.102	-13.344	-5.433	-17.983	-0.604	20.334	314.312	0.000934	0.000380	0.001259
0.0896	163.404	-13.344	-5.376	-18.204	-0.612	20.333	311.079	0.000934	0.000376	0.001274
0.0904	162.472	-13.426	-5.377	-18.454	-0.609	20.332	309.305	0.000940	0.000376	0.001292
0.0912	162.382	-13.579	-5.586	-18.578	-0.599	20.331	309.134	0.000951	0.000391	0.001300
0.0920	163.193	-13.705	-5.697	-18.482	-0.601	20.330	310.678	0.000959	0.000399	0.001294
0.0928	164.711	-13.689	-5.615	-18.384	-0.595	20.328	313.568	0.000958	0.000393	0.001287
0.0936	166.906	-13.508	-5.531	-18.119	-0.596	20.327	317.745	0.000946	0.000387	0.001268
0.0944	169.641	-13.438	-5.448	-17.759	-0.599	20.324	322.952	0.000941	0.000381	0.001243
0.0952	172.947	-13.257	-5.323	-17.634	-0.601	20.322	329.247	0.000928	0.000373	0.001234
0.0960	176.734	-13.146	-5.225	-17.273	-0.599	20.320	336.456	0.000920	0.000366	0.001209
0.0968	181.303	-13.008	-5.295	-16.913	-0.599	20.318	345.154	0.000911	0.000371	0.001184
0.0976	187.059	-12.661	-5.140	-16.496	-0.603	20.317	356.112	0.000886	0.000360	0.001155
0.0984	194.287	-11.967	-4.820	-15.718	-0.605	20.316	369.873	0.000838	0.000337	0.001100
0.0992	203.004	-11.258	-4.736	-14.787	-0.608	20.317	386.467	0.000788	0.000332	0.001035
0.1000	212.877	-10.410	-4.485	-13.577	-0.611	20.317	405.264	0.000729	0.000314	0.000950
0.1008	223.217	-9.520	-4.180	-12.590	-0.604	20.319	424.948	0.000666	0.000293	0.000881
0.1016	233.241	-9.033	-4.125	-11.714	-0.600	20.320	444.031	0.000632	0.000289	0.000820
0.1024	242.363	-8.227	-3.833	-10.908	-0.600	20.322	461.397	0.000576	0.000268	0.000764
0.1032	249.832	-7.531	-3.458	-10.172	-0.604	20.323	475.616	0.000527	0.000242	0.000712
0.1040	255.318	-7.379	-3.402	-9.616	-0.605	20.326	486.059	0.000517	0.000238	0.000673
0.1048	258.759	-7.004	-3.415	-9.129	-0.607	20.328	492.611	0.000490	0.000239	0.000639
0.1056	260.172	-6.921	-3.346	-8.795	-0.608	20.330	495.300	0.000484	0.000234	0.000616
0.1064	260.292	-7.075	-3.429	-8.976	-0.602	20.332	495.529	0.000495	0.000240	0.000628
0.1072	259.586	-6.866	-3.484	-9.017	-0.604	20.334	494.184	0.000481	0.000244	0.000631
0.1080	258.429	-6.879	-3.263	-8.934	-0.607	20.334	491.982	0.000482	0.000228	0.000625
0.1088	257.001	-7.102	-3.208	-9.045	-0.605	20.334	489.264	0.000497	0.000225	0.000633
0.1096	255.258	-7.171	-3.194	-9.003	-0.608	20.332	485.945	0.000502	0.000224	0.000630
0.1104	253.364	-7.227	-3.208	-8.960	-0.609	20.331	482.340	0.000506	0.000225	0.000627
0.1112	251.290	-7.393	-3.290	-9.309	-0.599	20.331	478.392	0.000517	0.000230	0.000652
0.1120	249.171	-7.336	-3.499	-9.491	-0.600	20.330	474.358	0.000514	0.000245	0.000664
0.1128	246.902	-7.295	-3.707	-9.755	-0.599	20.328	470.037	0.000511	0.000260	0.000683
0.1136	244.272	-7.325	-3.736	-10.020	-0.598	20.326	465.031	0.000513	0.000261	0.000701
0.1144	241.101	-7.561	-3.847	-10.243	-0.604	20.324	458.994	0.000529	0.000269	0.000717
0.1152	237.148	-7.812	-3.847	-10.466	-0.604	20.322	451.469	0.000547	0.000269	0.000733
0.1160	232.219	-8.284	-3.916	-10.717	-0.607	20.319	442.085	0.000580	0.000274	0.000750
0.1168	225.982	-9.047	-4.180	-11.466	-0.605	20.318	430.212	0.000633	0.000293	0.000803
0.1176	218.558	-9.451	-4.347	-12.146	-0.608	20.317	416.079	0.000662	0.000304	0.000850
0.1184	210.112	-10.131	-4.527	-12.881	-0.615	20.316	400.000	0.000709	0.000317	0.000902
0.1192	200.704	-10.688	-4.765	-13.979	-0.614	20.316	382.090	0.000748	0.000334	0.000979
0.1200	191.176	-11.271	-4.932	-14.911	-0.618	20.316	363.951	0.000789	0.000345	0.001044
0.1208	181.724	-11.952	-5.140	-15.995	-0.616	20.318	345.955	0.000837	0.000360	0.001120
0.1216	172.691	-12.606	-5.377	-17.233	-0.607	20.320	328.760	0.000882	0.000376	0.001206
0.1224	164.411	-13.398	-5.433	-18.149	-0.605	20.321	312.996	0.000938	0.000380	0.001270
0.1232	156.716	-13.955	-5.518	-18.982	-0.603	20.323	298.347	0.000977	0.000386	0.001329
0.1240	149.818	-14.579	-5.838	-19.552	-0.600	20.325	285.215	0.001021	0.000409	0.001369
0.1248	143.837	-15.052	-6.158	-20.316	-0.603	20.327	273.829	0.001054	0.000431	0.001422
0.1256	139.028	-15.301	-6.297	-20.997	-0.605	20.330	264.673	0.001071	0.000441	0.001470
0.1264	135.571	-15.496	-6.615	-21.386	-0.604	20.332	258.093	0.001085	0.000463	0.001497
0.1272	133.512	-15.622	-6.740	-22.054	-0.609	20.334	254.173	0.001094	0.000472	0.001544
0.1280	132.581	-15.609	-6.573	-21.887	-0.613	20.334	252.399	0.001093	0.000460	0.001532
0.1288	132.581	-15.624	-6.656	-21.706	-0.614	20.334	252.399	0.001094	0.000466	0.001519
0.1296	133.362	-15.651	-6.546	-21.692	-0.616	20.332	253.887	0.001096	0.000458	0.001518
0.1304	134.805	-15.594	-6.394	-21.428	-0.612	20.331	256.634	0.001092	0.000448	0.001500
0.1312	136.849	-15.580	-6.491	-21.457	-0.606	20.331	260.525	0.001091	0.000454	0.001502
0.1320	139.494	-15.412	-6.504	-21.304	-0.604	20.330	265.560	0.001079	0.000455	0.001491
0.1328	142.514	-15.315	-6.364	-21.069	-0.603	20.328	271.311	0.001072	0.000445	0.001475
0.1336	145.761	-15.148	-6.378	-20.790	-0.604	20.326	277.491	0.001060	0.000446	0.001455
0.1344	149.548	-15.093	-6.378	-20.456	-0.608	20.324	284.700	0.001056	0.000446	0.001432
0.1352	154.056	-15.009	-6.294	-20.136	-0.607	20.322	293.283	0.001051	0.000441	0.001410
0.1360	159.512	-14.703	-6.309	-19.747	-0.609	20.320	303.669	0.001029	0.000442	0.001382
0.1368	166.064	-14.425	-6.337	-19.233	-0.607	20.318	316.143	0.001010	0.000444	0.001346
0.1376	173.518	-13.771	-6.170	-18.523	-0.611	20.317	330.334	0.000964	0.000432	0.001297
0.1384	181.378	-13.119	-5.878	-17.495	-0.616	20.316	345.297	0.000918	0.000411	0.001225
0.1392	189.313	-12.424	-5.794	-16.592	-0.616	20.316	360.403	0.000870	0.000406	0.001161
0.1400	197.308	-11.813	-5.488	-15.606	-0.623	20.317	375.624	0.000827	0.000384	0.001092
0.1408	204.957	-11.342	-5.335	-14.717	-0.619	20.319	390.186	0.000794	0.000373	0.001030
0.1416	212.231	-10.689	-5.391	-14.189	-0.613	20.320	404.034	0.000748	0.000377	0.000993
0.1424	219.009	-10.356	-5.252	-13.507	-0.617	20.322	416.937	0.000725	0.000368	0.000946
0.1432	224.690	-9.828	-5.098	-12.951	-0.617	20.324	427.752	0.000688	0.000357	0.000907
0.1440	229.379	-9.174	-4.874	-12.631	-0.616	20.325	436.678	0.000642	0.000341	0.000884
0.1448	233.030	-8.937	-4.693	-12.200	-0.616	20.328	443.630	0.000626	0.000329	0.000854
0.1456	235.600	-8.715	-4.373	-11.855	-0.612	20.329	448.523	0.000610	0.000306	0.000830
0.1464	237.238	-8.743	-4.485	-11.674	-0.605	20.332	451.641	0.000612	0.000314	0.000817
0.1472	238.080	-9.049	-4.596	-11.562	-0.605	20.333	453.243	0.000633	0.000322	0.000809
0.1480	238.381	-8.910	-4.401	-11.284	-0.611	20.334	453.815	0.000624	0.000308	0.000790
0.1488	238.095	-8.758	-4.527	-11.270	-0.611	20.333	453.272	0.000613	0.000317	0.000789
0.1496	237.659	-8.674	-4.361	-11.214	-0.612	20.332	452.442	0.000607	0.000305	0.000785
0.1504	236.983	-8.618	-4.375	-11.118	-0.612	20.331	451.155	0.000603	0.000306	0.000778
0.1512	235.916	-8.979	-4.584	-11.244	-0.605	20.331	449.123	0.000629	0.000321	0.000787
0.1520	234.699	-8.992	-4.596	-11.327	-0.605	20.329	446.806	0.000629	0.000322	0.000793
0.1528	233.061	-8.839	-4.541	-11.438	-0.613	20.328	443.687	0.000619	0.000318	0.000801
0.1536	231.092	-8.880	-4.457	-11.564	-0.615	20.326	439.939	0.000622	0.000312	0.000809
0.1544	228.808	-8.908	-4.416	-12.050	-0.619	20.324	435.591	0.000624	0.000309	0.000843
0.1552	226.268	-9.048	-4.458	-12.341	-0.619	20.322	430.756	0.000633	0.000312	0.000864
0.1560	223.427	-9.480	-4.666	-12.617	-0.622	20.319	425.348	0.000664	0.000327	0.000883
0.1568	220.271	-9.842	-4.861	-13.157	-0.617	20.318	419.340	0.000689	0.000340	0.000921
0.1576	216.845	-9.996	-4.875	-13.297	-0.622	20.317	412.817	0.000700	0.000341	0.000931
0.1584	212.802	-10.175	-4.819	-13.354	-0.628	20.316	405.121	0.000712	0.000337	0.000935
0.1592	207.873	-10.494	-4.791	-13.771	-0.623	20.316	395.737	0.000735	0.000335	0.000964
0.1600	202.192	-10.659	-4.682	-14.119	-0.627	20.316	384.922	0.000746	0.000328	0.000988
0.1608	195.835	-11.173	-4.877	-14.634	-0.623	20.318	372.820	0.000782	0.000341	0.001024
0.1616	189.042	-11.841	-5.128	-15.550	-0.618	20.320	359.888	0.000829	0.000359	0.001089
0.1624	182.265	-12.244	-5.211	-16.412	-0.620	20.322	346.985	0.000857	0.000365	0.001149
0.1632	175.577	-12.786	-5.392	-17.231	-0.621	20.324	334.253	0.000895	0.000377	0.001206
0.1640	169.220	-13.188	-5.587	-18.092	-0.623	20.326	322.151	0.000923	0.000391	0.001266
0.1648	163.329	-13.633	-5.656	-18.801	-0.625	20.328	310.936	0.000954	0.000396	0.001316
0.1656	158.114	-13.856	-5.851	-19.315	-0.624	20.330	301.008	0.000970	0.000410	0.001352
0.1664	153.831	-14.163	-6.087	-19.788	-0.620	20.333	292.854	0.000991	0.000426	0.001385
0.1672	150.299	-14.441	-6.143	-20.302	-0.618	20.334	286.131	0.001011	0.000430	0.001421
0.1680	147.789	-14.580	-6.129	-20.427	-0.621	20.334	281.353	0.001021	0.000429	0.001430
0.1688	146.016	-14.928	-6.185	-20.496	-0.620	20.334	277.977	0.001045	0.000433	0.001435
0.1696	144.829	-15.025	-6.130	-20.594	-0.619	20.333	275.717	0.001052	0.000429	0.001442
0.1704	144.393	-15.136	-6.102	-20.524	-0.617	20.331	274.887	0.001060	0.000427	0.001437
0.1712	144.468	-15.178	-6.241	-20.607	-0.609	20.331	275.030	0.001062	0.000437	0.001442
0.1720	145.220	-15.107	-6.324	-20.718	-0.609	20.330	276.461	0.001058	0.000443	0.001450
0.1728	146.527	-15.177	-6.226	-20.675	-0.607	20.328	278.950	0.001062	0.000436	0.001447
0.1736	148.225	-15.081	-6.198	-20.593	-0.606	20.327	282.183	0.001056	0.000434	0.001441
0.1744	150.329	-14.983	-6.226	-20.496	-0.611	20.325	286.188	0.001049	0.000436	0.001435
0.1752	152.659	-14.941	-6.170	-20.317	-0.612	20.322	290.623	0.001046	0.000432	0.001422
0.1760	155.213	-14.745	-6.226	-20.123	-0.614	20.320	295.486	0.001032	0.000436	0.001409
0.1768	157.979	-14.647	-6.407	-20.067	-0.614	20.318	300.751	0.001025	0.000449	0.001405
0.1776	161.044	-14.549	-6.351	-19.802	-0.615	20.317	306.587	0.001018	0.000445	0.001386
0.1784	164.531	-14.174	-6.143	-19.246	-0.614	20.316	313.225	0.000992	0.000430	0.001347
0.1792	168.483	-13.827	-6.087	-18.760	-0.616	20.317	320.749	0.000968	0.000426	0.001313
0.1800	173.413	-13.549	-5.823	-17.982	-0.616	20.317	330.133	0.000948	0.000408	0.001259
0.1808	179.334	-13.229	-5.641	-17.399	-0.611	20.318	341.406	0.000926	0.000395	0.001218
0.1816	186.472	-13.021	-5.669	-16.968	-0.606	20.320	354.996	0.000911	0.000397	0.001188
0.1824	194.663	-12.300	-5.614	-16.175	-0.604	20.322	370.588	0.000861	0.000393	0.001132
0.1832	203.410	-11.579	-5.503	-15.285	-0.606	20.324	387.239	0.000811	0.000385	0.001070
0.1840	212.427	-10.926	-5.448	-14.339	-0.608	20.326	404.406	0.000765	0.000381	0.001004
0.1848	221.158	-10.037	-5.225	-13.463	-0.612	20.328	421.028	0.000703	0.000366	0.000942
0.1856	229.243	-9.647	-4.807	-12.657	-0.616	20.330	436.420	0.000675	0.000336	0.000886
0.1864	236.096	-9.355	-4.722	-12.158	-0.609	20.332	449.467	0.000655	0.000331	0.000851
0.1872	241.251	-8.827	-4.639	-11.672	-0.608	20.334	459.280	0.000618	0.000325	0.000817
0.1880	244.602	-8.521	-4.361	-10.965	-0.613	20.334	465.660	0.000596	0.000305	0.000768
0.1888	246.045	-8.424	-4.333	-10.645	-0.609	20.333	468.407	0.000590	0.000303	0.000745
0.1896	246.120	-8.284	-4.208	-10.450	-0.618	20.332	468.550	0.000580	0.000295	0.000732
0.1904	245.444	-8.340	-4.055	-10.478	-0.615	20.331	467.262	0.000584	0.000284	0.000733
0.1912	244.302	-8.520	-4.221	-10.631	-0.607	20.330	465.088	0.000596	0.000295	0.000744
0.1920	243.054	-8.534	-4.373	-10.812	-0.605	20.329	462.713	0.000597	0.000306	0.000757
0.1928	241.537	-8.563	-4.401	-10.771	-0.605	20.328	459.824	0.000599	0.000308	0.000754
0.1936	239.598	-8.604	-4.401	-10.840	-0.607	20.326	456.133	0.000602	0.000308	0.000759
0.1944	237.359	-8.798	-4.360	-11.160	-0.610	20.324	451.870	0.000616	0.000305	0.000781
0.1952	234.774	-8.978	-4.248	-11.423	-0.612	20.322	446.949	0.000628	0.000297	0.000800
0.1960	231.843	-9.075	-4.137	-11.729	-0.613	20.319	441.370	0.000635	0.000290	0.000821
0.1968	228.477	-9.230	-4.247	-12.021	-0.608	20.318	434.961	0.000646	0.000297	0.000841
0.1976	224.524	-9.355	-4.275	-12.256	-0.610	20.317	427.437	0.000655	0.000299	0.000858
0.1984	219.745	-9.550	-4.290	-12.396	-0.614	20.316	418.339	0.000669	0.000300	0.000868
0.1992	213.809	-9.940	-4.470	-12.937	-0.611	20.316	407.038	0.000696	0.000313	0.000906
0.2000	150.044	-15.957	-7.141	-21.623	-0.608	20.325	285.645	0.001117	0.000500	0.001514
0.2008	150.254	-15.929	-7.084	-21.539	-0.607	20.323	286.045	0.001115	0.000496	0.001508
0.2016	150.615	-15.832	-7.113	-21.316	-0.611	20.321	286.732	0.001108	0.000498	0.001492
0.2024	151.426	-15.748	-7.058	-21.178	-0.613	20.319	288.277	0.001102	0.000494	0.001482
0.2032	152.839	-15.652	-7.003	-21.221	-0.609	20.317	290.966	0.001096	0.000490	0.001485
0.2040	155.078	-15.652	-6.948	-21.151	-0.612	20.316	295.229	0.001096	0.000486	0.001481
0.2048	158.520	-15.582	-6.727	-20.790	-0.619	20.314	301.781	0.001091	0.000471	0.001455
0.2056	163.765	-15.318	-6.477	-20.387	-0.617	20.314	311.766	0.001072	0.000453	0.001427
0.2064	172.932	-14.831	-6.310	-19.415	-0.625	20.315	329.218	0.001038	0.000442	0.001359
0.2072	188.862	-13.704	-5.935	-17.970	-0.621	20.316	359.545	0.000959	0.000415	0.001258
0.2080	214.726	-11.966	-5.238	-15.747	-0.616	20.318	408.783	0.000838	0.000367	0.001102
0.2088	253.018	-9.200	-4.071	-11.994	-0.617	20.320	481.682	0.000644	0.000285	0.000840
0.2096	304.731	-5.518	-2.237	-6.630	-0.616	20.321	580.130	0.000386	0.000157	0.000464
0.2104	368.902	-0.878	0.112	0.165	-0.620	20.323	702.295	0.000061	-0.000008	-0.000012
0.2112	443.729	4.570	2.850	8.169	-0.617	20.325	844.746	-0.000320	-0.000199	-0.000572
0.2120	527.512	10.768	6.046	17.062	-0.621	20.327	1004.248	-0.000754	-0.000423	-0.001194
0.2128	617.968	17.383	9.618	26.721	-0.620	20.329	1176.453	-0.001217	-0.000673	-0.001870
0.2136	713.444	24.249	13.496	36.880	-0.617	20.332	1358.213	-0.001697	-0.000945	-0.002582
0.2144	811.985	31.363	17.873	47.610	-0.620	20.332	1545.811	-0.002195	-0.001251	-0.003333
0.2152	910.857	38.769	22.583	58.658	-0.620	20.332	1734.037	-0.002714	-0.001581	-0.004106
0.2160	1008.226	45.981	27.433	69.247	-0.621	20.331	1919.403	-0.003219	-0.001920	-0.004847
0.2168	1102.589	53.069	32.449	79.405	-0.621	20.330	2099.047	-0.003715	-0.002271	-0.005558
0.2176	1192.354	59.711	37.258	88.993	-0.619	20.329	2269.936	-0.004180	-0.002608	-0.006230
0.2184	1276.558	65.618	41.747	97.845	-0.616	20.328	2430.239	-0.004593	-0.002922	-0.006849
0.2192	1353.819	71.330	46.207	106.169	-0.611	20.327	2577.324	-0.004993	-0.003235	-0.007432
0.2200	1423.280	76.304	50.363	113.742	-0.612	20.325	2709.560	-0.005341	-0.003525	-0.007962
0.2208	1484.326	80.780	54.113	120.468	-0.610	20.323	2825.775	-0.005655	-0.003788	-0.008433
0.2216	1536.504	84.767	57.503	126.013	-0.608	20.321	2925.110	-0.005934	-0.004025	-0.008821
0.2224	1579.576	88.088	60.324	130.627	-0.612	20.319	3007.107	-0.006166	-0.004223	-0.009144
0.2232	1612.653	90.728	62.519	134.448	-0.604	20.317	3070.078	-0.006351	-0.004376	-0.009411
0.2240	1635.331	92.797	64.313	137.073	-0.605	20.316	3113.251	-0.006496	-0.004502	-0.009595
0.2248	1647.955	94.423	65.758	139.213	-0.609	20.314	3137.283	-0.006610	-0.004603	-0.009745
0.2256	1651.637	95.187	66.425	140.518	-0.608	20.314	3144.293	-0.006663	-0.004650	-0.009836
0.2264	1648.346	95.590	66.856	140.949	-0.615	20.314	3138.027	-0.006691	-0.004680	-0.009866
0.2272	1639.509	95.549	66.828	140.852	-0.617	20.315	3121.204	-0.006688	-0.004678	-0.009860
0.2280	1624.616	94.909	66.424	140.184	-0.611	20.317	3092.852	-0.006644	-0.004650	-0.009813
0.2288	1599.954	93.742	65.798	138.656	-0.613	20.319	3045.902	-0.006562	-0.004606	-0.009706
0.2296	1559.979	91.672	64.297	135.919	-0.615	20.320	2969.799	-0.006417	-0.004501	-0.009514
0.2304	1500.376	88.435	61.741	131.487	-0.611	20.322	2856.331	-0.006190	-0.004322	-0.009204
0.2312	1420.230	83.487	57.948	124.886	-0.617	20.325	2703.753	-0.005844	-0.004056	-0.008742
0.2320	1322.365	77.277	53.072	116.369	-0.617	20.327	2517.443	-0.005409	-0.003715	-0.008146
0.2328	1212.913	70.176	47.515	106.530	-0.612	20.329	2309.074	-0.004912	-0.003326	-0.007457
0.2336	1099.027	62.310	41.608	95.815	-0.611	20.331	2092.266	-0.004362	-0.002913	-0.006707
0.2344	986.600	54.723	35.828	84.963	-0.612	20.332	1878.233	-0.003831	-0.002508	-0.005947
0.2352	880.845	47.594	30.435	74.513	-0.614	20.332	1676.903	-0.003332	-0.002130	-0.005216
0.2360	784.964	40.979	25.501	64.675	-0.616	20.331	1494.370	-0.002869	-0.001785	-0.004527
0.2368	700.579	35.157	21.319	55.865	-0.621	20.330	1333.723	-0.002461	-0.001492	-0.003911
0.2376	627.917	29.876	17.608	47.791	-0.615	20.329	1195.393	-0.002091	-0.001233	-0.003345
0.2384	565.850	25.220	14.497	40.828	-0.611	20.328	1077.232	-0.001765	-0.001015	-0.002858
0.2392	512.784	21.370	11.940	34.741	-0.611	20.327	976.210	-0.001496	-0.000836	-0.002432
0.2400	466.497	17.938	9.675	29.043	-0.607	20.325	888.090	-0.001256	-0.000677	-0.002033
0.2408	425.109	14.825	7.784	24.151	-0.604	20.323	809.298	-0.001038	-0.000545	-0.001691
0.2416	387.658	11.810	6.116	19.510	-0.601	20.321	738.001	-0.000827	-0.000428	-0.001366
0.2424	353.754	9.031	4.504	15.243	-0.603	20.319	673.456	-0.000632	-0.000315	-0.001067
0.2432	323.892	6.390	3.198	11.451	-0.601	20.317	616.608	-0.000447	-0.000224	-0.000802
0.2440	299.246	4.139	1.933	8.088	-0.601	20.316	569.687	-0.000290	-0.000135	-0.000566
0.2448	280.821	2.777	1.071	5.685	-0.610	20.314	534.611	-0.000194	-0.000075	-0.000398
0.2456	268.978	1.429	0.530	3.822	-0.608	20.314	512.066	-0.000100	-0.000037	-0.000268
0.2464	263.628	0.873	0.085	2.892	-0.613	20.314	501.881	-0.000061	-0.000006	-0.000202
0.2472	263.929	0.608	-0.067	2.544	-0.617	20.315	502.453	-0.000043	0.000005	-0.000178
0.2480	269.249	0.414	-0.234	2.557	-0.614	20.318	512.581	-0.000029	0.000016	-0.000179
0.2488	281.933	1.025	-0.263	3.516	-0.615	20.319	536.728	-0.000072	0.000018	-0.000246
0.2496	308.007	2.359	0.265	5.739	-0.618	20.321	586.367	-0.000165	-0.000019	-0.000402
0.2504	353.754	5.278	1.475	10.186	-0.615	20.323	673.456	-0.000369	-0.000103	-0.000713
0.2512	422.449	9.906	3.643	17.119	-0.609	20.325	804.234	-0.000693	-0.000255	-0.001198
0.2520	513.310	15.840	7.145	26.459	-0.610	20.327	977.211	-0.001109	-0.000500	-0.001852
0.2528	620.628	22.984	11.688	37.588	-0.607	20.329	1181.517	-0.001609	-0.000818	-0.002631
0.2536	737.730	30.529	17.079	49.594	-0.607	20.331	1404.448	-0.002137	-0.001196	-0.003472
0.2544	859.880	38.407	23.138	62.005	-0.614	20.332	1636.992	-0.002688	-0.001620	-0.004340
0.2552	982.377	46.842	29.434	74.664	-0.617	20.331	1870.193	-0.003279	-0.002060	-0.005226
0.2560	1101.282	55.013	35.660	86.755	-0.617	20.331	2096.558	-0.003851	-0.002496	-0.006073
0.2568	1213.063	62.851	41.676	98.150	-0.621	20.330	2309.361	-0.004400	-0.002917	-0.006871
0.2576	1314.865	70.023	47.235	108.489	-0.616	20.329	2503.166	-0.004902	-0.003306	-0.007594
0.2584	1405.472	76.233	52.446	117.341	-0.610	20.328	2675.657	-0.005336	-0.003671	-0.008214
0.2592	1483.965	81.820	57.087	125.109	-0.610	20.327	2825.089	-0.005727	-0.003996	-0.008758
0.2600	1550.526	86.601	61.242	131.794	-0.610	20.325	2951.803	-0.006062	-0.004287	-0.009226
0.2608	1605.274	90.715	64.717	137.352	-0.610	20.323	3056.030	-0.006350	-0.004530	-0.009615
0.2616	1648.677	93.980	67.495	142.022	-0.617	20.320	3138.657	-0.006579	-0.004725	-0.009942
0.2624	1681.679	96.495	69.803	145.689	-0.616	20.318	3201.485	-0.006755	-0.004886	-0.010198
0.2632	1704.808	98.411	71.485	148.357	-0.611	20.317	3245.516	-0.006889	-0.005004	-0.010385
0.2640	1719.055	99.772	72.666	150.233	-0.611	20.315	3272.638	-0.006984	-0.005087	-0.010516
0.2648	1725.667	100.927	73.597	151.455	-0.613	20.314	3285.227	-0.007065	-0.005152	-0.010602
0.2656	1725.953	101.344	74.043	152.137	-0.616	20.314	3285.770	-0.007094	-0.005183	-0.010650
0.2664	1721.294	101.679	74.210	152.346	-0.620	20.314	3276.901	-0.007118	-0.005195	-0.010664
0.2672	1712.652	101.540	74.266	152.165	-0.621	20.315	3260.450	-0.007108	-0.005199	-0.010652
0.2680	1698.811	100.803	73.890	151.594	-0.613	20.317	3234.100	-0.007056	-0.005172	-0.010612
0.2688	1673.684	99.747	73.138	150.149	-0.612	20.319	3186.264	-0.006982	-0.005120	-0.010510
0.2696	1627.817	97.024	71.331	146.800	-0.615	20.321	3098.946	-0.006792	-0.004993	-0.010276
0.2704	1554.989	92.717	68.149	141.186	-0.614	20.323	2960.300	-0.006490	-0.004770	-0.009883
0.2712	1455.216	86.658	63.258	132.890	-0.619	20.325	2770.357	-0.006066	-0.004428	-0.009302
0.2720	1335.575	79.043	57.046	122.426	-0.617	20.327	2542.591	-0.005533	-0.003993	-0.008570
0.2728	1208.810	70.981	50.334	110.962	-0.615	20.329	2301.264	-0.004969	-0.003523	-0.007767
0.2736	1085.983	62.948	43.455	99.094	-0.609	20.331	2067.432	-0.004406	-0.003042	-0.006937
0.2744	973.901	55.527	37.507	87.992	-0.607	20.332	1854.057	-0.003887	-0.002626	-0.006159
0.2752	876.352	49.052	32.465	78.222	-0.612	20.332	1668.348	-0.003434	-0.002273	-0.005476
0.2760	793.545	43.286	28.004	69.565	-0.606	20.331	1510.706	-0.003030	-0.001960	-0.004870
0.2768	723.167	38.339	24.489	62.186	-0.611	20.330	1376.724	-0.002684	-0.001714	-0.004353
0.2776	661.505	33.824	21.182	55.391	-0.605	20.329	1259.336	-0.002368	-0.001483	-0.003877
0.2784	604.593	29.502	18.123	48.916	-0.599	20.328	1150.990	-0.002065	-0.001269	-0.003424
0.2792	549.709	25.625	15.399	42.649	-0.601	20.327	1046.505	-0.001794	-0.001078	-0.002985
0.2800	495.637	21.470	12.815	36.340	-0.600	20.325	943.565	-0.001503	-0.000897	-0.002544
0.2808	442.707	17.356	10.230	30.059	-0.599	20.323	842.800	-0.001215	-0.000716	-0.002104
0.2816	392.933	13.535	7.812	23.902	-0.601	20.321	748.043	-0.000947	-0.000547	-0.001673
0.2824	348.494	9.879	5.812	18.274	-0.601	20.319	663.443	-0.000692	-0.000407	-0.001279
0.2832	311.599	6.793	3.949	13.368	-0.600	20.317	593.204	-0.000476	-0.000276	-0.000936
0.2840	283.781	4.584	2.644	9.352	-0.603	20.316	540.247	-0.000321	-0.000185	-0.000655
0.2848	265.206	2.902	1.907	6.865	-0.607	20.314	504.885	-0.000203	-0.000134	-0.000481
0.2856	255.062	1.666	1.296	5.377	-0.607	20.315	485.573	-0.000117	-0.000091	-0.000376
0.2864	251.876	1.193	1.004	4.586	-0.608	20.315	479.507	-0.000084	-0.000070	-0.000321
0.2872	253.920	0.873	0.795	4.725	-0.611	20.316	483.398	-0.000061	-0.000056	-0.000331
0.2880	260.382	0.927	0.656	4.696	-0.604	20.318	495.701	-0.000065	-0.000046	-0.000329
0.2888	273.412	1.511	0.683	5.433	-0.605	20.319	520.506	-0.000106	-0.000048	-0.000380
0.2896	298.930	2.817	1.044	7.726	-0.609	20.321	569.086	-0.000197	-0.000073	-0.000541
0.2904	343.474	5.638	2.197	11.867	-0.611	20.323	653.887	-0.000395	-0.000154	-0.000831
0.2912	410.606	9.876	4.240	18.747	-0.613	20.325	781.689	-0.000691	-0.000297	-0.001312
0.2920	500.732	15.837	7.700	28.141	-0.615	20.327	953.264	-0.001109	-0.000539	-0.001970
0.2928	608.981	22.897	12.356	39.480	-0.615	20.329	1159.344	-0.001603	-0.000865	-0.002764
0.2936	728.818	30.512	17.805	51.917	-0.608	20.331	1387.482	-0.002136	-0.001246	-0.003634
0.2944	855.041	38.823	24.073	64.994	-0.614	20.332	1627.779	-0.002718	-0.001685	-0.004550
0.2952	982.046	47.232	30.673	77.973	-0.615	20.332	1869.564	-0.003306	-0.002147	-0.005458
0.2960	1105.249	55.598	37.190	90.410	-0.615	20.331	2104.111	-0.003892	-0.002603	-0.006329
0.2968	1220.502	63.532	43.623	101.902	-0.618	20.330	2323.523	-0.004447	-0.003054	-0.007133
0.2976	1323.988	70.646	49.404	112.185	-0.615	20.329	2520.533	-0.004945	-0.003458	-0.007853
0.2984	1413.587	76.969	54.503	121.009	-0.611	20.328	2691.107	-0.005388	-0.003815	-0.008471
0.2992	1488.248	82.388	59.116	128.319	-0.611	20.327	2833.242	-0.005767	-0.004138	-0.008982
0.3000	1548.407	86.795	62.965	134.421	-0.612	20.325	2947.769	-0.006076	-0.004408	-0.009409
0.3008	1595.822	90.521	66.077	139.215	-0.609	20.323	3038.034	-0.006336	-0.004625	-0.009745
0.3016	1632.341	93.327	68.635	142.980	-0.609	20.320	3107.557	-0.006533	-0.004804	-0.010009
0.3024	1659.767	95.496	70.539	146.120	-0.608	20.319	3159.771	-0.006685	-0.004938	-0.010228
0.3032	1679.650	97.303	71.818	148.342	-0.607	20.317	3197.622	-0.006811	-0.005027	-0.010384
0.3040	1693.070	98.525	72.874	149.955	-0.609	20.316	3223.171	-0.006897	-0.005101	-0.010497
0.3048	1700.795	99.484	73.666	151.471	-0.619	20.314	3237.877	-0.006964	-0.005157	-0.010603
0.3056	1703.365	100.275	74.071	152.223	-0.625	20.314	3242.769	-0.007019	-0.005185	-0.010656
0.3064	1701.441	100.594	74.543	152.612	-0.625	20.314	3239.107	-0.007042	-0.005218	-0.010683
0.3072	1695.385	100.691	74.640	152.611	-0.624	20.315	3227.577	-0.007048	-0.005225	-0.010683
0.3080	1684.639	100.608	74.376	151.999	-0.616	20.317	3207.121	-0.007043	-0.005206	-0.010640
0.3088	1665.148	99.690	73.917	150.761	-0.608	20.319	3170.013	-0.006978	-0.005174	-0.010553
0.3096	1627.396	97.758	72.512	148.247	-0.611	20.320	3098.145	-0.006843	-0.005076	-0.010377
0.3104	1563.450	94.006	69.719	143.410	-0.609	20.322	2976.408	-0.006580	-0.004880	-0.010039
0.3112	1470.710	88.239	65.119	135.782	-0.607	20.324	2799.854	-0.006177	-0.004558	-0.009505
0.3120	1353.203	80.818	59.046	125.763	-0.611	20.326	2576.151	-0.005657	-0.004133	-0.008803
0.3128	1222.922	72.328	51.945	114.007	-0.608	20.329	2328.129	-0.005063	-0.003636	-0.007980
0.3136	1091.649	63.587	44.733	101.501	-0.608	20.331	2078.218	-0.004451	-0.003131	-0.007105
0.3144	967.619	55.403	38.313	89.410	-0.615	20.331	1842.098	-0.003878	-0.002682	-0.006259
0.3152	856.800	47.942	32.685	78.292	-0.616	20.331	1631.126	-0.003356	-0.002288	-0.005480
0.3160	761.835	41.424	27.710	68.356	-0.616	20.331	1450.338	-0.002900	-0.001940	-0.004785
0.3168	683.657	36.059	23.612	60.130	-0.619	20.329	1301.508	-0.002524	-0.001653	-0.004209
0.3176	620.373	31.321	20.192	52.987	-0.611	20.328	1181.030	-0.002192	-0.001413	-0.003709
0.3184	568.074	27.346	17.150	46.719	-0.603	20.328	1081.467	-0.001914	-0.001200	-0.003270
0.3192	522.748	23.913	14.829	41.286	-0.601	20.326	995.178	-0.001674	-0.001038	-0.002890
0.3200	480.608	20.732	12.785	36.061	-0.597	20.325	914.955	-0.001451	-0.000895	-0.002524
0.3208	439.897	17.494	10.674	31.073	-0.596	20.323	837.450	-0.001225	-0.000747	-0.002175
0.3216	400.522	14.465	8.867	26.308	-0.601	20.320	762.491	-0.001013	-0.000621	-0.001842
0.3224	363.507	11.589	7.130	21.527	-0.599	20.318	692.024	-0.000811	-0.000499	-0.001507
0.3232	330.550	8.698	5.421	17.149	-0.596	20.317	629.282	-0.000609	-0.000380	-0.001200
0.3240	303.499	6.516	4.114	13.551	-0.598	20.316	577.784	-0.000456	-0.000288	-0.000949
0.3248	283.661	5.001	3.184	10.896	-0.599	20.314	540.018	-0.000350	-0.000223	-0.000763
0.3256	271.173	3.639	2.434	9.075	-0.602	20.314	516.243	-0.000255	-0.000170	-0.000635
0.3264	265.822	3.013	2.059	8.019	-0.607	20.314	506.058	-0.000211	-0.000144	-0.000561
0.3272	266.544	2.777	1.892	7.572	-0.610	20.316	507.431	-0.000194	-0.000132	-0.000530
0.3280	272.675	2.611	1.753	7.448	-0.612	20.318	519.104	-0.000183	-0.000123	-0.000521
0.3288	287.163	3.235	1.878	8.282	-0.612	20.319	546.684	-0.000226	-0.000131	-0.000580
0.3296	316.363	4.958	2.488	11.033	-0.616	20.321	602.274	-0.000347	-0.000174	-0.000772
0.3304	366.332	7.917	3.781	16.106	-0.613	20.322	697.403	-0.000554	-0.000265	-0.001127
0.3312	439.987	12.308	6.143	23.706	-0.611	20.325	837.622	-0.000862	-0.000430	-0.001659
0.3320	535.868	18.619	9.980	33.865	-0.614	20.327	1020.155	-0.001303	-0.000699	-0.002371
0.3328	647.213	25.735	14.858	45.428	-0.609	20.329	1232.128	-0.001801	-0.001040	-0.003180
0.3336	766.509	33.491	20.444	57.518	-0.610	20.331	1459.236	-0.002344	-0.001431	-0.004026
0.3344	887.984	41.829	26.656	70.206	-0.615	20.332	1690.493	-0.002928	-0.001866	-0.004914
0.3352	1006.167	49.694	32.825	82.380	-0.617	20.331	1915.483	-0.003479	-0.002298	-0.005767
0.3360	1117.708	57.295	38.799	93.552	-0.621	20.331	2127.829	-0.004011	-0.002716	-0.006549
0.3368	1220.397	64.229	44.650	103.987	-0.620	20.330	2323.322	-0.004496	-0.003125	-0.007279
0.3376	1312.626	70.524	49.847	112.936	-0.616	20.329	2498.903	-0.004937	-0.003489	-0.007906
0.3384	1394.065	76.110	54.669	120.787	-0.612	20.328	2653.942	-0.005328	-0.003827	-0.008455
0.3392	1464.353	81.001	59.006	127.874	-0.611	20.327	2787.752	-0.005670	-0.004130	-0.008951
0.3400	1524.076	85.405	62.730	133.711	-0.614	20.325	2901.449	-0.005978	-0.004391	-0.009360
0.3408	1574.346	89.157	65.953	138.728	-0.618	20.323	2997.150	-0.006241	-0.004617	-0.009711
0.3416	1615.990	92.366	68.621	142.967	-0.623	20.321	3076.429	-0.006466	-0.004803	-0.010008
0.3424	1649.593	95.019	70.915	146.511	-0.626	20.318	3140.402	-0.006651	-0.004964	-0.010256
0.3432	1675.081	97.202	72.541	149.249	-0.625	20.317	3188.925	-0.006804	-0.005078	-0.010447
0.3440	1692.319	98.689	73.737	151.237	-0.621	20.315	3221.741	-0.006908	-0.005162	-0.010587
0.3448	1701.997	99.857	74.724	152.848	-0.628	20.314	3240.166	-0.006990	-0.005231	-0.010699
0.3456	1704.913	100.664	75.236	153.487	-0.624	20.314	3245.716	-0.007046	-0.005267	-0.010744
0.3464	1702.373	101.067	75.597	153.834	-0.628	20.314	3240.881	-0.007075	-0.005292	-0.010768
0.3472	1695.415	101.109	75.694	153.764	-0.626	20.315	3227.634	-0.007078	-0.005299	-0.010763
0.3480	1682.836	100.638	75.321	153.027	-0.616	20.317	3203.688	-0.007045	-0.005272	-0.010712
0.3488	1659.452	99.595	74.626	151.679	-0.617	20.319	3159.170	-0.006972	-0.005224	-0.010618
0.3496	1616.471	97.093	73.014	148.594	-0.615	20.320	3077.345	-0.006796	-0.005111	-0.010402
0.3504	1547.460	93.021	69.777	143.284	-0.614	20.322	2945.967	-0.006511	-0.004884	-0.010030
0.3512	1451.233	87.197	65.093	135.267	-0.613	20.325	2762.775	-0.006104	-0.004556	-0.009469
0.3520	1333.621	79.596	58.908	125.095	-0.611	20.327	2538.872	-0.005572	-0.004124	-0.008757
0.3528	1206.511	71.383	51.946	113.560	-0.609	20.329	2296.886	-0.004997	-0.003636	-0.007949
0.3536	1081.204	63.058	45.109	101.596	-0.604	20.331	2058.334	-0.004414	-0.003158	-0.007112
0.3544	965.560	55.374	38.855	90.312	-0.603	20.331	1838.179	-0.003876	-0.002720	-0.006322
0.3552	864.359	48.717	33.575	80.112	-0.605	20.331	1645.517	-0.003410	-0.002350	-0.005608
0.3560	778.832	42.756	28.990	71.205	-0.600	20.331	1482.697	-0.002993	-0.002029	-0.004984
0.3568	707.733	37.796	25.307	63.660	-0.604	20.329	1347.342	-0.002646	-0.001772	-0.004456
0.3576	648.235	33.224	21.958	57.129	-0.600	20.329	1234.074	-0.002326	-0.001537	-0.003999
0.3584	596.342	29.250	18.930	51.016	-0.599	20.328	1135.283	-0.002047	-0.001325	-0.003571
0.3592	548.582	25.805	16.553	45.414	-0.602	20.327	1044.359	-0.001806	-0.001159	-0.003179
0.3600	502.400	22.386	14.302	39.897	-0.603	20.325	956.440	-0.001567	-0.001001	-0.002793
0.3608	456.834	19.036	12.133	34.227	-0.604	20.323	869.694	-0.001333	-0.000849	-0.002396
0.3616	412.470	15.715	10.089	28.958	-0.604	20.321	785.236	-0.001100	-0.000706	-0.002027
0.3624	370.616	12.323	8.074	23.817	-0.606	20.319	705.557	-0.000863	-0.000565	-0.001667
0.3632	333.255	9.168	6.045	18.939	-0.603	20.317	634.432	-0.000642	-0.000423	-0.001326
0.3640	302.131	6.612	4.447	14.812	-0.607	20.316	575.180	-0.000463	-0.000311	-0.001037
0.3648	278.717	4.708	3.448	11.686	-0.614	20.314	530.605	-0.000330	-0.000241	-0.000818
0.3656	263.508	3.388	2.572	9.421	-0.612	20.315	501.652	-0.000237	-0.000180	-0.000659
0.3664	255.994	2.457	2.309	8.143	-0.616	20.315	487.347	-0.000172	-0.000162	-0.000570
0.3672	255.047	1.970	2.254	7.670	-0.617	20.316	485.544	-0.000138	-0.000158	-0.000537
0.3680	259.706	1.707	2.073	7.336	-0.615	20.318	494.413	-0.000120	-0.000145	-0.000514
0.3688	272.195	2.152	2.240	7.949	-0.619	20.319	518.188	-0.000151	-0.000157	-0.000556
0.3696	298.795	3.764	2.712	10.353	-0.625	20.321	568.829	-0.000263	-0.000190	-0.000725
0.3704	346.224	6.640	3.810	15.065	-0.627	20.322	659.122	-0.000465	-0.000267	-0.001055
0.3712	417.745	11.128	6.076	22.500	-0.628	20.325	795.279	-0.000779	-0.000425	-0.001575
0.3720	512.198	17.244	9.647	32.575	-0.627	20.327	975.094	-0.001207	-0.000675	-0.002280
0.3728	623.303	24.372	14.511	44.123	-0.623	20.329	1186.609	-0.001706	-0.001016	-0.003089
0.3736	743.741	32.183	20.263	56.199	-0.618	20.332	1415.892	-0.002253	-0.001418	-0.003934
0.3744	868.176	40.340	26.557	68.982	-0.617	20.332	1652.784	-0.002824	-0.001859	-0.004829
0.3752	990.898	48.594	33.102	81.684	-0.621	20.332	1886.415	-0.003402	-0.002317	-0.005718
0.3760	1106.887	56.446	39.273	93.287	-0.621	20.331	2107.229	-0.003951	-0.002749	-0.006530
0.3768	1212.236	63.782	45.081	104.100	-0.629	20.330	2307.787	-0.004465	-0.003156	-0.007287
0.3776	1304.691	70.313	50.180	113.299	-0.620	20.329	2483.797	-0.004922	-0.003513	-0.007931
0.3784	1384.687	75.886	54.669	120.955	-0.617	20.329	2636.089	-0.005312	-0.003827	-0.008467
0.3792	1453.427	80.902	58.865	127.764	-0.613	20.328	2766.953	-0.005663	-0.004121	-0.008943
0.3800	1512.444	85.210	62.604	133.725	-0.606	20.326	2879.305	-0.005965	-0.004382	-0.009361
0.3808	1563.195	89.004	65.939	138.728	-0.615	20.323	2975.922	-0.006230	-0.004616	-0.009711
0.3816	1606.732	92.311	68.912	143.064	-0.612	20.321	3058.805	-0.006462	-0.004824	-0.010014
0.3824	1643.717	95.189	71.262	146.954	-0.614	20.319	3129.215	-0.006663	-0.004988	-0.010287
0.3832	1674.105	97.566	73.180	149.957	-0.610	20.317	3187.065	-0.006830	-0.005123	-0.010497
0.3840	1697.233	99.427	74.777	152.417	-0.600	20.316	3231.096	-0.006960	-0.005234	-0.010669
0.3848	1712.322	100.761	75.902	154.391	-0.607	20.314	3259.821	-0.007053	-0.005313	-0.010807
0.3856	1719.220	101.525	76.652	155.405	-0.604	20.314	3272.953	-0.007107	-0.005366	-0.010878
0.3864	1718.889	101.955	77.027	156.014	-0.606	20.314	3272.324	-0.007137	-0.005392	-0.010921
0.3872	1712.172	101.886	77.069	156.041	-0.608	20.315	3259.535	-0.007132	-0.005395	-0.010923
0.3880	1697.910	101.484	76.764	155.319	-0.595	20.317	3232.384	-0.007104	-0.005373	-0.010872
0.3888	1669.716	100.149	75.847	153.707	-0.599	20.319	3178.711	-0.007010	-0.005309	-0.010759
0.3896	1618.785	97.315	73.762	149.997	-0.599	20.320	3081.751	-0.006812	-0.005163	-0.010500
0.3904	1540.878	92.869	70.094	143.967	-0.599	20.322	2933.435	-0.006501	-0.004907	-0.010078
0.3912	1437.287	86.504	64.855	135.295	-0.607	20.325	2736.225	-0.006055	-0.004540	-0.009471
0.3920	1316.353	78.930	58.462	124.638	-0.604	20.327	2505.999	-0.005525	-0.004092	-0.008725
0.3928	1190.896	70.925	51.666	113.159	-0.604	20.329	2267.160	-0.004965	-0.003617	-0.007921
0.3936	1070.564	62.782	44.981	101.583	-0.604	20.331	2038.078	-0.004395	-0.003149	-0.007111
0.3944	961.638	55.471	39.062	90.981	-0.603	20.331	1830.711	-0.003883	-0.002734	-0.006369
0.3952	867.785	49.260	33.992	81.462	-0.609	20.331	1652.040	-0.003448	-0.002379	-0.005702
0.3960	788.706	43.701	29.657	73.207	-0.608	20.331	1501.493	-0.003059	-0.002076	-0.005125
0.3968	721.709	39.115	26.169	66.065	-0.607	20.330	1373.949	-0.002738	-0.001832	-0.004625
0.3976	662.212	34.752	22.931	59.437	-0.604	20.329	1260.681	-0.002433	-0.001605	-0.004161
0.3984	605.825	30.292	19.901	53.002	-0.597	20.328	1153.336	-0.002120	-0.001393	-0.003710
0.3992	549.574	26.124	17.177	46.568	-0.596	20.327	1046.247	-0.001829	-0.001202	-0.003260
Test Cycles
Time (sec)	Axial stress (kPa)	Axial micro-strain #1	Axial micro-strain #2	Axial micro-strain #3	Confining pressure (kPa)	Temperature (�C)	Load (N)	Displacement #1 (mm)	Displacement #2 (mm)	Displacement #3 (mm)
0.0000	492.496	22.025	14.302	39.952	-0.596	20.325	937.586	-0.001542	-0.001001	-0.002797
0.0008	435.929	17.786	11.550	33.156	-0.592	20.323	829.897	-0.001245	-0.000808	-0.002321
0.0016	382.338	13.895	9.103	26.735	-0.590	20.321	727.873	-0.000973	-0.000637	-0.001871
0.0024	334.442	10.170	6.797	20.690	-0.595	20.319	636.692	-0.000712	-0.000476	-0.001448
0.0032	294.707	6.780	4.921	15.368	-0.590	20.317	561.047	-0.000475	-0.000344	-0.001076
0.0040	264.906	4.194	3.615	11.297	-0.592	20.316	504.313	-0.000294	-0.000253	-0.000791
0.0048	245.504	2.346	2.685	8.698	-0.600	20.314	467.377	-0.000164	-0.000188	-0.000609
0.0056	235.375	1.303	2.130	6.821	-0.599	20.314	448.093	-0.000091	-0.000149	-0.000477
0.0064	233.121	0.719	1.976	6.099	-0.608	20.314	443.802	-0.000050	-0.000138	-0.000427
0.0072	237.118	0.651	1.823	5.988	-0.612	20.315	451.412	-0.000046	-0.000128	-0.000419
0.0080	248.194	0.902	1.796	6.252	-0.608	20.318	472.498	-0.000063	-0.000126	-0.000438
0.0088	271.849	2.056	2.018	8.449	-0.612	20.319	517.530	-0.000144	-0.000141	-0.000591
0.0096	313.478	4.641	2.893	12.507	-0.608	20.321	596.781	-0.000325	-0.000203	-0.000875
0.0104	376.161	8.684	4.756	18.956	-0.609	20.323	716.114	-0.000608	-0.000333	-0.001327
0.0112	459.704	14.257	7.785	27.642	-0.611	20.325	875.158	-0.000998	-0.000545	-0.001935
0.0120	559.312	20.705	12.050	38.190	-0.609	20.327	1064.787	-0.001449	-0.000844	-0.002673
0.0128	669.395	27.862	17.109	49.738	-0.609	20.329	1274.357	-0.001950	-0.001198	-0.003482
0.0136	786.121	35.352	22.626	61.590	-0.604	20.331	1496.572	-0.002475	-0.001584	-0.004311
0.0144	906.168	43.397	28.754	74.040	-0.604	20.332	1725.111	-0.003038	-0.002013	-0.005183
0.0152	1025.659	51.567	35.146	86.032	-0.606	20.331	1952.591	-0.003610	-0.002460	-0.006022
0.0160	1141.092	59.335	41.358	97.426	-0.609	20.331	2172.346	-0.004153	-0.002895	-0.006820
0.0168	1248.951	66.784	47.500	108.294	-0.612	20.330	2377.682	-0.004675	-0.003325	-0.007581
0.0176	1345.719	73.343	53.126	117.884	-0.607	20.329	2561.903	-0.005134	-0.003719	-0.008252
0.0184	1430.073	79.096	58.032	126.069	-0.597	20.328	2722.492	-0.005537	-0.004062	-0.008825
0.0192	1500.887	84.211	62.492	133.239	-0.599	20.327	2857.304	-0.005895	-0.004374	-0.009327
0.0200	1558.326	88.505	66.188	139.019	-0.595	20.325	2966.652	-0.006195	-0.004633	-0.009731
0.0208	1603.967	91.938	69.121	143.480	-0.600	20.323	3053.541	-0.006436	-0.004838	-0.010044
0.0216	1639.284	94.759	71.470	147.275	-0.608	20.321	3120.775	-0.006633	-0.005003	-0.010309
0.0224	1666.455	97.079	73.361	150.111	-0.607	20.318	3172.503	-0.006796	-0.005135	-0.010508
0.0232	1686.939	98.927	74.695	152.209	-0.607	20.317	3211.498	-0.006925	-0.005229	-0.010655
0.0240	1701.727	100.246	75.639	153.987	-0.603	20.316	3239.651	-0.007017	-0.005295	-0.010779
0.0248	1711.255	101.302	76.514	155.223	-0.606	20.314	3257.790	-0.007091	-0.005356	-0.010866
0.0256	1715.267	101.760	76.973	156.042	-0.608	20.314	3265.429	-0.007123	-0.005388	-0.010923
0.0264	1714.411	101.914	77.362	156.515	-0.609	20.314	3263.798	-0.007134	-0.005415	-0.010956
0.0272	1708.910	101.942	77.487	156.501	-0.610	20.315	3253.326	-0.007136	-0.005424	-0.010955
0.0280	1698.255	101.608	77.126	156.028	-0.601	20.317	3233.042	-0.007113	-0.005399	-0.010922
0.0288	1678.388	100.914	76.625	154.916	-0.596	20.319	3195.219	-0.007064	-0.005364	-0.010844
0.0296	1638.998	98.857	75.179	152.344	-0.596	20.321	3120.232	-0.006920	-0.005263	-0.010664
0.0304	1571.656	94.799	72.081	147.161	-0.595	20.322	2992.029	-0.006636	-0.005046	-0.010301
0.0312	1473.926	88.880	67.329	139.352	-0.596	20.325	2805.977	-0.006222	-0.004713	-0.009755
0.0320	1351.640	81.181	60.950	128.708	-0.596	20.327	2573.175	-0.005683	-0.004267	-0.009010
0.0328	1218.774	72.760	53.641	116.479	-0.597	20.329	2320.232	-0.005093	-0.003755	-0.008153
0.0336	1088.042	64.227	46.498	104.083	-0.595	20.331	2071.352	-0.004496	-0.003255	-0.007286
0.0344	968.100	56.335	40.079	92.299	-0.598	20.332	1843.014	-0.003943	-0.002806	-0.006461
0.0352	863.277	49.136	34.478	81.946	-0.605	20.332	1643.457	-0.003440	-0.002413	-0.005736
0.0360	774.729	42.702	29.878	72.860	-0.607	20.331	1474.886	-0.002989	-0.002091	-0.005100
0.0368	701.616	37.574	26.113	65.133	-0.609	20.329	1335.697	-0.002630	-0.001828	-0.004559
0.0376	640.000	32.960	22.778	58.144	-0.605	20.328	1218.395	-0.002307	-0.001594	-0.004070
0.0384	585.311	28.791	19.819	51.696	-0.598	20.328	1114.283	-0.002015	-0.001387	-0.003619
0.0392	533.644	25.123	17.109	45.636	-0.596	20.326	1015.921	-0.001759	-0.001198	-0.003195
0.0400	483.088	21.441	14.509	39.632	-0.596	20.325	919.676	-0.001501	-0.001016	-0.002774
0.0408	434.081	17.648	12.091	33.838	-0.597	20.323	826.378	-0.001235	-0.000846	-0.002369
0.0416	387.898	14.286	9.882	28.154	-0.597	20.320	738.459	-0.001000	-0.000692	-0.001971
0.0424	346.194	10.978	7.979	22.874	-0.595	20.318	659.065	-0.000768	-0.000559	-0.001601
0.0432	310.818	7.948	6.465	17.941	-0.591	20.317	591.717	-0.000556	-0.000453	-0.001256
0.0440	283.511	5.669	5.145	13.981	-0.587	20.316	539.732	-0.000397	-0.000360	-0.000979
0.0448	265.086	4.057	4.380	11.341	-0.592	20.314	504.656	-0.000284	-0.000307	-0.000794
0.0456	255.242	3.002	3.741	9.436	-0.595	20.314	485.916	-0.000210	-0.000262	-0.000661
0.0464	252.763	2.600	3.283	8.826	-0.596	20.314	481.195	-0.000182	-0.000230	-0.000618
0.0472	255.738	2.612	3.173	8.701	-0.601	20.315	486.860	-0.000183	-0.000222	-0.000609
0.0480	263.703	2.626	3.007	8.907	-0.595	20.318	502.024	-0.000184	-0.000210	-0.000624
0.0488	279.709	3.375	3.242	10.243	-0.595	20.319	532.494	-0.000236	-0.000227	-0.000717
0.0496	309.540	5.195	3.895	13.118	-0.601	20.321	589.285	-0.000364	-0.000273	-0.000918
0.0504	358.578	8.196	5.215	18.246	-0.597	20.322	682.640	-0.000574	-0.000365	-0.001277
0.0512	429.151	12.935	7.633	25.681	-0.599	20.325	816.994	-0.000905	-0.000534	-0.001798
0.0520	519.307	18.912	11.163	35.144	-0.599	20.327	988.626	-0.001324	-0.000781	-0.002460
0.0528	623.408	25.638	15.763	45.927	-0.596	20.329	1186.810	-0.001795	-0.001103	-0.003215
0.0536	736.106	32.781	21.042	57.308	-0.596	20.331	1401.358	-0.002295	-0.001473	-0.004012
0.0544	853.208	40.354	26.780	69.468	-0.603	20.332	1624.289	-0.002825	-0.001875	-0.004863
0.0552	970.850	48.288	32.880	81.587	-0.607	20.332	1848.249	-0.003380	-0.002302	-0.005711
0.0560	1085.682	56.070	38.952	93.135	-0.609	20.331	2066.860	-0.003925	-0.002727	-0.006519
0.0568	1194.458	63.546	45.025	104.084	-0.616	20.330	2273.941	-0.004448	-0.003152	-0.007286
0.0576	1294.262	70.466	50.723	113.686	-0.609	20.329	2463.942	-0.004933	-0.003551	-0.007958
0.0584	1382.989	76.302	55.794	122.190	-0.608	20.329	2632.856	-0.005341	-0.003906	-0.008553
0.0592	1459.890	81.542	60.339	129.778	-0.608	20.327	2779.255	-0.005708	-0.004224	-0.009084
0.0600	1525.098	86.323	64.341	136.283	-0.605	20.325	2903.395	-0.006043	-0.004504	-0.009540
0.0608	1579.486	90.200	67.801	141.716	-0.609	20.323	3006.935	-0.006314	-0.004746	-0.009920
0.0616	1624.406	93.618	70.678	146.163	-0.608	20.320	3092.451	-0.006553	-0.004947	-0.010231
0.0624	1660.624	96.439	73.124	149.832	-0.612	20.318	3161.402	-0.006751	-0.005119	-0.010488
0.0632	1688.336	98.634	74.957	152.443	-0.609	20.317	3214.159	-0.006904	-0.005247	-0.010671
0.0640	1707.738	100.287	76.208	154.541	-0.607	20.315	3251.095	-0.007020	-0.005335	-0.010818
0.0648	1719.175	101.608	77.181	156.223	-0.612	20.314	3272.867	-0.007113	-0.005403	-0.010936
0.0656	1723.338	102.248	77.751	157.030	-0.609	20.314	3280.792	-0.007157	-0.005443	-0.010992
0.0664	1721.594	102.345	77.946	157.544	-0.612	20.314	3277.473	-0.007164	-0.005456	-0.011028
0.0672	1714.441	102.291	77.987	157.434	-0.612	20.315	3263.855	-0.007160	-0.005459	-0.011020
0.0680	1700.615	101.831	77.721	156.640	-0.605	20.317	3237.534	-0.007128	-0.005440	-0.010965
0.0688	1673.413	100.567	76.929	155.055	-0.605	20.319	3185.749	-0.007040	-0.005385	-0.010854
0.0696	1623.639	97.982	74.956	151.609	-0.605	20.320	3090.992	-0.006859	-0.005247	-0.010613
0.0704	1546.709	93.479	71.330	145.729	-0.604	20.323	2944.536	-0.006544	-0.004993	-0.010201
0.0712	1443.043	86.824	66.147	137.295	-0.603	20.324	2747.183	-0.006078	-0.004630	-0.009611
0.0720	1321.944	79.054	59.575	126.817	-0.600	20.327	2516.642	-0.005534	-0.004170	-0.008877
0.0728	1196.877	71.050	52.821	115.243	-0.597	20.329	2278.547	-0.004974	-0.003697	-0.008067
0.0736	1078.469	63.227	46.360	103.794	-0.593	20.331	2053.127	-0.004426	-0.003245	-0.007266
0.0744	973.570	56.430	40.718	93.400	-0.593	20.331	1853.428	-0.003950	-0.002850	-0.006538
0.0752	883.565	50.539	36.076	84.186	-0.597	20.331	1682.081	-0.003538	-0.002525	-0.005893
0.0760	806.469	45.036	31.978	76.319	-0.595	20.331	1535.311	-0.003153	-0.002238	-0.005342
0.0768	737.985	40.187	28.379	69.246	-0.595	20.329	1404.934	-0.002813	-0.001987	-0.004847
0.0776	673.438	35.436	24.836	62.159	-0.594	20.329	1282.053	-0.002481	-0.001738	-0.004351
0.0784	610.183	30.863	21.487	55.030	-0.586	20.328	1161.633	-0.002160	-0.001504	-0.003852
0.0792	547.109	26.555	18.416	47.749	-0.587	20.326	1041.555	-0.001859	-0.001289	-0.003342
0.0800	485.222	22.094	15.484	40.370	-0.589	20.325	923.738	-0.001547	-0.001084	-0.002826
0.0808	426.702	17.869	12.774	33.463	-0.588	20.323	812.330	-0.001251	-0.000894	-0.002342
0.0816	373.877	13.853	10.232	27.029	-0.592	20.321	711.765	-0.000970	-0.000716	-0.001892
0.0824	329.002	10.225	7.922	21.331	-0.591	20.319	626.335	-0.000716	-0.000555	-0.001493
0.0832	293.370	7.237	6.143	16.411	-0.588	20.317	558.500	-0.000507	-0.000430	-0.001149
0.0840	267.461	4.986	4.893	12.659	-0.592	20.316	509.176	-0.000349	-0.000342	-0.000886
0.0848	250.914	3.583	4.101	10.172	-0.592	20.314	477.676	-0.000251	-0.000287	-0.000712
0.0856	242.303	2.555	3.630	8.770	-0.593	20.314	461.283	-0.000179	-0.000254	-0.000614
0.0864	240.064	2.180	3.296	8.271	-0.600	20.315	457.020	-0.000153	-0.000231	-0.000579
0.0872	242.859	1.860	3.128	8.160	-0.602	20.316	462.341	-0.000130	-0.000219	-0.000571
0.0880	250.433	1.679	2.990	8.271	-0.600	20.318	476.761	-0.000118	-0.000209	-0.000579
0.0888	266.844	2.431	3.197	9.369	-0.602	20.319	508.003	-0.000170	-0.000224	-0.000656
0.0896	298.675	4.447	3.796	12.313	-0.603	20.320	568.600	-0.000311	-0.000266	-0.000862
0.0904	351.590	8.031	5.089	17.677	-0.603	20.323	669.336	-0.000562	-0.000356	-0.001237
0.0912	428.250	13.062	7.631	25.875	-0.605	20.325	815.277	-0.000914	-0.000534	-0.001811
0.0920	525.874	19.607	11.411	36.117	-0.610	20.327	1001.129	-0.001372	-0.000799	-0.002528
0.0928	638.091	26.596	16.400	47.915	-0.607	20.329	1214.762	-0.001862	-0.001148	-0.003354
0.0936	757.883	34.254	22.152	60.186	-0.603	20.331	1442.814	-0.002398	-0.001551	-0.004213
0.0944	879.057	42.341	28.280	72.582	-0.606	20.332	1673.498	-0.002964	-0.001980	-0.005081
0.0952	996.368	50.053	34.533	84.616	-0.607	20.331	1896.830	-0.003504	-0.002417	-0.005923
0.0960	1106.151	57.599	40.439	95.596	-0.610	20.331	2105.827	-0.004032	-0.002831	-0.006692
0.0968	1206.150	64.450	45.984	105.739	-0.615	20.329	2296.200	-0.004511	-0.003219	-0.007402
0.0976	1295.659	70.579	51.140	114.535	-0.614	20.329	2466.602	-0.004941	-0.003580	-0.008017
0.0984	1374.859	76.027	55.685	122.190	-0.607	20.328	2617.378	-0.005322	-0.003898	-0.008553
0.0992	1444.350	80.876	59.841	129.054	-0.609	20.326	2749.672	-0.005661	-0.004189	-0.009034
0.1000	1504.945	85.141	63.621	135.002	-0.604	20.325	2865.028	-0.005960	-0.004453	-0.009450
0.1008	1558.055	89.017	66.900	140.284	-0.603	20.323	2966.137	-0.006231	-0.004683	-0.009820
0.1016	1605.109	92.436	69.873	144.967	-0.605	20.320	3055.716	-0.006471	-0.004891	-0.010148
0.1024	1646.167	95.411	72.568	149.178	-0.599	20.318	3133.879	-0.006679	-0.005080	-0.010442
0.1032	1680.612	98.162	74.873	152.512	-0.600	20.316	3199.453	-0.006871	-0.005241	-0.010676
0.1040	1706.912	100.206	76.598	155.347	-0.600	20.315	3249.521	-0.007014	-0.005362	-0.010874
0.1048	1723.909	101.777	77.947	157.515	-0.607	20.314	3281.879	-0.007124	-0.005456	-0.011026
0.1056	1731.799	102.721	78.739	158.599	-0.608	20.314	3296.900	-0.007190	-0.005512	-0.011102
0.1064	1731.934	102.999	79.004	159.267	-0.613	20.314	3297.157	-0.007210	-0.005530	-0.011149
0.1072	1725.622	102.901	79.087	159.086	-0.613	20.315	3285.141	-0.007203	-0.005536	-0.011136
0.1080	1712.352	102.567	78.711	158.392	-0.607	20.317	3259.878	-0.007180	-0.005510	-0.011087
0.1088	1685.902	101.510	77.849	156.959	-0.610	20.318	3209.524	-0.007106	-0.005449	-0.010987
0.1096	1637.706	98.996	75.987	153.444	-0.611	20.320	3117.771	-0.006930	-0.005319	-0.010741
0.1104	1563.390	94.717	72.665	147.843	-0.612	20.322	2976.294	-0.006630	-0.005087	-0.010349
0.1112	1463.256	88.353	67.676	139.518	-0.611	20.324	2785.664	-0.006185	-0.004737	-0.009766
0.1120	1345.313	80.669	61.575	129.139	-0.612	20.326	2561.131	-0.005647	-0.004310	-0.009040
0.1128	1220.803	72.707	54.877	117.854	-0.607	20.329	2324.095	-0.005089	-0.003841	-0.008250
0.1136	1098.982	64.591	48.221	106.279	-0.603	20.331	2092.180	-0.004521	-0.003375	-0.007440
0.1144	987.246	57.295	42.301	95.455	-0.608	20.332	1879.463	-0.004011	-0.002961	-0.006682
0.1152	889.171	50.873	37.174	85.533	-0.611	20.331	1692.753	-0.003561	-0.002602	-0.005987
0.1160	805.703	45.036	32.686	76.987	-0.613	20.330	1533.852	-0.003153	-0.002288	-0.005389
0.1168	734.408	40.158	28.962	69.301	-0.615	20.329	1398.125	-0.002811	-0.002027	-0.004851
0.1176	670.793	35.558	25.501	62.255	-0.612	20.328	1277.018	-0.002489	-0.001785	-0.004358
0.1184	611.145	31.223	22.237	55.599	-0.608	20.327	1163.464	-0.002186	-0.001557	-0.003892
0.1192	552.940	27.151	19.248	48.818	-0.608	20.326	1052.656	-0.001901	-0.001347	-0.003417
0.1200	495.667	22.982	16.316	42.092	-0.610	20.324	943.623	-0.001609	-0.001142	-0.002946
0.1208	439.942	18.993	13.676	35.519	-0.607	20.322	837.536	-0.001330	-0.000957	-0.002486
0.1216	387.763	15.117	11.119	29.128	-0.605	20.320	738.201	-0.001058	-0.000778	-0.002039
0.1224	341.551	11.337	8.979	23.333	-0.605	20.318	650.225	-0.000794	-0.000629	-0.001633
0.1232	303.213	8.239	7.076	18.302	-0.599	20.316	577.240	-0.000577	-0.000495	-0.001281
0.1240	274.223	5.669	5.548	14.175	-0.603	20.315	522.051	-0.000397	-0.000388	-0.000992
0.1248	254.792	4.098	4.728	11.340	-0.607	20.314	485.058	-0.000287	-0.000331	-0.000794
0.1256	244.016	3.099	4.075	9.549	-0.613	20.314	464.544	-0.000217	-0.000285	-0.000668
0.1264	240.815	2.543	3.839	8.827	-0.620	20.314	458.450	-0.000178	-0.000269	-0.000618
0.1272	243.595	2.417	3.755	8.744	-0.624	20.315	463.743	-0.000169	-0.000263	-0.000612
0.1280	252.718	2.334	3.561	9.173	-0.625	20.317	481.110	-0.000163	-0.000249	-0.000642
0.1288	272.585	3.334	3.685	10.784	-0.623	20.319	518.932	-0.000233	-0.000258	-0.000755
0.1296	308.593	5.724	4.269	14.174	-0.621	20.320	587.482	-0.000401	-0.000299	-0.000992
0.1304	364.619	9.337	5.838	19.886	-0.617	20.322	694.141	-0.000654	-0.000409	-0.001392
0.1312	441.189	14.325	8.464	27.876	-0.616	20.324	839.911	-0.001003	-0.000592	-0.001951
0.1320	534.275	20.383	12.272	37.686	-0.616	20.326	1017.122	-0.001427	-0.000859	-0.002638
0.1328	638.151	26.873	17.038	48.499	-0.617	20.329	1214.876	-0.001881	-0.001193	-0.003395
0.1336	747.964	33.837	22.195	59.823	-0.616	20.331	1423.931	-0.002369	-0.001554	-0.004188
0.1344	859.926	41.271	27.809	71.386	-0.621	20.331	1637.077	-0.002889	-0.001947	-0.004997
0.1352	971.061	48.790	33.646	82.823	-0.623	20.331	1848.650	-0.003415	-0.002355	-0.005798
0.1360	1078.904	56.057	39.316	93.704	-0.625	20.331	2053.957	-0.003924	-0.002752	-0.006559
0.1368	1181.924	63.074	44.929	103.974	-0.625	20.329	2250.080	-0.004415	-0.003145	-0.007278
0.1376	1278.827	69.703	50.377	113.520	-0.619	20.329	2434.559	-0.004879	-0.003526	-0.007946
0.1384	1368.126	75.637	55.477	122.080	-0.620	20.328	2604.561	-0.005295	-0.003883	-0.008546
0.1392	1448.543	81.057	60.269	129.918	-0.619	20.327	2757.654	-0.005674	-0.004219	-0.009094
0.1400	1518.966	86.073	64.674	136.867	-0.621	20.325	2891.722	-0.006025	-0.004527	-0.009581
0.1408	1578.870	90.215	68.371	142.690	-0.619	20.322	3005.762	-0.006315	-0.004786	-0.009988
0.1416	1628.373	93.759	71.413	147.596	-0.616	20.320	3100.004	-0.006563	-0.004999	-0.010332
0.1424	1667.717	96.955	74.041	151.569	-0.619	20.318	3174.906	-0.006787	-0.005183	-0.010610
0.1432	1697.143	99.332	75.917	154.487	-0.610	20.316	3230.925	-0.006953	-0.005314	-0.010814
0.1440	1717.131	100.957	77.209	156.529	-0.614	20.315	3268.976	-0.007067	-0.005405	-0.010957
0.1448	1728.387	102.166	78.364	158.057	-0.617	20.313	3290.405	-0.007152	-0.005485	-0.011064
0.1456	1731.949	102.666	78.851	158.989	-0.609	20.313	3297.186	-0.007187	-0.005520	-0.011129
0.1464	1729.620	102.860	79.185	159.337	-0.614	20.314	3292.751	-0.007200	-0.005543	-0.011154
0.1472	1722.316	102.846	79.449	159.477	-0.615	20.315	3278.847	-0.007199	-0.005561	-0.011163
0.1480	1709.151	102.512	79.088	158.853	-0.609	20.317	3253.784	-0.007176	-0.005536	-0.011120
0.1488	1683.843	101.512	78.475	157.256	-0.611	20.319	3205.605	-0.007106	-0.005493	-0.011008
0.1496	1637.180	99.094	76.585	153.975	-0.615	20.321	3116.770	-0.006937	-0.005361	-0.010778
0.1504	1564.067	94.953	73.222	148.304	-0.607	20.322	2977.581	-0.006647	-0.005126	-0.010381
0.1512	1464.398	88.768	68.288	140.049	-0.608	20.325	2787.838	-0.006214	-0.004780	-0.009803
0.1520	1346.335	81.181	62.105	129.848	-0.612	20.327	2563.076	-0.005683	-0.004347	-0.009089
0.1528	1221.644	73.093	55.517	118.494	-0.608	20.328	2325.697	-0.005117	-0.003886	-0.008295
0.1536	1099.839	65.062	48.806	106.863	-0.609	20.330	2093.811	-0.004554	-0.003416	-0.007480
0.1544	988.103	57.641	42.761	96.107	-0.610	20.331	1881.094	-0.004035	-0.002993	-0.006727
0.1552	889.847	51.109	37.523	86.213	-0.612	20.331	1694.040	-0.003578	-0.002627	-0.006035
0.1560	806.770	45.245	33.035	77.695	-0.608	20.330	1535.883	-0.003167	-0.002312	-0.005439
0.1568	737.384	40.534	29.310	70.204	-0.609	20.329	1403.790	-0.002837	-0.002052	-0.004914
0.1576	677.706	36.171	26.057	63.520	-0.611	20.329	1290.178	-0.002532	-0.001824	-0.004446
0.1584	623.604	32.322	23.027	57.322	-0.605	20.328	1187.181	-0.002263	-0.001612	-0.004013
0.1592	571.350	28.778	20.206	51.221	-0.608	20.326	1087.704	-0.002014	-0.001414	-0.003585
0.1600	519.412	24.887	17.552	45.370	-0.612	20.325	988.827	-0.001742	-0.001229	-0.003176
0.1608	467.804	21.329	14.995	39.298	-0.611	20.322	890.579	-0.001493	-0.001050	-0.002751
0.1616	418.075	17.563	12.619	33.240	-0.612	20.320	795.908	-0.001229	-0.000883	-0.002327
0.1624	372.148	14.145	10.465	27.486	-0.616	20.319	708.475	-0.000990	-0.000733	-0.001924
0.1632	332.068	10.977	8.603	22.150	-0.607	20.317	632.172	-0.000768	-0.000602	-0.001550
0.1640	299.712	8.239	7.047	17.786	-0.608	20.316	570.574	-0.000577	-0.000493	-0.001245
0.1648	276.433	6.391	5.936	14.687	-0.610	20.314	526.257	-0.000447	-0.000416	-0.001028
0.1656	262.261	4.807	5.102	12.560	-0.609	20.315	499.277	-0.000336	-0.000357	-0.000879
0.1664	256.370	4.057	4.602	11.574	-0.622	20.315	488.062	-0.000284	-0.000322	-0.000810
0.1672	257.497	3.878	4.379	11.241	-0.620	20.315	490.208	-0.000271	-0.000307	-0.000787
0.1680	265.191	3.781	4.197	11.463	-0.621	20.318	504.856	-0.000265	-0.000294	-0.000802
0.1688	283.646	4.711	4.350	12.909	-0.619	20.319	539.989	-0.000330	-0.000305	-0.000904
0.1696	319.218	6.809	4.920	16.201	-0.616	20.321	607.710	-0.000477	-0.000344	-0.001134
0.1704	376.356	10.435	6.519	22.010	-0.617	20.323	716.486	-0.000730	-0.000456	-0.001541
0.1712	456.142	15.687	9.313	30.306	-0.613	20.324	868.378	-0.001098	-0.000652	-0.002121
0.1720	554.458	22.038	13.370	40.506	-0.614	20.327	1055.546	-0.001543	-0.000936	-0.002835
0.1728	664.226	28.959	18.428	51.848	-0.611	20.329	1264.515	-0.002027	-0.001290	-0.003629
0.1736	778.967	36.018	23.876	63.493	-0.608	20.331	1482.954	-0.002521	-0.001671	-0.004444
0.1744	893.439	43.439	29.684	75.249	-0.609	20.332	1700.878	-0.003041	-0.002078	-0.005267
0.1752	1003.672	50.790	35.409	86.658	-0.616	20.332	1910.734	-0.003555	-0.002479	-0.006066
0.1760	1106.887	57.931	40.898	97.025	-0.619	20.331	2107.229	-0.004055	-0.002863	-0.006792
0.1768	1202.393	64.462	46.192	106.559	-0.625	20.330	2289.047	-0.004512	-0.003233	-0.007459
0.1776	1290.024	70.411	51.154	115.203	-0.625	20.329	2455.873	-0.004929	-0.003581	-0.008064
0.1784	1369.584	75.775	55.837	122.888	-0.622	20.328	2607.336	-0.005304	-0.003909	-0.008602
0.1792	1441.134	80.597	60.325	129.905	-0.620	20.327	2743.549	-0.005642	-0.004223	-0.009093
0.1800	1504.013	85.337	64.314	136.145	-0.620	20.325	2863.255	-0.005974	-0.004502	-0.009530
0.1808	1558.311	89.241	67.732	141.313	-0.620	20.323	2966.623	-0.006247	-0.004741	-0.009892
0.1816	1604.313	92.591	70.539	145.899	-0.621	20.321	3054.199	-0.006481	-0.004938	-0.010213
0.1824	1641.809	95.494	72.915	149.720	-0.625	20.318	3125.582	-0.006685	-0.005104	-0.010480
0.1832	1670.813	97.592	74.720	152.540	-0.619	20.317	3180.799	-0.006831	-0.005230	-0.010678
0.1840	1691.057	99.219	76.067	154.751	-0.620	20.316	3219.337	-0.006945	-0.005325	-0.010833
0.1848	1702.674	100.539	77.249	156.363	-0.620	20.314	3241.453	-0.007038	-0.005407	-0.010945
0.1856	1706.476	101.233	77.792	157.099	-0.617	20.314	3248.692	-0.007086	-0.005445	-0.010997
0.1864	1703.936	101.456	78.169	157.544	-0.621	20.314	3243.856	-0.007102	-0.005472	-0.011028
0.1872	1696.001	101.302	78.239	157.445	-0.618	20.315	3228.750	-0.007091	-0.005477	-0.011021
0.1880	1681.499	100.774	77.933	156.541	-0.608	20.317	3201.141	-0.007054	-0.005455	-0.010958
0.1888	1653.906	99.496	77.197	154.901	-0.609	20.319	3148.613	-0.006965	-0.005404	-0.010843
0.1896	1605.605	96.842	75.362	151.455	-0.609	20.321	3056.660	-0.006779	-0.005275	-0.010602
0.1904	1532.597	92.701	72.110	145.801	-0.613	20.322	2917.671	-0.006489	-0.005048	-0.010206
0.1912	1434.807	86.491	67.148	137.740	-0.617	20.325	2731.504	-0.006054	-0.004700	-0.009642
0.1920	1319.930	79.181	61.116	127.804	-0.617	20.327	2512.808	-0.005543	-0.004278	-0.008946
0.1928	1197.899	71.427	54.487	116.688	-0.617	20.329	2280.493	-0.005000	-0.003814	-0.008168
0.1936	1076.921	63.533	47.706	105.016	-0.608	20.331	2050.180	-0.004447	-0.003339	-0.007351
0.1944	964.433	56.308	41.786	94.136	-0.611	20.331	1836.033	-0.003942	-0.002925	-0.006590
0.1952	864.990	49.748	36.437	84.061	-0.611	20.331	1646.719	-0.003482	-0.002551	-0.005884
0.1960	780.621	43.995	31.838	75.182	-0.608	20.331	1486.101	-0.003080	-0.002229	-0.005263
0.1968	710.708	39.075	28.253	67.774	-0.617	20.329	1353.006	-0.002735	-0.001978	-0.004744
0.1976	651.497	34.724	24.974	60.951	-0.611	20.329	1240.282	-0.002431	-0.001748	-0.004267
0.1984	598.176	30.736	22.015	54.837	-0.606	20.328	1138.773	-0.002151	-0.001541	-0.003839
0.1992	546.718	27.067	19.360	48.833	-0.608	20.326	1040.812	-0.001895	-0.001355	-0.003418
0.2000	494.916	23.260	16.693	42.886	-0.608	20.324	942.192	-0.001628	-0.001168	-0.003002
0.2008	442.707	19.523	14.149	36.785	-0.607	20.322	842.800	-0.001367	-0.000990	-0.002575
0.2016	392.241	15.771	11.814	30.669	-0.606	20.320	746.727	-0.001104	-0.000827	-0.002147
0.2024	346.510	12.241	9.674	25.026	-0.604	20.318	659.666	-0.000857	-0.000677	-0.001752
0.2032	308.368	9.212	7.812	19.857	-0.595	20.317	587.053	-0.000645	-0.000547	-0.001390
0.2040	280.039	6.822	6.269	15.856	-0.594	20.316	533.123	-0.000478	-0.000439	-0.001110
0.2048	262.065	5.307	5.308	13.313	-0.597	20.315	498.905	-0.000372	-0.000372	-0.000932
0.2056	253.199	4.142	4.586	11.742	-0.599	20.315	482.025	-0.000290	-0.000321	-0.000822
0.2064	251.515	3.696	4.266	11.241	-0.603	20.315	478.821	-0.000259	-0.000299	-0.000787
0.2072	255.333	3.529	4.183	11.352	-0.608	20.315	486.088	-0.000247	-0.000293	-0.000795
0.2080	264.320	3.586	4.114	11.436	-0.605	20.317	503.197	-0.000251	-0.000288	-0.000800
0.2088	282.624	4.487	4.475	12.771	-0.603	20.319	538.044	-0.000314	-0.000313	-0.000894
0.2096	316.168	6.431	5.059	15.856	-0.601	20.320	601.902	-0.000450	-0.000354	-0.001110
0.2104	368.947	9.641	6.547	21.039	-0.601	20.322	702.381	-0.000675	-0.000458	-0.001473
0.2112	442.301	14.337	8.966	28.723	-0.603	20.325	842.028	-0.001004	-0.000628	-0.002011
0.2120	532.922	20.356	12.566	38.341	-0.605	20.327	1014.547	-0.001425	-0.000880	-0.002684
0.2128	635.281	26.776	17.221	48.972	-0.608	20.329	1209.412	-0.001874	-0.001205	-0.003428
0.2136	744.312	33.669	22.222	60.187	-0.604	20.331	1416.979	-0.002357	-0.001556	-0.004213
0.2144	855.718	40.896	27.822	71.750	-0.608	20.331	1629.066	-0.002863	-0.001948	-0.005022
0.2152	965.650	48.038	33.603	83.005	-0.611	20.331	1838.350	-0.003363	-0.002352	-0.005810
0.2160	1070.594	55.264	39.258	93.607	-0.612	20.331	2038.136	-0.003868	-0.002748	-0.006553
0.2168	1168.714	62.129	44.858	103.557	-0.616	20.329	2224.932	-0.004349	-0.003140	-0.007249
0.2176	1259.305	68.312	50.029	112.493	-0.610	20.329	2397.394	-0.004782	-0.003502	-0.007874
0.2184	1341.796	73.858	54.684	120.594	-0.610	20.328	2554.436	-0.005170	-0.003828	-0.008442
0.2192	1416.563	78.904	59.075	127.958	-0.607	20.326	2696.772	-0.005523	-0.004135	-0.008957
0.2200	1483.364	83.572	63.133	134.586	-0.603	20.325	2823.944	-0.005850	-0.004419	-0.009421
0.2208	1541.960	87.713	66.801	140.352	-0.601	20.322	2935.495	-0.006140	-0.004676	-0.009825
0.2216	1592.515	91.353	70.013	145.119	-0.598	20.320	3031.740	-0.006395	-0.004901	-0.010158
0.2224	1633.813	94.508	72.848	149.219	-0.597	20.318	3110.361	-0.006616	-0.005099	-0.010445
0.2232	1664.967	96.816	74.890	152.304	-0.599	20.316	3169.670	-0.006777	-0.005242	-0.010661
0.2240	1685.601	98.609	76.377	154.514	-0.600	20.315	3208.952	-0.006903	-0.005346	-0.010816
0.2248	1696.121	100.068	77.501	156.112	-0.608	20.314	3228.979	-0.007005	-0.005425	-0.010928
0.2256	1698.421	100.623	77.878	156.681	-0.610	20.313	3233.356	-0.007044	-0.005451	-0.010968
0.2264	1694.799	100.789	78.184	156.834	-0.610	20.314	3226.461	-0.007055	-0.005473	-0.010978
0.2272	1686.368	100.831	78.170	156.667	-0.612	20.314	3210.411	-0.007058	-0.005472	-0.010967
0.2280	1671.760	100.234	77.640	155.932	-0.601	20.316	3182.602	-0.007016	-0.005435	-0.010915
0.2288	1644.499	99.108	76.764	154.417	-0.603	20.318	3130.703	-0.006938	-0.005373	-0.010809
0.2296	1596.348	96.677	74.832	150.985	-0.606	20.320	3039.036	-0.006767	-0.005238	-0.010569
0.2304	1523.189	92.299	71.497	145.233	-0.609	20.322	2899.761	-0.006461	-0.005005	-0.010166
0.2312	1425.940	86.239	66.747	137.061	-0.617	20.324	2714.624	-0.006037	-0.004672	-0.009594
0.2320	1313.002	79.139	60.883	127.167	-0.617	20.326	2499.619	-0.005540	-0.004262	-0.008902
0.2328	1195.495	71.675	54.531	116.425	-0.612	20.328	2275.915	-0.005017	-0.003817	-0.008150
0.2336	1082.106	64.158	48.194	105.502	-0.609	20.331	2060.051	-0.004491	-0.003374	-0.007385
0.2344	979.011	57.432	42.593	95.510	-0.608	20.331	1863.785	-0.004020	-0.002981	-0.006686
0.2352	888.900	51.470	37.756	86.408	-0.612	20.331	1692.238	-0.003603	-0.002643	-0.006049
0.2360	812.030	46.064	33.504	78.361	-0.613	20.331	1545.897	-0.003224	-0.002345	-0.005485
0.2368	746.100	41.520	30.017	71.497	-0.611	20.329	1420.383	-0.002906	-0.002101	-0.005005
0.2376	686.678	37.324	26.765	64.938	-0.609	20.328	1307.259	-0.002613	-0.001874	-0.004546
0.2384	629.916	33.085	23.681	58.642	-0.605	20.328	1199.198	-0.002316	-0.001658	-0.004105
0.2392	573.063	29.070	20.777	52.264	-0.611	20.326	1090.965	-0.002035	-0.001454	-0.003658
0.2400	515.294	25.025	17.915	45.523	-0.617	20.324	980.988	-0.001752	-0.001254	-0.003187
0.2408	457.810	20.786	15.192	38.784	-0.616	20.322	871.553	-0.001455	-0.001063	-0.002715
0.2416	402.701	16.826	12.510	32.059	-0.618	20.320	766.640	-0.001178	-0.000876	-0.002244
0.2424	353.032	13.003	10.148	25.945	-0.616	20.318	672.083	-0.000910	-0.000710	-0.001816
0.2432	311.764	9.475	8.049	20.498	-0.606	20.316	593.519	-0.000663	-0.000563	-0.001435
0.2440	281.272	6.863	6.381	16.344	-0.607	20.315	535.469	-0.000480	-0.000447	-0.001144
0.2448	262.276	5.057	5.519	13.592	-0.606	20.314	499.306	-0.000354	-0.000386	-0.000951
0.2456	253.229	3.988	4.865	11.812	-0.604	20.314	482.082	-0.000279	-0.000341	-0.000827
0.2464	251.951	3.764	4.601	11.311	-0.605	20.314	479.650	-0.000264	-0.000322	-0.000792
0.2472	256.219	3.569	4.475	11.298	-0.605	20.315	487.776	-0.000250	-0.000313	-0.000791
0.2480	265.657	3.556	4.309	11.701	-0.600	20.317	505.743	-0.000249	-0.000302	-0.000819
0.2488	284.698	4.487	4.517	13.328	-0.603	20.319	541.992	-0.000314	-0.000316	-0.000933
0.2496	319.609	6.419	5.212	16.719	-0.607	20.320	608.454	-0.000449	-0.000365	-0.001170
0.2504	375.034	9.991	6.713	22.305	-0.609	20.322	713.968	-0.000699	-0.000470	-0.001561
0.2512	452.686	15.159	9.395	30.517	-0.609	20.324	861.797	-0.001061	-0.000658	-0.002136
0.2520	549.063	21.397	13.412	40.647	-0.605	20.326	1045.275	-0.001498	-0.000939	-0.002845
0.2528	657.944	28.318	18.289	51.805	-0.604	20.329	1252.556	-0.001982	-0.001280	-0.003626
0.2536	773.482	35.642	23.904	63.562	-0.594	20.331	1472.511	-0.002495	-0.001673	-0.004449
0.2544	890.433	43.313	29.975	75.542	-0.597	20.331	1695.156	-0.003032	-0.002098	-0.005288
0.2552	1004.514	50.943	35.951	87.257	-0.601	20.331	1912.336	-0.003566	-0.002517	-0.006108
0.2560	1112.042	58.267	41.815	98.068	-0.601	20.331	2117.043	-0.004079	-0.002927	-0.006865
0.2568	1211.004	65.145	47.414	108.087	-0.611	20.329	2305.441	-0.004560	-0.003319	-0.007566
0.2576	1301.024	71.038	52.487	116.787	-0.605	20.329	2476.816	-0.004973	-0.003674	-0.008175
0.2584	1382.869	76.513	57.295	124.540	-0.601	20.328	2632.627	-0.005356	-0.004011	-0.008718
0.2592	1458.131	81.876	61.951	132.003	-0.602	20.326	2775.908	-0.005731	-0.004337	-0.009240
0.2600	1527.698	86.670	66.301	138.674	-0.601	20.324	2908.344	-0.006067	-0.004641	-0.009707
0.2608	1591.178	91.325	70.192	144.718	-0.604	20.322	3029.194	-0.006393	-0.004913	-0.010130
0.2616	1646.723	95.356	73.652	150.165	-0.608	20.320	3134.937	-0.006675	-0.005156	-0.010512
0.2624	1691.598	98.594	76.528	154.556	-0.611	20.318	3220.367	-0.006902	-0.005357	-0.010819
0.2632	1723.773	101.095	78.516	157.862	-0.612	20.317	3281.622	-0.007077	-0.005496	-0.011050
0.2640	1742.860	102.873	79.947	160.113	-0.615	20.315	3317.957	-0.007201	-0.005596	-0.011208
0.2648	1750.584	104.054	80.822	161.586	-0.616	20.313	3332.663	-0.007284	-0.005658	-0.011311
0.2656	1749.878	104.458	81.099	162.032	-0.612	20.313	3331.318	-0.007312	-0.005677	-0.011342
0.2664	1743.491	104.542	81.251	162.045	-0.609	20.313	3319.159	-0.007318	-0.005688	-0.011343
0.2672	1732.355	104.334	81.155	161.531	-0.605	20.315	3297.958	-0.007303	-0.005681	-0.011307
0.2680	1712.923	103.486	80.697	160.239	-0.595	20.317	3260.965	-0.007244	-0.005649	-0.011217
0.2688	1676.419	101.692	79.559	157.821	-0.601	20.319	3191.471	-0.007118	-0.005569	-0.011047
0.2696	1615.404	98.315	76.959	153.375	-0.602	20.320	3075.314	-0.006882	-0.005387	-0.010736
0.2704	1527.232	93.076	72.790	146.566	-0.603	20.322	2907.457	-0.006515	-0.005095	-0.010260
0.2712	1415.631	86.170	66.954	137.046	-0.607	20.324	2694.998	-0.006032	-0.004687	-0.009593
0.2720	1292.112	78.373	60.312	126.110	-0.601	20.326	2459.850	-0.005486	-0.004222	-0.008828
0.2728	1168.429	70.452	53.463	114.563	-0.599	20.328	2224.388	-0.004932	-0.003742	-0.008019
0.2736	1053.401	62.753	46.945	103.293	-0.593	20.331	2005.405	-0.004393	-0.003286	-0.007231
0.2744	952.876	56.139	41.484	93.552	-0.601	20.331	1814.032	-0.003930	-0.002904	-0.006549
0.2752	867.635	50.386	36.884	84.866	-0.604	20.331	1651.754	-0.003527	-0.002582	-0.005941
0.2760	795.935	45.217	33.034	77.319	-0.608	20.330	1515.255	-0.003165	-0.002312	-0.005412
0.2768	733.822	40.825	29.810	70.731	-0.613	20.329	1397.009	-0.002858	-0.002087	-0.004951
0.2776	676.489	36.628	26.613	64.270	-0.608	20.328	1287.861	-0.002564	-0.001863	-0.004499
0.2784	620.418	32.513	23.459	58.073	-0.605	20.328	1181.116	-0.002276	-0.001642	-0.004065
0.2792	563.069	28.456	20.472	51.695	-0.607	20.326	1071.939	-0.001992	-0.001433	-0.003619
0.2800	503.978	24.190	17.415	44.789	-0.611	20.325	959.444	-0.001693	-0.001219	-0.003135
0.2808	444.751	19.812	14.623	37.828	-0.608	20.322	846.691	-0.001387	-0.001024	-0.002648
0.2816	388.514	15.617	12.025	30.920	-0.613	20.320	739.632	-0.001093	-0.000842	-0.002164
0.2824	338.921	11.740	9.717	24.638	-0.608	20.318	645.218	-0.000822	-0.000680	-0.001725
0.2832	298.780	8.488	7.772	19.454	-0.601	20.316	568.800	-0.000594	-0.000544	-0.001362
0.2840	269.580	5.891	6.214	15.479	-0.603	20.315	513.210	-0.000412	-0.000435	-0.001084
0.2848	251.245	4.209	5.213	13.048	-0.604	20.314	478.306	-0.000295	-0.000365	-0.000913
0.2856	241.987	3.279	4.601	11.339	-0.610	20.313	460.682	-0.000230	-0.000322	-0.000794
0.2864	239.838	2.821	4.337	10.574	-0.614	20.314	456.591	-0.000197	-0.000304	-0.000740
0.2872	242.724	2.640	4.199	10.448	-0.621	20.315	462.084	-0.000185	-0.000294	-0.000731
0.2880	250.043	2.458	4.128	10.490	-0.618	20.317	476.017	-0.000172	-0.000289	-0.000734
0.2888	265.762	2.972	4.295	11.727	-0.617	20.319	505.943	-0.000208	-0.000301	-0.000821
0.2896	296.631	4.819	4.823	14.840	-0.625	20.320	564.709	-0.000337	-0.000338	-0.001039
0.2904	348.268	8.155	6.115	19.856	-0.626	20.322	663.013	-0.000571	-0.000428	-0.001390
0.2912	422.944	13.144	8.644	27.444	-0.623	20.324	805.178	-0.000920	-0.000605	-0.001921
0.2920	517.593	19.397	12.368	37.519	-0.624	20.327	985.365	-0.001358	-0.000866	-0.002626
0.2928	625.618	26.137	17.094	48.581	-0.617	20.329	1191.015	-0.001830	-0.001197	-0.003401
0.2936	740.630	33.378	22.610	60.464	-0.607	20.331	1409.969	-0.002336	-0.001583	-0.004232
0.2944	857.867	41.034	28.544	72.734	-0.614	20.332	1633.158	-0.002872	-0.001998	-0.005091
0.2952	973.375	48.733	34.533	84.462	-0.614	20.331	1853.056	-0.003411	-0.002417	-0.005912
0.2960	1083.909	56.389	40.564	95.677	-0.618	20.331	2063.484	-0.003947	-0.002840	-0.006697
0.2968	1187.485	63.545	46.443	106.168	-0.622	20.329	2260.666	-0.004448	-0.003251	-0.007432
0.2976	1282.870	70.036	51.807	115.464	-0.614	20.329	2442.255	-0.004903	-0.003626	-0.008082
0.2984	1369.569	75.832	56.949	123.857	-0.612	20.328	2607.307	-0.005308	-0.003986	-0.008670
0.2992	1447.491	81.196	61.618	131.360	-0.609	20.326	2755.651	-0.005684	-0.004313	-0.009195
0.3000	1515.961	86.282	65.842	138.032	-0.611	20.324	2886.000	-0.006040	-0.004609	-0.009662
0.3008	1574.075	90.478	69.344	143.634	-0.613	20.322	2996.635	-0.006333	-0.004854	-0.010054
0.3016	1620.739	94.091	72.332	148.221	-0.614	20.320	3085.470	-0.006586	-0.005063	-0.010375
0.3024	1655.544	96.843	74.666	151.918	-0.612	20.318	3151.731	-0.006779	-0.005227	-0.010634
0.3032	1678.974	98.760	76.168	154.293	-0.608	20.316	3196.335	-0.006913	-0.005332	-0.010801
0.3040	1692.574	100.163	77.475	155.933	-0.604	20.315	3222.227	-0.007011	-0.005423	-0.010915
0.3048	1698.781	101.108	78.226	157.127	-0.608	20.313	3234.043	-0.007078	-0.005476	-0.010999
0.3056	1699.503	101.595	78.532	157.683	-0.608	20.313	3235.416	-0.007112	-0.005497	-0.011038
0.3064	1696.422	101.735	78.768	157.794	-0.608	20.313	3229.551	-0.007121	-0.005514	-0.011046
0.3072	1690.290	101.624	78.601	157.738	-0.611	20.315	3217.878	-0.007114	-0.005502	-0.011042
0.3080	1680.867	101.193	78.293	157.265	-0.603	20.317	3199.940	-0.007084	-0.005481	-0.011009
0.3088	1664.727	100.568	78.000	156.237	-0.606	20.319	3169.212	-0.007040	-0.005460	-0.010937
0.3096	1633.122	98.942	76.973	154.348	-0.605	20.320	3109.045	-0.006926	-0.005388	-0.010804
0.3104	1577.848	95.746	74.540	150.291	-0.600	20.322	3003.817	-0.006702	-0.005218	-0.010520
0.3112	1494.725	90.717	70.524	143.593	-0.601	20.324	2845.573	-0.006350	-0.004937	-0.010051
0.3120	1386.536	83.795	64.912	134.574	-0.601	20.326	2639.608	-0.005866	-0.004544	-0.009420
0.3128	1263.468	75.984	58.296	123.582	-0.600	20.328	2405.319	-0.005319	-0.004081	-0.008651
0.3136	1137.350	67.882	51.515	111.853	-0.601	20.330	2165.222	-0.004752	-0.003606	-0.007830
0.3144	1017.619	60.183	45.206	100.320	-0.605	20.331	1937.284	-0.004213	-0.003164	-0.007022
0.3152	909.504	53.194	39.549	89.633	-0.605	20.330	1731.462	-0.003724	-0.002768	-0.006274
0.3160	815.622	46.662	34.574	80.114	-0.609	20.330	1552.734	-0.003266	-0.002420	-0.005608
0.3168	735.866	41.173	30.322	71.636	-0.609	20.329	1400.900	-0.002882	-0.002123	-0.005015
0.3176	667.938	36.184	26.459	64.036	-0.601	20.328	1271.582	-0.002533	-0.001852	-0.004483
0.3184	608.951	31.779	23.179	57.212	-0.595	20.327	1159.286	-0.002225	-0.001623	-0.004005
0.3192	555.781	27.945	20.249	50.861	-0.591	20.326	1058.064	-0.001956	-0.001417	-0.003560
0.3200	505.931	24.415	17.664	44.942	-0.592	20.324	963.163	-0.001709	-0.001236	-0.003146
0.3208	458.381	20.898	15.427	39.480	-0.593	20.322	872.641	-0.001463	-0.001080	-0.002764
0.3216	413.176	17.466	13.217	34.143	-0.594	20.320	786.581	-0.001223	-0.000925	-0.002390
0.3224	371.412	14.131	11.202	29.016	-0.596	20.318	707.073	-0.000989	-0.000784	-0.002031
0.3232	334.788	10.990	9.409	24.234	-0.596	20.316	637.350	-0.000769	-0.000659	-0.001696
0.3240	304.836	8.656	7.881	20.191	-0.599	20.315	580.330	-0.000606	-0.000552	-0.001413
0.3248	282.669	6.725	6.756	17.094	-0.605	20.313	538.130	-0.000471	-0.000473	-0.001197
0.3256	268.437	5.419	5.977	14.926	-0.606	20.313	511.036	-0.000379	-0.000418	-0.001045
0.3264	261.660	4.710	5.547	13.758	-0.607	20.314	498.133	-0.000330	-0.000388	-0.000963
0.3272	261.089	4.362	5.381	13.174	-0.609	20.315	497.046	-0.000305	-0.000377	-0.000922
0.3280	265.973	4.252	5.227	13.036	-0.603	20.317	506.344	-0.000298	-0.000366	-0.000912
0.3288	278.777	4.682	5.325	13.772	-0.606	20.318	530.720	-0.000328	-0.000373	-0.000964
0.3296	305.753	6.072	5.645	16.260	-0.614	20.320	582.075	-0.000425	-0.000395	-0.001138
0.3304	353.423	8.838	6.685	20.874	-0.611	20.322	672.827	-0.000619	-0.000468	-0.001461
0.3312	425.379	13.465	9.006	28.182	-0.616	20.324	809.813	-0.000943	-0.000630	-0.001973
0.3320	520.554	19.802	12.786	38.160	-0.615	20.327	991.001	-0.001386	-0.000895	-0.002671
0.3328	632.185	26.901	17.720	49.541	-0.605	20.329	1203.518	-0.001883	-0.001240	-0.003468
0.3336	751.796	34.447	23.403	61.825	-0.603	20.330	1431.227	-0.002411	-0.001638	-0.004328
0.3344	872.790	42.285	29.587	74.346	-0.602	20.331	1661.568	-0.002960	-0.002071	-0.005204
0.3352	990.522	50.165	35.770	86.422	-0.607	20.331	1885.700	-0.003512	-0.002504	-0.006050
0.3360	1101.808	57.781	41.912	97.678	-0.610	20.330	2097.559	-0.004045	-0.002934	-0.006837
0.3368	1204.812	64.895	47.667	108.099	-0.613	20.329	2293.653	-0.004543	-0.003337	-0.007567
0.3376	1297.673	71.426	52.822	117.201	-0.606	20.329	2470.436	-0.005000	-0.003698	-0.008204
0.3384	1378.811	76.790	57.519	125.039	-0.602	20.328	2624.903	-0.005375	-0.004026	-0.008753
0.3392	1448.183	81.598	61.632	131.974	-0.603	20.326	2756.968	-0.005712	-0.004314	-0.009238
0.3400	1507.079	86.129	65.368	137.714	-0.604	20.324	2869.091	-0.006029	-0.004576	-0.009640
0.3408	1557.424	89.811	68.648	142.648	-0.607	20.322	2964.935	-0.006287	-0.004805	-0.009985
0.3416	1601.067	93.146	71.428	146.858	-0.603	20.320	3048.019	-0.006520	-0.005000	-0.010280
0.3424	1638.908	96.189	73.888	150.582	-0.605	20.318	3120.060	-0.006733	-0.005172	-0.010541
0.3432	1670.588	98.260	75.709	153.681	-0.600	20.316	3180.370	-0.006878	-0.005300	-0.010758
0.3440	1695.776	100.066	77.447	156.238	-0.604	20.315	3228.321	-0.007005	-0.005421	-0.010937
0.3448	1713.765	101.749	78.905	158.587	-0.609	20.314	3262.568	-0.007122	-0.005523	-0.011101
0.3456	1723.969	102.609	79.796	160.031	-0.607	20.314	3281.994	-0.007183	-0.005586	-0.011202
0.3464	1727.050	103.151	80.478	160.919	-0.611	20.314	3287.859	-0.007221	-0.005633	-0.011264
0.3472	1723.608	103.346	80.492	161.266	-0.607	20.314	3281.307	-0.007234	-0.005634	-0.011289
0.3480	1713.704	102.983	80.104	160.793	-0.602	20.317	3262.453	-0.007209	-0.005607	-0.011256
0.3488	1692.995	102.248	79.658	159.557	-0.601	20.318	3223.028	-0.007157	-0.005576	-0.011169
0.3496	1651.367	100.178	78.129	156.625	-0.600	20.320	3143.778	-0.007012	-0.005469	-0.010964
0.3504	1582.191	96.342	75.196	151.247	-0.601	20.322	3012.085	-0.006744	-0.005264	-0.010587
0.3512	1484.161	90.423	70.512	143.313	-0.603	20.324	2825.460	-0.006330	-0.004936	-0.010032
0.3520	1363.798	82.765	64.189	133.017	-0.602	20.326	2596.321	-0.005794	-0.004493	-0.009311
0.3528	1234.659	74.581	57.226	121.456	-0.602	20.329	2350.473	-0.005221	-0.004006	-0.008502
0.3536	1108.195	66.187	50.223	109.450	-0.598	20.331	2109.718	-0.004633	-0.003516	-0.007662
0.3544	992.251	58.655	43.956	98.068	-0.605	20.331	1888.990	-0.004106	-0.003077	-0.006865
0.3552	890.989	51.846	38.564	88.006	-0.609	20.331	1696.215	-0.003629	-0.002699	-0.006160
0.3560	806.199	45.925	33.895	79.194	-0.607	20.330	1534.796	-0.003215	-0.002373	-0.005544
0.3568	736.587	41.118	30.088	72.094	-0.611	20.329	1402.273	-0.002878	-0.002106	-0.005047
0.3576	678.007	36.560	26.793	65.549	-0.600	20.328	1290.751	-0.002559	-0.001876	-0.004588
0.3584	625.512	32.753	23.888	59.491	-0.593	20.328	1190.815	-0.002293	-0.001672	-0.004164
0.3592	573.920	29.056	21.275	53.545	-0.594	20.326	1092.596	-0.002034	-0.001489	-0.003748
0.3600	520.419	25.137	18.733	47.180	-0.596	20.324	990.744	-0.001760	-0.001311	-0.003303
0.3608	464.769	21.274	16.024	40.772	-0.597	20.322	884.800	-0.001489	-0.001122	-0.002854
0.3616	409.163	17.258	13.316	34.114	-0.601	20.320	778.942	-0.001208	-0.000932	-0.002388
0.3624	357.736	13.368	10.897	27.777	-0.601	20.318	681.038	-0.000936	-0.000763	-0.001944
0.3632	314.560	9.782	8.799	22.136	-0.595	20.317	598.841	-0.000685	-0.000616	-0.001550
0.3640	282.895	7.073	7.313	17.787	-0.597	20.315	538.559	-0.000495	-0.000512	-0.001245
0.3648	263.373	5.363	6.283	14.911	-0.602	20.314	501.394	-0.000375	-0.000440	-0.001044
0.3656	254.341	4.306	5.686	13.368	-0.605	20.314	484.200	-0.000301	-0.000398	-0.000936
0.3664	253.304	4.125	5.464	12.909	-0.612	20.314	482.225	-0.000289	-0.000382	-0.000904
0.3672	257.782	4.181	5.352	12.826	-0.614	20.315	490.751	-0.000293	-0.000375	-0.000898
0.3680	267.536	4.209	5.562	13.188	-0.608	20.317	509.319	-0.000295	-0.000389	-0.000923
0.3688	286.982	5.238	5.798	14.730	-0.610	20.319	546.341	-0.000367	-0.000406	-0.001031
0.3696	321.939	7.420	6.339	17.912	-0.611	20.320	612.888	-0.000519	-0.000444	-0.001254
0.3704	376.402	10.741	7.923	23.498	-0.615	20.322	716.572	-0.000752	-0.000555	-0.001645
0.3712	451.769	15.729	10.494	31.557	-0.614	20.324	860.052	-0.001101	-0.000735	-0.002209
0.3720	544.630	21.661	14.301	41.147	-0.617	20.326	1036.835	-0.001516	-0.001001	-0.002880
0.3728	649.242	28.137	19.123	52.056	-0.613	20.329	1235.991	-0.001970	-0.001339	-0.003644
0.3736	760.588	35.335	24.431	63.382	-0.605	20.331	1447.964	-0.002473	-0.001710	-0.004437
0.3744	874.172	42.757	29.962	75.012	-0.608	20.331	1664.200	-0.002993	-0.002097	-0.005251
0.3752	986.284	50.179	35.784	86.560	-0.608	20.331	1877.632	-0.003513	-0.002505	-0.006059
0.3760	1094.564	57.517	41.607	97.358	-0.612	20.330	2083.769	-0.004026	-0.002912	-0.006815
0.3768	1197.734	64.396	47.221	107.656	-0.615	20.329	2280.178	-0.004508	-0.003305	-0.007536
0.3776	1294.697	70.941	52.806	117.051	-0.615	20.328	2464.771	-0.004966	-0.003696	-0.008194
0.3784	1384.387	77.180	58.073	125.597	-0.613	20.327	2635.517	-0.005403	-0.004065	-0.008792
0.3792	1465.570	82.835	62.977	133.449	-0.615	20.326	2790.070	-0.005798	-0.004408	-0.009341
0.3800	1536.775	87.962	67.438	140.438	-0.616	20.324	2925.625	-0.006157	-0.004721	-0.009831
0.3808	1596.979	92.299	71.218	146.219	-0.615	20.322	3040.237	-0.006461	-0.004985	-0.010235
0.3816	1645.430	95.802	74.235	151.026	-0.615	20.319	3132.477	-0.006706	-0.005196	-0.010572
0.3824	1681.844	98.428	76.584	154.680	-0.608	20.317	3201.799	-0.006890	-0.005361	-0.010828
0.3832	1706.491	100.387	78.240	157.292	-0.608	20.316	3248.720	-0.007027	-0.005477	-0.011010
0.3840	1720.678	101.679	79.241	159.028	-0.603	20.314	3275.728	-0.007118	-0.005547	-0.011132
0.3848	1726.569	102.527	79.990	160.237	-0.612	20.313	3286.943	-0.007177	-0.005599	-0.011217
0.3856	1726.043	103.056	80.366	160.905	-0.616	20.313	3285.942	-0.007214	-0.005626	-0.011263
0.3864	1721.083	103.111	80.476	160.864	-0.617	20.313	3276.501	-0.007218	-0.005633	-0.011260
0.3872	1712.532	102.945	80.476	160.684	-0.622	20.314	3260.221	-0.007206	-0.005633	-0.011248
0.3880	1698.571	102.485	80.129	159.921	-0.611	20.316	3233.643	-0.007174	-0.005609	-0.011194
0.3888	1673.038	101.247	79.323	158.308	-0.612	20.318	3185.034	-0.007087	-0.005553	-0.011082
0.3896	1627.787	98.815	77.600	155.266	-0.611	20.319	3098.888	-0.006917	-0.005432	-0.010869
0.3904	1557.725	94.812	74.334	149.804	-0.609	20.321	2965.508	-0.006637	-0.005203	-0.010486
0.3912	1461.513	88.934	69.427	141.854	-0.611	20.323	2782.345	-0.006225	-0.004860	-0.009930
0.3920	1345.313	81.543	63.189	131.682	-0.611	20.326	2561.131	-0.005708	-0.004423	-0.009218
0.3928	1219.300	73.595	56.226	120.134	-0.609	20.328	2321.234	-0.005152	-0.003936	-0.008409
0.3936	1092.731	65.285	49.348	108.113	-0.601	20.330	2080.278	-0.004570	-0.003454	-0.007568
0.3944	974.427	57.461	43.123	96.622	-0.604	20.331	1855.059	-0.004022	-0.003019	-0.006764
0.3952	869.619	50.526	37.690	86.074	-0.601	20.331	1655.531	-0.003537	-0.002638	-0.006025
0.3960	780.921	44.398	33.119	76.903	-0.599	20.330	1486.673	-0.003108	-0.002318	-0.005383
0.3968	708.033	39.256	29.256	69.121	-0.605	20.329	1347.914	-0.002748	-0.002048	-0.004838
0.3976	647.800	34.851	25.935	62.173	-0.597	20.328	1233.244	-0.002440	-0.001815	-0.004352
0.3984	596.372	31.002	23.030	56.322	-0.596	20.327	1135.340	-0.002170	-0.001612	-0.003943
0.3992	549.168	27.499	20.319	50.736	-0.599	20.325	1045.475	-0.001925	-0.001422	-0.003552
