# Supplementary material for: Evaluation of a Cold-Mixed High-Performance Polyurethane Mixture
Source: Hindawi journal article supplement (doi:10.1155/2019/1507971), 2019-11-07
Supplement: f1 [file 1507971.f1.zip › 1507971.f1/dynamic modulus data/PUM/specimen1/temp20/zhs-1-20_Runtime.csv]

Time (sec)	Load (kN)	Confining Pressure (kPa)	Axial LVDT #1 (mm)	Axial LVDT #2 (mm)	Axial LVDT #3 (mm)	Temperature (�C)
0.0008	0.574465	-0.623	0.14016801	0.12185526	0.17831230	20.32
0.0016	0.574923	-0.618	0.14016998	0.12185037	0.17831230	20.32
0.0024	0.575066	-0.611	0.14017200	0.12185526	0.17831337	20.32
0.0032	0.574493	-0.611	0.14017105	0.12186497	0.17831725	20.32
0.0040	0.572262	-0.608	0.14017695	0.12187666	0.17832017	20.32
0.0048	0.567684	-0.612	0.14018762	0.12188542	0.17833376	20.33
0.0056	0.560417	-0.613	0.14021486	0.12189907	0.17835218	20.33
0.0064	0.549774	-0.612	0.14023727	0.12189811	0.17838532	20.33
0.0072	0.534468	-0.608	0.14027321	0.12190485	0.17844665	20.33
0.0080	0.513153	-0.601	0.14033157	0.12192231	0.17852938	20.33
0.0088	0.485344	-0.606	0.14039475	0.12193978	0.17862570	20.33
0.0096	0.452385	-0.605	0.14047843	0.12198055	0.17874342	20.33
0.0104	0.417738	-0.611	0.14057183	0.12202621	0.17886108	20.33
0.0112	0.385151	-0.613	0.14064968	0.12207776	0.17899042	20.33
0.0120	0.357599	-0.603	0.14073622	0.12212837	0.17911011	20.33
0.0128	0.336800	-0.601	0.14079452	0.12216437	0.17919660	20.33
0.0136	0.322809	-0.599	0.14082950	0.12218970	0.17926472	20.33
0.0144	0.315113	-0.598	0.14086354	0.12219751	0.17930466	20.33
0.0152	0.312338	-0.603	0.14087617	0.12219846	0.17932224	20.32
0.0160	0.313282	-0.604	0.14089274	0.12220043	0.17933494	20.32
0.0168	0.316544	-0.602	0.14090043	0.12219661	0.17934167	20.32
0.0176	0.321407	-0.599	0.14088780	0.12219751	0.17933685	20.32
0.0184	0.327559	-0.598	0.14088005	0.12219757	0.17931926	20.32
0.0192	0.334110	-0.603	0.14086735	0.12218690	0.17929298	20.32
0.0200	0.340862	-0.604	0.14085376	0.12218684	0.17926192	20.32
0.0208	0.348244	-0.608	0.14084303	0.12218106	0.17921907	20.32
0.0216	0.355911	-0.604	0.14082456	0.12217325	0.17920440	20.32
0.0224	0.364637	-0.595	0.14080125	0.12216932	0.17918885	20.32
0.0232	0.374222	-0.595	0.14077699	0.12215668	0.17914987	20.32
0.0240	0.384121	-0.601	0.14074689	0.12214792	0.17912650	20.32
0.0248	0.394621	-0.601	0.14072061	0.12213814	0.17908853	20.33
0.0256	0.405149	-0.607	0.14068943	0.12213129	0.17904764	20.33
0.0264	0.415707	-0.606	0.14066410	0.12212640	0.17901176	20.33
0.0272	0.425863	-0.596	0.14064950	0.12211370	0.17897391	20.33
0.0280	0.434961	-0.596	0.14062130	0.12211376	0.17893994	20.33
0.0288	0.442858	-0.601	0.14059407	0.12209916	0.17890108	20.33
0.0296	0.448666	-0.603	0.14056683	0.12208652	0.17887670	20.33
0.0304	0.452414	-0.605	0.14053667	0.12208074	0.17886204	20.33
0.0312	0.454187	-0.605	0.14053082	0.12207389	0.17884940	20.33
0.0320	0.454073	-0.597	0.14053375	0.12208462	0.17884934	20.33
0.0328	0.452757	-0.596	0.14054054	0.12208563	0.17885911	20.33
0.0336	0.450611	-0.599	0.14055800	0.12209433	0.17885619	20.33
0.0344	0.447922	-0.602	0.14055514	0.12209040	0.17885816	20.33
0.0352	0.444775	-0.604	0.14056194	0.12209624	0.17887384	20.32
0.0360	0.441370	-0.605	0.14056104	0.12210494	0.17887765	20.32
0.0368	0.437336	-0.603	0.14055914	0.12210691	0.17889905	20.32
0.0376	0.432730	-0.602	0.14056987	0.12212062	0.17892438	20.32
0.0384	0.427723	-0.603	0.14057475	0.12212449	0.17893499	20.32
0.0392	0.422115	-0.605	0.14058053	0.12212157	0.17894959	20.32
0.0400	0.415764	-0.608	0.14060098	0.12212843	0.17896223	20.32
0.0408	0.408669	-0.608	0.14062423	0.12213528	0.17898357	20.32
0.0416	0.399971	-0.609	0.14065838	0.12214118	0.17901570	20.32
0.0424	0.389872	-0.605	0.14069629	0.12216169	0.17905551	20.32
0.0432	0.378313	-0.603	0.14071572	0.12217140	0.17911100	20.32
0.0440	0.365496	-0.603	0.14074004	0.12217432	0.17915672	20.32
0.0448	0.352049	-0.600	0.14077300	0.12217432	0.17920542	20.33
0.0456	0.338717	-0.601	0.14080995	0.12218404	0.17925215	20.33
0.0464	0.326242	-0.598	0.14085084	0.12219471	0.17929488	20.33
0.0472	0.315142	-0.593	0.14088970	0.12221122	0.17934936	20.33
0.0480	0.306559	-0.592	0.14091307	0.12223458	0.17939115	20.33
0.0488	0.300121	-0.595	0.14092284	0.12222970	0.17942220	20.33
0.0496	0.295973	-0.597	0.14093834	0.12222582	0.17942899	20.33
0.0504	0.293913	-0.604	0.14094818	0.12221998	0.17942607	20.33
0.0512	0.293055	-0.607	0.14095885	0.12221313	0.17943960	20.33
0.0520	0.293627	-0.600	0.14097047	0.12222093	0.17944741	20.33
0.0528	0.295086	-0.600	0.14097339	0.12222582	0.17945623	20.33
0.0536	0.297146	-0.600	0.14097244	0.12222677	0.17945910	20.33
0.0544	0.299807	-0.600	0.14097732	0.12222487	0.17944551	20.33
0.0552	0.302954	-0.608	0.14096665	0.12222284	0.17943192	20.32
0.0560	0.306530	-0.610	0.14096475	0.12223065	0.17941922	20.32
0.0568	0.310707	-0.611	0.14096081	0.12222773	0.17940563	20.32
0.0576	0.315542	-0.608	0.14094234	0.12223256	0.17940176	20.32
0.0584	0.321264	-0.609	0.14094138	0.12222385	0.17938924	20.32
0.0592	0.328074	-0.611	0.14091897	0.12219948	0.17936301	20.32
0.0600	0.335970	-0.609	0.14089561	0.12219065	0.17933685	20.32
0.0608	0.345497	-0.615	0.14087325	0.12218004	0.17929989	20.32
0.0616	0.356770	-0.607	0.14084601	0.12217999	0.17927158	20.32
0.0624	0.370016	-0.604	0.14080918	0.12218392	0.17922777	20.32
0.0632	0.384951	-0.607	0.14077228	0.12218207	0.17917413	20.32
0.0640	0.400286	-0.607	0.14073342	0.12216932	0.17911381	20.32
0.0648	0.414906	-0.609	0.14069456	0.12214893	0.17904282	20.33
0.0656	0.428238	-0.611	0.14066041	0.12213039	0.17898840	20.33
0.0664	0.439482	-0.607	0.14062727	0.12211865	0.17894477	20.33
0.0672	0.448809	-0.601	0.14059800	0.12210989	0.17891467	20.33
0.0680	0.455990	-0.600	0.14056778	0.12211573	0.17890203	20.33
0.0688	0.460768	-0.601	0.14054638	0.12210506	0.17887968	20.33
0.0696	0.463257	-0.602	0.14052790	0.12209630	0.17886889	20.33
0.0704	0.463915	-0.601	0.14051718	0.12209725	0.17884940	20.33
0.0712	0.463314	-0.599	0.14051718	0.12208557	0.17883384	20.33
0.0720	0.461712	-0.591	0.14052784	0.12208849	0.17884165	20.33
0.0728	0.459480	-0.588	0.14053756	0.12209040	0.17884552	20.33
0.0736	0.456419	-0.588	0.14053661	0.12209040	0.17886013	20.33
0.0744	0.452614	-0.587	0.14053857	0.12209916	0.17887086	20.33
0.0752	0.448608	-0.591	0.14054441	0.12211472	0.17888248	20.32
0.0760	0.444546	-0.591	0.14055026	0.12212253	0.17888933	20.32
0.0768	0.440168	-0.596	0.14055610	0.12213230	0.17890006	20.32
0.0776	0.435677	-0.593	0.14057654	0.12214494	0.17891562	20.32
0.0784	0.430670	-0.595	0.14057755	0.12214786	0.17892724	20.32
0.0792	0.424976	-0.604	0.14058244	0.12213916	0.17893213	20.32
0.0800	0.419025	-0.599	0.14060384	0.12213421	0.17894858	20.32
0.0808	0.412474	-0.605	0.14061648	0.12212843	0.17897767	20.32
0.0816	0.405121	-0.605	0.14064175	0.12212938	0.17901462	20.32
0.0824	0.396595	-0.599	0.14067489	0.12214887	0.17905545	20.32
0.0832	0.386524	-0.605	0.14070702	0.12216258	0.17908949	20.32
0.0840	0.375252	-0.605	0.14074105	0.12217522	0.17912066	20.32
0.0848	0.363178	-0.609	0.14078486	0.12218499	0.17915857	20.33
0.0856	0.351276	-0.613	0.14081687	0.12219274	0.17920524	20.33
0.0864	0.340748	-0.609	0.14085388	0.12219852	0.17926174	20.33
0.0872	0.331793	-0.607	0.14088118	0.12221020	0.17930847	20.33
0.0880	0.324554	-0.601	0.14090067	0.12221891	0.17934555	20.33
0.0888	0.318975	-0.605	0.14090854	0.12221116	0.17936891	20.33
0.0896	0.314312	-0.604	0.14090550	0.12220633	0.17937565	20.33
0.0904	0.311079	-0.612	0.14090550	0.12220240	0.17939115	20.33
0.0912	0.309305	-0.609	0.14091128	0.12220246	0.17940861	20.33
0.0920	0.309134	-0.599	0.14092195	0.12221706	0.17941731	20.33
0.0928	0.310678	-0.601	0.14093077	0.12222487	0.17941058	20.33
0.0936	0.313568	-0.595	0.14092970	0.12221909	0.17940372	20.33
0.0944	0.317745	-0.596	0.14091700	0.12221324	0.17938519	20.33
0.0952	0.322952	-0.599	0.14091212	0.12220740	0.17935997	20.32
0.0960	0.329247	-0.601	0.14089942	0.12219864	0.17935121	20.32
0.0968	0.336456	-0.599	0.14089167	0.12219179	0.17932600	20.32
0.0976	0.345154	-0.599	0.14088202	0.12219667	0.17930079	20.32
0.0984	0.356112	-0.603	0.14085770	0.12218589	0.17927158	20.32
0.0992	0.369873	-0.605	0.14080912	0.12216347	0.17921710	20.32
0.1000	0.386467	-0.608	0.14075947	0.12215757	0.17915195	20.32
0.1008	0.405264	-0.611	0.14070010	0.12213999	0.17906725	20.32
0.1016	0.424948	-0.604	0.14063782	0.12211865	0.17899817	20.32
0.1024	0.444031	-0.600	0.14060372	0.12211478	0.17893684	20.32
0.1032	0.461397	-0.600	0.14054734	0.12209439	0.17888039	20.32
0.1040	0.475616	-0.604	0.14049864	0.12206811	0.17882890	20.32
0.1048	0.486059	-0.605	0.14048797	0.12206417	0.17878997	20.33
0.1056	0.492611	-0.607	0.14046174	0.12206513	0.17875588	20.33
0.1064	0.495300	-0.608	0.14045590	0.12206024	0.17873251	20.33
0.1072	0.495529	-0.602	0.14046669	0.12206608	0.17874515	20.33
0.1080	0.494184	-0.604	0.14045203	0.12206995	0.17874807	20.33
0.1088	0.491982	-0.607	0.14045298	0.12205446	0.17874223	20.33
0.1096	0.489264	-0.605	0.14046860	0.12205058	0.17874998	20.33
0.1104	0.485945	-0.608	0.14047343	0.12204963	0.17874706	20.33
0.1112	0.482340	-0.609	0.14047730	0.12205058	0.17874408	20.33
0.1120	0.478392	-0.599	0.14048892	0.12205637	0.17876852	20.33
0.1128	0.474358	-0.600	0.14048499	0.12207097	0.17878121	20.33
0.1136	0.470037	-0.599	0.14048207	0.12208557	0.17879969	20.33
0.1144	0.465031	-0.598	0.14048415	0.12208754	0.17881829	20.33
0.1152	0.458994	-0.604	0.14050072	0.12209535	0.17883384	20.32
0.1160	0.451469	-0.604	0.14051825	0.12209535	0.17884946	20.32
0.1168	0.442085	-0.607	0.14055133	0.12210017	0.17886704	20.32
0.1176	0.430212	-0.605	0.14060473	0.12211865	0.17891949	20.32
0.1184	0.416079	-0.608	0.14063299	0.12213033	0.17896706	20.32
0.1192	0.400000	-0.615	0.14068061	0.12214297	0.17901856	20.32
0.1200	0.382090	-0.614	0.14071959	0.12215960	0.17909539	20.32
0.1208	0.363951	-0.618	0.14076042	0.12217128	0.17916059	20.32
0.1216	0.345955	-0.616	0.14080811	0.12218589	0.17923653	20.32
0.1224	0.328760	-0.607	0.14085388	0.12220246	0.17932314	20.32
0.1232	0.312996	-0.605	0.14090931	0.12220639	0.17938727	20.32
0.1240	0.298347	-0.603	0.14094830	0.12221229	0.17944562	20.32
0.1248	0.285215	-0.600	0.14099199	0.12223470	0.17948550	20.33
0.1256	0.273829	-0.603	0.14102507	0.12225711	0.17953897	20.33
0.1264	0.264673	-0.605	0.14104247	0.12226683	0.17958665	20.33
0.1272	0.258093	-0.604	0.14105612	0.12228912	0.17961389	20.33
0.1280	0.254173	-0.609	0.14106500	0.12229782	0.17966062	20.33
0.1288	0.252399	-0.613	0.14106405	0.12228614	0.17964894	20.33
0.1296	0.252399	-0.614	0.14106512	0.12229198	0.17963630	20.33
0.1304	0.253887	-0.616	0.14106703	0.12228429	0.17963529	20.33
0.1312	0.256634	-0.612	0.14106303	0.12227362	0.17961681	20.33
0.1320	0.260525	-0.606	0.14106202	0.12228042	0.17961884	20.33
0.1328	0.265560	-0.604	0.14105028	0.12228131	0.17960817	20.33
0.1336	0.271311	-0.603	0.14104348	0.12227154	0.17959166	20.33
0.1344	0.277491	-0.604	0.14103180	0.12227249	0.17957217	20.33
0.1352	0.284700	-0.608	0.14102793	0.12227249	0.17954880	20.32
0.1360	0.293283	-0.607	0.14102209	0.12226665	0.17952639	20.32
0.1368	0.303669	-0.609	0.14100063	0.12226766	0.17949915	20.32
0.1376	0.316143	-0.607	0.14098120	0.12226963	0.17946315	20.32
0.1384	0.330334	-0.611	0.14093542	0.12225795	0.17941350	20.32
0.1392	0.345297	-0.616	0.14088976	0.12223750	0.17934150	20.32
0.1400	0.360403	-0.616	0.14084113	0.12223160	0.17927831	20.32
0.1408	0.375624	-0.623	0.14079833	0.12221020	0.17920929	20.32
0.1416	0.390186	-0.619	0.14076537	0.12219954	0.17914706	20.32
0.1424	0.404034	-0.613	0.14071965	0.12220341	0.17911011	20.32
0.1432	0.416937	-0.617	0.14069635	0.12219369	0.17906237	20.32
0.1440	0.427752	-0.617	0.14065939	0.12218291	0.17902344	20.32
0.1448	0.436678	-0.616	0.14061362	0.12216723	0.17900103	20.33
0.1456	0.443630	-0.616	0.14059705	0.12215459	0.17897087	20.33
0.1464	0.448523	-0.612	0.14058149	0.12213218	0.17894667	20.33
0.1472	0.451641	-0.605	0.14058346	0.12213999	0.17893404	20.33
0.1480	0.453243	-0.605	0.14060485	0.12214780	0.17892623	20.33
0.1488	0.453815	-0.611	0.14059514	0.12213415	0.17890674	20.33
0.1496	0.453272	-0.611	0.14058447	0.12214297	0.17890573	20.33
0.1504	0.452442	-0.612	0.14057863	0.12213129	0.17890185	20.33
0.1512	0.451155	-0.612	0.14057469	0.12213230	0.17889512	20.33
0.1520	0.449123	-0.605	0.14059997	0.12214690	0.17890394	20.33
0.1528	0.446806	-0.605	0.14060086	0.12214780	0.17890972	20.33
0.1536	0.443687	-0.613	0.14059013	0.12214392	0.17891753	20.33
0.1544	0.439939	-0.615	0.14059305	0.12213802	0.17892635	20.33
0.1552	0.435591	-0.619	0.14059502	0.12213516	0.17896032	20.32
0.1560	0.430756	-0.619	0.14060479	0.12213814	0.17898071	20.32
0.1568	0.425348	-0.622	0.14063501	0.12215269	0.17900008	20.32
0.1576	0.419340	-0.617	0.14066041	0.12216634	0.17903787	20.32
0.1584	0.412817	-0.622	0.14067113	0.12216729	0.17904764	20.32
0.1592	0.405121	-0.628	0.14068371	0.12216336	0.17905164	20.32
0.1600	0.395737	-0.623	0.14070600	0.12216145	0.17908084	20.32
0.1608	0.384922	-0.627	0.14071757	0.12215376	0.17910522	20.32
0.1616	0.372820	-0.623	0.14075357	0.12216741	0.17914122	20.32
0.1624	0.359888	-0.618	0.14080030	0.12218499	0.17920536	20.32
0.1632	0.346985	-0.620	0.14082849	0.12219083	0.17926568	20.32
0.1640	0.334253	-0.621	0.14086646	0.12220347	0.17932302	20.32
0.1648	0.322151	-0.623	0.14089459	0.12221712	0.17938328	20.33
0.1656	0.310936	-0.625	0.14092577	0.12222201	0.17943293	20.33
0.1664	0.301008	-0.624	0.14094138	0.12223566	0.17946893	20.33
0.1672	0.292854	-0.620	0.14096284	0.12225217	0.17950201	20.33
0.1680	0.286131	-0.618	0.14098233	0.12225604	0.17953801	20.33
0.1688	0.281353	-0.621	0.14099205	0.12225509	0.17954677	20.33
0.1696	0.277977	-0.620	0.14101642	0.12225902	0.17955160	20.33
0.1704	0.275717	-0.619	0.14102322	0.12225515	0.17955846	20.33
0.1712	0.274887	-0.617	0.14103097	0.12225318	0.17955357	20.33
0.1720	0.275030	-0.609	0.14103389	0.12226290	0.17955935	20.33
0.1728	0.276461	-0.609	0.14102894	0.12226874	0.17956710	20.33
0.1736	0.278950	-0.607	0.14103383	0.12226188	0.17956412	20.33
0.1744	0.282183	-0.606	0.14102709	0.12225991	0.17955834	20.33
0.1752	0.286188	-0.611	0.14102024	0.12226188	0.17955160	20.32
0.1760	0.290623	-0.612	0.14101732	0.12225795	0.17953902	20.32
0.1768	0.295486	-0.614	0.14100361	0.12226188	0.17952544	20.32
0.1776	0.300751	-0.614	0.14099669	0.12227458	0.17952156	20.32
0.1784	0.306587	-0.615	0.14098990	0.12227064	0.17950302	20.32
0.1792	0.313225	-0.614	0.14096361	0.12225604	0.17946410	20.32
0.1800	0.320749	-0.616	0.14093930	0.12225217	0.17943007	20.32
0.1808	0.330133	-0.616	0.14091986	0.12223363	0.17937559	20.32
0.1816	0.341406	-0.611	0.14089745	0.12222093	0.17933476	20.32
0.1824	0.354996	-0.606	0.14088291	0.12222290	0.17930460	20.32
0.1832	0.370588	-0.604	0.14083242	0.12221903	0.17924911	20.32
0.1840	0.387239	-0.606	0.14078194	0.12221128	0.17918682	20.32
0.1848	0.404406	-0.608	0.14073628	0.12220740	0.17912060	20.33
0.1856	0.421028	-0.612	0.14067405	0.12219179	0.17905927	20.33
0.1864	0.436420	-0.616	0.14064676	0.12216252	0.17900288	20.33
0.1872	0.449467	-0.609	0.14062625	0.12215662	0.17896789	20.33
0.1880	0.459280	-0.608	0.14058930	0.12215078	0.17893392	20.33
0.1888	0.465660	-0.613	0.14056790	0.12213135	0.17888439	20.33
0.1896	0.468407	-0.609	0.14056110	0.12212938	0.17886204	20.33
0.1904	0.468550	-0.618	0.14055133	0.12212062	0.17884839	20.33
0.1912	0.467262	-0.615	0.14055520	0.12210989	0.17885035	20.33
0.1920	0.465088	-0.607	0.14056784	0.12212151	0.17886102	20.33
0.1928	0.462713	-0.605	0.14056879	0.12213218	0.17887372	20.33
0.1936	0.459824	-0.605	0.14057082	0.12213415	0.17887080	20.33
0.1944	0.456133	-0.607	0.14057368	0.12213415	0.17887568	20.33
0.1952	0.451870	-0.610	0.14058727	0.12213123	0.17889804	20.32
0.1960	0.446949	-0.612	0.14059991	0.12212342	0.17891645	20.32
0.1968	0.441370	-0.613	0.14060670	0.12211561	0.17893791	20.32
0.1976	0.434961	-0.608	0.14061755	0.12212336	0.17895830	20.32
0.1984	0.427437	-0.610	0.14062631	0.12212533	0.17897481	20.32
0.1992	0.418339	-0.614	0.14063996	0.12212634	0.17898458	20.32
0.2000	0.407038	-0.611	0.14066720	0.12213898	0.17902243	20.32
0.2008	0.285645	-0.608	0.14108843	0.12232590	0.17963046	20.33
0.2016	0.286045	-0.607	0.14108646	0.12232196	0.17962462	20.32
0.2024	0.286732	-0.611	0.14107966	0.12232399	0.17960900	20.32
0.2032	0.288277	-0.613	0.14107382	0.12232012	0.17959934	20.32
0.2040	0.290966	-0.609	0.14106709	0.12231624	0.17960233	20.32
0.2048	0.295229	-0.612	0.14106709	0.12231243	0.17959744	20.32
0.2056	0.301781	-0.619	0.14106220	0.12229693	0.17957217	20.31
0.2064	0.311766	-0.617	0.14104372	0.12227947	0.17954397	20.31
0.2072	0.329218	-0.625	0.14100963	0.12226778	0.17947590	20.31
0.2080	0.359545	-0.621	0.14093071	0.12224150	0.17937475	20.32
0.2088	0.408783	-0.616	0.14080906	0.12219274	0.17921913	20.32
0.2096	0.481682	-0.617	0.14061540	0.12211102	0.17895645	20.32
0.2104	0.580130	-0.616	0.14035767	0.12198263	0.17858094	20.32
0.2112	0.702295	-0.620	0.14003289	0.12181818	0.17810529	20.32
0.2120	0.844746	-0.617	0.13965154	0.12162656	0.17754501	20.33
0.2128	1.004248	-0.621	0.13921767	0.12140280	0.17692250	20.33
0.2136	1.176453	-0.620	0.13875461	0.12115276	0.17624640	20.33
0.2144	1.358213	-0.617	0.13827401	0.12088132	0.17553526	20.33
0.2152	1.545811	-0.620	0.13777602	0.12057495	0.17478418	20.33
0.2160	1.734037	-0.620	0.13725764	0.12024522	0.17401081	20.33
0.2168	1.919403	-0.621	0.13675278	0.11990571	0.17326957	20.33
0.2176	2.099047	-0.621	0.13625664	0.11955464	0.17255849	20.33
0.2184	2.269936	-0.619	0.13579166	0.11921799	0.17188734	20.33
0.2192	2.430239	-0.616	0.13537818	0.11890376	0.17126769	20.33
0.2200	2.577324	-0.611	0.13497835	0.11859155	0.17068505	20.33
0.2208	2.709560	-0.612	0.13463014	0.11830068	0.17015493	20.33
0.2216	2.825775	-0.610	0.13431686	0.11803812	0.16968411	20.32
0.2224	2.925110	-0.608	0.13403773	0.11780083	0.16929597	20.32
0.2232	3.007107	-0.612	0.13380527	0.11760336	0.16897297	20.32
0.2240	3.070078	-0.604	0.13362050	0.11744970	0.16870552	20.32
0.2248	3.113251	-0.605	0.13347566	0.11732417	0.16852176	20.32
0.2256	3.137283	-0.609	0.13336182	0.11722296	0.16837198	20.31
0.2264	3.144293	-0.608	0.13330835	0.11717629	0.16828060	20.31
0.2272	3.138027	-0.615	0.13328016	0.11714613	0.16825044	20.31
0.2280	3.121204	-0.617	0.13328302	0.11714810	0.16825724	20.31
0.2288	3.092852	-0.611	0.13332778	0.11717635	0.16830397	20.32
0.2296	3.045902	-0.613	0.13340950	0.11722016	0.16841096	20.32
0.2304	2.969799	-0.615	0.13355440	0.11732525	0.16860253	20.32
0.2312	2.856331	-0.611	0.13378102	0.11750418	0.16891277	20.32
0.2320	2.703753	-0.617	0.13412732	0.11776966	0.16937482	20.32
0.2328	2.517443	-0.617	0.13456208	0.11811101	0.16997105	20.33
0.2336	2.309074	-0.612	0.13505912	0.11849999	0.17065978	20.33
0.2344	2.092266	-0.611	0.13560975	0.11891347	0.17140979	20.33
0.2352	1.878233	-0.612	0.13614082	0.11931813	0.17216945	20.33
0.2360	1.676903	-0.614	0.13663983	0.11969560	0.17290097	20.33
0.2368	1.494370	-0.616	0.13710290	0.12004095	0.17358959	20.33
0.2376	1.333723	-0.621	0.13751048	0.12033373	0.17420632	20.33
0.2384	1.195393	-0.615	0.13788015	0.12059349	0.17477149	20.33
0.2392	1.077232	-0.611	0.13820606	0.12081128	0.17525887	20.33
0.2400	0.976210	-0.611	0.13847554	0.12099028	0.17568499	20.33
0.2408	0.888090	-0.607	0.13871574	0.12114882	0.17608386	20.33
0.2416	0.809298	-0.604	0.13893366	0.12128115	0.17642629	20.32
0.2424	0.738001	-0.601	0.13914472	0.12139791	0.17675114	20.32
0.2432	0.673456	-0.603	0.13933927	0.12151074	0.17704982	20.32
0.2440	0.616608	-0.601	0.13952416	0.12160218	0.17731529	20.32
0.2448	0.569687	-0.601	0.13968170	0.12169075	0.17755067	20.32
0.2456	0.534611	-0.610	0.13977706	0.12175107	0.17771894	20.31
0.2464	0.512066	-0.608	0.13987142	0.12178898	0.17784929	20.31
0.2472	0.501881	-0.613	0.13991034	0.12182009	0.17791444	20.31
0.2480	0.502453	-0.617	0.13992888	0.12183076	0.17793876	20.32
0.2488	0.512581	-0.614	0.13994247	0.12184244	0.17793787	20.32
0.2496	0.536728	-0.615	0.13989967	0.12184447	0.17787075	20.32
0.2504	0.586367	-0.618	0.13980627	0.12180752	0.17771512	20.32
0.2512	0.673456	-0.615	0.13960195	0.12172282	0.17740387	20.32
0.2520	0.804234	-0.609	0.13927799	0.12157106	0.17691851	20.32
0.2528	0.977211	-0.610	0.13886261	0.12132591	0.17626476	20.33
0.2536	1.181517	-0.607	0.13836259	0.12100786	0.17548567	20.33
0.2544	1.404448	-0.607	0.13783443	0.12063050	0.17464525	20.33
0.2552	1.636992	-0.614	0.13728297	0.12020642	0.17377651	20.33
0.2560	1.870193	-0.617	0.13669246	0.11976570	0.17289037	20.33
0.2568	2.096558	-0.617	0.13612050	0.11932987	0.17204404	20.33
0.2576	2.309361	-0.621	0.13557184	0.11890870	0.17124635	20.33
0.2584	2.503166	-0.616	0.13506985	0.11851960	0.17052263	20.33
0.2592	2.675657	-0.610	0.13463509	0.11815482	0.16990298	20.33
0.2600	2.825089	-0.610	0.13424402	0.11782998	0.16935921	20.33
0.2608	2.951803	-0.610	0.13390934	0.11753911	0.16889131	20.32
0.2616	3.056030	-0.610	0.13362139	0.11729586	0.16850221	20.32
0.2624	3.138657	-0.617	0.13339281	0.11710137	0.16817534	20.32
0.2632	3.201485	-0.616	0.13321680	0.11693984	0.16791862	20.32
0.2640	3.245516	-0.611	0.13308269	0.11682212	0.16773188	20.32
0.2648	3.272638	-0.611	0.13298738	0.11673945	0.16760057	20.32
0.2656	3.285227	-0.613	0.13290656	0.11667424	0.16751498	20.31
0.2664	3.285770	-0.616	0.13287735	0.11664307	0.16746724	20.31
0.2672	3.276901	-0.620	0.13285393	0.11663133	0.16745263	20.31
0.2680	3.260450	-0.621	0.13286364	0.11662745	0.16746533	20.32
0.2688	3.234100	-0.613	0.13291526	0.11665374	0.16750526	20.32
0.2696	3.186264	-0.612	0.13298917	0.11670637	0.16760641	20.32
0.2704	3.098946	-0.615	0.13317978	0.11683285	0.16784084	20.32
0.2712	2.960300	-0.614	0.13348126	0.11705559	0.16823381	20.32
0.2720	2.770357	-0.619	0.13390535	0.11739802	0.16881454	20.32
0.2728	2.542591	-0.617	0.13443846	0.11783284	0.16954702	20.33
0.2736	2.301264	-0.615	0.13500273	0.11830264	0.17034954	20.33
0.2744	2.067432	-0.609	0.13556504	0.11878419	0.17118025	20.33
0.2752	1.854057	-0.607	0.13608456	0.11920053	0.17195743	20.33
0.2760	1.668348	-0.612	0.13653779	0.11955351	0.17264134	20.33
0.2768	1.510706	-0.606	0.13694143	0.11986578	0.17324734	20.33
0.2776	1.376724	-0.611	0.13728768	0.12011182	0.17376381	20.33
0.2784	1.259336	-0.605	0.13760376	0.12034333	0.17423952	20.33
0.2792	1.150990	-0.599	0.13790631	0.12055743	0.17469275	20.33
0.2800	1.046505	-0.601	0.13817769	0.12074810	0.17513144	20.33
0.2808	0.943565	-0.600	0.13846856	0.12092900	0.17557305	20.33
0.2816	0.842800	-0.599	0.13875651	0.12110996	0.17601275	20.32
0.2824	0.748043	-0.601	0.13902402	0.12127918	0.17644370	20.32
0.2832	0.663443	-0.601	0.13927990	0.12141919	0.17683768	20.32
0.2840	0.593204	-0.600	0.13949591	0.12154961	0.17718112	20.32
0.2848	0.540247	-0.603	0.13965058	0.12164098	0.17746222	20.32
0.2856	0.504885	-0.607	0.13976830	0.12169254	0.17763633	20.31
0.2864	0.485573	-0.607	0.13985485	0.12173533	0.17774045	20.31
0.2872	0.479507	-0.608	0.13988793	0.12175578	0.17779583	20.31
0.2880	0.483398	-0.611	0.13991034	0.12177038	0.17778611	20.32
0.2888	0.495701	-0.604	0.13990653	0.12178016	0.17778814	20.32
0.2896	0.520506	-0.605	0.13986570	0.12177825	0.17773652	20.32
0.2904	0.569086	-0.609	0.13977426	0.12175298	0.17757607	20.32
0.2912	0.653887	-0.611	0.13957679	0.12167227	0.17728615	20.32
0.2920	0.781689	-0.613	0.13928008	0.12152928	0.17680454	20.32
0.2928	0.953264	-0.615	0.13886285	0.12128705	0.17614698	20.33
0.2936	1.159344	-0.615	0.13836867	0.12096113	0.17535323	20.33
0.2944	1.387482	-0.608	0.13783556	0.12057972	0.17448264	20.33
0.2952	1.627779	-0.614	0.13725382	0.12014097	0.17356730	20.33
0.2960	1.869564	-0.615	0.13666523	0.11967897	0.17265874	20.33
0.2968	2.104111	-0.615	0.13607961	0.11922276	0.17178816	20.33
0.2976	2.323523	-0.618	0.13552421	0.11877245	0.17098373	20.33
0.2984	2.520533	-0.615	0.13502622	0.11836779	0.17026389	20.33
0.2992	2.691107	-0.611	0.13458359	0.11801082	0.16964620	20.33
0.3000	2.833242	-0.611	0.13420427	0.11768794	0.16913450	20.33
0.3008	2.947769	-0.612	0.13389581	0.11741853	0.16870737	20.32
0.3016	3.038034	-0.609	0.13363498	0.11720067	0.16837180	20.32
0.3024	3.107557	-0.609	0.13343853	0.11702162	0.16810822	20.32
0.3032	3.159771	-0.608	0.13328671	0.11688834	0.16788846	20.32
0.3040	3.197622	-0.607	0.13316023	0.11679882	0.16773289	20.32
0.3048	3.223171	-0.609	0.13307470	0.11672485	0.16762000	20.32
0.3056	3.237877	-0.619	0.13300759	0.11666942	0.16751391	20.31
0.3064	3.242769	-0.625	0.13295215	0.11664110	0.16746128	20.31
0.3072	3.239107	-0.625	0.13292986	0.11660802	0.16743404	20.31
0.3080	3.227577	-0.624	0.13292307	0.11660123	0.16743410	20.32
0.3088	3.207121	-0.616	0.13292891	0.11661971	0.16747695	20.32
0.3096	3.170013	-0.608	0.13299316	0.11665189	0.16756356	20.32
0.3104	3.098145	-0.611	0.13312840	0.11675018	0.16773957	20.32
0.3112	2.976408	-0.609	0.13339102	0.11694574	0.16807812	20.32
0.3120	2.799854	-0.607	0.13379472	0.11726773	0.16861212	20.32
0.3128	2.576151	-0.611	0.13431418	0.11769283	0.16931343	20.33
0.3136	2.328129	-0.608	0.13490850	0.11818987	0.17013639	20.33
0.3144	2.078218	-0.608	0.13552034	0.11869472	0.17101181	20.33
0.3152	1.842098	-0.615	0.13609320	0.11914414	0.17185813	20.33
0.3160	1.631126	-0.616	0.13661551	0.11953813	0.17263639	20.33
0.3168	1.450338	-0.616	0.13707173	0.11988634	0.17333192	20.33
0.3176	1.301508	-0.619	0.13744730	0.12017322	0.17390776	20.33
0.3184	1.181030	-0.611	0.13777900	0.12041259	0.17440778	20.33
0.3192	1.081467	-0.603	0.13805723	0.12062556	0.17484653	20.33
0.3200	0.995178	-0.601	0.13829750	0.12078804	0.17522687	20.33
0.3208	0.914955	-0.597	0.13852018	0.12093109	0.17559260	20.32
0.3216	0.837450	-0.596	0.13874686	0.12107885	0.17594177	20.32
0.3224	0.762491	-0.601	0.13895887	0.12120533	0.17627531	20.32
0.3232	0.692024	-0.599	0.13916022	0.12132698	0.17660993	20.32
0.3240	0.629282	-0.596	0.13936257	0.12144655	0.17691642	20.32
0.3248	0.577784	-0.598	0.13951528	0.12153804	0.17716831	20.32
0.3256	0.540018	-0.599	0.13962138	0.12160319	0.17735416	20.31
0.3264	0.516243	-0.602	0.13971668	0.12165564	0.17748159	20.31
0.3272	0.506058	-0.607	0.13976049	0.12168193	0.17755556	20.31
0.3280	0.507431	-0.610	0.13977706	0.12169361	0.17758679	20.32
0.3288	0.519104	-0.612	0.13978869	0.12170333	0.17759550	20.32
0.3296	0.546684	-0.612	0.13974500	0.12169462	0.17753714	20.32
0.3304	0.602274	-0.616	0.13962436	0.12165189	0.17734456	20.32
0.3312	0.697403	-0.613	0.13941723	0.12156141	0.17698944	20.32
0.3320	0.837622	-0.611	0.13910985	0.12139606	0.17645741	20.32
0.3328	1.020155	-0.614	0.13866812	0.12112749	0.17574632	20.33
0.3336	1.232128	-0.609	0.13817000	0.12078601	0.17493689	20.33
0.3344	1.459236	-0.610	0.13762707	0.12039495	0.17409056	20.33
0.3352	1.690493	-0.615	0.13704342	0.11996013	0.17320246	20.33
0.3360	1.915483	-0.617	0.13649285	0.11952829	0.17235029	20.33
0.3368	2.127829	-0.621	0.13596076	0.11911011	0.17156821	20.33
0.3376	2.323322	-0.620	0.13547540	0.11870056	0.17083776	20.33
0.3384	2.498903	-0.616	0.13503474	0.11833674	0.17021132	20.33
0.3392	2.653942	-0.612	0.13464373	0.11799920	0.16966176	20.33
0.3400	2.787752	-0.611	0.13430136	0.11769563	0.16916567	20.33
0.3408	2.901449	-0.614	0.13399309	0.11743498	0.16875708	20.33
0.3416	2.997150	-0.618	0.13373047	0.11720932	0.16840589	20.32
0.3424	3.076429	-0.623	0.13350582	0.11702257	0.16810918	20.32
0.3432	3.140402	-0.626	0.13332009	0.11686200	0.16786110	20.32
0.3440	3.188925	-0.625	0.13316733	0.11674815	0.16766942	20.32
0.3448	3.221741	-0.621	0.13306320	0.11666447	0.16753024	20.32
0.3456	3.240166	-0.628	0.13298148	0.11659539	0.16741747	20.31
0.3464	3.245716	-0.624	0.13292497	0.11655951	0.16737276	20.31
0.3472	3.240881	-0.628	0.13289672	0.11653423	0.16734850	20.31
0.3480	3.227634	-0.626	0.13289380	0.11652744	0.16735339	20.32
0.3488	3.203688	-0.616	0.13292676	0.11655360	0.16740495	20.32
0.3496	3.159170	-0.617	0.13299978	0.11660224	0.16749930	20.32
0.3504	3.077345	-0.615	0.13317496	0.11671507	0.16771525	20.32
0.3512	2.945967	-0.614	0.13345999	0.11694169	0.16808695	20.32
0.3520	2.762775	-0.613	0.13386762	0.11726958	0.16864818	20.32
0.3528	2.538872	-0.611	0.13439971	0.11770248	0.16936022	20.33
0.3536	2.296886	-0.609	0.13497460	0.11818981	0.17016762	20.33
0.3544	2.058334	-0.604	0.13555735	0.11866844	0.17100513	20.33
0.3552	1.838179	-0.603	0.13609529	0.11910617	0.17179501	20.33
0.3560	1.645517	-0.605	0.13656121	0.11947578	0.17250901	20.33
0.3568	1.482697	-0.600	0.13697851	0.11979675	0.17313248	20.33
0.3576	1.347342	-0.604	0.13732570	0.12005454	0.17366064	20.33
0.3584	1.234074	-0.600	0.13764572	0.12028897	0.17411780	20.33
0.3592	1.135283	-0.599	0.13792396	0.12050098	0.17454576	20.33
0.3600	1.044359	-0.602	0.13816512	0.12066734	0.17493790	20.33
0.3608	0.956440	-0.603	0.13840443	0.12082493	0.17532408	20.32
0.3616	0.869694	-0.604	0.13863891	0.12097675	0.17572099	20.32
0.3624	0.785236	-0.604	0.13887137	0.12111980	0.17608976	20.32
0.3632	0.705557	-0.606	0.13910884	0.12126088	0.17644966	20.32
0.3640	0.634432	-0.603	0.13932967	0.12140292	0.17679113	20.32
0.3648	0.575180	-0.607	0.13950861	0.12151474	0.17708004	20.32
0.3656	0.530605	-0.614	0.13964188	0.12158471	0.17729884	20.31
0.3664	0.501652	-0.612	0.13973427	0.12164599	0.17745739	20.31
0.3672	0.487347	-0.616	0.13979942	0.12166440	0.17754686	20.31
0.3680	0.485544	-0.617	0.13983351	0.12166828	0.17757994	20.32
0.3688	0.494413	-0.615	0.13985193	0.12168092	0.17760330	20.32
0.3696	0.518188	-0.619	0.13982081	0.12166923	0.17756045	20.32
0.3704	0.568829	-0.625	0.13970798	0.12163621	0.17739213	20.32
0.3712	0.659122	-0.627	0.13950664	0.12155932	0.17706233	20.32
0.3720	0.795279	-0.628	0.13919246	0.12140071	0.17654186	20.32
0.3728	0.975094	-0.627	0.13876438	0.12115073	0.17583662	20.33
0.3736	1.186609	-0.623	0.13826537	0.12081027	0.17502826	20.33
0.3744	1.415892	-0.618	0.13771862	0.12040764	0.17418295	20.33
0.3752	1.652784	-0.617	0.13714761	0.11996704	0.17328811	20.33
0.3760	1.886415	-0.621	0.13656986	0.11950892	0.17239898	20.33
0.3768	2.107229	-0.621	0.13602024	0.11907697	0.17158675	20.33
0.3776	2.307787	-0.629	0.13550669	0.11867040	0.17082989	20.33
0.3784	2.483797	-0.620	0.13504952	0.11831343	0.17018592	20.33
0.3792	2.636089	-0.617	0.13465941	0.11799920	0.16965002	20.33
0.3800	2.766953	-0.613	0.13430828	0.11770552	0.16917336	20.33
0.3808	2.879305	-0.606	0.13400674	0.11744380	0.16875613	20.33
0.3816	2.975922	-0.615	0.13374114	0.11721033	0.16840589	20.32
0.3824	3.058805	-0.612	0.13350964	0.11700219	0.16810238	20.32
0.3832	3.129215	-0.614	0.13330823	0.11683768	0.16783011	20.32
0.3840	3.187065	-0.610	0.13314182	0.11670345	0.16761988	20.32
0.3848	3.231096	-0.600	0.13301152	0.11659163	0.16744769	20.32
0.3856	3.259821	-0.607	0.13291818	0.11651289	0.16730952	20.31
0.3864	3.272953	-0.604	0.13286465	0.11646044	0.16723853	20.31
0.3872	3.272324	-0.606	0.13283455	0.11643416	0.16719586	20.31
0.3880	3.259535	-0.608	0.13283944	0.11643124	0.16719401	20.32
0.3888	3.232384	-0.595	0.13286757	0.11645257	0.16724455	20.32
0.3896	3.178711	-0.599	0.13296098	0.11651677	0.16735739	20.32
0.3904	3.081751	-0.599	0.13315940	0.11666268	0.16761708	20.32
0.3912	2.933435	-0.599	0.13347059	0.11691946	0.16803914	20.32
0.3920	2.736225	-0.607	0.13391614	0.11728621	0.16864622	20.32
0.3928	2.505999	-0.604	0.13444632	0.11773372	0.16939223	20.33
0.3936	2.267160	-0.604	0.13500667	0.11820942	0.17019570	20.33
0.3944	2.038078	-0.604	0.13557673	0.11867738	0.17100602	20.33
0.3952	1.830711	-0.603	0.13608843	0.11909169	0.17174822	20.33
0.3960	1.652040	-0.609	0.13652325	0.11944664	0.17241454	20.33
0.3968	1.501493	-0.608	0.13691235	0.11975008	0.17299235	20.33
0.3976	1.373949	-0.607	0.13723338	0.11999422	0.17349231	20.33
0.3984	1.260681	-0.604	0.13753879	0.12022090	0.17395628	20.33
0.3992	1.153336	-0.597	0.13785100	0.12043297	0.17440671	20.33
0.4000	1.046247	-0.596	0.13814276	0.12062365	0.17485708	20.33
0.4008	0.937586	-0.596	0.13842970	0.12082493	0.17532021	20.32
0.4016	0.829897	-0.592	0.13872641	0.12101758	0.17579597	20.32
0.4024	0.727873	-0.590	0.13899881	0.12118882	0.17624539	20.32
0.4032	0.636692	-0.595	0.13925952	0.12135029	0.17666858	20.32
0.4040	0.561047	-0.590	0.13949686	0.12148160	0.17704111	20.32
0.4048	0.504313	-0.592	0.13967782	0.12157297	0.17732608	20.32
0.4056	0.467377	-0.600	0.13980722	0.12163812	0.17750800	20.31
0.4064	0.448093	-0.599	0.13988024	0.12167698	0.17763937	20.31
0.4072	0.443802	-0.608	0.13992113	0.12168771	0.17768991	20.31
0.4080	0.451412	-0.612	0.13992590	0.12169844	0.17769772	20.32
0.4088	0.472498	-0.608	0.13990831	0.12170035	0.17767924	20.32
0.4096	0.517530	-0.612	0.13982755	0.12168479	0.17752546	20.32
0.4104	0.596781	-0.608	0.13964659	0.12162352	0.17724139	20.32
0.4112	0.716114	-0.609	0.13936353	0.12149316	0.17678994	20.32
0.4120	0.875158	-0.611	0.13897347	0.12128109	0.17618191	20.32
0.4128	1.064787	-0.609	0.13852209	0.12098253	0.17544359	20.33
0.4136	1.274357	-0.609	0.13802111	0.12062842	0.17463523	20.33
0.4144	1.496572	-0.604	0.13749683	0.12024224	0.17380553	20.33
0.4152	1.725111	-0.604	0.13693362	0.11981326	0.17293406	20.33
0.4160	1.952591	-0.606	0.13636172	0.11936581	0.17209464	20.33
0.4168	2.172346	-0.609	0.13581800	0.11893100	0.17129701	20.33
0.4176	2.377682	-0.612	0.13529658	0.11850107	0.17053628	20.33
0.4184	2.561903	-0.607	0.13483745	0.11810720	0.16986501	20.33
0.4192	2.722492	-0.597	0.13443470	0.11776382	0.16929203	20.33
0.4200	2.857304	-0.599	0.13407665	0.11745161	0.16879016	20.33
0.4208	2.966652	-0.595	0.13377607	0.11719286	0.16838551	20.32
0.4216	3.053541	-0.600	0.13353580	0.11698759	0.16807324	20.32
0.4224	3.120775	-0.608	0.13333833	0.11682314	0.16780764	20.32
0.4232	3.172503	-0.607	0.13317591	0.11669081	0.16760910	20.32
0.4240	3.211498	-0.607	0.13304657	0.11659741	0.16746223	20.32
0.4248	3.239651	-0.603	0.13295418	0.11653131	0.16733778	20.32
0.4256	3.257790	-0.606	0.13288027	0.11647010	0.16725123	20.31
0.4264	3.265429	-0.608	0.13284820	0.11643797	0.16719389	20.31
0.4272	3.263798	-0.609	0.13283747	0.11641073	0.16716081	20.31
0.4280	3.253326	-0.610	0.13283551	0.11640197	0.16716176	20.32
0.4288	3.233042	-0.601	0.13285887	0.11642724	0.16719490	20.32
0.4296	3.195219	-0.596	0.13290745	0.11646229	0.16727275	20.32
0.4304	3.120232	-0.596	0.13305146	0.11656350	0.16745275	20.32
0.4312	2.992029	-0.595	0.13333547	0.11678040	0.16781557	20.32
0.4320	2.805977	-0.596	0.13374984	0.11711305	0.16836220	20.32
0.4328	2.573175	-0.596	0.13428879	0.11755955	0.16910732	20.33
0.4336	2.320232	-0.597	0.13487822	0.11807120	0.16996336	20.33
0.4344	2.071352	-0.595	0.13547552	0.11857116	0.17083102	20.33
0.4352	1.843014	-0.598	0.13602799	0.11902052	0.17165595	20.33
0.4360	1.643457	-0.605	0.13653189	0.11941260	0.17238063	20.33
0.4368	1.474886	-0.607	0.13698232	0.11973459	0.17301667	20.33
0.4376	1.335697	-0.609	0.13734126	0.11999816	0.17355752	20.33
0.4384	1.218395	-0.605	0.13766426	0.12023157	0.17404675	20.33
0.4392	1.114283	-0.598	0.13795608	0.12043869	0.17449814	20.33
0.4400	1.015921	-0.596	0.13821286	0.12062842	0.17492235	20.33
0.4408	0.919676	-0.596	0.13847059	0.12081039	0.17534262	20.32
0.4416	0.826378	-0.597	0.13873607	0.12097967	0.17574823	20.32
0.4424	0.738459	-0.597	0.13897145	0.12113428	0.17614609	20.32
0.4432	0.659065	-0.595	0.13920295	0.12126750	0.17651570	20.32
0.4440	0.591717	-0.591	0.13941509	0.12137347	0.17686099	20.32
0.4448	0.539732	-0.587	0.13957459	0.12146592	0.17713821	20.32
0.4456	0.504656	-0.592	0.13968742	0.12151945	0.17732298	20.31
0.4464	0.485916	-0.595	0.13976133	0.12156415	0.17745632	20.31
0.4472	0.481195	-0.596	0.13978946	0.12159622	0.17749906	20.31
0.4480	0.486860	-0.601	0.13978857	0.12160397	0.17750782	20.32
0.4488	0.502024	-0.595	0.13978761	0.12161559	0.17749333	20.32
0.4496	0.532494	-0.595	0.13973516	0.12159908	0.17739987	20.32
0.4504	0.589285	-0.601	0.13960779	0.12155342	0.17719859	20.32
0.4512	0.682640	-0.597	0.13939768	0.12146097	0.17683965	20.32
0.4520	0.816994	-0.599	0.13906598	0.12129176	0.17631918	20.32
0.4528	0.988626	-0.599	0.13864762	0.12104464	0.17565680	20.33
0.4536	1.186810	-0.596	0.13817680	0.12072265	0.17490196	20.33
0.4544	1.401358	-0.596	0.13767678	0.12035310	0.17410529	20.33
0.4552	1.624289	-0.603	0.13714665	0.11995143	0.17325407	20.33
0.4560	1.848249	-0.607	0.13659126	0.11952442	0.17240578	20.33
0.4568	2.066860	-0.609	0.13604653	0.11909938	0.17159742	20.33
0.4576	2.273941	-0.616	0.13552320	0.11867428	0.17083097	20.33
0.4584	2.463942	-0.609	0.13503879	0.11827546	0.17015880	20.33
0.4592	2.632856	-0.608	0.13463026	0.11792046	0.16956353	20.33
0.4600	2.779255	-0.608	0.13426352	0.11760235	0.16903239	20.33
0.4608	2.903395	-0.605	0.13392884	0.11732221	0.16857708	20.33
0.4616	3.006935	-0.609	0.13365746	0.11707997	0.16819674	20.32
0.4624	3.092451	-0.608	0.13341814	0.11687857	0.16788542	20.32
0.4632	3.161402	-0.612	0.13322073	0.11670738	0.16762865	20.32
0.4640	3.214159	-0.609	0.13306707	0.11657906	0.16744584	20.32
0.4648	3.251095	-0.607	0.13295132	0.11649150	0.16729897	20.32
0.4656	3.272867	-0.612	0.13285887	0.11642337	0.16718125	20.31
0.4664	3.280792	-0.609	0.13281405	0.11638349	0.16712475	20.31
0.4672	3.277473	-0.612	0.13280725	0.11636984	0.16708875	20.31
0.4680	3.263855	-0.612	0.13281107	0.11636698	0.16709650	20.31
0.4688	3.237534	-0.605	0.13284326	0.11638558	0.16715205	20.32
0.4696	3.185749	-0.605	0.13293177	0.11644101	0.16726303	20.32
0.4704	3.090992	-0.605	0.13311273	0.11657912	0.16750425	20.32
0.4712	2.944536	-0.604	0.13342792	0.11683297	0.16791582	20.32
0.4720	2.747183	-0.603	0.13389379	0.11719579	0.16850621	20.32
0.4728	2.516642	-0.600	0.13443762	0.11765581	0.16923964	20.33
0.4736	2.278547	-0.597	0.13499790	0.11812860	0.17004985	20.33
0.4744	2.053127	-0.593	0.13554555	0.11858088	0.17085129	20.33
0.4752	1.853428	-0.593	0.13602132	0.11897576	0.17157888	20.33
0.4760	1.682081	-0.597	0.13643372	0.11930072	0.17222381	20.33
0.4768	1.535311	-0.595	0.13681889	0.11958760	0.17277449	20.33
0.4776	1.404934	-0.595	0.13715833	0.11983955	0.17326963	20.33
0.4784	1.282053	-0.594	0.13749093	0.12008756	0.17376572	20.33
0.4792	1.161633	-0.586	0.13781101	0.12032199	0.17426473	20.33
0.4800	1.041555	-0.587	0.13811260	0.12053692	0.17477441	20.33
0.4808	0.923738	-0.589	0.13842487	0.12074214	0.17529094	20.32
0.4816	0.812330	-0.588	0.13872063	0.12093186	0.17577446	20.32
0.4824	0.711765	-0.592	0.13900173	0.12110984	0.17622483	20.32
0.4832	0.626335	-0.591	0.13925570	0.12127149	0.17662370	20.32
0.4840	0.558500	-0.588	0.13946486	0.12139606	0.17696810	20.32
0.4848	0.509176	-0.592	0.13962239	0.12148356	0.17723072	20.32
0.4856	0.477676	-0.592	0.13972062	0.12153900	0.17740482	20.31
0.4864	0.461283	-0.593	0.13979256	0.12157196	0.17750299	20.31
0.4872	0.457020	-0.600	0.13981885	0.12159532	0.17753792	20.31
0.4880	0.462341	-0.602	0.13984126	0.12160707	0.17754567	20.32
0.4888	0.476761	-0.600	0.13985389	0.12161678	0.17753786	20.32
0.4896	0.508003	-0.602	0.13980126	0.12160224	0.17746103	20.32
0.4904	0.568600	-0.603	0.13966018	0.12156034	0.17725492	20.32
0.4912	0.669336	-0.603	0.13940924	0.12146986	0.17687947	20.32
0.4920	0.815277	-0.605	0.13905710	0.12129188	0.17630559	20.32
0.4928	1.001129	-0.610	0.13859898	0.12102729	0.17558867	20.33
0.4936	1.214762	-0.607	0.13810968	0.12067807	0.17476279	20.33
0.4944	1.442814	-0.603	0.13757366	0.12027538	0.17390382	20.33
0.4952	1.673498	-0.606	0.13700759	0.11984646	0.17303610	20.33
0.4960	1.896830	-0.607	0.13646775	0.11940873	0.17219371	20.33
0.4968	2.105827	-0.610	0.13593954	0.11899531	0.17142516	20.33
0.4976	2.296200	-0.615	0.13545996	0.11860716	0.17071509	20.33
0.4984	2.466602	-0.614	0.13503093	0.11824626	0.17009944	20.33
0.4992	2.617378	-0.607	0.13464957	0.11792809	0.16956353	20.33
0.5000	2.749672	-0.609	0.13431013	0.11763722	0.16908306	20.33
0.5008	2.865028	-0.604	0.13401157	0.11737257	0.16866672	20.32
0.5016	2.966137	-0.603	0.13374025	0.11714303	0.16829699	20.32
0.5024	3.055716	-0.605	0.13350093	0.11693496	0.16796917	20.32
0.5032	3.133879	-0.599	0.13329268	0.11674631	0.16767442	20.32
0.5040	3.199453	-0.600	0.13310009	0.11658496	0.16744101	20.32
0.5048	3.249521	-0.600	0.13295698	0.11646420	0.16724259	20.32
0.5056	3.281879	-0.607	0.13284707	0.11636978	0.16709083	20.31
0.5064	3.296900	-0.608	0.13278097	0.11631429	0.16701496	20.31
0.5072	3.297157	-0.613	0.13276148	0.11629575	0.16696817	20.31
0.5080	3.285141	-0.613	0.13276839	0.11628997	0.16698086	20.31
0.5088	3.259878	-0.607	0.13279176	0.11631626	0.16702944	20.32
0.5096	3.209524	-0.610	0.13286573	0.11637664	0.16712970	20.32
0.5104	3.117771	-0.611	0.13304174	0.11650699	0.16737580	20.32
0.5112	2.976294	-0.612	0.13334125	0.11673951	0.16776782	20.32
0.5120	2.785664	-0.611	0.13378674	0.11708874	0.16835058	20.32
0.5128	2.561131	-0.612	0.13432461	0.11751580	0.16907716	20.33
0.5136	2.324095	-0.607	0.13488197	0.11798465	0.16986710	20.33
0.5144	2.092180	-0.603	0.13545007	0.11845058	0.17067730	20.33
0.5152	1.879463	-0.608	0.13596082	0.11886495	0.17143500	20.33
0.5160	1.692753	-0.611	0.13641030	0.11922389	0.17212957	20.33
0.5168	1.533852	-0.613	0.13681889	0.11953801	0.17272776	20.33
0.5176	1.398125	-0.615	0.13716036	0.11979872	0.17326576	20.33
0.5184	1.277018	-0.612	0.13748235	0.12004095	0.17375898	20.33
0.5192	1.163464	-0.608	0.13778585	0.12026948	0.17422491	20.33
0.5200	1.052656	-0.608	0.13807088	0.12047869	0.17469960	20.33
0.5208	0.943623	-0.610	0.13836271	0.12068391	0.17517042	20.32
0.5216	0.837536	-0.607	0.13864189	0.12086874	0.17563051	20.32
0.5224	0.738201	-0.605	0.13891321	0.12104774	0.17607790	20.32
0.5232	0.650225	-0.605	0.13917786	0.12119752	0.17648357	20.32
0.5240	0.577240	-0.599	0.13939470	0.12133074	0.17683572	20.32
0.5248	0.522051	-0.603	0.13957459	0.12143767	0.17712462	20.32
0.5256	0.485058	-0.607	0.13968456	0.12149507	0.17732304	20.31
0.5264	0.464544	-0.613	0.13975447	0.12154078	0.17744845	20.31
0.5272	0.458450	-0.620	0.13979346	0.12155735	0.17749900	20.31
0.5280	0.463743	-0.624	0.13980228	0.12156320	0.17750478	20.32
0.5288	0.481110	-0.625	0.13980806	0.12157679	0.17747474	20.32
0.5296	0.518932	-0.623	0.13973808	0.12156808	0.17736197	20.32
0.5304	0.587482	-0.621	0.13957077	0.12152725	0.17712468	20.32
0.5312	0.694141	-0.617	0.13931787	0.12141740	0.17672485	20.32
0.5320	0.839911	-0.616	0.13896871	0.12123358	0.17616552	20.32
0.5328	1.017122	-0.616	0.13854462	0.12096703	0.17547882	20.33
0.5336	1.214876	-0.617	0.13809031	0.12063336	0.17472196	20.33
0.5344	1.423931	-0.616	0.13760287	0.12027240	0.17392927	20.33
0.5352	1.637077	-0.621	0.13708246	0.11987942	0.17311984	20.33
0.5360	1.848650	-0.623	0.13655615	0.11947083	0.17231923	20.33
0.5368	2.053957	-0.625	0.13604742	0.11907393	0.17155755	20.33
0.5376	2.250080	-0.625	0.13555622	0.11868101	0.17083865	20.33
0.5384	2.434559	-0.619	0.13509220	0.11829966	0.17017049	20.33
0.5392	2.604561	-0.620	0.13467681	0.11794269	0.16957128	20.33
0.5400	2.757654	-0.619	0.13429743	0.11760724	0.16902262	20.33
0.5408	2.891722	-0.621	0.13394630	0.11729884	0.16853619	20.32
0.5416	3.005762	-0.619	0.13365638	0.11704010	0.16812855	20.32
0.5424	3.100004	-0.616	0.13340831	0.11682713	0.16778511	20.32
0.5432	3.174906	-0.619	0.13318461	0.11664319	0.16750705	20.32
0.5440	3.230925	-0.610	0.13301820	0.11651188	0.16730279	20.32
0.5448	3.268976	-0.614	0.13290447	0.11642140	0.16715980	20.32
0.5456	3.290405	-0.617	0.13281983	0.11634058	0.16705287	20.31
0.5464	3.297186	-0.609	0.13278478	0.11630648	0.16698766	20.31
0.5472	3.292751	-0.614	0.13277125	0.11628312	0.16696328	20.31
0.5480	3.278847	-0.615	0.13277221	0.11626464	0.16695344	20.31
0.5488	3.253784	-0.609	0.13279557	0.11628991	0.16699713	20.32
0.5496	3.205605	-0.611	0.13286561	0.11633277	0.16710895	20.32
0.5504	3.116770	-0.615	0.13303483	0.11646509	0.16733861	20.32
0.5512	2.977581	-0.607	0.13332474	0.11670053	0.16773558	20.32
0.5520	2.787838	-0.608	0.13375765	0.11704588	0.16831344	20.32
0.5528	2.563076	-0.612	0.13428879	0.11747873	0.16902751	20.33
0.5536	2.325697	-0.608	0.13485491	0.11793983	0.16982228	20.33
0.5544	2.093811	-0.609	0.13541710	0.11840963	0.17063648	20.33
0.5552	1.881094	-0.610	0.13593656	0.11883277	0.17138940	20.33
0.5560	1.694040	-0.612	0.13639379	0.11919945	0.17208195	20.33
0.5568	1.535883	-0.608	0.13680428	0.11951363	0.17267823	20.33
0.5576	1.403790	-0.609	0.13713408	0.11977434	0.17320257	20.33
0.5584	1.290178	-0.611	0.13743949	0.12000203	0.17367047	20.33
0.5592	1.187181	-0.605	0.13770890	0.12021416	0.17410433	20.33
0.5600	1.087704	-0.608	0.13795698	0.12041163	0.17453140	20.33
0.5608	0.988827	-0.612	0.13822937	0.12059742	0.17494094	20.32
0.5616	0.890579	-0.611	0.13847840	0.12077641	0.17536598	20.32
0.5624	0.795908	-0.612	0.13874203	0.12094271	0.17579007	20.32
0.5632	0.708475	-0.616	0.13898128	0.12109351	0.17619282	20.32
0.5640	0.632172	-0.607	0.13920307	0.12122387	0.17656636	20.32
0.5648	0.570574	-0.608	0.13939470	0.12133276	0.17687184	20.32
0.5656	0.526257	-0.610	0.13952404	0.12141055	0.17708880	20.31
0.5664	0.499277	-0.609	0.13963497	0.12146890	0.17723763	20.31
0.5672	0.488062	-0.622	0.13968742	0.12150389	0.17730665	20.31
0.5680	0.490208	-0.620	0.13970000	0.12151951	0.17733002	20.32
0.5688	0.504856	-0.621	0.13970679	0.12153226	0.17731446	20.32
0.5696	0.539989	-0.619	0.13964164	0.12152153	0.17721325	20.32
0.5704	0.607710	-0.616	0.13949478	0.12148166	0.17698276	20.32
0.5712	0.716486	-0.617	0.13924098	0.12136972	0.17657614	20.32
0.5720	0.868378	-0.613	0.13887334	0.12117416	0.17599541	20.32
0.5728	1.055546	-0.614	0.13842875	0.12089014	0.17528141	20.33
0.5736	1.264515	-0.611	0.13794428	0.12053609	0.17448753	20.33
0.5744	1.482954	-0.608	0.13745016	0.12015474	0.17367238	20.33
0.5752	1.700878	-0.609	0.13693070	0.11974818	0.17284942	20.33
0.5760	1.910734	-0.616	0.13641614	0.11934739	0.17205077	20.33
0.5768	2.107229	-0.619	0.13591623	0.11896318	0.17132509	20.33
0.5776	2.289047	-0.625	0.13545907	0.11859262	0.17065775	20.33
0.5784	2.455873	-0.625	0.13504267	0.11824530	0.17005265	20.33
0.5792	2.607336	-0.622	0.13466722	0.11791748	0.16951472	20.33
0.5800	2.743549	-0.620	0.13432962	0.11760330	0.16902351	20.33
0.5808	2.863255	-0.620	0.13399786	0.11732405	0.16858673	20.32
0.5816	2.966623	-0.620	0.13372457	0.11708480	0.16822493	20.32
0.5824	3.054199	-0.621	0.13349009	0.11688834	0.16790390	20.32
0.5832	3.125582	-0.625	0.13328683	0.11672199	0.16763645	20.32
0.5840	3.180799	-0.619	0.13313997	0.11659569	0.16743904	20.32
0.5848	3.219337	-0.620	0.13302612	0.11650133	0.16728431	20.32
0.5856	3.241453	-0.620	0.13293374	0.11641860	0.16717148	20.31
0.5864	3.248692	-0.617	0.13288510	0.11638063	0.16711992	20.31
0.5872	3.243856	-0.621	0.13286954	0.11635423	0.16708881	20.31
0.5880	3.228750	-0.618	0.13288027	0.11634934	0.16709572	20.32
0.5888	3.201141	-0.608	0.13291728	0.11637074	0.16715896	20.32
0.5896	3.148613	-0.609	0.13300669	0.11642230	0.16727376	20.32
0.5904	3.056660	-0.609	0.13319248	0.11655074	0.16751498	20.32
0.5912	2.917671	-0.613	0.13348234	0.11677837	0.16791081	20.32
0.5920	2.731504	-0.617	0.13391709	0.11712569	0.16847503	20.32
0.5928	2.512808	-0.617	0.13442874	0.11754793	0.16917056	20.33
0.5936	2.280493	-0.617	0.13497156	0.11801195	0.16994870	20.33
0.5944	2.050180	-0.608	0.13552409	0.11848664	0.17076576	20.33
0.5952	1.836033	-0.611	0.13602990	0.11890101	0.17152733	20.33
0.5960	1.646719	-0.611	0.13648909	0.11927545	0.17223257	20.33
0.5968	1.486101	-0.608	0.13689178	0.11959738	0.17285413	20.33
0.5976	1.353006	-0.617	0.13723618	0.11984831	0.17337269	20.33
0.5984	1.240282	-0.611	0.13754076	0.12007785	0.17385030	20.33
0.5992	1.138773	-0.606	0.13781995	0.12028497	0.17427826	20.33
0.6000	1.040812	-0.608	0.13807672	0.12047082	0.17469853	20.33
0.6008	0.942192	-0.608	0.13834322	0.12065756	0.17511481	20.32
0.6016	0.842800	-0.607	0.13860482	0.12083560	0.17554194	20.32
0.6024	0.746727	-0.606	0.13886744	0.12099904	0.17597002	20.32
0.6032	0.659666	-0.604	0.13911456	0.12114888	0.17636502	20.32
0.6040	0.587053	-0.595	0.13932657	0.12127924	0.17672688	20.32
0.6048	0.533123	-0.594	0.13949388	0.12138724	0.17700696	20.32
0.6056	0.498905	-0.597	0.13959992	0.12145448	0.17718494	20.31
0.6064	0.482025	-0.599	0.13968152	0.12150502	0.17729491	20.31
0.6072	0.478821	-0.603	0.13971269	0.12152743	0.17732996	20.31
0.6080	0.486088	-0.608	0.13972437	0.12153327	0.17732221	20.32
0.6088	0.503197	-0.605	0.13972044	0.12153810	0.17731637	20.32
0.6096	0.538044	-0.603	0.13965738	0.12151283	0.17722291	20.32
0.6104	0.601902	-0.601	0.13952124	0.12147194	0.17700696	20.32
0.6112	0.702381	-0.601	0.13929653	0.12136775	0.17664415	20.32
0.6120	0.842028	-0.603	0.13896781	0.12119842	0.17610621	20.32
0.6128	1.014547	-0.605	0.13854653	0.12094647	0.17543298	20.33
0.6136	1.209412	-0.608	0.13809711	0.12062061	0.17468882	20.33
0.6144	1.416979	-0.604	0.13761461	0.12027049	0.17390376	20.33
0.6152	1.629066	-0.608	0.13710874	0.11987853	0.17309439	20.33
0.6160	1.838350	-0.611	0.13660878	0.11947387	0.17230654	20.33
0.6168	2.038136	-0.612	0.13610297	0.11907798	0.17156434	20.33
0.6176	2.224932	-0.616	0.13562238	0.11868596	0.17086786	20.33
0.6184	2.397394	-0.610	0.13518959	0.11832404	0.17024237	20.33
0.6192	2.554436	-0.610	0.13480139	0.11799818	0.16967529	20.33
0.6200	2.696772	-0.607	0.13444817	0.11769080	0.16915977	20.33
0.6208	2.823944	-0.603	0.13412142	0.11740673	0.16869587	20.32
0.6216	2.935495	-0.601	0.13383150	0.11714995	0.16829222	20.32
0.6224	3.031740	-0.598	0.13357669	0.11692512	0.16795856	20.32
0.6232	3.110361	-0.597	0.13335586	0.11672670	0.16767150	20.32
0.6240	3.169670	-0.599	0.13319433	0.11658376	0.16745555	20.32
0.6248	3.208952	-0.600	0.13306880	0.11647969	0.16730088	20.32
0.6256	3.228979	-0.608	0.13296670	0.11640096	0.16718900	20.31
0.6264	3.233356	-0.610	0.13292784	0.11637461	0.16714919	20.31
0.6272	3.226461	-0.610	0.13291621	0.11635315	0.16713846	20.31
0.6280	3.210411	-0.612	0.13291329	0.11635417	0.16715014	20.31
0.6288	3.182602	-0.601	0.13295507	0.11639124	0.16720164	20.32
0.6296	3.130703	-0.603	0.13303387	0.11645257	0.16730767	20.32
0.6304	3.039036	-0.606	0.13320404	0.11658782	0.16754788	20.32
0.6312	2.899761	-0.609	0.13351053	0.11682123	0.16795057	20.32
0.6320	2.714624	-0.617	0.13393468	0.11715376	0.16852260	20.32
0.6328	2.499619	-0.617	0.13443172	0.11756426	0.16921514	20.33
0.6336	2.275915	-0.612	0.13495415	0.11800885	0.16996711	20.33
0.6344	2.060051	-0.609	0.13548034	0.11845249	0.17073172	20.33
0.6352	1.863785	-0.608	0.13595116	0.11884457	0.17143112	20.33
0.6360	1.692238	-0.612	0.13636851	0.11918312	0.17206830	20.33
0.6368	1.545897	-0.613	0.13674694	0.11948079	0.17263156	20.33
0.6376	1.420383	-0.611	0.13706505	0.11972487	0.17311203	20.33
0.6384	1.307259	-0.609	0.13735878	0.11995250	0.17357123	20.33
0.6392	1.199198	-0.605	0.13765550	0.12016839	0.17401195	20.33
0.6400	1.090965	-0.611	0.13793653	0.12037164	0.17445838	20.33
0.6408	0.980988	-0.617	0.13821965	0.12057203	0.17493021	20.32
0.6416	0.871553	-0.616	0.13851643	0.12076265	0.17540199	20.32
0.6424	0.766640	-0.618	0.13879365	0.12095034	0.17587274	20.32
0.6432	0.672083	-0.616	0.13906121	0.12111568	0.17630070	20.32
0.6440	0.593519	-0.606	0.13930821	0.12126261	0.17668200	20.32
0.6448	0.535469	-0.607	0.13949102	0.12137938	0.17697281	20.32
0.6456	0.499306	-0.606	0.13961744	0.12143975	0.17716545	20.31
0.6464	0.482082	-0.604	0.13969231	0.12148553	0.17729002	20.31
0.6472	0.479650	-0.605	0.13970792	0.12150401	0.17732507	20.31
0.6480	0.487776	-0.605	0.13972157	0.12151277	0.17732602	20.32
0.6488	0.505743	-0.600	0.13972253	0.12152445	0.17729777	20.32
0.6496	0.541992	-0.603	0.13965732	0.12150985	0.17718393	20.32
0.6504	0.608454	-0.607	0.13952214	0.12146121	0.17694652	20.32
0.6512	0.713968	-0.609	0.13927209	0.12135613	0.17655551	20.32
0.6520	0.861797	-0.609	0.13891029	0.12116838	0.17598069	20.32
0.6528	1.045275	-0.605	0.13847363	0.12088722	0.17527157	20.33
0.6536	1.252556	-0.604	0.13798916	0.12054580	0.17449051	20.33
0.6544	1.472511	-0.594	0.13747650	0.12015277	0.17366749	20.33
0.6552	1.695156	-0.597	0.13693953	0.11972779	0.17282891	20.33
0.6560	1.912336	-0.601	0.13640541	0.11930948	0.17200887	20.33
0.6568	2.117043	-0.601	0.13589275	0.11889899	0.17125207	20.33
0.6576	2.305441	-0.611	0.13541126	0.11850709	0.17055076	20.33
0.6584	2.476816	-0.605	0.13499880	0.11815196	0.16994178	20.33
0.6592	2.632627	-0.601	0.13461554	0.11781543	0.16939902	20.33
0.6600	2.775908	-0.602	0.13424009	0.11748952	0.16887665	20.33
0.6608	2.908344	-0.601	0.13390452	0.11718500	0.16840971	20.32
0.6616	3.029194	-0.604	0.13357866	0.11691260	0.16798663	20.32
0.6624	3.134937	-0.608	0.13329655	0.11667043	0.16760534	20.32
0.6632	3.220367	-0.611	0.13306987	0.11646909	0.16729796	20.32
0.6640	3.281622	-0.612	0.13289481	0.11632991	0.16706651	20.32
0.6648	3.317957	-0.615	0.13277030	0.11622977	0.16690892	20.31
0.6656	3.332663	-0.616	0.13268763	0.11616850	0.16680580	20.31
0.6664	3.331318	-0.612	0.13265938	0.11614913	0.16677463	20.31
0.6672	3.319159	-0.609	0.13265347	0.11613846	0.16677368	20.31
0.6680	3.297958	-0.605	0.13266808	0.11614519	0.16680968	20.31
0.6688	3.260965	-0.595	0.13272744	0.11617726	0.16690010	20.32
0.6696	3.191471	-0.601	0.13285297	0.11625695	0.16706938	20.32
0.6704	3.075314	-0.602	0.13308936	0.11643893	0.16738063	20.32
0.6712	2.907457	-0.603	0.13345611	0.11673075	0.16785723	20.32
0.6720	2.694998	-0.607	0.13393956	0.11713928	0.16852361	20.32
0.6728	2.459850	-0.601	0.13448530	0.11760420	0.16928917	20.33
0.6736	2.224388	-0.599	0.13503981	0.11808366	0.17009747	20.33
0.6744	2.005405	-0.593	0.13557869	0.11853987	0.17088634	20.33
0.6752	1.814032	-0.601	0.13604170	0.11892217	0.17156821	20.33
0.6760	1.651754	-0.604	0.13644439	0.11924416	0.17217624	20.33
0.6768	1.515255	-0.608	0.13680625	0.11951369	0.17270452	20.33
0.6776	1.397009	-0.613	0.13711369	0.11973935	0.17316568	20.33
0.6784	1.287861	-0.608	0.13740748	0.11996311	0.17361796	20.33
0.6792	1.181116	-0.605	0.13769549	0.12018394	0.17405176	20.33
0.6800	1.071939	-0.607	0.13797951	0.12039304	0.17449820	20.33
0.6808	0.959444	-0.611	0.13827813	0.12060702	0.17498159	20.32
0.6816	0.846691	-0.608	0.13858461	0.12080246	0.17546892	20.32
0.6824	0.739632	-0.613	0.13887823	0.12098432	0.17595243	20.32
0.6832	0.645218	-0.608	0.13914967	0.12114584	0.17639220	20.32
0.6840	0.568800	-0.601	0.13937730	0.12128204	0.17675507	20.32
0.6848	0.513210	-0.603	0.13955903	0.12139106	0.17703331	20.32
0.6856	0.478306	-0.604	0.13967681	0.12146115	0.17720348	20.31
0.6864	0.460682	-0.610	0.13974190	0.12150395	0.17732310	20.31
0.6872	0.456591	-0.614	0.13977396	0.12152249	0.17737669	20.31
0.6880	0.462084	-0.621	0.13978666	0.12153214	0.17738551	20.32
0.6888	0.476017	-0.618	0.13979936	0.12153709	0.17738259	20.32
0.6896	0.505943	-0.617	0.13976341	0.12152541	0.17729598	20.32
0.6904	0.564709	-0.625	0.13963407	0.12148845	0.17707807	20.32
0.6912	0.663013	-0.626	0.13940060	0.12139803	0.17672694	20.32
0.6920	0.805178	-0.623	0.13905138	0.12122095	0.17619580	20.32
0.6928	0.985365	-0.624	0.13861364	0.12096030	0.17549056	20.33
0.6936	1.191015	-0.617	0.13814181	0.12062949	0.17471617	20.33
0.6944	1.409969	-0.607	0.13763499	0.12024337	0.17388439	20.33
0.6952	1.633158	-0.614	0.13709903	0.11982799	0.17302549	20.33
0.6960	1.853056	-0.614	0.13656014	0.11940873	0.17220449	20.33
0.6968	2.063484	-0.618	0.13602424	0.11898655	0.17141950	20.33
0.6976	2.260666	-0.622	0.13552326	0.11857504	0.17068511	20.33
0.6984	2.442255	-0.614	0.13506889	0.11819959	0.17003441	20.33
0.6992	2.607307	-0.612	0.13466322	0.11783963	0.16944689	20.33
0.7000	2.755651	-0.609	0.13428771	0.11751282	0.16892165	20.33
0.7008	2.886000	-0.611	0.13393170	0.11721712	0.16845465	20.32
0.7016	2.996635	-0.613	0.13363796	0.11697197	0.16806251	20.32
0.7024	3.085470	-0.614	0.13338506	0.11676282	0.16774142	20.32
0.7032	3.151731	-0.612	0.13319242	0.11659944	0.16748261	20.32
0.7040	3.196335	-0.608	0.13305825	0.11649430	0.16731632	20.32
0.7048	3.222227	-0.604	0.13296002	0.11640280	0.16720158	20.31
0.7056	3.234043	-0.608	0.13289386	0.11635023	0.16711795	20.31
0.7064	3.235416	-0.608	0.13285977	0.11632884	0.16707903	20.31
0.7072	3.229551	-0.608	0.13284999	0.11631233	0.16707128	20.31
0.7080	3.217878	-0.611	0.13285774	0.11632401	0.16707522	20.31
0.7088	3.199940	-0.603	0.13288790	0.11634552	0.16710830	20.32
0.7096	3.169212	-0.606	0.13293171	0.11636603	0.16718024	20.32
0.7104	3.109045	-0.605	0.13304549	0.11643797	0.16731250	20.32
0.7112	3.003817	-0.600	0.13326919	0.11660826	0.16759646	20.32
0.7120	2.845573	-0.601	0.13362128	0.11688936	0.16806537	20.32
0.7128	2.639608	-0.601	0.13410580	0.11728221	0.16869670	20.33
0.7136	2.405319	-0.600	0.13465256	0.11774534	0.16946614	20.33
0.7144	2.165222	-0.601	0.13521969	0.11822003	0.17028713	20.33
0.7152	1.937284	-0.605	0.13575864	0.11866164	0.17109448	20.33
0.7160	1.731462	-0.605	0.13624787	0.11905760	0.17184252	20.33
0.7168	1.552734	-0.609	0.13670510	0.11940587	0.17250890	20.33
0.7176	1.400900	-0.609	0.13708931	0.11970353	0.17310232	20.33
0.7184	1.271582	-0.601	0.13743854	0.11997396	0.17363435	20.33
0.7192	1.159286	-0.595	0.13774687	0.12020350	0.17411202	20.33
0.7200	1.058064	-0.591	0.13801527	0.12040865	0.17455655	20.33
0.7208	0.963163	-0.592	0.13826239	0.12058955	0.17497092	20.32
0.7216	0.872641	-0.593	0.13850856	0.12074620	0.17535329	20.32
0.7224	0.786581	-0.594	0.13874882	0.12090087	0.17572683	20.32
0.7232	0.707073	-0.596	0.13898230	0.12104189	0.17608577	20.32
0.7240	0.637350	-0.596	0.13920212	0.12116742	0.17642045	20.32
0.7248	0.580330	-0.599	0.13936549	0.12127435	0.17670345	20.31
0.7256	0.538130	-0.605	0.13950068	0.12135315	0.17692029	20.31
0.7264	0.511036	-0.606	0.13959211	0.12140769	0.17707205	20.31
0.7272	0.498133	-0.607	0.13964176	0.12143779	0.17715377	20.31
0.7280	0.497046	-0.609	0.13966608	0.12144941	0.17719465	20.31
0.7288	0.506344	-0.603	0.13967383	0.12146014	0.17720437	20.32
0.7296	0.530720	-0.606	0.13964373	0.12145329	0.17715281	20.32
0.7304	0.582075	-0.614	0.13954639	0.12143093	0.17697865	20.32
0.7312	0.672827	-0.611	0.13935280	0.12135810	0.17665571	20.32
0.7320	0.809813	-0.616	0.13902891	0.12119561	0.17614412	20.32
0.7328	0.991001	-0.615	0.13858533	0.12093103	0.17544568	20.33
0.7336	1.203518	-0.605	0.13808835	0.12058568	0.17464900	20.33
0.7344	1.431227	-0.603	0.13756013	0.12018782	0.17378908	20.33
0.7352	1.661568	-0.602	0.13701147	0.11975497	0.17291266	20.33
0.7360	1.885700	-0.607	0.13645989	0.11932212	0.17206734	20.33
0.7368	2.097559	-0.610	0.13592678	0.11889219	0.17127943	20.33
0.7376	2.293653	-0.613	0.13542879	0.11848938	0.17054993	20.33
0.7384	2.470436	-0.606	0.13497162	0.11812854	0.16991282	20.33
0.7392	2.624903	-0.602	0.13459617	0.11779970	0.16936415	20.33
0.7400	2.756968	-0.603	0.13425958	0.11751181	0.16887867	20.33
0.7408	2.869091	-0.604	0.13394243	0.11725026	0.16847688	20.32
0.7416	2.964935	-0.607	0.13368469	0.11702067	0.16813153	20.32
0.7424	3.048019	-0.603	0.13345122	0.11682612	0.16783679	20.32
0.7432	3.120060	-0.605	0.13323820	0.11665392	0.16757613	20.32
0.7440	3.180370	-0.600	0.13309324	0.11652642	0.16735917	20.32
0.7448	3.228321	-0.604	0.13296682	0.11640477	0.16718018	20.32
0.7456	3.262568	-0.609	0.13284904	0.11630267	0.16701579	20.31
0.7464	3.281994	-0.607	0.13278878	0.11624032	0.16691470	20.31
0.7472	3.287859	-0.611	0.13275087	0.11619258	0.16685253	20.31
0.7480	3.281307	-0.607	0.13273722	0.11619163	0.16682822	20.31
0.7488	3.262453	-0.602	0.13276261	0.11621881	0.16686136	20.32
0.7496	3.223028	-0.601	0.13281411	0.11624998	0.16694790	20.32
0.7504	3.143778	-0.600	0.13295901	0.11635703	0.16715312	20.32
0.7512	3.012085	-0.601	0.13322747	0.11656231	0.16752958	20.32
0.7520	2.825460	-0.603	0.13364184	0.11689019	0.16808492	20.32
0.7528	2.596321	-0.602	0.13417786	0.11733282	0.16880566	20.33
0.7536	2.350473	-0.602	0.13475078	0.11782020	0.16961491	20.33
0.7544	2.109718	-0.598	0.13533837	0.11831045	0.17045534	20.33
0.7552	1.888990	-0.605	0.13586557	0.11874914	0.17125207	20.33
0.7560	1.696215	-0.609	0.13634223	0.11912656	0.17195642	20.33
0.7568	1.534796	-0.607	0.13675666	0.11945337	0.17257327	20.33
0.7576	1.402273	-0.611	0.13709319	0.11971992	0.17307031	20.33
0.7584	1.290751	-0.600	0.13741225	0.11995053	0.17352843	20.33
0.7592	1.190815	-0.593	0.13767874	0.12015390	0.17395246	20.33
0.7600	1.092596	-0.594	0.13793755	0.12033677	0.17436874	20.33
0.7608	0.990744	-0.596	0.13821185	0.12051475	0.17481428	20.32
0.7616	0.884800	-0.597	0.13848227	0.12070435	0.17526281	20.32
0.7624	0.778942	-0.601	0.13876337	0.12089396	0.17572886	20.32
0.7632	0.681038	-0.601	0.13903570	0.12106323	0.17617244	20.32
0.7640	0.598841	-0.595	0.13928670	0.12121010	0.17656732	20.32
0.7648	0.538559	-0.597	0.13947636	0.12131417	0.17687178	20.32
0.7656	0.501394	-0.602	0.13959605	0.12138623	0.17707306	20.31
0.7664	0.484200	-0.605	0.13967001	0.12142801	0.17718107	20.31
0.7672	0.482225	-0.612	0.13968265	0.12144357	0.17721325	20.31
0.7680	0.490751	-0.614	0.13967878	0.12145138	0.17721903	20.32
0.7688	0.509319	-0.608	0.13967681	0.12143672	0.17719370	20.32
0.7696	0.546341	-0.610	0.13960475	0.12142020	0.17708576	20.32
0.7704	0.612888	-0.611	0.13945204	0.12138230	0.17686301	20.32
0.7712	0.716572	-0.615	0.13921958	0.12127143	0.17647201	20.32
0.7720	0.860052	-0.614	0.13887042	0.12109149	0.17590785	20.32
0.7728	1.036835	-0.617	0.13845515	0.12082499	0.17523658	20.33
0.7736	1.235991	-0.613	0.13800186	0.12048745	0.17447293	20.33
0.7744	1.447964	-0.605	0.13749796	0.12011588	0.17368013	20.33
0.7752	1.664200	-0.608	0.13697845	0.11972874	0.17286599	20.33
0.7760	1.877632	-0.608	0.13645893	0.11932117	0.17205763	20.33
0.7768	2.083769	-0.612	0.13594526	0.11891359	0.17130178	20.33
0.7776	2.280178	-0.615	0.13546371	0.11852062	0.17058092	20.33
0.7784	2.464771	-0.615	0.13500559	0.11812961	0.16992331	20.33
0.7792	2.635517	-0.613	0.13456887	0.11776096	0.16932505	20.33
0.7800	2.790070	-0.615	0.13417298	0.11741763	0.16877544	20.33
0.7808	2.925625	-0.616	0.13381410	0.11710542	0.16828620	20.32
0.7816	3.040237	-0.615	0.13351053	0.11684078	0.16788155	20.32
0.7824	3.132477	-0.615	0.13326532	0.11662960	0.16754502	20.32
0.7832	3.201799	-0.608	0.13308150	0.11646515	0.16728926	20.32
0.7840	3.248720	-0.608	0.13294435	0.11634922	0.16710645	20.32
0.7848	3.275728	-0.603	0.13285393	0.11627918	0.16698492	20.31
0.7856	3.286943	-0.612	0.13279456	0.11622673	0.16690028	20.31
0.7864	3.285942	-0.616	0.13275754	0.11620045	0.16685349	20.31
0.7872	3.276501	-0.617	0.13275367	0.11619276	0.16685641	20.31
0.7880	3.260221	-0.622	0.13276529	0.11619276	0.16686898	20.31
0.7888	3.233643	-0.611	0.13279748	0.11621702	0.16692239	20.32
0.7896	3.185034	-0.612	0.13288414	0.11627346	0.16703528	20.32
0.7904	3.098888	-0.611	0.13305438	0.11639404	0.16724825	20.32
0.7912	2.965508	-0.609	0.13333458	0.11662269	0.16763055	20.32
0.7920	2.782345	-0.611	0.13374603	0.11696613	0.16818708	20.32
0.7928	2.561131	-0.611	0.13426346	0.11740285	0.16889912	20.33
0.7936	2.321234	-0.609	0.13481981	0.11789024	0.16970748	20.33
0.7944	2.080278	-0.601	0.13540149	0.11837167	0.17054892	20.33
0.7952	1.855059	-0.604	0.13594919	0.11880744	0.17135334	20.33
0.7960	1.655531	-0.601	0.13643461	0.11918777	0.17209166	20.33
0.7968	1.486673	-0.599	0.13686359	0.11950773	0.17273366	20.33
0.7976	1.347914	-0.605	0.13722354	0.11977816	0.17327839	20.33
0.7984	1.233244	-0.597	0.13753188	0.12001061	0.17376477	20.33
0.7992	1.135340	-0.596	0.13780129	0.12021393	0.17417431	20.33
0.8000	1.045475	-0.599	0.13804650	0.12040371	0.17456532	20.33
0.8010	0.714426	-0.613	0.13943756	0.12140083	0.17679489	20.32
0.8020	0.714970	-0.612	0.13942671	0.12139690	0.17679584	20.32
0.8030	0.713997	-0.611	0.13944423	0.12140179	0.17679977	20.32
0.8040	0.708675	-0.615	0.13945198	0.12140858	0.17681342	20.32
0.8050	0.694971	-0.611	0.13948423	0.12141639	0.17686594	20.31
0.8060	0.668621	-0.604	0.13954645	0.12146109	0.17697585	20.31
0.8070	0.630970	-0.608	0.13964283	0.12149709	0.17711687	20.31
0.8080	0.588312	-0.606	0.13975471	0.12155932	0.17728812	20.31
0.8090	0.551863	-0.609	0.13985199	0.12161571	0.17743307	20.31
0.8100	0.528402	-0.609	0.13993263	0.12166137	0.17754591	20.31
0.8110	0.520363	-0.612	0.13998020	0.12169349	0.17759842	20.32
0.8120	0.525398	-0.619	0.13998115	0.12169057	0.17758375	20.32
0.8130	0.544596	-0.615	0.13994431	0.12169260	0.17753506	20.32
0.8140	0.593691	-0.613	0.13982964	0.12165946	0.17736864	20.32
0.8150	0.690479	-0.611	0.13961267	0.12156117	0.17701846	20.33
0.8160	0.840254	-0.600	0.13927507	0.12137926	0.17646307	20.33
0.8170	1.030741	-0.608	0.13880521	0.12107682	0.17570049	20.33
0.8180	1.235847	-0.610	0.13831401	0.12071985	0.17490286	20.33
0.8190	1.436148	-0.621	0.13781404	0.12034541	0.17412764	20.33
0.8200	1.614132	-0.609	0.13738990	0.12002349	0.17344964	20.33
0.8210	1.760588	-0.601	0.13702416	0.11975318	0.17290097	20.32
0.8220	1.872540	-0.597	0.13672453	0.11952549	0.17244673	20.32
0.8230	1.954451	-0.596	0.13649499	0.11935240	0.17211598	20.32
0.8240	2.014818	-0.603	0.13632464	0.11920750	0.17187089	20.32
0.8250	2.062654	-0.611	0.13619244	0.11908984	0.17166269	20.31
0.8260	2.105713	-0.610	0.13607574	0.11899638	0.17150515	20.31
0.8270	2.149115	-0.616	0.13593483	0.11888343	0.17130470	20.31
0.8280	2.193861	-0.605	0.13580155	0.11877924	0.17112672	20.31
0.8290	2.237463	-0.608	0.13567120	0.11867321	0.17093498	20.31
0.8300	2.274599	-0.605	0.13556898	0.11859733	0.17078328	20.31
0.8310	2.300034	-0.604	0.13548422	0.11853611	0.17067140	20.32
0.8320	2.311478	-0.607	0.13544339	0.11849141	0.17059845	20.32
0.8330	2.310247	-0.601	0.13542777	0.11846715	0.17057890	20.32
0.8340	2.299261	-0.598	0.13542688	0.11847490	0.17058861	20.32
0.8350	2.279892	-0.599	0.13545311	0.11848748	0.17061979	20.33
0.8360	2.248135	-0.592	0.13549787	0.11853319	0.17070055	20.33
0.8370	2.191029	-0.592	0.13560885	0.11857885	0.17085236	20.33
0.8380	2.095070	-0.592	0.13582283	0.11871701	0.17115003	20.33
0.8390	1.958256	-0.597	0.13612437	0.11892712	0.17159551	20.33
0.8400	1.792946	-0.593	0.13651735	0.11923355	0.17217034	20.33
0.8410	1.619968	-0.587	0.13692880	0.11955947	0.17278898	20.32
0.8420	1.454887	-0.587	0.13732958	0.11987573	0.17340672	20.32
0.8430	1.308002	-0.593	0.13770407	0.12016749	0.17397964	20.32
0.8440	1.183977	-0.601	0.13802707	0.12040877	0.17447197	20.32
0.8450	1.082582	-0.603	0.13829845	0.12060821	0.17488933	20.31
0.8460	0.998297	-0.599	0.13853389	0.12077451	0.17524534	20.31
0.8470	0.924997	-0.601	0.13871485	0.12089413	0.17554784	20.31
0.8480	0.855846	-0.603	0.13889384	0.12101364	0.17584360	20.31
0.8490	0.787182	-0.608	0.13907665	0.12112355	0.17612183	20.31
0.8500	0.716515	-0.601	0.13927615	0.12124521	0.17643213	20.31
0.8510	0.646963	-0.596	0.13947755	0.12136197	0.17675406	20.32
0.8520	0.582275	-0.596	0.13964981	0.12145448	0.17704982	20.32
0.8530	0.527573	-0.600	0.13981402	0.12154979	0.17731154	20.32
0.8540	0.484772	-0.604	0.13995403	0.12162268	0.17752457	20.32
0.8550	0.454817	-0.602	0.14005512	0.12167615	0.17768306	20.33
0.8560	0.436335	-0.595	0.14012724	0.12171501	0.17781532	20.33
0.8570	0.427208	-0.603	0.14015830	0.12172276	0.17785811	20.33
0.8580	0.424862	-0.606	0.14018071	0.12174225	0.17788720	20.33
0.8590	0.427895	-0.613	0.14018154	0.12173152	0.17786384	20.33
0.8600	0.435047	-0.606	0.14017189	0.12174129	0.17785895	20.33
0.8610	0.447636	-0.607	0.14015830	0.12173057	0.17784536	20.32
0.8620	0.471010	-0.605	0.14010483	0.12172085	0.17778212	20.32
0.8630	0.520763	-0.605	0.13999981	0.12169844	0.17762560	20.32
0.8640	0.610399	-0.606	0.13979065	0.12162167	0.17727441	20.32
0.8650	0.742378	-0.605	0.13946086	0.12146115	0.17675990	20.31
0.8660	0.904884	-0.602	0.13906884	0.12122864	0.17612171	20.31
0.8670	1.080866	-0.609	0.13862926	0.12092996	0.17540866	20.31
0.8680	1.257334	-0.610	0.13819057	0.12062454	0.17471409	20.31
0.8690	1.426363	-0.612	0.13775867	0.12031227	0.17405164	20.31
0.8700	1.581116	-0.606	0.13737339	0.12002730	0.17346507	20.31
0.8710	1.717272	-0.600	0.13703191	0.11976469	0.17293787	20.32
0.8720	1.831570	-0.600	0.13674009	0.11953223	0.17248064	20.32
0.8730	1.924267	-0.600	0.13648617	0.11934358	0.17211109	20.32
0.8740	1.998968	-0.606	0.13628876	0.11918306	0.17182416	20.32
0.8750	2.060795	-0.605	0.13613123	0.11906147	0.17158490	20.33
0.8760	2.113781	-0.599	0.13599217	0.11894667	0.17137861	20.33
0.8770	2.160273	-0.603	0.13585794	0.11883289	0.17116940	20.33
0.8780	2.200756	-0.599	0.13572466	0.11874050	0.17099816	20.33
0.8790	2.235546	-0.603	0.13561177	0.11865002	0.17084450	20.33
0.8800	2.263126	-0.594	0.13553482	0.11859256	0.17072684	20.33
0.8810	2.281437	-0.592	0.13547933	0.11855358	0.17064130	20.32
0.8820	2.289562	-0.595	0.13545501	0.11853021	0.17059749	20.32
0.8830	2.288189	-0.599	0.13544923	0.11851662	0.17058772	20.32
0.8840	2.279491	-0.599	0.13545704	0.11851275	0.17059261	20.32
0.8850	2.263899	-0.600	0.13546765	0.11853224	0.17061210	20.31
0.8860	2.238493	-0.593	0.13550365	0.11855757	0.17068017	20.31
0.8870	2.191429	-0.597	0.13558930	0.11858374	0.17079103	20.31
0.8880	2.106342	-0.597	0.13578492	0.11868584	0.17105073	20.31
0.8890	1.977081	-0.599	0.13608068	0.11886966	0.17145443	20.31
0.8900	1.813374	-0.600	0.13647169	0.11917126	0.17202836	20.31
0.8910	1.637363	-0.593	0.13690060	0.11949527	0.17266750	20.32
0.8920	1.468477	-0.592	0.13730329	0.11981726	0.17329097	20.32
0.8930	1.318760	-0.588	0.13767010	0.12008870	0.17387950	20.32
0.8940	1.193132	-0.593	0.13797361	0.12032104	0.17436677	20.32
0.8950	1.090279	-0.589	0.13823622	0.12051564	0.17478514	20.33
0.8960	1.004248	-0.587	0.13846582	0.12067896	0.17514503	20.33
0.8970	0.927916	-0.592	0.13865829	0.12080932	0.17546809	20.33
0.8980	0.855646	-0.594	0.13884705	0.12093973	0.17578912	20.33
0.8990	0.784349	-0.602	0.13903177	0.12106621	0.17609358	20.33
0.9000	0.712738	-0.592	0.13922256	0.12120146	0.17641073	20.33
0.9010	0.643101	-0.588	0.13941419	0.12131226	0.17672390	20.32
0.9020	0.578585	-0.587	0.13959616	0.12141931	0.17701870	20.32
0.9030	0.522594	-0.588	0.13975668	0.12151170	0.17728710	20.32
0.9040	0.477018	-0.588	0.13990152	0.12159729	0.17751378	20.32
0.9050	0.442743	-0.587	0.14001441	0.12166822	0.17769080	20.31
0.9060	0.420370	-0.585	0.14010674	0.12171209	0.17783773	20.31
0.9070	0.408840	-0.593	0.14014667	0.12172955	0.17789310	20.31
0.9080	0.405865	-0.593	0.14017880	0.12173438	0.17792326	20.31
0.9090	0.409241	-0.602	0.14017874	0.12173539	0.17790180	20.31
0.9100	0.417452	-0.599	0.14018458	0.12173444	0.17789984	20.31
0.9110	0.431271	-0.600	0.14016110	0.12173158	0.17787451	20.32
0.9120	0.457621	-0.601	0.14011544	0.12172478	0.17780256	20.32
0.9130	0.511780	-0.599	0.13999188	0.12169749	0.17761588	20.32
0.9140	0.605936	-0.600	0.13977307	0.12161386	0.17723846	20.32
0.9150	0.741005	-0.599	0.13944137	0.12144947	0.17671323	20.33
0.9160	0.904970	-0.596	0.13904649	0.12121218	0.17607415	20.33
0.9170	1.082354	-0.599	0.13862139	0.12092322	0.17536789	20.33
0.9180	1.261024	-0.597	0.13819635	0.12061286	0.17465872	20.33
0.9190	1.430769	-0.600	0.13776052	0.12030745	0.17397976	20.33
0.9200	1.582890	-0.604	0.13736951	0.12002730	0.17340285	20.33
0.9210	1.712894	-0.601	0.13703191	0.11977249	0.17290872	20.32
0.9220	1.819410	-0.603	0.13676441	0.11954772	0.17249525	20.32
0.9230	1.906414	-0.600	0.13652903	0.11936098	0.17215872	20.32
0.9240	1.980915	-0.597	0.13632381	0.11919856	0.17186493	20.32
0.9250	2.048807	-0.598	0.13613516	0.11905450	0.17160422	20.31
0.9260	2.113295	-0.593	0.13598436	0.11892802	0.17134833	20.31
0.9270	2.174063	-0.605	0.13581604	0.11878884	0.17109150	20.31
0.9280	2.228251	-0.606	0.13567108	0.11866635	0.17086488	20.31
0.9290	2.272139	-0.617	0.13553590	0.11854577	0.17068106	20.31
0.9300	2.301922	-0.607	0.13545901	0.11847389	0.17056334	20.31
0.9310	2.316856	-0.604	0.13541615	0.11843216	0.17048550	20.32
0.9320	2.319374	-0.600	0.13538593	0.11841851	0.17044073	20.32
0.9330	2.313137	-0.601	0.13537031	0.11841559	0.17044467	20.32
0.9340	2.300520	-0.604	0.13536644	0.11841458	0.17046613	20.32
0.9350	2.280664	-0.603	0.13539469	0.11842436	0.17050987	20.33
0.9360	2.247219	-0.600	0.13545406	0.11844772	0.17059541	20.33
0.9370	2.186365	-0.600	0.13556206	0.11850894	0.17075396	20.33
0.9380	2.087059	-0.596	0.13576150	0.11865187	0.17106724	20.33
0.9390	1.950645	-0.599	0.13606304	0.11887854	0.17150205	20.33
0.9400	1.792030	-0.593	0.13644534	0.11918110	0.17206627	20.33
0.9410	1.629868	-0.590	0.13684905	0.11949247	0.17265189	20.32
0.9420	1.477518	-0.592	0.13721776	0.11978716	0.17322099	20.32
0.9430	1.341906	-0.595	0.13755143	0.12003815	0.17375314	20.32
0.9440	1.225004	-0.599	0.13785684	0.12025887	0.17421031	20.32
0.9450	1.122665	-0.597	0.13812917	0.12045926	0.17461586	20.31
0.9460	1.028967	-0.592	0.13837731	0.12064302	0.17499620	20.31
0.9470	0.939217	-0.600	0.13859618	0.12080640	0.17536688	20.31
0.9480	0.850754	-0.598	0.13882673	0.12094635	0.17575216	20.31
0.9490	0.764151	-0.603	0.13906503	0.12108940	0.17612761	20.31
0.9500	0.681152	-0.600	0.13930732	0.12123728	0.17649442	20.31
0.9510	0.605078	-0.600	0.13952029	0.12137741	0.17683578	20.32
0.9520	0.539103	-0.601	0.13971299	0.12149316	0.17715102	20.32
0.9530	0.485115	-0.597	0.13987339	0.12157869	0.17741561	20.32
0.9540	0.443859	-0.596	0.13999975	0.12164682	0.17763352	20.32
0.9550	0.415392	-0.592	0.14008915	0.12169933	0.17779297	20.33
0.9560	0.398684	-0.586	0.14016014	0.12173539	0.17789894	20.33
0.9570	0.392303	-0.600	0.14019525	0.12175000	0.17794853	20.33
0.9580	0.393219	-0.604	0.14020598	0.12176174	0.17795247	20.33
0.9590	0.399742	-0.612	0.14020699	0.12176365	0.17793697	20.33
0.9600	0.410872	-0.608	0.14020991	0.12177241	0.17791653	20.33
0.9610	0.429668	-0.604	0.14018071	0.12175685	0.17787373	20.32
0.9620	0.466290	-0.607	0.14010483	0.12173355	0.17775995	20.32
0.9630	0.533924	-0.605	0.13994527	0.12166828	0.17750996	20.32
0.9640	0.639067	-0.611	0.13967776	0.12156612	0.17709172	20.32
0.9650	0.776453	-0.612	0.13934904	0.12139100	0.17654300	20.31
0.9660	0.933323	-0.610	0.13897163	0.12115765	0.17592818	20.31
0.9670	1.097918	-0.616	0.13856995	0.12087947	0.17526668	20.31
0.9680	1.260996	-0.616	0.13816231	0.12059349	0.17462665	20.31
0.9690	1.416121	-0.625	0.13776737	0.12030661	0.17400122	20.31
0.9700	1.557455	-0.616	0.13741618	0.12004101	0.17346329	20.31
0.9710	1.682453	-0.617	0.13709706	0.11980075	0.17299145	20.32
0.9720	1.789999	-0.615	0.13680333	0.11958563	0.17258579	20.32
0.9730	1.883898	-0.610	0.13655335	0.11938441	0.17222297	20.32
0.9740	1.968412	-0.603	0.13632774	0.11921227	0.17189229	20.32
0.9750	2.047777	-0.599	0.13612348	0.11904597	0.17159855	20.33
0.9760	2.122564	-0.597	0.13593566	0.11890197	0.17132515	20.33
0.9770	2.191830	-0.608	0.13574213	0.11873263	0.17103618	20.33
0.9780	2.252197	-0.611	0.13559234	0.11859655	0.17077547	20.33
0.9790	2.301035	-0.613	0.13545233	0.11848766	0.17056531	20.33
0.9800	2.334652	-0.598	0.13535303	0.11841184	0.17042625	20.33
0.9810	2.352333	-0.591	0.13529271	0.11836797	0.17034948	20.32
0.9820	2.355251	-0.594	0.13525665	0.11834365	0.17030573	20.32
0.9830	2.347441	-0.597	0.13525957	0.11833382	0.17031842	20.32
0.9840	2.331591	-0.601	0.13527125	0.11834162	0.17034268	20.32
0.9850	2.306471	-0.604	0.13530338	0.11835617	0.17040586	20.31
0.9860	2.262526	-0.601	0.13538998	0.11841363	0.17051774	20.31
0.9870	2.185621	-0.608	0.13555145	0.11851376	0.17072600	20.31
0.9880	2.069092	-0.607	0.13580918	0.11869282	0.17108494	20.31
0.9890	1.919775	-0.612	0.13615161	0.11894286	0.17157513	20.31
0.9900	1.754723	-0.607	0.13654554	0.11924052	0.17217040	20.31
0.9910	1.590014	-0.602	0.13695121	0.11955470	0.17277056	20.31
0.9920	1.436434	-0.605	0.13735002	0.11984646	0.17334741	20.32
0.9930	1.300249	-0.600	0.13767791	0.12010717	0.17386782	20.32
0.9940	1.183319	-0.604	0.13796782	0.12033480	0.17434353	20.32
0.9950	1.082840	-0.601	0.13821197	0.12052935	0.17476380	20.33
0.9960	0.993319	-0.596	0.13845706	0.12070346	0.17514515	20.33
0.9970	0.910149	-0.604	0.13867396	0.12083954	0.17547387	20.33
0.9980	0.829067	-0.603	0.13887721	0.12097090	0.17581141	20.33
0.9990	0.750275	-0.608	0.13908541	0.12109643	0.17613429	20.33
1.0000	0.673971	-0.599	0.13930535	0.12122768	0.17649329	20.33
1.0010	0.602732	-0.596	0.13951737	0.12135220	0.17682409	20.32
1.0020	0.538931	-0.599	0.13969350	0.12147272	0.17714018	20.32
1.0030	0.485172	-0.599	0.13984901	0.12156326	0.17739606	20.32
1.0040	0.443888	-0.600	0.13998133	0.12163329	0.17761588	20.32
1.0050	0.416079	-0.599	0.14008826	0.12167895	0.17776865	20.31
1.0060	0.401115	-0.596	0.14014870	0.12171692	0.17786688	20.31
1.0070	0.396738	-0.603	0.14016610	0.12171400	0.17789590	20.31
1.0080	0.399256	-0.605	0.14017397	0.12171894	0.17789590	20.31
1.0090	0.406837	-0.608	0.14016896	0.12171024	0.17789000	20.31
1.0100	0.417938	-0.605	0.14015931	0.12171900	0.17787457	20.31
1.0110	0.435820	-0.604	0.14013195	0.12171406	0.17784065	20.32
1.0120	0.470581	-0.603	0.14006293	0.12170130	0.17772686	20.32
1.0130	0.537243	-0.605	0.13990337	0.12165362	0.17747784	20.32
1.0140	0.644188	-0.604	0.13964367	0.12155151	0.17705071	20.32
1.0150	0.787725	-0.606	0.13928574	0.12136775	0.17648363	20.33
1.0160	0.952263	-0.600	0.13889563	0.12112463	0.17583573	20.33
1.0170	1.122150	-0.609	0.13846278	0.12083375	0.17516261	20.33
1.0180	1.284342	-0.604	0.13805902	0.12054676	0.17450696	20.33
1.0190	1.431456	-0.604	0.13769525	0.12026852	0.17392331	20.33
1.0200	1.560259	-0.593	0.13738883	0.12003505	0.17342716	20.33
1.0210	1.672325	-0.593	0.13711840	0.11981422	0.17299426	20.32
1.0220	1.769972	-0.593	0.13685769	0.11961681	0.17262071	20.32
1.0230	1.858549	-0.593	0.13661647	0.11942416	0.17227447	20.32
1.0240	1.943064	-0.597	0.13639563	0.11925012	0.17196912	20.32
1.0250	2.027407	-0.598	0.13617969	0.11908185	0.17165107	20.31
1.0260	2.110806	-0.597	0.13597834	0.11892527	0.17135626	20.31
1.0270	2.189255	-0.604	0.13575661	0.11875790	0.17103618	20.31
1.0280	2.255802	-0.599	0.13556892	0.11860323	0.17076272	20.31
1.0290	2.304983	-0.605	0.13542885	0.11849135	0.17053908	20.31
1.0300	2.333279	-0.605	0.13534039	0.11841947	0.17042720	20.31
1.0310	2.343063	-0.605	0.13531220	0.11837769	0.17035818	20.32
1.0320	2.339230	-0.605	0.13529474	0.11834759	0.17034459	20.32
1.0330	2.327070	-0.608	0.13530922	0.11834270	0.17035335	20.32
1.0340	2.309046	-0.608	0.13533539	0.11836398	0.17039996	20.32
1.0350	2.281666	-0.607	0.13537222	0.11838442	0.17046118	20.33
1.0360	2.233028	-0.598	0.13546467	0.11844373	0.17059350	20.33
1.0370	2.149715	-0.603	0.13564086	0.11853820	0.17083681	20.33
1.0380	2.026863	-0.600	0.13592696	0.11873662	0.17122012	20.33
1.0390	1.874142	-0.605	0.13627130	0.11900216	0.17172492	20.33
1.0400	1.711264	-0.598	0.13665062	0.11931241	0.17231047	20.33
1.0410	1.556311	-0.590	0.13700861	0.11960322	0.17288047	20.32
1.0420	1.419811	-0.593	0.13734812	0.11985707	0.17341071	20.32
1.0430	1.304741	-0.592	0.13764006	0.12006915	0.17385036	20.32
1.0440	1.207666	-0.597	0.13789004	0.12026656	0.17424428	20.32
1.0450	1.120691	-0.596	0.13811088	0.12043387	0.17459452	20.31
1.0460	1.036119	-0.593	0.13833362	0.12060314	0.17494577	20.31
1.0470	0.948172	-0.603	0.13856614	0.12074810	0.17529315	20.31
1.0480	0.854616	-0.599	0.13879663	0.12090468	0.17569387	20.31
1.0490	0.757742	-0.607	0.13903004	0.12106031	0.17609948	20.31
1.0500	0.662270	-0.599	0.13929266	0.12122768	0.17653328	20.31
1.0510	0.370846	-0.602	0.14061552	0.12197459	0.17855948	20.33
1.0520	0.370588	-0.601	0.14062721	0.12197262	0.17855561	20.33
1.0530	0.370760	-0.606	0.14061844	0.12196976	0.17853230	20.32
1.0540	0.370874	-0.593	0.14062715	0.12197185	0.17853528	20.32
1.0550	0.371733	-0.591	0.14060670	0.12197089	0.17852843	20.32
1.0560	0.372820	-0.590	0.14059699	0.12196702	0.17852068	20.32
1.0570	0.374880	-0.593	0.14058429	0.12196690	0.17852652	20.32
1.0580	0.379057	-0.600	0.14058530	0.12196881	0.17852068	20.31
1.0590	0.388327	-0.604	0.14058149	0.12196493	0.17850608	20.31
1.0600	0.412703	-0.604	0.14053977	0.12195712	0.17843789	20.31
1.0610	0.468950	-0.608	0.14039087	0.12191337	0.17821223	20.31
1.0620	0.571060	-0.604	0.14013010	0.12181026	0.17780656	20.31
1.0630	0.722094	-0.605	0.13973707	0.12160796	0.17718208	20.31
1.0640	0.908833	-0.596	0.13927990	0.12135512	0.17644078	20.31
1.0650	1.111937	-0.592	0.13877410	0.12103021	0.17562562	20.31
1.0660	1.313524	-0.592	0.13828766	0.12069756	0.17481822	20.32
1.0670	1.501465	-0.592	0.13780707	0.12035024	0.17408776	20.32
1.0680	1.670351	-0.597	0.13737917	0.12002051	0.17342335	20.32
1.0690	1.820755	-0.596	0.13697839	0.11971712	0.17284358	20.32
1.0700	1.957197	-0.596	0.13664091	0.11944383	0.17231053	20.33
1.0710	2.086143	-0.603	0.13630044	0.11917824	0.17180860	20.33
1.0720	2.213974	-0.601	0.13596094	0.11889803	0.17132127	20.33
1.0730	2.344322	-0.603	0.13561267	0.11860901	0.17082709	20.32
1.0740	2.477331	-0.592	0.13527024	0.11832023	0.17033589	20.32
1.0750	2.608681	-0.591	0.13493466	0.11803722	0.16983587	20.32
1.0760	2.730360	-0.592	0.13462335	0.11776876	0.16938353	20.32
1.0770	2.833328	-0.595	0.13435388	0.11753333	0.16898078	20.32
1.0780	2.909746	-0.596	0.13413596	0.11733878	0.16868126	20.31
1.0790	2.956553	-0.595	0.13400364	0.11720842	0.16848773	20.31
1.0800	2.977238	-0.594	0.13393074	0.11714131	0.16838461	20.31
1.0810	2.980185	-0.600	0.13387918	0.11709845	0.16833204	20.31
1.0820	2.973061	-0.597	0.13384813	0.11707801	0.16830969	20.31
1.0830	2.961016	-0.603	0.13384610	0.11706728	0.16830575	20.31
1.0840	2.944193	-0.595	0.13386554	0.11707890	0.16833985	20.31
1.0850	2.919502	-0.592	0.13390547	0.11709839	0.16838849	20.31
1.0860	2.873182	-0.593	0.13398141	0.11714119	0.16850328	20.32
1.0870	2.783661	-0.597	0.13416713	0.11725885	0.16874635	20.32
1.0880	2.638206	-0.598	0.13447845	0.11750299	0.16916651	20.32
1.0890	2.441711	-0.593	0.13494247	0.11786687	0.16978413	20.32
1.0900	2.218637	-0.591	0.13545513	0.11831242	0.17053705	20.33
1.0910	1.994247	-0.599	0.13596582	0.11874139	0.17131925	20.33
1.0920	1.786337	-0.595	0.13646770	0.11914986	0.17207903	20.33
1.0930	1.603518	-0.603	0.13693076	0.11950392	0.17274535	20.32
1.0940	1.447849	-0.591	0.13733053	0.11981815	0.17335719	20.32
1.0950	1.316757	-0.587	0.13765740	0.12007988	0.17388248	20.32
1.0960	1.203976	-0.583	0.13794631	0.12030166	0.17434168	20.32
1.0970	1.100779	-0.585	0.13821381	0.12049520	0.17476285	20.32
1.0980	1.000185	-0.585	0.13848901	0.12069064	0.17517716	20.31
1.0990	0.899820	-0.583	0.13876039	0.12087750	0.17562848	20.31
1.1000	0.802317	-0.583	0.13903272	0.12106031	0.17606825	20.31
1.1010	0.712051	-0.592	0.13926923	0.12120920	0.17645639	20.31
1.1020	0.631771	-0.594	0.13950658	0.12134635	0.17681247	20.31
1.1030	0.563936	-0.602	0.13970894	0.12145430	0.17712766	20.31
1.1040	0.509806	-0.589	0.13989079	0.12155640	0.17740488	20.31
1.1050	0.470524	-0.587	0.14001918	0.12162250	0.17761296	20.31
1.1060	0.445175	-0.587	0.14010870	0.12167805	0.17775685	20.32
1.1070	0.432043	-0.589	0.14016700	0.12169850	0.17783564	20.32
1.1080	0.428696	-0.588	0.14019525	0.12171596	0.17788619	20.32
1.1090	0.433216	-0.586	0.14021087	0.12172759	0.17788911	20.33
1.1100	0.444717	-0.584	0.14020801	0.12173051	0.17788035	20.33
1.1110	0.467949	-0.596	0.14016712	0.12172174	0.17781907	20.33
1.1120	0.519762	-0.592	0.14004356	0.12169254	0.17763919	20.33
1.1130	0.619011	-0.592	0.13980919	0.12159526	0.17725301	20.32
1.1140	0.771904	-0.583	0.13944250	0.12141919	0.17665476	20.32
1.1150	0.968370	-0.587	0.13897073	0.12113136	0.17587847	20.32
1.1160	1.188097	-0.591	0.13843477	0.12077832	0.17502540	20.32
1.1170	1.415005	-0.591	0.13789982	0.12037176	0.17413634	20.32
1.1180	1.634445	-0.589	0.13735402	0.11997199	0.17330760	20.31
1.1190	1.834917	-0.589	0.13685006	0.11957407	0.17255563	20.31
1.1200	2.009954	-0.588	0.13640934	0.11922199	0.17189509	20.31
1.1210	2.160444	-0.593	0.13602221	0.11889029	0.17132217	20.31
1.1220	2.291908	-0.596	0.13567692	0.11860240	0.17082119	20.31
1.1230	2.411385	-0.601	0.13534814	0.11832225	0.17037272	20.31
1.1240	2.522650	-0.591	0.13504946	0.11809075	0.16996413	20.31
1.1250	2.627535	-0.587	0.13476831	0.11786896	0.16957510	20.31
1.1260	2.725496	-0.583	0.13450074	0.11765403	0.16921616	20.32
1.1270	2.814159	-0.584	0.13426346	0.11744875	0.16889220	20.32
1.1280	2.888746	-0.585	0.13406110	0.11727065	0.16860914	20.32
1.1290	2.944622	-0.588	0.13390940	0.11712855	0.16839129	20.32
1.1300	2.979212	-0.585	0.13379943	0.11704868	0.16823471	20.33
1.1310	2.994661	-0.593	0.13370800	0.11697865	0.16812289	20.33
1.1320	2.994804	-0.585	0.13367689	0.11695814	0.16809183	20.33
1.1330	2.984848	-0.587	0.13366431	0.11693484	0.16807240	20.32
1.1340	2.966166	-0.576	0.13370913	0.11695713	0.16811216	20.32
1.1350	2.934980	-0.577	0.13375574	0.11697567	0.16817242	20.32
1.1360	2.872925	-0.582	0.13388216	0.11705256	0.16833293	20.32
1.1370	2.761145	-0.586	0.13411462	0.11722100	0.16865784	20.32
1.1380	2.593660	-0.587	0.13448429	0.11752170	0.16917139	20.31
1.1390	2.385492	-0.584	0.13497454	0.11792541	0.16984355	20.31
1.1400	2.165508	-0.583	0.13549882	0.11836022	0.17059165	20.31
1.1410	1.957598	-0.590	0.13599014	0.11874628	0.17131734	20.31
1.1420	1.775608	-0.585	0.13643664	0.11910421	0.17199147	20.31
1.1430	1.624002	-0.589	0.13681501	0.11940569	0.17256826	20.31
1.1440	1.496315	-0.582	0.13715547	0.11967909	0.17306238	20.31
1.1450	1.382589	-0.579	0.13745207	0.11991733	0.17350888	20.31
1.1460	1.270237	-0.580	0.13773900	0.12013924	0.17394865	20.32
1.1470	1.151934	-0.577	0.13803375	0.12036097	0.17443407	20.32
1.1480	1.026793	-0.579	0.13834900	0.12058568	0.17494762	20.32
1.1490	0.899849	-0.579	0.13869435	0.12081027	0.17548347	20.32
1.1500	0.778255	-0.578	0.13903189	0.12102711	0.17601359	20.33
1.1510	0.669250	-0.587	0.13932759	0.12120515	0.17649031	20.33
1.1520	0.577526	-0.586	0.13959223	0.12135696	0.17691451	20.33
1.1530	0.506516	-0.589	0.13979542	0.12147182	0.17725414	20.32
1.1540	0.455904	-0.578	0.13997835	0.12156320	0.17752743	20.32
1.1550	0.423975	-0.581	0.14007664	0.12162936	0.17771024	20.32
1.1560	0.406981	-0.588	0.14014864	0.12166542	0.17781818	20.32
1.1570	0.401115	-0.591	0.14018160	0.12169069	0.17786974	20.32
1.1580	0.402946	-0.597	0.14019811	0.12170529	0.17788726	20.31
1.1590	0.410042	-0.598	0.14020491	0.12171209	0.17787850	20.31
1.1600	0.422430	-0.602	0.14019716	0.12170917	0.17786974	20.31
1.1610	0.448465	-0.607	0.14013875	0.12169063	0.17779183	20.31
1.1620	0.507717	-0.604	0.13999766	0.12165844	0.17759442	20.31
1.1630	0.618181	-0.605	0.13972926	0.12154567	0.17716551	20.31
1.1640	0.781717	-0.597	0.13934702	0.12135011	0.17653620	20.31
1.1650	0.982304	-0.599	0.13886368	0.12105936	0.17574733	20.31
1.1660	1.197824	-0.599	0.13833350	0.12069362	0.17490387	20.32
1.1670	1.412630	-0.599	0.13781297	0.12031728	0.17406929	20.32
1.1680	1.616821	-0.601	0.13731104	0.11993116	0.17328906	20.32
1.1690	1.803732	-0.603	0.13685685	0.11957216	0.17258388	20.32
1.1700	1.970816	-0.603	0.13642693	0.11924630	0.17196226	20.33
1.1710	2.118444	-0.606	0.13603783	0.11893106	0.17138451	20.33
1.1720	2.249880	-0.603	0.13569045	0.11865777	0.17089236	20.33
1.1730	2.370930	-0.602	0.13537139	0.11839122	0.17042643	20.32
1.1740	2.487259	-0.594	0.13507861	0.11815000	0.17001003	20.32
1.1750	2.602329	-0.596	0.13478297	0.11790282	0.16958690	20.32
1.1760	2.714567	-0.599	0.13449597	0.11764109	0.16917640	20.32
1.1770	2.817936	-0.601	0.13423049	0.11740959	0.16879892	20.32
1.1780	2.904825	-0.605	0.13400483	0.11720729	0.16847587	20.31
1.1790	2.967939	-0.600	0.13382006	0.11705846	0.16823459	20.31
1.1800	3.005304	-0.596	0.13370425	0.11696512	0.16807419	20.31
1.1810	3.020010	-0.599	0.13362151	0.11689419	0.16796625	20.31
1.1820	3.018293	-0.594	0.13360298	0.11686897	0.16793126	20.31
1.1830	3.005905	-0.599	0.13360101	0.11686015	0.16793412	20.31
1.1840	2.983789	-0.591	0.13363320	0.11688352	0.16798955	20.31
1.1850	2.944078	-0.595	0.13369340	0.11692715	0.16807711	20.31
1.1860	2.866945	-0.597	0.13385677	0.11701471	0.16827261	20.32
1.1870	2.740717	-0.593	0.13414079	0.11720431	0.16863644	20.32
1.1880	2.567940	-0.592	0.13454360	0.11750495	0.16917628	20.32
1.1890	2.370787	-0.590	0.13500279	0.11789894	0.16981733	20.32
1.1900	2.172861	-0.588	0.13546586	0.11831242	0.17050117	20.33
1.1910	1.990128	-0.594	0.13588989	0.11866546	0.17113632	20.33
1.1920	1.828794	-0.588	0.13628292	0.11897290	0.17172390	20.33
1.1930	1.689034	-0.591	0.13663012	0.11923558	0.17225313	20.32
1.1940	1.564379	-0.578	0.13695508	0.11948949	0.17273766	20.32
1.1950	1.446819	-0.576	0.13724887	0.11973155	0.17319870	20.32
1.1960	1.327286	-0.579	0.13754660	0.11996406	0.17366171	20.32
1.1970	1.200714	-0.587	0.13785595	0.12020427	0.17416453	20.32
1.1980	1.068363	-0.589	0.13818955	0.12045825	0.17470831	20.31
1.1990	0.935869	-0.587	0.13852805	0.12069464	0.17526764	20.31
1.2000	0.810556	-0.584	0.13887429	0.12092417	0.17581147	20.31
1.2010	0.698633	-0.594	0.13916707	0.12110794	0.17630076	20.31
1.2020	0.603590	-0.598	0.13944721	0.12126750	0.17674148	20.31
1.2030	0.528173	-0.604	0.13965541	0.12139583	0.17710131	20.31
1.2040	0.472841	-0.595	0.13984603	0.12150776	0.17738533	20.31
1.2050	0.437307	-0.589	0.13996762	0.12158459	0.17758775	20.31
1.2060	0.418739	-0.592	0.14004928	0.12162453	0.17770547	20.32
1.2070	0.413446	-0.597	0.14008820	0.12165475	0.17776388	20.32
1.2080	0.417595	-0.603	0.14009798	0.12166637	0.17777461	20.32
1.2090	0.428324	-0.600	0.14009315	0.12167019	0.17775714	20.32
1.2100	0.447750	-0.596	0.14007759	0.12167209	0.17771631	20.33
1.2110	0.488348	-0.601	0.14000165	0.12163419	0.17757225	20.33
1.2120	0.566025	-0.604	0.13984025	0.12157100	0.17727846	20.33
1.2130	0.688963	-0.608	0.13953489	0.12142807	0.17678815	20.32
1.2140	0.851355	-0.596	0.13913989	0.12122285	0.17615587	20.32
1.2150	1.038265	-0.594	0.13869733	0.12093300	0.17543602	20.32
1.2160	1.236820	-0.593	0.13821089	0.12060130	0.17465973	20.32
1.2170	1.437349	-0.599	0.13772452	0.12025791	0.17388636	20.32
1.2180	1.633244	-0.603	0.13723713	0.11989403	0.17313337	20.31
1.2190	1.819725	-0.595	0.13678479	0.11953020	0.17243207	20.31
1.2200	1.994305	-0.600	0.13636166	0.11918104	0.17179382	20.31
1.2210	2.155695	-0.607	0.13593459	0.11882120	0.17117822	20.31
1.2220	2.302923	-0.612	0.13555622	0.11850697	0.17064035	20.31
1.2230	2.437220	-0.611	0.13518953	0.11821032	0.17014819	20.31
1.2240	2.558756	-0.601	0.13488990	0.11795634	0.16971242	20.31
1.2250	2.667990	-0.603	0.13459903	0.11771804	0.16932136	20.31
1.2260	2.761631	-0.606	0.13435870	0.11749238	0.16896045	20.32
1.2270	2.837191	-0.605	0.13413304	0.11730367	0.16866666	20.32
1.2280	2.892895	-0.603	0.13397449	0.11715186	0.16845268	20.32
1.2290	2.929659	-0.599	0.13385004	0.11706620	0.16829991	20.32
1.2300	2.949858	-0.592	0.13379359	0.11701655	0.16821325	20.33
1.2310	2.957125	-0.601	0.13374799	0.11697483	0.16812962	20.33
1.2320	2.954865	-0.602	0.13373536	0.11694855	0.16811109	20.33
1.2330	2.945967	-0.606	0.13371795	0.11693096	0.16809750	20.32
1.2340	2.930288	-0.595	0.13372958	0.11694252	0.16813344	20.32
1.2350	2.902737	-0.593	0.13375878	0.11695904	0.16818309	20.32
1.2360	2.843943	-0.591	0.13387150	0.11702341	0.16832805	20.32
1.2370	2.732792	-0.586	0.13410789	0.11719459	0.16864419	20.32
1.2380	2.561989	-0.590	0.13448435	0.11750108	0.16916656	20.31
1.2390	2.346869	-0.593	0.13498729	0.11792022	0.16987664	20.31
1.2400	2.118416	-0.595	0.13552511	0.11837548	0.17066365	20.31
1.2410	1.903524	-0.603	0.13603383	0.11878115	0.17140383	20.31
1.2420	1.718416	-0.599	0.13647443	0.11915863	0.17207795	20.31
1.2430	1.567497	-0.600	0.13684314	0.11945921	0.17264116	20.31
1.2440	1.443443	-0.592	0.13718557	0.11972970	0.17313927	20.31
1.2450	1.333780	-0.589	0.13747841	0.11994755	0.17357802	20.31
1.2460	1.228209	-0.594	0.13775951	0.12015480	0.17399919	20.32
1.2470	1.120691	-0.595	0.13803971	0.12035990	0.17445147	20.32
1.2480	1.011286	-0.599	0.13832575	0.12056029	0.17491347	20.32
1.2490	0.901794	-0.593	0.13862628	0.12077051	0.17538911	20.32
1.2500	0.796566	-0.589	0.13891703	0.12096024	0.17585701	20.33
1.2510	0.701180	-0.593	0.13916904	0.12112463	0.17626375	20.33
1.2520	0.619411	-0.593	0.13940346	0.12125689	0.17663246	20.33
1.2530	0.554123	-0.597	0.13958824	0.12136292	0.17693311	20.32
1.2540	0.504856	-0.588	0.13977885	0.12145728	0.17719090	20.32
1.2550	0.470209	-0.584	0.13989747	0.12153208	0.17738736	20.32
1.2560	0.449009	-0.585	0.13998413	0.12158448	0.17750704	20.32
1.2570	0.439396	-0.587	0.14000845	0.12162143	0.17758095	20.32
1.2580	0.439024	-0.591	0.14002794	0.12162536	0.17761695	20.31
1.2590	0.445433	-0.592	0.14003766	0.12162936	0.17762762	20.31
1.2600	0.458107	-0.597	0.14003760	0.12163228	0.17761201	20.31
1.2610	0.484371	-0.602	0.13998610	0.12160403	0.17753613	20.31
1.2620	0.542049	-0.603	0.13985580	0.12156898	0.17733282	20.31
1.2630	0.647993	-0.604	0.13960487	0.12145805	0.17692238	20.31
1.2640	0.806580	-0.597	0.13922745	0.12127233	0.17632025	20.31
1.2650	1.006050	-0.600	0.13874495	0.12096691	0.17554301	20.31
1.2660	1.227293	-0.599	0.13821381	0.12059343	0.17468208	20.32
1.2670	1.454000	-0.597	0.13765740	0.12018585	0.17380172	20.32
1.2680	1.671553	-0.598	0.13712633	0.11977345	0.17297196	20.32
1.2690	1.868534	-0.596	0.13662630	0.11940289	0.17223084	20.32
1.2700	2.039051	-0.592	0.13620317	0.11904985	0.17159075	20.33
1.2710	2.184877	-0.595	0.13582379	0.11872977	0.17104113	20.33
1.2720	2.311621	-0.595	0.13548231	0.11845344	0.17055458	20.33
1.2730	2.427721	-0.600	0.13516325	0.11819655	0.17011493	20.32
1.2740	2.537584	-0.592	0.13487726	0.11797088	0.16972578	20.32
1.2750	2.643042	-0.588	0.13460195	0.11774039	0.16935045	20.32
1.2760	2.741947	-0.587	0.13435203	0.11752254	0.16899341	20.32
1.2770	2.829409	-0.585	0.13410687	0.11732024	0.16866565	20.32
1.2780	2.898846	-0.587	0.13391334	0.11715382	0.16839033	20.31
1.2790	2.944050	-0.583	0.13377917	0.11704189	0.16820741	20.31
1.2800	2.964649	-0.579	0.13371301	0.11697662	0.16811603	20.31
1.2810	2.965679	-0.587	0.13368183	0.11693972	0.16806841	20.31
1.2820	2.953691	-0.584	0.13367212	0.11692810	0.16807616	20.31
1.2830	2.934294	-0.592	0.13369745	0.11692131	0.16808295	20.31
1.2840	2.905025	-0.585	0.13375574	0.11695337	0.16815287	20.31
1.2850	2.854500	-0.587	0.13384718	0.11701661	0.16827548	20.31
1.2860	2.765179	-0.590	0.13403779	0.11714703	0.16851580	20.32
1.2870	2.629023	-0.593	0.13433933	0.11737961	0.16892737	20.32
1.2880	2.452240	-0.593	0.13475263	0.11770260	0.16947699	20.32
1.2890	2.256260	-0.592	0.13521463	0.11809361	0.17014134	20.32
1.2900	2.061653	-0.592	0.13567382	0.11849147	0.17082316	20.33
1.2910	1.884527	-0.602	0.13609707	0.11883473	0.17144370	20.33
1.2920	1.730547	-0.595	0.13647556	0.11914212	0.17203218	20.33
1.2930	1.597881	-0.593	0.13681406	0.11939496	0.17251760	20.32
1.2940	1.478834	-0.578	0.13712335	0.11964202	0.17300111	20.32
1.2950	1.365137	-0.575	0.13741714	0.11985022	0.17343795	20.32
1.2960	1.250324	-0.577	0.13770896	0.12007403	0.17388928	20.32
1.2970	1.132450	-0.583	0.13801539	0.12029684	0.17438143	20.32
1.2980	1.012373	-0.583	0.13832575	0.12052155	0.17487460	20.31
1.2990	0.894642	-0.581	0.13863796	0.12074423	0.17537469	20.31
1.3000	0.783663	-0.580	0.13893366	0.12093979	0.17586493	20.31
1.3010	0.684471	-0.589	0.13918656	0.12109631	0.17628908	20.31
1.3020	0.599985	-0.589	0.13941318	0.12125009	0.17668301	20.31
1.3030	0.532551	-0.595	0.13962239	0.12137842	0.17699820	20.31
1.3040	0.481997	-0.588	0.13979363	0.12149030	0.17726570	20.31
1.3050	0.448208	-0.588	0.13992000	0.12154961	0.17744851	20.31
1.3060	0.429382	-0.587	0.13998705	0.12157774	0.17757982	20.32
1.3070	0.423145	-0.587	0.14002591	0.12158948	0.17764020	20.32
1.3080	0.425835	-0.587	0.14003378	0.12159628	0.17766553	20.32
1.3090	0.434904	-0.584	0.14003867	0.12161565	0.17765492	20.32
1.3100	0.451756	-0.585	0.14002901	0.12162632	0.17762375	20.33
1.3110	0.488176	-0.591	0.13994730	0.12160403	0.17750794	20.33
1.3120	0.562105	-0.593	0.13977516	0.12154579	0.17723751	20.33
1.3130	0.684099	-0.595	0.13947254	0.12141162	0.17675793	20.32
1.3140	0.850124	-0.584	0.13908446	0.12119180	0.17610818	20.32
1.3150	1.042957	-0.581	0.13861954	0.12088335	0.17534840	20.32
1.3160	1.244459	-0.577	0.13813704	0.12054586	0.17456239	20.32
1.3170	1.442041	-0.578	0.13765550	0.12020636	0.17380267	20.32
1.3180	1.627436	-0.580	0.13720119	0.11986107	0.17308962	20.31
1.3190	1.797895	-0.581	0.13677901	0.11953610	0.17244869	20.31
1.3200	1.955137	-0.584	0.13637918	0.11921716	0.17185432	20.31
1.3210	2.102652	-0.594	0.13599300	0.11889803	0.17128921	20.31
1.3220	2.244730	-0.592	0.13563204	0.11859465	0.17076200	20.31
1.3230	2.383060	-0.595	0.13529170	0.11829114	0.17025322	20.31
1.3240	2.515240	-0.583	0.13495994	0.11802173	0.16980475	20.31
1.3250	2.636318	-0.588	0.13464189	0.11774921	0.16936988	20.31
1.3260	2.739544	-0.589	0.13436270	0.11751968	0.16898757	20.32
1.3270	2.819967	-0.591	0.13414383	0.11733389	0.16867828	20.32
1.3280	2.876129	-0.591	0.13398230	0.11719286	0.16844779	20.32
1.3290	2.909889	-0.585	0.13388014	0.11710525	0.16831166	20.32
1.3300	2.926512	-0.588	0.13382763	0.11704969	0.16823578	20.33
1.3310	2.931032	-0.596	0.13378394	0.11700284	0.16817153	20.33
1.3320	2.927427	-0.597	0.13378298	0.11698532	0.16815394	20.32
1.3330	2.917957	-0.597	0.13375384	0.11697263	0.16814125	20.32
1.3340	2.901278	-0.589	0.13378388	0.11699116	0.16818309	20.32
1.3350	2.870607	-0.587	0.13382179	0.11701071	0.16825801	20.32
1.3360	2.805719	-0.586	0.13396281	0.11708665	0.16841173	20.32
1.3370	2.689104	-0.584	0.13420999	0.11727148	0.16874444	20.32
1.3380	2.520332	-0.583	0.13458067	0.11755550	0.16925412	20.31
1.3390	2.320690	-0.584	0.13504076	0.11794657	0.16991854	20.31
1.3400	2.121220	-0.583	0.13551736	0.11833954	0.17060727	20.31
1.3410	1.942120	-0.593	0.13592303	0.11868387	0.17122304	20.31
1.3420	1.789856	-0.592	0.13629651	0.11898357	0.17176396	20.31
1.3430	1.658907	-0.597	0.13660884	0.11923844	0.17225224	20.31
1.3440	1.535969	-0.589	0.13693565	0.11950302	0.17273271	20.31
1.3450	1.409054	-0.589	0.13725466	0.11975294	0.17322493	20.31
1.3460	1.272039	-0.590	0.13759416	0.12001461	0.17375308	20.32
1.3470	1.127329	-0.593	0.13795507	0.12028110	0.17433381	20.32
1.3480	0.983219	-0.595	0.13832963	0.12055248	0.17493796	20.32
1.3490	0.850067	-0.594	0.13868958	0.12080443	0.17551380	20.32
1.3500	0.737171	-0.592	0.13900173	0.12101841	0.17600989	20.33
1.3510	0.649710	-0.595	0.13924974	0.12117410	0.17640281	20.33
1.3520	0.587482	-0.592	0.13945109	0.12128502	0.17670530	20.32
1.3530	0.545883	-0.596	0.13959312	0.12135804	0.17692131	20.32
1.3540	0.518045	-0.589	0.13970983	0.12142527	0.17710519	20.32
1.3550	0.499620	-0.594	0.13979059	0.12147397	0.17721713	20.32
1.3560	0.487547	-0.595	0.13984609	0.12151295	0.17730856	20.32
1.3570	0.481453	-0.596	0.13987726	0.12152553	0.17735720	20.32
1.3580	0.480795	-0.597	0.13988703	0.12153518	0.17738247	20.31
1.3590	0.485601	-0.601	0.13988805	0.12154484	0.17738342	20.31
1.3600	0.496702	-0.606	0.13988411	0.12155646	0.17735618	20.31
1.3610	0.520048	-0.612	0.13984513	0.12154078	0.17727637	20.31
1.3620	0.572462	-0.612	0.13972259	0.12151062	0.17710614	20.31
1.3630	0.671339	-0.612	0.13947940	0.12140077	0.17673552	20.31
1.3640	0.821199	-0.601	0.13914084	0.12123346	0.17618787	20.31
1.3650	1.009541	-0.598	0.13869530	0.12094551	0.17544472	20.31
1.3660	1.215506	-0.592	0.13820797	0.12059343	0.17464995	20.32
1.3670	1.421556	-0.592	0.13770014	0.12021595	0.17385429	20.32
1.3680	1.614361	-0.591	0.13723618	0.11986285	0.17311209	20.32
1.3690	1.785908	-0.592	0.13681787	0.11954182	0.17246628	20.32
1.3700	1.938143	-0.596	0.13644344	0.11923158	0.17190391	20.33
1.3710	2.079935	-0.611	0.13607478	0.11892813	0.17136496	20.33
1.3720	2.220068	-0.608	0.13571197	0.11862767	0.17085034	20.33
1.3730	2.363377	-0.610	0.13533258	0.11831349	0.17031533	20.32
1.3740	2.507315	-0.600	0.13497949	0.11801392	0.16980946	20.32
1.3750	2.644186	-0.597	0.13462347	0.11771822	0.16932017	20.32
1.3760	2.762747	-0.600	0.13429374	0.11746430	0.16888446	20.32
1.3770	2.853670	-0.597	0.13404560	0.11725420	0.16855770	20.32
1.3780	2.912893	-0.595	0.13387918	0.11710232	0.16832328	20.31
1.3790	2.943420	-0.596	0.13378483	0.11700112	0.16820073	20.31
1.3800	2.953091	-0.595	0.13372260	0.11695045	0.16812009	20.31
1.3810	2.950573	-0.603	0.13368082	0.11693013	0.16808707	20.31
1.3820	2.941504	-0.598	0.13368374	0.11692619	0.16807044	20.31
1.3830	2.928486	-0.601	0.13368088	0.11693293	0.16808683	20.31
1.3840	2.910490	-0.599	0.13371980	0.11695516	0.16812766	20.31
1.3850	2.881279	-0.598	0.13377517	0.11697167	0.16818410	20.31
1.3860	2.820168	-0.600	0.13389283	0.11704087	0.16832817	20.32
1.3870	2.706270	-0.598	0.13413602	0.11721605	0.16863936	20.32
1.3880	2.535982	-0.599	0.13452125	0.11752450	0.16916460	20.32
1.3890	2.330704	-0.593	0.13500565	0.11793107	0.16984355	20.32
1.3900	2.123909	-0.594	0.13549298	0.11834258	0.17056143	20.33
1.3910	1.939945	-0.600	0.13592976	0.11870438	0.17120838	20.33
1.3920	1.786566	-0.599	0.13631403	0.11899626	0.17176282	20.33
1.3930	1.659107	-0.599	0.13663894	0.11923558	0.17222005	20.32
1.3940	1.543837	-0.590	0.13694918	0.11947876	0.17265576	20.32
1.3950	1.428652	-0.589	0.13723910	0.11971509	0.17310119	20.32
1.3960	1.305399	-0.592	0.13753963	0.11995834	0.17358565	20.32
1.3970	1.174479	-0.594	0.13785964	0.12020832	0.17412752	20.32
1.3980	1.041241	-0.595	0.13819820	0.12046212	0.17468297	20.31
1.3990	0.914268	-0.592	0.13854063	0.12068975	0.17523932	20.31
1.4000	0.801888	-0.592	0.13884324	0.12089598	0.17572862	20.31
1.4010	0.709276	-0.600	0.13909715	0.12105751	0.17613524	20.31
1.4020	0.637550	-0.604	0.13930148	0.12118876	0.17645633	20.31
1.4030	0.584679	-0.610	0.13946480	0.12128699	0.17672479	20.31
1.4040	0.546627	-0.599	0.13959318	0.12136483	0.17694855	20.31
1.4050	0.519876	-0.597	0.13970017	0.12141746	0.17709452	20.31
1.4060	0.501852	-0.596	0.13976628	0.12145156	0.17719179	20.32
1.4070	0.492125	-0.598	0.13981104	0.12147588	0.17725211	20.32
1.4080	0.489750	-0.598	0.13983637	0.12150210	0.17729586	20.32
1.4090	0.493727	-0.596	0.13984513	0.12151176	0.17731529	20.32
1.4100	0.503397	-0.597	0.13984704	0.12150979	0.17729968	20.33
1.4110	0.521708	-0.608	0.13979447	0.12148941	0.17724425	20.33
1.4120	0.563965	-0.607	0.13971472	0.12145048	0.17710805	20.32
1.4130	0.650997	-0.609	0.13949579	0.12137944	0.17677838	20.32
1.4140	0.793362	-0.603	0.13917392	0.12123060	0.17624241	20.32
1.4150	0.984020	-0.602	0.13871574	0.12095827	0.17550015	20.32
1.4160	1.201286	-0.601	0.13820511	0.12059444	0.17465866	20.32
1.4170	1.424074	-0.599	0.13766229	0.12019265	0.17381138	20.32
1.4180	1.636734	-0.599	0.13714772	0.11980063	0.17300504	20.31
1.4190	1.826992	-0.597	0.13667101	0.11943883	0.17228431	20.31
1.4200	1.989527	-0.599	0.13626927	0.11911690	0.17168128	20.31
1.4210	2.126284	-0.607	0.13590550	0.11881727	0.17115301	20.31
1.4220	2.245159	-0.607	0.13560987	0.11856240	0.17070651	20.31
1.4230	2.356739	-0.609	0.13530338	0.11832029	0.17028624	20.31
1.4240	2.468662	-0.602	0.13502121	0.11808687	0.16988450	20.31
1.4250	2.583590	-0.605	0.13472652	0.11783791	0.16947979	20.31
1.4260	2.698374	-0.608	0.13442981	0.11758590	0.16906631	20.31
1.4270	2.804604	-0.605	0.13415551	0.11734366	0.16868216	20.32
1.4280	2.891493	-0.600	0.13392496	0.11715096	0.16835922	20.32
1.4290	2.950830	-0.599	0.13377041	0.11700511	0.16813356	20.32
1.4300	2.981300	-0.591	0.13366240	0.11692822	0.16800511	20.33
1.4310	2.989197	-0.601	0.13361079	0.11687088	0.16793901	20.33
1.4320	2.982216	-0.601	0.13360006	0.11684555	0.16791284	20.32
1.4330	2.966537	-0.605	0.13360882	0.11683780	0.16792554	20.32
1.4340	2.942162	-0.593	0.13364780	0.11686122	0.16796929	20.32
1.4350	2.900219	-0.591	0.13372165	0.11689711	0.16807038	20.32
1.4360	2.822113	-0.597	0.13387638	0.11699241	0.16827846	20.32
1.4370	2.697973	-0.601	0.13414776	0.11718881	0.16863251	20.32
1.4380	2.531176	-0.601	0.13453978	0.11749625	0.16915786	20.31
1.4390	2.341347	-0.599	0.13498628	0.11786199	0.16978824	20.31
1.4400	2.147341	-0.599	0.13544941	0.11825401	0.17045945	20.31
1.4410	1.965380	-0.607	0.13585800	0.11860126	0.17109066	20.31
1.4420	1.804504	-0.604	0.13624412	0.11892909	0.17167234	20.31
1.4430	1.666546	-0.608	0.13657868	0.11920238	0.17217916	20.31
1.4440	1.545525	-0.597	0.13689673	0.11945242	0.17265582	20.31
1.4450	1.432228	-0.596	0.13718271	0.11967230	0.17309940	20.31
1.4460	1.317244	-0.593	0.13747650	0.11988825	0.17355365	20.31
1.4470	1.194649	-0.592	0.13780427	0.12012464	0.17404300	20.32
1.4480	1.063099	-0.592	0.13813502	0.12038338	0.17458481	20.32
1.4490	0.928345	-0.590	0.13847643	0.12063235	0.17514712	20.32
1.4500	0.799799	-0.591	0.13880229	0.12087661	0.17570645	20.33
1.4510	0.688133	-0.603	0.13910186	0.12105358	0.17617923	20.33
1.4520	0.599298	-0.602	0.13936359	0.12121809	0.17658973	20.32
1.4530	0.535669	-0.605	0.13955128	0.12132007	0.17689800	20.32
1.4540	0.493526	-0.593	0.13970214	0.12141544	0.17713636	20.32
1.4550	0.468464	-0.591	0.13980329	0.12147766	0.17728806	20.32
1.4560	0.455189	-0.595	0.13986659	0.12151176	0.17737758	20.32
1.4570	0.451126	-0.595	0.13990253	0.12153506	0.17743587	20.32
1.4580	0.453329	-0.598	0.13990551	0.12154478	0.17746598	20.31
1.4590	0.461111	-0.596	0.13991630	0.12155157	0.17747378	20.31
1.4600	0.474329	-0.597	0.13991243	0.12157005	0.17745042	20.31
1.4610	0.501709	-0.603	0.13986176	0.12155247	0.17734337	20.31
1.4620	0.562420	-0.601	0.13971764	0.12150586	0.17711675	20.31
1.4630	0.673857	-0.602	0.13945299	0.12138617	0.17670631	20.31
1.4640	0.839138	-0.595	0.13907170	0.12118292	0.17607403	20.31
1.4650	1.041384	-0.597	0.13859510	0.12087649	0.17529392	20.31
1.4660	1.257477	-0.597	0.13807768	0.12050498	0.17444080	20.32
1.4670	1.469851	-0.599	0.13755625	0.12012070	0.17362565	20.32
1.4680	1.667004	-0.600	0.13707089	0.11974525	0.17287469	20.32
1.4690	1.843128	-0.600	0.13663989	0.11940193	0.17221999	20.32
1.4700	1.997681	-0.595	0.13625371	0.11908573	0.17164212	20.33
1.4710	2.136211	-0.604	0.13589185	0.11877638	0.17111981	20.33
1.4720	2.265673	-0.606	0.13554752	0.11849028	0.17062271	20.33
1.4730	2.391729	-0.611	0.13521874	0.11821115	0.17016459	20.32
1.4740	2.515182	-0.600	0.13491714	0.11795926	0.16972005	20.32
1.4750	2.632713	-0.600	0.13461745	0.11770928	0.16929990	20.32
1.4760	2.737112	-0.599	0.13433731	0.11746323	0.16891670	20.32
1.4770	2.821026	-0.599	0.13410491	0.11726874	0.16859758	20.32
1.4780	2.879620	-0.597	0.13393283	0.11712182	0.16837472	20.31
1.4790	2.913580	-0.591	0.13383073	0.11702442	0.16822588	20.31
1.4800	2.928057	-0.591	0.13376939	0.11697471	0.16815192	20.31
1.4810	2.929773	-0.600	0.13374019	0.11693585	0.16810423	20.31
1.4820	2.923479	-0.603	0.13371879	0.11693001	0.16809452	20.31
1.4830	2.911720	-0.608	0.13372272	0.11692512	0.16809934	20.31
1.4840	2.893381	-0.599	0.13374120	0.11694062	0.16814709	20.31
1.4850	2.862396	-0.599	0.13378882	0.11696500	0.16820937	20.31
1.4860	2.799425	-0.597	0.13390654	0.11703604	0.16836309	20.32
1.4870	2.688332	-0.598	0.13413697	0.11720926	0.16868311	20.32
1.4880	2.527256	-0.597	0.13450664	0.11750400	0.16916269	20.32
1.4890	2.332878	-0.596	0.13497543	0.11788046	0.16979891	20.32
1.4900	2.131062	-0.594	0.13545316	0.11829680	0.17048383	20.33
1.4910	1.941376	-0.601	0.13589084	0.11864984	0.17114234	20.33
1.4920	1.774921	-0.597	0.13628781	0.11898935	0.17175806	20.33
1.4930	1.633472	-0.600	0.13663602	0.11926460	0.17228520	20.32
1.4940	1.508417	-0.587	0.13697255	0.11953992	0.17277455	20.32
1.4950	1.389656	-0.585	0.13727707	0.11978310	0.17324537	20.32
1.4960	1.267948	-0.584	0.13758153	0.12001657	0.17371136	20.32
1.4970	1.139688	-0.586	0.13791621	0.12026173	0.17422700	20.32
1.4980	1.006994	-0.591	0.13826352	0.12050593	0.17476773	20.31
1.4990	0.876474	-0.589	0.13861173	0.12074429	0.17532510	20.31
1.5000	0.756941	-0.587	0.13894051	0.12096316	0.17586589	20.31
1.5010	0.655775	-0.591	0.13920605	0.12112367	0.17630565	20.31
1.5020	0.576811	-0.591	0.13944334	0.12126279	0.17668110	20.31
1.5030	0.521107	-0.595	0.13961744	0.12135416	0.17695445	20.31
1.5040	0.485401	-0.585	0.13976043	0.12143397	0.17716837	20.31
1.5050	0.465946	-0.584	0.13984710	0.12148547	0.17730063	20.31
1.5060	0.457792	-0.589	0.13989580	0.12151372	0.17735523	20.32
1.5070	0.457163	-0.591	0.13991040	0.12152928	0.17738348	20.32
1.5080	0.462112	-0.595	0.13991141	0.12153029	0.17738736	20.32
1.5090	0.471354	-0.589	0.13991040	0.12152833	0.17739022	20.32
1.5100	0.487347	-0.593	0.13988799	0.12153119	0.17737466	20.33
1.5110	0.521164	-0.600	0.13981885	0.12151062	0.17725402	20.33
1.5120	0.590973	-0.601	0.13965547	0.12146783	0.17699623	20.33
1.5130	0.708618	-0.601	0.13937140	0.12133658	0.17654097	20.32
1.5140	0.871439	-0.592	0.13897938	0.12112361	0.17591649	20.32
1.5150	1.061668	-0.589	0.13852990	0.12081331	0.17519468	20.32
1.5160	1.260138	-0.595	0.13805318	0.12045628	0.17441952	20.32
1.5170	1.452770	-0.595	0.13757372	0.12010419	0.17367041	20.32
1.5180	1.631241	-0.594	0.13711947	0.11976767	0.17298561	20.31
1.5190	1.792459	-0.589	0.13672161	0.11946613	0.17237759	20.31
1.5200	1.939430	-0.587	0.13635582	0.11918396	0.17183286	20.31
1.5210	2.077875	-0.591	0.13599300	0.11888242	0.17129785	20.31
1.5220	2.213545	-0.593	0.13563800	0.11859936	0.17080367	20.31
1.5230	2.349272	-0.595	0.13528967	0.11829013	0.17030668	20.31
1.5240	2.483368	-0.588	0.13496280	0.11802357	0.16984552	20.31
1.5250	2.611656	-0.590	0.13463396	0.11774331	0.16937000	20.31
1.5260	2.727242	-0.584	0.13434023	0.11749321	0.16894776	20.32
1.5270	2.823086	-0.586	0.13408732	0.11727333	0.16859466	20.32
1.5280	2.893639	-0.586	0.13389963	0.11710602	0.16831642	20.32
1.5290	2.937555	-0.584	0.13376445	0.11699033	0.16814524	20.32
1.5300	2.958584	-0.585	0.13370031	0.11692911	0.16804409	20.33
1.5310	2.963161	-0.595	0.13364875	0.11689126	0.16798383	20.33
1.5320	2.957010	-0.599	0.13364285	0.11687869	0.16797215	20.33
1.5330	2.943535	-0.605	0.13364285	0.11687183	0.16796339	20.32
1.5340	2.922077	-0.592	0.13368768	0.11690098	0.16801202	20.32
1.5350	2.883482	-0.589	0.13373727	0.11693788	0.16809362	20.32
1.5360	2.807865	-0.588	0.13388026	0.11703223	0.16829497	20.32
1.5370	2.683525	-0.588	0.13414967	0.11723655	0.16865778	20.32
1.5380	2.513466	-0.587	0.13455439	0.11753333	0.16917628	20.31
1.5390	2.320662	-0.580	0.13501549	0.11791170	0.16981447	20.31
1.5400	2.128143	-0.580	0.13547558	0.11828625	0.17047983	20.31
1.5410	1.951389	-0.586	0.13589090	0.11863053	0.17108589	20.31
1.5420	1.795092	-0.586	0.13626534	0.11894184	0.17165977	20.31
1.5430	1.657591	-0.590	0.13661069	0.11920249	0.17216158	20.31
1.5440	1.531162	-0.581	0.13693172	0.11946219	0.17266262	20.31
1.5450	1.408682	-0.581	0.13723820	0.11970431	0.17315000	20.31
1.5460	1.284771	-0.584	0.13754463	0.11995041	0.17362863	20.31
1.5470	1.157942	-0.584	0.13786072	0.12019551	0.17414325	20.32
1.5480	1.030855	-0.584	0.13818657	0.12043869	0.17464805	20.32
1.5490	0.907917	-0.581	0.13850266	0.12066734	0.17517912	20.32
1.5500	0.794392	-0.581	0.13881499	0.12086385	0.17568582	20.33
1.5510	0.695057	-0.593	0.13908440	0.12103021	0.17611974	20.33
1.5520	0.612774	-0.590	0.13932568	0.12117803	0.17650408	20.33
1.5530	0.549631	-0.594	0.13951337	0.12128699	0.17680073	20.32
1.5540	0.505142	-0.585	0.13966125	0.12138826	0.17705846	20.32
1.5550	0.477190	-0.584	0.13975948	0.12144470	0.17722082	20.32
1.5560	0.462570	-0.587	0.13982368	0.12148756	0.17731237	20.32
1.5570	0.457821	-0.591	0.13985193	0.12150991	0.17735136	20.32
1.5580	0.460081	-0.595	0.13986266	0.12151766	0.17737287	20.31
1.5590	0.467720	-0.595	0.13987052	0.12152833	0.17738450	20.31
1.5600	0.480824	-0.595	0.13985002	0.12153029	0.17737758	20.31
1.5610	0.506945	-0.604	0.13980818	0.12150890	0.17728907	20.31
1.5620	0.563364	-0.601	0.13967681	0.12147093	0.17708868	20.31
1.5630	0.666533	-0.603	0.13944036	0.12135899	0.17668986	20.31
1.5640	0.820169	-0.593	0.13908148	0.12117606	0.17611396	20.31
1.5650	1.010914	-0.595	0.13862324	0.12088716	0.17536783	20.31
1.5660	1.218109	-0.595	0.13813978	0.12054181	0.17454690	20.32
1.5670	1.424904	-0.594	0.13764369	0.12017608	0.17374337	20.32
1.5680	1.620054	-0.594	0.13716507	0.11979973	0.17300606	20.32
1.5690	1.797638	-0.597	0.13671762	0.11945933	0.17235327	20.32
1.5700	1.955881	-0.599	0.13633144	0.11914510	0.17176968	20.33
1.5710	2.097502	-0.604	0.13596189	0.11884648	0.17122489	20.33
1.5720	2.227707	-0.599	0.13562822	0.11857700	0.17073166	20.32
1.5730	2.354078	-0.600	0.13529456	0.11829686	0.17025697	20.32
1.5740	2.481337	-0.592	0.13497448	0.11802846	0.16982317	20.32
1.5750	2.609425	-0.594	0.13466227	0.11774725	0.16936702	20.32
1.5760	2.731962	-0.592	0.13434523	0.11747593	0.16892439	20.32
1.5770	2.839193	-0.592	0.13406610	0.11723465	0.16853917	20.32
1.5780	2.920046	-0.589	0.13383847	0.11703432	0.16822106	20.31
1.5790	2.968626	-0.589	0.13369936	0.11691570	0.16804212	20.31
1.5800	2.987738	-0.589	0.13363123	0.11684960	0.16794491	20.31
1.5810	2.986794	-0.597	0.13358939	0.11681259	0.16790891	20.31
1.5820	2.975206	-0.597	0.13358551	0.11680180	0.16790986	20.31
1.5830	2.957840	-0.603	0.13358849	0.11679786	0.16791862	20.31
1.5840	2.932491	-0.595	0.13363624	0.11682808	0.16797024	20.31
1.5850	2.887945	-0.593	0.13371497	0.11686599	0.16807431	20.31
1.5860	2.804575	-0.595	0.13388509	0.11698180	0.16828740	20.31
1.5870	2.673111	-0.592	0.13417488	0.11719573	0.16868132	20.32
1.5880	2.498674	-0.592	0.13456988	0.11752152	0.16922700	20.32
1.5890	2.303381	-0.587	0.13502038	0.11791062	0.16988057	20.32
1.5900	2.108202	-0.585	0.13546491	0.11830169	0.17054498	20.33
1.5910	1.928759	-0.596	0.13587826	0.11865574	0.17116851	20.32
1.5920	1.772203	-0.596	0.13624793	0.11896414	0.17173862	20.32
1.5930	1.638222	-0.601	0.13659525	0.11922681	0.17223179	20.32
1.5940	1.519175	-0.586	0.13691431	0.11947483	0.17270255	20.32
1.5950	1.405621	-0.583	0.13721573	0.11970353	0.17314607	20.32
1.5960	1.289091	-0.584	0.13751823	0.11993891	0.17360908	20.32
1.5970	1.165838	-0.587	0.13783336	0.12017626	0.17410713	20.32
1.5980	1.036291	-0.584	0.13815737	0.12042820	0.17463535	20.31
1.5990	0.906458	-0.587	0.13849878	0.12068403	0.17519081	20.31
1.6000	0.784807	-0.587	0.13882273	0.12090188	0.17571908	20.31
1.6010	0.680351	-0.604	0.13911462	0.12107784	0.17618126	20.31
1.6020	0.597324	-0.601	0.13935882	0.12122178	0.17656356	20.31
1.6030	0.536442	-0.607	0.13954461	0.12132102	0.17685235	20.31
1.6040	0.494385	-0.594	0.13969833	0.12141937	0.17709064	20.31
1.6050	0.467405	-0.589	0.13979757	0.12147099	0.17723852	20.31
1.6060	0.452271	-0.590	0.13986474	0.12151474	0.17734164	20.32
1.6070	0.446148	-0.592	0.13989681	0.12153989	0.17740488	20.32
1.6080	0.447063	-0.596	0.13991040	0.12155348	0.17742819	20.32
1.6090	0.453901	-0.591	0.13992202	0.12156510	0.17743981	20.32
1.6100	0.467577	-0.595	0.13990557	0.12155640	0.17741841	20.33
1.6110	0.499220	-0.600	0.13984138	0.12153596	0.17731625	20.33
1.6120	0.569143	-0.605	0.13968664	0.12148345	0.17705452	20.32
1.6130	0.691795	-0.603	0.13939083	0.12134439	0.17656720	20.32
1.6140	0.865517	-0.596	0.13898021	0.12110794	0.17591345	20.32
1.6150	1.069450	-0.596	0.13849002	0.12077534	0.17512459	20.32
1.6160	1.278648	-0.597	0.13799393	0.12041247	0.17431235	20.32
1.6170	1.475487	-0.601	0.13752222	0.12005651	0.17355663	20.32
1.6180	1.649694	-0.601	0.13708252	0.11972773	0.17288548	20.31
1.6190	1.799755	-0.601	0.13670123	0.11943895	0.17232424	20.31
1.6200	1.931219	-0.603	0.13637245	0.11916268	0.17181939	20.31
1.6210	2.054386	-0.611	0.13604265	0.11889422	0.17133498	20.31
1.6220	2.181530	-0.610	0.13571775	0.11861211	0.17086798	20.31
1.6230	2.320175	-0.612	0.13535589	0.11832118	0.17036122	20.31
1.6240	2.468748	-0.598	0.13499594	0.11802256	0.16985726	20.31
1.6250	2.618437	-0.598	0.13462436	0.11771029	0.16932124	20.31
1.6260	2.755251	-0.599	0.13427800	0.11740577	0.16883576	20.31
1.6270	2.866659	-0.599	0.13398623	0.11714894	0.16842622	20.32
1.6280	2.943678	-0.596	0.13377517	0.11696213	0.16814321	20.32
1.6290	2.985191	-0.589	0.13363904	0.11686105	0.16796911	20.32
1.6300	2.998781	-0.587	0.13357866	0.11682034	0.16789615	20.33
1.6310	2.995520	-0.597	0.13354844	0.11679214	0.16785139	20.33
1.6320	2.984362	-0.594	0.13355041	0.11678630	0.16785336	20.32
1.6330	2.969084	-0.599	0.13355815	0.11677659	0.16785914	20.32
1.6340	2.947111	-0.588	0.13359225	0.11680388	0.16790396	20.32
1.6350	2.905941	-0.588	0.13367009	0.11684084	0.16798460	20.32
1.6360	2.822514	-0.591	0.13383061	0.11695272	0.16821527	20.32
1.6370	2.683697	-0.591	0.13412923	0.11718798	0.16863155	20.31
1.6380	2.496185	-0.596	0.13455617	0.11754298	0.16921723	20.31
1.6390	2.286873	-0.591	0.13506395	0.11795926	0.16992044	20.31
1.6400	2.085228	-0.596	0.13553965	0.11835915	0.17061889	20.31
1.6410	1.909590	-0.605	0.13595408	0.11870056	0.17123455	20.31
1.6420	1.765366	-0.607	0.13630426	0.11897981	0.17177248	20.31
1.6430	1.646061	-0.603	0.13660777	0.11922002	0.17220342	20.31
1.6440	1.535511	-0.594	0.13691229	0.11945540	0.17264706	20.31
1.6450	1.419697	-0.596	0.13720906	0.11969173	0.17308187	20.31
1.6460	1.290722	-0.604	0.13752711	0.11994267	0.17358959	20.31
1.6470	1.150331	-0.604	0.13786942	0.12020236	0.17415279	20.32
1.6480	1.006393	-0.598	0.13824874	0.12046790	0.17473257	20.32
1.6490	0.869837	-0.594	0.13861358	0.12071395	0.17532110	20.32
1.6500	0.751247	-0.586	0.13893175	0.12093484	0.17583668	20.32
1.6510	0.657148	-0.593	0.13917106	0.12110025	0.17625988	20.33
1.6520	0.588770	-0.593	0.13937539	0.12122089	0.17657608	20.32
1.6530	0.542765	-0.595	0.13952899	0.12129289	0.17679971	20.32
1.6540	0.513582	-0.588	0.13964862	0.12136006	0.17699128	20.32
1.6550	0.496416	-0.588	0.13971668	0.12139118	0.17710406	20.32
1.6560	0.486546	-0.592	0.13975757	0.12142718	0.17719263	20.32
1.6570	0.482254	-0.593	0.13978773	0.12145740	0.17723846	20.32
1.6580	0.482397	-0.607	0.13980919	0.12148088	0.17726481	20.31
1.6590	0.487204	-0.604	0.13981509	0.12148958	0.17727453	20.31
1.6600	0.497446	-0.611	0.13981509	0.12149251	0.17726380	20.31
1.6610	0.518274	-0.616	0.13976061	0.12147099	0.17718989	20.31
1.6620	0.566940	-0.616	0.13966036	0.12144172	0.17702448	20.31
1.6630	0.660868	-0.613	0.13942486	0.12134629	0.17667329	20.31
1.6640	0.806179	-0.608	0.13908827	0.12117994	0.17612469	20.31
1.6650	0.990715	-0.614	0.13864857	0.12090272	0.17540675	20.31
1.6660	1.193218	-0.608	0.13815928	0.12055546	0.17461598	20.32
1.6670	1.396980	-0.607	0.13767684	0.12018681	0.17383194	20.32
1.6680	1.590815	-0.609	0.13720691	0.11982799	0.17308879	20.32
1.6690	1.768284	-0.605	0.13676333	0.11949140	0.17242628	20.32
1.6700	1.928959	-0.602	0.13636744	0.11918402	0.17182410	20.33
1.6710	2.074871	-0.607	0.13598818	0.11887950	0.17126858	20.33
1.6720	2.210140	-0.612	0.13565260	0.11859262	0.17074817	20.32
1.6730	2.340031	-0.617	0.13531899	0.11831826	0.17027551	20.32
1.6740	2.466946	-0.608	0.13499308	0.11805367	0.16983485	20.32
1.6750	2.590857	-0.601	0.13467503	0.11777341	0.16939622	20.32
1.6760	2.704010	-0.600	0.13438994	0.11751854	0.16897988	20.32
1.6770	2.798195	-0.600	0.13414472	0.11729681	0.16862392	20.32
1.6780	2.866602	-0.604	0.13397449	0.11714119	0.16836023	20.31
1.6790	2.908630	-0.600	0.13385487	0.11703318	0.16821140	20.31
1.6800	2.928114	-0.598	0.13378191	0.11697668	0.16811025	20.31
1.6810	2.931976	-0.600	0.13374209	0.11693394	0.16805387	20.31
1.6820	2.925367	-0.594	0.13372850	0.11691749	0.16802567	20.31
1.6830	2.912722	-0.596	0.13372177	0.11691654	0.16803724	20.31
1.6840	2.893696	-0.587	0.13374215	0.11693978	0.16808677	20.31
1.6850	2.863255	-0.588	0.13378388	0.11696303	0.16815293	20.31
1.6860	2.805061	-0.590	0.13391131	0.11702245	0.16829985	20.31
1.6870	2.704840	-0.595	0.13413596	0.11716455	0.16856939	20.32
1.6880	2.558126	-0.593	0.13445318	0.11741847	0.16901582	20.32
1.6890	2.377939	-0.593	0.13486367	0.11776471	0.16959643	20.32
1.6900	2.184505	-0.588	0.13530731	0.11815578	0.17025208	20.33
1.6910	1.996021	-0.600	0.13574404	0.11852932	0.17090482	20.33
1.6920	1.823158	-0.600	0.13615257	0.11885327	0.17152441	20.32
1.6930	1.670008	-0.601	0.13651538	0.11913925	0.17208076	20.32
1.6940	1.533451	-0.591	0.13687247	0.11941743	0.17261386	20.32
1.6950	1.408939	-0.586	0.13718760	0.11967218	0.17309451	20.32
1.6960	1.290979	-0.588	0.13749397	0.11991733	0.17357314	20.32
1.6970	1.175337	-0.592	0.13779259	0.12014592	0.17404002	20.32
1.6980	1.059780	-0.596	0.13809323	0.12037170	0.17451960	20.31
1.6990	0.945768	-0.588	0.13840652	0.12058562	0.17500305	20.31
1.7000	0.837221	-0.585	0.13869053	0.12078303	0.17547488	20.31
1.7010	0.738888	-0.593	0.13893074	0.12095129	0.17590195	20.31
1.7020	0.653887	-0.596	0.13916016	0.12109822	0.17628628	20.31
1.7030	0.584793	-0.601	0.13937414	0.12122762	0.17661315	20.31
1.7040	0.532808	-0.593	0.13956088	0.12132680	0.17688155	20.31
1.7050	0.497417	-0.593	0.13968551	0.12140268	0.17706728	20.31
1.7060	0.476189	-0.595	0.13974983	0.12144071	0.17720735	20.32
1.7070	0.466719	-0.597	0.13981026	0.12147486	0.17727745	20.32
1.7080	0.466146	-0.596	0.13984036	0.12149632	0.17730659	20.32
1.7090	0.472269	-0.595	0.13985682	0.12150896	0.17729789	20.32
1.7100	0.484772	-0.599	0.13983542	0.12151480	0.17728138	20.33
1.7110	0.509892	-0.605	0.13978177	0.12148851	0.17721236	20.33
1.7120	0.563450	-0.610	0.13966125	0.12143987	0.17702657	20.32
1.7130	0.659952	-0.618	0.13942486	0.12134743	0.17665875	20.32
1.7140	0.803118	-0.603	0.13909423	0.12118191	0.17612565	20.32
1.7150	0.981817	-0.601	0.13867110	0.12092602	0.17542905	20.32
1.7160	1.178455	-0.599	0.13821089	0.12060410	0.17466742	20.32
1.7170	1.378412	-0.606	0.13773131	0.12024814	0.17389309	20.32
1.7180	1.569672	-0.604	0.13725853	0.11989212	0.17316067	20.31
1.7190	1.744881	-0.604	0.13683742	0.11955070	0.17250413	20.31
1.7200	1.902781	-0.599	0.13644540	0.11922592	0.17190969	20.31
1.7210	2.048120	-0.604	0.13608253	0.11891556	0.17136294	20.31
1.7220	2.187424	-0.604	0.13571388	0.11861980	0.17083955	20.31
1.7230	2.326212	-0.607	0.13535005	0.11832690	0.17034256	20.31
1.7240	2.464199	-0.600	0.13499892	0.11803222	0.16985923	20.31
1.7250	2.596521	-0.598	0.13466716	0.11773646	0.16938841	20.31
1.7260	2.715340	-0.598	0.13436854	0.11747587	0.16895163	20.31
1.7270	2.812815	-0.597	0.13411367	0.11725318	0.16858095	20.32
1.7280	2.884197	-0.601	0.13391042	0.11708778	0.16830468	20.32
1.7290	2.928915	-0.596	0.13377130	0.11696619	0.16813165	20.32
1.7300	2.950916	-0.593	0.13367796	0.11690289	0.16802567	20.33
1.7310	2.956610	-0.597	0.13363320	0.11685437	0.16797030	20.33
1.7320	2.952290	-0.603	0.13361371	0.11684072	0.16795659	20.32
1.7330	2.942076	-0.604	0.13360298	0.11683488	0.16796428	20.32
1.7340	2.926683	-0.595	0.13362926	0.11685240	0.16798967	20.32
1.7350	2.901936	-0.593	0.13367015	0.11687082	0.16802949	20.32
1.7360	2.850666	-0.591	0.13376361	0.11693406	0.16814137	20.32
1.7370	2.751703	-0.599	0.13397753	0.11708671	0.16842622	20.32
1.7380	2.595692	-0.604	0.13431603	0.11734647	0.16890967	20.31
1.7390	2.394819	-0.607	0.13477808	0.11772186	0.16955757	20.31
1.7400	2.177982	-0.605	0.13528496	0.11815870	0.17028135	20.31
1.7410	1.972246	-0.612	0.13576740	0.11855567	0.17097491	20.31
1.7420	1.793432	-0.605	0.13621575	0.11891758	0.17162174	20.31
1.7430	1.644831	-0.606	0.13658434	0.11920935	0.17218500	20.31
1.7440	1.518745	-0.595	0.13690341	0.11948651	0.17268020	20.31
1.7450	1.403732	-0.592	0.13719428	0.11971897	0.17311895	20.31
1.7460	1.289320	-0.595	0.13748908	0.11994374	0.17356831	20.31
1.7470	1.170101	-0.595	0.13781202	0.12016559	0.17404592	20.32
1.7480	1.045618	-0.595	0.13813591	0.12040681	0.17456830	20.32
1.7490	0.920563	-0.590	0.13846767	0.12064403	0.17509449	20.32
1.7500	0.802259	-0.585	0.13880330	0.12086970	0.17561007	20.32
1.7510	0.697517	-0.590	0.13908452	0.12103695	0.17605948	20.32
1.7520	0.610828	-0.593	0.13932675	0.12118393	0.17645544	20.32
1.7530	0.544281	-0.600	0.13950855	0.12128794	0.17677343	20.32
1.7540	0.497732	-0.597	0.13966900	0.12139487	0.17701852	20.32
1.7550	0.468950	-0.596	0.13977700	0.12145811	0.17718494	20.32
1.7560	0.454531	-0.595	0.13985199	0.12149417	0.17728227	20.32
1.7570	0.450325	-0.593	0.13987345	0.12151271	0.17734265	20.32
1.7580	0.453243	-0.597	0.13988417	0.12150598	0.17736888	20.31
1.7590	0.460825	-0.596	0.13989002	0.12151468	0.17736113	20.31
1.7600	0.474014	-0.601	0.13986564	0.12152255	0.17733967	20.31
1.7610	0.500593	-0.607	0.13980812	0.12150109	0.17725796	20.31
1.7620	0.558701	-0.607	0.13966990	0.12146705	0.17706048	20.31
1.7630	0.663643	-0.608	0.13944620	0.12135613	0.17665672	20.31
1.7640	0.818167	-0.600	0.13907659	0.12116843	0.17606628	20.31
1.7650	1.009254	-0.604	0.13861459	0.12086588	0.17531526	20.31
1.7660	1.218395	-0.604	0.13810390	0.12051380	0.17450207	20.31
1.7670	1.431313	-0.600	0.13757378	0.12012756	0.17368406	20.32
1.7680	1.635160	-0.602	0.13708645	0.11974138	0.17290390	20.32
1.7690	1.820440	-0.601	0.13662732	0.11937952	0.17220646	20.32
1.7700	1.983147	-0.602	0.13623720	0.11905658	0.17158973	20.32
1.7710	2.125998	-0.610	0.13586169	0.11875993	0.17104304	20.32
1.7720	2.257147	-0.612	0.13551539	0.11848748	0.17055660	20.32
1.7730	2.384863	-0.611	0.13516623	0.11821520	0.17009264	20.32
1.7740	2.512836	-0.602	0.13485593	0.11794966	0.16965491	20.32
1.7750	2.639322	-0.601	0.13453388	0.11766571	0.16922110	20.32
1.7760	2.757826	-0.603	0.13423717	0.11739713	0.16878241	20.32
1.7770	2.859707	-0.600	0.13397259	0.11715579	0.16840798	20.31
1.7780	2.936068	-0.604	0.13375092	0.11697775	0.16810346	20.31
1.7790	2.982731	-0.606	0.13362736	0.11686987	0.16792727	20.31
1.7800	3.002386	-0.603	0.13354754	0.11680955	0.16784149	20.31
1.7810	3.003387	-0.606	0.13351828	0.11676961	0.16778415	20.31
1.7820	2.993145	-0.601	0.13351536	0.11676568	0.16777056	20.31
1.7830	2.976093	-0.603	0.13352603	0.11675698	0.16777837	20.31
1.7840	2.950001	-0.594	0.13357961	0.11677951	0.16783583	20.31
1.7850	2.901192	-0.592	0.13366520	0.11681843	0.16796422	20.31
1.7860	2.808294	-0.596	0.13386267	0.11695558	0.16821331	20.31
1.7870	2.661295	-0.599	0.13417691	0.11722201	0.16865593	20.32
1.7880	2.469749	-0.602	0.13461655	0.11758286	0.16925228	20.32
1.7890	2.260380	-0.599	0.13511068	0.11800104	0.16995460	20.32
1.7900	2.058907	-0.598	0.13559222	0.11839604	0.17065203	20.32
1.7910	1.881924	-0.599	0.13601547	0.11873549	0.17128229	20.32
1.7920	1.735754	-0.594	0.13637936	0.11902249	0.17182696	20.32
1.7930	1.616220	-0.595	0.13667881	0.11926371	0.17227447	20.32
1.7940	1.511421	-0.591	0.13695699	0.11949426	0.17269373	20.32
1.7950	1.408195	-0.595	0.13721085	0.11970532	0.17309362	20.32
1.7960	1.295700	-0.596	0.13749683	0.11991930	0.17354006	20.32
1.7970	1.171875	-0.595	0.13780421	0.12015080	0.17403716	20.32
1.7980	1.041355	-0.594	0.13812512	0.12038821	0.17458582	20.31
1.7990	0.914211	-0.592	0.13845485	0.12062752	0.17512178	20.31
[truncated: 7,001 more rows]
