# Supplementary material for: Evaluation of a Cold-Mixed High-Performance Polyurethane Mixture
Source: Hindawi journal article supplement (doi:10.1155/2019/1507971), 2019-11-07
Supplement: f1 [file 1507971.f1.zip › 1507971.f1/dynamic modulus data/PUM/specimen1/temp20/zhs-1-20_Sum.csv]

Test Information
****************
Project name	zhs
Operator name	1
Target test temperature	20
Target confining stress	0
Average dynamic strain range from 75 to 125 micro-strain
Contact stress	5
Initial modulus	1000
Axial gauge length	70
Comments
Specimen information
********************
Identification	zhs-1-20
Dimensions	Point 1	Point 2	Point 3	Point 4	Point 5	Point 6	Average	Std Dev.
Diameter (mm)	49.2	49.2	49.3				49.23	0.058
Height (mm)	101.3	101.2	101.3				101.27	0.058
Cross-sectional area (mm�)	1903.7
Conditioning time
Properties/Comments
*********
Test date and time	Mon	Apr 1	2019	2:22 PM
Test results summary
	25 Hz	20 Hz	10 Hz	5 Hz	2 Hz	1 Hz	0.5 Hz	0.2 Hz	0.1 Hz
Dynamic modulus (MPa)	13733	13612	13308	13016	12652	12403	12170	11864	11680
Phase angle (Degrees)	4.55	4.60	4.43	4.38	4.27	4.13	3.99	3.85	3.78
Average temperature (�C)	20.3	20.3	20.3	20.3	20.3	20.3	20.3	20.3	20.3
Average confining pressure (kPa)	-0.6	-0.6	-0.6	-0.6	-0.6	-0.6	-0.6	-0.6	-0.6
Average micro-strain	111	100	100	99	98	98	98	98	98
Load drift (%)	-0.2	-0.3	-0.3	-0.1	0.7	-0.2	0.2	-0.9	0.8
Load standard error (%)	6.6	5.8	4.5	2.9	2.6	2.7	2.2	2.1	1.7
Average deformation drift (%)	-5.0	-3.0	-2.1	-1.7	-2.5	-1.1	-2.1	-0.6	-6.2
Average deformation standard error (%)	6.9	6.0	5.0	3.7	3.3	3.3	3.0	2.8	2.7
Deformation uniformity (%)	27.9	28.9	28.8	28.3	28.2	28.0	27.9	27.7	27.5
Phase uniformity (Degrees)	0.5	0.7	0.7	0.8	0.8	0.9	0.9	0.8	0.9
