# Supplementary material for: Evaluation of a Cold-Mixed High-Performance Polyurethane Mixture
Source: Hindawi journal article supplement (doi:10.1155/2019/1507971), 2019-11-07
Supplement: f1 [file 1507971.f1.zip › 1507971.f1/dynamic modulus data/PUM/specimen1/temp35/zhs-1-35_0.1Hz.csv]

Test Information
****************
Project name	zhs
Operator name	1
Target test temperature	35
Target confining stress	0
Average dynamic strain range from 75 to 125 micro-strain
Contact stress	5
Initial modulus	1000
Axial gauge length	70
Comments
Specimen information
********************
Identification	zhs-1-35
Dimensions	Point 1	Point 2	Point 3	Point 4	Point 5	Point 6	Average	Std Dev.
Diameter (mm)	49.2	49.2	49.3				49.23	0.058
Height (mm)	101.3	101.2	101.3				101.27	0.058
Cross-sectional area (mm�)	1903.7
Conditioning time
Properties/Comments
Test Data	0.1Hz
*********
Test date and time	Tue	Apr 2	2019	1:19 PM
Dynamic modulus (MPa)	10049
Phase angle (Degrees)	3.90
Average temperature (�C)	35.3
Average confining pressure (kPa)	-0.8
Average micro-strain	98
Load drift (%)	0.9
Load standard error (%)	2.3
Average deformation drift (%)	-4.9
Average deformation standard error (%)	2.8
Deformation uniformity (%)	18.3
Phase uniformity (Degrees)	0.2
Conditioning Cycles
Time (sec)	Axial stress (kPa)	Axial micro-strain #1	Axial micro-strain #2	Axial micro-strain #3	Confining pressure (kPa)	Temperature (�C)	Load (N)	Displacement #1 (mm)	Displacement #2 (mm)	Displacement #3 (mm)
0.0000	240.034	-42.263	9.824	6.558	-0.761	35.342	456.963	0.002958	-0.000688	-0.000459
0.2000	251.140	-42.513	9.494	6.782	-0.750	35.341	478.106	0.002976	-0.000665	-0.000475
0.4000	261.524	-42.472	10.553	7.436	-0.771	35.340	497.875	0.002973	-0.000739	-0.000521
0.6000	277.605	-40.955	11.712	8.576	-0.755	35.339	528.488	0.002867	-0.000820	-0.000600
0.8000	316.408	-39.356	15.839	11.799	-0.750	35.338	602.360	0.002755	-0.001109	-0.000826
1.0000	336.396	-37.634	18.946	13.913	-0.759	35.337	640.411	0.002634	-0.001326	-0.000974
1.2000	360.937	-36.523	22.595	16.469	-0.768	35.336	687.132	0.002557	-0.001582	-0.001153
1.4000	413.522	-31.577	28.030	20.821	-0.761	35.335	787.239	0.002210	-0.001962	-0.001457
1.6000	454.549	-29.825	34.155	24.473	-0.755	35.334	865.345	0.002088	-0.002391	-0.001713
1.8000	497.080	-26.792	39.879	28.475	-0.766	35.332	946.312	0.001875	-0.002792	-0.001993
2.0000	552.504	-21.581	45.878	33.395	-0.763	35.331	1051.826	0.001511	-0.003211	-0.002338
2.2000	590.872	-19.681	52.358	37.400	-0.752	35.330	1124.868	0.001378	-0.003665	-0.002618
2.4000	641.217	-16.356	57.918	42.110	-0.757	35.329	1220.713	0.001145	-0.004054	-0.002948
2.6000	684.649	-11.799	63.531	45.971	-0.774	35.328	1303.396	0.000826	-0.004447	-0.003218
2.8000	729.599	-9.356	69.655	50.667	-0.750	35.328	1388.969	0.000655	-0.004876	-0.003547
3.0000	779.148	-5.253	74.994	55.075	-0.762	35.327	1483.297	0.000368	-0.005250	-0.003855
3.2000	826.367	-0.237	82.026	59.689	-0.765	35.326	1573.191	0.000017	-0.005742	-0.004178
3.4000	849.826	2.026	85.216	62.395	-0.767	35.324	1617.851	-0.000142	-0.005965	-0.004368
3.6000	884.813	3.263	89.207	65.693	-0.768	35.323	1684.456	-0.000228	-0.006244	-0.004598
3.8000	915.936	6.514	93.199	69.025	-0.763	35.322	1743.708	-0.000456	-0.006524	-0.004832
4.0000	943.123	9.726	97.476	71.847	-0.768	35.321	1795.464	-0.000681	-0.006823	-0.005029
4.2000	965.801	11.267	99.113	73.929	-0.768	35.320	1838.636	-0.000789	-0.006938	-0.005175
4.4000	974.652	13.365	101.056	75.237	-0.775	35.319	1855.488	-0.000936	-0.007074	-0.005267
4.6000	989.485	13.019	102.291	76.545	-0.776	35.318	1883.726	-0.000911	-0.007160	-0.005358
4.8000	990.808	14.394	102.787	77.154	-0.770	35.317	1886.244	-0.001008	-0.007195	-0.005401
5.0000	988.208	13.586	103.519	77.031	-0.772	35.316	1881.294	-0.000951	-0.007246	-0.005392
5.2000	981.280	14.296	103.256	76.782	-0.774	35.314	1868.105	-0.001001	-0.007228	-0.005375
5.4000	977.463	12.752	102.139	76.129	-0.774	35.314	1860.838	-0.000893	-0.007150	-0.005329
5.6000	943.033	10.352	100.270	73.584	-0.767	35.313	1795.292	-0.000725	-0.007019	-0.005151
5.8000	918.536	9.477	97.133	71.400	-0.770	35.312	1748.657	-0.000663	-0.006799	-0.004998
6.0000	897.196	7.835	94.755	69.568	-0.772	35.311	1708.031	-0.000548	-0.006633	-0.004870
6.2000	857.175	5.113	90.430	66.023	-0.770	35.310	1631.842	-0.000358	-0.006330	-0.004622
6.4000	808.634	0.832	84.611	61.686	-0.781	35.309	1539.431	-0.000058	-0.005923	-0.004318
6.6000	770.762	-1.907	80.812	58.395	-0.782	35.308	1467.333	0.000134	-0.005657	-0.004088
6.8000	729.404	-6.100	75.309	54.535	-0.780	35.306	1388.597	0.000427	-0.005272	-0.003817
7.0000	679.464	-9.454	69.653	50.056	-0.781	35.306	1293.526	0.000662	-0.004876	-0.003504
7.2000	627.752	-12.855	63.283	45.111	-0.774	35.304	1195.078	0.000900	-0.004430	-0.003158
7.4000	589.595	-16.330	57.404	41.414	-0.778	35.304	1122.437	0.001143	-0.004018	-0.002899
7.6000	544.479	-20.320	52.288	37.095	-0.772	35.303	1036.549	0.001422	-0.003660	-0.002597
7.8000	487.101	-24.740	44.915	31.506	-0.782	35.302	927.315	0.001732	-0.003144	-0.002205
8.0000	442.887	-28.447	39.454	27.241	-0.780	35.300	843.143	0.001991	-0.002762	-0.001907
8.2000	402.581	-31.424	33.454	23.514	-0.766	35.299	766.411	0.002200	-0.002342	-0.001646
8.4000	358.172	-34.978	27.398	19.040	-0.778	35.299	681.868	0.002448	-0.001918	-0.001333
8.6000	339.372	-34.883	24.230	16.302	-0.778	35.297	646.076	0.002442	-0.001696	-0.001141
8.8000	295.143	-39.647	17.557	11.924	-0.779	35.296	561.876	0.002775	-0.001229	-0.000835
9.0000	277.860	-39.746	14.778	10.065	-0.784	35.295	528.975	0.002782	-0.001034	-0.000705
9.2000	263.433	-41.401	11.904	7.922	-0.787	35.294	501.509	0.002898	-0.000833	-0.000555
9.4000	248.675	-42.180	9.231	6.157	-0.789	35.294	473.413	0.002953	-0.000646	-0.000431
9.6000	239.989	-43.623	7.623	5.034	-0.791	35.292	456.877	0.003054	-0.000534	-0.000352
9.8000	235.134	-43.595	6.275	4.158	-0.790	35.291	447.636	0.003052	-0.000439	-0.000291
10.0000	240.049	-45.136	6.552	4.174	-0.784	35.290	456.991	0.003160	-0.000459	-0.000292
10.2000	248.254	-42.903	7.117	4.769	-0.782	35.289	472.612	0.003003	-0.000498	-0.000334
10.4000	263.343	-43.042	8.532	6.018	-0.783	35.288	501.337	0.003013	-0.000597	-0.000421
10.6000	282.474	-42.250	10.430	7.601	-0.778	35.287	537.758	0.002958	-0.000730	-0.000532
10.8000	313.688	-39.786	14.295	10.439	-0.775	35.287	597.181	0.002785	-0.001001	-0.000731
11.0000	339.281	-37.189	18.247	12.926	-0.778	35.286	645.905	0.002603	-0.001277	-0.000905
11.2000	379.392	-35.412	22.678	16.038	-0.778	35.285	722.265	0.002479	-0.001587	-0.001123
11.4000	416.482	-32.964	27.617	20.000	-0.773	35.284	792.875	0.002307	-0.001933	-0.001400
11.6000	451.769	-30.826	32.516	23.014	-0.778	35.283	860.052	0.002158	-0.002276	-0.001611
11.8000	498.628	-27.793	38.930	27.476	-0.778	35.282	949.259	0.001945	-0.002725	-0.001923
12.0000	544.539	-24.293	44.749	31.785	-0.783	35.281	1036.663	0.001701	-0.003132	-0.002225
12.2000	599.799	-20.544	51.463	36.927	-0.767	35.281	1141.863	0.001438	-0.003602	-0.002585
12.4000	636.784	-17.927	56.641	40.801	-0.780	35.279	1212.273	0.001255	-0.003965	-0.002856
12.6000	686.438	-12.703	62.816	45.276	-0.770	35.278	1306.801	0.000889	-0.004397	-0.003169
12.8000	742.328	-8.855	69.956	50.850	-0.787	35.277	1413.202	0.000620	-0.004897	-0.003559
13.0000	778.967	-5.351	74.209	54.173	-0.782	35.277	1482.954	0.000375	-0.005195	-0.003792
13.2000	816.719	-3.242	79.493	58.299	-0.782	35.276	1554.823	0.000227	-0.005565	-0.004081
13.4000	854.170	-0.153	84.363	62.146	-0.789	35.275	1626.120	0.000011	-0.005905	-0.004350
13.6000	898.759	4.861	89.786	66.259	-0.782	35.275	1711.006	-0.000340	-0.006285	-0.004638
13.8000	917.590	5.652	93.224	68.360	-0.783	35.274	1746.855	-0.000396	-0.006526	-0.004785
14.0000	947.376	9.309	96.086	71.472	-0.773	35.273	1803.560	-0.000652	-0.006726	-0.005003
14.2000	962.224	11.602	98.165	73.097	-0.775	35.273	1831.827	-0.000812	-0.006872	-0.005117
14.4000	978.440	11.627	100.355	75.196	-0.789	35.272	1862.698	-0.000814	-0.007025	-0.005264
14.6000	985.308	12.726	102.525	75.988	-0.787	35.272	1875.772	-0.000891	-0.007177	-0.005319
14.8000	989.606	13.476	102.815	76.504	-0.779	35.271	1883.955	-0.000943	-0.007197	-0.005355
15.0000	990.658	14.463	102.994	76.782	-0.784	35.271	1885.958	-0.001012	-0.007210	-0.005375
15.2000	975.238	12.253	101.783	76.031	-0.790	35.271	1856.604	-0.000858	-0.007125	-0.005322
15.4000	969.227	11.781	101.399	75.336	-0.782	35.269	1845.160	-0.000825	-0.007098	-0.005274
15.6000	938.208	9.697	99.019	73.221	-0.783	35.270	1786.108	-0.000679	-0.006931	-0.005125
15.8000	915.756	8.293	96.364	71.514	-0.780	35.270	1743.364	-0.000580	-0.006745	-0.005006
16.0000	887.397	6.696	93.929	68.733	-0.783	35.268	1689.377	-0.000469	-0.006575	-0.004811
16.2000	841.937	1.998	88.767	64.913	-0.777	35.268	1602.831	-0.000140	-0.006214	-0.004544
16.4000	816.794	1.276	85.383	62.451	-0.794	35.268	1554.966	-0.000089	-0.005977	-0.004372
16.6000	766.825	-2.642	79.765	58.369	-0.788	35.268	1459.837	0.000185	-0.005584	-0.004086
16.8000	713.083	-7.825	73.535	53.239	-0.786	35.267	1357.527	0.000548	-0.005147	-0.003727
17.0000	678.352	-10.701	68.995	49.584	-0.774	35.267	1291.409	0.000749	-0.004830	-0.003471
17.2000	628.443	-14.372	63.255	45.026	-0.792	35.266	1196.394	0.001006	-0.004428	-0.003152
17.4000	586.709	-17.802	57.283	41.025	-0.790	35.266	1116.943	0.001246	-0.004010	-0.002872
17.6000	537.025	-21.320	50.802	36.566	-0.791	35.266	1022.358	0.001492	-0.003556	-0.002560
17.8000	489.415	-23.778	45.038	31.909	-0.789	35.266	931.721	0.001664	-0.003153	-0.002234
18.0000	442.992	-29.086	38.294	27.004	-0.797	35.266	843.344	0.002036	-0.002681	-0.001890
18.2000	403.873	-30.688	32.955	23.486	-0.793	35.265	768.871	0.002148	-0.002307	-0.001644
18.4000	367.805	-33.201	28.030	19.681	-0.791	35.266	700.207	0.002324	-0.001962	-0.001378
18.6000	331.752	-35.715	22.788	16.247	-0.793	35.265	631.571	0.002500	-0.001595	-0.001137
18.8000	303.348	-39.163	18.028	13.092	-0.794	35.265	577.497	0.002741	-0.001262	-0.000916
19.0000	279.438	-40.453	14.888	10.302	-0.795	35.265	531.979	0.002832	-0.001042	-0.000721
19.2000	254.025	-43.220	10.940	7.172	-0.789	35.265	483.599	0.003025	-0.000766	-0.000502
19.4000	245.775	-42.806	8.611	6.031	-0.786	35.265	467.892	0.002996	-0.000603	-0.000422
19.6000	233.752	-43.443	7.005	4.602	-0.787	35.266	445.004	0.003041	-0.000490	-0.000322
19.8000	238.170	-44.734	6.522	4.351	-0.783	35.265	453.415	0.003131	-0.000457	-0.000305
20.0000	240.199	-43.429	6.223	4.783	-0.793	35.265	457.277	0.003040	-0.000436	-0.000335
20.2000	244.182	-43.609	6.637	4.936	-0.790	35.265	464.859	0.003053	-0.000465	-0.000346
20.4000	260.082	-43.512	7.980	5.755	-0.791	35.266	495.129	0.003046	-0.000559	-0.000403
20.6000	277.454	-41.345	10.459	7.630	-0.791	35.265	528.202	0.002894	-0.000732	-0.000534
20.8000	310.923	-40.105	14.119	10.591	-0.776	35.266	591.917	0.002807	-0.000988	-0.000741
21.0000	348.749	-37.538	18.959	14.094	-0.791	35.265	663.929	0.002628	-0.001327	-0.000987
21.2000	371.622	-36.607	22.032	15.901	-0.776	35.266	707.474	0.002562	-0.001542	-0.001113
21.4000	412.470	-32.463	27.121	19.861	-0.778	35.266	785.236	0.002272	-0.001898	-0.001390
21.6000	453.122	-31.050	33.150	23.999	-0.788	35.266	862.627	0.002173	-0.002320	-0.001680
21.8000	495.036	-27.377	37.963	27.379	-0.780	35.266	942.421	0.001916	-0.002657	-0.001917
22.0000	538.723	-24.517	43.883	31.619	-0.785	35.266	1025.591	0.001716	-0.003072	-0.002213
22.2000	603.646	-19.598	51.766	37.746	-0.782	35.266	1149.187	0.001372	-0.003624	-0.002642
22.4000	639.278	-16.760	56.830	41.137	-0.770	35.266	1217.022	0.001173	-0.003978	-0.002880
22.6000	685.882	-12.439	63.367	45.887	-0.780	35.265	1305.742	0.000871	-0.004436	-0.003212
22.8000	732.289	-9.827	68.981	50.126	-0.783	35.265	1394.091	0.000688	-0.004829	-0.003509
23.0000	778.802	-6.005	74.719	54.590	-0.780	35.266	1482.639	0.000420	-0.005230	-0.003821
23.2000	812.661	-2.838	79.189	58.132	-0.775	35.265	1547.098	0.000199	-0.005543	-0.004069
23.4000	855.853	1.248	84.269	62.438	-0.778	35.266	1629.324	-0.000087	-0.005899	-0.004371
23.6000	883.039	3.388	88.398	65.498	-0.774	35.265	1681.080	-0.000237	-0.006188	-0.004585
23.8000	916.598	6.751	92.385	68.469	-0.777	35.266	1744.967	-0.000473	-0.006467	-0.004793
24.0000	942.146	8.781	95.757	71.251	-0.789	35.266	1793.604	-0.000615	-0.006703	-0.004988
24.2000	966.567	10.450	98.125	73.499	-0.779	35.266	1840.096	-0.000731	-0.006869	-0.005145
24.4000	982.632	12.863	100.767	75.531	-0.786	35.266	1870.680	-0.000900	-0.007054	-0.005287
24.6000	989.320	13.908	101.438	75.947	-0.788	35.266	1883.411	-0.000974	-0.007101	-0.005316
24.8000	1002.515	13.852	103.119	77.416	-0.786	35.266	1908.531	-0.000970	-0.007218	-0.005419
25.0000	997.901	14.617	103.380	77.501	-0.782	35.266	1899.748	-0.001023	-0.007237	-0.005425
25.2000	978.379	12.476	102.211	76.031	-0.787	35.267	1862.583	-0.000873	-0.007155	-0.005322
25.4000	964.613	11.769	101.124	74.792	-0.780	35.267	1836.376	-0.000824	-0.007079	-0.005235
25.6000	946.594	10.238	98.962	73.262	-0.791	35.267	1802.073	-0.000717	-0.006927	-0.005128
25.8000	919.799	7.765	96.527	71.082	-0.792	35.267	1751.060	-0.000544	-0.006757	-0.004976
26.0000	893.754	6.751	93.764	69.039	-0.792	35.268	1701.479	-0.000473	-0.006563	-0.004833
26.2000	851.374	3.235	89.661	65.525	-0.795	35.268	1620.798	-0.000226	-0.006276	-0.004587
26.4000	812.646	0.500	84.982	61.934	-0.798	35.268	1547.070	-0.000035	-0.005949	-0.004335
26.6000	760.828	-3.617	79.107	57.422	-0.794	35.268	1448.421	0.000253	-0.005538	-0.004020
26.8000	722.701	-6.144	74.416	53.908	-0.793	35.268	1375.837	0.000430	-0.005209	-0.003774
27.0000	674.625	-10.453	68.221	49.363	-0.786	35.269	1284.313	0.000732	-0.004775	-0.003455
27.2000	628.037	-13.940	62.803	45.082	-0.795	35.269	1195.621	0.000976	-0.004396	-0.003156
27.4000	580.127	-17.915	56.349	40.246	-0.801	35.269	1104.412	0.001254	-0.003944	-0.002817
27.6000	543.502	-19.820	51.601	37.050	-0.796	35.269	1034.689	0.001387	-0.003612	-0.002594
27.8000	488.694	-23.529	44.941	31.424	-0.789	35.270	930.347	0.001647	-0.003146	-0.002200
28.0000	456.097	-27.501	39.921	27.889	-0.796	35.270	868.292	0.001925	-0.002795	-0.001952
28.2000	394.932	-31.007	31.981	22.651	-0.793	35.271	751.848	0.002171	-0.002239	-0.001586
28.4000	368.241	-33.894	27.564	19.180	-0.796	35.270	701.036	0.002373	-0.001929	-0.001343
28.6000	323.336	-36.761	21.951	14.873	-0.808	35.272	615.549	0.002573	-0.001537	-0.001041
28.8000	310.261	-37.926	19.248	13.384	-0.797	35.271	590.658	0.002655	-0.001347	-0.000937
29.0000	281.813	-40.272	15.220	10.094	-0.806	35.271	536.499	0.002819	-0.001065	-0.000707
29.2000	261.179	-43.029	11.287	7.867	-0.798	35.272	497.217	0.003012	-0.000790	-0.000551
29.4000	246.406	-43.123	8.848	5.962	-0.812	35.272	469.093	0.003019	-0.000619	-0.000417
29.6000	238.456	-43.788	7.279	4.769	-0.804	35.272	453.959	0.003065	-0.000510	-0.000334
29.8000	239.793	-44.497	6.647	4.783	-0.794	35.273	456.505	0.003115	-0.000465	-0.000335
30.0000	240.590	-44.152	6.562	4.643	-0.797	35.273	458.021	0.003091	-0.000459	-0.000325
30.2000	244.693	-43.401	6.980	4.173	-0.791	35.273	465.832	0.003038	-0.000489	-0.000292
30.4000	261.269	-43.026	8.519	5.949	-0.796	35.273	497.389	0.003012	-0.000596	-0.000416
30.6000	286.502	-41.652	11.437	8.020	-0.804	35.273	545.425	0.002916	-0.000801	-0.000561
30.8000	312.997	-39.994	14.297	9.926	-0.797	35.274	595.865	0.002800	-0.001001	-0.000695
31.0000	339.792	-38.204	17.531	13.216	-0.801	35.274	646.877	0.002674	-0.001227	-0.000925
31.2000	374.508	-35.786	22.595	16.136	-0.799	35.275	712.967	0.002505	-0.001582	-0.001130
31.4000	427.934	-33.116	28.773	20.822	-0.803	35.275	814.676	0.002318	-0.002014	-0.001458
31.6000	456.728	-29.991	32.874	23.889	-0.789	35.275	869.493	0.002099	-0.002301	-0.001672
31.8000	507.584	-26.114	39.836	28.666	-0.791	35.275	966.311	0.001828	-0.002789	-0.002007
32.0000	543.848	-24.712	45.230	31.826	-0.799	35.275	1035.347	0.001730	-0.003166	-0.002228
32.2000	593.562	-19.557	50.816	36.660	-0.791	35.275	1129.990	0.001369	-0.003557	-0.002566
32.4000	645.605	-16.453	58.465	41.401	-0.798	35.276	1229.067	0.001152	-0.004093	-0.002898
32.6000	688.977	-12.468	63.587	45.859	-0.797	35.276	1311.636	0.000873	-0.004451	-0.003210
32.8000	748.595	-7.771	70.230	51.069	-0.796	35.276	1425.133	0.000544	-0.004916	-0.003575
33.0000	771.288	-6.131	74.486	53.587	-0.797	35.276	1468.334	0.000429	-0.005214	-0.003751
33.2000	820.792	-2.643	79.973	58.534	-0.790	35.277	1562.576	0.000185	-0.005598	-0.004097
33.4000	855.207	0.806	84.407	61.979	-0.782	35.277	1628.094	-0.000056	-0.005908	-0.004339
33.6000	894.581	4.056	89.661	66.121	-0.798	35.277	1703.053	-0.000284	-0.006276	-0.004628
33.8000	929.026	7.527	93.292	69.414	-0.788	35.278	1768.627	-0.000527	-0.006530	-0.004859
34.0000	947.241	9.114	95.906	71.040	-0.791	35.278	1803.303	-0.000638	-0.006713	-0.004973
34.2000	973.330	11.074	100.093	74.222	-0.819	35.278	1852.970	-0.000775	-0.007007	-0.005196
34.4000	984.316	11.822	100.768	75.184	-0.796	35.278	1873.884	-0.000828	-0.007054	-0.005263
34.6000	990.417	13.560	102.279	75.851	-0.798	35.278	1885.500	-0.000949	-0.007160	-0.005310
34.8000	992.792	13.477	102.912	76.490	-0.788	35.279	1890.020	-0.000943	-0.007204	-0.005354
35.0000	987.817	13.392	102.635	76.281	-0.794	35.278	1880.550	-0.000937	-0.007184	-0.005340
35.2000	981.761	12.821	102.582	76.059	-0.794	35.279	1869.020	-0.000897	-0.007181	-0.005324
35.4000	961.277	11.671	101.097	74.763	-0.815	35.279	1830.025	-0.000817	-0.007077	-0.005233
35.6000	942.041	10.310	98.715	72.639	-0.797	35.279	1793.404	-0.000722	-0.006910	-0.005085
35.8000	915.440	8.835	96.720	70.444	-0.804	35.278	1742.764	-0.000618	-0.006770	-0.004931
36.0000	891.290	6.139	93.597	68.497	-0.808	35.279	1696.787	-0.000430	-0.006552	-0.004795
36.2000	847.903	3.096	88.959	64.720	-0.810	35.279	1614.189	-0.000217	-0.006227	-0.004530
36.4000	813.773	0.971	85.603	61.756	-0.812	35.279	1549.215	-0.000068	-0.005992	-0.004323
36.6000	774.489	-2.964	80.537	57.993	-0.805	35.280	1474.428	0.000207	-0.005638	-0.004059
36.8000	721.499	-6.505	74.194	53.393	-0.817	35.279	1373.549	0.000455	-0.005194	-0.003738
37.0000	682.139	-9.923	69.818	49.460	-0.797	35.280	1298.618	0.000695	-0.004887	-0.003462
37.2000	636.498	-13.773	63.793	45.137	-0.817	35.280	1211.729	0.000964	-0.004466	-0.003160
37.4000	586.965	-17.415	57.146	40.827	-0.829	35.280	1117.430	0.001219	-0.004000	-0.002858
37.6000	541.263	-20.627	51.573	36.288	-0.810	35.280	1030.426	0.001444	-0.003610	-0.002540
37.8000	490.257	-24.879	44.761	31.605	-0.829	35.281	933.323	0.001742	-0.003133	-0.002212
38.0000	445.908	-27.932	38.667	26.963	-0.802	35.281	848.894	0.001955	-0.002707	-0.001887
38.2000	404.324	-31.049	32.903	23.293	-0.825	35.281	769.730	0.002173	-0.002303	-0.001630
38.4000	361.854	-34.715	27.190	18.956	-0.826	35.281	688.877	0.002430	-0.001903	-0.001327
38.6000	336.456	-36.522	23.077	15.859	-0.815	35.281	640.526	0.002557	-0.001615	-0.001110
38.8000	299.140	-38.718	18.070	12.493	-0.813	35.282	569.487	0.002710	-0.001265	-0.000875
39.0000	284.413	-40.400	15.261	10.342	-0.818	35.282	541.449	0.002828	-0.001068	-0.000724
39.2000	261.915	-42.111	11.726	7.755	-0.810	35.282	498.619	0.002948	-0.000821	-0.000543
39.4000	251.801	-42.668	9.631	6.450	-0.809	35.282	479.364	0.002987	-0.000674	-0.000452
39.6000	241.116	-43.386	7.895	5.420	-0.836	35.282	459.023	0.003037	-0.000553	-0.000379
39.8000	241.867	-44.024	7.128	4.825	-0.823	35.282	460.453	0.003082	-0.000499	-0.000338
40.0000	242.363	-43.471	6.523	4.339	-0.830	35.283	461.397	0.003043	-0.000457	-0.000304
40.2000	248.314	-43.790	7.198	4.534	-0.809	35.283	472.727	0.003065	-0.000504	-0.000317
40.4000	265.417	-43.069	8.753	6.102	-0.814	35.283	505.285	0.003015	-0.000613	-0.000427
40.6000	293.926	-41.176	11.919	8.702	-0.823	35.283	559.559	0.002882	-0.000834	-0.000609
40.8000	308.653	-40.038	14.242	9.996	-0.825	35.283	587.597	0.002803	-0.000997	-0.000700
41.0000	347.126	-37.855	18.822	13.579	-0.832	35.284	660.839	0.002650	-0.001318	-0.000951
41.2000	375.049	-36.035	23.035	16.454	-0.815	35.284	713.997	0.002522	-0.001612	-0.001152
41.4000	419.353	-32.685	28.058	19.904	-0.823	35.283	798.340	0.002288	-0.001964	-0.001393
41.6000	458.847	-30.215	33.852	24.001	-0.827	35.284	873.528	0.002115	-0.002370	-0.001680
41.8000	496.689	-27.876	38.459	27.531	-0.824	35.284	945.568	0.001951	-0.002692	-0.001927
42.0000	550.160	-23.569	45.107	32.410	-0.825	35.284	1047.363	0.001650	-0.003157	-0.002269
42.2000	593.367	-20.306	51.162	36.689	-0.814	35.284	1129.618	0.001421	-0.003581	-0.002568
42.4000	635.040	-17.038	56.556	40.761	-0.821	35.284	1208.954	0.001193	-0.003959	-0.002853
42.6000	688.496	-12.914	62.897	46.138	-0.816	35.284	1310.720	0.000904	-0.004403	-0.003230
42.8000	736.377	-9.023	69.803	50.598	-0.819	35.284	1401.873	0.000632	-0.004886	-0.003542
43.0000	774.444	-6.046	74.390	54.130	-0.819	35.285	1474.342	0.000423	-0.005207	-0.003789
43.2000	821.844	-2.186	80.083	58.744	-0.827	35.284	1564.579	0.000153	-0.005606	-0.004112
43.4000	861.008	1.402	85.231	62.382	-0.813	35.285	1639.137	-0.000098	-0.005966	-0.004367
43.6000	894.175	3.651	89.318	65.788	-0.834	35.285	1702.280	-0.000256	-0.006252	-0.004605
43.8000	924.683	6.375	93.239	69.176	-0.815	35.285	1760.359	-0.000446	-0.006527	-0.004842
44.0000	948.202	9.100	96.221	71.182	-0.825	35.284	1805.134	-0.000637	-0.006736	-0.004983
44.2000	968.581	10.640	99.072	73.512	-0.810	35.285	1843.929	-0.000745	-0.006935	-0.005146
44.4000	978.545	11.447	100.410	75.142	-0.824	35.285	1862.898	-0.000801	-0.007029	-0.005260
44.6000	991.860	13.254	102.113	76.073	-0.820	35.285	1888.247	-0.000928	-0.007148	-0.005325
44.8000	989.591	12.892	102.787	76.378	-0.822	35.284	1883.926	-0.000902	-0.007195	-0.005346
45.0000	989.831	12.990	102.745	76.365	-0.799	35.285	1884.384	-0.000909	-0.007192	-0.005346
45.2000	980.318	12.879	102.458	76.003	-0.802	35.285	1866.274	-0.000902	-0.007172	-0.005320
45.4000	956.814	11.184	100.411	73.928	-0.810	35.285	1821.527	-0.000783	-0.007029	-0.005175
45.6000	936.615	10.086	98.893	72.776	-0.806	35.284	1783.075	-0.000706	-0.006923	-0.005094
45.8000	922.384	8.725	97.036	71.112	-0.820	35.285	1755.981	-0.000611	-0.006793	-0.004978
46.0000	880.214	5.709	92.730	67.747	-0.830	35.285	1675.701	-0.000400	-0.006491	-0.004742
46.2000	855.582	3.527	89.636	65.595	-0.823	35.284	1628.809	-0.000247	-0.006275	-0.004592
46.4000	799.346	-0.738	83.745	60.865	-0.820	35.284	1521.749	0.000052	-0.005862	-0.004261
46.6000	759.340	-3.420	78.779	56.948	-0.824	35.284	1445.589	0.000239	-0.005515	-0.003986
46.8000	727.585	-5.964	75.076	53.908	-0.827	35.284	1385.136	0.000417	-0.005255	-0.003774
47.0000	681.238	-9.938	69.434	49.653	-0.807	35.284	1296.902	0.000696	-0.004860	-0.003476
47.2000	632.726	-13.386	63.091	45.081	-0.823	35.284	1204.548	0.000937	-0.004416	-0.003156
47.4000	576.835	-17.497	56.900	40.358	-0.821	35.284	1098.146	0.001225	-0.003983	-0.002825
47.6000	538.333	-21.249	51.355	36.036	-0.813	35.284	1024.847	0.001487	-0.003595	-0.002523
47.8000	499.334	-24.335	45.536	32.491	-0.815	35.284	950.603	0.001703	-0.003188	-0.002274
48.0000	453.257	-27.294	39.466	27.794	-0.820	35.284	862.885	0.001911	-0.002763	-0.001946
48.2000	404.520	-31.035	33.190	23.179	-0.810	35.284	770.102	0.002172	-0.002323	-0.001622
48.4000	367.595	-34.325	27.633	19.500	-0.826	35.284	699.806	0.002403	-0.001934	-0.001365
48.6000	336.817	-36.426	23.173	15.914	-0.808	35.284	641.212	0.002550	-0.001622	-0.001114
48.8000	300.343	-38.952	18.179	12.549	-0.822	35.283	571.775	0.002727	-0.001272	-0.000878
49.0000	284.052	-40.594	15.177	10.619	-0.810	35.283	540.762	0.002842	-0.001062	-0.000743
49.2000	264.906	-41.916	11.878	7.839	-0.807	35.283	504.313	0.002934	-0.000831	-0.000549
49.4000	249.171	-43.040	9.327	6.337	-0.811	35.283	474.358	0.003013	-0.000653	-0.000444
49.6000	238.305	-43.581	7.541	4.934	-0.800	35.283	453.672	0.003051	-0.000528	-0.000345
49.8000	230.100	-44.455	5.878	3.936	-0.805	35.283	438.051	0.003112	-0.000411	-0.000275
50.0000	255.663	-43.859	7.224	5.101	-0.802	35.295	486.717	0.003070	-0.000506	-0.000357
50.2000	265.251	-43.220	8.311	6.130	-0.821	35.295	504.971	0.003025	-0.000582	-0.000429
50.4000	272.255	-42.653	9.507	6.491	-0.817	35.295	518.303	0.002986	-0.000665	-0.000454
50.6000	308.338	-40.620	13.223	9.758	-0.807	35.295	586.996	0.002843	-0.000926	-0.000683
50.8000	347.096	-37.914	18.399	13.523	-0.821	35.296	660.782	0.002654	-0.001288	-0.000947
51.0000	378.626	-35.828	22.541	16.247	-0.815	35.296	720.806	0.002508	-0.001578	-0.001137
51.2000	430.068	-32.256	29.337	20.986	-0.827	35.295	818.739	0.002258	-0.002054	-0.001469
51.4000	474.327	-29.616	34.993	24.973	-0.833	35.295	902.996	0.002073	-0.002450	-0.001748
51.6000	531.164	-24.724	42.782	30.156	-0.826	35.295	1011.200	0.001731	-0.002995	-0.002111
51.8000	588.407	-20.971	50.431	35.784	-0.829	35.295	1120.176	0.001468	-0.003530	-0.002505
52.0000	652.624	-16.301	58.384	41.986	-0.835	35.295	1242.428	0.001141	-0.004087	-0.002939
52.2000	707.312	-11.660	65.184	47.180	-0.830	35.294	1346.540	0.000816	-0.004563	-0.003303
52.4000	776.653	-6.326	74.056	53.519	-0.826	35.294	1478.548	0.000443	-0.005184	-0.003746
52.6000	835.534	-1.115	80.977	59.370	-0.828	35.294	1590.643	0.000078	-0.005668	-0.004156
52.8000	894.521	3.776	88.959	65.580	-0.830	35.294	1702.938	-0.000264	-0.006227	-0.004591
53.0000	952.651	8.599	95.977	71.071	-0.817	35.293	1813.602	-0.000602	-0.006718	-0.004975
53.2000	1009.744	13.658	102.758	76.339	-0.829	35.293	1922.293	-0.000956	-0.007193	-0.005344
53.4000	1058.225	17.216	108.429	81.312	-0.819	35.293	2014.589	-0.001205	-0.007590	-0.005692
53.6000	1094.729	21.147	112.542	85.285	-0.813	35.293	2084.084	-0.001480	-0.007878	-0.005970
53.8000	1149.328	25.623	119.039	89.605	-0.827	35.293	2188.025	-0.001794	-0.008333	-0.006272
54.0000	1172.306	28.012	122.397	92.971	-0.823	35.292	2231.770	-0.001961	-0.008568	-0.006508
54.2000	1194.187	29.957	125.260	95.315	-0.819	35.292	2273.426	-0.002097	-0.008768	-0.006672
54.4000	1214.566	32.180	128.207	97.500	-0.819	35.292	2312.222	-0.002253	-0.008974	-0.006825
54.6000	1233.622	34.363	130.778	99.142	-0.815	35.291	2348.499	-0.002405	-0.009154	-0.006940
54.8000	1234.629	34.377	130.487	100.043	-0.820	35.291	2350.416	-0.002406	-0.009134	-0.007003
55.0000	1228.648	34.641	130.569	100.111	-0.816	35.291	2339.029	-0.002425	-0.009140	-0.007008
55.2000	1212.597	34.016	129.951	98.530	-0.823	35.291	2308.474	-0.002381	-0.009097	-0.006897
55.4000	1196.562	32.278	128.973	97.720	-0.823	35.290	2277.946	-0.002259	-0.009028	-0.006840
55.6000	1171.960	30.722	126.653	95.442	-0.811	35.290	2231.112	-0.002151	-0.008866	-0.006681
55.8000	1129.941	27.554	122.839	92.275	-0.815	35.290	2151.117	-0.001929	-0.008599	-0.006459
56.0000	1089.154	24.427	118.889	88.910	-0.823	35.290	2073.469	-0.001710	-0.008322	-0.006224
56.2000	1054.573	21.413	115.022	85.813	-0.825	35.289	2007.637	-0.001499	-0.008052	-0.006007
56.4000	996.609	17.397	108.899	80.895	-0.808	35.289	1897.287	-0.001218	-0.007623	-0.005663
56.6000	948.217	13.559	103.201	76.336	-0.817	35.289	1805.162	-0.000949	-0.007224	-0.005343
56.8000	875.735	7.709	95.824	70.012	-0.817	35.289	1667.175	-0.000540	-0.006708	-0.004901
57.0000	828.080	3.764	89.347	65.513	-0.812	35.289	1576.452	-0.000263	-0.006254	-0.004586
57.2000	752.668	-2.157	79.752	58.103	-0.807	35.289	1432.886	0.000151	-0.005583	-0.004067
57.4000	701.676	-6.032	74.278	53.657	-0.826	35.288	1335.812	0.000422	-0.005199	-0.003756
57.6000	639.804	-11.274	66.120	47.153	-0.827	35.289	1218.023	0.000789	-0.004628	-0.003301
57.8000	582.065	-16.427	58.961	41.846	-0.823	35.289	1108.103	0.001150	-0.004127	-0.002929
58.0000	516.556	-20.875	50.321	35.717	-0.812	35.289	983.391	0.001461	-0.003522	-0.002500
58.2000	471.967	-24.572	44.227	30.575	-0.829	35.288	898.504	0.001720	-0.003096	-0.002140
58.4000	428.670	-27.807	37.677	26.073	-0.809	35.288	816.078	0.001947	-0.002637	-0.001825
58.6000	373.020	-32.462	30.107	20.680	-0.821	35.288	710.135	0.002272	-0.002108	-0.001448
58.8000	335.374	-35.381	24.741	16.744	-0.813	35.288	638.466	0.002477	-0.001732	-0.001172
59.0000	306.204	-37.357	20.420	13.497	-0.811	35.288	582.933	0.002615	-0.001429	-0.000945
59.2000	293.084	-38.606	17.531	11.395	-0.807	35.288	557.957	0.002702	-0.001227	-0.000798
59.4000	264.365	-41.164	12.909	8.270	-0.799	35.287	503.283	0.002881	-0.000904	-0.000579
59.6000	260.998	-41.191	11.065	7.352	-0.805	35.287	496.874	0.002883	-0.000775	-0.000515
59.8000	248.825	-42.500	10.019	6.115	-0.803	35.287	473.700	0.002975	-0.000701	-0.000428
60.0000	258.203	-42.320	10.387	6.629	-0.816	35.287	491.552	0.002962	-0.000727	-0.000464
60.2000	269.414	-41.707	11.161	7.283	-0.823	35.287	512.896	0.002919	-0.000781	-0.000510
60.4000	288.951	-40.397	13.114	9.245	-0.823	35.286	550.089	0.002828	-0.000918	-0.000647
60.6000	310.036	-38.900	16.003	10.937	-0.821	35.286	590.229	0.002723	-0.001120	-0.000766
60.8000	341.521	-37.260	19.648	13.955	-0.817	35.286	650.167	0.002608	-0.001375	-0.000977
61.0000	397.546	-33.423	26.241	18.943	-0.819	35.286	756.826	0.002340	-0.001837	-0.001326
61.2000	437.582	-30.507	31.718	22.541	-0.821	35.286	833.044	0.002136	-0.002220	-0.001578
61.4000	482.442	-27.502	37.965	26.643	-0.829	35.286	918.446	0.001925	-0.002658	-0.001865
61.6000	544.239	-23.082	45.462	32.353	-0.815	35.286	1036.091	0.001616	-0.003182	-0.002265
61.8000	615.278	-18.248	54.022	38.701	-0.814	35.286	1171.331	0.001277	-0.003782	-0.002709
62.0000	662.452	-14.441	60.391	43.153	-0.809	35.286	1261.139	0.001011	-0.004227	-0.003021
62.2000	711.370	-10.495	67.082	48.098	-0.814	35.286	1354.265	0.000735	-0.004696	-0.003367
62.4000	780.200	-5.227	75.351	54.296	-0.810	35.286	1485.300	0.000366	-0.005275	-0.003801
62.6000	836.376	-0.389	83.098	59.676	-0.816	35.286	1592.245	0.000027	-0.005817	-0.004177
62.8000	905.311	5.307	90.941	66.495	-0.822	35.286	1723.480	-0.000371	-0.006366	-0.004655
63.0000	949.209	9.226	96.445	71.015	-0.811	35.286	1807.051	-0.000646	-0.006751	-0.004971
63.2000	1011.622	14.365	103.574	77.212	-0.817	35.286	1925.869	-0.001006	-0.007250	-0.005405
63.4000	1056.497	18.632	109.037	81.477	-0.807	35.286	2011.299	-0.001304	-0.007633	-0.005703
63.6000	1107.954	23.345	115.062	86.368	-0.820	35.286	2109.261	-0.001634	-0.008054	-0.006046
63.8000	1138.176	25.594	118.970	89.132	-0.826	35.286	2166.796	-0.001792	-0.008328	-0.006239
64.0000	1192.685	29.943	124.873	94.344	-0.821	35.286	2270.565	-0.002096	-0.008741	-0.006604
64.2000	1207.472	32.140	127.172	96.248	-0.814	35.286	2298.717	-0.002250	-0.008902	-0.006737
64.4000	1220.397	33.351	128.821	97.876	-0.831	35.287	2323.322	-0.002335	-0.009017	-0.006851
64.6000	1232.375	34.933	131.106	99.448	-0.833	35.287	2346.125	-0.002445	-0.009177	-0.006961
64.8000	1233.126	34.836	131.081	99.681	-0.835	35.287	2347.555	-0.002439	-0.009176	-0.006978
65.0000	1223.853	34.962	131.341	99.363	-0.837	35.287	2329.903	-0.002447	-0.009194	-0.006955
65.2000	1218.293	34.891	131.437	99.614	-0.835	35.288	2319.317	-0.002442	-0.009201	-0.006973
65.4000	1199.628	33.418	129.912	97.639	-0.824	35.288	2283.783	-0.002339	-0.009094	-0.006835
65.6000	1164.672	30.290	126.181	94.496	-0.841	35.288	2217.236	-0.002120	-0.008833	-0.006615
65.8000	1137.500	28.695	123.798	92.666	-0.833	35.288	2165.508	-0.002009	-0.008666	-0.006487
66.0000	1094.429	25.510	119.148	88.687	-0.835	35.289	2083.511	-0.001786	-0.008340	-0.006208
66.2000	1049.809	21.745	114.979	84.895	-0.819	35.288	1998.568	-0.001522	-0.008049	-0.005943
66.4000	1003.732	18.202	109.794	81.034	-0.830	35.288	1910.849	-0.001274	-0.007686	-0.005672
66.6000	942.642	13.490	102.801	75.599	-0.822	35.289	1794.548	-0.000944	-0.007196	-0.005292
66.8000	882.168	8.570	96.761	70.026	-0.835	35.289	1679.420	-0.000600	-0.006773	-0.004902
67.0000	831.221	4.335	90.831	65.066	-0.830	35.290	1582.432	-0.000303	-0.006358	-0.004555
67.2000	761.880	-1.712	82.228	58.673	-0.813	35.290	1450.424	0.000120	-0.005756	-0.004107
67.4000	693.215	-6.882	74.014	52.362	-0.822	35.290	1319.704	0.000482	-0.005181	-0.003665
67.6000	636.213	-11.203	66.518	46.664	-0.824	35.291	1211.185	0.000784	-0.004656	-0.003267
67.8000	590.015	-15.079	59.760	41.734	-0.830	35.291	1123.238	0.001056	-0.004183	-0.002921
68.0000	518.540	-20.834	50.818	35.257	-0.832	35.291	987.167	0.001458	-0.003557	-0.002468
68.2000	468.721	-24.613	44.173	30.254	-0.826	35.292	892.324	0.001723	-0.003092	-0.002118
68.4000	413.522	-28.741	37.196	24.585	-0.826	35.292	787.239	0.002012	-0.002604	-0.001721
68.6000	378.731	-31.965	31.870	21.084	-0.813	35.293	721.006	0.002238	-0.002231	-0.001476
68.8000	343.414	-34.659	26.172	17.094	-0.818	35.293	653.772	0.002426	-0.001832	-0.001197
69.0000	303.394	-37.621	20.226	12.772	-0.831	35.293	577.583	0.002633	-0.001416	-0.000894
69.2000	283.631	-39.425	16.969	10.342	-0.810	35.293	539.961	0.002760	-0.001188	-0.000724
69.4000	268.062	-40.761	13.290	8.064	-0.832	35.294	510.321	0.002853	-0.000930	-0.000564
69.6000	257.331	-41.636	12.042	7.073	-0.813	35.294	489.893	0.002914	-0.000843	-0.000495
69.8000	249.562	-42.291	10.292	5.725	-0.822	35.294	475.101	0.002960	-0.000720	-0.000401
70.0000	262.832	-41.664	11.121	6.434	-0.822	35.295	500.364	0.002917	-0.000778	-0.000450
70.2000	270.391	-41.344	11.684	6.741	-0.823	35.294	514.755	0.002894	-0.000818	-0.000472
70.4000	283.736	-40.593	13.045	8.117	-0.823	35.295	540.161	0.002842	-0.000913	-0.000568
70.6000	318.227	-38.453	17.351	11.311	-0.823	35.296	605.822	0.002692	-0.001215	-0.000792
70.8000	341.806	-36.830	20.322	13.203	-0.825	35.295	650.711	0.002578	-0.001423	-0.000924
71.0000	380.850	-34.397	25.197	16.538	-0.817	35.295	725.040	0.002408	-0.001764	-0.001158
71.2000	429.692	-31.174	30.617	21.307	-0.826	35.295	818.024	0.002182	-0.002143	-0.001491
71.4000	488.513	-26.975	38.529	26.642	-0.823	35.295	930.004	0.001888	-0.002697	-0.001865
71.6000	538.303	-23.362	44.913	31.132	-0.819	35.296	1024.790	0.001635	-0.003144	-0.002179
71.8000	594.824	-19.403	52.301	36.481	-0.825	35.296	1132.393	0.001358	-0.003661	-0.002554
72.0000	665.924	-14.234	61.136	43.068	-0.818	35.296	1267.748	0.000996	-0.004280	-0.003015
72.2000	725.827	-9.342	68.304	48.862	-0.821	35.296	1381.788	0.000654	-0.004781	-0.003420
72.4000	775.195	-5.310	75.446	53.879	-0.821	35.296	1475.773	0.000372	-0.005281	-0.003772
72.6000	835.955	-0.168	82.450	59.786	-0.823	35.296	1591.444	0.000012	-0.005772	-0.004185
72.8000	914.253	5.960	91.216	66.842	-0.805	35.296	1740.503	-0.000417	-0.006385	-0.004679
73.0000	965.786	10.836	98.110	72.236	-0.819	35.296	1838.608	-0.000759	-0.006868	-0.005057
73.2000	1017.453	15.171	104.317	77.294	-0.823	35.297	1936.970	-0.001062	-0.007302	-0.005411
73.4000	1057.534	18.953	109.818	81.423	-0.806	35.296	2013.273	-0.001327	-0.007687	-0.005700
73.6000	1105.385	22.886	114.167	85.924	-0.801	35.296	2104.368	-0.001602	-0.007992	-0.006015
73.8000	1142.189	26.512	119.798	89.646	-0.815	35.296	2174.435	-0.001856	-0.008386	-0.006275
74.0000	1186.598	30.096	124.585	93.706	-0.802	35.296	2258.978	-0.002107	-0.008721	-0.006559
74.2000	1198.320	31.083	126.072	95.483	-0.809	35.296	2281.294	-0.002176	-0.008825	-0.006684
74.4000	1221.870	33.738	128.959	98.083	-0.811	35.296	2326.126	-0.002362	-0.009027	-0.006866
74.6000	1231.518	35.140	131.066	99.504	-0.794	35.295	2344.494	-0.002460	-0.009175	-0.006965
74.8000	1237.289	35.821	131.506	100.223	-0.805	35.296	2355.480	-0.002507	-0.009205	-0.007016
75.0000	1224.665	34.862	130.804	99.820	-0.806	35.295	2331.448	-0.002440	-0.009156	-0.006987
75.2000	1218.278	35.002	130.790	99.447	-0.802	35.295	2319.288	-0.002450	-0.009155	-0.006961
75.4000	1192.459	32.892	129.483	97.695	-0.818	35.295	2270.136	-0.002302	-0.009064	-0.006839
75.6000	1164.611	30.512	126.278	94.884	-0.805	35.295	2217.121	-0.002136	-0.008839	-0.006642
75.8000	1126.890	28.194	123.168	92.178	-0.824	35.295	2145.309	-0.001974	-0.008622	-0.006452
76.0000	1080.272	24.454	118.434	87.981	-0.816	35.294	2056.561	-0.001712	-0.008290	-0.006159
76.2000	1031.204	20.662	113.024	84.101	-0.803	35.294	1963.148	-0.001446	-0.007912	-0.005887
76.4000	999.134	18.173	109.395	80.922	-0.826	35.293	1902.094	-0.001272	-0.007658	-0.005665
76.6000	942.942	13.573	103.409	75.768	-0.803	35.294	1795.120	-0.000950	-0.007239	-0.005304
76.8000	876.382	8.044	96.155	69.790	-0.814	35.293	1668.406	-0.000563	-0.006731	-0.004885
77.0000	822.324	3.873	88.933	64.147	-0.808	35.293	1565.495	-0.000271	-0.006225	-0.004490
77.2000	753.389	-1.754	81.309	58.006	-0.807	35.293	1434.259	0.000123	-0.005692	-0.004060
77.4000	694.808	-6.157	74.235	52.419	-0.835	35.293	1322.737	0.000431	-0.005196	-0.003669
77.6000	649.107	-10.467	67.358	47.848	-0.802	35.293	1235.733	0.000733	-0.004715	-0.003349
77.8000	580.502	-15.857	59.170	41.471	-0.815	35.293	1105.127	0.001110	-0.004142	-0.002903
78.0000	524.296	-20.029	51.725	35.589	-0.818	35.292	998.125	0.001402	-0.003621	-0.002491
78.2000	468.090	-24.767	44.309	30.337	-0.821	35.291	891.123	0.001734	-0.003102	-0.002124
78.4000	418.556	-28.574	36.905	25.169	-0.815	35.291	796.824	0.002000	-0.002583	-0.001762
78.6000	377.393	-31.757	31.167	20.847	-0.814	35.291	718.460	0.002223	-0.002182	-0.001459
78.8000	320.270	-35.717	23.586	15.124	-0.819	35.291	609.713	0.002500	-0.001651	-0.001059
79.0000	306.715	-37.467	20.778	13.384	-0.821	35.290	583.906	0.002623	-0.001454	-0.000937
79.2000	282.188	-39.551	16.278	10.342	-0.816	35.289	537.214	0.002769	-0.001139	-0.000724
79.4000	256.775	-41.234	12.441	7.130	-0.809	35.290	488.834	0.002886	-0.000871	-0.000499
79.6000	248.961	-42.389	11.106	5.961	-0.810	35.289	473.957	0.002967	-0.000777	-0.000417
79.8000	258.864	-42.305	10.734	6.352	-0.810	35.288	492.811	0.002961	-0.000751	-0.000445
80.0000	254.431	-42.361	10.291	5.697	-0.810	35.288	484.371	0.002965	-0.000720	-0.000399
80.2000	259.330	-42.067	10.777	6.044	-0.816	35.287	493.698	0.002945	-0.000754	-0.000423
80.4000	279.363	-41.246	12.331	7.755	-0.815	35.287	531.836	0.002887	-0.000863	-0.000543
80.6000	312.140	-39.245	15.796	10.730	-0.809	35.287	594.234	0.002747	-0.001106	-0.000751
80.8000	354.310	-36.330	21.177	14.402	-0.810	35.286	674.515	0.002543	-0.001482	-0.001008
81.0000	397.020	-33.534	26.433	18.219	-0.799	35.285	755.825	0.002347	-0.001850	-0.001275
81.2000	423.215	-31.797	30.478	21.086	-0.830	35.284	805.693	0.002226	-0.002133	-0.001476
81.4000	482.577	-27.783	37.785	25.948	-0.815	35.284	918.703	0.001945	-0.002645	-0.001816
81.6000	537.897	-23.779	44.983	31.174	-0.826	35.284	1024.017	0.001665	-0.003149	-0.002182
81.8000	588.047	-20.056	52.053	36.132	-0.834	35.283	1119.490	0.001404	-0.003644	-0.002529
82.0000	651.692	-15.302	59.665	42.249	-0.826	35.282	1240.654	0.001071	-0.004177	-0.002957
82.2000	707.462	-10.465	66.956	47.305	-0.819	35.280	1346.827	0.000733	-0.004687	-0.003311
82.4000	788.781	-4.323	76.616	54.783	-0.793	35.281	1501.637	0.000303	-0.005363	-0.003835
82.6000	838.089	-0.223	83.208	60.008	-0.807	35.279	1595.507	0.000016	-0.005825	-0.004201
82.8000	900.833	5.014	90.597	65.828	-0.815	35.279	1714.954	-0.000351	-0.006342	-0.004608
83.0000	967.634	10.490	98.453	72.275	-0.819	35.278	1842.127	-0.000734	-0.006892	-0.005059
83.2000	1007.009	14.003	103.131	76.323	-0.821	35.278	1917.086	-0.000980	-0.007219	-0.005343
83.4000	1056.843	18.534	109.571	81.299	-0.815	35.277	2011.957	-0.001297	-0.007670	-0.005691
83.6000	1117.708	23.789	116.206	86.755	-0.804	35.276	2127.829	-0.001665	-0.008134	-0.006073
83.8000	1137.079	25.691	119.630	89.231	-0.815	35.276	2164.707	-0.001798	-0.008374	-0.006246
84.0000	1172.216	29.082	123.468	92.887	-0.807	35.275	2231.598	-0.002036	-0.008643	-0.006502
84.2000	1197.494	31.877	126.789	95.345	-0.801	35.275	2279.720	-0.002231	-0.008875	-0.006674
84.4000	1218.834	33.433	129.816	97.876	-0.808	35.274	2320.347	-0.002340	-0.009087	-0.006851
84.6000	1224.680	34.293	130.555	98.556	-0.809	35.273	2331.476	-0.002401	-0.009139	-0.006899
84.8000	1224.710	35.028	131.177	99.226	-0.805	35.273	2331.533	-0.002452	-0.009182	-0.006946
85.0000	1229.219	35.432	131.658	99.739	-0.811	35.272	2340.117	-0.002480	-0.009216	-0.006982
85.2000	1215.182	34.281	130.834	99.003	-0.813	35.272	2313.395	-0.002400	-0.009158	-0.006930
85.4000	1195.029	32.961	129.470	97.417	-0.827	35.271	2275.028	-0.002307	-0.009063	-0.006819
85.6000	1170.953	31.486	127.597	95.482	-0.829	35.271	2229.195	-0.002204	-0.008932	-0.006684
85.8000	1136.148	28.652	123.950	92.163	-0.818	35.270	2162.933	-0.002006	-0.008677	-0.006451
86.0000	1084.766	24.830	118.419	88.355	-0.799	35.269	2065.115	-0.001738	-0.008289	-0.006185
86.2000	1038.989	21.398	114.153	84.519	-0.816	35.269	1977.968	-0.001498	-0.007991	-0.005916
86.4000	981.956	16.952	108.004	79.642	-0.815	35.267	1869.392	-0.001187	-0.007560	-0.005575
86.6000	947.226	13.963	103.298	75.975	-0.797	35.267	1803.274	-0.000977	-0.007231	-0.005318
86.8000	872.760	8.294	95.797	69.456	-0.809	35.267	1661.510	-0.000581	-0.006706	-0.004862
87.0000	830.244	4.570	90.361	65.331	-0.815	35.267	1580.572	-0.000320	-0.006325	-0.004573
87.2000	765.532	-0.668	82.478	59.577	-0.815	35.266	1457.376	0.000047	-0.005773	-0.004170
87.4000	695.650	-5.949	74.473	52.810	-0.797	35.265	1324.339	0.000416	-0.005213	-0.003697
87.6000	640.015	-10.882	66.589	47.192	-0.793	35.265	1218.424	0.000762	-0.004661	-0.003303
87.8000	575.047	-16.051	58.646	41.121	-0.807	35.264	1094.742	0.001124	-0.004105	-0.002878
88.0000	517.744	-20.183	51.040	35.505	-0.800	35.264	985.651	0.001413	-0.003573	-0.002485
88.2000	469.262	-24.588	44.379	30.476	-0.802	35.263	893.354	0.001721	-0.003107	-0.002133
88.4000	418.631	-28.280	37.263	25.224	-0.796	35.263	796.967	0.001980	-0.002608	-0.001766
88.6000	365.250	-32.227	29.981	19.888	-0.795	35.263	695.343	0.002256	-0.002099	-0.001392
88.8000	346.585	-34.285	26.337	17.398	-0.809	35.262	659.809	0.002400	-0.001844	-0.001218
89.0000	307.872	-37.009	20.709	13.593	-0.799	35.261	586.109	0.002591	-0.001450	-0.000952
89.2000	277.379	-39.091	16.458	9.718	-0.802	35.261	528.059	0.002736	-0.001152	-0.000680
89.4000	256.325	-41.052	12.800	7.337	-0.811	35.260	487.976	0.002874	-0.000896	-0.000514
89.6000	252.537	-41.693	11.451	6.852	-0.803	35.260	480.766	0.002919	-0.000802	-0.000480
89.8000	249.457	-42.054	10.278	5.989	-0.825	35.260	474.901	0.002944	-0.000719	-0.000419
90.0000	252.357	-41.790	10.363	6.240	-0.802	35.259	480.423	0.002925	-0.000725	-0.000437
90.2000	260.923	-41.664	10.790	6.616	-0.800	35.258	496.731	0.002917	-0.000755	-0.000463
90.4000	281.377	-40.411	13.087	8.423	-0.798	35.258	535.669	0.002829	-0.000916	-0.000590
90.6000	307.060	-38.745	16.816	10.855	-0.794	35.258	584.564	0.002712	-0.001177	-0.000760
90.8000	346.705	-36.719	20.835	14.164	-0.813	35.257	660.038	0.002570	-0.001458	-0.000991
91.0000	386.756	-33.935	25.183	18.052	-0.801	35.257	736.284	0.002375	-0.001763	-0.001264
91.2000	424.733	-31.078	31.346	21.556	-0.794	35.257	808.582	0.002175	-0.002194	-0.001509
91.4000	470.089	-28.390	36.547	25.711	-0.815	35.257	894.928	0.001987	-0.002558	-0.001800
91.6000	539.355	-22.999	45.191	31.897	-0.810	35.256	1026.793	0.001610	-0.003163	-0.002233
91.8000	588.648	-19.305	52.427	36.480	-0.809	35.256	1120.634	0.001351	-0.003670	-0.002554
92.0000	640.706	-15.416	58.838	41.510	-0.807	35.256	1219.740	0.001079	-0.004119	-0.002906
92.2000	715.262	-9.687	67.577	48.418	-0.807	35.256	1361.675	0.000678	-0.004730	-0.003389
92.4000	769.620	-5.171	74.817	53.728	-0.815	35.255	1465.158	0.000362	-0.005237	-0.003761
92.6000	837.473	-0.043	82.960	60.439	-0.803	35.255	1594.334	0.000003	-0.005807	-0.004231
92.8000	897.647	5.252	90.377	66.189	-0.814	35.255	1708.889	-0.000368	-0.006326	-0.004633
93.0000	966.387	10.879	98.428	72.457	-0.813	35.255	1839.752	-0.000762	-0.006890	-0.005072
93.2000	1007.880	14.435	103.492	76.681	-0.809	35.255	1918.745	-0.001010	-0.007244	-0.005368
93.4000	1052.845	18.395	108.718	81.283	-0.820	35.255	2004.347	-0.001288	-0.007610	-0.005690
93.6000	1095.751	22.290	114.457	85.257	-0.812	35.255	2086.029	-0.001560	-0.008012	-0.005968
93.8000	1136.268	25.928	119.178	89.384	-0.818	35.255	2163.162	-0.001815	-0.008342	-0.006257
94.0000	1170.292	29.194	122.948	92.705	-0.804	35.255	2227.936	-0.002044	-0.008606	-0.006489
94.2000	1204.888	32.501	127.338	96.233	-0.815	35.254	2293.797	-0.002275	-0.008914	-0.006736
94.4000	1217.406	33.571	128.878	97.889	-0.823	35.255	2317.629	-0.002350	-0.009021	-0.006852
94.6000	1232.615	35.267	130.404	99.516	-0.822	35.255	2346.582	-0.002469	-0.009128	-0.006966
94.8000	1230.767	35.473	131.397	99.737	-0.824	35.256	2343.063	-0.002483	-0.009198	-0.006982
95.0000	1219.375	34.641	131.478	99.363	-0.806	35.255	2321.377	-0.002425	-0.009203	-0.006955
95.2000	1214.897	34.501	131.134	99.143	-0.808	35.256	2312.851	-0.002415	-0.009179	-0.006940
95.4000	1187.094	32.918	129.086	97.248	-0.805	35.256	2259.922	-0.002304	-0.009036	-0.006807
95.6000	1151.717	30.111	125.894	94.248	-0.817	35.256	2192.574	-0.002108	-0.008813	-0.006597
95.8000	1135.051	28.681	123.812	92.622	-0.808	35.256	2160.845	-0.002008	-0.008667	-0.006484
96.0000	1087.666	25.079	119.025	88.439	-0.801	35.256	2070.637	-0.001756	-0.008332	-0.006191
96.2000	1057.158	22.623	115.698	85.687	-0.815	35.256	2012.558	-0.001584	-0.008099	-0.005998
96.4000	1000.742	18.450	109.711	81.146	-0.814	35.256	1905.155	-0.001292	-0.007680	-0.005680
96.6000	932.528	12.934	102.346	74.946	-0.817	35.257	1775.293	-0.000905	-0.007164	-0.005246
96.8000	882.438	9.279	96.802	70.486	-0.822	35.257	1679.935	-0.000650	-0.006776	-0.004934
97.0000	824.789	4.500	90.046	65.275	-0.821	35.258	1570.187	-0.000315	-0.006303	-0.004569
97.2000	761.820	-0.404	82.753	59.385	-0.813	35.257	1450.310	0.000028	-0.005793	-0.004157
97.4000	701.721	-5.684	75.557	53.602	-0.797	35.257	1335.897	0.000398	-0.005289	-0.003752
97.6000	647.559	-10.104	68.045	48.459	-0.819	35.258	1232.786	0.000707	-0.004763	-0.003392
97.8000	583.673	-15.039	59.979	41.873	-0.806	35.258	1111.164	0.001053	-0.004199	-0.002931
98.0000	518.195	-20.294	51.574	35.868	-0.815	35.259	986.509	0.001421	-0.003610	-0.002511
98.2000	467.654	-23.974	44.666	30.686	-0.823	35.259	890.293	0.001678	-0.003127	-0.002148
98.4000	427.228	-27.432	38.683	26.352	-0.823	35.259	813.332	0.001920	-0.002708	-0.001845
98.6000	380.685	-31.410	32.364	22.066	-0.827	35.260	724.726	0.002199	-0.002265	-0.001545
98.8000	343.940	-33.896	26.709	18.053	-0.823	35.260	654.774	0.002373	-0.001870	-0.001264
99.0000	304.596	-37.176	21.206	13.773	-0.839	35.261	579.872	0.002602	-0.001484	-0.000964
99.2000	281.828	-38.966	17.214	11.119	-0.822	35.261	536.528	0.002728	-0.001205	-0.000778
99.4000	266.920	-39.856	14.447	9.328	-0.824	35.261	508.146	0.002790	-0.001011	-0.000653
99.6000	255.693	-41.134	12.416	7.239	-0.826	35.262	486.774	0.002879	-0.000869	-0.000507
99.8000	250.779	-42.111	11.079	6.769	-0.830	35.262	477.419	0.002948	-0.000776	-0.000474
Test Cycles
Time (sec)	Axial stress (kPa)	Axial micro-strain #1	Axial micro-strain #2	Axial micro-strain #3	Confining pressure (kPa)	Temperature (�C)	Load (N)	Displacement #1 (mm)	Displacement #2 (mm)	Displacement #3 (mm)
0.0000	256.325	-41.579	11.314	6.824	-0.842	35.262	487.976	0.002911	-0.000792	-0.000478
0.2000	265.868	-41.384	12.250	7.658	-0.819	35.263	506.144	0.002897	-0.000857	-0.000536
0.4000	282.113	-40.371	13.429	9.245	-0.818	35.264	537.071	0.002826	-0.000940	-0.000647
0.6000	319.609	-38.064	17.973	12.508	-0.814	35.264	608.454	0.002664	-0.001258	-0.000876
0.8000	343.204	-36.509	20.847	14.581	-0.818	35.265	653.372	0.002556	-0.001459	-0.001021
1.0000	385.028	-33.881	26.061	18.234	-0.815	35.266	732.994	0.002372	-0.001824	-0.001276
1.2000	426.401	-30.896	31.428	21.970	-0.818	35.265	811.758	0.002163	-0.002200	-0.001538
1.4000	488.213	-27.016	39.588	27.682	-0.818	35.266	929.432	0.001891	-0.002771	-0.001938
1.6000	552.820	-22.082	47.226	33.297	-0.814	35.266	1052.427	0.001546	-0.003306	-0.002331
1.8000	589.324	-19.278	52.218	37.150	-0.818	35.267	1121.922	0.001349	-0.003655	-0.002600
2.0000	650.384	-15.083	59.926	42.972	-0.823	35.267	1238.165	0.001056	-0.004195	-0.003008
2.2000	720.146	-8.981	69.297	49.362	-0.810	35.268	1370.974	0.000629	-0.004851	-0.003455
2.4000	769.695	-5.407	75.325	54.338	-0.811	35.269	1465.302	0.000378	-0.005273	-0.003804
2.6000	830.605	-0.169	82.381	60.160	-0.803	35.269	1581.259	0.000012	-0.005767	-0.004211
2.8000	894.596	5.446	90.470	66.175	-0.819	35.269	1703.081	-0.000381	-0.006333	-0.004632
3.0000	958.392	10.546	98.167	72.485	-0.802	35.269	1824.532	-0.000738	-0.006872	-0.005074
3.2000	1011.517	14.936	104.415	77.681	-0.815	35.270	1925.669	-0.001046	-0.007309	-0.005438
3.4000	1058.391	19.159	109.988	82.285	-0.803	35.270	2014.904	-0.001341	-0.007699	-0.005760
3.6000	1108.045	23.166	115.490	86.827	-0.825	35.271	2109.432	-0.001622	-0.008084	-0.006078
3.8000	1137.831	26.679	119.687	90.536	-0.810	35.271	2166.138	-0.001868	-0.008378	-0.006338
4.0000	1183.307	30.442	124.871	94.733	-0.805	35.272	2252.712	-0.002131	-0.008741	-0.006631
4.2000	1200.635	31.988	127.228	96.944	-0.799	35.272	2285.700	-0.002239	-0.008906	-0.006786
4.4000	1216.730	34.360	129.359	98.586	-0.802	35.273	2316.341	-0.002405	-0.009055	-0.006901
4.6000	1242.474	36.240	132.360	100.986	-0.796	35.273	2365.351	-0.002537	-0.009265	-0.007069
4.8000	1226.303	35.640	131.616	100.501	-0.818	35.273	2334.566	-0.002495	-0.009213	-0.007035
5.0000	1229.910	36.307	132.168	100.916	-0.806	35.273	2341.433	-0.002541	-0.009252	-0.007064
5.2000	1217.812	35.251	131.738	100.264	-0.805	35.274	2318.401	-0.002468	-0.009222	-0.007018
5.4000	1199.207	34.016	129.663	98.779	-0.807	35.274	2282.982	-0.002381	-0.009076	-0.006915
5.6000	1169.871	32.043	127.917	96.525	-0.806	35.275	2227.135	-0.002243	-0.008954	-0.006757
5.8000	1135.186	29.012	123.992	93.026	-0.799	35.275	2161.102	-0.002031	-0.008679	-0.006512
6.0000	1101.177	26.693	120.593	90.452	-0.820	35.275	2096.357	-0.001868	-0.008442	-0.006332
6.2000	1043.633	21.969	115.338	85.618	-0.807	35.275	1986.809	-0.001538	-0.008074	-0.005993
6.4000	998.863	18.535	110.138	81.604	-0.799	35.276	1901.579	-0.001297	-0.007710	-0.005712
6.6000	936.631	13.990	103.338	76.406	-0.808	35.276	1783.104	-0.000979	-0.007234	-0.005348
6.8000	877.298	9.183	96.789	70.680	-0.796	35.276	1670.151	-0.000643	-0.006775	-0.004948
7.0000	825.045	4.654	90.252	65.844	-0.796	35.277	1570.673	-0.000326	-0.006318	-0.004609
7.2000	756.891	-0.487	82.520	59.466	-0.798	35.277	1440.926	0.000034	-0.005776	-0.004163
7.4000	694.658	-5.490	74.966	53.365	-0.795	35.277	1322.451	0.000384	-0.005248	-0.003736
7.6000	631.960	-10.563	66.478	47.694	-0.803	35.278	1203.089	0.000739	-0.004653	-0.003339
7.8000	584.936	-14.357	60.380	42.749	-0.817	35.278	1113.567	0.001005	-0.004227	-0.002992
8.0000	529.496	-19.291	53.115	37.496	-0.814	35.279	1008.024	0.001350	-0.003718	-0.002625
8.2000	466.572	-23.916	44.805	31.089	-0.810	35.280	888.233	0.001674	-0.003136	-0.002176
8.4000	416.858	-27.848	37.676	26.058	-0.803	35.279	793.591	0.001949	-0.002637	-0.001824
8.6000	371.367	-31.399	31.181	21.183	-0.821	35.280	706.987	0.002198	-0.002183	-0.001483
8.8000	340.829	-33.728	26.793	18.053	-0.807	35.281	648.851	0.002361	-0.001876	-0.001264
9.0000	309.811	-36.105	22.321	14.539	-0.797	35.281	589.800	0.002527	-0.001562	-0.001018
9.2000	284.698	-38.577	17.461	11.577	-0.805	35.282	541.992	0.002700	-0.001222	-0.000810
9.4000	265.176	-39.676	14.614	8.967	-0.809	35.282	504.827	0.002777	-0.001023	-0.000628
9.6000	250.659	-41.259	12.537	7.449	-0.819	35.283	477.190	0.002888	-0.000878	-0.000521
9.8000	250.869	-41.359	10.815	6.881	-0.814	35.283	477.591	0.002895	-0.000757	-0.000482
10.0000	262.171	-40.482	11.658	7.518	-0.813	35.283	499.105	0.002834	-0.000816	-0.000526
10.2000	258.789	-41.024	11.518	7.130	-0.808	35.284	492.668	0.002872	-0.000806	-0.000499
10.4000	290.574	-39.537	14.393	9.579	-0.812	35.284	553.179	0.002768	-0.001007	-0.000671
10.6000	303.033	-38.424	16.264	10.910	-0.806	35.285	576.897	0.002690	-0.001139	-0.000764
10.8000	369.458	-34.493	24.426	16.649	-0.801	35.285	703.354	0.002415	-0.001710	-0.001165
11.0000	400.748	-32.837	28.196	19.598	-0.818	35.286	762.920	0.002299	-0.001974	-0.001372
11.2000	419.082	-31.161	30.660	21.403	-0.808	35.286	797.825	0.002181	-0.002146	-0.001498
11.4000	461.868	-28.225	37.221	25.363	-0.823	35.286	879.278	0.001976	-0.002605	-0.001775
11.6000	531.900	-23.195	44.832	31.590	-0.823	35.287	1012.602	0.001624	-0.003138	-0.002211
11.8000	596.027	-18.666	52.881	37.525	-0.815	35.287	1134.682	0.001307	-0.003702	-0.002627
12.0000	647.319	-14.289	60.066	42.554	-0.821	35.287	1232.328	0.001000	-0.004205	-0.002979
12.2000	718.809	-9.272	69.035	49.542	-0.823	35.288	1368.427	0.000649	-0.004832	-0.003468
12.4000	775.691	-4.658	75.807	54.726	-0.824	35.287	1476.717	0.000326	-0.005306	-0.003831
12.6000	835.970	0.834	83.995	60.922	-0.819	35.288	1591.473	-0.000058	-0.005880	-0.004265
12.8000	893.168	5.168	90.527	66.274	-0.814	35.288	1700.363	-0.000362	-0.006337	-0.004639
13.0000	950.321	10.157	98.016	72.026	-0.824	35.288	1809.168	-0.000711	-0.006861	-0.005042
13.2000	1012.268	15.547	104.538	77.696	-0.798	35.288	1927.099	-0.001088	-0.007318	-0.005439
13.4000	1056.527	19.339	110.290	82.228	-0.814	35.288	2011.356	-0.001354	-0.007720	-0.005756
13.6000	1108.721	23.705	116.055	87.259	-0.807	35.289	2110.720	-0.001659	-0.008124	-0.006108
13.8000	1144.744	27.360	120.717	90.704	-0.796	35.289	2179.298	-0.001915	-0.008450	-0.006349
14.0000	1174.996	29.567	124.239	93.622	-0.826	35.290	2236.891	-0.002070	-0.008697	-0.006554
14.2000	1196.923	31.931	126.747	96.151	-0.807	35.290	2278.633	-0.002235	-0.008872	-0.006731
14.4000	1221.509	34.656	129.870	98.726	-0.814	35.290	2325.439	-0.002426	-0.009091	-0.006911
14.6000	1230.466	35.502	131.905	100.138	-0.815	35.290	2342.491	-0.002485	-0.009233	-0.007010
14.8000	1224.034	35.099	131.519	100.072	-0.801	35.290	2330.246	-0.002457	-0.009206	-0.007005
15.0000	1233.832	36.560	132.676	100.875	-0.818	35.290	2348.900	-0.002559	-0.009287	-0.007061
15.2000	1214.310	35.168	131.697	99.890	-0.812	35.290	2311.735	-0.002462	-0.009219	-0.006992
15.4000	1198.455	33.711	130.349	98.335	-0.819	35.290	2281.551	-0.002360	-0.009124	-0.006883
15.6000	1169.661	32.169	127.488	96.078	-0.829	35.290	2226.734	-0.002252	-0.008924	-0.006725
15.8000	1144.774	30.290	125.329	93.762	-0.803	35.290	2179.356	-0.002120	-0.008773	-0.006563
16.0000	1100.666	26.442	120.994	90.146	-0.808	35.290	2095.385	-0.001851	-0.008470	-0.006310
16.2000	1053.567	23.135	116.468	86.366	-0.823	35.290	2005.720	-0.001619	-0.008153	-0.006046
16.4000	1011.803	19.813	110.963	82.420	-0.821	35.289	1926.212	-0.001387	-0.007767	-0.005769
16.6000	943.303	14.227	104.524	76.642	-0.824	35.289	1795.807	-0.000996	-0.007317	-0.005365
16.8000	889.742	10.004	97.946	71.543	-0.815	35.289	1693.840	-0.000700	-0.006856	-0.005008
17.0000	822.385	4.764	90.568	65.484	-0.821	35.288	1565.609	-0.000333	-0.006340	-0.004584
17.2000	767.095	-0.253	83.732	60.090	-0.820	35.289	1460.352	0.000018	-0.005861	-0.004206
17.4000	696.492	-5.505	75.297	53.602	-0.802	35.288	1325.941	0.000385	-0.005271	-0.003752
17.6000	638.287	-10.188	67.799	48.097	-0.829	35.287	1215.134	0.000713	-0.004746	-0.003367
17.8000	577.782	-15.176	60.202	42.222	-0.819	35.288	1099.949	0.001062	-0.004214	-0.002956
18.0000	516.376	-20.169	52.054	36.134	-0.813	35.287	983.047	0.001412	-0.003644	-0.002529
18.2000	478.084	-23.208	46.083	31.897	-0.822	35.287	910.149	0.001625	-0.003226	-0.002233
18.4000	426.010	-27.071	39.382	26.672	-0.822	35.286	811.014	0.001895	-0.002757	-0.001867
18.6000	383.525	-30.687	32.473	22.234	-0.805	35.286	730.133	0.002148	-0.002273	-0.001556
18.8000	340.018	-33.700	27.010	17.984	-0.809	35.286	647.306	0.002359	-0.001891	-0.001259
19.0000	300.643	-36.788	21.812	13.329	-0.807	35.286	572.348	0.002575	-0.001527	-0.000933
19.2000	279.228	-39.036	17.447	10.771	-0.807	35.286	531.578	0.002733	-0.001221	-0.000754
19.4000	265.056	-40.024	15.000	9.216	-0.822	35.286	504.599	0.002802	-0.001050	-0.000645
19.6000	247.037	-41.107	12.222	6.893	-0.818	35.285	470.295	0.002877	-0.000856	-0.000482
19.8000	252.177	-41.538	11.889	7.130	-0.819	35.285	480.080	0.002908	-0.000832	-0.000499
20.0000	258.564	-41.289	11.876	7.256	-0.813	35.285	492.239	0.002890	-0.000831	-0.000508
20.2000	262.667	-41.052	11.918	7.575	-0.810	35.285	500.050	0.002874	-0.000834	-0.000530
20.4000	282.504	-39.745	13.871	9.105	-0.820	35.285	537.815	0.002782	-0.000971	-0.000637
20.6000	307.030	-38.372	17.284	11.465	-0.815	35.284	584.507	0.002686	-0.001210	-0.000803
20.8000	347.261	-35.494	22.691	14.900	-0.833	35.284	661.097	0.002485	-0.001588	-0.001043
21.0000	383.104	-33.741	26.530	18.122	-0.814	35.284	729.332	0.002362	-0.001857	-0.001269
21.2000	434.592	-30.147	32.652	22.805	-0.808	35.284	827.351	0.002110	-0.002286	-0.001596
21.4000	485.252	-26.379	39.698	27.282	-0.822	35.283	923.796	0.001847	-0.002779	-0.001910
21.6000	532.066	-23.319	45.644	31.728	-0.819	35.283	1012.917	0.001632	-0.003195	-0.002221
21.8000	594.389	-18.302	53.680	37.663	-0.815	35.283	1131.563	0.001281	-0.003758	-0.002636
22.0000	653.390	-13.913	61.342	43.289	-0.805	35.282	1243.887	0.000974	-0.004294	-0.003030
22.2000	715.337	-9.412	69.407	49.336	-0.811	35.282	1361.818	0.000659	-0.004858	-0.003454
22.4000	777.675	-3.948	76.823	55.322	-0.830	35.282	1480.494	0.000276	-0.005378	-0.003873
22.6000	840.990	1.222	84.365	61.145	-0.812	35.282	1601.028	-0.000086	-0.005906	-0.004280
22.8000	897.992	6.001	91.491	66.690	-0.831	35.282	1709.547	-0.000420	-0.006404	-0.004668
23.0000	946.249	10.225	97.781	71.722	-0.807	35.282	1801.414	-0.000716	-0.006845	-0.005021
23.2000	1018.986	16.062	105.747	78.501	-0.829	35.282	1939.888	-0.001124	-0.007402	-0.005495
23.4000	1066.671	20.078	110.962	83.183	-0.818	35.282	2030.668	-0.001405	-0.007767	-0.005823
23.6000	1096.833	23.454	115.891	86.186	-0.827	35.281	2088.089	-0.001642	-0.008112	-0.006033
23.8000	1144.383	27.375	120.772	90.746	-0.826	35.281	2178.612	-0.001916	-0.008454	-0.006352
24.0000	1168.970	29.638	124.487	93.651	-0.821	35.281	2225.418	-0.002075	-0.008714	-0.006556
24.2000	1202.859	33.278	128.358	97.124	-0.821	35.282	2289.934	-0.002329	-0.008985	-0.006799
24.4000	1212.747	34.600	130.321	98.752	-0.830	35.281	2308.760	-0.002422	-0.009122	-0.006913
24.6000	1234.854	36.113	132.032	100.875	-0.805	35.281	2350.845	-0.002528	-0.009242	-0.007061
24.8000	1227.415	36.349	131.917	100.375	-0.814	35.281	2336.683	-0.002544	-0.009234	-0.007026
25.0000	1226.018	36.475	132.773	100.722	-0.824	35.281	2334.023	-0.002553	-0.009294	-0.007051
25.2000	1210.538	35.155	131.520	99.625	-0.819	35.281	2304.554	-0.002461	-0.009206	-0.006974
25.4000	1203.986	35.141	130.997	99.003	-0.814	35.281	2292.080	-0.002460	-0.009170	-0.006930
25.6000	1168.849	32.849	128.399	96.469	-0.827	35.281	2225.189	-0.002299	-0.008988	-0.006753
25.8000	1136.523	30.096	124.998	93.524	-0.800	35.281	2163.649	-0.002107	-0.008750	-0.006547
26.0000	1096.337	26.942	120.758	90.132	-0.821	35.281	2087.145	-0.001886	-0.008453	-0.006309
26.2000	1043.302	23.371	115.711	85.493	-0.822	35.280	1986.179	-0.001636	-0.008100	-0.005985
26.4000	998.352	19.133	110.536	81.436	-0.822	35.280	1900.606	-0.001339	-0.007738	-0.005701
26.6000	923.015	13.196	102.003	75.168	-0.819	35.280	1757.183	-0.000924	-0.007140	-0.005262
26.8000	857.521	8.821	95.688	69.471	-0.826	35.280	1632.500	-0.000617	-0.006698	-0.004863
27.0000	818.898	5.072	90.484	65.386	-0.814	35.279	1558.971	-0.000355	-0.006334	-0.004577
27.2000	761.474	0.163	82.809	60.048	-0.824	35.280	1449.652	-0.000011	-0.005797	-0.004203
27.4000	697.258	-4.547	74.691	53.811	-0.821	35.279	1327.400	0.000318	-0.005228	-0.003767
27.6000	647.048	-9.232	69.352	48.918	-0.826	35.279	1231.813	0.000646	-0.004855	-0.003424
27.8000	563.731	-15.582	58.810	41.248	-0.837	35.279	1073.198	0.001091	-0.004117	-0.002887
28.0000	512.694	-19.444	51.355	36.049	-0.831	35.280	976.038	0.001361	-0.003595	-0.002523
28.2000	470.284	-22.833	45.712	31.520	-0.831	35.279	895.300	0.001598	-0.003200	-0.002206
28.4000	415.791	-27.141	38.501	26.281	-0.825	35.279	791.559	0.001900	-0.002695	-0.001840
28.6000	383.420	-29.490	32.942	22.540	-0.829	35.279	729.933	0.002064	-0.002306	-0.001578
28.8000	337.418	-33.297	26.626	17.468	-0.826	35.280	642.357	0.002331	-0.001864	-0.001223
29.0000	312.350	-35.618	22.307	14.484	-0.835	35.280	594.635	0.002493	-0.001562	-0.001014
29.2000	284.488	-37.788	17.697	11.562	-0.832	35.280	541.592	0.002645	-0.001239	-0.000809
29.4000	259.646	-39.481	14.476	8.633	-0.835	35.279	494.299	0.002764	-0.001013	-0.000604
29.6000	246.451	-40.440	12.743	7.046	-0.829	35.280	469.179	0.002831	-0.000892	-0.000493
29.8000	250.809	-41.038	11.878	7.032	-0.824	35.280	477.476	0.002873	-0.000831	-0.000492
30.0000	258.970	-40.342	12.208	7.187	-0.836	35.280	493.011	0.002824	-0.000855	-0.000503
30.2000	266.499	-40.008	13.004	7.894	-0.820	35.280	507.345	0.002801	-0.000910	-0.000553
30.4000	297.307	-38.510	15.576	10.147	-0.836	35.280	565.996	0.002696	-0.001090	-0.000710
30.6000	307.962	-37.773	16.940	11.244	-0.835	35.281	586.281	0.002644	-0.001186	-0.000787
30.8000	348.343	-35.036	22.239	14.875	-0.826	35.281	663.157	0.002452	-0.001557	-0.001041
31.0000	385.734	-33.186	27.135	18.497	-0.838	35.281	734.339	0.002323	-0.001899	-0.001295
31.2000	426.296	-30.104	32.336	22.181	-0.838	35.281	811.558	0.002107	-0.002264	-0.001553
31.4000	482.427	-25.976	39.258	26.837	-0.829	35.281	918.417	0.001818	-0.002748	-0.001879
31.6000	549.213	-21.500	47.843	33.171	-0.830	35.281	1045.561	0.001505	-0.003349	-0.002322
31.8000	599.889	-17.789	54.135	37.747	-0.839	35.281	1142.035	0.001245	-0.003789	-0.002642
32.0000	671.935	-12.147	63.395	44.705	-0.834	35.281	1279.192	0.000850	-0.004438	-0.003129
32.2000	713.338	-8.590	69.008	48.822	-0.835	35.282	1358.013	0.000601	-0.004831	-0.003418
32.4000	795.574	-2.658	78.613	56.296	-0.839	35.282	1514.568	0.000186	-0.005503	-0.003941
32.6000	832.228	1.084	83.579	60.284	-0.832	35.282	1584.349	-0.000076	-0.005851	-0.004220
32.8000	896.880	6.501	91.657	66.552	-0.825	35.283	1707.430	-0.000455	-0.006416	-0.004659
33.0000	949.991	10.809	97.919	71.708	-0.846	35.283	1808.538	-0.000757	-0.006854	-0.005020
33.2000	1012.749	16.424	105.362	77.821	-0.853	35.283	1928.015	-0.001150	-0.007375	-0.005447
33.4000	1053.987	20.190	110.454	82.061	-0.847	35.284	2006.521	-0.001413	-0.007732	-0.005744
33.6000	1105.490	23.998	116.179	86.744	-0.846	35.284	2104.568	-0.001680	-0.008133	-0.006072
33.8000	1145.090	27.945	120.993	90.924	-0.836	35.284	2179.956	-0.001956	-0.008470	-0.006365
34.0000	1173.613	30.779	124.460	93.719	-0.825	35.285	2234.259	-0.002155	-0.008712	-0.006560
34.2000	1208.675	33.558	128.246	97.248	-0.821	35.285	2301.006	-0.002349	-0.008977	-0.006807
34.4000	1213.980	34.294	129.746	98.167	-0.837	35.285	2311.106	-0.002401	-0.009082	-0.006872
34.6000	1229.098	36.308	132.112	99.835	-0.834	35.286	2339.888	-0.002542	-0.009248	-0.006988
34.8000	1239.363	37.030	133.073	101.112	-0.839	35.286	2359.428	-0.002592	-0.009315	-0.007078
35.0000	1227.145	36.392	132.415	100.568	-0.828	35.287	2336.168	-0.002547	-0.009269	-0.007040
35.2000	1214.581	36.058	131.989	99.722	-0.826	35.287	2312.250	-0.002524	-0.009239	-0.006981
35.4000	1193.616	34.544	130.667	98.182	-0.823	35.287	2272.339	-0.002418	-0.009147	-0.006873
35.6000	1173.358	32.986	128.369	96.664	-0.836	35.287	2233.772	-0.002309	-0.008986	-0.006766
35.8000	1134.945	30.153	124.749	93.374	-0.828	35.288	2160.645	-0.002111	-0.008732	-0.006536
36.0000	1093.572	27.347	121.104	89.840	-0.835	35.287	2081.881	-0.001914	-0.008477	-0.006289
36.2000	1051.282	23.621	116.605	86.037	-0.831	35.287	2001.371	-0.001653	-0.008162	-0.006023
36.4000	993.588	19.201	110.372	81.451	-0.834	35.288	1891.537	-0.001344	-0.007726	-0.005702
36.6000	945.888	15.297	104.977	76.532	-0.849	35.288	1800.728	-0.001071	-0.007348	-0.005357
36.8000	870.836	9.239	97.327	70.096	-0.844	35.289	1657.848	-0.000647	-0.006813	-0.004907
37.0000	825.871	5.448	91.354	65.553	-0.842	35.289	1572.247	-0.000381	-0.006395	-0.004589
37.2000	771.513	1.125	84.393	60.562	-0.832	35.290	1468.763	-0.000079	-0.005908	-0.004239
37.4000	705.704	-4.074	76.742	54.477	-0.832	35.289	1343.479	0.000285	-0.005372	-0.003813
37.6000	632.982	-9.827	67.620	47.612	-0.842	35.291	1205.034	0.000688	-0.004733	-0.003333
37.8000	581.629	-14.429	60.875	42.318	-0.819	35.290	1107.273	0.001010	-0.004261	-0.002962
38.0000	512.559	-19.500	51.999	35.730	-0.836	35.291	975.780	0.001365	-0.003640	-0.002501
38.2000	461.522	-23.793	45.493	30.601	-0.837	35.291	878.620	0.001666	-0.003184	-0.002142
38.4000	417.279	-26.949	38.614	26.128	-0.830	35.291	794.392	0.001886	-0.002703	-0.001829
38.6000	355.242	-31.382	30.630	20.100	-0.821	35.291	676.289	0.002197	-0.002144	-0.001407
38.8000	331.587	-33.700	26.791	17.204	-0.835	35.292	631.256	0.002359	-0.001875	-0.001204
39.0000	298.464	-36.620	21.206	13.397	-0.838	35.292	568.199	0.002563	-0.001484	-0.000938
39.2000	285.465	-37.525	19.207	11.314	-0.823	35.292	543.451	0.002627	-0.001345	-0.000792
39.4000	263.568	-39.217	15.810	8.742	-0.825	35.293	501.766	0.002745	-0.001107	-0.000612
39.6000	255.784	-40.329	13.621	7.659	-0.833	35.293	486.946	0.002823	-0.000953	-0.000536
39.8000	250.764	-40.690	11.987	7.032	-0.825	35.293	477.390	0.002848	-0.000839	-0.000492
40.0000	251.515	-40.676	11.975	6.463	-0.822	35.293	478.821	0.002847	-0.000838	-0.000452
40.2000	269.459	-40.191	13.455	7.728	-0.819	35.293	512.981	0.002813	-0.000942	-0.000541
40.4000	284.743	-39.411	14.215	9.147	-0.821	35.293	542.078	0.002759	-0.000995	-0.000640
40.6000	302.191	-38.051	17.682	10.715	-0.841	35.294	575.294	0.002664	-0.001238	-0.000750
40.8000	353.378	-34.951	23.173	15.205	-0.838	35.293	672.741	0.002447	-0.001622	-0.001064
41.0000	387.508	-32.657	27.536	18.469	-0.839	35.294	737.715	0.002286	-0.001927	-0.001293
41.2000	425.184	-30.007	32.737	22.026	-0.839	35.294	809.441	0.002100	-0.002292	-0.001542
41.4000	480.128	-26.185	39.699	26.627	-0.835	35.295	914.040	0.001833	-0.002779	-0.001864
41.6000	538.468	-22.277	46.921	32.175	-0.830	35.295	1025.105	0.001559	-0.003284	-0.002252
41.8000	591.894	-17.942	53.750	37.038	-0.834	35.294	1126.814	0.001256	-0.003762	-0.002593
42.0000	651.481	-13.384	61.371	42.638	-0.831	35.295	1240.253	0.000937	-0.004296	-0.002985
42.2000	709.251	-8.855	69.089	48.558	-0.829	35.295	1350.231	0.000620	-0.004836	-0.003399
42.4000	778.892	-3.534	77.100	54.892	-0.832	35.295	1482.811	0.000247	-0.005397	-0.003842
42.6000	855.357	2.652	86.481	61.727	-0.822	35.295	1628.380	-0.000186	-0.006054	-0.004321
42.8000	897.782	6.362	92.248	66.369	-0.842	35.295	1709.147	-0.000445	-0.006457	-0.004646
43.0000	957.655	11.212	98.813	72.054	-0.832	35.296	1823.130	-0.000785	-0.006917	-0.005044
43.2000	1005.115	15.477	104.747	77.155	-0.839	35.295	1913.481	-0.001083	-0.007332	-0.005401
43.4000	1060.825	20.398	111.596	82.214	-0.837	35.295	2019.539	-0.001428	-0.007812	-0.005755
43.6000	1102.424	23.926	116.193	86.536	-0.838	35.296	2098.732	-0.001675	-0.008134	-0.006058
43.8000	1135.697	27.181	120.854	90.051	-0.837	35.296	2162.075	-0.001903	-0.008460	-0.006304
44.0000	1172.997	30.610	124.953	93.707	-0.841	35.296	2233.086	-0.002143	-0.008747	-0.006559
44.2000	1191.993	32.458	127.986	96.245	-0.843	35.297	2269.249	-0.002272	-0.008959	-0.006737
44.4000	1217.977	35.306	130.336	98.656	-0.832	35.296	2318.716	-0.002471	-0.009124	-0.006906
44.6000	1227.310	36.295	132.169	99.752	-0.839	35.297	2336.483	-0.002541	-0.009252	-0.006983
44.8000	1246.621	37.697	134.011	101.541	-0.848	35.296	2373.247	-0.002639	-0.009381	-0.007108
45.0000	1231.593	37.239	133.462	100.486	-0.839	35.296	2344.637	-0.002607	-0.009342	-0.007034
45.2000	1213.619	36.309	132.731	99.517	-0.829	35.296	2310.419	-0.002542	-0.009291	-0.006966
45.4000	1195.510	34.599	130.817	98.224	-0.829	35.296	2275.944	-0.002422	-0.009157	-0.006876
45.6000	1168.038	32.334	128.439	95.997	-0.837	35.297	2223.644	-0.002263	-0.008991	-0.006720
45.8000	1126.545	29.413	124.240	92.302	-0.833	35.297	2144.651	-0.002059	-0.008697	-0.006461
46.0000	1090.927	26.637	121.258	89.326	-0.817	35.297	2076.845	-0.001865	-0.008488	-0.006253
46.2000	1050.696	23.636	116.522	85.839	-0.834	35.296	2000.256	-0.001655	-0.008157	-0.006009
46.4000	999.059	19.589	111.362	81.228	-0.832	35.296	1901.951	-0.001371	-0.007795	-0.005686
46.6000	945.122	15.076	105.334	76.365	-0.835	35.296	1799.269	-0.001055	-0.007373	-0.005346
46.8000	884.422	10.365	98.440	71.000	-0.836	35.296	1683.712	-0.000726	-0.006891	-0.004970
47.0000	821.813	5.348	91.327	65.108	-0.841	35.296	1564.522	-0.000374	-0.006393	-0.004558
47.2000	755.824	-0.027	83.222	58.673	-0.826	35.296	1438.894	0.000002	-0.005826	-0.004107
47.4000	700.609	-4.672	76.423	53.671	-0.832	35.296	1333.780	0.000327	-0.005350	-0.003757
47.6000	646.191	-9.093	68.939	48.181	-0.830	35.296	1230.183	0.000637	-0.004826	-0.003373
47.8000	583.102	-13.982	61.715	42.041	-0.833	35.296	1110.077	0.000979	-0.004320	-0.002943
48.0000	521.591	-19.332	52.852	36.092	-0.831	35.295	992.975	0.001353	-0.003700	-0.002526
48.2000	476.491	-22.749	46.935	31.564	-0.826	35.296	907.116	0.001592	-0.003285	-0.002209
48.4000	420.901	-26.793	39.285	25.851	-0.821	35.295	801.287	0.001876	-0.002750	-0.001810
48.6000	380.519	-30.242	33.288	21.348	-0.832	35.295	724.411	0.002117	-0.002330	-0.001494
48.8000	325.891	-34.560	25.512	16.094	-0.843	35.295	620.413	0.002419	-0.001786	-0.001127
49.0000	304.971	-35.575	22.431	13.093	-0.821	35.295	580.587	0.002490	-0.001570	-0.000916
49.2000	285.465	-37.592	19.069	11.022	-0.826	35.295	543.451	0.002631	-0.001335	-0.000772
49.4000	264.620	-39.591	15.125	8.632	-0.838	35.294	503.769	0.002771	-0.001059	-0.000604
49.6000	248.675	-40.330	13.182	6.797	-0.823	35.294	473.413	0.002823	-0.000923	-0.000476
49.8000	251.846	-40.816	12.758	6.477	-0.827	35.295	479.450	0.002857	-0.000893	-0.000453
50.0000	256.189	-40.898	12.457	6.310	-0.841	35.294	487.719	0.002863	-0.000872	-0.000442
50.2000	277.064	-39.857	13.747	8.242	-0.838	35.294	527.458	0.002790	-0.000962	-0.000577
50.4000	284.533	-39.051	15.260	8.771	-0.828	35.294	541.677	0.002734	-0.001068	-0.000614
50.6000	303.424	-38.150	17.709	10.384	-0.837	35.294	577.641	0.002670	-0.001240	-0.000727
50.8000	342.813	-35.799	21.950	13.718	-0.829	35.294	652.628	0.002506	-0.001536	-0.000960
51.0000	384.863	-32.574	26.997	17.898	-0.841	35.293	732.679	0.002280	-0.001890	-0.001253
51.2000	432.593	-29.491	33.481	22.152	-0.843	35.294	823.545	0.002064	-0.002344	-0.001551
51.4000	477.392	-26.614	39.533	26.102	-0.835	35.294	908.833	0.001863	-0.002767	-0.001827
51.6000	531.465	-22.597	46.124	31.242	-0.835	35.294	1011.772	0.001582	-0.003229	-0.002187
51.8000	598.040	-17.663	54.654	37.872	-0.842	35.294	1138.515	0.001236	-0.003826	-0.002651
52.0000	657.343	-12.954	62.732	43.070	-0.822	35.294	1251.411	0.000907	-0.004391	-0.003015
52.2000	712.106	-8.994	69.089	48.544	-0.830	35.294	1355.667	0.000630	-0.004836	-0.003398
52.4000	781.162	-3.422	77.374	54.535	-0.825	35.295	1487.131	0.000240	-0.005416	-0.003817
52.6000	836.737	1.706	84.926	60.213	-0.834	35.294	1592.932	-0.000119	-0.005945	-0.004215
52.8000	892.342	6.000	92.109	65.815	-0.841	35.295	1698.790	-0.000420	-0.006448	-0.004607
53.0000	964.658	11.587	99.542	72.317	-0.833	35.295	1836.462	-0.000811	-0.006968	-0.005062
53.2000	1000.351	15.186	104.525	76.267	-0.831	35.294	1904.411	-0.001063	-0.007317	-0.005339
53.4000	1070.564	21.079	112.543	82.838	-0.826	35.294	2038.078	-0.001476	-0.007878	-0.005799
53.6000	1105.009	24.079	117.048	86.326	-0.823	35.295	2103.653	-0.001686	-0.008193	-0.006043
53.8000	1138.733	27.500	120.773	89.729	-0.811	35.295	2167.854	-0.001925	-0.008454	-0.006281
54.0000	1174.004	30.945	125.412	93.692	-0.834	35.295	2235.003	-0.002166	-0.008779	-0.006558
54.2000	1199.703	33.154	128.302	96.163	-0.813	35.295	2283.926	-0.002321	-0.008981	-0.006731
54.4000	1226.378	35.489	131.064	99.087	-0.826	35.295	2334.709	-0.002484	-0.009174	-0.006936
54.6000	1229.489	36.670	131.905	99.559	-0.827	35.295	2340.631	-0.002567	-0.009233	-0.006969
54.8000	1227.806	37.003	132.690	100.028	-0.837	35.296	2337.427	-0.002590	-0.009288	-0.007002
55.0000	1229.339	36.851	133.267	100.361	-0.823	35.295	2340.345	-0.002580	-0.009329	-0.007025
55.2000	1212.702	36.057	132.608	99.419	-0.822	35.295	2308.674	-0.002524	-0.009283	-0.006959
55.4000	1196.757	34.876	130.970	97.944	-0.823	35.296	2278.318	-0.002441	-0.009168	-0.006856
55.6000	1171.870	33.058	129.344	96.539	-0.828	35.296	2230.940	-0.002314	-0.009054	-0.006758
55.8000	1139.709	30.317	125.784	93.428	-0.814	35.296	2169.714	-0.002122	-0.008805	-0.006540
56.0000	1097.239	27.264	121.585	89.631	-0.811	35.297	2088.861	-0.001908	-0.008511	-0.006274
56.2000	1043.723	23.317	116.219	85.201	-0.822	35.296	1986.980	-0.001632	-0.008135	-0.005964
56.4000	999.554	19.577	111.332	81.548	-0.829	35.296	1902.895	-0.001370	-0.007793	-0.005708
56.6000	947.406	15.270	105.390	76.616	-0.827	35.296	1803.617	-0.001069	-0.007377	-0.005363
56.8000	889.051	10.683	98.427	71.207	-0.814	35.296	1692.524	-0.000748	-0.006890	-0.004984
57.0000	829.914	6.376	91.944	65.760	-0.835	35.297	1579.943	-0.000446	-0.006436	-0.004603
57.2000	764.360	0.623	84.037	59.578	-0.814	35.297	1455.145	-0.000044	-0.005883	-0.004170
57.4000	699.377	-4.366	75.970	53.476	-0.818	35.297	1331.434	0.000306	-0.005318	-0.003743
57.6000	648.836	-8.396	69.680	48.793	-0.814	35.297	1235.218	0.000588	-0.004878	-0.003416
57.8000	577.827	-14.150	61.096	41.708	-0.815	35.297	1100.035	0.000991	-0.004277	-0.002920
58.0000	528.489	-18.706	53.804	36.900	-0.811	35.297	1006.107	0.001309	-0.003766	-0.002583
58.2000	467.894	-23.165	45.879	30.797	-0.815	35.297	890.751	0.001622	-0.003211	-0.002156
58.4000	421.637	-26.364	39.326	26.004	-0.806	35.298	802.689	0.001845	-0.002753	-0.001820
58.6000	374.839	-30.409	32.639	21.554	-0.823	35.297	713.596	0.002129	-0.002285	-0.001509
58.8000	339.837	-33.351	27.410	17.481	-0.819	35.298	646.963	0.002335	-0.001919	-0.001224
59.0000	303.078	-36.023	22.500	13.661	-0.817	35.298	576.982	0.002522	-0.001575	-0.000956
59.2000	289.387	-37.219	19.497	11.367	-0.830	35.299	550.919	0.002605	-0.001365	-0.000796
59.4000	267.415	-39.107	15.674	9.188	-0.825	35.299	509.090	0.002738	-0.001097	-0.000643
59.6000	253.574	-40.150	13.072	7.144	-0.802	35.299	482.740	0.002810	-0.000915	-0.000500
59.8000	256.670	-39.996	12.868	6.743	-0.809	35.300	488.634	0.002800	-0.000901	-0.000472
60.0000	256.956	-40.288	12.621	6.865	-0.818	35.299	489.178	0.002820	-0.000883	-0.000481
60.2000	264.770	-40.288	12.950	7.088	-0.826	35.300	504.055	0.002820	-0.000906	-0.000496
60.4000	294.316	-38.024	16.181	9.759	-0.813	35.300	560.303	0.002662	-0.001133	-0.000683
60.6000	310.712	-37.273	18.425	11.507	-0.807	35.300	591.516	0.002609	-0.001290	-0.000805
60.8000	340.033	-35.549	22.910	14.358	-0.810	35.301	647.335	0.002488	-0.001604	-0.001005
61.0000	393.519	-32.145	28.058	18.650	-0.825	35.301	749.159	0.002250	-0.001964	-0.001306
61.2000	432.442	-29.434	33.563	22.443	-0.808	35.301	823.259	0.002060	-0.002349	-0.001571
61.4000	484.095	-25.810	40.030	26.685	-0.818	35.301	921.593	0.001807	-0.002802	-0.001868
61.6000	538.693	-21.929	47.170	32.049	-0.822	35.301	1025.534	0.001535	-0.003302	-0.002243
61.8000	588.963	-18.151	53.831	37.259	-0.813	35.302	1121.235	0.001271	-0.003768	-0.002608
62.0000	646.552	-13.303	61.014	42.569	-0.817	35.302	1230.869	0.000931	-0.004271	-0.002980
62.2000	714.240	-8.035	70.190	49.155	-0.824	35.301	1359.730	0.000562	-0.004913	-0.003441
62.4000	772.866	-3.366	77.030	54.824	-0.828	35.302	1471.338	0.000236	-0.005392	-0.003838
62.6000	832.138	1.747	84.324	60.660	-0.825	35.302	1584.177	-0.000122	-0.005903	-0.004246
62.8000	896.339	7.028	92.466	66.538	-0.827	35.303	1706.400	-0.000492	-0.006473	-0.004658
63.0000	951.839	11.199	98.783	72.013	-0.838	35.304	1812.057	-0.000784	-0.006915	-0.005041
63.2000	1002.154	15.827	104.759	77.488	-0.826	35.304	1907.845	-0.001108	-0.007333	-0.005424
63.4000	1057.775	20.677	112.009	82.506	-0.824	35.304	2013.731	-0.001447	-0.007841	-0.005775
63.6000	1099.433	24.260	116.937	86.424	-0.830	35.305	2093.039	-0.001698	-0.008186	-0.006050
63.8000	1146.442	28.569	121.434	90.924	-0.827	35.305	2182.531	-0.002000	-0.008500	-0.006365
64.0000	1176.304	31.402	125.383	93.814	-0.825	35.306	2239.380	-0.002198	-0.008777	-0.006567
64.2000	1187.259	32.876	127.958	95.664	-0.833	35.306	2260.237	-0.002301	-0.008957	-0.006696
64.4000	1220.547	35.626	131.437	99.071	-0.817	35.307	2323.608	-0.002494	-0.009201	-0.006935
64.6000	1228.828	36.974	132.594	99.670	-0.803	35.307	2339.373	-0.002588	-0.009282	-0.006977
64.8000	1233.697	37.767	133.377	100.585	-0.830	35.307	2348.642	-0.002644	-0.009336	-0.007041
65.0000	1231.007	37.422	133.461	100.779	-0.835	35.307	2343.521	-0.002620	-0.009342	-0.007055
65.2000	1223.147	37.129	132.911	100.459	-0.823	35.308	2328.558	-0.002599	-0.009304	-0.007032
65.4000	1198.110	35.573	131.850	98.795	-0.822	35.308	2280.893	-0.002490	-0.009229	-0.006916
65.6000	1169.045	33.447	128.728	95.968	-0.821	35.309	2225.561	-0.002341	-0.009011	-0.006718
65.8000	1133.773	30.277	125.383	93.138	-0.825	35.309	2158.413	-0.002119	-0.008777	-0.006520
66.0000	1095.586	27.582	121.654	89.578	-0.823	35.309	2085.714	-0.001931	-0.008516	-0.006270
66.2000	1044.880	23.872	116.922	85.549	-0.817	35.309	1989.183	-0.001671	-0.008185	-0.005988
66.4000	1005.265	20.049	111.914	81.658	-0.821	35.309	1913.767	-0.001403	-0.007834	-0.005716
66.6000	945.076	15.757	105.499	76.350	-0.825	35.309	1799.183	-0.001103	-0.007385	-0.005345
66.8000	880.665	10.725	98.372	70.557	-0.838	35.310	1676.559	-0.000751	-0.006886	-0.004939
67.0000	830.244	6.334	92.360	65.358	-0.830	35.309	1580.572	-0.000443	-0.006465	-0.004575
67.2000	772.370	1.721	85.135	60.106	-0.822	35.310	1470.394	-0.000120	-0.005959	-0.004207
67.4000	705.088	-3.811	77.085	53.631	-0.804	35.310	1342.306	0.000267	-0.005396	-0.003754
67.6000	639.399	-8.841	69.146	47.582	-0.818	35.310	1217.251	0.000619	-0.004840	-0.003331
67.8000	589.534	-13.080	62.568	42.653	-0.822	35.309	1122.322	0.000916	-0.004380	-0.002986
68.0000	527.422	-18.026	54.531	36.773	-0.838	35.309	1004.076	0.001262	-0.003817	-0.002574
68.2000	467.173	-22.695	46.590	30.714	-0.815	35.309	889.378	0.001589	-0.003261	-0.002150
68.4000	423.726	-25.811	40.251	26.378	-0.837	35.309	806.665	0.001807	-0.002818	-0.001846
68.6000	382.924	-29.504	34.252	22.164	-0.832	35.309	728.989	0.002065	-0.002398	-0.001551
68.8000	344.586	-32.256	28.442	18.080	-0.833	35.308	656.004	0.002258	-0.001991	-0.001266
69.0000	310.893	-34.826	23.821	14.457	-0.827	35.308	591.860	0.002438	-0.001667	-0.001012
69.2000	281.753	-37.456	19.068	10.909	-0.834	35.308	536.385	0.002622	-0.001335	-0.000764
69.4000	263.433	-38.994	15.976	8.909	-0.826	35.308	501.509	0.002730	-0.001118	-0.000624
69.6000	254.206	-39.870	14.229	7.520	-0.828	35.308	483.942	0.002791	-0.000996	-0.000526
69.8000	256.866	-39.620	13.787	7.087	-0.834	35.308	489.006	0.002773	-0.000965	-0.000496
70.0000	252.102	-40.286	13.086	6.671	-0.830	35.308	479.937	0.002820	-0.000916	-0.000467
70.2000	271.789	-39.231	14.544	8.522	-0.841	35.308	517.416	0.002746	-0.001018	-0.000597
70.4000	280.250	-38.635	15.358	8.899	-0.826	35.308	533.524	0.002704	-0.001075	-0.000623
70.6000	309.931	-36.954	18.959	11.230	-0.811	35.308	590.029	0.002587	-0.001327	-0.000786
70.8000	347.547	-34.757	23.062	14.442	-0.827	35.308	661.640	0.002433	-0.001614	-0.001011
71.0000	378.085	-32.158	27.244	17.747	-0.827	35.307	719.776	0.002251	-0.001907	-0.001242
71.2000	425.319	-29.297	33.412	21.901	-0.815	35.308	809.698	0.002051	-0.002339	-0.001533
71.4000	473.876	-26.157	39.245	26.115	-0.823	35.308	902.138	0.001831	-0.002747	-0.001828
71.6000	531.555	-21.845	46.701	31.562	-0.821	35.308	1011.944	0.001529	-0.003269	-0.002209
71.8000	589.069	-17.455	54.571	36.997	-0.809	35.308	1121.435	0.001222	-0.003820	-0.002590
72.0000	658.951	-12.468	62.953	43.555	-0.806	35.308	1254.473	0.000873	-0.004407	-0.003049
72.2000	716.810	-7.952	69.998	49.320	-0.809	35.308	1364.622	0.000557	-0.004900	-0.003452
72.4000	776.187	-2.755	77.472	54.796	-0.813	35.308	1477.661	0.000193	-0.005423	-0.003836
72.6000	839.757	2.359	85.342	60.936	-0.816	35.308	1598.682	-0.000165	-0.005974	-0.004265
72.8000	887.713	6.153	91.368	65.981	-0.809	35.308	1689.978	-0.000431	-0.006396	-0.004619
73.0000	958.963	12.240	99.914	72.509	-0.813	35.308	1825.619	-0.000857	-0.006994	-0.005076
73.2000	1013.741	16.813	106.120	77.988	-0.816	35.308	1929.903	-0.001177	-0.007428	-0.005459
73.4000	1057.414	20.618	111.706	82.451	-0.806	35.308	2013.044	-0.001443	-0.007819	-0.005772
73.6000	1101.928	24.650	116.993	86.938	-0.808	35.308	2097.788	-0.001725	-0.008189	-0.006086
73.8000	1141.889	28.569	121.695	90.815	-0.809	35.309	2173.862	-0.002000	-0.008519	-0.006357
74.0000	1172.396	31.290	125.425	94.192	-0.819	35.309	2231.941	-0.002190	-0.008780	-0.006593
74.2000	1199.703	33.654	129.013	97.290	-0.820	35.309	2283.926	-0.002356	-0.009031	-0.006810
74.4000	1217.647	35.557	130.777	98.654	-0.811	35.308	2318.087	-0.002489	-0.009154	-0.006906
74.6000	1228.467	36.936	132.895	100.223	-0.811	35.308	2338.686	-0.002586	-0.009303	-0.007016
74.8000	1227.190	37.198	133.323	101.083	-0.810	35.309	2336.254	-0.002604	-0.009333	-0.007076
75.0000	1235.350	37.976	133.955	101.209	-0.805	35.308	2351.789	-0.002658	-0.009377	-0.007085
75.2000	1215.994	37.073	133.143	100.194	-0.829	35.308	2314.939	-0.002595	-0.009320	-0.007014
75.4000	1191.663	35.320	131.754	98.529	-0.826	35.309	2268.620	-0.002472	-0.009223	-0.006897
75.6000	1161.711	33.072	128.713	96.414	-0.829	35.309	2211.599	-0.002315	-0.009010	-0.006749
75.8000	1131.699	31.444	125.729	93.539	-0.813	35.308	2154.465	-0.002201	-0.008801	-0.006548
76.0000	1093.257	28.040	121.805	90.287	-0.834	35.308	2081.280	-0.001963	-0.008526	-0.006320
76.2000	1049.840	24.633	117.348	86.480	-0.818	35.308	1998.625	-0.001724	-0.008214	-0.006054
76.4000	999.810	20.745	112.378	82.229	-0.826	35.308	1903.381	-0.001452	-0.007866	-0.005756
76.6000	942.477	16.159	105.745	77.155	-0.831	35.308	1794.233	-0.001131	-0.007402	-0.005401
76.8000	894.806	12.047	100.382	72.583	-0.821	35.309	1703.482	-0.000843	-0.007027	-0.005081
77.0000	830.335	6.999	92.977	66.549	-0.819	35.309	1580.744	-0.000490	-0.006508	-0.004658
77.2000	763.563	1.873	85.190	60.550	-0.819	35.309	1453.629	-0.000131	-0.005963	-0.004238
77.4000	702.849	-3.351	77.650	54.572	-0.814	35.310	1338.043	0.000235	-0.005435	-0.003820
77.6000	649.242	-7.909	69.970	49.722	-0.829	35.310	1235.991	0.000554	-0.004898	-0.003481
77.8000	581.629	-12.789	62.199	42.860	-0.814	35.309	1107.273	0.000895	-0.004354	-0.003000
78.0000	528.534	-17.454	54.875	37.455	-0.824	35.310	1006.193	0.001222	-0.003841	-0.002622
78.2000	461.583	-22.429	46.002	30.826	-0.823	35.310	878.735	0.001570	-0.003220	-0.002158
78.4000	416.212	-26.101	40.003	26.114	-0.813	35.311	792.360	0.001827	-0.002800	-0.001828
78.6000	383.495	-28.865	34.595	22.471	-0.825	35.311	730.076	0.002021	-0.002422	-0.001573
78.8000	331.707	-32.964	27.561	17.302	-0.809	35.311	631.485	0.002307	-0.001929	-0.001211
79.0000	312.891	-34.452	23.725	14.777	-0.816	35.311	595.665	0.002412	-0.001661	-0.001034
79.2000	288.004	-36.676	19.991	11.715	-0.822	35.312	548.286	0.002567	-0.001399	-0.000820
79.4000	257.767	-38.578	16.029	8.883	-0.821	35.312	490.723	0.002700	-0.001122	-0.000622
79.6000	256.820	-38.912	14.667	8.117	-0.824	35.313	488.920	0.002724	-0.001027	-0.000568
79.8000	255.979	-39.326	14.033	8.019	-0.822	35.314	487.318	0.002753	-0.000982	-0.000561
80.0000	259.285	-39.815	13.884	7.548	-0.818	35.314	493.612	0.002787	-0.000972	-0.000528
80.2000	262.095	-39.300	13.415	7.841	-0.815	35.315	498.962	0.002751	-0.000939	-0.000549
80.4000	285.510	-38.080	16.224	9.773	-0.830	35.316	543.537	0.002666	-0.001136	-0.000684
80.6000	315.116	-36.758	19.207	12.035	-0.828	35.317	599.899	0.002573	-0.001345	-0.000842
80.8000	347.757	-34.159	23.779	14.998	-0.833	35.317	662.041	0.002391	-0.001665	-0.001050
81.0000	373.787	-32.228	27.619	17.954	-0.829	35.318	711.594	0.002256	-0.001933	-0.001257
81.2000	425.469	-29.338	33.384	22.193	-0.830	35.319	809.984	0.002054	-0.002337	-0.001554
81.4000	476.461	-25.615	40.046	26.824	-0.817	35.320	907.059	0.001793	-0.002803	-0.001878
81.6000	542.931	-20.737	48.464	33.048	-0.827	35.320	1033.602	0.001452	-0.003392	-0.002313
81.8000	587.160	-17.565	54.875	37.537	-0.817	35.321	1117.802	0.001230	-0.003841	-0.002628
82.0000	653.796	-12.871	62.239	43.443	-0.834	35.321	1244.659	0.000901	-0.004357	-0.003041
82.2000	718.448	-7.271	70.769	49.487	-0.826	35.322	1367.741	0.000509	-0.004954	-0.003464
82.4000	767.892	-3.366	77.965	54.671	-0.844	35.323	1461.868	0.000236	-0.005458	-0.003827
82.6000	841.320	2.302	85.602	61.588	-0.838	35.323	1601.658	-0.000161	-0.005992	-0.004311
82.8000	891.485	7.277	92.648	66.563	-0.838	35.325	1697.159	-0.000509	-0.006485	-0.004659
83.0000	945.182	11.630	99.598	71.943	-0.840	35.325	1799.383	-0.000814	-0.006972	-0.005036
83.2000	1003.071	16.408	105.484	77.502	-0.840	35.326	1909.590	-0.001149	-0.007384	-0.005425
83.4000	1081.249	22.913	114.375	84.573	-0.832	35.327	2058.420	-0.001604	-0.008006	-0.005920
83.6000	1104.167	25.234	117.964	87.481	-0.835	35.328	2102.051	-0.001766	-0.008257	-0.006124
83.8000	1143.602	28.693	122.302	91.190	-0.837	35.330	2177.124	-0.002008	-0.008561	-0.006383
84.0000	1177.401	31.807	126.387	94.774	-0.835	35.330	2241.468	-0.002226	-0.008847	-0.006634
84.2000	1201.596	34.239	129.623	97.625	-0.833	35.331	2287.531	-0.002397	-0.009074	-0.006834
84.4000	1222.005	36.321	131.822	99.765	-0.841	35.332	2326.384	-0.002542	-0.009228	-0.006984
84.6000	1218.804	36.530	133.158	100.166	-0.816	35.333	2320.290	-0.002557	-0.009321	-0.007012
84.8000	1243.541	38.602	135.401	102.307	-0.825	35.333	2367.382	-0.002702	-0.009478	-0.007161
85.0000	1227.205	37.852	134.258	101.096	-0.833	35.334	2336.283	-0.002650	-0.009398	-0.007077
85.2000	1220.247	37.683	134.107	100.917	-0.839	35.335	2323.036	-0.002638	-0.009387	-0.007064
85.4000	1196.201	35.946	132.498	99.043	-0.802	35.337	2277.260	-0.002516	-0.009275	-0.006933
85.6000	1176.153	34.462	130.364	97.500	-0.820	35.337	2239.094	-0.002412	-0.009125	-0.006825
85.8000	1125.477	30.943	125.852	93.442	-0.834	35.338	2142.620	-0.002166	-0.008810	-0.006541
86.0000	1097.630	28.624	122.756	90.814	-0.829	35.338	2089.605	-0.002004	-0.008593	-0.006357
86.2000	1056.527	25.052	118.004	87.286	-0.817	35.339	2011.356	-0.001754	-0.008260	-0.006110
86.4000	1005.791	21.384	112.708	82.894	-0.825	35.340	1914.768	-0.001497	-0.007890	-0.005803
86.6000	951.644	16.368	106.806	77.696	-0.817	35.341	1811.686	-0.001146	-0.007476	-0.005439
86.8000	889.712	11.756	99.953	72.706	-0.801	35.341	1693.783	-0.000823	-0.006997	-0.005089
87.0000	829.207	7.000	93.045	66.800	-0.821	35.342	1578.598	-0.000490	-0.006513	-0.004676
87.2000	774.249	2.123	86.015	61.658	-0.803	35.342	1473.970	-0.000149	-0.006021	-0.004316
87.4000	703.871	-3.102	77.457	55.296	-0.809	35.343	1339.989	0.000217	-0.005422	-0.003871
87.6000	636.273	-8.424	69.420	48.918	-0.815	35.344	1211.300	0.000590	-0.004859	-0.003424
87.8000	587.836	-12.147	62.856	43.831	-0.798	35.344	1119.089	0.000850	-0.004400	-0.003068
88.0000	517.819	-17.956	54.093	37.440	-0.803	35.344	985.794	0.001257	-0.003787	-0.002621
88.2000	471.096	-21.472	47.650	33.088	-0.807	35.345	896.845	0.001503	-0.003335	-0.002316
88.4000	418.827	-26.004	40.046	27.309	-0.809	35.345	797.338	0.001820	-0.002803	-0.001912
88.6000	375.560	-29.004	34.237	23.027	-0.805	35.346	714.970	0.002030	-0.002397	-0.001612
88.8000	344.421	-31.882	29.131	19.360	-0.813	35.346	655.689	0.002232	-0.002039	-0.001355
89.0000	307.782	-35.118	23.671	15.721	-0.795	35.347	585.938	0.002458	-0.001657	-0.001100
89.2000	285.705	-36.260	20.102	12.829	-0.793	35.348	543.909	0.002538	-0.001407	-0.000898
89.4000	261.524	-38.371	16.374	10.327	-0.810	35.348	497.875	0.002686	-0.001146	-0.000723
89.6000	259.090	-39.079	15.014	9.538	-0.808	35.348	493.240	0.002736	-0.001051	-0.000668
89.8000	257.196	-38.912	13.871	8.952	-0.804	35.349	489.635	0.002724	-0.000971	-0.000627
90.0000	252.613	-39.760	13.238	8.466	-0.821	35.350	480.909	0.002783	-0.000927	-0.000593
90.2000	275.756	-38.619	14.779	10.133	-0.808	35.349	524.969	0.002703	-0.001034	-0.000709
90.4000	285.675	-37.510	17.175	11.381	-0.811	35.349	543.852	0.002626	-0.001202	-0.000797
90.6000	306.880	-36.816	19.125	12.996	-0.821	35.350	584.221	0.002577	-0.001339	-0.000910
90.8000	349.876	-33.352	24.234	16.843	-0.806	35.350	666.075	0.002335	-0.001696	-0.001179
91.0000	391.761	-31.104	29.612	20.557	-0.823	35.351	745.811	0.002177	-0.002073	-0.001439
91.2000	438.379	-28.127	35.061	24.515	-0.823	35.351	834.560	0.001969	-0.002454	-0.001716
91.4000	493.683	-23.850	42.024	29.364	-0.817	35.351	939.846	0.001669	-0.002942	-0.002055
91.6000	543.532	-20.541	48.780	33.950	-0.841	35.352	1034.746	0.001438	-0.003415	-0.002376
91.8000	603.541	-15.899	56.128	39.966	-0.823	35.352	1148.987	0.001113	-0.003929	-0.002798
92.0000	662.828	-10.965	63.862	45.385	-0.830	35.352	1261.854	0.000768	-0.004470	-0.003177
92.2000	722.896	-6.964	70.919	51.071	-0.828	35.352	1376.209	0.000487	-0.004964	-0.003575
92.4000	787.774	-1.558	78.998	57.239	-0.822	35.353	1499.720	0.000109	-0.005530	-0.004007
92.6000	842.042	2.860	86.841	62.884	-0.823	35.353	1603.031	-0.000200	-0.006079	-0.004402
92.8000	901.765	7.904	93.211	68.485	-0.835	35.353	1716.728	-0.000553	-0.006525	-0.004794
93.0000	961.217	13.392	100.422	74.486	-0.813	35.353	1829.910	-0.000937	-0.007030	-0.005214
93.2000	1012.133	17.175	106.600	79.448	-0.817	35.353	1926.842	-0.001202	-0.007462	-0.005561
93.4000	1058.691	21.009	112.295	84.087	-0.816	35.353	2015.476	-0.001471	-0.007861	-0.005886
93.6000	1107.984	26.290	117.964	88.606	-0.814	35.353	2109.318	-0.001840	-0.008258	-0.006202
93.8000	1145.976	28.958	122.659	92.122	-0.822	35.354	2181.644	-0.002027	-0.008586	-0.006449
94.0000	1172.291	31.417	125.892	95.247	-0.828	35.354	2231.741	-0.002199	-0.008812	-0.006667
94.2000	1203.956	35.072	129.771	98.016	-0.831	35.354	2292.023	-0.002455	-0.009084	-0.006861
94.4000	1221.900	36.418	132.402	100.349	-0.822	35.354	2326.183	-0.002549	-0.009268	-0.007024
94.6000	1233.727	38.144	133.336	102.001	-0.815	35.354	2348.700	-0.002670	-0.009333	-0.007140
94.8000	1231.323	37.990	134.353	101.903	-0.825	35.353	2344.122	-0.002659	-0.009405	-0.007133
95.0000	1228.031	37.810	134.011	102.001	-0.817	35.354	2337.856	-0.002647	-0.009381	-0.007140
95.2000	1218.188	37.685	133.365	100.957	-0.822	35.353	2319.117	-0.002638	-0.009336	-0.007067
95.4000	1195.164	35.570	132.210	99.322	-0.829	35.353	2275.286	-0.002490	-0.009255	-0.006953
95.6000	1170.803	34.005	129.622	97.528	-0.822	35.353	2228.909	-0.002380	-0.009074	-0.006827
95.8000	1129.535	31.180	126.197	93.900	-0.829	35.352	2150.345	-0.002183	-0.008834	-0.006573
96.0000	1096.322	28.179	122.287	90.981	-0.817	35.352	2087.116	-0.001972	-0.008560	-0.006369
96.2000	1045.752	24.482	117.075	86.689	-0.836	35.351	1990.843	-0.001714	-0.008195	-0.006068
96.4000	992.326	20.023	111.625	82.355	-0.833	35.350	1889.133	-0.001402	-0.007814	-0.005765
96.6000	935.428	15.241	105.499	77.168	-0.823	35.350	1780.815	-0.001067	-0.007385	-0.005402
96.8000	886.135	11.407	99.405	72.541	-0.821	35.349	1686.974	-0.000798	-0.006958	-0.005078
97.0000	821.573	6.528	91.986	66.550	-0.823	35.349	1564.064	-0.000457	-0.006439	-0.004659
97.2000	763.067	1.512	85.355	61.354	-0.826	35.349	1452.684	-0.000106	-0.005975	-0.004295
97.4000	699.061	-3.324	77.183	55.170	-0.815	35.348	1330.833	0.000233	-0.005403	-0.003862
97.6000	642.720	-7.894	70.204	49.653	-0.811	35.348	1223.574	0.000553	-0.004914	-0.003476
97.8000	573.785	-13.551	61.122	43.150	-0.820	35.348	1092.339	0.000949	-0.004279	-0.003020
98.0000	525.724	-17.359	54.709	38.271	-0.827	35.347	1000.843	0.001215	-0.003830	-0.002679
98.2000	462.995	-22.651	46.910	32.313	-0.818	35.346	881.424	0.001586	-0.003284	-0.002262
98.4000	417.369	-26.185	39.464	27.198	-0.833	35.346	794.563	0.001833	-0.002762	-0.001904
98.6000	368.482	-29.798	33.330	22.539	-0.829	35.346	701.494	0.002086	-0.002333	-0.001578
98.8000	341.445	-31.565	28.994	19.110	-0.829	35.345	650.024	0.002210	-0.002030	-0.001338
99.0000	306.249	-34.826	22.912	15.067	-0.827	35.345	583.019	0.002438	-0.001604	-0.001055
99.2000	283.751	-36.733	19.896	12.634	-0.829	35.344	540.190	0.002571	-0.001393	-0.000884
99.4000	262.426	-37.995	16.790	10.232	-0.827	35.343	499.592	0.002660	-0.001175	-0.000716
99.6000	251.200	-39.675	14.104	8.855	-0.824	35.343	478.220	0.002777	-0.000987	-0.000620
99.8000	464.273	-26.017	38.569	26.837	-0.819	35.342	883.856	0.001821	-0.002700	-0.001879
