# Supplementary material for: Evaluation of a Cold-Mixed High-Performance Polyurethane Mixture
Source: Hindawi journal article supplement (doi:10.1155/2019/1507971), 2019-11-07
Supplement: f1 [file 1507971.f1.zip › 1507971.f1/dynamic modulus data/PUM/specimen1/temp35/zhs-1-35_0.2Hz.csv]

Test Information
****************
Project name	zhs
Operator name	1
Target test temperature	35
Target confining stress	0
Average dynamic strain range from 75 to 125 micro-strain
Contact stress	5
Initial modulus	1000
Axial gauge length	70
Comments
Specimen information
********************
Identification	zhs-1-35
Dimensions	Point 1	Point 2	Point 3	Point 4	Point 5	Point 6	Average	Std Dev.
Diameter (mm)	49.2	49.2	49.3				49.23	0.058
Height (mm)	101.3	101.2	101.3				101.27	0.058
Cross-sectional area (mm�)	1903.7
Conditioning time
Properties/Comments
Test Data	0.2Hz
*********
Test date and time	Tue	Apr 2	2019	1:19 PM
Dynamic modulus (MPa)	10247
Phase angle (Degrees)	4.91
Average temperature (�C)	35.4
Average confining pressure (kPa)	-0.7
Average micro-strain	98
Load drift (%)	0.4
Load standard error (%)	2.0
Average deformation drift (%)	52.9
Average deformation standard error (%)	11.4
Deformation uniformity (%)	18.8
Phase uniformity (Degrees)	1.3
Conditioning Cycles
Time (sec)	Axial stress (kPa)	Axial micro-strain #1	Axial micro-strain #2	Axial micro-strain #3	Confining pressure (kPa)	Temperature (�C)	Load (N)	Displacement #1 (mm)	Displacement #2 (mm)	Displacement #3 (mm)
0.0000	232.880	1.638	7.253	3.699	-0.675	35.384	443.344	-0.000115	-0.000508	-0.000259
0.1000	246.421	1.998	7.829	4.255	-0.686	35.384	469.122	-0.000140	-0.000548	-0.000298
0.2000	264.966	2.371	8.835	5.350	-0.684	35.383	504.427	-0.000166	-0.000618	-0.000374
0.3000	277.800	3.248	9.961	6.281	-0.687	35.383	528.860	-0.000227	-0.000697	-0.000440
0.4000	298.073	4.475	13.155	8.354	-0.680	35.383	567.455	-0.000313	-0.000921	-0.000585
0.5000	346.405	7.639	18.357	12.410	-0.690	35.382	659.466	-0.000535	-0.001285	-0.000869
0.6000	368.677	8.499	21.206	14.290	-0.681	35.382	701.866	-0.000595	-0.001484	-0.001000
0.7000	408.773	11.727	25.853	18.219	-0.673	35.381	778.198	-0.000821	-0.001810	-0.001275
0.8000	453.152	14.727	32.089	22.277	-0.673	35.381	862.684	-0.001031	-0.002246	-0.001559
0.9000	501.603	18.366	38.268	26.321	-0.680	35.381	954.924	-0.001286	-0.002679	-0.001842
1.0000	573.875	22.858	46.797	32.480	-0.676	35.380	1092.510	-0.001600	-0.003276	-0.002274
1.1000	603.676	25.012	50.694	35.495	-0.671	35.380	1149.244	-0.001751	-0.003549	-0.002485
1.2000	642.239	28.084	56.131	39.423	-0.676	35.379	1222.658	-0.001966	-0.003929	-0.002760
1.3000	693.215	32.111	62.513	44.193	-0.672	35.379	1319.704	-0.002248	-0.004376	-0.003093
1.4000	740.435	35.765	68.154	48.503	-0.677	35.379	1409.597	-0.002504	-0.004771	-0.003395
1.5000	780.260	38.975	73.302	52.363	-0.674	35.378	1485.415	-0.002728	-0.005131	-0.003665
1.6000	825.315	42.868	79.807	56.629	-0.661	35.378	1571.188	-0.003001	-0.005587	-0.003964
1.7000	858.768	45.385	83.468	60.177	-0.671	35.377	1634.874	-0.003177	-0.005843	-0.004212
1.8000	901.239	48.550	88.161	63.898	-0.672	35.377	1715.727	-0.003398	-0.006171	-0.004473
1.9000	957.234	53.262	94.645	68.997	-0.675	35.376	1822.329	-0.003728	-0.006625	-0.004830
2.0000	960.045	53.804	95.675	69.804	-0.672	35.376	1827.679	-0.003766	-0.006697	-0.004886
2.1000	980.153	55.320	98.674	71.957	-0.679	35.376	1865.959	-0.003872	-0.006907	-0.005037
2.2000	998.127	56.987	101.001	74.041	-0.669	35.375	1900.177	-0.003989	-0.007070	-0.005183
2.3000	1000.396	57.346	100.877	74.375	-0.675	35.375	1904.497	-0.004014	-0.007061	-0.005206
2.4000	1020.865	59.112	103.739	76.339	-0.665	35.374	1943.464	-0.004138	-0.007262	-0.005344
2.5000	1013.441	59.197	103.547	76.169	-0.673	35.373	1929.331	-0.004144	-0.007248	-0.005332
2.6000	1005.896	58.014	102.816	75.459	-0.677	35.373	1914.968	-0.004061	-0.007197	-0.005282
2.7000	974.232	56.072	100.509	73.207	-0.679	35.373	1854.687	-0.003925	-0.007036	-0.005125
2.8000	972.022	55.960	100.575	72.930	-0.673	35.372	1850.481	-0.003917	-0.007040	-0.005105
2.9000	927.163	52.469	96.429	69.498	-0.679	35.371	1765.079	-0.003673	-0.006750	-0.004865
3.0000	910.992	51.137	94.093	68.094	-0.672	35.371	1734.295	-0.003580	-0.006586	-0.004767
3.1000	879.868	49.065	90.196	65.204	-0.663	35.371	1675.043	-0.003435	-0.006314	-0.004564
3.2000	834.392	45.953	86.069	61.478	-0.668	35.370	1588.469	-0.003217	-0.006025	-0.004303
3.3000	783.912	41.991	79.958	57.227	-0.667	35.369	1492.367	-0.002939	-0.005597	-0.004006
3.4000	752.052	39.061	76.342	54.102	-0.666	35.369	1431.713	-0.002734	-0.005344	-0.003787
3.5000	680.862	34.446	67.260	47.347	-0.687	35.369	1296.186	-0.002411	-0.004708	-0.003314
3.6000	646.176	31.612	63.241	44.221	-0.679	35.368	1230.154	-0.002213	-0.004427	-0.003095
3.7000	599.348	27.972	57.599	39.703	-0.671	35.368	1141.005	-0.001958	-0.004032	-0.002779
3.8000	531.044	22.553	48.602	33.756	-0.673	35.367	1010.971	-0.001579	-0.003402	-0.002363
3.9000	500.115	20.271	44.584	30.826	-0.668	35.366	952.091	-0.001419	-0.003121	-0.002158
4.0000	466.842	17.715	39.026	26.866	-0.677	35.366	888.748	-0.001240	-0.002732	-0.001881
4.1000	400.928	12.935	31.567	21.290	-0.668	35.365	763.264	-0.000905	-0.002210	-0.001490
4.2000	367.054	10.128	26.490	17.733	-0.682	35.365	698.776	-0.000709	-0.001854	-0.001241
4.3000	333.901	7.721	21.287	14.010	-0.671	35.365	635.662	-0.000540	-0.001490	-0.000981
4.4000	308.503	6.056	17.891	11.384	-0.678	35.365	587.311	-0.000424	-0.001252	-0.000797
4.5000	277.139	4.194	13.374	8.048	-0.661	35.364	527.601	-0.000294	-0.000936	-0.000563
4.6000	258.218	2.276	9.743	5.920	-0.665	35.363	491.581	-0.000159	-0.000682	-0.000414
4.7000	241.191	0.986	7.073	3.979	-0.666	35.363	459.166	-0.000069	-0.000495	-0.000279
4.8000	234.082	0.707	5.904	3.018	-0.669	35.363	445.633	-0.000049	-0.000413	-0.000211
4.9000	240.004	0.472	5.725	2.961	-0.672	35.362	456.905	-0.000033	-0.000401	-0.000207
5.0000	252.132	0.957	6.482	3.853	-0.663	35.362	479.994	-0.000067	-0.000454	-0.000270
5.1000	250.824	1.223	5.186	3.368	-0.670	35.361	477.505	-0.000086	-0.000363	-0.000236
5.2000	249.502	0.846	6.276	3.547	-0.673	35.361	474.987	-0.000059	-0.000439	-0.000248
5.3000	278.371	2.538	9.026	5.771	-0.679	35.360	529.947	-0.000178	-0.000632	-0.000404
5.4000	322.344	4.834	14.351	9.690	-0.669	35.360	613.661	-0.000338	-0.001005	-0.000678
5.5000	336.982	6.235	15.496	10.840	-0.669	35.360	641.527	-0.000436	-0.001085	-0.000759
5.6000	373.035	8.641	21.315	14.219	-0.664	35.359	710.163	-0.000605	-0.001492	-0.000995
5.7000	425.740	11.851	26.969	18.816	-0.670	35.358	810.499	-0.000830	-0.001888	-0.001317
5.8000	458.171	13.892	31.417	21.873	-0.683	35.358	872.240	-0.000972	-0.002199	-0.001531
5.9000	508.621	17.369	38.240	26.227	-0.672	35.357	968.285	-0.001216	-0.002677	-0.001836
6.0000	550.686	20.467	43.523	30.128	-0.670	35.357	1048.365	-0.001433	-0.003047	-0.002109
6.1000	589.414	23.386	48.848	33.879	-0.663	35.357	1122.093	-0.001637	-0.003419	-0.002372
6.2000	646.642	27.666	55.566	39.215	-0.661	35.356	1231.041	-0.001937	-0.003890	-0.002745
6.3000	696.296	31.583	61.538	43.679	-0.680	35.356	1325.569	-0.002211	-0.004308	-0.003058
6.4000	736.663	34.710	67.137	47.821	-0.671	35.355	1402.416	-0.002430	-0.004700	-0.003347
6.5000	779.929	38.310	72.792	52.153	-0.657	35.355	1484.785	-0.002682	-0.005095	-0.003651
6.6000	851.449	43.244	80.907	58.185	-0.674	35.354	1620.941	-0.003027	-0.005664	-0.004073
6.7000	886.796	46.231	84.940	61.589	-0.671	35.354	1688.232	-0.003236	-0.005946	-0.004311
6.8000	905.852	47.966	87.888	63.883	-0.671	35.354	1724.510	-0.003358	-0.006152	-0.004472
6.9000	943.679	51.468	92.673	67.927	-0.675	35.353	1796.522	-0.003603	-0.006487	-0.004755
7.0000	966.312	53.164	95.675	70.028	-0.677	35.353	1839.609	-0.003721	-0.006697	-0.004902
7.1000	974.141	54.235	97.793	71.207	-0.680	35.352	1854.515	-0.003796	-0.006846	-0.004984
7.2000	995.617	56.154	99.898	73.361	-0.679	35.352	1895.399	-0.003931	-0.006993	-0.005135
7.3000	1007.429	57.179	101.261	74.708	-0.684	35.351	1917.887	-0.004003	-0.007088	-0.005230
7.4000	1010.255	57.639	101.769	75.071	-0.684	35.351	1923.265	-0.004035	-0.007124	-0.005255
7.5000	1016.116	58.444	102.281	75.516	-0.681	35.351	1934.423	-0.004091	-0.007160	-0.005286
7.6000	1000.952	57.804	101.796	74.722	-0.675	35.350	1905.556	-0.004046	-0.007126	-0.005231
7.7000	985.623	56.293	100.160	73.666	-0.676	35.350	1876.373	-0.003941	-0.007011	-0.005157
7.8000	956.243	54.319	98.400	71.501	-0.677	35.349	1820.440	-0.003802	-0.006888	-0.005005
7.9000	932.498	52.484	95.909	69.497	-0.681	35.349	1775.236	-0.003674	-0.006714	-0.004865
8.0000	901.930	50.791	93.225	66.802	-0.674	35.348	1717.043	-0.003555	-0.006526	-0.004676
8.1000	850.788	46.743	87.695	62.813	-0.673	35.348	1619.682	-0.003272	-0.006139	-0.004397
8.2000	822.174	44.384	83.966	60.131	-0.685	35.347	1565.208	-0.003107	-0.005878	-0.004209
8.3000	782.725	41.435	79.177	56.363	-0.680	35.347	1490.107	-0.002900	-0.005542	-0.003945
8.4000	738.977	38.365	74.444	52.641	-0.667	35.347	1406.822	-0.002686	-0.005211	-0.003685
8.5000	695.905	34.903	69.158	48.516	-0.679	35.346	1324.825	-0.002443	-0.004841	-0.003396
8.6000	639.714	30.553	62.295	43.528	-0.689	35.346	1217.852	-0.002139	-0.004361	-0.003047
8.7000	593.802	26.872	56.320	39.203	-0.674	35.345	1130.447	-0.001881	-0.003942	-0.002744
8.8000	547.034	23.565	50.349	34.755	-0.673	35.345	1041.412	-0.001650	-0.003524	-0.002433
8.9000	505.916	20.480	44.914	30.547	-0.695	35.345	963.135	-0.001434	-0.003144	-0.002138
9.0000	442.857	15.700	36.877	24.933	-0.675	35.344	843.086	-0.001099	-0.002581	-0.001745
9.1000	410.681	13.210	32.132	21.889	-0.669	35.343	781.832	-0.000925	-0.002249	-0.001532
9.2000	379.603	10.864	27.038	18.301	-0.681	35.343	722.666	-0.000760	-0.001893	-0.001281
9.3000	326.417	7.306	20.008	13.021	-0.670	35.343	621.414	-0.000511	-0.001401	-0.000911
9.4000	306.925	5.502	16.388	10.840	-0.682	35.343	584.307	-0.000385	-0.001147	-0.000759
9.5000	279.002	3.459	12.358	8.035	-0.668	35.342	531.149	-0.000242	-0.000865	-0.000562
9.6000	266.799	2.791	10.415	6.490	-0.665	35.342	507.917	-0.000195	-0.000729	-0.000454
9.7000	246.586	1.666	7.582	4.339	-0.672	35.341	469.437	-0.000117	-0.000531	-0.000304
9.8000	235.600	0.362	5.244	2.752	-0.680	35.341	448.523	-0.000025	-0.000367	-0.000193
9.9000	244.407	0.431	5.379	3.143	-0.686	35.341	465.288	-0.000030	-0.000377	-0.000220
10.0000	237.208	-0.182	4.484	2.156	-0.674	35.340	451.584	0.000013	-0.000314	-0.000151
10.1000	249.547	0.624	5.395	3.156	-0.665	35.340	475.073	-0.000044	-0.000378	-0.000221
10.2000	279.979	2.234	8.752	5.519	-0.669	35.340	533.009	-0.000156	-0.000613	-0.000386
10.3000	286.577	3.040	10.197	6.363	-0.665	35.339	545.568	-0.000213	-0.000714	-0.000445
10.4000	351.740	6.737	17.147	11.910	-0.675	35.339	669.622	-0.000472	-0.001200	-0.000834
10.5000	349.666	6.834	17.766	11.895	-0.665	35.339	665.674	-0.000478	-0.001244	-0.000833
10.6000	388.950	8.723	22.925	15.595	-0.679	35.339	740.461	-0.000611	-0.001605	-0.001092
10.7000	442.436	12.099	28.458	20.112	-0.679	35.338	842.285	-0.000847	-0.001992	-0.001408
10.8000	465.821	14.185	32.294	22.747	-0.672	35.338	886.803	-0.000993	-0.002261	-0.001592
10.9000	505.075	17.187	37.096	25.838	-0.678	35.338	961.533	-0.001203	-0.002597	-0.001809
11.0000	556.081	20.592	43.924	30.562	-0.686	35.336	1058.636	-0.001441	-0.003075	-0.002139
11.1000	594.915	23.538	49.097	34.311	-0.681	35.336	1132.565	-0.001648	-0.003437	-0.002402
11.2000	666.735	28.971	57.860	40.885	-0.675	35.336	1269.293	-0.002028	-0.004050	-0.002862
11.3000	696.371	31.737	62.211	44.013	-0.661	35.336	1325.712	-0.002222	-0.004355	-0.003081
11.4000	785.069	37.823	71.910	51.570	-0.668	35.335	1494.570	-0.002648	-0.005034	-0.003610
11.5000	797.227	38.657	73.685	52.949	-0.672	35.335	1517.715	-0.002706	-0.005158	-0.003706
11.6000	838.134	42.507	79.107	57.295	-0.669	35.334	1595.592	-0.002976	-0.005538	-0.004011
11.7000	871.392	45.274	83.635	60.564	-0.673	35.334	1658.907	-0.003169	-0.005854	-0.004239
11.8000	909.414	48.189	88.700	64.094	-0.671	35.333	1731.291	-0.003373	-0.006209	-0.004487
11.9000	943.634	50.984	93.046	68.065	-0.657	35.332	1796.436	-0.003569	-0.006513	-0.004765
12.0000	929.883	50.374	93.032	67.247	-0.657	35.332	1770.258	-0.003526	-0.006512	-0.004707
12.1000	987.532	55.014	98.524	72.361	-0.651	35.331	1880.007	-0.003851	-0.006897	-0.005065
12.2000	995.737	55.877	99.639	73.221	-0.672	35.331	1895.628	-0.003911	-0.006975	-0.005125
12.3000	1010.600	57.472	100.905	74.669	-0.672	35.331	1923.923	-0.004023	-0.007063	-0.005227
12.4000	1008.526	57.442	101.508	74.932	-0.664	35.330	1919.975	-0.004021	-0.007106	-0.005245
12.5000	1008.211	58.027	101.796	75.057	-0.672	35.330	1919.374	-0.004062	-0.007126	-0.005254
12.6000	993.979	56.431	100.795	74.055	-0.671	35.329	1892.281	-0.003950	-0.007056	-0.005184
12.7000	982.377	55.862	100.283	73.513	-0.668	35.329	1870.193	-0.003910	-0.007020	-0.005146
12.8000	962.690	54.888	98.618	72.109	-0.664	35.329	1832.714	-0.003842	-0.006903	-0.005048
12.9000	924.818	51.676	94.357	68.484	-0.675	35.328	1760.616	-0.003617	-0.006605	-0.004794
13.0000	929.732	51.759	94.507	68.651	-0.661	35.328	1769.972	-0.003623	-0.006615	-0.004806
13.1000	878.185	48.315	89.168	64.466	-0.661	35.327	1671.839	-0.003382	-0.006242	-0.004513
13.2000	835.895	45.175	84.226	60.507	-0.675	35.327	1591.330	-0.003162	-0.005896	-0.004236
13.3000	774.985	41.007	78.159	55.711	-0.669	35.327	1475.372	-0.002871	-0.005471	-0.003900
13.4000	757.026	39.213	75.803	53.796	-0.665	35.326	1441.183	-0.002745	-0.005306	-0.003766
13.5000	683.447	33.293	66.945	46.986	-0.667	35.326	1301.107	-0.002331	-0.004686	-0.003289
13.6000	655.644	31.570	63.724	44.468	-0.671	35.325	1248.178	-0.002210	-0.004461	-0.003113
13.7000	570.584	25.455	53.912	37.259	-0.663	35.325	1086.245	-0.001782	-0.003774	-0.002608
13.8000	538.663	22.580	49.153	33.978	-0.656	35.324	1025.476	-0.001581	-0.003441	-0.002378
13.9000	505.871	19.952	44.186	30.672	-0.672	35.324	963.049	-0.001397	-0.003093	-0.002147
14.0000	470.690	17.508	39.285	27.059	-0.665	35.324	896.072	-0.001226	-0.002750	-0.001894
14.1000	407.706	12.768	31.139	21.237	-0.661	35.323	776.167	-0.000894	-0.002180	-0.001487
14.2000	377.093	10.364	26.557	17.984	-0.666	35.323	717.888	-0.000725	-0.001859	-0.001259
14.3000	343.579	8.057	21.882	14.847	-0.667	35.322	654.087	-0.000564	-0.001532	-0.001039
14.4000	308.158	5.196	16.720	10.936	-0.660	35.322	586.653	-0.000364	-0.001170	-0.000766
14.5000	281.317	3.694	12.716	8.019	-0.672	35.321	535.555	-0.000259	-0.000890	-0.000561
14.6000	261.975	1.942	9.508	5.878	-0.674	35.321	498.734	-0.000136	-0.000666	-0.000411
14.7000	246.391	0.777	6.853	4.297	-0.680	35.321	469.065	-0.000054	-0.000480	-0.000301
14.8000	240.815	0.513	5.834	3.532	-0.668	35.320	458.450	-0.000036	-0.000408	-0.000247
14.9000	233.812	0.110	4.405	2.545	-0.672	35.319	445.118	-0.000008	-0.000308	-0.000178
15.0000	238.441	0.082	4.073	2.226	-0.663	35.319	453.930	-0.000006	-0.000285	-0.000156
15.1000	243.881	0.194	4.447	2.836	-0.666	35.319	464.287	-0.000014	-0.000311	-0.000199
15.2000	278.552	1.943	7.732	5.447	-0.665	35.318	530.291	-0.000136	-0.000541	-0.000381
15.3000	274.434	1.803	7.843	5.075	-0.681	35.318	522.451	-0.000126	-0.000549	-0.000355
15.4000	314.469	3.818	12.621	8.577	-0.677	35.317	598.669	-0.000267	-0.000883	-0.000600
15.5000	335.539	5.584	15.052	10.383	-0.678	35.317	638.781	-0.000391	-0.001054	-0.000727
15.6000	370.931	7.974	19.441	13.733	-0.664	35.316	706.158	-0.000558	-0.001361	-0.000961
15.7000	408.081	10.418	24.863	17.621	-0.675	35.316	776.882	-0.000729	-0.001740	-0.001233
15.8000	455.241	13.335	30.796	21.846	-0.672	35.315	866.661	-0.000933	-0.002156	-0.001529
15.9000	494.690	15.895	35.500	25.043	-0.673	35.315	941.763	-0.001113	-0.002485	-0.001753
16.0000	546.854	20.008	42.285	29.697	-0.660	35.314	1041.069	-0.001401	-0.002960	-0.002079
16.1000	602.549	24.123	49.608	35.131	-0.672	35.314	1147.099	-0.001689	-0.003473	-0.002459
16.2000	645.515	27.208	56.047	39.328	-0.666	35.314	1228.895	-0.001905	-0.003923	-0.002753
16.3000	703.029	31.541	63.464	44.566	-0.679	35.313	1338.387	-0.002208	-0.004442	-0.003120
16.4000	743.335	35.002	67.853	48.252	-0.681	35.312	1415.119	-0.002450	-0.004750	-0.003378
16.5000	786.196	38.241	74.427	53.045	-0.669	35.312	1496.716	-0.002677	-0.005210	-0.003713
16.6000	831.597	41.714	78.614	56.670	-0.676	35.311	1583.147	-0.002920	-0.005503	-0.003967
16.7000	873.586	44.802	83.579	60.576	-0.673	35.311	1663.084	-0.003136	-0.005851	-0.004240
16.8000	904.830	47.605	87.517	63.786	-0.676	35.311	1722.565	-0.003332	-0.006126	-0.004465
16.9000	940.312	51.137	91.726	67.023	-0.671	35.310	1790.113	-0.003580	-0.006421	-0.004692
17.0000	959.293	52.412	95.099	69.566	-0.666	35.310	1826.248	-0.003669	-0.006657	-0.004870
17.1000	978.785	53.970	96.901	71.306	-0.684	35.310	1863.356	-0.003778	-0.006783	-0.004991
17.2000	1008.241	56.860	100.023	73.887	-0.678	35.309	1919.432	-0.003980	-0.007002	-0.005172
17.3000	1007.159	57.220	100.603	74.152	-0.667	35.309	1917.372	-0.004005	-0.007042	-0.005191
17.4000	1034.751	59.419	103.327	76.656	-0.676	35.308	1969.900	-0.004159	-0.007233	-0.005366
17.5000	1019.632	57.986	102.457	75.752	-0.674	35.308	1941.118	-0.004059	-0.007172	-0.005303
17.6000	981.340	55.794	100.106	73.403	-0.672	35.307	1868.219	-0.003906	-0.007007	-0.005138
17.7000	986.269	56.279	100.711	73.638	-0.664	35.307	1877.604	-0.003940	-0.007050	-0.005155
17.8000	966.462	54.500	98.866	72.069	-0.685	35.307	1839.895	-0.003815	-0.006921	-0.005045
17.9000	918.341	51.164	94.204	68.427	-0.679	35.306	1748.285	-0.003581	-0.006594	-0.004790
18.0000	907.385	50.529	92.742	67.134	-0.679	35.306	1727.428	-0.003537	-0.006492	-0.004699
18.1000	868.116	47.758	88.727	63.884	-0.668	35.305	1652.670	-0.003343	-0.006211	-0.004472
18.2000	832.454	44.883	84.599	60.506	-0.670	35.305	1584.778	-0.003142	-0.005922	-0.004235
18.3000	780.410	40.920	78.641	56.182	-0.660	35.305	1485.701	-0.002864	-0.005505	-0.003933
18.4000	749.316	38.505	74.637	53.322	-0.668	35.304	1426.506	-0.002695	-0.005225	-0.003733
18.5000	714.345	36.170	70.039	49.904	-0.663	35.305	1359.930	-0.002532	-0.004903	-0.003493
18.6000	622.071	29.470	60.172	42.014	-0.677	35.304	1184.263	-0.002063	-0.004212	-0.002941
18.7000	595.651	27.194	56.074	39.257	-0.675	35.303	1133.966	-0.001904	-0.003925	-0.002748
18.8000	547.079	23.747	50.060	34.741	-0.670	35.303	1041.498	-0.001662	-0.003504	-0.002432
18.9000	502.805	19.814	44.034	30.353	-0.670	35.303	957.212	-0.001387	-0.003082	-0.002125
19.0000	456.413	16.314	37.828	25.879	-0.672	35.302	868.893	-0.001142	-0.002648	-0.001812
19.1000	417.098	13.156	32.324	22.040	-0.675	35.302	794.048	-0.000921	-0.002263	-0.001543
19.2000	370.736	9.991	26.119	17.886	-0.670	35.302	705.786	-0.000699	-0.001828	-0.001252
19.3000	336.757	7.584	21.688	14.108	-0.673	35.301	641.098	-0.000531	-0.001518	-0.000988
19.4000	304.971	5.000	16.623	10.786	-0.686	35.300	580.587	-0.000350	-0.001164	-0.000755
19.5000	278.011	3.137	12.402	8.020	-0.683	35.300	529.261	-0.000220	-0.000868	-0.000561
19.6000	261.825	2.163	9.949	6.129	-0.676	35.300	498.447	-0.000151	-0.000696	-0.000429
19.7000	253.589	1.042	7.815	4.713	-0.683	35.299	482.769	-0.000073	-0.000547	-0.000330
19.8000	245.835	0.723	6.153	3.408	-0.688	35.299	468.006	-0.000051	-0.000431	-0.000239
19.9000	234.443	-0.348	4.224	2.475	-0.691	35.299	446.320	0.000024	-0.000296	-0.000173
20.0000	237.779	0.014	4.294	2.531	-0.685	35.299	452.671	-0.000001	-0.000301	-0.000177
20.1000	246.225	0.359	5.023	3.116	-0.686	35.298	468.750	-0.000025	-0.000352	-0.000218
20.2000	263.643	1.236	6.291	4.340	-0.677	35.298	501.909	-0.000086	-0.000440	-0.000304
20.3000	280.009	1.596	8.145	5.336	-0.690	35.297	533.066	-0.000112	-0.000570	-0.000374
20.4000	303.363	3.821	11.630	7.866	-0.665	35.297	577.526	-0.000267	-0.000814	-0.000551
20.5000	337.763	5.999	16.017	10.897	-0.672	35.297	643.015	-0.000420	-0.001121	-0.000763
20.6000	381.541	8.515	21.097	14.680	-0.672	35.297	726.357	-0.000596	-0.001477	-0.001028
20.7000	417.008	10.657	25.237	18.164	-0.679	35.297	793.877	-0.000746	-0.001767	-0.001271
20.8000	455.601	13.448	30.422	21.472	-0.669	35.296	867.348	-0.000941	-0.002130	-0.001503
20.9000	505.706	17.216	37.194	26.171	-0.687	35.296	962.734	-0.001205	-0.002604	-0.001832
21.0000	552.369	20.814	43.222	30.490	-0.680	35.296	1051.569	-0.001457	-0.003026	-0.002134
21.1000	590.211	23.234	48.009	34.021	-0.669	35.296	1123.610	-0.001626	-0.003361	-0.002381
21.2000	642.795	27.222	54.698	38.703	-0.685	35.295	1223.717	-0.001906	-0.003829	-0.002709
21.3000	686.603	30.638	60.366	42.846	-0.675	35.295	1307.116	-0.002145	-0.004226	-0.002999
21.4000	738.721	34.211	66.835	47.889	-0.673	35.295	1406.336	-0.002395	-0.004678	-0.003352
21.5000	782.619	37.616	72.160	52.128	-0.673	35.294	1489.906	-0.002633	-0.005051	-0.003649
21.6000	826.142	41.367	77.442	56.226	-0.672	35.295	1572.762	-0.002896	-0.005421	-0.003936
21.7000	874.308	45.203	83.635	60.603	-0.668	35.293	1664.457	-0.003164	-0.005854	-0.004242
21.8000	903.899	47.731	87.667	64.022	-0.671	35.294	1720.791	-0.003341	-0.006137	-0.004482
21.9000	938.765	50.442	91.175	67.009	-0.674	35.293	1787.167	-0.003531	-0.006382	-0.004691
22.0000	975.479	53.679	95.702	70.249	-0.675	35.293	1857.061	-0.003758	-0.006699	-0.004917
22.1000	976.095	54.262	96.733	71.096	-0.671	35.293	1858.234	-0.003798	-0.006771	-0.004977
22.2000	1002.169	56.405	100.162	73.611	-0.671	35.293	1907.873	-0.003948	-0.007011	-0.005153
22.3000	1007.535	57.014	100.548	74.194	-0.686	35.292	1918.087	-0.003991	-0.007038	-0.005194
22.4000	1006.903	57.014	100.671	74.361	-0.677	35.292	1916.885	-0.003991	-0.007047	-0.005205
22.5000	999.810	57.249	101.246	74.362	-0.671	35.292	1903.381	-0.004007	-0.007087	-0.005205
22.6000	993.107	56.765	100.973	74.150	-0.661	35.292	1890.621	-0.003974	-0.007068	-0.005190
22.7000	984.872	55.724	100.300	73.235	-0.663	35.291	1874.943	-0.003901	-0.007021	-0.005126
22.8000	960.691	54.095	97.752	71.459	-0.659	35.291	1828.909	-0.003787	-0.006843	-0.005002
22.9000	924.533	51.899	94.920	68.802	-0.677	35.291	1760.073	-0.003633	-0.006644	-0.004816
23.0000	895.047	49.650	91.423	66.023	-0.669	35.291	1703.939	-0.003475	-0.006400	-0.004622
23.1000	861.879	47.229	88.177	63.566	-0.675	35.290	1640.797	-0.003306	-0.006172	-0.004450
23.2000	825.240	44.617	83.608	60.147	-0.672	35.291	1571.045	-0.003123	-0.005853	-0.004210
23.3000	776.638	41.296	78.684	55.976	-0.671	35.290	1478.519	-0.002891	-0.005508	-0.003918
23.4000	735.656	37.920	73.850	52.376	-0.664	35.291	1400.499	-0.002654	-0.005170	-0.003666
23.5000	689.984	34.153	67.811	47.932	-0.670	35.290	1313.553	-0.002391	-0.004747	-0.003355
23.6000	638.542	30.596	61.429	43.276	-0.667	35.290	1215.620	-0.002142	-0.004300	-0.003029
23.7000	591.683	26.889	55.827	38.717	-0.677	35.289	1126.413	-0.001882	-0.003908	-0.002710
23.8000	542.450	22.873	49.813	34.409	-0.680	35.289	1032.686	-0.001601	-0.003487	-0.002409
23.9000	495.968	19.577	43.194	29.683	-0.673	35.289	944.195	-0.001370	-0.003024	-0.002078
24.0000	455.301	16.689	37.939	26.254	-0.674	35.289	866.776	-0.001168	-0.002656	-0.001838
24.1000	413.612	13.810	32.146	22.110	-0.668	35.290	787.411	-0.000967	-0.002250	-0.001548
24.2000	372.855	10.366	26.845	17.886	-0.663	35.289	709.820	-0.000726	-0.001879	-0.001252
24.3000	342.452	7.988	22.239	14.679	-0.671	35.289	651.941	-0.000559	-0.001557	-0.001028
24.4000	300.523	5.197	16.059	10.648	-0.680	35.288	572.119	-0.000364	-0.001124	-0.000745
24.5000	299.306	4.946	15.260	9.759	-0.673	35.289	569.801	-0.000346	-0.001068	-0.000683
24.6000	251.591	2.026	8.764	5.003	-0.662	35.288	478.964	-0.000142	-0.000614	-0.000350
24.7000	251.245	1.485	7.691	4.615	-0.677	35.288	478.306	-0.000104	-0.000538	-0.000323
24.8000	244.031	0.737	5.601	3.504	-0.668	35.288	464.573	-0.000052	-0.000392	-0.000245
24.9000	235.465	0.359	4.681	2.531	-0.663	35.288	448.265	-0.000025	-0.000328	-0.000177
25.0000	250.418	0.623	5.078	3.072	-0.673	35.288	476.732	-0.000044	-0.000355	-0.000215
25.1000	278.311	2.122	7.635	5.004	-0.670	35.288	529.833	-0.000149	-0.000534	-0.000350
25.2000	296.721	3.096	10.292	6.894	-0.672	35.288	564.880	-0.000217	-0.000720	-0.000483
25.3000	313.643	4.304	12.386	8.437	-0.672	35.287	597.095	-0.000301	-0.000867	-0.000591
25.4000	331.978	5.209	14.628	10.078	-0.664	35.288	632.000	-0.000365	-0.001024	-0.000705
25.5000	380.880	8.488	20.890	14.653	-0.655	35.287	725.098	-0.000594	-0.001462	-0.001026
25.6000	428.430	11.392	25.994	18.734	-0.664	35.287	815.620	-0.000797	-0.001820	-0.001311
25.7000	482.833	15.199	33.715	23.777	-0.667	35.287	919.189	-0.001064	-0.002360	-0.001664
25.8000	535.327	19.340	40.402	28.378	-0.666	35.287	1019.125	-0.001354	-0.002828	-0.001986
25.9000	606.967	24.050	49.125	34.881	-0.675	35.287	1155.510	-0.001684	-0.003439	-0.002442
26.0000	641.187	26.527	53.982	38.467	-0.668	35.287	1220.655	-0.001857	-0.003779	-0.002693
26.1000	705.403	31.889	62.695	44.582	-0.677	35.288	1342.907	-0.002232	-0.004389	-0.003121
26.2000	786.181	38.088	72.242	52.140	-0.675	35.287	1496.687	-0.002666	-0.005057	-0.003650
26.3000	851.870	43.060	79.988	58.088	-0.688	35.287	1621.742	-0.003014	-0.005599	-0.004066
26.4000	912.164	47.313	86.813	63.745	-0.676	35.287	1736.526	-0.003312	-0.006077	-0.004462
26.5000	965.515	52.274	93.446	68.998	-0.684	35.287	1838.093	-0.003659	-0.006541	-0.004830
26.6000	1025.929	57.651	101.028	74.778	-0.688	35.287	1953.106	-0.004036	-0.007072	-0.005234
26.7000	1059.803	60.338	105.087	78.642	-0.683	35.287	2017.593	-0.004224	-0.007356	-0.005505
26.8000	1117.437	65.187	111.401	83.558	-0.676	35.287	2127.314	-0.004563	-0.007798	-0.005849
26.9000	1150.860	68.311	115.835	87.258	-0.692	35.288	2190.943	-0.004782	-0.008108	-0.006108
27.0000	1195.675	72.315	121.228	91.286	-0.683	35.288	2276.258	-0.005062	-0.008486	-0.006390
27.1000	1219.465	73.996	123.993	93.762	-0.678	35.288	2321.548	-0.005180	-0.008680	-0.006563
27.2000	1244.067	76.329	126.844	96.373	-0.689	35.288	2368.383	-0.005343	-0.008879	-0.006746
27.3000	1249.266	77.779	128.164	97.487	-0.687	35.288	2378.283	-0.005445	-0.008971	-0.006824
27.4000	1238.641	76.971	128.300	96.970	-0.673	35.288	2358.055	-0.005388	-0.008981	-0.006788
27.5000	1250.213	78.348	130.171	98.446	-0.691	35.288	2380.085	-0.005484	-0.009112	-0.006891
27.6000	1232.089	77.277	129.139	97.235	-0.687	35.288	2345.581	-0.005409	-0.009040	-0.006806
27.7000	1216.384	76.247	127.681	96.067	-0.682	35.288	2315.683	-0.005337	-0.008938	-0.006725
27.8000	1191.001	74.509	125.549	94.069	-0.677	35.288	2267.361	-0.005216	-0.008788	-0.006585
27.9000	1141.002	70.774	121.188	90.412	-0.683	35.288	2172.174	-0.004954	-0.008483	-0.006329
28.0000	1117.377	68.687	117.909	87.800	-0.677	35.289	2127.199	-0.004808	-0.008254	-0.006146
28.1000	1053.912	64.143	112.172	83.005	-0.673	35.289	2006.378	-0.004490	-0.007852	-0.005810
28.2000	1008.361	60.656	107.440	78.905	-0.677	35.288	1919.661	-0.004246	-0.007521	-0.005523
28.3000	958.452	56.555	101.783	74.444	-0.675	35.288	1824.646	-0.003959	-0.007125	-0.005211
28.4000	909.189	52.663	96.086	69.928	-0.679	35.289	1730.862	-0.003686	-0.006726	-0.004895
28.5000	840.945	47.673	88.601	64.079	-0.663	35.289	1600.943	-0.003337	-0.006202	-0.004486
28.6000	784.483	43.092	81.709	58.521	-0.669	35.288	1493.454	-0.003016	-0.005720	-0.004096
28.7000	706.320	37.046	72.779	51.404	-0.667	35.289	1344.652	-0.002593	-0.005095	-0.003598
28.8000	653.616	32.556	65.650	46.679	-0.677	35.289	1244.316	-0.002279	-0.004596	-0.003268
28.9000	581.494	27.556	56.871	39.996	-0.674	35.289	1107.016	-0.001929	-0.003981	-0.002800
29.0000	528.128	23.373	50.087	34.658	-0.661	35.289	1005.421	-0.001636	-0.003506	-0.002426
29.1000	477.287	19.007	43.153	29.655	-0.677	35.290	908.632	-0.001330	-0.003021	-0.002076
29.2000	414.529	14.561	34.211	23.402	-0.679	35.290	789.156	-0.001019	-0.002395	-0.001638
29.3000	373.200	11.867	28.511	19.400	-0.673	35.290	710.478	-0.000831	-0.001996	-0.001358
29.4000	340.454	9.239	23.449	15.526	-0.679	35.290	648.136	-0.000647	-0.001641	-0.001087
29.5000	307.090	6.183	18.261	12.050	-0.688	35.290	584.621	-0.000433	-0.001278	-0.000843
29.6000	276.478	4.083	13.498	8.647	-0.671	35.290	526.342	-0.000286	-0.000945	-0.000605
29.7000	264.560	3.652	11.767	6.977	-0.661	35.290	503.654	-0.000256	-0.000824	-0.000488
29.8000	242.363	1.652	8.036	4.479	-0.665	35.291	461.397	-0.000116	-0.000562	-0.000314
29.9000	233.947	0.595	6.552	3.503	-0.671	35.291	445.375	-0.000042	-0.000459	-0.000245
30.0000	249.276	1.569	7.128	4.576	-0.688	35.291	474.558	-0.000110	-0.000499	-0.000320
30.1000	271.533	2.901	9.080	6.296	-0.677	35.292	516.930	-0.000203	-0.000636	-0.000441
30.2000	286.802	3.597	10.817	7.296	-0.664	35.292	545.998	-0.000252	-0.000757	-0.000511
30.3000	304.821	4.862	13.032	8.994	-0.669	35.292	580.301	-0.000340	-0.000912	-0.000630
30.4000	348.764	7.321	18.053	13.078	-0.689	35.292	663.958	-0.000512	-0.001264	-0.000915
30.5000	402.280	10.698	24.852	17.718	-0.674	35.292	765.839	-0.000749	-0.001740	-0.001240
30.6000	434.501	13.336	29.502	21.000	-0.679	35.293	827.179	-0.000934	-0.002065	-0.001470
30.7000	500.115	16.924	37.166	26.143	-0.681	35.293	952.091	-0.001185	-0.002602	-0.001830
30.8000	530.232	19.798	41.762	29.547	-0.686	35.293	1009.426	-0.001386	-0.002923	-0.002068
30.9000	589.414	23.830	49.760	34.935	-0.669	35.293	1122.093	-0.001668	-0.003483	-0.002445
31.0000	664.376	29.095	58.358	41.623	-0.664	35.293	1264.801	-0.002037	-0.004085	-0.002914
31.1000	715.833	32.751	65.018	46.332	-0.662	35.294	1362.762	-0.002293	-0.004551	-0.003243
31.2000	781.748	38.311	72.696	52.600	-0.680	35.294	1488.247	-0.002682	-0.005089	-0.003682
31.3000	850.728	43.924	81.143	58.869	-0.674	35.294	1619.568	-0.003075	-0.005680	-0.004121
31.4000	909.985	48.413	88.465	64.816	-0.658	35.295	1732.378	-0.003389	-0.006193	-0.004537
31.5000	972.789	53.373	95.717	70.402	-0.660	35.295	1851.940	-0.003736	-0.006700	-0.004928
31.6000	1013.125	56.876	100.768	74.695	-0.672	35.295	1928.730	-0.003981	-0.007054	-0.005229
31.7000	1076.575	62.725	108.113	80.574	-0.668	35.295	2049.522	-0.004391	-0.007568	-0.005640
31.8000	1113.981	65.714	113.603	84.699	-0.661	35.295	2120.733	-0.004600	-0.007952	-0.005929
31.9000	1166.235	69.911	118.584	89.547	-0.673	35.296	2220.211	-0.004894	-0.008301	-0.006268
32.0000	1186.147	71.745	121.144	91.259	-0.662	35.295	2258.120	-0.005022	-0.008480	-0.006388
32.1000	1208.224	74.257	124.447	93.985	-0.667	35.297	2300.148	-0.005198	-0.008711	-0.006579
32.2000	1247.734	77.902	128.629	97.777	-0.669	35.296	2375.364	-0.005453	-0.009004	-0.006844
32.3000	1247.178	77.722	129.012	98.028	-0.675	35.297	2374.306	-0.005441	-0.009031	-0.006862
32.4000	1249.853	78.527	129.705	98.848	-0.686	35.297	2379.398	-0.005497	-0.009079	-0.006919
32.5000	1250.318	78.806	130.199	99.225	-0.676	35.297	2380.285	-0.005516	-0.009114	-0.006946
32.6000	1232.810	77.764	129.289	97.818	-0.676	35.298	2346.954	-0.005443	-0.009050	-0.006847
32.7000	1212.387	76.233	128.055	96.554	-0.675	35.298	2308.073	-0.005336	-0.008964	-0.006759
32.8000	1174.560	73.497	124.761	93.484	-0.673	35.298	2236.061	-0.005145	-0.008733	-0.006544
32.9000	1150.620	71.898	122.619	91.635	-0.687	35.298	2190.485	-0.005033	-0.008583	-0.006414
33.0000	1105.400	68.712	118.351	87.802	-0.672	35.298	2104.397	-0.004810	-0.008285	-0.006146
33.1000	1062.388	65.394	113.796	84.451	-0.670	35.299	2022.514	-0.004578	-0.007966	-0.005912
33.2000	984.180	58.862	105.170	77.433	-0.668	35.299	1873.627	-0.004120	-0.007362	-0.005420
33.3000	948.743	56.710	101.534	74.584	-0.661	35.299	1806.164	-0.003970	-0.007107	-0.005221
33.4000	881.957	51.290	93.985	68.302	-0.673	35.299	1679.020	-0.003590	-0.006579	-0.004781
33.5000	839.412	48.232	88.986	64.580	-0.674	35.300	1598.024	-0.003376	-0.006229	-0.004521
33.6000	775.286	42.630	81.074	58.700	-0.669	35.300	1475.945	-0.002984	-0.005675	-0.004109
33.7000	712.903	38.310	73.837	52.961	-0.670	35.301	1357.183	-0.002682	-0.005169	-0.003707
33.8000	648.446	33.170	65.512	46.735	-0.671	35.302	1234.474	-0.002322	-0.004586	-0.003271
33.9000	585.341	28.317	57.875	40.801	-0.670	35.302	1114.340	-0.001982	-0.004051	-0.002856
34.0000	528.444	23.636	50.170	35.353	-0.665	35.301	1006.021	-0.001655	-0.003512	-0.002475
34.1000	467.459	18.825	42.395	29.684	-0.659	35.302	889.921	-0.001318	-0.002968	-0.002078
34.2000	429.557	15.993	36.371	25.294	-0.671	35.302	817.766	-0.001119	-0.002546	-0.001771
34.3000	381.421	12.308	29.681	20.916	-0.664	35.303	726.128	-0.000862	-0.002078	-0.001464
34.4000	334.427	8.640	23.146	15.830	-0.667	35.303	636.663	-0.000605	-0.001620	-0.001108
34.5000	311.524	6.875	19.607	13.259	-0.665	35.303	593.061	-0.000481	-0.001373	-0.000928
34.6000	285.840	5.168	15.948	10.507	-0.675	35.304	544.167	-0.000362	-0.001116	-0.000736
34.7000	251.936	3.166	10.692	6.531	-0.669	35.304	479.622	-0.000222	-0.000748	-0.000457
34.8000	250.088	2.221	9.603	6.158	-0.668	35.304	476.103	-0.000155	-0.000672	-0.000431
34.9000	252.793	2.524	8.889	6.031	-0.673	35.305	481.253	-0.000177	-0.000622	-0.000422
35.0000	251.410	2.429	8.793	5.656	-0.676	35.305	478.621	-0.000170	-0.000616	-0.000396
35.1000	251.275	2.192	8.916	5.547	-0.663	35.305	478.363	-0.000153	-0.000624	-0.000388
35.2000	281.692	3.583	11.051	7.797	-0.675	35.306	536.270	-0.000251	-0.000774	-0.000546
35.3000	312.305	5.362	14.559	10.479	-0.679	35.306	594.549	-0.000375	-0.001019	-0.000734
35.4000	341.175	7.488	18.836	13.093	-0.672	35.306	649.509	-0.000524	-0.001319	-0.000917
35.5000	380.369	9.877	23.352	16.537	-0.671	35.307	724.125	-0.000691	-0.001635	-0.001158
35.6000	422.749	12.531	28.622	20.474	-0.683	35.307	804.806	-0.000877	-0.002004	-0.001433
35.7000	494.089	17.342	37.290	26.545	-0.679	35.307	940.619	-0.001214	-0.002610	-0.001858
35.8000	539.294	20.690	43.003	30.838	-0.679	35.308	1026.678	-0.001448	-0.003010	-0.002159
35.9000	610.484	25.761	51.971	37.302	-0.666	35.309	1162.205	-0.001803	-0.003638	-0.002611
36.0000	642.119	28.111	56.762	40.773	-0.664	35.309	1222.429	-0.001968	-0.003973	-0.002854
36.1000	725.256	34.114	66.367	48.195	-0.667	35.308	1380.701	-0.002388	-0.004646	-0.003374
36.2000	774.234	38.659	73.327	53.047	-0.671	35.309	1473.942	-0.002706	-0.005133	-0.003713
36.3000	851.630	44.537	82.257	60.091	-0.670	35.310	1621.284	-0.003118	-0.005758	-0.004206
36.4000	905.462	48.634	88.641	65.151	-0.665	35.310	1723.766	-0.003404	-0.006205	-0.004561
36.5000	974.562	54.178	96.885	71.748	-0.655	35.310	1855.316	-0.003792	-0.006782	-0.005022
36.6000	1023.780	58.806	102.443	76.602	-0.675	35.311	1949.015	-0.004116	-0.007171	-0.005362
36.7000	1075.433	63.029	108.996	81.479	-0.679	35.311	2047.348	-0.004412	-0.007630	-0.005704
36.8000	1109.262	66.118	113.426	85.131	-0.664	35.311	2111.750	-0.004628	-0.007940	-0.005959
36.9000	1157.653	69.869	118.583	89.577	-0.672	35.312	2203.875	-0.004891	-0.008301	-0.006270
37.0000	1181.774	72.300	122.123	92.497	-0.665	35.312	2249.794	-0.005061	-0.008549	-0.006475
37.1000	1223.267	76.192	126.651	95.995	-0.673	35.313	2328.787	-0.005333	-0.008866	-0.006720
37.2000	1225.822	76.942	127.765	97.208	-0.686	35.313	2333.651	-0.005386	-0.008944	-0.006805
37.3000	1242.789	78.235	130.117	99.002	-0.677	35.314	2365.952	-0.005476	-0.009108	-0.006930
37.4000	1247.283	78.874	130.541	99.806	-0.677	35.314	2374.506	-0.005521	-0.009138	-0.006986
37.5000	1245.404	79.124	130.848	99.725	-0.668	35.315	2370.930	-0.005539	-0.009159	-0.006981
37.6000	1228.993	78.278	130.020	98.767	-0.678	35.316	2339.687	-0.005479	-0.009101	-0.006914
37.7000	1212.492	76.734	128.958	97.471	-0.664	35.316	2308.273	-0.005371	-0.009027	-0.006823
37.8000	1187.319	75.691	126.747	95.400	-0.665	35.316	2260.351	-0.005298	-0.008872	-0.006678
37.9000	1157.473	73.150	123.895	92.958	-0.668	35.317	2203.531	-0.005121	-0.008673	-0.006507
38.0000	1103.070	69.215	118.999	88.634	-0.677	35.318	2099.962	-0.004845	-0.008330	-0.006204
38.1000	1051.448	65.103	113.618	84.461	-0.673	35.318	2001.686	-0.004557	-0.007953	-0.005912
38.2000	1027.703	63.168	110.401	81.993	-0.676	35.319	1956.482	-0.004422	-0.007728	-0.005740
38.3000	952.065	57.651	102.622	75.643	-0.675	35.319	1812.487	-0.004036	-0.007184	-0.005295
38.4000	894.912	53.164	96.502	70.055	-0.680	35.320	1703.682	-0.003721	-0.006755	-0.004904
38.5000	830.575	47.967	89.069	64.691	-0.672	35.321	1581.202	-0.003358	-0.006235	-0.004528
38.6000	763.924	42.881	81.145	58.952	-0.669	35.321	1454.315	-0.003002	-0.005680	-0.004127
38.7000	710.333	38.687	74.551	53.643	-0.675	35.321	1352.291	-0.002708	-0.005219	-0.003755
38.8000	649.453	34.543	67.012	47.891	-0.672	35.322	1236.391	-0.002418	-0.004691	-0.003352
38.9000	587.085	29.082	59.142	42.208	-0.684	35.323	1117.659	-0.002036	-0.004140	-0.002955
39.0000	545.787	25.526	53.144	37.704	-0.677	35.323	1039.038	-0.001787	-0.003720	-0.002639
39.1000	462.604	19.772	42.739	30.366	-0.689	35.324	880.680	-0.001384	-0.002992	-0.002126
39.2000	417.249	15.895	36.368	25.503	-0.688	35.324	794.334	-0.001113	-0.002546	-0.001785
39.3000	375.620	12.795	30.576	21.155	-0.683	35.324	715.084	-0.000896	-0.002140	-0.001481
39.4000	338.966	9.781	24.838	17.369	-0.663	35.325	645.304	-0.000685	-0.001739	-0.001216
39.5000	306.414	7.973	19.801	13.593	-0.662	35.325	583.334	-0.000558	-0.001386	-0.000952
39.6000	280.490	5.570	15.989	10.909	-0.664	35.326	533.981	-0.000390	-0.001119	-0.000764
39.7000	270.617	4.418	13.787	9.286	-0.677	35.327	515.184	-0.000309	-0.000965	-0.000650
39.8000	254.281	3.025	11.121	7.212	-0.671	35.327	484.085	-0.000212	-0.000778	-0.000505
39.9000	245.489	2.387	9.233	6.115	-0.671	35.327	467.348	-0.000167	-0.000646	-0.000428
40.0000	250.283	2.512	9.203	6.198	-0.679	35.328	476.475	-0.000176	-0.000644	-0.000434
40.1000	256.535	3.011	9.659	6.560	-0.681	35.328	488.377	-0.000211	-0.000676	-0.000459
40.2000	293.159	4.488	12.921	9.426	-0.676	35.329	558.100	-0.000314	-0.000905	-0.000660
40.3000	311.344	6.153	15.164	11.050	-0.680	35.329	592.718	-0.000431	-0.001061	-0.000773
40.4000	338.199	7.443	18.671	13.509	-0.680	35.329	643.845	-0.000521	-0.001307	-0.000946
40.5000	405.346	11.992	26.734	19.138	-0.669	35.330	771.675	-0.000839	-0.001871	-0.001340
40.6000	437.357	13.782	30.837	22.275	-0.675	35.331	832.615	-0.000965	-0.002159	-0.001559
40.7000	478.219	16.953	36.299	26.171	-0.685	35.331	910.406	-0.001187	-0.002541	-0.001832
40.8000	530.563	20.633	42.821	30.854	-0.679	35.331	1010.056	-0.001444	-0.002997	-0.002160
40.9000	615.113	26.319	53.170	38.259	-0.676	35.332	1171.017	-0.001842	-0.003722	-0.002678
41.0000	666.931	29.971	60.063	43.293	-0.674	35.333	1269.665	-0.002098	-0.004204	-0.003030
41.1000	732.259	35.587	67.621	49.210	-0.680	35.333	1394.033	-0.002491	-0.004734	-0.003445
41.2000	775.751	39.020	73.549	53.630	-0.685	35.334	1476.831	-0.002731	-0.005148	-0.003754
41.3000	841.861	44.454	81.655	59.869	-0.677	35.334	1602.688	-0.003112	-0.005716	-0.004191
41.4000	898.699	48.982	88.934	65.412	-0.677	35.334	1710.892	-0.003429	-0.006225	-0.004579
41.5000	983.760	55.404	98.290	72.915	-0.676	35.335	1872.826	-0.003878	-0.006880	-0.005104
41.6000	1028.123	59.432	103.629	77.447	-0.679	35.335	1957.283	-0.004160	-0.007254	-0.005421
41.7000	1065.244	62.546	108.250	81.243	-0.677	35.336	2027.950	-0.004378	-0.007577	-0.005687
41.8000	1123.178	67.382	115.131	86.327	-0.668	35.337	2138.243	-0.004717	-0.008059	-0.006043
41.9000	1157.909	70.425	118.999	89.800	-0.665	35.337	2204.361	-0.004930	-0.008330	-0.006286
42.0000	1185.456	73.051	122.894	92.790	-0.680	35.338	2256.804	-0.005114	-0.008603	-0.006495
42.1000	1222.606	76.678	127.350	96.915	-0.686	35.338	2327.528	-0.005367	-0.008915	-0.006784
42.2000	1240.580	78.166	129.649	98.418	-0.683	35.338	2361.746	-0.005472	-0.009075	-0.006889
42.3000	1240.159	78.513	129.692	99.045	-0.667	35.338	2360.945	-0.005496	-0.009078	-0.006933
42.4000	1252.047	79.859	131.560	100.418	-0.676	35.340	2383.575	-0.005590	-0.009209	-0.007029
42.5000	1244.908	79.553	131.587	100.223	-0.672	35.340	2369.986	-0.005569	-0.009211	-0.007016
42.6000	1216.940	77.848	129.951	98.098	-0.680	35.341	2316.742	-0.005449	-0.009097	-0.006867
42.7000	1217.421	77.930	129.937	98.307	-0.676	35.341	2317.657	-0.005455	-0.009096	-0.006881
42.8000	1186.282	75.273	126.431	95.663	-0.672	35.341	2258.377	-0.005269	-0.008850	-0.006696
42.9000	1144.744	72.885	123.427	92.539	-0.671	35.341	2179.298	-0.005102	-0.008640	-0.006478
43.0000	1104.438	69.451	119.217	88.785	-0.679	35.342	2102.566	-0.004862	-0.008345	-0.006215
43.1000	1049.900	65.895	113.919	84.435	-0.677	35.342	1998.739	-0.004613	-0.007974	-0.005910
43.2000	1021.240	62.822	109.861	81.895	-0.683	35.343	1944.180	-0.004398	-0.007690	-0.005733
43.3000	939.125	57.193	101.617	75.029	-0.674	35.343	1787.853	-0.004004	-0.007113	-0.005252
43.4000	896.986	54.027	96.789	70.999	-0.680	35.343	1707.630	-0.003782	-0.006775	-0.004970
43.5000	849.000	49.721	91.233	66.411	-0.673	35.344	1616.278	-0.003480	-0.006386	-0.004649
43.6000	783.266	44.578	83.332	60.785	-0.676	35.344	1491.137	-0.003120	-0.005833	-0.004255
43.7000	718.959	39.727	75.735	54.893	-0.673	35.345	1368.713	-0.002781	-0.005301	-0.003843
43.8000	647.108	34.100	67.177	48.143	-0.672	35.345	1231.928	-0.002387	-0.004702	-0.003370
43.9000	589.700	29.678	59.391	42.512	-0.678	35.345	1122.637	-0.002077	-0.004157	-0.002976
44.0000	520.494	24.358	50.941	35.884	-0.699	35.346	990.887	-0.001705	-0.003566	-0.002512
44.1000	476.280	20.828	44.130	31.160	-0.683	35.346	906.715	-0.001458	-0.003089	-0.002181
44.2000	431.135	17.673	38.476	26.781	-0.686	35.347	820.770	-0.001237	-0.002693	-0.001875
44.3000	377.694	13.282	31.001	21.569	-0.669	35.347	719.032	-0.000930	-0.002170	-0.001510
44.4000	335.073	10.086	24.892	17.411	-0.687	35.347	637.894	-0.000706	-0.001742	-0.001219
44.5000	297.352	7.346	19.358	13.203	-0.688	35.348	566.082	-0.000514	-0.001355	-0.000924
44.6000	276.418	5.502	15.934	10.854	-0.678	35.348	526.228	-0.000385	-0.001115	-0.000760
44.7000	257.091	4.223	12.922	8.547	-0.686	35.348	489.435	-0.000296	-0.000905	-0.000598
44.8000	258.233	3.206	11.918	7.797	-0.686	35.349	491.610	-0.000224	-0.000834	-0.000546
44.9000	243.580	2.582	9.426	6.296	-0.673	35.349	463.715	-0.000181	-0.000660	-0.000441
45.0000	241.056	2.165	9.246	5.808	-0.685	35.350	458.908	-0.000152	-0.000647	-0.000407
45.1000	262.862	3.584	10.431	7.101	-0.683	35.350	500.422	-0.000251	-0.000730	-0.000497
45.2000	282.850	4.290	12.290	8.814	-0.675	35.350	538.473	-0.000300	-0.000860	-0.000617
45.3000	309.705	5.517	15.236	11.298	-0.677	35.350	589.600	-0.000386	-0.001067	-0.000791
45.4000	349.365	8.737	19.855	14.680	-0.686	35.351	665.102	-0.000612	-0.001390	-0.001028
45.5000	383.946	10.851	24.739	18.208	-0.668	35.351	730.934	-0.000760	-0.001732	-0.001275
45.6000	421.847	13.142	29.474	21.279	-0.679	35.351	803.089	-0.000920	-0.002063	-0.001490
45.7000	481.495	16.854	37.608	26.754	-0.664	35.352	916.643	-0.001180	-0.002633	-0.001873
45.8000	545.366	21.467	44.460	32.091	-0.681	35.353	1038.237	-0.001503	-0.003112	-0.002246
45.9000	608.094	26.748	52.813	38.106	-0.684	35.352	1157.656	-0.001872	-0.003697	-0.002667
46.0000	663.264	30.346	59.789	43.110	-0.685	35.353	1262.684	-0.002124	-0.004185	-0.003018
46.1000	732.515	35.502	68.373	49.695	-0.686	35.353	1394.520	-0.002485	-0.004786	-0.003479
46.2000	777.675	39.784	74.001	54.019	-0.683	35.354	1480.494	-0.002785	-0.005180	-0.003781
46.3000	841.651	44.647	81.847	59.925	-0.672	35.353	1602.287	-0.003125	-0.005729	-0.004195
46.4000	911.548	49.998	90.484	66.605	-0.676	35.355	1735.353	-0.003500	-0.006334	-0.004662
46.5000	965.184	54.361	96.887	71.721	-0.671	35.354	1837.463	-0.003805	-0.006782	-0.005020
46.6000	1025.989	58.973	103.477	77.309	-0.684	35.355	1953.220	-0.004128	-0.007243	-0.005412
46.7000	1065.469	63.211	108.608	81.466	-0.675	35.355	2028.379	-0.004425	-0.007603	-0.005703
46.8000	1109.472	67.008	114.208	85.812	-0.685	35.355	2112.150	-0.004691	-0.007995	-0.006007
46.9000	1148.170	70.092	119.343	89.633	-0.688	35.355	2185.822	-0.004906	-0.008354	-0.006274
47.0000	1188.281	73.370	122.949	93.373	-0.680	35.356	2262.182	-0.005136	-0.008606	-0.006536
47.1000	1215.979	76.246	126.843	96.510	-0.688	35.356	2314.911	-0.005337	-0.008879	-0.006756
47.2000	1236.237	77.959	129.275	98.335	-0.706	35.356	2353.477	-0.005457	-0.009049	-0.006883
47.3000	1241.993	78.888	130.570	99.572	-0.688	35.356	2364.435	-0.005522	-0.009140	-0.006970
47.4000	1245.509	79.261	130.985	100.264	-0.694	35.356	2371.130	-0.005548	-0.009169	-0.007018
47.5000	1241.827	79.817	131.522	100.404	-0.677	35.357	2364.120	-0.005587	-0.009207	-0.007028
47.6000	1225.702	78.831	130.461	99.309	-0.695	35.357	2333.422	-0.005518	-0.009132	-0.006952
47.7000	1208.855	77.736	129.731	97.903	-0.686	35.357	2301.350	-0.005442	-0.009081	-0.006853
47.8000	1185.681	75.789	127.765	96.358	-0.694	35.357	2257.233	-0.005305	-0.008944	-0.006745
47.9000	1150.515	73.469	124.019	93.415	-0.676	35.357	2190.285	-0.005143	-0.008681	-0.006539
48.0000	1117.978	70.785	121.131	90.731	-0.688	35.357	2128.344	-0.004955	-0.008479	-0.006351
48.1000	1052.139	65.771	114.717	85.075	-0.680	35.357	2003.002	-0.004604	-0.008030	-0.005955
48.2000	1021.075	63.295	111.101	82.562	-0.687	35.358	1943.865	-0.004431	-0.007777	-0.005779
48.3000	946.880	58.361	102.926	76.296	-0.688	35.358	1802.616	-0.004085	-0.007205	-0.005341
48.4000	889.817	53.483	96.926	70.639	-0.691	35.358	1693.983	-0.003744	-0.006785	-0.004945
48.5000	832.123	48.912	90.170	65.483	-0.688	35.358	1584.148	-0.003424	-0.006312	-0.004584
48.6000	774.790	44.453	83.112	60.328	-0.676	35.359	1475.000	-0.003112	-0.005818	-0.004223
48.7000	706.891	38.949	74.689	53.727	-0.672	35.359	1345.739	-0.002726	-0.005228	-0.003761
48.8000	650.580	34.625	68.046	48.710	-0.676	35.360	1238.537	-0.002424	-0.004763	-0.003410
48.9000	590.136	29.984	60.158	42.957	-0.669	35.360	1123.466	-0.002099	-0.004211	-0.003007
49.0000	512.063	23.817	50.404	35.674	-0.674	35.360	974.836	-0.001667	-0.003528	-0.002497
49.1000	467.714	20.551	43.978	30.896	-0.680	35.360	890.408	-0.001439	-0.003078	-0.002163
49.2000	428.189	17.134	38.198	26.767	-0.685	35.361	815.163	-0.001199	-0.002674	-0.001874
49.3000	368.271	13.088	30.452	21.444	-0.677	35.360	701.094	-0.000916	-0.002132	-0.001501
49.4000	341.400	10.628	25.539	17.941	-0.684	35.361	649.939	-0.000744	-0.001788	-0.001256
49.5000	307.722	7.667	20.625	13.955	-0.681	35.361	585.823	-0.000537	-0.001444	-0.000977
49.6000	282.624	6.461	16.967	11.424	-0.683	35.361	538.044	-0.000452	-0.001188	-0.000800
49.7000	264.199	4.778	14.269	9.329	-0.699	35.361	502.968	-0.000334	-0.000999	-0.000653
49.8000	244.152	3.096	11.036	7.047	-0.687	35.362	464.802	-0.000217	-0.000773	-0.000493
49.9000	249.517	2.846	9.922	6.977	-0.696	35.362	475.016	-0.000199	-0.000695	-0.000488
Test Cycles
Time (sec)	Axial stress (kPa)	Axial micro-strain #1	Axial micro-strain #2	Axial micro-strain #3	Confining pressure (kPa)	Temperature (�C)	Load (N)	Displacement #1 (mm)	Displacement #2 (mm)	Displacement #3 (mm)
0.0000	250.569	3.291	9.878	6.643	-0.688	35.362	477.018	-0.000230	-0.000691	-0.000465
0.1000	257.918	3.151	10.485	7.019	-0.688	35.362	491.009	-0.000221	-0.000734	-0.000491
0.2000	289.056	4.888	13.580	9.634	-0.690	35.362	550.289	-0.000342	-0.000951	-0.000674
0.3000	311.779	5.835	15.825	11.492	-0.686	35.363	593.548	-0.000408	-0.001108	-0.000804
0.4000	342.332	8.321	19.719	14.247	-0.690	35.362	651.712	-0.000582	-0.001380	-0.000997
0.5000	387.282	11.408	25.234	18.569	-0.686	35.363	737.286	-0.000799	-0.001766	-0.001300
0.6000	418.015	13.100	29.365	21.430	-0.686	35.362	795.794	-0.000917	-0.002056	-0.001500
0.7000	480.458	17.355	36.891	26.488	-0.685	35.362	914.669	-0.001215	-0.002582	-0.001854
0.8000	530.112	20.647	43.470	31.160	-0.695	35.363	1009.197	-0.001445	-0.003043	-0.002181
0.9000	600.956	26.178	52.096	37.608	-0.685	35.363	1144.066	-0.001832	-0.003647	-0.002633
1.0000	658.485	30.875	59.762	43.029	-0.692	35.363	1253.586	-0.002161	-0.004183	-0.003012
1.1000	707.192	33.947	66.504	48.042	-0.701	35.363	1346.312	-0.002376	-0.004655	-0.003363
1.2000	773.888	39.184	73.726	53.977	-0.694	35.363	1473.284	-0.002743	-0.005161	-0.003778
1.3000	842.267	44.619	82.313	60.132	-0.690	35.363	1603.460	-0.003123	-0.005762	-0.004209
1.4000	901.148	49.581	89.402	65.941	-0.688	35.364	1715.555	-0.003471	-0.006258	-0.004616
1.5000	955.461	53.790	96.278	71.193	-0.698	35.363	1818.953	-0.003765	-0.006739	-0.004983
1.6000	1039.064	60.352	105.034	78.472	-0.700	35.364	1978.111	-0.004225	-0.007352	-0.005493
1.7000	1065.619	63.003	109.022	81.855	-0.703	35.364	2028.666	-0.004410	-0.007632	-0.005730
1.8000	1121.375	67.882	115.297	86.493	-0.692	35.363	2134.809	-0.004752	-0.008071	-0.006055
1.9000	1166.204	71.578	120.211	90.925	-0.692	35.364	2220.154	-0.005010	-0.008415	-0.006365
2.0000	1183.262	73.482	123.415	93.136	-0.688	35.363	2252.626	-0.005144	-0.008639	-0.006519
2.1000	1211.575	76.192	127.267	96.233	-0.690	35.364	2306.528	-0.005333	-0.008909	-0.006736
2.2000	1236.507	78.693	129.328	98.432	-0.683	35.364	2353.992	-0.005509	-0.009053	-0.006890
2.3000	1245.179	79.179	130.954	99.920	-0.692	35.364	2370.501	-0.005543	-0.009167	-0.006994
2.4000	1251.596	79.664	131.054	100.266	-0.698	35.364	2382.717	-0.005576	-0.009174	-0.007019
2.5000	1248.455	80.345	132.197	100.446	-0.686	35.364	2376.738	-0.005624	-0.009254	-0.007031
2.6000	1236.447	79.456	131.947	100.057	-0.677	35.364	2353.878	-0.005562	-0.009236	-0.007004
2.7000	1221.885	78.333	130.886	98.905	-0.692	35.364	2326.155	-0.005483	-0.009162	-0.006923
2.8000	1176.920	74.857	126.772	95.371	-0.688	35.364	2240.553	-0.005240	-0.008874	-0.006676
2.9000	1154.813	73.592	124.585	93.538	-0.685	35.364	2198.467	-0.005151	-0.008721	-0.006548
3.0000	1110.118	70.563	120.319	89.718	-0.677	35.364	2113.380	-0.004939	-0.008422	-0.006280
3.1000	1074.035	67.535	116.605	86.244	-0.688	35.364	2044.687	-0.004727	-0.008162	-0.006037
3.2000	1016.597	63.155	110.167	81.882	-0.685	35.364	1935.339	-0.004421	-0.007712	-0.005732
3.3000	951.073	58.459	103.381	76.268	-0.677	35.364	1810.598	-0.004092	-0.007237	-0.005339
3.4000	900.051	54.305	97.713	71.541	-0.678	35.364	1713.467	-0.003801	-0.006840	-0.005008
3.5000	837.999	49.386	90.691	65.691	-0.684	35.364	1595.335	-0.003457	-0.006348	-0.004598
3.6000	775.947	44.496	83.347	60.273	-0.681	35.364	1477.203	-0.003115	-0.005834	-0.004219
3.7000	710.348	39.368	75.157	54.047	-0.674	35.364	1352.320	-0.002756	-0.005261	-0.003783
3.8000	665.232	35.363	69.201	49.682	-0.679	35.364	1266.432	-0.002475	-0.004844	-0.003478
3.9000	588.918	30.068	60.050	42.526	-0.680	35.364	1121.149	-0.002105	-0.004203	-0.002977
4.0000	537.731	25.635	53.047	37.608	-0.675	35.364	1023.703	-0.001794	-0.003713	-0.002633
4.1000	485.312	21.161	46.042	32.231	-0.690	35.364	923.910	-0.001481	-0.003223	-0.002256
4.2000	429.452	17.161	38.421	26.617	-0.683	35.364	817.566	-0.001201	-0.002689	-0.001863
4.3000	378.265	13.282	31.553	21.817	-0.686	35.364	720.119	-0.000930	-0.002209	-0.001527
4.4000	348.975	10.823	27.190	18.470	-0.683	35.364	664.358	-0.000758	-0.001903	-0.001293
4.5000	307.707	7.485	20.901	14.205	-0.687	35.363	585.794	-0.000524	-0.001463	-0.000994
4.6000	284.202	6.264	16.417	11.340	-0.696	35.363	541.048	-0.000438	-0.001149	-0.000794
4.7000	268.017	4.765	14.020	9.245	-0.676	35.363	510.235	-0.000334	-0.000981	-0.000647
4.8000	240.950	2.916	10.485	6.560	-0.682	35.363	458.708	-0.000204	-0.000734	-0.000459
4.9000	249.787	2.748	10.469	6.616	-0.694	35.363	475.531	-0.000192	-0.000733	-0.000463
5.0000	253.725	2.970	10.168	6.866	-0.683	35.363	483.027	-0.000208	-0.000712	-0.000481
5.1000	263.959	3.610	10.955	7.434	-0.686	35.362	502.510	-0.000253	-0.000767	-0.000520
5.2000	298.660	5.375	14.889	10.452	-0.681	35.363	568.571	-0.000376	-0.001042	-0.000732
5.3000	302.672	5.446	15.220	10.659	-0.692	35.362	576.210	-0.000381	-0.001065	-0.000746
5.4000	342.723	7.846	20.503	14.274	-0.702	35.362	652.456	-0.000549	-0.001435	-0.000999
5.5000	375.725	10.337	24.410	17.537	-0.699	35.361	715.284	-0.000724	-0.001709	-0.001228
5.6000	432.217	13.963	31.195	22.399	-0.688	35.361	822.830	-0.000977	-0.002184	-0.001568
5.7000	482.848	17.370	37.717	26.851	-0.677	35.361	919.218	-0.001216	-0.002640	-0.001880
5.8000	542.420	21.357	44.707	32.368	-0.684	35.361	1032.629	-0.001495	-0.003129	-0.002266
5.9000	598.912	25.707	51.860	37.303	-0.691	35.361	1140.175	-0.001799	-0.003630	-0.002611
6.0000	652.218	29.665	59.017	42.456	-0.682	35.361	1241.655	-0.002077	-0.004131	-0.002972
6.1000	734.859	36.126	69.227	50.083	-0.688	35.360	1398.983	-0.002529	-0.004846	-0.003506
6.2000	788.390	40.158	75.351	54.670	-0.677	35.361	1500.893	-0.002811	-0.005275	-0.003827
6.3000	845.709	44.815	82.685	60.726	-0.692	35.360	1610.012	-0.003137	-0.005788	-0.004251
6.4000	921.647	50.929	91.382	67.607	-0.682	35.360	1754.580	-0.003565	-0.006397	-0.004732
6.5000	957.595	54.053	97.726	71.540	-0.686	35.359	1823.015	-0.003784	-0.006841	-0.005008
6.6000	1031.475	59.655	104.385	77.805	-0.688	35.359	1963.663	-0.004176	-0.007307	-0.005446
6.7000	1071.015	63.418	109.819	82.187	-0.690	35.359	2038.937	-0.004439	-0.007687	-0.005753
6.8000	1120.939	67.881	115.393	86.772	-0.703	35.359	2133.980	-0.004752	-0.008078	-0.006074
6.9000	1147.028	70.356	119.564	89.730	-0.692	35.359	2183.647	-0.004925	-0.008370	-0.006281
7.0000	1187.259	73.661	123.399	93.193	-0.691	35.359	2260.237	-0.005156	-0.008638	-0.006523
7.1000	1221.103	76.916	127.049	96.803	-0.685	35.359	2324.667	-0.005384	-0.008893	-0.006776
7.2000	1232.239	78.596	129.467	98.616	-0.688	35.358	2345.867	-0.005502	-0.009063	-0.006903
7.3000	1245.314	79.525	130.916	99.712	-0.673	35.358	2370.758	-0.005567	-0.009164	-0.006980
7.4000	1248.981	79.775	131.989	100.418	-0.699	35.358	2377.739	-0.005584	-0.009239	-0.007029
7.5000	1244.457	80.194	131.601	100.681	-0.706	35.358	2369.127	-0.005614	-0.009212	-0.007048
7.6000	1231.548	79.152	131.299	99.905	-0.689	35.357	2344.551	-0.005541	-0.009191	-0.006993
7.7000	1215.032	78.402	130.157	98.503	-0.693	35.357	2313.108	-0.005488	-0.009111	-0.006895
7.8000	1168.519	74.370	125.974	94.829	-0.677	35.357	2224.560	-0.005206	-0.008818	-0.006638
7.9000	1159.757	73.646	125.356	94.262	-0.681	35.357	2207.880	-0.005155	-0.008775	-0.006598
8.0000	1111.336	70.856	120.457	90.286	-0.681	35.357	2115.698	-0.004960	-0.008432	-0.006320
8.1000	1059.202	66.576	115.326	85.647	-0.688	35.357	2016.449	-0.004660	-0.008073	-0.005995
8.2000	1010.165	62.669	109.945	81.492	-0.686	35.356	1923.094	-0.004387	-0.007696	-0.005704
8.3000	951.944	58.057	103.382	76.351	-0.679	35.356	1812.258	-0.004064	-0.007237	-0.005345
8.4000	894.280	53.637	96.939	71.431	-0.684	35.356	1702.480	-0.003755	-0.006786	-0.005000
8.5000	828.877	48.998	89.825	65.373	-0.690	35.356	1577.969	-0.003430	-0.006288	-0.004576
8.6000	771.814	44.261	83.207	60.342	-0.688	35.355	1469.336	-0.003098	-0.005825	-0.004224
8.7000	699.572	38.336	74.387	53.477	-0.698	35.355	1331.806	-0.002684	-0.005207	-0.003743
8.8000	648.641	34.808	67.662	48.641	-0.694	35.355	1234.846	-0.002437	-0.004736	-0.003405
8.9000	587.701	29.775	60.007	42.513	-0.695	35.354	1118.832	-0.002084	-0.004200	-0.002976
9.0000	528.414	25.160	52.080	36.732	-0.696	35.355	1005.964	-0.001761	-0.003646	-0.002571
9.1000	465.520	20.119	44.173	30.743	-0.691	35.355	886.230	-0.001408	-0.003092	-0.002152
9.2000	430.173	17.327	38.886	27.170	-0.693	35.355	818.939	-0.001213	-0.002722	-0.001902
9.3000	384.006	13.893	32.571	22.708	-0.680	35.355	731.049	-0.000973	-0.002280	-0.001590
9.4000	348.644	11.670	27.481	18.845	-0.687	35.354	663.729	-0.000817	-0.001924	-0.001319
9.5000	295.143	7.277	20.199	13.563	-0.671	35.354	561.876	-0.000509	-0.001414	-0.000949
9.6000	280.520	5.919	16.320	11.062	-0.697	35.354	534.039	-0.000414	-0.001142	-0.000774
9.7000	267.280	4.667	14.312	9.620	-0.701	35.354	508.833	-0.000327	-0.001002	-0.000673
9.8000	258.128	4.083	12.084	8.493	-0.679	35.353	491.409	-0.000286	-0.000846	-0.000594
9.9000	254.521	3.583	10.678	7.394	-0.695	35.354	484.543	-0.000251	-0.000747	-0.000518
10.0000	256.670	3.776	10.540	7.297	-0.689	35.353	488.634	-0.000264	-0.000738	-0.000511
10.1000	258.504	3.471	10.456	7.451	-0.681	35.353	492.125	-0.000243	-0.000732	-0.000522
10.2000	275.651	4.807	13.140	8.883	-0.690	35.352	524.769	-0.000336	-0.000920	-0.000622
10.3000	306.534	6.555	16.609	11.325	-0.688	35.353	583.563	-0.000459	-0.001163	-0.000793
10.4000	341.551	8.028	20.198	14.359	-0.687	35.353	650.225	-0.000562	-0.001414	-0.001005
10.5000	371.547	10.045	23.490	17.232	-0.692	35.352	707.331	-0.000703	-0.001644	-0.001206
10.6000	432.788	14.532	31.774	22.944	-0.684	35.352	823.917	-0.001017	-0.002224	-0.001606
10.7000	486.800	18.160	38.739	27.905	-0.684	35.353	926.743	-0.001271	-0.002712	-0.001953
10.8000	537.671	21.137	45.039	32.341	-0.698	35.352	1023.588	-0.001480	-0.003153	-0.002264
10.9000	597.004	25.663	51.969	37.914	-0.691	35.352	1136.541	-0.001796	-0.003638	-0.002654
11.0000	652.639	30.330	59.210	42.763	-0.689	35.352	1242.456	-0.002123	-0.004145	-0.002993
11.1000	721.845	35.529	68.031	49.333	-0.691	35.352	1374.207	-0.002487	-0.004762	-0.003453
11.2000	784.468	40.615	75.571	55.282	-0.690	35.352	1493.425	-0.002843	-0.005290	-0.003870
11.3000	839.111	44.440	81.969	60.548	-0.689	35.352	1597.452	-0.003111	-0.005738	-0.004238
11.4000	902.952	49.666	89.884	66.300	-0.681	35.351	1718.988	-0.003477	-0.006292	-0.004641
11.5000	960.390	54.918	96.709	71.805	-0.681	35.351	1828.337	-0.003844	-0.006770	-0.005026
11.6000	1014.883	58.986	103.132	77.045	-0.684	35.351	1932.077	-0.004129	-0.007219	-0.005393
11.7000	1061.577	62.348	108.678	81.549	-0.686	35.351	2020.969	-0.004364	-0.007607	-0.005708
11.8000	1111.772	67.286	114.747	86.354	-0.694	35.351	2116.528	-0.004710	-0.008032	-0.006045
11.9000	1165.528	72.289	120.939	91.535	-0.679	35.351	2218.866	-0.005060	-0.008466	-0.006407
12.0000	1190.611	74.523	124.130	94.192	-0.684	35.351	2266.617	-0.005217	-0.008689	-0.006593
12.1000	1213.980	76.163	126.899	96.442	-0.689	35.352	2311.106	-0.005331	-0.008883	-0.006751
12.2000	1228.227	77.776	128.548	98.085	-0.691	35.351	2338.228	-0.005444	-0.008998	-0.006866
12.3000	1242.564	79.373	131.299	99.989	-0.678	35.351	2365.522	-0.005556	-0.009191	-0.006999
12.4000	1253.565	80.484	132.636	101.250	-0.695	35.350	2386.465	-0.005634	-0.009284	-0.007088
12.5000	1236.387	79.498	131.506	100.527	-0.688	35.351	2353.764	-0.005565	-0.009205	-0.007037
12.6000	1240.535	79.983	131.987	100.583	-0.690	35.350	2361.660	-0.005599	-0.009239	-0.007041
12.7000	1208.254	77.804	129.828	98.140	-0.685	35.351	2300.205	-0.005446	-0.009088	-0.006870
12.8000	1189.844	76.538	127.985	96.455	-0.673	35.350	2265.158	-0.005358	-0.008959	-0.006752
12.9000	1146.051	73.315	124.529	93.275	-0.682	35.351	2181.787	-0.005132	-0.008717	-0.006529
13.0000	1111.095	70.396	120.320	90.397	-0.677	35.350	2115.240	-0.004928	-0.008422	-0.006328
13.1000	1069.121	67.313	116.275	86.645	-0.681	35.350	2035.332	-0.004712	-0.008139	-0.006065
13.2000	1009.714	63.115	109.971	81.521	-0.694	35.350	1922.235	-0.004418	-0.007698	-0.005706
13.3000	937.652	57.650	102.733	75.586	-0.689	35.350	1785.049	-0.004036	-0.007191	-0.005291
13.4000	901.599	54.042	98.166	72.013	-0.680	35.350	1716.413	-0.003783	-0.006872	-0.005041
13.5000	824.534	48.607	89.691	65.386	-0.696	35.350	1569.700	-0.003402	-0.006278	-0.004577
13.6000	775.120	44.549	83.481	60.714	-0.700	35.349	1475.630	-0.003118	-0.005844	-0.004250
13.7000	688.707	37.908	73.343	52.587	-0.683	35.349	1311.121	-0.002654	-0.005134	-0.003681
13.8000	639.970	34.085	67.138	48.224	-0.700	35.349	1218.338	-0.002386	-0.004700	-0.003376
13.9000	582.396	29.776	59.554	42.665	-0.682	35.349	1108.732	-0.002084	-0.004169	-0.002987
14.0000	525.964	25.274	52.261	37.024	-0.679	35.350	1001.301	-0.001769	-0.003658	-0.002592
14.1000	474.402	21.525	45.230	31.813	-0.676	35.349	903.139	-0.001507	-0.003166	-0.002227
14.2000	410.892	16.119	36.889	25.823	-0.681	35.349	782.232	-0.001128	-0.002582	-0.001808
14.3000	386.335	14.297	32.391	22.999	-0.676	35.349	735.483	-0.001001	-0.002267	-0.001610
14.4000	338.936	10.350	25.140	17.998	-0.678	35.348	645.247	-0.000724	-0.001760	-0.001260
14.5000	310.757	8.572	21.688	14.748	-0.680	35.348	591.602	-0.000600	-0.001518	-0.001032
14.6000	287.539	6.655	18.013	12.229	-0.680	35.348	547.400	-0.000466	-0.001261	-0.000856
14.7000	267.325	4.487	14.299	9.593	-0.684	35.349	508.919	-0.000314	-0.001001	-0.000672
14.8000	261.795	4.252	12.963	8.896	-0.678	35.349	498.390	-0.000298	-0.000907	-0.000623
14.9000	240.289	2.721	8.931	6.227	-0.679	35.348	457.449	-0.000190	-0.000625	-0.000436
15.0000	258.474	3.944	11.023	7.672	-0.683	35.348	492.067	-0.000276	-0.000772	-0.000537
15.1000	258.429	3.639	10.375	7.589	-0.676	35.349	491.982	-0.000255	-0.000726	-0.000531
15.2000	280.310	5.112	13.100	9.497	-0.691	35.348	533.638	-0.000358	-0.000917	-0.000665
15.3000	310.772	6.806	16.069	11.812	-0.689	35.349	591.631	-0.000476	-0.001125	-0.000827
15.4000	332.233	8.027	19.372	13.913	-0.694	35.348	632.486	-0.000562	-0.001356	-0.000974
15.5000	385.584	11.809	25.633	18.761	-0.686	35.349	734.053	-0.000827	-0.001794	-0.001313
15.6000	436.665	14.963	32.130	23.277	-0.685	35.348	831.299	-0.001047	-0.002249	-0.001629
15.7000	477.017	17.688	37.400	26.811	-0.686	35.348	908.117	-0.001238	-0.002618	-0.001877
15.8000	544.810	22.413	45.477	32.851	-0.687	35.347	1037.178	-0.001569	-0.003183	-0.002300
15.9000	581.434	25.344	51.163	36.900	-0.686	35.348	1106.901	-0.001774	-0.003581	-0.002583
16.0000	656.546	29.901	60.381	43.596	-0.683	35.348	1249.895	-0.002093	-0.004227	-0.003052
16.1000	710.889	34.670	67.013	48.739	-0.673	35.348	1353.350	-0.002427	-0.004691	-0.003412
16.2000	775.541	39.033	74.926	54.866	-0.675	35.348	1476.431	-0.002732	-0.005245	-0.003841
16.3000	828.952	43.926	81.763	59.967	-0.679	35.348	1578.112	-0.003075	-0.005723	-0.004198
16.4000	897.617	48.926	89.952	66.357	-0.686	35.347	1708.832	-0.003425	-0.006297	-0.004645
16.5000	983.294	56.139	99.858	74.333	-0.680	35.347	1871.939	-0.003930	-0.006990	-0.005203
16.6000	1029.656	60.463	105.115	78.751	-0.690	35.347	1960.201	-0.004232	-0.007358	-0.005513
16.7000	1069.632	63.837	109.640	82.824	-0.692	35.347	2036.304	-0.004469	-0.007675	-0.005798
16.8000	1114.762	68.060	115.504	87.147	-0.695	35.347	2122.221	-0.004764	-0.008085	-0.006100
16.9000	1157.458	71.260	120.787	91.356	-0.684	35.347	2203.503	-0.004988	-0.008455	-0.006395
17.0000	1187.319	73.759	124.432	94.621	-0.680	35.348	2260.351	-0.005163	-0.008710	-0.006623
17.1000	1218.428	76.735	127.695	97.500	-0.697	35.347	2319.574	-0.005371	-0.008939	-0.006825
17.2000	1225.687	77.873	129.908	98.711	-0.690	35.348	2333.393	-0.005451	-0.009094	-0.006910
17.3000	1243.556	79.525	131.741	100.363	-0.688	35.347	2367.411	-0.005567	-0.009222	-0.007025
17.4000	1251.791	80.568	132.637	101.639	-0.699	35.347	2383.089	-0.005640	-0.009285	-0.007115
17.5000	1230.376	78.805	131.713	100.584	-0.704	35.347	2342.319	-0.005516	-0.009220	-0.007041
17.6000	1224.049	79.136	131.410	100.292	-0.693	35.347	2330.275	-0.005540	-0.009199	-0.007020
17.7000	1224.019	79.512	131.809	100.042	-0.691	35.347	2330.217	-0.005566	-0.009227	-0.007003
17.8000	1180.091	76.318	127.986	96.900	-0.698	35.347	2246.590	-0.005342	-0.008959	-0.006783
17.9000	1151.882	73.842	125.024	94.054	-0.694	35.347	2192.888	-0.005169	-0.008752	-0.006584
18.0000	1112.643	70.966	120.963	90.981	-0.703	35.347	2118.187	-0.004968	-0.008467	-0.006369
18.1000	1071.285	67.924	116.508	87.619	-0.709	35.347	2039.452	-0.004755	-0.008156	-0.006133
18.2000	1018.821	64.116	111.595	83.378	-0.693	35.346	1939.573	-0.004488	-0.007812	-0.005836
18.3000	966.432	59.571	105.292	78.292	-0.691	35.346	1839.838	-0.004170	-0.007370	-0.005480
18.4000	895.528	54.555	98.028	72.220	-0.688	35.346	1704.855	-0.003819	-0.006862	-0.005055
18.5000	835.655	49.469	90.706	66.660	-0.692	35.346	1590.872	-0.003463	-0.006349	-0.004666
18.6000	775.270	44.996	83.924	60.963	-0.695	35.347	1475.916	-0.003150	-0.005875	-0.004267
18.7000	706.591	39.977	75.489	54.699	-0.690	35.347	1345.167	-0.002798	-0.005284	-0.003829
18.8000	638.572	34.905	67.287	48.669	-0.687	35.347	1215.677	-0.002443	-0.004710	-0.003407
18.9000	595.651	30.916	61.577	44.038	-0.686	35.346	1133.966	-0.002164	-0.004310	-0.003083
19.0000	531.885	25.858	53.157	37.955	-0.699	35.347	1012.573	-0.001810	-0.003721	-0.002657
19.1000	482.427	22.094	46.647	33.032	-0.695	35.346	918.417	-0.001547	-0.003265	-0.002312
19.2000	421.321	17.495	38.654	27.197	-0.686	35.346	802.088	-0.001225	-0.002706	-0.001904
19.3000	382.789	14.476	32.874	23.124	-0.707	35.347	728.731	-0.001013	-0.002301	-0.001619
19.4000	335.659	10.239	26.035	18.317	-0.708	35.347	639.009	-0.000717	-0.001822	-0.001282
19.5000	304.596	8.378	21.494	14.971	-0.697	35.346	579.872	-0.000586	-0.001505	-0.001048
19.6000	284.127	7.015	18.192	12.606	-0.692	35.347	540.905	-0.000491	-0.001273	-0.000882
19.7000	267.761	5.375	15.412	10.438	-0.692	35.346	509.748	-0.000376	-0.001079	-0.000731
19.8000	251.500	4.097	12.729	8.314	-0.702	35.346	478.792	-0.000287	-0.000891	-0.000582
19.9000	250.103	3.597	11.752	7.713	-0.697	35.346	476.131	-0.000252	-0.000823	-0.000540
20.0000	251.831	3.986	11.038	7.783	-0.708	35.346	479.422	-0.000279	-0.000773	-0.000545
20.1000	264.139	-40.440	12.001	8.410	-0.706	35.347	502.853	0.002831	-0.000840	-0.000589
20.2000	271.158	-40.775	13.418	9.270	-0.690	35.346	516.214	0.002854	-0.000939	-0.000649
20.3000	314.304	-37.690	17.504	12.535	-0.698	35.347	598.354	0.002638	-0.001225	-0.000877
20.4000	346.089	-36.117	21.496	15.857	-0.692	35.347	658.865	0.002528	-0.001505	-0.001110
20.5000	379.242	-33.545	25.856	18.706	-0.692	35.346	721.979	0.002348	-0.001810	-0.001309
20.6000	421.757	-30.591	30.673	22.414	-0.689	35.346	802.917	0.002141	-0.002147	-0.001569
20.7000	475.514	-27.695	37.497	27.032	-0.690	35.347	905.256	0.001939	-0.002625	-0.001892
20.8000	534.230	-23.850	45.121	32.089	-0.697	35.347	1017.036	0.001669	-0.003158	-0.002246
20.9000	588.257	-19.737	51.998	37.455	-0.690	35.347	1119.890	0.001382	-0.003640	-0.002622
21.0000	657.839	-14.177	60.186	43.442	-0.677	35.347	1252.356	0.000992	-0.004213	-0.003041
21.1000	727.480	-8.714	68.938	50.055	-0.702	35.347	1384.935	0.000610	-0.004826	-0.003504
21.2000	777.600	-4.864	75.792	55.142	-0.697	35.346	1480.350	0.000340	-0.005305	-0.003860
21.3000	838.480	-0.168	82.945	60.575	-0.691	35.347	1596.251	0.000012	-0.005806	-0.004240
21.4000	913.532	5.612	91.023	67.510	-0.699	35.347	1739.130	-0.000393	-0.006372	-0.004726
21.5000	982.723	11.920	99.377	74.040	-0.696	35.347	1870.852	-0.000834	-0.006956	-0.005183
21.6000	1008.091	14.366	103.561	77.002	-0.693	35.347	1919.146	-0.001006	-0.007249	-0.005390
21.7000	1074.922	19.632	110.495	83.074	-0.718	35.347	2046.375	-0.001374	-0.007735	-0.005815
21.8000	1112.343	23.163	115.241	86.841	-0.703	35.347	2117.615	-0.001621	-0.008067	-0.006079
21.9000	1134.194	25.008	118.459	89.591	-0.684	35.347	2159.214	-0.001751	-0.008292	-0.006271
22.0000	1189.844	30.180	124.363	94.566	-0.706	35.348	2265.158	-0.002113	-0.008705	-0.006620
22.1000	1211.695	31.556	127.159	96.832	-0.713	35.347	2306.757	-0.002209	-0.008901	-0.006778
22.2000	1247.839	35.238	131.109	100.265	-0.698	35.347	2375.565	-0.002467	-0.009178	-0.007019
22.3000	1244.548	35.419	131.931	100.819	-0.696	35.347	2369.299	-0.002479	-0.009235	-0.007057
22.4000	1252.047	36.515	132.826	101.651	-0.703	35.347	2383.575	-0.002556	-0.009298	-0.007116
22.5000	1245.870	36.336	132.814	101.473	-0.710	35.348	2371.817	-0.002544	-0.009297	-0.007103
22.6000	1227.836	35.225	131.879	100.377	-0.703	35.347	2337.484	-0.002466	-0.009232	-0.007026
22.7000	1216.339	33.962	131.175	99.416	-0.698	35.347	2315.598	-0.002377	-0.009182	-0.006959
22.8000	1190.881	32.502	128.629	97.402	-0.696	35.347	2267.132	-0.002275	-0.009004	-0.006818
22.9000	1159.502	30.123	125.369	94.691	-0.710	35.347	2207.394	-0.002109	-0.008776	-0.006628
23.0000	1122.547	27.736	122.372	91.774	-0.703	35.348	2137.041	-0.001942	-0.008566	-0.006424
23.1000	1060.810	22.273	116.000	86.311	-0.702	35.347	2019.510	-0.001559	-0.008120	-0.006042
23.2000	1024.426	19.630	112.090	83.435	-0.699	35.347	1950.245	-0.001374	-0.007846	-0.005840
23.3000	954.965	14.142	104.551	77.115	-0.696	35.347	1818.008	-0.000990	-0.007319	-0.005398
23.4000	872.459	8.167	95.579	70.263	-0.706	35.347	1660.938	-0.000572	-0.006691	-0.004918
23.5000	836.722	5.419	91.218	66.525	-0.699	35.347	1592.903	-0.000379	-0.006385	-0.004657
23.6000	779.028	0.098	84.461	61.436	-0.698	35.348	1483.068	-0.000007	-0.005912	-0.004301
23.7000	719.470	-4.588	77.085	55.697	-0.694	35.348	1369.686	0.000321	-0.005396	-0.003899
23.8000	647.454	-10.244	67.920	49.113	-0.706	35.348	1232.586	0.000717	-0.004754	-0.003438
23.9000	599.679	-13.802	62.101	44.441	-0.718	35.348	1141.634	0.000966	-0.004347	-0.003111
24.0000	545.171	-17.818	55.112	38.911	-0.709	35.349	1037.865	0.001247	-0.003858	-0.002724
24.1000	475.920	-23.542	46.468	32.685	-0.708	35.348	906.029	0.001648	-0.003253	-0.002288
24.2000	437.808	-26.890	40.483	28.363	-0.710	35.348	833.473	0.001882	-0.002834	-0.001985
24.3000	381.196	-30.909	32.613	23.237	-0.709	35.348	725.698	0.002164	-0.002283	-0.001627
24.4000	332.759	-34.215	25.719	17.844	-0.703	35.348	633.488	0.002395	-0.001800	-0.001249
24.5000	297.593	-36.845	21.069	14.261	-0.714	35.348	566.540	0.002579	-0.001475	-0.000998
24.6000	292.002	-37.593	19.126	13.203	-0.720	35.349	555.897	0.002631	-0.001339	-0.000924
24.7000	274.855	-39.329	15.494	10.855	-0.727	35.348	523.252	0.002753	-0.001085	-0.000760
24.8000	248.916	-40.898	12.262	8.396	-0.712	35.349	473.871	0.002863	-0.000858	-0.000588
24.9000	248.029	-41.025	11.298	7.895	-0.714	35.349	472.183	0.002872	-0.000791	-0.000553
25.0000	259.976	-40.678	12.042	8.380	-0.724	35.349	494.928	0.002847	-0.000843	-0.000587
25.1000	259.195	-41.080	11.794	8.200	-0.727	35.349	493.441	0.002876	-0.000826	-0.000574
25.2000	285.705	-39.773	14.088	10.285	-0.732	35.349	543.909	0.002784	-0.000986	-0.000720
25.3000	314.289	-37.608	17.256	12.646	-0.726	35.349	598.326	0.002633	-0.001208	-0.000885
25.4000	336.411	-36.009	20.474	14.607	-0.713	35.349	640.440	0.002521	-0.001433	-0.001022
25.5000	380.129	-33.742	26.020	18.749	-0.703	35.349	723.667	0.002362	-0.001821	-0.001312
25.6000	429.828	-30.298	32.420	23.167	-0.724	35.350	818.281	0.002121	-0.002269	-0.001622
25.7000	482.247	-27.016	38.337	27.848	-0.720	35.350	918.074	0.001891	-0.002684	-0.001949
25.8000	541.308	-22.999	46.193	33.283	-0.718	35.349	1030.512	0.001610	-0.003233	-0.002330
25.9000	601.332	-18.485	53.803	38.688	-0.723	35.350	1144.781	0.001294	-0.003766	-0.002708
26.0000	658.470	-13.997	60.739	43.929	-0.733	35.350	1253.557	0.000980	-0.004252	-0.003075
26.1000	718.553	-9.481	68.444	49.696	-0.718	35.350	1367.941	0.000664	-0.004791	-0.003479
26.2000	781.522	-4.379	75.959	55.518	-0.719	35.350	1487.818	0.000307	-0.005317	-0.003886
26.3000	847.707	0.624	83.773	61.741	-0.703	35.350	1613.817	-0.000044	-0.005864	-0.004322
26.4000	925.119	7.224	93.306	68.845	-0.716	35.350	1761.189	-0.000506	-0.006531	-0.004819
26.5000	965.470	10.740	98.455	72.944	-0.736	35.350	1838.007	-0.000752	-0.006892	-0.005106
26.6000	1021.556	15.186	105.088	78.431	-0.724	35.350	1944.780	-0.001063	-0.007356	-0.005490
26.7000	1072.247	19.630	110.400	83.487	-0.715	35.350	2041.283	-0.001374	-0.007728	-0.005844
26.8000	1124.410	24.455	116.536	88.189	-0.735	35.351	2140.589	-0.001712	-0.008157	-0.006173
26.9000	1154.633	27.041	120.923	91.273	-0.719	35.351	2198.124	-0.001893	-0.008465	-0.006389
27.0000	1190.100	30.165	125.081	94.997	-0.732	35.351	2265.644	-0.002112	-0.008756	-0.006650
27.1000	1210.944	32.335	127.488	97.290	-0.718	35.352	2305.326	-0.002263	-0.008924	-0.006810
27.2000	1233.562	34.058	130.294	99.476	-0.726	35.351	2348.385	-0.002384	-0.009121	-0.006963
27.3000	1244.022	35.961	132.305	101.040	-0.718	35.352	2368.298	-0.002517	-0.009261	-0.007073
27.4000	1248.184	36.102	132.814	101.501	-0.716	35.352	2376.223	-0.002527	-0.009297	-0.007105
27.5000	1242.789	36.419	132.705	101.557	-0.742	35.352	2365.952	-0.002549	-0.009289	-0.007109
27.6000	1235.350	35.642	132.221	101.112	-0.735	35.352	2351.789	-0.002495	-0.009255	-0.007078
27.7000	1215.197	34.612	131.010	99.668	-0.725	35.352	2313.423	-0.002423	-0.009171	-0.006977
27.8000	1181.579	32.153	128.054	97.013	-0.742	35.352	2249.422	-0.002251	-0.008964	-0.006791
27.9000	1151.657	29.847	125.411	94.402	-0.742	35.352	2192.459	-0.002089	-0.008779	-0.006608
28.0000	1117.377	27.471	122.121	91.620	-0.719	35.352	2127.199	-0.001923	-0.008548	-0.006413
28.1000	1066.671	23.150	116.949	87.133	-0.710	35.352	2030.668	-0.001620	-0.008186	-0.006099
28.2000	1008.000	18.603	110.549	82.574	-0.724	35.352	1918.974	-0.001302	-0.007738	-0.005780
28.3000	950.336	14.645	104.467	77.307	-0.732	35.352	1809.196	-0.001025	-0.007313	-0.005412
28.4000	889.862	9.949	97.890	72.194	-0.726	35.353	1694.069	-0.000696	-0.006852	-0.005054
28.5000	835.775	5.099	91.505	66.856	-0.731	35.353	1591.101	-0.000357	-0.006405	-0.004680
28.6000	775.270	0.347	84.323	61.521	-0.728	35.353	1475.916	-0.000024	-0.005903	-0.004306
28.7000	712.106	-4.200	76.850	55.572	-0.715	35.353	1355.667	0.000294	-0.005379	-0.003890
28.8000	634.109	-10.425	67.260	48.362	-0.723	35.353	1207.180	0.000730	-0.004708	-0.003385
28.9000	587.716	-14.190	61.219	43.748	-0.731	35.353	1118.860	0.000993	-0.004285	-0.003062
29.0000	522.808	-19.194	53.199	37.941	-0.735	35.353	995.293	0.001344	-0.003724	-0.002656
29.1000	471.411	-23.930	45.533	32.382	-0.726	35.353	897.446	0.001675	-0.003187	-0.002267
29.2000	420.931	-27.308	38.833	27.588	-0.719	35.353	801.344	0.001912	-0.002718	-0.001931
29.3000	378.040	-30.492	32.543	22.999	-0.724	35.353	719.690	0.002134	-0.002278	-0.001610
29.4000	344.151	-32.922	27.797	19.430	-0.738	35.354	655.174	0.002305	-0.001946	-0.001360
29.5000	289.643	-37.774	20.226	13.718	-0.723	35.354	551.405	0.002644	-0.001416	-0.000960
29.6000	280.761	-38.024	18.126	12.340	-0.735	35.354	534.496	0.002662	-0.001269	-0.000864
29.7000	264.530	-39.191	15.275	10.342	-0.724	35.354	503.597	0.002743	-0.001069	-0.000724
29.8000	258.849	-40.579	12.937	9.188	-0.728	35.354	492.783	0.002841	-0.000906	-0.000643
29.9000	249.231	-40.578	11.933	8.091	-0.719	35.354	474.472	0.002840	-0.000835	-0.000566
30.0000	251.455	-40.900	11.809	7.950	-0.723	35.354	478.706	0.002863	-0.000827	-0.000556
30.1000	262.366	-40.552	12.414	8.506	-0.730	35.354	499.477	0.002839	-0.000869	-0.000595
30.2000	288.801	-39.216	14.985	10.689	-0.738	35.354	549.803	0.002745	-0.001049	-0.000748
30.3000	312.666	-38.037	17.697	12.869	-0.719	35.355	595.236	0.002663	-0.001239	-0.000901
30.4000	347.893	-35.369	22.059	15.900	-0.738	35.354	662.298	0.002476	-0.001544	-0.001113
30.5000	380.624	-33.269	26.405	19.136	-0.724	35.355	724.611	0.002329	-0.001848	-0.001340
30.6000	433.494	-30.200	32.915	23.610	-0.736	35.355	825.262	0.002114	-0.002304	-0.001653
30.7000	487.131	-26.336	39.149	28.586	-0.735	35.355	927.372	0.001844	-0.002740	-0.002001
30.8000	543.803	-22.472	46.566	33.644	-0.728	35.355	1035.261	0.001573	-0.003260	-0.002355
30.9000	603.962	-17.984	54.133	39.286	-0.741	35.356	1149.788	0.001259	-0.003789	-0.002750
31.0000	655.554	-13.468	60.959	44.011	-0.727	35.355	1248.007	0.000943	-0.004267	-0.003081
31.1000	719.771	-9.451	69.103	50.168	-0.735	35.355	1370.258	0.000662	-0.004837	-0.003512
31.2000	794.853	-3.185	77.415	57.060	-0.739	35.356	1513.195	0.000223	-0.005419	-0.003994
31.3000	841.170	0.777	83.676	61.575	-0.736	35.356	1601.372	-0.000054	-0.005857	-0.004310
31.4000	922.053	7.625	92.755	68.745	-0.743	35.356	1755.352	-0.000534	-0.006493	-0.004812
31.5000	965.515	10.614	98.457	73.374	-0.739	35.356	1838.093	-0.000743	-0.006892	-0.005136
31.6000	1020.083	15.047	104.965	78.418	-0.732	35.356	1941.977	-0.001053	-0.007348	-0.005489
31.7000	1069.542	19.449	110.676	83.363	-0.734	35.356	2036.133	-0.001361	-0.007747	-0.005835
31.8000	1120.924	24.190	116.399	87.967	-0.739	35.356	2133.951	-0.001693	-0.008148	-0.006158
31.9000	1162.132	27.860	121.269	92.137	-0.740	35.357	2212.400	-0.001950	-0.008489	-0.006450
32.0000	1191.167	30.249	125.273	95.207	-0.736	35.357	2267.675	-0.002117	-0.008769	-0.006665
32.1000	1221.975	32.571	129.373	98.558	-0.743	35.356	2326.326	-0.002280	-0.009056	-0.006899
32.2000	1236.312	34.503	131.409	100.152	-0.742	35.357	2353.621	-0.002415	-0.009199	-0.007011
32.3000	1241.647	35.640	131.851	101.124	-0.749	35.357	2363.777	-0.002495	-0.009230	-0.007079
32.4000	1250.153	36.684	132.965	101.959	-0.737	35.357	2379.971	-0.002568	-0.009308	-0.007137
32.5000	1246.727	36.824	133.461	102.140	-0.723	35.357	2373.447	-0.002578	-0.009342	-0.007150
32.6000	1223.388	34.959	132.387	100.430	-0.728	35.357	2329.016	-0.002447	-0.009267	-0.007030
32.7000	1213.754	34.433	131.162	99.587	-0.739	35.358	2310.677	-0.002410	-0.009181	-0.006971
32.8000	1189.048	32.723	129.126	97.721	-0.742	35.358	2263.641	-0.002291	-0.009039	-0.006840
32.9000	1145.721	29.749	125.053	94.524	-0.734	35.358	2181.158	-0.002082	-0.008754	-0.006617
33.0000	1113.906	26.914	122.124	91.677	-0.742	35.358	2120.590	-0.001884	-0.008549	-0.006417
33.1000	1059.683	22.996	116.275	86.590	-0.740	35.358	2017.365	-0.001610	-0.008139	-0.006061
33.2000	1021.150	19.493	112.133	83.573	-0.728	35.358	1944.008	-0.001365	-0.007849	-0.005850
33.3000	946.820	13.698	104.305	77.322	-0.721	35.358	1802.502	-0.000959	-0.007301	-0.005413
33.4000	902.546	10.074	98.881	72.788	-0.730	35.358	1718.216	-0.000705	-0.006922	-0.005095
33.5000	837.218	5.404	92.015	66.927	-0.731	35.358	1593.847	-0.000378	-0.006441	-0.004685
33.6000	779.764	0.792	85.356	62.062	-0.731	35.358	1484.470	-0.000055	-0.005975	-0.004344
33.7000	698.100	-5.406	75.394	54.505	-0.735	35.358	1329.002	0.000378	-0.005278	-0.003815
33.8000	657.388	-8.869	69.846	50.430	-0.735	35.358	1251.497	0.000621	-0.004889	-0.003530
33.9000	582.366	-14.038	60.408	43.221	-0.739	35.358	1108.675	0.000983	-0.004229	-0.003025
34.0000	521.170	-18.901	52.716	37.634	-0.732	35.359	992.174	0.001323	-0.003690	-0.002634
34.1000	465.159	-23.569	45.671	32.257	-0.720	35.359	885.544	0.001650	-0.003197	-0.002258
34.2000	416.798	-27.252	38.805	27.211	-0.737	35.359	793.476	0.001908	-0.002716	-0.001905
34.3000	374.403	-31.036	32.446	22.707	-0.738	35.359	712.767	0.002173	-0.002271	-0.001589
34.4000	339.372	-32.992	27.149	19.221	-0.738	35.358	646.076	0.002309	-0.001900	-0.001345
34.5000	303.153	-36.414	21.894	15.318	-0.736	35.358	577.126	0.002549	-0.001533	-0.001072
34.6000	286.096	-38.024	18.617	13.176	-0.734	35.359	544.653	0.002662	-0.001303	-0.000922
34.7000	262.682	-39.635	15.564	10.618	-0.746	35.359	500.078	0.002774	-0.001089	-0.000743
34.8000	257.978	-40.815	13.968	9.773	-0.721	35.359	491.123	0.002857	-0.000978	-0.000684
34.9000	252.297	-40.247	12.606	8.729	-0.730	35.359	480.309	0.002817	-0.000882	-0.000611
35.0000	252.087	-40.886	12.606	8.397	-0.743	35.359	479.908	0.002862	-0.000882	-0.000588
35.1000	264.620	-39.968	13.251	9.188	-0.732	35.360	503.769	0.002798	-0.000928	-0.000643
35.2000	279.138	-40.190	14.545	10.370	-0.740	35.360	531.406	0.002813	-0.001018	-0.000726
35.3000	312.110	-38.272	17.670	13.120	-0.734	35.359	594.177	0.002679	-0.001237	-0.000918
35.4000	348.839	-35.996	22.114	16.384	-0.742	35.360	664.101	0.002520	-0.001548	-0.001147
35.5000	383.916	-32.714	26.834	19.472	-0.742	35.360	730.877	0.002290	-0.001878	-0.001363
35.6000	438.379	-29.211	33.811	24.320	-0.740	35.361	834.560	0.002045	-0.002367	-0.001702
35.7000	476.927	-27.030	38.998	28.183	-0.741	35.360	907.946	0.001892	-0.002730	-0.001973
35.8000	538.904	-22.193	46.662	33.630	-0.725	35.360	1025.934	0.001554	-0.003266	-0.002354
35.9000	596.943	-17.760	53.886	38.896	-0.742	35.360	1136.427	0.001243	-0.003772	-0.002723
36.0000	657.433	-14.219	61.329	44.594	-0.718	35.361	1251.583	0.000995	-0.004293	-0.003122
36.1000	717.246	-8.702	69.049	50.111	-0.746	35.360	1365.452	0.000609	-0.004833	-0.003508
36.2000	785.580	-4.296	77.499	56.655	-0.752	35.361	1495.543	0.000301	-0.005425	-0.003966
36.3000	862.721	1.803	85.659	63.244	-0.743	35.361	1642.399	-0.000126	-0.005996	-0.004427
36.4000	892.642	4.958	90.006	67.011	-0.728	35.361	1699.362	-0.000347	-0.006300	-0.004691
36.5000	965.741	10.726	98.524	73.372	-0.733	35.361	1838.522	-0.000751	-0.006897	-0.005136
36.6000	1030.603	16.579	105.694	79.501	-0.750	35.361	1962.004	-0.001161	-0.007399	-0.005565
36.7000	1076.004	20.663	111.636	84.031	-0.747	35.361	2048.435	-0.001446	-0.007815	-0.005882
36.8000	1108.270	23.053	114.925	87.023	-0.737	35.362	2109.861	-0.001614	-0.008045	-0.006092
36.9000	1158.690	27.068	120.828	91.897	-0.742	35.362	2205.849	-0.001895	-0.008458	-0.006433
37.0000	1192.444	31.308	124.666	95.468	-0.739	35.362	2270.107	-0.002192	-0.008727	-0.006683
37.1000	1226.949	33.419	129.055	98.683	-0.746	35.362	2335.796	-0.002339	-0.009034	-0.006908
37.2000	1241.226	35.238	131.382	100.542	-0.737	35.362	2362.976	-0.002467	-0.009197	-0.007038
37.3000	1250.995	36.098	132.403	101.639	-0.724	35.362	2381.573	-0.002527	-0.009268	-0.007115
37.4000	1248.230	35.821	132.568	102.139	-0.728	35.362	2376.308	-0.002507	-0.009280	-0.007150
37.5000	1242.338	36.405	132.936	101.569	-0.743	35.363	2365.093	-0.002548	-0.009306	-0.007110
37.6000	1234.403	35.640	132.361	101.180	-0.735	35.362	2349.987	-0.002495	-0.009265	-0.007083
37.7000	1214.175	34.239	131.203	99.779	-0.731	35.362	2311.478	-0.002397	-0.009184	-0.006985
37.8000	1191.107	32.236	129.193	97.987	-0.737	35.362	2267.561	-0.002257	-0.009044	-0.006859
37.9000	1142.971	29.331	124.695	94.107	-0.742	35.363	2175.922	-0.002053	-0.008729	-0.006588
38.0000	1095.826	26.165	120.183	90.202	-0.740	35.363	2086.172	-0.001832	-0.008413	-0.006314
38.1000	1061.952	22.708	116.274	86.867	-0.739	35.362	2021.685	-0.001590	-0.008139	-0.006081
38.2000	1001.268	18.272	110.027	82.063	-0.746	35.362	1906.157	-0.001279	-0.007702	-0.005744
38.3000	954.574	14.643	104.565	77.820	-0.730	35.362	1817.265	-0.001025	-0.007320	-0.005447
38.4000	894.897	9.642	98.097	72.761	-0.741	35.362	1703.653	-0.000675	-0.006867	-0.005093
38.5000	844.401	5.362	92.317	67.816	-0.749	35.362	1607.523	-0.000375	-0.006462	-0.004747
38.6000	775.796	0.151	84.296	61.463	-0.742	35.362	1476.917	-0.000011	-0.005901	-0.004302
38.7000	690.420	-6.630	74.305	53.797	-0.746	35.362	1314.383	0.000464	-0.005201	-0.003766
38.8000	646.687	-10.370	68.525	49.710	-0.729	35.362	1231.127	0.000726	-0.004797	-0.003480
38.9000	587.130	-14.873	60.544	43.721	-0.747	35.362	1117.744	0.001041	-0.004238	-0.003060
39.0000	516.872	-20.058	51.915	37.261	-0.744	35.362	983.992	0.001404	-0.003634	-0.002608
39.1000	457.314	-23.931	44.322	31.423	-0.727	35.363	870.609	0.001675	-0.003103	-0.002200
39.2000	436.124	-26.434	40.744	28.808	-0.722	35.362	830.269	0.001850	-0.002852	-0.002017
39.3000	375.425	-31.465	32.487	23.041	-0.747	35.362	714.712	0.002203	-0.002274	-0.001613
39.4000	342.092	-33.575	26.764	19.012	-0.732	35.362	651.255	0.002350	-0.001873	-0.001331
39.5000	315.116	-35.327	22.924	16.191	-0.745	35.362	599.899	0.002473	-0.001605	-0.001133
39.6000	285.239	-38.118	18.345	12.897	-0.754	35.362	543.022	0.002668	-0.001284	-0.000903
39.7000	259.240	-40.691	14.916	9.829	-0.756	35.362	493.526	0.002848	-0.001044	-0.000688
39.8000	242.363	-41.025	11.850	8.271	-0.745	35.362	461.397	0.002872	-0.000830	-0.000579
39.9000	251.996	-41.582	11.878	8.423	-0.740	35.362	479.736	0.002911	-0.000831	-0.000590
40.0000	250.584	-40.900	11.436	8.270	-0.741	35.362	477.047	0.002863	-0.000801	-0.000579
40.1000	269.159	-40.497	12.908	9.356	-0.748	35.362	512.409	0.002835	-0.000904	-0.000655
40.2000	277.304	-40.121	13.828	10.037	-0.751	35.361	527.916	0.002808	-0.000968	-0.000703
40.3000	315.642	-38.216	18.260	13.524	-0.743	35.362	600.901	0.002675	-0.001278	-0.000947
40.4000	345.894	-35.925	21.536	15.914	-0.748	35.362	658.493	0.002515	-0.001508	-0.001114
40.5000	382.789	-33.156	26.020	19.569	-0.746	35.362	728.731	0.002321	-0.001821	-0.001370
40.6000	417.309	-30.604	31.043	22.345	-0.743	35.361	794.449	0.002142	-0.002173	-0.001564
40.7000	484.290	-25.697	39.342	28.101	-0.748	35.361	921.965	0.001799	-0.002754	-0.001967
40.8000	546.718	-22.248	46.772	33.672	-0.747	35.361	1040.812	0.001557	-0.003274	-0.002357
40.9000	579.766	-20.364	51.874	37.274	-0.744	35.361	1103.725	0.001425	-0.003631	-0.002609
41.0000	661.986	-14.262	60.874	44.330	-0.750	35.361	1260.252	0.000998	-0.004261	-0.003103
41.1000	714.526	-9.465	67.880	49.376	-0.751	35.361	1360.273	0.000663	-0.004752	-0.003456
41.2000	775.000	-4.464	75.804	55.060	-0.744	35.361	1475.401	0.000313	-0.005306	-0.003854
41.3000	849.361	0.205	84.130	61.784	-0.756	35.361	1616.964	-0.000014	-0.005889	-0.004325
41.4000	900.427	5.002	90.623	66.898	-0.756	35.361	1714.182	-0.000350	-0.006344	-0.004683
41.5000	957.986	10.169	97.725	72.540	-0.754	35.361	1823.759	-0.000712	-0.006841	-0.005078
41.6000	1014.222	14.756	104.263	77.918	-0.754	35.361	1930.819	-0.001033	-0.007298	-0.005454
41.7000	1073.990	20.284	111.210	83.516	-0.744	35.361	2044.601	-0.001420	-0.007785	-0.005846
41.8000	1120.443	23.207	116.702	88.022	-0.751	35.360	2133.036	-0.001625	-0.008169	-0.006162
41.9000	1150.064	26.484	120.456	90.829	-0.768	35.361	2189.426	-0.001854	-0.008432	-0.006358
42.0000	1186.042	29.651	124.349	94.650	-0.743	35.361	2257.919	-0.002076	-0.008704	-0.006626
42.1000	1210.989	31.917	127.625	97.069	-0.754	35.361	2305.412	-0.002234	-0.008934	-0.006795
42.2000	1225.987	33.668	130.458	99.100	-0.761	35.361	2333.965	-0.002357	-0.009132	-0.006937
42.3000	1241.031	35.128	132.485	100.791	-0.771	35.361	2362.604	-0.002459	-0.009274	-0.007055
42.4000	1262.912	37.307	133.888	102.806	-0.763	35.361	2404.261	-0.002611	-0.009372	-0.007196
42.5000	1250.198	36.489	133.116	101.960	-0.761	35.361	2380.056	-0.002554	-0.009318	-0.007137
42.6000	1235.606	36.114	132.649	100.861	-0.753	35.360	2352.276	-0.002528	-0.009285	-0.007060
42.7000	1218.624	34.184	131.479	99.711	-0.764	35.361	2319.946	-0.002393	-0.009204	-0.006980
42.8000	1187.785	32.238	128.892	97.542	-0.755	35.361	2261.238	-0.002257	-0.009022	-0.006828
42.9000	1158.826	29.763	126.113	95.135	-0.756	35.360	2206.106	-0.002083	-0.008828	-0.006659
43.0000	1112.523	26.373	120.911	90.869	-0.755	35.360	2117.958	-0.001846	-0.008464	-0.006361
43.1000	1066.160	22.637	116.452	86.938	-0.753	35.360	2029.696	-0.001585	-0.008152	-0.006086
43.2000	1016.191	19.730	112.021	82.975	-0.750	35.360	1934.566	-0.001381	-0.007841	-0.005808
43.3000	965.996	14.893	106.133	78.418	-0.769	35.360	1839.008	-0.001043	-0.007429	-0.005489
43.4000	904.936	9.739	99.018	73.067	-0.768	35.360	1722.765	-0.000682	-0.006931	-0.005115
43.5000	840.854	4.653	91.753	67.232	-0.763	35.360	1600.771	-0.000326	-0.006423	-0.004706
43.6000	770.176	0.652	83.871	60.936	-0.767	35.360	1466.217	-0.000046	-0.005871	-0.004266
43.7000	714.045	-4.505	76.629	55.724	-0.764	35.360	1359.358	0.000315	-0.005364	-0.003901
43.8000	652.158	-9.548	69.324	49.780	-0.766	35.360	1241.541	0.000668	-0.004853	-0.003485
43.9000	596.733	-13.607	62.060	44.315	-0.770	35.360	1136.026	0.000952	-0.004344	-0.003102
44.0000	525.604	-19.639	53.184	37.941	-0.756	35.360	1000.614	0.001375	-0.003723	-0.002656
44.1000	475.439	-23.806	45.645	32.563	-0.761	35.359	905.113	0.001666	-0.003195	-0.002279
44.2000	418.211	-27.156	38.420	26.934	-0.763	35.359	796.165	0.001901	-0.002689	-0.001885
44.3000	385.930	-31.021	34.086	23.540	-0.768	35.359	734.711	0.002171	-0.002386	-0.001648
44.4000	334.592	-34.269	26.984	18.553	-0.764	35.359	636.978	0.002399	-0.001889	-0.001299
44.5000	300.568	-36.495	21.990	15.080	-0.752	35.359	572.205	0.002555	-0.001539	-0.001056
44.6000	281.407	-39.175	18.152	12.396	-0.765	35.359	535.727	0.002742	-0.001271	-0.000868
44.7000	264.079	-39.342	15.163	10.507	-0.758	35.359	502.739	0.002754	-0.001061	-0.000735
44.8000	254.777	-40.816	13.664	8.771	-0.767	35.359	485.029	0.002857	-0.000956	-0.000614
44.9000	242.408	-41.149	11.327	7.296	-0.772	35.359	461.483	0.002880	-0.000793	-0.000511
45.0000	249.547	-40.690	11.545	7.979	-0.771	35.359	475.073	0.002848	-0.000808	-0.000558
45.1000	265.191	-41.596	12.511	8.674	-0.774	35.359	504.856	0.002912	-0.000876	-0.000607
45.2000	276.598	-40.538	13.497	9.761	-0.754	35.359	526.571	0.002838	-0.000945	-0.000683
45.3000	310.472	-38.382	16.856	12.729	-0.764	35.359	591.059	0.002687	-0.001180	-0.000891
45.4000	351.199	-34.855	22.457	16.175	-0.763	35.358	668.592	0.002440	-0.001572	-0.001132
45.5000	391.174	-33.533	26.998	19.445	-0.759	35.358	744.696	0.002347	-0.001890	-0.001361
45.6000	415.520	-30.811	30.770	22.108	-0.766	35.358	791.044	0.002157	-0.002154	-0.001548
45.7000	481.150	-26.698	38.431	27.572	-0.770	35.358	915.985	0.001869	-0.002690	-0.001930
45.8000	523.815	-24.045	44.268	31.771	-0.763	35.358	997.210	0.001683	-0.003099	-0.002224
45.9000	595.771	-18.038	53.322	38.328	-0.754	35.358	1134.195	0.001263	-0.003733	-0.002683
46.0000	647.274	-15.512	59.734	43.264	-0.757	35.358	1232.243	0.001086	-0.004181	-0.003028
46.1000	721.319	-9.759	68.856	49.806	-0.758	35.358	1373.205	0.000683	-0.004820	-0.003486
46.2000	782.695	-4.143	76.080	55.739	-0.762	35.357	1490.049	0.000290	-0.005326	-0.003902
46.3000	837.458	0.360	82.947	60.895	-0.775	35.358	1594.305	-0.000025	-0.005806	-0.004263
46.4000	907.190	5.639	91.369	67.482	-0.767	35.357	1727.057	-0.000395	-0.006396	-0.004724
46.5000	959.098	9.544	97.657	72.679	-0.758	35.357	1825.876	-0.000668	-0.006836	-0.005088
46.6000	1010.390	13.615	103.408	77.378	-0.746	35.357	1923.523	-0.000953	-0.007239	-0.005416
46.7000	1076.199	19.593	111.072	83.599	-0.762	35.357	2048.807	-0.001372	-0.007775	-0.005852
46.8000	1118.534	22.954	115.627	87.299	-0.760	35.357	2129.402	-0.001607	-0.008094	-0.006111
46.9000	1146.442	26.487	119.536	90.439	-0.755	35.357	2182.531	-0.001854	-0.008368	-0.006331
47.0000	1199.072	30.793	125.700	95.315	-0.763	35.357	2282.724	-0.002155	-0.008799	-0.006672
47.1000	1207.457	31.375	127.228	96.566	-0.754	35.356	2298.689	-0.002196	-0.008906	-0.006760
47.2000	1241.873	34.516	130.446	99.958	-0.765	35.356	2364.206	-0.002416	-0.009131	-0.006997
47.3000	1246.952	36.169	131.588	100.751	-0.755	35.356	2373.877	-0.002532	-0.009211	-0.007053
47.4000	1260.027	36.740	132.979	102.182	-0.759	35.357	2398.767	-0.002572	-0.009309	-0.007153
47.5000	1250.364	36.114	132.759	101.764	-0.755	35.356	2380.371	-0.002528	-0.009293	-0.007123
47.6000	1232.390	34.723	132.099	100.612	-0.758	35.356	2346.153	-0.002431	-0.009247	-0.007043
47.7000	1213.003	33.432	130.750	99.238	-0.749	35.356	2309.246	-0.002340	-0.009152	-0.006947
47.8000	1196.246	32.974	129.043	98.099	-0.754	35.356	2277.346	-0.002308	-0.009033	-0.006867
47.9000	1158.510	30.137	125.658	94.787	-0.767	35.355	2205.505	-0.002110	-0.008796	-0.006635
48.0000	1117.648	27.124	121.818	91.301	-0.764	35.355	2127.714	-0.001899	-0.008527	-0.006391
48.1000	1059.713	21.692	116.124	86.382	-0.759	35.355	2017.422	-0.001518	-0.008129	-0.006047
48.2000	1008.662	19.048	110.235	82.159	-0.769	35.354	1920.233	-0.001333	-0.007716	-0.005751
48.3000	962.479	15.060	105.474	77.836	-0.762	35.354	1832.314	-0.001054	-0.007383	-0.005449
48.4000	890.223	8.083	96.706	71.541	-0.759	35.354	1694.756	-0.000566	-0.006769	-0.005008
48.5000	829.658	4.124	90.402	66.232	-0.757	35.353	1579.456	-0.000289	-0.006328	-0.004636
48.6000	776.157	0.278	84.089	61.338	-0.762	35.353	1477.604	-0.000019	-0.005886	-0.004294
48.7000	713.654	-4.811	76.494	55.362	-0.754	35.353	1358.614	0.000337	-0.005355	-0.003875
48.8000	653.315	-9.395	68.717	49.765	-0.755	35.353	1243.744	0.000658	-0.004810	-0.003484
48.9000	588.543	-14.636	60.709	43.498	-0.763	35.352	1120.434	0.001025	-0.004250	-0.003045
49.0000	529.526	-19.374	52.771	37.844	-0.754	35.352	1008.081	0.001356	-0.003694	-0.002649
49.1000	475.965	-22.624	46.275	32.481	-0.757	35.351	906.115	0.001584	-0.003239	-0.002274
49.2000	423.846	-28.225	38.516	27.225	-0.767	35.351	806.894	0.001976	-0.002696	-0.001906
49.3000	376.852	-30.910	31.788	22.595	-0.769	35.351	717.430	0.002164	-0.002225	-0.001582
49.4000	348.509	-32.963	27.894	19.708	-0.762	35.350	663.471	0.002307	-0.001953	-0.001380
49.5000	306.324	-36.648	20.929	14.928	-0.772	35.350	583.162	0.002565	-0.001465	-0.001045
49.6000	280.941	-37.786	17.545	12.410	-0.774	35.350	534.840	0.002645	-0.001228	-0.000869
49.7000	269.114	-39.093	15.262	10.714	-0.768	35.349	512.323	0.002737	-0.001068	-0.000750
49.8000	251.155	-41.679	13.115	8.604	-0.770	35.349	478.134	0.002918	-0.000918	-0.000602
49.9000	403.603	-32.089	27.686	20.582	-0.767	35.348	768.356	0.002246	-0.001938	-0.001441
