# Supplementary material for: Evaluation of a Cold-Mixed High-Performance Polyurethane Mixture
Source: Hindawi journal article supplement (doi:10.1155/2019/1507971), 2019-11-07
Supplement: f1 [file 1507971.f1.zip › 1507971.f1/dynamic modulus data/PUM/specimen1/temp35/zhs-1-35_0.5Hz.csv]

Test Information
****************
Project name	zhs
Operator name	1
Target test temperature	35
Target confining stress	0
Average dynamic strain range from 75 to 125 micro-strain
Contact stress	5
Initial modulus	1000
Axial gauge length	70
Comments
Specimen information
********************
Identification	zhs-1-35
Dimensions	Point 1	Point 2	Point 3	Point 4	Point 5	Point 6	Average	Std Dev.
Diameter (mm)	49.2	49.2	49.3				49.23	0.058
Height (mm)	101.3	101.2	101.3				101.27	0.058
Cross-sectional area (mm�)	1903.7
Conditioning time
Properties/Comments
Test Data	0.5Hz
*********
Test date and time	Tue	Apr 2	2019	1:19 PM
Dynamic modulus (MPa)	10511
Phase angle (Degrees)	3.90
Average temperature (�C)	35.4
Average confining pressure (kPa)	-0.7
Average micro-strain	98
Load drift (%)	-0.2
Load standard error (%)	2.2
Average deformation drift (%)	-2.9
Average deformation standard error (%)	2.6
Deformation uniformity (%)	19.1
Phase uniformity (Degrees)	0.4
Conditioning Cycles
Time (sec)	Axial stress (kPa)	Axial micro-strain #1	Axial micro-strain #2	Axial micro-strain #3	Confining pressure (kPa)	Temperature (�C)	Load (N)	Displacement #1 (mm)	Displacement #2 (mm)	Displacement #3 (mm)
0.0000	244.332	0.763	6.524	2.405	-0.684	35.358	465.145	-0.000053	-0.000457	-0.000168
0.0400	238.771	0.209	5.106	1.694	-0.686	35.358	454.559	-0.000015	-0.000357	-0.000119
0.0800	252.282	0.306	5.534	1.947	-0.690	35.359	480.280	-0.000021	-0.000387	-0.000136
0.1200	278.086	2.289	8.270	3.936	-0.685	35.358	529.404	-0.000160	-0.000579	-0.000276
0.1600	313.282	3.915	11.629	6.851	-0.699	35.358	596.409	-0.000274	-0.000814	-0.000480
0.2000	348.359	6.058	16.223	10.149	-0.691	35.358	663.185	-0.000424	-0.001136	-0.000710
0.2400	383.510	8.113	20.228	13.134	-0.694	35.359	730.104	-0.000568	-0.001416	-0.000919
0.2800	422.944	10.838	25.332	16.579	-0.689	35.358	805.178	-0.000759	-0.001773	-0.001161
0.3200	444.991	12.032	28.070	18.749	-0.688	35.358	847.149	-0.000842	-0.001965	-0.001312
0.3600	497.576	16.020	34.952	23.334	-0.687	35.358	947.256	-0.001121	-0.002447	-0.001633
0.4000	556.803	19.604	41.981	28.585	-0.672	35.359	1060.009	-0.001372	-0.002939	-0.002001
0.4400	607.478	23.164	48.104	33.116	-0.679	35.358	1156.483	-0.001621	-0.003367	-0.002318
0.4800	663.444	27.457	54.723	38.037	-0.688	35.358	1263.027	-0.001922	-0.003831	-0.002663
0.5200	701.451	30.166	59.940	41.875	-0.687	35.358	1335.382	-0.002112	-0.004196	-0.002931
0.5600	749.918	33.809	65.734	45.956	-0.683	35.358	1427.650	-0.002367	-0.004601	-0.003217
0.6000	796.626	37.502	71.994	50.541	-0.683	35.358	1516.571	-0.002625	-0.005040	-0.003538
0.6400	846.144	41.686	77.691	55.156	-0.673	35.358	1610.842	-0.002918	-0.005438	-0.003861
0.6800	866.177	42.979	81.102	57.603	-0.683	35.358	1648.979	-0.003009	-0.005677	-0.004032
0.7200	927.057	47.813	86.967	62.465	-0.675	35.358	1764.879	-0.003347	-0.006088	-0.004373
0.7600	939.651	48.816	89.400	64.064	-0.683	35.358	1788.855	-0.003417	-0.006258	-0.004484
0.8000	974.517	51.983	93.349	67.536	-0.687	35.358	1855.230	-0.003639	-0.006534	-0.004728
0.8400	996.113	53.818	96.251	69.540	-0.684	35.359	1896.343	-0.003767	-0.006738	-0.004868
0.8800	1018.761	55.821	98.907	71.998	-0.680	35.359	1939.459	-0.003907	-0.006923	-0.005040
0.9200	1010.675	55.420	99.803	71.777	-0.686	35.358	1924.067	-0.003879	-0.006986	-0.005024
0.9600	1022.353	56.557	100.644	72.817	-0.686	35.358	1946.297	-0.003959	-0.007045	-0.005097
1.0000	1035.773	57.580	101.770	74.111	-0.682	35.358	1971.846	-0.004031	-0.007124	-0.005188
1.0400	1014.658	56.737	100.824	72.902	-0.677	35.358	1931.648	-0.003972	-0.007058	-0.005103
1.0800	1006.948	55.961	100.121	72.524	-0.691	35.358	1916.971	-0.003917	-0.007008	-0.005077
1.1200	972.413	53.608	96.927	69.220	-0.680	35.358	1851.225	-0.003753	-0.006785	-0.004845
1.1600	966.793	52.914	96.583	69.163	-0.688	35.358	1840.525	-0.003704	-0.006761	-0.004841
1.2000	927.704	50.485	93.293	66.205	-0.691	35.358	1766.109	-0.003534	-0.006531	-0.004634
1.2400	874.293	46.355	86.883	61.573	-0.684	35.358	1664.429	-0.003245	-0.006082	-0.004310
1.2800	832.874	43.631	82.948	58.018	-0.685	35.359	1585.579	-0.003054	-0.005806	-0.004061
1.3200	812.015	41.756	79.933	56.087	-0.690	35.359	1545.868	-0.002923	-0.005595	-0.003926
1.3600	756.891	37.991	73.712	51.263	-0.678	35.358	1440.926	-0.002659	-0.005160	-0.003588
1.4000	699.377	33.446	67.290	46.693	-0.680	35.358	1331.434	-0.002341	-0.004710	-0.003268
1.4400	659.071	30.652	62.459	42.903	-0.688	35.358	1254.702	-0.002146	-0.004372	-0.003003
1.4800	608.125	26.915	56.185	38.135	-0.685	35.358	1157.713	-0.001884	-0.003933	-0.002669
1.5200	555.134	23.138	49.882	33.380	-0.686	35.359	1056.833	-0.001620	-0.003492	-0.002337
1.5600	518.585	19.814	44.419	29.585	-0.687	35.358	987.253	-0.001387	-0.003109	-0.002071
1.6000	447.681	15.340	36.065	23.459	-0.695	35.357	852.270	-0.001074	-0.002525	-0.001642
1.6400	426.867	13.615	32.336	21.419	-0.688	35.358	812.645	-0.000953	-0.002264	-0.001499
1.6800	387.748	10.518	27.287	17.509	-0.688	35.358	738.173	-0.000736	-0.001910	-0.001226
1.7200	347.141	7.638	21.744	13.605	-0.673	35.358	660.868	-0.000535	-0.001522	-0.000952
1.7600	315.386	5.250	16.994	10.051	-0.680	35.358	600.414	-0.000368	-0.001190	-0.000704
1.8000	291.686	3.541	13.429	7.631	-0.685	35.357	555.296	-0.000248	-0.000940	-0.000534
1.8400	261.449	1.971	9.575	4.755	-0.685	35.358	497.732	-0.000138	-0.000670	-0.000333
1.8800	257.301	1.251	7.898	3.644	-0.681	35.358	489.836	-0.000088	-0.000553	-0.000255
1.9200	243.175	-0.168	5.796	2.170	-0.687	35.358	462.942	0.000012	-0.000406	-0.000152
1.9600	241.567	-0.127	4.830	1.697	-0.696	35.358	459.881	0.000009	-0.000338	-0.000119
2.0000	241.206	-0.306	4.418	1.614	-0.691	35.358	459.194	0.000021	-0.000309	-0.000113
2.0400	249.366	0.165	4.802	1.544	-0.692	35.358	474.730	-0.000012	-0.000336	-0.000108
2.0800	265.822	0.541	6.001	2.807	-0.694	35.358	506.058	-0.000038	-0.000420	-0.000197
2.1200	268.873	0.861	6.938	3.323	-0.688	35.358	511.866	-0.000060	-0.000486	-0.000233
2.1600	309.074	3.221	10.816	6.422	-0.680	35.358	588.398	-0.000225	-0.000757	-0.000450
2.2000	341.491	5.542	15.083	9.343	-0.691	35.358	650.110	-0.000388	-0.001056	-0.000654
2.2400	386.921	7.792	20.391	13.494	-0.684	35.358	736.599	-0.000545	-0.001427	-0.000945
2.2800	422.043	10.267	24.881	16.356	-0.688	35.358	803.461	-0.000719	-0.001742	-0.001145
2.3200	482.186	13.852	32.198	21.678	-0.684	35.358	917.959	-0.000970	-0.002254	-0.001517
2.3600	487.582	14.825	33.192	22.499	-0.675	35.358	928.230	-0.001038	-0.002323	-0.001575
2.4000	568.720	20.202	42.972	29.337	-0.686	35.358	1082.697	-0.001414	-0.003008	-0.002054
2.4400	595.426	22.219	47.102	32.146	-0.682	35.358	1133.537	-0.001555	-0.003297	-0.002250
2.4800	651.557	26.553	54.381	37.330	-0.685	35.358	1240.396	-0.001859	-0.003807	-0.002613
2.5200	707.838	30.583	60.737	42.137	-0.679	35.358	1347.542	-0.002141	-0.004252	-0.002950
2.5600	750.053	33.406	65.844	45.987	-0.687	35.358	1427.908	-0.002338	-0.004609	-0.003219
2.6000	785.805	36.865	70.645	49.584	-0.694	35.358	1495.972	-0.002581	-0.004945	-0.003471
2.6400	845.994	41.156	77.431	54.949	-0.688	35.357	1610.556	-0.002881	-0.005420	-0.003846
2.6800	886.646	44.662	82.410	58.799	-0.688	35.358	1687.946	-0.003126	-0.005769	-0.004116
2.7200	914.914	46.980	86.593	61.991	-0.691	35.358	1741.762	-0.003289	-0.006061	-0.004339
2.7600	946.775	49.707	90.695	64.913	-0.684	35.358	1802.416	-0.003479	-0.006349	-0.004544
2.8000	981.550	52.539	93.819	67.995	-0.677	35.358	1868.620	-0.003678	-0.006567	-0.004760
2.8400	990.988	53.804	96.362	69.566	-0.672	35.357	1886.587	-0.003766	-0.006745	-0.004870
2.8800	1011.968	55.183	98.167	71.528	-0.675	35.357	1926.527	-0.003863	-0.006872	-0.005007
2.9200	1019.167	56.238	99.199	72.386	-0.674	35.357	1940.231	-0.003937	-0.006944	-0.005067
2.9600	1028.830	56.750	100.699	73.456	-0.676	35.357	1958.628	-0.003973	-0.007049	-0.005142
3.0000	1016.582	56.280	100.356	72.790	-0.670	35.357	1935.310	-0.003940	-0.007025	-0.005095
3.0400	1024.366	56.915	100.575	73.388	-0.674	35.357	1950.130	-0.003984	-0.007040	-0.005137
3.0800	1008.902	55.738	99.954	72.415	-0.677	35.357	1920.691	-0.003902	-0.006997	-0.005069
3.1200	985.323	54.332	98.236	70.430	-0.690	35.357	1875.801	-0.003803	-0.006877	-0.004930
3.1600	952.290	52.163	95.415	68.121	-0.677	35.357	1812.916	-0.003651	-0.006679	-0.004768
3.2000	920.640	50.095	91.683	65.288	-0.676	35.357	1752.663	-0.003507	-0.006418	-0.004570
3.2400	875.645	46.452	87.558	61.853	-0.681	35.357	1667.004	-0.003252	-0.006129	-0.004330
3.2800	845.198	44.327	83.648	58.883	-0.679	35.357	1609.039	-0.003103	-0.005855	-0.004122
3.3200	810.918	41.382	79.506	56.002	-0.668	35.357	1543.779	-0.002897	-0.005565	-0.003920
3.3600	745.920	37.255	72.503	50.640	-0.664	35.357	1420.040	-0.002608	-0.005075	-0.003545
3.4000	712.647	34.572	68.858	47.376	-0.665	35.357	1356.697	-0.002420	-0.004820	-0.003316
3.4400	659.477	30.277	62.225	42.971	-0.666	35.357	1255.474	-0.002119	-0.004356	-0.003008
3.4800	608.425	26.790	55.908	38.134	-0.681	35.357	1158.285	-0.001875	-0.003914	-0.002669
3.5200	552.955	23.024	49.235	33.172	-0.668	35.357	1052.685	-0.001612	-0.003446	-0.002322
3.5600	498.492	18.937	42.547	28.502	-0.668	35.357	949.001	-0.001326	-0.002978	-0.001995
3.6000	473.154	17.035	38.682	25.614	-0.671	35.357	900.764	-0.001192	-0.002708	-0.001793
3.6400	416.723	12.585	31.457	20.570	-0.673	35.357	793.333	-0.000881	-0.002202	-0.001440
3.6800	389.882	10.770	27.493	17.774	-0.677	35.357	742.235	-0.000754	-0.001925	-0.001244
3.7200	339.537	7.360	20.750	12.843	-0.675	35.357	646.391	-0.000515	-0.001453	-0.000899
3.7600	313.342	5.724	16.830	10.288	-0.672	35.357	596.523	-0.000401	-0.001178	-0.000720
3.8000	287.914	3.346	13.004	7.019	-0.667	35.356	548.115	-0.000234	-0.000910	-0.000491
3.8400	267.896	2.081	9.894	5.116	-0.670	35.357	510.006	-0.000146	-0.000693	-0.000358
3.8800	251.831	0.943	7.156	3.059	-0.679	35.356	479.422	-0.000066	-0.000501	-0.000214
3.9200	245.474	0.250	5.974	2.044	-0.674	35.356	467.319	-0.000018	-0.000418	-0.000143
3.9600	236.111	-0.545	4.017	1.181	-0.678	35.356	449.495	0.000038	-0.000281	-0.000083
4.0000	232.595	-0.739	3.481	0.752	-0.675	35.356	442.801	0.000052	-0.000244	-0.000053
4.0400	245.399	-0.222	3.879	1.338	-0.663	35.356	467.176	0.000016	-0.000271	-0.000094
4.0800	261.134	0.707	5.341	2.252	-0.672	35.356	497.131	-0.000049	-0.000374	-0.000158
4.1200	273.803	1.040	6.372	3.559	-0.667	35.356	521.250	-0.000073	-0.000446	-0.000249
4.1600	322.960	4.291	12.359	7.616	-0.673	35.356	614.834	-0.000300	-0.000865	-0.000533
4.2000	336.922	4.779	14.214	9.049	-0.669	35.355	641.413	-0.000335	-0.000995	-0.000633
4.2400	381.646	7.764	19.785	12.898	-0.680	35.356	726.557	-0.000543	-0.001385	-0.000903
4.2800	419.248	9.976	24.258	16.372	-0.678	35.356	798.140	-0.000698	-0.001698	-0.001146
4.3200	454.414	12.783	28.608	19.500	-0.682	35.356	865.088	-0.000895	-0.002003	-0.001365
4.3600	516.722	16.883	36.464	24.847	-0.674	35.356	983.706	-0.001182	-0.002552	-0.001739
4.4000	546.643	18.756	40.606	27.629	-0.669	35.355	1040.668	-0.001313	-0.002842	-0.001934
4.4400	609.056	23.179	47.926	33.157	-0.674	35.356	1159.487	-0.001623	-0.003355	-0.002321
4.4800	663.429	27.209	55.041	38.188	-0.672	35.355	1262.999	-0.001905	-0.003853	-0.002673
4.5200	704.261	30.013	59.829	41.651	-0.672	35.355	1340.733	-0.002101	-0.004188	-0.002916
4.5600	758.799	34.237	66.765	46.638	-0.679	35.355	1444.559	-0.002397	-0.004674	-0.003265
4.6000	800.669	37.530	71.652	50.667	-0.676	35.355	1524.267	-0.002627	-0.005016	-0.003547
4.6400	831.792	40.323	76.081	53.711	-0.675	35.355	1583.519	-0.002823	-0.005326	-0.003760
4.6800	882.844	44.455	81.600	58.466	-0.672	35.355	1680.708	-0.003112	-0.005712	-0.004093
4.7200	929.552	47.702	87.255	62.813	-0.673	35.355	1769.629	-0.003339	-0.006108	-0.004397
4.7600	943.514	49.192	89.675	64.424	-0.668	35.355	1796.207	-0.003443	-0.006277	-0.004510
4.8000	978.169	51.997	93.377	67.606	-0.677	35.355	1862.183	-0.003640	-0.006536	-0.004732
4.8400	993.678	53.540	95.510	69.136	-0.684	35.355	1891.708	-0.003748	-0.006686	-0.004840
4.8800	1014.613	55.278	98.632	71.515	-0.680	35.354	1931.562	-0.003869	-0.006904	-0.005006
4.9200	1020.053	55.724	98.893	72.011	-0.670	35.355	1941.919	-0.003901	-0.006922	-0.005041
4.9600	1021.526	56.114	100.493	72.678	-0.677	35.355	1944.723	-0.003928	-0.007035	-0.005087
5.0000	1024.547	56.528	100.659	73.110	-0.671	35.354	1950.474	-0.003957	-0.007046	-0.005118
5.0400	1020.519	56.335	100.684	73.124	-0.673	35.355	1942.806	-0.003943	-0.007048	-0.005119
5.0800	998.082	55.321	99.391	71.266	-0.675	35.354	1900.091	-0.003872	-0.006957	-0.004989
5.1200	980.739	53.972	97.559	70.082	-0.672	35.354	1867.075	-0.003778	-0.006829	-0.004906
5.1600	957.791	52.289	95.769	68.177	-0.672	35.354	1823.387	-0.003660	-0.006704	-0.004772
5.2000	928.260	49.972	92.523	65.747	-0.674	35.354	1767.168	-0.003498	-0.006477	-0.004602
5.2400	873.241	46.452	87.211	61.520	-0.687	35.354	1662.426	-0.003252	-0.006105	-0.004306
5.2800	838.345	43.174	83.181	58.215	-0.677	35.354	1595.993	-0.003022	-0.005823	-0.004075
5.3200	798.565	40.755	78.876	54.935	-0.672	35.354	1520.262	-0.002853	-0.005521	-0.003845
5.3600	739.743	36.239	71.789	49.891	-0.672	35.353	1408.281	-0.002537	-0.005025	-0.003492
5.4000	707.026	34.045	68.155	46.973	-0.675	35.353	1345.997	-0.002383	-0.004771	-0.003288
5.4400	657.748	29.832	62.045	42.485	-0.671	35.353	1252.184	-0.002088	-0.004343	-0.002974
5.4800	606.486	26.122	55.565	37.608	-0.679	35.353	1154.594	-0.001829	-0.003890	-0.002633
5.5200	551.648	22.246	49.027	32.909	-0.679	35.354	1050.196	-0.001557	-0.003432	-0.002304
5.5600	495.066	18.562	42.352	27.823	-0.679	35.353	942.478	-0.001299	-0.002965	-0.001948
5.6000	454.474	15.048	36.120	23.694	-0.677	35.354	865.202	-0.001053	-0.002528	-0.001659
5.6400	431.090	13.850	33.025	21.528	-0.676	35.353	820.684	-0.000970	-0.002312	-0.001507
5.6800	386.215	10.142	26.765	17.550	-0.681	35.352	735.254	-0.000710	-0.001874	-0.001229
5.7200	336.501	6.820	20.501	12.299	-0.683	35.353	640.612	-0.000477	-0.001435	-0.000861
5.7600	317.580	5.292	16.774	10.067	-0.664	35.353	604.591	-0.000370	-0.001174	-0.000705
5.8000	286.411	3.264	12.633	6.699	-0.664	35.352	545.254	-0.000228	-0.000884	-0.000469
5.8400	254.837	0.833	7.650	3.463	-0.657	35.352	485.144	-0.000058	-0.000535	-0.000242
5.8800	256.054	1.098	7.789	3.311	-0.684	35.352	487.461	-0.000077	-0.000545	-0.000232
5.9200	229.063	-0.793	3.798	0.710	-0.684	35.352	436.077	0.000055	-0.000266	-0.000050
5.9600	241.161	-0.419	4.240	0.960	-0.677	35.352	459.108	0.000029	-0.000297	-0.000067
6.0000	244.182	-0.323	3.961	1.308	-0.675	35.352	464.859	0.000023	-0.000277	-0.000092
6.0400	239.613	-0.585	3.853	0.919	-0.671	35.353	456.161	0.000041	-0.000270	-0.000064
6.0800	254.446	0.026	4.625	1.864	-0.671	35.352	484.400	-0.000002	-0.000324	-0.000130
6.1200	276.147	1.402	7.280	3.465	-0.668	35.352	525.713	-0.000098	-0.000510	-0.000243
6.1600	302.071	2.566	10.334	5.809	-0.673	35.352	575.066	-0.000180	-0.000723	-0.000407
6.2000	337.192	4.807	14.339	9.174	-0.683	35.352	641.928	-0.000336	-0.001004	-0.000642
6.2400	365.656	6.597	18.016	11.353	-0.683	35.352	696.115	-0.000462	-0.001261	-0.000795
6.2800	416.422	9.990	23.806	15.817	-0.669	35.352	792.761	-0.000699	-0.001666	-0.001107
6.3200	456.999	12.807	29.434	20.029	-0.675	35.352	870.008	-0.000897	-0.002060	-0.001402
6.3600	505.045	16.075	35.322	23.903	-0.664	35.352	961.475	-0.001125	-0.002473	-0.001673
6.4000	563.520	19.701	42.091	28.754	-0.679	35.351	1072.798	-0.001379	-0.002946	-0.002013
6.4400	615.383	23.387	48.821	33.477	-0.660	35.351	1171.532	-0.001637	-0.003417	-0.002343
6.4800	673.137	27.806	56.434	38.646	-0.677	35.352	1281.481	-0.001946	-0.003950	-0.002705
6.5200	699.783	29.844	59.981	41.458	-0.680	35.351	1332.207	-0.002089	-0.004199	-0.002902
6.5600	762.196	34.640	67.178	46.847	-0.690	35.351	1451.025	-0.002425	-0.004702	-0.003279
6.6000	799.947	37.365	72.050	50.473	-0.683	35.351	1522.894	-0.002616	-0.005044	-0.003533
6.6400	838.961	40.753	76.493	54.132	-0.688	35.351	1597.166	-0.002853	-0.005355	-0.003789
6.6800	867.590	43.172	80.345	57.213	-0.681	35.351	1651.669	-0.003022	-0.005624	-0.004005
6.7200	931.220	47.967	87.339	62.689	-0.683	35.351	1772.804	-0.003358	-0.006114	-0.004388
6.7600	954.154	49.872	90.498	64.984	-0.669	35.351	1816.463	-0.003491	-0.006335	-0.004549
6.8000	976.020	51.899	93.349	67.384	-0.684	35.351	1858.091	-0.003633	-0.006534	-0.004717
6.8400	1000.351	53.845	96.319	69.665	-0.679	35.351	1904.411	-0.003769	-0.006742	-0.004877
6.8800	1037.216	56.641	100.175	72.942	-0.667	35.350	1974.592	-0.003965	-0.007012	-0.005106
6.9200	1025.524	56.364	100.037	72.692	-0.676	35.351	1952.333	-0.003945	-0.007003	-0.005088
6.9600	1026.485	56.777	100.149	72.763	-0.664	35.351	1954.165	-0.003974	-0.007010	-0.005093
7.0000	1018.475	56.364	99.790	72.485	-0.667	35.350	1938.915	-0.003945	-0.006985	-0.005074
7.0400	1020.203	56.709	100.134	72.860	-0.672	35.350	1942.205	-0.003970	-0.007009	-0.005100
7.0800	1005.776	55.503	99.447	71.790	-0.671	35.350	1914.740	-0.003885	-0.006961	-0.005025
7.1200	975.208	53.651	97.532	69.511	-0.668	35.350	1856.546	-0.003756	-0.006827	-0.004866
7.1600	951.058	51.859	94.988	67.816	-0.667	35.350	1810.570	-0.003630	-0.006649	-0.004747
7.2000	908.107	48.718	90.830	64.355	-0.672	35.350	1728.802	-0.003410	-0.006358	-0.004505
7.2400	894.641	47.466	88.739	62.966	-0.673	35.350	1703.167	-0.003323	-0.006212	-0.004408
7.2800	842.703	43.924	83.553	58.619	-0.671	35.349	1604.290	-0.003075	-0.005849	-0.004103
7.3200	802.156	40.838	78.779	55.281	-0.669	35.349	1527.100	-0.002859	-0.005515	-0.003870
7.3600	750.864	37.433	72.804	50.792	-0.664	35.349	1429.453	-0.002620	-0.005096	-0.003555
7.4000	699.137	33.127	67.025	46.180	-0.669	35.349	1330.976	-0.002319	-0.004692	-0.003233
7.4400	646.627	29.540	60.999	41.622	-0.676	35.349	1231.012	-0.002068	-0.004270	-0.002914
7.4800	603.421	26.011	55.443	37.649	-0.669	35.349	1148.758	-0.001821	-0.003881	-0.002635
7.5200	551.272	22.610	49.014	32.727	-0.673	35.349	1049.480	-0.001583	-0.003431	-0.002291
7.5600	516.241	19.675	44.119	29.723	-0.676	35.349	982.790	-0.001377	-0.003088	-0.002081
7.6000	462.589	16.006	37.512	24.681	-0.667	35.349	880.651	-0.001120	-0.002626	-0.001728
7.6400	424.808	12.978	32.323	21.209	-0.675	35.349	808.725	-0.000908	-0.002263	-0.001485
7.6800	382.202	10.268	26.544	16.661	-0.675	35.349	727.615	-0.000719	-0.001858	-0.001166
7.7200	336.606	6.918	20.380	12.257	-0.679	35.348	640.812	-0.000484	-0.001427	-0.000858
7.7600	307.030	4.835	16.513	9.119	-0.667	35.348	584.507	-0.000338	-0.001156	-0.000638
7.8000	282.444	2.928	11.958	6.438	-0.672	35.349	537.701	-0.000205	-0.000837	-0.000451
7.8400	257.001	1.278	8.588	3.628	-0.677	35.348	489.264	-0.000089	-0.000601	-0.000254
7.8800	251.305	0.525	6.372	2.600	-0.673	35.348	478.420	-0.000037	-0.000446	-0.000182
7.9200	239.282	-0.307	5.174	1.627	-0.675	35.348	455.532	0.000022	-0.000362	-0.000114
7.9600	236.998	-0.279	4.143	1.473	-0.673	35.348	451.183	0.000020	-0.000290	-0.000103
8.0000	238.786	-0.599	4.059	1.125	-0.672	35.348	454.588	0.000042	-0.000284	-0.000079
8.0400	246.346	-0.333	4.034	1.626	-0.677	35.348	468.979	0.000023	-0.000282	-0.000114
8.0800	264.816	0.542	5.767	2.836	-0.683	35.348	504.141	-0.000038	-0.000404	-0.000199
8.1200	292.498	2.457	8.488	4.853	-0.677	35.348	556.841	-0.000172	-0.000594	-0.000340
8.1600	297.923	2.735	9.837	5.670	-0.666	35.348	567.169	-0.000191	-0.000689	-0.000397
8.2000	336.110	5.029	13.911	9.022	-0.667	35.348	639.868	-0.000352	-0.000974	-0.000632
8.2400	377.303	7.749	19.704	12.688	-0.676	35.347	718.288	-0.000542	-0.001379	-0.000888
8.2800	421.592	10.102	24.286	16.165	-0.664	35.348	802.603	-0.000707	-0.001700	-0.001132
8.3200	476.851	14.101	31.885	21.252	-0.671	35.347	907.803	-0.000987	-0.002232	-0.001488
8.3600	534.606	17.757	38.088	26.016	-0.661	35.348	1017.752	-0.001243	-0.002666	-0.001821
8.4000	552.204	18.880	41.185	27.779	-0.667	35.348	1051.254	-0.001322	-0.002883	-0.001945
8.4400	599.092	22.746	46.881	31.938	-0.663	35.347	1140.518	-0.001592	-0.003282	-0.002236
8.4800	634.214	25.370	51.957	35.618	-0.679	35.347	1207.380	-0.001776	-0.003637	-0.002493
8.5200	687.460	29.193	58.315	40.455	-0.670	35.348	1308.746	-0.002043	-0.004082	-0.002832
8.5600	766.148	34.890	67.357	47.110	-0.679	35.347	1458.549	-0.002442	-0.004715	-0.003298
8.6000	782.544	36.657	70.644	49.198	-0.678	35.347	1489.763	-0.002566	-0.004945	-0.003444
8.6400	840.614	40.933	77.072	54.464	-0.664	35.347	1600.313	-0.002865	-0.005395	-0.003812
8.6800	883.069	43.981	81.763	58.228	-0.667	35.347	1681.137	-0.003079	-0.005723	-0.004076
8.7200	923.841	47.216	86.937	61.921	-0.672	35.347	1758.757	-0.003305	-0.006086	-0.004334
8.7600	948.022	49.482	89.745	64.493	-0.661	35.347	1804.790	-0.003464	-0.006282	-0.004515
8.8000	993.077	52.803	95.003	68.567	-0.668	35.347	1890.564	-0.003696	-0.006650	-0.004800
8.8400	994.655	53.693	95.550	69.066	-0.675	35.346	1893.568	-0.003758	-0.006688	-0.004835
8.8800	1036.043	56.279	100.037	73.054	-0.666	35.346	1972.361	-0.003940	-0.007003	-0.005114
8.9200	1033.173	56.737	100.409	73.067	-0.668	35.347	1966.896	-0.003972	-0.007029	-0.005115
8.9600	1017.393	55.878	99.639	72.455	-0.669	35.347	1936.855	-0.003911	-0.006975	-0.005072
9.0000	1026.756	56.779	100.616	73.011	-0.675	35.347	1954.679	-0.003974	-0.007043	-0.005111
9.0400	1009.082	55.237	99.309	72.025	-0.665	35.346	1921.034	-0.003867	-0.006952	-0.005042
9.0800	1005.806	56.141	99.486	71.972	-0.655	35.346	1914.797	-0.003930	-0.006964	-0.005038
9.1200	985.518	54.304	97.918	70.278	-0.663	35.346	1876.173	-0.003801	-0.006854	-0.004919
9.1600	949.961	51.844	94.727	67.719	-0.670	35.346	1808.481	-0.003629	-0.006631	-0.004740
9.2000	927.103	49.998	92.331	65.773	-0.684	35.346	1764.965	-0.003500	-0.006463	-0.004604
9.2400	902.140	48.273	89.663	63.455	-0.686	35.347	1717.443	-0.003379	-0.006276	-0.004442
9.2800	853.884	44.453	84.420	59.259	-0.676	35.346	1625.576	-0.003112	-0.005909	-0.004148
9.3200	799.917	40.811	78.573	54.673	-0.671	35.346	1522.837	-0.002857	-0.005500	-0.003827
9.3600	731.312	36.142	71.030	49.209	-0.668	35.346	1392.231	-0.002530	-0.004972	-0.003445
9.4000	719.485	34.904	69.091	47.488	-0.673	35.346	1369.715	-0.002443	-0.004836	-0.003324
9.4400	644.779	29.332	60.325	41.232	-0.669	35.346	1227.493	-0.002053	-0.004223	-0.002886
9.4800	621.410	27.736	57.518	38.897	-0.664	35.346	1183.004	-0.001942	-0.004026	-0.002723
9.5200	570.869	23.441	50.775	33.894	-0.667	35.346	1086.788	-0.001641	-0.003554	-0.002373
9.5600	521.816	20.604	44.763	29.684	-0.668	35.346	993.404	-0.001442	-0.003133	-0.002078
9.6000	454.594	15.324	35.706	23.499	-0.680	35.346	865.431	-0.001073	-0.002499	-0.001645
9.6400	425.484	13.086	31.856	20.835	-0.681	35.345	810.013	-0.000916	-0.002230	-0.001458
9.6800	378.325	9.615	25.662	16.274	-0.671	35.346	720.234	-0.000673	-0.001796	-0.001139
9.7200	348.404	7.973	21.481	13.301	-0.677	35.346	663.271	-0.000558	-0.001504	-0.000931
9.7600	300.583	4.305	15.179	8.493	-0.679	35.346	572.233	-0.000301	-0.001063	-0.000594
9.8000	289.207	3.708	13.278	6.935	-0.673	35.345	550.575	-0.000260	-0.000929	-0.000485
9.8400	257.782	1.361	8.311	3.965	-0.680	35.345	490.751	-0.000095	-0.000582	-0.000278
9.8800	260.893	1.526	8.365	3.713	-0.680	35.345	496.674	-0.000107	-0.000586	-0.000260
9.9200	239.853	-0.153	4.143	1.405	-0.685	35.345	456.619	0.000011	-0.000290	-0.000098
9.9600	237.704	-0.488	4.226	1.168	-0.688	35.345	452.528	0.000034	-0.000296	-0.000082
10.0000	251.921	1.875	7.856	3.531	-0.675	35.348	479.593	-0.000131	-0.000550	-0.000247
10.0400	257.827	1.388	7.993	3.311	-0.679	35.347	490.837	-0.000097	-0.000560	-0.000232
10.0800	281.212	2.442	8.615	4.549	-0.686	35.347	535.355	-0.000171	-0.000603	-0.000318
10.1200	299.636	3.318	10.734	5.531	-0.687	35.347	570.431	-0.000232	-0.000751	-0.000387
10.1600	345.924	6.153	15.880	9.509	-0.680	35.347	658.550	-0.000431	-0.001112	-0.000666
10.2000	378.505	8.305	20.186	12.634	-0.676	35.347	720.577	-0.000581	-0.001413	-0.000884
10.2400	430.624	11.488	26.350	17.328	-0.679	35.347	819.798	-0.000804	-0.001844	-0.001213
10.2800	468.180	13.837	31.263	20.486	-0.683	35.347	891.294	-0.000969	-0.002188	-0.001434
10.3200	530.593	18.258	38.448	25.879	-0.678	35.347	1010.113	-0.001278	-0.002691	-0.001812
10.3600	610.063	23.248	48.174	32.784	-0.677	35.347	1161.404	-0.001627	-0.003372	-0.002295
10.4000	658.380	27.082	54.079	37.441	-0.672	35.347	1253.386	-0.001896	-0.003786	-0.002621
10.4400	718.598	31.389	61.592	42.957	-0.665	35.347	1368.027	-0.002197	-0.004311	-0.003007
10.4800	792.568	37.307	70.342	49.503	-0.673	35.347	1508.846	-0.002612	-0.004924	-0.003465
10.5200	853.839	41.797	77.925	54.962	-0.675	35.347	1625.490	-0.002926	-0.005455	-0.003847
10.5600	924.608	47.203	86.234	61.630	-0.675	35.347	1760.216	-0.003304	-0.006036	-0.004314
10.6000	974.998	51.178	91.957	66.164	-0.675	35.347	1856.146	-0.003582	-0.006437	-0.004631
10.6400	1041.469	56.099	99.350	72.346	-0.681	35.348	1982.689	-0.003927	-0.006954	-0.005064
10.6800	1114.958	61.851	107.976	79.226	-0.677	35.347	2122.593	-0.004330	-0.007558	-0.005546
10.7200	1138.612	64.617	110.852	81.715	-0.677	35.347	2167.625	-0.004523	-0.007760	-0.005720
10.7600	1191.467	68.380	117.007	86.229	-0.667	35.347	2268.248	-0.004787	-0.008191	-0.006036
10.8000	1219.630	71.414	120.101	89.034	-0.687	35.347	2321.863	-0.004999	-0.008407	-0.006232
10.8400	1238.521	73.149	123.675	91.773	-0.673	35.347	2357.826	-0.005120	-0.008657	-0.006424
10.8800	1248.230	74.382	124.542	92.539	-0.674	35.347	2376.308	-0.005207	-0.008718	-0.006478
10.9200	1289.873	77.221	128.957	96.233	-0.680	35.347	2455.587	-0.005405	-0.009027	-0.006736
10.9600	1271.824	76.832	128.069	95.720	-0.668	35.347	2421.227	-0.005378	-0.008965	-0.006700
11.0000	1271.659	76.747	128.411	95.983	-0.675	35.347	2420.912	-0.005372	-0.008989	-0.006719
11.0400	1263.709	76.792	128.190	95.428	-0.679	35.347	2405.777	-0.005375	-0.008973	-0.006680
11.0800	1250.213	75.884	127.503	94.774	-0.680	35.346	2380.085	-0.005312	-0.008925	-0.006634
11.1200	1216.925	73.566	124.653	92.162	-0.671	35.347	2316.713	-0.005150	-0.008726	-0.006451
11.1600	1181.293	70.951	121.463	89.533	-0.671	35.347	2248.878	-0.004967	-0.008502	-0.006267
11.2000	1152.979	69.118	118.778	87.049	-0.671	35.347	2194.977	-0.004838	-0.008314	-0.006093
11.2400	1083.413	63.808	112.310	81.645	-0.663	35.347	2062.540	-0.004467	-0.007862	-0.005715
11.2800	1029.701	60.140	106.505	76.837	-0.669	35.347	1960.287	-0.004210	-0.007455	-0.005379
11.3200	976.336	55.864	100.933	72.569	-0.683	35.346	1858.692	-0.003910	-0.007065	-0.005080
11.3600	927.899	52.150	95.169	67.829	-0.675	35.347	1766.481	-0.003650	-0.006662	-0.004748
11.4000	862.916	47.381	88.258	62.450	-0.660	35.347	1642.771	-0.003317	-0.006178	-0.004372
11.4400	799.241	42.702	80.867	56.476	-0.664	35.347	1521.549	-0.002989	-0.005661	-0.003953
11.4800	719.365	36.378	71.761	49.958	-0.667	35.346	1369.486	-0.002546	-0.005023	-0.003497
11.5200	663.865	32.531	65.057	44.762	-0.673	35.347	1263.828	-0.002277	-0.004554	-0.003133
11.5600	606.141	27.610	57.613	39.119	-0.667	35.347	1153.936	-0.001933	-0.004033	-0.002738
11.6000	537.566	22.859	48.822	32.991	-0.669	35.347	1023.388	-0.001600	-0.003418	-0.002309
11.6400	491.865	19.102	42.656	28.363	-0.678	35.347	936.384	-0.001337	-0.002986	-0.001985
11.6800	421.547	14.476	33.963	22.206	-0.686	35.347	802.517	-0.001013	-0.002377	-0.001554
11.7200	403.663	12.239	30.189	19.582	-0.688	35.347	768.471	-0.000857	-0.002113	-0.001371
11.7600	325.290	7.624	20.558	12.312	-0.663	35.347	619.268	-0.000534	-0.001439	-0.000862
11.8000	309.495	5.654	17.833	10.563	-0.677	35.347	589.199	-0.000396	-0.001248	-0.000739
11.8400	283.451	3.874	13.526	7.533	-0.685	35.347	539.618	-0.000271	-0.000947	-0.000527
11.8800	261.690	2.012	9.451	4.975	-0.674	35.347	498.190	-0.000141	-0.000662	-0.000348
11.9200	259.886	2.180	9.383	4.630	-0.683	35.347	494.757	-0.000153	-0.000657	-0.000324
11.9600	250.599	1.431	7.732	3.408	-0.673	35.348	477.076	-0.000100	-0.000541	-0.000239
12.0000	251.425	1.098	7.499	3.171	-0.673	35.347	478.649	-0.000077	-0.000525	-0.000222
12.0400	260.112	1.332	7.554	3.464	-0.680	35.348	495.186	-0.000093	-0.000529	-0.000242
12.0800	307.872	4.430	12.276	7.061	-0.669	35.347	586.109	-0.000310	-0.000859	-0.000494
12.1200	300.718	3.260	11.588	6.756	-0.693	35.347	572.491	-0.000228	-0.000811	-0.000473
12.1600	332.308	5.709	15.481	9.578	-0.679	35.347	632.629	-0.000400	-0.001084	-0.000670
12.2000	386.997	8.655	21.674	14.248	-0.673	35.346	736.742	-0.000606	-0.001517	-0.000997
12.2400	422.253	11.490	26.132	17.273	-0.684	35.347	803.862	-0.000804	-0.001829	-0.001209
12.2800	492.902	16.075	34.677	23.391	-0.679	35.347	938.358	-0.001125	-0.002427	-0.001637
12.3200	525.123	18.382	39.259	26.548	-0.672	35.347	999.699	-0.001287	-0.002748	-0.001858
12.3600	608.185	24.039	48.726	33.476	-0.676	35.347	1157.827	-0.001683	-0.003411	-0.002343
12.4000	664.090	28.165	55.908	38.508	-0.663	35.347	1264.257	-0.001972	-0.003914	-0.002696
12.4400	733.657	33.474	64.383	45.247	-0.673	35.347	1396.694	-0.002343	-0.004507	-0.003167
12.4800	794.387	37.934	71.858	50.613	-0.685	35.347	1512.308	-0.002655	-0.005030	-0.003543
12.5200	842.598	41.659	77.430	55.074	-0.679	35.347	1604.090	-0.002916	-0.005420	-0.003855
12.5600	912.720	47.592	86.167	61.577	-0.672	35.347	1737.585	-0.003331	-0.006032	-0.004310
12.6000	980.544	52.440	93.722	67.455	-0.693	35.347	1866.703	-0.003671	-0.006561	-0.004722
12.6400	1026.545	56.515	100.064	72.568	-0.688	35.348	1954.279	-0.003956	-0.007004	-0.005080
12.6800	1085.216	61.213	105.970	77.585	-0.689	35.348	2065.973	-0.004285	-0.007418	-0.005431
12.7200	1139.589	65.729	112.434	82.853	-0.690	35.348	2169.485	-0.004601	-0.007870	-0.005800
12.7600	1155.324	67.159	114.318	84.338	-0.679	35.347	2199.440	-0.004701	-0.008002	-0.005904
12.8000	1221.629	72.815	121.531	90.133	-0.680	35.348	2325.668	-0.005097	-0.008507	-0.006309
12.8400	1246.712	74.301	124.377	92.844	-0.680	35.348	2373.419	-0.005201	-0.008706	-0.006499
12.8800	1248.425	75.274	125.783	93.555	-0.683	35.348	2376.680	-0.005269	-0.008805	-0.006549
12.9200	1266.008	76.776	127.723	95.526	-0.682	35.348	2410.154	-0.005374	-0.008941	-0.006687
12.9600	1273.928	78.055	128.890	96.414	-0.690	35.348	2425.232	-0.005464	-0.009022	-0.006749
13.0000	1275.356	78.515	129.292	96.901	-0.695	35.348	2427.950	-0.005496	-0.009050	-0.006783
13.0400	1259.366	77.402	128.852	96.206	-0.683	35.348	2397.509	-0.005418	-0.009020	-0.006734
13.0800	1245.915	76.482	127.986	95.456	-0.667	35.348	2371.902	-0.005354	-0.008959	-0.006682
13.1200	1212.297	74.175	125.729	92.983	-0.671	35.348	2307.901	-0.005192	-0.008801	-0.006509
13.1600	1180.887	71.829	122.549	90.384	-0.673	35.348	2248.106	-0.005028	-0.008578	-0.006327
13.2000	1135.997	68.601	118.269	86.883	-0.671	35.348	2162.647	-0.004802	-0.008279	-0.006082
13.2400	1095.331	65.449	114.083	83.462	-0.676	35.348	2085.228	-0.004581	-0.007986	-0.005842
13.2800	1030.543	60.949	107.660	78.138	-0.677	35.348	1961.889	-0.004266	-0.007536	-0.005470
13.3200	988.058	57.431	102.305	74.358	-0.672	35.348	1881.008	-0.004020	-0.007161	-0.005205
13.3600	915.891	52.108	95.344	68.135	-0.686	35.348	1743.622	-0.003648	-0.006674	-0.004769
13.4000	861.669	47.688	88.589	63.298	-0.680	35.349	1640.396	-0.003338	-0.006201	-0.004431
13.4400	805.778	43.506	82.615	58.214	-0.680	35.348	1533.995	-0.003045	-0.005783	-0.004075
13.4800	732.515	38.573	74.276	51.890	-0.676	35.348	1394.520	-0.002700	-0.005199	-0.003632
13.5200	679.374	34.251	67.426	46.596	-0.676	35.348	1293.354	-0.002398	-0.004720	-0.003262
13.5600	606.186	28.624	58.384	40.371	-0.679	35.349	1154.022	-0.002004	-0.004087	-0.002826
13.6000	536.770	23.496	49.950	33.755	-0.690	35.348	1021.872	-0.001645	-0.003497	-0.002363
13.6400	487.386	19.534	43.179	28.878	-0.687	35.349	927.858	-0.001367	-0.003023	-0.002021
13.6800	443.263	15.937	37.263	24.459	-0.690	35.349	843.859	-0.001116	-0.002608	-0.001712
13.7200	388.680	12.295	29.736	19.208	-0.678	35.349	739.946	-0.000861	-0.002082	-0.001345
13.7600	339.537	8.877	23.118	14.526	-0.694	35.349	646.391	-0.000621	-0.001618	-0.001017
13.8000	313.102	6.569	18.234	11.284	-0.684	35.349	596.066	-0.000460	-0.001276	-0.000790
13.8400	279.949	4.542	14.367	8.005	-0.697	35.349	532.951	-0.000318	-0.001006	-0.000560
13.8800	265.928	3.097	11.450	6.195	-0.676	35.349	506.258	-0.000217	-0.000802	-0.000434
13.9200	255.693	2.360	9.767	4.601	-0.689	35.349	486.774	-0.000165	-0.000684	-0.000322
13.9600	245.534	1.638	7.581	3.447	-0.680	35.350	467.434	-0.000115	-0.000531	-0.000241
14.0000	251.395	1.692	8.323	3.574	-0.681	35.349	478.592	-0.000118	-0.000583	-0.000250
14.0400	258.609	1.608	8.255	4.243	-0.702	35.349	492.325	-0.000113	-0.000578	-0.000297
14.0800	273.727	2.347	9.329	4.825	-0.685	35.349	521.107	-0.000164	-0.000653	-0.000338
14.1200	308.097	4.487	12.344	7.799	-0.687	35.350	586.538	-0.000314	-0.000864	-0.000546
14.1600	334.577	5.987	17.189	10.621	-0.684	35.350	636.950	-0.000419	-0.001203	-0.000743
14.2000	386.260	9.294	22.115	14.623	-0.695	35.350	735.340	-0.000651	-0.001548	-0.001024
14.2400	431.285	12.281	27.674	18.484	-0.691	35.350	821.056	-0.000860	-0.001937	-0.001294
14.2800	511.251	17.548	37.468	25.363	-0.680	35.350	973.291	-0.001228	-0.002623	-0.001775
14.3200	565.218	20.967	44.186	30.310	-0.700	35.351	1076.031	-0.001468	-0.003093	-0.002122
14.3600	604.292	23.761	49.112	33.880	-0.686	35.350	1150.417	-0.001663	-0.003438	-0.002372
14.4000	663.294	28.387	56.844	39.259	-0.684	35.351	1262.741	-0.001987	-0.003979	-0.002748
14.4400	747.243	34.586	66.215	46.469	-0.683	35.350	1422.558	-0.002421	-0.004635	-0.003253
14.4800	807.807	39.073	74.250	52.446	-0.671	35.350	1537.857	-0.002735	-0.005197	-0.003671
14.5200	864.404	43.381	80.442	57.616	-0.683	35.351	1645.603	-0.003037	-0.005631	-0.004033
14.5600	903.072	46.562	85.615	61.298	-0.696	35.351	1719.217	-0.003259	-0.005993	-0.004291
14.6000	970.444	51.968	93.254	67.510	-0.696	35.351	1847.477	-0.003638	-0.006528	-0.004726
14.6400	1058.857	58.597	103.077	75.198	-0.690	35.351	2015.791	-0.004102	-0.007215	-0.005264
14.6800	1079.430	60.796	105.900	77.933	-0.684	35.351	2054.958	-0.004256	-0.007413	-0.005455
14.7200	1144.909	65.964	113.396	83.839	-0.690	35.351	2179.613	-0.004618	-0.007938	-0.005869
14.7600	1155.670	67.465	115.696	85.230	-0.690	35.351	2200.098	-0.004723	-0.008099	-0.005966
14.8000	1198.005	71.119	120.223	88.909	-0.697	35.351	2280.693	-0.004978	-0.008416	-0.006224
14.8400	1252.227	75.759	126.226	94.248	-0.692	35.351	2383.919	-0.005303	-0.008836	-0.006597
14.8800	1252.528	75.746	126.375	94.885	-0.691	35.352	2384.491	-0.005302	-0.008846	-0.006642
14.9200	1269.555	77.792	128.355	96.249	-0.687	35.351	2416.906	-0.005445	-0.008985	-0.006737
14.9600	1273.552	78.320	129.635	97.459	-0.679	35.352	2424.517	-0.005482	-0.009074	-0.006822
15.0000	1283.832	79.180	130.818	98.236	-0.690	35.352	2444.086	-0.005543	-0.009157	-0.006877
15.0400	1255.323	77.485	129.443	96.625	-0.679	35.352	2389.812	-0.005424	-0.009061	-0.006764
15.0800	1237.710	76.164	128.232	95.553	-0.687	35.352	2356.281	-0.005331	-0.008976	-0.006689
15.1200	1206.571	74.119	125.479	92.942	-0.681	35.352	2297.001	-0.005188	-0.008784	-0.006506
15.1600	1178.092	72.232	122.632	90.897	-0.701	35.351	2242.785	-0.005056	-0.008584	-0.006363
15.2000	1123.133	68.258	117.511	86.396	-0.699	35.352	2138.157	-0.004778	-0.008226	-0.006048
15.2400	1086.374	65.535	113.549	83.378	-0.694	35.352	2068.176	-0.004587	-0.007948	-0.005836
15.2800	1042.641	62.087	109.119	79.960	-0.688	35.352	1984.921	-0.004346	-0.007638	-0.005597
15.3200	978.229	57.443	102.402	73.957	-0.684	35.353	1862.297	-0.004021	-0.007168	-0.005177
15.3600	943.619	54.276	98.796	70.889	-0.696	35.352	1796.408	-0.003799	-0.006916	-0.004962
15.4000	837.518	46.980	87.019	62.034	-0.691	35.353	1594.419	-0.003289	-0.006091	-0.004342
15.4400	792.824	42.938	81.584	57.628	-0.689	35.353	1509.333	-0.003006	-0.005711	-0.004034
15.4800	733.356	38.907	74.815	52.475	-0.690	35.353	1396.122	-0.002724	-0.005237	-0.003673
15.5200	659.627	32.766	65.719	45.678	-0.696	35.353	1255.760	-0.002294	-0.004600	-0.003197
15.5600	599.333	28.498	58.163	39.992	-0.687	35.353	1140.976	-0.001995	-0.004071	-0.002799
15.6000	540.422	23.928	50.970	34.520	-0.698	35.353	1028.824	-0.001675	-0.003568	-0.002416
15.6400	462.394	18.561	40.976	27.308	-0.703	35.354	880.280	-0.001299	-0.002868	-0.001912
15.6800	424.387	15.143	35.266	23.415	-0.690	35.353	807.924	-0.001060	-0.002469	-0.001639
15.7200	375.485	11.879	28.856	18.944	-0.701	35.353	714.827	-0.000832	-0.002020	-0.001326
15.7600	348.629	9.197	24.592	15.734	-0.698	35.354	663.700	-0.000644	-0.001721	-0.001101
15.8000	308.443	6.666	18.822	11.410	-0.689	35.354	587.196	-0.000467	-0.001318	-0.000799
15.8400	282.188	4.528	15.152	8.868	-0.682	35.353	537.214	-0.000317	-0.001061	-0.000621
15.8800	253.544	2.637	10.362	5.809	-0.684	35.354	482.683	-0.000185	-0.000725	-0.000407
15.9200	253.108	2.499	9.769	5.321	-0.694	35.354	481.853	-0.000175	-0.000684	-0.000372
15.9600	244.242	2.038	7.953	3.879	-0.686	35.354	464.973	-0.000143	-0.000557	-0.000272
16.0000	246.240	1.652	7.911	3.896	-0.699	35.354	468.779	-0.000116	-0.000554	-0.000273
16.0400	273.637	3.276	9.756	5.519	-0.683	35.354	520.935	-0.000229	-0.000683	-0.000386
16.0800	272.255	2.818	9.437	5.352	-0.686	35.354	518.303	-0.000197	-0.000661	-0.000375
16.1200	308.413	5.043	13.305	8.450	-0.681	35.355	587.139	-0.000353	-0.000931	-0.000592
16.1600	340.769	6.875	17.338	11.270	-0.680	35.355	648.737	-0.000481	-0.001214	-0.000789
16.2000	379.092	9.389	21.823	14.497	-0.697	35.355	721.693	-0.000657	-0.001528	-0.001015
16.2400	439.491	12.795	28.964	19.863	-0.686	35.355	836.678	-0.000896	-0.002027	-0.001390
16.2800	483.734	16.242	34.870	23.695	-0.670	35.355	920.906	-0.001137	-0.002441	-0.001659
16.3200	542.165	19.842	41.996	28.849	-0.688	35.355	1032.143	-0.001389	-0.002940	-0.002019
16.3600	595.756	23.844	48.973	33.838	-0.684	35.356	1134.167	-0.001669	-0.003428	-0.002369
16.4000	657.463	28.026	56.515	39.382	-0.675	35.355	1251.640	-0.001962	-0.003956	-0.002757
16.4400	735.535	34.210	65.680	46.222	-0.679	35.356	1400.270	-0.002395	-0.004598	-0.003236
16.4800	797.678	38.393	73.109	52.239	-0.673	35.356	1518.574	-0.002688	-0.005118	-0.003657
16.5200	862.135	43.645	81.061	58.020	-0.678	35.356	1641.283	-0.003055	-0.005674	-0.004061
16.5600	907.656	47.161	86.578	62.702	-0.688	35.356	1727.943	-0.003301	-0.006060	-0.004389
16.6000	977.207	52.830	94.219	68.608	-0.675	35.356	1860.352	-0.003698	-0.006595	-0.004803
16.6400	1053.221	58.359	102.774	75.167	-0.681	35.356	2005.062	-0.004085	-0.007194	-0.005262
16.6800	1072.142	60.712	106.051	77.863	-0.675	35.356	2041.082	-0.004250	-0.007424	-0.005450
16.7200	1123.223	64.839	111.801	82.754	-0.679	35.356	2138.329	-0.004539	-0.007826	-0.005793
16.7600	1174.155	69.577	117.732	87.399	-0.679	35.356	2235.289	-0.004870	-0.008241	-0.006118
16.8000	1223.944	72.996	122.453	91.399	-0.686	35.357	2330.074	-0.005110	-0.008572	-0.006398
16.8400	1237.364	74.828	124.971	93.332	-0.688	35.357	2355.623	-0.005238	-0.008748	-0.006533
16.8800	1253.895	76.039	127.119	95.358	-0.691	35.357	2387.094	-0.005323	-0.008898	-0.006675
16.9200	1269.329	78.126	128.782	96.566	-0.686	35.357	2416.477	-0.005469	-0.009015	-0.006760
16.9600	1278.121	78.596	129.937	97.709	-0.695	35.358	2433.214	-0.005502	-0.009096	-0.006840
17.0000	1268.383	78.527	130.005	97.597	-0.677	35.358	2414.675	-0.005497	-0.009100	-0.006832
17.0400	1277.565	78.803	130.556	98.292	-0.686	35.358	2432.156	-0.005516	-0.009139	-0.006880
17.0800	1214.972	75.023	126.610	93.748	-0.686	35.358	2312.994	-0.005252	-0.008863	-0.006562
17.1200	1213.814	74.633	126.014	93.651	-0.677	35.358	2310.791	-0.005224	-0.008821	-0.006556
17.1600	1177.521	72.272	123.484	91.300	-0.681	35.357	2241.697	-0.005059	-0.008644	-0.006391
17.2000	1138.582	69.089	119.135	87.566	-0.691	35.358	2167.568	-0.004836	-0.008339	-0.006130
17.2400	1079.385	64.963	113.274	83.086	-0.679	35.358	2054.873	-0.004547	-0.007929	-0.005816
17.2800	1032.121	61.074	108.403	79.100	-0.681	35.358	1964.893	-0.004275	-0.007588	-0.005537
17.3200	983.173	57.748	102.815	74.528	-0.679	35.358	1871.710	-0.004042	-0.007197	-0.005217
17.3600	924.442	53.038	96.858	69.442	-0.681	35.358	1759.901	-0.003713	-0.006780	-0.004861
17.4000	863.638	48.606	89.977	64.038	-0.681	35.358	1644.144	-0.003402	-0.006298	-0.004483
17.4400	800.488	43.633	82.822	58.672	-0.684	35.358	1523.924	-0.003054	-0.005798	-0.004107
17.4800	708.379	37.184	72.364	50.361	-0.679	35.359	1348.572	-0.002603	-0.005066	-0.003525
17.5200	660.709	32.794	66.010	45.833	-0.674	35.359	1257.820	-0.002296	-0.004621	-0.003208
17.5600	601.227	28.583	58.632	40.579	-0.675	35.359	1144.581	-0.002001	-0.004104	-0.002841
17.6000	529.827	23.345	49.771	33.726	-0.694	35.359	1008.654	-0.001634	-0.003484	-0.002361
17.6400	488.994	19.882	43.980	29.503	-0.675	35.360	930.920	-0.001392	-0.003079	-0.002065
17.6800	445.592	16.660	37.731	25.446	-0.687	35.359	848.293	-0.001166	-0.002641	-0.001781
17.7200	377.979	12.129	29.517	18.970	-0.687	35.360	719.576	-0.000849	-0.002066	-0.001328
17.7600	352.777	9.918	25.428	16.608	-0.681	35.360	671.597	-0.000694	-0.001780	-0.001163
17.8000	316.754	7.778	20.502	12.897	-0.687	35.359	603.018	-0.000544	-0.001435	-0.000903
17.8400	271.849	4.321	13.912	8.133	-0.684	35.360	517.530	-0.000302	-0.000974	-0.000569
17.8800	267.701	3.917	12.635	7.005	-0.679	35.360	509.634	-0.000274	-0.000884	-0.000490
17.9200	239.403	1.984	8.284	4.045	-0.683	35.360	455.761	-0.000139	-0.000580	-0.000283
17.9600	254.461	2.691	9.165	4.506	-0.674	35.360	484.428	-0.000188	-0.000642	-0.000315
18.0000	254.431	2.124	8.753	4.713	-0.684	35.360	484.371	-0.000149	-0.000613	-0.000330
18.0400	269.895	3.248	9.713	5.324	-0.683	35.360	513.811	-0.000227	-0.000680	-0.000373
18.0800	290.244	3.722	11.505	7.088	-0.684	35.361	552.549	-0.000261	-0.000805	-0.000496
18.1200	301.846	5.014	12.868	7.909	-0.684	35.361	574.636	-0.000351	-0.000901	-0.000554
18.1600	321.758	5.583	16.197	10.244	-0.685	35.361	612.545	-0.000391	-0.001134	-0.000717
18.2000	383.300	9.572	22.775	15.096	-0.686	35.361	729.704	-0.000670	-0.001594	-0.001057
18.2400	440.347	12.878	29.420	20.001	-0.686	35.361	838.308	-0.000901	-0.002059	-0.001400
18.2800	494.901	16.938	36.106	24.514	-0.691	35.361	942.163	-0.001186	-0.002527	-0.001716
18.3200	542.871	20.023	42.616	28.765	-0.679	35.361	1033.487	-0.001402	-0.002983	-0.002014
18.3600	591.804	23.746	48.918	33.434	-0.687	35.362	1126.642	-0.001662	-0.003424	-0.002340
18.4000	648.401	27.763	55.977	38.772	-0.686	35.362	1234.388	-0.001943	-0.003918	-0.002714
18.4400	722.205	33.239	65.087	45.442	-0.682	35.362	1374.893	-0.002327	-0.004556	-0.003181
18.4800	772.986	36.823	70.850	50.153	-0.674	35.362	1471.567	-0.002578	-0.004960	-0.003511
18.5200	884.813	45.190	83.220	59.564	-0.685	35.362	1684.456	-0.003163	-0.005825	-0.004169
18.5600	930.394	48.730	88.889	64.149	-0.680	35.362	1771.231	-0.003411	-0.006222	-0.004490
18.6000	976.275	52.831	94.826	68.525	-0.674	35.362	1858.578	-0.003698	-0.006638	-0.004797
18.6400	1053.732	58.735	102.964	75.476	-0.682	35.362	2006.035	-0.004111	-0.007208	-0.005283
18.6800	1099.989	62.904	108.637	79.906	-0.676	35.363	2094.097	-0.004403	-0.007605	-0.005593
18.7200	1142.009	66.090	113.399	83.699	-0.670	35.363	2174.091	-0.004626	-0.007938	-0.005859
18.7600	1181.744	69.869	118.296	87.690	-0.673	35.363	2249.737	-0.004891	-0.008281	-0.006138
18.8000	1213.469	72.135	121.626	90.550	-0.677	35.363	2310.133	-0.005049	-0.008514	-0.006338
18.8400	1228.182	73.966	124.254	92.484	-0.678	35.363	2338.142	-0.005178	-0.008698	-0.006474
18.8800	1260.538	76.581	127.311	95.427	-0.667	35.363	2399.740	-0.005361	-0.008912	-0.006680
18.9200	1263.183	77.526	128.974	96.412	-0.668	35.363	2404.776	-0.005427	-0.009028	-0.006749
18.9600	1274.484	78.569	129.566	97.582	-0.679	35.363	2426.291	-0.005500	-0.009070	-0.006831
19.0000	1275.266	79.165	130.832	98.111	-0.677	35.363	2427.778	-0.005542	-0.009158	-0.006868
19.0400	1267.436	78.802	130.088	97.513	-0.675	35.363	2412.872	-0.005516	-0.009106	-0.006826
19.0800	1254.496	78.084	129.758	96.861	-0.669	35.363	2388.239	-0.005466	-0.009083	-0.006780
19.1200	1212.477	74.731	125.837	93.455	-0.680	35.364	2308.245	-0.005231	-0.008809	-0.006542
19.1600	1192.354	73.800	124.913	91.940	-0.672	35.364	2269.936	-0.005166	-0.008744	-0.006436
19.2000	1138.297	69.411	119.632	87.898	-0.676	35.364	2167.025	-0.004859	-0.008374	-0.006153
19.2400	1102.890	66.951	115.961	85.008	-0.668	35.364	2099.619	-0.004687	-0.008117	-0.005951
19.2800	1053.567	62.933	110.715	80.768	-0.675	35.364	2005.720	-0.004405	-0.007750	-0.005654
19.3200	998.668	58.876	105.264	76.016	-0.663	35.364	1901.207	-0.004121	-0.007369	-0.005321
19.3600	910.120	52.162	95.470	68.303	-0.681	35.364	1732.635	-0.003651	-0.006683	-0.004781
19.4000	857.671	48.412	89.402	63.468	-0.679	35.364	1632.786	-0.003389	-0.006258	-0.004443
19.4400	780.215	42.367	80.495	56.948	-0.681	35.365	1485.329	-0.002966	-0.005635	-0.003986
19.4800	724.520	38.379	74.358	51.765	-0.657	35.364	1379.299	-0.002687	-0.005205	-0.003624
19.5200	648.356	32.488	64.813	45.138	-0.667	35.364	1234.303	-0.002274	-0.004537	-0.003160
19.5600	592.014	28.651	58.203	39.982	-0.678	35.364	1127.043	-0.002006	-0.004074	-0.002799
19.6000	540.241	24.177	51.230	35.132	-0.669	35.365	1028.481	-0.001692	-0.003586	-0.002459
19.6400	495.036	20.981	45.231	30.074	-0.684	35.365	942.421	-0.001469	-0.003166	-0.002105
19.6800	424.237	15.174	35.694	23.585	-0.679	35.365	807.638	-0.001062	-0.002499	-0.001651
19.7200	387.432	12.795	30.989	20.140	-0.681	35.365	737.572	-0.000896	-0.002169	-0.001410
19.7600	349.801	9.698	24.576	15.874	-0.682	35.365	665.932	-0.000679	-0.001720	-0.001111
19.8000	309.961	6.999	19.883	11.756	-0.681	35.365	590.086	-0.000490	-0.001392	-0.000823
19.8400	279.078	4.848	14.654	8.395	-0.667	35.365	531.292	-0.000339	-0.001026	-0.000588
19.8800	251.876	3.040	10.637	5.795	-0.679	35.365	479.507	-0.000213	-0.000745	-0.000406
19.9200	235.450	1.580	7.527	3.659	-0.676	35.366	448.236	-0.000111	-0.000527	-0.000256
19.9600	251.756	2.539	8.753	4.659	-0.667	35.366	479.279	-0.000178	-0.000613	-0.000326
Test Cycles
Time (sec)	Axial stress (kPa)	Axial micro-strain #1	Axial micro-strain #2	Axial micro-strain #3	Confining pressure (kPa)	Temperature (�C)	Load (N)	Displacement #1 (mm)	Displacement #2 (mm)	Displacement #3 (mm)
0.0000	257.542	2.636	8.574	4.741	-0.679	35.366	490.294	-0.000185	-0.000600	-0.000332
0.0400	267.881	3.207	9.714	5.602	-0.687	35.366	509.977	-0.000224	-0.000680	-0.000392
0.0800	277.214	3.428	10.156	5.725	-0.676	35.366	527.744	-0.000240	-0.000711	-0.000401
0.1200	304.415	5.112	13.291	8.089	-0.676	35.366	579.529	-0.000358	-0.000930	-0.000566
0.1600	342.077	7.334	17.821	11.479	-0.680	35.367	651.226	-0.000513	-0.001247	-0.000804
0.2000	396.555	10.697	24.672	16.260	-0.687	35.367	754.938	-0.000749	-0.001727	-0.001138
0.2400	417.910	12.185	27.244	18.706	-0.678	35.367	795.593	-0.000853	-0.001907	-0.001309
0.2800	483.885	16.534	35.515	23.890	-0.682	35.367	921.192	-0.001157	-0.002486	-0.001672
0.3200	547.124	20.940	42.948	29.433	-0.687	35.367	1041.584	-0.001466	-0.003006	-0.002060
0.3600	599.889	24.497	49.883	34.408	-0.682	35.367	1142.035	-0.001715	-0.003492	-0.002409
0.4000	676.564	29.679	58.894	40.982	-0.681	35.367	1288.004	-0.002078	-0.004123	-0.002869
0.4400	725.121	33.696	64.936	45.736	-0.676	35.368	1380.444	-0.002359	-0.004546	-0.003202
0.4800	819.123	40.324	75.461	53.740	-0.669	35.368	1559.401	-0.002823	-0.005282	-0.003762
0.5200	855.297	43.230	80.345	57.268	-0.677	35.368	1628.265	-0.003026	-0.005624	-0.004009
0.5600	916.643	47.912	87.475	62.911	-0.667	35.368	1745.052	-0.003354	-0.006123	-0.004404
0.6000	982.768	53.429	95.635	68.928	-0.679	35.368	1870.937	-0.003740	-0.006694	-0.004825
0.6400	1024.051	57.083	100.148	73.223	-0.679	35.368	1949.530	-0.003996	-0.007010	-0.005126
0.6800	1099.463	63.128	108.582	80.170	-0.672	35.368	2093.096	-0.004419	-0.007601	-0.005612
0.7200	1134.510	65.938	112.944	83.740	-0.671	35.369	2159.815	-0.004616	-0.007906	-0.005862
0.7600	1170.397	69.158	117.390	86.784	-0.672	35.369	2228.136	-0.004841	-0.008217	-0.006075
0.8000	1193.767	71.286	120.320	89.199	-0.676	35.369	2272.625	-0.004990	-0.008422	-0.006244
0.8400	1223.884	74.272	125.591	92.873	-0.665	35.369	2329.960	-0.005199	-0.008791	-0.006501
0.8800	1267.586	77.790	129.140	96.846	-0.670	35.369	2413.158	-0.005445	-0.009040	-0.006779
0.9200	1266.143	77.582	129.594	96.802	-0.673	35.369	2410.412	-0.005431	-0.009072	-0.006776
0.9600	1289.257	79.733	131.904	98.920	-0.688	35.369	2454.414	-0.005581	-0.009233	-0.006924
1.0000	1269.044	78.860	131.082	97.861	-0.669	35.370	2415.934	-0.005520	-0.009176	-0.006850
1.0400	1278.542	79.427	131.493	99.032	-0.669	35.370	2434.015	-0.005560	-0.009205	-0.006932
1.0800	1237.048	76.593	128.589	95.748	-0.663	35.370	2355.022	-0.005361	-0.009001	-0.006702
1.1200	1200.334	74.341	125.274	92.916	-0.665	35.370	2285.128	-0.005204	-0.008769	-0.006504
1.1600	1190.385	73.663	125.259	92.165	-0.676	35.370	2266.188	-0.005156	-0.008768	-0.006452
1.2000	1138.492	69.924	119.935	87.996	-0.670	35.370	2167.397	-0.004895	-0.008395	-0.006160
1.2400	1081.264	65.784	114.306	83.670	-0.669	35.370	2058.449	-0.004605	-0.008001	-0.005857
1.2800	1024.366	61.254	108.224	78.626	-0.674	35.370	1950.130	-0.004288	-0.007576	-0.005504
1.3200	977.673	57.721	102.884	74.235	-0.680	35.371	1861.238	-0.004040	-0.007202	-0.005196
1.3600	895.197	51.996	94.563	67.564	-0.679	35.371	1704.226	-0.003640	-0.006619	-0.004730
1.4000	853.538	48.271	89.937	63.814	-0.693	35.372	1624.918	-0.003379	-0.006296	-0.004467
1.4400	801.405	44.259	83.221	58.785	-0.671	35.371	1525.669	-0.003098	-0.005825	-0.004115
1.4800	727.465	38.741	74.734	52.180	-0.684	35.371	1384.907	-0.002712	-0.005231	-0.003653
1.5200	661.205	33.961	66.409	46.054	-0.677	35.371	1258.764	-0.002377	-0.004649	-0.003224
1.5600	589.579	28.637	58.482	39.981	-0.680	35.372	1122.408	-0.002005	-0.004094	-0.002799
1.6000	533.418	24.023	50.817	34.381	-0.672	35.372	1015.491	-0.001682	-0.003557	-0.002407
1.6400	476.386	19.964	43.705	28.861	-0.673	35.371	906.916	-0.001397	-0.003059	-0.002020
1.6800	430.849	16.356	37.221	24.292	-0.678	35.372	820.227	-0.001145	-0.002605	-0.001700
1.7200	410.471	14.322	34.211	22.234	-0.683	35.372	781.431	-0.001003	-0.002395	-0.001556
1.7600	353.558	10.407	26.062	16.454	-0.679	35.372	673.084	-0.000728	-0.001824	-0.001152
1.8000	305.738	6.958	19.979	11.908	-0.668	35.373	582.047	-0.000487	-0.001399	-0.000834
1.8400	276.132	5.183	14.958	8.798	-0.671	35.373	525.684	-0.000363	-0.001047	-0.000616
1.8800	255.288	3.166	11.396	6.226	-0.689	35.372	486.002	-0.000222	-0.000798	-0.000436
1.9200	258.368	3.194	11.230	5.990	-0.675	35.373	491.867	-0.000224	-0.000786	-0.000419
1.9600	251.455	2.441	9.136	4.687	-0.688	35.373	478.706	-0.000171	-0.000639	-0.000328
2.0000	246.751	2.233	8.560	4.243	-0.679	35.373	469.751	-0.000156	-0.000599	-0.000297
2.0400	267.100	3.067	9.768	5.366	-0.672	35.373	508.490	-0.000215	-0.000684	-0.000376
2.0800	274.930	3.330	10.581	6.295	-0.679	35.373	523.396	-0.000233	-0.000741	-0.000441
2.1200	308.233	5.223	14.504	8.717	-0.674	35.374	586.796	-0.000366	-0.001015	-0.000610
2.1600	324.313	6.570	16.787	10.658	-0.684	35.374	617.409	-0.000460	-0.001175	-0.000746
2.2000	397.847	10.920	25.279	17.121	-0.679	35.374	757.399	-0.000764	-0.001770	-0.001198
2.2400	407.916	11.656	26.407	17.927	-0.680	35.374	776.567	-0.000816	-0.001849	-0.001255
2.2800	483.028	16.507	35.735	24.501	-0.671	35.374	919.561	-0.001155	-0.002501	-0.001715
2.3200	530.999	19.980	41.968	28.405	-0.672	35.375	1010.885	-0.001399	-0.002938	-0.001988
2.3600	601.061	24.676	50.103	34.576	-0.673	35.375	1144.266	-0.001727	-0.003507	-0.002420
2.4000	652.549	28.903	56.721	39.313	-0.676	35.374	1242.285	-0.002023	-0.003971	-0.002752
2.4400	717.486	32.959	64.908	45.358	-0.679	35.375	1365.910	-0.002307	-0.004544	-0.003175
2.4800	785.745	38.268	72.599	51.403	-0.682	35.375	1495.857	-0.002679	-0.005082	-0.003598
2.5200	876.126	44.816	82.864	59.078	-0.678	35.375	1667.919	-0.003137	-0.005800	-0.004135
2.5600	923.345	49.302	89.043	64.037	-0.680	35.375	1757.813	-0.003451	-0.006233	-0.004483
2.6000	971.196	52.761	94.837	68.289	-0.675	35.375	1848.907	-0.003693	-0.006639	-0.004780
2.6400	1020.820	57.014	100.588	73.345	-0.672	35.375	1943.378	-0.003991	-0.007041	-0.005134
2.6800	1088.177	62.405	108.416	79.628	-0.699	35.376	2071.609	-0.004368	-0.007589	-0.005574
2.7200	1125.898	65.993	112.930	83.323	-0.691	35.375	2143.421	-0.004619	-0.007905	-0.005833
2.7600	1202.363	71.816	120.733	89.687	-0.691	35.376	2288.990	-0.005027	-0.008451	-0.006278
2.8000	1190.761	71.537	120.951	89.799	-0.684	35.376	2266.903	-0.005008	-0.008467	-0.006286
2.8400	1251.776	75.913	126.772	94.483	-0.685	35.376	2383.060	-0.005314	-0.008874	-0.006614
2.8800	1267.030	77.874	128.876	96.720	-0.686	35.377	2412.100	-0.005451	-0.009021	-0.006770
2.9200	1268.909	78.570	129.469	97.362	-0.673	35.377	2415.676	-0.005500	-0.009063	-0.006815
2.9600	1265.031	78.610	130.624	97.528	-0.676	35.377	2408.295	-0.005503	-0.009144	-0.006827
3.0000	1258.764	77.973	130.736	97.415	-0.680	35.377	2396.364	-0.005458	-0.009152	-0.006819
3.0400	1248.710	78.069	130.062	96.985	-0.681	35.377	2377.224	-0.005465	-0.009104	-0.006789
3.0800	1246.411	77.875	130.281	96.958	-0.673	35.377	2372.847	-0.005451	-0.009120	-0.006787
3.1200	1208.329	75.049	126.774	94.040	-0.664	35.377	2300.348	-0.005253	-0.008874	-0.006583
3.1600	1187.951	73.357	124.432	92.165	-0.675	35.377	2261.553	-0.005135	-0.008710	-0.006452
3.2000	1123.869	69.187	118.681	87.231	-0.671	35.378	2139.559	-0.004843	-0.008308	-0.006106
3.2400	1097.960	66.646	115.544	84.868	-0.668	35.378	2090.235	-0.004665	-0.008088	-0.005941
3.2800	1027.432	61.783	108.789	79.253	-0.672	35.377	1955.967	-0.004325	-0.007615	-0.005548
3.3200	992.596	58.973	104.937	76.046	-0.675	35.378	1889.648	-0.004128	-0.007346	-0.005323
3.3600	910.361	53.329	96.058	68.816	-0.675	35.378	1733.093	-0.003733	-0.006724	-0.004817
3.4000	871.783	49.971	91.353	65.135	-0.678	35.379	1659.651	-0.003498	-0.006395	-0.004559
3.4400	803.569	44.745	83.758	59.329	-0.669	35.378	1529.789	-0.003132	-0.005863	-0.004153
3.4800	749.286	39.991	77.815	54.520	-0.680	35.378	1426.449	-0.002799	-0.005447	-0.003816
3.5200	671.259	34.557	67.769	47.014	-0.680	35.379	1277.905	-0.002419	-0.004744	-0.003291
3.5600	596.718	28.972	59.044	40.690	-0.680	35.379	1135.998	-0.002028	-0.004133	-0.002848
3.6000	555.931	25.692	53.017	36.550	-0.678	35.379	1058.350	-0.001798	-0.003711	-0.002559
3.6400	478.640	20.329	44.033	29.795	-0.693	35.379	911.207	-0.001423	-0.003082	-0.002086
3.6800	450.912	18.130	39.853	26.297	-0.684	35.379	858.421	-0.001269	-0.002790	-0.001841
3.7200	394.000	13.517	31.029	20.503	-0.681	35.379	750.074	-0.000946	-0.002172	-0.001435
3.7600	352.296	10.823	25.306	16.661	-0.676	35.380	670.681	-0.000758	-0.001771	-0.001166
3.8000	315.536	8.139	21.440	13.217	-0.677	35.380	600.700	-0.000570	-0.001501	-0.000925
3.8400	281.046	5.570	15.689	9.258	-0.673	35.380	535.040	-0.000390	-0.001098	-0.000648
3.8800	268.137	4.540	13.856	7.882	-0.676	35.380	510.464	-0.000318	-0.000970	-0.000552
3.9200	269.550	4.279	11.519	6.893	-0.676	35.381	513.153	-0.000300	-0.000806	-0.000482
3.9600	242.048	2.137	9.121	4.728	-0.703	35.380	460.796	-0.000150	-0.000638	-0.000331
4.0000	253.289	2.537	9.136	4.962	-0.690	35.381	482.197	-0.000178	-0.000639	-0.000347
4.0400	248.480	2.041	8.354	4.214	-0.684	35.381	473.042	-0.000143	-0.000585	-0.000295
4.0800	284.924	4.709	11.823	7.032	-0.683	35.381	542.421	-0.000330	-0.000828	-0.000492
4.1200	292.949	4.959	13.290	8.284	-0.684	35.381	557.699	-0.000347	-0.000930	-0.000580
4.1600	328.040	7.070	17.201	11.172	-0.679	35.382	624.504	-0.000495	-0.001204	-0.000782
4.2000	375.770	9.823	22.623	15.235	-0.679	35.381	715.370	-0.000688	-0.001584	-0.001066
4.2400	425.364	13.225	28.359	19.430	-0.684	35.382	809.784	-0.000926	-0.001985	-0.001360
4.2800	489.220	17.158	36.507	25.209	-0.673	35.382	931.349	-0.001201	-0.002555	-0.001765
4.3200	527.978	20.369	41.746	28.627	-0.680	35.383	1005.135	-0.001426	-0.002922	-0.002004
4.3600	606.066	25.149	50.884	35.174	-0.684	35.382	1153.793	-0.001760	-0.003562	-0.002462
4.4000	647.334	28.720	56.141	39.202	-0.684	35.383	1232.357	-0.002010	-0.003930	-0.002744
4.4400	722.626	33.626	65.678	46.012	-0.689	35.383	1375.694	-0.002354	-0.004597	-0.003221
4.4800	807.371	40.337	74.899	53.476	-0.683	35.383	1537.027	-0.002824	-0.005243	-0.003743
4.5200	859.730	44.482	81.968	58.757	-0.676	35.384	1636.705	-0.003114	-0.005738	-0.004113
4.5600	913.742	48.606	88.313	63.676	-0.673	35.383	1739.531	-0.003402	-0.006182	-0.004457
4.6000	963.441	52.481	95.429	68.706	-0.671	35.383	1834.145	-0.003674	-0.006680	-0.004809
4.6400	1031.595	58.069	101.576	74.473	-0.669	35.384	1963.892	-0.004065	-0.007110	-0.005213
4.6800	1067.167	61.255	106.216	77.945	-0.669	35.384	2031.612	-0.004288	-0.007435	-0.005456
4.7200	1141.438	67.077	114.112	84.715	-0.675	35.384	2173.004	-0.004695	-0.007988	-0.005930
4.7600	1176.664	69.951	118.515	87.993	-0.668	35.384	2240.067	-0.004897	-0.008296	-0.006159
4.8000	1228.167	74.121	124.006	92.747	-0.684	35.385	2338.114	-0.005188	-0.008680	-0.006492
4.8400	1221.389	74.092	124.927	93.068	-0.684	35.385	2325.211	-0.005186	-0.008745	-0.006515
4.8800	1254.782	77.026	127.944	96.122	-0.668	35.385	2388.783	-0.005392	-0.008956	-0.006729
4.9200	1275.281	79.095	130.527	97.918	-0.680	35.386	2427.807	-0.005537	-0.009137	-0.006854
4.9600	1271.884	79.108	130.556	98.293	-0.663	35.385	2421.341	-0.005538	-0.009139	-0.006881
5.0000	1276.333	79.873	131.725	99.267	-0.655	35.385	2429.810	-0.005591	-0.009221	-0.006949
5.0400	1261.304	78.816	130.640	98.348	-0.675	35.386	2401.199	-0.005517	-0.009145	-0.006884
5.0800	1249.387	78.223	130.363	97.415	-0.680	35.385	2378.511	-0.005476	-0.009125	-0.006819
5.1200	1215.528	75.677	127.503	95.122	-0.669	35.386	2314.053	-0.005297	-0.008925	-0.006659
5.1600	1194.563	74.204	125.590	92.720	-0.673	35.385	2274.141	-0.005194	-0.008791	-0.006490
5.2000	1142.925	70.565	120.787	88.769	-0.688	35.386	2175.837	-0.004940	-0.008455	-0.006214
5.2400	1105.369	67.798	117.129	85.744	-0.674	35.386	2104.340	-0.004746	-0.008199	-0.006002
5.2800	1028.785	62.002	109.105	79.571	-0.678	35.387	1958.542	-0.004340	-0.007637	-0.005570
5.3200	982.798	58.248	104.179	75.711	-0.674	35.387	1870.995	-0.004077	-0.007293	-0.005300
5.3600	924.412	54.165	97.851	70.751	-0.667	35.387	1759.844	-0.003792	-0.006850	-0.004953
5.4000	869.949	49.761	91.739	65.735	-0.675	35.387	1656.160	-0.003483	-0.006422	-0.004601
5.4400	778.562	42.992	81.543	57.755	-0.678	35.387	1482.182	-0.003009	-0.005708	-0.004043
5.4800	726.609	38.991	75.308	52.933	-0.668	35.387	1383.276	-0.002729	-0.005272	-0.003705
5.5200	676.113	35.154	69.035	48.307	-0.673	35.388	1287.146	-0.002461	-0.004832	-0.003381
5.5600	602.023	29.692	59.898	41.136	-0.666	35.387	1146.097	-0.002078	-0.004193	-0.002880
5.6000	541.894	25.163	52.137	35.899	-0.676	35.388	1031.628	-0.001761	-0.003650	-0.002513
5.6400	486.049	20.689	45.258	30.325	-0.681	35.388	925.312	-0.001448	-0.003168	-0.002123
5.6800	417.474	15.993	36.245	23.984	-0.676	35.388	794.764	-0.001119	-0.002537	-0.001679
5.7200	385.404	13.435	31.884	20.862	-0.676	35.389	733.709	-0.000940	-0.002232	-0.001460
5.7600	350.523	10.475	25.980	16.983	-0.670	35.388	667.305	-0.000733	-0.001819	-0.001189
5.8000	302.101	7.236	19.636	11.841	-0.684	35.388	575.123	-0.000507	-0.001375	-0.000829
5.8400	301.154	6.682	18.782	11.367	-0.683	35.389	573.320	-0.000468	-0.001315	-0.000796
5.8800	250.088	3.638	11.835	6.505	-0.680	35.389	476.103	-0.000255	-0.000828	-0.000455
5.9200	251.155	2.847	10.388	5.615	-0.679	35.389	478.134	-0.000199	-0.000727	-0.000393
5.9600	245.910	2.498	10.251	4.922	-0.680	35.389	468.149	-0.000175	-0.000718	-0.000345
6.0000	255.258	2.706	9.990	5.379	-0.688	35.390	485.945	-0.000189	-0.000699	-0.000377
6.0400	271.804	3.541	11.546	6.282	-0.687	35.390	517.445	-0.000248	-0.000808	-0.000440
6.0800	276.944	3.973	11.339	6.726	-0.681	35.390	527.229	-0.000278	-0.000794	-0.000471
6.1200	313.733	5.778	15.578	9.635	-0.679	35.390	597.267	-0.000404	-0.001090	-0.000674
6.1600	341.761	7.738	18.754	11.939	-0.684	35.390	650.625	-0.000542	-0.001313	-0.000836
6.2000	377.619	10.129	23.270	15.414	-0.680	35.391	718.889	-0.000709	-0.001629	-0.001079
6.2400	429.422	13.311	29.377	19.891	-0.680	35.391	817.509	-0.000932	-0.002056	-0.001392
6.2800	476.115	16.549	35.747	24.237	-0.677	35.391	906.401	-0.001158	-0.002502	-0.001697
6.3200	535.462	20.148	42.407	29.183	-0.673	35.391	1019.382	-0.001410	-0.002968	-0.002043
6.3600	606.321	25.248	51.545	35.549	-0.675	35.391	1154.280	-0.001767	-0.003608	-0.002488
6.4000	669.260	30.013	59.226	41.289	-0.672	35.392	1274.099	-0.002101	-0.004146	-0.002890
6.4400	723.783	34.142	65.940	46.177	-0.684	35.391	1377.897	-0.002390	-0.004616	-0.003232
6.4800	783.671	38.726	72.846	51.558	-0.681	35.392	1491.909	-0.002711	-0.005099	-0.003609
6.5200	890.298	46.661	85.824	61.048	-0.678	35.392	1694.899	-0.003266	-0.006008	-0.004273
6.5600	928.139	49.218	90.006	64.719	-0.676	35.392	1766.939	-0.003445	-0.006300	-0.004530
6.6000	973.661	53.482	95.701	68.900	-0.674	35.392	1853.600	-0.003744	-0.006699	-0.004823
6.6400	1063.350	60.144	104.851	76.751	-0.671	35.392	2024.345	-0.004210	-0.007340	-0.005373
6.6800	1096.262	63.503	109.627	80.241	-0.664	35.392	2087.002	-0.004445	-0.007674	-0.005617
6.7200	1124.621	65.980	113.397	84.045	-0.675	35.393	2140.989	-0.004619	-0.007938	-0.005883
6.7600	1190.370	71.231	120.429	88.951	-0.668	35.393	2266.159	-0.004986	-0.008430	-0.006227
6.8000	1214.250	73.440	123.044	91.355	-0.666	35.393	2311.621	-0.005141	-0.008613	-0.006395
6.8400	1260.403	77.610	128.617	95.941	-0.669	35.394	2399.483	-0.005433	-0.009003	-0.006716
6.8800	1237.349	76.039	127.103	94.747	-0.673	35.394	2355.595	-0.005323	-0.008897	-0.006632
6.9200	1262.236	78.168	130.721	97.487	-0.669	35.394	2402.973	-0.005472	-0.009150	-0.006824
6.9600	1277.279	79.345	131.561	98.641	-0.667	35.394	2431.612	-0.005554	-0.009209	-0.006905
7.0000	1269.149	79.484	131.684	98.559	-0.664	35.394	2416.134	-0.005564	-0.009218	-0.006899
7.0400	1274.680	79.996	131.725	99.059	-0.671	35.394	2426.662	-0.005600	-0.009221	-0.006934
7.0800	1231.969	77.040	129.609	95.900	-0.669	35.394	2345.352	-0.005393	-0.009073	-0.006713
7.1200	1204.617	75.218	126.775	93.886	-0.683	35.395	2293.282	-0.005265	-0.008874	-0.006572
7.1600	1170.578	72.884	124.116	91.163	-0.681	35.395	2228.479	-0.005102	-0.008688	-0.006381
7.2000	1153.115	71.355	122.164	89.354	-0.687	35.395	2195.234	-0.004995	-0.008551	-0.006255
7.2400	1081.850	66.188	114.926	84.019	-0.680	35.395	2059.565	-0.004633	-0.008045	-0.005881
7.2800	1041.183	62.725	110.109	80.294	-0.671	35.395	1982.145	-0.004391	-0.007708	-0.005621
7.3200	977.072	58.251	103.987	74.960	-0.672	35.395	1860.094	-0.004078	-0.007279	-0.005247
7.3600	906.559	52.649	96.240	68.830	-0.676	35.395	1725.855	-0.003685	-0.006737	-0.004818
7.4000	849.000	48.592	90.047	63.856	-0.676	35.395	1616.278	-0.003401	-0.006303	-0.004470
7.4400	788.480	43.867	82.795	58.242	-0.673	35.396	1501.064	-0.003071	-0.005796	-0.004077
7.4800	731.012	39.283	75.310	52.781	-0.664	35.396	1391.659	-0.002750	-0.005272	-0.003695
7.5200	658.605	33.933	66.725	46.276	-0.668	35.396	1253.815	-0.002375	-0.004671	-0.003239
7.5600	595.636	29.027	59.445	40.718	-0.673	35.396	1133.938	-0.002032	-0.004161	-0.002850
7.6000	532.907	24.385	51.011	34.533	-0.671	35.396	1014.519	-0.001707	-0.003571	-0.002417
7.6400	494.179	21.080	46.056	30.950	-0.685	35.396	940.790	-0.001476	-0.003224	-0.002167
7.6800	425.650	16.159	36.921	24.376	-0.674	35.396	810.328	-0.001131	-0.002584	-0.001706
7.7200	384.622	12.990	31.624	20.461	-0.680	35.397	732.222	-0.000909	-0.002214	-0.001432
7.7600	339.372	9.838	24.922	16.025	-0.674	35.397	646.076	-0.000689	-0.001745	-0.001122
7.8000	329.859	9.073	23.296	14.762	-0.680	35.397	627.966	-0.000635	-0.001631	-0.001033
7.8400	283.015	5.473	15.920	9.454	-0.681	35.397	538.788	-0.000383	-0.001114	-0.000662
7.8800	267.776	4.583	13.842	7.715	-0.679	35.397	509.777	-0.000321	-0.000969	-0.000540
7.9200	250.328	3.207	11.052	5.908	-0.679	35.397	476.561	-0.000224	-0.000774	-0.000414
7.9600	239.703	2.233	9.274	4.310	-0.672	35.397	456.333	-0.000156	-0.000649	-0.000302
8.0000	250.824	2.901	9.302	5.033	-0.672	35.398	477.505	-0.000203	-0.000651	-0.000352
8.0400	264.755	3.512	10.501	5.824	-0.671	35.397	504.026	-0.000246	-0.000735	-0.000408
8.0800	282.324	4.446	11.436	6.838	-0.679	35.398	537.472	-0.000311	-0.000800	-0.000479
8.1200	316.754	6.306	16.032	10.176	-0.677	35.398	603.018	-0.000441	-0.001122	-0.000712
8.1600	334.517	7.570	17.986	11.549	-0.670	35.398	636.835	-0.000530	-0.001259	-0.000808
8.2000	380.023	9.907	23.422	15.497	-0.677	35.398	723.467	-0.000694	-0.001640	-0.001085
8.2400	439.431	14.100	30.451	20.639	-0.669	35.399	836.563	-0.000987	-0.002132	-0.001445
8.2800	493.097	17.479	37.167	25.587	-0.669	35.399	938.730	-0.001224	-0.002602	-0.001791
8.3200	527.948	19.742	41.733	28.557	-0.671	35.398	1005.077	-0.001382	-0.002921	-0.001999
8.3600	605.104	25.068	51.298	35.450	-0.672	35.399	1151.962	-0.001755	-0.003591	-0.002482
8.4000	657.718	29.485	57.695	40.260	-0.679	35.399	1252.127	-0.002064	-0.004039	-0.002818
8.4400	730.321	34.613	67.137	46.541	-0.677	35.399	1390.343	-0.002423	-0.004700	-0.003258
8.4800	807.101	40.199	75.570	53.533	-0.671	35.399	1536.512	-0.002814	-0.005290	-0.003747
8.5200	858.348	44.328	81.764	58.382	-0.668	35.399	1634.073	-0.003103	-0.005723	-0.004087
8.5600	891.545	47.163	86.250	61.576	-0.668	35.399	1697.273	-0.003301	-0.006037	-0.004310
8.6000	965.861	52.899	95.250	68.677	-0.684	35.399	1838.751	-0.003703	-0.006667	-0.004807
8.6400	1030.528	58.207	102.292	74.861	-0.671	35.399	1961.861	-0.004075	-0.007160	-0.005240
8.6800	1093.722	63.264	109.188	80.198	-0.677	35.399	2082.167	-0.004428	-0.007643	-0.005614
8.7200	1142.760	67.299	114.704	84.825	-0.671	35.399	2175.522	-0.004711	-0.008029	-0.005938
8.7600	1185.696	70.869	119.617	88.563	-0.674	35.399	2257.261	-0.004961	-0.008373	-0.006199
8.8000	1253.955	76.484	126.706	94.733	-0.667	35.400	2387.209	-0.005354	-0.008869	-0.006631
8.8400	1236.417	75.482	126.444	93.747	-0.664	35.400	2353.821	-0.005284	-0.008851	-0.006562
8.8800	1257.442	77.914	128.384	96.163	-0.660	35.400	2393.847	-0.005454	-0.008987	-0.006731
8.9200	1285.079	80.025	132.070	99.016	-0.661	35.400	2446.461	-0.005602	-0.009245	-0.006931
8.9600	1275.236	79.484	131.438	98.794	-0.664	35.400	2427.721	-0.005564	-0.009201	-0.006916
9.0000	1275.416	79.691	131.808	98.753	-0.664	35.400	2428.064	-0.005578	-0.009227	-0.006913
9.0400	1237.800	77.764	129.649	96.692	-0.672	35.400	2356.453	-0.005443	-0.009075	-0.006768
9.0800	1275.085	80.040	132.016	99.087	-0.671	35.401	2427.435	-0.005603	-0.009241	-0.006936
9.1200	1218.924	76.387	127.847	95.052	-0.674	35.401	2320.518	-0.005347	-0.008949	-0.006654
9.1600	1159.817	71.859	123.113	90.660	-0.680	35.400	2207.994	-0.005030	-0.008618	-0.006346
9.2000	1136.358	70.091	119.989	88.314	-0.676	35.400	2163.334	-0.004906	-0.008399	-0.006182
9.2400	1071.330	65.841	114.031	83.586	-0.679	35.400	2039.537	-0.004609	-0.007982	-0.005851
9.2800	1055.941	63.892	112.144	81.757	-0.679	35.400	2010.241	-0.004472	-0.007850	-0.005723
9.3200	949.224	56.349	101.303	73.081	-0.673	35.400	1807.079	-0.003944	-0.007091	-0.005116
9.3600	879.012	51.040	93.211	66.842	-0.674	35.401	1673.412	-0.003573	-0.006525	-0.004679
9.4000	860.361	49.386	91.189	65.120	-0.672	35.401	1637.907	-0.003457	-0.006383	-0.004558
9.4400	802.457	44.731	84.009	59.743	-0.674	35.401	1527.672	-0.003131	-0.005881	-0.004182
9.4800	746.701	40.462	77.085	54.602	-0.672	35.402	1421.528	-0.002832	-0.005396	-0.003822
9.5200	658.560	34.030	67.179	46.485	-0.679	35.401	1253.729	-0.002382	-0.004703	-0.003254
9.5600	594.223	29.026	59.417	40.928	-0.683	35.401	1131.248	-0.002032	-0.004159	-0.002865
9.6000	534.485	24.482	51.449	35.130	-0.675	35.401	1017.523	-0.001714	-0.003601	-0.002459
9.6400	495.742	21.119	46.166	31.021	-0.665	35.401	943.766	-0.001478	-0.003232	-0.002171
9.6800	410.140	15.492	35.130	23.291	-0.669	35.402	780.802	-0.001084	-0.002459	-0.001630
9.7200	387.988	13.099	31.993	21.070	-0.665	35.402	738.630	-0.000917	-0.002240	-0.001475
9.7600	355.437	11.086	26.680	17.342	-0.667	35.401	676.661	-0.000776	-0.001868	-0.001214
9.8000	291.777	6.959	18.453	11.313	-0.673	35.401	555.468	-0.000487	-0.001292	-0.000792
9.8400	308.293	7.290	18.822	11.826	-0.679	35.401	586.910	-0.000510	-0.001318	-0.000828
9.8800	258.113	4.057	13.251	7.491	-0.680	35.402	491.381	-0.000284	-0.000928	-0.000524
9.9200	250.178	3.151	11.284	6.072	-0.678	35.401	476.274	-0.000221	-0.000790	-0.000425
9.9600	250.839	2.971	10.777	5.587	-0.677	35.401	477.533	-0.000208	-0.000754	-0.000391
10.0000	254.145	3.012	10.501	5.628	-0.680	35.402	483.828	-0.000211	-0.000735	-0.000394
10.0400	261.630	3.165	11.078	5.949	-0.687	35.402	498.075	-0.000222	-0.000775	-0.000416
10.0800	290.199	4.985	13.072	7.952	-0.684	35.402	552.464	-0.000349	-0.000915	-0.000557
10.1200	286.276	4.472	12.716	7.923	-0.677	35.401	544.996	-0.000313	-0.000890	-0.000555
10.1600	332.263	7.112	17.875	11.772	-0.679	35.402	632.544	-0.000498	-0.001251	-0.000824
10.2000	403.573	11.754	26.504	18.094	-0.668	35.402	768.299	-0.000823	-0.001855	-0.001267
10.2400	452.641	14.922	32.433	22.319	-0.673	35.403	861.712	-0.001045	-0.002270	-0.001562
10.2800	476.566	16.565	35.447	24.223	-0.673	35.402	907.259	-0.001160	-0.002481	-0.001696
10.3200	535.417	20.647	42.808	29.282	-0.678	35.402	1019.297	-0.001445	-0.002997	-0.002050
10.3600	607.058	25.568	51.603	35.953	-0.680	35.402	1155.682	-0.001790	-0.003612	-0.002517
10.4000	651.466	29.330	57.405	40.050	-0.676	35.403	1240.225	-0.002053	-0.004018	-0.002804
10.4400	739.834	35.486	68.154	48.029	-0.677	35.403	1408.453	-0.002484	-0.004771	-0.003362
10.4800	778.622	38.644	73.574	51.807	-0.677	35.402	1482.296	-0.002705	-0.005150	-0.003626
10.5200	857.807	44.357	82.465	58.730	-0.673	35.402	1633.043	-0.003105	-0.005773	-0.004111
10.5600	930.484	50.192	90.568	65.316	-0.683	35.402	1771.402	-0.003513	-0.006340	-0.004572
10.6000	973.285	53.582	96.170	69.358	-0.678	35.402	1852.884	-0.003751	-0.006732	-0.004855
10.6400	1032.166	58.390	102.058	74.807	-0.676	35.403	1964.979	-0.004087	-0.007144	-0.005237
10.6800	1087.020	62.753	108.762	80.199	-0.680	35.402	2069.407	-0.004393	-0.007613	-0.005614
10.7200	1146.607	68.062	116.014	85.521	-0.671	35.403	2182.846	-0.004764	-0.008121	-0.005986
10.7600	1185.080	71.107	120.141	89.146	-0.681	35.403	2256.088	-0.004977	-0.008410	-0.006240
10.8000	1214.656	73.895	124.433	92.747	-0.681	35.403	2312.393	-0.005173	-0.008710	-0.006492
10.8400	1225.492	74.856	126.320	93.941	-0.675	35.403	2333.021	-0.005240	-0.008842	-0.006576
10.8800	1256.210	77.679	128.850	96.608	-0.677	35.403	2391.500	-0.005438	-0.009019	-0.006763
10.9200	1268.307	78.722	129.993	97.766	-0.669	35.403	2414.532	-0.005511	-0.009100	-0.006844
10.9600	1272.110	79.428	131.244	98.670	-0.668	35.403	2421.770	-0.005560	-0.009187	-0.006907
11.0000	1273.522	79.415	131.575	99.085	-0.679	35.403	2424.459	-0.005559	-0.009210	-0.006936
11.0400	1267.601	79.484	131.410	98.668	-0.673	35.403	2413.187	-0.005564	-0.009199	-0.006907
11.0800	1247.899	78.220	130.254	97.724	-0.671	35.403	2375.679	-0.005475	-0.009118	-0.006841
11.1200	1220.938	76.679	128.698	95.607	-0.671	35.403	2324.352	-0.005368	-0.009009	-0.006692
11.1600	1167.647	72.803	123.828	91.233	-0.668	35.403	2222.900	-0.005096	-0.008668	-0.006386
11.2000	1117.723	69.271	118.887	87.258	-0.688	35.403	2127.857	-0.004849	-0.008322	-0.006108
11.2400	1098.562	67.256	116.758	85.492	-0.684	35.403	2091.379	-0.004708	-0.008173	-0.005984
11.2800	1037.877	63.142	110.083	80.282	-0.681	35.403	1975.851	-0.004420	-0.007706	-0.005620
11.3200	965.470	57.319	102.924	74.473	-0.681	35.403	1838.007	-0.004012	-0.007205	-0.005213
11.3600	915.591	53.790	97.423	70.041	-0.672	35.403	1743.050	-0.003765	-0.006820	-0.004903
11.4000	857.761	49.051	90.941	64.914	-0.681	35.403	1632.957	-0.003434	-0.006366	-0.004544
11.4400	782.995	43.839	82.272	58.381	-0.679	35.404	1490.622	-0.003069	-0.005759	-0.004087
11.4800	727.796	39.436	75.764	52.948	-0.679	35.403	1385.536	-0.002761	-0.005304	-0.003706
11.5200	656.291	34.279	67.345	46.748	-0.670	35.402	1249.409	-0.002400	-0.004714	-0.003272
11.5600	610.860	30.207	61.263	42.332	-0.685	35.402	1162.920	-0.002114	-0.004288	-0.002963
11.6000	538.934	25.358	52.369	35.828	-0.680	35.403	1025.991	-0.001775	-0.003666	-0.002508
11.6400	489.145	21.064	45.932	30.755	-0.671	35.403	931.206	-0.001474	-0.003215	-0.002153
11.6800	443.263	17.896	39.314	26.171	-0.660	35.403	843.859	-0.001253	-0.002752	-0.001832
11.7200	377.363	13.157	30.823	20.264	-0.668	35.403	718.403	-0.000921	-0.002158	-0.001418
11.7600	351.860	10.977	26.738	17.286	-0.665	35.403	669.851	-0.000768	-0.001872	-0.001210
11.8000	309.600	7.513	21.013	12.954	-0.671	35.403	589.399	-0.000526	-0.001471	-0.000907
11.8400	274.103	5.625	16.155	9.441	-0.673	35.403	521.822	-0.000394	-0.001131	-0.000661
11.8800	276.418	5.389	15.385	8.717	-0.670	35.404	526.228	-0.000377	-0.001077	-0.000610
11.9200	249.517	3.332	11.506	6.004	-0.671	35.403	475.016	-0.000233	-0.000805	-0.000420
11.9600	249.862	2.972	10.473	5.519	-0.672	35.403	475.674	-0.000208	-0.000733	-0.000386
12.0000	255.844	3.416	10.541	5.867	-0.677	35.403	487.061	-0.000239	-0.000738	-0.000411
12.0400	261.359	3.346	10.886	5.851	-0.672	35.404	497.561	-0.000234	-0.000762	-0.000410
12.0800	281.662	4.612	12.470	7.450	-0.676	35.403	536.213	-0.000323	-0.000873	-0.000521
12.1200	301.425	5.599	14.338	9.091	-0.685	35.403	573.835	-0.000392	-0.001004	-0.000636
12.1600	350.252	8.681	20.294	13.342	-0.677	35.402	666.790	-0.000608	-0.001421	-0.000934
12.2000	401.784	12.090	26.516	17.705	-0.687	35.403	764.894	-0.000846	-0.001856	-0.001239
12.2400	419.804	13.185	28.636	19.666	-0.683	35.403	799.198	-0.000923	-0.002005	-0.001377
12.2800	479.256	16.953	36.217	24.778	-0.667	35.403	912.380	-0.001187	-0.002535	-0.001734
12.3200	535.492	20.843	43.044	29.754	-0.665	35.403	1019.440	-0.001459	-0.003013	-0.002083
12.3600	595.020	25.025	50.872	35.353	-0.665	35.403	1132.765	-0.001752	-0.003561	-0.002475
12.4000	665.202	30.250	59.458	41.458	-0.675	35.403	1266.375	-0.002118	-0.004162	-0.002902
12.4400	723.588	34.459	66.284	46.706	-0.680	35.403	1377.525	-0.002412	-0.004640	-0.003269
12.4800	796.506	40.003	74.637	53.323	-0.681	35.403	1516.342	-0.002800	-0.005225	-0.003733
12.5200	853.734	44.661	81.707	58.993	-0.677	35.403	1625.290	-0.003126	-0.005719	-0.004130
12.5600	899.796	48.078	87.268	63.245	-0.689	35.402	1712.980	-0.003365	-0.006109	-0.004427
12.6000	970.700	53.527	95.551	69.289	-0.672	35.402	1847.963	-0.003747	-0.006689	-0.004850
12.6400	1017.093	57.526	101.015	74.165	-0.682	35.403	1936.283	-0.004027	-0.007071	-0.005192
12.6800	1094.053	63.253	109.049	80.671	-0.687	35.404	2082.796	-0.004428	-0.007633	-0.005647
12.7200	1146.983	67.673	115.214	85.519	-0.677	35.402	2183.561	-0.004737	-0.008065	-0.005986
12.7600	1168.248	69.869	118.762	88.121	-0.690	35.402	2224.045	-0.004891	-0.008313	-0.006168
12.8000	1199.643	73.037	122.729	91.175	-0.669	35.402	2283.812	-0.005113	-0.008591	-0.006382
12.8400	1236.763	76.024	125.934	94.289	-0.683	35.402	2354.479	-0.005322	-0.008815	-0.006600
12.8800	1260.553	78.195	128.877	96.943	-0.700	35.403	2399.769	-0.005474	-0.009021	-0.006786
12.9200	1261.905	78.540	129.923	97.890	-0.688	35.402	2402.344	-0.005498	-0.009095	-0.006852
12.9600	1300.138	81.459	133.818	101.083	-0.671	35.402	2475.128	-0.005702	-0.009367	-0.007076
13.0000	1265.753	79.303	132.070	98.739	-0.677	35.402	2409.668	-0.005551	-0.009245	-0.006912
13.0400	1263.889	79.692	132.263	99.015	-0.675	35.402	2406.120	-0.005578	-0.009258	-0.006931
13.0800	1248.019	78.638	131.246	98.043	-0.678	35.402	2375.908	-0.005505	-0.009187	-0.006863
13.1200	1217.151	76.609	128.454	95.567	-0.673	35.402	2317.142	-0.005363	-0.008992	-0.006690
13.1600	1190.505	74.829	126.141	93.318	-0.677	35.402	2266.417	-0.005238	-0.008830	-0.006532
13.2000	1139.138	71.092	121.037	89.257	-0.693	35.402	2168.627	-0.004976	-0.008473	-0.006248
13.2400	1077.537	66.284	114.993	84.169	-0.686	35.402	2051.353	-0.004640	-0.008049	-0.005892
13.2800	1024.261	62.031	109.227	79.822	-0.683	35.401	1949.930	-0.004342	-0.007646	-0.005588
13.3200	973.240	58.376	103.726	75.477	-0.678	35.401	1852.798	-0.004086	-0.007261	-0.005283
13.3600	911.263	53.721	97.106	69.886	-0.679	35.401	1734.810	-0.003760	-0.006797	-0.004892
13.4000	856.424	49.274	90.747	65.163	-0.692	35.401	1630.411	-0.003449	-0.006352	-0.004561
13.4400	796.190	44.843	83.885	59.494	-0.682	35.402	1515.741	-0.003139	-0.005872	-0.004165
13.4800	734.994	39.839	76.658	53.935	-0.670	35.401	1399.240	-0.002789	-0.005366	-0.003775
13.5200	668.509	35.322	68.745	48.183	-0.688	35.401	1272.669	-0.002473	-0.004812	-0.003373
13.5600	601.121	29.996	60.752	42.222	-0.686	35.401	1144.381	-0.002100	-0.004253	-0.002956
13.6000	547.169	26.262	53.967	37.148	-0.683	35.401	1041.670	-0.001838	-0.003778	-0.002600
13.6400	481.600	20.828	44.969	30.728	-0.676	35.401	916.843	-0.001458	-0.003148	-0.002151
13.6800	438.784	17.924	39.260	26.447	-0.676	35.401	835.333	-0.001255	-0.002748	-0.001851
13.7200	380.279	13.572	31.705	20.959	-0.682	35.400	723.953	-0.000950	-0.002219	-0.001467
13.7600	351.935	11.392	27.398	17.678	-0.691	35.401	669.994	-0.000797	-0.001918	-0.001237
13.8000	304.070	7.791	20.738	12.828	-0.681	35.401	578.871	-0.000545	-0.001452	-0.000898
13.8400	282.294	6.195	17.021	10.496	-0.693	35.401	537.415	-0.000434	-0.001191	-0.000735
13.8800	258.203	4.374	13.059	7.617	-0.693	35.400	491.552	-0.000306	-0.000914	-0.000533
13.9200	250.313	3.429	10.706	6.005	-0.689	35.400	476.532	-0.000240	-0.000749	-0.000420
13.9600	254.446	3.374	10.773	6.268	-0.692	35.401	484.400	-0.000236	-0.000754	-0.000439
14.0000	258.774	3.638	10.719	6.143	-0.703	35.401	492.640	-0.000255	-0.000750	-0.000430
14.0400	256.790	3.139	10.525	6.032	-0.692	35.401	488.863	-0.000220	-0.000737	-0.000422
14.0800	275.366	4.028	11.752	7.161	-0.686	35.400	524.225	-0.000282	-0.000823	-0.000501
14.1200	317.821	6.363	16.361	10.715	-0.688	35.401	605.049	-0.000445	-0.001145	-0.000750
14.1600	334.728	7.567	18.672	12.285	-0.702	35.400	637.236	-0.000530	-0.001307	-0.000860
14.2000	375.860	9.947	23.655	16.398	-0.698	35.401	715.542	-0.000696	-0.001656	-0.001148
14.2400	426.687	13.752	29.996	20.653	-0.704	35.402	812.302	-0.000963	-0.002100	-0.001446
14.2800	488.709	17.661	37.222	25.587	-0.683	35.400	930.376	-0.001236	-0.002606	-0.001791
14.3200	533.899	20.912	43.332	29.905	-0.672	35.400	1016.407	-0.001464	-0.003033	-0.002093
14.3600	591.939	24.789	50.157	35.090	-0.675	35.401	1126.900	-0.001735	-0.003511	-0.002456
14.4000	665.172	30.124	59.250	41.580	-0.686	35.401	1266.317	-0.002109	-0.004148	-0.002911
14.4400	727.029	34.503	66.461	47.083	-0.694	35.399	1384.077	-0.002415	-0.004652	-0.003296
14.4800	797.783	40.128	75.035	53.742	-0.703	35.400	1518.774	-0.002809	-0.005252	-0.003762
14.5200	849.150	44.259	81.503	58.798	-0.696	35.400	1616.564	-0.003098	-0.005705	-0.004116
14.5600	919.453	49.830	89.429	64.743	-0.688	35.400	1750.402	-0.003488	-0.006260	-0.004532
14.6000	980.799	54.388	96.582	70.849	-0.691	35.400	1867.189	-0.003807	-0.006761	-0.004959
14.6400	1032.482	58.932	102.705	75.377	-0.680	35.401	1965.580	-0.004125	-0.007189	-0.005276
14.6800	1083.127	62.863	108.898	80.462	-0.686	35.400	2061.996	-0.004400	-0.007623	-0.005632
14.7200	1141.363	67.742	115.309	85.505	-0.680	35.400	2172.861	-0.004742	-0.008072	-0.005985
14.7600	1171.690	70.342	118.640	88.466	-0.685	35.399	2230.597	-0.004924	-0.008305	-0.006193
14.8000	1207.563	74.063	123.113	91.914	-0.694	35.400	2298.889	-0.005184	-0.008618	-0.006434
14.8400	1227.160	75.204	125.439	93.928	-0.680	35.400	2336.197	-0.005264	-0.008781	-0.006575
14.8800	1254.602	77.874	129.359	97.388	-0.686	35.400	2388.439	-0.005451	-0.009055	-0.006817
14.9200	1269.825	78.818	130.487	98.655	-0.691	35.399	2417.421	-0.005517	-0.009134	-0.006906
14.9600	1269.344	79.441	131.423	99.266	-0.676	35.399	2416.506	-0.005561	-0.009200	-0.006949
15.0000	1271.899	79.553	131.477	99.475	-0.679	35.400	2421.370	-0.005569	-0.009203	-0.006963
15.0400	1257.292	79.233	131.273	98.556	-0.680	35.400	2393.560	-0.005546	-0.009189	-0.006899
15.0800	1224.890	76.776	128.824	96.247	-0.673	35.399	2331.877	-0.005374	-0.009018	-0.006737
15.1200	1230.857	77.610	129.179	96.594	-0.681	35.399	2343.235	-0.005433	-0.009043	-0.006762
15.1600	1175.237	73.580	124.679	92.427	-0.677	35.399	2237.349	-0.005151	-0.008728	-0.006470
15.2000	1128.122	70.425	120.127	88.756	-0.686	35.399	2147.655	-0.004930	-0.008409	-0.006213
15.2400	1104.708	68.103	117.487	86.508	-0.687	35.399	2103.081	-0.004767	-0.008224	-0.006056
15.2800	1052.364	64.129	111.609	82.242	-0.672	35.399	2003.431	-0.004489	-0.007813	-0.005757
15.3200	955.611	57.224	102.430	74.263	-0.673	35.399	1819.239	-0.004006	-0.007170	-0.005198
15.3600	939.741	55.488	99.748	72.442	-0.670	35.399	1789.026	-0.003884	-0.006982	-0.005071
15.4000	865.080	49.831	91.710	65.815	-0.669	35.399	1646.891	-0.003488	-0.006420	-0.004607
15.4400	785.760	44.299	82.946	58.996	-0.671	35.399	1495.886	-0.003101	-0.005806	-0.004130
15.4800	713.323	38.506	74.429	52.725	-0.674	35.398	1357.985	-0.002695	-0.005210	-0.003691
15.5200	659.882	34.599	67.977	47.806	-0.673	35.399	1256.247	-0.002422	-0.004758	-0.003346
15.5600	623.980	31.418	62.774	43.886	-0.666	35.398	1187.897	-0.002199	-0.004394	-0.003072
15.6000	541.188	25.439	52.921	36.551	-0.666	35.399	1030.283	-0.001781	-0.003704	-0.002559
15.6400	514.873	23.136	48.105	33.533	-0.670	35.399	980.186	-0.001620	-0.003367	-0.002347
15.6800	435.373	17.493	38.668	26.031	-0.676	35.398	828.838	-0.001225	-0.002707	-0.001822
15.7200	369.293	12.504	29.777	19.889	-0.680	35.398	703.039	-0.000875	-0.002084	-0.001392
15.7600	352.221	11.323	27.245	17.968	-0.671	35.398	670.538	-0.000793	-0.001907	-0.001258
15.8000	324.959	8.808	22.816	14.886	-0.668	35.398	618.639	-0.000617	-0.001597	-0.001042
15.8400	286.547	6.694	17.502	11.132	-0.680	35.398	545.511	-0.000469	-0.001225	-0.000779
15.8800	239.192	3.249	10.939	6.323	-0.686	35.398	455.360	-0.000227	-0.000766	-0.000443
15.9200	249.366	3.791	11.135	6.350	-0.676	35.398	474.730	-0.000265	-0.000779	-0.000445
15.9600	250.839	2.956	10.789	6.157	-0.676	35.398	477.533	-0.000207	-0.000755	-0.000431
16.0000	255.543	3.541	11.092	6.436	-0.669	35.398	486.488	-0.000248	-0.000776	-0.000450
16.0400	257.617	3.234	10.567	6.294	-0.673	35.397	490.437	-0.000226	-0.000740	-0.000441
16.0800	279.739	4.306	12.317	7.811	-0.682	35.397	532.551	-0.000301	-0.000862	-0.000547
16.1200	294.061	4.931	13.953	8.911	-0.679	35.398	559.816	-0.000345	-0.000977	-0.000624
16.1600	331.617	7.696	18.619	12.313	-0.684	35.397	631.313	-0.000539	-0.001303	-0.000862
16.2000	383.390	10.476	24.438	17.037	-0.668	35.398	729.876	-0.000733	-0.001711	-0.001193
16.2400	447.516	15.019	32.091	22.540	-0.681	35.397	851.955	-0.001051	-0.002246	-0.001578
16.2800	487.071	16.992	36.961	25.738	-0.692	35.398	927.258	-0.001189	-0.002587	-0.001802
16.3200	520.464	19.951	41.693	28.918	-0.683	35.398	990.829	-0.001397	-0.002919	-0.002024
16.3600	577.842	23.359	48.561	34.131	-0.686	35.397	1100.063	-0.001635	-0.003399	-0.002389
16.4000	667.457	30.123	59.430	41.581	-0.678	35.398	1270.666	-0.002109	-0.004160	-0.002911
16.4400	711.866	33.669	64.895	46.040	-0.672	35.397	1355.209	-0.002357	-0.004543	-0.003223
16.4800	781.402	39.311	73.630	52.237	-0.672	35.397	1487.589	-0.002752	-0.005154	-0.003657
16.5200	873.196	45.357	83.910	60.384	-0.682	35.397	1662.340	-0.003175	-0.005874	-0.004227
16.5600	903.448	48.704	88.699	63.663	-0.687	35.397	1719.933	-0.003409	-0.006209	-0.004456
16.6000	1004.303	55.308	98.633	72.069	-0.675	35.397	1911.936	-0.003872	-0.006904	-0.005045
16.6400	1023.495	58.014	102.059	74.526	-0.687	35.397	1948.471	-0.004061	-0.007144	-0.005217
16.6800	1075.313	62.335	109.325	80.185	-0.681	35.397	2047.119	-0.004363	-0.007653	-0.005613
16.7200	1116.475	65.952	112.861	83.573	-0.684	35.397	2125.483	-0.004617	-0.007900	-0.005850
16.7600	1160.494	69.130	117.500	87.370	-0.682	35.397	2209.282	-0.004839	-0.008225	-0.006116
16.8000	1199.342	73.133	123.992	91.984	-0.675	35.396	2283.239	-0.005119	-0.008679	-0.006439
16.8400	1246.697	76.429	127.144	95.496	-0.682	35.397	2373.390	-0.005350	-0.008900	-0.006685
16.8800	1251.280	77.708	128.301	96.581	-0.672	35.396	2382.116	-0.005440	-0.008981	-0.006761
16.9200	1279.879	79.567	131.395	99.532	-0.677	35.396	2436.562	-0.005570	-0.009198	-0.006967
16.9600	1271.569	79.622	132.128	99.600	-0.683	35.397	2420.740	-0.005574	-0.009249	-0.006972
17.0000	1270.381	79.609	131.905	99.363	-0.683	35.396	2418.480	-0.005573	-0.009233	-0.006955
17.0400	1251.596	78.609	131.327	98.250	-0.678	35.396	2382.717	-0.005503	-0.009193	-0.006877
17.0800	1258.479	79.305	131.587	99.018	-0.679	35.396	2395.821	-0.005551	-0.009211	-0.006931
17.1200	1209.366	76.036	127.916	95.123	-0.683	35.396	2302.322	-0.005323	-0.008954	-0.006659
17.1600	1157.563	72.024	122.987	91.411	-0.686	35.396	2203.703	-0.005042	-0.008609	-0.006399
17.2000	1148.200	71.705	121.737	89.674	-0.680	35.396	2185.879	-0.005019	-0.008522	-0.006277
17.2400	1083.173	66.576	115.422	84.922	-0.680	35.396	2062.082	-0.004660	-0.008080	-0.005945
17.2800	1021.631	62.211	109.282	80.018	-0.686	35.395	1944.923	-0.004355	-0.007650	-0.005601
17.3200	973.555	58.347	103.779	75.781	-0.681	35.396	1853.399	-0.004084	-0.007265	-0.005305
17.3600	920.956	54.471	98.538	70.956	-0.686	35.395	1753.263	-0.003813	-0.006898	-0.004967
17.4000	856.093	49.317	90.719	65.388	-0.684	35.395	1629.782	-0.003452	-0.006350	-0.004577
17.4400	795.394	44.858	84.226	60.133	-0.681	35.395	1514.225	-0.003140	-0.005896	-0.004209
17.4800	716.029	38.740	75.144	52.962	-0.697	35.395	1363.134	-0.002712	-0.005260	-0.003707
17.5200	663.835	34.709	68.552	48.184	-0.686	35.395	1263.771	-0.002430	-0.004799	-0.003373
17.5600	614.602	30.527	62.033	43.055	-0.691	35.395	1170.044	-0.002137	-0.004342	-0.003014
17.6000	538.453	25.273	52.867	36.231	-0.677	35.395	1025.076	-0.001769	-0.003701	-0.002536
17.6400	488.048	21.217	45.972	31.575	-0.673	35.395	929.117	-0.001485	-0.003218	-0.002210
17.6800	448.207	18.353	40.318	27.515	-0.680	35.395	853.271	-0.001285	-0.002822	-0.001926
17.7200	392.542	14.102	32.666	22.470	-0.679	35.395	747.299	-0.000987	-0.002287	-0.001573
17.7600	349.651	10.601	27.010	17.704	-0.675	35.395	665.646	-0.000742	-0.001891	-0.001239
17.8000	326.748	8.988	22.966	14.971	-0.684	35.395	622.044	-0.000629	-0.001608	-0.001048
17.8400	273.472	5.681	16.322	9.982	-0.682	35.394	520.620	-0.000398	-0.001143	-0.000699
17.8800	265.552	4.669	14.035	8.493	-0.673	35.394	505.543	-0.000327	-0.000982	-0.000594
17.9200	255.889	3.777	12.715	7.158	-0.686	35.395	487.146	-0.000264	-0.000890	-0.000501
17.9600	257.286	3.526	11.023	7.004	-0.681	35.395	489.807	-0.000247	-0.000772	-0.000490
18.0000	245.429	2.665	9.878	5.741	-0.677	35.395	467.234	-0.000187	-0.000691	-0.000402
18.0400	256.385	2.943	10.003	6.240	-0.672	35.394	488.091	-0.000206	-0.000700	-0.000437
18.0800	271.774	4.154	11.506	7.338	-0.667	35.394	517.387	-0.000291	-0.000805	-0.000514
18.1200	300.613	5.556	15.138	9.844	-0.683	35.394	572.290	-0.000389	-0.001060	-0.000689
18.1600	337.162	7.916	20.667	13.620	-0.678	35.394	641.870	-0.000554	-0.001447	-0.000953
18.2000	392.076	11.087	25.320	17.509	-0.673	35.394	746.412	-0.000776	-0.001772	-0.001226
18.2400	412.199	12.683	29.406	19.793	-0.667	35.393	784.721	-0.000888	-0.002058	-0.001386
18.2800	465.024	16.120	35.197	24.182	-0.683	35.394	885.286	-0.001128	-0.002464	-0.001693
18.3200	566.977	23.081	47.694	33.157	-0.673	35.393	1079.378	-0.001616	-0.003339	-0.002321
18.3600	593.833	24.800	50.831	35.715	-0.679	35.393	1130.505	-0.001736	-0.003558	-0.002500
18.4000	669.320	30.443	60.159	42.111	-0.668	35.393	1274.214	-0.002131	-0.004211	-0.002948
18.4400	726.368	34.558	66.710	47.263	-0.686	35.393	1382.818	-0.002419	-0.004670	-0.003308
18.4800	767.260	38.225	72.378	51.682	-0.679	35.393	1460.667	-0.002676	-0.005066	-0.003618
18.5200	852.006	44.161	81.572	59.009	-0.669	35.393	1622.000	-0.003091	-0.005710	-0.004131
18.5600	900.713	47.980	87.901	63.300	-0.673	35.393	1714.725	-0.003359	-0.006153	-0.004431
18.6000	983.459	54.251	96.748	70.958	-0.680	35.392	1872.253	-0.003798	-0.006772	-0.004967
18.6400	1043.588	59.712	104.249	76.672	-0.676	35.392	1986.723	-0.004180	-0.007297	-0.005367
18.6800	1075.974	62.463	107.963	80.087	-0.683	35.392	2048.378	-0.004372	-0.007557	-0.005606
18.7200	1129.069	66.646	114.112	84.797	-0.683	35.392	2149.458	-0.004665	-0.007988	-0.005936
18.7600	1175.056	70.384	118.956	88.797	-0.687	35.393	2237.005	-0.004927	-0.008327	-0.006216
18.8000	1204.031	73.091	122.976	92.122	-0.686	35.392	2292.166	-0.005116	-0.008608	-0.006449
18.8400	1242.955	76.192	126.388	95.400	-0.684	35.392	2366.266	-0.005333	-0.008847	-0.006678
18.8800	1249.522	77.581	128.754	96.927	-0.686	35.392	2378.769	-0.005431	-0.009013	-0.006785
18.9200	1274.649	79.468	130.572	99.003	-0.671	35.391	2426.605	-0.005563	-0.009140	-0.006930
18.9600	1273.853	79.901	131.713	99.626	-0.677	35.392	2425.089	-0.005593	-0.009220	-0.006974
19.0000	1278.211	79.968	131.835	100.194	-0.672	35.391	2433.386	-0.005598	-0.009228	-0.007014
19.0400	1262.987	79.553	131.738	99.349	-0.683	35.391	2404.404	-0.005569	-0.009222	-0.006954
19.0800	1238.882	77.890	129.814	97.791	-0.680	35.391	2358.513	-0.005452	-0.009087	-0.006845
19.1200	1216.339	76.706	128.029	95.539	-0.680	35.391	2315.598	-0.005369	-0.008962	-0.006688
19.1600	1173.238	73.355	124.157	92.276	-0.685	35.391	2233.543	-0.005135	-0.008691	-0.006459
19.2000	1149.523	71.688	121.338	89.926	-0.679	35.391	2188.396	-0.005018	-0.008494	-0.006295
19.2400	1100.681	67.922	116.521	86.214	-0.675	35.391	2095.413	-0.004755	-0.008156	-0.006035
19.2800	1053.957	64.700	112.226	82.506	-0.679	35.390	2006.464	-0.004529	-0.007856	-0.005775
19.3200	988.494	59.683	105.443	77.114	-0.680	35.390	1881.838	-0.004178	-0.007381	-0.005398
19.3600	917.890	54.442	98.166	70.986	-0.671	35.390	1747.427	-0.003811	-0.006872	-0.004969
19.4000	865.982	50.080	91.478	66.039	-0.675	35.389	1648.607	-0.003506	-0.006403	-0.004623
19.4400	754.501	42.407	79.794	56.809	-0.672	35.390	1436.377	-0.002968	-0.005586	-0.003977
19.4800	737.775	40.297	77.237	55.254	-0.679	35.389	1404.533	-0.002821	-0.005407	-0.003868
19.5200	656.997	34.600	68.044	47.778	-0.680	35.390	1250.753	-0.002422	-0.004763	-0.003344
19.5600	616.646	31.154	62.183	43.705	-0.680	35.389	1173.935	-0.002181	-0.004353	-0.003059
19.6000	543.412	25.885	53.611	37.191	-0.666	35.389	1034.517	-0.001812	-0.003753	-0.002603
19.6400	463.371	19.966	42.837	29.724	-0.672	35.390	882.139	-0.001398	-0.002999	-0.002081
19.6800	439.942	18.133	39.517	26.795	-0.672	35.389	837.536	-0.001269	-0.002766	-0.001876
19.7200	385.674	13.850	31.883	21.900	-0.681	35.389	734.224	-0.000970	-0.002232	-0.001533
19.7600	343.114	11.225	26.310	17.648	-0.670	35.389	653.200	-0.000786	-0.001842	-0.001235
19.8000	333.465	9.698	23.874	15.885	-0.671	35.389	634.832	-0.000679	-0.001671	-0.001112
19.8400	276.913	6.126	16.194	10.536	-0.671	35.388	527.172	-0.000429	-0.001134	-0.000737
19.8800	271.669	5.445	15.191	9.594	-0.680	35.389	517.187	-0.000381	-0.001063	-0.000672
19.9200	250.809	3.918	11.451	7.019	-0.679	35.388	477.476	-0.000274	-0.000802	-0.000491
19.9600	259.120	3.917	11.325	6.991	-0.671	35.388	493.298	-0.000274	-0.000793	-0.000489
