# Supplementary material for: Evaluation of a Cold-Mixed High-Performance Polyurethane Mixture
Source: Hindawi journal article supplement (doi:10.1155/2019/1507971), 2019-11-07
Supplement: f1 [file 1507971.f1.zip › 1507971.f1/dynamic modulus data/PUM/specimen1/temp35/zhs-1-35_1Hz.csv]

Test Information
****************
Project name	zhs
Operator name	1
Target test temperature	35
Target confining stress	0
Average dynamic strain range from 75 to 125 micro-strain
Contact stress	5
Initial modulus	1000
Axial gauge length	70
Comments
Specimen information
********************
Identification	zhs-1-35
Dimensions	Point 1	Point 2	Point 3	Point 4	Point 5	Point 6	Average	Std Dev.
Diameter (mm)	49.2	49.2	49.3				49.23	0.058
Height (mm)	101.3	101.2	101.3				101.27	0.058
Cross-sectional area (mm�)	1903.7
Conditioning time
Properties/Comments
Test Data	1Hz
*********
Test date and time	Tue	Apr 2	2019	1:19 PM
Dynamic modulus (MPa)	10735
Phase angle (Degrees)	4.00
Average temperature (�C)	35.4
Average confining pressure (kPa)	-0.7
Average micro-strain	98
Load drift (%)	0.3
Load standard error (%)	1.7
Average deformation drift (%)	-2.6
Average deformation standard error (%)	2.3
Deformation uniformity (%)	19.2
Phase uniformity (Degrees)	0.4
Conditioning Cycles
Time (sec)	Axial stress (kPa)	Axial micro-strain #1	Axial micro-strain #2	Axial micro-strain #3	Confining pressure (kPa)	Temperature (�C)	Load (N)	Displacement #1 (mm)	Displacement #2 (mm)	Displacement #3 (mm)
0.0000	248.164	-0.238	3.880	0.347	-0.690	35.316	472.441	0.000017	-0.000272	-0.000024
0.0200	248.239	-0.600	3.372	0.042	-0.687	35.317	472.584	0.000042	-0.000236	-0.000003
0.0400	252.868	-1.114	3.384	0.028	-0.696	35.317	481.396	0.000078	-0.000237	-0.000002
0.0600	271.774	-0.111	4.405	1.113	-0.700	35.317	517.387	0.000008	-0.000308	-0.000078
0.0800	308.533	2.401	8.644	4.186	-0.710	35.317	587.368	-0.000168	-0.000605	-0.000293
0.1000	336.170	3.860	12.084	6.490	-0.702	35.318	639.982	-0.000270	-0.000846	-0.000454
0.1200	360.381	5.072	15.373	8.633	-0.700	35.317	686.073	-0.000355	-0.001076	-0.000604
0.1400	410.997	8.516	21.137	12.857	-0.702	35.317	782.433	-0.000596	-0.001480	-0.000900
0.1600	412.665	8.724	21.604	13.258	-0.693	35.317	785.608	-0.000611	-0.001512	-0.000928
0.1800	508.141	14.323	32.531	21.348	-0.695	35.317	967.369	-0.001003	-0.002277	-0.001494
0.2000	560.860	18.090	39.274	25.794	-0.702	35.316	1067.734	-0.001266	-0.002749	-0.001806
0.2200	593.126	20.606	42.974	28.781	-0.696	35.317	1129.160	-0.001442	-0.003008	-0.002015
0.2400	678.683	26.539	53.473	35.813	-0.696	35.317	1292.038	-0.001858	-0.003743	-0.002507
0.2600	708.725	28.484	57.352	39.008	-0.700	35.318	1349.230	-0.001994	-0.004015	-0.002731
0.2800	756.350	32.238	62.788	43.276	-0.707	35.318	1439.896	-0.002257	-0.004395	-0.003029
0.3000	806.485	36.112	69.187	47.793	-0.710	35.318	1535.339	-0.002528	-0.004843	-0.003345
0.3200	861.068	40.464	75.806	52.601	-0.695	35.318	1639.252	-0.002832	-0.005306	-0.003682
0.3400	879.778	41.462	78.241	54.422	-0.699	35.318	1674.871	-0.002902	-0.005477	-0.003810
0.3600	913.983	44.358	82.369	58.061	-0.707	35.318	1739.988	-0.003105	-0.005766	-0.004064
0.3800	951.013	47.466	86.704	61.227	-0.710	35.317	1810.484	-0.003323	-0.006069	-0.004286
0.4000	986.810	50.374	91.273	64.635	-0.703	35.317	1878.633	-0.003526	-0.006389	-0.004524
0.4200	1001.764	51.414	92.784	65.899	-0.699	35.317	1907.101	-0.003599	-0.006495	-0.004613
0.4400	1032.692	53.943	96.459	69.053	-0.703	35.317	1965.981	-0.003776	-0.006752	-0.004834
0.4600	1042.115	55.042	98.578	70.248	-0.699	35.318	1983.919	-0.003853	-0.006900	-0.004917
0.4800	1035.157	54.569	98.207	69.957	-0.700	35.318	1970.673	-0.003820	-0.006875	-0.004897
0.5000	1055.114	55.905	99.788	71.529	-0.707	35.318	2008.667	-0.003913	-0.006985	-0.005007
0.5200	1037.246	55.614	99.031	70.889	-0.699	35.318	1974.649	-0.003893	-0.006932	-0.004962
0.5400	1016.552	54.153	98.096	69.568	-0.703	35.318	1935.253	-0.003791	-0.006867	-0.004870
0.5600	1000.531	52.747	97.064	68.358	-0.711	35.318	1904.755	-0.003692	-0.006795	-0.004785
0.5800	971.572	50.790	93.790	66.565	-0.700	35.318	1849.623	-0.003555	-0.006565	-0.004660
0.6000	945.092	49.107	91.491	64.120	-0.710	35.318	1799.212	-0.003437	-0.006404	-0.004488
0.6200	910.241	46.647	87.680	61.271	-0.703	35.318	1732.864	-0.003265	-0.006138	-0.004289
0.6400	862.841	43.075	82.616	57.323	-0.691	35.318	1642.628	-0.003015	-0.005783	-0.004013
0.6600	806.905	39.045	76.631	52.863	-0.710	35.318	1536.140	-0.002733	-0.005364	-0.003700
0.6800	777.209	37.169	73.326	50.198	-0.695	35.318	1479.607	-0.002602	-0.005133	-0.003514
0.7000	730.411	33.376	67.812	46.068	-0.706	35.318	1390.514	-0.002336	-0.004747	-0.003225
0.7200	645.816	27.498	58.260	38.841	-0.695	35.318	1229.467	-0.001925	-0.004078	-0.002719
0.7400	622.116	25.427	54.657	36.534	-0.698	35.318	1184.349	-0.001780	-0.003826	-0.002557
0.7600	584.861	23.274	50.513	33.268	-0.688	35.318	1113.424	-0.001629	-0.003536	-0.002329
0.7800	534.891	19.395	44.186	28.738	-0.691	35.317	1018.295	-0.001358	-0.003093	-0.002012
0.8000	478.955	15.576	37.263	23.806	-0.697	35.318	911.808	-0.001090	-0.002608	-0.001666
0.8200	433.930	12.214	31.004	19.515	-0.702	35.318	826.092	-0.000855	-0.002170	-0.001366
0.8400	387.492	9.170	25.235	15.371	-0.705	35.317	737.686	-0.000642	-0.001766	-0.001076
0.8600	356.624	6.598	20.792	12.090	-0.701	35.318	678.921	-0.000462	-0.001455	-0.000846
0.8800	318.948	4.055	15.771	8.619	-0.696	35.318	607.195	-0.000284	-0.001104	-0.000603
0.9000	292.693	2.277	11.438	5.462	-0.701	35.318	557.213	-0.000159	-0.000801	-0.000382
0.9200	264.680	0.570	7.336	2.629	-0.697	35.318	503.883	-0.000040	-0.000513	-0.000184
0.9400	259.105	-0.404	6.250	1.781	-0.692	35.318	493.269	0.000028	-0.000437	-0.000125
0.9600	243.866	-1.684	3.277	0.139	-0.691	35.318	464.258	0.000118	-0.000229	-0.000010
0.9800	240.289	-1.296	3.057	-0.501	-0.706	35.318	457.449	0.000091	-0.000214	0.000035
1.0000	241.582	-1.405	2.573	-0.569	-0.705	35.318	459.909	0.000098	-0.000180	0.000040
1.0200	241.777	-1.964	2.644	-0.929	-0.705	35.318	460.281	0.000137	-0.000185	0.000065
1.0400	249.772	-1.379	2.710	-0.608	-0.706	35.319	475.502	0.000097	-0.000190	0.000043
1.0600	269.670	-0.390	4.254	0.891	-0.714	35.319	513.382	0.000027	-0.000298	-0.000062
1.0800	304.310	1.761	8.267	3.755	-0.704	35.319	579.329	-0.000123	-0.000579	-0.000263
1.1000	324.028	2.704	10.484	5.545	-0.712	35.319	616.865	-0.000189	-0.000734	-0.000388
1.1200	368.707	5.544	15.701	9.287	-0.703	35.319	701.923	-0.000388	-0.001099	-0.000650
1.1400	399.064	7.417	20.091	11.868	-0.700	35.319	759.716	-0.000519	-0.001406	-0.000831
1.1600	457.224	11.297	27.052	16.899	-0.701	35.318	870.438	-0.000791	-0.001894	-0.001183
1.1800	505.751	14.130	32.639	21.390	-0.709	35.318	962.820	-0.000989	-0.002285	-0.001497
1.2000	548.402	17.701	37.965	24.779	-0.708	35.319	1044.016	-0.001239	-0.002658	-0.001734
1.2200	595.441	20.941	44.323	29.198	-0.703	35.319	1133.566	-0.001466	-0.003103	-0.002044
1.2400	654.848	24.621	51.134	34.199	-0.703	35.319	1246.662	-0.001723	-0.003579	-0.002394
1.2600	709.055	28.637	57.641	39.103	-0.700	35.319	1349.859	-0.002005	-0.004035	-0.002737
1.2800	750.609	31.864	62.472	42.749	-0.706	35.319	1428.967	-0.002230	-0.004373	-0.002992
1.3000	798.174	35.501	68.430	47.291	-0.696	35.319	1519.518	-0.002485	-0.004790	-0.003310
1.3200	848.669	39.354	74.498	51.891	-0.700	35.319	1615.648	-0.002755	-0.005215	-0.003632
1.3400	890.343	42.547	80.179	56.058	-0.691	35.319	1694.984	-0.002978	-0.005613	-0.003924
1.3600	922.609	44.842	83.525	58.632	-0.696	35.319	1756.411	-0.003139	-0.005847	-0.004104
1.3800	958.827	47.731	87.899	62.075	-0.702	35.319	1825.361	-0.003341	-0.006153	-0.004345
1.4000	993.393	50.443	91.821	65.414	-0.691	35.319	1891.165	-0.003531	-0.006427	-0.004579
1.4200	1020.880	52.538	94.961	67.801	-0.692	35.318	1943.493	-0.003678	-0.006647	-0.004746
1.4400	1018.641	53.235	95.812	68.245	-0.714	35.319	1939.230	-0.003726	-0.006707	-0.004777
1.4600	1040.266	54.640	98.096	70.125	-0.702	35.319	1980.400	-0.003825	-0.006867	-0.004909
1.4800	1047.976	55.306	98.923	71.028	-0.700	35.319	1995.077	-0.003871	-0.006925	-0.004972
1.5000	1038.553	55.278	98.592	70.637	-0.696	35.319	1977.139	-0.003869	-0.006901	-0.004945
1.5200	1038.688	55.460	98.796	71.001	-0.692	35.319	1977.396	-0.003882	-0.006916	-0.004970
1.5400	1024.156	54.401	98.290	69.987	-0.691	35.319	1949.730	-0.003808	-0.006880	-0.004899
1.5600	1014.463	53.609	97.450	69.498	-0.699	35.319	1931.276	-0.003753	-0.006822	-0.004865
1.5800	990.041	52.455	95.896	67.994	-0.690	35.319	1884.785	-0.003672	-0.006713	-0.004760
1.6000	944.400	48.998	91.105	64.066	-0.702	35.319	1797.895	-0.003430	-0.006377	-0.004485
1.6200	899.420	45.731	86.607	60.589	-0.698	35.319	1712.265	-0.003201	-0.006063	-0.004241
1.6400	863.833	42.909	82.409	57.823	-0.696	35.320	1644.516	-0.003004	-0.005769	-0.004048
1.6600	812.826	39.742	77.334	53.489	-0.697	35.320	1547.413	-0.002782	-0.005413	-0.003744
1.6800	765.517	36.321	72.324	49.528	-0.694	35.320	1457.348	-0.002542	-0.005063	-0.003467
1.7000	730.816	33.362	67.799	46.360	-0.702	35.319	1391.287	-0.002335	-0.004746	-0.003245
1.7200	674.896	29.414	60.959	41.190	-0.702	35.320	1284.828	-0.002059	-0.004267	-0.002883
1.7400	634.875	26.611	56.486	38.133	-0.702	35.320	1208.639	-0.001863	-0.003954	-0.002669
1.7600	571.861	22.276	48.932	32.049	-0.699	35.320	1088.676	-0.001559	-0.003425	-0.002243
1.7800	519.096	18.077	42.408	27.752	-0.703	35.320	988.226	-0.001265	-0.002969	-0.001943
1.8000	485.448	15.784	38.047	24.445	-0.694	35.320	924.168	-0.001105	-0.002663	-0.001711
1.8200	412.470	11.172	28.609	18.178	-0.699	35.320	785.236	-0.000782	-0.002003	-0.001272
1.8400	389.596	9.351	25.306	15.526	-0.705	35.320	741.692	-0.000655	-0.001771	-0.001087
1.8600	345.714	6.085	19.594	11.409	-0.698	35.320	658.150	-0.000426	-0.001372	-0.000799
1.8800	318.768	4.112	15.481	8.395	-0.698	35.321	606.852	-0.000288	-0.001084	-0.000588
1.9000	319.684	3.958	15.276	8.103	-0.710	35.320	608.597	-0.000277	-0.001069	-0.000567
1.9200	268.993	0.958	8.695	3.685	-0.699	35.320	512.094	-0.000067	-0.000609	-0.000258
1.9400	227.996	-1.920	2.257	-0.594	-0.707	35.320	434.046	0.000134	-0.000158	0.000042
1.9600	244.647	-0.780	3.137	-0.332	-0.712	35.320	465.746	0.000055	-0.000220	0.000023
1.9800	240.845	-1.406	2.795	-0.387	-0.712	35.320	458.508	0.000098	-0.000196	0.000027
2.0000	238.666	-1.781	2.367	-0.708	-0.708	35.320	454.359	0.000125	-0.000166	0.000050
2.0200	240.905	-1.643	1.722	-0.777	-0.720	35.320	458.622	0.000115	-0.000121	0.000054
2.0400	255.814	-1.224	3.151	-0.027	-0.703	35.320	487.003	0.000086	-0.000221	0.000002
2.0600	272.059	-0.098	4.568	1.293	-0.699	35.321	517.931	0.000007	-0.000320	-0.000091
2.0800	307.917	2.302	8.946	4.254	-0.693	35.320	586.195	-0.000161	-0.000626	-0.000298
2.1000	337.102	3.389	11.959	6.518	-0.699	35.320	641.756	-0.000237	-0.000837	-0.000456
2.1200	377.378	6.264	17.144	10.092	-0.706	35.320	718.431	-0.000439	-0.001200	-0.000706
2.1400	425.439	8.863	22.788	14.207	-0.702	35.321	809.927	-0.000620	-0.001595	-0.000995
2.1600	438.830	9.876	24.397	15.691	-0.710	35.320	835.419	-0.000691	-0.001708	-0.001098
2.1800	515.429	15.048	33.810	22.345	-0.714	35.320	981.245	-0.001053	-0.002367	-0.001564
2.2000	559.493	18.174	39.398	25.893	-0.716	35.320	1065.130	-0.001272	-0.002758	-0.001813
2.2200	606.517	21.344	45.466	30.312	-0.711	35.320	1154.652	-0.001494	-0.003183	-0.002122
2.2400	653.691	24.509	51.121	34.324	-0.711	35.321	1244.459	-0.001716	-0.003578	-0.002403
2.2600	706.756	28.747	57.407	39.037	-0.713	35.321	1345.482	-0.002012	-0.004018	-0.002733
2.2800	749.362	31.848	63.023	43.012	-0.708	35.321	1426.592	-0.002229	-0.004412	-0.003011
2.3000	777.630	33.946	66.778	45.847	-0.695	35.321	1480.408	-0.002376	-0.004674	-0.003209
2.3200	846.670	38.935	74.345	51.585	-0.707	35.321	1611.843	-0.002725	-0.005204	-0.003611
2.3400	882.077	41.631	78.928	55.157	-0.707	35.320	1679.249	-0.002914	-0.005525	-0.003861
2.3600	916.027	44.552	82.879	58.131	-0.708	35.320	1743.879	-0.003119	-0.005802	-0.004069
2.3800	936.691	46.077	86.014	60.381	-0.696	35.321	1783.218	-0.003225	-0.006021	-0.004227
2.4000	1007.429	51.359	93.320	66.564	-0.714	35.321	1917.887	-0.003595	-0.006532	-0.004659
2.4200	1004.303	51.816	93.665	66.799	-0.714	35.321	1911.936	-0.003627	-0.006557	-0.004676
2.4400	1016.131	52.859	95.468	67.773	-0.704	35.322	1934.452	-0.003700	-0.006683	-0.004744
2.4600	1055.671	55.904	99.278	71.499	-0.720	35.321	2009.726	-0.003913	-0.006949	-0.005005
2.4800	1077.041	57.624	101.647	73.569	-0.700	35.321	2050.409	-0.004034	-0.007115	-0.005150
2.5000	1056.677	56.653	101.728	72.859	-0.700	35.321	2011.642	-0.003966	-0.007121	-0.005100
2.5200	1029.386	54.961	99.583	71.250	-0.706	35.321	1959.686	-0.003847	-0.006971	-0.004987
2.5400	1010.585	53.344	97.722	69.428	-0.691	35.321	1923.895	-0.003734	-0.006841	-0.004860
2.5600	1001.418	52.817	97.133	68.817	-0.698	35.321	1906.443	-0.003697	-0.006799	-0.004817
2.5800	978.951	51.510	94.934	67.231	-0.707	35.321	1863.670	-0.003606	-0.006645	-0.004706
2.6000	933.069	48.023	90.515	63.522	-0.703	35.321	1776.323	-0.003362	-0.006336	-0.004447
2.6200	916.267	46.716	88.273	61.893	-0.697	35.321	1744.337	-0.003270	-0.006179	-0.004333
2.6400	854.260	42.284	81.845	57.045	-0.696	35.322	1626.291	-0.002960	-0.005729	-0.003993
2.6600	807.010	39.327	76.878	53.045	-0.681	35.322	1536.341	-0.002753	-0.005381	-0.003713
2.6800	779.824	36.851	73.355	50.319	-0.696	35.321	1484.585	-0.002580	-0.005135	-0.003522
2.7000	726.248	33.350	67.342	45.844	-0.695	35.321	1382.589	-0.002334	-0.004714	-0.003209
2.7200	654.848	28.511	59.223	39.744	-0.700	35.322	1246.662	-0.001996	-0.004146	-0.002782
2.7400	622.056	25.802	55.095	36.689	-0.701	35.322	1184.235	-0.001806	-0.003857	-0.002568
2.7600	569.952	21.761	48.931	32.255	-0.709	35.322	1085.043	-0.001523	-0.003425	-0.002258
2.7800	524.131	18.867	42.945	28.446	-0.700	35.322	997.810	-0.001321	-0.003006	-0.001991
2.8000	474.838	15.352	36.657	23.598	-0.699	35.322	903.969	-0.001075	-0.002566	-0.001652
2.8200	432.427	12.184	31.414	19.847	-0.702	35.322	823.231	-0.000853	-0.002199	-0.001389
2.8400	392.647	9.142	25.884	15.830	-0.699	35.322	747.499	-0.000640	-0.001812	-0.001108
2.8600	341.475	5.932	19.126	11.299	-0.698	35.323	650.082	-0.000415	-0.001339	-0.000791
2.8800	324.328	5.028	16.320	9.133	-0.695	35.322	617.437	-0.000352	-0.001142	-0.000639
2.9000	289.643	2.483	11.478	5.783	-0.705	35.322	551.405	-0.000174	-0.000803	-0.000405
2.9200	269.114	0.625	8.187	3.519	-0.706	35.322	512.323	-0.000044	-0.000573	-0.000246
2.9400	251.305	-0.265	4.845	1.362	-0.719	35.322	478.420	0.000019	-0.000339	-0.000095
2.9600	248.405	-0.586	4.568	0.919	-0.722	35.322	472.898	0.000041	-0.000320	-0.000064
2.9800	236.682	-1.767	2.723	-0.651	-0.703	35.322	450.583	0.000124	-0.000191	0.000046
3.0000	239.357	-1.587	2.338	-0.705	-0.707	35.322	455.675	0.000111	-0.000164	0.000049
3.0200	251.500	-1.379	2.960	0.014	-0.708	35.323	478.792	0.000096	-0.000207	-0.000001
3.0400	252.492	-1.058	3.220	-0.111	-0.703	35.323	480.680	0.000074	-0.000225	0.000008
3.0600	275.155	-0.084	4.789	1.499	-0.706	35.323	523.825	0.000006	-0.000335	-0.000105
3.0800	318.497	2.192	9.740	5.158	-0.703	35.323	606.337	-0.000153	-0.000682	-0.000361
3.1000	326.958	3.013	11.547	6.435	-0.701	35.322	622.444	-0.000211	-0.000808	-0.000450
3.1200	371.517	5.765	16.513	9.845	-0.699	35.322	707.273	-0.000404	-0.001156	-0.000689
3.1400	417.098	8.489	22.087	13.858	-0.703	35.323	794.048	-0.000594	-0.001546	-0.000970
3.1600	464.573	11.698	27.551	17.955	-0.704	35.323	884.428	-0.000819	-0.001929	-0.001257
3.1800	496.463	13.837	31.869	20.862	-0.706	35.323	945.139	-0.000969	-0.002231	-0.001460
3.2000	555.210	17.605	39.078	25.725	-0.703	35.323	1056.976	-0.001232	-0.002735	-0.001801
3.2200	583.538	19.731	42.989	28.406	-0.702	35.323	1110.907	-0.001381	-0.003009	-0.001988
3.2400	634.124	23.206	48.725	32.949	-0.701	35.324	1207.209	-0.001624	-0.003411	-0.002306
3.2600	702.804	28.207	56.939	39.063	-0.701	35.323	1337.957	-0.001975	-0.003986	-0.002734
3.2800	739.353	31.208	62.169	42.428	-0.710	35.323	1407.537	-0.002185	-0.004352	-0.002970
3.3000	793.816	34.932	68.127	47.278	-0.716	35.323	1511.221	-0.002445	-0.004769	-0.003309
3.3200	841.726	38.727	74.014	51.502	-0.707	35.323	1602.430	-0.002711	-0.005181	-0.003605
3.3400	888.600	42.383	79.313	55.796	-0.714	35.322	1691.666	-0.002967	-0.005552	-0.003906
3.3600	937.382	45.702	85.245	60.119	-0.707	35.322	1784.534	-0.003199	-0.005967	-0.004208
3.3800	954.154	47.468	87.638	61.853	-0.713	35.323	1816.463	-0.003323	-0.006135	-0.004330
3.4000	998.983	51.426	92.523	65.968	-0.716	35.323	1901.808	-0.003600	-0.006477	-0.004618
3.4200	996.699	51.400	93.321	66.064	-0.704	35.324	1897.459	-0.003598	-0.006532	-0.004624
3.4400	1018.731	52.983	95.620	68.316	-0.705	35.324	1939.402	-0.003709	-0.006693	-0.004782
3.4600	1040.853	54.973	98.111	70.362	-0.708	35.323	1981.516	-0.003848	-0.006868	-0.004925
3.4800	1038.824	54.988	98.180	70.569	-0.708	35.323	1977.654	-0.003849	-0.006873	-0.004940
3.5000	1045.346	56.043	99.378	71.029	-0.707	35.324	1990.070	-0.003923	-0.006956	-0.004972
3.5200	1038.974	55.348	99.061	71.069	-0.707	35.324	1977.940	-0.003874	-0.006934	-0.004975
3.5400	1017.814	54.124	97.958	70.124	-0.699	35.323	1937.656	-0.003789	-0.006857	-0.004909
3.5600	1009.909	53.456	97.395	69.332	-0.698	35.324	1922.607	-0.003742	-0.006818	-0.004853
3.5800	968.731	50.860	93.807	66.232	-0.700	35.323	1844.215	-0.003560	-0.006566	-0.004636
3.6000	932.753	47.814	90.131	63.413	-0.708	35.323	1775.723	-0.003347	-0.006309	-0.004439
3.6200	912.014	46.812	87.584	61.561	-0.698	35.324	1736.240	-0.003277	-0.006131	-0.004309
3.6400	869.754	43.966	83.154	58.255	-0.694	35.325	1655.788	-0.003078	-0.005821	-0.004078
3.6600	817.275	40.046	78.050	54.004	-0.699	35.324	1555.882	-0.002803	-0.005463	-0.003780
3.6800	767.576	36.544	72.352	49.736	-0.706	35.324	1461.267	-0.002558	-0.005065	-0.003482
3.7000	712.948	32.460	65.927	45.345	-0.715	35.323	1357.269	-0.002272	-0.004615	-0.003174
3.7200	685.070	30.418	62.610	42.416	-0.699	35.323	1304.197	-0.002129	-0.004383	-0.002969
3.7400	631.930	26.956	56.446	37.843	-0.707	35.323	1203.032	-0.001887	-0.003951	-0.002649
3.7600	589.309	23.274	50.790	33.781	-0.710	35.323	1121.893	-0.001629	-0.003555	-0.002365
3.7800	516.436	18.410	42.271	27.516	-0.710	35.324	983.162	-0.001289	-0.002959	-0.001926
3.8000	474.958	15.535	36.961	23.666	-0.703	35.324	904.198	-0.001087	-0.002587	-0.001657
3.8200	432.833	12.115	31.195	19.986	-0.710	35.324	824.003	-0.000848	-0.002184	-0.001399
3.8400	392.602	9.266	25.718	15.956	-0.702	35.324	747.414	-0.000649	-0.001800	-0.001117
3.8600	356.489	6.943	20.971	12.480	-0.708	35.324	678.663	-0.000486	-0.001468	-0.000874
3.8800	327.394	5.238	17.037	9.662	-0.706	35.324	623.274	-0.000367	-0.001193	-0.000676
3.9000	299.712	2.693	13.155	6.728	-0.704	35.324	570.574	-0.000189	-0.000921	-0.000471
3.9200	281.362	1.471	9.521	4.615	-0.705	35.324	535.641	-0.000103	-0.000666	-0.000323
3.9400	248.495	-0.168	4.955	1.294	-0.712	35.324	473.070	0.000012	-0.000347	-0.000091
3.9600	243.956	-0.599	4.252	0.541	-0.716	35.324	464.430	0.000042	-0.000298	-0.000038
3.9800	240.665	-1.168	3.276	-0.097	-0.721	35.324	458.164	0.000082	-0.000229	0.000007
4.0000	232.054	-1.976	1.476	-0.915	-0.730	35.324	441.771	0.000138	-0.000103	0.000064
4.0200	242.033	-1.419	1.983	-0.789	-0.711	35.325	460.768	0.000099	-0.000139	0.000055
4.0400	245.925	-1.212	2.148	-0.221	-0.722	35.325	468.178	0.000085	-0.000150	0.000015
4.0600	276.628	0.179	4.831	1.683	-0.727	35.325	526.628	-0.000013	-0.000338	-0.000118
4.0800	302.477	1.458	8.117	3.908	-0.716	35.324	575.838	-0.000102	-0.000568	-0.000274
4.1000	337.779	3.918	12.402	6.838	-0.710	35.325	643.044	-0.000274	-0.000868	-0.000479
4.1200	363.672	5.252	15.563	9.119	-0.705	35.324	692.339	-0.000368	-0.001089	-0.000638
4.1400	415.475	8.419	21.742	13.844	-0.697	35.325	790.958	-0.000589	-0.001522	-0.000969
4.1600	457.630	11.394	26.942	17.386	-0.698	35.325	871.210	-0.000798	-0.001886	-0.001217
4.1800	491.760	13.612	31.292	20.653	-0.701	35.325	936.184	-0.000953	-0.002190	-0.001446
4.2000	551.062	17.551	38.503	25.461	-0.701	35.325	1049.080	-0.001229	-0.002695	-0.001782
4.2200	601.227	20.925	44.446	30.016	-0.706	35.326	1144.581	-0.001465	-0.003111	-0.002101
4.2400	649.964	24.718	50.350	34.283	-0.702	35.326	1237.364	-0.001730	-0.003524	-0.002400
4.2600	706.230	28.985	57.490	39.202	-0.698	35.325	1344.481	-0.002029	-0.004024	-0.002744
4.2800	749.948	31.791	62.897	43.317	-0.707	35.325	1427.708	-0.002225	-0.004403	-0.003032
4.3000	791.697	34.808	67.702	47.307	-0.726	35.325	1507.187	-0.002437	-0.004739	-0.003311
4.3200	838.285	38.616	73.562	51.571	-0.700	35.325	1595.879	-0.002703	-0.005149	-0.003610
4.3400	874.503	41.466	78.036	54.669	-0.705	35.325	1664.829	-0.002903	-0.005463	-0.003827
4.3600	919.859	44.715	83.001	58.648	-0.714	35.325	1751.175	-0.003130	-0.005810	-0.004105
4.3800	951.584	47.397	86.910	61.882	-0.710	35.326	1811.571	-0.003318	-0.006084	-0.004332
4.4000	982.377	49.748	90.897	64.786	-0.712	35.326	1870.193	-0.003482	-0.006363	-0.004535
4.4200	1008.271	52.191	94.010	67.454	-0.705	35.326	1919.489	-0.003653	-0.006581	-0.004722
4.4400	1029.521	53.998	96.474	69.191	-0.708	35.326	1959.944	-0.003780	-0.006753	-0.004843
4.4600	1035.232	54.501	97.135	70.150	-0.710	35.326	1970.816	-0.003815	-0.006799	-0.004911
4.4800	1046.007	55.932	99.224	71.153	-0.714	35.325	1991.329	-0.003915	-0.006946	-0.004981
4.5000	1041.063	55.433	98.838	71.082	-0.704	35.326	1981.916	-0.003880	-0.006919	-0.004976
4.5200	1038.283	55.209	98.674	71.195	-0.709	35.326	1976.624	-0.003865	-0.006907	-0.004984
4.5400	1022.939	54.570	98.096	70.305	-0.721	35.326	1947.412	-0.003820	-0.006867	-0.004921
4.5600	1006.798	53.735	97.408	69.456	-0.714	35.326	1916.685	-0.003761	-0.006819	-0.004862
4.5800	977.598	51.417	94.879	66.983	-0.710	35.326	1861.095	-0.003599	-0.006642	-0.004689
4.6000	950.186	49.818	91.778	65.107	-0.712	35.326	1808.910	-0.003487	-0.006424	-0.004557
4.6200	908.693	46.813	87.571	61.561	-0.703	35.327	1729.918	-0.003277	-0.006130	-0.004309
4.6400	874.518	44.508	83.898	58.632	-0.707	35.327	1664.858	-0.003116	-0.005873	-0.004104
4.6600	826.502	40.504	78.875	54.576	-0.707	35.326	1573.448	-0.002835	-0.005521	-0.003820
4.6800	779.043	37.198	73.163	50.793	-0.704	35.327	1483.097	-0.002604	-0.005121	-0.003555
4.7000	718.749	33.042	66.807	45.470	-0.708	35.326	1368.313	-0.002313	-0.004676	-0.003183
4.7200	688.917	30.695	63.158	42.692	-0.704	35.326	1311.522	-0.002149	-0.004421	-0.002988
4.7400	623.814	25.750	55.606	37.496	-0.702	35.326	1187.582	-0.001803	-0.003892	-0.002625
4.7600	574.551	22.580	49.167	32.798	-0.716	35.327	1093.798	-0.001581	-0.003442	-0.002296
4.7800	527.482	19.451	43.498	28.475	-0.721	35.327	1004.190	-0.001362	-0.003045	-0.001993
4.8000	481.450	15.742	37.924	24.502	-0.716	35.326	916.557	-0.001102	-0.002655	-0.001715
4.8200	430.459	12.336	31.042	19.932	-0.714	35.327	819.483	-0.000864	-0.002173	-0.001395
4.8400	391.881	9.572	25.580	16.024	-0.718	35.327	746.040	-0.000670	-0.001791	-0.001122
4.8600	354.565	7.139	20.998	12.551	-0.709	35.327	675.001	-0.000500	-0.001470	-0.000879
4.8800	324.899	4.752	16.623	9.537	-0.711	35.327	618.525	-0.000333	-0.001164	-0.000668
4.9000	285.840	1.887	10.954	5.572	-0.719	35.327	544.167	-0.000132	-0.000767	-0.000390
4.9200	272.180	1.429	8.476	3.964	-0.711	35.327	518.160	-0.000100	-0.000593	-0.000277
4.9400	247.849	-0.320	5.231	1.196	-0.717	35.326	471.840	0.000022	-0.000366	-0.000084
4.9600	246.255	-0.850	4.348	0.988	-0.709	35.327	468.807	0.000059	-0.000304	-0.000069
4.9800	239.102	-1.531	3.136	0.083	-0.718	35.327	455.189	0.000107	-0.000220	-0.000006
5.0000	299.817	4.722	14.366	7.699	-0.692	35.329	570.774	-0.000331	-0.001006	-0.000539
5.0200	262.516	1.776	9.303	4.117	-0.696	35.330	499.763	-0.000124	-0.000651	-0.000288
5.0400	276.658	2.107	9.674	4.520	-0.708	35.330	526.686	-0.000148	-0.000677	-0.000316
5.0600	297.833	2.943	10.691	5.573	-0.707	35.330	566.998	-0.000206	-0.000748	-0.000390
5.0800	339.943	5.181	15.042	8.787	-0.695	35.330	647.163	-0.000363	-0.001053	-0.000615
5.1000	367.114	6.707	18.318	10.993	-0.704	35.330	698.891	-0.000470	-0.001282	-0.000769
5.1200	427.994	10.475	25.498	16.218	-0.691	35.330	814.791	-0.000733	-0.001785	-0.001135
5.1400	476.040	13.726	31.126	20.222	-0.702	35.330	906.258	-0.000961	-0.002179	-0.001416
5.1600	532.336	17.257	37.881	25.002	-0.710	35.330	1013.432	-0.001208	-0.002652	-0.001750
5.1800	591.007	21.133	44.970	30.267	-0.697	35.330	1125.126	-0.001479	-0.003148	-0.002119
5.2000	668.283	26.735	54.382	36.622	-0.719	35.330	1272.240	-0.001871	-0.003807	-0.002564
5.2200	722.265	30.290	60.764	41.693	-0.704	35.330	1375.008	-0.002120	-0.004254	-0.002918
5.2400	784.528	34.988	67.811	47.222	-0.700	35.330	1493.540	-0.002449	-0.004747	-0.003306
5.2600	866.778	41.061	77.360	54.144	-0.701	35.330	1650.124	-0.002874	-0.005415	-0.003790
5.2800	927.148	46.006	84.599	59.550	-0.708	35.330	1765.051	-0.003220	-0.005922	-0.004169
5.3000	978.665	49.426	90.280	64.343	-0.706	35.330	1863.127	-0.003460	-0.006320	-0.004504
5.3200	1036.269	54.082	96.748	69.609	-0.702	35.331	1972.790	-0.003786	-0.006772	-0.004873
5.3400	1107.774	60.045	104.645	75.724	-0.695	35.331	2108.917	-0.004203	-0.007325	-0.005301
5.3600	1153.340	63.378	109.890	80.366	-0.706	35.330	2195.663	-0.004436	-0.007692	-0.005626
5.3800	1191.648	66.729	114.252	83.644	-0.696	35.330	2268.591	-0.004671	-0.007998	-0.005855
5.4000	1232.299	70.299	118.584	87.552	-0.706	35.330	2345.982	-0.004921	-0.008301	-0.006129
5.4200	1258.749	72.800	122.287	89.995	-0.705	35.330	2396.336	-0.005096	-0.008560	-0.006300
5.4400	1284.989	75.232	125.453	92.747	-0.700	35.331	2446.289	-0.005266	-0.008782	-0.006492
5.4600	1280.931	74.606	125.451	92.887	-0.705	35.331	2438.564	-0.005222	-0.008782	-0.006502
5.4800	1289.077	76.052	126.459	93.790	-0.698	35.331	2454.071	-0.005324	-0.008852	-0.006565
5.5000	1295.764	76.888	127.668	94.677	-0.696	35.331	2466.803	-0.005382	-0.008937	-0.006627
5.5200	1284.944	76.136	127.256	94.415	-0.702	35.331	2446.203	-0.005329	-0.008908	-0.006609
5.5400	1273.252	75.219	126.512	93.664	-0.702	35.332	2423.944	-0.005265	-0.008856	-0.006557
5.5600	1249.717	73.718	125.188	92.234	-0.692	35.331	2379.141	-0.005160	-0.008763	-0.006456
5.5800	1198.170	70.439	120.692	87.982	-0.689	35.331	2281.008	-0.004931	-0.008448	-0.006159
5.6000	1155.985	67.216	116.661	85.033	-0.693	35.331	2200.699	-0.004705	-0.008166	-0.005952
5.6200	1120.969	64.267	112.970	82.506	-0.687	35.331	2134.037	-0.004499	-0.007908	-0.005775
5.6400	1056.302	59.836	106.587	77.169	-0.694	35.331	2010.927	-0.004189	-0.007461	-0.005402
5.6600	1011.998	56.556	102.057	72.985	-0.696	35.331	1926.584	-0.003959	-0.007144	-0.005109
5.6800	958.091	52.273	96.348	68.619	-0.701	35.331	1823.959	-0.003659	-0.006744	-0.004803
5.7000	892.597	47.411	88.808	62.896	-0.716	35.332	1699.276	-0.003319	-0.006217	-0.004403
5.7200	825.811	42.547	81.751	57.310	-0.704	35.332	1572.132	-0.002978	-0.005723	-0.004012
5.7400	744.973	37.268	72.696	50.277	-0.698	35.332	1418.238	-0.002609	-0.005089	-0.003519
5.7600	675.076	31.667	64.219	43.928	-0.704	35.331	1285.172	-0.002217	-0.004495	-0.003075
5.7800	614.316	27.013	56.555	38.313	-0.698	35.331	1169.500	-0.001891	-0.003959	-0.002682
5.8000	565.504	23.288	50.679	33.907	-0.704	35.331	1076.574	-0.001630	-0.003548	-0.002374
5.8200	506.788	19.034	43.070	28.433	-0.705	35.331	964.794	-0.001332	-0.003015	-0.001990
5.8400	442.572	13.811	34.458	22.567	-0.700	35.331	842.543	-0.000967	-0.002412	-0.001580
5.8600	394.240	10.949	28.098	18.136	-0.694	35.331	750.532	-0.000766	-0.001967	-0.001270
5.8800	363.041	8.670	23.862	14.749	-0.688	35.332	691.137	-0.000607	-0.001670	-0.001032
5.9000	319.594	5.392	18.042	10.536	-0.692	35.332	608.425	-0.000377	-0.001263	-0.000738
5.9200	292.318	3.053	13.690	7.421	-0.698	35.332	556.498	-0.000214	-0.000958	-0.000519
5.9400	268.287	1.956	9.920	5.255	-0.698	35.332	510.750	-0.000137	-0.000694	-0.000368
5.9600	256.971	1.014	7.954	3.143	-0.696	35.332	489.206	-0.000071	-0.000557	-0.000220
5.9800	250.524	0.276	6.482	2.405	-0.697	35.332	476.933	-0.000019	-0.000454	-0.000168
6.0000	251.636	-0.168	6.109	2.267	-0.700	35.332	479.050	0.000012	-0.000428	-0.000159
6.0200	256.971	0.402	6.276	2.309	-0.700	35.332	489.206	-0.000028	-0.000439	-0.000162
6.0400	273.397	1.124	7.182	3.185	-0.696	35.331	520.477	-0.000079	-0.000503	-0.000223
6.0600	306.925	2.692	10.390	5.560	-0.696	35.332	584.307	-0.000188	-0.000727	-0.000389
6.0800	345.909	5.198	14.834	9.176	-0.687	35.332	658.522	-0.000364	-0.001038	-0.000642
6.1000	374.313	7.180	18.481	11.661	-0.690	35.333	712.595	-0.000503	-0.001294	-0.000816
6.1200	418.286	9.587	23.710	15.011	-0.698	35.332	796.309	-0.000671	-0.001660	-0.001051
6.1400	469.202	13.045	29.626	19.749	-0.702	35.333	893.240	-0.000913	-0.002074	-0.001382
6.1600	524.687	16.745	36.298	24.390	-0.696	35.332	998.869	-0.001172	-0.002541	-0.001707
6.1800	598.251	21.926	45.546	30.658	-0.694	35.332	1138.916	-0.001535	-0.003188	-0.002146
6.2000	649.994	25.260	51.943	35.618	-0.686	35.332	1237.421	-0.001768	-0.003636	-0.002493
6.2200	726.654	30.747	60.959	42.193	-0.696	35.332	1383.362	-0.002152	-0.004267	-0.002954
6.2400	784.092	34.792	67.730	47.082	-0.696	35.332	1492.710	-0.002435	-0.004741	-0.003296
6.2600	867.184	41.379	77.569	54.699	-0.700	35.333	1650.896	-0.002897	-0.005430	-0.003829
6.2800	927.178	45.399	84.612	59.869	-0.689	35.333	1765.108	-0.003178	-0.005923	-0.004191
6.3000	984.135	49.915	91.009	65.234	-0.687	35.333	1873.541	-0.003494	-0.006371	-0.004566
6.3200	1054.528	55.670	98.893	71.347	-0.694	35.333	2007.551	-0.003897	-0.006923	-0.004994
6.3400	1087.275	58.347	102.941	74.582	-0.696	35.332	2069.893	-0.004084	-0.007206	-0.005221
6.3600	1146.773	63.111	109.489	79.920	-0.697	35.333	2183.161	-0.004418	-0.007664	-0.005594
6.3800	1189.709	66.660	114.635	84.267	-0.714	35.333	2264.900	-0.004666	-0.008024	-0.005899
6.4000	1219.480	69.451	117.884	86.382	-0.703	35.333	2321.577	-0.004862	-0.008252	-0.006047
6.4200	1254.496	72.411	122.328	89.731	-0.706	35.333	2388.239	-0.005069	-0.008563	-0.006281
6.4400	1277.730	74.216	124.955	92.357	-0.706	35.333	2432.470	-0.005195	-0.008747	-0.006465
6.4600	1284.343	75.104	125.866	92.899	-0.716	35.334	2445.059	-0.005257	-0.008811	-0.006503
6.4800	1298.815	76.875	128.152	95.052	-0.692	35.334	2472.610	-0.005381	-0.008971	-0.006654
6.5000	1296.456	76.637	128.344	95.400	-0.703	35.334	2468.119	-0.005365	-0.008984	-0.006678
6.5200	1279.909	75.495	127.586	94.456	-0.694	35.334	2436.619	-0.005285	-0.008931	-0.006612
6.5400	1277.370	75.898	127.322	94.371	-0.697	35.333	2431.784	-0.005313	-0.008913	-0.006606
6.5600	1229.880	72.623	124.130	91.176	-0.698	35.333	2341.375	-0.005084	-0.008689	-0.006382
6.5800	1201.070	70.705	121.489	88.661	-0.694	35.333	2286.530	-0.004949	-0.008504	-0.006206
6.6000	1164.596	67.658	117.677	85.924	-0.692	35.334	2217.093	-0.004736	-0.008237	-0.006015
6.6200	1122.096	64.993	113.481	82.490	-0.697	35.333	2136.183	-0.004550	-0.007944	-0.005774
6.6400	1063.350	60.935	108.045	77.959	-0.701	35.333	2024.345	-0.004265	-0.007563	-0.005457
6.6600	1009.022	56.488	102.127	73.194	-0.712	35.334	1920.919	-0.003954	-0.007149	-0.005124
6.6800	929.627	50.679	93.899	66.813	-0.719	35.334	1769.772	-0.003548	-0.006573	-0.004677
6.7000	880.935	47.049	88.684	62.397	-0.692	35.334	1677.074	-0.003293	-0.006208	-0.004368
6.7200	834.467	43.715	83.071	58.201	-0.696	35.334	1588.612	-0.003060	-0.005815	-0.004074
6.7400	756.230	37.462	74.261	51.251	-0.691	35.334	1439.667	-0.002622	-0.005198	-0.003588
6.7600	688.166	32.767	65.887	45.429	-0.708	35.334	1310.091	-0.002294	-0.004612	-0.003180
6.7800	634.665	28.762	59.389	40.273	-0.690	35.334	1208.239	-0.002013	-0.004157	-0.002819
6.8000	559.853	23.275	50.626	33.741	-0.703	35.334	1065.817	-0.001629	-0.003544	-0.002362
6.8200	514.092	19.659	43.909	29.239	-0.701	35.334	978.699	-0.001376	-0.003074	-0.002047
6.8400	459.764	15.520	36.932	24.473	-0.700	35.334	875.273	-0.001086	-0.002585	-0.001713
6.8600	403.137	12.003	29.736	19.109	-0.688	35.335	767.469	-0.000840	-0.002082	-0.001338
6.8800	350.282	8.001	22.596	14.067	-0.707	35.335	666.847	-0.000560	-0.001582	-0.000985
6.9000	317.625	5.391	17.849	10.536	-0.700	35.335	604.677	-0.000377	-0.001249	-0.000738
6.9200	294.782	4.210	14.366	7.841	-0.700	35.334	561.190	-0.000295	-0.001006	-0.000549
6.9400	258.939	1.872	9.232	4.186	-0.701	35.334	492.954	-0.000131	-0.000646	-0.000293
6.9600	253.108	0.834	7.856	3.185	-0.706	35.334	481.853	-0.000058	-0.000550	-0.000223
6.9800	247.232	0.402	6.138	2.169	-0.707	35.334	470.667	-0.000028	-0.000430	-0.000152
7.0000	252.628	0.541	6.386	2.391	-0.712	35.334	480.938	-0.000038	-0.000447	-0.000167
7.0200	258.819	0.487	6.730	2.683	-0.700	35.334	492.725	-0.000034	-0.000471	-0.000188
7.0400	270.436	0.972	7.349	3.047	-0.700	35.335	514.841	-0.000068	-0.000514	-0.000213
7.0600	309.675	2.944	10.830	6.185	-0.700	35.335	589.542	-0.000206	-0.000758	-0.000433
7.0800	328.912	4.319	13.154	7.589	-0.697	35.335	626.163	-0.000302	-0.000921	-0.000531
7.1000	369.203	6.805	18.067	11.201	-0.702	35.334	702.868	-0.000476	-0.001265	-0.000784
7.1200	432.082	10.392	25.511	16.717	-0.697	35.336	822.573	-0.000727	-0.001786	-0.001170
7.1400	493.368	14.226	32.696	21.944	-0.689	35.335	939.245	-0.000996	-0.002289	-0.001536
7.1600	542.195	17.922	38.997	25.975	-0.685	35.335	1032.200	-0.001255	-0.002730	-0.001818
7.1800	604.533	21.968	46.485	31.285	-0.698	35.335	1150.875	-0.001538	-0.003254	-0.002190
7.2000	664.060	26.220	53.459	36.718	-0.699	35.335	1264.200	-0.001835	-0.003742	-0.002570
7.2200	729.284	31.209	61.275	42.902	-0.691	35.335	1388.369	-0.002185	-0.004289	-0.003003
7.2400	789.728	35.502	68.856	48.237	-0.698	35.336	1503.439	-0.002485	-0.004820	-0.003377
7.2600	866.478	41.393	77.690	54.587	-0.681	35.336	1649.551	-0.002898	-0.005438	-0.003821
7.2800	925.870	45.703	84.421	60.299	-0.685	35.336	1762.619	-0.003199	-0.005909	-0.004221
7.3000	983.038	50.178	91.243	65.425	-0.694	35.335	1871.452	-0.003512	-0.006387	-0.004580
7.3200	1042.866	55.001	98.400	70.806	-0.690	35.336	1985.350	-0.003850	-0.006888	-0.004956
7.3400	1090.281	58.776	103.685	75.127	-0.687	35.336	2075.615	-0.004114	-0.007258	-0.005259
7.3600	1143.271	63.029	109.641	80.128	-0.692	35.336	2176.495	-0.004412	-0.007675	-0.005609
7.3800	1196.096	67.631	115.916	84.755	-0.682	35.335	2277.060	-0.004734	-0.008114	-0.005933
7.4000	1239.077	71.286	120.579	88.770	-0.691	35.335	2358.885	-0.004990	-0.008441	-0.006214
7.4200	1250.724	72.481	122.331	90.370	-0.695	35.336	2381.058	-0.005074	-0.008563	-0.006326
7.4400	1268.548	74.106	124.199	92.273	-0.689	35.336	2414.989	-0.005187	-0.008694	-0.006459
7.4600	1289.047	76.038	126.774	93.969	-0.686	35.337	2454.014	-0.005323	-0.008874	-0.006578
7.4800	1301.415	77.319	128.604	95.482	-0.694	35.336	2477.560	-0.005412	-0.009002	-0.006684
7.5000	1295.464	77.152	128.411	95.511	-0.680	35.337	2466.230	-0.005401	-0.008989	-0.006686
7.5200	1287.980	76.916	128.233	95.302	-0.691	35.336	2451.982	-0.005384	-0.008976	-0.006671
7.5400	1267.331	75.745	127.326	93.902	-0.680	35.337	2412.672	-0.005302	-0.008913	-0.006573
7.5600	1245.179	73.924	125.686	92.469	-0.693	35.335	2370.501	-0.005175	-0.008798	-0.006473
7.5800	1212.762	71.551	122.838	90.161	-0.701	35.336	2308.788	-0.005009	-0.008599	-0.006311
7.6000	1175.432	69.118	119.259	87.316	-0.710	35.336	2237.720	-0.004838	-0.008348	-0.006112
7.6200	1122.111	65.522	113.945	83.297	-0.695	35.336	2136.211	-0.004587	-0.007976	-0.005831
7.6400	1060.900	60.740	108.045	77.931	-0.690	35.336	2019.682	-0.004252	-0.007563	-0.005455
7.6600	1004.980	56.321	102.071	73.319	-0.698	35.336	1913.223	-0.003942	-0.007145	-0.005132
7.6800	932.408	51.164	94.259	67.358	-0.710	35.337	1775.064	-0.003581	-0.006598	-0.004715
7.7000	879.432	47.190	88.602	62.340	-0.692	35.337	1674.213	-0.003303	-0.006202	-0.004364
7.7200	811.880	42.312	81.338	56.544	-0.700	35.337	1545.610	-0.002962	-0.005694	-0.003958
7.7400	756.695	38.156	74.236	51.570	-0.714	35.337	1440.554	-0.002671	-0.005197	-0.003610
7.7600	680.486	32.335	65.279	45.234	-0.706	35.336	1295.471	-0.002263	-0.004570	-0.003166
7.7800	627.556	28.748	58.935	40.218	-0.706	35.337	1194.706	-0.002012	-0.004125	-0.002815
7.8000	552.610	22.819	49.909	33.532	-0.712	35.336	1052.027	-0.001597	-0.003494	-0.002347
7.8200	500.596	18.896	42.989	28.543	-0.700	35.337	953.007	-0.001323	-0.003009	-0.001998
7.8400	437.447	14.476	34.733	22.747	-0.708	35.337	832.787	-0.001013	-0.002431	-0.001592
7.8600	402.821	12.101	30.065	19.305	-0.701	35.337	766.869	-0.000847	-0.002105	-0.001351
7.8800	344.541	7.791	22.335	13.663	-0.695	35.337	655.918	-0.000545	-0.001563	-0.000956
7.9000	317.490	5.556	17.807	10.730	-0.701	35.337	604.420	-0.000389	-0.001247	-0.000751
7.9200	297.232	4.223	14.973	8.242	-0.704	35.337	565.853	-0.000296	-0.001048	-0.000577
7.9400	263.944	2.234	10.334	4.922	-0.708	35.337	502.481	-0.000156	-0.000723	-0.000345
7.9600	255.047	0.846	8.254	3.754	-0.707	35.337	485.544	-0.000059	-0.000578	-0.000263
7.9800	249.937	0.485	6.769	3.018	-0.703	35.337	475.817	-0.000034	-0.000474	-0.000211
8.0000	252.868	0.679	6.964	2.617	-0.706	35.337	481.396	-0.000048	-0.000487	-0.000183
8.0200	260.052	0.916	7.061	2.892	-0.698	35.338	495.071	-0.000064	-0.000494	-0.000202
8.0400	267.746	1.027	7.498	3.462	-0.692	35.338	509.720	-0.000072	-0.000525	-0.000242
8.0600	304.926	2.928	10.472	6.046	-0.706	35.338	580.502	-0.000205	-0.000733	-0.000423
8.0800	358.097	6.569	17.173	10.564	-0.702	35.338	681.725	-0.000460	-0.001202	-0.000740
8.1000	369.233	7.222	18.522	11.757	-0.690	35.337	702.925	-0.000506	-0.001297	-0.000823
8.1200	428.911	10.490	25.594	16.745	-0.703	35.338	816.536	-0.000734	-0.001792	-0.001172
8.1400	481.165	13.698	31.844	21.389	-0.708	35.338	916.014	-0.000959	-0.002229	-0.001497
8.1600	522.162	16.731	37.113	24.959	-0.714	35.338	994.062	-0.001171	-0.002598	-0.001747
8.1800	593.908	21.692	45.767	30.867	-0.703	35.338	1130.648	-0.001518	-0.003204	-0.002161
8.2000	654.833	25.790	53.279	36.412	-0.718	35.338	1246.634	-0.001805	-0.003730	-0.002549
8.2200	728.652	31.068	61.647	42.874	-0.698	35.338	1387.167	-0.002175	-0.004315	-0.003001
8.2400	784.212	35.613	68.514	47.847	-0.701	35.339	1492.939	-0.002493	-0.004796	-0.003349
8.2600	846.069	40.048	76.191	53.336	-0.694	35.338	1610.699	-0.002803	-0.005333	-0.003734
8.2800	915.110	45.175	83.676	59.564	-0.697	35.338	1742.134	-0.003162	-0.005857	-0.004169
8.3000	990.387	51.038	92.236	66.175	-0.696	35.338	1885.443	-0.003573	-0.006456	-0.004632
8.3200	1038.343	55.001	98.137	70.637	-0.697	35.338	1976.738	-0.003850	-0.006870	-0.004945
8.3400	1098.502	59.822	105.172	76.308	-0.692	35.337	2091.265	-0.004188	-0.007362	-0.005342
8.3600	1154.663	63.849	111.046	80.949	-0.696	35.338	2198.181	-0.004469	-0.007773	-0.005666
8.3800	1184.840	66.910	114.621	84.351	-0.705	35.338	2255.630	-0.004684	-0.008024	-0.005905
8.4000	1226.544	70.523	119.673	87.702	-0.716	35.338	2335.024	-0.004937	-0.008377	-0.006139
8.4200	1271.914	74.066	124.254	91.982	-0.704	35.338	2421.398	-0.005185	-0.008698	-0.006439
8.4400	1269.855	74.120	124.874	92.580	-0.717	35.339	2417.479	-0.005188	-0.008741	-0.006481
8.4600	1302.197	77.207	128.246	95.317	-0.713	35.339	2479.048	-0.005404	-0.008977	-0.006672
8.4800	1297.448	77.485	128.782	95.692	-0.706	35.339	2470.007	-0.005424	-0.009015	-0.006698
8.5000	1292.969	77.236	128.686	95.539	-0.700	35.339	2461.481	-0.005406	-0.009008	-0.006688
8.5200	1279.804	76.484	127.929	95.054	-0.702	35.339	2436.419	-0.005354	-0.008955	-0.006654
8.5400	1270.261	76.233	127.558	94.331	-0.708	35.339	2418.251	-0.005336	-0.008929	-0.006603
8.5600	1246.035	74.619	126.194	92.679	-0.707	35.339	2372.131	-0.005223	-0.008834	-0.006488
8.5800	1201.461	70.718	122.245	89.256	-0.700	35.339	2287.273	-0.004950	-0.008557	-0.006248
8.6000	1150.334	67.701	117.142	85.355	-0.710	35.339	2189.941	-0.004739	-0.008200	-0.005975
8.6200	1142.925	67.243	116.289	84.949	-0.698	35.339	2175.837	-0.004707	-0.008140	-0.005946
8.6400	1062.523	61.046	108.609	78.391	-0.695	35.339	2022.772	-0.004273	-0.007603	-0.005487
8.6600	1013.441	57.042	103.091	74.153	-0.692	35.339	1929.331	-0.003993	-0.007216	-0.005191
8.6800	944.160	51.953	95.935	68.219	-0.698	35.340	1797.438	-0.003637	-0.006715	-0.004775
8.7000	894.145	48.498	90.362	63.635	-0.694	35.339	1702.223	-0.003395	-0.006325	-0.004454
8.7200	824.909	43.354	82.782	58.132	-0.707	35.339	1570.415	-0.003035	-0.005795	-0.004069
8.7400	753.539	37.906	74.541	51.863	-0.715	35.339	1434.546	-0.002653	-0.005218	-0.003630
8.7600	683.898	32.808	66.119	45.277	-0.707	35.339	1301.966	-0.002297	-0.004628	-0.003169
8.7800	616.405	28.208	58.452	39.507	-0.707	35.339	1173.477	-0.001975	-0.004092	-0.002765
8.8000	555.179	23.179	50.473	33.894	-0.709	35.339	1056.919	-0.001623	-0.003533	-0.002373
8.8200	493.803	19.005	42.658	28.237	-0.696	35.340	940.075	-0.001330	-0.002986	-0.001977
8.8400	446.614	15.257	36.218	23.723	-0.692	35.340	850.239	-0.001068	-0.002535	-0.001661
8.8600	399.365	12.059	30.121	19.291	-0.698	35.340	760.288	-0.000844	-0.002108	-0.001350
8.8800	365.100	9.446	25.277	15.623	-0.695	35.339	695.057	-0.000661	-0.001769	-0.001094
8.9000	318.287	6.001	18.617	11.132	-0.702	35.340	605.936	-0.000420	-0.001303	-0.000779
8.9200	287.689	3.833	13.896	7.839	-0.708	35.340	547.686	-0.000268	-0.000973	-0.000549
8.9400	270.571	2.721	11.367	5.851	-0.702	35.339	515.099	-0.000190	-0.000796	-0.000410
8.9600	258.699	1.402	8.999	4.490	-0.695	35.339	492.496	-0.000098	-0.000630	-0.000314
8.9800	250.704	0.889	7.460	3.226	-0.704	35.340	477.276	-0.000062	-0.000522	-0.000226
9.0000	253.830	0.679	7.239	3.088	-0.709	35.340	483.227	-0.000048	-0.000507	-0.000216
9.0200	256.820	0.984	7.486	3.073	-0.689	35.340	488.920	-0.000069	-0.000524	-0.000215
9.0400	267.671	1.054	7.913	3.549	-0.703	35.340	509.577	-0.000074	-0.000554	-0.000248
9.0600	307.842	3.096	11.092	6.408	-0.698	35.340	586.052	-0.000217	-0.000776	-0.000449
9.0800	333.405	5.237	14.696	8.758	-0.701	35.340	634.718	-0.000367	-0.001029	-0.000613
9.1000	369.038	7.320	19.110	12.006	-0.703	35.340	702.553	-0.000512	-0.001338	-0.000840
9.1200	423.801	10.407	25.334	16.664	-0.708	35.340	806.808	-0.000728	-0.001773	-0.001166
9.1400	475.484	13.963	31.471	21.097	-0.702	35.340	905.199	-0.000977	-0.002203	-0.001477
9.1600	538.242	18.325	39.314	26.227	-0.695	35.340	1024.675	-0.001283	-0.002752	-0.001836
9.1800	600.520	22.149	47.061	31.924	-0.702	35.340	1143.236	-0.001550	-0.003294	-0.002235
9.2000	676.594	27.291	55.936	38.633	-0.701	35.340	1288.061	-0.001910	-0.003915	-0.002704
9.2200	731.327	31.375	62.418	43.456	-0.701	35.340	1392.260	-0.002196	-0.004369	-0.003042
9.2400	794.657	36.614	70.163	49.044	-0.694	35.341	1512.823	-0.002563	-0.004911	-0.003433
9.2600	854.365	40.741	77.111	54.547	-0.687	35.341	1626.492	-0.002852	-0.005398	-0.003818
9.2800	922.925	45.979	84.832	60.562	-0.690	35.340	1757.011	-0.003219	-0.005938	-0.004239
9.3000	987.832	50.997	92.345	66.580	-0.698	35.340	1880.579	-0.003570	-0.006464	-0.004661
9.3200	1028.123	54.444	97.533	70.097	-0.686	35.340	1957.283	-0.003811	-0.006827	-0.004907
9.3400	1091.769	59.321	104.523	75.959	-0.715	35.340	2078.447	-0.004152	-0.007317	-0.005317
9.3600	1146.968	63.656	110.315	80.922	-0.702	35.340	2183.533	-0.004456	-0.007722	-0.005665
9.3800	1188.792	67.590	115.325	84.769	-0.702	35.340	2263.155	-0.004731	-0.008073	-0.005934
9.4000	1230.947	71.052	120.208	88.604	-0.707	35.340	2343.407	-0.004974	-0.008415	-0.006202
9.4200	1270.096	74.008	124.598	92.470	-0.698	35.341	2417.936	-0.005181	-0.008722	-0.006473
9.4400	1271.043	74.674	125.218	92.747	-0.708	35.341	2419.739	-0.005227	-0.008765	-0.006492
9.4600	1294.036	76.637	127.820	95.190	-0.703	35.341	2463.512	-0.005365	-0.008947	-0.006663
9.4800	1295.704	77.374	128.562	95.789	-0.720	35.341	2466.688	-0.005416	-0.008999	-0.006705
9.5000	1299.476	77.890	129.003	96.317	-0.702	35.341	2473.869	-0.005452	-0.009030	-0.006742
9.5200	1286.372	77.235	128.370	95.636	-0.694	35.341	2448.921	-0.005406	-0.008986	-0.006694
9.5400	1263.258	75.830	127.751	94.345	-0.696	35.341	2404.919	-0.005308	-0.008943	-0.006604
9.5600	1248.710	74.897	126.898	93.456	-0.702	35.341	2377.224	-0.005243	-0.008883	-0.006542
9.5800	1198.486	70.897	122.096	89.716	-0.701	35.341	2281.609	-0.004963	-0.008547	-0.006280
9.6000	1158.390	67.993	118.047	86.368	-0.703	35.341	2205.276	-0.004759	-0.008263	-0.006046
9.6200	1111.666	64.963	113.644	82.810	-0.703	35.341	2116.327	-0.004547	-0.007955	-0.005797
9.6400	1063.335	61.545	108.678	78.626	-0.713	35.341	2024.317	-0.004308	-0.007607	-0.005504
9.6600	998.007	56.168	101.852	73.235	-0.700	35.342	1899.948	-0.003932	-0.007130	-0.005126
9.6800	947.752	52.679	96.391	68.690	-0.699	35.341	1804.276	-0.003688	-0.006747	-0.004808
9.7000	886.556	48.551	90.117	63.731	-0.697	35.341	1687.775	-0.003399	-0.006308	-0.004461
9.7200	812.526	42.506	81.738	57.129	-0.692	35.341	1546.841	-0.002975	-0.005722	-0.003999
9.7400	749.407	38.116	73.988	51.391	-0.695	35.342	1426.678	-0.002668	-0.005179	-0.003597
9.7600	679.224	32.808	65.623	45.234	-0.699	35.341	1293.068	-0.002297	-0.004594	-0.003166
9.7800	621.440	28.678	58.866	40.202	-0.700	35.341	1183.062	-0.002007	-0.004121	-0.002814
9.8000	558.335	23.664	51.246	34.421	-0.694	35.341	1062.927	-0.001656	-0.003587	-0.002409
9.8200	515.895	20.300	45.328	30.156	-0.700	35.342	982.132	-0.001421	-0.003173	-0.002111
9.8400	454.669	16.020	37.401	24.417	-0.696	35.342	865.574	-0.001121	-0.002618	-0.001709
9.8600	412.109	12.990	32.062	20.585	-0.700	35.342	784.550	-0.000909	-0.002244	-0.001441
9.8800	340.033	7.835	22.486	13.775	-0.702	35.341	647.335	-0.000548	-0.001574	-0.000964
9.9000	303.559	5.139	16.941	9.869	-0.688	35.341	577.898	-0.000360	-0.001186	-0.000691
9.9200	297.367	4.696	15.439	8.661	-0.685	35.342	566.111	-0.000329	-0.001081	-0.000606
9.9400	265.191	2.819	10.884	5.629	-0.690	35.342	504.856	-0.000197	-0.000762	-0.000394
9.9600	255.799	1.484	8.616	4.103	-0.687	35.342	486.975	-0.000104	-0.000603	-0.000287
9.9800	251.831	1.180	7.404	3.323	-0.688	35.342	479.422	-0.000083	-0.000518	-0.000233
Test Cycles
Time (sec)	Axial stress (kPa)	Axial micro-strain #1	Axial micro-strain #2	Axial micro-strain #3	Confining pressure (kPa)	Temperature (�C)	Load (N)	Displacement #1 (mm)	Displacement #2 (mm)	Displacement #3 (mm)
0.0000	254.055	1.027	7.513	2.921	-0.695	35.342	483.656	-0.000072	-0.000526	-0.000204
0.0200	254.416	1.124	7.225	2.991	-0.702	35.342	484.343	-0.000079	-0.000506	-0.000209
0.0400	265.507	0.957	7.897	3.561	-0.691	35.342	505.457	-0.000067	-0.000553	-0.000249
0.0600	297.472	3.304	10.707	5.809	-0.692	35.342	566.311	-0.000231	-0.000749	-0.000407
0.0800	333.180	5.530	14.903	8.632	-0.699	35.342	634.289	-0.000387	-0.001043	-0.000604
0.1000	385.373	8.335	20.985	13.370	-0.695	35.342	733.652	-0.000583	-0.001469	-0.000936
0.1200	409.674	9.753	23.558	15.524	-0.703	35.342	779.915	-0.000683	-0.001649	-0.001087
0.1400	474.762	14.350	31.484	21.113	-0.700	35.342	903.826	-0.001005	-0.002204	-0.001478
0.1600	528.173	17.772	38.597	25.822	-0.702	35.342	1005.507	-0.001244	-0.002702	-0.001808
0.1800	598.987	22.371	46.908	31.701	-0.711	35.342	1140.318	-0.001566	-0.003284	-0.002219
0.2000	641.683	25.370	52.069	35.744	-0.707	35.343	1221.600	-0.001776	-0.003645	-0.002502
0.2200	718.884	31.251	61.330	42.456	-0.715	35.343	1368.570	-0.002188	-0.004293	-0.002972
0.2400	797.302	36.849	70.754	49.279	-0.701	35.343	1517.859	-0.002579	-0.004953	-0.003449
0.2600	859.730	41.351	77.941	55.089	-0.700	35.343	1636.705	-0.002895	-0.005456	-0.003856
0.2800	921.136	46.010	84.972	60.618	-0.701	35.343	1753.607	-0.003221	-0.005948	-0.004243
0.3000	984.015	51.328	92.730	66.260	-0.693	35.342	1873.312	-0.003593	-0.006491	-0.004638
0.3200	1044.234	55.821	99.007	71.611	-0.702	35.342	1987.953	-0.003907	-0.006930	-0.005013
0.3400	1075.658	58.347	103.269	74.695	-0.710	35.343	2047.777	-0.004084	-0.007229	-0.005229
0.3600	1131.850	63.294	109.586	80.045	-0.703	35.343	2154.751	-0.004431	-0.007671	-0.005603
0.3800	1191.362	67.978	116.083	85.091	-0.716	35.343	2268.047	-0.004758	-0.008126	-0.005956
0.4000	1213.048	69.938	118.821	87.036	-0.705	35.343	2309.332	-0.004896	-0.008317	-0.006093
0.4200	1265.197	74.037	124.515	92.081	-0.704	35.343	2408.609	-0.005183	-0.008716	-0.006446
0.4400	1263.784	74.453	124.486	92.134	-0.703	35.344	2405.920	-0.005212	-0.008714	-0.006449
0.4600	1298.349	77.708	128.795	95.746	-0.707	35.343	2471.724	-0.005440	-0.009016	-0.006702
0.4800	1291.586	77.431	128.616	95.524	-0.698	35.344	2458.849	-0.005420	-0.009003	-0.006687
0.5000	1291.556	77.485	128.562	95.775	-0.702	35.343	2458.792	-0.005424	-0.008999	-0.006704
0.5200	1289.963	77.916	128.783	95.746	-0.704	35.344	2455.759	-0.005454	-0.009015	-0.006702
0.5400	1273.913	77.054	128.190	95.164	-0.704	35.344	2425.203	-0.005394	-0.008973	-0.006661
0.5600	1237.815	74.232	125.991	92.650	-0.702	35.343	2356.482	-0.005196	-0.008819	-0.006486
0.5800	1212.687	72.065	123.470	90.453	-0.711	35.343	2308.645	-0.005045	-0.008643	-0.006332
0.6000	1163.349	68.965	118.777	86.772	-0.696	35.344	2214.718	-0.004828	-0.008314	-0.006074
0.6200	1130.948	66.563	115.821	84.450	-0.717	35.344	2153.034	-0.004659	-0.008107	-0.005912
0.6400	1070.053	62.004	109.711	79.057	-0.708	35.343	2037.106	-0.004340	-0.007680	-0.005534
0.6600	1005.791	56.917	102.913	74.125	-0.708	35.343	1914.768	-0.003984	-0.007204	-0.005189
0.6800	931.190	52.163	95.098	67.633	-0.700	35.343	1772.747	-0.003651	-0.006657	-0.004734
0.7000	880.845	48.149	89.855	63.232	-0.707	35.343	1676.903	-0.003370	-0.006290	-0.004426
0.7200	809.520	42.783	81.668	56.851	-0.704	35.344	1541.119	-0.002995	-0.005717	-0.003980
0.7400	749.827	38.241	74.261	52.056	-0.696	35.343	1427.479	-0.002677	-0.005198	-0.003644
0.7600	691.848	34.308	67.867	46.470	-0.703	35.344	1317.101	-0.002402	-0.004751	-0.003253
0.7800	635.627	29.583	60.916	41.456	-0.693	35.344	1210.070	-0.002071	-0.004264	-0.002902
0.8000	557.599	23.900	51.173	34.256	-0.691	35.344	1061.525	-0.001673	-0.003582	-0.002398
0.8200	509.959	20.328	44.626	29.667	-0.697	35.344	970.831	-0.001423	-0.003124	-0.002077
0.8400	448.643	15.948	36.672	24.055	-0.696	35.344	854.101	-0.001116	-0.002567	-0.001684
0.8600	397.201	12.575	30.080	19.320	-0.706	35.344	756.168	-0.000880	-0.002106	-0.001352
0.8800	354.670	9.154	24.205	15.095	-0.701	35.344	675.201	-0.000641	-0.001694	-0.001057
0.9000	320.811	6.889	19.526	11.728	-0.700	35.344	610.743	-0.000482	-0.001367	-0.000821
0.9200	293.760	5.100	15.825	8.770	-0.698	35.344	559.244	-0.000357	-0.001108	-0.000614
0.9400	261.224	2.385	10.789	5.267	-0.699	35.344	497.303	-0.000167	-0.000755	-0.000369
0.9600	253.755	1.568	8.641	3.950	-0.700	35.344	483.084	-0.000110	-0.000605	-0.000277
0.9800	247.638	1.248	7.433	3.186	-0.696	35.344	471.439	-0.000087	-0.000520	-0.000223
1.0000	244.076	1.068	6.605	2.614	-0.701	35.345	464.659	-0.000075	-0.000462	-0.000183
1.0200	255.363	1.054	7.184	3.031	-0.707	35.344	486.145	-0.000074	-0.000503	-0.000212
1.0400	280.355	2.067	8.697	4.590	-0.702	35.344	533.724	-0.000145	-0.000609	-0.000321
1.0600	297.698	3.750	10.761	6.005	-0.691	35.344	566.740	-0.000262	-0.000753	-0.000420
1.0800	344.376	6.306	16.581	9.842	-0.703	35.344	655.603	-0.000441	-0.001161	-0.000689
1.1000	373.802	8.016	20.380	12.647	-0.703	35.344	711.622	-0.000561	-0.001427	-0.000885
1.1200	430.353	11.408	26.158	17.440	-0.702	35.344	819.283	-0.000799	-0.001831	-0.001221
1.1400	473.786	14.561	31.924	21.249	-0.717	35.345	901.966	-0.001019	-0.002235	-0.001487
1.1600	541.248	18.826	40.098	26.754	-0.699	35.345	1030.397	-0.001318	-0.002807	-0.001873
1.1800	619.591	24.052	49.373	33.438	-0.699	35.344	1179.543	-0.001684	-0.003456	-0.002341
1.2000	663.639	27.194	54.520	37.606	-0.691	35.344	1263.399	-0.001904	-0.003816	-0.002632
1.2200	713.293	30.847	61.385	42.220	-0.696	35.345	1357.927	-0.002159	-0.004297	-0.002955
1.2400	798.730	37.112	71.086	49.820	-0.692	35.345	1520.576	-0.002598	-0.004976	-0.003487
1.2600	858.002	41.326	78.076	54.962	-0.690	35.345	1633.415	-0.002893	-0.005465	-0.003847
1.2800	925.870	46.633	85.492	61.300	-0.688	35.345	1762.619	-0.003264	-0.005984	-0.004291
1.3000	976.275	51.025	91.903	65.759	-0.700	35.345	1858.578	-0.003572	-0.006433	-0.004603
1.3200	1067.032	57.860	101.592	73.539	-0.698	35.345	2031.355	-0.004050	-0.007111	-0.005148
1.3400	1088.989	60.060	104.690	76.279	-0.692	35.345	2073.154	-0.004204	-0.007328	-0.005340
1.3600	1142.730	64.323	110.412	81.171	-0.698	35.345	2175.465	-0.004503	-0.007729	-0.005682
1.3800	1185.050	67.865	115.821	84.839	-0.706	35.345	2256.031	-0.004751	-0.008107	-0.005939
1.4000	1228.708	71.469	120.485	88.676	-0.714	35.345	2339.144	-0.005003	-0.008434	-0.006207
1.4200	1245.284	72.828	122.617	90.787	-0.700	35.345	2370.701	-0.005098	-0.008583	-0.006355
1.4400	1277.896	75.620	125.878	93.745	-0.707	35.345	2432.785	-0.005293	-0.008811	-0.006562
1.4600	1310.312	78.527	129.705	96.635	-0.712	35.345	2494.497	-0.005497	-0.009079	-0.006764
1.4800	1303.880	78.401	129.979	96.622	-0.723	35.346	2482.252	-0.005488	-0.009099	-0.006764
1.5000	1290.129	77.500	129.196	96.277	-0.704	35.345	2456.074	-0.005425	-0.009044	-0.006739
1.5200	1288.746	78.028	129.565	96.428	-0.710	35.345	2453.442	-0.005462	-0.009070	-0.006750
1.5400	1266.083	76.676	128.385	95.079	-0.708	35.345	2410.297	-0.005367	-0.008987	-0.006656
1.5600	1248.620	75.079	127.272	93.705	-0.711	35.345	2377.052	-0.005256	-0.008909	-0.006559
1.5800	1225.221	73.286	124.776	92.010	-0.712	35.345	2332.506	-0.005130	-0.008734	-0.006441
1.6000	1146.036	67.963	117.458	85.619	-0.711	35.345	2181.759	-0.004757	-0.008222	-0.005993
1.6200	1109.142	65.340	114.043	82.908	-0.714	35.346	2111.521	-0.004574	-0.007983	-0.005804
1.6400	1047.781	60.740	107.688	77.681	-0.708	35.346	1994.705	-0.004252	-0.007538	-0.005438
1.6600	999.750	57.208	102.361	73.486	-0.707	35.346	1903.267	-0.004005	-0.007165	-0.005144
1.6800	932.393	52.358	95.373	67.954	-0.696	35.345	1775.036	-0.003665	-0.006676	-0.004757
1.7000	876.592	47.995	89.456	63.438	-0.706	35.346	1668.806	-0.003360	-0.006262	-0.004441
1.7200	822.805	43.479	83.304	58.453	-0.706	35.346	1566.410	-0.003044	-0.005831	-0.004092
1.7400	758.333	38.881	75.530	52.725	-0.703	35.346	1443.672	-0.002722	-0.005287	-0.003691
1.7600	689.413	34.044	67.580	46.401	-0.712	35.346	1312.466	-0.002383	-0.004731	-0.003248
1.7800	609.041	28.166	57.945	39.313	-0.706	35.346	1159.458	-0.001972	-0.004056	-0.002752
1.8000	560.590	24.384	51.779	34.881	-0.710	35.346	1067.219	-0.001707	-0.003624	-0.002442
1.8200	496.689	19.870	43.595	28.976	-0.716	35.346	945.568	-0.001391	-0.003052	-0.002028
1.8400	452.776	16.743	37.771	24.586	-0.717	35.346	861.969	-0.001172	-0.002644	-0.001721
1.8600	393.429	12.393	30.300	19.152	-0.709	35.346	748.987	-0.000867	-0.002121	-0.001341
1.8800	362.440	9.808	24.990	15.720	-0.715	35.346	689.993	-0.000687	-0.001749	-0.001100
1.9000	306.204	5.986	17.670	10.451	-0.708	35.346	582.933	-0.000419	-0.001237	-0.000732
1.9200	301.981	5.695	16.540	9.411	-0.706	35.346	574.894	-0.000399	-0.001158	-0.000659
1.9400	271.398	3.346	12.346	6.268	-0.712	35.346	516.672	-0.000234	-0.000864	-0.000439
1.9600	251.711	1.680	8.890	3.992	-0.706	35.346	479.193	-0.000118	-0.000622	-0.000279
1.9800	245.970	1.387	7.664	3.226	-0.703	35.346	468.264	-0.000097	-0.000537	-0.000226
2.0000	250.554	1.402	7.966	3.200	-0.699	35.346	476.990	-0.000098	-0.000558	-0.000224
2.0200	259.015	1.540	7.926	3.561	-0.712	35.347	493.097	-0.000108	-0.000555	-0.000249
2.0400	267.896	1.514	8.366	3.934	-0.710	35.346	510.006	-0.000106	-0.000586	-0.000275
2.0600	289.117	3.191	10.084	5.462	-0.706	35.346	550.404	-0.000223	-0.000706	-0.000382
2.0800	346.104	6.500	16.788	10.453	-0.692	35.347	658.894	-0.000455	-0.001175	-0.000732
2.1000	382.323	8.614	21.068	13.288	-0.707	35.346	727.844	-0.000603	-0.001475	-0.000930
2.1200	429.392	11.575	26.229	17.471	-0.707	35.346	817.451	-0.000810	-0.001836	-0.001223
2.1400	474.327	14.561	32.034	21.527	-0.701	35.346	902.996	-0.001019	-0.002242	-0.001507
2.1600	545.666	19.200	40.990	27.489	-0.710	35.347	1038.809	-0.001344	-0.002869	-0.001924
2.1800	591.308	22.178	46.248	31.658	-0.710	35.347	1125.698	-0.001552	-0.003237	-0.002216
2.2000	670.447	27.832	55.535	38.551	-0.708	35.347	1276.360	-0.001948	-0.003887	-0.002699
2.2200	728.247	32.141	63.203	43.929	-0.712	35.346	1386.395	-0.002250	-0.004424	-0.003075
2.2400	782.409	36.488	70.067	48.793	-0.698	35.346	1489.506	-0.002554	-0.004905	-0.003416
2.2600	845.889	40.920	77.004	54.157	-0.689	35.346	1610.355	-0.002864	-0.005390	-0.003791
2.2800	918.672	46.327	85.234	60.743	-0.708	35.346	1748.915	-0.003243	-0.005966	-0.004252
2.3000	975.975	51.122	92.179	65.886	-0.711	35.347	1858.006	-0.003579	-0.006453	-0.004612
2.3200	1038.253	55.851	98.951	71.500	-0.716	35.347	1976.566	-0.003910	-0.006927	-0.005005
2.3400	1104.002	60.741	106.121	77.278	-0.721	35.346	2101.736	-0.004252	-0.007428	-0.005409
2.3600	1135.532	63.865	110.013	80.545	-0.715	35.347	2161.760	-0.004471	-0.007701	-0.005638
2.3800	1178.903	67.673	115.779	84.852	-0.714	35.347	2244.329	-0.004737	-0.008105	-0.005940
2.4000	1241.617	72.329	121.929	90.007	-0.701	35.347	2363.720	-0.005063	-0.008535	-0.006301
2.4200	1241.857	72.621	122.451	90.563	-0.706	35.348	2364.178	-0.005083	-0.008572	-0.006339
2.4400	1279.534	76.301	126.608	94.026	-0.708	35.348	2435.904	-0.005341	-0.008863	-0.006582
2.4600	1303.158	78.193	129.500	96.359	-0.707	35.347	2480.879	-0.005473	-0.009065	-0.006745
2.4800	1300.123	78.234	129.993	96.594	-0.717	35.347	2475.100	-0.005476	-0.009099	-0.006762
2.5000	1298.379	78.360	129.800	96.692	-0.705	35.348	2471.781	-0.005485	-0.009086	-0.006768
2.5200	1284.764	77.804	129.443	96.290	-0.701	35.347	2445.860	-0.005446	-0.009061	-0.006740
2.5400	1259.501	76.345	128.466	94.873	-0.715	35.347	2397.766	-0.005344	-0.008993	-0.006641
2.5600	1248.169	75.091	127.475	93.844	-0.710	35.348	2376.194	-0.005256	-0.008923	-0.006569
2.5800	1208.359	72.621	123.388	90.664	-0.707	35.347	2300.406	-0.005084	-0.008637	-0.006346
2.6000	1156.481	68.963	118.874	86.814	-0.722	35.348	2201.643	-0.004827	-0.008321	-0.006077
2.6200	1104.002	65.060	113.976	82.839	-0.710	35.347	2101.736	-0.004554	-0.007978	-0.005799
2.6400	1073.494	62.502	110.729	80.046	-0.712	35.347	2043.657	-0.004375	-0.007751	-0.005603
2.6600	1003.041	57.320	103.039	74.222	-0.715	35.347	1909.533	-0.004012	-0.007213	-0.005196
2.6800	938.254	52.733	96.253	68.636	-0.710	35.348	1786.194	-0.003691	-0.006738	-0.004804
2.7000	884.211	48.594	90.225	63.828	-0.706	35.348	1683.311	-0.003402	-0.006316	-0.004468
2.7200	810.197	42.979	81.887	57.518	-0.708	35.348	1542.406	-0.003009	-0.005732	-0.004026
2.7400	770.957	39.993	76.906	53.755	-0.715	35.348	1467.705	-0.002800	-0.005383	-0.003763
2.7600	676.188	33.517	66.574	45.456	-0.702	35.348	1287.289	-0.002346	-0.004660	-0.003182
2.7800	622.747	29.401	59.761	40.957	-0.711	35.348	1185.551	-0.002058	-0.004183	-0.002867
2.8000	557.133	24.426	51.945	34.658	-0.708	35.348	1060.638	-0.001710	-0.003636	-0.002426
2.8200	508.712	20.633	45.178	30.058	-0.711	35.348	968.456	-0.001444	-0.003162	-0.002104
2.8400	445.682	16.325	37.331	24.375	-0.715	35.349	848.465	-0.001143	-0.002613	-0.001706
2.8600	390.092	12.254	30.203	19.096	-0.710	35.348	742.636	-0.000858	-0.002114	-0.001337
2.8800	366.242	10.241	26.115	16.607	-0.703	35.349	697.231	-0.000717	-0.001828	-0.001162
2.9000	325.200	7.167	20.518	12.339	-0.708	35.348	619.097	-0.000502	-0.001436	-0.000864
2.9200	290.364	4.960	15.727	8.687	-0.715	35.349	552.778	-0.000347	-0.001101	-0.000608
2.9400	270.196	3.237	12.414	6.256	-0.710	35.349	514.383	-0.000227	-0.000869	-0.000438
2.9600	253.244	1.693	8.999	4.256	-0.718	35.349	482.111	-0.000118	-0.000630	-0.000298
2.9800	250.463	1.596	8.627	3.756	-0.718	35.349	476.818	-0.000112	-0.000604	-0.000263
3.0000	260.022	1.733	8.738	4.075	-0.719	35.349	495.014	-0.000121	-0.000612	-0.000285
3.0200	262.125	1.763	8.614	4.283	-0.717	35.349	499.020	-0.000123	-0.000603	-0.000300
3.0400	271.353	2.177	8.903	4.712	-0.710	35.349	516.586	-0.000152	-0.000623	-0.000330
3.0600	297.758	3.626	11.617	6.409	-0.704	35.349	566.854	-0.000254	-0.000813	-0.000449
3.0800	324.118	4.930	14.641	8.617	-0.704	35.349	617.037	-0.000345	-0.001025	-0.000603
3.1000	375.365	7.918	20.544	13.093	-0.708	35.349	714.598	-0.000554	-0.001438	-0.000916
3.1200	412.079	10.478	24.905	16.606	-0.716	35.349	784.492	-0.000733	-0.001743	-0.001162
3.1400	484.411	15.185	33.728	22.541	-0.712	35.349	922.194	-0.001063	-0.002361	-0.001578
3.1600	525.799	18.062	39.246	25.948	-0.709	35.349	1000.986	-0.001264	-0.002747	-0.001816
3.1800	594.719	22.401	46.922	31.951	-0.710	35.349	1132.193	-0.001568	-0.003285	-0.002237
3.2000	650.820	26.470	53.776	36.787	-0.718	35.350	1238.995	-0.001853	-0.003764	-0.002575
3.2200	718.734	31.862	62.748	43.222	-0.722	35.349	1368.284	-0.002230	-0.004392	-0.003026
3.2400	791.832	36.990	70.851	49.403	-0.715	35.350	1507.444	-0.002589	-0.004960	-0.003458
3.2600	867.455	42.173	79.148	56.392	-0.720	35.350	1651.411	-0.002952	-0.005540	-0.003947
3.2800	915.771	46.326	85.437	60.743	-0.724	35.349	1743.393	-0.003243	-0.005981	-0.004252
3.3000	981.836	51.387	92.893	66.550	-0.727	35.350	1869.164	-0.003597	-0.006503	-0.004659
3.3200	1037.877	55.559	99.391	71.930	-0.723	35.350	1975.851	-0.003889	-0.006957	-0.005035
3.3400	1082.526	59.097	104.317	76.087	-0.720	35.349	2060.852	-0.004137	-0.007302	-0.005326
3.3600	1142.595	64.156	110.892	81.354	-0.717	35.349	2175.207	-0.004491	-0.007762	-0.005695
3.3800	1190.100	68.270	116.634	85.518	-0.713	35.350	2265.644	-0.004779	-0.008164	-0.005986
3.4000	1230.165	71.134	120.855	89.425	-0.716	35.349	2341.919	-0.004979	-0.008460	-0.006260
3.4200	1258.073	73.939	123.937	92.177	-0.710	35.350	2395.048	-0.005176	-0.008676	-0.006452
3.4400	1278.918	75.884	127.187	94.455	-0.703	35.350	2434.731	-0.005312	-0.008903	-0.006612
3.4600	1279.819	76.191	127.545	94.968	-0.707	35.350	2436.447	-0.005333	-0.008928	-0.006648
3.4800	1295.599	77.874	129.278	96.497	-0.715	35.350	2466.488	-0.005451	-0.009049	-0.006755
3.5000	1290.384	77.764	129.359	96.233	-0.708	35.350	2456.560	-0.005444	-0.009055	-0.006736
3.5200	1295.163	78.430	129.925	96.902	-0.708	35.350	2465.658	-0.005490	-0.009095	-0.006783
3.5400	1274.394	77.237	129.168	95.789	-0.714	35.350	2426.119	-0.005407	-0.009042	-0.006705
3.5600	1237.635	74.716	126.306	93.360	-0.716	35.350	2356.138	-0.005230	-0.008841	-0.006535
3.5800	1203.745	72.231	123.634	90.648	-0.710	35.350	2291.622	-0.005056	-0.008654	-0.006345
3.6000	1171.570	70.077	120.429	88.147	-0.705	35.350	2230.368	-0.004905	-0.008430	-0.006170
3.6200	1117.963	65.936	115.366	83.963	-0.712	35.350	2128.315	-0.004616	-0.008076	-0.005877
3.6400	1076.109	62.642	110.633	80.505	-0.706	35.350	2048.635	-0.004385	-0.007744	-0.005635
3.6600	1010.435	58.124	103.905	74.988	-0.697	35.350	1923.609	-0.004069	-0.007273	-0.005249
3.6800	948.593	53.774	97.835	69.638	-0.714	35.350	1805.878	-0.003764	-0.006848	-0.004875
3.7000	889.682	49.038	91.077	64.553	-0.714	35.350	1693.726	-0.003433	-0.006375	-0.004519
3.7200	828.231	44.218	84.254	59.313	-0.715	35.350	1576.738	-0.003095	-0.005898	-0.004152
3.7400	748.174	38.671	75.173	52.378	-0.711	35.350	1424.332	-0.002707	-0.005262	-0.003666
3.7600	682.936	33.780	67.508	46.582	-0.718	35.350	1300.135	-0.002365	-0.004726	-0.003261
3.7800	621.304	28.984	59.829	40.578	-0.711	35.350	1182.804	-0.002029	-0.004188	-0.002840
3.8000	569.456	24.815	52.937	35.898	-0.716	35.350	1084.099	-0.001737	-0.003706	-0.002513
3.8200	498.628	20.091	44.503	29.671	-0.705	35.350	949.259	-0.001406	-0.003115	-0.002077
3.8400	453.768	16.841	38.597	25.377	-0.714	35.350	863.857	-0.001179	-0.002702	-0.001776
3.8600	408.502	13.309	32.475	21.195	-0.708	35.350	777.683	-0.000932	-0.002273	-0.001484
3.8800	358.743	9.991	25.499	15.873	-0.709	35.350	682.955	-0.000699	-0.001785	-0.001111
3.9000	314.499	7.138	19.661	11.520	-0.713	35.350	598.726	-0.000500	-0.001376	-0.000806
3.9200	305.978	6.057	18.083	10.175	-0.722	35.350	582.504	-0.000424	-0.001266	-0.000712
3.9400	270.060	3.403	12.524	6.617	-0.715	35.351	514.126	-0.000238	-0.000877	-0.000463
3.9600	267.370	2.932	11.148	6.030	-0.712	35.351	509.005	-0.000205	-0.000780	-0.000422
3.9800	244.392	1.624	8.228	3.518	-0.712	35.351	465.260	-0.000114	-0.000576	-0.000246
4.0000	248.510	1.361	8.104	3.311	-0.700	35.351	473.099	-0.000095	-0.000567	-0.000232
4.0200	257.497	1.596	8.131	3.811	-0.701	35.351	490.208	-0.000112	-0.000569	-0.000267
4.0400	266.529	2.262	8.435	4.270	-0.706	35.350	507.402	-0.000158	-0.000590	-0.000299
4.0600	312.335	4.891	13.264	7.560	-0.702	35.350	594.606	-0.000342	-0.000928	-0.000529
4.0800	324.478	5.363	14.987	9.021	-0.694	35.350	617.723	-0.000375	-0.001049	-0.000631
4.1000	369.323	8.000	20.337	13.009	-0.710	35.351	703.096	-0.000560	-0.001424	-0.000911
4.1200	424.613	11.837	26.363	17.843	-0.705	35.351	808.353	-0.000829	-0.001845	-0.001249
4.1400	484.110	15.576	33.742	23.055	-0.696	35.351	921.621	-0.001090	-0.002362	-0.001614
4.1600	529.255	18.368	39.836	26.878	-0.712	35.351	1007.566	-0.001286	-0.002789	-0.001881
4.1800	593.517	22.580	47.061	32.228	-0.703	35.351	1129.904	-0.001581	-0.003294	-0.002256
4.2000	668.884	27.804	56.086	38.729	-0.695	35.351	1273.384	-0.001946	-0.003926	-0.002711
4.2200	739.668	33.252	64.961	45.236	-0.708	35.351	1408.138	-0.002328	-0.004547	-0.003166
4.2400	791.636	37.117	70.934	49.751	-0.688	35.351	1507.072	-0.002598	-0.004965	-0.003483
4.2600	857.626	41.768	78.544	55.530	-0.704	35.351	1632.700	-0.002924	-0.005498	-0.003887
4.2800	927.809	47.355	86.758	62.061	-0.698	35.351	1766.310	-0.003315	-0.006073	-0.004344
4.3000	976.967	51.330	92.756	66.480	-0.707	35.351	1859.894	-0.003593	-0.006493	-0.004654
4.3200	1034.210	55.403	99.088	71.834	-0.700	35.351	1968.870	-0.003878	-0.006936	-0.005028
4.3400	1092.565	60.282	105.403	76.976	-0.700	35.351	2079.964	-0.004220	-0.007378	-0.005388
4.3600	1157.984	65.590	112.489	82.867	-0.696	35.352	2204.504	-0.004591	-0.007874	-0.005801
4.3800	1189.859	68.353	116.923	85.952	-0.700	35.352	2265.186	-0.004785	-0.008185	-0.006017
4.4000	1225.461	71.386	120.826	89.341	-0.692	35.352	2332.964	-0.004997	-0.008458	-0.006254
4.4200	1270.201	75.302	125.399	93.348	-0.703	35.351	2418.137	-0.005271	-0.008778	-0.006534
4.4400	1269.284	75.580	126.335	93.678	-0.696	35.352	2416.391	-0.005291	-0.008843	-0.006557
4.4600	1280.886	76.552	127.545	94.858	-0.695	35.351	2438.478	-0.005359	-0.008928	-0.006640
4.4800	1303.414	78.347	130.391	97.264	-0.700	35.352	2481.365	-0.005484	-0.009127	-0.006808
4.5000	1302.662	78.527	130.225	97.570	-0.704	35.352	2479.935	-0.005497	-0.009116	-0.006830
4.5200	1283.591	77.944	129.951	96.471	-0.700	35.352	2443.628	-0.005456	-0.009097	-0.006753
4.5400	1269.495	76.680	129.220	95.761	-0.700	35.352	2416.792	-0.005368	-0.009045	-0.006703
4.5600	1257.833	75.912	128.357	95.052	-0.695	35.352	2394.590	-0.005314	-0.008985	-0.006654
4.5800	1188.777	71.188	122.095	89.661	-0.700	35.352	2263.126	-0.004983	-0.008547	-0.006276
4.6000	1171.119	69.884	120.676	88.369	-0.707	35.352	2229.509	-0.004892	-0.008447	-0.006186
4.6200	1113.620	65.630	115.186	83.880	-0.709	35.352	2120.047	-0.004594	-0.008063	-0.005872
4.6400	1072.472	62.324	110.619	80.213	-0.706	35.352	2041.712	-0.004363	-0.007743	-0.005615
4.6600	1001.764	57.249	103.090	74.164	-0.698	35.352	1907.101	-0.004007	-0.007216	-0.005192
4.6800	947.030	53.483	97.987	69.680	-0.707	35.352	1802.902	-0.003744	-0.006859	-0.004878
4.7000	886.075	48.801	90.746	64.593	-0.703	35.352	1686.859	-0.003416	-0.006352	-0.004521
4.7200	815.021	43.535	82.767	58.312	-0.718	35.352	1551.590	-0.003047	-0.005794	-0.004082
4.7400	752.788	38.951	75.504	52.864	-0.704	35.352	1433.115	-0.002727	-0.005285	-0.003700
4.7600	686.678	34.127	68.129	46.679	-0.703	35.352	1307.259	-0.002389	-0.004769	-0.003268
4.7800	631.464	29.636	61.097	41.859	-0.705	35.353	1202.145	-0.002075	-0.004277	-0.002930
4.8000	570.148	25.010	53.446	35.897	-0.694	35.352	1085.415	-0.001751	-0.003741	-0.002513
4.8200	514.212	21.094	46.510	30.728	-0.702	35.352	978.928	-0.001477	-0.003256	-0.002151
4.8400	460.095	17.230	39.258	25.711	-0.694	35.352	875.902	-0.001206	-0.002748	-0.001800
4.8600	397.066	12.573	31.044	19.986	-0.692	35.352	755.911	-0.000880	-0.002173	-0.001399
4.8800	364.409	9.975	26.131	16.510	-0.683	35.352	693.741	-0.000698	-0.001829	-0.001156
4.9000	319.203	7.237	20.036	12.034	-0.686	35.352	607.681	-0.000507	-0.001402	-0.000842
4.9200	290.785	5.196	15.989	8.772	-0.690	35.351	553.579	-0.000364	-0.001119	-0.000614
4.9400	270.962	3.290	12.647	6.839	-0.695	35.352	515.842	-0.000230	-0.000885	-0.000479
4.9600	255.092	2.149	9.658	4.866	-0.696	35.352	485.630	-0.000150	-0.000676	-0.000341
4.9800	250.569	1.665	8.655	4.131	-0.687	35.352	477.018	-0.000117	-0.000606	-0.000289
5.0000	246.706	1.331	7.967	3.505	-0.691	35.352	469.666	-0.000093	-0.000558	-0.000245
5.0200	255.543	1.430	8.227	3.839	-0.699	35.352	486.488	-0.000100	-0.000576	-0.000269
5.0400	273.066	2.205	9.053	4.507	-0.681	35.352	519.848	-0.000154	-0.000634	-0.000315
5.0600	306.324	4.390	12.868	7.491	-0.692	35.352	583.162	-0.000307	-0.000901	-0.000524
5.0800	332.639	5.667	16.153	9.899	-0.684	35.352	633.259	-0.000397	-0.001131	-0.000693
5.1000	388.424	8.988	22.322	14.498	-0.696	35.352	739.460	-0.000629	-0.001563	-0.001015
5.1200	441.685	12.210	28.442	18.971	-0.695	35.353	840.855	-0.000855	-0.001991	-0.001328
5.1400	477.002	14.741	33.316	22.483	-0.696	35.352	908.089	-0.001032	-0.002332	-0.001574
5.1600	539.324	19.008	40.839	27.240	-0.697	35.353	1026.735	-0.001331	-0.002859	-0.001907
5.1800	597.665	22.525	47.789	32.632	-0.697	35.353	1137.800	-0.001577	-0.003345	-0.002284
5.2000	674.595	28.151	56.926	39.354	-0.699	35.353	1284.256	-0.001971	-0.003985	-0.002755
5.2200	740.645	33.100	64.894	45.082	-0.687	35.353	1409.998	-0.002317	-0.004543	-0.003156
5.2400	792.538	37.267	71.414	49.875	-0.699	35.353	1508.789	-0.002609	-0.004999	-0.003491
5.2600	863.547	42.215	79.204	56.157	-0.694	35.353	1643.972	-0.002955	-0.005544	-0.003931
5.2800	927.027	47.398	86.938	62.090	-0.700	35.353	1764.822	-0.003318	-0.006086	-0.004346
5.3000	979.116	51.676	93.114	66.785	-0.701	35.353	1863.985	-0.003617	-0.006518	-0.004675
5.3200	1042.010	56.336	99.994	72.346	-0.703	35.353	1983.719	-0.003944	-0.007000	-0.005064
5.3400	1102.424	60.823	106.366	77.556	-0.695	35.353	2098.732	-0.004258	-0.007446	-0.005429
5.3600	1129.866	63.432	110.097	80.590	-0.697	35.353	2150.974	-0.004440	-0.007707	-0.005641
5.3800	1203.204	69.131	117.910	86.841	-0.696	35.353	2290.592	-0.004839	-0.008254	-0.006079
5.4000	1245.404	72.512	122.740	90.606	-0.689	35.353	2370.930	-0.005076	-0.008592	-0.006342
5.4200	1250.003	73.607	123.812	91.718	-0.694	35.353	2379.684	-0.005152	-0.008667	-0.006420
5.4400	1270.952	75.788	126.277	93.984	-0.698	35.353	2419.567	-0.005305	-0.008839	-0.006579
5.4600	1292.804	77.318	128.920	96.067	-0.694	35.352	2461.166	-0.005412	-0.009024	-0.006725
5.4800	1297.297	77.998	129.730	96.846	-0.708	35.353	2469.721	-0.005460	-0.009081	-0.006779
5.5000	1292.954	78.250	129.635	96.844	-0.694	35.353	2461.452	-0.005477	-0.009074	-0.006779
5.5200	1286.206	78.057	129.538	96.664	-0.698	35.354	2448.606	-0.005464	-0.009068	-0.006766
5.5400	1273.462	77.040	129.290	95.885	-0.698	35.354	2424.345	-0.005393	-0.009050	-0.006712
5.5600	1243.781	74.982	127.269	93.957	-0.694	35.354	2367.840	-0.005249	-0.008909	-0.006577
5.5800	1211.470	72.845	124.280	91.357	-0.698	35.353	2306.328	-0.005099	-0.008700	-0.006395
5.6000	1169.646	70.048	120.443	87.926	-0.691	35.354	2226.706	-0.004903	-0.008431	-0.006155
5.6200	1126.139	66.533	116.192	84.560	-0.698	35.353	2143.879	-0.004657	-0.008133	-0.005919
5.6400	1057.113	61.530	109.313	79.100	-0.688	35.353	2012.472	-0.004307	-0.007652	-0.005537
5.6600	1018.926	58.861	105.046	75.378	-0.695	35.353	1939.774	-0.004120	-0.007353	-0.005276
5.6800	930.258	52.138	96.127	68.259	-0.693	35.354	1770.973	-0.003650	-0.006729	-0.004778
5.7000	870.415	47.674	89.193	63.120	-0.699	35.354	1657.047	-0.003337	-0.006244	-0.004418
5.7200	816.899	43.551	83.125	58.465	-0.692	35.353	1555.166	-0.003049	-0.005819	-0.004093
5.7400	748.700	38.532	75.119	52.490	-0.696	35.353	1425.333	-0.002697	-0.005258	-0.003674
5.7600	683.898	34.071	67.661	46.749	-0.693	35.354	1301.966	-0.002385	-0.004736	-0.003272
5.7800	623.153	29.387	60.188	41.040	-0.693	35.354	1186.323	-0.002057	-0.004213	-0.002873
5.8000	555.540	23.955	51.861	34.867	-0.690	35.354	1057.606	-0.001677	-0.003630	-0.002441
5.8200	501.077	20.218	44.735	29.908	-0.698	35.354	953.922	-0.001415	-0.003131	-0.002094
5.8400	444.270	16.326	37.482	24.821	-0.696	35.353	845.776	-0.001143	-0.002624	-0.001737
5.8600	396.254	12.463	31.154	20.085	-0.692	35.353	754.366	-0.000872	-0.002181	-0.001406
5.8800	375.334	10.587	27.631	17.579	-0.708	35.353	714.540	-0.000741	-0.001934	-0.001231
5.9000	316.077	7.125	19.979	12.176	-0.700	35.354	601.730	-0.000499	-0.001399	-0.000852
5.9200	288.876	5.168	15.771	8.799	-0.712	35.354	549.946	-0.000362	-0.001104	-0.000616
5.9400	269.279	3.902	12.621	6.726	-0.702	35.354	512.638	-0.000273	-0.000883	-0.000471
5.9600	254.175	2.205	9.879	4.963	-0.683	35.354	483.885	-0.000154	-0.000692	-0.000347
5.9800	258.188	1.958	9.507	4.685	-0.701	35.354	491.524	-0.000137	-0.000665	-0.000328
6.0000	257.196	2.026	9.398	4.229	-0.699	35.354	489.635	-0.000142	-0.000658	-0.000296
6.0200	255.062	1.304	8.711	3.826	-0.692	35.354	485.573	-0.000091	-0.000610	-0.000268
6.0400	272.345	2.039	9.521	4.868	-0.680	35.354	518.475	-0.000143	-0.000666	-0.000341
6.0600	312.335	4.707	13.537	8.088	-0.688	35.354	594.606	-0.000329	-0.000948	-0.000566
6.0800	331.542	5.820	15.990	9.761	-0.682	35.354	631.170	-0.000407	-0.001119	-0.000683
6.1000	373.125	7.904	20.709	13.175	-0.679	35.354	710.335	-0.000553	-0.001450	-0.000922
6.1200	427.979	11.545	27.069	17.983	-0.680	35.354	814.762	-0.000808	-0.001895	-0.001259
6.1400	475.334	14.699	33.025	22.290	-0.696	35.354	904.913	-0.001029	-0.002312	-0.001560
6.1600	519.682	17.634	38.639	26.128	-0.692	35.354	989.342	-0.001234	-0.002705	-0.001829
6.1800	604.788	23.512	48.794	33.006	-0.680	35.354	1151.361	-0.001646	-0.003416	-0.002310
6.2000	667.502	27.665	56.007	38.689	-0.699	35.354	1270.752	-0.001937	-0.003920	-0.002708
6.2200	720.417	31.805	62.707	43.664	-0.684	35.354	1371.489	-0.002226	-0.004389	-0.003056
6.2400	789.337	36.670	71.166	49.696	-0.688	35.354	1502.695	-0.002567	-0.004982	-0.003479
6.2600	857.912	41.632	78.613	55.809	-0.698	35.354	1633.244	-0.002914	-0.005503	-0.003907
6.2800	931.821	47.661	87.294	62.520	-0.696	35.354	1773.949	-0.003336	-0.006111	-0.004376
6.3000	998.082	52.955	94.976	68.400	-0.683	35.354	1900.091	-0.003707	-0.006648	-0.004788
6.3200	1060.254	57.750	101.962	74.028	-0.698	35.354	2018.452	-0.004043	-0.007137	-0.005182
6.3400	1095.060	60.504	105.830	77.196	-0.691	35.354	2084.713	-0.004235	-0.007408	-0.005404
6.3600	1151.943	64.881	112.077	82.491	-0.700	35.355	2193.003	-0.004542	-0.007845	-0.005774
6.3800	1181.609	68.103	116.277	85.478	-0.700	35.355	2249.479	-0.004767	-0.008139	-0.005983
6.4000	1230.286	71.970	122.054	89.840	-0.696	35.355	2342.148	-0.005038	-0.008544	-0.006289
6.4200	1260.823	74.411	124.680	92.777	-0.703	35.354	2400.284	-0.005209	-0.008728	-0.006494
6.4400	1274.514	75.870	126.748	94.483	-0.694	35.354	2426.348	-0.005311	-0.008872	-0.006614
6.4600	1309.575	78.777	130.637	97.458	-0.698	35.354	2493.095	-0.005514	-0.009145	-0.006822
6.4800	1293.315	77.736	130.185	97.041	-0.692	35.355	2462.139	-0.005441	-0.009113	-0.006793
6.5000	1289.693	78.111	129.925	97.067	-0.694	35.354	2455.244	-0.005468	-0.009095	-0.006795
6.5200	1289.242	78.166	130.283	97.041	-0.698	35.355	2454.386	-0.005472	-0.009120	-0.006793
6.5400	1271.944	77.443	129.512	96.288	-0.689	35.355	2421.455	-0.005421	-0.009066	-0.006740
6.5600	1238.942	74.744	127.173	93.526	-0.697	35.355	2358.627	-0.005232	-0.008902	-0.006547
6.5800	1198.681	72.191	123.237	90.467	-0.694	35.355	2281.981	-0.005053	-0.008627	-0.006333
6.6000	1167.181	69.925	120.128	87.982	-0.696	35.354	2222.013	-0.004895	-0.008409	-0.006159
6.6200	1118.670	66.272	115.753	84.255	-0.687	35.354	2129.660	-0.004639	-0.008103	-0.005898
6.6400	1058.180	61.629	109.104	79.307	-0.696	35.354	2014.503	-0.004314	-0.007637	-0.005552
6.6600	999.645	57.388	103.285	74.543	-0.687	35.354	1903.067	-0.004017	-0.007230	-0.005218
6.6800	948.263	53.734	97.905	70.026	-0.686	35.354	1805.248	-0.003761	-0.006853	-0.004902
6.7000	880.980	48.481	90.651	64.120	-0.696	35.354	1677.160	-0.003394	-0.006346	-0.004488
6.7200	825.541	44.231	84.283	59.563	-0.698	35.354	1571.617	-0.003096	-0.005900	-0.004169
6.7400	760.017	39.313	76.342	53.617	-0.695	35.355	1446.877	-0.002752	-0.005344	-0.003753
6.7600	683.838	34.059	67.411	46.777	-0.696	35.355	1301.851	-0.002384	-0.004719	-0.003274
6.7800	621.605	29.205	60.352	41.289	-0.702	35.355	1183.376	-0.002044	-0.004225	-0.002890
6.8000	559.132	24.676	52.537	35.591	-0.680	35.355	1064.444	-0.001727	-0.003678	-0.002491
6.8200	491.910	19.716	43.649	29.363	-0.686	35.355	936.470	-0.001380	-0.003055	-0.002055
6.8400	441.820	15.881	37.278	24.612	-0.686	35.355	841.112	-0.001112	-0.002609	-0.001723
6.8600	395.518	12.476	31.306	20.002	-0.687	35.355	752.964	-0.000873	-0.002191	-0.001400
6.8800	358.999	9.752	25.690	16.425	-0.689	35.355	683.441	-0.000683	-0.001798	-0.001150
6.9000	316.649	6.930	20.089	12.159	-0.690	35.355	602.818	-0.000485	-0.001406	-0.000851
6.9200	295.894	5.557	16.857	9.397	-0.701	35.355	563.307	-0.000389	-0.001180	-0.000658
6.9400	267.551	3.263	12.633	6.532	-0.688	35.355	509.348	-0.000228	-0.000884	-0.000457
6.9600	259.496	2.428	11.065	5.365	-0.688	35.355	494.013	-0.000170	-0.000775	-0.000376
6.9800	248.435	1.707	8.656	3.964	-0.684	35.355	472.956	-0.000120	-0.000606	-0.000277
7.0000	253.424	1.872	8.891	3.934	-0.688	35.355	482.454	-0.000131	-0.000622	-0.000275
7.0200	259.886	2.165	9.164	4.200	-0.682	35.355	494.757	-0.000152	-0.000641	-0.000294
7.0400	271.293	2.291	9.451	4.809	-0.692	35.355	516.472	-0.000160	-0.000662	-0.000337
7.0600	297.893	3.914	12.029	6.810	-0.687	35.355	567.112	-0.000274	-0.000842	-0.000477
7.0800	339.567	6.555	16.939	10.329	-0.687	35.355	646.448	-0.000459	-0.001186	-0.000723
7.1000	382.488	8.820	21.990	14.164	-0.695	35.355	728.159	-0.000617	-0.001539	-0.000991
7.1200	426.942	11.602	26.983	18.065	-0.694	35.356	812.788	-0.000812	-0.001889	-0.001265
7.1400	457.795	13.782	31.028	20.835	-0.688	35.355	871.525	-0.000965	-0.002172	-0.001458
7.1600	545.847	19.604	41.815	28.001	-0.682	35.355	1039.152	-0.001372	-0.002927	-0.001960
7.1800	590.902	22.594	47.582	32.217	-0.684	35.355	1124.926	-0.001582	-0.003331	-0.002255
7.2000	662.783	27.720	55.621	38.619	-0.683	35.355	1261.768	-0.001940	-0.003893	-0.002703
7.2200	725.617	32.418	63.229	44.164	-0.683	35.355	1381.388	-0.002269	-0.004426	-0.003091
7.2400	772.295	35.710	69.406	48.571	-0.679	35.355	1470.251	-0.002500	-0.004858	-0.003400
7.2600	851.495	41.601	78.435	55.254	-0.678	35.355	1621.027	-0.002912	-0.005490	-0.003868
7.2800	921.662	47.049	86.221	61.769	-0.690	35.355	1754.608	-0.003293	-0.006035	-0.004324
7.3000	993.573	52.553	94.369	67.997	-0.680	35.355	1891.508	-0.003679	-0.006606	-0.004760
7.3200	1048.111	56.765	100.780	73.027	-0.679	35.355	1995.335	-0.003974	-0.007055	-0.005112
7.3400	1105.805	61.255	107.123	78.251	-0.678	35.356	2105.169	-0.004288	-0.007499	-0.005478
7.3600	1147.449	64.795	112.050	82.519	-0.681	35.355	2184.448	-0.004536	-0.007843	-0.005776
7.3800	1190.806	68.756	116.895	85.980	-0.674	35.355	2266.989	-0.004813	-0.008183	-0.006019
7.4000	1224.394	71.536	120.884	89.381	-0.683	35.355	2330.933	-0.005008	-0.008462	-0.006257
7.4200	1248.470	73.592	123.496	91.844	-0.688	35.355	2376.766	-0.005151	-0.008645	-0.006429
7.4400	1275.822	76.010	126.499	94.593	-0.682	35.355	2428.837	-0.005321	-0.008855	-0.006622
7.4600	1284.719	77.153	128.165	95.692	-0.683	35.356	2445.774	-0.005401	-0.008972	-0.006698
7.4800	1293.555	78.084	129.883	97.013	-0.685	35.355	2462.597	-0.005466	-0.009092	-0.006791
7.5000	1301.475	78.887	130.777	97.764	-0.690	35.356	2477.674	-0.005522	-0.009154	-0.006844
7.5200	1286.612	78.332	129.965	97.097	-0.694	35.355	2449.379	-0.005483	-0.009098	-0.006797
7.5400	1282.840	78.250	130.337	97.039	-0.695	35.356	2442.198	-0.005477	-0.009124	-0.006793
7.5600	1233.381	74.536	126.595	93.151	-0.691	35.356	2348.042	-0.005218	-0.008862	-0.006521
7.5800	1197.388	72.136	123.154	90.691	-0.691	35.356	2279.520	-0.005050	-0.008621	-0.006348
7.6000	1164.566	69.952	120.208	88.079	-0.691	35.355	2217.035	-0.004897	-0.008415	-0.006166
7.6200	1116.896	66.463	115.573	84.254	-0.682	35.355	2126.284	-0.004652	-0.008090	-0.005898
7.6400	1061.246	62.170	109.985	79.766	-0.703	35.355	2020.340	-0.004352	-0.007699	-0.005584
7.6600	1019.091	58.874	105.252	76.240	-0.691	35.356	1940.088	-0.004121	-0.007368	-0.005337
7.6800	950.321	53.970	97.973	69.944	-0.683	35.355	1809.168	-0.003778	-0.006858	-0.004896
7.7000	850.713	47.216	87.404	61.866	-0.694	35.355	1619.539	-0.003305	-0.006118	-0.004331
7.7200	804.666	42.741	82.134	57.659	-0.694	35.357	1531.878	-0.002992	-0.005749	-0.004036
7.7400	757.702	39.075	76.451	53.421	-0.695	35.356	1442.471	-0.002735	-0.005352	-0.003739
7.7600	700.128	35.224	69.393	48.336	-0.683	35.356	1332.865	-0.002466	-0.004858	-0.003384
7.7800	631.043	30.163	61.386	42.138	-0.691	35.355	1201.344	-0.002111	-0.004297	-0.002950
7.8000	553.226	24.219	51.999	35.034	-0.686	35.355	1053.200	-0.001695	-0.003640	-0.002452
7.8200	518.420	21.497	47.115	31.242	-0.687	35.356	986.938	-0.001505	-0.003298	-0.002187
7.8400	445.803	16.745	38.254	25.016	-0.685	35.356	848.694	-0.001172	-0.002678	-0.001751
7.8600	400.041	13.087	31.884	20.375	-0.683	35.356	761.576	-0.000916	-0.002232	-0.001426
7.8800	356.564	9.753	25.799	16.218	-0.683	35.355	678.806	-0.000683	-0.001806	-0.001135
7.9000	322.705	7.153	20.226	12.579	-0.686	35.356	614.347	-0.000501	-0.001416	-0.000881
7.9200	297.322	5.585	17.256	9.870	-0.677	35.356	566.025	-0.000391	-0.001208	-0.000691
7.9400	271.233	3.862	13.292	7.046	-0.681	35.356	516.357	-0.000270	-0.000930	-0.000493
7.9600	258.744	2.566	10.774	5.519	-0.690	35.356	492.582	-0.000180	-0.000754	-0.000386
7.9800	251.440	1.804	9.343	4.131	-0.680	35.356	478.678	-0.000126	-0.000654	-0.000289
8.0000	255.258	2.095	9.149	4.131	-0.684	35.355	485.945	-0.000147	-0.000640	-0.000289
8.0200	259.946	1.957	9.259	4.326	-0.695	35.356	494.871	-0.000137	-0.000648	-0.000303
8.0400	275.290	2.386	9.975	5.199	-0.681	35.355	524.082	-0.000167	-0.000698	-0.000364
8.0600	312.801	4.669	13.967	8.367	-0.687	35.356	595.493	-0.000327	-0.000978	-0.000586
8.0800	315.041	4.918	14.242	8.299	-0.681	35.356	599.756	-0.000344	-0.000997	-0.000581
8.1000	375.440	8.210	21.220	13.426	-0.684	35.356	714.741	-0.000575	-0.001485	-0.000940
8.1200	435.463	11.935	28.140	18.718	-0.687	35.356	829.010	-0.000835	-0.001970	-0.001310
8.1400	469.412	14.493	32.515	22.038	-0.678	35.356	893.641	-0.001015	-0.002276	-0.001543
8.1600	541.564	19.159	41.060	27.961	-0.690	35.356	1030.998	-0.001341	-0.002874	-0.001957
8.1800	577.452	21.692	46.274	31.353	-0.684	35.356	1099.319	-0.001518	-0.003239	-0.002195
8.2000	652.278	27.001	54.367	37.470	-0.684	35.356	1241.770	-0.001890	-0.003806	-0.002623
8.2200	715.503	31.541	62.128	43.292	-0.690	35.356	1362.133	-0.002208	-0.004349	-0.003030
8.2400	805.658	38.144	72.901	51.056	-0.684	35.356	1533.766	-0.002670	-0.005103	-0.003574
8.2600	870.220	42.840	80.469	56.961	-0.688	35.356	1656.675	-0.002999	-0.005633	-0.003987
8.2800	916.958	46.534	85.975	61.117	-0.683	35.355	1745.653	-0.003257	-0.006018	-0.004278
8.3000	990.763	52.567	94.300	67.830	-0.690	35.355	1886.158	-0.003680	-0.006601	-0.004748
8.3200	1042.025	56.528	100.188	72.790	-0.698	35.356	1983.747	-0.003957	-0.007013	-0.005095
8.3400	1094.489	60.629	105.899	77.376	-0.688	35.356	2083.626	-0.004244	-0.007413	-0.005416
8.3600	1158.555	65.576	112.612	83.060	-0.691	35.356	2205.591	-0.004590	-0.007883	-0.005814
8.3800	1185.907	68.437	116.330	85.757	-0.686	35.356	2257.662	-0.004791	-0.008143	-0.006003
8.4000	1217.166	71.105	120.346	88.715	-0.694	35.356	2317.171	-0.004977	-0.008424	-0.006210
8.4200	1244.067	73.258	123.208	91.508	-0.688	35.356	2368.383	-0.005128	-0.008625	-0.006406
8.4400	1277.234	76.079	126.884	94.678	-0.699	35.357	2431.526	-0.005326	-0.008882	-0.006627
8.4600	1287.694	77.555	128.630	96.067	-0.692	35.356	2451.439	-0.005429	-0.009004	-0.006725
8.4800	1296.561	78.346	129.869	97.041	-0.693	35.357	2468.319	-0.005484	-0.009091	-0.006793
8.5000	1292.128	77.750	129.868	97.111	-0.690	35.356	2459.879	-0.005443	-0.009091	-0.006798
8.5200	1300.138	78.873	130.611	97.904	-0.690	35.356	2475.128	-0.005521	-0.009143	-0.006853
8.5400	1268.443	77.137	129.208	96.179	-0.688	35.356	2414.789	-0.005400	-0.009045	-0.006733
8.5600	1245.059	75.453	127.696	94.414	-0.689	35.356	2370.272	-0.005282	-0.008939	-0.006609
8.5800	1191.122	71.494	122.688	89.966	-0.679	35.356	2267.590	-0.005005	-0.008588	-0.006298
8.6000	1188.492	71.314	122.370	89.673	-0.688	35.356	2262.583	-0.004992	-0.008566	-0.006277
8.6200	1088.117	64.296	112.694	82.020	-0.680	35.357	2071.495	-0.004501	-0.007889	-0.005741
8.6400	1067.257	62.820	110.481	80.323	-0.688	35.356	2031.784	-0.004397	-0.007734	-0.005623
8.6600	1011.006	58.388	104.484	75.627	-0.684	35.356	1924.696	-0.004087	-0.007314	-0.005294
8.6800	952.155	54.070	98.126	70.430	-0.685	35.355	1812.658	-0.003785	-0.006869	-0.004930
8.7000	890.208	49.720	91.710	65.274	-0.688	35.356	1694.727	-0.003480	-0.006420	-0.004569
8.7200	804.816	43.228	82.093	57.782	-0.677	35.356	1532.164	-0.003026	-0.005746	-0.004045
8.7400	752.382	39.090	75.723	53.117	-0.675	35.357	1432.343	-0.002736	-0.005301	-0.003718
8.7600	673.213	33.392	66.435	46.013	-0.683	35.357	1281.624	-0.002337	-0.004650	-0.003221
8.7800	608.681	28.748	59.127	40.343	-0.682	35.356	1158.772	-0.002012	-0.004139	-0.002824
8.8000	549.559	23.982	51.643	35.144	-0.676	35.356	1046.219	-0.001679	-0.003615	-0.002460
8.8200	515.910	21.260	46.644	31.241	-0.680	35.356	982.161	-0.001488	-0.003265	-0.002187
8.8400	434.652	15.700	36.436	24.139	-0.679	35.356	827.465	-0.001099	-0.002551	-0.001690
8.8600	381.181	12.267	29.998	19.304	-0.677	35.355	725.670	-0.000859	-0.002100	-0.001351
8.8800	362.125	10.268	26.212	16.817	-0.691	35.356	689.392	-0.000719	-0.001835	-0.001177
8.9000	321.939	7.388	20.805	12.743	-0.688	35.357	612.888	-0.000517	-0.001456	-0.000892
8.9200	289.252	5.153	15.784	9.177	-0.680	35.357	550.661	-0.000361	-0.001105	-0.000642
8.9400	262.336	3.276	12.401	6.518	-0.686	35.356	499.420	-0.000229	-0.000868	-0.000456
8.9600	261.584	2.484	11.091	5.628	-0.675	35.356	497.990	-0.000174	-0.000776	-0.000394
8.9800	259.961	2.345	10.360	5.214	-0.676	35.356	494.900	-0.000164	-0.000725	-0.000365
9.0000	245.970	1.596	8.351	3.991	-0.675	35.356	468.264	-0.000112	-0.000585	-0.000279
9.0200	253.048	1.540	8.533	4.034	-0.676	35.357	481.739	-0.000108	-0.000597	-0.000282
9.0400	265.221	2.025	9.012	4.757	-0.676	35.356	504.913	-0.000142	-0.000631	-0.000333
9.0600	294.872	3.637	11.849	6.990	-0.680	35.356	561.361	-0.000255	-0.000829	-0.000489
9.0800	344.271	6.847	17.572	11.216	-0.679	35.355	655.403	-0.000479	-0.001230	-0.000785
9.1000	403.753	10.031	24.218	16.053	-0.676	35.356	768.642	-0.000702	-0.001695	-0.001124
9.1200	416.618	11.006	26.832	17.511	-0.683	35.356	793.133	-0.000770	-0.001878	-0.001226
9.1400	477.062	14.895	33.108	22.597	-0.680	35.356	908.203	-0.001043	-0.002318	-0.001582
9.1600	519.517	18.229	39.162	26.421	-0.679	35.357	989.027	-0.001276	-0.002741	-0.001849
9.1800	600.039	23.122	48.434	33.310	-0.680	35.356	1142.321	-0.001619	-0.003390	-0.002332
9.2000	678.352	28.748	57.600	40.050	-0.679	35.356	1291.409	-0.002012	-0.004032	-0.002804
9.2200	726.293	32.279	63.476	44.485	-0.687	35.356	1382.675	-0.002260	-0.004443	-0.003114
9.2400	799.496	37.963	72.035	50.847	-0.690	35.356	1522.036	-0.002657	-0.005042	-0.003559
9.2600	850.788	41.715	78.751	55.642	-0.681	35.356	1619.682	-0.002920	-0.005513	-0.003895
9.2800	915.997	46.689	85.823	61.339	-0.681	35.356	1743.822	-0.003268	-0.006008	-0.004294
9.3000	981.911	51.746	93.363	67.093	-0.694	35.356	1869.307	-0.003622	-0.006535	-0.004696
9.3200	1038.057	56.361	100.035	72.484	-0.688	35.356	1976.194	-0.003945	-0.007002	-0.005074
9.3400	1085.382	60.144	105.569	76.962	-0.681	35.356	2066.288	-0.004210	-0.007390	-0.005387
9.3600	1147.329	65.158	111.885	82.826	-0.689	35.357	2184.219	-0.004561	-0.007832	-0.005798
9.3800	1189.423	68.839	116.799	86.131	-0.691	35.356	2264.357	-0.004819	-0.008176	-0.006029
9.4000	1249.868	73.564	123.416	91.469	-0.683	35.356	2379.427	-0.005149	-0.008639	-0.006403
9.4200	1248.245	73.564	124.006	92.094	-0.688	35.356	2376.337	-0.005149	-0.008680	-0.006447
9.4400	1280.150	76.511	127.585	95.414	-0.680	35.356	2437.077	-0.005356	-0.008931	-0.006679
9.4600	1282.464	77.208	128.371	95.636	-0.696	35.356	2441.483	-0.005405	-0.008986	-0.006694
9.4800	1297.297	78.624	130.736	97.359	-0.691	35.356	2469.721	-0.005504	-0.009152	-0.006815
9.5000	1302.888	78.848	131.065	98.028	-0.686	35.356	2480.364	-0.005519	-0.009175	-0.006862
9.5200	1284.764	78.057	130.143	97.082	-0.681	35.356	2445.860	-0.005464	-0.009110	-0.006796
9.5400	1276.994	77.958	130.034	96.832	-0.684	35.357	2431.068	-0.005457	-0.009102	-0.006778
9.5600	1242.579	75.664	127.791	94.415	-0.695	35.357	2365.551	-0.005296	-0.008945	-0.006609
9.5800	1210.643	73.008	124.667	92.107	-0.683	35.356	2304.754	-0.005111	-0.008727	-0.006447
9.6000	1157.638	69.077	119.424	87.704	-0.679	35.356	2203.846	-0.004835	-0.008360	-0.006139
9.6200	1117.753	66.423	115.338	84.532	-0.698	35.357	2127.914	-0.004650	-0.008074	-0.005917
9.6400	1082.857	63.559	112.186	81.688	-0.686	35.356	2061.481	-0.004449	-0.007853	-0.005718
9.6600	1019.212	58.959	105.320	76.323	-0.681	35.355	1940.317	-0.004127	-0.007372	-0.005343
9.6800	965.846	55.042	99.474	71.886	-0.688	35.356	1838.722	-0.003853	-0.006963	-0.005032
9.7000	879.072	48.689	90.471	64.356	-0.674	35.357	1673.527	-0.003408	-0.006333	-0.004505
9.7200	821.453	44.732	83.813	59.316	-0.686	35.356	1563.835	-0.003131	-0.005867	-0.004152
9.7400	743.651	38.643	75.160	52.723	-0.688	35.356	1415.720	-0.002705	-0.005261	-0.003691
9.7600	686.317	34.351	68.126	47.334	-0.684	35.356	1306.572	-0.002405	-0.004769	-0.003313
9.7800	620.553	29.858	60.313	41.387	-0.682	35.356	1181.374	-0.002090	-0.004222	-0.002897
9.8000	539.881	23.748	50.733	34.309	-0.694	35.356	1027.794	-0.001662	-0.003551	-0.002402
9.8200	496.463	19.938	44.639	29.767	-0.693	35.356	945.139	-0.001396	-0.003125	-0.002084
9.8400	452.806	16.771	38.530	25.558	-0.689	35.356	862.026	-0.001174	-0.002697	-0.001789
9.8600	408.021	13.558	32.846	21.501	-0.692	35.356	776.768	-0.000949	-0.002299	-0.001505
9.8800	347.442	9.349	24.962	15.693	-0.687	35.356	661.440	-0.000654	-0.001747	-0.001099
9.9000	330.700	7.751	22.061	13.494	-0.690	35.357	629.568	-0.000543	-0.001544	-0.000945
9.9200	293.069	5.571	16.912	9.662	-0.692	35.356	557.928	-0.000390	-0.001184	-0.000676
9.9400	266.003	3.748	12.963	6.922	-0.704	35.356	506.401	-0.000262	-0.000907	-0.000485
9.9600	266.093	3.013	12.044	6.270	-0.698	35.356	506.573	-0.000211	-0.000843	-0.000439
9.9800	239.012	1.291	8.089	3.560	-0.694	35.357	455.017	-0.000090	-0.000566	-0.000249
