# Supplementary material for: Evaluation of a Cold-Mixed High-Performance Polyurethane Mixture
Source: Hindawi journal article supplement (doi:10.1155/2019/1507971), 2019-11-07
Supplement: f1 [file 1507971.f1.zip › 1507971.f1/dynamic modulus data/PUM/specimen1/temp35/zhs-1-35_2Hz.csv]

Test Information
****************
Project name	zhs
Operator name	1
Target test temperature	35
Target confining stress	0
Average dynamic strain range from 75 to 125 micro-strain
Contact stress	5
Initial modulus	1000
Axial gauge length	70
Comments
Specimen information
********************
Identification	zhs-1-35
Dimensions	Point 1	Point 2	Point 3	Point 4	Point 5	Point 6	Average	Std Dev.
Diameter (mm)	49.2	49.2	49.3				49.23	0.058
Height (mm)	101.3	101.2	101.3				101.27	0.058
Cross-sectional area (mm�)	1903.7
Conditioning time
Properties/Comments
Test Data	2Hz
*********
Test date and time	Tue	Apr 2	2019	1:19 PM
Dynamic modulus (MPa)	10957
Phase angle (Degrees)	4.07
Average temperature (�C)	35.3
Average confining pressure (kPa)	-0.7
Average micro-strain	98
Load drift (%)	0.0
Load standard error (%)	2.1
Average deformation drift (%)	-3.3
Average deformation standard error (%)	2.7
Deformation uniformity (%)	19.4
Phase uniformity (Degrees)	0.4
Conditioning Cycles
Time (sec)	Axial stress (kPa)	Axial micro-strain #1	Axial micro-strain #2	Axial micro-strain #3	Confining pressure (kPa)	Temperature (�C)	Load (N)	Displacement #1 (mm)	Displacement #2 (mm)	Displacement #3 (mm)
0.0000	270.271	-0.583	5.794	1.030	-0.707	35.312	514.526	0.000041	-0.000406	-0.000072
0.0100	239.297	-2.948	-0.495	-2.916	-0.705	35.293	455.561	0.000206	0.000035	0.000204
0.0200	246.511	-3.171	-0.330	-2.831	-0.714	35.312	469.294	0.000222	0.000023	0.000198
0.0300	260.127	-2.739	0.800	-2.331	-0.699	35.292	495.214	0.000192	-0.000056	0.000163
0.0400	285.329	-1.336	2.586	-0.887	-0.696	35.312	543.194	0.000094	-0.000181	0.000062
0.0500	328.581	0.874	8.050	3.033	-0.699	35.293	625.534	-0.000061	-0.000564	-0.000212
0.0600	384.667	4.932	15.206	7.546	-0.700	35.312	732.307	-0.000345	-0.001064	-0.000528
0.0700	375.815	4.054	14.324	7.505	-0.695	35.293	715.456	-0.000284	-0.001003	-0.000525
0.0800	423.966	6.875	19.733	11.217	-0.680	35.312	807.123	-0.000481	-0.001381	-0.000785
0.0900	507.780	12.337	29.130	18.206	-0.700	35.293	966.682	-0.000864	-0.002039	-0.001274
0.1000	564.106	15.965	36.023	23.025	-0.702	35.312	1073.914	-0.001118	-0.002522	-0.001612
0.1100	590.346	17.966	39.589	25.432	-0.698	35.292	1123.867	-0.001258	-0.002771	-0.001780
0.1200	647.890	21.872	46.388	30.297	-0.711	35.312	1233.416	-0.001531	-0.003247	-0.002121
0.1300	689.383	24.914	51.161	33.851	-0.698	35.293	1312.408	-0.001744	-0.003581	-0.002370
0.1400	755.628	29.415	59.471	39.676	-0.683	35.311	1438.522	-0.002059	-0.004163	-0.002777
0.1500	807.026	33.168	64.881	44.052	-0.709	35.292	1536.369	-0.002322	-0.004542	-0.003084
0.1600	861.428	37.016	71.787	49.114	-0.697	35.311	1639.938	-0.002591	-0.005025	-0.003438
0.1700	886.015	39.450	75.006	51.515	-0.692	35.292	1686.745	-0.002761	-0.005250	-0.003606
0.1800	946.639	43.313	81.239	56.602	-0.689	35.312	1802.158	-0.003032	-0.005687	-0.003962
0.1900	967.018	45.482	84.572	58.870	-0.704	35.293	1840.954	-0.003184	-0.005920	-0.004121
0.2000	993.648	47.800	87.433	61.298	-0.701	35.312	1891.651	-0.003346	-0.006120	-0.004291
0.2100	1030.633	50.179	91.628	64.789	-0.709	35.293	1962.061	-0.003513	-0.006414	-0.004535
0.2200	1075.373	53.888	97.078	68.608	-0.708	35.312	2047.234	-0.003772	-0.006795	-0.004803
0.2300	1063.891	53.637	96.676	68.386	-0.706	35.293	2025.375	-0.003755	-0.006767	-0.004787
0.2400	1061.141	53.179	96.720	68.176	-0.704	35.311	2020.140	-0.003723	-0.006770	-0.004772
0.2500	1069.707	54.655	97.878	69.066	-0.702	35.292	2036.448	-0.003826	-0.006851	-0.004835
0.2600	1067.047	54.416	97.313	69.066	-0.697	35.312	2031.384	-0.003809	-0.006812	-0.004835
0.2700	1062.253	54.067	97.779	68.844	-0.708	35.292	2022.257	-0.003785	-0.006845	-0.004819
0.2800	1050.125	53.803	97.216	68.177	-0.695	35.312	1999.168	-0.003766	-0.006805	-0.004772
0.2900	1024.186	51.731	95.153	66.703	-0.711	35.292	1949.787	-0.003621	-0.006661	-0.004669
0.3000	984.015	49.025	91.961	64.022	-0.700	35.312	1873.312	-0.003432	-0.006437	-0.004482
0.3100	923.195	45.107	85.630	59.439	-0.700	35.292	1757.526	-0.003157	-0.005994	-0.004161
0.3200	911.954	43.687	84.117	58.327	-0.693	35.311	1736.126	-0.003058	-0.005888	-0.004083
0.3300	851.179	39.603	78.006	53.281	-0.696	35.291	1620.426	-0.002772	-0.005460	-0.003730
0.3400	823.437	37.670	74.720	50.682	-0.711	35.311	1567.612	-0.002637	-0.005230	-0.003548
0.3500	745.304	32.072	66.435	44.663	-0.700	35.292	1418.867	-0.002245	-0.004650	-0.003126
0.3600	699.663	29.083	61.303	40.510	-0.712	35.312	1331.978	-0.002036	-0.004291	-0.002836
0.3700	652.458	25.150	55.042	36.551	-0.708	35.292	1242.113	-0.001760	-0.003853	-0.002559
0.3800	610.875	22.581	50.554	32.768	-0.708	35.312	1162.949	-0.001581	-0.003539	-0.002294
0.3900	549.108	18.409	43.236	27.460	-0.697	35.293	1045.361	-0.001289	-0.003026	-0.001922
0.4000	516.391	15.702	38.542	24.293	-0.704	35.312	983.076	-0.001099	-0.002698	-0.001701
0.4100	458.953	12.101	31.580	19.360	-0.704	35.292	873.728	-0.000847	-0.002211	-0.001355
0.4200	424.447	10.031	26.819	16.275	-0.705	35.312	808.039	-0.000702	-0.001877	-0.001139
0.4300	355.828	4.987	18.110	9.829	-0.708	35.292	677.404	-0.000349	-0.001268	-0.000688
0.4400	340.814	4.584	15.975	8.158	-0.696	35.312	648.823	-0.000321	-0.001118	-0.000571
0.4500	319.023	2.607	12.443	5.530	-0.711	35.292	607.338	-0.000183	-0.000871	-0.000387
0.4600	285.405	0.179	8.036	2.601	-0.710	35.312	543.337	-0.000013	-0.000562	-0.000182
0.4700	250.208	-1.448	3.192	-1.081	-0.704	35.292	476.332	0.000101	-0.000223	0.000076
0.4800	244.678	-2.658	1.775	-1.678	-0.704	35.312	465.803	0.000186	-0.000124	0.000117
0.4900	233.436	-3.462	-0.206	-3.166	-0.697	35.291	444.403	0.000242	0.000014	0.000222
0.5000	238.531	-2.728	-0.123	-3.041	-0.700	35.312	454.102	0.000191	0.000009	0.000213
0.5100	240.289	-3.060	-0.496	-3.026	-0.691	35.292	457.449	0.000214	0.000035	0.000212
0.5200	250.899	-2.658	0.315	-2.372	-0.698	35.312	477.648	0.000186	-0.000022	0.000166
0.5300	257.226	-2.406	0.510	-2.122	-0.700	35.292	489.693	0.000168	-0.000036	0.000149
0.5400	277.560	-1.656	2.010	-1.052	-0.702	35.312	528.402	0.000116	-0.000141	0.000074
0.5500	322.765	1.123	7.608	2.616	-0.692	35.292	614.462	-0.000079	-0.000533	-0.000183
0.5600	396.299	5.542	16.402	9.079	-0.706	35.312	754.452	-0.000388	-0.001148	-0.000636
0.5700	401.544	5.558	17.284	9.495	-0.717	35.292	764.437	-0.000389	-0.001210	-0.000665
0.5800	427.724	7.611	20.515	11.952	-0.712	35.311	814.276	-0.000533	-0.001436	-0.000837
0.5900	504.188	12.170	29.270	18.414	-0.710	35.292	959.845	-0.000852	-0.002049	-0.001289
0.6000	528.053	13.602	32.504	20.375	-0.724	35.312	1005.278	-0.000952	-0.002275	-0.001426
0.6100	614.692	19.522	42.892	27.364	-0.714	35.292	1170.216	-0.001367	-0.003002	-0.001915
0.6200	654.848	22.359	47.720	31.297	-0.708	35.311	1246.662	-0.001565	-0.003340	-0.002191
0.6300	699.963	25.746	53.556	35.340	-0.709	35.292	1332.550	-0.001802	-0.003749	-0.002474
0.6400	756.154	29.721	59.789	40.176	-0.711	35.311	1439.524	-0.002081	-0.004185	-0.002812
0.6500	803.930	33.195	65.458	44.233	-0.711	35.292	1530.476	-0.002324	-0.004582	-0.003096
0.6600	843.980	36.461	70.685	47.918	-0.715	35.312	1606.722	-0.002552	-0.004948	-0.003354
0.6700	892.642	39.741	75.613	52.016	-0.716	35.293	1699.362	-0.002782	-0.005293	-0.003641
0.6800	956.363	44.592	83.374	57.644	-0.700	35.312	1820.669	-0.003121	-0.005836	-0.004035
0.6900	990.567	47.383	87.418	61.048	-0.704	35.292	1885.786	-0.003317	-0.006119	-0.004273
0.7000	991.725	47.675	87.929	61.519	-0.712	35.312	1887.989	-0.003337	-0.006155	-0.004306
0.7100	1015.695	49.512	90.872	63.814	-0.700	35.292	1933.622	-0.003466	-0.006361	-0.004467
0.7200	1041.363	51.899	94.039	65.802	-0.708	35.312	1982.489	-0.003633	-0.006583	-0.004606
0.7300	1053.612	52.621	95.344	67.484	-0.707	35.292	2005.806	-0.003683	-0.006674	-0.004724
0.7400	1090.086	55.626	99.223	70.511	-0.700	35.312	2075.243	-0.003894	-0.006946	-0.004936
0.7500	1085.502	55.723	99.775	70.902	-0.699	35.292	2066.517	-0.003901	-0.006984	-0.004963
0.7600	1070.939	54.612	99.210	70.040	-0.700	35.312	2038.794	-0.003823	-0.006945	-0.004903
0.7700	1051.748	53.761	98.194	68.845	-0.698	35.292	2002.258	-0.003763	-0.006874	-0.004819
0.7800	1033.834	52.247	96.471	67.983	-0.693	35.311	1968.155	-0.003657	-0.006753	-0.004759
0.7900	1022.969	51.774	96.003	67.188	-0.698	35.292	1947.470	-0.003624	-0.006720	-0.004703
0.8000	965.906	48.023	90.116	62.619	-0.700	35.311	1838.837	-0.003362	-0.006308	-0.004383
0.8100	939.756	46.021	87.405	60.604	-0.702	35.292	1789.055	-0.003221	-0.006118	-0.004242
0.8200	898.759	43.146	83.401	57.464	-0.702	35.312	1711.006	-0.003020	-0.005838	-0.004022
0.8300	840.509	39.325	77.127	52.544	-0.715	35.292	1600.113	-0.002753	-0.005399	-0.003678
0.8400	811.850	36.977	73.837	50.181	-0.706	35.312	1545.553	-0.002588	-0.005169	-0.003513
0.8500	743.410	32.238	66.532	44.371	-0.712	35.292	1415.262	-0.002257	-0.004657	-0.003106
0.8600	694.252	28.970	60.407	40.245	-0.705	35.312	1321.678	-0.002028	-0.004228	-0.002817
0.8700	648.085	25.426	54.956	36.440	-0.720	35.292	1233.788	-0.001780	-0.003847	-0.002551
0.8800	600.625	22.513	49.662	32.105	-0.704	35.312	1143.436	-0.001576	-0.003476	-0.002247
0.8900	541.038	18.145	42.231	26.504	-0.707	35.292	1029.997	-0.001270	-0.002956	-0.001855
0.9000	507.765	15.702	38.020	23.833	-0.712	35.311	966.654	-0.001099	-0.002661	-0.001668
0.9100	445.863	11.670	30.411	18.247	-0.709	35.292	848.808	-0.000817	-0.002129	-0.001277
0.9200	404.715	8.446	24.742	14.511	-0.705	35.311	770.473	-0.000591	-0.001732	-0.001016
0.9300	371.833	6.056	20.613	11.408	-0.711	35.292	707.874	-0.000424	-0.001443	-0.000799
0.9400	330.520	3.500	14.698	7.437	-0.700	35.312	629.225	-0.000245	-0.001029	-0.000521
0.9500	301.755	1.346	10.705	4.644	-0.697	35.292	574.465	-0.000094	-0.000749	-0.000325
0.9600	271.879	-0.252	6.412	1.349	-0.696	35.311	517.588	0.000018	-0.000449	-0.000094
0.9700	268.362	-0.961	5.272	0.973	-0.699	35.292	510.893	0.000067	-0.000369	-0.000068
0.9800	268.483	-1.281	5.066	0.487	-0.700	35.311	511.122	0.000090	-0.000355	-0.000034
0.9900	242.859	-2.575	1.517	-1.886	-0.706	35.292	462.341	0.000180	-0.000106	0.000132
1.0000	246.316	-2.520	0.909	-1.817	-0.710	35.311	468.922	0.000176	-0.000064	0.000127
1.0100	248.825	-2.767	1.046	-1.913	-0.706	35.292	473.700	0.000194	-0.000073	0.000134
1.0200	248.014	-2.547	0.978	-2.219	-0.704	35.312	472.155	0.000178	-0.000068	0.000155
1.0300	255.227	-2.670	1.046	-1.928	-0.707	35.292	485.888	0.000187	-0.000073	0.000135
1.0400	282.970	-1.001	3.428	-0.359	-0.710	35.311	538.702	0.000070	-0.000240	0.000025
1.0500	328.235	1.360	8.380	3.379	-0.704	35.292	624.876	-0.000095	-0.000587	-0.000237
1.0600	362.455	3.221	12.497	6.407	-0.711	35.312	690.022	-0.000225	-0.000875	-0.000448
1.0700	383.675	4.905	15.398	8.256	-0.715	35.292	730.419	-0.000343	-0.001078	-0.000578
1.0800	439.040	8.265	21.744	12.869	-0.710	35.312	835.819	-0.000579	-0.001522	-0.000901
1.0900	491.925	11.102	27.974	17.178	-0.711	35.292	936.499	-0.000777	-0.001958	-0.001202
1.1000	531.194	14.228	33.301	20.833	-0.707	35.311	1011.257	-0.000996	-0.002331	-0.001458
1.1100	583.763	17.550	39.246	25.446	-0.709	35.292	1111.336	-0.001229	-0.002747	-0.001781
1.1200	641.112	21.371	46.372	30.032	-0.716	35.312	1220.512	-0.001496	-0.003246	-0.002102
1.1300	709.161	26.400	54.451	36.189	-0.706	35.292	1350.060	-0.001848	-0.003812	-0.002533
1.1400	751.240	29.249	59.445	39.773	-0.704	35.312	1430.168	-0.002047	-0.004161	-0.002784
1.1500	788.841	32.251	64.246	43.348	-0.720	35.292	1501.751	-0.002258	-0.004497	-0.003034
1.1600	844.191	36.489	70.451	48.044	-0.705	35.311	1607.122	-0.002554	-0.004932	-0.003363
1.1700	883.791	38.979	75.213	51.808	-0.706	35.292	1682.510	-0.002729	-0.005265	-0.003627
1.1800	940.162	43.618	81.652	56.601	-0.711	35.311	1789.827	-0.003053	-0.005716	-0.003962
1.1900	951.975	44.773	83.661	58.257	-0.716	35.292	1812.315	-0.003134	-0.005856	-0.004078
1.2000	1005.310	48.773	89.427	62.912	-0.722	35.311	1913.853	-0.003414	-0.006260	-0.004404
1.2100	1012.569	49.761	90.748	63.633	-0.713	35.292	1927.671	-0.003483	-0.006352	-0.004454
1.2200	1046.638	51.997	94.231	66.871	-0.712	35.311	1992.531	-0.003640	-0.006596	-0.004681
1.2300	1067.287	54.136	97.270	68.413	-0.715	35.292	2031.841	-0.003790	-0.006809	-0.004789
1.2400	1062.764	54.027	97.283	68.774	-0.719	35.311	2023.230	-0.003782	-0.006810	-0.004814
1.2500	1059.924	53.929	96.995	68.510	-0.715	35.292	2017.822	-0.003775	-0.006790	-0.004796
1.2600	1062.343	54.152	97.545	68.873	-0.718	35.311	2022.429	-0.003791	-0.006828	-0.004821
1.2700	1056.933	54.150	97.311	68.719	-0.719	35.292	2012.129	-0.003790	-0.006812	-0.004810
1.2800	1043.753	53.038	96.582	68.192	-0.712	35.312	1987.038	-0.003713	-0.006761	-0.004773
1.2900	1006.873	50.886	94.260	65.594	-0.716	35.292	1916.828	-0.003562	-0.006598	-0.004592
1.3000	980.273	48.953	91.436	63.605	-0.715	35.311	1866.188	-0.003427	-0.006401	-0.004452
1.3100	959.173	47.078	89.428	62.033	-0.700	35.292	1826.019	-0.003295	-0.006260	-0.004342
1.3200	885.624	42.422	81.873	56.558	-0.692	35.312	1686.001	-0.002970	-0.005731	-0.003959
1.3300	879.673	41.533	81.047	55.710	-0.706	35.292	1674.671	-0.002907	-0.005673	-0.003900
1.3400	811.820	37.157	74.029	50.181	-0.713	35.312	1545.496	-0.002601	-0.005182	-0.003513
1.3500	752.112	33.252	67.232	45.219	-0.712	35.292	1431.828	-0.002328	-0.004706	-0.003165
1.3600	709.176	29.733	62.212	41.428	-0.719	35.311	1350.088	-0.002081	-0.004355	-0.002900
1.3700	648.160	25.649	55.220	36.217	-0.711	35.292	1233.931	-0.001795	-0.003865	-0.002535
1.3800	610.604	23.025	50.667	33.283	-0.711	35.311	1162.434	-0.001612	-0.003547	-0.002330
1.3900	557.659	18.951	44.311	28.405	-0.706	35.292	1061.640	-0.001327	-0.003102	-0.001988
1.4000	499.845	15.130	37.413	23.387	-0.704	35.311	951.576	-0.001059	-0.002619	-0.001637
1.4100	464.859	12.543	32.269	20.278	-0.709	35.292	884.972	-0.000878	-0.002259	-0.001419
1.4200	418.180	9.295	26.475	15.817	-0.705	35.311	796.108	-0.000651	-0.001853	-0.001107
1.4300	379.828	7.154	21.728	12.284	-0.708	35.292	723.095	-0.000501	-0.001521	-0.000860
1.4400	353.032	4.779	17.490	9.607	-0.703	35.312	672.083	-0.000335	-0.001224	-0.000673
1.4500	306.129	1.942	11.643	5.311	-0.696	35.292	582.790	-0.000136	-0.000815	-0.000372
1.4600	285.870	0.459	8.420	2.824	-0.699	35.312	544.224	-0.000032	-0.000589	-0.000198
1.4700	260.653	-1.462	4.926	0.209	-0.706	35.292	496.216	0.000102	-0.000345	-0.000015
1.4800	257.226	-1.685	3.824	-0.373	-0.706	35.312	489.693	0.000118	-0.000268	0.000026
1.4900	255.333	-1.908	2.864	-0.970	-0.706	35.292	486.088	0.000134	-0.000200	0.000068
1.5000	235.751	-3.381	0.330	-2.818	-0.714	35.312	448.809	0.000237	-0.000023	0.000197
1.5100	243.776	-2.713	0.482	-2.289	-0.709	35.293	464.087	0.000190	-0.000034	0.000160
1.5200	245.850	-2.908	0.330	-2.429	-0.714	35.312	468.035	0.000204	-0.000023	0.000170
1.5300	254.190	-2.518	0.743	-1.915	-0.717	35.292	483.913	0.000176	-0.000052	0.000134
1.5400	288.365	-0.557	4.032	0.113	-0.705	35.311	548.973	0.000039	-0.000282	-0.000008
1.5500	329.197	1.777	8.517	3.462	-0.705	35.291	626.707	-0.000124	-0.000596	-0.000242
1.5600	346.976	2.706	10.979	5.172	-0.699	35.311	660.553	-0.000189	-0.000769	-0.000362
1.5700	405.451	6.182	17.737	9.925	-0.698	35.292	771.875	-0.000433	-0.001242	-0.000695
1.5800	452.190	9.015	23.503	14.108	-0.701	35.311	860.853	-0.000631	-0.001645	-0.000988
1.5900	484.305	11.242	27.645	16.898	-0.703	35.292	921.993	-0.000787	-0.001935	-0.001183
1.6000	527.031	14.019	32.295	20.862	-0.699	35.311	1003.332	-0.000981	-0.002261	-0.001460
1.6100	561.957	16.479	36.877	23.555	-0.706	35.292	1069.822	-0.001154	-0.002581	-0.001649
1.6200	631.088	21.302	45.410	29.446	-0.696	35.312	1201.429	-0.001491	-0.003179	-0.002061
1.6300	696.642	25.512	52.769	35.174	-0.691	35.292	1326.227	-0.001786	-0.003694	-0.002462
1.6400	745.815	29.276	59.088	39.509	-0.688	35.311	1419.840	-0.002049	-0.004136	-0.002766
1.6500	812.285	33.918	66.406	45.176	-0.699	35.292	1546.383	-0.002374	-0.004648	-0.003162
1.6600	853.193	37.280	71.553	48.989	-0.696	35.312	1624.260	-0.002610	-0.005009	-0.003429
1.6700	925.945	42.506	80.042	55.363	-0.698	35.292	1762.762	-0.002975	-0.005603	-0.003875
1.6800	913.141	42.103	79.740	55.047	-0.695	35.312	1738.386	-0.002947	-0.005582	-0.003853
1.6900	998.878	47.646	88.079	61.825	-0.690	35.292	1901.608	-0.003335	-0.006166	-0.004328
1.7000	998.217	48.621	89.483	62.422	-0.699	35.311	1900.349	-0.003403	-0.006264	-0.004370
1.7100	1025.373	50.402	91.685	64.732	-0.692	35.292	1952.047	-0.003528	-0.006418	-0.004531
1.7200	1041.649	51.831	94.134	66.524	-0.692	35.311	1983.032	-0.003628	-0.006589	-0.004657
1.7300	1072.818	54.347	97.546	69.386	-0.695	35.292	2042.370	-0.003804	-0.006828	-0.004857
1.7400	1070.188	54.376	97.739	69.470	-0.707	35.311	2037.363	-0.003806	-0.006842	-0.004863
1.7500	1067.678	54.571	98.014	69.318	-0.699	35.292	2032.585	-0.003820	-0.006861	-0.004852
1.7600	1066.746	54.709	98.028	69.581	-0.686	35.311	2030.811	-0.003830	-0.006862	-0.004871
1.7700	1056.362	54.109	97.712	69.094	-0.700	35.292	2011.042	-0.003788	-0.006840	-0.004837
1.7800	1043.317	53.470	97.298	68.344	-0.696	35.311	1986.208	-0.003743	-0.006811	-0.004784
1.7900	1010.420	51.219	94.616	66.369	-0.699	35.292	1923.580	-0.003585	-0.006623	-0.004646
1.8000	967.379	48.035	90.445	63.119	-0.699	35.311	1841.640	-0.003362	-0.006331	-0.004418
1.8100	949.405	47.078	88.712	61.448	-0.692	35.291	1807.423	-0.003295	-0.006210	-0.004301
1.8200	894.295	43.172	82.670	57.214	-0.696	35.312	1702.509	-0.003022	-0.005787	-0.004005
1.8300	864.389	41.128	79.892	54.617	-0.702	35.291	1645.575	-0.002879	-0.005592	-0.003823
1.8400	808.919	37.269	73.740	49.916	-0.695	35.311	1539.974	-0.002609	-0.005162	-0.003494
1.8500	766.479	33.947	68.662	46.583	-0.692	35.292	1459.179	-0.002376	-0.004806	-0.003261
1.8600	704.291	29.790	61.950	41.651	-0.688	35.311	1340.790	-0.002085	-0.004336	-0.002916
1.8700	649.618	26.137	55.551	36.481	-0.684	35.292	1236.706	-0.001830	-0.003889	-0.002554
1.8800	626.700	23.649	52.301	34.323	-0.688	35.312	1193.075	-0.001655	-0.003661	-0.002403
1.8900	538.874	18.077	42.423	27.017	-0.706	35.292	1025.877	-0.001265	-0.002970	-0.001891
1.9000	517.729	16.702	39.054	24.919	-0.688	35.312	985.622	-0.001169	-0.002734	-0.001744
1.9100	475.935	13.475	34.114	21.373	-0.694	35.291	906.057	-0.000943	-0.002388	-0.001496
1.9200	415.130	9.601	26.792	15.789	-0.693	35.312	790.300	-0.000672	-0.001875	-0.001105
1.9300	370.150	6.141	20.598	11.340	-0.687	35.292	704.670	-0.000430	-0.001442	-0.000794
1.9400	343.925	4.389	16.898	8.994	-0.690	35.312	654.745	-0.000307	-0.001183	-0.000630
1.9500	316.348	2.497	12.826	5.893	-0.692	35.292	602.245	-0.000175	-0.000898	-0.000413
1.9600	284.307	0.262	8.323	2.921	-0.688	35.311	541.248	-0.000018	-0.000583	-0.000204
1.9700	274.058	-0.320	6.496	1.517	-0.696	35.292	521.736	0.000022	-0.000455	-0.000106
1.9800	250.463	-1.836	3.179	-0.844	-0.699	35.311	476.818	0.000129	-0.000223	0.000059
1.9900	245.324	-2.685	1.736	-1.568	-0.692	35.292	467.033	0.000188	-0.000122	0.000110
2.0000	227.530	-3.005	-0.371	-3.376	-0.693	35.311	433.159	0.000210	0.000026	0.000236
2.0100	223.923	-3.742	-2.063	-4.113	-0.681	35.292	426.292	0.000262	0.000144	0.000288
2.0200	239.237	-3.323	-0.852	-3.305	-0.692	35.311	455.446	0.000233	0.000060	0.000231
2.0300	260.502	-1.878	0.771	-2.024	-0.693	35.292	495.930	0.000131	-0.000054	0.000142
2.0400	293.159	-0.433	4.334	0.430	-0.701	35.312	558.100	0.000030	-0.000303	-0.000030
2.0500	315.582	0.956	7.169	2.351	-0.696	35.291	600.786	-0.000067	-0.000502	-0.000165
2.0600	352.161	2.887	11.491	5.674	-0.692	35.312	670.424	-0.000202	-0.000804	-0.000397
2.0700	398.373	5.502	16.855	9.703	-0.690	35.292	758.400	-0.000385	-0.001180	-0.000679
2.0800	443.233	8.600	22.514	13.858	-0.694	35.312	843.801	-0.000602	-0.001576	-0.000970
2.0900	482.307	11.158	27.411	17.244	-0.699	35.292	918.188	-0.000781	-0.001919	-0.001207
2.1000	547.455	15.172	34.772	22.194	-0.701	35.311	1042.213	-0.001062	-0.002434	-0.001554
2.1100	584.109	18.104	39.905	25.323	-0.700	35.292	1111.994	-0.001267	-0.002793	-0.001773
2.1200	642.810	21.843	46.525	30.671	-0.702	35.311	1223.745	-0.001529	-0.003257	-0.002147
2.1300	701.211	25.801	53.624	35.618	-0.695	35.292	1334.925	-0.001806	-0.003754	-0.002493
2.1400	757.011	29.902	60.147	40.607	-0.694	35.311	1441.154	-0.002093	-0.004210	-0.002842
2.1500	807.582	33.431	66.395	44.873	-0.694	35.292	1537.428	-0.002340	-0.004648	-0.003141
2.1600	863.232	37.741	72.737	49.837	-0.699	35.311	1643.372	-0.002642	-0.005092	-0.003489
2.1700	888.765	40.201	76.205	52.364	-0.698	35.292	1691.980	-0.002814	-0.005334	-0.003666
2.1800	933.384	42.966	81.019	56.336	-0.699	35.311	1776.924	-0.003008	-0.005671	-0.003944
2.1900	966.011	46.076	85.286	59.368	-0.704	35.292	1839.037	-0.003225	-0.005970	-0.004156
2.2000	995.797	48.175	88.355	61.976	-0.696	35.311	1895.742	-0.003372	-0.006185	-0.004338
2.2100	1041.574	51.802	93.749	66.081	-0.701	35.292	1982.889	-0.003626	-0.006562	-0.004626
2.2200	1042.641	52.317	94.178	66.591	-0.699	35.311	1984.921	-0.003662	-0.006592	-0.004661
2.2300	1045.722	52.455	94.769	67.121	-0.702	35.292	1990.786	-0.003672	-0.006634	-0.004698
2.2400	1067.438	54.262	97.272	69.026	-0.706	35.312	2032.127	-0.003798	-0.006809	-0.004832
2.2500	1069.527	55.099	98.153	69.623	-0.694	35.292	2036.104	-0.003857	-0.006871	-0.004874
2.2600	1068.460	54.583	97.917	69.777	-0.693	35.312	2034.073	-0.003821	-0.006854	-0.004884
2.2700	1057.324	54.179	97.780	69.137	-0.704	35.292	2012.873	-0.003793	-0.006845	-0.004840
2.2800	1048.788	53.832	97.243	69.053	-0.690	35.311	1996.622	-0.003768	-0.006807	-0.004834
2.2900	1009.248	51.012	94.397	66.108	-0.687	35.292	1921.349	-0.003571	-0.006608	-0.004628
2.3000	970.625	48.662	90.734	63.356	-0.690	35.311	1847.820	-0.003406	-0.006351	-0.004435
2.3100	943.318	46.604	88.093	61.313	-0.688	35.292	1795.835	-0.003262	-0.006167	-0.004292
2.3200	903.313	43.701	83.815	57.977	-0.694	35.311	1719.675	-0.003059	-0.005867	-0.004058
2.3300	839.667	39.742	77.155	52.822	-0.699	35.292	1598.511	-0.002782	-0.005401	-0.003698
2.3400	818.612	37.808	74.455	50.709	-0.692	35.311	1558.428	-0.002647	-0.005212	-0.003550
2.3500	755.974	33.501	67.811	45.678	-0.703	35.292	1439.180	-0.002345	-0.004747	-0.003197
2.3600	709.671	30.094	62.789	41.722	-0.700	35.312	1351.032	-0.002107	-0.004395	-0.002921
2.3700	646.372	25.483	55.263	36.523	-0.695	35.292	1230.526	-0.001784	-0.003868	-0.002557
2.3800	604.833	22.637	50.487	32.410	-0.699	35.312	1151.447	-0.001585	-0.003534	-0.002269
2.3900	559.943	19.495	44.874	28.446	-0.698	35.292	1065.989	-0.001365	-0.003141	-0.001991
2.4000	510.861	15.839	38.666	24.669	-0.692	35.312	972.548	-0.001109	-0.002707	-0.001727
2.4100	451.078	12.045	31.290	18.861	-0.685	35.293	858.736	-0.000843	-0.002190	-0.001320
2.4200	432.067	10.366	28.306	17.078	-0.695	35.311	822.544	-0.000726	-0.001981	-0.001195
2.4300	388.770	7.304	22.651	13.411	-0.708	35.292	740.118	-0.000511	-0.001586	-0.000939
2.4400	344.977	4.792	17.300	9.079	-0.699	35.312	656.748	-0.000335	-0.001211	-0.000636
2.4500	301.545	1.637	10.954	4.948	-0.699	35.291	574.064	-0.000115	-0.000767	-0.000346
2.4600	286.066	0.249	8.643	2.976	-0.690	35.312	544.596	-0.000017	-0.000605	-0.000208
2.4700	264.906	-0.849	5.517	0.750	-0.706	35.292	504.313	0.000059	-0.000386	-0.000053
2.4800	244.948	-2.393	1.968	-1.330	-0.696	35.311	466.318	0.000167	-0.000138	0.000093
2.4900	240.590	-2.767	1.376	-2.026	-0.702	35.292	458.021	0.000194	-0.000096	0.000142
2.5000	241.341	-4.115	-2.134	-3.708	-0.686	35.298	459.452	0.000288	0.000149	0.000260
2.5100	246.376	-3.783	-1.583	-3.558	-0.687	35.306	469.036	0.000265	0.000111	0.000249
2.5200	253.890	-3.088	-1.018	-3.262	-0.686	35.298	483.341	0.000216	0.000071	0.000228
2.5300	288.560	-1.671	1.995	-0.582	-0.688	35.306	549.345	0.000117	-0.000140	0.000041
2.5400	345.638	1.929	9.260	4.130	-0.687	35.298	658.007	-0.000135	-0.000648	-0.000289
2.5500	374.613	3.874	12.745	6.700	-0.690	35.305	713.167	-0.000271	-0.000892	-0.000469
2.5600	404.715	5.211	16.540	9.439	-0.684	35.298	770.473	-0.000365	-0.001158	-0.000661
2.5700	467.849	9.626	24.055	14.874	-0.692	35.306	890.665	-0.000674	-0.001684	-0.001041
2.5800	509.283	12.019	29.022	18.497	-0.693	35.298	969.543	-0.000841	-0.002032	-0.001295
2.5900	594.223	17.396	39.272	25.489	-0.695	35.306	1131.248	-0.001218	-0.002749	-0.001784
2.6000	652.684	21.775	46.882	30.476	-0.690	35.298	1242.542	-0.001524	-0.003282	-0.002133
2.6100	722.957	26.499	54.725	36.605	-0.692	35.306	1376.324	-0.001855	-0.003831	-0.002562
2.6200	791.847	31.445	63.642	42.914	-0.698	35.297	1507.473	-0.002201	-0.004455	-0.003004
2.6300	863.081	37.157	71.608	49.266	-0.691	35.306	1643.085	-0.002601	-0.005013	-0.003449
2.6400	901.900	39.881	75.928	52.586	-0.686	35.298	1716.986	-0.002792	-0.005315	-0.003681
2.6500	976.471	45.523	84.901	59.036	-0.696	35.306	1858.950	-0.003187	-0.005943	-0.004133
2.6600	1045.000	50.704	92.191	65.219	-0.697	35.298	1989.412	-0.003549	-0.006453	-0.004565
2.6700	1090.672	54.263	97.890	69.399	-0.701	35.306	2076.359	-0.003798	-0.006852	-0.004858
2.6800	1157.368	59.711	105.211	75.253	-0.696	35.298	2203.331	-0.004180	-0.007365	-0.005268
2.6900	1191.272	62.655	108.885	78.711	-0.694	35.306	2267.876	-0.004386	-0.007622	-0.005510
2.7000	1240.295	66.467	114.443	83.281	-0.695	35.298	2361.202	-0.004653	-0.008011	-0.005830
2.7100	1283.276	70.356	119.384	86.995	-0.697	35.306	2443.027	-0.004925	-0.008357	-0.006090
2.7200	1308.719	72.175	122.134	89.674	-0.691	35.298	2491.465	-0.005052	-0.008549	-0.006277
2.7300	1321.538	73.649	124.306	90.703	-0.684	35.306	2515.869	-0.005155	-0.008701	-0.006349
2.7400	1323.672	74.327	125.149	91.704	-0.702	35.298	2519.932	-0.005203	-0.008760	-0.006419
2.7500	1317.826	74.272	124.996	91.606	-0.694	35.306	2508.802	-0.005199	-0.008750	-0.006412
2.7600	1311.905	74.314	124.984	91.453	-0.691	35.298	2497.530	-0.005202	-0.008749	-0.006402
2.7700	1306.645	74.353	124.625	91.412	-0.697	35.306	2487.516	-0.005205	-0.008724	-0.006399
2.7800	1291.196	72.925	124.032	90.495	-0.691	35.298	2458.105	-0.005105	-0.008682	-0.006335
2.7900	1262.612	71.494	122.467	88.924	-0.694	35.306	2403.688	-0.005005	-0.008573	-0.006225
2.8000	1190.911	66.161	115.848	83.530	-0.690	35.298	2267.189	-0.004631	-0.008109	-0.005847
2.8100	1133.292	61.976	110.301	79.183	-0.701	35.306	2157.497	-0.004338	-0.007721	-0.005543
2.8200	1095.015	59.474	106.188	75.822	-0.688	35.297	2084.627	-0.004163	-0.007433	-0.005308
2.8300	1039.725	55.459	100.409	71.347	-0.685	35.306	1979.370	-0.003882	-0.007029	-0.004994
2.8400	972.083	50.512	93.845	65.802	-0.680	35.298	1850.595	-0.003536	-0.006569	-0.004606
2.8500	925.479	46.911	88.740	61.768	-0.685	35.305	1761.875	-0.003284	-0.006212	-0.004324
2.8600	841.861	40.700	79.507	54.560	-0.684	35.298	1602.688	-0.002849	-0.005565	-0.003819
2.8700	803.419	38.213	75.256	51.681	-0.681	35.306	1529.503	-0.002675	-0.005268	-0.003618
2.8800	700.474	30.749	63.283	42.443	-0.676	35.298	1333.523	-0.002152	-0.004430	-0.002971
2.8900	653.375	26.902	57.723	38.258	-0.684	35.305	1243.858	-0.001883	-0.004041	-0.002678
2.9000	571.455	21.579	47.870	31.129	-0.678	35.298	1087.904	-0.001511	-0.003351	-0.002179
2.9100	530.563	18.021	42.202	27.323	-0.691	35.306	1010.056	-0.001261	-0.002954	-0.001913
2.9200	471.065	13.963	35.377	22.181	-0.694	35.298	896.788	-0.000977	-0.002476	-0.001553
2.9300	416.753	10.212	27.892	16.774	-0.704	35.305	793.390	-0.000715	-0.001952	-0.001174
2.9400	370.480	7.041	21.605	12.439	-0.691	35.298	705.299	-0.000493	-0.001512	-0.000871
2.9500	337.929	4.820	17.024	9.191	-0.689	35.305	643.330	-0.000337	-0.001192	-0.000643
2.9600	308.879	2.733	12.909	6.172	-0.684	35.298	588.026	-0.000191	-0.000904	-0.000432
2.9700	289.943	1.028	9.852	3.993	-0.692	35.306	551.977	-0.000072	-0.000690	-0.000279
2.9800	268.903	0.166	6.631	2.002	-0.691	35.298	511.923	-0.000012	-0.000464	-0.000140
2.9900	241.777	-1.975	2.479	-0.998	-0.700	35.305	460.281	0.000138	-0.000174	0.000070
3.0000	238.756	-2.505	1.281	-1.762	-0.700	35.299	454.531	0.000175	-0.000090	0.000123
3.0100	249.577	-1.851	1.998	-1.109	-0.701	35.306	475.130	0.000130	-0.000140	0.000078
3.0200	266.604	-1.335	2.945	-0.319	-0.692	35.298	507.545	0.000093	-0.000206	0.000022
3.0300	290.815	-0.124	5.559	1.363	-0.707	35.306	553.637	0.000009	-0.000389	-0.000095
3.0400	326.071	2.027	9.438	4.047	-0.701	35.298	620.756	-0.000142	-0.000661	-0.000283
3.0500	373.351	4.598	15.027	8.034	-0.702	35.306	710.764	-0.000322	-0.001052	-0.000562
3.0600	416.347	7.348	20.132	11.729	-0.694	35.298	792.618	-0.000514	-0.001409	-0.000821
3.0700	466.677	10.670	26.048	16.135	-0.688	35.305	888.433	-0.000747	-0.001823	-0.001129
3.0800	544.630	15.352	35.310	22.457	-0.688	35.298	1036.835	-0.001075	-0.002472	-0.001572
3.0900	589.880	18.909	41.223	26.669	-0.691	35.305	1122.980	-0.001324	-0.002886	-0.001867
3.1000	649.498	22.720	47.967	31.825	-0.694	35.298	1236.477	-0.001590	-0.003358	-0.002228
3.1100	711.535	26.900	55.688	37.051	-0.695	35.305	1354.580	-0.001883	-0.003898	-0.002594
3.1200	782.604	32.418	64.000	43.137	-0.699	35.298	1489.878	-0.002269	-0.004480	-0.003020
3.1300	856.198	37.185	72.185	49.597	-0.699	35.305	1629.982	-0.002603	-0.005053	-0.003472
3.1400	922.263	42.325	79.905	55.295	-0.694	35.298	1755.753	-0.002963	-0.005593	-0.003871
3.1500	992.100	47.829	87.956	61.769	-0.687	35.306	1888.704	-0.003348	-0.006157	-0.004324
3.1600	1056.001	52.414	94.628	67.093	-0.691	35.299	2010.355	-0.003669	-0.006624	-0.004696
3.1700	1104.197	56.322	100.614	71.901	-0.696	35.305	2102.108	-0.003943	-0.007043	-0.005033
3.1800	1179.219	62.447	108.292	78.100	-0.700	35.299	2244.930	-0.004371	-0.007580	-0.005467
3.1900	1178.212	62.599	109.310	78.723	-0.700	35.306	2243.013	-0.004382	-0.007652	-0.005511
3.2000	1231.578	66.926	115.062	83.394	-0.697	35.298	2344.608	-0.004685	-0.008054	-0.005838
3.2100	1269.209	69.548	118.778	86.549	-0.686	35.306	2416.248	-0.004868	-0.008314	-0.006058
3.2200	1311.499	72.928	124.088	90.524	-0.694	35.298	2496.758	-0.005105	-0.008686	-0.006337
3.2300	1314.595	74.092	124.720	91.455	-0.693	35.306	2502.651	-0.005186	-0.008730	-0.006402
3.2400	1307.742	73.607	124.747	91.441	-0.692	35.298	2489.605	-0.005152	-0.008732	-0.006401
3.2500	1309.500	74.119	125.108	91.233	-0.698	35.305	2492.952	-0.005188	-0.008758	-0.006386
3.2600	1320.171	75.231	126.197	92.763	-0.698	35.298	2513.266	-0.005266	-0.008834	-0.006493
3.2700	1311.424	74.869	126.113	92.079	-0.702	35.305	2496.614	-0.005241	-0.008828	-0.006446
3.2800	1296.576	73.994	125.550	91.675	-0.707	35.298	2468.348	-0.005180	-0.008789	-0.006417
3.2900	1244.502	70.454	121.586	88.160	-0.703	35.305	2369.213	-0.004932	-0.008511	-0.006171
3.3000	1211.981	67.604	118.737	85.826	-0.695	35.299	2307.301	-0.004732	-0.008312	-0.006008
3.3100	1143.391	63.683	112.327	80.489	-0.703	35.305	2176.723	-0.004458	-0.007863	-0.005634
3.3200	1085.757	58.987	106.189	75.892	-0.708	35.298	2067.003	-0.004129	-0.007433	-0.005312
3.3300	1049.809	56.209	102.580	72.845	-0.708	35.305	1998.568	-0.003935	-0.007181	-0.005099
3.3400	971.496	50.791	94.411	66.177	-0.701	35.298	1849.480	-0.003555	-0.006609	-0.004632
3.3500	920.099	46.954	88.850	61.740	-0.708	35.306	1751.633	-0.003287	-0.006220	-0.004322
3.3600	853.629	42.339	81.610	56.379	-0.707	35.299	1625.090	-0.002964	-0.005713	-0.003947
3.3700	786.482	37.322	73.918	50.528	-0.692	35.306	1497.259	-0.002613	-0.005174	-0.003537
3.3800	699.512	30.889	64.192	43.290	-0.692	35.299	1331.692	-0.002162	-0.004493	-0.003030
3.3900	662.197	28.318	59.542	39.704	-0.694	35.305	1260.653	-0.001982	-0.004168	-0.002779
3.4000	596.282	23.219	51.161	33.963	-0.694	35.299	1135.168	-0.001625	-0.003581	-0.002377
3.4100	545.396	19.508	44.998	29.252	-0.698	35.306	1038.294	-0.001366	-0.003150	-0.002048
3.4200	456.308	13.839	34.291	21.542	-0.695	35.299	868.692	-0.000969	-0.002400	-0.001508
3.4300	419.849	10.794	28.870	17.941	-0.696	35.306	799.284	-0.000756	-0.002021	-0.001256
3.4400	370.465	7.417	22.636	13.121	-0.694	35.299	705.271	-0.000519	-0.001585	-0.000918
3.4500	331.467	4.876	17.091	9.215	-0.690	35.305	631.027	-0.000341	-0.001196	-0.000645
3.4600	287.208	1.597	10.748	4.589	-0.692	35.299	546.770	-0.000112	-0.000752	-0.000321
3.4700	282.489	1.041	9.356	3.698	-0.690	35.305	537.786	-0.000073	-0.000655	-0.000259
3.4800	274.238	0.471	7.885	2.699	-0.692	35.298	522.079	-0.000033	-0.000552	-0.000189
3.4900	249.321	-1.308	4.129	0.083	-0.692	35.305	474.644	0.000092	-0.000289	-0.000006
3.5000	252.117	-1.043	3.798	0.014	-0.693	35.299	479.965	0.000073	-0.000266	-0.000001
3.5100	259.931	-1.086	3.920	0.265	-0.686	35.305	494.843	0.000076	-0.000274	-0.000019
3.5200	263.012	-0.988	4.156	0.375	-0.690	35.298	500.708	0.000069	-0.000291	-0.000026
3.5300	274.283	-0.473	4.666	1.184	-0.693	35.305	522.165	0.000033	-0.000327	-0.000083
3.5400	306.955	1.178	7.596	2.990	-0.694	35.298	584.364	-0.000082	-0.000532	-0.000209
3.5500	360.547	4.418	14.243	7.644	-0.703	35.306	686.388	-0.000309	-0.000997	-0.000535
3.5600	420.961	7.945	21.149	12.883	-0.700	35.299	801.401	-0.000556	-0.001480	-0.000902
3.5700	456.037	10.058	25.333	15.914	-0.700	35.305	868.177	-0.000704	-0.001773	-0.001114
3.5800	520.855	14.381	33.314	21.069	-0.691	35.298	991.573	-0.001007	-0.002332	-0.001475
3.5900	582.621	18.409	40.386	26.267	-0.701	35.305	1109.161	-0.001289	-0.002827	-0.001839
3.6000	633.658	21.789	46.840	30.631	-0.694	35.298	1206.322	-0.001525	-0.003279	-0.002144
3.6100	708.439	27.333	55.896	37.412	-0.713	35.305	1348.686	-0.001913	-0.003913	-0.002619
3.6200	770.912	31.444	62.941	42.833	-0.704	35.298	1467.619	-0.002201	-0.004406	-0.002998
3.6300	853.268	37.573	72.833	49.972	-0.711	35.305	1624.403	-0.002630	-0.005098	-0.003498
3.6400	918.266	42.353	79.892	55.755	-0.696	35.299	1748.142	-0.002965	-0.005592	-0.003903
3.6500	964.719	45.717	85.204	60.133	-0.699	35.305	1836.576	-0.003200	-0.005964	-0.004209
3.6600	1034.390	51.318	93.405	66.065	-0.695	35.299	1969.213	-0.003592	-0.006538	-0.004625
3.6700	1100.666	56.488	100.395	71.581	-0.702	35.305	2095.385	-0.003954	-0.007028	-0.005011
3.6800	1141.167	59.516	105.183	75.419	-0.699	35.298	2172.489	-0.004166	-0.007363	-0.005279
3.6900	1199.883	64.462	111.762	80.755	-0.715	35.305	2284.269	-0.004512	-0.007823	-0.005653
3.7000	1238.115	67.464	115.848	84.728	-0.697	35.299	2357.054	-0.004722	-0.008109	-0.005931
3.7100	1280.526	70.924	120.745	88.022	-0.700	35.306	2437.792	-0.004965	-0.008452	-0.006162
3.7200	1299.822	73.149	123.154	90.022	-0.710	35.299	2474.527	-0.005120	-0.008621	-0.006302
3.7300	1300.784	73.299	123.676	90.732	-0.698	35.305	2476.358	-0.005131	-0.008657	-0.006351
3.7400	1316.474	74.841	125.591	92.304	-0.696	35.299	2506.227	-0.005239	-0.008791	-0.006461
3.7500	1325.040	75.760	126.953	93.011	-0.701	35.305	2522.535	-0.005303	-0.008887	-0.006511
3.7600	1321.974	75.662	126.773	93.248	-0.700	35.299	2516.699	-0.005296	-0.008874	-0.006527
3.7700	1314.790	75.564	127.172	93.246	-0.696	35.306	2503.023	-0.005289	-0.008902	-0.006527
3.7800	1299.762	74.730	125.865	92.442	-0.696	35.299	2474.413	-0.005231	-0.008811	-0.006471
3.7900	1259.756	71.634	123.592	89.827	-0.691	35.305	2398.252	-0.005014	-0.008651	-0.006288
3.8000	1195.795	67.783	117.871	84.866	-0.688	35.299	2276.487	-0.004745	-0.008251	-0.005941
3.8100	1142.865	63.532	112.199	80.866	-0.698	35.305	2175.722	-0.004447	-0.007854	-0.005661
3.8200	1101.402	60.408	108.417	77.600	-0.698	35.298	2096.786	-0.004229	-0.007589	-0.005432
3.8300	1039.470	56.112	101.879	72.625	-0.692	35.305	1978.884	-0.003928	-0.007132	-0.005084
3.8400	987.577	52.288	96.530	68.204	-0.686	35.299	1880.093	-0.003660	-0.006757	-0.004774
3.8500	929.116	47.856	90.418	63.244	-0.688	35.305	1768.799	-0.003350	-0.006329	-0.004427
3.8600	862.090	43.287	82.945	57.784	-0.694	35.299	1641.197	-0.003030	-0.005806	-0.004045
3.8700	792.132	38.033	75.048	51.585	-0.683	35.304	1508.017	-0.002662	-0.005253	-0.003611
3.8800	732.244	34.030	68.541	46.067	-0.694	35.299	1394.005	-0.002382	-0.004798	-0.003225
3.8900	656.832	28.221	59.416	39.687	-0.699	35.304	1250.439	-0.001975	-0.004159	-0.002778
3.9000	589.579	23.414	51.464	33.798	-0.700	35.299	1122.408	-0.001639	-0.003603	-0.002366
3.9100	531.104	19.216	43.924	28.364	-0.694	35.304	1011.086	-0.001345	-0.003075	-0.001985
3.9200	477.438	15.324	36.905	23.528	-0.699	35.299	908.918	-0.001073	-0.002583	-0.001647
3.9300	435.839	12.087	31.388	19.444	-0.700	35.305	829.725	-0.000846	-0.002197	-0.001361
3.9400	386.861	8.919	25.168	14.985	-0.696	35.299	736.485	-0.000624	-0.001762	-0.001049
3.9500	336.862	5.404	18.358	10.176	-0.693	35.305	641.298	-0.000378	-0.001285	-0.000712
3.9600	307.962	3.332	14.283	6.964	-0.689	35.299	586.281	-0.000233	-0.001000	-0.000487
3.9700	276.778	1.152	9.647	3.559	-0.699	35.305	526.915	-0.000081	-0.000675	-0.000249
3.9800	263.658	-0.140	7.115	2.017	-0.698	35.298	501.938	0.000010	-0.000498	-0.000141
3.9900	245.850	-1.056	4.390	0.292	-0.699	35.305	468.035	0.000074	-0.000307	-0.000020
4.0000	247.743	-1.309	3.508	-0.044	-0.694	35.299	471.640	0.000092	-0.000246	0.000003
4.0100	255.197	-1.294	4.129	0.363	-0.695	35.305	485.830	0.000091	-0.000289	-0.000025
4.0200	266.679	-0.473	4.706	0.878	-0.690	35.299	507.689	0.000033	-0.000329	-0.000061
4.0300	277.409	-0.168	5.065	1.488	-0.694	35.305	528.116	0.000012	-0.000355	-0.000104
4.0400	303.904	1.553	8.133	3.156	-0.693	35.299	578.556	-0.000109	-0.000569	-0.000221
4.0500	353.889	4.515	13.678	7.312	-0.693	35.305	673.714	-0.000316	-0.000957	-0.000512
4.0600	416.903	7.791	21.164	12.953	-0.699	35.299	793.676	-0.000545	-0.001481	-0.000907
4.0700	465.099	11.339	27.124	16.994	-0.696	35.304	885.429	-0.000794	-0.001899	-0.001190
4.0800	536.409	15.547	35.419	22.735	-0.695	35.299	1021.185	-0.001088	-0.002479	-0.001591
4.0900	566.902	17.397	39.480	25.558	-0.705	35.304	1079.235	-0.001218	-0.002764	-0.001789
4.1000	648.852	23.414	48.946	32.338	-0.698	35.299	1235.247	-0.001639	-0.003426	-0.002264
4.1100	713.008	27.680	56.377	38.077	-0.692	35.304	1357.384	-0.001938	-0.003946	-0.002665
4.1200	785.805	32.681	65.319	44.079	-0.691	35.299	1495.972	-0.002288	-0.004572	-0.003086
4.1300	850.082	37.962	72.820	50.001	-0.686	35.305	1618.338	-0.002657	-0.005097	-0.003500
4.1400	911.623	42.227	79.864	55.421	-0.692	35.299	1735.497	-0.002956	-0.005590	-0.003879
4.1500	980.979	47.576	87.653	61.450	-0.690	35.305	1867.533	-0.003330	-0.006136	-0.004301
4.1600	1036.269	51.693	93.968	66.315	-0.707	35.299	1972.790	-0.003618	-0.006578	-0.004642
4.1700	1093.121	55.890	100.010	71.388	-0.700	35.304	2081.022	-0.003912	-0.007001	-0.004997
4.1800	1164.146	61.670	107.920	77.696	-0.691	35.299	2216.234	-0.004317	-0.007554	-0.005439
4.1900	1198.230	64.449	111.870	80.949	-0.688	35.305	2281.122	-0.004511	-0.007831	-0.005666
4.2000	1235.185	67.506	116.232	84.309	-0.695	35.299	2351.475	-0.004725	-0.008136	-0.005902
4.2100	1270.156	70.716	120.319	87.552	-0.693	35.305	2418.051	-0.004950	-0.008422	-0.006129
4.2200	1284.673	71.898	121.834	89.297	-0.696	35.300	2445.688	-0.005033	-0.008528	-0.006251
4.2300	1322.320	74.924	126.195	92.581	-0.696	35.305	2517.357	-0.005245	-0.008834	-0.006481
4.2400	1317.646	75.410	126.209	92.623	-0.688	35.299	2508.459	-0.005279	-0.008835	-0.006484
4.2500	1317.916	75.411	126.554	92.858	-0.695	35.304	2508.974	-0.005279	-0.008859	-0.006500
4.2600	1315.587	75.453	126.829	93.041	-0.692	35.299	2504.539	-0.005282	-0.008878	-0.006513
4.2700	1307.517	75.231	126.169	92.734	-0.696	35.305	2489.176	-0.005266	-0.008832	-0.006491
4.2800	1289.738	73.969	125.715	91.939	-0.687	35.299	2455.330	-0.005178	-0.008800	-0.006436
4.2900	1235.846	70.647	121.999	88.328	-0.696	35.304	2352.734	-0.004945	-0.008540	-0.006183
4.3000	1206.285	68.157	118.503	85.910	-0.694	35.299	2296.457	-0.004771	-0.008295	-0.006014
4.3100	1155.023	64.615	113.962	81.922	-0.703	35.305	2198.868	-0.004523	-0.007977	-0.005735
4.3200	1102.364	61.283	108.678	77.737	-0.701	35.299	2098.618	-0.004290	-0.007607	-0.005442
4.3300	1046.458	56.917	102.953	73.125	-0.697	35.305	1992.188	-0.003984	-0.007207	-0.005119
4.3400	983.038	52.149	96.541	67.912	-0.703	35.300	1871.452	-0.003650	-0.006758	-0.004754
4.3500	922.985	47.926	90.062	63.148	-0.707	35.305	1757.126	-0.003355	-0.006304	-0.004420
4.3600	855.402	42.897	82.546	57.268	-0.700	35.299	1628.466	-0.003003	-0.005778	-0.004009
4.3700	777.540	37.393	74.209	50.586	-0.695	35.305	1480.236	-0.002617	-0.005195	-0.003541
4.3800	733.492	34.099	68.663	46.374	-0.698	35.299	1396.379	-0.002387	-0.004806	-0.003246
4.3900	656.546	28.276	59.555	39.786	-0.703	35.305	1249.895	-0.001979	-0.004169	-0.002785
4.4000	595.606	24.164	52.440	34.297	-0.703	35.300	1133.881	-0.001691	-0.003671	-0.002401
4.4100	537.566	19.784	45.121	29.239	-0.708	35.305	1023.388	-0.001385	-0.003158	-0.002047
4.4200	476.716	15.340	37.372	23.542	-0.694	35.299	907.545	-0.001074	-0.002616	-0.001648
4.4300	425.589	12.213	30.713	18.875	-0.692	35.305	810.213	-0.000855	-0.002150	-0.001321
4.4400	375.560	8.236	24.137	14.303	-0.691	35.300	714.970	-0.000576	-0.001690	-0.001001
4.4500	339.176	5.807	19.374	10.480	-0.690	35.305	645.704	-0.000407	-0.001356	-0.000734
4.4600	299.531	3.111	13.196	6.545	-0.701	35.300	570.230	-0.000218	-0.000924	-0.000458
4.4700	271.623	0.917	8.849	3.741	-0.703	35.304	517.101	-0.000064	-0.000619	-0.000262
4.4800	245.068	-0.347	5.118	0.695	-0.710	35.299	466.547	0.000024	-0.000358	-0.000049
4.4900	244.302	-0.933	4.031	0.097	-0.706	35.305	465.088	0.000065	-0.000282	-0.000007
4.5000	244.527	-1.350	4.004	-0.278	-0.706	35.300	465.517	0.000095	-0.000280	0.000019
4.5100	247.112	-1.128	3.660	-0.278	-0.705	35.304	470.438	0.000079	-0.000256	0.000019
4.5200	259.931	-0.681	3.948	0.558	-0.699	35.300	494.843	0.000048	-0.000276	-0.000039
4.5300	287.899	0.458	6.866	2.280	-0.707	35.305	548.086	-0.000032	-0.000481	-0.000160
4.5400	322.570	2.719	10.678	4.951	-0.707	35.300	614.090	-0.000190	-0.000747	-0.000347
4.5500	368.031	5.222	15.769	8.716	-0.700	35.305	700.636	-0.000366	-0.001104	-0.000610
4.5600	425.800	8.809	22.554	13.787	-0.707	35.300	810.614	-0.000617	-0.001579	-0.000965
4.5700	462.635	11.396	26.958	16.981	-0.708	35.305	880.737	-0.000798	-0.001887	-0.001189
4.5800	522.162	14.922	34.305	22.304	-0.706	35.299	994.062	-0.001045	-0.002401	-0.001561
4.5900	575.227	18.411	40.632	26.379	-0.703	35.304	1095.085	-0.001289	-0.002844	-0.001847
4.6000	652.579	23.746	49.262	32.909	-0.701	35.300	1242.342	-0.001662	-0.003448	-0.002304
4.6100	714.706	28.055	57.202	38.328	-0.712	35.304	1360.617	-0.001964	-0.004004	-0.002683
4.6200	774.128	32.559	64.481	43.943	-0.703	35.300	1473.742	-0.002279	-0.004514	-0.003076
4.6300	846.129	37.546	72.392	49.959	-0.708	35.304	1610.813	-0.002628	-0.005067	-0.003497
4.6400	909.805	42.284	80.014	55.503	-0.703	35.300	1732.035	-0.002960	-0.005601	-0.003885
4.6500	962.810	46.355	86.070	60.219	-0.695	35.305	1832.943	-0.003245	-0.006025	-0.004215
4.6600	1054.814	53.012	95.963	68.036	-0.699	35.300	2008.095	-0.003711	-0.006717	-0.004763
4.6700	1093.963	56.680	100.767	71.750	-0.711	35.305	2082.624	-0.003968	-0.007054	-0.005022
4.6800	1149.553	60.782	106.505	76.879	-0.711	35.300	2188.454	-0.004255	-0.007455	-0.005382
4.6900	1216.865	65.981	114.098	82.865	-0.709	35.304	2316.599	-0.004619	-0.007987	-0.005801
4.7000	1213.589	66.605	114.263	83.198	-0.703	35.299	2310.362	-0.004662	-0.007998	-0.005824
4.7100	1273.357	71.090	120.663	88.106	-0.709	35.305	2424.145	-0.004976	-0.008446	-0.006167
4.7200	1305.638	73.771	124.322	91.021	-0.711	35.300	2485.600	-0.005164	-0.008703	-0.006371
4.7300	1312.641	74.883	125.825	92.345	-0.706	35.304	2498.932	-0.005242	-0.008808	-0.006464
4.7400	1309.545	74.662	125.576	92.483	-0.703	35.300	2493.038	-0.005226	-0.008790	-0.006474
4.7500	1312.040	75.275	126.264	92.858	-0.700	35.305	2497.787	-0.005269	-0.008838	-0.006500
4.7600	1311.093	75.413	126.417	92.971	-0.698	35.300	2495.985	-0.005279	-0.008849	-0.006508
4.7700	1303.429	74.897	126.184	92.721	-0.693	35.305	2481.394	-0.005243	-0.008833	-0.006490
4.7800	1292.518	74.620	125.782	92.484	-0.693	35.300	2460.623	-0.005223	-0.008805	-0.006474
4.7900	1239.258	71.078	121.888	88.771	-0.709	35.304	2359.228	-0.004975	-0.008532	-0.006214
4.8000	1217.181	69.118	120.030	87.231	-0.702	35.300	2317.200	-0.004838	-0.008402	-0.006106
4.8100	1155.309	64.949	114.386	82.493	-0.707	35.304	2199.411	-0.004546	-0.008007	-0.005774
4.8200	1111.231	61.476	109.669	78.918	-0.698	35.300	2115.498	-0.004303	-0.007677	-0.005524
4.8300	1045.331	56.960	103.297	73.444	-0.698	35.305	1990.042	-0.003987	-0.007231	-0.005141
4.8400	988.253	53.191	97.381	68.818	-0.707	35.300	1881.380	-0.003723	-0.006817	-0.004817
4.8500	932.934	48.788	91.160	64.204	-0.703	35.304	1776.066	-0.003415	-0.006381	-0.004494
4.8600	869.604	44.398	84.709	58.438	-0.704	35.300	1655.502	-0.003108	-0.005930	-0.004091
4.8700	767.606	36.948	72.983	49.973	-0.702	35.304	1461.325	-0.002586	-0.005109	-0.003498
4.8800	714.496	32.975	66.945	45.514	-0.699	35.299	1360.216	-0.002308	-0.004686	-0.003186
4.8900	666.600	29.429	61.040	41.024	-0.706	35.304	1269.035	-0.002060	-0.004273	-0.002872
4.9000	599.769	24.509	52.937	34.840	-0.705	35.300	1141.806	-0.001716	-0.003706	-0.002439
4.9100	524.837	19.214	43.993	28.461	-0.706	35.304	999.155	-0.001345	-0.003080	-0.001992
4.9200	464.754	14.935	36.382	23.179	-0.706	35.300	884.771	-0.001045	-0.002547	-0.001623
4.9300	420.164	11.546	30.025	18.957	-0.711	35.304	799.885	-0.000808	-0.002102	-0.001327
4.9400	357.556	7.429	22.141	12.954	-0.695	35.300	680.695	-0.000520	-0.001550	-0.000907
4.9500	343.339	6.250	19.718	10.840	-0.715	35.305	653.629	-0.000437	-0.001380	-0.000759
4.9600	318.407	4.139	15.537	8.214	-0.697	35.300	606.165	-0.000290	-0.001088	-0.000575
4.9700	302.116	3.276	13.222	6.630	-0.704	35.304	575.151	-0.000229	-0.000926	-0.000464
4.9800	280.340	1.665	10.060	4.462	-0.706	35.300	533.695	-0.000117	-0.000704	-0.000312
4.9900	255.723	-0.334	6.235	1.739	-0.712	35.304	486.832	0.000023	-0.000436	-0.000122
Test Cycles
Time (sec)	Axial stress (kPa)	Axial micro-strain #1	Axial micro-strain #2	Axial micro-strain #3	Confining pressure (kPa)	Temperature (�C)	Load (N)	Displacement #1 (mm)	Displacement #2 (mm)	Displacement #3 (mm)
0.0000	263.583	0.042	6.344	1.878	-0.716	35.300	501.795	-0.000003	-0.000444	-0.000131
0.0100	265.792	0.055	6.083	1.725	-0.716	35.304	506.001	-0.000004	-0.000426	-0.000121
0.0200	271.879	0.179	6.619	1.918	-0.704	35.300	517.588	-0.000013	-0.000463	-0.000134
0.0300	285.735	0.834	7.528	2.822	-0.697	35.304	543.966	-0.000058	-0.000527	-0.000198
0.0400	318.257	2.387	10.553	5.087	-0.696	35.300	605.879	-0.000167	-0.000739	-0.000356
0.0500	364.649	5.390	15.866	8.717	-0.696	35.304	694.199	-0.000377	-0.001111	-0.000610
0.0600	410.411	7.959	21.162	12.801	-0.709	35.300	781.317	-0.000557	-0.001481	-0.000896
0.0700	471.862	11.642	28.071	18.107	-0.723	35.304	898.304	-0.000815	-0.001965	-0.001267
0.0800	511.537	14.868	33.561	21.445	-0.716	35.300	973.835	-0.001041	-0.002349	-0.001501
0.0900	584.530	19.338	41.762	27.266	-0.711	35.305	1112.795	-0.001354	-0.002923	-0.001909
0.1000	649.753	23.705	49.812	33.158	-0.696	35.301	1236.963	-0.001659	-0.003487	-0.002321
0.1100	718.974	28.637	57.931	39.146	-0.711	35.304	1368.742	-0.002005	-0.004055	-0.002740
0.1200	786.497	33.211	65.734	44.969	-0.703	35.301	1497.288	-0.002325	-0.004601	-0.003148
0.1300	865.621	38.964	74.925	51.599	-0.711	35.305	1647.921	-0.002728	-0.005245	-0.003612
0.1400	911.924	42.798	80.442	56.101	-0.709	35.300	1736.069	-0.002996	-0.005631	-0.003927
0.1500	992.491	48.594	89.002	62.979	-0.714	35.305	1889.448	-0.003402	-0.006230	-0.004409
0.1600	1022.894	51.484	93.459	65.955	-0.708	35.301	1947.327	-0.003604	-0.006542	-0.004617
0.1700	1125.853	58.863	103.752	74.681	-0.714	35.304	2143.335	-0.004120	-0.007263	-0.005228
0.1800	1151.567	61.339	107.523	77.599	-0.719	35.300	2192.287	-0.004294	-0.007527	-0.005432
0.1900	1201.581	65.758	112.846	81.674	-0.719	35.304	2287.502	-0.004603	-0.007899	-0.005717
0.2000	1230.902	68.020	116.109	84.728	-0.712	35.300	2343.321	-0.004761	-0.008128	-0.005931
0.2100	1255.729	69.828	119.109	86.870	-0.703	35.304	2390.585	-0.004888	-0.008338	-0.006081
0.2200	1284.974	72.719	122.782	89.870	-0.711	35.301	2446.260	-0.005090	-0.008595	-0.006291
0.2300	1308.659	74.593	125.136	92.219	-0.706	35.304	2491.350	-0.005221	-0.008759	-0.006455
0.2400	1319.915	75.787	127.077	93.221	-0.700	35.300	2512.779	-0.005305	-0.008895	-0.006525
0.2500	1320.426	76.304	127.145	93.901	-0.716	35.305	2513.752	-0.005341	-0.008900	-0.006573
0.2600	1317.586	75.872	127.213	93.900	-0.709	35.301	2508.345	-0.005311	-0.008905	-0.006573
0.2700	1303.173	75.634	127.241	93.291	-0.699	35.304	2480.907	-0.005294	-0.008907	-0.006530
0.2800	1273.102	73.621	125.177	91.606	-0.702	35.301	2423.658	-0.005153	-0.008762	-0.006412
0.2900	1216.775	69.410	120.345	87.147	-0.719	35.304	2316.427	-0.004859	-0.008424	-0.006100
0.3000	1186.463	67.534	117.362	84.907	-0.715	35.300	2258.720	-0.004727	-0.008215	-0.005943
0.3100	1177.626	66.480	116.055	84.184	-0.711	35.304	2241.898	-0.004654	-0.008124	-0.005893
0.3200	1097.855	60.671	108.842	77.752	-0.706	35.300	2090.034	-0.004247	-0.007619	-0.005443
0.3300	1031.505	56.431	102.087	72.472	-0.710	35.305	1963.720	-0.003950	-0.007146	-0.005073
0.3400	997.811	53.554	98.082	69.749	-0.700	35.301	1899.576	-0.003749	-0.006866	-0.004882
0.3500	923.706	48.761	90.790	63.508	-0.696	35.304	1758.499	-0.003413	-0.006355	-0.004446
0.3600	856.785	43.647	83.153	57.853	-0.692	35.300	1631.098	-0.003055	-0.005821	-0.004050
0.3700	792.959	38.783	75.887	52.447	-0.704	35.304	1509.590	-0.002715	-0.005312	-0.003671
0.3800	725.211	34.238	68.677	46.442	-0.702	35.300	1380.615	-0.002397	-0.004807	-0.003251
0.3900	638.467	28.053	58.163	39.161	-0.711	35.304	1215.477	-0.001964	-0.004071	-0.002741
0.4000	582.486	23.775	51.325	33.894	-0.702	35.301	1108.904	-0.001664	-0.003593	-0.002373
0.4100	533.118	19.924	45.133	28.988	-0.725	35.304	1014.919	-0.001395	-0.003159	-0.002029
0.4200	464.829	15.172	36.507	23.264	-0.716	35.301	884.914	-0.001062	-0.002555	-0.001628
0.4300	420.059	12.101	30.356	18.943	-0.722	35.304	799.685	-0.000847	-0.002125	-0.001326
0.4400	372.269	8.640	23.861	14.552	-0.711	35.301	708.704	-0.000605	-0.001670	-0.001019
0.4500	324.403	5.169	17.491	9.760	-0.706	35.304	617.580	-0.000362	-0.001224	-0.000683
0.4600	304.806	3.764	14.434	7.323	-0.708	35.301	580.273	-0.000263	-0.001010	-0.000513
0.4700	287.358	2.457	11.588	5.532	-0.707	35.304	547.056	-0.000172	-0.000811	-0.000387
0.4800	284.593	1.666	10.692	4.686	-0.716	35.301	541.792	-0.000117	-0.000748	-0.000328
0.4900	248.750	-0.071	5.863	1.362	-0.704	35.304	473.557	0.000005	-0.000410	-0.000095
0.5000	249.351	-0.557	4.763	0.738	-0.710	35.301	474.701	0.000039	-0.000333	-0.000052
0.5100	256.881	-0.557	5.367	0.834	-0.696	35.304	489.035	0.000039	-0.000376	-0.000058
0.5200	262.276	-0.015	5.451	1.127	-0.699	35.301	499.306	0.000001	-0.000382	-0.000079
0.5300	316.108	2.525	10.113	5.005	-0.697	35.305	601.788	-0.000177	-0.000708	-0.000350
0.5400	332.458	3.638	12.976	6.504	-0.707	35.301	632.915	-0.000255	-0.000908	-0.000455
0.5500	348.283	4.555	14.296	7.617	-0.709	35.304	663.042	-0.000319	-0.001001	-0.000533
0.5600	410.110	7.904	21.260	12.980	-0.720	35.301	780.745	-0.000553	-0.001488	-0.000909
0.5700	462.559	11.461	27.700	17.634	-0.711	35.304	880.594	-0.000802	-0.001939	-0.001234
0.5800	521.877	15.130	34.566	22.097	-0.706	35.301	993.519	-0.001059	-0.002420	-0.001547
0.5900	558.967	17.520	39.287	25.488	-0.707	35.304	1064.129	-0.001226	-0.002750	-0.001784
0.6000	634.289	22.817	48.396	31.911	-0.702	35.301	1207.523	-0.001597	-0.003388	-0.002234
0.6100	715.818	28.248	57.450	38.646	-0.696	35.304	1362.734	-0.001977	-0.004022	-0.002705
0.6200	782.364	33.280	65.857	44.718	-0.703	35.301	1489.420	-0.002330	-0.004610	-0.003130
0.6300	848.880	37.977	73.521	50.526	-0.699	35.304	1616.049	-0.002658	-0.005146	-0.003537
0.6400	923.255	43.647	81.707	56.822	-0.700	35.301	1757.641	-0.003055	-0.005719	-0.003978
0.6500	981.145	47.746	88.341	62.022	-0.710	35.304	1867.847	-0.003342	-0.006184	-0.004342
0.6600	1056.212	53.622	96.611	68.650	-0.710	35.301	2010.756	-0.003754	-0.006763	-0.004806
0.6700	1079.295	55.655	99.832	71.195	-0.722	35.304	2054.701	-0.003896	-0.006988	-0.004984
0.6800	1133.578	60.227	105.363	75.892	-0.708	35.301	2158.041	-0.004216	-0.007375	-0.005312
0.6900	1176.739	63.560	110.410	79.934	-0.710	35.304	2240.210	-0.004449	-0.007729	-0.005595
0.7000	1235.606	67.770	116.923	84.994	-0.706	35.301	2352.276	-0.004744	-0.008185	-0.005950
0.7100	1250.228	69.717	118.778	86.591	-0.703	35.304	2380.114	-0.004880	-0.008314	-0.006061
0.7200	1306.735	74.037	124.557	91.689	-0.704	35.301	2487.688	-0.005183	-0.008719	-0.006418
0.7300	1307.712	74.481	125.384	92.093	-0.709	35.305	2489.548	-0.005214	-0.008777	-0.006447
0.7400	1325.175	76.415	127.516	93.927	-0.699	35.301	2522.793	-0.005349	-0.008926	-0.006575
0.7500	1318.713	76.067	127.556	93.819	-0.710	35.305	2510.490	-0.005325	-0.008929	-0.006567
0.7600	1317.616	76.373	127.600	93.957	-0.715	35.302	2508.402	-0.005346	-0.008932	-0.006577
0.7700	1308.178	75.981	127.172	93.401	-0.710	35.304	2490.435	-0.005319	-0.008902	-0.006538
0.7800	1277.715	73.688	125.535	91.898	-0.715	35.302	2432.442	-0.005158	-0.008787	-0.006433
0.7900	1230.015	71.010	121.915	88.383	-0.727	35.304	2341.633	-0.004971	-0.008534	-0.006187
0.8000	1224.470	70.145	120.799	87.718	-0.726	35.301	2331.076	-0.004910	-0.008456	-0.006140
0.8100	1182.991	67.202	117.293	84.909	-0.717	35.304	2252.111	-0.004704	-0.008211	-0.005944
0.8200	1085.893	60.532	108.005	77.310	-0.712	35.302	2067.261	-0.004237	-0.007560	-0.005412
0.8300	1052.905	57.664	103.972	74.459	-0.720	35.305	2004.461	-0.004036	-0.007278	-0.005212
0.8400	977.658	52.302	96.940	68.192	-0.709	35.302	1861.210	-0.003661	-0.006786	-0.004773
0.8500	939.832	49.719	92.358	64.954	-0.708	35.304	1789.198	-0.003480	-0.006465	-0.004547
0.8600	850.232	43.214	82.781	57.588	-0.705	35.301	1618.624	-0.003025	-0.005795	-0.004031
0.8700	797.498	39.255	76.835	52.906	-0.713	35.304	1518.230	-0.002748	-0.005378	-0.003703
0.8800	729.614	34.545	69.090	47.041	-0.719	35.301	1388.998	-0.002418	-0.004836	-0.003293
0.8900	659.251	29.222	60.683	40.706	-0.716	35.304	1255.045	-0.002046	-0.004248	-0.002849
0.9000	577.467	23.357	50.939	33.798	-0.715	35.302	1099.348	-0.001635	-0.003566	-0.002366
0.9100	517.248	19.132	43.289	28.127	-0.713	35.305	984.707	-0.001339	-0.003030	-0.001969
0.9200	469.518	15.437	37.235	23.582	-0.717	35.301	893.841	-0.001081	-0.002606	-0.001651
0.9300	439.145	13.294	33.109	20.834	-0.698	35.305	836.020	-0.000931	-0.002318	-0.001458
0.9400	365.581	8.097	23.477	13.915	-0.706	35.302	695.972	-0.000567	-0.001643	-0.000974
0.9500	337.884	6.321	19.773	10.910	-0.705	35.304	643.244	-0.000442	-0.001384	-0.000764
0.9600	323.216	4.710	17.161	9.300	-0.700	35.302	615.320	-0.000330	-0.001201	-0.000651
0.9700	294.572	2.831	12.964	6.379	-0.708	35.304	560.789	-0.000198	-0.000907	-0.000446
0.9800	275.786	1.886	10.072	4.115	-0.710	35.301	525.026	-0.000132	-0.000705	-0.000288
0.9900	254.010	0.095	6.359	1.892	-0.715	35.304	483.570	-0.000007	-0.000445	-0.000132
1.0000	257.452	-0.418	6.537	1.697	-0.707	35.301	490.122	0.000029	-0.000458	-0.000119
1.0100	255.227	0.014	5.906	1.419	-0.710	35.304	485.888	-0.000001	-0.000413	-0.000099
1.0200	264.350	-0.197	5.851	1.780	-0.705	35.301	503.254	0.000014	-0.000410	-0.000125
1.0300	277.815	0.694	7.320	2.351	-0.708	35.304	528.889	-0.000049	-0.000512	-0.000165
1.0400	314.815	2.595	10.528	4.825	-0.710	35.302	599.327	-0.000182	-0.000737	-0.000338
1.0500	368.722	5.582	16.789	9.620	-0.716	35.304	701.952	-0.000391	-0.001175	-0.000673
1.0600	418.391	8.974	22.994	13.883	-0.699	35.302	796.509	-0.000628	-0.001610	-0.000972
1.0700	461.342	11.476	27.616	17.509	-0.701	35.304	878.277	-0.000803	-0.001933	-0.001226
1.0800	523.334	15.421	35.144	22.888	-0.705	35.302	996.294	-0.001079	-0.002460	-0.001602
1.0900	580.833	19.590	41.983	27.545	-0.715	35.304	1105.757	-0.001371	-0.002939	-0.001928
1.1000	650.084	23.830	50.103	33.352	-0.706	35.301	1237.593	-0.001668	-0.003507	-0.002335
1.1100	735.746	29.777	60.434	40.857	-0.704	35.305	1400.671	-0.002084	-0.004230	-0.002860
1.1200	792.162	34.362	67.261	46.027	-0.704	35.302	1508.074	-0.002405	-0.004708	-0.003222
1.1300	854.816	38.770	74.277	51.292	-0.706	35.305	1627.350	-0.002714	-0.005199	-0.003590
1.1400	921.377	43.534	81.943	57.214	-0.712	35.302	1754.065	-0.003047	-0.005736	-0.004005
1.1500	983.204	48.662	88.893	62.576	-0.714	35.304	1871.767	-0.003406	-0.006222	-0.004380
1.1600	1040.327	52.567	95.208	67.551	-0.718	35.302	1980.515	-0.003680	-0.006665	-0.004729
1.1700	1075.628	56.211	99.501	71.234	-0.726	35.304	2047.720	-0.003935	-0.006965	-0.004986
1.1800	1138.417	60.546	106.037	76.806	-0.710	35.302	2167.253	-0.004238	-0.007423	-0.005376
1.1900	1199.583	65.299	112.791	82.254	-0.715	35.304	2283.697	-0.004571	-0.007895	-0.005758
1.2000	1238.641	69.089	117.677	85.382	-0.714	35.302	2358.055	-0.004836	-0.008237	-0.005977
1.2100	1261.996	70.872	120.031	87.717	-0.710	35.304	2402.515	-0.004961	-0.008402	-0.006140
1.2200	1307.006	74.508	125.217	91.814	-0.716	35.302	2488.203	-0.005216	-0.008765	-0.006427
1.2300	1320.065	76.122	126.966	93.400	-0.722	35.304	2513.065	-0.005329	-0.008888	-0.006538
1.2400	1328.030	76.400	128.012	94.415	-0.705	35.303	2528.229	-0.005348	-0.008961	-0.006609
1.2500	1319.720	76.566	128.124	94.467	-0.700	35.304	2512.407	-0.005360	-0.008969	-0.006613
1.2600	1318.277	77.097	127.999	94.344	-0.703	35.303	2509.661	-0.005397	-0.008960	-0.006604
1.2700	1306.089	76.065	127.569	93.679	-0.709	35.305	2486.458	-0.005325	-0.008930	-0.006558
1.2800	1280.210	74.771	126.238	92.454	-0.712	35.302	2437.191	-0.005234	-0.008837	-0.006472
1.2900	1249.732	72.025	123.716	90.147	-0.704	35.304	2379.169	-0.005042	-0.008660	-0.006310
1.3000	1213.153	69.368	120.485	87.482	-0.709	35.302	2309.532	-0.004856	-0.008434	-0.006124
1.3100	1163.605	66.492	115.711	83.642	-0.708	35.304	2215.204	-0.004654	-0.008100	-0.005855
1.3200	1092.430	60.851	108.582	77.891	-0.708	35.302	2079.706	-0.004260	-0.007601	-0.005452
1.3300	1029.431	56.681	102.580	72.832	-0.702	35.305	1959.772	-0.003968	-0.007181	-0.005098
1.3400	991.439	53.915	98.277	69.471	-0.710	35.302	1887.445	-0.003774	-0.006879	-0.004863
1.3500	906.303	47.771	89.288	62.728	-0.713	35.304	1725.369	-0.003344	-0.006250	-0.004391
1.3600	854.590	43.995	83.527	57.826	-0.708	35.302	1626.921	-0.003080	-0.005847	-0.004048
1.3700	787.038	38.977	75.707	52.197	-0.728	35.304	1498.318	-0.002728	-0.005300	-0.003654
1.3800	707.943	33.098	66.986	45.427	-0.710	35.302	1347.742	-0.002317	-0.004689	-0.003180
1.3900	658.981	29.803	61.234	40.982	-0.720	35.304	1254.530	-0.002086	-0.004286	-0.002869
1.4000	578.879	23.608	51.077	33.880	-0.717	35.302	1102.037	-0.001653	-0.003575	-0.002372
1.4100	532.066	20.299	45.437	29.477	-0.708	35.304	1012.917	-0.001421	-0.003181	-0.002063
1.4200	468.541	15.851	37.635	23.861	-0.714	35.302	891.981	-0.001110	-0.002634	-0.001670
1.4300	426.626	12.532	31.623	19.917	-0.725	35.304	812.187	-0.000877	-0.002214	-0.001394
1.4400	377.378	9.532	25.193	15.193	-0.712	35.302	718.431	-0.000667	-0.001764	-0.001064
1.4500	327.755	6.334	18.439	10.358	-0.712	35.304	623.960	-0.000443	-0.001291	-0.000725
1.4600	316.077	4.667	16.223	8.827	-0.713	35.302	601.730	-0.000327	-0.001136	-0.000618
1.4700	280.385	2.652	11.492	5.422	-0.700	35.304	533.781	-0.000186	-0.000804	-0.000380
1.4800	254.927	0.874	7.362	2.405	-0.714	35.302	485.315	-0.000061	-0.000515	-0.000168
1.4900	252.552	0.152	6.442	1.836	-0.703	35.304	480.795	-0.000011	-0.000451	-0.000129
1.5000	256.655	0.569	6.495	1.628	-0.708	35.302	488.605	-0.000040	-0.000455	-0.000114
1.5100	261.675	0.389	6.152	1.753	-0.706	35.304	498.161	-0.000027	-0.000431	-0.000123
1.5200	269.835	0.749	6.951	2.142	-0.704	35.303	513.697	-0.000052	-0.000487	-0.000150
1.5300	278.251	0.889	7.500	2.779	-0.712	35.305	529.718	-0.000062	-0.000525	-0.000195
1.5400	322.750	2.956	11.589	5.878	-0.707	35.302	614.433	-0.000207	-0.000811	-0.000411
1.5500	348.689	5.058	14.738	8.242	-0.726	35.304	663.815	-0.000354	-0.001032	-0.000577
1.5600	413.026	8.988	22.306	13.466	-0.710	35.302	786.295	-0.000629	-0.001561	-0.000943
1.5700	464.498	11.574	28.030	17.845	-0.716	35.305	884.285	-0.000810	-0.001962	-0.001249
1.5800	530.728	16.202	36.339	23.473	-0.715	35.303	1010.370	-0.001134	-0.002544	-0.001643
1.5900	571.726	19.090	41.155	26.797	-0.708	35.304	1088.419	-0.001336	-0.002881	-0.001876
1.6000	664.586	25.093	52.083	34.783	-0.708	35.302	1265.202	-0.001756	-0.003646	-0.002435
1.6100	720.777	29.526	59.074	39.689	-0.722	35.304	1372.175	-0.002067	-0.004135	-0.002778
1.6200	789.803	34.156	66.876	45.679	-0.713	35.302	1503.582	-0.002391	-0.004681	-0.003198
1.6300	856.304	39.090	74.580	51.737	-0.718	35.304	1630.182	-0.002736	-0.005221	-0.003622
1.6400	918.747	43.631	81.681	57.101	-0.702	35.302	1749.058	-0.003054	-0.005718	-0.003997
1.6500	987.006	48.843	89.581	63.092	-0.716	35.304	1879.005	-0.003419	-0.006271	-0.004416
1.6600	1043.663	53.260	96.075	68.176	-0.699	35.302	1986.866	-0.003728	-0.006725	-0.004772
1.6700	1101.492	57.929	102.264	73.291	-0.715	35.304	2096.958	-0.004055	-0.007158	-0.005130
1.6800	1157.488	62.017	108.501	78.528	-0.715	35.303	2203.560	-0.004341	-0.007595	-0.005497
1.6900	1209.096	66.453	114.098	82.921	-0.720	35.305	2301.807	-0.004652	-0.007987	-0.005804
1.7000	1239.348	68.881	117.527	85.755	-0.709	35.303	2359.400	-0.004822	-0.008227	-0.006003
1.7100	1270.457	71.495	121.325	88.548	-0.716	35.305	2418.623	-0.005005	-0.008493	-0.006198
1.7200	1293.315	73.676	124.198	90.829	-0.706	35.303	2462.139	-0.005157	-0.008694	-0.006358
1.7300	1329.127	76.387	127.491	93.652	-0.708	35.305	2530.317	-0.005347	-0.008924	-0.006556
1.7400	1330.826	77.208	128.535	94.748	-0.710	35.303	2533.550	-0.005405	-0.008997	-0.006632
1.7500	1323.372	77.053	128.330	94.996	-0.719	35.305	2519.360	-0.005394	-0.008983	-0.006650
1.7600	1313.738	76.482	128.302	94.553	-0.709	35.303	2501.020	-0.005354	-0.008981	-0.006619
1.7700	1307.998	76.483	128.041	94.218	-0.699	35.305	2490.091	-0.005354	-0.008963	-0.006595
1.7800	1257.697	73.079	124.681	90.981	-0.702	35.303	2394.333	-0.005116	-0.008728	-0.006369
1.7900	1238.356	71.245	122.442	89.159	-0.707	35.305	2357.512	-0.004987	-0.008571	-0.006241
1.8000	1210.583	69.703	120.376	87.091	-0.700	35.303	2304.640	-0.004879	-0.008426	-0.006096
1.8100	1141.287	64.852	113.344	81.965	-0.706	35.305	2172.718	-0.004540	-0.007934	-0.005738
1.8200	1106.767	62.349	110.192	79.072	-0.708	35.303	2107.000	-0.004364	-0.007713	-0.005535
1.8300	1031.640	56.887	102.512	73.013	-0.713	35.304	1963.978	-0.003982	-0.007176	-0.005111
1.8400	985.232	53.442	97.931	68.969	-0.711	35.303	1875.629	-0.003741	-0.006855	-0.004828
1.8500	906.408	47.869	89.647	62.688	-0.709	35.305	1725.569	-0.003351	-0.006275	-0.004388
1.8600	853.343	44.092	83.663	57.951	-0.698	35.303	1624.546	-0.003086	-0.005856	-0.004057
1.8700	775.316	38.130	74.719	51.417	-0.706	35.305	1476.002	-0.002669	-0.005230	-0.003599
1.8800	717.892	34.087	68.225	46.123	-0.704	35.303	1366.682	-0.002386	-0.004776	-0.003229
1.8900	654.728	29.624	60.461	40.648	-0.706	35.305	1246.433	-0.002074	-0.004232	-0.002845
1.9000	582.336	24.053	51.987	34.184	-0.697	35.303	1108.618	-0.001684	-0.003639	-0.002393
1.9100	518.315	19.870	44.117	28.293	-0.696	35.305	986.738	-0.001391	-0.003088	-0.001981
1.9200	485.087	16.842	39.302	25.085	-0.700	35.303	923.481	-0.001179	-0.002751	-0.001756
1.9300	415.070	11.837	30.631	19.083	-0.699	35.304	790.186	-0.000829	-0.002144	-0.001336
1.9400	367.189	9.003	24.355	14.527	-0.697	35.303	699.034	-0.000630	-0.001705	-0.001017
1.9500	333.390	5.973	19.137	10.868	-0.710	35.305	634.689	-0.000418	-0.001340	-0.000761
1.9600	312.967	5.001	16.403	8.424	-0.702	35.303	595.808	-0.000350	-0.001148	-0.000590
1.9700	271.323	2.177	10.278	4.409	-0.716	35.304	516.529	-0.000152	-0.000719	-0.000309
1.9800	257.166	0.721	7.857	2.753	-0.715	35.303	489.578	-0.000050	-0.000550	-0.000193
1.9900	257.752	0.639	7.623	2.448	-0.716	35.305	490.694	-0.000045	-0.000534	-0.000171
2.0000	248.870	-0.085	5.628	1.419	-0.706	35.303	473.785	0.000006	-0.000394	-0.000099
2.0100	252.838	-0.652	5.671	1.156	-0.711	35.305	481.339	0.000046	-0.000397	-0.000081
2.0200	264.500	0.527	5.961	1.599	-0.712	35.303	503.540	-0.000037	-0.000417	-0.000112
2.0300	293.084	2.027	8.255	3.589	-0.708	35.304	557.957	-0.000142	-0.000578	-0.000251
2.0400	319.068	3.429	11.616	5.808	-0.707	35.303	607.424	-0.000240	-0.000813	-0.000407
2.0500	370.991	6.528	17.615	10.410	-0.711	35.304	706.272	-0.000457	-0.001233	-0.000729
2.0600	410.787	8.528	22.113	13.621	-0.702	35.303	782.032	-0.000597	-0.001548	-0.000953
2.0700	471.817	12.255	29.515	18.483	-0.708	35.305	898.218	-0.000858	-0.002066	-0.001294
2.0800	523.064	15.797	35.445	23.127	-0.703	35.303	995.779	-0.001106	-0.002481	-0.001619
2.0900	582.922	19.842	42.573	27.892	-0.710	35.305	1109.734	-0.001389	-0.002980	-0.001952
2.1000	656.741	24.675	51.477	34.409	-0.704	35.303	1250.267	-0.001727	-0.003603	-0.002409
2.1100	719.545	29.067	58.935	39.857	-0.702	35.305	1369.829	-0.002035	-0.004125	-0.002790
2.1200	781.778	33.696	66.256	44.984	-0.707	35.304	1488.304	-0.002359	-0.004638	-0.003149
2.1300	838.134	37.892	73.328	50.294	-0.711	35.305	1595.592	-0.002652	-0.005133	-0.003521
2.1400	931.325	44.618	83.235	58.270	-0.707	35.304	1773.005	-0.003123	-0.005826	-0.004079
2.1500	981.370	48.717	89.401	62.700	-0.714	35.305	1868.277	-0.003410	-0.006258	-0.004389
2.1600	1045.451	53.720	96.527	68.315	-0.704	35.304	1990.271	-0.003760	-0.006757	-0.004782
2.1700	1108.045	58.195	103.174	74.208	-0.704	35.305	2109.432	-0.004074	-0.007222	-0.005195
2.1800	1155.174	62.322	108.762	78.181	-0.707	35.303	2199.154	-0.004363	-0.007613	-0.005473
2.1900	1202.874	66.090	113.549	82.795	-0.703	35.305	2289.963	-0.004626	-0.007948	-0.005796
2.2000	1237.800	68.991	117.940	85.675	-0.703	35.304	2356.453	-0.004829	-0.008256	-0.005997
2.2100	1265.858	71.343	121.032	88.661	-0.714	35.305	2409.868	-0.004994	-0.008472	-0.006206
2.2200	1284.087	73.258	123.428	90.522	-0.712	35.303	2444.572	-0.005128	-0.008640	-0.006337
2.2300	1300.483	74.494	125.550	92.039	-0.714	35.305	2475.786	-0.005215	-0.008788	-0.006443
2.2400	1315.061	76.359	127.270	93.748	-0.707	35.304	2503.538	-0.005345	-0.008909	-0.006562
2.2500	1337.108	77.848	129.358	95.941	-0.708	35.305	2545.509	-0.005449	-0.009055	-0.006716
2.2600	1329.699	77.695	129.746	95.721	-0.711	35.304	2531.404	-0.005439	-0.009082	-0.006700
2.2700	1314.565	76.903	128.810	95.092	-0.702	35.305	2502.594	-0.005383	-0.009017	-0.006656
2.2800	1278.467	74.399	126.748	92.859	-0.699	35.304	2433.872	-0.005208	-0.008872	-0.006500
2.2900	1242.654	72.106	123.537	90.190	-0.693	35.305	2365.694	-0.005047	-0.008648	-0.006313
2.3000	1209.727	69.800	120.389	87.563	-0.692	35.303	2303.009	-0.004886	-0.008427	-0.006129
2.3100	1154.933	65.839	115.490	83.448	-0.692	35.305	2198.696	-0.004609	-0.008084	-0.005841
2.3200	1109.818	62.709	110.935	79.502	-0.701	35.304	2112.808	-0.004390	-0.007765	-0.005565
2.3300	1047.089	57.804	104.291	74.570	-0.710	35.305	1993.389	-0.004046	-0.007300	-0.005220
2.3400	979.927	53.276	97.752	69.206	-0.700	35.304	1865.530	-0.003729	-0.006843	-0.004844
2.3500	905.732	48.063	89.605	62.661	-0.711	35.305	1724.281	-0.003364	-0.006272	-0.004386
2.3600	844.401	43.117	82.974	57.713	-0.700	35.304	1607.523	-0.003018	-0.005808	-0.004040
2.3700	793.094	39.298	77.045	52.905	-0.702	35.305	1509.848	-0.002751	-0.005393	-0.003703
2.3800	713.489	33.545	67.838	46.153	-0.703	35.304	1358.299	-0.002348	-0.004749	-0.003231
2.3900	659.281	29.733	61.590	41.219	-0.702	35.305	1255.102	-0.002081	-0.004311	-0.002885
2.4000	579.541	24.177	52.193	34.256	-0.691	35.304	1103.296	-0.001692	-0.003654	-0.002398
2.4100	521.155	19.634	44.323	28.947	-0.703	35.305	992.146	-0.001374	-0.003103	-0.002026
2.4200	482.788	16.508	39.383	25.128	-0.700	35.304	919.104	-0.001156	-0.002757	-0.001759
2.4300	421.382	12.627	31.676	19.835	-0.698	35.305	802.202	-0.000884	-0.002217	-0.001388
2.4400	370.315	8.711	24.851	14.790	-0.702	35.304	704.985	-0.000610	-0.001740	-0.001035
2.4500	347.171	7.209	21.206	12.216	-0.707	35.305	660.925	-0.000505	-0.001484	-0.000855
2.4600	322.540	5.432	17.917	9.968	-0.698	35.304	614.033	-0.000380	-0.001254	-0.000698
2.4700	275.801	2.220	11.203	4.893	-0.709	35.305	525.055	-0.000155	-0.000784	-0.000342
2.4800	256.279	0.874	8.380	3.031	-0.698	35.304	487.890	-0.000061	-0.000587	-0.000212
2.4900	248.224	0.206	6.193	1.877	-0.705	35.306	472.555	-0.000014	-0.000434	-0.000131
2.5000	251.861	-0.152	6.165	1.573	-0.695	35.304	479.479	0.000011	-0.000432	-0.000110
2.5100	255.738	-0.029	6.165	1.683	-0.688	35.305	486.860	0.000002	-0.000432	-0.000118
2.5200	263.433	0.013	6.330	1.918	-0.702	35.304	501.509	-0.000001	-0.000443	-0.000134
2.5300	281.632	0.831	7.898	2.962	-0.706	35.305	536.156	-0.000058	-0.000553	-0.000207
2.5400	332.969	4.097	13.251	7.020	-0.702	35.304	633.888	-0.000287	-0.000928	-0.000491
2.5500	362.049	5.517	16.692	9.510	-0.711	35.305	689.249	-0.000386	-0.001168	-0.000666
2.5600	413.041	9.000	22.870	13.844	-0.704	35.304	786.324	-0.000630	-0.001601	-0.000969
2.5700	461.417	12.157	28.445	18.136	-0.699	35.305	878.420	-0.000851	-0.001991	-0.001270
2.5800	523.996	15.686	35.982	23.500	-0.695	35.304	997.553	-0.001098	-0.002519	-0.001645
2.5900	587.415	20.103	43.801	28.460	-0.699	35.305	1118.288	-0.001407	-0.003066	-0.001992
2.6000	651.662	24.483	51.187	34.116	-0.699	35.304	1240.597	-0.001714	-0.003583	-0.002388
2.6100	714.781	29.055	58.922	39.425	-0.699	35.305	1360.760	-0.002034	-0.004125	-0.002760
2.6200	798.655	34.933	68.484	46.637	-0.698	35.305	1520.433	-0.002445	-0.004794	-0.003265
2.6300	837.473	37.755	72.955	50.499	-0.695	35.305	1594.334	-0.002643	-0.005107	-0.003535
2.6400	958.993	46.759	86.344	60.714	-0.699	35.304	1825.676	-0.003273	-0.006044	-0.004250
2.6500	957.129	47.536	87.142	61.379	-0.697	35.305	1822.128	-0.003327	-0.006100	-0.004297
2.6600	1062.914	54.485	98.276	70.319	-0.691	35.304	2023.516	-0.003814	-0.006879	-0.004922
2.6700	1104.378	58.111	103.173	74.112	-0.694	35.305	2102.451	-0.004068	-0.007222	-0.005188
2.6800	1162.553	62.681	109.421	79.446	-0.703	35.304	2213.202	-0.004388	-0.007659	-0.005561
2.6900	1223.147	67.340	115.904	84.505	-0.698	35.305	2328.558	-0.004714	-0.008113	-0.005915
2.7000	1237.033	69.452	118.062	86.118	-0.694	35.305	2354.994	-0.004862	-0.008264	-0.006028
2.7100	1247.643	69.966	119.286	87.175	-0.702	35.305	2375.193	-0.004898	-0.008350	-0.006102
2.7200	1290.820	73.398	124.158	90.966	-0.709	35.305	2457.390	-0.005138	-0.008691	-0.006368
2.7300	1332.900	77.096	128.549	94.930	-0.702	35.306	2537.498	-0.005397	-0.008998	-0.006645
2.7400	1328.962	76.942	128.712	95.289	-0.695	35.305	2530.003	-0.005386	-0.009010	-0.006670
2.7500	1323.116	77.069	129.042	95.135	-0.700	35.305	2518.873	-0.005395	-0.009033	-0.006659
2.7600	1309.846	76.525	128.302	94.550	-0.699	35.305	2493.610	-0.005357	-0.008981	-0.006618
2.7700	1295.674	75.508	127.736	93.650	-0.697	35.305	2466.631	-0.005286	-0.008942	-0.006555
2.7800	1272.846	73.953	126.622	92.359	-0.703	35.305	2423.172	-0.005177	-0.008864	-0.006465
2.7900	1224.244	70.676	121.889	88.606	-0.696	35.305	2330.647	-0.004947	-0.008532	-0.006202
2.8000	1197.644	68.728	119.549	86.521	-0.701	35.305	2280.006	-0.004811	-0.008368	-0.006056
2.8100	1159.427	66.215	115.837	83.990	-0.700	35.304	2207.251	-0.004635	-0.008109	-0.005879
2.8200	1102.770	62.003	109.945	79.378	-0.694	35.304	2099.390	-0.004340	-0.007696	-0.005556
2.8300	1028.033	57.027	102.829	73.388	-0.708	35.305	1957.111	-0.003992	-0.007198	-0.005137
2.8400	976.892	53.067	97.133	68.761	-0.699	35.305	1859.751	-0.003715	-0.006799	-0.004813
2.8500	892.011	46.468	88.341	61.742	-0.705	35.305	1698.160	-0.003253	-0.006184	-0.004322
2.8600	888.885	46.218	87.666	60.978	-0.698	35.304	1692.209	-0.003235	-0.006137	-0.004268
2.8700	793.139	39.658	77.306	53.657	-0.697	35.305	1509.933	-0.002776	-0.005411	-0.003756
2.8800	737.053	35.334	70.647	48.293	-0.704	35.305	1403.160	-0.002473	-0.004945	-0.003381
2.8900	625.167	27.984	58.276	39.163	-0.701	35.306	1190.157	-0.001959	-0.004079	-0.002741
2.9000	574.491	23.483	51.173	33.949	-0.692	35.305	1093.683	-0.001644	-0.003582	-0.002376
2.9100	521.516	19.770	44.902	29.253	-0.695	35.306	992.832	-0.001384	-0.003143	-0.002048
2.9200	466.392	16.091	37.524	24.125	-0.706	35.305	887.890	-0.001126	-0.002627	-0.001689
2.9300	425.635	12.517	32.324	20.195	-0.694	35.306	810.299	-0.000876	-0.002263	-0.001414
2.9400	371.412	9.364	25.251	15.164	-0.700	35.305	707.073	-0.000655	-0.001768	-0.001061
2.9500	336.261	6.833	20.364	11.714	-0.706	35.305	640.154	-0.000478	-0.001426	-0.000820
2.9600	306.339	4.252	15.769	8.284	-0.696	35.305	583.191	-0.000298	-0.001104	-0.000580
2.9700	279.709	2.831	11.946	5.671	-0.708	35.305	532.494	-0.000198	-0.000836	-0.000397
2.9800	258.624	1.195	8.409	3.519	-0.717	35.305	492.353	-0.000084	-0.000589	-0.000246
2.9900	250.719	0.249	6.882	2.225	-0.713	35.305	477.304	-0.000017	-0.000482	-0.000156
3.0000	245.128	0.138	5.947	1.350	-0.706	35.305	466.661	-0.000010	-0.000416	-0.000094
3.0100	250.433	-0.209	5.186	1.349	-0.704	35.306	476.761	0.000015	-0.000363	-0.000094
3.0200	265.958	0.416	6.701	2.531	-0.706	35.305	506.315	-0.000029	-0.000469	-0.000177
3.0300	282.429	1.318	7.800	3.324	-0.710	35.305	537.672	-0.000092	-0.000546	-0.000233
3.0400	331.557	3.695	13.307	6.894	-0.703	35.305	631.199	-0.000259	-0.000932	-0.000483
3.0500	367.264	6.304	17.697	10.301	-0.716	35.305	699.177	-0.000441	-0.001239	-0.000721
3.0600	421.186	9.599	23.682	14.902	-0.704	35.305	801.830	-0.000672	-0.001658	-0.001043
3.0700	470.720	12.641	29.765	18.901	-0.704	35.306	896.130	-0.000885	-0.002084	-0.001323
3.0800	535.252	16.675	37.525	24.640	-0.695	35.305	1018.982	-0.001167	-0.002627	-0.001725
3.0900	575.077	19.618	42.091	27.878	-0.697	35.305	1094.799	-0.001373	-0.002946	-0.001951
3.1000	658.650	24.939	52.015	35.019	-0.692	35.305	1253.901	-0.001746	-0.003641	-0.002451
3.1100	718.538	29.733	59.445	40.162	-0.700	35.306	1367.912	-0.002081	-0.004161	-0.002811
3.1200	788.120	34.376	67.329	46.249	-0.698	35.306	1500.378	-0.002406	-0.004713	-0.003237
3.1300	859.520	39.868	75.958	52.642	-0.700	35.305	1636.305	-0.002791	-0.005317	-0.003685
3.1400	925.314	44.801	83.194	58.215	-0.698	35.305	1761.560	-0.003136	-0.005824	-0.004075
3.1500	982.302	48.815	89.359	63.342	-0.696	35.305	1870.050	-0.003417	-0.006255	-0.004434
3.1600	1043.993	53.776	96.692	68.774	-0.697	35.305	1987.495	-0.003764	-0.006768	-0.004814
3.1700	1078.078	56.611	100.383	72.069	-0.711	35.305	2052.383	-0.003963	-0.007027	-0.005045
3.1800	1138.432	61.143	107.424	77.100	-0.705	35.305	2167.282	-0.004280	-0.007520	-0.005397
3.1900	1196.742	65.784	113.411	82.560	-0.699	35.305	2278.290	-0.004605	-0.007939	-0.005779
3.2000	1231.984	68.590	117.375	85.769	-0.704	35.306	2345.381	-0.004801	-0.008216	-0.006004
3.2100	1275.010	72.259	122.426	89.494	-0.714	35.306	2427.292	-0.005058	-0.008570	-0.006265
3.2200	1310.372	75.245	126.319	92.775	-0.703	35.306	2494.612	-0.005267	-0.008842	-0.006494
3.2300	1326.407	76.538	127.874	94.678	-0.702	35.306	2525.139	-0.005358	-0.008951	-0.006627
3.2400	1335.965	77.569	129.566	95.606	-0.708	35.306	2543.335	-0.005430	-0.009070	-0.006692
3.2500	1333.546	78.028	129.690	96.053	-0.702	35.306	2538.729	-0.005462	-0.009078	-0.006724
3.2600	1321.884	77.442	129.317	95.637	-0.694	35.305	2516.527	-0.005421	-0.009052	-0.006695
3.2700	1302.798	76.330	128.494	94.790	-0.706	35.306	2480.192	-0.005343	-0.008995	-0.006635
3.2800	1288.521	75.133	127.654	93.762	-0.703	35.306	2453.012	-0.005259	-0.008936	-0.006563
3.2900	1234.343	71.605	123.139	89.980	-0.707	35.306	2349.873	-0.005012	-0.008620	-0.006299
3.3000	1202.859	69.731	120.238	87.411	-0.695	35.306	2289.934	-0.004881	-0.008417	-0.006119
3.3100	1141.032	65.075	113.739	82.449	-0.708	35.306	2172.232	-0.004555	-0.007962	-0.005771
3.3200	1094.324	61.698	109.794	78.791	-0.712	35.306	2083.311	-0.004319	-0.007686	-0.005515
3.3300	1048.457	58.293	104.674	75.153	-0.718	35.305	1995.993	-0.004081	-0.007327	-0.005261
3.3400	985.548	53.373	98.274	69.749	-0.695	35.305	1876.230	-0.003736	-0.006879	-0.004882
3.3500	920.535	49.068	91.685	64.231	-0.703	35.305	1752.462	-0.003435	-0.006418	-0.004496
3.3600	854.320	44.104	84.186	58.840	-0.699	35.306	1626.406	-0.003087	-0.005893	-0.004119
3.3700	782.845	39.145	76.191	52.558	-0.701	35.306	1490.335	-0.002740	-0.005333	-0.003679
3.3800	731.117	35.335	70.204	48.044	-0.698	35.305	1391.859	-0.002473	-0.004914	-0.003363
3.3900	656.681	29.678	61.358	41.636	-0.703	35.306	1250.153	-0.002077	-0.004295	-0.002914
3.4000	598.807	25.496	54.407	36.301	-0.703	35.306	1139.975	-0.001785	-0.003808	-0.002541
3.4100	521.486	19.952	45.202	29.434	-0.713	35.306	992.775	-0.001397	-0.003164	-0.002060
3.4200	466.407	15.742	37.814	24.348	-0.721	35.306	887.918	-0.001102	-0.002647	-0.001704
3.4300	407.796	12.019	30.329	18.706	-0.708	35.306	776.339	-0.000841	-0.002123	-0.001309
3.4400	392.061	10.253	27.479	16.952	-0.700	35.305	746.384	-0.000718	-0.001924	-0.001187
3.4500	334.307	6.306	20.088	11.466	-0.703	35.306	636.435	-0.000441	-0.001406	-0.000803
3.4600	307.090	4.695	16.418	8.592	-0.700	35.306	584.621	-0.000329	-0.001149	-0.000601
3.4700	267.040	2.149	10.650	4.769	-0.697	35.305	508.375	-0.000150	-0.000746	-0.000334
3.4800	267.566	1.261	9.687	4.325	-0.698	35.306	509.377	-0.000088	-0.000678	-0.000303
3.4900	253.890	0.860	7.636	2.656	-0.698	35.305	483.341	-0.000060	-0.000535	-0.000186
3.5000	251.681	0.332	6.688	2.155	-0.697	35.306	479.136	-0.000023	-0.000468	-0.000151
3.5100	257.211	0.361	6.757	2.475	-0.700	35.306	489.664	-0.000025	-0.000473	-0.000173
3.5200	264.019	0.847	7.032	2.573	-0.696	35.306	502.625	-0.000059	-0.000492	-0.000180
3.5300	268.753	0.513	6.881	2.851	-0.697	35.306	511.637	-0.000036	-0.000482	-0.000200
3.5400	308.684	2.775	10.954	5.352	-0.691	35.306	587.654	-0.000194	-0.000767	-0.000375
3.5500	368.136	6.305	17.547	10.218	-0.690	35.305	700.836	-0.000441	-0.001228	-0.000715
3.5600	390.153	7.695	20.489	12.244	-0.701	35.306	742.750	-0.000539	-0.001434	-0.000857
3.5700	448.433	11.005	27.192	17.316	-0.693	35.306	853.701	-0.000770	-0.001903	-0.001212
3.5800	516.962	15.715	35.035	22.901	-0.706	35.306	984.163	-0.001100	-0.002452	-0.001603
3.5900	590.752	20.565	44.143	29.044	-0.706	35.306	1124.640	-0.001440	-0.003090	-0.002033
3.6000	661.971	25.593	52.662	35.619	-0.707	35.306	1260.223	-0.001792	-0.003686	-0.002493
3.6100	714.631	29.096	58.920	39.800	-0.723	35.306	1360.474	-0.002037	-0.004124	-0.002786
3.6200	783.867	34.350	67.342	45.762	-0.712	35.306	1492.281	-0.002405	-0.004714	-0.003203
3.6300	845.543	38.951	74.291	51.266	-0.715	35.306	1609.697	-0.002727	-0.005200	-0.003589
3.6400	916.237	43.883	82.190	57.421	-0.712	35.306	1744.280	-0.003072	-0.005753	-0.004019
3.6500	978.109	48.662	89.333	62.909	-0.712	35.306	1862.068	-0.003406	-0.006253	-0.004404
3.6600	1060.089	54.821	98.014	69.972	-0.707	35.306	2018.137	-0.003837	-0.006861	-0.004898
3.6700	1097.149	57.860	102.666	73.624	-0.700	35.306	2088.690	-0.004050	-0.007187	-0.005154
3.6800	1152.934	62.543	108.844	78.599	-0.692	35.306	2194.891	-0.004378	-0.007619	-0.005502
3.6900	1200.229	66.214	113.783	83.032	-0.688	35.306	2284.927	-0.004635	-0.007965	-0.005812
3.7000	1242.158	69.381	118.599	86.732	-0.690	35.306	2364.750	-0.004857	-0.008302	-0.006071
3.7100	1269.885	71.898	122.193	89.215	-0.696	35.306	2417.536	-0.005033	-0.008554	-0.006245
3.7200	1297.793	74.439	125.052	91.788	-0.688	35.306	2470.665	-0.005211	-0.008754	-0.006425
3.7300	1298.004	74.980	125.798	92.540	-0.692	35.306	2471.066	-0.005249	-0.008806	-0.006478
3.7400	1317.480	76.554	127.626	94.358	-0.689	35.306	2508.144	-0.005359	-0.008934	-0.006605
3.7500	1329.368	77.500	129.290	95.663	-0.698	35.306	2530.775	-0.005425	-0.009050	-0.006696
3.7600	1328.151	78.152	129.869	96.206	-0.694	35.306	2528.458	-0.005471	-0.009091	-0.006734
3.7700	1308.959	76.873	128.753	95.178	-0.695	35.306	2491.922	-0.005381	-0.009013	-0.006662
3.7800	1293.705	75.899	128.233	93.983	-0.695	35.307	2462.883	-0.005313	-0.008976	-0.006579
3.7900	1239.468	72.272	123.784	90.355	-0.691	35.306	2359.629	-0.005059	-0.008665	-0.006325
3.8000	1195.871	68.991	119.506	86.967	-0.694	35.307	2276.630	-0.004829	-0.008365	-0.006088
3.8100	1164.085	66.980	116.827	84.405	-0.692	35.306	2216.120	-0.004689	-0.008178	-0.005908
3.8200	1101.177	62.044	110.318	79.279	-0.694	35.307	2096.357	-0.004343	-0.007722	-0.005550
3.8300	1051.643	58.444	105.060	75.098	-0.694	35.306	2002.058	-0.004091	-0.007354	-0.005257
3.8400	971.511	53.108	97.327	69.067	-0.693	35.307	1849.508	-0.003718	-0.006813	-0.004835
3.8500	925.555	49.037	91.972	65.024	-0.686	35.306	1762.018	-0.003433	-0.006438	-0.004552
3.8600	849.932	44.050	84.019	58.241	-0.687	35.307	1618.052	-0.003084	-0.005881	-0.004077
3.8700	782.274	39.437	76.357	52.836	-0.684	35.306	1489.248	-0.002761	-0.005345	-0.003699
3.8800	722.220	34.572	69.308	47.515	-0.695	35.307	1374.922	-0.002420	-0.004852	-0.003326
3.8900	633.297	28.291	59.416	39.883	-0.695	35.307	1205.635	-0.001980	-0.004159	-0.002792
3.9000	605.239	25.662	55.345	36.747	-0.700	35.307	1152.220	-0.001796	-0.003874	-0.002572
3.9100	534.350	20.745	46.522	30.603	-0.707	35.307	1017.265	-0.001452	-0.003257	-0.002142
3.9200	464.573	16.339	37.978	24.210	-0.698	35.307	884.428	-0.001144	-0.002658	-0.001695
3.9300	416.317	12.601	31.416	19.736	-0.701	35.306	792.561	-0.000882	-0.002199	-0.001382
3.9400	371.908	9.142	25.498	15.415	-0.694	35.307	708.017	-0.000640	-0.001785	-0.001079
3.9500	331.557	6.806	20.365	11.659	-0.704	35.306	631.199	-0.000476	-0.001426	-0.000816
3.9600	292.844	3.695	14.102	7.435	-0.695	35.307	557.499	-0.000259	-0.000987	-0.000520
3.9700	286.697	3.248	13.209	6.534	-0.709	35.306	545.797	-0.000227	-0.000925	-0.000457
3.9800	259.135	1.470	9.191	3.534	-0.708	35.307	493.326	-0.000103	-0.000643	-0.000247
3.9900	257.331	0.792	8.008	3.256	-0.708	35.306	489.893	-0.000055	-0.000561	-0.000228
4.0000	256.595	0.609	7.841	2.837	-0.699	35.307	488.491	-0.000043	-0.000549	-0.000199
4.0100	251.741	0.166	6.219	1.767	-0.701	35.306	479.250	-0.000012	-0.000435	-0.000124
4.0200	267.911	0.639	7.170	2.684	-0.691	35.307	510.035	-0.000045	-0.000502	-0.000188
4.0300	294.437	2.622	9.644	4.519	-0.694	35.307	560.532	-0.000184	-0.000675	-0.000316
4.0400	334.082	4.541	13.856	7.782	-0.700	35.307	636.005	-0.000318	-0.000970	-0.000545
4.0500	367.039	6.447	17.722	10.410	-0.719	35.306	698.748	-0.000451	-0.001241	-0.000729
4.0600	427.693	10.377	25.044	15.387	-0.705	35.307	814.219	-0.000726	-0.001753	-0.001077
4.0700	456.368	12.075	28.316	18.402	-0.711	35.306	868.807	-0.000845	-0.001982	-0.001288
4.0800	522.312	16.201	36.422	23.666	-0.703	35.307	994.349	-0.001134	-0.002550	-0.001657
4.0900	601.512	21.677	45.809	30.100	-0.708	35.307	1145.124	-0.001517	-0.003207	-0.002107
4.1000	671.529	26.317	53.817	36.452	-0.695	35.307	1278.419	-0.001842	-0.003767	-0.002552
4.1100	696.296	28.276	57.340	38.691	-0.711	35.307	1325.569	-0.001979	-0.004014	-0.002708
4.1200	766.404	33.266	65.074	44.691	-0.693	35.307	1459.036	-0.002329	-0.004555	-0.003128
4.1300	858.768	39.478	75.666	52.406	-0.700	35.307	1634.874	-0.002763	-0.005297	-0.003668
4.1400	926.456	44.661	83.483	58.672	-0.709	35.308	1763.735	-0.003126	-0.005844	-0.004107
4.1500	980.498	49.150	89.690	63.453	-0.702	35.306	1866.617	-0.003440	-0.006278	-0.004442
4.1600	1053.371	54.250	97.795	69.707	-0.705	35.307	2005.348	-0.003797	-0.006846	-0.004879
4.1700	1102.664	58.682	103.188	74.361	-0.700	35.307	2099.190	-0.004108	-0.007223	-0.005205
4.1800	1155.925	62.448	108.995	79.058	-0.699	35.307	2200.584	-0.004371	-0.007630	-0.005534
4.1900	1191.031	65.798	113.507	82.546	-0.706	35.307	2267.418	-0.004606	-0.007945	-0.005778
4.2000	1227.746	68.936	117.322	85.508	-0.710	35.307	2337.313	-0.004826	-0.008213	-0.005986
4.2100	1276.708	72.621	122.439	90.201	-0.706	35.306	2430.525	-0.005084	-0.008571	-0.006314
4.2200	1283.321	73.996	124.323	91.286	-0.702	35.307	2443.113	-0.005180	-0.008703	-0.006390
4.2300	1320.651	76.581	127.476	94.164	-0.692	35.306	2514.181	-0.005361	-0.008923	-0.006591
4.2400	1313.107	76.290	127.694	94.399	-0.716	35.308	2499.819	-0.005340	-0.008939	-0.006608
4.2500	1313.212	76.859	128.096	94.705	-0.707	35.307	2500.019	-0.005380	-0.008967	-0.006629
4.2600	1329.623	78.194	129.649	95.857	-0.705	35.307	2531.261	-0.005474	-0.009075	-0.006710
4.2700	1311.499	77.097	129.414	95.344	-0.700	35.307	2496.758	-0.005397	-0.009059	-0.006674
4.2800	1291.707	76.065	128.067	94.192	-0.699	35.308	2459.078	-0.005325	-0.008965	-0.006593
4.2900	1245.705	72.731	124.403	90.897	-0.702	35.307	2371.502	-0.005091	-0.008708	-0.006363
4.3000	1191.963	68.853	119.673	86.368	-0.704	35.308	2269.192	-0.004820	-0.008377	-0.006046
4.3100	1140.175	65.173	114.400	82.519	-0.710	35.307	2170.601	-0.004562	-0.008008	-0.005776
4.3200	1092.896	61.517	109.599	78.919	-0.707	35.308	2080.593	-0.004306	-0.007672	-0.005524
4.3300	1020.264	56.888	102.154	72.969	-0.699	35.307	1942.320	-0.003982	-0.007151	-0.005108
4.3400	993.738	54.527	99.142	70.541	-0.687	35.308	1891.823	-0.003817	-0.006940	-0.004938
4.3500	891.425	47.203	89.016	62.076	-0.702	35.307	1697.044	-0.003304	-0.006231	-0.004345
4.3600	868.041	45.454	85.659	59.813	-0.690	35.308	1652.527	-0.003182	-0.005996	-0.004187
4.3700	773.512	38.700	75.270	52.155	-0.700	35.307	1472.569	-0.002709	-0.005269	-0.003651
4.3800	720.297	34.877	69.474	47.195	-0.691	35.307	1371.260	-0.002441	-0.004863	-0.003304
4.3900	660.228	30.485	61.950	41.927	-0.698	35.307	1256.905	-0.002134	-0.004336	-0.002935
4.4000	594.539	25.231	54.216	36.299	-0.691	35.308	1131.849	-0.001766	-0.003795	-0.002541
4.4100	530.894	20.955	46.662	30.405	-0.690	35.307	1010.685	-0.001467	-0.003266	-0.002128
4.4200	468.751	16.451	38.227	24.543	-0.696	35.308	892.382	-0.001152	-0.002676	-0.001718
4.4300	407.435	12.101	30.644	18.886	-0.702	35.306	775.652	-0.000847	-0.002145	-0.001322
4.4400	381.797	10.322	26.806	16.273	-0.700	35.308	726.843	-0.000723	-0.001876	-0.001139
4.4500	351.560	7.818	22.294	13.398	-0.696	35.307	669.279	-0.000547	-0.001561	-0.000938
4.4600	301.996	4.473	15.894	8.603	-0.699	35.308	574.923	-0.000313	-0.001113	-0.000602
4.4700	274.359	2.887	11.864	5.560	-0.714	35.307	522.308	-0.000202	-0.000830	-0.000389
4.4800	262.787	1.431	8.985	3.949	-0.703	35.308	500.278	-0.000100	-0.000629	-0.000276
4.4900	253.665	1.194	7.940	2.935	-0.708	35.307	482.912	-0.000084	-0.000556	-0.000205
4.5000	229.664	-0.584	4.333	0.500	-0.704	35.308	437.222	0.000041	-0.000303	-0.000035
4.5100	235.555	-0.877	4.005	0.236	-0.693	35.306	448.437	0.000061	-0.000280	-0.000017
4.5200	259.571	0.611	5.823	1.809	-0.696	35.308	494.156	-0.000043	-0.000408	-0.000127
4.5300	301.049	2.845	10.457	5.006	-0.696	35.307	573.120	-0.000199	-0.000732	-0.000350
4.5400	302.732	2.748	10.457	5.061	-0.703	35.308	576.324	-0.000192	-0.000732	-0.000354
4.5500	355.903	6.112	16.486	9.481	-0.699	35.307	677.547	-0.000428	-0.001154	-0.000664
4.5600	389.882	8.069	20.392	12.577	-0.700	35.308	742.235	-0.000565	-0.001427	-0.000880
4.5700	448.508	11.434	27.479	17.302	-0.694	35.307	853.844	-0.000800	-0.001924	-0.001211
4.5800	528.955	16.799	36.519	24.194	-0.699	35.308	1006.994	-0.001176	-0.002556	-0.001694
4.5900	581.509	20.273	43.207	28.822	-0.711	35.306	1107.044	-0.001419	-0.003025	-0.002018
4.6000	646.492	24.954	51.394	34.324	-0.696	35.308	1230.755	-0.001747	-0.003598	-0.002403
4.6100	692.088	28.247	56.404	38.189	-0.700	35.307	1317.558	-0.001977	-0.003948	-0.002673
4.6200	783.942	34.016	66.972	45.987	-0.698	35.308	1492.424	-0.002381	-0.004688	-0.003219
4.6300	861.473	40.074	75.902	52.670	-0.691	35.307	1640.024	-0.002805	-0.005313	-0.003687
4.6400	922.128	44.759	82.918	58.298	-0.696	35.308	1755.495	-0.003133	-0.005804	-0.004081
4.6500	1001.704	50.790	92.248	65.077	-0.702	35.307	1906.986	-0.003555	-0.006457	-0.004555
4.6600	1028.559	53.358	95.525	67.997	-0.700	35.308	1958.113	-0.003735	-0.006687	-0.004760
4.6700	1093.512	57.986	101.962	73.416	-0.703	35.307	2081.766	-0.004059	-0.007137	-0.005139
4.6800	1121.856	60.323	106.147	76.394	-0.699	35.308	2135.725	-0.004223	-0.007430	-0.005348
4.6900	1189.934	65.910	113.178	82.368	-0.706	35.307	2265.329	-0.004614	-0.007922	-0.005766
4.7000	1220.532	68.379	116.523	85.157	-0.695	35.308	2323.580	-0.004787	-0.008157	-0.005961
4.7100	1252.287	71.243	120.251	87.925	-0.702	35.307	2384.033	-0.004987	-0.008418	-0.006155
4.7200	1275.747	73.356	123.017	90.272	-0.692	35.308	2428.694	-0.005135	-0.008611	-0.006319
4.7300	1304.781	75.357	126.237	93.122	-0.701	35.307	2483.969	-0.005275	-0.008837	-0.006519
4.7400	1308.283	76.359	127.406	93.681	-0.698	35.309	2490.635	-0.005345	-0.008918	-0.006558
4.7500	1313.753	76.732	127.792	94.524	-0.699	35.307	2501.049	-0.005371	-0.008945	-0.006617
4.7600	1350.498	79.607	132.155	97.777	-0.698	35.308	2571.001	-0.005572	-0.009251	-0.006844
4.7700	1318.998	78.402	130.432	96.164	-0.711	35.307	2511.034	-0.005488	-0.009130	-0.006731
4.7800	1281.713	75.259	127.516	93.693	-0.689	35.308	2440.052	-0.005268	-0.008926	-0.006558
4.7900	1247.553	73.063	124.969	91.300	-0.698	35.307	2375.021	-0.005114	-0.008748	-0.006391
4.8000	1202.739	70.104	120.619	87.787	-0.690	35.308	2289.705	-0.004907	-0.008443	-0.006145
4.8100	1175.131	67.490	117.854	85.493	-0.696	35.307	2237.148	-0.004724	-0.008250	-0.005984
4.8200	1110.915	63.195	111.487	80.365	-0.691	35.309	2114.897	-0.004424	-0.007804	-0.005626
4.8300	1041.303	58.139	104.744	74.749	-0.700	35.307	1982.374	-0.004070	-0.007332	-0.005232
4.8400	982.512	53.859	98.525	69.651	-0.696	35.309	1870.451	-0.003770	-0.006897	-0.004876
4.8500	938.224	50.720	93.515	65.997	-0.697	35.307	1786.137	-0.003550	-0.006546	-0.004620
4.8600	856.785	44.924	85.011	59.285	-0.697	35.308	1631.098	-0.003145	-0.005951	-0.004150
4.8700	798.955	40.699	78.474	54.282	-0.694	35.307	1521.006	-0.002849	-0.005493	-0.003800
4.8800	731.117	35.974	70.728	48.058	-0.684	35.309	1391.859	-0.002518	-0.004951	-0.003364
4.8900	647.228	29.359	60.807	41.289	-0.700	35.307	1232.157	-0.002055	-0.004256	-0.002890
4.9000	590.286	25.469	54.159	36.009	-0.699	35.309	1123.753	-0.001783	-0.003791	-0.002521
4.9100	540.046	21.955	47.320	31.338	-0.692	35.307	1028.109	-0.001537	-0.003312	-0.002194
4.9200	467.038	16.813	38.404	24.765	-0.700	35.309	889.120	-0.001177	-0.002688	-0.001734
4.9300	420.435	13.461	32.269	20.402	-0.704	35.307	800.400	-0.000942	-0.002259	-0.001428
4.9400	384.096	10.588	26.875	16.870	-0.698	35.309	731.220	-0.000741	-0.001881	-0.001181
4.9500	325.125	6.458	19.608	10.894	-0.693	35.307	618.954	-0.000452	-0.001373	-0.000763
4.9600	298.073	4.931	15.604	8.159	-0.703	35.309	567.455	-0.000345	-0.001092	-0.000571
4.9700	288.591	3.805	13.140	6.463	-0.697	35.307	549.402	-0.000266	-0.000920	-0.000452
4.9800	289.868	3.526	12.990	6.629	-0.698	35.309	551.834	-0.000247	-0.000909	-0.000464
4.9900	277.019	2.775	11.202	5.240	-0.695	35.307	527.372	-0.000194	-0.000784	-0.000367
