# Supplementary material for: Evaluation of a Cold-Mixed High-Performance Polyurethane Mixture
Source: Hindawi journal article supplement (doi:10.1155/2019/1507971), 2019-11-07
Supplement: f1 [file 1507971.f1.zip › 1507971.f1/dynamic modulus data/PUM/specimen1/temp35/zhs-1-35_5Hz.csv]

Test Information
****************
Project name	zhs
Operator name	1
Target test temperature	35
Target confining stress	0
Average dynamic strain range from 75 to 125 micro-strain
Contact stress	5
Initial modulus	1000
Axial gauge length	70
Comments
Specimen information
********************
Identification	zhs-1-35
Dimensions	Point 1	Point 2	Point 3	Point 4	Point 5	Point 6	Average	Std Dev.
Diameter (mm)	49.2	49.2	49.3				49.23	0.058
Height (mm)	101.3	101.2	101.3				101.27	0.058
Cross-sectional area (mm�)	1903.7
Conditioning time
Properties/Comments
Test Data	5Hz
*********
Test date and time	Tue	Apr 2	2019	1:19 PM
Dynamic modulus (MPa)	11278
Phase angle (Degrees)	4.12
Average temperature (�C)	35.3
Average confining pressure (kPa)	-0.7
Average micro-strain	99
Load drift (%)	0.0
Load standard error (%)	2.6
Average deformation drift (%)	-3.3
Average deformation standard error (%)	3.1
Deformation uniformity (%)	19.5
Phase uniformity (Degrees)	0.4
Conditioning Cycles
Time (sec)	Axial stress (kPa)	Axial micro-strain #1	Axial micro-strain #2	Axial micro-strain #3	Confining pressure (kPa)	Temperature (�C)	Load (N)	Displacement #1 (mm)	Displacement #2 (mm)	Displacement #3 (mm)
0.0000	450.642	7.653	22.800	12.842	-0.692	35.317	857.906	-0.000536	-0.001596	-0.000899
0.0040	363.868	3.014	14.394	6.797	-0.696	35.315	692.711	-0.000211	-0.001008	-0.000476
0.0080	251.455	-3.241	0.222	-3.208	-0.698	35.306	478.706	0.000227	-0.000016	0.000225
0.0120	245.775	-4.075	-1.678	-3.875	-0.702	35.298	467.892	0.000285	0.000117	0.000271
0.0160	254.807	-3.782	-1.583	-3.875	-0.687	35.305	485.086	0.000265	0.000111	0.000271
0.0200	264.500	-3.656	-1.293	-3.722	-0.684	35.317	503.540	0.000256	0.000091	0.000261
0.0240	287.103	-2.311	1.060	-2.108	-0.690	35.314	546.570	0.000162	-0.000074	0.000148
0.0280	341.971	0.498	6.950	2.017	-0.686	35.306	651.026	-0.000035	-0.000486	-0.000141
0.0320	405.136	4.472	14.477	7.534	-0.698	35.298	771.275	-0.000313	-0.001013	-0.000527
0.0360	460.500	8.042	21.411	12.092	-0.694	35.305	876.675	-0.000563	-0.001499	-0.000846
0.0400	499.965	10.574	25.676	15.249	-0.694	35.317	951.805	-0.000740	-0.001797	-0.001067
0.0440	547.335	13.824	31.153	19.485	-0.706	35.315	1041.985	-0.000968	-0.002181	-0.001364
0.0480	611.912	17.495	38.570	24.460	-0.696	35.305	1164.923	-0.001225	-0.002700	-0.001712
0.0520	664.211	20.925	44.680	28.851	-0.698	35.298	1264.486	-0.001465	-0.003128	-0.002020
0.0560	713.564	24.051	50.664	33.089	-0.692	35.305	1358.442	-0.001684	-0.003546	-0.002316
0.0600	770.191	28.027	57.364	37.551	-0.685	35.317	1466.246	-0.001962	-0.004016	-0.002629
0.0640	819.574	31.918	63.216	42.276	-0.694	35.315	1560.259	-0.002234	-0.004425	-0.002959
0.0680	863.517	34.989	68.071	45.818	-0.688	35.306	1643.915	-0.002449	-0.004765	-0.003207
0.0720	913.186	38.533	73.632	50.516	-0.691	35.297	1738.472	-0.002697	-0.005154	-0.003536
0.0760	964.869	42.159	79.685	54.670	-0.690	35.305	1836.863	-0.002951	-0.005578	-0.003827
0.0800	1004.153	45.272	83.965	58.089	-0.684	35.317	1911.650	-0.003169	-0.005878	-0.004066
0.0840	1026.711	46.882	87.351	60.673	-0.699	35.315	1954.594	-0.003282	-0.006115	-0.004247
0.0880	1048.562	49.107	89.896	62.591	-0.689	35.305	1996.193	-0.003438	-0.006293	-0.004381
0.0920	1068.805	50.817	92.290	64.496	-0.696	35.298	2034.731	-0.003557	-0.006460	-0.004515
0.0960	1087.035	52.482	94.383	66.383	-0.704	35.305	2069.435	-0.003674	-0.006607	-0.004647
0.1000	1099.659	53.177	95.837	67.510	-0.703	35.316	2093.468	-0.003722	-0.006709	-0.004726
0.1040	1097.840	53.860	96.760	68.176	-0.699	35.314	2090.006	-0.003770	-0.006773	-0.004772
0.1080	1093.121	53.163	96.377	67.927	-0.700	35.306	2081.022	-0.003721	-0.006746	-0.004755
0.1120	1084.766	52.914	96.294	67.455	-0.695	35.298	2065.115	-0.003704	-0.006741	-0.004722
0.1160	1072.307	52.483	95.661	67.066	-0.698	35.305	2041.397	-0.003674	-0.006696	-0.004695
0.1200	1050.501	51.136	94.480	65.649	-0.696	35.316	1999.884	-0.003579	-0.006614	-0.004595
0.1240	1003.236	48.023	90.405	62.702	-0.711	35.315	1909.904	-0.003362	-0.006328	-0.004389
0.1280	953.162	44.411	84.984	58.507	-0.704	35.305	1814.575	-0.003109	-0.005949	-0.004095
0.1320	917.469	41.713	81.117	55.822	-0.706	35.297	1746.626	-0.002920	-0.005678	-0.003908
0.1360	866.809	38.255	75.834	51.932	-0.700	35.305	1650.181	-0.002678	-0.005308	-0.003635
0.1400	812.015	34.598	70.342	47.083	-0.697	35.316	1545.868	-0.002422	-0.004924	-0.003296
0.1440	764.044	31.694	65.431	43.708	-0.702	35.314	1454.544	-0.002219	-0.004580	-0.003060
0.1480	720.026	28.719	60.393	39.563	-0.697	35.306	1370.745	-0.002010	-0.004228	-0.002769
0.1520	666.194	24.635	54.051	35.354	-0.700	35.298	1268.263	-0.001724	-0.003784	-0.002475
0.1560	611.626	20.925	47.444	30.545	-0.695	35.305	1164.379	-0.001465	-0.003321	-0.002138
0.1600	557.374	16.911	41.061	25.725	-0.686	35.316	1061.096	-0.001184	-0.002874	-0.001801
0.1640	513.115	14.200	35.736	22.304	-0.698	35.314	976.839	-0.000994	-0.002502	-0.001561
0.1680	476.866	11.642	31.482	18.942	-0.695	35.306	907.831	-0.000815	-0.002204	-0.001326
0.1720	435.388	8.808	26.172	14.997	-0.707	35.297	828.867	-0.000617	-0.001832	-0.001050
0.1760	383.946	5.665	19.746	10.426	-0.696	35.305	730.934	-0.000397	-0.001382	-0.000730
0.1800	341.626	3.000	13.965	6.561	-0.690	35.316	650.368	-0.000210	-0.000978	-0.000459
0.1840	309.270	0.873	9.619	3.644	-0.698	35.315	588.770	-0.000061	-0.000673	-0.000255
0.1880	281.197	-1.030	5.753	0.653	-0.693	35.306	535.326	0.000072	-0.000403	-0.000046
0.1920	262.306	-2.378	2.821	-1.330	-0.704	35.297	499.363	0.000166	-0.000197	0.000093
0.1960	256.625	-2.908	1.516	-2.205	-0.691	35.305	488.548	0.000204	-0.000106	0.000154
0.2000	253.334	-3.087	0.894	-2.999	-0.699	35.317	482.283	0.000216	-0.000063	0.000210
0.2040	251.305	-2.961	0.441	-2.860	-0.702	35.315	478.420	0.000207	-0.000031	0.000200
0.2080	250.704	-3.423	-0.441	-3.570	-0.702	35.306	477.276	0.000240	0.000031	0.000250
0.2120	253.860	-3.755	-0.454	-3.347	-0.711	35.298	483.284	0.000263	0.000032	0.000234
0.2160	263.208	-3.283	-0.220	-3.042	-0.701	35.305	501.080	0.000230	0.000015	0.000213
0.2200	278.552	-2.477	0.950	-2.011	-0.690	35.317	530.291	0.000173	-0.000067	0.000141
0.2240	312.155	-0.824	4.871	0.513	-0.694	35.315	594.263	0.000058	-0.000341	-0.000036
0.2280	374.388	3.041	12.014	5.297	-0.683	35.306	712.738	-0.000213	-0.000841	-0.000371
0.2320	423.786	6.085	17.955	9.731	-0.694	35.297	806.780	-0.000426	-0.001257	-0.000681
0.2360	458.877	8.196	21.713	12.466	-0.692	35.305	873.585	-0.000574	-0.001520	-0.000873
0.2400	497.906	10.351	26.063	15.415	-0.686	35.317	947.886	-0.000725	-0.001824	-0.001079
0.2440	550.716	14.241	32.640	20.363	-0.687	35.314	1048.422	-0.000997	-0.002285	-0.001425
0.2480	607.042	17.622	39.273	24.778	-0.687	35.306	1155.653	-0.001234	-0.002749	-0.001734
0.2520	659.341	21.300	45.368	29.239	-0.696	35.297	1255.217	-0.001491	-0.003176	-0.002047
0.2560	710.107	24.996	51.533	33.422	-0.695	35.305	1351.862	-0.001750	-0.003607	-0.002340
0.2600	761.069	28.191	56.997	37.786	-0.698	35.317	1448.879	-0.001973	-0.003990	-0.002645
0.2640	815.351	32.070	63.519	42.597	-0.693	35.315	1552.219	-0.002245	-0.004446	-0.002982
0.2680	872.534	36.086	69.942	47.444	-0.689	35.306	1661.081	-0.002526	-0.004896	-0.003321
0.2720	921.452	39.352	75.696	51.502	-0.690	35.297	1754.208	-0.002755	-0.005299	-0.003605
0.2760	966.973	42.827	80.866	55.921	-0.684	35.305	1840.868	-0.002998	-0.005661	-0.003914
0.2800	1004.123	45.440	85.149	59.065	-0.684	35.316	1911.592	-0.003181	-0.005960	-0.004135
0.2840	1027.943	48.176	88.244	61.242	-0.694	35.315	1956.940	-0.003372	-0.006177	-0.004287
0.2880	1054.062	49.944	90.996	63.634	-0.690	35.306	2006.664	-0.003496	-0.006370	-0.004454
0.2920	1077.026	52.011	93.859	65.884	-0.695	35.297	2050.381	-0.003641	-0.006570	-0.004612
0.2960	1081.655	52.427	94.561	66.440	-0.690	35.305	2059.193	-0.003670	-0.006619	-0.004651
0.3000	1079.987	52.344	94.700	66.371	-0.679	35.316	2056.017	-0.003664	-0.006629	-0.004646
0.3040	1080.573	52.830	95.454	67.412	-0.684	35.314	2057.133	-0.003698	-0.006682	-0.004719
0.3080	1083.157	53.303	95.866	67.287	-0.684	35.306	2062.054	-0.003731	-0.006711	-0.004710
0.3120	1080.708	53.539	96.100	67.663	-0.692	35.297	2057.390	-0.003748	-0.006727	-0.004736
0.3160	1069.857	52.928	95.468	66.884	-0.694	35.305	2036.734	-0.003705	-0.006683	-0.004682
0.3200	1053.206	51.553	94.300	65.926	-0.690	35.316	2005.033	-0.003609	-0.006601	-0.004615
0.3240	1025.358	49.913	92.565	64.718	-0.699	35.314	1952.019	-0.003494	-0.006480	-0.004530
0.3280	964.478	45.744	86.675	59.856	-0.692	35.306	1836.119	-0.003202	-0.006067	-0.004190
0.3320	905.371	41.809	80.716	55.296	-0.700	35.297	1723.595	-0.002927	-0.005650	-0.003871
0.3360	870.941	39.434	77.113	52.433	-0.691	35.304	1658.049	-0.002760	-0.005398	-0.003670
0.3400	827.329	36.349	72.530	48.763	-0.695	35.315	1575.022	-0.002544	-0.005077	-0.003413
0.3440	760.498	32.126	65.445	43.722	-0.698	35.314	1447.792	-0.002249	-0.004581	-0.003061
0.3480	708.439	28.167	59.239	39.232	-0.691	35.306	1348.686	-0.001972	-0.004147	-0.002746
0.3520	663.985	24.968	54.036	35.466	-0.694	35.297	1264.057	-0.001748	-0.003783	-0.002483
0.3560	610.890	21.342	48.065	30.853	-0.699	35.304	1162.977	-0.001494	-0.003365	-0.002160
0.3600	556.352	17.382	41.529	26.183	-0.695	35.315	1059.151	-0.001217	-0.002907	-0.001833
0.3640	504.474	14.601	35.531	22.127	-0.706	35.314	960.388	-0.001022	-0.002487	-0.001549
0.3680	459.539	11.574	29.778	17.885	-0.697	35.305	874.844	-0.000810	-0.002084	-0.001252
0.3720	420.525	8.753	24.727	14.150	-0.703	35.297	800.571	-0.000613	-0.001731	-0.000991
0.3760	388.575	6.292	20.132	11.117	-0.693	35.304	739.746	-0.000440	-0.001409	-0.000778
0.3800	361.779	4.138	16.609	8.577	-0.699	35.316	688.734	-0.000290	-0.001163	-0.000600
0.3840	319.429	1.816	11.310	5.031	-0.702	35.315	608.110	-0.000127	-0.000792	-0.000352
0.3880	285.765	0.026	6.743	1.529	-0.694	35.305	544.024	-0.000002	-0.000472	-0.000107
0.3920	267.641	-1.474	3.992	-0.402	-0.702	35.298	509.520	0.000103	-0.000279	0.000028
0.3960	249.442	-2.407	1.376	-2.359	-0.697	35.305	474.873	0.000169	-0.000096	0.000165
0.4000	234.729	-3.781	-1.391	-4.041	-0.690	35.317	446.863	0.000265	0.000097	0.000283
0.4040	233.782	-3.672	-1.953	-4.099	-0.711	35.315	445.061	0.000257	0.000137	0.000287
0.4080	236.923	-4.282	-1.941	-4.390	-0.696	35.306	451.040	0.000300	0.000136	0.000307
0.4120	241.491	-4.019	-1.884	-4.154	-0.691	35.297	459.738	0.000281	0.000132	0.000291
0.4160	249.141	-3.352	-1.293	-4.113	-0.686	35.305	474.300	0.000235	0.000090	0.000288
0.4200	264.891	-2.850	-0.371	-3.125	-0.686	35.316	504.284	0.000199	0.000026	0.000219
0.4240	308.413	-0.516	4.253	0.143	-0.702	35.315	587.139	0.000036	-0.000298	-0.000010
0.4280	370.375	2.692	11.476	5.102	-0.691	35.306	705.099	-0.000188	-0.000803	-0.000357
0.4320	414.003	5.431	16.570	8.728	-0.703	35.297	788.155	-0.000380	-0.001160	-0.000611
0.4360	458.096	7.778	21.976	12.895	-0.699	35.305	872.097	-0.000544	-0.001538	-0.000903
0.4400	499.184	10.587	26.751	15.982	-0.698	35.316	950.317	-0.000741	-0.001873	-0.001119
0.4440	546.463	14.157	32.751	20.167	-0.708	35.315	1040.325	-0.000991	-0.002293	-0.001412
0.4480	608.951	18.034	39.973	25.169	-0.710	35.306	1159.286	-0.001262	-0.002798	-0.001762
0.4520	668.809	21.912	46.950	29.936	-0.711	35.297	1273.241	-0.001534	-0.003286	-0.002096
0.4560	722.461	25.650	52.991	34.769	-0.706	35.304	1375.380	-0.001795	-0.003709	-0.002434
0.4600	775.286	29.082	58.853	39.285	-0.704	35.316	1475.945	-0.002036	-0.004120	-0.002750
0.4640	824.338	32.821	65.017	43.622	-0.707	35.315	1569.328	-0.002297	-0.004551	-0.003054
0.4680	873.601	36.405	70.672	47.708	-0.692	35.306	1663.113	-0.002548	-0.004947	-0.003340
0.4720	919.378	39.698	75.791	51.808	-0.699	35.297	1750.259	-0.002779	-0.005305	-0.003627
0.4760	965.395	43.199	80.826	55.504	-0.692	35.304	1837.864	-0.003024	-0.005658	-0.003885
0.4800	1000.817	45.980	84.998	58.854	-0.694	35.316	1905.298	-0.003219	-0.005950	-0.004120
0.4840	1018.746	47.565	87.503	60.976	-0.707	35.315	1939.430	-0.003330	-0.006125	-0.004268
0.4880	1038.824	48.831	89.427	62.507	-0.701	35.306	1977.654	-0.003418	-0.006260	-0.004376
0.4920	1069.752	50.985	93.157	65.107	-0.703	35.297	2036.533	-0.003569	-0.006521	-0.004557
0.4960	1087.140	52.553	95.428	67.289	-0.702	35.304	2069.635	-0.003679	-0.006680	-0.004710
0.5000	1088.147	53.052	96.004	67.426	-0.697	35.315	2071.552	-0.003714	-0.006720	-0.004720
0.5040	1089.980	53.831	96.419	67.968	-0.712	35.314	2075.043	-0.003768	-0.006749	-0.004758
0.5080	1090.567	53.777	96.721	68.025	-0.703	35.306	2076.159	-0.003764	-0.006770	-0.004762
0.5120	1083.157	53.581	96.432	67.927	-0.706	35.297	2062.054	-0.003751	-0.006750	-0.004755
0.5160	1070.954	52.427	95.660	67.552	-0.703	35.304	2038.822	-0.003670	-0.006696	-0.004729
0.5200	1052.094	51.189	94.782	65.969	-0.698	35.315	2002.916	-0.003583	-0.006635	-0.004618
0.5240	1015.545	49.357	92.082	64.175	-0.708	35.314	1933.336	-0.003455	-0.006446	-0.004492
0.5280	960.451	45.397	86.788	59.785	-0.704	35.306	1828.451	-0.003178	-0.006075	-0.004185
0.5320	909.534	42.049	81.502	55.655	-0.702	35.297	1731.520	-0.002943	-0.005705	-0.003896
0.5360	872.504	39.367	77.347	52.586	-0.694	35.304	1661.024	-0.002756	-0.005414	-0.003681
0.5400	826.547	36.057	72.158	48.472	-0.702	35.315	1573.534	-0.002524	-0.005051	-0.003393
0.5440	776.037	32.920	67.014	45.137	-0.714	35.314	1477.375	-0.002304	-0.004691	-0.003160
0.5480	731.357	29.429	61.963	41.205	-0.706	35.306	1392.317	-0.002060	-0.004337	-0.002884
0.5520	678.427	25.916	56.033	36.593	-0.716	35.297	1291.552	-0.001814	-0.003922	-0.002562
0.5560	622.116	22.009	49.730	32.104	-0.704	35.304	1184.349	-0.001541	-0.003481	-0.002247
0.5600	565.609	18.187	42.780	27.000	-0.703	35.315	1076.775	-0.001273	-0.002995	-0.001890
0.5640	508.261	14.268	36.120	22.485	-0.716	35.314	967.598	-0.000999	-0.002528	-0.001574
0.5680	469.292	11.655	30.948	19.026	-0.704	35.306	893.412	-0.000816	-0.002166	-0.001332
0.5720	427.799	8.959	25.746	15.013	-0.718	35.296	814.419	-0.000627	-0.001802	-0.001051
0.5760	387.628	6.264	20.654	11.298	-0.707	35.304	737.944	-0.000439	-0.001446	-0.000791
0.5800	349.831	3.583	15.798	7.992	-0.703	35.315	665.989	-0.000251	-0.001106	-0.000559
0.5840	313.027	1.486	10.914	4.629	-0.701	35.314	595.922	-0.000104	-0.000764	-0.000324
0.5880	285.074	-0.335	6.826	1.629	-0.692	35.306	542.707	0.000023	-0.000478	-0.000114
0.5920	265.116	-1.448	3.400	-0.179	-0.703	35.297	504.713	0.000101	-0.000238	0.000013
0.5960	249.216	-2.824	1.059	-2.400	-0.703	35.304	474.443	0.000198	-0.000074	0.000168
0.6000	238.441	-3.936	-0.688	-3.846	-0.694	35.315	453.930	0.000275	0.000048	0.000269
0.6040	235.886	-3.852	-0.964	-3.736	-0.703	35.314	449.066	0.000270	0.000067	0.000262
0.6080	239.658	-3.852	-1.362	-4.153	-0.703	35.305	456.247	0.000270	0.000095	0.000291
0.6120	247.818	-3.338	-0.798	-3.680	-0.709	35.297	471.783	0.000234	0.000056	0.000258
0.6160	256.685	-3.172	-0.387	-3.432	-0.705	35.304	488.663	0.000222	0.000027	0.000240
0.6200	273.427	-2.616	0.551	-2.594	-0.700	35.315	520.535	0.000183	-0.000039	0.000182
0.6240	318.001	-0.042	5.740	1.251	-0.706	35.314	605.392	0.000003	-0.000402	-0.000088
0.6280	377.438	3.110	12.496	6.101	-0.702	35.306	718.546	-0.000218	-0.000875	-0.000427
0.6320	409.178	5.224	16.637	8.814	-0.700	35.297	778.971	-0.000366	-0.001165	-0.000617
0.6360	441.414	7.167	20.681	11.674	-0.699	35.304	840.340	-0.000502	-0.001448	-0.000817
0.6400	493.653	10.212	26.350	15.844	-0.691	35.315	939.789	-0.000715	-0.001845	-0.001109
0.6440	549.228	14.102	33.080	20.515	-0.698	35.314	1045.589	-0.000987	-0.002316	-0.001436
0.6480	603.210	17.590	39.314	24.820	-0.695	35.305	1148.357	-0.001231	-0.002752	-0.001737
0.6520	658.695	21.329	45.725	29.380	-0.696	35.297	1253.986	-0.001493	-0.003201	-0.002057
0.6560	712.707	24.830	52.053	34.116	-0.690	35.304	1356.812	-0.001738	-0.003644	-0.002388
0.6600	767.005	28.458	58.549	38.384	-0.682	35.315	1460.180	-0.001992	-0.004098	-0.002687
0.6640	823.316	33.002	65.348	43.816	-0.690	35.314	1567.383	-0.002310	-0.004574	-0.003067
0.6680	873.105	36.406	70.589	47.625	-0.691	35.305	1662.169	-0.002548	-0.004941	-0.003334
0.6720	907.671	39.227	74.662	51.040	-0.695	35.297	1727.972	-0.002746	-0.005226	-0.003573
0.6760	947.616	41.756	79.370	54.531	-0.694	35.304	1804.018	-0.002923	-0.005556	-0.003817
0.6800	985.067	44.606	83.358	57.824	-0.688	35.315	1875.315	-0.003122	-0.005835	-0.004048
0.6840	1015.981	47.243	87.132	60.603	-0.691	35.315	1934.166	-0.003307	-0.006099	-0.004242
0.6880	1044.760	49.524	90.431	63.215	-0.690	35.306	1988.955	-0.003467	-0.006330	-0.004425
0.6920	1072.683	51.915	93.997	65.746	-0.690	35.297	2042.112	-0.003634	-0.006580	-0.004602
0.6960	1090.506	53.511	96.142	67.385	-0.688	35.304	2076.044	-0.003746	-0.006730	-0.004717
0.7000	1094.188	54.069	96.873	68.010	-0.687	35.315	2083.054	-0.003785	-0.006781	-0.004761
0.7040	1097.014	54.514	97.423	68.789	-0.694	35.314	2088.432	-0.003816	-0.006820	-0.004815
0.7080	1094.865	54.444	97.160	68.651	-0.683	35.306	2084.341	-0.003811	-0.006801	-0.004806
0.7120	1089.184	54.236	97.009	68.665	-0.689	35.297	2073.526	-0.003797	-0.006791	-0.004807
0.7160	1077.943	53.555	96.997	67.955	-0.690	35.304	2052.126	-0.003749	-0.006790	-0.004757
0.7200	1059.668	52.705	95.840	66.509	-0.684	35.315	2017.336	-0.003689	-0.006709	-0.004656
0.7240	1017.168	49.844	92.759	64.646	-0.689	35.314	1936.426	-0.003489	-0.006493	-0.004525
0.7280	958.151	45.576	86.457	59.687	-0.681	35.306	1824.074	-0.003190	-0.006052	-0.004178
0.7320	913.667	42.299	81.861	56.393	-0.687	35.297	1739.388	-0.002961	-0.005730	-0.003947
0.7360	870.881	39.076	77.443	52.989	-0.684	35.303	1657.934	-0.002735	-0.005421	-0.003709
0.7400	819.950	35.515	72.214	48.362	-0.685	35.314	1560.974	-0.002486	-0.005055	-0.003385
0.7440	768.868	32.460	66.904	44.665	-0.694	35.314	1463.728	-0.002272	-0.004683	-0.003127
0.7480	719.515	29.181	61.108	40.191	-0.681	35.306	1369.772	-0.002043	-0.004278	-0.002813
0.7520	660.168	25.121	54.258	35.452	-0.692	35.297	1256.790	-0.001758	-0.003798	-0.002482
0.7560	611.115	21.566	48.545	31.284	-0.686	35.304	1163.406	-0.001510	-0.003398	-0.002190
0.7600	565.925	18.272	43.055	27.142	-0.683	35.315	1077.375	-0.001279	-0.003014	-0.001900
0.7640	509.493	14.602	36.382	22.778	-0.686	35.314	969.944	-0.001022	-0.002547	-0.001594
0.7680	462.965	11.766	30.672	18.426	-0.678	35.306	881.367	-0.000824	-0.002147	-0.001290
0.7720	417.925	8.351	24.974	14.513	-0.686	35.297	795.622	-0.000585	-0.001748	-0.001016
0.7760	377.273	6.045	19.816	10.549	-0.685	35.304	718.231	-0.000423	-0.001387	-0.000738
0.7800	342.723	3.846	14.931	7.047	-0.681	35.315	652.456	-0.000269	-0.001045	-0.000493
0.7840	310.577	1.915	10.982	4.338	-0.685	35.314	591.259	-0.000134	-0.000769	-0.000304
0.7880	286.787	-0.140	6.895	1.739	-0.680	35.306	545.969	0.000010	-0.000483	-0.000122
0.7920	269.204	-1.726	4.555	-0.083	-0.692	35.297	512.495	0.000121	-0.000319	0.000006
0.7960	258.879	-2.490	2.685	-1.330	-0.692	35.303	492.840	0.000174	-0.000188	0.000093
0.8000	251.350	-2.824	1.266	-2.079	-0.687	35.314	478.506	0.000198	-0.000089	0.000146
0.8040	243.971	-2.853	0.318	-3.263	-0.696	35.314	464.458	0.000200	-0.000022	0.000228
0.8080	245.008	-3.241	-0.276	-3.513	-0.692	35.306	466.433	0.000227	0.000019	0.000246
0.8120	250.463	-3.311	-0.179	-3.098	-0.710	35.296	476.818	0.000232	0.000013	0.000217
0.8160	258.549	-3.046	0.110	-2.735	-0.696	35.303	492.210	0.000213	-0.000008	0.000191
0.8200	272.104	-2.741	0.786	-2.081	-0.692	35.314	518.017	0.000192	-0.000055	0.000146
0.8240	305.497	-0.710	4.789	0.793	-0.696	35.314	581.589	0.000050	-0.000335	-0.000055
0.8280	352.837	1.930	10.143	4.103	-0.690	35.305	671.711	-0.000135	-0.000710	-0.000287
0.8320	394.466	4.531	14.861	7.648	-0.692	35.296	750.961	-0.000317	-0.001040	-0.000535
0.8360	450.131	7.805	21.619	12.382	-0.688	35.303	856.934	-0.000546	-0.001513	-0.000867
0.8400	513.175	11.657	28.857	17.164	-0.690	35.314	976.954	-0.000816	-0.002020	-0.001201
0.8440	561.116	14.978	34.483	21.709	-0.699	35.314	1068.220	-0.001048	-0.002414	-0.001520
0.8480	607.659	17.813	39.988	25.086	-0.692	35.305	1156.826	-0.001247	-0.002799	-0.001756
0.8520	662.227	21.329	46.400	29.933	-0.701	35.296	1260.710	-0.001493	-0.003248	-0.002095
0.8560	721.003	25.666	53.350	34.992	-0.695	35.303	1372.604	-0.001797	-0.003735	-0.002449
0.8600	783.987	29.958	60.465	40.247	-0.690	35.314	1492.510	-0.002097	-0.004233	-0.002817
0.8640	833.325	33.756	66.394	44.776	-0.687	35.313	1586.437	-0.002363	-0.004648	-0.003134
0.8680	866.643	36.183	70.259	47.461	-0.683	35.306	1649.866	-0.002533	-0.004918	-0.003322
0.8720	905.356	38.866	74.636	50.752	-0.690	35.296	1723.566	-0.002721	-0.005225	-0.003553
0.8760	951.403	42.117	79.932	54.892	-0.684	35.303	1811.228	-0.002948	-0.005595	-0.003842
0.8800	992.085	45.078	84.585	58.256	-0.688	35.314	1888.676	-0.003155	-0.005921	-0.004078
0.8840	1023.525	48.093	88.382	61.326	-0.694	35.314	1948.528	-0.003367	-0.006187	-0.004293
0.8880	1050.651	50.013	91.339	63.899	-0.691	35.306	2000.170	-0.003501	-0.006394	-0.004473
0.8920	1068.881	51.662	93.569	65.649	-0.702	35.297	2034.874	-0.003616	-0.006550	-0.004595
0.8960	1078.378	52.677	94.686	66.732	-0.693	35.303	2052.956	-0.003687	-0.006628	-0.004671
0.9000	1082.316	52.468	95.429	67.204	-0.691	35.314	2060.452	-0.003673	-0.006680	-0.004704
0.9040	1085.006	53.162	96.361	67.926	-0.693	35.314	2065.573	-0.003721	-0.006745	-0.004755
0.9080	1087.320	53.442	96.829	68.093	-0.688	35.306	2069.979	-0.003741	-0.006778	-0.004767
0.9120	1079.761	53.511	96.651	67.925	-0.706	35.297	2055.588	-0.003746	-0.006766	-0.004755
0.9160	1066.807	52.859	96.045	67.315	-0.696	35.303	2030.926	-0.003700	-0.006723	-0.004712
0.9200	1051.012	51.774	94.973	66.205	-0.702	35.314	2000.856	-0.003624	-0.006648	-0.004634
0.9240	1019.136	49.566	92.621	64.731	-0.714	35.314	1940.174	-0.003470	-0.006483	-0.004531
0.9280	961.923	45.535	86.786	60.216	-0.693	35.306	1831.255	-0.003187	-0.006075	-0.004215
0.9320	916.688	42.367	82.451	56.377	-0.697	35.296	1745.138	-0.002966	-0.005772	-0.003946
0.9360	879.928	39.881	78.722	53.547	-0.698	35.303	1675.158	-0.002792	-0.005511	-0.003748
0.9400	831.687	36.628	73.508	49.348	-0.699	35.314	1583.319	-0.002564	-0.005146	-0.003454
0.9440	774.008	33.266	67.633	45.194	-0.704	35.314	1473.513	-0.002329	-0.004734	-0.003164
0.9480	728.728	29.583	62.098	40.929	-0.695	35.306	1387.310	-0.002071	-0.004347	-0.002865
0.9520	679.089	26.276	56.306	37.121	-0.708	35.297	1292.810	-0.001839	-0.003941	-0.002598
0.9560	610.860	21.550	48.629	31.143	-0.694	35.303	1162.920	-0.001509	-0.003404	-0.002180
0.9600	547.635	16.938	40.952	25.920	-0.696	35.314	1042.557	-0.001186	-0.002867	-0.001814
0.9640	508.907	14.714	36.726	22.847	-0.705	35.314	968.828	-0.001030	-0.002571	-0.001599
0.9680	475.183	12.478	32.158	19.721	-0.702	35.306	904.627	-0.000873	-0.002251	-0.001380
0.9720	428.189	9.322	26.309	15.245	-0.711	35.296	815.163	-0.000653	-0.001842	-0.001067
0.9760	379.001	6.208	20.064	10.909	-0.697	35.302	721.521	-0.000435	-0.001404	-0.000764
0.9800	337.418	3.095	14.269	6.921	-0.701	35.314	642.357	-0.000217	-0.000999	-0.000484
0.9840	309.104	1.361	10.636	4.392	-0.719	35.314	588.455	-0.000095	-0.000745	-0.000307
0.9880	287.944	-0.209	7.335	2.142	-0.714	35.306	548.172	0.000015	-0.000513	-0.000150
0.9920	271.924	-1.421	5.010	0.320	-0.716	35.296	517.673	0.000099	-0.000351	-0.000022
0.9960	253.259	-2.144	2.162	-1.874	-0.706	35.302	482.140	0.000150	-0.000151	0.000131
1.0000	250.148	-5.628	-5.600	-6.057	-0.683	35.308	476.217	0.000394	0.000392	0.000424
1.0040	250.238	-6.004	-5.722	-6.419	-0.690	35.297	476.389	0.000420	0.000401	0.000449
1.0080	252.222	-5.879	-5.473	-5.976	-0.693	35.298	480.165	0.000412	0.000383	0.000418
1.0120	257.001	-5.840	-5.076	-5.599	-0.691	35.309	489.264	0.000409	0.000355	0.000392
1.0160	272.195	-5.060	-3.648	-4.932	-0.700	35.314	518.188	0.000354	0.000255	0.000345
1.0200	313.508	-2.282	0.909	-1.775	-0.691	35.308	596.838	0.000160	-0.000064	0.000124
1.0240	367.805	0.790	7.472	2.644	-0.692	35.297	700.207	-0.000055	-0.000523	-0.000185
1.0280	420.540	4.000	13.720	7.381	-0.698	35.299	800.600	-0.000280	-0.000960	-0.000517
1.0320	471.727	6.930	20.033	11.771	-0.692	35.309	898.046	-0.000485	-0.001402	-0.000824
1.0360	526.009	10.603	26.146	16.510	-0.694	35.314	1001.387	-0.000742	-0.001830	-0.001156
1.0400	595.365	14.895	34.374	22.234	-0.688	35.308	1133.423	-0.001043	-0.002406	-0.001556
1.0440	670.387	19.784	43.344	28.058	-0.688	35.297	1276.245	-0.001385	-0.003034	-0.001964
1.0480	738.586	24.592	51.752	34.034	-0.688	35.299	1406.078	-0.001721	-0.003623	-0.002382
1.0520	802.682	29.192	59.239	39.661	-0.687	35.309	1528.101	-0.002043	-0.004147	-0.002776
1.0560	872.985	34.460	67.508	45.597	-0.695	35.315	1661.940	-0.002412	-0.004726	-0.003192
1.0600	941.229	39.200	75.131	51.600	-0.702	35.308	1791.859	-0.002744	-0.005259	-0.003612
1.0640	1001.208	43.270	81.515	56.838	-0.708	35.297	1906.042	-0.003029	-0.005706	-0.003979
1.0680	1070.458	48.648	89.607	63.064	-0.699	35.299	2037.878	-0.003405	-0.006272	-0.004414
1.0720	1128.528	53.371	96.279	68.136	-0.696	35.309	2148.428	-0.003736	-0.006740	-0.004770
1.0760	1177.070	57.514	101.922	72.624	-0.697	35.315	2240.839	-0.004026	-0.007135	-0.005084
1.0800	1233.126	61.670	107.962	77.071	-0.690	35.308	2347.555	-0.004317	-0.007557	-0.005395
1.0840	1277.535	65.116	112.408	81.534	-0.693	35.297	2432.098	-0.004558	-0.007869	-0.005707
1.0880	1316.714	68.533	117.127	85.408	-0.695	35.299	2506.685	-0.004797	-0.008199	-0.005979
1.0920	1337.919	70.286	119.990	87.259	-0.700	35.309	2547.054	-0.004920	-0.008399	-0.006108
1.0960	1344.321	71.675	121.120	88.051	-0.695	35.315	2559.242	-0.005017	-0.008478	-0.006164
1.1000	1355.277	72.524	122.810	89.828	-0.694	35.308	2580.099	-0.005077	-0.008597	-0.006288
1.1040	1357.727	72.845	123.387	90.009	-0.696	35.297	2584.763	-0.005099	-0.008637	-0.006301
1.1080	1354.240	73.563	123.482	90.537	-0.694	35.299	2578.125	-0.005149	-0.008644	-0.006338
1.1120	1347.958	72.912	123.371	90.022	-0.692	35.309	2566.166	-0.005104	-0.008636	-0.006302
1.1160	1336.356	72.636	122.824	89.731	-0.691	35.315	2544.079	-0.005085	-0.008598	-0.006281
1.1200	1313.588	71.093	121.695	88.424	-0.692	35.307	2500.734	-0.004977	-0.008519	-0.006190
1.1240	1255.969	67.061	117.320	84.645	-0.695	35.297	2391.043	-0.004694	-0.008212	-0.005925
1.1280	1179.490	61.865	110.094	79.032	-0.701	35.298	2245.445	-0.004331	-0.007707	-0.005532
1.1320	1133.007	58.848	105.596	75.014	-0.691	35.309	2156.954	-0.004119	-0.007392	-0.005251
1.1360	1075.087	54.904	99.942	70.303	-0.700	35.315	2046.690	-0.003843	-0.006996	-0.004921
1.1400	998.608	49.218	92.124	64.440	-0.690	35.308	1901.093	-0.003445	-0.006449	-0.004511
1.1440	941.289	45.009	85.728	59.382	-0.692	35.297	1791.973	-0.003151	-0.006001	-0.004157
1.1480	882.543	40.799	79.658	55.103	-0.695	35.298	1680.136	-0.002856	-0.005576	-0.003857
1.1520	809.190	35.919	71.663	48.806	-0.702	35.309	1540.489	-0.002514	-0.005016	-0.003416
1.1560	732.214	30.360	63.422	42.359	-0.696	35.315	1393.948	-0.002125	-0.004440	-0.002965
1.1600	666.390	25.818	55.605	36.705	-0.695	35.307	1268.635	-0.001807	-0.003892	-0.002569
1.1640	602.474	21.482	47.943	30.725	-0.690	35.297	1146.955	-0.001504	-0.003356	-0.002151
1.1680	531.840	16.797	39.492	25.084	-0.692	35.298	1012.487	-0.001176	-0.002764	-0.001756
1.1720	475.183	12.392	32.049	20.054	-0.683	35.309	904.627	-0.000867	-0.002243	-0.001404
1.1760	428.836	9.251	26.050	15.676	-0.692	35.314	816.393	-0.000648	-0.001823	-0.001097
1.1800	392.151	6.723	21.507	12.216	-0.694	35.307	746.555	-0.000471	-0.001505	-0.000855
1.1840	354.385	3.832	16.444	8.437	-0.688	35.297	674.658	-0.000268	-0.001151	-0.000591
1.1880	313.207	1.388	11.009	4.824	-0.684	35.298	596.266	-0.000097	-0.000771	-0.000338
1.1920	279.889	-0.600	6.276	1.099	-0.696	35.308	532.837	0.000042	-0.000439	-0.000077
1.1960	266.108	-1.599	3.303	-0.513	-0.695	35.314	506.601	0.000112	-0.000231	0.000036
1.2000	261.780	-2.309	2.257	-1.108	-0.695	35.308	498.362	0.000162	-0.000158	0.000078
1.2040	258.624	-3.173	1.295	-2.193	-0.700	35.297	492.353	0.000222	-0.000091	0.000153
1.2080	259.706	-2.950	1.363	-1.803	-0.700	35.299	494.413	0.000206	-0.000095	0.000126
1.2120	263.974	-2.837	1.436	-1.846	-0.699	35.309	502.539	0.000199	-0.000100	0.000129
1.2160	273.697	-2.311	2.051	-1.456	-0.703	35.315	521.049	0.000162	-0.000144	0.000102
1.2200	294.887	-1.628	3.291	-0.181	-0.696	35.308	561.390	0.000114	-0.000230	0.000013
1.2240	352.040	1.526	9.399	3.976	-0.696	35.297	670.195	-0.000107	-0.000658	-0.000278
1.2280	421.667	5.709	17.447	9.938	-0.690	35.298	802.746	-0.000400	-0.001221	-0.000696
1.2320	478.520	9.391	24.177	14.651	-0.699	35.309	910.978	-0.000657	-0.001692	-0.001026
1.2360	532.577	12.780	30.686	19.012	-0.698	35.314	1013.889	-0.000895	-0.002148	-0.001331
1.2400	600.791	17.227	38.556	24.959	-0.691	35.308	1143.751	-0.001206	-0.002699	-0.001747
1.2440	676.323	22.247	47.363	30.893	-0.696	35.297	1287.546	-0.001557	-0.003315	-0.002163
1.2480	743.335	26.973	55.275	36.771	-0.699	35.298	1415.119	-0.001888	-0.003869	-0.002574
1.2520	807.612	31.235	62.638	42.385	-0.700	35.308	1537.485	-0.002186	-0.004385	-0.002967
1.2560	885.594	36.768	71.170	48.944	-0.700	35.314	1685.944	-0.002574	-0.004982	-0.003426
1.2600	958.602	42.157	79.519	54.935	-0.701	35.308	1824.932	-0.002951	-0.005566	-0.003845
1.2640	1007.294	45.634	85.258	59.021	-0.700	35.297	1917.629	-0.003194	-0.005968	-0.004131
1.2680	1068.790	50.719	92.179	64.885	-0.720	35.298	2034.702	-0.003550	-0.006453	-0.004542
1.2720	1143.707	56.207	100.010	71.333	-0.714	35.308	2177.324	-0.003935	-0.007001	-0.004993
1.2760	1191.407	59.793	105.458	75.391	-0.715	35.314	2268.133	-0.004185	-0.007382	-0.005277
1.2800	1227.896	62.752	109.364	78.710	-0.695	35.308	2337.599	-0.004393	-0.007656	-0.005510
1.2840	1277.625	66.228	114.457	82.546	-0.701	35.297	2432.270	-0.004636	-0.008012	-0.005778
1.2880	1328.286	70.536	120.389	87.412	-0.696	35.299	2528.715	-0.004938	-0.008427	-0.006119
1.2920	1345.103	72.260	122.961	89.202	-0.694	35.309	2560.730	-0.005058	-0.008607	-0.006244
1.2960	1348.664	73.355	123.469	89.785	-0.695	35.314	2567.511	-0.005135	-0.008643	-0.006285
1.3000	1355.142	73.940	124.474	90.952	-0.686	35.308	2579.842	-0.005176	-0.008713	-0.006367
1.3040	1356.329	74.118	124.929	91.176	-0.694	35.297	2582.102	-0.005188	-0.008745	-0.006382
1.3080	1352.632	74.133	125.011	91.273	-0.697	35.298	2575.064	-0.005189	-0.008751	-0.006389
1.3120	1345.929	73.842	124.666	91.231	-0.690	35.309	2562.304	-0.005169	-0.008727	-0.006386
1.3160	1334.342	73.275	124.335	90.688	-0.699	35.315	2540.245	-0.005129	-0.008703	-0.006348
1.3200	1315.572	72.316	123.592	89.647	-0.694	35.308	2504.511	-0.005062	-0.008651	-0.006275
1.3240	1255.593	68.284	118.641	85.546	-0.699	35.296	2390.327	-0.004780	-0.008305	-0.005988
1.3280	1173.523	62.948	111.031	79.462	-0.702	35.298	2234.087	-0.004406	-0.007772	-0.005562
1.3320	1126.605	59.042	106.311	75.643	-0.702	35.309	2144.766	-0.004133	-0.007442	-0.005295
1.3360	1069.572	55.055	100.561	71.108	-0.702	35.314	2036.190	-0.003854	-0.007039	-0.004978
1.3400	997.045	49.929	93.280	65.052	-0.697	35.308	1898.117	-0.003495	-0.006530	-0.004554
1.3440	929.928	45.148	85.918	59.644	-0.703	35.297	1770.344	-0.003160	-0.006014	-0.004175
1.3480	879.177	41.562	80.979	55.420	-0.706	35.298	1673.727	-0.002909	-0.005669	-0.003879
1.3520	816.704	37.308	74.194	50.419	-0.702	35.309	1554.794	-0.002612	-0.005194	-0.003529
1.3560	734.799	31.957	65.046	43.624	-0.704	35.315	1398.869	-0.002237	-0.004553	-0.003054
1.3600	660.949	26.455	56.127	37.257	-0.692	35.308	1258.278	-0.001852	-0.003929	-0.002608
1.3640	606.321	22.220	49.346	32.201	-0.696	35.297	1154.280	-0.001555	-0.003454	-0.002254
1.3680	545.005	18.160	42.546	26.863	-0.696	35.298	1037.550	-0.001271	-0.002978	-0.001880
1.3720	482.367	13.851	34.580	21.417	-0.698	35.309	918.303	-0.000970	-0.002421	-0.001499
1.3760	423.110	9.794	27.397	16.010	-0.715	35.314	805.492	-0.000686	-0.001918	-0.001121
1.3800	379.212	6.944	21.275	11.772	-0.704	35.308	721.922	-0.000486	-0.001489	-0.000824
1.3840	346.044	4.403	16.705	8.478	-0.699	35.297	658.779	-0.000308	-0.001169	-0.000593
1.3880	313.553	2.136	12.095	5.492	-0.701	35.298	596.924	-0.000150	-0.000847	-0.000384
1.3920	285.254	0.192	7.650	2.656	-0.692	35.308	543.051	-0.000013	-0.000535	-0.000186
1.3960	272.630	-0.725	5.656	0.639	-0.708	35.314	519.018	0.000051	-0.000396	-0.000045
1.4000	267.385	-1.517	4.544	0.097	-0.698	35.308	509.033	0.000106	-0.000318	-0.000007
1.4040	264.154	-1.933	3.454	-0.677	-0.702	35.297	502.882	0.000135	-0.000242	0.000047
1.4080	265.206	-1.656	3.591	-0.831	-0.704	35.298	504.885	0.000116	-0.000251	0.000058
1.4120	271.022	-1.727	3.590	-0.513	-0.705	35.308	515.957	0.000121	-0.000251	0.000036
1.4160	280.130	-1.351	3.839	-0.192	-0.711	35.315	533.295	0.000095	-0.000269	0.000013
1.4200	297.292	-0.558	5.037	0.932	-0.705	35.308	565.968	0.000039	-0.000353	-0.000065
1.4240	351.905	2.137	10.431	4.811	-0.700	35.297	669.937	-0.000150	-0.000730	-0.000337
1.4280	424.928	6.321	19.498	11.035	-0.691	35.298	808.954	-0.000442	-0.001365	-0.000772
1.4320	484.080	10.268	26.351	15.828	-0.696	35.308	921.564	-0.000719	-0.001845	-0.001108
1.4360	534.140	13.879	32.393	19.889	-0.699	35.314	1016.865	-0.000972	-0.002268	-0.001392
1.4400	596.132	17.812	39.327	25.196	-0.700	35.308	1134.882	-0.001247	-0.002753	-0.001764
1.4440	671.379	22.108	47.762	31.117	-0.704	35.297	1278.133	-0.001548	-0.003343	-0.002178
1.4480	738.917	27.012	55.646	37.271	-0.700	35.298	1406.708	-0.001891	-0.003895	-0.002609
1.4520	798.865	31.139	62.623	42.275	-0.695	35.308	1520.834	-0.002180	-0.004384	-0.002959
1.4560	871.407	36.018	70.974	48.029	-0.694	35.314	1658.936	-0.002521	-0.004968	-0.003362
1.4600	955.536	42.450	80.360	55.340	-0.684	35.307	1819.096	-0.002971	-0.005625	-0.003874
1.4640	1023.720	47.300	87.625	61.269	-0.688	35.296	1948.900	-0.003311	-0.006134	-0.004289
1.4680	1082.196	51.887	94.409	66.648	-0.694	35.297	2060.223	-0.003632	-0.006609	-0.004665
1.4720	1137.846	55.904	100.160	71.388	-0.698	35.308	2166.166	-0.003913	-0.007011	-0.004997
1.4760	1192.339	60.476	106.393	75.933	-0.703	35.314	2269.907	-0.004233	-0.007448	-0.005315
1.4800	1241.136	64.227	111.432	80.573	-0.699	35.308	2362.804	-0.004496	-0.007800	-0.005640
1.4840	1272.936	66.618	115.145	83.433	-0.696	35.296	2423.344	-0.004663	-0.008060	-0.005840
1.4880	1297.838	69.199	118.434	85.645	-0.700	35.298	2470.751	-0.004844	-0.008290	-0.005995
1.4920	1335.890	72.257	122.440	89.078	-0.699	35.308	2543.192	-0.005058	-0.008571	-0.006235
1.4960	1351.685	73.636	124.364	90.605	-0.705	35.314	2573.261	-0.005155	-0.008705	-0.006342
1.5000	1355.172	74.368	124.845	91.719	-0.700	35.308	2579.899	-0.005206	-0.008739	-0.006420
1.5040	1357.125	74.578	125.423	91.663	-0.698	35.297	2583.618	-0.005220	-0.008780	-0.006416
1.5080	1354.616	74.579	125.728	92.163	-0.699	35.297	2578.840	-0.005221	-0.008801	-0.006451
1.5120	1348.048	74.342	125.906	91.593	-0.690	35.308	2566.338	-0.005204	-0.008813	-0.006411
1.5160	1332.479	73.842	125.370	90.703	-0.696	35.314	2536.697	-0.005169	-0.008776	-0.006349
1.5200	1303.324	72.134	123.415	89.605	-0.688	35.308	2481.194	-0.005049	-0.008639	-0.006272
1.5240	1240.385	67.644	118.119	84.756	-0.687	35.296	2361.374	-0.004735	-0.008268	-0.005933
1.5280	1169.421	62.865	111.276	79.823	-0.690	35.298	2226.276	-0.004401	-0.007789	-0.005588
1.5320	1116.355	58.778	105.969	75.432	-0.690	35.308	2125.254	-0.004114	-0.007418	-0.005280
1.5360	1074.140	55.683	101.730	71.902	-0.690	35.315	2044.888	-0.003898	-0.007121	-0.005033
1.5400	1013.411	51.316	95.854	67.302	-0.688	35.308	1929.274	-0.003592	-0.006710	-0.004711
1.5440	939.832	46.398	87.928	60.879	-0.685	35.297	1789.198	-0.003248	-0.006155	-0.004262
1.5480	871.332	41.616	80.992	55.741	-0.695	35.298	1658.792	-0.002913	-0.005669	-0.003902
1.5520	802.352	36.739	73.134	49.542	-0.690	35.308	1527.472	-0.002572	-0.005119	-0.003468
1.5560	731.914	31.737	64.964	43.762	-0.691	35.314	1393.375	-0.002222	-0.004547	-0.003063
1.5600	664.451	26.748	57.312	37.744	-0.691	35.308	1264.944	-0.001872	-0.004012	-0.002642
1.5640	604.893	22.468	49.963	32.492	-0.690	35.297	1151.562	-0.001573	-0.003497	-0.002274
1.5680	547.921	18.771	43.566	27.616	-0.698	35.297	1043.100	-0.001314	-0.003050	-0.001933
1.5720	485.583	14.505	35.845	22.290	-0.695	35.308	924.425	-0.001015	-0.002509	-0.001560
1.5760	428.355	10.587	28.361	17.233	-0.706	35.314	815.477	-0.000741	-0.001985	-0.001206
1.5800	379.092	7.305	21.783	12.480	-0.695	35.308	721.693	-0.000511	-0.001525	-0.000874
1.5840	350.132	4.861	17.230	8.995	-0.696	35.297	666.561	-0.000340	-0.001206	-0.000630
1.5880	332.849	3.444	15.151	7.604	-0.699	35.297	633.659	-0.000241	-0.001061	-0.000532
1.5920	303.198	1.469	10.900	4.491	-0.697	35.308	577.211	-0.000103	-0.000763	-0.000314
1.5960	274.599	-0.209	7.196	1.864	-0.701	35.314	522.766	0.000015	-0.000504	-0.000130
1.6000	257.151	-1.155	4.059	-0.220	-0.698	35.308	489.550	0.000081	-0.000284	0.000015
1.6040	253.229	-1.890	2.863	-0.984	-0.698	35.297	482.082	0.000132	-0.000200	0.000069
1.6080	255.197	-1.991	2.642	-0.914	-0.700	35.297	485.830	0.000139	-0.000185	0.000064
1.6120	261.630	-1.893	2.986	-0.873	-0.696	35.307	498.075	0.000133	-0.000209	0.000061
1.6160	271.744	-1.768	3.412	-0.650	-0.709	35.314	517.330	0.000124	-0.000239	0.000045
1.6200	296.646	-0.292	5.368	1.196	-0.699	35.308	564.737	0.000020	-0.000376	-0.000084
1.6240	361.238	3.291	12.468	5.656	-0.692	35.297	687.704	-0.000230	-0.000873	-0.000396
1.6280	432.758	7.750	20.972	12.147	-0.699	35.297	823.860	-0.000543	-0.001468	-0.000850
1.6320	493.548	11.407	27.836	16.872	-0.692	35.308	939.589	-0.000798	-0.001949	-0.001181
1.6360	549.679	14.812	34.168	21.542	-0.699	35.314	1046.448	-0.001037	-0.002392	-0.001508
1.6400	607.779	18.494	40.992	26.572	-0.698	35.308	1157.055	-0.001295	-0.002869	-0.001860
1.6440	659.792	22.120	47.540	30.657	-0.696	35.297	1256.075	-0.001548	-0.003328	-0.002146
1.6480	723.182	26.316	54.838	36.148	-0.700	35.297	1376.753	-0.001842	-0.003839	-0.002530
1.6520	802.517	31.862	63.904	42.774	-0.692	35.308	1527.786	-0.002230	-0.004473	-0.002994
1.6560	875.029	37.392	72.049	49.096	-0.697	35.314	1665.831	-0.002617	-0.005043	-0.003437
1.6600	942.101	41.602	79.353	55.018	-0.693	35.308	1793.518	-0.002912	-0.005555	-0.003851
1.6640	1008.451	46.315	86.331	60.368	-0.696	35.297	1919.832	-0.003242	-0.006043	-0.004226
1.6680	1069.857	51.607	93.570	65.858	-0.702	35.298	2036.734	-0.003613	-0.006550	-0.004610
1.6720	1138.883	56.418	100.629	71.693	-0.710	35.308	2168.140	-0.003949	-0.007044	-0.005019
1.6760	1204.016	61.487	107.895	77.072	-0.707	35.314	2292.137	-0.004304	-0.007553	-0.005395
1.6800	1243.375	64.573	112.421	80.992	-0.698	35.308	2367.067	-0.004520	-0.007869	-0.005669
1.6840	1263.724	66.909	114.786	82.825	-0.697	35.296	2405.806	-0.004684	-0.008035	-0.005798
1.6880	1279.970	68.575	117.004	84.950	-0.698	35.297	2436.733	-0.004800	-0.008190	-0.005947
1.6920	1323.477	71.634	121.351	88.148	-0.695	35.308	2519.560	-0.005014	-0.008495	-0.006170
1.6960	1356.224	74.385	125.135	91.246	-0.703	35.314	2581.902	-0.005207	-0.008759	-0.006387
1.7000	1354.510	74.272	125.548	91.746	-0.706	35.308	2578.640	-0.005199	-0.008788	-0.006422
1.7040	1348.830	74.329	125.494	91.495	-0.703	35.297	2567.825	-0.005203	-0.008785	-0.006405
1.7080	1345.268	74.647	125.783	91.856	-0.704	35.298	2561.045	-0.005225	-0.008805	-0.006430
1.7120	1338.821	74.606	125.647	91.592	-0.697	35.308	2548.771	-0.005222	-0.008795	-0.006411
1.7160	1324.499	73.787	124.708	90.438	-0.702	35.315	2521.505	-0.005165	-0.008730	-0.006331
1.7200	1300.063	72.106	123.222	89.647	-0.704	35.308	2474.985	-0.005047	-0.008626	-0.006275
1.7240	1242.068	67.868	118.159	85.368	-0.704	35.296	2364.578	-0.004751	-0.008271	-0.005976
1.7280	1167.963	62.892	111.457	80.282	-0.700	35.297	2223.501	-0.004402	-0.007802	-0.005620
1.7320	1122.337	59.433	107.069	76.113	-0.703	35.308	2136.641	-0.004160	-0.007495	-0.005328
1.7360	1084.675	56.859	103.298	73.389	-0.700	35.314	2064.943	-0.003980	-0.007231	-0.005137
1.7400	1013.050	51.972	96.349	67.426	-0.692	35.308	1928.587	-0.003638	-0.006744	-0.004720
1.7440	934.301	46.300	87.983	60.910	-0.689	35.297	1778.669	-0.003241	-0.006159	-0.004264
1.7480	873.767	42.145	81.324	56.073	-0.694	35.297	1663.427	-0.002950	-0.005693	-0.003925
1.7520	813.473	37.408	74.568	50.835	-0.699	35.307	1548.643	-0.002619	-0.005220	-0.003558
1.7560	734.694	32.140	66.062	44.442	-0.700	35.314	1398.668	-0.002250	-0.004624	-0.003111
1.7600	676.519	27.846	59.210	39.176	-0.692	35.307	1287.918	-0.001949	-0.004145	-0.002742
1.7640	618.494	23.899	52.427	34.158	-0.694	35.297	1177.454	-0.001673	-0.003670	-0.002391
1.7680	549.514	19.453	44.254	28.448	-0.707	35.297	1046.133	-0.001362	-0.003098	-0.001991
1.7720	484.546	14.476	36.177	22.485	-0.714	35.307	922.451	-0.001013	-0.002532	-0.001574
1.7760	427.047	10.754	28.234	17.567	-0.712	35.314	812.988	-0.000753	-0.001976	-0.001230
1.7800	384.847	7.598	23.092	13.302	-0.704	35.308	732.651	-0.000532	-0.001616	-0.000931
1.7840	346.585	5.042	17.835	9.382	-0.704	35.297	659.809	-0.000353	-0.001248	-0.000657
1.7880	312.125	2.734	13.238	6.492	-0.710	35.297	594.206	-0.000191	-0.000927	-0.000454
1.7920	286.607	1.248	9.590	3.337	-0.703	35.307	545.626	-0.000087	-0.000671	-0.000234
1.7960	266.965	0.041	6.400	1.210	-0.702	35.313	508.232	-0.000003	-0.000448	-0.000085
1.8000	262.381	-0.945	4.804	0.502	-0.700	35.308	499.506	0.000066	-0.000336	-0.000035
1.8040	264.169	-1.227	4.543	0.002	-0.702	35.297	502.911	0.000086	-0.000318	-0.000000
1.8080	266.288	-1.533	4.639	0.293	-0.700	35.298	506.945	0.000107	-0.000325	-0.000021
1.8120	271.684	-1.420	4.885	0.348	-0.705	35.308	517.216	0.000099	-0.000342	-0.000024
1.8160	283.165	-0.542	5.354	1.058	-0.712	35.314	539.074	0.000038	-0.000375	-0.000074
1.8200	305.858	0.513	7.154	2.224	-0.703	35.308	582.275	-0.000036	-0.000501	-0.000156
1.8240	352.672	3.053	11.972	5.519	-0.703	35.297	671.396	-0.000214	-0.000838	-0.000386
1.8280	413.176	6.764	19.154	10.981	-0.708	35.297	786.581	-0.000473	-0.001341	-0.000769
1.8320	476.100	10.421	26.049	15.843	-0.707	35.307	906.372	-0.000729	-0.001823	-0.001109
1.8360	530.473	13.728	32.806	20.584	-0.707	35.314	1009.884	-0.000961	-0.002296	-0.001441
1.8400	584.921	17.381	39.149	24.681	-0.706	35.308	1113.539	-0.001217	-0.002740	-0.001728
1.8440	666.525	22.732	48.492	31.452	-0.711	35.297	1268.892	-0.001591	-0.003394	-0.002202
1.8480	744.357	28.401	57.668	38.286	-0.716	35.296	1417.065	-0.001988	-0.004037	-0.002680
1.8520	800.984	32.068	64.124	43.235	-0.706	35.308	1524.868	-0.002245	-0.004489	-0.003026
1.8560	870.686	37.157	71.814	48.946	-0.704	35.314	1657.562	-0.002601	-0.005027	-0.003426
1.8600	942.882	42.158	79.658	54.948	-0.703	35.307	1795.006	-0.002951	-0.005576	-0.003846
1.8640	1005.205	46.399	86.675	60.230	-0.703	35.296	1913.652	-0.003248	-0.006067	-0.004216
1.8680	1064.192	51.263	93.433	65.732	-0.707	35.297	2025.948	-0.003588	-0.006540	-0.004601
1.8720	1139.003	56.988	101.605	71.818	-0.707	35.307	2168.369	-0.003989	-0.007112	-0.005027
1.8760	1201.401	61.724	108.016	77.320	-0.711	35.314	2287.159	-0.004321	-0.007561	-0.005412
1.8800	1239.769	64.921	112.600	81.256	-0.706	35.307	2360.201	-0.004544	-0.007882	-0.005688
1.8840	1269.344	67.187	115.655	83.767	-0.711	35.297	2416.506	-0.004703	-0.008096	-0.005864
1.8880	1313.047	70.786	120.389	87.425	-0.711	35.297	2499.704	-0.004955	-0.008427	-0.006120
1.8920	1355.487	74.218	124.971	91.244	-0.707	35.307	2580.500	-0.005195	-0.008748	-0.006387
1.8960	1359.530	75.009	126.072	92.150	-0.711	35.314	2588.196	-0.005251	-0.008825	-0.006450
1.9000	1355.457	75.080	126.278	92.041	-0.703	35.307	2580.442	-0.005256	-0.008839	-0.006443
1.9040	1358.658	75.704	126.746	92.315	-0.707	35.296	2586.536	-0.005299	-0.008872	-0.006462
1.9080	1364.670	76.526	127.640	93.609	-0.716	35.297	2597.980	-0.005357	-0.008935	-0.006553
1.9120	1358.688	76.164	127.283	93.221	-0.710	35.307	2586.594	-0.005331	-0.008910	-0.006525
1.9160	1343.224	75.426	126.678	92.595	-0.702	35.314	2557.154	-0.005280	-0.008867	-0.006482
1.9200	1313.107	73.190	125.065	91.302	-0.705	35.308	2499.819	-0.005123	-0.008755	-0.006391
1.9240	1232.299	67.644	118.325	85.034	-0.700	35.297	2345.982	-0.004735	-0.008283	-0.005952
1.9280	1163.109	63.128	111.760	79.934	-0.695	35.296	2214.260	-0.004419	-0.007823	-0.005595
1.9320	1130.662	60.728	108.265	77.071	-0.697	35.308	2152.491	-0.004251	-0.007579	-0.005395
1.9360	1080.272	56.972	103.132	73.028	-0.698	35.314	2056.561	-0.003988	-0.007219	-0.005112
1.9400	1000.621	51.567	95.137	66.552	-0.687	35.307	1904.926	-0.003610	-0.006660	-0.004659
1.9440	927.103	45.925	87.171	60.785	-0.691	35.297	1764.965	-0.003215	-0.006102	-0.004255
1.9480	874.052	42.032	81.749	56.462	-0.708	35.296	1663.971	-0.002942	-0.005722	-0.003952
1.9520	804.320	37.393	74.141	50.571	-0.711	35.307	1531.219	-0.002617	-0.005190	-0.003540
1.9560	719.109	31.612	64.783	43.513	-0.703	35.313	1368.999	-0.002213	-0.004535	-0.003046
1.9600	655.720	26.929	57.326	37.815	-0.689	35.307	1248.322	-0.001885	-0.004013	-0.002647
1.9640	594.569	22.439	49.632	32.158	-0.694	35.297	1131.907	-0.001571	-0.003474	-0.002251
1.9680	534.816	18.507	42.327	27.169	-0.704	35.297	1018.152	-0.001296	-0.002963	-0.001902
1.9720	481.886	14.601	35.984	22.485	-0.700	35.307	917.387	-0.001022	-0.002519	-0.001574
1.9760	436.831	11.241	29.998	18.108	-0.698	35.314	831.614	-0.000787	-0.002100	-0.001268
1.9800	393.233	8.252	24.590	14.274	-0.690	35.307	748.615	-0.000578	-0.001721	-0.000999
1.9840	351.439	5.653	18.782	10.187	-0.686	35.296	669.050	-0.000396	-0.001315	-0.000713
1.9880	317.220	3.556	14.408	6.934	-0.695	35.296	603.905	-0.000249	-0.001009	-0.000485
1.9920	287.884	1.677	9.482	3.478	-0.696	35.306	548.058	-0.000117	-0.000664	-0.000243
1.9960	269.114	-0.126	6.922	1.530	-0.697	35.313	512.323	0.000009	-0.000485	-0.000107
Test Cycles
Time (sec)	Axial stress (kPa)	Axial micro-strain #1	Axial micro-strain #2	Axial micro-strain #3	Confining pressure (kPa)	Temperature (�C)	Load (N)	Displacement #1 (mm)	Displacement #2 (mm)	Displacement #3 (mm)
0.0000	257.301	-0.879	4.610	0.265	-0.697	35.308	489.836	0.000062	-0.000323	-0.000019
0.0040	252.973	-1.545	3.785	-0.831	-0.700	35.297	481.596	0.000108	-0.000265	0.000058
0.0080	256.279	-1.196	3.797	-0.457	-0.706	35.296	487.890	0.000084	-0.000266	0.000032
0.0120	263.688	-1.448	4.004	-0.264	-0.706	35.307	501.995	0.000101	-0.000280	0.000018
0.0160	273.742	-0.612	4.374	0.432	-0.712	35.314	521.135	0.000043	-0.000306	-0.000030
0.0200	296.901	0.177	6.276	1.668	-0.705	35.308	565.224	-0.000012	-0.000439	-0.000117
0.0240	359.134	3.430	12.839	6.423	-0.706	35.296	683.699	-0.000240	-0.000899	-0.000450
0.0280	428.234	7.904	21.136	12.342	-0.706	35.296	815.248	-0.000553	-0.001480	-0.000864
0.0320	477.798	10.906	26.818	16.192	-0.710	35.307	909.605	-0.000763	-0.001877	-0.001133
0.0360	528.354	14.156	32.998	20.570	-0.709	35.313	1005.850	-0.000991	-0.002310	-0.001440
0.0400	598.672	18.590	40.828	26.001	-0.703	35.307	1139.717	-0.001301	-0.002858	-0.001820
0.0440	674.460	23.775	49.317	32.240	-0.701	35.296	1283.998	-0.001664	-0.003452	-0.002257
0.0480	739.593	28.235	56.939	38.230	-0.709	35.296	1407.995	-0.001976	-0.003986	-0.002676
0.0520	801.510	32.348	64.288	43.498	-0.700	35.307	1525.869	-0.002264	-0.004500	-0.003045
0.0560	865.501	36.975	71.428	48.887	-0.711	35.314	1647.692	-0.002588	-0.005000	-0.003422
0.0600	942.221	42.507	80.224	55.574	-0.708	35.307	1793.747	-0.002976	-0.005616	-0.003890
0.0640	1015.485	47.648	88.065	61.452	-0.704	35.296	1933.222	-0.003335	-0.006165	-0.004302
0.0680	1072.232	52.398	94.589	66.914	-0.712	35.296	2041.254	-0.003668	-0.006621	-0.004684
0.0720	1124.380	56.166	100.201	71.318	-0.710	35.307	2140.532	-0.003932	-0.007014	-0.004992
0.0760	1188.747	61.086	107.179	76.585	-0.710	35.314	2263.069	-0.004276	-0.007503	-0.005361
0.0800	1243.586	65.172	112.873	81.213	-0.711	35.308	2367.468	-0.004562	-0.007901	-0.005685
0.0840	1272.606	67.271	116.234	84.158	-0.709	35.297	2422.714	-0.004709	-0.008136	-0.005891
0.0880	1306.269	70.563	120.154	87.565	-0.714	35.297	2486.801	-0.004939	-0.008411	-0.006130
0.0920	1340.429	73.162	123.841	90.523	-0.706	35.307	2551.832	-0.005121	-0.008669	-0.006337
0.0960	1347.703	74.619	125.329	91.620	-0.710	35.314	2565.680	-0.005223	-0.008773	-0.006413
0.1000	1345.238	74.594	125.189	91.539	-0.708	35.308	2560.987	-0.005222	-0.008763	-0.006408
0.1040	1347.192	74.536	125.273	91.704	-0.710	35.297	2564.707	-0.005218	-0.008769	-0.006419
0.1080	1351.475	75.453	126.485	92.888	-0.707	35.297	2572.861	-0.005282	-0.008854	-0.006502
0.1120	1348.093	74.995	126.389	92.540	-0.702	35.307	2566.423	-0.005250	-0.008847	-0.006478
0.1160	1335.680	74.966	126.114	91.773	-0.706	35.314	2542.791	-0.005248	-0.008828	-0.006424
0.1200	1311.695	73.371	125.054	90.843	-0.698	35.307	2497.129	-0.005136	-0.008754	-0.006359
0.1240	1249.447	69.188	119.892	86.672	-0.700	35.297	2378.626	-0.004843	-0.008392	-0.006067
0.1280	1177.897	64.129	113.234	81.519	-0.700	35.296	2242.413	-0.004489	-0.007926	-0.005706
0.1320	1129.700	60.740	108.266	77.432	-0.698	35.306	2150.660	-0.004252	-0.007579	-0.005420
0.1360	1071.826	56.583	102.402	72.804	-0.708	35.314	2040.482	-0.003961	-0.007168	-0.005096
0.1400	1003.627	51.663	95.605	67.219	-0.708	35.307	1910.648	-0.003616	-0.006692	-0.004705
0.1440	933.234	46.522	88.232	61.217	-0.703	35.297	1776.638	-0.003257	-0.006176	-0.004285
0.1480	870.415	42.395	81.887	56.283	-0.704	35.296	1657.047	-0.002968	-0.005732	-0.003940
0.1520	803.193	37.490	74.403	50.502	-0.702	35.306	1529.074	-0.002624	-0.005208	-0.003535
0.1560	737.504	32.794	66.752	45.123	-0.703	35.313	1404.018	-0.002296	-0.004673	-0.003159
0.1600	680.005	28.707	60.104	40.162	-0.694	35.307	1294.556	-0.002010	-0.004207	-0.002811
0.1640	608.410	23.386	51.573	33.672	-0.707	35.296	1158.257	-0.001637	-0.003610	-0.002357
0.1680	541.218	18.786	43.921	28.157	-0.702	35.296	1030.340	-0.001315	-0.003074	-0.001971
0.1720	486.785	15.396	36.850	23.262	-0.703	35.307	926.714	-0.001078	-0.002580	-0.001628
0.1760	447.741	12.615	31.898	19.402	-0.699	35.314	852.385	-0.000883	-0.002233	-0.001358
0.1800	400.567	9.198	25.526	15.150	-0.699	35.308	762.577	-0.000644	-0.001787	-0.001060
0.1840	355.933	6.472	19.567	10.756	-0.695	35.296	677.605	-0.000453	-0.001370	-0.000753
0.1880	320.917	3.875	14.860	7.727	-0.705	35.296	610.943	-0.000271	-0.001040	-0.000541
0.1920	292.438	2.040	10.719	4.450	-0.696	35.306	556.726	-0.000143	-0.000750	-0.000311
0.1960	266.183	0.330	6.947	1.668	-0.700	35.314	506.744	-0.000023	-0.000486	-0.000117
0.2000	255.979	-0.489	5.187	0.167	-0.698	35.308	487.318	0.000034	-0.000363	-0.000012
0.2040	250.539	-1.365	4.073	-0.761	-0.697	35.297	476.961	0.000096	-0.000285	0.000053
0.2080	247.939	-1.419	3.249	-0.886	-0.710	35.296	472.012	0.000099	-0.000227	0.000062
0.2120	251.696	-1.530	2.835	-0.900	-0.705	35.307	479.164	0.000107	-0.000198	0.000063
0.2160	260.037	-1.642	3.070	-0.789	-0.711	35.314	495.043	0.000115	-0.000215	0.000055
0.2200	276.959	-0.918	4.389	0.360	-0.702	35.308	527.258	0.000064	-0.000307	-0.000025
0.2240	336.967	2.109	10.415	4.533	-0.710	35.297	641.499	-0.000148	-0.000729	-0.000317
0.2280	431.601	8.016	21.632	12.538	-0.719	35.296	821.657	-0.000561	-0.001514	-0.000878
0.2320	497.080	12.475	29.366	17.983	-0.709	35.306	946.312	-0.000873	-0.002056	-0.001259
0.2360	556.006	16.088	36.012	23.058	-0.715	35.314	1058.493	-0.001126	-0.002521	-0.001614
0.2400	618.464	19.924	43.319	28.213	-0.710	35.307	1177.397	-0.001395	-0.003032	-0.001975
0.2440	674.400	23.818	49.881	32.977	-0.710	35.296	1283.884	-0.001667	-0.003492	-0.002308
0.2480	737.955	27.955	57.338	38.175	-0.718	35.296	1404.877	-0.001957	-0.004014	-0.002672
0.2520	812.977	33.112	66.022	44.332	-0.713	35.307	1547.699	-0.002318	-0.004622	-0.003103
0.2560	887.833	38.645	74.456	51.085	-0.715	35.314	1690.207	-0.002705	-0.005212	-0.003576
0.2600	956.393	43.729	81.955	56.742	-0.712	35.307	1820.726	-0.003061	-0.005737	-0.003972
0.2640	1016.296	47.883	88.383	61.936	-0.706	35.296	1934.767	-0.003352	-0.006187	-0.004336
0.2680	1061.171	51.664	93.735	66.079	-0.711	35.296	2020.197	-0.003617	-0.006561	-0.004626
0.2720	1129.445	56.402	100.752	71.776	-0.708	35.306	2150.173	-0.003948	-0.007053	-0.005024
0.2760	1193.661	61.406	107.700	77.349	-0.718	35.313	2272.425	-0.004298	-0.007539	-0.005414
0.2800	1231.593	64.283	112.173	80.798	-0.715	35.308	2344.637	-0.004500	-0.007852	-0.005656
0.2840	1276.047	68.380	116.991	84.702	-0.718	35.296	2429.266	-0.004787	-0.008189	-0.005929
0.2880	1314.820	71.509	121.614	88.314	-0.719	35.296	2503.080	-0.005006	-0.008513	-0.006182
0.2920	1340.068	73.619	124.116	90.620	-0.718	35.307	2551.146	-0.005153	-0.008688	-0.006343
0.2960	1348.770	74.508	125.328	91.273	-0.724	35.314	2567.711	-0.005216	-0.008773	-0.006389
0.3000	1360.432	75.564	126.637	93.069	-0.712	35.308	2589.912	-0.005289	-0.008865	-0.006515
0.3040	1377.865	77.000	128.521	94.554	-0.715	35.297	2623.100	-0.005390	-0.008996	-0.006619
0.3080	1373.461	77.054	129.125	94.873	-0.716	35.296	2614.717	-0.005394	-0.009039	-0.006641
0.3120	1361.348	76.664	128.725	93.900	-0.706	35.307	2591.658	-0.005367	-0.009011	-0.006573
0.3160	1342.383	75.662	127.834	93.180	-0.707	35.314	2555.552	-0.005296	-0.008948	-0.006523
0.3200	1312.867	73.564	125.784	91.984	-0.703	35.308	2499.361	-0.005149	-0.008805	-0.006439
0.3240	1236.057	68.272	118.930	85.937	-0.707	35.297	2353.134	-0.004779	-0.008325	-0.006016
0.3280	1159.532	63.127	111.579	80.087	-0.715	35.296	2207.451	-0.004419	-0.007811	-0.005606
0.3320	1134.780	60.811	109.174	77.945	-0.714	35.306	2160.330	-0.004257	-0.007642	-0.005456
0.3360	1084.480	57.570	104.399	74.195	-0.723	35.314	2064.571	-0.004030	-0.007308	-0.005194
0.3400	992.912	51.400	95.358	66.524	-0.712	35.307	1890.249	-0.003598	-0.006675	-0.004657
0.3440	927.433	46.397	88.148	60.883	-0.712	35.296	1765.594	-0.003248	-0.006170	-0.004262
0.3480	864.344	42.172	81.365	56.102	-0.719	35.296	1645.489	-0.002952	-0.005696	-0.003927
0.3520	784.348	36.557	72.489	49.348	-0.713	35.306	1493.196	-0.002559	-0.005074	-0.003454
0.3560	719.665	31.974	65.073	43.706	-0.715	35.313	1370.058	-0.002238	-0.004555	-0.003059
0.3600	659.206	27.429	57.933	38.496	-0.703	35.307	1254.959	-0.001920	-0.004055	-0.002695
0.3640	591.894	22.678	50.005	32.548	-0.700	35.296	1126.814	-0.001587	-0.003500	-0.002278
0.3680	539.069	19.479	44.047	27.877	-0.713	35.296	1026.249	-0.001364	-0.003083	-0.001951
0.3720	487.296	15.713	37.209	23.166	-0.708	35.306	927.687	-0.001100	-0.002605	-0.001622
0.3760	423.516	11.420	29.146	17.622	-0.710	35.313	806.265	-0.000799	-0.002040	-0.001234
0.3800	371.247	7.208	22.266	12.743	-0.704	35.308	706.758	-0.000505	-0.001559	-0.000892
0.3840	353.032	5.641	18.933	10.203	-0.707	35.296	672.083	-0.000395	-0.001325	-0.000714
0.3880	339.642	5.127	17.406	9.327	-0.716	35.295	646.591	-0.000359	-0.001218	-0.000653
0.3920	306.670	2.706	13.267	5.837	-0.710	35.306	583.820	-0.000189	-0.000929	-0.000409
0.3960	270.030	0.792	8.076	2.351	-0.719	35.313	514.069	-0.000055	-0.000565	-0.000165
0.4000	254.942	-0.697	5.367	0.596	-0.714	35.308	485.344	0.000049	-0.000376	-0.000042
0.4040	251.591	-1.139	3.964	-0.513	-0.712	35.297	478.964	0.000080	-0.000277	0.000036
0.4080	254.070	-0.807	3.988	-0.072	-0.728	35.296	483.685	0.000057	-0.000279	0.000005
0.4120	260.412	-0.947	4.045	0.209	-0.713	35.306	495.758	0.000066	-0.000283	-0.000015
0.4160	272.435	-0.489	4.871	0.211	-0.709	35.313	518.646	0.000034	-0.000341	-0.000015
0.4200	302.372	1.041	7.390	2.365	-0.707	35.308	575.638	-0.000073	-0.000517	-0.000166
0.4240	364.679	4.487	14.545	7.242	-0.703	35.296	694.256	-0.000314	-0.001018	-0.000507
0.4280	422.719	8.041	21.234	12.396	-0.707	35.296	804.749	-0.000563	-0.001486	-0.000868
0.4320	470.089	10.782	26.638	16.441	-0.695	35.306	894.928	-0.000755	-0.001865	-0.001151
0.4360	530.428	14.561	33.275	21.054	-0.692	35.314	1009.798	-0.001019	-0.002329	-0.001474
0.4400	602.850	19.021	41.640	27.031	-0.683	35.307	1147.671	-0.001331	-0.002915	-0.001892
0.4440	672.702	23.608	50.047	32.533	-0.691	35.296	1280.651	-0.001653	-0.003503	-0.002277
0.4480	727.390	27.680	56.735	37.606	-0.689	35.295	1384.764	-0.001938	-0.003971	-0.002632
0.4520	799.406	32.475	64.880	43.456	-0.687	35.306	1521.864	-0.002273	-0.004542	-0.003042
0.4560	881.416	38.672	73.975	50.573	-0.695	35.313	1677.990	-0.002707	-0.005178	-0.003540
0.4600	955.837	43.882	81.943	56.907	-0.694	35.308	1819.668	-0.003072	-0.005736	-0.003983
0.4640	1014.493	47.857	88.314	61.879	-0.709	35.296	1931.334	-0.003350	-0.006182	-0.004332
0.4680	1084.089	53.262	96.197	68.177	-0.704	35.295	2063.828	-0.003728	-0.006734	-0.004772
0.4720	1163.184	59.002	104.524	74.946	-0.699	35.306	2214.403	-0.004130	-0.007317	-0.005246
0.4760	1204.903	62.739	109.684	78.586	-0.702	35.313	2293.825	-0.004392	-0.007678	-0.005501
0.4800	1225.086	64.545	111.981	80.282	-0.699	35.308	2332.249	-0.004518	-0.007839	-0.005620
0.4840	1272.035	68.188	116.645	84.312	-0.706	35.296	2421.627	-0.004773	-0.008165	-0.005902
0.4880	1323.101	72.231	122.110	88.991	-0.716	35.295	2518.845	-0.005056	-0.008548	-0.006229
0.4920	1332.193	73.190	123.895	90.177	-0.702	35.306	2536.154	-0.005123	-0.008673	-0.006312
0.4960	1327.595	72.761	124.088	90.217	-0.705	35.313	2527.399	-0.005093	-0.008686	-0.006315
0.5000	1330.991	73.411	124.474	90.829	-0.707	35.307	2533.865	-0.005139	-0.008713	-0.006358
0.5040	1354.060	75.551	126.924	92.916	-0.704	35.296	2577.782	-0.005289	-0.008885	-0.006504
0.5080	1368.622	77.082	128.658	94.675	-0.714	35.295	2605.505	-0.005396	-0.009006	-0.006627
0.5120	1360.251	76.887	128.315	93.997	-0.709	35.306	2589.569	-0.005382	-0.008982	-0.006580
0.5160	1341.962	75.468	127.572	93.263	-0.711	35.313	2554.750	-0.005283	-0.008930	-0.006528
0.5200	1304.060	73.258	124.848	91.035	-0.702	35.308	2482.595	-0.005128	-0.008739	-0.006372
0.5240	1224.710	67.507	117.965	84.977	-0.709	35.296	2331.533	-0.004725	-0.008258	-0.005948
0.5280	1174.079	64.171	113.478	81.479	-0.715	35.295	2235.146	-0.004492	-0.007943	-0.005704
0.5320	1141.212	61.781	110.027	78.682	-0.710	35.306	2172.575	-0.004325	-0.007702	-0.005508
0.5360	1068.219	56.680	102.981	72.930	-0.710	35.313	2033.615	-0.003968	-0.007209	-0.005105
0.5400	984.872	50.997	94.574	66.330	-0.703	35.308	1874.943	-0.003570	-0.006620	-0.004643
0.5440	922.789	46.285	87.736	60.827	-0.699	35.297	1756.754	-0.003240	-0.006142	-0.004258
0.5480	874.713	42.673	82.520	57.020	-0.705	35.296	1665.230	-0.002987	-0.005776	-0.003991
0.5520	812.526	38.336	75.778	51.848	-0.705	35.306	1546.841	-0.002684	-0.005304	-0.003629
0.5560	746.040	34.127	68.321	46.151	-0.710	35.313	1420.269	-0.002389	-0.004782	-0.003231
0.5600	679.915	29.441	60.944	40.688	-0.699	35.308	1294.384	-0.002061	-0.004266	-0.002848
0.5640	600.535	23.636	51.656	33.282	-0.699	35.297	1143.265	-0.001655	-0.003616	-0.002330
0.5680	529.466	18.549	43.071	27.585	-0.703	35.296	1007.967	-0.001298	-0.003015	-0.001931
0.5720	486.004	15.423	37.057	23.416	-0.700	35.306	925.226	-0.001080	-0.002594	-0.001639
0.5760	442.121	12.421	31.401	19.389	-0.708	35.313	841.684	-0.000869	-0.002198	-0.001357
0.5800	381.872	8.237	23.902	13.829	-0.698	35.307	726.986	-0.000577	-0.001673	-0.000968
0.5840	332.338	5.056	17.229	9.133	-0.701	35.296	632.687	-0.000354	-0.001206	-0.000639
0.5880	309.630	3.582	14.256	6.893	-0.712	35.295	589.457	-0.000251	-0.000998	-0.000482
0.5920	288.170	2.040	10.802	4.255	-0.697	35.306	548.601	-0.000143	-0.000756	-0.000298
0.5960	261.915	0.083	6.648	1.544	-0.693	35.313	498.619	-0.000006	-0.000465	-0.000108
0.6000	247.818	-0.905	4.349	0.277	-0.691	35.307	471.783	0.000063	-0.000304	-0.000019
0.6040	248.540	-1.559	3.923	-0.624	-0.688	35.296	473.156	0.000109	-0.000275	0.000044
0.6080	251.621	-1.071	4.156	-0.359	-0.698	35.295	479.021	0.000075	-0.000291	0.000025
0.6120	255.768	-1.350	4.073	-0.347	-0.697	35.306	486.917	0.000094	-0.000285	0.000024
0.6160	264.801	-0.682	4.389	0.100	-0.699	35.313	504.112	0.000048	-0.000307	-0.000007
0.6200	290.469	0.637	6.441	1.654	-0.698	35.307	552.979	-0.000045	-0.000451	-0.000116
0.6240	362.771	3.958	14.104	7.245	-0.695	35.297	690.622	-0.000277	-0.000987	-0.000507
0.6280	429.617	8.014	22.044	12.703	-0.706	35.295	817.881	-0.000561	-0.001543	-0.000889
0.6320	485.613	11.474	28.471	17.553	-0.698	35.306	924.482	-0.000803	-0.001993	-0.001229
0.6360	541.894	15.199	35.297	22.265	-0.698	35.313	1031.628	-0.001064	-0.002471	-0.001559
0.6400	602.654	19.147	42.396	27.267	-0.699	35.307	1147.299	-0.001340	-0.002968	-0.001909
0.6440	665.278	23.371	49.593	32.437	-0.693	35.296	1266.518	-0.001636	-0.003471	-0.002271
0.6480	729.208	28.082	56.927	38.038	-0.709	35.295	1388.226	-0.001966	-0.003985	-0.002663
0.6520	807.176	33.113	65.471	44.318	-0.700	35.306	1536.655	-0.002318	-0.004583	-0.003102
0.6560	879.598	38.294	73.699	50.764	-0.693	35.313	1674.528	-0.002681	-0.005159	-0.003553
0.6600	945.618	42.812	81.142	56.322	-0.695	35.307	1800.213	-0.002997	-0.005680	-0.003943
0.6640	1011.908	47.843	88.465	61.867	-0.695	35.296	1926.413	-0.003349	-0.006193	-0.004331
0.6680	1072.277	52.735	95.510	67.122	-0.699	35.295	2041.340	-0.003691	-0.006686	-0.004699
0.6720	1134.540	57.250	101.963	72.557	-0.698	35.306	2159.872	-0.004008	-0.007137	-0.005079
0.6760	1194.488	62.115	108.391	77.891	-0.702	35.314	2273.998	-0.004348	-0.007587	-0.005452
0.6800	1237.379	65.381	112.874	81.783	-0.695	35.308	2355.652	-0.004577	-0.007901	-0.005725
0.6840	1275.386	68.103	117.030	84.632	-0.691	35.297	2428.007	-0.004767	-0.008192	-0.005924
0.6880	1321.989	72.357	122.479	89.189	-0.703	35.295	2516.727	-0.005065	-0.008574	-0.006243
0.6920	1339.993	73.758	124.638	91.078	-0.691	35.305	2551.003	-0.005163	-0.008725	-0.006375
0.6960	1347.447	75.273	125.906	92.039	-0.695	35.313	2565.193	-0.005269	-0.008813	-0.006443
0.7000	1361.048	76.372	127.393	93.289	-0.692	35.308	2591.085	-0.005346	-0.008918	-0.006530
0.7040	1363.512	76.540	127.916	93.636	-0.700	35.297	2595.778	-0.005358	-0.008954	-0.006555
0.7080	1356.780	76.498	128.013	94.079	-0.704	35.296	2582.960	-0.005355	-0.008961	-0.006586
0.7120	1348.138	75.912	127.694	93.486	-0.695	35.306	2566.509	-0.005314	-0.008939	-0.006544
0.7160	1334.763	74.774	127.021	92.666	-0.703	35.313	2541.046	-0.005234	-0.008891	-0.006487
0.7200	1300.619	73.011	125.067	90.843	-0.696	35.308	2476.044	-0.005111	-0.008755	-0.006359
0.7240	1227.986	68.188	118.600	85.396	-0.699	35.296	2337.770	-0.004773	-0.008302	-0.005978
0.7280	1174.335	64.491	113.839	81.601	-0.698	35.295	2235.632	-0.004514	-0.007969	-0.005712
0.7320	1132.345	61.379	109.270	78.112	-0.692	35.306	2155.695	-0.004297	-0.007649	-0.005468
0.7360	1069.677	57.181	102.982	73.194	-0.694	35.313	2036.390	-0.004003	-0.007209	-0.005124
0.7400	999.464	51.623	95.937	67.773	-0.698	35.308	1902.723	-0.003614	-0.006716	-0.004744
0.7440	927.223	46.590	88.451	61.578	-0.695	35.297	1765.194	-0.003261	-0.006192	-0.004310
0.7480	864.945	42.507	82.066	56.713	-0.702	35.295	1646.633	-0.002976	-0.005745	-0.003970
0.7520	812.481	38.783	76.108	51.724	-0.707	35.305	1546.755	-0.002715	-0.005328	-0.003621
0.7560	743.470	34.016	68.416	46.040	-0.697	35.313	1415.377	-0.002381	-0.004789	-0.003223
0.7600	665.563	28.526	59.445	39.219	-0.694	35.308	1267.061	-0.001997	-0.004161	-0.002745
0.7640	591.233	22.913	50.540	33.005	-0.697	35.297	1125.555	-0.001604	-0.003538	-0.002310
0.7680	536.800	19.297	43.896	28.364	-0.701	35.295	1021.929	-0.001351	-0.003073	-0.001985
0.7720	485.282	15.298	37.619	23.471	-0.702	35.305	923.853	-0.001071	-0.002633	-0.001643
0.7760	426.822	11.658	30.329	18.303	-0.696	35.313	812.559	-0.000816	-0.002123	-0.001281
0.7800	375.304	8.098	23.682	13.579	-0.696	35.307	714.483	-0.000567	-0.001658	-0.000951
0.7840	342.107	5.712	18.920	10.188	-0.694	35.296	651.283	-0.000400	-0.001324	-0.000713
0.7880	320.781	4.401	15.633	8.116	-0.697	35.295	610.685	-0.000308	-0.001094	-0.000568
0.7920	301.770	2.693	12.276	5.657	-0.694	35.305	574.493	-0.000189	-0.000859	-0.000396
0.7960	283.842	1.151	9.921	3.867	-0.698	35.313	540.361	-0.000081	-0.000694	-0.000271
0.8000	266.814	0.193	7.280	2.003	-0.695	35.307	507.946	-0.000014	-0.000510	-0.000140
0.8040	261.013	-0.406	5.988	1.142	-0.700	35.296	496.902	0.000028	-0.000419	-0.000080
0.8080	261.990	-0.417	5.986	1.239	-0.701	35.295	498.762	0.000029	-0.000419	-0.000087
0.8120	265.687	-0.485	5.699	1.168	-0.699	35.305	505.800	0.000034	-0.000399	-0.000082
0.8160	275.080	-0.031	5.863	1.544	-0.706	35.313	523.682	0.000002	-0.000410	-0.000108
0.8200	297.082	0.790	7.428	2.573	-0.708	35.308	565.567	-0.000055	-0.000520	-0.000180
0.8240	355.272	3.638	13.580	6.672	-0.702	35.296	676.346	-0.000255	-0.000951	-0.000467
0.8280	419.623	7.905	21.384	12.620	-0.706	35.295	798.855	-0.000553	-0.001497	-0.000883
0.8320	471.922	10.934	27.370	16.900	-0.695	35.305	898.418	-0.000765	-0.001916	-0.001183
0.8360	530.833	15.272	34.264	21.612	-0.707	35.313	1010.571	-0.001069	-0.002398	-0.001513
0.8400	594.854	18.938	41.776	26.516	-0.700	35.308	1132.450	-0.001326	-0.002924	-0.001856
0.8440	667.246	23.928	49.703	32.547	-0.695	35.296	1270.266	-0.001675	-0.003479	-0.002278
0.8480	744.913	29.165	58.659	39.411	-0.700	35.295	1418.123	-0.002042	-0.004106	-0.002759
0.8520	813.608	33.835	66.531	45.010	-0.691	35.306	1548.901	-0.002368	-0.004657	-0.003151
0.8560	876.923	38.171	73.974	50.583	-0.696	35.313	1669.436	-0.002672	-0.005178	-0.003541
0.8600	943.213	43.354	81.654	56.158	-0.690	35.308	1795.635	-0.003035	-0.005716	-0.003931
0.8640	1009.593	48.176	88.629	61.979	-0.696	35.296	1922.007	-0.003372	-0.006204	-0.004339
0.8680	1067.844	52.510	95.235	67.179	-0.700	35.295	2032.900	-0.003676	-0.006666	-0.004703
0.8720	1132.391	57.486	101.633	72.569	-0.703	35.305	2155.781	-0.004024	-0.007114	-0.005080
0.8760	1188.447	61.558	107.592	77.518	-0.704	35.313	2262.497	-0.004309	-0.007531	-0.005426
0.8800	1233.862	65.117	112.886	81.605	-0.708	35.307	2348.957	-0.004558	-0.007902	-0.005712
0.8840	1275.686	68.367	117.361	85.158	-0.706	35.296	2428.579	-0.004786	-0.008215	-0.005961
0.8880	1306.615	71.566	121.213	88.326	-0.708	35.294	2487.459	-0.005010	-0.008485	-0.006183
0.8920	1337.093	73.731	124.254	90.689	-0.708	35.305	2545.481	-0.005161	-0.008698	-0.006348
0.8960	1354.556	75.482	126.596	92.830	-0.706	35.313	2578.726	-0.005284	-0.008862	-0.006498
0.9000	1356.118	75.829	127.147	93.039	-0.701	35.307	2581.701	-0.005308	-0.008900	-0.006513
0.9040	1358.598	75.967	127.529	93.568	-0.706	35.297	2586.422	-0.005318	-0.008927	-0.006550
0.9080	1356.179	76.246	128.038	94.065	-0.702	35.295	2581.816	-0.005337	-0.008963	-0.006585
0.9120	1349.431	76.010	127.806	93.652	-0.691	35.305	2568.970	-0.005321	-0.008946	-0.006556
0.9160	1337.829	75.647	127.583	93.041	-0.704	35.313	2546.883	-0.005295	-0.008931	-0.006513
0.9200	1311.740	74.065	126.100	91.412	-0.702	35.307	2497.215	-0.005185	-0.008827	-0.006399
0.9240	1237.980	68.911	119.563	86.241	-0.706	35.296	2356.796	-0.004824	-0.008369	-0.006037
0.9280	1168.970	64.197	113.093	81.422	-0.724	35.295	2225.418	-0.004494	-0.007917	-0.005700
0.9320	1130.858	61.032	109.118	78.112	-0.710	35.305	2152.863	-0.004272	-0.007638	-0.005468
0.9360	1068.039	56.890	103.064	73.222	-0.711	35.313	2033.272	-0.003982	-0.007214	-0.005126
0.9400	993.829	51.970	95.883	67.174	-0.698	35.308	1891.994	-0.003638	-0.006712	-0.004702
0.9440	924.863	46.467	88.628	61.187	-0.706	35.297	1760.702	-0.003253	-0.006204	-0.004283
0.9480	868.131	43.048	82.520	56.894	-0.712	35.295	1652.699	-0.003013	-0.005776	-0.003983
0.9520	801.315	37.949	74.909	51.085	-0.713	35.305	1525.497	-0.002656	-0.005244	-0.003576
0.9560	727.420	32.836	66.628	44.790	-0.704	35.313	1384.821	-0.002299	-0.004664	-0.003135
0.9600	660.408	28.139	58.728	38.981	-0.707	35.308	1257.248	-0.001970	-0.004111	-0.002729
0.9640	604.863	23.596	52.276	33.964	-0.712	35.296	1151.505	-0.001652	-0.003659	-0.002377
0.9680	548.176	20.146	45.890	29.058	-0.719	35.295	1043.587	-0.001410	-0.003212	-0.002034
0.9720	489.836	16.312	38.405	24.042	-0.710	35.305	932.522	-0.001142	-0.002688	-0.001683
0.9760	435.869	12.391	31.332	19.291	-0.711	35.313	829.782	-0.000867	-0.002193	-0.001350
0.9800	389.176	9.112	25.209	14.830	-0.696	35.307	740.891	-0.000638	-0.001765	-0.001038
0.9840	347.051	5.874	19.485	10.674	-0.702	35.297	660.696	-0.000411	-0.001364	-0.000747
0.9880	312.561	3.721	14.763	7.854	-0.703	35.295	595.036	-0.000260	-0.001033	-0.000550
0.9920	286.772	2.011	11.065	4.798	-0.696	35.305	545.940	-0.000141	-0.000775	-0.000336
0.9960	262.050	0.362	7.391	2.365	-0.703	35.313	498.877	-0.000025	-0.000517	-0.000166
1.0000	247.653	-0.683	4.885	0.179	-0.695	35.308	471.468	0.000048	-0.000342	-0.000013
1.0040	247.353	-0.989	4.074	0.041	-0.696	35.297	470.896	0.000069	-0.000285	-0.000003
1.0080	250.974	-0.752	4.045	0.139	-0.702	35.295	477.791	0.000053	-0.000283	-0.000010
1.0120	257.948	-1.086	4.335	0.335	-0.712	35.305	491.066	0.000076	-0.000303	-0.000023
1.0160	270.632	-0.432	4.995	0.848	-0.711	35.312	515.213	0.000030	-0.000350	-0.000059
1.0200	310.021	1.528	8.628	3.575	-0.704	35.308	590.200	-0.000107	-0.000604	-0.000250
1.0240	379.618	5.446	16.855	8.994	-0.707	35.296	722.694	-0.000381	-0.001180	-0.000630
1.0280	428.535	8.946	22.637	13.566	-0.711	35.295	815.821	-0.000626	-0.001585	-0.000950
1.0320	473.710	11.296	27.770	16.857	-0.696	35.305	901.823	-0.000791	-0.001944	-0.001180
1.0360	545.186	15.716	35.818	22.818	-0.700	35.313	1037.893	-0.001100	-0.002507	-0.001597
1.0400	616.691	20.149	43.854	28.448	-0.700	35.308	1174.021	-0.001410	-0.003070	-0.001991
1.0440	668.629	23.455	50.336	32.910	-0.699	35.296	1272.898	-0.001642	-0.003524	-0.002304
1.0480	720.221	27.525	56.637	37.594	-0.711	35.295	1371.117	-0.001927	-0.003965	-0.002632
1.0520	791.727	32.458	64.674	43.596	-0.713	35.305	1507.244	-0.002272	-0.004527	-0.003052
1.0560	875.209	38.144	73.881	50.681	-0.710	35.313	1666.174	-0.002670	-0.005172	-0.003548
1.0600	933.099	42.659	80.456	55.533	-0.707	35.308	1776.381	-0.002986	-0.005632	-0.003887
1.0640	1003.747	47.330	87.944	61.577	-0.714	35.297	1910.877	-0.003313	-0.006156	-0.004310
1.0680	1072.593	52.970	95.606	67.706	-0.716	35.295	2041.941	-0.003708	-0.006692	-0.004739
1.0720	1136.103	57.348	102.281	73.001	-0.719	35.305	2162.848	-0.004014	-0.007160	-0.005110
1.0760	1188.822	61.728	108.251	77.641	-0.722	35.313	2263.212	-0.004321	-0.007578	-0.005435
1.0800	1232.946	65.242	113.232	81.672	-0.717	35.307	2347.212	-0.004567	-0.007926	-0.005717
1.0840	1274.619	68.798	117.732	85.061	-0.715	35.296	2426.548	-0.004816	-0.008241	-0.005954
1.0880	1312.461	71.787	121.833	88.659	-0.714	35.294	2498.589	-0.005025	-0.008528	-0.006206
1.0920	1335.019	73.689	124.446	90.816	-0.702	35.305	2541.533	-0.005158	-0.008711	-0.006357
1.0960	1346.140	74.718	125.906	92.135	-0.712	35.313	2562.704	-0.005230	-0.008813	-0.006449
1.1000	1361.168	76.136	127.529	93.555	-0.708	35.308	2591.314	-0.005329	-0.008927	-0.006549
1.1040	1374.168	77.137	129.110	94.885	-0.711	35.297	2616.062	-0.005400	-0.009038	-0.006642
1.1080	1368.817	77.722	129.496	95.218	-0.719	35.295	2605.877	-0.005441	-0.009065	-0.006665
1.1120	1357.426	76.985	129.235	94.524	-0.716	35.305	2584.190	-0.005389	-0.009046	-0.006617
1.1160	1342.668	76.359	128.330	93.802	-0.714	35.313	2556.095	-0.005345	-0.008983	-0.006566
1.1200	1312.145	73.898	126.333	91.927	-0.710	35.307	2497.988	-0.005173	-0.008843	-0.006435
1.1240	1247.568	69.494	120.664	87.382	-0.721	35.296	2375.050	-0.004865	-0.008446	-0.006117
1.1280	1185.200	65.172	114.911	82.659	-0.716	35.295	2256.317	-0.004562	-0.008044	-0.005786
1.1320	1141.678	62.072	110.702	79.267	-0.708	35.305	2173.462	-0.004345	-0.007749	-0.005549
1.1360	1086.088	58.625	105.403	74.736	-0.707	35.313	2067.633	-0.004104	-0.007378	-0.005231
1.1400	1011.923	53.110	97.905	68.677	-0.698	35.308	1926.441	-0.003718	-0.006853	-0.004807
1.1440	940.057	47.857	90.062	62.912	-0.700	35.297	1789.627	-0.003350	-0.006304	-0.004404
1.1480	878.425	43.534	83.689	57.922	-0.702	35.294	1672.297	-0.003047	-0.005858	-0.004055
1.1520	817.170	38.935	76.783	52.516	-0.700	35.305	1555.681	-0.002725	-0.005375	-0.003676
1.1560	745.259	34.295	68.981	46.277	-0.704	35.313	1418.781	-0.002401	-0.004829	-0.003239
1.1600	673.213	29.040	60.848	40.357	-0.700	35.308	1281.624	-0.002033	-0.004259	-0.002825
1.1640	610.890	25.067	53.419	34.894	-0.701	35.296	1162.977	-0.001755	-0.003739	-0.002443
1.1680	559.958	21.427	47.252	30.546	-0.708	35.294	1066.017	-0.001500	-0.003308	-0.002138
1.1720	498.628	17.049	39.409	25.156	-0.707	35.304	949.259	-0.001193	-0.002759	-0.001761
1.1760	426.657	11.963	30.671	18.832	-0.712	35.312	812.244	-0.000837	-0.002147	-0.001318
1.1800	374.448	8.042	23.629	13.648	-0.704	35.307	712.852	-0.000563	-0.001654	-0.000955
1.1840	347.953	6.349	19.870	10.909	-0.711	35.296	662.413	-0.000444	-0.001391	-0.000764
1.1880	323.607	4.889	16.733	8.702	-0.707	35.294	616.064	-0.000342	-0.001171	-0.000609
1.1920	298.194	3.164	12.962	5.755	-0.704	35.304	567.684	-0.000221	-0.000907	-0.000403
1.1960	276.643	1.708	9.645	3.520	-0.705	35.312	526.657	-0.000120	-0.000675	-0.000246
1.2000	260.067	-0.097	6.923	1.686	-0.706	35.308	495.100	0.000007	-0.000485	-0.000118
1.2040	246.015	-0.891	4.335	-0.041	-0.702	35.297	468.349	0.000062	-0.000303	0.000003
1.2080	247.037	-1.130	4.005	-0.126	-0.712	35.295	470.295	0.000079	-0.000280	0.000009
1.2120	255.558	-0.892	4.403	-0.096	-0.698	35.305	486.517	0.000062	-0.000308	0.000007
1.2160	270.406	-0.086	5.354	1.209	-0.700	35.313	514.784	0.000006	-0.000375	-0.000085
1.2200	308.924	1.970	9.068	3.476	-0.701	35.308	588.112	-0.000138	-0.000635	-0.000243
1.2240	355.226	4.405	14.215	7.310	-0.711	35.297	676.260	-0.000308	-0.000995	-0.000512
1.2280	401.259	7.570	19.635	11.190	-0.716	35.295	763.893	-0.000530	-0.001374	-0.000783
1.2320	463.897	10.891	26.668	16.192	-0.711	35.304	883.141	-0.000762	-0.001867	-0.001133
1.2360	526.475	14.492	33.893	21.471	-0.711	35.313	1002.274	-0.001014	-0.002373	-0.001503
1.2400	584.530	18.269	40.882	26.056	-0.708	35.308	1112.795	-0.001279	-0.002862	-0.001824
1.2440	648.010	22.927	48.187	31.563	-0.715	35.296	1233.644	-0.001605	-0.003373	-0.002209
1.2480	728.141	28.416	57.644	38.202	-0.719	35.294	1386.194	-0.001989	-0.004035	-0.002674
1.2520	805.207	34.004	66.214	44.483	-0.713	35.305	1532.907	-0.002380	-0.004635	-0.003114
1.2560	848.519	36.892	71.305	48.694	-0.708	35.313	1615.362	-0.002582	-0.004991	-0.003409
1.2600	921.707	41.728	78.915	54.921	-0.700	35.307	1754.694	-0.002921	-0.005524	-0.003844
1.2640	1012.208	48.371	88.697	62.354	-0.709	35.297	1926.985	-0.003386	-0.006209	-0.004365
1.2680	1083.323	53.748	97.090	68.219	-0.710	35.294	2062.368	-0.003762	-0.006796	-0.004775
1.2720	1144.293	58.568	103.380	73.930	-0.701	35.304	2178.440	-0.004100	-0.007237	-0.005175
1.2760	1197.960	62.878	109.587	78.710	-0.715	35.312	2280.607	-0.004401	-0.007671	-0.005510
1.2800	1241.226	66.508	114.237	82.185	-0.704	35.307	2362.976	-0.004656	-0.007997	-0.005753
1.2840	1293.796	70.454	119.494	86.813	-0.703	35.296	2463.055	-0.004932	-0.008365	-0.006077
1.2880	1324.529	73.149	123.209	90.009	-0.711	35.294	2521.563	-0.005120	-0.008625	-0.006301
1.2920	1344.036	74.300	125.591	91.912	-0.708	35.304	2558.699	-0.005201	-0.008791	-0.006434
1.2960	1357.080	75.884	127.338	93.319	-0.711	35.313	2583.532	-0.005312	-0.008914	-0.006532
1.3000	1359.244	76.218	128.055	93.872	-0.695	35.307	2587.652	-0.005335	-0.008964	-0.006571
1.3040	1356.870	76.567	128.041	93.679	-0.702	35.297	2583.132	-0.005360	-0.008963	-0.006558
1.3080	1352.722	76.331	128.426	93.927	-0.718	35.295	2575.235	-0.005343	-0.008990	-0.006575
1.3120	1345.659	76.262	127.876	93.704	-0.707	35.305	2561.789	-0.005338	-0.008951	-0.006559
1.3160	1331.923	75.495	127.116	93.277	-0.716	35.313	2535.639	-0.005285	-0.008898	-0.006529
1.3200	1308.554	73.619	126.100	91.855	-0.704	35.307	2491.150	-0.005153	-0.008827	-0.006430
1.3240	1249.011	69.703	121.131	87.508	-0.716	35.296	2377.796	-0.004879	-0.008479	-0.006126
1.3280	1173.553	64.881	114.277	82.130	-0.711	35.294	2234.144	-0.004542	-0.007999	-0.005749
1.3320	1122.652	61.143	109.049	78.084	-0.704	35.304	2137.241	-0.004280	-0.007633	-0.005466
1.3360	1079.566	58.028	104.716	74.375	-0.703	35.312	2055.216	-0.004062	-0.007330	-0.005206
1.3400	1025.599	54.054	98.978	70.151	-0.709	35.307	1952.477	-0.003784	-0.006928	-0.004911
1.3440	945.527	48.510	90.803	63.648	-0.723	35.297	1800.041	-0.003396	-0.006356	-0.004455
1.3480	861.519	42.674	82.423	56.603	-0.720	35.295	1640.110	-0.002987	-0.005770	-0.003962
1.3520	795.544	38.157	74.857	50.890	-0.715	35.304	1514.511	-0.002671	-0.005240	-0.003562
1.3560	728.758	33.170	67.715	45.151	-0.718	35.313	1387.367	-0.002322	-0.004740	-0.003161
1.3600	663.489	28.664	60.021	39.591	-0.710	35.308	1263.113	-0.002006	-0.004201	-0.002771
1.3640	604.052	24.108	52.716	34.451	-0.706	35.297	1149.960	-0.001688	-0.003690	-0.002412
1.3680	538.768	19.883	44.901	28.823	-0.709	35.294	1025.677	-0.001392	-0.003143	-0.002018
1.3720	473.590	15.060	36.617	22.972	-0.711	35.305	901.594	-0.001054	-0.002563	-0.001608
1.3760	423.020	11.589	30.218	18.400	-0.718	35.313	805.321	-0.000811	-0.002115	-0.001288
1.3800	387.087	9.001	25.182	14.859	-0.715	35.308	736.914	-0.000630	-0.001763	-0.001040
1.3840	345.473	6.111	19.898	10.699	-0.721	35.297	657.692	-0.000428	-0.001393	-0.000749
1.3880	309.796	4.014	14.876	7.408	-0.723	35.294	589.771	-0.000281	-0.001041	-0.000519
1.3920	281.151	1.984	10.624	4.464	-0.714	35.304	535.240	-0.000139	-0.000744	-0.000312
1.3960	261.494	0.694	7.265	2.211	-0.716	35.312	497.818	-0.000049	-0.000509	-0.000155
1.4000	257.076	-0.391	6.137	1.600	-0.705	35.307	489.407	0.000027	-0.000430	-0.000112
1.4040	257.482	-0.628	5.781	0.989	-0.711	35.296	490.179	0.000044	-0.000405	-0.000069
1.4080	259.285	-0.112	5.948	1.211	-0.711	35.294	493.612	0.000008	-0.000416	-0.000085
1.4120	264.004	-0.280	5.932	1.251	-0.713	35.304	502.596	0.000020	-0.000415	-0.000088
1.4160	272.360	0.292	6.249	1.558	-0.724	35.312	518.503	-0.000020	-0.000437	-0.000109
1.4200	291.822	0.833	7.333	2.405	-0.719	35.307	555.553	-0.000058	-0.000513	-0.000168
1.4240	353.002	4.028	13.747	7.187	-0.716	35.296	672.026	-0.000282	-0.000962	-0.000503
1.4280	427.573	8.210	22.525	13.219	-0.724	35.294	813.990	-0.000575	-0.001577	-0.000925
1.4320	490.452	12.365	29.889	18.471	-0.723	35.304	933.695	-0.000866	-0.002092	-0.001293
1.4360	549.709	16.409	36.905	23.459	-0.713	35.313	1046.505	-0.001149	-0.002583	-0.001642
1.4400	623.303	21.080	45.381	29.755	-0.711	35.308	1186.609	-0.001476	-0.003177	-0.002083
1.4440	695.485	25.789	53.830	35.326	-0.715	35.296	1324.024	-0.001805	-0.003768	-0.002473
1.4480	754.441	30.207	60.765	40.913	-0.709	35.294	1436.262	-0.002114	-0.004254	-0.002864
1.4520	816.854	34.336	67.714	45.970	-0.707	35.304	1555.080	-0.002403	-0.004740	-0.003218
1.4560	891.861	39.503	76.012	52.084	-0.706	35.313	1697.874	-0.002765	-0.005321	-0.003646
1.4600	959.849	44.317	83.991	57.853	-0.701	35.307	1827.307	-0.003102	-0.005879	-0.004050
1.4640	1020.654	49.164	90.391	63.243	-0.712	35.296	1943.064	-0.003442	-0.006327	-0.004427
1.4680	1087.230	54.640	97.738	69.219	-0.718	35.294	2069.807	-0.003825	-0.006842	-0.004845
1.4720	1150.800	59.072	104.331	74.612	-0.708	35.304	2190.828	-0.004135	-0.007303	-0.005223
1.4760	1203.670	63.170	110.220	79.363	-0.701	35.313	2291.479	-0.004422	-0.007715	-0.005555
1.4800	1245.269	66.687	114.705	83.171	-0.688	35.307	2370.672	-0.004668	-0.008029	-0.005822
1.4840	1273.312	68.743	118.007	85.577	-0.694	35.296	2424.059	-0.004812	-0.008260	-0.005990
1.4880	1305.788	71.580	121.886	88.897	-0.697	35.294	2485.886	-0.005011	-0.008532	-0.006223
1.4920	1341.391	74.494	125.643	91.508	-0.689	35.304	2553.663	-0.005215	-0.008795	-0.006406
1.4960	1355.142	76.191	127.488	93.110	-0.703	35.312	2579.842	-0.005333	-0.008924	-0.006518
1.5000	1359.154	76.790	128.164	93.859	-0.704	35.308	2587.481	-0.005375	-0.008972	-0.006570
1.5040	1361.063	76.887	128.331	94.538	-0.703	35.297	2591.114	-0.005382	-0.008983	-0.006618
1.5080	1356.855	76.720	128.589	94.745	-0.701	35.294	2583.103	-0.005370	-0.009001	-0.006632
1.5120	1347.492	76.358	128.399	94.249	-0.702	35.304	2565.279	-0.005345	-0.008988	-0.006597
1.5160	1334.989	75.759	128.055	93.555	-0.707	35.313	2541.475	-0.005303	-0.008964	-0.006549
1.5200	1311.905	74.341	126.816	92.148	-0.696	35.308	2497.530	-0.005204	-0.008877	-0.006450
1.5240	1240.775	69.549	120.690	87.065	-0.704	35.296	2362.118	-0.004868	-0.008448	-0.006095
1.5280	1160.043	64.142	113.068	81.477	-0.714	35.294	2208.424	-0.004490	-0.007915	-0.005703
1.5320	1118.564	60.683	108.732	77.752	-0.704	35.304	2129.459	-0.004248	-0.007611	-0.005443
1.5360	1066.912	57.000	103.297	73.402	-0.702	35.312	2031.126	-0.003990	-0.007231	-0.005138
1.5400	987.577	51.317	95.606	67.468	-0.693	35.308	1880.093	-0.003592	-0.006692	-0.004723
1.5440	926.486	47.051	89.358	61.896	-0.702	35.297	1763.792	-0.003294	-0.006255	-0.004333
1.5480	869.574	43.299	83.361	57.618	-0.706	35.294	1655.445	-0.003031	-0.005835	-0.004033
1.5520	801.029	38.547	75.792	51.543	-0.699	35.304	1524.954	-0.002698	-0.005305	-0.003608
1.5560	725.947	33.126	67.151	45.414	-0.703	35.312	1382.017	-0.002319	-0.004701	-0.003179
1.5600	658.440	28.234	59.156	39.507	-0.702	35.307	1253.500	-0.001976	-0.004141	-0.002765
1.5640	599.017	23.649	52.029	34.090	-0.704	35.296	1140.375	-0.001655	-0.003642	-0.002386
1.5680	538.483	19.675	45.052	29.185	-0.714	35.294	1025.133	-0.001377	-0.003154	-0.002043
1.5720	481.165	15.646	37.897	23.847	-0.703	35.304	916.014	-0.001095	-0.002653	-0.001669
1.5760	430.774	12.046	31.456	19.359	-0.711	35.312	820.084	-0.000843	-0.002202	-0.001355
1.5800	379.377	8.904	24.838	14.511	-0.704	35.307	722.237	-0.000623	-0.001739	-0.001016
1.5840	335.509	5.777	18.742	10.022	-0.710	35.297	638.723	-0.000404	-0.001312	-0.000702
1.5880	304.521	3.861	14.242	7.200	-0.723	35.295	579.729	-0.000270	-0.000997	-0.000504
1.5920	282.564	1.942	10.733	4.797	-0.715	35.304	537.930	-0.000136	-0.000751	-0.000336
1.5960	269.009	0.834	8.641	3.074	-0.715	35.312	512.123	-0.000058	-0.000605	-0.000215
1.6000	263.553	0.499	7.460	2.253	-0.707	35.308	501.738	-0.000035	-0.000522	-0.000158
1.6040	255.513	-0.237	6.042	1.266	-0.711	35.296	486.431	0.000017	-0.000423	-0.000089
1.6080	252.658	-0.462	5.628	0.876	-0.715	35.294	480.995	0.000032	-0.000394	-0.000061
1.6120	257.527	-0.445	5.093	0.850	-0.710	35.304	490.265	0.000031	-0.000356	-0.000059
1.6160	266.183	-0.267	5.588	1.141	-0.719	35.313	506.744	0.000019	-0.000391	-0.000080
1.6200	286.967	0.541	6.798	2.350	-0.714	35.307	546.312	-0.000038	-0.000476	-0.000165
1.6240	344.045	3.513	13.114	6.394	-0.718	35.296	654.974	-0.000246	-0.000918	-0.000448
1.6280	410.531	7.738	20.847	12.328	-0.731	35.294	781.546	-0.000542	-0.001459	-0.000863
1.6320	466.782	11.143	27.468	16.817	-0.722	35.304	888.634	-0.000780	-0.001923	-0.001177
1.6360	523.394	14.866	33.959	21.721	-0.710	35.313	996.408	-0.001041	-0.002377	-0.001520
1.6400	593.276	19.273	41.941	26.891	-0.705	35.308	1129.446	-0.001349	-0.002936	-0.001882
1.6440	666.074	23.664	50.418	33.242	-0.704	35.296	1268.034	-0.001656	-0.003529	-0.002327
1.6480	729.780	28.373	58.040	38.772	-0.728	35.294	1389.313	-0.001986	-0.004063	-0.002714
1.6520	793.816	32.723	64.950	44.013	-0.714	35.304	1511.221	-0.002291	-0.004547	-0.003081
1.6560	865.366	37.642	73.205	50.141	-0.715	35.312	1647.434	-0.002635	-0.005124	-0.003510
1.6600	942.326	43.353	81.832	56.658	-0.712	35.307	1793.947	-0.003035	-0.005728	-0.003966
1.6640	1009.263	48.357	89.318	62.398	-0.714	35.296	1921.377	-0.003385	-0.006252	-0.004368
1.6680	1066.055	52.871	95.676	67.788	-0.723	35.294	2029.495	-0.003701	-0.006697	-0.004745
1.6720	1123.238	56.735	101.385	72.430	-0.714	35.303	2138.357	-0.003971	-0.007097	-0.005070
1.6760	1183.863	61.671	107.743	77.684	-0.712	35.312	2253.771	-0.004317	-0.007542	-0.005438
1.6800	1235.786	65.617	113.630	82.449	-0.711	35.307	2352.619	-0.004593	-0.007954	-0.005771
1.6840	1265.257	68.535	117.320	84.866	-0.703	35.296	2408.724	-0.004797	-0.008212	-0.005941
1.6880	1298.920	71.510	121.215	88.230	-0.710	35.294	2472.811	-0.005006	-0.008485	-0.006176
1.6920	1336.266	74.021	124.954	91.136	-0.708	35.303	2543.907	-0.005181	-0.008747	-0.006379
1.6960	1343.825	74.953	125.866	92.443	-0.714	35.312	2558.298	-0.005247	-0.008811	-0.006471
1.7000	1347.898	75.287	126.814	92.959	-0.703	35.307	2566.051	-0.005270	-0.008877	-0.006507
1.7040	1355.863	76.414	127.751	93.929	-0.711	35.297	2581.215	-0.005349	-0.008943	-0.006575
1.7080	1358.268	76.749	128.576	94.704	-0.715	35.294	2585.793	-0.005372	-0.009000	-0.006629
1.7120	1351.715	76.845	128.741	94.442	-0.702	35.304	2573.318	-0.005379	-0.009012	-0.006611
1.7160	1338.610	76.262	128.043	93.942	-0.712	35.313	2548.370	-0.005338	-0.008963	-0.006576
1.7200	1309.786	74.231	126.528	92.037	-0.705	35.307	2493.496	-0.005196	-0.008857	-0.006443
1.7240	1246.456	69.857	120.926	87.716	-0.705	35.297	2372.932	-0.004890	-0.008465	-0.006140
1.7280	1185.486	65.437	115.518	83.325	-0.712	35.294	2256.861	-0.004581	-0.008086	-0.005833
1.7320	1137.651	62.128	110.728	79.226	-0.710	35.304	2165.794	-0.004349	-0.007751	-0.005546
1.7360	1076.440	57.819	104.756	74.069	-0.710	35.313	2049.265	-0.004047	-0.007333	-0.005185
1.7400	1014.087	53.554	98.454	69.318	-0.709	35.308	1930.561	-0.003749	-0.006892	-0.004852
1.7440	959.399	49.316	92.953	64.746	-0.711	35.297	1826.448	-0.003452	-0.006507	-0.004532
1.7480	895.257	45.231	86.030	59.672	-0.714	35.294	1704.340	-0.003166	-0.006022	-0.004177
1.7520	826.998	40.116	78.586	53.822	-0.711	35.304	1574.392	-0.002808	-0.005501	-0.003768
1.7560	753.585	34.933	70.411	47.834	-0.707	35.313	1434.631	-0.002445	-0.004929	-0.003348
1.7600	673.769	29.206	61.303	40.955	-0.696	35.308	1282.682	-0.002044	-0.004291	-0.002867
1.7640	601.587	24.067	52.868	34.479	-0.701	35.297	1145.267	-0.001685	-0.003701	-0.002414
1.7680	556.066	21.218	47.404	30.464	-0.712	35.294	1058.607	-0.001485	-0.003318	-0.002132
1.7720	513.896	18.229	41.831	26.407	-0.699	35.304	978.327	-0.001276	-0.002928	-0.001849
1.7760	448.403	13.796	33.852	21.166	-0.704	35.312	853.643	-0.000966	-0.002370	-0.001482
1.7800	387.177	9.197	25.774	15.427	-0.704	35.307	737.085	-0.000644	-0.001804	-0.001080
1.7840	350.057	6.640	20.725	11.647	-0.698	35.296	666.418	-0.000465	-0.001451	-0.000815
1.7880	322.254	4.764	16.981	9.008	-0.714	35.293	613.489	-0.000333	-0.001189	-0.000631
1.7920	297.743	2.818	13.540	6.462	-0.720	35.304	566.826	-0.000197	-0.000948	-0.000452
1.7960	271.864	1.708	9.562	3.756	-0.727	35.312	517.559	-0.000120	-0.000669	-0.000263
1.8000	248.825	-0.223	6.317	1.043	-0.714	35.307	473.700	0.000016	-0.000442	-0.000073
1.8040	242.333	-0.571	4.418	-0.054	-0.718	35.296	461.340	0.000040	-0.000309	0.000004
1.8080	248.314	-0.653	4.265	0.473	-0.717	35.294	472.727	0.000046	-0.000299	-0.000033
1.8120	258.489	-0.683	4.720	0.585	-0.697	35.303	492.096	0.000048	-0.000330	-0.000041
1.8160	273.066	-0.014	5.879	1.516	-0.702	35.312	519.848	0.000001	-0.000412	-0.000106
1.8200	305.422	1.611	9.178	3.700	-0.696	35.308	581.446	-0.000113	-0.000642	-0.000259
1.8240	362.966	5.097	15.660	8.117	-0.695	35.296	690.994	-0.000357	-0.001096	-0.000568
1.8280	419.157	8.529	22.224	13.260	-0.712	35.293	797.968	-0.000597	-0.001556	-0.000928
1.8320	470.374	11.686	27.947	17.148	-0.709	35.304	895.472	-0.000818	-0.001956	-0.001200
1.8360	533.929	15.702	35.034	22.208	-0.703	35.313	1016.464	-0.001099	-0.002452	-0.001555
1.8400	611.115	20.536	43.949	28.823	-0.708	35.307	1163.406	-0.001437	-0.003076	-0.002018
1.8440	675.121	24.663	51.987	34.534	-0.715	35.296	1285.257	-0.001726	-0.003639	-0.002417
1.8480	731.553	28.886	58.700	39.218	-0.711	35.293	1392.689	-0.002022	-0.004109	-0.002745
1.8520	800.744	33.362	66.337	44.875	-0.697	35.304	1524.410	-0.002335	-0.004644	-0.003141
1.8560	875.720	39.075	74.760	51.224	-0.702	35.312	1667.147	-0.002735	-0.005233	-0.003586
1.8600	945.587	43.953	82.273	57.116	-0.701	35.308	1800.156	-0.003077	-0.005759	-0.003998
1.8640	1011.217	48.315	89.455	62.840	-0.707	35.297	1925.097	-0.003382	-0.006262	-0.004399
1.8680	1074.817	53.331	96.693	68.539	-0.703	35.294	2046.175	-0.003733	-0.006769	-0.004798
1.8720	1134.014	57.736	102.735	73.652	-0.698	35.304	2158.871	-0.004042	-0.007191	-0.005156
1.8760	1193.541	62.336	109.669	78.626	-0.704	35.312	2272.196	-0.004364	-0.007677	-0.005504
1.8800	1237.319	66.007	114.319	82.336	-0.700	35.308	2355.537	-0.004620	-0.008002	-0.005764
1.8840	1270.276	68.952	117.898	85.310	-0.708	35.297	2418.280	-0.004827	-0.008253	-0.005972
1.8880	1297.763	71.274	121.104	88.398	-0.715	35.294	2470.608	-0.004989	-0.008477	-0.006188
1.8920	1328.436	73.521	124.007	90.786	-0.713	35.304	2529.001	-0.005147	-0.008680	-0.006355
1.8960	1347.462	75.147	126.484	92.902	-0.718	35.313	2565.222	-0.005260	-0.008854	-0.006503
1.9000	1354.616	76.220	127.612	93.580	-0.708	35.308	2578.840	-0.005335	-0.008933	-0.006551
1.9040	1357.276	76.595	128.520	94.067	-0.708	35.297	2583.904	-0.005362	-0.008996	-0.006585
1.9080	1353.879	76.860	128.659	94.497	-0.703	35.294	2577.438	-0.005380	-0.009006	-0.006615
1.9120	1344.742	76.345	128.301	94.303	-0.695	35.304	2560.043	-0.005344	-0.008981	-0.006601
1.9160	1329.804	75.552	127.310	93.469	-0.704	35.312	2531.605	-0.005289	-0.008912	-0.006543
1.9200	1299.341	73.344	125.574	91.593	-0.702	35.308	2473.612	-0.005134	-0.008790	-0.006411
1.9240	1227.115	68.464	119.369	86.090	-0.718	35.297	2336.111	-0.004793	-0.008356	-0.006026
1.9280	1173.689	64.866	114.430	82.394	-0.720	35.294	2234.402	-0.004541	-0.008010	-0.005768
1.9320	1137.155	62.557	110.756	79.322	-0.718	35.303	2164.850	-0.004379	-0.007753	-0.005553
1.9360	1077.627	58.097	104.950	74.459	-0.715	35.312	2051.525	-0.004067	-0.007347	-0.005212
1.9400	986.735	51.872	95.839	67.245	-0.706	35.308	1878.490	-0.003631	-0.006709	-0.004707
1.9440	910.165	46.396	87.654	61.048	-0.715	35.297	1732.721	-0.003248	-0.006136	-0.004273
1.9480	855.913	42.562	81.776	56.492	-0.718	35.294	1629.438	-0.002979	-0.005724	-0.003954
1.9520	787.068	37.353	74.290	50.543	-0.706	35.303	1498.375	-0.002615	-0.005200	-0.003538
1.9560	717.426	32.392	66.382	44.817	-0.709	35.312	1365.795	-0.002267	-0.004647	-0.003137
1.9600	661.265	28.569	59.760	39.898	-0.711	35.307	1258.879	-0.002000	-0.004183	-0.002793
1.9640	612.468	24.775	53.968	35.576	-0.713	35.297	1165.981	-0.001734	-0.003778	-0.002490
1.9680	537.401	20.092	45.383	29.143	-0.716	35.294	1023.073	-0.001406	-0.003177	-0.002040
1.9720	469.773	15.019	36.520	23.111	-0.713	35.303	894.327	-0.001051	-0.002556	-0.001618
1.9760	430.429	12.324	31.029	19.501	-0.720	35.312	819.426	-0.000863	-0.002172	-0.001365
1.9800	391.625	9.544	26.132	15.719	-0.701	35.307	745.554	-0.000668	-0.001829	-0.001100
1.9840	352.506	6.708	21.136	11.952	-0.708	35.296	671.082	-0.000470	-0.001480	-0.000837
1.9880	328.160	5.418	17.929	9.618	-0.714	35.293	624.733	-0.000379	-0.001255	-0.000673
1.9920	305.843	3.957	14.148	7.046	-0.696	35.303	582.247	-0.000277	-0.000990	-0.000493
1.9960	283.496	2.220	10.981	4.659	-0.695	35.312	539.703	-0.000155	-0.000769	-0.000326
