# Supplementary material for: Evaluation of a Cold-Mixed High-Performance Polyurethane Mixture
Source: Hindawi journal article supplement (doi:10.1155/2019/1507971), 2019-11-07
Supplement: f1 [file 1507971.f1.zip › 1507971.f1/dynamic modulus data/PUM/specimen1/temp35/zhs-1-35_10Hz.csv]

Test Information
****************
Project name	zhs
Operator name	1
Target test temperature	35
Target confining stress	0
Average dynamic strain range from 75 to 125 micro-strain
Contact stress	5
Initial modulus	1000
Axial gauge length	70
Comments
Specimen information
********************
Identification	zhs-1-35
Dimensions	Point 1	Point 2	Point 3	Point 4	Point 5	Point 6	Average	Std Dev.
Diameter (mm)	49.2	49.2	49.3				49.23	0.058
Height (mm)	101.3	101.2	101.3				101.27	0.058
Cross-sectional area (mm�)	1903.7
Conditioning time
Properties/Comments
Test Data	10Hz
*********
Test date and time	Tue	Apr 2	2019	1:19 PM
Dynamic modulus (MPa)	11499
Phase angle (Degrees)	4.19
Average temperature (�C)	35.3
Average confining pressure (kPa)	-0.7
Average micro-strain	102
Load drift (%)	0.3
Load standard error (%)	3.7
Average deformation drift (%)	-3.6
Average deformation standard error (%)	4.0
Deformation uniformity (%)	19.9
Phase uniformity (Degrees)	0.5
Conditioning Cycles
Time (sec)	Axial stress (kPa)	Axial micro-strain #1	Axial micro-strain #2	Axial micro-strain #3	Confining pressure (kPa)	Temperature (�C)	Load (N)	Displacement #1 (mm)	Displacement #2 (mm)	Displacement #3 (mm)
0.0000	454.384	6.694	20.736	11.811	-0.700	35.302	865.030	-0.000469	-0.001451	-0.000827
0.0020	449.590	6.805	20.736	11.688	-0.706	35.303	855.904	-0.000476	-0.001452	-0.000818
0.0040	421.291	5.123	18.068	9.660	-0.695	35.306	802.031	-0.000359	-0.001265	-0.000676
0.0060	344.526	0.761	9.673	3.754	-0.694	35.311	655.890	-0.000053	-0.000677	-0.000263
0.0080	262.261	-4.130	-0.632	-3.166	-0.691	35.317	499.277	0.000289	0.000044	0.000222
0.0100	227.575	-6.033	-5.805	-6.722	-0.692	35.321	433.245	0.000422	0.000406	0.000471
0.0120	231.483	-6.087	-6.219	-6.472	-0.702	35.320	440.683	0.000426	0.000435	0.000453
0.0140	253.259	-5.351	-4.773	-5.752	-0.695	35.317	482.140	0.000375	0.000334	0.000403
0.0160	297.292	-2.851	-0.288	-2.639	-0.694	35.312	565.968	0.000200	0.000020	0.000185
0.0180	360.351	0.706	7.184	2.378	-0.696	35.306	686.016	-0.000049	-0.000503	-0.000166
0.0200	416.708	3.804	13.844	6.923	-0.700	35.302	793.304	-0.000266	-0.000969	-0.000485
0.0220	460.966	6.737	19.182	10.951	-0.705	35.302	877.562	-0.000472	-0.001343	-0.000767
0.0240	505.105	9.435	24.053	14.412	-0.696	35.307	961.590	-0.000660	-0.001684	-0.001009
0.0260	557.554	12.491	29.763	18.595	-0.696	35.311	1061.440	-0.000874	-0.002083	-0.001302
0.0280	620.673	16.480	36.754	23.473	-0.704	35.317	1181.602	-0.001154	-0.002573	-0.001643
0.0300	691.547	20.815	44.805	29.240	-0.704	35.322	1316.528	-0.001457	-0.003136	-0.002047
0.0320	762.045	25.833	52.895	35.230	-0.706	35.320	1450.739	-0.001808	-0.003703	-0.002466
0.0340	823.271	29.860	59.816	40.274	-0.697	35.317	1567.297	-0.002090	-0.004187	-0.002819
0.0360	870.851	33.320	65.349	44.302	-0.698	35.312	1657.877	-0.002332	-0.004574	-0.003101
0.0380	904.455	35.808	69.640	47.236	-0.696	35.306	1721.849	-0.002507	-0.004875	-0.003307
0.0400	931.401	37.657	72.971	49.724	-0.699	35.302	1773.148	-0.002636	-0.005108	-0.003481
0.0420	962.885	40.144	76.877	52.613	-0.710	35.302	1833.086	-0.002810	-0.005381	-0.003683
0.0440	1005.942	43.367	81.432	56.269	-0.707	35.307	1915.054	-0.003036	-0.005700	-0.003939
0.0460	1052.845	46.813	86.676	60.299	-0.710	35.311	2004.347	-0.003277	-0.006067	-0.004221
0.0480	1083.323	49.023	90.158	62.896	-0.710	35.318	2062.368	-0.003432	-0.006311	-0.004403
0.0500	1090.597	49.956	91.189	63.939	-0.704	35.321	2076.216	-0.003497	-0.006383	-0.004476
0.0520	1086.824	50.277	91.478	64.411	-0.705	35.320	2069.035	-0.003519	-0.006403	-0.004509
0.0540	1084.420	50.167	91.436	64.147	-0.698	35.317	2064.457	-0.003512	-0.006401	-0.004490
0.0560	1085.502	50.305	91.684	64.314	-0.696	35.312	2066.517	-0.003521	-0.006418	-0.004502
0.0580	1085.712	50.388	91.889	64.440	-0.699	35.306	2066.917	-0.003527	-0.006432	-0.004511
0.0600	1081.069	50.430	92.041	64.427	-0.698	35.302	2058.077	-0.003530	-0.006443	-0.004510
0.0620	1069.602	50.067	91.726	63.830	-0.708	35.302	2036.247	-0.003505	-0.006421	-0.004468
0.0640	1050.997	48.578	90.694	62.730	-0.704	35.307	2000.828	-0.003400	-0.006349	-0.004391
0.0660	1018.535	46.507	88.326	60.827	-0.699	35.311	1939.030	-0.003255	-0.006183	-0.004258
0.0680	964.854	43.104	83.373	57.090	-0.704	35.317	1836.834	-0.003017	-0.005836	-0.003996
0.0700	899.540	38.670	76.838	51.989	-0.706	35.321	1712.494	-0.002707	-0.005379	-0.003639
0.0720	839.607	35.001	70.798	47.416	-0.715	35.319	1598.396	-0.002450	-0.004956	-0.003319
0.0740	786.767	31.152	64.962	43.164	-0.700	35.317	1497.803	-0.002181	-0.004547	-0.003021
0.0760	736.437	27.735	59.569	39.010	-0.698	35.312	1401.987	-0.001941	-0.004170	-0.002731
0.0780	685.821	24.635	53.791	34.772	-0.703	35.306	1305.628	-0.001724	-0.003765	-0.002434
0.0800	633.207	21.258	47.899	30.255	-0.694	35.302	1205.463	-0.001488	-0.003353	-0.002118
0.0820	580.352	17.924	41.871	26.309	-0.701	35.302	1104.841	-0.001255	-0.002931	-0.001842
0.0840	532.261	14.311	35.682	22.055	-0.693	35.307	1013.288	-0.001002	-0.002498	-0.001544
0.0860	492.571	11.419	30.714	18.567	-0.691	35.311	937.729	-0.000799	-0.002150	-0.001300
0.0880	451.919	8.517	25.994	15.148	-0.694	35.317	860.338	-0.000596	-0.001820	-0.001060
0.0900	405.992	5.697	20.449	11.065	-0.695	35.322	772.905	-0.000399	-0.001431	-0.000775
0.0920	367.129	3.443	15.673	7.756	-0.701	35.320	698.919	-0.000241	-0.001097	-0.000543
0.0940	338.605	1.401	11.516	4.990	-0.692	35.317	644.617	-0.000098	-0.000806	-0.000349
0.0960	315.972	0.083	8.408	2.710	-0.690	35.312	601.530	-0.000006	-0.000589	-0.000190
0.0980	294.121	-1.183	5.519	0.362	-0.690	35.306	559.931	0.000083	-0.000386	-0.000025
0.1000	269.219	-2.755	1.954	-1.957	-0.688	35.302	512.524	0.000193	-0.000137	0.000137
0.1020	243.265	-4.116	-1.459	-4.085	-0.694	35.303	463.114	0.000288	0.000102	0.000286
0.1040	222.886	-5.615	-4.761	-6.084	-0.694	35.307	424.318	0.000393	0.000333	0.000426
0.1060	212.336	-6.006	-6.575	-7.640	-0.691	35.311	404.234	0.000420	0.000460	0.000535
0.1080	212.006	-6.282	-7.141	-7.932	-0.690	35.318	403.605	0.000440	0.000500	0.000555
0.1100	217.431	-6.184	-7.279	-7.820	-0.695	35.322	413.933	0.000433	0.000510	0.000547
0.1120	225.411	-5.851	-6.700	-7.084	-0.702	35.320	429.125	0.000410	0.000469	0.000496
0.1140	237.825	-5.697	-5.861	-6.598	-0.688	35.317	452.757	0.000399	0.000410	0.000462
0.1160	262.772	-4.491	-3.770	-5.044	-0.688	35.312	500.250	0.000314	0.000264	0.000353
0.1180	317.385	-1.781	2.159	-1.221	-0.697	35.307	604.219	0.000125	-0.000151	0.000085
0.1200	403.077	2.917	12.232	5.840	-0.695	35.303	767.355	-0.000204	-0.000856	-0.000409
0.1220	492.075	8.420	22.772	13.579	-0.700	35.302	936.785	-0.000589	-0.001594	-0.000951
0.1240	557.419	12.726	30.438	18.889	-0.700	35.306	1061.182	-0.000891	-0.002131	-0.001322
0.1260	598.551	15.547	35.612	22.376	-0.704	35.311	1139.488	-0.001088	-0.002493	-0.001566
0.1280	634.920	17.992	39.961	25.501	-0.698	35.317	1208.725	-0.001259	-0.002797	-0.001785
0.1300	682.440	20.814	45.259	29.296	-0.699	35.321	1299.191	-0.001457	-0.003168	-0.002051
0.1320	743.846	25.289	52.137	34.813	-0.711	35.319	1416.092	-0.001770	-0.003650	-0.002437
0.1340	810.121	29.624	59.431	40.024	-0.695	35.317	1542.263	-0.002074	-0.004160	-0.002802
0.1360	868.281	33.655	66.132	44.902	-0.698	35.312	1652.985	-0.002356	-0.004629	-0.003143
0.1380	915.350	37.087	71.553	48.849	-0.703	35.306	1742.592	-0.002596	-0.005009	-0.003419
0.1400	950.487	39.643	75.599	51.890	-0.700	35.302	1809.483	-0.002775	-0.005292	-0.003632
0.1420	971.872	41.394	78.447	54.060	-0.704	35.302	1850.195	-0.002898	-0.005491	-0.003784
0.1440	987.261	42.297	80.305	55.477	-0.700	35.307	1879.492	-0.002961	-0.005621	-0.003883
0.1460	1009.563	44.190	82.933	57.561	-0.698	35.311	1921.949	-0.003093	-0.005805	-0.004029
0.1480	1038.718	46.383	86.249	59.869	-0.698	35.317	1977.453	-0.003247	-0.006037	-0.004191
0.1500	1070.023	48.608	89.524	62.730	-0.693	35.321	2037.048	-0.003403	-0.006267	-0.004391
0.1520	1096.848	50.929	92.757	65.123	-0.703	35.320	2088.118	-0.003565	-0.006493	-0.004559
0.1540	1111.711	52.203	94.617	66.441	-0.695	35.318	2116.413	-0.003654	-0.006623	-0.004651
0.1560	1115.965	53.039	95.483	67.108	-0.698	35.312	2124.510	-0.003713	-0.006684	-0.004698
0.1580	1111.441	52.818	95.401	67.260	-0.700	35.306	2115.898	-0.003697	-0.006678	-0.004708
0.1600	1100.470	52.316	95.167	66.425	-0.696	35.302	2095.013	-0.003662	-0.006662	-0.004650
0.1620	1082.842	51.691	94.547	65.828	-0.707	35.302	2061.453	-0.003618	-0.006618	-0.004608
0.1640	1054.964	49.803	92.261	64.022	-0.702	35.306	2008.381	-0.003486	-0.006458	-0.004482
0.1660	1010.104	46.717	88.175	61.145	-0.704	35.311	1922.979	-0.003270	-0.006172	-0.004280
0.1680	948.743	42.562	82.204	56.394	-0.708	35.317	1806.164	-0.002979	-0.005754	-0.003948
0.1700	884.347	38.155	75.639	51.181	-0.700	35.321	1683.569	-0.002671	-0.005295	-0.003583
0.1720	823.136	33.945	69.531	46.737	-0.706	35.320	1567.039	-0.002376	-0.004867	-0.003272
0.1740	770.672	30.375	63.766	42.569	-0.700	35.317	1467.161	-0.002126	-0.004464	-0.002980
0.1760	729.734	27.788	58.921	39.233	-0.703	35.312	1389.227	-0.001945	-0.004124	-0.002746
0.1780	689.894	24.898	54.669	35.799	-0.707	35.306	1313.381	-0.001743	-0.003827	-0.002506
0.1800	639.865	21.508	49.221	31.587	-0.698	35.302	1218.138	-0.001506	-0.003445	-0.002211
0.1820	585.717	18.354	43.111	27.322	-0.698	35.302	1115.055	-0.001285	-0.003018	-0.001913
0.1840	535.823	15.117	36.946	22.876	-0.698	35.306	1020.069	-0.001058	-0.002586	-0.001601
0.1860	488.889	12.032	31.387	18.930	-0.704	35.311	930.719	-0.000842	-0.002197	-0.001325
0.1880	441.475	8.794	25.457	14.650	-0.710	35.316	840.454	-0.000616	-0.001782	-0.001025
0.1900	395.397	5.794	19.761	10.716	-0.702	35.321	752.735	-0.000406	-0.001383	-0.000750
0.1920	355.482	3.443	14.710	7.142	-0.712	35.319	676.746	-0.000241	-0.001030	-0.000500
0.1940	326.417	1.248	10.541	4.350	-0.698	35.317	621.414	-0.000087	-0.000738	-0.000305
0.1960	307.226	-0.225	7.501	2.156	-0.703	35.312	584.879	0.000016	-0.000525	-0.000151
0.1980	292.693	-1.155	5.230	0.613	-0.710	35.306	557.213	0.000081	-0.000366	-0.000043
0.2000	278.552	-2.073	3.191	-0.843	-0.707	35.302	530.291	0.000145	-0.000223	0.000059
0.2020	264.530	-2.837	1.184	-1.900	-0.706	35.302	503.597	0.000199	-0.000083	0.000133
0.2040	252.177	-3.851	-0.743	-3.415	-0.702	35.307	480.080	0.000270	0.000052	0.000239
0.2060	244.422	-4.378	-1.898	-4.265	-0.703	35.311	465.317	0.000306	0.000133	0.000299
0.2080	243.100	-4.475	-2.463	-4.739	-0.703	35.317	462.799	0.000313	0.000172	0.000332
0.2100	245.669	-4.463	-2.531	-4.792	-0.695	35.321	467.691	0.000312	0.000177	0.000335
0.2120	250.313	-4.270	-2.285	-4.406	-0.707	35.319	476.532	0.000299	0.000160	0.000308
0.2140	257.918	-4.089	-2.078	-4.266	-0.709	35.317	491.009	0.000286	0.000145	0.000299
0.2160	271.744	-3.366	-1.227	-3.528	-0.711	35.312	517.330	0.000236	0.000086	0.000247
0.2180	302.822	-1.866	1.692	-1.290	-0.704	35.306	576.496	0.000131	-0.000118	0.000090
0.2200	363.222	1.178	8.313	3.309	-0.703	35.302	691.481	-0.000082	-0.000582	-0.000232
0.2220	441.189	5.791	17.520	9.813	-0.707	35.302	839.911	-0.000405	-0.001226	-0.000687
0.2240	517.638	10.349	26.187	15.943	-0.695	35.307	985.451	-0.000724	-0.001833	-0.001116
0.2260	580.487	14.227	33.423	21.307	-0.696	35.311	1105.099	-0.000996	-0.002340	-0.001491
0.2280	629.871	17.700	39.367	25.101	-0.695	35.317	1199.112	-0.001239	-0.002756	-0.001757
0.2300	677.105	20.661	45.052	28.908	-0.696	35.321	1289.034	-0.001446	-0.003154	-0.002024
0.2320	729.599	24.413	51.271	33.758	-0.704	35.319	1388.969	-0.001709	-0.003589	-0.002363
0.2340	789.547	28.403	57.889	38.662	-0.695	35.317	1503.096	-0.001988	-0.004052	-0.002706
0.2360	850.803	32.835	64.797	43.510	-0.694	35.312	1619.711	-0.002298	-0.004536	-0.003046
0.2380	904.981	36.854	71.113	48.247	-0.699	35.306	1722.851	-0.002580	-0.004978	-0.003377
0.2400	948.563	39.880	76.096	51.848	-0.703	35.302	1805.820	-0.002792	-0.005327	-0.003629
0.2420	982.482	42.616	79.989	55.156	-0.707	35.302	1870.394	-0.002983	-0.005599	-0.003861
0.2440	1011.021	44.451	83.195	57.702	-0.697	35.306	1924.725	-0.003112	-0.005824	-0.004039
0.2460	1037.892	46.563	86.416	60.133	-0.700	35.311	1975.880	-0.003259	-0.006049	-0.004209
0.2480	1066.551	48.815	89.387	62.897	-0.704	35.317	2030.439	-0.003417	-0.006257	-0.004403
0.2500	1095.105	50.680	92.567	64.954	-0.698	35.321	2084.799	-0.003548	-0.006480	-0.004547
0.2520	1113.906	52.261	94.906	66.952	-0.698	35.319	2120.590	-0.003658	-0.006643	-0.004687
0.2540	1118.008	53.121	95.606	67.886	-0.699	35.317	2128.401	-0.003718	-0.006692	-0.004752
0.2560	1113.590	52.996	95.784	67.845	-0.705	35.312	2119.989	-0.003710	-0.006705	-0.004749
0.2580	1106.376	52.593	95.742	67.537	-0.711	35.306	2106.256	-0.003681	-0.006702	-0.004728
0.2600	1097.810	52.024	95.236	67.022	-0.708	35.302	2089.949	-0.003642	-0.006667	-0.004692
0.2620	1086.013	51.787	94.907	66.801	-0.714	35.302	2067.490	-0.003625	-0.006643	-0.004676
0.2640	1065.559	50.609	93.610	65.442	-0.703	35.306	2028.551	-0.003543	-0.006553	-0.004581
0.2660	1027.222	48.036	90.376	62.800	-0.695	35.310	1955.566	-0.003363	-0.006326	-0.004396
0.2680	970.024	44.437	84.901	58.548	-0.699	35.317	1846.676	-0.003111	-0.005943	-0.004098
0.2700	907.355	40.102	78.433	53.684	-0.695	35.321	1727.371	-0.002807	-0.005490	-0.003758
0.2720	849.496	36.418	72.503	49.376	-0.704	35.320	1617.222	-0.002549	-0.005075	-0.003456
0.2740	798.309	32.887	66.752	45.110	-0.696	35.317	1519.775	-0.002302	-0.004673	-0.003158
0.2760	749.647	29.652	61.425	40.802	-0.698	35.312	1427.135	-0.002076	-0.004300	-0.002856
0.2780	698.175	25.873	56.033	36.591	-0.701	35.306	1329.145	-0.001811	-0.003922	-0.002561
0.2800	644.027	22.357	49.716	31.976	-0.692	35.302	1226.063	-0.001565	-0.003480	-0.002238
0.2820	590.767	18.715	43.676	27.655	-0.708	35.302	1124.668	-0.001310	-0.003057	-0.001936
0.2840	538.257	15.255	37.580	23.251	-0.696	35.306	1024.704	-0.001068	-0.002631	-0.001628
0.2860	485.087	11.906	31.332	18.844	-0.691	35.310	923.481	-0.000833	-0.002193	-0.001319
0.2880	432.172	8.098	24.880	14.426	-0.691	35.316	822.744	-0.000567	-0.001742	-0.001010
0.2900	384.457	5.292	18.962	10.078	-0.688	35.321	731.907	-0.000370	-0.001327	-0.000705
0.2920	346.330	3.084	14.131	6.478	-0.695	35.320	659.323	-0.000216	-0.000989	-0.000453
0.2940	317.265	1.069	9.963	3.615	-0.688	35.317	603.991	-0.000075	-0.000697	-0.000253
0.2960	293.790	-0.462	6.647	1.377	-0.691	35.312	559.301	0.000032	-0.000465	-0.000096
0.2980	272.751	-1.475	3.509	-0.858	-0.693	35.306	519.247	0.000103	-0.000246	0.000060
0.3000	253.394	-2.852	0.496	-2.984	-0.694	35.302	482.397	0.000200	-0.000035	0.000209
0.3020	237.269	-3.965	-2.050	-4.390	-0.705	35.302	451.698	0.000278	0.000143	0.000307
0.3040	227.139	-4.823	-3.822	-5.586	-0.692	35.306	432.415	0.000338	0.000268	0.000391
0.3060	223.953	-5.407	-4.868	-5.794	-0.696	35.311	426.350	0.000378	0.000341	0.000406
0.3080	225.336	-5.254	-5.253	-6.183	-0.706	35.317	428.982	0.000368	0.000368	0.000433
0.3100	229.844	-5.338	-4.965	-6.152	-0.707	35.321	437.565	0.000374	0.000348	0.000431
0.3120	237.148	-4.990	-4.237	-5.488	-0.707	35.320	451.469	0.000349	0.000297	0.000384
0.3140	248.570	-4.754	-3.522	-4.988	-0.694	35.317	473.213	0.000333	0.000247	0.000349
0.3160	273.262	-3.658	-1.364	-3.458	-0.690	35.312	520.220	0.000256	0.000095	0.000242
0.3180	324.478	-0.892	4.223	0.224	-0.702	35.307	617.723	0.000062	-0.000296	-0.000016
0.3200	394.917	3.179	12.396	5.950	-0.696	35.303	751.820	-0.000223	-0.000868	-0.000417
0.3220	466.437	7.543	20.901	12.262	-0.700	35.302	887.976	-0.000528	-0.001463	-0.000858
0.3240	528.820	11.475	28.001	17.194	-0.694	35.306	1006.737	-0.000803	-0.001960	-0.001204
0.3260	583.313	15.171	34.455	21.779	-0.698	35.310	1110.477	-0.001062	-0.002412	-0.001525
0.3280	635.596	18.354	40.496	26.001	-0.702	35.316	1210.012	-0.001285	-0.002835	-0.001820
0.3300	691.262	21.758	46.687	30.421	-0.701	35.321	1315.985	-0.001523	-0.003268	-0.002129
0.3320	749.031	26.109	53.501	35.354	-0.702	35.319	1425.962	-0.001828	-0.003745	-0.002475
0.3340	805.282	29.943	59.846	40.024	-0.694	35.317	1533.051	-0.002096	-0.004189	-0.002802
0.3360	857.461	33.292	65.844	44.457	-0.703	35.312	1632.385	-0.002330	-0.004609	-0.003112
0.3380	903.298	36.378	71.292	48.305	-0.707	35.306	1719.646	-0.002546	-0.004990	-0.003381
0.3400	942.041	39.160	75.627	51.389	-0.702	35.302	1793.404	-0.002741	-0.005294	-0.003597
0.3420	975.764	42.034	79.562	55.016	-0.706	35.301	1857.605	-0.002942	-0.005569	-0.003851
0.3440	1010.165	44.688	83.291	57.811	-0.695	35.305	1923.094	-0.003128	-0.005830	-0.004047
0.3460	1044.925	47.230	87.377	60.797	-0.691	35.310	1989.269	-0.003306	-0.006116	-0.004256
0.3480	1073.389	49.289	90.652	63.229	-0.694	35.316	2043.457	-0.003450	-0.006346	-0.004426
0.3500	1090.206	50.635	92.675	64.801	-0.690	35.320	2075.472	-0.003544	-0.006487	-0.004536
0.3520	1096.187	51.745	93.652	65.969	-0.699	35.319	2086.859	-0.003622	-0.006556	-0.004618
0.3540	1096.999	52.037	94.121	65.762	-0.685	35.316	2088.404	-0.003643	-0.006588	-0.004603
0.3560	1095.150	51.954	94.260	65.844	-0.688	35.311	2084.885	-0.003637	-0.006598	-0.004609
0.3580	1090.717	51.733	94.191	65.953	-0.690	35.306	2076.445	-0.003621	-0.006593	-0.004617
0.3600	1083.744	51.524	93.777	65.385	-0.695	35.302	2063.169	-0.003607	-0.006564	-0.004577
0.3620	1073.389	51.082	93.293	65.440	-0.706	35.302	2043.457	-0.003576	-0.006531	-0.004581
0.3640	1057.744	50.095	92.371	64.370	-0.695	35.306	2013.674	-0.003507	-0.006466	-0.004506
0.3660	1029.957	48.230	90.418	62.965	-0.694	35.310	1960.773	-0.003376	-0.006329	-0.004408
0.3680	980.348	45.020	86.194	59.521	-0.696	35.316	1866.331	-0.003151	-0.006034	-0.004166
0.3700	913.757	40.533	79.410	54.184	-0.700	35.321	1739.559	-0.002837	-0.005559	-0.003793
0.3720	846.220	36.239	72.723	49.209	-0.712	35.319	1610.985	-0.002537	-0.005091	-0.003445
0.3740	788.616	32.223	66.463	44.471	-0.699	35.317	1501.322	-0.002256	-0.004652	-0.003113
0.3760	739.698	29.014	61.027	40.483	-0.692	35.312	1408.195	-0.002031	-0.004272	-0.002834
0.3780	691.592	25.733	55.661	36.607	-0.696	35.306	1316.614	-0.001801	-0.003896	-0.002562
0.3800	640.300	21.967	49.757	31.796	-0.697	35.302	1218.967	-0.001538	-0.003483	-0.002226
0.3820	588.918	18.828	43.936	27.613	-0.712	35.302	1121.149	-0.001318	-0.003076	-0.001933
0.3840	537.762	15.548	37.760	23.501	-0.704	35.306	1023.760	-0.001088	-0.002643	-0.001645
0.3860	485.418	12.155	31.471	18.998	-0.703	35.310	924.110	-0.000851	-0.002203	-0.001330
0.3880	433.374	8.627	25.140	14.385	-0.695	35.316	825.033	-0.000604	-0.001760	-0.001007
0.3900	386.966	5.377	19.073	10.216	-0.690	35.321	736.685	-0.000376	-0.001335	-0.000715
0.3920	349.230	3.096	14.326	7.117	-0.699	35.319	664.845	-0.000217	-0.001003	-0.000498
0.3940	317.941	0.915	10.154	3.949	-0.692	35.316	605.278	-0.000064	-0.000711	-0.000276
0.3960	290.499	-0.586	6.330	1.310	-0.690	35.312	553.036	0.000041	-0.000443	-0.000092
0.3980	266.559	-2.170	3.028	-1.150	-0.695	35.306	507.460	0.000152	-0.000212	0.000080
0.4000	248.570	-3.434	0.069	-3.360	-0.697	35.302	473.213	0.000240	-0.000005	0.000235
0.4020	237.509	-3.892	-1.417	-4.223	-0.702	35.302	452.156	0.000272	0.000099	0.000296
0.4040	233.196	-4.587	-2.603	-4.892	-0.699	35.306	443.945	0.000321	0.000182	0.000342
0.4060	233.181	-4.656	-3.029	-5.060	-0.702	35.310	443.916	0.000326	0.000212	0.000354
0.4080	235.360	-4.546	-3.111	-5.267	-0.698	35.315	448.065	0.000318	0.000218	0.000369
0.4100	239.357	-4.464	-3.083	-5.433	-0.686	35.320	455.675	0.000312	0.000216	0.000380
0.4120	245.850	-4.381	-2.711	-4.725	-0.687	35.319	468.035	0.000307	0.000190	0.000331
0.4140	256.505	-4.422	-2.270	-4.349	-0.685	35.317	488.319	0.000310	0.000159	0.000304
0.4160	277.034	-3.394	-0.565	-3.263	-0.683	35.312	527.401	0.000238	0.000040	0.000228
0.4180	320.616	-0.837	4.170	0.183	-0.687	35.306	610.371	0.000059	-0.000292	-0.000013
0.4200	388.334	2.639	11.739	6.062	-0.687	35.302	739.288	-0.000185	-0.000822	-0.000424
0.4220	464.618	7.225	20.724	12.357	-0.696	35.302	884.514	-0.000506	-0.001451	-0.000865
0.4240	535.402	11.533	28.979	17.763	-0.694	35.306	1019.268	-0.000807	-0.002029	-0.001243
0.4260	593.006	15.326	35.764	22.529	-0.696	35.310	1128.931	-0.001073	-0.002503	-0.001577
0.4280	637.881	18.508	41.227	26.226	-0.698	35.316	1214.361	-0.001296	-0.002886	-0.001836
0.4300	680.291	21.190	46.194	29.686	-0.694	35.321	1295.099	-0.001483	-0.003234	-0.002078
0.4320	729.118	24.663	51.780	33.770	-0.698	35.319	1388.054	-0.001726	-0.003625	-0.002364
0.4340	785.054	28.333	58.055	38.454	-0.688	35.316	1494.541	-0.001983	-0.004064	-0.002692
0.4360	845.393	32.668	64.686	43.595	-0.684	35.312	1609.411	-0.002287	-0.004528	-0.003052
0.4380	904.485	36.780	71.278	48.416	-0.688	35.306	1721.907	-0.002575	-0.004989	-0.003389
0.4400	957.460	40.463	76.906	53.017	-0.694	35.302	1822.758	-0.002832	-0.005383	-0.003711
0.4420	1000.787	43.714	81.887	56.894	-0.695	35.302	1905.241	-0.003060	-0.005732	-0.003983
0.4440	1032.602	45.993	85.658	59.729	-0.698	35.306	1965.809	-0.003219	-0.005996	-0.004181
0.4460	1055.460	48.007	88.452	61.770	-0.696	35.310	2009.325	-0.003361	-0.006192	-0.004324
0.4480	1071.751	49.289	90.556	63.411	-0.696	35.316	2040.339	-0.003450	-0.006339	-0.004439
0.4500	1084.285	50.291	92.207	64.342	-0.695	35.321	2064.199	-0.003520	-0.006454	-0.004504
0.4520	1093.542	51.456	93.653	65.509	-0.707	35.320	2081.823	-0.003602	-0.006556	-0.004586
0.4540	1099.584	51.954	94.467	66.369	-0.696	35.317	2093.325	-0.003637	-0.006613	-0.004646
0.4560	1101.642	52.412	95.004	66.452	-0.695	35.312	2097.244	-0.003669	-0.006650	-0.004652
0.4580	1098.757	52.538	95.114	66.883	-0.705	35.306	2091.751	-0.003678	-0.006658	-0.004682
0.4600	1092.505	52.358	94.769	66.704	-0.704	35.302	2079.849	-0.003665	-0.006634	-0.004669
0.4620	1081.519	51.828	94.357	66.093	-0.706	35.302	2058.935	-0.003628	-0.006605	-0.004627
0.4640	1064.537	50.735	93.213	65.231	-0.694	35.306	2026.606	-0.003551	-0.006525	-0.004566
0.4660	1032.737	48.665	90.857	63.133	-0.699	35.310	1966.066	-0.003407	-0.006360	-0.004419
0.4680	975.254	44.770	85.835	59.284	-0.698	35.316	1856.632	-0.003134	-0.006008	-0.004150
0.4700	903.808	39.977	78.488	53.459	-0.698	35.320	1720.619	-0.002798	-0.005494	-0.003742
0.4720	839.442	35.947	71.951	48.527	-0.704	35.319	1598.082	-0.002516	-0.005037	-0.003397
0.4740	790.870	32.321	66.544	44.262	-0.695	35.316	1505.613	-0.002262	-0.004658	-0.003098
0.4760	750.699	29.486	61.975	41.122	-0.692	35.311	1429.138	-0.002064	-0.004338	-0.002879
0.4780	706.516	26.247	57.297	37.551	-0.698	35.305	1345.024	-0.001837	-0.004011	-0.002629
0.4800	652.443	22.704	51.312	33.201	-0.693	35.301	1242.085	-0.001589	-0.003592	-0.002324
0.4820	592.525	19.354	44.818	28.407	-0.698	35.301	1128.016	-0.001355	-0.003137	-0.001988
0.4840	533.448	15.381	37.938	23.084	-0.696	35.306	1015.549	-0.001077	-0.002656	-0.001616
0.4860	481.345	12.101	31.511	18.622	-0.698	35.310	916.357	-0.000847	-0.002206	-0.001304
0.4880	437.823	9.293	26.091	14.927	-0.691	35.315	833.502	-0.000651	-0.001826	-0.001045
0.4900	398.734	6.419	21.193	11.217	-0.687	35.321	759.087	-0.000449	-0.001484	-0.000785
0.4920	362.290	4.111	16.554	8.145	-0.699	35.320	689.707	-0.000288	-0.001159	-0.000570
0.4940	327.679	1.858	11.516	4.824	-0.692	35.317	623.817	-0.000130	-0.000806	-0.000338
0.4960	294.467	-0.002	6.949	1.628	-0.692	35.312	560.589	0.000000	-0.000486	-0.000114
0.4980	265.281	-2.156	2.794	-1.138	-0.698	35.306	505.028	0.000151	-0.000196	0.000080
0.5000	227.650	-8.218	-10.730	-10.130	-0.710	35.303	433.388	0.000575	0.000751	0.000709
0.5020	228.086	-8.315	-10.539	-9.976	-0.714	35.300	434.217	0.000582	0.000738	0.000698
0.5040	229.003	-8.063	-10.607	-9.825	-0.710	35.302	435.963	0.000564	0.000742	0.000688
0.5060	231.017	-7.826	-10.621	-10.048	-0.703	35.306	439.796	0.000548	0.000743	0.000703
0.5080	234.608	-7.657	-10.359	-9.908	-0.703	35.311	446.634	0.000536	0.000725	0.000694
0.5100	240.470	-7.379	-9.977	-9.394	-0.703	35.317	457.792	0.000517	0.000698	0.000658
0.5120	252.387	-6.894	-9.082	-8.530	-0.703	35.319	480.480	0.000483	0.000636	0.000597
0.5140	284.217	-5.213	-5.613	-5.972	-0.706	35.317	541.077	0.000365	0.000393	0.000418
0.5160	345.638	-2.087	1.087	-1.430	-0.695	35.314	658.007	0.000146	-0.000076	0.000100
0.5180	421.427	2.110	9.909	4.881	-0.695	35.308	802.288	-0.000148	-0.000694	-0.000342
0.5200	496.403	6.473	18.742	11.218	-0.696	35.303	945.024	-0.000453	-0.001312	-0.000785
0.5220	567.638	11.045	27.148	17.083	-0.702	35.300	1080.637	-0.000773	-0.001900	-0.001196
0.5240	637.821	15.646	35.667	23.153	-0.706	35.302	1214.247	-0.001095	-0.002497	-0.001621
0.5260	709.055	20.245	43.882	28.684	-0.705	35.306	1349.859	-0.001417	-0.003072	-0.002008
0.5280	781.402	25.096	52.358	34.757	-0.700	35.311	1487.589	-0.001757	-0.003665	-0.002433
0.5300	853.103	30.140	60.546	40.885	-0.692	35.317	1624.088	-0.002110	-0.004238	-0.002862
0.5320	924.518	35.476	68.649	46.945	-0.695	35.320	1760.044	-0.002483	-0.004805	-0.003286
0.5340	997.105	40.674	77.085	53.143	-0.699	35.317	1898.232	-0.002847	-0.005396	-0.003720
0.5360	1069.061	45.913	84.902	59.381	-0.699	35.314	2035.217	-0.003214	-0.005943	-0.004157
0.5380	1135.006	50.941	92.180	64.912	-0.703	35.309	2160.759	-0.003566	-0.006453	-0.004544
0.5400	1191.663	55.320	98.509	70.011	-0.700	35.303	2268.620	-0.003872	-0.006896	-0.004901
0.5420	1238.536	58.988	103.613	74.500	-0.703	35.300	2357.855	-0.004129	-0.007253	-0.005215
0.5440	1275.837	62.031	108.086	77.876	-0.704	35.301	2428.865	-0.004342	-0.007566	-0.005451
0.5460	1308.253	64.575	111.471	80.935	-0.696	35.306	2490.578	-0.004520	-0.007803	-0.005665
0.5480	1337.047	67.007	114.856	83.672	-0.695	35.311	2545.395	-0.004690	-0.008040	-0.005857
0.5500	1361.679	69.131	117.787	85.826	-0.702	35.317	2592.287	-0.004839	-0.008245	-0.006008
0.5520	1379.728	70.883	120.265	87.578	-0.703	35.320	2626.648	-0.004962	-0.008419	-0.006130
0.5540	1387.227	72.024	121.903	88.939	-0.705	35.317	2640.924	-0.005042	-0.008533	-0.006226
0.5560	1385.484	71.996	121.930	89.007	-0.700	35.314	2637.606	-0.005040	-0.008535	-0.006230
0.5580	1378.646	71.801	122.109	88.659	-0.704	35.308	2624.588	-0.005026	-0.008548	-0.006206
0.5600	1367.976	71.316	121.806	88.467	-0.707	35.303	2604.275	-0.004992	-0.008526	-0.006193
0.5620	1351.685	70.844	121.131	87.774	-0.708	35.299	2573.261	-0.004959	-0.008479	-0.006144
0.5640	1322.831	69.215	119.424	86.438	-0.717	35.301	2518.330	-0.004845	-0.008360	-0.006051
0.5660	1266.399	65.353	114.621	82.311	-0.710	35.307	2410.898	-0.004575	-0.008024	-0.005762
0.5680	1185.306	59.725	107.137	76.766	-0.719	35.311	2256.517	-0.004181	-0.007500	-0.005374
0.5700	1100.485	53.805	98.800	69.622	-0.712	35.318	2095.041	-0.003766	-0.006916	-0.004874
0.5720	1027.087	48.871	91.422	63.773	-0.708	35.320	1955.309	-0.003421	-0.006400	-0.004464
0.5740	967.604	44.938	85.395	59.105	-0.707	35.318	1842.070	-0.003146	-0.005978	-0.004137
0.5760	910.992	40.615	79.329	54.754	-0.695	35.314	1734.295	-0.002843	-0.005553	-0.003833
0.5780	843.920	36.225	72.393	49.180	-0.695	35.309	1606.607	-0.002536	-0.005068	-0.003443
0.5800	764.931	30.834	63.573	42.637	-0.698	35.303	1456.232	-0.002158	-0.004450	-0.002985
0.5820	686.107	25.609	54.600	36.063	-0.698	35.299	1306.171	-0.001793	-0.003822	-0.002524
0.5840	618.434	20.899	47.087	30.393	-0.702	35.302	1177.340	-0.001463	-0.003296	-0.002128
0.5860	562.062	16.618	40.123	25.586	-0.695	35.306	1070.023	-0.001163	-0.002809	-0.001791
0.5880	506.457	13.213	33.547	20.846	-0.704	35.311	964.165	-0.000925	-0.002348	-0.001459
0.5900	448.027	9.169	26.241	15.718	-0.706	35.317	852.928	-0.000642	-0.001837	-0.001100
0.5920	392.151	5.917	19.239	10.244	-0.706	35.320	746.555	-0.000414	-0.001347	-0.000717
0.5940	343.309	3.041	13.115	5.922	-0.711	35.317	653.572	-0.000213	-0.000918	-0.000415
0.5960	305.062	0.303	7.598	2.003	-0.699	35.314	580.759	-0.000021	-0.000532	-0.000140
0.5980	275.801	-1.809	3.193	-0.748	-0.701	35.309	525.055	0.000127	-0.000224	0.000052
0.6000	255.558	-3.478	-0.152	-2.971	-0.699	35.304	486.517	0.000243	0.000011	0.000208
0.6020	243.295	-4.088	-2.342	-4.447	-0.700	35.300	463.171	0.000286	0.000164	0.000311
0.6040	237.043	-4.590	-3.275	-4.934	-0.705	35.301	451.269	0.000321	0.000229	0.000345
0.6060	236.111	-5.143	-4.114	-5.641	-0.696	35.306	449.495	0.000360	0.000288	0.000395
0.6080	238.471	-5.214	-4.304	-5.710	-0.690	35.311	453.987	0.000365	0.000301	0.000400
0.6100	243.911	-5.185	-4.000	-5.461	-0.691	35.317	464.344	0.000363	0.000280	0.000382
0.6120	252.778	-4.809	-3.452	-4.975	-0.704	35.319	481.224	0.000337	0.000242	0.000348
0.6140	269.565	-3.783	-2.174	-4.030	-0.707	35.317	513.182	0.000265	0.000152	0.000282
0.6160	312.786	-1.614	1.941	-1.081	-0.700	35.314	595.465	0.000113	-0.000136	0.000076
0.6180	388.725	2.514	10.583	5.158	-0.697	35.309	740.032	-0.000176	-0.000741	-0.000361
0.6200	477.017	7.628	20.696	12.257	-0.692	35.303	908.117	-0.000534	-0.001449	-0.000858
0.6220	561.401	12.921	30.396	19.054	-0.699	35.300	1068.764	-0.000905	-0.002128	-0.001334
0.6240	635.070	17.925	39.010	25.474	-0.710	35.301	1209.011	-0.001255	-0.002731	-0.001783
0.6260	698.009	21.816	46.166	30.559	-0.704	35.306	1328.831	-0.001527	-0.003232	-0.002139
0.6280	758.048	25.762	52.962	35.229	-0.700	35.311	1443.129	-0.001803	-0.003707	-0.002466
0.6300	825.150	30.335	60.531	40.845	-0.695	35.317	1570.873	-0.002123	-0.004237	-0.002859
0.6320	902.456	35.672	69.242	47.737	-0.703	35.319	1718.044	-0.002497	-0.004847	-0.003342
0.6340	984.165	41.575	78.489	54.656	-0.711	35.317	1873.598	-0.002910	-0.005494	-0.003826
0.6360	1062.358	46.842	87.048	60.964	-0.700	35.314	2022.457	-0.003279	-0.006093	-0.004267
0.6380	1128.513	51.720	94.256	66.384	-0.708	35.309	2148.399	-0.003620	-0.006598	-0.004647
0.6400	1179.204	55.723	99.594	70.622	-0.705	35.304	2244.902	-0.003901	-0.006972	-0.004944
0.6420	1222.065	59.458	104.438	74.569	-0.697	35.300	2326.498	-0.004162	-0.007311	-0.005220
0.6440	1265.287	63.044	109.518	78.878	-0.696	35.301	2408.781	-0.004413	-0.007666	-0.005521
0.6460	1309.275	66.561	114.183	82.437	-0.696	35.306	2492.523	-0.004659	-0.007993	-0.005771
0.6480	1345.704	69.439	118.171	85.590	-0.700	35.311	2561.874	-0.004861	-0.008272	-0.005991
0.6500	1367.059	71.273	120.594	87.690	-0.696	35.317	2602.530	-0.004989	-0.008442	-0.006138
0.6520	1375.550	72.286	121.890	88.952	-0.696	35.320	2618.694	-0.005060	-0.008532	-0.006227
0.6540	1376.557	72.592	122.674	89.605	-0.694	35.318	2620.611	-0.005081	-0.008587	-0.006272
0.6560	1375.220	72.801	122.688	89.648	-0.686	35.314	2618.065	-0.005096	-0.008588	-0.006275
0.6580	1371.523	72.578	122.661	89.981	-0.690	35.309	2611.027	-0.005080	-0.008586	-0.006299
0.6600	1364.534	72.122	122.343	89.231	-0.688	35.304	2597.723	-0.005049	-0.008564	-0.006246
0.6620	1352.346	71.776	122.065	88.303	-0.690	35.300	2574.520	-0.005024	-0.008545	-0.006181
0.6640	1331.382	70.661	121.324	87.844	-0.693	35.301	2534.609	-0.004946	-0.008493	-0.006149
0.6660	1284.899	67.464	117.760	84.842	-0.687	35.306	2446.117	-0.004722	-0.008243	-0.005939
0.6680	1198.726	61.988	110.192	78.489	-0.691	35.311	2282.066	-0.004339	-0.007713	-0.005494
0.6700	1099.043	54.972	100.670	70.470	-0.692	35.317	2092.295	-0.003848	-0.007047	-0.004933
0.6720	1015.830	49.413	92.222	64.050	-0.692	35.320	1933.880	-0.003459	-0.006456	-0.004484
0.6740	958.106	45.438	86.208	59.522	-0.696	35.317	1823.988	-0.003181	-0.006035	-0.004167
0.6760	913.772	42.033	81.419	55.753	-0.688	35.314	1739.588	-0.002942	-0.005699	-0.003903
0.6780	859.565	38.379	75.874	51.488	-0.692	35.309	1636.391	-0.002687	-0.005311	-0.003604
0.6800	786.662	33.127	67.702	45.403	-0.693	35.304	1497.602	-0.002319	-0.004739	-0.003178
0.6820	706.215	27.833	58.441	38.871	-0.701	35.300	1344.452	-0.001948	-0.004091	-0.002721
0.6840	630.802	22.801	49.840	32.507	-0.702	35.301	1200.886	-0.001596	-0.003489	-0.002275
0.6860	564.437	17.784	42.148	26.655	-0.694	35.306	1074.543	-0.001245	-0.002950	-0.001866
0.6880	504.759	14.004	34.761	21.653	-0.698	35.311	960.932	-0.000980	-0.002433	-0.001516
0.6900	448.733	10.195	27.756	16.568	-0.697	35.317	854.273	-0.000714	-0.001943	-0.001160
0.6920	396.720	6.626	21.384	11.716	-0.700	35.320	755.253	-0.000464	-0.001497	-0.000820
0.6940	352.266	3.751	15.631	7.838	-0.703	35.318	670.624	-0.000263	-0.001094	-0.000549
0.6960	319.264	1.194	10.733	4.393	-0.695	35.315	607.796	-0.000084	-0.000751	-0.000308
0.6980	295.323	-0.126	7.322	1.878	-0.690	35.309	562.220	0.000009	-0.000513	-0.000131
0.7000	276.883	-1.196	4.309	-0.207	-0.694	35.304	527.115	0.000084	-0.000302	0.000014
0.7020	262.997	-2.255	2.052	-1.540	-0.699	35.300	500.679	0.000158	-0.000144	0.000108
0.7040	252.853	-2.715	0.525	-2.746	-0.700	35.302	481.367	0.000190	-0.000037	0.000192
0.7060	247.593	-3.408	-0.797	-3.764	-0.696	35.307	471.354	0.000239	0.000056	0.000263
0.7080	247.353	-3.798	-1.224	-3.902	-0.697	35.311	470.896	0.000266	0.000086	0.000273
0.7100	251.470	-3.936	-1.457	-3.847	-0.696	35.318	478.735	0.000276	0.000102	0.000269
0.7120	259.736	-3.811	-0.962	-3.514	-0.690	35.320	494.471	0.000267	0.000067	0.000246
0.7140	275.741	-3.046	0.069	-2.472	-0.695	35.318	524.940	0.000213	-0.000005	0.000173
0.7160	315.852	-1.071	3.661	-0.125	-0.686	35.314	601.301	0.000075	-0.000256	0.000009
0.7180	388.680	2.847	12.027	5.310	-0.685	35.309	739.946	-0.000199	-0.000842	-0.000372
0.7200	477.633	7.933	21.960	12.857	-0.681	35.304	909.290	-0.000555	-0.001537	-0.000900
0.7220	565.354	13.657	32.323	20.360	-0.680	35.300	1076.288	-0.000956	-0.002263	-0.001425
0.7240	644.508	18.910	41.612	26.739	-0.687	35.302	1226.978	-0.001324	-0.002913	-0.001872
0.7260	718.628	23.775	50.074	33.006	-0.682	35.306	1368.084	-0.001664	-0.003505	-0.002310
0.7280	791.381	28.666	58.399	38.676	-0.689	35.311	1506.586	-0.002007	-0.004088	-0.002707
0.7300	863.277	33.556	66.573	44.609	-0.690	35.317	1643.457	-0.002349	-0.004660	-0.003123
0.7320	933.264	38.782	74.361	50.836	-0.691	35.320	1776.695	-0.002715	-0.005205	-0.003559
0.7340	1001.463	43.731	81.692	56.561	-0.694	35.318	1906.528	-0.003061	-0.005718	-0.003959
0.7360	1067.949	48.288	88.808	61.981	-0.683	35.314	2033.100	-0.003380	-0.006217	-0.004339
0.7380	1129.851	52.846	95.677	67.276	-0.685	35.309	2150.946	-0.003699	-0.006697	-0.004709
0.7400	1185.261	56.792	101.468	72.333	-0.688	35.303	2256.432	-0.003975	-0.007103	-0.005063
0.7420	1233.892	60.766	106.683	76.697	-0.700	35.299	2349.014	-0.004254	-0.007468	-0.005369
0.7440	1276.829	64.281	111.582	80.324	-0.708	35.301	2430.754	-0.004500	-0.007811	-0.005623
0.7460	1313.348	67.104	115.724	83.506	-0.704	35.306	2500.277	-0.004697	-0.008101	-0.005845
0.7480	1339.858	69.425	118.751	85.896	-0.695	35.311	2550.745	-0.004860	-0.008313	-0.006013
0.7500	1357.396	70.786	120.788	87.662	-0.700	35.317	2584.133	-0.004955	-0.008455	-0.006136
0.7520	1371.342	72.493	122.549	88.953	-0.709	35.320	2610.683	-0.005075	-0.008578	-0.006227
0.7540	1380.510	73.577	123.964	90.313	-0.708	35.317	2628.136	-0.005150	-0.008677	-0.006322
0.7560	1381.712	73.815	124.404	90.482	-0.701	35.315	2630.425	-0.005167	-0.008708	-0.006334
0.7580	1376.527	73.886	124.336	90.538	-0.699	35.309	2620.554	-0.005172	-0.008704	-0.006338
0.7600	1365.436	73.371	123.979	90.328	-0.698	35.304	2599.440	-0.005136	-0.008679	-0.006323
0.7620	1347.207	72.621	123.169	89.673	-0.697	35.300	2564.735	-0.005084	-0.008622	-0.006277
0.7640	1312.296	70.161	120.789	87.450	-0.700	35.301	2498.274	-0.004911	-0.008455	-0.006122
0.7660	1249.251	65.768	115.091	82.880	-0.699	35.306	2378.254	-0.004604	-0.008056	-0.005802
0.7680	1169.360	60.503	107.785	77.127	-0.695	35.311	2226.162	-0.004235	-0.007545	-0.005399
0.7700	1090.912	54.695	100.216	70.914	-0.695	35.317	2076.817	-0.003829	-0.007015	-0.004964
0.7720	1020.669	49.873	93.074	65.092	-0.706	35.320	1943.092	-0.003491	-0.006515	-0.004556
0.7740	959.789	45.702	87.019	60.521	-0.711	35.318	1827.192	-0.003199	-0.006091	-0.004236
0.7760	902.531	41.618	81.050	55.575	-0.698	35.314	1718.187	-0.002913	-0.005674	-0.003890
0.7780	836.677	37.005	74.169	50.168	-0.695	35.309	1592.817	-0.002590	-0.005192	-0.003512
0.7800	760.347	31.876	65.856	43.886	-0.698	35.303	1447.506	-0.002231	-0.004610	-0.003072
0.7820	682.335	26.858	57.258	37.537	-0.699	35.300	1298.990	-0.001880	-0.004008	-0.002628
0.7840	613.249	22.217	49.124	31.756	-0.708	35.302	1167.469	-0.001555	-0.003439	-0.002223
0.7860	554.623	18.395	41.735	26.336	-0.698	35.307	1055.861	-0.001288	-0.002921	-0.001844
0.7880	499.139	14.560	35.104	21.708	-0.695	35.311	950.232	-0.001019	-0.002457	-0.001520
0.7900	445.743	10.655	28.112	16.693	-0.705	35.317	848.579	-0.000746	-0.001968	-0.001168
0.7920	397.051	7.222	21.810	12.258	-0.707	35.319	755.882	-0.000506	-0.001527	-0.000858
0.7940	353.017	4.387	16.307	8.535	-0.710	35.317	672.054	-0.000307	-0.001141	-0.000597
0.7960	314.785	1.526	11.008	4.504	-0.695	35.314	599.270	-0.000107	-0.000771	-0.000315
0.7980	284.969	-0.473	6.562	1.626	-0.696	35.309	542.507	0.000033	-0.000459	-0.000114
0.8000	262.997	-1.837	3.193	-0.887	-0.701	35.304	500.679	0.000129	-0.000224	0.000062
0.8020	246.586	-2.699	0.606	-2.636	-0.699	35.300	469.437	0.000189	-0.000042	0.000185
0.8040	236.156	-3.409	-1.102	-3.819	-0.701	35.302	449.581	0.000239	0.000077	0.000267
0.8060	233.286	-3.924	-2.107	-4.544	-0.694	35.306	444.117	0.000275	0.000147	0.000318
0.8080	235.916	-3.922	-2.423	-4.349	-0.695	35.311	449.123	0.000275	0.000170	0.000304
0.8100	241.867	-3.908	-2.229	-4.251	-0.693	35.317	460.453	0.000274	0.000156	0.000298
0.8120	251.891	-3.669	-1.597	-3.862	-0.700	35.320	479.536	0.000257	0.000112	0.000270
0.8140	273.216	-2.419	0.179	-2.554	-0.709	35.318	520.134	0.000169	-0.000013	0.000179
0.8160	323.772	0.151	5.215	1.212	-0.695	35.315	616.379	-0.000011	-0.000365	-0.000085
0.8180	399.876	4.166	13.773	6.950	-0.698	35.309	761.261	-0.000292	-0.000964	-0.000486
0.8200	482.998	8.793	23.144	13.829	-0.696	35.304	919.504	-0.000616	-0.001620	-0.000968
0.8220	563.069	13.810	32.337	20.623	-0.698	35.299	1071.939	-0.000967	-0.002264	-0.001444
0.8240	636.874	18.827	41.365	26.960	-0.703	35.301	1212.444	-0.001318	-0.002896	-0.001887
0.8260	706.516	23.191	49.070	32.380	-0.697	35.306	1345.024	-0.001623	-0.003435	-0.002267
0.8280	774.895	27.789	56.913	38.035	-0.699	35.311	1475.201	-0.001945	-0.003984	-0.002662
0.8300	846.430	32.722	65.127	43.928	-0.693	35.317	1611.385	-0.002291	-0.004559	-0.003075
0.8320	922.744	38.295	73.673	50.390	-0.703	35.320	1756.668	-0.002681	-0.005157	-0.003527
0.8340	999.960	43.911	82.287	57.048	-0.713	35.318	1903.667	-0.003074	-0.005760	-0.003993
0.8360	1072.818	49.026	90.131	62.606	-0.702	35.314	2042.370	-0.003432	-0.006309	-0.004382
0.8380	1136.313	53.945	97.024	68.414	-0.694	35.309	2163.248	-0.003776	-0.006792	-0.004789
0.8400	1189.919	58.252	102.529	73.181	-0.694	35.304	2265.301	-0.004078	-0.007177	-0.005123
0.8420	1237.935	61.906	107.827	77.043	-0.700	35.300	2356.710	-0.004333	-0.007548	-0.005393
0.8440	1285.245	65.491	113.000	81.682	-0.713	35.301	2446.775	-0.004584	-0.007910	-0.005718
0.8460	1328.722	68.798	117.527	85.297	-0.701	35.306	2529.545	-0.004816	-0.008227	-0.005971
0.8480	1359.575	71.509	120.940	88.076	-0.698	35.310	2588.282	-0.005006	-0.008466	-0.006165
0.8500	1373.236	72.691	122.564	89.507	-0.698	35.317	2614.288	-0.005088	-0.008579	-0.006265
0.8520	1375.806	73.065	123.485	90.146	-0.704	35.319	2619.181	-0.005115	-0.008644	-0.006310
0.8540	1374.633	73.480	123.963	90.604	-0.703	35.317	2616.949	-0.005144	-0.008677	-0.006342
0.8560	1371.718	73.466	123.771	90.538	-0.693	35.315	2611.399	-0.005143	-0.008664	-0.006338
0.8580	1366.683	73.342	123.991	90.414	-0.700	35.310	2601.814	-0.005134	-0.008679	-0.006329
0.8600	1358.132	72.914	123.758	89.981	-0.699	35.304	2585.535	-0.005104	-0.008663	-0.006299
0.8620	1344.637	72.343	123.250	89.300	-0.694	35.300	2559.843	-0.005064	-0.008627	-0.006251
0.8640	1317.180	70.981	121.737	88.007	-0.696	35.301	2507.572	-0.004969	-0.008522	-0.006160
0.8660	1254.692	66.742	116.453	83.699	-0.696	35.306	2388.611	-0.004672	-0.008152	-0.005859
0.8680	1164.942	60.461	108.211	77.127	-0.692	35.311	2217.751	-0.004232	-0.007575	-0.005399
0.8700	1078.709	54.430	99.914	70.233	-0.689	35.317	2053.585	-0.003810	-0.006994	-0.004916
0.8720	1011.652	50.025	92.992	64.703	-0.693	35.320	1925.926	-0.003502	-0.006509	-0.004529
0.8740	961.893	46.230	87.695	60.993	-0.697	35.318	1831.198	-0.003236	-0.006139	-0.004269
0.8760	915.711	42.895	82.660	56.825	-0.696	35.315	1743.279	-0.003003	-0.005786	-0.003978
0.8780	855.101	38.849	76.438	51.780	-0.696	35.310	1627.893	-0.002719	-0.005351	-0.003625
0.8800	773.091	33.071	67.617	45.206	-0.699	35.304	1471.767	-0.002315	-0.004733	-0.003164
0.8820	683.492	27.124	57.546	37.855	-0.706	35.300	1301.193	-0.001899	-0.004028	-0.002650
0.8840	604.563	21.995	48.561	31.309	-0.707	35.301	1150.932	-0.001540	-0.003399	-0.002192
0.8860	543.998	17.646	40.994	26.000	-0.695	35.306	1035.633	-0.001235	-0.002870	-0.001820
0.8880	498.853	14.297	35.406	22.041	-0.699	35.310	949.688	-0.001001	-0.002478	-0.001543
0.8900	459.133	11.517	30.369	18.207	-0.694	35.317	874.071	-0.000806	-0.002126	-0.001274
0.8920	415.611	8.890	24.865	14.397	-0.695	35.320	791.216	-0.000622	-0.001741	-0.001008
0.8940	368.887	5.986	18.976	10.398	-0.700	35.317	702.267	-0.000419	-0.001328	-0.000728
0.8960	324.584	2.956	12.907	6.005	-0.696	35.314	617.924	-0.000207	-0.000903	-0.000420
0.8980	287.223	0.470	7.554	2.251	-0.689	35.310	546.799	-0.000033	-0.000529	-0.000158
0.9000	260.412	-1.212	3.619	-0.652	-0.691	35.304	495.758	0.000085	-0.000253	0.000046
0.9020	244.362	-2.338	1.087	-2.347	-0.692	35.299	465.202	0.000164	-0.000076	0.000164
0.9040	237.088	-2.949	-0.480	-3.333	-0.702	35.301	451.355	0.000206	0.000034	0.000233
0.9060	236.051	-3.546	-1.499	-3.916	-0.696	35.306	449.381	0.000248	0.000105	0.000274
0.9080	238.396	-3.630	-1.720	-3.820	-0.699	35.311	453.844	0.000254	0.000120	0.000267
0.9100	243.100	-3.660	-1.416	-3.709	-0.695	35.317	462.799	0.000256	0.000099	0.000260
0.9120	250.824	-3.297	-0.879	-3.390	-0.694	35.319	477.505	0.000231	0.000062	0.000237
0.9140	266.033	-2.491	0.358	-2.539	-0.703	35.317	506.458	0.000174	-0.000025	0.000178
0.9160	308.142	-0.490	4.252	0.156	-0.700	35.315	586.624	0.000034	-0.000298	-0.000011
0.9180	388.605	4.042	13.445	6.617	-0.693	35.310	739.803	-0.000283	-0.000941	-0.000463
0.9200	482.051	9.321	24.149	14.219	-0.691	35.304	917.702	-0.000652	-0.001690	-0.000995
0.9220	564.497	14.617	33.548	21.166	-0.695	35.300	1074.657	-0.001023	-0.002348	-0.001482
0.9240	628.894	18.800	41.350	26.573	-0.699	35.301	1197.252	-0.001316	-0.002895	-0.001860
0.9260	685.371	22.385	47.652	31.005	-0.693	35.306	1304.770	-0.001567	-0.003336	-0.002170
0.9280	749.963	26.691	54.766	36.298	-0.696	35.311	1427.736	-0.001868	-0.003834	-0.002541
0.9300	827.419	31.820	63.214	42.649	-0.695	35.317	1575.193	-0.002227	-0.004425	-0.002985
0.9320	913.246	37.782	72.559	49.695	-0.694	35.319	1738.586	-0.002645	-0.005079	-0.003479
0.9340	997.015	43.730	82.013	57.200	-0.702	35.318	1898.060	-0.003061	-0.005741	-0.004004
0.9360	1069.797	48.955	89.842	63.133	-0.687	35.314	2036.619	-0.003427	-0.006289	-0.004419
0.9380	1127.536	53.374	96.267	68.054	-0.694	35.309	2146.540	-0.003736	-0.006739	-0.004764
0.9400	1175.702	56.779	101.441	72.362	-0.700	35.304	2238.235	-0.003974	-0.007101	-0.005065
0.9420	1224.725	60.752	106.808	76.321	-0.698	35.299	2331.562	-0.004253	-0.007477	-0.005342
0.9440	1281.172	65.337	113.177	81.560	-0.698	35.301	2439.022	-0.004574	-0.007922	-0.005709
0.9460	1337.543	69.785	118.820	86.215	-0.694	35.306	2546.339	-0.004885	-0.008317	-0.006035
0.9480	1375.550	72.787	123.002	89.576	-0.692	35.310	2618.694	-0.005095	-0.008610	-0.006270
0.9500	1389.872	74.232	124.900	91.161	-0.703	35.317	2645.960	-0.005196	-0.008743	-0.006381
0.9520	1390.128	74.800	125.396	91.606	-0.704	35.319	2646.446	-0.005236	-0.008778	-0.006412
0.9540	1385.770	74.954	125.536	92.078	-0.707	35.317	2638.149	-0.005247	-0.008788	-0.006445
0.9560	1379.638	74.717	125.260	91.912	-0.699	35.314	2626.476	-0.005230	-0.008768	-0.006434
0.9580	1371.778	74.480	125.148	91.079	-0.702	35.309	2611.513	-0.005214	-0.008760	-0.006376
0.9600	1362.295	73.813	124.929	90.537	-0.701	35.304	2593.460	-0.005167	-0.008745	-0.006338
0.9620	1349.130	72.939	124.308	90.271	-0.706	35.300	2568.398	-0.005106	-0.008702	-0.006319
0.9640	1325.836	71.744	123.113	89.132	-0.708	35.301	2524.052	-0.005022	-0.008618	-0.006239
0.9660	1276.092	68.187	118.971	85.757	-0.700	35.306	2429.352	-0.004773	-0.008328	-0.006003
0.9680	1193.962	62.587	111.622	79.863	-0.698	35.310	2272.997	-0.004381	-0.007814	-0.005590
0.9700	1101.763	56.349	102.925	72.471	-0.697	35.317	2097.473	-0.003944	-0.007205	-0.005073
0.9720	1024.171	50.983	95.040	66.440	-0.703	35.320	1949.759	-0.003569	-0.006653	-0.004651
0.9740	964.463	47.077	88.932	61.979	-0.708	35.318	1836.090	-0.003295	-0.006225	-0.004339
0.9760	907.941	42.909	82.797	56.852	-0.696	35.315	1728.487	-0.003004	-0.005796	-0.003980
0.9780	841.651	38.281	75.572	51.154	-0.695	35.310	1602.287	-0.002680	-0.005290	-0.003581
0.9800	767.831	33.210	67.467	45.289	-0.701	35.304	1461.754	-0.002325	-0.004723	-0.003170
0.9820	697.333	28.763	59.692	39.134	-0.692	35.300	1327.543	-0.002013	-0.004178	-0.002739
0.9840	634.034	24.234	52.344	34.242	-0.696	35.301	1207.037	-0.001696	-0.003664	-0.002397
0.9860	575.904	19.882	45.065	29.255	-0.686	35.306	1096.373	-0.001392	-0.003155	-0.002048
0.9880	518.074	15.977	38.350	24.113	-0.684	35.310	986.280	-0.001118	-0.002685	-0.001688
0.9900	459.554	11.586	31.058	19.027	-0.687	35.316	874.872	-0.000811	-0.002174	-0.001332
0.9920	403.979	7.946	24.122	13.856	-0.691	35.319	769.072	-0.000556	-0.001689	-0.000970
0.9940	353.618	4.848	17.833	9.520	-0.697	35.317	673.199	-0.000339	-0.001248	-0.000666
0.9960	311.990	2.068	11.985	5.186	-0.687	35.314	593.948	-0.000145	-0.000839	-0.000363
0.9980	280.701	0.319	7.416	2.156	-0.691	35.309	534.382	-0.000022	-0.000519	-0.000151
Test Cycles
Time (sec)	Axial stress (kPa)	Axial micro-strain #1	Axial micro-strain #2	Axial micro-strain #3	Confining pressure (kPa)	Temperature (�C)	Load (N)	Displacement #1 (mm)	Displacement #2 (mm)	Displacement #3 (mm)
0.0000	260.082	-1.073	4.100	-0.304	-0.687	35.303	495.129	0.000075	-0.000287	0.000021
0.0020	248.540	-1.878	2.107	-1.608	-0.692	35.300	473.156	0.000131	-0.000148	0.000113
0.0040	242.784	-2.197	1.073	-2.483	-0.699	35.301	462.198	0.000154	-0.000075	0.000174
0.0060	240.950	-2.644	0.206	-3.067	-0.692	35.306	458.708	0.000185	-0.000014	0.000215
0.0080	242.724	-2.866	-0.124	-3.123	-0.694	35.311	462.084	0.000201	0.000009	0.000219
0.0100	248.194	-2.781	-0.262	-2.984	-0.695	35.317	472.498	0.000195	0.000018	0.000209
0.0120	256.820	-2.657	0.110	-2.664	-0.696	35.320	488.920	0.000186	-0.000008	0.000187
0.0140	272.856	-1.894	1.460	-1.540	-0.701	35.318	519.447	0.000133	-0.000102	0.000108
0.0160	314.034	-0.212	5.065	1.143	-0.691	35.314	597.839	0.000015	-0.000355	-0.000080
0.0180	390.408	3.874	13.665	6.979	-0.693	35.309	743.237	-0.000271	-0.000957	-0.000489
0.0200	482.863	9.295	24.481	14.498	-0.697	35.304	919.247	-0.000651	-0.001714	-0.001015
0.0220	570.118	14.728	34.663	21.848	-0.704	35.300	1085.358	-0.001031	-0.002426	-0.001529
0.0240	644.583	19.801	43.427	28.114	-0.709	35.301	1227.121	-0.001386	-0.003040	-0.001968
0.0260	710.648	24.039	50.981	33.242	-0.698	35.305	1352.892	-0.001683	-0.003569	-0.002327
0.0280	775.105	28.485	58.425	38.746	-0.701	35.310	1475.601	-0.001994	-0.004090	-0.002712
0.0300	843.214	33.293	65.926	44.457	-0.707	35.317	1605.263	-0.002330	-0.004615	-0.003112
0.0320	916.808	38.587	74.084	50.669	-0.712	35.320	1745.367	-0.002701	-0.005186	-0.003547
0.0340	993.122	44.119	82.257	57.323	-0.715	35.318	1890.650	-0.003088	-0.005758	-0.004013
0.0360	1065.093	49.067	89.758	63.189	-0.699	35.315	2027.664	-0.003435	-0.006283	-0.004423
0.0380	1125.282	53.485	96.253	68.373	-0.698	35.310	2142.248	-0.003744	-0.006738	-0.004786
0.0400	1175.297	57.335	101.662	72.653	-0.695	35.304	2237.463	-0.004013	-0.007116	-0.005086
0.0420	1224.394	61.170	106.906	76.850	-0.698	35.300	2330.933	-0.004282	-0.007483	-0.005379
0.0440	1275.296	65.088	112.601	81.670	-0.708	35.301	2427.835	-0.004556	-0.007882	-0.005717
0.0460	1324.108	68.646	117.883	85.618	-0.699	35.306	2520.761	-0.004805	-0.008252	-0.005993
0.0480	1360.417	71.635	121.983	88.785	-0.695	35.310	2589.884	-0.005014	-0.008539	-0.006215
0.0500	1377.714	73.497	124.447	90.258	-0.692	35.317	2622.814	-0.005145	-0.008711	-0.006318
0.0520	1380.825	74.216	125.163	91.162	-0.704	35.320	2628.736	-0.005195	-0.008761	-0.006381
0.0540	1377.910	74.063	125.383	91.634	-0.706	35.318	2623.186	-0.005184	-0.008777	-0.006414
0.0560	1374.679	73.967	125.136	90.995	-0.693	35.315	2617.035	-0.005178	-0.008759	-0.006370
0.0580	1370.531	74.232	125.068	91.258	-0.695	35.310	2609.138	-0.005196	-0.008755	-0.006388
0.0600	1362.956	74.078	124.929	91.147	-0.700	35.304	2594.719	-0.005185	-0.008745	-0.006380
0.0620	1349.852	73.287	124.376	90.412	-0.700	35.300	2569.771	-0.005130	-0.008706	-0.006329
0.0640	1325.295	71.982	123.001	89.538	-0.701	35.301	2523.022	-0.005039	-0.008610	-0.006268
0.0660	1272.711	68.408	118.709	85.773	-0.698	35.306	2422.915	-0.004789	-0.008310	-0.006004
0.0680	1188.702	62.656	110.963	79.851	-0.694	35.311	2262.983	-0.004386	-0.007767	-0.005590
0.0700	1097.675	56.248	102.308	72.249	-0.689	35.316	2089.691	-0.003937	-0.007162	-0.005057
0.0720	1017.769	50.594	94.371	65.982	-0.691	35.319	1937.571	-0.003542	-0.006606	-0.004619
0.0740	953.237	46.286	87.764	60.954	-0.691	35.317	1814.718	-0.003240	-0.006144	-0.004267
0.0760	896.445	42.215	81.627	56.159	-0.686	35.314	1706.600	-0.002955	-0.005714	-0.003931
0.0780	835.820	38.099	75.241	51.085	-0.683	35.309	1591.187	-0.002667	-0.005267	-0.003576
0.0800	766.103	33.320	67.591	45.166	-0.684	35.304	1458.464	-0.002332	-0.004731	-0.003162
0.0820	692.614	28.236	59.403	39.245	-0.686	35.300	1318.560	-0.001976	-0.004158	-0.002747
0.0840	622.011	23.733	51.406	33.367	-0.689	35.301	1184.149	-0.001661	-0.003598	-0.002336
0.0860	557.013	19.119	43.454	27.657	-0.690	35.306	1060.410	-0.001338	-0.003042	-0.001936
0.0880	498.011	15.117	36.176	22.684	-0.690	35.310	948.086	-0.001058	-0.002532	-0.001588
0.0900	445.562	11.629	29.653	17.791	-0.684	35.317	848.236	-0.000814	-0.002076	-0.001245
0.0920	398.088	8.432	23.571	13.273	-0.686	35.320	757.856	-0.000590	-0.001650	-0.000929
0.0940	355.061	5.597	18.124	9.478	-0.694	35.318	675.945	-0.000392	-0.001269	-0.000663
0.0960	318.136	2.636	12.592	5.949	-0.686	35.314	605.650	-0.000185	-0.000881	-0.000416
0.0980	287.388	0.720	8.133	2.849	-0.685	35.309	547.113	-0.000050	-0.000569	-0.000199
0.1000	264.109	-0.878	4.748	0.321	-0.684	35.304	502.796	0.000061	-0.000332	-0.000022
0.1020	249.742	-1.922	2.408	-1.330	-0.681	35.300	475.445	0.000135	-0.000169	0.000093
0.1040	242.964	-2.491	1.459	-2.302	-0.689	35.301	462.542	0.000174	-0.000102	0.000161
0.1060	242.093	-2.755	0.731	-2.956	-0.687	35.306	460.882	0.000193	-0.000051	0.000207
0.1080	244.933	-2.782	0.674	-2.956	-0.687	35.310	466.290	0.000195	-0.000047	0.000207
0.1100	250.659	-2.630	0.936	-2.749	-0.686	35.316	477.190	0.000184	-0.000066	0.000192
0.1120	260.472	-2.144	1.281	-2.152	-0.692	35.319	495.872	0.000150	-0.000090	0.000151
0.1140	278.927	-1.251	2.767	-0.902	-0.694	35.317	531.006	0.000088	-0.000194	0.000063
0.1160	324.704	0.902	7.032	1.975	-0.686	35.314	618.153	-0.000063	-0.000492	-0.000138
0.1180	402.190	5.027	15.578	8.020	-0.687	35.310	765.667	-0.000352	-0.001090	-0.000561
0.1200	489.761	9.987	25.512	15.206	-0.690	35.304	932.379	-0.000699	-0.001786	-0.001064
0.1220	569.772	15.074	34.538	22.042	-0.692	35.300	1084.700	-0.001055	-0.002418	-0.001543
0.1240	635.837	19.632	42.547	27.849	-0.696	35.300	1210.470	-0.001374	-0.002978	-0.001949
0.1260	692.584	23.190	49.109	32.020	-0.696	35.305	1318.502	-0.001623	-0.003438	-0.002241
0.1280	754.246	27.067	56.102	37.215	-0.694	35.310	1435.890	-0.001895	-0.003927	-0.002605
0.1300	831.672	32.307	64.647	43.483	-0.689	35.315	1583.290	-0.002261	-0.004525	-0.003044
0.1320	916.507	38.421	74.305	50.807	-0.690	35.319	1744.795	-0.002689	-0.005201	-0.003556
0.1340	995.316	44.285	83.028	57.518	-0.696	35.317	1894.827	-0.003100	-0.005812	-0.004026
0.1360	1063.621	49.136	90.459	62.979	-0.687	35.314	2024.860	-0.003439	-0.006332	-0.004409
0.1380	1123.719	53.902	96.968	67.998	-0.691	35.309	2139.273	-0.003773	-0.006788	-0.004760
0.1400	1180.061	58.057	102.789	72.904	-0.689	35.303	2246.532	-0.004064	-0.007195	-0.005103
0.1420	1232.690	62.045	108.320	77.779	-0.692	35.299	2346.725	-0.004343	-0.007582	-0.005445
0.1440	1279.789	65.924	113.262	82.088	-0.698	35.300	2436.390	-0.004615	-0.007928	-0.005746
0.1460	1321.688	69.146	117.664	85.506	-0.691	35.305	2516.155	-0.004840	-0.008236	-0.005985
0.1480	1355.142	72.024	121.460	88.243	-0.694	35.309	2579.842	-0.005042	-0.008502	-0.006177
0.1500	1376.317	73.550	123.921	90.035	-0.690	35.316	2620.153	-0.005149	-0.008675	-0.006302
0.1520	1385.108	74.508	125.301	91.550	-0.687	35.320	2636.890	-0.005216	-0.008771	-0.006409
0.1540	1385.439	74.966	125.907	92.023	-0.694	35.318	2637.520	-0.005248	-0.008814	-0.006442
0.1560	1382.313	74.993	126.003	92.009	-0.690	35.314	2631.569	-0.005250	-0.008820	-0.006441
0.1580	1376.963	74.967	126.127	92.051	-0.692	35.309	2621.384	-0.005248	-0.008829	-0.006444
0.1600	1367.179	74.232	125.797	91.508	-0.702	35.303	2602.758	-0.005196	-0.008806	-0.006406
0.1620	1350.077	73.176	125.121	90.941	-0.708	35.299	2570.200	-0.005122	-0.008758	-0.006366
0.1640	1315.271	71.245	123.016	88.910	-0.710	35.300	2503.939	-0.004987	-0.008611	-0.006224
0.1660	1252.287	67.227	117.485	84.603	-0.700	35.305	2384.033	-0.004706	-0.008224	-0.005922
0.1680	1173.538	62.157	110.081	78.141	-0.699	35.310	2234.116	-0.004351	-0.007706	-0.005470
0.1700	1097.224	56.806	102.486	72.443	-0.696	35.316	2088.833	-0.003976	-0.007174	-0.005071
0.1720	1029.551	52.025	95.992	66.816	-0.696	35.319	1960.001	-0.003642	-0.006719	-0.004677
0.1740	968.371	47.510	89.771	62.131	-0.706	35.318	1843.529	-0.003326	-0.006284	-0.004349
0.1760	908.723	43.298	83.056	57.143	-0.700	35.315	1729.975	-0.003031	-0.005814	-0.004000
0.1780	843.605	38.823	76.025	51.613	-0.696	35.310	1606.007	-0.002718	-0.005322	-0.003613
0.1800	771.994	33.878	68.223	45.652	-0.691	35.304	1469.679	-0.002371	-0.004776	-0.003196
0.1820	700.985	28.668	60.435	40.108	-0.694	35.299	1334.496	-0.002007	-0.004230	-0.002808
0.1840	634.980	24.274	52.977	34.952	-0.697	35.300	1208.839	-0.001699	-0.003708	-0.002447
0.1860	574.085	20.190	45.725	29.338	-0.693	35.305	1092.911	-0.001413	-0.003201	-0.002054
0.1880	514.437	15.992	38.585	24.292	-0.688	35.309	979.357	-0.001119	-0.002701	-0.001700
0.1900	456.653	11.920	31.471	19.165	-0.689	35.315	869.350	-0.000834	-0.002203	-0.001342
0.1920	401.499	8.502	24.385	14.007	-0.694	35.319	764.351	-0.000595	-0.001707	-0.000980
0.1940	350.493	5.515	18.248	9.464	-0.695	35.317	667.248	-0.000386	-0.001277	-0.000662
0.1960	308.518	2.610	12.372	5.351	-0.683	35.314	587.339	-0.000183	-0.000866	-0.000375
0.1980	277.935	0.500	7.651	2.114	-0.681	35.309	529.118	-0.000035	-0.000536	-0.000148
0.2000	257.632	-0.905	4.099	-0.194	-0.689	35.304	490.465	0.000063	-0.000287	0.000014
0.2020	244.723	-1.894	1.998	-1.679	-0.685	35.300	465.889	0.000133	-0.000140	0.000118
0.2040	237.554	-2.408	0.621	-2.624	-0.695	35.300	452.242	0.000169	-0.000043	0.000184
0.2060	235.615	-3.030	-0.277	-3.556	-0.684	35.306	448.551	0.000212	0.000019	0.000249
0.2080	237.704	-3.185	-0.524	-3.500	-0.685	35.310	452.528	0.000223	0.000037	0.000245
0.2100	242.709	-3.157	-0.510	-3.403	-0.686	35.316	462.055	0.000221	0.000036	0.000238
0.2120	252.838	-2.811	0.165	-2.652	-0.691	35.319	481.339	0.000197	-0.000012	0.000186
0.2140	275.846	-1.809	2.230	-0.997	-0.699	35.317	525.141	0.000127	-0.000156	0.000070
0.2160	330.700	0.971	7.980	3.017	-0.689	35.315	629.568	-0.000068	-0.000559	-0.000211
0.2180	412.770	5.637	17.172	9.423	-0.692	35.310	785.809	-0.000395	-0.001202	-0.000660
0.2200	499.199	10.920	27.110	16.513	-0.695	35.304	950.346	-0.000764	-0.001898	-0.001156
0.2220	578.173	15.993	36.260	23.016	-0.698	35.300	1100.693	-0.001119	-0.002538	-0.001611
0.2240	644.072	20.412	44.130	28.517	-0.701	35.301	1226.149	-0.001429	-0.003089	-0.001996
0.2260	701.466	24.039	50.568	33.116	-0.691	35.306	1335.411	-0.001683	-0.003540	-0.002318
0.2280	760.708	28.012	57.283	38.132	-0.692	35.310	1448.193	-0.001961	-0.004010	-0.002669
0.2300	828.666	32.419	64.852	43.400	-0.693	35.316	1577.568	-0.002269	-0.004540	-0.003038
0.2320	905.912	37.685	73.232	50.015	-0.690	35.319	1724.625	-0.002638	-0.005126	-0.003501
0.2340	986.570	43.701	82.079	56.838	-0.699	35.318	1878.176	-0.003059	-0.005746	-0.003979
0.2360	1060.765	48.787	90.076	63.160	-0.687	35.315	2019.424	-0.003415	-0.006305	-0.004421
0.2380	1121.615	53.193	96.792	68.219	-0.693	35.310	2135.267	-0.003724	-0.006775	-0.004775
0.2400	1173.358	57.611	102.240	72.835	-0.703	35.304	2233.772	-0.004033	-0.007157	-0.005098
0.2420	1221.118	61.322	107.593	76.905	-0.707	35.300	2324.696	-0.004293	-0.007532	-0.005383
0.2440	1266.519	64.783	112.669	81.308	-0.715	35.300	2411.127	-0.004535	-0.007887	-0.005692
0.2460	1307.126	67.980	116.865	84.755	-0.699	35.305	2488.432	-0.004759	-0.008181	-0.005933
0.2480	1337.498	70.493	120.291	87.216	-0.699	35.310	2546.253	-0.004934	-0.008420	-0.006105
0.2500	1357.757	72.175	122.687	88.939	-0.698	35.316	2584.820	-0.005052	-0.008588	-0.006226
0.2520	1370.170	73.689	124.364	90.704	-0.695	35.319	2608.452	-0.005158	-0.008705	-0.006349
0.2540	1375.039	74.439	125.370	91.565	-0.695	35.318	2617.722	-0.005211	-0.008776	-0.006410
0.2560	1373.551	74.425	125.190	91.634	-0.691	35.315	2614.889	-0.005210	-0.008763	-0.006414
0.2580	1367.510	74.256	125.036	91.537	-0.694	35.310	2603.388	-0.005198	-0.008753	-0.006408
0.2600	1357.441	73.911	124.803	90.802	-0.694	35.304	2584.219	-0.005174	-0.008736	-0.006356
0.2620	1342.292	73.023	124.116	90.106	-0.692	35.300	2555.380	-0.005112	-0.008688	-0.006307
0.2640	1313.618	71.188	122.314	88.980	-0.692	35.301	2500.792	-0.004983	-0.008562	-0.006229
0.2660	1256.961	67.171	117.731	85.034	-0.686	35.305	2392.931	-0.004702	-0.008241	-0.005952
0.2680	1180.962	62.267	110.756	79.324	-0.687	35.310	2248.249	-0.004359	-0.007753	-0.005553
0.2700	1107.098	57.154	103.615	73.502	-0.688	35.316	2107.630	-0.004001	-0.007253	-0.005145
0.2720	1042.220	52.734	97.230	67.943	-0.687	35.319	1984.119	-0.003691	-0.006806	-0.004756
0.2740	982.091	48.551	91.409	63.439	-0.694	35.317	1869.650	-0.003399	-0.006399	-0.004441
0.2760	920.159	43.966	84.722	58.673	-0.682	35.314	1751.747	-0.003078	-0.005931	-0.004107
0.2780	850.443	39.240	77.512	52.741	-0.686	35.309	1619.024	-0.002747	-0.005426	-0.003692
0.2800	772.310	33.902	69.021	46.179	-0.690	35.304	1470.280	-0.002373	-0.004831	-0.003233
0.2820	694.853	28.903	60.105	39.620	-0.686	35.300	1322.823	-0.002023	-0.004207	-0.002773
0.2840	629.254	24.386	52.674	34.340	-0.691	35.300	1197.939	-0.001707	-0.003687	-0.002404
0.2860	574.701	20.397	45.808	29.378	-0.684	35.305	1094.084	-0.001428	-0.003207	-0.002056
0.2880	522.222	16.562	39.548	24.959	-0.682	35.310	994.177	-0.001159	-0.002768	-0.001747
0.2900	467.158	12.824	32.886	20.234	-0.688	35.316	889.349	-0.000898	-0.002302	-0.001416
0.2920	411.358	9.349	25.856	15.038	-0.688	35.319	783.119	-0.000654	-0.001810	-0.001053
0.2940	361.027	6.042	19.732	10.772	-0.699	35.318	687.304	-0.000423	-0.001381	-0.000754
0.2960	321.563	3.221	14.257	6.686	-0.696	35.314	612.173	-0.000225	-0.000998	-0.000468
0.2980	292.378	1.374	9.785	3.822	-0.698	35.309	556.612	-0.000096	-0.000685	-0.000268
0.3000	271.759	0.026	6.577	1.348	-0.700	35.304	517.359	-0.000002	-0.000460	-0.000094
0.3020	257.196	-1.142	4.403	-0.429	-0.703	35.300	489.635	0.000080	-0.000308	0.000030
0.3040	246.451	-1.809	2.614	-1.358	-0.711	35.300	469.179	0.000127	-0.000183	0.000095
0.3060	239.778	-2.380	0.951	-2.373	-0.699	35.305	456.476	0.000167	-0.000067	0.000166
0.3080	238.471	-2.434	0.277	-3.026	-0.695	35.309	453.987	0.000170	-0.000019	0.000212
0.3100	242.513	-2.587	0.221	-3.053	-0.699	35.315	461.683	0.000181	-0.000015	0.000214
0.3120	251.681	-2.614	0.496	-2.679	-0.696	35.319	479.136	0.000183	-0.000035	0.000188
0.3140	269.489	-1.586	1.860	-1.330	-0.694	35.318	513.039	0.000111	-0.000130	0.000093
0.3160	313.237	0.317	5.849	1.614	-0.690	35.315	596.323	-0.000022	-0.000409	-0.000113
0.3180	389.356	4.445	14.654	7.672	-0.687	35.309	741.234	-0.000311	-0.001026	-0.000537
0.3200	476.957	9.641	24.672	15.052	-0.688	35.304	908.003	-0.000675	-0.001727	-0.001054
0.3220	560.965	14.853	34.303	21.807	-0.691	35.299	1067.934	-0.001040	-0.002401	-0.001526
0.3240	634.650	19.982	43.152	27.766	-0.698	35.300	1208.210	-0.001399	-0.003021	-0.001944
0.3260	697.408	23.858	50.488	32.809	-0.693	35.305	1327.686	-0.001670	-0.003534	-0.002297
0.3280	761.009	28.165	57.547	38.272	-0.704	35.309	1448.765	-0.001972	-0.004028	-0.002679
0.3300	836.481	33.196	65.857	44.595	-0.704	35.316	1592.445	-0.002324	-0.004610	-0.003122
0.3320	921.211	39.282	75.308	51.320	-0.694	35.319	1753.750	-0.002750	-0.005272	-0.003592
0.3340	1003.612	45.216	84.473	58.451	-0.700	35.317	1910.620	-0.003165	-0.005913	-0.004092
0.3360	1073.810	50.191	91.780	64.175	-0.699	35.314	2044.258	-0.003513	-0.006425	-0.004492
0.3380	1129.009	54.431	97.697	68.748	-0.698	35.309	2149.343	-0.003810	-0.006839	-0.004812
0.3400	1176.379	58.014	102.845	73.055	-0.697	35.304	2239.523	-0.004061	-0.007199	-0.005114
0.3420	1225.236	61.893	107.992	77.182	-0.694	35.299	2332.535	-0.004332	-0.007559	-0.005403
0.3440	1276.167	65.521	113.342	81.936	-0.698	35.300	2429.495	-0.004586	-0.007934	-0.005736
0.3460	1322.921	69.090	118.352	86.062	-0.689	35.305	2518.501	-0.004836	-0.008285	-0.006024
0.3480	1357.261	71.967	122.094	89.202	-0.695	35.309	2583.876	-0.005038	-0.008547	-0.006244
0.3500	1376.888	73.660	124.529	90.745	-0.699	35.316	2621.241	-0.005156	-0.008717	-0.006352
0.3520	1384.687	74.592	125.824	91.731	-0.700	35.320	2636.089	-0.005221	-0.008808	-0.006421
0.3540	1385.063	75.022	126.541	92.746	-0.706	35.318	2636.805	-0.005252	-0.008858	-0.006492
0.3560	1381.516	75.064	126.444	92.567	-0.692	35.315	2630.053	-0.005255	-0.008851	-0.006480
0.3580	1374.258	75.023	126.347	92.429	-0.692	35.310	2616.234	-0.005252	-0.008844	-0.006470
0.3600	1363.257	74.645	126.142	91.414	-0.690	35.304	2595.291	-0.005225	-0.008830	-0.006399
0.3620	1346.636	73.606	125.246	90.856	-0.695	35.300	2563.648	-0.005152	-0.008767	-0.006360
0.3640	1316.684	72.008	123.290	89.231	-0.707	35.300	2506.628	-0.005041	-0.008630	-0.006246
0.3660	1262.116	67.977	118.530	85.283	-0.698	35.305	2402.744	-0.004758	-0.008297	-0.005970
0.3680	1188.371	63.059	111.719	79.864	-0.697	35.309	2262.354	-0.004414	-0.007820	-0.005590
0.3700	1110.329	57.862	104.276	73.793	-0.700	35.316	2113.781	-0.004050	-0.007299	-0.005166
0.3720	1035.502	52.247	96.818	67.775	-0.694	35.320	1971.331	-0.003657	-0.006777	-0.004744
0.3740	964.749	47.370	89.649	62.423	-0.697	35.318	1836.634	-0.003316	-0.006275	-0.004370
0.3760	895.663	42.494	82.260	56.893	-0.690	35.315	1705.112	-0.002975	-0.005758	-0.003983
0.3780	828.471	38.018	75.157	51.126	-0.682	35.310	1577.196	-0.002661	-0.005261	-0.003579
0.3800	763.353	33.305	68.072	45.527	-0.682	35.304	1453.228	-0.002331	-0.004765	-0.003187
0.3820	699.046	29.027	60.890	40.260	-0.685	35.300	1330.805	-0.002032	-0.004262	-0.002818
0.3840	633.778	24.873	53.584	35.076	-0.697	35.300	1206.551	-0.001741	-0.003751	-0.002455
0.3860	569.892	20.134	46.084	29.156	-0.688	35.305	1084.929	-0.001409	-0.003226	-0.002041
0.3880	509.568	15.895	38.694	23.986	-0.687	35.309	970.087	-0.001113	-0.002709	-0.001679
0.3900	452.250	12.240	31.348	19.081	-0.691	35.315	860.968	-0.000857	-0.002194	-0.001336
0.3920	398.779	8.793	24.355	14.106	-0.688	35.319	759.172	-0.000615	-0.001705	-0.000987
0.3940	353.183	5.930	18.644	9.979	-0.695	35.317	672.369	-0.000415	-0.001305	-0.000699
0.3960	317.490	3.165	13.362	6.295	-0.686	35.314	604.420	-0.000222	-0.000935	-0.000441
0.3980	289.342	1.041	9.028	3.379	-0.691	35.310	550.833	-0.000073	-0.000632	-0.000237
0.4000	266.995	-0.501	5.862	0.905	-0.694	35.304	508.289	0.000035	-0.000410	-0.000063
0.4020	251.395	-1.559	3.439	-0.804	-0.691	35.300	478.592	0.000109	-0.000241	0.000056
0.4040	243.445	-2.282	2.161	-1.649	-0.695	35.300	463.457	0.000160	-0.000151	0.000115
0.4060	242.438	-2.561	1.474	-2.302	-0.686	35.305	461.540	0.000179	-0.000103	0.000161
0.4080	245.384	-2.423	1.253	-2.066	-0.690	35.310	467.148	0.000170	-0.000088	0.000145
0.4100	251.395	-2.436	1.489	-2.053	-0.695	35.316	478.592	0.000171	-0.000104	0.000144
0.4120	262.050	-2.172	2.095	-1.775	-0.694	35.319	498.877	0.000152	-0.000147	0.000124
0.4140	285.585	-0.809	4.087	-0.069	-0.700	35.318	543.680	0.000057	-0.000286	0.000005
0.4160	338.635	2.041	9.550	3.920	-0.684	35.315	644.674	-0.000143	-0.000669	-0.000274
0.4180	414.694	6.114	18.012	10.034	-0.684	35.310	789.471	-0.000428	-0.001261	-0.000702
0.4200	493.758	10.865	26.929	16.343	-0.685	35.304	939.989	-0.000761	-0.001885	-0.001144
0.4220	568.840	15.576	35.212	22.582	-0.688	35.300	1082.926	-0.001090	-0.002465	-0.001581
0.4240	641.698	20.536	43.895	28.669	-0.691	35.301	1221.628	-0.001438	-0.003073	-0.002007
0.4260	715.112	25.108	52.261	34.520	-0.682	35.305	1361.389	-0.001758	-0.003658	-0.002416
0.4280	790.479	30.070	60.656	40.705	-0.692	35.309	1504.869	-0.002105	-0.004246	-0.002849
0.4300	862.931	35.156	68.953	46.610	-0.693	35.315	1642.799	-0.002461	-0.004827	-0.003263
0.4320	928.064	39.713	76.259	52.169	-0.691	35.319	1766.796	-0.002780	-0.005338	-0.003652
0.4340	988.043	44.312	83.030	57.631	-0.698	35.318	1880.980	-0.003102	-0.005812	-0.004034
0.4360	1046.744	48.549	89.291	62.133	-0.685	35.315	1992.731	-0.003398	-0.006250	-0.004349
0.4380	1105.400	52.970	95.758	67.261	-0.686	35.309	2104.397	-0.003708	-0.006703	-0.004708
0.4400	1165.273	57.543	101.950	72.361	-0.687	35.304	2218.380	-0.004028	-0.007137	-0.005065
0.4420	1224.485	61.948	108.319	77.655	-0.687	35.300	2331.104	-0.004336	-0.007582	-0.005436
0.4440	1278.166	66.256	114.180	82.493	-0.687	35.300	2433.300	-0.004638	-0.007993	-0.005774
0.4460	1324.904	69.884	118.750	86.061	-0.691	35.305	2522.278	-0.004892	-0.008313	-0.006024
0.4480	1357.456	72.718	122.589	89.285	-0.703	35.309	2584.248	-0.005090	-0.008581	-0.006250
0.4500	1371.823	74.175	124.335	90.439	-0.702	35.315	2611.599	-0.005192	-0.008703	-0.006331
0.4520	1374.994	74.495	124.970	91.190	-0.697	35.319	2617.636	-0.005215	-0.008748	-0.006383
0.4540	1373.101	74.605	125.438	91.398	-0.699	35.318	2614.031	-0.005222	-0.008781	-0.006398
0.4560	1370.230	74.452	125.591	91.468	-0.680	35.315	2608.566	-0.005212	-0.008791	-0.006403
0.4580	1365.737	74.466	125.617	91.539	-0.683	35.310	2600.012	-0.005213	-0.008793	-0.006408
0.4600	1358.057	74.078	125.411	91.010	-0.686	35.304	2585.392	-0.005185	-0.008779	-0.006371
0.4620	1345.418	73.261	124.888	90.717	-0.684	35.300	2561.331	-0.005128	-0.008742	-0.006350
0.4640	1320.231	72.138	123.801	89.300	-0.685	35.300	2513.380	-0.005050	-0.008666	-0.006251
0.4660	1263.919	68.481	119.081	85.617	-0.680	35.305	2406.178	-0.004794	-0.008336	-0.005993
0.4680	1177.145	62.490	111.197	79.294	-0.687	35.309	2240.982	-0.004374	-0.007784	-0.005551
0.4700	1089.154	56.516	102.583	72.152	-0.689	35.315	2073.469	-0.003956	-0.007181	-0.005051
0.4720	1014.883	51.429	95.179	66.412	-0.687	35.319	1932.077	-0.003600	-0.006663	-0.004649
0.4740	953.011	47.093	89.055	61.618	-0.695	35.317	1814.289	-0.003296	-0.006234	-0.004313
0.4760	897.361	43.020	82.685	56.979	-0.690	35.314	1708.345	-0.003011	-0.005788	-0.003989
0.4780	837.368	38.756	76.204	51.670	-0.690	35.309	1594.133	-0.002713	-0.005334	-0.003617
0.4800	766.404	33.683	68.443	45.886	-0.699	35.303	1459.036	-0.002358	-0.004791	-0.003212
0.4820	690.450	28.583	59.871	39.565	-0.688	35.299	1314.440	-0.002001	-0.004191	-0.002770
0.4840	622.537	24.039	52.151	33.826	-0.687	35.300	1185.150	-0.001683	-0.003651	-0.002368
0.4860	565.624	19.912	45.230	28.626	-0.683	35.304	1076.803	-0.001394	-0.003166	-0.002004
0.4880	513.626	16.241	38.969	24.348	-0.687	35.309	977.812	-0.001137	-0.002728	-0.001704
0.4900	460.816	12.725	32.681	19.622	-0.690	35.315	877.275	-0.000891	-0.002288	-0.001374
0.4920	407.886	9.154	26.118	14.857	-0.686	35.319	776.510	-0.000641	-0.001828	-0.001040
0.4940	360.967	6.418	20.145	10.591	-0.696	35.317	687.189	-0.000449	-0.001410	-0.000741
0.4960	324.028	3.792	14.903	7.032	-0.687	35.314	616.865	-0.000265	-0.001043	-0.000492
0.4980	295.924	2.165	10.803	4.073	-0.692	35.310	563.364	-0.000152	-0.000756	-0.000285
0.5000	272.961	0.430	7.417	1.599	-0.698	35.304	519.648	-0.000030	-0.000519	-0.000112
0.5020	255.137	-0.877	4.280	-0.343	-0.697	35.300	485.716	0.000061	-0.000300	0.000024
0.5040	244.227	-1.531	2.355	-1.523	-0.703	35.300	464.945	0.000107	-0.000165	0.000107
0.5060	240.755	-2.130	1.157	-2.038	-0.695	35.305	458.336	0.000149	-0.000081	0.000143
0.5080	242.543	-2.172	0.977	-2.151	-0.690	35.309	461.740	0.000152	-0.000068	0.000151
0.5100	247.864	-1.990	1.074	-2.096	-0.694	35.315	471.869	0.000139	-0.000075	0.000147
0.5120	257.692	-2.004	1.487	-1.956	-0.687	35.319	490.580	0.000140	-0.000104	0.000137
0.5140	277.214	-1.184	3.290	-0.706	-0.699	35.317	527.744	0.000083	-0.000230	0.000049
0.5160	324.298	1.248	7.994	2.600	-0.692	35.314	617.380	-0.000087	-0.000560	-0.000182
0.5180	399.380	5.501	16.418	8.812	-0.700	35.310	760.317	-0.000385	-0.001149	-0.000617
0.5200	480.729	10.307	25.705	15.496	-0.690	35.304	915.184	-0.000722	-0.001799	-0.001085
0.5220	555.615	14.949	34.373	21.637	-0.687	35.299	1057.749	-0.001046	-0.002406	-0.001515
0.5240	623.048	19.174	42.409	27.252	-0.696	35.300	1186.123	-0.001342	-0.002969	-0.001908
0.5260	689.368	23.563	49.743	32.519	-0.692	35.304	1312.380	-0.001649	-0.003482	-0.002276
0.5280	760.032	28.386	57.573	38.244	-0.699	35.309	1446.905	-0.001987	-0.004030	-0.002677
0.5300	835.940	33.669	66.103	44.344	-0.697	35.315	1591.415	-0.002357	-0.004627	-0.003104
0.5320	912.284	38.809	74.387	50.778	-0.697	35.319	1736.755	-0.002717	-0.005207	-0.003554
0.5340	985.293	44.271	82.506	57.491	-0.703	35.317	1875.744	-0.003099	-0.005775	-0.004024
0.5360	1053.837	48.940	89.813	62.925	-0.686	35.314	2006.235	-0.003426	-0.006287	-0.004405
0.5380	1117.933	53.596	96.611	68.441	-0.694	35.309	2128.258	-0.003752	-0.006763	-0.004791
0.5400	1179.249	58.181	103.421	73.682	-0.699	35.304	2244.987	-0.004073	-0.007239	-0.005158
0.5420	1236.778	62.659	109.695	78.602	-0.698	35.300	2354.507	-0.004386	-0.007679	-0.005502
0.5440	1286.357	66.687	115.062	82.881	-0.703	35.300	2448.893	-0.004668	-0.008054	-0.005802
0.5460	1324.003	69.367	119.191	86.175	-0.693	35.305	2520.561	-0.004856	-0.008343	-0.006032
0.5480	1346.846	71.758	121.929	88.453	-0.696	35.309	2564.049	-0.005023	-0.008535	-0.006192
0.5500	1357.561	72.994	123.331	89.592	-0.707	35.315	2584.448	-0.005110	-0.008633	-0.006271
0.5520	1363.753	74.049	124.183	90.773	-0.699	35.319	2596.235	-0.005183	-0.008693	-0.006354
0.5540	1369.824	74.953	125.383	91.675	-0.698	35.318	2607.794	-0.005247	-0.008777	-0.006417
0.5560	1374.919	75.315	126.059	92.121	-0.687	35.315	2617.493	-0.005272	-0.008824	-0.006448
0.5580	1375.640	75.579	126.472	92.498	-0.690	35.310	2618.866	-0.005291	-0.008853	-0.006475
0.5600	1370.501	75.315	126.540	92.220	-0.699	35.304	2609.081	-0.005272	-0.008858	-0.006455
0.5620	1358.613	74.564	125.673	91.732	-0.702	35.299	2586.451	-0.005219	-0.008797	-0.006421
0.5640	1335.064	73.272	124.570	90.997	-0.709	35.300	2541.618	-0.005129	-0.008720	-0.006370
0.5660	1277.971	69.342	120.114	86.813	-0.692	35.304	2432.928	-0.004854	-0.008408	-0.006077
0.5680	1183.141	62.921	111.719	79.880	-0.695	35.309	2252.398	-0.004404	-0.007820	-0.005592
0.5700	1090.071	56.653	102.898	72.485	-0.699	35.315	2075.214	-0.003966	-0.007203	-0.005074
0.5720	1019.993	51.929	95.855	66.704	-0.694	35.319	1941.805	-0.003635	-0.006710	-0.004669
0.5740	967.424	48.287	90.654	63.023	-0.695	35.318	1841.726	-0.003380	-0.006346	-0.004412
0.5760	916.733	44.799	85.245	58.548	-0.685	35.314	1745.224	-0.003136	-0.005967	-0.004098
0.5780	851.960	40.325	78.378	53.198	-0.681	35.310	1621.914	-0.002823	-0.005486	-0.003724
0.5800	769.244	34.626	69.503	46.682	-0.686	35.304	1464.443	-0.002424	-0.004865	-0.003268
0.5820	682.365	28.804	59.583	39.439	-0.687	35.299	1299.047	-0.002016	-0.004171	-0.002761
0.5840	610.544	23.913	51.216	33.269	-0.693	35.299	1162.319	-0.001674	-0.003585	-0.002329
0.5860	559.117	19.799	44.570	28.532	-0.687	35.305	1064.415	-0.001386	-0.003120	-0.001997
0.5880	515.369	16.575	39.079	24.641	-0.689	35.309	981.131	-0.001160	-0.002736	-0.001725
0.5900	467.203	13.380	33.244	20.262	-0.690	35.315	889.435	-0.000937	-0.002327	-0.001418
0.5920	413.296	9.862	26.545	15.358	-0.693	35.319	786.810	-0.000690	-0.001858	-0.001075
0.5940	361.133	6.902	19.968	10.897	-0.695	35.318	687.504	-0.000483	-0.001398	-0.000763
0.5960	319.008	3.957	14.202	6.769	-0.687	35.314	607.309	-0.000277	-0.000994	-0.000474
0.5980	289.913	1.790	10.113	3.601	-0.688	35.310	551.920	-0.000125	-0.000708	-0.000252
0.6000	271.233	0.444	7.361	1.517	-0.695	35.304	516.357	-0.000031	-0.000515	-0.000106
0.6020	258.459	-0.557	4.982	0.071	-0.699	35.300	492.039	0.000039	-0.000349	-0.000005
0.6040	249.983	-0.933	3.591	-0.915	-0.702	35.300	475.903	0.000065	-0.000251	0.000064
0.6060	245.955	-1.560	2.572	-1.568	-0.687	35.305	468.235	0.000109	-0.000180	0.000110
0.6080	246.571	-1.907	2.256	-1.790	-0.687	35.309	469.408	0.000134	-0.000158	0.000125
0.6100	250.388	-1.879	2.173	-1.816	-0.689	35.315	476.675	0.000132	-0.000152	0.000127
0.6120	258.579	-1.476	2.504	-1.496	-0.687	35.319	492.268	0.000103	-0.000175	0.000105
0.6140	274.764	-0.794	3.549	-0.248	-0.696	35.318	523.081	0.000056	-0.000248	0.000017
0.6160	316.619	1.248	7.197	2.377	-0.694	35.315	602.760	-0.000087	-0.000504	-0.000166
0.6180	392.512	5.472	15.619	8.145	-0.698	35.310	747.242	-0.000383	-0.001093	-0.000570
0.6200	480.413	10.335	25.651	15.442	-0.688	35.304	914.583	-0.000723	-0.001796	-0.001081
0.6220	562.829	15.311	35.103	22.293	-0.684	35.300	1071.482	-0.001072	-0.002457	-0.001561
0.6240	633.327	19.939	43.539	28.336	-0.691	35.300	1205.692	-0.001396	-0.003048	-0.001984
0.6260	696.206	23.927	50.817	33.144	-0.686	35.304	1325.397	-0.001675	-0.003557	-0.002320
0.6280	761.279	28.485	58.316	38.689	-0.689	35.309	1449.280	-0.001994	-0.004082	-0.002708
0.6300	836.045	33.863	66.545	44.805	-0.689	35.315	1591.616	-0.002370	-0.004658	-0.003136
0.6320	917.755	39.505	75.338	51.446	-0.689	35.318	1747.169	-0.002765	-0.005274	-0.003601
0.6340	997.901	45.440	84.297	58.743	-0.695	35.317	1899.748	-0.003181	-0.005901	-0.004112
0.6360	1069.587	50.678	91.961	64.300	-0.685	35.314	2036.219	-0.003547	-0.006437	-0.004501
0.6380	1129.039	55.040	98.400	69.886	-0.686	35.310	2149.401	-0.003853	-0.006888	-0.004892
0.6400	1180.797	59.238	103.931	74.222	-0.689	35.304	2247.934	-0.004147	-0.007275	-0.005196
0.6420	1229.955	63.142	109.036	78.280	-0.691	35.299	2341.518	-0.004420	-0.007633	-0.005480
0.6440	1277.745	66.492	114.113	82.533	-0.699	35.300	2432.499	-0.004654	-0.007988	-0.005777
0.6460	1319.675	69.620	118.725	86.089	-0.695	35.304	2512.321	-0.004873	-0.008311	-0.006026
0.6480	1350.333	72.259	122.041	88.841	-0.701	35.308	2570.686	-0.005058	-0.008543	-0.006219
0.6500	1370.426	73.966	124.543	90.814	-0.695	35.314	2608.938	-0.005178	-0.008718	-0.006357
0.6520	1382.794	74.882	126.265	92.122	-0.694	35.319	2632.484	-0.005242	-0.008839	-0.006449
0.6540	1388.490	75.997	127.310	92.874	-0.697	35.317	2643.328	-0.005320	-0.008912	-0.006501
0.6560	1387.242	76.304	127.364	93.387	-0.695	35.315	2640.953	-0.005341	-0.008915	-0.006537
0.6580	1381.321	76.095	127.419	92.997	-0.699	35.310	2629.681	-0.005327	-0.008919	-0.006510
0.6600	1370.696	75.787	127.228	92.483	-0.708	35.304	2609.453	-0.005305	-0.008906	-0.006474
0.6620	1352.437	74.772	126.266	91.411	-0.698	35.300	2574.692	-0.005234	-0.008839	-0.006399
0.6640	1313.814	72.300	123.719	89.564	-0.708	35.299	2501.163	-0.005061	-0.008660	-0.006269
0.6660	1243.901	67.451	117.528	84.535	-0.700	35.304	2368.069	-0.004722	-0.008227	-0.005917
0.6680	1164.762	62.157	109.918	78.629	-0.698	35.309	2217.407	-0.004351	-0.007694	-0.005504
0.6700	1093.737	56.999	103.023	72.834	-0.688	35.314	2082.195	-0.003990	-0.007212	-0.005098
0.6720	1032.602	52.873	96.734	67.609	-0.687	35.319	1965.809	-0.003701	-0.006771	-0.004733
0.6740	975.404	48.733	91.078	63.606	-0.692	35.317	1856.918	-0.003411	-0.006375	-0.004452
0.6760	913.276	44.201	84.625	58.713	-0.679	35.314	1738.644	-0.003094	-0.005924	-0.004110
0.6780	841.846	39.463	77.277	52.834	-0.687	35.310	1602.659	-0.002762	-0.005409	-0.003698
0.6800	766.404	34.168	69.146	46.415	-0.689	35.304	1459.036	-0.002392	-0.004840	-0.003249
0.6820	694.207	28.984	60.835	40.135	-0.685	35.299	1321.592	-0.002029	-0.004258	-0.002809
0.6840	627.346	24.415	53.321	34.840	-0.695	35.299	1194.305	-0.001709	-0.003733	-0.002439
0.6860	566.917	20.370	46.028	29.308	-0.692	35.304	1079.264	-0.001426	-0.003222	-0.002052
0.6880	511.312	16.756	39.410	24.767	-0.707	35.309	973.406	-0.001173	-0.002759	-0.001734
0.6900	459.674	13.323	32.942	20.124	-0.711	35.314	875.101	-0.000933	-0.002306	-0.001409
0.6920	412.049	10.224	26.626	15.734	-0.696	35.319	784.435	-0.000716	-0.001864	-0.001101
0.6940	367.610	7.153	20.944	11.577	-0.702	35.317	699.835	-0.000501	-0.001466	-0.000810
0.6960	329.648	4.582	15.577	7.714	-0.692	35.314	627.565	-0.000321	-0.001090	-0.000540
0.6980	299.426	2.623	11.380	4.784	-0.689	35.309	570.030	-0.000184	-0.000797	-0.000335
0.7000	276.853	0.790	7.981	2.601	-0.695	35.303	527.058	-0.000055	-0.000559	-0.000182
0.7020	260.863	-0.556	5.202	0.960	-0.698	35.299	496.616	0.000039	-0.000364	-0.000067
0.7040	250.373	-1.072	3.758	-0.305	-0.700	35.300	476.646	0.000075	-0.000263	0.000021
0.7060	245.955	-1.601	2.463	-1.261	-0.695	35.304	468.235	0.000112	-0.000172	0.000088
0.7080	247.383	-1.921	2.312	-1.511	-0.700	35.309	470.953	0.000134	-0.000162	0.000106
0.7100	252.688	-1.781	2.421	-1.385	-0.702	35.314	481.052	0.000125	-0.000169	0.000097
0.7120	261.494	-1.517	2.767	-1.054	-0.710	35.319	497.818	0.000106	-0.000194	0.000074
0.7140	278.882	-0.448	4.225	0.015	-0.722	35.317	530.920	0.000031	-0.000296	-0.000001
0.7160	323.021	1.845	8.353	3.142	-0.708	35.314	614.948	-0.000129	-0.000585	-0.000220
0.7180	401.063	6.155	17.173	9.160	-0.704	35.309	763.521	-0.000431	-0.001202	-0.000641
0.7200	492.691	11.433	27.533	16.705	-0.699	35.304	937.958	-0.000800	-0.001927	-0.001169
0.7220	579.601	16.936	37.277	23.808	-0.702	35.300	1103.411	-0.001186	-0.002609	-0.001667
0.7240	652.113	21.760	45.987	29.922	-0.716	35.300	1241.455	-0.001523	-0.003219	-0.002095
0.7260	711.625	25.428	52.702	34.631	-0.704	35.304	1354.752	-0.001780	-0.003689	-0.002424
0.7280	768.868	29.526	59.072	39.509	-0.698	35.308	1463.728	-0.002067	-0.004135	-0.002766
0.7300	834.197	33.737	66.338	44.807	-0.707	35.314	1588.097	-0.002362	-0.004644	-0.003136
0.7320	908.978	38.908	74.620	51.072	-0.706	35.319	1730.461	-0.002724	-0.005223	-0.003575
0.7340	984.195	44.271	82.933	57.742	-0.717	35.317	1873.655	-0.003099	-0.005805	-0.004042
0.7360	1054.513	49.371	90.461	63.606	-0.703	35.314	2007.523	-0.003456	-0.006332	-0.004452
0.7380	1121.209	54.526	97.672	68.955	-0.700	35.309	2134.495	-0.003817	-0.006837	-0.004827
0.7400	1182.946	59.210	104.276	74.251	-0.698	35.303	2252.026	-0.004145	-0.007299	-0.005198
0.7420	1236.327	63.351	110.000	78.739	-0.699	35.299	2353.649	-0.004435	-0.007700	-0.005512
0.7440	1279.970	66.937	114.858	82.921	-0.706	35.299	2436.733	-0.004686	-0.008040	-0.005804
0.7460	1316.579	69.981	118.724	85.716	-0.699	35.304	2506.428	-0.004899	-0.008311	-0.006000
0.7480	1347.567	72.302	122.233	88.831	-0.703	35.308	2565.422	-0.005061	-0.008556	-0.006218
0.7500	1370.140	74.217	124.930	91.080	-0.704	35.314	2608.395	-0.005195	-0.008745	-0.006376
0.7520	1382.283	75.399	126.292	92.136	-0.699	35.319	2631.512	-0.005278	-0.008840	-0.006450
0.7540	1385.574	76.010	127.119	93.108	-0.712	35.318	2637.777	-0.005321	-0.008898	-0.006518
0.7560	1384.477	76.135	127.172	93.123	-0.700	35.315	2635.689	-0.005329	-0.008902	-0.006519
0.7580	1379.623	75.954	127.172	93.221	-0.698	35.310	2626.448	-0.005317	-0.008902	-0.006525
0.7600	1369.343	75.497	126.884	92.623	-0.704	35.304	2606.878	-0.005285	-0.008882	-0.006484
0.7620	1351.550	74.412	126.016	91.732	-0.704	35.299	2573.004	-0.005209	-0.008821	-0.006421
0.7640	1317.030	72.606	124.145	90.077	-0.704	35.299	2507.286	-0.005082	-0.008690	-0.006305
0.7660	1250.844	68.006	118.463	85.116	-0.690	35.304	2381.287	-0.004760	-0.008292	-0.005958
0.7680	1167.497	62.461	110.674	78.934	-0.691	35.309	2222.614	-0.004372	-0.007747	-0.005525
0.7700	1089.560	57.057	103.036	72.598	-0.702	35.315	2074.242	-0.003994	-0.007213	-0.005082
0.7720	1021.857	52.152	96.307	67.179	-0.702	35.319	1945.353	-0.003651	-0.006742	-0.004703
0.7740	960.541	47.954	90.212	62.161	-0.711	35.317	1828.623	-0.003357	-0.006315	-0.004351
0.7760	898.744	43.452	83.539	57.478	-0.695	35.314	1710.978	-0.003042	-0.005848	-0.004023
0.7780	832.288	39.131	76.233	51.962	-0.689	35.309	1584.463	-0.002739	-0.005336	-0.003637
0.7800	760.588	34.154	68.402	45.847	-0.701	35.304	1447.964	-0.002391	-0.004788	-0.003209
0.7820	688.992	29.014	60.146	39.872	-0.695	35.300	1311.665	-0.002031	-0.004210	-0.002791
0.7840	624.731	24.761	52.813	34.619	-0.699	35.299	1189.327	-0.001733	-0.003697	-0.002423
0.7860	570.118	20.689	46.166	29.755	-0.700	35.304	1085.358	-0.001448	-0.003232	-0.002083
0.7880	518.901	16.923	40.125	25.099	-0.705	35.308	987.854	-0.001185	-0.002809	-0.001757
0.7900	464.648	13.061	33.782	20.610	-0.704	35.314	884.571	-0.000914	-0.002365	-0.001443
0.7920	408.652	9.627	26.587	15.498	-0.704	35.319	777.969	-0.000674	-0.001861	-0.001085
0.7940	356.880	6.209	20.228	11.120	-0.709	35.317	679.407	-0.000435	-0.001416	-0.000778
0.7960	314.635	3.639	14.284	6.727	-0.695	35.314	598.984	-0.000255	-0.001000	-0.000471
0.7980	283.376	1.790	9.975	3.489	-0.687	35.310	539.474	-0.000125	-0.000698	-0.000244
0.8000	263.223	0.137	6.866	1.251	-0.693	35.304	501.108	-0.000010	-0.000481	-0.000088
0.8020	252.718	-0.613	4.555	-0.069	-0.694	35.300	481.110	0.000043	-0.000319	0.000005
0.8040	248.465	-0.865	3.632	-0.720	-0.700	35.299	473.013	0.000061	-0.000254	0.000050
0.8060	249.231	-1.463	3.163	-1.054	-0.695	35.304	474.472	0.000102	-0.000221	0.000074
0.8080	252.808	-1.366	2.904	-1.097	-0.699	35.309	481.281	0.000096	-0.000203	0.000077
0.8100	258.278	-1.294	3.179	-1.109	-0.695	35.315	491.695	0.000091	-0.000223	0.000078
0.8120	266.454	-1.099	3.466	-0.829	-0.694	35.319	507.259	0.000077	-0.000243	0.000058
0.8140	281.497	-0.307	4.321	0.628	-0.704	35.318	535.898	0.000021	-0.000302	-0.000044
0.8160	320.436	1.471	8.106	2.907	-0.698	35.315	610.027	-0.000103	-0.000567	-0.000203
0.8180	392.166	5.166	16.115	8.563	-0.696	35.310	746.584	-0.000362	-0.001128	-0.000599
0.8200	477.633	10.212	25.939	15.526	-0.697	35.304	909.290	-0.000715	-0.001816	-0.001087
0.8220	559.673	15.215	35.226	22.222	-0.692	35.300	1065.474	-0.001065	-0.002466	-0.001556
0.8240	631.539	20.091	44.075	28.156	-0.700	35.300	1202.288	-0.001406	-0.003085	-0.001971
0.8260	696.687	24.525	51.492	33.689	-0.694	35.304	1326.313	-0.001717	-0.003604	-0.002358
0.8280	764.255	29.360	59.142	39.190	-0.701	35.308	1454.945	-0.002055	-0.004140	-0.002743
0.8300	838.224	34.224	67.220	45.414	-0.700	35.314	1595.764	-0.002396	-0.004705	-0.003179
0.8320	915.050	39.603	75.476	51.653	-0.692	35.319	1742.020	-0.002772	-0.005283	-0.003616
0.8340	989.185	45.090	83.649	58.046	-0.706	35.318	1883.154	-0.003156	-0.005855	-0.004063
0.8360	1056.182	49.774	90.763	63.854	-0.692	35.314	2010.698	-0.003484	-0.006353	-0.004470
0.8380	1115.408	54.181	97.134	68.774	-0.696	35.310	2123.451	-0.003793	-0.006799	-0.004814
0.8400	1168.098	58.474	102.956	73.152	-0.700	35.304	2223.759	-0.004093	-0.007207	-0.005121
0.8420	1217.511	62.143	108.142	77.642	-0.694	35.299	2317.829	-0.004350	-0.007570	-0.005435
0.8440	1266.008	65.853	113.496	82.047	-0.700	35.299	2410.154	-0.004610	-0.007945	-0.005743
0.8460	1310.447	68.896	118.285	85.575	-0.689	35.304	2494.755	-0.004823	-0.008280	-0.005990
0.8480	1346.140	72.065	122.053	88.955	-0.696	35.308	2562.704	-0.005045	-0.008544	-0.006227
0.8500	1369.148	74.148	124.792	91.038	-0.699	35.314	2606.506	-0.005190	-0.008735	-0.006373
0.8520	1380.780	75.342	126.362	92.259	-0.694	35.319	2628.651	-0.005274	-0.008845	-0.006458
0.8540	1383.350	76.233	127.214	93.122	-0.697	35.318	2633.543	-0.005336	-0.008905	-0.006519
0.8560	1380.840	76.095	127.268	93.235	-0.695	35.315	2628.765	-0.005327	-0.008909	-0.006526
0.8580	1375.685	75.801	127.228	93.235	-0.692	35.310	2618.952	-0.005306	-0.008906	-0.006526
0.8600	1367.149	75.801	126.912	92.761	-0.692	35.304	2602.701	-0.005306	-0.008884	-0.006493
0.8620	1354.601	75.024	126.017	92.052	-0.693	35.299	2578.812	-0.005252	-0.008821	-0.006444
0.8640	1331.998	73.662	125.068	91.036	-0.701	35.299	2535.782	-0.005156	-0.008755	-0.006373
0.8660	1283.110	70.161	121.255	87.812	-0.693	35.304	2442.713	-0.004911	-0.008488	-0.006147
0.8680	1201.416	64.352	113.865	81.783	-0.694	35.308	2287.188	-0.004505	-0.007971	-0.005725
0.8700	1107.008	57.667	104.840	74.430	-0.694	35.313	2107.458	-0.004037	-0.007339	-0.005210
0.8720	1023.029	51.942	96.515	67.510	-0.690	35.318	1947.584	-0.003636	-0.006756	-0.004726
0.8740	958.827	47.718	90.170	62.703	-0.698	35.317	1825.361	-0.003340	-0.006312	-0.004389
0.8760	906.484	43.855	84.446	58.131	-0.690	35.314	1725.712	-0.003070	-0.005911	-0.004069
0.8780	848.504	39.767	78.544	53.365	-0.690	35.309	1615.334	-0.002784	-0.005498	-0.003736
0.8800	775.827	34.820	70.729	47.223	-0.699	35.303	1476.974	-0.002437	-0.004951	-0.003306
0.8820	697.198	29.388	61.647	40.621	-0.695	35.299	1327.286	-0.002057	-0.004315	-0.002843
0.8840	625.978	24.805	53.598	34.702	-0.698	35.299	1191.702	-0.001736	-0.003752	-0.002429
0.8860	566.661	20.719	46.209	29.517	-0.698	35.304	1078.777	-0.001450	-0.003235	-0.002066
0.8880	513.926	16.842	39.783	25.153	-0.699	35.308	978.384	-0.001179	-0.002785	-0.001761
0.8900	463.070	13.380	33.575	20.623	-0.704	35.314	881.567	-0.000937	-0.002350	-0.001444
0.8920	411.643	9.753	26.804	15.621	-0.704	35.319	783.663	-0.000683	-0.001876	-0.001093
0.8940	361.073	6.653	20.571	11.175	-0.710	35.317	687.389	-0.000466	-0.001440	-0.000782
0.8960	316.769	3.736	14.627	7.088	-0.696	35.314	603.046	-0.000262	-0.001024	-0.000496
0.8980	283.225	1.277	9.742	3.767	-0.698	35.310	539.188	-0.000089	-0.000682	-0.000264
0.9000	260.307	-0.181	6.275	1.362	-0.706	35.304	495.558	0.000013	-0.000439	-0.000095
0.9020	247.007	-1.196	4.101	-0.429	-0.711	35.300	470.238	0.000084	-0.000287	0.000030
0.9040	241.236	-1.600	2.947	-1.122	-0.717	35.299	459.251	0.000112	-0.000206	0.000079
0.9060	240.455	-1.947	2.216	-1.636	-0.707	35.304	457.764	0.000136	-0.000155	0.000115
0.9080	242.574	-1.822	2.064	-1.706	-0.707	35.308	461.798	0.000128	-0.000144	0.000119
0.9100	246.857	-1.879	2.079	-1.746	-0.704	35.314	469.952	0.000132	-0.000146	0.000122
0.9120	255.333	-1.712	2.230	-1.594	-0.698	35.319	486.088	0.000120	-0.000156	0.000112
0.9140	272.210	-0.863	3.604	-0.347	-0.700	35.317	518.217	0.000060	-0.000252	0.000024
0.9160	314.379	1.457	7.636	2.628	-0.704	35.314	598.497	-0.000102	-0.000535	-0.000184
0.9180	388.815	5.444	15.824	8.326	-0.704	35.310	740.204	-0.000381	-0.001108	-0.000583
0.9200	477.573	10.294	25.803	15.775	-0.703	35.304	909.176	-0.000721	-0.001806	-0.001104
0.9220	563.145	15.380	35.516	22.389	-0.696	35.299	1072.083	-0.001077	-0.002486	-0.001567
0.9240	636.168	20.357	44.184	28.572	-0.703	35.299	1211.100	-0.001425	-0.003093	-0.002000
0.9260	698.836	24.344	51.532	33.938	-0.691	35.304	1330.404	-0.001704	-0.003607	-0.002376
0.9280	761.054	28.512	58.728	39.220	-0.688	35.308	1448.851	-0.001996	-0.004111	-0.002745
0.9300	832.469	33.543	66.530	45.167	-0.692	35.314	1584.806	-0.002348	-0.004657	-0.003162
0.9320	911.668	38.949	75.227	51.378	-0.690	35.319	1735.582	-0.002726	-0.005266	-0.003596
0.9340	989.365	44.827	83.786	58.006	-0.700	35.318	1883.497	-0.003138	-0.005865	-0.004060
0.9360	1060.164	50.316	91.368	64.038	-0.696	35.315	2018.280	-0.003522	-0.006396	-0.004483
0.9380	1123.764	55.110	98.206	69.582	-0.696	35.310	2139.359	-0.003858	-0.006874	-0.004871
0.9400	1179.610	58.986	104.109	74.321	-0.702	35.304	2245.674	-0.004129	-0.007288	-0.005202
0.9420	1228.467	62.796	109.407	78.128	-0.701	35.299	2338.686	-0.004396	-0.007658	-0.005469
0.9440	1273.117	66.618	114.443	82.200	-0.706	35.299	2423.687	-0.004663	-0.008011	-0.005754
0.9460	1313.543	69.688	118.613	85.993	-0.700	35.303	2500.648	-0.004878	-0.008303	-0.006020
0.9480	1345.569	71.856	122.053	88.618	-0.704	35.308	2561.617	-0.005030	-0.008544	-0.006203
0.9500	1365.812	73.674	124.584	90.965	-0.700	35.314	2600.155	-0.005157	-0.008721	-0.006368
0.9520	1376.813	74.757	125.851	91.953	-0.696	35.319	2621.098	-0.005233	-0.008810	-0.006437
0.9540	1381.081	75.704	126.787	92.803	-0.694	35.318	2629.223	-0.005299	-0.008875	-0.006496
0.9560	1381.156	75.899	127.090	93.193	-0.688	35.315	2629.366	-0.005313	-0.008896	-0.006523
0.9580	1378.015	75.815	127.419	93.124	-0.699	35.310	2623.386	-0.005307	-0.008919	-0.006519
0.9600	1370.636	75.467	127.393	92.762	-0.696	35.304	2609.339	-0.005283	-0.008918	-0.006493
0.9620	1357.757	74.952	126.954	91.995	-0.698	35.299	2584.820	-0.005247	-0.008887	-0.006440
0.9640	1333.230	73.842	125.728	91.161	-0.711	35.299	2538.128	-0.005169	-0.008801	-0.006381
0.9660	1277.805	70.287	121.048	87.535	-0.701	35.303	2432.613	-0.004920	-0.008473	-0.006127
0.9680	1188.807	64.366	112.902	80.753	-0.696	35.308	2263.184	-0.004506	-0.007903	-0.005653
0.9700	1094.354	57.461	103.767	73.459	-0.698	35.313	2083.368	-0.004022	-0.007264	-0.005142
0.9720	1017.634	51.916	95.963	67.235	-0.690	35.319	1937.313	-0.003634	-0.006717	-0.004706
0.9740	962.855	47.982	90.321	63.051	-0.696	35.317	1833.029	-0.003359	-0.006322	-0.004414
0.9760	917.289	44.522	85.217	58.992	-0.687	35.314	1746.283	-0.003117	-0.005965	-0.004129
0.9780	859.234	40.519	79.095	54.323	-0.691	35.310	1635.761	-0.002836	-0.005537	-0.003803
0.9800	778.396	35.044	70.632	47.597	-0.699	35.304	1481.867	-0.002453	-0.004944	-0.003332
0.9820	691.021	29.096	60.919	40.024	-0.691	35.299	1315.527	-0.002037	-0.004264	-0.002802
0.9840	618.659	24.081	52.909	34.270	-0.692	35.299	1177.769	-0.001686	-0.003704	-0.002399
0.9860	565.354	20.300	46.221	29.587	-0.685	35.303	1076.288	-0.001421	-0.003235	-0.002071
0.9880	517.864	17.036	40.565	25.403	-0.682	35.308	985.880	-0.001193	-0.002840	-0.001778
0.9900	466.166	13.462	34.209	20.831	-0.683	35.313	887.461	-0.000942	-0.002395	-0.001458
0.9920	410.561	9.849	27.054	15.816	-0.684	35.318	781.603	-0.000689	-0.001894	-0.001107
0.9940	358.773	6.876	20.546	11.342	-0.692	35.317	683.012	-0.000481	-0.001438	-0.000794
0.9960	317.460	4.139	14.946	7.062	-0.681	35.315	604.362	-0.000290	-0.001046	-0.000494
0.9980	287.463	2.069	10.513	4.173	-0.681	35.310	547.256	-0.000145	-0.000736	-0.000292
