# Supplementary material for: Evaluation of a Cold-Mixed High-Performance Polyurethane Mixture
Source: Hindawi journal article supplement (doi:10.1155/2019/1507971), 2019-11-07
Supplement: f1 [file 1507971.f1.zip › 1507971.f1/dynamic modulus data/PUM/specimen1/temp35/zhs-1-35_20Hz.csv]

Test Information
****************
Project name	zhs
Operator name	1
Target test temperature	35
Target confining stress	0
Average dynamic strain range from 75 to 125 micro-strain
Contact stress	5
Initial modulus	1000
Axial gauge length	70
Comments
Specimen information
********************
Identification	zhs-1-35
Dimensions	Point 1	Point 2	Point 3	Point 4	Point 5	Point 6	Average	Std Dev.
Diameter (mm)	49.2	49.2	49.3				49.23	0.058
Height (mm)	101.3	101.2	101.3				101.27	0.058
Cross-sectional area (mm�)	1903.7
Conditioning time
Properties/Comments
Test Data	20Hz
*********
Test date and time	Tue	Apr 2	2019	1:19 PM
Dynamic modulus (MPa)	11739
Phase angle (Degrees)	4.34
Average temperature (�C)	35.3
Average confining pressure (kPa)	-0.7
Average micro-strain	103
Load drift (%)	-0.5
Load standard error (%)	7.0
Average deformation drift (%)	-2.9
Average deformation standard error (%)	7.1
Deformation uniformity (%)	20.1
Phase uniformity (Degrees)	0.6
Conditioning Cycles
Time (sec)	Axial stress (kPa)	Axial micro-strain #1	Axial micro-strain #2	Axial micro-strain #3	Confining pressure (kPa)	Temperature (�C)	Load (N)	Displacement #1 (mm)	Displacement #2 (mm)	Displacement #3 (mm)
0.0000	467.564	6.612	20.611	11.883	-0.701	35.320	890.121	-0.000463	-0.001443	-0.000832
0.0010	468.060	6.667	20.570	11.771	-0.697	35.318	891.066	-0.000467	-0.001440	-0.000824
0.0020	467.399	6.584	20.570	11.688	-0.697	35.316	889.807	-0.000461	-0.001440	-0.000818
0.0030	464.318	6.611	20.323	11.673	-0.698	35.313	883.942	-0.000463	-0.001423	-0.000817
0.0040	456.773	6.195	19.979	11.187	-0.702	35.310	869.579	-0.000434	-0.001399	-0.000783
0.0050	440.528	5.487	18.578	10.048	-0.700	35.307	838.652	-0.000384	-0.001300	-0.000703
0.0060	413.071	3.834	15.673	7.743	-0.698	35.306	786.381	-0.000268	-0.001097	-0.000542
0.0070	377.348	2.000	11.806	5.145	-0.696	35.304	718.374	-0.000140	-0.000826	-0.000360
0.0080	341.716	-0.169	7.444	2.325	-0.703	35.304	650.539	0.000012	-0.000521	-0.000163
0.0090	315.281	-1.545	4.155	0.074	-0.710	35.305	600.214	0.000108	-0.000291	-0.000005
0.0100	301.500	-2.353	1.926	-1.218	-0.714	35.307	573.978	0.000165	-0.000135	0.000085
0.0110	299.441	-2.645	1.155	-1.704	-0.711	35.309	570.059	0.000185	-0.000081	0.000119
0.0120	306.549	-2.574	1.418	-1.482	-0.710	35.311	583.591	0.000180	-0.000099	0.000104
0.0130	324.508	-2.017	2.712	-0.414	-0.703	35.314	617.781	0.000141	-0.000190	0.000029
0.0140	361.929	-0.140	6.057	2.254	-0.699	35.317	689.020	0.000010	-0.000424	-0.000158
0.0150	424.718	3.458	12.386	6.867	-0.698	35.321	808.554	-0.000242	-0.000867	-0.000481
0.0160	510.139	8.349	21.412	13.371	-0.697	35.323	971.174	-0.000584	-0.001499	-0.000936
0.0170	608.215	14.380	32.364	21.333	-0.700	35.323	1157.885	-0.001007	-0.002266	-0.001493
0.0180	706.470	20.314	43.235	29.350	-0.701	35.323	1344.938	-0.001422	-0.003026	-0.002055
0.0190	796.972	26.401	53.404	36.618	-0.704	35.321	1517.229	-0.001848	-0.003738	-0.002563
0.0200	872.309	31.361	61.646	42.580	-0.700	35.320	1660.652	-0.002195	-0.004315	-0.002981
0.0210	928.064	35.238	67.975	47.152	-0.695	35.318	1766.796	-0.002467	-0.004758	-0.003301
0.0220	964.238	37.823	72.309	50.376	-0.696	35.315	1835.661	-0.002648	-0.005062	-0.003526
0.0230	984.887	39.671	75.117	52.142	-0.700	35.313	1874.971	-0.002777	-0.005258	-0.003650
0.0240	995.873	40.686	76.866	53.017	-0.702	35.310	1895.885	-0.002848	-0.005381	-0.003711
0.0250	1003.011	41.282	77.941	53.866	-0.698	35.307	1909.475	-0.002890	-0.005456	-0.003771
0.0260	1010.886	41.783	78.971	54.713	-0.695	35.306	1924.467	-0.002925	-0.005528	-0.003830
0.0270	1023.209	42.923	80.387	56.311	-0.701	35.304	1947.927	-0.003005	-0.005627	-0.003942
0.0280	1041.048	44.354	82.465	57.827	-0.701	35.304	1981.888	-0.003105	-0.005773	-0.004048
0.0290	1063.335	46.286	85.080	59.897	-0.705	35.304	2024.317	-0.003240	-0.005956	-0.004193
0.0300	1085.712	47.828	87.501	61.758	-0.704	35.307	2066.917	-0.003348	-0.006125	-0.004323
0.0310	1103.266	49.094	89.632	63.313	-0.701	35.309	2100.334	-0.003437	-0.006274	-0.004432
0.0320	1112.718	50.053	90.939	64.412	-0.698	35.311	2118.330	-0.003504	-0.006366	-0.004509
0.0330	1113.665	50.373	91.544	64.608	-0.704	35.314	2120.132	-0.003526	-0.006408	-0.004523
0.0340	1107.549	50.415	91.669	64.637	-0.708	35.317	2108.488	-0.003529	-0.006417	-0.004525
0.0350	1095.225	49.610	91.079	63.912	-0.708	35.320	2085.028	-0.003473	-0.006376	-0.004474
0.0360	1074.712	48.414	89.856	62.689	-0.700	35.323	2045.975	-0.003389	-0.006290	-0.004388
0.0370	1040.071	46.454	87.379	60.575	-0.704	35.323	1980.028	-0.003252	-0.006117	-0.004240
0.0380	986.239	43.145	82.672	56.934	-0.701	35.323	1877.546	-0.003020	-0.005787	-0.003985
0.0390	914.313	38.796	76.053	51.836	-0.701	35.321	1740.618	-0.002716	-0.005324	-0.003628
0.0400	831.206	33.375	67.398	45.443	-0.697	35.320	1582.403	-0.002336	-0.004718	-0.003181
0.0410	747.017	27.832	58.400	38.662	-0.694	35.318	1422.129	-0.001948	-0.004088	-0.002706
0.0420	668.464	22.691	49.648	32.297	-0.695	35.315	1272.583	-0.001588	-0.003475	-0.002261
0.0430	600.175	18.202	41.900	26.655	-0.696	35.313	1142.578	-0.001274	-0.002933	-0.001866
0.0440	543.908	14.408	35.296	21.958	-0.701	35.309	1035.461	-0.001009	-0.002471	-0.001537
0.0450	499.169	11.378	30.011	18.040	-0.699	35.307	950.289	-0.000796	-0.002101	-0.001263
0.0460	463.356	8.696	25.484	14.927	-0.696	35.305	882.111	-0.000609	-0.001784	-0.001045
0.0470	433.299	7.071	21.852	12.216	-0.700	35.304	824.890	-0.000495	-0.001530	-0.000855
0.0480	405.557	5.194	18.164	9.782	-0.699	35.304	772.076	-0.000364	-0.001271	-0.000685
0.0490	378.115	3.680	14.834	7.352	-0.702	35.304	719.833	-0.000258	-0.001038	-0.000515
0.0500	349.861	1.735	11.160	4.741	-0.698	35.307	666.046	-0.000121	-0.000781	-0.000332
0.0510	321.488	-0.112	7.541	2.281	-0.696	35.309	612.030	0.000008	-0.000528	-0.000160
0.0520	294.076	-1.724	3.867	-0.387	-0.698	35.311	559.845	0.000121	-0.000271	0.000027
0.0530	269.339	-3.198	0.374	-2.683	-0.699	35.314	512.753	0.000224	-0.000026	0.000188
0.0540	248.961	-4.338	-2.791	-4.738	-0.703	35.318	473.957	0.000304	0.000195	0.000332
0.0550	234.218	-5.353	-5.048	-6.210	-0.703	35.321	445.890	0.000375	0.000353	0.000435
0.0560	225.832	-5.922	-6.534	-7.459	-0.699	35.323	429.926	0.000415	0.000457	0.000522
0.0570	223.382	-5.961	-6.878	-8.043	-0.704	35.323	425.262	0.000417	0.000481	0.000563
0.0580	225.396	-6.058	-6.878	-7.862	-0.708	35.323	429.096	0.000424	0.000481	0.000550
0.0590	231.017	-5.669	-6.506	-7.527	-0.712	35.321	439.796	0.000397	0.000455	0.000527
0.0600	240.424	-5.530	-6.162	-7.054	-0.705	35.320	457.706	0.000387	0.000431	0.000494
0.0610	256.775	-4.767	-5.213	-6.208	-0.698	35.318	488.834	0.000334	0.000365	0.000435
0.0620	285.930	-3.378	-2.517	-4.111	-0.696	35.315	544.338	0.000236	0.000176	0.000288
0.0630	333.030	-1.058	2.449	-0.249	-0.699	35.313	634.003	0.000074	-0.000171	0.000017
0.0640	398.343	2.568	9.811	4.796	-0.701	35.310	758.343	-0.000180	-0.000687	-0.000336
0.0650	475.920	6.835	18.701	11.050	-0.701	35.307	906.029	-0.000478	-0.001309	-0.000773
0.0660	558.125	11.656	27.866	17.332	-0.698	35.306	1062.527	-0.000816	-0.001951	-0.001213
0.0670	639.038	16.700	37.003	24.225	-0.703	35.304	1216.564	-0.001169	-0.002590	-0.001696
0.0680	714.045	21.536	45.314	30.339	-0.699	35.304	1359.358	-0.001508	-0.003172	-0.002124
0.0690	780.200	26.094	52.799	35.855	-0.703	35.305	1485.300	-0.001827	-0.003696	-0.002510
0.0700	834.813	29.790	59.101	39.983	-0.705	35.307	1589.270	-0.002085	-0.004137	-0.002799
0.0710	878.260	32.903	64.109	43.471	-0.707	35.310	1671.982	-0.002303	-0.004488	-0.003043
0.0720	912.209	35.461	68.155	46.362	-0.709	35.311	1736.612	-0.002482	-0.004771	-0.003245
0.0730	940.207	37.517	71.264	49.001	-0.716	35.314	1789.913	-0.002626	-0.004988	-0.003430
0.0740	965.756	39.351	74.126	51.156	-0.710	35.317	1838.551	-0.002755	-0.005189	-0.003581
0.0750	991.965	41.103	77.015	53.419	-0.708	35.320	1888.447	-0.002877	-0.005391	-0.003739
0.0760	1020.053	42.923	79.932	55.741	-0.699	35.323	1941.919	-0.003005	-0.005595	-0.003902
0.0770	1049.479	45.106	83.497	58.464	-0.707	35.323	1997.938	-0.003157	-0.005845	-0.004092
0.0780	1077.537	47.302	86.744	61.021	-0.706	35.323	2051.353	-0.003311	-0.006072	-0.004271
0.0790	1101.026	49.262	89.564	63.203	-0.712	35.321	2096.071	-0.003448	-0.006270	-0.004424
0.0800	1116.791	50.609	91.436	64.593	-0.701	35.320	2126.083	-0.003543	-0.006401	-0.004521
0.0810	1123.779	51.053	92.344	65.454	-0.694	35.319	2139.387	-0.003574	-0.006464	-0.004582
0.0820	1122.848	51.123	92.922	65.814	-0.690	35.316	2137.613	-0.003579	-0.006505	-0.004607
0.0830	1116.310	50.833	92.991	65.563	-0.693	35.313	2125.168	-0.003558	-0.006509	-0.004589
0.0840	1105.339	50.416	92.496	64.979	-0.697	35.310	2104.282	-0.003529	-0.006475	-0.004549
0.0850	1088.868	49.540	91.602	64.201	-0.697	35.308	2072.926	-0.003468	-0.006412	-0.004494
0.0860	1062.283	47.845	89.552	62.492	-0.694	35.306	2022.314	-0.003349	-0.006269	-0.004374
0.0870	1020.925	45.328	86.305	59.963	-0.702	35.304	1943.579	-0.003173	-0.006041	-0.004197
0.0880	962.524	41.631	80.952	55.822	-0.702	35.304	1832.399	-0.002914	-0.005667	-0.003908
0.0890	891.410	37.252	74.169	50.570	-0.703	35.305	1697.016	-0.002608	-0.005192	-0.003540
0.0900	814.104	32.403	66.201	44.400	-0.695	35.307	1549.845	-0.002268	-0.004634	-0.003108
0.0910	738.105	27.553	58.013	38.132	-0.692	35.309	1405.163	-0.001929	-0.004061	-0.002669
0.0920	668.043	22.857	50.239	32.449	-0.692	35.311	1271.782	-0.001600	-0.003517	-0.002271
0.0930	607.268	18.827	43.263	27.390	-0.699	35.314	1156.082	-0.001318	-0.003028	-0.001917
0.0940	556.201	15.421	37.332	23.180	-0.700	35.317	1058.865	-0.001079	-0.002613	-0.001623
0.0950	513.355	12.711	32.075	19.471	-0.700	35.320	977.297	-0.000890	-0.002245	-0.001363
0.0960	475.965	10.029	27.534	16.165	-0.696	35.323	906.115	-0.000702	-0.001927	-0.001132
0.0970	441.685	7.932	23.364	13.344	-0.704	35.323	840.855	-0.000555	-0.001635	-0.000934
0.0980	408.487	5.846	19.292	10.439	-0.711	35.323	777.655	-0.000409	-0.001350	-0.000731
0.0990	375.650	4.108	15.274	7.646	-0.715	35.321	715.141	-0.000288	-0.001069	-0.000535
0.1000	343.399	1.926	11.119	4.756	-0.713	35.320	653.744	-0.000135	-0.000778	-0.000333
0.1010	312.816	0.050	6.880	1.795	-0.706	35.318	595.522	-0.000004	-0.000482	-0.000126
0.1020	285.389	-1.699	3.042	-0.805	-0.703	35.316	543.308	0.000119	-0.000213	0.000056
0.1030	262.576	-2.950	-0.342	-3.154	-0.701	35.313	499.878	0.000206	0.000024	0.000221
0.1040	245.579	-4.171	-2.943	-4.794	-0.704	35.310	467.520	0.000292	0.000206	0.000336
0.1050	234.699	-5.130	-4.828	-6.001	-0.703	35.307	446.806	0.000359	0.000338	0.000420
0.1060	229.694	-5.824	-5.833	-6.917	-0.698	35.306	437.279	0.000408	0.000408	0.000484
0.1070	229.439	-5.769	-6.026	-7.084	-0.707	35.303	436.792	0.000404	0.000422	0.000496
0.1080	232.535	-5.811	-5.875	-7.015	-0.712	35.304	442.686	0.000407	0.000411	0.000491
0.1090	238.245	-5.450	-5.559	-6.501	-0.723	35.304	453.558	0.000382	0.000389	0.000455
0.1100	246.797	-5.533	-5.270	-6.252	-0.718	35.307	469.837	0.000387	0.000369	0.000438
0.1110	260.998	-5.005	-4.278	-5.641	-0.714	35.309	496.874	0.000350	0.000299	0.000395
0.1120	286.051	-3.836	-1.938	-4.001	-0.714	35.311	544.567	0.000269	0.000136	0.000280
0.1130	326.988	-1.419	2.342	-1.012	-0.715	35.314	622.501	0.000099	-0.000164	0.000071
0.1140	385.028	1.779	8.864	3.797	-0.719	35.317	732.994	-0.000125	-0.000620	-0.000266
0.1150	456.548	5.738	16.954	9.619	-0.719	35.320	869.150	-0.000402	-0.001187	-0.000673
0.1160	534.936	10.129	25.760	15.733	-0.719	35.323	1018.381	-0.000709	-0.001803	-0.001101
0.1170	614.782	15.270	34.868	22.376	-0.722	35.323	1170.387	-0.001069	-0.002441	-0.001566
0.1180	691.923	20.286	43.536	28.601	-0.719	35.323	1317.244	-0.001420	-0.003048	-0.002002
0.1190	763.984	25.122	51.695	34.757	-0.716	35.321	1454.430	-0.001759	-0.003619	-0.002433
0.1200	828.982	29.498	58.741	40.024	-0.710	35.320	1578.169	-0.002065	-0.004112	-0.002802
0.1210	885.804	33.417	65.072	44.568	-0.705	35.318	1686.344	-0.002339	-0.004555	-0.003120
0.1220	934.391	36.808	70.576	48.736	-0.703	35.316	1778.841	-0.002577	-0.004940	-0.003412
0.1230	975.945	39.740	75.338	52.099	-0.705	35.313	1857.948	-0.002782	-0.005274	-0.003647
0.1240	1012.238	42.215	79.355	55.170	-0.703	35.310	1927.042	-0.002955	-0.005555	-0.003862
0.1250	1044.369	44.744	82.905	57.866	-0.704	35.308	1988.211	-0.003132	-0.005803	-0.004051
0.1260	1072.893	46.814	86.042	60.271	-0.700	35.306	2042.513	-0.003277	-0.006023	-0.004219
0.1270	1097.885	48.912	88.959	62.828	-0.706	35.304	2090.092	-0.003424	-0.006227	-0.004398
0.1280	1119.045	50.705	91.451	64.774	-0.706	35.304	2130.375	-0.003549	-0.006402	-0.004534
0.1290	1136.012	52.150	93.501	66.650	-0.709	35.305	2162.676	-0.003650	-0.006545	-0.004665
0.1300	1147.494	52.955	94.836	67.553	-0.706	35.307	2184.534	-0.003707	-0.006639	-0.004729
0.1310	1152.904	53.483	95.744	68.332	-0.707	35.309	2194.834	-0.003744	-0.006702	-0.004783
0.1320	1152.408	53.817	96.239	68.485	-0.710	35.311	2193.890	-0.003767	-0.006737	-0.004794
0.1330	1146.983	53.719	96.074	68.332	-0.716	35.314	2183.561	-0.003760	-0.006725	-0.004783
0.1340	1137.034	53.497	95.704	68.095	-0.716	35.317	2164.621	-0.003745	-0.006699	-0.004767
0.1350	1120.398	52.427	94.782	67.234	-0.714	35.320	2132.950	-0.003670	-0.006635	-0.004706
0.1360	1090.627	50.537	92.912	65.302	-0.705	35.323	2076.273	-0.003538	-0.006504	-0.004571
0.1370	1040.913	47.438	88.949	61.951	-0.713	35.323	1981.630	-0.003321	-0.006226	-0.004337
0.1380	970.309	42.964	82.453	56.767	-0.719	35.323	1847.219	-0.003007	-0.005772	-0.003974
0.1390	886.345	37.753	74.292	50.680	-0.727	35.321	1687.374	-0.002643	-0.005200	-0.003548
0.1400	800.022	31.986	65.251	43.774	-0.719	35.320	1523.037	-0.002239	-0.004568	-0.003064
0.1410	719.560	26.706	56.650	37.341	-0.710	35.319	1369.858	-0.001869	-0.003965	-0.002614
0.1420	648.972	22.038	48.889	31.476	-0.702	35.316	1235.476	-0.001543	-0.003422	-0.002203
0.1430	589.564	18.078	42.090	26.447	-0.705	35.313	1122.379	-0.001265	-0.002946	-0.001851
0.1440	540.331	14.687	36.229	22.236	-0.709	35.310	1028.652	-0.001028	-0.002536	-0.001557
0.1450	498.748	11.907	31.097	18.748	-0.709	35.307	949.488	-0.000834	-0.002177	-0.001312
0.1460	461.823	9.322	26.447	15.427	-0.707	35.305	879.192	-0.000653	-0.001851	-0.001080
0.1470	427.739	7.334	22.402	12.634	-0.712	35.304	814.304	-0.000513	-0.001568	-0.000884
0.1480	395.412	5.429	18.563	9.688	-0.711	35.304	752.764	-0.000380	-0.001299	-0.000678
0.1490	364.815	3.540	14.724	7.076	-0.710	35.305	694.513	-0.000248	-0.001031	-0.000495
0.1500	336.005	1.706	10.762	4.130	-0.704	35.307	639.668	-0.000119	-0.000753	-0.000289
0.1510	309.405	-0.003	6.882	1.503	-0.700	35.309	589.027	0.000000	-0.000482	-0.000105
0.1520	285.600	-1.212	3.524	-0.608	-0.701	35.311	543.709	0.000085	-0.000247	0.000043
0.1530	265.191	-2.533	0.565	-2.665	-0.704	35.314	504.856	0.000177	-0.000040	0.000187
0.1540	248.615	-3.658	-2.009	-4.388	-0.702	35.317	473.299	0.000256	0.000141	0.000307
0.1550	236.292	-4.631	-4.087	-5.680	-0.702	35.320	449.839	0.000324	0.000286	0.000398
0.1560	228.582	-5.381	-5.628	-6.778	-0.700	35.323	435.162	0.000377	0.000394	0.000474
0.1570	225.411	-5.630	-6.343	-7.111	-0.708	35.323	429.125	0.000394	0.000444	0.000498
0.1580	226.102	-5.713	-6.466	-7.279	-0.712	35.323	430.441	0.000400	0.000453	0.000510
0.1590	230.010	-5.364	-6.384	-7.000	-0.717	35.321	437.880	0.000376	0.000447	0.000490
0.1600	236.803	-5.392	-6.137	-6.860	-0.710	35.320	450.811	0.000377	0.000430	0.000480
0.1610	248.390	-5.044	-5.586	-6.208	-0.702	35.318	472.870	0.000353	0.000391	0.000435
0.1620	269.670	-4.280	-3.811	-5.028	-0.700	35.316	513.382	0.000300	0.000267	0.000352
0.1630	307.060	-2.364	0.042	-2.124	-0.702	35.313	584.564	0.000165	-0.000003	0.000149
0.1640	363.672	0.608	6.275	2.226	-0.703	35.310	692.339	-0.000043	-0.000439	-0.000156
0.1650	436.891	4.540	14.600	8.300	-0.703	35.307	831.728	-0.000318	-0.001022	-0.000581
0.1660	519.472	9.266	23.873	14.802	-0.699	35.306	988.941	-0.000649	-0.001671	-0.001036
0.1670	604.608	14.506	33.809	21.682	-0.709	35.304	1151.018	-0.001015	-0.002367	-0.001518
0.1680	686.964	19.911	43.153	28.477	-0.713	35.304	1307.802	-0.001394	-0.003021	-0.001993
0.1690	762.962	24.983	51.711	34.786	-0.714	35.305	1452.484	-0.001749	-0.003620	-0.002435
0.1700	830.064	29.540	59.141	40.344	-0.711	35.307	1580.229	-0.002068	-0.004140	-0.002824
0.1710	887.217	33.458	65.498	44.833	-0.707	35.309	1689.034	-0.002342	-0.004585	-0.003138
0.1720	934.361	36.876	70.865	48.709	-0.707	35.311	1778.784	-0.002581	-0.004961	-0.003410
0.1730	972.759	39.641	75.350	52.058	-0.710	35.314	1851.883	-0.002775	-0.005275	-0.003644
0.1740	1004.243	42.130	79.038	54.849	-0.707	35.317	1911.821	-0.002949	-0.005533	-0.003839
0.1750	1030.874	44.187	82.122	57.031	-0.712	35.320	1962.519	-0.003093	-0.005749	-0.003992
0.1760	1054.213	46.009	84.694	58.824	-0.708	35.322	2006.950	-0.003221	-0.005929	-0.004118
0.1770	1074.727	47.634	87.156	60.896	-0.716	35.323	2046.003	-0.003334	-0.006101	-0.004263
0.1780	1091.904	49.135	89.248	62.494	-0.715	35.322	2078.705	-0.003439	-0.006247	-0.004375
0.1790	1105.039	50.150	91.024	63.871	-0.717	35.321	2103.710	-0.003510	-0.006372	-0.004471
0.1800	1112.929	50.886	92.111	64.830	-0.712	35.320	2118.731	-0.003562	-0.006448	-0.004538
0.1810	1115.303	51.275	92.648	65.261	-0.709	35.318	2123.251	-0.003589	-0.006485	-0.004568
0.1820	1112.854	51.469	92.896	65.524	-0.710	35.316	2118.587	-0.003603	-0.006503	-0.004587
0.1830	1106.376	51.260	92.607	65.232	-0.717	35.313	2106.256	-0.003588	-0.006482	-0.004566
0.1840	1096.653	50.816	92.151	64.606	-0.718	35.310	2087.746	-0.003557	-0.006451	-0.004522
0.1850	1082.541	49.983	91.312	64.038	-0.715	35.307	2060.881	-0.003499	-0.006392	-0.004483
0.1860	1060.284	48.425	89.634	62.412	-0.703	35.306	2018.509	-0.003390	-0.006274	-0.004369
0.1870	1024.877	46.188	86.924	60.451	-0.707	35.304	1951.103	-0.003233	-0.006085	-0.004232
0.1880	972.924	42.687	82.274	56.739	-0.707	35.304	1852.198	-0.002988	-0.005759	-0.003972
0.1890	906.964	38.366	76.108	52.027	-0.707	35.304	1726.627	-0.002686	-0.005328	-0.003642
0.1900	832.243	33.473	68.486	46.246	-0.703	35.307	1584.377	-0.002343	-0.004794	-0.003237
0.1910	755.944	28.665	60.381	40.273	-0.700	35.309	1439.123	-0.002007	-0.004227	-0.002819
0.1920	683.131	24.022	52.524	34.410	-0.703	35.311	1300.507	-0.001682	-0.003677	-0.002409
0.1930	617.863	19.784	45.231	28.991	-0.714	35.314	1176.252	-0.001385	-0.003166	-0.002029
0.1940	561.627	16.088	38.639	24.210	-0.722	35.317	1069.193	-0.001126	-0.002705	-0.001695
0.1950	513.942	12.921	32.929	20.082	-0.723	35.320	978.413	-0.000904	-0.002305	-0.001406
0.1960	472.959	10.085	27.851	16.275	-0.716	35.322	900.393	-0.000706	-0.001950	-0.001139
0.1970	436.545	7.780	23.613	13.274	-0.720	35.323	831.070	-0.000545	-0.001653	-0.000929
0.1980	403.167	5.696	19.538	10.286	-0.722	35.322	767.527	-0.000399	-0.001368	-0.000720
0.1990	371.923	4.043	15.645	7.549	-0.726	35.321	708.046	-0.000283	-0.001095	-0.000528
0.2000	342.768	2.306	11.655	5.060	-0.718	35.320	652.542	-0.000161	-0.000816	-0.000354
0.2010	315.897	0.527	7.927	2.461	-0.709	35.318	601.387	-0.000037	-0.000555	-0.000172
0.2020	292.167	-1.239	4.542	0.155	-0.709	35.316	556.211	0.000087	-0.000318	-0.000011
0.2030	272.480	-2.422	1.610	-1.901	-0.710	35.313	518.732	0.000170	-0.000113	0.000133
0.2040	257.948	-3.324	-0.606	-3.527	-0.710	35.310	491.066	0.000233	0.000042	0.000247
0.2050	248.946	-3.769	-2.148	-4.502	-0.706	35.307	473.928	0.000264	0.000150	0.000315
0.2060	245.279	-4.281	-2.961	-5.226	-0.703	35.306	466.948	0.000300	0.000207	0.000366
0.2070	246.060	-4.351	-3.235	-5.142	-0.708	35.304	468.435	0.000305	0.000226	0.000360
0.2080	249.968	-4.379	-3.220	-4.989	-0.710	35.304	475.874	0.000307	0.000225	0.000349
0.2090	256.490	-4.061	-2.918	-4.503	-0.712	35.305	488.291	0.000284	0.000204	0.000315
0.2100	266.213	-3.950	-2.587	-4.197	-0.706	35.307	506.802	0.000277	0.000181	0.000294
0.2110	282.624	-3.354	-1.459	-3.320	-0.710	35.309	538.044	0.000235	0.000102	0.000232
0.2120	310.787	-1.907	1.074	-1.387	-0.714	35.311	591.660	0.000134	-0.000075	0.000097
0.2130	354.250	0.427	5.697	1.948	-0.712	35.314	674.400	-0.000030	-0.000399	-0.000136
0.2140	412.665	3.695	12.233	6.574	-0.708	35.317	785.608	-0.000259	-0.000856	-0.000460
0.2150	481.405	7.433	20.077	12.439	-0.715	35.320	916.471	-0.000520	-0.001405	-0.000871
0.2160	554.864	11.560	28.167	18.164	-0.718	35.323	1056.318	-0.000809	-0.001972	-0.001271
0.2170	629.059	16.230	36.712	24.375	-0.727	35.323	1197.567	-0.001136	-0.002570	-0.001706
0.2180	700.249	20.704	44.831	29.878	-0.721	35.323	1333.094	-0.001449	-0.003138	-0.002091
0.2190	766.253	25.249	52.536	35.506	-0.719	35.321	1458.750	-0.001767	-0.003678	-0.002485
0.2200	824.909	29.264	59.059	40.231	-0.715	35.320	1570.415	-0.002048	-0.004134	-0.002816
0.2210	876.322	32.876	64.824	44.303	-0.712	35.318	1668.291	-0.002301	-0.004538	-0.003101
0.2220	921.136	36.211	69.943	47.916	-0.709	35.315	1753.607	-0.002535	-0.004896	-0.003354
0.2230	960.721	39.072	74.469	51.252	-0.715	35.313	1828.966	-0.002735	-0.005213	-0.003588
0.2240	995.963	41.560	78.459	54.295	-0.716	35.310	1896.057	-0.002909	-0.005492	-0.003801
0.2250	1027.673	43.964	81.969	57.006	-0.718	35.307	1956.425	-0.003078	-0.005738	-0.003990
0.2260	1055.971	46.174	85.038	59.117	-0.706	35.305	2010.298	-0.003232	-0.005953	-0.004138
0.2270	1080.467	48.482	87.886	61.312	-0.708	35.304	2056.932	-0.003394	-0.006152	-0.004292
0.2280	1100.004	49.968	90.266	63.006	-0.706	35.304	2094.126	-0.003498	-0.006319	-0.004410
0.2290	1114.326	51.177	92.193	64.869	-0.709	35.304	2121.391	-0.003582	-0.006454	-0.004541
0.2300	1122.832	51.690	93.337	66.036	-0.706	35.307	2137.585	-0.003618	-0.006534	-0.004623
0.2310	1125.898	51.996	93.971	66.647	-0.702	35.309	2143.421	-0.003640	-0.006578	-0.004665
0.2320	1124.245	52.079	94.094	66.495	-0.702	35.311	2140.274	-0.003646	-0.006587	-0.004655
0.2330	1118.685	52.094	94.066	66.135	-0.702	35.314	2129.688	-0.003647	-0.006585	-0.004629
0.2340	1109.923	51.830	93.775	65.761	-0.700	35.317	2113.008	-0.003628	-0.006564	-0.004603
0.2350	1097.404	51.234	93.182	65.176	-0.699	35.320	2089.176	-0.003586	-0.006523	-0.004562
0.2360	1077.672	49.816	91.750	63.841	-0.691	35.323	2051.611	-0.003487	-0.006423	-0.004469
0.2370	1044.775	47.745	89.207	62.035	-0.700	35.324	1988.983	-0.003342	-0.006244	-0.004342
0.2380	993.618	44.492	84.749	58.478	-0.698	35.323	1891.594	-0.003114	-0.005932	-0.004093
0.2390	925.149	40.199	78.323	53.642	-0.705	35.322	1761.246	-0.002814	-0.005483	-0.003755
0.2400	845.288	34.960	70.052	47.347	-0.698	35.320	1609.211	-0.002447	-0.004904	-0.003314
0.2410	762.722	29.596	61.302	40.842	-0.696	35.319	1452.026	-0.002072	-0.004291	-0.002859
0.2420	684.183	24.483	52.758	34.506	-0.689	35.316	1302.509	-0.001714	-0.003693	-0.002415
0.2430	614.421	19.897	44.984	28.850	-0.687	35.314	1169.701	-0.001393	-0.003149	-0.002020
0.2440	555.645	15.964	38.201	23.918	-0.689	35.310	1057.806	-0.001117	-0.002674	-0.001674
0.2450	507.825	12.642	32.365	19.847	-0.692	35.308	966.768	-0.000885	-0.002266	-0.001389
0.2460	468.916	9.932	27.494	16.178	-0.692	35.306	892.696	-0.000695	-0.001925	-0.001132
0.2470	436.215	7.819	23.504	13.314	-0.702	35.304	830.441	-0.000547	-0.001645	-0.000932
0.2480	406.398	5.889	19.912	10.840	-0.706	35.304	773.678	-0.000412	-0.001394	-0.000759
0.2490	377.348	4.056	16.307	8.366	-0.708	35.305	718.374	-0.000284	-0.001141	-0.000586
0.2500	230.401	-9.021	-13.208	-11.297	-0.691	35.319	438.623	0.000631	0.000925	0.000791
0.2510	230.295	-9.021	-13.401	-11.587	-0.686	35.322	438.423	0.000631	0.000938	0.000811
0.2520	230.325	-8.966	-13.428	-11.337	-0.691	35.323	438.480	0.000628	0.000940	0.000794
0.2530	230.431	-9.107	-13.373	-11.350	-0.694	35.323	438.681	0.000637	0.000936	0.000795
0.2540	230.987	-8.968	-13.208	-11.131	-0.695	35.321	439.739	0.000628	0.000925	0.000779
0.2550	232.009	-9.051	-13.002	-11.117	-0.691	35.320	441.685	0.000634	0.000910	0.000778
0.2560	233.962	-8.883	-12.920	-11.256	-0.684	35.318	445.404	0.000622	0.000904	0.000788
0.2570	237.043	-8.632	-12.728	-11.089	-0.680	35.316	451.269	0.000604	0.000891	0.000776
0.2580	241.912	-8.298	-12.426	-10.949	-0.683	35.313	460.539	0.000581	0.000870	0.000766
0.2590	250.989	-8.034	-11.780	-10.352	-0.687	35.310	477.819	0.000562	0.000825	0.000725
0.2600	269.985	-7.159	-9.990	-8.879	-0.696	35.307	513.983	0.000501	0.000699	0.000621
0.2610	305.347	-5.617	-6.398	-6.516	-0.690	35.305	581.303	0.000393	0.000448	0.000456
0.2620	361.012	-2.394	-0.247	-1.958	-0.700	35.303	687.275	0.000168	0.000017	0.000137
0.2630	435.193	1.873	8.187	4.115	-0.700	35.303	828.495	-0.000131	-0.000573	-0.000288
0.2640	522.883	6.932	18.315	11.592	-0.702	35.303	995.436	-0.000485	-0.001282	-0.000811
0.2650	618.780	12.812	29.102	19.289	-0.694	35.305	1177.998	-0.000897	-0.002037	-0.001350
0.2660	718.358	18.842	40.372	27.210	-0.691	35.308	1367.569	-0.001319	-0.002826	-0.001905
0.2670	817.756	25.498	51.504	35.438	-0.691	35.310	1556.797	-0.001785	-0.003605	-0.002481
0.2680	913.276	31.834	62.306	43.333	-0.691	35.312	1738.644	-0.002228	-0.004361	-0.003033
0.2690	1001.764	37.908	72.145	50.767	-0.688	35.315	1907.101	-0.002654	-0.005050	-0.003554
0.2700	1080.422	43.578	80.717	57.214	-0.691	35.318	2056.847	-0.003050	-0.005650	-0.004005
0.2710	1147.599	48.637	87.925	62.828	-0.687	35.321	2184.734	-0.003405	-0.006155	-0.004398
0.2720	1203.400	53.069	94.172	67.732	-0.691	35.322	2290.964	-0.003715	-0.006592	-0.004741
0.2730	1249.447	56.876	99.361	71.874	-0.692	35.322	2378.626	-0.003981	-0.006955	-0.005031
0.2740	1287.965	59.919	103.875	75.584	-0.690	35.320	2451.954	-0.004194	-0.007271	-0.005291
0.2750	1321.027	62.448	107.743	78.698	-0.688	35.319	2514.896	-0.004371	-0.007542	-0.005509
0.2760	1349.822	64.450	110.934	81.448	-0.684	35.318	2569.714	-0.004511	-0.007765	-0.005701
0.2770	1374.769	66.479	113.893	83.561	-0.687	35.315	2617.207	-0.004654	-0.007973	-0.005849
0.2780	1395.448	68.244	116.521	85.339	-0.688	35.313	2656.574	-0.004777	-0.008156	-0.005974
0.2790	1410.882	70.023	118.681	86.965	-0.686	35.310	2685.957	-0.004902	-0.008308	-0.006088
0.2800	1420.245	71.205	120.183	88.286	-0.682	35.307	2703.781	-0.004984	-0.008413	-0.006180
0.2810	1423.040	71.885	120.871	89.077	-0.675	35.306	2709.103	-0.005032	-0.008461	-0.006235
0.2820	1419.989	72.080	121.366	89.215	-0.676	35.304	2703.295	-0.005046	-0.008496	-0.006245
0.2830	1411.874	71.969	121.324	89.077	-0.680	35.303	2687.845	-0.005038	-0.008493	-0.006235
0.2840	1398.784	71.511	120.939	88.493	-0.683	35.304	2662.926	-0.005006	-0.008466	-0.006195
0.2850	1377.053	70.260	119.742	87.328	-0.686	35.305	2621.555	-0.004918	-0.008382	-0.006113
0.2860	1338.220	67.618	116.949	84.895	-0.683	35.307	2547.626	-0.004733	-0.008186	-0.005943
0.2870	1274.890	63.490	111.678	80.740	-0.681	35.309	2427.063	-0.004444	-0.007817	-0.005652
0.2880	1185.997	57.639	103.737	74.181	-0.680	35.312	2257.833	-0.004035	-0.007262	-0.005193
0.2890	1079.671	50.858	93.609	66.121	-0.679	35.315	2055.416	-0.003560	-0.006553	-0.004628
0.2900	968.325	43.647	82.547	57.088	-0.687	35.318	1843.443	-0.003055	-0.005778	-0.003996
0.2910	863.021	36.545	71.429	48.765	-0.683	35.322	1642.971	-0.002558	-0.005000	-0.003414
0.2920	771.619	30.376	61.454	41.456	-0.688	35.323	1468.964	-0.002126	-0.004302	-0.002902
0.2930	697.544	25.207	53.279	35.341	-0.691	35.322	1327.944	-0.001764	-0.003730	-0.002474
0.2940	640.135	21.371	46.619	30.171	-0.687	35.320	1218.653	-0.001496	-0.003263	-0.002112
0.2950	595.365	18.076	41.240	26.349	-0.680	35.319	1133.423	-0.001265	-0.002887	-0.001844
0.2960	558.080	15.255	36.424	23.055	-0.676	35.318	1062.441	-0.001068	-0.002550	-0.001614
0.2970	523.229	12.768	32.089	20.261	-0.681	35.316	996.094	-0.000894	-0.002246	-0.001418
0.2980	487.266	10.447	27.617	17.095	-0.686	35.313	927.629	-0.000731	-0.001933	-0.001197
0.2990	448.237	7.821	22.772	13.579	-0.688	35.310	853.329	-0.000547	-0.001594	-0.000951
0.3000	406.158	5.167	17.571	9.785	-0.689	35.307	773.220	-0.000362	-0.001230	-0.000685
0.3010	363.327	2.305	12.082	5.740	-0.684	35.305	691.681	-0.000161	-0.000846	-0.000402
0.3020	323.652	-0.001	6.840	1.836	-0.687	35.303	616.150	0.000000	-0.000479	-0.000129
0.3030	290.169	-1.918	2.382	-1.220	-0.691	35.303	552.406	0.000134	-0.000167	0.000085
0.3040	265.657	-3.309	-1.307	-3.555	-0.689	35.303	505.743	0.000232	0.000091	0.000249
0.3050	250.569	-4.574	-3.632	-4.820	-0.691	35.305	477.018	0.000320	0.000254	0.000337
0.3060	244.452	-5.395	-5.022	-5.613	-0.683	35.307	465.374	0.000378	0.000352	0.000393
0.3070	244.963	-5.796	-5.324	-5.932	-0.686	35.309	466.347	0.000406	0.000373	0.000415
0.3080	250.223	-5.768	-5.214	-5.974	-0.687	35.312	476.360	0.000404	0.000365	0.000418
0.3090	259.631	-5.474	-4.898	-5.487	-0.694	35.315	494.270	0.000383	0.000343	0.000384
0.3100	276.733	-4.684	-3.810	-4.556	-0.698	35.318	526.829	0.000328	0.000267	0.000319
0.3110	308.323	-3.143	-1.224	-2.430	-0.696	35.321	586.967	0.000220	0.000086	0.000170
0.3120	359.750	-0.393	4.321	1.350	-0.700	35.322	684.872	0.000027	-0.000302	-0.000094
0.3130	431.315	3.735	12.426	7.102	-0.702	35.322	821.114	-0.000261	-0.000870	-0.000497
0.3140	517.819	8.752	22.334	14.245	-0.700	35.321	985.794	-0.000613	-0.001563	-0.000997
0.3150	612.603	14.574	32.998	21.763	-0.698	35.319	1166.239	-0.001020	-0.002310	-0.001523
0.3160	710.498	20.661	43.677	29.505	-0.689	35.318	1352.606	-0.001446	-0.003057	-0.002065
0.3170	806.830	26.941	54.450	37.358	-0.690	35.316	1535.997	-0.001886	-0.003811	-0.002615
0.3180	898.083	32.944	64.508	44.944	-0.693	35.313	1709.719	-0.002306	-0.004516	-0.003146
0.3190	981.851	38.725	73.768	51.850	-0.700	35.310	1869.192	-0.002711	-0.005164	-0.003630
0.3200	1056.602	44.076	81.832	57.880	-0.705	35.307	2011.499	-0.003085	-0.005728	-0.004052
0.3210	1121.465	48.842	88.794	63.090	-0.696	35.305	2134.981	-0.003419	-0.006216	-0.004416
0.3220	1177.085	53.026	94.903	67.717	-0.696	35.303	2240.868	-0.003712	-0.006643	-0.004740
0.3230	1224.259	56.820	100.242	71.929	-0.696	35.303	2330.675	-0.003977	-0.007017	-0.005035
0.3240	1264.971	60.141	104.839	75.695	-0.698	35.303	2408.180	-0.004210	-0.007339	-0.005299
0.3250	1300.243	63.073	108.774	78.879	-0.696	35.305	2475.328	-0.004415	-0.007614	-0.005522
0.3260	1330.886	65.421	111.979	81.491	-0.692	35.307	2533.665	-0.004579	-0.007839	-0.005704
0.3270	1356.885	67.548	114.951	83.841	-0.693	35.309	2583.160	-0.004728	-0.008047	-0.005869
0.3280	1377.504	69.021	117.373	85.800	-0.698	35.312	2622.414	-0.004831	-0.008216	-0.006006
0.3290	1392.337	70.371	119.258	87.259	-0.700	35.315	2650.652	-0.004926	-0.008348	-0.006108
0.3300	1400.978	71.315	120.566	88.106	-0.700	35.318	2667.103	-0.004992	-0.008440	-0.006167
0.3310	1403.623	71.704	121.048	88.384	-0.688	35.321	2672.138	-0.005019	-0.008473	-0.006187
0.3320	1401.008	71.843	121.270	88.785	-0.690	35.322	2667.160	-0.005029	-0.008489	-0.006215
0.3330	1393.870	71.662	121.049	89.037	-0.690	35.322	2653.570	-0.005016	-0.008473	-0.006233
0.3340	1382.253	71.398	120.953	88.883	-0.691	35.321	2631.454	-0.004998	-0.008467	-0.006222
0.3350	1363.437	70.507	120.031	88.050	-0.687	35.319	2595.634	-0.004936	-0.008402	-0.006163
0.3360	1329.067	68.131	117.623	85.339	-0.683	35.318	2530.203	-0.004769	-0.008234	-0.005974
0.3370	1270.832	64.199	112.917	81.267	-0.685	35.316	2419.338	-0.004494	-0.007904	-0.005689
0.3380	1186.703	58.627	105.430	75.167	-0.681	35.313	2259.178	-0.004104	-0.007380	-0.005262
0.3390	1084.330	51.874	95.757	67.441	-0.679	35.310	2064.285	-0.003631	-0.006703	-0.004721
0.3400	975.885	44.967	85.039	59.104	-0.684	35.307	1857.834	-0.003148	-0.005953	-0.004137
0.3410	871.437	37.838	74.154	50.432	-0.679	35.306	1658.993	-0.002649	-0.005191	-0.003530
0.3420	778.036	31.487	64.109	42.886	-0.677	35.304	1481.180	-0.002204	-0.004488	-0.003002
0.3430	699.723	26.220	55.261	36.466	-0.676	35.303	1332.092	-0.001835	-0.003868	-0.002553
0.3440	637.911	22.052	48.078	31.241	-0.678	35.303	1214.418	-0.001544	-0.003365	-0.002187
0.3450	590.616	19.010	42.229	27.310	-0.680	35.305	1124.382	-0.001331	-0.002956	-0.001912
0.3460	552.850	16.284	37.550	23.919	-0.678	35.308	1052.485	-0.001140	-0.002629	-0.001674
0.3470	518.615	14.047	33.312	20.918	-0.682	35.309	987.310	-0.000983	-0.002332	-0.001464
0.3480	482.547	11.516	28.937	17.637	-0.683	35.312	918.646	-0.000806	-0.002026	-0.001235
0.3490	441.955	9.099	24.080	13.996	-0.687	35.315	841.370	-0.000637	-0.001686	-0.000980
0.3500	397.081	5.944	18.506	9.813	-0.695	35.318	755.939	-0.000416	-0.001295	-0.000687
0.3510	351.229	3.000	12.425	5.547	-0.693	35.321	668.650	-0.000210	-0.000870	-0.000388
0.3520	308.939	0.347	6.660	1.545	-0.696	35.322	588.140	-0.000024	-0.000466	-0.000108
0.3530	274.314	-1.655	1.693	-1.513	-0.699	35.322	522.223	0.000116	-0.000118	0.000106
0.3540	249.712	-3.213	-1.857	-3.807	-0.699	35.321	475.388	0.000225	0.000130	0.000266
0.3550	235.645	-4.490	-4.334	-5.475	-0.695	35.320	448.608	0.000314	0.000303	0.000383
0.3560	230.551	-5.100	-5.599	-6.336	-0.687	35.319	438.910	0.000357	0.000392	0.000444
0.3570	232.189	-5.210	-5.972	-6.403	-0.689	35.316	442.028	0.000365	0.000418	0.000448
0.3580	237.990	-4.963	-5.750	-6.125	-0.688	35.313	453.072	0.000347	0.000403	0.000429
0.3590	248.119	-4.782	-5.214	-5.708	-0.691	35.310	472.355	0.000335	0.000365	0.000400
0.3600	266.228	-4.213	-3.976	-4.889	-0.692	35.308	506.830	0.000295	0.000278	0.000342
0.3610	299.005	-2.809	-0.965	-2.833	-0.690	35.306	569.229	0.000197	0.000068	0.000198
0.3620	351.755	0.095	4.609	1.322	-0.694	35.304	669.651	-0.000007	-0.000323	-0.000093
0.3630	423.996	4.124	12.700	7.075	-0.702	35.304	807.180	-0.000289	-0.000889	-0.000495
0.3640	510.560	9.183	22.663	14.469	-0.702	35.304	971.975	-0.000643	-0.001586	-0.001013
0.3650	604.818	14.699	33.437	21.916	-0.704	35.305	1151.419	-0.001029	-0.002341	-0.001534
0.3660	701.466	20.690	44.102	29.558	-0.692	35.308	1335.411	-0.001448	-0.003087	-0.002069
0.3670	795.634	26.914	54.629	37.326	-0.696	35.310	1514.683	-0.001884	-0.003824	-0.002613
0.3680	883.595	32.931	64.330	44.468	-0.698	35.312	1682.138	-0.002305	-0.004503	-0.003113
0.3690	963.216	38.405	73.246	51.140	-0.695	35.315	1833.715	-0.002688	-0.005127	-0.003580
0.3700	1034.390	43.451	81.130	56.824	-0.691	35.318	1969.213	-0.003042	-0.005679	-0.003978
0.3710	1098.081	47.885	87.941	62.105	-0.687	35.321	2090.464	-0.003352	-0.006156	-0.004347
0.3720	1156.120	52.373	94.093	67.038	-0.697	35.322	2200.956	-0.003666	-0.006586	-0.004693
0.3730	1209.772	56.501	99.720	71.569	-0.699	35.322	2303.095	-0.003955	-0.006980	-0.005010
0.3740	1260.147	60.600	105.183	75.931	-0.699	35.321	2398.996	-0.004242	-0.007363	-0.005315
0.3750	1307.426	64.435	110.109	80.100	-0.693	35.319	2489.004	-0.004510	-0.007708	-0.005607
0.3760	1350.663	67.575	114.580	83.686	-0.686	35.318	2571.316	-0.004730	-0.008021	-0.005858
0.3770	1387.889	70.688	118.461	86.828	-0.684	35.315	2642.183	-0.004948	-0.008292	-0.006078
0.3780	1416.247	72.953	121.708	89.358	-0.684	35.313	2696.171	-0.005107	-0.008520	-0.006255
0.3790	1433.890	74.481	123.896	91.192	-0.684	35.310	2729.759	-0.005214	-0.008673	-0.006383
0.3800	1440.879	75.190	125.080	92.164	-0.686	35.307	2743.063	-0.005263	-0.008756	-0.006451
0.3810	1438.850	75.092	125.412	92.358	-0.684	35.305	2739.201	-0.005256	-0.008779	-0.006465
0.3820	1429.938	74.829	125.329	92.345	-0.682	35.304	2722.235	-0.005238	-0.008773	-0.006464
0.3830	1414.384	74.217	124.957	91.857	-0.684	35.303	2692.623	-0.005195	-0.008747	-0.006430
0.3840	1388.279	72.759	123.568	90.535	-0.681	35.303	2642.927	-0.005093	-0.008650	-0.006337
0.3850	1344.937	70.118	120.376	87.548	-0.683	35.305	2560.415	-0.004908	-0.008426	-0.006128
0.3860	1281.938	65.797	114.857	83.073	-0.676	35.307	2440.481	-0.004606	-0.008040	-0.005815
0.3870	1203.385	60.571	107.564	77.196	-0.681	35.309	2290.936	-0.004240	-0.007529	-0.005404
0.3880	1118.534	54.708	99.514	70.650	-0.681	35.312	2129.402	-0.003830	-0.006966	-0.004946
0.3890	1035.638	49.136	91.438	64.231	-0.679	35.315	1971.588	-0.003439	-0.006401	-0.004496
0.3900	959.083	43.952	83.966	57.991	-0.681	35.318	1825.848	-0.003077	-0.005878	-0.004059
0.3910	890.734	39.450	76.796	52.406	-0.676	35.321	1695.728	-0.002761	-0.005376	-0.003668
0.3920	829.809	35.183	70.329	47.292	-0.676	35.322	1579.742	-0.002463	-0.004923	-0.003310
0.3930	774.399	31.500	64.164	43.026	-0.680	35.322	1474.257	-0.002205	-0.004492	-0.003012
0.3940	721.379	27.956	58.303	38.746	-0.684	35.321	1373.320	-0.001957	-0.004081	-0.002712
0.3950	667.397	24.481	52.192	34.451	-0.688	35.319	1270.552	-0.001714	-0.003653	-0.002412
0.3960	609.943	20.730	45.519	29.338	-0.688	35.318	1161.175	-0.001451	-0.003186	-0.002054
0.3970	548.852	16.673	38.377	24.182	-0.688	35.316	1044.874	-0.001167	-0.002686	-0.001693
0.3980	486.304	12.685	30.960	18.888	-0.689	35.313	925.798	-0.000888	-0.002167	-0.001322
0.3990	425.785	8.752	23.654	13.537	-0.686	35.310	810.585	-0.000613	-0.001656	-0.000948
0.4000	371.127	5.431	16.690	8.506	-0.690	35.307	706.530	-0.000380	-0.001168	-0.000595
0.4010	325.230	2.374	10.389	4.087	-0.684	35.306	619.154	-0.000166	-0.000727	-0.000286
0.4020	289.988	0.192	5.394	0.642	-0.683	35.304	552.063	-0.000013	-0.000378	-0.000045
0.4030	265.943	-1.517	1.913	-1.595	-0.690	35.303	506.287	0.000106	-0.000134	0.000112
0.4040	252.117	-2.448	-0.344	-3.263	-0.692	35.303	479.965	0.000171	0.000024	0.000228
0.4050	246.917	-2.991	-1.623	-4.113	-0.695	35.305	470.066	0.000209	0.000114	0.000288
0.4060	247.548	-3.422	-2.283	-4.461	-0.694	35.308	471.268	0.000240	0.000160	0.000312
0.4070	252.207	-3.506	-2.380	-4.308	-0.693	35.310	480.137	0.000245	0.000167	0.000302
0.4080	259.556	-3.604	-2.120	-4.086	-0.692	35.312	494.127	0.000252	0.000148	0.000286
0.4090	271.143	-3.255	-1.556	-3.432	-0.694	35.315	516.186	0.000228	0.000109	0.000240
0.4100	291.581	-2.394	0.234	-2.140	-0.696	35.318	555.096	0.000168	-0.000016	0.000150
0.4110	327.304	-0.587	3.414	0.168	-0.694	35.321	623.102	0.000041	-0.000239	-0.000012
0.4120	381.842	2.346	9.317	4.338	-0.702	35.322	726.929	-0.000164	-0.000652	-0.000304
0.4130	453.648	6.488	17.284	10.090	-0.710	35.322	863.628	-0.000454	-0.001210	-0.000706
0.4140	537.731	11.519	26.902	16.914	-0.712	35.321	1023.703	-0.000806	-0.001883	-0.001184
0.4150	629.044	16.981	37.141	24.389	-0.711	35.320	1197.538	-0.001189	-0.002600	-0.001707
0.4160	723.708	22.565	47.487	31.894	-0.702	35.318	1377.754	-0.001580	-0.003324	-0.002233
0.4170	817.996	28.721	57.862	39.620	-0.706	35.316	1557.255	-0.002010	-0.004050	-0.002773
0.4180	908.843	34.961	67.798	47.097	-0.703	35.314	1730.204	-0.002447	-0.004746	-0.003297
0.4190	993.483	40.882	76.976	54.004	-0.700	35.311	1891.336	-0.002862	-0.005388	-0.003780
0.4200	1069.767	46.065	85.425	60.270	-0.695	35.308	2036.562	-0.003225	-0.005980	-0.004219
0.4210	1136.027	50.817	92.538	65.494	-0.691	35.306	2162.704	-0.003557	-0.006478	-0.004585
0.4220	1192.354	55.082	98.826	70.316	-0.698	35.304	2269.936	-0.003856	-0.006918	-0.004922
0.4230	1239.588	59.070	103.876	74.806	-0.708	35.303	2359.858	-0.004135	-0.007271	-0.005236
0.4240	1279.429	62.253	108.308	78.378	-0.711	35.304	2435.703	-0.004358	-0.007582	-0.005486
0.4250	1312.762	65.074	112.106	81.187	-0.705	35.305	2499.161	-0.004555	-0.007847	-0.005683
0.4260	1340.098	67.285	115.120	83.381	-0.699	35.307	2551.203	-0.004710	-0.008058	-0.005837
0.4270	1361.258	69.049	117.678	85.327	-0.703	35.309	2591.486	-0.004833	-0.008237	-0.005973
0.4280	1376.317	70.439	119.521	86.869	-0.708	35.312	2620.153	-0.004931	-0.008366	-0.006081
0.4290	1385.514	71.315	120.814	87.730	-0.708	35.315	2637.663	-0.004992	-0.008457	-0.006141
0.4300	1389.451	71.913	121.668	88.647	-0.710	35.318	2645.159	-0.005034	-0.008517	-0.006205
0.4310	1388.805	72.108	121.806	88.910	-0.704	35.321	2643.929	-0.005048	-0.008526	-0.006224
0.4320	1384.252	72.134	121.765	89.034	-0.705	35.323	2635.260	-0.005049	-0.008524	-0.006232
0.4330	1375.791	71.786	121.393	88.673	-0.707	35.322	2619.152	-0.005025	-0.008497	-0.006207
0.4340	1362.235	71.285	120.924	88.202	-0.706	35.321	2593.346	-0.004990	-0.008465	-0.006174
0.4350	1338.625	69.924	119.658	87.133	-0.709	35.319	2548.399	-0.004895	-0.008376	-0.006099
0.4360	1296.335	67.130	116.356	84.271	-0.702	35.318	2467.890	-0.004699	-0.008145	-0.005899
0.4370	1230.496	62.739	110.880	79.546	-0.703	35.316	2342.548	-0.004392	-0.007762	-0.005568
0.4380	1143.211	56.860	102.831	72.931	-0.701	35.313	2176.380	-0.003980	-0.007198	-0.005105
0.4390	1045.091	50.219	93.281	65.495	-0.703	35.310	1989.584	-0.003515	-0.006530	-0.004585
0.4400	947.000	43.689	83.333	57.838	-0.709	35.307	1802.845	-0.003058	-0.005833	-0.004049
0.4410	856.860	37.546	73.675	50.195	-0.704	35.305	1631.241	-0.002628	-0.005157	-0.003514
0.4420	778.607	32.473	65.282	43.831	-0.705	35.304	1482.267	-0.002273	-0.004570	-0.003068
0.4430	712.812	28.055	57.878	38.399	-0.710	35.303	1357.012	-0.001964	-0.004051	-0.002688
0.4440	657.658	24.289	51.712	34.188	-0.708	35.303	1252.012	-0.001700	-0.003620	-0.002393
0.4450	609.868	20.843	46.069	30.172	-0.707	35.305	1161.032	-0.001459	-0.003225	-0.002112
0.4460	565.444	17.770	40.675	26.016	-0.696	35.307	1076.460	-0.001244	-0.002847	-0.001821
0.4470	521.125	14.908	35.406	22.222	-0.696	35.309	992.088	-0.001044	-0.002478	-0.001556
0.4480	474.973	11.864	29.791	17.971	-0.696	35.312	904.226	-0.000830	-0.002085	-0.001258
0.4490	427.483	8.711	23.998	13.788	-0.699	35.315	813.818	-0.000610	-0.001680	-0.000965
0.4500	380.309	5.737	18.135	9.494	-0.705	35.318	724.010	-0.000402	-0.001269	-0.000665
0.4510	336.185	3.028	12.273	5.352	-0.700	35.321	640.011	-0.000212	-0.000859	-0.000375
0.4520	298.149	0.679	7.101	1.837	-0.700	35.323	567.598	-0.000048	-0.000497	-0.000129
0.4530	268.498	-0.961	2.876	-0.706	-0.702	35.323	511.150	0.000067	-0.000201	0.000049
0.4540	248.675	-2.185	-0.069	-2.847	-0.704	35.322	473.413	0.000153	0.000005	0.000199
0.4550	238.305	-2.838	-1.941	-3.960	-0.703	35.320	453.672	0.000199	0.000136	0.000277
0.4560	235.600	-3.644	-3.027	-4.920	-0.695	35.319	448.523	0.000255	0.000212	0.000344
0.4570	238.050	-3.908	-3.248	-4.921	-0.698	35.316	453.186	0.000274	0.000227	0.000344
0.4580	244.076	-3.977	-3.166	-4.726	-0.707	35.314	464.659	0.000278	0.000222	0.000331
0.4590	253.875	-3.519	-2.602	-4.392	-0.712	35.311	483.313	0.000246	0.000182	0.000307
0.4600	271.699	-2.893	-1.542	-3.432	-0.715	35.308	517.244	0.000203	0.000108	0.000240
0.4610	304.536	-1.419	1.225	-1.390	-0.711	35.306	579.758	0.000099	-0.000086	0.000097
0.4620	357.977	1.178	6.813	2.807	-0.715	35.304	681.496	-0.000082	-0.000477	-0.000197
0.4630	431.841	5.500	15.096	8.519	-0.722	35.303	822.115	-0.000385	-0.001057	-0.000596
0.4640	521.275	10.614	25.306	16.067	-0.727	35.303	992.374	-0.000743	-0.001771	-0.001125
0.4650	619.591	16.423	36.203	23.891	-0.724	35.305	1179.543	-0.001150	-0.002534	-0.001672
0.4660	721.514	22.578	47.514	32.186	-0.712	35.307	1373.577	-0.001580	-0.003326	-0.002253
0.4670	821.573	29.360	58.523	40.245	-0.711	35.309	1564.064	-0.002055	-0.004097	-0.002817
0.4680	915.365	35.709	68.801	47.819	-0.706	35.312	1742.620	-0.002500	-0.004816	-0.003347
0.4690	1000.261	41.714	78.006	54.837	-0.706	35.314	1904.240	-0.002920	-0.005460	-0.003839
0.4700	1074.982	47.092	86.180	60.827	-0.707	35.317	2046.490	-0.003296	-0.006033	-0.004258
0.4710	1139.739	51.733	93.321	66.232	-0.705	35.321	2169.771	-0.003621	-0.006532	-0.004636
0.4720	1195.209	55.987	99.430	71.138	-0.706	35.322	2275.372	-0.003919	-0.006960	-0.004980
0.4730	1242.624	59.600	104.632	75.182	-0.714	35.322	2365.637	-0.004172	-0.007324	-0.005263
0.4740	1283.922	62.908	109.008	79.198	-0.721	35.321	2444.258	-0.004404	-0.007631	-0.005544
0.4750	1320.892	65.713	112.986	82.323	-0.722	35.319	2514.639	-0.004600	-0.007909	-0.005763
0.4760	1355.066	68.465	116.563	85.228	-0.710	35.318	2579.699	-0.004793	-0.008159	-0.005966
0.4770	1386.761	70.966	120.043	87.702	-0.712	35.316	2640.038	-0.004968	-0.008403	-0.006139
0.4780	1414.594	73.440	123.235	90.064	-0.706	35.313	2693.024	-0.005141	-0.008626	-0.006305
0.4790	1436.490	75.344	125.740	92.259	-0.708	35.310	2734.709	-0.005274	-0.008802	-0.006458
0.4800	1450.106	76.525	127.543	93.663	-0.707	35.308	2760.630	-0.005357	-0.008928	-0.006556
0.4810	1454.810	76.971	128.259	94.260	-0.699	35.306	2769.585	-0.005388	-0.008978	-0.006598
0.4820	1451.384	77.095	128.561	94.564	-0.702	35.304	2763.062	-0.005397	-0.008999	-0.006620
0.4830	1441.119	76.998	128.356	94.481	-0.703	35.303	2743.521	-0.005390	-0.008985	-0.006614
0.4840	1422.664	76.094	127.708	93.856	-0.702	35.303	2708.387	-0.005327	-0.008940	-0.006570
0.4850	1389.046	74.121	125.727	91.732	-0.693	35.305	2644.386	-0.005188	-0.008801	-0.006421
0.4860	1332.163	70.091	121.255	87.688	-0.685	35.307	2536.097	-0.004906	-0.008488	-0.006138
0.4870	1250.679	64.811	114.197	81.698	-0.686	35.309	2380.972	-0.004537	-0.007994	-0.005719
0.4880	1151.417	58.097	104.908	74.473	-0.686	35.312	2192.001	-0.004067	-0.007344	-0.005213
0.4890	1047.390	51.137	94.602	66.413	-0.691	35.315	1993.961	-0.003580	-0.006622	-0.004649
0.4900	948.894	44.285	84.528	58.659	-0.692	35.318	1806.450	-0.003100	-0.005917	-0.004106
0.4910	862.691	38.352	75.184	51.322	-0.692	35.321	1642.342	-0.002685	-0.005263	-0.003593
0.4920	791.982	33.377	67.410	45.443	-0.691	35.322	1507.730	-0.002336	-0.004719	-0.003181
0.4930	735.686	29.474	61.178	40.872	-0.695	35.322	1400.557	-0.002063	-0.004282	-0.002861
0.4940	689.654	26.470	55.964	36.995	-0.692	35.321	1312.923	-0.001853	-0.003917	-0.002590
0.4950	648.311	23.565	51.258	33.381	-0.694	35.319	1234.217	-0.001650	-0.003588	-0.002337
0.4960	605.991	20.813	46.125	29.684	-0.687	35.318	1153.650	-0.001457	-0.003229	-0.002078
0.4970	559.598	17.686	40.675	25.572	-0.691	35.316	1065.331	-0.001238	-0.002847	-0.001790
0.4980	507.870	14.324	34.566	21.209	-0.696	35.313	966.854	-0.001003	-0.002420	-0.001485
0.4990	452.611	10.599	27.905	16.319	-0.700	35.310	861.654	-0.000742	-0.001953	-0.001142
Test Cycles
Time (sec)	Axial stress (kPa)	Axial micro-strain #1	Axial micro-strain #2	Axial micro-strain #3	Confining pressure (kPa)	Temperature (�C)	Load (N)	Displacement #1 (mm)	Displacement #2 (mm)	Displacement #3 (mm)
0.0000	397.171	6.876	21.053	11.496	-0.704	35.308	756.111	-0.000481	-0.001474	-0.000805
0.0010	345.909	3.541	14.366	6.757	-0.699	35.306	658.522	-0.000248	-0.001006	-0.000473
0.0020	302.567	0.776	8.656	2.795	-0.703	35.304	576.010	-0.000054	-0.000606	-0.000196
0.0030	269.459	-1.087	4.033	-0.290	-0.706	35.303	512.981	0.000076	-0.000282	0.000020
0.0040	247.458	-2.491	0.687	-2.375	-0.710	35.303	471.096	0.000174	-0.000048	0.000166
0.0050	235.796	-3.337	-1.294	-3.793	-0.710	35.305	448.895	0.000234	0.000091	0.000265
0.0060	232.369	-3.920	-2.588	-4.669	-0.704	35.307	442.371	0.000274	0.000181	0.000327
0.0070	234.744	-4.018	-2.877	-4.752	-0.702	35.309	446.892	0.000281	0.000201	0.000333
0.0080	240.740	-3.893	-2.671	-4.641	-0.709	35.312	458.307	0.000273	0.000187	0.000325
0.0090	250.524	-3.477	-2.285	-4.084	-0.712	35.314	476.933	0.000243	0.000160	0.000286
0.0100	267.776	-2.684	-0.880	-3.123	-0.716	35.318	509.777	0.000188	0.000062	0.000219
0.0110	298.975	-1.156	1.708	-1.094	-0.711	35.321	569.172	0.000081	-0.000120	0.000077
0.0120	349.380	1.414	7.143	2.560	-0.716	35.322	665.131	-0.000099	-0.000500	-0.000179
0.0130	419.022	5.416	14.918	8.117	-0.719	35.322	797.710	-0.000379	-0.001044	-0.000568
0.0140	503.497	10.378	24.481	15.190	-0.723	35.321	958.529	-0.000726	-0.001714	-0.001063
0.0150	596.658	15.992	34.939	22.680	-0.722	35.320	1135.883	-0.001119	-0.002446	-0.001588
0.0160	692.825	21.774	45.342	30.226	-0.717	35.318	1318.960	-0.001524	-0.003174	-0.002116
0.0170	786.752	27.832	55.675	37.857	-0.718	35.316	1497.774	-0.001948	-0.003897	-0.002650
0.0180	874.157	33.598	65.196	44.931	-0.722	35.313	1664.171	-0.002352	-0.004564	-0.003145
0.0190	952.876	39.130	73.824	51.434	-0.725	35.311	1814.032	-0.002739	-0.005168	-0.003600
0.0200	1023.074	43.939	81.502	57.256	-0.717	35.308	1947.670	-0.003076	-0.005705	-0.004008
0.0210	1086.103	48.399	88.162	62.174	-0.708	35.306	2067.661	-0.003388	-0.006171	-0.004352
0.0220	1144.323	52.748	94.477	67.136	-0.711	35.304	2178.497	-0.003692	-0.006613	-0.004700
0.0230	1199.222	57.001	100.491	71.680	-0.719	35.303	2283.010	-0.003990	-0.007034	-0.005018
0.0240	1251.401	61.031	106.133	75.987	-0.718	35.303	2382.345	-0.004272	-0.007429	-0.005319
0.0250	1300.108	64.741	111.348	80.517	-0.715	35.305	2475.071	-0.004532	-0.007794	-0.005636
0.0260	1343.059	67.880	115.806	84.158	-0.706	35.308	2556.839	-0.004752	-0.008106	-0.005891
0.0270	1378.120	70.549	119.851	87.451	-0.712	35.309	2623.587	-0.004938	-0.008390	-0.006122
0.0280	1402.932	72.605	122.714	89.536	-0.711	35.312	2670.822	-0.005082	-0.008590	-0.006267
0.0290	1417.239	73.842	124.586	90.828	-0.713	35.315	2698.059	-0.005169	-0.008721	-0.006358
0.0300	1422.319	74.648	125.425	91.621	-0.716	35.318	2707.729	-0.005225	-0.008780	-0.006413
0.0310	1420.771	74.689	125.618	91.913	-0.714	35.321	2704.782	-0.005228	-0.008793	-0.006434
0.0320	1414.789	74.675	125.727	92.191	-0.716	35.322	2693.396	-0.005227	-0.008801	-0.006453
0.0330	1405.397	74.577	125.631	92.093	-0.719	35.322	2675.514	-0.005220	-0.008794	-0.006447
0.0340	1391.676	74.022	125.246	91.565	-0.726	35.321	2649.393	-0.005182	-0.008767	-0.006410
0.0350	1369.328	72.828	124.007	90.133	-0.720	35.320	2606.850	-0.005098	-0.008680	-0.006309
0.0360	1329.999	70.299	121.048	87.340	-0.715	35.319	2531.977	-0.004921	-0.008473	-0.006114
0.0370	1267.676	66.131	115.846	83.005	-0.712	35.316	2413.330	-0.004629	-0.008109	-0.005810
0.0380	1182.495	60.712	108.003	76.821	-0.714	35.313	2251.167	-0.004250	-0.007560	-0.005377
0.0390	1082.827	54.112	98.481	69.372	-0.709	35.310	2061.424	-0.003788	-0.006894	-0.004856
0.0400	979.131	47.232	88.107	61.269	-0.715	35.307	1864.014	-0.003306	-0.006167	-0.004289
0.0410	880.079	40.381	77.690	52.960	-0.711	35.306	1675.444	-0.002827	-0.005438	-0.003707
0.0420	791.426	34.348	68.236	45.650	-0.717	35.304	1506.672	-0.002404	-0.004777	-0.003196
0.0430	716.419	29.250	59.952	39.509	-0.722	35.303	1363.878	-0.002047	-0.004197	-0.002766
0.0440	655.419	24.970	52.839	34.590	-0.724	35.303	1247.749	-0.001748	-0.003699	-0.002421
0.0450	606.096	21.552	46.964	30.380	-0.722	35.305	1153.851	-0.001509	-0.003287	-0.002127
0.0460	564.151	18.607	41.764	26.588	-0.713	35.307	1073.999	-0.001302	-0.002923	-0.001861
0.0470	524.837	16.007	37.031	23.058	-0.711	35.309	999.155	-0.001121	-0.002592	-0.001614
0.0480	484.321	13.213	32.062	19.417	-0.712	35.311	922.022	-0.000925	-0.002244	-0.001359
0.0490	440.483	10.279	26.613	15.692	-0.710	35.314	838.566	-0.000720	-0.001863	-0.001098
0.0500	393.399	7.166	20.724	11.411	-0.709	35.317	748.930	-0.000502	-0.001451	-0.000799
0.0510	345.142	4.039	14.532	6.742	-0.704	35.321	657.063	-0.000283	-0.001017	-0.000472
0.0520	299.426	1.134	8.477	2.421	-0.703	35.322	570.030	-0.000079	-0.000593	-0.000169
0.0530	260.307	-1.131	3.137	-1.235	-0.705	35.322	495.558	0.000079	-0.000220	0.000086
0.0540	231.182	-2.992	-1.101	-3.805	-0.706	35.321	440.111	0.000209	0.000077	0.000266
0.0550	213.403	-4.143	-3.936	-5.613	-0.708	35.320	406.265	0.000290	0.000275	0.000393
0.0560	205.934	-5.016	-5.710	-6.918	-0.701	35.319	392.046	0.000351	0.000400	0.000484
0.0570	206.235	-5.044	-6.425	-7.111	-0.707	35.316	392.618	0.000353	0.000450	0.000498
0.0580	212.036	-5.003	-6.396	-7.193	-0.707	35.314	403.662	0.000350	0.000448	0.000504
0.0590	223.773	-4.616	-5.654	-6.445	-0.712	35.311	426.006	0.000323	0.000396	0.000451
0.0600	247.443	-3.895	-3.714	-5.069	-0.716	35.308	471.067	0.000273	0.000260	0.000355
0.0610	289.763	-1.991	0.413	-1.929	-0.716	35.305	551.634	0.000139	-0.000029	0.000135
0.0620	353.633	1.359	7.389	3.158	-0.720	35.304	673.227	-0.000095	-0.000517	-0.000221
0.0630	435.328	6.113	16.760	9.661	-0.720	35.303	828.753	-0.000428	-0.001173	-0.000676
0.0640	527.182	11.588	27.218	17.221	-0.727	35.303	1003.618	-0.000811	-0.001905	-0.001205
0.0650	622.522	17.618	37.785	24.904	-0.728	35.305	1185.122	-0.001233	-0.002645	-0.001743
0.0660	716.013	23.523	47.980	32.409	-0.716	35.307	1363.106	-0.001647	-0.003359	-0.002269
0.0670	803.073	29.360	57.737	39.426	-0.711	35.309	1528.845	-0.002055	-0.004042	-0.002760
0.0680	881.025	34.543	66.448	45.889	-0.707	35.312	1677.246	-0.002418	-0.004651	-0.003212
0.0690	949.570	39.296	74.266	51.462	-0.708	35.314	1807.737	-0.002751	-0.005199	-0.003602
0.0700	1011.397	43.757	81.076	56.451	-0.706	35.318	1925.440	-0.003063	-0.005675	-0.003952
0.0710	1070.278	47.954	87.544	61.036	-0.706	35.320	2037.535	-0.003357	-0.006128	-0.004273
0.0720	1130.362	52.220	93.640	66.066	-0.710	35.322	2151.918	-0.003655	-0.006555	-0.004625
0.0730	1193.872	56.974	100.218	71.693	-0.713	35.322	2272.825	-0.003988	-0.007015	-0.005019
0.0740	1261.229	61.893	107.083	77.475	-0.716	35.321	2401.056	-0.004332	-0.007496	-0.005423
0.0750	1329.563	66.840	114.004	83.282	-0.717	35.319	2531.147	-0.004679	-0.007980	-0.005830
0.0760	1392.803	71.440	120.525	88.146	-0.706	35.318	2651.539	-0.005001	-0.008437	-0.006170
0.0770	1443.944	75.344	125.877	92.341	-0.706	35.316	2748.899	-0.005274	-0.008811	-0.006464
0.0780	1477.353	78.150	129.744	95.483	-0.707	35.314	2812.500	-0.005471	-0.009082	-0.006684
0.0790	1492.306	79.538	131.919	97.472	-0.709	35.311	2840.967	-0.005568	-0.009234	-0.006823
0.0800	1492.411	80.052	132.608	97.987	-0.710	35.308	2841.167	-0.005604	-0.009283	-0.006859
0.0810	1482.583	79.844	132.456	97.890	-0.703	35.306	2822.456	-0.005589	-0.009272	-0.006852
0.0820	1465.646	79.109	131.741	96.874	-0.703	35.304	2790.213	-0.005538	-0.009222	-0.006781
0.0830	1439.030	77.610	130.418	95.624	-0.709	35.303	2739.544	-0.005433	-0.009129	-0.006694
0.0840	1398.243	75.192	127.666	93.095	-0.712	35.303	2661.896	-0.005263	-0.008937	-0.006517
0.0850	1342.082	71.426	123.222	89.356	-0.719	35.305	2554.979	-0.005000	-0.008626	-0.006255
0.0860	1273.703	66.743	116.975	84.284	-0.711	35.307	2424.803	-0.004672	-0.008188	-0.005900
0.0870	1199.282	61.865	110.149	78.808	-0.710	35.309	2283.125	-0.004331	-0.007710	-0.005517
0.0880	1122.141	56.779	102.967	72.679	-0.704	35.311	2136.269	-0.003974	-0.007208	-0.005088
0.0890	1043.858	51.637	95.399	66.536	-0.703	35.314	1987.238	-0.003615	-0.006678	-0.004658
0.0900	965.665	46.288	87.460	60.033	-0.702	35.317	1838.379	-0.003240	-0.006122	-0.004202
0.0910	889.216	40.924	79.259	54.044	-0.692	35.320	1692.839	-0.002865	-0.005548	-0.003783
0.0920	815.997	35.948	71.320	48.153	-0.694	35.322	1553.450	-0.002516	-0.004992	-0.003371
0.0930	747.167	31.430	63.806	42.774	-0.697	35.322	1422.415	-0.002200	-0.004466	-0.002994
0.0940	682.876	27.233	56.623	37.493	-0.699	35.321	1300.020	-0.001906	-0.003964	-0.002625
0.0950	623.003	23.162	49.852	32.309	-0.697	35.319	1186.037	-0.001621	-0.003490	-0.002262
0.0960	566.736	19.104	43.026	27.294	-0.694	35.318	1078.920	-0.001337	-0.003012	-0.001911
0.0970	513.791	15.561	36.559	22.681	-0.693	35.316	978.127	-0.001089	-0.002559	-0.001588
0.0980	463.581	12.130	30.231	18.248	-0.695	35.314	882.540	-0.000849	-0.002116	-0.001277
0.0990	416.723	8.919	24.245	14.164	-0.700	35.311	793.333	-0.000624	-0.001697	-0.000991
0.1000	373.696	6.127	18.838	10.203	-0.705	35.308	711.422	-0.000429	-0.001319	-0.000714
0.1010	335.599	3.541	13.690	6.424	-0.704	35.306	638.895	-0.000248	-0.000958	-0.000450
0.1020	303.318	1.722	9.274	3.309	-0.702	35.304	577.440	-0.000121	-0.000649	-0.000232
0.1030	277.454	0.123	5.505	0.877	-0.708	35.303	528.202	-0.000009	-0.000385	-0.000061
0.1040	258.263	-1.212	2.601	-1.069	-0.708	35.303	491.667	0.000085	-0.000182	0.000075
0.1050	246.105	-2.101	0.496	-2.542	-0.712	35.305	468.521	0.000147	-0.000035	0.000178
0.1060	240.199	-3.019	-0.894	-3.500	-0.703	35.308	457.277	0.000211	0.000063	0.000245
0.1070	239.793	-3.254	-1.458	-3.903	-0.707	35.309	456.505	0.000228	0.000102	0.000273
0.1080	243.205	-3.352	-1.499	-3.708	-0.710	35.312	462.999	0.000235	0.000105	0.000260
0.1090	250.358	-3.283	-1.293	-3.722	-0.717	35.315	476.618	0.000230	0.000090	0.000261
0.1100	263.794	-2.783	-0.467	-3.151	-0.721	35.318	502.195	0.000195	0.000033	0.000221
0.1110	291.311	-1.615	1.693	-1.428	-0.716	35.321	554.581	0.000113	-0.000118	0.000100
0.1120	341.205	1.011	6.810	2.448	-0.719	35.322	649.567	-0.000071	-0.000477	-0.000171
0.1130	415.866	5.222	15.039	8.576	-0.723	35.322	791.702	-0.000366	-0.001053	-0.000600
0.1140	510.515	10.864	25.621	16.093	-0.726	35.321	971.889	-0.000760	-0.001794	-0.001127
0.1150	616.075	17.312	37.566	24.666	-0.722	35.320	1172.848	-0.001212	-0.002630	-0.001727
0.1160	724.174	24.136	49.388	33.185	-0.709	35.318	1378.641	-0.001689	-0.003457	-0.002323
0.1170	827.434	30.834	60.904	41.496	-0.704	35.316	1575.222	-0.002158	-0.004263	-0.002905
0.1180	919.633	37.032	71.045	49.223	-0.704	35.313	1750.746	-0.002592	-0.004973	-0.003446
0.1190	997.345	42.605	79.548	55.671	-0.708	35.310	1898.689	-0.002982	-0.005568	-0.003897
0.1200	1060.029	47.246	86.578	61.145	-0.712	35.308	2018.023	-0.003307	-0.006060	-0.004280
0.1210	1110.419	50.984	92.013	64.981	-0.711	35.306	2113.953	-0.003569	-0.006441	-0.004549
0.1220	1153.100	54.068	96.818	68.483	-0.712	35.304	2195.206	-0.003785	-0.006777	-0.004794
0.1230	1193.631	57.140	101.193	72.249	-0.719	35.303	2272.367	-0.004000	-0.007084	-0.005057
0.1240	1236.613	60.475	105.748	76.002	-0.720	35.303	2354.193	-0.004233	-0.007402	-0.005320
0.1250	1283.712	64.004	110.646	80.101	-0.719	35.305	2443.857	-0.004480	-0.007745	-0.005607
0.1260	1333.456	67.562	115.545	83.950	-0.715	35.307	2538.557	-0.004729	-0.008088	-0.005876
0.1270	1381.411	71.064	120.636	88.119	-0.714	35.309	2629.852	-0.004974	-0.008444	-0.006168
0.1280	1422.289	74.330	124.929	91.606	-0.715	35.312	2707.672	-0.005203	-0.008745	-0.006412
0.1290	1451.594	76.845	128.354	94.455	-0.710	35.315	2763.462	-0.005379	-0.008985	-0.006612
0.1300	1467.449	78.484	130.213	96.081	-0.711	35.318	2793.646	-0.005494	-0.009115	-0.006726
0.1310	1470.289	79.039	130.859	96.566	-0.701	35.322	2799.053	-0.005533	-0.009160	-0.006760
0.1320	1462.294	78.859	130.790	96.456	-0.701	35.323	2783.833	-0.005520	-0.009155	-0.006752
0.1330	1443.388	77.816	130.103	95.622	-0.705	35.323	2747.841	-0.005447	-0.009107	-0.006694
0.1340	1406.884	75.843	128.094	93.412	-0.703	35.322	2678.347	-0.005309	-0.008967	-0.006539
0.1350	1346.215	71.869	123.541	89.564	-0.701	35.320	2562.847	-0.005031	-0.008648	-0.006269
0.1360	1262.416	66.227	116.247	83.407	-0.691	35.319	2403.316	-0.004636	-0.008137	-0.005839
0.1370	1165.949	59.571	107.193	76.460	-0.692	35.316	2219.667	-0.004170	-0.007504	-0.005352
0.1380	1070.128	53.055	97.837	68.914	-0.690	35.314	2037.249	-0.003714	-0.006849	-0.004824
0.1390	983.910	47.163	89.084	61.910	-0.690	35.311	1873.112	-0.003301	-0.006236	-0.004334
0.1400	911.623	42.312	81.654	56.157	-0.689	35.308	1735.497	-0.002962	-0.005716	-0.003931
0.1410	853.944	38.226	75.407	51.280	-0.687	35.306	1625.690	-0.002676	-0.005278	-0.003590
0.1420	808.078	35.154	70.356	47.375	-0.686	35.304	1538.372	-0.002461	-0.004925	-0.003316
0.1430	768.357	32.501	65.966	43.791	-0.696	35.303	1462.755	-0.002275	-0.004618	-0.003065
0.1440	728.833	29.819	61.647	40.553	-0.692	35.303	1387.510	-0.002087	-0.004315	-0.002839
0.1450	684.063	26.804	56.624	36.940	-0.696	35.304	1302.280	-0.001876	-0.003964	-0.002586
0.1460	630.893	23.024	50.404	32.575	-0.691	35.307	1201.057	-0.001612	-0.003528	-0.002280
0.1470	569.547	19.076	43.400	27.336	-0.694	35.309	1084.270	-0.001335	-0.003038	-0.001913
0.1480	502.820	14.878	35.557	21.930	-0.692	35.311	957.241	-0.001041	-0.002489	-0.001535
0.1490	435.944	10.780	27.686	15.955	-0.690	35.314	829.926	-0.000755	-0.001938	-0.001117
0.1500	374.313	6.931	19.775	10.467	-0.691	35.317	712.595	-0.000485	-0.001384	-0.000733
0.1510	322.810	3.541	12.868	5.616	-0.688	35.321	614.548	-0.000248	-0.000901	-0.000393
0.1520	284.067	0.983	7.336	1.878	-0.691	35.323	540.791	-0.000069	-0.000513	-0.000131
0.1530	258.459	-0.599	3.648	-0.538	-0.698	35.323	492.039	0.000042	-0.000255	0.000038
0.1540	244.407	-1.683	1.253	-2.010	-0.695	35.321	465.288	0.000118	-0.000088	0.000141
0.1550	239.282	-2.350	-0.095	-2.957	-0.695	35.320	455.532	0.000165	0.000007	0.000207
0.1560	240.109	-2.767	-0.701	-3.334	-0.688	35.319	457.106	0.000194	0.000049	0.000233
0.1570	244.527	-2.699	-0.729	-3.403	-0.691	35.316	465.517	0.000189	0.000051	0.000238
0.1580	251.260	-2.726	-0.605	-3.097	-0.691	35.314	478.334	0.000191	0.000042	0.000217
0.1590	261.074	-2.449	-0.165	-2.639	-0.695	35.311	497.017	0.000171	0.000012	0.000185
0.1600	277.665	-2.004	0.867	-1.638	-0.706	35.308	528.603	0.000140	-0.000061	0.000115
0.1610	307.060	-0.641	3.454	0.419	-0.703	35.306	584.564	0.000045	-0.000242	-0.000029
0.1620	354.144	1.846	8.270	3.920	-0.704	35.304	674.200	-0.000129	-0.000579	-0.000274
0.1630	419.563	5.723	15.701	9.006	-0.705	35.303	798.740	-0.000401	-0.001099	-0.000630
0.1640	499.725	10.351	24.934	15.607	-0.709	35.303	951.347	-0.000725	-0.001745	-0.001092
0.1650	589.504	15.785	35.102	22.848	-0.708	35.304	1122.265	-0.001105	-0.002457	-0.001599
0.1660	684.319	21.579	45.657	30.283	-0.703	35.307	1302.767	-0.001511	-0.003196	-0.002120
0.1670	779.343	27.875	56.114	37.857	-0.700	35.309	1483.669	-0.001951	-0.003928	-0.002650
0.1680	870.761	33.962	66.214	45.180	-0.698	35.312	1657.705	-0.002377	-0.004635	-0.003163
0.1690	955.536	39.700	75.598	52.324	-0.698	35.314	1819.096	-0.002779	-0.005292	-0.003663
0.1700	1032.226	45.023	83.952	58.659	-0.700	35.317	1965.094	-0.003152	-0.005877	-0.004106
0.1710	1100.125	49.887	91.245	64.231	-0.696	35.321	2094.355	-0.003492	-0.006387	-0.004496
0.1720	1159.938	54.501	97.492	69.289	-0.700	35.322	2208.223	-0.003815	-0.006824	-0.004850
0.1730	1212.732	58.627	103.188	73.888	-0.708	35.322	2308.731	-0.004104	-0.007223	-0.005172
0.1740	1259.997	62.393	108.266	77.849	-0.708	35.321	2398.710	-0.004368	-0.007579	-0.005449
0.1750	1302.497	65.617	112.889	81.699	-0.708	35.319	2479.620	-0.004593	-0.007902	-0.005719
0.1760	1339.707	68.300	116.728	84.799	-0.697	35.319	2550.459	-0.004781	-0.008171	-0.005936
0.1770	1370.982	70.828	120.168	87.801	-0.694	35.317	2609.997	-0.004958	-0.008412	-0.006146
0.1780	1395.072	72.732	122.851	89.885	-0.696	35.314	2655.859	-0.005091	-0.008600	-0.006292
0.1790	1411.348	74.204	124.806	91.442	-0.699	35.311	2686.844	-0.005194	-0.008736	-0.006401
0.1800	1419.959	75.303	125.975	92.290	-0.706	35.307	2703.238	-0.005271	-0.008818	-0.006460
0.1810	1421.597	75.761	126.513	92.471	-0.699	35.305	2706.356	-0.005303	-0.008856	-0.006473
0.1820	1417.720	75.859	126.485	92.666	-0.701	35.304	2698.975	-0.005310	-0.008854	-0.006487
0.1830	1409.379	75.538	126.472	92.751	-0.702	35.303	2683.096	-0.005288	-0.008853	-0.006493
0.1840	1395.538	74.634	125.907	92.374	-0.701	35.303	2656.746	-0.005224	-0.008814	-0.006466
0.1850	1371.132	73.301	124.598	90.997	-0.699	35.305	2610.283	-0.005131	-0.008722	-0.006370
0.1860	1327.234	70.410	121.255	87.966	-0.688	35.307	2526.712	-0.004929	-0.008488	-0.006158
0.1870	1259.531	66.046	115.557	83.172	-0.690	35.309	2397.823	-0.004623	-0.008089	-0.005822
0.1880	1171.389	60.181	107.729	76.836	-0.690	35.311	2230.024	-0.004213	-0.007541	-0.005379
0.1890	1074.140	53.706	98.428	69.318	-0.691	35.314	2044.888	-0.003759	-0.006890	-0.004852
0.1900	978.154	47.356	88.824	61.675	-0.691	35.317	1862.154	-0.003315	-0.006218	-0.004317
0.1910	889.832	41.339	79.549	54.365	-0.686	35.320	1694.012	-0.002894	-0.005568	-0.003806
0.1920	811.790	35.863	71.113	48.112	-0.687	35.322	1545.439	-0.002510	-0.004978	-0.003368
0.1930	744.207	31.125	63.903	42.734	-0.697	35.321	1416.779	-0.002179	-0.004473	-0.002991
0.1940	685.671	26.984	57.340	37.760	-0.698	35.321	1305.342	-0.001889	-0.004014	-0.002643
0.1950	633.943	23.454	51.464	33.436	-0.700	35.319	1206.865	-0.001642	-0.003603	-0.002340
0.1960	586.003	20.049	45.617	29.171	-0.690	35.318	1115.599	-0.001403	-0.003193	-0.002042
0.1970	539.430	16.922	40.002	25.084	-0.690	35.316	1026.936	-0.001185	-0.002800	-0.001756
0.1980	491.940	13.907	34.374	21.027	-0.688	35.313	936.527	-0.000973	-0.002406	-0.001472
0.1990	443.218	10.781	28.444	16.551	-0.691	35.310	843.773	-0.000755	-0.001991	-0.001159
0.2000	394.691	7.738	22.376	12.272	-0.698	35.307	751.390	-0.000542	-0.001566	-0.000859
0.2010	349.065	4.750	16.348	8.019	-0.695	35.305	664.530	-0.000332	-0.001144	-0.000561
0.2020	309.660	2.374	10.981	4.378	-0.697	35.304	589.514	-0.000166	-0.000769	-0.000306
0.2030	278.476	0.456	6.578	1.432	-0.699	35.303	530.148	-0.000032	-0.000460	-0.000100
0.2040	256.610	-0.976	3.234	-0.720	-0.699	35.303	488.520	0.000068	-0.000226	0.000050
0.2050	244.016	-2.032	1.047	-2.221	-0.695	35.304	464.544	0.000142	-0.000073	0.000155
0.2060	239.207	-2.657	-0.150	-3.012	-0.690	35.307	455.389	0.000186	0.000010	0.000211
0.2070	240.545	-2.725	-0.618	-3.457	-0.694	35.309	457.935	0.000191	0.000043	0.000242
0.2080	246.090	-2.503	-0.536	-3.206	-0.694	35.311	468.493	0.000175	0.000038	0.000224
0.2090	256.054	-2.183	-0.151	-2.956	-0.698	35.314	487.461	0.000153	0.000011	0.000207
0.2100	274.434	-1.516	1.239	-1.845	-0.701	35.317	522.451	0.000106	-0.000087	0.000129
0.2110	308.158	-0.043	4.157	0.350	-0.702	35.320	586.653	0.000003	-0.000291	-0.000024
0.2120	362.109	2.862	9.785	4.337	-0.706	35.322	689.363	-0.000200	-0.000685	-0.000304
0.2130	435.223	7.044	17.849	10.382	-0.716	35.322	828.552	-0.000493	-0.001249	-0.000727
0.2140	521.922	12.101	27.550	17.442	-0.715	35.321	993.605	-0.000847	-0.001929	-0.001221
0.2150	616.150	17.660	38.062	25.516	-0.714	35.319	1172.991	-0.001236	-0.002664	-0.001786
0.2160	713.519	23.620	48.630	33.047	-0.705	35.319	1358.356	-0.001653	-0.003404	-0.002313
0.2170	810.197	30.095	59.375	40.661	-0.703	35.316	1542.406	-0.002107	-0.004156	-0.002846
0.2180	902.471	36.252	69.489	47.957	-0.706	35.314	1718.073	-0.002538	-0.004864	-0.003357
0.2190	987.697	41.978	78.873	55.072	-0.705	35.311	1880.322	-0.002938	-0.005521	-0.003855
0.2200	1064.117	47.357	87.213	61.521	-0.714	35.308	2025.805	-0.003315	-0.006105	-0.004306
0.2210	1131.113	52.151	94.312	66.983	-0.708	35.306	2153.349	-0.003651	-0.006602	-0.004689
0.2220	1189.453	56.597	100.518	71.819	-0.709	35.304	2264.414	-0.003962	-0.007036	-0.005027
0.2230	1240.039	60.655	106.090	76.434	-0.714	35.303	2360.716	-0.004246	-0.007426	-0.005350
0.2240	1284.087	64.101	110.893	80.323	-0.712	35.303	2444.572	-0.004487	-0.007762	-0.005623
0.2250	1322.275	67.269	115.159	83.617	-0.711	35.304	2517.271	-0.004709	-0.008061	-0.005853
0.2260	1354.676	69.577	118.476	86.188	-0.710	35.307	2578.955	-0.004870	-0.008293	-0.006033
0.2270	1380.945	71.841	121.503	88.384	-0.715	35.309	2628.965	-0.005029	-0.008505	-0.006187
0.2280	1400.452	73.550	123.898	90.218	-0.716	35.312	2666.101	-0.005148	-0.008673	-0.006315
0.2290	1413.181	74.911	125.536	91.525	-0.715	35.314	2690.334	-0.005244	-0.008788	-0.006407
0.2300	1419.433	75.689	126.651	92.637	-0.716	35.317	2702.236	-0.005298	-0.008866	-0.006485
0.2310	1420.200	75.981	126.966	93.054	-0.706	35.321	2703.695	-0.005319	-0.008888	-0.006514
0.2320	1416.443	76.051	127.227	92.984	-0.699	35.322	2696.543	-0.005324	-0.008906	-0.006509
0.2330	1408.703	75.800	127.131	92.775	-0.708	35.322	2681.808	-0.005306	-0.008899	-0.006494
0.2340	1396.319	75.273	126.815	92.315	-0.708	35.321	2658.234	-0.005269	-0.008877	-0.006462
0.2350	1374.904	74.162	125.535	91.467	-0.710	35.319	2617.464	-0.005191	-0.008787	-0.006403
0.2360	1334.568	71.494	122.522	88.717	-0.698	35.319	2540.674	-0.005005	-0.008577	-0.006210
0.2370	1268.202	67.132	117.099	84.299	-0.703	35.316	2414.331	-0.004699	-0.008197	-0.005901
0.2380	1176.153	60.962	108.691	77.504	-0.699	35.314	2239.094	-0.004267	-0.007608	-0.005425
0.2390	1068.850	53.751	98.440	69.165	-0.701	35.311	2034.817	-0.003763	-0.006891	-0.004842
0.2400	958.933	46.441	87.281	60.549	-0.699	35.308	1825.562	-0.003251	-0.006110	-0.004238
0.2410	856.274	39.339	76.425	52.072	-0.699	35.306	1630.125	-0.002754	-0.005350	-0.003645
0.2420	766.930	33.224	66.586	44.845	-0.695	35.304	1460.037	-0.002326	-0.004661	-0.003139
0.2430	693.907	28.098	58.398	38.883	-0.707	35.303	1321.020	-0.001967	-0.004088	-0.002722
0.2440	636.799	24.193	51.711	34.116	-0.706	35.303	1212.301	-0.001693	-0.003620	-0.002388
0.2450	592.660	21.177	46.413	30.294	-0.707	35.304	1128.273	-0.001482	-0.003249	-0.002121
0.2460	556.457	18.369	41.846	26.613	-0.698	35.307	1059.351	-0.001286	-0.002929	-0.001863
0.2470	522.868	16.146	37.800	23.625	-0.700	35.309	995.407	-0.001130	-0.002646	-0.001654
0.2480	487.537	13.590	33.630	20.555	-0.706	35.311	928.144	-0.000951	-0.002354	-0.001439
0.2490	448.177	11.087	28.911	16.969	-0.708	35.314	853.214	-0.000776	-0.002024	-0.001188
0.2500	404.865	8.294	23.626	13.288	-0.713	35.317	770.760	-0.000581	-0.001654	-0.000930
0.2510	360.021	5.292	17.875	8.924	-0.703	35.320	685.387	-0.000370	-0.001251	-0.000625
0.2520	317.505	2.792	12.260	5.046	-0.702	35.322	604.448	-0.000195	-0.000858	-0.000353
0.2530	281.362	0.708	7.292	1.654	-0.706	35.322	535.641	-0.000050	-0.000510	-0.000116
0.2540	254.476	-0.737	3.343	-0.986	-0.706	35.321	484.457	0.000052	-0.000234	0.000069
0.2550	238.065	-1.766	0.619	-2.598	-0.705	35.320	453.215	0.000124	-0.000043	0.000182
0.2560	231.092	-2.726	-0.922	-3.765	-0.695	35.319	439.939	0.000191	0.000065	0.000264
0.2570	231.362	-2.809	-1.583	-4.016	-0.692	35.316	440.454	0.000197	0.000111	0.000281
0.2580	236.457	-2.810	-1.447	-4.016	-0.696	35.314	450.153	0.000197	0.000101	0.000281
0.2590	246.120	-2.491	-1.019	-3.667	-0.700	35.311	468.550	0.000174	0.000071	0.000257
0.2600	264.229	-1.921	0.289	-2.679	-0.704	35.308	503.025	0.000134	-0.000020	0.000188
0.2610	298.269	-0.475	3.304	-0.260	-0.700	35.306	567.827	0.000033	-0.000231	0.000018
0.2620	353.709	2.388	8.945	4.020	-0.705	35.304	673.370	-0.000167	-0.000626	-0.000281
0.2630	430.429	6.793	17.490	10.315	-0.708	35.303	819.426	-0.000476	-0.001224	-0.000722
0.2640	522.282	12.046	27.699	17.679	-0.711	35.303	994.291	-0.000843	-0.001939	-0.001238
0.2650	622.101	18.036	38.901	25.878	-0.708	35.304	1184.320	-0.001263	-0.002723	-0.001811
0.2660	723.438	24.219	50.087	34.021	-0.700	35.307	1377.239	-0.001695	-0.003506	-0.002381
0.2670	820.476	30.598	60.861	41.885	-0.697	35.309	1561.975	-0.002142	-0.004260	-0.002932
0.2680	908.708	36.587	70.576	49.014	-0.702	35.311	1729.946	-0.002561	-0.004940	-0.003431
0.2690	985.172	41.910	78.901	55.336	-0.703	35.314	1875.515	-0.002934	-0.005523	-0.003874
0.2700	1049.314	46.454	85.975	60.562	-0.702	35.317	1997.623	-0.003252	-0.006018	-0.004239
0.2710	1102.093	50.455	91.740	64.883	-0.693	35.320	2098.103	-0.003532	-0.006422	-0.004542
0.2720	1146.893	53.971	96.488	68.567	-0.692	35.322	2183.390	-0.003778	-0.006754	-0.004800
0.2730	1187.199	57.279	101.112	72.248	-0.698	35.322	2260.122	-0.004010	-0.007078	-0.005057
0.2740	1226.814	60.392	105.350	75.792	-0.702	35.321	2335.539	-0.004227	-0.007374	-0.005305
0.2750	1267.887	63.351	109.780	79.433	-0.704	35.320	2413.731	-0.004435	-0.007685	-0.005560
0.2760	1310.808	66.380	114.154	82.824	-0.694	35.319	2495.441	-0.004647	-0.007991	-0.005798
0.2770	1353.774	69.480	118.585	86.256	-0.693	35.316	2577.238	-0.004864	-0.008301	-0.006038
0.2780	1392.532	72.482	122.810	89.467	-0.693	35.314	2651.024	-0.005074	-0.008597	-0.006263
0.2790	1422.364	74.943	126.236	92.037	-0.694	35.311	2707.815	-0.005246	-0.008837	-0.006443
0.2800	1440.052	76.623	128.548	93.942	-0.695	35.308	2741.489	-0.005364	-0.008998	-0.006576
0.2810	1445.643	77.249	129.621	94.859	-0.691	35.306	2752.132	-0.005407	-0.009073	-0.006640
0.2820	1441.495	77.263	129.662	95.247	-0.691	35.305	2744.236	-0.005408	-0.009076	-0.006667
0.2830	1429.562	76.721	129.442	95.094	-0.696	35.303	2721.519	-0.005370	-0.009061	-0.006657
0.2840	1407.606	75.859	128.314	94.024	-0.698	35.303	2679.720	-0.005310	-0.008982	-0.006582
0.2850	1367.720	73.650	125.701	91.384	-0.701	35.304	2603.788	-0.005156	-0.008799	-0.006397
0.2860	1303.880	69.564	120.389	86.839	-0.696	35.307	2482.252	-0.004869	-0.008427	-0.006079
0.2870	1218.083	64.005	112.669	80.614	-0.695	35.309	2318.916	-0.004480	-0.007887	-0.005643
0.2880	1120.338	57.347	103.504	73.289	-0.695	35.311	2132.835	-0.004014	-0.007245	-0.005130
0.2890	1023.690	50.942	93.996	65.564	-0.692	35.314	1948.843	-0.003566	-0.006580	-0.004589
0.2900	936.255	44.952	85.149	58.546	-0.698	35.317	1782.389	-0.003147	-0.005960	-0.004098
0.2910	862.495	39.755	77.306	52.309	-0.690	35.320	1641.970	-0.002783	-0.005411	-0.003662
0.2920	802.352	35.392	70.674	47.390	-0.687	35.322	1527.472	-0.002477	-0.004947	-0.003317
0.2930	752.953	31.945	65.169	43.485	-0.698	35.322	1433.430	-0.002236	-0.004562	-0.003044
0.2940	709.236	28.846	59.995	39.844	-0.699	35.321	1350.203	-0.002019	-0.004200	-0.002789
0.2950	666.284	25.914	55.179	36.258	-0.705	35.319	1268.435	-0.001814	-0.003863	-0.002538
0.2960	619.185	22.593	49.510	32.118	-0.694	35.318	1178.770	-0.001581	-0.003466	-0.002248
0.2970	565.729	18.896	43.345	27.560	-0.690	35.316	1077.003	-0.001323	-0.003034	-0.001929
0.2980	505.931	15.172	36.355	22.571	-0.693	35.314	963.163	-0.001062	-0.002545	-0.001580
0.2990	442.812	11.157	28.773	17.039	-0.696	35.311	843.000	-0.000781	-0.002014	-0.001193
0.3000	380.925	7.447	21.218	11.396	-0.702	35.308	725.183	-0.000521	-0.001485	-0.000798
0.3010	325.260	3.834	13.802	6.254	-0.698	35.306	619.211	-0.000268	-0.000966	-0.000438
0.3020	279.619	0.817	7.528	1.849	-0.698	35.304	532.322	-0.000057	-0.000527	-0.000129
0.3030	246.466	-1.253	2.712	-0.984	-0.706	35.303	469.208	0.000088	-0.000190	0.000069
0.3040	225.847	-2.574	-0.522	-3.236	-0.710	35.303	429.955	0.000180	0.000037	0.000226
0.3050	216.319	-3.379	-2.202	-4.348	-0.712	35.304	411.816	0.000237	0.000154	0.000304
0.3060	214.861	-3.741	-3.042	-5.072	-0.703	35.307	409.040	0.000262	0.000213	0.000355
0.3070	218.844	-3.894	-3.236	-5.169	-0.702	35.309	416.622	0.000273	0.000226	0.000362
0.3080	226.824	-3.506	-2.919	-4.932	-0.708	35.311	431.814	0.000245	0.000204	0.000345
0.3090	240.725	-3.019	-2.188	-4.320	-0.708	35.314	458.279	0.000211	0.000153	0.000302
0.3100	266.859	-1.823	0.247	-2.415	-0.711	35.317	508.032	0.000128	-0.000017	0.000169
0.3110	311.133	0.164	4.733	0.657	-0.704	35.320	592.318	-0.000012	-0.000331	-0.000046
0.3120	375.470	3.610	11.808	5.769	-0.712	35.322	714.798	-0.000253	-0.000827	-0.000404
0.3130	455.120	8.224	20.794	12.397	-0.716	35.322	866.432	-0.000576	-0.001456	-0.000868
0.3140	543.232	13.575	30.633	19.512	-0.722	35.321	1034.174	-0.000950	-0.002144	-0.001366
0.3150	634.349	19.022	40.856	27.183	-0.719	35.320	1207.638	-0.001332	-0.002860	-0.001903
0.3160	724.399	24.664	50.569	34.216	-0.707	35.319	1379.070	-0.001726	-0.003540	-0.002395
0.3170	809.941	30.346	60.050	41.233	-0.701	35.317	1541.920	-0.002124	-0.004203	-0.002886
0.3180	888.254	35.696	68.745	47.528	-0.704	35.314	1691.008	-0.002499	-0.004812	-0.003327
0.3190	958.226	40.656	76.618	53.211	-0.703	35.311	1824.217	-0.002846	-0.005363	-0.003725
0.3200	1021.331	45.145	83.511	58.575	-0.708	35.308	1944.351	-0.003160	-0.005846	-0.004100
0.3210	1080.407	49.260	89.717	63.216	-0.708	35.306	2056.818	-0.003448	-0.006280	-0.004425
0.3220	1139.394	53.513	95.812	68.121	-0.707	35.304	2169.113	-0.003746	-0.006707	-0.004768
0.3230	1200.334	58.196	102.073	73.373	-0.707	35.303	2285.128	-0.004074	-0.007145	-0.005136
0.3240	1262.837	62.811	108.471	78.488	-0.706	35.303	2404.118	-0.004397	-0.007593	-0.005494
0.3250	1323.552	67.341	114.925	83.574	-0.708	35.304	2519.703	-0.004714	-0.008045	-0.005850
0.3260	1377.143	71.009	120.416	87.786	-0.699	35.307	2621.727	-0.004971	-0.008429	-0.006145
0.3270	1418.697	74.218	124.998	91.703	-0.703	35.309	2700.834	-0.005195	-0.008750	-0.006419
0.3280	1444.726	76.372	127.957	94.329	-0.706	35.311	2750.387	-0.005346	-0.008957	-0.006603
0.3290	1456.042	77.597	129.636	95.635	-0.704	35.314	2771.931	-0.005432	-0.009075	-0.006694
0.3300	1455.682	77.736	130.226	96.053	-0.702	35.318	2771.244	-0.005441	-0.009116	-0.006724
0.3310	1447.236	77.596	130.129	95.387	-0.692	35.321	2755.165	-0.005432	-0.009109	-0.006677
0.3320	1432.117	77.067	129.620	94.623	-0.693	35.323	2726.383	-0.005395	-0.009073	-0.006624
0.3330	1406.914	76.010	128.396	93.248	-0.698	35.323	2678.404	-0.005321	-0.008988	-0.006527
0.3340	1365.601	73.300	125.645	90.704	-0.699	35.322	2599.754	-0.005131	-0.008795	-0.006349
0.3350	1306.540	69.437	120.871	87.173	-0.703	35.320	2487.316	-0.004861	-0.008461	-0.006102
0.3360	1233.457	64.434	114.211	81.740	-0.695	35.319	2348.185	-0.004510	-0.007995	-0.005722
0.3370	1154.918	59.307	106.891	75.794	-0.698	35.317	2198.668	-0.004151	-0.007482	-0.005306
0.3380	1077.822	54.165	99.461	69.723	-0.694	35.314	2051.897	-0.003792	-0.006962	-0.004881
0.3390	1006.453	49.038	92.454	64.123	-0.695	35.311	1916.027	-0.003433	-0.006472	-0.004489
0.3400	942.462	44.549	85.931	58.993	-0.700	35.308	1794.205	-0.003118	-0.006015	-0.004130
0.3410	884.783	40.659	79.767	54.142	-0.702	35.306	1684.399	-0.002846	-0.005584	-0.003790
0.3420	830.695	37.239	73.768	49.625	-0.701	35.304	1581.430	-0.002607	-0.005164	-0.003474
0.3430	777.224	33.877	67.866	45.554	-0.706	35.302	1479.635	-0.002371	-0.004751	-0.003189
0.3440	722.416	30.236	61.701	41.136	-0.704	35.303	1375.294	-0.002117	-0.004319	-0.002880
0.3450	665.593	26.290	55.385	36.619	-0.709	35.304	1267.118	-0.001840	-0.003877	-0.002563
0.3460	606.892	22.176	48.628	31.269	-0.699	35.307	1155.367	-0.001552	-0.003404	-0.002189
0.3470	547.545	18.063	41.776	26.418	-0.698	35.309	1042.385	-0.001264	-0.002924	-0.001849
0.3480	489.415	14.269	34.773	21.194	-0.697	35.311	931.721	-0.000999	-0.002434	-0.001484
0.3490	434.832	10.643	28.045	16.483	-0.698	35.314	827.808	-0.000745	-0.001963	-0.001154
0.3500	385.704	7.418	21.632	12.036	-0.700	35.317	734.282	-0.000519	-0.001514	-0.000843
0.3510	343.384	4.306	15.922	8.006	-0.695	35.320	653.715	-0.000301	-0.001115	-0.000560
0.3520	308.488	2.026	11.079	4.656	-0.692	35.322	587.282	-0.000142	-0.000776	-0.000326
0.3530	281.407	0.414	7.268	2.086	-0.695	35.322	535.727	-0.000029	-0.000509	-0.000146
0.3540	262.366	-0.739	4.405	-0.012	-0.694	35.322	499.477	0.000052	-0.000308	0.000001
0.3550	251.440	-1.517	2.560	-1.206	-0.697	35.320	478.678	0.000106	-0.000179	0.000084
0.3560	247.803	-2.059	1.527	-2.275	-0.693	35.319	471.754	0.000144	-0.000107	0.000159
0.3570	250.163	-2.213	1.129	-2.233	-0.694	35.317	476.246	0.000155	-0.000079	0.000156
0.3580	257.136	-2.242	1.322	-1.983	-0.695	35.314	489.521	0.000157	-0.000093	0.000139
0.3590	270.436	-1.949	2.191	-1.137	-0.699	35.311	514.841	0.000136	-0.000153	0.000080
0.3600	297.217	-0.657	4.363	0.545	-0.700	35.308	565.825	0.000046	-0.000305	-0.000038
0.3610	344.752	1.804	8.972	3.935	-0.694	35.306	656.319	-0.000126	-0.000628	-0.000275
0.3620	414.393	5.709	16.361	9.522	-0.698	35.304	788.898	-0.000400	-0.001145	-0.000667
0.3630	500.611	10.906	26.118	16.580	-0.707	35.303	953.035	-0.000763	-0.001828	-0.001161
0.3640	594.043	16.672	36.713	24.099	-0.709	35.303	1130.905	-0.001167	-0.002570	-0.001687
0.3650	687.444	22.690	47.322	31.617	-0.708	35.304	1308.718	-0.001588	-0.003313	-0.002213
0.3660	774.940	28.123	56.995	38.511	-0.701	35.307	1475.286	-0.001969	-0.003990	-0.002696
0.3670	852.261	33.251	65.567	44.902	-0.699	35.309	1622.486	-0.002328	-0.004590	-0.003143
0.3680	917.574	37.712	72.763	50.267	-0.698	35.311	1746.826	-0.002640	-0.005093	-0.003519
0.3690	971.917	41.728	78.914	54.770	-0.700	35.314	1850.281	-0.002921	-0.005524	-0.003834
0.3700	1019.377	45.300	84.102	58.730	-0.702	35.317	1940.632	-0.003171	-0.005887	-0.004111
0.3710	1064.808	48.591	88.960	62.218	-0.698	35.320	2027.121	-0.003401	-0.006227	-0.004355
0.3720	1112.914	51.928	93.900	65.996	-0.703	35.322	2118.702	-0.003635	-0.006573	-0.004620
0.3730	1166.235	55.945	99.652	70.860	-0.705	35.322	2220.211	-0.003916	-0.006976	-0.004960
0.3740	1224.304	60.156	105.679	75.849	-0.704	35.321	2330.761	-0.004211	-0.007398	-0.005309
0.3750	1283.231	64.519	111.774	80.892	-0.706	35.319	2442.942	-0.004516	-0.007824	-0.005662
0.3760	1335.905	68.395	117.072	85.005	-0.705	35.319	2543.221	-0.004788	-0.008195	-0.005950
0.3770	1375.731	71.521	121.393	88.201	-0.702	35.316	2619.038	-0.005006	-0.008497	-0.006174
0.3780	1399.280	73.481	124.201	90.550	-0.708	35.314	2663.870	-0.005144	-0.008694	-0.006338
0.3790	1407.891	74.370	125.549	91.787	-0.706	35.311	2680.264	-0.005206	-0.008788	-0.006425
0.3800	1405.953	74.605	125.852	91.967	-0.705	35.308	2676.573	-0.005222	-0.008810	-0.006438
0.3810	1397.672	74.370	125.712	91.537	-0.700	35.306	2660.809	-0.005206	-0.008800	-0.006408
0.3820	1384.823	73.773	125.272	90.855	-0.699	35.304	2636.347	-0.005164	-0.008769	-0.006360
0.3830	1365.421	72.828	124.488	90.285	-0.709	35.303	2599.411	-0.005098	-0.008714	-0.006320
0.3840	1333.816	70.898	122.478	88.632	-0.712	35.303	2539.244	-0.004963	-0.008573	-0.006204
0.3850	1285.936	67.839	118.736	85.549	-0.715	35.304	2448.092	-0.004749	-0.008312	-0.005988
0.3860	1222.050	63.435	113.025	80.964	-0.706	35.307	2326.469	-0.004440	-0.007912	-0.005667
0.3870	1147.870	58.403	106.009	75.376	-0.705	35.308	2185.249	-0.004088	-0.007421	-0.005276
0.3880	1070.068	53.165	98.538	69.358	-0.702	35.311	2037.134	-0.003722	-0.006898	-0.004855
0.3890	993.769	48.038	91.038	63.286	-0.695	35.313	1891.880	-0.003363	-0.006373	-0.004430
0.3900	921.181	43.242	83.621	57.269	-0.698	35.317	1753.693	-0.003027	-0.005853	-0.004009
0.3910	853.027	38.698	76.589	51.962	-0.696	35.320	1623.945	-0.002709	-0.005361	-0.003637
0.3920	788.060	34.251	69.517	46.529	-0.694	35.322	1500.263	-0.002398	-0.004866	-0.003257
0.3930	725.391	30.082	62.733	41.652	-0.695	35.322	1380.959	-0.002106	-0.004391	-0.002916
0.3940	664.481	26.054	55.827	36.550	-0.694	35.321	1265.001	-0.001824	-0.003908	-0.002559
0.3950	606.051	22.190	49.084	31.519	-0.695	35.320	1153.765	-0.001553	-0.003436	-0.002206
0.3960	550.866	18.506	42.523	26.530	-0.688	35.319	1048.708	-0.001295	-0.002977	-0.001857
0.3970	499.845	15.004	36.260	22.098	-0.687	35.317	951.576	-0.001050	-0.002538	-0.001547
0.3980	453.016	11.808	30.535	17.942	-0.689	35.314	862.427	-0.000827	-0.002137	-0.001256
0.3990	410.621	8.931	25.100	14.246	-0.688	35.311	781.717	-0.000625	-0.001757	-0.000997
0.4000	372.494	6.471	20.132	10.883	-0.692	35.308	709.133	-0.000453	-0.001409	-0.000762
0.4010	338.815	4.236	15.509	7.617	-0.689	35.306	645.018	-0.000297	-0.001086	-0.000533
0.4020	309.720	2.278	11.298	4.754	-0.688	35.304	589.628	-0.000159	-0.000791	-0.000333
0.4030	285.765	0.792	7.954	2.349	-0.700	35.303	544.024	-0.000055	-0.000557	-0.000164
0.4040	267.400	-0.404	5.092	0.530	-0.700	35.303	509.062	0.000028	-0.000356	-0.000037
0.4050	255.378	-1.141	3.193	-0.762	-0.700	35.304	486.174	0.000080	-0.000224	0.000053
0.4060	249.426	-2.058	1.693	-1.637	-0.688	35.307	474.844	0.000144	-0.000118	0.000115
0.4070	248.976	-2.378	1.184	-2.039	-0.687	35.309	473.986	0.000166	-0.000083	0.000143
0.4080	252.973	-2.490	1.046	-1.928	-0.693	35.311	481.596	0.000174	-0.000073	0.000135
0.4090	261.915	-2.199	1.403	-1.593	-0.696	35.314	498.619	0.000154	-0.000098	0.000112
0.4100	280.054	-1.379	2.587	-0.677	-0.706	35.317	533.152	0.000096	-0.000181	0.000047
0.4110	315.101	0.261	5.753	1.559	-0.702	35.320	599.871	-0.000018	-0.000403	-0.000109
0.4120	371.953	3.137	11.533	5.713	-0.702	35.322	708.103	-0.000220	-0.000807	-0.000400
0.4130	449.229	7.500	20.270	12.244	-0.705	35.322	855.217	-0.000525	-0.001419	-0.000857
0.4140	539.625	12.851	30.383	19.554	-0.706	35.321	1027.308	-0.000900	-0.002127	-0.001369
0.4150	635.942	18.882	41.335	27.586	-0.709	35.320	1210.670	-0.001322	-0.002893	-0.001931
0.4160	733.251	25.053	51.931	35.022	-0.701	35.319	1395.922	-0.001754	-0.003635	-0.002452
0.4170	827.644	31.335	62.444	42.789	-0.705	35.317	1575.623	-0.002193	-0.004371	-0.002995
0.4180	915.726	37.547	72.202	49.988	-0.710	35.314	1743.307	-0.002628	-0.005054	-0.003499
0.4190	995.106	43.148	80.939	56.408	-0.708	35.311	1894.426	-0.003020	-0.005666	-0.003949
0.4200	1064.117	48.109	88.561	62.010	-0.702	35.308	2025.805	-0.003368	-0.006199	-0.004341
0.4210	1122.547	52.416	94.628	66.860	-0.702	35.306	2137.041	-0.003669	-0.006624	-0.004680
0.4220	1172.111	56.112	99.994	71.182	-0.703	35.304	2231.398	-0.003928	-0.007000	-0.004983
0.4230	1216.024	59.641	104.729	75.196	-0.708	35.303	2314.997	-0.004175	-0.007331	-0.005264
0.4240	1257.367	62.865	109.215	78.614	-0.710	35.303	2393.703	-0.004401	-0.007645	-0.005503
0.4250	1297.989	66.034	113.632	82.214	-0.712	35.304	2471.037	-0.004622	-0.007954	-0.005755
0.4260	1337.453	68.924	117.581	85.424	-0.704	35.307	2546.167	-0.004825	-0.008231	-0.005980
0.4270	1374.318	71.786	121.474	88.591	-0.703	35.309	2616.348	-0.005025	-0.008503	-0.006201
0.4280	1405.517	74.121	124.736	90.996	-0.707	35.311	2675.743	-0.005188	-0.008732	-0.006370
0.4290	1428.646	76.177	127.337	93.205	-0.703	35.314	2719.774	-0.005332	-0.008914	-0.006524
0.4300	1441.765	77.208	129.099	94.691	-0.702	35.317	2744.751	-0.005405	-0.009037	-0.006628
0.4310	1445.297	77.695	129.815	95.386	-0.692	35.320	2751.474	-0.005439	-0.009087	-0.006677
0.4320	1440.834	77.765	130.033	95.331	-0.697	35.322	2742.977	-0.005444	-0.009102	-0.006673
0.4330	1430.148	77.473	129.936	95.150	-0.704	35.322	2722.635	-0.005423	-0.009095	-0.006661
0.4340	1410.987	76.638	129.042	94.455	-0.702	35.321	2686.157	-0.005365	-0.009033	-0.006612
0.4350	1375.595	74.622	126.813	92.470	-0.702	35.320	2618.780	-0.005224	-0.008877	-0.006473
0.4360	1316.699	70.480	121.817	88.148	-0.693	35.319	2506.657	-0.004934	-0.008527	-0.006170
0.4370	1234.268	65.019	114.593	82.061	-0.694	35.316	2349.730	-0.004551	-0.008022	-0.005744
0.4380	1136.704	58.154	105.511	74.598	-0.693	35.314	2163.992	-0.004071	-0.007386	-0.005222
0.4390	1036.569	51.386	95.882	66.884	-0.690	35.311	1973.362	-0.003597	-0.006712	-0.004682
0.4400	942.627	44.924	86.456	59.534	-0.697	35.308	1794.519	-0.003145	-0.006052	-0.004167
0.4410	859.565	39.366	77.650	52.627	-0.695	35.306	1636.391	-0.002756	-0.005435	-0.003684
0.4420	788.586	34.516	69.777	46.749	-0.698	35.304	1501.265	-0.002416	-0.004884	-0.003272
0.4430	727.991	30.541	63.050	41.829	-0.706	35.303	1385.908	-0.002138	-0.004413	-0.002928
0.4440	674.866	26.817	56.939	37.507	-0.708	35.303	1284.771	-0.001877	-0.003986	-0.002626
0.4450	626.369	23.454	51.547	33.505	-0.710	35.304	1192.446	-0.001642	-0.003608	-0.002345
0.4460	579.090	20.009	45.877	29.002	-0.706	35.307	1102.438	-0.001401	-0.003211	-0.002030
0.4470	530.773	16.883	40.332	24.903	-0.708	35.309	1010.456	-0.001182	-0.002823	-0.001743
0.4480	480.158	13.563	34.111	20.526	-0.710	35.311	914.097	-0.000949	-0.002388	-0.001437
0.4490	428.445	10.448	27.768	16.218	-0.709	35.313	815.649	-0.000731	-0.001944	-0.001135
0.4500	378.911	7.238	21.646	11.591	-0.706	35.317	721.350	-0.000507	-0.001515	-0.000811
0.4510	334.848	4.499	15.785	7.603	-0.705	35.320	637.465	-0.000315	-0.001105	-0.000532
0.4520	298.840	2.193	10.831	4.143	-0.707	35.322	568.914	-0.000154	-0.000758	-0.000290
0.4530	272.195	0.568	6.866	1.821	-0.716	35.322	518.188	-0.000040	-0.000481	-0.000127
0.4540	254.897	-0.766	4.060	-0.110	-0.711	35.321	485.258	0.000054	-0.000284	0.000008
0.4550	246.316	-1.545	2.410	-1.277	-0.714	35.319	468.922	0.000108	-0.000169	0.000089
0.4560	244.377	-2.016	1.405	-1.984	-0.702	35.319	465.231	0.000141	-0.000098	0.000139
0.4570	247.217	-2.183	1.170	-2.206	-0.700	35.316	470.638	0.000153	-0.000082	0.000154
0.4580	252.913	-1.920	1.155	-1.970	-0.694	35.314	481.482	0.000134	-0.000081	0.000138
0.4590	261.810	-1.726	1.459	-1.554	-0.703	35.311	498.419	0.000121	-0.000102	0.000109
0.4600	277.560	-1.114	2.477	-0.569	-0.704	35.309	528.402	0.000078	-0.000173	0.000040
0.4610	307.030	0.221	5.065	1.237	-0.705	35.306	584.507	-0.000015	-0.000355	-0.000087
0.4620	356.248	2.765	10.141	4.822	-0.707	35.304	678.205	-0.000194	-0.000710	-0.000338
0.4630	425.815	6.696	17.835	10.396	-0.714	35.303	810.642	-0.000469	-0.001248	-0.000728
0.4640	510.981	11.559	27.370	17.247	-0.723	35.303	972.776	-0.000809	-0.001916	-0.001207
0.4650	604.939	17.104	37.924	24.988	-0.727	35.304	1151.648	-0.001197	-0.002655	-0.001749
0.4660	701.436	23.037	48.684	32.547	-0.719	35.307	1335.354	-0.001613	-0.003408	-0.002278
0.4670	795.318	29.263	59.170	40.231	-0.715	35.309	1514.082	-0.002048	-0.004142	-0.002816
0.4680	882.709	35.142	68.911	47.361	-0.714	35.311	1680.450	-0.002460	-0.004824	-0.003315
0.4690	961.683	40.701	77.524	53.962	-0.716	35.313	1830.797	-0.002849	-0.005427	-0.003777
0.4700	1032.061	45.621	85.133	59.576	-0.719	35.317	1964.779	-0.003193	-0.005959	-0.004170
0.4710	1093.918	50.192	91.822	64.605	-0.715	35.320	2082.539	-0.003513	-0.006428	-0.004522
0.4720	1148.486	54.347	97.561	69.011	-0.714	35.322	2186.422	-0.003804	-0.006829	-0.004831
0.4730	1196.983	58.306	102.885	73.513	-0.720	35.322	2278.748	-0.004081	-0.007202	-0.005146
0.4740	1241.091	61.822	107.632	77.655	-0.716	35.321	2362.719	-0.004328	-0.007534	-0.005436
0.4750	1282.419	64.977	112.174	81.421	-0.719	35.319	2441.397	-0.004548	-0.007852	-0.005699
0.4760	1321.238	67.730	116.137	84.339	-0.706	35.319	2515.297	-0.004741	-0.008130	-0.005904
0.4770	1356.750	70.480	119.948	87.131	-0.704	35.317	2582.903	-0.004934	-0.008396	-0.006099
0.4780	1386.280	72.799	123.333	89.703	-0.700	35.314	2639.122	-0.005096	-0.008633	-0.006279
0.4790	1407.576	74.633	125.851	91.704	-0.701	35.311	2679.663	-0.005224	-0.008810	-0.006419
0.4800	1419.328	75.828	127.380	93.123	-0.706	35.308	2702.036	-0.005308	-0.008917	-0.006519
0.4810	1422.198	76.301	127.971	93.540	-0.704	35.306	2707.500	-0.005341	-0.008958	-0.006548
0.4820	1418.231	76.413	128.067	93.486	-0.711	35.304	2699.947	-0.005349	-0.008965	-0.006544
0.4830	1408.838	76.093	128.122	93.251	-0.718	35.303	2682.066	-0.005327	-0.008969	-0.006528
0.4840	1392.352	75.093	127.489	92.360	-0.716	35.303	2650.681	-0.005257	-0.008924	-0.006465
0.4850	1361.769	73.328	125.631	90.622	-0.714	35.304	2592.459	-0.005133	-0.008794	-0.006344
0.4860	1308.418	69.771	121.215	87.230	-0.708	35.306	2490.892	-0.004884	-0.008485	-0.006106
0.4870	1230.571	64.726	114.266	81.782	-0.710	35.308	2342.691	-0.004531	-0.007999	-0.005725
0.4880	1134.510	58.390	105.252	74.888	-0.703	35.311	2159.815	-0.004087	-0.007368	-0.005242
0.4890	1033.549	51.413	95.221	66.855	-0.702	35.314	1967.611	-0.003599	-0.006665	-0.004680
0.4900	938.374	44.826	85.547	59.421	-0.699	35.317	1786.423	-0.003138	-0.005988	-0.004159
0.4910	855.733	39.115	76.933	52.654	-0.698	35.320	1629.095	-0.002738	-0.005385	-0.003686
0.4920	787.699	34.336	69.543	46.985	-0.694	35.322	1499.577	-0.002403	-0.004868	-0.003289
0.4930	732.485	30.695	63.516	42.538	-0.707	35.322	1394.463	-0.002149	-0.004446	-0.002978
0.4940	685.325	27.400	58.068	38.355	-0.703	35.321	1304.684	-0.001918	-0.004065	-0.002685
0.4950	641.337	24.579	53.211	34.784	-0.705	35.320	1220.942	-0.001721	-0.003725	-0.002435
0.4960	595.816	21.439	47.900	30.643	-0.691	35.319	1134.281	-0.001501	-0.003353	-0.002145
0.4970	546.779	18.341	42.134	26.488	-0.695	35.316	1040.926	-0.001284	-0.002949	-0.001854
0.4980	494.359	14.839	35.927	21.875	-0.697	35.314	941.133	-0.001039	-0.002515	-0.001531
0.4990	441.009	11.393	29.378	17.193	-0.704	35.311	839.567	-0.000798	-0.002056	-0.001203
