# Supplementary material for: Evaluation of a Cold-Mixed High-Performance Polyurethane Mixture
Source: Hindawi journal article supplement (doi:10.1155/2019/1507971), 2019-11-07
Supplement: f1 [file 1507971.f1.zip › 1507971.f1/dynamic modulus data/PUM/specimen1/temp35/zhs-1-35_25Hz.csv]

Test Information
****************
Project name	zhs
Operator name	1
Target test temperature	35
Target confining stress	0
Average dynamic strain range from 75 to 125 micro-strain
Contact stress	5
Initial modulus	1000
Axial gauge length	70
Comments
Specimen information
********************
Identification	zhs-1-35
Dimensions	Point 1	Point 2	Point 3	Point 4	Point 5	Point 6	Average	Std Dev.
Diameter (mm)	49.2	49.2	49.3				49.23	0.058
Height (mm)	101.3	101.2	101.3				101.27	0.058
Cross-sectional area (mm�)	1903.7
Conditioning time
Properties/Comments
Test Data	25Hz
*********
Test date and time	Tue	Apr 2	2019	1:19 PM
Dynamic modulus (MPa)	11870
Phase angle (Degrees)	4.24
Average temperature (�C)	35.3
Average confining pressure (kPa)	-0.7
Average micro-strain	103
Load drift (%)	0.0
Load standard error (%)	10.1
Average deformation drift (%)	-5.3
Average deformation standard error (%)	10.1
Deformation uniformity (%)	19.6
Phase uniformity (Degrees)	0.5
Conditioning Cycles
Time (sec)	Axial stress (kPa)	Axial micro-strain #1	Axial micro-strain #2	Axial micro-strain #3	Confining pressure (kPa)	Temperature (�C)	Load (N)	Displacement #1 (mm)	Displacement #2 (mm)	Displacement #3 (mm)
0.0000	392.813	0.680	1.006	-0.000	-0.698	35.318	747.814	-0.000048	-0.000070	0.000000
0.0008	391.806	0.638	0.910	-0.055	-0.699	35.320	745.897	-0.000045	-0.000064	0.000004
0.0016	390.648	0.554	0.759	-0.180	-0.699	35.323	743.694	-0.000039	-0.000053	0.000013
0.0024	388.559	0.429	0.635	-0.541	-0.698	35.325	739.717	-0.000030	-0.000044	0.000038
0.0032	384.171	0.276	0.443	-0.651	-0.703	35.325	731.363	-0.000019	-0.000031	0.000046
0.0040	375.695	-0.169	-0.287	-1.052	-0.704	35.325	715.227	0.000012	0.000020	0.000074
0.0048	361.764	-0.891	-1.540	-2.123	-0.704	35.324	688.705	0.000062	0.000108	0.000149
0.0056	342.107	-1.835	-3.592	-3.540	-0.709	35.323	651.283	0.000128	0.000251	0.000248
0.0064	317.625	-3.363	-6.537	-5.695	-0.702	35.322	604.677	0.000235	0.000458	0.000399
0.0072	290.649	-4.823	-9.743	-7.891	-0.699	35.320	553.322	0.000338	0.000682	0.000552
0.0080	264.094	-6.325	-13.045	-10.044	-0.699	35.318	502.768	0.000443	0.000913	0.000703
0.0088	240.259	-7.744	-16.057	-12.144	-0.696	35.316	457.392	0.000542	0.001124	0.000850
0.0096	221.233	-8.800	-18.493	-13.756	-0.696	35.314	421.171	0.000616	0.001294	0.000963
0.0104	207.933	-9.688	-20.351	-14.923	-0.698	35.312	395.851	0.000678	0.001425	0.001045
0.0112	200.434	-10.215	-21.644	-15.730	-0.700	35.309	381.575	0.000715	0.001515	0.001101
0.0120	198.150	-10.631	-22.278	-16.242	-0.696	35.308	377.226	0.000744	0.001559	0.001137
0.0128	199.938	-10.548	-22.402	-16.159	-0.696	35.306	380.630	0.000738	0.001568	0.001131
0.0136	204.762	-10.244	-21.975	-15.840	-0.700	35.305	389.814	0.000717	0.001538	0.001109
0.0144	211.465	-10.037	-21.438	-15.409	-0.696	35.305	402.575	0.000703	0.001501	0.001079
0.0152	219.971	-9.635	-20.654	-14.590	-0.704	35.306	418.768	0.000674	0.001446	0.001021
0.0160	230.040	-9.454	-19.760	-14.048	-0.704	35.307	437.937	0.000662	0.001383	0.000983
0.0168	241.461	-9.176	-18.646	-13.658	-0.700	35.310	459.681	0.000642	0.001305	0.000956
0.0176	253.710	-8.535	-17.256	-12.699	-0.704	35.311	482.998	0.000597	0.001208	0.000889
0.0184	265.627	-7.868	-15.783	-11.865	-0.702	35.313	505.686	0.000551	0.001105	0.000831
0.0192	276.072	-7.145	-14.515	-11.142	-0.698	35.315	525.570	0.000500	0.001016	0.000780
0.0200	284.247	-6.575	-13.580	-10.365	-0.698	35.317	541.134	0.000460	0.000951	0.000726
0.0208	289.763	-6.145	-12.796	-9.864	-0.694	35.320	551.634	0.000430	0.000896	0.000690
0.0216	292.723	-5.896	-12.604	-9.600	-0.693	35.322	557.270	0.000413	0.000882	0.000672
0.0224	293.745	-5.869	-12.508	-9.434	-0.695	35.325	559.216	0.000411	0.000876	0.000660
0.0232	293.535	-5.661	-12.426	-9.266	-0.703	35.325	558.815	0.000396	0.000870	0.000649
0.0240	292.618	-5.549	-12.605	-9.406	-0.705	35.325	557.070	0.000388	0.000882	0.000658
0.0248	291.641	-5.409	-12.357	-9.309	-0.701	35.324	555.210	0.000379	0.000865	0.000652
0.0256	290.740	-5.380	-12.206	-9.101	-0.702	35.322	553.493	0.000377	0.000854	0.000637
0.0264	290.048	-5.475	-12.427	-9.253	-0.693	35.322	552.177	0.000383	0.000870	0.000648
0.0272	289.793	-5.571	-12.496	-9.198	-0.694	35.320	551.691	0.000390	0.000875	0.000644
0.0280	289.582	-5.627	-12.715	-9.350	-0.696	35.319	551.291	0.000394	0.000890	0.000655
0.0288	289.387	-5.641	-12.826	-9.434	-0.698	35.317	550.919	0.000395	0.000898	0.000660
0.0296	288.951	-5.850	-12.744	-9.476	-0.698	35.314	550.089	0.000409	0.000892	0.000663
0.0304	288.065	-6.018	-12.689	-9.546	-0.698	35.312	548.401	0.000421	0.000888	0.000668
0.0312	286.772	-6.185	-12.758	-9.658	-0.703	35.309	545.940	0.000433	0.000893	0.000676
0.0320	284.984	-6.323	-12.962	-9.922	-0.700	35.308	542.536	0.000443	0.000907	0.000695
0.0328	282.835	-6.310	-13.208	-10.020	-0.709	35.306	538.445	0.000442	0.000925	0.000701
0.0336	280.370	-6.281	-13.373	-10.241	-0.716	35.306	533.752	0.000440	0.000936	0.000717
0.0344	277.334	-6.488	-13.565	-10.255	-0.720	35.306	527.973	0.000454	0.000950	0.000718
0.0352	273.968	-6.602	-13.868	-10.366	-0.722	35.307	521.564	0.000462	0.000971	0.000726
0.0360	270.106	-6.880	-14.103	-10.575	-0.717	35.308	514.212	0.000482	0.000987	0.000740
0.0368	265.792	-7.270	-14.655	-10.798	-0.707	35.310	506.001	0.000509	0.001026	0.000756
0.0376	261.058	-7.368	-15.232	-11.201	-0.703	35.311	496.988	0.000516	0.001066	0.000784
0.0384	255.678	-7.686	-15.687	-11.687	-0.703	35.313	486.746	0.000538	0.001098	0.000818
0.0392	249.592	-8.034	-16.429	-12.117	-0.702	35.315	475.159	0.000562	0.001150	0.000848
0.0400	242.904	-8.312	-17.130	-12.672	-0.707	35.317	462.427	0.000582	0.001199	0.000887
0.0408	235.841	-8.869	-17.859	-13.436	-0.706	35.319	448.980	0.000621	0.001250	0.000941
0.0416	228.477	-9.218	-18.808	-14.047	-0.703	35.322	434.961	0.000645	0.001317	0.000983
0.0424	221.023	-9.718	-19.785	-14.979	-0.703	35.324	420.771	0.000680	0.001385	0.001049
0.0432	213.629	-10.134	-20.598	-15.604	-0.709	35.325	406.694	0.000709	0.001442	0.001092
0.0440	206.520	-10.411	-21.383	-16.008	-0.711	35.325	393.162	0.000729	0.001497	0.001121
0.0448	200.148	-10.729	-22.141	-16.535	-0.712	35.324	381.031	0.000751	0.001550	0.001157
0.0456	195.024	-10.840	-22.815	-16.952	-0.710	35.322	371.275	0.000759	0.001597	0.001187
0.0464	191.297	-11.035	-23.420	-17.409	-0.700	35.322	364.180	0.000772	0.001639	0.001219
0.0472	189.042	-11.243	-23.804	-17.865	-0.699	35.320	359.888	0.000787	0.001666	0.001251
0.0480	188.020	-11.341	-24.010	-18.075	-0.701	35.319	357.943	0.000794	0.001681	0.001265
0.0488	187.945	-11.369	-24.107	-18.173	-0.702	35.317	357.800	0.000796	0.001687	0.001272
0.0496	188.817	-11.411	-24.216	-18.173	-0.700	35.314	359.459	0.000799	0.001695	0.001272
0.0504	190.395	-11.425	-24.258	-18.118	-0.699	35.312	362.463	0.000800	0.001698	0.001268
0.0512	192.634	-11.453	-24.149	-17.992	-0.698	35.309	366.726	0.000802	0.001690	0.001259
0.0520	195.339	-11.522	-23.874	-17.866	-0.697	35.308	371.876	0.000807	0.001671	0.001251
0.0528	198.345	-11.425	-23.614	-17.686	-0.700	35.306	377.598	0.000800	0.001653	0.001238
0.0536	201.832	-11.049	-23.324	-17.312	-0.710	35.305	384.235	0.000773	0.001633	0.001212
0.0544	205.769	-10.731	-23.062	-16.910	-0.707	35.305	391.731	0.000751	0.001614	0.001184
0.0552	210.608	-10.272	-22.732	-16.480	-0.712	35.306	400.944	0.000719	0.001591	0.001154
0.0560	216.499	-9.966	-22.236	-16.216	-0.708	35.307	412.159	0.000698	0.001557	0.001135
0.0568	223.442	-9.827	-21.686	-15.827	-0.698	35.309	425.377	0.000688	0.001518	0.001108
0.0576	231.693	-9.437	-20.943	-15.256	-0.699	35.311	441.084	0.000661	0.001466	0.001068
0.0584	241.116	-9.076	-20.021	-14.423	-0.698	35.313	459.023	0.000635	0.001401	0.001010
0.0592	251.425	-8.520	-18.892	-13.491	-0.700	35.315	478.649	0.000596	0.001322	0.000944
0.0600	262.441	-7.937	-17.611	-12.519	-0.703	35.317	499.620	0.000556	0.001233	0.000876
0.0608	273.622	-7.465	-16.250	-11.741	-0.704	35.320	520.906	0.000523	0.001137	0.000822
0.0616	284.232	-6.993	-14.956	-10.838	-0.699	35.322	541.105	0.000490	0.001047	0.000759
0.0624	293.865	-6.674	-13.912	-10.157	-0.699	35.325	559.444	0.000467	0.000974	0.000711
0.0632	301.876	-6.132	-12.963	-9.419	-0.702	35.325	574.694	0.000429	0.000907	0.000659
0.0640	307.722	-5.645	-12.137	-8.626	-0.700	35.325	585.823	0.000395	0.000850	0.000604
0.0648	311.268	-5.296	-11.601	-8.363	-0.704	35.324	592.575	0.000371	0.000812	0.000585
0.0656	312.666	-5.045	-11.145	-8.181	-0.703	35.322	595.236	0.000353	0.000780	0.000573
0.0664	312.200	-5.100	-11.049	-8.195	-0.698	35.321	594.349	0.000357	0.000773	0.000574
0.0672	310.577	-5.280	-11.117	-8.390	-0.696	35.320	591.259	0.000370	0.000778	0.000587
0.0680	308.248	-5.587	-11.241	-8.640	-0.700	35.318	586.824	0.000391	0.000787	0.000605
0.0688	305.407	-5.823	-11.530	-8.544	-0.702	35.316	581.417	0.000408	0.000807	0.000598
0.0696	302.417	-6.031	-11.654	-8.712	-0.699	35.314	575.724	0.000422	0.000816	0.000610
0.0704	299.246	-6.143	-11.860	-8.976	-0.702	35.312	569.687	0.000430	0.000830	0.000628
0.0712	296.030	-6.086	-12.122	-9.003	-0.696	35.309	563.564	0.000426	0.000849	0.000630
0.0720	292.663	-6.213	-12.439	-9.434	-0.692	35.308	557.156	0.000435	0.000871	0.000660
0.0728	288.936	-6.449	-12.715	-9.614	-0.695	35.306	550.060	0.000451	0.000890	0.000673
0.0736	284.623	-6.617	-12.784	-9.642	-0.700	35.305	541.849	0.000463	0.000895	0.000675
0.0744	279.153	-6.992	-13.170	-10.046	-0.699	35.306	531.435	0.000489	0.000922	0.000703
0.0752	272.570	-7.242	-13.652	-10.394	-0.702	35.306	518.904	0.000507	0.000956	0.000728
0.0760	264.831	-7.603	-14.395	-11.018	-0.701	35.307	504.169	0.000532	0.001008	0.000771
0.0768	256.159	-8.242	-15.604	-11.949	-0.690	35.309	487.661	0.000577	0.001092	0.000836
0.0776	247.292	-8.646	-16.595	-12.643	-0.694	35.311	470.781	0.000605	0.001162	0.000885
0.0784	238.621	-9.161	-17.515	-13.365	-0.693	35.312	454.273	0.000641	0.001226	0.000936
0.0792	230.656	-9.550	-18.561	-14.200	-0.693	35.314	439.110	0.000669	0.001299	0.000994
0.0800	223.683	-9.703	-19.538	-14.742	-0.694	35.317	425.835	0.000679	0.001368	0.001032
0.0808	217.671	-9.994	-20.349	-15.243	-0.692	35.319	414.391	0.000700	0.001424	0.001067
0.0816	212.412	-10.230	-21.218	-15.813	-0.689	35.322	404.377	0.000716	0.001485	0.001107
0.0824	207.678	-10.341	-22.015	-16.300	-0.686	35.324	395.365	0.000724	0.001541	0.001141
0.0832	203.274	-10.563	-22.470	-16.717	-0.689	35.325	386.982	0.000739	0.001573	0.001170
0.0840	198.781	-10.659	-23.007	-17.202	-0.690	35.325	378.428	0.000746	0.001610	0.001204
0.0848	194.407	-10.839	-23.514	-17.439	-0.693	35.324	370.102	0.000759	0.001646	0.001221
0.0856	190.410	-11.076	-23.941	-17.703	-0.695	35.322	362.492	0.000775	0.001676	0.001239
0.0864	186.953	-11.396	-24.520	-18.049	-0.693	35.322	355.911	0.000798	0.001716	0.001263
0.0872	184.699	-11.689	-25.001	-18.314	-0.694	35.320	351.620	0.000818	0.001750	0.001282
0.0880	183.587	-11.705	-25.249	-18.522	-0.692	35.319	349.503	0.000819	0.001767	0.001297
0.0888	183.557	-11.759	-25.373	-18.563	-0.696	35.316	349.445	0.000823	0.001776	0.001299
0.0896	184.489	-11.773	-25.524	-18.604	-0.698	35.314	351.219	0.000824	0.001787	0.001302
0.0904	186.037	-11.773	-25.455	-18.618	-0.697	35.312	354.166	0.000824	0.001782	0.001303
0.0912	188.156	-11.855	-25.468	-18.520	-0.702	35.309	358.200	0.000830	0.001783	0.001296
0.0920	190.605	-11.897	-25.523	-18.617	-0.698	35.308	362.864	0.000833	0.001787	0.001303
0.0928	193.356	-11.772	-25.260	-18.466	-0.699	35.306	368.099	0.000824	0.001768	0.001293
0.0936	196.241	-11.480	-24.985	-17.882	-0.706	35.305	373.592	0.000804	0.001749	0.001252
0.0944	198.991	-11.425	-24.780	-17.897	-0.700	35.305	378.828	0.000800	0.001735	0.001253
0.0952	201.877	-11.396	-24.409	-17.536	-0.705	35.306	384.321	0.000798	0.001709	0.001227
0.0960	205.108	-11.313	-24.094	-17.299	-0.703	35.307	390.472	0.000792	0.001687	0.001211
0.0968	208.940	-11.257	-23.914	-17.395	-0.693	35.309	397.768	0.000788	0.001674	0.001218
0.0976	213.734	-11.090	-23.295	-16.910	-0.696	35.310	406.895	0.000776	0.001631	0.001184
0.0984	219.460	-10.729	-22.704	-16.438	-0.693	35.312	417.795	0.000751	0.001589	0.001151
0.0992	226.027	-10.423	-22.030	-16.104	-0.689	35.315	430.298	0.000730	0.001542	0.001127
0.1000	233.556	-10.118	-21.081	-15.494	-0.693	35.317	444.632	0.000708	0.001476	0.001085
0.1008	241.897	-9.618	-20.063	-14.826	-0.691	35.320	460.510	0.000673	0.001404	0.001038
0.1016	251.080	-9.147	-18.989	-14.172	-0.688	35.322	477.991	0.000640	0.001329	0.000992
0.1024	261.013	-8.619	-17.917	-13.561	-0.688	35.324	496.902	0.000603	0.001254	0.000949
0.1032	271.473	-8.007	-16.596	-12.422	-0.688	35.325	516.815	0.000561	0.001162	0.000870
0.1040	282.038	-7.256	-15.411	-11.310	-0.692	35.325	536.928	0.000508	0.001079	0.000792
0.1048	292.092	-6.631	-14.131	-10.324	-0.695	35.324	556.068	0.000464	0.000989	0.000723
0.1056	301.169	-6.075	-12.810	-9.240	-0.697	35.322	573.349	0.000425	0.000897	0.000647
0.1064	308.368	-5.671	-11.983	-8.836	-0.695	35.322	587.053	0.000397	0.000839	0.000619
0.1072	313.312	-5.365	-11.350	-8.641	-0.688	35.320	596.466	0.000376	0.000795	0.000605
0.1080	315.777	-5.199	-10.965	-8.558	-0.687	35.318	601.158	0.000364	0.000768	0.000599
0.1088	316.002	-5.032	-10.922	-8.419	-0.690	35.316	601.587	0.000352	0.000765	0.000589
0.1096	314.515	-5.060	-10.951	-8.558	-0.691	35.314	598.755	0.000354	0.000767	0.000599
0.1104	311.839	-5.185	-11.035	-8.768	-0.694	35.312	593.662	0.000363	0.000772	0.000614
0.1112	308.578	-5.253	-11.256	-8.810	-0.699	35.309	587.454	0.000368	0.000788	0.000617
0.1120	304.731	-5.488	-11.574	-9.213	-0.695	35.308	580.130	0.000384	0.000810	0.000645
0.1128	300.643	-5.696	-11.821	-9.449	-0.696	35.307	572.348	0.000399	0.000827	0.000661
0.1136	296.390	-5.780	-12.026	-9.309	-0.703	35.305	564.251	0.000405	0.000842	0.000652
0.1144	291.716	-6.003	-12.356	-9.642	-0.698	35.305	555.353	0.000420	0.000865	0.000675
0.1152	286.772	-6.198	-12.645	-9.878	-0.702	35.305	545.940	0.000434	0.000885	0.000691
0.1160	281.227	-6.491	-13.209	-10.308	-0.699	35.307	535.383	0.000454	0.000925	0.000722
0.1168	274.704	-7.047	-14.050	-10.977	-0.689	35.309	522.966	0.000493	0.000983	0.000768
0.1176	266.980	-7.409	-14.819	-11.337	-0.691	35.310	508.261	0.000519	0.001037	0.000794
0.1184	257.827	-7.979	-15.934	-12.004	-0.688	35.312	490.837	0.000559	0.001115	0.000840
0.1192	247.338	-8.563	-17.199	-12.797	-0.688	35.314	470.867	0.000599	0.001204	0.000896
0.1200	236.096	-9.174	-18.465	-13.867	-0.691	35.317	449.467	0.000642	0.001293	0.000971
0.1208	224.780	-9.854	-20.007	-15.035	-0.691	35.319	427.923	0.000690	0.001400	0.001052
0.1216	213.929	-10.425	-21.355	-16.077	-0.691	35.322	407.267	0.000730	0.001495	0.001125
0.1224	204.116	-10.856	-22.717	-16.979	-0.690	35.325	388.584	0.000760	0.001590	0.001189
0.1232	195.925	-11.246	-23.817	-17.632	-0.692	35.325	372.992	0.000787	0.001667	0.001234
0.1240	189.418	-11.593	-24.573	-18.285	-0.693	35.325	360.603	0.000812	0.001720	0.001280
0.1248	184.654	-11.870	-25.138	-18.521	-0.694	35.324	351.534	0.000831	0.001760	0.001296
0.1256	181.678	-12.022	-25.371	-18.744	-0.695	35.323	345.869	0.000842	0.001776	0.001312
0.1264	179.920	-12.175	-25.661	-18.939	-0.694	35.322	342.522	0.000852	0.001796	0.001326
0.1272	179.169	-12.286	-25.826	-18.924	-0.692	35.321	341.091	0.000860	0.001808	0.001325
0.1280	179.259	-12.273	-25.936	-19.062	-0.691	35.319	341.263	0.000859	0.001815	0.001334
0.1288	179.725	-12.260	-26.018	-19.075	-0.689	35.317	342.150	0.000858	0.001821	0.001335
0.1296	180.626	-12.191	-26.005	-19.047	-0.687	35.314	343.866	0.000853	0.001820	0.001333
0.1304	181.964	-12.052	-26.032	-18.993	-0.688	35.312	346.413	0.000844	0.001822	0.001329
0.1312	183.632	-11.940	-25.990	-18.868	-0.692	35.310	349.588	0.000836	0.001819	0.001321
0.1320	185.721	-12.010	-25.977	-18.911	-0.691	35.308	353.565	0.000841	0.001818	0.001324
0.1328	188.216	-11.996	-25.839	-18.911	-0.696	35.307	358.315	0.000840	0.001809	0.001324
0.1336	191.116	-11.717	-25.495	-18.605	-0.703	35.306	363.836	0.000820	0.001785	0.001302
0.1344	194.257	-11.496	-25.261	-18.410	-0.702	35.306	369.816	0.000805	0.001768	0.001289
0.1352	197.954	-11.258	-24.794	-18.076	-0.710	35.306	376.854	0.000788	0.001736	0.001265
0.1360	202.297	-11.035	-24.395	-17.630	-0.707	35.307	385.122	0.000772	0.001708	0.001234
0.1368	207.542	-11.076	-24.012	-17.436	-0.702	35.309	395.107	0.000775	0.001681	0.001221
0.1376	214.275	-10.937	-23.489	-16.923	-0.702	35.311	407.925	0.000766	0.001644	0.001185
0.1384	222.300	-10.520	-22.801	-16.270	-0.699	35.313	423.203	0.000736	0.001596	0.001139
0.1392	231.422	-9.840	-21.727	-15.840	-0.700	35.315	440.569	0.000689	0.001521	0.001109
0.1400	241.266	-9.299	-20.612	-15.089	-0.706	35.317	459.309	0.000651	0.001443	0.001056
0.1408	251.020	-8.786	-19.374	-14.380	-0.704	35.320	477.877	0.000615	0.001356	0.001007
0.1416	260.217	-8.243	-18.288	-13.755	-0.705	35.322	495.386	0.000577	0.001280	0.000963
0.1424	268.618	-8.035	-17.475	-13.033	-0.703	35.324	511.379	0.000562	0.001223	0.000912
0.1432	275.952	-7.423	-16.566	-12.310	-0.702	35.325	525.341	0.000520	0.001160	0.000862
0.1440	282.143	-6.756	-15.672	-11.672	-0.710	35.325	537.128	0.000473	0.001097	0.000817
0.1448	287.298	-6.519	-14.929	-11.172	-0.707	35.324	546.942	0.000456	0.001045	0.000782
0.1456	291.521	-6.102	-14.297	-10.645	-0.708	35.323	554.981	0.000427	0.001001	0.000745
0.1464	294.857	-6.046	-13.844	-10.616	-0.704	35.322	561.333	0.000423	0.000969	0.000743
0.1472	297.562	-6.170	-13.609	-10.352	-0.698	35.320	566.483	0.000432	0.000953	0.000725
0.1480	299.636	-6.087	-13.291	-10.047	-0.702	35.318	570.431	0.000426	0.000930	0.000703
0.1488	300.944	-6.115	-13.070	-9.865	-0.703	35.317	572.920	0.000428	0.000915	0.000691
0.1496	301.455	-6.157	-13.002	-9.379	-0.704	35.314	573.893	0.000431	0.000910	0.000657
0.1504	301.079	-6.144	-12.852	-9.394	-0.708	35.312	573.177	0.000430	0.000900	0.000658
0.1512	299.877	-6.213	-12.798	-9.546	-0.710	35.310	570.889	0.000435	0.000896	0.000668
0.1520	297.653	-6.380	-13.032	-9.755	-0.706	35.308	566.654	0.000447	0.000912	0.000683
0.1528	294.617	-6.547	-13.239	-10.130	-0.706	35.307	560.875	0.000458	0.000927	0.000709
0.1536	290.875	-6.673	-13.416	-10.422	-0.710	35.305	553.751	0.000467	0.000939	0.000730
0.1544	286.156	-6.798	-13.870	-10.616	-0.707	35.306	544.767	0.000476	0.000971	0.000743
0.1552	281.031	-6.924	-14.050	-10.741	-0.712	35.306	535.011	0.000485	0.000983	0.000752
0.1560	275.155	-7.050	-14.447	-11.088	-0.710	35.307	523.825	0.000493	0.001011	0.000776
0.1568	268.167	-7.382	-15.192	-11.420	-0.699	35.309	510.521	0.000517	0.001063	0.000799
0.1576	260.142	-7.826	-15.948	-12.045	-0.700	35.311	495.243	0.000548	0.001116	0.000843
0.1584	250.914	-8.230	-16.911	-12.921	-0.695	35.312	477.676	0.000576	0.001184	0.000905
0.1592	240.920	-8.730	-17.929	-13.741	-0.694	35.314	458.651	0.000611	0.001255	0.000962
0.1600	230.851	-9.064	-19.085	-14.478	-0.695	35.317	439.482	0.000634	0.001336	0.001013
0.1608	221.459	-9.494	-20.352	-15.257	-0.698	35.319	421.600	0.000665	0.001425	0.001068
0.1616	213.133	-10.008	-21.438	-16.076	-0.696	35.322	405.750	0.000701	0.001501	0.001125
0.1624	206.265	-10.424	-22.525	-16.771	-0.698	35.324	392.675	0.000730	0.001577	0.001174
0.1632	201.095	-10.840	-23.227	-17.382	-0.704	35.325	382.833	0.000759	0.001626	0.001217
0.1640	197.278	-11.063	-23.557	-17.658	-0.705	35.325	375.566	0.000774	0.001649	0.001236
0.1648	194.768	-11.230	-23.969	-17.743	-0.704	35.324	370.789	0.000786	0.001678	0.001242
0.1656	193.461	-11.230	-24.230	-17.783	-0.702	35.323	368.299	0.000786	0.001696	0.001245
0.1664	192.830	-11.315	-24.436	-18.048	-0.695	35.322	367.098	0.000792	0.001711	0.001263
0.1672	192.965	-11.273	-24.642	-18.104	-0.690	35.321	367.355	0.000789	0.001725	0.001267
0.1680	193.506	-11.149	-24.724	-18.202	-0.691	35.319	368.385	0.000780	0.001731	0.001274
0.1688	194.287	-11.205	-24.681	-18.091	-0.688	35.317	369.873	0.000784	0.001728	0.001266
0.1696	195.475	-11.232	-24.572	-17.994	-0.687	35.315	372.133	0.000786	0.001720	0.001260
0.1704	196.977	-11.329	-24.394	-18.119	-0.687	35.312	374.994	0.000793	0.001708	0.001268
0.1712	198.811	-11.175	-24.312	-17.881	-0.691	35.309	378.485	0.000782	0.001702	0.001252
0.1720	200.960	-11.035	-24.258	-18.047	-0.686	35.308	382.576	0.000772	0.001698	0.001263
0.1728	203.410	-10.950	-24.285	-18.006	-0.688	35.306	387.239	0.000767	0.001700	0.001260
0.1736	206.130	-10.602	-24.023	-17.505	-0.695	35.305	392.418	0.000742	0.001682	0.001225
0.1744	209.015	-10.838	-23.818	-17.229	-0.694	35.306	397.911	0.000759	0.001667	0.001206
0.1752	212.442	-10.866	-23.501	-16.813	-0.702	35.306	404.434	0.000761	0.001645	0.001177
0.1760	216.364	-10.589	-23.076	-16.465	-0.702	35.307	411.901	0.000741	0.001615	0.001153
0.1768	220.978	-10.605	-22.911	-16.188	-0.696	35.309	420.685	0.000742	0.001604	0.001133
0.1776	226.538	-10.258	-22.347	-15.993	-0.697	35.311	431.271	0.000718	0.001564	0.001119
0.1784	232.790	-9.968	-21.659	-15.548	-0.699	35.312	443.172	0.000698	0.001516	0.001088
0.1792	239.944	-9.690	-20.915	-14.825	-0.699	35.315	456.791	0.000678	0.001464	0.001038
0.1800	247.879	-9.383	-20.020	-14.506	-0.702	35.317	471.897	0.000657	0.001401	0.001015
0.1808	256.294	-9.022	-19.126	-13.894	-0.700	35.320	487.919	0.000632	0.001339	0.000973
0.1816	265.041	-8.576	-18.135	-13.171	-0.698	35.322	504.570	0.000600	0.001269	0.000922
0.1824	273.577	-8.242	-17.130	-12.741	-0.692	35.325	520.821	0.000577	0.001199	0.000892
0.1832	281.452	-7.604	-16.043	-11.866	-0.694	35.326	535.812	0.000532	0.001123	0.000831
0.1840	288.335	-6.868	-14.997	-11.046	-0.697	35.326	548.916	0.000481	0.001050	0.000773
0.1848	293.850	-6.465	-14.213	-10.560	-0.696	35.325	559.416	0.000453	0.000995	0.000739
0.1856	298.329	-6.270	-13.567	-10.088	-0.699	35.323	567.942	0.000439	0.000950	0.000706
0.1864	301.755	-6.116	-13.127	-9.699	-0.695	35.322	574.465	0.000428	0.000919	0.000679
0.1872	304.536	-6.227	-12.838	-9.574	-0.691	35.321	579.758	0.000436	0.000899	0.000670
0.1880	306.865	-6.158	-12.412	-9.309	-0.690	35.319	584.192	0.000431	0.000869	0.000652
0.1888	308.368	-5.824	-12.068	-9.045	-0.691	35.317	587.053	0.000408	0.000845	0.000633
0.1896	308.954	-5.825	-11.820	-9.073	-0.688	35.314	588.169	0.000408	0.000827	0.000635
0.1904	308.488	-5.672	-11.751	-9.058	-0.689	35.312	587.282	0.000397	0.000823	0.000634
0.1912	306.534	-5.685	-11.902	-9.198	-0.691	35.310	583.563	0.000398	0.000833	0.000644
0.1920	303.243	-5.865	-12.301	-9.504	-0.686	35.308	577.297	0.000411	0.000861	0.000665
0.1928	298.840	-5.767	-12.713	-9.809	-0.692	35.307	568.914	0.000404	0.000890	0.000687
0.1936	293.159	-5.823	-12.947	-9.864	-0.699	35.306	558.100	0.000408	0.000906	0.000690
0.1944	286.276	-6.004	-13.334	-10.295	-0.696	35.306	544.996	0.000420	0.000933	0.000721
0.1952	278.131	-6.281	-13.897	-10.642	-0.703	35.306	529.490	0.000440	0.000973	0.000745
0.1960	268.663	-6.922	-14.722	-11.309	-0.700	35.307	511.465	0.000485	0.001031	0.000792
0.1968	257.857	-7.784	-15.989	-12.351	-0.692	35.309	490.894	0.000545	0.001119	0.000865
0.1976	246.361	-8.479	-17.487	-13.323	-0.696	35.311	469.007	0.000594	0.001224	0.000933
0.1984	234.563	-9.134	-18.863	-14.352	-0.696	35.313	446.548	0.000639	0.001320	0.001005
0.1992	223.202	-9.745	-20.308	-15.256	-0.694	35.315	424.919	0.000682	0.001422	0.001068
0.2000	186.683	-12.524	-27.641	-20.454	-0.706	35.319	355.396	0.000877	0.001935	0.001432
0.2008	185.571	-12.524	-27.738	-20.356	-0.708	35.317	353.279	0.000877	0.001942	0.001425
0.2016	184.744	-12.634	-27.891	-20.327	-0.711	35.315	351.706	0.000884	0.001952	0.001423
0.2024	184.429	-12.730	-28.043	-20.438	-0.712	35.312	351.105	0.000891	0.001963	0.001431
0.2032	184.895	-12.855	-28.085	-20.341	-0.715	35.310	351.992	0.000900	0.001966	0.001424
0.2040	186.382	-12.952	-28.086	-20.522	-0.707	35.308	354.824	0.000907	0.001966	0.001437
0.2048	188.952	-13.022	-28.058	-20.634	-0.703	35.306	359.716	0.000912	0.001964	0.001444
0.2056	193.145	-12.717	-27.604	-20.050	-0.708	35.305	367.699	0.000890	0.001932	0.001404
0.2064	199.607	-12.287	-27.039	-19.564	-0.704	35.305	380.001	0.000860	0.001893	0.001369
0.2072	210.969	-11.800	-26.049	-18.798	-0.708	35.305	401.630	0.000826	0.001823	0.001316
0.2080	230.175	-10.772	-24.025	-17.019	-0.710	35.306	438.194	0.000754	0.001682	0.001191
0.2088	259.751	-9.410	-21.040	-14.865	-0.704	35.308	494.499	0.000659	0.001473	0.001041
0.2096	301.470	-7.394	-16.416	-11.614	-0.703	35.309	573.921	0.000518	0.001149	0.000813
0.2104	354.986	-4.491	-10.388	-7.057	-0.711	35.311	675.802	0.000314	0.000727	0.000494
0.2112	418.361	-0.919	-3.288	-1.987	-0.713	35.313	796.452	0.000064	0.000230	0.000139
0.2120	489.280	3.249	4.653	3.809	-0.718	35.316	931.463	-0.000227	-0.000326	-0.000267
0.2128	565.564	7.848	13.156	10.228	-0.724	35.318	1076.689	-0.000549	-0.000921	-0.000716
0.2136	644.583	12.587	22.100	16.691	-0.723	35.320	1227.121	-0.000881	-0.001547	-0.001168
0.2144	724.670	17.451	31.030	23.196	-0.715	35.323	1379.585	-0.001222	-0.002172	-0.001624
0.2152	804.275	22.370	40.124	30.004	-0.712	35.324	1531.134	-0.001566	-0.002809	-0.002100
0.2160	881.867	27.485	49.069	36.827	-0.711	35.324	1678.848	-0.001924	-0.003435	-0.002578
0.2168	956.618	32.668	57.669	43.331	-0.705	35.324	1821.156	-0.002287	-0.004037	-0.003033
0.2176	1027.597	37.699	66.021	49.640	-0.711	35.322	1956.282	-0.002639	-0.004621	-0.003475
0.2184	1093.918	42.562	73.713	55.226	-0.707	35.321	2082.539	-0.002979	-0.005160	-0.003866
0.2192	1155.008	46.967	80.689	60.159	-0.706	35.320	2198.839	-0.003288	-0.005648	-0.004211
0.2200	1210.193	50.900	87.253	65.146	-0.703	35.319	2303.896	-0.003563	-0.006108	-0.004560
0.2208	1259.050	54.680	92.907	69.537	-0.702	35.317	2396.908	-0.003828	-0.006504	-0.004868
0.2216	1301.265	57.988	97.904	73.457	-0.701	35.314	2477.274	-0.004059	-0.006853	-0.005142
0.2224	1336.446	60.823	102.224	76.794	-0.696	35.312	2544.250	-0.004258	-0.007156	-0.005376
0.2232	1364.129	63.201	105.651	79.240	-0.698	35.309	2596.951	-0.004424	-0.007396	-0.005547
0.2240	1383.921	64.895	108.446	81.227	-0.698	35.308	2634.630	-0.004543	-0.007591	-0.005686
0.2248	1395.884	66.188	110.303	82.741	-0.699	35.306	2657.404	-0.004633	-0.007721	-0.005792
0.2256	1400.753	67.034	111.624	83.837	-0.708	35.305	2666.674	-0.004692	-0.007814	-0.005869
0.2264	1399.310	67.395	112.242	84.268	-0.714	35.305	2663.927	-0.004718	-0.007857	-0.005899
0.2272	1392.607	67.381	112.324	84.338	-0.714	35.305	2651.167	-0.004717	-0.007863	-0.005904
0.2280	1380.945	66.839	112.104	83.936	-0.718	35.306	2628.965	-0.004679	-0.007847	-0.005876
0.2288	1362.491	65.852	111.168	82.810	-0.711	35.308	2593.832	-0.004610	-0.007782	-0.005797
0.2296	1334.207	64.254	109.409	80.991	-0.707	35.310	2539.988	-0.004498	-0.007659	-0.005669
0.2304	1292.338	61.781	106.298	78.296	-0.712	35.311	2460.279	-0.004325	-0.007441	-0.005481
0.2312	1234.118	58.043	101.523	74.029	-0.706	35.313	2349.443	-0.004063	-0.007107	-0.005182
0.2320	1160.058	53.248	94.946	68.485	-0.705	35.316	2208.452	-0.003727	-0.006646	-0.004794
0.2328	1073.675	47.634	86.869	61.994	-0.704	35.318	2044.001	-0.003334	-0.006081	-0.004340
0.2336	980.183	41.407	77.705	54.434	-0.696	35.321	1866.016	-0.002899	-0.005439	-0.003810
0.2344	885.444	35.057	67.922	46.722	-0.694	35.323	1685.658	-0.002454	-0.004755	-0.003271
0.2352	794.146	28.888	58.249	39.411	-0.694	35.325	1511.850	-0.002022	-0.004077	-0.002759
0.2360	709.401	23.343	49.015	32.548	-0.701	35.324	1350.517	-0.001634	-0.003431	-0.002278
0.2368	633.312	18.229	40.539	26.141	-0.703	35.324	1205.664	-0.001276	-0.002838	-0.001830
0.2376	567.052	14.004	32.956	20.818	-0.708	35.322	1079.521	-0.000980	-0.002307	-0.001457
0.2384	510.725	10.295	26.158	15.927	-0.706	35.321	972.290	-0.000721	-0.001831	-0.001115
0.2392	463.702	6.986	20.241	11.536	-0.700	35.320	882.769	-0.000489	-0.001417	-0.000808
0.2400	424.658	4.318	15.149	8.216	-0.700	35.318	808.439	-0.000302	-0.001060	-0.000575
0.2408	391.761	2.053	10.705	5.158	-0.700	35.317	745.811	-0.000144	-0.000749	-0.000361
0.2416	363.748	0.120	6.935	2.448	-0.700	35.314	692.482	-0.000008	-0.000485	-0.000171
0.2424	340.033	-1.311	3.495	0.238	-0.699	35.312	647.335	0.000092	-0.000245	-0.000017
0.2432	320.195	-2.491	0.523	-1.680	-0.700	35.310	609.570	0.000174	-0.000037	0.000118
0.2440	304.190	-3.491	-1.886	-3.473	-0.697	35.308	579.100	0.000244	0.000132	0.000243
0.2448	292.107	-4.143	-3.868	-4.820	-0.700	35.307	556.097	0.000290	0.000271	0.000337
0.2456	283.887	-4.712	-5.215	-5.461	-0.704	35.305	540.447	0.000330	0.000365	0.000382
0.2464	279.468	-5.046	-6.026	-6.099	-0.710	35.305	532.036	0.000353	0.000422	0.000427
0.2472	278.912	-5.226	-6.437	-6.375	-0.714	35.305	530.977	0.000366	0.000451	0.000446
0.2480	281.948	-5.241	-6.506	-6.195	-0.717	35.306	536.757	0.000367	0.000455	0.000434
0.2488	288.921	-5.198	-6.301	-6.084	-0.714	35.308	550.032	0.000364	0.000441	0.000426
0.2496	301.530	-4.711	-5.585	-5.557	-0.713	35.310	574.036	0.000330	0.000391	0.000389
0.2504	324.343	-3.697	-3.714	-3.919	-0.714	35.312	617.466	0.000259	0.000260	0.000274
0.2512	362.996	-1.780	-0.122	-0.986	-0.717	35.313	691.051	0.000125	0.000009	0.000069
0.2520	421.261	1.485	5.851	3.629	-0.717	35.316	801.973	-0.000104	-0.000410	-0.000254
0.2528	499.785	5.876	14.257	10.036	-0.715	35.318	951.462	-0.000411	-0.000998	-0.000703
0.2536	594.854	11.559	24.508	17.428	-0.716	35.321	1132.450	-0.000809	-0.001716	-0.001220
0.2544	700.414	17.980	35.998	25.501	-0.707	35.323	1333.408	-0.001259	-0.002520	-0.001785
0.2552	810.692	24.928	47.983	34.159	-0.712	35.325	1543.350	-0.001745	-0.003359	-0.002391
0.2560	920.520	32.334	60.009	43.234	-0.720	35.324	1752.434	-0.002263	-0.004201	-0.003026
0.2568	1025.418	39.504	71.348	52.059	-0.723	35.324	1952.133	-0.002765	-0.004994	-0.003644
0.2576	1121.886	46.299	81.805	60.286	-0.728	35.322	2135.782	-0.003241	-0.005726	-0.004220
0.2584	1206.180	52.386	90.955	67.373	-0.720	35.321	2296.257	-0.003667	-0.006367	-0.004716
0.2592	1276.167	57.402	98.442	73.223	-0.709	35.321	2429.495	-0.004018	-0.006891	-0.005126
0.2600	1330.330	61.446	104.496	77.766	-0.704	35.319	2532.606	-0.004301	-0.007315	-0.005444
0.2608	1368.652	64.366	108.927	81.227	-0.702	35.317	2605.562	-0.004506	-0.007625	-0.005686
0.2616	1393.269	66.589	112.008	83.548	-0.705	35.315	2652.426	-0.004661	-0.007841	-0.005848
0.2624	1406.930	68.035	114.002	84.881	-0.707	35.312	2678.432	-0.004762	-0.007980	-0.005942
0.2632	1412.866	68.841	115.118	85.799	-0.710	35.310	2689.734	-0.004819	-0.008058	-0.006006
0.2640	1413.963	69.410	115.820	86.188	-0.708	35.308	2691.822	-0.004859	-0.008107	-0.006033
0.2648	1412.325	69.508	116.207	86.451	-0.706	35.306	2688.704	-0.004866	-0.008134	-0.006052
0.2656	1409.274	69.521	116.565	86.715	-0.712	35.305	2682.896	-0.004866	-0.008160	-0.006070
0.2664	1405.442	69.508	116.758	86.562	-0.710	35.305	2675.600	-0.004866	-0.008173	-0.006059
0.2672	1400.648	69.633	116.730	86.605	-0.712	35.305	2666.473	-0.004874	-0.008171	-0.006062
0.2680	1394.531	69.548	116.536	86.563	-0.707	35.306	2654.829	-0.004868	-0.008157	-0.006059
0.2688	1385.890	69.270	116.039	86.119	-0.699	35.308	2638.378	-0.004849	-0.008123	-0.006028
0.2696	1372.529	68.701	115.350	85.744	-0.698	35.310	2612.944	-0.004809	-0.008075	-0.006002
0.2704	1350.017	67.436	114.139	84.534	-0.698	35.311	2570.086	-0.004721	-0.007990	-0.005917
0.2712	1311.649	65.075	111.499	81.881	-0.698	35.313	2497.044	-0.004555	-0.007805	-0.005732
0.2720	1251.866	61.184	106.712	77.531	-0.700	35.316	2383.232	-0.004283	-0.007470	-0.005427
0.2728	1169.000	55.805	99.378	71.334	-0.703	35.318	2225.475	-0.003906	-0.006956	-0.004993
0.2736	1066.807	49.066	89.705	63.469	-0.701	35.320	2030.926	-0.003435	-0.006279	-0.004443
0.2744	953.958	41.505	78.338	54.699	-0.703	35.323	1816.092	-0.002905	-0.005484	-0.003829
0.2752	840.869	34.084	66.518	45.749	-0.702	35.324	1600.800	-0.002386	-0.004656	-0.003202
0.2760	735.776	27.276	55.235	37.314	-0.707	35.324	1400.728	-0.001909	-0.003866	-0.002612
0.2768	643.862	21.163	44.915	29.740	-0.707	35.324	1225.748	-0.001481	-0.003144	-0.002082
0.2776	567.773	16.230	36.026	23.362	-0.707	35.322	1080.894	-0.001136	-0.002522	-0.001635
0.2784	507.389	12.118	28.719	18.109	-0.707	35.321	965.939	-0.000848	-0.002010	-0.001268
0.2792	461.222	8.657	22.802	13.843	-0.695	35.320	878.048	-0.000606	-0.001596	-0.000969
0.2800	426.942	6.127	18.055	10.564	-0.698	35.319	812.788	-0.000429	-0.001264	-0.000739
0.2808	401.213	4.195	14.518	7.994	-0.697	35.317	763.807	-0.000294	-0.001016	-0.000560
0.2816	380.940	2.736	11.587	5.896	-0.699	35.315	725.212	-0.000192	-0.000811	-0.000413
0.2824	363.733	1.430	8.988	4.241	-0.702	35.312	692.453	-0.000100	-0.000629	-0.000297
0.2832	347.923	0.249	6.744	2.573	-0.703	35.310	662.355	-0.000017	-0.000472	-0.000180
0.2840	333.090	-0.961	4.474	0.961	-0.700	35.308	634.117	0.000067	-0.000313	-0.000067
0.2848	319.519	-2.087	2.326	-0.470	-0.698	35.307	608.282	0.000146	-0.000163	0.000033
0.2856	308.052	-2.588	0.592	-1.567	-0.703	35.305	586.452	0.000181	-0.000041	0.000110
0.2864	299.666	-3.075	-0.909	-2.400	-0.703	35.305	570.488	0.000215	0.000064	0.000168
0.2872	295.308	-3.380	-1.803	-2.930	-0.708	35.306	562.191	0.000237	0.000126	0.000205
0.2880	295.308	-3.436	-2.311	-2.972	-0.712	35.306	562.191	0.000241	0.000162	0.000208
0.2888	299.757	-3.547	-2.381	-3.013	-0.711	35.308	570.660	0.000248	0.000167	0.000211
0.2896	309.751	-3.393	-1.912	-2.707	-0.708	35.310	589.685	0.000238	0.000134	0.000189
0.2904	328.927	-2.614	-0.660	-1.470	-0.708	35.311	626.192	0.000183	0.000046	0.000103
0.2912	363.447	-1.058	2.436	1.074	-0.708	35.313	691.910	0.000074	-0.000171	-0.000075
0.2920	418.316	1.861	7.886	5.173	-0.705	35.315	796.366	-0.000130	-0.000552	-0.000362
0.2928	494.931	6.224	16.115	11.176	-0.708	35.318	942.221	-0.000436	-0.001128	-0.000782
0.2936	590.541	11.935	26.696	18.583	-0.708	35.320	1124.239	-0.000835	-0.001869	-0.001301
0.2944	698.776	18.758	38.571	26.837	-0.706	35.323	1330.290	-0.001313	-0.002700	-0.001879
0.2952	812.992	26.052	51.038	35.856	-0.705	35.324	1547.728	-0.001824	-0.003573	-0.002510
0.2960	927.538	33.752	63.642	45.278	-0.713	35.324	1765.795	-0.002363	-0.004455	-0.003169
0.2968	1037.291	41.310	75.392	54.325	-0.714	35.324	1974.735	-0.002892	-0.005277	-0.003803
0.2976	1137.590	48.245	86.153	62.816	-0.717	35.322	2165.680	-0.003377	-0.006031	-0.004397
0.2984	1224.124	54.486	95.400	70.180	-0.716	35.321	2330.418	-0.003814	-0.006678	-0.004913
0.2992	1294.141	59.835	102.761	76.085	-0.707	35.320	2463.713	-0.004188	-0.007193	-0.005326
0.3000	1346.095	63.921	108.610	80.505	-0.706	35.318	2562.618	-0.004474	-0.007603	-0.005635
0.3008	1380.510	66.840	112.765	83.506	-0.707	35.316	2628.136	-0.004679	-0.007894	-0.005845
0.3016	1400.137	68.645	115.311	85.424	-0.704	35.314	2665.501	-0.004805	-0.008072	-0.005980
0.3024	1408.793	69.508	116.728	86.579	-0.707	35.312	2681.980	-0.004866	-0.008171	-0.006061
0.3032	1410.657	69.883	117.374	87.274	-0.708	35.310	2685.528	-0.004892	-0.008216	-0.006109
0.3040	1409.154	70.105	117.499	87.496	-0.706	35.308	2682.667	-0.004907	-0.008225	-0.006125
0.3048	1406.434	70.148	117.595	87.398	-0.706	35.306	2677.488	-0.004910	-0.008232	-0.006118
0.3056	1403.488	70.245	117.746	87.453	-0.712	35.305	2671.881	-0.004917	-0.008242	-0.006122
0.3064	1400.197	70.440	117.828	87.452	-0.712	35.305	2665.615	-0.004931	-0.008248	-0.006122
0.3072	1396.064	70.551	117.869	87.578	-0.716	35.305	2657.747	-0.004939	-0.008251	-0.006130
0.3080	1390.368	70.551	117.883	87.635	-0.714	35.306	2646.904	-0.004939	-0.008252	-0.006134
0.3088	1381.757	70.175	117.595	87.176	-0.703	35.308	2630.510	-0.004912	-0.008232	-0.006102
0.3096	1367.720	69.327	116.799	86.508	-0.701	35.309	2603.788	-0.004853	-0.008176	-0.006056
0.3104	1342.773	67.758	115.258	85.035	-0.695	35.311	2556.295	-0.004743	-0.008068	-0.005952
0.3112	1299.612	64.992	111.968	82.061	-0.697	35.313	2474.127	-0.004549	-0.007838	-0.005744
0.3120	1233.547	60.629	106.229	77.238	-0.700	35.315	2348.356	-0.004244	-0.007436	-0.005407
0.3128	1144.579	54.751	98.194	70.665	-0.701	35.318	2178.984	-0.003833	-0.006874	-0.004947
0.3136	1037.982	47.719	87.900	62.423	-0.703	35.320	1976.051	-0.003340	-0.006153	-0.004370
0.3144	923.406	39.909	76.149	53.251	-0.702	35.323	1757.927	-0.002794	-0.005330	-0.003728
0.3152	810.166	32.418	64.343	44.302	-0.699	35.324	1542.349	-0.002269	-0.004504	-0.003101
0.3160	705.554	25.705	53.003	35.799	-0.707	35.324	1343.193	-0.001799	-0.003710	-0.002506
0.3168	614.827	19.535	42.643	28.127	-0.706	35.324	1170.473	-0.001367	-0.002985	-0.001969
0.3176	540.827	14.727	34.166	22.097	-0.708	35.322	1029.596	-0.001031	-0.002392	-0.001547
0.3184	483.975	10.864	27.163	17.135	-0.708	35.322	921.364	-0.000760	-0.001901	-0.001199
0.3192	442.496	7.766	21.673	13.133	-0.699	35.321	842.400	-0.000544	-0.001517	-0.000919
0.3200	413.447	5.709	17.806	10.354	-0.702	35.319	787.096	-0.000400	-0.001246	-0.000725
0.3208	393.068	4.264	14.836	8.394	-0.702	35.317	748.301	-0.000299	-0.001038	-0.000588
0.3216	377.874	3.014	12.468	6.769	-0.704	35.315	719.376	-0.000211	-0.000873	-0.000474
0.3224	365.175	1.958	10.610	5.323	-0.706	35.312	695.200	-0.000137	-0.000743	-0.000373
0.3232	352.927	1.083	8.712	4.045	-0.707	35.310	671.883	-0.000076	-0.000610	-0.000283
0.3240	340.393	-0.043	6.729	2.560	-0.704	35.308	648.022	0.000003	-0.000471	-0.000179
0.3248	327.800	-0.904	4.734	1.018	-0.703	35.307	624.046	0.000063	-0.000331	-0.000071
0.3256	316.198	-1.516	3.056	0.019	-0.710	35.305	601.959	0.000106	-0.000214	-0.000001
0.3264	306.880	-2.071	1.721	-0.788	-0.708	35.305	584.221	0.000145	-0.000120	0.000055
0.3272	300.989	-2.364	0.647	-1.566	-0.711	35.306	573.006	0.000165	-0.000045	0.000110
0.3280	299.186	-2.532	0.192	-1.802	-0.712	35.306	569.572	0.000177	-0.000013	0.000126
0.3288	301.545	-2.686	-0.193	-1.955	-0.708	35.308	574.064	0.000188	0.000014	0.000137
0.3296	308.608	-2.589	-0.124	-1.941	-0.708	35.310	587.511	0.000181	0.000009	0.000136
0.3304	322.855	-2.004	0.921	-1.150	-0.714	35.311	614.634	0.000140	-0.000064	0.000080
0.3312	349.891	-0.752	3.096	0.725	-0.714	35.313	666.103	0.000053	-0.000217	-0.000051
0.3320	395.653	1.763	7.513	4.185	-0.712	35.316	753.222	-0.000123	-0.000526	-0.000293
0.3328	463.145	5.474	14.420	9.604	-0.711	35.318	881.710	-0.000383	-0.001009	-0.000672
0.3336	551.362	10.531	23.708	16.552	-0.707	35.320	1049.652	-0.000737	-0.001660	-0.001159
0.3344	654.683	16.603	34.923	24.487	-0.701	35.323	1246.347	-0.001162	-0.002445	-0.001714
0.3352	765.998	23.412	47.102	33.381	-0.704	35.324	1458.263	-0.001639	-0.003297	-0.002337
0.3360	879.447	30.903	59.583	42.484	-0.710	35.324	1674.242	-0.002163	-0.004171	-0.002974
0.3368	989.981	38.380	71.458	51.475	-0.708	35.324	1884.670	-0.002687	-0.005002	-0.003603
0.3376	1093.317	45.703	82.562	60.104	-0.708	35.323	2081.394	-0.003199	-0.005779	-0.004207
0.3384	1185.261	52.137	92.207	67.718	-0.702	35.321	2256.432	-0.003650	-0.006454	-0.004740
0.3392	1262.131	57.612	100.229	74.068	-0.697	35.321	2402.773	-0.004033	-0.007016	-0.005185
0.3400	1321.733	62.157	106.777	79.210	-0.700	35.319	2516.241	-0.004351	-0.007474	-0.005545
0.3408	1363.482	65.423	111.428	82.922	-0.705	35.317	2595.720	-0.004580	-0.007800	-0.005805
0.3416	1389.091	67.841	114.676	85.314	-0.707	35.315	2644.472	-0.004749	-0.008027	-0.005972
0.3424	1402.256	69.174	116.699	86.759	-0.706	35.312	2669.535	-0.004842	-0.008169	-0.006073
0.3432	1406.914	69.841	117.745	87.510	-0.704	35.310	2678.404	-0.004889	-0.008242	-0.006126
0.3440	1406.734	70.133	118.281	87.717	-0.704	35.308	2678.061	-0.004909	-0.008280	-0.006140
0.3448	1404.495	70.231	118.445	87.689	-0.707	35.307	2673.798	-0.004916	-0.008291	-0.006138
0.3456	1401.369	70.496	118.487	88.037	-0.715	35.306	2667.847	-0.004935	-0.008294	-0.006163
0.3464	1397.777	70.661	118.542	88.063	-0.719	35.305	2661.009	-0.004946	-0.008298	-0.006164
0.3472	1393.584	70.731	118.514	88.217	-0.721	35.305	2653.027	-0.004951	-0.008296	-0.006175
0.3480	1388.189	70.578	118.446	88.176	-0.718	35.306	2642.756	-0.004940	-0.008291	-0.006172
0.3488	1380.555	70.174	118.185	87.425	-0.712	35.308	2628.222	-0.004912	-0.008273	-0.006120
0.3496	1368.472	69.396	117.636	86.731	-0.707	35.310	2605.219	-0.004858	-0.008235	-0.006071
0.3504	1347.086	68.269	116.411	85.632	-0.703	35.311	2564.507	-0.004779	-0.008149	-0.005994
0.3512	1309.080	66.073	113.715	83.269	-0.703	35.313	2492.151	-0.004625	-0.007960	-0.005829
0.3520	1248.861	62.237	108.801	79.239	-0.702	35.315	2377.510	-0.004357	-0.007616	-0.005547
0.3528	1165.348	56.832	101.385	73.264	-0.700	35.318	2218.523	-0.003978	-0.007097	-0.005129
0.3536	1062.989	50.093	91.711	65.190	-0.697	35.320	2023.659	-0.003506	-0.006420	-0.004563
0.3544	951.028	42.450	80.429	56.088	-0.696	35.323	1810.513	-0.002971	-0.005630	-0.003926
0.3552	839.216	35.127	68.747	47.014	-0.695	35.324	1597.652	-0.002459	-0.004812	-0.003291
0.3560	734.829	28.526	57.450	38.647	-0.703	35.324	1398.926	-0.001997	-0.004021	-0.002705
0.3568	642.795	22.287	47.117	31.087	-0.703	35.324	1223.717	-0.001560	-0.003298	-0.002176
0.3576	566.120	17.410	38.253	24.793	-0.700	35.323	1077.747	-0.001219	-0.002678	-0.001736
0.3584	505.465	13.157	30.892	19.721	-0.703	35.321	962.276	-0.000921	-0.002162	-0.001381
0.3592	459.584	9.669	24.934	15.428	-0.692	35.320	874.929	-0.000677	-0.001745	-0.001080
0.3600	426.070	7.362	20.283	12.260	-0.696	35.319	811.129	-0.000515	-0.001420	-0.000858
0.3608	401.559	5.430	16.788	9.911	-0.702	35.317	764.465	-0.000380	-0.001175	-0.000694
0.3616	383.074	4.151	14.118	7.937	-0.699	35.314	729.275	-0.000291	-0.000988	-0.000556
0.3624	368.151	3.124	11.916	6.297	-0.702	35.312	700.865	-0.000219	-0.000834	-0.000441
0.3632	355.031	2.193	10.017	4.796	-0.704	35.310	675.888	-0.000154	-0.000701	-0.000336
0.3640	342.708	1.346	8.105	3.421	-0.700	35.308	652.428	-0.000094	-0.000567	-0.000239
0.3648	331.166	0.221	6.165	1.989	-0.702	35.307	630.455	-0.000015	-0.000432	-0.000139
0.3656	321.097	-0.656	4.597	0.946	-0.707	35.305	611.286	0.000046	-0.000322	-0.000066
0.3664	313.252	-1.310	3.291	0.390	-0.710	35.305	596.352	0.000092	-0.000230	-0.000027
0.3672	308.623	-1.810	2.300	-0.249	-0.718	35.306	587.540	0.000127	-0.000161	0.000017
0.3680	307.662	-1.908	1.790	-0.567	-0.719	35.306	585.709	0.000134	-0.000125	0.000040
0.3688	310.457	-1.976	1.706	-0.593	-0.716	35.308	591.030	0.000138	-0.000119	0.000042
0.3696	317.731	-1.740	1.912	-0.316	-0.712	35.309	604.877	0.000122	-0.000134	0.000022
0.3704	331.902	-1.113	2.889	0.517	-0.712	35.311	631.857	0.000078	-0.000202	-0.000036
0.3712	358.728	0.111	5.077	2.463	-0.713	35.313	682.926	-0.000008	-0.000355	-0.000172
0.3720	404.399	2.543	9.248	5.866	-0.715	35.316	769.873	-0.000178	-0.000647	-0.000411
0.3728	471.892	6.253	16.143	10.994	-0.719	35.318	898.361	-0.000438	-0.001130	-0.000770
0.3736	560.484	11.338	25.747	17.858	-0.719	35.321	1067.019	-0.000794	-0.001802	-0.001250
0.3744	664.301	17.536	37.141	25.848	-0.714	35.323	1264.658	-0.001227	-0.002600	-0.001809
0.3752	775.827	24.483	49.386	34.770	-0.713	35.324	1476.974	-0.001714	-0.003457	-0.002434
0.3760	888.810	31.806	61.921	43.941	-0.714	35.324	1692.066	-0.002226	-0.004334	-0.003076
0.3768	997.676	39.171	73.507	52.975	-0.708	35.324	1899.319	-0.002742	-0.005145	-0.003708
0.3776	1098.066	46.300	84.281	61.423	-0.712	35.322	2090.435	-0.003241	-0.005900	-0.004300
0.3784	1185.817	52.692	93.639	68.552	-0.709	35.321	2257.490	-0.003688	-0.006555	-0.004799
0.3792	1257.863	57.973	101.180	74.597	-0.703	35.320	2394.648	-0.004058	-0.007083	-0.005222
0.3800	1312.807	62.060	107.179	79.391	-0.703	35.319	2499.247	-0.004344	-0.007503	-0.005557
0.3808	1350.828	65.158	111.569	82.782	-0.702	35.317	2571.630	-0.004561	-0.007810	-0.005795
0.3816	1374.483	67.409	114.554	84.894	-0.698	35.315	2616.663	-0.004719	-0.008019	-0.005943
0.3824	1387.332	68.854	116.467	86.146	-0.704	35.312	2641.125	-0.004820	-0.008153	-0.006030
0.3832	1392.923	69.951	117.568	86.743	-0.701	35.310	2651.768	-0.004897	-0.008230	-0.006072
0.3840	1394.426	70.355	118.090	87.064	-0.700	35.308	2654.629	-0.004925	-0.008266	-0.006094
0.3848	1393.900	70.522	118.434	87.301	-0.703	35.307	2653.627	-0.004937	-0.008290	-0.006111
0.3856	1392.577	70.814	118.557	87.550	-0.705	35.305	2651.110	-0.004957	-0.008299	-0.006128
0.3864	1390.744	70.800	118.778	87.896	-0.713	35.305	2647.619	-0.004956	-0.008314	-0.006153
0.3872	1388.219	71.008	118.835	88.022	-0.715	35.305	2642.813	-0.004971	-0.008318	-0.006162
0.3880	1384.417	70.953	118.710	88.202	-0.716	35.306	2635.574	-0.004967	-0.008310	-0.006174
0.3888	1378.225	70.633	118.517	87.759	-0.710	35.308	2623.787	-0.004944	-0.008296	-0.006143
0.3896	1368.231	70.118	118.104	87.106	-0.704	35.310	2604.761	-0.004908	-0.008267	-0.006097
0.3904	1350.543	69.133	117.140	86.313	-0.701	35.311	2571.087	-0.004839	-0.008200	-0.006042
0.3912	1318.052	67.160	115.144	84.255	-0.702	35.313	2509.232	-0.004701	-0.008060	-0.005898
0.3920	1263.874	63.630	110.768	80.586	-0.702	35.316	2406.092	-0.004454	-0.007754	-0.005641
0.3928	1185.035	58.489	103.792	75.028	-0.702	35.318	2256.002	-0.004094	-0.007265	-0.005252
0.3936	1084.255	51.831	94.368	67.317	-0.701	35.321	2064.142	-0.003628	-0.006606	-0.004712
0.3944	970.249	44.007	82.824	58.215	-0.697	35.323	1847.105	-0.003080	-0.005798	-0.004075
0.3952	853.839	36.364	70.798	49.071	-0.696	35.325	1625.490	-0.002545	-0.004956	-0.003435
0.3960	743.561	29.402	59.047	40.136	-0.702	35.325	1415.548	-0.002058	-0.004133	-0.002810
0.3968	645.335	22.830	47.969	31.979	-0.702	35.324	1228.552	-0.001598	-0.003358	-0.002239
0.3976	563.039	17.508	38.350	25.224	-0.706	35.323	1071.882	-0.001226	-0.002685	-0.001766
0.3984	497.861	13.019	30.617	19.457	-0.706	35.321	947.800	-0.000911	-0.002143	-0.001362
0.3992	449.109	9.308	24.274	14.968	-0.698	35.321	854.988	-0.000652	-0.001699	-0.001048
Test Cycles
Time (sec)	Axial stress (kPa)	Axial micro-strain #1	Axial micro-strain #2	Axial micro-strain #3	Confining pressure (kPa)	Temperature (�C)	Load (N)	Displacement #1 (mm)	Displacement #2 (mm)	Displacement #3 (mm)
0.0000	414.318	6.792	19.733	11.717	-0.700	35.319	788.755	-0.000475	-0.001381	-0.000820
0.0008	389.687	4.998	16.390	9.327	-0.699	35.317	741.863	-0.000350	-0.001147	-0.000653
0.0016	371.668	3.609	13.665	7.549	-0.699	35.315	707.560	-0.000253	-0.000957	-0.000528
0.0024	357.210	2.415	11.532	5.824	-0.699	35.313	680.037	-0.000169	-0.000807	-0.000408
0.0032	344.376	1.554	9.606	4.406	-0.699	35.310	655.603	-0.000109	-0.000672	-0.000308
0.0040	332.248	0.638	7.777	2.975	-0.697	35.308	632.515	-0.000045	-0.000544	-0.000208
0.0048	320.796	-0.169	5.851	1.585	-0.695	35.307	610.714	0.000012	-0.000410	-0.000111
0.0056	310.863	-0.835	4.364	0.586	-0.701	35.305	591.803	0.000058	-0.000305	-0.000041
0.0064	303.394	-1.489	3.015	-0.164	-0.704	35.305	577.583	0.000104	-0.000211	0.000012
0.0072	299.216	-1.906	2.051	-0.679	-0.704	35.306	569.630	0.000133	-0.000144	0.000048
0.0080	298.975	-2.170	1.694	-0.817	-0.707	35.306	569.172	0.000152	-0.000119	0.000057
0.0088	302.898	-2.087	1.626	-0.680	-0.704	35.308	576.639	0.000146	-0.000114	0.000048
0.0096	311.854	-1.767	2.024	-0.473	-0.703	35.310	593.691	0.000124	-0.000142	0.000033
0.0104	329.783	-1.003	3.400	0.459	-0.709	35.311	627.823	0.000070	-0.000238	-0.000032
0.0112	363.116	0.706	6.358	2.779	-0.708	35.313	691.280	-0.000049	-0.000445	-0.000195
0.0120	417.128	3.598	11.602	6.853	-0.707	35.315	794.106	-0.000252	-0.000812	-0.000480
0.0128	493.668	8.002	19.830	12.871	-0.707	35.318	939.817	-0.000560	-0.001388	-0.000901
0.0136	590.030	13.645	30.178	20.334	-0.706	35.320	1123.266	-0.000955	-0.002112	-0.001423
0.0144	699.167	20.287	41.997	28.713	-0.701	35.323	1331.034	-0.001420	-0.002940	-0.002010
0.0152	813.803	27.637	54.560	37.676	-0.707	35.325	1549.273	-0.001935	-0.003819	-0.002637
0.0160	927.959	35.183	66.902	47.195	-0.711	35.325	1766.596	-0.002463	-0.004683	-0.003304
0.0168	1036.164	42.576	78.543	56.171	-0.709	35.324	1972.589	-0.002980	-0.005498	-0.003932
0.0176	1133.923	49.483	89.056	64.593	-0.711	35.323	2158.699	-0.003464	-0.006234	-0.004521
0.0184	1217.121	55.445	97.821	71.693	-0.707	35.321	2317.085	-0.003881	-0.006848	-0.005019
0.0192	1283.095	60.308	104.688	76.973	-0.703	35.321	2442.684	-0.004222	-0.007328	-0.005388
0.0200	1331.096	64.241	109.931	81.184	-0.706	35.319	2534.065	-0.004497	-0.007695	-0.005683
0.0208	1362.370	66.894	113.551	84.102	-0.710	35.317	2593.603	-0.004683	-0.007949	-0.005887
0.0216	1380.434	68.576	115.931	85.924	-0.706	35.315	2627.993	-0.004800	-0.008115	-0.006015
0.0224	1389.376	69.661	117.418	87.007	-0.707	35.312	2645.016	-0.004876	-0.008219	-0.006090
0.0232	1393.028	70.202	118.339	87.646	-0.705	35.310	2651.968	-0.004914	-0.008284	-0.006135
0.0240	1394.065	70.454	118.668	87.674	-0.701	35.308	2653.942	-0.004932	-0.008307	-0.006137
0.0248	1393.945	70.662	118.875	87.591	-0.702	35.307	2653.713	-0.004946	-0.008321	-0.006131
0.0256	1393.374	70.815	119.231	87.702	-0.708	35.305	2652.626	-0.004957	-0.008346	-0.006139
0.0264	1392.081	70.872	119.438	87.787	-0.711	35.305	2650.166	-0.004961	-0.008361	-0.006145
0.0272	1389.677	71.052	119.701	87.925	-0.715	35.305	2645.588	-0.004974	-0.008379	-0.006155
0.0280	1385.514	71.023	119.783	88.273	-0.715	35.306	2637.663	-0.004972	-0.008385	-0.006179
0.0288	1378.361	70.647	119.426	88.148	-0.708	35.308	2624.044	-0.004945	-0.008360	-0.006170
0.0296	1366.203	70.063	118.778	87.632	-0.706	35.310	2600.899	-0.004904	-0.008314	-0.006134
0.0304	1343.840	68.617	117.415	86.575	-0.705	35.311	2558.327	-0.004803	-0.008219	-0.006060
0.0312	1303.850	66.045	114.499	83.824	-0.705	35.313	2482.195	-0.004623	-0.008015	-0.005868
0.0320	1240.745	62.016	109.325	79.169	-0.705	35.315	2362.061	-0.004341	-0.007653	-0.005542
0.0328	1153.686	56.291	101.647	72.931	-0.703	35.318	2196.321	-0.003940	-0.007115	-0.005105
0.0336	1047.976	49.537	91.616	64.802	-0.700	35.320	1995.077	-0.003468	-0.006413	-0.004536
0.0344	933.610	42.063	80.015	55.657	-0.698	35.323	1777.353	-0.002944	-0.005601	-0.003896
0.0352	821.062	34.629	68.250	46.709	-0.698	35.325	1563.091	-0.002424	-0.004777	-0.003270
0.0360	717.982	28.041	57.064	38.482	-0.703	35.325	1366.854	-0.001963	-0.003994	-0.002694
0.0368	629.044	22.079	47.006	31.075	-0.704	35.324	1197.538	-0.001546	-0.003290	-0.002175
0.0376	556.712	17.313	38.654	24.933	-0.708	35.323	1059.837	-0.001212	-0.002706	-0.001745
0.0384	500.641	13.574	31.760	20.194	-0.706	35.322	953.093	-0.000950	-0.002223	-0.001414
0.0392	458.832	10.488	26.255	16.122	-0.697	35.321	873.499	-0.000734	-0.001838	-0.001129
0.0400	428.355	8.237	22.223	13.134	-0.697	35.319	815.477	-0.000577	-0.001556	-0.000919
0.0408	405.587	6.472	18.962	11.092	-0.695	35.317	772.133	-0.000453	-0.001327	-0.000776
0.0416	387.402	5.096	16.390	9.257	-0.695	35.315	737.514	-0.000357	-0.001147	-0.000648
0.0424	371.277	3.957	14.119	7.438	-0.700	35.312	706.816	-0.000277	-0.000988	-0.000521
0.0432	355.798	2.818	11.917	5.756	-0.700	35.310	677.347	-0.000197	-0.000834	-0.000403
0.0440	340.318	1.775	9.729	4.019	-0.700	35.308	647.879	-0.000124	-0.000681	-0.000281
0.0448	325.200	0.720	7.403	2.434	-0.701	35.307	619.097	-0.000050	-0.000518	-0.000170
0.0456	311.689	-0.169	5.352	1.224	-0.707	35.306	593.376	0.000012	-0.000375	-0.000086
0.0464	301.004	-0.782	3.578	0.167	-0.712	35.305	573.034	0.000055	-0.000250	-0.000012
0.0472	294.301	-1.283	2.368	-0.598	-0.721	35.305	560.274	0.000090	-0.000166	0.000042
0.0480	292.182	-1.672	1.653	-1.014	-0.727	35.306	556.240	0.000117	-0.000116	0.000071
0.0488	294.587	-1.881	1.269	-1.263	-0.724	35.308	560.818	0.000132	-0.000089	0.000088
0.0496	302.206	-1.825	1.379	-0.832	-0.724	35.309	575.323	0.000128	-0.000097	0.000058
0.0504	317.986	-1.406	2.356	0.184	-0.722	35.311	605.364	0.000098	-0.000165	-0.000013
0.0512	348.133	0.053	4.901	2.185	-0.718	35.313	662.756	-0.000004	-0.000343	-0.000153
0.0520	398.403	2.818	9.799	6.117	-0.716	35.316	758.457	-0.000197	-0.000686	-0.000428
0.0528	470.750	6.931	17.394	11.551	-0.719	35.318	896.187	-0.000485	-0.001218	-0.000809
0.0536	563.160	12.252	27.287	18.832	-0.719	35.320	1072.111	-0.000858	-0.001910	-0.001318
0.0544	668.689	18.409	38.832	27.170	-0.714	35.323	1273.012	-0.001289	-0.002718	-0.001902
0.0552	779.584	25.261	50.982	35.951	-0.714	35.324	1484.127	-0.001768	-0.003569	-0.002517
0.0560	889.937	32.459	63.104	44.845	-0.712	35.324	1694.212	-0.002272	-0.004417	-0.003139
0.0568	994.400	39.589	74.443	53.237	-0.709	35.324	1893.082	-0.002771	-0.005211	-0.003727
0.0576	1088.973	46.328	84.709	61.352	-0.711	35.322	2073.126	-0.003243	-0.005930	-0.004295
0.0584	1170.563	52.179	93.420	68.093	-0.707	35.321	2228.451	-0.003653	-0.006539	-0.004767
0.0592	1237.169	57.043	100.492	73.763	-0.701	35.321	2355.251	-0.003993	-0.007034	-0.005163
0.0600	1288.761	61.171	106.174	78.072	-0.700	35.319	2453.470	-0.004282	-0.007432	-0.005465
0.0608	1326.422	64.394	110.425	81.032	-0.699	35.317	2525.167	-0.004508	-0.007730	-0.005672
0.0616	1352.331	66.687	113.644	83.297	-0.703	35.315	2574.492	-0.004668	-0.007955	-0.005831
0.0624	1369.569	68.244	115.819	85.076	-0.703	35.312	2607.307	-0.004777	-0.008107	-0.005955
0.0632	1380.810	69.370	117.388	86.397	-0.707	35.310	2628.708	-0.004856	-0.008217	-0.006048
0.0640	1388.249	70.105	118.544	87.259	-0.707	35.308	2642.870	-0.004907	-0.008298	-0.006108
0.0648	1393.509	70.717	119.232	87.869	-0.705	35.307	2652.884	-0.004950	-0.008346	-0.006151
0.0656	1397.206	71.383	119.976	88.369	-0.711	35.305	2659.922	-0.004997	-0.008398	-0.006186
0.0664	1399.010	71.772	120.582	88.924	-0.711	35.305	2663.355	-0.005024	-0.008441	-0.006225
0.0672	1398.724	72.036	120.829	89.327	-0.716	35.305	2662.811	-0.005043	-0.008458	-0.006253
0.0680	1395.914	72.036	120.994	89.689	-0.716	35.306	2657.461	-0.005043	-0.008470	-0.006278
0.0688	1389.857	71.744	120.842	89.495	-0.714	35.307	2645.931	-0.005022	-0.008459	-0.006265
0.0696	1379.247	71.453	120.305	88.912	-0.710	35.309	2625.732	-0.005002	-0.008421	-0.006224
0.0704	1359.395	70.453	119.204	87.814	-0.708	35.311	2587.938	-0.004932	-0.008344	-0.006147
0.0712	1322.350	68.298	116.659	85.313	-0.709	35.313	2517.414	-0.004781	-0.008166	-0.005972
0.0720	1261.455	64.478	111.636	81.061	-0.707	35.315	2401.485	-0.004513	-0.007815	-0.005674
0.0728	1174.981	58.627	103.903	74.668	-0.711	35.317	2236.862	-0.004104	-0.007273	-0.005227
0.0736	1067.348	51.555	93.775	66.595	-0.709	35.320	2031.956	-0.003609	-0.006564	-0.004662
0.0744	949.149	43.564	81.818	57.423	-0.708	35.322	1806.936	-0.003049	-0.005727	-0.004020
0.0752	831.717	35.794	69.627	47.903	-0.710	35.324	1583.376	-0.002506	-0.004874	-0.003353
0.0760	723.362	28.582	58.013	39.302	-0.716	35.324	1377.096	-0.002001	-0.004061	-0.002751
0.0768	629.435	22.188	47.364	31.477	-0.715	35.323	1198.282	-0.001553	-0.003315	-0.002203
0.0776	552.940	17.199	38.407	25.030	-0.717	35.322	1052.656	-0.001204	-0.002688	-0.001752
0.0784	493.864	13.059	31.046	19.875	-0.715	35.321	940.189	-0.000914	-0.002173	-0.001391
0.0792	450.266	10.001	25.322	15.829	-0.704	35.320	857.191	-0.000700	-0.001773	-0.001108
0.0800	418.992	7.569	20.931	12.744	-0.703	35.318	797.653	-0.000530	-0.001465	-0.000892
0.0808	395.803	5.805	17.834	10.354	-0.699	35.316	753.508	-0.000406	-0.001248	-0.000725
0.0816	377.348	4.458	15.357	8.617	-0.701	35.314	718.374	-0.000312	-0.001075	-0.000603
0.0824	361.012	3.138	12.935	6.909	-0.699	35.312	687.275	-0.000220	-0.000905	-0.000484
0.0832	345.338	2.166	10.817	5.171	-0.702	35.310	657.434	-0.000152	-0.000757	-0.000362
0.0840	329.603	1.012	8.533	3.447	-0.698	35.308	627.480	-0.000071	-0.000597	-0.000241
0.0848	314.154	-0.267	6.165	1.752	-0.690	35.306	598.068	0.000019	-0.000432	-0.000123
0.0856	300.132	-1.197	4.279	0.362	-0.693	35.305	571.375	0.000084	-0.000300	-0.000025
0.0864	288.891	-1.961	2.586	-0.624	-0.694	35.304	549.974	0.000137	-0.000181	0.000044
0.0872	281.753	-2.434	1.334	-1.443	-0.702	35.305	536.385	0.000170	-0.000093	0.000101
0.0880	279.468	-2.601	0.730	-1.791	-0.709	35.305	532.036	0.000182	-0.000051	0.000125
0.0888	282.173	-2.643	0.483	-1.971	-0.712	35.307	537.186	0.000185	-0.000034	0.000138
0.0896	290.409	-2.450	0.690	-1.901	-0.710	35.309	552.864	0.000171	-0.000048	0.000133
0.0904	307.556	-1.866	1.776	-0.789	-0.708	35.311	585.508	0.000131	-0.000124	0.000055
0.0912	339.702	-0.240	4.597	1.489	-0.706	35.313	646.706	0.000017	-0.000322	-0.000104
0.0920	392.362	2.622	9.675	5.422	-0.702	35.315	746.956	-0.000184	-0.000677	-0.000380
0.0928	467.308	6.763	17.600	11.272	-0.704	35.317	889.635	-0.000473	-0.001232	-0.000789
0.0936	562.093	12.351	27.962	18.874	-0.706	35.320	1070.080	-0.000865	-0.001957	-0.001321
0.0944	670.027	18.883	39.699	27.227	-0.703	35.322	1275.558	-0.001322	-0.002779	-0.001906
0.0952	783.822	25.957	52.193	36.246	-0.706	35.324	1492.195	-0.001817	-0.003654	-0.002537
0.0960	898.038	33.586	64.769	45.542	-0.710	35.324	1709.633	-0.002351	-0.004534	-0.003188
0.0968	1007.790	41.145	76.437	54.254	-0.710	35.323	1918.573	-0.002880	-0.005351	-0.003798
0.0976	1108.886	48.260	87.266	62.828	-0.712	35.322	2111.034	-0.003378	-0.006109	-0.004398
0.0984	1197.584	54.749	96.636	70.415	-0.710	35.321	2279.892	-0.003832	-0.006765	-0.004929
0.0992	1270.983	60.099	104.219	76.488	-0.699	35.320	2419.624	-0.004207	-0.007295	-0.005354
0.1000	1327.519	64.365	110.343	81.325	-0.695	35.319	2527.256	-0.004506	-0.007724	-0.005693
0.1008	1367.209	67.616	114.815	84.715	-0.694	35.317	2602.816	-0.004733	-0.008037	-0.005930
0.1016	1392.142	69.728	117.801	86.911	-0.695	35.315	2650.280	-0.004881	-0.008246	-0.006084
0.1024	1405.577	71.090	119.549	88.495	-0.697	35.312	2675.858	-0.004976	-0.008368	-0.006195
0.1032	1411.122	71.939	120.540	89.398	-0.702	35.310	2686.415	-0.005036	-0.008438	-0.006258
0.1040	1412.009	72.105	120.967	89.688	-0.704	35.308	2688.103	-0.005047	-0.008468	-0.006278
0.1048	1410.371	72.218	121.215	89.547	-0.703	35.307	2684.984	-0.005055	-0.008485	-0.006268
0.1056	1407.636	72.524	121.613	89.589	-0.712	35.305	2679.777	-0.005077	-0.008513	-0.006271
0.1064	1403.849	72.470	121.654	89.491	-0.711	35.305	2672.567	-0.005073	-0.008516	-0.006264
0.1072	1398.739	72.499	121.530	89.228	-0.714	35.305	2662.840	-0.005075	-0.008507	-0.006246
0.1080	1391.781	72.401	121.366	89.382	-0.714	35.306	2649.593	-0.005068	-0.008496	-0.006257
0.1088	1381.306	71.664	120.733	88.896	-0.703	35.307	2629.652	-0.005017	-0.008451	-0.006223
0.1096	1364.114	70.663	119.867	88.091	-0.702	35.309	2596.922	-0.004946	-0.008391	-0.006166
0.1104	1334.177	68.911	117.941	86.479	-0.696	35.310	2539.930	-0.004824	-0.008256	-0.006054
0.1112	1285.245	65.798	114.322	83.171	-0.698	35.313	2446.775	-0.004606	-0.008003	-0.005822
0.1120	1214.731	61.142	108.156	77.959	-0.702	35.315	2312.536	-0.004280	-0.007571	-0.005457
0.1128	1124.576	55.082	99.804	71.108	-0.701	35.317	2140.903	-0.003856	-0.006986	-0.004978
0.1136	1021.556	48.273	89.800	63.340	-0.701	35.320	1944.780	-0.003379	-0.006286	-0.004434
0.1144	914.358	41.061	78.613	54.670	-0.694	35.322	1740.704	-0.002874	-0.005503	-0.003827
0.1152	810.497	34.308	67.826	46.236	-0.692	35.323	1542.978	-0.002402	-0.004748	-0.003237
0.1160	715.743	28.263	57.629	38.704	-0.699	35.324	1362.591	-0.001978	-0.004034	-0.002709
0.1168	633.943	22.760	48.258	31.771	-0.700	35.324	1206.865	-0.001593	-0.003378	-0.002224
0.1176	567.352	18.216	40.455	26.268	-0.705	35.322	1080.093	-0.001275	-0.002832	-0.001839
0.1184	515.414	14.491	34.042	21.792	-0.702	35.321	981.216	-0.001014	-0.002383	-0.001525
0.1192	476.160	11.488	28.882	18.124	-0.696	35.320	906.487	-0.000804	-0.002022	-0.001269
0.1200	446.329	9.320	25.070	15.274	-0.696	35.319	849.695	-0.000652	-0.001755	-0.001069
0.1208	422.358	7.695	21.893	12.813	-0.698	35.317	804.062	-0.000539	-0.001532	-0.000897
0.1216	401.319	6.334	19.045	10.701	-0.704	35.315	764.008	-0.000443	-0.001333	-0.000749
0.1224	381.166	4.986	16.444	8.728	-0.701	35.312	725.641	-0.000349	-0.001151	-0.000611
0.1232	361.178	3.680	13.665	6.757	-0.706	35.310	687.590	-0.000258	-0.000957	-0.000473
0.1240	341.430	2.360	10.912	4.811	-0.700	35.308	649.996	-0.000165	-0.000764	-0.000337
0.1248	323.036	1.123	8.216	2.921	-0.699	35.307	614.977	-0.000079	-0.000575	-0.000204
0.1256	307.421	0.263	5.959	1.308	-0.706	35.305	585.251	-0.000018	-0.000417	-0.000092
0.1264	295.849	-0.639	4.130	0.057	-0.706	35.304	563.221	0.000045	-0.000289	-0.000004
0.1272	289.117	-1.169	2.767	-0.582	-0.714	35.305	550.404	0.000082	-0.000194	0.000041
0.1280	287.689	-1.516	2.162	-0.817	-0.712	35.305	547.686	0.000106	-0.000151	0.000057
0.1288	291.296	-1.642	1.750	-1.039	-0.712	35.307	554.552	0.000115	-0.000122	0.000073
0.1296	300.989	-1.391	2.094	-0.540	-0.711	35.309	573.006	0.000097	-0.000147	0.000038
0.1304	320.902	-0.584	3.594	0.724	-0.712	35.311	610.914	0.000041	-0.000252	-0.000051
0.1312	357.135	1.264	6.827	3.351	-0.718	35.312	679.893	-0.000088	-0.000478	-0.000235
0.1320	414.273	4.321	12.579	7.714	-0.713	35.315	788.670	-0.000302	-0.000881	-0.000540
0.1328	492.917	8.879	20.957	13.758	-0.713	35.317	938.387	-0.000622	-0.001467	-0.000963
0.1336	589.249	14.479	31.387	21.194	-0.712	35.320	1121.778	-0.001014	-0.002197	-0.001484
0.1344	696.071	20.857	43.000	29.447	-0.704	35.323	1325.140	-0.001460	-0.003010	-0.002061
0.1352	806.710	27.693	55.164	38.327	-0.707	35.324	1535.769	-0.001939	-0.003861	-0.002683
0.1360	916.357	34.807	67.220	47.180	-0.712	35.324	1744.509	-0.002437	-0.004705	-0.003303
0.1368	1020.459	41.881	78.434	55.602	-0.712	35.324	1942.692	-0.002932	-0.005490	-0.003892
0.1376	1115.198	48.663	88.534	63.830	-0.716	35.322	2123.051	-0.003406	-0.006197	-0.004468
0.1384	1197.343	54.624	97.093	70.749	-0.712	35.321	2279.434	-0.003824	-0.006796	-0.004952
0.1392	1264.595	59.669	104.109	76.266	-0.702	35.320	2407.465	-0.004177	-0.007288	-0.005339
0.1400	1316.474	63.699	109.819	80.685	-0.696	35.319	2506.227	-0.004459	-0.007687	-0.005648
0.1408	1353.804	66.700	114.042	83.714	-0.692	35.317	2577.295	-0.004669	-0.007983	-0.005860
0.1416	1379.082	68.965	117.138	86.091	-0.689	35.314	2625.418	-0.004828	-0.008200	-0.006026
0.1424	1395.418	70.396	119.300	87.966	-0.690	35.312	2656.517	-0.004928	-0.008351	-0.006158
0.1432	1405.607	71.496	120.689	89.133	-0.689	35.310	2675.915	-0.005005	-0.008448	-0.006239
0.1440	1412.144	72.094	121.777	89.840	-0.690	35.308	2688.360	-0.005047	-0.008524	-0.006289
0.1448	1416.488	72.552	122.574	90.173	-0.689	35.307	2696.629	-0.005079	-0.008580	-0.006312
0.1456	1419.388	73.301	123.180	90.786	-0.696	35.305	2702.150	-0.005131	-0.008623	-0.006355
0.1464	1420.605	73.800	123.772	91.259	-0.699	35.305	2704.468	-0.005166	-0.008664	-0.006388
0.1472	1419.839	74.174	124.088	91.580	-0.705	35.305	2703.009	-0.005192	-0.008686	-0.006411
0.1480	1416.488	74.327	124.184	91.802	-0.706	35.306	2696.629	-0.005203	-0.008693	-0.006426
0.1488	1409.590	74.007	123.950	91.204	-0.701	35.307	2683.496	-0.005180	-0.008676	-0.006384
0.1496	1397.432	73.257	123.359	90.481	-0.698	35.309	2660.351	-0.005128	-0.008635	-0.006334
0.1504	1374.859	71.979	122.079	89.231	-0.693	35.311	2617.378	-0.005039	-0.008546	-0.006246
0.1512	1334.117	69.506	119.162	86.730	-0.694	35.312	2539.816	-0.004865	-0.008341	-0.006071
0.1520	1269.405	65.213	113.989	82.450	-0.694	35.314	2416.620	-0.004565	-0.007979	-0.005772
0.1528	1180.346	59.433	105.980	76.141	-0.694	35.317	2247.076	-0.004160	-0.007419	-0.005330
0.1536	1072.382	52.332	95.716	67.996	-0.692	35.319	2041.540	-0.003663	-0.006700	-0.004760
0.1544	956.092	44.495	83.938	58.629	-0.690	35.322	1820.154	-0.003115	-0.005876	-0.004104
0.1552	841.967	36.963	71.910	49.359	-0.688	35.324	1602.888	-0.002587	-0.005034	-0.003455
0.1560	737.053	30.069	60.655	40.912	-0.698	35.324	1403.160	-0.002105	-0.004246	-0.002864
0.1568	645.951	24.037	50.377	33.310	-0.698	35.324	1229.725	-0.001683	-0.003526	-0.002332
0.1576	571.185	19.074	41.736	27.044	-0.702	35.322	1087.389	-0.001335	-0.002922	-0.001893
0.1584	512.634	14.934	34.457	21.917	-0.703	35.321	975.924	-0.001045	-0.002412	-0.001534
0.1592	468.330	11.724	28.719	17.775	-0.689	35.320	891.581	-0.000821	-0.002010	-0.001244
0.1600	435.268	9.251	24.260	14.732	-0.692	35.319	828.638	-0.000648	-0.001698	-0.001031
0.1608	409.599	7.363	20.641	12.356	-0.690	35.317	779.772	-0.000515	-0.001445	-0.000865
0.1616	388.049	5.987	17.779	10.285	-0.693	35.315	738.745	-0.000419	-0.001245	-0.000720
0.1624	368.557	4.528	15.000	8.244	-0.695	35.313	701.637	-0.000317	-0.001050	-0.000577
0.1632	349.861	3.166	12.345	6.258	-0.694	35.310	666.046	-0.000222	-0.000864	-0.000438
0.1640	331.842	1.860	9.758	4.381	-0.692	35.308	631.742	-0.000130	-0.000683	-0.000307
0.1648	315.251	0.484	7.199	2.476	-0.688	35.307	600.157	-0.000034	-0.000504	-0.000173
0.1656	301.365	-0.462	5.244	0.933	-0.696	35.305	573.721	0.000032	-0.000367	-0.000065
0.1664	291.446	-1.267	3.744	-0.095	-0.702	35.305	554.838	0.000089	-0.000262	0.000007
0.1672	286.156	-1.754	2.863	-0.774	-0.707	35.305	544.767	0.000123	-0.000200	0.000054
0.1680	285.780	-1.865	2.326	-0.940	-0.714	35.306	544.052	0.000131	-0.000163	0.000066
0.1688	289.958	-1.851	2.160	-0.844	-0.711	35.308	552.006	0.000130	-0.000151	0.000059
0.1696	299.486	-1.448	2.545	-0.427	-0.704	35.310	570.145	0.000101	-0.000178	0.000030
0.1704	317.941	-0.669	3.866	0.585	-0.705	35.311	605.278	0.000047	-0.000271	-0.000041
0.1712	351.019	1.026	6.878	2.920	-0.700	35.313	668.249	-0.000072	-0.000481	-0.000204
0.1720	402.852	3.793	11.943	6.978	-0.702	35.315	766.926	-0.000265	-0.000836	-0.000488
0.1728	474.342	7.725	19.552	12.439	-0.700	35.317	903.025	-0.000541	-0.001369	-0.000871
0.1736	562.619	12.950	29.157	19.387	-0.698	35.320	1071.081	-0.000906	-0.002041	-0.001357
0.1744	661.716	18.786	40.070	27.294	-0.697	35.323	1259.737	-0.001315	-0.002805	-0.001911
0.1752	766.389	25.317	51.670	35.382	-0.695	35.324	1459.007	-0.001772	-0.003617	-0.002477
0.1760	872.279	32.404	63.298	44.109	-0.706	35.324	1660.595	-0.002268	-0.004431	-0.003088
0.1768	975.193	39.270	74.278	52.419	-0.710	35.324	1856.518	-0.002749	-0.005199	-0.003669
0.1776	1071.450	46.080	84.544	60.395	-0.709	35.323	2039.766	-0.003226	-0.005918	-0.004228
0.1784	1157.638	52.236	93.584	67.704	-0.710	35.321	2203.846	-0.003657	-0.006551	-0.004739
0.1792	1231.067	57.476	101.248	73.653	-0.702	35.321	2343.636	-0.004023	-0.007087	-0.005156
0.1800	1290.324	62.019	107.619	78.711	-0.697	35.319	2456.446	-0.004341	-0.007533	-0.005510
0.1808	1334.943	65.645	112.503	82.465	-0.699	35.317	2541.389	-0.004595	-0.007875	-0.005773
0.1816	1366.293	68.258	116.163	85.132	-0.697	35.314	2601.070	-0.004778	-0.008131	-0.005959
0.1824	1386.852	70.077	118.600	87.188	-0.696	35.312	2640.209	-0.004905	-0.008302	-0.006103
0.1832	1399.656	71.342	120.251	88.619	-0.699	35.310	2664.585	-0.004994	-0.008418	-0.006203
0.1840	1407.471	72.121	121.421	89.479	-0.695	35.308	2679.462	-0.005048	-0.008500	-0.006264
0.1848	1411.949	72.705	122.015	89.925	-0.695	35.307	2687.988	-0.005089	-0.008541	-0.006295
0.1856	1414.203	73.260	122.675	90.342	-0.702	35.305	2692.280	-0.005128	-0.008587	-0.006324
0.1864	1414.143	73.510	123.128	90.731	-0.705	35.305	2692.165	-0.005146	-0.008619	-0.006351
0.1872	1411.859	73.594	123.237	90.996	-0.709	35.305	2687.817	-0.005152	-0.008627	-0.006370
0.1880	1407.065	73.454	123.263	91.245	-0.708	35.305	2678.690	-0.005142	-0.008628	-0.006387
0.1888	1398.739	73.024	122.850	90.855	-0.704	35.307	2662.840	-0.005112	-0.008600	-0.006360
0.1896	1384.627	72.357	122.081	89.981	-0.700	35.309	2635.975	-0.005065	-0.008546	-0.006299
0.1904	1358.989	70.925	120.512	88.410	-0.699	35.310	2587.166	-0.004965	-0.008436	-0.006189
0.1912	1314.760	68.327	117.333	85.478	-0.700	35.312	2502.966	-0.004783	-0.008213	-0.005983
0.1920	1247.839	63.977	111.692	80.782	-0.702	35.314	2375.565	-0.004478	-0.007818	-0.005655
0.1928	1158.871	58.029	103.767	74.319	-0.705	35.317	2206.192	-0.004062	-0.007264	-0.005202
0.1936	1054.032	51.108	93.859	66.274	-0.708	35.319	2006.607	-0.003578	-0.006570	-0.004639
0.1944	943.033	43.549	82.644	57.407	-0.707	35.322	1795.292	-0.003048	-0.005785	-0.004018
0.1952	834.768	36.309	71.388	48.569	-0.704	35.323	1589.184	-0.002542	-0.004997	-0.003400
0.1960	735.520	29.833	60.737	40.718	-0.709	35.323	1400.242	-0.002088	-0.004252	-0.002850
0.1968	649.468	23.899	50.953	33.687	-0.708	35.323	1236.420	-0.001673	-0.003567	-0.002358
0.1976	578.879	19.105	42.656	27.809	-0.713	35.322	1102.037	-0.001337	-0.002986	-0.001947
0.1984	523.545	15.339	35.983	23.098	-0.714	35.321	996.695	-0.001074	-0.002519	-0.001617
0.1992	481.841	12.282	30.479	19.124	-0.704	35.320	917.301	-0.000860	-0.002134	-0.001339
0.2000	450.642	10.072	26.407	16.093	-0.701	35.319	857.906	-0.000705	-0.001848	-0.001127
0.2008	426.070	8.307	23.324	13.703	-0.698	35.317	811.129	-0.000582	-0.001633	-0.000959
0.2016	404.670	6.849	20.476	11.758	-0.695	35.314	770.388	-0.000479	-0.001433	-0.000823
0.2024	383.826	5.486	17.834	9.604	-0.694	35.312	730.705	-0.000384	-0.001248	-0.000672
0.2032	362.155	4.056	14.848	7.508	-0.695	35.310	689.449	-0.000284	-0.001039	-0.000526
0.2040	340.168	2.778	11.684	5.340	-0.692	35.308	647.593	-0.000194	-0.000818	-0.000374
0.2048	319.248	1.331	8.546	3.226	-0.690	35.307	607.767	-0.000093	-0.000598	-0.000226
0.2056	301.485	0.066	6.028	1.600	-0.693	35.305	573.950	-0.000005	-0.000422	-0.000112
0.2064	288.921	-0.782	4.171	0.334	-0.693	35.305	550.032	0.000055	-0.000292	-0.000023
0.2072	282.083	-1.366	2.890	-0.486	-0.696	35.305	537.014	0.000096	-0.000202	0.000034
0.2080	281.121	-1.574	2.353	-0.874	-0.700	35.305	535.183	0.000110	-0.000165	0.000061
0.2088	285.465	-1.587	1.995	-1.012	-0.698	35.307	543.451	0.000111	-0.000140	0.000071
0.2096	295.789	-1.267	2.477	-0.526	-0.696	35.309	563.107	0.000089	-0.000173	0.000037
0.2104	316.453	-0.489	4.005	0.822	-0.696	35.311	602.446	0.000034	-0.000280	-0.000058
0.2112	353.453	1.178	7.279	3.559	-0.695	35.313	672.884	-0.000082	-0.000510	-0.000249
0.2120	411.207	4.361	13.127	8.034	-0.692	35.315	782.833	-0.000305	-0.000919	-0.000562
0.2128	490.617	8.892	21.493	14.204	-0.695	35.318	934.010	-0.000622	-0.001505	-0.000994
0.2136	587.941	14.590	32.101	21.861	-0.692	35.321	1119.289	-0.001021	-0.002247	-0.001530
0.2144	696.341	21.259	43.866	30.101	-0.689	35.323	1325.655	-0.001488	-0.003071	-0.002107
0.2152	809.190	28.249	56.058	38.841	-0.688	35.325	1540.489	-0.001977	-0.003924	-0.002719
0.2160	921.196	35.627	68.208	47.860	-0.690	35.325	1753.721	-0.002494	-0.004775	-0.003350
0.2168	1027.372	42.937	79.520	56.447	-0.695	35.324	1955.853	-0.003006	-0.005566	-0.003951
0.2176	1123.719	49.676	89.896	64.520	-0.699	35.323	2139.273	-0.003477	-0.006293	-0.004516
0.2184	1207.172	55.873	98.853	71.706	-0.699	35.322	2298.145	-0.003911	-0.006920	-0.005019
0.2192	1275.641	60.821	106.022	77.404	-0.695	35.321	2428.494	-0.004257	-0.007422	-0.005418
0.2200	1328.556	64.837	111.870	81.963	-0.694	35.319	2529.230	-0.004539	-0.007831	-0.005737
0.2208	1366.834	68.062	116.080	85.437	-0.693	35.317	2602.100	-0.004764	-0.008126	-0.005981
0.2216	1392.698	70.231	119.012	87.758	-0.692	35.315	2651.339	-0.004916	-0.008331	-0.006143
0.2224	1408.733	71.884	121.035	89.161	-0.691	35.312	2681.866	-0.005032	-0.008472	-0.006241
0.2232	1417.765	72.982	122.411	90.342	-0.688	35.310	2699.060	-0.005109	-0.008569	-0.006324
0.2240	1422.093	73.496	123.375	91.025	-0.686	35.308	2707.300	-0.005145	-0.008636	-0.006372
0.2248	1423.341	73.870	123.924	91.247	-0.684	35.307	2709.675	-0.005171	-0.008675	-0.006387
0.2256	1422.649	74.106	124.391	91.664	-0.685	35.305	2708.359	-0.005187	-0.008707	-0.006416
0.2264	1420.185	74.410	124.500	91.775	-0.692	35.305	2703.667	-0.005209	-0.008715	-0.006424
0.2272	1415.691	74.493	124.458	91.663	-0.695	35.305	2695.112	-0.005215	-0.008712	-0.006416
0.2280	1408.568	74.327	124.458	91.566	-0.698	35.305	2681.551	-0.005203	-0.008712	-0.006410
0.2288	1397.371	73.814	123.921	91.023	-0.695	35.307	2660.236	-0.005167	-0.008675	-0.006372
0.2296	1378.496	72.704	122.904	89.911	-0.688	35.309	2624.302	-0.005089	-0.008603	-0.006294
0.2304	1345.433	70.786	120.799	87.855	-0.692	35.311	2561.359	-0.004955	-0.008456	-0.006150
0.2312	1292.638	67.395	116.451	84.366	-0.691	35.313	2460.852	-0.004718	-0.008152	-0.005906
0.2320	1218.248	62.475	110.012	79.169	-0.695	35.315	2319.231	-0.004373	-0.007701	-0.005542
0.2328	1125.402	56.165	101.454	72.234	-0.694	35.318	2142.477	-0.003932	-0.007102	-0.005056
0.2336	1022.142	49.093	91.285	64.438	-0.691	35.320	1945.896	-0.003437	-0.006390	-0.004511
0.2344	916.703	41.964	80.552	55.919	-0.690	35.323	1745.167	-0.002937	-0.005639	-0.003914
0.2352	815.787	35.266	69.806	47.761	-0.687	35.324	1553.049	-0.002469	-0.004886	-0.003343
0.2360	724.084	29.429	59.760	40.383	-0.695	35.325	1378.469	-0.002060	-0.004183	-0.002827
0.2368	644.433	24.288	50.747	33.561	-0.694	35.324	1226.835	-0.001700	-0.003552	-0.002349
0.2376	578.519	19.897	43.138	28.045	-0.701	35.323	1101.351	-0.001393	-0.003020	-0.001963
0.2384	525.784	16.313	36.711	23.488	-0.699	35.321	1000.957	-0.001142	-0.002570	-0.001644
0.2392	484.290	13.117	31.317	19.486	-0.692	35.321	921.965	-0.000918	-0.002192	-0.001364
0.2400	451.243	10.699	26.997	16.470	-0.690	35.319	859.051	-0.000749	-0.001890	-0.001153
0.2408	423.365	8.671	23.145	13.872	-0.688	35.317	805.979	-0.000607	-0.001620	-0.000971
0.2416	398.238	6.906	19.746	11.356	-0.688	35.315	758.142	-0.000483	-0.001382	-0.000795
0.2424	374.403	5.238	16.485	9.132	-0.689	35.313	712.767	-0.000367	-0.001154	-0.000639
0.2432	351.364	3.515	13.168	6.798	-0.692	35.310	668.907	-0.000246	-0.000922	-0.000476
0.2440	329.618	2.000	10.265	4.644	-0.690	35.308	627.508	-0.000140	-0.000719	-0.000325
0.2448	310.322	0.553	7.540	2.573	-0.687	35.307	590.773	-0.000039	-0.000528	-0.000180
0.2456	295.113	-0.474	5.325	1.030	-0.692	35.305	561.819	0.000033	-0.000373	-0.000072
0.2464	284.879	-1.155	3.757	-0.095	-0.699	35.305	542.336	0.000081	-0.000263	0.000007
0.2472	280.235	-1.600	2.683	-0.679	-0.704	35.305	533.495	0.000112	-0.000188	0.000048
0.2480	281.212	-1.795	2.340	-0.804	-0.712	35.306	535.355	0.000126	-0.000164	0.000056
0.2488	287.388	-1.780	2.285	-0.845	-0.707	35.308	547.113	0.000125	-0.000160	0.000059
0.2496	300.643	-1.377	2.986	0.016	-0.702	35.309	572.348	0.000096	-0.000209	-0.000001
0.2504	326.056	-0.154	4.899	1.684	-0.703	35.311	620.728	0.000011	-0.000343	-0.000118
0.2512	368.797	2.097	8.779	4.838	-0.702	35.313	702.095	-0.000147	-0.000615	-0.000339
0.2520	431.691	5.598	15.369	9.882	-0.707	35.315	821.829	-0.000392	-0.001076	-0.000692
0.2528	513.987	10.266	24.273	16.220	-0.708	35.317	978.498	-0.000719	-0.001699	-0.001135
0.2536	610.274	15.922	34.979	23.585	-0.707	35.320	1161.804	-0.001115	-0.002448	-0.001651
0.2544	713.774	22.022	46.482	31.575	-0.706	35.323	1358.843	-0.001542	-0.003254	-0.002210
0.2552	818.868	28.637	58.055	40.025	-0.702	35.324	1558.914	-0.002005	-0.004064	-0.002802
0.2560	920.956	35.558	69.269	48.404	-0.706	35.324	1753.263	-0.002489	-0.004849	-0.003388
0.2568	1016.011	42.130	79.492	56.256	-0.705	35.324	1934.223	-0.002949	-0.005564	-0.003938
0.2576	1100.921	48.482	88.561	63.384	-0.700	35.323	2095.871	-0.003394	-0.006199	-0.004437
0.2584	1173.313	53.929	96.211	69.359	-0.699	35.321	2233.686	-0.003775	-0.006735	-0.004855
0.2592	1231.819	58.292	102.417	74.292	-0.688	35.321	2345.066	-0.004080	-0.007169	-0.005200
0.2600	1276.768	61.795	107.329	78.100	-0.688	35.319	2430.639	-0.004326	-0.007513	-0.005467
0.2608	1309.921	64.436	111.100	81.157	-0.689	35.317	2493.753	-0.004511	-0.007777	-0.005681
0.2616	1334.132	66.505	114.017	83.187	-0.688	35.315	2539.845	-0.004655	-0.007981	-0.005823
0.2624	1352.361	68.048	116.122	84.576	-0.691	35.312	2574.549	-0.004763	-0.008129	-0.005920
0.2632	1367.104	69.424	117.869	86.118	-0.692	35.310	2602.615	-0.004860	-0.008251	-0.006028
0.2640	1379.848	70.508	119.355	87.229	-0.691	35.308	2626.877	-0.004936	-0.008355	-0.006106
0.2648	1390.879	71.329	120.594	88.312	-0.691	35.307	2647.877	-0.004993	-0.008442	-0.006182
0.2656	1400.287	72.344	121.983	89.423	-0.697	35.305	2665.787	-0.005064	-0.008539	-0.006260
0.2664	1406.809	73.177	123.085	90.230	-0.700	35.304	2678.204	-0.005122	-0.008616	-0.006316
0.2672	1409.590	73.815	123.621	90.953	-0.700	35.305	2683.496	-0.005167	-0.008653	-0.006367
0.2680	1408.387	74.162	123.853	91.217	-0.703	35.305	2681.208	-0.005191	-0.008670	-0.006385
0.2688	1402.226	73.968	123.620	91.162	-0.692	35.307	2669.477	-0.005178	-0.008653	-0.006381
0.2696	1390.053	73.064	122.960	90.592	-0.686	35.309	2646.303	-0.005114	-0.008607	-0.006341
0.2704	1367.074	71.646	121.681	89.092	-0.686	35.310	2602.558	-0.005015	-0.008518	-0.006236
0.2712	1325.641	69.034	118.778	86.590	-0.682	35.312	2523.680	-0.004832	-0.008314	-0.006061
0.2720	1260.583	64.823	113.425	82.200	-0.684	35.315	2399.826	-0.004538	-0.007940	-0.005754
0.2728	1171.900	59.141	105.512	75.682	-0.683	35.317	2230.997	-0.004140	-0.007386	-0.005298
0.2736	1065.664	52.151	95.522	67.593	-0.684	35.320	2028.751	-0.003651	-0.006687	-0.004732
0.2744	952.786	44.619	84.198	58.562	-0.679	35.322	1813.860	-0.003123	-0.005894	-0.004099
0.2752	843.590	37.393	72.737	49.694	-0.683	35.324	1605.978	-0.002617	-0.005092	-0.003479
0.2760	744.883	31.028	62.225	41.871	-0.692	35.324	1418.066	-0.002172	-0.004356	-0.002931
0.2768	661.070	25.400	52.854	34.994	-0.692	35.324	1258.507	-0.001778	-0.003700	-0.002450
0.2776	593.908	20.689	45.080	29.434	-0.698	35.322	1130.648	-0.001448	-0.003156	-0.002060
0.2784	542.646	16.979	38.957	24.960	-0.698	35.321	1033.058	-0.001189	-0.002727	-0.001747
0.2792	504.639	13.977	34.031	21.555	-0.694	35.321	960.703	-0.000978	-0.002382	-0.001509
0.2800	475.995	11.795	30.137	18.886	-0.696	35.319	906.172	-0.000826	-0.002110	-0.001322
0.2808	452.355	10.211	26.944	16.636	-0.698	35.317	861.168	-0.000715	-0.001886	-0.001164
0.2816	430.338	8.765	24.123	14.495	-0.698	35.315	819.254	-0.000614	-0.001689	-0.001015
0.2824	407.766	7.362	21.288	12.327	-0.695	35.313	776.281	-0.000515	-0.001490	-0.000863
0.2832	383.856	5.805	18.357	10.007	-0.694	35.310	730.762	-0.000406	-0.001285	-0.000700
0.2840	359.389	4.207	15.110	7.700	-0.690	35.308	684.185	-0.000295	-0.001058	-0.000539
0.2848	335.960	2.638	11.739	5.366	-0.689	35.307	639.582	-0.000185	-0.000822	-0.000376
0.2856	315.612	1.402	8.821	3.281	-0.694	35.305	600.843	-0.000098	-0.000617	-0.000230
0.2864	300.192	0.472	6.495	1.876	-0.701	35.305	571.489	-0.000033	-0.000455	-0.000131
0.2872	290.755	-0.265	4.886	0.737	-0.704	35.305	553.522	0.000019	-0.000342	-0.000052
0.2880	287.478	-0.599	4.074	0.360	-0.707	35.306	547.285	0.000042	-0.000285	-0.000025
0.2888	290.063	-0.779	3.799	0.222	-0.707	35.307	552.206	0.000055	-0.000266	-0.000016
0.2896	298.825	-0.724	3.965	0.376	-0.700	35.309	568.886	0.000051	-0.000278	-0.000026
0.2904	317.610	0.208	5.299	1.557	-0.702	35.311	604.649	-0.000015	-0.000371	-0.000109
0.2912	352.551	1.930	8.258	3.892	-0.703	35.312	671.167	-0.000135	-0.000578	-0.000272
0.2920	408.322	4.877	13.679	8.019	-0.699	35.315	777.340	-0.000341	-0.000958	-0.000561
0.2928	485.929	9.267	21.921	14.147	-0.701	35.317	925.083	-0.000649	-0.001534	-0.000990
0.2936	581.675	14.756	32.255	21.636	-0.699	35.320	1107.359	-0.001033	-0.002258	-0.001515
0.2944	688.466	21.066	43.936	29.905	-0.696	35.322	1310.663	-0.001475	-0.003076	-0.002093
0.2952	799.211	28.028	55.976	38.688	-0.695	35.324	1521.492	-0.001962	-0.003918	-0.002708
0.2960	908.618	35.311	67.921	47.665	-0.699	35.324	1729.774	-0.002472	-0.004754	-0.003337
0.2968	1011.652	42.203	79.054	56.032	-0.700	35.324	1925.926	-0.002954	-0.005534	-0.003922
0.2976	1104.182	48.775	88.947	63.827	-0.702	35.323	2102.079	-0.003414	-0.006226	-0.004468
0.2984	1183.141	54.625	97.354	70.471	-0.702	35.321	2252.398	-0.003824	-0.006815	-0.004933
0.2992	1246.546	59.363	103.847	75.502	-0.696	35.321	2373.104	-0.004155	-0.007269	-0.005285
0.3000	1294.156	63.102	108.842	79.685	-0.694	35.319	2463.741	-0.004417	-0.007619	-0.005578
0.3008	1327.204	65.950	112.586	82.660	-0.691	35.317	2526.655	-0.004616	-0.007881	-0.005786
0.3016	1348.364	67.715	115.200	84.605	-0.693	35.315	2566.938	-0.004740	-0.008064	-0.005922
0.3024	1360.988	68.785	117.003	85.868	-0.694	35.312	2590.971	-0.004815	-0.008190	-0.006011
0.3032	1368.276	69.715	118.268	86.591	-0.698	35.310	2604.847	-0.004880	-0.008279	-0.006061
0.3040	1372.499	70.147	119.122	86.993	-0.698	35.308	2612.886	-0.004910	-0.008339	-0.006090
0.3048	1375.024	70.592	119.535	87.258	-0.699	35.307	2617.693	-0.004941	-0.008367	-0.006108
0.3056	1376.407	71.023	119.975	87.745	-0.703	35.305	2620.325	-0.004972	-0.008398	-0.006142
0.3064	1376.272	71.302	120.361	88.133	-0.705	35.305	2620.068	-0.004991	-0.008425	-0.006169
0.3072	1374.423	71.523	120.498	88.287	-0.707	35.305	2616.549	-0.005007	-0.008435	-0.006180
0.3080	1370.516	71.522	120.663	88.259	-0.707	35.305	2609.110	-0.005007	-0.008446	-0.006178
0.3088	1363.512	71.285	120.498	88.051	-0.702	35.307	2595.778	-0.004990	-0.008435	-0.006164
0.3096	1351.865	70.729	119.906	87.523	-0.698	35.309	2573.605	-0.004951	-0.008393	-0.006127
0.3104	1330.811	69.549	118.737	86.507	-0.699	35.310	2533.522	-0.004868	-0.008312	-0.006055
0.3112	1293.014	67.200	116.039	84.381	-0.696	35.312	2461.567	-0.004704	-0.008123	-0.005907
0.3120	1233.246	63.407	111.072	80.295	-0.701	35.315	2347.784	-0.004438	-0.007775	-0.005621
0.3128	1150.560	57.917	103.779	74.056	-0.699	35.317	2190.371	-0.004054	-0.007265	-0.005184
0.3136	1049.614	51.205	94.230	66.275	-0.698	35.320	1998.196	-0.003584	-0.006596	-0.004639
0.3144	939.832	43.771	83.030	57.603	-0.696	35.322	1789.198	-0.003064	-0.005812	-0.004032
0.3152	830.951	36.475	71.678	48.778	-0.692	35.324	1581.917	-0.002553	-0.005017	-0.003414
0.3160	730.140	29.973	60.834	40.856	-0.703	35.324	1389.999	-0.002098	-0.004258	-0.002860
0.3168	642.314	24.275	50.969	33.769	-0.700	35.324	1222.801	-0.001699	-0.003568	-0.002364
0.3176	570.418	19.509	42.795	27.628	-0.703	35.322	1085.930	-0.001366	-0.002996	-0.001934
0.3184	514.768	15.771	35.998	22.835	-0.703	35.321	979.986	-0.001104	-0.002520	-0.001598
0.3192	473.710	12.727	30.549	18.972	-0.694	35.320	901.823	-0.000891	-0.002138	-0.001328
0.3200	444.089	10.447	26.626	16.026	-0.691	35.319	845.432	-0.000731	-0.001864	-0.001122
0.3208	422.118	8.835	23.517	13.886	-0.691	35.317	803.604	-0.000618	-0.001646	-0.000972
0.3216	404.324	7.501	21.054	11.981	-0.687	35.315	769.730	-0.000525	-0.001474	-0.000839
0.3224	388.199	6.375	18.880	10.382	-0.686	35.312	739.031	-0.000446	-0.001322	-0.000727
0.3232	372.479	5.140	16.625	8.827	-0.686	35.310	709.105	-0.000360	-0.001164	-0.000618
0.3240	356.579	4.014	14.326	7.061	-0.685	35.308	678.835	-0.000281	-0.001003	-0.000494
0.3248	341.040	2.792	12.069	5.310	-0.686	35.307	649.252	-0.000195	-0.000845	-0.000372
0.3256	327.048	1.764	10.046	3.990	-0.690	35.305	622.616	-0.000124	-0.000703	-0.000279
0.3264	315.972	1.124	8.285	2.809	-0.696	35.305	601.530	-0.000079	-0.000580	-0.000197
0.3272	308.909	0.485	7.116	2.016	-0.696	35.305	588.083	-0.000034	-0.000498	-0.000141
0.3280	306.610	0.220	6.442	1.960	-0.699	35.305	583.706	-0.000015	-0.000451	-0.000137
0.3288	309.059	0.010	6.112	1.682	-0.700	35.307	588.369	-0.000001	-0.000428	-0.000118
0.3296	316.754	-0.003	6.331	1.917	-0.694	35.309	603.018	0.000000	-0.000443	-0.000134
0.3304	333.045	0.776	7.445	2.946	-0.700	35.310	634.031	-0.000054	-0.000521	-0.000206
0.3312	363.883	2.262	9.991	5.017	-0.702	35.312	692.739	-0.000158	-0.000699	-0.000351
0.3320	414.574	4.972	14.889	8.714	-0.706	35.314	789.242	-0.000348	-0.001042	-0.000610
0.3328	486.950	9.113	22.457	14.329	-0.712	35.317	927.029	-0.000638	-0.001572	-0.001003
0.3336	578.609	14.323	32.282	21.401	-0.708	35.319	1101.522	-0.001003	-0.002260	-0.001498
0.3344	683.086	20.521	43.703	29.252	-0.707	35.322	1300.421	-0.001436	-0.003059	-0.002048
0.3352	793.710	27.484	55.785	37.937	-0.699	35.324	1511.021	-0.001924	-0.003905	-0.002656
0.3360	905.326	34.961	67.798	47.095	-0.702	35.324	1723.509	-0.002447	-0.004746	-0.003297
0.3368	1013.050	42.397	79.300	55.948	-0.702	35.323	1928.587	-0.002968	-0.005551	-0.003916
0.3376	1112.343	49.623	89.908	64.412	-0.703	35.322	2117.615	-0.003474	-0.006294	-0.004509
0.3384	1199.027	55.974	99.071	71.819	-0.702	35.321	2282.639	-0.003918	-0.006935	-0.005027
0.3392	1269.991	61.199	106.626	77.598	-0.696	35.320	2417.736	-0.004284	-0.007464	-0.005432
0.3400	1323.928	65.311	112.419	82.170	-0.697	35.319	2520.418	-0.004572	-0.007869	-0.005752
0.3408	1361.363	68.271	116.534	85.394	-0.700	35.316	2591.686	-0.004779	-0.008157	-0.005978
0.3416	1384.823	70.453	119.301	87.450	-0.703	35.314	2636.347	-0.004932	-0.008351	-0.006122
0.3424	1397.567	71.675	121.036	88.757	-0.702	35.312	2660.608	-0.005017	-0.008473	-0.006213
0.3432	1403.142	72.592	122.178	89.646	-0.702	35.310	2671.223	-0.005081	-0.008552	-0.006275
0.3440	1404.540	73.080	122.838	90.119	-0.696	35.308	2673.883	-0.005116	-0.008599	-0.006308
0.3448	1403.759	73.164	123.072	90.217	-0.696	35.306	2672.396	-0.005121	-0.008615	-0.006315
0.3456	1402.000	73.427	123.304	90.287	-0.698	35.305	2669.048	-0.005140	-0.008631	-0.006320
0.3464	1399.430	73.580	123.442	90.176	-0.703	35.304	2664.156	-0.005151	-0.008641	-0.006312
0.3472	1395.628	73.413	123.388	90.162	-0.704	35.304	2656.918	-0.005139	-0.008637	-0.006311
0.3480	1390.233	73.329	123.304	90.342	-0.704	35.305	2646.647	-0.005133	-0.008631	-0.006324
0.3488	1382.253	72.968	122.878	90.105	-0.698	35.307	2631.454	-0.005108	-0.008601	-0.006307
0.3496	1369.374	72.191	122.164	89.632	-0.692	35.309	2606.936	-0.005053	-0.008551	-0.006274
0.3504	1346.320	70.926	120.719	88.395	-0.691	35.310	2563.047	-0.004965	-0.008450	-0.006188
0.3512	1305.593	68.452	117.733	85.562	-0.690	35.312	2485.514	-0.004792	-0.008241	-0.005989
0.3520	1242.368	64.409	112.449	81.213	-0.692	35.314	2365.150	-0.004509	-0.007871	-0.005685
0.3528	1156.331	58.711	104.578	74.947	-0.691	35.317	2201.357	-0.004110	-0.007320	-0.005246
0.3536	1053.041	51.888	94.657	66.942	-0.691	35.319	2004.719	-0.003632	-0.006626	-0.004686
0.3544	941.755	44.342	83.402	58.145	-0.688	35.322	1792.860	-0.003104	-0.005838	-0.004070
0.3552	831.552	36.852	71.912	49.112	-0.688	35.323	1583.061	-0.002580	-0.005034	-0.003438
0.3560	729.284	30.209	61.028	40.857	-0.698	35.323	1388.369	-0.002115	-0.004272	-0.002860
0.3568	639.684	24.289	51.080	33.491	-0.699	35.323	1217.794	-0.001700	-0.003576	-0.002344
0.3576	565.744	19.425	42.549	27.446	-0.704	35.322	1077.032	-0.001360	-0.002978	-0.001921
0.3584	507.960	15.464	35.462	22.402	-0.704	35.321	967.026	-0.001082	-0.002482	-0.001568
0.3592	464.784	12.211	29.861	18.455	-0.694	35.320	884.829	-0.000855	-0.002090	-0.001292
0.3600	433.164	9.946	25.663	15.483	-0.694	35.319	824.633	-0.000696	-0.001796	-0.001084
0.3608	409.404	8.139	22.429	13.009	-0.697	35.317	779.400	-0.000570	-0.001570	-0.000911
0.3616	390.002	6.694	19.774	11.286	-0.698	35.315	742.464	-0.000469	-0.001384	-0.000790
0.3624	372.524	5.333	17.325	9.492	-0.700	35.312	709.190	-0.000373	-0.001213	-0.000664
0.3632	355.467	4.110	14.959	7.505	-0.702	35.310	676.718	-0.000288	-0.001047	-0.000525
0.3640	338.470	2.944	12.592	5.838	-0.696	35.308	644.360	-0.000206	-0.000881	-0.000409
0.3648	322.089	1.846	10.226	4.004	-0.695	35.307	613.174	-0.000129	-0.000716	-0.000280
0.3656	307.812	1.055	8.106	2.490	-0.692	35.305	585.995	-0.000074	-0.000567	-0.000174
0.3664	297.082	0.332	6.497	1.544	-0.699	35.305	565.567	-0.000023	-0.000455	-0.000108
0.3672	290.815	-0.155	5.396	0.751	-0.701	35.305	553.637	0.000011	-0.000378	-0.000053
0.3680	289.643	-0.321	4.872	0.389	-0.702	35.305	551.405	0.000022	-0.000341	-0.000027
0.3688	293.114	-0.475	4.721	0.236	-0.706	35.307	558.014	0.000033	-0.000330	-0.000017
0.3696	302.026	-0.266	4.900	0.668	-0.702	35.309	574.980	0.000019	-0.000343	-0.000047
0.3704	319.865	0.374	6.000	1.780	-0.704	35.310	608.940	-0.000026	-0.000420	-0.000125
0.3712	352.702	1.971	8.945	4.143	-0.708	35.312	671.453	-0.000138	-0.000626	-0.000290
0.3720	405.797	4.918	14.106	8.229	-0.707	35.315	772.533	-0.000344	-0.000987	-0.000576
0.3728	480.639	9.170	21.907	13.871	-0.708	35.317	915.012	-0.000642	-0.001534	-0.000971
0.3736	574.746	14.894	32.118	21.235	-0.708	35.320	1094.170	-0.001043	-0.002248	-0.001486
0.3744	681.538	21.259	43.704	29.421	-0.709	35.322	1297.474	-0.001488	-0.003059	-0.002059
0.3752	794.206	28.276	56.005	38.161	-0.710	35.324	1511.965	-0.001979	-0.003920	-0.002671
0.3760	907.761	35.878	68.374	47.596	-0.713	35.324	1728.144	-0.002511	-0.004786	-0.003332
0.3768	1017.363	43.258	80.016	56.420	-0.713	35.324	1936.798	-0.003028	-0.005601	-0.003949
0.3776	1118.940	50.469	90.597	64.884	-0.707	35.322	2130.175	-0.003533	-0.006342	-0.004542
0.3784	1208.810	57.098	99.899	72.485	-0.704	35.321	2301.264	-0.003997	-0.006993	-0.005074
0.3792	1283.697	62.351	107.660	78.349	-0.695	35.320	2443.829	-0.004365	-0.007536	-0.005484
0.3800	1341.796	66.700	113.839	83.241	-0.695	35.319	2554.436	-0.004669	-0.007969	-0.005827
0.3808	1382.629	70.161	118.311	86.978	-0.696	35.317	2632.170	-0.004911	-0.008282	-0.006088
0.3816	1407.997	72.314	121.435	89.479	-0.700	35.315	2680.464	-0.005062	-0.008500	-0.006264
0.3824	1421.086	73.592	123.085	91.163	-0.702	35.313	2705.383	-0.005151	-0.008616	-0.006381
0.3832	1425.670	74.301	124.131	91.899	-0.707	35.310	2714.109	-0.005201	-0.008689	-0.006433
0.3840	1425.234	74.370	124.708	92.276	-0.704	35.308	2713.280	-0.005206	-0.008730	-0.006459
0.3848	1422.274	74.328	124.817	91.970	-0.702	35.307	2707.644	-0.005203	-0.008737	-0.006438
0.3856	1418.261	74.370	125.052	91.871	-0.702	35.306	2700.005	-0.005206	-0.008754	-0.006431
0.3864	1413.587	74.383	125.189	92.093	-0.702	35.305	2691.107	-0.005207	-0.008763	-0.006447
0.3872	1408.162	74.258	125.093	91.843	-0.707	35.305	2680.779	-0.005198	-0.008757	-0.006429
0.3880	1401.294	74.037	124.983	91.676	-0.704	35.306	2667.704	-0.005183	-0.008749	-0.006417
0.3888	1391.285	73.648	124.543	91.287	-0.706	35.307	2648.649	-0.005155	-0.008718	-0.006390
0.3896	1374.618	72.649	123.416	90.384	-0.701	35.309	2616.920	-0.005085	-0.008639	-0.006327
0.3904	1345.268	70.996	121.503	88.674	-0.702	35.310	2561.045	-0.004970	-0.008505	-0.006207
0.3912	1297.297	68.091	117.775	85.547	-0.704	35.312	2469.721	-0.004766	-0.008244	-0.005988
0.3920	1227.701	63.518	111.748	80.572	-0.704	35.314	2337.227	-0.004446	-0.007822	-0.005640
0.3928	1137.756	57.597	103.492	73.707	-0.705	35.317	2165.995	-0.004032	-0.007244	-0.005159
0.3936	1033.849	50.580	93.474	65.718	-0.704	35.319	1968.184	-0.003541	-0.006543	-0.004600
0.3944	924.232	43.242	82.286	57.241	-0.704	35.322	1759.501	-0.003027	-0.005760	-0.004007
0.3952	816.794	36.225	70.960	48.403	-0.702	35.324	1554.966	-0.002536	-0.004967	-0.003388
0.3960	717.847	29.778	60.323	40.301	-0.709	35.325	1366.596	-0.002084	-0.004223	-0.002821
0.3968	631.539	24.108	50.540	33.117	-0.707	35.324	1202.288	-0.001688	-0.003538	-0.002318
0.3976	560.439	19.342	42.243	27.086	-0.710	35.323	1066.933	-0.001354	-0.002957	-0.001896
0.3984	504.654	15.465	35.516	22.416	-0.710	35.321	960.732	-0.001083	-0.002486	-0.001569
0.3992	462.379	12.338	30.095	18.665	-0.700	35.321	880.251	-0.000864	-0.002107	-0.001307
