# Supplementary material for: Evaluation of a Cold-Mixed High-Performance Polyurethane Mixture
Source: Hindawi journal article supplement (doi:10.1155/2019/1507971), 2019-11-07
Supplement: f1 [file 1507971.f1.zip › 1507971.f1/dynamic modulus data/PUM/specimen1/temp35/zhs-1-35_Runtime.csv]

Time (sec)	Load (kN)	Confining Pressure (kPa)	Axial LVDT #1 (mm)	Axial LVDT #2 (mm)	Axial LVDT #3 (mm)	Temperature (�C)
0.0008	0.747814	-0.698	0.13067293	0.16797793	0.25652146	35.32
0.0016	0.745897	-0.699	0.13067591	0.16798466	0.25652534	35.32
0.0024	0.743694	-0.699	0.13068175	0.16799527	0.25653404	35.32
0.0032	0.739717	-0.698	0.13069052	0.16800392	0.25655931	35.32
0.0040	0.731363	-0.703	0.13070124	0.16801739	0.25656700	35.33
0.0048	0.715227	-0.704	0.13073236	0.16806847	0.25659513	35.33
0.0056	0.688705	-0.704	0.13078290	0.16815621	0.25667006	35.32
0.0064	0.651283	-0.709	0.13084900	0.16829979	0.25676924	35.32
0.0072	0.604677	-0.702	0.13095599	0.16850597	0.25692010	35.32
0.0080	0.553322	-0.699	0.13105816	0.16873038	0.25707382	35.32
0.0088	0.502768	-0.699	0.13116330	0.16896153	0.25722456	35.32
0.0096	0.457392	-0.696	0.13126266	0.16917241	0.25737154	35.32
0.0104	0.421171	-0.696	0.13133657	0.16934288	0.25748438	35.31
0.0112	0.395851	-0.698	0.13139874	0.16947293	0.25756609	35.31
0.0120	0.381575	-0.700	0.13143563	0.16956347	0.25762254	35.31
0.0128	0.377226	-0.696	0.13146472	0.16960782	0.25765842	35.31
0.0136	0.380630	-0.696	0.13145894	0.16961652	0.25765258	35.31
0.0144	0.389814	-0.700	0.13143766	0.16958660	0.25763023	35.31
0.0152	0.402575	-0.696	0.13142312	0.16954905	0.25760007	35.31
0.0160	0.418768	-0.704	0.13139498	0.16949415	0.25754279	35.31
0.0168	0.437937	-0.704	0.13138235	0.16943157	0.25750482	35.31
0.0176	0.459681	-0.700	0.13136286	0.16935360	0.25747752	35.31
0.0184	0.482998	-0.704	0.13131803	0.16925627	0.25741041	35.31
0.0192	0.505686	-0.702	0.13127130	0.16915321	0.25735199	35.31
0.0200	0.525570	-0.698	0.13122070	0.16906446	0.25730139	35.32
0.0208	0.541134	-0.698	0.13118082	0.16899896	0.25724703	35.32
0.0216	0.551634	-0.694	0.13115072	0.16894412	0.25721192	35.32
0.0224	0.557270	-0.693	0.13113326	0.16893065	0.25719345	35.32
0.0232	0.559216	-0.695	0.13113135	0.16892397	0.25718182	35.32
0.0240	0.558815	-0.703	0.13111681	0.16891819	0.25717008	35.32
0.0248	0.557070	-0.705	0.13110900	0.16893071	0.25717992	35.32
0.0256	0.555210	-0.701	0.13109916	0.16891336	0.25717312	35.32
0.0264	0.553493	-0.702	0.13109714	0.16890281	0.25715852	35.32
0.0272	0.552177	-0.693	0.13110381	0.16891825	0.25716919	35.32
0.0280	0.551691	-0.694	0.13111055	0.16892308	0.25716531	35.32
0.0288	0.551291	-0.696	0.13111442	0.16893846	0.25717598	35.32
0.0296	0.550919	-0.698	0.13111544	0.16894621	0.25718182	35.32
0.0304	0.550089	-0.698	0.13113004	0.16894048	0.25718480	35.31
0.0312	0.548401	-0.698	0.13114178	0.16893661	0.25718969	35.31
0.0320	0.545940	-0.703	0.13115352	0.16894144	0.25719750	35.31
0.0328	0.542536	-0.700	0.13116318	0.16895574	0.25721604	35.31
0.0336	0.538445	-0.709	0.13116223	0.16897297	0.25722283	35.31
0.0344	0.533752	-0.716	0.13116020	0.16898447	0.25723833	35.31
0.0352	0.527973	-0.720	0.13117474	0.16899794	0.25723928	35.31
0.0360	0.521564	-0.722	0.13118267	0.16901916	0.25724709	35.31
0.0368	0.514212	-0.717	0.13120216	0.16903561	0.25726169	35.31
0.0376	0.506001	-0.707	0.13122946	0.16907424	0.25727731	35.31
0.0384	0.496988	-0.703	0.13123631	0.16911465	0.25730556	35.31
0.0392	0.486746	-0.703	0.13125861	0.16914648	0.25733954	35.31
0.0400	0.475159	-0.702	0.13128293	0.16919839	0.25736964	35.31
0.0408	0.462427	-0.707	0.13130242	0.16924745	0.25740850	35.32
0.0416	0.448980	-0.706	0.13134140	0.16929853	0.25746197	35.32
0.0424	0.434961	-0.703	0.13136584	0.16936493	0.25750476	35.32
0.0432	0.420771	-0.703	0.13140082	0.16943336	0.25756997	35.32
0.0440	0.406694	-0.709	0.13142997	0.16949022	0.25761372	35.32
0.0448	0.393162	-0.711	0.13144934	0.16954517	0.25764203	35.32
0.0456	0.381031	-0.712	0.13147157	0.16959822	0.25767893	35.32
0.0464	0.371275	-0.710	0.13147932	0.16964543	0.25770807	35.32
0.0472	0.364180	-0.700	0.13149297	0.16968781	0.25774008	35.32
0.0480	0.359888	-0.699	0.13150758	0.16971469	0.25777203	35.32
0.0488	0.357943	-0.701	0.13151443	0.16972911	0.25778669	35.32
0.0496	0.357800	-0.702	0.13151640	0.16973585	0.25779355	35.32
0.0504	0.359459	-0.700	0.13151932	0.16974348	0.25779361	35.31
0.0512	0.362463	-0.699	0.13152033	0.16974646	0.25778973	35.31
0.0520	0.366726	-0.698	0.13152224	0.16973883	0.25778091	35.31
0.0528	0.371876	-0.697	0.13152713	0.16971958	0.25777209	35.31
0.0536	0.377598	-0.700	0.13152033	0.16970134	0.25775951	35.31
0.0544	0.384235	-0.710	0.13149399	0.16968107	0.25773329	35.31
0.0552	0.391731	-0.707	0.13147169	0.16966271	0.25770515	35.31
0.0560	0.400944	-0.712	0.13143957	0.16963959	0.25767505	35.31
0.0568	0.412159	-0.708	0.13141817	0.16960490	0.25765657	35.31
0.0576	0.425377	-0.698	0.13140845	0.16956639	0.25762933	35.31
0.0584	0.441084	-0.699	0.13138115	0.16951436	0.25758940	35.31
0.0592	0.459023	-0.698	0.13135588	0.16944987	0.25753105	35.31
0.0600	0.478649	-0.700	0.13131696	0.16937083	0.25746584	35.31
0.0608	0.499620	-0.703	0.13127613	0.16928118	0.25739777	35.32
0.0616	0.520906	-0.704	0.13124311	0.16918588	0.25734335	35.32
0.0624	0.541105	-0.699	0.13121009	0.16909528	0.25728011	35.32
0.0632	0.559444	-0.699	0.13118774	0.16902220	0.25723243	35.32
0.0640	0.574694	-0.702	0.13114977	0.16895580	0.25718081	35.32
0.0648	0.585823	-0.700	0.13111568	0.16889799	0.25712532	35.32
0.0656	0.592575	-0.704	0.13109130	0.16886044	0.25710684	35.32
0.0664	0.595236	-0.703	0.13107371	0.16882855	0.25709414	35.32
0.0672	0.594349	-0.698	0.13107759	0.16882181	0.25709510	35.32
0.0680	0.591259	-0.696	0.13109016	0.16882658	0.25710875	35.32
0.0688	0.586824	-0.700	0.13111162	0.16883528	0.25712627	35.32
0.0696	0.581417	-0.702	0.13112813	0.16885549	0.25711954	35.32
0.0704	0.575724	-0.699	0.13114274	0.16886419	0.25713128	35.31
0.0712	0.569687	-0.702	0.13115054	0.16887861	0.25714976	35.31
0.0720	0.563564	-0.696	0.13114661	0.16889691	0.25715166	35.31
0.0728	0.557156	-0.692	0.13115543	0.16891915	0.25718182	35.31
0.0736	0.550060	-0.695	0.13117200	0.16893840	0.25719446	35.31
0.0744	0.541849	-0.700	0.13118374	0.16894329	0.25719643	35.31
0.0752	0.531435	-0.699	0.13121003	0.16897029	0.25722468	35.31
0.0760	0.518904	-0.702	0.13122749	0.16900402	0.25724906	35.31
0.0768	0.504169	-0.701	0.13125277	0.16905600	0.25729275	35.31
0.0776	0.487661	-0.690	0.13129753	0.16914070	0.25735790	35.31
0.0784	0.470781	-0.694	0.13132578	0.16921002	0.25740647	35.31
0.0792	0.454273	-0.693	0.13136184	0.16927445	0.25745702	35.31
0.0800	0.439110	-0.693	0.13138908	0.16934764	0.25751543	35.31
0.0808	0.425835	-0.694	0.13139975	0.16941601	0.25755340	35.32
0.0816	0.414391	-0.692	0.13142014	0.16947281	0.25758851	35.32
0.0824	0.404377	-0.689	0.13143665	0.16953361	0.25762838	35.32
0.0832	0.395365	-0.686	0.13144439	0.16958946	0.25766248	35.32
0.0840	0.386982	-0.689	0.13145995	0.16962129	0.25769162	35.32
0.0848	0.378428	-0.690	0.13146669	0.16965884	0.25772560	35.32
0.0856	0.370102	-0.693	0.13147926	0.16969436	0.25774217	35.32
0.0864	0.362492	-0.695	0.13149589	0.16972429	0.25776064	35.32
0.0872	0.355911	-0.693	0.13151830	0.16976476	0.25778490	35.32
0.0880	0.351620	-0.694	0.13153881	0.16979843	0.25780344	35.32
0.0888	0.349503	-0.692	0.13153988	0.16981584	0.25781798	35.32
0.0896	0.349445	-0.696	0.13154370	0.16982448	0.25782084	35.32
0.0904	0.351219	-0.698	0.13154465	0.16983503	0.25782377	35.31
0.0912	0.354166	-0.697	0.13154465	0.16983026	0.25782472	35.31
0.0920	0.358200	-0.702	0.13155043	0.16983116	0.25781786	35.31
0.0928	0.362864	-0.698	0.13155335	0.16983497	0.25782466	35.31
0.0936	0.368099	-0.699	0.13154459	0.16981661	0.25781405	35.31
0.0944	0.373592	-0.706	0.13152415	0.16979736	0.25777322	35.31
0.0952	0.378828	-0.700	0.13152027	0.16978300	0.25777423	35.31
0.0960	0.384321	-0.705	0.13151830	0.16975701	0.25774896	35.31
0.0968	0.390472	-0.703	0.13151246	0.16973495	0.25773239	35.31
0.0976	0.397768	-0.693	0.13150853	0.16972238	0.25773913	35.31
0.0984	0.406895	-0.696	0.13149685	0.16967905	0.25770515	35.31
0.0992	0.417795	-0.693	0.13147157	0.16963768	0.25767213	35.31
0.1000	0.430298	-0.689	0.13145018	0.16959047	0.25764877	35.31
0.1008	0.444632	-0.693	0.13142884	0.16952407	0.25760603	35.32
0.1016	0.460510	-0.691	0.13139385	0.16945279	0.25755930	35.32
0.1024	0.477991	-0.688	0.13136083	0.16937763	0.25751352	35.32
0.1032	0.496902	-0.688	0.13132387	0.16930258	0.25747073	35.32
0.1040	0.516815	-0.688	0.13128108	0.16921008	0.25739098	35.32
0.1048	0.536928	-0.692	0.13122851	0.16912717	0.25731313	35.32
0.1056	0.556068	-0.695	0.13118470	0.16903758	0.25724411	35.32
0.1064	0.573349	-0.697	0.13114578	0.16894507	0.25716823	35.32
0.1072	0.587053	-0.695	0.13111752	0.16888720	0.25713998	35.32
0.1080	0.596466	-0.688	0.13109612	0.16884291	0.25712633	35.32
0.1088	0.601158	-0.687	0.13108450	0.16881591	0.25712049	35.32
0.1096	0.601587	-0.690	0.13107282	0.16881293	0.25711077	35.32
0.1104	0.598755	-0.691	0.13107479	0.16881496	0.25712055	35.31
0.1112	0.593662	-0.694	0.13108349	0.16882086	0.25713521	35.31
0.1120	0.587454	-0.699	0.13108826	0.16883630	0.25713813	35.31
0.1128	0.580130	-0.695	0.13110471	0.16885853	0.25716639	35.31
0.1136	0.572348	-0.696	0.13111925	0.16887587	0.25718290	35.31
0.1144	0.564251	-0.703	0.13112515	0.16889018	0.25717306	35.31
0.1152	0.555353	-0.698	0.13114077	0.16891330	0.25719643	35.31
0.1160	0.545940	-0.702	0.13115442	0.16893351	0.25721294	35.31
0.1168	0.535383	-0.699	0.13117492	0.16897303	0.25724304	35.31
0.1176	0.522966	-0.689	0.13121384	0.16903186	0.25728983	35.31
0.1184	0.508261	-0.691	0.13123918	0.16908574	0.25731504	35.31
0.1192	0.490837	-0.688	0.13127911	0.16916376	0.25736171	35.31
0.1200	0.470867	-0.688	0.13131994	0.16925234	0.25741726	35.31
0.1208	0.449467	-0.691	0.13136274	0.16934091	0.25749213	35.32
0.1216	0.427923	-0.691	0.13141036	0.16944885	0.25757390	35.32
0.1224	0.407267	-0.691	0.13145030	0.16954321	0.25764686	35.32
0.1232	0.388584	-0.690	0.13148046	0.16963857	0.25770998	35.32
0.1240	0.372992	-0.692	0.13150775	0.16971558	0.25775570	35.33
0.1248	0.360603	-0.693	0.13153207	0.16976851	0.25780141	35.33
0.1256	0.351534	-0.694	0.13155144	0.16980803	0.25781792	35.32
0.1264	0.345869	-0.695	0.13156211	0.16982436	0.25783354	35.32
0.1272	0.342522	-0.694	0.13157278	0.16984463	0.25784719	35.32
0.1280	0.341091	-0.692	0.13158059	0.16985619	0.25784612	35.32
0.1288	0.341263	-0.691	0.13157970	0.16986388	0.25785583	35.32
0.1296	0.342150	-0.689	0.13157874	0.16986966	0.25785673	35.32
0.1304	0.343866	-0.687	0.13157392	0.16986871	0.25785476	35.31
0.1312	0.346413	-0.688	0.13156420	0.16987062	0.25785095	35.31
0.1320	0.349588	-0.692	0.13155633	0.16986769	0.25784224	35.31
0.1328	0.353565	-0.691	0.13156128	0.16986674	0.25784522	35.31
0.1336	0.358315	-0.696	0.13156027	0.16985714	0.25784522	35.31
0.1344	0.363836	-0.703	0.13154078	0.16983300	0.25782382	35.31
0.1352	0.369816	-0.702	0.13152528	0.16981667	0.25781018	35.31
0.1360	0.376854	-0.710	0.13150865	0.16978395	0.25778675	35.31
0.1368	0.385122	-0.707	0.13149303	0.16975605	0.25775558	35.31
0.1376	0.395107	-0.702	0.13149589	0.16972923	0.25774199	35.31
0.1384	0.407925	-0.702	0.13148612	0.16969264	0.25770605	35.31
0.1392	0.423203	-0.699	0.13145697	0.16964448	0.25766039	35.31
0.1400	0.440569	-0.700	0.13140935	0.16956925	0.25763023	35.31
0.1408	0.459309	-0.706	0.13137150	0.16949123	0.25757772	35.32
0.1416	0.477877	-0.704	0.13133556	0.16940457	0.25752807	35.32
0.1424	0.495386	-0.705	0.13129759	0.16932851	0.25748432	35.32
0.1432	0.511379	-0.703	0.13128299	0.16927165	0.25743377	35.32
0.1440	0.525341	-0.702	0.13124019	0.16920799	0.25738317	35.32
0.1448	0.537128	-0.710	0.13119346	0.16914541	0.25733852	35.32
0.1456	0.546942	-0.707	0.13117689	0.16909343	0.25730348	35.32
0.1464	0.554981	-0.708	0.13114768	0.16904920	0.25726658	35.32
0.1472	0.561333	-0.704	0.13114375	0.16901743	0.25726461	35.32
0.1480	0.566483	-0.698	0.13115245	0.16900098	0.25724608	35.32
0.1488	0.570431	-0.702	0.13114667	0.16897875	0.25722474	35.32
0.1496	0.572920	-0.703	0.13114864	0.16896331	0.25721204	35.32
0.1504	0.573893	-0.704	0.13115156	0.16895854	0.25717801	35.31
0.1512	0.573177	-0.708	0.13115060	0.16894805	0.25717902	35.31
0.1520	0.570889	-0.710	0.13115549	0.16894424	0.25718969	35.31
0.1528	0.566654	-0.706	0.13116717	0.16896063	0.25720429	35.31
0.1536	0.560875	-0.706	0.13117886	0.16897511	0.25723058	35.31
0.1544	0.553751	-0.710	0.13118768	0.16898751	0.25725102	35.31
0.1552	0.544767	-0.707	0.13119644	0.16901928	0.25726461	35.31
0.1560	0.535011	-0.712	0.13120520	0.16903186	0.25727332	35.31
0.1568	0.523825	-0.710	0.13121402	0.16905969	0.25729764	35.31
0.1576	0.510521	-0.699	0.13123733	0.16911179	0.25732088	35.31
0.1584	0.495243	-0.700	0.13126838	0.16916472	0.25736463	35.31
0.1592	0.477676	-0.695	0.13129663	0.16923213	0.25742596	35.31
0.1600	0.458651	-0.694	0.13133162	0.16930342	0.25748336	35.31
0.1608	0.439482	-0.695	0.13135505	0.16938430	0.25753492	35.32
0.1616	0.421600	-0.698	0.13138515	0.16947299	0.25758946	35.32
0.1624	0.405750	-0.696	0.13142109	0.16954905	0.25764680	35.32
0.1632	0.392675	-0.698	0.13145024	0.16962516	0.25769544	35.32
0.1640	0.382833	-0.704	0.13147932	0.16967428	0.25773817	35.32
0.1648	0.375566	-0.705	0.13149500	0.16969734	0.25775754	35.32
0.1656	0.370789	-0.704	0.13150662	0.16972619	0.25776345	35.32
0.1664	0.368299	-0.702	0.13150668	0.16974449	0.25776631	35.32
0.1672	0.367098	-0.695	0.13151258	0.16975892	0.25778484	35.32
0.1680	0.367355	-0.690	0.13150966	0.16977334	0.25778878	35.32
0.1688	0.368385	-0.691	0.13150102	0.16977906	0.25779557	35.32
0.1696	0.369873	-0.688	0.13150489	0.16977608	0.25778782	35.32
0.1704	0.372133	-0.687	0.13150680	0.16976839	0.25778103	35.31
0.1712	0.374994	-0.687	0.13151360	0.16975594	0.25778979	35.31
0.1720	0.378485	-0.691	0.13150281	0.16975021	0.25777316	35.31
0.1728	0.382576	-0.686	0.13149297	0.16974646	0.25778478	35.31
0.1736	0.387239	-0.688	0.13148707	0.16974837	0.25778186	35.31
0.1744	0.392418	-0.695	0.13146269	0.16973001	0.25774682	35.31
0.1752	0.397911	-0.694	0.13147920	0.16971564	0.25772750	35.31
0.1760	0.404434	-0.702	0.13148117	0.16969347	0.25769836	35.31
0.1768	0.411901	-0.702	0.13146180	0.16966367	0.25767404	35.31
0.1776	0.420685	-0.696	0.13146287	0.16965216	0.25765461	35.31
0.1784	0.431271	-0.697	0.13143861	0.16961265	0.25764096	35.31
0.1792	0.443172	-0.699	0.13141829	0.16956449	0.25760984	35.31
0.1800	0.456791	-0.699	0.13139886	0.16951245	0.25755924	35.31
0.1808	0.471897	-0.702	0.13137740	0.16944981	0.25753689	35.32
0.1816	0.487919	-0.700	0.13135207	0.16938722	0.25749403	35.32
0.1824	0.504570	-0.698	0.13132089	0.16931784	0.25744343	35.32
0.1832	0.520821	-0.692	0.13129753	0.16924751	0.25741333	35.32
0.1840	0.535812	-0.694	0.13125283	0.16917139	0.25735205	35.33
0.1848	0.548916	-0.697	0.13120133	0.16909820	0.25729471	35.33
0.1856	0.559416	-0.696	0.13117307	0.16904330	0.25726068	35.32
0.1864	0.567942	-0.699	0.13115948	0.16899806	0.25722760	35.32
0.1872	0.574465	-0.695	0.13114870	0.16896731	0.25720036	35.32
0.1880	0.579758	-0.691	0.13115644	0.16894704	0.25719166	35.32
0.1888	0.584192	-0.690	0.13115162	0.16891724	0.25717312	35.32
0.1896	0.587053	-0.691	0.13112825	0.16889316	0.25715458	35.32
0.1904	0.588169	-0.688	0.13112831	0.16887581	0.25715655	35.31
0.1912	0.587282	-0.689	0.13111758	0.16887099	0.25715554	35.31
0.1920	0.583563	-0.691	0.13111854	0.16888154	0.25716531	35.31
0.1928	0.577297	-0.686	0.13113111	0.16890943	0.25718677	35.31
0.1936	0.568914	-0.692	0.13112426	0.16893828	0.25720811	35.31
0.1944	0.558100	-0.699	0.13112819	0.16895467	0.25721192	35.31
0.1952	0.544996	-0.696	0.13114083	0.16898173	0.25724208	35.31
0.1960	0.529490	-0.703	0.13116026	0.16902119	0.25726640	35.31
0.1968	0.511465	-0.700	0.13120508	0.16907895	0.25731307	35.31
0.1976	0.490894	-0.692	0.13126540	0.16916758	0.25738603	35.31
0.1984	0.469007	-0.696	0.13131410	0.16927248	0.25745410	35.31
0.1992	0.446548	-0.696	0.13135993	0.16936880	0.25752610	35.31
0.2000	0.424919	-0.694	0.13140273	0.16946995	0.25758940	35.31
0.2008	0.355396	-0.706	0.13159722	0.16998327	0.25795323	35.32
0.2016	0.353279	-0.708	0.13159722	0.16999006	0.25794637	35.32
0.2024	0.351706	-0.711	0.13160491	0.17000073	0.25794435	35.31
0.2032	0.351105	-0.712	0.13161165	0.17001140	0.25795209	35.31
0.2040	0.351992	-0.715	0.13162041	0.17001432	0.25794530	35.31
0.2048	0.354824	-0.707	0.13162720	0.17001438	0.25795799	35.31
0.2056	0.359716	-0.703	0.13163209	0.17001247	0.25796586	35.31
0.2064	0.367699	-0.708	0.13161075	0.16998065	0.25792497	35.30
0.2072	0.380001	-0.704	0.13158065	0.16994113	0.25789094	35.30
0.2080	0.401630	-0.708	0.13154656	0.16987181	0.25783736	35.30
0.2088	0.438194	-0.710	0.13147461	0.16973013	0.25771278	35.31
0.2096	0.494499	-0.704	0.13137925	0.16952115	0.25756204	35.31
0.2104	0.573921	-0.703	0.13123816	0.16919750	0.25733441	35.31
0.2112	0.675802	-0.711	0.13103491	0.16877556	0.25701547	35.31
0.2120	0.796452	-0.713	0.13078487	0.16827852	0.25666052	35.31
0.2128	0.931463	-0.718	0.13049310	0.16772270	0.25625485	35.32
0.2136	1.076689	-0.724	0.13017118	0.16712749	0.25580549	35.32
0.2144	1.227121	-0.723	0.12983948	0.16650140	0.25535309	35.32
0.2152	1.379585	-0.715	0.12949902	0.16587627	0.25489777	35.32
0.2160	1.531134	-0.712	0.12915462	0.16523969	0.25442117	35.32
0.2168	1.678848	-0.711	0.12879658	0.16461354	0.25394356	35.32
0.2176	1.821156	-0.705	0.12843376	0.16401154	0.25348830	35.32
0.2184	1.956282	-0.711	0.12808162	0.16342694	0.25304669	35.32
0.2192	2.082539	-0.707	0.12774122	0.16288847	0.25265563	35.32
0.2200	2.198839	-0.706	0.12743288	0.16240013	0.25231034	35.32
0.2208	2.303896	-0.703	0.12715757	0.16194069	0.25196123	35.32
0.2216	2.396908	-0.702	0.12689298	0.16154486	0.25165385	35.32
0.2224	2.477274	-0.701	0.12666142	0.16119510	0.25137949	35.31
0.2232	2.544250	-0.696	0.12646294	0.16089273	0.25114590	35.31
0.2240	2.596951	-0.698	0.12629652	0.16065282	0.25097466	35.31
0.2248	2.634630	-0.698	0.12617791	0.16045719	0.25083560	35.31
0.2256	2.657404	-0.699	0.12608743	0.16032720	0.25072962	35.31
0.2264	2.666674	-0.708	0.12602818	0.16023469	0.25065285	35.30
0.2272	2.663927	-0.714	0.12600291	0.16019148	0.25062269	35.30
0.2280	2.651167	-0.714	0.12600386	0.16018569	0.25061780	35.31
0.2288	2.628965	-0.718	0.12604183	0.16020113	0.25064594	35.31
0.2296	2.593832	-0.711	0.12611091	0.16026664	0.25072473	35.31
0.2304	2.539988	-0.707	0.12622279	0.16038978	0.25085211	35.31
0.2312	2.460279	-0.712	0.12639588	0.16060752	0.25104076	35.31
0.2320	2.349443	-0.706	0.12665755	0.16094178	0.25133944	35.31
0.2328	2.208452	-0.705	0.12699318	0.16140217	0.25172752	35.32
0.2336	2.044001	-0.704	0.12738615	0.16196758	0.25218189	35.32
0.2344	1.866016	-0.696	0.12782204	0.16260904	0.25271112	35.32
0.2352	1.685658	-0.694	0.12826657	0.16329384	0.25325096	35.32
0.2360	1.511850	-0.694	0.12869841	0.16397095	0.25376266	35.32
0.2368	1.350517	-0.701	0.12908655	0.16461730	0.25424314	35.32
0.2376	1.205664	-0.703	0.12944454	0.16521066	0.25469160	35.32
0.2384	1.079521	-0.708	0.12974030	0.16574144	0.25506419	35.32
0.2392	0.972290	-0.706	0.12999994	0.16621733	0.25540656	35.32
0.2400	0.882769	-0.700	0.13023156	0.16663152	0.25571394	35.32
0.2408	0.808439	-0.700	0.13041830	0.16698796	0.25594634	35.32
0.2416	0.745811	-0.700	0.13057685	0.16729903	0.25616038	35.32
0.2424	0.692482	-0.700	0.13071215	0.16756290	0.25635010	35.31
0.2432	0.647335	-0.699	0.13081235	0.16780376	0.25650477	35.31
0.2440	0.609570	-0.700	0.13089496	0.16801178	0.25663906	35.31
0.2448	0.579100	-0.697	0.13096493	0.16818041	0.25676459	35.31
0.2456	0.556097	-0.700	0.13101059	0.16831917	0.25685889	35.31
0.2464	0.540447	-0.704	0.13105041	0.16841346	0.25690371	35.31
0.2472	0.532036	-0.710	0.13107377	0.16847020	0.25694841	35.30
0.2480	0.530977	-0.714	0.13108641	0.16849899	0.25696772	35.31
0.2488	0.536757	-0.717	0.13108742	0.16850382	0.25695515	35.31
0.2496	0.550032	-0.714	0.13108444	0.16848946	0.25694734	35.31
0.2504	0.574036	-0.713	0.13105035	0.16843933	0.25691044	35.31
0.2512	0.617466	-0.714	0.13097936	0.16830838	0.25679576	35.31
0.2520	0.691051	-0.717	0.13084519	0.16805691	0.25659049	35.31
0.2528	0.801973	-0.717	0.13061661	0.16763884	0.25626743	35.32
0.2536	0.951462	-0.715	0.13030922	0.16705042	0.25581896	35.32
0.2544	1.132450	-0.716	0.12991142	0.16633284	0.25530148	35.32
0.2552	1.333408	-0.707	0.12946194	0.16552854	0.25473636	35.32
0.2560	1.543350	-0.712	0.12897563	0.16468954	0.25413036	35.32
0.2568	1.752434	-0.720	0.12845719	0.16384774	0.25349510	35.32
0.2576	1.952133	-0.723	0.12795526	0.16305405	0.25287735	35.32
0.2584	2.135782	-0.728	0.12747961	0.16232204	0.25230145	35.32
0.2592	2.296257	-0.720	0.12705356	0.16168153	0.25180537	35.32
0.2600	2.429495	-0.709	0.12670243	0.16115743	0.25139588	35.32
0.2608	2.532606	-0.704	0.12641931	0.16073364	0.25107783	35.32
0.2616	2.605562	-0.702	0.12621492	0.16042352	0.25083560	35.32
0.2624	2.652426	-0.705	0.12605929	0.16020781	0.25067312	35.31
0.2632	2.678432	-0.707	0.12595809	0.16006821	0.25057977	35.31
0.2640	2.689734	-0.710	0.12590170	0.15999013	0.25051552	35.31
0.2648	2.691822	-0.708	0.12586188	0.15994096	0.25048828	35.31
0.2656	2.688704	-0.706	0.12585503	0.15991390	0.25046986	35.31
0.2664	2.682896	-0.712	0.12585407	0.15988880	0.25045139	35.30
0.2672	2.675600	-0.710	0.12585503	0.15987533	0.25046211	35.30
0.2680	2.666473	-0.712	0.12584627	0.15987730	0.25045913	35.31
0.2688	2.654829	-0.707	0.12585217	0.15989089	0.25046206	35.31
0.2696	2.638378	-0.699	0.12587166	0.15992564	0.25049311	35.31
0.2704	2.612944	-0.698	0.12591147	0.15997386	0.25051939	35.31
0.2712	2.570086	-0.698	0.12600005	0.16005862	0.25060409	35.31
0.2720	2.497044	-0.698	0.12616533	0.16024345	0.25078982	35.31
0.2728	2.383232	-0.700	0.12643766	0.16057855	0.25109428	35.32
0.2736	2.225475	-0.703	0.12681419	0.16109192	0.25152808	35.32
0.2744	2.030926	-0.701	0.12728596	0.16176903	0.25207865	35.32
0.2752	1.816092	-0.703	0.12781519	0.16256469	0.25269252	35.32
0.2760	1.600800	-0.702	0.12833464	0.16339213	0.25331903	35.32
0.2768	1.400728	-0.707	0.12881124	0.16418195	0.25390947	35.32
0.2776	1.225748	-0.707	0.12923914	0.16490436	0.25443965	35.32
0.2784	1.080894	-0.707	0.12958443	0.16552657	0.25488615	35.32
0.2792	0.965939	-0.707	0.12987232	0.16603804	0.25525385	35.32
0.2800	0.878048	-0.695	0.13011456	0.16645223	0.25555247	35.32
0.2808	0.812788	-0.698	0.13029170	0.16678452	0.25578201	35.32
0.2816	0.763807	-0.697	0.13042688	0.16703212	0.25596190	35.32
0.2824	0.725212	-0.699	0.13052905	0.16723728	0.25610876	35.31
0.2832	0.692453	-0.702	0.13062048	0.16741925	0.25622457	35.31
0.2840	0.662355	-0.703	0.13070315	0.16757631	0.25634134	35.31
0.2848	0.634117	-0.700	0.13078785	0.16773522	0.25645417	35.31
0.2856	0.608282	-0.698	0.13086665	0.16788554	0.25655437	35.31
0.2864	0.586452	-0.703	0.13090169	0.16800696	0.25663114	35.31
0.2872	0.570488	-0.703	0.13093579	0.16811198	0.25668949	35.31
0.2880	0.562191	-0.708	0.13095719	0.16817456	0.25672656	35.31
0.2888	0.562191	-0.712	0.13096106	0.16821015	0.25672948	35.31
0.2896	0.570660	-0.711	0.13096887	0.16821504	0.25673240	35.31
0.2904	0.589685	-0.708	0.13095808	0.16818225	0.25671095	35.31
0.2912	0.626192	-0.708	0.13090354	0.16809458	0.25662434	35.31
0.2920	0.691910	-0.708	0.13079458	0.16787785	0.25644630	35.31
0.2928	0.796366	-0.705	0.13059032	0.16749638	0.25615937	35.32
0.2936	0.942221	-0.708	0.13028491	0.16692036	0.25573915	35.32
0.2944	1.124239	-0.708	0.12988508	0.16617966	0.25522065	35.32
0.2952	1.330290	-0.706	0.12940753	0.16534841	0.25464284	35.32
0.2960	1.547728	-0.705	0.12889689	0.16447574	0.25401151	35.32
0.2968	1.765795	-0.713	0.12835795	0.16359341	0.25335199	35.32
0.2976	1.974735	-0.714	0.12782884	0.16277093	0.25271875	35.32
0.2984	2.165680	-0.717	0.12734342	0.16201770	0.25212437	35.32
0.2992	2.330418	-0.716	0.12690651	0.16137040	0.25160885	35.32
0.3000	2.463713	-0.707	0.12653208	0.16085511	0.25119549	35.32
0.3008	2.562618	-0.706	0.12624609	0.16044569	0.25088608	35.32
0.3016	2.628136	-0.707	0.12604177	0.16015482	0.25067604	35.32
0.3024	2.665501	-0.704	0.12591541	0.15997660	0.25054181	35.31
0.3032	2.681980	-0.707	0.12585503	0.15987742	0.25046092	35.31
0.3040	2.685528	-0.708	0.12582874	0.15983218	0.25041229	35.31
0.3048	2.682667	-0.706	0.12581319	0.15982348	0.25039673	35.31
0.3056	2.677488	-0.706	0.12581021	0.15981674	0.25040358	35.31
0.3064	2.671881	-0.712	0.12580341	0.15980613	0.25039977	35.31
0.3072	2.665615	-0.712	0.12578976	0.15980041	0.25039983	35.30
0.3080	2.657747	-0.716	0.12578201	0.15979755	0.25039101	35.30
0.3088	2.646904	-0.714	0.12578201	0.15979660	0.25038701	35.31
0.3096	2.630510	-0.703	0.12580830	0.15981674	0.25041914	35.31
0.3104	2.603788	-0.701	0.12586766	0.15987247	0.25046587	35.31
0.3112	2.556295	-0.695	0.12597752	0.15998036	0.25056899	35.31
0.3120	2.474127	-0.697	0.12617111	0.16021061	0.25077719	35.31
0.3128	2.348356	-0.700	0.12647653	0.16061234	0.25111479	35.32
0.3136	2.178984	-0.701	0.12688798	0.16117483	0.25157493	35.32
0.3144	1.976051	-0.703	0.12738025	0.16189539	0.25215185	35.32
0.3152	1.757927	-0.702	0.12792695	0.16271794	0.25279391	35.32
0.3160	1.542349	-0.699	0.12845129	0.16354436	0.25342029	35.32
0.3168	1.343193	-0.707	0.12892121	0.16433817	0.25401556	35.32
0.3176	1.170473	-0.706	0.12935311	0.16506338	0.25455254	35.32
0.3184	1.029596	-0.708	0.12968963	0.16565675	0.25497466	35.32
0.3192	0.921364	-0.708	0.12996006	0.16614699	0.25532198	35.32
0.3200	0.842400	-0.699	0.13017690	0.16653126	0.25560212	35.32
0.3208	0.787096	-0.702	0.13032091	0.16680193	0.25579667	35.32
0.3216	0.748301	-0.702	0.13042206	0.16700989	0.25593388	35.32
0.3224	0.719376	-0.704	0.13050956	0.16717559	0.25604767	35.31
0.3232	0.695200	-0.706	0.13058347	0.16730565	0.25614887	35.31
0.3240	0.671883	-0.707	0.13064474	0.16743857	0.25623828	35.31
0.3248	0.648022	-0.704	0.13072354	0.16757733	0.25634229	35.31
0.3256	0.624046	-0.703	0.13078386	0.16771698	0.25645024	35.31
0.3264	0.601959	-0.710	0.13082665	0.16783446	0.25652015	35.31
0.3272	0.584221	-0.708	0.13086551	0.16792792	0.25657660	35.31
0.3280	0.573006	-0.711	0.13088602	0.16800308	0.25663108	35.31
0.3288	0.569572	-0.712	0.13089782	0.16803491	0.25664759	35.31
0.3296	0.574064	-0.708	0.13090855	0.16806191	0.25665832	35.31
0.3304	0.587511	-0.708	0.13090181	0.16805708	0.25665730	35.31
0.3312	0.614634	-0.714	0.13086087	0.16798389	0.25660193	35.31
0.3320	0.666103	-0.714	0.13077319	0.16783166	0.25647068	35.31
0.3328	0.753222	-0.712	0.13059711	0.16752249	0.25622851	35.32
0.3336	0.881710	-0.711	0.13033736	0.16703898	0.25584918	35.32
0.3344	1.049652	-0.707	0.12998337	0.16638881	0.25536281	35.32
0.3352	1.246347	-0.701	0.12955832	0.16560376	0.25480735	35.32
0.3360	1.458263	-0.704	0.12908173	0.16475123	0.25418478	35.32
0.3368	1.674242	-0.710	0.12855732	0.16387761	0.25354761	35.32
0.3376	1.884670	-0.708	0.12803394	0.16304630	0.25291824	35.32
0.3384	2.081394	-0.708	0.12752134	0.16226906	0.25231421	35.32
0.3392	2.256432	-0.702	0.12707096	0.16159391	0.25178123	35.32
0.3400	2.402773	-0.697	0.12668771	0.16103238	0.25133669	35.32
0.3408	2.516241	-0.700	0.12636960	0.16057396	0.25097674	35.32
0.3416	2.595720	-0.705	0.12614095	0.16024840	0.25071692	35.32
0.3424	2.644472	-0.707	0.12597167	0.16002107	0.25054950	35.31
0.3432	2.669535	-0.706	0.12587839	0.15987945	0.25044835	35.31
0.3440	2.678404	-0.704	0.12583166	0.15980625	0.25039577	35.31
0.3448	2.678061	-0.704	0.12581122	0.15976870	0.25038129	35.31
0.3456	2.673798	-0.707	0.12580436	0.15975720	0.25038326	35.31
0.3464	2.667847	-0.715	0.12578583	0.15975428	0.25035888	35.31
0.3472	2.661009	-0.719	0.12577426	0.15975046	0.25035703	35.31
0.3480	2.653027	-0.721	0.12576938	0.15975237	0.25034624	35.31
0.3488	2.642756	-0.718	0.12578011	0.15975714	0.25034916	35.31
0.3496	2.628222	-0.712	0.12580836	0.15977544	0.25040174	35.31
0.3504	2.605219	-0.707	0.12586284	0.15981388	0.25045031	35.31
0.3512	2.564507	-0.703	0.12594169	0.15989959	0.25052720	35.31
0.3520	2.492151	-0.703	0.12609541	0.16008836	0.25069261	35.31
0.3528	2.377510	-0.702	0.12636393	0.16043228	0.25097471	35.32
0.3536	2.218523	-0.700	0.12674230	0.16095144	0.25139296	35.32
0.3544	2.023659	-0.697	0.12721407	0.16162860	0.25195813	35.32
0.3552	1.810513	-0.696	0.12774909	0.16241837	0.25259531	35.32
0.3560	1.597652	-0.695	0.12826169	0.16323608	0.25323051	35.32
0.3568	1.398926	-0.703	0.12872374	0.16402692	0.25381619	35.32
0.3576	1.223717	-0.703	0.12916046	0.16475022	0.25434536	35.32
0.3584	1.077747	-0.700	0.12950188	0.16537064	0.25478596	35.32
0.3592	0.962276	-0.703	0.12979954	0.16588593	0.25514096	35.32
0.3600	0.874929	-0.692	0.13004375	0.16630298	0.25544149	35.32
0.3608	0.811129	-0.696	0.13020521	0.16662860	0.25566328	35.32
0.3616	0.764465	-0.702	0.13034046	0.16687322	0.25582772	35.32
0.3624	0.729275	-0.699	0.13042998	0.16706014	0.25596589	35.31
0.3632	0.700865	-0.702	0.13050187	0.16721427	0.25608069	35.31
0.3640	0.675888	-0.704	0.13056701	0.16734719	0.25618571	35.31
0.3648	0.652428	-0.700	0.13062632	0.16748106	0.25628197	35.31
0.3656	0.630455	-0.702	0.13070506	0.16761684	0.25638223	35.31
0.3664	0.611286	-0.707	0.13076645	0.16772658	0.25645524	35.31
0.3672	0.596352	-0.710	0.13081223	0.16781801	0.25649416	35.31
0.3680	0.587540	-0.718	0.13084728	0.16788739	0.25653887	35.31
0.3688	0.585709	-0.719	0.13085413	0.16792309	0.25656116	35.31
0.3696	0.591030	-0.716	0.13085890	0.16792893	0.25656301	35.31
0.3704	0.604877	-0.712	0.13084233	0.16791457	0.25654358	35.31
0.3712	0.631857	-0.712	0.13079846	0.16784614	0.25648528	35.31
0.3720	0.682926	-0.713	0.13071281	0.16769296	0.25634909	35.31
0.3728	0.769873	-0.715	0.13054258	0.16740102	0.25611085	35.32
0.3736	0.898361	-0.719	0.13028288	0.16691840	0.25575191	35.32
0.3744	1.067019	-0.719	0.12992692	0.16624612	0.25527138	35.32
0.3752	1.264658	-0.714	0.12949306	0.16544855	0.25471210	35.32
0.3760	1.476974	-0.713	0.12900674	0.16459137	0.25408757	35.32
0.3768	1.692066	-0.714	0.12849414	0.16371393	0.25344557	35.32
0.3776	1.899319	-0.708	0.12797856	0.16290289	0.25281322	35.32
0.3784	2.090435	-0.712	0.12747955	0.16214871	0.25222182	35.32
0.3792	2.257490	-0.709	0.12703210	0.16149366	0.25172281	35.32
0.3800	2.394648	-0.703	0.12666243	0.16096580	0.25129968	35.32
0.3808	2.499247	-0.703	0.12637639	0.16054583	0.25096411	35.32
0.3816	2.571630	-0.702	0.12615949	0.16023856	0.25072670	35.32
0.3824	2.616663	-0.698	0.12600189	0.16002959	0.25057888	35.31
0.3832	2.641125	-0.704	0.12590075	0.15989566	0.25049126	35.31
0.3840	2.651768	-0.701	0.12582397	0.15981865	0.25044942	35.31
0.3848	2.654629	-0.700	0.12579572	0.15978211	0.25042701	35.31
0.3856	2.653627	-0.703	0.12578404	0.15975803	0.25041038	35.31
0.3864	2.651110	-0.705	0.12576360	0.15974939	0.25039297	35.31
0.3872	2.647619	-0.713	0.12576455	0.15973389	0.25036871	35.31
0.3880	2.642813	-0.715	0.12575001	0.15972996	0.25035995	35.31
0.3888	2.635574	-0.716	0.12575388	0.15973866	0.25034732	35.31
0.3896	2.623787	-0.710	0.12577623	0.15975219	0.25037831	35.31
0.3904	2.604761	-0.704	0.12581229	0.15978110	0.25042403	35.31
0.3912	2.571087	-0.701	0.12588125	0.15984857	0.25047958	35.31
0.3920	2.509232	-0.702	0.12601936	0.15998828	0.25062358	35.31
0.3928	2.406092	-0.702	0.12626648	0.16029459	0.25088042	35.32
0.3936	2.256002	-0.702	0.12662631	0.16078293	0.25126952	35.32
0.3944	2.064142	-0.701	0.12709236	0.16144264	0.25180930	35.32
0.3952	1.847105	-0.697	0.12764007	0.16225070	0.25244641	35.32
0.3960	1.625490	-0.696	0.12817508	0.16309249	0.25308651	35.32
0.3968	1.415548	-0.702	0.12866241	0.16391510	0.25371194	35.32
0.3976	1.228552	-0.702	0.12912244	0.16469055	0.25428295	35.32
0.3984	1.071882	-0.706	0.12949497	0.16536385	0.25475580	35.32
0.3992	0.947800	-0.706	0.12980920	0.16590518	0.25515950	35.32
0.4000	0.854988	-0.698	0.13006902	0.16634923	0.25547367	35.32
0.4008	0.788755	-0.700	0.13024515	0.16666704	0.25570130	35.32
0.4016	0.741863	-0.699	0.13037068	0.16690111	0.25586855	35.32
0.4024	0.707560	-0.699	0.13046789	0.16709185	0.25599307	35.31
0.4032	0.680037	-0.699	0.13055152	0.16724116	0.25611377	35.31
0.4040	0.655603	-0.699	0.13061178	0.16737598	0.25621301	35.31
0.4048	0.632515	-0.697	0.13067591	0.16750401	0.25631320	35.31
0.4056	0.610714	-0.695	0.13073236	0.16763884	0.25641048	35.31
0.4064	0.591803	-0.701	0.13077903	0.16774291	0.25648046	35.31
0.4072	0.577583	-0.704	0.13082480	0.16783732	0.25653297	35.31
0.4080	0.569630	-0.704	0.13085401	0.16790479	0.25656897	35.31
0.4088	0.569172	-0.707	0.13087243	0.16792977	0.25657868	35.31
0.4096	0.576639	-0.704	0.13086665	0.16793460	0.25656909	35.31
0.4104	0.593691	-0.703	0.13084424	0.16790670	0.25655454	35.31
0.4112	0.627823	-0.709	0.13079077	0.16781038	0.25648934	35.31
0.4120	0.691280	-0.708	0.13067114	0.16760331	0.25632691	35.31
0.4128	0.794106	-0.707	0.13046873	0.16723627	0.25604177	35.32
0.4136	0.939817	-0.707	0.13016039	0.16666025	0.25562048	35.32
0.4144	1.123266	-0.706	0.12976539	0.16593593	0.25509810	35.32
0.4152	1.331034	-0.701	0.12930048	0.16510862	0.25451154	35.32
0.4160	1.549273	-0.707	0.12878597	0.16422921	0.25388414	35.32
0.4168	1.766596	-0.711	0.12825775	0.16336524	0.25321782	35.32
0.4176	1.972589	-0.709	0.12774026	0.16255039	0.25258946	35.32
0.4184	2.158699	-0.711	0.12725675	0.16181445	0.25199997	35.32
0.4192	2.317085	-0.707	0.12683940	0.16120088	0.25150293	35.32
0.4200	2.442684	-0.703	0.12649900	0.16072023	0.25113332	35.32
0.4208	2.534065	-0.706	0.12622368	0.16035318	0.25083858	35.32
0.4216	2.593603	-0.710	0.12603796	0.16009980	0.25063431	35.32
0.4224	2.627993	-0.706	0.12592024	0.15993321	0.25050682	35.31
0.4232	2.645016	-0.707	0.12584430	0.15982914	0.25043100	35.31
0.4240	2.651968	-0.705	0.12580639	0.15976465	0.25038624	35.31
0.4248	2.653942	-0.701	0.12578881	0.15974164	0.25038427	35.31
0.4256	2.653713	-0.702	0.12577420	0.15972716	0.25039011	35.31
0.4264	2.652626	-0.708	0.12576348	0.15970218	0.25038230	35.31
0.4272	2.650166	-0.711	0.12575954	0.15968770	0.25037640	35.30
0.4280	2.645588	-0.715	0.12574691	0.15966934	0.25036669	35.31
0.4288	2.637663	-0.715	0.12574893	0.15966356	0.25034237	35.31
0.4296	2.624044	-0.708	0.12577528	0.15968859	0.25035113	35.31
0.4304	2.600899	-0.706	0.12581617	0.15973395	0.25038725	35.31
0.4312	2.558327	-0.705	0.12591738	0.15982932	0.25046122	35.31
0.4320	2.482195	-0.705	0.12609738	0.16003346	0.25065380	35.31
0.4328	2.362061	-0.705	0.12637943	0.16039562	0.25097966	35.32
0.4336	2.196321	-0.703	0.12678021	0.16093308	0.25141633	35.32
0.4344	1.995077	-0.700	0.12725294	0.16163528	0.25198531	35.32
0.4352	1.777353	-0.698	0.12777615	0.16244733	0.25262547	35.32
0.4360	1.563091	-0.698	0.12829655	0.16327089	0.25325185	35.32
0.4368	1.366854	-0.703	0.12875766	0.16405392	0.25382775	35.32
0.4376	1.197538	-0.704	0.12917501	0.16475797	0.25434619	35.32
0.4384	1.059837	-0.708	0.12950867	0.16534263	0.25477612	35.32
0.4392	0.953093	-0.706	0.12977040	0.16582519	0.25510788	35.32
0.4400	0.873499	-0.697	0.12998641	0.16621053	0.25539291	35.32
0.4408	0.815477	-0.697	0.13014394	0.16649276	0.25560206	35.32
0.4416	0.772133	-0.695	0.13026750	0.16672105	0.25574505	35.32
0.4424	0.737514	-0.695	0.13036382	0.16690111	0.25587344	35.31
0.4432	0.706816	-0.700	0.13044357	0.16706002	0.25600082	35.31
0.4440	0.677347	-0.700	0.13052332	0.16721421	0.25611854	35.31
0.4448	0.647879	-0.700	0.13059628	0.16736734	0.25624013	35.31
0.4456	0.619097	-0.701	0.13067019	0.16753018	0.25635105	35.31
0.4464	0.593376	-0.707	0.13073242	0.16767371	0.25643581	35.31
0.4472	0.573034	-0.712	0.13077527	0.16779792	0.25650978	35.30
0.4480	0.560274	-0.721	0.13081038	0.16788262	0.25656331	35.31
0.4488	0.556240	-0.727	0.13083762	0.16793269	0.25659245	35.31
0.4496	0.560818	-0.724	0.13085222	0.16795957	0.25660986	35.31
0.4504	0.575323	-0.724	0.13084829	0.16795182	0.25657970	35.31
0.4512	0.605364	-0.722	0.13081896	0.16788346	0.25650859	35.31
0.4520	0.662756	-0.718	0.13071686	0.16770530	0.25636852	35.31
0.4528	0.758457	-0.716	0.13052332	0.16736245	0.25609326	35.32
0.4536	0.896187	-0.719	0.13023537	0.16683078	0.25571293	35.32
0.4544	1.072111	-0.719	0.12986290	0.16613829	0.25520325	35.32
0.4552	1.273012	-0.714	0.12943190	0.16533017	0.25461960	35.32
0.4560	1.484127	-0.714	0.12895226	0.16447967	0.25400490	35.32
0.4568	1.694212	-0.712	0.12844843	0.16363108	0.25338233	35.32
0.4576	1.893082	-0.709	0.12794936	0.16283739	0.25279486	35.32
0.4584	2.073126	-0.711	0.12747759	0.16211873	0.25222683	35.32
0.4592	2.228451	-0.707	0.12706804	0.16150898	0.25175494	35.32
0.4600	2.355251	-0.701	0.12672752	0.16101396	0.25135803	35.32
0.4608	2.453470	-0.700	0.12643862	0.16061622	0.25105643	35.32
0.4616	2.525167	-0.699	0.12621295	0.16031861	0.25084925	35.32
0.4624	2.574492	-0.703	0.12605244	0.16009331	0.25069064	35.31
0.4632	2.607307	-0.703	0.12594348	0.15994108	0.25056612	35.31
0.4640	2.628708	-0.707	0.12586468	0.15983123	0.25047368	35.31
0.4648	2.642870	-0.707	0.12581319	0.15975028	0.25041330	35.31
0.4656	2.652884	-0.705	0.12577039	0.15970212	0.25037062	35.31
0.4664	2.659922	-0.711	0.12572372	0.15965003	0.25033563	35.31
0.4672	2.663355	-0.711	0.12569654	0.15960765	0.25029677	35.30
0.4680	2.662811	-0.716	0.12567800	0.15959036	0.25026858	35.30
0.4688	2.657461	-0.716	0.12567800	0.15957880	0.25024325	35.31
0.4696	2.645931	-0.714	0.12569845	0.15958947	0.25025684	35.31
0.4704	2.625732	-0.710	0.12571883	0.15962702	0.25029761	35.31
0.4712	2.587938	-0.708	0.12578887	0.15970409	0.25037450	35.31
0.4720	2.517414	-0.709	0.12593967	0.15988225	0.25054955	35.31
0.4728	2.401485	-0.707	0.12620711	0.16023386	0.25084722	35.31
0.4736	2.236862	-0.711	0.12661666	0.16077518	0.25129473	35.32
0.4744	2.031956	-0.709	0.12711173	0.16148412	0.25185978	35.32
0.4752	1.806936	-0.708	0.12767106	0.16232115	0.25250185	35.32
0.4760	1.583376	-0.710	0.12821496	0.16317451	0.25316823	35.32
0.4768	1.377096	-0.716	0.12871981	0.16398746	0.25377035	35.32
0.4776	1.198282	-0.715	0.12916738	0.16473293	0.25431806	35.32
0.4784	1.052656	-0.717	0.12951660	0.16535991	0.25476938	35.32
0.4792	0.940189	-0.715	0.12980646	0.16587520	0.25513023	35.32
0.4800	0.857191	-0.704	0.13002050	0.16627586	0.25541341	35.32
0.4808	0.797653	-0.703	0.13019073	0.16658318	0.25562936	35.32
0.4816	0.753508	-0.699	0.13031423	0.16680002	0.25579667	35.32
0.4824	0.718374	-0.701	0.13040853	0.16697341	0.25591826	35.31
0.4832	0.687275	-0.699	0.13050091	0.16714293	0.25603783	35.31
0.4840	0.657434	-0.702	0.13056892	0.16729122	0.25615948	35.31
0.4848	0.627480	-0.698	0.13064969	0.16745108	0.25628018	35.31
0.4856	0.598068	-0.690	0.13073921	0.16761684	0.25639886	35.31
0.4864	0.571375	-0.693	0.13080436	0.16774887	0.25649613	35.30
0.4872	0.549974	-0.694	0.13085783	0.16786736	0.25656515	35.30
0.4880	0.536385	-0.702	0.13089097	0.16795498	0.25662249	35.30
0.4888	0.532036	-0.709	0.13090265	0.16799730	0.25664681	35.31
0.4896	0.537186	-0.712	0.13090557	0.16801459	0.25665945	35.31
0.4904	0.552864	-0.710	0.13089204	0.16800010	0.25665456	35.31
0.4912	0.585508	-0.708	0.13085115	0.16792405	0.25657672	35.31
0.4920	0.646706	-0.706	0.13073736	0.16772658	0.25641721	35.31
0.4928	0.746956	-0.702	0.13053703	0.16737115	0.25614190	35.32
0.4936	0.889635	-0.704	0.13024712	0.16681635	0.25573242	35.32
0.4944	1.070080	-0.706	0.12985599	0.16609102	0.25520027	35.32
0.4952	1.275558	-0.703	0.12939876	0.16526943	0.25461560	35.32
0.4960	1.492195	-0.706	0.12890357	0.16439486	0.25398427	35.32
0.4968	1.709633	-0.710	0.12836951	0.16351455	0.25333351	35.32
0.4976	1.918573	-0.710	0.12784040	0.16269779	0.25272369	35.32
0.4984	2.111034	-0.712	0.12734234	0.16193974	0.25212348	35.32
0.4992	2.279892	-0.710	0.12688810	0.16128385	0.25159240	35.32
0.5000	2.419624	-0.699	0.12651366	0.16075307	0.25116730	35.32
0.5008	2.527256	-0.695	0.12621504	0.16032439	0.25082874	35.32
0.5016	2.602816	-0.694	0.12598741	0.16001135	0.25059140	35.32
0.5024	2.650280	-0.695	0.12583959	0.15980232	0.25043768	35.31
0.5032	2.675858	-0.697	0.12574422	0.15967995	0.25032681	35.31
0.5040	2.686415	-0.702	0.12568486	0.15961057	0.25026363	35.31
0.5048	2.688103	-0.704	0.12567323	0.15958071	0.25024331	35.31
0.5056	2.684984	-0.703	0.12566531	0.15956336	0.25025314	35.31
0.5064	2.679777	-0.712	0.12564385	0.15953547	0.25025022	35.31
0.5072	2.672567	-0.711	0.12564766	0.15953261	0.25025707	35.30
0.5080	2.662840	-0.714	0.12564564	0.15954125	0.25027549	35.31
0.5088	2.649593	-0.714	0.12565249	0.15955275	0.25026470	35.31
0.5096	2.629652	-0.703	0.12570405	0.15959704	0.25029874	35.31
0.5104	2.596922	-0.702	0.12577415	0.15965772	0.25035506	35.31
0.5112	2.539930	-0.696	0.12589675	0.15979254	0.25046796	35.31
0.5120	2.446775	-0.698	0.12611473	0.16004586	0.25069952	35.31
0.5128	2.312536	-0.702	0.12644064	0.16047746	0.25106430	35.31
0.5136	2.140903	-0.701	0.12686479	0.16106212	0.25154388	35.32
0.5144	1.944780	-0.701	0.12734145	0.16176236	0.25208765	35.32
0.5152	1.740704	-0.694	0.12784630	0.16254550	0.25269455	35.32
0.5160	1.542978	-0.692	0.12831903	0.16330057	0.25328493	35.32
0.5168	1.362591	-0.699	0.12874216	0.16401434	0.25381219	35.32
0.5176	1.206865	-0.700	0.12912738	0.16467035	0.25429749	35.32
0.5184	1.080093	-0.705	0.12944543	0.16521651	0.25468272	35.32
0.5192	0.981216	-0.702	0.12970620	0.16566545	0.25499600	35.32
0.5200	0.906487	-0.696	0.12991637	0.16602665	0.25525278	35.32
0.5208	0.849695	-0.696	0.13006812	0.16629350	0.25545228	35.32
0.5216	0.804062	-0.698	0.13018191	0.16651589	0.25562453	35.32
0.5224	0.764008	-0.704	0.13027716	0.16671526	0.25577241	35.31
0.5232	0.725641	-0.701	0.13037151	0.16689730	0.25591052	35.31
0.5240	0.687590	-0.706	0.13046294	0.16709185	0.25604850	35.31
0.5248	0.649996	-0.700	0.13055533	0.16728455	0.25618470	35.31
0.5256	0.614977	-0.699	0.13064194	0.16747326	0.25631702	35.31
0.5264	0.585251	-0.706	0.13070214	0.16763127	0.25642991	35.30
0.5272	0.563221	-0.706	0.13076532	0.16775930	0.25651747	35.30
0.5280	0.550404	-0.714	0.13080239	0.16785467	0.25656217	35.30
0.5288	0.547686	-0.712	0.13082665	0.16789705	0.25657868	35.31
0.5296	0.554552	-0.712	0.13083547	0.16792589	0.25659418	35.31
0.5304	0.573006	-0.711	0.13081795	0.16790181	0.25655925	35.31
0.5312	0.610914	-0.712	0.13076144	0.16779679	0.25647080	35.31
0.5320	0.679893	-0.718	0.13063210	0.16757047	0.25628692	35.31
0.5328	0.788670	-0.713	0.13041806	0.16716784	0.25598150	35.31
0.5336	0.938387	-0.713	0.13009900	0.16658139	0.25555837	35.32
0.5344	1.121778	-0.712	0.12970704	0.16585130	0.25503790	35.32
0.5352	1.325140	-0.704	0.12926060	0.16503835	0.25446016	35.32
0.5360	1.535769	-0.707	0.12878203	0.16418689	0.25383854	35.32
0.5368	1.744509	-0.712	0.12828404	0.16334301	0.25321883	35.32
0.5376	1.942692	-0.712	0.12778890	0.16255802	0.25262934	35.32
0.5384	2.123051	-0.716	0.12731415	0.16185099	0.25205338	35.32
0.5392	2.279434	-0.712	0.12689686	0.16125190	0.25156903	35.32
0.5400	2.407465	-0.702	0.12654370	0.16076076	0.25118285	35.32
0.5408	2.506227	-0.696	0.12626165	0.16036105	0.25087351	35.32
0.5416	2.577295	-0.692	0.12605155	0.16006547	0.25066149	35.32
0.5424	2.625418	-0.689	0.12589300	0.15984869	0.25049508	35.31
0.5432	2.656517	-0.690	0.12579280	0.15969741	0.25036383	35.31
0.5440	2.675915	-0.689	0.12571585	0.15960014	0.25028217	35.31
0.5448	2.688360	-0.690	0.12567401	0.15952396	0.25023264	35.31
0.5456	2.696629	-0.689	0.12564194	0.15946817	0.25020933	35.31
0.5464	2.702150	-0.696	0.12558949	0.15942580	0.25016648	35.31
0.5472	2.704468	-0.699	0.12555456	0.15938437	0.25013334	35.30
0.5480	2.703009	-0.705	0.12552840	0.15936226	0.25011086	35.31
0.5488	2.696629	-0.706	0.12551767	0.15935552	0.25009531	35.31
0.5496	2.683496	-0.701	0.12554008	0.15937191	0.25013721	35.31
0.5504	2.660351	-0.698	0.12559259	0.15941328	0.25018781	35.31
0.5512	2.617378	-0.693	0.12568200	0.15950286	0.25027531	35.31
0.5520	2.539816	-0.694	0.12585515	0.15970707	0.25045037	35.31
0.5528	2.416620	-0.694	0.12615567	0.16006917	0.25074995	35.31
0.5536	2.247076	-0.694	0.12656027	0.16062981	0.25119162	35.32
0.5544	2.041540	-0.692	0.12705731	0.16134828	0.25176173	35.32
0.5552	1.820154	-0.690	0.12760592	0.16217273	0.25241745	35.32
0.5560	1.602888	-0.688	0.12813318	0.16301465	0.25306630	35.32
0.5568	1.403160	-0.698	0.12861574	0.16380250	0.25365764	35.32
0.5576	1.229725	-0.698	0.12903798	0.16452199	0.25418973	35.32
0.5584	1.087389	-0.702	0.12938535	0.16512686	0.25462836	35.32
0.5592	0.975924	-0.703	0.12967515	0.16563636	0.25498724	35.32
0.5600	0.891581	-0.689	0.12989986	0.16603804	0.25527722	35.32
0.5608	0.828638	-0.692	0.13007295	0.16635019	0.25549024	35.32
0.5616	0.779772	-0.690	0.13020515	0.16660351	0.25565654	35.32
0.5624	0.738745	-0.693	0.13030148	0.16680384	0.25580150	35.31
0.5632	0.701637	-0.695	0.13040358	0.16699839	0.25594437	35.31
0.5640	0.666046	-0.694	0.13049895	0.16718423	0.25608337	35.31
0.5648	0.631742	-0.692	0.13059038	0.16736531	0.25621480	35.31
0.5656	0.600157	-0.688	0.13068670	0.16754448	0.25634813	35.31
0.5664	0.573721	-0.696	0.13075286	0.16768128	0.25645614	35.31
0.5672	0.554838	-0.702	0.13080925	0.16778630	0.25652814	35.30
0.5680	0.544767	-0.707	0.13084334	0.16784799	0.25657564	35.31
0.5688	0.544052	-0.714	0.13085109	0.16788554	0.25658727	35.31
0.5696	0.552006	-0.711	0.13085014	0.16789716	0.25658053	35.31
0.5704	0.570145	-0.704	0.13082194	0.16787022	0.25655138	35.31
0.5712	0.605278	-0.705	0.13076741	0.16777778	0.25648052	35.31
0.5720	0.668249	-0.700	0.13064873	0.16756690	0.25631708	35.31
0.5728	0.766926	-0.702	0.13045508	0.16721237	0.25603300	35.31
0.5736	0.903025	-0.700	0.13017982	0.16667974	0.25565076	35.32
0.5744	1.071081	-0.698	0.12981409	0.16600740	0.25516438	35.32
0.5752	1.259737	-0.697	0.12940556	0.16524351	0.25461090	35.32
0.5760	1.459007	-0.695	0.12894833	0.16443151	0.25404471	35.32
0.5768	1.660595	-0.706	0.12845224	0.16361755	0.25343382	35.32
0.5776	1.856518	-0.710	0.12797165	0.16284889	0.25285214	35.32
0.5784	2.039766	-0.709	0.12749493	0.16213030	0.25229383	35.32
0.5792	2.203846	-0.710	0.12706405	0.16149753	0.25178218	35.32
0.5800	2.343636	-0.702	0.12669724	0.16096103	0.25136578	35.32
0.5808	2.456446	-0.697	0.12637919	0.16051507	0.25101167	35.32
0.5816	2.541389	-0.699	0.12612540	0.16017318	0.25074893	35.32
0.5824	2.601070	-0.697	0.12594253	0.15991694	0.25056219	35.31
0.5832	2.640209	-0.696	0.12581515	0.15974641	0.25041831	35.31
0.5840	2.664585	-0.699	0.12572664	0.15963084	0.25031811	35.31
0.5848	2.679462	-0.695	0.12567210	0.15954888	0.25025791	35.31
0.5856	2.687988	-0.695	0.12563121	0.15950733	0.25022674	35.31
0.5864	2.692280	-0.702	0.12559235	0.15946114	0.25019753	35.31
0.5872	2.692165	-0.705	0.12557483	0.15942943	0.25017029	35.30
0.5880	2.687817	-0.709	0.12556899	0.15942180	0.25015175	35.30
0.5888	2.678690	-0.708	0.12557876	0.15941995	0.25013429	35.31
0.5896	2.662840	-0.704	0.12560886	0.15944886	0.25016159	35.31
0.5904	2.635975	-0.700	0.12565553	0.15950269	0.25022280	35.31
0.5912	2.587166	-0.699	0.12575579	0.15961254	0.25033277	35.31
0.5920	2.502966	-0.700	0.12593770	0.15983504	0.25053799	35.31
0.5928	2.375565	-0.702	0.12624216	0.16022992	0.25086671	35.31
0.5936	2.206192	-0.705	0.12665856	0.16078472	0.25131911	35.32
0.5944	2.006607	-0.708	0.12714297	0.16147822	0.25188231	35.32
0.5952	1.795292	-0.707	0.12767214	0.16226333	0.25250298	35.32
0.5960	1.589184	-0.704	0.12817895	0.16305125	0.25312161	35.32
0.5968	1.400242	-0.709	0.12863225	0.16379678	0.25367123	35.32
0.5976	1.236420	-0.708	0.12904763	0.16448164	0.25416338	35.32
0.5984	1.102037	-0.713	0.12938321	0.16506243	0.25457484	35.32
0.5992	0.996695	-0.714	0.12964684	0.16552955	0.25490463	35.32
0.6000	0.917301	-0.704	0.12986082	0.16591483	0.25518280	35.32
0.6008	0.857906	-0.701	0.13001549	0.16619992	0.25539494	35.32
0.6016	0.811129	-0.698	0.13013905	0.16641569	0.25556225	35.32
0.6024	0.770388	-0.695	0.13024110	0.16661507	0.25569838	35.31
0.6032	0.730705	-0.694	0.13033652	0.16680002	0.25584918	35.31
0.6040	0.689449	-0.695	0.13043666	0.16700906	0.25599593	35.31
0.6048	0.647593	-0.692	0.13052613	0.16723049	0.25614768	35.31
0.6056	0.607767	-0.690	0.13062739	0.16745013	0.25629562	35.31
0.6064	0.573950	-0.693	0.13071591	0.16762644	0.25640947	35.31
0.6072	0.550032	-0.693	0.13077527	0.16775644	0.25649810	35.30
0.6080	0.537014	-0.696	0.13081616	0.16784608	0.25655550	35.30
0.6088	0.535183	-0.700	0.13083071	0.16788369	0.25658268	35.31
0.6096	0.543451	-0.698	0.13083166	0.16790873	0.25659233	35.31
0.6104	0.563107	-0.696	0.13080925	0.16787499	0.25655830	35.31
0.6112	0.602446	-0.696	0.13075477	0.16776806	0.25646394	35.31
0.6120	0.672884	-0.695	0.13063806	0.16753882	0.25627232	35.31
0.6128	0.782833	-0.692	0.13041526	0.16712946	0.25595909	35.32
0.6136	0.934010	-0.695	0.13009810	0.16654384	0.25552720	35.32
0.6144	1.119289	-0.692	0.12969929	0.16580129	0.25499117	35.32
0.6152	1.325655	-0.689	0.12923241	0.16497773	0.25441438	35.32
0.6160	1.540489	-0.688	0.12874311	0.16412431	0.25380260	35.32
0.6168	1.753721	-0.690	0.12822664	0.16327381	0.25317127	35.32
0.6176	1.955853	-0.695	0.12771499	0.16248196	0.25257015	35.32
0.6184	2.139273	-0.699	0.12724322	0.16175568	0.25200504	35.32
0.6192	2.298145	-0.699	0.12680942	0.16112864	0.25150204	35.32
0.6200	2.428494	-0.695	0.12646312	0.16062683	0.25110316	35.32
0.6208	2.529230	-0.694	0.12618196	0.16021746	0.25078404	35.32
0.6216	2.602100	-0.693	0.12595624	0.15992278	0.25054085	35.32
0.6224	2.651339	-0.692	0.12580436	0.15971756	0.25037843	35.31
0.6232	2.681866	-0.691	0.12568867	0.15957594	0.25028020	35.31
0.6240	2.699060	-0.688	0.12561184	0.15947962	0.25019753	35.31
0.6248	2.707300	-0.686	0.12557584	0.15941215	0.25014973	35.31
0.6256	2.709675	-0.684	0.12554967	0.15937370	0.25013417	35.31
0.6264	2.708359	-0.685	0.12553316	0.15934104	0.25010496	35.31
0.6272	2.703667	-0.692	0.12551183	0.15933341	0.25009722	35.30
0.6280	2.695112	-0.695	0.12550604	0.15933633	0.25010508	35.30
0.6288	2.681551	-0.698	0.12551767	0.15933633	0.25011188	35.31
0.6296	2.660236	-0.695	0.12555355	0.15937388	0.25014985	35.31
0.6304	2.624302	-0.688	0.12563127	0.15944511	0.25022769	35.31
0.6312	2.561359	-0.692	0.12576550	0.15959245	0.25037164	35.31
0.6320	2.460852	-0.691	0.12600291	0.15989679	0.25061584	35.31
0.6328	2.319231	-0.695	0.12634730	0.16034752	0.25097966	35.32
0.6336	2.142477	-0.694	0.12678897	0.16094661	0.25146508	35.32
0.6344	1.945896	-0.691	0.12728405	0.16165841	0.25201082	35.32
0.6352	1.745167	-0.690	0.12778306	0.16240972	0.25260717	35.32
0.6360	1.553049	-0.687	0.12825197	0.16316199	0.25317818	35.32
0.6368	1.378469	-0.695	0.12866050	0.16386515	0.25369465	35.32
0.6376	1.226835	-0.694	0.12902039	0.16449612	0.25417221	35.32
0.6384	1.101351	-0.701	0.12932777	0.16502875	0.25455832	35.32
0.6392	1.000957	-0.699	0.12957865	0.16547859	0.25487733	35.32
0.6400	0.921965	-0.692	0.12980235	0.16585618	0.25515747	35.32
0.6408	0.859051	-0.690	0.12997162	0.16615856	0.25536859	35.32
0.6416	0.805979	-0.688	0.13011360	0.16642821	0.25555044	35.32
0.6424	0.758142	-0.688	0.13023710	0.16666615	0.25572652	35.32
0.6432	0.712767	-0.689	0.13035387	0.16689444	0.25588220	35.31
0.6440	0.668907	-0.692	0.13047451	0.16712660	0.25604558	35.31
0.6448	0.627508	-0.690	0.13058054	0.16732985	0.25619638	35.31
0.6456	0.590773	-0.687	0.13068181	0.16752058	0.25634134	35.31
0.6464	0.561819	-0.692	0.13075376	0.16767561	0.25644934	35.31
0.6472	0.542336	-0.699	0.13080144	0.16778541	0.25652814	35.30
0.6480	0.533495	-0.704	0.13083255	0.16786057	0.25656903	35.30
0.6488	0.535355	-0.712	0.13084620	0.16788459	0.25657773	35.31
0.6496	0.547113	-0.707	0.13084519	0.16788846	0.25658059	35.31
0.6504	0.572348	-0.702	0.13081694	0.16783935	0.25652033	35.31
0.6512	0.620728	-0.703	0.13073134	0.16770548	0.25640357	35.31
0.6520	0.702095	-0.702	0.13057375	0.16743386	0.25618279	35.31
0.6528	0.821829	-0.707	0.13032871	0.16697252	0.25582969	35.31
0.6536	0.978498	-0.708	0.13000190	0.16634929	0.25538605	35.32
0.6544	1.161804	-0.707	0.12960601	0.16559988	0.25487053	35.32
0.6552	1.358843	-0.706	0.12917900	0.16479462	0.25431120	35.32
0.6560	1.558914	-0.702	0.12871593	0.16398454	0.25371975	35.32
0.6568	1.753263	-0.706	0.12823153	0.16319954	0.25313318	35.32
0.6576	1.934223	-0.705	0.12777144	0.16248393	0.25258356	35.32
0.6584	2.095871	-0.700	0.12732685	0.16184914	0.25208455	35.32
0.6592	2.233686	-0.699	0.12694550	0.16131359	0.25166631	35.32
0.6600	2.345066	-0.688	0.12664008	0.16087919	0.25132102	35.32
0.6608	2.430639	-0.688	0.12639493	0.16053534	0.25105447	35.32
0.6616	2.493753	-0.689	0.12621003	0.16027141	0.25084049	35.32
0.6624	2.539845	-0.688	0.12606519	0.16006720	0.25069839	35.31
0.6632	2.574549	-0.691	0.12595719	0.15991986	0.25060111	35.31
0.6640	2.602615	-0.692	0.12586087	0.15979755	0.25049317	35.31
0.6648	2.626877	-0.691	0.12578499	0.15969354	0.25041544	35.31
0.6656	2.647877	-0.691	0.12572753	0.15960681	0.25033963	35.31
0.6664	2.665787	-0.697	0.12565649	0.15950954	0.25026184	35.31
0.6672	2.678204	-0.700	0.12559819	0.15943241	0.25020540	35.30
0.6680	2.683496	-0.700	0.12555349	0.15939492	0.25015473	35.30
0.6688	2.681208	-0.703	0.12552923	0.15937865	0.25013626	35.31
0.6696	2.669477	-0.692	0.12554282	0.15939498	0.25014013	35.31
0.6704	2.646303	-0.686	0.12560606	0.15944117	0.25018001	35.31
0.6712	2.602558	-0.686	0.12570530	0.15953070	0.25028503	35.31
0.6720	2.523680	-0.682	0.12588817	0.15973389	0.25046015	35.31
0.6728	2.399826	-0.684	0.12618291	0.16010863	0.25076747	35.31
0.6736	2.230997	-0.683	0.12658072	0.16066253	0.25122374	35.32
0.6744	2.028751	-0.684	0.12707001	0.16136181	0.25178993	35.32
0.6752	1.813860	-0.679	0.12759721	0.16215450	0.25242215	35.32
0.6760	1.605978	-0.683	0.12810308	0.16295677	0.25304288	35.32
0.6768	1.418066	-0.692	0.12854862	0.16369265	0.25359046	35.32
0.6776	1.258507	-0.692	0.12894255	0.16434860	0.25407189	35.32
0.6784	1.130648	-0.698	0.12927234	0.16489279	0.25446111	35.32
0.6792	1.033058	-0.698	0.12953204	0.16532141	0.25477427	35.32
0.6800	0.960703	-0.694	0.12974215	0.16566622	0.25501263	35.32
0.6808	0.906172	-0.696	0.12989491	0.16593879	0.25519943	35.32
0.6816	0.861168	-0.698	0.13000578	0.16616231	0.25535697	35.32
0.6824	0.819254	-0.698	0.13010699	0.16635978	0.25550681	35.31
0.6832	0.776281	-0.695	0.13020521	0.16655821	0.25565857	35.31
0.6840	0.730762	-0.694	0.13031417	0.16676337	0.25582099	35.31
0.6848	0.684185	-0.690	0.13042605	0.16699070	0.25598246	35.31
0.6856	0.639582	-0.689	0.13053590	0.16722667	0.25614583	35.31
0.6864	0.600843	-0.694	0.13062245	0.16743094	0.25629181	35.31
0.6872	0.571489	-0.701	0.13068753	0.16759372	0.25639015	35.30
0.6880	0.553522	-0.704	0.13073909	0.16770637	0.25646991	35.31
0.6888	0.547285	-0.707	0.13076246	0.16776323	0.25649625	35.31
0.6896	0.552206	-0.707	0.13077509	0.16778243	0.25650591	35.31
0.6904	0.568886	-0.700	0.13077122	0.16777086	0.25649512	35.31
0.6912	0.604649	-0.702	0.13070601	0.16767746	0.25641245	35.31
0.6920	0.671167	-0.703	0.13058543	0.16747034	0.25624901	35.31
0.6928	0.777340	-0.699	0.13037920	0.16709083	0.25596011	35.31
0.6936	0.925083	-0.701	0.13007188	0.16651392	0.25553119	35.32
0.6944	1.107359	-0.699	0.12968761	0.16579056	0.25500691	35.32
0.6952	1.310663	-0.696	0.12924594	0.16497284	0.25442809	35.32
0.6960	1.521492	-0.695	0.12875861	0.16413003	0.25381333	35.32
0.6968	1.729774	-0.699	0.12824881	0.16329390	0.25318491	35.32
0.6976	1.925926	-0.700	0.12776637	0.16251463	0.25259924	35.32
0.6984	2.102079	-0.702	0.12730628	0.16182208	0.25205356	35.32
0.6992	2.252398	-0.702	0.12689680	0.16123360	0.25158852	35.32
0.7000	2.373104	-0.696	0.12656516	0.16077906	0.25123632	35.32
0.7008	2.463741	-0.694	0.12630343	0.16042942	0.25094354	35.32
0.7016	2.526655	-0.691	0.12610406	0.16016740	0.25073528	35.32
0.7024	2.566938	-0.693	0.12598050	0.15998441	0.25059915	35.31
0.7032	2.590971	-0.694	0.12590557	0.15985817	0.25051069	35.31
0.7040	2.604847	-0.698	0.12584049	0.15976959	0.25046009	35.31
0.7048	2.612886	-0.698	0.12581027	0.15970987	0.25043195	35.31
0.7056	2.617693	-0.699	0.12577909	0.15968096	0.25041342	35.31
0.7064	2.620325	-0.703	0.12574893	0.15965015	0.25037932	35.31
0.7072	2.620068	-0.705	0.12572944	0.15962315	0.25035214	35.30
0.7080	2.616549	-0.707	0.12571394	0.15961355	0.25034136	35.30
0.7088	2.609110	-0.707	0.12571400	0.15960199	0.25034332	35.31
0.7096	2.595778	-0.702	0.12573057	0.15961355	0.25035793	35.31
0.7104	2.573605	-0.698	0.12576950	0.15965497	0.25039488	35.31
0.7112	2.533522	-0.699	0.12585211	0.15973681	0.25046599	35.31
0.7120	2.461567	-0.696	0.12601656	0.15992564	0.25061482	35.31
0.7128	2.347784	-0.701	0.12628210	0.16027337	0.25090081	35.31
0.7136	2.190371	-0.699	0.12666637	0.16078383	0.25133753	35.32
0.7144	1.998196	-0.698	0.12713623	0.16145229	0.25188220	35.32
0.7152	1.789198	-0.696	0.12765658	0.16223627	0.25248927	35.32
0.7160	1.581917	-0.692	0.12816727	0.16303092	0.25310701	35.32
0.7168	1.389999	-0.703	0.12862247	0.16378999	0.25366151	35.32
0.7176	1.222801	-0.700	0.12902129	0.16448057	0.25415766	35.32
0.7184	1.085930	-0.703	0.12935495	0.16505271	0.25458753	35.32
0.7192	0.979986	-0.703	0.12961662	0.16552854	0.25492305	35.32
0.7200	0.901823	-0.694	0.12982965	0.16590995	0.25519341	35.32
0.7208	0.845432	-0.691	0.12998927	0.16618454	0.25539964	35.32
0.7216	0.803604	-0.691	0.13010210	0.16640222	0.25554943	35.32
0.7224	0.769730	-0.687	0.13019550	0.16657460	0.25568277	35.31
0.7232	0.739031	-0.686	0.13027430	0.16672677	0.25579470	35.31
0.7240	0.709105	-0.686	0.13036078	0.16688466	0.25590360	35.31
0.7248	0.678835	-0.685	0.13043958	0.16704553	0.25602722	35.31
0.7256	0.649252	-0.686	0.13052511	0.16720355	0.25614977	35.31
0.7264	0.622616	-0.690	0.13059705	0.16734517	0.25624216	35.31
0.7272	0.601530	-0.696	0.13064188	0.16746843	0.25632483	35.30
0.7280	0.588083	-0.696	0.13068664	0.16755027	0.25638032	35.30
0.7288	0.583706	-0.699	0.13070518	0.16759741	0.25638425	35.31
0.7296	0.588369	-0.700	0.13071984	0.16762054	0.25640374	35.31
0.7304	0.603018	-0.694	0.13072079	0.16760522	0.25638729	35.31
0.7312	0.634031	-0.700	0.13066626	0.16752720	0.25631523	35.31
0.7320	0.692739	-0.702	0.13056219	0.16734904	0.25617027	35.31
0.7328	0.789242	-0.706	0.13037252	0.16700614	0.25591147	35.31
0.7336	0.927029	-0.712	0.13008267	0.16647637	0.25551844	35.32
0.7344	1.101522	-0.708	0.12971795	0.16578865	0.25502336	35.32
0.7352	1.300421	-0.707	0.12928408	0.16498917	0.25447381	35.32
0.7360	1.511021	-0.699	0.12879670	0.16414344	0.25386590	35.32
0.7368	1.723509	-0.702	0.12827331	0.16330254	0.25322479	35.32
0.7376	1.928587	-0.702	0.12775278	0.16249740	0.25260508	35.32
0.7384	2.117615	-0.703	0.12724698	0.16175479	0.25201261	35.32
0.7392	2.282639	-0.702	0.12680238	0.16111338	0.25149411	35.32
0.7400	2.417736	-0.696	0.12643659	0.16058457	0.25108957	35.32
0.7408	2.520418	-0.697	0.12614876	0.16017902	0.25076956	35.32
0.7416	2.591686	-0.700	0.12594157	0.15989101	0.25054389	35.32
0.7424	2.636347	-0.703	0.12578887	0.15969729	0.25039995	35.31
0.7432	2.660608	-0.702	0.12570328	0.15957588	0.25030845	35.31
0.7440	2.671223	-0.702	0.12563908	0.15949595	0.25024623	35.31
0.7448	2.673883	-0.696	0.12560499	0.15944976	0.25021315	35.31
0.7456	2.672396	-0.696	0.12559909	0.15943336	0.25020629	35.31
0.7464	2.669048	-0.698	0.12558067	0.15941709	0.25020140	35.30
0.7472	2.664156	-0.703	0.12556994	0.15940744	0.25020915	35.30
0.7480	2.656918	-0.704	0.12558162	0.15941125	0.25021011	35.30
0.7488	2.646647	-0.704	0.12558752	0.15941709	0.25019753	35.30
0.7496	2.631454	-0.698	0.12561280	0.15944690	0.25021410	35.31
0.7504	2.606936	-0.692	0.12566721	0.15949690	0.25024724	35.31
0.7512	2.563047	-0.691	0.12575573	0.15959805	0.25033379	35.31
0.7520	2.485514	-0.690	0.12592894	0.15980709	0.25053215	35.31
0.7528	2.365150	-0.692	0.12621194	0.16017693	0.25083655	35.31
0.7536	2.201357	-0.691	0.12661082	0.16072792	0.25127518	35.32
0.7544	2.004719	-0.691	0.12708843	0.16142237	0.25183553	35.32
0.7552	1.792860	-0.688	0.12761658	0.16221023	0.25245130	35.32
0.7560	1.583061	-0.688	0.12814093	0.16301453	0.25308365	35.32
0.7568	1.388369	-0.698	0.12860590	0.16377640	0.25366145	35.32
0.7576	1.217794	-0.699	0.12902033	0.16447276	0.25417709	35.32
0.7584	1.077032	-0.704	0.12936080	0.16506994	0.25460023	35.32
0.7592	0.967026	-0.704	0.12963808	0.16556603	0.25495332	35.32
0.7600	0.884829	-0.694	0.12986577	0.16595811	0.25522959	35.32
0.7608	0.824633	-0.694	0.13002431	0.16625196	0.25543767	35.32
0.7616	0.779400	-0.697	0.13015080	0.16647834	0.25561082	35.32
0.7624	0.742464	-0.698	0.13025194	0.16666418	0.25573146	35.31
0.7632	0.709190	-0.700	0.13034725	0.16683561	0.25585699	35.31
0.7640	0.676718	-0.702	0.13043284	0.16700125	0.25599611	35.31
0.7648	0.644360	-0.696	0.13051450	0.16716695	0.25611281	35.31
0.7656	0.613174	-0.695	0.13059133	0.16733259	0.25624120	35.31
0.7664	0.585995	-0.692	0.13064671	0.16748095	0.25634718	35.31
0.7672	0.565567	-0.699	0.13069731	0.16759360	0.25641340	35.30
0.7680	0.553637	-0.701	0.13073140	0.16767067	0.25646889	35.31
0.7688	0.551405	-0.702	0.13074303	0.16770732	0.25649422	35.31
0.7696	0.558014	-0.706	0.13075382	0.16771793	0.25650495	35.31
0.7704	0.574980	-0.702	0.13073915	0.16770542	0.25647473	35.31
0.7712	0.608940	-0.704	0.13069439	0.16762835	0.25639683	35.31
0.7720	0.671453	-0.708	0.13058257	0.16742224	0.25623149	35.31
0.7728	0.772533	-0.707	0.13037628	0.16706097	0.25594544	35.31
0.7736	0.915012	-0.708	0.13007867	0.16651487	0.25555050	35.32
0.7744	1.094170	-0.708	0.12967795	0.16580015	0.25503504	35.32
0.7752	1.297474	-0.709	0.12923241	0.16498911	0.25446200	35.32
0.7760	1.511965	-0.710	0.12874120	0.16412807	0.25385022	35.32
0.7768	1.728144	-0.713	0.12820911	0.16326219	0.25318974	35.32
0.7776	1.936798	-0.713	0.12769252	0.16244727	0.25257206	35.32
0.7784	2.130175	-0.707	0.12718773	0.16170657	0.25197959	35.32
0.7792	2.301264	-0.704	0.12672371	0.16105545	0.25144750	35.32
0.7800	2.443829	-0.695	0.12635601	0.16051215	0.25103700	35.32
0.7808	2.554436	-0.695	0.12605155	0.16007966	0.25069457	35.32
0.7816	2.632170	-0.696	0.12580931	0.15976661	0.25043303	35.32
0.7824	2.680464	-0.700	0.12565857	0.15954793	0.25025791	35.32
0.7832	2.705383	-0.702	0.12556911	0.15943241	0.25014007	35.31
0.7840	2.714109	-0.707	0.12551951	0.15935922	0.25008851	35.31
0.7848	2.713280	-0.704	0.12551469	0.15931880	0.25006217	35.31
0.7856	2.707644	-0.702	0.12551761	0.15931118	0.25008357	35.31
0.7864	2.700005	-0.702	0.12551469	0.15929472	0.25009048	35.31
0.7872	2.691107	-0.702	0.12551373	0.15928513	0.25007492	35.30
0.7880	2.680779	-0.707	0.12552249	0.15929186	0.25009245	35.31
0.7888	2.667704	-0.704	0.12553799	0.15929955	0.25010413	35.31
0.7896	2.648649	-0.706	0.12556517	0.15933037	0.25013137	35.31
0.7904	2.616920	-0.701	0.12563515	0.15940928	0.25019455	35.31
0.7912	2.561045	-0.702	0.12575084	0.15954316	0.25031430	35.31
0.7920	2.469721	-0.704	0.12595421	0.15980411	0.25053316	35.31
0.7928	2.337227	-0.704	0.12627429	0.16022599	0.25088143	35.31
0.7936	2.165995	-0.705	0.12668878	0.16080397	0.25136197	35.32
0.7944	1.968184	-0.704	0.12717998	0.16150522	0.25192124	35.32
0.7952	1.759501	-0.704	0.12769359	0.16228837	0.25251460	35.32
0.7960	1.554966	-0.702	0.12818480	0.16308117	0.25313324	35.32
0.7968	1.366596	-0.709	0.12863606	0.16382575	0.25370038	35.32
0.7976	1.202288	-0.707	0.12903297	0.16451061	0.25420326	35.32
0.7984	1.066933	-0.710	0.12936664	0.16509140	0.25462544	35.32
0.7992	0.960732	-0.710	0.12963802	0.16556227	0.25495231	35.32
0.8000	0.880251	-0.700	0.12985688	0.16594172	0.25521493	35.32
0.8010	0.890121	-0.701	0.13025773	0.16660559	0.25568968	35.32
0.8020	0.891066	-0.697	0.13025385	0.16660851	0.25569749	35.32
0.8030	0.889807	-0.697	0.13025969	0.16660851	0.25570333	35.32
0.8040	0.883942	-0.698	0.13025779	0.16662580	0.25570434	35.31
0.8050	0.869579	-0.702	0.13028687	0.16664982	0.25573838	35.31
0.8060	0.838652	-0.700	0.13033646	0.16674793	0.25581813	35.31
0.8070	0.786381	-0.698	0.13045216	0.16695124	0.25597948	35.31
0.8080	0.718374	-0.696	0.13058054	0.16722196	0.25616133	35.30
0.8090	0.650539	-0.703	0.13073236	0.16752732	0.25635874	35.30
0.8100	0.600214	-0.710	0.13082868	0.16775751	0.25651628	35.30
0.8110	0.573978	-0.714	0.13088524	0.16791356	0.25660670	35.31
0.8120	0.570059	-0.711	0.13090569	0.16796750	0.25664073	35.31
0.8130	0.583591	-0.710	0.13090074	0.16794914	0.25662524	35.31
0.8140	0.617781	-0.703	0.13086176	0.16785854	0.25655043	35.31
0.8150	0.689020	-0.699	0.13073039	0.16762441	0.25636369	35.32
0.8160	0.808554	-0.698	0.13047850	0.16718137	0.25604075	35.32
0.8170	0.971174	-0.697	0.13013613	0.16654956	0.25558549	35.32
0.8180	1.157885	-0.700	0.12971395	0.16578287	0.25502819	35.32
0.8190	1.344938	-0.701	0.12929857	0.16502196	0.25446695	35.32
0.8200	1.517229	-0.704	0.12887251	0.16431010	0.25395823	35.32
0.8210	1.660652	-0.700	0.12852532	0.16373318	0.25354087	35.32
0.8220	1.766796	-0.695	0.12825388	0.16329014	0.25322080	35.32
0.8230	1.835661	-0.696	0.12807292	0.16298676	0.25299513	35.32
0.8240	1.874971	-0.700	0.12794358	0.16279018	0.25287151	35.31
0.8250	1.895885	-0.702	0.12787253	0.16266775	0.25281024	35.31
0.8260	1.909475	-0.698	0.12783080	0.16259253	0.25275087	35.31
0.8270	1.924467	-0.695	0.12779576	0.16252041	0.25269157	35.31
0.8280	1.947927	-0.701	0.12771595	0.16242129	0.25257969	35.30
0.8290	1.981888	-0.701	0.12761575	0.16227585	0.25247359	35.30
0.8300	2.024317	-0.705	0.12748057	0.16209280	0.25232869	35.30
0.8310	2.066917	-0.704	0.12737262	0.16192329	0.25219840	35.31
0.8320	2.100334	-0.701	0.12728399	0.16177416	0.25208956	35.31
0.8330	2.118330	-0.698	0.12721682	0.16168267	0.25201261	35.31
0.8340	2.120132	-0.704	0.12719446	0.16164029	0.25199890	35.31
0.8350	2.108488	-0.708	0.12719148	0.16163152	0.25199687	35.32
0.8360	2.085028	-0.708	0.12724787	0.16167283	0.25204760	35.32
0.8370	2.045975	-0.700	0.12733155	0.16175848	0.25213325	35.32
0.8380	1.980028	-0.704	0.12746876	0.16193187	0.25228119	35.32
0.8390	1.877546	-0.701	0.12770039	0.16226137	0.25253606	35.32
0.8400	1.740618	-0.701	0.12800485	0.16272467	0.25289297	35.32
0.8410	1.582403	-0.697	0.12838429	0.16333050	0.25334042	35.32
0.8420	1.422129	-0.694	0.12877232	0.16396040	0.25381511	35.32
0.8430	1.272583	-0.695	0.12913221	0.16457301	0.25426066	35.32
0.8440	1.142578	-0.696	0.12944645	0.16511536	0.25465560	35.31
0.8450	1.035461	-0.701	0.12971199	0.16557765	0.25498438	35.31
0.8460	0.950289	-0.699	0.12992412	0.16594762	0.25525868	35.31
0.8470	0.882111	-0.696	0.13011181	0.16626447	0.25547659	35.31
0.8480	0.824890	-0.700	0.13022560	0.16651875	0.25566638	35.30
0.8490	0.772076	-0.699	0.13035697	0.16677690	0.25583673	35.30
0.8500	0.719833	-0.702	0.13046294	0.16701001	0.25600684	35.30
0.8510	0.666046	-0.698	0.13059908	0.16726720	0.25618958	35.31
0.8520	0.612030	-0.696	0.13072842	0.16752052	0.25636178	35.31
0.8530	0.559845	-0.698	0.13084126	0.16777766	0.25654858	35.31
0.8540	0.512753	-0.699	0.13094443	0.16802222	0.25670928	35.31
0.8550	0.473957	-0.703	0.13102424	0.16824377	0.25685310	35.32
0.8560	0.445890	-0.703	0.13109529	0.16840172	0.25695616	35.32
0.8570	0.429926	-0.699	0.13113511	0.16850579	0.25704360	35.32
0.8580	0.425262	-0.704	0.13113785	0.16852987	0.25708449	35.32
0.8590	0.429096	-0.708	0.13114464	0.16852987	0.25707179	35.32
0.8600	0.439796	-0.712	0.13111740	0.16850382	0.25704837	35.32
0.8610	0.457706	-0.705	0.13110769	0.16847974	0.25701523	35.32
0.8620	0.488834	-0.698	0.13105422	0.16841328	0.25695604	35.32
0.8630	0.544338	-0.696	0.13095701	0.16822457	0.25680923	35.32
0.8640	0.634003	-0.699	0.13079458	0.16787696	0.25653893	35.31
0.8650	0.758343	-0.701	0.13054079	0.16736162	0.25618571	35.31
0.8660	0.906029	-0.701	0.13024211	0.16673934	0.25574797	35.31
0.8670	1.062527	-0.698	0.12990463	0.16609776	0.25530821	35.31
0.8680	1.216564	-0.703	0.12955153	0.16545820	0.25482571	35.30
0.8690	1.359358	-0.699	0.12921304	0.16487640	0.25439775	35.30
0.8700	1.485300	-0.703	0.12889397	0.16435248	0.25401163	35.30
0.8710	1.589270	-0.705	0.12863523	0.16391134	0.25372267	35.31
0.8720	1.671982	-0.707	0.12841731	0.16356075	0.25347847	35.31
0.8730	1.736612	-0.709	0.12823832	0.16327751	0.25327611	35.31
0.8740	1.789913	-0.716	0.12809438	0.16305989	0.25309139	35.31
0.8750	1.838551	-0.710	0.12796599	0.16285956	0.25294054	35.32
0.8760	1.888447	-0.708	0.12784338	0.16265732	0.25278211	35.32
0.8770	1.941919	-0.699	0.12771595	0.16245312	0.25261962	35.32
0.8780	1.997938	-0.707	0.12756312	0.16220361	0.25242901	35.32
0.8790	2.051353	-0.706	0.12740940	0.16197628	0.25225002	35.32
0.8800	2.096071	-0.712	0.12727225	0.16177887	0.25209725	35.32
0.8810	2.126083	-0.701	0.12717795	0.16164786	0.25199997	35.32
0.8820	2.139387	-0.694	0.12714684	0.16158432	0.25193971	35.32
0.8830	2.137613	-0.690	0.12714195	0.16154385	0.25191450	35.32
0.8840	2.125168	-0.693	0.12716228	0.16153902	0.25193208	35.31
0.8850	2.104282	-0.697	0.12719142	0.16157365	0.25197291	35.31
0.8860	2.072926	-0.697	0.12725276	0.16163623	0.25202739	35.31
0.8870	2.022314	-0.694	0.12737143	0.16177976	0.25214702	35.31
0.8880	1.943579	-0.702	0.12754756	0.16200703	0.25232404	35.30
0.8890	1.832399	-0.702	0.12780637	0.16238177	0.25261390	35.30
0.8900	1.697016	-0.703	0.12811291	0.16285658	0.25298154	35.30
0.8910	1.549845	-0.695	0.12845236	0.16341430	0.25341344	35.31
0.8920	1.405163	-0.692	0.12879187	0.16398746	0.25385219	35.31
0.8930	1.271782	-0.692	0.12912059	0.16453165	0.25425005	35.31
0.8940	1.156082	-0.699	0.12940270	0.16501999	0.25460416	35.31
0.8950	1.058865	-0.700	0.12964106	0.16543514	0.25489885	35.32
0.8960	0.977297	-0.700	0.12983078	0.16580313	0.25515848	35.32
0.8970	0.906115	-0.696	0.13001853	0.16612101	0.25538993	35.32
0.8980	0.840855	-0.704	0.13016534	0.16641289	0.25558740	35.32
0.8990	0.777655	-0.711	0.13031131	0.16669792	0.25579071	35.32
0.9000	0.715141	-0.715	0.13043296	0.16697919	0.25598621	35.32
0.9010	0.653744	-0.713	0.13058573	0.16727006	0.25618857	35.32
0.9020	0.595522	-0.706	0.13071704	0.16756678	0.25639582	35.32
0.9030	0.543308	-0.703	0.13083947	0.16783547	0.25657779	35.32
0.9040	0.499878	-0.701	0.13092703	0.16807234	0.25674224	35.31
0.9050	0.467520	-0.704	0.13101256	0.16825438	0.25685704	35.31
0.9060	0.446806	-0.703	0.13107967	0.16838634	0.25694156	35.31
0.9070	0.437279	-0.698	0.13112825	0.16845667	0.25700563	35.31
0.9080	0.436792	-0.707	0.13112438	0.16847020	0.25701731	35.30
0.9090	0.442686	-0.712	0.13112736	0.16845965	0.25701249	35.30
0.9100	0.453558	-0.723	0.13110209	0.16843748	0.25697654	35.30
0.9110	0.469837	-0.718	0.13110787	0.16841727	0.25695908	35.31
0.9120	0.496874	-0.714	0.13107091	0.16834784	0.25691634	35.31
0.9130	0.544567	-0.714	0.13098907	0.16818404	0.25680155	35.31
0.9140	0.622501	-0.715	0.13081986	0.16788441	0.25659227	35.31
0.9150	0.732994	-0.719	0.13059604	0.16742790	0.25625569	35.32
0.9160	0.869150	-0.719	0.13031888	0.16686159	0.25584811	35.32
0.9170	1.018381	-0.719	0.13001156	0.16624516	0.25542015	35.32
0.9180	1.170387	-0.722	0.12965167	0.16560763	0.25495517	35.32
0.9190	1.317244	-0.719	0.12930053	0.16500086	0.25451940	35.32
0.9200	1.454430	-0.716	0.12896204	0.16442972	0.25408846	35.32
0.9210	1.578169	-0.710	0.12865567	0.16393650	0.25371981	35.32
0.9220	1.686344	-0.705	0.12838137	0.16349334	0.25340170	35.32
0.9230	1.778841	-0.703	0.12814397	0.16310805	0.25310993	35.32
0.9240	1.857948	-0.705	0.12793875	0.16277474	0.25287455	35.31
0.9250	1.927042	-0.703	0.12776554	0.16249353	0.25265956	35.31
0.9260	1.988211	-0.704	0.12758851	0.16224504	0.25247085	35.31
0.9270	2.042513	-0.700	0.12744355	0.16202545	0.25230253	35.31
0.9280	2.090092	-0.706	0.12729669	0.16182125	0.25212348	35.30
0.9290	2.130375	-0.706	0.12717122	0.16164684	0.25198728	35.30
0.9300	2.162676	-0.709	0.12707007	0.16150332	0.25185597	35.30
0.9310	2.184534	-0.706	0.12701368	0.16140985	0.25179273	35.31
0.9320	2.194834	-0.707	0.12697673	0.16134632	0.25173825	35.31
0.9330	2.193890	-0.710	0.12695336	0.16131163	0.25172752	35.31
0.9340	2.183561	-0.716	0.12696022	0.16132319	0.25173825	35.31
0.9350	2.164621	-0.716	0.12697577	0.16134912	0.25175482	35.32
0.9360	2.132950	-0.714	0.12705070	0.16141367	0.25181508	35.32
0.9370	2.076273	-0.705	0.12718296	0.16154456	0.25195032	35.32
0.9380	1.981630	-0.713	0.12739992	0.16182196	0.25218487	35.32
0.9390	1.847219	-0.719	0.12771308	0.16227669	0.25254780	35.32
0.9400	1.687374	-0.727	0.12807786	0.16284794	0.25297385	35.32
0.9410	1.523037	-0.719	0.12848151	0.16348082	0.25345731	35.32
0.9420	1.369858	-0.710	0.12885112	0.16408288	0.25390762	35.32
0.9430	1.235476	-0.702	0.12917787	0.16462618	0.25431812	35.32
0.9440	1.122379	-0.705	0.12945509	0.16510206	0.25467020	35.31
0.9450	1.028652	-0.709	0.12969249	0.16551238	0.25496495	35.31
0.9460	0.949488	-0.709	0.12988704	0.16587156	0.25520909	35.31
0.9470	0.879192	-0.707	0.13006800	0.16619706	0.25544155	35.31
0.9480	0.814304	-0.712	0.13020718	0.16648024	0.25563705	35.30
0.9490	0.752764	-0.711	0.13034052	0.16674894	0.25584328	35.30
0.9500	0.694513	-0.710	0.13047278	0.16701770	0.25602615	35.30
0.9510	0.639668	-0.704	0.13060117	0.16729504	0.25623238	35.31
0.9520	0.589027	-0.700	0.13072079	0.16756666	0.25641626	35.31
0.9530	0.543709	-0.701	0.13080537	0.16780168	0.25656402	35.31
0.9540	0.504856	-0.704	0.13089788	0.16800886	0.25670803	35.31
0.9550	0.473299	-0.702	0.13097662	0.16818899	0.25682861	35.32
0.9560	0.449839	-0.702	0.13104475	0.16833448	0.25691909	35.32
0.9570	0.435162	-0.700	0.13109720	0.16844231	0.25699592	35.32
0.9580	0.429125	-0.708	0.13111466	0.16849238	0.25701922	35.32
0.9590	0.430441	-0.712	0.13112044	0.16850102	0.25703096	35.32
0.9600	0.437880	-0.717	0.13109607	0.16849524	0.25701147	35.32
0.9610	0.450811	-0.710	0.13109797	0.16847795	0.25700170	35.32
0.9620	0.472870	-0.702	0.13107365	0.16843939	0.25695604	35.32
0.9630	0.513382	-0.700	0.13102019	0.16831517	0.25687343	35.32
0.9640	0.584564	-0.702	0.13088602	0.16804546	0.25667012	35.31
0.9650	0.692339	-0.703	0.13067800	0.16760916	0.25636566	35.31
0.9660	0.831728	-0.703	0.13040274	0.16702640	0.25594050	35.31
0.9670	0.988941	-0.699	0.13007194	0.16637725	0.25548530	35.31
0.9680	1.151018	-0.709	0.12970513	0.16568178	0.25500375	35.30
0.9690	1.307802	-0.713	0.12932676	0.16502768	0.25452811	35.30
0.9700	1.452484	-0.714	0.12897176	0.16442859	0.25408643	35.30
0.9710	1.580229	-0.711	0.12865275	0.16390848	0.25369740	35.31
0.9720	1.689034	-0.707	0.12837851	0.16346353	0.25338316	35.31
0.9730	1.778784	-0.707	0.12813926	0.16308784	0.25311184	35.31
0.9740	1.851883	-0.710	0.12794566	0.16277385	0.25287741	35.31
0.9750	1.911821	-0.707	0.12777144	0.16251570	0.25268203	35.32
0.9760	1.962519	-0.712	0.12762743	0.16229987	0.25252926	35.32
0.9770	2.006950	-0.708	0.12749994	0.16211981	0.25240380	35.32
0.9780	2.046003	-0.716	0.12738615	0.16194743	0.25225878	35.32
0.9790	2.078705	-0.715	0.12728113	0.16180104	0.25214690	35.32
0.9800	2.103710	-0.717	0.12721008	0.16167670	0.25205052	35.32
0.9810	2.118731	-0.712	0.12715852	0.16160059	0.25198334	35.32
0.9820	2.123251	-0.709	0.12713128	0.16156304	0.25195318	35.32
0.9830	2.118587	-0.710	0.12711775	0.16154569	0.25193477	35.32
0.9840	2.106256	-0.717	0.12713236	0.16156590	0.25195521	35.31
0.9850	2.087746	-0.718	0.12716347	0.16159779	0.25199902	35.31
0.9860	2.060881	-0.715	0.12722176	0.16165656	0.25203884	35.31
0.9870	2.018509	-0.703	0.12733078	0.16177398	0.25215262	35.31
0.9880	1.951103	-0.707	0.12748736	0.16196370	0.25228989	35.30
0.9890	1.852198	-0.707	0.12773246	0.16228920	0.25254971	35.30
0.9900	1.726627	-0.707	0.12803495	0.16272080	0.25287956	35.30
0.9910	1.584377	-0.703	0.12837744	0.16325438	0.25328422	35.31
0.9920	1.439123	-0.700	0.12871403	0.16382170	0.25370234	35.31
0.9930	1.300507	-0.703	0.12903899	0.16437167	0.25411278	35.31
0.9940	1.176252	-0.714	0.12933564	0.16488218	0.25449210	35.31
0.9950	1.069193	-0.722	0.12959439	0.16534364	0.25482678	35.32
0.9960	0.978413	-0.723	0.12981611	0.16574335	0.25511575	35.32
0.9970	0.900393	-0.716	0.13001460	0.16609883	0.25538224	35.32
0.9980	0.831070	-0.720	0.13017595	0.16639549	0.25559229	35.32
0.9990	0.767527	-0.722	0.13032186	0.16668069	0.25580144	35.32
1.0000	0.708046	-0.726	0.13043755	0.16695327	0.25599307	35.32
1.0010	0.652542	-0.718	0.13055915	0.16723251	0.25616729	35.32
1.0020	0.601387	-0.709	0.13068366	0.16749352	0.25634921	35.32
1.0030	0.556211	-0.709	0.13080728	0.16773045	0.25651062	35.32
1.0040	0.518732	-0.710	0.13089007	0.16793567	0.25665450	35.31
1.0050	0.491066	-0.710	0.13095325	0.16809082	0.25676835	35.31
1.0060	0.473928	-0.706	0.13098437	0.16819876	0.25683659	35.31
1.0070	0.466948	-0.703	0.13102025	0.16825563	0.25688732	35.31
1.0080	0.468435	-0.708	0.13102514	0.16827482	0.25688142	35.30
1.0090	0.475874	-0.710	0.13102710	0.16827381	0.25687069	35.30
1.0100	0.488291	-0.712	0.13100481	0.16825265	0.25683665	35.30
1.0110	0.506802	-0.706	0.13099706	0.16822946	0.25681525	35.31
1.0120	0.538044	-0.710	0.13095534	0.16815054	0.25675386	35.31
1.0130	0.591660	-0.714	0.13085407	0.16797322	0.25661856	35.31
1.0140	0.674400	-0.712	0.13069063	0.16764963	0.25638509	35.31
1.0150	0.785608	-0.708	0.13046193	0.16719204	0.25606126	35.32
1.0160	0.916471	-0.715	0.13020027	0.16664302	0.25565076	35.32
1.0170	1.056318	-0.718	0.12991136	0.16607666	0.25524998	35.32
1.0180	1.197567	-0.727	0.12958443	0.16547853	0.25481522	35.32
1.0190	1.333094	-0.721	0.12927127	0.16491020	0.25443000	35.32
1.0200	1.458750	-0.719	0.12895316	0.16437083	0.25403601	35.32
1.0210	1.570415	-0.715	0.12867206	0.16391426	0.25370532	35.32
1.0220	1.668291	-0.712	0.12841922	0.16351068	0.25342023	35.32
1.0230	1.753607	-0.709	0.12818581	0.16315240	0.25316733	35.32
1.0240	1.828966	-0.715	0.12798554	0.16283554	0.25293380	35.31
1.0250	1.896057	-0.716	0.12781137	0.16255623	0.25272083	35.31
1.0260	1.956425	-0.718	0.12764305	0.16231054	0.25253105	35.31
1.0270	2.010298	-0.706	0.12748837	0.16209573	0.25238329	35.31
1.0280	2.056932	-0.708	0.12732685	0.16189635	0.25222963	35.30
1.0290	2.094126	-0.706	0.12722278	0.16172975	0.25211102	35.30
1.0300	2.121391	-0.709	0.12713820	0.16159487	0.25198066	35.30
1.0310	2.137585	-0.706	0.12710226	0.16151482	0.25189894	35.31
1.0320	2.143421	-0.702	0.12708086	0.16147041	0.25185615	35.31
1.0330	2.140274	-0.702	0.12707502	0.16146177	0.25186682	35.31
1.0340	2.129688	-0.702	0.12707400	0.16146374	0.25189203	35.31
1.0350	2.113008	-0.700	0.12709248	0.16148412	0.25191820	35.32
1.0360	2.089176	-0.699	0.12713420	0.16152561	0.25195915	35.32
1.0370	2.051611	-0.691	0.12723345	0.16162586	0.25205261	35.32
1.0380	1.988983	-0.700	0.12737840	0.16180390	0.25217903	35.32
1.0390	1.891594	-0.698	0.12760609	0.16211593	0.25242800	35.32
1.0400	1.761246	-0.705	0.12790662	0.16256577	0.25276649	35.32
1.0410	1.609211	-0.698	0.12827337	0.16314471	0.25320715	35.32
1.0420	1.452026	-0.696	0.12864882	0.16375726	0.25366253	35.32
1.0430	1.302509	-0.689	0.12900674	0.16435534	0.25410604	35.32
1.0440	1.169701	-0.687	0.12932777	0.16489947	0.25450194	35.31
1.0450	1.057806	-0.689	0.12960309	0.16537434	0.25484723	35.31
1.0460	0.966768	-0.692	0.12983561	0.16578281	0.25513220	35.31
1.0470	0.892696	-0.692	0.13002533	0.16612381	0.25538903	35.31
1.0480	0.830441	-0.702	0.13017321	0.16640311	0.25558949	35.30
1.0490	0.773678	-0.706	0.13030833	0.16665453	0.25576264	35.30
1.0500	0.718374	-0.708	0.13043666	0.16690689	0.25593585	35.30
1.0510	0.438623	-0.691	0.13135201	0.16897297	0.25731224	35.32
1.0520	0.438423	-0.686	0.13135201	0.16898644	0.25733256	35.32
1.0530	0.438480	-0.691	0.13134819	0.16898835	0.25731504	35.32
1.0540	0.438681	-0.694	0.13135803	0.16898447	0.25731599	35.32
1.0550	0.439739	-0.695	0.13134831	0.16897291	0.25730062	35.32
1.0560	0.441685	-0.691	0.13135415	0.16895854	0.25729966	35.32
1.0570	0.445404	-0.684	0.13134235	0.16895276	0.25730938	35.32
1.0580	0.451269	-0.680	0.13132477	0.16893935	0.25729769	35.32
1.0590	0.460539	-0.683	0.13130140	0.16891819	0.25728792	35.31
1.0600	0.477819	-0.687	0.13128293	0.16887295	0.25724614	35.31
1.0610	0.513983	-0.696	0.13122171	0.16874766	0.25714296	35.31
1.0620	0.581303	-0.690	0.13111377	0.16849625	0.25697762	35.31
1.0630	0.687275	-0.700	0.13088810	0.16806567	0.25665849	35.30
1.0640	0.828495	-0.700	0.13058943	0.16747528	0.25623339	35.30
1.0650	0.995436	-0.702	0.13023531	0.16676635	0.25571001	35.30
1.0660	1.177998	-0.694	0.12982374	0.16601121	0.25517124	35.31
1.0670	1.367569	-0.691	0.12940162	0.16522235	0.25461674	35.31
1.0680	1.556797	-0.691	0.12893569	0.16444308	0.25404084	35.31
1.0690	1.738644	-0.691	0.12849218	0.16368693	0.25348818	35.31
1.0700	1.907101	-0.688	0.12806702	0.16299826	0.25296777	35.31
1.0710	2.056847	-0.691	0.12767011	0.16239822	0.25251645	35.32
1.0720	2.184734	-0.687	0.12731600	0.16189361	0.25212353	35.32
1.0730	2.290964	-0.691	0.12700576	0.16145635	0.25178021	35.32
1.0740	2.378626	-0.692	0.12673926	0.16109312	0.25149029	35.32
1.0750	2.451954	-0.690	0.12652624	0.16077715	0.25123060	35.32
1.0760	2.514896	-0.688	0.12634921	0.16050637	0.25101262	35.32
1.0770	2.569714	-0.684	0.12620908	0.16028297	0.25082010	35.32
1.0780	2.617207	-0.687	0.12606704	0.16007584	0.25067222	35.32
1.0790	2.656574	-0.688	0.12594348	0.15989190	0.25054771	35.31
1.0800	2.685957	-0.686	0.12581897	0.15974069	0.25043392	35.31
1.0810	2.703781	-0.682	0.12573624	0.15963560	0.25034148	35.31
1.0820	2.709103	-0.675	0.12568861	0.15958744	0.25028610	35.31
1.0830	2.703295	-0.676	0.12567496	0.15955275	0.25027645	35.30
1.0840	2.687845	-0.680	0.12568271	0.15955567	0.25028610	35.30
1.0850	2.662926	-0.683	0.12571478	0.15958267	0.25032693	35.30
1.0860	2.621555	-0.686	0.12580234	0.15966642	0.25040853	35.31
1.0870	2.547626	-0.683	0.12598729	0.15986198	0.25057882	35.31
1.0880	2.427063	-0.681	0.12627625	0.16023093	0.25086963	35.31
1.0890	2.257833	-0.680	0.12668580	0.16078681	0.25132877	35.31
1.0900	2.055416	-0.679	0.12716049	0.16149575	0.25189298	35.31
1.0910	1.843443	-0.687	0.12766528	0.16227007	0.25252527	35.32
1.0920	1.642971	-0.683	0.12816238	0.16304833	0.25310791	35.32
1.0930	1.468964	-0.688	0.12859422	0.16374660	0.25361955	35.32
1.0940	1.327944	-0.691	0.12895608	0.16431886	0.25404757	35.32
1.0950	1.218653	-0.687	0.12922460	0.16478503	0.25440949	35.32
1.0960	1.133423	-0.680	0.12945521	0.16516155	0.25467706	35.32
1.0970	1.062441	-0.676	0.12965274	0.16549867	0.25490761	35.32
1.0980	0.996094	-0.681	0.12982678	0.16580212	0.25510317	35.32
1.0990	0.927629	-0.686	0.12998927	0.16611522	0.25532484	35.31
1.1000	0.853329	-0.688	0.13017309	0.16645432	0.25557095	35.31
1.1010	0.773220	-0.689	0.13035887	0.16681838	0.25583649	35.31
1.1020	0.691681	-0.684	0.13055921	0.16720265	0.25611967	35.31
1.1030	0.616150	-0.687	0.13072062	0.16756958	0.25639296	35.30
1.1040	0.552406	-0.691	0.13085485	0.16788167	0.25660688	35.30
1.1050	0.505743	-0.689	0.13095218	0.16813987	0.25677031	35.30
1.1060	0.477018	-0.691	0.13104075	0.16830266	0.25685889	35.30
1.1070	0.465374	-0.683	0.13109821	0.16839993	0.25691438	35.31
1.1080	0.466347	-0.686	0.13112628	0.16842109	0.25693673	35.31
1.1090	0.476360	-0.687	0.13112432	0.16841334	0.25693965	35.31
1.1100	0.494270	-0.694	0.13110375	0.16839123	0.25690556	35.31
1.1110	0.526829	-0.698	0.13104844	0.16831511	0.25684041	35.32
1.1120	0.586967	-0.696	0.13094056	0.16813409	0.25669158	35.32
1.1130	0.684872	-0.700	0.13074803	0.16774589	0.25642699	35.32
1.1140	0.821114	-0.702	0.13045913	0.16717857	0.25602430	35.32
1.1150	0.985794	-0.700	0.13010794	0.16648501	0.25552434	35.32
1.1160	1.166239	-0.698	0.12970036	0.16573852	0.25499803	35.32
1.1170	1.352606	-0.689	0.12927431	0.16499102	0.25445610	35.32
1.1180	1.535997	-0.690	0.12883466	0.16423690	0.25390643	35.32
1.1190	1.709719	-0.693	0.12841445	0.16353279	0.25337535	35.31
1.1200	1.869192	-0.700	0.12800980	0.16288459	0.25289196	35.31
1.1210	2.011499	-0.705	0.12763524	0.16232014	0.25246984	35.31
1.1220	2.134981	-0.696	0.12730163	0.16183281	0.25210518	35.31
1.1230	2.240868	-0.696	0.12700874	0.16140515	0.25178128	35.30
1.1240	2.330675	-0.696	0.12674314	0.16103143	0.25148642	35.30
1.1250	2.408180	-0.698	0.12651068	0.16070962	0.25122279	35.30
1.1260	2.475328	-0.696	0.12630546	0.16043419	0.25099993	35.30
1.1270	2.533665	-0.692	0.12614107	0.16020983	0.25081712	35.31
1.1280	2.583160	-0.693	0.12599218	0.16000181	0.25065261	35.31
1.1290	2.622414	-0.698	0.12588906	0.15983230	0.25051546	35.31
1.1300	2.650652	-0.700	0.12579459	0.15970033	0.25041330	35.31
1.1310	2.667103	-0.700	0.12572849	0.15960878	0.25035405	35.32
1.1320	2.672138	-0.688	0.12570125	0.15957505	0.25033456	35.32
1.1330	2.667160	-0.690	0.12569153	0.15955949	0.25030649	35.32
1.1340	2.653570	-0.690	0.12570423	0.15957493	0.25028884	35.32
1.1350	2.631454	-0.691	0.12572271	0.15958166	0.25029963	35.32
1.1360	2.595634	-0.687	0.12578505	0.15964621	0.25035799	35.32
1.1370	2.530203	-0.683	0.12595141	0.15981478	0.25054777	35.32
1.1380	2.419338	-0.685	0.12622660	0.16014421	0.25083280	35.32
1.1390	2.259178	-0.681	0.12661666	0.16066825	0.25125980	35.31
1.1400	2.064285	-0.679	0.12708938	0.16134542	0.25180060	35.31
1.1410	1.857834	-0.684	0.12757283	0.16209567	0.25238419	35.31
1.1420	1.658993	-0.679	0.12807190	0.16285759	0.25299120	35.31
1.1430	1.481180	-0.677	0.12851650	0.16356075	0.25351942	35.30
1.1440	1.332092	-0.676	0.12888515	0.16418010	0.25396883	35.30
1.1450	1.214418	-0.678	0.12917691	0.16468292	0.25433457	35.30
1.1460	1.124382	-0.680	0.12938988	0.16509235	0.25460976	35.31
1.1470	1.052485	-0.678	0.12958068	0.16541988	0.25484711	35.31
1.1480	0.987310	-0.682	0.12973726	0.16571653	0.25505722	35.31
1.1490	0.918646	-0.683	0.12991440	0.16602278	0.25528687	35.31
1.1500	0.841370	-0.687	0.13008362	0.16636276	0.25554174	35.31
1.1510	0.755939	-0.695	0.13030446	0.16675293	0.25583452	35.32
1.1520	0.668650	-0.693	0.13051057	0.16717863	0.25613314	35.32
1.1530	0.588140	-0.696	0.13069630	0.16758221	0.25641328	35.32
1.1540	0.522223	-0.699	0.13083643	0.16792989	0.25662738	35.32
1.1550	0.475388	-0.699	0.13094544	0.16817838	0.25678796	35.32
1.1560	0.448608	-0.695	0.13103485	0.16835177	0.25690472	35.32
1.1570	0.438910	-0.687	0.13107753	0.16844034	0.25696498	35.32
1.1580	0.442028	-0.689	0.13108528	0.16846639	0.25696969	35.32
1.1590	0.453072	-0.688	0.13106793	0.16845089	0.25695020	35.31
1.1600	0.472355	-0.691	0.13105530	0.16841334	0.25692105	35.31
1.1610	0.506830	-0.692	0.13101548	0.16832674	0.25686371	35.31
1.1620	0.569229	-0.690	0.13091719	0.16811591	0.25671977	35.31
1.1630	0.669651	-0.694	0.13071394	0.16772574	0.25642890	35.30
1.1640	0.807180	-0.702	0.13043189	0.16715938	0.25602621	35.30
1.1650	0.971975	-0.702	0.13007778	0.16646194	0.25550866	35.30
1.1660	1.151419	-0.704	0.12969160	0.16570777	0.25498736	35.31
1.1670	1.335411	-0.692	0.12927228	0.16496122	0.25445241	35.31
1.1680	1.514683	-0.696	0.12883657	0.16422433	0.25390863	35.31
1.1690	1.682138	-0.698	0.12841541	0.16354531	0.25340867	35.31
1.1700	1.833715	-0.695	0.12803221	0.16292119	0.25294167	35.31
1.1710	1.969213	-0.691	0.12767899	0.16236931	0.25254381	35.32
1.1720	2.090464	-0.687	0.12736863	0.16189253	0.25217408	35.32
1.1730	2.200956	-0.697	0.12705445	0.16146189	0.25182879	35.32
1.1740	2.303095	-0.699	0.12676549	0.16106796	0.25151163	35.32
1.1750	2.398996	-0.699	0.12647855	0.16068560	0.25120628	35.32
1.1760	2.489004	-0.693	0.12621009	0.16034079	0.25091445	35.32
1.1770	2.571316	-0.686	0.12599027	0.16002780	0.25066346	35.32
1.1780	2.642183	-0.684	0.12577242	0.15975612	0.25044352	35.32
1.1790	2.696171	-0.684	0.12561387	0.15952879	0.25026643	35.31
1.1800	2.729759	-0.684	0.12550688	0.15937567	0.25013804	35.31
1.1810	2.743063	-0.686	0.12545729	0.15929276	0.25006998	35.31
1.1820	2.739201	-0.684	0.12546408	0.15926957	0.25005639	35.31
1.1830	2.722235	-0.682	0.12548256	0.15927535	0.25005734	35.30
1.1840	2.692623	-0.684	0.12552536	0.15930140	0.25009149	35.30
1.1850	2.642927	-0.681	0.12562746	0.15939862	0.25018400	35.30
1.1860	2.560415	-0.683	0.12581229	0.15962207	0.25039309	35.30
1.1870	2.440481	-0.676	0.12611479	0.16000837	0.25070637	35.31
1.1880	2.290936	-0.681	0.12648058	0.16051888	0.25111777	35.31
1.1890	2.129402	-0.681	0.12689102	0.16108239	0.25157595	35.31
1.1900	1.971588	-0.679	0.12728107	0.16164774	0.25202531	35.31
1.1910	1.825848	-0.681	0.12764388	0.16217077	0.25246209	35.32
1.1920	1.695728	-0.676	0.12795907	0.16267264	0.25285304	35.32
1.1930	1.579742	-0.676	0.12825775	0.16312534	0.25321102	35.32
1.1940	1.474257	-0.680	0.12851554	0.16355687	0.25350964	35.32
1.1950	1.373320	-0.684	0.12876362	0.16396719	0.25380927	35.32
1.1960	1.270552	-0.688	0.12900686	0.16439492	0.25410992	35.32
1.1970	1.161175	-0.688	0.12926942	0.16486204	0.25446779	35.32
1.1980	1.044874	-0.688	0.12955344	0.16536200	0.25482869	35.32
1.1990	0.925798	-0.689	0.12983263	0.16588116	0.25519931	35.31
1.2000	0.810585	-0.686	0.13010794	0.16639262	0.25557387	35.31
1.2010	0.706530	-0.690	0.13034040	0.16688007	0.25592607	35.31
1.2020	0.619154	-0.684	0.13055438	0.16732115	0.25623536	35.31
1.2030	0.552063	-0.683	0.13070709	0.16767079	0.25647652	35.30
1.2040	0.506287	-0.690	0.13082677	0.16791445	0.25663310	35.30
1.2050	0.479965	-0.692	0.13089192	0.16807246	0.25674987	35.30
1.2060	0.470066	-0.695	0.13092995	0.16816199	0.25680935	35.30
1.2070	0.471268	-0.694	0.13096011	0.16820818	0.25683373	35.31
1.2080	0.480137	-0.693	0.13096595	0.16821498	0.25682300	35.31
1.2090	0.494127	-0.692	0.13097280	0.16819680	0.25680751	35.31
1.2100	0.516186	-0.694	0.13094842	0.16815728	0.25676167	35.32
1.2110	0.555096	-0.696	0.13088810	0.16803199	0.25667125	35.32
1.2120	0.623102	-0.694	0.13076162	0.16780943	0.25650972	35.32
1.2130	0.726929	-0.702	0.13055635	0.16739619	0.25621784	35.32
1.2140	0.863628	-0.710	0.13026643	0.16683853	0.25581515	35.32
1.2150	1.023703	-0.712	0.12991422	0.16616523	0.25533748	35.32
1.2160	1.197538	-0.711	0.12953192	0.16544855	0.25481421	35.32
1.2170	1.377754	-0.702	0.12914097	0.16472429	0.25428891	35.32
1.2180	1.557255	-0.706	0.12871009	0.16399801	0.25374806	35.32
1.2190	1.730204	-0.703	0.12827331	0.16330254	0.25322467	35.31
1.2200	1.891336	-0.700	0.12785882	0.16266006	0.25274122	35.31
1.2210	2.036562	-0.695	0.12749600	0.16206867	0.25230259	35.31
1.2220	2.162704	-0.691	0.12716335	0.16157073	0.25193685	35.31
1.2230	2.269936	-0.698	0.12686479	0.16113055	0.25159931	35.30
1.2240	2.359858	-0.708	0.12658566	0.16077703	0.25128508	35.30
1.2250	2.435703	-0.711	0.12636286	0.16046685	0.25103498	35.30
1.2260	2.499161	-0.705	0.12616539	0.16020095	0.25083840	35.31
1.2270	2.551203	-0.699	0.12601060	0.15999001	0.25068480	35.31
1.2280	2.591486	-0.703	0.12588710	0.15981090	0.25054860	35.31
1.2290	2.620153	-0.708	0.12578982	0.15968192	0.25044066	35.31
1.2300	2.637663	-0.708	0.12572849	0.15959138	0.25038040	35.31
1.2310	2.645159	-0.710	0.12568665	0.15953165	0.25031620	35.32
1.2320	2.643929	-0.704	0.12567300	0.15952194	0.25029778	35.32
1.2330	2.635260	-0.705	0.12567115	0.15952486	0.25028908	35.32
1.2340	2.619152	-0.707	0.12569553	0.15955091	0.25031435	35.32
1.2350	2.593346	-0.706	0.12573057	0.15958369	0.25034732	35.32
1.2360	2.548399	-0.709	0.12582588	0.15967232	0.25042212	35.32
1.2370	2.467890	-0.702	0.12602144	0.15990347	0.25062251	35.32
1.2380	2.342548	-0.703	0.12632883	0.16028678	0.25095326	35.32
1.2390	2.176380	-0.701	0.12674034	0.16085023	0.25141633	35.31
1.2400	1.989584	-0.703	0.12720525	0.16151869	0.25193679	35.31
1.2410	1.802845	-0.709	0.12766236	0.16221505	0.25247282	35.31
1.2420	1.631241	-0.704	0.12809235	0.16289115	0.25300783	35.31
1.2430	1.482267	-0.705	0.12844741	0.16347861	0.25345331	35.30
1.2440	1.357012	-0.710	0.12875670	0.16399693	0.25383353	35.30
1.2450	1.252012	-0.708	0.12902033	0.16442853	0.25412834	35.30
1.2460	1.161032	-0.707	0.12926155	0.16482353	0.25440943	35.30
1.2470	1.076460	-0.696	0.12947667	0.16520113	0.25470036	35.31
1.2480	0.992088	-0.696	0.12967700	0.16556996	0.25496590	35.31
1.2490	0.904226	-0.696	0.12989008	0.16596299	0.25526351	35.31
1.2500	0.813818	-0.699	0.13011080	0.16636854	0.25555629	35.31
1.2510	0.724010	-0.705	0.13031900	0.16677892	0.25585687	35.32
1.2520	0.640011	-0.700	0.13050860	0.16718924	0.25614679	35.32
1.2530	0.567598	-0.700	0.13067305	0.16755134	0.25639290	35.32
1.2540	0.511150	-0.702	0.13078785	0.16784704	0.25657088	35.32
1.2550	0.473413	-0.704	0.13087350	0.16805321	0.25672078	35.32
1.2560	0.453672	-0.703	0.13091922	0.16818422	0.25679868	35.32
1.2570	0.448523	-0.695	0.13097560	0.16826028	0.25686586	35.32
1.2580	0.453186	-0.698	0.13099408	0.16827577	0.25686592	35.32
1.2590	0.464659	-0.707	0.13099897	0.16826999	0.25685227	35.31
1.2600	0.483313	-0.712	0.13096690	0.16823053	0.25682890	35.31
1.2610	0.517244	-0.715	0.13092309	0.16815633	0.25676173	35.31
1.2620	0.579758	-0.711	0.13081992	0.16796261	0.25661874	35.31
1.2630	0.681496	-0.715	0.13063806	0.16757149	0.25632495	35.30
1.2640	0.822115	-0.722	0.13033557	0.16699165	0.25592512	35.30
1.2650	0.992374	-0.727	0.12997758	0.16627699	0.25539678	35.30
1.2660	1.179543	-0.724	0.12957096	0.16551417	0.25484908	35.31
1.2670	1.373577	-0.712	0.12914008	0.16472238	0.25426847	35.31
1.2680	1.564064	-0.711	0.12866539	0.16395175	0.25370431	35.31
1.2690	1.742620	-0.706	0.12822092	0.16323233	0.25317413	35.31
1.2700	1.904240	-0.706	0.12780058	0.16258794	0.25268286	35.31
1.2710	2.046490	-0.707	0.12742412	0.16201580	0.25226361	35.32
1.2720	2.169771	-0.705	0.12709922	0.16151589	0.25188524	35.32
1.2730	2.275372	-0.706	0.12680149	0.16108829	0.25154179	35.32
1.2740	2.365637	-0.714	0.12654853	0.16072416	0.25125873	35.32
1.2750	2.444258	-0.721	0.12631702	0.16041785	0.25097764	35.32
1.2760	2.514639	-0.722	0.12612063	0.16013938	0.25075883	35.32
1.2770	2.579699	-0.710	0.12592798	0.15988898	0.25055552	35.32
1.2780	2.640038	-0.712	0.12575293	0.15964538	0.25038230	35.32
1.2790	2.693024	-0.706	0.12557977	0.15942192	0.25021696	35.31
1.2800	2.734709	-0.708	0.12544650	0.15924656	0.25006330	35.31
1.2810	2.760630	-0.707	0.12536383	0.15912038	0.24996507	35.31
1.2820	2.769585	-0.699	0.12533259	0.15907025	0.24992329	35.31
1.2830	2.763062	-0.702	0.12532389	0.15904909	0.24990195	35.30
1.2840	2.743521	-0.703	0.12533069	0.15906346	0.24990779	35.30
1.2850	2.708387	-0.702	0.12539399	0.15910882	0.24995154	35.30
1.2860	2.644386	-0.693	0.12553209	0.15924746	0.25010026	35.30
1.2870	2.536097	-0.685	0.12581420	0.15956050	0.25038332	35.31
1.2880	2.380972	-0.686	0.12618381	0.16005462	0.25080258	35.31
1.2890	2.192001	-0.686	0.12665373	0.16070479	0.25130838	35.31
1.2900	1.993961	-0.691	0.12714100	0.16142625	0.25187254	35.31
1.2910	1.806450	-0.692	0.12762064	0.16213143	0.25241530	35.32
1.2920	1.642342	-0.692	0.12803590	0.16278547	0.25292891	35.32
1.2930	1.507730	-0.691	0.12838417	0.16332966	0.25334042	35.32
1.2940	1.400557	-0.695	0.12865740	0.16376591	0.25366044	35.32
1.2950	1.312923	-0.692	0.12886769	0.16413093	0.25393182	35.32
1.2960	1.234217	-0.694	0.12907100	0.16446030	0.25418478	35.32
1.2970	1.153650	-0.687	0.12926364	0.16481960	0.25444359	35.32
1.2980	1.065331	-0.691	0.12948251	0.16520113	0.25473142	35.32
1.2990	0.966854	-0.696	0.12971789	0.16562879	0.25503683	35.31
1.3000	0.861654	-0.700	0.12997860	0.16609502	0.25537914	35.31
1.3010	0.756111	-0.704	0.13023925	0.16657466	0.25571674	35.31
1.3020	0.658522	-0.699	0.13047272	0.16704273	0.25604844	35.31
1.3030	0.576010	-0.703	0.13066626	0.16744244	0.25632578	35.30
1.3040	0.512981	-0.706	0.13079667	0.16776609	0.25654179	35.30
1.3050	0.471096	-0.710	0.13089490	0.16800028	0.25668770	35.30
1.3060	0.448895	-0.710	0.13095415	0.16813898	0.25678694	35.30
1.3070	0.442371	-0.704	0.13099498	0.16822952	0.25684828	35.31
1.3080	0.446892	-0.702	0.13100183	0.16824979	0.25685412	35.31
1.3090	0.458307	-0.709	0.13099307	0.16823536	0.25684637	35.31
1.3100	0.476933	-0.712	0.13096392	0.16820830	0.25680733	35.31
1.3110	0.509777	-0.716	0.13090843	0.16810995	0.25674009	35.32
1.3120	0.569172	-0.711	0.13080150	0.16792881	0.25659806	35.32
1.3130	0.665131	-0.716	0.13062155	0.16754836	0.25634229	35.32
1.3140	0.797710	-0.719	0.13034147	0.16700411	0.25595325	35.32
1.3150	0.958529	-0.723	0.12999409	0.16633469	0.25545818	35.32
1.3160	1.135883	-0.722	0.12960112	0.16560262	0.25493383	35.32
1.3170	1.318960	-0.717	0.12919641	0.16487443	0.25440562	35.32
1.3180	1.497774	-0.718	0.12877232	0.16415113	0.25387144	35.32
1.3190	1.664171	-0.722	0.12836868	0.16348469	0.25337631	35.31
1.3200	1.814032	-0.725	0.12798148	0.16288072	0.25292110	35.31
1.3210	1.947670	-0.717	0.12764484	0.16234326	0.25251353	35.31
1.3220	2.067661	-0.708	0.12733263	0.16187704	0.25216925	35.31
1.3230	2.178497	-0.711	0.12702817	0.16143501	0.25182194	35.30
1.3240	2.283010	-0.719	0.12673050	0.16101402	0.25150388	35.30
1.3250	2.382345	-0.718	0.12644839	0.16061908	0.25120234	35.30
1.3260	2.475071	-0.715	0.12618870	0.16025400	0.25088525	35.30
1.3270	2.556839	-0.706	0.12596893	0.15994197	0.25063044	35.31
1.3280	2.623587	-0.712	0.12578213	0.15965879	0.25039989	35.31
1.3290	2.670822	-0.711	0.12563819	0.15945840	0.25025398	35.31
1.3300	2.698059	-0.713	0.12555158	0.15932733	0.25016350	35.31
1.3310	2.707729	-0.716	0.12549520	0.15926862	0.25010800	35.32
1.3320	2.704782	-0.714	0.12549233	0.15925509	0.25008756	35.32
1.3330	2.693396	-0.716	0.12549329	0.15924746	0.25006807	35.32
1.3340	2.675514	-0.719	0.12550014	0.15925419	0.25007492	35.32
1.3350	2.649393	-0.726	0.12553900	0.15928119	0.25011194	35.32
1.3360	2.606850	-0.720	0.12562263	0.15936792	0.25021213	35.32
1.3370	2.531977	-0.715	0.12579966	0.15957505	0.25040764	35.32
1.3380	2.413330	-0.712	0.12609142	0.15993917	0.25071108	35.32
1.3390	2.251167	-0.714	0.12647074	0.16048819	0.25114399	35.31
1.3400	2.061424	-0.709	0.12693274	0.16115469	0.25166541	35.31
1.3410	1.864014	-0.715	0.12741429	0.16188091	0.25223261	35.31
1.3420	1.675444	-0.711	0.12789387	0.16261005	0.25281429	35.31
1.3430	1.506672	-0.717	0.12831616	0.16327184	0.25332594	35.30
1.3440	1.363878	-0.722	0.12867308	0.16385174	0.25375587	35.30
1.3450	1.247749	-0.724	0.12897265	0.16434968	0.25410014	35.30
1.3460	1.153851	-0.722	0.12921190	0.16476089	0.25439483	35.30
1.3470	1.073999	-0.713	0.12941808	0.16512489	0.25466031	35.31
1.3480	0.999155	-0.711	0.12960005	0.16545624	0.25490737	35.31
1.3490	0.922022	-0.712	0.12979567	0.16580403	0.25516230	35.31
1.3500	0.838566	-0.710	0.13000101	0.16618550	0.25542301	35.31
1.3510	0.748930	-0.709	0.13021892	0.16659772	0.25572270	35.32
1.3520	0.657063	-0.704	0.13043779	0.16703117	0.25604951	35.32
1.3530	0.570030	-0.703	0.13064116	0.16745496	0.25635201	35.32
1.3540	0.495558	-0.705	0.13079971	0.16782880	0.25660789	35.32
1.3550	0.440111	-0.706	0.13093001	0.16812545	0.25678784	35.32
1.3560	0.406265	-0.708	0.13101059	0.16832387	0.25691438	35.32
1.3570	0.392046	-0.701	0.13107169	0.16844809	0.25700569	35.32
1.3580	0.392618	-0.707	0.13107365	0.16849810	0.25701922	35.32
1.3590	0.403662	-0.707	0.13107073	0.16849613	0.25702500	35.31
1.3600	0.426006	-0.712	0.13104367	0.16844416	0.25697261	35.31
1.3610	0.471067	-0.716	0.13099319	0.16830838	0.25687629	35.31
1.3620	0.551634	-0.716	0.13085991	0.16801947	0.25665653	35.31
1.3630	0.673227	-0.720	0.13062543	0.16753113	0.25630039	35.30
1.3640	0.828753	-0.720	0.13029265	0.16687518	0.25584519	35.30
1.3650	1.003618	-0.727	0.12990940	0.16614312	0.25531602	35.30
1.3660	1.185122	-0.728	0.12948728	0.16540343	0.25477821	35.30
1.3670	1.363106	-0.716	0.12907392	0.16468978	0.25425285	35.31
1.3680	1.528845	-0.711	0.12866539	0.16400677	0.25376165	35.31
1.3690	1.677246	-0.707	0.12830251	0.16339701	0.25330925	35.31
1.3700	1.807737	-0.708	0.12796980	0.16284978	0.25291914	35.31
1.3710	1.925440	-0.706	0.12765753	0.16237307	0.25256991	35.32
1.3720	2.037535	-0.706	0.12736374	0.16192031	0.25224894	35.32
1.3730	2.151918	-0.710	0.12706518	0.16149360	0.25189686	35.32
1.3740	2.272825	-0.713	0.12673241	0.16103315	0.25150293	35.32
1.3750	2.401056	-0.716	0.12638807	0.16055256	0.25109822	35.32
1.3760	2.531147	-0.717	0.12604177	0.16006809	0.25069171	35.32
1.3770	2.651539	-0.706	0.12571979	0.15961164	0.25035125	35.32
1.3780	2.748899	-0.706	0.12544650	0.15923697	0.25005758	35.32
1.3790	2.812500	-0.707	0.12525004	0.15896630	0.24983764	35.31
1.3800	2.840967	-0.709	0.12515289	0.15881407	0.24969840	35.31
1.3810	2.841167	-0.710	0.12511694	0.15876579	0.24966240	35.31
1.3820	2.822456	-0.703	0.12513149	0.15877646	0.24966919	35.31
1.3830	2.790213	-0.703	0.12518293	0.15882653	0.24974030	35.30
1.3840	2.739544	-0.709	0.12528789	0.15891910	0.24982780	35.30
1.3850	2.661896	-0.712	0.12545711	0.15911174	0.25000483	35.30
1.3860	2.554979	-0.719	0.12572074	0.15942287	0.25026655	35.30
1.3870	2.424803	-0.711	0.12604856	0.15986013	0.25062162	35.31
1.3880	2.283125	-0.710	0.12639004	0.16033792	0.25100493	35.31
1.3890	2.136269	-0.704	0.12674606	0.16084069	0.25143391	35.31
1.3900	1.987238	-0.703	0.12710595	0.16137046	0.25186396	35.31
1.3910	1.838379	-0.702	0.12748039	0.16192621	0.25231916	35.32
1.3920	1.692839	-0.692	0.12785590	0.16250026	0.25273842	35.32
1.3930	1.553450	-0.694	0.12820417	0.16305602	0.25315076	35.32
1.3940	1.422415	-0.697	0.12852043	0.16358197	0.25352728	35.32
1.3950	1.300020	-0.699	0.12881422	0.16408479	0.25389695	35.32
1.3960	1.186037	-0.697	0.12909925	0.16455871	0.25425982	35.32
1.3970	1.078920	-0.694	0.12938327	0.16503656	0.25461090	35.32
1.3980	0.978127	-0.693	0.12963128	0.16548926	0.25493377	35.32
1.3990	0.882540	-0.695	0.12987149	0.16593224	0.25524414	35.31
1.4000	0.793333	-0.700	0.13009620	0.16635120	0.25553000	35.31
1.4010	0.711422	-0.705	0.13029170	0.16672975	0.25580728	35.31
1.4020	0.638895	-0.704	0.13047266	0.16709006	0.25607181	35.31
1.4030	0.577440	-0.702	0.13060004	0.16739917	0.25628984	35.30
1.4040	0.528202	-0.708	0.13071197	0.16766304	0.25646007	35.30
1.4050	0.491667	-0.708	0.13080537	0.16786629	0.25659627	35.30
1.4060	0.468521	-0.712	0.13086766	0.16801363	0.25669938	35.30
1.4070	0.457277	-0.703	0.13093185	0.16811097	0.25676644	35.31
1.4080	0.456505	-0.707	0.13094836	0.16815042	0.25679469	35.31
1.4090	0.462999	-0.710	0.13095522	0.16815329	0.25678104	35.31
1.4100	0.476618	-0.717	0.13095033	0.16813886	0.25678200	35.31
1.4110	0.502195	-0.721	0.13091534	0.16808110	0.25674206	35.32
1.4120	0.554581	-0.716	0.13083363	0.16792989	0.25662142	35.32
1.4130	0.649567	-0.719	0.13064981	0.16757166	0.25635010	35.32
1.4140	0.791702	-0.723	0.13035500	0.16699564	0.25592113	35.32
1.4150	0.971889	-0.726	0.12996006	0.16625488	0.25539494	35.32
1.4160	1.172848	-0.722	0.12950873	0.16541874	0.25479484	35.32
1.4170	1.378641	-0.709	0.12903106	0.16459125	0.25419849	35.32
1.4180	1.575222	-0.704	0.12856215	0.16378510	0.25361675	35.32
1.4190	1.750746	-0.704	0.12812829	0.16307521	0.25307584	35.31
1.4200	1.898689	-0.708	0.12773824	0.16248006	0.25262451	35.31
1.4210	2.018023	-0.712	0.12741333	0.16198790	0.25224131	35.31
1.4220	2.113953	-0.711	0.12715167	0.16160744	0.25197279	35.31
1.4230	2.195206	-0.712	0.12693578	0.16127115	0.25172764	35.30
1.4240	2.272367	-0.719	0.12672079	0.16096485	0.25146401	35.30
1.4250	2.354193	-0.720	0.12648731	0.16064602	0.25120133	35.30
1.4260	2.443857	-0.719	0.12624025	0.16030318	0.25091439	35.30
1.4270	2.538557	-0.715	0.12599123	0.15996021	0.25064498	35.31
1.4280	2.629852	-0.714	0.12574607	0.15960389	0.25035316	35.31
1.4290	2.707672	-0.715	0.12551743	0.15930337	0.25010902	35.31
1.4300	2.763462	-0.710	0.12534142	0.15906358	0.24990964	35.31
1.4310	2.793646	-0.711	0.12522668	0.15893346	0.24979579	35.32
1.4320	2.799053	-0.701	0.12518781	0.15888822	0.24976182	35.32
1.4330	2.783833	-0.701	0.12520045	0.15889305	0.24976957	35.32
1.4340	2.747841	-0.705	0.12527341	0.15894115	0.24982792	35.32
1.4350	2.678347	-0.703	0.12541157	0.15908182	0.24998260	35.32
1.4360	2.562847	-0.701	0.12568974	0.15940052	0.25025201	35.32
1.4370	2.403316	-0.691	0.12608469	0.15991110	0.25068295	35.32
1.4380	2.219667	-0.692	0.12655056	0.16054487	0.25116926	35.32
1.4390	2.037249	-0.690	0.12700671	0.16119981	0.25169748	35.31
1.4400	1.873112	-0.690	0.12741911	0.16181248	0.25218773	35.31
1.4410	1.735497	-0.689	0.12775868	0.16233259	0.25259048	35.31
1.4420	1.625690	-0.687	0.12804472	0.16276991	0.25293189	35.31
1.4430	1.538372	-0.686	0.12825978	0.16312343	0.25320518	35.30
1.4440	1.462755	-0.696	0.12844551	0.16343075	0.25345612	35.30
1.4450	1.387510	-0.692	0.12863320	0.16373312	0.25368273	35.30
1.4460	1.302280	-0.696	0.12884426	0.16408473	0.25393569	35.30
1.4470	1.201057	-0.691	0.12910891	0.16452008	0.25424123	35.31
1.4480	1.084270	-0.694	0.12938523	0.16501039	0.25460798	35.31
1.4490	0.957241	-0.692	0.12967908	0.16555941	0.25498635	35.31
1.4500	0.829926	-0.690	0.12996596	0.16611034	0.25540459	35.31
1.4510	0.712595	-0.691	0.13023537	0.16666412	0.25578880	35.32
1.4520	0.614548	-0.688	0.13047272	0.16714764	0.25612837	35.32
1.4530	0.540791	-0.691	0.13065171	0.16753489	0.25638998	35.32
1.4540	0.492039	-0.698	0.13076252	0.16779304	0.25655913	35.32
1.4550	0.465288	-0.695	0.13083833	0.16796064	0.25666219	35.32
1.4560	0.455532	-0.695	0.13088506	0.16805500	0.25672847	35.32
1.4570	0.457106	-0.688	0.13091427	0.16809744	0.25675482	35.32
1.4580	0.465517	-0.691	0.13090950	0.16809940	0.25675970	35.32
1.4590	0.478334	-0.691	0.13091141	0.16809076	0.25673825	35.31
1.4600	0.497017	-0.695	0.13089198	0.16805995	0.25670618	35.31
1.4610	0.528603	-0.706	0.13086081	0.16798770	0.25663614	35.31
1.4620	0.584564	-0.703	0.13076544	0.16780663	0.25649214	35.31
1.4630	0.674200	-0.704	0.13059133	0.16746950	0.25624704	35.30
1.4640	0.798740	-0.705	0.13031995	0.16694933	0.25589103	35.30
1.4650	0.951347	-0.709	0.12999600	0.16630298	0.25542897	35.30
1.4660	1.122265	-0.708	0.12961560	0.16559124	0.25492209	35.30
1.4670	1.302767	-0.703	0.12921000	0.16485238	0.25440168	35.31
1.4680	1.483669	-0.700	0.12876934	0.16412044	0.25387150	35.31
1.4690	1.657705	-0.698	0.12834322	0.16341341	0.25335884	35.31
1.4700	1.819096	-0.698	0.12794155	0.16275650	0.25285882	35.31
1.4710	1.965094	-0.700	0.12756896	0.16217172	0.25241530	35.32
1.4720	2.094355	-0.696	0.12722850	0.16166121	0.25202531	35.32
1.4730	2.208223	-0.700	0.12690550	0.16122395	0.25167125	35.32
1.4740	2.308731	-0.708	0.12661666	0.16082525	0.25134933	35.32
1.4750	2.398710	-0.708	0.12635303	0.16046977	0.25107205	35.32
1.4760	2.479620	-0.708	0.12612736	0.16014612	0.25080252	35.32
1.4770	2.550459	-0.697	0.12593955	0.15987742	0.25058556	35.32
1.4780	2.609997	-0.694	0.12576258	0.15963662	0.25037539	35.32
1.4790	2.655859	-0.696	0.12562931	0.15944880	0.25022954	35.31
1.4800	2.686844	-0.699	0.12552625	0.15931195	0.25012052	35.31
1.4810	2.703238	-0.706	0.12544936	0.15923011	0.25006115	35.31
1.4820	2.706356	-0.699	0.12541729	0.15919250	0.25004846	35.31
1.4830	2.698975	-0.701	0.12541044	0.15919441	0.25003481	35.30
1.4840	2.683096	-0.702	0.12543291	0.15919536	0.25002891	35.30
1.4850	2.656746	-0.701	0.12549615	0.15923488	0.25005531	35.30
1.4860	2.610283	-0.699	0.12558949	0.15932649	0.25015169	35.30
1.4870	2.526712	-0.688	0.12579185	0.15956056	0.25036383	35.31
1.4880	2.397823	-0.690	0.12609732	0.15995938	0.25069940	35.31
1.4890	2.230024	-0.690	0.12650788	0.16050732	0.25114292	35.31
1.4900	2.044888	-0.691	0.12696111	0.16115844	0.25166923	35.31
1.4910	1.862154	-0.691	0.12740564	0.16183072	0.25220424	35.32
1.4920	1.694012	-0.686	0.12782681	0.16247994	0.25271595	35.32
1.4930	1.545439	-0.687	0.12821013	0.16307044	0.25315362	35.32
1.4940	1.416779	-0.697	0.12854183	0.16357517	0.25353009	35.32
1.4950	1.305342	-0.698	0.12883168	0.16403461	0.25387830	35.32
1.4960	1.206865	-0.700	0.12907875	0.16444588	0.25418097	35.32
1.4970	1.115599	-0.690	0.12931710	0.16485518	0.25447953	35.32
1.4980	1.026936	-0.690	0.12953603	0.16524822	0.25476557	35.32
1.4990	0.936527	-0.688	0.12974709	0.16564220	0.25504959	35.31
1.5000	0.843773	-0.691	0.12996590	0.16605729	0.25536287	35.31
1.5010	0.751390	-0.698	0.13017893	0.16648209	0.25566244	35.31
1.5020	0.664530	-0.695	0.13038808	0.16690403	0.25596011	35.31
1.5030	0.589514	-0.697	0.13055438	0.16727972	0.25621498	35.30
1.5040	0.530148	-0.699	0.13068861	0.16758794	0.25642121	35.30
1.5050	0.488520	-0.699	0.13078886	0.16782200	0.25657189	35.30
1.5060	0.464544	-0.695	0.13086277	0.16797507	0.25667691	35.30
1.5070	0.455389	-0.690	0.13090652	0.16805887	0.25673229	35.31
1.5080	0.457935	-0.694	0.13091129	0.16809165	0.25676346	35.31
1.5090	0.468493	-0.694	0.13089579	0.16808593	0.25674587	35.31
1.5100	0.487461	-0.698	0.13087338	0.16805893	0.25672835	35.31
1.5110	0.522451	-0.701	0.13082665	0.16796166	0.25665063	35.32
1.5120	0.586653	-0.702	0.13072354	0.16775739	0.25649697	35.32
1.5130	0.689363	-0.706	0.13052022	0.16736341	0.25621790	35.32
1.5140	0.828552	-0.716	0.13022751	0.16679895	0.25579470	35.32
1.5150	0.993605	-0.715	0.12987345	0.16611987	0.25530052	35.32
1.5160	1.172991	-0.714	0.12948436	0.16538405	0.25473535	35.32
1.5170	1.358356	-0.705	0.12906712	0.16464430	0.25420815	35.32
1.5180	1.542406	-0.703	0.12861389	0.16389215	0.25367516	35.32
1.5190	1.718073	-0.706	0.12818295	0.16318417	0.25316447	35.31
1.5200	1.880322	-0.705	0.12778211	0.16252726	0.25266641	35.31
1.5210	2.025805	-0.714	0.12740558	0.16194350	0.25221503	35.31
1.5220	2.153349	-0.708	0.12707001	0.16144651	0.25183266	35.31
1.5230	2.264414	-0.709	0.12675875	0.16101211	0.25149411	35.30
1.5240	2.360716	-0.714	0.12647468	0.16062206	0.25117111	35.30
1.5250	2.444572	-0.712	0.12623346	0.16028589	0.25089884	35.30
1.5260	2.517271	-0.711	0.12601173	0.15998727	0.25066829	35.30
1.5270	2.578955	-0.710	0.12585020	0.15975505	0.25048828	35.31
1.5280	2.628965	-0.715	0.12569171	0.15954316	0.25033456	35.31
1.5290	2.666101	-0.716	0.12557209	0.15937549	0.25020617	35.31
1.5300	2.690334	-0.715	0.12547678	0.15926087	0.25011474	35.31
1.5310	2.702236	-0.716	0.12542230	0.15918285	0.25003690	35.32
1.5320	2.703695	-0.706	0.12540185	0.15916073	0.25000769	35.32
1.5330	2.696543	-0.699	0.12539697	0.15914249	0.25001258	35.32
1.5340	2.681808	-0.708	0.12541455	0.15914923	0.25002724	35.32
1.5350	2.658234	-0.708	0.12545145	0.15917134	0.25005943	35.32
1.5360	2.617464	-0.710	0.12552923	0.15926093	0.25011879	35.32
1.5370	2.540674	-0.698	0.12571597	0.15947187	0.25031126	35.32
1.5380	2.414331	-0.703	0.12602133	0.15985143	0.25062054	35.32
1.5390	2.239094	-0.699	0.12645322	0.16044003	0.25109619	35.31
1.5400	2.034817	-0.701	0.12695801	0.16115761	0.25167990	35.31
1.5410	1.825562	-0.699	0.12746972	0.16193873	0.25228304	35.31
1.5420	1.630125	-0.699	0.12796682	0.16269863	0.25287640	35.31
1.5430	1.460037	-0.695	0.12839484	0.16338736	0.25338233	35.30
1.5440	1.321020	-0.707	0.12875372	0.16396052	0.25379968	35.30
1.5450	1.212301	-0.706	0.12902707	0.16442859	0.25413334	35.30
1.5460	1.128273	-0.707	0.12923819	0.16479945	0.25440085	35.30
1.5470	1.059351	-0.698	0.12943470	0.16511917	0.25465858	35.31
1.5480	0.995407	-0.700	0.12959033	0.16540241	0.25486773	35.31
1.5490	0.928144	-0.706	0.12976927	0.16569430	0.25508261	35.31
1.5500	0.853214	-0.708	0.12994444	0.16602463	0.25533360	35.31
1.5510	0.770760	-0.713	0.13013995	0.16639453	0.25559133	35.32
1.5520	0.685387	-0.703	0.13035011	0.16679716	0.25589681	35.32
1.5530	0.604448	-0.702	0.13052511	0.16719019	0.25616825	35.32
1.5540	0.535641	-0.706	0.13067096	0.16753793	0.25640565	35.32
1.5550	0.484457	-0.706	0.13077217	0.16781437	0.25659049	35.32
1.5560	0.453215	-0.705	0.13084418	0.16800505	0.25670332	35.32
1.5570	0.439939	-0.695	0.13091141	0.16811293	0.25678504	35.32
1.5580	0.440454	-0.692	0.13091719	0.16815919	0.25680256	35.32
1.5590	0.450153	-0.696	0.13091725	0.16814965	0.25680256	35.31
1.5600	0.468550	-0.700	0.13089490	0.16811973	0.25677812	35.31
1.5610	0.503025	-0.704	0.13085502	0.16802818	0.25670898	35.31
1.5620	0.567827	-0.700	0.13075382	0.16781712	0.25653964	35.31
1.5630	0.673370	-0.705	0.13055342	0.16742224	0.25624007	35.30
1.5640	0.819426	-0.708	0.13024503	0.16682410	0.25579941	35.30
1.5650	0.994291	-0.711	0.12987733	0.16610944	0.25528395	35.30
1.5660	1.184320	-0.708	0.12945801	0.16532528	0.25471002	35.30
1.5670	1.377239	-0.700	0.12902522	0.16454226	0.25414002	35.31
1.5680	1.561975	-0.697	0.12857872	0.16378808	0.25358951	35.31
1.5690	1.729946	-0.702	0.12815946	0.16310805	0.25309050	35.31
1.5700	1.875515	-0.703	0.12778687	0.16252530	0.25264794	35.31
1.5710	1.997623	-0.702	0.12746876	0.16203016	0.25228214	35.32
1.5720	2.098103	-0.693	0.12718868	0.16162658	0.25197965	35.32
1.5730	2.183390	-0.692	0.12694258	0.16129422	0.25172180	35.32
1.5740	2.260122	-0.698	0.12671101	0.16097051	0.25146413	35.32
1.5750	2.335539	-0.702	0.12649310	0.16067392	0.25121605	35.32
1.5760	2.413731	-0.704	0.12628597	0.16036379	0.25096118	35.32
1.5770	2.495441	-0.694	0.12607396	0.16005760	0.25072378	35.32
1.5780	2.577238	-0.693	0.12585694	0.15974742	0.25048351	35.32
1.5790	2.651024	-0.693	0.12564683	0.15945166	0.25025880	35.31
1.5800	2.707815	-0.694	0.12547457	0.15921187	0.25007886	35.31
1.5810	2.741489	-0.695	0.12535691	0.15905005	0.24994552	35.31
1.5820	2.752132	-0.691	0.12531310	0.15897489	0.24988133	35.31
1.5830	2.744236	-0.691	0.12531215	0.15897202	0.24985421	35.30
1.5840	2.721519	-0.696	0.12535012	0.15898746	0.24986488	35.30
1.5850	2.679720	-0.698	0.12541044	0.15906638	0.24993980	35.30
1.5860	2.603788	-0.701	0.12556505	0.15924931	0.25012457	35.30
1.5870	2.482252	-0.696	0.12585109	0.15962112	0.25044274	35.31
1.5880	2.318916	-0.695	0.12624019	0.16016155	0.25087851	35.31
1.5890	2.132835	-0.695	0.12670624	0.16080308	0.25139123	35.31
1.5900	1.948843	-0.692	0.12715465	0.16146868	0.25193197	35.31
1.5910	1.782389	-0.698	0.12757391	0.16208798	0.25242323	35.32
1.5920	1.641970	-0.690	0.12793773	0.16263700	0.25285983	35.32
1.5930	1.527472	-0.687	0.12824315	0.16310120	0.25320417	35.32
1.5940	1.433430	-0.698	0.12848443	0.16348654	0.25347751	35.32
1.5950	1.350203	-0.699	0.12870133	0.16384870	0.25373238	35.32
1.5960	1.268435	-0.705	0.12890655	0.16418588	0.25398338	35.32
1.5970	1.178770	-0.694	0.12913907	0.16458267	0.25427318	35.32
1.5980	1.077003	-0.690	0.12939787	0.16501421	0.25459224	35.32
1.5990	0.963163	-0.693	0.12965852	0.16550350	0.25494146	35.31
1.6000	0.843000	-0.696	0.12993956	0.16603428	0.25532871	35.31
1.6010	0.725183	-0.702	0.13019925	0.16656309	0.25572377	35.31
1.6020	0.619211	-0.698	0.13045216	0.16708225	0.25608367	35.31
1.6030	0.532322	-0.698	0.13066334	0.16752142	0.25639200	35.30
1.6040	0.469208	-0.706	0.13080829	0.16785854	0.25659037	35.30
1.6050	0.429955	-0.710	0.13090074	0.16808492	0.25674796	35.30
1.6060	0.411816	-0.712	0.13095707	0.16820252	0.25682580	35.30
1.6070	0.409040	-0.703	0.13098240	0.16826135	0.25687647	35.31
1.6080	0.416622	-0.702	0.13099313	0.16827488	0.25688326	35.31
1.6090	0.431814	-0.708	0.13096595	0.16825271	0.25686669	35.31
1.6100	0.458279	-0.708	0.13093185	0.16820157	0.25682384	35.31
1.6110	0.508032	-0.711	0.13084817	0.16803110	0.25669050	35.32
1.6120	0.592318	-0.704	0.13070905	0.16771704	0.25647551	35.32
1.6130	0.714798	-0.712	0.13046783	0.16722184	0.25611764	35.32
1.6140	0.866432	-0.716	0.13014489	0.16659284	0.25565368	35.32
1.6150	1.034174	-0.722	0.12977034	0.16590410	0.25515562	35.32
1.6160	1.207638	-0.719	0.12938899	0.16518849	0.25461864	35.32
1.6170	1.379070	-0.707	0.12899411	0.16450852	0.25412637	35.32
1.6180	1.541920	-0.701	0.12859631	0.16384488	0.25363517	35.32
1.6190	1.691008	-0.704	0.12822187	0.16323620	0.25319451	35.31
1.6200	1.824217	-0.703	0.12787461	0.16268516	0.25279671	35.31
1.6210	1.944351	-0.708	0.12756038	0.16220260	0.25242120	35.31
1.6220	2.056818	-0.708	0.12727237	0.16176820	0.25209636	35.31
1.6230	2.169113	-0.707	0.12697464	0.16134155	0.25175297	35.30
1.6240	2.285128	-0.707	0.12664682	0.16090328	0.25138533	35.30
1.6250	2.404118	-0.706	0.12632382	0.16045541	0.25102729	35.30
1.6260	2.519703	-0.708	0.12600666	0.16000360	0.25067127	35.30
1.6270	2.621727	-0.699	0.12574995	0.15961927	0.25037646	35.31
1.6280	2.700834	-0.703	0.12552530	0.15929854	0.25010228	35.31
1.6290	2.750387	-0.706	0.12537450	0.15909141	0.24991846	35.31
1.6300	2.771931	-0.704	0.12528878	0.15897387	0.24982703	35.31
1.6310	2.771244	-0.702	0.12527907	0.15893257	0.24979776	35.32
1.6320	2.755165	-0.692	0.12528884	0.15893936	0.24984437	35.32
1.6330	2.726383	-0.693	0.12532586	0.15897501	0.24989784	35.32
1.6340	2.678404	-0.698	0.12539983	0.15906066	0.24999410	35.32
1.6350	2.599754	-0.699	0.12558955	0.15925324	0.25017220	35.32
1.6360	2.487316	-0.703	0.12585998	0.15958744	0.25041932	35.32
1.6370	2.348185	-0.695	0.12621015	0.16005361	0.25079966	35.32
1.6380	2.198668	-0.698	0.12656909	0.16056603	0.25121588	35.32
1.6390	2.051897	-0.694	0.12692899	0.16108614	0.25164086	35.31
1.6400	1.916027	-0.695	0.12728792	0.16157657	0.25203288	35.31
1.6410	1.794205	-0.700	0.12760210	0.16203320	0.25239193	35.31
1.6420	1.684399	-0.702	0.12787443	0.16246468	0.25273150	35.31
1.6430	1.581430	-0.701	0.12811381	0.16288459	0.25304770	35.30
1.6440	1.479635	-0.706	0.12834919	0.16329777	0.25333267	35.30
1.6450	1.375294	-0.704	0.12860405	0.16372931	0.25364196	35.30
1.6460	1.267118	-0.709	0.12888026	0.16417146	0.25395811	35.30
1.6470	1.155367	-0.699	0.12916821	0.16464442	0.25433260	35.31
1.6480	1.042385	-0.698	0.12945616	0.16512406	0.25467217	35.31
1.6490	0.931721	-0.697	0.12972176	0.16561425	0.25503790	35.31
1.6500	0.827808	-0.698	0.12997556	0.16608524	0.25536764	35.31
1.6510	0.734282	-0.700	0.13020128	0.16653413	0.25567895	35.32
1.6520	0.653715	-0.695	0.13041914	0.16693383	0.25596106	35.32
1.6530	0.587282	-0.692	0.13057876	0.16727287	0.25619555	35.32
1.6540	0.535727	-0.695	0.13069159	0.16753966	0.25637543	35.32
1.6550	0.499477	-0.694	0.13077229	0.16774005	0.25652230	35.32
1.6560	0.478678	-0.697	0.13082677	0.16786921	0.25660586	35.32
1.6570	0.471754	-0.693	0.13086468	0.16794151	0.25668073	35.32
1.6580	0.476246	-0.694	0.13087547	0.16796935	0.25667775	35.32
1.6590	0.489521	-0.695	0.13087749	0.16795582	0.25666028	35.31
1.6600	0.514841	-0.699	0.13085699	0.16789502	0.25660104	35.31
1.6610	0.565825	-0.700	0.13076651	0.16774297	0.25648332	35.31
1.6620	0.656319	-0.694	0.13059425	0.16742033	0.25624603	35.31
1.6630	0.788898	-0.698	0.13032091	0.16690314	0.25585490	35.30
1.6640	0.953035	-0.707	0.12995714	0.16622013	0.25536084	35.30
1.6650	1.130905	-0.709	0.12955350	0.16547847	0.25483453	35.30
1.6660	1.308718	-0.708	0.12913227	0.16473585	0.25430828	35.30
1.6670	1.475286	-0.701	0.12875193	0.16405874	0.25382572	35.31
1.6680	1.622486	-0.699	0.12839299	0.16345870	0.25337833	35.31
1.6690	1.746826	-0.698	0.12808073	0.16295499	0.25300276	35.31
1.6700	1.850281	-0.700	0.12779963	0.16252440	0.25268757	35.31
1.6710	1.940632	-0.702	0.12754959	0.16216123	0.25241035	35.32
1.6720	2.027121	-0.698	0.12731916	0.16182119	0.25216621	35.32
1.6730	2.118702	-0.703	0.12708563	0.16147536	0.25190175	35.32
1.6740	2.220211	-0.705	0.12680441	0.16107273	0.25156128	35.32
1.6750	2.330761	-0.704	0.12650961	0.16065085	0.25121206	35.32
1.6760	2.442942	-0.706	0.12620425	0.16022420	0.25085902	35.32
1.6770	2.543221	-0.705	0.12593287	0.15985334	0.25057113	35.32
1.6780	2.619038	-0.702	0.12571406	0.15955091	0.25034738	35.32
1.6790	2.663870	-0.708	0.12557691	0.15935433	0.25018299	35.31
1.6800	2.680264	-0.706	0.12551469	0.15925997	0.25009638	35.31
1.6810	2.676573	-0.705	0.12549818	0.15923876	0.25008380	35.31
1.6820	2.660809	-0.700	0.12551469	0.15924853	0.25011390	35.31
1.6830	2.636347	-0.699	0.12555647	0.15927935	0.25016159	35.30
1.6840	2.599411	-0.709	0.12562257	0.15933424	0.25020152	35.30
1.6850	2.539244	-0.712	0.12575769	0.15947491	0.25031722	35.30
1.6860	2.448092	-0.715	0.12597179	0.15973687	0.25053304	35.30
1.6870	2.326469	-0.706	0.12628013	0.16013664	0.25085402	35.31
1.6880	2.185249	-0.705	0.12663233	0.16062772	0.25124514	35.31
1.6890	2.037134	-0.702	0.12699902	0.16115075	0.25166643	35.31
1.6900	1.891880	-0.695	0.12735790	0.16167575	0.25209147	35.31
1.6910	1.753693	-0.698	0.12769359	0.16219491	0.25251263	35.32
1.6920	1.623945	-0.696	0.12801170	0.16268712	0.25288409	35.32
1.6930	1.500263	-0.694	0.12832302	0.16318220	0.25326443	35.32
1.6940	1.380959	-0.695	0.12861478	0.16365707	0.25360584	35.32
1.6950	1.265001	-0.694	0.12889677	0.16414052	0.25396293	35.32
1.6960	1.153765	-0.695	0.12916726	0.16461247	0.25431514	35.32
1.6970	1.048708	-0.688	0.12942511	0.16507179	0.25466436	35.32
1.6980	0.951576	-0.687	0.12967026	0.16551018	0.25497460	35.32
1.6990	0.862427	-0.689	0.12989402	0.16591090	0.25526553	35.31
1.7000	0.781717	-0.688	0.13009536	0.16629142	0.25552422	35.31
1.7010	0.709133	-0.692	0.13026756	0.16663915	0.25575966	35.31
1.7020	0.645018	-0.689	0.13042402	0.16696274	0.25598830	35.31
1.7030	0.589628	-0.688	0.13056111	0.16725755	0.25618869	35.30
1.7040	0.544024	-0.700	0.13066512	0.16749161	0.25635701	35.30
1.7050	0.509062	-0.700	0.13074881	0.16769195	0.25648433	35.30
1.7060	0.486174	-0.700	0.13080043	0.16782486	0.25657481	35.30
1.7070	0.474844	-0.688	0.13086462	0.16792989	0.25663602	35.31
1.7080	0.473986	-0.687	0.13088703	0.16796547	0.25666422	35.31
1.7090	0.481596	-0.693	0.13089484	0.16797519	0.25665641	35.31
1.7100	0.498619	-0.696	0.13087446	0.16795015	0.25663298	35.31
1.7110	0.533152	-0.706	0.13081706	0.16786730	0.25656885	35.32
1.7120	0.599871	-0.702	0.13070232	0.16764569	0.25641233	35.32
1.7130	0.708103	-0.702	0.13050097	0.16724110	0.25612158	35.32
1.7140	0.855217	-0.705	0.13019556	0.16662949	0.25566441	35.32
1.7150	1.027308	-0.706	0.12982100	0.16592157	0.25515270	35.32
1.7160	1.210670	-0.709	0.12939882	0.16515493	0.25459045	35.32
1.7170	1.395922	-0.701	0.12896687	0.16441321	0.25406992	35.32
1.7180	1.575623	-0.705	0.12852710	0.16367728	0.25352621	35.32
1.7190	1.743307	-0.710	0.12809229	0.16299427	0.25302231	35.31
1.7200	1.894426	-0.708	0.12770021	0.16238266	0.25257289	35.31
1.7210	2.025805	-0.702	0.12735295	0.16184908	0.25218076	35.31
1.7220	2.137041	-0.702	0.12705141	0.16142440	0.25184125	35.31
1.7230	2.231398	-0.703	0.12679273	0.16104877	0.25153875	35.30
1.7240	2.314997	-0.708	0.12654567	0.16071737	0.25125772	35.30
1.7250	2.393703	-0.710	0.12632000	0.16040331	0.25101846	35.30
1.7260	2.471037	-0.712	0.12609816	0.16009414	0.25076652	35.30
1.7270	2.546167	-0.704	0.12589586	0.15981770	0.25054181	35.31
1.7280	2.616348	-0.703	0.12569553	0.15954518	0.25032008	35.31
1.7290	2.675743	-0.707	0.12553209	0.15931684	0.25015175	35.31
1.7300	2.719774	-0.703	0.12538815	0.15913481	0.24999714	35.31
1.7310	2.744751	-0.702	0.12531602	0.15901142	0.24989307	35.32
1.7320	2.751474	-0.692	0.12528193	0.15896136	0.24984443	35.32
1.7330	2.742977	-0.697	0.12527698	0.15894604	0.24984831	35.32
1.7340	2.722635	-0.704	0.12529743	0.15895289	0.24986094	35.32
1.7350	2.686157	-0.702	0.12535590	0.15901548	0.24990958	35.32
1.7360	2.618780	-0.702	0.12549704	0.15917146	0.25004858	35.32
1.7370	2.506657	-0.693	0.12578696	0.15952116	0.25035113	35.32
1.7380	2.349730	-0.694	0.12616920	0.16002685	0.25077719	35.32
1.7390	2.163992	-0.693	0.12664980	0.16066259	0.25129962	35.31
1.7400	1.973362	-0.690	0.12712353	0.16133666	0.25183958	35.31
1.7410	1.794519	-0.697	0.12757587	0.16199648	0.25235409	35.31
1.7420	1.636391	-0.695	0.12796491	0.16261292	0.25283760	35.31
1.7430	1.501265	-0.698	0.12830442	0.16316396	0.25324905	35.30
1.7440	1.385908	-0.706	0.12858266	0.16363490	0.25359344	35.30
1.7450	1.284771	-0.708	0.12884337	0.16406262	0.25389594	35.30
1.7460	1.192446	-0.710	0.12907875	0.16444010	0.25417614	35.30
1.7470	1.102438	-0.706	0.12931991	0.16483700	0.25449133	35.31
1.7480	1.010456	-0.708	0.12953871	0.16522515	0.25477827	35.31
1.7490	0.914097	-0.710	0.12977117	0.16566062	0.25508463	35.31
1.7500	0.815649	-0.709	0.12998921	0.16610461	0.25538617	35.31
1.7510	0.721350	-0.706	0.13021392	0.16653317	0.25571007	35.32
1.7520	0.637465	-0.705	0.13040560	0.16694343	0.25598925	35.32
1.7530	0.568914	-0.707	0.13056701	0.16729021	0.25623149	35.32
1.7540	0.518188	-0.716	0.13068080	0.16756773	0.25639397	35.32
1.7550	0.485258	-0.711	0.13077420	0.16776419	0.25652915	35.32
1.7560	0.468922	-0.714	0.13082868	0.16787970	0.25661087	35.32
1.7570	0.465231	-0.702	0.13086170	0.16795003	0.25666034	35.32
1.7580	0.470638	-0.700	0.13087338	0.16796649	0.25667590	35.32
1.7590	0.481482	-0.694	0.13085496	0.16796750	0.25665939	35.31
1.7600	0.498419	-0.703	0.13084137	0.16794622	0.25663024	35.31
1.7610	0.528402	-0.704	0.13079852	0.16787499	0.25656128	35.31
1.7620	0.584507	-0.705	0.13070512	0.16769385	0.25643486	35.31
1.7630	0.678205	-0.707	0.13052702	0.16733849	0.25618392	35.30
1.7640	0.810642	-0.714	0.13025182	0.16679996	0.25579375	35.30
1.7650	0.972776	-0.723	0.12991142	0.16613251	0.25531417	35.30
1.7660	1.151648	-0.727	0.12952328	0.16539371	0.25477231	35.30
1.7670	1.335354	-0.719	0.12910795	0.16464049	0.25424320	35.31
1.7680	1.514082	-0.715	0.12867212	0.16390646	0.25370526	35.31
1.7690	1.680450	-0.714	0.12826061	0.16322458	0.25320619	35.31
1.7700	1.830797	-0.716	0.12787151	0.16262168	0.25274414	35.31
1.7710	1.964779	-0.719	0.12752712	0.16208905	0.25235116	35.32
1.7720	2.082539	-0.715	0.12720710	0.16162086	0.25199908	35.32
1.7730	2.186422	-0.714	0.12691629	0.16121912	0.25169069	35.32
1.7740	2.278748	-0.720	0.12663913	0.16084641	0.25137556	35.32
1.7750	2.362719	-0.716	0.12639302	0.16051412	0.25108558	35.32
1.7760	2.441397	-0.719	0.12617218	0.16019619	0.25082201	35.32
1.7770	2.515297	-0.706	0.12597948	0.15991879	0.25061774	35.32
1.7780	2.582903	-0.704	0.12578696	0.15965199	0.25042230	35.32
1.7790	2.639122	-0.700	0.12562460	0.15941507	0.25024223	35.31
1.7800	2.679663	-0.701	0.12549627	0.15923882	0.25010216	35.31
1.7810	2.702036	-0.706	0.12541258	0.15913177	0.25000286	35.31
1.7820	2.707500	-0.704	0.12537950	0.15909040	0.24997365	35.31
1.7830	2.699947	-0.711	0.12537163	0.15908366	0.24997747	35.30
1.7840	2.682066	-0.718	0.12539405	0.15907985	0.24999392	35.30
1.7850	2.650681	-0.716	0.12546402	0.15912414	0.25005627	35.30
1.7860	2.592459	-0.714	0.12558758	0.15925419	0.25017792	35.30
1.7870	2.490892	-0.708	0.12583661	0.15956336	0.25041538	35.31
1.7880	2.342691	-0.710	0.12618971	0.16004980	0.25079674	35.31
1.7890	2.159815	-0.703	0.12663329	0.16068071	0.25127929	35.31
1.7900	1.967611	-0.702	0.12712163	0.16138291	0.25184160	35.31
1.7910	1.786423	-0.699	0.12758273	0.16206008	0.25236201	35.32
1.7920	1.629095	-0.698	0.12798250	0.16266304	0.25283569	35.32
1.7930	1.499577	-0.694	0.12831706	0.16318035	0.25323254	35.32
1.7940	1.394463	-0.707	0.12857193	0.16360223	0.25354379	35.32
1.7950	1.304684	-0.703	0.12880254	0.16398364	0.25383663	35.32
1.7960	1.220942	-0.705	0.12900001	0.16432363	0.25408661	35.32
1.7970	1.134281	-0.691	0.12921983	0.16469538	0.25437647	35.32
1.7980	1.040926	-0.695	0.12943667	0.16509902	0.25466728	35.32
1.7990	0.941133	-0.697	0.12968183	0.16553348	0.25499022	35.31
[truncated: 7,001 more rows]
