# Supplementary material for: Evaluation of a Cold-Mixed High-Performance Polyurethane Mixture
Source: Hindawi journal article supplement (doi:10.1155/2019/1507971), 2019-11-07
Supplement: f1 [file 1507971.f1.zip › 1507971.f1/dynamic modulus data/PUM/specimen1/temp35/zhs-1-35_Sum.csv]

Test Information
****************
Project name	zhs
Operator name	1
Target test temperature	35
Target confining stress	0
Average dynamic strain range from 75 to 125 micro-strain
Contact stress	5
Initial modulus	1000
Axial gauge length	70
Comments
Specimen information
********************
Identification	zhs-1-35
Dimensions	Point 1	Point 2	Point 3	Point 4	Point 5	Point 6	Average	Std Dev.
Diameter (mm)	49.2	49.2	49.3				49.23	0.058
Height (mm)	101.3	101.2	101.3				101.27	0.058
Cross-sectional area (mm�)	1903.7
Conditioning time
Properties/Comments
*********
Test date and time	Tue	Apr 2	2019	1:19 PM
Test results summary
	25 Hz	20 Hz	10 Hz	5 Hz	2 Hz	1 Hz	0.5 Hz	0.2 Hz	0.1 Hz
Dynamic modulus (MPa)	11870	11739	11499	11278	10957	10735	10511	10247	10049
Phase angle (Degrees)	4.24	4.34	4.19	4.12	4.07	4.00	3.90	4.91	3.90
Average temperature (�C)	35.3	35.3	35.3	35.3	35.3	35.4	35.4	35.4	35.3
Average confining pressure (kPa)	-0.7	-0.7	-0.7	-0.7	-0.7	-0.7	-0.7	-0.7	-0.8
Average micro-strain	103	103	102	99	98	98	98	98	98
Load drift (%)	0.0	-0.5	0.3	0.0	0.0	0.3	-0.2	0.4	0.9
Load standard error (%)	10.1	7.0	3.7	2.6	2.1	1.7	2.2	2.0	2.3
Average deformation drift (%)	-5.3	-2.9	-3.6	-3.3	-3.3	-2.6	-2.9	52.9	-4.9
Average deformation standard error (%)	10.1	7.1	4.0	3.1	2.7	2.3	2.6	11.4	2.8
Deformation uniformity (%)	19.6	20.1	19.9	19.5	19.4	19.2	19.1	18.8	18.3
Phase uniformity (Degrees)	0.5	0.6	0.5	0.4	0.4	0.4	0.4	1.3	0.2
