# Supplementary material for: Evaluation of a Cold-Mixed High-Performance Polyurethane Mixture
Source: Hindawi journal article supplement (doi:10.1155/2019/1507971), 2019-11-07
Supplement: f1 [file 1507971.f1.zip › 1507971.f1/dynamic modulus data/PUM/specimen1/temp50/zhs-1-50_0.1Hz.csv]

Test Information
****************
Project name	zhs
Operator name	1
Target test temperature	50
Target confining stress	0
Average dynamic strain range from 75 to 125 micro-strain
Contact stress	5
Initial modulus	1000
Axial gauge length	70
Comments
Specimen information
********************
Identification	zhs-1-50
Dimensions	Point 1	Point 2	Point 3	Point 4	Point 5	Point 6	Average	Std Dev.
Diameter (mm)	49.2	49.2	49.3				49.23	0.058
Height (mm)	101.3	101.2	101.3				101.27	0.058
Cross-sectional area (mm�)	1903.7
Conditioning time
Properties/Comments
Test Data	0.1Hz
*********
Test date and time	Wed	Apr 3	2019	1:50 PM
Dynamic modulus (MPa)	8321
Phase angle (Degrees)	4.14
Average temperature (�C)	50.3
Average confining pressure (kPa)	-0.7
Average micro-strain	98
Load drift (%)	2.2
Load standard error (%)	3.0
Average deformation drift (%)	1.1
Average deformation standard error (%)	3.2
Deformation uniformity (%)	2.6
Phase uniformity (Degrees)	0.2
Conditioning Cycles
Time (sec)	Axial stress (kPa)	Axial micro-strain #1	Axial micro-strain #2	Axial micro-strain #3	Confining pressure (kPa)	Temperature (�C)	Load (N)	Displacement #1 (mm)	Displacement #2 (mm)	Displacement #3 (mm)
0.0000	226.478	-5.697	10.360	5.920	-0.659	50.344	431.156	0.000399	-0.000725	-0.000414
0.2000	224.900	-6.608	9.727	5.488	-0.651	50.343	428.152	0.000463	-0.000681	-0.000384
0.4000	242.033	-5.528	10.844	6.628	-0.673	50.343	460.768	0.000387	-0.000759	-0.000464
0.6000	267.911	-3.013	13.787	9.200	-0.658	50.343	510.035	0.000211	-0.000965	-0.000644
0.8000	282.113	-2.073	15.685	10.436	-0.649	50.342	537.071	0.000145	-0.001098	-0.000731
1.0000	314.950	0.535	19.234	14.522	-0.671	50.342	599.585	-0.000037	-0.001346	-0.001017
1.2000	335.028	3.006	21.821	16.717	-0.648	50.341	637.808	-0.000210	-0.001527	-0.001170
1.4000	359.104	5.642	25.180	19.996	-0.657	50.340	683.641	-0.000395	-0.001763	-0.001400
1.6000	404.114	9.812	30.162	24.819	-0.659	50.341	769.329	-0.000687	-0.002111	-0.001737
1.8000	452.100	14.850	35.623	30.503	-0.655	50.340	860.682	-0.001040	-0.002494	-0.002135
2.0000	460.485	16.446	37.577	32.031	-0.666	50.339	876.646	-0.001151	-0.002630	-0.002242
2.2000	523.980	23.660	44.996	39.773	-0.664	50.339	997.524	-0.001656	-0.003150	-0.002784
2.4000	546.688	26.330	47.525	42.828	-0.656	50.338	1040.754	-0.001843	-0.003327	-0.002998
2.6000	604.533	32.995	54.130	50.042	-0.675	50.337	1150.875	-0.002310	-0.003789	-0.003503
2.8000	623.649	35.700	56.721	52.320	-0.661	50.338	1187.267	-0.002499	-0.003970	-0.003662
3.0000	669.110	40.895	62.346	58.114	-0.642	50.337	1273.813	-0.002863	-0.004364	-0.004068
3.2000	716.359	46.492	66.985	63.701	-0.672	50.336	1363.764	-0.003254	-0.004689	-0.004459
3.4000	728.848	48.755	69.653	65.980	-0.656	50.337	1387.539	-0.003413	-0.004876	-0.004619
3.6000	770.567	54.085	74.110	71.026	-0.657	50.336	1466.961	-0.003786	-0.005188	-0.004972
3.8000	789.127	56.284	76.285	73.430	-0.667	50.337	1502.295	-0.003940	-0.005340	-0.005140
4.0000	821.242	60.737	79.711	77.500	-0.640	50.336	1563.435	-0.004252	-0.005580	-0.005425
4.2000	821.753	61.338	80.470	77.889	-0.665	50.335	1564.407	-0.004294	-0.005633	-0.005452
4.4000	839.276	63.486	82.670	80.445	-0.664	50.336	1597.767	-0.004444	-0.005787	-0.005631
4.6000	853.644	64.973	84.089	82.237	-0.645	50.334	1625.118	-0.004548	-0.005886	-0.005757
4.8000	853.569	65.705	84.226	82.655	-0.664	50.335	1624.975	-0.004599	-0.005896	-0.005786
5.0000	846.069	64.946	83.922	82.114	-0.649	50.334	1610.699	-0.004546	-0.005875	-0.005748
5.2000	849.511	65.283	84.061	82.557	-0.647	50.334	1617.250	-0.004570	-0.005884	-0.005779
5.4000	826.773	63.641	82.340	80.488	-0.661	50.334	1573.963	-0.004455	-0.005764	-0.005634
5.6000	816.659	62.403	81.363	79.126	-0.643	50.334	1554.708	-0.004368	-0.005695	-0.005539
5.8000	778.231	57.789	77.606	75.095	-0.662	50.334	1481.552	-0.004045	-0.005432	-0.005257
6.0000	757.492	55.727	75.433	73.026	-0.677	50.334	1442.070	-0.003901	-0.005280	-0.005112
6.2000	733.792	52.805	73.284	70.078	-0.647	50.333	1396.952	-0.003696	-0.005130	-0.004905
6.4000	686.513	47.714	68.537	64.714	-0.669	50.332	1306.944	-0.003340	-0.004798	-0.004530
6.6000	663.489	44.663	65.526	62.173	-0.673	50.333	1263.113	-0.003126	-0.004587	-0.004352
6.8000	626.189	40.782	61.604	57.725	-0.649	50.332	1192.102	-0.002855	-0.004312	-0.004041
7.0000	586.003	35.856	57.255	53.098	-0.669	50.332	1115.599	-0.002510	-0.004008	-0.003717
7.2000	536.003	30.201	51.503	47.776	-0.663	50.333	1020.412	-0.002114	-0.003605	-0.003344
7.4000	509.162	26.876	47.786	43.745	-0.647	50.332	969.315	-0.001881	-0.003345	-0.003062
7.6000	471.922	22.356	43.316	38.967	-0.662	50.332	898.418	-0.001565	-0.003032	-0.002728
7.8000	436.680	17.528	38.557	34.268	-0.664	50.333	831.327	-0.001227	-0.002699	-0.002399
8.0000	404.505	13.615	34.304	29.839	-0.661	50.332	770.073	-0.000953	-0.002401	-0.002089
8.2000	364.304	9.532	29.570	25.027	-0.671	50.333	693.541	-0.000667	-0.002070	-0.001752
8.4000	322.870	4.566	24.011	19.413	-0.661	50.332	614.662	-0.000320	-0.001681	-0.001359
8.6000	309.720	2.656	21.339	17.189	-0.668	50.332	589.628	-0.000186	-0.001494	-0.001203
8.8000	280.115	-0.644	17.187	12.996	-0.653	50.332	533.266	0.000045	-0.001203	-0.000910
9.0000	254.025	-3.422	13.771	9.686	-0.668	50.332	483.599	0.000240	-0.000964	-0.000678
9.2000	233.692	-6.147	10.596	6.353	-0.667	50.333	444.889	0.000430	-0.000742	-0.000445
9.4000	233.166	-6.495	9.809	5.920	-0.657	50.331	443.888	0.000455	-0.000687	-0.000414
9.6000	222.676	-7.643	8.406	4.085	-0.664	50.332	423.918	0.000535	-0.000588	-0.000286
9.8000	214.666	-8.639	7.222	3.195	-0.675	50.332	408.669	0.000605	-0.000506	-0.000224
10.0000	221.414	-8.724	7.551	3.682	-0.657	50.331	421.515	0.000611	-0.000529	-0.000258
10.2000	230.987	-7.784	8.667	4.279	-0.676	50.332	439.739	0.000545	-0.000607	-0.000300
10.4000	242.799	-6.859	10.098	5.713	-0.656	50.332	462.227	0.000480	-0.000707	-0.000400
10.6000	259.075	-5.935	11.501	7.575	-0.663	50.332	493.212	0.000415	-0.000805	-0.000530
10.8000	285.675	-3.099	14.902	10.144	-0.668	50.332	543.852	0.000217	-0.001043	-0.000710
11.0000	303.499	-1.243	17.366	12.592	-0.647	50.332	577.784	0.000087	-0.001216	-0.000881
11.2000	344.136	2.333	21.889	16.843	-0.646	50.331	655.146	-0.000163	-0.001532	-0.001179
11.4000	384.847	6.638	26.567	22.262	-0.669	50.332	732.651	-0.000465	-0.001860	-0.001558
11.6000	401.469	9.168	29.335	23.985	-0.672	50.332	764.294	-0.000642	-0.002053	-0.001679
11.8000	445.066	13.615	34.193	28.976	-0.655	50.332	847.292	-0.000953	-0.002394	-0.002028
12.0000	495.727	18.988	39.947	35.257	-0.667	50.331	943.737	-0.001329	-0.002796	-0.002468
12.2000	515.069	21.947	43.069	38.022	-0.673	50.333	980.558	-0.001536	-0.003015	-0.002662
12.4000	553.917	26.470	47.857	42.565	-0.660	50.331	1054.516	-0.001853	-0.003350	-0.002980
12.6000	592.841	30.833	52.151	47.830	-0.686	50.332	1128.616	-0.002158	-0.003651	-0.003348
12.8000	632.606	35.505	56.841	52.833	-0.653	50.331	1204.319	-0.002485	-0.003979	-0.003698
13.0000	668.929	40.051	61.577	57.392	-0.665	50.331	1273.470	-0.002804	-0.004310	-0.004017
13.2000	705.418	44.526	65.844	62.118	-0.679	50.332	1342.936	-0.003117	-0.004609	-0.004348
13.4000	736.963	48.755	69.445	66.201	-0.663	50.331	1402.988	-0.003413	-0.004861	-0.004634
13.6000	760.873	51.951	72.363	69.204	-0.681	50.332	1448.507	-0.003637	-0.005065	-0.004844
13.8000	797.107	56.467	76.588	73.831	-0.675	50.332	1517.487	-0.003953	-0.005361	-0.005168
14.0000	809.851	58.197	78.102	75.566	-0.677	50.332	1541.748	-0.004074	-0.005467	-0.005290
14.2000	829.733	61.085	80.317	78.209	-0.681	50.332	1579.599	-0.004276	-0.005622	-0.005475
14.4000	838.811	62.758	81.870	79.570	-0.690	50.332	1596.880	-0.004393	-0.005731	-0.005570
14.6000	844.942	63.473	82.848	80.848	-0.671	50.333	1608.553	-0.004443	-0.005799	-0.005659
14.8000	849.841	64.146	83.318	81.336	-0.660	50.332	1617.880	-0.004490	-0.005832	-0.005693
15.0000	842.417	64.133	83.026	80.987	-0.681	50.332	1603.746	-0.004489	-0.005812	-0.005669
15.2000	832.514	63.206	82.533	80.294	-0.672	50.332	1584.892	-0.004424	-0.005777	-0.005621
15.4000	818.597	61.532	81.018	79.196	-0.673	50.332	1558.399	-0.004307	-0.005671	-0.005544
15.6000	808.724	60.555	80.095	77.931	-0.668	50.333	1539.602	-0.004239	-0.005607	-0.005455
15.8000	786.407	58.521	78.173	74.971	-0.651	50.333	1497.116	-0.004096	-0.005472	-0.005248
16.0000	756.470	54.564	75.173	72.081	-0.677	50.332	1440.125	-0.003819	-0.005262	-0.005046
16.2000	721.905	50.884	71.525	68.245	-0.675	50.333	1374.321	-0.003562	-0.005007	-0.004777
16.4000	690.751	47.503	68.305	64.810	-0.664	50.332	1315.012	-0.003325	-0.004781	-0.004537
16.6000	661.190	43.898	65.292	61.423	-0.661	50.332	1258.736	-0.003073	-0.004570	-0.004300
16.8000	621.079	39.024	60.005	56.086	-0.665	50.333	1182.375	-0.002732	-0.004200	-0.003926
17.0000	585.236	34.619	56.128	52.347	-0.670	50.332	1114.140	-0.002423	-0.003929	-0.003664
17.2000	550.866	30.819	52.039	47.759	-0.679	50.333	1048.708	-0.002157	-0.003643	-0.003343
17.4000	480.323	22.916	44.594	39.844	-0.674	50.333	914.412	-0.001604	-0.003122	-0.002789
17.6000	493.187	23.704	45.284	40.732	-0.672	50.333	938.902	-0.001659	-0.003170	-0.002851
17.8000	412.770	14.681	35.456	30.822	-0.690	50.333	785.809	-0.001028	-0.002482	-0.002158
18.0000	397.757	12.546	33.231	28.643	-0.668	50.334	757.227	-0.000878	-0.002326	-0.002005
18.2000	363.282	8.591	29.171	24.251	-0.680	50.333	691.595	-0.000601	-0.002042	-0.001698
18.4000	330.024	4.537	24.532	19.690	-0.677	50.334	628.281	-0.000318	-0.001717	-0.001378
18.6000	310.637	2.248	21.285	16.745	-0.669	50.334	591.373	-0.000157	-0.001490	-0.001172
18.8000	273.457	-1.692	16.527	11.674	-0.673	50.334	520.592	0.000118	-0.001157	-0.000817
19.0000	257.527	-4.013	13.744	9.352	-0.685	50.335	490.265	0.000281	-0.000962	-0.000655
19.2000	238.862	-6.076	10.937	7.004	-0.661	50.335	454.731	0.000425	-0.000766	-0.000490
19.4000	237.795	-6.648	10.234	6.241	-0.660	50.334	452.700	0.000465	-0.000716	-0.000437
19.6000	179.800	-10.918	3.247	-0.417	-0.667	50.334	342.293	0.000764	-0.000227	0.000029
19.8000	230.491	-7.757	8.311	4.071	-0.683	50.335	438.795	0.000543	-0.000582	-0.000285
20.0000	224.795	-8.515	7.509	3.112	-0.654	50.335	427.952	0.000596	-0.000526	-0.000218
20.2000	237.464	-7.488	8.776	4.709	-0.660	50.335	452.070	0.000524	-0.000614	-0.000330
20.4000	258.654	-5.698	11.722	6.852	-0.659	50.336	492.411	0.000399	-0.000821	-0.000480
20.6000	261.524	-5.684	11.860	7.005	-0.656	50.335	497.875	0.000398	-0.000830	-0.000490
20.8000	291.010	-2.649	15.685	11.103	-0.668	50.335	554.008	0.000185	-0.001098	-0.000777
21.0000	313.342	-0.602	18.271	13.008	-0.675	50.336	596.523	0.000042	-0.001279	-0.000911
21.2000	338.365	1.855	21.339	16.148	-0.650	50.336	644.159	-0.000130	-0.001494	-0.001130
21.4000	378.295	5.768	26.143	20.761	-0.667	50.336	720.177	-0.000404	-0.001830	-0.001453
21.6000	408.998	9.070	29.815	24.945	-0.669	50.337	778.627	-0.000635	-0.002087	-0.001746
21.8000	443.834	13.391	34.509	29.225	-0.663	50.336	844.946	-0.000937	-0.002416	-0.002046
22.0000	477.377	17.204	38.583	33.118	-0.681	50.337	908.804	-0.001204	-0.002701	-0.002318
22.2000	519.803	21.949	43.578	38.244	-0.654	50.337	989.571	-0.001536	-0.003050	-0.002677
22.4000	551.963	26.077	47.636	42.953	-0.660	50.337	1050.797	-0.001825	-0.003335	-0.003007
22.6000	601.677	31.856	53.304	48.458	-0.694	50.337	1145.439	-0.002230	-0.003731	-0.003392
22.8000	639.880	36.137	58.040	53.695	-0.656	50.338	1218.166	-0.002530	-0.004063	-0.003759
23.0000	670.913	40.106	61.562	57.323	-0.668	50.338	1277.246	-0.002807	-0.004309	-0.004013
23.2000	704.907	44.652	66.214	61.715	-0.672	50.338	1341.963	-0.003126	-0.004635	-0.004320
23.4000	741.141	49.274	70.328	66.204	-0.661	50.338	1410.942	-0.003449	-0.004923	-0.004634
23.6000	758.574	51.572	72.708	68.786	-0.686	50.338	1444.130	-0.003610	-0.005090	-0.004815
23.8000	788.165	55.360	75.789	72.290	-0.669	50.339	1500.463	-0.003875	-0.005305	-0.005060
24.0000	813.999	58.912	78.845	75.901	-0.670	50.338	1549.644	-0.004124	-0.005519	-0.005313
24.2000	822.174	60.402	80.288	77.862	-0.687	50.339	1565.208	-0.004228	-0.005620	-0.005450
24.4000	840.869	62.446	82.215	79.805	-0.667	50.339	1600.800	-0.004371	-0.005755	-0.005586
24.6000	844.777	63.976	82.863	80.584	-0.665	50.339	1608.238	-0.004478	-0.005800	-0.005641
24.8000	847.467	64.244	83.757	81.402	-0.657	50.340	1613.359	-0.004497	-0.005863	-0.005698
25.0000	848.594	64.526	83.964	81.669	-0.670	50.340	1615.505	-0.004517	-0.005877	-0.005717
25.2000	835.910	63.318	82.972	80.752	-0.669	50.340	1591.358	-0.004432	-0.005808	-0.005653
25.4000	825.541	62.461	81.898	80.113	-0.662	50.341	1571.617	-0.004372	-0.005733	-0.005608
25.6000	770.987	56.819	77.304	74.233	-0.662	50.340	1467.762	-0.003977	-0.005411	-0.005196
25.8000	787.128	58.575	78.678	75.680	-0.664	50.341	1498.489	-0.004100	-0.005507	-0.005298
26.0000	754.426	54.493	75.268	72.177	-0.656	50.341	1436.234	-0.003815	-0.005269	-0.005052
26.2000	739.788	52.765	73.614	70.356	-0.662	50.340	1408.367	-0.003694	-0.005153	-0.004925
26.4000	706.380	49.147	69.983	66.510	-0.652	50.342	1344.767	-0.003440	-0.004899	-0.004656
26.6000	661.235	43.924	65.609	61.298	-0.658	50.341	1258.821	-0.003075	-0.004593	-0.004291
26.8000	630.367	39.615	61.464	57.281	-0.668	50.342	1200.056	-0.002773	-0.004303	-0.004010
27.0000	588.558	35.433	56.952	52.610	-0.663	50.342	1120.462	-0.002480	-0.003987	-0.003683
27.2000	545.140	30.314	52.218	47.552	-0.650	50.341	1037.807	-0.002122	-0.003655	-0.003329
27.4000	513.175	26.132	48.227	43.620	-0.673	50.343	976.954	-0.001829	-0.003376	-0.003053
27.6000	472.042	21.545	43.220	38.464	-0.659	50.342	898.647	-0.001508	-0.003025	-0.002692
27.8000	428.550	16.321	37.949	32.949	-0.653	50.342	815.849	-0.001142	-0.002656	-0.002306
28.0000	402.776	13.306	34.371	29.407	-0.661	50.343	766.783	-0.000931	-0.002406	-0.002059
28.2000	363.312	8.604	29.158	24.555	-0.657	50.343	691.652	-0.000602	-0.002041	-0.001719
28.4000	328.401	4.746	24.355	19.882	-0.652	50.343	625.191	-0.000332	-0.001705	-0.001392
28.6000	303.814	1.854	21.092	16.092	-0.665	50.343	578.384	-0.000130	-0.001476	-0.001126
28.8000	280.550	-0.909	17.778	12.803	-0.656	50.343	534.096	0.000064	-0.001244	-0.000896
29.0000	264.650	-2.818	15.011	10.547	-0.664	50.343	503.826	0.000197	-0.001051	-0.000738
29.2000	254.130	-4.039	13.069	8.532	-0.657	50.343	483.799	0.000283	-0.000915	-0.000597
29.4000	227.620	-7.224	10.071	5.267	-0.664	50.343	433.331	0.000506	-0.000705	-0.000369
29.6000	228.642	-7.813	9.727	4.836	-0.684	50.343	435.276	0.000547	-0.000681	-0.000339
29.8000	221.459	-8.696	8.047	3.445	-0.639	50.344	421.600	0.000609	-0.000563	-0.000241
30.0000	227.725	-7.770	8.420	3.988	-0.669	50.344	433.531	0.000544	-0.000589	-0.000279
30.2000	233.241	-7.448	9.011	4.641	-0.664	50.344	444.031	0.000521	-0.000631	-0.000325
30.4000	248.585	-6.873	10.759	6.046	-0.655	50.345	473.242	0.000481	-0.000753	-0.000423
30.6000	259.180	-5.655	11.860	7.352	-0.664	50.345	493.412	0.000396	-0.000830	-0.000515
30.8000	287.253	-2.887	15.300	10.228	-0.665	50.345	546.856	0.000202	-0.001071	-0.000716
31.0000	309.330	-0.770	18.368	12.828	-0.650	50.345	588.884	0.000054	-0.001286	-0.000898
31.2000	345.864	2.373	22.746	16.969	-0.669	50.345	658.436	-0.000166	-0.001592	-0.001188
31.4000	374.358	5.726	25.881	20.525	-0.655	50.346	712.681	-0.000401	-0.001812	-0.001437
31.6000	401.529	8.887	29.596	24.166	-0.655	50.345	764.408	-0.000622	-0.002072	-0.001692
31.8000	444.345	13.615	34.840	28.878	-0.680	50.346	845.919	-0.000953	-0.002439	-0.002021
32.0000	462.860	15.607	37.123	31.670	-0.654	50.346	881.166	-0.001092	-0.002599	-0.002217
32.2000	518.976	21.851	43.689	38.395	-0.655	50.346	987.997	-0.001530	-0.003058	-0.002688
32.4000	565.474	27.604	49.067	44.497	-0.673	50.346	1076.517	-0.001932	-0.003435	-0.003115
32.6000	587.340	30.426	52.204	47.609	-0.655	50.346	1118.145	-0.002130	-0.003654	-0.003333
32.8000	634.785	35.956	57.419	52.637	-0.664	50.346	1208.467	-0.002517	-0.004019	-0.003685
33.0000	667.637	39.698	61.521	57.184	-0.661	50.347	1271.009	-0.002779	-0.004306	-0.004003
33.2000	704.381	44.499	65.733	61.604	-0.652	50.347	1340.961	-0.003115	-0.004601	-0.004312
33.4000	737.324	48.867	69.980	65.886	-0.679	50.347	1403.675	-0.003421	-0.004899	-0.004612
33.6000	768.538	52.735	73.726	69.731	-0.651	50.347	1463.099	-0.003691	-0.005161	-0.004881
33.8000	799.286	56.412	76.782	73.540	-0.652	50.347	1521.635	-0.003949	-0.005375	-0.005148
34.0000	806.830	58.042	78.116	75.291	-0.677	50.347	1535.997	-0.004063	-0.005468	-0.005270
34.2000	825.721	60.709	80.645	77.808	-0.665	50.348	1571.960	-0.004250	-0.005645	-0.005447
34.4000	845.844	63.318	83.041	80.265	-0.660	50.347	1610.270	-0.004432	-0.005813	-0.005619
34.6000	844.867	63.556	83.234	80.806	-0.677	50.347	1608.410	-0.004449	-0.005826	-0.005656
34.8000	848.624	64.287	83.565	81.446	-0.671	50.348	1615.562	-0.004500	-0.005850	-0.005701
35.0000	831.973	63.275	82.779	80.267	-0.669	50.348	1583.862	-0.004429	-0.005795	-0.005619
35.2000	836.361	63.837	83.208	80.402	-0.669	50.347	1592.216	-0.004469	-0.005825	-0.005628
35.4000	825.240	62.335	82.189	79.627	-0.666	50.348	1571.045	-0.004363	-0.005753	-0.005574
35.6000	815.502	61.647	81.075	78.655	-0.643	50.348	1552.505	-0.004315	-0.005675	-0.005506
35.8000	788.766	58.436	78.584	76.068	-0.677	50.348	1501.608	-0.004090	-0.005501	-0.005325
36.0000	761.895	55.362	76.326	72.751	-0.663	50.348	1450.453	-0.003875	-0.005343	-0.005093
36.2000	736.332	52.342	73.420	69.911	-0.648	50.348	1401.787	-0.003664	-0.005139	-0.004894
36.4000	703.931	48.249	69.708	65.897	-0.676	50.348	1340.103	-0.003377	-0.004880	-0.004613
36.6000	666.916	44.291	65.941	61.882	-0.646	50.349	1269.636	-0.003100	-0.004616	-0.004332
36.8000	628.293	39.866	61.770	57.392	-0.658	50.348	1196.108	-0.002791	-0.004324	-0.004017
37.0000	590.030	35.377	57.434	52.777	-0.664	50.349	1123.266	-0.002476	-0.004020	-0.003694
37.2000	548.958	30.384	52.412	48.026	-0.663	50.349	1045.074	-0.002127	-0.003669	-0.003362
37.4000	512.078	26.230	48.282	43.481	-0.660	50.348	974.865	-0.001836	-0.003380	-0.003044
37.6000	463.957	21.025	42.862	37.758	-0.667	50.349	883.255	-0.001472	-0.003000	-0.002643
37.8000	434.246	16.896	38.721	33.562	-0.651	50.349	826.693	-0.001183	-0.002710	-0.002349
38.0000	394.000	12.293	33.328	28.349	-0.699	50.349	750.074	-0.000861	-0.002333	-0.001984
38.2000	366.934	8.773	29.731	24.749	-0.665	50.349	698.547	-0.000614	-0.002081	-0.001732
38.4000	336.832	5.388	25.894	20.789	-0.673	50.348	641.241	-0.000377	-0.001813	-0.001455
38.6000	307.782	1.940	21.642	16.746	-0.671	50.349	585.938	-0.000136	-0.001515	-0.001172
38.8000	266.739	-2.480	16.237	11.562	-0.658	50.349	507.803	0.000174	-0.001137	-0.000809
39.0000	261.870	-3.240	14.888	10.241	-0.676	50.348	498.533	0.000227	-0.001042	-0.000717
39.2000	242.784	-5.163	12.176	7.173	-0.678	50.349	462.198	0.000361	-0.000852	-0.000502
39.4000	233.061	-6.942	10.553	5.891	-0.657	50.348	443.687	0.000486	-0.000739	-0.000412
39.6000	227.064	-7.742	9.011	4.849	-0.669	50.348	432.272	0.000542	-0.000631	-0.000339
39.8000	225.336	-7.980	8.336	4.292	-0.668	50.350	428.982	0.000559	-0.000584	-0.000300
40.0000	224.194	-8.122	8.351	3.875	-0.657	50.349	426.807	0.000569	-0.000585	-0.000271
40.2000	234.128	-7.629	9.479	4.683	-0.668	50.349	445.719	0.000534	-0.000664	-0.000328
40.4000	242.303	-7.292	10.221	5.421	-0.664	50.350	461.283	0.000510	-0.000715	-0.000379
40.6000	259.225	-5.641	12.135	7.284	-0.658	50.349	493.498	0.000395	-0.000849	-0.000510
40.8000	284.082	-2.985	15.533	10.060	-0.686	50.349	540.819	0.000209	-0.001087	-0.000704
41.0000	326.943	0.690	20.406	14.870	-0.659	50.350	622.416	-0.000048	-0.001428	-0.001041
41.2000	338.530	1.574	22.084	16.620	-0.661	50.349	644.474	-0.000110	-0.001546	-0.001163
41.4000	365.596	4.873	25.057	19.594	-0.676	50.350	696.001	-0.000341	-0.001754	-0.001372
41.6000	408.457	9.349	30.298	24.750	-0.676	50.351	777.597	-0.000654	-0.002121	-0.001732
41.8000	442.076	12.815	34.661	28.933	-0.656	50.350	841.599	-0.000897	-0.002426	-0.002025
42.0000	465.730	15.525	37.812	32.183	-0.691	50.350	886.631	-0.001087	-0.002647	-0.002253
42.2000	516.181	21.794	43.275	38.227	-0.664	50.351	982.676	-0.001526	-0.003029	-0.002676
42.4000	560.995	26.890	48.914	43.760	-0.671	50.350	1067.991	-0.001882	-0.003424	-0.003063
42.6000	594.223	30.805	52.796	47.913	-0.679	50.351	1131.248	-0.002156	-0.003696	-0.003354
42.8000	633.733	35.237	57.476	52.346	-0.672	50.351	1206.465	-0.002467	-0.004023	-0.003664
43.0000	669.891	39.979	61.551	57.351	-0.671	50.350	1275.301	-0.002799	-0.004309	-0.004015
43.2000	712.226	45.156	66.530	62.019	-0.661	50.351	1355.896	-0.003161	-0.004657	-0.004341
43.4000	735.310	48.291	69.693	65.494	-0.653	50.351	1399.841	-0.003380	-0.004879	-0.004585
43.6000	763.894	51.683	72.529	69.078	-0.665	50.351	1454.258	-0.003618	-0.005077	-0.004835
43.8000	786.617	55.166	75.735	72.581	-0.685	50.351	1497.517	-0.003862	-0.005301	-0.005081
44.0000	803.629	57.492	78.170	75.192	-0.651	50.351	1529.903	-0.004024	-0.005472	-0.005263
44.2000	831.372	61.098	81.020	78.294	-0.666	50.350	1582.718	-0.004277	-0.005671	-0.005481
44.4000	840.900	62.447	82.090	79.640	-0.687	50.351	1600.857	-0.004371	-0.005746	-0.005575
44.6000	854.365	64.568	83.620	81.364	-0.646	50.351	1626.492	-0.004520	-0.005853	-0.005695
44.8000	852.727	64.582	83.718	81.629	-0.674	50.351	1623.373	-0.004521	-0.005860	-0.005714
45.0000	847.707	64.385	83.744	81.182	-0.674	50.351	1613.817	-0.004507	-0.005862	-0.005683
45.2000	837.308	63.291	82.877	80.569	-0.642	50.351	1594.019	-0.004430	-0.005801	-0.005640
45.4000	822.099	61.700	81.294	78.849	-0.677	50.351	1565.065	-0.004319	-0.005691	-0.005519
45.6000	807.296	60.499	80.413	77.292	-0.666	50.352	1536.884	-0.004235	-0.005629	-0.005410
45.8000	789.668	58.505	78.719	75.387	-0.667	50.351	1503.325	-0.004095	-0.005510	-0.005277
46.0000	764.706	55.489	75.901	72.636	-0.681	50.351	1455.803	-0.003884	-0.005313	-0.005085
46.2000	734.198	51.726	72.872	69.275	-0.660	50.351	1397.724	-0.003621	-0.005101	-0.004849
46.4000	705.343	48.529	69.721	65.688	-0.662	50.351	1342.793	-0.003397	-0.004880	-0.004598
46.6000	666.480	44.259	66.268	61.480	-0.669	50.352	1268.806	-0.003098	-0.004639	-0.004304
46.8000	627.616	39.629	61.452	56.947	-0.665	50.352	1194.820	-0.002774	-0.004302	-0.003986
47.0000	592.270	35.069	57.116	52.736	-0.659	50.351	1127.529	-0.002455	-0.003998	-0.003692
47.2000	548.131	30.287	51.875	47.663	-0.675	50.351	1043.501	-0.002120	-0.003631	-0.003336
47.4000	512.694	26.147	47.885	43.467	-0.650	50.351	976.038	-0.001830	-0.003352	-0.003043
47.6000	467.624	20.871	42.640	37.548	-0.666	50.351	890.236	-0.001461	-0.002985	-0.002628
47.8000	436.154	16.796	38.554	33.297	-0.657	50.351	830.326	-0.001176	-0.002699	-0.002331
48.0000	391.851	11.816	32.789	27.834	-0.660	50.351	745.983	-0.000827	-0.002295	-0.001948
48.2000	365.085	8.381	28.978	24.209	-0.673	50.350	695.028	-0.000587	-0.002028	-0.001695
48.4000	336.170	5.025	25.317	20.078	-0.647	50.350	639.982	-0.000352	-0.001772	-0.001405
48.6000	313.478	2.387	21.986	17.094	-0.669	50.350	596.781	-0.000167	-0.001539	-0.001197
48.8000	282.835	-1.049	17.584	13.092	-0.686	50.350	538.445	0.000073	-0.001231	-0.000916
49.0000	253.785	-4.560	13.714	9.045	-0.669	50.350	483.141	0.000319	-0.000960	-0.000633
49.2000	247.368	-5.458	12.051	7.729	-0.675	50.349	470.924	0.000382	-0.000844	-0.000541
49.4000	233.496	-6.887	10.415	5.616	-0.690	50.350	444.517	0.000482	-0.000729	-0.000393
49.6000	226.809	-7.855	9.232	4.614	-0.659	50.349	431.786	0.000550	-0.000646	-0.000323
49.8000	226.929	-8.416	8.475	3.681	-0.661	50.349	432.014	0.000589	-0.000593	-0.000258
50.0000	236.743	-8.669	8.927	4.194	-0.672	50.335	450.697	0.000607	-0.000625	-0.000294
50.2000	247.398	-7.629	9.879	5.406	-0.673	50.335	470.982	0.000534	-0.000692	-0.000378
50.4000	257.046	-6.216	11.585	6.379	-0.656	50.335	489.349	0.000435	-0.000811	-0.000447
50.6000	281.723	-4.349	14.475	8.976	-0.683	50.334	536.327	0.000304	-0.001013	-0.000628
50.8000	309.510	-1.875	17.875	12.341	-0.676	50.335	589.228	0.000131	-0.001251	-0.000864
51.0000	345.338	2.023	22.262	16.635	-0.657	50.334	657.434	-0.000142	-0.001558	-0.001164
51.2000	384.276	6.316	26.914	21.149	-0.678	50.334	731.564	-0.000442	-0.001884	-0.001480
51.4000	418.872	9.827	31.441	25.929	-0.664	50.334	797.424	-0.000688	-0.002201	-0.001815
51.6000	464.708	14.766	36.986	31.142	-0.664	50.333	884.686	-0.001034	-0.002589	-0.002180
51.8000	515.459	20.507	42.684	37.533	-0.691	50.334	981.302	-0.001436	-0.002988	-0.002627
52.0000	556.111	25.767	47.885	42.885	-0.655	50.334	1058.693	-0.001804	-0.003352	-0.003002
52.2000	625.813	33.526	55.356	50.556	-0.669	50.332	1191.387	-0.002347	-0.003875	-0.003539
52.4000	665.142	38.353	60.379	55.919	-0.684	50.333	1266.260	-0.002685	-0.004227	-0.003914
52.6000	714.826	44.497	66.351	61.896	-0.664	50.333	1360.846	-0.003115	-0.004645	-0.004333
52.8000	767.305	51.332	72.515	68.759	-0.653	50.331	1460.752	-0.003593	-0.005076	-0.004813
53.0000	818.447	57.845	78.625	75.387	-0.669	50.332	1558.113	-0.004049	-0.005504	-0.005277
53.2000	861.864	63.078	83.234	80.529	-0.660	50.331	1640.768	-0.004415	-0.005826	-0.005637
53.4000	910.211	69.183	88.147	86.505	-0.669	50.330	1732.807	-0.004843	-0.006170	-0.006055
53.6000	946.579	74.389	92.231	91.299	-0.677	50.331	1802.044	-0.005207	-0.006456	-0.006391
53.8000	973.104	78.723	95.780	94.870	-0.660	50.330	1852.541	-0.005511	-0.006705	-0.006641
54.0000	998.487	81.715	98.839	98.553	-0.671	50.330	1900.864	-0.005720	-0.006919	-0.006899
54.2000	1027.868	85.728	101.574	102.236	-0.669	50.330	1956.797	-0.006001	-0.007110	-0.007156
54.4000	1037.636	87.428	103.447	104.140	-0.658	50.330	1975.393	-0.006120	-0.007241	-0.007290
54.6000	1041.138	88.899	104.452	104.711	-0.670	50.329	1982.059	-0.006223	-0.007312	-0.007330
54.8000	1049.419	90.218	105.348	106.462	-0.643	50.329	1997.824	-0.006315	-0.007374	-0.007452
55.0000	1048.186	90.174	105.195	106.838	-0.671	50.329	1995.478	-0.006312	-0.007364	-0.007479
55.2000	1040.928	89.978	105.098	105.961	-0.685	50.329	1981.659	-0.006298	-0.007357	-0.007417
55.4000	1020.023	87.765	103.173	104.168	-0.641	50.328	1941.862	-0.006144	-0.007222	-0.007292
55.6000	993.904	84.800	101.187	101.682	-0.666	50.327	1892.138	-0.005936	-0.007083	-0.007118
55.8000	973.135	82.487	99.142	99.233	-0.686	50.328	1852.598	-0.005774	-0.006940	-0.006946
56.0000	939.456	78.792	95.989	95.413	-0.659	50.327	1788.483	-0.005515	-0.006719	-0.006679
56.2000	903.072	74.472	92.865	91.340	-0.664	50.326	1719.217	-0.005213	-0.006501	-0.006394
56.4000	863.818	69.548	88.449	86.933	-0.667	50.327	1644.487	-0.004868	-0.006191	-0.006085
56.6000	810.317	63.332	83.015	80.683	-0.655	50.326	1542.635	-0.004433	-0.005811	-0.005648
56.8000	758.153	57.677	78.090	75.316	-0.685	50.326	1443.329	-0.004037	-0.005466	-0.005272
57.0000	717.501	52.429	73.656	69.800	-0.670	50.326	1365.938	-0.003670	-0.005156	-0.004886
57.2000	665.713	46.197	67.179	63.952	-0.676	50.325	1267.347	-0.003234	-0.004703	-0.004477
57.4000	612.708	39.417	60.929	57.295	-0.682	50.326	1166.439	-0.002759	-0.004265	-0.004011
57.6000	560.710	33.429	55.000	50.999	-0.665	50.325	1067.448	-0.002340	-0.003850	-0.003570
57.8000	509.734	27.477	49.165	44.830	-0.691	50.325	970.402	-0.001923	-0.003442	-0.003138
58.0000	467.414	21.921	43.826	39.119	-0.656	50.325	889.835	-0.001534	-0.003068	-0.002738
58.2000	419.518	16.293	37.617	33.031	-0.660	50.324	798.655	-0.001140	-0.002633	-0.002312
58.4000	377.859	11.199	31.922	27.514	-0.670	50.325	719.347	-0.000784	-0.002235	-0.001926
58.6000	346.886	7.481	27.576	22.986	-0.665	50.324	660.381	-0.000524	-0.001930	-0.001609
58.8000	309.510	3.076	22.743	17.873	-0.659	50.324	589.228	-0.000215	-0.001592	-0.001251
59.0000	286.952	0.015	19.040	14.411	-0.660	50.323	546.284	-0.000001	-0.001333	-0.001009
59.2000	264.229	-2.775	15.793	10.965	-0.681	50.324	503.025	0.000194	-0.001105	-0.000768
59.4000	243.250	-5.007	12.713	8.144	-0.652	50.323	463.085	0.000350	-0.000890	-0.000570
59.6000	235.660	-6.033	11.199	6.657	-0.672	50.323	448.637	0.000422	-0.000784	-0.000466
59.8000	235.570	-6.594	10.954	6.018	-0.670	50.323	448.465	0.000462	-0.000767	-0.000421
60.0000	239.418	-6.914	10.897	6.004	-0.648	50.322	455.790	0.000484	-0.000763	-0.000420
60.2000	251.290	-5.921	11.707	7.187	-0.668	50.322	478.392	0.000414	-0.000820	-0.000503
60.4000	264.320	-5.092	13.317	8.256	-0.668	50.322	503.197	0.000356	-0.000932	-0.000578
60.6000	289.402	-2.523	16.237	10.951	-0.655	50.321	550.947	0.000177	-0.001137	-0.000767
60.8000	313.553	-0.197	19.580	13.884	-0.696	50.321	596.924	0.000014	-0.001371	-0.000972
61.0000	341.656	2.655	22.885	17.469	-0.664	50.321	650.425	-0.000186	-0.001602	-0.001223
61.2000	382.518	6.609	27.423	22.344	-0.668	50.321	728.216	-0.000463	-0.001920	-0.001564
61.4000	426.191	11.575	32.847	27.571	-0.683	50.319	811.357	-0.000810	-0.002299	-0.001930
61.6000	465.580	16.012	38.018	32.518	-0.688	50.321	886.345	-0.001121	-0.002661	-0.002276
61.8000	524.431	22.565	44.458	39.187	-0.669	50.320	998.383	-0.001580	-0.003112	-0.002743
62.0000	569.952	27.533	50.003	44.927	-0.659	50.319	1085.043	-0.001927	-0.003500	-0.003145
62.2000	621.244	33.805	55.674	51.195	-0.675	50.319	1182.690	-0.002366	-0.003897	-0.003584
62.4000	666.224	39.122	61.163	57.005	-0.671	50.320	1268.320	-0.002739	-0.004281	-0.003990
62.6000	726.593	46.814	68.344	64.187	-0.654	50.318	1383.247	-0.003277	-0.004784	-0.004493
62.8000	769.650	52.667	73.284	69.577	-0.681	50.319	1465.216	-0.003687	-0.005130	-0.004870
63.0000	821.844	58.883	79.048	76.083	-0.669	50.319	1564.579	-0.004122	-0.005533	-0.005326
63.2000	870.115	64.846	84.390	82.280	-0.676	50.317	1656.475	-0.004539	-0.005907	-0.005760
63.4000	903.373	69.324	88.560	86.698	-0.676	50.318	1719.790	-0.004853	-0.006199	-0.006069
63.6000	942.597	74.557	93.129	91.687	-0.665	50.317	1794.462	-0.005219	-0.006519	-0.006418
63.8000	973.375	79.031	96.703	95.916	-0.690	50.317	1853.056	-0.005532	-0.006769	-0.006714
64.0000	1003.402	83.061	99.857	99.540	-0.653	50.317	1910.219	-0.005814	-0.006990	-0.006968
64.2000	1019.152	85.614	101.865	102.014	-0.660	50.316	1940.203	-0.005993	-0.007131	-0.007141
64.4000	1036.960	88.341	103.737	104.639	-0.700	50.317	1974.106	-0.006184	-0.007262	-0.007325
64.6000	1047.721	90.499	105.236	106.391	-0.671	50.316	1994.591	-0.006335	-0.007367	-0.007447
64.8000	1046.804	90.328	105.665	106.851	-0.673	50.315	1992.846	-0.006323	-0.007397	-0.007480
65.0000	1045.045	90.611	105.734	106.976	-0.690	50.315	1989.498	-0.006343	-0.007401	-0.007488
65.2000	1031.685	89.054	104.741	106.058	-0.675	50.316	1964.064	-0.006234	-0.007332	-0.007424
65.4000	1016.852	88.186	103.721	104.390	-0.663	50.314	1935.825	-0.006173	-0.007261	-0.007307
65.6000	997.871	86.192	102.112	102.735	-0.681	50.315	1899.691	-0.006033	-0.007148	-0.007191
65.8000	970.234	82.671	99.569	99.455	-0.665	50.315	1847.076	-0.005787	-0.006970	-0.006962
66.0000	933.940	78.498	96.044	95.427	-0.664	50.314	1777.983	-0.005495	-0.006723	-0.006680
66.2000	895.828	74.150	92.838	91.367	-0.687	50.314	1705.427	-0.005190	-0.006499	-0.006396
66.4000	854.440	69.266	88.434	86.491	-0.659	50.314	1626.635	-0.004849	-0.006190	-0.006054
66.6000	804.861	63.600	83.498	80.975	-0.673	50.313	1532.249	-0.004452	-0.005845	-0.005668
66.8000	762.857	58.239	78.680	75.694	-0.671	50.314	1452.284	-0.004077	-0.005508	-0.005299
67.0000	709.912	52.035	72.940	69.688	-0.654	50.313	1351.490	-0.003642	-0.005106	-0.004878
67.2000	670.598	47.238	68.414	64.797	-0.676	50.313	1276.646	-0.003307	-0.004789	-0.004536
67.4000	602.113	39.025	61.177	56.698	-0.672	50.313	1146.269	-0.002732	-0.004282	-0.003969
67.6000	558.861	33.456	55.317	51.154	-0.667	50.313	1063.929	-0.002342	-0.003872	-0.003581
67.8000	504.398	26.919	48.860	44.830	-0.672	50.313	960.245	-0.001884	-0.003420	-0.003138
68.0000	458.577	22.017	43.149	38.648	-0.671	50.313	873.013	-0.001541	-0.003020	-0.002705
68.2000	416.092	16.474	37.838	32.851	-0.661	50.312	792.131	-0.001153	-0.002649	-0.002300
68.4000	368.887	10.498	31.646	26.904	-0.667	50.313	702.267	-0.000735	-0.002215	-0.001883
68.6000	340.980	7.061	27.396	22.626	-0.664	50.313	649.137	-0.000494	-0.001918	-0.001584
68.8000	311.298	3.341	23.488	18.511	-0.667	50.312	592.632	-0.000234	-0.001644	-0.001296
69.0000	254.251	-2.313	15.850	11.174	-0.690	50.312	484.028	0.000162	-0.001109	-0.000782
69.2000	257.407	-2.987	15.519	10.978	-0.677	50.312	490.036	0.000209	-0.001086	-0.000768
69.4000	216.319	-7.153	9.468	5.474	-0.663	50.312	411.816	0.000501	-0.000663	-0.000383
69.6000	236.156	-5.586	11.556	6.977	-0.689	50.312	449.581	0.000391	-0.000809	-0.000488
69.8000	231.197	-6.482	10.748	6.115	-0.670	50.312	440.140	0.000454	-0.000752	-0.000428
70.0000	234.774	-6.901	10.719	6.018	-0.660	50.311	446.949	0.000483	-0.000750	-0.000421
70.2000	243.926	-6.132	11.392	6.838	-0.684	50.311	464.373	0.000429	-0.000797	-0.000479
70.4000	275.471	-3.434	15.217	10.145	-0.661	50.311	524.426	0.000240	-0.001065	-0.000710
70.6000	285.104	-2.705	16.223	11.046	-0.665	50.311	542.765	0.000189	-0.001136	-0.000773
70.8000	317.986	0.352	20.156	14.576	-0.684	50.311	605.364	-0.000025	-0.001411	-0.001020
71.0000	343.549	3.091	23.270	17.761	-0.672	50.311	654.030	-0.000216	-0.001629	-0.001243
71.2000	384.126	7.496	28.248	22.875	-0.691	50.310	731.277	-0.000525	-0.001977	-0.001601
71.4000	442.031	13.559	35.196	29.727	-0.681	50.311	841.513	-0.000949	-0.002464	-0.002081
71.6000	469.037	16.711	38.735	33.059	-0.677	50.310	892.925	-0.001170	-0.002711	-0.002314
71.8000	517.999	22.143	44.293	39.216	-0.671	50.310	986.137	-0.001550	-0.003101	-0.002745
72.0000	566.766	28.007	49.769	44.858	-0.691	50.310	1078.978	-0.001961	-0.003484	-0.003140
72.2000	624.956	34.760	57.034	52.083	-0.680	50.310	1189.756	-0.002433	-0.003992	-0.003646
72.4000	674.490	40.598	62.660	58.115	-0.687	50.309	1284.056	-0.002842	-0.004386	-0.004068
72.6000	720.251	46.491	67.808	63.756	-0.690	50.310	1371.174	-0.003254	-0.004747	-0.004463
72.8000	770.822	52.863	73.793	70.273	-0.668	50.309	1467.447	-0.003700	-0.005166	-0.004919
73.0000	817.515	59.109	79.587	76.403	-0.696	50.309	1556.339	-0.004138	-0.005571	-0.005348
73.2000	857.145	64.090	84.322	81.432	-0.666	50.310	1631.784	-0.004486	-0.005903	-0.005700
73.4000	880.560	67.104	86.825	84.673	-0.684	50.309	1676.359	-0.004697	-0.006078	-0.005927
73.6000	941.695	75.076	93.308	92.242	-0.696	50.309	1792.746	-0.005255	-0.006532	-0.006457
73.8000	981.024	80.017	97.588	96.814	-0.684	50.308	1867.619	-0.005601	-0.006831	-0.006777
74.0000	999.600	83.329	100.077	99.663	-0.687	50.308	1902.981	-0.005833	-0.007005	-0.006976
74.2000	1069.241	91.227	106.350	107.350	-0.688	50.309	2035.561	-0.006386	-0.007445	-0.007514
74.4000	1037.216	88.608	104.617	105.168	-0.679	50.308	1974.592	-0.006203	-0.007323	-0.007362
74.6000	1046.533	90.526	105.745	106.739	-0.695	50.308	1992.331	-0.006337	-0.007402	-0.007472
74.8000	1053.086	91.594	106.832	107.878	-0.689	50.308	2004.805	-0.006412	-0.007478	-0.007551
75.0000	1030.573	89.474	105.361	106.059	-0.664	50.308	1961.946	-0.006263	-0.007375	-0.007424
75.2000	1037.020	89.880	105.292	106.253	-0.715	50.308	1974.220	-0.006292	-0.007370	-0.007438
75.4000	1016.807	88.343	104.190	104.695	-0.690	50.308	1935.740	-0.006184	-0.007293	-0.007329
75.6000	994.956	86.205	102.703	102.942	-0.684	50.307	1894.140	-0.006034	-0.007189	-0.007206
75.8000	971.647	83.216	100.449	100.222	-0.693	50.308	1849.766	-0.005825	-0.007031	-0.007016
76.0000	939.170	79.455	97.022	96.636	-0.673	50.307	1787.939	-0.005562	-0.006792	-0.006765
76.2000	898.579	74.949	93.198	91.994	-0.696	50.307	1710.663	-0.005246	-0.006524	-0.006440
76.4000	846.054	69.141	88.162	86.199	-0.677	50.307	1610.670	-0.004840	-0.006171	-0.006034
76.6000	809.340	64.258	84.226	81.640	-0.668	50.306	1540.775	-0.004498	-0.005896	-0.005715
76.8000	763.368	58.730	78.858	76.137	-0.683	50.306	1453.257	-0.004111	-0.005520	-0.005330
77.0000	712.226	52.876	73.395	70.092	-0.674	50.307	1355.896	-0.003701	-0.005138	-0.004906
77.2000	661.085	46.521	67.700	64.035	-0.664	50.306	1258.535	-0.003256	-0.004739	-0.004482
77.4000	596.838	38.663	59.925	55.600	-0.676	50.306	1136.227	-0.002706	-0.004195	-0.003892
77.6000	556.111	33.315	55.219	50.917	-0.675	50.306	1058.693	-0.002332	-0.003865	-0.003564
77.8000	507.314	27.449	49.122	44.814	-0.678	50.305	965.796	-0.001921	-0.003439	-0.003137
78.0000	466.632	22.763	44.377	39.424	-0.684	50.306	888.348	-0.001593	-0.003106	-0.002760
78.2000	415.596	16.419	38.087	33.060	-0.679	50.306	791.187	-0.001149	-0.002666	-0.002314
78.4000	390.017	12.577	33.673	28.947	-0.669	50.305	742.493	-0.000880	-0.002357	-0.002026
78.6000	342.693	7.187	27.493	23.124	-0.679	50.305	652.399	-0.000503	-0.001925	-0.001619
78.8000	316.709	4.382	23.143	18.651	-0.671	50.305	602.932	-0.000307	-0.001620	-0.001306
79.0000	282.564	0.365	18.987	14.287	-0.668	50.304	537.930	-0.000026	-0.001329	-0.001000
79.2000	241.507	-4.334	13.747	8.851	-0.671	50.304	459.766	0.000303	-0.000962	-0.000620
79.4000	245.038	-4.952	12.960	8.671	-0.671	50.304	466.490	0.000347	-0.000907	-0.000607
79.6000	240.019	-5.430	11.488	6.812	-0.664	50.304	456.934	0.000380	-0.000804	-0.000477
79.8000	245.820	-5.234	12.535	7.591	-0.696	50.304	467.978	0.000366	-0.000877	-0.000531
80.0000	242.739	-5.990	11.008	6.046	-0.672	50.304	462.112	0.000419	-0.000771	-0.000423
80.2000	259.706	-4.869	12.603	7.337	-0.681	50.303	494.413	0.000341	-0.000882	-0.000514
80.4000	216.740	-8.036	8.103	3.280	-0.698	50.303	412.617	0.000563	-0.000567	-0.000230
80.6000	270.301	-3.492	14.475	9.033	-0.673	50.303	514.584	0.000244	-0.001013	-0.000632
80.8000	315.672	0.100	19.524	13.827	-0.687	50.303	600.958	-0.000007	-0.001367	-0.000968
81.0000	291.792	-1.190	18.216	12.689	-0.665	50.303	555.496	0.000083	-0.001275	-0.000888
81.2000	376.492	6.288	27.201	21.260	-0.676	50.302	716.743	-0.000440	-0.001904	-0.001488
81.4000	422.388	11.185	32.680	26.999	-0.680	50.303	804.119	-0.000783	-0.002288	-0.001890
81.6000	471.065	16.657	38.540	32.670	-0.668	50.303	896.788	-0.001166	-0.002698	-0.002287
81.8000	522.207	22.298	44.485	38.855	-0.677	50.302	994.148	-0.001561	-0.003114	-0.002720
82.0000	575.137	28.724	50.595	45.525	-0.695	50.302	1094.913	-0.002011	-0.003542	-0.003187
82.2000	634.665	35.576	57.432	52.416	-0.675	50.303	1208.239	-0.002490	-0.004020	-0.003669
82.4000	675.557	40.444	62.509	57.601	-0.667	50.302	1286.087	-0.002831	-0.004376	-0.004032
82.6000	716.374	45.817	67.342	63.120	-0.685	50.302	1363.792	-0.003207	-0.004714	-0.004418
82.8000	778.111	53.438	74.205	70.440	-0.659	50.302	1481.323	-0.003741	-0.005194	-0.004931
83.0000	817.019	58.815	79.022	76.027	-0.667	50.302	1555.395	-0.004117	-0.005532	-0.005322
83.2000	865.110	64.569	84.460	81.710	-0.662	50.303	1646.948	-0.004520	-0.005912	-0.005720
83.4000	896.895	68.847	88.064	85.990	-0.660	50.302	1707.458	-0.004819	-0.006164	-0.006019
83.6000	972.143	78.203	95.437	94.481	-0.670	50.301	1850.710	-0.005474	-0.006681	-0.006614
83.8000	968.641	78.668	96.596	95.455	-0.674	50.302	1844.044	-0.005507	-0.006762	-0.006682
84.0000	1007.865	83.550	100.396	99.805	-0.667	50.301	1918.716	-0.005849	-0.007028	-0.006986
84.2000	1004.258	84.757	101.149	101.193	-0.693	50.301	1911.850	-0.005933	-0.007080	-0.007084
84.4000	1069.061	92.351	107.507	108.350	-0.679	50.303	2035.217	-0.006465	-0.007526	-0.007585
84.6000	1039.710	89.360	105.264	105.848	-0.653	50.302	1979.342	-0.006255	-0.007368	-0.007409
84.8000	1048.397	90.738	105.831	106.809	-0.673	50.301	1995.878	-0.006352	-0.007408	-0.007477
85.0000	1044.925	90.862	105.981	106.989	-0.655	50.302	1989.269	-0.006360	-0.007419	-0.007489
85.2000	1038.117	90.302	105.277	105.975	-0.678	50.301	1976.309	-0.006321	-0.007369	-0.007418
85.4000	1019.978	88.690	104.259	104.669	-0.685	50.301	1941.776	-0.006208	-0.007298	-0.007327
85.6000	992.927	85.250	101.878	101.681	-0.667	50.302	1890.278	-0.005967	-0.007131	-0.007118
85.8000	968.250	82.543	99.484	99.221	-0.653	50.301	1843.300	-0.005778	-0.006964	-0.006945
86.0000	933.234	78.766	96.265	95.384	-0.690	50.301	1776.638	-0.005514	-0.006739	-0.006677
86.2000	890.448	73.756	92.632	90.439	-0.655	50.301	1695.185	-0.005163	-0.006484	-0.006331
86.4000	849.556	68.619	87.543	85.631	-0.675	50.301	1617.336	-0.004803	-0.006128	-0.005994
86.6000	809.024	64.132	83.356	80.750	-0.665	50.301	1540.174	-0.004489	-0.005835	-0.005652
86.8000	767.230	59.024	79.021	76.179	-0.677	50.301	1460.609	-0.004132	-0.005531	-0.005333
87.0000	710.754	51.950	73.174	69.438	-0.683	50.301	1353.092	-0.003636	-0.005122	-0.004861
87.2000	653.165	45.128	66.543	62.661	-0.670	50.302	1243.458	-0.003159	-0.004658	-0.004386
87.4000	598.702	38.925	60.173	55.989	-0.663	50.301	1139.774	-0.002725	-0.004212	-0.003919
87.6000	558.456	33.818	55.179	50.641	-0.679	50.301	1063.156	-0.002367	-0.003863	-0.003545
87.8000	495.892	26.443	47.952	43.204	-0.655	50.301	944.052	-0.001851	-0.003357	-0.003024
88.0000	460.636	21.514	43.274	38.424	-0.691	50.300	876.932	-0.001506	-0.003029	-0.002690
88.2000	407.345	15.034	35.680	30.933	-0.681	50.301	775.480	-0.001052	-0.002498	-0.002165
88.4000	394.962	13.294	34.401	29.099	-0.666	50.300	751.905	-0.000931	-0.002408	-0.002037
88.6000	330.745	6.161	25.702	20.914	-0.676	50.299	629.654	-0.000431	-0.001799	-0.001464
88.8000	299.351	2.122	20.983	16.203	-0.685	50.301	569.887	-0.000149	-0.001469	-0.001134
89.0000	282.008	0.014	18.629	13.633	-0.678	50.300	536.871	-0.000001	-0.001304	-0.000954
89.2000	265.056	-2.284	16.141	11.201	-0.681	50.299	504.599	0.000160	-0.001130	-0.000784
89.4000	244.452	-4.813	12.780	8.242	-0.684	50.300	465.374	0.000337	-0.000895	-0.000577
89.6000	243.580	-5.585	11.776	7.004	-0.669	50.298	463.715	0.000391	-0.000824	-0.000490
89.8000	230.536	-6.858	9.974	5.268	-0.695	50.299	438.881	0.000480	-0.000698	-0.000369
90.0000	248.134	-5.851	11.778	6.338	-0.658	50.299	472.383	0.000410	-0.000824	-0.000444
90.2000	254.356	-5.262	12.342	7.353	-0.691	50.298	484.228	0.000368	-0.000864	-0.000515
90.4000	265.266	-4.236	13.759	8.700	-0.662	50.299	504.999	0.000297	-0.000963	-0.000609
90.6000	277.950	-3.154	15.246	9.645	-0.664	50.298	529.146	0.000221	-0.001067	-0.000675
90.8000	312.305	0.072	19.688	14.175	-0.691	50.298	594.549	-0.000005	-0.001378	-0.000992
91.0000	348.253	3.189	23.408	17.914	-0.662	50.298	662.985	-0.000223	-0.001639	-0.001254
91.2000	377.634	6.678	27.658	21.665	-0.672	50.297	718.918	-0.000467	-0.001936	-0.001517
91.4000	423.501	11.481	32.941	26.957	-0.677	50.299	806.236	-0.000804	-0.002306	-0.001887
91.6000	484.471	17.948	40.165	34.074	-0.667	50.298	922.308	-0.001256	-0.002812	-0.002385
91.8000	534.470	23.647	45.942	40.274	-0.667	50.296	1017.494	-0.001655	-0.003216	-0.002819
92.0000	542.210	25.388	47.623	42.146	-0.669	50.298	1032.228	-0.001777	-0.003334	-0.002950
92.2000	610.679	32.995	55.620	49.904	-0.669	50.296	1162.577	-0.002310	-0.003893	-0.003493
92.4000	686.603	41.539	63.459	58.629	-0.684	50.297	1307.116	-0.002908	-0.004442	-0.004104
92.6000	717.020	45.789	67.795	63.146	-0.686	50.296	1365.023	-0.003205	-0.004746	-0.004420
92.8000	776.984	53.131	74.208	70.259	-0.664	50.296	1479.177	-0.003719	-0.005195	-0.004918
93.0000	827.660	59.502	79.903	76.514	-0.679	50.296	1575.651	-0.004165	-0.005593	-0.005356
93.2000	879.553	65.916	85.560	82.697	-0.691	50.296	1674.442	-0.004614	-0.005989	-0.005789
93.4000	896.986	68.860	88.134	85.963	-0.673	50.294	1707.630	-0.004820	-0.006169	-0.006017
93.6000	949.089	75.722	93.884	92.161	-0.692	50.295	1806.822	-0.005301	-0.006572	-0.006451
93.8000	973.540	79.104	96.541	95.720	-0.679	50.295	1853.371	-0.005537	-0.006758	-0.006700
94.0000	999.479	82.867	99.348	99.137	-0.671	50.294	1902.752	-0.005801	-0.006954	-0.006940
94.2000	1025.644	86.612	102.017	102.418	-0.691	50.294	1952.562	-0.006063	-0.007141	-0.007169
94.4000	1033.263	88.271	103.776	104.390	-0.678	50.294	1967.068	-0.006179	-0.007264	-0.007307
94.6000	1043.498	89.992	105.263	105.864	-0.677	50.294	1986.551	-0.006299	-0.007368	-0.007410
94.8000	1047.585	90.737	105.912	106.962	-0.705	50.293	1994.333	-0.006352	-0.007414	-0.007487
95.0000	1048.352	91.340	105.732	106.949	-0.699	50.294	1995.792	-0.006394	-0.007401	-0.007486
95.2000	1036.134	90.358	105.222	106.156	-0.675	50.293	1972.532	-0.006325	-0.007366	-0.007431
95.4000	1009.939	87.486	103.295	103.819	-0.699	50.293	1922.665	-0.006124	-0.007231	-0.007267
95.6000	999.254	86.148	101.990	102.540	-0.671	50.293	1902.323	-0.006030	-0.007139	-0.007178
95.8000	979.987	84.251	100.120	100.040	-0.680	50.292	1865.644	-0.005898	-0.007008	-0.007003
96.0000	940.373	79.638	97.064	96.082	-0.691	50.292	1790.228	-0.005575	-0.006794	-0.006726
96.2000	911.578	75.934	94.131	92.743	-0.680	50.292	1735.411	-0.005315	-0.006589	-0.006492
96.4000	854.605	69.240	88.394	86.393	-0.678	50.292	1626.949	-0.004847	-0.006188	-0.006047
96.6000	811.188	64.722	83.705	81.280	-0.683	50.292	1544.294	-0.004531	-0.005859	-0.005690
96.8000	741.877	56.820	77.276	73.819	-0.663	50.292	1412.344	-0.003977	-0.005409	-0.005167
97.0000	706.966	52.062	73.217	69.619	-0.691	50.292	1345.882	-0.003644	-0.005125	-0.004873
97.2000	660.979	46.421	67.343	63.562	-0.703	50.292	1258.335	-0.003249	-0.004714	-0.004449
97.4000	609.312	39.980	61.605	57.281	-0.688	50.291	1159.973	-0.002799	-0.004312	-0.004010
97.6000	554.834	33.469	55.122	50.401	-0.680	50.291	1056.261	-0.002343	-0.003859	-0.003528
97.8000	508.381	27.856	49.672	44.760	-0.698	50.291	967.827	-0.001950	-0.003477	-0.003133
98.0000	472.433	23.254	44.830	39.828	-0.676	50.291	899.391	-0.001628	-0.003138	-0.002788
98.2000	413.401	16.111	37.647	32.767	-0.692	50.290	787.010	-0.001128	-0.002635	-0.002294
98.4000	352.687	9.786	30.409	25.264	-0.699	50.292	671.425	-0.000685	-0.002129	-0.001768
98.6000	336.201	6.948	27.533	22.526	-0.675	50.291	640.039	-0.000486	-0.001927	-0.001577
98.8000	309.841	3.568	23.392	18.122	-0.690	50.291	589.857	-0.000250	-0.001637	-0.001269
99.0000	273.126	-0.686	18.299	13.190	-0.694	50.291	519.962	0.000048	-0.001281	-0.000923
99.2000	259.030	-2.395	15.891	10.950	-0.672	50.291	493.126	0.000168	-0.001112	-0.000767
99.4000	249.727	-3.928	14.406	9.505	-0.692	50.291	475.416	0.000275	-0.001008	-0.000665
99.6000	235.345	-5.920	11.998	6.924	-0.695	50.292	448.036	0.000414	-0.000840	-0.000485
99.8000	234.714	-6.034	11.324	6.657	-0.673	50.291	446.835	0.000422	-0.000793	-0.000466
Test Cycles
Time (sec)	Axial stress (kPa)	Axial micro-strain #1	Axial micro-strain #2	Axial micro-strain #3	Confining pressure (kPa)	Temperature (�C)	Load (N)	Displacement #1 (mm)	Displacement #2 (mm)	Displacement #3 (mm)
0.0000	235.675	-6.203	11.419	6.200	-0.701	50.291	448.666	0.000434	-0.000799	-0.000434
0.2000	247.112	-5.711	12.369	7.381	-0.677	50.292	470.438	0.000400	-0.000866	-0.000517
0.4000	260.112	-4.727	13.511	8.311	-0.691	50.291	495.186	0.000331	-0.000946	-0.000582
0.6000	281.257	-2.676	15.919	10.909	-0.675	50.292	535.440	0.000187	-0.001114	-0.000764
0.8000	312.035	0.522	20.130	14.285	-0.679	50.291	594.034	-0.000037	-0.001409	-0.001000
1.0000	347.036	3.933	24.644	18.524	-0.697	50.291	660.667	-0.000275	-0.001725	-0.001297
1.2000	383.585	7.424	28.400	22.708	-0.684	50.292	730.247	-0.000520	-0.001988	-0.001590
1.4000	415.941	10.916	32.155	26.833	-0.683	50.291	791.845	-0.000764	-0.002251	-0.001878
1.6000	467.474	16.544	38.624	32.698	-0.690	50.291	889.950	-0.001158	-0.002704	-0.002289
1.8000	509.628	21.626	44.279	38.035	-0.694	50.292	970.201	-0.001514	-0.003100	-0.002662
2.0000	567.112	27.757	50.486	45.345	-0.681	50.291	1079.636	-0.001943	-0.003534	-0.003174
2.2000	616.285	33.693	56.142	50.862	-0.695	50.291	1173.248	-0.002358	-0.003930	-0.003560
2.4000	669.561	40.317	62.372	57.656	-0.693	50.293	1274.672	-0.002822	-0.004366	-0.004036
2.6000	720.777	46.900	68.344	63.910	-0.669	50.291	1372.175	-0.003283	-0.004784	-0.004474
2.8000	770.431	52.863	73.958	69.743	-0.692	50.291	1466.703	-0.003700	-0.005177	-0.004882
3.0000	820.190	59.349	79.614	76.235	-0.681	50.292	1561.432	-0.004154	-0.005573	-0.005336
3.2000	861.594	64.932	84.527	81.836	-0.678	50.291	1640.253	-0.004545	-0.005917	-0.005729
3.4000	899.075	69.619	89.111	86.365	-0.693	50.291	1711.607	-0.004873	-0.006238	-0.006046
3.6000	939.155	74.612	93.198	91.546	-0.673	50.292	1787.910	-0.005223	-0.006524	-0.006408
3.8000	969.723	79.089	96.307	95.648	-0.676	50.291	1846.104	-0.005536	-0.006742	-0.006695
4.0000	997.931	83.091	99.679	99.471	-0.688	50.292	1899.805	-0.005816	-0.006978	-0.006963
4.2000	1018.716	86.472	102.374	102.098	-0.664	50.292	1939.373	-0.006053	-0.007166	-0.007147
4.4000	1036.239	88.649	104.425	104.904	-0.700	50.291	1972.733	-0.006205	-0.007310	-0.007343
4.6000	1041.799	89.880	105.304	106.155	-0.686	50.292	1983.318	-0.006292	-0.007371	-0.007431
4.8000	1049.253	91.325	106.092	107.128	-0.665	50.292	1997.509	-0.006393	-0.007426	-0.007499
5.0000	1052.905	92.070	106.723	108.184	-0.689	50.292	2004.461	-0.006445	-0.007471	-0.007573
5.2000	1035.412	90.457	105.497	106.920	-0.697	50.293	1971.159	-0.006332	-0.007385	-0.007484
5.4000	1014.703	88.074	103.846	104.569	-0.668	50.292	1931.734	-0.006165	-0.007269	-0.007320
5.6000	999.975	86.472	102.389	102.970	-0.705	50.293	1903.696	-0.006053	-0.007167	-0.007208
5.8000	965.500	82.950	99.719	99.358	-0.688	50.293	1838.064	-0.005807	-0.006980	-0.006955
6.0000	927.854	78.542	96.113	95.108	-0.672	50.292	1766.396	-0.005498	-0.006728	-0.006658
6.2000	892.357	74.249	92.810	91.340	-0.695	50.293	1698.818	-0.005197	-0.006497	-0.006394
6.4000	860.031	70.393	89.234	87.504	-0.674	50.293	1637.278	-0.004928	-0.006246	-0.006125
6.6000	816.899	65.803	84.900	82.475	-0.682	50.292	1555.166	-0.004606	-0.005943	-0.005773
6.8000	760.618	58.773	78.734	75.833	-0.707	50.293	1448.021	-0.004114	-0.005511	-0.005308
7.0000	628.383	43.743	65.444	60.895	-0.679	50.293	1196.280	-0.003062	-0.004581	-0.004263
7.2000	662.107	46.590	67.631	64.354	-0.673	50.293	1260.481	-0.003261	-0.004734	-0.004505
7.4000	612.408	40.853	62.304	57.920	-0.685	50.294	1165.867	-0.002860	-0.004361	-0.004054
7.6000	551.422	33.401	55.082	50.304	-0.666	50.294	1049.767	-0.002338	-0.003856	-0.003521
7.8000	507.419	27.714	50.072	45.163	-0.691	50.293	965.996	-0.001940	-0.003505	-0.003161
8.0000	423.741	18.538	39.630	34.839	-0.696	50.294	806.694	-0.001298	-0.002774	-0.002439
8.2000	421.862	17.487	39.091	33.907	-0.672	50.294	803.118	-0.001224	-0.002736	-0.002374
8.4000	363.357	10.875	32.140	26.751	-0.683	50.294	691.738	-0.000761	-0.002250	-0.001873
8.6000	349.200	8.226	28.827	23.625	-0.686	50.295	664.787	-0.000576	-0.002018	-0.001654
8.8000	316.243	4.409	24.506	19.552	-0.693	50.295	602.045	-0.000309	-0.001715	-0.001369
9.0000	278.747	0.142	19.151	14.104	-0.693	50.294	530.663	-0.000010	-0.001341	-0.000987
9.2000	262.276	-2.155	16.785	11.465	-0.716	50.295	499.306	0.000151	-0.001175	-0.000803
9.4000	246.376	-4.097	14.240	8.934	-0.670	50.295	469.036	0.000287	-0.000997	-0.000625
9.6000	234.113	-5.725	11.653	6.879	-0.697	50.294	445.690	0.000401	-0.000816	-0.000482
9.8000	235.150	-6.104	11.639	6.239	-0.700	50.296	447.664	0.000427	-0.000815	-0.000437
10.0000	241.612	-5.782	12.452	6.949	-0.682	50.296	459.967	0.000405	-0.000872	-0.000486
10.2000	242.348	-5.993	12.439	6.950	-0.706	50.296	461.369	0.000419	-0.000871	-0.000486
10.4000	238.531	-6.356	11.721	6.520	-0.674	50.297	454.102	0.000445	-0.000820	-0.000456
10.6000	283.225	-2.633	16.803	11.200	-0.671	50.296	539.188	0.000184	-0.001176	-0.000784
10.8000	317.686	1.167	21.134	15.633	-0.690	50.296	604.792	-0.000082	-0.001479	-0.001094
11.0000	337.899	3.019	23.365	17.385	-0.688	50.297	643.272	-0.000211	-0.001636	-0.001217
11.2000	382.789	7.496	28.540	22.709	-0.687	50.297	728.731	-0.000525	-0.001998	-0.001590
11.4000	425.048	11.970	33.562	27.916	-0.700	50.298	809.183	-0.000838	-0.002349	-0.001954
11.6000	470.795	17.091	39.228	33.408	-0.690	50.299	896.273	-0.001196	-0.002746	-0.002339
11.8000	519.352	22.733	45.312	39.439	-0.681	50.298	988.712	-0.001591	-0.003172	-0.002761
12.0000	586.950	30.173	52.701	47.635	-0.703	50.299	1117.401	-0.002112	-0.003689	-0.003334
12.2000	652.443	37.698	59.977	54.864	-0.676	50.299	1242.085	-0.002639	-0.004198	-0.003840
12.4000	674.445	40.780	63.197	58.432	-0.699	50.299	1283.970	-0.002855	-0.004424	-0.004090
12.6000	717.306	46.632	68.579	64.062	-0.704	50.299	1365.566	-0.003264	-0.004801	-0.004484
12.8000	766.930	52.398	74.137	69.980	-0.683	50.300	1460.037	-0.003668	-0.005190	-0.004899
13.0000	818.522	59.136	79.669	76.417	-0.703	50.300	1558.256	-0.004140	-0.005577	-0.005349
13.2000	870.055	65.592	85.875	82.667	-0.677	50.301	1656.361	-0.004591	-0.006011	-0.005787
13.4000	899.616	69.719	89.673	86.769	-0.697	50.301	1712.637	-0.004880	-0.006277	-0.006074
13.6000	933.129	74.402	93.404	91.174	-0.685	50.301	1776.438	-0.005208	-0.006538	-0.006382
13.8000	951.193	77.112	95.589	94.065	-0.692	50.301	1810.827	-0.005398	-0.006691	-0.006585
14.0000	1000.652	83.733	101.050	100.387	-0.698	50.301	1904.984	-0.005861	-0.007074	-0.007027
14.2000	1028.123	87.682	103.954	103.735	-0.691	50.302	1957.283	-0.006138	-0.007277	-0.007261
14.4000	1039.560	89.319	105.539	106.114	-0.687	50.302	1979.055	-0.006252	-0.007388	-0.007428
14.6000	1042.521	90.372	106.132	106.934	-0.718	50.303	1984.692	-0.006326	-0.007429	-0.007485
14.8000	1050.831	91.874	107.314	107.668	-0.690	50.304	2000.513	-0.006431	-0.007512	-0.007537
15.0000	1025.343	89.347	105.596	105.960	-0.693	50.303	1951.990	-0.006254	-0.007392	-0.007417
15.2000	1014.643	88.341	104.659	105.112	-0.724	50.304	1931.620	-0.006184	-0.007326	-0.007358
15.4000	1016.852	88.761	104.797	105.155	-0.683	50.304	1935.825	-0.006213	-0.007336	-0.007361
15.6000	998.292	87.062	103.214	103.320	-0.696	50.304	1900.492	-0.006094	-0.007225	-0.007232
15.8000	934.887	79.874	97.656	96.399	-0.700	50.305	1779.785	-0.005591	-0.006836	-0.006748
16.0000	931.085	79.032	96.430	95.734	-0.687	50.305	1772.547	-0.005532	-0.006750	-0.006701
16.2000	899.916	75.542	93.514	92.158	-0.707	50.305	1713.209	-0.005288	-0.006546	-0.006451
16.4000	855.342	70.407	89.605	87.352	-0.689	50.306	1628.351	-0.004928	-0.006272	-0.006115
16.6000	813.683	65.354	85.436	82.306	-0.696	50.305	1549.044	-0.004575	-0.005980	-0.005761
16.8000	756.034	58.534	79.008	75.817	-0.703	50.307	1439.295	-0.004097	-0.005531	-0.005307
17.0000	703.555	52.415	73.600	69.771	-0.692	50.306	1339.388	-0.003669	-0.005152	-0.004884
17.2000	663.685	47.404	68.576	64.673	-0.692	50.307	1263.485	-0.003318	-0.004800	-0.004527
17.4000	609.958	40.584	62.509	57.879	-0.688	50.307	1161.203	-0.002841	-0.004376	-0.004052
17.6000	552.850	33.848	55.812	50.792	-0.689	50.307	1052.485	-0.002369	-0.003907	-0.003555
17.8000	506.578	28.050	50.057	45.443	-0.732	50.308	964.394	-0.001963	-0.003504	-0.003181
18.0000	467.654	23.688	45.228	40.160	-0.717	50.309	890.293	-0.001658	-0.003166	-0.002811
18.2000	423.440	17.836	39.835	34.325	-0.700	50.309	806.122	-0.001249	-0.002788	-0.002403
18.4000	363.357	10.582	31.854	26.667	-0.694	50.309	691.738	-0.000741	-0.002230	-0.001867
18.6000	344.902	7.902	28.825	23.596	-0.706	50.310	656.605	-0.000553	-0.002018	-0.001652
18.8000	305.513	3.667	23.666	18.288	-0.691	50.309	581.617	-0.000257	-0.001657	-0.001280
19.0000	285.359	0.857	20.736	15.450	-0.715	50.310	543.251	-0.000060	-0.001452	-0.001082
19.2000	256.745	-2.592	16.498	11.201	-0.706	50.310	488.777	0.000181	-0.001155	-0.000784
19.4000	241.642	-4.491	13.689	8.839	-0.735	50.310	460.024	0.000314	-0.000958	-0.000619
19.6000	237.449	-5.261	12.698	7.783	-0.703	50.311	452.042	0.000368	-0.000889	-0.000545
19.8000	235.736	-5.864	12.259	7.005	-0.693	50.311	448.780	0.000410	-0.000858	-0.000490
20.0000	241.507	-5.739	12.548	7.213	-0.706	50.311	459.766	0.000402	-0.000878	-0.000505
20.2000	249.472	-5.402	13.110	7.852	-0.727	50.312	474.930	0.000378	-0.000918	-0.000550
20.4000	255.498	-4.615	13.760	8.603	-0.692	50.312	486.403	0.000323	-0.000963	-0.000602
20.6000	283.706	-2.367	16.992	11.687	-0.690	50.311	540.104	0.000166	-0.001189	-0.000818
20.8000	304.911	-0.167	20.046	13.662	-0.703	50.313	580.473	0.000012	-0.001403	-0.000956
21.0000	357.631	4.537	25.912	19.927	-0.689	50.313	680.838	-0.000318	-0.001814	-0.001395
21.2000	379.257	7.285	28.469	22.414	-0.727	50.313	722.008	-0.000510	-0.001993	-0.001569
21.4000	423.891	12.110	33.603	27.918	-0.704	50.314	806.980	-0.000848	-0.002352	-0.001954
21.6000	475.123	17.737	40.274	33.700	-0.682	50.313	904.512	-0.001242	-0.002819	-0.002359
21.8000	517.608	22.353	45.231	39.021	-0.719	50.314	985.394	-0.001565	-0.003166	-0.002732
22.0000	564.272	27.923	50.472	45.414	-0.698	50.314	1074.228	-0.001955	-0.003533	-0.003179
22.2000	615.639	33.945	56.595	51.389	-0.701	50.314	1172.018	-0.002376	-0.003962	-0.003597
22.4000	665.653	39.995	62.250	57.185	-0.722	50.315	1267.233	-0.002800	-0.004358	-0.004003
22.6000	712.046	46.013	68.027	63.439	-0.686	50.315	1355.553	-0.003221	-0.004762	-0.004441
22.8000	777.630	53.890	75.598	71.595	-0.719	50.314	1480.408	-0.003772	-0.005292	-0.005012
23.0000	816.824	59.180	79.682	76.486	-0.703	50.315	1555.023	-0.004143	-0.005578	-0.005354
23.2000	857.055	64.497	84.253	81.558	-0.710	50.314	1631.613	-0.004515	-0.005898	-0.005709
23.4000	900.803	70.026	89.510	86.811	-0.714	50.316	1714.897	-0.004902	-0.006266	-0.006077
23.6000	963.216	77.240	95.685	94.106	-0.682	50.315	1833.715	-0.005407	-0.006698	-0.006587
23.8000	969.167	79.104	97.200	96.026	-0.711	50.315	1845.045	-0.005537	-0.006804	-0.006722
24.0000	1002.831	83.622	100.601	100.264	-0.703	50.316	1909.132	-0.005854	-0.007042	-0.007019
24.2000	1032.542	87.821	103.970	104.126	-0.698	50.315	1965.694	-0.006148	-0.007278	-0.007289
24.4000	1036.479	89.054	105.112	105.113	-0.723	50.316	1973.190	-0.006234	-0.007358	-0.007358
24.6000	1058.180	91.847	107.397	107.947	-0.716	50.317	2014.503	-0.006429	-0.007518	-0.007556
24.8000	1043.783	90.906	106.323	107.240	-0.703	50.315	1987.095	-0.006363	-0.007443	-0.007507
25.0000	1045.166	91.734	106.749	107.643	-0.704	50.317	1989.727	-0.006421	-0.007472	-0.007535
25.2000	1007.459	87.609	103.090	103.266	-0.689	50.317	1917.944	-0.006133	-0.007216	-0.007229
25.4000	1018.565	88.900	105.071	105.515	-0.724	50.316	1939.087	-0.006223	-0.007355	-0.007386
25.6000	987.201	85.515	102.345	102.070	-0.710	50.317	1879.377	-0.005986	-0.007164	-0.007145
25.8000	971.617	83.621	100.560	100.207	-0.710	50.315	1849.709	-0.005853	-0.007039	-0.007015
26.0000	938.434	80.001	97.478	96.802	-0.710	50.317	1786.537	-0.005600	-0.006823	-0.006776
26.2000	895.347	75.201	93.857	92.021	-0.694	50.316	1704.512	-0.005264	-0.006570	-0.006441
26.4000	865.486	71.219	90.775	88.521	-0.732	50.316	1647.663	-0.004985	-0.006354	-0.006196
26.6000	817.065	65.270	85.436	82.781	-0.708	50.317	1555.481	-0.004569	-0.005980	-0.005795
26.8000	763.488	59.152	79.571	76.750	-0.698	50.316	1453.485	-0.004141	-0.005570	-0.005373
27.0000	715.653	53.567	74.386	70.551	-0.734	50.316	1362.419	-0.003750	-0.005207	-0.004939
27.2000	661.791	46.899	68.882	64.282	-0.727	50.317	1259.880	-0.003283	-0.004822	-0.004500
27.4000	644.884	43.882	65.580	61.282	-0.700	50.316	1227.694	-0.003072	-0.004591	-0.004290
27.6000	559.147	34.141	56.032	51.808	-0.734	50.316	1064.472	-0.002390	-0.003922	-0.003627
27.8000	511.372	28.569	50.764	45.442	-0.720	50.316	973.520	-0.002000	-0.003553	-0.003181
28.0000	463.386	22.605	45.037	39.325	-0.720	50.315	882.168	-0.001582	-0.003153	-0.002753
28.2000	417.940	16.952	39.176	33.420	-0.734	50.315	795.650	-0.001187	-0.002742	-0.002339
28.4000	371.803	11.436	33.134	27.767	-0.717	50.316	707.817	-0.000800	-0.002319	-0.001944
28.6000	337.613	7.045	27.904	22.346	-0.717	50.315	642.729	-0.000493	-0.001953	-0.001564
28.8000	306.264	3.569	23.529	18.053	-0.730	50.315	583.048	-0.000250	-0.001647	-0.001264
29.0000	284.683	0.844	20.421	14.896	-0.703	50.314	541.964	-0.000059	-0.001429	-0.001043
29.2000	253.980	-2.789	15.947	10.271	-0.733	50.313	483.513	0.000195	-0.001116	-0.000719
29.4000	243.866	-4.573	13.760	8.630	-0.726	50.314	464.258	0.000320	-0.000963	-0.000604
29.6000	235.615	-5.458	12.465	7.033	-0.704	50.313	448.551	0.000382	-0.000873	-0.000492
29.8000	225.501	-7.043	11.022	5.629	-0.730	50.314	429.296	0.000493	-0.000772	-0.000394
30.0000	220.301	-7.672	10.221	4.503	-0.709	50.312	419.397	0.000537	-0.000715	-0.000315
30.2000	236.652	-6.677	11.433	5.794	-0.739	50.313	450.525	0.000467	-0.000800	-0.000406
30.4000	260.187	-4.894	13.869	8.477	-0.710	50.311	495.329	0.000343	-0.000971	-0.000593
30.6000	284.097	-2.564	16.843	11.020	-0.732	50.311	540.848	0.000179	-0.001179	-0.000771
30.8000	307.196	-0.198	19.879	13.578	-0.720	50.311	584.822	0.000014	-0.001392	-0.000950
31.0000	338.440	3.090	24.188	17.649	-0.727	50.310	644.302	-0.000216	-0.001693	-0.001235
31.2000	385.058	7.481	29.377	22.833	-0.732	50.311	733.051	-0.000524	-0.002056	-0.001598
31.4000	423.185	11.576	34.236	27.695	-0.714	50.310	805.635	-0.000810	-0.002397	-0.001939
31.6000	468.195	16.642	39.449	33.131	-0.731	50.309	891.323	-0.001165	-0.002761	-0.002319
31.8000	528.669	23.493	46.122	39.938	-0.718	50.310	1006.451	-0.001644	-0.003229	-0.002796
32.0000	573.574	28.767	51.680	45.359	-0.734	50.309	1091.938	-0.002014	-0.003618	-0.003175
32.2000	611.265	33.583	56.265	50.612	-0.736	50.308	1163.692	-0.002351	-0.003939	-0.003543
32.4000	666.300	39.896	62.564	57.533	-0.742	50.308	1268.463	-0.002793	-0.004379	-0.004027
32.6000	720.282	46.533	69.047	64.269	-0.731	50.308	1371.231	-0.003257	-0.004833	-0.004499
32.8000	773.677	53.273	74.675	70.482	-0.704	50.307	1472.883	-0.003729	-0.005227	-0.004934
33.0000	821.618	59.361	80.330	76.639	-0.751	50.307	1564.150	-0.004155	-0.005623	-0.005365
33.2000	858.453	64.386	84.859	81.458	-0.742	50.307	1634.274	-0.004507	-0.005940	-0.005702
33.4000	914.283	70.983	90.541	87.964	-0.735	50.306	1740.561	-0.004969	-0.006338	-0.006157
33.6000	925.359	73.028	92.507	90.312	-0.762	50.306	1761.646	-0.005112	-0.006476	-0.006322
33.8000	968.626	78.934	96.787	95.623	-0.736	50.305	1844.015	-0.005525	-0.006775	-0.006694
34.0000	980.799	81.520	98.825	97.787	-0.744	50.304	1867.189	-0.005706	-0.006918	-0.006845
34.2000	1013.140	85.446	102.291	101.945	-0.745	50.305	1928.759	-0.005981	-0.007160	-0.007136
34.4000	1049.449	90.189	106.035	106.267	-0.739	50.304	1997.881	-0.006313	-0.007422	-0.007439
34.6000	1044.324	89.839	105.966	106.363	-0.760	50.304	1988.125	-0.006289	-0.007418	-0.007445
34.8000	1046.789	91.017	105.883	106.823	-0.731	50.303	1992.817	-0.006371	-0.007412	-0.007478
35.0000	1047.690	91.468	106.474	107.408	-0.758	50.303	1994.534	-0.006403	-0.007453	-0.007519
35.2000	1030.017	89.586	105.457	105.934	-0.728	50.303	1960.888	-0.006271	-0.007382	-0.007415
35.4000	1006.483	87.384	103.546	103.778	-0.750	50.302	1916.084	-0.006117	-0.007248	-0.007264
35.6000	989.816	85.332	102.305	101.903	-0.761	50.301	1884.356	-0.005973	-0.007161	-0.007133
35.8000	963.336	82.222	99.457	99.402	-0.741	50.302	1833.944	-0.005756	-0.006962	-0.006958
36.0000	925.720	78.346	96.305	95.094	-0.727	50.301	1762.333	-0.005484	-0.006741	-0.006657
36.2000	891.530	74.346	92.865	90.992	-0.749	50.301	1697.245	-0.005204	-0.006501	-0.006369
36.4000	845.829	68.945	88.489	86.117	-0.754	50.301	1610.241	-0.004826	-0.006194	-0.006028
36.6000	804.456	63.766	84.007	81.293	-0.743	50.300	1531.477	-0.004464	-0.005880	-0.005691
36.8000	748.941	57.073	78.200	74.997	-0.757	50.299	1425.791	-0.003995	-0.005474	-0.005250
37.0000	692.584	50.462	71.553	68.135	-0.746	50.300	1318.502	-0.003532	-0.005009	-0.004769
37.2000	656.020	45.776	67.205	63.188	-0.749	50.299	1248.894	-0.003204	-0.004704	-0.004423
37.4000	600.129	39.093	60.861	56.421	-0.747	50.299	1142.492	-0.002737	-0.004260	-0.003949
37.6000	546.298	32.448	54.847	50.194	-0.727	50.299	1040.010	-0.002271	-0.003839	-0.003514
37.8000	501.303	26.877	49.040	44.331	-0.731	50.298	954.351	-0.001881	-0.003433	-0.003103
38.0000	455.075	21.223	43.122	38.450	-0.751	50.298	866.346	-0.001486	-0.003019	-0.002692
38.2000	413.311	16.194	37.730	32.823	-0.733	50.296	786.839	-0.001134	-0.002641	-0.002298
38.4000	379.362	12.012	32.874	28.251	-0.758	50.296	722.208	-0.000841	-0.002301	-0.001978
38.6000	332.639	6.581	27.202	22.221	-0.740	50.296	633.259	-0.000461	-0.001904	-0.001556
38.8000	307.977	3.021	23.311	18.287	-0.740	50.295	586.309	-0.000211	-0.001632	-0.001280
39.0000	281.662	-0.112	19.193	14.385	-0.742	50.296	536.213	0.000008	-0.001343	-0.001007
39.2000	260.983	-2.760	15.768	10.979	-0.730	50.294	496.845	0.000193	-0.001104	-0.000769
39.4000	241.642	-5.081	13.082	8.298	-0.741	50.295	460.024	0.000356	-0.000916	-0.000581
39.6000	232.700	-6.315	11.900	6.700	-0.735	50.294	443.001	0.000442	-0.000833	-0.000469
39.8000	234.909	-6.425	11.476	6.590	-0.747	50.293	447.206	0.000450	-0.000803	-0.000461
40.0000	231.227	-7.195	10.775	5.933	-0.742	50.293	440.197	0.000504	-0.000754	-0.000415
40.2000	246.331	-6.327	12.190	7.171	-0.738	50.294	468.950	0.000443	-0.000853	-0.000502
40.4000	256.400	-5.542	13.345	8.339	-0.739	50.293	488.119	0.000388	-0.000934	-0.000584
40.6000	299.336	-1.482	18.039	12.743	-0.751	50.293	569.859	0.000104	-0.001263	-0.000892
40.8000	309.781	-0.238	19.976	14.177	-0.743	50.293	589.743	0.000017	-0.001398	-0.000992
41.0000	349.020	3.708	24.670	18.552	-0.725	50.292	664.444	-0.000260	-0.001727	-0.001299
41.2000	377.168	6.413	27.822	22.026	-0.743	50.292	718.031	-0.000449	-0.001948	-0.001542
41.4000	422.073	11.255	33.136	27.377	-0.728	50.292	803.518	-0.000788	-0.002320	-0.001916
41.6000	487.416	17.950	40.383	34.520	-0.731	50.291	927.916	-0.001257	-0.002827	-0.002416
41.8000	526.054	22.538	45.149	39.634	-0.733	50.291	1001.472	-0.001578	-0.003160	-0.002774
42.0000	564.677	27.532	50.043	44.678	-0.715	50.291	1075.001	-0.001927	-0.003503	-0.003127
42.2000	623.499	34.225	56.828	51.808	-0.746	50.291	1186.981	-0.002396	-0.003978	-0.003627
42.4000	668.419	40.065	62.455	57.407	-0.724	50.291	1272.497	-0.002805	-0.004372	-0.004018
42.6000	723.287	46.491	68.785	64.174	-0.744	50.289	1376.953	-0.003254	-0.004815	-0.004492
42.8000	768.523	52.189	73.821	69.994	-0.749	50.290	1463.070	-0.003653	-0.005167	-0.004900
43.0000	825.045	59.152	79.684	76.805	-0.726	50.290	1570.673	-0.004141	-0.005578	-0.005376
43.2000	871.212	65.186	85.009	82.767	-0.745	50.289	1658.564	-0.004563	-0.005951	-0.005794
43.4000	912.465	70.644	89.948	87.661	-0.743	50.289	1737.099	-0.004945	-0.006296	-0.006136
43.6000	945.092	75.245	93.953	92.355	-0.736	50.289	1799.212	-0.005267	-0.006577	-0.006465
43.8000	986.149	80.466	98.149	97.523	-0.740	50.288	1877.375	-0.005633	-0.006870	-0.006827
44.0000	1012.118	83.902	101.137	100.959	-0.746	50.288	1926.813	-0.005873	-0.007080	-0.007067
44.2000	1028.604	86.669	102.952	103.332	-0.730	50.288	1958.199	-0.006067	-0.007207	-0.007233
44.4000	1037.216	88.535	104.355	104.667	-0.739	50.287	1974.592	-0.006197	-0.007305	-0.007327
44.6000	1044.459	90.006	105.691	106.253	-0.738	50.289	1988.382	-0.006300	-0.007398	-0.007438
44.8000	1054.047	91.537	106.844	107.907	-0.727	50.287	2006.636	-0.006408	-0.007479	-0.007553
45.0000	1051.012	91.285	106.697	107.505	-0.758	50.287	2000.856	-0.006390	-0.007469	-0.007525
45.2000	1029.701	89.333	105.222	105.975	-0.764	50.286	1960.287	-0.006253	-0.007366	-0.007418
45.4000	1025.208	88.718	104.631	105.126	-0.740	50.286	1951.733	-0.006210	-0.007324	-0.007359
45.6000	993.468	85.598	102.098	102.306	-0.764	50.286	1891.308	-0.005992	-0.007147	-0.007161
45.8000	973.706	83.160	100.298	99.874	-0.750	50.286	1853.685	-0.005821	-0.007021	-0.006991
46.0000	938.795	79.215	96.869	96.135	-0.756	50.285	1787.224	-0.005545	-0.006781	-0.006729
46.2000	900.051	74.880	93.569	91.993	-0.761	50.286	1713.467	-0.005242	-0.006550	-0.006440
46.4000	855.192	69.211	88.945	86.587	-0.736	50.285	1628.065	-0.004845	-0.006226	-0.006061
46.6000	805.703	63.641	83.992	81.153	-0.764	50.284	1533.852	-0.004455	-0.005879	-0.005681
46.8000	766.238	58.660	79.172	76.042	-0.743	50.284	1458.721	-0.004106	-0.005542	-0.005323
47.0000	710.333	51.963	73.297	69.465	-0.749	50.283	1352.291	-0.003637	-0.005131	-0.004863
47.2000	666.810	46.802	68.413	64.479	-0.758	50.285	1269.436	-0.003276	-0.004789	-0.004514
47.4000	611.401	40.149	62.290	57.673	-0.740	50.283	1163.950	-0.002810	-0.004360	-0.004037
47.6000	560.935	33.597	56.073	51.249	-0.768	50.284	1067.877	-0.002352	-0.003925	-0.003587
47.8000	511.071	27.701	49.963	44.916	-0.760	50.284	972.948	-0.001939	-0.003497	-0.003144
48.0000	455.556	20.702	43.730	38.313	-0.754	50.283	867.262	-0.001449	-0.003061	-0.002682
48.2000	419.518	16.250	38.308	33.101	-0.774	50.283	798.655	-0.001137	-0.002682	-0.002317
48.4000	380.008	11.521	33.135	27.919	-0.742	50.283	723.438	-0.000806	-0.002319	-0.001954
48.6000	341.566	7.061	27.985	22.832	-0.757	50.282	650.253	-0.000494	-0.001959	-0.001598
48.8000	313.883	3.426	23.775	18.179	-0.777	50.282	597.553	-0.000240	-0.001664	-0.001272
49.0000	283.376	-0.349	19.853	14.300	-0.758	50.282	539.474	0.000024	-0.001390	-0.001001
49.2000	250.238	-4.041	15.274	9.685	-0.767	50.281	476.389	0.000283	-0.001069	-0.000678
49.4000	237.314	-5.866	12.727	7.507	-0.762	50.281	451.784	0.000411	-0.000891	-0.000525
49.6000	240.575	-6.215	12.094	7.117	-0.745	50.281	457.993	0.000435	-0.000847	-0.000498
49.8000	227.846	-7.320	10.842	5.656	-0.759	50.280	433.760	0.000512	-0.000759	-0.000396
50.0000	241.191	-6.607	11.804	6.240	-0.776	50.280	459.166	0.000462	-0.000826	-0.000437
50.2000	244.662	-6.328	12.273	6.463	-0.752	50.280	465.775	0.000443	-0.000859	-0.000452
50.4000	257.918	-5.262	13.552	8.185	-0.764	50.279	491.009	0.000368	-0.000949	-0.000573
50.6000	282.309	-3.294	16.399	10.673	-0.769	50.279	537.443	0.000231	-0.001148	-0.000747
50.8000	309.871	-0.950	19.443	13.633	-0.759	50.279	589.914	0.000067	-0.001361	-0.000954
51.0000	349.426	2.697	24.092	18.301	-0.766	50.278	665.216	-0.000189	-0.001686	-0.001281
51.2000	383.750	6.486	28.317	22.457	-0.769	50.279	730.562	-0.000454	-0.001982	-0.001572
51.4000	429.001	11.155	33.508	27.820	-0.772	50.278	816.708	-0.000781	-0.002346	-0.001947
51.6000	464.558	15.593	38.171	32.268	-0.772	50.278	884.399	-0.001092	-0.002672	-0.002259
51.8000	525.814	22.143	45.174	39.299	-0.738	50.277	1001.015	-0.001550	-0.003162	-0.002751
52.0000	564.467	26.904	49.755	44.287	-0.750	50.277	1074.600	-0.001883	-0.003483	-0.003100
52.2000	617.908	33.190	55.907	50.499	-0.752	50.276	1176.338	-0.002323	-0.003913	-0.003535
52.4000	682.154	40.753	63.321	58.712	-0.739	50.274	1298.647	-0.002853	-0.004432	-0.004110
52.6000	723.483	45.945	68.235	63.909	-0.768	50.275	1377.325	-0.003216	-0.004776	-0.004474
52.8000	767.245	51.585	73.421	69.355	-0.752	50.274	1460.638	-0.003611	-0.005139	-0.004855
53.0000	818.958	58.379	78.995	75.778	-0.752	50.273	1559.086	-0.004087	-0.005530	-0.005304
53.2000	860.632	63.809	83.936	81.377	-0.762	50.273	1638.422	-0.004467	-0.005876	-0.005696
53.4000	902.246	69.069	88.947	86.558	-0.751	50.273	1717.644	-0.004835	-0.006226	-0.006059
53.6000	939.982	74.122	93.128	91.534	-0.766	50.272	1789.484	-0.005189	-0.006519	-0.006407
53.8000	987.862	80.354	97.985	97.121	-0.758	50.273	1880.636	-0.005625	-0.006859	-0.006798
54.0000	995.256	81.912	99.361	98.773	-0.748	50.271	1894.712	-0.005734	-0.006955	-0.006914
54.2000	1020.519	85.277	101.904	102.236	-0.759	50.270	1942.806	-0.005969	-0.007133	-0.007157
54.4000	1037.591	88.046	103.531	104.805	-0.763	50.270	1975.307	-0.006163	-0.007247	-0.007336
54.6000	1056.046	90.976	105.953	107.087	-0.764	50.269	2010.441	-0.006368	-0.007417	-0.007496
54.8000	1045.586	90.387	105.236	106.671	-0.766	50.268	1990.528	-0.006327	-0.007367	-0.007467
55.0000	1043.092	90.344	105.625	106.879	-0.750	50.268	1985.779	-0.006324	-0.007394	-0.007482
55.2000	1034.841	89.824	105.195	106.293	-0.764	50.267	1970.072	-0.006288	-0.007364	-0.007441
55.4000	1028.695	88.942	104.643	105.529	-0.770	50.266	1958.370	-0.006226	-0.007325	-0.007387
55.6000	995.948	85.545	101.919	102.304	-0.771	50.266	1896.029	-0.005988	-0.007134	-0.007161
55.8000	962.074	81.377	98.466	98.442	-0.752	50.265	1831.541	-0.005696	-0.006893	-0.006891
56.0000	928.470	77.394	95.616	95.191	-0.776	50.264	1767.569	-0.005418	-0.006693	-0.006663
56.2000	893.604	73.589	92.259	91.172	-0.758	50.264	1701.193	-0.005151	-0.006458	-0.006382
56.4000	856.514	69.295	88.601	86.878	-0.766	50.262	1630.583	-0.004851	-0.006202	-0.006081
56.6000	816.148	64.539	84.214	82.044	-0.759	50.263	1553.736	-0.004518	-0.005895	-0.005743
56.8000	753.314	57.155	78.034	74.832	-0.740	50.261	1434.116	-0.004001	-0.005462	-0.005238
57.0000	712.001	52.246	73.230	69.870	-0.755	50.261	1355.467	-0.003657	-0.005126	-0.004891
57.2000	657.673	45.170	67.105	63.103	-0.766	50.260	1252.041	-0.003162	-0.004697	-0.004417
57.4000	620.027	40.289	62.387	57.947	-0.776	50.260	1180.372	-0.002820	-0.004367	-0.004056
57.6000	555.014	32.588	54.835	50.681	-0.770	50.260	1056.604	-0.002281	-0.003838	-0.003548
57.8000	512.168	27.534	49.535	45.123	-0.759	50.259	975.037	-0.001927	-0.003467	-0.003159
58.0000	463.130	21.852	43.825	39.033	-0.773	50.258	881.681	-0.001530	-0.003068	-0.002732
58.2000	414.228	15.552	37.523	32.324	-0.763	50.258	788.584	-0.001089	-0.002627	-0.002263
58.4000	373.892	10.918	32.168	26.989	-0.767	50.257	711.794	-0.000764	-0.002252	-0.001889
58.6000	335.554	6.710	26.997	22.138	-0.764	50.257	638.809	-0.000470	-0.001890	-0.001550
58.8000	303.950	2.403	22.952	17.775	-0.766	50.256	578.642	-0.000168	-0.001607	-0.001244
59.0000	279.904	-0.643	19.085	14.133	-0.782	50.255	532.866	0.000045	-0.001336	-0.000989
59.2000	232.850	-5.698	12.230	7.520	-0.786	50.255	443.287	0.000399	-0.000856	-0.000526
59.4000	239.778	-5.559	12.754	7.812	-0.776	50.255	456.476	0.000389	-0.000893	-0.000547
59.6000	232.399	-6.929	11.322	6.450	-0.778	50.254	442.429	0.000485	-0.000793	-0.000452
59.8000	231.332	-7.519	10.402	5.794	-0.790	50.254	440.397	0.000526	-0.000728	-0.000406
60.0000	234.984	-7.589	10.621	5.697	-0.758	50.253	447.350	0.000531	-0.000743	-0.000399
60.2000	262.110	-5.347	13.248	8.241	-0.782	50.253	498.991	0.000374	-0.000927	-0.000577
60.4000	257.737	-5.373	13.015	7.881	-0.760	50.253	490.665	0.000376	-0.000911	-0.000552
60.6000	291.251	-2.592	16.867	11.285	-0.770	50.251	554.466	0.000181	-0.001181	-0.000790
60.8000	314.169	-0.267	20.170	14.162	-0.763	50.252	598.097	0.000019	-0.001412	-0.000991
61.0000	347.547	3.147	24.175	18.053	-0.772	50.250	661.640	-0.000220	-0.001692	-0.001264
61.2000	381.887	6.667	28.236	22.443	-0.775	50.250	727.015	-0.000467	-0.001977	-0.001571
61.4000	426.687	10.931	33.052	27.236	-0.788	50.250	812.302	-0.000765	-0.002314	-0.001907
61.6000	467.173	15.706	38.196	32.352	-0.768	50.249	889.378	-0.001099	-0.002674	-0.002265
61.8000	518.360	21.598	44.322	38.534	-0.770	50.248	986.824	-0.001512	-0.003103	-0.002697
62.0000	563.415	26.792	49.563	44.232	-0.777	50.248	1072.598	-0.001875	-0.003469	-0.003096
62.2000	615.323	33.190	55.743	50.404	-0.772	50.247	1171.417	-0.002323	-0.003902	-0.003528
62.4000	667.802	39.685	61.715	57.129	-0.789	50.247	1271.324	-0.002778	-0.004320	-0.003999
62.6000	719.004	45.887	67.657	63.242	-0.762	50.247	1368.799	-0.003212	-0.004736	-0.004427
62.8000	764.285	51.669	73.203	69.230	-0.778	50.245	1455.002	-0.003617	-0.005124	-0.004846
63.0000	818.567	58.294	79.048	75.846	-0.788	50.246	1558.342	-0.004081	-0.005533	-0.005309
63.2000	864.885	64.386	84.321	81.709	-0.762	50.245	1646.519	-0.004507	-0.005902	-0.005720
63.4000	896.760	68.494	88.311	86.199	-0.775	50.244	1707.201	-0.004795	-0.006182	-0.006034
63.6000	946.189	74.697	93.528	92.145	-0.786	50.245	1801.300	-0.005229	-0.006547	-0.006450
63.8000	985.082	80.046	97.477	97.080	-0.760	50.243	1875.343	-0.005603	-0.006823	-0.006796
64.0000	995.602	81.927	98.865	99.026	-0.782	50.243	1895.370	-0.005735	-0.006921	-0.006932
64.2000	1018.971	85.389	101.701	102.207	-0.772	50.242	1939.859	-0.005977	-0.007119	-0.007155
64.4000	1046.323	89.123	104.712	105.823	-0.769	50.242	1991.930	-0.006239	-0.007330	-0.007408
64.6000	1040.988	89.181	104.727	105.878	-0.778	50.241	1981.773	-0.006243	-0.007331	-0.007411
64.8000	1047.675	90.454	105.705	106.893	-0.775	50.241	1994.505	-0.006332	-0.007399	-0.007483
65.0000	1048.938	90.989	106.036	107.074	-0.773	50.240	1996.908	-0.006369	-0.007423	-0.007495
65.2000	1028.649	88.928	104.616	105.544	-0.771	50.240	1958.284	-0.006225	-0.007323	-0.007388
65.4000	1020.008	88.045	103.779	104.543	-0.758	50.239	1941.833	-0.006163	-0.007265	-0.007318
65.6000	998.232	85.670	102.125	102.361	-0.778	50.239	1900.377	-0.005997	-0.007149	-0.007165
65.8000	967.890	82.082	99.279	99.319	-0.754	50.238	1842.613	-0.005746	-0.006950	-0.006952
66.0000	936.300	78.628	96.471	95.692	-0.777	50.238	1782.475	-0.005504	-0.006753	-0.006698
66.2000	899.931	74.135	92.797	91.921	-0.774	50.238	1713.238	-0.005189	-0.006496	-0.006435
66.4000	858.272	69.450	88.667	87.047	-0.763	50.237	1633.930	-0.004861	-0.006207	-0.006093
66.6000	803.028	63.204	83.194	80.555	-0.776	50.237	1528.759	-0.004424	-0.005824	-0.005639
66.8000	765.697	58.392	79.159	76.457	-0.760	50.237	1457.691	-0.004087	-0.005541	-0.005352
67.0000	710.483	51.515	73.024	69.605	-0.780	50.235	1352.577	-0.003606	-0.005112	-0.004872
67.2000	662.723	45.466	67.316	63.826	-0.778	50.236	1261.654	-0.003183	-0.004712	-0.004468
67.4000	607.058	38.872	61.177	56.906	-0.752	50.235	1155.682	-0.002721	-0.004282	-0.003983
67.6000	559.508	32.924	55.178	50.804	-0.781	50.235	1065.159	-0.002305	-0.003862	-0.003556
67.8000	503.963	26.512	48.986	44.358	-0.771	50.235	959.415	-0.001856	-0.003429	-0.003105
68.0000	458.802	20.788	42.863	38.174	-0.764	50.233	873.442	-0.001455	-0.003000	-0.002672
68.2000	421.081	15.914	37.935	32.949	-0.780	50.234	801.630	-0.001114	-0.002655	-0.002306
68.4000	381.932	11.339	32.526	28.030	-0.763	50.233	727.100	-0.000794	-0.002277	-0.001962
68.6000	332.879	5.528	26.500	21.665	-0.798	50.233	633.717	-0.000387	-0.001855	-0.001517
68.8000	303.003	2.066	22.373	17.260	-0.760	50.231	576.839	-0.000145	-0.001566	-0.001208
69.0000	287.689	-0.350	19.771	14.398	-0.776	50.231	547.686	0.000024	-0.001384	-0.001008
69.2000	264.635	-3.142	16.138	11.076	-0.765	50.231	503.798	0.000220	-0.001130	-0.000775
69.4000	242.378	-5.318	13.219	7.910	-0.771	50.230	461.426	0.000372	-0.000925	-0.000554
69.6000	235.886	-6.663	11.706	6.478	-0.772	50.229	449.066	0.000466	-0.000819	-0.000453
69.8000	232.925	-7.097	10.649	5.686	-0.762	50.229	443.430	0.000497	-0.000745	-0.000398
70.0000	233.286	-7.588	10.855	5.421	-0.766	50.228	444.117	0.000531	-0.000760	-0.000379
70.2000	250.734	-6.551	12.259	7.045	-0.791	50.228	477.333	0.000459	-0.000858	-0.000493
70.4000	268.452	-5.374	14.075	8.463	-0.788	50.228	511.065	0.000376	-0.000985	-0.000592
70.6000	286.637	-3.520	16.251	10.757	-0.773	50.227	545.683	0.000246	-0.001138	-0.000753
70.8000	308.984	-1.665	18.999	13.122	-0.776	50.226	588.226	0.000117	-0.001330	-0.000919
71.0000	342.392	2.038	23.160	17.386	-0.771	50.226	651.827	-0.000143	-0.001621	-0.001217
71.2000	381.075	6.175	27.807	21.609	-0.788	50.226	725.470	-0.000432	-0.001947	-0.001513
71.4000	436.380	11.674	34.085	27.987	-0.778	50.225	830.755	-0.000817	-0.002386	-0.001959
71.6000	466.106	14.922	38.047	32.116	-0.779	50.225	887.346	-0.001045	-0.002663	-0.002248
71.8000	522.583	21.655	44.198	38.744	-0.789	50.224	994.864	-0.001516	-0.003094	-0.002712
72.0000	573.304	27.491	49.894	44.943	-0.778	50.224	1091.423	-0.001924	-0.003493	-0.003146
72.2000	622.882	33.092	55.866	50.849	-0.764	50.223	1185.808	-0.002316	-0.003911	-0.003559
72.4000	667.652	38.928	61.300	56.573	-0.783	50.223	1271.038	-0.002725	-0.004291	-0.003960
72.6000	728.848	46.450	68.468	64.213	-0.778	50.222	1387.539	-0.003251	-0.004793	-0.004495
72.8000	775.962	52.399	73.696	69.828	-0.775	50.221	1477.232	-0.003668	-0.005159	-0.004888
73.0000	815.111	57.719	78.721	75.234	-0.789	50.221	1551.762	-0.004040	-0.005510	-0.005266
73.2000	877.990	65.424	85.147	82.809	-0.760	50.221	1671.467	-0.004580	-0.005960	-0.005797
73.4000	894.942	68.128	87.804	85.644	-0.783	50.220	1703.739	-0.004769	-0.006146	-0.005995
73.6000	938.614	73.956	92.948	91.061	-0.789	50.220	1786.880	-0.005177	-0.006506	-0.006374
73.8000	973.615	78.611	96.291	95.082	-0.754	50.219	1853.514	-0.005503	-0.006740	-0.006656
74.0000	1007.039	83.063	100.313	99.831	-0.787	50.218	1917.143	-0.005814	-0.007022	-0.006988
74.2000	1033.594	86.599	102.910	103.124	-0.774	50.219	1967.697	-0.006062	-0.007204	-0.007219
74.4000	1038.253	87.848	103.667	104.167	-0.783	50.217	1976.566	-0.006149	-0.007257	-0.007292
74.6000	1053.582	89.893	105.292	106.504	-0.782	50.218	2005.749	-0.006293	-0.007370	-0.007455
74.8000	1050.185	89.908	105.678	106.657	-0.780	50.217	1999.283	-0.006294	-0.007397	-0.007466
75.0000	1053.957	90.987	106.036	107.253	-0.772	50.216	2006.464	-0.006369	-0.007423	-0.007508
75.2000	1038.673	89.628	105.071	106.295	-0.788	50.216	1977.367	-0.006274	-0.007355	-0.007441
75.4000	1027.492	88.493	104.464	105.182	-0.775	50.216	1956.081	-0.006195	-0.007312	-0.007363
75.6000	996.414	84.744	101.616	101.834	-0.790	50.214	1896.915	-0.005932	-0.007113	-0.007128
75.8000	979.086	83.187	99.568	99.971	-0.784	50.215	1863.928	-0.005823	-0.006970	-0.006998
76.0000	943.138	78.976	96.594	95.928	-0.780	50.214	1795.492	-0.005528	-0.006762	-0.006715
76.2000	900.532	74.221	92.823	91.519	-0.781	50.214	1714.382	-0.005195	-0.006498	-0.006406
76.4000	865.486	70.012	88.958	87.086	-0.780	50.214	1647.663	-0.004901	-0.006227	-0.006096
76.6000	817.861	64.217	84.404	81.987	-0.794	50.212	1556.997	-0.004495	-0.005908	-0.005739
76.8000	771.078	58.912	79.778	76.417	-0.784	50.213	1467.934	-0.004124	-0.005584	-0.005349
77.0000	711.866	51.866	72.955	69.313	-0.784	50.211	1355.209	-0.003631	-0.005107	-0.004852
77.2000	654.998	44.975	66.789	62.717	-0.785	50.212	1246.948	-0.003148	-0.004675	-0.004390
77.4000	610.153	39.306	61.743	56.949	-0.774	50.211	1161.575	-0.002751	-0.004322	-0.003986
77.6000	563.280	33.230	55.840	51.041	-0.780	50.211	1072.340	-0.002326	-0.003909	-0.003573
77.8000	513.746	27.422	49.947	44.845	-0.794	50.211	978.041	-0.001920	-0.003496	-0.003139
78.0000	455.316	20.197	43.125	37.576	-0.784	50.210	866.804	-0.001414	-0.003019	-0.002630
78.2000	413.897	15.133	37.549	31.974	-0.799	50.209	787.954	-0.001059	-0.002628	-0.002238
78.4000	376.988	10.650	32.486	27.430	-0.780	50.210	717.688	-0.000746	-0.002274	-0.001920
78.6000	339.356	6.330	27.065	22.040	-0.783	50.208	646.048	-0.000443	-0.001895	-0.001543
78.8000	311.329	2.640	23.256	18.011	-0.796	50.209	592.690	-0.000185	-0.001628	-0.001261
79.0000	283.000	-0.755	18.905	13.702	-0.772	50.208	538.759	0.000053	-0.001323	-0.000959
79.2000	258.744	-3.632	15.604	10.186	-0.797	50.207	492.582	0.000254	-0.001092	-0.000713
79.4000	250.584	-5.136	13.951	8.449	-0.794	50.208	477.047	0.000360	-0.000977	-0.000591
79.6000	244.813	-6.132	12.603	7.129	-0.782	50.207	466.061	0.000429	-0.000882	-0.000499
79.8000	236.712	-7.251	11.323	5.976	-0.799	50.207	450.640	0.000508	-0.000793	-0.000418
80.0000	241.762	-7.517	11.928	5.934	-0.773	50.206	460.253	0.000526	-0.000835	-0.000415
80.2000	239.342	-7.953	11.212	5.794	-0.793	50.205	455.647	0.000557	-0.000785	-0.000406
80.4000	263.012	-5.836	13.413	7.852	-0.790	50.206	500.708	0.000409	-0.000939	-0.000550
80.6000	285.329	-3.675	16.293	10.701	-0.768	50.205	543.194	0.000257	-0.001141	-0.000749
80.8000	327.860	0.352	20.750	15.202	-0.807	50.205	624.161	-0.000025	-0.001453	-0.001064
81.0000	343.489	2.122	23.089	17.164	-0.786	50.205	653.915	-0.000149	-0.001616	-0.001201
81.2000	377.318	5.839	27.369	21.221	-0.789	50.204	718.317	-0.000409	-0.001916	-0.001485
81.4000	428.610	11.157	33.272	26.988	-0.788	50.205	815.964	-0.000781	-0.002329	-0.001889
81.6000	466.301	15.313	37.824	31.629	-0.774	50.204	887.718	-0.001072	-0.002648	-0.002214
81.8000	519.111	21.219	44.402	38.479	-0.794	50.203	988.255	-0.001485	-0.003108	-0.002694
82.0000	581.389	28.444	51.531	45.525	-0.787	50.204	1106.815	-0.001991	-0.003607	-0.003187
82.2000	618.073	32.672	55.702	50.151	-0.787	50.203	1176.653	-0.002287	-0.003899	-0.003511
82.4000	670.583	38.998	61.909	56.992	-0.798	50.203	1276.617	-0.002730	-0.004334	-0.003989
82.6000	732.470	46.547	68.508	64.547	-0.778	50.203	1394.434	-0.003258	-0.004796	-0.004518
82.8000	764.435	50.701	72.486	68.634	-0.795	50.202	1455.288	-0.003549	-0.005074	-0.004804
83.0000	821.363	58.097	78.911	75.792	-0.786	50.202	1563.663	-0.004067	-0.005524	-0.005305
83.2000	862.255	63.738	83.924	80.694	-0.782	50.201	1641.512	-0.004462	-0.005875	-0.005649
83.4000	900.517	68.608	88.161	85.658	-0.779	50.201	1714.354	-0.004803	-0.006171	-0.005996
83.6000	948.067	74.669	93.294	91.923	-0.780	50.201	1804.876	-0.005227	-0.006531	-0.006435
83.8000	969.633	77.967	96.070	95.120	-0.787	50.201	1845.932	-0.005458	-0.006725	-0.006658
84.0000	1000.591	82.277	99.954	99.402	-0.779	50.200	1904.869	-0.005759	-0.006997	-0.006958
84.2000	1032.286	86.403	102.660	102.694	-0.785	50.200	1965.208	-0.006048	-0.007186	-0.007189
84.4000	1035.713	87.485	103.847	104.057	-0.769	50.199	1971.731	-0.006124	-0.007269	-0.007284
84.6000	1052.469	89.754	105.319	106.543	-0.797	50.200	2003.632	-0.006283	-0.007372	-0.007458
84.8000	1049.764	89.978	105.637	106.769	-0.787	50.199	1998.482	-0.006298	-0.007395	-0.007474
85.0000	1045.632	90.161	105.665	106.322	-0.801	50.198	1990.614	-0.006311	-0.007397	-0.007443
85.2000	1040.792	90.048	105.443	106.601	-0.810	50.199	1981.401	-0.006303	-0.007381	-0.007462
85.4000	1025.959	88.326	104.094	104.500	-0.791	50.197	1953.163	-0.006183	-0.007287	-0.007315
85.6000	1012.614	86.893	102.675	103.347	-0.812	50.198	1927.757	-0.006083	-0.007187	-0.007234
85.8000	973.525	82.248	99.403	98.873	-0.786	50.197	1853.342	-0.005757	-0.006958	-0.006921
86.0000	937.788	78.514	96.307	95.345	-0.797	50.197	1785.307	-0.005496	-0.006741	-0.006674
86.2000	905.326	74.375	92.712	91.686	-0.789	50.198	1723.509	-0.005206	-0.006490	-0.006418
86.4000	862.255	69.141	88.682	86.893	-0.790	50.196	1641.512	-0.004840	-0.006208	-0.006082
86.6000	805.282	63.078	83.177	80.444	-0.811	50.197	1533.051	-0.004415	-0.005822	-0.005631
86.8000	758.935	57.254	78.392	75.178	-0.785	50.197	1444.817	-0.004008	-0.005487	-0.005262
87.0000	722.040	52.765	73.877	70.440	-0.779	50.196	1374.578	-0.003694	-0.005171	-0.004931
87.2000	657.688	45.045	66.930	62.673	-0.799	50.197	1252.069	-0.003153	-0.004685	-0.004387
87.4000	614.316	39.557	61.812	57.130	-0.786	50.196	1169.500	-0.002769	-0.004327	-0.003999
87.6000	565.955	33.441	56.296	51.097	-0.797	50.195	1077.433	-0.002341	-0.003941	-0.003577
87.8000	512.379	27.071	49.537	44.649	-0.797	50.196	975.437	-0.001895	-0.003468	-0.003125
88.0000	460.636	20.871	42.779	38.005	-0.787	50.196	876.932	-0.001461	-0.002995	-0.002660
88.2000	414.243	15.005	37.192	31.739	-0.810	50.195	788.612	-0.001050	-0.002603	-0.002222
88.4000	378.220	10.989	32.748	27.182	-0.783	50.196	720.034	-0.000769	-0.002292	-0.001903
88.6000	327.394	5.095	26.460	20.649	-0.784	50.195	623.274	-0.000357	-0.001852	-0.001445
88.8000	311.253	2.544	22.965	17.706	-0.806	50.195	592.546	-0.000178	-0.001608	-0.001239
89.0000	273.021	-1.763	17.998	12.646	-0.801	50.195	519.762	0.000123	-0.001260	-0.000885
89.2000	263.703	-3.406	16.057	10.576	-0.788	50.194	502.024	0.000238	-0.001124	-0.000740
89.4000	245.910	-5.543	13.151	8.004	-0.796	50.194	468.149	0.000388	-0.000921	-0.000560
89.6000	241.101	-6.425	12.232	6.990	-0.793	50.194	458.994	0.000450	-0.000856	-0.000489
89.8000	230.836	-7.800	10.773	5.351	-0.792	50.194	439.453	0.000546	-0.000754	-0.000375
90.0000	238.952	-7.113	11.132	5.823	-0.795	50.194	454.903	0.000498	-0.000779	-0.000408
90.2000	254.236	-6.117	12.808	7.102	-0.794	50.193	483.999	0.000428	-0.000897	-0.000497
90.4000	262.501	-5.416	13.606	7.993	-0.809	50.194	499.735	0.000379	-0.000952	-0.000560
90.6000	290.379	-3.027	17.199	11.132	-0.795	50.193	552.807	0.000212	-0.001204	-0.000779
90.8000	318.873	-0.306	20.640	14.618	-0.795	50.193	607.052	0.000021	-0.001445	-0.001023
91.0000	350.312	2.740	23.969	17.857	-0.811	50.193	666.904	-0.000192	-0.001678	-0.001250
91.2000	391.761	7.215	28.897	23.179	-0.782	50.193	745.811	-0.000505	-0.002023	-0.001623
91.4000	425.529	10.511	32.941	27.167	-0.794	50.193	810.099	-0.000736	-0.002306	-0.001902
91.6000	471.622	15.662	38.638	33.018	-0.794	50.193	897.846	-0.001096	-0.002705	-0.002311
91.8000	527.768	21.907	45.134	39.203	-0.786	50.193	1004.734	-0.001534	-0.003159	-0.002744
92.0000	578.143	27.924	50.873	45.443	-0.793	50.193	1100.636	-0.001955	-0.003561	-0.003181
92.2000	630.983	34.016	57.171	51.861	-0.786	50.193	1201.229	-0.002381	-0.004002	-0.003630
92.4000	672.416	39.461	61.976	57.492	-0.793	50.192	1280.107	-0.002762	-0.004338	-0.004024
92.6000	719.996	45.480	67.368	63.368	-0.778	50.193	1370.687	-0.003184	-0.004716	-0.004436
92.8000	779.944	52.751	73.946	70.746	-0.794	50.192	1484.814	-0.003693	-0.005176	-0.004952
93.0000	826.517	58.786	79.559	76.764	-0.818	50.192	1573.477	-0.004115	-0.005569	-0.005373
93.2000	861.909	63.948	84.019	81.086	-0.777	50.192	1640.854	-0.004476	-0.005881	-0.005676
93.4000	912.630	69.984	89.715	87.240	-0.806	50.192	1737.413	-0.004899	-0.006280	-0.006107
93.6000	946.624	75.006	93.761	91.923	-0.776	50.193	1802.130	-0.005250	-0.006563	-0.006435
93.8000	978.184	79.129	97.021	96.110	-0.781	50.192	1862.211	-0.005539	-0.006791	-0.006728
94.0000	1008.947	83.202	100.106	100.040	-0.790	50.193	1920.776	-0.005824	-0.007007	-0.007003
94.2000	1028.244	85.742	102.635	102.777	-0.772	50.192	1957.512	-0.006002	-0.007184	-0.007194
94.4000	1045.586	88.577	104.174	104.959	-0.789	50.192	1990.528	-0.006200	-0.007292	-0.007347
94.6000	1051.538	89.979	105.237	106.294	-0.803	50.193	2001.858	-0.006299	-0.007367	-0.007441
94.8000	1054.017	90.694	105.831	107.088	-0.776	50.192	2006.578	-0.006349	-0.007408	-0.007496
95.0000	1048.006	90.597	105.374	106.934	-0.779	50.192	1995.134	-0.006342	-0.007376	-0.007485
95.2000	1039.515	90.063	105.209	106.128	-0.773	50.193	1978.970	-0.006304	-0.007365	-0.007429
95.4000	1020.729	88.159	103.844	104.402	-0.776	50.192	1943.207	-0.006171	-0.007269	-0.007308
95.6000	998.247	85.362	101.603	102.374	-0.786	50.192	1900.406	-0.005975	-0.007112	-0.007166
95.8000	966.357	81.674	99.128	98.595	-0.783	50.192	1839.695	-0.005717	-0.006939	-0.006902
96.0000	934.812	78.166	95.988	95.428	-0.778	50.192	1779.642	-0.005472	-0.006719	-0.006680
96.2000	898.218	73.911	92.699	91.009	-0.799	50.193	1709.976	-0.005174	-0.006489	-0.006371
96.4000	849.376	67.776	87.499	85.477	-0.755	50.192	1616.993	-0.004744	-0.006125	-0.005983
96.6000	800.398	62.192	82.062	79.876	-0.788	50.192	1523.752	-0.004353	-0.005744	-0.005591
96.8000	773.031	58.379	78.679	76.528	-0.770	50.192	1471.653	-0.004087	-0.005508	-0.005357
97.0000	713.564	51.825	72.790	69.771	-0.768	50.192	1358.442	-0.003628	-0.005095	-0.004884
97.2000	666.690	45.605	67.699	63.979	-0.793	50.192	1269.207	-0.003192	-0.004739	-0.004479
97.4000	598.777	37.878	60.144	55.933	-0.766	50.193	1139.917	-0.002651	-0.004210	-0.003915
97.6000	558.531	32.897	55.138	50.861	-0.793	50.193	1063.299	-0.002303	-0.003860	-0.003560
97.8000	510.290	27.324	49.302	44.635	-0.785	50.193	971.460	-0.001913	-0.003451	-0.003124
98.0000	453.317	19.817	42.298	37.659	-0.770	50.193	862.999	-0.001387	-0.002961	-0.002636
98.2000	414.679	14.933	37.262	32.059	-0.782	50.193	789.442	-0.001045	-0.002608	-0.002244
98.4000	376.943	10.585	32.252	27.235	-0.785	50.194	717.602	-0.000741	-0.002258	-0.001906
98.6000	343.805	6.697	27.712	22.875	-0.779	50.193	654.516	-0.000469	-0.001940	-0.001601
98.8000	309.796	2.543	22.662	17.941	-0.799	50.193	589.771	-0.000178	-0.001586	-0.001256
99.0000	286.051	-0.548	19.375	14.536	-0.788	50.194	544.567	0.000038	-0.001356	-0.001018
99.2000	271.669	-2.663	16.759	11.424	-0.766	50.194	517.187	0.000186	-0.001173	-0.000800
99.4000	247.593	-5.220	13.855	8.643	-0.789	50.193	471.354	0.000365	-0.000970	-0.000605
99.6000	240.184	-6.466	12.657	7.088	-0.784	50.194	457.249	0.000453	-0.000886	-0.000496
99.8000	441.129	12.645	34.634	29.141	-0.782	50.194	839.796	-0.000885	-0.002424	-0.002040
