# Supplementary material for: Evaluation of a Cold-Mixed High-Performance Polyurethane Mixture
Source: Hindawi journal article supplement (doi:10.1155/2019/1507971), 2019-11-07
Supplement: f1 [file 1507971.f1.zip › 1507971.f1/dynamic modulus data/PUM/specimen1/temp50/zhs-1-50_0.2Hz.csv]

Test Information
****************
Project name	zhs
Operator name	1
Target test temperature	50
Target confining stress	0
Average dynamic strain range from 75 to 125 micro-strain
Contact stress	5
Initial modulus	1000
Axial gauge length	70
Comments
Specimen information
********************
Identification	zhs-1-50
Dimensions	Point 1	Point 2	Point 3	Point 4	Point 5	Point 6	Average	Std Dev.
Diameter (mm)	49.2	49.2	49.3				49.23	0.058
Height (mm)	101.3	101.2	101.3				101.27	0.058
Cross-sectional area (mm�)	1903.7
Conditioning time
Properties/Comments
Test Data	0.2Hz
*********
Test date and time	Wed	Apr 3	2019	1:50 PM
Dynamic modulus (MPa)	8486
Phase angle (Degrees)	4.02
Average temperature (�C)	50.4
Average confining pressure (kPa)	-0.7
Average micro-strain	98
Load drift (%)	0.3
Load standard error (%)	3.7
Average deformation drift (%)	-2.0
Average deformation standard error (%)	3.5
Deformation uniformity (%)	2.1
Phase uniformity (Degrees)	0.2
Conditioning Cycles
Time (sec)	Axial stress (kPa)	Axial micro-strain #1	Axial micro-strain #2	Axial micro-strain #3	Confining pressure (kPa)	Temperature (�C)	Load (N)	Displacement #1 (mm)	Displacement #2 (mm)	Displacement #3 (mm)
0.0000	221.038	-6.481	6.935	4.195	-0.719	50.353	420.799	0.000454	-0.000485	-0.000294
0.1000	227.455	-6.439	7.208	4.404	-0.711	50.354	433.016	0.000451	-0.000505	-0.000308
0.2000	245.354	-5.880	8.420	5.559	-0.695	50.354	467.091	0.000412	-0.000589	-0.000389
0.3000	254.957	-4.981	9.326	6.518	-0.738	50.354	485.373	0.000349	-0.000653	-0.000456
0.4000	273.953	-3.125	11.846	8.588	-0.716	50.354	521.536	0.000219	-0.000829	-0.000601
0.5000	306.008	-0.364	15.507	12.147	-0.680	50.355	582.561	0.000025	-0.001085	-0.000850
0.6000	331.016	1.814	19.029	15.300	-0.703	50.354	630.169	-0.000127	-0.001332	-0.001071
0.7000	378.010	6.442	23.887	20.094	-0.708	50.354	719.633	-0.000451	-0.001672	-0.001407
0.8000	392.527	8.604	26.252	22.692	-0.681	50.354	747.271	-0.000602	-0.001838	-0.001588
0.9000	455.376	14.598	33.561	29.238	-0.705	50.355	866.919	-0.001022	-0.002349	-0.002047
1.0000	478.520	17.274	36.379	32.295	-0.731	50.355	910.978	-0.001209	-0.002547	-0.002261
1.1000	520.374	21.767	40.932	37.588	-0.695	50.354	990.658	-0.001524	-0.002865	-0.002631
1.2000	555.360	26.315	45.203	41.856	-0.701	50.355	1057.262	-0.001842	-0.003164	-0.002930
1.3000	598.236	31.143	50.472	46.927	-0.706	50.356	1138.887	-0.002180	-0.003533	-0.003285
1.4000	656.907	37.359	56.829	52.973	-0.717	50.354	1250.582	-0.002615	-0.003978	-0.003708
1.5000	667.682	39.067	58.396	55.209	-0.685	50.355	1271.095	-0.002735	-0.004088	-0.003865
1.6000	718.628	45.115	64.092	61.048	-0.703	50.356	1368.084	-0.003158	-0.004486	-0.004273
1.7000	757.868	50.310	69.073	66.495	-0.739	50.356	1442.785	-0.003522	-0.004835	-0.004655
1.8000	761.970	51.374	69.955	67.176	-0.714	50.355	1450.596	-0.003596	-0.004897	-0.004702
1.9000	814.450	57.214	75.666	73.348	-0.702	50.355	1550.503	-0.004005	-0.005297	-0.005134
2.0000	823.016	58.673	77.071	75.081	-0.722	50.355	1566.811	-0.004107	-0.005395	-0.005256
2.1000	826.262	59.853	77.869	75.986	-0.740	50.355	1572.990	-0.004190	-0.005451	-0.005319
2.2000	867.830	64.342	81.911	80.390	-0.702	50.355	1652.126	-0.004504	-0.005734	-0.005627
2.3000	856.018	63.641	81.528	79.613	-0.702	50.356	1629.639	-0.004455	-0.005707	-0.005573
2.4000	863.322	64.596	82.217	80.683	-0.725	50.356	1643.543	-0.004522	-0.005755	-0.005648
2.5000	852.532	64.161	81.391	80.098	-0.706	50.355	1623.001	-0.004491	-0.005697	-0.005607
2.6000	856.379	64.694	81.955	80.723	-0.699	50.355	1630.325	-0.004529	-0.005737	-0.005651
2.7000	850.818	64.272	81.652	80.043	-0.723	50.355	1619.740	-0.004499	-0.005716	-0.005603
2.8000	827.374	61.420	79.132	77.918	-0.720	50.355	1575.108	-0.004299	-0.005539	-0.005454
2.9000	795.920	58.281	76.355	74.733	-0.713	50.355	1515.226	-0.004080	-0.005345	-0.005231
3.0000	776.142	56.018	74.565	72.386	-0.719	50.356	1477.575	-0.003921	-0.005220	-0.005067
3.1000	745.529	52.639	71.593	69.051	-0.726	50.356	1419.296	-0.003685	-0.005011	-0.004834
3.2000	717.471	49.105	68.399	65.492	-0.708	50.355	1365.881	-0.003437	-0.004788	-0.004584
3.3000	679.555	44.611	63.956	61.548	-0.686	50.355	1293.697	-0.003123	-0.004477	-0.004308
3.4000	634.199	39.574	59.252	56.572	-0.724	50.356	1207.352	-0.002770	-0.004148	-0.003960
3.5000	590.406	34.732	54.682	51.277	-0.735	50.355	1123.981	-0.002431	-0.003828	-0.003589
3.6000	568.014	32.069	51.968	48.624	-0.707	50.355	1081.352	-0.002245	-0.003638	-0.003404
3.7000	530.007	27.518	47.565	44.289	-0.699	50.356	1008.997	-0.001926	-0.003330	-0.003100
3.8000	480.804	21.740	41.554	38.173	-0.723	50.356	915.327	-0.001522	-0.002909	-0.002672
3.9000	431.736	16.656	35.416	31.864	-0.726	50.356	821.915	-0.001166	-0.002479	-0.002230
4.0000	410.636	14.092	33.052	29.017	-0.683	50.356	781.746	-0.000986	-0.002314	-0.002031
4.1000	368.692	9.069	27.396	23.707	-0.717	50.357	701.895	-0.000635	-0.001918	-0.001660
4.2000	336.681	5.164	23.187	19.748	-0.744	50.356	640.955	-0.000362	-0.001623	-0.001382
4.3000	312.140	2.361	19.318	16.232	-0.699	50.356	594.234	-0.000165	-0.001352	-0.001136
4.4000	281.738	-0.698	15.259	11.856	-0.687	50.356	536.356	0.000049	-0.001068	-0.000830
4.5000	238.696	-4.939	9.780	6.796	-0.726	50.356	454.416	0.000346	-0.000685	-0.000476
4.6000	237.975	-5.669	8.626	5.838	-0.708	50.356	453.043	0.000397	-0.000604	-0.000409
4.7000	225.561	-7.489	5.984	3.460	-0.708	50.356	429.411	0.000524	-0.000419	-0.000242
4.8000	214.455	-8.542	4.389	1.710	-0.703	50.357	408.268	0.000598	-0.000307	-0.000120
4.9000	208.504	-8.991	4.045	1.195	-0.719	50.357	396.938	0.000629	-0.000283	-0.000084
5.0000	234.233	-7.643	6.439	3.073	-0.684	50.356	445.919	0.000535	-0.000451	-0.000215
5.1000	224.164	-8.515	5.106	2.363	-0.698	50.357	426.750	0.000596	-0.000357	-0.000165
5.2000	236.773	-7.363	6.659	3.750	-0.720	50.357	450.754	0.000515	-0.000466	-0.000262
5.3000	257.046	-5.782	9.011	5.795	-0.727	50.356	489.349	0.000405	-0.000631	-0.000406
5.4000	281.392	-3.395	11.929	8.242	-0.682	50.357	535.698	0.000238	-0.000835	-0.000577
5.5000	303.889	-1.933	14.655	10.840	-0.714	50.358	578.527	0.000135	-0.001026	-0.000759
5.6000	335.359	1.166	18.093	14.772	-0.725	50.357	638.437	-0.000082	-0.001266	-0.001034
5.7000	388.935	6.750	24.685	20.832	-0.708	50.357	740.433	-0.000472	-0.001728	-0.001458
5.8000	395.593	7.764	26.074	21.901	-0.677	50.358	753.107	-0.000543	-0.001825	-0.001533
5.9000	503.993	18.354	37.729	33.574	-0.715	50.358	959.473	-0.001285	-0.002641	-0.002350
6.0000	473.290	15.858	35.703	31.350	-0.734	50.357	901.022	-0.001110	-0.002499	-0.002195
6.1000	520.374	21.097	41.017	36.699	-0.699	50.357	990.658	-0.001477	-0.002871	-0.002569
6.2000	568.450	26.639	46.715	42.508	-0.699	50.358	1082.182	-0.001865	-0.003270	-0.002976
6.3000	614.692	31.916	51.915	47.983	-0.720	50.357	1170.216	-0.002234	-0.003634	-0.003359
6.4000	644.133	35.348	55.205	51.624	-0.716	50.357	1226.263	-0.002474	-0.003864	-0.003614
6.5000	681.012	39.770	59.469	56.171	-0.692	50.358	1296.473	-0.002784	-0.004163	-0.003932
6.6000	722.446	45.183	64.520	61.214	-0.712	50.358	1375.351	-0.003163	-0.004516	-0.004285
6.7000	739.142	47.461	66.984	63.742	-0.720	50.357	1407.137	-0.003322	-0.004689	-0.004462
6.8000	771.288	51.459	70.766	67.925	-0.688	50.357	1468.334	-0.003602	-0.004954	-0.004755
6.9000	813.803	56.636	74.966	72.997	-0.707	50.358	1549.273	-0.003965	-0.005248	-0.005110
7.0000	829.628	58.744	77.030	74.955	-0.732	50.357	1579.399	-0.004112	-0.005392	-0.005247
7.1000	845.032	61.211	79.145	77.584	-0.706	50.357	1608.725	-0.004285	-0.005540	-0.005431
7.2000	853.118	62.544	80.358	78.475	-0.712	50.359	1624.117	-0.004378	-0.005625	-0.005493
7.3000	859.715	63.500	81.199	79.573	-0.715	50.359	1636.677	-0.004445	-0.005684	-0.005570
7.4000	869.589	64.595	82.408	81.405	-0.692	50.358	1655.474	-0.004522	-0.005769	-0.005698
7.5000	859.174	63.977	81.872	80.126	-0.685	50.358	1635.647	-0.004478	-0.005731	-0.005609
7.6000	824.534	61.114	79.228	76.860	-0.703	50.358	1569.700	-0.004278	-0.005546	-0.005380
7.7000	837.894	62.222	80.151	78.445	-0.721	50.358	1595.135	-0.004356	-0.005611	-0.005491
7.8000	824.383	60.399	78.720	76.846	-0.696	50.357	1569.414	-0.004228	-0.005510	-0.005379
7.9000	804.320	58.535	77.235	75.249	-0.691	50.358	1531.219	-0.004097	-0.005406	-0.005267
8.0000	777.915	55.765	74.345	72.207	-0.735	50.359	1480.951	-0.003904	-0.005204	-0.005054
8.1000	742.764	51.754	71.524	68.498	-0.729	50.358	1414.032	-0.003623	-0.005007	-0.004795
8.2000	707.252	47.701	67.177	64.200	-0.691	50.358	1346.426	-0.003339	-0.004702	-0.004494
8.3000	672.852	43.420	63.527	60.491	-0.700	50.358	1280.937	-0.003039	-0.004447	-0.004234
8.4000	626.129	38.522	58.575	55.307	-0.733	50.358	1191.988	-0.002697	-0.004100	-0.003872
8.5000	598.356	35.308	54.808	51.584	-0.710	50.357	1139.116	-0.002472	-0.003837	-0.003611
8.6000	566.150	31.453	51.076	48.093	-0.681	50.358	1077.805	-0.002202	-0.003575	-0.003367
8.7000	514.723	25.558	45.503	42.189	-0.714	50.358	979.900	-0.001789	-0.003185	-0.002953
8.8000	459.749	19.284	39.131	35.492	-0.708	50.358	875.244	-0.001350	-0.002739	-0.002484
8.9000	416.137	14.486	33.768	30.309	-0.694	50.357	792.217	-0.001014	-0.002364	-0.002122
9.0000	395.262	12.000	30.930	27.347	-0.708	50.358	752.478	-0.000840	-0.002165	-0.001914
9.1000	369.669	8.844	27.519	23.655	-0.731	50.358	703.754	-0.000619	-0.001926	-0.001656
9.2000	316.664	3.007	20.543	17.399	-0.691	50.358	602.846	-0.000210	-0.001438	-0.001218
9.3000	292.002	0.716	17.104	13.966	-0.696	50.358	555.897	-0.000050	-0.001197	-0.000978
9.4000	300.223	0.198	17.118	13.480	-0.715	50.358	571.547	-0.000014	-0.001198	-0.000944
9.5000	258.639	-3.829	11.626	8.685	-0.687	50.358	492.382	0.000268	-0.000814	-0.000608
9.6000	236.081	-6.048	8.474	5.572	-0.731	50.359	449.438	0.000423	-0.000593	-0.000390
9.7000	238.831	-6.592	7.870	5.129	-0.740	50.358	454.674	0.000461	-0.000551	-0.000359
9.8000	224.434	-7.897	5.725	3.180	-0.685	50.358	427.265	0.000553	-0.000401	-0.000223
9.9000	212.141	-9.147	4.044	1.376	-0.692	50.359	403.862	0.000640	-0.000283	-0.000096
10.0000	227.740	-8.123	5.586	3.112	-0.721	50.359	433.559	0.000569	-0.000391	-0.000218
10.1000	234.639	-7.756	6.356	3.875	-0.711	50.358	446.692	0.000543	-0.000445	-0.000271
10.2000	237.614	-7.600	6.481	3.683	-0.695	50.359	452.356	0.000532	-0.000454	-0.000258
10.3000	264.139	-5.094	9.960	7.061	-0.706	50.359	502.853	0.000357	-0.000697	-0.000494
10.4000	276.673	-4.180	11.516	8.104	-0.711	50.358	526.714	0.000293	-0.000806	-0.000567
10.5000	313.448	-1.018	15.534	11.828	-0.691	50.359	596.724	0.000071	-0.001087	-0.000828
10.6000	363.703	4.003	21.657	17.956	-0.694	50.359	692.396	-0.000280	-0.001516	-0.001257
10.7000	360.141	3.850	21.409	17.747	-0.716	50.359	685.616	-0.000269	-0.001499	-0.001242
10.8000	387.868	7.032	25.702	21.734	-0.702	50.359	738.401	-0.000492	-0.001799	-0.001521
10.9000	395.833	7.635	26.847	22.542	-0.683	50.359	753.565	-0.000534	-0.001879	-0.001578
11.0000	475.228	16.459	36.118	31.989	-0.726	50.358	904.713	-0.001152	-0.002528	-0.002239
11.1000	521.381	21.446	41.223	37.034	-0.695	50.358	992.575	-0.001501	-0.002886	-0.002592
11.2000	556.938	25.415	45.493	41.133	-0.679	50.359	1060.266	-0.001779	-0.003184	-0.002879
11.3000	582.907	28.823	48.792	45.053	-0.693	50.359	1109.705	-0.002018	-0.003415	-0.003154
11.4000	627.661	33.443	53.704	49.749	-0.720	50.359	1194.906	-0.002341	-0.003759	-0.003482
11.5000	689.203	40.515	60.090	57.004	-0.706	50.358	1312.065	-0.002836	-0.004206	-0.003990
11.6000	698.520	42.606	62.292	58.877	-0.693	50.359	1329.803	-0.002982	-0.004360	-0.004121
11.7000	748.340	48.796	67.960	64.938	-0.707	50.359	1424.646	-0.003416	-0.004757	-0.004546
11.8000	778.577	52.034	71.429	68.676	-0.730	50.358	1482.210	-0.003642	-0.005000	-0.004807
11.9000	798.414	54.690	73.848	71.371	-0.683	50.358	1519.976	-0.003828	-0.005169	-0.004996
12.0000	825.661	58.562	76.505	74.538	-0.686	50.359	1571.846	-0.004099	-0.005355	-0.005218
12.1000	839.382	60.821	78.515	76.597	-0.704	50.359	1597.967	-0.004258	-0.005496	-0.005362
12.2000	850.458	62.139	80.138	78.515	-0.692	50.358	1619.053	-0.004350	-0.005610	-0.005496
12.3000	855.041	63.066	81.060	79.072	-0.681	50.359	1627.779	-0.004415	-0.005674	-0.005535
12.4000	865.606	64.440	81.831	80.502	-0.708	50.359	1647.892	-0.004511	-0.005728	-0.005635
12.5000	860.391	64.118	81.773	80.070	-0.703	50.358	1637.964	-0.004488	-0.005724	-0.005605
12.6000	855.763	63.853	81.623	79.920	-0.671	50.358	1629.152	-0.004470	-0.005714	-0.005594
12.7000	832.138	61.602	79.765	77.931	-0.691	50.358	1584.177	-0.004312	-0.005584	-0.005455
12.8000	827.464	60.821	79.009	77.165	-0.721	50.358	1575.279	-0.004257	-0.005531	-0.005402
12.9000	804.080	58.533	76.669	75.109	-0.693	50.358	1530.762	-0.004097	-0.005367	-0.005258
13.0000	777.690	55.654	74.124	71.887	-0.698	50.359	1480.522	-0.003896	-0.005189	-0.005032
13.1000	735.175	51.094	70.202	67.593	-0.708	50.359	1399.584	-0.003577	-0.004914	-0.004732
13.2000	709.221	48.319	67.918	64.714	-0.707	50.358	1350.174	-0.003382	-0.004754	-0.004530
13.3000	647.364	41.132	61.397	58.017	-0.690	50.358	1232.414	-0.002879	-0.004298	-0.004061
13.4000	645.620	40.514	59.994	57.031	-0.716	50.359	1229.095	-0.002836	-0.004200	-0.003992
13.5000	599.904	35.461	55.372	52.223	-0.715	50.359	1142.063	-0.002482	-0.003876	-0.003656
13.6000	573.589	32.013	51.957	48.359	-0.710	50.358	1091.967	-0.002241	-0.003637	-0.003385
13.7000	512.168	25.387	45.766	41.814	-0.690	50.359	975.037	-0.001777	-0.003204	-0.002927
13.8000	484.411	22.170	41.718	38.157	-0.719	50.359	922.194	-0.001552	-0.002920	-0.002671
13.9000	439.371	16.754	36.311	32.588	-0.710	50.359	836.449	-0.001173	-0.002542	-0.002281
14.0000	394.255	11.816	30.518	27.043	-0.687	50.359	750.561	-0.000827	-0.002136	-0.001893
14.1000	363.507	8.295	26.955	23.154	-0.727	50.359	692.024	-0.000581	-0.001887	-0.001621
14.2000	342.032	5.503	23.818	20.191	-0.697	50.359	651.140	-0.000385	-0.001667	-0.001413
14.3000	303.108	0.928	18.615	15.118	-0.687	50.359	577.040	-0.000065	-0.001303	-0.001058
14.4000	277.590	-1.524	14.709	11.757	-0.714	50.359	528.460	0.000107	-0.001030	-0.000823
14.5000	252.162	-4.322	11.173	8.243	-0.705	50.358	480.051	0.000303	-0.000782	-0.000577
14.6000	234.503	-5.852	8.667	5.670	-0.697	50.359	446.434	0.000410	-0.000607	-0.000397
14.7000	222.090	-7.883	6.467	3.419	-0.724	50.359	422.802	0.000552	-0.000453	-0.000239
14.8000	199.156	-9.793	3.314	0.947	-0.736	50.359	379.143	0.000686	-0.000232	-0.000066
14.9000	217.897	-8.711	4.856	2.195	-0.695	50.359	414.820	0.000610	-0.000340	-0.000154
15.0000	215.928	-8.824	4.678	1.796	-0.687	50.359	411.072	0.000618	-0.000327	-0.000126
15.1000	229.905	-7.910	6.177	2.876	-0.703	50.359	437.679	0.000554	-0.000432	-0.000201
15.2000	245.594	-7.349	8.130	4.655	-0.692	50.359	467.548	0.000514	-0.000569	-0.000326
15.3000	297.502	-2.831	13.498	10.506	-0.669	50.360	566.368	0.000198	-0.000945	-0.000735
15.4000	270.707	-4.532	10.828	7.520	-0.713	50.360	515.356	0.000317	-0.000758	-0.000526
15.5000	305.047	-1.356	15.053	11.258	-0.731	50.359	580.730	0.000095	-0.001054	-0.000788
15.6000	341.385	1.968	19.854	15.523	-0.695	50.359	649.910	-0.000138	-0.001390	-0.001087
15.7000	380.189	5.587	24.091	19.928	-0.695	50.360	723.782	-0.000391	-0.001686	-0.001395
15.8000	400.237	8.143	26.351	22.554	-0.726	50.360	761.948	-0.000570	-0.001845	-0.001579
15.9000	444.360	12.828	32.060	27.639	-0.688	50.360	845.947	-0.000898	-0.002244	-0.001935
16.0000	489.716	17.554	37.166	32.754	-0.681	50.360	932.293	-0.001229	-0.002602	-0.002293
16.1000	545.456	23.662	43.453	38.814	-0.702	50.361	1038.408	-0.001656	-0.003042	-0.002717
16.2000	567.503	26.216	46.217	42.148	-0.706	50.360	1080.379	-0.001835	-0.003235	-0.002950
16.3000	601.617	30.525	50.168	46.551	-0.684	50.360	1145.325	-0.002137	-0.003512	-0.003259
16.4000	638.016	34.972	54.710	51.307	-0.681	50.362	1214.619	-0.002448	-0.003830	-0.003591
16.5000	684.349	40.276	59.855	56.308	-0.704	50.361	1302.824	-0.002819	-0.004190	-0.003942
16.6000	709.221	43.506	63.652	59.906	-0.678	50.360	1350.174	-0.003045	-0.004456	-0.004193
16.7000	740.810	47.321	66.941	63.757	-0.686	50.361	1410.313	-0.003312	-0.004686	-0.004463
16.8000	774.279	51.781	71.331	68.563	-0.700	50.361	1474.028	-0.003625	-0.004993	-0.004799
16.9000	823.542	57.817	76.491	74.040	-0.689	50.361	1567.812	-0.004047	-0.005354	-0.005183
17.0000	824.714	58.477	77.071	74.636	-0.680	50.361	1570.044	-0.004093	-0.005395	-0.005225
17.1000	830.455	59.208	78.366	75.789	-0.687	50.362	1580.973	-0.004145	-0.005486	-0.005305
17.2000	867.004	63.613	81.721	80.113	-0.698	50.362	1650.553	-0.004453	-0.005720	-0.005608
17.3000	858.558	63.458	81.487	79.836	-0.686	50.361	1634.474	-0.004442	-0.005704	-0.005589
17.4000	860.962	63.894	81.843	79.821	-0.667	50.362	1639.051	-0.004473	-0.005729	-0.005587
17.5000	859.084	63.838	82.107	80.170	-0.700	50.362	1635.475	-0.004469	-0.005747	-0.005612
17.6000	855.131	63.542	81.858	79.932	-0.711	50.361	1627.951	-0.004448	-0.005730	-0.005595
17.7000	851.449	63.373	81.267	79.697	-0.661	50.362	1620.941	-0.004436	-0.005689	-0.005579
17.8000	807.206	58.969	77.224	75.123	-0.694	50.363	1536.713	-0.004128	-0.005406	-0.005259
17.9000	807.476	59.180	77.455	75.374	-0.727	50.362	1537.228	-0.004143	-0.005422	-0.005276
18.0000	772.866	54.845	74.221	71.537	-0.688	50.362	1471.338	-0.003839	-0.005195	-0.005008
18.1000	750.353	52.246	71.963	69.009	-0.690	50.363	1428.480	-0.003657	-0.005037	-0.004831
18.2000	701.406	47.012	66.943	63.882	-0.710	50.362	1335.297	-0.003291	-0.004686	-0.004472
18.3000	687.685	44.863	64.561	61.576	-0.680	50.362	1309.175	-0.003140	-0.004519	-0.004310
18.4000	636.829	39.769	59.854	56.435	-0.675	50.363	1212.358	-0.002784	-0.004190	-0.003950
18.5000	617.502	37.191	56.855	53.361	-0.714	50.363	1175.566	-0.002603	-0.003980	-0.003735
18.6000	544.705	29.190	49.454	45.815	-0.700	50.362	1036.978	-0.002043	-0.003462	-0.003207
18.7000	516.677	25.683	45.684	42.022	-0.679	50.363	983.620	-0.001798	-0.003198	-0.002942
18.8000	493.653	22.818	43.041	38.981	-0.696	50.364	939.789	-0.001597	-0.003013	-0.002729
18.9000	447.471	17.612	37.605	33.490	-0.691	50.362	851.870	-0.001233	-0.002632	-0.002344
19.0000	402.220	12.476	32.156	28.168	-0.680	50.363	765.724	-0.000873	-0.002251	-0.001972
19.1000	354.310	7.187	26.047	22.179	-0.703	50.364	674.515	-0.000503	-0.001823	-0.001553
19.2000	336.110	4.829	23.269	19.538	-0.702	50.363	639.868	-0.000338	-0.001629	-0.001368
19.3000	309.615	1.799	19.549	15.981	-0.695	50.363	589.428	-0.000126	-0.001368	-0.001119
19.4000	292.949	-0.140	16.704	13.189	-0.684	50.364	557.699	0.000010	-0.001169	-0.000923
19.5000	260.728	-3.379	12.437	9.060	-0.723	50.364	496.359	0.000237	-0.000871	-0.000634
19.6000	231.888	-6.511	8.667	5.419	-0.688	50.363	441.456	0.000456	-0.000607	-0.000379
19.7000	232.354	-7.349	7.840	4.571	-0.672	50.364	442.343	0.000514	-0.000549	-0.000320
19.8000	220.331	-8.543	5.532	2.778	-0.683	50.364	419.455	0.000598	-0.000387	-0.000194
19.9000	217.897	-8.669	5.078	2.112	-0.683	50.363	414.820	0.000607	-0.000355	-0.000148
20.0000	217.987	-8.920	5.352	1.960	-0.668	50.364	414.991	0.000624	-0.000375	-0.000137
20.1000	231.813	-8.036	6.522	2.919	-0.683	50.365	441.313	0.000563	-0.000457	-0.000204
20.2000	249.126	-6.941	8.147	4.752	-0.687	50.364	474.272	0.000486	-0.000570	-0.000333
20.3000	233.752	-7.953	6.812	3.584	-0.668	50.364	445.004	0.000557	-0.000477	-0.000251
20.4000	278.702	-4.095	12.232	8.229	-0.706	50.365	530.577	0.000287	-0.000856	-0.000576
20.5000	330.279	0.422	18.217	14.022	-0.691	50.364	628.767	-0.000030	-0.001275	-0.000982
20.6000	340.228	1.419	19.592	15.315	-0.669	50.365	647.707	-0.000099	-0.001371	-0.001072
20.7000	366.633	4.257	22.620	18.539	-0.683	50.365	697.975	-0.000298	-0.001583	-0.001298
20.8000	399.846	8.015	26.968	22.234	-0.703	50.365	761.204	-0.000561	-0.001888	-0.001556
20.9000	446.028	12.660	32.542	27.669	-0.676	50.364	849.123	-0.000886	-0.002278	-0.001937
21.0000	484.636	16.995	36.918	32.085	-0.694	50.366	922.623	-0.001190	-0.002584	-0.002246
21.1000	514.392	20.465	40.672	36.478	-0.731	50.365	979.271	-0.001433	-0.002847	-0.002553
21.2000	565.684	25.865	46.219	42.189	-0.686	50.365	1076.918	-0.001811	-0.003235	-0.002953
21.3000	606.021	30.947	51.035	47.318	-0.665	50.366	1153.708	-0.002166	-0.003572	-0.003312
21.4000	639.083	34.746	54.873	51.126	-0.677	50.366	1216.650	-0.002432	-0.003841	-0.003579
21.5000	669.966	38.970	58.988	54.946	-0.695	50.366	1275.444	-0.002728	-0.004129	-0.003846
21.6000	711.535	43.617	63.679	60.197	-0.667	50.366	1354.580	-0.003053	-0.004458	-0.004214
21.7000	753.524	48.685	68.482	65.101	-0.690	50.367	1434.517	-0.003408	-0.004794	-0.004557
21.8000	773.407	51.501	71.208	68.218	-0.681	50.366	1472.368	-0.003605	-0.004985	-0.004775
21.9000	805.778	55.584	74.827	72.165	-0.669	50.366	1533.995	-0.003891	-0.005238	-0.005052
22.0000	822.234	58.085	77.099	74.011	-0.681	50.367	1565.323	-0.004066	-0.005397	-0.005181
22.1000	839.096	60.149	78.830	76.694	-0.677	50.366	1597.424	-0.004210	-0.005518	-0.005369
22.2000	853.058	62.222	80.606	78.556	-0.668	50.367	1624.002	-0.004356	-0.005642	-0.005499
22.3000	878.050	64.919	83.069	81.362	-0.678	50.367	1671.581	-0.004544	-0.005815	-0.005695
22.4000	868.867	64.764	82.766	80.643	-0.707	50.367	1654.100	-0.004533	-0.005794	-0.005645
22.5000	860.602	64.173	82.409	80.365	-0.692	50.366	1638.365	-0.004492	-0.005769	-0.005626
22.6000	841.185	61.855	80.357	78.502	-0.678	50.368	1601.400	-0.004330	-0.005625	-0.005495
22.7000	846.475	62.699	80.798	79.209	-0.712	50.368	1611.471	-0.004389	-0.005656	-0.005545
22.8000	831.341	61.448	79.393	77.597	-0.696	50.367	1582.661	-0.004301	-0.005557	-0.005432
22.9000	804.020	58.407	77.441	74.760	-0.677	50.367	1530.647	-0.004088	-0.005421	-0.005233
23.0000	780.170	55.836	74.897	72.387	-0.678	50.368	1485.243	-0.003909	-0.005243	-0.005067
23.1000	747.348	51.938	71.800	68.940	-0.699	50.368	1422.758	-0.003636	-0.005026	-0.004826
23.2000	706.606	47.195	67.452	64.297	-0.686	50.367	1345.196	-0.003304	-0.004722	-0.004501
23.3000	664.075	42.985	63.032	59.547	-0.681	50.368	1264.229	-0.003009	-0.004412	-0.004168
23.4000	650.189	41.090	61.108	57.461	-0.682	50.368	1237.793	-0.002876	-0.004278	-0.004022
23.5000	602.158	35.125	55.977	52.056	-0.699	50.368	1146.355	-0.002459	-0.003918	-0.003644
23.6000	575.498	32.014	52.658	48.901	-0.671	50.368	1095.600	-0.002241	-0.003686	-0.003423
23.7000	515.880	26.005	45.985	42.147	-0.709	50.369	982.103	-0.001820	-0.003219	-0.002950
23.8000	483.103	21.991	42.186	37.938	-0.712	50.368	919.704	-0.001539	-0.002953	-0.002656
23.9000	439.145	17.009	37.000	32.587	-0.681	50.369	836.020	-0.001191	-0.002590	-0.002281
24.0000	404.850	12.674	32.597	28.528	-0.707	50.369	770.731	-0.000887	-0.002282	-0.001997
24.1000	370.811	8.747	27.821	23.959	-0.728	50.369	705.929	-0.000612	-0.001947	-0.001677
24.2000	344.782	5.629	24.120	20.455	-0.687	50.369	656.376	-0.000394	-0.001688	-0.001432
24.3000	310.592	2.303	19.675	16.161	-0.701	50.370	591.288	-0.000161	-0.001377	-0.001131
24.4000	284.443	-0.882	16.055	12.356	-0.723	50.369	541.506	0.000062	-0.001124	-0.000865
24.5000	259.210	-3.295	12.782	9.186	-0.713	50.369	493.469	0.000231	-0.000895	-0.000643
24.6000	236.487	-6.230	9.093	5.783	-0.662	50.369	450.211	0.000436	-0.000637	-0.000405
24.7000	242.904	-6.299	8.885	5.670	-0.681	50.370	462.427	0.000441	-0.000622	-0.000397
24.8000	233.587	-7.250	7.731	4.321	-0.695	50.370	444.689	0.000508	-0.000541	-0.000302
24.9000	233.286	-7.320	7.814	3.931	-0.683	50.370	444.117	0.000512	-0.000547	-0.000275
25.0000	238.576	-7.812	7.387	3.320	-0.692	50.363	454.187	0.000547	-0.000517	-0.000232
25.1000	241.582	-7.686	7.813	3.697	-0.691	50.362	459.909	0.000538	-0.000547	-0.000259
25.2000	275.095	-5.078	11.282	7.297	-0.674	50.362	523.710	0.000355	-0.000790	-0.000511
25.3000	289.658	-3.985	12.904	8.575	-0.673	50.363	551.434	0.000279	-0.000903	-0.000600
25.4000	337.147	0.464	17.888	13.829	-0.694	50.362	641.842	-0.000032	-0.001252	-0.000968
25.5000	338.530	1.096	18.945	14.578	-0.690	50.362	644.474	-0.000077	-0.001326	-0.001020
25.6000	409.043	8.267	27.918	23.139	-0.688	50.363	778.713	-0.000579	-0.001954	-0.001620
25.7000	416.152	9.519	28.785	23.721	-0.708	50.363	792.246	-0.000666	-0.002015	-0.001660
25.8000	482.938	16.081	36.215	31.364	-0.706	50.362	919.390	-0.001126	-0.002535	-0.002195
25.9000	527.242	20.970	41.183	36.464	-0.692	50.362	1003.733	-0.001468	-0.002883	-0.002553
26.0000	581.644	27.129	47.458	43.288	-0.690	50.363	1107.302	-0.001899	-0.003322	-0.003030
26.1000	619.546	32.139	52.370	48.012	-0.706	50.363	1179.457	-0.002250	-0.003666	-0.003361
26.2000	674.024	38.299	58.852	54.724	-0.705	50.362	1283.169	-0.002681	-0.004120	-0.003831
26.3000	729.449	44.680	65.168	61.352	-0.671	50.363	1388.683	-0.003128	-0.004562	-0.004295
26.4000	760.137	49.035	68.923	65.369	-0.694	50.363	1447.105	-0.003432	-0.004825	-0.004576
26.5000	826.608	56.945	76.147	73.344	-0.696	50.362	1573.648	-0.003986	-0.005330	-0.005134
26.6000	877.389	63.642	82.092	79.722	-0.684	50.362	1670.322	-0.004455	-0.005746	-0.005581
26.7000	932.212	70.027	87.722	85.825	-0.687	50.363	1774.693	-0.004902	-0.006141	-0.006008
26.8000	947.992	72.438	90.153	88.700	-0.708	50.362	1804.733	-0.005071	-0.006311	-0.006209
26.9000	973.150	76.188	93.169	92.410	-0.677	50.362	1852.627	-0.005333	-0.006522	-0.006469
27.0000	1021.872	82.263	97.806	97.733	-0.663	50.363	1945.381	-0.005758	-0.006846	-0.006841
27.1000	1037.877	85.165	100.092	100.542	-0.696	50.363	1975.851	-0.005962	-0.007006	-0.007038
27.2000	1059.894	88.411	102.939	103.708	-0.673	50.362	2017.765	-0.006189	-0.007206	-0.007260
27.3000	1086.043	91.889	105.485	106.753	-0.676	50.364	2067.547	-0.006432	-0.007384	-0.007473
27.4000	1074.922	90.863	104.644	105.917	-0.694	50.363	2046.375	-0.006360	-0.007325	-0.007414
27.5000	1083.067	92.421	105.885	107.351	-0.686	50.363	2061.882	-0.006469	-0.007412	-0.007515
27.6000	1044.895	88.718	103.021	103.791	-0.676	50.363	1989.212	-0.006210	-0.007211	-0.007265
27.7000	1035.337	87.581	102.374	103.346	-0.701	50.363	1971.016	-0.006131	-0.007166	-0.007234
27.8000	1023.585	86.106	101.369	101.849	-0.673	50.363	1948.643	-0.006027	-0.007096	-0.007129
27.9000	985.548	82.122	97.630	97.496	-0.680	50.363	1876.230	-0.005749	-0.006834	-0.006825
28.0000	949.014	78.457	94.450	93.940	-0.692	50.363	1806.679	-0.005492	-0.006611	-0.006576
28.1000	918.942	75.064	91.766	91.022	-0.682	50.362	1749.430	-0.005254	-0.006424	-0.006372
28.2000	870.956	68.888	87.116	85.241	-0.680	50.363	1658.077	-0.004822	-0.006098	-0.005967
28.3000	826.983	64.046	82.615	80.876	-0.694	50.364	1574.364	-0.004483	-0.005783	-0.005661
28.4000	772.235	57.788	76.589	74.387	-0.690	50.362	1470.137	-0.004045	-0.005361	-0.005207
28.5000	741.547	54.141	72.900	70.303	-0.692	50.363	1411.715	-0.003790	-0.005103	-0.004921
28.6000	679.404	46.729	66.309	63.437	-0.701	50.364	1293.411	-0.003271	-0.004642	-0.004441
28.7000	627.241	40.528	60.405	57.071	-0.708	50.363	1194.105	-0.002837	-0.004228	-0.003995
28.8000	573.875	34.016	54.130	50.877	-0.667	50.363	1092.510	-0.002381	-0.003789	-0.003561
28.9000	535.898	29.640	49.371	46.191	-0.690	50.364	1020.212	-0.002075	-0.003456	-0.003233
29.0000	485.282	23.464	43.248	39.509	-0.696	50.362	923.853	-0.001642	-0.003027	-0.002766
29.1000	436.245	17.697	37.427	33.573	-0.668	50.363	830.498	-0.001239	-0.002620	-0.002350
29.2000	385.208	11.634	31.069	26.932	-0.678	50.364	733.337	-0.000814	-0.002175	-0.001885
29.3000	344.872	7.145	25.371	21.845	-0.693	50.363	656.548	-0.000500	-0.001776	-0.001529
29.4000	292.979	1.715	18.326	15.357	-0.667	50.363	557.756	-0.000120	-0.001283	-0.001075
29.5000	282.414	-0.099	16.499	13.091	-0.682	50.364	537.643	0.000007	-0.001155	-0.000916
29.6000	249.111	-3.253	12.231	8.756	-0.686	50.363	474.243	0.000228	-0.000856	-0.000613
29.7000	251.395	-4.391	11.461	7.841	-0.688	50.363	478.592	0.000307	-0.000802	-0.000549
29.8000	233.151	-6.313	8.391	5.406	-0.686	50.364	443.859	0.000442	-0.000587	-0.000378
29.9000	234.759	-6.355	8.474	5.267	-0.696	50.363	446.920	0.000445	-0.000593	-0.000369
30.0000	235.059	-6.522	8.101	4.905	-0.684	50.363	447.493	0.000457	-0.000567	-0.000343
30.1000	244.828	-5.936	9.079	5.808	-0.676	50.364	466.089	0.000416	-0.000636	-0.000407
30.2000	267.851	-4.278	12.010	8.282	-0.687	50.364	509.920	0.000299	-0.000841	-0.000580
30.3000	284.247	-2.664	13.443	10.087	-0.678	50.363	541.134	0.000187	-0.000941	-0.000706
30.4000	318.302	0.589	17.503	13.480	-0.684	50.364	605.965	-0.000041	-0.001225	-0.000944
30.5000	356.714	4.284	22.276	18.010	-0.700	50.363	679.092	-0.000300	-0.001559	-0.001261
30.6000	376.041	6.162	25.028	20.524	-0.675	50.362	715.885	-0.000431	-0.001752	-0.001437
30.7000	425.169	11.071	30.547	25.929	-0.677	50.364	809.412	-0.000775	-0.002138	-0.001815
30.8000	469.202	15.691	35.486	31.129	-0.698	50.364	893.240	-0.001098	-0.002484	-0.002179
30.9000	522.117	22.073	42.103	37.603	-0.691	50.363	993.977	-0.001545	-0.002947	-0.002632
31.0000	582.170	28.964	49.000	44.678	-0.674	50.364	1108.303	-0.002027	-0.003430	-0.003127
31.1000	616.105	32.685	53.318	49.067	-0.682	50.364	1172.905	-0.002288	-0.003732	-0.003435
31.2000	699.918	41.779	62.111	58.433	-0.696	50.363	1332.464	-0.002925	-0.004348	-0.004090
31.3000	721.724	44.975	65.348	61.770	-0.684	50.363	1373.978	-0.003148	-0.004574	-0.004324
31.4000	774.985	51.810	71.099	68.522	-0.677	50.364	1475.372	-0.003627	-0.004977	-0.004797
31.5000	850.773	60.821	79.215	76.959	-0.688	50.363	1619.654	-0.004257	-0.005545	-0.005387
31.6000	888.104	65.734	83.869	81.780	-0.668	50.362	1690.722	-0.004601	-0.005871	-0.005725
31.7000	909.339	68.677	86.784	85.310	-0.665	50.363	1731.148	-0.004807	-0.006075	-0.005972
31.8000	942.326	72.914	90.556	89.299	-0.686	50.364	1793.947	-0.005104	-0.006339	-0.006251
31.9000	989.320	79.089	94.958	94.828	-0.692	50.363	1883.411	-0.005536	-0.006647	-0.006638
32.0000	1011.998	82.726	97.709	97.969	-0.677	50.363	1926.584	-0.005791	-0.006840	-0.006858
32.1000	1033.729	85.895	100.613	101.084	-0.687	50.363	1967.955	-0.006013	-0.007043	-0.007076
32.2000	1051.493	88.311	102.854	103.583	-0.695	50.362	2001.772	-0.006182	-0.007200	-0.007251
32.3000	1057.294	89.292	103.321	104.806	-0.660	50.362	2012.815	-0.006250	-0.007232	-0.007336
32.4000	1068.264	90.990	104.685	106.406	-0.678	50.364	2033.701	-0.006369	-0.007328	-0.007448
32.5000	1124.531	98.062	110.865	113.285	-0.670	50.363	2140.818	-0.006864	-0.007761	-0.007930
32.6000	1041.694	89.347	104.052	104.931	-0.675	50.362	1983.118	-0.006254	-0.007284	-0.007345
32.7000	1039.184	88.817	103.710	104.209	-0.677	50.364	1978.340	-0.006217	-0.007260	-0.007295
32.8000	1003.176	84.841	100.422	100.763	-0.683	50.363	1909.790	-0.005939	-0.007030	-0.007053
32.9000	974.322	81.730	97.681	97.984	-0.666	50.363	1854.858	-0.005721	-0.006838	-0.006859
33.0000	932.242	77.224	93.664	93.245	-0.682	50.364	1774.750	-0.005406	-0.006556	-0.006527
33.1000	915.260	75.006	91.821	90.660	-0.697	50.363	1742.420	-0.005250	-0.006427	-0.006346
33.2000	862.240	68.861	86.991	85.546	-0.658	50.363	1641.483	-0.004820	-0.006089	-0.005988
33.3000	816.884	63.669	82.133	80.682	-0.691	50.364	1555.138	-0.004457	-0.005749	-0.005648
33.4000	778.231	59.140	77.771	75.887	-0.692	50.362	1481.552	-0.004140	-0.005444	-0.005312
33.5000	726.804	53.298	72.239	69.632	-0.666	50.362	1383.648	-0.003731	-0.005057	-0.004874
33.6000	672.491	46.745	66.584	63.438	-0.673	50.364	1280.251	-0.003272	-0.004661	-0.004441
33.7000	621.680	40.261	60.640	57.226	-0.701	50.363	1183.519	-0.002818	-0.004245	-0.004006
33.8000	567.818	34.128	54.226	50.847	-0.661	50.363	1080.980	-0.002389	-0.003796	-0.003559
33.9000	500.266	26.442	46.618	42.911	-0.684	50.363	952.377	-0.001851	-0.003263	-0.003004
34.0000	464.062	22.089	41.636	38.063	-0.691	50.364	883.455	-0.001546	-0.002914	-0.002664
34.1000	418.331	16.825	36.175	32.199	-0.676	50.363	796.394	-0.001178	-0.002532	-0.002254
34.2000	379.843	12.070	31.163	27.153	-0.672	50.363	723.124	-0.000845	-0.002181	-0.001901
34.3000	341.941	7.256	25.801	21.941	-0.681	50.364	650.969	-0.000508	-0.001806	-0.001536
34.4000	307.947	3.399	21.092	17.470	-0.680	50.363	586.252	-0.000238	-0.001476	-0.001223
34.5000	272.104	-0.588	15.962	12.813	-0.675	50.363	518.017	0.000041	-0.001117	-0.000897
34.6000	257.722	-2.268	13.814	10.186	-0.684	50.364	490.637	0.000159	-0.000967	-0.000713
34.7000	248.104	-3.827	12.052	8.424	-0.691	50.363	472.326	0.000268	-0.000844	-0.000590
34.8000	235.630	-5.416	10.031	6.604	-0.665	50.363	448.580	0.000379	-0.000702	-0.000462
34.9000	236.682	-5.753	9.506	6.130	-0.676	50.363	450.583	0.000403	-0.000665	-0.000429
35.0000	234.714	-6.398	8.709	5.823	-0.707	50.363	446.835	0.000448	-0.000610	-0.000408
35.1000	247.773	-5.164	10.140	6.615	-0.684	50.363	471.697	0.000362	-0.000710	-0.000463
35.2000	257.737	-4.630	11.407	7.421	-0.676	50.363	490.665	0.000324	-0.000798	-0.000519
35.3000	278.371	-2.606	13.950	9.993	-0.685	50.363	529.947	0.000182	-0.000977	-0.000700
35.4000	314.454	0.323	17.819	13.927	-0.686	50.362	598.640	-0.000023	-0.001247	-0.000975
35.5000	346.901	3.652	21.532	17.329	-0.657	50.363	660.410	-0.000256	-0.001507	-0.001213
35.6000	377.829	7.004	25.373	21.317	-0.680	50.365	719.290	-0.000490	-0.001776	-0.001492
35.7000	427.633	12.266	31.564	26.832	-0.698	50.363	814.104	-0.000859	-0.002209	-0.001878
35.8000	479.707	17.836	37.581	32.781	-0.667	50.363	913.239	-0.001249	-0.002631	-0.002295
35.9000	526.445	22.777	43.426	38.507	-0.679	50.364	1002.216	-0.001594	-0.003040	-0.002696
36.0000	578.519	28.415	48.805	44.608	-0.696	50.364	1101.351	-0.001989	-0.003416	-0.003123
36.1000	634.454	34.787	55.150	51.346	-0.680	50.363	1207.838	-0.002435	-0.003861	-0.003594
36.2000	688.572	41.570	61.702	57.891	-0.689	50.364	1310.863	-0.002910	-0.004319	-0.004052
36.3000	726.473	46.407	66.627	63.076	-0.712	50.363	1383.018	-0.003249	-0.004664	-0.004415
36.4000	781.417	53.102	72.527	69.606	-0.670	50.364	1487.617	-0.003717	-0.005077	-0.004872
36.5000	825.856	58.674	77.662	75.221	-0.676	50.364	1572.218	-0.004107	-0.005436	-0.005265
36.6000	881.867	65.171	83.288	81.668	-0.685	50.364	1678.848	-0.004562	-0.005830	-0.005717
36.7000	910.601	69.519	87.225	85.769	-0.675	50.363	1733.551	-0.004866	-0.006106	-0.006004
36.8000	962.344	75.906	92.839	91.673	-0.669	50.364	1832.056	-0.005313	-0.006499	-0.006417
36.9000	979.732	78.513	94.999	94.496	-0.691	50.365	1865.158	-0.005496	-0.006650	-0.006615
37.0000	1017.123	83.608	98.880	99.332	-0.683	50.364	1936.340	-0.005853	-0.006922	-0.006953
37.1000	1033.143	85.855	100.917	101.388	-0.669	50.364	1966.839	-0.006010	-0.007064	-0.007097
37.2000	1046.729	87.975	102.773	103.472	-0.687	50.365	1992.702	-0.006158	-0.007194	-0.007243
37.3000	1059.848	90.287	104.217	105.237	-0.680	50.365	2017.679	-0.006320	-0.007295	-0.007367
37.4000	1070.353	91.875	105.746	107.099	-0.661	50.365	2037.678	-0.006431	-0.007402	-0.007497
37.5000	1054.679	90.511	104.919	106.056	-0.687	50.365	2007.837	-0.006336	-0.007344	-0.007424
37.6000	1056.212	90.470	104.631	106.002	-0.695	50.364	2010.756	-0.006333	-0.007324	-0.007420
37.7000	1038.072	89.011	103.530	104.473	-0.672	50.364	1976.223	-0.006231	-0.007247	-0.007313
37.8000	1000.471	85.151	100.421	100.749	-0.677	50.365	1904.640	-0.005961	-0.007029	-0.007052
37.9000	987.607	83.762	99.100	99.346	-0.697	50.366	1880.150	-0.005863	-0.006937	-0.006954
38.0000	953.793	79.566	96.404	95.733	-0.678	50.365	1815.777	-0.005570	-0.006748	-0.006701
38.1000	899.781	73.854	91.269	90.246	-0.680	50.366	1712.952	-0.005170	-0.006389	-0.006317
38.2000	862.555	69.252	87.307	85.781	-0.697	50.365	1642.084	-0.004848	-0.006112	-0.006005
38.3000	818.417	64.145	82.680	80.959	-0.685	50.365	1558.056	-0.004490	-0.005788	-0.005667
38.4000	768.944	58.618	77.718	75.040	-0.688	50.365	1463.871	-0.004103	-0.005440	-0.005253
38.5000	727.826	53.481	73.256	70.245	-0.693	50.366	1385.593	-0.003744	-0.005128	-0.004917
38.6000	660.634	45.747	65.871	62.409	-0.687	50.366	1257.677	-0.003202	-0.004611	-0.004369
38.7000	614.136	39.670	60.156	56.727	-0.681	50.366	1169.157	-0.002777	-0.004211	-0.003971
38.8000	559.733	33.259	53.510	50.112	-0.694	50.367	1065.588	-0.002328	-0.003746	-0.003508
38.9000	515.339	28.317	48.628	44.538	-0.680	50.366	981.073	-0.001982	-0.003404	-0.003118
39.0000	462.574	22.312	42.269	38.187	-0.671	50.366	880.623	-0.001562	-0.002959	-0.002673
39.1000	424.583	17.569	37.454	33.129	-0.671	50.368	808.296	-0.001230	-0.002622	-0.002319
39.2000	375.921	11.661	30.724	27.029	-0.697	50.367	715.656	-0.000816	-0.002151	-0.001892
39.3000	345.924	7.860	26.623	22.748	-0.670	50.366	658.550	-0.000550	-0.001864	-0.001592
39.4000	313.327	4.215	22.166	18.358	-0.685	50.367	596.495	-0.000295	-0.001552	-0.001285
39.5000	280.986	0.493	17.846	13.925	-0.692	50.367	534.925	-0.000035	-0.001249	-0.000975
39.6000	256.565	-2.495	14.226	10.436	-0.668	50.366	488.434	0.000175	-0.000996	-0.000731
39.7000	240.530	-4.687	11.407	7.866	-0.681	50.368	457.907	0.000328	-0.000798	-0.000551
39.8000	232.550	-5.725	9.547	6.045	-0.706	50.367	442.715	0.000401	-0.000668	-0.000423
39.9000	229.634	-6.258	8.996	5.614	-0.668	50.366	437.164	0.000438	-0.000630	-0.000393
40.0000	231.693	-6.385	8.969	5.572	-0.669	50.367	441.084	0.000447	-0.000628	-0.000390
40.1000	240.229	-5.656	10.031	6.100	-0.693	50.368	457.335	0.000396	-0.000702	-0.000427
40.2000	265.612	-3.873	12.576	8.477	-0.672	50.367	505.657	0.000271	-0.000880	-0.000593
40.3000	278.086	-2.705	13.800	9.991	-0.659	50.368	529.404	0.000189	-0.000966	-0.000699
40.4000	309.690	0.351	17.392	13.371	-0.689	50.368	589.571	-0.000025	-0.001217	-0.000936
40.5000	338.575	3.285	21.259	16.857	-0.695	50.367	644.560	-0.000230	-0.001488	-0.001180
40.6000	374.493	7.018	25.838	20.955	-0.677	50.368	712.938	-0.000491	-0.001809	-0.001467
40.7000	411.778	10.499	30.090	25.541	-0.687	50.369	783.920	-0.000735	-0.002106	-0.001788
40.8000	475.379	17.359	37.412	32.851	-0.688	50.367	904.999	-0.001215	-0.002619	-0.002300
40.9000	512.649	21.403	41.595	37.297	-0.664	50.368	975.952	-0.001498	-0.002912	-0.002611
41.0000	568.465	27.898	48.436	44.344	-0.681	50.369	1082.211	-0.001953	-0.003390	-0.003104
41.1000	633.177	35.278	55.590	51.527	-0.686	50.368	1205.406	-0.002469	-0.003891	-0.003607
41.2000	671.574	40.022	60.270	56.321	-0.667	50.368	1278.505	-0.002802	-0.004219	-0.003942
41.3000	726.894	46.548	66.735	63.449	-0.673	50.369	1383.820	-0.003258	-0.004671	-0.004441
41.4000	790.209	53.917	73.258	70.510	-0.700	50.369	1504.354	-0.003774	-0.005128	-0.004936
41.5000	834.933	59.714	78.447	76.097	-0.673	50.368	1589.499	-0.004180	-0.005491	-0.005327
41.6000	873.421	64.679	83.040	81.196	-0.669	50.369	1662.769	-0.004528	-0.005813	-0.005684
41.7000	905.341	69.169	87.321	85.228	-0.681	50.369	1723.537	-0.004842	-0.006112	-0.005966
41.8000	973.180	76.960	93.651	93.078	-0.683	50.369	1852.684	-0.005387	-0.006556	-0.006515
41.9000	974.998	78.094	94.903	94.358	-0.656	50.369	1856.146	-0.005467	-0.006643	-0.006605
42.0000	1011.773	82.895	98.287	98.817	-0.674	50.369	1926.155	-0.005803	-0.006880	-0.006917
42.1000	1025.764	85.446	100.558	101.265	-0.675	50.370	1952.791	-0.005981	-0.007039	-0.007089
42.2000	1047.044	88.480	102.868	103.721	-0.663	50.368	1993.303	-0.006194	-0.007201	-0.007261
42.3000	1055.099	89.909	104.396	105.138	-0.645	50.369	2008.638	-0.006294	-0.007308	-0.007360
42.4000	1061.967	91.060	105.458	106.503	-0.681	50.370	2021.713	-0.006374	-0.007382	-0.007455
42.5000	1059.398	91.144	105.376	106.726	-0.678	50.369	2016.821	-0.006380	-0.007376	-0.007471
42.6000	1051.237	90.625	104.576	106.100	-0.671	50.369	2001.286	-0.006344	-0.007320	-0.007427
42.7000	1041.363	89.741	104.053	104.998	-0.672	50.371	1982.489	-0.006282	-0.007284	-0.007350
42.8000	1010.615	86.640	101.546	101.971	-0.676	50.370	1923.952	-0.006065	-0.007108	-0.007138
42.9000	986.931	83.735	99.580	99.763	-0.657	50.369	1878.862	-0.005861	-0.006971	-0.006983
43.0000	919.949	76.328	93.609	92.855	-0.665	50.371	1751.347	-0.005343	-0.006553	-0.006500
43.1000	904.875	74.053	91.765	90.717	-0.682	50.370	1722.651	-0.005184	-0.006424	-0.006350
43.2000	867.891	70.405	88.270	86.657	-0.669	50.369	1652.241	-0.004928	-0.006179	-0.006066
43.3000	816.388	64.343	83.056	81.001	-0.680	50.370	1554.193	-0.004504	-0.005814	-0.005670
43.4000	772.445	59.081	78.324	76.027	-0.696	50.370	1470.537	-0.004136	-0.005483	-0.005322
43.5000	724.850	53.482	73.380	70.342	-0.675	50.369	1379.929	-0.003744	-0.005137	-0.004924
43.6000	675.211	47.405	67.163	64.410	-0.668	50.371	1285.429	-0.003318	-0.004701	-0.004509
43.7000	611.912	39.853	59.938	57.337	-0.690	50.371	1164.923	-0.002790	-0.004196	-0.004014
43.8000	554.789	33.247	53.883	50.207	-0.672	50.370	1056.175	-0.002327	-0.003772	-0.003514
43.9000	503.226	27.658	48.010	44.231	-0.651	50.370	958.014	-0.001936	-0.003361	-0.003096
44.0000	468.946	22.989	43.509	39.285	-0.671	50.371	892.754	-0.001609	-0.003046	-0.002750
44.1000	415.115	16.910	36.613	32.698	-0.687	50.371	790.272	-0.001184	-0.002563	-0.002289
44.2000	368.346	11.452	30.547	26.889	-0.670	50.371	701.237	-0.000802	-0.002138	-0.001882
44.3000	330.595	7.045	25.592	21.720	-0.677	50.372	629.368	-0.000493	-0.001791	-0.001520
44.4000	313.568	4.650	22.745	18.762	-0.687	50.371	596.952	-0.000326	-0.001592	-0.001313
44.5000	265.206	-0.616	16.014	12.592	-0.681	50.371	504.885	0.000043	-0.001121	-0.000881
44.6000	256.279	-2.155	14.472	10.782	-0.680	50.372	487.890	0.000151	-0.001013	-0.000755
44.7000	235.600	-4.574	10.802	7.700	-0.695	50.372	448.523	0.000320	-0.000756	-0.000539
44.8000	236.953	-4.967	10.704	7.602	-0.685	50.371	451.097	0.000348	-0.000749	-0.000532
44.9000	236.727	-5.177	10.442	7.049	-0.669	50.371	450.668	0.000362	-0.000731	-0.000493
45.0000	214.410	-7.126	7.400	4.113	-0.686	50.373	408.182	0.000499	-0.000518	-0.000288
45.1000	243.175	-5.233	10.387	6.671	-0.688	50.372	462.942	0.000366	-0.000727	-0.000467
45.2000	259.886	-3.956	12.175	8.558	-0.665	50.372	494.757	0.000277	-0.000852	-0.000599
45.3000	277.229	-2.396	14.226	10.186	-0.680	50.373	527.773	0.000168	-0.000996	-0.000713
45.4000	308.383	0.844	18.107	14.037	-0.695	50.372	587.082	-0.000059	-0.001267	-0.000983
45.5000	331.887	3.174	21.023	16.688	-0.672	50.372	631.828	-0.000222	-0.001472	-0.001168
45.6000	379.107	7.510	26.446	22.040	-0.676	50.374	721.722	-0.000526	-0.001851	-0.001543
45.7000	424.162	12.068	31.798	27.112	-0.699	50.374	807.495	-0.000845	-0.002226	-0.001898
45.8000	457.284	15.901	35.761	31.211	-0.693	50.372	870.552	-0.001113	-0.002503	-0.002185
45.9000	527.302	23.788	43.979	39.745	-0.672	50.374	1003.847	-0.001665	-0.003079	-0.002782
46.0000	572.597	29.035	49.276	45.136	-0.691	50.374	1090.078	-0.002032	-0.003449	-0.003160
46.1000	620.974	34.479	54.986	50.681	-0.679	50.373	1182.175	-0.002414	-0.003849	-0.003548
46.2000	673.363	40.191	60.848	56.977	-0.675	50.374	1281.910	-0.002813	-0.004259	-0.003988
46.3000	747.528	48.965	68.757	65.520	-0.689	50.374	1423.101	-0.003428	-0.004813	-0.004586
46.4000	785.370	54.158	73.765	70.662	-0.679	50.374	1495.142	-0.003791	-0.005164	-0.004946
46.5000	825.676	59.208	78.448	75.914	-0.663	50.375	1571.875	-0.004145	-0.005491	-0.005314
46.6000	866.132	64.441	83.468	81.170	-0.688	50.375	1648.893	-0.004511	-0.005843	-0.005682
46.7000	912.254	69.971	88.490	86.726	-0.675	50.375	1736.698	-0.004898	-0.006194	-0.006071
46.8000	946.023	74.684	91.996	90.952	-0.659	50.375	1800.985	-0.005228	-0.006440	-0.006367
46.9000	975.795	78.990	95.288	94.581	-0.684	50.376	1857.662	-0.005529	-0.006670	-0.006621
47.0000	1009.924	83.385	99.140	99.233	-0.694	50.375	1922.636	-0.005837	-0.006940	-0.006946
47.1000	1012.659	84.504	100.298	100.596	-0.668	50.376	1927.843	-0.005915	-0.007021	-0.007042
47.2000	1051.222	89.220	103.803	104.598	-0.687	50.377	2001.257	-0.006245	-0.007266	-0.007322
47.3000	1059.247	90.764	105.056	106.283	-0.693	50.375	2016.535	-0.006353	-0.007354	-0.007440
47.4000	1061.607	91.328	105.679	107.337	-0.671	50.376	2021.027	-0.006393	-0.007398	-0.007514
47.5000	1061.111	91.944	105.803	107.379	-0.688	50.377	2020.082	-0.006436	-0.007406	-0.007517
47.6000	1052.034	91.171	105.636	106.754	-0.703	50.377	2002.802	-0.006382	-0.007395	-0.007473
47.7000	1036.043	89.584	104.232	105.447	-0.681	50.376	1972.361	-0.006271	-0.007296	-0.007381
47.8000	1008.647	86.655	102.030	102.637	-0.661	50.377	1920.204	-0.006066	-0.007142	-0.007185
47.9000	992.145	84.659	99.928	100.540	-0.681	50.377	1888.790	-0.005926	-0.006995	-0.007038
48.0000	931.145	78.177	95.000	94.565	-0.675	50.377	1772.661	-0.005472	-0.006650	-0.006620
48.1000	909.519	75.779	92.687	91.509	-0.662	50.378	1731.491	-0.005305	-0.006488	-0.006406
48.2000	859.324	69.605	87.858	85.964	-0.690	50.378	1635.933	-0.004872	-0.006150	-0.006017
48.3000	831.552	65.930	84.748	83.115	-0.690	50.378	1583.061	-0.004615	-0.005932	-0.005818
48.4000	787.128	60.961	79.668	77.347	-0.675	50.378	1498.489	-0.004267	-0.005577	-0.005414
48.5000	716.990	53.286	72.557	70.219	-0.680	50.379	1364.965	-0.003730	-0.005079	-0.004915
48.6000	686.438	49.245	68.897	65.660	-0.677	50.378	1306.801	-0.003447	-0.004823	-0.004596
48.7000	604.984	39.910	60.321	56.810	-0.660	50.378	1151.733	-0.002794	-0.004222	-0.003977
48.8000	573.469	35.854	55.920	52.723	-0.678	50.379	1091.738	-0.002510	-0.003914	-0.003691
48.9000	517.548	29.020	49.590	46.027	-0.693	50.379	985.279	-0.002031	-0.003471	-0.003222
49.0000	485.282	24.981	45.231	41.687	-0.663	50.379	923.853	-0.001749	-0.003166	-0.002918
49.1000	408.713	16.979	36.643	32.656	-0.665	50.380	778.084	-0.001189	-0.002565	-0.002286
49.2000	386.020	13.824	32.832	28.947	-0.700	50.380	734.882	-0.000968	-0.002298	-0.002026
49.3000	349.005	9.336	28.027	24.056	-0.681	50.380	664.415	-0.000654	-0.001962	-0.001684
49.4000	307.857	4.522	22.921	18.691	-0.667	50.381	586.081	-0.000317	-0.001604	-0.001308
49.5000	271.714	0.548	17.405	13.968	-0.695	50.380	517.273	-0.000038	-0.001218	-0.000978
49.6000	263.613	-0.951	15.644	11.770	-0.671	50.381	501.852	0.000067	-0.001095	-0.000824
49.7000	246.421	-2.845	12.918	9.351	-0.683	50.381	469.122	0.000199	-0.000904	-0.000655
49.8000	239.237	-3.746	11.625	7.866	-0.699	50.382	455.446	0.000262	-0.000814	-0.000551
49.9000	233.992	-4.995	10.608	7.004	-0.676	50.381	445.461	0.000350	-0.000743	-0.000490
Test Cycles
Time (sec)	Axial stress (kPa)	Axial micro-strain #1	Axial micro-strain #2	Axial micro-strain #3	Confining pressure (kPa)	Temperature (�C)	Load (N)	Displacement #1 (mm)	Displacement #2 (mm)	Displacement #3 (mm)
0.0000	235.991	-5.262	10.346	6.561	-0.671	50.382	449.266	0.000368	-0.000724	-0.000459
0.1000	250.073	-4.223	11.529	8.131	-0.687	50.382	476.074	0.000296	-0.000807	-0.000569
0.2000	268.422	-2.593	13.317	9.575	-0.690	50.382	511.007	0.000181	-0.000932	-0.000670
0.3000	283.105	-1.131	15.656	11.522	-0.664	50.382	538.960	0.000079	-0.001096	-0.000807
0.4000	308.458	1.069	18.602	14.343	-0.699	50.383	587.225	-0.000075	-0.001302	-0.001004
0.5000	339.341	4.003	22.221	17.607	-0.687	50.382	646.019	-0.000280	-0.001556	-0.001233
0.6000	378.836	7.819	26.969	22.596	-0.665	50.383	721.207	-0.000547	-0.001888	-0.001582
0.7000	422.764	12.099	31.964	27.599	-0.688	50.384	804.834	-0.000847	-0.002237	-0.001932
0.8000	471.757	17.865	38.101	33.323	-0.694	50.383	898.104	-0.001251	-0.002667	-0.002333
0.9000	516.842	22.903	43.551	38.716	-0.673	50.383	983.934	-0.001603	-0.003049	-0.002710
1.0000	551.407	26.822	47.511	42.827	-0.673	50.384	1049.738	-0.001878	-0.003326	-0.002998
1.1000	627.782	35.349	56.336	52.083	-0.697	50.384	1195.135	-0.002474	-0.003944	-0.003646
1.2000	695.860	43.125	63.734	60.127	-0.678	50.384	1324.739	-0.003019	-0.004461	-0.004209
1.3000	746.521	49.399	69.486	66.106	-0.688	50.384	1421.185	-0.003458	-0.004864	-0.004627
1.4000	780.621	54.030	73.654	70.259	-0.688	50.386	1486.101	-0.003782	-0.005156	-0.004918
1.5000	822.264	59.279	78.338	75.638	-0.683	50.385	1565.380	-0.004149	-0.005484	-0.005295
1.6000	870.551	65.100	83.841	81.835	-0.674	50.385	1657.305	-0.004557	-0.005869	-0.005728
1.7000	905.311	69.296	87.983	86.145	-0.686	50.387	1723.480	-0.004851	-0.006159	-0.006030
1.8000	942.882	74.796	91.449	91.188	-0.700	50.386	1795.006	-0.005236	-0.006401	-0.006383
1.9000	997.285	81.759	97.421	97.481	-0.674	50.386	1898.575	-0.005723	-0.006819	-0.006824
2.0000	1068.114	90.019	104.466	105.224	-0.685	50.387	2033.415	-0.006301	-0.007313	-0.007366
2.1000	1091.649	93.504	107.944	109.142	-0.695	50.386	2078.218	-0.006545	-0.007556	-0.007640
2.2000	1049.644	89.220	104.494	105.114	-0.672	50.387	1998.253	-0.006245	-0.007315	-0.007358
2.3000	1070.909	92.267	106.517	107.989	-0.662	50.387	2038.736	-0.006459	-0.007456	-0.007559
2.4000	1069.361	92.800	106.598	108.348	-0.699	50.387	2035.789	-0.006496	-0.007462	-0.007584
2.5000	1066.326	92.800	106.517	107.796	-0.670	50.387	2030.010	-0.006496	-0.007456	-0.007546
2.6000	1052.815	91.622	106.065	107.364	-0.661	50.388	2004.290	-0.006414	-0.007425	-0.007515
2.7000	1023.585	88.565	103.641	104.346	-0.676	50.388	1948.643	-0.006200	-0.007255	-0.007304
2.8000	1024.096	88.523	103.488	104.251	-0.692	50.388	1949.615	-0.006197	-0.007244	-0.007298
2.9000	975.404	83.162	99.278	99.444	-0.647	50.388	1856.918	-0.005821	-0.006949	-0.006961
3.0000	915.651	76.720	93.899	93.354	-0.665	50.390	1743.164	-0.005370	-0.006573	-0.006535
3.1000	903.298	75.259	92.630	91.577	-0.684	50.389	1719.646	-0.005268	-0.006484	-0.006410
3.2000	874.563	71.781	89.481	88.146	-0.681	50.389	1664.944	-0.005025	-0.006264	-0.006170
3.3000	817.906	65.522	84.156	81.973	-0.675	50.389	1557.083	-0.004587	-0.005891	-0.005738
3.4000	764.420	58.914	78.420	76.015	-0.697	50.390	1455.259	-0.004124	-0.005489	-0.005321
3.5000	722.100	53.889	73.628	70.884	-0.690	50.390	1374.693	-0.003772	-0.005154	-0.004962
3.6000	679.540	48.852	68.481	65.617	-0.673	50.390	1293.669	-0.003420	-0.004794	-0.004593
3.7000	626.444	42.466	62.414	59.295	-0.696	50.391	1192.589	-0.002973	-0.004369	-0.004151
3.8000	528.714	31.831	52.232	48.692	-0.697	50.390	1006.536	-0.002228	-0.003656	-0.003408
3.9000	518.074	29.583	49.851	46.137	-0.678	50.390	986.280	-0.002071	-0.003490	-0.003230
4.0000	470.960	24.040	44.225	40.384	-0.677	50.391	896.587	-0.001683	-0.003096	-0.002827
4.1000	420.705	18.075	37.866	33.768	-0.689	50.391	800.915	-0.001265	-0.002651	-0.002364
4.2000	379.377	13.025	32.557	28.557	-0.679	50.391	722.237	-0.000912	-0.002279	-0.001999
4.3000	352.702	9.671	28.634	24.472	-0.687	50.392	671.453	-0.000677	-0.002004	-0.001713
4.4000	302.146	4.536	22.566	18.332	-0.698	50.392	575.209	-0.000318	-0.001580	-0.001283
4.5000	264.695	-0.000	17.186	13.579	-0.689	50.391	503.912	0.000000	-0.001203	-0.000951
4.6000	271.849	-0.395	17.130	13.105	-0.684	50.392	517.530	0.000028	-0.001199	-0.000917
4.7000	251.891	-2.354	13.759	10.395	-0.687	50.392	479.536	0.000165	-0.000963	-0.000728
4.8000	235.315	-4.265	11.460	8.285	-0.687	50.392	447.979	0.000299	-0.000802	-0.000580
4.9000	230.401	-4.996	10.457	6.796	-0.670	50.392	438.623	0.000350	-0.000732	-0.000476
5.0000	232.745	-5.022	10.525	6.739	-0.686	50.393	443.087	0.000352	-0.000737	-0.000472
5.1000	243.791	-4.702	11.501	7.284	-0.703	50.393	464.115	0.000329	-0.000805	-0.000510
5.2000	258.383	-3.435	13.122	9.046	-0.673	50.393	491.896	0.000240	-0.000919	-0.000633
5.3000	282.910	-1.273	15.891	11.743	-0.687	50.393	538.588	0.000089	-0.001112	-0.000822
5.4000	328.867	2.851	20.583	16.370	-0.687	50.393	626.078	-0.000200	-0.001441	-0.001146
5.5000	351.995	5.277	24.203	19.525	-0.673	50.393	670.109	-0.000369	-0.001694	-0.001367
5.6000	407.315	11.155	30.587	25.816	-0.673	50.394	775.423	-0.000781	-0.002141	-0.001807
5.7000	457.871	15.956	36.079	31.350	-0.689	50.395	871.668	-0.001117	-0.002526	-0.002195
5.8000	482.307	19.144	39.464	34.756	-0.688	50.394	918.188	-0.001340	-0.002762	-0.002433
5.9000	511.582	22.383	43.234	38.548	-0.675	50.395	973.921	-0.001567	-0.003026	-0.002698
6.0000	581.314	29.906	50.913	46.621	-0.702	50.395	1106.672	-0.002093	-0.003564	-0.003263
6.1000	636.573	36.644	57.598	53.084	-0.693	50.395	1211.872	-0.002565	-0.004032	-0.003716
6.2000	682.756	42.059	63.198	59.003	-0.668	50.395	1299.791	-0.002944	-0.004424	-0.004130
6.3000	742.479	49.176	69.708	65.770	-0.680	50.395	1413.488	-0.003442	-0.004880	-0.004604
6.4000	783.521	54.142	74.896	71.526	-0.680	50.395	1491.623	-0.003790	-0.005243	-0.005007
6.5000	852.547	62.180	81.486	79.393	-0.657	50.396	1623.030	-0.004353	-0.005704	-0.005557
6.6000	888.419	67.329	85.971	83.544	-0.691	50.396	1691.322	-0.004713	-0.006018	-0.005848
6.7000	907.340	70.406	88.546	86.310	-0.663	50.395	1727.343	-0.004928	-0.006198	-0.006042
6.8000	934.046	74.233	91.985	90.647	-0.656	50.396	1778.183	-0.005196	-0.006439	-0.006345
6.9000	960.375	77.589	94.861	93.925	-0.681	50.396	1828.308	-0.005431	-0.006640	-0.006575
7.0000	1020.925	84.856	100.751	100.777	-0.675	50.395	1943.579	-0.005940	-0.007053	-0.007054
7.1000	1027.537	86.514	101.891	102.220	-0.672	50.396	1956.167	-0.006056	-0.007132	-0.007155
7.2000	1056.317	90.456	105.152	105.877	-0.683	50.396	2010.956	-0.006332	-0.007361	-0.007411
7.3000	1031.475	88.382	103.447	103.681	-0.667	50.396	1963.663	-0.006187	-0.007241	-0.007258
7.4000	1078.529	93.926	107.946	109.252	-0.676	50.397	2053.242	-0.006575	-0.007556	-0.007648
7.5000	1069.016	93.011	107.162	108.072	-0.700	50.397	2035.131	-0.006511	-0.007501	-0.007565
7.6000	1044.354	90.862	105.458	106.364	-0.676	50.397	1988.182	-0.006360	-0.007382	-0.007446
7.7000	1037.186	90.288	104.590	105.306	-0.665	50.397	1974.535	-0.006320	-0.007321	-0.007371
7.8000	1012.539	87.555	102.497	103.291	-0.688	50.398	1927.614	-0.006129	-0.007175	-0.007230
7.9000	991.304	85.334	100.708	101.085	-0.675	50.397	1887.188	-0.005973	-0.007050	-0.007076
8.0000	950.652	80.593	97.311	96.898	-0.666	50.397	1809.797	-0.005642	-0.006812	-0.006783
8.1000	919.423	76.959	93.857	93.175	-0.683	50.398	1750.345	-0.005387	-0.006570	-0.006522
8.2000	861.083	69.972	88.051	86.449	-0.706	50.397	1639.280	-0.004898	-0.006164	-0.006051
8.3000	787.263	62.137	81.018	79.198	-0.679	50.397	1498.747	-0.004350	-0.005671	-0.005544
8.4000	779.824	60.837	79.517	77.459	-0.672	50.398	1484.585	-0.004259	-0.005566	-0.005422
8.5000	697.228	51.572	71.138	68.383	-0.688	50.397	1327.343	-0.003610	-0.004980	-0.004787
8.6000	667.832	47.771	67.833	64.451	-0.689	50.397	1271.381	-0.003344	-0.004748	-0.004512
8.7000	619.651	41.875	62.358	58.600	-0.659	50.398	1179.657	-0.002931	-0.004365	-0.004102
8.8000	577.632	36.447	57.034	53.361	-0.689	50.398	1099.663	-0.002551	-0.003992	-0.003735
8.9000	511.747	29.021	49.482	45.845	-0.672	50.397	974.236	-0.002031	-0.003464	-0.003209
9.0000	465.971	23.494	43.551	39.980	-0.661	50.398	887.089	-0.001645	-0.003049	-0.002799
9.1000	422.554	18.692	37.920	34.312	-0.684	50.398	804.434	-0.001308	-0.002654	-0.002402
9.2000	363.492	11.705	30.494	26.638	-0.699	50.398	691.996	-0.000819	-0.002135	-0.001865
9.3000	310.848	6.259	24.669	20.539	-0.690	50.398	591.774	-0.000438	-0.001727	-0.001438
9.4000	284.788	2.823	20.530	16.495	-0.681	50.399	542.164	-0.000198	-0.001437	-0.001155
9.5000	276.463	0.984	18.231	14.898	-0.699	50.398	526.314	-0.000069	-0.001276	-0.001043
9.6000	252.327	-1.666	14.641	11.090	-0.683	50.398	480.366	0.000117	-0.001025	-0.000776
9.7000	236.893	-3.253	11.955	8.658	-0.677	50.399	450.983	0.000228	-0.000837	-0.000606
9.8000	241.597	-3.323	12.371	8.783	-0.698	50.399	459.938	0.000233	-0.000866	-0.000615
9.9000	226.959	-5.193	9.878	6.269	-0.686	50.398	432.072	0.000364	-0.000691	-0.000439
10.0000	234.022	-5.038	10.746	6.909	-0.677	50.399	445.518	0.000353	-0.000752	-0.000484
10.1000	243.656	-4.391	11.488	7.520	-0.709	50.398	463.858	0.000307	-0.000804	-0.000526
10.2000	257.196	-3.366	12.917	9.183	-0.683	50.398	489.635	0.000236	-0.000904	-0.000643
10.3000	283.135	-0.993	15.878	11.603	-0.686	50.399	539.017	0.000069	-0.001111	-0.000812
10.4000	314.409	1.897	19.660	15.411	-0.709	50.399	598.555	-0.000133	-0.001376	-0.001079
10.5000	367.054	7.174	26.047	21.400	-0.695	50.399	698.776	-0.000502	-0.001823	-0.001498
10.6000	375.229	8.015	27.301	22.527	-0.686	50.399	714.340	-0.000561	-0.001911	-0.001577
10.7000	415.370	12.210	31.853	27.083	-0.693	50.400	790.758	-0.000855	-0.002230	-0.001896
10.8000	458.366	16.545	37.179	32.364	-0.686	50.399	872.612	-0.001158	-0.002603	-0.002266
10.9000	531.269	24.616	45.354	40.815	-0.682	50.399	1011.400	-0.001723	-0.003175	-0.002857
11.0000	575.092	29.640	50.071	45.747	-0.675	50.400	1094.828	-0.002075	-0.003505	-0.003202
11.1000	622.928	35.490	56.158	51.833	-0.691	50.399	1185.894	-0.002484	-0.003931	-0.003628
11.2000	699.031	43.589	64.149	60.351	-0.672	50.399	1330.776	-0.003051	-0.004490	-0.004225
11.3000	723.498	47.631	67.973	64.214	-0.684	50.399	1377.354	-0.003334	-0.004758	-0.004495
11.4000	768.132	53.145	73.311	69.758	-0.707	50.400	1462.326	-0.003720	-0.005132	-0.004883
11.5000	843.995	61.926	81.514	78.874	-0.695	50.399	1606.750	-0.004335	-0.005706	-0.005521
11.6000	879.508	66.516	85.134	83.016	-0.668	50.400	1674.356	-0.004656	-0.005959	-0.005811
11.7000	912.826	71.417	89.289	87.407	-0.707	50.400	1737.785	-0.004999	-0.006250	-0.006118
11.8000	962.509	76.874	93.994	92.771	-0.679	50.399	1832.371	-0.005381	-0.006580	-0.006494
11.9000	964.643	78.665	95.479	94.315	-0.667	50.399	1836.433	-0.005507	-0.006684	-0.006602
12.0000	1005.190	83.804	99.817	99.401	-0.698	50.400	1913.624	-0.005866	-0.006987	-0.006958
12.1000	1030.137	87.020	102.399	102.444	-0.695	50.400	1961.117	-0.006091	-0.007168	-0.007171
12.2000	1066.220	91.663	106.187	107.350	-0.679	50.399	2029.810	-0.006416	-0.007433	-0.007514
12.3000	1062.358	91.634	105.952	106.864	-0.687	50.400	2022.457	-0.006414	-0.007417	-0.007481
12.4000	1055.941	91.679	105.938	107.212	-0.700	50.400	2010.241	-0.006418	-0.007416	-0.007505
12.5000	1159.923	102.975	115.020	117.385	-0.687	50.399	2208.195	-0.007208	-0.008051	-0.008217
12.6000	1053.221	91.958	106.886	107.754	-0.669	50.400	2005.062	-0.006437	-0.007482	-0.007543
12.7000	1027.643	89.221	104.162	104.598	-0.704	50.400	1956.367	-0.006245	-0.007291	-0.007322
12.8000	1015.950	88.089	102.910	103.331	-0.687	50.400	1934.109	-0.006166	-0.007204	-0.007233
12.9000	986.104	84.827	100.462	100.459	-0.663	50.401	1877.289	-0.005938	-0.007032	-0.007032
13.0000	949.360	80.535	97.173	96.955	-0.702	50.400	1807.337	-0.005637	-0.006802	-0.006787
13.1000	911.293	76.566	93.679	92.451	-0.704	50.400	1734.867	-0.005360	-0.006558	-0.006472
13.2000	852.381	69.479	87.913	86.171	-0.671	50.401	1622.715	-0.004864	-0.006154	-0.006032
13.3000	819.830	65.466	84.307	82.195	-0.704	50.401	1560.745	-0.004583	-0.005902	-0.005754
13.4000	770.702	59.881	79.325	76.792	-0.683	50.400	1467.218	-0.004192	-0.005553	-0.005375
13.5000	721.559	53.975	73.505	70.786	-0.669	50.401	1373.663	-0.003778	-0.005145	-0.004955
13.6000	699.572	51.150	70.326	67.386	-0.693	50.401	1331.806	-0.003581	-0.004923	-0.004717
13.7000	629.239	43.267	62.908	59.544	-0.680	50.400	1197.910	-0.003029	-0.004404	-0.004168
13.8000	571.185	36.193	56.347	52.597	-0.664	50.400	1087.389	-0.002533	-0.003944	-0.003682
13.9000	509.012	28.978	48.876	45.191	-0.684	50.401	969.028	-0.002028	-0.003421	-0.003163
14.0000	460.095	23.241	43.358	39.133	-0.681	50.400	875.902	-0.001627	-0.003035	-0.002739
14.1000	412.034	17.415	37.287	33.144	-0.669	50.401	784.407	-0.001219	-0.002610	-0.002320
14.2000	398.373	14.641	33.822	29.836	-0.679	50.401	758.400	-0.001025	-0.002368	-0.002089
14.3000	341.415	8.787	27.025	23.430	-0.687	50.400	649.967	-0.000615	-0.001892	-0.001640
14.4000	322.555	6.190	24.381	20.317	-0.658	50.400	614.061	-0.000433	-0.001707	-0.001422
14.5000	270.181	0.745	17.653	13.856	-0.660	50.400	514.355	-0.000052	-0.001236	-0.000970
14.6000	234.203	-2.776	13.083	9.532	-0.675	50.400	445.862	0.000194	-0.000916	-0.000667
14.7000	241.867	-3.196	12.848	9.200	-0.668	50.400	460.453	0.000224	-0.000899	-0.000644
14.8000	239.959	-3.843	12.067	8.449	-0.659	50.401	456.820	0.000269	-0.000845	-0.000591
14.9000	229.739	-5.078	10.293	6.713	-0.687	50.401	437.365	0.000355	-0.000721	-0.000470
15.0000	209.541	-6.803	7.842	4.349	-0.676	50.400	398.912	0.000476	-0.000549	-0.000304
15.1000	232.474	-5.388	10.140	6.297	-0.661	50.401	442.572	0.000377	-0.000710	-0.000441
15.2000	255.393	-3.379	13.043	8.989	-0.675	50.401	486.202	0.000237	-0.000913	-0.000629
15.3000	287.719	-0.726	16.442	12.034	-0.679	50.400	547.743	0.000051	-0.001151	-0.000842
15.4000	316.664	1.757	19.992	15.454	-0.656	50.400	602.846	-0.000123	-0.001399	-0.001082
15.5000	342.287	4.607	22.855	18.496	-0.672	50.401	651.627	-0.000322	-0.001600	-0.001295
15.6000	343.038	4.635	23.597	19.191	-0.684	50.400	653.057	-0.000324	-0.001652	-0.001343
15.7000	448.222	15.957	35.997	31.085	-0.663	50.401	853.300	-0.001117	-0.002520	-0.002176
15.8000	364.785	8.071	27.739	22.749	-0.656	50.401	694.456	-0.000565	-0.001942	-0.001592
15.9000	452.460	17.038	38.252	33.253	-0.667	50.401	861.368	-0.001193	-0.002678	-0.002328
16.0000	525.288	25.402	46.783	41.801	-0.669	50.399	1000.013	-0.001778	-0.003275	-0.002926
16.1000	631.208	35.728	56.321	51.944	-0.646	50.400	1201.658	-0.002501	-0.003942	-0.003636
16.2000	669.110	40.741	61.218	57.324	-0.661	50.400	1273.813	-0.002852	-0.004285	-0.004013
16.3000	722.731	47.307	67.658	63.507	-0.661	50.400	1375.895	-0.003311	-0.004736	-0.004445
16.4000	786.722	54.915	74.565	70.927	-0.646	50.399	1497.717	-0.003844	-0.005220	-0.004965
16.5000	794.327	56.369	76.064	72.763	-0.657	50.400	1512.194	-0.003946	-0.005324	-0.005093
16.6000	866.192	64.835	83.592	81.530	-0.676	50.399	1649.008	-0.004538	-0.005851	-0.005707
16.7000	882.528	67.539	86.080	83.811	-0.664	50.399	1680.107	-0.004728	-0.006026	-0.005867
16.8000	965.124	77.267	94.090	93.078	-0.657	50.399	1837.349	-0.005409	-0.006586	-0.006515
16.9000	985.728	80.761	97.489	96.995	-0.666	50.400	1876.574	-0.005653	-0.006824	-0.006790
17.0000	1004.469	83.524	99.457	98.789	-0.670	50.398	1912.251	-0.005847	-0.006962	-0.006915
17.1000	1030.768	86.852	102.277	102.597	-0.645	50.399	1962.318	-0.006080	-0.007159	-0.007182
17.2000	1052.109	89.613	104.520	105.237	-0.672	50.399	2002.945	-0.006273	-0.007316	-0.007367
17.3000	1063.004	91.636	105.706	107.184	-0.674	50.399	2023.687	-0.006415	-0.007399	-0.007503
17.4000	1064.477	92.323	106.009	107.308	-0.652	50.398	2026.491	-0.006463	-0.007421	-0.007512
17.5000	1062.463	92.463	106.682	107.809	-0.660	50.399	2022.657	-0.006472	-0.007468	-0.007547
17.6000	1059.503	92.759	106.807	108.171	-0.681	50.398	2017.021	-0.006493	-0.007477	-0.007572
17.7000	1032.737	89.739	104.245	104.960	-0.643	50.398	1966.066	-0.006282	-0.007297	-0.007347
17.8000	1011.562	87.189	102.537	103.180	-0.663	50.398	1925.755	-0.006103	-0.007178	-0.007223
17.9000	993.122	85.066	100.626	100.722	-0.665	50.398	1890.650	-0.005955	-0.007044	-0.007051
18.0000	952.936	80.959	97.050	96.843	-0.651	50.397	1814.146	-0.005667	-0.006793	-0.006779
18.1000	914.899	76.524	93.665	92.535	-0.653	50.398	1741.734	-0.005357	-0.006557	-0.006477
18.2000	872.204	71.584	89.427	87.881	-0.663	50.397	1660.452	-0.005011	-0.006260	-0.006152
18.3000	828.907	66.447	85.118	83.198	-0.655	50.397	1578.026	-0.004651	-0.005958	-0.005824
18.4000	773.227	59.796	79.187	76.903	-0.665	50.398	1472.025	-0.004186	-0.005543	-0.005383
18.5000	724.069	53.930	73.987	70.970	-0.673	50.398	1378.441	-0.003775	-0.005179	-0.004968
18.6000	663.294	47.110	67.438	63.993	-0.663	50.397	1262.741	-0.003298	-0.004721	-0.004480
18.7000	603.676	40.346	60.777	57.309	-0.655	50.397	1149.244	-0.002824	-0.004254	-0.004012
18.8000	565.684	35.476	55.990	52.084	-0.681	50.397	1076.918	-0.002483	-0.003919	-0.003646
18.9000	513.115	29.373	49.453	45.789	-0.666	50.396	976.839	-0.002056	-0.003462	-0.003205
19.0000	455.210	22.692	42.917	38.867	-0.659	50.396	866.604	-0.001588	-0.003004	-0.002721
19.1000	427.423	18.976	39.092	34.935	-0.666	50.397	813.704	-0.001328	-0.002736	-0.002445
19.2000	377.619	13.391	32.485	28.642	-0.660	50.395	718.889	-0.000937	-0.002274	-0.002005
19.3000	338.335	8.731	27.535	23.388	-0.639	50.396	644.102	-0.000611	-0.001927	-0.001637
19.4000	308.623	5.050	23.282	18.761	-0.657	50.396	587.540	-0.000354	-0.001630	-0.001313
19.5000	280.565	1.826	19.235	15.105	-0.654	50.395	534.124	-0.000128	-0.001346	-0.001057
19.6000	258.143	-1.021	15.643	11.730	-0.644	50.395	491.438	0.000071	-0.001095	-0.000821
19.7000	246.000	-2.945	13.495	9.895	-0.653	50.395	468.321	0.000206	-0.000945	-0.000693
19.8000	232.805	-4.195	11.337	7.755	-0.680	50.394	443.201	0.000294	-0.000794	-0.000543
19.9000	235.811	-4.434	11.281	7.478	-0.654	50.394	448.923	0.000310	-0.000790	-0.000523
20.0000	230.205	-5.109	10.264	6.434	-0.654	50.395	438.251	0.000358	-0.000718	-0.000450
20.1000	245.113	-4.477	11.900	7.881	-0.668	50.395	466.633	0.000313	-0.000833	-0.000552
20.2000	256.775	-3.437	13.054	9.102	-0.671	50.393	488.834	0.000241	-0.000914	-0.000637
20.3000	277.379	-1.552	15.478	11.270	-0.659	50.394	528.059	0.000109	-0.001083	-0.000789
20.4000	305.497	0.983	18.408	14.370	-0.681	50.394	581.589	-0.000069	-0.001289	-0.001006
20.5000	342.888	4.719	23.378	18.526	-0.670	50.393	652.771	-0.000330	-0.001636	-0.001297
20.6000	381.902	8.661	28.207	23.028	-0.652	50.392	727.043	-0.000606	-0.001975	-0.001612
20.7000	430.609	13.586	33.464	28.725	-0.668	50.394	819.769	-0.000951	-0.002342	-0.002011
20.8000	469.863	18.061	38.489	33.671	-0.670	50.392	894.499	-0.001264	-0.002694	-0.002357
20.9000	517.188	22.959	43.675	39.119	-0.649	50.393	984.592	-0.001607	-0.003057	-0.002738
21.0000	567.999	29.020	49.592	45.276	-0.661	50.393	1081.324	-0.002031	-0.003471	-0.003169
21.1000	627.722	36.094	56.677	52.362	-0.669	50.392	1195.021	-0.002527	-0.003967	-0.003665
21.2000	683.672	42.479	63.280	58.781	-0.667	50.391	1301.537	-0.002974	-0.004430	-0.004115
21.3000	729.900	48.052	68.635	64.852	-0.647	50.391	1389.542	-0.003364	-0.004804	-0.004540
21.4000	776.292	53.650	73.779	70.718	-0.659	50.392	1477.861	-0.003756	-0.005165	-0.004950
21.5000	815.006	58.647	77.937	75.345	-0.668	50.391	1551.561	-0.004105	-0.005456	-0.005274
21.6000	869.949	65.466	83.882	82.099	-0.661	50.391	1656.160	-0.004583	-0.005872	-0.005747
21.7000	907.280	70.490	88.464	86.630	-0.647	50.391	1727.228	-0.004934	-0.006192	-0.006064
21.8000	951.944	76.286	93.486	92.437	-0.663	50.391	1812.258	-0.005340	-0.006544	-0.006471
21.9000	987.637	80.956	97.298	96.843	-0.663	50.389	1880.207	-0.005667	-0.006811	-0.006779
22.0000	1016.011	84.702	100.436	100.443	-0.644	50.390	1934.223	-0.005929	-0.007031	-0.007031
22.1000	1045.000	88.595	103.242	104.291	-0.665	50.391	1989.412	-0.006202	-0.007227	-0.007300
22.2000	1053.086	90.314	104.810	105.946	-0.658	50.389	2004.805	-0.006322	-0.007337	-0.007416
22.3000	1063.155	91.733	105.886	107.338	-0.634	50.388	2023.973	-0.006421	-0.007412	-0.007514
22.4000	1051.478	91.046	105.624	107.003	-0.651	50.390	2001.743	-0.006373	-0.007394	-0.007490
22.5000	1068.009	93.307	107.245	108.474	-0.665	50.389	2033.215	-0.006531	-0.007507	-0.007593
22.6000	1055.400	92.000	106.420	107.433	-0.657	50.388	2009.211	-0.006440	-0.007449	-0.007520
22.7000	1035.788	90.104	104.906	106.156	-0.645	50.388	1971.874	-0.006307	-0.007343	-0.007431
22.8000	1010.165	87.525	102.207	103.386	-0.656	50.389	1923.094	-0.006127	-0.007155	-0.007237
22.9000	971.917	83.510	99.210	99.472	-0.656	50.387	1850.281	-0.005846	-0.006945	-0.006963
23.0000	952.621	81.195	97.422	96.983	-0.637	50.388	1813.545	-0.005684	-0.006820	-0.006789
23.1000	910.391	76.341	93.584	92.535	-0.656	50.387	1733.150	-0.005344	-0.006551	-0.006477
23.2000	870.220	71.473	89.250	87.810	-0.671	50.387	1656.675	-0.005003	-0.006248	-0.006147
23.3000	819.469	65.874	84.185	82.461	-0.642	50.386	1560.059	-0.004611	-0.005893	-0.005772
23.4000	776.067	60.639	79.462	77.249	-0.652	50.387	1477.432	-0.004245	-0.005562	-0.005407
23.5000	709.732	53.228	72.639	69.830	-0.655	50.386	1351.147	-0.003726	-0.005085	-0.004888
23.6000	667.517	48.065	67.547	64.714	-0.653	50.386	1270.781	-0.003365	-0.004728	-0.004530
23.7000	618.735	42.284	62.235	58.809	-0.636	50.386	1177.912	-0.002960	-0.004356	-0.004117
23.8000	584.094	37.372	57.875	54.292	-0.662	50.386	1111.965	-0.002616	-0.004051	-0.003800
23.9000	522.357	30.231	50.568	47.010	-0.657	50.385	994.434	-0.002116	-0.003540	-0.003291
24.0000	467.083	24.013	44.129	40.217	-0.643	50.386	889.206	-0.001681	-0.003089	-0.002815
24.1000	415.325	17.808	37.414	34.033	-0.665	50.385	790.672	-0.001247	-0.002619	-0.002382
24.2000	361.764	11.916	31.013	27.014	-0.661	50.384	688.705	-0.000834	-0.002171	-0.001891
24.3000	337.132	8.547	27.398	23.236	-0.636	50.385	641.813	-0.000598	-0.001918	-0.001626
24.4000	307.496	4.871	23.228	19.037	-0.645	50.385	585.394	-0.000341	-0.001626	-0.001333
24.5000	275.020	1.195	18.739	14.687	-0.656	50.384	523.567	-0.000084	-0.001312	-0.001028
24.6000	253.169	-1.132	15.356	11.535	-0.645	50.383	481.968	0.000079	-0.001075	-0.000807
24.7000	240.650	-2.902	12.713	9.379	-0.655	50.384	458.136	0.000203	-0.000890	-0.000657
24.8000	232.805	-3.844	11.323	7.882	-0.662	50.384	443.201	0.000269	-0.000793	-0.000552
24.9000	235.089	-4.350	11.378	7.631	-0.656	50.383	447.550	0.000305	-0.000796	-0.000534
25.0000	232.129	-4.980	10.483	6.909	-0.657	50.384	441.914	0.000349	-0.000734	-0.000484
25.1000	239.823	-4.588	11.515	7.686	-0.673	50.383	456.562	0.000321	-0.000806	-0.000538
25.2000	264.455	-2.635	13.952	10.019	-0.650	50.382	503.454	0.000184	-0.000977	-0.000701
25.3000	291.777	-0.309	16.993	13.203	-0.639	50.383	555.468	0.000022	-0.001190	-0.000924
25.4000	321.322	2.389	20.322	16.397	-0.666	50.383	611.715	-0.000167	-0.001423	-0.001148
25.5000	339.777	4.621	23.311	18.344	-0.662	50.382	646.849	-0.000323	-0.001632	-0.001284
25.6000	381.631	8.759	28.083	23.512	-0.648	50.382	726.528	-0.000613	-0.001966	-0.001646
25.7000	416.001	12.182	32.333	27.806	-0.665	50.383	791.960	-0.000853	-0.002263	-0.001946
25.8000	483.734	19.454	39.876	35.243	-0.665	50.382	920.906	-0.001362	-0.002791	-0.002467
25.9000	524.552	24.279	44.817	40.344	-0.639	50.382	998.611	-0.001700	-0.003137	-0.002824
26.0000	613.971	34.170	54.958	50.722	-0.660	50.382	1168.842	-0.002392	-0.003847	-0.003551
26.1000	612.272	34.536	55.756	51.168	-0.672	50.381	1165.609	-0.002418	-0.003903	-0.003582
26.2000	670.312	41.257	62.168	57.629	-0.653	50.381	1276.102	-0.002888	-0.004352	-0.004034
26.3000	732.695	48.304	68.897	65.104	-0.659	50.381	1394.863	-0.003381	-0.004823	-0.004557
26.4000	777.735	54.086	74.152	70.872	-0.672	50.381	1480.608	-0.003786	-0.005191	-0.004961
26.5000	817.470	59.136	78.544	75.818	-0.656	50.380	1556.253	-0.004140	-0.005498	-0.005307
26.6000	911.202	69.943	88.010	85.878	-0.639	50.381	1734.695	-0.004896	-0.006161	-0.006011
26.7000	915.185	71.501	89.688	87.978	-0.654	50.381	1742.277	-0.005005	-0.006278	-0.006158
26.8000	965.906	78.080	95.259	93.884	-0.658	50.380	1838.837	-0.005466	-0.006668	-0.006572
26.9000	982.272	80.522	96.883	96.191	-0.648	50.380	1869.993	-0.005637	-0.006782	-0.006733
27.0000	1013.681	84.476	100.545	100.694	-0.664	50.380	1929.789	-0.005913	-0.007038	-0.007049
27.1000	1042.431	88.552	103.115	104.196	-0.686	50.380	1984.520	-0.006199	-0.007218	-0.007294
27.2000	1053.296	90.469	104.753	105.764	-0.653	50.379	2005.205	-0.006333	-0.007333	-0.007403
27.3000	1041.409	90.021	104.576	105.362	-0.656	50.380	1982.574	-0.006301	-0.007320	-0.007375
27.4000	1069.346	93.687	107.562	108.808	-0.681	50.380	2035.761	-0.006558	-0.007529	-0.007617
27.5000	1062.043	92.731	107.203	108.475	-0.669	50.379	2021.856	-0.006491	-0.007504	-0.007593
27.6000	1053.176	92.014	106.364	107.642	-0.651	50.379	2004.976	-0.006441	-0.007445	-0.007535
27.7000	1035.893	90.428	104.879	106.059	-0.663	50.380	1972.075	-0.006330	-0.007342	-0.007424
27.8000	1005.070	87.034	102.332	102.946	-0.659	50.379	1913.395	-0.006092	-0.007163	-0.007206
27.9000	984.782	84.771	100.654	100.777	-0.653	50.378	1874.771	-0.005934	-0.007046	-0.007054
28.0000	946.730	80.719	97.034	96.748	-0.649	50.379	1802.330	-0.005650	-0.006792	-0.006772
28.1000	871.768	72.046	89.920	88.172	-0.667	50.378	1659.622	-0.005043	-0.006294	-0.006172
28.2000	846.655	69.084	87.212	85.352	-0.662	50.378	1611.814	-0.004836	-0.006105	-0.005975
28.3000	807.957	64.342	83.511	81.489	-0.660	50.378	1538.143	-0.004504	-0.005846	-0.005704
28.4000	767.681	59.628	78.598	76.681	-0.674	50.379	1461.468	-0.004174	-0.005502	-0.005368
28.5000	700.970	52.076	71.386	68.607	-0.680	50.377	1334.467	-0.003645	-0.004997	-0.004802
28.6000	695.650	51.206	70.533	67.413	-0.639	50.377	1324.339	-0.003584	-0.004937	-0.004719
28.7000	602.564	40.934	61.011	57.392	-0.652	50.378	1147.127	-0.002865	-0.004271	-0.004017
28.8000	572.387	36.391	56.650	52.985	-0.687	50.377	1089.678	-0.002547	-0.003965	-0.003709
28.9000	530.758	31.283	51.777	48.219	-0.662	50.377	1010.427	-0.002190	-0.003624	-0.003375
29.0000	466.497	24.068	43.992	40.049	-0.632	50.377	888.090	-0.001685	-0.003079	-0.002803
29.1000	406.729	17.162	36.641	32.808	-0.657	50.377	774.307	-0.001201	-0.002565	-0.002297
29.2000	375.440	13.095	32.280	28.378	-0.667	50.376	714.741	-0.000917	-0.002260	-0.001986
29.3000	331.241	8.435	26.914	22.915	-0.667	50.376	630.598	-0.000590	-0.001884	-0.001604
29.4000	292.348	3.948	21.616	17.371	-0.665	50.376	556.555	-0.000276	-0.001513	-0.001216
29.5000	278.326	1.545	18.873	15.008	-0.695	50.376	529.861	-0.000108	-0.001321	-0.001051
29.6000	285.765	1.293	18.850	14.647	-0.665	50.375	544.024	-0.000091	-0.001319	-0.001025
29.7000	259.105	-1.524	14.819	11.034	-0.652	50.376	493.269	0.000107	-0.001037	-0.000772
29.8000	221.173	-5.177	9.437	5.838	-0.666	50.376	421.057	0.000362	-0.000661	-0.000409
29.9000	233.797	-4.434	11.092	7.129	-0.661	50.375	445.089	0.000310	-0.000776	-0.000499
30.0000	232.700	-4.700	10.609	6.713	-0.663	50.375	443.001	0.000329	-0.000743	-0.000470
30.1000	246.842	-3.772	12.371	8.145	-0.690	50.375	469.923	0.000264	-0.000866	-0.000570
30.2000	259.496	-3.395	13.168	8.936	-0.664	50.374	494.013	0.000238	-0.000922	-0.000625
30.3000	290.995	-0.393	17.422	12.954	-0.651	50.374	553.980	0.000027	-0.001220	-0.000907
30.4000	318.452	2.489	20.418	15.787	-0.675	50.375	606.251	-0.000174	-0.001429	-0.001105
30.5000	393.369	9.265	28.606	23.666	-0.651	50.374	748.873	-0.000649	-0.002002	-0.001657
30.6000	395.007	10.109	29.966	24.945	-0.642	50.374	751.991	-0.000708	-0.002098	-0.001746
30.7000	411.343	11.774	31.962	26.779	-0.668	50.375	783.091	-0.000824	-0.002237	-0.001875
30.8000	487.191	20.111	41.058	36.119	-0.652	50.373	927.486	-0.001408	-0.002874	-0.002528
30.9000	522.688	23.927	44.499	39.855	-0.652	50.373	995.064	-0.001675	-0.003115	-0.002790
31.0000	579.105	30.582	50.887	46.761	-0.661	50.374	1102.467	-0.002141	-0.003562	-0.003273
31.1000	628.127	36.292	57.172	52.527	-0.686	50.373	1195.793	-0.002540	-0.004002	-0.003677
31.2000	669.200	41.510	62.100	57.685	-0.659	50.372	1273.985	-0.002906	-0.004347	-0.004038
31.3000	722.371	47.449	68.289	64.063	-0.647	50.373	1375.208	-0.003321	-0.004780	-0.004484
31.4000	780.921	54.884	74.854	71.344	-0.672	50.373	1486.673	-0.003842	-0.005240	-0.004994
31.5000	817.425	59.319	78.871	75.846	-0.672	50.372	1556.168	-0.004152	-0.005521	-0.005309
31.6000	875.254	66.406	85.037	82.918	-0.647	50.372	1666.260	-0.004648	-0.005953	-0.005804
31.7000	910.917	71.248	88.934	86.963	-0.653	50.373	1734.152	-0.004987	-0.006225	-0.006087
31.8000	964.133	78.008	94.682	93.383	-0.667	50.371	1835.461	-0.005461	-0.006628	-0.006537
31.9000	975.344	79.777	96.802	95.941	-0.663	50.371	1856.804	-0.005584	-0.006776	-0.006716
32.0000	1009.067	84.295	100.313	100.000	-0.648	50.372	1921.005	-0.005901	-0.007022	-0.007000
32.1000	1022.894	86.570	102.290	102.514	-0.675	50.372	1947.327	-0.006060	-0.007160	-0.007176
32.2000	1058.736	90.821	105.650	106.754	-0.662	50.370	2015.562	-0.006357	-0.007396	-0.007473
32.3000	1061.682	91.986	106.049	107.350	-0.651	50.371	2021.170	-0.006439	-0.007423	-0.007514
32.4000	1055.866	92.070	106.461	107.504	-0.676	50.371	2010.098	-0.006445	-0.007452	-0.007525
32.5000	1061.441	92.927	106.955	108.197	-0.656	50.370	2020.712	-0.006505	-0.007487	-0.007574
32.6000	1051.282	92.139	106.433	107.655	-0.642	50.370	2001.371	-0.006450	-0.007450	-0.007536
32.7000	1042.055	91.131	105.541	106.477	-0.661	50.371	1983.805	-0.006379	-0.007388	-0.007453
32.8000	1015.890	88.018	103.089	103.985	-0.667	50.370	1933.994	-0.006161	-0.007216	-0.007279
32.9000	981.671	84.393	100.256	100.262	-0.638	50.370	1868.849	-0.005907	-0.007018	-0.007018
33.0000	953.312	81.464	97.711	97.884	-0.668	50.370	1814.861	-0.005702	-0.006840	-0.006852
33.1000	909.910	76.552	93.954	92.800	-0.674	50.369	1732.235	-0.005359	-0.006577	-0.006496
33.2000	871.272	72.020	90.086	88.242	-0.657	50.369	1658.678	-0.005041	-0.006306	-0.006177
33.3000	816.223	65.734	84.542	82.308	-0.670	50.370	1553.879	-0.004601	-0.005918	-0.005762
33.4000	760.843	59.110	78.461	75.916	-0.679	50.369	1448.450	-0.004138	-0.005492	-0.005314
33.5000	708.980	53.257	73.094	70.051	-0.658	50.369	1349.716	-0.003728	-0.005117	-0.004904
33.6000	667.652	47.969	68.165	65.007	-0.666	50.370	1271.038	-0.003358	-0.004772	-0.004550
33.7000	613.054	41.863	62.195	58.503	-0.674	50.369	1167.097	-0.002930	-0.004354	-0.004095
33.8000	556.517	35.000	55.701	51.766	-0.664	50.368	1059.465	-0.002450	-0.003899	-0.003624
33.9000	505.976	29.105	49.454	45.470	-0.658	50.368	963.249	-0.002037	-0.003462	-0.003183
34.0000	464.934	23.815	44.445	40.120	-0.672	50.369	885.115	-0.001667	-0.003111	-0.002808
34.1000	412.349	17.388	37.852	33.727	-0.675	50.367	785.007	-0.001217	-0.002650	-0.002361
34.2000	383.525	13.910	33.588	29.641	-0.656	50.367	730.133	-0.000974	-0.002351	-0.002075
34.3000	339.822	9.183	28.015	23.832	-0.656	50.368	646.935	-0.000643	-0.001961	-0.001668
34.4000	302.101	5.038	23.048	19.009	-0.686	50.367	575.123	-0.000353	-0.001613	-0.001331
34.5000	272.210	1.390	18.903	14.314	-0.655	50.366	518.217	-0.000097	-0.001323	-0.001002
34.6000	246.616	-1.594	14.848	10.880	-0.661	50.367	469.494	0.000112	-0.001039	-0.000762
34.7000	245.519	-2.817	13.938	10.368	-0.668	50.366	467.405	0.000197	-0.000976	-0.000726
34.8000	236.427	-3.506	12.341	8.838	-0.652	50.366	450.096	0.000245	-0.000864	-0.000619
34.9000	231.077	-4.490	11.227	7.686	-0.667	50.366	439.911	0.000314	-0.000786	-0.000538
35.0000	228.973	-5.136	10.814	6.975	-0.676	50.366	435.905	0.000360	-0.000757	-0.000488
35.1000	231.903	-4.939	10.912	6.811	-0.669	50.365	441.484	0.000346	-0.000764	-0.000477
35.2000	265.432	-2.029	15.011	10.644	-0.652	50.366	505.314	0.000142	-0.001051	-0.000745
35.3000	282.429	-0.853	16.540	12.173	-0.661	50.365	537.672	0.000060	-0.001158	-0.000852
35.4000	312.576	1.967	19.950	15.438	-0.663	50.365	595.064	-0.000138	-0.001396	-0.001081
35.5000	357.601	6.329	25.220	20.719	-0.639	50.365	680.780	-0.000443	-0.001765	-0.001450
35.6000	400.417	10.875	30.479	25.583	-0.658	50.366	762.291	-0.000761	-0.002134	-0.001791
35.7000	410.576	12.222	31.880	26.946	-0.677	50.365	781.631	-0.000856	-0.002232	-0.001886
35.8000	469.247	18.046	38.775	33.448	-0.642	50.364	893.326	-0.001263	-0.002714	-0.002341
35.9000	530.277	24.742	45.614	40.691	-0.658	50.365	1009.512	-0.001732	-0.003193	-0.002848
36.0000	561.176	28.540	49.977	45.344	-0.676	50.365	1068.335	-0.001998	-0.003498	-0.003174
36.1000	615.534	34.562	55.879	51.572	-0.656	50.363	1171.818	-0.002419	-0.003911	-0.003610
36.2000	671.064	41.106	62.318	58.129	-0.661	50.364	1277.533	-0.002877	-0.004362	-0.004069
36.3000	724.640	47.954	68.676	64.909	-0.671	50.364	1379.528	-0.003357	-0.004807	-0.004544
36.4000	780.260	54.760	75.060	71.637	-0.662	50.363	1485.415	-0.003833	-0.005254	-0.005015
36.5000	810.798	58.912	78.706	75.748	-0.624	50.362	1543.550	-0.004124	-0.005509	-0.005302
36.6000	881.882	67.007	85.792	83.642	-0.646	50.363	1678.877	-0.004690	-0.006005	-0.005855
36.7000	926.321	72.564	90.994	89.522	-0.661	50.363	1763.477	-0.005080	-0.006370	-0.006267
36.8000	950.697	76.371	93.679	92.718	-0.659	50.362	1809.883	-0.005346	-0.006558	-0.006490
36.9000	976.351	80.144	97.007	96.316	-0.639	50.363	1858.721	-0.005610	-0.006790	-0.006742
37.0000	1013.696	85.012	100.738	100.791	-0.654	50.362	1929.817	-0.005951	-0.007052	-0.007055
37.1000	1044.955	88.899	104.162	104.582	-0.655	50.361	1989.326	-0.006223	-0.007291	-0.007321
37.2000	1044.775	89.599	104.865	105.319	-0.651	50.361	1988.983	-0.006272	-0.007341	-0.007372
37.3000	1056.933	91.451	105.745	107.128	-0.662	50.362	2012.129	-0.006402	-0.007402	-0.007499
37.4000	1075.733	94.037	107.603	109.322	-0.656	50.361	2047.920	-0.006583	-0.007532	-0.007653
37.5000	1061.562	92.970	106.805	108.393	-0.653	50.360	2020.941	-0.006508	-0.007476	-0.007587
37.6000	1053.296	92.392	106.283	107.698	-0.671	50.361	2005.205	-0.006467	-0.007440	-0.007539
37.7000	1027.703	89.738	104.810	105.460	-0.668	50.360	1956.482	-0.006282	-0.007337	-0.007382
37.8000	999.795	86.627	102.250	102.722	-0.651	50.360	1903.353	-0.006064	-0.007158	-0.007191
37.9000	985.939	84.869	100.737	101.110	-0.644	50.361	1876.974	-0.005941	-0.007052	-0.007078
38.0000	954.424	81.506	97.834	97.510	-0.661	50.360	1816.978	-0.005705	-0.006848	-0.006826
38.1000	917.033	77.085	94.146	93.606	-0.666	50.359	1745.796	-0.005396	-0.006590	-0.006552
38.2000	872.940	72.061	89.784	88.659	-0.653	50.359	1661.854	-0.005044	-0.006285	-0.006206
38.3000	820.626	66.210	84.732	82.809	-0.652	50.360	1562.262	-0.004635	-0.005931	-0.005797
38.4000	768.207	60.024	79.255	76.999	-0.652	50.360	1462.469	-0.004202	-0.005548	-0.005390
38.5000	717.456	53.960	73.766	70.983	-0.640	50.359	1365.852	-0.003777	-0.005164	-0.004969
38.6000	667.968	47.659	68.126	65.090	-0.667	50.360	1271.639	-0.003336	-0.004769	-0.004556
38.7000	600.670	40.443	60.956	57.545	-0.659	50.359	1143.522	-0.002831	-0.004267	-0.004028
38.8000	564.317	36.138	55.936	52.459	-0.647	50.358	1074.314	-0.002530	-0.003916	-0.003672
38.9000	519.292	30.174	50.925	47.011	-0.649	50.359	988.598	-0.002112	-0.003565	-0.003291
39.0000	461.147	23.632	44.294	40.106	-0.669	50.358	877.905	-0.001654	-0.003101	-0.002807
39.1000	420.825	18.849	38.733	34.451	-0.654	50.358	801.144	-0.001319	-0.002711	-0.002412
39.2000	382.157	13.755	33.602	29.308	-0.653	50.358	727.530	-0.000963	-0.002352	-0.002052
39.3000	337.493	8.604	27.657	23.666	-0.677	50.358	642.500	-0.000602	-0.001936	-0.001657
39.4000	312.095	5.697	23.819	19.941	-0.664	50.357	594.149	-0.000399	-0.001667	-0.001396
39.5000	277.500	2.092	19.222	15.258	-0.647	50.357	528.288	-0.000146	-0.001346	-0.001068
39.6000	264.335	-0.129	16.774	13.134	-0.672	50.357	503.225	0.000009	-0.001174	-0.000919
39.7000	246.180	-2.578	14.075	10.241	-0.645	50.356	468.664	0.000180	-0.000985	-0.000717
39.8000	236.878	-3.802	12.466	8.522	-0.645	50.356	450.954	0.000266	-0.000873	-0.000597
39.9000	232.790	-4.729	11.132	7.783	-0.668	50.357	443.172	0.000331	-0.000779	-0.000545
40.0000	232.069	-4.699	10.759	7.518	-0.674	50.356	441.799	0.000329	-0.000753	-0.000526
40.1000	243.716	-3.856	11.955	8.368	-0.644	50.356	463.972	0.000270	-0.000837	-0.000586
40.2000	263.959	-2.451	14.297	10.504	-0.652	50.357	502.510	0.000172	-0.001001	-0.000735
40.3000	298.194	0.322	18.231	13.773	-0.668	50.356	567.684	-0.000023	-0.001276	-0.000964
40.4000	309.630	1.601	19.743	15.426	-0.658	50.355	589.457	-0.000112	-0.001382	-0.001080
40.5000	329.363	3.625	22.181	18.109	-0.656	50.356	627.022	-0.000254	-0.001553	-0.001268
40.6000	377.904	8.225	27.903	23.291	-0.664	50.356	719.433	-0.000576	-0.001953	-0.001630
40.7000	421.577	13.446	32.969	28.420	-0.660	50.355	802.574	-0.000941	-0.002308	-0.001989
40.8000	477.167	19.355	39.574	34.838	-0.660	50.356	908.403	-0.001355	-0.002770	-0.002439
40.9000	517.383	23.859	44.830	39.759	-0.689	50.355	984.964	-0.001670	-0.003138	-0.002783
41.0000	571.185	29.778	50.706	45.914	-0.687	50.354	1087.389	-0.002084	-0.003549	-0.003214
41.1000	618.359	34.634	55.798	51.819	-0.652	50.355	1177.197	-0.002424	-0.003906	-0.003627
41.2000	661.536	40.374	60.959	56.948	-0.685	50.355	1259.394	-0.002826	-0.004267	-0.003986
41.3000	733.822	48.839	69.212	65.828	-0.677	50.354	1397.009	-0.003419	-0.004845	-0.004608
41.4000	767.516	53.424	73.698	70.246	-0.663	50.354	1461.153	-0.003740	-0.005159	-0.004917
41.5000	827.434	60.569	80.302	77.387	-0.662	50.355	1575.222	-0.004240	-0.005621	-0.005417
41.6000	871.362	65.885	85.422	82.891	-0.687	50.354	1658.850	-0.004612	-0.005980	-0.005802
41.7000	912.540	71.346	89.606	87.921	-0.652	50.354	1737.242	-0.004994	-0.006272	-0.006154
41.8000	953.282	76.355	94.063	92.940	-0.660	50.355	1814.804	-0.005345	-0.006584	-0.006506
41.9000	992.626	81.773	97.821	97.775	-0.684	50.353	1889.706	-0.005724	-0.006847	-0.006844
42.0000	1008.301	84.225	100.091	100.053	-0.652	50.353	1919.546	-0.005896	-0.007006	-0.007004
42.1000	1032.046	87.667	102.967	103.151	-0.673	50.354	1964.750	-0.006137	-0.007208	-0.007221
42.2000	1081.730	93.870	108.029	109.224	-0.687	50.354	2059.336	-0.006571	-0.007562	-0.007646
42.3000	1050.907	90.793	105.610	106.336	-0.676	50.353	2000.656	-0.006356	-0.007393	-0.007444
42.4000	1081.084	94.262	108.415	109.684	-0.648	50.354	2058.105	-0.006598	-0.007589	-0.007678
42.5000	1063.395	93.024	107.506	108.613	-0.679	50.353	2024.431	-0.006512	-0.007525	-0.007603
42.6000	1041.048	90.709	105.376	106.419	-0.653	50.352	1981.888	-0.006350	-0.007376	-0.007449
42.7000	1040.266	91.185	105.705	107.059	-0.652	50.353	1980.400	-0.006383	-0.007399	-0.007494
42.8000	990.537	85.614	101.535	101.444	-0.672	50.353	1885.729	-0.005993	-0.007107	-0.007101
42.9000	992.807	85.785	101.548	101.973	-0.657	50.352	1890.049	-0.006005	-0.007108	-0.007138
43.0000	940.989	79.665	96.512	96.011	-0.655	50.353	1791.401	-0.005577	-0.006756	-0.006721
43.1000	899.450	75.244	92.838	91.924	-0.670	50.354	1712.322	-0.005267	-0.006499	-0.006435
43.2000	885.489	73.336	90.926	89.771	-0.675	50.352	1685.743	-0.005134	-0.006365	-0.006284
43.3000	815.036	65.537	84.225	82.237	-0.663	50.352	1551.619	-0.004588	-0.005896	-0.005757
43.4000	777.510	61.256	80.523	77.986	-0.668	50.353	1480.179	-0.004288	-0.005637	-0.005459
43.5000	708.033	53.327	73.023	69.884	-0.662	50.352	1347.914	-0.003733	-0.005112	-0.004892
43.6000	667.562	48.081	68.742	65.506	-0.655	50.352	1270.866	-0.003366	-0.004812	-0.004585
43.7000	609.672	41.077	61.894	58.476	-0.659	50.352	1160.660	-0.002875	-0.004333	-0.004093
43.8000	571.110	36.391	57.034	53.528	-0.675	50.352	1087.246	-0.002547	-0.003992	-0.003747
43.9000	506.502	28.936	49.537	45.913	-0.656	50.351	964.251	-0.002025	-0.003468	-0.003214
44.0000	473.064	24.644	45.023	41.343	-0.637	50.352	900.593	-0.001725	-0.003152	-0.002894
44.1000	423.455	18.975	39.272	35.089	-0.661	50.352	806.150	-0.001328	-0.002749	-0.002456
44.2000	381.631	14.148	33.424	29.532	-0.669	50.351	726.528	-0.000990	-0.002340	-0.002067
44.3000	341.761	9.166	28.440	24.376	-0.642	50.351	650.625	-0.000642	-0.001991	-0.001706
44.4000	318.332	5.952	24.727	20.955	-0.661	50.352	606.022	-0.000417	-0.001731	-0.001467
44.5000	287.629	2.375	20.432	16.426	-0.673	50.350	547.571	-0.000166	-0.001430	-0.001150
44.6000	263.553	-0.267	16.993	13.022	-0.655	50.351	501.738	0.000019	-0.001190	-0.000912
44.7000	247.969	-2.072	14.528	10.435	-0.673	50.351	472.069	0.000145	-0.001017	-0.000730
44.8000	229.243	-4.154	11.707	7.907	-0.675	50.351	436.420	0.000291	-0.000820	-0.000553
44.9000	236.893	-3.830	12.259	8.159	-0.647	50.350	450.983	0.000268	-0.000858	-0.000571
45.0000	233.752	-4.713	11.558	7.893	-0.653	50.351	445.004	0.000330	-0.000809	-0.000552
45.1000	242.589	-4.167	12.286	8.420	-0.657	50.350	461.826	0.000292	-0.000860	-0.000589
45.2000	266.754	-2.719	14.642	10.393	-0.648	50.351	507.832	0.000190	-0.001025	-0.000728
45.3000	280.565	-0.978	16.403	12.271	-0.655	50.351	534.124	0.000068	-0.001148	-0.000859
45.4000	304.836	1.490	19.580	14.966	-0.669	50.350	580.330	-0.000104	-0.001371	-0.001048
45.5000	337.253	4.566	23.668	18.552	-0.656	50.350	642.042	-0.000320	-0.001657	-0.001299
45.6000	367.865	7.382	27.177	22.361	-0.655	50.350	700.321	-0.000517	-0.001902	-0.001565
45.7000	428.595	13.448	33.867	28.947	-0.681	50.351	815.935	-0.000941	-0.002371	-0.002026
45.8000	468.195	17.963	38.679	34.188	-0.670	50.350	891.323	-0.001257	-0.002708	-0.002393
45.9000	515.279	23.044	44.237	39.326	-0.657	50.350	980.959	-0.001613	-0.003097	-0.002753
46.0000	564.362	28.965	49.838	45.789	-0.663	50.350	1074.400	-0.002028	-0.003489	-0.003205
46.1000	621.199	35.168	56.635	52.208	-0.675	50.349	1182.604	-0.002462	-0.003964	-0.003655
46.2000	681.133	42.340	63.046	59.130	-0.660	50.350	1296.701	-0.002964	-0.004413	-0.004139
46.3000	715.638	46.787	67.519	63.701	-0.673	50.350	1362.391	-0.003275	-0.004726	-0.004459
46.4000	779.043	54.239	74.347	71.249	-0.667	50.349	1483.097	-0.003797	-0.005204	-0.004987
46.5000	847.287	62.404	81.555	79.238	-0.656	50.350	1613.016	-0.004368	-0.005709	-0.005547
46.6000	886.902	67.399	86.191	84.435	-0.665	50.350	1688.433	-0.004718	-0.006033	-0.005910
46.7000	925.675	72.536	90.665	89.048	-0.661	50.349	1762.247	-0.005078	-0.006347	-0.006233
46.8000	965.680	77.758	95.040	94.009	-0.645	50.349	1838.408	-0.005443	-0.006653	-0.006581
46.9000	976.396	79.861	96.899	95.595	-0.671	50.350	1858.807	-0.005590	-0.006783	-0.006692
47.0000	1024.186	85.910	101.449	101.320	-0.653	50.349	1949.787	-0.006014	-0.007101	-0.007092
47.1000	1044.204	88.592	103.996	104.430	-0.660	50.350	1987.896	-0.006201	-0.007280	-0.007310
47.2000	1051.538	90.301	105.415	106.307	-0.664	50.350	2001.858	-0.006321	-0.007379	-0.007442
47.3000	1057.294	91.354	106.296	107.338	-0.652	50.349	2012.815	-0.006395	-0.007441	-0.007514
47.4000	1066.837	93.251	107.191	108.418	-0.637	50.349	2030.983	-0.006528	-0.007503	-0.007589
47.5000	1059.668	92.435	106.859	108.101	-0.647	50.349	2017.336	-0.006470	-0.007480	-0.007567
47.6000	1044.940	91.172	106.049	107.018	-0.639	50.348	1989.298	-0.006382	-0.007423	-0.007491
47.7000	1013.230	87.766	103.544	104.068	-0.628	50.349	1928.930	-0.006144	-0.007248	-0.007285
47.8000	1004.033	86.935	102.647	103.096	-0.661	50.349	1911.421	-0.006085	-0.007185	-0.007217
47.9000	977.373	84.098	100.010	100.390	-0.652	50.348	1860.666	-0.005887	-0.007001	-0.007027
48.0000	957.355	81.703	98.080	97.999	-0.631	50.349	1822.557	-0.005719	-0.006866	-0.006860
48.1000	915.861	76.962	94.240	93.525	-0.665	50.350	1743.565	-0.005387	-0.006597	-0.006547
48.2000	852.547	69.801	88.999	86.934	-0.659	50.348	1623.030	-0.004886	-0.006230	-0.006085
48.3000	835.084	67.244	86.080	84.116	-0.654	50.349	1589.785	-0.004707	-0.006026	-0.005888
48.4000	759.115	59.054	78.625	76.236	-0.661	50.349	1445.160	-0.004134	-0.005504	-0.005337
48.5000	708.274	52.765	72.515	70.190	-0.664	50.348	1348.372	-0.003694	-0.005076	-0.004913
48.6000	674.956	48.923	68.703	65.425	-0.645	50.348	1284.943	-0.003425	-0.004809	-0.004580
48.7000	623.724	42.662	63.017	59.600	-0.652	50.349	1187.410	-0.002986	-0.004411	-0.004172
48.8000	579.661	37.163	57.736	54.335	-0.660	50.348	1103.525	-0.002601	-0.004042	-0.003803
48.9000	506.893	28.950	49.784	45.775	-0.655	50.348	964.994	-0.002026	-0.003485	-0.003204
49.0000	472.313	24.488	45.121	40.967	-0.663	50.349	899.162	-0.001714	-0.003158	-0.002868
49.1000	426.251	18.806	39.173	35.213	-0.669	50.349	811.472	-0.001316	-0.002742	-0.002465
49.2000	381.346	13.602	33.370	29.475	-0.655	50.348	725.985	-0.000952	-0.002336	-0.002063
49.3000	348.689	9.813	29.019	25.111	-0.637	50.349	663.815	-0.000687	-0.002031	-0.001758
49.4000	306.715	5.026	23.420	19.247	-0.670	50.348	583.906	-0.000352	-0.001639	-0.001347
49.5000	275.335	1.447	19.428	15.214	-0.663	50.348	524.168	-0.000101	-0.001360	-0.001065
49.6000	270.707	0.352	18.259	14.063	-0.655	50.348	515.356	-0.000025	-0.001278	-0.000984
49.7000	239.433	-3.183	13.330	9.281	-0.666	50.349	455.818	0.000223	-0.000933	-0.000650
49.8000	237.644	-4.097	12.741	8.991	-0.681	50.348	452.414	0.000287	-0.000892	-0.000629
49.9000	388.590	9.251	28.469	24.056	-0.652	50.348	739.775	-0.000648	-0.001993	-0.001684
