# Supplementary material for: Evaluation of a Cold-Mixed High-Performance Polyurethane Mixture
Source: Hindawi journal article supplement (doi:10.1155/2019/1507971), 2019-11-07
Supplement: f1 [file 1507971.f1.zip › 1507971.f1/dynamic modulus data/PUM/specimen1/temp50/zhs-1-50_0.5Hz.csv]

Test Information
****************
Project name	zhs
Operator name	1
Target test temperature	50
Target confining stress	0
Average dynamic strain range from 75 to 125 micro-strain
Contact stress	5
Initial modulus	1000
Axial gauge length	70
Comments
Specimen information
********************
Identification	zhs-1-50
Dimensions	Point 1	Point 2	Point 3	Point 4	Point 5	Point 6	Average	Std Dev.
Diameter (mm)	49.2	49.2	49.3				49.23	0.058
Height (mm)	101.3	101.2	101.3				101.27	0.058
Cross-sectional area (mm�)	1903.7
Conditioning time
Properties/Comments
Test Data	0.5Hz
*********
Test date and time	Wed	Apr 3	2019	1:50 PM
Dynamic modulus (MPa)	8714
Phase angle (Degrees)	4.00
Average temperature (�C)	50.3
Average confining pressure (kPa)	-0.7
Average micro-strain	99
Load drift (%)	-1.5
Load standard error (%)	5.6
Average deformation drift (%)	-3.9
Average deformation standard error (%)	6.2
Deformation uniformity (%)	2.6
Phase uniformity (Degrees)	0.2
Conditioning Cycles
Time (sec)	Axial stress (kPa)	Axial micro-strain #1	Axial micro-strain #2	Axial micro-strain #3	Confining pressure (kPa)	Temperature (�C)	Load (N)	Displacement #1 (mm)	Displacement #2 (mm)	Displacement #3 (mm)
0.0000	221.399	-1.958	-0.209	1.918	-0.711	50.334	421.486	0.000137	0.000015	-0.000134
0.0400	228.883	-1.342	-0.181	2.251	-0.746	50.335	435.734	0.000094	0.000013	-0.000158
0.0800	244.046	-0.672	1.157	3.029	-0.703	50.335	464.602	0.000047	-0.000081	-0.000212
0.1200	255.934	0.140	2.242	4.182	-0.713	50.334	487.232	-0.000010	-0.000157	-0.000293
0.1600	276.913	2.093	4.458	6.643	-0.750	50.335	527.172	-0.000147	-0.000312	-0.000465
0.2000	305.798	4.705	7.526	9.632	-0.723	50.335	582.161	-0.000329	-0.000527	-0.000674
0.2400	331.587	7.313	10.719	12.882	-0.712	50.334	631.256	-0.000512	-0.000750	-0.000902
0.2800	355.452	9.813	13.318	15.535	-0.747	50.335	676.689	-0.000687	-0.000932	-0.001087
0.3200	409.855	15.173	19.097	21.387	-0.715	50.335	780.258	-0.001062	-0.001337	-0.001497
0.3600	439.506	18.567	22.759	24.667	-0.716	50.335	836.706	-0.001300	-0.001593	-0.001727
0.4000	496.223	24.235	28.511	31.058	-0.736	50.335	944.681	-0.001696	-0.001996	-0.002174
0.4400	529.947	28.768	32.515	35.257	-0.683	50.335	1008.883	-0.002014	-0.002276	-0.002468
0.4800	568.134	32.519	36.863	40.008	-0.719	50.334	1081.581	-0.002276	-0.002580	-0.002801
0.5200	610.198	37.557	41.415	45.080	-0.747	50.335	1161.661	-0.002629	-0.002899	-0.003156
0.5600	662.572	43.281	47.072	50.778	-0.715	50.335	1261.368	-0.003030	-0.003295	-0.003554
0.6000	691.292	46.913	50.236	54.195	-0.726	50.334	1316.042	-0.003284	-0.003516	-0.003794
0.6400	733.942	51.781	55.097	59.350	-0.751	50.335	1397.238	-0.003625	-0.003857	-0.004155
0.6800	752.457	54.845	57.378	61.771	-0.698	50.335	1432.486	-0.003839	-0.004016	-0.004324
0.7200	805.417	60.890	62.618	67.855	-0.727	50.334	1533.308	-0.004262	-0.004383	-0.004750
0.7600	825.045	63.964	65.111	70.343	-0.735	50.335	1570.673	-0.004478	-0.004558	-0.004924
0.8000	820.716	63.597	65.473	70.579	-0.692	50.334	1562.433	-0.004452	-0.004583	-0.004941
0.8400	877.058	70.294	70.602	76.916	-0.722	50.334	1669.693	-0.004921	-0.004942	-0.005384
0.8800	863.683	69.139	70.121	75.844	-0.735	50.335	1644.230	-0.004840	-0.004908	-0.005309
0.9200	873.000	70.702	71.140	77.429	-0.691	50.334	1661.968	-0.004949	-0.004980	-0.005420
0.9600	892.372	72.845	73.351	79.711	-0.720	50.334	1698.847	-0.005099	-0.005135	-0.005580
1.0000	877.268	71.963	72.352	78.946	-0.730	50.335	1670.094	-0.005037	-0.005065	-0.005526
1.0400	883.009	72.034	72.830	79.056	-0.692	50.334	1681.023	-0.005042	-0.005098	-0.005534
1.0800	868.176	71.220	71.827	78.292	-0.712	50.334	1652.784	-0.004985	-0.005028	-0.005480
1.1200	842.748	68.044	69.307	75.497	-0.732	50.335	1604.376	-0.004763	-0.004852	-0.005285
1.1600	823.166	66.463	67.687	73.402	-0.681	50.335	1567.097	-0.004652	-0.004738	-0.005138
1.2000	794.432	63.248	65.100	70.689	-0.711	50.334	1512.394	-0.004427	-0.004557	-0.004948
1.2400	766.419	60.135	62.495	68.023	-0.742	50.335	1459.064	-0.004209	-0.004375	-0.004762
1.2800	743.395	57.240	60.033	64.952	-0.696	50.335	1415.234	-0.004007	-0.004202	-0.004547
1.3200	691.923	51.979	55.015	59.240	-0.734	50.333	1317.244	-0.003639	-0.003851	-0.004147
1.3600	649.768	46.943	50.513	54.793	-0.740	50.335	1236.992	-0.003286	-0.003536	-0.003835
1.4000	614.497	43.055	47.181	51.097	-0.698	50.334	1169.844	-0.003014	-0.003303	-0.003577
1.4400	576.685	38.509	42.725	46.551	-0.726	50.333	1097.860	-0.002696	-0.002991	-0.003259
1.4800	545.125	34.480	39.270	42.802	-0.738	50.335	1037.779	-0.002414	-0.002749	-0.002996
1.5200	488.528	28.288	32.624	36.145	-0.702	50.334	930.033	-0.001980	-0.002284	-0.002530
1.5600	448.327	24.152	28.701	31.531	-0.724	50.333	853.500	-0.001691	-0.002009	-0.002207
1.6000	422.704	20.422	25.234	28.363	-0.746	50.335	804.720	-0.001430	-0.001766	-0.001985
1.6400	366.378	14.751	18.503	21.136	-0.711	50.334	697.489	-0.001033	-0.001295	-0.001480
1.6800	345.473	11.747	15.904	18.678	-0.720	50.333	657.692	-0.000822	-0.001113	-0.001307
1.7200	312.531	8.198	11.556	14.148	-0.749	50.334	594.978	-0.000574	-0.000809	-0.000990
1.7600	272.164	3.483	6.466	9.145	-0.714	50.334	518.131	-0.000244	-0.000453	-0.000640
1.8000	274.885	3.793	6.385	8.518	-0.733	50.334	523.310	-0.000265	-0.000447	-0.000596
1.8400	239.898	-0.239	1.637	4.377	-0.746	50.334	456.705	0.000017	-0.000115	-0.000306
1.8800	234.323	-1.146	1.102	2.794	-0.718	50.334	446.091	0.000080	-0.000077	-0.000196
1.9200	224.750	-2.397	-0.869	1.626	-0.713	50.332	427.866	0.000168	0.000061	-0.000114
1.9600	216.033	-3.294	-1.914	0.306	-0.742	50.334	411.272	0.000231	0.000134	-0.000021
2.0000	225.156	-3.042	-1.516	0.972	-0.707	50.334	428.638	0.000213	0.000106	-0.000068
2.0400	226.734	-3.055	-1.253	0.808	-0.729	50.332	431.643	0.000214	0.000088	-0.000057
2.0800	240.755	-2.185	-0.385	1.959	-0.746	50.334	458.336	0.000153	0.000027	-0.000137
2.1200	262.411	0.127	2.310	4.335	-0.710	50.334	499.563	-0.000009	-0.000162	-0.000303
2.1600	281.287	1.684	4.139	6.269	-0.719	50.333	535.498	-0.000118	-0.000290	-0.000439
2.2000	301.590	3.990	6.962	8.782	-0.732	50.334	574.150	-0.000279	-0.000487	-0.000615
2.2400	338.560	7.300	10.719	12.341	-0.700	50.334	644.531	-0.000511	-0.000750	-0.000864
2.2800	356.609	9.504	13.168	15.384	-0.705	50.333	678.892	-0.000665	-0.000922	-0.001077
2.3200	398.133	13.630	17.725	19.760	-0.728	50.334	757.942	-0.000954	-0.001241	-0.001383
2.3600	440.423	18.032	22.346	24.542	-0.701	50.334	838.451	-0.001262	-0.001564	-0.001718
2.4000	483.238	22.735	27.107	29.864	-0.691	50.333	919.962	-0.001591	-0.001898	-0.002091
2.4400	531.420	28.316	32.513	34.784	-0.731	50.333	1011.686	-0.001982	-0.002276	-0.002435
2.4800	556.096	31.030	35.363	38.338	-0.708	50.334	1058.664	-0.002172	-0.002475	-0.002684
2.5200	611.311	37.330	41.458	44.399	-0.696	50.333	1163.778	-0.002613	-0.002902	-0.003108
2.5600	653.285	41.974	45.916	49.555	-0.718	50.334	1243.687	-0.002938	-0.003214	-0.003469
2.6000	700.730	47.559	51.323	54.738	-0.702	50.334	1334.009	-0.003329	-0.003593	-0.003832
2.6400	709.897	49.176	52.176	56.463	-0.683	50.333	1351.461	-0.003442	-0.003652	-0.003952
2.6800	751.931	54.256	57.378	61.212	-0.722	50.333	1431.484	-0.003798	-0.004016	-0.004285
2.7200	791.110	59.124	61.342	66.201	-0.706	50.334	1506.071	-0.004139	-0.004294	-0.004634
2.7600	810.482	61.899	63.734	68.578	-0.681	50.333	1542.950	-0.004333	-0.004461	-0.004800
2.8000	833.851	64.639	66.046	71.148	-0.731	50.332	1587.439	-0.004525	-0.004623	-0.004980
2.8400	849.947	67.033	68.676	74.345	-0.713	50.333	1618.080	-0.004692	-0.004807	-0.005204
2.8800	862.931	68.593	69.652	75.123	-0.691	50.333	1642.799	-0.004802	-0.004876	-0.005259
2.9200	891.650	72.327	73.011	78.599	-0.723	50.333	1697.474	-0.005063	-0.005111	-0.005502
2.9600	877.629	71.067	71.279	77.723	-0.731	50.334	1670.780	-0.004975	-0.004990	-0.005441
3.0000	877.839	71.320	72.143	78.113	-0.700	50.333	1671.181	-0.004992	-0.005050	-0.005468
3.0400	871.858	70.814	71.485	77.764	-0.736	50.332	1659.794	-0.004957	-0.005004	-0.005444
3.0800	858.077	69.774	70.753	76.637	-0.726	50.333	1633.558	-0.004884	-0.004953	-0.005365
3.1200	842.372	67.833	69.116	75.027	-0.705	50.333	1603.661	-0.004748	-0.004838	-0.005252
3.1600	822.565	66.014	67.713	73.027	-0.732	50.332	1565.952	-0.004621	-0.004740	-0.005112
3.2000	797.317	63.246	65.140	70.831	-0.739	50.334	1517.887	-0.004427	-0.004560	-0.004958
3.2400	763.774	59.629	62.058	67.189	-0.696	50.333	1454.029	-0.004174	-0.004344	-0.004703
3.2800	733.927	56.242	59.125	63.980	-0.724	50.332	1397.209	-0.003937	-0.004139	-0.004479
3.3200	690.781	51.402	54.860	59.073	-0.742	50.333	1315.069	-0.003598	-0.003840	-0.004135
3.3600	668.945	48.685	52.300	56.658	-0.706	50.333	1273.499	-0.003408	-0.003661	-0.003966
3.4000	613.324	42.635	46.796	50.655	-0.716	50.332	1167.612	-0.002984	-0.003276	-0.003546
3.4400	584.650	39.108	43.137	47.218	-0.746	50.333	1113.024	-0.002738	-0.003020	-0.003305
3.4800	525.799	32.406	37.412	40.412	-0.694	50.333	1000.986	-0.002268	-0.002619	-0.002829
3.5200	496.283	29.049	33.230	36.591	-0.699	50.333	944.796	-0.002033	-0.002326	-0.002561
3.5600	450.386	23.705	28.565	31.587	-0.736	50.333	857.420	-0.001659	-0.002000	-0.002211
3.6000	409.239	19.130	23.489	26.680	-0.698	50.333	779.085	-0.001339	-0.001644	-0.001868
3.6400	368.977	14.527	18.904	21.692	-0.687	50.332	702.438	-0.001017	-0.001323	-0.001518
3.6800	347.457	12.139	15.891	18.539	-0.726	50.332	661.469	-0.000850	-0.001112	-0.001298
3.7200	318.813	8.337	12.562	14.938	-0.704	50.333	606.937	-0.000584	-0.000879	-0.001046
3.7600	285.630	4.719	7.801	10.228	-0.692	50.332	543.766	-0.000330	-0.000546	-0.000716
3.8000	258.684	1.741	4.457	6.867	-0.715	50.332	492.468	-0.000122	-0.000312	-0.000481
3.8400	252.267	0.775	3.150	5.546	-0.723	50.333	480.251	-0.000054	-0.000220	-0.000388
3.8800	231.693	-1.621	0.742	2.669	-0.685	50.332	441.084	0.000113	-0.000052	-0.000187
3.9200	221.053	-2.985	-1.557	0.986	-0.709	50.332	420.828	0.000209	0.000109	-0.000069
3.9600	227.380	-2.550	-0.951	1.431	-0.726	50.333	432.873	0.000179	0.000067	-0.000100
4.0000	227.380	-2.817	-1.350	0.946	-0.675	50.333	432.873	0.000197	0.000094	-0.000066
4.0400	232.264	-2.944	-0.620	1.475	-0.704	50.332	442.171	0.000206	0.000043	-0.000103
4.0800	239.658	-2.255	-0.386	1.795	-0.722	50.333	456.247	0.000158	0.000027	-0.000126
4.1200	256.385	-0.783	1.609	3.433	-0.693	50.332	488.091	0.000055	-0.000113	-0.000240
4.1600	279.123	1.517	4.014	5.978	-0.702	50.331	531.378	-0.000106	-0.000281	-0.000418
4.2000	296.826	2.949	6.342	8.032	-0.731	50.333	565.081	-0.000206	-0.000444	-0.000562
4.2400	330.084	6.413	9.577	11.980	-0.698	50.332	628.395	-0.000449	-0.000670	-0.000839
4.2800	364.289	9.814	13.898	15.757	-0.689	50.331	693.512	-0.000687	-0.000973	-0.001103
4.3200	394.706	13.038	16.966	19.204	-0.727	50.332	751.419	-0.000913	-0.001188	-0.001344
4.3600	458.787	19.776	24.298	26.333	-0.703	50.333	873.413	-0.001384	-0.001701	-0.001843
4.4000	474.146	21.837	26.032	28.391	-0.694	50.332	902.653	-0.001529	-0.001822	-0.001987
4.4400	539.881	28.739	33.121	35.922	-0.726	50.332	1027.794	-0.002012	-0.002318	-0.002515
4.4800	567.187	31.845	36.310	39.744	-0.734	50.332	1079.779	-0.002229	-0.002542	-0.002782
4.5200	610.634	36.727	41.264	44.331	-0.688	50.332	1162.491	-0.002571	-0.002889	-0.003103
4.5600	646.402	41.441	45.202	48.956	-0.739	50.332	1230.583	-0.002901	-0.003164	-0.003427
4.6000	687.805	46.239	49.976	53.640	-0.720	50.333	1309.404	-0.003237	-0.003498	-0.003755
4.6400	716.104	49.833	53.208	56.990	-0.703	50.332	1363.277	-0.003488	-0.003725	-0.003989
4.6800	761.039	54.913	57.886	62.270	-0.736	50.332	1448.822	-0.003844	-0.004052	-0.004359
4.7200	785.249	58.337	60.750	65.255	-0.744	50.333	1494.913	-0.004084	-0.004252	-0.004568
4.7600	817.260	62.431	64.245	69.260	-0.702	50.333	1555.853	-0.004370	-0.004497	-0.004848
4.8000	831.146	64.469	66.063	71.080	-0.711	50.332	1582.289	-0.004513	-0.004624	-0.004976
4.8400	857.716	67.358	68.936	74.332	-0.736	50.332	1632.872	-0.004715	-0.004826	-0.005203
4.8800	864.825	68.860	69.762	75.527	-0.711	50.333	1646.404	-0.004820	-0.004883	-0.005287
4.9200	885.729	71.388	72.170	78.472	-0.708	50.332	1686.201	-0.004997	-0.005052	-0.005493
4.9600	886.841	72.076	72.282	78.848	-0.726	50.332	1688.318	-0.005045	-0.005060	-0.005519
5.0000	878.831	71.237	72.090	78.335	-0.710	50.333	1673.069	-0.004987	-0.005046	-0.005483
5.0400	884.121	72.299	72.583	78.767	-0.675	50.332	1683.140	-0.005061	-0.005081	-0.005514
5.0800	867.169	70.448	71.457	77.680	-0.726	50.331	1650.867	-0.004931	-0.005002	-0.005438
5.1200	848.774	68.888	69.651	76.193	-0.728	50.332	1615.849	-0.004822	-0.004876	-0.005333
5.1600	824.924	65.846	67.755	72.998	-0.688	50.332	1570.444	-0.004609	-0.004743	-0.005110
5.2000	787.188	61.687	63.969	69.371	-0.716	50.331	1498.604	-0.004318	-0.004478	-0.004856
5.2400	757.387	58.646	61.314	66.354	-0.726	50.332	1441.870	-0.004105	-0.004292	-0.004645
5.2800	728.728	55.276	58.315	62.883	-0.693	50.333	1387.310	-0.003869	-0.004082	-0.004402
5.3200	687.264	50.590	54.489	58.505	-0.705	50.331	1308.374	-0.003541	-0.003814	-0.004095
5.3600	661.280	47.490	51.652	55.767	-0.734	50.332	1258.907	-0.003324	-0.003616	-0.003904
5.4000	614.842	42.044	46.990	50.528	-0.701	50.333	1170.502	-0.002943	-0.003289	-0.003537
5.4400	568.104	36.993	41.676	45.398	-0.680	50.331	1081.524	-0.002590	-0.002917	-0.003178
5.4800	540.407	33.511	38.651	42.135	-0.735	50.331	1028.795	-0.002346	-0.002706	-0.002949
5.5200	486.004	28.036	32.626	35.798	-0.698	50.332	925.226	-0.001963	-0.002284	-0.002506
5.5600	441.069	22.833	27.560	30.352	-0.675	50.332	839.682	-0.001598	-0.001929	-0.002125
5.6000	416.828	19.494	24.257	26.943	-0.723	50.331	793.533	-0.001365	-0.001698	-0.001886
5.6400	362.395	13.586	18.326	20.967	-0.707	50.332	689.907	-0.000951	-0.001283	-0.001468
5.6800	340.919	11.169	15.384	17.969	-0.687	50.331	649.023	-0.000782	-0.001077	-0.001258
5.7200	313.012	7.440	11.281	13.896	-0.719	50.331	595.894	-0.000521	-0.000790	-0.000973
5.7600	282.639	4.439	7.787	10.102	-0.731	50.332	538.073	-0.000311	-0.000545	-0.000707
5.8000	258.218	1.672	4.362	6.937	-0.681	50.332	491.581	-0.000117	-0.000305	-0.000486
5.8400	241.702	-0.420	1.911	4.168	-0.704	50.331	460.138	0.000029	-0.000134	-0.000292
5.8800	238.290	-1.258	1.171	3.322	-0.722	50.332	453.644	0.000088	-0.000082	-0.000233
5.9200	226.658	-2.648	-0.801	1.543	-0.698	50.332	431.499	0.000185	0.000056	-0.000108
5.9600	221.218	-3.533	-1.502	1.002	-0.708	50.331	421.143	0.000247	0.000105	-0.000070
6.0000	219.535	-3.591	-2.011	0.140	-0.720	50.331	417.938	0.000251	0.000141	-0.000010
6.0400	229.935	-3.029	-0.966	1.112	-0.703	50.332	437.737	0.000212	0.000068	-0.000078
6.0800	241.507	-2.071	-0.166	1.920	-0.695	50.331	459.766	0.000145	0.000012	-0.000134
6.1200	250.208	-1.213	1.033	2.862	-0.729	50.331	476.332	0.000085	-0.000072	-0.000200
6.1600	283.120	1.715	4.362	6.434	-0.730	50.333	538.988	-0.000120	-0.000305	-0.000450
6.2000	314.319	4.370	7.936	9.520	-0.694	50.331	598.383	-0.000306	-0.000556	-0.000666
6.2400	336.711	6.806	10.622	12.467	-0.743	50.330	641.012	-0.000476	-0.000744	-0.000873
6.2800	375.019	10.820	14.875	16.883	-0.738	50.332	713.940	-0.000757	-0.001041	-0.001182
6.3200	412.755	15.117	18.890	21.413	-0.703	50.332	785.780	-0.001058	-0.001322	-0.001499
6.3600	439.551	17.541	22.497	24.904	-0.730	50.331	836.792	-0.001228	-0.001575	-0.001743
6.4000	500.266	24.377	28.648	31.168	-0.741	50.332	952.377	-0.001706	-0.002005	-0.002182
6.4400	532.998	27.770	32.872	35.326	-0.702	50.332	1014.690	-0.001944	-0.002301	-0.002473
6.4800	570.704	32.393	36.794	39.467	-0.687	50.330	1086.473	-0.002267	-0.002576	-0.002763
6.5200	606.562	36.587	40.879	43.898	-0.712	50.331	1154.737	-0.002561	-0.002861	-0.003073
6.5600	662.377	42.579	46.892	50.208	-0.691	50.333	1260.996	-0.002981	-0.003282	-0.003515
6.6000	705.328	47.771	51.640	55.420	-0.689	50.331	1342.764	-0.003344	-0.003615	-0.003879
6.6400	729.389	51.361	54.365	58.281	-0.736	50.331	1388.569	-0.003595	-0.003806	-0.004080
6.6800	763.488	55.249	58.409	62.688	-0.737	50.332	1453.485	-0.003867	-0.004089	-0.004388
6.7200	792.328	59.305	61.496	66.230	-0.688	50.331	1508.389	-0.004151	-0.004305	-0.004636
6.7600	820.731	62.418	64.590	69.482	-0.726	50.330	1562.462	-0.004369	-0.004521	-0.004864
6.8000	839.457	65.184	66.765	71.940	-0.746	50.332	1598.110	-0.004563	-0.004674	-0.005036
6.8400	867.665	68.283	69.694	75.290	-0.706	50.331	1651.812	-0.004780	-0.004879	-0.005270
6.8800	861.579	68.452	69.541	75.289	-0.724	50.330	1640.224	-0.004792	-0.004868	-0.005270
6.9200	889.622	71.670	72.378	78.502	-0.732	50.331	1693.611	-0.005017	-0.005066	-0.005495
6.9600	875.856	70.758	71.552	77.678	-0.697	50.332	1667.404	-0.004953	-0.005009	-0.005437
7.0000	881.416	71.235	72.158	78.277	-0.694	50.330	1677.990	-0.004986	-0.005051	-0.005479
7.0400	872.745	70.871	71.499	78.029	-0.740	50.331	1661.482	-0.004961	-0.005005	-0.005462
7.0800	863.728	69.927	71.041	76.956	-0.711	50.332	1644.316	-0.004895	-0.004973	-0.005387
7.1200	836.030	67.134	68.827	74.582	-0.685	50.331	1591.587	-0.004699	-0.004818	-0.005221
7.1600	822.941	65.508	67.398	73.137	-0.735	50.331	1566.668	-0.004586	-0.004718	-0.005120
7.2000	784.693	61.728	63.954	69.439	-0.720	50.331	1493.855	-0.004321	-0.004477	-0.004861
7.2400	760.287	58.758	61.878	66.620	-0.683	50.330	1447.392	-0.004113	-0.004331	-0.004663
7.2800	730.336	55.626	58.711	63.244	-0.700	50.330	1390.371	-0.003894	-0.004110	-0.004427
7.3200	692.148	51.473	54.847	59.281	-0.739	50.332	1317.673	-0.003603	-0.003839	-0.004150
7.3600	641.863	45.803	49.851	53.653	-0.693	50.331	1221.943	-0.003206	-0.003490	-0.003756
7.4000	607.839	41.665	46.192	50.123	-0.714	50.331	1157.169	-0.002917	-0.003233	-0.003509
7.4400	568.074	37.078	41.552	45.346	-0.739	50.331	1081.467	-0.002595	-0.002909	-0.003174
7.4800	519.247	31.621	36.739	39.689	-0.701	50.331	988.512	-0.002213	-0.002572	-0.002778
7.5200	493.052	28.516	33.410	36.547	-0.700	50.330	938.644	-0.001996	-0.002339	-0.002558
7.5600	433.269	21.503	26.804	29.780	-0.725	50.331	824.833	-0.001505	-0.001876	-0.002085
7.6000	410.065	19.395	23.844	26.833	-0.708	50.331	780.659	-0.001358	-0.001669	-0.001878
7.6400	367.204	13.953	18.437	21.178	-0.697	50.330	699.062	-0.000977	-0.001291	-0.001482
7.6800	342.272	11.140	15.355	17.900	-0.743	50.331	651.598	-0.000780	-0.001075	-0.001253
7.7200	316.558	7.663	11.998	14.412	-0.735	50.331	602.646	-0.000536	-0.000840	-0.001009
7.7600	272.946	3.441	6.438	8.770	-0.709	50.331	519.619	-0.000241	-0.000451	-0.000614
7.8000	273.833	3.049	6.287	8.546	-0.717	50.330	521.307	-0.000213	-0.000440	-0.000598
7.8400	243.175	-0.029	2.047	4.600	-0.731	50.331	462.942	0.000002	-0.000143	-0.000322
7.8800	240.770	-1.285	1.390	3.655	-0.691	50.331	458.364	0.000090	-0.000097	-0.000256
7.9200	225.156	-2.606	-0.923	1.585	-0.710	50.330	428.638	0.000182	0.000065	-0.000111
7.9600	225.186	-3.155	-0.816	1.489	-0.738	50.331	428.696	0.000221	0.000057	-0.000104
8.0000	221.955	-3.564	-1.832	0.680	-0.698	50.331	422.544	0.000249	0.000128	-0.000048
8.0400	228.507	-3.099	-1.115	1.530	-0.692	50.330	435.019	0.000217	0.000078	-0.000107
8.0800	241.266	-2.381	0.109	2.197	-0.728	50.330	459.309	0.000167	-0.000008	-0.000154
8.1200	263.809	-0.280	2.338	4.138	-0.711	50.331	502.224	0.000020	-0.000164	-0.000290
8.1600	291.266	2.529	5.394	7.323	-0.712	50.330	554.495	-0.000177	-0.000378	-0.000513
8.2000	313.613	4.732	7.869	9.574	-0.730	50.329	597.038	-0.000331	-0.000551	-0.000670
8.2400	338.921	7.004	10.748	12.923	-0.736	50.331	645.218	-0.000490	-0.000752	-0.000905
8.2800	376.958	10.569	14.888	16.997	-0.698	50.331	717.630	-0.000740	-0.001042	-0.001190
8.3200	412.665	14.681	19.290	21.429	-0.717	50.330	785.608	-0.001028	-0.001350	-0.001500
8.3600	451.468	18.976	23.708	25.765	-0.729	50.331	859.480	-0.001328	-0.001660	-0.001804
8.4000	485.282	22.622	27.245	29.752	-0.708	50.331	923.853	-0.001584	-0.001907	-0.002083
8.4400	527.948	27.254	32.292	34.492	-0.688	50.330	1005.077	-0.001908	-0.002260	-0.002414
8.4800	568.615	31.802	36.354	39.689	-0.726	50.330	1082.497	-0.002226	-0.002545	-0.002778
8.5200	612.287	36.785	41.745	44.622	-0.711	50.331	1165.638	-0.002575	-0.002922	-0.003124
8.5600	643.727	41.034	45.231	48.483	-0.696	50.330	1225.491	-0.002872	-0.003166	-0.003394
8.6000	703.630	47.546	51.599	55.184	-0.713	50.330	1339.531	-0.003328	-0.003612	-0.003863
8.6400	730.426	51.022	54.600	58.491	-0.721	50.331	1390.543	-0.003572	-0.003822	-0.004094
8.6800	764.074	55.334	58.451	62.410	-0.683	50.331	1454.601	-0.003873	-0.004092	-0.004369
8.7200	797.302	59.250	61.756	66.411	-0.688	50.330	1517.859	-0.004147	-0.004323	-0.004649
8.7600	817.260	62.207	64.284	69.079	-0.733	50.330	1555.853	-0.004354	-0.004500	-0.004836
8.8000	840.208	64.917	66.791	72.359	-0.711	50.331	1599.541	-0.004544	-0.004675	-0.005065
8.8400	860.632	67.637	69.278	74.762	-0.686	50.331	1638.422	-0.004735	-0.004849	-0.005233
8.8800	881.491	70.181	70.656	77.153	-0.719	50.331	1678.133	-0.004913	-0.004946	-0.005401
8.9200	878.951	70.702	71.567	77.599	-0.731	50.332	1673.298	-0.004949	-0.005010	-0.005432
8.9600	879.718	71.151	71.471	77.833	-0.695	50.330	1674.757	-0.004981	-0.005003	-0.005448
9.0000	878.365	71.249	71.895	77.931	-0.703	50.330	1672.182	-0.004987	-0.005033	-0.005455
9.0400	878.200	71.193	71.785	78.376	-0.732	50.332	1671.867	-0.004983	-0.005025	-0.005486
9.0800	859.009	69.463	70.657	76.387	-0.694	50.331	1635.332	-0.004862	-0.004946	-0.005347
9.1200	840.509	67.355	68.907	74.553	-0.693	50.331	1600.113	-0.004715	-0.004824	-0.005219
9.1600	817.726	65.017	66.859	72.248	-0.728	50.330	1556.740	-0.004551	-0.004680	-0.005057
9.2000	791.907	62.404	64.410	70.165	-0.703	50.331	1507.587	-0.004368	-0.004509	-0.004912
9.2400	761.760	59.137	61.907	66.883	-0.688	50.330	1450.195	-0.004140	-0.004333	-0.004682
9.2800	729.825	55.265	58.149	63.174	-0.722	50.331	1389.399	-0.003869	-0.004070	-0.004422
9.3200	675.918	49.498	53.331	57.295	-0.715	50.332	1286.774	-0.003465	-0.003733	-0.004011
9.3600	657.267	47.140	51.091	55.044	-0.679	50.330	1251.268	-0.003300	-0.003576	-0.003853
9.4000	615.188	42.510	46.977	50.626	-0.715	50.330	1171.160	-0.002976	-0.003288	-0.003544
9.4400	558.711	36.038	40.563	44.275	-0.731	50.331	1063.643	-0.002523	-0.002839	-0.003099
9.4800	534.335	33.037	38.266	41.412	-0.698	50.331	1017.237	-0.002313	-0.002679	-0.002899
9.5200	482.292	27.255	32.072	35.548	-0.698	50.329	918.159	-0.001908	-0.002245	-0.002488
9.5600	457.991	24.348	29.377	32.045	-0.721	50.330	871.897	-0.001704	-0.002056	-0.002243
9.6000	418.241	19.623	24.259	27.265	-0.687	50.330	796.223	-0.001374	-0.001698	-0.001909
9.6400	379.663	15.565	20.060	22.889	-0.684	50.329	722.780	-0.001090	-0.001404	-0.001602
9.6800	329.603	9.912	13.868	16.760	-0.737	50.330	627.480	-0.000694	-0.000971	-0.001173
9.7200	314.590	7.861	12.164	14.480	-0.723	50.331	598.898	-0.000550	-0.000851	-0.001014
9.7600	283.917	4.481	7.566	10.146	-0.703	50.329	540.504	-0.000314	-0.000530	-0.000710
9.8000	264.740	2.193	5.117	7.354	-0.727	50.329	503.998	-0.000153	-0.000358	-0.000515
9.8400	250.989	0.718	2.958	5.714	-0.730	50.331	477.819	-0.000050	-0.000207	-0.000400
9.8800	239.929	-0.644	1.267	3.514	-0.686	50.330	456.762	0.000045	-0.000089	-0.000246
9.9200	226.839	-2.761	-0.775	1.793	-0.716	50.329	431.843	0.000193	0.000054	-0.000126
9.9600	223.683	-2.987	-1.198	1.182	-0.741	50.329	425.835	0.000209	0.000084	-0.000083
10.0000	247.728	0.943	2.889	4.766	-0.707	50.310	471.611	-0.000066	-0.000202	-0.000334
10.0400	235.961	-1.329	0.288	1.834	-0.703	50.308	449.209	0.000093	-0.000020	-0.000128
10.0800	259.811	0.086	2.614	4.599	-0.730	50.308	494.614	-0.000006	-0.000183	-0.000322
10.1200	276.342	1.659	4.334	5.586	-0.722	50.310	526.085	-0.000116	-0.000303	-0.000391
10.1600	326.071	6.357	9.671	11.285	-0.707	50.309	620.756	-0.000445	-0.000677	-0.000790
10.2000	348.960	8.380	12.506	14.397	-0.738	50.308	664.330	-0.000587	-0.000875	-0.001008
10.2400	392.828	12.531	17.339	19.037	-0.742	50.310	747.843	-0.000877	-0.001214	-0.001333
10.2800	405.857	14.458	18.656	20.927	-0.725	50.309	772.648	-0.001012	-0.001306	-0.001465
10.3200	485.267	22.804	27.725	29.628	-0.739	50.308	923.824	-0.001596	-0.001941	-0.002074
10.3600	517.804	26.428	31.440	33.061	-0.751	50.309	985.765	-0.001850	-0.002201	-0.002314
10.4000	587.776	33.722	38.885	41.523	-0.704	50.309	1118.975	-0.002361	-0.002722	-0.002907
10.4400	615.383	37.613	42.076	45.010	-0.708	50.308	1171.532	-0.002633	-0.002945	-0.003151
10.4800	702.984	46.733	50.678	54.277	-0.750	50.309	1338.301	-0.003271	-0.003547	-0.003799
10.5200	754.231	53.511	56.773	60.838	-0.746	50.309	1435.862	-0.003746	-0.003974	-0.004259
10.5600	782.604	57.115	61.151	65.382	-0.707	50.308	1489.878	-0.003998	-0.004281	-0.004577
10.6000	768.808	57.300	61.010	65.424	-0.726	50.308	1463.614	-0.004011	-0.004271	-0.004580
10.6400	894.205	69.703	71.525	77.403	-0.739	50.309	1702.337	-0.004879	-0.005007	-0.005418
10.6800	925.990	74.641	75.268	81.668	-0.708	50.309	1762.848	-0.005225	-0.005269	-0.005717
10.7200	962.194	79.609	79.393	86.435	-0.738	50.308	1831.770	-0.005573	-0.005558	-0.006050
10.7600	1018.866	86.782	84.761	92.798	-0.750	50.309	1939.659	-0.006075	-0.005933	-0.006496
10.8000	1029.822	88.521	86.329	94.899	-0.710	50.309	1960.516	-0.006196	-0.006043	-0.006643
10.8400	1067.723	93.855	90.115	99.151	-0.710	50.308	2032.671	-0.006570	-0.006308	-0.006941
10.8800	1080.047	95.606	91.653	101.040	-0.737	50.308	2056.131	-0.006692	-0.006416	-0.007073
10.9200	1191.813	113.828	108.317	120.119	-0.733	50.309	2268.906	-0.007968	-0.007582	-0.008408
10.9600	1155.023	107.041	103.584	114.311	-0.718	50.308	2198.868	-0.007493	-0.007251	-0.008002
11.0000	1000.246	88.647	88.257	96.149	-0.735	50.308	1904.211	-0.006205	-0.006178	-0.006730
11.0400	955.897	82.978	83.606	90.770	-0.734	50.309	1819.782	-0.005808	-0.005852	-0.006354
11.0800	1058.661	95.046	93.128	101.873	-0.708	50.308	2015.419	-0.006653	-0.006519	-0.007131
11.1200	1054.994	94.778	93.721	102.320	-0.722	50.308	2008.438	-0.006634	-0.006560	-0.007162
11.1600	1158.059	105.375	101.439	111.796	-0.739	50.308	2204.647	-0.007376	-0.007101	-0.007826
11.2000	951.373	83.931	84.983	92.397	-0.706	50.309	1811.171	-0.005875	-0.005949	-0.006468
11.2400	944.851	83.383	83.757	91.743	-0.718	50.308	1798.754	-0.005837	-0.005863	-0.006422
11.2800	898.158	77.827	79.724	86.617	-0.744	50.308	1709.862	-0.005448	-0.005581	-0.006063
11.3200	842.177	71.249	74.275	80.613	-0.740	50.308	1603.289	-0.004987	-0.005199	-0.005643
11.3600	795.273	66.027	69.775	75.500	-0.731	50.308	1513.996	-0.004622	-0.004884	-0.005285
11.4000	801.270	65.664	68.951	74.887	-0.742	50.308	1525.412	-0.004596	-0.004827	-0.005242
11.4400	839.502	68.216	70.850	77.391	-0.750	50.308	1598.196	-0.004775	-0.004960	-0.005417
11.4800	648.130	49.106	53.619	58.823	-0.738	50.309	1233.873	-0.003437	-0.003753	-0.004118
11.5200	503.271	31.815	37.139	41.107	-0.726	50.308	958.099	-0.002227	-0.002600	-0.002877
11.5600	524.236	34.073	38.967	43.202	-0.752	50.308	998.011	-0.002385	-0.002728	-0.003024
11.6000	486.710	29.442	34.910	38.868	-0.728	50.308	926.571	-0.002061	-0.002444	-0.002721
11.6400	428.250	22.549	27.809	32.045	-0.727	50.308	815.277	-0.001578	-0.001947	-0.002243
11.6800	391.956	18.314	23.486	27.096	-0.743	50.308	746.183	-0.001282	-0.001644	-0.001897
11.7200	365.311	14.894	19.937	22.902	-0.751	50.309	695.457	-0.001043	-0.001396	-0.001603
11.7600	311.614	8.675	13.471	16.147	-0.723	50.308	593.233	-0.000607	-0.000943	-0.001130
11.8000	255.318	2.291	5.778	8.727	-0.736	50.308	486.059	-0.000160	-0.000404	-0.000611
11.8400	272.074	3.766	7.525	10.421	-0.752	50.308	517.960	-0.000264	-0.000527	-0.000730
11.8800	246.992	0.364	3.741	6.740	-0.730	50.308	470.209	-0.000026	-0.000262	-0.000472
11.9200	235.736	-0.867	2.503	5.183	-0.715	50.308	448.780	0.000061	-0.000175	-0.000363
11.9600	230.295	-1.623	1.377	4.279	-0.747	50.307	438.423	0.000114	-0.000096	-0.000300
12.0000	293.550	3.245	7.592	10.019	-0.742	50.309	558.844	-0.000227	-0.000531	-0.000701
12.0400	331.557	7.607	12.161	14.939	-0.714	50.308	631.199	-0.000533	-0.000851	-0.001046
12.0800	240.755	-1.664	1.968	4.389	-0.743	50.308	458.336	0.000116	-0.000138	-0.000307
12.1200	237.764	-1.987	0.657	3.489	-0.756	50.308	452.642	0.000139	-0.000046	-0.000244
12.1600	282.068	2.081	5.903	8.170	-0.732	50.309	536.985	-0.000146	-0.000413	-0.000572
12.2000	333.796	6.991	11.571	14.229	-0.707	50.308	635.462	-0.000489	-0.000810	-0.000996
12.2400	334.728	7.048	11.858	14.647	-0.738	50.307	637.236	-0.000493	-0.000830	-0.001025
12.2800	410.321	14.879	19.482	22.555	-0.747	50.309	781.145	-0.001042	-0.001364	-0.001579
12.3200	470.164	21.082	26.996	29.810	-0.732	50.309	895.071	-0.001476	-0.001890	-0.002087
12.3600	548.687	29.668	35.306	38.368	-0.736	50.307	1044.559	-0.002077	-0.002471	-0.002686
12.4000	596.643	35.110	40.947	44.245	-0.750	50.308	1135.855	-0.002458	-0.002866	-0.003097
12.4400	644.869	40.711	45.833	50.127	-0.735	50.309	1227.665	-0.002850	-0.003208	-0.003509
12.4800	676.940	44.904	50.113	53.958	-0.710	50.308	1288.719	-0.003143	-0.003508	-0.003777
12.5200	741.652	52.191	56.498	61.436	-0.738	50.308	1411.915	-0.003653	-0.003955	-0.004301
12.5600	786.392	58.140	62.030	66.813	-0.743	50.309	1497.087	-0.004070	-0.004342	-0.004677
12.6000	848.023	65.213	68.155	73.986	-0.718	50.309	1614.418	-0.004565	-0.004771	-0.005179
12.6400	1518.050	137.529	128.024	143.146	-0.725	50.307	2889.977	-0.009627	-0.008962	-0.010020
12.6800	1319.675	115.882	111.841	123.955	-0.758	50.308	2512.321	-0.008112	-0.007829	-0.008677
12.7200	510.064	35.926	41.677	45.969	-0.733	50.309	971.031	-0.002515	-0.002917	-0.003218
12.7600	338.500	14.596	19.538	23.720	-0.717	50.308	644.417	-0.001022	-0.001368	-0.001660
12.8000	1471.131	132.465	125.066	141.216	-0.738	50.308	2800.655	-0.009273	-0.008755	-0.009885
12.8400	795.243	66.615	69.969	77.445	-0.736	50.308	1513.939	-0.004663	-0.004898	-0.005421
12.8800	1232.059	114.409	110.809	123.192	-0.704	50.308	2345.524	-0.008009	-0.007757	-0.008623
12.9200	1108.435	99.859	99.211	109.963	-0.712	50.307	2110.176	-0.006990	-0.006945	-0.007697
12.9600	1088.237	97.728	97.655	107.711	-0.740	50.308	2071.724	-0.006841	-0.006836	-0.007540
13.0000	1075.042	96.516	96.718	106.584	-0.712	50.309	2046.604	-0.006756	-0.006770	-0.007461
13.0400	1073.930	96.629	96.773	106.308	-0.699	50.308	2044.487	-0.006764	-0.006774	-0.007442
13.0800	1071.901	96.617	96.554	106.253	-0.742	50.308	2040.625	-0.006763	-0.006759	-0.007438
13.1200	1048.322	94.050	94.420	103.361	-0.731	50.309	1995.735	-0.006584	-0.006609	-0.007235
13.1600	1010.330	89.445	91.158	100.000	-0.711	50.308	1923.409	-0.006261	-0.006381	-0.007000
13.2000	984.556	86.866	88.930	97.110	-0.736	50.308	1874.342	-0.006081	-0.006225	-0.006798
13.2400	941.004	81.239	84.224	92.146	-0.749	50.309	1791.430	-0.005687	-0.005896	-0.006450
13.2800	889.201	76.201	79.821	86.866	-0.713	50.309	1692.810	-0.005334	-0.005587	-0.006081
13.3200	846.731	70.335	75.115	81.973	-0.715	50.308	1611.958	-0.004923	-0.005258	-0.005738
13.3600	766.614	61.771	66.956	73.151	-0.747	50.308	1459.436	-0.004324	-0.004687	-0.005121
13.4000	775.165	62.405	67.643	73.638	-0.727	50.309	1475.716	-0.004368	-0.004735	-0.005155
13.4400	689.804	52.442	58.866	64.311	-0.704	50.308	1313.210	-0.003671	-0.004121	-0.004502
13.4800	629.630	45.270	51.886	56.949	-0.728	50.308	1198.654	-0.003169	-0.003632	-0.003986
13.5200	605.194	42.015	48.407	53.557	-0.739	50.309	1152.134	-0.002941	-0.003389	-0.003749
13.5600	508.727	30.581	38.030	42.982	-0.710	50.310	968.485	-0.002141	-0.002662	-0.003009
13.6000	464.934	25.360	33.025	37.257	-0.702	50.308	885.115	-0.001775	-0.002312	-0.002608
13.6400	428.821	20.759	28.497	32.227	-0.731	50.308	816.364	-0.001453	-0.001995	-0.002256
13.6800	400.342	17.388	24.685	28.365	-0.713	50.309	762.148	-0.001217	-0.001728	-0.001986
13.7200	353.949	11.507	18.382	21.943	-0.691	50.308	673.828	-0.000805	-0.001287	-0.001536
13.7600	314.620	7.467	13.801	17.023	-0.716	50.308	598.955	-0.000523	-0.000966	-0.001192
13.8000	285.359	3.667	9.865	12.982	-0.718	50.309	543.251	-0.000257	-0.000691	-0.000909
13.8400	265.357	1.140	6.825	9.685	-0.698	50.309	505.171	-0.000080	-0.000478	-0.000678
13.8800	257.632	-0.323	5.709	8.575	-0.701	50.308	490.465	0.000023	-0.000400	-0.000600
13.9200	221.864	-3.801	0.755	3.655	-0.738	50.309	422.373	0.000266	-0.000053	-0.000256
13.9600	235.871	-3.547	1.473	4.418	-0.717	50.309	449.038	0.000248	-0.000103	-0.000309
14.0000	233.106	-3.744	1.142	4.028	-0.707	50.307	443.773	0.000262	-0.000080	-0.000282
14.0400	239.643	-3.436	1.528	4.154	-0.727	50.308	456.219	0.000241	-0.000107	-0.000291
14.0800	256.640	-2.015	3.286	6.100	-0.715	50.309	488.577	0.000141	-0.000230	-0.000427
14.1200	298.073	1.531	7.428	10.367	-0.698	50.308	567.455	-0.000107	-0.000520	-0.000726
14.1600	302.522	2.122	8.145	11.146	-0.714	50.308	575.924	-0.000149	-0.000570	-0.000780
14.2000	347.216	6.133	13.111	15.840	-0.727	50.309	661.011	-0.000429	-0.000918	-0.001109
14.2400	396.479	11.578	18.203	21.287	-0.702	50.309	754.795	-0.000810	-0.001274	-0.001490
14.2800	432.262	15.203	22.510	25.751	-0.713	50.308	822.916	-0.001064	-0.001576	-0.001803
14.3200	486.635	20.830	28.125	31.670	-0.736	50.308	926.428	-0.001458	-0.001969	-0.002217
14.3600	527.587	25.248	33.011	36.825	-0.707	50.309	1004.391	-0.001767	-0.002311	-0.002578
14.4000	582.050	31.648	39.092	42.812	-0.685	50.309	1108.074	-0.002215	-0.002736	-0.002997
14.4400	629.555	36.967	44.417	48.762	-0.716	50.308	1198.511	-0.002588	-0.003109	-0.003413
14.4800	697.423	44.890	51.431	56.421	-0.732	50.309	1327.715	-0.003142	-0.003600	-0.003949
14.5200	710.618	47.027	53.800	58.476	-0.691	50.309	1352.835	-0.003292	-0.003766	-0.004093
14.5600	803.178	57.761	63.390	68.995	-0.701	50.308	1529.045	-0.004043	-0.004437	-0.004830
14.6000	818.898	59.965	66.076	71.622	-0.723	50.309	1558.971	-0.004198	-0.004625	-0.005014
14.6400	894.175	68.943	73.107	79.877	-0.713	50.309	1702.280	-0.004826	-0.005117	-0.005591
14.6800	954.499	76.033	79.202	86.907	-0.700	50.308	1817.122	-0.005322	-0.005544	-0.006083
14.7200	990.011	81.168	83.291	91.352	-0.740	50.308	1884.727	-0.005682	-0.005830	-0.006395
14.7600	1011.262	84.083	86.288	94.553	-0.736	50.309	1925.182	-0.005886	-0.006040	-0.006619
14.8000	1018.295	85.810	87.499	95.956	-0.698	50.308	1938.572	-0.006007	-0.006125	-0.006717
14.8400	1067.663	91.847	92.535	101.402	-0.720	50.308	2032.557	-0.006429	-0.006477	-0.007098
14.8800	1082.000	94.318	93.830	103.818	-0.732	50.309	2059.851	-0.006602	-0.006568	-0.007267
14.9200	1090.341	95.758	95.274	104.722	-0.695	50.309	2075.729	-0.006703	-0.006669	-0.007331
14.9600	1092.956	96.475	95.533	105.626	-0.692	50.308	2080.708	-0.006753	-0.006687	-0.007394
15.0000	1088.553	96.421	95.837	105.640	-0.728	50.309	2072.325	-0.006749	-0.006709	-0.007395
15.0400	1082.692	96.139	95.369	105.626	-0.711	50.309	2061.167	-0.006730	-0.006676	-0.007394
15.0800	1072.998	95.125	94.916	104.361	-0.690	50.308	2042.713	-0.006659	-0.006644	-0.007305
15.1200	1042.896	91.931	92.453	101.820	-0.728	50.309	1985.407	-0.006435	-0.006472	-0.007127
15.1600	1003.026	87.639	89.302	97.942	-0.734	50.309	1909.504	-0.006135	-0.006251	-0.006856
15.2000	988.238	86.135	87.695	96.622	-0.694	50.309	1881.351	-0.006029	-0.006139	-0.006764
15.2400	937.953	80.170	83.315	91.410	-0.719	50.308	1785.622	-0.005612	-0.005832	-0.006399
15.2800	884.407	74.165	78.117	85.436	-0.733	50.309	1683.683	-0.005192	-0.005468	-0.005980
15.3200	845.979	69.634	74.250	81.168	-0.708	50.309	1610.527	-0.004874	-0.005197	-0.005682
15.3600	794.041	63.796	68.812	75.373	-0.714	50.308	1511.650	-0.004466	-0.004817	-0.005276
15.4000	735.070	57.100	62.853	69.369	-0.743	50.309	1399.384	-0.003997	-0.004400	-0.004856
15.4400	676.624	49.987	56.732	61.938	-0.721	50.309	1288.118	-0.003499	-0.003971	-0.004336
15.4800	630.652	44.538	51.364	56.628	-0.693	50.308	1200.600	-0.003118	-0.003595	-0.003964
15.5200	592.029	39.348	46.633	51.499	-0.727	50.308	1127.071	-0.002754	-0.003264	-0.003605
15.5600	549.739	34.648	42.215	47.012	-0.731	50.309	1046.562	-0.002425	-0.002955	-0.003291
15.6000	466.602	25.432	32.695	37.035	-0.696	50.309	888.290	-0.001780	-0.002289	-0.002592
15.6400	424.958	20.663	27.973	31.880	-0.728	50.308	809.011	-0.001446	-0.001958	-0.002232
15.6800	352.101	12.097	19.263	23.069	-0.748	50.309	670.309	-0.000847	-0.001348	-0.001615
15.7200	374.252	13.658	20.585	24.056	-0.711	50.309	712.481	-0.000956	-0.001441	-0.001684
15.7600	312.546	6.780	13.523	17.162	-0.699	50.308	595.007	-0.000475	-0.000947	-0.001201
15.8000	300.598	4.845	11.406	14.842	-0.732	50.308	572.262	-0.000339	-0.000798	-0.001039
15.8400	268.963	1.335	6.840	10.172	-0.704	50.309	512.037	-0.000093	-0.000479	-0.000712
15.8800	241.912	-1.776	3.673	6.771	-0.710	50.308	460.539	0.000124	-0.000257	-0.000474
15.9200	228.161	-3.462	1.444	4.739	-0.708	50.308	434.361	0.000242	-0.000101	-0.000332
15.9600	241.236	-2.775	2.394	5.809	-0.728	50.309	459.251	0.000194	-0.000168	-0.000407
16.0000	235.375	-4.027	1.376	4.974	-0.697	50.309	448.093	0.000282	-0.000096	-0.000348
16.0400	242.513	-3.335	2.134	5.154	-0.710	50.308	461.683	0.000233	-0.000149	-0.000361
16.0800	265.176	-1.862	4.170	7.062	-0.727	50.308	504.827	0.000130	-0.000292	-0.000494
16.1200	272.931	-0.644	5.243	8.268	-0.706	50.309	519.590	0.000045	-0.000367	-0.000579
16.1600	319.098	3.527	9.918	13.064	-0.692	50.308	607.481	-0.000247	-0.000694	-0.000914
16.2000	333.961	6.022	12.259	15.675	-0.719	50.308	635.777	-0.000422	-0.000858	-0.001097
16.2400	367.490	8.002	15.657	18.901	-0.724	50.309	699.606	-0.000560	-0.001096	-0.001323
16.2800	425.995	14.881	22.069	25.653	-0.712	50.309	810.986	-0.001042	-0.001545	-0.001796
16.3200	475.394	19.815	27.576	31.142	-0.710	50.308	905.027	-0.001387	-0.001930	-0.002180
16.3600	555.751	27.913	35.432	39.632	-0.736	50.309	1058.006	-0.001954	-0.002480	-0.002774
16.4000	570.283	30.202	38.294	42.382	-0.720	50.309	1085.672	-0.002114	-0.002681	-0.002967
16.4400	653.105	39.587	46.976	51.277	-0.694	50.309	1243.343	-0.002771	-0.003288	-0.003589
16.4800	663.309	41.483	48.562	53.278	-0.731	50.309	1262.770	-0.002904	-0.003399	-0.003729
16.5200	741.517	50.603	56.637	62.188	-0.733	50.309	1411.657	-0.003542	-0.003965	-0.004353
16.5600	789.698	56.300	62.031	67.717	-0.695	50.309	1503.382	-0.003941	-0.004342	-0.004740
16.6000	852.727	63.977	68.813	75.291	-0.715	50.308	1623.373	-0.004478	-0.004817	-0.005270
16.6400	898.263	69.675	74.056	80.488	-0.716	50.309	1710.062	-0.004877	-0.005184	-0.005634
16.6800	944.986	75.695	78.776	85.853	-0.710	50.309	1799.011	-0.005299	-0.005514	-0.006010
16.7200	965.816	78.793	81.542	88.980	-0.709	50.309	1838.665	-0.005516	-0.005708	-0.006229
16.7600	995.286	82.839	85.216	93.233	-0.737	50.309	1894.770	-0.005799	-0.005965	-0.006526
16.8000	1051.072	89.472	90.899	99.499	-0.704	50.310	2000.971	-0.006263	-0.006363	-0.006965
16.8400	1065.544	91.916	92.397	101.611	-0.691	50.309	2028.522	-0.006434	-0.006468	-0.007113
16.8800	1073.494	93.517	93.597	102.818	-0.728	50.308	2043.657	-0.006546	-0.006552	-0.007197
16.9200	1095.331	96.223	95.452	105.321	-0.734	50.310	2085.228	-0.006736	-0.006682	-0.007372
16.9600	1091.138	96.658	95.754	105.739	-0.696	50.309	2077.246	-0.006766	-0.006703	-0.007402
17.0000	1086.404	96.193	95.577	105.307	-0.717	50.309	2068.233	-0.006734	-0.006690	-0.007371
17.0400	1078.679	95.787	95.287	105.182	-0.744	50.309	2053.528	-0.006705	-0.006670	-0.007363
17.0800	1072.006	95.536	94.267	104.277	-0.731	50.309	2040.825	-0.006688	-0.006599	-0.007299
17.1200	1065.559	94.822	94.930	104.695	-0.703	50.309	2028.551	-0.006638	-0.006645	-0.007329
17.1600	985.924	86.400	87.695	96.038	-0.746	50.309	1876.945	-0.006048	-0.006139	-0.006723
17.2000	976.967	85.121	87.100	95.413	-0.725	50.309	1859.894	-0.005958	-0.006097	-0.006679
17.2400	957.625	82.698	84.886	93.272	-0.707	50.309	1823.072	-0.005789	-0.005942	-0.006529
17.2800	886.421	74.683	78.515	85.729	-0.730	50.309	1687.517	-0.005228	-0.005496	-0.006001
17.3200	838.615	68.917	73.395	80.419	-0.709	50.310	1596.508	-0.004824	-0.005138	-0.005629
17.3600	776.353	61.983	67.535	73.819	-0.700	50.309	1477.976	-0.004339	-0.004727	-0.005167
17.4000	733.026	56.792	62.620	68.815	-0.706	50.309	1395.493	-0.003975	-0.004383	-0.004817
17.4400	694.042	51.980	58.602	64.257	-0.732	50.309	1321.278	-0.003639	-0.004102	-0.004498
17.4800	625.122	44.290	51.131	56.531	-0.723	50.310	1190.071	-0.003100	-0.003579	-0.003957
17.5200	578.774	38.591	46.137	50.805	-0.696	50.309	1101.837	-0.002701	-0.003230	-0.003556
17.5600	522.463	31.731	39.339	44.345	-0.722	50.309	994.635	-0.002221	-0.002754	-0.003104
17.6000	486.199	27.854	35.210	39.495	-0.731	50.310	925.598	-0.001950	-0.002465	-0.002765
17.6400	417.685	19.608	27.024	31.280	-0.694	50.310	795.164	-0.001373	-0.001892	-0.002190
17.6800	384.923	15.735	23.048	26.791	-0.719	50.309	732.794	-0.001101	-0.001613	-0.001875
17.7200	356.233	11.803	18.847	22.832	-0.747	50.310	678.177	-0.000826	-0.001319	-0.001598
17.7600	319.534	7.424	14.294	17.873	-0.718	50.310	608.311	-0.000520	-0.001001	-0.001251
17.8000	272.931	2.739	8.764	12.106	-0.694	50.309	519.590	-0.000192	-0.000613	-0.000847
17.8400	265.131	1.139	7.237	10.631	-0.718	50.309	504.742	-0.000080	-0.000507	-0.000744
17.8800	250.824	-0.852	4.664	8.506	-0.711	50.310	477.505	0.000060	-0.000327	-0.000595
17.9200	229.424	-3.168	1.774	5.308	-0.707	50.310	436.764	0.000222	-0.000124	-0.000372
17.9600	197.293	-7.096	-3.112	0.514	-0.715	50.309	375.595	0.000497	0.000218	-0.000036
18.0000	252.913	-1.803	3.369	6.533	-0.735	50.310	481.482	0.000126	-0.000236	-0.000457
18.0400	205.619	-6.620	-2.288	1.350	-0.706	50.310	391.445	0.000463	0.000160	-0.000094
18.0800	276.868	-0.364	5.118	8.145	-0.710	50.309	527.086	0.000025	-0.000358	-0.000570
18.1200	275.786	-0.450	5.585	8.810	-0.728	50.309	525.026	0.000031	-0.000391	-0.000617
18.1600	288.034	0.929	6.397	9.754	-0.715	50.310	548.344	-0.000065	-0.000448	-0.000683
18.2000	364.920	8.128	15.615	18.580	-0.690	50.310	694.714	-0.000569	-0.001093	-0.001301
18.2400	373.246	9.406	16.250	19.886	-0.732	50.310	710.564	-0.000658	-0.001137	-0.001392
18.2800	407.781	12.857	20.145	23.485	-0.739	50.311	776.310	-0.000900	-0.001410	-0.001644
18.3200	477.753	20.491	27.395	31.297	-0.711	50.311	909.519	-0.001434	-0.001918	-0.002191
18.3600	531.269	25.753	33.696	37.602	-0.720	50.310	1011.400	-0.001803	-0.002359	-0.002632
18.4000	566.015	30.595	38.046	42.287	-0.740	50.309	1077.547	-0.002142	-0.002663	-0.002960
18.4400	634.605	38.201	45.914	50.139	-0.712	50.311	1208.124	-0.002674	-0.003214	-0.003510
18.4800	703.224	45.720	52.329	57.295	-0.699	50.311	1338.758	-0.003200	-0.003663	-0.004011
18.5200	739.232	50.182	57.048	62.077	-0.726	50.310	1407.309	-0.003513	-0.003993	-0.004345
18.5600	794.898	56.974	62.413	68.632	-0.718	50.311	1513.281	-0.003988	-0.004369	-0.004804
18.6000	852.501	63.767	69.019	74.862	-0.701	50.310	1622.944	-0.004464	-0.004831	-0.005240
18.6400	897.241	69.449	74.043	80.737	-0.700	50.310	1708.117	-0.004861	-0.005183	-0.005652
18.6800	944.731	75.554	79.077	85.991	-0.733	50.310	1798.525	-0.005289	-0.005535	-0.006019
18.7200	968.566	79.384	81.610	89.828	-0.714	50.312	1843.901	-0.005557	-0.005713	-0.006288
18.7600	996.804	83.229	85.243	93.397	-0.691	50.311	1897.659	-0.005826	-0.005967	-0.006538
18.8000	1046.097	88.887	89.702	98.775	-0.719	50.310	1991.501	-0.006222	-0.006279	-0.006914
18.8400	1074.351	93.223	93.113	102.584	-0.748	50.311	2045.288	-0.006526	-0.006518	-0.007181
18.8800	1089.635	95.407	94.503	104.639	-0.713	50.312	2074.385	-0.006678	-0.006615	-0.007325
18.9200	1099.644	97.050	96.525	106.558	-0.708	50.310	2093.439	-0.006793	-0.006757	-0.007459
18.9600	1087.125	96.110	95.588	105.892	-0.738	50.311	2069.607	-0.006728	-0.006691	-0.007412
19.0000	1089.590	97.193	96.208	106.363	-0.740	50.312	2074.299	-0.006804	-0.006735	-0.007445
19.0400	1090.176	97.065	95.891	106.406	-0.719	50.311	2075.415	-0.006795	-0.006712	-0.007448
19.0800	1075.117	96.012	95.616	105.640	-0.716	50.311	2046.747	-0.006721	-0.006693	-0.007395
19.1200	1015.364	89.387	90.402	99.955	-0.746	50.312	1932.993	-0.006257	-0.006328	-0.006997
19.1600	1026.966	91.158	91.435	100.417	-0.698	50.312	1955.080	-0.006381	-0.006400	-0.007029
19.2000	968.130	84.407	86.468	94.983	-0.696	50.311	1843.071	-0.005908	-0.006053	-0.006649
19.2400	950.111	81.871	84.541	92.550	-0.720	50.312	1808.767	-0.005731	-0.005918	-0.006478
19.2800	882.468	74.387	77.981	85.533	-0.728	50.312	1679.993	-0.005207	-0.005459	-0.005987
19.3200	836.947	69.198	73.517	80.391	-0.694	50.312	1593.332	-0.004844	-0.005146	-0.005627
19.3600	793.891	64.215	69.267	75.875	-0.720	50.311	1511.364	-0.004495	-0.004849	-0.005311
19.4000	757.702	59.925	64.809	71.148	-0.733	50.312	1442.471	-0.004195	-0.004537	-0.004980
19.4400	688.827	51.613	58.162	63.493	-0.687	50.312	1311.350	-0.003613	-0.004071	-0.004445
19.4800	635.236	45.945	52.494	57.976	-0.715	50.312	1209.326	-0.003216	-0.003675	-0.004058
19.5200	580.021	38.509	46.453	51.016	-0.743	50.313	1104.212	-0.002696	-0.003252	-0.003571
19.5600	513.115	31.228	38.776	43.384	-0.712	50.312	976.839	-0.002186	-0.002714	-0.003037
19.6000	471.171	26.203	33.892	38.187	-0.710	50.312	896.988	-0.001834	-0.002372	-0.002673
19.6400	418.271	20.437	27.657	31.724	-0.736	50.313	796.280	-0.001431	-0.001936	-0.002221
19.6800	392.933	16.797	24.229	28.183	-0.708	50.313	748.043	-0.001176	-0.001696	-0.001973
19.7200	361.674	12.885	20.170	23.750	-0.695	50.312	688.534	-0.000902	-0.001412	-0.001662
19.7600	309.255	7.004	13.799	17.246	-0.723	50.312	588.741	-0.000490	-0.000966	-0.001207
19.8000	289.252	4.607	10.774	14.371	-0.715	50.313	550.661	-0.000322	-0.000754	-0.001006
19.8400	255.784	0.815	6.287	9.853	-0.692	50.313	486.946	-0.000057	-0.000440	-0.000690
19.8800	241.101	-1.636	3.907	7.227	-0.703	50.312	458.994	0.000115	-0.000273	-0.000506
19.9200	241.206	-1.973	3.769	6.629	-0.736	50.313	459.194	0.000138	-0.000264	-0.000464
19.9600	238.576	-2.381	2.627	5.852	-0.710	50.313	454.187	0.000167	-0.000184	-0.000410
Test Cycles
Time (sec)	Axial stress (kPa)	Axial micro-strain #1	Axial micro-strain #2	Axial micro-strain #3	Confining pressure (kPa)	Temperature (�C)	Load (N)	Displacement #1 (mm)	Displacement #2 (mm)	Displacement #3 (mm)
0.0000	236.111	-2.972	2.312	5.364	-0.704	50.312	449.495	0.000208	-0.000162	-0.000375
0.0400	245.234	-2.817	2.971	5.683	-0.742	50.312	466.862	0.000197	-0.000208	-0.000398
0.0800	260.563	-1.259	4.470	7.173	-0.733	50.314	496.044	0.000088	-0.000313	-0.000502
0.1200	305.918	2.795	8.969	12.300	-0.699	50.313	582.390	-0.000196	-0.000628	-0.000861
0.1600	312.621	3.440	10.208	13.078	-0.738	50.313	595.150	-0.000241	-0.000715	-0.000915
0.2000	335.990	5.417	12.411	15.716	-0.734	50.314	639.639	-0.000379	-0.000869	-0.001100
0.2400	384.291	10.765	17.750	20.900	-0.700	50.315	731.592	-0.000754	-0.001243	-0.001463
0.2800	435.223	16.279	23.476	26.901	-0.705	50.314	828.552	-0.001140	-0.001643	-0.001883
0.3200	471.396	20.199	28.041	31.253	-0.728	50.314	897.417	-0.001414	-0.001963	-0.002188
0.3600	524.281	25.612	33.299	37.130	-0.710	50.314	998.096	-0.001793	-0.002331	-0.002599
0.4000	569.772	31.184	38.487	42.342	-0.696	50.313	1084.700	-0.002183	-0.002694	-0.002964
0.4400	631.268	37.683	45.065	49.653	-0.714	50.314	1201.773	-0.002638	-0.003155	-0.003476
0.4800	677.706	43.576	50.568	55.181	-0.728	50.314	1290.178	-0.003050	-0.003540	-0.003863
0.5200	743.395	51.205	57.308	62.965	-0.710	50.314	1415.234	-0.003584	-0.004012	-0.004408
0.5600	786.106	56.635	62.467	68.177	-0.708	50.312	1496.544	-0.003964	-0.004373	-0.004772
0.6000	841.906	63.429	68.290	74.595	-0.742	50.314	1602.774	-0.004440	-0.004780	-0.005222
0.6400	890.568	69.435	73.917	80.350	-0.711	50.315	1695.414	-0.004860	-0.005174	-0.005624
0.6800	938.103	74.936	78.654	86.141	-0.693	50.314	1785.908	-0.005246	-0.005506	-0.006030
0.7200	964.268	79.088	81.761	89.577	-0.724	50.314	1835.718	-0.005536	-0.005723	-0.006270
0.7600	1010.195	84.308	86.426	94.788	-0.737	50.314	1923.151	-0.005902	-0.006050	-0.006635
0.8000	1039.199	88.886	89.702	98.623	-0.690	50.315	1978.369	-0.006222	-0.006279	-0.006904
0.8400	1063.485	91.958	92.259	101.653	-0.715	50.315	2024.603	-0.006437	-0.006458	-0.007116
0.8800	1086.103	95.492	94.724	104.432	-0.738	50.315	2067.661	-0.006684	-0.006631	-0.007310
0.9200	1087.365	95.955	95.356	105.543	-0.720	50.316	2070.065	-0.006717	-0.006675	-0.007388
0.9600	1087.576	96.629	95.727	105.906	-0.687	50.315	2070.465	-0.006764	-0.006701	-0.007413
1.0000	1096.052	97.924	96.827	106.934	-0.708	50.315	2086.601	-0.006855	-0.006778	-0.007485
1.0400	1078.378	96.337	95.562	106.058	-0.725	50.316	2052.956	-0.006744	-0.006689	-0.007424
1.0800	1069.752	95.449	95.177	105.126	-0.694	50.316	2036.533	-0.006681	-0.006662	-0.007359
1.1200	1030.618	91.227	92.013	101.445	-0.696	50.314	1962.032	-0.006386	-0.006441	-0.007101
1.1600	1019.452	90.161	90.981	100.154	-0.746	50.316	1940.775	-0.006311	-0.006369	-0.007011
1.2000	985.022	86.277	88.091	96.844	-0.708	50.316	1875.229	-0.006039	-0.006166	-0.006779
1.2400	948.458	81.842	84.624	92.409	-0.692	50.315	1805.620	-0.005729	-0.005924	-0.006469
1.2800	901.780	76.525	79.874	87.699	-0.725	50.316	1716.757	-0.005357	-0.005591	-0.006139
1.3200	861.218	71.936	76.038	83.280	-0.714	50.316	1639.538	-0.005036	-0.005323	-0.005830
1.3600	797.513	64.737	69.819	76.416	-0.696	50.315	1518.259	-0.004532	-0.004887	-0.005349
1.4000	733.086	57.536	63.625	69.634	-0.736	50.315	1395.607	-0.004028	-0.004454	-0.004874
1.4400	677.962	50.966	57.460	62.688	-0.742	50.317	1290.665	-0.003568	-0.004022	-0.004388
1.4800	636.964	46.183	52.864	58.017	-0.702	50.318	1212.616	-0.003233	-0.003700	-0.004061
1.5200	606.742	42.284	49.108	54.501	-0.709	50.316	1155.081	-0.002960	-0.003438	-0.003815
1.5600	542.465	34.704	42.243	46.649	-0.728	50.316	1032.715	-0.002429	-0.002957	-0.003265
1.6000	476.791	26.739	34.769	38.826	-0.717	50.317	907.688	-0.001872	-0.002434	-0.002718
1.6400	444.946	23.143	30.533	34.855	-0.691	50.317	847.063	-0.001620	-0.002137	-0.002440
1.6800	392.347	17.051	24.078	28.239	-0.711	50.317	746.927	-0.001194	-0.001685	-0.001977
1.7200	360.366	12.758	20.141	23.736	-0.731	50.317	686.045	-0.000893	-0.001410	-0.001662
1.7600	326.267	8.746	15.533	19.039	-0.719	50.318	621.128	-0.000612	-0.001087	-0.001333
1.8000	302.732	5.811	12.740	15.813	-0.708	50.316	576.324	-0.000407	-0.000892	-0.001107
1.8400	263.283	1.307	7.483	10.923	-0.724	50.317	501.223	-0.000091	-0.000524	-0.000765
1.8800	247.728	-0.434	5.312	8.075	-0.690	50.318	471.611	0.000030	-0.000372	-0.000565
1.9200	238.952	-2.256	3.591	6.742	-0.689	50.317	454.903	0.000158	-0.000251	-0.000472
1.9600	236.938	-2.382	2.903	5.893	-0.706	50.317	451.069	0.000167	-0.000203	-0.000413
2.0000	238.786	-2.733	2.626	6.072	-0.726	50.319	454.588	0.000191	-0.000184	-0.000425
2.0400	240.364	-3.126	2.792	5.698	-0.690	50.318	457.592	0.000219	-0.000195	-0.000399
2.0800	266.574	-0.674	5.119	8.339	-0.696	50.317	507.488	0.000047	-0.000358	-0.000584
2.1200	273.848	-0.169	6.028	8.629	-0.720	50.318	521.336	0.000012	-0.000422	-0.000604
2.1600	305.738	2.851	9.480	12.536	-0.699	50.318	582.047	-0.000200	-0.000664	-0.000877
2.2000	342.527	6.876	13.594	16.648	-0.689	50.317	652.084	-0.000481	-0.000952	-0.001165
2.2400	381.045	10.374	17.462	20.747	-0.723	50.318	725.412	-0.000726	-0.001222	-0.001452
2.2800	430.248	15.859	23.007	26.332	-0.720	50.319	819.082	-0.001110	-0.001610	-0.001843
2.3200	479.106	20.788	28.401	32.060	-0.700	50.319	912.094	-0.001455	-0.001988	-0.002244
2.3600	534.320	26.975	34.359	38.189	-0.716	50.318	1017.208	-0.001888	-0.002405	-0.002673
2.4000	569.006	31.059	38.830	42.578	-0.736	50.319	1083.241	-0.002174	-0.002718	-0.002980
2.4400	624.010	37.316	44.885	49.027	-0.722	50.319	1187.954	-0.002612	-0.003142	-0.003432
2.4800	679.494	43.801	50.735	55.420	-0.699	50.319	1293.583	-0.003066	-0.003551	-0.003879
2.5200	731.974	50.239	56.609	61.465	-0.734	50.319	1393.490	-0.003517	-0.003963	-0.004303
2.5600	788.480	56.735	62.990	68.299	-0.729	50.320	1501.064	-0.003971	-0.004409	-0.004781
2.6000	837.548	63.318	68.207	74.138	-0.707	50.320	1594.477	-0.004432	-0.004775	-0.005190
2.6400	890.824	69.210	73.848	80.390	-0.712	50.319	1695.900	-0.004845	-0.005169	-0.005627
2.6800	935.999	75.244	78.515	85.644	-0.738	50.320	1781.902	-0.005267	-0.005496	-0.005995
2.7200	979.582	80.775	83.607	90.814	-0.712	50.320	1864.872	-0.005654	-0.005852	-0.006357
2.7600	1002.425	84.195	86.151	94.274	-0.699	50.319	1908.360	-0.005894	-0.006031	-0.006599
2.8000	1045.902	89.363	90.403	99.193	-0.723	50.320	1991.129	-0.006255	-0.006328	-0.006944
2.8400	1057.729	91.804	91.901	101.124	-0.726	50.321	2013.645	-0.006426	-0.006433	-0.007079
2.8800	1082.857	94.765	95.274	104.473	-0.690	50.320	2061.481	-0.006634	-0.006669	-0.007313
2.9200	1098.006	97.656	96.290	106.170	-0.710	50.320	2090.321	-0.006836	-0.006740	-0.007432
2.9600	1094.128	97.488	96.388	106.531	-0.710	50.320	2082.939	-0.006824	-0.006747	-0.007457
3.0000	1095.751	98.204	96.829	107.031	-0.708	50.322	2086.029	-0.006874	-0.006778	-0.007492
3.0400	1081.129	97.053	96.084	106.267	-0.699	50.321	2058.191	-0.006794	-0.006726	-0.007439
3.0800	1069.482	95.659	95.149	105.070	-0.730	50.320	2036.018	-0.006696	-0.006660	-0.007355
3.1200	1032.256	91.945	92.688	101.725	-0.731	50.321	1965.151	-0.006436	-0.006488	-0.007121
3.1600	1008.947	89.010	90.262	99.318	-0.697	50.321	1920.776	-0.006231	-0.006318	-0.006952
3.2000	959.023	83.899	86.233	94.192	-0.699	50.320	1825.733	-0.005873	-0.006036	-0.006593
3.2400	946.023	82.122	84.487	92.494	-0.726	50.321	1800.985	-0.005749	-0.005914	-0.006475
3.2800	903.598	77.323	80.647	88.077	-0.707	50.321	1720.219	-0.005413	-0.005645	-0.006165
3.3200	840.975	70.111	74.278	81.529	-0.688	50.320	1601.000	-0.004908	-0.005199	-0.005707
3.3600	780.230	62.910	68.140	74.319	-0.727	50.320	1485.357	-0.004404	-0.004770	-0.005202
3.4000	746.521	58.898	64.507	70.371	-0.736	50.322	1421.185	-0.004123	-0.004515	-0.004926
3.4400	685.085	51.964	58.424	63.812	-0.693	50.322	1304.226	-0.003637	-0.004090	-0.004467
3.4800	627.887	45.199	51.901	57.323	-0.717	50.321	1195.335	-0.003164	-0.003633	-0.004013
3.5200	577.271	39.165	46.619	51.278	-0.734	50.322	1098.976	-0.002742	-0.003263	-0.003589
3.5600	517.128	32.043	39.656	44.189	-0.708	50.322	984.478	-0.002243	-0.002776	-0.003093
3.6000	480.458	27.897	35.623	39.760	-0.686	50.322	914.669	-0.001953	-0.002494	-0.002783
3.6400	432.232	21.767	29.595	33.462	-0.710	50.323	822.859	-0.001524	-0.002072	-0.002342
3.6800	401.289	18.145	25.441	29.295	-0.694	50.323	763.950	-0.001270	-0.001781	-0.002051
3.7200	346.480	11.635	18.629	22.526	-0.691	50.322	659.609	-0.000814	-0.001304	-0.001577
3.7600	307.060	7.159	13.897	17.399	-0.728	50.321	584.564	-0.000501	-0.000973	-0.001218
3.8000	296.030	4.999	11.721	15.369	-0.726	50.323	563.564	-0.000350	-0.000820	-0.001076
3.8400	268.663	2.276	8.296	11.271	-0.696	50.323	511.465	-0.000159	-0.000581	-0.000789
3.8800	242.498	-1.063	4.498	7.979	-0.714	50.322	461.655	0.000074	-0.000315	-0.000558
3.9200	267.476	1.152	7.003	10.073	-0.746	50.322	509.205	-0.000081	-0.000490	-0.000705
3.9600	217.641	-4.151	0.743	4.279	-0.705	50.322	414.333	0.000291	-0.000052	-0.000300
4.0000	240.530	-2.044	3.177	6.212	-0.686	50.322	457.907	0.000143	-0.000222	-0.000435
4.0400	250.809	-1.694	3.685	6.673	-0.707	50.322	477.476	0.000119	-0.000258	-0.000467
4.0800	258.819	-0.588	4.527	7.811	-0.703	50.323	492.725	0.000041	-0.000317	-0.000547
4.1200	280.115	0.605	6.742	9.658	-0.687	50.322	533.266	-0.000042	-0.000472	-0.000676
4.1600	308.714	3.948	10.195	13.175	-0.704	50.322	587.711	-0.000276	-0.000714	-0.000922
4.2000	348.884	7.553	14.310	17.399	-0.730	50.323	664.186	-0.000529	-0.001002	-0.001218
4.2400	373.110	9.952	16.951	20.232	-0.708	50.324	710.306	-0.000697	-0.001187	-0.001416
4.2800	441.520	17.330	24.549	27.945	-0.694	50.323	840.540	-0.001213	-0.001718	-0.001956
4.3200	474.312	21.361	28.373	31.865	-0.718	50.323	902.967	-0.001495	-0.001986	-0.002231
4.3600	522.463	26.161	33.672	37.550	-0.727	50.323	994.635	-0.001831	-0.002357	-0.002629
4.4000	584.575	33.190	40.520	44.650	-0.716	50.323	1112.881	-0.002323	-0.002836	-0.003125
4.4400	628.593	38.145	45.533	49.847	-0.716	50.323	1196.680	-0.002670	-0.003187	-0.003489
4.4800	679.720	44.429	50.993	55.711	-0.737	50.323	1294.012	-0.003110	-0.003570	-0.003900
4.5200	746.446	52.020	58.327	63.631	-0.703	50.323	1421.041	-0.003641	-0.004083	-0.004454
4.5600	786.016	57.001	62.594	68.509	-0.702	50.323	1496.372	-0.003990	-0.004382	-0.004796
4.6000	856.229	65.283	70.118	76.612	-0.734	50.323	1630.039	-0.004570	-0.004908	-0.005363
4.6400	885.955	69.181	73.779	80.418	-0.746	50.324	1686.630	-0.004843	-0.005165	-0.005629
4.6800	925.509	74.655	78.089	85.353	-0.723	50.324	1761.932	-0.005226	-0.005466	-0.005975
4.7200	976.741	80.789	83.343	91.147	-0.725	50.323	1859.465	-0.005655	-0.005834	-0.006380
4.7600	1003.206	84.561	86.385	94.648	-0.734	50.323	1909.847	-0.005919	-0.006047	-0.006625
4.8000	1037.426	89.137	89.880	99.082	-0.740	50.324	1974.993	-0.006240	-0.006292	-0.006936
4.8400	1067.077	93.194	93.320	102.638	-0.706	50.323	2031.441	-0.006524	-0.006532	-0.007185
4.8800	1085.607	95.729	94.820	105.058	-0.727	50.323	2066.717	-0.006701	-0.006637	-0.007354
4.9200	1080.212	95.533	95.536	105.419	-0.742	50.323	2056.446	-0.006687	-0.006688	-0.007379
4.9600	1101.011	98.611	97.078	107.684	-0.714	50.324	2096.043	-0.006903	-0.006795	-0.007538
5.0000	1093.888	98.289	97.148	107.752	-0.699	50.324	2082.481	-0.006880	-0.006800	-0.007543
5.0400	1084.675	97.515	96.388	106.906	-0.732	50.324	2064.943	-0.006826	-0.006747	-0.007483
5.0800	1066.822	95.914	95.398	105.710	-0.710	50.323	2030.954	-0.006714	-0.006678	-0.007400
5.1200	1062.433	95.350	94.724	104.904	-0.704	50.323	2022.600	-0.006675	-0.006631	-0.007343
5.1600	884.076	72.931	76.686	83.711	-0.721	50.323	1683.054	-0.005105	-0.005368	-0.005860
5.2000	981.671	84.379	86.136	94.719	-0.734	50.325	1868.849	-0.005907	-0.006029	-0.006630
5.2400	957.956	82.909	85.037	92.825	-0.698	50.324	1823.702	-0.005804	-0.005953	-0.006498
5.2800	873.045	73.083	76.975	84.450	-0.718	50.323	1662.054	-0.005116	-0.005388	-0.005911
5.3200	858.333	71.417	75.597	82.768	-0.746	50.324	1634.045	-0.004999	-0.005292	-0.005794
5.3600	801.315	64.695	69.927	76.721	-0.722	50.325	1525.497	-0.004529	-0.004895	-0.005370
5.4000	721.243	56.104	62.277	68.038	-0.694	50.324	1373.062	-0.003927	-0.004359	-0.004763
5.4400	681.072	50.800	57.132	62.689	-0.729	50.324	1296.587	-0.003556	-0.003999	-0.004388
5.4800	652.248	47.911	54.309	59.837	-0.729	50.325	1241.713	-0.003354	-0.003802	-0.004189
5.5200	570.554	38.955	45.959	51.291	-0.703	50.324	1086.187	-0.002727	-0.003217	-0.003590
5.5600	553.827	36.123	43.631	48.388	-0.716	50.324	1054.344	-0.002529	-0.003054	-0.003387
5.6000	485.072	28.599	36.051	40.245	-0.742	50.325	923.452	-0.002002	-0.002524	-0.002817
5.6400	457.886	24.113	31.509	35.575	-0.700	50.325	871.696	-0.001688	-0.002206	-0.002490
5.6800	340.514	11.886	18.627	22.444	-0.690	50.324	648.251	-0.000832	-0.001304	-0.001571
5.7200	360.516	14.108	20.722	24.249	-0.728	50.324	686.331	-0.000988	-0.001451	-0.001697
5.7600	326.147	9.068	16.043	19.913	-0.717	50.325	620.899	-0.000635	-0.001123	-0.001394
5.8000	274.870	3.752	9.809	13.382	-0.694	50.324	523.281	-0.000263	-0.000687	-0.000937
5.8400	276.853	2.641	8.955	12.425	-0.718	50.324	527.058	-0.000185	-0.000627	-0.000870
5.8800	246.526	-0.235	5.352	8.755	-0.724	50.325	469.322	0.000016	-0.000375	-0.000613
5.9200	215.628	-3.211	1.472	4.949	-0.694	50.325	410.500	0.000225	-0.000103	-0.000346
5.9600	249.847	-1.246	4.280	7.533	-0.715	50.325	475.645	0.000087	-0.000300	-0.000527
6.0000	214.891	-4.490	0.301	3.876	-0.735	50.326	409.098	0.000314	-0.000021	-0.000271
6.0400	207.272	-4.406	0.108	3.766	-0.708	50.326	394.592	0.000308	-0.000008	-0.000264
6.0800	244.046	-2.282	2.984	6.281	-0.697	50.324	464.602	0.000160	-0.000209	-0.000440
6.1200	306.414	3.904	9.505	12.925	-0.727	50.324	583.334	-0.000273	-0.000665	-0.000905
6.1600	306.444	3.512	10.031	13.397	-0.713	50.326	583.391	-0.000246	-0.000702	-0.000938
6.2000	363.086	8.886	15.850	18.844	-0.698	50.325	691.223	-0.000622	-0.001109	-0.001319
6.2400	389.807	12.070	19.537	22.765	-0.720	50.325	742.092	-0.000845	-0.001368	-0.001594
6.2800	444.165	17.821	25.166	28.448	-0.730	50.325	845.575	-0.001247	-0.001762	-0.001991
6.3200	484.305	21.837	29.555	33.350	-0.701	50.325	921.993	-0.001529	-0.002069	-0.002334
6.3600	533.193	27.741	35.294	38.897	-0.700	50.325	1015.062	-0.001942	-0.002471	-0.002723
6.4000	565.910	31.127	39.518	43.164	-0.735	50.325	1077.347	-0.002179	-0.002766	-0.003021
6.4400	634.184	38.942	46.123	50.333	-0.710	50.326	1207.323	-0.002726	-0.003229	-0.003523
6.4800	680.862	43.587	51.036	55.516	-0.684	50.325	1296.186	-0.003051	-0.003573	-0.003886
6.5200	784.483	56.148	62.249	67.548	-0.726	50.325	1493.454	-0.003930	-0.004357	-0.004728
6.5600	790.073	57.578	64.022	69.399	-0.743	50.326	1504.097	-0.004030	-0.004482	-0.004858
6.6000	823.512	62.066	67.547	73.831	-0.710	50.326	1567.755	-0.004345	-0.004728	-0.005168
6.6400	897.361	70.434	75.240	81.906	-0.720	50.325	1708.345	-0.004930	-0.005267	-0.005733
6.6800	929.312	75.021	78.802	85.935	-0.739	50.325	1769.171	-0.005251	-0.005516	-0.006015
6.7200	937.878	77.084	81.197	88.340	-0.711	50.325	1785.479	-0.005396	-0.005684	-0.006184
6.7600	1054.573	90.176	90.789	100.165	-0.698	50.325	2007.637	-0.006312	-0.006355	-0.007012
6.8000	1017.017	87.203	89.399	97.275	-0.715	50.325	1936.140	-0.006104	-0.006258	-0.006809
6.8400	1101.041	96.531	96.250	106.475	-0.722	50.326	2096.100	-0.006757	-0.006738	-0.007453
6.8800	1038.538	90.863	92.466	101.376	-0.697	50.326	1977.110	-0.006360	-0.006473	-0.007096
6.9200	1099.103	97.825	97.076	107.282	-0.706	50.325	2092.409	-0.006848	-0.006795	-0.007510
6.9600	1102.559	98.949	97.696	108.085	-0.732	50.326	2098.989	-0.006926	-0.006839	-0.007566
7.0000	1087.005	97.615	96.815	107.282	-0.718	50.326	2069.378	-0.006833	-0.006777	-0.007510
7.0400	1094.474	99.032	97.696	107.975	-0.700	50.326	2083.597	-0.006932	-0.006839	-0.007558
7.0800	1075.268	96.659	96.415	106.766	-0.727	50.325	2047.033	-0.006766	-0.006749	-0.007474
7.1200	1085.757	98.106	96.856	107.197	-0.726	50.326	2067.003	-0.006867	-0.006780	-0.007504
7.1600	1023.029	91.032	92.027	100.890	-0.698	50.326	1947.584	-0.006372	-0.006442	-0.007062
7.2000	972.849	85.530	87.515	96.011	-0.727	50.326	1852.055	-0.005987	-0.006126	-0.006721
7.2400	941.921	81.730	84.460	92.923	-0.732	50.326	1793.175	-0.005721	-0.005912	-0.006505
7.2800	882.348	75.907	79.242	86.782	-0.710	50.326	1679.764	-0.005314	-0.005547	-0.006075
7.3200	857.476	71.783	76.326	83.504	-0.698	50.325	1632.414	-0.005025	-0.005343	-0.005845
7.3600	783.927	64.062	69.336	75.944	-0.726	50.325	1492.395	-0.004484	-0.004854	-0.005316
7.4000	774.609	62.771	68.139	74.263	-0.715	50.326	1474.657	-0.004394	-0.004770	-0.005198
7.4400	660.213	50.689	56.857	62.646	-0.698	50.326	1256.876	-0.003548	-0.003980	-0.004385
7.4800	660.634	48.936	55.673	60.823	-0.707	50.325	1257.677	-0.003426	-0.003897	-0.004258
7.5200	562.062	38.705	45.614	50.598	-0.747	50.326	1070.023	-0.002709	-0.003193	-0.003542
7.5600	517.158	32.208	40.001	44.886	-0.720	50.327	984.535	-0.002255	-0.002800	-0.003142
7.6000	488.814	29.076	36.422	40.966	-0.695	50.325	930.576	-0.002035	-0.002550	-0.002868
7.6400	447.065	23.773	31.424	35.826	-0.742	50.326	851.097	-0.001664	-0.002200	-0.002508
7.6800	405.331	19.228	26.570	30.529	-0.728	50.326	771.646	-0.001346	-0.001860	-0.002137
7.7200	346.239	12.153	19.220	22.819	-0.708	50.326	659.151	-0.000851	-0.001345	-0.001597
7.7600	308.188	7.663	14.158	17.677	-0.714	50.325	586.710	-0.000536	-0.000991	-0.001237
7.8000	296.871	5.881	12.617	16.023	-0.727	50.326	565.166	-0.000412	-0.000883	-0.001122
7.8400	263.779	2.079	8.197	11.648	-0.706	50.326	502.167	-0.000146	-0.000574	-0.000815
7.8800	250.328	0.421	6.163	9.546	-0.695	50.325	476.561	-0.000029	-0.000431	-0.000668
7.9200	254.957	-0.043	5.807	9.005	-0.720	50.326	485.373	0.000003	-0.000407	-0.000630
7.9600	228.266	-2.607	2.738	5.601	-0.716	50.327	434.561	0.000183	-0.000192	-0.000392
8.0000	230.491	-2.804	1.815	5.475	-0.704	50.325	438.795	0.000196	-0.000127	-0.000383
8.0400	225.892	-3.183	1.967	5.181	-0.722	50.325	430.040	0.000223	-0.000138	-0.000363
8.0800	169.626	-7.661	-4.652	-0.889	-0.737	50.326	322.924	0.000536	0.000326	0.000062
8.1200	324.659	5.851	12.232	15.243	-0.706	50.326	618.067	-0.000410	-0.000856	-0.001067
8.1600	289.267	2.346	8.295	11.770	-0.710	50.325	550.690	-0.000164	-0.000581	-0.000824
8.2000	329.904	6.344	12.712	16.121	-0.739	50.326	628.052	-0.000444	-0.000890	-0.001128
8.2400	417.820	14.808	22.096	25.680	-0.728	50.327	795.422	-0.001037	-0.001547	-0.001798
8.2800	438.243	17.359	24.946	28.335	-0.706	50.326	834.303	-0.001215	-0.001746	-0.001983
8.3200	471.216	21.444	29.184	32.781	-0.721	50.325	897.074	-0.001501	-0.002043	-0.002295
8.3600	523.770	26.682	34.290	37.783	-0.720	50.326	997.124	-0.001868	-0.002400	-0.002645
8.4000	563.220	31.284	39.050	43.092	-0.699	50.326	1072.226	-0.002190	-0.002733	-0.003016
8.4400	655.178	41.848	48.984	53.029	-0.689	50.326	1247.292	-0.002929	-0.003429	-0.003712
8.4800	672.717	44.010	51.654	56.157	-0.718	50.326	1280.680	-0.003081	-0.003616	-0.003931
8.5200	727.706	50.548	57.571	62.259	-0.714	50.327	1385.365	-0.003538	-0.004030	-0.004358
8.5600	806.965	59.600	65.787	71.330	-0.691	50.326	1536.255	-0.004172	-0.004605	-0.004993
8.6000	897.797	70.293	74.840	81.391	-0.715	50.326	1709.175	-0.004921	-0.005239	-0.005697
8.6400	919.498	73.152	77.277	84.089	-0.737	50.327	1750.488	-0.005121	-0.005409	-0.005886
8.6800	915.681	73.982	77.938	84.769	-0.715	50.327	1743.221	-0.005179	-0.005456	-0.005934
8.7200	952.050	78.343	82.077	89.162	-0.700	50.326	1812.458	-0.005484	-0.005745	-0.006241
8.7600	1003.687	85.474	87.693	95.747	-0.728	50.326	1910.763	-0.005983	-0.006139	-0.006702
8.8000	1050.561	90.889	91.779	100.848	-0.729	50.327	1999.998	-0.006362	-0.006425	-0.007059
8.8400	1043.182	90.945	91.695	100.568	-0.692	50.326	1985.950	-0.006366	-0.006419	-0.007040
8.8800	1085.833	96.098	96.029	106.128	-0.715	50.326	2067.146	-0.006727	-0.006722	-0.007429
8.9200	1083.428	96.490	95.932	106.127	-0.731	50.327	2062.569	-0.006754	-0.006715	-0.007429
8.9600	1105.805	99.202	98.343	108.655	-0.701	50.326	2105.169	-0.006944	-0.006884	-0.007606
9.0000	1045.361	93.572	93.939	103.470	-0.690	50.326	1990.099	-0.006550	-0.006576	-0.007243
9.0400	1090.176	98.006	97.230	107.628	-0.722	50.327	2075.415	-0.006860	-0.006806	-0.007534
9.0800	1043.948	93.293	93.871	103.722	-0.719	50.327	1987.410	-0.006531	-0.006571	-0.007261
9.1200	1043.032	93.377	93.830	103.735	-0.693	50.326	1985.664	-0.006536	-0.006568	-0.007261
9.1600	1013.892	90.215	91.257	100.263	-0.699	50.326	1930.189	-0.006315	-0.006388	-0.007018
9.2000	961.262	84.380	86.853	95.093	-0.731	50.327	1829.996	-0.005907	-0.006080	-0.006657
9.2400	948.157	82.936	85.436	93.773	-0.693	50.327	1805.048	-0.005806	-0.005980	-0.006564
9.2800	904.304	77.615	81.267	88.745	-0.699	50.326	1721.563	-0.005433	-0.005689	-0.006212
9.3200	840.554	70.490	74.922	82.114	-0.725	50.327	1600.199	-0.004934	-0.005245	-0.005748
9.3600	801.164	65.930	71.154	77.793	-0.695	50.328	1525.211	-0.004615	-0.004981	-0.005445
9.4000	740.299	59.165	64.948	70.941	-0.681	50.326	1409.340	-0.004142	-0.004546	-0.004966
9.4400	682.891	52.160	59.210	64.491	-0.716	50.327	1300.049	-0.003651	-0.004145	-0.004514
9.4800	625.888	45.691	52.619	58.019	-0.723	50.327	1191.530	-0.003198	-0.003683	-0.004061
9.5200	585.898	41.019	48.184	52.931	-0.686	50.327	1115.398	-0.002871	-0.003373	-0.003705
9.5600	508.997	32.028	39.490	44.580	-0.688	50.326	969.000	-0.002242	-0.002764	-0.003121
9.6000	485.072	28.923	36.819	40.911	-0.714	50.327	923.452	-0.002025	-0.002577	-0.002864
9.6400	428.926	22.439	29.735	34.186	-0.707	50.328	816.565	-0.001571	-0.002081	-0.002393
9.6800	386.636	17.599	24.987	28.905	-0.704	50.326	736.055	-0.001232	-0.001749	-0.002023
9.7200	340.303	11.619	18.833	22.889	-0.739	50.327	647.850	-0.000813	-0.001318	-0.001602
9.7600	311.419	8.521	15.508	18.510	-0.711	50.328	592.861	-0.000596	-0.001086	-0.001296
9.8000	291.205	5.403	12.010	15.175	-0.694	50.327	554.380	-0.000378	-0.000841	-0.001062
9.8400	226.854	-0.893	4.334	7.784	-0.732	50.327	431.871	0.000063	-0.000303	-0.000545
9.8800	248.344	0.126	5.587	9.019	-0.727	50.327	472.784	-0.000009	-0.000391	-0.000631
9.9200	237.314	-0.715	4.018	7.297	-0.687	50.327	451.784	0.000050	-0.000281	-0.000511
9.9600	234.804	-2.072	3.395	6.367	-0.702	50.327	447.006	0.000145	-0.000238	-0.000446
10.0000	237.419	-1.271	3.590	6.518	-0.707	50.327	451.984	0.000089	-0.000251	-0.000456
10.0400	248.660	-1.510	4.252	7.159	-0.678	50.328	473.385	0.000106	-0.000298	-0.000501
10.0800	257.031	-0.366	5.477	8.451	-0.680	50.327	489.321	0.000026	-0.000383	-0.000592
10.1200	257.782	-0.503	5.203	8.073	-0.714	50.327	490.751	0.000035	-0.000364	-0.000565
10.1600	305.452	4.117	10.704	13.426	-0.696	50.328	581.503	-0.000288	-0.000749	-0.000940
10.2000	359.840	8.900	16.236	19.191	-0.679	50.328	685.043	-0.000623	-0.001137	-0.001343
10.2400	357.556	9.447	16.553	19.704	-0.679	50.327	680.695	-0.000661	-0.001159	-0.001379
10.2800	436.515	17.149	25.027	28.294	-0.696	50.328	831.013	-0.001200	-0.001752	-0.001981
10.3200	492.676	23.155	30.640	34.549	-0.682	50.328	937.929	-0.001621	-0.002145	-0.002418
10.3600	521.816	26.526	34.248	38.022	-0.700	50.327	993.404	-0.001857	-0.002397	-0.002662
10.4000	600.114	35.125	42.834	46.982	-0.711	50.327	1142.464	-0.002459	-0.002998	-0.003289
10.4400	645.500	40.179	48.023	52.026	-0.695	50.328	1228.867	-0.002813	-0.003362	-0.003642
10.4800	703.465	47.321	54.187	59.127	-0.692	50.327	1339.216	-0.003312	-0.003793	-0.004139
10.5200	756.199	53.146	59.885	64.811	-0.706	50.327	1439.610	-0.003720	-0.004192	-0.004537
10.5600	786.151	57.605	63.529	69.092	-0.721	50.328	1496.630	-0.004032	-0.004447	-0.004836
10.6000	830.079	63.008	68.688	74.512	-0.699	50.328	1580.257	-0.004411	-0.004808	-0.005216
10.6400	882.829	69.465	74.250	80.683	-0.679	50.327	1680.679	-0.004863	-0.005197	-0.005648
10.6800	960.120	79.103	82.422	89.909	-0.724	50.327	1827.822	-0.005537	-0.005770	-0.006294
10.7200	1000.576	83.566	85.969	93.899	-0.706	50.329	1904.840	-0.005850	-0.006018	-0.006573
10.7600	1005.896	85.769	87.626	95.652	-0.690	50.328	1914.968	-0.006004	-0.006134	-0.006696
10.8000	1041.063	89.950	91.271	100.011	-0.704	50.327	1981.916	-0.006297	-0.006389	-0.007001
10.8400	1063.575	93.461	93.967	103.222	-0.714	50.328	2024.775	-0.006542	-0.006578	-0.007226
10.8800	1066.731	94.232	94.186	103.959	-0.681	50.328	2030.783	-0.006596	-0.006593	-0.007277
10.9200	1084.540	97.094	96.279	106.323	-0.692	50.327	2064.686	-0.006797	-0.006740	-0.007443
10.9600	1088.823	97.516	97.076	107.127	-0.711	50.328	2072.840	-0.006826	-0.006795	-0.007499
11.0000	1073.344	96.305	96.031	105.851	-0.719	50.329	2043.371	-0.006741	-0.006722	-0.007410
11.0400	1084.240	97.964	96.857	107.057	-0.684	50.328	2064.114	-0.006858	-0.006780	-0.007494
11.0800	1064.883	96.279	95.850	105.642	-0.716	50.328	2027.264	-0.006739	-0.006710	-0.007395
11.1200	1041.198	93.532	93.733	103.721	-0.722	50.329	1982.174	-0.006547	-0.006561	-0.007261
11.1600	1028.048	91.932	92.962	102.016	-0.690	50.329	1957.140	-0.006435	-0.006507	-0.007141
11.2000	971.451	85.699	87.735	96.470	-0.698	50.328	1849.394	-0.005999	-0.006141	-0.006753
11.2400	934.361	81.716	84.375	92.548	-0.712	50.328	1778.784	-0.005720	-0.005906	-0.006478
11.2800	894.235	76.692	80.287	87.867	-0.695	50.329	1702.394	-0.005368	-0.005620	-0.006151
11.3200	846.024	71.403	75.886	82.404	-0.685	50.328	1610.613	-0.004998	-0.005312	-0.005768
11.3600	789.668	64.595	70.120	76.750	-0.694	50.329	1503.325	-0.004522	-0.004908	-0.005373
11.4000	745.695	59.824	65.856	71.721	-0.711	50.329	1419.611	-0.004188	-0.004610	-0.005020
11.4400	691.517	53.566	59.786	65.381	-0.683	50.329	1316.471	-0.003750	-0.004185	-0.004577
11.4800	627.556	46.379	53.304	58.573	-0.690	50.328	1194.706	-0.003247	-0.003731	-0.004100
11.5200	560.484	38.677	46.122	50.975	-0.731	50.329	1067.019	-0.002707	-0.003229	-0.003568
11.5600	534.816	34.972	42.451	46.954	-0.709	50.329	1018.152	-0.002448	-0.002972	-0.003287
11.6000	498.297	30.272	37.880	42.398	-0.705	50.328	948.629	-0.002119	-0.002652	-0.002968
11.6400	413.837	20.675	28.385	32.365	-0.727	50.328	787.840	-0.001447	-0.001987	-0.002266
11.6800	379.362	16.264	23.790	28.001	-0.722	50.329	722.208	-0.001139	-0.001665	-0.001960
11.7200	345.233	12.717	19.936	23.540	-0.684	50.329	657.234	-0.000890	-0.001396	-0.001648
11.7600	315.912	8.985	15.822	19.660	-0.700	50.328	601.416	-0.000629	-0.001108	-0.001376
11.8000	288.696	5.261	11.873	15.492	-0.731	50.328	549.603	-0.000368	-0.000831	-0.001084
11.8400	268.933	2.824	9.107	12.605	-0.711	50.329	511.980	-0.000198	-0.000637	-0.000882
11.8800	245.204	0.239	5.876	9.185	-0.697	50.329	466.805	-0.000017	-0.000411	-0.000643
11.9200	237.058	-1.119	4.980	7.950	-0.727	50.329	451.298	0.000078	-0.000349	-0.000556
11.9600	241.777	-1.441	3.852	7.407	-0.727	50.329	460.281	0.000101	-0.000270	-0.000519
12.0000	236.592	-2.284	3.602	6.574	-0.669	50.329	450.411	0.000160	-0.000252	-0.000460
12.0400	234.624	-2.227	2.917	6.436	-0.691	50.328	446.663	0.000156	-0.000204	-0.000450
12.0800	268.708	0.900	6.837	10.089	-0.712	50.329	511.551	-0.000063	-0.000479	-0.000706
12.1200	259.586	-0.168	5.779	8.574	-0.698	50.330	494.184	0.000012	-0.000405	-0.000600
12.1600	307.707	4.229	10.869	13.953	-0.687	50.329	585.794	-0.000296	-0.000761	-0.000977
12.2000	328.371	6.540	13.220	16.759	-0.713	50.329	625.134	-0.000458	-0.000925	-0.001173
12.2400	397.111	13.179	20.776	23.819	-0.723	50.331	755.997	-0.000923	-0.001454	-0.001667
12.2800	413.612	15.202	22.800	25.945	-0.714	50.329	787.411	-0.001064	-0.001596	-0.001816
12.3200	478.234	21.963	29.995	33.323	-0.713	50.329	910.435	-0.001537	-0.002100	-0.002333
12.3600	500.401	24.475	32.362	36.312	-0.729	50.330	952.635	-0.001713	-0.002265	-0.002542
12.4000	552.399	31.073	39.326	42.995	-0.687	50.330	1051.626	-0.002175	-0.002753	-0.003010
12.4400	636.273	39.572	47.015	51.321	-0.684	50.329	1211.300	-0.002770	-0.003291	-0.003592
12.4800	714.436	48.699	55.659	60.477	-0.710	50.330	1360.102	-0.003409	-0.003896	-0.004233
12.5200	723.813	50.253	56.911	62.118	-0.705	50.330	1377.954	-0.003518	-0.003984	-0.004348
12.5600	799.211	59.673	66.090	71.331	-0.676	50.330	1521.492	-0.004177	-0.004626	-0.004993
12.6000	832.213	63.600	69.089	75.234	-0.691	50.329	1584.320	-0.004452	-0.004836	-0.005266
12.6400	878.065	69.128	74.083	80.641	-0.724	50.330	1671.610	-0.004839	-0.005186	-0.005645
12.6800	936.540	75.863	79.874	87.019	-0.687	50.331	1782.932	-0.005310	-0.005591	-0.006091
12.7200	967.875	80.901	83.910	91.270	-0.685	50.330	1842.585	-0.005663	-0.005874	-0.006389
12.7600	1009.188	85.699	87.897	96.233	-0.695	50.330	1921.234	-0.005999	-0.006153	-0.006736
12.8000	1020.384	88.368	90.263	98.636	-0.698	50.331	1942.549	-0.006186	-0.006318	-0.006905
12.8400	1046.158	91.454	92.205	101.195	-0.684	50.331	1991.615	-0.006402	-0.006454	-0.007084
12.8800	1085.878	96.616	96.445	106.281	-0.728	50.330	2067.232	-0.006763	-0.006751	-0.007440
12.9200	1095.045	97.699	97.464	107.254	-0.720	50.331	2084.684	-0.006839	-0.006822	-0.007508
12.9600	1115.995	101.359	100.038	110.727	-0.683	50.331	2124.567	-0.007095	-0.007003	-0.007751
13.0000	1048.697	93.854	94.614	104.487	-0.676	50.330	1996.450	-0.006570	-0.006623	-0.007314
13.0400	1059.818	95.619	95.479	104.987	-0.714	50.331	2017.622	-0.006693	-0.006684	-0.007349
13.0800	1099.133	99.610	98.812	109.308	-0.699	50.332	2092.466	-0.006973	-0.006917	-0.007652
13.1200	970.204	86.402	88.463	97.150	-0.680	50.331	1847.019	-0.006048	-0.006192	-0.006800
13.1600	1054.138	95.224	95.165	105.084	-0.707	50.330	2006.807	-0.006666	-0.006662	-0.007356
13.2000	966.778	85.966	87.774	96.262	-0.725	50.331	1840.496	-0.006018	-0.006144	-0.006738
13.2400	906.393	78.850	82.133	89.645	-0.691	50.332	1725.540	-0.005520	-0.005749	-0.006275
13.2800	891.335	77.197	80.578	88.270	-0.698	50.330	1696.873	-0.005404	-0.005640	-0.006179
13.3200	859.174	73.252	77.332	84.436	-0.729	50.332	1635.647	-0.005128	-0.005413	-0.005911
13.3600	810.302	67.175	72.266	79.100	-0.707	50.332	1542.606	-0.004702	-0.005059	-0.005537
13.4000	752.217	60.612	66.475	72.651	-0.695	50.331	1432.028	-0.004243	-0.004653	-0.005086
13.4400	693.441	53.763	60.034	66.119	-0.722	50.331	1320.133	-0.003763	-0.004202	-0.004628
13.4800	613.249	45.382	52.560	57.809	-0.718	50.332	1167.469	-0.003177	-0.003679	-0.004047
13.5200	527.091	35.166	42.697	47.510	-0.681	50.332	1003.447	-0.002462	-0.002989	-0.003326
13.5600	508.261	31.957	39.685	44.427	-0.705	50.330	967.598	-0.002237	-0.002778	-0.003110
13.6000	464.904	27.308	34.990	38.951	-0.724	50.331	885.057	-0.001912	-0.002449	-0.002727
13.6400	428.219	22.945	30.503	34.506	-0.695	50.332	815.220	-0.001606	-0.002135	-0.002415
13.6800	368.617	15.914	23.186	27.223	-0.685	50.332	701.752	-0.001114	-0.001623	-0.001906
13.7200	343.970	12.577	20.005	23.334	-0.723	50.332	654.831	-0.000880	-0.001400	-0.001633
13.7600	327.905	10.094	17.075	20.940	-0.702	50.333	624.247	-0.000707	-0.001195	-0.001466
13.8000	274.148	4.733	11.379	14.425	-0.679	50.333	521.908	-0.000331	-0.000796	-0.001010
13.8400	266.935	3.048	9.024	12.566	-0.694	50.331	508.175	-0.000213	-0.000632	-0.000880
13.8800	259.120	2.079	8.159	10.937	-0.719	50.332	493.298	-0.000146	-0.000571	-0.000766
13.9200	216.680	-2.677	2.381	5.839	-0.686	50.333	412.502	0.000187	-0.000167	-0.000409
13.9600	228.462	-2.142	3.397	6.505	-0.692	50.332	434.933	0.000150	-0.000238	-0.000455
14.0000	237.704	-1.932	3.853	6.714	-0.722	50.332	452.528	0.000135	-0.000270	-0.000470
14.0400	239.117	-1.425	4.169	6.561	-0.702	50.333	455.217	0.000100	-0.000292	-0.000459
14.0800	256.851	-0.323	5.601	8.671	-0.671	50.332	488.977	0.000023	-0.000392	-0.000607
14.1200	304.656	4.524	10.829	13.538	-0.693	50.332	579.987	-0.000317	-0.000758	-0.000948
14.1600	302.462	4.340	10.554	13.758	-0.703	50.333	575.809	-0.000304	-0.000739	-0.000963
14.2000	352.386	8.886	16.072	18.899	-0.704	50.333	670.853	-0.000622	-0.001125	-0.001323
14.2400	382.894	12.027	19.316	22.640	-0.684	50.332	728.931	-0.000842	-0.001352	-0.001585
14.2800	423.425	16.251	24.299	27.083	-0.706	50.333	806.093	-0.001138	-0.001701	-0.001896
14.3200	482.487	22.649	30.642	34.130	-0.700	50.334	918.531	-0.001585	-0.002145	-0.002389
14.3600	541.504	29.132	37.055	40.537	-0.689	50.333	1030.884	-0.002039	-0.002594	-0.002838
14.4000	559.928	31.648	39.602	43.413	-0.703	50.333	1065.960	-0.002215	-0.002772	-0.003039
14.4400	623.980	38.367	46.274	50.558	-0.707	50.333	1187.897	-0.002686	-0.003239	-0.003539
14.4800	683.297	45.536	53.179	57.962	-0.684	50.334	1300.821	-0.003188	-0.003723	-0.004057
14.5200	745.574	53.088	59.553	64.645	-0.678	50.333	1419.382	-0.003716	-0.004169	-0.004525
14.5600	783.175	57.352	64.105	69.508	-0.710	50.333	1490.965	-0.004015	-0.004487	-0.004866
14.6000	827.028	63.333	69.035	74.456	-0.703	50.334	1574.450	-0.004433	-0.004832	-0.005212
14.6400	880.274	69.338	74.565	81.113	-0.690	50.334	1675.816	-0.004854	-0.005220	-0.005678
14.6800	962.555	78.628	82.424	89.353	-0.699	50.334	1832.457	-0.005504	-0.005770	-0.006255
14.7200	975.840	81.732	84.954	92.466	-0.721	50.334	1857.748	-0.005721	-0.005947	-0.006473
14.7600	1009.428	86.429	88.298	96.509	-0.684	50.334	1921.692	-0.006050	-0.006181	-0.006756
14.8000	1023.780	88.468	90.333	98.608	-0.700	50.334	1949.015	-0.006193	-0.006323	-0.006903
14.8400	1074.681	94.973	95.273	104.429	-0.715	50.334	2045.918	-0.006648	-0.006669	-0.007310
14.8800	1048.006	92.379	93.390	102.653	-0.704	50.335	1995.134	-0.006467	-0.006537	-0.007186
14.9200	1074.231	96.250	96.319	105.931	-0.696	50.334	2045.059	-0.006738	-0.006742	-0.007415
14.9600	1076.034	96.600	96.747	106.837	-0.729	50.334	2048.492	-0.006762	-0.006772	-0.007479
15.0000	1089.244	98.526	97.890	107.837	-0.698	50.335	2073.641	-0.006897	-0.006852	-0.007549
15.0400	1076.320	97.403	97.339	107.432	-0.695	50.334	2049.036	-0.006818	-0.006814	-0.007520
15.0800	1060.915	96.166	95.851	105.641	-0.719	50.334	2019.711	-0.006732	-0.006710	-0.007395
15.1200	1054.032	95.462	95.547	105.711	-0.724	50.335	2006.607	-0.006682	-0.006688	-0.007400
15.1600	992.686	88.398	90.539	99.428	-0.704	50.335	1889.820	-0.006188	-0.006338	-0.006960
15.2000	934.436	81.842	84.954	92.686	-0.710	50.334	1778.927	-0.005729	-0.005947	-0.006488
15.2400	942.101	82.389	85.339	93.440	-0.735	50.335	1793.518	-0.005767	-0.005974	-0.006541
15.2800	904.274	78.218	82.051	89.689	-0.717	50.335	1721.506	-0.005475	-0.005744	-0.006278
15.3200	848.083	72.105	76.602	83.532	-0.694	50.335	1614.532	-0.005047	-0.005362	-0.005847
15.3600	792.448	65.451	71.056	77.460	-0.726	50.334	1508.617	-0.004582	-0.004974	-0.005422
15.4000	747.528	60.543	66.200	72.025	-0.738	50.336	1423.101	-0.004238	-0.004634	-0.005042
15.4400	680.847	53.144	59.923	65.187	-0.688	50.335	1296.158	-0.003720	-0.004195	-0.004563
15.4800	626.940	46.338	53.124	58.267	-0.703	50.335	1193.533	-0.003244	-0.003719	-0.004079
15.5200	596.132	42.325	49.548	54.266	-0.719	50.335	1134.882	-0.002963	-0.003468	-0.003799
15.5600	523.996	34.043	41.482	46.219	-0.701	50.336	997.553	-0.002383	-0.002904	-0.003235
15.6000	489.821	29.428	37.686	41.925	-0.698	50.335	932.493	-0.002060	-0.002638	-0.002935
15.6400	448.914	24.842	32.583	36.604	-0.716	50.335	854.616	-0.001739	-0.002281	-0.002562
15.6800	360.141	15.286	23.032	26.486	-0.723	50.336	685.616	-0.001070	-0.001612	-0.001854
15.7200	319.309	10.654	17.599	21.193	-0.686	50.336	607.882	-0.000746	-0.001232	-0.001484
15.7600	324.614	9.980	17.475	20.706	-0.702	50.335	617.981	-0.000699	-0.001223	-0.001449
15.8000	275.035	4.648	11.076	14.647	-0.743	50.337	523.596	-0.000325	-0.000775	-0.001025
15.8400	276.357	3.863	10.220	13.162	-0.710	50.336	526.114	-0.000270	-0.000715	-0.000921
15.8800	268.903	2.165	8.088	11.464	-0.695	50.335	511.923	-0.000152	-0.000566	-0.000802
15.9200	235.645	-1.006	4.566	7.283	-0.719	50.336	448.608	0.000070	-0.000320	-0.000510
15.9600	238.516	-0.825	4.252	7.602	-0.716	50.337	454.073	0.000058	-0.000298	-0.000532
16.0000	414.679	18.890	27.009	30.168	-0.695	50.337	789.442	-0.001322	-0.001891	-0.002112
16.0400	278.026	3.019	9.878	13.244	-0.712	50.336	529.289	-0.000211	-0.000691	-0.000927
16.0800	256.610	0.873	7.194	9.991	-0.726	50.336	488.520	-0.000061	-0.000504	-0.000699
16.1200	287.193	3.007	9.547	12.411	-0.695	50.337	546.741	-0.000211	-0.000668	-0.000869
16.1600	0.842	-18.997	-27.574	-22.428	-0.707	50.336	1.602	0.001330	0.001930	0.001570
16.2000	344.015	3.386	19.291	15.816	-0.733	50.336	654.917	-0.000237	-0.001350	-0.001107
16.2400	383.209	7.973	25.221	21.148	-0.718	50.337	729.532	-0.000558	-0.001765	-0.001480
16.2800	403.152	10.077	27.121	23.638	-0.684	50.337	767.498	-0.000705	-0.001898	-0.001655
16.3200	379.603	8.241	25.783	21.970	-0.712	50.336	722.666	-0.000577	-0.001805	-0.001538
16.3600	533.028	23.604	42.545	38.591	-0.732	50.337	1014.748	-0.001652	-0.002978	-0.002701
16.4000	577.226	29.020	47.911	44.427	-0.707	50.337	1098.890	-0.002031	-0.003354	-0.003110
16.4400	606.682	32.084	50.938	47.732	-0.713	50.336	1154.966	-0.002246	-0.003566	-0.003341
16.4800	677.195	40.431	59.388	56.045	-0.725	50.337	1289.206	-0.002830	-0.004157	-0.003923
16.5200	748.760	48.502	66.956	64.134	-0.723	50.338	1425.447	-0.003395	-0.004687	-0.004489
16.5600	778.922	52.176	70.862	68.259	-0.712	50.337	1482.868	-0.003652	-0.004960	-0.004778
16.6000	861.519	61.520	79.215	77.320	-0.719	50.336	1640.110	-0.004306	-0.005545	-0.005412
16.6400	894.311	66.054	83.000	81.739	-0.730	50.338	1702.538	-0.004624	-0.005810	-0.005722
16.6800	919.784	69.281	86.480	85.505	-0.701	50.338	1751.032	-0.004850	-0.006054	-0.005985
16.7200	965.169	75.033	91.242	90.883	-0.686	50.337	1837.435	-0.005252	-0.006387	-0.006362
16.7600	1006.407	80.073	95.619	95.511	-0.720	50.338	1915.941	-0.005605	-0.006693	-0.006686
16.8000	1042.190	84.800	99.237	99.971	-0.702	50.338	1984.062	-0.005936	-0.006947	-0.006998
16.8400	1048.998	86.206	100.559	101.722	-0.688	50.338	1997.023	-0.006034	-0.007039	-0.007121
16.8800	1053.582	87.512	101.658	102.930	-0.701	50.337	2005.749	-0.006126	-0.007116	-0.007205
16.9200	1098.006	92.393	105.665	107.544	-0.711	50.338	2090.321	-0.006468	-0.007397	-0.007528
16.9600	1039.695	87.300	101.425	102.889	-0.707	50.339	1979.313	-0.006111	-0.007100	-0.007202
17.0000	1091.408	92.323	105.664	107.267	-0.690	50.337	2077.761	-0.006463	-0.007396	-0.007509
17.0400	1094.128	93.716	106.310	108.462	-0.712	50.338	2082.939	-0.006560	-0.007442	-0.007592
17.0800	1063.711	90.247	104.066	105.697	-0.734	50.339	2025.032	-0.006317	-0.007285	-0.007399
17.1200	1044.970	88.426	102.414	103.972	-0.688	50.338	1989.355	-0.006190	-0.007169	-0.007278
17.1600	999.119	83.776	98.893	99.260	-0.710	50.338	1902.065	-0.005864	-0.006922	-0.006948
17.2000	958.211	78.555	93.996	93.898	-0.744	50.339	1824.188	-0.005499	-0.006580	-0.006573
17.2400	912.375	73.547	90.416	89.534	-0.715	50.338	1736.927	-0.005148	-0.006329	-0.006267
17.2800	903.493	72.647	89.178	88.589	-0.680	50.338	1720.018	-0.005085	-0.006242	-0.006201
17.3200	865.772	68.494	86.026	84.657	-0.722	50.338	1648.207	-0.004795	-0.006022	-0.005926
17.3600	784.318	59.698	77.374	75.625	-0.703	50.339	1493.139	-0.004179	-0.005416	-0.005294
17.4000	741.968	54.508	73.326	70.829	-0.683	50.339	1412.516	-0.003816	-0.005133	-0.004958
17.4400	717.141	51.528	69.790	67.788	-0.710	50.338	1365.252	-0.003607	-0.004885	-0.004745
17.4800	625.452	41.653	60.489	58.017	-0.740	50.339	1190.701	-0.002916	-0.004234	-0.004061
17.5200	577.752	35.926	54.266	51.624	-0.729	50.339	1099.892	-0.002515	-0.003799	-0.003614
17.5600	516.947	29.020	48.187	45.231	-0.697	50.338	984.135	-0.002031	-0.003373	-0.003166
17.6000	498.267	25.964	44.623	41.675	-0.723	50.338	948.572	-0.001817	-0.003124	-0.002917
17.6400	438.649	19.608	37.935	34.938	-0.703	50.339	835.075	-0.001373	-0.002655	-0.002446
17.6800	376.326	12.743	30.369	27.530	-0.690	50.339	716.429	-0.000892	-0.002126	-0.001927
17.7200	342.663	9.125	25.949	22.903	-0.698	50.338	652.342	-0.000639	-0.001816	-0.001603
17.7600	326.898	6.316	22.853	19.801	-0.728	50.339	622.330	-0.000442	-0.001600	-0.001386
17.8000	292.603	2.865	18.285	15.410	-0.696	50.339	557.041	-0.000201	-0.001280	-0.001079
17.8400	266.198	-0.502	13.111	10.742	-0.686	50.338	506.773	0.000035	-0.000918	-0.000752
17.8800	227.801	-3.449	9.217	7.130	-0.717	50.338	433.674	0.000241	-0.000645	-0.000499
17.9200	277.274	-0.405	13.869	11.063	-0.698	50.340	527.859	0.000028	-0.000971	-0.000774
17.9600	227.215	-4.700	7.579	5.212	-0.697	50.339	432.558	0.000329	-0.000531	-0.000365
18.0000	235.420	-4.573	8.407	6.062	-0.716	50.339	448.179	0.000320	-0.000588	-0.000424
18.0400	243.776	-3.478	9.326	6.906	-0.732	50.340	464.087	0.000243	-0.000653	-0.000483
18.0800	258.849	-2.958	10.539	8.339	-0.688	50.340	492.783	0.000207	-0.000738	-0.000584
18.1200	265.342	-2.424	11.625	9.211	-0.708	50.338	505.142	0.000170	-0.000814	-0.000645
18.1600	338.981	4.215	20.969	17.900	-0.732	50.339	645.332	-0.000295	-0.001468	-0.001253
18.2000	335.058	4.088	20.140	16.899	-0.723	50.340	637.865	-0.000286	-0.001410	-0.001183
18.2400	389.221	8.563	25.869	22.584	-0.702	50.340	740.976	-0.000599	-0.001811	-0.001581
18.2800	426.476	12.646	30.641	27.041	-0.722	50.340	811.901	-0.000885	-0.002145	-0.001893
18.3200	413.432	12.027	30.243	26.833	-0.719	50.340	787.067	-0.000842	-0.002117	-0.001878
18.3600	518.315	22.789	41.167	37.326	-0.707	50.341	986.738	-0.001595	-0.002882	-0.002613
18.4000	551.392	26.076	45.121	41.939	-0.720	50.339	1049.709	-0.001825	-0.003158	-0.002936
18.4400	644.568	36.279	55.095	52.015	-0.719	50.340	1227.093	-0.002540	-0.003857	-0.003641
18.4800	682.230	40.741	59.703	56.657	-0.714	50.340	1298.790	-0.002852	-0.004179	-0.003966
18.5200	731.463	46.871	65.526	62.576	-0.706	50.340	1392.517	-0.003281	-0.004587	-0.004380
18.5600	775.361	51.755	70.437	68.023	-0.728	50.340	1476.088	-0.003623	-0.004931	-0.004762
18.6000	838.300	59.573	77.771	75.484	-0.741	50.340	1595.907	-0.004170	-0.005444	-0.005284
18.6400	887.698	65.101	82.353	80.933	-0.719	50.341	1689.949	-0.004557	-0.005765	-0.005665
18.6800	943.123	72.019	88.670	87.408	-0.698	50.340	1795.464	-0.005041	-0.006207	-0.006119
18.7200	1033.158	82.809	97.863	98.219	-0.719	50.340	1966.867	-0.005797	-0.006850	-0.006875
18.7600	993.438	79.227	95.026	94.412	-0.723	50.341	1891.251	-0.005546	-0.006652	-0.006609
18.8000	1032.752	83.859	98.783	99.444	-0.699	50.340	1966.095	-0.005870	-0.006915	-0.006961
18.8400	1040.312	85.599	99.940	100.862	-0.701	50.340	1980.486	-0.005992	-0.006996	-0.007060
18.8800	1021.421	84.323	99.293	99.763	-0.741	50.341	1944.523	-0.005903	-0.006950	-0.006983
18.9200	1078.168	90.763	104.066	105.335	-0.687	50.342	2052.555	-0.006353	-0.007285	-0.007373
18.9600	1072.382	90.625	104.920	105.669	-0.674	50.340	2041.540	-0.006344	-0.007344	-0.007397
19.0000	1088.282	92.579	106.132	107.421	-0.718	50.340	2071.810	-0.006481	-0.007429	-0.007519
19.0400	1077.883	91.634	105.347	106.628	-0.706	50.341	2052.011	-0.006414	-0.007374	-0.007464
19.0800	1077.296	92.043	105.471	106.836	-0.687	50.341	2050.896	-0.006443	-0.007383	-0.007479
19.1200	1064.733	90.301	104.369	105.391	-0.693	50.340	2026.978	-0.006321	-0.007306	-0.007377
19.1600	1010.375	84.800	99.637	100.334	-0.725	50.341	1923.494	-0.005936	-0.006975	-0.007023
19.2000	996.188	83.678	98.331	98.984	-0.702	50.342	1896.486	-0.005857	-0.006883	-0.006929
19.2400	934.361	76.608	92.384	92.214	-0.698	50.341	1778.784	-0.005363	-0.006467	-0.006455
19.2800	875.285	70.041	86.758	85.602	-0.728	50.341	1666.317	-0.004903	-0.006073	-0.005992
19.3200	842.913	66.321	83.248	82.336	-0.715	50.342	1604.691	-0.004642	-0.005827	-0.005764
19.3600	819.995	63.401	81.005	79.280	-0.692	50.341	1561.060	-0.004438	-0.005670	-0.005550
19.4000	736.482	53.874	72.186	70.287	-0.715	50.341	1402.073	-0.003771	-0.005053	-0.004920
19.4400	699.527	49.763	68.743	66.495	-0.726	50.342	1331.720	-0.003483	-0.004812	-0.004655
19.4800	660.138	44.917	63.831	61.186	-0.690	50.342	1256.733	-0.003144	-0.004468	-0.004283
19.5200	576.114	35.138	54.296	51.389	-0.696	50.341	1096.773	-0.002460	-0.003801	-0.003597
19.5600	508.276	27.897	46.647	43.497	-0.732	50.342	967.627	-0.001953	-0.003265	-0.003045
19.6000	493.818	25.711	44.651	41.493	-0.712	50.342	940.104	-0.001800	-0.003126	-0.002905
19.6400	440.558	19.761	38.046	35.243	-0.680	50.342	838.709	-0.001383	-0.002663	-0.002467
19.6800	374.508	12.532	30.461	27.194	-0.706	50.341	712.967	-0.000877	-0.002132	-0.001904
19.7200	358.052	10.038	27.301	24.374	-0.716	50.343	681.639	-0.000703	-0.001911	-0.001706
19.7600	316.754	5.627	21.945	19.039	-0.692	50.343	603.018	-0.000394	-0.001536	-0.001333
19.8000	297.788	2.881	18.974	16.258	-0.689	50.342	566.912	-0.000202	-0.001328	-0.001138
19.8400	270.076	0.113	15.561	12.675	-0.713	50.342	514.154	-0.000008	-0.001089	-0.000887
19.8800	253.574	-1.945	12.328	9.894	-0.704	50.343	482.740	0.000136	-0.000863	-0.000693
19.9200	240.620	-3.379	10.415	7.965	-0.677	50.342	458.078	0.000237	-0.000729	-0.000558
19.9600	191.011	-7.981	3.439	1.433	-0.704	50.342	363.636	0.000559	-0.000241	-0.000100
