# Supplementary material for: Evaluation of a Cold-Mixed High-Performance Polyurethane Mixture
Source: Hindawi journal article supplement (doi:10.1155/2019/1507971), 2019-11-07
Supplement: f1 [file 1507971.f1.zip › 1507971.f1/dynamic modulus data/PUM/specimen1/temp50/zhs-1-50_1Hz.csv]

Test Information
****************
Project name	zhs
Operator name	1
Target test temperature	50
Target confining stress	0
Average dynamic strain range from 75 to 125 micro-strain
Contact stress	5
Initial modulus	1000
Axial gauge length	70
Comments
Specimen information
********************
Identification	zhs-1-50
Dimensions	Point 1	Point 2	Point 3	Point 4	Point 5	Point 6	Average	Std Dev.
Diameter (mm)	49.2	49.2	49.3				49.23	0.058
Height (mm)	101.3	101.2	101.3				101.27	0.058
Cross-sectional area (mm�)	1903.7
Conditioning time
Properties/Comments
Test Data	1Hz
*********
Test date and time	Wed	Apr 3	2019	1:50 PM
Dynamic modulus (MPa)	8966
Phase angle (Degrees)	4.07
Average temperature (�C)	50.3
Average confining pressure (kPa)	-0.7
Average micro-strain	98
Load drift (%)	0.1
Load standard error (%)	2.0
Average deformation drift (%)	-2.2
Average deformation standard error (%)	2.5
Deformation uniformity (%)	3.6
Phase uniformity (Degrees)	0.2
Conditioning Cycles
Time (sec)	Axial stress (kPa)	Axial micro-strain #1	Axial micro-strain #2	Axial micro-strain #3	Confining pressure (kPa)	Temperature (�C)	Load (N)	Displacement #1 (mm)	Displacement #2 (mm)	Displacement #3 (mm)
0.0000	231.693	-1.076	-0.249	1.418	-0.716	50.379	441.084	0.000075	0.000017	-0.000099
0.0200	224.765	-2.844	-2.067	-1.058	-0.713	50.379	427.895	0.000199	0.000145	0.000074
0.0400	259.586	-0.027	1.307	2.153	-0.717	50.379	494.184	0.000002	-0.000091	-0.000151
0.0600	268.032	0.394	1.952	3.211	-0.716	50.378	510.263	-0.000028	-0.000137	-0.000225
0.0800	264.079	0.141	1.293	2.113	-0.710	50.379	502.739	-0.000010	-0.000091	-0.000148
0.1000	289.132	2.332	4.086	4.808	-0.709	50.379	550.432	-0.000163	-0.000286	-0.000337
0.1200	375.560	10.497	13.249	14.177	-0.724	50.379	714.970	-0.000735	-0.000927	-0.000992
0.1400	369.864	10.152	13.151	14.675	-0.716	50.379	704.126	-0.000711	-0.000921	-0.001027
0.1600	423.200	15.509	18.890	20.134	-0.726	50.379	805.664	-0.001086	-0.001322	-0.001409
0.1800	438.334	17.120	20.612	21.442	-0.718	50.379	834.475	-0.001198	-0.001443	-0.001501
0.2000	483.599	21.948	25.759	26.722	-0.701	50.378	920.649	-0.001536	-0.001803	-0.001871
0.2200	538.122	27.828	31.135	32.837	-0.710	50.379	1024.446	-0.001948	-0.002179	-0.002299
0.2400	568.419	31.240	34.868	35.910	-0.715	50.378	1082.125	-0.002187	-0.002441	-0.002514
0.2600	593.412	33.945	37.700	39.535	-0.707	50.379	1129.704	-0.002376	-0.002639	-0.002767
0.2800	629.420	38.006	41.840	44.066	-0.696	50.379	1198.254	-0.002660	-0.002929	-0.003085
0.3000	672.672	43.266	46.343	48.818	-0.714	50.379	1280.594	-0.003029	-0.003244	-0.003417
0.3200	724.189	49.258	51.875	54.265	-0.714	50.379	1378.670	-0.003448	-0.003631	-0.003799
0.3400	774.294	55.053	57.350	60.672	-0.713	50.379	1474.056	-0.003854	-0.004014	-0.004247
0.3600	779.989	55.822	58.178	61.561	-0.715	50.379	1484.900	-0.003908	-0.004072	-0.004309
0.3800	843.124	63.177	64.658	68.688	-0.714	50.379	1605.091	-0.004422	-0.004526	-0.004808
0.4000	835.534	63.289	64.768	68.355	-0.718	50.379	1590.643	-0.004430	-0.004534	-0.004785
0.4200	861.308	66.224	67.122	70.858	-0.735	50.379	1639.709	-0.004636	-0.004699	-0.004960
0.4400	894.145	69.550	70.203	74.846	-0.738	50.378	1702.223	-0.004869	-0.004914	-0.005239
0.4600	886.571	69.548	69.995	74.470	-0.739	50.379	1687.803	-0.004868	-0.004900	-0.005213
0.4800	886.270	70.153	70.423	74.860	-0.732	50.379	1687.231	-0.004911	-0.004930	-0.005240
0.5000	901.389	71.937	72.076	76.375	-0.719	50.379	1716.013	-0.005036	-0.005045	-0.005346
0.5200	890.989	70.925	71.251	75.748	-0.731	50.379	1696.215	-0.004965	-0.004988	-0.005302
0.5400	878.080	69.845	70.368	75.402	-0.727	50.379	1671.638	-0.004889	-0.004926	-0.005278
0.5600	846.190	66.838	67.851	72.233	-0.723	50.379	1610.928	-0.004679	-0.004750	-0.005056
0.5800	851.359	66.979	68.319	72.664	-0.723	50.378	1620.770	-0.004689	-0.004782	-0.005086
0.6000	794.853	60.767	63.032	66.605	-0.726	50.379	1513.195	-0.004254	-0.004412	-0.004662
0.6200	769.019	58.323	60.546	64.296	-0.695	50.379	1464.014	-0.004083	-0.004238	-0.004501
0.6400	747.077	55.935	58.796	61.800	-0.708	50.379	1422.243	-0.003915	-0.004116	-0.004326
0.6600	700.234	50.969	54.434	56.906	-0.718	50.379	1333.065	-0.003568	-0.003810	-0.003983
0.6800	676.384	47.631	51.118	54.334	-0.718	50.379	1287.661	-0.003334	-0.003578	-0.003803
0.7000	641.818	44.177	47.858	50.430	-0.706	50.379	1221.857	-0.003092	-0.003350	-0.003530
0.7200	591.383	38.789	42.903	44.955	-0.708	50.379	1125.841	-0.002715	-0.003003	-0.003147
0.7400	555.540	34.241	38.707	40.412	-0.698	50.379	1057.606	-0.002397	-0.002710	-0.002829
0.7600	538.513	32.211	36.491	38.715	-0.700	50.379	1025.190	-0.002255	-0.002554	-0.002710
0.7800	477.528	25.852	29.747	31.616	-0.717	50.379	909.090	-0.001810	-0.002082	-0.002213
0.8000	427.784	20.941	24.698	26.196	-0.701	50.379	814.390	-0.001466	-0.001729	-0.001834
0.8200	383.179	15.425	19.274	20.692	-0.715	50.380	729.475	-0.001080	-0.001349	-0.001448
0.8400	343.399	10.541	14.143	16.050	-0.724	50.379	653.744	-0.000738	-0.000990	-0.001123
0.8600	316.168	8.099	10.951	12.091	-0.711	50.379	601.902	-0.000567	-0.000767	-0.000846
0.8800	275.035	3.597	5.668	6.964	-0.719	50.379	523.596	-0.000252	-0.000397	-0.000488
0.9000	276.748	3.329	5.628	6.628	-0.730	50.380	526.857	-0.000233	-0.000394	-0.000464
0.9200	247.548	-0.209	1.390	2.669	-0.727	50.380	471.268	0.000015	-0.000097	-0.000187
0.9400	251.440	-0.099	1.184	2.918	-0.719	50.380	478.678	0.000007	-0.000083	-0.000204
0.9600	247.187	-0.364	1.006	2.516	-0.714	50.379	470.581	0.000026	-0.000070	-0.000176
0.9800	238.155	-1.875	-0.430	0.780	-0.720	50.379	453.386	0.000131	0.000030	-0.000055
1.0000	214.951	-4.420	-3.882	-2.169	-0.723	50.380	409.212	0.000309	0.000272	0.000152
1.0200	228.492	-2.904	-2.244	-0.806	-0.715	50.379	434.990	0.000203	0.000157	0.000056
1.0400	225.531	-3.310	-2.686	-1.418	-0.713	50.379	429.354	0.000232	0.000188	0.000099
1.0600	232.835	-3.196	-2.121	-0.863	-0.721	50.380	443.258	0.000224	0.000148	0.000060
1.0800	275.095	0.296	1.952	3.417	-0.723	50.380	523.710	-0.000021	-0.000137	-0.000239
1.1000	309.751	4.186	6.245	7.949	-0.708	50.380	589.685	-0.000293	-0.000437	-0.000556
1.1200	328.266	5.796	8.475	9.395	-0.717	50.380	624.933	-0.000406	-0.000593	-0.000658
1.1400	387.207	11.411	14.681	15.313	-0.718	50.380	737.143	-0.000799	-0.001028	-0.001072
1.1600	388.289	11.816	15.122	16.593	-0.721	50.380	739.202	-0.000827	-0.001059	-0.001162
1.1800	453.648	18.284	21.684	23.152	-0.733	50.379	863.628	-0.001280	-0.001518	-0.001621
1.2000	490.106	22.538	26.350	27.126	-0.723	50.379	933.037	-0.001578	-0.001844	-0.001899
1.2200	558.396	29.216	33.202	34.534	-0.724	50.380	1063.042	-0.002045	-0.002324	-0.002417
1.2400	589.264	32.840	36.683	38.813	-0.722	50.380	1121.807	-0.002299	-0.002568	-0.002717
1.2600	587.430	33.511	37.222	38.689	-0.699	50.380	1118.317	-0.002346	-0.002606	-0.002708
1.2800	640.360	39.543	42.931	45.122	-0.711	50.380	1219.082	-0.002768	-0.003005	-0.003159
1.3000	692.088	44.933	48.324	50.833	-0.711	50.380	1317.558	-0.003145	-0.003383	-0.003558
1.3200	747.288	51.417	53.964	56.767	-0.691	50.380	1422.644	-0.003599	-0.003778	-0.003974
1.3400	759.325	53.299	55.866	58.725	-0.708	50.380	1445.560	-0.003731	-0.003911	-0.004111
1.3600	809.866	59.391	61.369	64.034	-0.714	50.380	1541.777	-0.004157	-0.004296	-0.004482
1.3800	833.190	62.082	63.610	66.772	-0.706	50.380	1586.180	-0.004346	-0.004453	-0.004674
1.4000	848.143	64.007	65.361	69.078	-0.710	50.380	1614.647	-0.004480	-0.004575	-0.004835
1.4200	869.243	66.755	67.603	72.041	-0.718	50.380	1654.816	-0.004673	-0.004732	-0.005043
1.4400	888.344	69.507	70.396	74.360	-0.727	50.380	1691.179	-0.004865	-0.004928	-0.005205
1.4600	882.709	69.000	69.775	74.151	-0.721	50.380	1680.450	-0.004830	-0.004884	-0.005191
1.4800	902.982	71.739	71.622	76.430	-0.735	50.381	1719.046	-0.005022	-0.005014	-0.005350
1.5000	885.143	70.181	70.862	75.207	-0.715	50.381	1685.085	-0.004913	-0.004960	-0.005265
1.5200	892.312	71.459	71.525	75.971	-0.715	50.380	1698.732	-0.005002	-0.005007	-0.005318
1.5400	869.018	68.592	69.679	74.040	-0.727	50.380	1654.387	-0.004801	-0.004878	-0.005183
1.5600	859.986	67.525	68.771	73.054	-0.718	50.380	1637.192	-0.004727	-0.004814	-0.005114
1.5800	852.817	67.091	68.359	72.025	-0.726	50.380	1623.545	-0.004696	-0.004785	-0.005042
1.6000	798.204	61.520	63.652	67.203	-0.727	50.379	1519.575	-0.004306	-0.004456	-0.004704
1.6200	781.612	59.474	61.812	65.536	-0.711	50.380	1487.989	-0.004163	-0.004327	-0.004588
1.6400	741.246	55.332	57.874	61.325	-0.711	50.380	1411.142	-0.003873	-0.004051	-0.004293
1.6600	742.494	55.318	57.834	61.074	-0.708	50.380	1413.517	-0.003872	-0.004048	-0.004275
1.6800	686.032	49.274	52.397	55.405	-0.710	50.380	1306.028	-0.003449	-0.003668	-0.003878
1.7000	635.732	43.506	47.276	49.804	-0.708	50.381	1210.270	-0.003045	-0.003309	-0.003486
1.7200	586.965	37.796	41.940	44.733	-0.718	50.380	1117.430	-0.002646	-0.002936	-0.003131
1.7400	542.285	33.079	37.138	39.620	-0.710	50.380	1032.372	-0.002316	-0.002600	-0.002773
1.7600	481.180	26.777	31.123	32.935	-0.722	50.380	916.042	-0.001874	-0.002179	-0.002305
1.7800	438.454	21.278	25.676	27.529	-0.727	50.380	834.703	-0.001489	-0.001797	-0.001927
1.8000	425.424	19.563	23.583	25.764	-0.716	50.380	809.898	-0.001369	-0.001651	-0.001803
1.8200	374.869	14.808	18.601	20.134	-0.719	50.380	713.654	-0.001037	-0.001302	-0.001409
1.8400	332.819	9.966	13.568	14.939	-0.728	50.380	633.602	-0.000698	-0.000950	-0.001046
1.8600	319.233	7.566	10.966	12.134	-0.719	50.379	607.738	-0.000530	-0.000768	-0.000849
1.8800	296.420	5.122	8.144	9.630	-0.732	50.380	564.308	-0.000359	-0.000570	-0.000674
1.9000	268.543	2.275	4.565	5.517	-0.711	50.380	511.236	-0.000159	-0.000320	-0.000386
1.9200	254.386	0.563	2.434	3.528	-0.713	50.380	484.285	-0.000039	-0.000170	-0.000247
1.9400	234.879	-1.664	-0.345	0.972	-0.728	50.380	447.149	0.000116	0.000024	-0.000068
1.9600	227.064	-2.692	-1.875	-0.168	-0.705	50.380	432.272	0.000188	0.000131	0.000012
1.9800	226.673	-2.928	-1.901	-0.765	-0.703	50.379	431.528	0.000205	0.000133	0.000054
2.0000	217.792	-3.942	-2.824	-1.780	-0.723	50.380	414.619	0.000276	0.000198	0.000125
2.0200	225.426	-4.025	-3.002	-1.710	-0.694	50.380	429.153	0.000282	0.000210	0.000120
2.0400	252.928	-1.370	-0.387	1.126	-0.721	50.380	481.510	0.000096	0.000027	-0.000079
2.0600	255.949	-0.673	0.288	1.640	-0.724	50.380	487.261	0.000047	-0.000020	-0.000115
2.0800	276.883	0.519	2.543	3.821	-0.722	50.380	527.115	-0.000036	-0.000178	-0.000267
2.1000	301.410	2.654	4.939	6.436	-0.720	50.380	573.807	-0.000186	-0.000346	-0.000450
2.1200	340.213	6.541	8.982	10.770	-0.717	50.381	647.678	-0.000458	-0.000629	-0.000754
2.1400	382.022	11.099	14.076	15.300	-0.715	50.380	727.272	-0.000777	-0.000985	-0.001071
2.1600	411.553	13.938	17.297	18.747	-0.712	50.380	783.491	-0.000976	-0.001211	-0.001312
2.1800	453.332	18.270	21.794	23.320	-0.722	50.380	863.028	-0.001279	-0.001526	-0.001632
2.2000	485.643	21.768	25.330	27.139	-0.713	50.380	924.540	-0.001524	-0.001773	-0.001900
2.2200	534.906	27.324	31.027	32.602	-0.717	50.380	1018.324	-0.001913	-0.002172	-0.002282
2.2400	570.028	31.017	34.962	36.896	-0.730	50.380	1085.186	-0.002171	-0.002447	-0.002583
2.2600	589.129	33.454	37.466	39.299	-0.720	50.380	1121.550	-0.002342	-0.002623	-0.002751
2.2800	654.607	40.473	43.908	46.538	-0.721	50.380	1246.204	-0.002833	-0.003074	-0.003258
2.3000	714.826	47.575	50.525	52.805	-0.718	50.380	1360.846	-0.003330	-0.003537	-0.003696
2.3200	716.434	48.052	51.118	53.944	-0.706	50.380	1363.907	-0.003364	-0.003578	-0.003776
2.3400	778.066	54.944	57.448	60.254	-0.708	50.380	1481.237	-0.003846	-0.004021	-0.004218
2.3600	787.459	57.144	58.866	62.550	-0.707	50.380	1499.119	-0.004000	-0.004121	-0.004378
2.3800	828.982	61.870	63.239	67.108	-0.712	50.380	1578.169	-0.004331	-0.004427	-0.004698
2.4000	859.535	65.269	66.379	70.676	-0.719	50.380	1636.333	-0.004569	-0.004647	-0.004947
2.4200	881.311	67.862	68.510	73.220	-0.708	50.380	1677.790	-0.004750	-0.004796	-0.005125
2.4400	880.439	68.383	69.183	73.498	-0.712	50.380	1676.130	-0.004787	-0.004843	-0.005145
2.4600	881.717	69.127	69.640	73.831	-0.715	50.380	1678.562	-0.004839	-0.004875	-0.005168
2.4800	893.574	70.589	70.837	75.707	-0.715	50.381	1701.136	-0.004941	-0.004959	-0.005300
2.5000	894.070	70.997	71.014	76.137	-0.715	50.381	1702.080	-0.004970	-0.004971	-0.005330
2.5200	900.938	72.048	71.663	76.971	-0.708	50.381	1715.155	-0.005043	-0.005016	-0.005388
2.5400	874.082	69.548	70.078	74.748	-0.711	50.380	1664.028	-0.004868	-0.004905	-0.005232
2.5600	863.848	67.919	69.294	73.889	-0.704	50.381	1644.545	-0.004754	-0.004851	-0.005172
2.5800	855.192	67.174	68.152	72.678	-0.704	50.380	1628.065	-0.004702	-0.004771	-0.005087
2.6000	810.212	62.839	64.285	68.496	-0.720	50.380	1542.435	-0.004399	-0.004500	-0.004795
2.6200	776.202	59.124	61.591	65.089	-0.705	50.380	1477.690	-0.004139	-0.004311	-0.004556
2.6400	737.444	54.675	57.830	60.520	-0.708	50.381	1403.904	-0.003827	-0.004048	-0.004236
2.6600	705.584	51.024	54.379	57.644	-0.708	50.380	1343.250	-0.003572	-0.003807	-0.004035
2.6800	669.726	47.012	50.789	53.556	-0.716	50.380	1274.986	-0.003291	-0.003555	-0.003749
2.7000	624.911	42.215	46.330	48.917	-0.707	50.380	1189.671	-0.002955	-0.003243	-0.003424
2.7200	583.087	37.416	41.980	44.136	-0.723	50.381	1110.048	-0.002619	-0.002939	-0.003089
2.7400	547.575	33.134	37.674	40.119	-0.717	50.380	1042.442	-0.002319	-0.002637	-0.002808
2.7600	503.407	28.853	32.790	35.019	-0.704	50.380	958.357	-0.002020	-0.002295	-0.002451
2.7800	466.677	24.629	28.744	30.547	-0.714	50.380	888.433	-0.001724	-0.002012	-0.002138
2.8000	422.343	19.423	23.722	25.720	-0.724	50.380	804.033	-0.001360	-0.001661	-0.001800
2.8200	390.573	15.846	19.758	21.665	-0.714	50.380	743.551	-0.001109	-0.001383	-0.001517
2.8400	347.562	11.100	14.543	16.244	-0.725	50.380	661.669	-0.000777	-0.001018	-0.001137
2.8600	306.444	6.947	10.016	11.480	-0.720	50.380	583.391	-0.000486	-0.000701	-0.000804
2.8800	290.454	4.563	7.415	8.965	-0.719	50.380	552.950	-0.000319	-0.000519	-0.000628
2.9000	267.821	2.038	4.250	5.990	-0.714	50.381	509.863	-0.000143	-0.000297	-0.000419
2.9200	259.465	1.321	3.080	4.349	-0.712	50.381	493.956	-0.000092	-0.000216	-0.000304
2.9400	248.810	-0.378	1.251	2.279	-0.723	50.380	473.671	0.000026	-0.000088	-0.000160
2.9600	238.260	-1.611	0.137	1.419	-0.724	50.380	453.587	0.000113	-0.000010	-0.000099
2.9800	209.045	-4.588	-4.183	-2.417	-0.718	50.380	397.968	0.000321	0.000293	0.000169
3.0000	222.435	-3.393	-3.181	-1.735	-0.714	50.380	423.460	0.000238	0.000223	0.000121
3.0200	226.598	-3.251	-2.577	-1.223	-0.709	50.380	431.385	0.000228	0.000180	0.000086
3.0400	229.679	-3.463	-2.602	-1.143	-0.708	50.380	437.250	0.000242	0.000182	0.000080
3.0600	256.159	-0.922	-0.084	1.557	-0.712	50.380	487.661	0.000065	0.000006	-0.000109
3.0800	282.038	1.278	2.778	4.113	-0.715	50.380	536.928	-0.000089	-0.000194	-0.000288
3.1000	302.086	3.006	5.409	6.240	-0.719	50.380	575.094	-0.000210	-0.000379	-0.000437
3.1200	329.423	5.487	8.639	9.700	-0.730	50.381	627.136	-0.000384	-0.000605	-0.000679
3.1400	368.692	9.211	12.520	13.716	-0.725	50.380	701.895	-0.000645	-0.000876	-0.000960
3.1600	391.490	12.013	15.094	16.258	-0.717	50.380	745.296	-0.000841	-0.001057	-0.001138
3.1800	450.477	17.808	21.477	22.916	-0.719	50.380	857.592	-0.001247	-0.001503	-0.001604
3.2000	509.102	23.857	27.876	29.266	-0.731	50.380	969.200	-0.001670	-0.001951	-0.002049
3.2200	518.690	25.682	29.444	30.920	-0.714	50.381	987.453	-0.001798	-0.002061	-0.002164
3.2400	559.432	29.836	34.084	35.547	-0.727	50.380	1065.016	-0.002088	-0.002386	-0.002488
3.2600	612.678	35.575	39.629	41.357	-0.728	50.381	1166.382	-0.002490	-0.002774	-0.002895
3.2800	641.097	39.179	42.808	44.983	-0.711	50.380	1220.484	-0.002743	-0.002997	-0.003149
3.3000	717.817	47.365	50.225	53.238	-0.717	50.381	1366.539	-0.003316	-0.003516	-0.003727
3.3200	734.408	50.295	53.304	55.864	-0.723	50.381	1398.125	-0.003521	-0.003731	-0.003910
3.3400	780.185	55.514	57.956	60.826	-0.712	50.380	1485.271	-0.003886	-0.004057	-0.004258
3.3600	788.886	56.707	58.866	62.369	-0.708	50.380	1501.837	-0.003969	-0.004121	-0.004366
3.3800	810.452	59.685	61.205	64.965	-0.713	50.380	1542.892	-0.004178	-0.004284	-0.004548
3.4000	850.097	64.554	65.678	69.747	-0.705	50.380	1618.366	-0.004519	-0.004597	-0.004882
3.4200	854.215	65.241	66.337	70.385	-0.696	50.380	1626.205	-0.004567	-0.004644	-0.004927
3.4400	879.928	68.354	68.881	73.539	-0.704	50.381	1675.158	-0.004785	-0.004822	-0.005148
3.4600	896.971	70.575	70.588	75.402	-0.700	50.381	1707.602	-0.004940	-0.004941	-0.005278
3.4800	891.335	70.477	70.534	75.305	-0.705	50.381	1696.873	-0.004933	-0.004937	-0.005271
3.5000	904.004	72.006	71.704	76.706	-0.704	50.381	1720.991	-0.005040	-0.005019	-0.005369
3.5200	884.287	69.943	70.353	75.470	-0.718	50.381	1683.455	-0.004896	-0.004925	-0.005283
3.5400	875.856	69.296	69.761	74.887	-0.714	50.380	1667.404	-0.004851	-0.004883	-0.005242
3.5600	858.708	67.720	68.429	73.179	-0.720	50.380	1634.760	-0.004740	-0.004790	-0.005123
3.5800	843.079	66.280	67.190	71.761	-0.712	50.380	1605.005	-0.004640	-0.004703	-0.005023
3.6000	789.037	60.108	62.289	66.385	-0.704	50.380	1502.123	-0.004208	-0.004360	-0.004647
3.6200	776.758	59.039	61.231	64.755	-0.708	50.380	1478.748	-0.004133	-0.004286	-0.004533
3.6400	752.728	56.482	58.865	62.130	-0.718	50.380	1433.001	-0.003954	-0.004121	-0.004349
3.6600	712.933	52.077	55.067	57.893	-0.716	50.380	1357.241	-0.003645	-0.003855	-0.004053
3.6800	657.403	45.690	49.442	52.096	-0.725	50.380	1251.526	-0.003198	-0.003461	-0.003647
3.7000	652.819	45.060	48.682	51.637	-0.720	50.381	1242.800	-0.003154	-0.003408	-0.003615
3.7200	593.276	38.956	42.875	45.622	-0.715	50.381	1129.446	-0.002727	-0.003001	-0.003194
3.7400	522.147	31.003	35.459	37.243	-0.722	50.380	994.034	-0.002170	-0.002482	-0.002607
3.7600	492.571	27.281	31.659	33.380	-0.718	50.380	937.729	-0.001910	-0.002216	-0.002337
3.7800	544.434	31.816	35.856	38.021	-0.708	50.380	1036.463	-0.002227	-0.002510	-0.002661
3.8000	495.937	27.716	31.703	33.436	-0.717	50.380	944.138	-0.001940	-0.002219	-0.002340
3.8200	411.748	18.412	22.525	24.279	-0.712	50.380	783.863	-0.001289	-0.001577	-0.001700
3.8400	302.387	6.809	9.700	11.144	-0.722	50.380	575.666	-0.000477	-0.000679	-0.000780
3.8600	308.623	6.864	9.439	10.909	-0.722	50.381	587.540	-0.000480	-0.000661	-0.000764
3.8800	280.295	4.047	6.176	7.854	-0.725	50.381	533.609	-0.000283	-0.000432	-0.000550
3.9000	260.037	1.814	3.575	4.849	-0.712	50.381	495.043	-0.000127	-0.000250	-0.000339
3.9200	253.063	0.338	2.118	3.627	-0.725	50.381	481.768	-0.000024	-0.000148	-0.000254
3.9400	241.612	-0.797	0.537	2.195	-0.715	50.380	459.967	0.000056	-0.000038	-0.000154
3.9600	211.465	-3.858	-3.800	-2.320	-0.703	50.380	402.575	0.000270	0.000266	0.000162
3.9800	230.175	-2.649	-1.776	-0.596	-0.712	50.380	438.194	0.000185	0.000124	0.000042
4.0000	228.597	-3.252	-2.522	-1.000	-0.711	50.380	435.190	0.000228	0.000177	0.000070
4.0200	232.505	-2.888	-2.245	-0.834	-0.708	50.380	442.629	0.000202	0.000157	0.000058
4.0400	239.974	-2.227	-1.488	-0.001	-0.695	50.380	456.848	0.000156	0.000104	0.000000
4.0600	266.364	-0.055	1.350	2.474	-0.704	50.380	507.088	0.000004	-0.000095	-0.000173
4.0800	275.471	0.381	2.048	3.322	-0.714	50.381	524.426	-0.000027	-0.000143	-0.000233
4.1000	278.161	0.970	2.380	3.975	-0.716	50.380	529.547	-0.000068	-0.000167	-0.000278
4.1200	312.546	4.101	6.356	7.159	-0.706	50.380	595.007	-0.000287	-0.000445	-0.000501
4.1400	350.237	7.650	10.692	11.742	-0.705	50.380	666.761	-0.000535	-0.000748	-0.000822
4.1600	409.870	13.179	16.828	18.220	-0.722	50.380	780.287	-0.000923	-0.001178	-0.001275
4.1800	465.790	19.383	22.896	24.736	-0.722	50.380	886.745	-0.001357	-0.001603	-0.001732
4.2000	477.858	21.138	24.920	26.138	-0.715	50.380	909.719	-0.001480	-0.001744	-0.001830
4.2200	539.835	27.645	31.757	33.032	-0.723	50.380	1027.708	-0.001935	-0.002223	-0.002312
4.2400	577.106	31.649	35.638	37.575	-0.720	50.380	1098.661	-0.002215	-0.002495	-0.002630
4.2600	563.565	30.821	34.976	36.438	-0.699	50.380	1072.884	-0.002157	-0.002448	-0.002551
4.2800	664.571	42.003	45.696	47.274	-0.712	50.380	1265.173	-0.002940	-0.003199	-0.003309
4.3000	696.311	45.957	49.136	51.458	-0.711	50.381	1325.598	-0.003217	-0.003439	-0.003602
4.3200	750.714	51.641	54.600	57.449	-0.699	50.380	1429.167	-0.003615	-0.003822	-0.004021
4.3400	807.356	58.828	60.515	64.424	-0.722	50.380	1536.999	-0.004118	-0.004236	-0.004510
4.3600	756.620	53.651	56.485	59.045	-0.713	50.380	1440.411	-0.003756	-0.003954	-0.004133
4.3800	829.568	61.478	63.377	66.731	-0.714	50.380	1579.285	-0.004303	-0.004436	-0.004671
4.4000	861.894	65.351	66.268	70.412	-0.723	50.380	1640.825	-0.004575	-0.004639	-0.004929
4.4200	885.053	68.325	69.045	73.471	-0.720	50.380	1684.914	-0.004783	-0.004833	-0.005143
4.4400	897.617	70.434	71.084	75.985	-0.727	50.380	1708.832	-0.004930	-0.004976	-0.005319
4.4600	878.140	68.494	69.431	74.611	-0.727	50.381	1671.753	-0.004795	-0.004860	-0.005223
4.4800	887.127	69.758	70.133	75.025	-0.714	50.380	1688.862	-0.004883	-0.004909	-0.005252
4.5000	897.977	71.317	71.414	76.165	-0.716	50.380	1709.518	-0.004992	-0.004999	-0.005332
4.5200	895.002	71.488	71.621	76.166	-0.712	50.380	1703.854	-0.005004	-0.005013	-0.005332
4.5400	881.957	69.915	70.574	75.428	-0.707	50.380	1679.020	-0.004894	-0.004940	-0.005280
4.5600	851.149	66.836	67.932	72.540	-0.699	50.380	1620.369	-0.004679	-0.004755	-0.005078
4.5800	831.492	64.946	66.515	70.760	-0.696	50.380	1582.947	-0.004546	-0.004656	-0.004953
4.6000	818.733	63.627	65.416	69.217	-0.709	50.380	1558.657	-0.004454	-0.004579	-0.004845
4.6200	788.240	59.966	62.305	65.951	-0.708	50.380	1500.607	-0.004198	-0.004361	-0.004617
4.6400	730.606	53.973	56.539	60.394	-0.702	50.380	1390.886	-0.003778	-0.003958	-0.004228
4.6600	662.798	46.631	49.796	52.570	-0.704	50.380	1261.797	-0.003264	-0.003486	-0.003680
4.6800	694.899	49.887	52.672	55.807	-0.720	50.380	1322.908	-0.003492	-0.003687	-0.003906
4.7000	604.067	40.093	44.486	46.817	-0.713	50.380	1149.988	-0.002806	-0.003114	-0.003277
4.7200	606.562	39.883	43.811	46.414	-0.712	50.380	1154.737	-0.002792	-0.003067	-0.003249
4.7400	549.634	33.653	37.977	40.454	-0.711	50.380	1046.362	-0.002356	-0.002658	-0.002832
4.7600	490.678	27.449	31.740	33.493	-0.720	50.380	934.124	-0.001921	-0.002222	-0.002344
4.7800	472.208	24.531	28.924	30.533	-0.703	50.380	898.962	-0.001717	-0.002025	-0.002137
4.8000	411.914	18.341	22.303	24.194	-0.719	50.380	784.178	-0.001284	-0.001561	-0.001694
4.8200	422.839	19.383	23.089	24.681	-0.715	50.380	804.977	-0.001357	-0.001616	-0.001728
4.8400	340.649	10.582	13.868	15.286	-0.714	50.380	648.508	-0.000741	-0.000971	-0.001070
4.8600	298.599	5.740	8.667	10.103	-0.716	50.380	568.457	-0.000402	-0.000607	-0.000707
4.8800	293.625	4.844	7.538	8.990	-0.712	50.380	558.987	-0.000339	-0.000528	-0.000629
4.9000	261.900	2.038	3.811	4.974	-0.711	50.380	498.590	-0.000143	-0.000267	-0.000348
4.9200	247.683	-0.169	1.665	3.295	-0.721	50.380	471.525	0.000012	-0.000117	-0.000231
4.9400	241.281	-0.965	0.507	1.780	-0.717	50.380	459.337	0.000068	-0.000036	-0.000125
4.9600	229.634	-2.732	-1.626	0.209	-0.722	50.380	437.164	0.000191	0.000114	-0.000015
4.9800	216.875	-3.744	-3.333	-1.834	-0.721	50.379	412.874	0.000262	0.000233	0.000128
5.0000	250.944	3.512	4.361	5.921	-0.712	50.358	477.734	-0.000246	-0.000305	-0.000414
5.0200	238.035	0.800	1.637	2.987	-0.706	50.358	453.157	-0.000056	-0.000115	-0.000209
5.0400	266.709	2.683	4.333	5.421	-0.716	50.358	507.746	-0.000188	-0.000303	-0.000379
5.0600	289.958	4.004	5.778	7.451	-0.711	50.358	552.006	-0.000280	-0.000404	-0.000522
5.0800	343.339	9.054	11.446	12.758	-0.718	50.358	653.629	-0.000634	-0.000801	-0.000893
5.1000	327.214	7.454	10.263	11.562	-0.721	50.358	622.931	-0.000522	-0.000718	-0.000809
5.1200	376.056	11.999	15.025	16.315	-0.712	50.358	715.914	-0.000840	-0.001052	-0.001142
5.1400	439.566	17.978	21.602	23.013	-0.721	50.358	836.821	-0.001258	-0.001512	-0.001611
5.1600	467.714	21.345	24.752	26.486	-0.716	50.358	890.408	-0.001494	-0.001733	-0.001854
5.1800	510.936	26.132	29.679	31.615	-0.723	50.358	972.691	-0.001829	-0.002078	-0.002213
5.2000	575.844	32.574	36.587	38.242	-0.732	50.358	1096.258	-0.002280	-0.002561	-0.002677
5.2200	622.176	37.906	41.733	44.357	-0.718	50.358	1184.464	-0.002653	-0.002921	-0.003105
5.2400	748.400	51.458	53.883	57.671	-0.719	50.358	1424.761	-0.003602	-0.003772	-0.004037
5.2600	739.788	51.712	54.586	57.531	-0.714	50.358	1408.367	-0.003620	-0.003821	-0.004027
5.2800	790.765	57.507	59.416	62.730	-0.708	50.358	1505.413	-0.004026	-0.004159	-0.004391
5.3000	834.783	62.390	63.860	68.286	-0.730	50.357	1589.212	-0.004367	-0.004470	-0.004780
5.3200	924.007	72.831	72.804	78.194	-0.722	50.358	1759.071	-0.005098	-0.005096	-0.005474
5.3400	950.592	76.736	75.763	81.196	-0.714	50.358	1809.683	-0.005372	-0.005303	-0.005684
5.3600	940.297	75.779	75.379	81.182	-0.735	50.358	1790.085	-0.005305	-0.005277	-0.005683
5.3800	1042.265	87.372	84.501	91.578	-0.729	50.358	1984.205	-0.006116	-0.005915	-0.006410
5.4000	1040.312	88.675	84.982	92.243	-0.725	50.358	1980.486	-0.006207	-0.005949	-0.006457
5.4200	1110.179	96.264	91.406	99.708	-0.718	50.358	2113.495	-0.006738	-0.006398	-0.006980
5.4400	1083.263	94.232	90.279	98.428	-0.727	50.357	2062.254	-0.006596	-0.006320	-0.006890
5.4600	1108.405	97.065	91.928	100.805	-0.724	50.357	2110.119	-0.006795	-0.006435	-0.007056
5.4800	1106.166	97.628	92.507	101.028	-0.737	50.358	2105.856	-0.006834	-0.006476	-0.007072
5.5000	1105.745	98.134	92.783	101.432	-0.734	50.357	2105.055	-0.006869	-0.006495	-0.007100
5.5200	1098.547	97.334	92.384	101.110	-0.715	50.357	2091.351	-0.006813	-0.006467	-0.007078
5.5400	1079.881	95.548	90.995	100.069	-0.715	50.357	2055.817	-0.006688	-0.006370	-0.007005
5.5600	1065.604	94.331	89.729	98.566	-0.709	50.357	2028.637	-0.006603	-0.006281	-0.006900
5.5800	1030.528	90.794	87.460	95.261	-0.703	50.357	1961.861	-0.006356	-0.006122	-0.006668
5.6000	1008.015	87.934	85.284	93.105	-0.700	50.358	1919.003	-0.006155	-0.005970	-0.006517
5.6200	958.752	82.810	81.254	88.408	-0.712	50.358	1825.218	-0.005797	-0.005688	-0.006189
5.6400	939.411	80.354	78.680	85.797	-0.707	50.358	1788.397	-0.005625	-0.005508	-0.006006
5.6600	865.531	72.005	72.598	78.530	-0.716	50.358	1647.749	-0.005040	-0.005082	-0.005497
5.6800	827.329	67.426	68.510	73.985	-0.727	50.357	1575.022	-0.004720	-0.004796	-0.005179
5.7000	755.568	60.246	62.220	67.105	-0.711	50.357	1438.408	-0.004217	-0.004355	-0.004697
5.7200	705.824	54.143	56.595	61.130	-0.711	50.357	1343.708	-0.003790	-0.003962	-0.004279
5.7400	643.742	47.095	50.305	53.805	-0.721	50.357	1225.519	-0.003297	-0.003521	-0.003766
5.7600	587.220	40.220	44.473	47.817	-0.723	50.357	1117.916	-0.002815	-0.003113	-0.003347
5.7800	522.132	32.783	37.041	39.732	-0.718	50.357	994.005	-0.002295	-0.002593	-0.002781
5.8000	495.201	29.708	33.644	36.481	-0.717	50.357	942.736	-0.002080	-0.002355	-0.002554
5.8200	442.557	23.591	27.754	30.239	-0.724	50.357	842.514	-0.001651	-0.001943	-0.002117
5.8400	407.210	19.563	23.447	26.095	-0.727	50.357	775.223	-0.001369	-0.001641	-0.001827
5.8600	347.276	12.758	16.416	18.620	-0.723	50.357	661.125	-0.000893	-0.001149	-0.001303
5.8800	324.794	10.220	13.275	15.272	-0.714	50.357	618.324	-0.000715	-0.000929	-0.001069
5.9000	279.694	5.263	7.896	9.574	-0.722	50.357	532.465	-0.000368	-0.000553	-0.000670
5.9200	281.272	4.746	7.222	9.297	-0.725	50.357	535.469	-0.000332	-0.000506	-0.000651
5.9400	247.939	1.041	2.765	4.849	-0.722	50.357	472.012	-0.000073	-0.000194	-0.000339
5.9600	243.520	0.494	1.487	3.502	-0.726	50.357	463.600	-0.000035	-0.000104	-0.000245
5.9800	230.806	-1.047	-0.124	1.501	-0.727	50.357	439.396	0.000073	0.000009	-0.000105
6.0000	237.689	-1.161	0.508	2.252	-0.726	50.357	452.499	0.000081	-0.000036	-0.000158
6.0200	237.795	-1.246	-0.041	1.820	-0.719	50.356	452.700	0.000087	0.000003	-0.000127
6.0400	253.995	0.155	1.280	3.237	-0.723	50.357	483.541	-0.000011	-0.000090	-0.000227
6.0600	272.270	1.869	3.355	4.794	-0.718	50.357	518.332	-0.000131	-0.000235	-0.000336
6.0800	307.812	4.802	7.027	8.701	-0.719	50.357	585.995	-0.000336	-0.000492	-0.000609
6.1000	331.406	6.947	9.864	11.436	-0.718	50.357	630.913	-0.000486	-0.000690	-0.000801
6.1200	372.028	11.255	13.815	16.024	-0.724	50.357	708.246	-0.000788	-0.000967	-0.001122
6.1400	413.552	15.593	18.945	20.427	-0.710	50.357	787.296	-0.001092	-0.001326	-0.001430
6.1600	462.845	20.649	24.079	25.890	-0.718	50.357	881.138	-0.001445	-0.001686	-0.001812
6.1800	520.359	26.160	29.968	32.267	-0.710	50.357	990.629	-0.001831	-0.002098	-0.002259
6.2000	582.636	32.979	36.750	39.549	-0.718	50.357	1109.190	-0.002309	-0.002572	-0.002768
6.2200	627.872	38.507	42.132	44.732	-0.723	50.357	1195.307	-0.002696	-0.002949	-0.003131
6.2400	669.636	43.127	46.645	49.110	-0.729	50.357	1274.815	-0.003019	-0.003265	-0.003438
6.2600	744.838	51.698	54.103	57.561	-0.715	50.357	1417.980	-0.003619	-0.003787	-0.004029
6.2800	798.640	58.125	59.855	64.382	-0.720	50.356	1520.405	-0.004069	-0.004190	-0.004507
6.3000	846.971	63.864	65.015	69.439	-0.722	50.357	1612.415	-0.004470	-0.004551	-0.004861
6.3200	874.578	67.650	68.648	73.163	-0.726	50.357	1664.972	-0.004736	-0.004805	-0.005121
6.3400	928.590	73.870	73.642	79.543	-0.736	50.357	1767.797	-0.005171	-0.005155	-0.005568
6.3600	990.718	81.646	79.655	85.963	-0.728	50.356	1886.072	-0.005715	-0.005576	-0.006017
6.3800	1016.401	85.261	82.946	89.452	-0.726	50.356	1934.967	-0.005968	-0.005806	-0.006262
6.4000	1047.029	89.222	85.986	93.564	-0.726	50.356	1993.275	-0.006246	-0.006019	-0.006549
6.4200	1087.245	94.175	90.044	98.483	-0.714	50.357	2069.836	-0.006592	-0.006303	-0.006894
6.4400	1086.404	95.000	90.004	98.817	-0.724	50.357	2068.233	-0.006650	-0.006300	-0.006917
6.4600	1104.543	97.515	92.302	101.027	-0.727	50.356	2102.766	-0.006826	-0.006461	-0.007072
6.4800	1106.557	98.066	92.686	101.514	-0.730	50.356	2106.600	-0.006865	-0.006488	-0.007106
6.5000	1107.413	98.569	92.811	102.264	-0.723	50.356	2108.231	-0.006900	-0.006497	-0.007158
6.5200	1101.973	98.275	92.561	102.014	-0.724	50.356	2097.874	-0.006879	-0.006479	-0.007141
6.5400	1087.426	97.460	91.778	101.042	-0.724	50.357	2070.179	-0.006822	-0.006424	-0.007073
6.5600	1060.870	94.205	89.975	98.777	-0.712	50.356	2019.625	-0.006594	-0.006298	-0.006914
6.5800	1038.568	91.719	87.873	96.872	-0.708	50.356	1977.167	-0.006420	-0.006151	-0.006781
6.6000	1004.093	88.048	84.872	93.258	-0.718	50.356	1911.535	-0.006163	-0.005941	-0.006528
6.6200	965.921	83.943	81.759	89.077	-0.727	50.356	1838.865	-0.005876	-0.005723	-0.006235
6.6400	934.436	80.198	78.968	86.185	-0.727	50.356	1778.927	-0.005614	-0.005528	-0.006033
6.6600	860.016	71.977	72.048	78.417	-0.727	50.357	1637.249	-0.005038	-0.005043	-0.005489
6.6800	821.723	67.497	68.166	73.943	-0.724	50.356	1564.350	-0.004725	-0.004772	-0.005176
6.7000	758.950	60.487	62.303	66.995	-0.722	50.356	1444.845	-0.004234	-0.004361	-0.004690
6.7200	716.044	55.500	57.791	62.203	-0.719	50.356	1363.163	-0.003885	-0.004045	-0.004354
6.7400	649.017	47.771	50.746	54.989	-0.708	50.356	1235.561	-0.003344	-0.003552	-0.003849
6.7600	606.727	42.958	46.151	49.917	-0.716	50.356	1155.052	-0.003007	-0.003231	-0.003494
6.7800	547.019	36.137	39.918	43.008	-0.711	50.356	1041.384	-0.002530	-0.002794	-0.003011
6.8000	495.171	29.710	33.740	37.118	-0.712	50.356	942.678	-0.002080	-0.002362	-0.002598
6.8200	447.666	24.589	28.428	31.311	-0.715	50.356	852.242	-0.001721	-0.001990	-0.002192
6.8400	412.334	20.237	24.176	27.056	-0.719	50.356	784.979	-0.001417	-0.001692	-0.001894
6.8600	347.096	13.347	16.676	19.217	-0.728	50.356	660.782	-0.000934	-0.001167	-0.001345
6.8800	328.731	10.765	13.881	16.413	-0.720	50.356	625.820	-0.000754	-0.000972	-0.001149
6.9000	295.639	6.693	9.411	11.813	-0.718	50.356	562.820	-0.000468	-0.000659	-0.000827
6.9200	264.635	3.342	5.572	7.547	-0.715	50.356	503.798	-0.000234	-0.000390	-0.000528
6.9400	260.082	2.585	4.252	6.809	-0.711	50.356	495.129	-0.000181	-0.000298	-0.000477
6.9600	223.983	-1.244	-0.030	2.168	-0.712	50.356	426.407	0.000087	0.000002	-0.000152
6.9800	230.055	-1.217	-0.415	1.765	-0.723	50.356	437.965	0.000085	0.000029	-0.000124
7.0000	236.367	-0.714	0.246	2.334	-0.728	50.356	449.982	0.000050	-0.000017	-0.000163
7.0200	240.244	-0.686	0.769	2.127	-0.714	50.356	457.363	0.000048	-0.000054	-0.000149
7.0400	249.817	-0.153	1.443	2.822	-0.721	50.355	475.588	0.000011	-0.000101	-0.000198
7.0600	271.623	1.547	3.342	5.072	-0.712	50.355	517.101	-0.000108	-0.000234	-0.000355
7.0800	304.506	4.478	6.895	8.563	-0.719	50.355	579.700	-0.000313	-0.000483	-0.000599
7.1000	395.698	13.979	17.309	19.288	-0.715	50.355	753.307	-0.000979	-0.001212	-0.001350
7.1200	363.733	10.302	13.483	15.425	-0.720	50.356	692.453	-0.000721	-0.000944	-0.001080
7.1400	412.860	15.511	18.724	20.832	-0.721	50.355	785.980	-0.001086	-0.001311	-0.001458
7.1600	457.630	20.198	23.585	25.806	-0.728	50.356	871.210	-0.001414	-0.001651	-0.001806
7.1800	539.279	28.838	32.541	34.673	-0.707	50.355	1026.649	-0.002019	-0.002278	-0.002427
7.2000	571.410	32.252	36.229	38.855	-0.722	50.355	1087.818	-0.002258	-0.002536	-0.002720
7.2200	628.293	38.382	42.201	44.998	-0.732	50.355	1196.108	-0.002687	-0.002954	-0.003150
7.2400	707.117	47.125	50.168	53.542	-0.731	50.355	1346.169	-0.003299	-0.003512	-0.003748
7.2600	719.275	49.636	52.741	55.672	-0.733	50.355	1369.314	-0.003475	-0.003692	-0.003897
7.2800	781.628	56.482	58.976	62.354	-0.724	50.354	1488.018	-0.003954	-0.004128	-0.004365
7.3000	842.778	63.571	64.754	69.760	-0.722	50.355	1604.433	-0.004450	-0.004533	-0.004883
7.3200	889.727	69.410	69.846	74.667	-0.713	50.355	1693.811	-0.004859	-0.004889	-0.005227
7.3400	946.489	76.328	75.803	81.417	-0.707	50.355	1801.872	-0.005343	-0.005306	-0.005699
7.3600	990.748	81.785	80.260	86.715	-0.716	50.355	1886.129	-0.005725	-0.005618	-0.006070
7.3800	1016.491	85.445	83.042	90.298	-0.728	50.355	1935.139	-0.005981	-0.005813	-0.006321
7.4000	1045.316	89.586	86.000	93.649	-0.734	50.355	1990.013	-0.006271	-0.006020	-0.006555
7.4200	1077.657	93.520	89.442	97.262	-0.724	50.355	2051.582	-0.006546	-0.006261	-0.006808
7.4400	1097.750	96.138	91.600	100.402	-0.724	50.355	2089.834	-0.006730	-0.006412	-0.007028
7.4600	1101.011	97.136	91.943	101.306	-0.725	50.354	2096.043	-0.006800	-0.006436	-0.007091
7.4800	1124.380	100.726	94.573	103.805	-0.728	50.355	2140.532	-0.007051	-0.006620	-0.007266
7.5000	1105.535	98.723	93.416	102.971	-0.735	50.355	2104.654	-0.006911	-0.006539	-0.007208
7.5200	1095.376	97.672	92.714	102.387	-0.708	50.355	2085.314	-0.006837	-0.006490	-0.007167
7.5400	1094.384	97.853	92.439	102.443	-0.712	50.355	2083.426	-0.006850	-0.006471	-0.007171
7.5600	1060.389	94.610	90.347	99.318	-0.706	50.354	2018.709	-0.006623	-0.006324	-0.006952
7.5800	1040.372	92.282	88.477	97.496	-0.711	50.355	1980.600	-0.006460	-0.006193	-0.006825
7.6000	1010.766	89.095	86.026	94.537	-0.710	50.355	1924.238	-0.006237	-0.006022	-0.006618
7.6200	959.519	83.453	81.391	89.186	-0.720	50.355	1826.677	-0.005842	-0.005697	-0.006243
7.6400	898.699	76.847	75.763	82.918	-0.718	50.355	1710.892	-0.005379	-0.005303	-0.005804
7.6600	880.785	74.290	74.358	80.919	-0.708	50.354	1676.788	-0.005200	-0.005205	-0.005664
7.6800	807.852	66.281	67.506	72.900	-0.707	50.354	1537.943	-0.004640	-0.004725	-0.005103
7.7000	768.372	61.521	63.128	68.397	-0.723	50.355	1462.784	-0.004306	-0.004419	-0.004788
7.7200	704.126	54.662	57.170	61.478	-0.714	50.354	1340.475	-0.003826	-0.004002	-0.004303
7.7400	668.088	50.210	52.933	57.116	-0.719	50.355	1271.868	-0.003515	-0.003705	-0.003998
7.7600	597.229	42.003	45.695	49.346	-0.723	50.354	1136.971	-0.002940	-0.003199	-0.003454
7.7800	549.018	36.235	40.192	43.689	-0.718	50.355	1045.189	-0.002536	-0.002813	-0.003058
7.8000	496.268	30.554	34.291	37.310	-0.715	50.355	944.767	-0.002139	-0.002400	-0.002612
7.8200	452.701	25.346	29.197	32.545	-0.717	50.354	861.826	-0.001774	-0.002044	-0.002278
7.8400	407.781	19.776	23.736	26.567	-0.723	50.354	776.310	-0.001384	-0.001662	-0.001860
7.8600	345.668	13.208	16.512	18.747	-0.731	50.354	658.064	-0.000925	-0.001156	-0.001312
7.8800	329.393	11.339	14.131	16.259	-0.730	50.354	627.079	-0.000794	-0.000989	-0.001138
7.9000	297.908	7.411	10.166	12.606	-0.720	50.354	567.141	-0.000519	-0.000712	-0.000882
7.9200	268.888	3.919	6.288	8.506	-0.722	50.354	511.894	-0.000274	-0.000440	-0.000595
7.9400	251.260	1.700	3.521	5.823	-0.723	50.354	478.334	-0.000119	-0.000246	-0.000408
7.9600	236.457	0.351	1.557	3.695	-0.706	50.354	450.153	-0.000025	-0.000109	-0.000259
7.9800	229.183	-1.063	0.261	2.197	-0.714	50.354	436.306	0.000074	-0.000018	-0.000154
8.0000	233.572	-1.104	0.234	2.210	-0.716	50.354	444.660	0.000077	-0.000016	-0.000155
8.0200	238.516	-0.770	0.467	2.445	-0.708	50.354	454.073	0.000054	-0.000033	-0.000171
8.0400	257.707	0.731	2.037	3.890	-0.712	50.354	490.608	-0.000051	-0.000143	-0.000272
8.0600	270.541	2.066	3.701	5.350	-0.721	50.354	515.041	-0.000145	-0.000259	-0.000374
8.0800	300.824	4.423	6.660	8.615	-0.714	50.354	572.691	-0.000310	-0.000466	-0.000603
8.1000	329.122	7.272	9.725	11.866	-0.710	50.354	626.564	-0.000509	-0.000681	-0.000831
8.1200	370.616	11.423	14.585	16.566	-0.724	50.354	705.557	-0.000800	-0.001021	-0.001160
8.1400	424.522	17.149	20.323	21.873	-0.720	50.355	808.182	-0.001200	-0.001423	-0.001531
8.1600	465.039	21.250	24.739	26.819	-0.731	50.354	885.315	-0.001487	-0.001732	-0.001877
8.1800	526.325	27.534	31.137	33.282	-0.730	50.354	1001.987	-0.001927	-0.002180	-0.002330
8.2000	572.688	32.826	36.408	38.855	-0.722	50.354	1090.250	-0.002298	-0.002549	-0.002720
8.2200	617.202	37.571	41.307	44.370	-0.725	50.354	1174.994	-0.002630	-0.002891	-0.003106
8.2400	687.234	44.988	48.629	51.695	-0.734	50.354	1308.317	-0.003149	-0.003404	-0.003619
8.2600	749.993	52.851	55.041	58.585	-0.723	50.353	1427.794	-0.003700	-0.003853	-0.004101
8.2800	820.536	61.211	62.660	67.230	-0.734	50.353	1562.090	-0.004285	-0.004386	-0.004706
8.3000	817.831	61.520	63.115	67.370	-0.727	50.354	1556.940	-0.004306	-0.004418	-0.004716
8.3200	882.694	68.762	69.432	74.512	-0.727	50.354	1680.422	-0.004813	-0.004860	-0.005216
8.3400	946.098	76.440	75.844	81.834	-0.731	50.354	1801.128	-0.005351	-0.005309	-0.005728
8.3600	973.255	80.311	78.776	85.449	-0.739	50.353	1852.827	-0.005622	-0.005514	-0.005981
8.3800	1003.567	84.184	82.353	89.229	-0.716	50.354	1910.534	-0.005893	-0.005765	-0.006246
8.4000	1049.719	89.517	86.483	94.495	-0.737	50.353	1998.396	-0.006266	-0.006054	-0.006615
8.4200	1068.099	92.603	88.492	97.053	-0.732	50.353	2033.386	-0.006482	-0.006194	-0.006794
8.4400	1089.469	95.788	90.955	99.652	-0.732	50.353	2074.070	-0.006705	-0.006367	-0.006976
8.4600	1121.525	99.678	94.119	103.584	-0.739	50.353	2135.096	-0.006977	-0.006588	-0.007251
8.4800	1115.033	99.411	93.704	103.166	-0.727	50.353	2122.736	-0.006959	-0.006559	-0.007222
8.5000	1105.324	98.696	93.306	102.930	-0.724	50.353	2104.254	-0.006909	-0.006531	-0.007205
8.5200	1099.794	98.892	93.432	102.736	-0.724	50.353	2093.725	-0.006922	-0.006540	-0.007192
8.5400	1093.497	98.233	93.154	102.389	-0.730	50.353	2081.738	-0.006876	-0.006521	-0.007167
8.5600	1054.513	93.867	89.989	99.220	-0.724	50.353	2007.523	-0.006571	-0.006299	-0.006945
8.5800	1039.680	92.296	88.589	97.621	-0.723	50.353	1979.284	-0.006461	-0.006201	-0.006833
8.6000	992.206	87.639	84.832	92.633	-0.721	50.353	1888.905	-0.006135	-0.005938	-0.006484
8.6200	969.257	84.646	82.835	90.396	-0.720	50.353	1845.217	-0.005925	-0.005798	-0.006328
8.6400	908.287	77.756	76.918	84.198	-0.721	50.353	1729.145	-0.005443	-0.005384	-0.005894
8.6600	870.536	73.868	73.492	80.196	-0.720	50.353	1657.276	-0.005171	-0.005144	-0.005614
8.6800	817.095	67.707	68.578	74.346	-0.707	50.353	1555.538	-0.004739	-0.004800	-0.005204
8.7000	774.203	62.770	64.410	69.370	-0.716	50.353	1473.885	-0.004394	-0.004509	-0.004856
8.7200	706.170	54.703	57.516	62.201	-0.723	50.353	1344.366	-0.003829	-0.004026	-0.004354
8.7400	649.798	48.515	51.449	55.907	-0.719	50.353	1237.049	-0.003396	-0.003601	-0.003913
8.7600	588.407	41.483	45.381	48.915	-0.728	50.353	1120.176	-0.002904	-0.003177	-0.003424
8.7800	576.370	39.503	43.247	46.692	-0.731	50.353	1097.260	-0.002765	-0.003027	-0.003268
8.8000	493.623	30.357	34.373	37.674	-0.715	50.353	939.732	-0.002125	-0.002406	-0.002637
8.8200	467.864	27.171	30.820	34.228	-0.736	50.353	890.694	-0.001902	-0.002157	-0.002396
8.8400	393.414	19.383	22.909	25.569	-0.719	50.352	748.959	-0.001357	-0.001604	-0.001790
8.8600	364.815	15.397	19.109	22.012	-0.721	50.353	694.513	-0.001078	-0.001338	-0.001541
8.8800	328.536	11.367	14.296	16.940	-0.718	50.352	625.448	-0.000796	-0.001001	-0.001186
8.9000	295.053	7.188	9.823	12.229	-0.719	50.352	561.705	-0.000503	-0.000688	-0.000856
8.9200	269.625	4.594	6.989	9.185	-0.721	50.353	513.296	-0.000322	-0.000489	-0.000643
8.9400	250.554	2.401	4.196	6.451	-0.716	50.352	476.990	-0.000168	-0.000294	-0.000452
8.9600	244.587	1.055	2.834	5.141	-0.726	50.352	465.631	-0.000074	-0.000198	-0.000360
8.9800	227.906	-0.869	0.192	2.403	-0.721	50.352	433.874	0.000061	-0.000013	-0.000168
9.0000	229.709	-0.782	0.467	2.445	-0.739	50.352	437.307	0.000055	-0.000033	-0.000171
9.0200	237.795	-0.714	0.522	2.791	-0.742	50.352	452.700	0.000050	-0.000037	-0.000195
9.0400	254.100	0.520	1.980	4.280	-0.734	50.352	483.742	-0.000036	-0.000139	-0.000300
9.0600	275.200	2.529	3.976	5.949	-0.729	50.352	523.911	-0.000177	-0.000278	-0.000416
9.0800	301.906	5.207	7.344	9.103	-0.738	50.352	574.751	-0.000364	-0.000514	-0.000637
9.1000	342.768	8.718	11.764	13.162	-0.723	50.352	652.542	-0.000610	-0.000823	-0.000921
9.1200	383.570	12.646	15.851	18.039	-0.722	50.353	730.219	-0.000885	-0.001110	-0.001263
9.1400	415.986	16.209	19.206	21.665	-0.722	50.352	791.931	-0.001135	-0.001344	-0.001517
9.1600	480.669	23.255	26.969	29.267	-0.709	50.352	915.070	-0.001628	-0.001888	-0.002049
9.1800	533.418	28.697	32.525	34.686	-0.719	50.352	1015.491	-0.002009	-0.002277	-0.002428
9.2000	575.077	33.079	36.778	39.675	-0.715	50.352	1094.799	-0.002316	-0.002574	-0.002777
9.2200	624.626	38.773	42.381	45.386	-0.710	50.353	1189.127	-0.002714	-0.002967	-0.003177
9.2400	688.151	45.902	49.384	52.750	-0.700	50.352	1310.062	-0.003213	-0.003457	-0.003693
9.2600	732.740	51.460	54.460	57.977	-0.704	50.352	1394.949	-0.003602	-0.003812	-0.004058
9.2800	772.160	55.836	58.215	62.645	-0.705	50.352	1469.994	-0.003909	-0.004075	-0.004385
9.3000	861.263	66.097	67.134	72.053	-0.712	50.353	1639.624	-0.004627	-0.004699	-0.005044
9.3200	895.798	70.869	71.195	76.388	-0.712	50.352	1705.370	-0.004961	-0.004984	-0.005347
9.3400	939.937	76.188	76.134	82.045	-0.711	50.352	1789.398	-0.005333	-0.005329	-0.005743
9.3600	991.965	82.053	80.854	87.506	-0.704	50.352	1888.447	-0.005744	-0.005660	-0.006125
9.3800	1004.980	84.450	82.338	89.467	-0.714	50.352	1913.223	-0.005911	-0.005764	-0.006263
9.4000	1052.334	90.765	87.142	94.953	-0.706	50.352	2003.374	-0.006354	-0.006100	-0.006647
9.4200	1083.924	94.625	90.307	98.831	-0.735	50.352	2063.513	-0.006624	-0.006321	-0.006918
9.4400	1078.378	94.442	90.180	98.650	-0.732	50.352	2052.956	-0.006611	-0.006313	-0.006905
9.4600	1094.369	96.757	91.765	101.029	-0.715	50.352	2083.397	-0.006773	-0.006424	-0.007072
9.4800	1117.753	100.250	94.461	104.014	-0.726	50.352	2127.914	-0.007017	-0.006612	-0.007281
9.5000	1110.644	99.398	93.967	103.693	-0.729	50.352	2114.382	-0.006958	-0.006578	-0.007259
9.5200	1103.190	99.186	93.526	103.571	-0.720	50.352	2100.191	-0.006943	-0.006547	-0.007250
9.5400	1090.461	98.133	92.770	102.918	-0.716	50.352	2075.958	-0.006869	-0.006494	-0.007204
9.5600	1060.149	95.088	90.515	99.955	-0.728	50.352	2018.251	-0.006656	-0.006336	-0.006997
9.5800	1037.486	92.407	88.782	98.067	-0.711	50.352	1975.107	-0.006468	-0.006215	-0.006865
9.6000	999.209	88.242	85.421	94.204	-0.732	50.352	1902.237	-0.006177	-0.005979	-0.006594
9.6200	949.375	83.118	80.854	88.421	-0.730	50.352	1807.365	-0.005818	-0.005660	-0.006189
9.6400	946.324	82.515	80.841	88.284	-0.717	50.352	1801.558	-0.005776	-0.005659	-0.006180
9.6600	820.175	68.170	69.033	75.054	-0.730	50.351	1561.403	-0.004772	-0.004832	-0.005254
9.6800	813.548	67.062	67.878	74.261	-0.715	50.351	1548.786	-0.004694	-0.004751	-0.005198
9.7000	764.871	61.928	63.403	68.523	-0.718	50.351	1456.118	-0.004335	-0.004438	-0.004797
9.7200	693.967	54.170	56.362	60.991	-0.732	50.352	1321.135	-0.003792	-0.003945	-0.004269
9.7400	648.897	48.515	51.804	55.626	-0.734	50.351	1235.332	-0.003396	-0.003626	-0.003894
9.7600	604.037	43.069	46.672	50.876	-0.721	50.351	1149.931	-0.003015	-0.003267	-0.003561
9.7800	530.653	34.957	38.819	42.633	-0.730	50.351	1010.227	-0.002447	-0.002717	-0.002984
9.8000	480.218	29.442	33.051	36.077	-0.732	50.351	914.211	-0.002061	-0.002314	-0.002525
9.8200	433.990	23.914	27.752	30.975	-0.738	50.351	826.206	-0.001674	-0.001943	-0.002168
9.8400	416.272	21.277	24.986	28.098	-0.739	50.351	792.475	-0.001489	-0.001749	-0.001967
9.8600	356.519	14.908	18.081	21.164	-0.736	50.351	678.720	-0.001044	-0.001266	-0.001481
9.8800	324.268	11.549	14.460	16.856	-0.739	50.351	617.323	-0.000808	-0.001012	-0.001180
9.9000	289.973	6.849	9.700	11.951	-0.736	50.351	552.034	-0.000479	-0.000679	-0.000837
9.9200	267.295	4.411	6.316	8.769	-0.740	50.351	508.862	-0.000309	-0.000442	-0.000614
9.9400	250.599	2.443	4.237	6.853	-0.729	50.351	477.076	-0.000171	-0.000297	-0.000480
9.9600	237.133	0.773	2.242	4.599	-0.743	50.351	451.441	-0.000054	-0.000157	-0.000322
9.9800	240.349	0.577	1.968	4.560	-0.739	50.351	457.563	-0.000040	-0.000138	-0.000319
Test Cycles
Time (sec)	Axial stress (kPa)	Axial micro-strain #1	Axial micro-strain #2	Axial micro-strain #3	Confining pressure (kPa)	Temperature (�C)	Load (N)	Displacement #1 (mm)	Displacement #2 (mm)	Displacement #3 (mm)
0.0000	233.316	-0.573	0.576	3.237	-0.736	50.351	444.174	0.000040	-0.000040	-0.000227
0.0200	232.865	-0.754	0.481	3.182	-0.742	50.350	443.316	0.000053	-0.000034	-0.000223
0.0400	250.839	0.605	2.381	4.320	-0.742	50.350	477.533	-0.000042	-0.000167	-0.000302
0.0600	284.608	3.414	5.627	7.646	-0.744	50.351	541.821	-0.000239	-0.000394	-0.000535
0.0800	297.202	4.579	6.946	9.282	-0.737	50.351	565.796	-0.000321	-0.000486	-0.000650
0.1000	332.654	8.113	10.814	12.743	-0.739	50.351	633.287	-0.000568	-0.000757	-0.000892
0.1200	387.748	13.799	16.855	18.691	-0.735	50.351	738.173	-0.000966	-0.001180	-0.001308
0.1400	431.060	17.710	21.354	24.012	-0.733	50.351	820.627	-0.001240	-0.001495	-0.001681
0.1600	467.804	21.725	25.316	28.127	-0.730	50.351	890.579	-0.001521	-0.001772	-0.001969
0.1800	526.265	28.206	31.672	34.520	-0.721	50.351	1001.873	-0.001974	-0.002217	-0.002416
0.2000	582.366	34.113	38.183	40.426	-0.732	50.351	1108.675	-0.002388	-0.002673	-0.002830
0.2200	634.424	39.670	43.635	46.594	-0.732	50.351	1207.781	-0.002777	-0.003054	-0.003262
0.2400	715.037	48.572	51.584	55.254	-0.748	50.351	1361.246	-0.003400	-0.003611	-0.003868
0.2600	734.589	51.474	54.530	58.142	-0.742	50.350	1398.468	-0.003603	-0.003817	-0.004070
0.2800	769.605	56.062	58.464	62.187	-0.732	50.350	1465.130	-0.003924	-0.004092	-0.004353
0.3000	842.402	64.301	65.981	70.635	-0.744	50.351	1603.718	-0.004501	-0.004619	-0.004944
0.3200	903.929	71.530	71.965	78.029	-0.727	50.351	1720.848	-0.005007	-0.005038	-0.005462
0.3400	934.557	76.004	75.570	82.002	-0.735	50.351	1779.156	-0.005320	-0.005290	-0.005740
0.3600	1001.899	83.859	82.022	88.437	-0.728	50.351	1907.358	-0.005870	-0.005742	-0.006191
0.3800	1017.468	86.304	83.980	91.408	-0.736	50.351	1936.998	-0.006041	-0.005879	-0.006399
0.4000	1036.209	89.098	85.751	93.842	-0.740	50.351	1972.675	-0.006237	-0.006003	-0.006569
0.4200	1074.907	94.037	89.619	97.955	-0.742	50.351	2046.347	-0.006583	-0.006273	-0.006857
0.4400	1095.586	96.644	91.805	101.055	-0.732	50.351	2085.714	-0.006765	-0.006426	-0.007074
0.4600	1081.414	95.521	91.213	100.415	-0.736	50.351	2058.735	-0.006686	-0.006385	-0.007029
0.4800	1127.506	101.219	94.848	105.030	-0.740	50.351	2146.482	-0.007085	-0.006639	-0.007352
0.5000	1111.847	99.984	94.215	104.154	-0.733	50.351	2116.671	-0.006999	-0.006595	-0.007291
0.5200	1105.249	99.886	94.158	104.403	-0.731	50.351	2104.111	-0.006992	-0.006591	-0.007308
0.5400	1089.755	98.372	92.976	103.000	-0.720	50.351	2074.614	-0.006886	-0.006508	-0.007210
0.5600	1040.958	93.053	89.054	98.345	-0.735	50.351	1981.716	-0.006514	-0.006234	-0.006884
0.5800	1040.973	93.013	89.069	98.428	-0.726	50.351	1981.745	-0.006511	-0.006235	-0.006890
0.6000	993.062	88.073	85.531	93.856	-0.727	50.351	1890.535	-0.006165	-0.005987	-0.006570
0.6200	969.317	84.827	82.957	91.061	-0.739	50.350	1845.331	-0.005938	-0.005807	-0.006374
0.6400	926.216	80.058	78.995	86.881	-0.733	50.350	1763.277	-0.005604	-0.005530	-0.006082
0.6600	874.563	74.361	73.793	81.112	-0.734	50.350	1664.944	-0.005205	-0.005166	-0.005678
0.6800	806.500	66.769	68.013	73.372	-0.736	50.350	1535.368	-0.004674	-0.004761	-0.005136
0.7000	749.076	60.161	62.443	67.466	-0.743	50.350	1426.048	-0.004211	-0.004371	-0.004723
0.7200	736.467	58.166	60.144	65.744	-0.735	50.351	1402.044	-0.004072	-0.004210	-0.004602
0.7400	651.256	49.216	52.161	56.394	-0.736	50.351	1239.824	-0.003445	-0.003651	-0.003948
0.7600	599.378	43.143	46.770	50.319	-0.742	50.351	1141.062	-0.003020	-0.003274	-0.003522
0.7800	539.971	36.068	40.179	43.871	-0.739	50.350	1027.966	-0.002525	-0.002813	-0.003071
0.8000	503.737	31.732	35.443	39.106	-0.733	50.350	958.986	-0.002221	-0.002481	-0.002737
0.8200	438.574	24.504	28.373	31.627	-0.743	50.351	834.932	-0.001715	-0.001986	-0.002214
0.8400	398.914	20.056	23.460	26.291	-0.732	50.350	759.430	-0.001404	-0.001642	-0.001840
0.8600	361.689	15.384	19.125	21.748	-0.726	50.350	688.562	-0.001077	-0.001339	-0.001522
0.8800	320.571	10.597	13.758	16.717	-0.738	50.350	610.285	-0.000742	-0.000963	-0.001170
0.9000	291.266	7.581	9.739	12.592	-0.719	50.350	554.495	-0.000531	-0.000682	-0.000881
0.9200	264.470	4.411	6.590	8.879	-0.725	50.350	503.483	-0.000309	-0.000461	-0.000622
0.9400	267.536	3.990	6.261	8.424	-0.722	50.350	509.319	-0.000279	-0.000438	-0.000590
0.9600	234.188	0.550	1.803	4.459	-0.717	50.350	445.833	-0.000039	-0.000126	-0.000312
0.9800	224.990	-0.742	0.534	2.835	-0.738	50.350	428.324	0.000052	-0.000037	-0.000198
1.0000	232.279	-0.435	0.865	2.974	-0.738	50.350	442.200	0.000030	-0.000061	-0.000208
1.0200	246.691	0.324	1.939	4.143	-0.728	50.349	469.637	-0.000023	-0.000136	-0.000290
1.0400	245.399	-0.014	1.485	3.948	-0.729	50.350	467.176	0.000001	-0.000104	-0.000276
1.0600	283.526	3.653	5.381	7.227	-0.719	50.350	539.761	-0.000256	-0.000377	-0.000506
1.0800	300.057	5.263	7.524	9.379	-0.714	50.350	571.232	-0.000368	-0.000527	-0.000657
1.1000	329.813	7.608	10.897	12.967	-0.712	50.350	627.880	-0.000533	-0.000763	-0.000908
1.1200	378.220	12.645	15.698	18.329	-0.712	50.350	720.034	-0.000885	-0.001099	-0.001283
1.1400	424.583	17.415	20.750	23.207	-0.723	50.350	808.296	-0.001219	-0.001453	-0.001624
1.1600	483.990	23.815	27.697	29.822	-0.734	50.350	921.392	-0.001667	-0.001939	-0.002088
1.1800	537.506	29.582	33.259	35.645	-0.710	50.351	1023.273	-0.002071	-0.002328	-0.002495
1.2000	583.884	34.337	38.059	40.926	-0.726	50.350	1111.565	-0.002404	-0.002664	-0.002865
1.2200	624.986	39.320	43.001	46.233	-0.725	50.350	1189.814	-0.002752	-0.003010	-0.003236
1.2400	688.106	46.198	49.576	52.932	-0.720	50.350	1309.977	-0.003234	-0.003470	-0.003705
1.2600	747.588	52.948	55.811	59.837	-0.715	50.351	1423.216	-0.003706	-0.003907	-0.004189
1.2800	802.066	59.587	61.384	65.773	-0.719	50.350	1526.928	-0.004171	-0.004297	-0.004604
1.3000	847.392	65.423	66.612	71.873	-0.712	50.350	1613.216	-0.004580	-0.004663	-0.005031
1.3200	905.041	72.061	72.777	78.237	-0.722	50.350	1722.965	-0.005044	-0.005094	-0.005477
1.3400	950.532	77.423	76.891	83.350	-0.736	50.350	1809.568	-0.005420	-0.005382	-0.005835
1.3600	986.735	82.375	80.536	87.145	-0.722	50.350	1878.490	-0.005766	-0.005638	-0.006100
1.3800	1015.965	86.303	84.033	91.452	-0.717	50.349	1934.137	-0.006041	-0.005882	-0.006402
1.4000	1047.134	90.483	87.156	94.954	-0.732	50.350	1993.475	-0.006334	-0.006101	-0.006647
1.4200	1077.837	94.248	89.880	98.594	-0.738	50.350	2051.926	-0.006597	-0.006292	-0.006902
1.4400	1091.092	96.532	91.476	100.583	-0.721	50.350	2077.160	-0.006757	-0.006403	-0.007041
1.4600	1115.273	99.831	94.174	103.624	-0.717	50.350	2123.194	-0.006988	-0.006592	-0.007254
1.4800	1090.101	97.389	92.810	102.167	-0.714	50.350	2075.272	-0.006817	-0.006497	-0.007152
1.5000	1100.590	98.655	93.360	102.944	-0.718	50.350	2095.242	-0.006906	-0.006535	-0.007206
1.5200	1097.194	98.877	93.333	102.833	-0.708	50.350	2088.776	-0.006921	-0.006533	-0.007198
1.5400	1093.918	98.778	93.429	103.222	-0.715	50.350	2082.539	-0.006914	-0.006540	-0.007226
1.5600	1065.800	95.831	91.242	100.834	-0.710	50.349	2029.009	-0.006708	-0.006387	-0.007058
1.5800	1033.894	92.311	88.670	97.609	-0.729	50.350	1968.269	-0.006462	-0.006207	-0.006833
1.6000	985.353	87.344	84.473	92.675	-0.723	50.350	1875.858	-0.006114	-0.005913	-0.006487
1.6200	964.148	84.870	82.629	90.633	-0.723	50.350	1835.489	-0.005941	-0.005784	-0.006344
1.6400	911.683	78.947	78.033	85.047	-0.728	50.350	1735.611	-0.005526	-0.005462	-0.005953
1.6600	862.646	73.281	73.435	79.850	-0.718	50.350	1642.256	-0.005130	-0.005140	-0.005589
1.6800	803.794	66.755	67.342	73.611	-0.722	50.350	1530.218	-0.004673	-0.004714	-0.005153
1.7000	762.271	62.068	63.624	68.995	-0.730	50.350	1451.168	-0.004345	-0.004454	-0.004830
1.7200	698.671	54.773	57.599	62.089	-0.724	50.349	1330.090	-0.003834	-0.004032	-0.004346
1.7400	646.327	48.628	51.665	56.071	-0.723	50.350	1230.440	-0.003404	-0.003617	-0.003925
1.7600	597.169	43.000	46.439	50.584	-0.728	50.350	1136.856	-0.003010	-0.003251	-0.003541
1.7800	546.568	37.092	40.948	44.553	-0.728	50.350	1040.525	-0.002596	-0.002866	-0.003119
1.8000	482.983	29.948	33.781	37.244	-0.722	50.350	919.476	-0.002096	-0.002365	-0.002607
1.8200	446.870	25.135	29.239	32.407	-0.725	50.350	850.725	-0.001759	-0.002047	-0.002268
1.8400	392.707	19.326	23.034	26.347	-0.736	50.350	747.614	-0.001353	-0.001612	-0.001844
1.8600	371.382	16.826	20.130	23.192	-0.729	50.350	707.016	-0.001178	-0.001409	-0.001623
1.8800	327.709	11.857	14.847	17.582	-0.734	50.349	623.875	-0.000830	-0.001039	-0.001231
1.9000	290.394	7.355	9.836	12.688	-0.732	50.349	552.835	-0.000515	-0.000688	-0.000888
1.9200	248.961	3.174	4.718	7.698	-0.730	50.349	473.957	-0.000222	-0.000330	-0.000539
1.9400	248.765	2.557	4.057	6.644	-0.744	50.349	473.585	-0.000179	-0.000284	-0.000465
1.9600	232.700	0.661	1.746	4.514	-0.746	50.349	443.001	-0.000046	-0.000122	-0.000316
1.9800	236.021	0.269	1.513	4.252	-0.736	50.349	449.324	-0.000019	-0.000106	-0.000298
2.0000	239.357	0.296	1.431	4.280	-0.746	50.350	455.675	-0.000021	-0.000100	-0.000300
2.0200	238.786	0.198	1.405	3.808	-0.744	50.349	454.588	-0.000014	-0.000098	-0.000267
2.0400	246.736	0.731	1.994	4.349	-0.748	50.349	469.723	-0.000051	-0.000140	-0.000304
2.0600	268.272	1.882	4.127	6.575	-0.735	50.350	510.721	-0.000132	-0.000289	-0.000460
2.0800	305.798	5.769	7.967	10.547	-0.736	50.349	582.161	-0.000404	-0.000558	-0.000738
2.1000	340.454	9.406	12.301	14.424	-0.727	50.349	648.136	-0.000658	-0.000861	-0.001010
2.1200	377.469	12.631	15.919	18.094	-0.733	50.349	718.603	-0.000884	-0.001114	-0.001267
2.1400	425.499	17.428	21.023	23.553	-0.744	50.349	810.041	-0.001220	-0.001472	-0.001649
2.1600	477.738	23.114	26.747	29.391	-0.733	50.350	909.491	-0.001618	-0.001872	-0.002057
2.1800	521.636	28.105	31.703	34.323	-0.731	50.349	993.061	-0.001967	-0.002219	-0.002403
2.2000	571.545	33.300	37.180	40.119	-0.742	50.349	1088.076	-0.002331	-0.002603	-0.002808
2.2200	623.423	38.856	42.683	45.830	-0.744	50.349	1186.838	-0.002720	-0.002988	-0.003208
2.2400	677.556	45.240	48.489	52.139	-0.731	50.349	1289.892	-0.003167	-0.003394	-0.003650
2.2600	746.085	53.005	55.577	59.643	-0.725	50.349	1420.355	-0.003710	-0.003890	-0.004175
2.2800	811.188	61.142	62.895	67.482	-0.731	50.349	1544.294	-0.004280	-0.004403	-0.004724
2.3000	879.523	67.893	69.141	74.472	-0.722	50.349	1674.385	-0.004753	-0.004840	-0.005213
2.3200	885.684	70.012	70.698	76.610	-0.728	50.349	1686.115	-0.004901	-0.004949	-0.005363
2.3400	937.307	76.383	75.886	81.960	-0.724	50.349	1784.391	-0.005347	-0.005312	-0.005737
2.3600	976.832	81.575	80.041	87.117	-0.741	50.349	1859.636	-0.005710	-0.005603	-0.006098
2.3800	1016.011	86.163	83.647	91.675	-0.743	50.350	1934.223	-0.006031	-0.005855	-0.006417
2.4000	1062.313	91.830	88.160	96.495	-0.728	50.349	2022.371	-0.006428	-0.006171	-0.006755
2.4200	1066.731	93.434	89.001	97.872	-0.735	50.349	2030.783	-0.006540	-0.006230	-0.006851
2.4400	1074.381	94.444	90.513	99.194	-0.730	50.349	2045.345	-0.006611	-0.006336	-0.006944
2.4600	1099.764	97.907	92.643	102.751	-0.727	50.350	2093.668	-0.006854	-0.006485	-0.007193
2.4800	1135.832	102.200	95.712	106.475	-0.728	50.349	2162.333	-0.007154	-0.006700	-0.007453
2.5000	1112.012	100.334	94.696	105.377	-0.728	50.349	2116.985	-0.007023	-0.006629	-0.007376
2.5200	1081.745	96.954	92.564	101.904	-0.709	50.349	2059.364	-0.006787	-0.006480	-0.007133
2.5400	1095.466	98.739	93.225	103.291	-0.710	50.349	2085.485	-0.006912	-0.006526	-0.007230
2.5600	1080.212	97.517	92.412	102.597	-0.728	50.349	2056.446	-0.006826	-0.006469	-0.007182
2.5800	1020.760	91.397	87.926	96.968	-0.720	50.349	1943.264	-0.006398	-0.006155	-0.006788
2.6000	989.816	87.878	85.092	93.412	-0.735	50.349	1884.356	-0.006151	-0.005956	-0.006539
2.6200	967.334	84.730	82.724	90.882	-0.732	50.349	1841.555	-0.005931	-0.005791	-0.006362
2.6400	916.973	79.425	78.324	85.546	-0.716	50.349	1745.682	-0.005560	-0.005483	-0.005988
2.6600	877.854	74.937	74.951	81.600	-0.717	50.349	1671.209	-0.005246	-0.005247	-0.005712
2.6800	823.181	68.689	69.874	75.639	-0.716	50.349	1567.125	-0.004808	-0.004891	-0.005295
2.7000	767.035	62.179	63.955	69.816	-0.714	50.349	1460.238	-0.004353	-0.004477	-0.004887
2.7200	710.333	55.839	58.218	63.229	-0.724	50.349	1352.291	-0.003909	-0.004075	-0.004426
2.7400	656.516	50.016	52.782	57.113	-0.711	50.349	1249.838	-0.003501	-0.003695	-0.003998
2.7600	592.330	42.564	46.287	50.139	-0.717	50.349	1127.644	-0.002979	-0.003240	-0.003510
2.7800	543.758	36.503	40.493	44.510	-0.728	50.349	1035.175	-0.002555	-0.002834	-0.003116
2.8000	491.925	30.525	34.482	38.257	-0.718	50.349	936.499	-0.002137	-0.002414	-0.002678
2.8200	449.560	25.921	30.036	33.172	-0.721	50.349	855.846	-0.001814	-0.002103	-0.002322
2.8400	406.864	20.885	24.919	27.432	-0.710	50.349	774.565	-0.001462	-0.001744	-0.001920
2.8600	359.104	15.257	18.863	21.635	-0.715	50.349	683.641	-0.001068	-0.001320	-0.001514
2.8800	320.857	11.100	13.705	16.898	-0.731	50.349	610.828	-0.000777	-0.000959	-0.001183
2.9000	293.911	7.834	10.800	13.218	-0.716	50.349	559.530	-0.000548	-0.000756	-0.000925
2.9200	267.130	4.634	6.947	9.490	-0.726	50.349	508.547	-0.000324	-0.000486	-0.000664
2.9400	251.756	2.669	4.401	7.465	-0.731	50.349	479.279	-0.000187	-0.000308	-0.000523
2.9600	234.879	0.520	1.981	4.682	-0.722	50.349	447.149	-0.000036	-0.000139	-0.000328
2.9800	239.012	0.846	1.952	4.808	-0.723	50.349	455.017	-0.000059	-0.000137	-0.000337
3.0000	235.029	0.014	1.499	4.210	-0.715	50.349	447.435	-0.000001	-0.000105	-0.000295
3.0200	233.857	-0.699	0.892	3.404	-0.702	50.349	445.204	0.000049	-0.000062	-0.000238
3.0400	248.390	0.366	2.077	4.711	-0.696	50.349	472.870	-0.000026	-0.000145	-0.000330
3.0600	272.525	2.950	4.652	6.684	-0.715	50.349	518.818	-0.000206	-0.000326	-0.000468
3.0800	307.316	5.713	8.145	10.478	-0.701	50.349	585.051	-0.000400	-0.000570	-0.000733
3.1000	333.180	8.339	11.103	13.202	-0.709	50.349	634.289	-0.000584	-0.000777	-0.000924
3.1200	379.347	12.715	15.946	18.553	-0.731	50.349	722.179	-0.000890	-0.001116	-0.001299
3.1400	424.718	17.709	21.133	23.569	-0.736	50.349	808.554	-0.001240	-0.001479	-0.001650
3.1600	467.489	21.893	25.758	28.349	-0.730	50.349	889.978	-0.001532	-0.001803	-0.001984
3.1800	520.208	27.450	31.508	34.074	-0.728	50.349	990.343	-0.001921	-0.002206	-0.002385
3.2000	567.247	32.505	36.588	39.563	-0.734	50.349	1079.893	-0.002275	-0.002561	-0.002769
3.2200	631.599	39.937	43.634	46.649	-0.728	50.349	1202.402	-0.002796	-0.003054	-0.003265
3.2400	677.631	45.228	48.793	52.166	-0.721	50.349	1290.035	-0.003166	-0.003416	-0.003652
3.2600	736.272	51.922	54.502	58.808	-0.726	50.349	1401.672	-0.003635	-0.003815	-0.004117
3.2800	790.554	58.518	60.338	64.755	-0.730	50.349	1505.013	-0.004096	-0.004224	-0.004533
3.3000	846.129	65.199	66.639	71.441	-0.736	50.349	1610.813	-0.004564	-0.004665	-0.005001
3.3200	889.336	70.365	71.124	76.235	-0.731	50.349	1693.068	-0.004926	-0.004979	-0.005336
3.3400	938.810	76.257	75.885	82.239	-0.732	50.349	1787.252	-0.005338	-0.005312	-0.005757
3.3600	981.009	81.660	79.862	87.047	-0.724	50.349	1867.590	-0.005716	-0.005590	-0.006093
3.3800	1016.446	86.780	83.896	91.493	-0.740	50.349	1935.053	-0.006075	-0.005873	-0.006405
3.4000	1043.603	90.147	86.894	95.178	-0.720	50.349	1986.752	-0.006310	-0.006083	-0.006662
3.4200	1085.968	95.322	90.774	99.902	-0.718	50.349	2067.404	-0.006673	-0.006354	-0.006993
3.4400	1081.384	95.379	90.776	100.069	-0.700	50.349	2058.678	-0.006676	-0.006354	-0.007005
3.4600	1111.621	99.438	93.899	103.249	-0.691	50.349	2116.241	-0.006961	-0.006573	-0.007227
3.4800	1109.968	99.509	93.966	103.695	-0.695	50.350	2113.094	-0.006966	-0.006578	-0.007259
3.5000	1111.651	100.014	94.366	104.237	-0.695	50.349	2116.299	-0.007001	-0.006606	-0.007297
3.5200	1104.663	99.845	93.994	104.415	-0.707	50.349	2102.995	-0.006989	-0.006580	-0.007309
3.5400	1080.317	97.826	92.685	102.419	-0.708	50.349	2056.646	-0.006848	-0.006488	-0.007169
3.5600	1074.471	96.716	91.916	101.958	-0.691	50.349	2045.517	-0.006770	-0.006434	-0.007137
3.5800	1023.765	91.495	87.887	97.067	-0.710	50.349	1948.986	-0.006405	-0.006152	-0.006795
3.6000	998.968	89.013	85.682	94.260	-0.719	50.348	1901.779	-0.006231	-0.005998	-0.006598
3.6200	963.065	84.758	83.027	90.578	-0.722	50.349	1833.429	-0.005933	-0.005812	-0.006340
3.6400	927.794	80.649	79.450	87.128	-0.716	50.349	1766.281	-0.005645	-0.005561	-0.006099
3.6600	874.458	74.599	74.330	81.350	-0.724	50.349	1664.743	-0.005222	-0.005203	-0.005695
3.6800	834.663	69.900	70.533	76.987	-0.729	50.349	1588.984	-0.004893	-0.004937	-0.005389
3.7000	764.976	62.404	63.871	69.119	-0.718	50.349	1456.318	-0.004368	-0.004471	-0.004838
3.7200	705.899	55.655	58.229	63.092	-0.743	50.349	1343.851	-0.003896	-0.004076	-0.004416
3.7400	660.664	49.915	53.140	57.866	-0.731	50.348	1257.734	-0.003494	-0.003720	-0.004051
3.7600	604.473	43.548	46.935	51.223	-0.719	50.349	1150.761	-0.003048	-0.003285	-0.003586
3.7800	546.538	37.176	40.782	44.594	-0.740	50.348	1040.468	-0.002602	-0.002855	-0.003122
3.8000	497.260	31.212	35.279	38.898	-0.735	50.349	946.655	-0.002185	-0.002470	-0.002723
3.8200	444.255	25.248	29.169	32.532	-0.735	50.349	845.747	-0.001767	-0.002042	-0.002277
3.8400	401.709	20.592	24.039	26.990	-0.725	50.348	764.751	-0.001441	-0.001683	-0.001889
3.8600	360.622	15.831	19.303	21.915	-0.722	50.349	686.531	-0.001108	-0.001351	-0.001534
3.8800	315.987	10.387	13.801	16.287	-0.725	50.349	601.559	-0.000727	-0.000966	-0.001140
3.9000	292.167	7.551	10.235	13.063	-0.715	50.348	556.211	-0.000529	-0.000716	-0.000914
3.9200	270.556	5.234	7.347	9.880	-0.718	50.348	515.070	-0.000366	-0.000514	-0.000692
3.9400	249.201	2.738	4.498	6.992	-0.721	50.348	474.415	-0.000192	-0.000315	-0.000489
3.9600	242.198	1.615	3.397	6.046	-0.721	50.348	461.082	-0.000113	-0.000238	-0.000423
3.9800	233.466	0.001	1.308	4.181	-0.728	50.349	444.460	-0.000000	-0.000092	-0.000293
4.0000	231.918	-0.169	1.018	3.502	-0.733	50.349	441.513	0.000012	-0.000071	-0.000245
4.0200	237.284	-0.083	1.459	3.752	-0.742	50.348	451.727	0.000006	-0.000102	-0.000263
4.0400	253.634	1.098	2.697	5.184	-0.714	50.348	482.855	-0.000077	-0.000189	-0.000363
4.0600	284.428	4.045	5.929	8.436	-0.719	50.349	541.477	-0.000283	-0.000415	-0.000591
4.0800	301.184	5.530	7.854	9.839	-0.708	50.348	573.378	-0.000387	-0.000550	-0.000689
4.1000	334.112	8.746	11.419	13.634	-0.704	50.348	636.063	-0.000612	-0.000799	-0.000954
4.1200	381.932	13.097	16.622	18.775	-0.704	50.348	727.100	-0.000917	-0.001164	-0.001314
4.1400	428.159	17.877	21.476	23.821	-0.719	50.348	815.105	-0.001251	-0.001503	-0.001667
4.1600	469.277	22.367	26.116	28.960	-0.705	50.348	893.383	-0.001566	-0.001828	-0.002027
4.1800	517.037	27.673	31.590	34.188	-0.714	50.348	984.306	-0.001937	-0.002211	-0.002393
4.2000	572.507	33.161	37.317	40.300	-0.715	50.348	1089.907	-0.002321	-0.002612	-0.002821
4.2200	632.831	39.684	43.618	47.370	-0.724	50.348	1204.748	-0.002778	-0.003053	-0.003316
4.2400	660.754	43.798	46.811	50.584	-0.722	50.348	1257.906	-0.003066	-0.003277	-0.003541
4.2600	742.388	52.850	55.370	59.322	-0.709	50.348	1413.317	-0.003699	-0.003876	-0.004153
4.2800	797.558	59.347	61.218	65.395	-0.711	50.349	1518.345	-0.004154	-0.004285	-0.004578
4.3000	857.461	66.110	67.397	72.624	-0.716	50.348	1632.385	-0.004628	-0.004718	-0.005084
4.3200	891.816	70.895	71.138	76.665	-0.722	50.348	1697.788	-0.004963	-0.004980	-0.005367
4.3400	955.822	78.638	77.621	83.742	-0.719	50.348	1819.639	-0.005505	-0.005433	-0.005862
4.3600	993.423	83.314	81.623	88.521	-0.739	50.348	1891.222	-0.005832	-0.005714	-0.006196
4.3800	1018.460	86.781	83.992	91.869	-0.728	50.349	1938.887	-0.006075	-0.005879	-0.006431
4.4000	1036.795	89.334	85.929	94.162	-0.732	50.348	1973.791	-0.006253	-0.006015	-0.006591
4.4200	1071.030	93.829	89.659	98.134	-0.729	50.349	2038.965	-0.006568	-0.006276	-0.006869
4.4400	1085.727	96.194	91.241	100.693	-0.728	50.348	2066.946	-0.006734	-0.006387	-0.007048
4.4600	1097.359	97.657	92.521	102.513	-0.713	50.348	2089.090	-0.006836	-0.006476	-0.007176
4.4800	1123.644	101.233	94.752	105.181	-0.716	50.348	2139.130	-0.007086	-0.006633	-0.007363
4.5000	1109.713	100.208	94.503	104.486	-0.703	50.347	2112.608	-0.007015	-0.006615	-0.007314
4.5200	1099.493	99.033	93.857	104.209	-0.710	50.348	2093.153	-0.006932	-0.006570	-0.007295
4.5400	1087.982	98.120	92.811	103.612	-0.730	50.348	2071.238	-0.006868	-0.006497	-0.007253
4.5600	1054.754	94.874	90.583	100.082	-0.707	50.348	2007.980	-0.006641	-0.006341	-0.007006
4.5800	1038.253	93.572	89.427	98.928	-0.711	50.348	1976.566	-0.006550	-0.006260	-0.006925
4.6000	991.244	88.017	85.313	93.843	-0.730	50.348	1887.074	-0.006161	-0.005972	-0.006569
4.6200	956.213	83.985	81.912	89.871	-0.728	50.348	1820.383	-0.005879	-0.005734	-0.006291
4.6400	916.598	79.440	78.571	86.186	-0.732	50.348	1744.967	-0.005561	-0.005500	-0.006033
4.6600	868.462	74.080	73.945	80.889	-0.739	50.348	1653.328	-0.005186	-0.005176	-0.005662
4.6800	818.011	68.425	69.293	75.679	-0.739	50.348	1557.283	-0.004790	-0.004851	-0.005298
4.7000	758.694	61.589	63.017	69.120	-0.727	50.348	1444.359	-0.004311	-0.004411	-0.004838
4.7200	706.335	55.838	57.955	63.439	-0.726	50.348	1344.681	-0.003909	-0.004057	-0.004441
4.7400	650.760	49.273	52.272	56.934	-0.726	50.348	1238.880	-0.003449	-0.003659	-0.003985
4.7600	596.372	42.943	46.632	50.695	-0.737	50.348	1135.340	-0.003006	-0.003264	-0.003549
4.7800	536.695	36.039	39.726	43.787	-0.724	50.348	1021.729	-0.002523	-0.002781	-0.003065
4.8000	492.601	30.889	34.742	38.631	-0.708	50.348	937.786	-0.002162	-0.002432	-0.002704
4.8200	459.779	27.253	31.068	34.255	-0.721	50.348	875.301	-0.001908	-0.002175	-0.002398
4.8400	416.482	21.682	25.743	29.183	-0.710	50.348	792.875	-0.001518	-0.001802	-0.002043
4.8600	351.514	14.626	18.039	21.316	-0.714	50.349	669.193	-0.001024	-0.001263	-0.001492
4.8800	322.570	11.436	14.296	17.052	-0.714	50.348	614.090	-0.000801	-0.001001	-0.001194
4.9000	300.944	8.760	11.667	14.105	-0.716	50.348	572.920	-0.000613	-0.000817	-0.000987
4.9200	271.037	5.052	7.691	10.145	-0.715	50.348	515.985	-0.000354	-0.000538	-0.000710
4.9400	251.561	2.669	4.292	7.116	-0.722	50.348	478.907	-0.000187	-0.000300	-0.000498
4.9600	239.357	1.533	2.641	5.502	-0.727	50.348	455.675	-0.000107	-0.000185	-0.000385
4.9800	229.784	0.042	1.293	3.837	-0.712	50.347	437.450	-0.000003	-0.000091	-0.000269
5.0000	237.118	0.014	1.637	4.252	-0.732	50.348	451.412	-0.000001	-0.000115	-0.000298
5.0200	239.583	0.141	1.377	4.378	-0.728	50.348	456.104	-0.000010	-0.000096	-0.000306
5.0400	252.222	1.322	2.600	5.170	-0.719	50.348	480.165	-0.000093	-0.000182	-0.000362
5.0600	280.520	3.962	5.903	7.894	-0.716	50.348	534.039	-0.000277	-0.000413	-0.000553
5.0800	292.182	4.732	6.935	9.271	-0.715	50.347	556.240	-0.000331	-0.000485	-0.000649
5.1000	348.569	9.856	12.988	15.163	-0.716	50.347	663.586	-0.000690	-0.000909	-0.001061
5.1200	390.784	14.358	17.312	19.942	-0.706	50.347	743.952	-0.001005	-0.001212	-0.001396
5.1400	421.877	17.246	21.105	23.750	-0.728	50.348	803.146	-0.001207	-0.001477	-0.001662
5.1600	466.602	22.327	26.183	28.712	-0.724	50.348	888.290	-0.001563	-0.001833	-0.002010
5.1800	530.533	28.824	32.666	35.782	-0.727	50.348	1009.998	-0.002018	-0.002287	-0.002505
5.2000	593.487	35.645	39.422	42.535	-0.734	50.348	1129.847	-0.002495	-0.002760	-0.002977
5.2200	636.498	40.838	44.472	47.818	-0.723	50.347	1211.729	-0.002859	-0.003113	-0.003347
5.2400	692.449	46.843	50.375	53.986	-0.726	50.348	1318.245	-0.003279	-0.003526	-0.003779
5.2600	737.173	52.232	54.793	59.475	-0.730	50.348	1403.389	-0.003656	-0.003835	-0.004163
5.2800	800.819	59.783	61.590	66.007	-0.716	50.347	1524.553	-0.004185	-0.004311	-0.004620
5.3000	843.184	65.185	66.254	71.496	-0.731	50.347	1605.206	-0.004563	-0.004638	-0.005005
5.3200	903.884	72.033	72.432	78.361	-0.733	50.348	1720.762	-0.005042	-0.005070	-0.005485
5.3400	941.770	76.889	76.228	83.321	-0.721	50.347	1792.889	-0.005382	-0.005336	-0.005832
5.3600	987.246	82.657	80.868	87.936	-0.732	50.348	1879.463	-0.005786	-0.005661	-0.006156
5.3800	1028.199	88.118	85.215	92.758	-0.730	50.348	1957.426	-0.006168	-0.005965	-0.006493
5.4000	1050.035	91.298	87.432	95.884	-0.720	50.348	1998.997	-0.006391	-0.006120	-0.006712
5.4200	1066.686	93.672	89.029	98.427	-0.721	50.348	2030.697	-0.006557	-0.006232	-0.006890
5.4400	1080.528	95.998	90.511	100.251	-0.719	50.348	2057.047	-0.006720	-0.006336	-0.007018
5.4600	1114.266	99.957	94.049	104.026	-0.720	50.348	2121.277	-0.006997	-0.006583	-0.007282
5.4800	1111.651	100.012	94.366	104.404	-0.718	50.347	2116.299	-0.007001	-0.006606	-0.007308
5.5000	1108.465	100.264	94.062	104.376	-0.727	50.347	2110.233	-0.007018	-0.006584	-0.007306
5.5200	1102.153	99.845	93.788	104.111	-0.731	50.348	2098.217	-0.006989	-0.006565	-0.007288
5.5400	1083.097	98.234	92.988	103.265	-0.726	50.348	2061.939	-0.006876	-0.006509	-0.007229
5.5600	1068.535	96.602	91.724	101.569	-0.732	50.347	2034.216	-0.006762	-0.006421	-0.007110
5.5800	1033.804	92.786	88.614	98.246	-0.734	50.348	1968.098	-0.006495	-0.006203	-0.006877
5.6000	998.653	89.066	85.876	94.719	-0.738	50.348	1901.178	-0.006235	-0.006011	-0.006630
5.6200	938.464	82.361	81.058	88.547	-0.742	50.348	1786.594	-0.005765	-0.005674	-0.006198
5.6400	904.875	78.402	77.649	85.061	-0.718	50.348	1722.651	-0.005488	-0.005435	-0.005954
5.6600	859.565	72.942	73.216	80.307	-0.726	50.348	1636.391	-0.005106	-0.005125	-0.005621
5.6800	815.261	68.030	69.004	75.123	-0.720	50.348	1552.048	-0.004762	-0.004830	-0.005259
5.7000	756.245	61.787	63.597	68.745	-0.726	50.347	1439.695	-0.004325	-0.004452	-0.004812
5.7200	715.548	56.764	59.235	64.214	-0.724	50.347	1362.219	-0.003973	-0.004146	-0.004495
5.7400	658.319	49.944	53.126	57.683	-0.715	50.347	1253.271	-0.003496	-0.003719	-0.004038
5.7600	594.779	42.718	46.287	50.585	-0.709	50.348	1132.307	-0.002990	-0.003240	-0.003541
5.7800	534.110	36.123	39.878	43.592	-0.715	50.348	1016.808	-0.002529	-0.002791	-0.003051
5.8000	509.433	32.364	36.931	40.481	-0.702	50.348	969.830	-0.002266	-0.002585	-0.002834
5.8200	457.705	26.779	30.655	34.423	-0.694	50.348	871.353	-0.001875	-0.002146	-0.002410
5.8400	392.211	19.636	23.366	26.792	-0.697	50.348	746.670	-0.001375	-0.001636	-0.001875
5.8600	343.279	14.373	17.656	20.565	-0.707	50.348	653.515	-0.001006	-0.001236	-0.001440
5.8800	320.796	11.211	14.406	17.162	-0.699	50.347	610.714	-0.000785	-0.001008	-0.001201
5.9000	298.630	8.296	11.228	13.994	-0.725	50.347	568.514	-0.000581	-0.000786	-0.000980
5.9200	273.412	5.389	7.924	10.714	-0.712	50.347	520.506	-0.000377	-0.000555	-0.000750
5.9400	254.115	3.315	5.106	7.701	-0.714	50.347	483.770	-0.000232	-0.000357	-0.000539
5.9600	233.617	0.858	2.394	5.085	-0.727	50.347	444.746	-0.000060	-0.000168	-0.000356
5.9800	232.535	0.253	1.554	4.127	-0.722	50.347	442.686	-0.000018	-0.000109	-0.000289
6.0000	239.252	0.830	1.801	4.170	-0.722	50.348	455.475	-0.000058	-0.000126	-0.000292
6.0200	238.035	0.423	1.842	4.097	-0.730	50.347	453.157	-0.000030	-0.000129	-0.000287
6.0400	246.691	0.563	2.325	4.628	-0.716	50.348	469.637	-0.000039	-0.000163	-0.000324
6.0600	272.420	2.796	4.816	7.310	-0.724	50.347	518.618	-0.000196	-0.000337	-0.000512
6.0800	313.958	6.738	8.956	11.689	-0.735	50.347	597.696	-0.000472	-0.000627	-0.000818
6.1000	338.695	9.392	12.107	14.384	-0.721	50.347	644.789	-0.000657	-0.000848	-0.001007
6.1200	386.110	13.728	16.992	19.079	-0.721	50.347	735.054	-0.000961	-0.001189	-0.001336
6.1400	409.058	16.166	19.439	22.250	-0.702	50.347	778.742	-0.001132	-0.001361	-0.001557
6.1600	470.059	22.565	25.949	28.767	-0.723	50.347	894.871	-0.001580	-0.001816	-0.002014
6.1800	520.449	28.290	31.949	34.910	-0.725	50.348	990.801	-0.001980	-0.002236	-0.002444
6.2000	587.791	35.139	38.965	42.232	-0.726	50.348	1119.003	-0.002460	-0.002728	-0.002956
6.2200	631.794	39.896	43.496	47.122	-0.720	50.348	1202.774	-0.002793	-0.003045	-0.003299
6.2400	698.460	47.390	50.580	54.460	-0.727	50.347	1329.689	-0.003317	-0.003541	-0.003812
6.2600	734.799	52.287	54.874	59.101	-0.729	50.347	1398.869	-0.003660	-0.003841	-0.004137
6.2800	794.236	59.460	61.411	65.588	-0.716	50.347	1512.022	-0.004162	-0.004299	-0.004591
6.3000	833.235	63.921	65.278	70.314	-0.712	50.347	1586.266	-0.004474	-0.004569	-0.004922
6.3200	905.477	72.173	72.517	78.654	-0.716	50.347	1723.795	-0.005052	-0.005076	-0.005506
6.3400	948.428	78.065	77.138	83.351	-0.714	50.347	1805.563	-0.005465	-0.005400	-0.005835
6.3600	980.754	82.012	80.812	87.797	-0.719	50.347	1867.104	-0.005741	-0.005657	-0.006146
6.3800	1017.604	86.695	84.007	91.882	-0.704	50.347	1937.256	-0.006069	-0.005880	-0.006432
6.4000	1070.023	93.434	88.848	97.788	-0.711	50.347	2037.048	-0.006540	-0.006219	-0.006845
6.4200	1075.298	94.668	90.456	99.721	-0.723	50.347	2047.091	-0.006627	-0.006332	-0.006980
6.4400	1083.804	95.829	91.336	100.735	-0.707	50.347	2063.284	-0.006708	-0.006394	-0.007051
6.4600	1102.018	98.612	93.183	103.179	-0.711	50.347	2097.960	-0.006903	-0.006523	-0.007223
6.4800	1123.719	101.849	94.885	105.848	-0.707	50.347	2139.273	-0.007129	-0.006642	-0.007409
6.5000	1098.171	99.314	93.816	104.266	-0.718	50.347	2090.635	-0.006952	-0.006567	-0.007299
6.5200	1102.364	99.552	94.145	104.472	-0.702	50.347	2098.618	-0.006969	-0.006590	-0.007313
6.5400	1096.277	99.398	93.651	104.417	-0.716	50.347	2087.030	-0.006958	-0.006556	-0.007309
6.5600	1062.163	96.124	91.061	101.055	-0.700	50.347	2022.085	-0.006729	-0.006374	-0.007074
6.5800	1033.654	92.984	89.180	98.844	-0.702	50.347	1967.812	-0.006509	-0.006243	-0.006919
6.6000	1004.634	89.542	86.411	95.650	-0.707	50.348	1912.565	-0.006268	-0.006049	-0.006696
6.6200	966.312	85.221	82.959	91.464	-0.707	50.347	1839.609	-0.005965	-0.005807	-0.006402
6.6400	921.587	80.424	78.911	86.741	-0.708	50.347	1754.465	-0.005630	-0.005524	-0.006072
6.6600	856.078	73.278	73.147	80.155	-0.711	50.347	1629.753	-0.005129	-0.005120	-0.005611
6.6800	818.763	68.649	69.430	75.693	-0.714	50.347	1558.714	-0.004805	-0.004860	-0.005298
6.7000	773.557	63.375	64.672	71.080	-0.721	50.347	1472.654	-0.004436	-0.004527	-0.004976
6.7200	685.836	53.792	56.032	61.325	-0.714	50.347	1305.656	-0.003765	-0.003922	-0.004293
6.7400	651.046	49.650	52.521	57.060	-0.714	50.347	1239.424	-0.003475	-0.003676	-0.003994
6.7600	596.658	43.196	46.576	51.028	-0.711	50.347	1135.883	-0.003024	-0.003260	-0.003572
6.7800	541.173	36.487	40.357	44.663	-0.721	50.347	1030.254	-0.002554	-0.002825	-0.003126
6.8000	482.427	30.004	33.781	37.422	-0.721	50.347	918.417	-0.002100	-0.002365	-0.002620
6.8200	440.272	25.375	29.349	32.422	-0.716	50.348	838.165	-0.001776	-0.002054	-0.002270
6.8400	399.590	20.522	24.189	27.598	-0.720	50.347	760.717	-0.001437	-0.001693	-0.001932
6.8600	340.363	14.091	17.033	20.482	-0.703	50.348	647.964	-0.000986	-0.001192	-0.001434
6.8800	336.727	12.955	16.180	19.039	-0.731	50.346	641.041	-0.000907	-0.001133	-0.001333
6.9000	291.491	8.113	10.814	13.410	-0.719	50.347	554.924	-0.000568	-0.000757	-0.000939
6.9200	264.094	4.594	7.304	9.520	-0.719	50.347	502.768	-0.000322	-0.000511	-0.000666
6.9400	244.317	2.235	4.086	6.921	-0.724	50.347	465.117	-0.000156	-0.000286	-0.000484
6.9600	243.656	2.010	3.467	6.351	-0.728	50.347	463.858	-0.000141	-0.000243	-0.000445
6.9800	228.672	0.070	1.294	4.057	-0.711	50.347	435.333	-0.000005	-0.000091	-0.000284
7.0000	234.984	0.042	1.609	4.236	-0.720	50.347	447.350	-0.000003	-0.000113	-0.000297
7.0200	237.599	0.155	1.528	4.321	-0.718	50.347	452.328	-0.000011	-0.000107	-0.000302
7.0400	256.941	1.952	3.356	5.865	-0.732	50.347	489.149	-0.000137	-0.000235	-0.000411
7.0600	267.626	2.866	4.637	6.826	-0.718	50.347	509.491	-0.000201	-0.000325	-0.000478
7.0800	309.570	6.316	8.914	11.340	-0.712	50.347	589.342	-0.000442	-0.000624	-0.000794
7.1000	338.846	9.252	11.970	14.578	-0.723	50.347	645.075	-0.000648	-0.000838	-0.001020
7.1200	375.380	12.730	15.961	18.732	-0.730	50.347	714.626	-0.000891	-0.001117	-0.001311
7.1400	410.170	16.839	20.227	22.846	-0.726	50.347	780.859	-0.001179	-0.001416	-0.001599
7.1600	474.492	23.465	26.610	29.586	-0.719	50.347	903.311	-0.001643	-0.001863	-0.002071
7.1800	517.834	27.938	31.536	34.507	-0.729	50.347	985.823	-0.001956	-0.002208	-0.002415
7.2000	569.517	33.426	37.207	40.605	-0.723	50.347	1084.213	-0.002340	-0.002604	-0.002842
7.2200	626.354	39.881	43.620	46.954	-0.722	50.347	1192.417	-0.002792	-0.003053	-0.003287
7.2400	681.343	46.352	49.343	52.988	-0.722	50.347	1297.102	-0.003245	-0.003454	-0.003709
7.2600	734.829	52.258	54.682	59.310	-0.703	50.347	1398.926	-0.003658	-0.003828	-0.004152
7.2800	786.016	58.688	60.104	65.214	-0.707	50.347	1496.372	-0.004108	-0.004207	-0.004565
7.3000	847.422	65.957	66.778	71.847	-0.722	50.347	1613.274	-0.004617	-0.004674	-0.005029
7.3200	893.574	71.262	71.497	77.541	-0.731	50.347	1701.136	-0.004988	-0.005005	-0.005428
7.3400	954.139	78.441	77.208	84.102	-0.736	50.347	1816.435	-0.005491	-0.005405	-0.005887
7.3600	979.597	81.842	80.359	87.478	-0.734	50.347	1864.901	-0.005729	-0.005625	-0.006123
7.3800	1030.303	88.522	85.477	93.384	-0.732	50.347	1961.432	-0.006197	-0.005983	-0.006537
7.4000	1047.630	91.213	87.238	95.691	-0.728	50.347	1994.419	-0.006385	-0.006107	-0.006698
7.4200	1073.164	94.330	89.851	99.359	-0.720	50.347	2043.028	-0.006603	-0.006290	-0.006955
7.4400	1093.542	97.123	91.930	101.625	-0.709	50.347	2081.823	-0.006799	-0.006435	-0.007114
7.4600	1102.709	99.201	93.211	103.014	-0.722	50.346	2099.276	-0.006944	-0.006525	-0.007211
7.4800	1100.891	99.158	93.555	103.416	-0.728	50.346	2095.814	-0.006941	-0.006549	-0.007239
7.5000	1117.152	101.021	94.737	105.500	-0.734	50.347	2126.770	-0.007071	-0.006632	-0.007385
7.5200	1106.091	100.713	94.186	104.862	-0.731	50.346	2105.713	-0.007050	-0.006593	-0.007340
7.5400	1082.541	98.457	93.125	102.942	-0.731	50.347	2060.881	-0.006892	-0.006519	-0.007206
7.5600	1065.740	96.308	91.655	101.195	-0.740	50.347	2028.894	-0.006742	-0.006416	-0.007084
7.5800	1035.983	93.237	88.862	98.608	-0.715	50.347	1972.246	-0.006527	-0.006220	-0.006903
7.6000	1000.141	89.502	86.041	95.232	-0.714	50.347	1904.011	-0.006265	-0.006023	-0.006666
7.6200	965.936	85.630	83.345	91.591	-0.706	50.347	1838.894	-0.005994	-0.005834	-0.006411
7.6400	895.919	77.799	77.277	84.437	-0.687	50.347	1705.599	-0.005446	-0.005409	-0.005911
7.6600	886.210	76.314	75.722	82.863	-0.706	50.346	1687.117	-0.005342	-0.005301	-0.005800
7.6800	815.982	68.409	69.129	75.666	-0.703	50.346	1553.421	-0.004789	-0.004839	-0.005297
7.7000	765.382	62.911	64.549	70.316	-0.704	50.346	1457.090	-0.004404	-0.004518	-0.004922
7.7200	708.604	56.114	58.507	63.742	-0.722	50.346	1349.001	-0.003928	-0.004095	-0.004462
7.7400	644.088	48.755	51.830	56.725	-0.712	50.346	1226.177	-0.003413	-0.003628	-0.003971
7.7600	594.013	43.197	46.537	50.818	-0.704	50.346	1130.848	-0.003024	-0.003258	-0.003557
7.7800	540.542	36.868	40.479	44.512	-0.712	50.346	1029.053	-0.002581	-0.002834	-0.003116
7.8000	498.613	31.802	35.952	39.438	-0.703	50.347	949.230	-0.002226	-0.002517	-0.002761
7.8200	461.297	27.198	31.260	34.991	-0.703	50.347	878.191	-0.001904	-0.002188	-0.002449
7.8400	401.364	21.026	24.327	27.892	-0.698	50.346	764.093	-0.001472	-0.001703	-0.001952
7.8600	362.681	16.390	19.647	23.180	-0.706	50.347	690.451	-0.001147	-0.001375	-0.001623
7.8800	329.573	12.266	15.741	18.524	-0.709	50.346	627.422	-0.000859	-0.001102	-0.001297
7.9000	295.158	8.114	10.884	13.925	-0.702	50.346	561.905	-0.000568	-0.000762	-0.000975
7.9200	255.258	4.298	5.888	8.921	-0.723	50.347	485.945	-0.000301	-0.000412	-0.000624
7.9400	261.254	4.188	6.259	8.796	-0.708	50.348	497.360	-0.000293	-0.000438	-0.000616
7.9600	238.275	1.614	3.093	5.641	-0.712	50.347	453.615	-0.000113	-0.000216	-0.000395
7.9800	242.483	1.364	2.943	5.628	-0.694	50.347	461.626	-0.000095	-0.000206	-0.000394
8.0000	242.574	1.250	2.723	5.461	-0.679	50.348	461.798	-0.000087	-0.000191	-0.000382
8.0200	235.796	0.590	1.828	4.473	-0.676	50.348	448.895	-0.000041	-0.000128	-0.000313
8.0400	251.606	1.251	3.437	5.392	-0.687	50.347	478.992	-0.000088	-0.000241	-0.000377
8.0600	260.142	1.996	3.644	6.434	-0.684	50.347	495.243	-0.000140	-0.000255	-0.000450
8.0800	314.214	7.102	9.327	11.757	-0.688	50.346	598.183	-0.000497	-0.000653	-0.000823
8.1000	344.196	10.262	12.988	15.189	-0.735	50.346	655.260	-0.000718	-0.000909	-0.001063
8.1200	390.453	14.445	18.108	20.273	-0.746	50.346	743.322	-0.001011	-0.001268	-0.001419
8.1400	393.143	14.962	18.505	20.997	-0.750	50.347	748.444	-0.001047	-0.001295	-0.001470
8.1600	475.078	23.325	26.996	29.504	-0.754	50.347	904.427	-0.001633	-0.001890	-0.002065
8.1800	525.664	29.007	32.625	35.521	-0.732	50.348	1000.729	-0.002030	-0.002284	-0.002486
8.2000	561.852	32.799	37.069	40.162	-0.691	50.347	1069.622	-0.002296	-0.002595	-0.002811
8.2200	634.094	40.600	44.389	47.665	-0.699	50.347	1207.151	-0.002842	-0.003107	-0.003337
8.2400	679.675	46.267	49.137	52.848	-0.743	50.346	1293.926	-0.003239	-0.003440	-0.003699
8.2600	743.440	53.789	55.867	60.227	-0.759	50.347	1415.319	-0.003765	-0.003911	-0.004216
8.2800	803.013	60.639	62.454	67.244	-0.746	50.348	1528.730	-0.004245	-0.004372	-0.004707
8.3000	839.141	64.891	66.570	71.859	-0.714	50.347	1597.509	-0.004542	-0.004660	-0.005030
8.3200	896.234	71.587	71.951	78.557	-0.694	50.346	1706.200	-0.005011	-0.005037	-0.005499
8.3400	958.993	79.315	78.171	85.228	-0.726	50.347	1825.676	-0.005552	-0.005472	-0.005966
8.3600	987.006	83.315	81.363	88.477	-0.752	50.347	1879.005	-0.005832	-0.005695	-0.006193
8.3800	1017.799	87.062	84.789	92.424	-0.737	50.347	1937.628	-0.006094	-0.005935	-0.006470
8.4000	1058.210	92.295	88.216	96.706	-0.702	50.347	2014.561	-0.006461	-0.006175	-0.006769
8.4200	1070.023	94.472	90.126	98.830	-0.691	50.346	2037.048	-0.006613	-0.006309	-0.006918
8.4400	1101.853	97.767	92.907	102.430	-0.718	50.346	2097.645	-0.006844	-0.006504	-0.007170
8.4600	1115.393	100.264	94.477	105.167	-0.740	50.347	2123.423	-0.007018	-0.006613	-0.007362
8.4800	1107.714	99.901	93.872	104.777	-0.719	50.348	2108.803	-0.006993	-0.006571	-0.007334
8.5000	1114.928	101.260	95.054	105.556	-0.690	50.347	2122.536	-0.007088	-0.006654	-0.007389
8.5200	1110.374	101.189	95.040	105.252	-0.678	50.347	2113.867	-0.007083	-0.006653	-0.007368
8.5400	1073.584	97.249	92.575	102.847	-0.703	50.346	2043.829	-0.006807	-0.006480	-0.007199
8.5600	1052.875	94.848	90.349	100.486	-0.733	50.346	2004.404	-0.006639	-0.006324	-0.007034
8.5800	1056.948	95.702	90.967	100.667	-0.711	50.347	2012.157	-0.006699	-0.006368	-0.007047
8.6000	1003.146	89.627	86.646	95.941	-0.690	50.347	1909.733	-0.006274	-0.006065	-0.006716
8.6200	964.042	85.009	83.328	91.493	-0.690	50.346	1835.289	-0.005951	-0.005833	-0.006405
8.6400	915.516	79.737	78.569	86.686	-0.706	50.346	1742.907	-0.005582	-0.005500	-0.006068
8.6600	865.291	74.304	74.110	81.057	-0.724	50.347	1647.291	-0.005201	-0.005188	-0.005674
8.6800	810.963	68.171	69.089	75.097	-0.746	50.347	1543.865	-0.004772	-0.004836	-0.005257
8.7000	768.072	63.093	64.479	70.274	-0.708	50.347	1462.212	-0.004417	-0.004514	-0.004919
8.7200	704.652	56.117	58.258	63.493	-0.687	50.346	1341.476	-0.003928	-0.004078	-0.004445
8.7400	664.376	51.234	53.828	58.894	-0.706	50.346	1264.801	-0.003586	-0.003768	-0.004123
8.7600	561.041	40.277	43.853	47.956	-0.737	50.346	1068.077	-0.002819	-0.003070	-0.003357
8.7800	543.037	36.712	40.808	44.733	-0.739	50.347	1033.802	-0.002570	-0.002857	-0.003131
8.8000	466.572	29.021	32.431	36.548	-0.711	50.347	888.233	-0.002031	-0.002270	-0.002558
8.8200	465.189	28.162	31.812	35.340	-0.692	50.347	885.601	-0.001971	-0.002227	-0.002474
8.8400	403.964	21.125	24.822	27.959	-0.686	50.346	769.043	-0.001479	-0.001738	-0.001957
8.8600	352.266	15.259	18.917	22.110	-0.731	50.346	670.624	-0.001068	-0.001324	-0.001548
8.8800	319.714	11.253	14.212	17.290	-0.754	50.346	608.654	-0.000788	-0.000995	-0.001210
8.9000	288.966	7.930	10.387	13.357	-0.741	50.347	550.117	-0.000555	-0.000727	-0.000935
8.9200	271.233	6.148	8.169	10.895	-0.698	50.347	516.357	-0.000430	-0.000572	-0.000763
8.9400	255.648	3.695	5.449	8.464	-0.690	50.346	486.689	-0.000259	-0.000381	-0.000592
8.9600	243.656	1.953	3.686	6.533	-0.728	50.346	463.858	-0.000137	-0.000258	-0.000457
8.9800	221.864	-0.112	0.838	3.237	-0.738	50.347	422.373	0.000008	-0.000059	-0.000227
9.0000	231.858	0.253	1.402	4.045	-0.738	50.347	441.399	-0.000018	-0.000098	-0.000283
9.0200	236.938	0.112	1.610	4.030	-0.698	50.347	451.069	-0.000008	-0.000113	-0.000282
9.0400	250.734	1.307	2.929	5.393	-0.686	50.346	477.333	-0.000091	-0.000205	-0.000377
9.0600	285.495	4.564	6.385	9.047	-0.718	50.346	543.509	-0.000319	-0.000447	-0.000633
9.0800	299.621	5.739	8.227	10.518	-0.727	50.345	570.402	-0.000402	-0.000576	-0.000736
9.1000	336.742	9.097	12.203	14.383	-0.748	50.346	641.069	-0.000637	-0.000854	-0.001007
9.1200	375.470	12.954	16.002	18.788	-0.727	50.347	714.798	-0.000907	-0.001120	-0.001315
9.1400	430.038	18.805	22.084	24.806	-0.696	50.347	818.682	-0.001316	-0.001546	-0.001736
9.1600	455.526	21.865	25.329	27.876	-0.692	50.347	867.205	-0.001531	-0.001773	-0.001951
9.1800	529.842	28.949	33.150	36.104	-0.736	50.346	1008.682	-0.002026	-0.002321	-0.002527
9.2000	574.506	34.030	37.826	41.245	-0.749	50.346	1093.712	-0.002382	-0.002648	-0.002887
9.2200	639.895	41.371	44.830	48.718	-0.738	50.347	1218.195	-0.002896	-0.003138	-0.003410
9.2400	695.485	48.109	50.981	54.765	-0.697	50.347	1324.024	-0.003368	-0.003569	-0.003834
9.2600	732.409	52.204	55.067	59.449	-0.691	50.345	1394.320	-0.003654	-0.003855	-0.004161
9.2800	783.762	58.365	60.199	65.270	-0.700	50.346	1492.081	-0.004086	-0.004214	-0.004569
9.3000	847.227	65.733	66.899	72.484	-0.725	50.346	1612.902	-0.004601	-0.004683	-0.005074
9.3200	890.298	70.997	71.552	77.724	-0.731	50.347	1694.899	-0.004970	-0.005009	-0.005441
9.3400	940.312	77.268	76.560	83.419	-0.711	50.347	1790.113	-0.005409	-0.005359	-0.005839
9.3600	971.662	81.463	79.297	87.186	-0.688	50.347	1849.794	-0.005702	-0.005551	-0.006103
9.3800	1008.767	86.428	83.733	91.895	-0.677	50.346	1920.433	-0.006050	-0.005861	-0.006433
9.4000	1025.824	88.646	85.492	93.676	-0.700	50.346	1952.906	-0.006205	-0.005984	-0.006557
9.4200	1079.821	95.324	90.803	99.998	-0.734	50.346	2055.702	-0.006673	-0.006356	-0.007000
9.4400	1103.746	98.498	93.389	103.735	-0.731	50.347	2101.250	-0.006895	-0.006537	-0.007261
9.4600	1102.935	99.189	93.665	103.666	-0.706	50.347	2099.705	-0.006943	-0.006557	-0.007257
9.4800	1106.722	99.998	94.325	104.306	-0.687	50.346	2106.915	-0.007000	-0.006603	-0.007301
9.5000	1119.752	101.696	95.520	106.280	-0.706	50.346	2131.720	-0.007119	-0.006686	-0.007440
9.5200	1104.618	100.684	94.476	105.849	-0.736	50.346	2102.909	-0.007048	-0.006613	-0.007409
9.5400	1080.543	98.203	92.810	103.320	-0.746	50.347	2057.076	-0.006874	-0.006497	-0.007232
9.5600	1067.242	96.842	91.984	102.041	-0.722	50.347	2031.755	-0.006779	-0.006439	-0.007143
9.5800	1043.558	94.233	89.978	99.749	-0.687	50.347	1986.666	-0.006596	-0.006298	-0.006982
9.6000	1001.989	89.810	86.577	96.095	-0.707	50.346	1907.530	-0.006287	-0.006060	-0.006727
9.6200	950.442	84.182	81.900	90.452	-0.724	50.346	1809.397	-0.005893	-0.005733	-0.006332
9.6400	922.489	80.664	79.614	87.087	-0.754	50.347	1756.182	-0.005646	-0.005573	-0.006096
9.6600	861.669	73.911	74.029	80.960	-0.747	50.347	1640.396	-0.005174	-0.005182	-0.005667
9.6800	811.068	68.128	68.895	75.568	-0.710	50.347	1544.065	-0.004769	-0.004823	-0.005290
9.7000	774.354	64.049	65.485	71.358	-0.699	50.346	1474.171	-0.004483	-0.004584	-0.004995
9.7200	712.076	56.832	59.347	64.659	-0.716	50.346	1355.610	-0.003978	-0.004154	-0.004526
9.7400	657.448	50.462	53.484	58.308	-0.751	50.346	1251.612	-0.003532	-0.003744	-0.004082
9.7600	602.038	43.953	47.195	51.862	-0.749	50.347	1146.126	-0.003077	-0.003304	-0.003630
9.7800	564.151	39.459	43.400	47.414	-0.734	50.347	1073.999	-0.002762	-0.003038	-0.003319
9.8000	492.511	31.410	35.500	39.229	-0.720	50.347	937.614	-0.002199	-0.002485	-0.002746
9.8200	443.488	26.020	29.857	33.658	-0.694	50.346	844.288	-0.001821	-0.002090	-0.002356
9.8400	407.315	21.083	25.264	28.740	-0.716	50.346	775.423	-0.001476	-0.001768	-0.002012
9.8600	378.656	18.047	21.395	24.904	-0.736	50.346	720.863	-0.001263	-0.001498	-0.001743
9.8800	320.962	11.664	14.997	17.594	-0.746	50.346	611.029	-0.000816	-0.001050	-0.001232
9.9000	285.119	7.664	10.374	13.315	-0.719	50.346	542.793	-0.000537	-0.000726	-0.000932
9.9200	280.686	6.612	8.681	11.550	-0.700	50.346	534.353	-0.000463	-0.000608	-0.000808
9.9400	240.680	2.655	3.919	6.853	-0.710	50.346	458.193	-0.000186	-0.000274	-0.000480
9.9600	243.550	2.107	3.767	6.323	-0.740	50.346	463.657	-0.000148	-0.000264	-0.000443
9.9800	240.695	1.448	3.313	6.102	-0.749	50.347	458.221	-0.000101	-0.000232	-0.000427
