# Supplementary material for: Evaluation of a Cold-Mixed High-Performance Polyurethane Mixture
Source: Hindawi journal article supplement (doi:10.1155/2019/1507971), 2019-11-07
Supplement: f1 [file 1507971.f1.zip › 1507971.f1/dynamic modulus data/PUM/specimen1/temp50/zhs-1-50_2Hz.csv]

Test Information
****************
Project name	zhs
Operator name	1
Target test temperature	50
Target confining stress	0
Average dynamic strain range from 75 to 125 micro-strain
Contact stress	5
Initial modulus	1000
Axial gauge length	70
Comments
Specimen information
********************
Identification	zhs-1-50
Dimensions	Point 1	Point 2	Point 3	Point 4	Point 5	Point 6	Average	Std Dev.
Diameter (mm)	49.2	49.2	49.3				49.23	0.058
Height (mm)	101.3	101.2	101.3				101.27	0.058
Cross-sectional area (mm�)	1903.7
Conditioning time
Properties/Comments
Test Data	2Hz
*********
Test date and time	Wed	Apr 3	2019	1:50 PM
Dynamic modulus (MPa)	9159
Phase angle (Degrees)	4.04
Average temperature (�C)	50.4
Average confining pressure (kPa)	-0.7
Average micro-strain	98
Load drift (%)	0.3
Load standard error (%)	4.3
Average deformation drift (%)	-2.9
Average deformation standard error (%)	4.4
Deformation uniformity (%)	3.3
Phase uniformity (Degrees)	0.2
Conditioning Cycles
Time (sec)	Axial stress (kPa)	Axial micro-strain #1	Axial micro-strain #2	Axial micro-strain #3	Confining pressure (kPa)	Temperature (�C)	Load (N)	Displacement #1 (mm)	Displacement #2 (mm)	Displacement #3 (mm)
0.0000	292.393	2.907	5.613	6.254	-0.736	50.346	556.641	-0.000203	-0.000393	-0.000438
0.0100	243.160	-2.465	-1.075	-0.655	-0.719	50.366	462.914	0.000173	0.000075	0.000046
0.0200	238.816	-3.492	-2.328	-1.362	-0.724	50.346	454.645	0.000244	0.000163	0.000095
0.0300	245.399	-3.364	-1.722	-1.028	-0.728	50.366	467.176	0.000235	0.000121	0.000072
0.0400	259.285	-2.057	-0.525	-0.223	-0.737	50.346	493.612	0.000144	0.000037	0.000016
0.0500	283.571	-0.378	1.775	2.127	-0.733	50.366	539.846	0.000026	-0.000124	-0.000149
0.0600	320.481	3.231	5.932	6.046	-0.730	50.346	610.113	-0.000226	-0.000415	-0.000423
0.0700	352.551	6.625	8.956	9.601	-0.727	50.366	671.167	-0.000464	-0.000627	-0.000672
0.0800	407.270	11.691	14.805	15.260	-0.726	50.346	775.337	-0.000818	-0.001036	-0.001068
0.0900	443.759	15.510	18.986	19.399	-0.722	50.367	844.803	-0.001086	-0.001329	-0.001358
0.1000	484.200	19.761	23.102	23.666	-0.731	50.347	921.793	-0.001383	-0.001617	-0.001657
0.1100	520.885	23.393	27.245	27.752	-0.727	50.367	991.631	-0.001638	-0.001907	-0.001943
0.1200	562.378	28.081	31.646	32.491	-0.732	50.347	1070.623	-0.001966	-0.002215	-0.002274
0.1300	610.604	32.813	36.684	37.758	-0.732	50.368	1162.434	-0.002297	-0.002568	-0.002643
0.1400	648.506	37.583	41.085	42.162	-0.727	50.346	1234.589	-0.002631	-0.002876	-0.002951
0.1500	691.352	42.410	45.490	46.859	-0.728	50.367	1316.156	-0.002969	-0.003184	-0.003280
0.1600	744.613	48.024	50.842	53.001	-0.731	50.347	1417.551	-0.003362	-0.003559	-0.003710
0.1700	767.411	51.375	53.937	55.684	-0.719	50.368	1460.953	-0.003596	-0.003776	-0.003898
0.1800	814.389	56.608	58.316	60.880	-0.733	50.347	1550.388	-0.003963	-0.004082	-0.004262
0.1900	827.945	58.758	60.394	62.730	-0.726	50.367	1576.195	-0.004113	-0.004228	-0.004391
0.2000	871.287	63.613	64.741	67.579	-0.722	50.347	1658.707	-0.004453	-0.004532	-0.004731
0.2100	884.257	65.510	66.147	69.259	-0.735	50.367	1683.397	-0.004586	-0.004630	-0.004848
0.2200	907.911	68.003	68.745	71.914	-0.735	50.347	1728.430	-0.004760	-0.004812	-0.005034
0.2300	917.064	69.858	70.066	73.427	-0.730	50.367	1745.853	-0.004890	-0.004905	-0.005140
0.2400	912.795	69.424	69.899	73.443	-0.731	50.347	1737.728	-0.004860	-0.004893	-0.005141
0.2500	921.061	70.927	71.042	74.372	-0.727	50.368	1753.464	-0.004965	-0.004973	-0.005206
0.2600	913.652	70.364	70.534	74.582	-0.728	50.347	1739.359	-0.004925	-0.004937	-0.005221
0.2700	903.523	69.128	70.133	73.413	-0.732	50.368	1720.076	-0.004839	-0.004909	-0.005139
0.2800	890.583	68.339	69.158	72.845	-0.728	50.347	1695.442	-0.004784	-0.004841	-0.005099
0.2900	881.236	67.147	68.360	71.817	-0.726	50.368	1677.647	-0.004700	-0.004785	-0.005027
0.3000	831.988	62.531	64.327	66.773	-0.728	50.347	1583.891	-0.004377	-0.004503	-0.004674
0.3100	811.324	60.233	62.112	64.952	-0.715	50.368	1544.552	-0.004216	-0.004348	-0.004547
0.3200	776.533	55.992	58.961	61.366	-0.721	50.347	1478.319	-0.003919	-0.004127	-0.004296
0.3300	745.154	53.018	56.388	58.268	-0.727	50.368	1418.581	-0.003711	-0.003947	-0.004079
0.3400	691.397	47.014	50.705	52.457	-0.734	50.346	1316.242	-0.003291	-0.003549	-0.003672
0.3500	652.849	42.846	47.100	48.540	-0.726	50.368	1242.857	-0.002999	-0.003297	-0.003398
0.3600	608.004	37.839	42.408	43.745	-0.730	50.347	1157.484	-0.002649	-0.002969	-0.003062
0.3700	578.368	34.239	38.830	40.397	-0.715	50.368	1101.065	-0.002397	-0.002718	-0.002828
0.3800	530.939	29.386	34.304	35.186	-0.711	50.347	1010.771	-0.002057	-0.002401	-0.002463
0.3900	503.707	26.681	31.040	31.753	-0.716	50.368	958.929	-0.001868	-0.002173	-0.002223
0.4000	448.072	20.154	24.698	25.542	-0.727	50.347	853.014	-0.001411	-0.001729	-0.001788
0.4100	402.010	15.677	19.978	20.386	-0.727	50.368	765.324	-0.001097	-0.001398	-0.001427
0.4200	352.221	10.025	13.676	14.246	-0.734	50.347	670.538	-0.000702	-0.000957	-0.000997
0.4300	323.832	6.638	10.304	10.618	-0.725	50.368	616.493	-0.000465	-0.000721	-0.000743
0.4400	303.213	4.762	7.784	8.117	-0.727	50.347	577.240	-0.000333	-0.000545	-0.000568
0.4500	290.469	2.710	5.450	6.116	-0.726	50.368	552.979	-0.000190	-0.000381	-0.000428
0.4600	265.507	0.478	2.640	2.890	-0.730	50.347	505.457	-0.000033	-0.000185	-0.000202
0.4700	254.581	-0.965	0.964	1.238	-0.723	50.368	484.657	0.000068	-0.000067	-0.000087
0.4800	227.921	-3.702	-2.494	-1.959	-0.730	50.347	433.903	0.000259	0.000175	0.000137
0.4900	229.950	-3.816	-2.630	-2.169	-0.728	50.368	437.765	0.000267	0.000184	0.000152
0.5000	229.288	-4.166	-3.168	-2.433	-0.727	50.348	436.506	0.000292	0.000222	0.000170
0.5100	225.682	-4.827	-3.690	-3.155	-0.726	50.368	429.640	0.000338	0.000258	0.000221
0.5200	232.610	-4.068	-3.223	-2.945	-0.719	50.347	442.829	0.000285	0.000226	0.000206
0.5300	244.542	-3.408	-2.299	-1.849	-0.724	50.368	465.546	0.000239	0.000161	0.000129
0.5400	263.388	-1.820	-0.372	-0.360	-0.726	50.348	501.423	0.000127	0.000026	0.000025
0.5500	291.491	0.747	2.696	2.501	-0.731	50.369	554.924	-0.000052	-0.000189	-0.000175
0.5600	325.636	3.907	6.258	6.992	-0.731	50.348	619.926	-0.000273	-0.000438	-0.000489
0.5700	329.002	4.326	6.987	7.088	-0.729	50.368	626.335	-0.000303	-0.000489	-0.000496
0.5800	371.036	8.438	11.200	11.521	-0.727	50.348	706.358	-0.000591	-0.000784	-0.000806
0.5900	422.449	13.319	16.579	17.193	-0.724	50.369	804.234	-0.000932	-0.001161	-0.001203
0.6000	471.697	18.414	22.428	22.414	-0.727	50.347	897.989	-0.001289	-0.001570	-0.001569
0.6100	522.327	23.578	27.396	27.920	-0.725	50.368	994.377	-0.001650	-0.001918	-0.001954
0.6200	561.717	27.872	31.839	32.628	-0.728	50.348	1069.365	-0.001951	-0.002229	-0.002284
0.6300	608.440	33.260	37.055	38.215	-0.734	50.369	1158.314	-0.002328	-0.002594	-0.002675
0.6400	656.080	38.312	41.802	43.052	-0.734	50.348	1249.008	-0.002682	-0.002926	-0.003014
0.6500	699.617	43.362	46.784	48.137	-0.720	50.369	1331.892	-0.003035	-0.003275	-0.003370
0.6600	741.186	48.151	50.953	52.736	-0.729	50.348	1411.028	-0.003371	-0.003567	-0.003692
0.6700	791.757	53.988	56.445	58.366	-0.727	50.369	1507.301	-0.003779	-0.003951	-0.004086
0.6800	814.404	57.157	59.154	61.269	-0.729	50.348	1550.417	-0.004001	-0.004141	-0.004289
0.6900	844.221	60.555	61.853	64.867	-0.732	50.369	1607.180	-0.004239	-0.004330	-0.004541
0.7000	874.007	64.174	65.442	68.329	-0.738	50.348	1663.885	-0.004492	-0.004581	-0.004783
0.7100	874.233	64.821	65.788	68.856	-0.737	50.369	1664.314	-0.004537	-0.004605	-0.004820
0.7200	886.721	66.419	67.147	70.636	-0.723	50.348	1688.089	-0.004649	-0.004700	-0.004945
0.7300	913.427	69.337	69.873	73.263	-0.728	50.369	1738.930	-0.004854	-0.004891	-0.005128
0.7400	918.206	70.589	70.821	74.625	-0.731	50.348	1748.028	-0.004941	-0.004957	-0.005224
0.7500	915.290	69.928	70.588	74.221	-0.722	50.369	1742.477	-0.004895	-0.004941	-0.005195
0.7600	909.414	69.999	70.752	73.956	-0.733	50.348	1731.291	-0.004900	-0.004953	-0.005177
0.7700	908.678	69.957	70.395	74.248	-0.724	50.369	1729.889	-0.004897	-0.004928	-0.005197
0.7800	889.697	68.044	69.308	72.997	-0.723	50.349	1693.754	-0.004763	-0.004852	-0.005110
0.7900	866.403	66.044	67.562	70.704	-0.731	50.369	1649.408	-0.004623	-0.004729	-0.004949
0.8000	830.846	62.124	64.078	67.175	-0.731	50.348	1581.717	-0.004349	-0.004485	-0.004702
0.8100	796.415	58.519	61.326	63.841	-0.728	50.369	1516.171	-0.004096	-0.004293	-0.004469
0.8200	786.091	57.396	60.145	62.437	-0.720	50.348	1496.515	-0.004018	-0.004210	-0.004371
0.8300	748.355	53.411	56.429	59.017	-0.728	50.369	1424.675	-0.003739	-0.003950	-0.004131
0.8400	692.359	47.391	51.324	52.723	-0.734	50.348	1318.073	-0.003317	-0.003593	-0.003691
0.8500	670.477	44.681	48.737	50.459	-0.724	50.370	1276.417	-0.003128	-0.003412	-0.003532
0.8600	608.470	38.044	42.627	44.107	-0.734	50.349	1158.371	-0.002663	-0.002984	-0.003088
0.8700	588.633	35.899	40.178	41.772	-0.733	50.369	1120.605	-0.002513	-0.002812	-0.002924
0.8800	547.244	31.199	35.637	37.187	-0.746	50.349	1041.813	-0.002184	-0.002495	-0.002603
0.8900	498.327	26.147	31.012	31.463	-0.734	50.369	948.687	-0.001830	-0.002171	-0.002202
0.9000	458.216	22.047	26.337	26.988	-0.727	50.348	872.326	-0.001543	-0.001844	-0.001889
0.9100	413.732	16.966	21.149	21.830	-0.735	50.370	787.640	-0.001188	-0.001480	-0.001528
0.9200	359.705	11.367	15.066	15.467	-0.735	50.348	684.786	-0.000796	-0.001055	-0.001083
0.9300	336.155	8.606	12.122	12.188	-0.735	50.370	639.954	-0.000602	-0.000849	-0.000853
0.9400	299.050	4.327	7.388	7.881	-0.732	50.348	569.315	-0.000303	-0.000517	-0.000552
0.9500	286.742	2.979	5.667	5.948	-0.724	50.369	545.883	-0.000209	-0.000397	-0.000416
0.9600	281.873	1.994	4.583	4.920	-0.736	50.349	536.613	-0.000140	-0.000321	-0.000344
0.9700	230.536	-2.874	-1.734	-1.239	-0.729	50.370	438.881	0.000201	0.000121	0.000087
0.9800	231.813	-2.872	-2.271	-1.671	-0.735	50.349	441.313	0.000201	0.000159	0.000117
0.9900	229.769	-3.899	-3.030	-2.030	-0.728	50.370	437.422	0.000273	0.000212	0.000142
1.0000	232.024	-3.844	-2.560	-2.125	-0.729	50.349	441.713	0.000269	0.000179	0.000149
1.0100	229.364	-3.999	-2.948	-2.362	-0.727	50.370	436.649	0.000280	0.000206	0.000165
1.0200	233.046	-4.265	-3.305	-2.724	-0.731	50.349	443.659	0.000299	0.000231	0.000191
1.0300	243.175	-3.252	-1.889	-1.668	-0.736	50.370	462.942	0.000228	0.000132	0.000117
1.0400	264.665	-1.636	-0.278	0.221	-0.735	50.349	503.855	0.000115	0.000019	-0.000015
1.0500	298.464	1.208	3.728	3.752	-0.729	50.370	568.199	-0.000085	-0.000261	-0.000263
1.0600	319.008	3.526	6.028	5.991	-0.725	50.349	607.309	-0.000247	-0.000422	-0.000419
1.0700	354.851	6.934	9.423	9.713	-0.717	50.369	675.545	-0.000485	-0.000660	-0.000680
1.0800	379.182	9.169	12.451	12.562	-0.735	50.349	721.865	-0.000642	-0.000872	-0.000879
1.0900	443.503	15.748	18.892	19.412	-0.722	50.370	844.316	-0.001102	-0.001322	-0.001359
1.1000	478.880	19.354	23.158	23.609	-0.738	50.349	911.665	-0.001355	-0.001621	-0.001653
1.1100	531.239	24.630	28.813	28.767	-0.728	50.371	1011.343	-0.001724	-0.002017	-0.002014
1.1200	556.427	27.953	31.825	32.240	-0.733	50.350	1059.294	-0.001957	-0.002228	-0.002257
1.1300	610.484	33.233	37.177	38.201	-0.734	50.371	1162.205	-0.002326	-0.002602	-0.002674
1.1400	644.523	37.652	41.361	42.258	-0.731	50.349	1227.007	-0.002636	-0.002895	-0.002958
1.1500	698.671	43.492	46.521	48.095	-0.732	50.370	1330.090	-0.003044	-0.003256	-0.003367
1.1600	735.070	47.575	50.677	52.279	-0.734	50.349	1399.384	-0.003330	-0.003547	-0.003660
1.1700	772.280	51.951	54.737	56.545	-0.726	50.370	1470.222	-0.003637	-0.003832	-0.003958
1.1800	792.253	54.438	56.733	59.309	-0.732	50.349	1508.245	-0.003811	-0.003971	-0.004152
1.1900	827.134	58.689	60.626	63.258	-0.726	50.371	1574.650	-0.004108	-0.004244	-0.004428
1.2000	853.012	61.828	63.237	66.371	-0.719	50.349	1623.917	-0.004328	-0.004427	-0.004646
1.2100	888.495	65.971	66.917	70.371	-0.724	50.370	1691.465	-0.004618	-0.004684	-0.004926
1.2200	888.750	66.572	67.535	70.830	-0.718	50.349	1691.952	-0.004660	-0.004727	-0.004958
1.2300	901.359	68.198	68.757	72.471	-0.723	50.370	1715.956	-0.004774	-0.004813	-0.005073
1.2400	914.223	69.773	70.355	73.609	-0.721	50.349	1740.446	-0.004884	-0.004925	-0.005153
1.2500	910.586	70.182	70.299	73.775	-0.720	50.370	1733.522	-0.004913	-0.004921	-0.005164
1.2600	908.347	69.775	70.092	74.027	-0.716	50.350	1729.259	-0.004884	-0.004906	-0.005182
1.2700	905.477	70.012	70.439	73.653	-0.719	50.370	1723.795	-0.004901	-0.004931	-0.005156
1.2800	891.771	68.606	69.240	73.192	-0.713	50.350	1697.702	-0.004802	-0.004847	-0.005123
1.2900	871.452	66.448	67.835	71.108	-0.719	50.370	1659.021	-0.004651	-0.004748	-0.004978
1.3000	842.673	63.697	65.512	68.190	-0.714	50.349	1604.233	-0.004459	-0.004586	-0.004773
1.3100	811.489	60.291	62.140	64.965	-0.732	50.371	1544.867	-0.004220	-0.004350	-0.004548
1.3200	783.476	57.155	59.857	62.492	-0.730	50.349	1491.537	-0.004001	-0.004190	-0.004374
1.3300	740.735	52.892	55.783	58.310	-0.727	50.371	1410.170	-0.003702	-0.003905	-0.004082
1.3400	723.994	50.560	53.854	56.016	-0.725	50.350	1378.298	-0.003539	-0.003770	-0.003921
1.3500	658.019	43.897	48.104	49.207	-0.716	50.370	1252.699	-0.003073	-0.003367	-0.003444
1.3600	615.083	39.279	43.440	44.816	-0.724	50.350	1170.959	-0.002750	-0.003041	-0.003137
1.3700	573.725	34.311	38.926	40.244	-0.726	50.371	1092.224	-0.002402	-0.002725	-0.002817
1.3800	529.466	29.822	34.537	35.088	-0.727	50.350	1007.967	-0.002088	-0.002418	-0.002456
1.3900	494.705	25.654	30.353	31.295	-0.712	50.370	941.792	-0.001796	-0.002125	-0.002191
1.4000	453.768	21.461	25.715	26.333	-0.726	50.350	863.857	-0.001502	-0.001800	-0.001843
1.4100	424.973	17.766	22.276	22.845	-0.717	50.371	809.040	-0.001244	-0.001559	-0.001599
1.4200	386.951	13.936	17.763	18.372	-0.703	50.350	736.656	-0.000976	-0.001243	-0.001286
1.4300	330.369	8.099	11.598	12.049	-0.721	50.371	628.939	-0.000567	-0.000812	-0.000843
1.4400	308.203	5.460	8.489	9.115	-0.730	50.350	586.739	-0.000382	-0.000594	-0.000638
1.4500	284.428	2.557	5.255	5.976	-0.722	50.371	541.477	-0.000179	-0.000368	-0.000418
1.4600	253.905	-0.126	1.625	1.933	-0.707	50.350	483.370	0.000009	-0.000114	-0.000135
1.4700	243.701	-1.482	-0.416	0.444	-0.705	50.371	463.943	0.000104	0.000029	-0.000031
1.4800	229.439	-3.364	-2.081	-1.517	-0.710	50.350	436.792	0.000235	0.000146	0.000106
1.4900	229.288	-3.279	-2.685	-2.056	-0.711	50.370	436.506	0.000230	0.000188	0.000144
1.5000	229.935	-3.774	-3.084	-2.278	-0.719	50.351	437.737	0.000264	0.000216	0.000159
1.5100	230.220	-3.997	-2.961	-2.002	-0.722	50.372	438.280	0.000280	0.000207	0.000140
1.5200	233.977	-3.758	-2.837	-2.502	-0.723	50.351	445.433	0.000263	0.000199	0.000175
1.5300	242.348	-3.493	-2.312	-2.015	-0.717	50.372	461.369	0.000244	0.000162	0.000141
1.5400	276.913	-0.223	1.486	1.655	-0.715	50.350	527.172	0.000016	-0.000104	-0.000116
1.5500	299.576	1.896	3.881	4.377	-0.718	50.371	570.316	-0.000133	-0.000272	-0.000306
1.5600	324.959	3.878	6.673	7.073	-0.715	50.350	618.639	-0.000271	-0.000467	-0.000495
1.5700	358.578	7.580	10.415	10.839	-0.722	50.371	682.640	-0.000531	-0.000729	-0.000759
1.5800	388.875	10.190	13.179	13.911	-0.715	50.351	740.318	-0.000713	-0.000923	-0.000974
1.5900	434.832	14.906	18.421	18.594	-0.725	50.372	827.808	-0.001043	-0.001289	-0.001302
1.6000	478.489	19.693	23.144	23.597	-0.716	50.351	910.921	-0.001378	-0.001620	-0.001652
1.6100	520.103	23.549	27.505	28.404	-0.720	50.372	990.143	-0.001648	-0.001925	-0.001988
1.6200	576.370	29.877	33.657	34.825	-0.730	50.351	1097.260	-0.002091	-0.002356	-0.002438
1.6300	616.510	34.298	38.073	38.951	-0.736	50.372	1173.677	-0.002401	-0.002665	-0.002727
1.6400	635.040	36.560	40.341	41.493	-0.719	50.351	1208.954	-0.002559	-0.002824	-0.002905
1.6500	691.788	42.888	46.178	47.636	-0.727	50.371	1316.986	-0.003002	-0.003232	-0.003335
1.6600	721.288	46.239	49.273	51.320	-0.722	50.351	1373.148	-0.003237	-0.003449	-0.003592
1.6700	775.736	52.316	55.013	57.142	-0.724	50.372	1476.803	-0.003662	-0.003851	-0.004000
1.6800	806.409	56.159	58.330	60.715	-0.728	50.351	1535.196	-0.003931	-0.004083	-0.004250
1.6900	831.762	59.404	61.024	63.798	-0.720	50.371	1583.462	-0.004158	-0.004272	-0.004466
1.7000	855.582	62.406	63.762	66.716	-0.723	50.351	1628.809	-0.004368	-0.004463	-0.004670
1.7100	871.978	64.525	65.540	68.454	-0.716	50.372	1660.023	-0.004517	-0.004588	-0.004792
1.7200	894.431	66.881	67.907	71.191	-0.716	50.351	1702.766	-0.004682	-0.004753	-0.004983
1.7300	908.001	69.324	69.845	73.248	-0.712	50.372	1728.601	-0.004853	-0.004889	-0.005127
1.7400	906.979	69.101	69.555	73.400	-0.712	50.351	1726.656	-0.004837	-0.004869	-0.005138
1.7500	904.785	69.197	69.957	73.582	-0.715	50.372	1722.479	-0.004844	-0.004897	-0.005151
1.7600	901.479	69.408	69.886	73.388	-0.720	50.352	1716.185	-0.004859	-0.004892	-0.005137
1.7700	899.240	69.225	69.557	73.361	-0.711	50.372	1711.922	-0.004846	-0.004869	-0.005135
1.7800	894.311	68.774	69.583	72.971	-0.717	50.351	1702.538	-0.004814	-0.004871	-0.005108
1.7900	889.712	68.705	69.240	72.983	-0.711	50.372	1693.783	-0.004809	-0.004847	-0.005109
1.8000	876.216	66.979	68.194	71.983	-0.727	50.351	1668.091	-0.004689	-0.004774	-0.005039
1.8100	795.950	59.336	61.478	64.021	-0.713	50.372	1515.284	-0.004154	-0.004303	-0.004481
1.8200	778.396	56.777	59.345	61.699	-0.720	50.351	1481.867	-0.003974	-0.004154	-0.004319
1.8300	736.663	52.400	55.661	57.864	-0.723	50.372	1402.416	-0.003668	-0.003896	-0.004050
1.8400	693.486	47.926	51.407	52.931	-0.730	50.352	1320.219	-0.003355	-0.003599	-0.003705
1.8500	663.324	43.940	47.868	49.874	-0.727	50.372	1262.798	-0.003076	-0.003351	-0.003491
1.8600	622.852	39.727	44.389	45.844	-0.722	50.352	1185.751	-0.002781	-0.003107	-0.003209
1.8700	577.166	34.802	39.451	40.606	-0.728	50.372	1098.776	-0.002436	-0.002762	-0.002842
1.8800	540.316	30.791	35.362	36.576	-0.725	50.352	1028.624	-0.002155	-0.002475	-0.002560
1.8900	491.669	25.921	30.381	31.169	-0.731	50.372	936.012	-0.001814	-0.002127	-0.002182
1.9000	446.284	20.592	24.809	26.043	-0.731	50.352	849.609	-0.001441	-0.001737	-0.001823
1.9100	410.741	16.658	20.914	21.400	-0.727	50.373	781.946	-0.001166	-0.001464	-0.001498
1.9200	371.638	12.546	16.373	17.011	-0.731	50.352	707.502	-0.000878	-0.001146	-0.001191
1.9300	338.815	9.012	12.149	13.009	-0.724	50.373	645.018	-0.000631	-0.000850	-0.000911
1.9400	309.210	5.783	8.626	9.311	-0.730	50.352	588.655	-0.000405	-0.000604	-0.000652
1.9500	285.660	3.470	5.573	5.991	-0.718	50.372	543.823	-0.000243	-0.000390	-0.000419
1.9600	266.063	0.548	2.696	3.697	-0.721	50.352	506.516	-0.000038	-0.000189	-0.000259
1.9700	253.529	-0.364	1.225	1.905	-0.729	50.372	482.655	0.000025	-0.000086	-0.000133
1.9800	232.970	-2.746	-1.790	-1.110	-0.742	50.352	443.516	0.000192	0.000125	0.000078
1.9900	223.998	-3.788	-2.961	-2.055	-0.736	50.372	426.435	0.000265	0.000207	0.000144
2.0000	225.787	-3.885	-3.237	-2.559	-0.732	50.352	429.840	0.000272	0.000227	0.000179
2.0100	229.003	-3.830	-3.374	-2.337	-0.733	50.372	435.963	0.000268	0.000236	0.000164
2.0200	235.420	-3.689	-2.575	-2.113	-0.729	50.353	448.179	0.000258	0.000180	0.000148
2.0300	246.736	-2.692	-1.765	-1.318	-0.733	50.373	469.723	0.000188	0.000124	0.000092
2.0400	262.336	-1.861	-0.401	0.070	-0.734	50.353	499.420	0.000130	0.000028	-0.000005
2.0500	324.238	4.353	6.578	6.894	-0.735	50.373	617.266	-0.000305	-0.000460	-0.000483
2.0600	328.656	4.858	7.291	7.561	-0.742	50.353	625.677	-0.000340	-0.000510	-0.000529
2.0700	333.616	5.053	7.663	8.214	-0.743	50.373	635.118	-0.000354	-0.000536	-0.000575
2.0800	391.791	10.836	14.144	14.204	-0.734	50.352	745.869	-0.000759	-0.000990	-0.000994
2.0900	440.212	15.635	18.974	19.609	-0.730	50.373	838.051	-0.001094	-0.001328	-0.001373
2.1000	463.942	18.273	21.932	22.316	-0.726	50.353	883.226	-0.001279	-0.001535	-0.001562
2.1100	518.901	24.125	27.724	28.320	-0.714	50.373	987.854	-0.001689	-0.001941	-0.001982
2.1200	559.042	28.010	31.935	32.852	-0.714	50.353	1064.272	-0.001961	-0.002235	-0.002300
2.1300	610.048	33.737	37.688	38.509	-0.718	50.373	1161.375	-0.002362	-0.002638	-0.002696
2.1400	641.938	37.371	41.128	42.175	-0.726	50.353	1222.086	-0.002616	-0.002879	-0.002952
2.1500	690.856	42.622	46.013	47.971	-0.716	50.372	1315.212	-0.002984	-0.003221	-0.003358
2.1600	735.986	48.249	50.940	52.457	-0.722	50.353	1401.129	-0.003377	-0.003566	-0.003672
2.1700	774.008	52.414	54.669	56.906	-0.708	50.373	1473.513	-0.003669	-0.003827	-0.003983
2.1800	810.632	56.509	58.824	61.464	-0.718	50.353	1543.236	-0.003956	-0.004118	-0.004303
2.1900	829.598	59.418	60.890	63.313	-0.726	50.373	1579.342	-0.004159	-0.004262	-0.004432
2.2000	872.700	64.358	65.250	68.424	-0.726	50.353	1661.396	-0.004505	-0.004568	-0.004790
2.2100	880.259	65.580	66.446	70.065	-0.722	50.372	1675.787	-0.004591	-0.004651	-0.004905
2.2200	900.006	68.101	68.523	71.927	-0.723	50.353	1713.381	-0.004767	-0.004797	-0.005035
2.2300	906.889	68.944	69.212	73.178	-0.718	50.373	1726.484	-0.004826	-0.004845	-0.005122
2.2400	911.759	70.138	70.356	74.179	-0.715	50.354	1735.754	-0.004910	-0.004925	-0.005193
2.2500	909.970	70.054	70.205	73.927	-0.723	50.373	1732.349	-0.004904	-0.004914	-0.005175
2.2600	909.053	70.055	70.535	74.472	-0.721	50.354	1730.604	-0.004904	-0.004937	-0.005213
2.2700	908.723	70.716	70.464	74.430	-0.716	50.373	1729.975	-0.004950	-0.004932	-0.005210
2.2800	891.966	68.592	69.543	73.372	-0.712	50.353	1698.074	-0.004801	-0.004868	-0.005136
2.2900	870.430	66.641	68.166	71.415	-0.718	50.374	1657.076	-0.004665	-0.004772	-0.004999
2.3000	829.117	62.603	64.191	67.357	-0.714	50.353	1578.426	-0.004382	-0.004493	-0.004715
2.3100	812.842	60.611	62.428	65.478	-0.712	50.373	1547.441	-0.004243	-0.004370	-0.004583
2.3200	799.752	59.307	61.507	64.257	-0.720	50.353	1522.522	-0.004152	-0.004305	-0.004498
2.3300	747.738	54.043	56.649	58.935	-0.726	50.374	1423.502	-0.003783	-0.003965	-0.004125
2.3400	702.518	48.528	52.164	54.253	-0.720	50.353	1337.414	-0.003397	-0.003651	-0.003798
2.3500	653.135	43.506	47.650	48.999	-0.722	50.374	1243.401	-0.003045	-0.003335	-0.003430
2.3600	624.445	39.995	44.128	45.885	-0.714	50.353	1188.784	-0.002800	-0.003089	-0.003212
2.3700	573.965	34.704	39.199	40.231	-0.713	50.373	1092.682	-0.002429	-0.002744	-0.002816
2.3800	520.644	29.259	33.587	34.421	-0.718	50.353	991.173	-0.002048	-0.002351	-0.002409
2.3900	499.063	26.359	30.462	31.865	-0.710	50.374	950.089	-0.001845	-0.002132	-0.002231
2.4000	438.649	20.042	24.326	25.111	-0.715	50.354	835.075	-0.001403	-0.001703	-0.001758
2.4100	410.351	16.994	20.734	21.845	-0.712	50.373	781.202	-0.001190	-0.001451	-0.001529
2.4200	368.346	12.040	15.946	16.996	-0.714	50.354	701.237	-0.000843	-0.001116	-0.001190
2.4300	345.248	9.953	13.125	13.910	-0.722	50.373	657.263	-0.000697	-0.000919	-0.000974
2.4400	306.670	5.629	8.254	8.824	-0.726	50.354	583.820	-0.000394	-0.000578	-0.000618
2.4500	295.534	3.821	6.713	7.117	-0.723	50.374	562.620	-0.000267	-0.000470	-0.000498
2.4600	293.084	3.694	5.928	6.546	-0.725	50.354	557.957	-0.000259	-0.000415	-0.000458
2.4700	235.480	-2.296	-0.951	-0.126	-0.716	50.374	448.294	0.000161	0.000067	0.000009
2.4800	233.947	-2.437	-1.322	-0.848	-0.730	50.354	445.375	0.000171	0.000093	0.000059
2.4900	221.399	-3.800	-3.442	-2.486	-0.725	50.374	421.486	0.000266	0.000241	0.000174
2.5000	221.113	-6.551	-6.401	-5.336	-0.717	50.355	420.942	0.000459	0.000448	0.000374
2.5100	228.823	-6.119	-5.173	-4.723	-0.716	50.375	435.619	0.000428	0.000362	0.000331
2.5200	239.568	-5.178	-4.032	-4.125	-0.719	50.356	456.076	0.000362	0.000282	0.000289
2.5300	262.727	-3.294	-1.943	-1.712	-0.731	50.376	500.164	0.000231	0.000136	0.000120
2.5400	295.413	-0.067	1.952	2.239	-0.730	50.356	562.391	0.000005	-0.000137	-0.000157
2.5500	327.214	3.020	5.339	5.907	-0.727	50.375	622.931	-0.000211	-0.000374	-0.000413
2.5600	373.847	7.440	10.622	10.604	-0.730	50.356	711.708	-0.000521	-0.000744	-0.000742
2.5700	414.709	11.818	15.150	15.315	-0.743	50.377	789.499	-0.000827	-0.001060	-0.001072
2.5800	460.170	16.027	19.675	20.816	-0.736	50.356	876.045	-0.001122	-0.001377	-0.001457
2.5900	524.897	23.029	27.174	27.627	-0.742	50.377	999.269	-0.001612	-0.001902	-0.001934
2.6000	572.282	28.391	31.908	33.227	-0.731	50.356	1089.478	-0.001987	-0.002234	-0.002326
2.6100	621.635	33.610	37.135	38.425	-0.731	50.377	1183.434	-0.002353	-0.002599	-0.002690
2.6200	670.823	39.181	43.028	44.302	-0.720	50.356	1277.075	-0.002743	-0.003012	-0.003101
2.6300	743.185	47.265	50.225	52.098	-0.719	50.377	1414.833	-0.003309	-0.003516	-0.003647
2.6400	788.556	52.725	54.957	57.129	-0.721	50.356	1501.207	-0.003691	-0.003847	-0.003999
2.6500	847.497	60.050	61.798	63.798	-0.720	50.376	1613.417	-0.004203	-0.004326	-0.004466
2.6600	916.613	67.472	67.974	71.385	-0.717	50.356	1744.995	-0.004723	-0.004758	-0.004997
2.6700	958.843	72.999	72.776	76.709	-0.720	50.376	1825.390	-0.005110	-0.005094	-0.005370
2.6800	967.694	74.823	74.055	78.307	-0.722	50.356	1842.241	-0.005238	-0.005184	-0.005481
2.6900	1030.032	81.730	79.711	84.770	-0.719	50.376	1960.917	-0.005721	-0.005580	-0.005934
2.7000	1039.154	83.679	81.666	87.046	-0.717	50.356	1978.283	-0.005858	-0.005717	-0.006093
2.7100	1086.599	89.474	85.807	91.952	-0.721	50.376	2068.605	-0.006263	-0.006006	-0.006437
2.7200	1138.928	95.688	90.925	98.191	-0.724	50.357	2168.226	-0.006698	-0.006365	-0.006873
2.7300	1137.079	96.574	91.656	98.359	-0.732	50.377	2164.707	-0.006760	-0.006416	-0.006885
2.7400	1136.133	96.672	91.846	98.830	-0.746	50.356	2162.905	-0.006767	-0.006429	-0.006918
2.7500	1133.954	96.813	92.039	99.333	-0.734	50.376	2158.756	-0.006777	-0.006443	-0.006953
2.7600	1131.714	97.557	91.944	99.039	-0.739	50.356	2154.493	-0.006829	-0.006436	-0.006933
2.7700	1117.077	95.885	90.900	98.566	-0.734	50.377	2126.627	-0.006712	-0.006363	-0.006900
2.7800	1088.613	93.095	89.136	96.233	-0.739	50.356	2072.439	-0.006517	-0.006240	-0.006736
2.7900	1075.538	91.887	88.105	95.384	-0.737	50.377	2047.548	-0.006432	-0.006167	-0.006677
2.8000	1014.448	85.151	83.194	88.924	-0.739	50.356	1931.248	-0.005961	-0.005824	-0.006225
2.8100	1007.084	84.574	82.641	88.491	-0.724	50.377	1917.229	-0.005920	-0.005785	-0.006194
2.8200	926.592	75.794	75.474	80.597	-0.727	50.356	1763.992	-0.005306	-0.005283	-0.005642
2.8300	898.443	72.452	72.858	77.584	-0.718	50.376	1710.405	-0.005072	-0.005100	-0.005431
2.8400	831.507	65.424	66.597	70.164	-0.726	50.356	1582.975	-0.004580	-0.004662	-0.004911
2.8500	792.358	60.681	62.730	65.981	-0.717	50.376	1508.446	-0.004248	-0.004391	-0.004619
2.8600	747.769	55.654	58.507	61.073	-0.719	50.357	1423.559	-0.003896	-0.004095	-0.004275
2.8700	680.321	48.445	51.394	54.084	-0.719	50.376	1295.156	-0.003391	-0.003598	-0.003786
2.8800	615.368	40.893	44.721	47.136	-0.720	50.357	1171.503	-0.002863	-0.003130	-0.003300
2.8900	579.300	36.894	40.838	42.689	-0.702	50.376	1102.839	-0.002583	-0.002859	-0.002988
2.9000	526.160	30.594	34.784	36.355	-0.724	50.356	1001.673	-0.002142	-0.002435	-0.002545
2.9100	471.982	25.136	29.292	30.571	-0.729	50.376	898.533	-0.001760	-0.002050	-0.002140
2.9200	417.174	18.862	22.925	23.764	-0.728	50.357	794.191	-0.001320	-0.001605	-0.001664
2.9300	372.810	13.953	17.309	18.315	-0.732	50.376	709.734	-0.000977	-0.001212	-0.001282
2.9400	342.032	10.203	13.662	14.523	-0.709	50.357	651.140	-0.000714	-0.000956	-0.001017
2.9500	303.424	6.344	8.776	9.353	-0.721	50.377	577.641	-0.000444	-0.000614	-0.000655
2.9600	273.953	2.628	4.761	5.768	-0.719	50.357	521.536	-0.000184	-0.000333	-0.000404
2.9700	253.935	0.703	2.379	2.681	-0.711	50.377	483.427	-0.000049	-0.000167	-0.000188
2.9800	234.113	-1.623	-0.593	-0.223	-0.705	50.357	445.690	0.000114	0.000042	0.000016
2.9900	229.439	-2.579	-1.776	-0.891	-0.720	50.377	436.792	0.000181	0.000124	0.000062
3.0000	230.611	-2.860	-2.050	-1.058	-0.715	50.357	439.024	0.000200	0.000143	0.000074
3.0100	235.240	-2.732	-2.065	-1.222	-0.712	50.377	447.836	0.000191	0.000145	0.000086
3.0200	239.823	-2.748	-1.392	-0.986	-0.710	50.357	456.562	0.000192	0.000097	0.000069
3.0300	253.815	-1.231	-0.234	0.125	-0.698	50.377	483.198	0.000086	0.000016	-0.000009
3.0400	286.456	1.110	2.777	3.684	-0.699	50.357	545.340	-0.000078	-0.000194	-0.000258
3.0500	341.851	6.304	9.079	9.685	-0.715	50.376	650.797	-0.000441	-0.000636	-0.000678
3.0600	374.072	9.515	12.119	13.299	-0.713	50.357	712.137	-0.000666	-0.000848	-0.000931
3.0700	416.182	13.965	16.952	17.927	-0.716	50.377	792.303	-0.000978	-0.001187	-0.001255
3.0800	454.158	17.512	21.216	21.887	-0.718	50.357	864.601	-0.001226	-0.001485	-0.001532
3.0900	522.433	24.516	28.179	29.503	-0.722	50.377	994.577	-0.001716	-0.001972	-0.002065
3.1000	543.427	27.128	31.053	31.921	-0.716	50.357	1034.546	-0.001899	-0.002174	-0.002234
3.1100	613.640	34.550	38.293	39.370	-0.716	50.377	1168.213	-0.002419	-0.002681	-0.002756
3.1200	669.786	40.839	44.019	45.579	-0.735	50.357	1275.101	-0.002859	-0.003081	-0.003191
3.1300	732.755	47.759	50.732	52.877	-0.724	50.377	1394.978	-0.003343	-0.003551	-0.003701
3.1400	797.272	55.528	57.184	59.839	-0.726	50.357	1517.801	-0.003887	-0.004003	-0.004189
3.1500	853.358	61.644	63.143	66.215	-0.723	50.377	1624.575	-0.004315	-0.004420	-0.004635
3.1600	914.554	68.819	69.486	73.275	-0.715	50.357	1741.076	-0.004817	-0.004864	-0.005129
3.1700	944.145	72.775	72.472	76.763	-0.722	50.378	1797.409	-0.005094	-0.005073	-0.005373
3.1800	1039.801	83.635	81.569	86.992	-0.732	50.357	1979.513	-0.005854	-0.005710	-0.006089
3.1900	1032.602	84.027	81.914	86.783	-0.734	50.376	1965.809	-0.005882	-0.005734	-0.006075
3.2000	1057.504	86.626	84.048	90.062	-0.727	50.357	2013.216	-0.006064	-0.005883	-0.006304
3.2100	1079.896	90.132	86.537	92.981	-0.727	50.377	2055.845	-0.006309	-0.006058	-0.006509
3.2200	1096.398	92.618	88.381	94.997	-0.721	50.357	2087.259	-0.006483	-0.006187	-0.006650
3.2300	1112.493	94.791	89.963	97.179	-0.722	50.378	2117.901	-0.006635	-0.006297	-0.006802
3.2400	1120.157	96.166	91.037	98.387	-0.714	50.357	2132.492	-0.006732	-0.006373	-0.006887
3.2500	1123.238	97.025	91.616	99.025	-0.718	50.378	2138.357	-0.006792	-0.006413	-0.006932
3.2600	1129.640	97.769	92.356	99.872	-0.728	50.357	2150.545	-0.006844	-0.006465	-0.006991
3.2700	1130.602	98.514	93.044	100.542	-0.722	50.377	2152.376	-0.006896	-0.006513	-0.007038
3.2800	1112.463	96.378	91.519	99.040	-0.723	50.358	2117.844	-0.006746	-0.006406	-0.006933
3.2900	1063.380	91.622	88.203	94.623	-0.715	50.377	2024.403	-0.006414	-0.006174	-0.006624
3.3000	1041.093	89.234	86.068	93.119	-0.713	50.358	1981.974	-0.006246	-0.006025	-0.006518
3.3100	986.615	83.131	81.306	87.450	-0.721	50.377	1878.262	-0.005819	-0.005691	-0.006122
3.3200	939.982	77.926	77.195	82.476	-0.716	50.358	1789.484	-0.005455	-0.005404	-0.005773
3.3300	893.649	73.055	72.941	77.459	-0.714	50.378	1701.279	-0.005114	-0.005106	-0.005422
3.3400	849.751	67.903	68.979	73.125	-0.718	50.357	1617.708	-0.004753	-0.004829	-0.005119
3.3500	811.910	63.894	65.305	68.538	-0.721	50.378	1545.668	-0.004473	-0.004571	-0.004798
3.3600	774.790	59.391	61.343	65.090	-0.727	50.357	1475.000	-0.004157	-0.004294	-0.004556
3.3700	696.822	51.106	54.186	57.101	-0.728	50.377	1326.571	-0.003577	-0.003793	-0.003997
3.3800	627.256	43.591	46.989	49.249	-0.718	50.357	1194.134	-0.003051	-0.003289	-0.003447
3.3900	573.454	36.867	40.548	42.731	-0.700	50.377	1091.709	-0.002581	-0.002838	-0.002991
3.4000	516.496	30.580	34.729	36.131	-0.704	50.358	983.276	-0.002141	-0.002431	-0.002529
3.4100	466.091	25.331	29.045	30.350	-0.711	50.377	887.318	-0.001773	-0.002033	-0.002124
3.4200	418.752	19.382	23.420	25.139	-0.721	50.358	797.195	-0.001357	-0.001639	-0.001760
3.4300	378.235	15.258	18.863	19.692	-0.708	50.377	720.062	-0.001068	-0.001320	-0.001378
3.4400	342.888	11.339	14.131	15.356	-0.716	50.357	652.771	-0.000794	-0.000989	-0.001075
3.4500	279.363	4.578	6.810	7.587	-0.715	50.378	531.836	-0.000320	-0.000477	-0.000531
3.4600	265.447	3.063	4.361	5.127	-0.712	50.357	505.342	-0.000214	-0.000305	-0.000359
3.4700	247.398	0.549	1.430	2.598	-0.716	50.377	470.982	-0.000038	-0.000100	-0.000182
3.4800	246.255	-0.336	1.060	2.153	-0.724	50.358	468.807	0.000024	-0.000074	-0.000151
3.4900	250.088	-0.041	1.182	1.973	-0.711	50.377	476.103	0.000003	-0.000083	-0.000138
3.5000	247.232	-0.698	0.590	1.390	-0.720	50.358	470.667	0.000049	-0.000041	-0.000097
3.5100	235.600	-1.860	-1.074	-0.042	-0.724	50.377	448.523	0.000130	0.000075	0.000003
3.5200	239.252	-1.861	-1.034	0.014	-0.720	50.358	455.475	0.000130	0.000072	-0.000001
3.5300	256.325	-0.840	0.618	1.390	-0.719	50.377	487.976	0.000059	-0.000043	-0.000097
3.5400	295.834	2.993	4.843	5.087	-0.719	50.358	563.192	-0.000210	-0.000339	-0.000356
3.5500	340.033	7.117	9.423	10.088	-0.719	50.377	647.335	-0.000498	-0.000660	-0.000706
3.5600	366.348	9.393	12.354	13.149	-0.730	50.357	697.432	-0.000657	-0.000865	-0.000920
3.5700	413.296	14.458	17.298	18.371	-0.720	50.378	786.810	-0.001012	-0.001211	-0.001286
3.5800	445.908	17.122	20.596	21.803	-0.726	50.358	848.894	-0.001199	-0.001442	-0.001526
3.5900	520.900	25.037	28.853	29.918	-0.721	50.378	991.659	-0.001753	-0.002020	-0.002094
3.6000	567.112	30.131	33.464	35.046	-0.728	50.358	1079.636	-0.002109	-0.002342	-0.002453
3.6100	619.802	35.899	39.451	40.913	-0.714	50.378	1179.943	-0.002513	-0.002762	-0.002864
3.6200	670.748	41.763	44.843	46.319	-0.722	50.358	1276.932	-0.002923	-0.003139	-0.003242
3.6300	757.717	51.039	53.083	55.794	-0.728	50.378	1442.499	-0.003573	-0.003716	-0.003906
3.6400	805.748	56.945	58.961	61.714	-0.726	50.358	1533.937	-0.003986	-0.004127	-0.004320
3.6500	861.804	63.556	64.892	67.982	-0.722	50.378	1640.654	-0.004449	-0.004542	-0.004759
3.6600	907.956	68.677	69.116	73.375	-0.716	50.358	1728.516	-0.004807	-0.004838	-0.005136
3.6700	966.537	76.158	75.392	79.946	-0.722	50.377	1840.038	-0.005331	-0.005277	-0.005596
3.6800	1001.178	80.507	78.665	83.630	-0.720	50.358	1905.985	-0.005635	-0.005507	-0.005854
3.6900	1034.435	84.476	82.187	87.490	-0.730	50.377	1969.299	-0.005913	-0.005753	-0.006124
3.7000	1068.700	89.166	85.998	91.772	-0.727	50.358	2034.531	-0.006242	-0.006020	-0.006424
3.7100	1085.727	91.537	87.375	93.664	-0.724	50.377	2066.946	-0.006408	-0.006116	-0.006556
3.7200	1091.243	92.364	88.519	94.788	-0.727	50.358	2077.446	-0.006465	-0.006196	-0.006635
3.7300	1113.695	95.579	90.501	97.777	-0.716	50.377	2120.190	-0.006691	-0.006335	-0.006844
3.7400	1128.258	97.729	92.164	99.610	-0.723	50.358	2147.913	-0.006841	-0.006451	-0.006973
3.7500	1147.629	99.859	94.132	102.415	-0.728	50.378	2184.792	-0.006990	-0.006589	-0.007169
3.7600	1136.478	99.481	93.429	101.374	-0.731	50.358	2163.563	-0.006964	-0.006540	-0.007096
3.7700	1120.067	97.992	92.411	100.889	-0.723	50.378	2132.320	-0.006859	-0.006469	-0.007062
3.7800	1099.749	95.872	91.311	98.997	-0.723	50.358	2093.639	-0.006711	-0.006392	-0.006930
3.7900	1065.394	92.294	88.022	95.537	-0.723	50.377	2028.236	-0.006461	-0.006162	-0.006688
3.8000	1036.269	88.886	86.248	92.841	-0.720	50.358	1972.790	-0.006222	-0.006037	-0.006499
3.8100	1000.652	85.601	83.014	89.353	-0.716	50.377	1904.984	-0.005992	-0.005811	-0.006255
3.8200	958.136	80.830	79.381	85.394	-0.713	50.358	1824.045	-0.005658	-0.005557	-0.005978
3.8300	890.568	73.195	73.313	77.974	-0.720	50.378	1695.414	-0.005124	-0.005132	-0.005458
3.8400	841.095	67.623	68.467	72.927	-0.723	50.358	1601.229	-0.004734	-0.004793	-0.005105
3.8500	780.125	60.763	62.732	66.731	-0.710	50.378	1485.157	-0.004253	-0.004391	-0.004671
3.8600	739.879	56.188	58.658	61.829	-0.698	50.358	1408.539	-0.003933	-0.004106	-0.004328
3.8700	677.090	49.313	52.410	55.017	-0.711	50.377	1289.005	-0.003452	-0.003669	-0.003851
3.8800	621.019	42.775	46.563	48.860	-0.707	50.358	1182.261	-0.002994	-0.003259	-0.003420
3.8900	539.971	34.240	37.978	39.773	-0.722	50.377	1027.966	-0.002397	-0.002658	-0.002784
3.9000	517.714	31.059	34.663	36.785	-0.722	50.358	985.594	-0.002174	-0.002426	-0.002575
3.9100	441.895	23.155	26.777	28.167	-0.727	50.378	841.255	-0.001621	-0.001874	-0.001972
3.9200	413.507	19.721	23.059	24.263	-0.717	50.359	787.210	-0.001380	-0.001614	-0.001698
3.9300	381.541	15.858	19.303	20.608	-0.716	50.378	726.357	-0.001110	-0.001351	-0.001443
3.9400	360.832	13.053	16.471	17.720	-0.725	50.359	686.932	-0.000914	-0.001153	-0.001240
3.9500	311.659	8.324	10.610	11.522	-0.731	50.377	593.319	-0.000583	-0.000743	-0.000807
3.9600	287.989	5.263	7.649	8.325	-0.710	50.359	548.258	-0.000368	-0.000535	-0.000583
3.9700	278.882	4.158	6.151	6.906	-0.722	50.378	530.920	-0.000291	-0.000431	-0.000483
3.9800	266.348	2.613	4.030	5.253	-0.723	50.358	507.059	-0.000183	-0.000282	-0.000368
3.9900	245.414	0.057	1.266	2.335	-0.733	50.378	467.205	-0.000004	-0.000089	-0.000163
4.0000	231.513	-1.342	-0.442	0.583	-0.728	50.358	440.741	0.000094	0.000031	-0.000041
4.0100	230.701	-1.847	-1.239	-0.347	-0.726	50.378	439.196	0.000129	0.000087	0.000024
4.0200	244.031	-1.022	-0.166	0.780	-0.722	50.358	464.573	0.000072	0.000012	-0.000055
4.0300	253.634	-0.210	0.577	1.530	-0.715	50.378	482.855	0.000015	-0.000040	-0.000107
4.0400	287.704	2.445	4.030	4.864	-0.726	50.358	547.714	-0.000171	-0.000282	-0.000340
4.0500	309.134	4.607	6.396	6.992	-0.722	50.378	588.512	-0.000322	-0.000448	-0.000489
4.0600	361.373	9.348	11.736	12.591	-0.719	50.358	687.962	-0.000654	-0.000822	-0.000881
4.0700	400.282	13.137	16.017	17.149	-0.720	50.378	762.033	-0.000920	-0.001121	-0.001200
4.0800	457.134	19.114	22.194	23.083	-0.725	50.359	870.266	-0.001338	-0.001554	-0.001616
4.0900	511.958	24.658	27.753	28.877	-0.715	50.377	974.636	-0.001726	-0.001943	-0.002021
4.1000	563.731	29.991	33.753	34.699	-0.719	50.359	1073.198	-0.002099	-0.002363	-0.002429
4.1100	618.464	36.264	39.381	40.911	-0.724	50.378	1177.397	-0.002539	-0.002757	-0.002864
4.1200	687.865	43.449	46.536	48.609	-0.713	50.358	1309.519	-0.003041	-0.003258	-0.003403
4.1300	727.225	48.572	51.118	53.069	-0.709	50.378	1384.449	-0.003400	-0.003578	-0.003715
4.1400	809.205	57.789	59.126	62.088	-0.719	50.359	1540.518	-0.004045	-0.004139	-0.004346
4.1500	825.165	59.796	61.245	64.520	-0.716	50.378	1570.902	-0.004186	-0.004287	-0.004516
4.1600	908.618	69.254	69.582	73.747	-0.732	50.359	1729.774	-0.004848	-0.004871	-0.005162
4.1700	927.824	71.794	71.704	75.637	-0.721	50.378	1766.338	-0.005026	-0.005019	-0.005295
4.1800	981.550	78.303	77.193	81.864	-0.730	50.359	1868.620	-0.005481	-0.005404	-0.005730
4.1900	1022.668	83.607	81.182	86.505	-0.719	50.378	1946.898	-0.005853	-0.005683	-0.006055
4.2000	1053.867	87.202	84.184	90.660	-0.720	50.359	2006.292	-0.006104	-0.005893	-0.006346
4.2100	1083.007	91.383	87.390	93.883	-0.720	50.378	2061.768	-0.006397	-0.006117	-0.006572
4.2200	1108.345	94.637	89.797	96.773	-0.724	50.359	2110.004	-0.006625	-0.006286	-0.006774
4.2300	1122.307	96.518	91.380	99.151	-0.726	50.378	2136.583	-0.006756	-0.006397	-0.006941
4.2400	1141.603	99.438	93.569	101.570	-0.735	50.359	2173.319	-0.006961	-0.006550	-0.007110
4.2500	1134.449	98.948	93.140	101.346	-0.732	50.378	2159.700	-0.006926	-0.006520	-0.007094
4.2600	1129.415	98.753	93.429	101.207	-0.721	50.359	2150.116	-0.006913	-0.006540	-0.007084
4.2700	1124.666	98.978	93.308	100.999	-0.727	50.378	2141.075	-0.006928	-0.006532	-0.007070
4.2800	1119.361	98.092	92.481	100.803	-0.727	50.359	2130.976	-0.006866	-0.006474	-0.007056
4.2900	1071.616	93.712	89.551	96.928	-0.729	50.377	2040.081	-0.006560	-0.006269	-0.006785
4.3000	1054.393	91.720	87.556	94.941	-0.726	50.359	2007.294	-0.006420	-0.006129	-0.006646
4.3100	996.549	85.404	82.797	89.409	-0.721	50.378	1897.173	-0.005978	-0.005796	-0.006259
4.3200	954.650	80.522	79.338	85.310	-0.715	50.359	1817.408	-0.005637	-0.005554	-0.005972
4.3300	907.776	75.654	75.019	80.265	-0.718	50.377	1728.172	-0.005296	-0.005251	-0.005619
4.3400	858.603	69.408	70.367	74.761	-0.716	50.358	1634.560	-0.004859	-0.004926	-0.005233
4.3500	799.752	63.878	65.278	68.718	-0.720	50.378	1522.522	-0.004471	-0.004569	-0.004810
4.3600	756.169	58.534	60.131	63.979	-0.715	50.359	1439.552	-0.004097	-0.004209	-0.004479
4.3700	683.838	50.729	53.126	55.864	-0.703	50.379	1301.851	-0.003551	-0.003719	-0.003910
4.3800	635.536	45.059	48.173	50.735	-0.717	50.359	1209.898	-0.003154	-0.003372	-0.003551
4.3900	582.606	38.704	42.518	44.315	-0.706	50.378	1109.133	-0.002709	-0.002976	-0.003102
4.4000	537.476	33.695	37.714	39.508	-0.721	50.359	1023.216	-0.002359	-0.002640	-0.002766
4.4100	467.383	26.455	29.994	31.739	-0.714	50.378	889.778	-0.001852	-0.002100	-0.002222
4.4200	405.887	19.340	22.896	24.527	-0.718	50.359	772.705	-0.001354	-0.001603	-0.001717
4.4300	382.518	16.361	19.991	21.094	-0.706	50.378	728.216	-0.001145	-0.001399	-0.001477
4.4400	360.381	13.629	16.856	18.207	-0.707	50.359	686.073	-0.000954	-0.001180	-0.001274
4.4500	368.436	13.687	17.006	18.580	-0.713	50.378	701.408	-0.000958	-0.001190	-0.001301
4.4600	283.150	6.163	7.884	9.144	-0.718	50.359	539.045	-0.000431	-0.000552	-0.000640
4.4700	217.596	-1.146	-0.910	0.473	-0.718	50.378	414.248	0.000080	0.000064	-0.000033
4.4800	222.856	-0.950	-0.923	0.154	-0.716	50.359	424.261	0.000067	0.000065	-0.000011
4.4900	208.715	-2.860	-3.237	-1.863	-0.720	50.378	397.339	0.000200	0.000227	0.000130
4.5000	214.921	-2.985	-2.836	-2.112	-0.724	50.359	409.155	0.000209	0.000199	0.000148
4.5100	223.067	-2.480	-2.423	-1.072	-0.714	50.378	424.662	0.000174	0.000170	0.000075
4.5200	229.875	-2.423	-2.163	-0.694	-0.713	50.359	437.622	0.000170	0.000151	0.000049
4.5300	263.057	0.563	1.528	2.348	-0.712	50.378	500.793	-0.000039	-0.000107	-0.000164
4.5400	293.324	3.442	4.871	5.381	-0.711	50.359	558.414	-0.000241	-0.000341	-0.000377
4.5500	318.828	5.530	7.319	8.172	-0.724	50.378	606.966	-0.000387	-0.000512	-0.000572
4.5600	356.759	8.999	11.805	12.745	-0.722	50.360	679.178	-0.000630	-0.000826	-0.000892
4.5700	397.036	13.095	15.698	16.579	-0.716	50.378	755.854	-0.000917	-0.001099	-0.001161
4.5800	471.637	20.548	23.901	25.207	-0.709	50.359	897.875	-0.001438	-0.001673	-0.001764
4.5900	496.554	23.605	26.858	28.100	-0.711	50.379	945.311	-0.001652	-0.001880	-0.001967
4.6000	558.155	29.596	32.955	34.534	-0.710	50.360	1062.584	-0.002072	-0.002307	-0.002417
4.6100	606.201	34.704	38.474	40.146	-0.714	50.378	1154.051	-0.002429	-0.002693	-0.002810
4.6200	680.667	43.070	46.288	47.902	-0.712	50.359	1295.815	-0.003015	-0.003240	-0.003353
4.6300	742.854	50.339	52.479	54.904	-0.708	50.378	1414.204	-0.003524	-0.003674	-0.003843
4.6400	801.525	56.919	58.659	61.479	-0.706	50.359	1525.898	-0.003984	-0.004106	-0.004304
4.6500	841.516	62.067	63.115	66.411	-0.726	50.378	1602.030	-0.004345	-0.004418	-0.004649
4.6600	892.402	67.806	68.207	72.137	-0.711	50.359	1698.904	-0.004746	-0.004775	-0.005050
4.6700	945.242	74.403	73.877	78.308	-0.724	50.378	1799.498	-0.005208	-0.005171	-0.005482
4.6800	973.089	77.897	76.367	81.487	-0.722	50.360	1852.512	-0.005453	-0.005346	-0.005704
4.6900	1012.178	82.500	80.400	85.852	-0.727	50.378	1926.928	-0.005775	-0.005628	-0.006010
4.7000	1070.804	89.797	86.027	92.646	-0.717	50.359	2038.536	-0.006286	-0.006022	-0.006485
4.7100	1102.259	93.504	89.083	96.317	-0.727	50.378	2098.417	-0.006545	-0.006236	-0.006742
4.7200	1109.848	95.000	90.651	98.233	-0.728	50.359	2112.865	-0.006650	-0.006346	-0.006876
4.7300	1116.370	96.603	91.311	98.649	-0.725	50.378	2125.282	-0.006762	-0.006392	-0.006905
4.7400	1124.456	97.741	92.149	100.138	-0.732	50.360	2140.675	-0.006842	-0.006450	-0.007010
4.7500	1133.623	99.340	93.459	101.514	-0.738	50.378	2158.127	-0.006954	-0.006542	-0.007106
4.7600	1141.964	100.334	94.035	102.444	-0.737	50.359	2174.006	-0.007023	-0.006582	-0.007171
4.7700	1145.435	100.923	94.930	103.222	-0.719	50.378	2180.614	-0.007065	-0.006645	-0.007226
4.7800	1119.932	99.033	93.209	101.875	-0.732	50.360	2132.063	-0.006932	-0.006525	-0.007131
4.7900	1059.518	92.338	88.188	96.120	-0.733	50.378	2017.050	-0.006464	-0.006173	-0.006728
4.8000	1043.558	90.372	86.811	94.175	-0.732	50.360	1986.666	-0.006326	-0.006077	-0.006592
4.8100	1006.077	87.019	84.089	90.855	-0.714	50.378	1915.312	-0.006091	-0.005886	-0.006360
4.8200	939.681	79.329	78.119	83.809	-0.715	50.360	1788.912	-0.005553	-0.005468	-0.005867
4.8300	908.963	76.006	75.212	80.863	-0.709	50.378	1730.433	-0.005320	-0.005265	-0.005660
4.8400	859.926	70.364	70.644	75.275	-0.720	50.360	1637.077	-0.004925	-0.004945	-0.005269
4.8500	807.461	64.623	65.772	69.622	-0.715	50.378	1537.199	-0.004524	-0.004604	-0.004874
4.8600	743.951	57.802	59.718	63.271	-0.710	50.360	1416.292	-0.004046	-0.004180	-0.004429
4.8700	679.209	50.098	52.728	55.822	-0.709	50.378	1293.039	-0.003507	-0.003691	-0.003908
4.8800	624.581	43.811	47.431	50.013	-0.707	50.360	1189.041	-0.003067	-0.003320	-0.003501
4.8900	582.696	39.239	42.751	44.941	-0.712	50.378	1109.304	-0.002747	-0.002993	-0.003146
4.9000	521.561	32.195	35.982	38.160	-0.711	50.360	992.918	-0.002254	-0.002519	-0.002671
4.9100	538.017	33.077	36.836	38.716	-0.727	50.378	1024.246	-0.002315	-0.002578	-0.002710
4.9200	496.118	29.148	32.568	34.368	-0.720	50.360	944.481	-0.002040	-0.002280	-0.002406
4.9300	381.827	17.106	20.472	22.138	-0.730	50.378	726.900	-0.001197	-0.001433	-0.001550
4.9400	354.099	13.586	16.703	17.954	-0.716	50.359	674.114	-0.000951	-0.001169	-0.001257
4.9500	337.493	11.367	14.199	15.439	-0.727	50.378	642.500	-0.000796	-0.000994	-0.001081
4.9600	269.985	4.522	6.328	7.784	-0.724	50.360	513.983	-0.000317	-0.000443	-0.000545
4.9700	261.990	3.258	4.649	5.767	-0.727	50.378	498.762	-0.000228	-0.000325	-0.000404
4.9800	217.656	-1.217	-0.966	0.765	-0.723	50.360	414.362	0.000085	0.000068	-0.000054
4.9900	199.622	-3.464	-3.717	-2.792	-0.721	50.378	380.030	0.000242	0.000260	0.000195
Test Cycles
Time (sec)	Axial stress (kPa)	Axial micro-strain #1	Axial micro-strain #2	Axial micro-strain #3	Confining pressure (kPa)	Temperature (�C)	Load (N)	Displacement #1 (mm)	Displacement #2 (mm)	Displacement #3 (mm)
0.0000	213.614	-2.494	-3.071	-1.545	-0.729	50.360	406.666	0.000175	0.000215	0.000108
0.0100	217.115	-2.929	-2.835	-1.515	-0.721	50.378	413.332	0.000205	0.000198	0.000106
0.0200	237.975	-1.246	-0.743	0.291	-0.721	50.360	453.043	0.000087	0.000052	-0.000020
0.0300	265.552	1.405	2.119	3.030	-0.725	50.378	505.543	-0.000098	-0.000148	-0.000212
0.0400	306.519	4.452	6.412	7.325	-0.732	50.360	583.534	-0.000312	-0.000449	-0.000513
0.0500	302.898	4.844	6.315	7.380	-0.721	50.378	576.639	-0.000339	-0.000442	-0.000517
0.0600	344.992	7.902	10.401	11.396	-0.712	50.360	656.776	-0.000553	-0.000728	-0.000798
0.0700	411.854	14.569	17.695	18.414	-0.719	50.378	784.063	-0.001020	-0.001239	-0.001289
0.0800	439.386	17.654	20.652	21.998	-0.720	50.360	836.477	-0.001236	-0.001446	-0.001540
0.0900	500.822	23.816	27.424	28.766	-0.708	50.378	953.436	-0.001667	-0.001920	-0.002014
0.1000	541.534	28.557	31.991	33.130	-0.722	50.360	1030.941	-0.001999	-0.002239	-0.002319
0.1100	625.557	37.176	40.468	42.605	-0.731	50.378	1190.901	-0.002602	-0.002833	-0.002982
0.1200	718.553	47.082	50.224	52.182	-0.730	50.360	1367.941	-0.003296	-0.003516	-0.003653
0.1300	762.256	52.807	54.902	57.628	-0.710	50.378	1451.139	-0.003697	-0.003843	-0.004034
0.1400	788.435	55.936	57.805	60.562	-0.724	50.360	1500.978	-0.003916	-0.004046	-0.004239
0.1500	841.861	62.348	63.431	66.940	-0.721	50.378	1602.688	-0.004364	-0.004440	-0.004686
0.1600	889.276	67.749	68.372	71.721	-0.712	50.360	1692.953	-0.004742	-0.004786	-0.005020
0.1700	932.212	72.662	72.169	77.167	-0.708	50.379	1774.693	-0.005086	-0.005052	-0.005402
0.1800	990.117	79.651	78.666	83.461	-0.704	50.360	1884.928	-0.005576	-0.005507	-0.005842
0.1900	1026.981	84.350	82.065	87.740	-0.708	50.378	1955.109	-0.005904	-0.005745	-0.006142
0.2000	1079.806	90.512	87.212	93.760	-0.719	50.360	2055.674	-0.006336	-0.006105	-0.006563
0.2100	1081.309	91.804	88.079	94.775	-0.715	50.378	2058.535	-0.006426	-0.006166	-0.006634
0.2200	1087.531	93.125	88.505	95.984	-0.711	50.360	2070.379	-0.006519	-0.006195	-0.006719
0.2300	1099.148	94.456	90.058	97.401	-0.720	50.378	2092.495	-0.006612	-0.006304	-0.006818
0.2400	1103.311	95.717	91.021	98.566	-0.712	50.360	2100.420	-0.006700	-0.006371	-0.006900
0.2500	1141.002	99.900	93.705	102.223	-0.717	50.378	2172.174	-0.006993	-0.006559	-0.007156
0.2600	1137.185	100.124	94.214	102.874	-0.715	50.361	2164.907	-0.007009	-0.006595	-0.007201
0.2700	1130.948	100.056	93.941	102.416	-0.718	50.379	2153.034	-0.007004	-0.006576	-0.007169
0.2800	1100.621	96.560	91.916	100.401	-0.720	50.360	2095.299	-0.006759	-0.006434	-0.007028
0.2900	1045.722	90.976	87.597	95.010	-0.723	50.378	1990.786	-0.006368	-0.006132	-0.006651
0.3000	1041.814	90.442	86.646	94.358	-0.720	50.361	1983.347	-0.006331	-0.006065	-0.006605
0.3100	992.897	85.361	83.208	89.368	-0.726	50.378	1890.221	-0.005975	-0.005825	-0.006256
0.3200	964.989	82.011	80.342	86.603	-0.706	50.360	1837.091	-0.005741	-0.005624	-0.006062
0.3300	914.313	76.676	76.094	81.698	-0.717	50.378	1740.618	-0.005367	-0.005327	-0.005719
0.3400	858.483	70.166	71.138	75.609	-0.720	50.360	1634.331	-0.004912	-0.004980	-0.005293
0.3500	791.591	63.291	64.438	68.150	-0.716	50.378	1506.987	-0.004430	-0.004511	-0.004771
0.3600	730.396	56.090	58.176	62.242	-0.724	50.361	1390.486	-0.003926	-0.004072	-0.004357
0.3700	679.269	50.814	53.251	56.183	-0.723	50.379	1293.154	-0.003557	-0.003728	-0.003933
0.3800	642.344	45.886	48.794	51.805	-0.720	50.361	1222.858	-0.003212	-0.003416	-0.003626
0.3900	591.097	40.148	43.757	46.025	-0.716	50.379	1125.298	-0.002810	-0.003063	-0.003222
0.4000	520.058	32.474	36.449	38.551	-0.718	50.361	990.057	-0.002273	-0.002551	-0.002699
0.4100	472.929	27.395	30.849	32.614	-0.711	50.379	900.335	-0.001918	-0.002159	-0.002283
0.4200	421.802	21.529	25.153	26.918	-0.720	50.361	803.003	-0.001507	-0.001761	-0.001884
0.4300	393.759	17.976	21.352	23.067	-0.711	50.379	749.617	-0.001258	-0.001495	-0.001615
0.4400	345.518	12.758	15.726	17.523	-0.728	50.361	657.778	-0.000893	-0.001101	-0.001227
0.4500	311.885	8.832	11.764	12.967	-0.725	50.378	593.748	-0.000618	-0.000823	-0.000908
0.4600	298.720	7.272	9.588	10.768	-0.718	50.361	568.686	-0.000509	-0.000671	-0.000754
0.4700	267.731	3.708	5.351	7.047	-0.715	50.378	509.691	-0.000260	-0.000375	-0.000493
0.4800	234.894	0.703	1.390	2.503	-0.724	50.361	447.178	-0.000049	-0.000097	-0.000175
0.4900	226.944	-0.980	-0.621	1.014	-0.726	50.378	432.043	0.000069	0.000043	-0.000071
0.5000	231.287	-1.133	-0.303	1.030	-0.730	50.361	440.311	0.000079	0.000021	-0.000072
0.5100	237.148	-0.599	-0.151	1.502	-0.728	50.378	451.469	0.000042	0.000011	-0.000105
0.5200	254.912	0.169	1.582	2.628	-0.718	50.360	485.287	-0.000012	-0.000111	-0.000184
0.5300	268.137	1.912	2.970	3.808	-0.726	50.378	510.464	-0.000134	-0.000208	-0.000267
0.5400	308.864	5.265	6.919	7.908	-0.729	50.361	587.997	-0.000369	-0.000484	-0.000554
0.5500	315.687	5.853	8.033	8.463	-0.732	50.378	600.986	-0.000410	-0.000562	-0.000592
0.5600	354.475	9.366	12.437	12.979	-0.732	50.361	674.829	-0.000656	-0.000871	-0.000909
0.5700	416.753	15.201	18.188	19.427	-0.732	50.379	793.390	-0.001064	-0.001273	-0.001360
0.5800	461.958	20.029	23.308	24.542	-0.718	50.361	879.450	-0.001402	-0.001632	-0.001718
0.5900	517.488	26.315	29.472	30.641	-0.711	50.379	985.165	-0.001842	-0.002063	-0.002145
0.6000	570.749	31.523	35.005	36.699	-0.720	50.361	1086.559	-0.002207	-0.002450	-0.002569
0.6100	600.490	35.462	38.969	40.175	-0.714	50.379	1143.179	-0.002482	-0.002728	-0.002812
0.6200	699.362	45.704	48.379	50.695	-0.722	50.361	1331.406	-0.003199	-0.003386	-0.003549
0.6300	725.677	48.936	51.557	53.695	-0.715	50.379	1381.502	-0.003426	-0.003609	-0.003759
0.6400	830.049	60.358	61.602	65.229	-0.696	50.361	1580.200	-0.004225	-0.004312	-0.004566
0.6500	830.109	61.618	62.907	66.216	-0.710	50.378	1580.315	-0.004313	-0.004403	-0.004635
0.6600	882.664	66.896	67.604	71.526	-0.712	50.361	1680.365	-0.004683	-0.004732	-0.005007
0.6700	942.867	74.640	74.401	79.031	-0.699	50.378	1794.977	-0.005225	-0.005208	-0.005532
0.6800	972.563	78.010	76.629	81.930	-0.709	50.361	1851.511	-0.005461	-0.005364	-0.005735
0.6900	1009.563	82.866	81.018	86.323	-0.714	50.378	1921.949	-0.005801	-0.005671	-0.006043
0.7000	1067.363	89.809	86.204	92.591	-0.719	50.361	2031.984	-0.006287	-0.006034	-0.006481
0.7100	1071.526	90.807	86.814	93.662	-0.721	50.378	2039.909	-0.006356	-0.006077	-0.006556
0.7200	1096.924	93.997	89.687	96.885	-0.714	50.361	2088.261	-0.006580	-0.006278	-0.006782
0.7300	1134.945	99.019	93.114	101.388	-0.706	50.379	2160.645	-0.006931	-0.006518	-0.007097
0.7400	1131.293	98.821	93.277	101.250	-0.710	50.361	2153.692	-0.006917	-0.006529	-0.007087
0.7500	1129.700	99.342	93.555	101.319	-0.723	50.379	2150.660	-0.006954	-0.006549	-0.007092
0.7600	1126.334	99.327	93.308	101.209	-0.717	50.361	2144.251	-0.006953	-0.006532	-0.007085
0.7700	1123.719	99.202	93.500	101.666	-0.712	50.379	2139.273	-0.006944	-0.006545	-0.007117
0.7800	1096.428	96.629	91.543	99.622	-0.715	50.361	2087.317	-0.006764	-0.006408	-0.006974
0.7900	1054.258	91.987	88.257	95.969	-0.717	50.379	2007.036	-0.006439	-0.006178	-0.006718
0.8000	1028.815	89.433	86.136	93.397	-0.714	50.361	1958.599	-0.006260	-0.006029	-0.006538
0.8100	999.314	86.106	83.388	90.311	-0.712	50.378	1902.437	-0.006027	-0.005837	-0.006322
0.8200	932.843	78.852	77.923	83.419	-0.711	50.362	1775.894	-0.005520	-0.005455	-0.005839
0.8300	923.225	78.066	76.782	82.294	-0.694	50.378	1757.584	-0.005465	-0.005375	-0.005761
0.8400	880.003	72.832	72.541	78.278	-0.715	50.361	1675.301	-0.005098	-0.005078	-0.005479
0.8500	791.772	63.471	64.575	68.926	-0.713	50.378	1507.330	-0.004443	-0.004520	-0.004825
0.8600	759.566	59.810	61.546	65.341	-0.720	50.361	1446.018	-0.004187	-0.004308	-0.004574
0.8700	688.692	51.544	53.854	57.310	-0.706	50.379	1311.092	-0.003608	-0.003770	-0.004012
0.8800	658.560	47.783	50.938	53.723	-0.714	50.361	1253.729	-0.003345	-0.003566	-0.003761
0.8900	575.257	39.039	42.407	45.122	-0.718	50.378	1095.142	-0.002733	-0.002968	-0.003159
0.9000	516.947	32.335	36.050	38.479	-0.716	50.362	984.135	-0.002263	-0.002523	-0.002694
0.9100	470.013	27.268	31.011	32.698	-0.714	50.378	894.785	-0.001909	-0.002171	-0.002289
0.9200	440.092	23.408	26.997	28.724	-0.716	50.362	837.822	-0.001639	-0.001890	-0.002011
0.9300	385.689	17.526	20.721	22.541	-0.723	50.379	734.253	-0.001227	-0.001450	-0.001578
0.9400	341.145	12.770	15.411	16.814	-0.723	50.361	649.452	-0.000894	-0.001079	-0.001177
0.9500	307.707	8.761	11.253	12.521	-0.718	50.378	585.794	-0.000613	-0.000788	-0.000876
0.9600	274.975	5.012	6.878	8.297	-0.718	50.361	523.481	-0.000351	-0.000481	-0.000581
0.9700	251.771	2.712	3.755	5.295	-0.727	50.379	479.307	-0.000190	-0.000263	-0.000371
0.9800	238.065	0.536	1.388	2.737	-0.729	50.361	453.215	-0.000037	-0.000097	-0.000192
0.9900	241.642	1.054	1.458	2.890	-0.732	50.379	460.024	-0.000074	-0.000102	-0.000202
1.0000	204.942	-2.818	-3.444	-1.752	-0.719	50.362	390.158	0.000197	0.000241	0.000123
1.0100	213.163	-2.776	-2.851	-1.069	-0.730	50.379	405.807	0.000194	0.000200	0.000075
1.0200	233.346	-1.088	-0.896	0.486	-0.730	50.362	444.231	0.000076	0.000063	-0.000034
1.0300	272.600	2.023	3.068	4.195	-0.730	50.378	518.961	-0.000142	-0.000215	-0.000294
1.0400	283.766	3.328	4.445	5.421	-0.735	50.362	540.218	-0.000233	-0.000311	-0.000380
1.0500	336.035	7.749	9.727	10.908	-0.740	50.378	639.725	-0.000542	-0.000681	-0.000764
1.0600	357.165	9.546	12.136	13.368	-0.738	50.361	679.951	-0.000668	-0.000850	-0.000936
1.0700	402.476	14.641	17.365	18.065	-0.737	50.378	766.211	-0.001025	-0.001216	-0.001265
1.0800	464.829	20.352	23.308	25.220	-0.732	50.362	884.914	-0.001425	-0.001632	-0.001765
1.0900	503.211	24.630	27.944	29.491	-0.732	50.378	957.985	-0.001724	-0.001956	-0.002064
1.1000	549.889	29.933	33.121	34.240	-0.723	50.362	1046.848	-0.002095	-0.002318	-0.002397
1.1100	620.042	37.065	39.973	42.494	-0.736	50.378	1180.401	-0.002595	-0.002798	-0.002975
1.1200	693.982	45.199	48.393	50.917	-0.743	50.362	1321.163	-0.003164	-0.003388	-0.003564
1.1300	711.280	47.603	50.168	52.765	-0.740	50.378	1354.094	-0.003332	-0.003512	-0.003694
1.1400	786.136	55.738	57.735	60.853	-0.738	50.362	1496.601	-0.003902	-0.004041	-0.004260
1.1500	846.670	62.941	64.149	67.398	-0.727	50.379	1611.843	-0.004406	-0.004490	-0.004718
1.1600	896.084	69.170	69.735	73.582	-0.723	50.362	1705.914	-0.004842	-0.004881	-0.005151
1.1700	914.358	71.179	71.375	75.666	-0.737	50.379	1740.704	-0.004983	-0.004996	-0.005297
1.1800	987.517	80.141	78.570	83.337	-0.738	50.362	1879.978	-0.005610	-0.005500	-0.005834
1.1900	1015.830	83.747	81.212	87.242	-0.738	50.379	1933.880	-0.005862	-0.005685	-0.006107
1.2000	1060.329	89.151	85.764	92.034	-0.723	50.362	2018.595	-0.006241	-0.006003	-0.006442
1.2100	1089.139	92.969	88.520	95.705	-0.724	50.379	2073.441	-0.006508	-0.006196	-0.006699
1.2200	1105.535	95.254	90.376	97.941	-0.730	50.362	2104.654	-0.006668	-0.006326	-0.006856
1.2300	1119.376	97.376	92.288	99.830	-0.727	50.378	2131.004	-0.006816	-0.006460	-0.006988
1.2400	1139.619	100.293	93.940	102.374	-0.721	50.362	2169.542	-0.007021	-0.006576	-0.007166
1.2500	1135.006	99.915	93.912	102.278	-0.730	50.378	2160.759	-0.006994	-0.006574	-0.007159
1.2600	1132.345	100.319	94.064	102.375	-0.718	50.362	2155.695	-0.007022	-0.006584	-0.007166
1.2700	1121.375	99.186	93.100	101.805	-0.728	50.378	2134.809	-0.006943	-0.006517	-0.007126
1.2800	1097.976	96.870	91.998	100.207	-0.720	50.362	2090.263	-0.006781	-0.006440	-0.007015
1.2900	1070.594	94.106	89.826	97.455	-0.718	50.379	2038.136	-0.006587	-0.006288	-0.006822
1.3000	1030.197	89.727	86.233	93.827	-0.719	50.362	1961.231	-0.006281	-0.006036	-0.006568
1.3100	979.627	84.126	82.202	88.437	-0.716	50.378	1864.958	-0.005889	-0.005754	-0.006191
1.3200	954.710	81.309	79.478	85.906	-0.709	50.362	1817.522	-0.005692	-0.005563	-0.006013
1.3300	907.821	75.877	75.419	80.962	-0.710	50.379	1728.258	-0.005311	-0.005279	-0.005667
1.3400	848.759	69.900	70.216	75.082	-0.724	50.361	1615.820	-0.004893	-0.004915	-0.005256
1.3500	802.111	64.074	65.485	69.898	-0.727	50.379	1527.014	-0.004485	-0.004584	-0.004893
1.3600	771.093	60.443	62.139	66.035	-0.731	50.363	1467.962	-0.004231	-0.004350	-0.004622
1.3700	648.927	47.979	50.636	53.919	-0.726	50.379	1235.390	-0.003359	-0.003545	-0.003774
1.3800	646.252	46.605	49.411	52.488	-0.718	50.362	1230.297	-0.003262	-0.003459	-0.003674
1.3900	567.548	38.255	42.050	44.051	-0.712	50.378	1080.465	-0.002678	-0.002944	-0.003084
1.4000	525.604	32.812	36.641	38.786	-0.714	50.362	1000.614	-0.002297	-0.002565	-0.002715
1.4100	482.547	28.235	32.142	34.144	-0.715	50.379	918.646	-0.001976	-0.002250	-0.002390
1.4200	416.708	21.278	24.753	26.265	-0.731	50.362	793.304	-0.001489	-0.001733	-0.001839
1.4300	383.811	17.472	20.557	22.427	-0.725	50.378	730.677	-0.001223	-0.001439	-0.001570
1.4400	320.451	10.485	13.344	14.716	-0.723	50.362	610.056	-0.000734	-0.000934	-0.001030
1.4500	297.878	7.832	10.098	11.230	-0.713	50.378	567.083	-0.000548	-0.000707	-0.000786
1.4600	282.234	5.502	7.510	9.227	-0.719	50.363	537.300	-0.000385	-0.000526	-0.000646
1.4700	260.698	3.231	5.008	6.199	-0.725	50.379	496.302	-0.000226	-0.000351	-0.000434
1.4800	239.944	1.041	1.993	3.725	-0.724	50.362	456.791	-0.000073	-0.000140	-0.000261
1.4900	230.040	-0.405	0.563	1.390	-0.731	50.378	437.937	0.000028	-0.000039	-0.000097
1.5000	229.965	-0.393	0.163	1.499	-0.745	50.362	437.794	0.000027	-0.000011	-0.000105
1.5100	233.496	-0.864	-0.014	1.417	-0.732	50.379	444.517	0.000060	0.000001	-0.000099
1.5200	250.944	0.295	1.515	2.209	-0.723	50.362	477.734	-0.000021	-0.000106	-0.000155
1.5300	289.868	3.976	5.588	6.629	-0.734	50.378	551.834	-0.000278	-0.000391	-0.000464
1.5400	289.357	3.680	5.339	6.158	-0.738	50.363	550.861	-0.000258	-0.000374	-0.000431
1.5500	316.919	6.190	8.196	9.034	-0.740	50.378	603.333	-0.000433	-0.000574	-0.000632
1.5600	367.775	10.959	13.469	14.438	-0.732	50.362	700.150	-0.000767	-0.000943	-0.001011
1.5700	406.023	14.820	17.666	18.566	-0.728	50.379	772.963	-0.001037	-0.001237	-0.001300
1.5800	461.492	20.648	24.051	24.971	-0.735	50.363	878.563	-0.001445	-0.001684	-0.001748
1.5900	551.918	29.345	32.720	34.463	-0.729	50.379	1050.711	-0.002054	-0.002290	-0.002412
1.6000	615.879	36.813	40.014	42.022	-0.736	50.363	1172.476	-0.002577	-0.002801	-0.002942
1.6100	604.638	36.417	39.782	41.635	-0.738	50.379	1151.075	-0.002549	-0.002785	-0.002914
1.6200	637.715	39.601	42.848	45.080	-0.739	50.363	1214.046	-0.002772	-0.002999	-0.003156
1.6300	713.158	47.968	50.678	52.736	-0.738	50.378	1357.670	-0.003358	-0.003547	-0.003692
1.6400	806.019	58.519	59.881	62.910	-0.727	50.362	1534.452	-0.004096	-0.004192	-0.004404
1.6500	871.633	65.451	66.379	69.952	-0.735	50.378	1659.365	-0.004582	-0.004647	-0.004897
1.6600	890.914	68.887	69.143	72.914	-0.741	50.363	1696.072	-0.004822	-0.004840	-0.005104
1.6700	961.998	76.721	75.958	80.642	-0.740	50.378	1831.398	-0.005370	-0.005317	-0.005645
1.6800	969.047	78.317	77.415	82.100	-0.744	50.363	1844.816	-0.005482	-0.005419	-0.005747
1.6900	1043.783	86.964	84.225	90.187	-0.739	50.378	1987.095	-0.006087	-0.005896	-0.006313
1.7000	1043.482	87.499	84.445	90.952	-0.741	50.362	1986.523	-0.006125	-0.005911	-0.006367
1.7100	1103.296	94.610	89.950	97.010	-0.736	50.379	2100.391	-0.006623	-0.006297	-0.006791
1.7200	1119.316	97.053	91.680	99.889	-0.716	50.363	2130.890	-0.006794	-0.006418	-0.006992
1.7300	1113.289	97.234	91.710	99.443	-0.733	50.379	2119.417	-0.006806	-0.006420	-0.006961
1.7400	1117.152	98.176	92.563	99.971	-0.726	50.363	2126.770	-0.006872	-0.006479	-0.006998
1.7500	1131.263	99.761	93.555	102.278	-0.711	50.379	2153.635	-0.006983	-0.006549	-0.007159
1.7600	1126.785	99.678	93.596	101.903	-0.712	50.363	2145.109	-0.006977	-0.006552	-0.007133
1.7700	1112.463	98.794	93.004	101.306	-0.715	50.379	2117.844	-0.006916	-0.006510	-0.007091
1.7800	1097.059	96.658	91.531	100.012	-0.715	50.363	2088.518	-0.006766	-0.006407	-0.007001
1.7900	1082.902	95.842	91.063	98.860	-0.712	50.379	2061.567	-0.006709	-0.006374	-0.006920
1.8000	1017.048	88.579	85.532	92.356	-0.718	50.363	1936.197	-0.006201	-0.005987	-0.006465
1.8100	989.861	85.585	82.807	89.855	-0.713	50.378	1884.441	-0.005991	-0.005796	-0.006290
1.8200	960.270	82.613	80.647	86.518	-0.714	50.363	1828.108	-0.005783	-0.005645	-0.006056
1.8300	887.262	74.347	73.601	79.098	-0.706	50.378	1689.119	-0.005204	-0.005152	-0.005537
1.8400	828.396	67.625	68.264	72.984	-0.721	50.363	1577.053	-0.004734	-0.004779	-0.005109
1.8500	798.820	64.300	65.513	69.468	-0.715	50.379	1520.748	-0.004501	-0.004586	-0.004863
1.8600	762.902	59.951	61.727	65.730	-0.712	50.363	1452.370	-0.004197	-0.004321	-0.004601
1.8700	676.038	50.644	53.553	56.920	-0.721	50.378	1287.003	-0.003545	-0.003749	-0.003984
1.8800	632.425	45.831	48.642	51.138	-0.710	50.363	1203.976	-0.003208	-0.003405	-0.003580
1.8900	575.483	38.956	42.572	45.274	-0.712	50.378	1095.572	-0.002727	-0.002980	-0.003169
1.9000	527.076	33.695	37.716	39.605	-0.722	50.363	1003.418	-0.002359	-0.002640	-0.002772
1.9100	473.786	27.743	31.261	33.018	-0.722	50.379	901.966	-0.001942	-0.002188	-0.002311
1.9200	420.735	21.699	25.138	27.194	-0.721	50.363	800.972	-0.001519	-0.001760	-0.001904
1.9300	383.194	17.429	20.900	22.445	-0.718	50.379	729.504	-0.001220	-0.001463	-0.001571
1.9400	343.730	13.066	15.863	17.358	-0.715	50.363	654.373	-0.000915	-0.001110	-0.001215
1.9500	310.487	9.320	11.805	13.202	-0.701	50.379	591.087	-0.000652	-0.000826	-0.000924
1.9600	284.743	6.499	8.253	9.575	-0.712	50.363	542.078	-0.000455	-0.000578	-0.000670
1.9700	250.388	2.488	3.989	5.281	-0.711	50.379	476.675	-0.000174	-0.000279	-0.000370
1.9800	246.992	1.953	3.220	4.239	-0.712	50.363	470.209	-0.000137	-0.000225	-0.000297
1.9900	234.608	0.437	0.920	2.267	-0.712	50.379	446.634	-0.000031	-0.000064	-0.000159
2.0000	233.181	-0.267	0.370	1.972	-0.702	50.364	443.916	0.000019	-0.000026	-0.000138
2.0100	234.939	-0.210	0.509	1.683	-0.712	50.379	447.264	0.000015	-0.000036	-0.000118
2.0200	240.725	-0.462	0.617	1.781	-0.716	50.364	458.279	0.000032	-0.000043	-0.000125
2.0300	258.909	1.223	2.587	3.238	-0.725	50.378	492.897	-0.000086	-0.000181	-0.000227
2.0400	300.418	4.955	6.617	7.504	-0.723	50.363	571.918	-0.000347	-0.000463	-0.000525
2.0500	323.637	7.032	8.940	9.991	-0.722	50.378	616.121	-0.000492	-0.000626	-0.000699
2.0600	366.678	11.351	13.884	14.522	-0.724	50.364	698.061	-0.000795	-0.000972	-0.001017
2.0700	406.819	15.299	17.998	18.760	-0.726	50.378	774.479	-0.001071	-0.001260	-0.001313
2.0800	463.100	20.590	24.037	25.526	-0.738	50.364	881.624	-0.001441	-0.001683	-0.001787
2.0900	507.164	25.542	29.047	29.989	-0.730	50.379	965.509	-0.001788	-0.002033	-0.002099
2.1000	550.446	30.019	33.270	34.853	-0.728	50.364	1047.907	-0.002101	-0.002329	-0.002440
2.1100	607.433	36.235	39.589	40.885	-0.737	50.378	1156.397	-0.002536	-0.002771	-0.002862
2.1200	703.510	46.406	49.054	51.291	-0.739	50.364	1339.302	-0.003248	-0.003434	-0.003590
2.1300	739.879	50.774	53.056	55.529	-0.734	50.378	1408.539	-0.003554	-0.003714	-0.003887
2.1400	798.174	57.817	59.580	62.730	-0.732	50.364	1519.518	-0.004047	-0.004171	-0.004391
2.1500	845.664	63.585	64.066	67.800	-0.730	50.379	1609.926	-0.004451	-0.004485	-0.004746
2.1600	907.460	69.942	70.312	74.403	-0.735	50.364	1727.571	-0.004896	-0.004922	-0.005208
2.1700	932.678	73.771	73.246	77.639	-0.716	50.379	1775.579	-0.005164	-0.005127	-0.005435
2.1800	1033.489	85.066	82.656	88.452	-0.723	50.364	1967.497	-0.005955	-0.005786	-0.006192
2.1900	1025.223	84.856	83.000	88.772	-0.719	50.379	1951.761	-0.005940	-0.005810	-0.006214
2.2000	1062.268	89.628	86.083	92.174	-0.709	50.363	2022.285	-0.006274	-0.006026	-0.006452
2.2100	1116.040	96.181	91.353	99.151	-0.711	50.378	2124.653	-0.006733	-0.006395	-0.006941
2.2200	1097.945	95.139	90.567	98.092	-0.724	50.364	2090.206	-0.006660	-0.006340	-0.006866
2.2300	1114.537	97.278	92.081	99.637	-0.719	50.379	2121.792	-0.006809	-0.006446	-0.006975
2.2400	1118.264	97.811	92.700	100.597	-0.720	50.364	2128.887	-0.006847	-0.006489	-0.007042
2.2500	1127.281	99.579	93.568	101.584	-0.708	50.379	2146.053	-0.006971	-0.006550	-0.007111
2.2600	1124.501	99.536	93.446	102.291	-0.705	50.364	2140.760	-0.006968	-0.006541	-0.007160
2.2700	1111.802	98.668	92.907	101.042	-0.714	50.378	2116.585	-0.006907	-0.006504	-0.007073
2.2800	1079.971	95.296	90.471	98.288	-0.711	50.364	2055.988	-0.006671	-0.006333	-0.006880
2.2900	1072.517	94.178	89.880	97.732	-0.731	50.379	2041.798	-0.006592	-0.006292	-0.006841
2.3000	1035.743	90.470	87.143	94.564	-0.730	50.364	1971.788	-0.006333	-0.006100	-0.006620
2.3100	995.362	86.318	83.604	90.342	-0.716	50.379	1894.913	-0.006042	-0.005852	-0.006324
2.3200	994.415	85.729	83.384	90.160	-0.707	50.364	1893.110	-0.006001	-0.005837	-0.006311
2.3300	915.110	77.477	76.477	82.251	-0.718	50.378	1742.134	-0.005423	-0.005353	-0.005758
2.3400	833.536	68.665	69.116	73.929	-0.711	50.364	1586.838	-0.004807	-0.004838	-0.005175
2.3500	752.533	59.545	61.453	65.341	-0.718	50.379	1432.629	-0.004168	-0.004302	-0.004574
2.3600	702.758	53.496	55.964	59.366	-0.724	50.364	1337.872	-0.003745	-0.003917	-0.004156
2.3700	659.161	48.516	51.434	54.180	-0.714	50.379	1254.873	-0.003396	-0.003600	-0.003793
2.3800	634.003	45.228	48.711	51.263	-0.712	50.364	1206.980	-0.003166	-0.003410	-0.003588
2.3900	609.086	42.872	46.068	48.693	-0.712	50.379	1159.544	-0.003001	-0.003225	-0.003408
2.4000	536.003	34.394	38.169	40.647	-0.704	50.364	1020.412	-0.002408	-0.002672	-0.002845
2.4100	485.433	29.358	32.886	34.798	-0.712	50.378	924.139	-0.002055	-0.002302	-0.002436
2.4200	457.810	25.416	29.196	31.197	-0.718	50.364	871.553	-0.001779	-0.002044	-0.002184
2.4300	343.820	14.121	16.757	18.398	-0.712	50.378	654.545	-0.000988	-0.001173	-0.001288
2.4400	309.420	9.743	12.065	13.590	-0.720	50.364	589.056	-0.000682	-0.000845	-0.000951
2.4500	303.499	8.604	10.787	12.339	-0.705	50.378	577.784	-0.000602	-0.000755	-0.000864
2.4600	281.166	5.994	7.815	9.422	-0.712	50.364	535.269	-0.000420	-0.000547	-0.000660
2.4700	266.965	4.381	5.750	7.394	-0.722	50.378	508.232	-0.000307	-0.000403	-0.000518
2.4800	206.460	-1.679	-1.640	0.001	-0.729	50.364	393.047	0.000118	0.000115	-0.000000
2.4900	217.717	-1.202	-1.404	-0.083	-0.726	50.379	414.476	0.000084	0.000098	0.000006
2.5000	275.095	3.371	4.235	5.768	-0.727	50.365	523.710	-0.000236	-0.000296	-0.000404
2.5100	256.340	1.601	2.669	3.878	-0.735	50.379	488.005	-0.000112	-0.000187	-0.000271
2.5200	247.368	0.887	1.514	3.002	-0.735	50.364	470.924	-0.000062	-0.000106	-0.000210
2.5300	264.485	1.687	2.710	4.097	-0.733	50.379	503.511	-0.000118	-0.000190	-0.000287
2.5400	283.601	3.624	5.117	6.075	-0.743	50.365	539.904	-0.000254	-0.000358	-0.000425
2.5500	326.703	7.735	9.314	10.450	-0.734	50.379	621.958	-0.000541	-0.000652	-0.000732
2.5600	366.513	11.057	13.690	14.772	-0.743	50.365	697.746	-0.000774	-0.000958	-0.001034
2.5700	445.908	19.186	22.469	23.443	-0.734	50.379	848.894	-0.001343	-0.001573	-0.001641
2.5800	438.514	18.412	21.573	23.167	-0.732	50.365	834.818	-0.001289	-0.001510	-0.001622
2.5900	508.381	25.473	28.783	30.504	-0.728	50.379	967.827	-0.001783	-0.002015	-0.002135
2.6000	535.913	28.823	32.336	33.365	-0.728	50.364	1020.241	-0.002018	-0.002263	-0.002336
2.6100	656.651	40.837	44.223	46.357	-0.719	50.378	1250.095	-0.002859	-0.003096	-0.003245
2.6200	694.823	45.676	48.888	50.708	-0.711	50.365	1322.765	-0.003197	-0.003422	-0.003550
2.6300	745.093	51.698	53.979	56.657	-0.718	50.378	1418.467	-0.003619	-0.003779	-0.003966
2.6400	789.547	56.510	58.590	61.644	-0.731	50.365	1503.096	-0.003956	-0.004101	-0.004315
2.6500	889.021	67.485	68.330	72.260	-0.734	50.379	1692.467	-0.004724	-0.004783	-0.005058
2.6600	935.323	73.967	73.629	78.100	-0.727	50.365	1780.615	-0.005178	-0.005154	-0.005467
2.6700	937.683	74.628	74.219	78.946	-0.719	50.379	1785.107	-0.005224	-0.005195	-0.005526
2.6800	992.882	81.324	79.271	84.616	-0.720	50.365	1890.192	-0.005693	-0.005549	-0.005923
2.6900	1053.401	88.187	84.803	91.674	-0.704	50.379	2005.405	-0.006173	-0.005936	-0.006417
2.7000	1060.194	89.725	86.411	92.798	-0.724	50.365	2018.337	-0.006281	-0.006049	-0.006496
2.7100	1083.879	93.194	88.779	96.164	-0.728	50.379	2063.427	-0.006524	-0.006215	-0.006731
2.7200	1091.964	94.233	89.633	96.623	-0.727	50.365	2078.819	-0.006596	-0.006274	-0.006764
2.7300	1129.926	99.146	93.211	101.347	-0.720	50.379	2151.089	-0.006940	-0.006525	-0.007094
2.7400	1128.904	99.608	93.322	101.891	-0.728	50.365	2149.143	-0.006973	-0.006533	-0.007132
2.7500	1138.237	100.683	94.434	102.946	-0.722	50.379	2166.910	-0.007048	-0.006610	-0.007206
2.7600	1120.067	99.243	93.582	102.235	-0.721	50.365	2132.320	-0.006947	-0.006551	-0.007156
2.7700	1094.774	96.869	91.654	100.040	-0.722	50.379	2084.169	-0.006781	-0.006416	-0.007003
2.7800	1072.202	94.008	89.743	97.775	-0.732	50.365	2041.197	-0.006581	-0.006282	-0.006844
2.7900	1067.588	93.995	89.591	97.523	-0.720	50.379	2032.413	-0.006580	-0.006271	-0.006827
2.8000	1053.777	92.604	88.463	96.469	-0.704	50.365	2006.121	-0.006482	-0.006192	-0.006753
2.8100	1002.590	87.483	84.624	91.342	-0.708	50.378	1908.674	-0.006124	-0.005924	-0.006394
2.8200	896.535	75.499	74.703	80.543	-0.714	50.365	1706.772	-0.005285	-0.005229	-0.005638
2.8300	868.537	72.101	72.185	77.764	-0.715	50.379	1653.471	-0.005047	-0.005053	-0.005443
2.8400	825.330	67.328	68.111	72.707	-0.724	50.366	1571.217	-0.004713	-0.004768	-0.005090
2.8500	777.915	62.167	63.115	67.371	-0.715	50.378	1480.951	-0.004352	-0.004418	-0.004716
2.8600	743.350	58.057	60.242	63.424	-0.718	50.365	1415.148	-0.004064	-0.004217	-0.004440
2.8700	680.456	51.221	53.882	56.848	-0.707	50.379	1295.414	-0.003585	-0.003772	-0.003979
2.8800	627.977	45.031	48.119	51.306	-0.714	50.365	1195.507	-0.003152	-0.003368	-0.003591
2.8900	562.588	38.046	41.455	44.093	-0.720	50.379	1071.024	-0.002663	-0.002902	-0.003087
2.9000	532.832	34.239	37.647	40.035	-0.722	50.365	1014.376	-0.002397	-0.002635	-0.002802
2.9100	491.714	29.429	32.886	35.506	-0.714	50.379	936.098	-0.002060	-0.002302	-0.002485
2.9200	434.997	23.717	27.161	28.989	-0.705	50.365	828.123	-0.001660	-0.001901	-0.002029
2.9300	378.536	17.722	20.377	22.429	-0.692	50.379	720.634	-0.001241	-0.001426	-0.001570
2.9400	362.094	14.921	17.997	19.330	-0.712	50.365	689.335	-0.001044	-0.001260	-0.001353
2.9500	338.019	12.323	15.108	16.272	-0.722	50.379	643.501	-0.000863	-0.001058	-0.001139
2.9600	321.112	10.105	12.493	14.035	-0.717	50.366	611.315	-0.000707	-0.000875	-0.000982
2.9700	265.251	4.507	6.203	7.951	-0.700	50.379	504.971	-0.000315	-0.000434	-0.000557
2.9800	254.160	2.922	4.074	5.421	-0.712	50.364	483.856	-0.000205	-0.000285	-0.000379
2.9900	235.751	0.646	1.416	3.114	-0.704	50.378	448.809	-0.000045	-0.000099	-0.000218
3.0000	237.960	0.759	1.334	2.891	-0.703	50.365	453.014	-0.000053	-0.000093	-0.000202
3.0100	243.941	0.774	1.171	2.917	-0.720	50.378	464.401	-0.000054	-0.000082	-0.000204
3.0200	249.366	0.887	1.801	3.307	-0.710	50.365	474.730	-0.000062	-0.000126	-0.000232
3.0300	261.810	1.842	3.217	4.416	-0.707	50.379	498.419	-0.000129	-0.000225	-0.000309
3.0400	272.285	2.429	3.908	5.198	-0.726	50.365	518.360	-0.000170	-0.000274	-0.000364
3.0500	317.520	6.332	8.695	9.768	-0.708	50.378	604.477	-0.000443	-0.000609	-0.000684
3.0600	368.497	11.815	14.433	15.424	-0.706	50.365	701.523	-0.000827	-0.001010	-0.001080
3.0700	370.255	11.929	14.528	15.938	-0.707	50.378	704.870	-0.000835	-0.001017	-0.001116
3.0800	450.912	19.578	22.634	24.041	-0.719	50.366	858.421	-0.001370	-0.001584	-0.001683
3.0900	530.578	27.785	30.890	32.589	-0.730	50.379	1010.084	-0.001945	-0.002162	-0.002281
3.1000	546.102	29.976	33.300	35.103	-0.724	50.365	1039.639	-0.002098	-0.002331	-0.002457
3.1100	576.595	33.134	36.532	38.423	-0.724	50.379	1097.689	-0.002319	-0.002557	-0.002690
3.1200	650.655	40.907	43.937	46.191	-0.723	50.365	1238.680	-0.002863	-0.003076	-0.003233
3.1300	785.490	56.288	57.805	60.851	-0.726	50.379	1495.371	-0.003940	-0.004046	-0.004260
3.1400	861.368	64.611	65.235	69.218	-0.738	50.366	1639.824	-0.004523	-0.004566	-0.004845
3.1500	868.011	65.971	66.750	70.857	-0.728	50.379	1652.470	-0.004618	-0.004672	-0.004960
3.1600	902.336	70.125	70.481	75.001	-0.720	50.366	1717.815	-0.004909	-0.004934	-0.005250
3.1700	938.960	74.613	74.180	78.946	-0.717	50.379	1787.539	-0.005223	-0.005193	-0.005526
3.1800	995.316	81.659	79.711	85.199	-0.722	50.366	1894.827	-0.005716	-0.005580	-0.005964
3.1900	1028.664	85.895	83.234	89.118	-0.722	50.378	1958.313	-0.006013	-0.005826	-0.006238
3.2000	1039.034	87.260	83.965	90.437	-0.725	50.366	1978.054	-0.006108	-0.005878	-0.006331
3.2100	1097.239	94.051	89.621	97.108	-0.727	50.378	2088.861	-0.006584	-0.006273	-0.006798
3.2200	1099.103	95.195	90.388	97.829	-0.733	50.365	2092.409	-0.006664	-0.006327	-0.006848
3.2300	1136.373	99.468	93.635	102.110	-0.722	50.378	2163.363	-0.006963	-0.006554	-0.007148
3.2400	1136.268	100.530	94.186	102.500	-0.717	50.366	2163.162	-0.007037	-0.006593	-0.007175
3.2500	1131.459	100.347	93.911	102.915	-0.724	50.378	2154.007	-0.007024	-0.006574	-0.007204
3.2600	1125.943	99.706	94.063	102.568	-0.732	50.365	2143.507	-0.006979	-0.006584	-0.007180
3.2700	1114.792	99.217	93.445	101.959	-0.724	50.378	2122.278	-0.006945	-0.006541	-0.007137
3.2800	1100.560	97.627	92.219	100.735	-0.728	50.365	2095.184	-0.006834	-0.006455	-0.007051
3.2900	1053.116	92.688	88.725	96.773	-0.728	50.378	2004.862	-0.006488	-0.006211	-0.006774
3.3000	1029.762	90.413	86.620	94.219	-0.723	50.365	1960.402	-0.006329	-0.006063	-0.006595
3.3100	982.482	84.982	82.848	89.369	-0.727	50.379	1870.394	-0.005949	-0.005799	-0.006256
3.3200	942.116	80.803	79.092	85.364	-0.722	50.366	1793.547	-0.005656	-0.005536	-0.005975
3.3300	901.780	76.342	75.487	81.392	-0.726	50.378	1716.757	-0.005344	-0.005284	-0.005697
3.3400	832.213	68.324	68.867	73.486	-0.729	50.366	1584.320	-0.004783	-0.004821	-0.005144
3.3500	748.535	59.572	61.177	64.811	-0.722	50.379	1425.018	-0.004170	-0.004282	-0.004537
3.3600	742.103	58.029	59.896	63.771	-0.716	50.366	1412.773	-0.004062	-0.004193	-0.004464
3.3700	677.030	50.799	53.166	56.587	-0.704	50.379	1288.891	-0.003556	-0.003722	-0.003961
3.3800	636.243	46.408	49.094	52.140	-0.728	50.366	1211.243	-0.003249	-0.003437	-0.003650
3.3900	566.872	38.324	41.831	44.539	-0.717	50.378	1079.178	-0.002683	-0.002928	-0.003118
3.4000	529.661	34.186	37.728	39.704	-0.730	50.366	1008.339	-0.002393	-0.002641	-0.002779
3.4100	464.663	27.227	30.545	32.835	-0.732	50.378	884.600	-0.001906	-0.002138	-0.002298
3.4200	410.276	21.095	24.451	26.320	-0.732	50.366	781.059	-0.001477	-0.001712	-0.001842
3.4300	381.692	17.428	20.735	22.500	-0.727	50.379	726.643	-0.001220	-0.001451	-0.001575
3.4400	344.977	13.208	16.209	17.745	-0.727	50.366	656.748	-0.000925	-0.001135	-0.001242
3.4500	333.841	11.789	14.488	15.966	-0.728	50.378	635.548	-0.000825	-0.001014	-0.001118
3.4600	275.907	5.838	7.537	9.089	-0.730	50.365	525.255	-0.000409	-0.000528	-0.000636
3.4700	249.998	2.781	4.005	5.823	-0.730	50.378	475.931	-0.000195	-0.000280	-0.000408
3.4800	241.266	1.671	2.434	3.960	-0.716	50.366	459.309	-0.000117	-0.000170	-0.000277
3.4900	234.143	0.521	1.129	2.959	-0.702	50.379	445.747	-0.000036	-0.000079	-0.000207
3.5000	229.784	-0.449	0.246	1.892	-0.711	50.365	437.450	0.000031	-0.000017	-0.000132
3.5100	237.825	0.352	0.907	2.127	-0.705	50.378	452.757	-0.000025	-0.000063	-0.000149
3.5200	245.775	0.324	1.306	2.432	-0.722	50.366	467.892	-0.000023	-0.000091	-0.000170
3.5300	252.838	1.054	2.009	3.141	-0.711	50.378	481.339	-0.000074	-0.000141	-0.000220
3.5400	315.341	6.877	8.655	9.561	-0.704	50.366	600.328	-0.000481	-0.000606	-0.000669
3.5500	326.673	7.510	9.698	11.214	-0.697	50.379	621.901	-0.000526	-0.000679	-0.000785
3.5600	388.514	14.037	16.579	17.874	-0.696	50.366	739.632	-0.000983	-0.001161	-0.001251
3.5700	401.950	15.270	17.666	19.121	-0.698	50.378	765.209	-0.001069	-0.001237	-0.001338
3.5800	454.113	20.324	23.585	25.110	-0.719	50.366	864.515	-0.001423	-0.001651	-0.001758
3.5900	534.530	28.517	31.728	33.449	-0.711	50.378	1017.609	-0.001996	-0.002221	-0.002341
3.6000	565.609	32.169	35.319	37.311	-0.713	50.366	1076.775	-0.002252	-0.002472	-0.002612
3.6100	612.738	37.008	40.235	42.244	-0.704	50.378	1166.496	-0.002591	-0.002816	-0.002957
3.6200	680.622	44.600	47.456	49.387	-0.718	50.366	1295.729	-0.003122	-0.003322	-0.003457
3.6300	737.564	50.925	53.208	56.238	-0.718	50.378	1404.133	-0.003565	-0.003725	-0.003937
3.6400	812.992	59.405	61.492	64.173	-0.718	50.366	1547.728	-0.004158	-0.004304	-0.004492
3.6500	850.848	64.525	65.651	69.594	-0.708	50.379	1619.797	-0.004517	-0.004596	-0.004872
3.6600	864.900	66.238	66.928	71.107	-0.724	50.366	1646.547	-0.004637	-0.004685	-0.004977
3.6700	956.032	76.835	76.023	80.861	-0.726	50.378	1820.040	-0.005378	-0.005322	-0.005660
3.6800	960.135	77.970	76.436	81.681	-0.719	50.366	1827.850	-0.005458	-0.005351	-0.005718
3.6900	1049.193	87.426	84.622	91.118	-0.732	50.379	1997.395	-0.006120	-0.005924	-0.006378
3.7000	1057.850	89.839	86.234	92.730	-0.733	50.366	2013.874	-0.006289	-0.006036	-0.006491
3.7100	1082.872	93.010	88.724	95.648	-0.733	50.379	2061.510	-0.006511	-0.006211	-0.006695
3.7200	1149.162	100.713	94.587	102.598	-0.720	50.367	2187.710	-0.007050	-0.006621	-0.007182
3.7300	1117.001	98.177	92.660	101.001	-0.720	50.378	2126.484	-0.006872	-0.006486	-0.007070
3.7400	1122.817	98.556	93.143	101.777	-0.723	50.366	2137.556	-0.006899	-0.006520	-0.007124
3.7500	1121.660	99.174	93.802	102.126	-0.733	50.378	2135.353	-0.006942	-0.006566	-0.007149
3.7600	1129.415	100.264	93.979	103.016	-0.715	50.366	2150.116	-0.007019	-0.006579	-0.007211
3.7700	1113.169	98.835	93.309	101.916	-0.722	50.378	2119.188	-0.006918	-0.006532	-0.007134
3.7800	1072.848	94.903	90.332	98.330	-0.723	50.366	2042.427	-0.006643	-0.006323	-0.006883
3.7900	1078.469	95.323	90.387	98.524	-0.719	50.378	2053.127	-0.006673	-0.006327	-0.006897
3.8000	1011.352	88.494	85.339	92.440	-0.731	50.366	1925.354	-0.006195	-0.005974	-0.006471
3.8100	1013.020	88.411	85.188	92.367	-0.720	50.379	1928.530	-0.006189	-0.005963	-0.006466
3.8200	965.019	83.400	81.500	87.992	-0.734	50.367	1837.149	-0.005838	-0.005705	-0.006159
3.8300	879.057	74.009	73.628	78.751	-0.726	50.378	1673.498	-0.005181	-0.005154	-0.005513
3.8400	867.380	72.060	71.978	77.445	-0.727	50.366	1651.268	-0.005044	-0.005038	-0.005421
3.8500	813.878	66.223	66.875	71.373	-0.710	50.378	1549.416	-0.004636	-0.004681	-0.004996
3.8600	738.316	58.590	60.253	64.146	-0.722	50.366	1405.563	-0.004101	-0.004218	-0.004490
3.8700	706.395	53.988	56.005	59.921	-0.734	50.379	1344.795	-0.003779	-0.003920	-0.004194
3.8800	604.458	42.761	46.371	48.832	-0.735	50.366	1150.732	-0.002993	-0.003246	-0.003418
3.8900	600.084	42.199	45.270	48.387	-0.730	50.379	1142.406	-0.002954	-0.003169	-0.003387
3.9000	476.821	28.978	32.392	34.797	-0.729	50.367	907.745	-0.002028	-0.002267	-0.002436
3.9100	465.715	27.074	30.599	32.616	-0.722	50.378	886.602	-0.001895	-0.002142	-0.002283
3.9200	441.790	24.251	27.452	29.794	-0.738	50.367	841.055	-0.001698	-0.001922	-0.002086
3.9300	361.088	15.607	18.712	20.677	-0.735	50.379	687.418	-0.001092	-0.001310	-0.001447
3.9400	361.042	15.103	17.901	19.301	-0.737	50.367	687.332	-0.001057	-0.001253	-0.001351
3.9500	288.050	7.664	9.630	11.924	-0.733	50.378	548.372	-0.000537	-0.000674	-0.000835
3.9600	294.422	7.594	9.534	10.757	-0.731	50.366	560.503	-0.000532	-0.000667	-0.000753
3.9700	242.213	2.669	3.053	4.877	-0.731	50.378	461.111	-0.000187	-0.000214	-0.000341
3.9800	247.593	2.121	2.779	4.836	-0.738	50.367	471.354	-0.000148	-0.000195	-0.000338
3.9900	246.255	1.953	2.723	4.280	-0.728	50.378	468.807	-0.000137	-0.000191	-0.000300
4.0000	224.960	-0.531	0.164	1.725	-0.719	50.366	428.267	0.000037	-0.000012	-0.000121
4.0100	237.028	-0.057	0.647	2.154	-0.724	50.378	451.241	0.000004	-0.000045	-0.000151
4.0200	241.011	0.284	1.018	2.210	-0.712	50.366	458.822	-0.000020	-0.000071	-0.000155
4.0300	269.129	2.600	3.645	4.918	-0.719	50.378	512.352	-0.000182	-0.000255	-0.000344
4.0400	282.203	3.665	4.994	6.296	-0.702	50.366	537.243	-0.000257	-0.000350	-0.000441
4.0500	326.041	7.524	9.451	10.659	-0.712	50.378	620.699	-0.000527	-0.000662	-0.000746
4.0600	373.982	12.181	14.972	16.537	-0.712	50.366	711.966	-0.000853	-0.001048	-0.001158
4.0700	395.322	14.472	17.130	18.483	-0.712	50.378	752.592	-0.001013	-0.001199	-0.001294
4.0800	508.907	25.670	28.741	30.477	-0.702	50.366	968.828	-0.001797	-0.002012	-0.002133
4.0900	531.885	28.641	31.703	33.420	-0.709	50.378	1012.573	-0.002005	-0.002219	-0.002339
4.1000	572.387	32.897	36.367	38.201	-0.711	50.367	1089.678	-0.002303	-0.002546	-0.002674
4.1100	605.344	36.405	39.548	42.161	-0.721	50.379	1152.420	-0.002548	-0.002768	-0.002951
4.1200	695.094	46.001	48.806	51.417	-0.723	50.367	1323.280	-0.003220	-0.003416	-0.003599
4.1300	791.156	57.116	58.535	61.493	-0.719	50.378	1506.157	-0.003998	-0.004097	-0.004305
4.1400	785.099	56.987	58.729	62.423	-0.726	50.367	1494.627	-0.003989	-0.004111	-0.004370
4.1500	816.779	60.651	62.207	65.284	-0.718	50.378	1554.937	-0.004246	-0.004354	-0.004570
4.1600	892.146	68.831	69.157	73.332	-0.713	50.367	1698.418	-0.004818	-0.004841	-0.005133
4.1700	918.070	72.298	72.168	76.930	-0.704	50.378	1747.770	-0.005061	-0.005052	-0.005385
4.1800	953.928	77.380	76.270	81.113	-0.720	50.367	1816.034	-0.005417	-0.005339	-0.005678
4.1900	1036.630	86.570	83.398	89.591	-0.726	50.378	1973.476	-0.006060	-0.005838	-0.006271
4.2000	1028.619	86.445	83.606	89.925	-0.730	50.367	1958.227	-0.006051	-0.005852	-0.006295
4.2100	1084.600	92.986	88.644	95.497	-0.724	50.378	2064.800	-0.006509	-0.006205	-0.006685
4.2200	1094.294	94.695	89.839	97.399	-0.720	50.367	2083.254	-0.006629	-0.006289	-0.006818
4.2300	1130.497	99.258	93.473	101.709	-0.717	50.378	2152.176	-0.006948	-0.006543	-0.007120
4.2400	1128.047	99.662	93.526	101.916	-0.725	50.367	2147.512	-0.006976	-0.006547	-0.007134
4.2500	1140.972	101.231	94.709	103.681	-0.714	50.378	2172.117	-0.007086	-0.006630	-0.007258
4.2600	1131.594	100.951	94.489	103.069	-0.730	50.367	2154.264	-0.007067	-0.006614	-0.007215
4.2700	1122.983	100.125	93.830	102.666	-0.715	50.378	2137.871	-0.007009	-0.006568	-0.007187
4.2800	1105.264	98.470	92.907	101.806	-0.730	50.367	2104.139	-0.006893	-0.006504	-0.007126
4.2900	1050.922	92.843	88.561	96.441	-0.710	50.378	2000.685	-0.006499	-0.006199	-0.006751
4.3000	1027.507	90.118	86.427	94.051	-0.708	50.367	1956.110	-0.006308	-0.006050	-0.006584
4.3100	992.461	86.260	83.550	90.702	-0.706	50.378	1889.391	-0.006038	-0.005849	-0.006349
4.3200	939.516	80.297	79.132	85.671	-0.714	50.368	1788.597	-0.005621	-0.005539	-0.005997
4.3300	893.950	75.300	74.910	80.683	-0.699	50.378	1701.851	-0.005271	-0.005244	-0.005648
4.3400	847.227	70.462	70.672	75.527	-0.708	50.367	1612.902	-0.004932	-0.004947	-0.005287
4.3500	789.517	63.894	64.714	69.412	-0.714	50.378	1503.038	-0.004473	-0.004530	-0.004859
4.3600	782.484	62.574	63.940	67.982	-0.717	50.367	1489.649	-0.004380	-0.004476	-0.004759
4.3700	707.357	54.648	56.856	60.672	-0.705	50.378	1346.626	-0.003825	-0.003980	-0.004247
4.3800	624.566	45.523	48.352	51.418	-0.705	50.367	1189.013	-0.003187	-0.003385	-0.003599
4.3900	595.621	41.834	45.381	47.983	-0.713	50.378	1133.909	-0.002928	-0.003177	-0.003359
4.4000	545.636	35.913	39.298	41.842	-0.714	50.367	1038.752	-0.002514	-0.002751	-0.002929
4.4100	450.747	25.949	29.418	31.517	-0.705	50.378	858.107	-0.001816	-0.002059	-0.002206
4.4200	471.486	27.658	30.765	32.682	-0.695	50.367	897.589	-0.001936	-0.002154	-0.002288
4.4300	375.635	17.554	20.421	22.693	-0.706	50.378	715.113	-0.001229	-0.001429	-0.001589
4.4400	340.273	13.180	16.278	17.622	-0.707	50.367	647.793	-0.000923	-0.001139	-0.001234
4.4500	326.612	11.816	13.979	15.617	-0.710	50.378	621.786	-0.000827	-0.000979	-0.001093
4.4600	290.679	7.357	9.230	10.534	-0.715	50.367	553.379	-0.000515	-0.000646	-0.000737
4.4700	262.606	4.468	5.778	7.505	-0.702	50.378	499.935	-0.000313	-0.000404	-0.000525
4.4800	244.602	2.655	3.275	4.682	-0.696	50.367	465.660	-0.000186	-0.000229	-0.000328
4.4900	241.897	1.279	2.268	4.084	-0.705	50.378	460.510	-0.000090	-0.000159	-0.000286
4.5000	245.970	1.701	2.654	4.057	-0.723	50.367	468.264	-0.000119	-0.000186	-0.000284
4.5100	248.870	1.699	2.395	3.584	-0.719	50.377	473.785	-0.000119	-0.000168	-0.000251
4.5200	253.274	1.518	2.751	4.252	-0.720	50.367	482.168	-0.000106	-0.000193	-0.000298
4.5300	267.701	2.877	4.099	5.266	-0.715	50.378	509.634	-0.000201	-0.000287	-0.000369
4.5400	295.023	4.844	6.178	7.699	-0.716	50.367	561.647	-0.000339	-0.000432	-0.000539
4.5500	340.439	9.406	11.763	12.981	-0.719	50.378	648.108	-0.000658	-0.000823	-0.000909
4.5600	327.063	8.239	10.331	11.771	-0.724	50.367	622.644	-0.000577	-0.000723	-0.000824
4.5700	339.236	9.040	11.666	12.634	-0.723	50.378	645.819	-0.000633	-0.000817	-0.000884
4.5800	377.408	12.758	15.220	16.772	-0.719	50.367	718.489	-0.000893	-0.001065	-0.001174
4.5900	464.047	21.193	24.147	25.862	-0.722	50.378	883.427	-0.001484	-0.001690	-0.001810
4.6000	563.460	31.184	34.799	36.407	-0.719	50.367	1072.683	-0.002183	-0.002436	-0.002549
4.6100	723.903	48.936	51.160	54.016	-0.723	50.378	1378.126	-0.003426	-0.003581	-0.003781
4.6200	714.045	48.781	51.186	54.040	-0.722	50.367	1359.358	-0.003415	-0.003583	-0.003783
4.6300	741.802	52.064	54.268	56.947	-0.726	50.378	1412.201	-0.003644	-0.003799	-0.003986
4.6400	767.215	55.501	57.324	60.059	-0.731	50.367	1460.581	-0.003885	-0.004013	-0.004204
4.6500	832.018	62.265	63.405	67.328	-0.714	50.378	1583.948	-0.004359	-0.004438	-0.004713
4.6600	866.252	66.475	67.180	71.010	-0.727	50.367	1649.122	-0.004653	-0.004703	-0.004971
4.6700	943.093	75.413	74.525	79.655	-0.724	50.378	1795.406	-0.005279	-0.005217	-0.005576
4.6800	983.098	79.820	78.624	84.034	-0.726	50.368	1871.567	-0.005587	-0.005504	-0.005882
4.6900	1012.103	84.265	81.749	87.770	-0.728	50.378	1926.785	-0.005899	-0.005722	-0.006144
4.7000	1065.394	90.499	86.440	93.648	-0.715	50.368	2028.236	-0.006335	-0.006051	-0.006555
4.7100	1097.314	94.835	90.429	97.471	-0.730	50.378	2089.005	-0.006638	-0.006330	-0.006823
4.7200	1099.088	95.675	90.540	98.481	-0.726	50.368	2092.381	-0.006697	-0.006338	-0.006894
4.7300	1119.286	97.837	92.259	100.693	-0.719	50.378	2130.833	-0.006849	-0.006458	-0.007048
4.7400	1137.861	100.980	94.518	103.431	-0.726	50.367	2166.195	-0.007069	-0.006616	-0.007240
4.7500	1134.299	101.134	94.215	103.389	-0.727	50.378	2159.414	-0.007079	-0.006595	-0.007237
4.7600	1131.233	100.657	94.352	103.626	-0.719	50.368	2153.578	-0.007046	-0.006605	-0.007254
4.7700	1111.802	99.158	93.638	102.209	-0.725	50.377	2116.585	-0.006941	-0.006555	-0.007155
4.7800	1096.999	97.362	91.944	101.152	-0.724	50.367	2088.404	-0.006815	-0.006436	-0.007081
4.7900	1099.388	98.063	92.603	101.221	-0.738	50.378	2092.953	-0.006864	-0.006482	-0.007086
4.8000	1036.013	91.340	87.265	95.400	-0.725	50.368	1972.303	-0.006394	-0.006109	-0.006678
4.8100	966.898	83.705	81.348	88.341	-0.731	50.378	1840.725	-0.005859	-0.005694	-0.006184
4.8200	941.575	80.817	79.463	85.659	-0.717	50.367	1792.517	-0.005657	-0.005562	-0.005996
4.8300	910.827	77.407	76.314	82.365	-0.715	50.377	1733.980	-0.005418	-0.005342	-0.005766
4.8400	857.867	71.208	71.388	77.055	-0.722	50.368	1633.158	-0.004985	-0.004997	-0.005394
4.8500	801.826	65.774	66.310	70.704	-0.711	50.378	1526.470	-0.004604	-0.004642	-0.004949
4.8600	770.822	61.659	62.757	67.342	-0.737	50.368	1467.447	-0.004316	-0.004393	-0.004714
4.8700	664.646	49.944	52.397	55.865	-0.726	50.377	1265.316	-0.003496	-0.003668	-0.003911
4.8800	673.799	50.546	52.837	56.171	-0.725	50.368	1282.740	-0.003538	-0.003699	-0.003932
4.8900	514.468	33.682	37.137	39.994	-0.720	50.378	979.414	-0.002358	-0.002600	-0.002800
4.9000	533.073	34.338	38.046	40.063	-0.712	50.368	1014.833	-0.002404	-0.002663	-0.002804
4.9100	473.305	28.712	31.770	34.103	-0.714	50.378	901.051	-0.002010	-0.002224	-0.002387
4.9200	424.598	22.734	25.950	28.184	-0.733	50.368	808.325	-0.001591	-0.001817	-0.001973
4.9300	368.482	16.753	19.770	21.373	-0.726	50.378	701.494	-0.001173	-0.001384	-0.001496
4.9400	340.168	12.942	15.615	17.483	-0.714	50.367	647.593	-0.000906	-0.001093	-0.001224
4.9500	280.265	6.837	8.858	10.229	-0.702	50.377	533.552	-0.000479	-0.000620	-0.000716
4.9600	283.000	6.780	8.393	9.630	-0.700	50.367	538.759	-0.000475	-0.000588	-0.000674
4.9700	296.090	7.467	9.274	10.590	-0.712	50.378	563.679	-0.000523	-0.000649	-0.000741
4.9800	287.629	6.273	8.310	9.605	-0.714	50.368	547.571	-0.000439	-0.000582	-0.000672
4.9900	181.904	-3.308	-4.472	-2.599	-0.719	50.378	346.298	0.000232	0.000313	0.000182
