# Supplementary material for: Evaluation of a Cold-Mixed High-Performance Polyurethane Mixture
Source: Hindawi journal article supplement (doi:10.1155/2019/1507971), 2019-11-07
Supplement: f1 [file 1507971.f1.zip › 1507971.f1/dynamic modulus data/PUM/specimen1/temp50/zhs-1-50_5Hz.csv]

Test Information
****************
Project name	zhs
Operator name	1
Target test temperature	50
Target confining stress	0
Average dynamic strain range from 75 to 125 micro-strain
Contact stress	5
Initial modulus	1000
Axial gauge length	70
Comments
Specimen information
********************
Identification	zhs-1-50
Dimensions	Point 1	Point 2	Point 3	Point 4	Point 5	Point 6	Average	Std Dev.
Diameter (mm)	49.2	49.2	49.3				49.23	0.058
Height (mm)	101.3	101.2	101.3				101.27	0.058
Cross-sectional area (mm�)	1903.7
Conditioning time
Properties/Comments
Test Data	5Hz
*********
Test date and time	Wed	Apr 3	2019	1:50 PM
Dynamic modulus (MPa)	9434
Phase angle (Degrees)	4.07
Average temperature (�C)	50.4
Average confining pressure (kPa)	-0.7
Average micro-strain	100
Load drift (%)	0.4
Load standard error (%)	4.2
Average deformation drift (%)	-4.1
Average deformation standard error (%)	4.6
Deformation uniformity (%)	3.3
Phase uniformity (Degrees)	0.2
Conditioning Cycles
Time (sec)	Axial stress (kPa)	Axial micro-strain #1	Axial micro-strain #2	Axial micro-strain #3	Confining pressure (kPa)	Temperature (�C)	Load (N)	Displacement #1 (mm)	Displacement #2 (mm)	Displacement #3 (mm)
0.0000	423.065	12.196	16.596	16.204	-0.711	50.331	805.407	-0.000854	-0.001162	-0.001134
0.0040	349.546	6.259	10.098	9.269	-0.722	50.330	665.445	-0.000438	-0.000707	-0.000649
0.0080	247.338	-3.351	-1.777	-2.114	-0.723	50.340	470.867	0.000235	0.000124	0.000148
0.0120	242.513	-4.545	-3.209	-3.460	-0.724	50.348	461.683	0.000318	0.000225	0.000242
0.0160	250.433	-4.392	-3.083	-3.113	-0.714	50.343	476.761	0.000307	0.000216	0.000218
0.0200	260.758	-3.858	-2.148	-2.085	-0.712	50.331	496.416	0.000270	0.000150	0.000146
0.0240	277.394	-2.213	-0.209	-0.542	-0.717	50.330	528.088	0.000155	0.000015	0.000038
0.0280	308.398	0.435	2.927	2.265	-0.711	50.341	587.111	-0.000030	-0.000205	-0.000159
0.0320	355.978	4.885	7.720	7.407	-0.712	50.349	677.691	-0.000342	-0.000540	-0.000519
0.0360	412.199	10.134	13.346	13.244	-0.711	50.343	784.721	-0.000709	-0.000934	-0.000927
0.0400	461.342	14.850	18.464	18.148	-0.707	50.331	878.277	-0.001040	-0.001292	-0.001270
0.0440	494.946	18.370	22.097	22.249	-0.718	50.330	942.249	-0.001286	-0.001547	-0.001557
0.0480	530.217	21.978	26.171	25.792	-0.714	50.341	1009.398	-0.001538	-0.001832	-0.001805
0.0520	570.298	26.285	30.256	30.365	-0.706	50.349	1085.701	-0.001840	-0.002118	-0.002126
0.0560	607.899	30.258	34.360	34.047	-0.695	50.343	1157.284	-0.002118	-0.002405	-0.002383
0.0600	658.380	35.391	39.244	39.549	-0.707	50.331	1253.386	-0.002477	-0.002747	-0.002768
0.0640	720.762	42.395	45.490	46.593	-0.716	50.331	1372.147	-0.002968	-0.003184	-0.003262
0.0680	777.134	47.983	51.172	52.084	-0.717	50.341	1479.464	-0.003359	-0.003582	-0.003646
0.0720	802.607	51.403	53.912	55.420	-0.719	50.349	1527.958	-0.003598	-0.003774	-0.003879
0.0760	825.240	54.253	56.594	58.016	-0.702	50.343	1571.045	-0.003798	-0.003962	-0.004061
0.0800	856.724	57.914	59.979	61.213	-0.704	50.331	1630.983	-0.004054	-0.004199	-0.004285
0.0840	881.912	61.382	62.759	65.093	-0.722	50.331	1678.934	-0.004297	-0.004393	-0.004556
0.0880	912.750	64.580	65.649	68.023	-0.719	50.341	1737.642	-0.004521	-0.004595	-0.004762
0.0920	934.767	67.203	68.028	70.760	-0.726	50.349	1779.556	-0.004704	-0.004762	-0.004953
0.0960	939.080	67.875	68.894	71.526	-0.720	50.343	1787.767	-0.004751	-0.004823	-0.005007
0.1000	934.932	67.539	69.087	71.482	-0.719	50.332	1779.871	-0.004728	-0.004836	-0.005004
0.1040	934.361	68.440	69.543	72.094	-0.723	50.331	1778.784	-0.004791	-0.004868	-0.005047
0.1080	935.007	68.494	69.458	72.054	-0.708	50.342	1780.014	-0.004795	-0.004862	-0.005044
0.1120	932.843	68.679	69.595	72.151	-0.707	50.349	1775.894	-0.004808	-0.004872	-0.005051
0.1160	927.358	68.212	69.061	71.843	-0.701	50.343	1765.451	-0.004775	-0.004834	-0.005029
0.1200	917.770	67.090	68.521	71.094	-0.713	50.331	1747.198	-0.004696	-0.004797	-0.004977
0.1240	906.904	66.434	67.755	70.663	-0.728	50.330	1726.513	-0.004650	-0.004743	-0.004946
0.1280	876.667	63.499	65.442	67.882	-0.723	50.341	1668.949	-0.004445	-0.004581	-0.004752
0.1320	807.942	56.399	59.691	60.964	-0.731	50.349	1538.115	-0.003948	-0.004178	-0.004268
0.1360	757.161	51.149	54.806	55.989	-0.724	50.343	1441.441	-0.003580	-0.003836	-0.003919
0.1400	734.363	48.614	52.410	53.348	-0.734	50.332	1398.039	-0.003403	-0.003669	-0.003734
0.1440	683.552	43.644	47.967	48.594	-0.739	50.331	1301.308	-0.003055	-0.003358	-0.003402
0.1480	624.701	36.979	41.774	42.107	-0.732	50.341	1189.270	-0.002589	-0.002924	-0.002948
0.1520	593.923	33.287	38.432	38.742	-0.733	50.349	1130.676	-0.002330	-0.002690	-0.002712
0.1560	544.660	28.432	33.382	33.809	-0.733	50.343	1036.892	-0.001990	-0.002337	-0.002367
0.1600	510.650	24.658	29.925	29.877	-0.729	50.331	972.147	-0.001726	-0.002095	-0.002091
0.1640	468.961	20.730	25.524	25.693	-0.733	50.331	892.782	-0.001451	-0.001787	-0.001799
0.1680	430.128	16.462	20.982	20.622	-0.726	50.341	818.853	-0.001152	-0.001469	-0.001444
0.1720	383.269	11.705	15.576	15.451	-0.728	50.349	729.647	-0.000819	-0.001090	-0.001082
0.1760	342.242	7.101	10.663	10.591	-0.718	50.343	651.541	-0.000497	-0.000746	-0.000741
0.1800	308.323	3.525	6.769	6.131	-0.716	50.332	586.967	-0.000247	-0.000474	-0.000429
0.1840	285.991	1.238	4.154	3.695	-0.730	50.331	544.453	-0.000087	-0.000291	-0.000259
0.1880	267.040	-0.826	1.527	0.932	-0.732	50.341	508.375	0.000058	-0.000107	-0.000065
0.1920	253.048	-2.199	-0.427	-0.737	-0.738	50.349	481.739	0.000154	0.000030	0.000052
0.1960	245.098	-3.168	-1.872	-2.113	-0.736	50.343	466.604	0.000222	0.000131	0.000148
0.2000	242.829	-3.914	-2.547	-2.681	-0.735	50.332	462.284	0.000274	0.000178	0.000188
0.2040	244.167	-3.746	-2.603	-2.361	-0.738	50.330	464.830	0.000262	0.000182	0.000165
0.2080	245.654	-3.999	-2.536	-2.683	-0.734	50.341	467.663	0.000280	0.000178	0.000188
0.2120	249.216	-4.028	-2.370	-2.543	-0.723	50.349	474.443	0.000282	0.000166	0.000178
0.2160	253.334	-3.675	-1.872	-2.418	-0.723	50.343	482.283	0.000257	0.000131	0.000169
0.2200	263.087	-3.253	-1.172	-1.933	-0.723	50.331	500.851	0.000228	0.000082	0.000135
0.2240	287.614	-0.754	1.208	0.709	-0.730	50.330	547.543	0.000053	-0.000085	-0.000050
0.2280	334.021	3.047	5.640	5.393	-0.723	50.341	635.891	-0.000213	-0.000395	-0.000377
0.2320	364.980	5.839	8.913	8.660	-0.715	50.349	694.828	-0.000409	-0.000624	-0.000606
0.2360	400.327	9.362	12.632	12.423	-0.715	50.343	762.119	-0.000655	-0.000884	-0.000870
0.2400	443.999	13.544	17.365	17.091	-0.714	50.331	845.261	-0.000948	-0.001216	-0.001196
0.2440	491.173	18.442	22.346	22.331	-0.730	50.331	935.068	-0.001291	-0.001564	-0.001563
0.2480	539.775	23.493	27.506	27.264	-0.728	50.341	1027.594	-0.001644	-0.001925	-0.001908
0.2520	581.419	27.927	31.785	32.199	-0.740	50.350	1106.873	-0.001955	-0.002225	-0.002254
0.2560	611.175	31.002	34.704	35.328	-0.727	50.343	1163.521	-0.002170	-0.002429	-0.002473
0.2600	654.292	35.394	39.079	40.009	-0.734	50.331	1245.604	-0.002478	-0.002735	-0.002801
0.2640	709.882	41.582	45.352	46.386	-0.735	50.331	1351.433	-0.002911	-0.003175	-0.003247
0.2680	744.132	45.636	48.832	49.819	-0.729	50.341	1416.636	-0.003195	-0.003418	-0.003487
0.2720	770.627	48.879	51.790	52.750	-0.736	50.350	1467.075	-0.003422	-0.003625	-0.003693
0.2760	807.627	52.961	55.424	56.807	-0.725	50.343	1537.514	-0.003707	-0.003880	-0.003977
0.2800	836.947	56.103	58.192	60.018	-0.723	50.332	1593.332	-0.003927	-0.004073	-0.004201
0.2840	866.673	59.826	61.383	63.908	-0.722	50.331	1649.923	-0.004188	-0.004297	-0.004474
0.2880	897.436	63.249	64.659	67.091	-0.716	50.342	1708.488	-0.004427	-0.004526	-0.004696
0.2920	915.215	65.550	66.667	69.316	-0.713	50.350	1742.334	-0.004588	-0.004667	-0.004852
0.2960	923.120	66.825	67.713	70.246	-0.712	50.343	1757.383	-0.004678	-0.004740	-0.004917
0.3000	930.935	68.087	68.882	71.316	-0.731	50.331	1772.261	-0.004766	-0.004822	-0.004992
0.3040	926.652	68.044	68.705	71.413	-0.735	50.331	1764.107	-0.004763	-0.004809	-0.004999
0.3080	924.878	68.101	68.592	71.790	-0.731	50.342	1760.731	-0.004767	-0.004801	-0.005025
0.3120	924.292	68.128	68.826	71.412	-0.726	50.350	1759.615	-0.004769	-0.004818	-0.004999
0.3160	919.228	67.539	68.319	71.356	-0.722	50.343	1749.973	-0.004728	-0.004782	-0.004995
0.3200	907.160	66.488	67.660	70.453	-0.723	50.331	1726.999	-0.004654	-0.004736	-0.004932
0.3240	889.066	65.071	66.750	69.412	-0.734	50.331	1692.553	-0.004555	-0.004673	-0.004859
0.3280	848.835	61.255	63.267	65.200	-0.729	50.342	1615.963	-0.004288	-0.004429	-0.004564
0.3320	807.356	56.790	59.594	61.353	-0.727	50.350	1536.999	-0.003975	-0.004172	-0.004295
0.3360	765.126	52.163	55.329	57.086	-0.719	50.343	1456.604	-0.003651	-0.003873	-0.003996
0.3400	711.896	46.280	50.236	51.305	-0.716	50.331	1355.267	-0.003240	-0.003517	-0.003591
0.3440	676.819	42.677	47.251	48.331	-0.716	50.331	1288.490	-0.002987	-0.003308	-0.003383
0.3480	628.398	37.527	42.601	42.995	-0.714	50.342	1196.308	-0.002627	-0.002982	-0.003010
0.3520	572.372	31.943	36.820	36.895	-0.707	50.350	1089.649	-0.002236	-0.002577	-0.002583
0.3560	542.240	28.851	33.327	33.450	-0.704	50.343	1032.286	-0.002020	-0.002333	-0.002342
0.3600	504.474	24.601	29.226	28.988	-0.718	50.332	960.388	-0.001722	-0.002046	-0.002029
0.3640	449.515	19.116	23.391	23.541	-0.721	50.331	855.761	-0.001338	-0.001637	-0.001648
0.3680	413.927	14.836	19.344	19.594	-0.723	50.341	788.012	-0.001038	-0.001354	-0.001372
0.3720	386.155	11.702	16.291	15.730	-0.722	50.349	735.140	-0.000819	-0.001140	-0.001101
0.3760	354.610	8.394	12.657	12.021	-0.711	50.343	675.087	-0.000588	-0.000886	-0.000841
0.3800	321.698	5.319	8.559	7.990	-0.715	50.332	612.431	-0.000372	-0.000599	-0.000559
0.3840	299.110	2.921	5.957	5.656	-0.719	50.331	569.429	-0.000205	-0.000417	-0.000396
0.3880	274.599	0.295	2.558	2.459	-0.724	50.342	522.766	-0.000021	-0.000179	-0.000172
0.3920	257.918	-1.411	0.330	0.152	-0.720	50.350	491.009	0.000099	-0.000023	-0.000011
0.3960	256.129	-2.410	-0.484	-0.251	-0.715	50.343	487.604	0.000169	0.000034	0.000018
0.4000	247.473	-3.688	-1.584	-1.559	-0.720	50.332	471.125	0.000258	0.000111	0.000109
0.4040	236.938	-4.209	-2.837	-2.877	-0.722	50.332	451.069	0.000295	0.000199	0.000201
0.4080	234.894	-4.658	-3.292	-3.640	-0.719	50.342	447.178	0.000326	0.000230	0.000255
0.4120	236.592	-4.729	-3.386	-3.600	-0.717	50.350	450.411	0.000331	0.000237	0.000252
0.4160	242.243	-4.658	-3.265	-3.501	-0.711	50.343	461.168	0.000326	0.000229	0.000245
0.4200	253.424	-4.125	-2.507	-2.820	-0.712	50.332	482.454	0.000289	0.000175	0.000197
0.4240	275.065	-2.002	-0.003	-0.514	-0.728	50.332	523.653	0.000140	0.000000	0.000036
0.4280	319.444	1.630	4.320	3.794	-0.722	50.342	608.139	-0.000114	-0.000302	-0.000266
0.4320	370.014	6.610	9.879	9.354	-0.731	50.350	704.412	-0.000463	-0.000692	-0.000655
0.4360	413.341	10.863	14.584	14.189	-0.724	50.343	786.896	-0.000760	-0.001021	-0.000993
0.4400	450.356	14.346	18.106	17.927	-0.724	50.332	857.363	-0.001004	-0.001267	-0.001255
0.4440	496.418	19.143	23.130	23.567	-0.727	50.332	945.053	-0.001340	-0.001619	-0.001650
0.4480	536.710	23.269	27.093	27.320	-0.734	50.343	1021.757	-0.001629	-0.001897	-0.001912
0.4520	577.211	27.408	31.260	31.877	-0.718	50.350	1098.862	-0.001919	-0.002188	-0.002231
0.4560	630.186	33.120	37.219	37.410	-0.724	50.344	1199.713	-0.002318	-0.002605	-0.002619
0.4600	676.068	38.071	41.953	42.482	-0.726	50.332	1287.060	-0.002665	-0.002937	-0.002974
0.4640	719.635	43.209	46.728	47.650	-0.731	50.332	1370.001	-0.003025	-0.003271	-0.003335
0.4680	751.285	46.648	49.563	50.667	-0.723	50.343	1430.254	-0.003265	-0.003469	-0.003547
0.4720	788.450	50.828	53.236	54.627	-0.723	50.350	1501.007	-0.003558	-0.003727	-0.003824
0.4760	834.062	55.838	57.958	59.866	-0.718	50.344	1587.839	-0.003909	-0.004057	-0.004191
0.4800	864.194	59.418	61.245	63.256	-0.726	50.332	1645.203	-0.004159	-0.004287	-0.004428
0.4840	882.543	62.235	63.748	65.562	-0.732	50.332	1680.136	-0.004356	-0.004462	-0.004589
0.4880	895.468	63.797	64.809	67.094	-0.723	50.343	1704.741	-0.004466	-0.004537	-0.004697
0.4920	915.125	66.208	66.996	69.718	-0.726	50.351	1742.163	-0.004635	-0.004690	-0.004880
0.4960	937.893	68.676	69.101	72.261	-0.727	50.343	1785.507	-0.004807	-0.004837	-0.005058
0.5000	944.851	69.732	69.858	73.178	-0.726	50.332	1798.754	-0.004881	-0.004890	-0.005122
0.5040	939.982	69.719	70.147	73.094	-0.735	50.332	1789.484	-0.004880	-0.004910	-0.005117
0.5080	935.398	69.365	70.148	72.860	-0.735	50.343	1780.758	-0.004856	-0.004910	-0.005100
0.5120	931.461	69.353	70.093	72.873	-0.728	50.350	1773.262	-0.004855	-0.004907	-0.005101
0.5160	922.910	68.619	69.389	72.360	-0.730	50.344	1756.983	-0.004803	-0.004857	-0.005065
0.5200	909.309	67.191	68.443	70.831	-0.727	50.332	1731.091	-0.004703	-0.004791	-0.004958
0.5240	882.378	64.932	66.446	69.080	-0.722	50.333	1679.821	-0.004545	-0.004651	-0.004836
0.5280	824.759	58.701	60.970	63.187	-0.722	50.343	1570.129	-0.004109	-0.004268	-0.004423
0.5320	788.556	54.689	58.081	59.713	-0.722	50.350	1501.207	-0.003828	-0.004066	-0.004180
0.5360	758.123	51.290	55.122	56.684	-0.719	50.344	1443.272	-0.003590	-0.003859	-0.003968
0.5400	717.667	47.083	51.324	52.238	-0.720	50.332	1366.253	-0.003296	-0.003593	-0.003657
0.5440	674.189	42.886	47.415	47.788	-0.722	50.332	1283.484	-0.003002	-0.003319	-0.003345
0.5480	633.282	38.452	43.151	43.580	-0.731	50.343	1205.606	-0.002692	-0.003021	-0.003051
0.5520	589.895	33.876	38.528	38.965	-0.717	50.351	1123.009	-0.002371	-0.002697	-0.002728
0.5560	546.839	29.064	33.960	34.312	-0.725	50.344	1041.040	-0.002034	-0.002377	-0.002402
0.5600	505.045	24.544	29.502	29.267	-0.726	50.333	961.475	-0.001718	-0.002065	-0.002049
0.5640	466.106	20.660	25.552	25.333	-0.735	50.332	887.346	-0.001446	-0.001789	-0.001773
0.5680	426.972	16.631	21.105	20.942	-0.724	50.343	812.845	-0.001164	-0.001477	-0.001466
0.5720	385.088	12.365	16.333	15.994	-0.716	50.350	733.109	-0.000866	-0.001143	-0.001120
0.5760	354.926	9.068	12.767	12.522	-0.705	50.344	675.688	-0.000635	-0.000894	-0.000877
0.5800	322.690	5.208	8.530	8.600	-0.707	50.333	614.319	-0.000365	-0.000597	-0.000602
0.5840	291.401	2.416	4.953	5.057	-0.714	50.332	554.752	-0.000169	-0.000347	-0.000354
0.5880	271.488	-0.081	2.158	2.239	-0.722	50.343	516.844	0.000006	-0.000151	-0.000157
0.5920	250.313	-2.032	-0.316	-0.806	-0.712	50.350	476.532	0.000142	0.000022	0.000056
0.5960	240.815	-3.126	-1.542	-1.931	-0.720	50.344	458.450	0.000219	0.000108	0.000135
0.6000	237.584	-3.773	-2.424	-3.085	-0.723	50.333	452.299	0.000264	0.000170	0.000216
0.6040	231.302	-4.390	-3.346	-3.654	-0.738	50.333	440.340	0.000307	0.000234	0.000256
0.6080	231.873	-4.840	-3.854	-4.127	-0.731	50.343	441.427	0.000339	0.000270	0.000289
0.6120	233.106	-5.050	-3.855	-3.779	-0.727	50.350	443.773	0.000354	0.000270	0.000265
0.6160	237.644	-4.910	-3.731	-3.475	-0.725	50.344	452.414	0.000344	0.000261	0.000243
0.6200	248.795	-4.349	-2.794	-3.098	-0.725	50.333	473.642	0.000304	0.000196	0.000217
0.6240	269.324	-2.156	-0.565	-0.666	-0.722	50.332	512.724	0.000151	0.000040	0.000047
0.6280	317.400	1.952	4.278	4.017	-0.730	50.343	604.248	-0.000137	-0.000299	-0.000281
0.6320	367.820	6.670	9.452	9.380	-0.729	50.350	700.235	-0.000467	-0.000662	-0.000657
0.6360	408.577	10.596	13.787	13.662	-0.719	50.344	777.826	-0.000742	-0.000965	-0.000956
0.6400	437.928	13.151	16.787	16.564	-0.722	50.332	833.702	-0.000921	-0.001175	-0.001159
0.6440	485.147	18.483	22.235	21.831	-0.722	50.333	923.595	-0.001294	-0.001556	-0.001528
0.6480	518.480	22.159	25.938	25.541	-0.718	50.343	987.053	-0.001551	-0.001816	-0.001788
0.6520	553.000	25.612	29.279	29.293	-0.720	50.352	1052.771	-0.001793	-0.002050	-0.002051
0.6560	611.296	31.283	35.294	36.018	-0.719	50.344	1163.750	-0.002190	-0.002471	-0.002521
0.6600	666.330	37.007	40.756	41.384	-0.718	50.333	1268.520	-0.002590	-0.002853	-0.002897
0.6640	713.158	42.509	45.710	46.802	-0.727	50.333	1357.670	-0.002976	-0.003200	-0.003276
0.6680	755.884	47.054	49.837	51.499	-0.734	50.344	1439.009	-0.003294	-0.003489	-0.003605
0.6720	796.761	51.685	54.613	55.489	-0.732	50.351	1516.829	-0.003618	-0.003823	-0.003884
0.6760	822.490	55.082	57.558	58.697	-0.731	50.344	1565.809	-0.003856	-0.004029	-0.004109
0.6800	836.677	56.917	58.963	60.475	-0.726	50.332	1592.817	-0.003984	-0.004127	-0.004233
0.6840	888.570	62.883	63.777	66.342	-0.730	50.333	1691.608	-0.004402	-0.004464	-0.004644
0.6880	909.670	65.100	66.503	68.912	-0.739	50.344	1731.777	-0.004557	-0.004655	-0.004824
0.6920	909.174	65.425	66.624	69.580	-0.729	50.351	1730.833	-0.004580	-0.004664	-0.004871
0.6960	908.452	65.832	66.956	69.427	-0.724	50.344	1729.460	-0.004608	-0.004687	-0.004860
0.7000	914.659	66.503	67.713	70.259	-0.716	50.332	1741.276	-0.004655	-0.004740	-0.004918
0.7040	936.210	69.324	69.720	72.915	-0.731	50.333	1782.303	-0.004853	-0.004880	-0.005104
0.7080	941.650	69.998	70.313	73.082	-0.730	50.344	1792.660	-0.004900	-0.004922	-0.005116
0.7120	937.683	70.068	70.327	73.469	-0.726	50.351	1785.107	-0.004905	-0.004923	-0.005143
0.7160	928.485	69.211	69.624	72.957	-0.723	50.344	1767.597	-0.004845	-0.004874	-0.005107
0.7200	915.245	67.385	68.731	71.691	-0.730	50.333	1742.392	-0.004717	-0.004811	-0.005018
0.7240	894.055	65.690	67.421	69.940	-0.738	50.333	1702.051	-0.004598	-0.004719	-0.004896
0.7280	849.436	61.565	63.776	65.869	-0.723	50.344	1617.107	-0.004310	-0.004464	-0.004611
0.7320	799.481	56.400	59.223	60.712	-0.723	50.352	1522.007	-0.003948	-0.004146	-0.004250
0.7360	767.756	52.851	56.251	57.184	-0.724	50.344	1461.611	-0.003700	-0.003938	-0.004003
0.7400	730.381	48.683	52.369	53.640	-0.732	50.333	1390.457	-0.003408	-0.003666	-0.003755
0.7440	675.166	43.083	47.318	48.289	-0.736	50.334	1285.343	-0.003016	-0.003312	-0.003380
0.7480	636.393	38.451	43.468	44.344	-0.732	50.345	1211.529	-0.002692	-0.003043	-0.003104
0.7520	597.469	34.396	39.545	39.882	-0.737	50.352	1137.428	-0.002408	-0.002768	-0.002792
0.7560	545.110	29.360	34.317	34.254	-0.730	50.344	1037.750	-0.002055	-0.002402	-0.002398
0.7600	494.224	24.068	28.495	28.447	-0.728	50.333	940.876	-0.001685	-0.001995	-0.001991
0.7640	453.978	19.664	24.162	24.555	-0.727	50.333	864.258	-0.001376	-0.001691	-0.001719
0.7680	417.775	15.579	20.169	20.066	-0.730	50.344	795.336	-0.001091	-0.001412	-0.001405
0.7720	377.934	11.310	15.343	15.523	-0.734	50.351	719.490	-0.000792	-0.001074	-0.001087
0.7760	348.779	8.058	11.983	11.674	-0.719	50.344	663.986	-0.000564	-0.000839	-0.000817
0.7800	324.689	5.586	8.915	8.352	-0.714	50.333	618.124	-0.000391	-0.000624	-0.000585
0.7840	299.997	3.300	6.290	6.184	-0.730	50.334	571.117	-0.000231	-0.000440	-0.000433
0.7880	269.174	0.309	2.436	2.335	-0.723	50.344	512.438	-0.000022	-0.000171	-0.000163
0.7920	250.974	-1.551	-0.291	-0.250	-0.718	50.351	477.791	0.000109	0.000020	0.000018
0.7960	244.527	-2.762	-1.419	-1.114	-0.719	50.345	465.517	0.000193	0.000099	0.000078
0.8000	238.065	-3.900	-2.685	-2.544	-0.722	50.334	453.215	0.000273	0.000188	0.000178
0.8040	228.056	-4.727	-3.633	-3.849	-0.728	50.334	434.160	0.000331	0.000254	0.000269
0.8080	227.199	-5.347	-4.074	-4.030	-0.723	50.344	432.529	0.000374	0.000285	0.000282
0.8120	232.474	-4.856	-3.879	-3.862	-0.726	50.352	442.572	0.000340	0.000272	0.000270
0.8160	241.251	-4.377	-3.277	-3.572	-0.728	50.345	459.280	0.000306	0.000229	0.000250
0.8200	256.340	-2.887	-2.068	-2.474	-0.733	50.333	488.005	0.000202	0.000145	0.000173
0.8240	288.666	-0.628	1.099	1.167	-0.727	50.334	549.545	0.000044	-0.000077	-0.000082
0.8280	335.614	3.540	6.137	6.309	-0.721	50.344	638.924	-0.000248	-0.000430	-0.000442
0.8320	380.715	7.707	11.047	11.006	-0.722	50.351	724.783	-0.000539	-0.000773	-0.000770
0.8360	427.183	12.589	16.348	15.690	-0.729	50.345	813.246	-0.000881	-0.001144	-0.001098
0.8400	460.215	15.900	19.785	19.232	-0.723	50.333	876.131	-0.001113	-0.001385	-0.001346
0.8440	495.922	19.651	23.682	23.680	-0.726	50.334	944.109	-0.001376	-0.001658	-0.001658
0.8480	538.257	23.829	27.740	27.862	-0.714	50.345	1024.704	-0.001668	-0.001942	-0.001950
0.8520	578.504	28.025	31.730	32.239	-0.715	50.352	1101.322	-0.001962	-0.002221	-0.002257
0.8560	622.807	32.741	36.627	37.159	-0.720	50.345	1185.665	-0.002292	-0.002564	-0.002601
0.8600	660.183	36.980	40.466	41.412	-0.724	50.333	1256.819	-0.002589	-0.002833	-0.002899
0.8640	686.964	40.107	43.908	44.705	-0.730	50.334	1307.802	-0.002807	-0.003074	-0.003129
0.8680	732.109	44.948	48.311	49.402	-0.735	50.345	1393.747	-0.003146	-0.003382	-0.003458
0.8720	800.097	52.273	54.532	56.266	-0.730	50.353	1523.180	-0.003659	-0.003817	-0.003939
0.8760	845.859	57.579	59.497	61.380	-0.726	50.345	1610.298	-0.004031	-0.004165	-0.004297
0.8800	860.527	59.164	61.233	63.160	-0.723	50.334	1638.222	-0.004142	-0.004286	-0.004421
0.8840	873.677	61.479	62.922	65.144	-0.735	50.334	1663.256	-0.004304	-0.004405	-0.004560
0.8880	903.057	64.371	65.827	68.440	-0.734	50.345	1719.189	-0.004506	-0.004608	-0.004791
0.8920	922.444	67.190	67.737	70.637	-0.730	50.352	1756.096	-0.004703	-0.004742	-0.004945
0.8960	930.965	68.606	68.952	71.997	-0.717	50.345	1772.318	-0.004802	-0.004827	-0.005040
0.9000	943.649	70.082	70.368	73.332	-0.727	50.334	1796.465	-0.004906	-0.004926	-0.005133
0.9040	942.251	70.505	70.505	73.943	-0.722	50.334	1793.804	-0.004935	-0.004935	-0.005176
0.9080	936.631	69.646	70.286	73.400	-0.720	50.345	1783.104	-0.004875	-0.004920	-0.005138
0.9120	928.470	69.057	69.818	73.126	-0.718	50.352	1767.569	-0.004834	-0.004887	-0.005119
0.9160	918.281	68.438	69.417	72.206	-0.720	50.344	1748.171	-0.004791	-0.004859	-0.005054
0.9200	904.365	67.118	68.539	71.161	-0.719	50.333	1721.678	-0.004698	-0.004798	-0.004981
0.9240	874.172	64.470	66.021	68.729	-0.730	50.334	1664.200	-0.004513	-0.004621	-0.004811
0.9280	837.037	60.300	62.663	64.897	-0.739	50.345	1593.504	-0.004221	-0.004386	-0.004543
0.9320	808.739	57.072	60.047	62.160	-0.737	50.352	1539.631	-0.003995	-0.004203	-0.004351
0.9360	777.915	53.693	57.227	58.893	-0.733	50.344	1480.951	-0.003758	-0.004006	-0.004122
0.9400	735.851	49.441	53.264	54.432	-0.725	50.333	1400.871	-0.003461	-0.003729	-0.003810
0.9440	687.144	44.766	49.094	49.846	-0.735	50.334	1308.146	-0.003134	-0.003437	-0.003489
0.9480	645.726	40.220	44.776	45.401	-0.733	50.345	1229.296	-0.002815	-0.003134	-0.003178
0.9520	603.526	35.674	40.220	40.995	-0.731	50.351	1148.958	-0.002497	-0.002815	-0.002870
0.9560	540.407	29.106	33.697	34.297	-0.726	50.344	1028.795	-0.002037	-0.002359	-0.002401
0.9600	490.137	23.326	28.139	28.530	-0.719	50.334	933.094	-0.001633	-0.001970	-0.001997
0.9640	459.914	20.322	25.137	25.390	-0.715	50.334	875.559	-0.001423	-0.001760	-0.001777
0.9680	424.868	16.295	21.229	21.150	-0.715	50.345	808.840	-0.001141	-0.001486	-0.001481
0.9720	372.945	11.284	15.618	15.397	-0.718	50.352	709.991	-0.000790	-0.001093	-0.001078
0.9760	335.644	7.552	11.075	10.602	-0.701	50.344	638.981	-0.000529	-0.000775	-0.000742
0.9800	301.214	3.793	6.358	6.228	-0.716	50.333	573.435	-0.000265	-0.000445	-0.000436
0.9840	272.119	0.844	2.681	3.322	-0.722	50.334	518.045	-0.000059	-0.000188	-0.000233
0.9880	249.757	-1.637	-0.111	0.417	-0.730	50.345	475.473	0.000115	0.000008	-0.000029
0.9920	243.641	-2.903	-1.213	-1.267	-0.736	50.352	463.829	0.000203	0.000085	0.000089
0.9960	241.401	-3.310	-1.750	-1.752	-0.732	50.344	459.566	0.000232	0.000122	0.000123
1.0000	227.951	-8.865	-8.629	-8.684	-0.736	50.335	433.960	0.000621	0.000604	0.000608
1.0040	233.962	-8.358	-8.561	-8.407	-0.734	50.346	445.404	0.000585	0.000599	0.000588
1.0080	241.957	-8.080	-7.596	-7.573	-0.736	50.355	460.625	0.000566	0.000532	0.000530
1.0120	253.484	-7.207	-6.620	-6.696	-0.738	50.348	482.569	0.000504	0.000463	0.000469
1.0160	273.893	-5.433	-4.143	-4.945	-0.742	50.337	521.421	0.000380	0.000290	0.000346
1.0200	301.710	-2.537	-0.731	-1.500	-0.740	50.336	574.379	0.000178	0.000051	0.000105
1.0240	335.028	0.549	2.710	2.406	-0.739	50.346	637.808	-0.000038	-0.000190	-0.000168
1.0280	381.917	5.097	7.937	7.324	-0.732	50.354	727.072	-0.000357	-0.000556	-0.000513
1.0320	419.999	8.493	11.971	11.494	-0.724	50.348	799.570	-0.000594	-0.000838	-0.000805
1.0360	463.326	12.856	16.375	16.050	-0.732	50.337	882.053	-0.000900	-0.001146	-0.001123
1.0400	522.959	18.989	22.786	22.971	-0.739	50.336	995.579	-0.001329	-0.001595	-0.001608
1.0440	589.655	25.668	29.871	29.962	-0.731	50.346	1122.551	-0.001797	-0.002091	-0.002097
1.0480	641.097	31.619	35.639	35.827	-0.731	50.354	1220.484	-0.002213	-0.002495	-0.002508
1.0520	687.955	36.628	40.673	41.147	-0.726	50.348	1309.690	-0.002564	-0.002847	-0.002880
1.0560	766.329	45.074	48.229	48.998	-0.709	50.337	1458.893	-0.003155	-0.003376	-0.003430
1.0600	820.070	51.499	54.102	55.349	-0.719	50.335	1561.203	-0.003605	-0.003787	-0.003874
1.0640	877.704	57.957	59.869	61.978	-0.708	50.345	1670.923	-0.004057	-0.004191	-0.004338
1.0680	930.980	64.089	65.386	68.105	-0.720	50.354	1772.346	-0.004486	-0.004577	-0.004767
1.0720	972.293	69.114	69.774	72.720	-0.716	50.348	1850.996	-0.004838	-0.004884	-0.005090
1.0760	1025.283	75.357	74.800	78.668	-0.716	50.337	1951.876	-0.005275	-0.005236	-0.005507
1.0800	1077.777	82.122	80.303	84.712	-0.725	50.337	2051.811	-0.005749	-0.005621	-0.005930
1.0840	1103.431	85.221	83.166	87.672	-0.726	50.346	2100.649	-0.005965	-0.005822	-0.006137
1.0880	1124.936	88.368	85.105	90.895	-0.734	50.354	2141.590	-0.006186	-0.005957	-0.006363
1.0920	1154.512	92.294	88.271	94.342	-0.735	50.348	2197.895	-0.006461	-0.006179	-0.006604
1.0960	1162.958	93.476	89.675	95.052	-0.731	50.337	2213.974	-0.006543	-0.006277	-0.006654
1.1000	1188.356	96.912	92.328	98.733	-0.725	50.336	2262.325	-0.006784	-0.006463	-0.006911
1.1040	1197.539	98.822	93.678	100.261	-0.718	50.346	2279.806	-0.006918	-0.006557	-0.007018
1.1080	1181.533	97.276	92.617	99.220	-0.727	50.355	2249.336	-0.006809	-0.006483	-0.006945
1.1120	1171.825	96.560	92.109	99.012	-0.728	50.348	2230.854	-0.006759	-0.006448	-0.006931
1.1160	1157.984	95.228	90.980	97.471	-0.730	50.337	2204.504	-0.006666	-0.006369	-0.006823
1.1200	1114.612	91.328	88.050	94.037	-0.738	50.336	2121.935	-0.006393	-0.006163	-0.006583
1.1240	1044.550	83.621	82.492	87.422	-0.726	50.347	1988.554	-0.005853	-0.005774	-0.006120
1.1280	1001.598	78.892	78.942	82.906	-0.723	50.356	1906.786	-0.005522	-0.005526	-0.005803
1.1320	980.033	76.298	76.807	80.906	-0.719	50.348	1865.730	-0.005341	-0.005376	-0.005663
1.1360	937.352	72.382	73.201	76.859	-0.716	50.336	1784.477	-0.005067	-0.005124	-0.005380
1.1400	837.759	62.014	64.177	66.688	-0.718	50.336	1594.877	-0.004341	-0.004492	-0.004668
1.1440	802.126	57.577	59.909	62.506	-0.720	50.347	1527.042	-0.004030	-0.004194	-0.004375
1.1480	771.604	53.945	57.104	59.434	-0.729	50.356	1468.935	-0.003776	-0.003997	-0.004160
1.1520	715.728	47.939	51.697	53.500	-0.724	50.348	1362.562	-0.003356	-0.003619	-0.003745
1.1560	653.390	41.314	45.890	46.844	-0.724	50.337	1243.887	-0.002892	-0.003212	-0.003279
1.1600	585.958	34.382	39.297	40.065	-0.731	50.336	1115.513	-0.002407	-0.002751	-0.002805
1.1640	527.136	28.082	32.403	33.170	-0.722	50.347	1003.532	-0.001966	-0.002268	-0.002322
1.1680	485.974	23.240	27.823	28.267	-0.731	50.355	925.169	-0.001627	-0.001948	-0.001979
1.1720	437.823	17.977	22.276	22.776	-0.718	50.348	833.502	-0.001258	-0.001559	-0.001594
1.1760	398.493	13.671	17.651	17.871	-0.722	50.337	758.629	-0.000957	-0.001236	-0.001251
1.1800	370.616	10.499	14.641	14.718	-0.722	50.336	705.557	-0.000735	-0.001025	-0.001030
1.1840	328.371	6.218	9.836	9.533	-0.712	50.347	625.134	-0.000435	-0.000689	-0.000667
1.1880	285.435	2.078	4.429	4.265	-0.715	50.356	543.394	-0.000145	-0.000310	-0.000299
1.1920	270.842	-0.055	2.091	2.181	-0.710	50.348	515.614	0.000004	-0.000146	-0.000153
1.1960	266.649	-1.190	0.937	1.112	-0.714	50.337	507.631	0.000083	-0.000066	-0.000078
1.2000	256.911	-2.016	-0.317	0.165	-0.730	50.336	489.092	0.000141	0.000022	-0.000012
1.2040	248.795	-3.182	-1.614	-1.530	-0.726	50.347	473.642	0.000223	0.000113	0.000107
1.2080	243.069	-3.928	-2.299	-2.472	-0.715	50.356	462.742	0.000275	0.000161	0.000173
1.2120	244.542	-3.816	-2.560	-2.503	-0.723	50.349	465.546	0.000267	0.000179	0.000175
1.2160	250.058	-3.828	-2.438	-2.390	-0.721	50.337	476.046	0.000268	0.000171	0.000167
1.2200	266.484	-2.426	-0.774	-1.001	-0.727	50.336	507.317	0.000170	0.000054	0.000070
1.2240	324.253	2.305	4.774	4.711	-0.730	50.347	617.294	-0.000161	-0.000334	-0.000330
1.2280	400.207	9.306	12.811	12.868	-0.736	50.355	761.890	-0.000651	-0.000897	-0.000901
1.2320	428.745	12.365	16.045	15.882	-0.729	50.348	816.221	-0.000866	-0.001123	-0.001112
1.2360	459.238	15.550	19.414	19.109	-0.726	50.337	874.271	-0.001089	-0.001359	-0.001338
1.2400	522.342	21.992	26.142	26.041	-0.739	50.337	994.406	-0.001539	-0.001830	-0.001823
1.2440	588.858	28.671	32.582	33.172	-0.732	50.347	1121.035	-0.002007	-0.002281	-0.002322
1.2480	661.821	36.488	40.163	40.953	-0.726	50.355	1259.937	-0.002554	-0.002811	-0.002867
1.2520	688.151	39.292	43.083	44.147	-0.713	50.348	1310.062	-0.002750	-0.003016	-0.003090
1.2560	731.207	44.052	47.404	48.833	-0.715	50.337	1392.031	-0.003084	-0.003318	-0.003418
1.2600	817.771	53.298	56.072	57.933	-0.710	50.337	1556.826	-0.003731	-0.003925	-0.004055
1.2640	926.035	65.365	66.707	68.983	-0.716	50.347	1762.934	-0.004576	-0.004669	-0.004829
1.2680	951.058	69.099	69.831	72.371	-0.714	50.355	1810.570	-0.004837	-0.004888	-0.005066
1.2720	986.810	73.281	73.177	76.887	-0.708	50.349	1878.633	-0.005130	-0.005122	-0.005382
1.2760	1043.047	79.469	78.305	82.599	-0.705	50.338	1985.693	-0.005563	-0.005481	-0.005782
1.2800	1066.581	82.994	81.085	85.879	-0.715	50.337	2030.497	-0.005810	-0.005676	-0.006012
1.2840	1104.423	87.342	84.790	90.188	-0.722	50.347	2102.537	-0.006114	-0.005935	-0.006313
1.2880	1135.186	91.593	88.148	93.482	-0.727	50.355	2161.102	-0.006411	-0.006170	-0.006544
1.2920	1149.598	93.587	89.509	95.622	-0.724	50.349	2188.540	-0.006551	-0.006266	-0.006694
1.2960	1167.948	96.055	91.419	97.649	-0.728	50.337	2223.473	-0.006724	-0.006399	-0.006835
1.3000	1172.381	97.403	92.179	99.066	-0.735	50.337	2231.913	-0.006818	-0.006453	-0.006935
1.3040	1168.669	97.011	92.053	99.123	-0.733	50.348	2224.846	-0.006791	-0.006444	-0.006939
1.3080	1164.942	96.926	91.834	99.191	-0.735	50.356	2217.751	-0.006785	-0.006428	-0.006943
1.3120	1160.088	96.757	91.847	99.110	-0.726	50.349	2208.509	-0.006773	-0.006429	-0.006938
1.3160	1146.908	95.323	91.242	97.886	-0.725	50.337	2183.418	-0.006673	-0.006387	-0.006852
1.3200	1124.771	93.810	90.006	96.315	-0.729	50.337	2141.275	-0.006567	-0.006300	-0.006742
1.3240	1079.325	89.193	86.414	91.886	-0.726	50.347	2054.758	-0.006244	-0.006049	-0.006432
1.3280	1014.342	82.471	81.101	85.727	-0.728	50.356	1931.047	-0.005773	-0.005677	-0.006001
1.3320	959.699	76.256	75.885	80.308	-0.719	50.349	1827.021	-0.005338	-0.005312	-0.005622
1.3360	916.658	71.133	71.908	76.042	-0.723	50.338	1745.081	-0.004979	-0.005034	-0.005323
1.3400	872.670	66.587	68.360	71.497	-0.739	50.337	1661.339	-0.004661	-0.004785	-0.005005
1.3440	819.574	61.074	63.433	66.285	-0.733	50.347	1560.259	-0.004275	-0.004440	-0.004640
1.3480	757.342	54.365	57.518	59.477	-0.724	50.356	1441.784	-0.003806	-0.004026	-0.004163
1.3520	705.824	48.696	52.177	53.446	-0.724	50.349	1343.708	-0.003409	-0.003652	-0.003741
1.3560	651.902	42.562	46.604	48.234	-0.728	50.338	1241.055	-0.002979	-0.003262	-0.003376
1.3600	589.489	36.052	40.027	41.510	-0.736	50.338	1122.236	-0.002524	-0.002802	-0.002906
1.3640	533.734	29.794	34.125	34.976	-0.723	50.348	1016.092	-0.002086	-0.002389	-0.002448
1.3680	484.501	24.756	28.907	29.502	-0.722	50.356	922.365	-0.001733	-0.002024	-0.002065
1.3720	435.674	19.088	23.583	24.056	-0.730	50.349	829.411	-0.001336	-0.001651	-0.001684
1.3760	389.401	14.301	18.245	18.093	-0.722	50.337	741.320	-0.001001	-0.001277	-0.001267
1.3800	349.756	9.979	13.414	13.592	-0.723	50.337	665.846	-0.000699	-0.000939	-0.000951
1.3840	312.456	5.825	8.778	8.727	-0.713	50.348	594.835	-0.000408	-0.000614	-0.000611
1.3880	282.775	2.726	4.664	5.017	-0.715	50.356	538.330	-0.000191	-0.000326	-0.000351
1.3920	260.908	-0.140	1.761	2.211	-0.716	50.349	496.702	0.000010	-0.000123	-0.000155
1.3960	245.504	-1.958	-0.236	-0.277	-0.722	50.337	467.377	0.000137	0.000017	0.000019
1.4000	240.259	-2.523	-1.199	-1.001	-0.732	50.337	457.392	0.000177	0.000084	0.000070
1.4040	242.784	-2.830	-1.433	-1.072	-0.725	50.348	462.198	0.000198	0.000100	0.000075
1.4080	246.225	-2.692	-1.517	-0.944	-0.724	50.356	468.750	0.000188	0.000106	0.000066
1.4120	252.808	-2.451	-1.157	-0.655	-0.723	50.349	481.281	0.000172	0.000081	0.000046
1.4160	263.508	-1.974	-0.331	-0.347	-0.715	50.338	501.652	0.000138	0.000023	0.000024
1.4200	282.594	-0.124	1.651	1.723	-0.726	50.337	537.987	0.000009	-0.000116	-0.000121
1.4240	331.031	4.254	6.631	6.546	-0.721	50.348	630.198	-0.000298	-0.000464	-0.000458
1.4280	383.660	9.097	12.285	12.034	-0.728	50.356	730.391	-0.000637	-0.000860	-0.000842
1.4320	420.780	12.801	16.180	16.021	-0.731	50.349	801.058	-0.000896	-0.001133	-0.001121
1.4360	462.905	16.673	20.266	20.760	-0.723	50.338	881.252	-0.001167	-0.001419	-0.001453
1.4400	521.396	22.762	26.226	26.889	-0.739	50.338	992.603	-0.001593	-0.001836	-0.001882
1.4440	597.034	30.313	33.889	34.935	-0.728	50.348	1136.599	-0.002122	-0.002372	-0.002445
1.4480	651.331	36.251	39.985	40.925	-0.726	50.356	1239.967	-0.002538	-0.002799	-0.002865
1.4520	701.135	41.751	45.298	46.345	-0.717	50.349	1334.782	-0.002923	-0.003171	-0.003244
1.4560	759.416	48.052	50.967	52.140	-0.720	50.339	1445.732	-0.003364	-0.003568	-0.003650
1.4600	811.158	53.972	56.445	58.018	-0.734	50.338	1544.237	-0.003778	-0.003951	-0.004061
1.4640	881.251	61.606	62.963	65.603	-0.728	50.348	1677.675	-0.004312	-0.004407	-0.004592
1.4680	917.680	65.901	66.791	69.857	-0.728	50.356	1747.026	-0.004613	-0.004675	-0.004890
1.4720	955.611	70.375	70.809	73.986	-0.722	50.349	1819.239	-0.004926	-0.004957	-0.005179
1.4760	1010.645	76.509	76.440	80.001	-0.714	50.338	1924.009	-0.005356	-0.005351	-0.005600
1.4800	1061.171	83.230	81.417	86.075	-0.721	50.338	2020.197	-0.005826	-0.005699	-0.006025
1.4840	1093.993	87.399	84.513	89.645	-0.727	50.348	2082.682	-0.006118	-0.005916	-0.006275
1.4880	1110.614	89.770	86.041	91.855	-0.734	50.356	2114.325	-0.006284	-0.006023	-0.006430
1.4920	1143.301	93.347	89.358	95.344	-0.731	50.349	2176.552	-0.006534	-0.006255	-0.006674
1.4960	1163.650	96.055	91.242	98.108	-0.731	50.338	2215.290	-0.006724	-0.006387	-0.006868
1.5000	1160.419	96.421	91.737	98.427	-0.740	50.338	2209.139	-0.006749	-0.006422	-0.006890
1.5040	1158.675	96.518	91.984	98.329	-0.741	50.348	2205.820	-0.006756	-0.006439	-0.006883
1.5080	1156.676	96.926	92.150	98.554	-0.731	50.356	2202.015	-0.006785	-0.006451	-0.006899
1.5120	1152.514	96.942	91.887	98.846	-0.728	50.349	2194.090	-0.006786	-0.006432	-0.006919
1.5160	1141.798	95.634	91.230	97.705	-0.718	50.338	2173.691	-0.006694	-0.006386	-0.006839
1.5200	1126.003	94.402	90.264	96.939	-0.730	50.338	2143.621	-0.006608	-0.006319	-0.006786
1.5240	1088.312	90.457	87.237	94.037	-0.730	50.348	2071.867	-0.006332	-0.006107	-0.006583
1.5280	1022.052	83.342	82.078	87.338	-0.713	50.356	1945.724	-0.005834	-0.005745	-0.006114
1.5320	980.408	78.808	78.557	83.073	-0.705	50.349	1866.446	-0.005517	-0.005499	-0.005815
1.5360	932.152	73.744	74.456	78.029	-0.713	50.338	1774.578	-0.005162	-0.005212	-0.005462
1.5400	860.767	66.291	67.934	71.079	-0.714	50.338	1638.680	-0.004640	-0.004755	-0.004976
1.5440	807.882	60.443	62.661	65.495	-0.722	50.349	1538.000	-0.004231	-0.004386	-0.004585
1.5480	762.226	55.097	57.970	60.351	-0.719	50.356	1451.082	-0.003857	-0.004058	-0.004225
1.5520	697.769	48.164	51.628	53.390	-0.716	50.349	1328.373	-0.003371	-0.003614	-0.003737
1.5560	640.000	41.568	45.972	47.234	-0.714	50.338	1218.395	-0.002910	-0.003218	-0.003306
1.5600	593.727	36.613	41.458	42.358	-0.727	50.338	1130.304	-0.002563	-0.002902	-0.002965
1.5640	535.943	30.833	35.087	36.200	-0.721	50.349	1020.298	-0.002158	-0.002456	-0.002534
1.5680	478.670	24.616	28.786	29.392	-0.719	50.357	911.264	-0.001723	-0.002015	-0.002057
1.5720	434.817	19.720	23.582	24.414	-0.711	50.349	827.780	-0.001380	-0.001651	-0.001709
1.5760	388.755	14.400	18.149	18.832	-0.711	50.338	740.089	-0.001008	-0.001270	-0.001318
1.5800	352.326	10.528	14.033	14.731	-0.719	50.338	670.738	-0.000737	-0.000982	-0.001031
1.5840	321.833	6.975	10.346	10.438	-0.704	50.349	612.688	-0.000488	-0.000724	-0.000731
1.5880	290.559	3.807	6.647	6.838	-0.698	50.357	553.150	-0.000266	-0.000465	-0.000479
1.5920	268.903	1.560	3.549	3.947	-0.702	50.349	511.923	-0.000109	-0.000248	-0.000276
1.5960	248.931	-0.810	0.824	0.932	-0.706	50.338	473.900	0.000057	-0.000058	-0.000065
1.6000	234.939	-2.170	-1.350	-0.639	-0.716	50.338	447.264	0.000152	0.000095	0.000045
1.6040	234.909	-2.859	-1.874	-1.446	-0.712	50.349	447.206	0.000200	0.000131	0.000101
1.6080	238.336	-2.971	-2.079	-1.307	-0.718	50.357	453.730	0.000208	0.000146	0.000091
1.6120	244.016	-2.648	-1.323	-1.097	-0.714	50.350	464.544	0.000185	0.000093	0.000077
1.6160	256.926	-1.901	-0.372	-0.570	-0.714	50.339	489.120	0.000133	0.000026	0.000040
1.6200	296.796	1.869	3.797	3.655	-0.719	50.338	565.023	-0.000131	-0.000266	-0.000256
1.6240	347.126	6.162	8.764	8.812	-0.718	50.349	660.839	-0.000431	-0.000613	-0.000617
1.6280	385.689	9.839	12.878	12.772	-0.720	50.356	734.253	-0.000689	-0.000901	-0.000894
1.6320	425.559	13.376	16.854	17.050	-0.708	50.349	810.156	-0.000936	-0.001180	-0.001194
1.6360	474.041	18.300	21.768	22.205	-0.704	50.339	902.452	-0.001281	-0.001524	-0.001554
1.6400	537.251	24.910	28.619	29.028	-0.712	50.339	1022.787	-0.001744	-0.002003	-0.002032
1.6440	601.647	31.605	35.352	35.799	-0.704	50.349	1145.382	-0.002212	-0.002475	-0.002506
1.6480	649.152	37.077	40.467	41.315	-0.711	50.357	1235.819	-0.002595	-0.002833	-0.002892
1.6520	694.327	41.524	44.719	46.262	-0.716	50.349	1321.821	-0.002907	-0.003130	-0.003238
1.6560	780.651	50.548	53.072	55.002	-0.718	50.338	1486.158	-0.003538	-0.003715	-0.003850
1.6600	831.702	56.580	58.988	60.951	-0.719	50.339	1583.347	-0.003961	-0.004129	-0.004267
1.6640	877.494	61.690	63.377	65.839	-0.717	50.349	1670.523	-0.004318	-0.004436	-0.004609
1.6680	944.355	69.549	70.024	73.206	-0.714	50.356	1797.810	-0.004868	-0.004902	-0.005124
1.6720	993.182	75.442	74.674	78.639	-0.708	50.349	1890.764	-0.005281	-0.005227	-0.005505
1.6760	1055.595	82.317	80.757	84.767	-0.707	50.338	2009.583	-0.005762	-0.005653	-0.005934
1.6800	1085.201	86.640	84.088	89.215	-0.714	50.339	2065.945	-0.006065	-0.005886	-0.006245
1.6840	1082.286	86.571	83.923	89.173	-0.700	50.349	2060.394	-0.006060	-0.005875	-0.006242
1.6880	1092.280	88.198	85.161	90.827	-0.698	50.356	2079.420	-0.006174	-0.005961	-0.006358
1.6920	1118.399	91.411	87.776	93.619	-0.706	50.350	2129.145	-0.006399	-0.006144	-0.006553
1.6960	1128.032	92.688	88.931	94.232	-0.704	50.338	2147.484	-0.006488	-0.006225	-0.006596
1.7000	1157.518	96.674	91.818	98.484	-0.707	50.339	2203.617	-0.006767	-0.006427	-0.006894
1.7040	1166.821	98.035	92.826	99.943	-0.719	50.349	2221.327	-0.006862	-0.006498	-0.006996
1.7080	1162.057	98.079	92.534	99.748	-0.717	50.357	2212.257	-0.006866	-0.006477	-0.006982
1.7120	1155.850	97.476	92.150	99.651	-0.719	50.349	2200.441	-0.006823	-0.006450	-0.006976
1.7160	1146.728	96.491	91.737	98.956	-0.715	50.338	2183.075	-0.006754	-0.006422	-0.006927
1.7200	1131.474	95.436	91.105	98.163	-0.713	50.338	2154.036	-0.006680	-0.006377	-0.006871
1.7240	1086.344	90.975	87.776	94.119	-0.710	50.349	2068.119	-0.006368	-0.006144	-0.006588
1.7280	1011.412	83.301	81.487	86.367	-0.710	50.357	1925.468	-0.005831	-0.005704	-0.006046
1.7320	962.900	77.953	77.030	81.558	-0.705	50.349	1833.115	-0.005457	-0.005392	-0.005709
1.7360	910.857	71.864	72.226	76.248	-0.715	50.338	1734.037	-0.005031	-0.005056	-0.005337
1.7400	873.316	67.696	68.965	72.790	-0.727	50.338	1662.569	-0.004739	-0.004828	-0.005095
1.7440	819.514	61.773	64.009	67.062	-0.719	50.348	1560.144	-0.004324	-0.004481	-0.004694
1.7480	757.943	55.417	58.356	60.352	-0.723	50.357	1442.928	-0.003879	-0.004085	-0.004225
1.7520	709.882	50.338	53.208	55.641	-0.722	50.350	1351.433	-0.003524	-0.003725	-0.003895
1.7560	658.770	44.429	48.049	49.886	-0.716	50.339	1254.129	-0.003110	-0.003363	-0.003492
1.7600	602.684	38.662	42.475	43.607	-0.727	50.339	1147.356	-0.002706	-0.002973	-0.003052
1.7640	523.935	30.314	33.918	35.048	-0.720	50.349	997.438	-0.002122	-0.002374	-0.002453
1.7680	471.982	24.280	28.236	29.532	-0.727	50.357	898.533	-0.001700	-0.001976	-0.002067
1.7720	440.347	20.407	24.740	25.318	-0.729	50.350	838.308	-0.001428	-0.001732	-0.001772
1.7760	391.700	15.199	19.057	19.860	-0.732	50.339	745.697	-0.001064	-0.001334	-0.001390
1.7800	355.226	11.524	15.080	15.538	-0.734	50.339	676.260	-0.000807	-0.001056	-0.001088
1.7840	328.731	8.311	11.488	11.826	-0.734	50.350	625.820	-0.000582	-0.000804	-0.000828
1.7880	294.076	4.731	7.084	7.408	-0.728	50.357	559.845	-0.000331	-0.000496	-0.000519
1.7920	265.747	1.643	3.288	4.031	-0.735	50.350	505.915	-0.000115	-0.000230	-0.000282
1.7960	247.818	-0.518	0.631	1.208	-0.730	50.339	471.783	0.000036	-0.000044	-0.000085
1.8000	243.490	-0.964	-0.029	0.652	-0.732	50.339	463.543	0.000067	0.000002	-0.000046
1.8040	245.399	-1.315	-0.167	-0.041	-0.734	50.350	467.176	0.000092	0.000012	0.000003
1.8080	246.646	-1.469	-0.112	0.043	-0.724	50.357	469.551	0.000103	0.000008	-0.000003
1.8120	254.145	-1.400	0.192	0.765	-0.714	50.350	483.828	0.000098	-0.000013	-0.000054
1.8160	264.710	-0.602	0.727	0.862	-0.711	50.338	503.941	0.000042	-0.000051	-0.000060
1.8200	276.057	0.142	1.568	2.170	-0.724	50.339	525.541	-0.000010	-0.000110	-0.000152
1.8240	308.578	3.033	4.831	5.142	-0.716	50.349	587.454	-0.000212	-0.000338	-0.000360
1.8280	363.913	8.113	10.966	11.050	-0.720	50.357	692.797	-0.000568	-0.000768	-0.000773
1.8320	417.414	13.376	16.497	16.801	-0.718	50.349	794.649	-0.000936	-0.001155	-0.001176
1.8360	462.289	17.571	21.149	21.249	-0.715	50.339	880.079	-0.001230	-0.001480	-0.001487
1.8400	519.156	23.843	27.203	27.431	-0.725	50.339	988.340	-0.001669	-0.001904	-0.001920
1.8440	581.389	29.864	33.256	33.838	-0.720	50.350	1106.815	-0.002090	-0.002328	-0.002369
1.8480	634.875	35.168	38.981	39.967	-0.723	50.357	1208.639	-0.002462	-0.002729	-0.002798
1.8520	701.902	42.255	45.849	47.444	-0.709	50.350	1336.241	-0.002958	-0.003209	-0.003321
1.8560	764.119	49.342	52.082	53.697	-0.711	50.338	1454.687	-0.003454	-0.003646	-0.003759
1.8600	815.967	55.447	57.667	59.853	-0.720	50.339	1553.392	-0.003881	-0.004037	-0.004190
1.8640	869.769	61.578	62.883	65.855	-0.724	50.350	1655.817	-0.004310	-0.004402	-0.004610
1.8680	921.963	67.260	68.030	71.316	-0.720	50.357	1755.180	-0.004708	-0.004762	-0.004992
1.8720	964.553	72.158	72.157	76.027	-0.717	50.349	1836.262	-0.005051	-0.005051	-0.005322
1.8760	1018.641	78.487	77.264	82.002	-0.715	50.339	1939.230	-0.005494	-0.005408	-0.005740
1.8800	1074.291	85.178	83.110	87.919	-0.724	50.339	2045.174	-0.005962	-0.005818	-0.006154
1.8840	1104.272	89.208	86.084	91.785	-0.710	50.350	2102.251	-0.006245	-0.006026	-0.006425
1.8880	1122.487	92.001	88.063	94.135	-0.719	50.357	2136.927	-0.006440	-0.006164	-0.006589
1.8920	1149.117	95.281	90.648	97.122	-0.715	50.350	2187.624	-0.006670	-0.006345	-0.006799
1.8960	1158.600	96.645	91.172	98.703	-0.720	50.339	2205.677	-0.006765	-0.006382	-0.006909
1.9000	1159.938	97.433	92.177	99.499	-0.732	50.340	2208.223	-0.006820	-0.006452	-0.006965
1.9040	1155.594	97.023	92.369	99.110	-0.722	50.351	2199.955	-0.006792	-0.006466	-0.006938
1.9080	1151.056	97.039	92.204	99.289	-0.712	50.357	2191.315	-0.006793	-0.006454	-0.006950
1.9120	1145.646	96.885	91.984	99.068	-0.718	50.350	2181.015	-0.006782	-0.006439	-0.006935
1.9160	1133.352	95.704	91.214	97.829	-0.718	50.338	2157.612	-0.006699	-0.006385	-0.006848
1.9200	1111.982	94.049	89.936	96.553	-0.723	50.339	2116.928	-0.006583	-0.006296	-0.006759
1.9240	1048.262	87.285	84.734	90.743	-0.720	50.350	1995.621	-0.006110	-0.005931	-0.006352
1.9280	1008.376	82.558	81.033	86.532	-0.715	50.358	1919.689	-0.005779	-0.005672	-0.006057
1.9320	986.750	80.268	79.120	84.268	-0.715	50.350	1878.519	-0.005619	-0.005538	-0.005899
1.9360	915.050	72.299	73.190	77.403	-0.722	50.339	1742.020	-0.005061	-0.005123	-0.005418
1.9400	866.478	67.624	69.006	72.304	-0.732	50.340	1649.551	-0.004734	-0.004830	-0.005061
1.9440	818.477	62.520	64.356	66.965	-0.723	50.351	1558.170	-0.004376	-0.004505	-0.004688
1.9480	759.581	56.062	58.700	61.104	-0.720	50.357	1446.047	-0.003924	-0.004109	-0.004277
1.9520	707.928	50.211	53.113	55.503	-0.714	50.350	1347.713	-0.003515	-0.003718	-0.003885
1.9560	663.113	44.892	48.434	50.529	-0.733	50.339	1262.398	-0.003142	-0.003390	-0.003537
1.9600	623.153	40.445	44.773	46.441	-0.725	50.340	1186.323	-0.002831	-0.003134	-0.003251
1.9640	551.933	33.120	37.566	38.578	-0.729	50.350	1050.739	-0.002318	-0.002630	-0.002700
1.9680	489.866	26.861	31.095	31.573	-0.716	50.358	932.579	-0.001880	-0.002177	-0.002210
1.9720	436.861	20.968	24.821	25.430	-0.712	50.350	831.671	-0.001468	-0.001737	-0.001780
1.9760	386.606	15.171	18.742	19.303	-0.723	50.339	735.998	-0.001062	-0.001312	-0.001351
1.9800	352.687	11.562	14.640	15.689	-0.728	50.340	671.425	-0.000809	-0.001025	-0.001098
1.9840	330.505	8.690	11.805	12.187	-0.727	50.350	629.196	-0.000608	-0.000826	-0.000853
1.9880	284.563	3.960	6.344	6.742	-0.716	50.357	541.735	-0.000277	-0.000444	-0.000472
1.9920	263.253	1.699	3.616	3.572	-0.724	50.350	501.165	-0.000119	-0.000253	-0.000250
1.9960	261.404	0.914	2.835	2.961	-0.714	50.339	497.646	-0.000064	-0.000198	-0.000207
Test Cycles
Time (sec)	Axial stress (kPa)	Axial micro-strain #1	Axial micro-strain #2	Axial micro-strain #3	Confining pressure (kPa)	Temperature (�C)	Load (N)	Displacement #1 (mm)	Displacement #2 (mm)	Displacement #3 (mm)
0.0000	241.627	-0.854	0.191	0.765	-0.710	50.340	459.995	0.000060	-0.000013	-0.000054
0.0040	230.881	-2.326	-1.516	-0.902	-0.719	50.351	439.539	0.000163	0.000106	0.000063
0.0080	231.918	-2.382	-1.886	-1.098	-0.728	50.358	441.513	0.000167	0.000132	0.000077
0.0120	238.381	-2.818	-1.777	-1.237	-0.726	50.350	453.815	0.000197	0.000124	0.000087
0.0160	250.193	-2.143	-0.689	-0.376	-0.726	50.339	476.303	0.000150	0.000048	0.000026
0.0200	276.387	0.490	2.284	2.321	-0.739	50.340	526.171	-0.000034	-0.000160	-0.000162
0.0240	335.389	5.896	8.214	8.256	-0.732	50.351	638.494	-0.000413	-0.000575	-0.000578
0.0280	383.750	10.260	13.099	13.328	-0.740	50.357	730.562	-0.000718	-0.000917	-0.000933
0.0320	422.268	14.205	16.953	17.496	-0.724	50.350	803.890	-0.000994	-0.001187	-0.001225
0.0360	472.418	18.805	21.987	22.707	-0.727	50.339	899.363	-0.001316	-0.001539	-0.001589
0.0400	532.201	24.897	28.551	29.446	-0.724	50.341	1013.174	-0.001743	-0.001999	-0.002061
0.0440	586.619	30.623	34.553	35.228	-0.728	50.351	1116.772	-0.002144	-0.002419	-0.002466
0.0480	643.336	36.726	40.385	41.286	-0.729	50.358	1224.747	-0.002571	-0.002827	-0.002890
0.0520	712.587	44.317	47.240	48.247	-0.726	50.350	1356.583	-0.003102	-0.003307	-0.003377
0.0560	768.718	50.238	52.797	54.418	-0.728	50.340	1463.442	-0.003517	-0.003696	-0.003809
0.0600	827.254	56.889	58.642	61.118	-0.738	50.341	1574.879	-0.003982	-0.004105	-0.004278
0.0640	880.680	62.687	64.066	66.704	-0.734	50.351	1676.588	-0.004388	-0.004485	-0.004669
0.0680	931.611	68.313	69.254	72.873	-0.738	50.358	1773.548	-0.004782	-0.004848	-0.005101
0.0720	977.222	74.025	73.876	77.723	-0.735	50.350	1860.380	-0.005182	-0.005171	-0.005441
0.0760	1013.110	78.389	77.415	81.572	-0.728	50.339	1928.701	-0.005487	-0.005419	-0.005710
0.0800	1064.507	84.772	82.352	87.660	-0.731	50.341	2026.548	-0.005934	-0.005765	-0.006136
0.0840	1102.454	89.404	85.792	91.854	-0.730	50.351	2098.789	-0.006258	-0.006005	-0.006430
0.0880	1110.690	90.836	87.129	92.746	-0.734	50.358	2114.468	-0.006359	-0.006099	-0.006492
0.0920	1128.228	92.771	88.889	95.232	-0.732	50.351	2147.856	-0.006494	-0.006222	-0.006666
0.0960	1150.365	95.900	91.256	97.678	-0.735	50.340	2189.999	-0.006713	-0.006388	-0.006837
0.1000	1154.588	96.967	91.997	98.915	-0.738	50.340	2198.038	-0.006788	-0.006440	-0.006924
0.1040	1156.737	97.558	92.632	99.624	-0.730	50.351	2202.129	-0.006829	-0.006484	-0.006974
0.1080	1157.398	98.499	92.660	99.776	-0.727	50.358	2203.388	-0.006895	-0.006486	-0.006984
0.1120	1153.490	98.079	92.728	100.027	-0.716	50.351	2195.950	-0.006866	-0.006491	-0.007002
0.1160	1143.121	96.799	91.640	99.110	-0.723	50.339	2176.208	-0.006776	-0.006415	-0.006938
0.1200	1127.912	95.380	91.200	98.205	-0.738	50.341	2147.255	-0.006677	-0.006384	-0.006874
0.1240	1082.677	90.711	88.132	94.299	-0.744	50.351	2061.138	-0.006350	-0.006169	-0.006601
0.1280	1011.141	83.763	82.174	87.128	-0.731	50.358	1924.953	-0.005863	-0.005752	-0.006099
0.1320	970.580	79.032	78.254	82.960	-0.735	50.351	1847.734	-0.005532	-0.005478	-0.005807
0.1360	929.101	74.475	74.427	78.639	-0.734	50.339	1768.770	-0.005213	-0.005210	-0.005505
0.1400	867.289	67.863	69.020	72.484	-0.738	50.341	1651.096	-0.004750	-0.004831	-0.005074
0.1440	812.541	62.040	63.777	66.606	-0.741	50.351	1546.869	-0.004343	-0.004464	-0.004662
0.1480	741.667	53.987	57.158	59.615	-0.744	50.358	1411.943	-0.003779	-0.004001	-0.004173
0.1520	695.905	49.090	52.479	54.584	-0.739	50.350	1324.825	-0.003436	-0.003674	-0.003821
0.1560	636.303	42.732	46.618	47.926	-0.740	50.340	1211.357	-0.002991	-0.003263	-0.003355
0.1600	580.803	36.923	40.894	41.854	-0.743	50.341	1105.700	-0.002585	-0.002863	-0.002930
0.1640	528.324	30.818	34.893	35.658	-0.732	50.352	1005.793	-0.002157	-0.002443	-0.002496
0.1680	477.828	25.389	29.348	30.379	-0.727	50.358	909.662	-0.001777	-0.002054	-0.002127
0.1720	432.863	20.196	24.122	25.402	-0.723	50.351	824.060	-0.001414	-0.001689	-0.001778
0.1760	393.684	15.748	19.567	20.248	-0.717	50.339	749.474	-0.001102	-0.001370	-0.001417
0.1800	356.203	11.942	15.658	15.926	-0.727	50.341	678.120	-0.000836	-0.001096	-0.001115
0.1840	323.171	8.465	11.379	11.868	-0.711	50.351	615.234	-0.000593	-0.000796	-0.000831
0.1880	299.125	5.950	8.200	8.588	-0.717	50.357	569.458	-0.000417	-0.000574	-0.000601
0.1920	275.831	3.273	5.175	5.642	-0.731	50.350	525.112	-0.000229	-0.000362	-0.000395
0.1960	258.293	0.984	2.310	2.961	-0.731	50.339	491.724	-0.000069	-0.000162	-0.000207
0.2000	250.373	-0.181	1.348	2.140	-0.729	50.341	476.646	0.000013	-0.000094	-0.000150
0.2040	246.751	-0.770	0.466	1.196	-0.732	50.351	469.751	0.000054	-0.000033	-0.000084
0.2080	245.294	-1.300	0.273	0.668	-0.735	50.357	466.976	0.000091	-0.000019	-0.000047
0.2120	248.344	-0.897	0.302	0.376	-0.732	50.350	472.784	0.000063	-0.000021	-0.000026
0.2160	256.279	-0.588	0.549	0.904	-0.732	50.340	487.890	0.000041	-0.000038	-0.000063
0.2200	280.415	1.306	2.807	3.100	-0.742	50.341	533.838	-0.000091	-0.000197	-0.000217
0.2240	335.990	5.826	8.266	8.725	-0.742	50.351	639.639	-0.000408	-0.000579	-0.000611
0.2280	384.126	10.316	13.443	13.633	-0.740	50.358	731.277	-0.000722	-0.000941	-0.000954
0.2320	439.731	16.013	19.304	19.704	-0.728	50.350	837.135	-0.001121	-0.001351	-0.001379
0.2360	494.840	21.530	25.167	25.404	-0.724	50.340	942.049	-0.001507	-0.001762	-0.001778
0.2400	541.188	26.426	30.312	30.393	-0.728	50.341	1030.283	-0.001850	-0.002122	-0.002128
0.2440	563.686	28.936	32.419	33.017	-0.727	50.352	1073.112	-0.002026	-0.002269	-0.002311
0.2480	618.720	34.497	37.797	38.884	-0.726	50.358	1177.883	-0.002415	-0.002646	-0.002722
0.2520	686.182	41.259	44.652	46.051	-0.728	50.351	1306.314	-0.002888	-0.003126	-0.003224
0.2560	743.395	47.658	50.414	51.930	-0.730	50.340	1415.234	-0.003336	-0.003529	-0.003635
0.2600	804.531	54.603	56.829	59.086	-0.735	50.341	1531.620	-0.003822	-0.003978	-0.004136
0.2640	875.059	62.545	63.750	66.495	-0.730	50.352	1665.888	-0.004378	-0.004462	-0.004655
0.2680	922.444	68.285	68.827	71.317	-0.729	50.358	1756.096	-0.004780	-0.004818	-0.004992
0.2720	970.234	73.632	73.233	77.056	-0.714	50.351	1847.076	-0.005154	-0.005126	-0.005394
0.2760	1015.455	78.528	77.468	82.294	-0.708	50.339	1933.165	-0.005497	-0.005423	-0.005761
0.2800	1052.905	83.566	81.224	86.506	-0.722	50.341	2004.461	-0.005850	-0.005686	-0.006055
0.2840	1089.755	87.906	85.077	90.907	-0.728	50.352	2074.614	-0.006153	-0.005955	-0.006364
0.2880	1124.155	92.550	88.478	94.580	-0.720	50.358	2140.102	-0.006478	-0.006193	-0.006621
0.2920	1154.272	96.294	91.531	98.121	-0.716	50.351	2197.437	-0.006741	-0.006407	-0.006868
0.2960	1182.796	99.759	93.911	101.665	-0.710	50.340	2251.740	-0.006983	-0.006574	-0.007117
0.3000	1194.533	101.639	95.425	103.432	-0.721	50.341	2274.084	-0.007115	-0.006680	-0.007240
0.3040	1183.051	100.853	94.794	102.679	-0.725	50.352	2252.226	-0.007060	-0.006636	-0.007188
0.3080	1178.558	100.475	94.985	102.557	-0.720	50.358	2243.671	-0.007033	-0.006649	-0.007179
0.3120	1177.085	100.725	95.178	102.916	-0.724	50.351	2240.868	-0.007051	-0.006662	-0.007204
0.3160	1155.174	98.905	93.721	100.970	-0.718	50.340	2199.154	-0.006923	-0.006560	-0.007068
0.3200	1092.325	92.758	89.070	95.496	-0.724	50.341	2079.506	-0.006493	-0.006235	-0.006685
0.3240	1054.979	88.492	85.683	91.689	-0.723	50.352	2008.410	-0.006194	-0.005998	-0.006418
0.3280	1014.643	84.252	82.380	87.965	-0.731	50.359	1931.620	-0.005898	-0.005767	-0.006158
0.3320	963.607	78.459	77.827	82.767	-0.727	50.351	1834.459	-0.005492	-0.005448	-0.005794
0.3360	919.077	73.574	73.795	78.195	-0.719	50.340	1749.687	-0.005150	-0.005166	-0.005474
0.3400	878.531	69.099	70.463	74.372	-0.728	50.342	1672.497	-0.004837	-0.004932	-0.005206
0.3440	818.838	63.065	64.975	68.120	-0.723	50.353	1558.857	-0.004415	-0.004548	-0.004768
0.3480	748.475	55.486	58.342	60.727	-0.723	50.359	1424.904	-0.003884	-0.004084	-0.004251
0.3520	699.678	49.945	52.755	55.238	-0.725	50.351	1332.006	-0.003496	-0.003693	-0.003867
0.3560	673.513	46.548	49.646	51.929	-0.727	50.340	1282.196	-0.003258	-0.003475	-0.003635
0.3600	639.414	42.915	46.660	48.624	-0.732	50.341	1217.279	-0.003004	-0.003266	-0.003404
0.3640	562.258	34.537	38.994	40.342	-0.736	50.352	1070.395	-0.002418	-0.002730	-0.002824
0.3680	496.253	28.224	31.965	33.168	-0.730	50.358	944.738	-0.001976	-0.002238	-0.002322
0.3720	429.302	20.885	24.616	25.250	-0.725	50.351	817.280	-0.001462	-0.001723	-0.001768
0.3760	380.474	15.228	18.725	19.204	-0.728	50.340	724.325	-0.001066	-0.001311	-0.001344
0.3800	342.347	11.185	14.281	14.480	-0.720	50.342	651.741	-0.000783	-0.001000	-0.001014
0.3840	311.389	7.314	10.070	10.730	-0.727	50.352	592.804	-0.000512	-0.000705	-0.000751
0.3880	284.082	4.395	6.535	7.229	-0.732	50.358	540.819	-0.000308	-0.000457	-0.000506
0.3920	260.623	1.912	3.644	3.710	-0.742	50.351	496.159	-0.000134	-0.000255	-0.000260
0.3960	251.140	0.590	1.939	2.101	-0.736	50.340	478.106	-0.000041	-0.000136	-0.000147
0.4000	244.572	-0.140	0.978	1.530	-0.740	50.342	465.603	0.000010	-0.000068	-0.000107
0.4040	237.975	-1.161	-0.249	0.251	-0.739	50.353	453.043	0.000081	0.000017	-0.000018
0.4080	238.230	-1.048	-0.813	-0.029	-0.740	50.359	453.529	0.000073	0.000057	0.000002
0.4120	243.671	-1.580	-0.606	0.195	-0.739	50.351	463.886	0.000111	0.000042	-0.000014
0.4160	254.401	-1.022	0.232	0.557	-0.729	50.340	484.314	0.000072	-0.000016	-0.000039
0.4200	280.565	1.207	3.066	2.919	-0.730	50.342	534.124	-0.000085	-0.000215	-0.000204
0.4240	333.736	6.106	8.256	8.770	-0.731	50.353	635.347	-0.000427	-0.000578	-0.000614
0.4280	412.695	13.416	16.593	16.745	-0.721	50.359	785.666	-0.000939	-0.001162	-0.001172
0.4320	486.500	21.009	24.231	25.013	-0.713	50.351	926.170	-0.001471	-0.001696	-0.001751
0.4360	488.604	21.474	24.849	25.444	-0.716	50.341	930.176	-0.001503	-0.001739	-0.001781
0.4400	508.937	23.268	26.929	27.708	-0.723	50.342	968.885	-0.001629	-0.001885	-0.001940
0.4440	585.417	30.988	34.566	35.659	-0.734	50.353	1114.483	-0.002169	-0.002420	-0.002496
0.4480	643.637	37.090	40.743	41.993	-0.740	50.359	1225.319	-0.002596	-0.002852	-0.002940
0.4520	724.880	45.749	48.780	50.389	-0.736	50.351	1379.986	-0.003202	-0.003415	-0.003527
0.4560	803.855	54.503	56.732	58.587	-0.734	50.340	1530.333	-0.003815	-0.003971	-0.004101
0.4600	833.761	58.436	60.241	62.868	-0.738	50.342	1587.267	-0.004091	-0.004217	-0.004401
0.4640	847.692	60.247	61.409	64.548	-0.739	50.353	1613.789	-0.004217	-0.004299	-0.004518
0.4680	911.353	66.911	68.001	71.413	-0.738	50.358	1734.982	-0.004684	-0.004760	-0.004999
0.4720	984.165	75.260	74.648	78.903	-0.735	50.351	1873.598	-0.005268	-0.005225	-0.005523
0.4760	1010.600	78.918	77.816	81.766	-0.730	50.340	1923.923	-0.005524	-0.005447	-0.005724
0.4800	1036.780	82.386	80.413	84.977	-0.734	50.342	1973.763	-0.005767	-0.005629	-0.005948
0.4840	1107.368	90.373	86.675	92.480	-0.734	50.352	2108.145	-0.006326	-0.006067	-0.006474
0.4880	1134.194	94.021	89.315	96.205	-0.730	50.358	2159.214	-0.006581	-0.006252	-0.006734
0.4920	1157.308	96.758	91.544	98.788	-0.726	50.351	2203.217	-0.006773	-0.006408	-0.006915
0.4960	1154.272	96.869	91.875	98.830	-0.724	50.340	2197.437	-0.006781	-0.006431	-0.006918
0.5000	1152.363	97.150	92.494	99.888	-0.739	50.342	2193.804	-0.006800	-0.006475	-0.006992
0.5040	1151.657	97.811	92.357	99.721	-0.735	50.353	2192.459	-0.006847	-0.006465	-0.006980
0.5080	1149.748	98.161	92.480	99.860	-0.734	50.359	2188.826	-0.006871	-0.006474	-0.006990
0.5120	1142.895	97.672	92.149	99.484	-0.735	50.352	2175.779	-0.006837	-0.006450	-0.006964
0.5160	1130.452	96.322	91.009	98.705	-0.731	50.340	2152.090	-0.006743	-0.006371	-0.006909
0.5200	1106.226	93.784	89.785	96.913	-0.728	50.342	2105.970	-0.006565	-0.006285	-0.006784
0.5240	1052.199	88.056	85.491	91.743	-0.729	50.353	2003.117	-0.006164	-0.005984	-0.006422
0.5280	1004.829	83.227	81.500	87.118	-0.728	50.359	1912.937	-0.005826	-0.005705	-0.006098
0.5320	966.206	79.133	78.349	83.142	-0.730	50.351	1839.409	-0.005539	-0.005484	-0.005820
0.5360	924.503	74.362	74.386	78.530	-0.724	50.340	1760.015	-0.005205	-0.005207	-0.005497
0.5400	880.529	69.914	70.477	74.513	-0.727	50.342	1676.302	-0.004894	-0.004933	-0.005216
0.5440	818.207	63.234	64.617	67.968	-0.714	50.353	1557.655	-0.004426	-0.004523	-0.004758
0.5480	769.409	57.508	59.800	62.770	-0.726	50.359	1464.758	-0.004026	-0.004186	-0.004394
0.5520	737.775	53.874	56.717	59.559	-0.724	50.351	1404.533	-0.003771	-0.003970	-0.004169
0.5560	683.717	48.066	51.627	53.585	-0.727	50.340	1301.622	-0.003365	-0.003614	-0.003751
0.5600	623.604	41.708	45.780	47.332	-0.729	50.342	1187.181	-0.002920	-0.003205	-0.003313
0.5640	549.439	34.004	38.115	39.410	-0.723	50.354	1045.990	-0.002380	-0.002668	-0.002759
0.5680	484.336	26.958	30.723	32.284	-0.715	50.359	922.050	-0.001887	-0.002151	-0.002260
0.5720	432.503	20.939	24.561	25.792	-0.708	50.352	823.374	-0.001466	-0.001719	-0.001805
0.5760	379.257	14.962	18.672	19.357	-0.719	50.340	722.008	-0.001047	-0.001307	-0.001355
0.5800	331.662	10.204	13.511	14.010	-0.722	50.343	631.399	-0.000714	-0.000946	-0.000981
0.5840	303.123	6.836	9.534	9.879	-0.726	50.353	577.068	-0.000479	-0.000667	-0.000692
0.5880	276.643	4.227	6.041	6.685	-0.726	50.358	526.657	-0.000296	-0.000423	-0.000468
0.5920	257.001	1.910	3.467	3.974	-0.716	50.351	489.264	-0.000134	-0.000243	-0.000278
0.5960	246.000	0.086	1.087	1.987	-0.714	50.340	468.321	-0.000006	-0.000076	-0.000139
0.6000	243.430	-0.309	0.797	1.223	-0.724	50.343	463.428	0.000022	-0.000056	-0.000086
0.6040	243.069	-0.825	0.412	0.807	-0.723	50.353	462.742	0.000058	-0.000029	-0.000057
0.6080	241.912	-1.062	-0.028	0.834	-0.724	50.359	460.539	0.000074	0.000002	-0.000058
0.6120	245.188	-1.006	0.329	0.266	-0.715	50.351	466.776	0.000070	-0.000023	-0.000019
0.6160	252.883	-0.742	0.660	0.639	-0.711	50.340	481.424	0.000052	-0.000046	-0.000045
0.6200	264.530	0.211	1.471	1.640	-0.720	50.343	503.597	-0.000015	-0.000103	-0.000115
0.6240	296.946	2.724	4.389	4.642	-0.723	50.353	565.310	-0.000191	-0.000307	-0.000325
0.6280	359.885	8.479	10.965	11.355	-0.732	50.359	685.129	-0.000594	-0.000768	-0.000795
0.6320	415.866	13.713	16.936	17.439	-0.727	50.352	791.702	-0.000960	-0.001186	-0.001221
0.6360	459.328	18.102	21.492	21.957	-0.728	50.341	874.443	-0.001267	-0.001504	-0.001537
0.6400	518.270	24.547	27.726	28.504	-0.728	50.343	986.652	-0.001718	-0.001941	-0.001995
0.6440	576.114	30.397	33.960	34.493	-0.731	50.354	1096.773	-0.002128	-0.002377	-0.002415
0.6480	633.012	36.166	39.641	41.176	-0.723	50.359	1205.091	-0.002532	-0.002775	-0.002882
0.6520	691.878	42.270	45.408	47.122	-0.711	50.352	1317.158	-0.002959	-0.003179	-0.003299
0.6560	754.456	49.159	51.695	53.682	-0.712	50.341	1436.291	-0.003441	-0.003619	-0.003758
0.6600	812.676	55.753	58.053	60.060	-0.708	50.343	1547.127	-0.003903	-0.004064	-0.004204
0.6640	867.785	62.082	63.846	66.287	-0.718	50.354	1652.040	-0.004346	-0.004469	-0.004640
0.6680	917.830	68.257	68.840	72.012	-0.717	50.359	1747.313	-0.004778	-0.004819	-0.005041
0.6720	976.922	74.725	74.083	78.404	-0.723	50.351	1859.808	-0.005231	-0.005186	-0.005488
0.6760	1059.247	83.987	81.388	86.658	-0.717	50.341	2016.535	-0.005879	-0.005697	-0.006066
0.6800	1096.052	88.929	85.532	91.591	-0.720	50.343	2086.601	-0.006225	-0.005987	-0.006411
0.6840	1086.915	88.607	85.532	91.176	-0.727	50.354	2069.206	-0.006203	-0.005987	-0.006382
0.6880	1087.456	89.195	86.193	91.674	-0.726	50.359	2070.236	-0.006244	-0.006033	-0.006417
0.6920	1114.627	92.269	88.325	94.289	-0.716	50.352	2121.964	-0.006459	-0.006183	-0.006600
0.6960	1153.551	96.981	91.847	98.733	-0.720	50.341	2196.064	-0.006789	-0.006429	-0.006911
0.7000	1160.328	98.627	92.893	100.110	-0.718	50.343	2208.967	-0.006904	-0.006503	-0.007008
0.7040	1158.780	98.627	93.100	100.346	-0.725	50.354	2206.020	-0.006904	-0.006517	-0.007024
0.7080	1154.527	98.470	93.032	100.486	-0.723	50.360	2197.924	-0.006893	-0.006512	-0.007034
0.7120	1148.185	97.810	92.892	100.248	-0.725	50.351	2185.850	-0.006847	-0.006502	-0.007017
0.7160	1139.304	96.743	92.288	99.249	-0.724	50.341	2168.941	-0.006772	-0.006460	-0.006947
0.7200	1127.296	96.405	91.503	99.011	-0.731	50.344	2146.082	-0.006748	-0.006405	-0.006931
0.7240	1086.509	92.380	88.682	95.399	-0.726	50.354	2068.434	-0.006467	-0.006208	-0.006678
0.7280	1021.301	85.516	83.068	89.089	-0.731	50.359	1944.294	-0.005986	-0.005815	-0.006236
0.7320	973.510	79.890	78.846	84.183	-0.729	50.352	1853.313	-0.005592	-0.005519	-0.005893
0.7360	919.829	73.884	74.083	78.655	-0.716	50.341	1751.118	-0.005172	-0.005186	-0.005506
0.7400	877.599	69.281	70.505	74.095	-0.711	50.344	1670.723	-0.004850	-0.004935	-0.005187
0.7440	803.719	61.888	63.860	67.106	-0.708	50.354	1530.075	-0.004332	-0.004470	-0.004697
0.7480	747.032	55.529	58.343	60.810	-0.711	50.359	1422.157	-0.003887	-0.004084	-0.004257
0.7520	704.712	51.094	53.800	56.308	-0.707	50.352	1341.591	-0.003577	-0.003766	-0.003942
0.7560	661.686	45.805	49.095	51.223	-0.725	50.341	1259.680	-0.003206	-0.003437	-0.003586
0.7600	610.078	40.179	43.991	46.038	-0.713	50.344	1161.432	-0.002813	-0.003079	-0.003223
0.7640	545.651	33.176	37.414	38.786	-0.722	50.355	1038.780	-0.002322	-0.002619	-0.002715
0.7680	492.646	27.617	31.867	32.864	-0.726	50.360	937.872	-0.001933	-0.002231	-0.002301
0.7720	462.950	23.900	28.289	29.252	-0.722	50.352	881.338	-0.001673	-0.001980	-0.002048
0.7760	409.644	18.369	22.455	23.151	-0.720	50.341	779.858	-0.001286	-0.001572	-0.001621
0.7800	354.325	12.954	16.042	17.039	-0.716	50.343	674.543	-0.000907	-0.001123	-0.001193
0.7840	328.190	9.488	12.466	13.424	-0.717	50.355	624.790	-0.000664	-0.000873	-0.000940
0.7880	290.710	5.800	7.746	8.714	-0.718	50.359	553.436	-0.000406	-0.000542	-0.000610
0.7920	263.313	2.290	4.334	5.002	-0.713	50.352	501.280	-0.000160	-0.000303	-0.000350
0.7960	241.597	0.140	1.238	1.739	-0.711	50.341	459.938	-0.000010	-0.000087	-0.000122
0.8000	233.076	-0.828	0.026	0.919	-0.723	50.344	443.716	0.000058	-0.000002	-0.000064
0.8040	237.464	-0.867	0.095	0.487	-0.717	50.354	452.070	0.000061	-0.000007	-0.000034
0.8080	242.048	-0.672	0.043	0.791	-0.727	50.359	460.796	0.000047	-0.000003	-0.000055
0.8120	248.885	-0.504	0.412	0.987	-0.723	50.352	473.814	0.000035	-0.000029	-0.000069
0.8160	260.878	-0.156	1.059	1.557	-0.723	50.341	496.645	0.000011	-0.000074	-0.000109
0.8200	284.894	2.037	3.632	4.139	-0.717	50.343	542.364	-0.000143	-0.000254	-0.000290
0.8240	328.250	5.980	8.336	8.394	-0.716	50.354	624.905	-0.000419	-0.000584	-0.000588
0.8280	381.722	11.159	13.814	14.355	-0.715	50.359	726.700	-0.000781	-0.000967	-0.001005
0.8320	435.433	16.603	19.578	20.120	-0.711	50.352	828.953	-0.001162	-0.001370	-0.001408
0.8360	466.647	19.493	22.509	23.109	-0.713	50.341	888.376	-0.001365	-0.001576	-0.001618
0.8400	534.560	26.202	29.419	30.531	-0.708	50.344	1017.666	-0.001834	-0.002059	-0.002137
0.8440	591.999	31.985	35.470	36.745	-0.710	50.354	1127.014	-0.002239	-0.002483	-0.002572
0.8480	623.980	35.647	39.174	40.243	-0.716	50.359	1187.897	-0.002495	-0.002742	-0.002817
0.8520	687.715	42.129	45.475	47.112	-0.719	50.352	1309.233	-0.002949	-0.003183	-0.003298
0.8560	771.784	51.558	53.813	55.405	-0.717	50.342	1469.278	-0.003609	-0.003767	-0.003878
0.8600	850.533	60.385	61.740	64.479	-0.717	50.344	1619.196	-0.004227	-0.004322	-0.004514
0.8640	908.557	66.784	67.369	70.844	-0.715	50.355	1729.660	-0.004675	-0.004716	-0.004959
0.8680	955.912	72.621	72.062	76.431	-0.706	50.360	1819.811	-0.005084	-0.005044	-0.005350
0.8720	981.295	75.710	75.091	79.125	-0.704	50.352	1868.134	-0.005300	-0.005256	-0.005539
0.8760	980.859	76.116	75.572	79.391	-0.714	50.341	1867.304	-0.005328	-0.005290	-0.005557
0.8800	1024.968	81.349	79.682	84.127	-0.711	50.344	1951.275	-0.005694	-0.005578	-0.005889
0.8840	1085.923	88.549	85.228	90.591	-0.717	50.355	2067.318	-0.006198	-0.005966	-0.006341
0.8880	1100.771	90.806	86.852	92.911	-0.715	50.360	2095.585	-0.006356	-0.006080	-0.006504
0.8920	1121.194	93.376	88.958	95.523	-0.710	50.352	2134.466	-0.006536	-0.006227	-0.006687
0.8960	1141.498	95.522	90.871	97.497	-0.709	50.341	2173.119	-0.006687	-0.006361	-0.006825
0.9000	1186.763	100.982	95.040	102.735	-0.718	50.344	2259.293	-0.007069	-0.006653	-0.007191
0.9040	1191.723	102.286	96.030	104.292	-0.713	50.355	2268.734	-0.007160	-0.006722	-0.007300
0.9080	1175.627	101.119	95.246	103.500	-0.712	50.360	2238.092	-0.007078	-0.006667	-0.007245
0.9120	1169.135	100.810	94.916	102.764	-0.719	50.352	2225.733	-0.007057	-0.006644	-0.007193
0.9160	1151.026	99.019	93.774	101.361	-0.718	50.342	2191.257	-0.006931	-0.006564	-0.007095
0.9200	1106.256	94.301	90.375	97.385	-0.702	50.344	2106.028	-0.006601	-0.006326	-0.006817
0.9240	1047.630	87.931	85.643	91.686	-0.706	50.356	1994.419	-0.006155	-0.005995	-0.006418
0.9280	1015.169	84.730	82.779	88.660	-0.704	50.360	1932.621	-0.005931	-0.005795	-0.006206
0.9320	982.948	80.973	80.193	85.671	-0.706	50.353	1871.281	-0.005668	-0.005614	-0.005997
0.9360	922.729	74.629	74.937	79.444	-0.715	50.342	1756.639	-0.005224	-0.005246	-0.005561
0.9400	867.214	69.085	69.680	73.275	-0.722	50.344	1650.953	-0.004836	-0.004878	-0.005129
0.9440	821.919	63.851	65.582	68.983	-0.727	50.355	1564.722	-0.004470	-0.004591	-0.004829
0.9480	768.267	58.126	60.158	63.244	-0.726	50.360	1462.584	-0.004069	-0.004211	-0.004427
0.9520	702.548	50.519	53.854	56.141	-0.723	50.352	1337.471	-0.003536	-0.003770	-0.003930
0.9560	634.424	43.291	47.003	48.832	-0.729	50.341	1207.781	-0.003030	-0.003290	-0.003418
0.9600	583.358	37.553	41.995	43.302	-0.722	50.344	1110.563	-0.002629	-0.002940	-0.003031
0.9640	527.437	31.986	35.885	37.187	-0.724	50.356	1004.105	-0.002239	-0.002512	-0.002603
0.9680	474.973	26.286	29.968	31.196	-0.724	50.360	904.226	-0.001840	-0.002098	-0.002184
0.9720	435.102	21.614	25.192	26.360	-0.712	50.353	828.323	-0.001513	-0.001763	-0.001845
0.9760	392.317	16.728	20.210	20.914	-0.718	50.342	746.870	-0.001171	-0.001415	-0.001464
0.9800	350.132	12.112	15.523	15.981	-0.714	50.344	666.561	-0.000848	-0.001087	-0.001119
0.9840	318.181	8.674	11.778	11.938	-0.724	50.355	605.736	-0.000607	-0.000824	-0.000836
0.9880	288.470	5.741	8.019	8.353	-0.721	50.359	549.173	-0.000402	-0.000561	-0.000585
0.9920	265.402	2.726	4.994	5.128	-0.718	50.352	505.257	-0.000191	-0.000350	-0.000359
0.9960	256.370	1.700	3.093	3.584	-0.725	50.342	488.062	-0.000119	-0.000216	-0.000251
1.0000	245.519	0.297	1.348	2.169	-0.723	50.345	467.405	-0.000021	-0.000094	-0.000152
1.0040	244.647	-0.197	0.781	1.918	-0.726	50.355	465.746	0.000014	-0.000055	-0.000134
1.0080	247.623	-0.322	0.811	1.807	-0.736	50.360	471.411	0.000023	-0.000057	-0.000126
1.0120	258.188	0.267	1.705	2.432	-0.728	50.352	491.524	-0.000019	-0.000119	-0.000170
1.0160	272.976	1.533	2.970	3.208	-0.727	50.342	519.676	-0.000107	-0.000208	-0.000225
1.0200	305.347	4.183	6.356	6.199	-0.732	50.345	581.303	-0.000293	-0.000445	-0.000434
1.0240	359.705	9.223	11.682	12.327	-0.735	50.355	684.786	-0.000646	-0.000818	-0.000863
1.0280	410.877	14.259	17.021	17.663	-0.726	50.360	782.204	-0.000998	-0.001191	-0.001236
1.0320	443.233	17.332	20.582	21.012	-0.729	50.352	843.801	-0.001213	-0.001441	-0.001471
1.0360	485.357	21.432	24.848	25.363	-0.722	50.342	923.996	-0.001500	-0.001739	-0.001775
1.0400	545.471	27.535	31.221	31.837	-0.715	50.345	1038.437	-0.001927	-0.002185	-0.002229
1.0440	619.366	35.099	38.596	39.619	-0.726	50.355	1179.113	-0.002457	-0.002702	-0.002773
1.0480	691.652	43.069	46.110	47.734	-0.723	50.360	1316.729	-0.003015	-0.003228	-0.003341
1.0520	741.817	48.626	51.022	53.169	-0.721	50.353	1412.230	-0.003404	-0.003572	-0.003722
1.0560	778.862	52.724	54.862	57.295	-0.720	50.342	1482.754	-0.003691	-0.003840	-0.004011
1.0600	828.140	58.113	59.606	62.713	-0.719	50.345	1576.567	-0.004068	-0.004172	-0.004390
1.0640	890.163	65.199	66.091	69.399	-0.715	50.355	1694.641	-0.004564	-0.004626	-0.004858
1.0680	918.206	68.916	69.336	72.845	-0.723	50.360	1748.028	-0.004824	-0.004853	-0.005099
1.0720	932.783	71.022	70.987	74.622	-0.721	50.353	1775.780	-0.004972	-0.004969	-0.005224
1.0760	1003.552	78.612	77.220	81.948	-0.723	50.342	1910.505	-0.005503	-0.005405	-0.005736
1.0800	1054.078	84.616	82.327	87.521	-0.726	50.345	2006.693	-0.005923	-0.005763	-0.006126
1.0840	1082.181	88.002	84.842	90.659	-0.730	50.356	2060.194	-0.006160	-0.005939	-0.006346
1.0880	1108.961	91.536	87.871	93.759	-0.735	50.360	2111.177	-0.006407	-0.006151	-0.006563
1.0920	1140.115	95.705	90.801	97.511	-0.728	50.353	2170.486	-0.006699	-0.006356	-0.006826
1.0960	1152.258	97.599	92.094	99.122	-0.731	50.342	2193.604	-0.006832	-0.006447	-0.006939
1.1000	1163.499	99.413	93.417	100.748	-0.738	50.345	2215.004	-0.006959	-0.006539	-0.007052
1.1040	1162.943	99.636	93.790	101.276	-0.745	50.356	2213.945	-0.006975	-0.006565	-0.007089
1.1080	1160.584	99.593	93.773	101.555	-0.739	50.360	2209.454	-0.006971	-0.006564	-0.007109
1.1120	1153.325	98.878	93.417	101.263	-0.740	50.353	2195.635	-0.006921	-0.006539	-0.007088
1.1160	1141.889	97.812	92.852	100.166	-0.724	50.342	2173.862	-0.006847	-0.006500	-0.007012
1.1200	1122.697	96.138	91.640	98.789	-0.719	50.345	2137.327	-0.006730	-0.006415	-0.006915
1.1240	1071.676	91.005	87.816	94.300	-0.720	50.356	2040.195	-0.006370	-0.006147	-0.006601
1.1280	1016.041	85.390	82.987	89.021	-0.723	50.360	1934.280	-0.005977	-0.005809	-0.006231
1.1320	985.458	81.688	80.249	85.589	-0.718	50.352	1876.059	-0.005718	-0.005617	-0.005991
1.1360	935.969	76.031	75.790	80.724	-0.711	50.342	1781.845	-0.005322	-0.005305	-0.005651
1.1400	857.761	67.723	69.074	72.930	-0.707	50.345	1632.957	-0.004741	-0.004835	-0.005105
1.1440	807.506	62.319	64.272	67.385	-0.706	50.356	1537.285	-0.004362	-0.004499	-0.004717
1.1480	774.940	58.998	61.287	64.021	-0.711	50.361	1475.286	-0.004130	-0.004290	-0.004481
1.1520	703.825	51.755	54.324	56.627	-0.706	50.353	1339.903	-0.003623	-0.003803	-0.003964
1.1560	623.363	42.774	46.234	47.582	-0.704	50.343	1186.724	-0.002994	-0.003236	-0.003331
1.1600	577.046	37.342	41.045	42.690	-0.703	50.345	1098.547	-0.002614	-0.002873	-0.002988
1.1640	535.417	32.516	36.366	38.020	-0.698	50.356	1019.297	-0.002276	-0.002546	-0.002661
1.1680	473.966	26.173	30.008	31.074	-0.702	50.360	902.309	-0.001832	-0.002101	-0.002175
1.1720	423.035	20.533	24.149	25.194	-0.696	50.354	805.349	-0.001437	-0.001690	-0.001764
1.1760	386.275	16.365	19.784	20.428	-0.701	50.342	735.369	-0.001146	-0.001385	-0.001430
1.1800	352.672	12.759	16.017	16.424	-0.696	50.345	671.396	-0.000893	-0.001121	-0.001150
1.1840	291.356	6.823	8.888	9.435	-0.700	50.356	554.667	-0.000478	-0.000622	-0.000660
1.1880	213.764	-0.671	-0.716	0.584	-0.703	50.361	406.952	0.000047	0.000050	-0.000041
1.1920	197.578	-3.013	-3.869	-2.600	-0.708	50.353	376.139	0.000211	0.000271	0.000182
1.1960	195.820	-4.082	-4.788	-4.001	-0.699	50.342	372.791	0.000286	0.000335	0.000280
1.2000	193.461	-4.307	-5.119	-4.434	-0.705	50.345	368.299	0.000301	0.000358	0.000310
1.2040	194.423	-4.547	-5.298	-4.473	-0.699	50.356	370.131	0.000318	0.000371	0.000313
1.2080	198.285	-4.195	-5.200	-4.377	-0.703	50.360	377.483	0.000294	0.000364	0.000306
1.2120	205.649	-4.139	-5.063	-3.906	-0.704	50.353	391.502	0.000290	0.000354	0.000273
1.2160	216.319	-3.828	-4.225	-3.667	-0.704	50.342	411.816	0.000268	0.000296	0.000257
1.2200	252.733	-1.147	-0.413	-0.278	-0.702	50.345	481.138	0.000080	0.000029	0.000019
1.2240	379.122	10.064	12.672	13.481	-0.703	50.356	721.750	-0.000704	-0.000887	-0.000944
1.2280	467.579	19.229	22.539	23.154	-0.711	50.361	890.150	-0.001346	-0.001578	-0.001621
1.2320	477.768	20.718	24.176	24.636	-0.715	50.353	909.548	-0.001450	-0.001692	-0.001725
1.2360	481.450	21.432	24.573	25.112	-0.707	50.342	916.557	-0.001500	-0.001720	-0.001758
1.2400	576.279	30.524	33.987	35.075	-0.715	50.346	1097.088	-0.002137	-0.002379	-0.002455
1.2440	624.791	35.799	39.435	40.578	-0.718	50.356	1189.442	-0.002506	-0.002760	-0.002840
1.2480	625.993	36.460	39.944	41.050	-0.724	50.360	1191.730	-0.002552	-0.002796	-0.002873
1.2520	682.094	42.226	45.242	47.192	-0.718	50.353	1298.532	-0.002956	-0.003167	-0.003303
1.2560	753.990	49.734	52.493	54.098	-0.723	50.342	1435.404	-0.003481	-0.003675	-0.003787
1.2600	819.138	57.522	59.209	61.354	-0.712	50.345	1559.429	-0.004027	-0.004145	-0.004295
1.2640	867.049	62.785	64.135	66.592	-0.718	50.356	1650.639	-0.004395	-0.004489	-0.004661
1.2680	914.404	68.144	68.743	72.207	-0.734	50.361	1740.789	-0.004770	-0.004812	-0.005054
1.2720	981.806	75.329	74.813	79.501	-0.724	50.353	1869.106	-0.005273	-0.005237	-0.005565
1.2760	1033.504	81.545	79.987	85.006	-0.714	50.343	1967.525	-0.005708	-0.005599	-0.005950
1.2800	1067.964	86.107	83.799	89.076	-0.714	50.345	2033.129	-0.006027	-0.005866	-0.006235
1.2840	1108.060	91.061	87.460	93.494	-0.718	50.357	2109.461	-0.006374	-0.006122	-0.006545
1.2880	1156.932	97.292	92.191	99.179	-0.727	50.360	2202.501	-0.006810	-0.006453	-0.006943
1.2920	1162.432	98.808	92.963	100.417	-0.715	50.353	2212.973	-0.006917	-0.006507	-0.007029
1.2960	1166.204	99.201	93.446	100.903	-0.726	50.342	2220.154	-0.006944	-0.006541	-0.007063
1.3000	1178.678	101.037	94.929	102.819	-0.725	50.346	2243.900	-0.007073	-0.006645	-0.007197
1.3040	1183.412	101.764	95.740	103.722	-0.728	50.357	2252.913	-0.007123	-0.006702	-0.007261
1.3080	1176.394	101.794	95.754	103.694	-0.726	50.361	2239.552	-0.007126	-0.006703	-0.007259
1.3120	1168.639	101.204	95.192	103.166	-0.727	50.353	2224.789	-0.007084	-0.006663	-0.007222
1.3160	1151.236	99.929	94.062	101.721	-0.724	50.343	2191.658	-0.006995	-0.006584	-0.007120
1.3200	1104.768	95.030	90.457	97.860	-0.718	50.346	2103.195	-0.006652	-0.006332	-0.006850
1.3240	1051.583	89.362	86.137	92.701	-0.732	50.357	2001.944	-0.006255	-0.006030	-0.006489
1.3280	1042.175	88.032	85.190	91.535	-0.727	50.361	1984.034	-0.006162	-0.005963	-0.006407
1.3320	991.875	82.780	81.308	86.866	-0.728	50.353	1888.275	-0.005795	-0.005692	-0.006081
1.3360	937.442	76.720	76.631	81.057	-0.720	50.343	1784.649	-0.005370	-0.005364	-0.005674
1.3400	900.938	73.195	73.270	77.569	-0.714	50.346	1715.155	-0.005124	-0.005129	-0.005430
1.3440	834.708	65.899	67.438	70.578	-0.720	50.357	1589.069	-0.004613	-0.004721	-0.004940
1.3480	782.244	60.272	61.987	65.188	-0.734	50.361	1489.191	-0.004219	-0.004339	-0.004563
1.3520	727.691	54.028	56.623	59.589	-0.722	50.353	1385.336	-0.003782	-0.003964	-0.004171
1.3560	657.433	46.296	49.632	51.487	-0.719	50.343	1251.583	-0.003241	-0.003474	-0.003604
1.3600	599.123	39.601	43.689	45.440	-0.712	50.346	1140.575	-0.002772	-0.003058	-0.003181
1.3640	546.718	34.157	38.460	39.452	-0.724	50.357	1040.812	-0.002391	-0.002692	-0.002762
1.3680	488.679	28.305	32.157	32.977	-0.729	50.361	930.319	-0.001981	-0.002251	-0.002308
1.3720	444.014	23.115	26.831	27.751	-0.726	50.353	845.289	-0.001618	-0.001878	-0.001943
1.3760	402.867	18.610	21.740	23.123	-0.732	50.343	766.954	-0.001303	-0.001522	-0.001619
1.3800	363.477	14.064	17.089	18.317	-0.725	50.346	691.967	-0.000984	-0.001196	-0.001282
1.3840	330.460	10.414	13.333	14.217	-0.722	50.357	629.110	-0.000729	-0.000933	-0.000995
1.3880	291.536	6.302	8.708	9.325	-0.731	50.361	555.010	-0.000441	-0.000610	-0.000653
1.3920	267.385	3.554	5.476	5.949	-0.718	50.353	509.033	-0.000249	-0.000383	-0.000416
1.3960	255.799	2.262	3.577	4.156	-0.728	50.343	486.975	-0.000158	-0.000250	-0.000291
1.4000	246.917	1.067	1.855	2.750	-0.733	50.346	470.066	-0.000075	-0.000130	-0.000193
1.4040	211.405	-2.285	-2.368	-1.126	-0.739	50.357	402.460	0.000160	0.000166	0.000079
1.4080	175.637	-5.656	-7.348	-5.893	-0.746	50.361	334.368	0.000396	0.000514	0.000413
1.4120	202.643	-4.265	-4.915	-3.959	-0.736	50.353	385.780	0.000299	0.000344	0.000277
1.4160	269.249	1.180	2.160	2.363	-0.736	50.342	512.581	-0.000083	-0.000151	-0.000165
1.4200	302.687	4.550	5.777	6.213	-0.726	50.346	576.239	-0.000318	-0.000404	-0.000435
1.4240	334.427	7.466	9.231	9.492	-0.723	50.357	636.663	-0.000523	-0.000646	-0.000664
1.4280	350.988	9.196	11.130	11.299	-0.724	50.360	668.192	-0.000644	-0.000779	-0.000791
1.4320	346.600	8.421	10.427	10.950	-0.735	50.353	659.838	-0.000589	-0.000730	-0.000767
1.4360	376.281	10.682	13.029	13.565	-0.735	50.343	716.343	-0.000748	-0.000912	-0.000950
1.4400	466.151	19.410	22.508	23.458	-0.738	50.346	887.432	-0.001359	-0.001576	-0.001642
1.4440	608.049	33.499	37.124	38.009	-0.738	50.357	1157.570	-0.002345	-0.002599	-0.002661
1.4480	684.409	42.426	45.365	46.830	-0.741	50.361	1302.938	-0.002970	-0.003176	-0.003278
1.4520	706.876	45.158	48.064	49.667	-0.741	50.354	1345.711	-0.003161	-0.003365	-0.003477
1.4560	770.732	51.812	53.924	56.182	-0.740	50.343	1467.276	-0.003627	-0.003775	-0.003933
1.4600	796.040	55.067	57.116	59.406	-0.728	50.346	1515.455	-0.003855	-0.003998	-0.004158
1.4640	840.524	59.839	61.136	63.688	-0.737	50.358	1600.142	-0.004189	-0.004279	-0.004458
1.4680	979.416	74.881	74.345	78.487	-0.731	50.361	1864.557	-0.005242	-0.005204	-0.005494
1.4720	1011.833	79.594	78.200	82.712	-0.744	50.354	1926.270	-0.005572	-0.005474	-0.005790
1.4760	1011.126	80.059	78.859	83.238	-0.747	50.343	1924.925	-0.005604	-0.005520	-0.005827
1.4800	1071.856	86.794	84.198	89.744	-0.739	50.346	2040.539	-0.006076	-0.005894	-0.006282
1.4840	1121.345	92.843	88.642	95.121	-0.736	50.357	2134.752	-0.006499	-0.006205	-0.006658
1.4880	1126.514	94.249	89.593	96.399	-0.739	50.360	2144.594	-0.006597	-0.006272	-0.006748
1.4920	1111.546	93.137	89.028	95.732	-0.734	50.354	2116.098	-0.006520	-0.006232	-0.006701
1.4960	1113.410	93.644	89.439	95.733	-0.736	50.343	2119.646	-0.006555	-0.006261	-0.006701
1.5000	1144.218	97.166	92.136	99.094	-0.744	50.346	2178.297	-0.006802	-0.006450	-0.006937
1.5040	1184.930	101.766	95.505	103.668	-0.746	50.358	2255.802	-0.007124	-0.006685	-0.007257
1.5080	1201.912	104.464	97.254	105.739	-0.751	50.361	2288.132	-0.007312	-0.006808	-0.007402
1.5120	1196.397	104.071	96.912	105.849	-0.747	50.353	2277.632	-0.007285	-0.006784	-0.007409
1.5160	1185.185	102.987	96.500	105.002	-0.743	50.343	2256.289	-0.007209	-0.006755	-0.007350
1.5200	1154.107	100.448	94.572	102.569	-0.740	50.346	2197.123	-0.007031	-0.006620	-0.007180
1.5240	1083.834	92.968	89.536	96.190	-0.742	50.358	2063.341	-0.006508	-0.006267	-0.006733
1.5280	1031.114	87.342	85.010	91.395	-0.747	50.362	1962.976	-0.006114	-0.005951	-0.006398
1.5320	1001.794	84.226	82.325	88.076	-0.738	50.353	1907.158	-0.005896	-0.005763	-0.006165
1.5360	922.609	75.807	75.364	80.210	-0.735	50.343	1756.411	-0.005306	-0.005275	-0.005615
1.5400	871.077	69.619	70.382	74.541	-0.742	50.346	1658.306	-0.004873	-0.004927	-0.005218
1.5440	838.826	66.124	67.522	71.164	-0.733	50.358	1596.909	-0.004629	-0.004727	-0.004981
1.5480	766.118	58.713	61.039	64.020	-0.748	50.361	1458.492	-0.004110	-0.004273	-0.004481
1.5520	709.732	52.484	55.261	57.489	-0.743	50.353	1351.147	-0.003674	-0.003868	-0.004024
1.5560	662.798	47.055	50.196	52.111	-0.748	50.343	1261.797	-0.003294	-0.003514	-0.003648
1.5600	602.850	40.696	44.349	45.872	-0.748	50.347	1147.671	-0.002849	-0.003104	-0.003211
1.5640	539.174	33.766	37.357	39.130	-0.747	50.358	1026.449	-0.002364	-0.002615	-0.002739
1.5680	481.119	27.548	31.055	32.352	-0.747	50.362	915.928	-0.001928	-0.002174	-0.002265
1.5720	436.019	22.147	26.130	26.917	-0.740	50.354	830.069	-0.001550	-0.001829	-0.001884
1.5760	379.302	16.281	19.621	20.344	-0.728	50.343	722.094	-0.001140	-0.001373	-0.001424
1.5800	341.776	12.042	15.273	15.982	-0.723	50.347	650.654	-0.000843	-0.001069	-0.001119
1.5840	312.155	9.098	11.339	11.939	-0.736	50.358	594.263	-0.000637	-0.000794	-0.000836
1.5880	286.532	6.231	8.103	8.615	-0.734	50.361	545.483	-0.000436	-0.000567	-0.000603
1.5920	271.503	4.370	5.751	6.379	-0.728	50.353	516.872	-0.000306	-0.000403	-0.000447
1.5960	259.195	2.305	3.672	4.432	-0.730	50.343	493.441	-0.000161	-0.000257	-0.000310
1.6000	239.853	0.267	1.335	2.112	-0.736	50.347	456.619	-0.000019	-0.000093	-0.000148
1.6040	231.618	-0.741	0.123	0.709	-0.740	50.358	440.941	0.000052	-0.000009	-0.000050
1.6080	235.089	-0.604	0.081	0.572	-0.744	50.361	447.550	0.000042	-0.000006	-0.000040
1.6120	247.894	-0.055	1.060	1.544	-0.742	50.354	471.926	0.000004	-0.000074	-0.000108
1.6160	265.747	1.393	2.365	2.667	-0.744	50.343	505.915	-0.000098	-0.000166	-0.000187
1.6200	307.090	4.688	6.369	6.517	-0.744	50.347	584.621	-0.000328	-0.000446	-0.000456
1.6240	354.716	9.097	11.459	12.159	-0.743	50.358	675.287	-0.000637	-0.000802	-0.000851
1.6280	371.006	10.973	13.454	14.079	-0.742	50.361	706.301	-0.000768	-0.000942	-0.000986
1.6320	386.726	12.491	15.051	15.689	-0.724	50.354	736.227	-0.000874	-0.001054	-0.001098
1.6360	442.617	17.712	20.665	21.413	-0.730	50.344	842.628	-0.001240	-0.001447	-0.001499
1.6400	506.743	24.111	27.231	28.041	-0.729	50.347	964.708	-0.001688	-0.001906	-0.001963
1.6440	575.768	30.959	34.456	35.409	-0.728	50.358	1096.115	-0.002167	-0.002412	-0.002479
1.6480	639.369	37.918	41.031	42.662	-0.735	50.361	1217.194	-0.002654	-0.002872	-0.002986
1.6520	687.399	42.789	45.834	47.511	-0.725	50.354	1308.632	-0.002995	-0.003208	-0.003326
1.6560	760.513	50.830	53.224	54.904	-0.733	50.343	1447.821	-0.003558	-0.003726	-0.003843
1.6600	833.250	59.207	60.640	62.952	-0.735	50.347	1586.294	-0.004144	-0.004245	-0.004407
1.6640	871.693	63.979	65.083	67.886	-0.742	50.358	1659.479	-0.004479	-0.004556	-0.004752
1.6680	917.109	69.214	69.349	72.929	-0.736	50.361	1745.939	-0.004845	-0.004854	-0.005105
1.6720	991.634	77.053	76.051	80.695	-0.732	50.354	1887.817	-0.005394	-0.005324	-0.005649
1.6760	1057.970	84.703	82.339	87.436	-0.730	50.344	2014.103	-0.005929	-0.005764	-0.006121
1.6800	1092.460	89.221	85.945	91.800	-0.736	50.347	2079.763	-0.006245	-0.006016	-0.006426
1.6840	1114.867	92.462	88.505	94.816	-0.741	50.358	2122.421	-0.006472	-0.006195	-0.006637
1.6880	1142.941	96.518	91.489	98.358	-0.746	50.362	2175.865	-0.006756	-0.006404	-0.006885
1.6920	1147.825	97.489	92.302	99.108	-0.732	50.353	2185.163	-0.006824	-0.006461	-0.006938
1.6960	1172.351	100.281	94.173	102.028	-0.728	50.343	2231.855	-0.007020	-0.006592	-0.007142
1.7000	1189.258	102.764	95.921	104.515	-0.734	50.347	2264.042	-0.007193	-0.006714	-0.007316
1.7040	1183.773	102.243	95.891	104.417	-0.738	50.359	2253.599	-0.007157	-0.006712	-0.007309
1.7080	1175.732	101.864	95.987	104.071	-0.733	50.362	2238.293	-0.007131	-0.006719	-0.007285
1.7120	1166.926	101.316	95.510	103.597	-0.728	50.353	2221.527	-0.007092	-0.006686	-0.007252
1.7160	1152.303	99.846	94.242	102.375	-0.730	50.343	2193.689	-0.006989	-0.006597	-0.007166
1.7200	1117.182	96.562	91.943	99.220	-0.717	50.347	2126.827	-0.006759	-0.006436	-0.006945
1.7240	1057.068	90.303	87.047	93.661	-0.726	50.358	2012.386	-0.006321	-0.006093	-0.006556
1.7280	1018.265	86.008	83.578	89.605	-0.727	50.362	1938.515	-0.006021	-0.005850	-0.006272
1.7320	984.030	82.011	80.675	86.198	-0.723	50.355	1873.341	-0.005741	-0.005647	-0.006034
1.7360	928.921	75.863	76.081	80.724	-0.726	50.343	1768.427	-0.005310	-0.005326	-0.005651
1.7400	877.930	70.673	71.305	75.554	-0.724	50.348	1671.352	-0.004947	-0.004991	-0.005289
1.7440	822.309	64.836	66.281	69.815	-0.727	50.359	1565.466	-0.004539	-0.004640	-0.004887
1.7480	761.024	58.365	60.448	63.298	-0.721	50.362	1448.793	-0.004086	-0.004231	-0.004431
1.7520	707.462	52.217	54.544	57.379	-0.724	50.354	1346.827	-0.003655	-0.003818	-0.004017
1.7560	647.574	45.483	48.723	50.750	-0.724	50.344	1232.815	-0.003184	-0.003411	-0.003552
1.7600	582.351	38.269	42.146	44.107	-0.706	50.348	1108.646	-0.002679	-0.002950	-0.003088
1.7640	520.374	31.451	35.691	37.215	-0.722	50.359	990.658	-0.002202	-0.002498	-0.002605
1.7680	469.307	26.467	30.078	31.240	-0.722	50.362	893.440	-0.001853	-0.002105	-0.002187
1.7720	437.507	22.693	26.337	27.126	-0.712	50.354	832.901	-0.001589	-0.001844	-0.001899
1.7760	388.620	17.233	20.308	21.429	-0.712	50.344	739.832	-0.001206	-0.001422	-0.001500
1.7800	351.259	12.785	16.041	17.108	-0.714	50.347	668.707	-0.000895	-0.001123	-0.001198
1.7840	320.947	9.559	12.079	12.885	-0.710	50.358	611.000	-0.000669	-0.000846	-0.000902
1.7880	297.277	7.172	9.259	10.020	-0.710	50.361	565.939	-0.000502	-0.000648	-0.000701
1.7920	276.087	4.452	6.646	7.060	-0.708	50.354	525.599	-0.000312	-0.000465	-0.000494
1.7960	259.511	2.584	4.250	4.988	-0.711	50.343	494.041	-0.000181	-0.000297	-0.000349
1.8000	246.706	0.955	2.091	3.042	-0.715	50.348	469.666	-0.000067	-0.000146	-0.000213
1.8040	247.879	0.592	1.652	2.446	-0.727	50.359	471.897	-0.000041	-0.000116	-0.000171
1.8080	251.065	1.027	1.677	2.820	-0.730	50.362	477.962	-0.000072	-0.000117	-0.000197
1.8120	254.506	0.704	1.581	2.889	-0.726	50.354	484.514	-0.000049	-0.000111	-0.000202
1.8160	264.560	1.322	2.628	3.488	-0.723	50.344	503.654	-0.000093	-0.000184	-0.000244
1.8200	286.637	3.104	4.842	5.352	-0.721	50.348	545.683	-0.000217	-0.000339	-0.000375
1.8240	332.879	7.468	9.617	10.090	-0.727	50.359	633.717	-0.000523	-0.000673	-0.000706
1.8280	376.627	11.805	14.159	14.619	-0.730	50.362	717.001	-0.000826	-0.000991	-0.001023
1.8320	418.406	15.201	18.327	19.024	-0.724	50.354	796.537	-0.001064	-0.001283	-0.001332
1.8360	458.081	19.311	22.277	23.179	-0.729	50.344	872.068	-0.001352	-0.001559	-0.001622
1.8400	510.229	24.447	27.960	28.724	-0.727	50.348	971.346	-0.001711	-0.001957	-0.002011
1.8440	578.879	31.338	34.715	36.119	-0.736	50.359	1102.037	-0.002194	-0.002430	-0.002528
1.8480	649.783	39.096	42.559	43.762	-0.739	50.361	1237.020	-0.002737	-0.002979	-0.003063
1.8520	694.899	44.092	47.003	48.567	-0.741	50.354	1322.908	-0.003086	-0.003290	-0.003400
1.8560	731.012	48.136	50.691	52.516	-0.738	50.344	1391.659	-0.003370	-0.003548	-0.003676
1.8600	802.938	55.613	57.639	60.158	-0.727	50.348	1528.587	-0.003893	-0.004035	-0.004211
1.8640	864.359	62.616	63.913	66.870	-0.740	50.359	1645.517	-0.004383	-0.004474	-0.004681
1.8680	909.114	67.962	68.552	71.996	-0.732	50.362	1730.719	-0.004757	-0.004799	-0.005040
1.8720	971.316	74.924	74.468	78.529	-0.728	50.354	1849.136	-0.005245	-0.005213	-0.005497
1.8760	1022.879	81.140	79.656	84.490	-0.728	50.344	1947.298	-0.005680	-0.005576	-0.005914
1.8800	1054.513	85.390	82.710	88.313	-0.728	50.348	2007.523	-0.005977	-0.005790	-0.006182
1.8840	1104.919	91.090	87.197	93.675	-0.727	50.359	2103.481	-0.006376	-0.006104	-0.006557
1.8880	1134.044	95.088	90.445	97.497	-0.722	50.362	2158.928	-0.006656	-0.006331	-0.006825
1.8920	1146.036	96.757	91.612	99.137	-0.711	50.354	2181.759	-0.006773	-0.006413	-0.006940
1.8960	1157.683	98.429	93.224	100.373	-0.716	50.344	2203.932	-0.006890	-0.006526	-0.007026
1.9000	1167.422	100.432	94.296	101.792	-0.730	50.348	2222.471	-0.007030	-0.006601	-0.007125
1.9040	1168.278	101.050	94.696	102.569	-0.726	50.359	2224.102	-0.007074	-0.006629	-0.007180
1.9080	1165.468	101.217	94.654	102.764	-0.728	50.362	2218.752	-0.007085	-0.006626	-0.007194
1.9120	1158.976	100.475	94.338	102.445	-0.720	50.354	2206.392	-0.007033	-0.006604	-0.007171
1.9160	1144.699	98.992	93.446	101.513	-0.723	50.343	2179.213	-0.006929	-0.006541	-0.007106
1.9200	1120.999	96.602	91.805	99.358	-0.718	50.348	2134.094	-0.006762	-0.006426	-0.006955
1.9240	1063.771	90.499	87.458	94.300	-0.722	50.359	2025.146	-0.006335	-0.006122	-0.006601
1.9280	1018.821	85.966	84.102	89.964	-0.730	50.362	1939.573	-0.006018	-0.005887	-0.006297
1.9320	980.619	82.036	80.385	85.824	-0.722	50.354	1866.846	-0.005743	-0.005627	-0.006008
1.9360	928.350	76.216	75.748	80.808	-0.724	50.343	1767.340	-0.005335	-0.005302	-0.005657
1.9400	872.549	70.293	70.672	75.179	-0.711	50.348	1661.110	-0.004920	-0.004947	-0.005263
1.9440	815.637	64.077	65.333	69.038	-0.711	50.360	1552.763	-0.004485	-0.004573	-0.004833
1.9480	756.214	57.691	60.006	62.783	-0.723	50.362	1439.638	-0.004038	-0.004200	-0.004395
1.9520	701.045	51.377	54.406	56.626	-0.714	50.354	1334.610	-0.003596	-0.003808	-0.003964
1.9560	647.334	45.621	48.904	50.958	-0.712	50.344	1232.357	-0.003193	-0.003423	-0.003567
1.9600	584.725	38.987	42.682	44.802	-0.712	50.348	1113.167	-0.002729	-0.002988	-0.003136
1.9640	528.369	32.712	36.379	38.076	-0.716	50.360	1005.878	-0.002290	-0.002547	-0.002665
1.9680	483.810	28.040	31.206	32.864	-0.718	50.362	921.049	-0.001963	-0.002184	-0.002301
1.9720	439.806	22.680	26.239	27.709	-0.713	50.355	837.278	-0.001588	-0.001837	-0.001940
1.9760	392.347	17.781	21.065	22.123	-0.722	50.344	746.927	-0.001245	-0.001475	-0.001549
1.9800	352.461	13.320	16.442	17.274	-0.716	50.348	670.996	-0.000932	-0.001151	-0.001209
1.9840	321.728	9.700	12.782	13.438	-0.719	50.360	612.488	-0.000679	-0.000895	-0.000941
1.9880	290.664	6.878	8.804	9.853	-0.724	50.362	553.350	-0.000481	-0.000616	-0.000690
1.9920	265.281	4.017	5.091	6.532	-0.726	50.355	505.028	-0.000281	-0.000356	-0.000457
1.9960	248.630	1.855	2.682	3.737	-0.723	50.344	473.328	-0.000130	-0.000188	-0.000262
