# Supplementary material for: Evaluation of a Cold-Mixed High-Performance Polyurethane Mixture
Source: Hindawi journal article supplement (doi:10.1155/2019/1507971), 2019-11-07
Supplement: f1 [file 1507971.f1.zip › 1507971.f1/dynamic modulus data/PUM/specimen1/temp50/zhs-1-50_10Hz.csv]

Test Information
****************
Project name	zhs
Operator name	1
Target test temperature	50
Target confining stress	0
Average dynamic strain range from 75 to 125 micro-strain
Contact stress	5
Initial modulus	1000
Axial gauge length	70
Comments
Specimen information
********************
Identification	zhs-1-50
Dimensions	Point 1	Point 2	Point 3	Point 4	Point 5	Point 6	Average	Std Dev.
Diameter (mm)	49.2	49.2	49.3				49.23	0.058
Height (mm)	101.3	101.2	101.3				101.27	0.058
Cross-sectional area (mm�)	1903.7
Conditioning time
Properties/Comments
Test Data	10Hz
*********
Test date and time	Wed	Apr 3	2019	1:50 PM
Dynamic modulus (MPa)	9634
Phase angle (Degrees)	4.11
Average temperature (�C)	50.3
Average confining pressure (kPa)	-0.7
Average micro-strain	101
Load drift (%)	-0.3
Load standard error (%)	4.3
Average deformation drift (%)	-3.7
Average deformation standard error (%)	4.3
Deformation uniformity (%)	3.1
Phase uniformity (Degrees)	0.2
Conditioning Cycles
Time (sec)	Axial stress (kPa)	Axial micro-strain #1	Axial micro-strain #2	Axial micro-strain #3	Confining pressure (kPa)	Temperature (�C)	Load (N)	Displacement #1 (mm)	Displacement #2 (mm)	Displacement #3 (mm)
0.0000	440.092	11.732	15.700	14.619	-0.703	50.338	837.822	-0.000821	-0.001099	-0.001023
0.0020	435.283	11.298	15.465	15.049	-0.714	50.338	828.667	-0.000791	-0.001083	-0.001053
0.0040	408.833	9.152	13.277	12.730	-0.710	50.334	778.313	-0.000641	-0.000929	-0.000891
0.0060	342.272	3.133	7.196	6.352	-0.704	50.329	651.598	-0.000219	-0.000504	-0.000445
0.0080	273.502	-3.127	-0.551	-1.416	-0.714	50.323	520.678	0.000219	0.000039	0.000099
0.0100	244.828	-5.977	-4.473	-5.212	-0.716	50.318	466.089	0.000418	0.000313	0.000365
0.0120	246.195	-6.018	-4.528	-5.100	-0.719	50.317	468.693	0.000421	0.000317	0.000357
0.0140	257.557	-5.220	-3.567	-4.320	-0.723	50.321	490.322	0.000365	0.000250	0.000302
0.0160	272.886	-4.083	-2.259	-3.196	-0.720	50.326	519.505	0.000286	0.000158	0.000224
0.0180	297.112	-2.075	-0.153	-1.014	-0.728	50.332	565.624	0.000145	0.000011	0.000071
0.0200	335.539	0.957	3.550	2.474	-0.723	50.338	638.781	-0.000067	-0.000248	-0.000173
0.0220	386.891	5.828	8.736	8.005	-0.731	50.337	736.542	-0.000408	-0.000612	-0.000560
0.0240	444.435	10.907	14.598	14.106	-0.723	50.334	846.090	-0.000763	-0.001022	-0.000987
0.0260	499.544	16.294	20.186	19.871	-0.720	50.329	951.004	-0.001141	-0.001413	-0.001391
0.0280	553.136	21.416	25.595	25.527	-0.728	50.324	1053.028	-0.001499	-0.001792	-0.001787
0.0300	603.947	26.664	30.931	30.503	-0.724	50.319	1149.759	-0.001866	-0.002165	-0.002135
0.0320	648.025	31.507	35.788	35.298	-0.727	50.318	1233.673	-0.002205	-0.002505	-0.002471
0.0340	687.204	35.674	39.600	39.883	-0.715	50.322	1308.260	-0.002497	-0.002772	-0.002792
0.0360	729.494	40.293	43.989	44.176	-0.719	50.326	1388.769	-0.002820	-0.003079	-0.003092
0.0380	778.111	45.372	48.970	49.277	-0.719	50.333	1481.323	-0.003176	-0.003428	-0.003449
0.0400	825.300	50.676	53.333	54.139	-0.710	50.338	1571.159	-0.003547	-0.003733	-0.003790
0.0420	861.428	55.110	57.503	58.573	-0.712	50.338	1639.938	-0.003858	-0.004025	-0.004100
0.0440	887.322	58.155	59.965	61.672	-0.711	50.334	1689.234	-0.004071	-0.004198	-0.004317
0.0460	907.130	60.596	62.111	64.076	-0.706	50.329	1726.942	-0.004242	-0.004348	-0.004485
0.0480	923.135	62.658	63.969	65.826	-0.712	50.323	1757.412	-0.004386	-0.004478	-0.004608
0.0500	936.706	64.146	65.265	67.537	-0.717	50.319	1783.247	-0.004490	-0.004569	-0.004728
0.0520	945.512	65.425	66.629	69.051	-0.726	50.317	1800.013	-0.004580	-0.004664	-0.004834
0.0540	947.030	65.915	67.123	69.384	-0.719	50.321	1802.902	-0.004614	-0.004699	-0.004857
0.0560	943.243	65.775	67.177	69.258	-0.713	50.326	1795.692	-0.004604	-0.004702	-0.004848
0.0580	937.893	65.622	67.067	68.788	-0.721	50.332	1785.507	-0.004594	-0.004695	-0.004815
0.0600	931.851	64.961	66.722	68.482	-0.712	50.338	1774.006	-0.004547	-0.004671	-0.004794
0.0620	923.992	64.554	66.544	68.314	-0.720	50.338	1759.043	-0.004519	-0.004658	-0.004782
0.0640	912.705	63.740	65.814	67.578	-0.711	50.334	1737.556	-0.004462	-0.004607	-0.004730
0.0660	892.312	61.831	64.079	65.952	-0.716	50.329	1698.732	-0.004328	-0.004486	-0.004617
0.0680	850.052	57.931	60.833	62.019	-0.722	50.323	1618.280	-0.004055	-0.004258	-0.004341
0.0700	787.143	51.378	55.287	55.573	-0.719	50.318	1498.518	-0.003596	-0.003870	-0.003890
0.0720	723.933	45.076	49.356	49.860	-0.719	50.317	1378.183	-0.003155	-0.003455	-0.003490
0.0740	673.318	39.520	44.458	44.135	-0.717	50.321	1281.824	-0.002766	-0.003112	-0.003089
0.0760	637.265	35.478	40.398	40.493	-0.715	50.326	1213.188	-0.002483	-0.002828	-0.002834
0.0780	606.396	32.109	37.372	37.227	-0.716	50.332	1154.423	-0.002248	-0.002616	-0.002606
0.0800	570.659	28.276	33.643	33.338	-0.713	50.337	1086.388	-0.001979	-0.002355	-0.002334
0.0820	527.933	24.306	29.515	28.945	-0.727	50.337	1005.049	-0.001701	-0.002066	-0.002026
0.0840	483.043	19.688	25.015	23.886	-0.718	50.334	919.590	-0.001378	-0.001751	-0.001672
0.0860	439.491	15.046	20.351	19.148	-0.721	50.329	836.678	-0.001053	-0.001425	-0.001340
0.0880	397.411	10.668	15.742	14.757	-0.729	50.323	756.569	-0.000747	-0.001102	-0.001033
0.0900	359.224	6.863	11.240	10.005	-0.718	50.318	683.870	-0.000480	-0.000787	-0.000700
0.0920	327.048	3.806	7.692	6.685	-0.727	50.318	622.616	-0.000266	-0.000538	-0.000468
0.0940	298.599	0.984	4.211	3.154	-0.725	50.322	568.457	-0.000069	-0.000295	-0.000221
0.0960	272.014	-1.682	0.949	-0.083	-0.719	50.326	517.845	0.000118	-0.000066	0.000006
0.0980	249.998	-4.166	-1.942	-3.043	-0.725	50.332	475.931	0.000292	0.000136	0.000213
0.1000	235.916	-5.695	-4.336	-5.015	-0.727	50.338	449.123	0.000399	0.000304	0.000351
0.1020	228.567	-6.285	-5.188	-5.766	-0.727	50.337	435.133	0.000440	0.000363	0.000404
0.1040	224.344	-7.223	-5.959	-6.670	-0.723	50.334	427.094	0.000506	0.000417	0.000467
0.1060	220.121	-7.741	-6.826	-7.363	-0.716	50.329	419.054	0.000542	0.000478	0.000515
0.1080	216.905	-8.232	-7.708	-8.003	-0.727	50.323	412.931	0.000576	0.000540	0.000560
0.1100	217.656	-8.570	-7.872	-8.476	-0.726	50.319	414.362	0.000600	0.000551	0.000593
0.1120	222.871	-8.220	-7.307	-7.795	-0.721	50.318	424.290	0.000575	0.000511	0.000546
0.1140	232.444	-7.589	-6.522	-7.129	-0.723	50.322	442.514	0.000531	0.000457	0.000499
0.1160	249.697	-6.482	-4.927	-5.574	-0.715	50.326	475.359	0.000454	0.000345	0.000390
0.1180	284.848	-3.492	-1.156	-2.113	-0.715	50.332	542.278	0.000244	0.000081	0.000148
0.1200	336.727	1.210	4.265	2.989	-0.705	50.338	641.041	-0.000085	-0.000299	-0.000209
0.1220	392.557	6.683	9.933	8.658	-0.709	50.337	747.328	-0.000468	-0.000695	-0.000606
0.1240	445.667	11.523	15.506	14.424	-0.711	50.334	848.436	-0.000807	-0.001085	-0.001010
0.1260	494.750	16.337	20.679	19.733	-0.714	50.329	941.877	-0.001144	-0.001447	-0.001381
0.1280	545.156	21.516	25.495	25.251	-0.715	50.324	1037.836	-0.001506	-0.001785	-0.001768
0.1300	598.957	26.917	30.725	30.852	-0.718	50.319	1140.261	-0.001884	-0.002151	-0.002160
0.1320	649.708	32.473	36.188	36.493	-0.726	50.318	1236.877	-0.002273	-0.002533	-0.002555
0.1340	694.027	37.077	40.839	41.091	-0.725	50.322	1321.249	-0.002595	-0.002859	-0.002876
0.1360	733.221	41.302	44.927	45.357	-0.724	50.326	1395.864	-0.002891	-0.003145	-0.003175
0.1380	771.483	45.357	48.971	49.680	-0.720	50.332	1468.706	-0.003175	-0.003428	-0.003478
0.1400	811.519	49.791	52.795	53.459	-0.714	50.338	1544.924	-0.003485	-0.003696	-0.003742
0.1420	850.728	54.491	57.008	58.060	-0.722	50.337	1619.568	-0.003814	-0.003991	-0.004064
0.1440	885.699	58.393	60.613	61.701	-0.712	50.334	1686.144	-0.004088	-0.004243	-0.004319
0.1460	913.171	61.663	63.460	65.174	-0.710	50.329	1738.443	-0.004316	-0.004442	-0.004562
0.1480	931.115	64.230	65.608	67.134	-0.724	50.323	1772.604	-0.004496	-0.004593	-0.004699
0.1500	942.431	65.706	66.735	68.286	-0.714	50.318	1794.147	-0.004599	-0.004671	-0.004780
0.1520	949.375	66.783	67.684	69.662	-0.722	50.318	1807.365	-0.004675	-0.004738	-0.004876
0.1540	952.711	67.243	68.084	70.065	-0.722	50.322	1813.717	-0.004707	-0.004766	-0.004905
0.1560	952.771	67.440	68.333	70.537	-0.720	50.326	1813.831	-0.004721	-0.004783	-0.004938
0.1580	948.278	67.216	68.181	70.480	-0.726	50.333	1805.277	-0.004705	-0.004773	-0.004934
0.1600	939.516	66.574	67.713	69.884	-0.724	50.338	1788.597	-0.004660	-0.004740	-0.004892
0.1620	927.268	65.594	67.176	69.370	-0.728	50.338	1765.280	-0.004592	-0.004702	-0.004856
0.1640	910.541	63.923	66.047	67.856	-0.723	50.335	1733.437	-0.004475	-0.004623	-0.004750
0.1660	881.311	60.873	63.777	65.259	-0.721	50.329	1677.790	-0.004261	-0.004464	-0.004568
0.1680	836.692	56.567	59.953	61.200	-0.719	50.323	1592.846	-0.003960	-0.004197	-0.004284
0.1700	788.841	51.881	55.467	56.446	-0.717	50.319	1501.751	-0.003632	-0.003883	-0.003951
0.1720	745.379	47.530	51.462	52.388	-0.718	50.318	1419.010	-0.003327	-0.003602	-0.003667
0.1740	706.425	43.350	47.829	48.442	-0.719	50.323	1344.852	-0.003035	-0.003348	-0.003391
0.1760	669.636	39.408	44.431	44.593	-0.720	50.327	1274.815	-0.002759	-0.003110	-0.003121
0.1780	628.488	35.294	40.508	40.022	-0.726	50.333	1196.480	-0.002471	-0.002836	-0.002802
0.1800	581.990	30.313	35.444	34.967	-0.718	50.339	1107.960	-0.002122	-0.002481	-0.002448
0.1820	532.832	25.444	30.547	30.071	-0.719	50.338	1014.376	-0.001781	-0.002138	-0.002105
0.1840	482.953	20.335	25.359	25.277	-0.709	50.335	919.418	-0.001423	-0.001775	-0.001769
0.1860	435.102	15.116	19.951	19.607	-0.715	50.330	828.323	-0.001058	-0.001397	-0.001373
0.1880	391.385	10.666	15.341	14.160	-0.718	50.324	745.096	-0.000747	-0.001074	-0.000991
0.1900	352.446	6.584	10.771	9.576	-0.713	50.319	670.967	-0.000461	-0.000754	-0.000670
0.1920	317.160	3.288	6.824	5.669	-0.711	50.318	603.790	-0.000230	-0.000478	-0.000397
0.1940	286.802	-0.026	3.109	1.946	-0.713	50.322	545.998	0.000002	-0.000218	-0.000136
0.1960	263.974	-2.284	0.177	-0.556	-0.711	50.327	502.539	0.000160	-0.000012	0.000039
0.1980	246.887	-3.830	-1.834	-2.751	-0.717	50.333	470.009	0.000268	0.000128	0.000193
0.2000	234.082	-5.290	-4.046	-4.682	-0.715	50.339	445.633	0.000370	0.000283	0.000328
0.2020	224.479	-6.201	-5.602	-5.990	-0.716	50.338	427.351	0.000434	0.000392	0.000419
0.2040	217.957	-7.154	-6.511	-6.824	-0.711	50.335	414.934	0.000501	0.000456	0.000478
0.2060	215.658	-7.336	-7.046	-7.574	-0.707	50.330	410.557	0.000514	0.000493	0.000530
0.2080	216.875	-7.589	-7.087	-7.727	-0.714	50.323	412.874	0.000531	0.000496	0.000541
0.2100	220.812	-7.700	-7.225	-7.921	-0.702	50.320	420.370	0.000539	0.000506	0.000554
0.2120	226.824	-7.405	-6.606	-7.476	-0.710	50.319	431.814	0.000518	0.000462	0.000523
0.2140	236.217	-7.027	-5.891	-6.545	-0.706	50.322	449.696	0.000492	0.000412	0.000458
0.2160	254.446	-5.640	-4.130	-5.113	-0.700	50.327	484.400	0.000395	0.000289	0.000358
0.2180	289.838	-2.761	-0.525	-1.361	-0.714	50.333	551.777	0.000193	0.000037	0.000095
0.2200	339.462	1.673	4.292	3.363	-0.712	50.339	646.248	-0.000117	-0.000300	-0.000235
0.2220	392.106	6.769	10.237	9.074	-0.716	50.338	746.469	-0.000474	-0.000717	-0.000635
0.2240	442.376	11.595	15.576	14.494	-0.711	50.335	842.171	-0.000812	-0.001090	-0.001015
0.2260	488.363	15.886	20.433	19.357	-0.717	50.329	929.718	-0.001112	-0.001430	-0.001355
0.2280	535.267	20.742	25.261	24.638	-0.724	50.323	1019.011	-0.001452	-0.001768	-0.001725
0.2300	586.649	26.117	30.339	29.990	-0.720	50.319	1116.829	-0.001828	-0.002124	-0.002099
0.2320	639.143	31.648	35.804	35.770	-0.730	50.318	1216.764	-0.002215	-0.002506	-0.002504
0.2340	688.106	36.670	40.881	40.965	-0.722	50.322	1309.977	-0.002567	-0.002862	-0.002868
0.2360	729.885	41.189	44.967	45.438	-0.723	50.327	1389.513	-0.002883	-0.003148	-0.003181
0.2380	767.125	45.426	48.654	49.374	-0.731	50.333	1460.409	-0.003180	-0.003406	-0.003456
0.2400	804.937	49.384	52.410	53.184	-0.723	50.339	1532.393	-0.003457	-0.003669	-0.003723
0.2420	842.177	53.901	56.318	57.462	-0.724	50.338	1603.289	-0.003773	-0.003942	-0.004022
0.2440	874.037	57.367	59.648	60.937	-0.724	50.335	1663.942	-0.004016	-0.004175	-0.004266
0.2460	896.369	60.172	62.028	63.548	-0.722	50.330	1706.457	-0.004212	-0.004342	-0.004448
0.2480	911.774	62.180	63.900	65.521	-0.722	50.324	1735.783	-0.004353	-0.004473	-0.004586
0.2500	926.231	63.895	65.719	66.774	-0.718	50.319	1763.306	-0.004473	-0.004600	-0.004674
0.2520	942.281	66.040	67.412	68.871	-0.719	50.318	1793.861	-0.004623	-0.004719	-0.004821
0.2540	955.867	67.667	68.757	70.775	-0.708	50.322	1819.725	-0.004737	-0.004813	-0.004954
0.2560	961.803	68.775	69.555	72.094	-0.712	50.327	1831.026	-0.004814	-0.004869	-0.005047
0.2580	959.639	68.832	69.652	71.982	-0.723	50.334	1826.906	-0.004818	-0.004876	-0.005039
0.2600	953.102	68.312	69.143	71.414	-0.717	50.339	1814.461	-0.004782	-0.004840	-0.004999
0.2620	942.822	67.581	68.647	71.039	-0.722	50.337	1794.891	-0.004731	-0.004805	-0.004973
0.2640	928.064	66.251	67.614	70.121	-0.718	50.335	1766.796	-0.004638	-0.004733	-0.004908
0.2660	902.606	63.711	65.606	67.745	-0.718	50.330	1718.330	-0.004460	-0.004592	-0.004742
0.2680	857.686	58.923	62.042	63.382	-0.714	50.324	1632.814	-0.004125	-0.004343	-0.004437
0.2700	801.164	53.284	56.979	57.782	-0.706	50.319	1525.211	-0.003730	-0.003989	-0.004045
0.2720	746.506	47.742	52.232	52.932	-0.717	50.319	1421.156	-0.003342	-0.003656	-0.003705
0.2740	699.257	42.604	47.636	47.776	-0.715	50.323	1331.205	-0.002982	-0.003335	-0.003344
0.2760	657.072	38.269	43.675	43.428	-0.712	50.327	1250.896	-0.002679	-0.003057	-0.003040
0.2780	614.752	33.933	39.339	38.980	-0.710	50.333	1170.330	-0.002375	-0.002754	-0.002729
0.2800	571.095	29.331	34.660	34.213	-0.704	50.339	1087.217	-0.002053	-0.002426	-0.002395
0.2820	526.220	25.091	30.438	29.781	-0.706	50.338	1001.787	-0.001756	-0.002131	-0.002085
0.2840	481.706	20.628	25.636	24.985	-0.698	50.335	917.044	-0.001444	-0.001795	-0.001749
0.2860	437.252	15.788	20.654	20.081	-0.697	50.330	832.415	-0.001105	-0.001446	-0.001406
0.2880	392.001	11.229	15.727	14.746	-0.698	50.324	746.269	-0.000786	-0.001101	-0.001032
0.2900	350.658	6.668	10.925	9.799	-0.698	50.320	667.562	-0.000467	-0.000765	-0.000686
0.2920	317.205	3.539	6.975	6.086	-0.707	50.319	603.876	-0.000248	-0.000488	-0.000426
0.2940	292.798	0.886	3.743	2.974	-0.704	50.322	557.413	-0.000062	-0.000262	-0.000208
0.2960	272.811	-1.455	1.101	0.265	-0.706	50.326	519.361	0.000102	-0.000077	-0.000019
0.2980	251.500	-3.422	-1.542	-2.389	-0.715	50.333	478.792	0.000240	0.000108	0.000167
0.3000	230.972	-5.640	-4.321	-4.683	-0.710	50.338	439.711	0.000395	0.000302	0.000328
0.3020	217.702	-6.872	-5.904	-6.325	-0.715	50.338	414.448	0.000481	0.000413	0.000443
0.3040	214.215	-7.445	-6.730	-7.199	-0.709	50.335	407.810	0.000521	0.000471	0.000504
0.3060	216.063	-7.545	-6.950	-7.380	-0.712	50.330	411.329	0.000528	0.000486	0.000517
0.3080	218.829	-7.432	-6.840	-7.503	-0.716	50.324	416.594	0.000520	0.000479	0.000525
0.3100	222.150	-7.389	-7.033	-7.546	-0.704	50.320	422.916	0.000517	0.000492	0.000528
0.3120	227.470	-6.998	-6.496	-7.198	-0.712	50.319	433.044	0.000490	0.000455	0.000504
0.3140	236.111	-6.747	-5.574	-6.628	-0.706	50.323	449.495	0.000472	0.000390	0.000464
0.3160	254.927	-5.022	-3.948	-4.530	-0.704	50.327	485.315	0.000352	0.000276	0.000317
0.3180	296.961	-1.932	0.124	-0.542	-0.706	50.333	565.338	0.000135	-0.000009	0.000038
0.3200	358.488	3.455	6.342	5.530	-0.706	50.339	682.468	-0.000242	-0.000444	-0.000387
0.3220	418.857	9.278	12.879	12.480	-0.713	50.338	797.396	-0.000649	-0.000902	-0.000874
0.3240	465.730	13.908	17.736	17.247	-0.706	50.335	886.631	-0.000974	-0.001242	-0.001207
0.3260	501.573	17.599	21.726	20.872	-0.707	50.330	954.866	-0.001232	-0.001521	-0.001461
0.3280	538.558	21.304	25.553	24.997	-0.715	50.324	1025.276	-0.001491	-0.001789	-0.001750
0.3300	587.701	26.172	30.506	29.820	-0.708	50.319	1118.832	-0.001832	-0.002135	-0.002087
0.3320	648.716	32.852	37.014	36.383	-0.711	50.319	1234.989	-0.002300	-0.002591	-0.002547
0.3340	708.394	39.366	43.081	42.871	-0.710	50.323	1348.600	-0.002756	-0.003016	-0.003001
0.3360	750.248	43.631	47.429	47.524	-0.710	50.327	1428.280	-0.003054	-0.003320	-0.003327
0.3380	773.858	46.353	49.935	50.498	-0.718	50.333	1473.227	-0.003245	-0.003495	-0.003535
0.3400	793.665	48.641	51.971	52.834	-0.710	50.339	1510.935	-0.003405	-0.003638	-0.003698
0.3420	821.122	51.980	54.683	55.934	-0.715	50.338	1563.206	-0.003639	-0.003828	-0.003915
0.3440	857.897	55.963	58.096	59.587	-0.718	50.335	1633.215	-0.003917	-0.004067	-0.004171
0.3460	896.805	60.425	61.987	63.938	-0.715	50.329	1707.287	-0.004230	-0.004339	-0.004476
0.3480	925.074	63.557	65.111	67.024	-0.728	50.323	1761.103	-0.004449	-0.004558	-0.004692
0.3500	938.299	64.946	66.489	68.302	-0.720	50.319	1786.280	-0.004546	-0.004654	-0.004781
0.3520	941.815	66.239	67.410	69.204	-0.727	50.319	1792.974	-0.004637	-0.004719	-0.004844
0.3540	941.154	66.365	67.603	69.606	-0.732	50.322	1791.716	-0.004646	-0.004732	-0.004872
0.3560	939.681	66.322	67.548	69.857	-0.729	50.327	1788.912	-0.004643	-0.004728	-0.004890
0.3580	936.841	66.379	67.672	69.843	-0.732	50.334	1783.504	-0.004647	-0.004737	-0.004889
0.3600	931.671	66.027	67.425	69.495	-0.727	50.339	1773.663	-0.004622	-0.004720	-0.004865
0.3620	924.037	65.508	67.260	69.204	-0.734	50.339	1759.129	-0.004586	-0.004708	-0.004844
0.3640	912.826	64.610	66.751	68.300	-0.729	50.335	1737.785	-0.004523	-0.004673	-0.004781
0.3660	894.280	63.164	65.042	66.659	-0.727	50.330	1702.480	-0.004421	-0.004553	-0.004666
0.3680	857.536	59.250	61.878	63.379	-0.733	50.324	1632.528	-0.004147	-0.004331	-0.004437
0.3700	800.879	53.454	56.788	57.753	-0.731	50.320	1524.668	-0.003742	-0.003975	-0.004043
0.3720	739.082	47.322	51.255	52.014	-0.728	50.319	1407.022	-0.003313	-0.003588	-0.003641
0.3740	686.768	41.891	46.289	46.816	-0.719	50.323	1307.430	-0.002932	-0.003240	-0.003277
0.3760	645.049	37.216	42.106	42.217	-0.724	50.328	1228.008	-0.002605	-0.002947	-0.002955
0.3780	605.960	32.909	38.059	38.006	-0.731	50.334	1153.593	-0.002304	-0.002664	-0.002660
0.3800	564.362	28.826	33.876	33.602	-0.728	50.339	1074.400	-0.002018	-0.002371	-0.002352
0.3820	519.247	24.504	29.611	29.236	-0.726	50.339	988.512	-0.001715	-0.002073	-0.002047
0.3840	477.047	20.083	24.946	24.333	-0.718	50.336	908.175	-0.001406	-0.001746	-0.001703
0.3860	441.820	16.281	21.133	20.568	-0.716	50.330	841.112	-0.001140	-0.001479	-0.001440
0.3880	410.516	12.842	17.555	16.885	-0.727	50.324	781.517	-0.000899	-0.001229	-0.001182
0.3900	378.791	9.797	13.951	12.994	-0.723	50.320	721.121	-0.000686	-0.000977	-0.000910
0.3920	345.368	6.614	10.540	9.283	-0.724	50.319	657.492	-0.000463	-0.000738	-0.000650
0.3940	313.838	3.119	6.702	5.697	-0.716	50.323	597.467	-0.000218	-0.000469	-0.000399
0.3960	287.208	0.409	3.220	2.558	-0.731	50.328	546.770	-0.000029	-0.000225	-0.000179
0.3980	266.724	-1.723	0.357	-0.152	-0.734	50.334	507.774	0.000121	-0.000025	0.000011
0.4000	249.096	-3.647	-2.176	-2.445	-0.731	50.340	474.215	0.000255	0.000152	0.000171
0.4020	231.573	-5.289	-4.282	-4.544	-0.730	50.339	440.855	0.000370	0.000300	0.000318
0.4040	217.085	-6.942	-6.360	-6.724	-0.722	50.336	413.275	0.000486	0.000445	0.000471
0.4060	209.917	-7.828	-7.390	-7.949	-0.718	50.330	399.628	0.000548	0.000517	0.000556
0.4080	209.541	-8.037	-7.625	-8.380	-0.723	50.324	398.912	0.000563	0.000534	0.000587
0.4100	213.388	-8.065	-7.557	-8.420	-0.726	50.320	406.237	0.000565	0.000529	0.000589
0.4120	220.226	-7.321	-6.799	-7.545	-0.726	50.319	419.254	0.000512	0.000476	0.000528
0.4140	230.851	-7.027	-6.110	-6.530	-0.722	50.323	439.482	0.000492	0.000428	0.000457
0.4160	252.282	-5.471	-4.103	-4.557	-0.728	50.327	480.280	0.000383	0.000287	0.000319
0.4180	294.797	-1.724	0.190	-0.446	-0.731	50.334	561.218	0.000121	-0.000013	0.000031
0.4200	352.687	3.468	5.956	5.281	-0.725	50.339	671.425	-0.000243	-0.000417	-0.000370
0.4220	412.109	9.194	12.409	11.478	-0.730	50.339	784.550	-0.000644	-0.000869	-0.000803
0.4240	464.889	14.231	17.926	17.370	-0.727	50.335	885.029	-0.000996	-0.001255	-0.001216
0.4260	509.178	18.875	22.455	22.038	-0.728	50.330	969.343	-0.001321	-0.001572	-0.001543
0.4280	549.063	22.664	26.736	26.138	-0.736	50.324	1045.275	-0.001586	-0.001872	-0.001830
0.4300	589.444	26.665	30.738	30.266	-0.738	50.320	1122.150	-0.001867	-0.002152	-0.002119
0.4320	632.681	31.296	35.446	35.297	-0.733	50.319	1204.462	-0.002191	-0.002481	-0.002471
0.4340	679.765	36.192	40.206	40.216	-0.720	50.323	1294.098	-0.002533	-0.002814	-0.002815
0.4360	725.977	41.271	45.062	45.301	-0.730	50.328	1382.074	-0.002889	-0.003154	-0.003171
0.4380	767.020	45.637	49.397	49.540	-0.732	50.334	1460.209	-0.003195	-0.003458	-0.003468
0.4400	804.065	49.705	52.949	53.237	-0.725	50.340	1530.733	-0.003479	-0.003706	-0.003727
0.4420	842.402	54.309	56.924	57.920	-0.732	50.339	1603.718	-0.003802	-0.003985	-0.004054
0.4440	884.121	58.940	60.968	62.172	-0.711	50.335	1683.140	-0.004126	-0.004268	-0.004352
0.4460	919.694	62.995	64.645	66.230	-0.706	50.330	1750.860	-0.004410	-0.004525	-0.004636
0.4480	939.621	65.606	66.709	68.550	-0.707	50.324	1788.797	-0.004592	-0.004670	-0.004799
0.4500	944.445	66.252	67.384	69.552	-0.710	50.319	1797.981	-0.004638	-0.004717	-0.004869
0.4520	942.431	66.601	67.604	70.024	-0.719	50.319	1794.147	-0.004662	-0.004732	-0.004902
0.4540	940.012	66.601	67.535	69.621	-0.719	50.323	1789.541	-0.004662	-0.004727	-0.004873
0.4560	938.539	66.546	67.411	69.635	-0.719	50.327	1786.737	-0.004658	-0.004719	-0.004874
0.4580	936.766	66.477	67.520	69.760	-0.724	50.334	1783.361	-0.004653	-0.004726	-0.004883
0.4600	932.888	66.126	67.603	69.607	-0.723	50.339	1775.980	-0.004629	-0.004732	-0.004873
0.4620	925.209	66.056	67.218	69.383	-0.730	50.338	1761.360	-0.004624	-0.004705	-0.004857
0.4640	914.223	64.878	66.503	68.355	-0.716	50.335	1740.446	-0.004541	-0.004655	-0.004785
0.4660	896.925	63.459	65.210	67.176	-0.714	50.330	1707.516	-0.004442	-0.004565	-0.004702
0.4680	863.081	60.230	62.581	64.493	-0.720	50.324	1643.085	-0.004216	-0.004381	-0.004515
0.4700	806.154	54.377	57.669	58.877	-0.716	50.320	1534.710	-0.003806	-0.004037	-0.004121
0.4720	739.578	47.782	51.779	52.208	-0.714	50.319	1407.967	-0.003345	-0.003624	-0.003655
0.4740	680.321	41.384	45.916	46.247	-0.708	50.323	1295.156	-0.002897	-0.003214	-0.003237
0.4760	633.943	36.655	41.361	41.342	-0.713	50.328	1206.865	-0.002566	-0.002895	-0.002894
0.4780	597.545	32.600	37.576	37.423	-0.719	50.334	1137.571	-0.002282	-0.002630	-0.002620
0.4800	564.933	29.131	33.945	33.727	-0.719	50.339	1075.487	-0.002039	-0.002376	-0.002361
0.4820	529.286	25.539	30.436	30.269	-0.727	50.338	1007.624	-0.001788	-0.002131	-0.002119
0.4840	487.461	20.923	26.032	25.639	-0.726	50.336	928.001	-0.001465	-0.001822	-0.001795
0.4860	441.444	16.238	21.174	20.513	-0.719	50.330	840.397	-0.001137	-0.001482	-0.001436
0.4880	395.067	11.482	16.207	15.301	-0.718	50.324	752.106	-0.000804	-0.001135	-0.001071
0.4900	353.979	7.272	11.308	10.714	-0.714	50.320	673.885	-0.000509	-0.000792	-0.000750
0.4920	321.533	4.423	7.744	7.186	-0.713	50.319	612.116	-0.000310	-0.000542	-0.000503
0.4940	296.255	1.672	4.567	4.059	-0.707	50.323	563.993	-0.000117	-0.000320	-0.000284
0.4960	274.404	-0.714	2.021	0.861	-0.705	50.328	522.394	0.000050	-0.000141	-0.000060
0.4980	255.348	-2.746	-0.484	-1.654	-0.710	50.333	486.116	0.000192	0.000034	0.000116
0.5000	217.176	-12.245	-12.151	-12.437	-0.731	50.329	413.446	0.000857	0.000851	0.000871
0.5020	217.130	-12.371	-12.153	-12.298	-0.724	50.335	413.361	0.000866	0.000851	0.000861
0.5040	217.551	-12.385	-12.235	-12.508	-0.721	50.341	414.162	0.000867	0.000856	0.000876
0.5060	218.378	-12.024	-11.656	-12.606	-0.723	50.342	415.735	0.000842	0.000816	0.000882
0.5080	220.617	-12.135	-11.325	-12.173	-0.728	50.338	419.998	0.000849	0.000793	0.000852
0.5100	226.208	-11.688	-11.105	-11.882	-0.723	50.334	430.641	0.000818	0.000777	0.000832
0.5120	237.013	-10.721	-10.020	-11.075	-0.725	50.328	451.212	0.000750	0.000701	0.000775
0.5140	262.937	-8.740	-7.680	-8.461	-0.722	50.323	500.565	0.000612	0.000538	0.000592
0.5160	311.900	-4.306	-2.465	-2.959	-0.724	50.321	593.777	0.000301	0.000173	0.000207
0.5180	373.486	1.223	4.043	3.699	-0.723	50.324	711.021	-0.000086	-0.000283	-0.000259
0.5200	435.809	6.991	10.428	10.230	-0.726	50.329	829.668	-0.000489	-0.000730	-0.000716
0.5220	493.894	12.646	16.525	16.190	-0.725	50.335	940.247	-0.000885	-0.001157	-0.001133
0.5240	550.611	18.202	22.484	22.096	-0.721	50.341	1048.222	-0.001274	-0.001574	-0.001547
0.5260	609.357	24.461	28.798	28.962	-0.726	50.341	1160.059	-0.001712	-0.002016	-0.002027
0.5280	670.613	30.917	35.238	35.827	-0.725	50.339	1276.674	-0.002164	-0.002467	-0.002508
0.5300	731.267	37.315	41.610	41.980	-0.720	50.334	1392.145	-0.002612	-0.002913	-0.002939
0.5320	791.561	43.924	48.036	48.442	-0.710	50.328	1506.929	-0.003075	-0.003363	-0.003391
0.5340	850.848	50.408	54.035	54.766	-0.711	50.323	1619.797	-0.003529	-0.003782	-0.003834
0.5360	906.814	57.270	59.690	61.158	-0.715	50.321	1726.341	-0.004009	-0.004178	-0.004281
0.5380	961.097	63.585	65.125	67.231	-0.721	50.324	1829.681	-0.004451	-0.004559	-0.004706
0.5400	1014.898	69.520	70.436	73.235	-0.712	50.329	1932.106	-0.004866	-0.004930	-0.005126
0.5420	1063.515	75.429	75.213	78.613	-0.714	50.335	2024.660	-0.005280	-0.005265	-0.005503
0.5440	1098.862	79.863	78.584	82.280	-0.712	50.341	2091.951	-0.005590	-0.005501	-0.005760
0.5460	1119.752	83.062	80.949	85.420	-0.717	50.341	2131.720	-0.005814	-0.005666	-0.005979
0.5480	1136.614	85.293	82.848	87.547	-0.720	50.338	2163.820	-0.005970	-0.005799	-0.006128
0.5500	1156.902	87.917	85.051	89.937	-0.719	50.334	2202.444	-0.006154	-0.005954	-0.006296
0.5520	1177.416	90.470	87.404	92.340	-0.720	50.327	2241.497	-0.006333	-0.006118	-0.006464
0.5540	1192.128	92.294	88.823	93.926	-0.715	50.323	2269.506	-0.006461	-0.006218	-0.006575
0.5560	1195.630	93.586	89.579	94.871	-0.723	50.321	2276.173	-0.006551	-0.006271	-0.006641
0.5580	1190.055	93.504	89.798	95.136	-0.718	50.324	2265.558	-0.006545	-0.006286	-0.006660
0.5600	1179.429	92.717	89.345	94.635	-0.718	50.329	2245.331	-0.006490	-0.006254	-0.006624
0.5620	1163.079	91.199	88.395	93.590	-0.722	50.335	2214.203	-0.006384	-0.006188	-0.006551
0.5640	1133.713	88.393	86.233	91.118	-0.718	50.342	2158.298	-0.006187	-0.006036	-0.006378
0.5660	1076.229	82.906	82.133	86.269	-0.716	50.341	2048.864	-0.005803	-0.005749	-0.006039
0.5680	1001.884	75.371	75.747	79.280	-0.716	50.338	1907.330	-0.005276	-0.005302	-0.005550
0.5700	934.602	68.146	69.720	72.720	-0.720	50.334	1779.242	-0.004770	-0.004880	-0.005090
0.5720	879.447	62.335	64.892	66.798	-0.717	50.328	1674.242	-0.004363	-0.004542	-0.004676
0.5740	832.919	57.282	60.199	61.618	-0.719	50.323	1585.665	-0.004010	-0.004214	-0.004313
0.5760	786.346	52.555	55.850	57.142	-0.726	50.322	1497.002	-0.003679	-0.003909	-0.004000
0.5780	733.116	46.719	50.787	51.500	-0.724	50.324	1395.664	-0.003270	-0.003555	-0.003605
0.5800	671.800	40.039	44.732	45.190	-0.730	50.329	1278.934	-0.002803	-0.003131	-0.003163
0.5820	610.334	33.543	38.415	38.964	-0.731	50.335	1161.919	-0.002348	-0.002689	-0.002727
0.5840	555.315	27.663	32.692	32.781	-0.729	50.342	1057.177	-0.001936	-0.002288	-0.002295
0.5860	505.465	22.609	27.670	27.433	-0.730	50.341	962.276	-0.001583	-0.001937	-0.001920
0.5880	460.455	17.921	22.800	22.137	-0.731	50.338	876.589	-0.001254	-0.001596	-0.001550
0.5900	418.992	13.262	18.024	17.315	-0.734	50.334	797.653	-0.000928	-0.001262	-0.001212
0.5920	379.437	9.458	13.498	12.826	-0.739	50.328	722.351	-0.000662	-0.000945	-0.000898
0.5940	340.874	5.404	8.861	8.003	-0.728	50.323	648.937	-0.000378	-0.000620	-0.000560
0.5960	304.731	1.700	4.677	3.724	-0.731	50.321	580.130	-0.000119	-0.000327	-0.000261
0.5980	276.568	-1.441	1.113	0.264	-0.735	50.325	526.514	0.000101	-0.000078	-0.000018
0.6000	257.782	-3.478	-1.625	-2.098	-0.733	50.329	490.751	0.000243	0.000114	0.000147
0.6020	246.872	-4.744	-3.606	-3.890	-0.732	50.335	469.980	0.000332	0.000252	0.000272
0.6040	240.274	-5.992	-4.898	-5.087	-0.730	50.342	457.420	0.000419	0.000343	0.000356
0.6060	237.569	-6.091	-5.463	-5.448	-0.734	50.342	452.271	0.000426	0.000382	0.000381
0.6080	238.862	-6.454	-5.395	-5.739	-0.733	50.339	454.731	0.000452	0.000378	0.000402
0.6100	243.160	-6.720	-5.368	-5.448	-0.737	50.334	462.914	0.000470	0.000376	0.000381
0.6120	249.487	-6.301	-4.636	-5.280	-0.732	50.328	474.958	0.000441	0.000325	0.000370
0.6140	259.511	-5.740	-3.924	-4.724	-0.731	50.323	494.041	0.000402	0.000275	0.000331
0.6160	281.257	-3.632	-1.913	-2.738	-0.733	50.321	535.440	0.000254	0.000134	0.000192
0.6180	328.671	0.409	3.109	2.166	-0.728	50.324	625.706	-0.000029	-0.000218	-0.000152
0.6200	397.321	6.514	9.988	9.352	-0.720	50.329	756.397	-0.000456	-0.000699	-0.000655
0.6220	471.306	13.544	17.418	17.093	-0.724	50.335	897.245	-0.000948	-0.001219	-0.001197
0.6240	543.998	20.798	24.615	24.790	-0.719	50.342	1035.633	-0.001456	-0.001723	-0.001735
0.6260	612.964	28.068	32.060	32.254	-0.729	50.342	1166.925	-0.001965	-0.002244	-0.002258
0.6280	680.471	34.944	39.010	39.355	-0.727	50.338	1295.443	-0.002446	-0.002731	-0.002755
0.6300	746.461	41.736	45.517	46.332	-0.723	50.334	1421.070	-0.002922	-0.003186	-0.003243
0.6320	805.508	48.247	51.406	52.640	-0.734	50.328	1533.480	-0.003377	-0.003598	-0.003685
0.6340	858.137	54.111	56.801	57.781	-0.732	50.323	1633.673	-0.003788	-0.003976	-0.004045
0.6360	907.415	59.878	61.892	63.353	-0.732	50.322	1727.486	-0.004191	-0.004332	-0.004435
0.6380	956.919	65.435	66.900	68.926	-0.734	50.325	1821.728	-0.004580	-0.004683	-0.004825
0.6400	1007.279	71.091	71.730	74.791	-0.730	50.329	1917.601	-0.004976	-0.005021	-0.005235
0.6420	1054.498	76.931	76.381	79.834	-0.727	50.336	2007.494	-0.005385	-0.005347	-0.005588
0.6440	1094.669	81.659	80.219	83.977	-0.719	50.341	2083.969	-0.005716	-0.005615	-0.005878
0.6460	1127.266	85.954	83.509	87.896	-0.733	50.342	2146.025	-0.006017	-0.005846	-0.006153
0.6480	1151.417	88.928	85.987	90.896	-0.732	50.339	2192.001	-0.006225	-0.006019	-0.006363
0.6500	1168.068	91.342	87.776	93.077	-0.731	50.334	2223.701	-0.006394	-0.006144	-0.006515
0.6520	1178.062	93.012	89.096	94.398	-0.731	50.328	2242.727	-0.006511	-0.006237	-0.006608
0.6540	1180.617	93.573	89.579	95.066	-0.727	50.323	2247.591	-0.006550	-0.006271	-0.006655
0.6560	1176.394	93.630	89.414	95.539	-0.734	50.322	2239.552	-0.006554	-0.006259	-0.006688
0.6580	1167.091	92.899	89.164	95.220	-0.739	50.325	2221.842	-0.006503	-0.006242	-0.006665
0.6600	1154.633	91.830	88.504	94.399	-0.734	50.330	2198.124	-0.006428	-0.006195	-0.006608
0.6620	1138.252	90.287	87.265	92.910	-0.731	50.336	2166.939	-0.006320	-0.006109	-0.006504
0.6640	1111.772	87.747	85.269	90.007	-0.724	50.342	2116.528	-0.006142	-0.005969	-0.006301
0.6660	1066.912	83.552	82.106	86.325	-0.724	50.342	2031.126	-0.005849	-0.005747	-0.006043
0.6680	1014.342	78.038	77.814	81.531	-0.731	50.339	1931.047	-0.005463	-0.005447	-0.005707
0.6700	967.228	72.887	73.741	76.944	-0.734	50.334	1841.354	-0.005102	-0.005162	-0.005386
0.6720	919.663	67.977	69.806	72.150	-0.735	50.328	1750.803	-0.004758	-0.004886	-0.005050
0.6740	864.209	62.168	64.618	66.492	-0.732	50.323	1645.231	-0.004352	-0.004523	-0.004654
0.6760	802.682	55.950	58.894	60.545	-0.739	50.322	1528.101	-0.003917	-0.004123	-0.004238
0.6780	739.653	49.256	52.852	53.807	-0.740	50.325	1408.110	-0.003448	-0.003700	-0.003766
0.6800	678.638	42.535	46.727	47.553	-0.739	50.329	1291.952	-0.002977	-0.003271	-0.003329
0.6820	619.877	36.276	40.701	41.301	-0.728	50.336	1180.086	-0.002539	-0.002849	-0.002891
0.6840	562.138	30.328	34.551	35.006	-0.727	50.342	1070.166	-0.002123	-0.002419	-0.002450
0.6860	507.810	24.588	29.115	28.987	-0.728	50.342	966.740	-0.001721	-0.002038	-0.002029
0.6880	460.155	19.142	23.790	23.665	-0.727	50.339	876.017	-0.001340	-0.001665	-0.001657
0.6900	416.888	14.245	18.850	18.567	-0.720	50.334	793.648	-0.000997	-0.001319	-0.001300
0.6920	375.440	9.699	14.143	13.716	-0.716	50.328	714.741	-0.000679	-0.000990	-0.000960
0.6940	335.434	5.685	9.561	8.922	-0.714	50.323	638.580	-0.000398	-0.000669	-0.000625
0.6960	299.651	2.275	5.282	4.906	-0.716	50.322	570.459	-0.000159	-0.000370	-0.000343
0.6980	273.938	-0.503	1.995	1.471	-0.718	50.325	521.507	0.000035	-0.000140	-0.000103
0.7000	258.248	-2.228	-0.359	-1.099	-0.719	50.329	491.638	0.000156	0.000025	0.000077
0.7020	246.781	-3.408	-2.066	-2.739	-0.720	50.336	469.809	0.000239	0.000145	0.000192
0.7040	238.486	-4.686	-3.454	-4.337	-0.711	50.342	454.016	0.000328	0.000242	0.000304
0.7060	235.510	-5.262	-4.073	-4.587	-0.718	50.343	448.351	0.000368	0.000285	0.000321
0.7080	237.028	-5.374	-4.102	-4.822	-0.708	50.340	451.241	0.000376	0.000287	0.000338
0.7100	241.161	-5.388	-4.321	-4.669	-0.709	50.335	459.108	0.000377	0.000302	0.000327
0.7120	247.939	-5.219	-3.840	-4.001	-0.712	50.328	472.012	0.000365	0.000269	0.000280
0.7140	260.006	-4.672	-3.002	-3.765	-0.710	50.324	494.986	0.000327	0.000210	0.000264
0.7160	288.365	-2.145	-0.305	-0.750	-0.713	50.323	548.973	0.000150	0.000021	0.000053
0.7180	343.760	2.627	5.598	5.003	-0.717	50.325	654.430	-0.000184	-0.000392	-0.000350
0.7200	414.273	9.054	12.875	12.187	-0.720	50.330	788.670	-0.000634	-0.000901	-0.000853
0.7220	482.292	15.621	19.949	19.675	-0.723	50.336	918.159	-0.001093	-0.001396	-0.001377
0.7240	540.737	21.444	25.908	25.639	-0.720	50.342	1029.425	-0.001501	-0.001814	-0.001795
0.7260	592.750	27.311	31.318	31.171	-0.730	50.342	1128.445	-0.001912	-0.002192	-0.002182
0.7280	651.647	32.924	37.249	37.560	-0.725	50.339	1240.568	-0.002305	-0.002607	-0.002629
0.7300	720.507	40.304	43.935	44.844	-0.719	50.334	1371.660	-0.002821	-0.003075	-0.003139
0.7320	788.766	47.657	50.897	51.959	-0.724	50.329	1501.608	-0.003336	-0.003563	-0.003637
0.7340	847.933	54.239	56.636	57.948	-0.724	50.324	1614.246	-0.003797	-0.003965	-0.004056
0.7360	899.195	60.316	61.714	63.505	-0.729	50.322	1711.836	-0.004222	-0.004320	-0.004445
0.7380	950.141	66.069	66.599	69.328	-0.732	50.325	1808.825	-0.004625	-0.004662	-0.004853
0.7400	1001.583	71.442	71.854	75.041	-0.730	50.330	1906.757	-0.005001	-0.005030	-0.005253
0.7420	1050.350	77.069	76.601	80.377	-0.731	50.336	1999.598	-0.005395	-0.005362	-0.005626
0.7440	1094.188	82.233	80.717	84.559	-0.720	50.342	2083.054	-0.005756	-0.005650	-0.005919
0.7460	1129.129	86.669	84.347	89.060	-0.727	50.342	2149.572	-0.006067	-0.005904	-0.006234
0.7480	1150.845	89.559	86.619	91.731	-0.731	50.339	2190.914	-0.006269	-0.006063	-0.006421
0.7500	1157.668	91.003	87.638	93.023	-0.727	50.334	2203.903	-0.006370	-0.006135	-0.006512
0.7520	1157.082	91.677	88.119	93.202	-0.735	50.328	2202.787	-0.006417	-0.006168	-0.006524
0.7540	1156.827	91.803	88.284	93.244	-0.734	50.324	2202.301	-0.006426	-0.006180	-0.006527
0.7560	1159.667	92.633	88.834	94.272	-0.735	50.322	2207.708	-0.006484	-0.006218	-0.006599
0.7580	1163.094	93.407	89.262	94.898	-0.733	50.325	2214.231	-0.006539	-0.006248	-0.006643
0.7600	1160.103	93.251	89.358	95.274	-0.728	50.330	2208.538	-0.006528	-0.006255	-0.006669
0.7620	1148.802	92.281	88.699	94.315	-0.719	50.336	2187.023	-0.006460	-0.006209	-0.006602
0.7640	1129.235	90.525	87.238	92.494	-0.715	50.342	2149.773	-0.006337	-0.006107	-0.006475
0.7660	1090.086	87.061	84.404	89.298	-0.722	50.342	2075.243	-0.006094	-0.005908	-0.006251
0.7680	1023.104	79.777	78.996	83.143	-0.727	50.339	1947.727	-0.005584	-0.005530	-0.005820
0.7700	950.081	71.863	72.555	76.056	-0.720	50.334	1808.710	-0.005030	-0.005079	-0.005324
0.7720	890.418	65.618	67.437	70.038	-0.724	50.328	1695.127	-0.004593	-0.004721	-0.004903
0.7740	844.356	60.623	63.074	65.313	-0.720	50.323	1607.437	-0.004244	-0.004415	-0.004572
0.7760	801.916	56.216	59.194	61.339	-0.722	50.322	1526.642	-0.003935	-0.004144	-0.004294
0.7780	751.450	50.800	54.668	55.934	-0.720	50.326	1430.569	-0.003556	-0.003827	-0.003915
0.7800	688.632	44.415	48.601	49.332	-0.727	50.330	1310.978	-0.003109	-0.003402	-0.003453
0.7820	623.874	37.498	42.159	42.497	-0.732	50.336	1187.696	-0.002625	-0.002951	-0.002975
0.7840	565.083	31.071	35.969	35.909	-0.723	50.342	1075.773	-0.002175	-0.002518	-0.002514
0.7860	511.522	25.766	30.315	30.379	-0.730	50.342	973.806	-0.001804	-0.002122	-0.002127
0.7880	462.244	20.405	25.015	24.804	-0.723	50.339	879.993	-0.001428	-0.001751	-0.001736
0.7900	417.504	15.522	19.758	19.440	-0.719	50.334	794.821	-0.001087	-0.001383	-0.001361
0.7920	376.206	11.004	14.902	14.409	-0.726	50.328	716.200	-0.000770	-0.001043	-0.001009
0.7940	335.449	6.668	9.948	9.476	-0.720	50.323	638.609	-0.000467	-0.000696	-0.000663
0.7960	296.616	2.668	5.450	5.044	-0.715	50.322	564.680	-0.000187	-0.000381	-0.000353
0.7980	266.965	-0.473	1.609	1.557	-0.719	50.325	508.232	0.000033	-0.000113	-0.000109
0.8000	250.734	-2.396	-0.524	-1.069	-0.722	50.330	477.333	0.000168	0.000037	0.000075
0.8020	245.234	-3.266	-1.734	-2.141	-0.715	50.336	466.862	0.000229	0.000121	0.000150
0.8040	244.106	-3.787	-2.518	-2.737	-0.713	50.342	464.716	0.000265	0.000176	0.000192
0.8060	243.430	-3.927	-2.534	-2.779	-0.720	50.342	463.428	0.000275	0.000177	0.000195
0.8080	243.265	-4.363	-2.850	-3.294	-0.712	50.339	463.114	0.000305	0.000199	0.000231
0.8100	246.165	-4.223	-2.864	-3.405	-0.710	50.335	468.636	0.000296	0.000200	0.000238
0.8120	252.808	-3.844	-2.520	-3.334	-0.703	50.329	481.281	0.000269	0.000176	0.000233
0.8140	264.846	-3.295	-1.763	-2.572	-0.710	50.324	504.198	0.000231	0.000123	0.000180
0.8160	291.431	-0.994	0.701	0.486	-0.715	50.323	554.810	0.000070	-0.000049	-0.000034
0.8180	344.466	3.621	6.162	5.712	-0.723	50.325	655.775	-0.000253	-0.000431	-0.000400
0.8200	415.701	9.966	13.428	12.814	-0.728	50.330	791.388	-0.000698	-0.000940	-0.000897
0.8220	487.522	16.800	20.708	20.470	-0.724	50.337	928.116	-0.001176	-0.001450	-0.001433
0.8240	550.010	22.834	27.162	26.779	-0.712	50.343	1047.077	-0.001598	-0.001901	-0.001875
0.8260	606.051	29.079	33.174	33.129	-0.719	50.343	1153.765	-0.002035	-0.002322	-0.002319
0.8280	667.562	35.506	39.353	39.729	-0.718	50.340	1270.866	-0.002485	-0.002755	-0.002781
0.8300	737.158	42.548	46.234	46.982	-0.719	50.335	1403.360	-0.002978	-0.003236	-0.003289
0.8320	805.057	49.818	53.153	53.778	-0.720	50.328	1532.621	-0.003487	-0.003721	-0.003764
0.8340	865.411	56.385	59.056	60.546	-0.712	50.324	1647.520	-0.003947	-0.004134	-0.004238
0.8360	916.733	62.729	64.398	66.480	-0.719	50.322	1745.224	-0.004391	-0.004508	-0.004654
0.8380	962.600	67.863	68.883	70.928	-0.721	50.325	1832.542	-0.004750	-0.004822	-0.004965
0.8400	1011.487	73.463	73.423	75.972	-0.722	50.330	1925.611	-0.005142	-0.005140	-0.005318
0.8420	1062.689	79.258	78.292	81.641	-0.725	50.337	2023.087	-0.005548	-0.005480	-0.005715
0.8440	1108.435	84.674	82.448	86.769	-0.719	50.343	2110.176	-0.005927	-0.005771	-0.006074
0.8460	1141.603	88.871	85.905	91.131	-0.724	50.342	2173.319	-0.006221	-0.006013	-0.006379
0.8480	1161.891	91.635	88.106	93.883	-0.725	50.339	2211.943	-0.006414	-0.006167	-0.006572
0.8500	1171.975	93.321	89.478	95.371	-0.723	50.334	2231.140	-0.006532	-0.006263	-0.006676
0.8520	1174.711	93.912	89.906	95.869	-0.726	50.328	2236.347	-0.006574	-0.006293	-0.006711
0.8540	1174.470	94.135	89.975	95.704	-0.727	50.323	2235.889	-0.006589	-0.006298	-0.006699
0.8560	1172.607	94.608	90.470	96.288	-0.729	50.322	2232.342	-0.006623	-0.006333	-0.006740
0.8580	1169.015	94.637	90.417	96.316	-0.719	50.326	2225.504	-0.006625	-0.006329	-0.006742
0.8600	1163.064	94.092	90.360	96.259	-0.720	50.331	2214.174	-0.006586	-0.006325	-0.006738
0.8620	1153.490	93.446	89.811	95.690	-0.723	50.337	2195.950	-0.006541	-0.006287	-0.006698
0.8640	1138.642	92.112	88.850	94.288	-0.714	50.343	2167.683	-0.006448	-0.006220	-0.006600
0.8660	1108.510	89.572	86.895	92.189	-0.715	50.343	2110.319	-0.006270	-0.006083	-0.006453
0.8680	1049.960	83.738	82.150	86.644	-0.715	50.340	1998.854	-0.005862	-0.005750	-0.006065
0.8700	969.768	75.163	75.253	78.626	-0.717	50.335	1846.189	-0.005261	-0.005268	-0.005504
0.8720	887.683	66.460	67.988	70.523	-0.718	50.328	1689.920	-0.004652	-0.004759	-0.004937
0.8740	822.535	59.066	61.754	63.952	-0.708	50.324	1565.895	-0.004135	-0.004323	-0.004477
0.8760	773.392	53.973	56.869	58.714	-0.712	50.323	1472.340	-0.003778	-0.003981	-0.004110
0.8780	726.368	48.977	52.315	53.751	-0.712	50.326	1382.818	-0.003428	-0.003662	-0.003763
0.8800	672.672	42.957	47.291	48.428	-0.720	50.331	1280.594	-0.003007	-0.003310	-0.003390
0.8820	613.640	36.684	41.417	42.064	-0.722	50.337	1168.213	-0.002568	-0.002899	-0.002944
0.8840	555.826	30.383	35.280	35.201	-0.715	50.343	1058.149	-0.002127	-0.002470	-0.002464
0.8860	501.017	25.065	29.486	29.669	-0.725	50.342	953.808	-0.001755	-0.002064	-0.002077
0.8880	448.297	19.466	24.010	23.345	-0.722	50.339	853.443	-0.001363	-0.001681	-0.001634
0.8900	399.395	14.231	18.437	17.926	-0.731	50.334	760.345	-0.000996	-0.001291	-0.001255
0.8920	356.414	9.601	13.387	12.853	-0.725	50.328	678.520	-0.000672	-0.000937	-0.000900
0.8940	318.317	5.572	8.653	8.143	-0.719	50.323	605.993	-0.000390	-0.000606	-0.000570
0.8960	285.465	2.500	4.512	4.058	-0.729	50.322	543.451	-0.000175	-0.000316	-0.000284
0.8980	260.728	-0.557	1.253	0.654	-0.724	50.326	496.359	0.000039	-0.000088	-0.000046
0.9000	244.091	-2.536	-1.252	-1.417	-0.728	50.331	464.687	0.000178	0.000088	0.000099
0.9020	232.850	-3.816	-2.932	-3.141	-0.718	50.337	443.287	0.000267	0.000205	0.000220
0.9040	226.839	-5.010	-4.074	-4.460	-0.710	50.343	431.843	0.000351	0.000285	0.000312
0.9060	225.201	-5.346	-4.417	-4.599	-0.718	50.343	428.724	0.000374	0.000309	0.000322
0.9080	226.779	-5.458	-4.307	-4.808	-0.715	50.340	431.728	0.000382	0.000301	0.000337
0.9100	230.791	-5.331	-4.142	-4.710	-0.722	50.335	439.367	0.000373	0.000290	0.000330
0.9120	238.155	-4.854	-3.717	-4.529	-0.718	50.329	453.386	0.000340	0.000260	0.000317
0.9140	253.214	-3.901	-2.537	-3.584	-0.712	50.324	482.054	0.000273	0.000178	0.000251
0.9160	290.830	-0.643	1.304	0.556	-0.720	50.323	553.665	0.000045	-0.000091	-0.000039
0.9180	358.397	5.377	8.171	7.353	-0.719	50.326	682.297	-0.000376	-0.000572	-0.000515
0.9200	435.749	12.520	16.222	15.454	-0.715	50.331	829.554	-0.000876	-0.001136	-0.001082
0.9220	500.611	19.045	22.703	22.359	-0.716	50.338	953.035	-0.001333	-0.001589	-0.001565
0.9240	547.049	23.437	27.285	27.111	-0.711	50.343	1041.441	-0.001641	-0.001910	-0.001898
0.9260	591.082	27.969	31.882	32.101	-0.713	50.343	1125.269	-0.001958	-0.002232	-0.002247
0.9280	654.502	34.424	38.170	38.465	-0.710	50.340	1246.004	-0.002410	-0.002672	-0.002693
0.9300	734.589	42.578	46.081	46.774	-0.709	50.335	1398.468	-0.002980	-0.003226	-0.003274
0.9320	808.062	50.281	53.195	54.611	-0.716	50.329	1538.343	-0.003520	-0.003724	-0.003823
0.9340	862.240	56.301	58.714	60.114	-0.706	50.324	1641.483	-0.003941	-0.004110	-0.004208
0.9360	903.763	61.649	63.269	65.117	-0.715	50.323	1720.533	-0.004315	-0.004429	-0.004558
0.9380	946.820	66.391	67.714	70.330	-0.707	50.326	1802.502	-0.004647	-0.004740	-0.004923
0.9400	999.945	72.425	72.778	75.902	-0.702	50.330	1903.639	-0.005070	-0.005094	-0.005313
0.9420	1056.347	79.189	78.114	81.808	-0.714	50.337	2011.013	-0.005543	-0.005468	-0.005727
0.9440	1099.644	84.283	82.270	86.353	-0.708	50.343	2093.439	-0.005900	-0.005759	-0.006045
0.9460	1120.999	87.371	84.637	89.175	-0.711	50.342	2134.094	-0.006116	-0.005925	-0.006242
0.9480	1129.941	88.886	85.738	91.133	-0.703	50.339	2151.117	-0.006222	-0.006002	-0.006379
0.9500	1142.670	90.399	86.990	92.355	-0.709	50.335	2175.350	-0.006328	-0.006089	-0.006465
0.9520	1162.853	93.123	89.029	94.788	-0.706	50.329	2213.774	-0.006519	-0.006232	-0.006635
0.9540	1180.271	95.338	90.470	96.869	-0.707	50.324	2246.933	-0.006674	-0.006333	-0.006781
0.9560	1185.261	96.223	91.474	98.024	-0.714	50.323	2256.432	-0.006736	-0.006403	-0.006862
0.9580	1180.076	96.139	91.228	98.108	-0.706	50.326	2246.561	-0.006730	-0.006386	-0.006868
0.9600	1169.225	95.353	90.678	97.219	-0.709	50.331	2225.904	-0.006675	-0.006347	-0.006805
0.9620	1154.272	93.896	89.770	96.262	-0.711	50.337	2197.437	-0.006573	-0.006284	-0.006738
0.9640	1130.722	91.636	88.202	94.192	-0.708	50.342	2152.605	-0.006415	-0.006174	-0.006593
0.9660	1085.968	87.257	85.299	90.245	-0.709	50.343	2067.404	-0.006108	-0.005971	-0.006317
0.9680	1023.435	80.928	80.262	84.450	-0.713	50.339	1948.357	-0.005665	-0.005618	-0.005911
0.9700	958.993	74.024	74.578	78.083	-0.706	50.335	1825.676	-0.005182	-0.005220	-0.005466
0.9720	900.172	67.794	69.351	71.983	-0.711	50.329	1713.696	-0.004746	-0.004855	-0.005039
0.9740	846.024	62.042	64.287	66.244	-0.707	50.324	1610.613	-0.004343	-0.004500	-0.004637
0.9760	789.247	56.148	59.155	60.838	-0.716	50.323	1502.523	-0.003930	-0.004141	-0.004259
0.9780	727.044	49.537	52.949	54.350	-0.712	50.326	1384.106	-0.003468	-0.003706	-0.003805
0.9800	661.536	42.381	46.494	47.317	-0.707	50.331	1259.394	-0.002967	-0.003255	-0.003312
0.9820	598.852	35.646	40.054	40.827	-0.710	50.337	1140.060	-0.002495	-0.002804	-0.002858
0.9840	547.725	29.949	34.522	34.963	-0.705	50.343	1042.728	-0.002096	-0.002417	-0.002447
0.9860	505.571	25.486	30.243	30.378	-0.707	50.343	962.477	-0.001784	-0.002117	-0.002126
0.9880	460.531	20.559	25.484	25.415	-0.705	50.340	876.732	-0.001439	-0.001784	-0.001779
0.9900	407.014	15.100	19.688	19.191	-0.699	50.335	774.851	-0.001057	-0.001378	-0.001343
0.9920	356.354	10.034	13.758	13.216	-0.706	50.328	678.406	-0.000702	-0.000963	-0.000925
0.9940	314.815	5.433	8.639	8.019	-0.711	50.324	599.327	-0.000380	-0.000605	-0.000561
0.9960	284.322	2.501	4.980	4.293	-0.709	50.323	541.277	-0.000175	-0.000349	-0.000301
0.9980	266.634	0.366	2.489	1.737	-0.708	50.326	507.603	-0.000026	-0.000174	-0.000122
Test Cycles
Time (sec)	Axial stress (kPa)	Axial micro-strain #1	Axial micro-strain #2	Axial micro-strain #3	Confining pressure (kPa)	Temperature (�C)	Load (N)	Displacement #1 (mm)	Displacement #2 (mm)	Displacement #3 (mm)
0.0000	254.882	-1.078	0.630	0.181	-0.714	50.331	485.229	0.000075	-0.000044	-0.000013
0.0020	242.198	-2.522	-1.282	-1.904	-0.714	50.337	461.082	0.000177	0.000090	0.000133
0.0040	230.836	-3.928	-3.398	-3.363	-0.716	50.343	439.453	0.000275	0.000238	0.000235
0.0060	221.113	-4.771	-4.677	-4.795	-0.723	50.343	420.942	0.000334	0.000327	0.000336
0.0080	215.417	-5.767	-5.532	-5.420	-0.712	50.340	410.099	0.000404	0.000387	0.000379
0.0100	218.904	-5.837	-5.782	-5.737	-0.726	50.335	416.737	0.000409	0.000405	0.000402
0.0120	230.716	-5.262	-4.873	-4.765	-0.724	50.329	439.224	0.000368	0.000341	0.000334
0.0140	254.145	-3.605	-2.767	-3.334	-0.718	50.324	483.828	0.000252	0.000194	0.000233
0.0160	299.035	0.226	1.927	1.514	-0.718	50.323	569.286	-0.000016	-0.000135	-0.000106
0.0180	355.392	5.306	7.870	7.156	-0.721	50.326	676.575	-0.000371	-0.000551	-0.000501
0.0200	404.384	9.811	13.056	12.521	-0.723	50.331	769.844	-0.000687	-0.000914	-0.000876
0.0220	448.523	13.908	17.789	17.064	-0.723	50.337	853.872	-0.000974	-0.001245	-0.001194
0.0240	506.728	19.521	23.486	22.845	-0.716	50.343	964.680	-0.001366	-0.001644	-0.001599
0.0260	588.768	27.815	31.785	31.865	-0.722	50.343	1120.863	-0.001947	-0.002225	-0.002231
0.0280	674.730	36.685	40.591	41.091	-0.723	50.340	1284.513	-0.002568	-0.002841	-0.002876
0.0300	735.550	43.334	46.825	47.720	-0.721	50.335	1400.299	-0.003033	-0.003278	-0.003340
0.0320	777.344	47.966	50.816	52.099	-0.726	50.329	1479.864	-0.003358	-0.003557	-0.003647
0.0340	829.253	53.452	55.769	57.184	-0.717	50.324	1578.684	-0.003742	-0.003904	-0.004003
0.0360	896.249	60.947	62.181	64.604	-0.723	50.323	1706.228	-0.004266	-0.004353	-0.004522
0.0380	960.841	68.201	68.428	71.816	-0.717	50.326	1829.195	-0.004774	-0.004790	-0.005027
0.0400	1012.374	74.067	74.001	77.487	-0.718	50.331	1927.299	-0.005185	-0.005180	-0.005424
0.0420	1054.258	78.908	77.992	81.893	-0.717	50.338	2007.036	-0.005524	-0.005459	-0.005732
0.0440	1092.806	83.524	81.706	85.810	-0.707	50.344	2080.421	-0.005847	-0.005719	-0.006007
0.0460	1123.419	87.678	84.954	89.812	-0.719	50.343	2138.700	-0.006137	-0.005947	-0.006287
0.0480	1146.111	90.582	87.237	92.634	-0.718	50.340	2181.902	-0.006341	-0.006107	-0.006484
0.0500	1167.136	93.446	89.425	95.218	-0.712	50.335	2221.928	-0.006541	-0.006260	-0.006665
0.0520	1186.793	96.027	91.365	97.538	-0.717	50.329	2259.350	-0.006722	-0.006396	-0.006828
0.0540	1201.206	98.036	92.838	99.524	-0.715	50.324	2286.787	-0.006863	-0.006499	-0.006967
0.0560	1207.097	99.411	93.596	101.026	-0.719	50.323	2298.002	-0.006959	-0.006552	-0.007072
0.0580	1205.263	99.439	93.693	100.861	-0.718	50.327	2294.512	-0.006961	-0.006558	-0.007060
0.0600	1197.764	98.892	93.404	100.556	-0.722	50.332	2280.235	-0.006922	-0.006538	-0.007039
0.0620	1182.585	97.712	92.618	99.386	-0.721	50.338	2251.339	-0.006840	-0.006483	-0.006957
0.0640	1154.302	95.046	90.663	96.912	-0.722	50.344	2197.495	-0.006653	-0.006346	-0.006784
0.0660	1099.493	89.461	86.674	92.036	-0.726	50.343	2093.153	-0.006262	-0.006067	-0.006442
0.0680	1027.778	81.674	80.606	84.920	-0.726	50.340	1956.625	-0.005717	-0.005642	-0.005944
0.0700	962.885	74.840	74.924	78.569	-0.730	50.335	1833.086	-0.005239	-0.005245	-0.005500
0.0720	909.204	69.197	70.314	73.608	-0.728	50.328	1730.890	-0.004844	-0.004922	-0.005153
0.0740	856.920	63.500	65.540	67.911	-0.728	50.324	1631.355	-0.004445	-0.004588	-0.004754
0.0760	788.255	56.511	59.704	61.089	-0.730	50.323	1500.635	-0.003956	-0.004179	-0.004276
0.0780	709.206	48.373	51.944	53.098	-0.724	50.326	1350.145	-0.003386	-0.003636	-0.003717
0.0800	646.041	41.497	45.491	46.457	-0.734	50.331	1229.897	-0.002905	-0.003184	-0.003252
0.0820	602.489	36.501	40.867	41.550	-0.734	50.338	1146.984	-0.002555	-0.002861	-0.002909
0.0840	562.528	32.039	36.699	36.865	-0.722	50.343	1070.910	-0.002243	-0.002569	-0.002581
0.0860	505.706	26.621	30.877	30.849	-0.723	50.343	962.734	-0.001863	-0.002161	-0.002159
0.0880	432.067	18.975	22.909	22.707	-0.722	50.340	822.544	-0.001328	-0.001604	-0.001589
0.0900	369.278	12.000	15.727	15.452	-0.721	50.335	703.011	-0.000840	-0.001101	-0.001082
0.0920	336.381	8.112	11.419	11.215	-0.726	50.328	640.383	-0.000568	-0.000799	-0.000785
0.0940	326.297	6.484	9.520	9.435	-0.719	50.324	621.185	-0.000454	-0.000666	-0.000660
0.0960	316.077	5.376	8.253	8.145	-0.724	50.323	601.730	-0.000376	-0.000578	-0.000570
0.0980	291.686	2.837	5.460	4.767	-0.719	50.326	555.296	-0.000199	-0.000382	-0.000334
0.1000	263.313	-0.152	1.952	1.347	-0.720	50.331	501.280	0.000011	-0.000137	-0.000094
0.1020	244.001	-2.171	-0.760	-1.209	-0.723	50.338	464.516	0.000152	0.000053	0.000085
0.1040	236.126	-3.422	-2.136	-2.376	-0.712	50.344	449.524	0.000240	0.000149	0.000166
0.1060	236.773	-3.254	-2.176	-2.514	-0.714	50.344	450.754	0.000228	0.000152	0.000176
0.1080	241.522	-3.167	-1.860	-2.628	-0.707	50.340	459.795	0.000222	0.000130	0.000184
0.1100	248.134	-2.956	-1.765	-2.183	-0.704	50.335	472.383	0.000207	0.000124	0.000153
0.1120	256.655	-2.578	-1.199	-1.488	-0.706	50.329	488.605	0.000180	0.000084	0.000104
0.1140	272.796	-1.525	0.121	-0.542	-0.706	50.324	519.333	0.000107	-0.000008	0.000038
0.1160	308.338	1.603	3.425	3.460	-0.714	50.323	586.996	-0.000112	-0.000240	-0.000242
0.1180	359.735	6.022	8.586	8.670	-0.710	50.326	684.843	-0.000422	-0.000601	-0.000607
0.1200	412.695	11.031	14.048	13.869	-0.721	50.331	785.666	-0.000772	-0.000983	-0.000971
0.1220	461.222	15.732	19.181	18.830	-0.726	50.338	878.048	-0.001101	-0.001343	-0.001318
0.1240	512.514	20.560	24.589	24.235	-0.723	50.343	975.695	-0.001439	-0.001721	-0.001696
0.1260	580.803	27.689	31.633	31.753	-0.728	50.343	1105.700	-0.001938	-0.002214	-0.002223
0.1280	666.465	36.066	40.069	40.730	-0.733	50.340	1268.778	-0.002525	-0.002805	-0.002851
0.1300	751.315	44.851	48.518	49.359	-0.727	50.335	1430.311	-0.003140	-0.003396	-0.003455
0.1320	817.470	52.064	55.274	56.308	-0.731	50.329	1556.253	-0.003644	-0.003869	-0.003942
0.1340	861.368	57.412	59.663	60.923	-0.739	50.324	1639.824	-0.004019	-0.004176	-0.004265
0.1360	891.290	61.410	63.006	64.772	-0.740	50.324	1696.787	-0.004299	-0.004410	-0.004534
0.1380	923.916	65.058	66.036	68.536	-0.733	50.326	1758.900	-0.004554	-0.004623	-0.004798
0.1400	972.789	70.305	70.534	73.651	-0.726	50.331	1851.940	-0.004921	-0.004937	-0.005156
0.1420	1041.108	77.827	76.781	80.670	-0.732	50.338	1982.002	-0.005448	-0.005375	-0.005647
0.1440	1111.787	85.952	83.234	88.022	-0.723	50.344	2116.556	-0.006017	-0.005826	-0.006162
0.1460	1156.541	91.594	87.912	93.413	-0.726	50.343	2201.757	-0.006412	-0.006154	-0.006539
0.1480	1167.752	93.517	89.220	95.080	-0.723	50.340	2223.101	-0.006546	-0.006245	-0.006656
0.1500	1162.823	93.546	89.495	95.023	-0.723	50.336	2213.717	-0.006548	-0.006265	-0.006652
0.1520	1158.059	93.405	89.714	95.107	-0.723	50.329	2204.647	-0.006538	-0.006280	-0.006657
0.1540	1158.089	93.448	89.838	95.524	-0.727	50.324	2204.704	-0.006541	-0.006289	-0.006687
0.1560	1159.607	94.358	90.291	95.872	-0.726	50.324	2207.594	-0.006605	-0.006320	-0.006711
0.1580	1158.164	94.457	90.375	96.164	-0.720	50.327	2204.847	-0.006612	-0.006326	-0.006731
0.1600	1152.619	94.108	90.004	96.135	-0.726	50.332	2194.290	-0.006588	-0.006300	-0.006729
0.1620	1141.873	93.449	89.632	95.372	-0.723	50.338	2173.834	-0.006541	-0.006274	-0.006676
0.1640	1119.827	91.342	87.913	93.384	-0.718	50.344	2131.863	-0.006394	-0.006154	-0.006537
0.1660	1073.404	87.047	84.390	89.520	-0.732	50.343	2043.486	-0.006093	-0.005907	-0.006266
0.1680	1006.663	79.918	78.928	82.919	-0.732	50.340	1916.428	-0.005594	-0.005525	-0.005804
0.1700	942.837	72.902	73.354	76.681	-0.726	50.335	1794.920	-0.005103	-0.005135	-0.005368
0.1720	890.929	67.402	68.745	71.429	-0.720	50.329	1696.100	-0.004718	-0.004812	-0.005000
0.1740	842.658	62.000	64.176	66.036	-0.715	50.324	1604.204	-0.004340	-0.004492	-0.004623
0.1760	784.543	55.923	58.795	60.602	-0.723	50.324	1493.568	-0.003915	-0.004116	-0.004242
0.1780	721.078	48.989	52.839	54.183	-0.708	50.327	1372.747	-0.003429	-0.003699	-0.003793
0.1800	665.368	43.236	47.294	48.248	-0.713	50.332	1266.689	-0.003027	-0.003311	-0.003377
0.1820	617.112	37.778	42.477	42.869	-0.720	50.338	1174.822	-0.002644	-0.002973	-0.003001
0.1840	569.291	32.714	37.345	37.422	-0.716	50.344	1083.784	-0.002290	-0.002614	-0.002620
0.1860	517.879	27.648	32.418	32.241	-0.718	50.343	985.909	-0.001935	-0.002269	-0.002257
0.1880	468.616	22.371	26.858	26.834	-0.714	50.340	892.124	-0.001566	-0.001880	-0.001878
0.1900	424.342	17.655	21.795	21.511	-0.719	50.335	807.838	-0.001236	-0.001526	-0.001506
0.1920	380.715	13.178	17.021	16.593	-0.723	50.329	724.783	-0.000922	-0.001191	-0.001162
0.1940	336.967	8.660	11.817	11.326	-0.716	50.324	641.499	-0.000606	-0.000827	-0.000793
0.1960	297.021	4.619	6.960	6.600	-0.722	50.324	565.453	-0.000323	-0.000487	-0.000462
0.1980	266.619	1.040	2.818	2.556	-0.723	50.327	507.574	-0.000073	-0.000197	-0.000179
0.2000	245.865	-1.303	-0.029	-0.152	-0.727	50.332	468.063	0.000091	0.000002	0.000011
0.2020	233.812	-2.931	-1.957	-1.876	-0.732	50.339	445.118	0.000205	0.000137	0.000131
0.2040	230.355	-3.747	-3.002	-2.849	-0.727	50.344	438.538	0.000262	0.000210	0.000199
0.2060	231.693	-3.801	-2.824	-2.597	-0.727	50.343	441.084	0.000266	0.000198	0.000182
0.2080	234.909	-3.701	-2.768	-3.000	-0.720	50.340	447.206	0.000259	0.000194	0.000210
0.2100	239.838	-3.478	-2.494	-2.958	-0.728	50.335	456.591	0.000243	0.000175	0.000207
0.2120	247.578	-2.958	-1.872	-2.514	-0.728	50.329	471.325	0.000207	0.000131	0.000176
0.2140	265.402	-2.073	-0.304	-1.167	-0.727	50.324	505.257	0.000145	0.000021	0.000082
0.2160	311.689	2.067	4.223	3.448	-0.736	50.324	593.376	-0.000145	-0.000296	-0.000241
0.2180	378.986	8.086	11.103	10.771	-0.724	50.327	721.493	-0.000566	-0.000777	-0.000754
0.2200	434.426	13.320	16.882	16.453	-0.723	50.332	827.036	-0.000932	-0.001182	-0.001152
0.2220	473.365	17.290	20.830	20.719	-0.724	50.339	901.165	-0.001210	-0.001458	-0.001450
0.2240	518.149	21.641	25.276	25.319	-0.720	50.344	986.423	-0.001515	-0.001769	-0.001772
0.2260	583.177	28.067	31.799	32.142	-0.723	50.344	1110.220	-0.001965	-0.002226	-0.002250
0.2280	662.227	35.955	39.629	40.466	-0.722	50.340	1260.710	-0.002517	-0.002774	-0.002833
0.2300	733.236	43.617	46.838	47.748	-0.727	50.335	1395.893	-0.003053	-0.003279	-0.003342
0.2320	777.209	48.429	51.666	52.542	-0.725	50.329	1479.607	-0.003390	-0.003617	-0.003678
0.2340	808.919	52.035	54.791	55.976	-0.716	50.325	1539.974	-0.003642	-0.003835	-0.003918
0.2360	859.625	57.817	59.994	61.521	-0.715	50.324	1636.505	-0.004047	-0.004200	-0.004306
0.2380	938.269	66.055	67.355	69.705	-0.715	50.327	1786.222	-0.004624	-0.004715	-0.004879
0.2400	1023.405	75.736	75.158	78.556	-0.714	50.332	1948.299	-0.005302	-0.005261	-0.005499
0.2420	1085.231	83.032	81.199	85.505	-0.722	50.339	2066.002	-0.005812	-0.005684	-0.005985
0.2440	1115.348	86.949	84.087	89.035	-0.724	50.344	2123.337	-0.006086	-0.005886	-0.006232
0.2460	1135.036	90.036	86.302	91.994	-0.727	50.344	2160.816	-0.006303	-0.006041	-0.006440
0.2480	1166.204	93.880	89.302	95.620	-0.721	50.341	2220.154	-0.006572	-0.006251	-0.006693
0.2500	1201.055	97.767	92.660	99.194	-0.728	50.335	2286.501	-0.006844	-0.006486	-0.006944
0.2520	1219.856	100.321	94.559	101.305	-0.730	50.329	2322.292	-0.007022	-0.006619	-0.007091
0.2540	1220.487	100.740	94.820	101.444	-0.722	50.324	2323.494	-0.007052	-0.006637	-0.007101
0.2560	1213.544	100.854	94.889	101.875	-0.724	50.324	2310.276	-0.007060	-0.006642	-0.007131
0.2580	1205.263	100.139	94.310	101.694	-0.723	50.327	2294.512	-0.007010	-0.006602	-0.007119
0.2600	1196.201	99.285	93.857	101.361	-0.723	50.332	2277.260	-0.006950	-0.006570	-0.007095
0.2620	1181.368	98.064	93.140	100.304	-0.728	50.339	2249.022	-0.006864	-0.006520	-0.007021
0.2640	1144.398	94.371	90.621	96.762	-0.728	50.344	2178.640	-0.006606	-0.006343	-0.006773
0.2660	1075.072	87.525	85.352	90.508	-0.728	50.343	2046.661	-0.006127	-0.005975	-0.006336
0.2680	1002.335	79.834	79.093	83.419	-0.719	50.340	1908.188	-0.005588	-0.005536	-0.005839
0.2700	949.660	74.220	74.594	78.292	-0.724	50.336	1807.909	-0.005195	-0.005222	-0.005480
0.2720	909.549	69.788	71.083	74.040	-0.720	50.329	1731.548	-0.004885	-0.004976	-0.005183
0.2740	856.048	64.131	66.061	68.843	-0.718	50.324	1629.696	-0.004489	-0.004624	-0.004819
0.2760	777.269	56.272	58.866	60.838	-0.718	50.324	1479.721	-0.003939	-0.004121	-0.004259
0.2780	699.948	47.811	51.366	52.722	-0.714	50.327	1332.521	-0.003347	-0.003596	-0.003691
0.2800	648.566	41.974	45.861	47.068	-0.716	50.332	1234.703	-0.002938	-0.003210	-0.003295
0.2820	612.693	37.893	41.967	42.620	-0.712	50.339	1166.410	-0.002653	-0.002938	-0.002983
0.2840	570.569	33.065	37.563	38.062	-0.714	50.344	1086.216	-0.002315	-0.002629	-0.002664
0.2860	507.885	26.623	31.426	31.559	-0.718	50.344	966.883	-0.001864	-0.002200	-0.002209
0.2880	437.717	19.437	24.092	23.733	-0.708	50.340	833.302	-0.001361	-0.001686	-0.001661
0.2900	382.052	13.755	17.502	17.160	-0.710	50.335	727.329	-0.000963	-0.001225	-0.001201
0.2920	345.879	9.561	13.251	13.132	-0.707	50.329	658.464	-0.000669	-0.000928	-0.000919
0.2940	319.684	6.682	10.003	9.200	-0.712	50.324	608.597	-0.000468	-0.000700	-0.000644
0.2960	289.252	3.779	6.396	5.475	-0.715	50.324	550.661	-0.000265	-0.000448	-0.000383
0.2980	257.602	0.537	2.518	1.807	-0.707	50.327	490.408	-0.000038	-0.000176	-0.000126
0.3000	236.412	-1.803	-0.703	-1.238	-0.710	50.332	450.068	0.000126	0.000049	0.000087
0.3020	229.228	-2.984	-2.162	-2.431	-0.718	50.339	436.392	0.000209	0.000151	0.000170
0.3040	230.355	-3.576	-2.560	-2.779	-0.708	50.345	438.538	0.000250	0.000179	0.000195
0.3060	233.346	-3.394	-2.547	-2.487	-0.714	50.344	444.231	0.000238	0.000178	0.000174
0.3080	237.795	-3.268	-2.342	-2.446	-0.712	50.341	452.700	0.000229	0.000164	0.000171
0.3100	245.068	-3.140	-2.119	-2.170	-0.715	50.336	466.547	0.000220	0.000148	0.000152
0.3120	257.106	-2.354	-1.045	-1.278	-0.706	50.329	489.464	0.000165	0.000073	0.000089
0.3140	283.811	-0.446	1.446	0.918	-0.704	50.325	540.304	0.000031	-0.000101	-0.000064
0.3160	335.825	4.142	6.906	6.602	-0.716	50.324	639.324	-0.000290	-0.000483	-0.000462
0.3180	402.987	10.386	13.758	13.536	-0.715	50.327	767.183	-0.000727	-0.000963	-0.000948
0.3200	464.062	16.406	20.322	19.914	-0.719	50.332	883.455	-0.001148	-0.001423	-0.001394
0.3220	514.227	21.683	25.440	25.305	-0.715	50.339	978.956	-0.001518	-0.001781	-0.001771
0.3240	562.874	26.524	30.340	30.212	-0.711	50.344	1071.568	-0.001857	-0.002124	-0.002115
0.3260	615.939	32.165	35.652	36.089	-0.718	50.343	1172.590	-0.002252	-0.002496	-0.002526
0.3280	673.408	37.721	41.527	42.077	-0.704	50.340	1281.996	-0.002640	-0.002907	-0.002945
0.3300	730.847	43.966	47.290	47.955	-0.708	50.335	1391.344	-0.003078	-0.003310	-0.003357
0.3320	783.070	49.706	52.437	53.500	-0.713	50.329	1490.765	-0.003479	-0.003671	-0.003745
0.3340	829.794	54.717	56.842	58.200	-0.714	50.325	1579.714	-0.003830	-0.003979	-0.004074
0.3360	875.811	60.119	61.533	63.646	-0.718	50.324	1667.318	-0.004208	-0.004307	-0.004455
0.3380	928.500	65.590	66.651	69.121	-0.719	50.327	1767.626	-0.004591	-0.004666	-0.004838
0.3400	983.173	71.763	72.114	75.112	-0.724	50.333	1871.710	-0.005023	-0.005048	-0.005258
0.3420	1028.890	77.027	76.520	80.335	-0.716	50.339	1958.742	-0.005392	-0.005356	-0.005623
0.3440	1064.597	81.489	79.835	84.003	-0.713	50.344	2026.720	-0.005704	-0.005588	-0.005880
0.3460	1099.899	86.037	83.372	88.272	-0.723	50.344	2093.925	-0.006023	-0.005836	-0.006179
0.3480	1143.857	91.103	87.431	92.899	-0.722	50.341	2177.610	-0.006377	-0.006120	-0.006503
0.3500	1182.796	95.705	91.118	97.386	-0.717	50.336	2251.740	-0.006699	-0.006378	-0.006817
0.3520	1197.914	98.007	92.976	99.385	-0.712	50.329	2280.521	-0.006860	-0.006508	-0.006957
0.3540	1194.187	98.386	93.030	99.302	-0.717	50.325	2273.426	-0.006887	-0.006512	-0.006951
0.3560	1183.652	97.910	92.852	99.164	-0.725	50.324	2253.370	-0.006854	-0.006500	-0.006941
0.3580	1171.194	96.757	91.847	98.720	-0.720	50.327	2229.652	-0.006773	-0.006429	-0.006910
0.3600	1160.960	95.561	91.171	98.038	-0.731	50.333	2210.169	-0.006689	-0.006382	-0.006863
0.3620	1152.078	94.750	90.580	97.663	-0.732	50.339	2193.260	-0.006633	-0.006341	-0.006836
0.3640	1137.440	93.364	89.440	95.872	-0.723	50.344	2165.394	-0.006535	-0.006261	-0.006711
0.3660	1107.113	90.443	87.334	93.453	-0.726	50.344	2107.658	-0.006331	-0.006113	-0.006542
0.3680	1054.423	84.983	83.247	88.298	-0.718	50.341	2007.351	-0.005949	-0.005827	-0.006181
0.3700	985.007	77.912	77.578	81.865	-0.720	50.336	1875.200	-0.005454	-0.005430	-0.005731
0.3720	910.211	70.236	71.291	74.540	-0.722	50.329	1732.807	-0.004916	-0.004990	-0.005218
0.3740	844.852	63.178	65.180	67.466	-0.719	50.325	1608.381	-0.004422	-0.004563	-0.004723
0.3760	790.720	57.690	60.199	62.242	-0.723	50.324	1505.327	-0.004038	-0.004214	-0.004357
0.3780	733.221	51.572	54.653	56.031	-0.710	50.328	1395.864	-0.003610	-0.003826	-0.003922
0.3800	663.113	44.120	47.844	48.929	-0.715	50.333	1262.398	-0.003088	-0.003349	-0.003425
0.3820	590.316	36.334	40.426	40.814	-0.714	50.339	1123.810	-0.002543	-0.002830	-0.002857
0.3840	529.075	29.712	34.081	34.131	-0.715	50.344	1007.223	-0.002080	-0.002386	-0.002389
0.3860	481.134	24.813	28.660	29.001	-0.721	50.344	915.956	-0.001737	-0.002006	-0.002030
0.3880	438.063	19.619	23.473	23.984	-0.730	50.341	833.960	-0.001373	-0.001643	-0.001679
0.3900	394.195	14.779	18.560	18.691	-0.730	50.336	750.446	-0.001035	-0.001299	-0.001308
0.3920	351.424	10.499	13.689	13.702	-0.722	50.329	669.022	-0.000735	-0.000958	-0.000959
0.3940	313.628	6.374	9.177	8.907	-0.720	50.325	597.067	-0.000446	-0.000642	-0.000624
0.3960	280.926	3.189	5.530	4.878	-0.723	50.325	534.811	-0.000223	-0.000387	-0.000341
0.3980	255.197	0.116	2.050	1.779	-0.722	50.328	485.830	-0.000008	-0.000143	-0.000125
0.4000	237.855	-1.832	-0.537	-0.917	-0.716	50.333	452.814	0.000128	0.000038	0.000064
0.4020	228.342	-2.662	-1.872	-2.294	-0.716	50.340	434.704	0.000186	0.000131	0.000161
0.4040	224.600	-3.408	-3.002	-2.904	-0.715	50.345	427.580	0.000239	0.000210	0.000203
0.4060	223.923	-3.521	-3.181	-3.432	-0.721	50.344	426.292	0.000246	0.000223	0.000240
0.4080	226.373	-3.815	-3.334	-3.709	-0.717	50.341	430.956	0.000267	0.000233	0.000260
0.4100	231.994	-3.648	-3.112	-3.418	-0.718	50.336	441.656	0.000255	0.000218	0.000239
0.4120	239.898	-3.394	-2.561	-3.071	-0.723	50.330	456.705	0.000238	0.000179	0.000215
0.4140	252.808	-2.649	-1.735	-2.141	-0.722	50.325	481.281	0.000185	0.000121	0.000150
0.4160	283.406	-0.318	1.376	1.112	-0.729	50.324	539.532	0.000022	-0.000096	-0.000078
0.4180	348.163	5.307	7.913	7.644	-0.724	50.328	662.813	-0.000372	-0.000554	-0.000535
0.4200	433.239	13.110	16.662	16.579	-0.726	50.333	824.776	-0.000918	-0.001166	-0.001161
0.4220	507.569	20.265	24.462	24.138	-0.723	50.339	966.282	-0.001419	-0.001712	-0.001690
0.4240	558.426	25.725	29.953	29.683	-0.731	50.345	1063.099	-0.001801	-0.002097	-0.002078
0.4260	598.116	30.189	34.317	34.241	-0.742	50.344	1138.659	-0.002113	-0.002402	-0.002397
0.4280	649.092	35.268	39.560	39.675	-0.739	50.341	1235.704	-0.002469	-0.002769	-0.002777
0.4300	716.269	42.171	46.013	46.636	-0.740	50.336	1363.592	-0.002952	-0.003221	-0.003264
0.4320	786.376	49.861	52.713	54.070	-0.738	50.329	1497.059	-0.003490	-0.003690	-0.003785
0.4340	848.158	56.597	58.839	60.506	-0.735	50.324	1614.676	-0.003962	-0.004119	-0.004235
0.4360	898.248	62.729	63.930	66.217	-0.742	50.324	1710.033	-0.004391	-0.004475	-0.004635
0.4380	942.747	67.667	68.456	71.079	-0.739	50.328	1794.748	-0.004737	-0.004792	-0.004975
0.4400	987.532	72.581	72.817	75.901	-0.739	50.333	1880.007	-0.005081	-0.005097	-0.005313
0.4420	1034.075	77.885	77.083	81.002	-0.744	50.340	1968.613	-0.005452	-0.005396	-0.005670
0.4440	1077.717	82.908	80.936	85.379	-0.741	50.345	2051.697	-0.005804	-0.005666	-0.005977
0.4460	1112.959	87.511	84.444	89.660	-0.744	50.344	2118.788	-0.006126	-0.005911	-0.006276
0.4480	1138.176	90.597	87.184	92.801	-0.734	50.342	2166.796	-0.006342	-0.006103	-0.006496
0.4500	1155.519	93.109	89.151	95.038	-0.730	50.336	2199.812	-0.006518	-0.006241	-0.006653
0.4520	1171.645	95.310	90.927	96.899	-0.729	50.329	2230.511	-0.006672	-0.006365	-0.006783
0.4540	1192.835	97.768	92.949	99.345	-0.732	50.325	2270.851	-0.006844	-0.006506	-0.006954
0.4560	1209.682	100.377	94.765	101.638	-0.734	50.325	2302.923	-0.007026	-0.006634	-0.007115
0.4580	1210.583	101.007	95.081	101.763	-0.722	50.329	2304.640	-0.007070	-0.006656	-0.007123
0.4600	1199.027	100.166	94.599	101.164	-0.723	50.334	2282.639	-0.007012	-0.006622	-0.007081
0.4620	1177.626	98.358	93.417	99.831	-0.727	50.340	2241.898	-0.006885	-0.006539	-0.006988
0.4640	1139.153	94.624	90.568	96.413	-0.723	50.345	2168.655	-0.006624	-0.006340	-0.006749
0.4660	1077.236	88.211	85.779	90.841	-0.727	50.344	2050.781	-0.006175	-0.006005	-0.006359
0.4680	1012.509	81.266	79.960	84.504	-0.717	50.341	1927.557	-0.005689	-0.005597	-0.005915
0.4700	957.310	75.302	75.227	79.126	-0.720	50.336	1822.472	-0.005271	-0.005266	-0.005539
0.4720	907.911	69.927	70.796	74.138	-0.723	50.330	1728.430	-0.004895	-0.004956	-0.005190
0.4740	862.315	64.974	66.654	69.731	-0.722	50.325	1641.626	-0.004548	-0.004666	-0.004881
0.4760	814.404	59.923	62.387	64.812	-0.729	50.324	1550.417	-0.004195	-0.004367	-0.004537
0.4780	753.224	53.538	56.718	58.086	-0.720	50.328	1433.945	-0.003748	-0.003970	-0.004066
0.4800	682.335	46.058	49.947	50.931	-0.724	50.333	1298.990	-0.003224	-0.003496	-0.003565
0.4820	619.937	39.225	43.591	44.454	-0.726	50.340	1180.201	-0.002746	-0.003051	-0.003112
0.4840	571.921	33.836	38.362	38.728	-0.723	50.345	1088.791	-0.002369	-0.002685	-0.002711
0.4860	530.292	29.877	34.110	34.325	-0.730	50.344	1009.541	-0.002091	-0.002388	-0.002403
0.4880	487.552	25.260	29.337	29.239	-0.725	50.341	928.173	-0.001768	-0.002054	-0.002047
0.4900	439.295	19.929	23.928	23.986	-0.728	50.336	836.306	-0.001395	-0.001675	-0.001679
0.4920	389.747	14.806	18.381	18.233	-0.728	50.329	741.978	-0.001036	-0.001287	-0.001276
0.4940	346.390	10.077	13.250	13.148	-0.724	50.325	659.437	-0.000705	-0.000928	-0.000920
0.4960	312.290	6.485	9.053	9.449	-0.733	50.324	594.521	-0.000454	-0.000634	-0.000661
0.4980	285.615	3.384	5.683	5.740	-0.727	50.328	543.737	-0.000237	-0.000398	-0.000402
0.5000	262.591	1.027	2.793	2.669	-0.731	50.333	499.907	-0.000072	-0.000196	-0.000187
0.5020	244.197	-1.091	0.302	0.306	-0.729	50.340	464.888	0.000076	-0.000021	-0.000021
0.5040	234.849	-2.438	-1.614	-1.654	-0.727	50.345	447.092	0.000171	0.000113	0.000116
0.5060	234.098	-2.621	-1.669	-2.056	-0.731	50.344	445.662	0.000183	0.000117	0.000144
0.5080	237.569	-2.789	-1.626	-2.015	-0.723	50.341	452.271	0.000195	0.000114	0.000141
0.5100	243.250	-2.464	-1.501	-1.696	-0.721	50.336	463.085	0.000172	0.000105	0.000119
0.5120	251.155	-1.987	-0.840	-0.890	-0.708	50.329	478.134	0.000139	0.000059	0.000062
0.5140	265.898	-0.908	0.426	-0.166	-0.705	50.325	506.201	0.000064	-0.000030	0.000012
0.5160	299.516	1.995	3.702	3.460	-0.711	50.324	570.202	-0.000140	-0.000259	-0.000242
0.5180	356.654	6.977	9.439	9.089	-0.707	50.328	678.978	-0.000488	-0.000661	-0.000636
0.5200	423.711	12.998	16.194	16.051	-0.704	50.333	806.637	-0.000910	-0.001134	-0.001124
0.5220	484.531	18.862	22.331	22.484	-0.705	50.340	922.422	-0.001320	-0.001563	-0.001574
0.5240	532.216	23.718	27.258	27.319	-0.700	50.345	1013.203	-0.001660	-0.001908	-0.001912
0.5260	573.048	28.110	31.647	32.060	-0.704	50.344	1090.937	-0.001968	-0.002215	-0.002244
0.5280	621.876	32.852	36.544	37.201	-0.701	50.341	1183.891	-0.002300	-0.002558	-0.002604
0.5300	683.988	38.971	42.794	43.761	-0.700	50.336	1302.137	-0.002728	-0.002996	-0.003063
0.5320	751.195	46.128	49.482	50.764	-0.708	50.329	1430.082	-0.003229	-0.003464	-0.003553
0.5340	814.945	53.046	55.700	56.919	-0.708	50.325	1551.447	-0.003713	-0.003899	-0.003984
0.5360	878.125	60.274	61.960	64.159	-0.717	50.325	1671.724	-0.004219	-0.004337	-0.004491
0.5380	950.336	68.172	68.785	71.747	-0.712	50.328	1809.196	-0.004772	-0.004815	-0.005022
0.5400	1014.207	75.595	75.199	78.627	-0.723	50.333	1930.790	-0.005292	-0.005264	-0.005504
0.5420	1052.229	80.380	78.845	82.935	-0.726	50.340	2003.174	-0.005627	-0.005519	-0.005805
0.5440	1079.686	83.665	81.417	86.063	-0.718	50.345	2055.445	-0.005857	-0.005699	-0.006024
0.5460	1118.700	88.422	85.242	90.563	-0.728	50.344	2129.717	-0.006190	-0.005967	-0.006339
0.5480	1171.434	94.133	89.823	96.176	-0.719	50.341	2230.110	-0.006589	-0.006288	-0.006732
0.5500	1214.190	99.213	93.899	100.804	-0.724	50.336	2311.506	-0.006945	-0.006573	-0.007056
0.5520	1228.272	101.807	95.548	103.125	-0.726	50.330	2338.314	-0.007127	-0.006688	-0.007219
0.5540	1222.666	101.680	95.658	103.070	-0.722	50.325	2327.642	-0.007118	-0.006696	-0.007215
0.5560	1211.756	101.174	95.274	102.832	-0.732	50.325	2306.871	-0.007082	-0.006669	-0.007198
0.5580	1200.605	100.180	94.723	102.084	-0.729	50.329	2285.643	-0.007013	-0.006631	-0.007146
0.5600	1186.373	98.950	93.786	101.125	-0.734	50.334	2258.549	-0.006926	-0.006565	-0.007079
0.5620	1157.112	96.155	92.079	98.720	-0.731	50.340	2202.845	-0.006731	-0.006446	-0.006910
0.5640	1105.595	90.792	88.034	93.772	-0.725	50.345	2104.769	-0.006355	-0.006162	-0.006564
0.5660	1048.442	85.180	83.591	88.645	-0.730	50.344	1995.964	-0.005963	-0.005851	-0.006205
0.5680	1003.041	80.340	79.615	84.045	-0.718	50.341	1909.533	-0.005624	-0.005573	-0.005883
0.5700	966.161	76.326	76.270	80.209	-0.719	50.336	1839.323	-0.005343	-0.005339	-0.005615
0.5720	914.283	70.867	71.936	74.929	-0.723	50.329	1740.561	-0.004961	-0.005036	-0.005245
0.5740	840.599	63.192	65.070	67.481	-0.723	50.325	1600.285	-0.004423	-0.004555	-0.004724
0.5760	771.393	55.796	58.589	61.186	-0.731	50.325	1468.534	-0.003906	-0.004101	-0.004283
0.5780	722.942	50.324	53.402	55.710	-0.734	50.329	1376.295	-0.003523	-0.003738	-0.003900
0.5800	684.574	45.987	49.508	51.082	-0.735	50.334	1303.253	-0.003219	-0.003466	-0.003576
0.5820	637.956	41.021	45.145	46.426	-0.728	50.340	1214.504	-0.002871	-0.003160	-0.003250
0.5840	579.556	34.805	39.187	39.881	-0.723	50.345	1103.325	-0.002436	-0.002743	-0.002792
0.5860	517.578	28.659	33.104	33.293	-0.721	50.344	985.336	-0.002006	-0.002317	-0.002331
0.5880	457.750	22.456	26.471	26.625	-0.715	50.342	871.439	-0.001572	-0.001853	-0.001864
0.5900	405.557	16.574	20.679	20.663	-0.715	50.336	772.076	-0.001160	-0.001448	-0.001446
0.5920	365.296	12.225	15.989	15.564	-0.719	50.330	695.429	-0.000856	-0.001119	-0.001089
0.5940	332.864	8.509	12.027	11.715	-0.711	50.325	633.688	-0.000596	-0.000842	-0.000820
0.5960	302.131	5.629	8.434	8.102	-0.732	50.325	575.180	-0.000394	-0.000590	-0.000567
0.5980	275.125	2.824	4.719	4.475	-0.730	50.329	523.767	-0.000198	-0.000330	-0.000313
0.6000	253.725	0.381	1.759	1.711	-0.728	50.334	483.027	-0.000027	-0.000123	-0.000120
0.6020	240.965	-1.077	-0.222	-0.501	-0.722	50.340	458.736	0.000075	0.000016	0.000035
0.6040	237.825	-2.270	-1.269	-1.253	-0.723	50.345	452.757	0.000159	0.000089	0.000088
0.6060	238.937	-2.424	-1.364	-1.322	-0.731	50.344	454.874	0.000170	0.000095	0.000093
0.6080	241.176	-2.536	-1.335	-1.224	-0.723	50.341	459.137	0.000178	0.000093	0.000086
0.6100	244.362	-2.466	-1.281	-1.127	-0.726	50.336	465.202	0.000173	0.000090	0.000079
0.6120	250.373	-2.284	-0.911	-1.001	-0.724	50.330	476.646	0.000160	0.000064	0.000070
0.6140	260.983	-1.315	-0.084	-0.598	-0.720	50.325	496.845	0.000092	0.000006	0.000042
0.6160	284.428	0.831	2.256	1.904	-0.720	50.325	541.477	-0.000058	-0.000158	-0.000133
0.6180	332.789	4.831	7.238	6.935	-0.716	50.329	633.545	-0.000338	-0.000507	-0.000485
0.6200	398.313	10.737	13.897	13.592	-0.724	50.334	758.286	-0.000752	-0.000973	-0.000951
0.6220	468.165	17.360	21.064	20.637	-0.726	50.341	891.266	-0.001215	-0.001474	-0.001445
0.6240	535.207	24.014	27.809	27.572	-0.724	50.345	1018.896	-0.001681	-0.001947	-0.001930
0.6260	595.155	30.398	34.015	34.353	-0.727	50.344	1133.022	-0.002128	-0.002381	-0.002405
0.6280	650.715	35.939	39.450	40.259	-0.724	50.341	1238.794	-0.002516	-0.002761	-0.002818
0.6300	708.048	41.945	45.284	46.248	-0.724	50.336	1347.942	-0.002936	-0.003170	-0.003237
0.6320	769.229	48.259	51.311	52.724	-0.722	50.329	1464.415	-0.003378	-0.003592	-0.003691
0.6340	827.088	54.548	56.912	58.643	-0.716	50.325	1574.564	-0.003818	-0.003984	-0.004105
0.6360	872.955	59.937	61.948	63.852	-0.716	50.325	1661.882	-0.004196	-0.004336	-0.004470
0.6380	917.890	64.817	66.184	68.954	-0.720	50.329	1747.427	-0.004537	-0.004633	-0.004827
0.6400	978.875	71.415	72.142	75.278	-0.712	50.334	1863.527	-0.004999	-0.005050	-0.005269
0.6420	1051.838	79.693	78.968	83.002	-0.711	50.340	2002.430	-0.005579	-0.005528	-0.005810
0.6440	1115.183	87.102	84.694	89.772	-0.715	50.346	2123.022	-0.006097	-0.005929	-0.006284
0.6460	1148.546	92.071	88.422	93.565	-0.724	50.345	2186.537	-0.006445	-0.006190	-0.006550
0.6480	1155.384	93.546	89.234	94.649	-0.711	50.342	2199.554	-0.006548	-0.006246	-0.006625
0.6500	1154.467	93.743	89.728	95.288	-0.716	50.336	2197.809	-0.006562	-0.006281	-0.006670
0.6520	1160.494	94.736	90.499	96.484	-0.718	50.330	2209.282	-0.006631	-0.006335	-0.006754
0.6540	1180.542	97.191	92.179	98.817	-0.714	50.325	2247.448	-0.006803	-0.006453	-0.006917
0.6560	1198.110	99.634	93.801	101.181	-0.723	50.325	2280.893	-0.006974	-0.006566	-0.007083
0.6580	1198.320	99.734	94.117	101.515	-0.711	50.329	2281.294	-0.006981	-0.006588	-0.007106
0.6600	1187.124	98.977	93.720	100.902	-0.708	50.334	2259.979	-0.006928	-0.006560	-0.007063
0.6620	1169.300	97.460	92.838	99.358	-0.712	50.341	2226.048	-0.006822	-0.006499	-0.006955
0.6640	1138.627	94.077	90.637	96.800	-0.711	50.346	2167.654	-0.006585	-0.006345	-0.006776
0.6660	1082.632	88.842	86.481	91.521	-0.719	50.345	2061.052	-0.006219	-0.006054	-0.006406
0.6680	1013.501	81.686	80.660	84.878	-0.705	50.341	1929.445	-0.005718	-0.005646	-0.005941
0.6700	951.749	75.119	75.281	79.069	-0.706	50.336	1811.886	-0.005258	-0.005270	-0.005535
0.6720	901.389	69.618	71.056	74.109	-0.708	50.330	1716.013	-0.004873	-0.004974	-0.005188
0.6740	853.012	64.215	66.543	68.870	-0.712	50.325	1623.917	-0.004495	-0.004658	-0.004821
0.6760	795.799	58.702	61.244	63.160	-0.711	50.325	1514.997	-0.004109	-0.004287	-0.004421
0.6780	731.388	51.853	54.971	56.226	-0.703	50.329	1392.374	-0.003630	-0.003848	-0.003936
0.6800	667.111	45.103	48.380	49.501	-0.710	50.334	1270.008	-0.003157	-0.003387	-0.003465
0.6820	608.485	38.549	42.422	43.456	-0.710	50.341	1158.400	-0.002698	-0.002970	-0.003042
0.6840	557.313	32.867	36.807	37.785	-0.709	50.346	1060.982	-0.002301	-0.002576	-0.002645
0.6860	513.731	28.321	32.349	33.032	-0.721	50.345	978.012	-0.001982	-0.002264	-0.002312
0.6880	474.717	23.717	28.084	28.293	-0.713	50.341	903.740	-0.001660	-0.001966	-0.001980
0.6900	432.728	19.282	23.557	23.832	-0.714	50.336	823.803	-0.001350	-0.001649	-0.001668
0.6920	384.968	14.316	18.065	18.441	-0.716	50.329	732.880	-0.001002	-0.001265	-0.001291
0.6940	338.229	9.461	12.685	12.562	-0.711	50.325	643.902	-0.000662	-0.000888	-0.000879
0.6960	299.531	5.504	8.433	8.101	-0.713	50.325	570.230	-0.000385	-0.000590	-0.000567
0.6980	274.494	2.839	5.063	4.808	-0.707	50.329	522.566	-0.000199	-0.000354	-0.000337
0.7000	260.953	1.393	2.875	2.599	-0.713	50.335	496.788	-0.000098	-0.000201	-0.000182
0.7020	251.020	0.086	1.335	1.016	-0.718	50.341	477.877	-0.000006	-0.000093	-0.000071
0.7040	242.769	-0.909	0.011	-0.457	-0.712	50.346	462.170	0.000064	-0.000001	0.000032
0.7060	239.147	-1.622	-0.593	-0.708	-0.722	50.345	455.275	0.000114	0.000042	0.000050
0.7080	239.778	-1.916	-1.046	-1.236	-0.708	50.342	456.476	0.000134	0.000073	0.000087
0.7100	243.039	-2.085	-0.936	-1.211	-0.706	50.336	462.685	0.000146	0.000066	0.000085
0.7120	250.073	-1.974	-0.758	-0.847	-0.719	50.330	476.074	0.000138	0.000053	0.000059
0.7140	263.899	-1.078	0.357	-0.194	-0.716	50.326	502.396	0.000075	-0.000025	0.000014
0.7160	297.502	1.728	3.674	3.446	-0.720	50.325	566.368	-0.000121	-0.000257	-0.000241
0.7180	360.321	7.188	9.796	10.007	-0.718	50.329	685.959	-0.000503	-0.000686	-0.000700
0.7200	432.247	13.838	17.169	17.663	-0.718	50.335	822.887	-0.000969	-0.001202	-0.001236
0.7220	495.862	20.110	23.762	24.207	-0.711	50.341	943.995	-0.001408	-0.001663	-0.001695
0.7240	550.070	25.655	29.419	29.601	-0.716	50.346	1047.192	-0.001796	-0.002059	-0.002072
0.7260	602.985	31.492	35.129	35.564	-0.723	50.345	1147.928	-0.002204	-0.002459	-0.002489
0.7280	663.685	37.413	41.254	41.996	-0.711	50.342	1263.485	-0.002619	-0.002888	-0.002940
0.7300	730.937	44.556	47.748	48.831	-0.716	50.337	1391.516	-0.003119	-0.003342	-0.003418
0.7320	796.310	51.825	54.214	55.751	-0.726	50.330	1515.970	-0.003628	-0.003795	-0.003903
0.7340	855.853	58.338	60.103	62.117	-0.720	50.325	1629.324	-0.004084	-0.004207	-0.004348
0.7360	909.865	64.441	65.660	68.218	-0.723	50.325	1732.149	-0.004511	-0.004596	-0.004775
0.7380	958.347	69.589	70.230	73.317	-0.714	50.329	1824.446	-0.004871	-0.004916	-0.005132
0.7400	1006.888	75.300	74.855	78.584	-0.714	50.335	1916.857	-0.005271	-0.005240	-0.005501
0.7420	1052.244	80.842	79.174	83.628	-0.707	50.341	2003.202	-0.005659	-0.005542	-0.005854
0.7440	1084.149	84.658	82.120	87.062	-0.707	50.346	2063.942	-0.005926	-0.005748	-0.006094
0.7460	1105.941	87.595	84.871	89.840	-0.716	50.344	2105.427	-0.006132	-0.005941	-0.006289
0.7480	1128.062	90.459	87.005	92.257	-0.710	50.341	2147.541	-0.006332	-0.006090	-0.006458
0.7500	1150.981	93.349	89.261	94.898	-0.715	50.337	2191.172	-0.006534	-0.006248	-0.006643
0.7520	1163.845	95.241	90.923	96.732	-0.712	50.330	2215.662	-0.006667	-0.006365	-0.006771
0.7540	1164.657	95.717	91.158	97.162	-0.716	50.326	2217.207	-0.006700	-0.006381	-0.006801
0.7560	1161.410	95.802	91.380	97.497	-0.723	50.326	2211.027	-0.006706	-0.006397	-0.006825
0.7580	1157.623	95.901	91.199	97.304	-0.712	50.329	2203.817	-0.006713	-0.006384	-0.006811
0.7600	1152.003	95.648	90.926	97.165	-0.719	50.334	2193.117	-0.006695	-0.006365	-0.006802
0.7620	1142.460	94.723	90.608	96.177	-0.718	50.341	2174.950	-0.006631	-0.006343	-0.006732
0.7640	1123.599	93.079	89.205	94.912	-0.718	50.346	2139.044	-0.006516	-0.006244	-0.006644
0.7660	1079.611	88.729	86.014	91.480	-0.726	50.345	2055.302	-0.006211	-0.006021	-0.006404
0.7680	1008.556	81.196	80.152	84.686	-0.719	50.342	1920.033	-0.005684	-0.005611	-0.005928
0.7700	941.154	73.928	74.124	78.140	-0.718	50.336	1791.716	-0.005175	-0.005189	-0.005470
0.7720	892.687	68.552	69.734	73.205	-0.721	50.330	1699.448	-0.004799	-0.004881	-0.005124
0.7740	855.056	64.440	66.159	68.884	-0.724	50.326	1627.808	-0.004511	-0.004631	-0.004822
0.7760	811.429	60.019	62.621	64.840	-0.731	50.326	1544.752	-0.004201	-0.004384	-0.004539
0.7780	750.714	53.620	56.953	58.602	-0.724	50.330	1429.167	-0.003753	-0.003987	-0.004102
0.7800	678.533	46.155	49.715	51.055	-0.726	50.334	1291.752	-0.003231	-0.003480	-0.003574
0.7820	607.448	38.634	42.696	43.565	-0.720	50.340	1156.425	-0.002704	-0.002989	-0.003050
0.7840	547.064	32.023	36.435	36.813	-0.723	50.346	1041.470	-0.002242	-0.002550	-0.002577
0.7860	499.890	27.323	31.412	32.017	-0.724	50.345	951.662	-0.001913	-0.002199	-0.002241
0.7880	460.050	22.904	26.995	27.223	-0.716	50.342	875.816	-0.001603	-0.001890	-0.001906
0.7900	419.728	18.581	22.165	22.456	-0.723	50.337	799.055	-0.001301	-0.001552	-0.001572
0.7920	375.079	13.598	17.061	17.204	-0.731	50.330	714.054	-0.000952	-0.001194	-0.001204
0.7940	331.527	9.027	11.915	11.980	-0.730	50.326	631.142	-0.000632	-0.000834	-0.000839
0.7960	296.075	5.531	7.649	7.837	-0.739	50.325	563.650	-0.000387	-0.000535	-0.000549
0.7980	270.857	2.544	4.498	4.667	-0.734	50.330	515.642	-0.000178	-0.000315	-0.000327
0.8000	254.311	0.438	2.049	2.194	-0.740	50.335	484.142	-0.000031	-0.000143	-0.000154
0.8020	244.452	-0.853	0.603	0.514	-0.742	50.341	465.374	0.000060	-0.000042	-0.000036
0.8040	240.575	-1.454	-0.304	-0.222	-0.741	50.345	457.993	0.000102	0.000021	0.000016
0.8060	240.199	-1.384	-0.469	-0.514	-0.736	50.345	457.277	0.000097	0.000033	0.000036
0.8080	241.747	-1.648	-0.745	-1.168	-0.732	50.341	460.224	0.000115	0.000052	0.000082
0.8100	244.798	-1.819	-0.594	-0.987	-0.734	50.336	466.032	0.000127	0.000042	0.000069
0.8120	250.884	-1.510	-0.181	-0.611	-0.727	50.329	477.619	0.000106	0.000013	0.000043
0.8140	262.742	-0.769	0.632	-0.014	-0.727	50.326	500.193	0.000054	-0.000044	0.000001
0.8160	292.333	1.630	3.481	3.418	-0.734	50.326	556.526	-0.000114	-0.000244	-0.000239
0.8180	352.521	6.849	9.288	9.075	-0.730	50.330	671.110	-0.000479	-0.000650	-0.000635
0.8200	425.905	13.572	16.717	16.691	-0.722	50.335	810.814	-0.000950	-0.001170	-0.001168
0.8220	490.843	19.774	23.310	23.637	-0.732	50.342	934.439	-0.001384	-0.001632	-0.001655
0.8240	543.923	25.035	28.689	28.890	-0.730	50.346	1035.490	-0.001752	-0.002008	-0.002022
0.8260	590.977	30.159	33.767	34.435	-0.726	50.345	1125.069	-0.002111	-0.002364	-0.002410
0.8280	641.713	35.071	39.050	39.605	-0.717	50.342	1221.657	-0.002455	-0.002734	-0.002772
0.8300	701.120	41.286	45.159	45.983	-0.720	50.337	1334.753	-0.002890	-0.003161	-0.003219
0.8320	768.853	48.864	51.833	53.280	-0.728	50.330	1463.699	-0.003420	-0.003628	-0.003730
0.8340	839.111	56.342	58.810	60.255	-0.725	50.326	1597.452	-0.003944	-0.004117	-0.004218
0.8360	900.532	63.430	64.824	67.077	-0.731	50.326	1714.382	-0.004440	-0.004538	-0.004695
0.8380	950.427	68.989	69.501	72.512	-0.726	50.330	1809.368	-0.004829	-0.004865	-0.005076
0.8400	996.098	74.333	73.974	77.640	-0.729	50.335	1896.315	-0.005203	-0.005178	-0.005435
0.8420	1042.957	79.608	78.544	82.836	-0.728	50.341	1985.521	-0.005573	-0.005498	-0.005799
0.8440	1089.605	85.095	82.615	87.659	-0.722	50.346	2074.327	-0.005957	-0.005783	-0.006136
0.8460	1128.168	89.895	86.481	91.952	-0.719	50.345	2147.741	-0.006293	-0.006054	-0.006437
0.8480	1156.256	93.333	89.193	95.189	-0.710	50.342	2201.214	-0.006533	-0.006244	-0.006663
0.8500	1175.507	95.843	91.256	97.678	-0.719	50.337	2237.864	-0.006709	-0.006388	-0.006837
0.8520	1188.973	97.683	92.962	99.400	-0.725	50.330	2263.498	-0.006838	-0.006507	-0.006958
0.8540	1195.825	99.018	93.721	100.539	-0.725	50.326	2276.545	-0.006931	-0.006561	-0.007038
0.8560	1192.279	99.454	94.050	100.942	-0.726	50.326	2269.793	-0.006962	-0.006584	-0.007066
0.8580	1181.368	98.569	93.264	100.319	-0.723	50.330	2249.022	-0.006900	-0.006528	-0.007022
0.8600	1166.189	97.121	92.550	99.358	-0.726	50.335	2220.125	-0.006798	-0.006478	-0.006955
0.8620	1145.886	95.310	91.106	97.664	-0.718	50.342	2181.473	-0.006672	-0.006377	-0.006836
0.8640	1114.221	92.323	88.847	94.885	-0.715	50.346	2121.191	-0.006463	-0.006219	-0.006642
0.8660	1067.738	87.734	85.215	90.909	-0.709	50.345	2032.700	-0.006141	-0.005965	-0.006364
0.8680	1014.793	82.275	80.635	85.421	-0.708	50.342	1931.906	-0.005759	-0.005644	-0.005979
0.8700	960.526	76.438	76.217	80.238	-0.712	50.337	1828.594	-0.005351	-0.005335	-0.005617
0.8720	902.486	70.067	70.932	74.708	-0.718	50.330	1718.102	-0.004905	-0.004965	-0.005230
0.8740	843.169	63.654	65.483	68.189	-0.724	50.326	1605.177	-0.004456	-0.004584	-0.004773
0.8760	785.009	57.581	60.061	62.520	-0.723	50.326	1494.455	-0.004031	-0.004204	-0.004376
0.8780	728.712	51.223	54.502	56.295	-0.710	50.330	1387.281	-0.003586	-0.003815	-0.003941
0.8800	673.363	45.202	49.066	50.874	-0.722	50.336	1281.910	-0.003164	-0.003435	-0.003561
0.8820	617.322	39.336	43.632	44.913	-0.730	50.342	1175.222	-0.002753	-0.003054	-0.003144
0.8840	560.229	33.121	37.785	38.175	-0.718	50.346	1066.532	-0.002318	-0.002645	-0.002672
0.8860	505.420	27.789	32.170	32.548	-0.718	50.345	962.191	-0.001945	-0.002252	-0.002278
0.8880	457.074	22.541	26.721	27.086	-0.708	50.342	870.152	-0.001578	-0.001870	-0.001896
0.8900	415.355	18.035	21.973	22.109	-0.712	50.336	790.730	-0.001262	-0.001538	-0.001548
0.8920	375.860	13.965	17.584	17.164	-0.707	50.330	715.542	-0.000978	-0.001231	-0.001201
0.8940	335.915	9.614	12.865	12.273	-0.712	50.326	639.496	-0.000673	-0.000901	-0.000859
0.8960	299.441	5.853	8.295	8.102	-0.722	50.326	570.059	-0.000410	-0.000581	-0.000567
0.8980	271.518	2.683	4.567	4.683	-0.704	50.330	516.901	-0.000188	-0.000320	-0.000328
0.9000	255.273	0.886	2.103	2.086	-0.701	50.335	485.973	-0.000062	-0.000147	-0.000146
0.9020	247.518	-0.419	0.786	0.793	-0.706	50.342	471.210	0.000029	-0.000055	-0.000055
0.9040	243.520	-1.313	0.111	0.139	-0.703	50.346	463.600	0.000092	-0.000008	-0.000010
0.9060	242.318	-1.706	-0.181	0.056	-0.710	50.345	461.311	0.000119	0.000013	-0.000004
0.9080	243.866	-1.846	-0.456	-0.360	-0.709	50.342	464.258	0.000129	0.000032	0.000025
0.9100	247.518	-1.495	-0.290	-0.374	-0.711	50.337	471.210	0.000105	0.000020	0.000026
0.9120	252.342	-1.510	0.178	-0.124	-0.715	50.330	480.394	0.000106	-0.000012	0.000009
0.9140	260.878	-1.020	0.592	0.209	-0.716	50.326	496.645	0.000071	-0.000041	-0.000015
0.9160	285.044	1.152	2.903	2.571	-0.726	50.326	542.650	-0.000081	-0.000203	-0.000180
0.9180	346.886	6.276	9.079	8.754	-0.722	50.330	660.381	-0.000439	-0.000636	-0.000613
0.9200	432.533	14.136	17.777	17.606	-0.722	50.335	823.431	-0.000989	-0.001244	-0.001232
0.9220	509.132	21.851	25.510	25.749	-0.722	50.342	969.257	-0.001530	-0.001786	-0.001802
0.9240	563.190	27.211	31.068	31.504	-0.718	50.346	1072.168	-0.001905	-0.002175	-0.002205
0.9260	604.172	31.603	35.527	36.172	-0.719	50.345	1150.188	-0.002212	-0.002487	-0.002532
0.9280	652.413	36.612	40.122	40.995	-0.713	50.342	1242.027	-0.002563	-0.002809	-0.002870
0.9300	713.128	42.928	46.190	47.289	-0.723	50.337	1357.613	-0.003005	-0.003233	-0.003310
0.9320	778.306	49.875	52.466	54.015	-0.716	50.331	1481.695	-0.003491	-0.003673	-0.003781
0.9340	840.869	56.540	58.714	60.534	-0.716	50.326	1600.800	-0.003958	-0.004110	-0.004237
0.9360	897.692	63.233	64.562	67.038	-0.720	50.326	1708.975	-0.004426	-0.004519	-0.004693
0.9380	949.991	69.015	69.806	72.748	-0.709	50.330	1808.538	-0.004831	-0.004886	-0.005092
0.9400	998.202	74.642	74.441	78.321	-0.705	50.335	1900.320	-0.005225	-0.005211	-0.005482
0.9420	1039.545	79.652	78.556	82.849	-0.698	50.342	1979.027	-0.005576	-0.005499	-0.005799
0.9440	1078.454	84.129	82.036	86.588	-0.704	50.346	2053.099	-0.005889	-0.005743	-0.006061
0.9460	1121.570	89.489	86.316	91.590	-0.708	50.345	2135.181	-0.006264	-0.006042	-0.006411
0.9480	1161.966	94.260	89.961	96.179	-0.704	50.342	2212.086	-0.006598	-0.006297	-0.006733
0.9500	1185.982	97.614	92.219	98.845	-0.705	50.336	2257.805	-0.006833	-0.006455	-0.006919
0.9520	1191.633	98.582	93.433	99.858	-0.705	50.330	2268.562	-0.006901	-0.006540	-0.006990
0.9540	1187.560	98.640	93.320	99.706	-0.708	50.326	2260.809	-0.006905	-0.006532	-0.006979
0.9560	1181.203	98.570	93.237	99.637	-0.711	50.326	2248.707	-0.006900	-0.006527	-0.006975
0.9580	1173.208	97.671	92.742	99.290	-0.706	50.330	2233.486	-0.006837	-0.006492	-0.006950
0.9600	1161.350	96.842	91.887	99.164	-0.713	50.335	2210.913	-0.006779	-0.006432	-0.006941
0.9620	1144.068	95.170	90.980	97.831	-0.714	50.341	2178.011	-0.006662	-0.006369	-0.006848
0.9640	1115.889	92.225	89.013	94.899	-0.713	50.346	2124.367	-0.006456	-0.006231	-0.006643
0.9660	1065.965	87.311	85.326	90.563	-0.719	50.345	2029.324	-0.006112	-0.005973	-0.006339
0.9680	999.675	80.562	79.504	84.087	-0.713	50.342	1903.124	-0.005639	-0.005565	-0.005886
0.9700	939.050	74.221	74.399	78.264	-0.717	50.337	1787.710	-0.005195	-0.005208	-0.005479
0.9720	891.245	68.960	70.134	73.109	-0.718	50.330	1696.701	-0.004827	-0.004909	-0.005118
0.9740	844.146	64.048	65.689	68.299	-0.721	50.326	1607.037	-0.004483	-0.004598	-0.004781
0.9760	785.370	57.971	60.405	62.547	-0.726	50.326	1495.142	-0.004058	-0.004228	-0.004378
0.9780	721.845	51.025	54.008	55.765	-0.712	50.331	1374.207	-0.003572	-0.003781	-0.003904
0.9800	660.033	44.374	48.063	49.525	-0.714	50.336	1256.533	-0.003106	-0.003364	-0.003467
0.9820	598.521	37.638	41.761	42.815	-0.723	50.342	1139.431	-0.002635	-0.002923	-0.002997
0.9840	536.199	31.028	35.059	35.951	-0.725	50.346	1020.784	-0.002172	-0.002454	-0.002517
0.9860	477.528	24.967	28.825	29.642	-0.727	50.345	909.090	-0.001748	-0.002018	-0.002075
0.9880	429.211	19.635	23.500	23.764	-0.720	50.342	817.108	-0.001374	-0.001645	-0.001664
0.9900	391.340	15.341	19.235	19.414	-0.718	50.337	745.010	-0.001074	-0.001346	-0.001359
0.9920	360.261	12.059	15.506	15.648	-0.727	50.330	685.844	-0.000844	-0.001085	-0.001095
0.9940	329.768	8.788	11.763	11.882	-0.722	50.326	627.794	-0.000615	-0.000823	-0.000832
0.9960	299.847	5.729	8.489	8.461	-0.728	50.327	570.831	-0.000401	-0.000594	-0.000592
0.9980	277.605	3.358	5.476	5.295	-0.720	50.331	528.488	-0.000235	-0.000383	-0.000371
