# Supplementary material for: Evaluation of a Cold-Mixed High-Performance Polyurethane Mixture
Source: Hindawi journal article supplement (doi:10.1155/2019/1507971), 2019-11-07
Supplement: f1 [file 1507971.f1.zip › 1507971.f1/dynamic modulus data/PUM/specimen1/temp50/zhs-1-50_20Hz.csv]

Test Information
****************
Project name	zhs
Operator name	1
Target test temperature	50
Target confining stress	0
Average dynamic strain range from 75 to 125 micro-strain
Contact stress	5
Initial modulus	1000
Axial gauge length	70
Comments
Specimen information
********************
Identification	zhs-1-50
Dimensions	Point 1	Point 2	Point 3	Point 4	Point 5	Point 6	Average	Std Dev.
Diameter (mm)	49.2	49.2	49.3				49.23	0.058
Height (mm)	101.3	101.2	101.3				101.27	0.058
Cross-sectional area (mm�)	1903.7
Conditioning time
Properties/Comments
Test Data	20Hz
*********
Test date and time	Wed	Apr 3	2019	1:50 PM
Dynamic modulus (MPa)	9860
Phase angle (Degrees)	4.24
Average temperature (�C)	50.3
Average confining pressure (kPa)	-0.7
Average micro-strain	102
Load drift (%)	-0.1
Load standard error (%)	6.3
Average deformation drift (%)	-4.2
Average deformation standard error (%)	6.4
Deformation uniformity (%)	3.0
Phase uniformity (Degrees)	0.3
Conditioning Cycles
Time (sec)	Axial stress (kPa)	Axial micro-strain #1	Axial micro-strain #2	Axial micro-strain #3	Confining pressure (kPa)	Temperature (�C)	Load (N)	Displacement #1 (mm)	Displacement #2 (mm)	Displacement #3 (mm)
0.0000	435.734	9.939	14.144	13.145	-0.745	50.311	829.525	-0.000696	-0.000990	-0.000920
0.0010	435.568	9.911	14.240	13.132	-0.739	50.313	829.210	-0.000694	-0.000997	-0.000919
0.0020	434.637	9.659	14.089	12.856	-0.738	50.315	827.436	-0.000676	-0.000986	-0.000900
0.0030	431.285	9.406	13.730	12.884	-0.739	50.318	821.056	-0.000658	-0.000961	-0.000902
0.0040	422.914	8.717	13.056	12.495	-0.739	50.321	805.120	-0.000610	-0.000914	-0.000875
0.0050	406.218	7.285	11.803	10.966	-0.739	50.324	773.335	-0.000510	-0.000826	-0.000768
0.0060	380.023	4.983	9.408	8.464	-0.741	50.327	723.467	-0.000349	-0.000659	-0.000592
0.0070	347.742	1.840	6.079	4.905	-0.735	50.330	662.012	-0.000129	-0.000426	-0.000343
0.0080	316.634	-0.909	2.653	1.696	-0.739	50.331	602.789	0.000064	-0.000186	-0.000119
0.0090	293.805	-3.042	-0.001	-0.874	-0.739	50.331	559.330	0.000213	0.000000	0.000061
0.0100	282.399	-4.152	-1.294	-2.028	-0.740	50.329	537.615	0.000291	0.000091	0.000142
0.0110	281.166	-4.406	-1.789	-2.710	-0.739	50.327	535.269	0.000308	0.000125	0.000190
0.0120	288.140	-4.124	-1.377	-2.364	-0.738	50.325	548.544	0.000289	0.000096	0.000165
0.0130	303.544	-3.014	-0.055	-1.377	-0.742	50.323	577.869	0.000211	0.000004	0.000096
0.0140	332.383	-0.628	2.463	1.445	-0.741	50.320	632.772	0.000044	-0.000172	-0.000101
0.0150	379.227	3.455	6.921	5.976	-0.743	50.317	721.951	-0.000242	-0.000484	-0.000418
0.0160	442.001	9.194	12.935	12.187	-0.743	50.313	841.455	-0.000644	-0.000905	-0.000853
0.0170	513.521	15.859	19.774	18.969	-0.735	50.312	977.612	-0.001110	-0.001384	-0.001328
0.0180	584.635	22.665	26.985	26.681	-0.735	50.311	1112.995	-0.001587	-0.001889	-0.001868
0.0190	649.813	29.191	33.451	33.461	-0.733	50.311	1237.078	-0.002043	-0.002342	-0.002342
0.0200	706.215	34.958	39.298	39.715	-0.735	50.311	1344.452	-0.002447	-0.002751	-0.002780
0.0210	752.502	39.967	43.784	44.162	-0.736	50.313	1432.571	-0.002798	-0.003065	-0.003091
0.0220	789.593	43.897	47.513	48.082	-0.735	50.315	1503.181	-0.003073	-0.003326	-0.003366
0.0230	819.033	47.321	50.609	51.194	-0.735	50.318	1559.229	-0.003312	-0.003543	-0.003584
0.0240	842.628	49.903	53.126	53.793	-0.735	50.321	1604.147	-0.003493	-0.003719	-0.003766
0.0250	862.616	52.261	55.218	56.112	-0.736	50.324	1642.199	-0.003658	-0.003865	-0.003928
0.0260	880.890	54.296	57.088	58.113	-0.735	50.327	1676.989	-0.003801	-0.003996	-0.004068
0.0270	898.759	56.330	58.946	60.309	-0.731	50.330	1711.006	-0.003943	-0.004126	-0.004222
0.0280	916.387	58.447	60.954	62.381	-0.733	50.331	1744.566	-0.004091	-0.004267	-0.004367
0.0290	932.272	60.355	62.730	64.187	-0.729	50.331	1774.807	-0.004225	-0.004391	-0.004493
0.0300	944.415	62.082	64.342	65.911	-0.727	50.329	1797.924	-0.004346	-0.004504	-0.004614
0.0310	950.998	63.204	65.043	66.785	-0.723	50.328	1810.455	-0.004424	-0.004553	-0.004675
0.0320	951.794	63.570	65.471	67.355	-0.719	50.326	1811.972	-0.004450	-0.004583	-0.004715
0.0330	947.466	63.430	65.431	67.146	-0.716	50.324	1803.732	-0.004440	-0.004580	-0.004700
0.0340	939.441	62.881	64.962	66.882	-0.720	50.321	1788.454	-0.004402	-0.004547	-0.004682
0.0350	927.824	62.068	64.301	65.660	-0.726	50.317	1766.338	-0.004345	-0.004501	-0.004596
0.0360	910.932	60.637	63.088	64.492	-0.723	50.314	1734.180	-0.004245	-0.004416	-0.004514
0.0370	884.662	57.986	61.189	62.088	-0.724	50.312	1684.170	-0.004059	-0.004283	-0.004346
0.0380	845.153	54.337	58.121	58.642	-0.729	50.310	1608.953	-0.003804	-0.004068	-0.004105
0.0390	791.862	49.271	53.580	53.723	-0.731	50.310	1507.502	-0.003449	-0.003751	-0.003761
0.0400	729.163	43.181	48.008	47.456	-0.732	50.311	1388.140	-0.003023	-0.003361	-0.003322
0.0410	663.685	36.557	41.706	41.481	-0.726	50.313	1263.485	-0.002559	-0.002919	-0.002904
0.0420	601.181	30.074	35.403	34.949	-0.726	50.315	1144.495	-0.002105	-0.002478	-0.002446
0.0430	545.125	24.461	29.624	29.377	-0.726	50.318	1037.779	-0.001712	-0.002074	-0.002056
0.0440	497.020	19.550	24.683	23.999	-0.730	50.320	946.198	-0.001369	-0.001728	-0.001680
0.0450	457.029	15.466	20.322	19.676	-0.728	50.324	870.066	-0.001083	-0.001423	-0.001377
0.0460	423.741	11.972	16.758	15.633	-0.725	50.326	806.694	-0.000838	-0.001173	-0.001094
0.0470	395.142	8.925	13.457	12.326	-0.721	50.329	752.249	-0.000625	-0.000942	-0.000863
0.0480	369.383	6.247	10.553	9.533	-0.732	50.330	703.211	-0.000437	-0.000739	-0.000667
0.0490	345.097	3.946	7.870	6.893	-0.741	50.330	656.977	-0.000276	-0.000551	-0.000482
0.0500	322.044	1.632	5.159	4.252	-0.743	50.328	613.089	-0.000114	-0.000361	-0.000298
0.0510	300.147	-0.628	2.491	1.487	-0.740	50.327	571.404	0.000044	-0.000174	-0.000104
0.0520	280.190	-2.789	-0.056	-1.085	-0.734	50.326	533.409	0.000195	0.000004	0.000076
0.0530	262.682	-4.376	-2.162	-2.905	-0.734	50.323	500.078	0.000306	0.000151	0.000203
0.0540	248.450	-5.696	-3.867	-4.810	-0.736	50.321	472.984	0.000399	0.000271	0.000337
0.0550	238.140	-6.888	-5.257	-6.268	-0.738	50.317	453.358	0.000482	0.000368	0.000439
0.0560	231.843	-7.701	-6.303	-7.115	-0.739	50.314	441.370	0.000539	0.000441	0.000498
0.0570	229.394	-8.234	-6.949	-7.975	-0.736	50.312	436.707	0.000576	0.000486	0.000558
0.0580	230.325	-8.205	-7.032	-8.169	-0.743	50.311	438.480	0.000574	0.000492	0.000572
0.0590	233.917	-8.078	-6.854	-8.182	-0.746	50.311	445.318	0.000565	0.000480	0.000573
0.0600	240.304	-7.629	-6.180	-7.405	-0.750	50.311	457.478	0.000534	0.000433	0.000518
0.0610	250.388	-7.250	-5.340	-6.780	-0.745	50.313	476.675	0.000508	0.000374	0.000475
0.0620	267.881	-5.960	-3.976	-5.100	-0.747	50.316	509.977	0.000417	0.000278	0.000357
0.0630	297.728	-3.434	-1.032	-2.432	-0.746	50.318	566.797	0.000240	0.000072	0.000170
0.0640	343.279	0.606	3.411	2.224	-0.746	50.321	653.515	-0.000042	-0.000239	-0.000156
0.0650	402.386	5.910	9.342	8.061	-0.741	50.324	766.039	-0.000414	-0.000654	-0.000564
0.0660	469.247	12.028	16.041	15.162	-0.742	50.327	893.326	-0.000842	-0.001123	-0.001061
0.0670	537.100	18.454	22.675	21.971	-0.734	50.330	1022.501	-0.001292	-0.001587	-0.001538
0.0680	601.377	25.008	29.130	29.072	-0.733	50.331	1144.867	-0.001751	-0.002039	-0.002035
0.0690	659.011	30.945	35.157	34.895	-0.732	50.330	1254.587	-0.002166	-0.002461	-0.002443
0.0700	708.770	36.320	40.330	40.356	-0.736	50.328	1349.316	-0.002542	-0.002823	-0.002825
0.0710	750.459	40.725	44.511	44.636	-0.735	50.327	1428.680	-0.002851	-0.003116	-0.003125
0.0720	785.069	44.347	47.870	48.124	-0.733	50.325	1494.570	-0.003104	-0.003351	-0.003369
0.0730	814.149	47.644	50.841	51.306	-0.734	50.323	1549.931	-0.003335	-0.003559	-0.003591
0.0740	839.532	50.522	53.416	54.030	-0.734	50.321	1598.253	-0.003537	-0.003739	-0.003782
0.0750	863.487	53.244	55.727	56.670	-0.736	50.318	1643.858	-0.003727	-0.003901	-0.003967
0.0760	887.082	55.924	58.149	59.338	-0.735	50.314	1688.776	-0.003915	-0.004070	-0.004154
0.0770	910.361	58.506	60.281	61.532	-0.732	50.312	1733.093	-0.004095	-0.004220	-0.004307
0.0780	931.716	61.172	62.704	64.465	-0.738	50.310	1773.748	-0.004282	-0.004389	-0.004513
0.0790	948.819	63.178	64.617	66.271	-0.736	50.310	1806.307	-0.004422	-0.004523	-0.004639
0.0800	960.015	64.721	66.132	68.384	-0.735	50.311	1827.621	-0.004530	-0.004629	-0.004787
0.0810	964.628	65.465	66.752	68.676	-0.727	50.313	1836.405	-0.004583	-0.004673	-0.004807
0.0820	963.712	65.564	66.793	69.078	-0.728	50.315	1834.660	-0.004589	-0.004676	-0.004835
0.0830	958.362	65.283	66.654	68.398	-0.727	50.318	1824.474	-0.004570	-0.004666	-0.004788
0.0840	949.705	64.637	66.062	68.619	-0.733	50.320	1807.995	-0.004525	-0.004624	-0.004803
0.0850	937.427	63.795	65.236	67.243	-0.728	50.324	1784.620	-0.004466	-0.004566	-0.004707
0.0860	919.002	62.224	63.955	66.063	-0.728	50.327	1749.544	-0.004356	-0.004477	-0.004624
0.0870	889.712	59.390	61.685	63.034	-0.724	50.330	1693.783	-0.004157	-0.004318	-0.004412
0.0880	846.355	55.124	58.424	59.547	-0.731	50.331	1611.242	-0.003859	-0.004090	-0.004168
0.0890	790.660	49.665	53.760	54.196	-0.729	50.330	1505.213	-0.003477	-0.003763	-0.003794
0.0900	728.712	43.617	48.297	48.276	-0.730	50.328	1387.281	-0.003053	-0.003381	-0.003379
0.0910	667.321	37.485	42.421	41.981	-0.723	50.327	1270.409	-0.002624	-0.002970	-0.002939
0.0920	610.604	31.718	36.820	36.117	-0.723	50.325	1162.434	-0.002220	-0.002577	-0.002528
0.0930	560.289	26.567	31.907	30.907	-0.727	50.323	1066.647	-0.001860	-0.002234	-0.002163
0.0940	516.722	22.175	27.298	26.515	-0.727	50.321	983.706	-0.001552	-0.001911	-0.001856
0.0950	479.421	18.259	23.375	22.456	-0.724	50.317	912.695	-0.001278	-0.001636	-0.001572
0.0960	446.990	14.849	19.744	18.787	-0.719	50.314	850.954	-0.001039	-0.001382	-0.001315
0.0970	417.519	11.551	16.496	15.189	-0.717	50.312	794.849	-0.000809	-0.001155	-0.001063
0.0980	389.792	8.800	13.359	12.118	-0.724	50.311	742.064	-0.000616	-0.000935	-0.000848
0.0990	362.651	6.344	10.265	9.186	-0.726	50.311	690.393	-0.000444	-0.000719	-0.000643
0.1000	336.201	3.861	7.360	6.297	-0.725	50.311	640.039	-0.000270	-0.000515	-0.000441
0.1010	310.277	1.153	4.196	3.100	-0.720	50.313	590.687	-0.000081	-0.000294	-0.000217
0.1020	285.885	-1.486	1.113	0.112	-0.714	50.316	544.252	0.000104	-0.000078	-0.000008
0.1030	263.959	-3.549	-1.625	-2.432	-0.716	50.319	502.510	0.000248	0.000114	0.000170
0.1040	245.835	-5.359	-4.033	-4.768	-0.720	50.321	468.006	0.000375	0.000282	0.000334
0.1050	232.700	-6.734	-5.725	-6.407	-0.724	50.324	443.001	0.000471	0.000401	0.000448
0.1060	225.065	-7.784	-6.743	-7.712	-0.720	50.327	428.467	0.000545	0.000472	0.000540
0.1070	222.571	-8.388	-7.540	-8.504	-0.717	50.330	423.717	0.000587	0.000528	0.000595
0.1080	224.254	-8.529	-7.567	-8.378	-0.721	50.331	426.922	0.000597	0.000530	0.000586
0.1090	228.928	-8.402	-7.526	-8.323	-0.723	50.330	435.820	0.000588	0.000527	0.000583
0.1100	236.442	-7.882	-6.673	-7.600	-0.727	50.328	450.125	0.000552	0.000467	0.000532
0.1110	248.164	-7.265	-5.642	-6.711	-0.732	50.327	472.441	0.000509	0.000395	0.000470
0.1120	267.821	-5.905	-3.827	-5.142	-0.733	50.325	509.863	0.000413	0.000268	0.000360
0.1130	299.110	-3.254	-0.759	-1.974	-0.734	50.323	569.429	0.000228	0.000053	0.000138
0.1140	343.670	0.760	3.590	2.599	-0.734	50.320	654.259	-0.000053	-0.000251	-0.000182
0.1150	399.109	5.644	9.343	8.338	-0.737	50.317	759.802	-0.000395	-0.000654	-0.000584
0.1160	460.260	11.313	15.493	14.731	-0.736	50.314	876.217	-0.000792	-0.001085	-0.001031
0.1170	522.538	17.081	21.740	20.735	-0.737	50.312	994.778	-0.001196	-0.001522	-0.001451
0.1180	582.531	23.283	27.725	27.129	-0.743	50.310	1108.990	-0.001630	-0.001941	-0.001899
0.1190	638.377	29.022	33.490	32.949	-0.742	50.310	1215.305	-0.002032	-0.002344	-0.002306
0.1200	689.158	34.439	38.898	38.673	-0.741	50.311	1311.979	-0.002411	-0.002723	-0.002707
0.1210	734.649	39.113	43.439	43.355	-0.732	50.313	1398.582	-0.002738	-0.003041	-0.003035
0.1220	775.286	43.603	47.375	47.733	-0.728	50.315	1475.945	-0.003052	-0.003316	-0.003341
0.1230	811.564	47.630	50.815	51.681	-0.730	50.318	1545.010	-0.003334	-0.003557	-0.003618
0.1240	843.575	51.234	53.952	55.197	-0.734	50.320	1605.949	-0.003586	-0.003777	-0.003864
0.1250	871.242	54.391	56.784	58.197	-0.740	50.324	1658.621	-0.003807	-0.003975	-0.004074
0.1260	894.401	57.115	59.112	60.628	-0.740	50.326	1702.709	-0.003998	-0.004138	-0.004244
0.1270	912.735	59.221	60.913	62.449	-0.736	50.329	1737.614	-0.004145	-0.004264	-0.004371
0.1280	926.351	61.004	62.483	64.479	-0.739	50.330	1763.535	-0.004270	-0.004374	-0.004514
0.1290	935.203	62.308	63.625	65.632	-0.738	50.330	1780.386	-0.004362	-0.004454	-0.004594
0.1300	940.538	63.135	64.548	67.272	-0.738	50.328	1790.543	-0.004419	-0.004518	-0.004709
0.1310	942.672	63.599	64.892	67.050	-0.738	50.327	1794.605	-0.004452	-0.004542	-0.004694
0.1320	942.191	63.698	64.906	67.370	-0.740	50.326	1793.690	-0.004459	-0.004543	-0.004716
0.1330	938.825	63.502	64.892	66.995	-0.742	50.323	1787.281	-0.004445	-0.004542	-0.004690
0.1340	932.693	62.883	64.769	66.730	-0.748	50.321	1775.608	-0.004402	-0.004534	-0.004671
0.1350	923.631	62.264	64.232	66.231	-0.746	50.317	1758.356	-0.004358	-0.004496	-0.004636
0.1360	910.165	61.073	63.254	64.897	-0.747	50.314	1732.721	-0.004275	-0.004428	-0.004543
0.1370	888.059	59.024	61.549	63.104	-0.739	50.312	1690.636	-0.004132	-0.004308	-0.004417
0.1380	852.592	55.713	58.935	59.657	-0.747	50.311	1623.116	-0.003900	-0.004125	-0.004176
0.1390	802.231	50.731	54.779	55.294	-0.744	50.311	1527.243	-0.003551	-0.003835	-0.003871
0.1400	740.916	44.837	49.494	49.416	-0.747	50.311	1410.513	-0.003139	-0.003465	-0.003459
0.1410	675.617	38.311	43.356	43.162	-0.742	50.313	1286.201	-0.002682	-0.003035	-0.003021
0.1420	612.708	31.997	37.164	36.687	-0.743	50.316	1166.439	-0.002240	-0.002602	-0.002568
0.1430	555.615	26.286	31.413	30.586	-0.745	50.318	1057.749	-0.001840	-0.002199	-0.002141
0.1440	506.367	21.262	26.432	25.319	-0.744	50.321	963.993	-0.001488	-0.001850	-0.001772
0.1450	465.069	17.038	22.043	20.665	-0.744	50.324	885.372	-0.001193	-0.001543	-0.001447
0.1460	430.639	13.586	18.273	16.857	-0.737	50.327	819.826	-0.000951	-0.001279	-0.001180
0.1470	400.973	10.260	14.888	13.396	-0.734	50.330	763.350	-0.000718	-0.001042	-0.000938
0.1480	374.328	7.635	11.998	10.561	-0.737	50.331	712.624	-0.000534	-0.000840	-0.000739
0.1490	349.546	5.082	9.148	7.837	-0.735	50.330	665.445	-0.000356	-0.000640	-0.000549
0.1500	326.703	2.934	6.521	5.198	-0.733	50.329	621.958	-0.000205	-0.000456	-0.000364
0.1510	305.678	0.901	3.632	2.460	-0.729	50.327	581.932	-0.000063	-0.000254	-0.000172
0.1520	286.772	-1.247	1.320	0.167	-0.724	50.326	545.940	0.000087	-0.000092	-0.000012
0.1530	270.091	-3.058	-0.812	-2.001	-0.722	50.324	514.183	0.000214	0.000057	0.000140
0.1540	256.039	-4.461	-2.492	-3.391	-0.724	50.321	487.432	0.000312	0.000174	0.000237
0.1550	245.309	-5.611	-4.087	-4.934	-0.729	50.318	467.005	0.000393	0.000286	0.000345
0.1560	238.320	-6.340	-5.229	-5.935	-0.727	50.314	453.701	0.000444	0.000366	0.000415
0.1570	235.270	-7.126	-5.972	-6.838	-0.725	50.312	447.893	0.000499	0.000418	0.000479
0.1580	236.021	-7.196	-6.097	-6.630	-0.730	50.311	449.324	0.000504	0.000427	0.000464
0.1590	239.868	-6.916	-5.987	-6.505	-0.731	50.311	456.648	0.000484	0.000419	0.000455
0.1600	246.751	-6.468	-5.381	-5.908	-0.728	50.312	469.751	0.000453	0.000377	0.000414
0.1610	257.707	-5.965	-4.363	-5.379	-0.727	50.314	490.608	0.000418	0.000305	0.000377
0.1620	276.898	-4.799	-2.629	-3.503	-0.730	50.316	527.143	0.000336	0.000184	0.000245
0.1630	308.819	-2.272	0.329	-0.500	-0.737	50.319	587.912	0.000159	-0.000023	0.000035
0.1640	355.662	1.955	4.857	4.517	-0.738	50.322	677.090	-0.000137	-0.000340	-0.000316
0.1650	414.844	7.315	10.678	10.187	-0.735	50.325	789.757	-0.000512	-0.000747	-0.000713
0.1660	480.789	13.419	17.655	16.996	-0.731	50.328	915.298	-0.000939	-0.001236	-0.001190
0.1670	547.590	19.733	24.452	23.581	-0.718	50.331	1042.471	-0.001381	-0.001712	-0.001651
0.1680	611.356	26.200	30.782	30.781	-0.724	50.332	1163.864	-0.001834	-0.002155	-0.002155
0.1690	668.659	32.095	36.670	36.464	-0.723	50.331	1272.955	-0.002247	-0.002567	-0.002552
0.1700	718.057	37.441	41.816	42.050	-0.730	50.329	1366.997	-0.002621	-0.002927	-0.002944
0.1710	759.385	41.847	46.097	46.233	-0.725	50.328	1445.675	-0.002929	-0.003227	-0.003236
0.1720	794.402	45.761	49.453	49.763	-0.725	50.326	1512.337	-0.003203	-0.003462	-0.003483
0.1730	824.969	49.241	52.522	53.015	-0.726	50.324	1570.530	-0.003447	-0.003677	-0.003711
0.1740	852.486	52.427	55.356	56.365	-0.731	50.321	1622.915	-0.003670	-0.003875	-0.003946
0.1750	877.719	55.360	57.985	59.297	-0.732	50.318	1670.952	-0.003875	-0.004059	-0.004151
0.1760	900.532	58.097	60.420	61.743	-0.730	50.314	1714.382	-0.004067	-0.004229	-0.004322
0.1770	920.340	60.384	62.168	63.535	-0.728	50.312	1752.090	-0.004227	-0.004352	-0.004447
0.1780	936.044	62.503	63.900	65.536	-0.733	50.311	1781.988	-0.004375	-0.004473	-0.004588
0.1790	946.444	63.767	65.139	66.898	-0.733	50.311	1801.786	-0.004464	-0.004560	-0.004683
0.1800	951.644	64.694	66.020	68.063	-0.735	50.312	1811.686	-0.004529	-0.004621	-0.004764
0.1810	952.395	64.821	66.227	68.327	-0.734	50.314	1813.116	-0.004537	-0.004636	-0.004783
0.1820	949.780	64.905	66.062	68.312	-0.730	50.316	1808.138	-0.004543	-0.004624	-0.004782
0.1830	944.295	64.611	65.733	67.925	-0.724	50.319	1797.695	-0.004523	-0.004601	-0.004755
0.1840	935.879	63.978	65.279	67.369	-0.723	50.322	1781.673	-0.004478	-0.004570	-0.004716
0.1850	923.977	62.939	64.465	66.550	-0.722	50.325	1759.014	-0.004406	-0.004513	-0.004659
0.1860	905.807	61.184	63.459	65.050	-0.723	50.328	1724.424	-0.004283	-0.004442	-0.004553
0.1870	877.043	58.280	60.996	62.506	-0.718	50.331	1669.664	-0.004080	-0.004270	-0.004375
0.1880	834.392	54.084	57.749	58.516	-0.723	50.331	1588.469	-0.003786	-0.004042	-0.004096
0.1890	779.238	48.736	52.949	53.736	-0.724	50.331	1483.469	-0.003412	-0.003706	-0.003762
0.1900	717.441	42.688	47.445	47.623	-0.726	50.329	1365.824	-0.002988	-0.003321	-0.003334
0.1910	655.870	36.472	41.597	41.425	-0.726	50.328	1248.608	-0.002553	-0.002912	-0.002900
0.1920	598.657	30.635	35.872	35.340	-0.727	50.326	1139.688	-0.002144	-0.002511	-0.002474
0.1930	547.560	25.430	30.724	30.169	-0.731	50.324	1042.414	-0.001780	-0.002151	-0.002112
0.1940	503.016	20.952	26.142	25.390	-0.734	50.321	957.613	-0.001467	-0.001830	-0.001777
0.1950	464.723	16.883	22.083	21.304	-0.738	50.317	884.714	-0.001182	-0.001546	-0.001491
0.1960	431.405	13.544	18.547	17.565	-0.735	50.314	821.285	-0.000948	-0.001298	-0.001230
0.1970	400.913	10.317	15.067	13.814	-0.730	50.312	763.235	-0.000722	-0.001055	-0.000967
0.1980	371.953	7.678	11.970	10.437	-0.732	50.311	708.103	-0.000537	-0.000838	-0.000731
0.1990	343.805	4.885	8.695	7.365	-0.738	50.311	654.516	-0.000342	-0.000609	-0.000516
0.2000	317.144	2.346	5.777	4.294	-0.744	50.311	603.762	-0.000164	-0.000404	-0.000301
0.2010	292.558	-0.306	2.558	1.238	-0.741	50.313	556.955	0.000021	-0.000179	-0.000087
0.2020	271.263	-2.509	-0.071	-1.402	-0.738	50.316	516.415	0.000176	0.000005	0.000098
0.2030	253.755	-4.307	-2.326	-3.501	-0.733	50.319	483.084	0.000301	0.000163	0.000245
0.2040	240.981	-5.612	-4.197	-5.141	-0.731	50.322	458.765	0.000393	0.000294	0.000360
0.2050	232.925	-6.608	-5.464	-6.461	-0.734	50.325	443.430	0.000463	0.000382	0.000452
0.2060	229.303	-7.194	-6.180	-6.863	-0.727	50.328	436.535	0.000504	0.000433	0.000480
0.2070	229.138	-7.433	-6.593	-7.267	-0.724	50.331	436.220	0.000520	0.000462	0.000509
0.2080	231.813	-7.334	-6.469	-6.864	-0.734	50.331	441.313	0.000513	0.000453	0.000480
0.2090	236.517	-7.167	-6.317	-6.976	-0.735	50.331	450.268	0.000502	0.000442	0.000488
0.2100	243.626	-6.677	-5.809	-6.074	-0.736	50.329	463.800	0.000467	0.000407	0.000425
0.2110	254.130	-6.214	-5.024	-5.546	-0.734	50.328	483.799	0.000435	0.000352	0.000388
0.2120	271.548	-4.965	-3.427	-4.087	-0.735	50.326	516.958	0.000348	0.000240	0.000286
0.2130	300.358	-2.734	-0.771	-1.167	-0.736	50.324	571.804	0.000191	0.000054	0.000082
0.2140	343.429	1.055	3.440	2.848	-0.737	50.321	653.801	-0.000074	-0.000241	-0.000199
0.2150	399.380	6.093	9.137	8.602	-0.736	50.317	760.317	-0.000427	-0.000640	-0.000602
0.2160	463.371	11.973	15.699	15.133	-0.737	50.314	882.139	-0.000838	-0.001099	-0.001059
0.2170	529.721	18.047	22.385	22.193	-0.736	50.312	1008.453	-0.001263	-0.001567	-0.001553
0.2180	594.223	24.516	28.949	28.906	-0.740	50.311	1131.248	-0.001716	-0.002026	-0.002023
0.2190	653.826	30.634	35.004	35.173	-0.732	50.311	1244.717	-0.002144	-0.002450	-0.002462
0.2200	706.801	36.402	40.455	40.884	-0.728	50.312	1345.568	-0.002548	-0.002832	-0.002862
0.2210	751.946	41.145	45.064	45.664	-0.724	50.314	1431.513	-0.002880	-0.003154	-0.003196
0.2220	789.367	45.242	48.916	49.415	-0.724	50.316	1502.752	-0.003167	-0.003424	-0.003459
0.2230	819.875	48.836	52.067	52.724	-0.725	50.319	1560.831	-0.003419	-0.003645	-0.003691
0.2240	845.092	51.853	54.750	55.447	-0.724	50.321	1608.839	-0.003630	-0.003833	-0.003881
0.2250	866.673	54.266	57.048	58.032	-0.724	50.324	1649.923	-0.003799	-0.003993	-0.004062
0.2260	885.880	56.540	59.057	59.907	-0.716	50.328	1686.487	-0.003958	-0.004134	-0.004193
0.2270	903.267	58.490	60.735	61.895	-0.710	50.331	1719.589	-0.004094	-0.004251	-0.004333
0.2280	918.702	60.638	62.428	63.507	-0.714	50.331	1748.972	-0.004245	-0.004370	-0.004445
0.2290	931.310	62.308	63.763	65.674	-0.714	50.331	1772.976	-0.004362	-0.004463	-0.004597
0.2300	940.493	63.598	65.126	66.618	-0.716	50.329	1790.457	-0.004452	-0.004559	-0.004663
0.2310	945.497	64.244	65.622	67.839	-0.711	50.327	1799.984	-0.004497	-0.004594	-0.004749
0.2320	946.294	64.553	65.939	67.618	-0.712	50.325	1801.500	-0.004519	-0.004616	-0.004733
0.2330	943.093	64.469	65.706	68.147	-0.710	50.323	1795.406	-0.004513	-0.004599	-0.004770
0.2340	936.390	63.923	65.334	67.287	-0.718	50.320	1782.646	-0.004475	-0.004573	-0.004710
0.2350	926.336	63.080	64.769	66.857	-0.718	50.317	1763.506	-0.004416	-0.004534	-0.004680
0.2360	911.368	61.705	63.779	65.537	-0.718	50.314	1735.010	-0.004319	-0.004465	-0.004588
0.2370	887.593	59.600	61.934	63.521	-0.711	50.312	1689.749	-0.004172	-0.004335	-0.004446
0.2380	850.563	56.065	59.045	60.102	-0.712	50.311	1619.253	-0.003925	-0.004133	-0.004207
0.2390	799.677	51.124	54.697	55.419	-0.710	50.311	1522.379	-0.003579	-0.003829	-0.003879
0.2400	739.262	45.202	49.494	49.750	-0.715	50.311	1407.366	-0.003164	-0.003465	-0.003483
0.2410	675.707	38.787	43.481	43.385	-0.718	50.314	1286.373	-0.002715	-0.003044	-0.003037
0.2420	614.527	32.586	37.564	36.910	-0.722	50.317	1169.901	-0.002281	-0.002629	-0.002584
0.2430	558.696	26.819	31.840	31.351	-0.723	50.319	1063.614	-0.001877	-0.002229	-0.002195
0.2440	510.260	21.740	26.982	26.112	-0.726	50.322	971.403	-0.001522	-0.001889	-0.001828
0.2450	469.142	17.446	22.649	21.972	-0.722	50.325	893.126	-0.001221	-0.001585	-0.001538
0.2460	433.930	13.939	18.822	17.692	-0.722	50.328	826.092	-0.000976	-0.001318	-0.001238
0.2470	401.995	10.738	15.245	14.079	-0.718	50.331	765.295	-0.000752	-0.001067	-0.000986
0.2480	371.352	7.804	11.983	10.826	-0.724	50.331	706.959	-0.000546	-0.000839	-0.000758
0.2490	341.295	4.842	8.723	7.462	-0.727	50.331	649.738	-0.000339	-0.000611	-0.000522
0.2500	222.511	-13.214	-13.239	-14.704	-0.726	50.324	423.603	0.000925	0.000927	0.001029
0.2510	222.030	-13.199	-13.322	-14.815	-0.723	50.327	422.688	0.000924	0.000933	0.001037
0.2520	221.624	-13.438	-13.486	-14.967	-0.718	50.331	421.915	0.000941	0.000944	0.001048
0.2530	221.278	-13.608	-13.747	-14.701	-0.712	50.333	421.257	0.000953	0.000962	0.001029
0.2540	221.128	-13.440	-13.707	-14.673	-0.717	50.333	420.971	0.000941	0.000959	0.001027
0.2550	221.188	-13.286	-13.721	-14.257	-0.720	50.332	421.085	0.000930	0.000960	0.000998
0.2560	221.849	-13.075	-13.638	-14.383	-0.720	50.330	422.344	0.000915	0.000955	0.001007
0.2570	223.518	-13.271	-13.734	-14.411	-0.714	50.329	425.520	0.000929	0.000961	0.001009
0.2580	227.260	-13.215	-13.472	-14.076	-0.719	50.326	432.644	0.000925	0.000943	0.000985
0.2590	235.285	-12.697	-12.661	-13.423	-0.723	50.324	447.922	0.000889	0.000886	0.000940
0.2600	251.831	-11.378	-11.148	-11.810	-0.723	50.321	479.422	0.000796	0.000780	0.000827
0.2610	281.242	-9.007	-8.341	-8.644	-0.722	50.318	535.412	0.000630	0.000584	0.000605
0.2620	325.260	-5.302	-3.800	-4.224	-0.724	50.315	619.211	0.000371	0.000266	0.000296
0.2630	382.894	-0.306	2.116	1.500	-0.721	50.313	728.931	0.000021	-0.000148	-0.000105
0.2640	450.837	6.050	9.272	9.047	-0.726	50.312	858.278	-0.000423	-0.000649	-0.000633
0.2650	525.679	13.236	17.033	16.872	-0.726	50.312	1000.757	-0.000926	-0.001192	-0.001181
0.2660	604.082	20.868	25.070	25.278	-0.734	50.314	1150.017	-0.001461	-0.001755	-0.001769
0.2670	683.086	28.769	33.036	33.282	-0.729	50.317	1300.421	-0.002014	-0.002313	-0.002330
0.2680	759.911	36.627	40.755	41.258	-0.731	50.319	1446.676	-0.002564	-0.002853	-0.002888
0.2690	831.717	44.415	47.992	48.763	-0.728	50.321	1583.376	-0.003109	-0.003359	-0.003413
0.2700	896.580	51.698	54.652	55.976	-0.728	50.324	1706.858	-0.003619	-0.003826	-0.003918
0.2710	953.011	58.139	60.502	61.937	-0.727	50.327	1814.289	-0.004070	-0.004235	-0.004336
0.2720	1001.508	63.612	65.318	67.454	-0.725	50.331	1906.614	-0.004453	-0.004572	-0.004722
0.2730	1043.633	68.595	69.447	71.969	-0.728	50.333	1986.809	-0.004802	-0.004861	-0.005038
0.2740	1081.564	73.366	73.382	76.443	-0.732	50.333	2059.021	-0.005136	-0.005137	-0.005351
0.2750	1116.866	77.898	76.987	80.820	-0.732	50.332	2126.226	-0.005453	-0.005389	-0.005657
0.2760	1149.899	82.051	80.331	84.378	-0.734	50.330	2189.112	-0.005744	-0.005623	-0.005906
0.2770	1179.039	85.489	83.137	87.781	-0.722	50.329	2244.587	-0.005984	-0.005820	-0.006145
0.2780	1202.213	88.520	85.504	89.949	-0.722	50.327	2288.704	-0.006196	-0.005985	-0.006296
0.2790	1216.925	90.737	87.334	92.367	-0.724	50.324	2316.713	-0.006352	-0.006113	-0.006466
0.2800	1222.997	92.028	88.381	93.271	-0.731	50.321	2328.272	-0.006442	-0.006187	-0.006529
0.2810	1221.840	92.392	88.808	94.426	-0.734	50.318	2326.069	-0.006467	-0.006217	-0.006610
0.2820	1215.588	92.056	88.451	93.856	-0.726	50.315	2314.167	-0.006444	-0.006192	-0.006570
0.2830	1205.459	91.313	87.720	93.634	-0.724	50.313	2294.884	-0.006392	-0.006140	-0.006554
0.2840	1190.596	90.246	87.087	92.564	-0.725	50.313	2266.588	-0.006317	-0.006096	-0.006480
0.2850	1166.595	88.280	85.684	90.745	-0.722	50.313	2220.898	-0.006180	-0.005998	-0.006352
0.2860	1126.154	84.646	82.919	87.464	-0.718	50.314	2143.908	-0.005925	-0.005804	-0.006122
0.2870	1063.906	78.290	77.883	81.627	-0.711	50.316	2025.404	-0.005480	-0.005452	-0.005714
0.2880	981.535	70.026	70.976	73.955	-0.715	50.319	1868.591	-0.004902	-0.004968	-0.005177
0.2890	888.119	60.455	62.966	64.617	-0.711	50.321	1690.750	-0.004232	-0.004408	-0.004523
0.2900	796.010	50.984	54.629	55.488	-0.720	50.324	1515.398	-0.003569	-0.003824	-0.003884
0.2910	714.721	42.382	46.991	47.192	-0.716	50.327	1360.645	-0.002967	-0.003289	-0.003303
0.2920	649.242	35.213	40.248	40.202	-0.714	50.331	1235.991	-0.002465	-0.002817	-0.002814
0.2930	599.588	29.740	35.101	34.646	-0.707	50.333	1141.462	-0.002082	-0.002457	-0.002425
0.2940	561.912	25.839	31.247	30.879	-0.713	50.333	1069.736	-0.001809	-0.002187	-0.002162
0.2950	530.548	22.554	28.013	27.295	-0.706	50.332	1010.027	-0.001579	-0.001961	-0.001911
0.2960	499.995	19.438	24.821	24.097	-0.709	50.330	951.862	-0.001361	-0.001737	-0.001687
0.2970	465.806	15.662	20.776	19.969	-0.704	50.329	886.774	-0.001096	-0.001454	-0.001398
0.2980	425.875	11.649	16.566	15.592	-0.706	50.326	810.757	-0.000815	-0.001160	-0.001091
0.2990	381.271	7.272	11.613	10.436	-0.707	50.324	725.842	-0.000509	-0.000813	-0.000731
0.3000	336.155	2.923	6.604	5.183	-0.713	50.321	639.954	-0.000205	-0.000462	-0.000363
0.3010	295.564	-1.064	1.884	0.376	-0.719	50.318	562.677	0.000075	-0.000132	-0.000026
0.3020	263.298	-4.250	-2.243	-3.695	-0.714	50.315	501.251	0.000297	0.000157	0.000259
0.3030	240.981	-6.594	-5.256	-6.571	-0.712	50.313	458.765	0.000462	0.000368	0.000460
0.3040	228.011	-7.912	-7.018	-8.044	-0.712	50.312	434.074	0.000554	0.000491	0.000563
0.3050	222.586	-8.655	-8.051	-9.114	-0.715	50.313	423.746	0.000606	0.000564	0.000638
0.3060	222.556	-9.048	-8.506	-9.366	-0.716	50.315	423.689	0.000633	0.000595	0.000656
0.3070	225.742	-9.075	-8.658	-9.587	-0.710	50.317	429.754	0.000635	0.000606	0.000671
0.3080	231.272	-9.089	-8.425	-9.156	-0.707	50.319	440.283	0.000636	0.000590	0.000641
0.3090	238.786	-8.612	-7.778	-8.712	-0.709	50.322	454.588	0.000603	0.000544	0.000610
0.3100	250.524	-7.897	-6.773	-7.669	-0.708	50.325	476.933	0.000553	0.000474	0.000537
0.3110	271.578	-6.311	-5.066	-5.794	-0.712	50.328	517.015	0.000442	0.000355	0.000406
0.3120	307.316	-3.505	-1.832	-2.848	-0.708	50.331	585.051	0.000245	0.000128	0.000199
0.3130	360.216	0.902	3.329	2.724	-0.707	50.333	685.759	-0.000063	-0.000233	-0.000191
0.3140	428.054	6.992	10.278	9.672	-0.716	50.333	814.905	-0.000489	-0.000719	-0.000677
0.3150	505.616	14.274	18.286	18.108	-0.720	50.332	962.563	-0.000999	-0.001280	-0.001268
0.3160	587.596	22.230	26.721	26.292	-0.720	50.330	1118.631	-0.001556	-0.001870	-0.001840
0.3170	668.689	30.284	34.646	34.990	-0.707	50.329	1273.012	-0.002120	-0.002425	-0.002449
0.3180	745.078	38.073	42.255	42.633	-0.712	50.327	1418.438	-0.002665	-0.002958	-0.002984
0.3190	814.164	45.455	48.984	50.123	-0.715	50.325	1549.959	-0.003182	-0.003429	-0.003509
0.3200	875.765	52.148	55.162	56.406	-0.723	50.322	1667.233	-0.003650	-0.003861	-0.003948
0.3210	930.769	58.195	60.721	62.213	-0.719	50.319	1771.946	-0.004074	-0.004250	-0.004355
0.3220	980.679	63.669	65.579	67.439	-0.713	50.316	1866.961	-0.004457	-0.004591	-0.004721
0.3230	1026.831	68.888	70.038	72.455	-0.714	50.314	1954.823	-0.004822	-0.004903	-0.005072
0.3240	1069.872	74.193	74.276	77.417	-0.720	50.313	2036.762	-0.005194	-0.005199	-0.005419
0.3250	1109.788	79.020	78.293	81.766	-0.721	50.313	2112.751	-0.005531	-0.005481	-0.005724
0.3260	1145.525	83.511	81.911	86.018	-0.716	50.314	2180.786	-0.005846	-0.005734	-0.006021
0.3270	1175.417	87.089	84.747	89.410	-0.710	50.317	2237.692	-0.006096	-0.005932	-0.006259
0.3280	1197.554	90.022	87.059	92.037	-0.710	50.319	2279.835	-0.006302	-0.006094	-0.006443
0.3290	1210.854	92.001	88.491	94.037	-0.710	50.322	2305.155	-0.006440	-0.006194	-0.006583
0.3300	1215.843	93.137	89.427	94.759	-0.714	50.325	2314.653	-0.006520	-0.006260	-0.006633
0.3310	1214.310	93.601	89.660	95.147	-0.712	50.328	2311.735	-0.006552	-0.006276	-0.006660
0.3320	1208.494	93.391	89.481	94.912	-0.709	50.331	2300.663	-0.006537	-0.006264	-0.006644
0.3330	1199.703	92.773	89.056	94.427	-0.708	50.333	2283.926	-0.006494	-0.006234	-0.006610
0.3340	1187.410	91.958	88.383	93.871	-0.719	50.333	2260.523	-0.006437	-0.006187	-0.006571
0.3350	1168.263	90.316	87.254	92.550	-0.722	50.332	2224.073	-0.006322	-0.006108	-0.006478
0.3360	1136.042	87.228	84.873	90.132	-0.727	50.331	2162.733	-0.006106	-0.005941	-0.006309
0.3370	1085.397	82.037	80.868	85.005	-0.722	50.329	2066.317	-0.005743	-0.005661	-0.005950
0.3380	1016.386	75.064	75.282	78.655	-0.726	50.327	1934.938	-0.005255	-0.005270	-0.005506
0.3390	936.044	66.954	68.359	70.442	-0.728	50.325	1781.988	-0.004687	-0.004785	-0.004931
0.3400	854.155	58.590	61.024	63.007	-0.732	50.321	1626.091	-0.004101	-0.004272	-0.004411
0.3410	778.697	50.535	53.965	54.960	-0.732	50.318	1482.439	-0.003537	-0.003778	-0.003847
0.3420	713.699	43.517	47.732	48.691	-0.729	50.315	1358.700	-0.003046	-0.003341	-0.003408
0.3430	659.927	37.582	42.353	42.368	-0.731	50.313	1256.332	-0.002631	-0.002965	-0.002966
0.3440	614.662	32.852	37.798	38.062	-0.734	50.312	1170.158	-0.002300	-0.002646	-0.002664
0.3450	573.364	28.544	33.532	33.394	-0.732	50.313	1091.537	-0.001998	-0.002347	-0.002338
0.3460	532.111	24.250	29.405	29.141	-0.728	50.315	1013.002	-0.001697	-0.002058	-0.002040
0.3470	488.649	19.747	24.823	23.874	-0.722	50.317	930.262	-0.001382	-0.001738	-0.001671
0.3480	442.782	15.187	19.979	18.704	-0.726	50.319	842.943	-0.001063	-0.001399	-0.001309
0.3490	395.743	10.332	14.791	13.437	-0.725	50.321	753.393	-0.000723	-0.001035	-0.000941
0.3500	349.876	5.685	9.578	8.310	-0.731	50.324	666.075	-0.000398	-0.000670	-0.000582
0.3510	308.563	1.461	4.624	3.612	-0.733	50.327	587.425	-0.000102	-0.000324	-0.000253
0.3520	274.404	-1.934	0.398	-0.875	-0.731	50.331	522.394	0.000135	-0.000028	0.000061
0.3530	249.141	-4.361	-2.850	-4.072	-0.728	50.333	474.300	0.000305	0.000199	0.000285
0.3540	232.685	-6.044	-4.915	-6.531	-0.730	50.333	442.972	0.000423	0.000344	0.000457
0.3550	224.179	-7.139	-6.235	-7.657	-0.728	50.332	426.779	0.000500	0.000436	0.000536
0.3560	221.894	-7.827	-6.937	-8.225	-0.730	50.330	422.430	0.000548	0.000486	0.000576
0.3570	223.878	-8.136	-7.308	-8.281	-0.725	50.329	426.207	0.000570	0.000512	0.000580
0.3580	228.823	-7.996	-7.308	-8.113	-0.732	50.327	435.619	0.000560	0.000512	0.000568
0.3590	236.111	-7.645	-6.729	-7.433	-0.734	50.325	449.495	0.000535	0.000471	0.000520
0.3600	247.969	-6.958	-5.863	-6.740	-0.736	50.322	472.069	0.000487	0.000410	0.000472
0.3610	269.144	-5.499	-4.018	-4.518	-0.739	50.318	512.381	0.000385	0.000281	0.000316
0.3620	305.302	-2.763	-0.840	-1.545	-0.738	50.316	581.217	0.000193	0.000059	0.000108
0.3630	358.623	1.798	4.429	3.598	-0.734	50.314	682.726	-0.000126	-0.000310	-0.000252
0.3640	426.341	8.043	11.435	10.770	-0.735	50.313	811.644	-0.000563	-0.000800	-0.000754
0.3650	502.866	15.285	19.236	18.662	-0.732	50.313	957.327	-0.001070	-0.001347	-0.001306
0.3660	583.087	23.058	27.342	27.236	-0.732	50.315	1110.048	-0.001614	-0.001914	-0.001907
0.3670	662.783	30.915	35.129	35.504	-0.728	50.317	1261.768	-0.002164	-0.002459	-0.002485
0.3680	738.391	38.689	42.490	43.454	-0.732	50.319	1405.706	-0.002708	-0.002974	-0.003042
0.3690	807.161	46.070	49.288	50.765	-0.734	50.322	1536.627	-0.003225	-0.003450	-0.003554
0.3700	868.507	52.553	55.410	57.339	-0.735	50.325	1653.414	-0.003679	-0.003879	-0.004014
0.3710	922.849	58.505	60.846	62.841	-0.727	50.328	1756.868	-0.004095	-0.004259	-0.004399
0.3720	971.947	63.795	65.539	67.830	-0.723	50.331	1850.338	-0.004466	-0.004588	-0.004748
0.3730	1017.438	68.974	69.833	72.777	-0.714	50.333	1936.941	-0.004828	-0.004888	-0.005094
0.3740	1060.780	74.054	74.125	77.460	-0.725	50.333	2019.453	-0.005184	-0.005189	-0.005422
0.3750	1101.853	78.964	78.061	82.363	-0.726	50.332	2097.645	-0.005527	-0.005464	-0.005765
0.3760	1139.319	83.566	81.775	86.142	-0.732	50.330	2168.970	-0.005850	-0.005724	-0.006030
0.3770	1171.134	87.523	84.776	90.035	-0.726	50.329	2229.538	-0.006127	-0.005934	-0.006302
0.3780	1195.390	90.597	87.416	92.690	-0.732	50.327	2275.715	-0.006342	-0.006119	-0.006488
0.3790	1210.854	92.786	89.246	94.927	-0.738	50.324	2305.155	-0.006495	-0.006247	-0.006645
0.3800	1217.587	94.090	90.319	95.734	-0.741	50.321	2317.972	-0.006586	-0.006322	-0.006701
0.3810	1217.331	94.623	90.648	96.400	-0.737	50.318	2317.486	-0.006624	-0.006345	-0.006748
0.3820	1211.981	94.568	90.595	95.900	-0.729	50.315	2307.301	-0.006620	-0.006342	-0.006713
0.3830	1203.355	93.995	89.977	95.732	-0.726	50.313	2290.878	-0.006580	-0.006298	-0.006701
0.3840	1190.731	93.209	89.345	94.772	-0.729	50.312	2266.846	-0.006525	-0.006254	-0.006634
0.3850	1170.217	91.482	88.038	93.438	-0.731	50.313	2227.793	-0.006404	-0.006163	-0.006541
0.3860	1134.945	88.085	85.808	90.659	-0.727	50.314	2160.645	-0.006166	-0.006007	-0.006346
0.3870	1080.002	82.333	81.527	85.489	-0.721	50.317	2056.046	-0.005763	-0.005707	-0.005984
0.3880	1007.159	74.994	75.487	78.888	-0.721	50.319	1917.372	-0.005250	-0.005284	-0.005522
0.3890	924.758	66.658	68.359	70.579	-0.720	50.322	1760.502	-0.004666	-0.004785	-0.004941
0.3900	843.394	58.393	60.915	62.422	-0.717	50.325	1605.606	-0.004088	-0.004264	-0.004370
0.3910	770.281	50.731	54.213	54.724	-0.719	50.328	1466.417	-0.003551	-0.003795	-0.003831
0.3920	708.800	43.939	48.090	48.387	-0.714	50.331	1349.373	-0.003076	-0.003366	-0.003387
0.3930	658.319	38.508	42.986	42.939	-0.712	50.333	1253.271	-0.002696	-0.003009	-0.003006
0.3940	615.654	34.073	38.666	38.840	-0.716	50.333	1172.047	-0.002385	-0.002707	-0.002719
0.3950	576.385	29.962	34.675	34.768	-0.719	50.332	1097.288	-0.002097	-0.002427	-0.002434
0.3960	536.379	25.879	30.670	30.766	-0.722	50.330	1021.128	-0.001812	-0.002147	-0.002154
0.3970	492.586	21.080	25.950	25.597	-0.716	50.329	937.757	-0.001476	-0.001817	-0.001792
0.3980	444.450	16.041	20.873	20.331	-0.718	50.326	846.119	-0.001123	-0.001461	-0.001423
0.3990	394.030	10.806	15.232	14.592	-0.715	50.324	750.132	-0.000756	-0.001066	-0.001021
0.4000	345.218	5.811	9.699	8.701	-0.718	50.321	657.206	-0.000407	-0.000679	-0.000609
0.4010	302.597	1.489	4.594	3.322	-0.717	50.318	576.067	-0.000104	-0.000322	-0.000233
0.4020	268.963	-1.865	0.286	-0.693	-0.715	50.315	512.037	0.000131	-0.000020	0.000049
0.4030	245.639	-4.334	-2.741	-3.805	-0.721	50.313	467.634	0.000303	0.000192	0.000266
0.4040	231.888	-5.738	-4.515	-5.612	-0.730	50.313	441.456	0.000402	0.000316	0.000393
0.4050	225.967	-6.761	-5.616	-6.795	-0.732	50.313	430.183	0.000473	0.000393	0.000476
0.4060	225.772	-7.069	-5.988	-7.060	-0.731	50.315	429.811	0.000495	0.000419	0.000494
0.4070	229.003	-7.251	-6.427	-7.283	-0.723	50.318	435.963	0.000508	0.000450	0.000510
0.4080	234.894	-6.887	-6.082	-6.949	-0.724	50.320	447.178	0.000482	0.000426	0.000486
0.4090	243.190	-6.468	-5.462	-6.281	-0.730	50.322	462.971	0.000453	0.000382	0.000440
0.4100	256.535	-5.655	-4.308	-5.364	-0.736	50.325	488.377	0.000396	0.000302	0.000376
0.4110	279.859	-4.069	-2.080	-3.099	-0.739	50.328	532.780	0.000285	0.000146	0.000217
0.4120	317.716	-0.981	1.470	0.417	-0.736	50.332	604.849	0.000069	-0.000103	-0.000029
0.4130	371.322	3.805	6.603	6.005	-0.733	50.334	706.902	-0.000266	-0.000462	-0.000420
0.4140	437.237	9.882	13.360	12.829	-0.738	50.334	832.386	-0.000692	-0.000935	-0.000898
0.4150	510.861	16.954	20.957	20.455	-0.742	50.333	972.548	-0.001187	-0.001467	-0.001432
0.4160	587.926	24.434	28.732	28.472	-0.747	50.331	1119.261	-0.001710	-0.002011	-0.001993
0.4170	664.767	32.067	36.300	36.573	-0.738	50.329	1265.545	-0.002245	-0.002541	-0.002560
0.4180	737.865	39.546	43.482	44.328	-0.739	50.327	1404.705	-0.002768	-0.003044	-0.003103
0.4190	804.426	46.535	49.908	51.304	-0.739	50.325	1531.420	-0.003257	-0.003494	-0.003591
0.4200	863.382	52.989	55.604	57.641	-0.743	50.322	1643.658	-0.003709	-0.003892	-0.004035
0.4210	915.155	58.673	60.778	62.589	-0.742	50.319	1742.220	-0.004107	-0.004254	-0.004381
0.4220	961.968	63.934	65.236	67.941	-0.744	50.316	1831.341	-0.004475	-0.004566	-0.004756
0.4230	1006.377	68.875	69.501	72.027	-0.742	50.314	1915.884	-0.004821	-0.004865	-0.005042
0.4240	1050.245	73.941	73.711	77.321	-0.744	50.313	1999.397	-0.005176	-0.005160	-0.005412
0.4250	1093.362	78.894	77.908	81.405	-0.743	50.313	2081.480	-0.005523	-0.005454	-0.005698
0.4260	1133.954	83.832	81.912	86.560	-0.743	50.315	2158.756	-0.005868	-0.005734	-0.006059
0.4270	1168.729	87.804	85.174	89.937	-0.736	50.317	2224.960	-0.006146	-0.005962	-0.006296
0.4280	1194.969	91.216	87.844	93.702	-0.736	50.320	2274.914	-0.006385	-0.006149	-0.006559
0.4290	1211.034	93.363	89.482	95.217	-0.736	50.323	2305.498	-0.006535	-0.006264	-0.006665
0.4300	1217.797	94.793	90.349	96.565	-0.738	50.325	2318.373	-0.006635	-0.006324	-0.006760
0.4310	1217.647	95.043	90.763	96.775	-0.738	50.328	2318.087	-0.006653	-0.006353	-0.006774
0.4320	1212.717	94.805	90.733	96.525	-0.734	50.332	2308.702	-0.006636	-0.006351	-0.006757
0.4330	1204.888	94.385	90.484	96.288	-0.733	50.334	2293.797	-0.006607	-0.006334	-0.006740
0.4340	1194.112	93.993	90.111	95.510	-0.739	50.334	2273.283	-0.006580	-0.006308	-0.006686
0.4350	1178.107	92.913	89.315	94.800	-0.738	50.333	2242.813	-0.006504	-0.006252	-0.006636
0.4360	1151.176	90.429	87.678	92.328	-0.734	50.331	2191.544	-0.006330	-0.006137	-0.006463
0.4370	1106.812	85.784	84.308	88.715	-0.726	50.330	2107.086	-0.006005	-0.005902	-0.006210
0.4380	1042.972	79.202	79.147	82.420	-0.726	50.327	1985.550	-0.005544	-0.005540	-0.005769
0.4390	963.516	71.245	72.322	75.028	-0.729	50.325	1834.288	-0.004987	-0.005063	-0.005252
0.4400	877.854	62.490	64.823	66.274	-0.735	50.322	1671.209	-0.004374	-0.004538	-0.004639
0.4410	795.048	53.916	57.049	58.130	-0.736	50.319	1513.567	-0.003774	-0.003993	-0.004069
0.4420	721.138	46.143	49.921	50.516	-0.732	50.316	1372.862	-0.003230	-0.003495	-0.003536
0.4430	659.176	39.504	43.770	44.081	-0.727	50.314	1254.902	-0.002765	-0.003064	-0.003086
0.4440	608.380	34.241	38.679	38.731	-0.736	50.313	1158.199	-0.002397	-0.002708	-0.002711
0.4450	565.579	29.582	34.262	33.936	-0.739	50.314	1076.717	-0.002071	-0.002398	-0.002376
0.4460	526.941	25.513	30.133	29.934	-0.739	50.315	1003.160	-0.001786	-0.002109	-0.002095
0.4470	488.874	21.361	25.977	25.306	-0.734	50.318	930.691	-0.001495	-0.001818	-0.001771
0.4480	449.755	17.108	21.642	21.166	-0.732	50.320	856.218	-0.001198	-0.001515	-0.001482
0.4490	409.163	13.010	17.130	15.926	-0.733	50.323	778.942	-0.000911	-0.001199	-0.001115
0.4500	368.752	8.688	12.672	11.605	-0.731	50.325	702.009	-0.000608	-0.000887	-0.000812
0.4510	330.595	4.856	8.049	6.602	-0.730	50.328	629.368	-0.000340	-0.000563	-0.000462
0.4520	296.901	1.195	3.990	3.086	-0.725	50.332	565.224	-0.000084	-0.000279	-0.000216
0.4530	269.519	-1.556	0.398	-0.599	-0.727	50.334	513.096	0.000109	-0.000028	0.000042
0.4540	249.682	-3.591	-2.204	-2.822	-0.732	50.334	475.330	0.000251	0.000154	0.000198
0.4550	237.719	-4.896	-3.677	-4.447	-0.733	50.333	452.557	0.000343	0.000257	0.000311
0.4560	232.895	-5.809	-4.500	-5.364	-0.736	50.331	443.373	0.000407	0.000315	0.000375
0.4570	233.331	-6.272	-5.035	-5.738	-0.731	50.330	444.202	0.000439	0.000352	0.000402
0.4580	237.599	-6.090	-5.035	-5.780	-0.737	50.327	452.328	0.000426	0.000352	0.000405
0.4590	244.632	-5.725	-4.608	-5.391	-0.737	50.325	465.717	0.000401	0.000323	0.000377
0.4600	255.648	-5.051	-3.797	-4.460	-0.737	50.322	486.689	0.000354	0.000266	0.000312
0.4610	274.930	-3.689	-2.064	-2.613	-0.739	50.319	523.396	0.000258	0.000144	0.000183
0.4620	307.827	-1.079	0.963	0.652	-0.735	50.316	586.023	0.000076	-0.000067	-0.000046
0.4630	357.120	3.441	5.668	5.405	-0.736	50.314	679.865	-0.000241	-0.000397	-0.000378
0.4640	421.006	9.306	12.233	12.103	-0.738	50.313	801.487	-0.000651	-0.000856	-0.000847
0.4650	494.765	16.351	19.813	19.635	-0.744	50.313	941.906	-0.001145	-0.001387	-0.001374
0.4660	573.574	23.830	27.820	27.680	-0.744	50.315	1091.938	-0.001668	-0.001947	-0.001938
0.4670	653.165	31.534	35.593	35.699	-0.740	50.317	1243.458	-0.002207	-0.002492	-0.002499
0.4680	729.780	39.349	42.997	43.788	-0.736	50.320	1389.313	-0.002754	-0.003010	-0.003065
0.4690	800.067	46.745	49.989	51.168	-0.735	50.322	1523.123	-0.003272	-0.003499	-0.003582
0.4700	862.886	53.482	56.168	57.587	-0.735	50.325	1642.714	-0.003744	-0.003932	-0.004031
0.4710	917.995	59.657	61.549	63.103	-0.736	50.328	1747.627	-0.004176	-0.004308	-0.004417
0.4720	966.958	64.960	66.310	68.607	-0.727	50.332	1840.839	-0.004547	-0.004642	-0.004802
0.4730	1011.427	69.968	70.563	73.360	-0.730	50.334	1925.497	-0.004898	-0.004939	-0.005135
0.4740	1052.980	74.711	74.718	78.487	-0.730	50.334	2004.604	-0.005230	-0.005230	-0.005494
0.4750	1092.505	79.441	78.529	82.753	-0.739	50.333	2079.849	-0.005561	-0.005497	-0.005793
0.4760	1129.761	83.807	82.079	86.936	-0.734	50.331	2150.774	-0.005866	-0.005746	-0.006086
0.4770	1163.139	87.720	85.078	90.354	-0.732	50.329	2214.317	-0.006140	-0.005955	-0.006325
0.4780	1190.445	91.074	87.680	93.343	-0.729	50.327	2266.302	-0.006375	-0.006138	-0.006534
0.4790	1209.396	93.710	89.619	95.745	-0.730	50.325	2302.380	-0.006560	-0.006273	-0.006702
0.4800	1219.405	95.282	90.746	96.997	-0.730	50.322	2321.434	-0.006670	-0.006352	-0.006790
0.4810	1221.689	96.081	91.337	97.815	-0.735	50.319	2325.783	-0.006726	-0.006394	-0.006847
0.4820	1218.308	95.912	91.242	97.442	-0.733	50.316	2319.345	-0.006714	-0.006387	-0.006821
0.4830	1211.064	95.646	91.036	97.691	-0.726	50.314	2305.555	-0.006695	-0.006373	-0.006838
0.4840	1200.439	95.128	90.734	96.914	-0.729	50.313	2285.328	-0.006659	-0.006351	-0.006784
0.4850	1184.930	94.035	90.046	96.497	-0.727	50.313	2255.802	-0.006582	-0.006303	-0.006755
0.4860	1159.968	91.805	88.573	94.008	-0.729	50.315	2208.281	-0.006426	-0.006200	-0.006581
0.4870	1118.594	87.623	85.505	90.785	-0.723	50.318	2129.517	-0.006134	-0.005985	-0.006355
0.4880	1058.030	81.463	80.689	84.879	-0.727	50.320	2014.217	-0.005702	-0.005648	-0.005942
0.4890	981.024	73.519	74.262	77.403	-0.724	50.323	1867.619	-0.005146	-0.005198	-0.005418
0.4900	896.910	64.945	66.832	68.816	-0.730	50.325	1707.487	-0.004546	-0.004678	-0.004817
0.4910	814.840	56.413	59.415	60.380	-0.732	50.328	1551.247	-0.003949	-0.004159	-0.004227
0.4920	740.855	48.653	52.467	53.029	-0.727	50.332	1410.398	-0.003406	-0.003673	-0.003712
0.4930	677.390	41.945	46.261	46.192	-0.726	50.334	1289.577	-0.002936	-0.003238	-0.003233
0.4940	623.799	36.345	40.991	40.883	-0.728	50.334	1187.553	-0.002544	-0.002869	-0.002862
0.4950	578.098	31.603	36.119	35.782	-0.730	50.333	1100.550	-0.002212	-0.002528	-0.002505
0.4960	537.551	27.127	31.881	31.572	-0.728	50.331	1023.359	-0.001899	-0.002232	-0.002210
0.4970	499.274	23.015	27.519	26.973	-0.716	50.330	950.489	-0.001611	-0.001926	-0.001888
0.4980	461.417	19.030	23.335	22.805	-0.716	50.327	878.420	-0.001332	-0.001633	-0.001596
0.4990	422.914	15.199	19.097	18.275	-0.715	50.325	805.120	-0.001064	-0.001337	-0.001279
Test Cycles
Time (sec)	Axial stress (kPa)	Axial micro-strain #1	Axial micro-strain #2	Axial micro-strain #3	Confining pressure (kPa)	Temperature (�C)	Load (N)	Displacement #1 (mm)	Displacement #2 (mm)	Displacement #3 (mm)
0.0000	384.442	11.102	14.887	13.591	-0.725	50.322	731.878	-0.000777	-0.001042	-0.000951
0.0010	347.622	7.159	10.843	9.297	-0.731	50.318	661.783	-0.000501	-0.000759	-0.000651
0.0020	314.424	3.567	6.604	5.281	-0.726	50.316	598.583	-0.000250	-0.000462	-0.000370
0.0030	286.967	0.720	3.124	2.030	-0.727	50.314	546.312	-0.000050	-0.000219	-0.000142
0.0040	266.514	-1.287	0.426	-0.429	-0.727	50.313	507.374	0.000090	-0.000030	0.000030
0.0050	253.649	-2.733	-1.377	-2.041	-0.725	50.313	482.883	0.000191	0.000096	0.000143
0.0060	247.758	-3.506	-2.437	-2.791	-0.727	50.315	471.668	0.000245	0.000171	0.000195
0.0070	247.277	-4.223	-3.000	-3.598	-0.721	50.318	470.753	0.000296	0.000210	0.000252
0.0080	250.824	-4.292	-2.973	-3.571	-0.726	50.321	477.505	0.000300	0.000208	0.000250
0.0090	257.301	-4.025	-2.546	-3.307	-0.732	50.323	489.836	0.000282	0.000178	0.000232
0.0100	267.987	-3.420	-1.817	-2.501	-0.738	50.326	510.178	0.000239	0.000127	0.000175
0.0110	287.253	-2.101	-0.056	-0.542	-0.741	50.329	546.856	0.000147	0.000004	0.000038
0.0120	321.443	0.453	2.957	2.600	-0.739	50.332	611.944	-0.000032	-0.000207	-0.000182
0.0130	373.591	4.943	8.035	7.755	-0.740	50.334	711.222	-0.000346	-0.000562	-0.000543
0.0140	441.565	11.356	15.012	14.744	-0.746	50.334	840.626	-0.000795	-0.001051	-0.001032
0.0150	518.736	18.653	22.869	22.777	-0.746	50.333	987.539	-0.001306	-0.001601	-0.001594
0.0160	599.032	26.581	30.960	30.988	-0.744	50.331	1140.404	-0.001861	-0.002167	-0.002169
0.0170	677.481	34.480	38.473	39.064	-0.742	50.329	1289.749	-0.002414	-0.002693	-0.002734
0.0180	750.834	42.128	45.601	46.346	-0.742	50.327	1429.396	-0.002949	-0.003192	-0.003244
0.0190	816.824	49.200	51.999	53.516	-0.744	50.325	1555.023	-0.003444	-0.003640	-0.003746
0.0200	875.645	55.586	57.943	59.353	-0.740	50.322	1667.004	-0.003891	-0.004056	-0.004155
0.0210	928.440	61.480	63.145	65.258	-0.743	50.318	1767.511	-0.004304	-0.004420	-0.004568
0.0220	977.072	66.910	67.576	70.037	-0.739	50.316	1860.094	-0.004684	-0.004730	-0.004903
0.0230	1023.029	72.031	71.870	75.290	-0.741	50.314	1947.584	-0.005042	-0.005031	-0.005270
0.0240	1067.077	77.152	76.121	79.987	-0.744	50.313	2031.441	-0.005401	-0.005328	-0.005599
0.0250	1108.781	82.261	80.331	84.671	-0.747	50.314	2110.834	-0.005758	-0.005623	-0.005927
0.0260	1146.547	86.907	84.032	88.938	-0.745	50.315	2182.732	-0.006083	-0.005882	-0.006226
0.0270	1177.671	90.585	86.935	92.133	-0.736	50.318	2241.983	-0.006341	-0.006085	-0.006449
0.0280	1199.733	93.263	89.123	94.914	-0.736	50.320	2283.983	-0.006528	-0.006239	-0.006644
0.0290	1211.665	94.918	90.417	96.220	-0.736	50.323	2306.700	-0.006644	-0.006329	-0.006735
0.0300	1215.122	95.843	91.078	97.331	-0.740	50.325	2313.280	-0.006709	-0.006375	-0.006813
0.0310	1212.793	96.013	91.201	97.581	-0.738	50.328	2308.846	-0.006721	-0.006384	-0.006831
0.0320	1206.826	95.734	90.993	97.304	-0.728	50.332	2297.487	-0.006701	-0.006370	-0.006811
0.0330	1197.704	95.075	90.649	96.873	-0.723	50.334	2280.121	-0.006655	-0.006345	-0.006781
0.0340	1184.464	94.021	89.961	96.010	-0.728	50.334	2254.915	-0.006581	-0.006297	-0.006721
0.0350	1163.229	92.211	88.738	94.592	-0.728	50.333	2214.489	-0.006455	-0.006212	-0.006621
0.0360	1128.303	88.856	86.274	91.508	-0.733	50.331	2147.999	-0.006220	-0.006039	-0.006406
0.0370	1076.049	83.412	82.119	86.214	-0.722	50.329	2048.521	-0.005839	-0.005748	-0.006035
0.0380	1008.271	76.423	76.683	80.017	-0.723	50.327	1919.489	-0.005350	-0.005368	-0.005601
0.0390	932.002	68.678	70.217	72.678	-0.725	50.325	1774.292	-0.004807	-0.004915	-0.005087
0.0400	855.612	60.960	63.391	65.092	-0.730	50.322	1628.866	-0.004267	-0.004437	-0.004556
0.0410	785.039	53.748	57.061	58.115	-0.730	50.319	1494.513	-0.003762	-0.003994	-0.004068
0.0420	723.092	47.026	50.979	51.251	-0.729	50.316	1376.581	-0.003292	-0.003569	-0.003588
0.0430	669.486	41.230	45.695	46.108	-0.730	50.314	1274.529	-0.002886	-0.003199	-0.003228
0.0440	622.146	36.262	40.852	40.966	-0.734	50.313	1184.406	-0.002538	-0.002860	-0.002868
0.0450	578.053	31.617	36.475	36.505	-0.735	50.314	1100.464	-0.002213	-0.002553	-0.002555
0.0460	534.876	27.296	31.990	31.823	-0.738	50.315	1018.267	-0.001911	-0.002239	-0.002228
0.0470	491.324	22.665	27.477	27.125	-0.730	50.317	935.354	-0.001587	-0.001923	-0.001899
0.0480	447.636	18.161	22.619	22.011	-0.730	50.320	852.184	-0.001271	-0.001583	-0.001541
0.0490	404.610	13.881	17.846	17.161	-0.730	50.322	770.273	-0.000972	-0.001249	-0.001201
0.0500	363.703	9.630	13.209	12.464	-0.733	50.325	692.396	-0.000674	-0.000925	-0.000872
0.0510	326.312	5.883	8.737	7.727	-0.731	50.328	621.214	-0.000412	-0.000612	-0.000541
0.0520	293.820	2.305	4.623	3.572	-0.723	50.332	559.359	-0.000161	-0.000324	-0.000250
0.0530	267.626	-0.502	1.251	0.473	-0.724	50.334	509.491	0.000035	-0.000088	-0.000033
0.0540	248.134	-2.440	-1.378	-1.905	-0.734	50.333	472.383	0.000171	0.000096	0.000133
0.0550	235.675	-3.914	-3.056	-3.600	-0.733	50.332	448.666	0.000274	0.000214	0.000252
0.0560	229.559	-4.646	-4.280	-4.641	-0.735	50.331	437.021	0.000325	0.000300	0.000325
0.0570	228.642	-5.306	-4.995	-5.238	-0.728	50.329	435.276	0.000371	0.000350	0.000367
0.0580	231.798	-5.473	-5.064	-5.266	-0.731	50.327	441.284	0.000383	0.000354	0.000369
0.0590	238.110	-5.262	-4.693	-4.834	-0.732	50.324	453.300	0.000368	0.000329	0.000338
0.0600	248.855	-4.700	-3.910	-4.125	-0.732	50.322	473.757	0.000329	0.000274	0.000289
0.0610	268.528	-3.451	-2.273	-2.376	-0.735	50.318	511.208	0.000242	0.000159	0.000166
0.0620	303.514	-0.799	0.823	0.765	-0.730	50.315	577.812	0.000056	-0.000058	-0.000054
0.0630	357.240	3.763	6.094	6.253	-0.732	50.314	680.094	-0.000263	-0.000427	-0.000438
0.0640	427.693	10.526	13.290	13.215	-0.736	50.313	814.219	-0.000737	-0.000930	-0.000925
0.0650	508.065	18.089	21.588	21.776	-0.739	50.314	967.226	-0.001266	-0.001511	-0.001524
0.0660	591.278	25.989	30.008	30.407	-0.738	50.315	1125.641	-0.001819	-0.002101	-0.002128
0.0670	671.710	33.820	37.934	38.855	-0.732	50.318	1278.763	-0.002367	-0.002655	-0.002720
0.0680	745.454	41.581	45.145	46.402	-0.735	50.320	1419.153	-0.002911	-0.003160	-0.003248
0.0690	810.572	48.725	51.600	52.641	-0.738	50.323	1543.121	-0.003411	-0.003612	-0.003685
0.0700	867.545	54.984	57.270	58.908	-0.741	50.325	1651.583	-0.003849	-0.004009	-0.004124
0.0710	918.807	60.737	62.472	63.826	-0.744	50.328	1749.172	-0.004252	-0.004373	-0.004468
0.0720	967.108	66.097	67.066	69.314	-0.738	50.332	1841.125	-0.004627	-0.004695	-0.004852
0.0730	1014.778	71.429	71.565	74.136	-0.737	50.334	1931.877	-0.005000	-0.005010	-0.005190
0.0740	1062.373	76.929	76.159	79.668	-0.738	50.334	2022.486	-0.005385	-0.005331	-0.005577
0.0750	1109.397	82.473	80.688	84.684	-0.740	50.333	2112.007	-0.005773	-0.005648	-0.005928
0.0760	1153.626	87.666	84.913	89.576	-0.739	50.331	2196.207	-0.006137	-0.005944	-0.006270
0.0770	1191.422	92.170	88.450	93.744	-0.735	50.329	2268.162	-0.006452	-0.006191	-0.006562
0.0780	1219.796	95.678	91.200	96.984	-0.737	50.327	2322.178	-0.006697	-0.006384	-0.006789
0.0790	1237.063	97.895	93.126	99.541	-0.736	50.324	2355.051	-0.006853	-0.006519	-0.006968
0.0800	1244.247	99.088	94.034	100.291	-0.735	50.322	2368.727	-0.006936	-0.006582	-0.007020
0.0810	1244.022	99.495	94.393	101.208	-0.737	50.318	2368.298	-0.006965	-0.006608	-0.007085
0.0820	1238.762	99.299	94.202	100.442	-0.731	50.316	2358.284	-0.006951	-0.006594	-0.007031
0.0830	1230.030	98.836	93.693	100.568	-0.725	50.313	2341.661	-0.006918	-0.006558	-0.007040
0.0840	1216.955	98.022	93.156	99.553	-0.725	50.313	2316.771	-0.006862	-0.006521	-0.006969
0.0850	1195.029	96.210	91.709	98.457	-0.723	50.314	2275.028	-0.006735	-0.006420	-0.006892
0.0860	1156.646	92.492	89.108	94.759	-0.720	50.315	2201.958	-0.006474	-0.006238	-0.006633
0.0870	1097.660	86.416	84.375	89.492	-0.714	50.318	2089.663	-0.006049	-0.005906	-0.006264
0.0880	1020.895	78.502	78.059	82.030	-0.721	50.320	1943.522	-0.005495	-0.005464	-0.005742
0.0890	935.894	69.787	70.836	74.095	-0.718	50.323	1781.702	-0.004885	-0.004959	-0.005187
0.0900	852.757	61.283	63.349	65.409	-0.722	50.325	1623.430	-0.004290	-0.004434	-0.004579
0.0910	777.795	53.481	56.484	57.752	-0.717	50.328	1480.722	-0.003744	-0.003954	-0.004043
0.0920	713.263	46.395	50.223	50.581	-0.716	50.332	1357.870	-0.003248	-0.003516	-0.003541
0.0930	658.425	40.388	44.802	44.858	-0.716	50.334	1253.471	-0.002827	-0.003136	-0.003140
0.0940	610.559	35.337	40.069	40.134	-0.728	50.334	1162.348	-0.002474	-0.002805	-0.002809
0.0950	566.526	30.987	35.597	35.450	-0.736	50.333	1078.520	-0.002169	-0.002492	-0.002482
0.0960	523.830	26.624	31.221	31.157	-0.734	50.331	997.238	-0.001864	-0.002185	-0.002181
0.0970	480.939	21.978	26.500	26.153	-0.720	50.329	915.585	-0.001538	-0.001855	-0.001831
0.0980	437.702	17.348	21.904	21.192	-0.718	50.326	833.273	-0.001214	-0.001533	-0.001483
0.0990	395.082	12.970	17.088	16.300	-0.723	50.324	752.134	-0.000908	-0.001196	-0.001141
0.1000	354.911	9.027	12.340	11.534	-0.730	50.322	675.659	-0.000632	-0.000864	-0.000807
0.1010	318.888	5.421	8.089	7.588	-0.732	50.319	607.080	-0.000379	-0.000566	-0.000531
0.1020	287.959	2.192	4.249	3.252	-0.726	50.316	548.201	-0.000153	-0.000297	-0.000228
0.1030	263.117	-0.502	0.920	0.208	-0.728	50.314	500.908	0.000035	-0.000064	-0.000015
0.1040	244.708	-2.579	-1.459	-2.113	-0.734	50.313	465.860	0.000181	0.000102	0.000148
0.1050	233.000	-3.898	-3.262	-3.503	-0.738	50.314	443.573	0.000273	0.000228	0.000245
0.1060	227.500	-4.798	-4.321	-4.725	-0.737	50.315	433.102	0.000336	0.000302	0.000331
0.1070	227.064	-5.403	-4.900	-5.461	-0.730	50.318	432.272	0.000378	0.000343	0.000382
0.1080	230.370	-5.445	-4.803	-5.225	-0.733	50.320	438.566	0.000381	0.000336	0.000366
0.1090	236.442	-5.178	-4.527	-5.142	-0.742	50.323	450.125	0.000362	0.000317	0.000360
0.1100	245.895	-4.617	-3.853	-4.267	-0.749	50.326	468.121	0.000323	0.000270	0.000299
0.1110	262.832	-3.492	-2.504	-2.766	-0.753	50.329	500.364	0.000244	0.000175	0.000194
0.1120	293.460	-1.372	0.138	-0.181	-0.750	50.332	558.672	0.000096	-0.000010	0.000013
0.1130	342.437	2.768	4.871	4.543	-0.748	50.334	651.913	-0.000194	-0.000341	-0.000318
0.1140	409.524	8.802	11.668	11.714	-0.749	50.334	779.629	-0.000616	-0.000817	-0.000820
0.1150	490.287	16.295	19.813	19.746	-0.750	50.333	933.380	-0.001141	-0.001387	-0.001382
0.1160	578.669	24.813	28.826	29.182	-0.750	50.331	1101.637	-0.001737	-0.002018	-0.002043
0.1170	668.584	33.512	37.605	38.214	-0.747	50.330	1272.812	-0.002346	-0.002632	-0.002675
0.1180	753.539	42.311	46.096	47.123	-0.748	50.327	1434.546	-0.002962	-0.003227	-0.003299
0.1190	827.780	50.311	53.430	54.905	-0.747	50.325	1575.880	-0.003522	-0.003740	-0.003843
0.1200	888.239	57.004	59.429	61.144	-0.746	50.322	1690.979	-0.003990	-0.004160	-0.004280
0.1210	935.518	62.252	64.176	66.757	-0.744	50.319	1780.987	-0.004358	-0.004492	-0.004673
0.1220	973.345	66.629	67.796	70.202	-0.742	50.316	1852.999	-0.004664	-0.004746	-0.004914
0.1230	1006.287	70.642	71.140	74.622	-0.739	50.314	1915.712	-0.004945	-0.004980	-0.005224
0.1240	1038.553	74.599	74.358	77.722	-0.743	50.313	1977.139	-0.005222	-0.005205	-0.005441
0.1250	1072.968	78.502	77.812	82.016	-0.747	50.314	2042.656	-0.005495	-0.005447	-0.005741
0.1260	1110.629	82.810	81.390	85.531	-0.749	50.315	2114.353	-0.005797	-0.005697	-0.005987
0.1270	1149.643	87.498	84.901	89.852	-0.744	50.318	2188.625	-0.006125	-0.005943	-0.006290
0.1280	1186.087	91.931	88.355	93.438	-0.740	50.320	2258.005	-0.006435	-0.006185	-0.006541
0.1290	1214.641	95.621	91.066	97.095	-0.738	50.323	2312.365	-0.006693	-0.006375	-0.006797
0.1300	1231.638	97.726	92.839	98.999	-0.741	50.326	2344.723	-0.006841	-0.006499	-0.006930
0.1310	1236.673	98.807	93.624	100.208	-0.739	50.329	2354.307	-0.006917	-0.006554	-0.007015
0.1320	1231.909	98.766	93.555	99.901	-0.732	50.333	2345.238	-0.006914	-0.006549	-0.006993
0.1330	1219.976	98.079	93.101	99.358	-0.728	50.335	2322.521	-0.006866	-0.006517	-0.006955
0.1340	1200.184	96.535	92.151	98.163	-0.729	50.335	2284.842	-0.006757	-0.006451	-0.006871
0.1350	1168.834	93.658	90.142	95.648	-0.727	50.333	2225.161	-0.006556	-0.006310	-0.006695
0.1360	1122.772	89.069	86.675	91.729	-0.730	50.332	2137.470	-0.006235	-0.006067	-0.006421
0.1370	1062.313	82.922	81.666	85.754	-0.723	50.330	2022.371	-0.005805	-0.005717	-0.006003
0.1380	992.266	75.625	75.804	79.502	-0.723	50.328	1889.019	-0.005294	-0.005306	-0.005565
0.1390	918.687	68.088	69.378	71.916	-0.719	50.325	1748.943	-0.004766	-0.004856	-0.005034
0.1400	847.121	60.763	63.007	65.009	-0.722	50.322	1612.701	-0.004253	-0.004411	-0.004551
0.1410	781.612	53.888	56.745	57.921	-0.727	50.319	1487.989	-0.003772	-0.003972	-0.004054
0.1420	723.723	47.616	51.200	52.002	-0.726	50.316	1377.783	-0.003333	-0.003584	-0.003640
0.1430	672.972	42.060	46.260	46.707	-0.730	50.314	1281.166	-0.002944	-0.003238	-0.003269
0.1440	627.541	37.204	41.802	42.037	-0.731	50.313	1194.677	-0.002604	-0.002926	-0.002943
0.1450	584.320	32.852	37.440	37.576	-0.730	50.314	1112.394	-0.002300	-0.002621	-0.002630
0.1460	540.872	28.418	32.886	32.823	-0.727	50.315	1029.682	-0.001989	-0.002302	-0.002298
0.1470	495.427	23.464	28.124	27.516	-0.720	50.318	943.165	-0.001642	-0.001969	-0.001926
0.1480	448.628	18.580	23.212	22.541	-0.726	50.320	854.073	-0.001301	-0.001625	-0.001578
0.1490	402.175	13.711	18.190	17.177	-0.727	50.323	765.638	-0.000960	-0.001273	-0.001202
0.1500	358.473	9.333	13.180	11.938	-0.730	50.326	682.440	-0.000653	-0.000923	-0.000836
0.1510	319.865	5.544	8.557	7.658	-0.732	50.329	608.940	-0.000388	-0.000599	-0.000536
0.1520	288.275	2.191	4.745	3.545	-0.728	50.333	548.801	-0.000153	-0.000332	-0.000248
0.1530	264.966	-0.307	1.636	0.765	-0.730	50.335	504.427	0.000021	-0.000115	-0.000054
0.1540	250.073	-1.821	-0.304	-1.597	-0.735	50.335	476.074	0.000127	0.000021	0.000112
0.1550	242.589	-2.762	-1.598	-2.460	-0.734	50.333	461.826	0.000193	0.000112	0.000172
0.1560	240.935	-3.085	-2.286	-3.111	-0.734	50.331	458.679	0.000216	0.000160	0.000218
0.1570	243.160	-3.380	-2.493	-3.015	-0.729	50.330	462.914	0.000237	0.000175	0.000211
0.1580	248.164	-3.365	-2.370	-3.056	-0.729	50.327	472.441	0.000236	0.000166	0.000214
0.1590	255.573	-3.055	-1.833	-2.669	-0.734	50.325	486.546	0.000214	0.000128	0.000187
0.1600	267.055	-2.520	-0.966	-1.738	-0.735	50.322	508.404	0.000176	0.000068	0.000122
0.1610	287.478	-1.104	0.796	-0.209	-0.739	50.319	547.285	0.000077	-0.000056	0.000015
0.1620	322.179	1.562	3.810	3.210	-0.739	50.316	613.346	-0.000109	-0.000267	-0.000225
0.1630	373.787	6.149	8.639	8.323	-0.744	50.314	711.594	-0.000430	-0.000605	-0.000583
0.1640	439.806	12.379	15.272	15.146	-0.746	50.313	837.278	-0.000867	-0.001069	-0.001060
0.1650	514.933	19.465	22.922	22.858	-0.746	50.314	980.301	-0.001363	-0.001605	-0.001600
0.1660	593.878	27.086	30.999	31.309	-0.741	50.316	1130.590	-0.001896	-0.002170	-0.002192
0.1670	672.010	34.635	38.689	39.507	-0.738	50.319	1279.335	-0.002424	-0.002708	-0.002765
0.1680	745.740	42.228	45.859	47.054	-0.739	50.321	1419.697	-0.002956	-0.003210	-0.003294
0.1690	812.436	49.397	52.355	53.751	-0.739	50.324	1546.669	-0.003458	-0.003665	-0.003763
0.1700	871.933	55.880	58.190	60.157	-0.740	50.326	1659.937	-0.003912	-0.004073	-0.004211
0.1710	925.269	61.675	63.516	65.604	-0.740	50.329	1761.475	-0.004317	-0.004446	-0.004592
0.1720	973.991	66.938	68.194	70.872	-0.734	50.333	1854.229	-0.004686	-0.004774	-0.004961
0.1730	1019.738	72.045	72.597	75.416	-0.735	50.334	1941.319	-0.005043	-0.005082	-0.005279
0.1740	1062.884	77.210	76.864	80.475	-0.739	50.334	2023.458	-0.005405	-0.005380	-0.005633
0.1750	1102.815	82.136	80.786	84.657	-0.742	50.333	2099.476	-0.005750	-0.005655	-0.005926
0.1760	1137.876	86.346	84.295	88.839	-0.734	50.332	2166.224	-0.006044	-0.005901	-0.006219
0.1770	1165.844	89.924	86.950	91.229	-0.726	50.330	2219.467	-0.006295	-0.006086	-0.006386
0.1780	1185.756	92.519	88.973	94.218	-0.730	50.328	2257.376	-0.006476	-0.006228	-0.006595
0.1790	1197.043	94.328	90.349	95.289	-0.731	50.325	2278.862	-0.006603	-0.006324	-0.006670
0.1800	1201.266	95.224	91.022	96.789	-0.736	50.322	2286.901	-0.006666	-0.006372	-0.006775
0.1810	1200.018	95.561	91.256	96.414	-0.735	50.319	2284.527	-0.006689	-0.006388	-0.006749
0.1820	1195.179	95.365	91.062	96.705	-0.728	50.316	2275.314	-0.006676	-0.006374	-0.006769
0.1830	1187.470	94.947	90.774	95.859	-0.724	50.314	2260.637	-0.006646	-0.006354	-0.006710
0.1840	1176.424	94.218	90.320	96.054	-0.730	50.313	2239.609	-0.006595	-0.006322	-0.006724
0.1850	1158.856	92.758	89.261	94.455	-0.727	50.314	2206.163	-0.006493	-0.006248	-0.006612
0.1860	1128.664	89.993	87.183	92.577	-0.729	50.316	2148.685	-0.006299	-0.006103	-0.006480
0.1870	1080.528	84.998	83.371	87.393	-0.721	50.319	2057.047	-0.005950	-0.005836	-0.006118
0.1880	1014.207	78.304	77.949	81.503	-0.729	50.321	1930.790	-0.005481	-0.005456	-0.005705
0.1890	935.849	70.166	71.372	73.638	-0.728	50.323	1781.616	-0.004912	-0.004996	-0.005155
0.1900	854.921	61.872	64.079	65.787	-0.732	50.326	1627.550	-0.004331	-0.004486	-0.004605
0.1910	778.757	53.959	57.008	57.936	-0.732	50.329	1482.553	-0.003777	-0.003991	-0.004056
0.1920	711.580	46.662	50.305	50.833	-0.727	50.333	1354.666	-0.003266	-0.003521	-0.003558
0.1930	653.901	40.277	44.514	44.774	-0.727	50.335	1244.860	-0.002819	-0.003116	-0.003134
0.1940	603.917	34.972	39.656	39.757	-0.730	50.335	1149.702	-0.002448	-0.002776	-0.002783
0.1950	558.711	30.145	35.045	35.199	-0.733	50.334	1063.643	-0.002110	-0.002453	-0.002464
0.1960	515.760	25.822	30.560	30.683	-0.734	50.332	981.874	-0.001808	-0.002139	-0.002148
0.1970	473.019	21.345	25.703	25.541	-0.730	50.330	900.507	-0.001494	-0.001799	-0.001788
0.1980	430.369	17.050	21.068	20.484	-0.728	50.328	819.311	-0.001194	-0.001475	-0.001434
0.1990	388.815	12.728	16.595	15.773	-0.727	50.325	740.204	-0.000891	-0.001162	-0.001104
0.2000	350.628	8.659	12.273	11.132	-0.727	50.322	667.505	-0.000606	-0.000859	-0.000779
0.2010	317.385	5.249	8.435	7.338	-0.730	50.319	604.219	-0.000367	-0.000590	-0.000514
0.2020	289.973	2.261	4.761	3.836	-0.726	50.316	552.034	-0.000158	-0.000333	-0.000269
0.2030	268.648	0.018	2.134	0.946	-0.728	50.314	511.436	-0.000001	-0.000149	-0.000066
0.2040	253.589	-1.523	0.150	-0.847	-0.727	50.314	482.769	0.000107	-0.000010	0.000059
0.2050	244.783	-2.422	-1.214	-2.113	-0.726	50.314	466.003	0.000170	0.000085	0.000148
0.2060	241.627	-3.069	-1.929	-2.878	-0.728	50.316	459.995	0.000215	0.000135	0.000201
0.2070	242.904	-3.393	-2.218	-3.087	-0.723	50.318	462.427	0.000238	0.000155	0.000216
0.2080	247.638	-3.436	-2.092	-2.933	-0.725	50.321	471.439	0.000241	0.000146	0.000205
0.2090	255.348	-2.957	-1.556	-2.613	-0.725	50.323	486.116	0.000207	0.000109	0.000183
0.2100	268.377	-2.186	-0.634	-1.571	-0.734	50.326	510.921	0.000153	0.000044	0.000110
0.2110	291.536	-0.502	1.333	0.485	-0.738	50.329	555.010	0.000035	-0.000093	-0.000034
0.2120	329.828	2.543	4.855	4.224	-0.730	50.333	627.909	-0.000178	-0.000340	-0.000296
0.2130	384.006	7.187	10.221	9.353	-0.733	50.335	731.049	-0.000503	-0.000715	-0.000655
0.2140	450.206	13.530	16.964	16.370	-0.735	50.334	857.077	-0.000947	-0.001188	-0.001146
0.2150	522.868	20.645	24.202	23.775	-0.739	50.333	995.407	-0.001445	-0.001694	-0.001664
0.2160	597.920	28.012	31.730	31.780	-0.738	50.331	1138.287	-0.001961	-0.002221	-0.002225
0.2170	672.566	35.366	38.926	39.340	-0.733	50.330	1280.394	-0.002476	-0.002725	-0.002754
0.2180	744.943	42.761	46.068	46.914	-0.733	50.327	1418.180	-0.002993	-0.003225	-0.003284
0.2190	813.232	49.945	52.548	54.321	-0.732	50.325	1548.185	-0.003496	-0.003678	-0.003802
0.2200	876.817	56.737	58.741	60.310	-0.730	50.322	1669.235	-0.003972	-0.004112	-0.004222
0.2210	934.496	62.967	64.369	66.870	-0.727	50.319	1779.041	-0.004408	-0.004506	-0.004681
0.2220	985.939	68.524	69.227	71.789	-0.721	50.316	1876.974	-0.004797	-0.004846	-0.005025
0.2230	1030.588	73.745	73.630	77.028	-0.723	50.314	1961.975	-0.005162	-0.005154	-0.005392
0.2240	1068.685	78.473	77.415	81.142	-0.725	50.314	2034.502	-0.005493	-0.005419	-0.005680
0.2250	1100.605	82.584	80.704	84.880	-0.723	50.314	2095.270	-0.005781	-0.005649	-0.005942
0.2260	1127.086	85.839	83.359	88.006	-0.719	50.316	2145.681	-0.006009	-0.005835	-0.006160
0.2270	1148.366	88.280	85.396	90.453	-0.718	50.318	2186.193	-0.006180	-0.005978	-0.006332
0.2280	1164.837	90.371	87.169	92.523	-0.725	50.321	2217.550	-0.006326	-0.006102	-0.006477
0.2290	1176.243	92.070	88.492	93.732	-0.724	50.323	2239.265	-0.006445	-0.006194	-0.006561
0.2300	1182.796	93.279	89.316	94.829	-0.720	50.326	2251.740	-0.006530	-0.006252	-0.006638
0.2310	1185.050	93.953	89.798	95.413	-0.719	50.329	2256.031	-0.006577	-0.006286	-0.006679
0.2320	1183.743	93.995	89.756	95.663	-0.716	50.332	2253.542	-0.006580	-0.006283	-0.006696
0.2330	1179.475	93.979	89.742	95.482	-0.721	50.334	2245.417	-0.006579	-0.006282	-0.006684
0.2340	1171.930	93.601	89.590	95.204	-0.721	50.334	2231.054	-0.006552	-0.006271	-0.006664
0.2350	1159.517	92.689	89.191	94.648	-0.719	50.333	2207.422	-0.006488	-0.006243	-0.006625
0.2360	1136.088	90.556	87.802	92.563	-0.721	50.331	2162.819	-0.006339	-0.006146	-0.006479
0.2370	1090.807	86.248	84.336	88.338	-0.717	50.330	2076.616	-0.006037	-0.005904	-0.006184
0.2380	1018.385	79.077	78.583	81.556	-0.723	50.327	1938.744	-0.005535	-0.005501	-0.005709
0.2390	924.488	69.508	70.698	72.926	-0.726	50.325	1759.987	-0.004866	-0.004949	-0.005105
0.2400	825.901	59.165	61.767	63.171	-0.727	50.322	1572.304	-0.004142	-0.004324	-0.004422
0.2410	738.812	50.141	53.593	54.043	-0.730	50.319	1406.507	-0.003510	-0.003752	-0.003783
0.2420	671.590	42.971	46.755	46.971	-0.723	50.316	1278.534	-0.003008	-0.003273	-0.003288
0.2430	624.911	37.834	41.980	41.969	-0.720	50.314	1189.671	-0.002648	-0.002939	-0.002938
0.2440	593.968	34.314	38.637	38.606	-0.724	50.314	1130.762	-0.002402	-0.002705	-0.002702
0.2450	571.064	31.717	36.202	36.271	-0.727	50.314	1087.160	-0.002220	-0.002534	-0.002539
0.2460	547.500	29.079	33.505	33.603	-0.724	50.316	1042.299	-0.002036	-0.002345	-0.002352
0.2470	515.670	25.725	29.956	29.864	-0.714	50.319	981.703	-0.001801	-0.002097	-0.002091
0.2480	472.508	21.333	25.443	25.375	-0.714	50.321	899.534	-0.001493	-0.001781	-0.001776
0.2490	420.345	15.944	19.897	19.636	-0.708	50.323	800.228	-0.001116	-0.001393	-0.001375
0.2500	366.558	10.444	14.049	13.980	-0.714	50.326	697.832	-0.000731	-0.000983	-0.000979
0.2510	318.677	5.531	8.449	7.907	-0.714	50.330	606.680	-0.000387	-0.000591	-0.000553
0.2520	281.978	1.700	3.839	3.334	-0.710	50.333	536.814	-0.000119	-0.000269	-0.000233
0.2530	257.812	-0.910	0.757	-0.028	-0.714	50.335	490.808	0.000064	-0.000053	0.000002
0.2540	244.843	-2.410	-0.937	-1.737	-0.721	50.335	466.118	0.000169	0.000066	0.000122
0.2550	240.500	-3.070	-1.681	-2.529	-0.722	50.333	457.850	0.000215	0.000118	0.000177
0.2560	241.627	-3.280	-2.149	-2.807	-0.722	50.332	459.995	0.000230	0.000150	0.000196
0.2570	245.910	-3.351	-2.135	-2.835	-0.716	50.330	468.149	0.000235	0.000149	0.000198
0.2580	251.921	-3.126	-1.913	-2.085	-0.715	50.328	479.593	0.000219	0.000134	0.000146
0.2590	259.601	-2.902	-1.170	-1.726	-0.717	50.325	494.213	0.000203	0.000082	0.000121
0.2600	270.647	-2.170	-0.305	-0.781	-0.719	50.322	515.242	0.000152	0.000021	0.000055
0.2610	288.861	-0.543	1.402	0.416	-0.725	50.319	549.917	0.000038	-0.000098	-0.000029
0.2620	319.203	2.123	4.223	3.238	-0.721	50.317	607.681	-0.000149	-0.000296	-0.000227
0.2630	365.220	6.373	8.683	7.756	-0.720	50.315	695.286	-0.000446	-0.000608	-0.000543
0.2640	426.822	11.958	14.873	14.355	-0.720	50.314	812.559	-0.000837	-0.001041	-0.001005
0.2650	500.717	18.905	22.345	21.817	-0.722	50.315	953.236	-0.001323	-0.001564	-0.001527
0.2660	581.900	26.721	30.283	30.446	-0.725	50.316	1107.788	-0.001870	-0.002120	-0.002131
0.2670	664.962	34.676	38.390	38.868	-0.720	50.319	1265.917	-0.002427	-0.002687	-0.002721
0.2680	745.214	42.800	46.164	47.179	-0.719	50.321	1418.695	-0.002996	-0.003231	-0.003303
0.2690	818.973	50.546	53.416	54.419	-0.711	50.323	1559.114	-0.003538	-0.003739	-0.003809
0.2700	884.647	57.774	59.772	61.340	-0.713	50.326	1684.141	-0.004044	-0.004184	-0.004294
0.2710	941.695	64.076	65.303	67.385	-0.709	50.330	1792.746	-0.004485	-0.004571	-0.004717
0.2720	990.823	69.352	69.886	72.804	-0.710	50.333	1886.272	-0.004855	-0.004892	-0.005096
0.2730	1033.609	74.276	73.849	77.611	-0.706	50.335	1967.726	-0.005199	-0.005169	-0.005433
0.2740	1071.526	79.075	77.606	81.711	-0.711	50.334	2039.909	-0.005535	-0.005432	-0.005720
0.2750	1106.211	83.425	81.073	85.978	-0.707	50.333	2105.942	-0.005840	-0.005675	-0.006018
0.2760	1138.161	87.271	84.156	88.952	-0.707	50.332	2166.767	-0.006109	-0.005891	-0.006227
0.2770	1167.241	90.484	86.702	92.676	-0.700	50.330	2222.128	-0.006334	-0.006069	-0.006487
0.2780	1191.903	93.291	89.123	94.731	-0.704	50.328	2269.077	-0.006530	-0.006239	-0.006631
0.2790	1210.163	95.734	91.105	97.566	-0.710	50.325	2303.839	-0.006701	-0.006377	-0.006830
0.2800	1220.697	97.319	92.494	98.469	-0.712	50.322	2323.895	-0.006812	-0.006475	-0.006893
0.2810	1223.703	98.177	93.197	99.651	-0.718	50.319	2329.617	-0.006872	-0.006524	-0.006976
0.2820	1220.547	98.176	93.348	99.512	-0.712	50.316	2323.608	-0.006872	-0.006534	-0.006966
0.2830	1212.402	97.671	93.016	99.387	-0.716	50.315	2308.102	-0.006837	-0.006511	-0.006957
0.2840	1199.042	96.743	92.480	98.749	-0.718	50.314	2282.667	-0.006772	-0.006474	-0.006912
0.2850	1176.694	94.891	91.118	97.276	-0.719	50.315	2240.124	-0.006642	-0.006378	-0.006809
0.2860	1139.153	91.326	88.753	93.704	-0.712	50.316	2168.655	-0.006393	-0.006213	-0.006559
0.2870	1083.473	85.673	84.363	88.618	-0.708	50.319	2062.654	-0.005997	-0.005905	-0.006203
0.2880	1012.524	78.417	78.473	81.545	-0.713	50.321	1927.586	-0.005489	-0.005493	-0.005708
0.2890	934.451	70.504	71.661	74.193	-0.714	50.324	1778.955	-0.004935	-0.005016	-0.005194
0.2900	857.641	62.644	64.616	66.592	-0.716	50.326	1632.729	-0.004385	-0.004523	-0.004661
0.2910	787.849	55.194	58.092	59.533	-0.713	50.330	1499.863	-0.003864	-0.004066	-0.004167
0.2920	727.826	48.738	52.190	53.266	-0.709	50.333	1385.593	-0.003412	-0.003653	-0.003729
0.2930	677.315	43.362	47.265	47.721	-0.707	50.334	1289.434	-0.003035	-0.003309	-0.003340
0.2940	633.688	38.705	43.041	43.608	-0.711	50.334	1206.379	-0.002709	-0.003013	-0.003053
0.2950	593.517	34.509	38.967	39.285	-0.710	50.333	1129.904	-0.002416	-0.002728	-0.002750
0.2960	553.466	30.300	34.962	35.047	-0.708	50.332	1053.658	-0.002121	-0.002447	-0.002453
0.2970	510.966	25.865	30.340	30.002	-0.703	50.330	972.748	-0.001811	-0.002124	-0.002100
0.2980	465.445	21.290	25.619	24.847	-0.707	50.328	886.087	-0.001490	-0.001793	-0.001739
0.2990	417.865	16.224	20.347	19.469	-0.713	50.325	795.507	-0.001136	-0.001424	-0.001363
0.3000	371.036	11.425	15.063	14.314	-0.720	50.322	706.358	-0.000800	-0.001054	-0.001002
0.3010	328.416	7.061	10.097	9.324	-0.727	50.319	625.219	-0.000494	-0.000707	-0.000653
0.3020	292.768	3.412	5.448	4.987	-0.718	50.316	557.356	-0.000239	-0.000381	-0.000349
0.3030	265.853	0.606	1.981	1.666	-0.718	50.314	506.115	-0.000042	-0.000139	-0.000117
0.3040	247.683	-1.414	-0.303	-0.571	-0.721	50.314	471.525	0.000099	0.000021	0.000040
0.3050	237.764	-2.664	-1.832	-2.237	-0.726	50.315	452.642	0.000187	0.000128	0.000157
0.3060	234.503	-3.281	-2.465	-3.070	-0.725	50.316	446.434	0.000230	0.000173	0.000215
0.3070	235.946	-3.717	-2.864	-3.473	-0.717	50.319	449.181	0.000260	0.000201	0.000243
0.3080	240.755	-3.590	-2.699	-3.210	-0.712	50.322	458.336	0.000251	0.000189	0.000225
0.3090	248.510	-3.408	-2.148	-2.613	-0.715	50.324	473.099	0.000239	0.000150	0.000183
0.3100	261.374	-2.439	-1.129	-1.891	-0.720	50.327	497.589	0.000171	0.000079	0.000132
0.3110	284.578	-0.769	0.936	0.318	-0.723	50.330	541.763	0.000054	-0.000066	-0.000022
0.3120	323.201	2.347	4.430	3.877	-0.719	50.334	615.292	-0.000164	-0.000310	-0.000271
0.3130	379.031	7.244	9.949	9.448	-0.721	50.335	721.579	-0.000507	-0.000696	-0.000661
0.3140	448.808	13.910	17.146	16.731	-0.728	50.335	854.416	-0.000974	-0.001200	-0.001171
0.3150	527.136	21.459	25.002	24.874	-0.726	50.334	1003.532	-0.001502	-0.001750	-0.001741
0.3160	608.380	29.388	33.080	33.198	-0.727	50.332	1158.199	-0.002057	-0.002316	-0.002324
0.3170	686.949	37.148	40.770	41.286	-0.719	50.331	1307.774	-0.002600	-0.002854	-0.002890
0.3180	758.424	44.626	47.939	48.623	-0.723	50.328	1443.844	-0.003124	-0.003356	-0.003404
0.3190	820.311	51.305	53.939	55.155	-0.724	50.325	1561.661	-0.003591	-0.003776	-0.003861
0.3200	873.391	57.269	59.237	60.754	-0.727	50.322	1662.712	-0.004009	-0.004147	-0.004253
0.3210	920.280	62.293	63.860	65.674	-0.726	50.319	1751.976	-0.004360	-0.004470	-0.004597
0.3220	964.358	67.120	68.097	70.414	-0.720	50.317	1835.890	-0.004698	-0.004767	-0.004929
0.3230	1008.271	71.989	72.266	75.055	-0.717	50.315	1919.489	-0.005039	-0.005059	-0.005254
0.3240	1052.785	77.293	76.395	80.168	-0.722	50.314	2004.232	-0.005410	-0.005348	-0.005612
0.3250	1096.443	82.331	80.592	84.518	-0.724	50.315	2087.345	-0.005763	-0.005641	-0.005916
0.3260	1136.343	86.934	84.308	89.312	-0.729	50.316	2163.305	-0.006085	-0.005902	-0.006252
0.3270	1169.165	90.694	87.348	92.328	-0.723	50.319	2225.790	-0.006349	-0.006114	-0.006463
0.3280	1192.579	93.584	89.687	95.508	-0.724	50.321	2270.365	-0.006551	-0.006278	-0.006686
0.3290	1205.759	95.465	91.103	96.995	-0.722	50.324	2295.456	-0.006683	-0.006377	-0.006790
0.3300	1210.253	96.392	91.860	97.815	-0.726	50.327	2304.010	-0.006747	-0.006430	-0.006847
0.3310	1208.479	96.660	91.997	98.191	-0.726	50.330	2300.634	-0.006766	-0.006440	-0.006873
0.3320	1202.739	96.365	91.861	97.678	-0.722	50.334	2289.705	-0.006746	-0.006430	-0.006837
0.3330	1194.037	95.900	91.476	97.816	-0.717	50.335	2273.140	-0.006713	-0.006403	-0.006847
0.3340	1181.428	95.127	90.885	96.817	-0.719	50.335	2249.136	-0.006659	-0.006362	-0.006777
0.3350	1161.005	93.513	89.800	95.637	-0.720	50.334	2210.255	-0.006546	-0.006286	-0.006695
0.3360	1126.244	90.132	87.391	92.580	-0.718	50.332	2144.079	-0.006309	-0.006117	-0.006481
0.3370	1073.013	84.519	83.263	87.813	-0.706	50.330	2042.742	-0.005916	-0.005828	-0.006147
0.3380	1002.996	77.322	77.482	81.044	-0.712	50.328	1909.447	-0.005413	-0.005424	-0.005673
0.3390	923.451	69.253	70.588	73.540	-0.717	50.325	1758.013	-0.004848	-0.004941	-0.005148
0.3400	843.079	61.102	63.392	65.076	-0.722	50.322	1605.005	-0.004277	-0.004437	-0.004555
0.3410	768.583	53.384	56.430	57.737	-0.718	50.319	1463.184	-0.003737	-0.003950	-0.004042
0.3420	703.780	46.452	50.183	50.692	-0.715	50.316	1339.817	-0.003252	-0.003513	-0.003548
0.3430	649.332	40.782	44.912	44.996	-0.719	50.315	1236.162	-0.002855	-0.003144	-0.003150
0.3440	603.150	35.914	40.356	40.356	-0.726	50.314	1148.243	-0.002514	-0.002825	-0.002825
0.3450	561.642	31.577	36.187	36.048	-0.726	50.314	1069.221	-0.002210	-0.002533	-0.002523
0.3460	521.771	27.395	32.060	31.865	-0.726	50.316	993.319	-0.001918	-0.002244	-0.002231
0.3470	481.495	23.184	27.491	26.932	-0.718	50.319	916.643	-0.001623	-0.001924	-0.001885
0.3480	440.242	18.919	22.772	22.110	-0.719	50.321	838.108	-0.001324	-0.001594	-0.001548
0.3490	398.839	14.666	18.189	17.344	-0.723	50.324	759.287	-0.001027	-0.001273	-0.001214
0.3500	359.164	10.554	13.814	12.689	-0.725	50.327	683.756	-0.000739	-0.000967	-0.000888
0.3510	323.592	6.750	9.576	8.770	-0.727	50.330	616.035	-0.000472	-0.000670	-0.000614
0.3520	293.730	3.606	5.612	4.975	-0.716	50.334	559.187	-0.000252	-0.000393	-0.000348
0.3530	270.556	0.997	2.598	1.918	-0.723	50.335	515.070	-0.000070	-0.000182	-0.000134
0.3540	254.461	-0.811	0.314	-0.098	-0.731	50.335	484.428	0.000057	-0.000022	0.000007
0.3550	245.143	-2.032	-0.993	-1.168	-0.736	50.334	466.690	0.000142	0.000069	0.000082
0.3560	241.522	-2.566	-1.654	-2.238	-0.732	50.332	459.795	0.000180	0.000116	0.000157
0.3570	242.093	-3.044	-1.929	-2.695	-0.723	50.330	460.882	0.000213	0.000135	0.000189
0.3580	245.609	-3.100	-1.929	-2.570	-0.721	50.328	467.577	0.000217	0.000135	0.000180
0.3590	251.485	-3.099	-1.734	-2.529	-0.725	50.325	478.764	0.000217	0.000121	0.000177
0.3600	260.908	-2.592	-1.047	-1.626	-0.728	50.322	496.702	0.000181	0.000073	0.000114
0.3610	278.071	-1.497	0.343	-0.362	-0.732	50.319	529.375	0.000105	-0.000024	0.000025
0.3620	309.315	0.874	3.205	2.668	-0.724	50.316	588.856	-0.000061	-0.000224	-0.000187
0.3630	358.758	5.321	7.953	7.253	-0.730	50.314	682.983	-0.000372	-0.000557	-0.000508
0.3640	425.289	11.551	14.681	14.174	-0.732	50.314	809.641	-0.000809	-0.001028	-0.000992
0.3650	503.362	19.114	22.620	22.526	-0.734	50.314	958.271	-0.001338	-0.001583	-0.001577
0.3660	586.153	27.085	30.780	30.962	-0.729	50.316	1115.885	-0.001896	-0.002155	-0.002167
0.3670	668.028	35.126	38.844	39.425	-0.723	50.319	1271.753	-0.002459	-0.002719	-0.002760
0.3680	744.417	43.055	46.261	47.095	-0.727	50.322	1417.179	-0.003014	-0.003238	-0.003297
0.3690	812.781	50.310	53.155	54.613	-0.726	50.324	1547.327	-0.003522	-0.003721	-0.003823
0.3700	872.850	56.892	59.084	60.658	-0.728	50.327	1661.682	-0.003982	-0.004136	-0.004246
0.3710	925.555	62.742	64.326	66.621	-0.723	50.330	1762.018	-0.004392	-0.004503	-0.004663
0.3720	972.999	67.836	68.854	71.027	-0.721	50.333	1852.341	-0.004749	-0.004820	-0.004972
0.3730	1017.288	72.971	73.161	76.156	-0.716	50.335	1936.655	-0.005108	-0.005121	-0.005331
0.3740	1059.909	78.037	77.152	80.351	-0.720	50.335	2017.794	-0.005463	-0.005401	-0.005625
0.3750	1101.041	83.116	81.033	85.685	-0.717	50.334	2096.100	-0.005818	-0.005672	-0.005998
0.3760	1139.078	87.761	84.624	89.631	-0.719	50.332	2168.512	-0.006143	-0.005924	-0.006274
0.3770	1171.464	91.438	87.692	93.425	-0.710	50.330	2230.167	-0.006401	-0.006138	-0.006540
0.3780	1195.570	94.469	89.893	96.053	-0.712	50.328	2276.058	-0.006613	-0.006293	-0.006724
0.3790	1210.253	96.406	91.613	97.789	-0.711	50.325	2304.010	-0.006748	-0.006413	-0.006845
0.3800	1216.264	97.557	92.371	98.859	-0.716	50.322	2315.454	-0.006829	-0.006466	-0.006920
0.3810	1215.783	97.924	92.866	99.108	-0.715	50.319	2314.539	-0.006855	-0.006501	-0.006938
0.3820	1210.613	97.657	92.686	98.983	-0.708	50.317	2304.697	-0.006836	-0.006488	-0.006929
0.3830	1201.762	97.052	92.438	98.510	-0.707	50.315	2287.846	-0.006794	-0.006471	-0.006896
0.3840	1188.176	96.055	91.709	97.857	-0.718	50.314	2261.982	-0.006724	-0.006420	-0.006850
0.3850	1165.739	94.217	90.390	96.343	-0.722	50.315	2219.267	-0.006595	-0.006327	-0.006744
0.3860	1128.844	90.723	87.720	92.827	-0.721	50.317	2149.029	-0.006351	-0.006140	-0.006498
0.3870	1074.486	85.082	83.607	87.964	-0.714	50.320	2045.546	-0.005956	-0.005853	-0.006157
0.3880	1005.641	77.982	77.937	81.349	-0.716	50.322	1914.482	-0.005459	-0.005456	-0.005694
0.3890	929.838	70.180	71.416	74.209	-0.716	50.324	1770.172	-0.004913	-0.004999	-0.005195
0.3900	855.192	62.434	64.577	66.566	-0.716	50.327	1628.065	-0.004370	-0.004520	-0.004660
0.3910	786.842	55.276	58.329	59.533	-0.719	50.330	1497.946	-0.003869	-0.004083	-0.004167
0.3920	726.849	48.793	52.550	53.056	-0.719	50.333	1383.734	-0.003416	-0.003679	-0.003714
0.3930	674.580	43.278	47.430	47.551	-0.724	50.335	1284.227	-0.003029	-0.003320	-0.003329
0.3940	628.037	38.522	42.861	42.966	-0.727	50.335	1195.621	-0.002697	-0.003000	-0.003008
0.3950	584.695	33.905	38.443	38.591	-0.733	50.334	1113.110	-0.002373	-0.002691	-0.002701
0.3960	542.405	29.430	34.096	34.271	-0.736	50.332	1032.600	-0.002060	-0.002387	-0.002399
0.3970	499.484	24.813	29.665	29.294	-0.728	50.330	950.890	-0.001737	-0.002077	-0.002051
0.3980	455.767	20.618	25.014	24.165	-0.722	50.328	867.662	-0.001443	-0.001751	-0.001692
0.3990	412.214	16.142	20.350	19.245	-0.720	50.325	784.750	-0.001130	-0.001424	-0.001347
0.4000	370.826	11.917	15.438	14.410	-0.723	50.322	705.957	-0.000834	-0.001081	-0.001009
0.4010	333.931	7.778	11.117	9.991	-0.728	50.319	635.719	-0.000544	-0.000778	-0.000699
0.4020	303.394	4.578	7.222	6.170	-0.726	50.316	577.583	-0.000320	-0.000506	-0.000432
0.4030	280.325	2.122	4.181	3.280	-0.730	50.314	533.667	-0.000149	-0.000293	-0.000230
0.4040	264.695	0.410	2.283	1.390	-0.731	50.314	503.912	-0.000029	-0.000160	-0.000097
0.4050	255.919	-0.684	0.892	0.209	-0.735	50.315	487.204	0.000048	-0.000062	-0.000015
0.4060	253.063	-1.399	0.109	-0.613	-0.736	50.317	481.768	0.000098	-0.000008	0.000043
0.4070	254.431	-1.706	-0.414	-0.892	-0.732	50.319	484.371	0.000119	0.000029	0.000062
0.4080	258.849	-1.637	-0.262	-0.863	-0.734	50.322	492.783	0.000115	0.000018	0.000060
0.4090	265.296	-1.412	0.081	-0.530	-0.734	50.324	505.056	0.000099	-0.000006	0.000037
0.4100	274.764	-0.852	0.782	0.180	-0.738	50.327	523.081	0.000060	-0.000055	-0.000013
0.4110	290.920	0.143	2.075	1.695	-0.739	50.330	553.837	-0.000010	-0.000145	-0.000119
0.4120	319.474	2.500	4.401	3.864	-0.736	50.333	608.196	-0.000175	-0.000308	-0.000270
0.4130	365.040	6.472	8.873	8.422	-0.742	50.335	694.942	-0.000453	-0.000621	-0.000590
0.4140	427.498	12.211	15.176	15.079	-0.746	50.334	813.847	-0.000855	-0.001062	-0.001056
0.4150	502.911	19.270	22.772	23.111	-0.750	50.333	957.413	-0.001349	-0.001594	-0.001618
0.4160	585.567	27.128	30.986	31.728	-0.747	50.332	1114.769	-0.001899	-0.002169	-0.002221
0.4170	669.996	35.364	39.009	40.273	-0.741	50.330	1275.501	-0.002476	-0.002731	-0.002819
0.4180	750.849	43.657	46.962	48.415	-0.735	50.328	1429.424	-0.003056	-0.003287	-0.003389
0.4190	823.467	51.557	54.064	56.001	-0.727	50.325	1567.669	-0.003609	-0.003784	-0.003920
0.4200	886.150	58.420	60.201	62.547	-0.721	50.322	1687.002	-0.004089	-0.004214	-0.004378
0.4210	939.020	64.483	65.540	68.010	-0.722	50.319	1787.653	-0.004514	-0.004588	-0.004761
0.4220	984.376	69.506	69.970	73.055	-0.716	50.316	1873.999	-0.004865	-0.004898	-0.005114
0.4230	1024.622	74.249	74.083	77.180	-0.723	50.315	1950.617	-0.005197	-0.005186	-0.005403
0.4240	1061.892	78.669	77.881	81.848	-0.726	50.314	2021.570	-0.005507	-0.005452	-0.005729
0.4250	1097.600	83.132	81.445	85.364	-0.729	50.315	2089.548	-0.005819	-0.005701	-0.005975
0.4260	1131.519	87.104	84.583	89.366	-0.725	50.316	2154.121	-0.006097	-0.005921	-0.006256
0.4270	1161.696	90.710	87.308	92.063	-0.720	50.319	2211.571	-0.006350	-0.006112	-0.006444
0.4280	1186.162	93.670	89.702	95.551	-0.723	50.322	2258.148	-0.006557	-0.006279	-0.006689
0.4290	1203.114	95.916	91.489	97.177	-0.722	50.324	2290.421	-0.006714	-0.006404	-0.006802
0.4300	1212.447	97.403	92.589	99.067	-0.722	50.327	2308.187	-0.006818	-0.006481	-0.006935
0.4310	1215.137	97.980	92.961	99.220	-0.720	50.330	2313.309	-0.006859	-0.006507	-0.006945
0.4320	1212.477	98.022	92.935	99.415	-0.714	50.334	2308.245	-0.006862	-0.006505	-0.006959
0.4330	1206.015	97.586	92.797	98.830	-0.710	50.335	2295.942	-0.006831	-0.006496	-0.006918
0.4340	1195.871	97.207	92.397	98.622	-0.716	50.335	2276.630	-0.006804	-0.006468	-0.006904
0.4350	1180.241	95.998	91.559	97.552	-0.716	50.333	2246.876	-0.006720	-0.006409	-0.006829
0.4360	1152.904	93.473	89.880	95.719	-0.715	50.332	2194.834	-0.006543	-0.006292	-0.006700
0.4370	1107.233	88.702	86.413	91.162	-0.707	50.330	2107.887	-0.006209	-0.006049	-0.006381
0.4380	1041.829	81.912	81.184	85.617	-0.712	50.328	1983.376	-0.005734	-0.005683	-0.005993
0.4390	961.953	73.759	74.290	77.570	-0.711	50.325	1831.312	-0.005163	-0.005200	-0.005430
0.4400	878.125	65.129	67.039	69.524	-0.712	50.322	1671.724	-0.004559	-0.004693	-0.004867
0.4410	798.835	56.750	59.663	61.325	-0.718	50.319	1520.777	-0.003973	-0.004176	-0.004293
0.4420	728.953	49.201	53.073	53.889	-0.708	50.317	1387.739	-0.003444	-0.003715	-0.003772
0.4430	670.027	43.026	47.335	47.984	-0.719	50.315	1275.558	-0.003012	-0.003313	-0.003359
0.4440	620.643	37.876	42.366	42.633	-0.721	50.314	1181.545	-0.002651	-0.002966	-0.002984
0.4450	577.406	33.470	38.115	38.396	-0.728	50.315	1099.234	-0.002343	-0.002668	-0.002688
0.4460	536.905	29.217	33.835	33.782	-0.722	50.317	1022.129	-0.002045	-0.002368	-0.002365
0.4470	495.953	24.783	29.459	29.100	-0.720	50.319	944.166	-0.001735	-0.002062	-0.002037
0.4480	453.407	20.364	24.807	24.555	-0.725	50.321	863.171	-0.001425	-0.001737	-0.001719
0.4490	409.629	15.845	20.032	19.454	-0.728	50.324	779.829	-0.001109	-0.001402	-0.001362
0.4500	366.603	11.411	15.175	14.590	-0.729	50.327	697.918	-0.000799	-0.001062	-0.001021
0.4510	327.334	7.497	10.663	10.047	-0.727	50.330	623.159	-0.000525	-0.000746	-0.000703
0.4520	294.542	4.030	6.550	5.586	-0.722	50.333	560.732	-0.000282	-0.000458	-0.000391
0.4530	269.955	1.517	3.262	2.474	-0.724	50.335	513.926	-0.000106	-0.000228	-0.000173
0.4540	253.619	-0.307	1.018	0.139	-0.726	50.335	482.826	0.000022	-0.000071	-0.000010
0.4550	244.647	-1.415	-0.249	-1.042	-0.727	50.333	465.746	0.000099	0.000017	0.000073
0.4560	241.461	-2.172	-0.896	-1.738	-0.726	50.332	459.681	0.000152	0.000063	0.000122
0.4570	242.468	-2.549	-1.226	-2.252	-0.720	50.330	461.597	0.000178	0.000086	0.000158
0.4580	246.391	-2.451	-1.390	-2.142	-0.724	50.327	469.065	0.000172	0.000097	0.000150
0.4590	252.733	-2.227	-1.156	-1.809	-0.726	50.325	481.138	0.000156	0.000081	0.000127
0.4600	262.501	-1.652	-0.440	-1.058	-0.735	50.322	499.735	0.000116	0.000031	0.000074
0.4610	280.039	-0.714	1.003	0.735	-0.737	50.319	533.123	0.000050	-0.000070	-0.000051
0.4620	311.479	1.910	3.700	3.362	-0.736	50.316	592.976	-0.000134	-0.000259	-0.000235
0.4630	361.178	6.259	8.433	8.546	-0.735	50.314	687.590	-0.000438	-0.000590	-0.000598
0.4640	427.949	12.365	15.162	15.093	-0.739	50.313	814.705	-0.000866	-0.001061	-0.001056
0.4650	506.427	19.718	23.169	23.334	-0.743	50.314	964.108	-0.001380	-0.001622	-0.001633
0.4660	589.895	27.674	31.563	32.045	-0.743	50.316	1123.009	-0.001937	-0.002209	-0.002243
0.4670	672.611	35.885	39.504	40.494	-0.740	50.319	1280.479	-0.002512	-0.002765	-0.002835
0.4680	749.782	43.856	46.991	48.777	-0.741	50.322	1427.393	-0.003070	-0.003289	-0.003414
0.4690	818.011	51.210	53.940	55.406	-0.742	50.324	1557.283	-0.003585	-0.003776	-0.003878
0.4700	876.652	57.552	59.787	61.881	-0.742	50.327	1668.921	-0.004029	-0.004185	-0.004332
0.4710	926.967	63.192	64.892	67.022	-0.746	50.330	1764.708	-0.004423	-0.004542	-0.004692
0.4720	971.481	68.144	69.159	71.732	-0.736	50.333	1849.451	-0.004770	-0.004841	-0.005021
0.4730	1012.930	73.029	73.149	76.166	-0.736	50.334	1928.358	-0.005112	-0.005120	-0.005332
0.4740	1053.416	77.871	77.180	80.459	-0.735	50.334	2005.434	-0.005451	-0.005403	-0.005632
0.4750	1093.798	82.740	81.033	85.364	-0.739	50.333	2082.310	-0.005792	-0.005672	-0.005975
0.4760	1132.826	87.328	84.610	89.172	-0.736	50.332	2156.610	-0.006113	-0.005923	-0.006242
0.4770	1167.196	91.284	87.802	93.355	-0.731	50.330	2222.042	-0.006390	-0.006146	-0.006535
0.4780	1193.541	94.597	90.389	95.830	-0.728	50.328	2272.196	-0.006622	-0.006327	-0.006708
0.4790	1209.637	96.786	92.342	98.345	-0.728	50.325	2302.837	-0.006775	-0.006464	-0.006884
0.4800	1216.369	98.120	93.320	99.207	-0.732	50.322	2315.655	-0.006868	-0.006532	-0.006944
0.4810	1215.994	98.653	93.555	99.624	-0.736	50.319	2314.939	-0.006906	-0.006549	-0.006974
0.4820	1210.839	98.486	93.336	99.067	-0.724	50.317	2305.126	-0.006894	-0.006534	-0.006935
0.4830	1201.942	98.063	92.908	99.108	-0.725	50.315	2288.189	-0.006864	-0.006504	-0.006938
0.4840	1188.161	96.927	92.302	97.995	-0.725	50.315	2261.953	-0.006785	-0.006461	-0.006860
0.4850	1165.528	94.933	90.843	96.550	-0.723	50.315	2218.866	-0.006645	-0.006359	-0.006759
0.4860	1128.153	91.187	88.051	93.229	-0.722	50.317	2147.713	-0.006383	-0.006164	-0.006526
0.4870	1073.855	85.629	83.675	88.213	-0.715	50.320	2044.344	-0.005994	-0.005857	-0.006175
0.4880	1005.716	78.501	78.034	81.904	-0.724	50.322	1914.625	-0.005495	-0.005462	-0.005733
0.4890	931.566	70.798	71.661	74.524	-0.723	50.324	1773.462	-0.004956	-0.005016	-0.005217
0.4900	858.768	63.276	65.083	67.688	-0.729	50.327	1634.874	-0.004429	-0.004556	-0.004738
0.4910	791.907	56.274	58.960	60.519	-0.723	50.330	1507.587	-0.003939	-0.004127	-0.004236
0.4920	732.124	49.664	53.223	54.600	-0.716	50.334	1393.776	-0.003477	-0.003726	-0.003822
0.4930	678.187	43.995	47.940	48.723	-0.717	50.335	1291.094	-0.003080	-0.003356	-0.003411
0.4940	627.571	38.747	43.013	43.775	-0.722	50.335	1194.735	-0.002712	-0.003011	-0.003064
0.4950	578.113	33.794	38.101	38.549	-0.727	50.333	1100.578	-0.002366	-0.002667	-0.002698
0.4960	528.549	28.658	33.051	33.156	-0.728	50.331	1006.222	-0.002006	-0.002314	-0.002321
0.4970	478.760	23.339	27.602	27.708	-0.723	50.330	911.436	-0.001634	-0.001932	-0.001940
0.4980	429.707	18.190	22.359	21.885	-0.726	50.328	818.052	-0.001273	-0.001565	-0.001532
0.4990	383.104	13.446	17.187	16.827	-0.722	50.325	729.332	-0.000941	-0.001203	-0.001178
