# Supplementary material for: Evaluation of a Cold-Mixed High-Performance Polyurethane Mixture
Source: Hindawi journal article supplement (doi:10.1155/2019/1507971), 2019-11-07
Supplement: f1 [file 1507971.f1.zip › 1507971.f1/dynamic modulus data/PUM/specimen1/temp50/zhs-1-50_25Hz.csv]

Test Information
****************
Project name	zhs
Operator name	1
Target test temperature	50
Target confining stress	0
Average dynamic strain range from 75 to 125 micro-strain
Contact stress	5
Initial modulus	1000
Axial gauge length	70
Comments
Specimen information
********************
Identification	zhs-1-50
Dimensions	Point 1	Point 2	Point 3	Point 4	Point 5	Point 6	Average	Std Dev.
Diameter (mm)	49.2	49.2	49.3				49.23	0.058
Height (mm)	101.3	101.2	101.3				101.27	0.058
Cross-sectional area (mm�)	1903.7
Conditioning time
Properties/Comments
Test Data	25Hz
*********
Test date and time	Wed	Apr 3	2019	1:50 PM
Dynamic modulus (MPa)	9954
Phase angle (Degrees)	4.22
Average temperature (�C)	50.3
Average confining pressure (kPa)	-0.7
Average micro-strain	101
Load drift (%)	-0.9
Load standard error (%)	8.2
Average deformation drift (%)	-4.9
Average deformation standard error (%)	8.1
Deformation uniformity (%)	3.1
Phase uniformity (Degrees)	0.2
Conditioning Cycles
Time (sec)	Axial stress (kPa)	Axial micro-strain #1	Axial micro-strain #2	Axial micro-strain #3	Confining pressure (kPa)	Temperature (�C)	Load (N)	Displacement #1 (mm)	Displacement #2 (mm)	Displacement #3 (mm)
0.0000	380.850	0.225	0.027	-0.168	-0.731	50.325	725.040	-0.000016	-0.000002	0.000012
0.0008	380.534	0.238	0.027	-0.154	-0.735	50.326	724.440	-0.000017	-0.000002	0.000011
0.0016	379.843	0.421	0.206	0.013	-0.740	50.326	723.124	-0.000030	-0.000014	-0.000001
0.0024	378.115	0.238	0.027	0.096	-0.737	50.325	719.833	-0.000017	-0.000002	-0.000007
0.0032	374.718	0.112	-0.014	-0.083	-0.744	50.324	713.367	-0.000008	0.000001	0.000006
0.0040	368.346	-0.531	-0.579	-0.763	-0.735	50.323	701.237	0.000037	0.000041	0.000053
0.0048	356.940	-1.611	-1.708	-1.944	-0.726	50.322	679.522	0.000113	0.000120	0.000136
0.0056	339.462	-3.140	-3.264	-3.833	-0.728	50.319	646.248	0.000220	0.000228	0.000268
0.0064	315.672	-5.175	-5.616	-6.224	-0.725	50.317	600.958	0.000362	0.000393	0.000436
0.0072	287.283	-7.478	-8.520	-9.143	-0.726	50.315	546.913	0.000523	0.000596	0.000640
0.0080	257.933	-10.102	-11.615	-12.464	-0.727	50.312	491.037	0.000707	0.000813	0.000872
0.0088	231.032	-12.334	-14.629	-15.425	-0.727	50.309	439.825	0.000863	0.001024	0.001080
0.0096	209.376	-14.243	-17.188	-18.037	-0.727	50.307	398.598	0.000997	0.001203	0.001263
0.0104	194.317	-15.561	-19.128	-19.802	-0.726	50.306	369.930	0.001089	0.001339	0.001386
0.0112	185.706	-16.221	-20.161	-20.678	-0.730	50.304	353.537	0.001135	0.001411	0.001447
0.0120	182.415	-16.585	-20.822	-20.788	-0.731	50.305	347.271	0.001161	0.001458	0.001455
0.0128	182.911	-16.585	-20.917	-21.024	-0.730	50.306	348.215	0.001161	0.001464	0.001472
0.0136	185.901	-16.613	-20.641	-20.497	-0.735	50.307	353.909	0.001163	0.001445	0.001435
0.0144	190.079	-16.473	-20.448	-20.776	-0.729	50.309	361.862	0.001153	0.001431	0.001454
0.0152	194.933	-16.249	-19.870	-20.498	-0.730	50.311	371.103	0.001137	0.001391	0.001435
0.0160	200.088	-15.940	-19.294	-20.179	-0.734	50.313	380.917	0.001116	0.001351	0.001413
0.0168	205.453	-15.504	-18.772	-19.790	-0.734	50.315	391.130	0.001085	0.001314	0.001385
0.0176	211.284	-14.913	-18.291	-19.246	-0.736	50.317	402.231	0.001044	0.001280	0.001347
0.0184	217.822	-14.379	-17.672	-18.593	-0.736	50.320	414.677	0.001007	0.001237	0.001302
0.0192	225.321	-13.986	-17.175	-18.052	-0.736	50.323	428.953	0.000979	0.001202	0.001264
0.0200	233.677	-13.424	-16.404	-17.329	-0.731	50.325	444.860	0.000940	0.001148	0.001213
0.0208	242.724	-12.696	-15.538	-16.328	-0.735	50.326	462.084	0.000889	0.001088	0.001143
0.0216	251.771	-11.855	-14.506	-15.258	-0.736	50.326	479.307	0.000830	0.001015	0.001068
0.0224	260.187	-11.000	-13.570	-14.200	-0.736	50.325	495.329	0.000770	0.000950	0.000994
0.0232	267.746	-10.328	-12.621	-13.159	-0.739	50.324	509.720	0.000723	0.000883	0.000921
0.0240	273.983	-9.962	-11.931	-12.562	-0.735	50.323	521.593	0.000697	0.000835	0.000879
0.0248	278.957	-9.568	-11.504	-12.270	-0.728	50.322	531.063	0.000670	0.000805	0.000859
0.0256	282.654	-9.259	-11.076	-11.910	-0.728	50.320	538.101	0.000648	0.000775	0.000834
0.0264	284.954	-8.908	-10.815	-11.798	-0.728	50.317	542.479	0.000624	0.000757	0.000826
0.0272	286.141	-8.824	-10.595	-11.646	-0.725	50.315	544.739	0.000618	0.000742	0.000815
0.0280	286.456	-8.853	-10.486	-11.548	-0.726	50.312	545.340	0.000620	0.000734	0.000808
0.0288	286.141	-8.895	-10.419	-11.311	-0.722	50.310	544.739	0.000623	0.000729	0.000792
0.0296	285.359	-9.161	-10.679	-11.797	-0.719	50.308	543.251	0.000641	0.000748	0.000826
0.0304	284.292	-9.274	-10.735	-11.589	-0.718	50.306	541.220	0.000649	0.000751	0.000811
0.0312	282.940	-9.217	-10.817	-11.688	-0.724	50.305	538.645	0.000645	0.000757	0.000818
0.0320	281.091	-9.385	-10.857	-11.688	-0.725	50.305	535.126	0.000657	0.000760	0.000818
0.0328	278.957	-9.357	-10.885	-11.758	-0.729	50.306	531.063	0.000655	0.000762	0.000823
0.0336	276.553	-9.526	-11.091	-11.952	-0.730	50.307	526.485	0.000667	0.000776	0.000837
0.0344	273.803	-9.807	-11.559	-12.188	-0.726	50.309	521.250	0.000686	0.000809	0.000853
0.0352	270.827	-9.976	-11.766	-12.563	-0.729	50.311	515.585	0.000698	0.000824	0.000879
0.0360	267.491	-10.202	-12.207	-12.479	-0.726	50.313	509.233	0.000714	0.000854	0.000874
0.0368	263.553	-10.440	-12.566	-13.091	-0.728	50.315	501.738	0.000731	0.000880	0.000916
0.0376	259.030	-10.904	-12.867	-13.619	-0.726	50.317	493.126	0.000763	0.000901	0.000953
0.0384	253.770	-11.255	-13.541	-14.286	-0.725	50.320	483.112	0.000788	0.000948	0.001000
0.0392	247.728	-11.786	-14.147	-15.189	-0.727	50.323	471.611	0.000825	0.000990	0.001063
0.0400	241.131	-12.375	-15.026	-16.050	-0.719	50.325	459.051	0.000866	0.001052	0.001123
0.0408	234.158	-12.822	-15.688	-16.773	-0.726	50.326	445.776	0.000898	0.001098	0.001174
0.0416	227.109	-13.283	-16.528	-17.273	-0.728	50.326	432.358	0.000930	0.001157	0.001209
0.0424	220.347	-13.804	-17.215	-17.898	-0.722	50.325	419.483	0.000966	0.001205	0.001253
0.0432	214.290	-14.254	-17.821	-18.065	-0.731	50.324	407.953	0.000998	0.001247	0.001265
0.0440	209.120	-14.761	-18.413	-18.856	-0.727	50.323	398.111	0.001033	0.001289	0.001320
0.0448	205.153	-15.141	-19.018	-19.245	-0.726	50.322	390.558	0.001060	0.001331	0.001347
0.0456	202.327	-15.464	-19.240	-19.565	-0.735	50.320	385.180	0.001082	0.001347	0.001370
0.0464	200.614	-15.590	-19.487	-19.828	-0.734	50.317	381.918	0.001091	0.001364	0.001388
0.0472	199.818	-15.645	-19.708	-19.926	-0.731	50.315	380.402	0.001095	0.001380	0.001395
0.0480	199.773	-15.786	-19.598	-20.232	-0.732	50.312	380.316	0.001105	0.001372	0.001416
0.0488	200.269	-15.771	-19.790	-20.260	-0.727	50.310	381.260	0.001104	0.001385	0.001418
0.0496	200.975	-15.813	-20.051	-20.733	-0.727	50.308	382.605	0.001107	0.001404	0.001451
0.0504	201.967	-15.926	-20.106	-20.317	-0.727	50.307	384.493	0.001115	0.001407	0.001422
0.0512	203.079	-15.799	-20.106	-20.150	-0.727	50.305	386.610	0.001106	0.001407	0.001410
0.0520	204.191	-15.771	-19.941	-20.401	-0.724	50.305	388.727	0.001104	0.001396	0.001428
0.0528	205.393	-15.700	-19.693	-19.915	-0.722	50.306	391.016	0.001099	0.001379	0.001394
0.0536	206.776	-15.574	-19.596	-20.123	-0.717	50.307	393.648	0.001090	0.001372	0.001409
0.0544	208.369	-15.602	-19.499	-20.136	-0.715	50.309	396.681	0.001092	0.001365	0.001410
0.0552	210.262	-15.658	-19.430	-19.607	-0.715	50.311	400.286	0.001096	0.001360	0.001373
0.0560	212.457	-15.588	-19.114	-19.565	-0.716	50.313	404.463	0.001091	0.001338	0.001370
0.0568	214.801	-15.532	-18.867	-19.245	-0.720	50.315	408.926	0.001087	0.001321	0.001347
0.0576	217.356	-15.378	-18.592	-18.982	-0.718	50.318	413.790	0.001076	0.001301	0.001329
0.0584	220.316	-15.014	-18.317	-18.953	-0.722	50.320	419.426	0.001051	0.001282	0.001327
0.0592	223.758	-14.916	-17.862	-18.536	-0.718	50.323	425.978	0.001044	0.001250	0.001298
0.0600	227.771	-14.664	-17.503	-18.411	-0.715	50.325	433.617	0.001026	0.001225	0.001289
0.0608	232.535	-14.270	-16.774	-17.591	-0.719	50.326	442.686	0.000999	0.001174	0.001231
0.0616	237.975	-13.736	-16.086	-16.911	-0.723	50.326	453.043	0.000962	0.001126	0.001184
0.0624	243.896	-13.034	-15.371	-16.342	-0.724	50.325	464.315	0.000912	0.001076	0.001144
0.0632	250.298	-12.290	-14.630	-15.549	-0.729	50.324	476.503	0.000860	0.001024	0.001088
0.0640	256.625	-11.856	-13.998	-15.105	-0.720	50.323	488.548	0.000830	0.000980	0.001057
0.0648	262.712	-11.521	-13.407	-14.659	-0.711	50.322	500.135	0.000806	0.000938	0.001026
0.0656	268.302	-11.016	-12.884	-13.979	-0.715	50.320	510.778	0.000771	0.000902	0.000979
0.0664	273.141	-10.593	-12.305	-13.549	-0.713	50.317	519.991	0.000742	0.000861	0.000948
0.0672	277.169	-10.088	-11.946	-13.063	-0.718	50.315	527.658	0.000706	0.000836	0.000914
0.0680	280.190	-9.609	-11.616	-12.771	-0.723	50.312	533.409	0.000673	0.000813	0.000894
0.0688	282.234	-9.412	-11.313	-12.506	-0.725	50.310	537.300	0.000659	0.000792	0.000875
0.0696	283.255	-9.441	-11.204	-12.463	-0.722	50.308	539.246	0.000661	0.000784	0.000872
0.0704	283.586	-9.384	-11.134	-12.560	-0.720	50.306	539.875	0.000657	0.000779	0.000879
0.0712	283.376	-9.230	-10.954	-11.935	-0.722	50.305	539.474	0.000646	0.000767	0.000835
0.0720	282.504	-9.372	-11.175	-12.213	-0.719	50.305	537.815	0.000656	0.000782	0.000855
0.0728	281.182	-9.203	-11.132	-11.923	-0.722	50.306	535.297	0.000644	0.000779	0.000835
0.0736	279.393	-9.287	-11.354	-12.049	-0.725	50.307	531.893	0.000650	0.000795	0.000843
0.0744	277.019	-9.681	-11.656	-12.549	-0.721	50.309	527.372	0.000678	0.000816	0.000878
0.0752	274.329	-9.695	-11.945	-12.925	-0.722	50.311	522.251	0.000679	0.000836	0.000905
0.0760	271.143	-9.949	-12.386	-13.090	-0.724	50.313	516.186	0.000696	0.000867	0.000916
0.0768	267.415	-10.215	-12.881	-13.575	-0.727	50.315	509.090	0.000715	0.000902	0.000950
0.0776	263.117	-10.539	-13.307	-13.853	-0.730	50.318	500.908	0.000738	0.000932	0.000970
0.0784	258.083	-11.030	-13.884	-14.256	-0.733	50.320	491.323	0.000772	0.000972	0.000998
0.0792	252.297	-11.633	-14.407	-15.049	-0.730	50.323	480.309	0.000814	0.001009	0.001053
0.0800	245.459	-12.307	-15.081	-15.675	-0.722	50.325	467.291	0.000861	0.001056	0.001097
0.0808	237.840	-12.922	-15.976	-16.704	-0.725	50.326	452.785	0.000905	0.001118	0.001169
0.0816	229.514	-13.609	-16.830	-17.150	-0.724	50.326	436.935	0.000953	0.001178	0.001200
0.0824	221.098	-14.311	-17.710	-18.109	-0.723	50.326	420.914	0.001002	0.001240	0.001268
0.0832	213.464	-14.985	-18.496	-18.720	-0.725	50.324	406.380	0.001049	0.001295	0.001310
0.0840	206.956	-15.646	-19.171	-19.429	-0.720	50.324	393.991	0.001095	0.001342	0.001360
0.0848	202.207	-16.109	-19.679	-20.039	-0.713	50.322	384.951	0.001128	0.001378	0.001403
0.0856	199.051	-16.389	-20.214	-20.469	-0.718	50.320	378.942	0.001147	0.001415	0.001433
0.0864	197.173	-16.473	-20.366	-20.885	-0.720	50.318	375.366	0.001153	0.001426	0.001462
0.0872	196.346	-16.655	-20.586	-20.927	-0.720	50.315	373.793	0.001166	0.001441	0.001465
0.0880	196.151	-16.825	-20.558	-21.247	-0.724	50.313	373.421	0.001178	0.001439	0.001487
0.0888	196.436	-16.923	-20.587	-21.108	-0.723	50.310	373.964	0.001185	0.001441	0.001478
0.0896	196.947	-17.063	-20.710	-21.233	-0.719	50.308	374.937	0.001194	0.001450	0.001486
0.0904	197.714	-16.909	-20.710	-21.080	-0.718	50.307	376.396	0.001184	0.001450	0.001476
0.0912	198.796	-16.599	-20.518	-21.080	-0.723	50.305	378.456	0.001162	0.001436	0.001476
0.0920	199.923	-16.389	-20.353	-20.857	-0.721	50.306	380.602	0.001147	0.001425	0.001460
0.0928	201.591	-16.164	-19.982	-20.593	-0.722	50.306	383.778	0.001131	0.001399	0.001441
0.0936	203.830	-16.009	-19.735	-20.606	-0.722	50.307	388.041	0.001121	0.001381	0.001442
0.0944	206.535	-15.855	-19.611	-20.301	-0.718	50.310	393.190	0.001110	0.001373	0.001421
0.0952	209.947	-15.587	-19.294	-20.163	-0.719	50.311	399.685	0.001091	0.001351	0.001411
0.0960	213.854	-15.265	-19.060	-19.914	-0.720	50.313	407.124	0.001069	0.001334	0.001394
0.0968	218.212	-14.970	-18.508	-19.387	-0.718	50.315	415.421	0.001048	0.001296	0.001357
0.0976	223.127	-14.746	-18.123	-19.039	-0.717	50.318	424.776	0.001032	0.001269	0.001333
0.0984	228.717	-14.311	-17.531	-18.316	-0.717	50.321	435.419	0.001002	0.001227	0.001282
0.0992	235.074	-13.847	-16.967	-17.787	-0.714	50.323	447.521	0.000969	0.001188	0.001245
0.1000	242.303	-13.202	-16.334	-17.063	-0.708	50.325	461.283	0.000924	0.001143	0.001194
0.1008	250.418	-12.233	-15.454	-16.272	-0.712	50.326	476.732	0.000856	0.001082	0.001139
0.1016	258.879	-11.505	-14.449	-15.300	-0.714	50.326	492.840	0.000805	0.001011	0.001071
0.1024	267.010	-10.789	-13.540	-14.438	-0.717	50.325	508.318	0.000755	0.000948	0.001011
0.1032	274.238	-10.074	-12.673	-13.576	-0.725	50.324	522.079	0.000705	0.000887	0.000950
0.1040	279.709	-9.750	-12.109	-13.007	-0.720	50.323	532.494	0.000683	0.000848	0.000911
0.1048	283.195	-9.441	-11.751	-12.896	-0.718	50.321	539.131	0.000661	0.000823	0.000903
0.1056	284.969	-9.287	-11.489	-12.439	-0.719	50.319	542.507	0.000650	0.000804	0.000871
0.1064	285.074	-9.315	-11.338	-12.787	-0.722	50.317	542.707	0.000652	0.000794	0.000895
0.1072	284.217	-9.384	-11.405	-12.411	-0.719	50.315	541.077	0.000657	0.000798	0.000869
0.1080	282.955	-9.484	-11.447	-12.786	-0.723	50.312	538.673	0.000664	0.000801	0.000895
0.1088	281.317	-9.624	-11.571	-12.799	-0.720	50.310	535.555	0.000674	0.000810	0.000896
0.1096	279.619	-9.836	-11.832	-12.895	-0.717	50.308	532.322	0.000688	0.000828	0.000903
0.1104	277.950	-10.117	-11.930	-13.187	-0.719	50.306	529.146	0.000708	0.000835	0.000923
0.1112	276.297	-10.088	-11.972	-12.895	-0.723	50.305	525.999	0.000706	0.000838	0.000903
0.1120	274.629	-10.157	-12.207	-13.131	-0.727	50.305	522.823	0.000711	0.000854	0.000919
0.1128	273.051	-10.171	-12.415	-12.950	-0.727	50.306	519.819	0.000712	0.000869	0.000907
0.1136	271.323	-10.215	-12.373	-13.159	-0.730	50.307	516.529	0.000715	0.000866	0.000921
0.1144	269.354	-10.510	-12.759	-13.450	-0.722	50.309	512.781	0.000736	0.000893	0.000942
0.1152	267.145	-10.651	-12.910	-13.811	-0.719	50.311	508.575	0.000746	0.000904	0.000967
0.1160	264.290	-10.848	-13.143	-13.965	-0.719	50.313	503.139	0.000759	0.000920	0.000978
0.1168	260.578	-11.002	-13.583	-14.395	-0.717	50.315	496.073	0.000770	0.000951	0.001008
0.1176	255.964	-11.367	-14.133	-14.646	-0.718	50.317	487.289	0.000796	0.000989	0.001025
0.1184	250.223	-11.870	-14.532	-15.244	-0.721	50.320	476.360	0.000831	0.001017	0.001067
0.1192	243.400	-12.416	-15.289	-15.870	-0.724	50.323	463.371	0.000869	0.001070	0.001111
0.1200	235.841	-13.286	-16.114	-16.884	-0.720	50.325	448.980	0.000930	0.001128	0.001182
0.1208	227.680	-14.030	-16.843	-17.580	-0.727	50.326	433.445	0.000982	0.001179	0.001231
0.1216	219.264	-14.607	-17.751	-18.247	-0.730	50.325	417.423	0.001022	0.001243	0.001277
0.1224	211.104	-15.155	-18.659	-19.261	-0.730	50.325	401.888	0.001061	0.001306	0.001348
0.1232	203.500	-15.589	-19.430	-19.830	-0.736	50.323	387.411	0.001091	0.001360	0.001388
0.1240	196.797	-16.235	-20.298	-20.870	-0.728	50.322	374.651	0.001136	0.001421	0.001461
0.1248	191.312	-16.753	-21.041	-21.343	-0.723	50.321	364.208	0.001173	0.001473	0.001494
0.1256	187.134	-17.342	-21.537	-22.079	-0.725	50.319	356.255	0.001214	0.001508	0.001546
0.1264	184.399	-17.566	-22.032	-22.204	-0.726	50.317	351.048	0.001230	0.001542	0.001554
0.1272	182.956	-17.511	-22.224	-22.692	-0.730	50.315	348.301	0.001226	0.001556	0.001588
0.1280	182.700	-17.623	-22.458	-22.873	-0.735	50.312	347.815	0.001234	0.001572	0.001601
0.1288	183.332	-17.595	-22.431	-22.608	-0.731	50.310	349.016	0.001232	0.001570	0.001583
0.1296	184.594	-17.637	-22.514	-22.873	-0.730	50.308	351.419	0.001235	0.001576	0.001601
0.1304	186.247	-17.678	-22.445	-22.442	-0.729	50.307	354.567	0.001237	0.001571	0.001571
0.1312	188.111	-17.412	-22.142	-22.442	-0.731	50.305	358.114	0.001219	0.001550	0.001571
0.1320	190.139	-17.287	-22.074	-22.233	-0.732	50.305	361.977	0.001210	0.001545	0.001556
0.1328	192.258	-17.007	-21.785	-21.997	-0.730	50.306	366.011	0.001190	0.001525	0.001540
0.1336	194.633	-16.937	-21.468	-21.662	-0.728	50.307	370.531	0.001186	0.001503	0.001516
0.1344	197.263	-16.950	-21.400	-21.745	-0.722	50.309	375.538	0.001186	0.001498	0.001522
0.1352	200.269	-16.795	-21.165	-21.593	-0.722	50.311	381.260	0.001176	0.001482	0.001512
0.1360	203.635	-16.641	-20.944	-21.218	-0.727	50.313	387.669	0.001165	0.001466	0.001485
0.1368	207.587	-16.317	-20.601	-20.914	-0.726	50.315	395.193	0.001142	0.001442	0.001464
0.1376	212.291	-16.094	-20.077	-20.316	-0.724	50.317	404.148	0.001127	0.001405	0.001422
0.1384	217.912	-15.673	-19.335	-19.677	-0.728	50.320	414.848	0.001097	0.001353	0.001377
0.1392	224.720	-15.251	-18.647	-18.982	-0.724	50.323	427.809	0.001068	0.001305	0.001329
0.1400	232.565	-14.704	-17.904	-18.649	-0.721	50.325	442.743	0.001029	0.001253	0.001305
0.1408	241.371	-13.847	-16.900	-17.413	-0.726	50.326	459.509	0.000969	0.001183	0.001219
0.1416	250.734	-13.007	-15.853	-16.524	-0.727	50.325	477.333	0.000910	0.001110	0.001157
0.1424	259.991	-12.236	-14.670	-15.468	-0.726	50.325	494.957	0.000857	0.001027	0.001083
0.1432	268.738	-11.338	-13.624	-14.300	-0.730	50.323	511.608	0.000794	0.000954	0.001001
0.1440	276.342	-10.664	-12.716	-13.535	-0.722	50.322	526.085	0.000746	0.000890	0.000947
0.1448	282.339	-10.116	-12.070	-13.215	-0.716	50.321	537.500	0.000708	0.000845	0.000925
0.1456	286.562	-9.666	-11.561	-12.812	-0.715	50.319	545.540	0.000677	0.000809	0.000897
0.1464	288.876	-9.329	-11.354	-12.589	-0.714	50.317	549.946	0.000653	0.000795	0.000881
0.1472	289.477	-9.188	-11.215	-12.604	-0.715	50.315	551.090	0.000643	0.000785	0.000882
0.1480	288.906	-9.174	-11.132	-12.479	-0.714	50.312	550.003	0.000642	0.000779	0.000874
0.1488	287.463	-9.046	-11.173	-12.590	-0.714	50.310	547.256	0.000633	0.000782	0.000881
0.1496	285.359	-9.243	-11.284	-12.855	-0.708	50.308	543.251	0.000647	0.000790	0.000900
0.1504	283.045	-9.412	-11.449	-13.063	-0.707	50.306	538.845	0.000659	0.000801	0.000914
0.1512	280.475	-9.327	-11.600	-12.827	-0.712	50.305	533.953	0.000653	0.000812	0.000898
0.1520	277.605	-9.567	-11.849	-13.146	-0.716	50.306	528.488	0.000670	0.000829	0.000920
0.1528	274.779	-9.765	-12.137	-13.007	-0.718	50.307	523.109	0.000684	0.000850	0.000910
0.1536	271.774	-9.934	-12.564	-13.327	-0.720	50.308	517.387	0.000695	0.000879	0.000933
0.1544	268.332	-10.300	-13.087	-13.924	-0.711	50.310	510.836	0.000721	0.000916	0.000975
0.1552	264.590	-10.804	-13.444	-14.160	-0.706	50.311	503.712	0.000756	0.000941	0.000991
0.1560	260.006	-11.057	-13.953	-14.814	-0.706	50.313	494.986	0.000774	0.000977	0.001037
0.1568	254.491	-11.518	-14.475	-15.147	-0.702	50.315	484.486	0.000806	0.001013	0.001060
0.1576	248.029	-12.148	-15.053	-15.883	-0.703	50.317	472.183	0.000850	0.001054	0.001112
0.1584	240.560	-12.738	-15.879	-16.579	-0.704	50.320	457.964	0.000892	0.001112	0.001161
0.1592	232.294	-13.579	-16.734	-17.440	-0.707	50.323	442.228	0.000951	0.001171	0.001221
0.1600	223.487	-14.324	-17.697	-18.552	-0.704	50.325	425.463	0.001003	0.001239	0.001299
0.1608	215.011	-15.054	-18.607	-19.415	-0.712	50.325	409.327	0.001054	0.001302	0.001359
0.1616	207.332	-15.616	-19.487	-20.136	-0.715	50.325	394.707	0.001093	0.001364	0.001410
0.1624	201.155	-16.150	-20.160	-20.775	-0.717	50.325	382.948	0.001131	0.001411	0.001454
0.1632	196.857	-16.614	-20.820	-21.373	-0.721	50.324	374.765	0.001163	0.001457	0.001496
0.1640	194.242	-16.951	-21.356	-21.470	-0.718	50.323	369.787	0.001187	0.001495	0.001503
0.1648	193.040	-17.189	-21.701	-21.915	-0.715	50.322	367.498	0.001203	0.001519	0.001534
0.1656	192.754	-17.260	-21.701	-21.637	-0.716	50.319	366.955	0.001208	0.001519	0.001515
0.1664	192.890	-17.316	-21.728	-21.651	-0.719	50.317	367.212	0.001212	0.001521	0.001516
0.1672	193.310	-17.387	-21.521	-21.720	-0.718	50.315	368.013	0.001217	0.001506	0.001520
0.1680	193.957	-17.400	-21.506	-21.580	-0.724	50.312	369.244	0.001218	0.001505	0.001511
0.1688	194.783	-17.484	-21.521	-21.942	-0.725	50.310	370.817	0.001224	0.001506	0.001536
0.1696	195.805	-17.539	-21.521	-21.748	-0.719	50.308	372.763	0.001228	0.001506	0.001522
0.1704	196.872	-17.356	-21.507	-21.803	-0.720	50.306	374.794	0.001215	0.001505	0.001526
0.1712	198.089	-17.131	-21.286	-21.499	-0.723	50.305	377.111	0.001199	0.001490	0.001505
0.1720	199.307	-16.865	-21.120	-21.220	-0.721	50.305	379.429	0.001181	0.001478	0.001485
0.1728	200.915	-16.556	-20.831	-20.997	-0.726	50.306	382.490	0.001159	0.001458	0.001470
0.1736	202.868	-16.415	-20.626	-20.983	-0.727	50.307	386.209	0.001149	0.001444	0.001469
0.1744	205.108	-16.416	-20.434	-20.802	-0.718	50.310	390.472	0.001149	0.001430	0.001456
0.1752	207.873	-16.276	-20.092	-20.885	-0.720	50.311	395.737	0.001139	0.001406	0.001462
0.1760	210.803	-16.067	-19.749	-20.538	-0.719	50.314	401.316	0.001125	0.001382	0.001438
0.1768	214.110	-15.801	-19.377	-19.968	-0.718	50.316	407.610	0.001106	0.001356	0.001398
0.1776	217.972	-15.295	-18.952	-19.788	-0.718	50.318	414.963	0.001071	0.001327	0.001385
0.1784	222.466	-14.929	-18.511	-18.941	-0.719	50.321	423.517	0.001045	0.001296	0.001326
0.1792	227.816	-14.563	-17.973	-18.649	-0.719	50.324	433.702	0.001019	0.001258	0.001305
0.1800	234.052	-14.198	-17.449	-18.259	-0.716	50.326	445.576	0.000994	0.001221	0.001278
0.1808	241.116	-13.691	-16.678	-17.480	-0.722	50.327	459.023	0.000958	0.001167	0.001224
0.1816	248.630	-12.893	-15.936	-16.994	-0.726	50.327	473.328	0.000903	0.001116	0.001190
0.1824	256.219	-12.180	-15.056	-15.884	-0.724	50.326	487.776	0.000853	0.001054	0.001112
0.1832	263.794	-11.296	-14.272	-15.287	-0.726	50.324	502.195	0.000791	0.000999	0.001070
0.1840	270.812	-10.708	-13.391	-14.412	-0.724	50.324	515.556	0.000750	0.000937	0.001009
0.1848	277.154	-10.328	-12.881	-13.896	-0.718	50.322	527.630	0.000723	0.000902	0.000973
0.1856	282.684	-9.863	-12.302	-13.325	-0.722	50.320	538.158	0.000690	0.000861	0.000933
0.1864	286.772	-9.554	-11.862	-12.727	-0.727	50.318	545.940	0.000669	0.000830	0.000891
0.1872	289.477	-9.076	-11.601	-12.505	-0.723	50.315	551.090	0.000635	0.000812	0.000875
0.1880	290.905	-9.020	-11.312	-12.367	-0.727	50.312	553.808	0.000631	0.000792	0.000866
0.1888	291.085	-9.034	-11.120	-12.256	-0.723	50.310	554.152	0.000632	0.000778	0.000858
0.1896	290.334	-9.188	-11.230	-12.423	-0.716	50.308	552.721	0.000643	0.000786	0.000870
0.1904	288.801	-9.469	-11.449	-12.438	-0.722	50.307	549.803	0.000663	0.000801	0.000871
0.1912	286.472	-9.412	-11.476	-12.298	-0.722	50.306	545.368	0.000659	0.000803	0.000861
0.1920	283.391	-9.455	-11.807	-12.480	-0.725	50.306	539.503	0.000662	0.000826	0.000874
0.1928	279.844	-9.611	-11.889	-12.730	-0.727	50.306	532.751	0.000673	0.000832	0.000891
0.1936	275.937	-9.949	-12.249	-13.007	-0.722	50.307	525.312	0.000696	0.000857	0.000911
0.1944	271.623	-10.385	-12.717	-13.647	-0.718	50.309	517.101	0.000727	0.000890	0.000955
0.1952	267.085	-10.876	-13.350	-14.106	-0.716	50.312	508.461	0.000761	0.000934	0.000987
0.1960	262.110	-11.254	-13.831	-14.522	-0.718	50.313	498.991	0.000788	0.000968	0.001017
0.1968	256.790	-11.729	-14.381	-15.037	-0.720	50.316	488.863	0.000821	0.001007	0.001053
0.1976	251.170	-12.290	-14.986	-15.398	-0.716	50.318	478.163	0.000860	0.001049	0.001078
0.1984	245.309	-12.864	-15.592	-16.092	-0.716	50.321	467.005	0.000901	0.001091	0.001126
0.1992	239.222	-13.412	-16.238	-16.761	-0.711	50.324	455.418	0.000939	0.001137	0.001173
0.2000	190.320	-18.799	-23.489	-24.139	-0.736	50.322	362.320	0.001316	0.001644	0.001690
0.2008	190.455	-18.701	-23.669	-24.429	-0.724	50.325	362.577	0.001309	0.001657	0.001710
0.2016	190.816	-18.672	-23.710	-24.527	-0.722	50.326	363.264	0.001307	0.001660	0.001717
0.2024	191.552	-18.517	-23.573	-24.263	-0.725	50.326	364.666	0.001296	0.001650	0.001698
0.2032	192.724	-18.406	-23.532	-24.000	-0.725	50.327	366.898	0.001288	0.001647	0.001680
0.2040	194.573	-18.308	-23.298	-23.487	-0.730	50.326	370.417	0.001282	0.001631	0.001644
0.2048	197.218	-18.167	-22.955	-23.167	-0.728	50.325	375.452	0.001272	0.001607	0.001622
0.2056	201.035	-17.903	-22.844	-23.014	-0.719	50.324	382.719	0.001253	0.001599	0.001611
0.2064	207.061	-17.440	-22.238	-22.624	-0.714	50.322	394.192	0.001221	0.001557	0.001584
0.2072	216.695	-16.682	-21.385	-21.694	-0.716	50.320	412.531	0.001168	0.001497	0.001519
0.2080	232.189	-15.657	-19.870	-20.139	-0.720	50.318	442.028	0.001096	0.001391	0.001410
0.2088	255.423	-13.931	-17.573	-17.692	-0.726	50.315	486.259	0.000975	0.001230	0.001238
0.2096	287.764	-11.307	-14.326	-14.330	-0.731	50.313	547.829	0.000791	0.001003	0.001003
0.2104	329.663	-7.743	-10.088	-10.063	-0.731	50.310	627.594	0.000542	0.000706	0.000704
0.2112	379.918	-3.311	-5.148	-5.088	-0.723	50.308	723.267	0.000232	0.000360	0.000356
0.2120	437.071	1.895	0.728	0.762	-0.726	50.307	832.071	-0.000133	-0.000051	-0.000053
0.2128	499.154	7.802	7.113	7.447	-0.730	50.306	950.260	-0.000546	-0.000498	-0.000521
0.2136	564.091	13.822	13.772	14.327	-0.728	50.307	1073.885	-0.000968	-0.000964	-0.001003
0.2144	630.261	20.195	20.708	21.652	-0.738	50.308	1199.856	-0.001414	-0.001450	-0.001516
0.2152	696.116	26.538	27.463	28.795	-0.732	50.310	1325.226	-0.001858	-0.001922	-0.002016
0.2160	760.227	32.740	34.040	35.396	-0.730	50.312	1447.277	-0.002292	-0.002383	-0.002478
0.2168	821.453	39.069	40.438	42.218	-0.734	50.313	1563.835	-0.002735	-0.002831	-0.002955
0.2176	879.072	45.173	46.492	48.874	-0.735	50.315	1673.527	-0.003162	-0.003254	-0.003421
0.2184	932.423	50.982	52.149	54.530	-0.737	50.317	1775.093	-0.003569	-0.003650	-0.003817
0.2192	981.054	56.526	57.323	60.519	-0.740	50.320	1867.676	-0.003957	-0.004013	-0.004236
0.2200	1024.682	61.521	62.058	64.938	-0.738	50.323	1950.731	-0.004306	-0.004344	-0.004546
0.2208	1063.080	65.913	66.048	69.412	-0.736	50.325	2023.830	-0.004614	-0.004623	-0.004859
0.2216	1096.367	69.871	69.625	73.011	-0.732	50.327	2087.202	-0.004891	-0.004874	-0.005111
0.2224	1124.636	73.449	72.970	76.610	-0.732	50.327	2141.018	-0.005141	-0.005108	-0.005363
0.2232	1147.629	76.578	75.557	79.848	-0.734	50.327	2184.792	-0.005360	-0.005289	-0.005589
0.2240	1165.092	79.160	77.923	81.919	-0.734	50.326	2218.037	-0.005541	-0.005455	-0.005734
0.2248	1176.349	81.055	79.547	84.169	-0.735	50.325	2239.466	-0.005674	-0.005568	-0.005892
0.2256	1181.248	82.108	80.276	84.573	-0.731	50.324	2248.793	-0.005748	-0.005619	-0.005920
0.2264	1180.451	82.600	80.673	85.241	-0.729	50.322	2247.276	-0.005782	-0.005647	-0.005967
0.2272	1174.726	82.671	80.577	85.018	-0.728	50.320	2236.376	-0.005787	-0.005640	-0.005951
0.2280	1164.897	82.347	80.109	84.588	-0.733	50.318	2217.665	-0.005764	-0.005608	-0.005921
0.2288	1150.650	81.279	79.421	83.963	-0.732	50.315	2190.542	-0.005690	-0.005560	-0.005877
0.2296	1129.716	79.651	78.171	82.185	-0.737	50.312	2150.688	-0.005576	-0.005472	-0.005753
0.2304	1099.238	76.900	76.080	79.906	-0.738	50.310	2092.667	-0.005383	-0.005326	-0.005593
0.2312	1057.023	72.776	72.832	75.861	-0.732	50.308	2012.300	-0.005094	-0.005098	-0.005310
0.2320	1002.861	67.612	68.455	70.997	-0.735	50.307	1909.189	-0.004733	-0.004792	-0.004970
0.2328	938.659	61.326	63.184	64.520	-0.735	50.306	1786.966	-0.004293	-0.004423	-0.004516
0.2336	867.650	54.281	57.033	57.808	-0.725	50.307	1651.783	-0.003800	-0.003992	-0.004047
0.2344	793.996	46.844	50.635	50.512	-0.728	50.308	1511.564	-0.003279	-0.003544	-0.003536
0.2352	720.537	39.435	43.824	43.148	-0.727	50.309	1371.717	-0.002760	-0.003068	-0.003020
0.2360	650.219	32.096	36.862	35.977	-0.723	50.312	1237.850	-0.002247	-0.002580	-0.002518
0.2368	585.477	25.444	30.354	29.113	-0.731	50.313	1114.597	-0.001781	-0.002125	-0.002038
0.2376	527.167	19.593	24.135	22.638	-0.731	50.315	1003.590	-0.001372	-0.001689	-0.001585
0.2384	476.280	14.288	18.672	16.884	-0.728	50.318	906.715	-0.001000	-0.001307	-0.001182
0.2392	432.623	9.784	13.828	11.964	-0.730	50.320	823.603	-0.000685	-0.000968	-0.000838
0.2400	395.458	5.742	9.548	7.629	-0.729	50.322	752.850	-0.000402	-0.000668	-0.000534
0.2408	364.108	2.262	5.818	3.878	-0.728	50.325	693.169	-0.000158	-0.000407	-0.000271
0.2416	337.779	-0.503	2.488	0.918	-0.727	50.327	643.044	0.000035	-0.000174	-0.000064
0.2424	315.762	-2.735	-0.154	-1.749	-0.727	50.327	601.130	0.000191	0.000011	0.000122
0.2432	297.562	-4.461	-2.589	-4.001	-0.729	50.327	566.483	0.000312	0.000181	0.000280
0.2440	283.060	-5.794	-4.405	-5.780	-0.727	50.326	538.874	0.000406	0.000308	0.000405
0.2448	272.210	-7.070	-5.904	-7.364	-0.726	50.325	518.217	0.000495	0.000413	0.000515
0.2456	265.116	-8.192	-7.101	-8.531	-0.720	50.324	504.713	0.000573	0.000497	0.000597
0.2464	261.615	-8.711	-7.761	-9.086	-0.718	50.322	498.047	0.000610	0.000543	0.000636
0.2472	261.374	-9.006	-8.079	-9.365	-0.722	50.320	497.589	0.000630	0.000566	0.000656
0.2480	264.019	-8.894	-8.162	-9.434	-0.727	50.318	502.625	0.000623	0.000571	0.000660
0.2488	269.625	-8.542	-7.748	-9.114	-0.731	50.315	513.296	0.000598	0.000542	0.000638
0.2496	279.558	-7.925	-7.046	-8.337	-0.735	50.313	532.207	0.000555	0.000493	0.000584
0.2504	297.382	-6.746	-5.572	-6.906	-0.735	50.310	566.139	0.000472	0.000390	0.000483
0.2512	328.431	-4.473	-2.889	-3.879	-0.732	50.309	625.248	0.000313	0.000202	0.000271
0.2520	376.777	-0.208	1.542	1.124	-0.736	50.307	717.287	0.000015	-0.000108	-0.000079
0.2528	443.203	5.883	8.009	7.893	-0.739	50.307	843.744	-0.000412	-0.000561	-0.000552
0.2536	524.552	13.404	16.127	16.440	-0.739	50.307	998.611	-0.000938	-0.001129	-0.001151
0.2544	614.632	22.063	25.141	25.585	-0.738	50.308	1170.101	-0.001544	-0.001760	-0.001791
0.2552	706.516	31.045	34.332	34.992	-0.733	50.310	1345.024	-0.002173	-0.002403	-0.002449
0.2560	794.146	39.801	42.823	43.927	-0.727	50.312	1511.850	-0.002786	-0.002998	-0.003075
0.2568	872.579	48.080	50.391	52.083	-0.730	50.313	1661.167	-0.003366	-0.003527	-0.003646
0.2576	938.449	55.363	56.858	59.281	-0.732	50.315	1786.566	-0.003875	-0.003980	-0.004150
0.2584	990.868	61.200	62.072	64.924	-0.732	50.318	1886.358	-0.004284	-0.004345	-0.004545
0.2592	1031.204	65.746	66.158	69.509	-0.731	50.320	1963.148	-0.004602	-0.004631	-0.004866
0.2600	1062.493	69.562	69.350	72.955	-0.727	50.323	2022.715	-0.004869	-0.004855	-0.005107
0.2608	1087.876	72.522	71.950	75.568	-0.719	50.325	2071.037	-0.005077	-0.005037	-0.005290
0.2616	1110.389	75.272	74.125	78.320	-0.719	50.327	2113.895	-0.005269	-0.005189	-0.005482
0.2624	1131.850	78.079	76.451	80.697	-0.724	50.327	2154.751	-0.005466	-0.005352	-0.005649
0.2632	1152.814	80.648	78.597	83.463	-0.723	50.327	2194.662	-0.005645	-0.005502	-0.005842
0.2640	1173.103	83.216	80.729	85.784	-0.729	50.326	2233.286	-0.005825	-0.005651	-0.006005
0.2648	1190.896	85.616	82.724	88.228	-0.731	50.325	2267.160	-0.005993	-0.005791	-0.006176
0.2656	1204.256	87.454	84.196	89.535	-0.728	50.324	2292.595	-0.006122	-0.005894	-0.006267
0.2664	1211.876	88.717	85.145	90.869	-0.730	50.323	2307.100	-0.006210	-0.005960	-0.006361
0.2672	1212.913	89.474	85.614	91.535	-0.732	50.320	2309.074	-0.006263	-0.005993	-0.006407
0.2680	1207.848	89.404	85.614	91.355	-0.732	50.318	2299.433	-0.006258	-0.005993	-0.006395
0.2688	1196.667	88.550	85.023	91.203	-0.732	50.316	2278.147	-0.006198	-0.005952	-0.006384
0.2696	1177.055	86.866	83.991	89.410	-0.727	50.313	2240.810	-0.006081	-0.005879	-0.006259
0.2704	1145.180	83.835	81.913	86.923	-0.726	50.311	2180.128	-0.005868	-0.005734	-0.006085
0.2712	1097.059	79.105	78.253	82.282	-0.718	50.309	2088.518	-0.005537	-0.005478	-0.005760
0.2720	1032.061	72.719	73.245	76.360	-0.716	50.307	1964.779	-0.005090	-0.005127	-0.005345
0.2728	953.553	65.015	66.874	68.758	-0.724	50.307	1815.319	-0.004551	-0.004681	-0.004813
0.2736	868.011	56.484	59.416	60.518	-0.720	50.307	1652.470	-0.003954	-0.004159	-0.004236
0.2744	783.566	47.952	51.750	52.140	-0.727	50.308	1491.709	-0.003357	-0.003623	-0.003650
0.2752	706.485	40.010	44.444	43.885	-0.730	50.309	1344.967	-0.002801	-0.003111	-0.003072
0.2760	640.511	33.064	37.769	37.467	-0.725	50.311	1219.368	-0.002314	-0.002644	-0.002623
0.2768	586.544	27.367	32.333	31.074	-0.728	50.313	1116.629	-0.001916	-0.002263	-0.002175
0.2776	542.751	22.694	27.834	26.626	-0.729	50.316	1033.258	-0.001589	-0.001948	-0.001864
0.2784	506.022	18.849	23.775	22.304	-0.727	50.318	963.335	-0.001319	-0.001664	-0.001561
0.2792	473.335	15.424	20.171	18.648	-0.726	50.321	901.108	-0.001080	-0.001412	-0.001305
0.2800	442.361	12.140	16.553	15.243	-0.726	50.323	842.142	-0.000850	-0.001159	-0.001067
0.2808	411.583	8.912	12.975	11.367	-0.722	50.325	783.548	-0.000624	-0.000908	-0.000796
0.2816	380.609	5.824	9.369	7.852	-0.723	50.327	724.583	-0.000408	-0.000656	-0.000550
0.2824	350.012	2.906	5.956	4.045	-0.727	50.327	666.332	-0.000203	-0.000417	-0.000283
0.2832	320.977	0.043	2.557	0.794	-0.726	50.327	611.057	-0.000003	-0.000179	-0.000056
0.2840	295.684	-2.426	-0.566	-2.168	-0.731	50.326	562.906	0.000170	0.000040	0.000152
0.2848	275.786	-4.559	-3.195	-4.670	-0.731	50.325	525.026	0.000319	0.000224	0.000327
0.2856	262.231	-6.327	-5.272	-6.464	-0.727	50.324	499.220	0.000443	0.000369	0.000452
0.2864	255.197	-7.267	-6.482	-7.812	-0.730	50.322	485.830	0.000509	0.000454	0.000547
0.2872	253.905	-7.631	-7.059	-8.116	-0.734	50.320	483.370	0.000534	0.000494	0.000568
0.2880	257.452	-7.771	-7.086	-8.226	-0.738	50.318	490.122	0.000544	0.000496	0.000576
0.2888	265.567	-7.365	-6.660	-7.753	-0.742	50.315	505.571	0.000516	0.000466	0.000543
0.2896	280.205	-6.635	-5.505	-6.447	-0.746	50.313	533.438	0.000464	0.000385	0.000451
0.2904	305.077	-4.980	-3.441	-4.377	-0.747	50.310	580.788	0.000349	0.000241	0.000306
0.2912	344.120	-1.893	0.054	-0.388	-0.744	50.309	655.117	0.000133	-0.000004	0.000027
0.2920	398.974	2.893	5.255	4.808	-0.746	50.307	759.544	-0.000203	-0.000368	-0.000337
0.2928	468.120	9.321	12.121	12.228	-0.748	50.306	891.180	-0.000652	-0.000848	-0.000856
0.2936	547.320	16.787	19.950	20.261	-0.746	50.307	1041.956	-0.001175	-0.001396	-0.001418
0.2944	631.644	24.983	28.454	29.169	-0.749	50.308	1202.488	-0.001749	-0.001992	-0.002042
0.2952	716.885	33.247	36.848	37.882	-0.746	50.310	1364.765	-0.002327	-0.002579	-0.002652
0.2960	799.286	41.511	44.788	46.374	-0.746	50.312	1521.635	-0.002906	-0.003135	-0.003246
0.2968	875.705	49.525	52.135	54.184	-0.749	50.314	1667.118	-0.003467	-0.003649	-0.003793
0.2976	943.378	56.877	58.837	61.367	-0.749	50.316	1795.950	-0.003981	-0.004119	-0.004296
0.2984	1000.682	63.206	64.437	67.759	-0.751	50.318	1905.041	-0.004424	-0.004511	-0.004743
0.2992	1047.450	68.468	69.089	72.177	-0.747	50.321	1994.076	-0.004793	-0.004836	-0.005052
0.3000	1084.555	72.816	72.929	76.818	-0.747	50.323	2064.714	-0.005097	-0.005105	-0.005377
0.3008	1113.785	76.325	75.886	79.696	-0.743	50.326	2120.361	-0.005343	-0.005312	-0.005579
0.3016	1137.335	79.427	78.224	82.518	-0.741	50.327	2165.194	-0.005560	-0.005476	-0.005776
0.3024	1157.202	82.304	80.550	85.116	-0.747	50.327	2203.016	-0.005761	-0.005638	-0.005958
0.3032	1174.305	84.606	82.324	87.159	-0.743	50.327	2235.575	-0.005922	-0.005763	-0.006101
0.3040	1188.852	86.627	84.003	89.118	-0.748	50.326	2263.269	-0.006064	-0.005880	-0.006238
0.3048	1200.109	88.170	85.449	90.411	-0.749	50.325	2284.698	-0.006172	-0.005981	-0.006329
0.3056	1207.112	89.221	86.027	91.982	-0.743	50.324	2298.031	-0.006245	-0.006022	-0.006439
0.3064	1209.501	89.937	86.550	92.231	-0.744	50.322	2302.580	-0.006296	-0.006059	-0.006456
0.3072	1207.082	90.272	86.620	92.677	-0.742	50.320	2297.974	-0.006319	-0.006063	-0.006487
0.3080	1200.063	90.049	86.399	92.580	-0.743	50.318	2284.613	-0.006303	-0.006048	-0.006481
0.3088	1188.056	89.123	85.876	91.329	-0.741	50.315	2261.753	-0.006239	-0.006011	-0.006393
0.3096	1169.120	87.607	84.857	90.161	-0.739	50.313	2225.704	-0.006132	-0.005940	-0.006311
0.3104	1139.244	84.843	82.806	87.047	-0.735	50.311	2168.827	-0.005939	-0.005796	-0.006093
0.3112	1094.369	80.450	79.187	83.170	-0.729	50.309	2083.397	-0.005632	-0.005543	-0.005822
0.3120	1033.624	74.530	74.495	77.681	-0.730	50.308	1967.754	-0.005217	-0.005215	-0.005438
0.3128	959.714	67.290	68.358	70.706	-0.734	50.307	1827.049	-0.004710	-0.004785	-0.004949
0.3136	878.951	59.067	61.285	63.146	-0.734	50.307	1673.298	-0.004135	-0.004290	-0.004420
0.3144	798.504	51.097	54.185	55.044	-0.735	50.308	1520.147	-0.003577	-0.003793	-0.003853
0.3152	723.107	43.350	46.865	47.358	-0.738	50.310	1376.610	-0.003034	-0.003281	-0.003315
0.3160	655.629	36.220	40.041	40.076	-0.730	50.312	1248.150	-0.002535	-0.002803	-0.002805
0.3168	596.853	30.073	34.111	33.907	-0.730	50.313	1136.255	-0.002105	-0.002388	-0.002373
0.3176	546.238	24.572	28.786	28.125	-0.734	50.315	1039.896	-0.001720	-0.002015	-0.001969
0.3184	502.625	19.802	24.107	23.484	-0.728	50.317	956.869	-0.001386	-0.001687	-0.001644
0.3192	464.002	15.621	19.979	19.163	-0.732	50.320	883.341	-0.001093	-0.001399	-0.001341
0.3200	428.926	11.973	15.975	15.217	-0.734	50.323	816.565	-0.000838	-0.001118	-0.001065
0.3208	396.329	8.395	12.163	11.382	-0.729	50.325	754.509	-0.000588	-0.000851	-0.000797
0.3216	365.987	5.349	8.544	7.629	-0.728	50.327	696.745	-0.000374	-0.000598	-0.000534
0.3224	338.410	2.640	5.338	4.434	-0.731	50.327	644.245	-0.000185	-0.000374	-0.000310
0.3232	314.409	0.072	2.365	1.640	-0.732	50.327	598.555	-0.000005	-0.000166	-0.000115
0.3240	295.278	-1.836	-0.014	-1.001	-0.734	50.326	562.134	0.000129	0.000001	0.000070
0.3248	281.768	-3.450	-1.843	-2.626	-0.734	50.325	536.413	0.000242	0.000129	0.000184
0.3256	273.998	-4.686	-3.055	-4.100	-0.728	50.324	521.622	0.000328	0.000214	0.000287
0.3264	271.353	-5.347	-3.770	-4.808	-0.728	50.322	516.586	0.000374	0.000264	0.000337
0.3272	272.645	-5.614	-3.937	-4.710	-0.724	50.320	519.047	0.000393	0.000276	0.000330
0.3280	277.034	-5.487	-3.815	-4.488	-0.728	50.318	527.401	0.000384	0.000267	0.000314
0.3288	284.578	-5.108	-3.402	-4.085	-0.732	50.316	541.763	0.000358	0.000238	0.000286
0.3296	296.736	-4.180	-2.480	-3.265	-0.729	50.313	564.909	0.000293	0.000174	0.000229
0.3304	317.190	-2.664	-0.773	-1.460	-0.733	50.311	603.848	0.000187	0.000054	0.000102
0.3312	350.102	-0.040	2.049	1.195	-0.729	50.309	666.504	0.000003	-0.000143	-0.000084
0.3320	397.847	4.227	6.618	6.350	-0.736	50.308	757.399	-0.000296	-0.000463	-0.000445
0.3328	460.546	9.993	12.796	12.728	-0.744	50.307	876.760	-0.000700	-0.000896	-0.000891
0.3336	535.086	17.080	20.199	20.608	-0.747	50.307	1018.667	-0.001196	-0.001414	-0.001443
0.3344	616.706	25.106	28.414	28.903	-0.753	50.308	1174.049	-0.001757	-0.001989	-0.002023
0.3352	700.609	33.400	36.586	37.462	-0.746	50.309	1333.780	-0.002338	-0.002561	-0.002622
0.3360	782.334	41.455	44.443	45.856	-0.741	50.312	1489.363	-0.002902	-0.003111	-0.003210
0.3368	858.077	49.313	51.859	53.431	-0.743	50.313	1633.558	-0.003452	-0.003630	-0.003740
0.3376	924.773	56.344	58.217	60.949	-0.743	50.315	1760.530	-0.003944	-0.004075	-0.004266
0.3384	980.949	62.462	63.775	66.537	-0.744	50.318	1867.476	-0.004372	-0.004464	-0.004658
0.3392	1026.561	67.668	68.275	71.469	-0.743	50.320	1954.308	-0.004737	-0.004779	-0.005003
0.3400	1062.839	71.795	71.826	75.679	-0.741	50.322	2023.373	-0.005026	-0.005028	-0.005298
0.3408	1091.994	75.303	74.703	78.571	-0.739	50.325	2078.876	-0.005271	-0.005229	-0.005500
0.3416	1116.430	78.292	77.139	81.588	-0.737	50.327	2125.397	-0.005480	-0.005400	-0.005711
0.3424	1138.161	81.112	79.450	83.894	-0.746	50.327	2166.767	-0.005678	-0.005562	-0.005873
0.3432	1158.179	83.819	81.473	86.465	-0.746	50.327	2204.876	-0.005867	-0.005703	-0.006053
0.3440	1176.529	86.205	83.537	88.841	-0.748	50.326	2239.809	-0.006034	-0.005848	-0.006219
0.3448	1192.174	88.198	85.147	90.534	-0.751	50.325	2269.592	-0.006174	-0.005960	-0.006337
0.3456	1203.745	89.685	86.290	92.466	-0.740	50.324	2291.622	-0.006278	-0.006040	-0.006473
0.3464	1210.117	90.695	87.185	93.371	-0.741	50.322	2303.753	-0.006349	-0.006103	-0.006536
0.3472	1211.004	91.187	87.488	93.564	-0.740	50.320	2305.441	-0.006383	-0.006124	-0.006549
0.3480	1206.541	91.116	87.460	93.939	-0.739	50.318	2296.944	-0.006378	-0.006122	-0.006576
0.3488	1196.577	90.596	87.019	92.951	-0.743	50.316	2277.975	-0.006342	-0.006091	-0.006507
0.3496	1179.460	89.135	86.000	91.837	-0.742	50.313	2245.388	-0.006239	-0.006020	-0.006429
0.3504	1150.319	86.427	84.100	89.198	-0.740	50.311	2189.913	-0.006050	-0.005887	-0.006244
0.3512	1104.453	82.049	80.742	85.044	-0.739	50.309	2102.594	-0.005743	-0.005652	-0.005953
0.3520	1040.552	75.722	75.789	79.236	-0.737	50.307	1980.944	-0.005301	-0.005305	-0.005547
0.3528	961.022	67.990	69.336	71.580	-0.742	50.307	1829.538	-0.004759	-0.004853	-0.005011
0.3536	873.151	59.219	61.754	63.186	-0.744	50.307	1662.254	-0.004145	-0.004323	-0.004423
0.3544	785.685	50.294	53.897	54.265	-0.744	50.308	1495.743	-0.003521	-0.003773	-0.003799
0.3552	705.013	42.001	46.192	46.274	-0.746	50.310	1342.163	-0.002940	-0.003233	-0.003239
0.3560	635.221	34.606	39.187	38.409	-0.739	50.312	1209.297	-0.002422	-0.002743	-0.002689
0.3568	577.391	28.546	33.189	32.670	-0.739	50.313	1099.205	-0.001998	-0.002323	-0.002287
0.3576	530.728	23.576	28.083	27.361	-0.741	50.315	1010.370	-0.001650	-0.001966	-0.001915
0.3584	492.917	19.310	23.954	23.013	-0.738	50.318	938.387	-0.001352	-0.001677	-0.001611
0.3592	460.906	15.829	20.323	19.538	-0.740	50.320	877.447	-0.001108	-0.001423	-0.001368
0.3600	432.142	12.643	17.074	15.981	-0.738	50.323	822.687	-0.000885	-0.001195	-0.001119
0.3608	404.309	9.655	13.814	12.675	-0.731	50.325	769.701	-0.000676	-0.000967	-0.000887
0.3616	376.417	6.975	10.622	9.310	-0.731	50.327	716.600	-0.000488	-0.000744	-0.000652
0.3624	348.990	4.407	7.457	6.448	-0.738	50.327	664.387	-0.000309	-0.000522	-0.000451
0.3632	322.900	1.826	4.513	3.238	-0.740	50.327	614.719	-0.000128	-0.000316	-0.000227
0.3640	299.997	-0.474	1.734	0.777	-0.746	50.326	571.117	0.000033	-0.000121	-0.000054
0.3648	281.813	-2.468	-0.647	-1.431	-0.744	50.325	536.499	0.000173	0.000045	0.000100
0.3656	269.114	-4.054	-2.560	-3.613	-0.734	50.324	512.323	0.000284	0.000179	0.000253
0.3664	262.231	-4.968	-3.770	-4.558	-0.730	50.322	499.220	0.000348	0.000264	0.000319
0.3672	260.548	-5.334	-4.418	-5.266	-0.729	50.320	496.016	0.000373	0.000309	0.000369
0.3680	263.177	-5.305	-4.458	-5.295	-0.734	50.318	501.022	0.000371	0.000312	0.000371
0.3688	269.685	-5.192	-4.225	-4.988	-0.735	50.316	513.411	0.000363	0.000296	0.000349
0.3696	281.151	-4.728	-3.455	-4.141	-0.735	50.313	535.240	0.000331	0.000242	0.000290
0.3704	300.703	-3.535	-1.873	-2.474	-0.735	50.311	572.462	0.000247	0.000131	0.000173
0.3712	332.534	-1.260	0.864	0.403	-0.728	50.310	633.059	0.000088	-0.000060	-0.000028
0.3720	379.362	2.754	5.296	4.890	-0.734	50.308	722.208	-0.000193	-0.000371	-0.000342
0.3728	441.009	8.535	11.419	11.254	-0.738	50.308	839.567	-0.000597	-0.000799	-0.000788
0.3736	514.498	15.369	18.589	18.731	-0.733	50.308	979.471	-0.001076	-0.001301	-0.001311
0.3744	595.065	23.100	26.612	26.861	-0.736	50.309	1132.851	-0.001617	-0.001863	-0.001880
0.3752	678.217	31.239	34.894	35.727	-0.730	50.310	1291.151	-0.002187	-0.002443	-0.002501
0.3760	760.483	39.336	42.806	43.676	-0.727	50.312	1447.763	-0.002753	-0.002996	-0.003057
0.3768	839.051	47.503	50.484	52.180	-0.734	50.314	1597.338	-0.003325	-0.003534	-0.003653
0.3776	911.458	55.207	57.598	59.531	-0.733	50.316	1735.182	-0.003864	-0.004032	-0.004167
0.3784	976.275	62.167	63.722	66.730	-0.735	50.318	1858.578	-0.004352	-0.004461	-0.004671
0.3792	1032.512	68.440	69.199	72.734	-0.734	50.321	1965.637	-0.004791	-0.004844	-0.005091
0.3800	1079.581	73.871	73.892	77.751	-0.733	50.323	2055.244	-0.005171	-0.005172	-0.005443
0.3808	1118.099	78.235	77.579	81.947	-0.731	50.326	2128.572	-0.005476	-0.005431	-0.005736
0.3816	1148.787	82.082	80.676	84.977	-0.730	50.327	2186.995	-0.005746	-0.005647	-0.005948
0.3824	1172.832	85.168	83.263	88.382	-0.734	50.327	2232.771	-0.005962	-0.005828	-0.006187
0.3832	1191.257	87.609	85.121	90.438	-0.733	50.327	2267.847	-0.006133	-0.005958	-0.006331
0.3840	1204.602	89.685	86.677	92.924	-0.732	50.326	2293.253	-0.006278	-0.006067	-0.006505
0.3848	1213.258	91.101	87.776	93.884	-0.734	50.324	2309.732	-0.006377	-0.006144	-0.006572
0.3856	1217.436	91.971	88.299	94.356	-0.732	50.324	2317.686	-0.006438	-0.006181	-0.006605
0.3864	1217.707	92.406	88.767	95.038	-0.732	50.322	2318.201	-0.006468	-0.006214	-0.006653
0.3872	1214.581	92.575	88.848	94.455	-0.735	50.321	2312.250	-0.006480	-0.006219	-0.006612
0.3880	1208.254	92.322	88.767	94.830	-0.735	50.318	2300.205	-0.006463	-0.006214	-0.006638
0.3888	1198.320	91.803	88.339	93.968	-0.732	50.316	2281.294	-0.006426	-0.006184	-0.006578
0.3896	1182.631	90.597	87.375	92.508	-0.736	50.313	2251.425	-0.006342	-0.006116	-0.006476
0.3904	1156.541	88.183	85.628	90.728	-0.734	50.311	2201.757	-0.006173	-0.005994	-0.006351
0.3912	1115.183	84.100	82.463	86.518	-0.733	50.309	2123.022	-0.005887	-0.005772	-0.006056
0.3920	1056.677	78.304	77.908	81.640	-0.733	50.308	2011.642	-0.005481	-0.005454	-0.005715
0.3928	982.482	71.063	71.813	74.594	-0.733	50.307	1870.394	-0.004974	-0.005027	-0.005222
0.3936	898.383	62.629	64.534	66.396	-0.734	50.308	1710.291	-0.004384	-0.004517	-0.004648
0.3944	812.331	54.125	56.773	58.017	-0.730	50.309	1546.469	-0.003789	-0.003974	-0.004061
0.3952	730.321	45.664	48.943	49.498	-0.728	50.310	1390.343	-0.003196	-0.003426	-0.003465
0.3960	656.892	37.735	41.650	41.856	-0.724	50.312	1250.553	-0.002641	-0.002916	-0.002930
0.3968	594.073	31.098	35.225	35.047	-0.725	50.314	1130.962	-0.002177	-0.002466	-0.002453
0.3976	541.849	25.499	29.735	29.391	-0.730	50.316	1031.542	-0.001785	-0.002081	-0.002057
0.3984	498.823	20.840	25.099	24.473	-0.729	50.318	949.631	-0.001459	-0.001757	-0.001713
0.3992	462.785	17.009	21.095	20.387	-0.727	50.321	881.023	-0.001191	-0.001477	-0.001427
Test Cycles
Time (sec)	Axial stress (kPa)	Axial micro-strain #1	Axial micro-strain #2	Axial micro-strain #3	Confining pressure (kPa)	Temperature (�C)	Load (N)	Displacement #1 (mm)	Displacement #2 (mm)	Displacement #3 (mm)
0.0000	431.315	13.571	17.558	16.551	-0.728	50.323	821.114	-0.000950	-0.001229	-0.001159
0.0008	402.280	10.316	14.075	13.286	-0.719	50.326	765.839	-0.000722	-0.000985	-0.000930
0.0016	374.643	7.398	10.800	9.838	-0.717	50.327	713.224	-0.000518	-0.000756	-0.000689
0.0024	348.208	4.873	7.840	7.073	-0.722	50.327	662.899	-0.000341	-0.000549	-0.000495
0.0032	323.757	2.417	4.785	4.141	-0.717	50.327	616.350	-0.000169	-0.000335	-0.000290
0.0040	302.852	0.144	2.295	1.459	-0.727	50.326	576.553	-0.000010	-0.000161	-0.000102
0.0048	286.757	-1.568	0.190	-0.457	-0.724	50.325	545.912	0.000110	-0.000013	0.000032
0.0056	276.087	-3.127	-1.502	-2.235	-0.720	50.324	525.599	0.000219	0.000105	0.000156
0.0064	270.977	-3.970	-2.368	-2.888	-0.725	50.323	515.871	0.000278	0.000166	0.000202
0.0072	270.571	-4.279	-2.835	-3.430	-0.724	50.321	515.099	0.000300	0.000198	0.000240
0.0080	274.253	-4.392	-2.946	-3.347	-0.730	50.318	522.108	0.000307	0.000206	0.000234
0.0088	281.843	-4.083	-2.491	-3.112	-0.730	50.316	536.556	0.000286	0.000174	0.000218
0.0096	294.963	-3.310	-1.488	-2.000	-0.734	50.313	561.533	0.000232	0.000104	0.000140
0.0104	317.610	-1.682	0.507	0.014	-0.732	50.311	604.649	0.000118	-0.000036	-0.000001
0.0112	353.949	1.293	3.796	3.391	-0.734	50.309	673.828	-0.000091	-0.000266	-0.000237
0.0120	406.323	6.036	8.873	8.699	-0.739	50.308	773.535	-0.000423	-0.000621	-0.000609
0.0128	474.011	12.435	15.465	15.272	-0.742	50.307	902.395	-0.000870	-0.001083	-0.001069
0.0136	552.790	19.999	23.293	23.513	-0.744	50.308	1052.370	-0.001400	-0.001631	-0.001646
0.0144	637.475	28.194	31.825	32.225	-0.748	50.308	1213.589	-0.001974	-0.002228	-0.002256
0.0152	723.017	36.613	40.191	40.965	-0.743	50.310	1376.438	-0.002563	-0.002813	-0.002868
0.0160	805.237	44.933	47.980	49.428	-0.738	50.312	1532.965	-0.003145	-0.003359	-0.003460
0.0168	880.875	52.863	55.288	57.321	-0.735	50.313	1676.960	-0.003700	-0.003870	-0.004012
0.0176	947.030	60.048	61.617	64.075	-0.732	50.315	1802.902	-0.004203	-0.004313	-0.004485
0.0184	1002.485	66.280	66.941	70.287	-0.736	50.318	1908.474	-0.004640	-0.004686	-0.004920
0.0192	1047.555	71.388	71.427	75.066	-0.735	50.321	1994.276	-0.004997	-0.005000	-0.005255
0.0200	1083.173	75.499	74.990	79.193	-0.737	50.323	2062.082	-0.005285	-0.005249	-0.005544
0.0208	1111.636	78.951	77.729	82.294	-0.731	50.326	2116.270	-0.005527	-0.005441	-0.005761
0.0216	1135.366	81.869	80.178	84.504	-0.726	50.327	2161.446	-0.005731	-0.005612	-0.005915
0.0224	1155.820	84.563	82.462	87.451	-0.729	50.327	2200.384	-0.005919	-0.005772	-0.006122
0.0232	1174.079	86.849	84.319	89.243	-0.728	50.327	2235.146	-0.006079	-0.005902	-0.006247
0.0240	1189.874	88.926	86.068	91.786	-0.732	50.326	2265.215	-0.006225	-0.006025	-0.006425
0.0248	1202.062	90.610	87.391	93.412	-0.734	50.325	2288.418	-0.006343	-0.006117	-0.006539
0.0256	1209.682	91.663	88.093	94.412	-0.727	50.324	2302.923	-0.006416	-0.006167	-0.006609
0.0264	1212.327	92.492	88.508	94.816	-0.726	50.323	2307.959	-0.006474	-0.006196	-0.006637
0.0272	1209.832	92.646	88.727	94.759	-0.723	50.320	2303.209	-0.006485	-0.006211	-0.006633
0.0280	1202.663	92.196	88.465	94.649	-0.720	50.318	2289.562	-0.006454	-0.006193	-0.006625
0.0288	1190.355	91.256	87.902	93.439	-0.721	50.316	2266.130	-0.006388	-0.006153	-0.006541
0.0296	1169.856	89.488	86.663	92.535	-0.718	50.313	2227.106	-0.006264	-0.006066	-0.006477
0.0304	1136.508	86.359	84.240	89.117	-0.716	50.310	2163.620	-0.006045	-0.005897	-0.006238
0.0312	1086.794	81.405	80.304	84.461	-0.710	50.309	2068.977	-0.005698	-0.005621	-0.005912
0.0320	1020.639	74.991	75.157	78.348	-0.711	50.307	1943.035	-0.005249	-0.005261	-0.005484
0.0328	941.830	67.105	68.580	70.719	-0.715	50.306	1793.003	-0.004697	-0.004801	-0.004950
0.0336	857.521	58.614	61.095	62.784	-0.716	50.307	1632.500	-0.004103	-0.004277	-0.004395
0.0344	774.549	50.364	53.623	54.891	-0.722	50.308	1474.543	-0.003525	-0.003754	-0.003842
0.0352	697.859	42.353	46.000	46.997	-0.722	50.310	1328.545	-0.002965	-0.003220	-0.003290
0.0360	630.397	35.294	39.299	39.730	-0.719	50.312	1200.113	-0.002471	-0.002751	-0.002781
0.0368	573.033	29.148	33.424	33.435	-0.719	50.314	1090.908	-0.002040	-0.002340	-0.002340
0.0376	525.183	24.011	28.333	28.239	-0.722	50.316	999.813	-0.001681	-0.001983	-0.001977
0.0384	485.027	19.577	23.958	23.570	-0.718	50.318	923.367	-0.001370	-0.001677	-0.001650
0.0392	450.582	15.759	20.214	19.706	-0.720	50.321	857.792	-0.001103	-0.001415	-0.001379
0.0400	419.819	12.518	16.678	16.247	-0.723	50.323	799.227	-0.000876	-0.001167	-0.001137
0.0408	391.235	9.474	13.265	12.577	-0.716	50.326	744.810	-0.000663	-0.000929	-0.000880
0.0416	363.913	6.710	10.154	9.381	-0.715	50.327	692.797	-0.000470	-0.000711	-0.000657
0.0424	337.658	4.254	7.140	6.269	-0.717	50.328	642.815	-0.000298	-0.000500	-0.000439
0.0432	313.222	1.842	4.223	3.197	-0.715	50.327	596.294	-0.000129	-0.000296	-0.000224
0.0440	291.716	-0.319	1.719	0.791	-0.719	50.326	555.353	0.000022	-0.000120	-0.000055
0.0448	274.238	-2.102	-0.537	-1.446	-0.717	50.325	522.079	0.000147	0.000038	0.000101
0.0456	261.885	-3.618	-2.547	-3.239	-0.713	50.324	498.562	0.000253	0.000178	0.000227
0.0464	254.882	-4.630	-3.606	-4.281	-0.709	50.323	485.229	0.000324	0.000252	0.000300
0.0472	252.838	-5.262	-4.281	-4.919	-0.712	50.321	481.339	0.000368	0.000300	0.000344
0.0480	255.258	-5.444	-4.474	-4.989	-0.720	50.318	485.945	0.000381	0.000313	0.000349
0.0488	261.780	-5.318	-4.185	-4.864	-0.724	50.316	498.362	0.000372	0.000293	0.000340
0.0496	273.652	-4.673	-3.402	-3.890	-0.734	50.313	520.964	0.000327	0.000238	0.000272
0.0504	294.361	-3.128	-1.709	-2.389	-0.734	50.311	560.389	0.000219	0.000120	0.000167
0.0512	328.205	-0.502	1.305	0.946	-0.731	50.309	624.819	0.000035	-0.000091	-0.000066
0.0520	377.814	3.904	6.026	6.394	-0.737	50.308	719.261	-0.000273	-0.000422	-0.000448
0.0528	442.857	9.923	12.425	12.606	-0.740	50.307	843.086	-0.000695	-0.000870	-0.000882
0.0536	519.833	17.121	20.006	20.582	-0.743	50.308	989.628	-0.001198	-0.001400	-0.001441
0.0544	603.947	25.190	28.536	29.212	-0.748	50.309	1149.759	-0.001763	-0.001998	-0.002045
0.0552	690.210	33.414	37.026	37.425	-0.743	50.310	1313.982	-0.002339	-0.002592	-0.002620
0.0560	774.895	41.652	45.227	46.624	-0.739	50.312	1475.201	-0.002916	-0.003166	-0.003264
0.0568	854.575	49.861	52.947	54.766	-0.737	50.314	1626.892	-0.003490	-0.003706	-0.003834
0.0576	925.990	57.508	59.759	62.257	-0.735	50.316	1762.848	-0.004026	-0.004183	-0.004358
0.0584	987.472	64.301	65.813	68.705	-0.735	50.319	1879.892	-0.004501	-0.004607	-0.004809
0.0592	1038.162	70.124	70.725	74.471	-0.731	50.321	1976.395	-0.004909	-0.004951	-0.005213
0.0600	1078.544	74.770	74.730	78.779	-0.732	50.323	2053.270	-0.005234	-0.005231	-0.005515
0.0608	1110.374	78.475	77.880	81.919	-0.726	50.326	2113.867	-0.005493	-0.005452	-0.005734
0.0616	1135.577	81.646	80.331	85.253	-0.724	50.327	2161.846	-0.005715	-0.005623	-0.005968
0.0624	1156.166	84.425	82.629	87.075	-0.731	50.328	2201.042	-0.005910	-0.005784	-0.006095
0.0632	1173.553	86.739	84.405	89.520	-0.726	50.327	2234.144	-0.006072	-0.005908	-0.006266
0.0640	1188.341	88.928	86.153	91.631	-0.727	50.326	2262.297	-0.006225	-0.006031	-0.006414
0.0648	1200.364	90.711	87.514	93.286	-0.727	50.325	2285.185	-0.006350	-0.006126	-0.006530
0.0656	1208.735	91.847	88.477	94.341	-0.719	50.324	2301.121	-0.006429	-0.006193	-0.006604
0.0664	1213.018	92.760	89.136	95.202	-0.723	50.323	2309.275	-0.006493	-0.006240	-0.006664
0.0672	1212.838	93.139	89.385	95.537	-0.727	50.321	2308.931	-0.006520	-0.006257	-0.006688
0.0680	1208.269	93.068	89.480	95.175	-0.722	50.318	2300.234	-0.006515	-0.006264	-0.006662
0.0688	1199.282	92.674	89.054	95.161	-0.724	50.315	2283.125	-0.006487	-0.006234	-0.006661
0.0696	1184.284	91.537	88.339	93.606	-0.720	50.313	2254.572	-0.006408	-0.006184	-0.006552
0.0704	1158.871	89.361	86.605	91.812	-0.723	50.311	2206.192	-0.006255	-0.006062	-0.006427
0.0712	1118.354	85.320	83.537	87.672	-0.726	50.309	2129.059	-0.005972	-0.005848	-0.006137
0.0720	1060.465	79.693	79.079	82.473	-0.729	50.308	2018.852	-0.005579	-0.005536	-0.005773
0.0728	986.164	72.425	73.039	75.608	-0.738	50.307	1877.403	-0.005070	-0.005113	-0.005293
0.0736	901.043	63.768	65.787	67.285	-0.730	50.308	1715.355	-0.004464	-0.004605	-0.004710
0.0744	812.842	54.927	57.834	58.865	-0.729	50.309	1547.441	-0.003845	-0.004048	-0.004121
0.0752	727.826	46.156	49.689	50.055	-0.728	50.310	1385.593	-0.003231	-0.003478	-0.003504
0.0760	650.745	37.989	42.024	42.052	-0.720	50.313	1238.852	-0.002659	-0.002942	-0.002944
0.0768	584.049	31.126	35.102	34.964	-0.723	50.314	1111.879	-0.002179	-0.002457	-0.002447
0.0776	528.264	25.302	29.212	29.072	-0.724	50.317	1005.678	-0.001771	-0.002045	-0.002035
0.0784	482.818	20.364	24.408	24.028	-0.720	50.319	919.161	-0.001425	-0.001709	-0.001682
0.0792	445.848	16.308	20.239	20.108	-0.720	50.321	848.780	-0.001142	-0.001417	-0.001408
0.0800	415.415	12.743	16.895	16.287	-0.725	50.324	790.844	-0.000892	-0.001183	-0.001140
0.0808	389.191	9.768	13.662	13.133	-0.718	50.326	740.919	-0.000684	-0.000956	-0.000919
0.0816	365.326	7.115	10.691	10.046	-0.719	50.328	695.486	-0.000498	-0.000748	-0.000703
0.0824	342.888	4.899	8.063	7.253	-0.723	50.328	652.771	-0.000343	-0.000564	-0.000508
0.0832	321.578	2.738	5.339	4.848	-0.721	50.328	612.202	-0.000192	-0.000374	-0.000339
0.0840	302.311	0.676	3.054	2.445	-0.728	50.327	575.523	-0.000047	-0.000214	-0.000171
0.0848	286.246	-1.007	1.004	0.513	-0.724	50.326	544.939	0.000071	-0.000070	-0.000036
0.0856	274.449	-2.579	-0.800	-1.127	-0.721	50.325	522.480	0.000181	0.000056	0.000079
0.0864	267.701	-3.617	-1.942	-2.281	-0.720	50.323	509.634	0.000253	0.000136	0.000160
0.0872	265.777	-4.207	-2.576	-2.990	-0.722	50.320	505.972	0.000295	0.000180	0.000209
0.0880	268.332	-4.348	-2.726	-2.948	-0.728	50.318	510.836	0.000304	0.000191	0.000206
0.0888	275.350	-4.052	-2.342	-2.906	-0.732	50.316	524.197	0.000284	0.000164	0.000203
0.0896	288.455	-3.210	-1.378	-1.890	-0.736	50.313	549.145	0.000225	0.000096	0.000132
0.0904	311.885	-1.428	0.673	0.097	-0.736	50.311	593.748	0.000100	-0.000047	-0.000007
0.0912	349.967	1.659	3.948	3.321	-0.736	50.310	666.246	-0.000116	-0.000276	-0.000232
0.0920	404.565	6.569	9.342	9.047	-0.740	50.308	770.187	-0.000460	-0.000654	-0.000633
0.0928	474.387	13.135	16.290	16.105	-0.741	50.308	903.111	-0.000919	-0.001140	-0.001127
0.0936	554.413	20.825	24.230	24.541	-0.740	50.308	1055.460	-0.001458	-0.001696	-0.001718
0.0944	638.722	29.104	32.802	33.213	-0.743	50.309	1215.963	-0.002037	-0.002296	-0.002325
0.0952	721.890	37.313	40.879	41.578	-0.735	50.311	1374.292	-0.002612	-0.002862	-0.002910
0.0960	799.947	45.145	48.461	49.416	-0.734	50.312	1522.894	-0.003160	-0.003392	-0.003459
0.0968	870.310	52.499	55.355	57.127	-0.736	50.314	1656.847	-0.003675	-0.003875	-0.003999
0.0976	930.905	59.095	61.327	63.464	-0.735	50.316	1772.203	-0.004137	-0.004293	-0.004442
0.0984	982.061	64.765	66.308	68.911	-0.736	50.319	1869.593	-0.004534	-0.004642	-0.004824
0.0992	1024.637	69.719	70.505	73.998	-0.735	50.321	1950.645	-0.004880	-0.004935	-0.005180
0.1000	1060.495	73.941	73.959	77.223	-0.735	50.324	2018.909	-0.005176	-0.005177	-0.005406
0.1008	1091.994	77.436	76.904	80.934	-0.724	50.327	2078.876	-0.005421	-0.005383	-0.005665
0.1016	1121.074	80.832	79.807	84.005	-0.723	50.328	2134.237	-0.005658	-0.005587	-0.005880
0.1024	1148.817	84.255	82.518	87.270	-0.730	50.328	2187.052	-0.005898	-0.005776	-0.006109
0.1032	1174.665	87.342	85.104	90.494	-0.730	50.328	2236.261	-0.006114	-0.005957	-0.006335
0.1040	1197.449	90.386	87.429	93.038	-0.735	50.327	2279.634	-0.006327	-0.006120	-0.006513
0.1048	1215.017	92.701	89.135	95.803	-0.735	50.326	2313.080	-0.006489	-0.006239	-0.006706
0.1056	1225.852	94.174	90.195	96.582	-0.724	50.325	2333.708	-0.006592	-0.006314	-0.006761
0.1064	1229.700	95.128	90.786	97.581	-0.725	50.323	2341.032	-0.006659	-0.006355	-0.006831
0.1072	1227.115	95.282	90.800	97.552	-0.728	50.321	2336.111	-0.006670	-0.006356	-0.006829
0.1080	1219.029	94.876	90.484	96.830	-0.727	50.319	2320.719	-0.006641	-0.006334	-0.006778
0.1088	1205.263	93.825	89.783	96.163	-0.730	50.316	2294.512	-0.006568	-0.006285	-0.006731
0.1096	1182.931	91.847	88.490	93.926	-0.727	50.314	2251.997	-0.006429	-0.006194	-0.006575
0.1104	1147.404	88.395	86.041	91.341	-0.724	50.311	2184.362	-0.006188	-0.006023	-0.006394
0.1112	1095.917	83.343	82.065	86.171	-0.722	50.310	2086.344	-0.005834	-0.005745	-0.006032
0.1120	1029.206	76.790	76.725	80.252	-0.723	50.308	1959.343	-0.005375	-0.005371	-0.005618
0.1128	951.614	69.043	70.135	73.081	-0.725	50.308	1811.628	-0.004833	-0.004909	-0.005116
0.1136	869.694	60.779	62.856	64.856	-0.728	50.308	1655.674	-0.004255	-0.004400	-0.004540
0.1144	789.277	52.682	55.591	57.392	-0.726	50.309	1502.581	-0.003688	-0.003891	-0.004017
0.1152	714.030	44.739	48.449	49.262	-0.722	50.311	1359.329	-0.003132	-0.003391	-0.003448
0.1160	646.237	37.553	41.610	42.133	-0.718	50.313	1230.268	-0.002629	-0.002913	-0.002949
0.1168	587.115	31.378	35.638	35.531	-0.717	50.314	1117.716	-0.002196	-0.002495	-0.002487
0.1176	536.604	25.989	30.312	30.015	-0.727	50.317	1021.557	-0.001819	-0.002122	-0.002101
0.1184	493.758	21.514	25.702	25.125	-0.728	50.319	939.989	-0.001506	-0.001799	-0.001759
0.1192	456.819	17.613	21.875	21.166	-0.728	50.322	869.665	-0.001233	-0.001531	-0.001482
0.1200	424.027	14.092	18.339	17.497	-0.726	50.324	807.238	-0.000986	-0.001284	-0.001225
0.1208	393.729	10.738	14.789	13.884	-0.718	50.326	749.559	-0.000752	-0.001035	-0.000972
0.1216	365.025	7.819	11.500	10.409	-0.714	50.327	694.914	-0.000547	-0.000805	-0.000729
0.1224	337.929	5.195	8.406	7.128	-0.722	50.327	643.330	-0.000364	-0.000588	-0.000499
0.1232	312.846	2.626	5.173	4.071	-0.719	50.327	595.579	-0.000184	-0.000362	-0.000285
0.1240	291.296	0.480	2.572	1.319	-0.723	50.326	554.552	-0.000034	-0.000180	-0.000092
0.1248	274.539	-1.513	0.301	-0.598	-0.723	50.325	522.652	0.000106	-0.000021	0.000042
0.1256	263.418	-3.197	-1.557	-2.291	-0.717	50.324	501.480	0.000224	0.000109	0.000160
0.1264	258.233	-3.998	-2.440	-3.208	-0.719	50.323	491.610	0.000280	0.000171	0.000225
0.1272	258.143	-4.364	-2.811	-3.473	-0.716	50.321	491.438	0.000305	0.000197	0.000243
0.1280	262.246	-4.154	-2.838	-3.764	-0.719	50.319	499.249	0.000291	0.000199	0.000264
0.1288	270.481	-3.605	-2.273	-3.265	-0.720	50.316	514.927	0.000252	0.000159	0.000229
0.1296	284.653	-2.804	-1.158	-2.292	-0.724	50.313	541.906	0.000196	0.000081	0.000160
0.1304	308.653	-0.966	0.770	-0.277	-0.727	50.311	587.597	0.000068	-0.000054	0.000019
0.1312	346.345	1.911	4.238	3.363	-0.726	50.310	659.351	-0.000134	-0.000297	-0.000235
0.1320	399.500	6.569	9.261	8.810	-0.730	50.308	760.546	-0.000460	-0.000648	-0.000617
0.1328	466.858	12.954	15.934	15.605	-0.732	50.308	888.777	-0.000907	-0.001115	-0.001092
0.1336	544.329	20.195	23.638	23.568	-0.730	50.308	1036.263	-0.001414	-0.001655	-0.001650
0.1344	627.151	28.250	31.963	32.531	-0.733	50.309	1193.933	-0.001978	-0.002237	-0.002277
0.1352	710.468	36.459	40.025	40.535	-0.728	50.311	1352.549	-0.002552	-0.002802	-0.002837
0.1360	790.584	44.514	47.663	49.332	-0.725	50.313	1505.070	-0.003116	-0.003336	-0.003453
0.1368	864.464	52.387	54.778	56.615	-0.728	50.315	1645.718	-0.003667	-0.003834	-0.003963
0.1376	929.748	59.418	61.025	63.425	-0.728	50.317	1770.000	-0.004159	-0.004272	-0.004440
0.1384	986.014	65.607	66.420	69.442	-0.729	50.319	1877.117	-0.004592	-0.004649	-0.004861
0.1392	1033.549	70.967	71.029	74.445	-0.728	50.321	1967.611	-0.004968	-0.004972	-0.005211
0.1400	1073.209	75.387	74.868	79.087	-0.725	50.324	2043.114	-0.005277	-0.005241	-0.005536
0.1408	1106.572	79.273	78.088	82.296	-0.716	50.326	2106.628	-0.005549	-0.005466	-0.005761
0.1416	1134.705	82.641	80.949	85.935	-0.715	50.328	2160.187	-0.005785	-0.005666	-0.006015
0.1424	1158.465	85.629	83.647	88.436	-0.720	50.328	2205.420	-0.005994	-0.005855	-0.006191
0.1432	1178.302	88.154	85.753	91.020	-0.725	50.328	2243.185	-0.006171	-0.006003	-0.006371
0.1440	1194.052	90.316	87.529	93.034	-0.730	50.326	2273.169	-0.006322	-0.006127	-0.006512
0.1448	1205.369	92.057	88.781	94.356	-0.729	50.325	2294.712	-0.006444	-0.006215	-0.006605
0.1456	1211.861	93.012	89.372	95.495	-0.719	50.324	2307.072	-0.006511	-0.006256	-0.006685
0.1464	1213.694	93.658	89.825	95.427	-0.714	50.323	2310.562	-0.006556	-0.006288	-0.006680
0.1472	1211.094	93.757	89.894	96.010	-0.713	50.321	2305.613	-0.006563	-0.006293	-0.006721
0.1480	1204.602	93.321	89.661	95.621	-0.712	50.319	2293.253	-0.006532	-0.006276	-0.006693
0.1488	1193.902	92.702	89.193	94.857	-0.714	50.316	2272.882	-0.006489	-0.006244	-0.006640
0.1496	1176.499	91.398	88.079	94.092	-0.711	50.314	2239.752	-0.006398	-0.006166	-0.006586
0.1504	1147.524	88.731	86.124	91.133	-0.712	50.311	2184.591	-0.006211	-0.006029	-0.006379
0.1512	1102.544	84.367	82.835	87.325	-0.707	50.310	2098.961	-0.005906	-0.005798	-0.006113
0.1520	1040.101	78.208	78.019	81.600	-0.712	50.308	1980.085	-0.005475	-0.005461	-0.005712
0.1528	962.810	70.559	71.717	74.179	-0.718	50.308	1832.943	-0.004939	-0.005020	-0.005193
0.1536	877.794	62.111	64.273	66.105	-0.716	50.308	1671.095	-0.004348	-0.004499	-0.004627
0.1544	792.899	53.579	56.498	57.226	-0.719	50.309	1509.476	-0.003751	-0.003955	-0.004006
0.1552	714.105	45.398	48.806	49.374	-0.715	50.311	1359.472	-0.003178	-0.003416	-0.003456
0.1560	645.094	38.102	41.884	41.829	-0.713	50.312	1228.094	-0.002667	-0.002932	-0.002928
0.1568	586.950	31.760	36.010	35.881	-0.712	50.314	1117.401	-0.002223	-0.002521	-0.002512
0.1576	539.204	26.582	30.960	30.725	-0.712	50.317	1026.506	-0.001861	-0.002167	-0.002151
0.1584	500.206	22.413	26.819	26.264	-0.710	50.319	952.263	-0.001569	-0.001877	-0.001839
0.1592	467.804	18.708	23.254	22.708	-0.708	50.321	890.579	-0.001310	-0.001628	-0.001590
0.1600	439.566	15.733	20.034	19.234	-0.711	50.324	836.821	-0.001101	-0.001402	-0.001346
0.1608	413.161	12.856	16.854	16.038	-0.711	50.326	786.552	-0.000900	-0.001180	-0.001123
0.1616	387.297	9.980	13.759	12.884	-0.716	50.327	737.314	-0.000699	-0.000963	-0.000902
0.1624	361.418	7.453	10.733	10.048	-0.720	50.327	688.047	-0.000522	-0.000751	-0.000703
0.1632	336.185	4.886	7.651	6.935	-0.720	50.327	640.011	-0.000342	-0.000536	-0.000485
0.1640	313.102	2.514	4.968	4.463	-0.722	50.326	596.066	-0.000176	-0.000348	-0.000312
0.1648	293.490	0.340	2.463	1.878	-0.718	50.325	558.729	-0.000024	-0.000172	-0.000131
0.1656	278.702	-1.540	0.411	-0.221	-0.712	50.325	530.577	0.000108	-0.000029	0.000015
0.1664	269.399	-2.833	-1.034	-1.417	-0.712	50.323	512.867	0.000198	0.000072	0.000099
0.1672	265.462	-3.661	-1.915	-2.376	-0.711	50.321	505.371	0.000256	0.000134	0.000166
0.1680	266.318	-3.759	-2.149	-2.445	-0.716	50.319	507.002	0.000263	0.000150	0.000171
0.1688	271.518	-3.675	-1.861	-2.444	-0.720	50.316	516.901	0.000257	0.000130	0.000171
0.1696	281.572	-3.070	-1.200	-1.792	-0.723	50.314	536.041	0.000215	0.000084	0.000125
0.1704	299.591	-1.906	0.397	-0.569	-0.726	50.311	570.345	0.000133	-0.000028	0.000040
0.1712	330.204	0.507	3.067	2.391	-0.719	50.309	628.624	-0.000036	-0.000215	-0.000167
0.1720	376.447	4.661	7.388	6.894	-0.726	50.308	716.658	-0.000326	-0.000517	-0.000483
0.1728	438.469	10.272	13.540	13.301	-0.725	50.308	834.732	-0.000719	-0.000948	-0.000931
0.1736	513.280	17.500	20.956	21.013	-0.724	50.308	977.154	-0.001225	-0.001467	-0.001471
0.1744	596.057	25.400	29.198	29.392	-0.730	50.309	1134.739	-0.001778	-0.002044	-0.002057
0.1752	681.854	33.651	37.702	38.034	-0.725	50.311	1298.075	-0.002356	-0.002639	-0.002662
0.1760	766.734	42.169	45.820	46.593	-0.726	50.313	1459.665	-0.002952	-0.003207	-0.003262
0.1768	846.761	50.618	53.580	54.973	-0.729	50.314	1612.015	-0.003543	-0.003751	-0.003848
0.1776	918.551	58.406	60.515	62.505	-0.728	50.317	1748.686	-0.004088	-0.004236	-0.004375
0.1784	980.258	65.309	66.515	69.120	-0.727	50.319	1866.159	-0.004572	-0.004656	-0.004838
0.1792	1031.520	71.146	71.510	74.763	-0.722	50.321	1963.749	-0.004980	-0.005006	-0.005233
0.1800	1073.164	75.875	75.638	79.433	-0.723	50.324	2043.028	-0.005311	-0.005295	-0.005560
0.1808	1106.647	79.635	78.818	82.532	-0.715	50.326	2106.771	-0.005574	-0.005517	-0.005777
0.1816	1133.743	83.018	81.487	86.006	-0.715	50.328	2158.356	-0.005811	-0.005704	-0.006020
0.1824	1155.985	85.895	83.935	88.521	-0.724	50.328	2200.699	-0.006013	-0.005875	-0.006196
0.1832	1174.545	88.224	85.807	90.924	-0.720	50.327	2236.032	-0.006176	-0.006006	-0.006365
0.1840	1190.220	90.345	87.500	93.383	-0.730	50.326	2265.873	-0.006324	-0.006125	-0.006537
0.1848	1202.859	92.044	88.752	94.579	-0.731	50.325	2289.934	-0.006443	-0.006213	-0.006621
0.1856	1212.011	93.349	89.523	95.830	-0.722	50.324	2307.358	-0.006534	-0.006267	-0.006708
0.1864	1217.241	94.400	90.074	96.246	-0.721	50.323	2317.314	-0.006608	-0.006305	-0.006737
0.1872	1218.188	94.975	90.459	96.830	-0.718	50.321	2319.117	-0.006648	-0.006332	-0.006778
0.1880	1214.791	95.002	90.596	96.955	-0.715	50.319	2312.651	-0.006650	-0.006342	-0.006787
0.1888	1206.856	94.498	90.280	96.428	-0.717	50.316	2297.544	-0.006615	-0.006320	-0.006750
0.1896	1192.760	93.291	89.633	95.789	-0.718	50.313	2270.708	-0.006530	-0.006274	-0.006705
0.1904	1167.362	91.173	87.844	93.232	-0.716	50.312	2222.357	-0.006382	-0.006149	-0.006526
0.1912	1124.681	87.019	84.762	89.773	-0.712	50.310	2141.104	-0.006091	-0.005933	-0.006284
0.1920	1061.952	80.859	79.974	83.881	-0.711	50.308	2021.685	-0.005660	-0.005598	-0.005872
0.1928	980.483	72.735	73.301	76.460	-0.714	50.308	1866.589	-0.005091	-0.005131	-0.005352
0.1936	887.412	63.275	65.293	67.608	-0.712	50.308	1689.405	-0.004429	-0.004570	-0.004733
0.1944	792.418	53.677	56.541	58.199	-0.719	50.309	1508.560	-0.003757	-0.003958	-0.004074
0.1952	703.224	44.528	47.886	49.111	-0.717	50.311	1338.758	-0.003117	-0.003352	-0.003438
0.1960	624.761	36.431	39.958	40.648	-0.710	50.313	1189.384	-0.002550	-0.002797	-0.002845
0.1968	559.117	29.402	33.092	33.450	-0.707	50.315	1064.415	-0.002058	-0.002316	-0.002342
0.1976	506.578	23.705	27.644	27.518	-0.707	50.317	964.394	-0.001659	-0.001935	-0.001926
0.1984	465.700	19.229	23.350	23.001	-0.709	50.319	886.574	-0.001346	-0.001634	-0.001610
0.1992	434.111	15.593	19.813	19.096	-0.714	50.321	826.435	-0.001092	-0.001387	-0.001337
0.2000	409.254	12.801	16.992	16.413	-0.722	50.324	779.114	-0.000896	-0.001189	-0.001149
0.2008	388.319	10.442	14.335	13.772	-0.717	50.326	739.260	-0.000731	-0.001003	-0.000964
0.2016	369.083	8.237	11.983	11.173	-0.714	50.328	702.639	-0.000577	-0.000839	-0.000782
0.2024	350.508	6.373	10.003	9.257	-0.719	50.328	667.276	-0.000446	-0.000700	-0.000648
0.2032	332.158	4.394	7.856	6.948	-0.713	50.327	632.343	-0.000308	-0.000550	-0.000486
0.2040	314.800	2.767	5.820	4.739	-0.719	50.326	599.298	-0.000194	-0.000407	-0.000332
0.2048	299.697	1.085	3.810	3.323	-0.722	50.325	570.545	-0.000076	-0.000267	-0.000233
0.2056	288.019	-0.501	2.090	1.362	-0.713	50.324	548.315	0.000035	-0.000146	-0.000095
0.2064	280.671	-1.524	0.838	0.334	-0.715	50.322	534.325	0.000107	-0.000059	-0.000023
0.2072	277.650	-2.239	0.178	-0.404	-0.710	50.321	528.574	0.000157	-0.000012	0.000028
0.2080	278.642	-2.296	-0.057	-0.737	-0.711	50.319	530.462	0.000161	0.000004	0.000052
0.2088	283.270	-1.848	-0.016	-0.806	-0.715	50.316	539.274	0.000129	0.000001	0.000056
0.2096	292.242	-1.259	0.701	-0.249	-0.720	50.313	556.355	0.000088	-0.000049	0.000017
0.2104	308.578	-0.264	1.870	0.834	-0.721	50.311	587.454	0.000018	-0.000131	-0.000058
0.2112	337.072	1.770	4.320	3.433	-0.717	50.309	641.699	-0.000124	-0.000302	-0.000240
0.2120	381.586	5.447	8.503	8.074	-0.720	50.307	726.442	-0.000381	-0.000595	-0.000565
0.2128	442.887	11.018	14.405	14.342	-0.724	50.307	843.143	-0.000771	-0.001008	-0.001004
0.2136	518.570	18.175	21.753	22.013	-0.728	50.308	987.225	-0.001272	-0.001523	-0.001541
0.2144	603.300	26.496	30.243	30.614	-0.735	50.309	1148.529	-0.001855	-0.002117	-0.002143
0.2152	691.562	35.139	38.609	39.424	-0.734	50.311	1316.557	-0.002460	-0.002703	-0.002760
0.2160	779.223	43.882	47.113	48.373	-0.730	50.313	1483.440	-0.003072	-0.003298	-0.003386
0.2168	862.210	52.539	55.052	56.974	-0.734	50.315	1641.426	-0.003678	-0.003854	-0.003988
0.2176	936.661	60.454	62.055	64.827	-0.735	50.317	1783.161	-0.004232	-0.004344	-0.004538
0.2184	999.870	67.302	68.303	71.609	-0.733	50.319	1903.496	-0.004711	-0.004781	-0.005013
0.2192	1050.215	72.971	73.175	76.667	-0.732	50.321	1999.340	-0.005108	-0.005122	-0.005367
0.2200	1088.027	77.461	77.056	81.156	-0.729	50.324	2071.323	-0.005422	-0.005394	-0.005681
0.2208	1115.378	80.688	79.782	83.684	-0.723	50.326	2123.394	-0.005648	-0.005585	-0.005858
0.2216	1134.885	83.269	81.859	86.227	-0.725	50.328	2160.530	-0.005829	-0.005730	-0.006036
0.2224	1149.358	85.502	83.524	88.241	-0.731	50.328	2188.082	-0.005985	-0.005847	-0.006177
0.2232	1160.764	87.059	84.735	89.868	-0.730	50.328	2209.797	-0.006094	-0.005931	-0.006291
0.2240	1170.698	88.674	86.027	91.229	-0.735	50.327	2228.708	-0.006207	-0.006022	-0.006386
0.2248	1179.429	89.951	87.072	92.592	-0.730	50.325	2245.331	-0.006297	-0.006095	-0.006481
0.2256	1186.568	90.723	87.870	93.509	-0.723	50.324	2258.921	-0.006351	-0.006151	-0.006546
0.2264	1191.347	91.565	88.434	93.732	-0.724	50.323	2268.019	-0.006410	-0.006190	-0.006561
0.2272	1192.639	92.085	88.779	94.719	-0.725	50.321	2270.479	-0.006446	-0.006214	-0.006630
0.2280	1189.994	92.156	88.834	94.260	-0.729	50.318	2265.444	-0.006451	-0.006218	-0.006598
0.2288	1182.826	91.903	88.463	93.997	-0.732	50.316	2251.797	-0.006433	-0.006192	-0.006580
0.2296	1169.676	90.852	87.941	93.343	-0.736	50.313	2226.763	-0.006360	-0.006156	-0.006534
0.2304	1146.081	88.733	86.386	91.383	-0.734	50.311	2181.845	-0.006211	-0.006047	-0.006397
0.2312	1106.467	84.972	83.400	87.770	-0.729	50.310	2106.428	-0.005948	-0.005838	-0.006144
0.2320	1048.307	79.443	78.969	82.544	-0.731	50.308	1995.707	-0.005561	-0.005528	-0.005778
0.2328	972.729	72.089	72.694	75.499	-0.731	50.308	1851.826	-0.005046	-0.005089	-0.005285
0.2336	885.955	63.459	65.166	67.008	-0.731	50.308	1686.630	-0.004442	-0.004562	-0.004691
0.2344	796.701	54.547	57.185	58.338	-0.732	50.309	1516.714	-0.003818	-0.004003	-0.004084
0.2352	711.941	45.692	49.135	49.791	-0.731	50.311	1355.352	-0.003198	-0.003439	-0.003485
0.2360	636.513	37.875	41.705	42.079	-0.727	50.313	1211.758	-0.002651	-0.002919	-0.002946
0.2368	572.823	31.056	35.210	35.103	-0.726	50.315	1090.508	-0.002174	-0.002465	-0.002457
0.2376	521.396	25.528	29.652	29.725	-0.732	50.317	992.603	-0.001787	-0.002076	-0.002081
0.2384	480.894	21.178	25.248	24.765	-0.733	50.319	915.499	-0.001482	-0.001767	-0.001734
0.2392	448.598	17.417	21.642	20.901	-0.735	50.322	854.015	-0.001219	-0.001515	-0.001463
0.2400	421.908	14.457	18.602	17.803	-0.736	50.324	803.204	-0.001012	-0.001302	-0.001246
0.2408	398.012	11.763	15.630	14.718	-0.730	50.327	757.713	-0.000823	-0.001094	-0.001030
0.2416	375.079	9.349	12.892	12.078	-0.727	50.328	714.054	-0.000654	-0.000902	-0.000845
0.2424	352.431	7.245	10.237	9.382	-0.727	50.328	670.938	-0.000507	-0.000717	-0.000657
0.2432	329.844	4.914	7.526	6.740	-0.724	50.328	627.937	-0.000344	-0.000527	-0.000472
0.2440	308.774	2.752	5.131	4.198	-0.727	50.327	587.826	-0.000193	-0.000359	-0.000294
0.2448	290.770	0.647	2.847	2.113	-0.721	50.326	553.551	-0.000045	-0.000199	-0.000148
0.2456	277.379	-1.107	0.837	0.168	-0.715	50.325	528.059	0.000077	-0.000059	-0.000012
0.2464	269.535	-2.088	-0.428	-1.083	-0.713	50.323	513.124	0.000146	0.000030	0.000076
0.2472	266.980	-2.619	-1.090	-1.571	-0.708	50.321	508.261	0.000183	0.000076	0.000110
0.2480	269.024	-2.662	-1.323	-1.934	-0.714	50.319	512.152	0.000186	0.000093	0.000135
0.2488	275.305	-2.409	-0.966	-1.531	-0.719	50.316	524.111	0.000169	0.000068	0.000107
0.2496	286.832	-1.932	-0.058	-0.586	-0.725	50.314	546.055	0.000135	0.000004	0.000041
0.2504	307.196	-0.530	1.540	0.972	-0.728	50.311	584.822	0.000037	-0.000108	-0.000068
0.2512	340.814	2.136	4.485	3.988	-0.726	50.310	648.823	-0.000149	-0.000314	-0.000279
0.2520	390.137	6.527	9.287	9.281	-0.731	50.308	742.722	-0.000457	-0.000650	-0.000650
0.2528	454.775	12.505	15.521	15.369	-0.732	50.308	865.774	-0.000875	-0.001086	-0.001076
0.2536	530.833	19.591	23.281	23.289	-0.730	50.308	1010.571	-0.001371	-0.001630	-0.001630
0.2544	613.324	27.577	31.550	31.947	-0.731	50.309	1167.612	-0.001930	-0.002209	-0.002236
0.2552	697.529	35.799	39.709	40.120	-0.722	50.311	1327.915	-0.002506	-0.002780	-0.002808
0.2560	780.050	44.191	47.691	48.889	-0.721	50.313	1485.014	-0.003093	-0.003338	-0.003422
0.2568	858.107	52.428	55.121	57.060	-0.724	50.315	1633.615	-0.003670	-0.003858	-0.003994
0.2576	928.816	59.950	61.959	64.398	-0.728	50.317	1768.227	-0.004196	-0.004337	-0.004508
0.2584	990.688	66.812	68.056	70.817	-0.732	50.319	1886.015	-0.004677	-0.004764	-0.004957
0.2592	1042.776	72.846	73.188	76.431	-0.729	50.322	1985.178	-0.005099	-0.005123	-0.005350
0.2600	1085.292	77.870	77.386	80.822	-0.731	50.324	2066.116	-0.005451	-0.005417	-0.005658
0.2608	1119.707	81.954	80.826	84.699	-0.724	50.327	2131.634	-0.005737	-0.005658	-0.005929
0.2616	1147.524	85.279	83.482	87.603	-0.724	50.328	2184.591	-0.005970	-0.005844	-0.006132
0.2624	1170.397	88.169	85.864	90.590	-0.731	50.328	2228.136	-0.006172	-0.006010	-0.006341
0.2632	1189.318	90.568	87.722	92.743	-0.730	50.328	2264.156	-0.006340	-0.006141	-0.006492
0.2640	1204.752	92.785	89.345	94.772	-0.737	50.326	2293.539	-0.006495	-0.006254	-0.006634
0.2648	1216.414	94.469	90.569	96.427	-0.739	50.325	2315.741	-0.006613	-0.006340	-0.006750
0.2656	1223.763	95.562	91.215	97.260	-0.732	50.324	2329.731	-0.006689	-0.006385	-0.006808
0.2664	1226.559	96.179	91.819	97.997	-0.732	50.322	2335.052	-0.006733	-0.006427	-0.006860
0.2672	1224.740	96.306	91.860	97.664	-0.727	50.321	2331.591	-0.006741	-0.006430	-0.006836
0.2680	1218.368	96.138	91.709	97.955	-0.727	50.318	2319.460	-0.006730	-0.006420	-0.006857
0.2688	1207.022	95.382	91.324	96.747	-0.728	50.316	2297.859	-0.006677	-0.006393	-0.006772
0.2696	1187.906	93.741	90.017	95.384	-0.727	50.313	2261.467	-0.006562	-0.006301	-0.006677
0.2704	1156.060	90.683	87.719	93.034	-0.724	50.311	2200.842	-0.006348	-0.006140	-0.006512
0.2712	1108.030	85.757	83.935	88.102	-0.722	50.310	2109.404	-0.006003	-0.005875	-0.006167
0.2720	1043.452	79.273	78.706	82.822	-0.724	50.308	1986.465	-0.005549	-0.005509	-0.005798
0.2728	965.936	71.696	72.281	75.568	-0.731	50.308	1838.894	-0.005019	-0.005060	-0.005290
0.2736	882.513	63.347	65.030	67.259	-0.736	50.308	1680.079	-0.004434	-0.004552	-0.004708
0.2744	800.473	55.082	57.667	59.309	-0.735	50.309	1523.895	-0.003856	-0.004037	-0.004152
0.2752	724.459	47.042	50.360	51.069	-0.735	50.311	1379.185	-0.003293	-0.003525	-0.003575
0.2760	657.237	39.772	43.782	44.092	-0.727	50.313	1251.211	-0.002784	-0.003065	-0.003086
0.2768	599.618	33.584	37.960	38.117	-0.729	50.314	1141.520	-0.002351	-0.002657	-0.002668
0.2776	550.746	28.335	32.910	32.935	-0.732	50.317	1048.479	-0.001983	-0.002304	-0.002305
0.2784	509.193	24.012	28.535	28.236	-0.731	50.319	969.372	-0.001681	-0.001997	-0.001977
0.2792	473.154	20.153	24.572	24.277	-0.731	50.322	900.764	-0.001411	-0.001720	-0.001699
0.2800	440.678	16.631	20.981	20.344	-0.728	50.324	838.938	-0.001164	-0.001469	-0.001424
0.2808	410.095	13.319	17.486	16.855	-0.719	50.326	780.716	-0.000932	-0.001224	-0.001180
0.2816	380.504	10.134	14.046	13.396	-0.720	50.328	724.382	-0.000709	-0.000983	-0.000938
0.2824	351.770	7.371	10.841	10.144	-0.726	50.328	669.680	-0.000516	-0.000759	-0.000710
0.2832	324.523	4.802	7.553	6.726	-0.723	50.328	617.809	-0.000336	-0.000529	-0.000471
0.2840	300.343	2.417	4.690	3.697	-0.728	50.327	571.775	-0.000169	-0.000328	-0.000259
0.2848	280.610	0.312	2.200	1.446	-0.720	50.325	534.210	-0.000022	-0.000154	-0.000101
0.2856	266.364	-1.584	0.177	-1.028	-0.716	50.324	507.088	0.000111	-0.000012	0.000072
0.2864	258.278	-2.706	-1.144	-1.779	-0.716	50.323	491.695	0.000189	0.000080	0.000125
0.2872	255.468	-3.366	-1.873	-2.433	-0.721	50.321	486.345	0.000236	0.000131	0.000170
0.2880	257.256	-3.408	-2.011	-2.767	-0.729	50.319	489.750	0.000239	0.000141	0.000194
0.2888	263.223	-3.155	-1.832	-2.377	-0.732	50.316	501.108	0.000221	0.000128	0.000166
0.2896	274.148	-2.606	-1.020	-1.878	-0.739	50.313	521.908	0.000182	0.000071	0.000131
0.2904	293.971	-1.287	0.659	-0.155	-0.735	50.311	559.645	0.000090	-0.000046	0.000011
0.2912	327.153	1.212	3.480	2.807	-0.732	50.310	622.816	-0.000085	-0.000244	-0.000196
0.2920	376.176	5.645	8.186	7.880	-0.735	50.308	716.143	-0.000395	-0.000573	-0.000552
0.2928	440.618	11.650	14.585	14.494	-0.736	50.308	838.823	-0.000816	-0.001021	-0.001015
0.2936	516.707	18.764	22.002	21.915	-0.740	50.309	983.677	-0.001314	-0.001540	-0.001534
0.2944	599.213	26.692	30.285	30.781	-0.738	50.309	1140.747	-0.001868	-0.002120	-0.002155
0.2952	683.702	34.831	38.568	38.979	-0.735	50.311	1301.594	-0.002438	-0.002700	-0.002729
0.2960	766.584	43.096	46.494	47.652	-0.727	50.313	1459.379	-0.003017	-0.003255	-0.003336
0.2968	844.747	51.305	53.938	55.810	-0.728	50.314	1608.181	-0.003591	-0.003776	-0.003907
0.2976	915.471	58.897	60.735	63.341	-0.730	50.317	1742.821	-0.004123	-0.004251	-0.004434
0.2984	977.342	65.520	66.708	69.927	-0.730	50.319	1860.609	-0.004586	-0.004670	-0.004895
0.2992	1029.987	71.302	71.826	75.430	-0.730	50.322	1960.831	-0.004991	-0.005028	-0.005280
0.3000	1073.690	76.382	76.161	80.016	-0.727	50.324	2044.029	-0.005347	-0.005331	-0.005601
0.3008	1109.472	80.548	79.436	83.532	-0.721	50.327	2112.150	-0.005638	-0.005561	-0.005847
0.3016	1138.252	84.085	82.161	86.991	-0.723	50.328	2166.939	-0.005886	-0.005751	-0.006089
0.3024	1161.005	87.116	84.487	89.659	-0.727	50.328	2210.255	-0.006098	-0.005914	-0.006276
0.3032	1178.618	89.235	86.344	92.259	-0.726	50.328	2243.786	-0.006246	-0.006044	-0.006458
0.3040	1192.083	91.074	88.009	93.593	-0.730	50.327	2269.421	-0.006375	-0.006161	-0.006552
0.3048	1201.732	92.757	89.219	94.956	-0.724	50.326	2287.788	-0.006493	-0.006245	-0.006647
0.3056	1207.713	93.641	89.975	95.805	-0.722	50.325	2299.175	-0.006555	-0.006298	-0.006706
0.3064	1210.133	94.342	90.471	96.026	-0.723	50.323	2303.782	-0.006604	-0.006333	-0.006722
0.3072	1208.930	94.553	90.733	96.846	-0.724	50.321	2301.493	-0.006619	-0.006351	-0.006779
0.3080	1204.061	94.317	90.705	96.457	-0.726	50.318	2292.223	-0.006602	-0.006349	-0.006752
0.3088	1195.525	93.727	90.320	95.844	-0.725	50.316	2275.972	-0.006561	-0.006322	-0.006709
0.3096	1181.714	92.787	89.604	95.274	-0.726	50.313	2249.680	-0.006495	-0.006272	-0.006669
0.3104	1158.254	90.921	88.022	92.994	-0.722	50.311	2205.019	-0.006364	-0.006162	-0.006510
0.3112	1120.082	87.231	85.216	89.937	-0.720	50.310	2132.349	-0.006106	-0.005965	-0.006296
0.3120	1064.222	81.857	81.128	84.949	-0.722	50.308	2026.005	-0.005730	-0.005679	-0.005946
0.3128	991.454	74.504	75.308	78.252	-0.725	50.308	1887.474	-0.005215	-0.005272	-0.005478
0.3136	907.385	66.027	68.125	70.151	-0.728	50.308	1727.428	-0.004622	-0.004769	-0.004911
0.3144	819.875	57.060	60.295	61.382	-0.727	50.309	1560.831	-0.003994	-0.004221	-0.004297
0.3152	735.535	48.499	52.192	52.821	-0.721	50.311	1400.270	-0.003395	-0.003653	-0.003697
0.3160	658.936	40.626	44.568	44.510	-0.718	50.313	1254.444	-0.002844	-0.003120	-0.003116
0.3168	592.164	33.540	37.840	37.895	-0.714	50.315	1127.329	-0.002348	-0.002649	-0.002653
0.3176	536.033	27.744	32.020	31.642	-0.719	50.317	1020.470	-0.001942	-0.002241	-0.002215
0.3184	489.956	22.707	27.024	26.626	-0.720	50.319	932.751	-0.001589	-0.001892	-0.001864
0.3192	452.220	18.568	22.731	22.277	-0.712	50.322	860.910	-0.001300	-0.001591	-0.001559
0.3200	420.825	15.199	19.248	18.399	-0.716	50.324	801.144	-0.001064	-0.001347	-0.001288
0.3208	393.414	12.014	15.767	14.855	-0.708	50.326	748.959	-0.000841	-0.001104	-0.001040
0.3216	368.031	9.263	12.877	12.020	-0.711	50.327	700.636	-0.000648	-0.000901	-0.000841
0.3224	343.895	6.780	10.152	9.310	-0.723	50.327	654.688	-0.000475	-0.000711	-0.000652
0.3232	320.811	4.310	7.263	6.531	-0.722	50.327	610.743	-0.000302	-0.000508	-0.000457
0.3240	299.802	2.233	4.636	4.126	-0.726	50.326	570.745	-0.000156	-0.000324	-0.000289
0.3248	282.083	0.353	2.393	1.513	-0.721	50.325	537.014	-0.000025	-0.000167	-0.000106
0.3256	268.888	-1.232	0.411	-0.392	-0.712	50.324	511.894	0.000086	-0.000029	0.000027
0.3264	261.013	-2.396	-0.771	-1.712	-0.715	50.323	496.902	0.000168	0.000054	0.000120
0.3272	258.188	-3.041	-1.240	-1.905	-0.718	50.321	491.524	0.000213	0.000087	0.000133
0.3280	260.037	-3.224	-1.583	-2.168	-0.724	50.318	495.043	0.000226	0.000111	0.000152
0.3288	266.078	-3.098	-1.377	-1.737	-0.728	50.316	506.544	0.000217	0.000096	0.000122
0.3296	277.379	-2.354	-0.648	-1.222	-0.727	50.313	528.059	0.000165	0.000045	0.000086
0.3304	297.457	-0.965	0.934	0.307	-0.727	50.312	566.282	0.000068	-0.000065	-0.000021
0.3312	330.580	1.464	3.892	3.238	-0.726	50.310	629.339	-0.000102	-0.000272	-0.000227
0.3320	379.708	5.855	8.750	8.256	-0.734	50.309	722.866	-0.000410	-0.000612	-0.000578
0.3328	444.646	11.862	15.203	14.870	-0.738	50.309	846.491	-0.000830	-0.001064	-0.001041
0.3336	521.922	19.102	22.868	22.735	-0.740	50.309	993.605	-0.001337	-0.001601	-0.001591
0.3344	606.471	27.450	31.316	31.490	-0.744	50.310	1154.566	-0.001922	-0.002192	-0.002204
0.3352	693.110	35.899	39.807	40.216	-0.736	50.312	1319.504	-0.002513	-0.002786	-0.002815
0.3360	778.126	44.346	47.912	48.929	-0.734	50.313	1481.352	-0.003104	-0.003354	-0.003425
0.3368	858.032	52.822	55.563	57.322	-0.732	50.315	1633.472	-0.003698	-0.003889	-0.004013
0.3376	929.748	60.554	62.374	64.922	-0.731	50.317	1770.000	-0.004239	-0.004366	-0.004545
0.3384	991.409	67.444	68.235	71.204	-0.733	50.319	1887.388	-0.004721	-0.004776	-0.004984
0.3392	1041.905	73.267	73.215	76.999	-0.734	50.322	1983.519	-0.005129	-0.005125	-0.005390
0.3400	1081.670	77.842	77.137	80.947	-0.736	50.325	2059.221	-0.005449	-0.005400	-0.005666
0.3408	1112.268	81.476	80.109	84.546	-0.730	50.327	2117.472	-0.005703	-0.005608	-0.005918
0.3416	1135.727	84.395	82.559	86.923	-0.729	50.328	2162.132	-0.005908	-0.005779	-0.006085
0.3424	1153.881	86.991	84.444	89.340	-0.729	50.328	2196.693	-0.006089	-0.005911	-0.006254
0.3432	1168.068	88.997	86.164	91.078	-0.730	50.327	2223.701	-0.006230	-0.006032	-0.006375
0.3440	1179.159	90.710	87.540	92.510	-0.731	50.326	2244.816	-0.006350	-0.006128	-0.006476
0.3448	1187.395	92.015	88.586	94.232	-0.734	50.325	2260.494	-0.006441	-0.006201	-0.006596
0.3456	1192.730	92.787	89.247	94.553	-0.730	50.324	2270.651	-0.006495	-0.006247	-0.006619
0.3464	1195.014	93.461	89.617	95.510	-0.729	50.323	2275.000	-0.006542	-0.006273	-0.006686
0.3472	1194.157	93.756	89.811	95.329	-0.735	50.321	2273.369	-0.006563	-0.006287	-0.006673
0.3480	1189.979	93.672	89.756	94.954	-0.735	50.319	2265.415	-0.006557	-0.006283	-0.006647
0.3488	1182.315	93.139	89.315	95.010	-0.739	50.316	2250.824	-0.006520	-0.006252	-0.006651
0.3496	1169.631	92.128	88.601	93.745	-0.736	50.313	2226.677	-0.006449	-0.006202	-0.006562
0.3504	1147.524	90.107	87.046	92.411	-0.730	50.311	2184.591	-0.006307	-0.006093	-0.006469
0.3512	1110.344	86.654	84.280	88.936	-0.726	50.310	2113.810	-0.006066	-0.005900	-0.006226
0.3520	1054.619	81.336	80.070	83.988	-0.729	50.308	2007.723	-0.005693	-0.005605	-0.005879
0.3528	980.934	73.955	74.071	77.053	-0.736	50.308	1867.447	-0.005177	-0.005185	-0.005394
0.3536	894.641	65.213	66.763	68.896	-0.742	50.308	1703.167	-0.004565	-0.004673	-0.004823
0.3544	804.290	55.880	58.508	60.253	-0.744	50.310	1531.162	-0.003912	-0.004096	-0.004218
0.3552	717.381	46.647	50.182	51.110	-0.740	50.311	1365.709	-0.003265	-0.003513	-0.003578
0.3560	639.143	38.606	42.311	43.232	-0.734	50.313	1216.764	-0.002702	-0.002962	-0.003026
0.3568	572.853	31.533	35.501	35.936	-0.734	50.315	1090.565	-0.002207	-0.002485	-0.002515
0.3576	519.322	25.738	29.899	29.905	-0.739	50.317	988.655	-0.001802	-0.002093	-0.002093
0.3584	477.392	21.247	25.401	25.346	-0.736	50.319	908.833	-0.001487	-0.001778	-0.001774
0.3592	444.615	17.486	21.920	21.538	-0.737	50.322	846.434	-0.001224	-0.001534	-0.001508
0.3600	417.730	14.567	18.823	18.384	-0.740	50.325	795.250	-0.001020	-0.001318	-0.001287
0.3608	393.970	12.000	15.961	15.548	-0.735	50.327	750.017	-0.000840	-0.001117	-0.001088
0.3616	371.217	9.670	13.236	12.577	-0.740	50.328	706.701	-0.000677	-0.000926	-0.000880
0.3624	348.464	7.398	10.676	10.034	-0.743	50.328	663.385	-0.000518	-0.000747	-0.000702
0.3632	325.711	5.054	7.979	7.116	-0.739	50.328	620.070	-0.000354	-0.000558	-0.000498
0.3640	304.040	2.668	5.445	4.629	-0.738	50.326	578.814	-0.000187	-0.000381	-0.000324
0.3648	284.848	0.634	3.052	2.265	-0.732	50.325	542.278	-0.000044	-0.000214	-0.000159
0.3656	269.760	-1.191	0.892	-0.125	-0.730	50.324	513.554	0.000083	-0.000062	0.000009
0.3664	259.781	-2.313	-0.416	-1.488	-0.731	50.323	494.556	0.000162	0.000029	0.000104
0.3672	255.017	-2.832	-1.337	-2.266	-0.738	50.321	485.487	0.000198	0.000094	0.000159
0.3680	255.122	-3.057	-1.585	-2.767	-0.742	50.319	485.687	0.000214	0.000111	0.000194
0.3688	259.480	-2.903	-1.502	-2.406	-0.742	50.316	493.984	0.000203	0.000105	0.000168
0.3696	268.768	-2.468	-0.978	-1.863	-0.745	50.314	511.665	0.000173	0.000068	0.000130
0.3704	286.006	-1.387	0.302	-0.932	-0.740	50.311	544.481	0.000097	-0.000021	0.000065
0.3712	316.258	0.830	2.779	1.848	-0.742	50.310	602.074	-0.000058	-0.000195	-0.000129
0.3720	363.357	4.788	7.127	6.489	-0.749	50.308	691.738	-0.000335	-0.000499	-0.000454
0.3728	427.934	10.611	13.456	12.825	-0.748	50.308	814.676	-0.000743	-0.000942	-0.000898
0.3736	507.269	18.062	21.381	21.315	-0.752	50.309	965.710	-0.001264	-0.001497	-0.001492
0.3744	595.952	26.579	30.271	30.057	-0.752	50.309	1134.539	-0.001861	-0.002119	-0.002104
0.3752	688.331	35.715	39.228	39.564	-0.746	50.311	1310.406	-0.002500	-0.002746	-0.002769
0.3760	780.095	44.893	47.966	49.042	-0.742	50.313	1485.100	-0.003142	-0.003358	-0.003433
0.3768	867.124	53.833	56.195	57.936	-0.743	50.315	1650.782	-0.003768	-0.003934	-0.004056
0.3776	945.497	62.324	63.639	66.524	-0.742	50.317	1799.984	-0.004363	-0.004455	-0.004657
0.3784	1012.253	69.606	70.065	73.402	-0.740	50.319	1927.071	-0.004872	-0.004905	-0.005138
0.3792	1065.379	75.836	75.239	79.530	-0.742	50.322	2028.208	-0.005309	-0.005267	-0.005567
0.3800	1104.693	80.563	79.147	83.685	-0.736	50.324	2103.052	-0.005639	-0.005540	-0.005858
0.3808	1132.045	83.762	81.873	86.965	-0.730	50.327	2155.123	-0.005863	-0.005731	-0.006088
0.3816	1150.485	86.302	83.854	88.910	-0.728	50.328	2190.228	-0.006041	-0.005870	-0.006224
0.3824	1163.469	88.183	85.381	90.786	-0.731	50.328	2214.947	-0.006173	-0.005977	-0.006355
0.3832	1174.064	89.840	86.564	92.342	-0.728	50.328	2235.117	-0.006289	-0.006059	-0.006464
0.3840	1184.419	91.481	87.801	93.634	-0.735	50.327	2254.829	-0.006404	-0.006146	-0.006554
0.3848	1194.894	92.926	88.917	95.176	-0.727	50.325	2274.771	-0.006505	-0.006224	-0.006662
0.3856	1204.797	94.203	89.880	95.997	-0.724	50.324	2293.625	-0.006594	-0.006292	-0.006720
0.3864	1212.627	95.212	90.774	97.330	-0.730	50.323	2308.531	-0.006665	-0.006354	-0.006813
0.3872	1216.505	95.913	91.297	97.552	-0.728	50.321	2315.912	-0.006714	-0.006391	-0.006829
0.3880	1215.513	96.236	91.490	98.149	-0.732	50.319	2314.024	-0.006737	-0.006404	-0.006870
0.3888	1208.945	95.872	91.283	97.691	-0.729	50.316	2301.521	-0.006711	-0.006390	-0.006838
0.3896	1195.164	94.918	90.554	96.705	-0.722	50.314	2275.286	-0.006644	-0.006339	-0.006769
0.3904	1169.616	92.602	89.041	94.844	-0.718	50.311	2226.648	-0.006482	-0.006233	-0.006639
0.3912	1127.251	88.421	86.013	90.926	-0.718	50.310	2145.996	-0.006189	-0.006021	-0.006365
0.3920	1066.010	82.415	81.417	85.520	-0.721	50.308	2029.409	-0.005769	-0.005699	-0.005986
0.3928	987.607	74.670	75.075	78.169	-0.730	50.308	1880.150	-0.005227	-0.005255	-0.005472
0.3936	899.225	65.958	67.479	69.707	-0.733	50.309	1711.893	-0.004617	-0.004724	-0.004879
0.3944	809.776	56.836	59.456	60.619	-0.732	50.310	1541.605	-0.003979	-0.004162	-0.004243
0.3952	726.218	48.219	51.490	52.364	-0.731	50.312	1382.532	-0.003375	-0.003604	-0.003665
0.3960	652.969	40.445	44.265	44.290	-0.727	50.313	1243.086	-0.002831	-0.003099	-0.003100
0.3968	591.548	33.835	38.003	38.091	-0.725	50.315	1126.156	-0.002368	-0.002660	-0.002666
0.3976	541.474	28.460	32.679	32.449	-0.725	50.317	1030.827	-0.001992	-0.002288	-0.002271
0.3984	500.912	24.068	28.247	27.933	-0.727	50.320	953.608	-0.001685	-0.001977	-0.001955
0.3992	467.308	20.447	24.546	24.250	-0.725	50.322	889.635	-0.001431	-0.001718	-0.001697
