# Supplementary material for: Evaluation of a Cold-Mixed High-Performance Polyurethane Mixture
Source: Hindawi journal article supplement (doi:10.1155/2019/1507971), 2019-11-07
Supplement: f1 [file 1507971.f1.zip › 1507971.f1/dynamic modulus data/PUM/specimen1/temp50/zhs-1-50_Runtime.csv]

Time (sec)	Load (kN)	Confining Pressure (kPa)	Axial LVDT #1 (mm)	Axial LVDT #2 (mm)	Axial LVDT #3 (mm)	Temperature (�C)
0.0008	0.725040	-0.731	0.08391762	0.16455567	0.17331737	50.32
0.0016	0.724440	-0.735	0.08391666	0.16455567	0.17331642	50.33
0.0024	0.723124	-0.740	0.08390385	0.16454315	0.17330474	50.33
0.0032	0.719833	-0.737	0.08391666	0.16455567	0.17329890	50.33
0.0040	0.713367	-0.744	0.08392549	0.16455859	0.17331147	50.32
0.0048	0.701237	-0.735	0.08397055	0.16459811	0.17335904	50.32
0.0056	0.679522	-0.726	0.08404613	0.16467714	0.17344171	50.32
0.0064	0.646248	-0.728	0.08415318	0.16478604	0.17357397	50.32
0.0072	0.600958	-0.725	0.08429557	0.16495073	0.17374134	50.32
0.0080	0.546913	-0.726	0.08445680	0.16515398	0.17394567	50.31
0.0088	0.491037	-0.727	0.08464050	0.16537064	0.17417812	50.31
0.0096	0.439825	-0.727	0.08479673	0.16558158	0.17438537	50.31
0.0104	0.398598	-0.727	0.08493036	0.16576076	0.17456824	50.31
0.0112	0.369930	-0.726	0.08502263	0.16589653	0.17469174	50.31
0.0120	0.353537	-0.730	0.08506882	0.16596884	0.17475307	50.30
0.0128	0.347271	-0.731	0.08509427	0.16601509	0.17476082	50.31
0.0136	0.348215	-0.730	0.08509427	0.16602176	0.17477733	50.31
0.0144	0.353909	-0.735	0.08509624	0.16600245	0.17474043	50.31
0.0152	0.361862	-0.729	0.08508646	0.16598892	0.17475992	50.31
0.0160	0.371103	-0.730	0.08507079	0.16594845	0.17474049	50.31
0.0168	0.380917	-0.734	0.08504915	0.16590816	0.17471814	50.31
0.0176	0.391130	-0.734	0.08501863	0.16587162	0.17469090	50.32
0.0184	0.402231	-0.736	0.08497727	0.16583794	0.17465287	50.32
0.0192	0.414677	-0.736	0.08493990	0.16579461	0.17460716	50.32
0.0200	0.428953	-0.736	0.08491236	0.16575980	0.17456925	50.32
0.0208	0.444860	-0.731	0.08487302	0.16570586	0.17451864	50.32
0.0216	0.462084	-0.735	0.08482206	0.16564524	0.17444861	50.33
0.0224	0.479307	-0.736	0.08476317	0.16557300	0.17437369	50.33
0.0232	0.495329	-0.736	0.08470333	0.16550750	0.17429966	50.33
0.0240	0.509720	-0.739	0.08465630	0.16544104	0.17422676	50.32
0.0248	0.521593	-0.735	0.08463067	0.16539276	0.17418498	50.32
0.0256	0.531063	-0.728	0.08460313	0.16536283	0.17416453	50.32
0.0264	0.538101	-0.728	0.08458149	0.16533291	0.17413932	50.32
0.0272	0.542479	-0.728	0.08455694	0.16531461	0.17413151	50.32
0.0280	0.544739	-0.725	0.08455104	0.16529924	0.17412084	50.32
0.0288	0.545340	-0.726	0.08455306	0.16529161	0.17411399	50.31
0.0296	0.544739	-0.722	0.08455598	0.16528690	0.17409742	50.31
0.0304	0.543251	-0.719	0.08457464	0.16530514	0.17413145	50.31
0.0312	0.541220	-0.718	0.08458257	0.16530901	0.17411685	50.31
0.0320	0.538645	-0.724	0.08457857	0.16531473	0.17412376	50.30
0.0328	0.535126	-0.725	0.08459032	0.16531760	0.17412382	50.30
0.0336	0.531063	-0.729	0.08458835	0.16531950	0.17412871	50.31
0.0344	0.526485	-0.730	0.08460015	0.16533393	0.17414230	50.31
0.0352	0.521250	-0.726	0.08461982	0.16536671	0.17415881	50.31
0.0360	0.515585	-0.729	0.08463168	0.16538119	0.17418504	50.31
0.0368	0.509233	-0.726	0.08464748	0.16541207	0.17417914	50.31
0.0376	0.501738	-0.728	0.08466417	0.16543716	0.17422199	50.31
0.0384	0.493126	-0.726	0.08469665	0.16545826	0.17425895	50.32
0.0392	0.483112	-0.725	0.08472121	0.16550547	0.17430562	50.32
0.0400	0.471611	-0.727	0.08475840	0.16554785	0.17436886	50.32
0.0408	0.459051	-0.719	0.08479959	0.16560942	0.17442912	50.33
0.0416	0.445776	-0.726	0.08483088	0.16565573	0.17447972	50.33
0.0424	0.432358	-0.728	0.08486319	0.16571450	0.17451477	50.33
0.0432	0.419483	-0.722	0.08489960	0.16576260	0.17455852	50.33
0.0440	0.407953	-0.731	0.08493114	0.16580504	0.17457020	50.32
0.0448	0.398111	-0.727	0.08496660	0.16584647	0.17462558	50.32
0.0456	0.390558	-0.726	0.08499324	0.16588885	0.17465281	50.32
0.0464	0.385180	-0.735	0.08501583	0.16590434	0.17467517	50.32
0.0472	0.381918	-0.734	0.08502465	0.16592169	0.17469358	50.32
0.0480	0.380402	-0.731	0.08502853	0.16593713	0.17470044	50.31
0.0488	0.380316	-0.732	0.08503836	0.16592944	0.17472184	50.31
0.0496	0.381260	-0.727	0.08503735	0.16594291	0.17472380	50.31
0.0504	0.382605	-0.727	0.08504027	0.16596115	0.17475694	50.31
0.0512	0.384493	-0.727	0.08504814	0.16596502	0.17472780	50.31
0.0520	0.386610	-0.727	0.08503926	0.16596502	0.17471612	50.31
0.0528	0.388727	-0.724	0.08503729	0.16595346	0.17473370	50.31
0.0536	0.391016	-0.722	0.08503234	0.16593611	0.17469966	50.31
0.0544	0.393648	-0.717	0.08502352	0.16592932	0.17471421	50.31
0.0552	0.396681	-0.715	0.08502549	0.16592252	0.17471516	50.31
0.0560	0.400286	-0.715	0.08502942	0.16591769	0.17467815	50.31
0.0568	0.404463	-0.716	0.08502454	0.16589558	0.17467517	50.31
0.0576	0.408926	-0.720	0.08502060	0.16587824	0.17465281	50.31
0.0584	0.413790	-0.718	0.08500981	0.16585898	0.17463434	50.32
0.0592	0.419426	-0.722	0.08498430	0.16583973	0.17463237	50.32
0.0600	0.425978	-0.718	0.08497745	0.16580790	0.17460316	50.32
0.0608	0.433617	-0.715	0.08495981	0.16578281	0.17459440	50.33
0.0616	0.442686	-0.719	0.08493227	0.16573173	0.17453700	50.33
0.0624	0.453043	-0.723	0.08489490	0.16568357	0.17448938	50.33
0.0632	0.464315	-0.724	0.08484572	0.16563356	0.17444956	50.33
0.0640	0.476503	-0.729	0.08479369	0.16558164	0.17439407	50.32
0.0648	0.488548	-0.720	0.08476329	0.16553742	0.17436296	50.32
0.0656	0.500135	-0.711	0.08473980	0.16549605	0.17433178	50.32
0.0664	0.510778	-0.715	0.08470446	0.16545945	0.17428416	50.32
0.0672	0.519991	-0.713	0.08467489	0.16541892	0.17425406	50.32
0.0680	0.527658	-0.718	0.08463949	0.16539383	0.17422003	50.31
0.0688	0.533409	-0.723	0.08460599	0.16537070	0.17419958	50.31
0.0696	0.537300	-0.725	0.08459222	0.16534948	0.17418104	50.31
0.0704	0.539246	-0.722	0.08459419	0.16534185	0.17417806	50.31
0.0712	0.539875	-0.720	0.08459026	0.16533697	0.17418486	50.31
0.0720	0.539474	-0.722	0.08457947	0.16532439	0.17414111	50.30
0.0728	0.537815	-0.719	0.08458936	0.16533983	0.17416054	50.31
0.0736	0.535297	-0.722	0.08457756	0.16533685	0.17414021	50.31
0.0744	0.531893	-0.725	0.08458346	0.16535234	0.17414904	50.31
0.0752	0.527372	-0.721	0.08461100	0.16537350	0.17418408	50.31
0.0760	0.522251	-0.722	0.08461201	0.16539371	0.17421037	50.31
0.0768	0.516186	-0.724	0.08462977	0.16542459	0.17422193	50.31
0.0776	0.509090	-0.727	0.08464843	0.16545922	0.17425591	50.32
0.0784	0.500908	-0.730	0.08467108	0.16548908	0.17427534	50.32
0.0792	0.491323	-0.733	0.08470547	0.16552949	0.17430353	50.32
0.0800	0.480309	-0.730	0.08474767	0.16556609	0.17435908	50.32
0.0808	0.467291	-0.722	0.08479482	0.16561323	0.17440289	50.33
0.0816	0.452785	-0.725	0.08483791	0.16567588	0.17447490	50.33
0.0824	0.436935	-0.724	0.08488595	0.16573566	0.17450613	50.33
0.0832	0.420914	-0.723	0.08493513	0.16579729	0.17457324	50.33
0.0840	0.406380	-0.725	0.08498234	0.16585231	0.17461604	50.32
0.0848	0.393991	-0.720	0.08502859	0.16589952	0.17466563	50.32
0.0856	0.384951	-0.713	0.08506101	0.16593510	0.17470837	50.32
0.0864	0.378942	-0.718	0.08508056	0.16597259	0.17473847	50.32
0.0872	0.375366	-0.720	0.08508646	0.16598320	0.17476761	50.32
0.0880	0.373793	-0.720	0.08509922	0.16599858	0.17477053	50.32
0.0888	0.373421	-0.724	0.08511108	0.16599667	0.17479289	50.31
0.0896	0.373964	-0.723	0.08511800	0.16599864	0.17478317	50.31
0.0904	0.374937	-0.719	0.08512777	0.16600728	0.17479193	50.31
0.0912	0.376396	-0.718	0.08511698	0.16600728	0.17478126	50.31
0.0920	0.378456	-0.723	0.08509529	0.16599381	0.17478120	50.31
0.0928	0.380602	-0.721	0.08508056	0.16598231	0.17476565	50.31
0.0936	0.383778	-0.722	0.08506483	0.16595632	0.17474711	50.31
0.0944	0.388041	-0.722	0.08505398	0.16593903	0.17474806	50.31
0.0952	0.393190	-0.718	0.08504319	0.16593033	0.17472672	50.31
0.0960	0.399685	-0.719	0.08502448	0.16590816	0.17471701	50.31
0.0968	0.407124	-0.720	0.08500189	0.16589177	0.17469960	50.31
0.0976	0.415421	-0.718	0.08498126	0.16585314	0.17466271	50.32
0.0984	0.424776	-0.717	0.08496559	0.16582620	0.17463833	50.32
0.0992	0.435419	-0.717	0.08493513	0.16578478	0.17458773	50.32
0.1000	0.447521	-0.714	0.08490264	0.16574526	0.17455071	50.32
0.1008	0.461283	-0.708	0.08485746	0.16570097	0.17450005	50.33
0.1016	0.476732	-0.712	0.08478969	0.16563934	0.17444468	50.33
0.1024	0.492840	-0.714	0.08473867	0.16556901	0.17437661	50.33
0.1032	0.508318	-0.717	0.08468860	0.16550535	0.17431629	50.32
0.1040	0.522079	-0.725	0.08463854	0.16544467	0.17425597	50.32
0.1048	0.532494	-0.720	0.08461589	0.16540521	0.17421615	50.32
0.1056	0.539131	-0.718	0.08459419	0.16538012	0.17420834	50.32
0.1064	0.542507	-0.719	0.08458346	0.16536182	0.17417634	50.32
0.1072	0.542707	-0.722	0.08458537	0.16535121	0.17420071	50.32
0.1080	0.541077	-0.719	0.08459026	0.16535592	0.17417437	50.31
0.1088	0.538673	-0.723	0.08459723	0.16535884	0.17420065	50.31
0.1096	0.535555	-0.720	0.08460706	0.16536754	0.17420155	50.31
0.1104	0.532322	-0.717	0.08462185	0.16538584	0.17420828	50.31
0.1112	0.529146	-0.719	0.08464152	0.16539270	0.17422873	50.31
0.1120	0.525999	-0.723	0.08463949	0.16539562	0.17420828	50.31
0.1128	0.522823	-0.727	0.08464438	0.16541207	0.17422479	50.31
0.1136	0.519819	-0.727	0.08464533	0.16542661	0.17421216	50.31
0.1144	0.516529	-0.730	0.08464837	0.16542369	0.17422676	50.31
0.1152	0.512781	-0.722	0.08466905	0.16545069	0.17424715	50.31
0.1160	0.508575	-0.719	0.08467895	0.16546124	0.17427242	50.31
0.1168	0.503139	-0.719	0.08469272	0.16547757	0.17428315	50.31
0.1176	0.496073	-0.717	0.08470351	0.16550839	0.17431331	50.31
0.1184	0.487289	-0.718	0.08472902	0.16554689	0.17433083	50.32
0.1192	0.476360	-0.721	0.08476424	0.16557479	0.17437273	50.32
0.1200	0.463371	-0.724	0.08480251	0.16562778	0.17441654	50.32
0.1208	0.448980	-0.720	0.08486336	0.16568553	0.17448753	50.32
0.1216	0.433445	-0.727	0.08491546	0.16573656	0.17453623	50.33
0.1224	0.417423	-0.730	0.08495581	0.16580015	0.17458290	50.33
0.1232	0.401888	-0.730	0.08499420	0.16586369	0.17465389	50.32
0.1240	0.387411	-0.736	0.08502460	0.16591769	0.17469370	50.32
0.1248	0.374651	-0.728	0.08506978	0.16597843	0.17476654	50.32
0.1256	0.364208	-0.723	0.08510607	0.16603047	0.17479962	50.32
0.1264	0.356255	-0.725	0.08514726	0.16606516	0.17485118	50.32
0.1272	0.351048	-0.726	0.08516300	0.16609979	0.17485994	50.32
0.1280	0.348301	-0.730	0.08515912	0.16611326	0.17489409	50.31
0.1288	0.347815	-0.735	0.08516699	0.16612965	0.17490673	50.31
0.1296	0.349016	-0.731	0.08516502	0.16612774	0.17488819	50.31
0.1304	0.351419	-0.730	0.08516794	0.16613352	0.17490673	50.31
0.1312	0.354567	-0.729	0.08517081	0.16612875	0.17487657	50.31
0.1320	0.358114	-0.731	0.08515221	0.16610754	0.17487657	50.31
0.1328	0.361977	-0.732	0.08514345	0.16610277	0.17486197	50.31
0.1336	0.366011	-0.730	0.08512384	0.16608256	0.17484540	50.31
0.1344	0.370531	-0.728	0.08511895	0.16606033	0.17482197	50.31
0.1352	0.375538	-0.722	0.08511984	0.16605556	0.17482781	50.31
0.1360	0.381260	-0.722	0.08510900	0.16603911	0.17481714	50.31
0.1368	0.387669	-0.727	0.08509821	0.16602367	0.17479092	50.31
0.1376	0.395193	-0.726	0.08507556	0.16599965	0.17476958	50.31
0.1384	0.404148	-0.724	0.08505994	0.16596299	0.17472774	50.32
0.1392	0.414848	-0.728	0.08503044	0.16591102	0.17468303	50.32
0.1400	0.427809	-0.724	0.08500093	0.16586286	0.17463440	50.32
0.1408	0.442743	-0.721	0.08496267	0.16581082	0.17461109	50.32
0.1416	0.459509	-0.726	0.08490264	0.16574055	0.17452455	50.33
0.1424	0.477333	-0.727	0.08484381	0.16566730	0.17446232	50.33
0.1432	0.494957	-0.726	0.08478987	0.16558445	0.17438841	50.32
0.1440	0.511608	-0.730	0.08472699	0.16551125	0.17430663	50.32
0.1448	0.526085	-0.722	0.08467984	0.16544771	0.17425311	50.32
0.1456	0.537500	-0.716	0.08464146	0.16540247	0.17423069	50.32
0.1464	0.545540	-0.715	0.08460999	0.16536683	0.17420244	50.32
0.1472	0.549946	-0.714	0.08458638	0.16535234	0.17418689	50.32
0.1480	0.551090	-0.715	0.08457655	0.16534263	0.17418790	50.31
0.1488	0.550003	-0.714	0.08457553	0.16533685	0.17417914	50.31
0.1496	0.547256	-0.714	0.08456659	0.16533971	0.17418695	50.31
0.1504	0.543251	-0.708	0.08458036	0.16534746	0.17420548	50.31
0.1512	0.538845	-0.707	0.08459216	0.16535902	0.17422003	50.31
0.1520	0.533953	-0.712	0.08458626	0.16536957	0.17420352	50.31
0.1528	0.528488	-0.716	0.08460307	0.16538697	0.17422587	50.31
0.1536	0.523109	-0.718	0.08461690	0.16540718	0.17421609	50.31
0.1544	0.517387	-0.720	0.08462876	0.16543704	0.17423850	50.31
0.1552	0.510836	-0.711	0.08465433	0.16547370	0.17428035	50.31
0.1560	0.503712	-0.706	0.08468962	0.16549867	0.17429686	50.31
0.1568	0.494986	-0.706	0.08470732	0.16553426	0.17434263	50.31
0.1576	0.484486	-0.702	0.08473963	0.16557086	0.17436594	50.31
0.1584	0.472183	-0.703	0.08478373	0.16561127	0.17441744	50.32
0.1592	0.457964	-0.704	0.08482504	0.16566908	0.17446619	50.32
0.1600	0.442228	-0.707	0.08488387	0.16572893	0.17452645	50.32
0.1608	0.425463	-0.704	0.08493602	0.16579640	0.17460430	50.32
0.1616	0.409327	-0.712	0.08498716	0.16586006	0.17466468	50.33
0.1624	0.394707	-0.715	0.08502650	0.16592169	0.17471516	50.33
0.1632	0.382948	-0.717	0.08506387	0.16596878	0.17475986	50.32
0.1640	0.374765	-0.721	0.08509630	0.16601497	0.17480171	50.32
0.1648	0.369787	-0.718	0.08511990	0.16605252	0.17480850	50.32
0.1656	0.367498	-0.715	0.08513659	0.16607666	0.17483968	50.32
0.1664	0.366955	-0.716	0.08514154	0.16607666	0.17482024	50.32
0.1672	0.367212	-0.719	0.08514547	0.16607857	0.17482120	50.32
0.1680	0.368013	-0.718	0.08515042	0.16606402	0.17482603	50.31
0.1688	0.369244	-0.724	0.08515137	0.16606301	0.17481625	50.31
0.1696	0.370817	-0.725	0.08515722	0.16606402	0.17484158	50.31
0.1704	0.372763	-0.719	0.08516109	0.16606402	0.17482799	50.31
0.1712	0.374794	-0.720	0.08514827	0.16606307	0.17483187	50.31
0.1720	0.377111	-0.723	0.08513254	0.16604757	0.17481053	50.31
0.1728	0.379429	-0.721	0.08511388	0.16603595	0.17479104	50.31
0.1736	0.382490	-0.726	0.08509225	0.16601574	0.17477542	50.31
0.1744	0.386209	-0.727	0.08508241	0.16600138	0.17477447	50.31
0.1752	0.390472	-0.718	0.08508247	0.16598797	0.17476177	50.31
0.1760	0.395737	-0.720	0.08507270	0.16596401	0.17476761	50.31
0.1768	0.401316	-0.719	0.08505803	0.16593999	0.17474329	50.31
0.1776	0.407610	-0.718	0.08503944	0.16591400	0.17470342	50.32
0.1784	0.414963	-0.718	0.08500403	0.16588420	0.17469078	50.32
0.1792	0.423517	-0.719	0.08497840	0.16585332	0.17463148	50.32
0.1800	0.433702	-0.719	0.08495277	0.16581565	0.17461103	50.32
0.1808	0.445576	-0.716	0.08492720	0.16577899	0.17458373	50.33
0.1816	0.459023	-0.722	0.08489174	0.16572505	0.17452925	50.33
0.1824	0.473328	-0.726	0.08483589	0.16567308	0.17449522	50.33
0.1832	0.487776	-0.724	0.08478594	0.16561151	0.17441750	50.33
0.1840	0.502195	-0.726	0.08472407	0.16555661	0.17437571	50.32
0.1848	0.515556	-0.724	0.08468294	0.16549492	0.17431444	50.32
0.1856	0.527630	-0.718	0.08465630	0.16545922	0.17427838	50.32
0.1864	0.538158	-0.722	0.08462375	0.16541874	0.17423838	50.32
0.1872	0.545940	-0.727	0.08460212	0.16538793	0.17419654	50.32
0.1880	0.551090	-0.723	0.08456868	0.16536963	0.17418098	50.32
0.1888	0.553808	-0.727	0.08456475	0.16534942	0.17417133	50.31
0.1896	0.554152	-0.723	0.08456576	0.16533595	0.17416358	50.31
0.1904	0.552721	-0.716	0.08457655	0.16534364	0.17417526	50.31
0.1912	0.549803	-0.722	0.08459616	0.16535902	0.17417628	50.31
0.1920	0.545368	-0.722	0.08459222	0.16536093	0.17416650	50.31
0.1928	0.539503	-0.725	0.08459520	0.16538405	0.17417920	50.31
0.1936	0.532751	-0.727	0.08460611	0.16538984	0.17419672	50.31
0.1944	0.525312	-0.722	0.08462977	0.16541499	0.17421615	50.31
0.1952	0.517101	-0.718	0.08466029	0.16544777	0.17426091	50.31
0.1960	0.508461	-0.716	0.08469468	0.16549206	0.17429304	50.31
0.1968	0.498991	-0.718	0.08472115	0.16552573	0.17432219	50.31
0.1976	0.488863	-0.720	0.08475441	0.16556424	0.17435819	50.32
0.1984	0.478163	-0.716	0.08479363	0.16560662	0.17438346	50.32
0.1992	0.467005	-0.716	0.08483386	0.16564900	0.17443210	50.32
0.2000	0.455418	-0.711	0.08487219	0.16569424	0.17447889	50.32
0.2008	0.362320	-0.736	0.08524930	0.16620183	0.17499536	50.32
0.2016	0.362577	-0.724	0.08524239	0.16621441	0.17501569	50.32
0.2024	0.363264	-0.722	0.08524042	0.16621727	0.17502254	50.33
0.2032	0.364666	-0.725	0.08522958	0.16620767	0.17500407	50.33
0.2040	0.366898	-0.725	0.08522177	0.16620481	0.17498565	50.33
0.2048	0.370417	-0.730	0.08521491	0.16618842	0.17494971	50.33
0.2056	0.375452	-0.728	0.08520508	0.16616440	0.17492729	50.32
0.2064	0.382719	-0.719	0.08518654	0.16615665	0.17491663	50.32
0.2072	0.394192	-0.714	0.08515418	0.16611421	0.17488933	50.32
0.2080	0.412531	-0.716	0.08510113	0.16605455	0.17482424	50.32
0.2088	0.442028	-0.720	0.08502936	0.16594851	0.17471534	50.32
0.2096	0.486259	-0.726	0.08490855	0.16578770	0.17454410	50.32
0.2104	0.547829	-0.731	0.08472484	0.16556042	0.17430872	50.31
0.2112	0.627594	-0.731	0.08447540	0.16526371	0.17401004	50.31
0.2120	0.723267	-0.723	0.08416516	0.16491795	0.17366177	50.31
0.2128	0.832071	-0.726	0.08380067	0.16450661	0.17325228	50.31
0.2136	0.950260	-0.730	0.08338720	0.16405970	0.17278433	50.31
0.2144	1.073885	-0.728	0.08296579	0.16359353	0.17230272	50.31
0.2152	1.199856	-0.738	0.08251971	0.16310805	0.17179000	50.31
0.2160	1.325226	-0.732	0.08207572	0.16263515	0.17128998	50.31
0.2168	1.447277	-0.730	0.08164155	0.16217476	0.17082793	50.31
0.2176	1.563835	-0.734	0.08119851	0.16172689	0.17035037	50.31
0.2184	1.673527	-0.735	0.08077127	0.16130310	0.16988444	50.32
0.2192	1.775093	-0.737	0.08036464	0.16090715	0.16948855	50.32
0.2200	1.867676	-0.740	0.07997656	0.16054493	0.16906929	50.32
0.2208	1.950731	-0.738	0.07962692	0.16021353	0.16876000	50.32
0.2216	2.023830	-0.736	0.07931942	0.15993422	0.16844678	50.33
0.2224	2.087202	-0.732	0.07904238	0.15968382	0.16819483	50.33
0.2232	2.141018	-0.732	0.07879192	0.15944970	0.16794294	50.33
0.2240	2.184792	-0.734	0.07857287	0.15926862	0.16771626	50.33
0.2248	2.218037	-0.734	0.07839215	0.15910298	0.16757131	50.33
0.2256	2.239466	-0.735	0.07825953	0.15898931	0.16741377	50.33
0.2264	2.248793	-0.731	0.07818580	0.15893829	0.16738552	50.32
0.2272	2.247276	-0.729	0.07815135	0.15891045	0.16733879	50.32
0.2280	2.236376	-0.728	0.07814640	0.15891719	0.16735440	50.32
0.2288	2.217665	-0.733	0.07816905	0.15894991	0.16738451	50.32
0.2296	2.190542	-0.732	0.07824379	0.15899807	0.16742826	50.31
0.2304	2.150688	-0.737	0.07835776	0.15908563	0.16755271	50.31
0.2312	2.092667	-0.738	0.07855034	0.15923196	0.16771221	50.31
0.2320	2.012300	-0.732	0.07883906	0.15945935	0.16799533	50.31
0.2328	1.909189	-0.735	0.07920051	0.15976572	0.16833586	50.31
0.2336	1.786966	-0.735	0.07964057	0.16013467	0.16878921	50.31
0.2344	1.651783	-0.725	0.08013368	0.16056526	0.16925907	50.31
0.2352	1.511564	-0.728	0.08065426	0.16101313	0.16976976	50.31
0.2360	1.371717	-0.727	0.08117288	0.16148990	0.17028528	50.31
0.2368	1.237850	-0.723	0.08168662	0.16197723	0.17078722	50.31
0.2376	1.114597	-0.731	0.08215225	0.16243279	0.17126769	50.31
0.2384	1.003590	-0.731	0.08256185	0.16286814	0.17172098	50.32
0.2392	0.906715	-0.728	0.08293319	0.16325051	0.17212373	50.32
0.2400	0.823603	-0.730	0.08324850	0.16358960	0.17246813	50.32
0.2408	0.752850	-0.729	0.08353138	0.16388923	0.17277163	50.32
0.2416	0.693169	-0.728	0.08377504	0.16415030	0.17303419	50.33
0.2424	0.643044	-0.727	0.08396858	0.16438341	0.17324138	50.33
0.2432	0.601130	-0.727	0.08412480	0.16456836	0.17342806	50.33
0.2440	0.566483	-0.729	0.08424562	0.16473883	0.17358571	50.33
0.2448	0.538874	-0.727	0.08433890	0.16486591	0.17371023	50.33
0.2456	0.518217	-0.726	0.08442825	0.16497087	0.17382109	50.32
0.2464	0.504713	-0.720	0.08450681	0.16505468	0.17390281	50.32
0.2472	0.498047	-0.718	0.08454311	0.16510087	0.17394167	50.32
0.2480	0.497589	-0.722	0.08456379	0.16512311	0.17396116	50.32
0.2488	0.502625	-0.727	0.08455592	0.16512889	0.17396599	50.32
0.2496	0.513296	-0.731	0.08453131	0.16509992	0.17394364	50.32
0.2504	0.532207	-0.735	0.08448809	0.16505080	0.17388922	50.31
0.2512	0.566139	-0.735	0.08440554	0.16494763	0.17378908	50.31
0.2520	0.625248	-0.732	0.08424646	0.16475981	0.17357713	50.31
0.2528	0.717287	-0.736	0.08394790	0.16444963	0.17322695	50.31
0.2536	0.843744	-0.739	0.08352154	0.16399693	0.17275316	50.31
0.2544	0.998611	-0.739	0.08299506	0.16342866	0.17215484	50.31
0.2552	1.170101	-0.738	0.08238894	0.16279769	0.17151469	50.31
0.2560	1.345024	-0.733	0.08176023	0.16215432	0.17085618	50.31
0.2568	1.511850	-0.727	0.08114731	0.16156000	0.17023075	50.31
0.2576	1.661167	-0.730	0.08056778	0.16103023	0.16965979	50.31
0.2584	1.786566	-0.732	0.08005792	0.16057754	0.16915596	50.32
0.2592	1.886358	-0.732	0.07964933	0.16021252	0.16876096	50.32
0.2600	1.963148	-0.731	0.07933116	0.15992653	0.16843998	50.32
0.2608	2.022715	-0.727	0.07906401	0.15970308	0.16819876	50.32
0.2616	2.071037	-0.719	0.07885683	0.15952104	0.16801584	50.33
0.2624	2.113895	-0.719	0.07866430	0.15936881	0.16782326	50.33
0.2632	2.154751	-0.724	0.07846785	0.15920597	0.16765684	50.33
0.2640	2.194662	-0.723	0.07828802	0.15905577	0.16746324	50.33
0.2648	2.233286	-0.729	0.07810825	0.15890652	0.16730076	50.33
0.2656	2.267160	-0.731	0.07794023	0.15876687	0.16712964	50.33
0.2664	2.292595	-0.728	0.07781154	0.15866387	0.16703820	50.32
0.2672	2.307100	-0.730	0.07772315	0.15859741	0.16694480	50.32
0.2680	2.309074	-0.732	0.07767016	0.15856463	0.16689819	50.32
0.2688	2.299433	-0.732	0.07767504	0.15856463	0.16691077	50.32
0.2696	2.278147	-0.732	0.07773489	0.15860599	0.16692144	50.32
0.2704	2.240810	-0.727	0.07785273	0.15867817	0.16704690	50.31
0.2712	2.180128	-0.726	0.07806492	0.15882367	0.16722101	50.31
0.2720	2.088518	-0.718	0.07839602	0.15907985	0.16754591	50.31
0.2728	1.964779	-0.716	0.07884300	0.15943044	0.16796041	50.31
0.2736	1.815319	-0.724	0.07938230	0.15987641	0.16849256	50.31
0.2744	1.652470	-0.720	0.07997948	0.16039848	0.16906935	50.31
0.2752	1.491709	-0.727	0.08057672	0.16093504	0.16965586	50.31
0.2760	1.344967	-0.730	0.08113265	0.16144651	0.17023367	50.31
0.2768	1.219368	-0.725	0.08161891	0.16191375	0.17068297	50.31
0.2776	1.116629	-0.728	0.08201766	0.16229427	0.17113048	50.31
0.2784	1.033258	-0.729	0.08234477	0.16260922	0.17144179	50.32
0.2792	0.963335	-0.727	0.08261395	0.16289330	0.17174435	50.32
0.2800	0.901108	-0.726	0.08285367	0.16314560	0.17200029	50.32
0.2808	0.842142	-0.726	0.08308357	0.16339886	0.17223859	50.32
0.2816	0.783548	-0.722	0.08330953	0.16364932	0.17250997	50.33
0.2824	0.724583	-0.723	0.08352566	0.16390175	0.17275596	50.33
0.2832	0.666332	-0.727	0.08372992	0.16414064	0.17302245	50.33
0.2840	0.611057	-0.726	0.08393031	0.16437858	0.17325008	50.33
0.2848	0.562906	-0.731	0.08410317	0.16459721	0.17345738	50.33
0.2856	0.525026	-0.731	0.08425248	0.16478121	0.17363256	50.32
0.2864	0.499220	-0.727	0.08437622	0.16492665	0.17375809	50.32
0.2872	0.485830	-0.730	0.08444202	0.16501129	0.17385244	50.32
0.2880	0.483370	-0.734	0.08446753	0.16505170	0.17387378	50.32
0.2888	0.490122	-0.738	0.08447731	0.16505361	0.17388147	50.32
0.2896	0.505571	-0.742	0.08444887	0.16502374	0.17384833	50.32
0.2904	0.533438	-0.746	0.08439779	0.16494292	0.17375690	50.31
0.2912	0.580788	-0.747	0.08428192	0.16479844	0.17361200	50.31
0.2920	0.655117	-0.744	0.08406585	0.16455382	0.17333281	50.31
0.2928	0.759544	-0.746	0.08373082	0.16418976	0.17296904	50.31
0.2936	0.891180	-0.748	0.08328086	0.16370910	0.17244965	50.31
0.2944	1.041956	-0.746	0.08275825	0.16316110	0.17188734	50.31
0.2952	1.202488	-0.749	0.08218455	0.16256577	0.17126381	50.31
0.2960	1.364765	-0.746	0.08160603	0.16197819	0.17065388	50.31
0.2968	1.521635	-0.746	0.08102757	0.16142243	0.17005944	50.31
0.2976	1.667118	-0.749	0.08046663	0.16090810	0.16951275	50.31
0.2984	1.795950	-0.749	0.07995194	0.16043901	0.16900992	50.32
0.2992	1.905041	-0.751	0.07950896	0.16004699	0.16856253	50.32
0.3000	1.994076	-0.747	0.07914060	0.15972137	0.16825324	50.32
0.3008	2.064714	-0.747	0.07883620	0.15945256	0.16792834	50.32
0.3016	2.120361	-0.743	0.07859057	0.15924555	0.16772693	50.33
0.3024	2.165194	-0.741	0.07837349	0.15908188	0.16752934	50.33
0.3032	2.203016	-0.747	0.07817209	0.15891910	0.16734749	50.33
0.3040	2.235575	-0.743	0.07801092	0.15879488	0.16720450	50.33
0.3048	2.263269	-0.748	0.07786947	0.15867734	0.16706735	50.33
0.3056	2.284698	-0.749	0.07776147	0.15857613	0.16697687	50.32
0.3064	2.298031	-0.743	0.07768786	0.15853566	0.16686690	50.32
0.3072	2.302580	-0.744	0.07763779	0.15849906	0.16684943	50.32
0.3080	2.297974	-0.742	0.07761431	0.15849417	0.16681826	50.32
0.3088	2.284613	-0.743	0.07762992	0.15850961	0.16682506	50.32
0.3096	2.261753	-0.741	0.07769471	0.15854627	0.16691262	50.32
0.3104	2.225704	-0.739	0.07780087	0.15861756	0.16699433	50.31
0.3112	2.168827	-0.735	0.07799435	0.15876114	0.16721231	50.31
0.3120	2.083397	-0.729	0.07830185	0.15901446	0.16748375	50.31
0.3128	1.967754	-0.730	0.07871628	0.15934294	0.16786796	50.31
0.3136	1.827049	-0.734	0.07922304	0.15977252	0.16835624	50.31
0.3144	1.673298	-0.734	0.07979864	0.16026765	0.16888541	50.31
0.3152	1.520147	-0.735	0.08035660	0.16076463	0.16945255	50.31
0.3160	1.376610	-0.738	0.08089888	0.16127700	0.16999054	50.31
0.3168	1.248150	-0.730	0.08139795	0.16175473	0.17050028	50.31
0.3176	1.136255	-0.730	0.08182824	0.16216981	0.17093217	50.31
0.3184	1.039896	-0.734	0.08221328	0.16254258	0.17133689	50.31
0.3192	0.956869	-0.728	0.08254725	0.16287011	0.17166173	50.32
0.3200	0.883341	-0.732	0.08283991	0.16315907	0.17196423	50.32
0.3208	0.816565	-0.734	0.08309525	0.16343933	0.17224044	50.32
0.3216	0.754509	-0.729	0.08334571	0.16370618	0.17250890	50.33
0.3224	0.696745	-0.728	0.08355892	0.16395950	0.17277157	50.33
0.3232	0.644245	-0.731	0.08374852	0.16418391	0.17299527	50.33
0.3240	0.598555	-0.732	0.08392829	0.16439199	0.17319083	50.33
0.3248	0.562134	-0.734	0.08406186	0.16455853	0.17337567	50.33
0.3256	0.536413	-0.734	0.08417487	0.16468662	0.17348945	50.32
0.3264	0.521622	-0.728	0.08426136	0.16477144	0.17359263	50.32
0.3272	0.516586	-0.728	0.08430761	0.16482151	0.17364222	50.32
0.3280	0.519047	-0.724	0.08432633	0.16483319	0.17363536	50.32
0.3288	0.527401	-0.728	0.08431745	0.16482461	0.17361981	50.32
0.3296	0.541763	-0.732	0.08429092	0.16479570	0.17359161	50.32
0.3304	0.564909	-0.729	0.08422595	0.16473120	0.17353421	50.31
0.3312	0.603848	-0.733	0.08411986	0.16461170	0.17340785	50.31
0.3320	0.666504	-0.729	0.08393615	0.16441417	0.17322201	50.31
0.3328	0.757399	-0.736	0.08363748	0.16409433	0.17286110	50.31
0.3336	0.876760	-0.744	0.08323383	0.16366184	0.17241466	50.31
0.3344	1.018667	-0.747	0.08273774	0.16314363	0.17186308	50.31
0.3352	1.174049	-0.753	0.08217591	0.16256863	0.17128241	50.31
0.3360	1.333780	-0.746	0.08159536	0.16199654	0.17068326	50.31
0.3368	1.489363	-0.741	0.08103150	0.16144657	0.17009568	50.31
0.3376	1.633558	-0.743	0.08048141	0.16092741	0.16956544	50.31
0.3384	1.760530	-0.743	0.07998925	0.16048241	0.16903919	50.32
0.3392	1.867476	-0.744	0.07956100	0.16009331	0.16864806	50.32
0.3400	1.954308	-0.743	0.07919657	0.15977830	0.16830277	50.32
0.3408	2.023373	-0.741	0.07890773	0.15952975	0.16800809	50.32
0.3416	2.078876	-0.739	0.07866216	0.15932840	0.16780567	50.33
0.3424	2.125397	-0.737	0.07845294	0.15915781	0.16759449	50.33
0.3432	2.166767	-0.746	0.07825553	0.15899605	0.16743302	50.33
0.3440	2.204876	-0.746	0.07806599	0.15885448	0.16725308	50.33
0.3448	2.239809	-0.748	0.07789898	0.15871000	0.16708678	50.33
0.3456	2.269592	-0.751	0.07775950	0.15859729	0.16696823	50.32
0.3464	2.291622	-0.740	0.07765538	0.15851730	0.16683298	50.32
0.3472	2.303753	-0.741	0.07758468	0.15845466	0.16676968	50.32
0.3480	2.305441	-0.740	0.07755029	0.15843344	0.16675615	50.32
0.3488	2.296944	-0.739	0.07755524	0.15843540	0.16672993	50.32
0.3496	2.277975	-0.743	0.07759166	0.15846622	0.16679907	50.32
0.3504	2.245388	-0.742	0.07769388	0.15853757	0.16687703	50.31
0.3512	2.189913	-0.740	0.07788348	0.15867054	0.16706175	50.31
0.3520	2.102594	-0.739	0.07818991	0.15890563	0.16735256	50.31
0.3528	1.980944	-0.737	0.07863283	0.15925235	0.16775912	50.31
0.3536	1.829538	-0.742	0.07917404	0.15970409	0.16829503	50.31
0.3544	1.662254	-0.744	0.07978803	0.16023481	0.16888261	50.31
0.3552	1.495743	-0.744	0.08041275	0.16078478	0.16950709	50.31
0.3560	1.342163	-0.746	0.08099329	0.16132414	0.17006642	50.31
0.3568	1.209297	-0.739	0.08151090	0.16181445	0.17061698	50.31
0.3576	1.099205	-0.739	0.08193517	0.16223437	0.17101872	50.31
0.3584	1.010370	-0.741	0.08228302	0.16259176	0.17139035	50.32
0.3592	0.938387	-0.738	0.08258164	0.16288078	0.17169476	50.32
0.3600	0.877447	-0.740	0.08282530	0.16313499	0.17193794	50.32
0.3608	0.822687	-0.738	0.08304834	0.16336238	0.17218697	50.32
0.3616	0.769701	-0.731	0.08325750	0.16359061	0.17241842	50.33
0.3624	0.716600	-0.731	0.08344507	0.16381407	0.17265391	50.33
0.3632	0.664387	-0.738	0.08362484	0.16403562	0.17285430	50.33
0.3640	0.614719	-0.740	0.08380550	0.16424167	0.17307895	50.33
0.3648	0.571117	-0.746	0.08396655	0.16443622	0.17325121	50.33
0.3656	0.536499	-0.744	0.08410615	0.16460288	0.17340583	50.32
0.3664	0.512323	-0.734	0.08421713	0.16473675	0.17355853	50.32
0.3672	0.499220	-0.730	0.08428109	0.16482151	0.17362469	50.32
0.3680	0.496016	-0.729	0.08430672	0.16486681	0.17367429	50.32
0.3688	0.501022	-0.734	0.08430469	0.16486967	0.17367625	50.32
0.3696	0.513411	-0.735	0.08429682	0.16485333	0.17365479	50.32
0.3704	0.535240	-0.735	0.08426434	0.16479945	0.17359549	50.31
0.3712	0.572462	-0.735	0.08418077	0.16468871	0.17347878	50.31
0.3720	0.633059	-0.728	0.08402157	0.16449708	0.17327744	50.31
0.3728	0.722208	-0.734	0.08374059	0.16418684	0.17296332	50.31
0.3736	0.839567	-0.738	0.08333588	0.16375822	0.17251784	50.31
0.3744	0.979471	-0.733	0.08285755	0.16325635	0.17199445	50.31
0.3752	1.132851	-0.736	0.08231634	0.16269475	0.17142534	50.31
0.3760	1.291151	-0.730	0.08174664	0.16211498	0.17080474	50.31
0.3768	1.447763	-0.727	0.08117986	0.16156113	0.17024833	50.31
0.3776	1.597338	-0.734	0.08060813	0.16102368	0.16965306	50.31
0.3784	1.735182	-0.733	0.08006889	0.16052574	0.16913843	50.32
0.3792	1.858578	-0.735	0.07958168	0.16009706	0.16863453	50.32
0.3800	1.965637	-0.734	0.07914257	0.15971363	0.16821426	50.32
0.3808	2.055244	-0.733	0.07876241	0.15938514	0.16786307	50.32
0.3816	2.128572	-0.731	0.07845688	0.15912706	0.16756934	50.33
0.3824	2.186995	-0.730	0.07818764	0.15891027	0.16735727	50.33
0.3832	2.232771	-0.734	0.07797158	0.15872920	0.16711891	50.33
0.3840	2.267847	-0.733	0.07780069	0.15859914	0.16697496	50.33
0.3848	2.293253	-0.732	0.07765538	0.15849018	0.16680092	50.33
0.3856	2.309732	-0.734	0.07755625	0.15841323	0.16673374	50.32
0.3864	2.317686	-0.732	0.07749540	0.15837663	0.16670072	50.32
0.3872	2.318201	-0.732	0.07746494	0.15834391	0.16665298	50.32
0.3880	2.312250	-0.735	0.07745314	0.15833819	0.16669375	50.32
0.3888	2.300205	-0.735	0.07747084	0.15834391	0.16666752	50.32
0.3896	2.281294	-0.732	0.07750714	0.15837383	0.16672790	50.32
0.3904	2.251425	-0.736	0.07759154	0.15844131	0.16683006	50.31
0.3912	2.201757	-0.734	0.07776052	0.15856361	0.16695464	50.31
0.3920	2.123022	-0.733	0.07804632	0.15878516	0.16724938	50.31
0.3928	2.011642	-0.733	0.07845205	0.15910399	0.16759080	50.31
0.3936	1.870394	-0.733	0.07895893	0.15953064	0.16808403	50.31
0.3944	1.710291	-0.734	0.07954931	0.16004020	0.16865790	50.31
0.3952	1.546469	-0.730	0.08014458	0.16058350	0.16924447	50.31
0.3960	1.390343	-0.728	0.08073688	0.16113156	0.16984075	50.31
0.3968	1.250553	-0.724	0.08129191	0.16164207	0.17037570	50.31
0.3976	1.130962	-0.725	0.08175647	0.16209185	0.17085236	50.31
0.3984	1.031542	-0.730	0.08214843	0.16247612	0.17124826	50.32
0.3992	0.949631	-0.729	0.08247453	0.16280067	0.17159253	50.32
0.4000	0.881023	-0.727	0.08274275	0.16308093	0.17187852	50.32
0.4008	0.821114	-0.728	0.08298337	0.16332853	0.17214704	50.32
0.4016	0.765839	-0.719	0.08321124	0.16357231	0.17237562	50.33
0.4024	0.713224	-0.717	0.08341551	0.16380161	0.17261696	50.33
0.4032	0.662899	-0.722	0.08359224	0.16400880	0.17281055	50.33
0.4040	0.616350	-0.717	0.08376414	0.16422266	0.17301577	50.33
0.4048	0.576553	-0.727	0.08392328	0.16439694	0.17320353	50.33
0.4056	0.545912	-0.724	0.08404315	0.16454428	0.17333764	50.32
0.4064	0.525599	-0.720	0.08415222	0.16466272	0.17346209	50.32
0.4072	0.515871	-0.725	0.08421123	0.16472334	0.17350781	50.32
0.4080	0.515099	-0.724	0.08423287	0.16475606	0.17354572	50.32
0.4088	0.522108	-0.730	0.08424079	0.16476381	0.17353994	50.32
0.4096	0.536556	-0.730	0.08421916	0.16473198	0.17352349	50.32
0.4104	0.561533	-0.734	0.08416504	0.16466171	0.17344564	50.31
0.4112	0.604649	-0.732	0.08405107	0.16452205	0.17330468	50.31
0.4120	0.673828	-0.734	0.08384281	0.16429186	0.17306829	50.31
0.4128	0.773535	-0.739	0.08351082	0.16393644	0.17269671	50.31
0.4136	0.902395	-0.742	0.08306289	0.16347504	0.17223662	50.31
0.4144	1.052370	-0.744	0.08253342	0.16292703	0.17165971	50.31
0.4152	1.213589	-0.748	0.08195978	0.16232979	0.17104989	50.31
0.4160	1.376438	-0.743	0.08137047	0.16174418	0.17043805	50.31
0.4168	1.532965	-0.738	0.08078802	0.16119897	0.16984564	50.31
0.4176	1.676960	-0.735	0.08023298	0.16068745	0.16929317	50.31
0.4184	1.802902	-0.732	0.07972997	0.16024441	0.16882038	50.32
0.4192	1.908474	-0.736	0.07929373	0.15987170	0.16838557	50.32
0.4200	1.994276	-0.735	0.07893622	0.15955770	0.16805100	50.32
0.4208	2.062082	-0.737	0.07864845	0.15930825	0.16776210	50.32
0.4216	2.116270	-0.731	0.07840681	0.15911657	0.16754508	50.33
0.4224	2.161446	-0.726	0.07820255	0.15894514	0.16739035	50.33
0.4232	2.200384	-0.729	0.07801396	0.15878522	0.16718405	50.33
0.4240	2.235146	-0.728	0.07785392	0.15865523	0.16705859	50.33
0.4248	2.265215	-0.732	0.07770854	0.15853280	0.16688061	50.33
0.4256	2.288418	-0.734	0.07759064	0.15844017	0.16676682	50.33
0.4264	2.302923	-0.727	0.07751697	0.15839106	0.16669679	50.32
0.4272	2.307959	-0.726	0.07745892	0.15836203	0.16666853	50.32
0.4280	2.303209	-0.723	0.07744813	0.15834665	0.16667247	50.32
0.4288	2.289562	-0.720	0.07747960	0.15836501	0.16668022	50.32
0.4296	2.266130	-0.721	0.07754540	0.15840447	0.16676492	50.32
0.4304	2.227106	-0.718	0.07766920	0.15849119	0.16682816	50.31
0.4312	2.163620	-0.716	0.07788825	0.15866077	0.16706741	50.31
0.4320	2.068977	-0.710	0.07823503	0.15893626	0.16739333	50.31
0.4328	1.943035	-0.711	0.07868397	0.15929657	0.16782129	50.31
0.4336	1.793003	-0.715	0.07923603	0.15975696	0.16835529	50.31
0.4344	1.632500	-0.716	0.07983035	0.16028094	0.16891074	50.31
0.4352	1.474543	-0.722	0.08040786	0.16080397	0.16946328	50.31
0.4360	1.328545	-0.722	0.08096868	0.16133755	0.17001581	50.31
0.4368	1.200113	-0.719	0.08146274	0.16180664	0.17052454	50.31
0.4376	1.090908	-0.719	0.08189297	0.16221792	0.17096519	50.31
0.4384	0.999813	-0.722	0.08225256	0.16257429	0.17132890	50.32
0.4392	0.923367	-0.718	0.08256298	0.16288054	0.17165571	50.32
0.4400	0.857792	-0.720	0.08283019	0.16314256	0.17192620	50.32
0.4408	0.799227	-0.723	0.08305711	0.16339010	0.17216837	50.32
0.4416	0.744810	-0.716	0.08327019	0.16362900	0.17242521	50.33
0.4424	0.692797	-0.715	0.08346367	0.16384679	0.17264897	50.33
0.4432	0.642815	-0.717	0.08363557	0.16405779	0.17286682	50.33
0.4440	0.596294	-0.715	0.08380443	0.16426200	0.17308187	50.33
0.4448	0.555353	-0.719	0.08395571	0.16443723	0.17325026	50.33
0.4456	0.522079	-0.717	0.08408052	0.16459519	0.17340684	50.33
0.4464	0.498562	-0.713	0.08418661	0.16473585	0.17353237	50.32
0.4472	0.485229	-0.709	0.08425742	0.16481000	0.17360532	50.32
0.4480	0.481339	-0.712	0.08430171	0.16485727	0.17364997	50.32
0.4488	0.485945	-0.720	0.08431447	0.16487074	0.17365485	50.32
0.4496	0.498362	-0.724	0.08430564	0.16485053	0.17364609	50.32
0.4504	0.520964	-0.734	0.08426046	0.16479570	0.17357796	50.31
0.4512	0.560389	-0.734	0.08415228	0.16467720	0.17347288	50.31
0.4520	0.624819	-0.731	0.08396852	0.16446620	0.17323941	50.31
0.4528	0.719261	-0.737	0.08366007	0.16413575	0.17285806	50.31
0.4536	0.843086	-0.740	0.08323872	0.16368783	0.17242318	50.31
0.4544	0.989628	-0.743	0.08273488	0.16315717	0.17186487	50.31
0.4552	1.149759	-0.748	0.08217007	0.16256005	0.17126077	50.31
0.4560	1.313982	-0.743	0.08159441	0.16196573	0.17068589	50.31
0.4568	1.475201	-0.739	0.08101773	0.16139168	0.17004198	50.31
0.4576	1.626892	-0.737	0.08044308	0.16085130	0.16947198	50.31
0.4584	1.762848	-0.735	0.07990777	0.16037446	0.16894764	50.32
0.4592	1.879892	-0.735	0.07943231	0.15995067	0.16849631	50.32
0.4600	1.976395	-0.731	0.07902467	0.15960681	0.16809267	50.32
0.4608	2.053270	-0.732	0.07869947	0.15932649	0.16779113	50.32
0.4616	2.113867	-0.726	0.07844013	0.15910596	0.16757131	50.33
0.4624	2.161846	-0.724	0.07821816	0.15893441	0.16733789	50.33
0.4632	2.201042	-0.731	0.07802361	0.15877354	0.16721040	50.33
0.4640	2.234144	-0.726	0.07786161	0.15864921	0.16703922	50.33
0.4648	2.262297	-0.727	0.07770836	0.15852690	0.16689146	50.33
0.4656	2.285185	-0.727	0.07758361	0.15843159	0.16677564	50.32
0.4664	2.301121	-0.719	0.07750404	0.15836418	0.16670173	50.32
0.4672	2.309275	-0.723	0.07744014	0.15831804	0.16664147	50.32
0.4680	2.308931	-0.727	0.07741362	0.15830064	0.16661805	50.32
0.4688	2.300234	-0.722	0.07741857	0.15829396	0.16664338	50.32
0.4696	2.283125	-0.724	0.07744616	0.15832382	0.16664433	50.32
0.4704	2.254572	-0.720	0.07752579	0.15837383	0.16675323	50.31
0.4712	2.206192	-0.723	0.07767808	0.15849525	0.16687876	50.31
0.4720	2.129059	-0.726	0.07796097	0.15871000	0.16716862	50.31
0.4728	2.018852	-0.729	0.07835484	0.15902203	0.16753250	50.31
0.4736	1.877403	-0.738	0.07886362	0.15944487	0.16801304	50.31
0.4744	1.715355	-0.730	0.07946962	0.15995246	0.16859567	50.31
0.4752	1.547441	-0.729	0.08008850	0.16050917	0.16918510	50.31
0.4760	1.385593	-0.728	0.08070242	0.16107935	0.16980177	50.31
0.4768	1.238852	-0.720	0.08127415	0.16161591	0.17036200	50.31
0.4776	1.111879	-0.723	0.08175457	0.16210043	0.17085814	50.31
0.4784	1.005678	-0.724	0.08216220	0.16251272	0.17127061	50.32
0.4792	0.919161	-0.720	0.08250791	0.16284901	0.17162365	50.32
0.4800	0.848780	-0.720	0.08279181	0.16314083	0.17189807	50.32
0.4808	0.790844	-0.725	0.08304131	0.16337490	0.17216551	50.32
0.4816	0.740919	-0.718	0.08324957	0.16360122	0.17238635	50.33
0.4824	0.695486	-0.719	0.08343530	0.16380924	0.17260242	50.33
0.4832	0.652771	-0.723	0.08359045	0.16399318	0.17279792	50.33
0.4840	0.612202	-0.721	0.08374172	0.16418386	0.17296624	50.33
0.4848	0.575523	-0.728	0.08388603	0.16434377	0.17313451	50.33
0.4856	0.544939	-0.724	0.08400387	0.16448730	0.17326975	50.33
0.4864	0.522480	-0.721	0.08411390	0.16461354	0.17338455	50.32
0.4872	0.509634	-0.720	0.08418655	0.16469353	0.17346531	50.32
0.4880	0.505972	-0.722	0.08422786	0.16473788	0.17351496	50.32
0.4888	0.510836	-0.728	0.08423769	0.16474843	0.17351198	50.32
0.4896	0.524197	-0.732	0.08421701	0.16472149	0.17350906	50.32
0.4904	0.549145	-0.736	0.08415806	0.16465402	0.17343795	50.31
0.4912	0.593748	-0.736	0.08403331	0.16451049	0.17329884	50.31
0.4920	0.666246	-0.736	0.08381724	0.16428125	0.17307317	50.31
0.4928	0.770187	-0.740	0.08347350	0.16390365	0.17267233	50.31
0.4936	0.903111	-0.741	0.08301389	0.16341728	0.17217827	50.31
0.4944	1.055460	-0.740	0.08247560	0.16286147	0.17158777	50.31
0.4952	1.215963	-0.743	0.08189607	0.16226143	0.17098075	50.31
0.4960	1.374292	-0.735	0.08132142	0.16169602	0.17039520	50.31
0.4968	1.522894	-0.734	0.08077317	0.16116530	0.16984653	50.31
0.4976	1.656847	-0.736	0.08025843	0.16068274	0.16930676	50.31
0.4984	1.772203	-0.735	0.07979667	0.16026467	0.16886318	50.32
0.4992	1.869593	-0.736	0.07939982	0.15991604	0.16848183	50.32
0.5000	1.950645	-0.735	0.07905304	0.15962219	0.16812575	50.32
0.5008	2.018909	-0.735	0.07875746	0.15938044	0.16790003	50.32
0.5016	2.078876	-0.724	0.07851285	0.15917432	0.16764027	50.33
0.5024	2.134237	-0.723	0.07827514	0.15897107	0.16742527	50.33
0.5032	2.187052	-0.730	0.07803553	0.15878135	0.16719675	50.33
0.5040	2.236261	-0.730	0.07781941	0.15860027	0.16697103	50.33
0.5048	2.279634	-0.735	0.07760632	0.15843755	0.16679299	50.33
0.5056	2.313080	-0.735	0.07744426	0.15831810	0.16659945	50.33
0.5064	2.333708	-0.724	0.07734120	0.15824395	0.16654491	50.32
0.5072	2.341032	-0.725	0.07727438	0.15820259	0.16647494	50.32
0.5080	2.336111	-0.728	0.07726359	0.15820158	0.16647696	50.32
0.5088	2.320719	-0.727	0.07729203	0.15822369	0.16652751	50.32
0.5096	2.294512	-0.730	0.07736564	0.15827274	0.16657424	50.32
0.5104	2.251997	-0.727	0.07750410	0.15836328	0.16673082	50.31
0.5112	2.184362	-0.724	0.07774574	0.15853471	0.16691178	50.31
0.5120	2.086344	-0.722	0.07809937	0.15881306	0.16727364	50.31
0.5128	1.959343	-0.723	0.07855809	0.15918684	0.16768801	50.31
0.5136	1.811628	-0.725	0.07910031	0.15964812	0.16818994	50.31
0.5144	1.655674	-0.728	0.07967883	0.16015768	0.16876572	50.31
0.5152	1.502581	-0.726	0.08024561	0.16066623	0.16928816	50.31
0.5160	1.359329	-0.722	0.08080161	0.16116613	0.16985726	50.31
0.5168	1.230268	-0.718	0.08130461	0.16164488	0.17035633	50.31
0.5176	1.117716	-0.717	0.08173686	0.16206294	0.17081845	50.31
0.5184	1.021557	-0.727	0.08211410	0.16243577	0.17120457	50.32
0.5192	0.939989	-0.728	0.08242738	0.16275847	0.17154688	50.32
0.5200	0.869665	-0.728	0.08270043	0.16302633	0.17182404	50.32
0.5208	0.807238	-0.726	0.08294690	0.16327381	0.17208081	50.32
0.5216	0.749559	-0.718	0.08318168	0.16352236	0.17233372	50.33
0.5224	0.694914	-0.714	0.08338600	0.16375256	0.17257702	50.33
0.5232	0.643330	-0.722	0.08356971	0.16396916	0.17280668	50.33
0.5240	0.595579	-0.719	0.08374953	0.16419548	0.17302066	50.33
0.5248	0.554552	-0.723	0.08389974	0.16437751	0.17321330	50.33
0.5256	0.522652	-0.723	0.08403927	0.16453648	0.17334747	50.33
0.5264	0.501480	-0.717	0.08415717	0.16466659	0.17346603	50.32
0.5272	0.491610	-0.719	0.08421320	0.16472834	0.17353022	50.32
0.5280	0.491438	-0.716	0.08423883	0.16475433	0.17354876	50.32
0.5288	0.499249	-0.719	0.08422410	0.16475624	0.17356914	50.32
0.5296	0.514927	-0.720	0.08418572	0.16471672	0.17353415	50.32
0.5304	0.541906	-0.724	0.08412963	0.16463864	0.17346609	50.31
0.5312	0.587597	-0.727	0.08400095	0.16450369	0.17332500	50.31
0.5320	0.659351	-0.726	0.08379960	0.16426092	0.17307019	50.31
0.5328	0.760546	-0.730	0.08347350	0.16390932	0.17268890	50.31
0.5336	0.888777	-0.732	0.08302659	0.16344219	0.17221326	50.31
0.5344	1.036263	-0.730	0.08251971	0.16290289	0.17165589	50.31
0.5352	1.193933	-0.733	0.08195585	0.16232020	0.17102849	50.31
0.5360	1.352549	-0.728	0.08138120	0.16175580	0.17046815	50.31
0.5368	1.505070	-0.725	0.08081734	0.16122115	0.16985238	50.31
0.5376	1.645718	-0.728	0.08026624	0.16072315	0.16934258	50.31
0.5384	1.770000	-0.728	0.07977408	0.16028583	0.16886586	50.32
0.5392	1.877117	-0.729	0.07934088	0.15990818	0.16844469	50.32
0.5400	1.967611	-0.728	0.07896566	0.15958554	0.16809446	50.32
0.5408	2.043114	-0.725	0.07865626	0.15931684	0.16776955	50.32
0.5416	2.106628	-0.716	0.07838422	0.15909141	0.16754490	50.33
0.5424	2.160187	-0.715	0.07814848	0.15889114	0.16729015	50.33
0.5432	2.205420	-0.720	0.07793933	0.15870231	0.16711509	50.33
0.5440	2.243185	-0.725	0.07776254	0.15855485	0.16693425	50.33
0.5448	2.273169	-0.730	0.07761121	0.15843058	0.16679323	50.33
0.5456	2.294712	-0.729	0.07748938	0.15834290	0.16670072	50.33
0.5464	2.307072	-0.719	0.07742250	0.15830153	0.16662097	50.32
0.5472	2.310562	-0.714	0.07737726	0.15826982	0.16662574	50.32
0.5480	2.305613	-0.713	0.07737035	0.15826499	0.16658491	50.32
0.5488	2.293253	-0.712	0.07740086	0.15828133	0.16661215	50.32
0.5496	2.272882	-0.714	0.07744420	0.15831405	0.16666567	50.32
0.5504	2.239752	-0.711	0.07753551	0.15839201	0.16671920	50.31
0.5512	2.184591	-0.712	0.07772219	0.15852892	0.16692632	50.31
0.5520	2.098961	-0.707	0.07802767	0.15875912	0.16719288	50.31
0.5528	1.980085	-0.712	0.07845879	0.15909624	0.16759360	50.31
0.5536	1.832943	-0.718	0.07899421	0.15953738	0.16811311	50.31
0.5544	1.671095	-0.716	0.07958561	0.16005844	0.16867828	50.31
0.5552	1.509476	-0.719	0.08018279	0.16060269	0.16929984	50.31
0.5560	1.359472	-0.715	0.08075547	0.16114116	0.16984946	50.31
0.5568	1.228094	-0.713	0.08126622	0.16162568	0.17037761	50.31
0.5576	1.117401	-0.712	0.08171016	0.16203690	0.17079395	50.31
0.5584	1.026506	-0.712	0.08207262	0.16239035	0.17115486	50.32
0.5592	0.952263	-0.710	0.08236444	0.16268027	0.17146713	50.32
0.5600	0.890579	-0.708	0.08262378	0.16292977	0.17171609	50.32
0.5608	0.836821	-0.711	0.08283204	0.16315520	0.17195922	50.32
0.5616	0.786552	-0.711	0.08303344	0.16337776	0.17218298	50.33
0.5624	0.737314	-0.716	0.08323479	0.16359442	0.17240375	50.33
0.5632	0.688047	-0.720	0.08341163	0.16380626	0.17260224	50.33
0.5640	0.640011	-0.720	0.08359134	0.16402203	0.17282015	50.33
0.5648	0.596066	-0.722	0.08375734	0.16420984	0.17299324	50.33
0.5656	0.558729	-0.718	0.08390957	0.16438520	0.17317420	50.33
0.5664	0.530577	-0.712	0.08404118	0.16452879	0.17332113	50.32
0.5672	0.512867	-0.712	0.08413166	0.16462994	0.17340481	50.32
0.5680	0.505371	-0.711	0.08418965	0.16469163	0.17347193	50.32
0.5688	0.507002	-0.716	0.08419651	0.16470802	0.17347676	50.32
0.5696	0.516901	-0.720	0.08419061	0.16468781	0.17347670	50.32
0.5704	0.536041	-0.723	0.08414823	0.16464156	0.17343104	50.31
0.5712	0.570345	-0.726	0.08406675	0.16452980	0.17334545	50.31
0.5720	0.628624	-0.719	0.08389783	0.16434288	0.17313826	50.31
0.5728	0.716658	-0.726	0.08360708	0.16404039	0.17282307	50.31
0.5736	0.834732	-0.725	0.08321428	0.16360980	0.17237455	50.31
0.5744	0.977154	-0.724	0.08270836	0.16309065	0.17183471	50.31
0.5752	1.134739	-0.730	0.08215535	0.16251373	0.17124820	50.31
0.5760	1.298075	-0.725	0.08157778	0.16191846	0.17064327	50.31
0.5768	1.459665	-0.726	0.08098149	0.16135019	0.17004412	50.31
0.5776	1.612015	-0.729	0.08039010	0.16080695	0.16945755	50.31
0.5784	1.748686	-0.728	0.07984495	0.16032153	0.16893029	50.32
0.5792	1.866159	-0.727	0.07936174	0.15990156	0.16846722	50.32
0.5800	1.963749	-0.722	0.07895315	0.15955186	0.16807222	50.32
0.5808	2.043028	-0.723	0.07862210	0.15926290	0.16774535	50.32
0.5816	2.106771	-0.715	0.07835889	0.15904033	0.16752839	50.33
0.5824	2.158356	-0.715	0.07812208	0.15885347	0.16728520	50.33
0.5832	2.200699	-0.724	0.07792068	0.15868211	0.16710919	50.33
0.5840	2.236032	-0.720	0.07775766	0.15855110	0.16694093	50.33
0.5848	2.265873	-0.730	0.07760918	0.15843260	0.16676879	50.33
0.5856	2.289934	-0.731	0.07749027	0.15834492	0.16668510	50.32
0.5864	2.307358	-0.722	0.07739896	0.15829098	0.16659755	50.32
0.5872	2.317314	-0.721	0.07732534	0.15825242	0.16656840	50.32
0.5880	2.319117	-0.718	0.07728511	0.15822548	0.16652751	50.32
0.5888	2.312651	-0.715	0.07728320	0.15821588	0.16651881	50.32
0.5896	2.297544	-0.717	0.07731849	0.15823799	0.16655570	50.32
0.5904	2.270708	-0.718	0.07740295	0.15828323	0.16660041	50.31
0.5912	2.222357	-0.716	0.07755125	0.15840846	0.16677940	50.31
0.5920	2.141104	-0.712	0.07784200	0.15862423	0.16702151	50.31
0.5928	2.021685	-0.711	0.07827324	0.15895939	0.16743398	50.31
0.5936	1.866589	-0.714	0.07884192	0.15942651	0.16795343	50.31
0.5944	1.689405	-0.712	0.07950407	0.15998709	0.16857308	50.31
0.5952	1.508560	-0.719	0.08017594	0.16059971	0.16923171	50.31
0.5960	1.338758	-0.717	0.08081639	0.16120559	0.16986787	50.31
0.5968	1.189384	-0.710	0.08138317	0.16176051	0.17046028	50.31
0.5976	1.064415	-0.707	0.08187521	0.16224110	0.17096412	50.31
0.5984	0.964394	-0.707	0.08227402	0.16262251	0.17137939	50.32
0.5992	0.886574	-0.709	0.08258730	0.16292310	0.17169559	50.32
0.6000	0.826435	-0.714	0.08284181	0.16317064	0.17196894	50.32
0.6008	0.779114	-0.722	0.08303732	0.16336817	0.17215669	50.32
0.6016	0.739260	-0.717	0.08320242	0.16355413	0.17234159	50.33
0.6024	0.702639	-0.714	0.08335674	0.16371876	0.17252350	50.33
0.6032	0.667276	-0.719	0.08348727	0.16385740	0.17265767	50.33
0.6040	0.632343	-0.713	0.08362579	0.16400766	0.17281926	50.33
0.6048	0.599298	-0.719	0.08373964	0.16415018	0.17297387	50.33
0.6056	0.570545	-0.722	0.08385742	0.16429085	0.17307305	50.32
0.6064	0.548315	-0.713	0.08396840	0.16441125	0.17321032	50.32
0.6072	0.534325	-0.715	0.08404005	0.16449893	0.17328227	50.32
0.6080	0.528574	-0.710	0.08409011	0.16454512	0.17333388	50.32
0.6088	0.530462	-0.711	0.08409405	0.16456157	0.17335725	50.32
0.6096	0.539274	-0.715	0.08406270	0.16455871	0.17336202	50.32
0.6104	0.556355	-0.720	0.08402151	0.16450852	0.17332309	50.31
0.6112	0.587454	-0.721	0.08395183	0.16442668	0.17324722	50.31
0.6120	0.641699	-0.717	0.08380944	0.16425514	0.17306530	50.31
0.6128	0.726442	-0.720	0.08355206	0.16396236	0.17274046	50.31
0.6136	0.843143	-0.724	0.08316207	0.16354924	0.17230171	50.31
0.6144	0.987225	-0.728	0.08266109	0.16303486	0.17176473	50.31
0.6152	1.148529	-0.735	0.08207864	0.16244060	0.17116266	50.31
0.6160	1.316557	-0.734	0.08147359	0.16185492	0.17054594	50.31
0.6168	1.483440	-0.730	0.08086163	0.16125965	0.16991949	50.31
0.6176	1.641426	-0.734	0.08025563	0.16070396	0.16931742	50.31
0.6184	1.783161	-0.735	0.07970160	0.16021371	0.16876775	50.32
0.6192	1.903496	-0.733	0.07922220	0.15977639	0.16829300	50.32
0.6200	1.999340	-0.732	0.07882541	0.15943533	0.16793895	50.32
0.6208	2.071323	-0.729	0.07851106	0.15916365	0.16762471	50.32
0.6216	2.123394	-0.723	0.07828522	0.15897286	0.16744775	50.33
0.6224	2.160530	-0.725	0.07810450	0.15882742	0.16726977	50.33
0.6232	2.188082	-0.731	0.07794821	0.15871090	0.16712874	50.33
0.6240	2.209797	-0.730	0.07783920	0.15862614	0.16701490	50.33
0.6248	2.228708	-0.735	0.07772619	0.15853566	0.16691959	50.33
0.6256	2.245331	-0.730	0.07763678	0.15846252	0.16682422	50.33
0.6264	2.258921	-0.723	0.07758278	0.15840667	0.16675997	50.32
0.6272	2.268019	-0.724	0.07752383	0.15836722	0.16674441	50.32
0.6280	2.270479	-0.725	0.07748741	0.15834308	0.16667527	50.32
0.6288	2.265444	-0.729	0.07748246	0.15833920	0.16670740	50.32
0.6296	2.251797	-0.732	0.07750016	0.15836519	0.16672587	50.32
0.6304	2.226763	-0.736	0.07757372	0.15840173	0.16677159	50.31
0.6312	2.181845	-0.734	0.07772207	0.15851057	0.16690880	50.31
0.6320	2.106428	-0.729	0.07798535	0.15871960	0.16716176	50.31
0.6328	1.995707	-0.731	0.07837236	0.15902972	0.16752756	50.31
0.6336	1.851826	-0.731	0.07888711	0.15946901	0.16802073	50.31
0.6344	1.686630	-0.731	0.07949126	0.15999597	0.16861504	50.31
0.6352	1.516714	-0.732	0.08011508	0.16055465	0.16922200	50.31
0.6360	1.355352	-0.731	0.08073491	0.16111815	0.16982025	50.31
0.6368	1.211758	-0.727	0.08128208	0.16163826	0.17036009	50.31
0.6376	1.090508	-0.726	0.08175945	0.16209286	0.17084843	50.31
0.6384	0.992603	-0.732	0.08214641	0.16248196	0.17122489	50.32
0.6392	0.915499	-0.733	0.08245087	0.16279024	0.17157209	50.32
0.6400	0.854015	-0.735	0.08271414	0.16304260	0.17184258	50.32
0.6408	0.803204	-0.736	0.08292139	0.16325545	0.17205942	50.32
0.6416	0.757713	-0.730	0.08310997	0.16346347	0.17227536	50.33
0.6424	0.714054	-0.727	0.08327895	0.16365516	0.17246020	50.33
0.6432	0.670938	-0.727	0.08342624	0.16384101	0.17264891	50.33
0.6440	0.627937	-0.724	0.08358938	0.16403079	0.17283380	50.33
0.6448	0.587826	-0.727	0.08374071	0.16419840	0.17301178	50.33
0.6456	0.553551	-0.721	0.08388805	0.16435832	0.17315769	50.33
0.6464	0.528059	-0.715	0.08401084	0.16449898	0.17329389	50.32
0.6472	0.513124	-0.713	0.08407950	0.16458756	0.17338145	50.32
0.6480	0.508261	-0.708	0.08411670	0.16463387	0.17341560	50.32
0.6488	0.512152	-0.714	0.08411968	0.16465020	0.17344099	50.32
0.6496	0.524111	-0.719	0.08410197	0.16462517	0.17341280	50.32
0.6504	0.546055	-0.725	0.08406860	0.16456163	0.17334664	50.31
0.6512	0.584822	-0.728	0.08397043	0.16444981	0.17323762	50.31
0.6520	0.648823	-0.726	0.08378386	0.16424364	0.17302650	50.31
0.6528	0.742722	-0.731	0.08347648	0.16390747	0.17265594	50.31
0.6536	0.865774	-0.732	0.08305800	0.16347110	0.17222983	50.31
0.6544	1.010571	-0.730	0.08256197	0.16292793	0.17167538	50.31
0.6552	1.167612	-0.731	0.08200300	0.16234905	0.17106932	50.31
0.6560	1.327915	-0.722	0.08142740	0.16177791	0.17049724	50.31
0.6568	1.485014	-0.721	0.08083999	0.16121924	0.16988343	50.31
0.6576	1.633615	-0.724	0.08026338	0.16069913	0.16931140	50.31
0.6584	1.768227	-0.728	0.07973689	0.16022044	0.16879779	50.32
0.6592	1.886015	-0.732	0.07925653	0.15979367	0.16834843	50.32
0.6600	1.985178	-0.729	0.07883412	0.15943444	0.16795546	50.32
0.6608	2.066116	-0.731	0.07848245	0.15914059	0.16764808	50.32
0.6616	2.131634	-0.724	0.07819659	0.15889972	0.16737670	50.33
0.6624	2.184591	-0.724	0.07796383	0.15871382	0.16717345	50.33
0.6632	2.228136	-0.731	0.07776153	0.15854710	0.16696435	50.33
0.6640	2.264156	-0.730	0.07759357	0.15841705	0.16681361	50.33
0.6648	2.293539	-0.737	0.07743841	0.15830344	0.16667157	50.33
0.6656	2.315741	-0.739	0.07732052	0.15821773	0.16655576	50.33
0.6664	2.329731	-0.732	0.07724398	0.15817255	0.16649741	50.32
0.6672	2.335052	-0.732	0.07720083	0.15813023	0.16644585	50.32
0.6680	2.331591	-0.727	0.07719195	0.15812737	0.16646916	50.32
0.6688	2.319460	-0.727	0.07720369	0.15813798	0.16644877	50.32
0.6696	2.297859	-0.728	0.07725662	0.15816492	0.16653335	50.32
0.6704	2.261467	-0.727	0.07737148	0.15825641	0.16662872	50.31
0.6712	2.200842	-0.724	0.07758558	0.15841722	0.16679323	50.31
0.6720	2.109404	-0.722	0.07793039	0.15868211	0.16713846	50.31
0.6728	1.986465	-0.724	0.07838422	0.15904814	0.16750813	50.31
0.6736	1.838894	-0.731	0.07891464	0.15949792	0.16801584	50.31
0.6744	1.680079	-0.736	0.07949907	0.16000551	0.16859752	50.31
0.6752	1.523895	-0.735	0.08007759	0.16052085	0.16915399	50.31
0.6760	1.379185	-0.735	0.08064044	0.16103238	0.16973078	50.31
0.6768	1.251211	-0.727	0.08114928	0.16149282	0.17021918	50.31
0.6776	1.141520	-0.729	0.08158249	0.16190034	0.17063743	50.31
0.6784	1.048479	-0.732	0.08194989	0.16225386	0.17100018	50.32
0.6792	0.969372	-0.731	0.08225250	0.16256011	0.17132908	50.32
0.6800	0.900764	-0.731	0.08252263	0.16283756	0.17160624	50.32
0.6808	0.838938	-0.728	0.08276922	0.16308892	0.17188156	50.32
0.6816	0.780716	-0.719	0.08300102	0.16333354	0.17212576	50.33
0.6824	0.724382	-0.720	0.08322394	0.16357434	0.17236793	50.33
0.6832	0.669680	-0.726	0.08341742	0.16379869	0.17259556	50.33
0.6840	0.617809	-0.723	0.08359718	0.16402888	0.17283481	50.33
0.6848	0.571775	-0.728	0.08376420	0.16422927	0.17304683	50.33
0.6856	0.534210	-0.720	0.08391154	0.16440356	0.17320442	50.33
0.6864	0.507088	-0.716	0.08404422	0.16454518	0.17337757	50.32
0.6872	0.491695	-0.716	0.08412278	0.16463768	0.17343014	50.32
0.6880	0.486345	-0.721	0.08416897	0.16468871	0.17347592	50.32
0.6888	0.489750	-0.729	0.08417189	0.16469836	0.17349929	50.32
0.6896	0.501108	-0.732	0.08415419	0.16468585	0.17347205	50.32
0.6904	0.521908	-0.739	0.08411580	0.16462898	0.17343706	50.31
0.6912	0.559645	-0.735	0.08402342	0.16451144	0.17331648	50.31
0.6920	0.622816	-0.732	0.08384854	0.16431397	0.17310917	50.31
0.6928	0.716143	-0.735	0.08353817	0.16398454	0.17275405	50.31
0.6936	0.838823	-0.736	0.08311784	0.16353661	0.17229104	50.31
0.6944	0.983677	-0.740	0.08261985	0.16301745	0.17177159	50.31
0.6952	1.140747	-0.738	0.08206493	0.16243762	0.17115098	50.31
0.6960	1.301594	-0.735	0.08149517	0.16185778	0.17057711	50.31
0.6968	1.459379	-0.727	0.08091664	0.16130298	0.16996998	50.31
0.6976	1.608181	-0.728	0.08034199	0.16078192	0.16939896	50.31
0.6984	1.742821	-0.730	0.07981056	0.16030610	0.16887176	50.32
0.6992	1.860609	-0.730	0.07934695	0.15988803	0.16841072	50.32
0.7000	1.960831	-0.730	0.07894218	0.15952975	0.16802555	50.32
0.7008	2.044029	-0.727	0.07858664	0.15922630	0.16770452	50.32
0.7016	2.112150	-0.721	0.07829499	0.15899706	0.16745842	50.33
0.7024	2.166939	-0.723	0.07804739	0.15880632	0.16721624	50.33
0.7032	2.210255	-0.727	0.07783526	0.15864348	0.16702950	50.33
0.7040	2.243786	-0.726	0.07768691	0.15851349	0.16684753	50.33
0.7048	2.269421	-0.730	0.07755816	0.15839696	0.16675413	50.33
0.7056	2.287788	-0.724	0.07744038	0.15831226	0.16665870	50.33
0.7064	2.299175	-0.722	0.07737851	0.15825933	0.16659927	50.32
0.7072	2.303782	-0.723	0.07732940	0.15822458	0.16658378	50.32
0.7080	2.301493	-0.724	0.07731462	0.15820628	0.16652638	50.32
0.7088	2.292223	-0.726	0.07733119	0.15820825	0.16655362	50.32
0.7096	2.275972	-0.725	0.07737243	0.15823519	0.16659653	50.32
0.7104	2.249680	-0.726	0.07743824	0.15828532	0.16663647	50.31
0.7112	2.205019	-0.722	0.07756889	0.15839607	0.16679603	50.31
0.7120	2.132349	-0.720	0.07782722	0.15859246	0.16701001	50.31
0.7128	2.026005	-0.722	0.07820338	0.15887862	0.16735917	50.31
0.7136	1.887474	-0.725	0.07871807	0.15928602	0.16782796	50.31
0.7144	1.727428	-0.728	0.07931143	0.15978885	0.16839504	50.31
0.7152	1.560831	-0.727	0.07993919	0.16033691	0.16900891	50.31
0.7160	1.400270	-0.721	0.08053845	0.16090417	0.16960818	50.31
0.7168	1.254444	-0.718	0.08108956	0.16143781	0.17018992	50.31
0.7176	1.127329	-0.714	0.08158559	0.16190875	0.17065299	50.31
0.7184	1.020470	-0.719	0.08199126	0.16231620	0.17109072	50.32
0.7192	0.932751	-0.720	0.08234388	0.16266590	0.17144179	50.32
0.7200	0.860910	-0.712	0.08263361	0.16296643	0.17174625	50.32
0.7208	0.801144	-0.716	0.08286941	0.16321021	0.17201769	50.32
0.7216	0.748959	-0.708	0.08309239	0.16345388	0.17226577	50.33
0.7224	0.700636	-0.711	0.08328491	0.16365618	0.17246425	50.33
0.7232	0.654688	-0.723	0.08345878	0.16384691	0.17265391	50.33
0.7240	0.610743	-0.722	0.08363163	0.16404915	0.17284846	50.33
0.7248	0.570745	-0.726	0.08377707	0.16423309	0.17301679	50.33
0.7256	0.537014	-0.721	0.08390862	0.16439009	0.17319971	50.32
0.7264	0.511894	-0.712	0.08401960	0.16452879	0.17333305	50.32
0.7272	0.496902	-0.715	0.08410108	0.16461158	0.17342544	50.32
0.7280	0.491524	-0.718	0.08414620	0.16464436	0.17343897	50.32
0.7288	0.495043	-0.724	0.08415902	0.16466838	0.17345738	50.32
0.7296	0.506544	-0.728	0.08415020	0.16465396	0.17342722	50.32
0.7304	0.528059	-0.727	0.08409816	0.16460294	0.17339116	50.31
0.7312	0.566282	-0.727	0.08400089	0.16449219	0.17328417	50.31
0.7320	0.629339	-0.726	0.08383089	0.16428512	0.17307895	50.31
0.7328	0.722866	-0.734	0.08352351	0.16394508	0.17272770	50.31
0.7336	0.846491	-0.738	0.08310300	0.16349334	0.17226475	50.31
0.7344	0.993605	-0.740	0.08259624	0.16295683	0.17171419	50.31
0.7352	1.154566	-0.744	0.08201182	0.16236544	0.17110133	50.31
0.7360	1.319504	-0.736	0.08142042	0.16177112	0.17049050	50.31
0.7368	1.481352	-0.734	0.08082914	0.16120374	0.16988057	50.31
0.7376	1.633472	-0.732	0.08023578	0.16066819	0.16929311	50.31
0.7384	1.770000	-0.731	0.07969457	0.16019142	0.16876107	50.32
0.7392	1.887388	-0.733	0.07921225	0.15978116	0.16832137	50.32
0.7400	1.983519	-0.734	0.07880467	0.15943253	0.16791570	50.32
0.7408	2.059221	-0.736	0.07848442	0.15915799	0.16763937	50.32
0.7416	2.117472	-0.730	0.07823002	0.15894991	0.16738743	50.33
0.7424	2.162132	-0.729	0.07802570	0.15877843	0.16722101	50.33
0.7432	2.196693	-0.729	0.07784396	0.15864646	0.16705185	50.33
0.7440	2.223701	-0.730	0.07770354	0.15852606	0.16693020	50.33
0.7448	2.244816	-0.731	0.07758367	0.15842974	0.16682994	50.33
0.7456	2.260494	-0.734	0.07749230	0.15835655	0.16670942	50.33
0.7464	2.270651	-0.730	0.07743824	0.15831029	0.16668695	50.32
0.7472	2.275000	-0.729	0.07739109	0.15828437	0.16661990	50.32
0.7480	2.273369	-0.735	0.07737041	0.15827084	0.16663259	50.32
0.7488	2.265415	-0.735	0.07737631	0.15827465	0.16665882	50.32
0.7496	2.250824	-0.739	0.07741362	0.15830553	0.16665494	50.32
0.7504	2.226677	-0.736	0.07748437	0.15835553	0.16674346	50.31
0.7512	2.184591	-0.730	0.07762587	0.15846437	0.16683686	50.31
0.7520	2.113810	-0.726	0.07786757	0.15865797	0.16708010	50.31
0.7528	2.007723	-0.729	0.07823986	0.15895265	0.16742647	50.31
0.7536	1.867447	-0.736	0.07875651	0.15937263	0.16791195	50.31
0.7544	1.703167	-0.742	0.07936847	0.15988415	0.16848290	50.31
0.7552	1.531162	-0.744	0.08002174	0.16046202	0.16908789	50.31
0.7560	1.365709	-0.740	0.08066809	0.16104484	0.16972792	50.31
0.7568	1.216764	-0.734	0.08123094	0.16159582	0.17027938	50.31
0.7576	1.090565	-0.734	0.08172601	0.16207254	0.17079014	50.32
0.7584	0.988655	-0.739	0.08213168	0.16246462	0.17121232	50.32
0.7592	0.908833	-0.736	0.08244604	0.16277951	0.17153144	50.32
0.7600	0.846434	-0.737	0.08270931	0.16302317	0.17179799	50.32
0.7608	0.795250	-0.740	0.08291364	0.16323996	0.17201877	50.32
0.7616	0.750017	-0.735	0.08309335	0.16344029	0.17221725	50.33
0.7624	0.706701	-0.740	0.08325642	0.16363108	0.17242527	50.33
0.7632	0.663385	-0.743	0.08341551	0.16381025	0.17260325	50.33
0.7640	0.620070	-0.739	0.08357960	0.16399908	0.17280751	50.33
0.7648	0.578814	-0.738	0.08374661	0.16417640	0.17298162	50.33
0.7656	0.542278	-0.732	0.08388901	0.16434395	0.17314708	50.33
0.7664	0.513554	-0.730	0.08401674	0.16449517	0.17331439	50.32
0.7672	0.494556	-0.731	0.08409524	0.16458666	0.17340976	50.32
0.7680	0.485487	-0.738	0.08413160	0.16465116	0.17346424	50.32
0.7688	0.485687	-0.742	0.08414733	0.16466850	0.17349929	50.32
0.7696	0.493984	-0.742	0.08413655	0.16466272	0.17347407	50.32
0.7704	0.511665	-0.745	0.08410609	0.16462606	0.17343605	50.31
0.7712	0.544481	-0.740	0.08403045	0.16453642	0.17337084	50.31
0.7720	0.602074	-0.742	0.08387524	0.16436303	0.17317629	50.31
0.7728	0.691738	-0.749	0.08359820	0.16405869	0.17285138	50.31
0.7736	0.814676	-0.748	0.08319056	0.16361564	0.17240787	50.31
0.7744	0.965710	-0.752	0.08266902	0.16306090	0.17181355	50.31
0.7752	1.134539	-0.752	0.08207279	0.16243863	0.17120165	50.31
0.7760	1.310406	-0.746	0.08143330	0.16181159	0.17053616	50.31
0.7768	1.485100	-0.742	0.08079088	0.16119993	0.16987270	50.31
0.7776	1.650782	-0.743	0.08016503	0.16062391	0.16925013	50.31
0.7784	1.799984	-0.742	0.07957065	0.16010284	0.16864896	50.32
0.7792	1.927071	-0.740	0.07906091	0.15965301	0.16816747	50.32
0.7800	2.028208	-0.742	0.07862484	0.15929085	0.16773856	50.32
0.7808	2.103052	-0.736	0.07829392	0.15901726	0.16744769	50.32
0.7816	2.155123	-0.730	0.07806998	0.15882647	0.16721809	50.33
0.7824	2.190228	-0.728	0.07789218	0.15868783	0.16708195	50.33
0.7832	2.214947	-0.731	0.07776052	0.15858090	0.16695064	50.33
0.7840	2.235117	-0.728	0.07764459	0.15849811	0.16684169	50.33
0.7848	2.254829	-0.735	0.07752967	0.15841150	0.16675127	50.33
0.7856	2.274771	-0.727	0.07742852	0.15833336	0.16664332	50.33
0.7864	2.293625	-0.724	0.07733917	0.15826595	0.16658586	50.32
0.7872	2.308531	-0.730	0.07726848	0.15820336	0.16649252	50.32
0.7880	2.315912	-0.728	0.07721943	0.15816677	0.16647696	50.32
0.7888	2.314024	-0.732	0.07719684	0.15815330	0.16643518	50.32
0.7896	2.301521	-0.729	0.07722235	0.15816778	0.16646725	50.32
0.7904	2.275286	-0.722	0.07728910	0.15821880	0.16653627	50.31
0.7912	2.226648	-0.718	0.07745123	0.15832472	0.16666657	50.31
0.7920	2.145996	-0.718	0.07774389	0.15853667	0.16694081	50.31
0.7928	2.029409	-0.721	0.07816428	0.15885836	0.16731924	50.31
0.7936	1.880150	-0.730	0.07870644	0.15930235	0.16783381	50.31
0.7944	1.711893	-0.733	0.07931632	0.15983403	0.16842616	50.31
0.7952	1.541605	-0.732	0.07995480	0.16039562	0.16906232	50.31
0.7960	1.382532	-0.731	0.08055800	0.16095328	0.16964018	50.31
0.7968	1.243086	-0.727	0.08110219	0.16145903	0.17020535	50.31
0.7976	1.126156	-0.725	0.08156490	0.16189736	0.17063928	50.32
0.7984	1.030827	-0.725	0.08194113	0.16227007	0.17103422	50.32
0.7992	0.953608	-0.727	0.08224857	0.16258025	0.17135030	50.32
0.8000	0.889635	-0.725	0.08250207	0.16283935	0.17160815	50.32
0.8010	0.829525	-0.745	0.08323765	0.16356748	0.17238545	50.31
0.8020	0.829210	-0.739	0.08323956	0.16356075	0.17238641	50.31
0.8030	0.827436	-0.738	0.08325726	0.16357136	0.17240572	50.32
0.8040	0.821056	-0.739	0.08327496	0.16359645	0.17240375	50.32
0.8050	0.805120	-0.739	0.08332318	0.16364366	0.17243099	50.32
0.8060	0.773335	-0.739	0.08342344	0.16373134	0.17253804	50.32
0.8070	0.723467	-0.741	0.08358455	0.16389900	0.17271316	50.33
0.8080	0.662012	-0.735	0.08380455	0.16413206	0.17296225	50.33
0.8090	0.602789	-0.739	0.08399701	0.16437185	0.17318690	50.33
0.8100	0.559330	-0.739	0.08414632	0.16455764	0.17336684	50.33
0.8110	0.537615	-0.740	0.08422399	0.16464818	0.17344761	50.33
0.8120	0.535269	-0.739	0.08424175	0.16468281	0.17349535	50.33
0.8130	0.548544	-0.738	0.08422202	0.16465396	0.17347109	50.33
0.8140	0.577869	-0.742	0.08414435	0.16456145	0.17340201	50.32
0.8150	0.632772	-0.741	0.08397728	0.16438520	0.17320448	50.32
0.8160	0.721951	-0.743	0.08369148	0.16407311	0.17288733	50.32
0.8170	0.841455	-0.743	0.08328980	0.16365212	0.17245251	50.31
0.8180	0.977612	-0.735	0.08282322	0.16317338	0.17197782	50.31
0.8190	1.112995	-0.735	0.08234680	0.16266865	0.17143798	50.31
0.8200	1.237078	-0.733	0.08188999	0.16221601	0.17096335	50.31
0.8210	1.344452	-0.735	0.08148628	0.16180670	0.17052561	50.31
0.8220	1.432571	-0.736	0.08113563	0.16149271	0.17021430	50.31
0.8230	1.503181	-0.735	0.08086056	0.16123170	0.16993988	50.32
0.8240	1.559229	-0.735	0.08062088	0.16101497	0.16972202	50.32
0.8250	1.604147	-0.735	0.08044016	0.16083878	0.16954011	50.32
0.8260	1.642199	-0.736	0.08027506	0.16069233	0.16937780	50.32
0.8270	1.676989	-0.735	0.08013266	0.16056138	0.16923773	50.33
0.8280	1.711006	-0.731	0.07999027	0.16043139	0.16908401	50.33
0.8290	1.744566	-0.733	0.07984203	0.16029078	0.16893899	50.33
0.8300	1.774807	-0.729	0.07970852	0.16016644	0.16881251	50.33
0.8310	1.797924	-0.727	0.07958764	0.16005367	0.16869187	50.33
0.8320	1.810455	-0.723	0.07950908	0.16000456	0.16863066	50.33
0.8330	1.811972	-0.719	0.07948345	0.15997458	0.16859078	50.33
0.8340	1.803732	-0.716	0.07949328	0.15997738	0.16860539	50.32
0.8350	1.788454	-0.720	0.07953167	0.16001022	0.16862392	50.32
0.8360	1.766338	-0.726	0.07958859	0.16005653	0.16870946	50.32
0.8370	1.734180	-0.723	0.07968879	0.16014141	0.16879117	50.31
0.8380	1.684170	-0.724	0.07987434	0.16027433	0.16895944	50.31
0.8390	1.608953	-0.729	0.08012974	0.16048908	0.16920066	50.31
0.8400	1.507502	-0.731	0.08048439	0.16080695	0.16954499	50.31
0.8410	1.388140	-0.732	0.08091068	0.16119701	0.16998369	50.31
0.8420	1.263485	-0.726	0.08137435	0.16163814	0.17040199	50.31
0.8430	1.144495	-0.726	0.08182818	0.16207933	0.17085922	50.32
0.8440	1.037779	-0.726	0.08222109	0.16248387	0.17124927	50.32
0.8450	0.946198	-0.730	0.08256483	0.16282976	0.17162573	50.32
0.8460	0.870066	-0.728	0.08285075	0.16313505	0.17192829	50.32
0.8470	0.806694	-0.725	0.08309531	0.16338450	0.17221135	50.33
0.8480	0.752249	-0.721	0.08330858	0.16361558	0.17244279	50.33
0.8490	0.703211	-0.732	0.08349603	0.16381890	0.17263830	50.33
0.8500	0.656977	-0.741	0.08365715	0.16400665	0.17282313	50.33
0.8510	0.613089	-0.743	0.08381909	0.16419643	0.17300797	50.33
0.8520	0.571404	-0.740	0.08397728	0.16438323	0.17320156	50.33
0.8530	0.533409	-0.734	0.08412856	0.16456151	0.17338157	50.33
0.8540	0.500078	-0.734	0.08423966	0.16470891	0.17350900	50.32
0.8550	0.472984	-0.736	0.08433205	0.16482830	0.17364234	50.32
0.8560	0.453358	-0.738	0.08441550	0.16492558	0.17374438	50.32
0.8570	0.441370	-0.739	0.08447242	0.16499877	0.17380369	50.31
0.8580	0.436707	-0.736	0.08450973	0.16504401	0.17386389	50.31
0.8590	0.438480	-0.743	0.08450770	0.16504985	0.17387748	50.31
0.8600	0.445318	-0.746	0.08449882	0.16503733	0.17387837	50.31
0.8610	0.457478	-0.750	0.08446735	0.16499019	0.17382401	50.31
0.8620	0.476675	-0.745	0.08444089	0.16493136	0.17378026	50.31
0.8630	0.509977	-0.747	0.08435053	0.16483593	0.17366266	50.32
0.8640	0.566797	-0.746	0.08417374	0.16462982	0.17347586	50.32
0.8650	0.653515	-0.746	0.08389091	0.16431880	0.17314994	50.32
0.8660	0.766039	-0.741	0.08351964	0.16390365	0.17274135	50.32
0.8670	0.893326	-0.742	0.08309138	0.16343468	0.17224431	50.33
0.8680	1.022501	-0.734	0.08264154	0.16297030	0.17176765	50.33
0.8690	1.144867	-0.733	0.08218277	0.16251850	0.17127061	50.33
0.8700	1.254587	-0.732	0.08176720	0.16209662	0.17086297	50.33
0.8710	1.349316	-0.736	0.08139098	0.16173446	0.17048073	50.33
0.8720	1.428680	-0.735	0.08108258	0.16144180	0.17018110	50.33
0.8730	1.494570	-0.733	0.08082908	0.16120666	0.16993696	50.33
0.8740	1.549931	-0.734	0.08059829	0.16099870	0.16971421	50.32
0.8750	1.598253	-0.734	0.08039683	0.16081846	0.16952354	50.32
0.8760	1.643858	-0.736	0.08020628	0.16065669	0.16933876	50.32
0.8770	1.688776	-0.735	0.08001864	0.16048712	0.16915196	50.31
0.8780	1.733093	-0.732	0.07983792	0.16033792	0.16899836	50.31
0.8790	1.773748	-0.738	0.07965130	0.16016829	0.16879308	50.31
0.8800	1.806307	-0.736	0.07951093	0.16003442	0.16866666	50.31
0.8810	1.827621	-0.735	0.07940286	0.15992832	0.16851878	50.31
0.8820	1.836405	-0.727	0.07935077	0.15988493	0.16849834	50.31
0.8830	1.834660	-0.728	0.07934386	0.15988207	0.16847014	50.32
0.8840	1.824474	-0.727	0.07936352	0.15989178	0.16851777	50.32
0.8850	1.807995	-0.733	0.07940876	0.15993327	0.16850227	50.32
0.8860	1.784620	-0.728	0.07946771	0.15999109	0.16859859	50.32
0.8870	1.749544	-0.728	0.07957768	0.16008073	0.16868120	50.33
0.8880	1.693783	-0.724	0.07977605	0.16023964	0.16889322	50.33
0.8890	1.611242	-0.731	0.08007467	0.16046792	0.16913736	50.33
0.8900	1.505213	-0.729	0.08045679	0.16079438	0.16951191	50.33
0.8910	1.387281	-0.730	0.08088017	0.16117680	0.16992629	50.33
0.8920	1.270409	-0.723	0.08130944	0.16158807	0.17036694	50.33
0.8930	1.162434	-0.723	0.08171308	0.16198015	0.17077744	50.33
0.8940	1.066647	-0.727	0.08207363	0.16232407	0.17114216	50.32
0.8950	0.983706	-0.727	0.08238113	0.16264671	0.17144960	50.32
0.8960	0.912695	-0.724	0.08265519	0.16292131	0.17173368	50.32
0.8970	0.850954	-0.719	0.08289391	0.16317552	0.17199051	50.31
0.8980	0.794849	-0.717	0.08312482	0.16340286	0.17224240	50.31
0.8990	0.742064	-0.724	0.08331734	0.16362244	0.17245734	50.31
0.9000	0.690393	-0.726	0.08348924	0.16383904	0.17266262	50.31
0.9010	0.640039	-0.725	0.08366311	0.16404235	0.17286485	50.31
0.9020	0.590687	-0.720	0.08385265	0.16426384	0.17308861	50.31
0.9030	0.544252	-0.714	0.08403736	0.16447967	0.17329776	50.32
0.9040	0.502510	-0.716	0.08418179	0.16467130	0.17347586	50.32
0.9050	0.468006	-0.720	0.08430851	0.16483986	0.17363936	50.32
0.9060	0.443001	-0.724	0.08440471	0.16495830	0.17375410	50.32
0.9070	0.428467	-0.720	0.08447826	0.16502959	0.17384547	50.33
0.9080	0.423717	-0.717	0.08452052	0.16508538	0.17390090	50.33
0.9090	0.426922	-0.721	0.08453035	0.16508728	0.17389208	50.33
0.9100	0.435820	-0.723	0.08452147	0.16508442	0.17388821	50.33
0.9110	0.450125	-0.727	0.08448511	0.16502470	0.17383766	50.33
0.9120	0.472441	-0.732	0.08444190	0.16495252	0.17377543	50.33
0.9130	0.509863	-0.733	0.08434671	0.16482544	0.17366558	50.33
0.9140	0.569429	-0.734	0.08416110	0.16461068	0.17344379	50.32
0.9150	0.654259	-0.734	0.08388019	0.16430628	0.17312372	50.32
0.9160	0.759802	-0.737	0.08353829	0.16390359	0.17272198	50.32
0.9170	0.876217	-0.736	0.08314145	0.16347307	0.17227447	50.31
0.9180	0.994778	-0.737	0.08273768	0.16303581	0.17185420	50.31
0.9190	1.108990	-0.743	0.08230352	0.16261685	0.17140663	50.31
0.9200	1.215305	-0.742	0.08190179	0.16221327	0.17099917	50.31
0.9210	1.311979	-0.741	0.08152264	0.16183472	0.17059851	50.31
0.9220	1.398582	-0.732	0.08119547	0.16151685	0.17027080	50.31
0.9230	1.475945	-0.728	0.08088112	0.16124135	0.16996431	50.31
0.9240	1.545010	-0.730	0.08059925	0.16100055	0.16968793	50.32
0.9250	1.605949	-0.734	0.08034694	0.16078097	0.16944182	50.32
0.9260	1.658621	-0.740	0.08012599	0.16058266	0.16923183	50.32
0.9270	1.702709	-0.740	0.07993531	0.16041976	0.16906166	50.33
0.9280	1.737614	-0.736	0.07978791	0.16029370	0.16893417	50.33
0.9290	1.763535	-0.739	0.07966310	0.16018379	0.16879207	50.33
0.9300	1.780386	-0.738	0.07957178	0.16010386	0.16871136	50.33
0.9310	1.790543	-0.738	0.07951391	0.16003925	0.16859657	50.33
0.9320	1.794605	-0.738	0.07948142	0.16001511	0.16861212	50.33
0.9330	1.793690	-0.740	0.07947451	0.16001415	0.16858971	50.33
0.9340	1.787281	-0.742	0.07948822	0.16001511	0.16861600	50.32
0.9350	1.775608	-0.748	0.07953155	0.16002375	0.16863453	50.32
0.9360	1.758356	-0.746	0.07957488	0.16006136	0.16866946	50.32
0.9370	1.732721	-0.747	0.07965827	0.16012979	0.16876286	50.31
0.9380	1.690636	-0.739	0.07980168	0.16024917	0.16888833	50.31
0.9390	1.623116	-0.747	0.08003342	0.16043216	0.16912961	50.31
0.9400	1.527243	-0.744	0.08038217	0.16072303	0.16943508	50.31
0.9410	1.410513	-0.747	0.08079475	0.16109300	0.16984653	50.31
0.9420	1.286201	-0.742	0.08125156	0.16152263	0.17028427	50.31
0.9430	1.166439	-0.743	0.08169359	0.16195607	0.17073756	50.32
0.9440	1.057749	-0.745	0.08209336	0.16235864	0.17116463	50.32
0.9450	0.963993	-0.744	0.08244503	0.16270733	0.17153329	50.32
0.9460	0.885372	-0.744	0.08274066	0.16301459	0.17185909	50.32
0.9470	0.819826	-0.737	0.08298236	0.16327846	0.17212564	50.33
0.9480	0.763350	-0.734	0.08321518	0.16351545	0.17236793	50.33
0.9490	0.712624	-0.737	0.08339894	0.16371775	0.17256635	50.33
0.9500	0.665445	-0.735	0.08357763	0.16391718	0.17275703	50.33
0.9510	0.621958	-0.733	0.08372796	0.16410112	0.17294174	50.33
0.9520	0.581932	-0.729	0.08387029	0.16430336	0.17313343	50.33
0.9530	0.545940	-0.724	0.08402067	0.16446519	0.17329395	50.33
0.9540	0.514183	-0.722	0.08414739	0.16461444	0.17344570	50.32
0.9550	0.487432	-0.724	0.08424562	0.16473204	0.17354298	50.32
0.9560	0.467005	-0.729	0.08432615	0.16484368	0.17365098	50.32
0.9570	0.453701	-0.727	0.08437717	0.16492361	0.17372108	50.31
0.9580	0.447893	-0.725	0.08443218	0.16497564	0.17378432	50.31
0.9590	0.449324	-0.730	0.08443707	0.16498435	0.17376971	50.31
0.9600	0.456648	-0.731	0.08441746	0.16497666	0.17376095	50.31
0.9610	0.469751	-0.728	0.08438611	0.16493422	0.17371917	50.31
0.9620	0.490608	-0.727	0.08435088	0.16486299	0.17368215	50.31
0.9630	0.527143	-0.730	0.08426929	0.16474164	0.17355084	50.32
0.9640	0.587912	-0.737	0.08409238	0.16453457	0.17334062	50.32
0.9650	0.677090	-0.738	0.08379650	0.16421759	0.17298943	50.32
0.9660	0.789757	-0.735	0.08342129	0.16381013	0.17259252	50.32
0.9670	0.915298	-0.731	0.08299404	0.16332173	0.17211592	50.33
0.9680	1.042471	-0.718	0.08255208	0.16284591	0.17165494	50.33
0.9690	1.163864	-0.724	0.08209932	0.16240287	0.17115098	50.33
0.9700	1.272955	-0.723	0.08168674	0.16199064	0.17075318	50.33
0.9710	1.366997	-0.730	0.08131248	0.16163045	0.17036211	50.33
0.9720	1.445675	-0.725	0.08100408	0.16133082	0.17006934	50.33
0.9730	1.512337	-0.725	0.08073008	0.16109586	0.16982222	50.33
0.9740	1.570530	-0.726	0.08048648	0.16088104	0.16959459	50.32
0.9750	1.622915	-0.731	0.08026350	0.16068268	0.16936010	50.32
0.9760	1.670952	-0.732	0.08005816	0.16049862	0.16915482	50.32
0.9770	1.714382	-0.730	0.07986659	0.16032821	0.16898364	50.31
0.9780	1.752090	-0.728	0.07970649	0.16020584	0.16885817	50.31
0.9790	1.781988	-0.733	0.07955813	0.16008455	0.16871810	50.31
0.9800	1.801786	-0.733	0.07946968	0.15999788	0.16862279	50.31
0.9810	1.811686	-0.735	0.07940477	0.15993619	0.16854119	50.31
0.9820	1.813116	-0.734	0.07939589	0.15992171	0.16852278	50.31
0.9830	1.808138	-0.730	0.07938999	0.15993321	0.16852379	50.32
0.9840	1.797695	-0.724	0.07941061	0.15995628	0.16855091	50.32
0.9850	1.781673	-0.723	0.07945490	0.15998805	0.16858977	50.32
0.9860	1.759014	-0.722	0.07952762	0.16004503	0.16864711	50.32
0.9870	1.724424	-0.723	0.07965046	0.16011542	0.16875213	50.33
0.9880	1.669664	-0.718	0.07985377	0.16028786	0.16893023	50.33
0.9890	1.588469	-0.723	0.08014750	0.16051513	0.16920948	50.33
0.9900	1.483469	-0.724	0.08052182	0.16085118	0.16954410	50.33
0.9910	1.365824	-0.726	0.08094519	0.16123641	0.16997200	50.33
0.9920	1.248608	-0.726	0.08138031	0.16164577	0.17040586	50.33
0.9930	1.139688	-0.727	0.08178890	0.16204655	0.17083186	50.33
0.9940	1.042414	-0.731	0.08215326	0.16240692	0.17119378	50.32
0.9950	0.957613	-0.734	0.08246672	0.16272765	0.17152834	50.32
0.9960	0.884714	-0.738	0.08275151	0.16301179	0.17181438	50.32
0.9970	0.821285	-0.735	0.08298528	0.16325927	0.17207605	50.31
0.9980	0.763235	-0.730	0.08321118	0.16350287	0.17233866	50.31
0.9990	0.708103	-0.732	0.08339590	0.16371965	0.17257506	50.31
1.0000	0.654516	-0.738	0.08359140	0.16394895	0.17279005	50.31
1.0010	0.603762	-0.744	0.08376914	0.16415316	0.17300504	50.31
1.0020	0.556955	-0.741	0.08395475	0.16437852	0.17321897	50.31
1.0030	0.516415	-0.738	0.08410901	0.16456252	0.17340380	50.32
1.0040	0.483084	-0.733	0.08423483	0.16472042	0.17355073	50.32
1.0050	0.458765	-0.731	0.08432621	0.16485137	0.17366552	50.32
1.0060	0.443430	-0.734	0.08439589	0.16494006	0.17375791	50.33
1.0070	0.436535	-0.727	0.08443695	0.16499019	0.17378604	50.33
1.0080	0.436220	-0.724	0.08445364	0.16501909	0.17381430	50.33
1.0090	0.441313	-0.734	0.08444673	0.16501039	0.17378610	50.33
1.0100	0.450268	-0.735	0.08443505	0.16499978	0.17379397	50.33
1.0110	0.463800	-0.736	0.08440071	0.16496420	0.17373079	50.33
1.0120	0.483799	-0.734	0.08436835	0.16490924	0.17369384	50.33
1.0130	0.516958	-0.735	0.08428091	0.16479748	0.17359173	50.33
1.0140	0.571804	-0.736	0.08412474	0.16461152	0.17338735	50.32
1.0150	0.653801	-0.737	0.08385950	0.16431677	0.17310625	50.32
1.0160	0.760317	-0.736	0.08350682	0.16391802	0.17270350	50.32
1.0170	0.882139	-0.737	0.08309525	0.16345865	0.17224634	50.31
1.0180	1.008453	-0.736	0.08267003	0.16299063	0.17175215	50.31
1.0190	1.131248	-0.740	0.08221722	0.16253114	0.17128223	50.31
1.0200	1.244717	-0.732	0.08178896	0.16210729	0.17084354	50.31
1.0210	1.345568	-0.728	0.08138520	0.16172576	0.17044377	50.31
1.0220	1.431513	-0.724	0.08105320	0.16140312	0.17010915	50.31
1.0230	1.502752	-0.724	0.08076638	0.16113347	0.16984659	50.32
1.0240	1.560831	-0.725	0.08051485	0.16091287	0.16961497	50.32
1.0250	1.608839	-0.724	0.08030361	0.16072506	0.16942436	50.32
1.0260	1.649923	-0.724	0.08013475	0.16056418	0.16924340	50.32
1.0270	1.686487	-0.716	0.07997555	0.16042358	0.16911215	50.33
1.0280	1.719589	-0.710	0.07983905	0.16030610	0.16897297	50.33
1.0290	1.748972	-0.714	0.07968867	0.16018760	0.16886014	50.33
1.0300	1.772976	-0.714	0.07957178	0.16009414	0.16870844	50.33
1.0310	1.790457	-0.716	0.07948148	0.15999877	0.16864240	50.33
1.0320	1.799984	-0.711	0.07943630	0.15996403	0.16855687	50.33
1.0330	1.801500	-0.712	0.07941467	0.15994185	0.16857237	50.33
1.0340	1.795406	-0.710	0.07942051	0.15995818	0.16853535	50.32
1.0350	1.782646	-0.718	0.07945877	0.15998423	0.16859555	50.32
1.0360	1.763506	-0.718	0.07951772	0.16002375	0.16862565	50.32
1.0370	1.735010	-0.718	0.07961398	0.16009307	0.16871804	50.31
1.0380	1.689749	-0.711	0.07976133	0.16022217	0.16885918	50.31
1.0390	1.619253	-0.712	0.08000880	0.16042441	0.16909850	50.31
1.0400	1.522379	-0.710	0.08035469	0.16072881	0.16942632	50.31
1.0410	1.407366	-0.715	0.08076924	0.16109300	0.16982311	50.31
1.0420	1.286373	-0.718	0.08121824	0.16151392	0.17026865	50.31
1.0430	1.169901	-0.722	0.08165234	0.16192812	0.17072195	50.32
1.0440	1.063614	-0.723	0.08205605	0.16232878	0.17111105	50.32
1.0450	0.971403	-0.726	0.08241153	0.16266882	0.17147779	50.32
1.0460	0.893126	-0.722	0.08271211	0.16297215	0.17176759	50.32
1.0470	0.826092	-0.722	0.08295763	0.16324002	0.17206717	50.33
1.0480	0.765295	-0.718	0.08318168	0.16349041	0.17232013	50.33
1.0490	0.706959	-0.724	0.08338708	0.16371876	0.17254782	50.33
1.0500	0.649738	-0.727	0.08359438	0.16394699	0.17278332	50.33
1.0510	0.423603	-0.726	0.08485836	0.16548431	0.17433488	50.32
1.0520	0.422688	-0.723	0.08485729	0.16549015	0.17434269	50.33
1.0530	0.421915	-0.718	0.08487403	0.16550159	0.17435330	50.33
1.0540	0.421257	-0.712	0.08488590	0.16551989	0.17433470	50.33
1.0550	0.420971	-0.717	0.08487415	0.16551703	0.17433274	50.33
1.0560	0.421085	-0.720	0.08486336	0.16551805	0.17430365	50.33
1.0570	0.422344	-0.720	0.08484858	0.16551226	0.17431241	50.33
1.0580	0.425520	-0.714	0.08486235	0.16551894	0.17431438	50.33
1.0590	0.432644	-0.719	0.08485842	0.16550064	0.17429096	50.33
1.0600	0.447922	-0.723	0.08482212	0.16544384	0.17424524	50.32
1.0610	0.479422	-0.723	0.08472979	0.16533792	0.17413235	50.32
1.0620	0.535412	-0.722	0.08456385	0.16514146	0.17391068	50.32
1.0630	0.619211	-0.724	0.08430451	0.16482359	0.17360133	50.32
1.0640	0.728931	-0.721	0.08395475	0.16440946	0.17320061	50.31
1.0650	0.858278	-0.726	0.08350986	0.16390854	0.17267233	50.31
1.0660	1.000757	-0.726	0.08300686	0.16336524	0.17212462	50.31
1.0670	1.150017	-0.734	0.08247262	0.16280270	0.17153615	50.31
1.0680	1.300421	-0.729	0.08191955	0.16224504	0.17097592	50.32
1.0690	1.446676	-0.731	0.08136946	0.16170472	0.17041755	50.32
1.0700	1.583376	-0.728	0.08082432	0.16119814	0.16989225	50.32
1.0710	1.706858	-0.728	0.08031452	0.16073191	0.16938734	50.32
1.0720	1.814289	-0.727	0.07986361	0.16032243	0.16897005	50.33
1.0730	1.906614	-0.725	0.07948053	0.15998530	0.16858387	50.33
1.0740	1.986809	-0.728	0.07913172	0.15969628	0.16826779	50.33
1.0750	2.059021	-0.732	0.07879776	0.15942085	0.16795462	50.33
1.0760	2.126226	-0.732	0.07848048	0.15916848	0.16764826	50.33
1.0770	2.189112	-0.734	0.07818979	0.15893441	0.16739917	50.33
1.0780	2.244587	-0.722	0.07794911	0.15873796	0.16716093	50.33
1.0790	2.288704	-0.722	0.07773697	0.15857232	0.16700923	50.33
1.0800	2.316713	-0.724	0.07758176	0.15844423	0.16683996	50.32
1.0810	2.328272	-0.731	0.07749140	0.15837091	0.16677666	50.32
1.0820	2.326069	-0.734	0.07746589	0.15834105	0.16669583	50.32
1.0830	2.314167	-0.726	0.07748944	0.15836602	0.16673571	50.32
1.0840	2.294884	-0.724	0.07754147	0.15841717	0.16675127	50.31
1.0850	2.266588	-0.725	0.07761616	0.15846151	0.16682613	50.31
1.0860	2.220898	-0.722	0.07775372	0.15855968	0.16695350	50.31
1.0870	2.143908	-0.718	0.07800812	0.15875322	0.16718316	50.31
1.0880	2.025404	-0.711	0.07845306	0.15910578	0.16759175	50.32
1.0890	1.868591	-0.715	0.07903153	0.15958929	0.16812879	50.32
1.0900	1.690750	-0.711	0.07970148	0.16014993	0.16878241	50.32
1.0910	1.515398	-0.720	0.08036447	0.16073358	0.16942149	50.32
1.0920	1.360645	-0.716	0.08096659	0.16126817	0.17000216	50.33
1.0930	1.235991	-0.714	0.08146846	0.16174018	0.17049146	50.33
1.0940	1.141462	-0.707	0.08185154	0.16210049	0.17088044	50.33
1.0950	1.069736	-0.713	0.08212465	0.16237026	0.17114413	50.33
1.0960	1.010027	-0.706	0.08235455	0.16259664	0.17139500	50.33
1.0970	0.951862	-0.709	0.08257270	0.16282010	0.17161882	50.33
1.0980	0.886774	-0.704	0.08283699	0.16310322	0.17190778	50.33
1.0990	0.810757	-0.706	0.08311790	0.16339797	0.17221421	50.33
1.1000	0.725842	-0.707	0.08342433	0.16374469	0.17257512	50.32
1.1010	0.639954	-0.713	0.08372873	0.16409528	0.17294282	50.32
1.1020	0.562677	-0.719	0.08400786	0.16442567	0.17327935	50.32
1.1030	0.501251	-0.714	0.08423084	0.16471457	0.17356431	50.32
1.1040	0.458765	-0.712	0.08439493	0.16492552	0.17376560	50.31
1.1050	0.434074	-0.712	0.08448720	0.16504884	0.17386872	50.31
1.1060	0.423746	-0.715	0.08453923	0.16512114	0.17394358	50.31
1.1070	0.423689	-0.716	0.08456671	0.16515303	0.17396122	50.31
1.1080	0.429754	-0.710	0.08456862	0.16516364	0.17397672	50.32
1.1090	0.440283	-0.707	0.08456957	0.16514730	0.17394656	50.32
1.1100	0.454588	-0.709	0.08453619	0.16510201	0.17391545	50.32
1.1110	0.476933	-0.708	0.08448613	0.16503167	0.17384249	50.32
1.1120	0.517015	-0.712	0.08437514	0.16491216	0.17371124	50.33
1.1130	0.585051	-0.708	0.08417869	0.16468579	0.17350501	50.33
1.1140	0.685759	-0.707	0.08387023	0.16432452	0.17311496	50.33
1.1150	0.814905	-0.716	0.08344394	0.16383809	0.17262858	50.33
1.1160	0.962563	-0.720	0.08293420	0.16327757	0.17203808	50.33
1.1170	1.118631	-0.720	0.08237725	0.16268712	0.17146522	50.33
1.1180	1.273012	-0.707	0.08181345	0.16213232	0.17085630	50.33
1.1190	1.418438	-0.712	0.08126825	0.16159970	0.17032135	50.33
1.1200	1.549959	-0.715	0.08075154	0.16112870	0.16979700	50.32
1.1210	1.667233	-0.723	0.08028299	0.16069627	0.16935724	50.32
1.1220	1.771946	-0.719	0.07985967	0.16030711	0.16895074	50.32
1.1230	1.866961	-0.713	0.07947654	0.15996706	0.16858488	50.32
1.1240	1.954823	-0.714	0.07911116	0.15965492	0.16823375	50.31
1.1250	2.036762	-0.720	0.07873982	0.15935826	0.16788644	50.31
1.1260	2.112751	-0.721	0.07840192	0.15907705	0.16758204	50.31
1.1270	2.180786	-0.716	0.07808757	0.15882379	0.16728437	50.31
1.1280	2.237692	-0.710	0.07783711	0.15862530	0.16704696	50.32
1.1290	2.279835	-0.710	0.07763183	0.15846342	0.16686302	50.32
1.1300	2.305155	-0.710	0.07749331	0.15836322	0.16672301	50.32
1.1310	2.314653	-0.714	0.07741374	0.15829772	0.16667253	50.33
1.1320	2.311735	-0.712	0.07738125	0.15828139	0.16664535	50.33
1.1330	2.300663	-0.709	0.07739598	0.15829390	0.16666180	50.33
1.1340	2.283926	-0.708	0.07743925	0.15832365	0.16669577	50.33
1.1350	2.260523	-0.719	0.07749629	0.15837079	0.16673470	50.33
1.1360	2.224073	-0.722	0.07761127	0.15844983	0.16682714	50.33
1.1370	2.162733	-0.727	0.07782739	0.15861648	0.16699636	50.33
1.1380	2.066317	-0.722	0.07819074	0.15889680	0.16735530	50.33
1.1390	1.934938	-0.726	0.07867885	0.15928787	0.16779977	50.33
1.1400	1.781988	-0.728	0.07924658	0.15977246	0.16837466	50.32
1.1410	1.626091	-0.732	0.07983208	0.16028589	0.16889513	50.32
1.1420	1.482439	-0.732	0.08039588	0.16078001	0.16945845	50.32
1.1430	1.358700	-0.729	0.08088714	0.16121632	0.16989726	50.32
1.1440	1.256332	-0.731	0.08130258	0.16159290	0.17033988	50.31
1.1450	1.170158	-0.734	0.08163369	0.16191173	0.17064130	50.31
1.1460	1.091537	-0.732	0.08193529	0.16221035	0.17096806	50.31
1.1470	1.013002	-0.728	0.08223587	0.16249925	0.17126578	50.31
1.1480	0.930262	-0.722	0.08255106	0.16281998	0.17163444	50.32
1.1490	0.842943	-0.726	0.08287024	0.16315901	0.17199636	50.32
1.1500	0.753393	-0.725	0.08321011	0.16352218	0.17236501	50.32
1.1510	0.666075	-0.731	0.08353537	0.16388714	0.17272395	50.32
1.1520	0.587425	-0.733	0.08383107	0.16423392	0.17305279	50.33
1.1530	0.522394	-0.731	0.08406872	0.16452968	0.17336690	50.33
1.1540	0.474300	-0.728	0.08423865	0.16475707	0.17359066	50.33
1.1550	0.442972	-0.730	0.08435643	0.16490161	0.17376280	50.33
1.1560	0.426779	-0.728	0.08443308	0.16499406	0.17384160	50.33
1.1570	0.422430	-0.730	0.08448124	0.16504318	0.17388141	50.33
1.1580	0.426207	-0.725	0.08450288	0.16506910	0.17388529	50.33
1.1590	0.435619	-0.732	0.08449310	0.16506910	0.17387354	50.33
1.1600	0.449495	-0.734	0.08446848	0.16502863	0.17382592	50.32
1.1610	0.472069	-0.736	0.08442044	0.16496795	0.17377740	50.32
1.1620	0.512381	-0.739	0.08431828	0.16483885	0.17362189	50.32
1.1630	0.581217	-0.738	0.08412677	0.16461635	0.17341375	50.32
1.1640	0.682726	-0.734	0.08380747	0.16424751	0.17305374	50.31
1.1650	0.811644	-0.735	0.08337033	0.16375715	0.17255175	50.31
1.1660	0.957327	-0.732	0.08286339	0.16321105	0.17199928	50.31
1.1670	1.110048	-0.732	0.08231932	0.16264361	0.17139912	50.31
1.1680	1.261768	-0.728	0.08176929	0.16209853	0.17082036	50.32
1.1690	1.405706	-0.732	0.08122516	0.16158324	0.17026383	50.32
1.1700	1.536627	-0.734	0.08070844	0.16110742	0.16975206	50.32
1.1710	1.653414	-0.735	0.08025461	0.16067886	0.16929191	50.32
1.1720	1.756868	-0.727	0.07983804	0.16029835	0.16890675	50.33
1.1730	1.850338	-0.723	0.07946771	0.15996987	0.16855752	50.33
1.1740	1.936941	-0.714	0.07910520	0.15966928	0.16821122	50.33
1.1750	2.019453	-0.725	0.07874960	0.15936881	0.16788346	50.33
1.1760	2.097645	-0.726	0.07840586	0.15909332	0.16754019	50.33
1.1770	2.168970	-0.732	0.07808375	0.15883332	0.16727567	50.33
1.1780	2.229538	-0.726	0.07780677	0.15862328	0.16700321	50.33
1.1790	2.275715	-0.732	0.07759160	0.15843844	0.16681731	50.33
1.1800	2.305155	-0.738	0.07743835	0.15831035	0.16666073	50.32
1.1810	2.317972	-0.741	0.07734704	0.15823525	0.16660428	50.32
1.1820	2.317486	-0.737	0.07730973	0.15821218	0.16655761	50.32
1.1830	2.307301	-0.729	0.07731360	0.15821594	0.16659266	50.32
1.1840	2.290878	-0.726	0.07735372	0.15825921	0.16660440	50.31
1.1850	2.266846	-0.729	0.07740873	0.15830344	0.16667157	50.31
1.1860	2.227793	-0.731	0.07752961	0.15839493	0.16676497	50.31
1.1870	2.160645	-0.727	0.07776737	0.15855104	0.16695952	50.31
1.1880	2.056046	-0.721	0.07817006	0.15885067	0.16732138	50.32
1.1890	1.917372	-0.721	0.07868379	0.15927351	0.16778344	50.32
1.1900	1.760502	-0.720	0.07926726	0.15977246	0.16836512	50.32
1.1910	1.605606	-0.717	0.07984585	0.16029352	0.16893607	50.32
1.1920	1.466417	-0.719	0.08038217	0.16076267	0.16947496	50.33
1.1930	1.349373	-0.714	0.08085763	0.16119128	0.16991854	50.33
1.1940	1.253271	-0.712	0.08123779	0.16154855	0.17029989	50.33
1.1950	1.172047	-0.716	0.08154821	0.16185099	0.17058682	50.33
1.1960	1.097288	-0.719	0.08183599	0.16213036	0.17087185	50.33
1.1970	1.021128	-0.722	0.08212185	0.16241068	0.17115200	50.33
1.1980	0.937757	-0.716	0.08245778	0.16274107	0.17151386	50.33
1.1990	0.846119	-0.718	0.08281046	0.16309649	0.17188245	50.33
1.2000	0.750132	-0.715	0.08317691	0.16349137	0.17228419	50.32
1.2010	0.657206	-0.718	0.08352661	0.16387862	0.17269659	50.32
1.2020	0.576067	-0.717	0.08382910	0.16423601	0.17307311	50.32
1.2030	0.512037	-0.715	0.08406389	0.16453755	0.17335415	50.32
1.2040	0.467634	-0.721	0.08423674	0.16474944	0.17357200	50.31
1.2050	0.441456	-0.730	0.08433503	0.16487366	0.17369848	50.31
1.2060	0.430183	-0.732	0.08440661	0.16495073	0.17378128	50.31
1.2070	0.429811	-0.731	0.08442819	0.16497672	0.17379981	50.31
1.2080	0.435963	-0.723	0.08444095	0.16500747	0.17381543	50.32
1.2090	0.447178	-0.724	0.08441544	0.16498333	0.17379206	50.32
1.2100	0.462971	-0.730	0.08438611	0.16493994	0.17374533	50.32
1.2110	0.488377	-0.736	0.08432919	0.16485912	0.17368114	50.33
1.2120	0.532780	-0.739	0.08421820	0.16470319	0.17352253	50.33
1.2130	0.604849	-0.736	0.08400202	0.16445470	0.17327642	50.33
1.2140	0.706902	-0.733	0.08366698	0.16409534	0.17288530	50.33
1.2150	0.832386	-0.738	0.08324164	0.16362238	0.17240763	50.33
1.2160	0.972548	-0.742	0.08274657	0.16309059	0.17187375	50.33
1.2170	1.119261	-0.747	0.08222300	0.16254634	0.17131257	50.33
1.2180	1.265545	-0.738	0.08168864	0.16201657	0.17074549	50.33
1.2190	1.404705	-0.739	0.08116513	0.16151381	0.17020267	50.33
1.2200	1.531420	-0.739	0.08067590	0.16106403	0.16971433	50.32
1.2210	1.643658	-0.743	0.08022410	0.16066527	0.16927075	50.32
1.2220	1.742220	-0.742	0.07982624	0.16030312	0.16892439	50.32
1.2230	1.831341	-0.744	0.07945794	0.15999109	0.16854978	50.32
1.2240	1.915884	-0.742	0.07911211	0.15969253	0.16826373	50.31
1.2250	1.999397	-0.744	0.07875746	0.15939784	0.16789317	50.31
1.2260	2.081480	-0.743	0.07841080	0.15910405	0.16760725	50.31
1.2270	2.158756	-0.743	0.07806510	0.15882373	0.16724646	50.31
1.2280	2.224960	-0.736	0.07778710	0.15859538	0.16701007	50.32
1.2290	2.274914	-0.736	0.07754827	0.15840846	0.16674650	50.32
1.2300	2.305498	-0.736	0.07739794	0.15829384	0.16664046	50.32
1.2310	2.318373	-0.738	0.07729787	0.15823317	0.16654605	50.33
1.2320	2.318087	-0.738	0.07728034	0.15820420	0.16653138	50.33
1.2330	2.308702	-0.734	0.07729703	0.15820628	0.16654891	50.33
1.2340	2.293797	-0.733	0.07732642	0.15822369	0.16656548	50.33
1.2350	2.273283	-0.739	0.07735384	0.15824980	0.16661996	50.33
1.2360	2.242813	-0.738	0.07742947	0.15830553	0.16666961	50.33
1.2370	2.191544	-0.734	0.07760334	0.15842009	0.16684270	50.33
1.2380	2.107086	-0.726	0.07792848	0.15865600	0.16709560	50.33
1.2390	1.985550	-0.726	0.07838923	0.15901726	0.16753620	50.33
1.2400	1.834288	-0.729	0.07894617	0.15949506	0.16805369	50.32
1.2410	1.671209	-0.735	0.07955909	0.16001999	0.16866648	50.32
1.2420	1.513567	-0.736	0.08015925	0.16056412	0.16923654	50.32
1.2430	1.372862	-0.732	0.08070338	0.16106308	0.16976953	50.32
1.2440	1.254902	-0.727	0.08116806	0.16149366	0.17021996	50.31
1.2450	1.158199	-0.736	0.08153647	0.16185004	0.17059445	50.31
1.2460	1.076717	-0.739	0.08186263	0.16215926	0.17093009	50.31
1.2470	1.003160	-0.739	0.08214742	0.16244829	0.17121023	50.32
1.2480	0.930691	-0.734	0.08243811	0.16273922	0.17153418	50.32
1.2490	0.856218	-0.732	0.08273578	0.16304260	0.17182404	50.32
1.2500	0.778942	-0.733	0.08302265	0.16335851	0.17219085	50.32
1.2510	0.702009	-0.731	0.08332521	0.16367054	0.17249328	50.33
1.2520	0.629368	-0.730	0.08359343	0.16399413	0.17284346	50.33
1.2530	0.565224	-0.725	0.08384973	0.16427827	0.17308962	50.33
1.2540	0.513096	-0.727	0.08404225	0.16452968	0.17334753	50.33
1.2550	0.475330	-0.732	0.08418471	0.16471183	0.17350316	50.33
1.2560	0.452557	-0.733	0.08427608	0.16481495	0.17361695	50.33
1.2570	0.443373	-0.736	0.08433998	0.16487259	0.17368108	50.33
1.2580	0.444202	-0.731	0.08437240	0.16491002	0.17370731	50.33
1.2590	0.452328	-0.737	0.08435965	0.16491002	0.17371023	50.33
1.2600	0.465717	-0.737	0.08433408	0.16488016	0.17368299	50.32
1.2610	0.486689	-0.737	0.08428693	0.16482335	0.17361784	50.32
1.2620	0.523396	-0.739	0.08419156	0.16470206	0.17348856	50.32
1.2630	0.586023	-0.735	0.08400887	0.16449016	0.17325997	50.32
1.2640	0.679865	-0.736	0.08369249	0.16416079	0.17292726	50.31
1.2650	0.801487	-0.738	0.08328193	0.16370130	0.17245841	50.31
1.2660	0.941906	-0.744	0.08278877	0.16317070	0.17193121	50.31
1.2670	1.091938	-0.744	0.08226526	0.16261017	0.17136806	50.31
1.2680	1.243458	-0.740	0.08172596	0.16206604	0.17080671	50.32
1.2690	1.389313	-0.736	0.08117890	0.16154778	0.17024046	50.32
1.2700	1.523123	-0.735	0.08066118	0.16105837	0.16972387	50.32
1.2710	1.642714	-0.735	0.08018959	0.16062582	0.16927451	50.33
1.2720	1.747627	-0.736	0.07975739	0.16024911	0.16888839	50.33
1.2730	1.840839	-0.727	0.07938617	0.15991586	0.16850317	50.33
1.2740	1.925497	-0.730	0.07903558	0.15961820	0.16817045	50.33
1.2750	2.004604	-0.730	0.07870358	0.15932733	0.16781151	50.33
1.2760	2.079849	-0.739	0.07837248	0.15906054	0.16751289	50.33
1.2770	2.150774	-0.734	0.07806689	0.15881205	0.16722012	50.33
1.2780	2.214317	-0.732	0.07779294	0.15860212	0.16698086	50.33
1.2790	2.266302	-0.729	0.07755816	0.15841997	0.16677165	50.33
1.2800	2.302380	-0.730	0.07737362	0.15828425	0.16660345	50.32
1.2810	2.321434	-0.730	0.07726359	0.15820533	0.16651583	50.32
1.2820	2.325783	-0.735	0.07720768	0.15816396	0.16645855	50.32
1.2830	2.319345	-0.733	0.07721949	0.15817064	0.16648471	50.32
1.2840	2.305555	-0.726	0.07723814	0.15818506	0.16646725	50.31
1.2850	2.285328	-0.729	0.07727438	0.15820616	0.16652167	50.31
1.2860	2.255802	-0.727	0.07735091	0.15825439	0.16655087	50.31
1.2870	2.208281	-0.729	0.07750702	0.15835744	0.16672504	50.31
1.2880	2.129517	-0.723	0.07779974	0.15857226	0.16695070	50.32
1.2890	2.014217	-0.727	0.07823098	0.15890938	0.16736412	50.32
1.2900	1.867619	-0.724	0.07878703	0.15935922	0.16788739	50.32
1.2910	1.707487	-0.730	0.07938719	0.15987933	0.16848850	50.33
1.2920	1.551247	-0.732	0.07998443	0.16039854	0.16907901	50.33
1.2930	1.410398	-0.727	0.08052766	0.16088486	0.16959363	50.33
1.2940	1.289577	-0.726	0.08099723	0.16131932	0.17007220	50.33
1.2950	1.187553	-0.728	0.08138919	0.16168821	0.17044383	50.33
1.2960	1.100550	-0.730	0.08172113	0.16202927	0.17080086	50.33
1.2970	1.023359	-0.728	0.08203447	0.16232592	0.17109561	50.33
1.2980	0.950489	-0.716	0.08232230	0.16263127	0.17141753	50.33
1.2990	0.878420	-0.716	0.08260125	0.16292411	0.17170930	50.33
1.3000	0.805120	-0.715	0.08286941	0.16322076	0.17202640	50.32
1.3010	0.731878	-0.725	0.08315623	0.16351551	0.17235428	50.32
1.3020	0.661783	-0.731	0.08343220	0.16379857	0.17265487	50.32
1.3030	0.598583	-0.726	0.08368367	0.16409528	0.17293596	50.32
1.3040	0.546312	-0.727	0.08388299	0.16433889	0.17316353	50.31
1.3050	0.507374	-0.727	0.08402348	0.16452777	0.17333567	50.31
1.3060	0.482883	-0.725	0.08412468	0.16465396	0.17344850	50.31
1.3070	0.471668	-0.727	0.08417875	0.16472816	0.17350101	50.32
1.3080	0.470753	-0.721	0.08422893	0.16476756	0.17355752	50.32
1.3090	0.477505	-0.726	0.08423376	0.16476566	0.17355561	50.32
1.3100	0.489836	-0.732	0.08421510	0.16473579	0.17353714	50.32
1.3110	0.510178	-0.738	0.08417279	0.16468477	0.17348069	50.33
1.3120	0.546856	-0.741	0.08408046	0.16456151	0.17334354	50.33
1.3130	0.611944	-0.739	0.08390164	0.16435057	0.17312366	50.33
1.3140	0.711222	-0.740	0.08358735	0.16399515	0.17276275	50.33
1.3150	0.840626	-0.746	0.08313841	0.16350675	0.17227352	50.33
1.3160	0.987539	-0.746	0.08262765	0.16295677	0.17171127	50.33
1.3170	1.140404	-0.744	0.08207268	0.16239041	0.17113644	50.33
1.3180	1.289749	-0.742	0.08151972	0.16186446	0.17057115	50.33
1.3190	1.429396	-0.742	0.08098441	0.16136551	0.17006141	50.33
1.3200	1.555023	-0.744	0.08048934	0.16091764	0.16955948	50.32
1.3210	1.667004	-0.740	0.08004230	0.16050154	0.16915095	50.32
1.3220	1.767511	-0.743	0.07962978	0.16013741	0.16873759	50.32
1.3230	1.860094	-0.739	0.07924962	0.15982723	0.16840303	50.32
1.3240	1.947584	-0.741	0.07889122	0.15952671	0.16803533	50.31
1.3250	2.031441	-0.744	0.07853270	0.15922910	0.16770655	50.31
1.3260	2.110834	-0.747	0.07817507	0.15893441	0.16737866	50.31
1.3270	2.182732	-0.745	0.07784986	0.15867531	0.16707999	50.32
1.3280	2.241983	-0.736	0.07759243	0.15847212	0.16685629	50.32
1.3290	2.283983	-0.736	0.07740492	0.15831894	0.16666168	50.32
1.3300	2.306700	-0.736	0.07728910	0.15822840	0.16657025	50.32
1.3310	2.313280	-0.740	0.07722431	0.15818214	0.16649246	50.33
1.3320	2.308846	-0.738	0.07721245	0.15817350	0.16647494	50.33
1.3330	2.297487	-0.728	0.07723200	0.15818805	0.16649437	50.33
1.3340	2.280121	-0.723	0.07727814	0.15821213	0.16652453	50.33
1.3350	2.254915	-0.728	0.07735187	0.15826029	0.16658491	50.33
1.3360	2.214489	-0.728	0.07747859	0.15834594	0.16668421	50.33
1.3370	2.147999	-0.733	0.07771343	0.15851837	0.16690010	50.33
1.3380	2.048521	-0.722	0.07809454	0.15880924	0.16727066	50.33
1.3390	1.919489	-0.723	0.07858372	0.15918976	0.16770446	50.33
1.3400	1.774292	-0.725	0.07912588	0.15964240	0.16821820	50.32
1.3410	1.628866	-0.730	0.07966614	0.16012019	0.16874921	50.32
1.3420	1.494513	-0.730	0.08017099	0.16056329	0.16923755	50.32
1.3430	1.376581	-0.729	0.08064151	0.16098905	0.16971803	50.32
1.3440	1.274529	-0.730	0.08104724	0.16135889	0.17007804	50.31
1.3450	1.184406	-0.734	0.08139503	0.16169792	0.17043799	50.31
1.3460	1.100464	-0.735	0.08172017	0.16200429	0.17075026	50.31
1.3470	1.018267	-0.738	0.08202267	0.16231829	0.17107803	50.31
1.3480	0.935354	-0.730	0.08234680	0.16263419	0.17140687	50.32
1.3490	0.852184	-0.730	0.08266211	0.16297424	0.17176485	50.32
1.3500	0.770273	-0.730	0.08296168	0.16330838	0.17210436	50.32
1.3510	0.692396	-0.733	0.08325928	0.16363293	0.17243314	50.33
1.3520	0.621214	-0.731	0.08352154	0.16394597	0.17276472	50.33
1.3530	0.559359	-0.723	0.08377200	0.16423398	0.17305559	50.33
1.3540	0.509491	-0.724	0.08396846	0.16447002	0.17327255	50.33
1.3550	0.472383	-0.734	0.08410412	0.16465402	0.17343897	50.33
1.3560	0.448666	-0.733	0.08420736	0.16477150	0.17355764	50.33
1.3570	0.437021	-0.735	0.08425856	0.16485721	0.17363054	50.33
1.3580	0.435276	-0.728	0.08430475	0.16490722	0.17367232	50.33
1.3590	0.441284	-0.731	0.08431649	0.16491205	0.17367423	50.33
1.3600	0.453300	-0.732	0.08430171	0.16488612	0.17364401	50.32
1.3610	0.473757	-0.732	0.08426237	0.16483128	0.17359442	50.32
1.3620	0.511208	-0.735	0.08417493	0.16471666	0.17347193	50.32
1.3630	0.577812	-0.730	0.08398926	0.16449994	0.17325211	50.32
1.3640	0.680094	-0.732	0.08366996	0.16413099	0.17286789	50.31
1.3650	0.814219	-0.736	0.08319652	0.16362727	0.17238057	50.31
1.3660	0.967226	-0.739	0.08266711	0.16304642	0.17178130	50.31
1.3670	1.125641	-0.738	0.08211410	0.16245699	0.17117715	50.32
1.3680	1.278763	-0.732	0.08156598	0.16190219	0.17058575	50.32
1.3690	1.419153	-0.735	0.08102268	0.16139746	0.17005748	50.32
1.3700	1.543121	-0.738	0.08052260	0.16094559	0.16962075	50.32
1.3710	1.651583	-0.741	0.08008450	0.16054869	0.16918206	50.33
1.3720	1.749172	-0.744	0.07968175	0.16018456	0.16883785	50.33
1.3730	1.841125	-0.738	0.07930654	0.15986294	0.16845363	50.33
1.3740	1.931877	-0.737	0.07893336	0.15954804	0.16811609	50.33
1.3750	2.022486	-0.738	0.07854831	0.15922642	0.16772890	50.33
1.3760	2.112007	-0.740	0.07816023	0.15890944	0.16737777	50.33
1.3770	2.196207	-0.739	0.07779676	0.15861368	0.16703534	50.33
1.3780	2.268162	-0.735	0.07748145	0.15836608	0.16674352	50.33
1.3790	2.322178	-0.737	0.07723588	0.15817356	0.16651678	50.33
1.3800	2.355051	-0.736	0.07708073	0.15803874	0.16633779	50.32
1.3810	2.368727	-0.735	0.07699716	0.15797520	0.16628528	50.32
1.3820	2.368298	-0.737	0.07696867	0.15795004	0.16622108	50.32
1.3830	2.358284	-0.731	0.07698244	0.15796345	0.16627467	50.32
1.3840	2.341661	-0.725	0.07701486	0.15799910	0.16626585	50.31
1.3850	2.316771	-0.725	0.07707185	0.15803665	0.16633689	50.31
1.3860	2.275028	-0.723	0.07719862	0.15813798	0.16641366	50.31
1.3870	2.201958	-0.720	0.07745892	0.15832001	0.16667247	50.32
1.3880	2.089663	-0.714	0.07788426	0.15865135	0.16704118	50.32
1.3890	1.943522	-0.721	0.07843822	0.15909344	0.16756350	50.32
1.3900	1.781702	-0.718	0.07904828	0.15959907	0.16811901	50.32
1.3910	1.623430	-0.722	0.07964355	0.16012317	0.16872698	50.33
1.3920	1.480722	-0.717	0.08018970	0.16060370	0.16926301	50.33
1.3930	1.357870	-0.716	0.08068573	0.16104198	0.16976494	50.33
1.3940	1.253471	-0.716	0.08110619	0.16142142	0.17016560	50.33
1.3950	1.162348	-0.728	0.08145976	0.16175276	0.17049629	50.33
1.3960	1.078520	-0.736	0.08176428	0.16206580	0.17082411	50.33
1.3970	0.997238	-0.734	0.08206970	0.16237211	0.17112464	50.33
1.3980	0.915585	-0.720	0.08239490	0.16270256	0.17147493	50.33
1.3990	0.833273	-0.718	0.08271903	0.16302431	0.17182219	50.33
1.4000	0.752134	-0.723	0.08302546	0.16336143	0.17216462	50.32
1.4010	0.675659	-0.730	0.08330148	0.16369379	0.17249823	50.32
1.4020	0.607080	-0.732	0.08355391	0.16399133	0.17277449	50.32
1.4030	0.548201	-0.726	0.08377993	0.16426015	0.17307800	50.32
1.4040	0.500908	-0.728	0.08396846	0.16449314	0.17329109	50.31
1.4050	0.465860	-0.734	0.08411390	0.16465974	0.17345357	50.31
1.4060	0.443573	-0.738	0.08420622	0.16478592	0.17355084	50.31
1.4070	0.433102	-0.737	0.08426923	0.16486007	0.17363638	50.32
1.4080	0.432272	-0.730	0.08431154	0.16490054	0.17368788	50.32
1.4090	0.438566	-0.733	0.08431453	0.16489381	0.17367136	50.32
1.4100	0.450125	-0.742	0.08429581	0.16487449	0.17366558	50.32
1.4110	0.468121	-0.749	0.08425653	0.16482729	0.17360431	50.33
1.4120	0.500364	-0.753	0.08417779	0.16473287	0.17349923	50.33
1.4130	0.558672	-0.750	0.08402938	0.16454792	0.17331833	50.33
1.4140	0.651913	-0.748	0.08373958	0.16421664	0.17298764	50.33
1.4150	0.779629	-0.749	0.08331722	0.16374081	0.17248565	50.33
1.4160	0.933380	-0.750	0.08279270	0.16317064	0.17192340	50.33
1.4170	1.101637	-0.750	0.08219647	0.16253978	0.17126286	50.33
1.4180	1.272812	-0.747	0.08158749	0.16192526	0.17063063	50.33
1.4190	1.434546	-0.748	0.08097160	0.16133088	0.17000705	50.33
1.4200	1.575880	-0.747	0.08041161	0.16081744	0.16946226	50.32
1.4210	1.690979	-0.746	0.07994306	0.16039753	0.16902554	50.32
1.4220	1.780987	-0.744	0.07957572	0.16006523	0.16863263	50.32
1.4230	1.852999	-0.742	0.07926935	0.15981185	0.16839147	50.32
1.4240	1.915712	-0.739	0.07898843	0.15957779	0.16808206	50.31
1.4250	1.977139	-0.743	0.07871139	0.15935248	0.16786510	50.31
1.4260	2.042656	-0.747	0.07843822	0.15911072	0.16756451	50.31
1.4270	2.114353	-0.749	0.07813662	0.15886027	0.16731846	50.32
1.4280	2.188625	-0.744	0.07780850	0.15861452	0.16701597	50.32
1.4290	2.258005	-0.740	0.07749820	0.15837276	0.16676497	50.32
1.4300	2.312365	-0.738	0.07723987	0.15818298	0.16650897	50.32
1.4310	2.344723	-0.741	0.07709253	0.15805882	0.16637570	50.33
1.4320	2.354307	-0.739	0.07701683	0.15800387	0.16629106	50.33
1.4330	2.345238	-0.732	0.07701975	0.15800869	0.16631258	50.33
1.4340	2.322521	-0.728	0.07706785	0.15804052	0.16635054	50.33
1.4350	2.284842	-0.729	0.07717592	0.15810698	0.16643423	50.33
1.4360	2.225161	-0.727	0.07737732	0.15824765	0.16661030	50.33
1.4370	2.137470	-0.730	0.07769853	0.15849036	0.16688460	50.33
1.4380	2.022371	-0.723	0.07812881	0.15884095	0.16730285	50.33
1.4390	1.889019	-0.723	0.07863963	0.15925127	0.16774046	50.33
1.4400	1.748943	-0.719	0.07916719	0.15970111	0.16827154	50.32
1.4410	1.612701	-0.722	0.07967997	0.16014707	0.16875499	50.32
1.4420	1.487989	-0.727	0.08016121	0.16058540	0.16925114	50.32
1.4430	1.377783	-0.726	0.08060026	0.16097355	0.16966552	50.32
1.4440	1.281166	-0.730	0.08098918	0.16131938	0.17003614	50.31
1.4450	1.194677	-0.731	0.08132911	0.16163141	0.17036301	50.31
1.4460	1.112394	-0.730	0.08163369	0.16193676	0.17067528	50.31
1.4470	1.029682	-0.727	0.08194411	0.16225559	0.17100799	50.32
1.4480	0.943165	-0.720	0.08229089	0.16258889	0.17137951	50.32
1.4490	0.854073	-0.726	0.08263272	0.16293275	0.17172778	50.32
1.4500	0.765638	-0.727	0.08297360	0.16328430	0.17210323	50.32
1.4510	0.682440	-0.730	0.08328003	0.16363496	0.17246997	50.33
1.4520	0.608940	-0.732	0.08354527	0.16395861	0.17276955	50.33
1.4530	0.548801	-0.728	0.08377999	0.16422546	0.17305750	50.33
1.4540	0.504427	-0.730	0.08395481	0.16444308	0.17325211	50.33
1.4550	0.476074	-0.735	0.08406085	0.16457886	0.17341745	50.33
1.4560	0.461826	-0.734	0.08412671	0.16466945	0.17347783	50.33
1.4570	0.458679	-0.734	0.08414930	0.16471761	0.17352343	50.33
1.4580	0.462914	-0.729	0.08416998	0.16473210	0.17351669	50.33
1.4590	0.472441	-0.729	0.08416891	0.16472346	0.17351955	50.33
1.4600	0.486546	-0.734	0.08414721	0.16468591	0.17349243	50.33
1.4610	0.508404	-0.735	0.08410978	0.16462523	0.17342728	50.32
1.4620	0.547285	-0.739	0.08401060	0.16450185	0.17332029	50.32
1.4630	0.613346	-0.739	0.08382404	0.16429091	0.17308092	50.32
1.4640	0.711594	-0.744	0.08350295	0.16395283	0.17272300	50.31
1.4650	0.837278	-0.746	0.08306682	0.16348857	0.17224538	50.31
1.4660	0.980301	-0.746	0.08257079	0.16295302	0.17170554	50.31
1.4670	1.130590	-0.741	0.08203733	0.16238767	0.17111403	50.32
1.4680	1.279335	-0.738	0.08150887	0.16184932	0.17054015	50.32
1.4690	1.419697	-0.739	0.08097738	0.16134745	0.17001188	50.32
1.4700	1.546669	-0.739	0.08047557	0.16089273	0.16954309	50.32
1.4710	1.659937	-0.740	0.08002174	0.16048425	0.16909462	50.33
1.4720	1.761475	-0.740	0.07961607	0.16011149	0.16871333	50.33
1.4730	1.854229	-0.734	0.07924771	0.15978402	0.16834462	50.33
1.4740	1.941319	-0.735	0.07889020	0.15947580	0.16802651	50.33
1.4750	2.023458	-0.739	0.07852864	0.15917712	0.16767240	50.33
1.4760	2.099476	-0.742	0.07818383	0.15890259	0.16737962	50.33
1.4770	2.166224	-0.734	0.07788914	0.15865695	0.16708690	50.33
1.4780	2.219467	-0.726	0.07763869	0.15847111	0.16691959	50.33
1.4790	2.257376	-0.730	0.07745701	0.15832949	0.16671038	50.33
1.4800	2.278862	-0.731	0.07733041	0.15823317	0.16663539	50.33
1.4810	2.286901	-0.736	0.07726765	0.15818602	0.16653043	50.32
1.4820	2.284527	-0.735	0.07724410	0.15816969	0.16655666	50.32
1.4830	2.275314	-0.728	0.07725781	0.15818322	0.16653627	50.32
1.4840	2.260637	-0.724	0.07728708	0.15820342	0.16659552	50.31
1.4850	2.239609	-0.730	0.07733810	0.15823519	0.16658187	50.31
1.4860	2.206163	-0.727	0.07744026	0.15830934	0.16669381	50.31
1.4870	2.148685	-0.729	0.07763386	0.15845478	0.16682523	50.32
1.4880	2.057047	-0.721	0.07798350	0.15872163	0.16718811	50.32
1.4890	1.930790	-0.729	0.07845205	0.15910113	0.16760045	50.32
1.4900	1.781616	-0.728	0.07902175	0.15956151	0.16815096	50.32
1.4910	1.627550	-0.732	0.07960230	0.16007203	0.16870052	50.33
1.4920	1.482553	-0.732	0.08015621	0.16056705	0.16925013	50.33
1.4930	1.354666	-0.727	0.08066702	0.16103619	0.16974729	50.33
1.4940	1.244860	-0.727	0.08111399	0.16144162	0.17017144	50.33
1.4950	1.149702	-0.730	0.08148533	0.16178167	0.17052263	50.33
1.4960	1.063643	-0.733	0.08182323	0.16210443	0.17084169	50.33
1.4970	0.981874	-0.734	0.08212578	0.16241837	0.17115784	50.33
1.4980	0.900507	-0.730	0.08243918	0.16275835	0.17151773	50.33
1.4990	0.819311	-0.728	0.08273983	0.16308284	0.17187172	50.33
1.5000	0.740204	-0.727	0.08304238	0.16339594	0.17220151	50.33
1.5010	0.667505	-0.727	0.08332723	0.16369843	0.17252642	50.32
1.5020	0.604219	-0.730	0.08356595	0.16396713	0.17279196	50.32
1.5030	0.552034	-0.726	0.08377510	0.16422433	0.17303711	50.32
1.5040	0.511436	-0.728	0.08393210	0.16440821	0.17323941	50.31
1.5050	0.482769	-0.727	0.08403999	0.16454709	0.17336494	50.31
1.5060	0.466003	-0.726	0.08410287	0.16464257	0.17345351	50.31
1.5070	0.459995	-0.728	0.08414817	0.16469264	0.17350709	50.32
1.5080	0.462427	-0.723	0.08417088	0.16471285	0.17352170	50.32
1.5090	0.471439	-0.725	0.08417386	0.16470402	0.17351091	50.32
1.5100	0.486116	-0.725	0.08414036	0.16466647	0.17348856	50.32
1.5110	0.510921	-0.734	0.08408636	0.16460192	0.17341560	50.33
1.5120	0.555010	-0.738	0.08396846	0.16446429	0.17327166	50.33
1.5130	0.627909	-0.730	0.08375537	0.16421771	0.17300993	50.33
1.5140	0.731049	-0.733	0.08343029	0.16384208	0.17265093	50.33
1.5150	0.857077	-0.735	0.08298624	0.16337007	0.17215973	50.33
1.5160	0.995407	-0.739	0.08248818	0.16286343	0.17164135	50.33
1.5170	1.138287	-0.738	0.08197248	0.16233647	0.17108101	50.33
1.5180	1.280394	-0.733	0.08145773	0.16183275	0.17055184	50.33
1.5190	1.418180	-0.733	0.08094007	0.16133279	0.17002165	50.33
1.5200	1.548185	-0.732	0.08043718	0.16087919	0.16950315	50.32
1.5210	1.669235	-0.730	0.07996178	0.16044569	0.16908395	50.32
1.5220	1.779041	-0.727	0.07952565	0.16005176	0.16862470	50.32
1.5230	1.876974	-0.721	0.07913667	0.15971172	0.16828042	50.32
1.5240	1.961975	-0.723	0.07877123	0.15940350	0.16791368	50.31
1.5250	2.034502	-0.725	0.07844025	0.15913856	0.16762573	50.31
1.5260	2.095270	-0.723	0.07815248	0.15890831	0.16736406	50.31
1.5270	2.145681	-0.719	0.07792461	0.15872246	0.16714519	50.32
1.5280	2.186193	-0.718	0.07775372	0.15857989	0.16697395	50.32
1.5290	2.217550	-0.725	0.07760739	0.15845573	0.16682899	50.32
1.5300	2.239265	-0.724	0.07748842	0.15836316	0.16674441	50.32
1.5310	2.251740	-0.720	0.07740384	0.15830547	0.16666758	50.33
1.5320	2.256031	-0.719	0.07735664	0.15827173	0.16662675	50.33
1.5330	2.253542	-0.716	0.07735372	0.15827465	0.16660923	50.33
1.5340	2.245417	-0.721	0.07735479	0.15827560	0.16662192	50.33
1.5350	2.231054	-0.721	0.07738131	0.15828627	0.16664135	50.33
1.5360	2.207422	-0.719	0.07744515	0.15831423	0.16668028	50.33
1.5370	2.162819	-0.721	0.07759446	0.15841144	0.16682619	50.33
1.5380	2.076616	-0.717	0.07789600	0.15865403	0.16712195	50.33
1.5390	1.938744	-0.723	0.07839793	0.15905678	0.16759670	50.33
1.5400	1.759987	-0.726	0.07906783	0.15960872	0.16820079	50.33
1.5410	1.572304	-0.727	0.07979178	0.16023391	0.16888368	50.32
1.5420	1.406507	-0.730	0.08042347	0.16080606	0.16952264	50.32
1.5430	1.278534	-0.723	0.08092541	0.16128474	0.17001766	50.32
1.5440	1.189671	-0.720	0.08128494	0.16161895	0.17036778	50.31
1.5450	1.130762	-0.724	0.08153141	0.16185296	0.17060322	50.31
1.5460	1.087160	-0.727	0.08171314	0.16202343	0.17076665	50.31
1.5470	1.042299	-0.724	0.08189780	0.16221225	0.17095345	50.32
1.5480	0.981703	-0.714	0.08213264	0.16246068	0.17121512	50.32
1.5490	0.899534	-0.714	0.08244008	0.16277659	0.17152935	50.32
1.5500	0.800228	-0.708	0.08281726	0.16316479	0.17193109	50.32
1.5510	0.697832	-0.714	0.08320230	0.16357416	0.17232704	50.33
1.5520	0.606680	-0.714	0.08354616	0.16396618	0.17275214	50.33
1.5530	0.536814	-0.710	0.08381432	0.16428888	0.17307222	50.33
1.5540	0.490808	-0.714	0.08399707	0.16450459	0.17330760	50.34
1.5550	0.466118	-0.721	0.08410203	0.16462314	0.17342722	50.33
1.5560	0.457850	-0.722	0.08414823	0.16467524	0.17348266	50.33
1.5570	0.459995	-0.722	0.08416295	0.16470802	0.17350209	50.33
1.5580	0.468149	-0.716	0.08416796	0.16470701	0.17350411	50.33
1.5590	0.479593	-0.715	0.08415216	0.16469151	0.17345160	50.33
1.5600	0.494213	-0.717	0.08413649	0.16463947	0.17342645	50.33
1.5610	0.515242	-0.719	0.08408529	0.16457891	0.17336029	50.32
1.5620	0.549917	-0.725	0.08397138	0.16445941	0.17327654	50.32
1.5630	0.607681	-0.721	0.08378476	0.16426200	0.17307895	50.32
1.5640	0.695286	-0.720	0.08348721	0.16394979	0.17276269	50.31
1.5650	0.812559	-0.720	0.08309627	0.16351646	0.17230076	50.31
1.5660	0.953236	-0.722	0.08261001	0.16299343	0.17177844	50.31
1.5670	1.107788	-0.725	0.08206290	0.16243774	0.17117441	50.32
1.5680	1.265917	-0.720	0.08150601	0.16187030	0.17058486	50.32
1.5690	1.418695	-0.719	0.08093733	0.16132611	0.17000312	50.32
1.5700	1.559114	-0.711	0.08039510	0.16081846	0.16949630	50.32
1.5710	1.684141	-0.713	0.07988918	0.16037357	0.16901183	50.33
1.5720	1.792746	-0.709	0.07944804	0.15998638	0.16858870	50.33
1.5730	1.886272	-0.710	0.07907873	0.15966558	0.16820937	50.33
1.5740	1.967726	-0.706	0.07873404	0.15938812	0.16787285	50.33
1.5750	2.039909	-0.711	0.07839811	0.15912515	0.16758585	50.33
1.5760	2.105942	-0.707	0.07809359	0.15888244	0.16728717	50.33
1.5770	2.166767	-0.707	0.07782441	0.15866667	0.16707897	50.33
1.5780	2.222128	-0.700	0.07759947	0.15848845	0.16681832	50.33
1.5790	2.269077	-0.704	0.07740301	0.15831894	0.16667444	50.33
1.5800	2.303839	-0.710	0.07723200	0.15818024	0.16647601	50.33
1.5810	2.323895	-0.712	0.07712102	0.15808296	0.16641277	50.32
1.5820	2.329617	-0.718	0.07706100	0.15803379	0.16633004	50.32
1.5830	2.323608	-0.712	0.07706106	0.15802324	0.16633981	50.32
1.5840	2.308102	-0.716	0.07709640	0.15804642	0.16634852	50.31
1.5850	2.282667	-0.718	0.07716131	0.15808398	0.16639322	50.31
1.5860	2.240124	-0.719	0.07729095	0.15817928	0.16649634	50.31
1.5870	2.168655	-0.712	0.07754052	0.15834486	0.16674638	50.32
1.5880	2.062654	-0.708	0.07793623	0.15865219	0.16710240	50.32
1.5890	1.927586	-0.713	0.07844418	0.15906447	0.16759747	50.32
1.5900	1.778955	-0.714	0.07899809	0.15954131	0.16811210	50.32
1.5910	1.632729	-0.716	0.07954824	0.16003448	0.16864419	50.33
1.5920	1.499863	-0.713	0.08006978	0.16049111	0.16913831	50.33
1.5930	1.385593	-0.709	0.08052170	0.16090429	0.16957700	50.33
1.5940	1.289434	-0.707	0.08089799	0.16124904	0.16996515	50.33
1.5950	1.206379	-0.711	0.08122402	0.16154474	0.17025310	50.33
1.5960	1.129904	-0.710	0.08151770	0.16182989	0.17055565	50.33
1.5970	1.053658	-0.708	0.08181232	0.16211021	0.17085236	50.33
1.5980	0.972748	-0.703	0.08212280	0.16243380	0.17120552	50.33
1.5990	0.886087	-0.707	0.08244306	0.16276425	0.17156637	50.33
1.6000	0.795507	-0.713	0.08279771	0.16313326	0.17194283	50.33
1.6010	0.706358	-0.720	0.08313364	0.16350317	0.17230368	50.32
1.6020	0.625219	-0.727	0.08343911	0.16385078	0.17265296	50.32
1.6030	0.557356	-0.718	0.08369452	0.16417623	0.17295653	50.32
1.6040	0.506115	-0.718	0.08389091	0.16441888	0.17318904	50.31
1.6050	0.471525	-0.721	0.08403236	0.16457880	0.17334557	50.31
1.6060	0.452642	-0.726	0.08411986	0.16468579	0.17346221	50.31
1.6070	0.446434	-0.725	0.08416301	0.16473013	0.17352051	50.32
1.6080	0.449181	-0.717	0.08419353	0.16475809	0.17354876	50.32
1.6090	0.458336	-0.712	0.08418465	0.16474652	0.17353034	50.32
1.6100	0.473099	-0.715	0.08417189	0.16470796	0.17348856	50.32
1.6110	0.497589	-0.720	0.08410406	0.16463661	0.17343801	50.33
1.6120	0.541763	-0.723	0.08398718	0.16449207	0.17328334	50.33
1.6130	0.615292	-0.719	0.08376908	0.16424745	0.17303425	50.33
1.6140	0.721579	-0.721	0.08342630	0.16386116	0.17264426	50.34
1.6150	0.854416	-0.728	0.08295965	0.16335738	0.17213446	50.34
1.6160	1.003532	-0.726	0.08243120	0.16280741	0.17156446	50.33
1.6170	1.158199	-0.727	0.08187616	0.16224200	0.17098176	50.33
1.6180	1.307774	-0.719	0.08133298	0.16170365	0.17041564	50.33
1.6190	1.443844	-0.723	0.08080953	0.16120183	0.16990203	50.33
1.6200	1.561661	-0.724	0.08034199	0.16078186	0.16944480	50.33
1.6210	1.662712	-0.727	0.07992452	0.16041100	0.16905284	50.32
1.6220	1.751976	-0.726	0.07957286	0.16008741	0.16870844	50.32
1.6230	1.835890	-0.720	0.07923496	0.15979075	0.16837668	50.32
1.6240	1.919489	-0.717	0.07889414	0.15949893	0.16805178	50.31
1.6250	2.004232	-0.722	0.07852286	0.15920991	0.16769385	50.31
1.6260	2.087345	-0.724	0.07817018	0.15891612	0.16738939	50.31
1.6270	2.163305	-0.729	0.07784796	0.15865600	0.16705382	50.32
1.6280	2.225790	-0.723	0.07758474	0.15844321	0.16684270	50.32
1.6290	2.270365	-0.724	0.07738250	0.15827948	0.16662008	50.32
1.6300	2.295456	-0.722	0.07725084	0.15818036	0.16651601	50.32
1.6310	2.304010	-0.726	0.07718593	0.15812737	0.16645861	50.33
1.6320	2.300634	-0.726	0.07716715	0.15811777	0.16643226	50.33
1.6330	2.289705	-0.722	0.07718784	0.15812731	0.16646820	50.33
1.6340	2.273140	-0.717	0.07722038	0.15815425	0.16645849	50.34
1.6350	2.249136	-0.719	0.07727444	0.15819561	0.16652846	50.34
1.6360	2.210255	-0.720	0.07738745	0.15827161	0.16661108	50.33
1.6370	2.144079	-0.718	0.07762408	0.15844017	0.16682506	50.33
1.6380	2.042742	-0.706	0.07801700	0.15872914	0.16715872	50.33
1.6390	1.909447	-0.712	0.07852083	0.15913385	0.16763252	50.33
1.6400	1.758013	-0.717	0.07908565	0.15961641	0.16815782	50.33
1.6410	1.605005	-0.722	0.07965624	0.16012013	0.16875029	50.32
1.6420	1.463184	-0.718	0.08019650	0.16060746	0.16926402	50.32
1.6430	1.339817	-0.715	0.08068174	0.16104478	0.16975719	50.32
1.6440	1.236162	-0.719	0.08107859	0.16141373	0.17015594	50.31
1.6450	1.148243	-0.726	0.08141941	0.16173267	0.17048073	50.31
1.6460	1.069221	-0.726	0.08172297	0.16202450	0.17078227	50.31
1.6470	0.993319	-0.726	0.08201569	0.16231340	0.17107511	50.32
1.6480	0.916643	-0.718	0.08231050	0.16263318	0.17142040	50.32
1.6490	0.838108	-0.719	0.08260906	0.16296357	0.17175794	50.32
1.6500	0.759287	-0.723	0.08290672	0.16328436	0.17209154	50.32
1.6510	0.683756	-0.725	0.08319455	0.16359061	0.17241740	50.33
1.6520	0.616035	-0.727	0.08346087	0.16388726	0.17269176	50.33
1.6530	0.559187	-0.716	0.08368093	0.16416472	0.17295736	50.33
1.6540	0.515070	-0.723	0.08386356	0.16437572	0.17317140	50.34
1.6550	0.484428	-0.731	0.08399016	0.16453558	0.17331249	50.34
1.6560	0.466690	-0.736	0.08407557	0.16462708	0.17338741	50.33
1.6570	0.459795	-0.732	0.08411294	0.16467333	0.17346227	50.33
1.6580	0.460882	-0.723	0.08414644	0.16469264	0.17349428	50.33
1.6590	0.467577	-0.721	0.08415037	0.16469264	0.17348552	50.33
1.6600	0.478764	-0.725	0.08415031	0.16467899	0.17348266	50.33
1.6610	0.496702	-0.728	0.08411479	0.16463089	0.17341948	50.32
1.6620	0.529375	-0.732	0.08403814	0.16453356	0.17333096	50.32
1.6630	0.588856	-0.724	0.08387214	0.16433322	0.17311889	50.32
1.6640	0.682983	-0.730	0.08356088	0.16400087	0.17279792	50.31
1.6650	0.809641	-0.732	0.08312476	0.16352993	0.17231345	50.31
1.6660	0.958271	-0.734	0.08259535	0.16297418	0.17172879	50.31
1.6670	1.115885	-0.729	0.08203739	0.16240299	0.17113829	50.32
1.6680	1.271753	-0.723	0.08147454	0.16183847	0.17054588	50.32
1.6690	1.417179	-0.727	0.08091950	0.16131932	0.17000896	50.32
1.6700	1.547327	-0.726	0.08041167	0.16083676	0.16948271	50.32
1.6710	1.661682	-0.728	0.07995093	0.16042167	0.16905957	50.33
1.6720	1.762018	-0.723	0.07954139	0.16005474	0.16864216	50.33
1.6730	1.852341	-0.721	0.07918483	0.15973783	0.16833377	50.33
1.6740	1.936655	-0.716	0.07882535	0.15943629	0.16797471	50.34
1.6750	2.017794	-0.720	0.07847077	0.15915692	0.16768104	50.33
1.6760	2.096100	-0.717	0.07811522	0.15888524	0.16730767	50.33
1.6770	2.168512	-0.719	0.07779008	0.15863389	0.16703147	50.33
1.6780	2.230167	-0.710	0.07753271	0.15841913	0.16676587	50.33
1.6790	2.276058	-0.712	0.07732052	0.15826505	0.16658193	50.33
1.6800	2.304010	-0.711	0.07718492	0.15814465	0.16646039	50.33
1.6810	2.315454	-0.716	0.07710433	0.15809160	0.16638553	50.32
1.6820	2.314539	-0.715	0.07707870	0.15805697	0.16636807	50.32
1.6830	2.304697	-0.708	0.07709736	0.15806955	0.16637683	50.32
1.6840	2.287846	-0.707	0.07713974	0.15808690	0.16640991	50.31
1.6850	2.261982	-0.718	0.07720947	0.15813792	0.16645563	50.31
1.6860	2.219267	-0.722	0.07733816	0.15823025	0.16656160	50.32
1.6870	2.149029	-0.721	0.07758272	0.15841717	0.16680771	50.32
1.6880	2.045546	-0.714	0.07797760	0.15870506	0.16714817	50.32
1.6890	1.914482	-0.716	0.07847458	0.15910196	0.16761118	50.32
1.6900	1.770172	-0.716	0.07902074	0.15955848	0.16811103	50.32
1.6910	1.628065	-0.716	0.07956296	0.16003722	0.16864604	50.33
1.6920	1.497946	-0.719	0.08006400	0.16047454	0.16913831	50.33
1.6930	1.383734	-0.719	0.08051783	0.16087908	0.16959172	50.33
1.6940	1.284227	-0.724	0.08090389	0.16123748	0.16997707	50.34
1.6950	1.195621	-0.727	0.08123684	0.16155732	0.17029798	50.34
1.6960	1.113110	-0.733	0.08156002	0.16186655	0.17060429	50.33
1.6970	1.032600	-0.736	0.08187324	0.16217089	0.17090666	50.33
1.6980	0.950890	-0.728	0.08219641	0.16248101	0.17125505	50.33
1.6990	0.867662	-0.722	0.08249009	0.16280663	0.17161405	50.33
1.7000	0.784750	-0.720	0.08280343	0.16313308	0.17195845	50.33
1.7010	0.705957	-0.723	0.08309919	0.16347694	0.17229694	50.32
1.7020	0.635719	-0.728	0.08338892	0.16377938	0.17260623	50.32
1.7030	0.577583	-0.726	0.08361292	0.16405201	0.17287374	50.32
1.7040	0.533667	-0.730	0.08378482	0.16426492	0.17307603	50.31
1.7050	0.503912	-0.731	0.08390462	0.16439778	0.17320830	50.31
1.7060	0.487204	-0.735	0.08398122	0.16449511	0.17329103	50.31
1.7070	0.481768	-0.736	0.08403128	0.16454995	0.17334855	50.32
1.7080	0.484371	-0.732	0.08405280	0.16458654	0.17336804	50.32
1.7090	0.492783	-0.734	0.08404791	0.16457593	0.17336607	50.32
1.7100	0.505056	-0.734	0.08403218	0.16455191	0.17334270	50.32
1.7110	0.523081	-0.738	0.08399302	0.16450286	0.17329305	50.33
1.7120	0.553837	-0.739	0.08392334	0.16441232	0.17318696	50.33
1.7130	0.608196	-0.736	0.08375835	0.16424954	0.17303514	50.33
1.7140	0.694942	-0.742	0.08348030	0.16393644	0.17271608	50.33
1.7150	0.813847	-0.746	0.08307856	0.16349524	0.17225009	50.33
1.7160	0.957413	-0.750	0.08258444	0.16296357	0.17168784	50.33
1.7170	1.114769	-0.747	0.08203441	0.16238856	0.17108470	50.33
1.7180	1.275501	-0.741	0.08145785	0.16182697	0.17048651	50.33
1.7190	1.429424	-0.735	0.08087736	0.16127020	0.16991657	50.33
1.7200	1.567669	-0.727	0.08032435	0.16077310	0.16938555	50.33
1.7210	1.687002	-0.721	0.07984394	0.16034353	0.16892731	50.32
1.7220	1.787653	-0.722	0.07941955	0.15996975	0.16854495	50.32
1.7230	1.873999	-0.716	0.07906795	0.15965968	0.16819179	50.32
1.7240	1.950617	-0.723	0.07873595	0.15937173	0.16790301	50.31
1.7250	2.021570	-0.726	0.07842654	0.15910590	0.16757625	50.31
1.7260	2.089548	-0.729	0.07811409	0.15885639	0.16733015	50.31
1.7270	2.154121	-0.725	0.07783610	0.15863675	0.16705000	50.32
1.7280	2.211571	-0.720	0.07758367	0.15844601	0.16686124	50.32
1.7290	2.258148	-0.723	0.07737648	0.15827847	0.16661710	50.32
1.7300	2.290421	-0.722	0.07721925	0.15815336	0.16650325	50.32
1.7310	2.308187	-0.722	0.07711512	0.15807635	0.16637093	50.33
1.7320	2.313309	-0.720	0.07707477	0.15805030	0.16636020	50.33
1.7330	2.308245	-0.714	0.07707185	0.15805215	0.16634655	50.33
1.7340	2.295942	-0.710	0.07710236	0.15806180	0.16638750	50.33
1.7350	2.276630	-0.716	0.07712889	0.15808976	0.16640210	50.33
1.7360	2.246876	-0.716	0.07721347	0.15814847	0.16647696	50.33
1.7370	2.194834	-0.715	0.07739025	0.15826595	0.16660529	50.33
1.7380	2.107887	-0.707	0.07772422	0.15850866	0.16692430	50.33
1.7390	1.983376	-0.712	0.07819951	0.15887469	0.16731244	50.33
1.7400	1.831312	-0.711	0.07877022	0.15935725	0.16787571	50.32
1.7410	1.671724	-0.712	0.07937431	0.15986484	0.16843897	50.32
1.7420	1.520777	-0.718	0.07996082	0.16038114	0.16901290	50.32
1.7430	1.387739	-0.708	0.08048928	0.16084248	0.16953337	50.32
1.7440	1.275558	-0.719	0.08092153	0.16124415	0.16994673	50.31
1.7450	1.181545	-0.721	0.08128202	0.16159195	0.17032135	50.31
1.7460	1.099234	-0.728	0.08159047	0.16188955	0.17061794	50.31
1.7470	1.022129	-0.722	0.08188814	0.16218913	0.17094088	50.32
1.7480	0.944166	-0.720	0.08219856	0.16249543	0.17126864	50.32
1.7490	0.863171	-0.725	0.08250791	0.16282105	0.17158675	50.32
1.7500	0.779829	-0.728	0.08282423	0.16315532	0.17194384	50.32
1.7510	0.697918	-0.729	0.08313459	0.16349530	0.17228431	50.33
1.7520	0.623159	-0.727	0.08340859	0.16381115	0.17260236	50.33
1.7530	0.560732	-0.722	0.08365124	0.16409910	0.17291462	50.33
1.7540	0.513926	-0.724	0.08382714	0.16432923	0.17313248	50.33
1.7550	0.482826	-0.726	0.08395487	0.16448635	0.17329592	50.33
1.7560	0.465746	-0.727	0.08403242	0.16457498	0.17337859	50.33
1.7570	0.459681	-0.726	0.08408540	0.16462028	0.17342728	50.33
1.7580	0.461597	-0.720	0.08411181	0.16464341	0.17346329	50.33
1.7590	0.469065	-0.724	0.08410496	0.16465485	0.17345560	50.33
1.7600	0.481138	-0.726	0.08408922	0.16463852	0.17343223	50.33
1.7610	0.499735	-0.735	0.08404899	0.16458839	0.17337972	50.32
1.7620	0.533123	-0.737	0.08398330	0.16448736	0.17325419	50.32
1.7630	0.592976	-0.736	0.08379966	0.16429859	0.17307031	50.32
1.7640	0.687590	-0.735	0.08349520	0.16396725	0.17270738	50.31
1.7650	0.814705	-0.739	0.08306783	0.16349626	0.17224914	50.31
1.7660	0.964108	-0.743	0.08255309	0.16293573	0.17167228	50.31
1.7670	1.123009	-0.743	0.08199614	0.16234815	0.17106247	50.32
1.7680	1.280479	-0.740	0.08142143	0.16179228	0.17047107	50.32
1.7690	1.427393	-0.741	0.08086342	0.16126823	0.16989124	50.32
1.7700	1.557283	-0.742	0.08034867	0.16078180	0.16942722	50.32
1.7710	1.668921	-0.742	0.07990474	0.16037250	0.16897398	50.33
1.7720	1.764708	-0.746	0.07950991	0.16001511	0.16861409	50.33
1.7730	1.849451	-0.736	0.07916325	0.15971643	0.16828436	50.33
1.7740	1.928358	-0.736	0.07882130	0.15943712	0.16797400	50.33
1.7750	2.005434	-0.735	0.07848239	0.15915495	0.16767347	50.33
1.7760	2.082310	-0.739	0.07814157	0.15888530	0.16733015	50.33
1.7770	2.156610	-0.736	0.07782036	0.15863484	0.16706359	50.33
1.7780	2.222042	-0.731	0.07754350	0.15841144	0.16677076	50.33
1.7790	2.272196	-0.728	0.07731158	0.15823036	0.16659755	50.33
1.7800	2.302837	-0.728	0.07715833	0.15809363	0.16642147	50.32
1.7810	2.315655	-0.732	0.07706493	0.15802515	0.16636115	50.32
1.7820	2.314939	-0.736	0.07702762	0.15800869	0.16633195	50.32
1.7830	2.305126	-0.724	0.07703936	0.15802407	0.16637093	50.32
1.7840	2.288189	-0.725	0.07706892	0.15805399	0.16636807	50.32
1.7850	2.261953	-0.725	0.07714850	0.15809643	0.16644597	50.31
1.7860	2.218866	-0.723	0.07728803	0.15819854	0.16654712	50.32
1.7870	2.147713	-0.722	0.07755029	0.15839398	0.16677958	50.32
1.7880	2.044344	-0.715	0.07793933	0.15870035	0.16713071	50.32
1.7890	1.914625	-0.724	0.07843828	0.15909523	0.16757238	50.32
1.7900	1.773462	-0.723	0.07897753	0.15954131	0.16808897	50.32
1.7910	1.634874	-0.729	0.07950401	0.16000175	0.16856748	50.33
1.7920	1.507587	-0.723	0.07999414	0.16043037	0.16906929	50.33
1.7930	1.393776	-0.716	0.08045685	0.16083199	0.16948360	50.33
1.7940	1.291094	-0.717	0.08085370	0.16120178	0.16989505	50.33
1.7950	1.194735	-0.722	0.08122104	0.16154665	0.17024136	50.33
1.7960	1.100578	-0.727	0.08156776	0.16189051	0.17060721	50.33
1.7970	1.006222	-0.728	0.08192730	0.16224402	0.17098469	50.33
1.7980	0.911436	-0.723	0.08229965	0.16262543	0.17136610	50.33
1.7990	0.818052	-0.726	0.08266008	0.16299242	0.17177367	50.33
[truncated: 7,001 more rows]
