# Supplementary material for: Evaluation of a Cold-Mixed High-Performance Polyurethane Mixture
Source: Hindawi journal article supplement (doi:10.1155/2019/1507971), 2019-11-07
Supplement: f1 [file 1507971.f1.zip › 1507971.f1/dynamic modulus data/PUM/specimen1/temp50/zhs-1-50_Sum.csv]

Test Information
****************
Project name	zhs
Operator name	1
Target test temperature	50
Target confining stress	0
Average dynamic strain range from 75 to 125 micro-strain
Contact stress	5
Initial modulus	1000
Axial gauge length	70
Comments
Specimen information
********************
Identification	zhs-1-50
Dimensions	Point 1	Point 2	Point 3	Point 4	Point 5	Point 6	Average	Std Dev.
Diameter (mm)	49.2	49.2	49.3				49.23	0.058
Height (mm)	101.3	101.2	101.3				101.27	0.058
Cross-sectional area (mm�)	1903.7
Conditioning time
Properties/Comments
*********
Test date and time	Wed	Apr 3	2019	1:50 PM
Test results summary
	25 Hz	20 Hz	10 Hz	5 Hz	2 Hz	1 Hz	0.5 Hz	0.2 Hz	0.1 Hz
Dynamic modulus (MPa)	9954	9860	9634	9434	9159	8966	8714	8486	8321
Phase angle (Degrees)	4.22	4.24	4.11	4.07	4.04	4.07	4.00	4.02	4.14
Average temperature (�C)	50.3	50.3	50.3	50.4	50.4	50.3	50.3	50.4	50.3
Average confining pressure (kPa)	-0.7	-0.7	-0.7	-0.7	-0.7	-0.7	-0.7	-0.7	-0.7
Average micro-strain	101	102	101	100	98	98	99	98	98
Load drift (%)	-0.9	-0.1	-0.3	0.4	0.3	0.1	-1.5	0.3	2.2
Load standard error (%)	8.2	6.3	4.3	4.2	4.3	2.0	5.6	3.7	3.0
Average deformation drift (%)	-4.9	-4.2	-3.7	-4.1	-2.9	-2.2	-3.9	-2.0	1.1
Average deformation standard error (%)	8.1	6.4	4.3	4.6	4.4	2.5	6.2	3.5	3.2
Deformation uniformity (%)	3.1	3.0	3.1	3.3	3.3	3.6	2.6	2.1	2.6
Phase uniformity (Degrees)	0.2	0.3	0.2	0.2	0.2	0.2	0.2	0.2	0.2
