# Supplementary material for: Evaluation of a Cold-Mixed High-Performance Polyurethane Mixture
Source: Hindawi journal article supplement (doi:10.1155/2019/1507971), 2019-11-07
Supplement: f1 [file 1507971.f1.zip › 1507971.f1/dynamic modulus data/PUM/specimen2/temp10/zhs-2-10_0.1Hz.csv]

Test Information
****************
Project name	zhs
Operator name	2
Target test temperature	10
Target confining stress	0
Average dynamic strain range from 75 to 125 micro-strain
Contact stress	5
Initial modulus	4000
Axial gauge length	70
Comments	Run at High Pressure
Specimen information
********************
Identification	zhs-2-10
Dimensions	Point 1	Point 2	Point 3	Point 4	Point 5	Point 6	Average	Std Dev.
Diameter (mm)	49.2	49.3	49.2				49.23	0.058
Height (mm)	100.8	101.0	100.8				100.87	0.115
Cross-sectional area (mm�)	1903.7
Conditioning time
Properties/Comments
Test Data	0.1Hz
*********
Test date and time	Fri	Mar 29	2019	11:20 AM
Dynamic modulus (MPa)	10363
Phase angle (Degrees)	4.45
Average temperature (�C)	9.9
Average confining pressure (kPa)	-0.6
Average micro-strain	100
Load drift (%)	0.0
Load standard error (%)	1.2
Average deformation drift (%)	-6.3
Average deformation standard error (%)	4.6
Deformation uniformity (%)	39.2
Phase uniformity (Degrees)	0.4
Conditioning Cycles
Time (sec)	Axial stress (kPa)	Axial micro-strain #1	Axial micro-strain #2	Axial micro-strain #3	Confining pressure (kPa)	Temperature (�C)	Load (N)	Displacement #1 (mm)	Displacement #2 (mm)	Displacement #3 (mm)
0.0000	43.748	33.447	10.048	24.933	-0.569	9.836	83.284	-0.002341	-0.000703	-0.001745
0.2000	52.419	34.432	10.296	25.524	-0.556	9.836	99.792	-0.002410	-0.000721	-0.001787
0.4000	58.476	35.254	10.255	26.061	-0.557	9.836	111.322	-0.002468	-0.000718	-0.001824
0.6000	84.790	39.283	10.589	27.532	-0.572	9.836	161.419	-0.002750	-0.000741	-0.001927
0.8000	113.765	43.661	11.216	29.980	-0.584	9.835	216.579	-0.003056	-0.000785	-0.002099
1.0000	146.813	48.691	11.271	33.202	-0.569	9.834	279.493	-0.003408	-0.000789	-0.002324
1.2000	188.471	55.379	11.717	36.848	-0.565	9.834	358.801	-0.003877	-0.000820	-0.002579
1.4000	227.470	61.130	12.744	40.551	-0.579	9.834	433.044	-0.004279	-0.000892	-0.002839
1.6000	273.607	67.856	14.481	44.376	-0.584	9.833	520.878	-0.004750	-0.001014	-0.003106
1.8000	322.795	75.470	16.982	49.946	-0.568	9.832	614.519	-0.005283	-0.001189	-0.003496
2.0000	364.244	81.905	19.123	53.800	-0.580	9.833	693.426	-0.005733	-0.001339	-0.003766
2.2000	425.785	90.657	21.581	59.084	-0.579	9.832	810.585	-0.006346	-0.001511	-0.004136
2.4000	467.699	96.730	23.321	63.297	-0.565	9.830	890.379	-0.006771	-0.001632	-0.004431
2.6000	518.555	103.639	26.055	68.413	-0.563	9.832	987.196	-0.007255	-0.001824	-0.004789
2.8000	569.171	110.951	28.643	73.630	-0.577	9.831	1083.555	-0.007767	-0.002005	-0.005154
3.0000	604.908	116.786	31.018	77.676	-0.578	9.831	1151.590	-0.008175	-0.002171	-0.005437
3.2000	652.503	123.384	33.547	82.629	-0.549	9.830	1242.199	-0.008637	-0.002348	-0.005784
3.4000	687.490	128.568	35.271	86.549	-0.561	9.831	1308.804	-0.009000	-0.002469	-0.006058
3.6000	730.922	134.294	37.394	90.677	-0.578	9.831	1391.487	-0.009401	-0.002618	-0.006347
3.8000	756.410	137.839	39.133	92.989	-0.569	9.829	1440.010	-0.009649	-0.002739	-0.006509
4.0000	796.491	143.271	41.331	96.759	-0.553	9.829	1516.314	-0.010029	-0.002893	-0.006773
4.2000	796.731	144.522	41.818	97.558	-0.569	9.830	1516.771	-0.010117	-0.002927	-0.006829
4.4000	819.920	148.022	43.689	100.722	-0.571	9.829	1560.917	-0.010362	-0.003058	-0.007051
4.6000	824.519	148.983	43.773	100.971	-0.550	9.829	1569.672	-0.010429	-0.003064	-0.007068
4.8000	832.393	150.108	44.094	102.223	-0.566	9.830	1584.663	-0.010508	-0.003087	-0.007156
5.0000	819.544	149.081	43.800	101.217	-0.574	9.829	1560.202	-0.010436	-0.003066	-0.007085
5.2000	819.138	149.026	43.885	102.304	-0.565	9.828	1559.429	-0.010432	-0.003072	-0.007161
5.4000	798.354	146.884	43.523	100.420	-0.548	9.829	1519.861	-0.010282	-0.003047	-0.007029
5.6000	784.723	145.354	43.219	99.842	-0.584	9.829	1493.912	-0.010175	-0.003025	-0.006989
5.8000	752.623	141.839	41.454	96.114	-0.563	9.828	1432.800	-0.009929	-0.002902	-0.006728
6.0000	717.186	137.116	39.397	93.527	-0.564	9.829	1365.337	-0.009598	-0.002758	-0.006547
6.2000	683.988	133.252	37.702	91.256	-0.588	9.828	1302.137	-0.009328	-0.002639	-0.006388
6.4000	636.243	127.055	35.425	86.386	-0.569	9.827	1211.243	-0.008894	-0.002480	-0.006047
6.6000	592.871	121.496	33.505	82.820	-0.558	9.827	1128.674	-0.008505	-0.002345	-0.005797
6.8000	545.937	115.382	31.129	78.501	-0.593	9.827	1039.324	-0.008077	-0.002179	-0.005495
7.0000	499.274	109.238	28.822	73.229	-0.578	9.827	950.489	-0.007647	-0.002018	-0.005126
7.2000	447.381	101.859	25.960	69.254	-0.556	9.827	851.698	-0.007130	-0.001817	-0.004848
7.4000	404.354	95.300	23.723	64.962	-0.588	9.828	769.787	-0.006671	-0.001661	-0.004547
7.6000	346.270	86.810	21.093	58.864	-0.596	9.827	659.208	-0.006077	-0.001477	-0.004120
7.8000	310.878	80.917	19.569	54.847	-0.559	9.827	591.831	-0.005664	-0.001370	-0.003839
8.0000	260.052	73.579	17.411	50.072	-0.589	9.827	495.071	-0.005151	-0.001219	-0.003505
8.2000	216.379	66.203	15.551	44.734	-0.590	9.827	411.930	-0.004634	-0.001089	-0.003131
8.4000	179.995	59.323	13.759	40.865	-0.570	9.827	342.665	-0.004153	-0.000963	-0.002861
8.6000	141.177	52.179	12.813	37.521	-0.560	9.828	268.764	-0.003653	-0.000897	-0.002626
8.8000	111.240	46.857	12.146	33.271	-0.584	9.828	211.773	-0.003280	-0.000850	-0.002329
9.0000	78.148	41.270	11.704	30.739	-0.553	9.827	148.773	-0.002889	-0.000819	-0.002152
9.2000	61.376	37.588	11.270	27.325	-0.568	9.828	116.844	-0.002631	-0.000789	-0.001913
9.4000	51.367	35.448	10.590	25.579	-0.568	9.827	97.790	-0.002481	-0.000741	-0.001791
9.6000	45.160	33.628	10.089	25.249	-0.556	9.827	85.974	-0.002354	-0.000706	-0.001767
9.8000	38.939	32.379	10.157	24.671	-0.566	9.828	74.129	-0.002267	-0.000711	-0.001727
10.0000	41.554	32.377	10.616	24.480	-0.581	9.827	79.107	-0.002266	-0.000743	-0.001714
10.2000	66.140	35.560	10.688	26.515	-0.557	9.828	125.914	-0.002489	-0.000748	-0.001856
10.4000	67.132	36.031	10.590	25.346	-0.588	9.828	127.802	-0.002522	-0.000741	-0.001774
10.6000	93.928	39.881	10.519	28.951	-0.549	9.828	178.814	-0.002792	-0.000736	-0.002027
10.8000	121.099	44.163	11.173	30.696	-0.566	9.829	230.541	-0.003091	-0.000782	-0.002149
11.0000	148.391	48.456	11.548	33.271	-0.572	9.829	282.497	-0.003392	-0.000808	-0.002329
11.2000	193.401	55.794	12.257	36.837	-0.560	9.829	368.185	-0.003906	-0.000858	-0.002579
11.4000	235.360	62.031	13.328	40.770	-0.572	9.830	448.065	-0.004342	-0.000933	-0.002854
11.6000	280.400	68.312	14.788	45.518	-0.580	9.829	533.810	-0.004782	-0.001035	-0.003186
11.8000	321.247	75.011	16.788	49.068	-0.555	9.830	611.572	-0.005251	-0.001175	-0.003435
12.0000	382.067	83.502	19.652	54.750	-0.569	9.830	727.358	-0.005845	-0.001376	-0.003833
12.2000	420.901	89.673	21.650	58.702	-0.574	9.830	801.287	-0.006277	-0.001516	-0.004109
12.4000	466.061	96.646	24.167	63.188	-0.551	9.831	887.260	-0.006765	-0.001692	-0.004423
12.6000	521.140	103.721	26.252	69.224	-0.573	9.833	992.117	-0.007261	-0.001838	-0.004846
12.8000	564.317	110.114	28.809	72.733	-0.557	9.831	1074.314	-0.007708	-0.002017	-0.005091
13.0000	609.492	116.326	31.143	77.896	-0.559	9.833	1160.316	-0.008143	-0.002180	-0.005453
13.2000	653.616	123.010	33.714	82.559	-0.574	9.834	1244.316	-0.008611	-0.002360	-0.005779
13.4000	700.128	129.569	36.160	86.772	-0.569	9.833	1332.865	-0.009070	-0.002531	-0.006074
13.6000	726.203	133.628	37.954	89.483	-0.553	9.834	1382.504	-0.009354	-0.002657	-0.006264
13.8000	768.883	139.185	40.107	94.834	-0.568	9.835	1463.757	-0.009743	-0.002807	-0.006638
14.0000	781.868	141.547	40.968	95.865	-0.559	9.834	1488.476	-0.009908	-0.002868	-0.006711
14.2000	804.441	144.812	42.540	98.480	-0.551	9.835	1531.448	-0.010137	-0.002978	-0.006894
14.4000	831.191	148.386	44.414	101.535	-0.571	9.836	1582.375	-0.010387	-0.003109	-0.007107
14.6000	830.350	149.096	44.290	101.341	-0.553	9.836	1580.772	-0.010437	-0.003100	-0.007094
14.8000	825.375	148.885	44.565	102.235	-0.556	9.837	1571.302	-0.010422	-0.003120	-0.007156
15.0000	822.009	148.928	44.497	102.320	-0.569	9.836	1564.894	-0.010425	-0.003115	-0.007162
15.2000	815.021	148.217	44.415	101.314	-0.541	9.837	1551.590	-0.010375	-0.003109	-0.007092
15.4000	789.998	145.091	43.635	99.416	-0.564	9.838	1503.954	-0.010156	-0.003054	-0.006959
15.6000	742.884	140.547	41.677	96.800	-0.566	9.837	1414.261	-0.009838	-0.002917	-0.006776
15.8000	749.527	141.018	41.831	96.497	-0.546	9.839	1426.907	-0.009871	-0.002928	-0.006755
16.0000	703.871	135.654	39.620	92.152	-0.561	9.839	1339.989	-0.009496	-0.002773	-0.006451
16.2000	685.205	132.766	38.132	91.199	-0.544	9.838	1304.455	-0.009294	-0.002669	-0.006384
16.4000	633.192	126.404	35.466	86.069	-0.545	9.840	1205.435	-0.008848	-0.002483	-0.006025
16.6000	593.051	120.773	33.380	82.423	-0.567	9.840	1129.017	-0.008454	-0.002337	-0.005770
16.8000	548.762	115.005	31.212	77.758	-0.549	9.841	1044.703	-0.008050	-0.002185	-0.005443
17.0000	489.550	106.946	28.503	73.052	-0.571	9.842	931.978	-0.007486	-0.001995	-0.005114
17.2000	451.619	101.429	26.485	69.459	-0.565	9.841	859.766	-0.007100	-0.001854	-0.004862
17.4000	404.580	94.731	24.264	64.616	-0.547	9.842	770.216	-0.006631	-0.001698	-0.004523
17.6000	357.150	87.588	21.763	60.036	-0.560	9.843	679.922	-0.006131	-0.001523	-0.004203
17.8000	287.133	77.541	18.873	53.333	-0.554	9.842	546.627	-0.005428	-0.001321	-0.003733
18.0000	243.160	70.580	16.928	48.573	-0.561	9.844	462.914	-0.004941	-0.001185	-0.003400
18.2000	211.089	64.645	15.425	44.088	-0.567	9.843	401.859	-0.004525	-0.001080	-0.003086
18.4000	159.316	56.334	13.746	39.917	-0.552	9.845	303.297	-0.003943	-0.000962	-0.002794
18.6000	138.336	51.845	12.981	36.396	-0.565	9.845	263.357	-0.003629	-0.000909	-0.002548
18.8000	111.000	46.329	12.241	34.096	-0.554	9.845	211.315	-0.003243	-0.000857	-0.002387
19.0000	84.324	41.729	11.646	30.503	-0.568	9.846	160.532	-0.002921	-0.000815	-0.002135
19.2000	65.509	37.798	11.105	27.852	-0.568	9.846	124.712	-0.002646	-0.000777	-0.001950
19.4000	39.855	32.920	10.714	24.958	-0.558	9.847	75.874	-0.002304	-0.000750	-0.001747
19.6000	39.750	32.255	10.491	23.941	-0.565	9.848	75.674	-0.002258	-0.000734	-0.001676
19.8000	40.201	31.711	10.603	24.672	-0.558	9.848	76.532	-0.002220	-0.000742	-0.001727
20.0000	44.770	32.336	10.759	23.226	-0.552	9.849	85.230	-0.002264	-0.000753	-0.001626
20.2000	52.825	33.599	10.758	25.247	-0.574	9.849	100.565	-0.002352	-0.000753	-0.001767
20.4000	68.214	35.627	10.660	25.716	-0.540	9.849	129.862	-0.002494	-0.000746	-0.001800
20.6000	88.337	38.298	10.646	27.919	-0.559	9.850	168.171	-0.002681	-0.000745	-0.001954
20.8000	125.202	44.121	11.062	30.587	-0.565	9.850	238.352	-0.003088	-0.000774	-0.002141
21.0000	148.841	47.886	11.423	32.776	-0.540	9.850	283.356	-0.003352	-0.000800	-0.002294
21.2000	178.853	52.318	11.966	36.602	-0.548	9.852	340.490	-0.003662	-0.000838	-0.002562
21.4000	237.945	61.492	13.203	41.114	-0.547	9.852	452.986	-0.004304	-0.000924	-0.002878
21.6000	271.097	66.841	14.509	44.171	-0.549	9.853	516.100	-0.004679	-0.001016	-0.003092
21.8000	318.196	73.830	16.830	48.355	-0.560	9.853	605.764	-0.005168	-0.001178	-0.003385
22.0000	370.450	81.738	19.082	53.856	-0.550	9.853	705.242	-0.005722	-0.001336	-0.003770
22.2000	423.966	89.476	21.733	59.140	-0.558	9.854	807.123	-0.006263	-0.001521	-0.004140
22.4000	464.348	95.466	23.932	63.599	-0.556	9.853	883.999	-0.006683	-0.001675	-0.004452
22.6000	512.333	102.290	25.984	68.210	-0.554	9.854	975.351	-0.007160	-0.001819	-0.004775
22.8000	577.617	111.089	29.544	74.028	-0.564	9.853	1099.634	-0.007776	-0.002068	-0.005182
23.0000	611.401	116.216	31.046	77.869	-0.544	9.854	1163.950	-0.008135	-0.002173	-0.005451
23.2000	642.975	121.079	33.186	82.025	-0.558	9.854	1224.060	-0.008476	-0.002323	-0.005742
23.4000	691.202	127.637	35.981	86.525	-0.566	9.854	1315.870	-0.008935	-0.002519	-0.006057
23.6000	739.217	134.501	38.744	91.848	-0.554	9.855	1407.280	-0.009415	-0.002712	-0.006429
23.8000	764.450	138.241	40.272	94.682	-0.580	9.854	1455.317	-0.009677	-0.002819	-0.006628
24.0000	782.319	141.088	41.481	95.907	-0.539	9.854	1489.334	-0.009876	-0.002904	-0.006714
24.2000	807.026	144.799	42.941	98.907	-0.568	9.854	1536.369	-0.010136	-0.003006	-0.006923
24.4000	819.785	147.104	44.303	100.779	-0.575	9.853	1560.659	-0.010297	-0.003101	-0.007055
24.6000	830.861	148.398	44.594	101.287	-0.543	9.853	1581.745	-0.010388	-0.003122	-0.007090
24.8000	828.922	149.081	44.844	101.618	-0.559	9.854	1578.054	-0.010436	-0.003139	-0.007113
25.0000	822.249	148.232	44.371	102.018	-0.562	9.853	1565.351	-0.010376	-0.003106	-0.007141
25.2000	815.276	147.815	44.398	100.846	-0.560	9.855	1552.076	-0.010347	-0.003108	-0.007059
25.4000	774.489	143.244	42.678	98.702	-0.581	9.853	1474.428	-0.010027	-0.002987	-0.006909
25.6000	779.403	143.938	43.455	98.785	-0.554	9.854	1483.784	-0.010076	-0.003042	-0.006915
25.8000	753.043	140.921	42.273	97.241	-0.575	9.853	1433.601	-0.009864	-0.002959	-0.006807
26.0000	722.115	136.794	40.260	94.312	-0.568	9.853	1374.722	-0.009576	-0.002818	-0.006602
26.2000	679.825	132.182	38.230	91.118	-0.560	9.853	1294.212	-0.009253	-0.002676	-0.006378
26.4000	631.899	126.164	36.062	85.726	-0.592	9.852	1202.974	-0.008832	-0.002524	-0.006001
26.6000	592.285	120.455	33.615	82.024	-0.564	9.853	1127.558	-0.008432	-0.002353	-0.005742
26.8000	542.315	114.214	31.254	77.414	-0.573	9.853	1032.429	-0.007995	-0.002188	-0.005419
27.0000	496.629	107.626	28.989	72.969	-0.562	9.852	945.454	-0.007534	-0.002029	-0.005108
27.2000	448.673	100.971	26.235	69.238	-0.566	9.853	854.158	-0.007068	-0.001836	-0.004847
27.4000	395.578	93.398	23.946	64.617	-0.578	9.852	753.078	-0.006538	-0.001676	-0.004523
27.6000	343.008	85.558	21.664	59.042	-0.561	9.852	653.000	-0.005989	-0.001516	-0.004133
27.8000	295.909	78.069	19.084	53.266	-0.574	9.853	563.335	-0.005465	-0.001336	-0.003729
28.0000	257.437	71.928	17.803	50.030	-0.558	9.851	490.093	-0.005035	-0.001246	-0.003502
28.2000	199.277	62.867	15.273	44.432	-0.550	9.853	379.372	-0.004401	-0.001069	-0.003110
28.4000	183.827	59.296	14.258	40.977	-0.566	9.853	349.960	-0.004151	-0.000998	-0.002868
28.6000	140.471	51.762	13.455	36.711	-0.569	9.852	267.420	-0.003623	-0.000942	-0.002570
28.8000	107.603	45.926	12.648	32.831	-0.550	9.853	204.849	-0.003215	-0.000885	-0.002298
29.0000	81.168	40.825	12.050	30.326	-0.566	9.852	154.524	-0.002858	-0.000844	-0.002123
29.2000	65.283	37.576	11.481	28.001	-0.544	9.852	124.283	-0.002630	-0.000804	-0.001960
29.4000	46.723	33.961	11.132	25.303	-0.566	9.853	88.949	-0.002377	-0.000779	-0.001771
29.6000	36.339	31.974	10.452	24.135	-0.564	9.852	69.180	-0.002238	-0.000732	-0.001689
29.8000	45.491	32.364	10.536	23.982	-0.554	9.853	86.603	-0.002266	-0.000737	-0.001679
30.0000	50.240	32.852	10.661	24.342	-0.553	9.851	95.644	-0.002300	-0.000746	-0.001704
30.2000	63.044	34.252	10.298	26.129	-0.548	9.852	120.020	-0.002398	-0.000721	-0.001829
30.4000	71.114	35.419	10.562	25.511	-0.556	9.851	135.384	-0.002479	-0.000739	-0.001786
30.6000	87.210	38.229	10.771	27.284	-0.544	9.852	166.025	-0.002676	-0.000754	-0.001910
30.8000	129.981	44.205	11.258	31.839	-0.554	9.851	247.450	-0.003094	-0.000788	-0.002229
31.0000	149.217	47.788	11.440	33.794	-0.549	9.850	284.071	-0.003345	-0.000801	-0.002366
31.2000	182.670	52.625	12.076	36.326	-0.548	9.851	347.757	-0.003684	-0.000845	-0.002543
31.4000	228.717	60.089	13.051	40.552	-0.546	9.850	435.419	-0.004206	-0.000914	-0.002839
31.6000	283.887	68.145	15.163	45.242	-0.537	9.850	540.447	-0.004770	-0.001061	-0.003167
31.8000	314.469	72.956	16.983	48.820	-0.549	9.851	598.669	-0.005107	-0.001189	-0.003417
32.0000	370.014	80.931	19.304	54.477	-0.541	9.849	704.412	-0.005665	-0.001351	-0.003813
32.2000	419.578	88.160	21.678	58.493	-0.542	9.850	798.769	-0.006171	-0.001517	-0.004095
32.4000	472.884	95.939	24.057	64.066	-0.568	9.849	900.249	-0.006716	-0.001684	-0.004485
32.6000	512.348	102.109	26.542	68.388	-0.534	9.850	975.380	-0.007148	-0.001858	-0.004787
32.8000	563.190	109.211	29.255	73.657	-0.547	9.849	1072.168	-0.007645	-0.002048	-0.005156
33.0000	608.711	115.771	31.711	77.058	-0.553	9.849	1158.829	-0.008104	-0.002220	-0.005394
33.2000	649.663	121.591	33.978	81.612	-0.541	9.849	1236.792	-0.008511	-0.002378	-0.005713
33.4000	687.219	127.152	36.063	86.481	-0.564	9.847	1308.289	-0.008901	-0.002524	-0.006054
33.6000	730.245	133.308	38.480	90.334	-0.541	9.848	1390.200	-0.009332	-0.002694	-0.006323
33.8000	755.809	136.933	40.162	92.838	-0.564	9.847	1438.866	-0.009585	-0.002811	-0.006499
34.0000	783.701	141.047	41.275	96.485	-0.540	9.848	1491.966	-0.009873	-0.002889	-0.006754
34.2000	804.816	144.120	42.898	98.191	-0.568	9.847	1532.164	-0.010088	-0.003003	-0.006873
34.4000	831.943	147.287	44.107	101.481	-0.543	9.846	1583.805	-0.010310	-0.003088	-0.007104
34.6000	825.480	147.730	44.579	101.217	-0.556	9.847	1571.503	-0.010341	-0.003121	-0.007085
34.8000	827.149	148.204	44.481	102.139	-0.547	9.845	1574.678	-0.010374	-0.003114	-0.007150
35.0000	823.963	147.926	44.553	101.988	-0.559	9.846	1568.613	-0.010355	-0.003119	-0.007139
35.2000	817.485	147.438	44.637	101.507	-0.568	9.844	1556.282	-0.010321	-0.003125	-0.007105
35.4000	800.383	145.410	43.913	100.694	-0.534	9.845	1523.724	-0.010179	-0.003074	-0.007049
35.6000	770.401	142.340	42.691	97.833	-0.562	9.845	1466.646	-0.009964	-0.002988	-0.006848
35.8000	739.127	138.615	41.206	95.330	-0.551	9.843	1407.108	-0.009703	-0.002884	-0.006673
36.0000	713.834	135.863	39.772	93.019	-0.556	9.844	1358.957	-0.009510	-0.002784	-0.006511
36.2000	673.934	130.765	37.939	90.060	-0.564	9.843	1282.997	-0.009154	-0.002656	-0.006304
36.4000	642.179	126.220	36.286	86.494	-0.542	9.843	1222.544	-0.008835	-0.002540	-0.006055
36.6000	599.694	120.814	33.882	82.133	-0.562	9.844	1141.663	-0.008457	-0.002372	-0.005749
36.8000	559.102	114.879	31.269	78.115	-0.553	9.842	1064.386	-0.008042	-0.002189	-0.005468
37.0000	462.048	102.930	27.347	70.590	-0.551	9.843	879.622	-0.007205	-0.001914	-0.004941
37.2000	454.910	101.124	26.555	69.118	-0.565	9.842	866.032	-0.007079	-0.001859	-0.004838
37.4000	401.935	93.592	23.931	64.313	-0.541	9.843	765.181	-0.006551	-0.001675	-0.004502
37.6000	357.541	86.770	21.428	59.288	-0.568	9.842	680.666	-0.006074	-0.001500	-0.004150
37.8000	306.775	79.124	19.208	54.835	-0.542	9.843	584.021	-0.005539	-0.001345	-0.003838
38.0000	268.002	72.804	17.510	50.086	-0.552	9.842	510.206	-0.005096	-0.001226	-0.003506
38.2000	204.176	63.199	15.312	44.252	-0.549	9.842	388.699	-0.004424	-0.001072	-0.003098
38.4000	175.487	57.583	14.386	40.990	-0.563	9.842	334.082	-0.004031	-0.001007	-0.002869
38.6000	135.075	50.818	13.398	36.201	-0.557	9.841	257.149	-0.003557	-0.000938	-0.002534
38.8000	110.774	45.510	12.467	34.399	-0.575	9.842	210.886	-0.003186	-0.000873	-0.002408
39.0000	87.345	41.797	12.256	31.675	-0.563	9.841	166.283	-0.002926	-0.000858	-0.002217
39.2000	63.029	36.686	11.605	27.862	-0.549	9.842	119.991	-0.002568	-0.000812	-0.001950
39.4000	52.494	34.559	11.340	26.102	-0.574	9.841	99.936	-0.002419	-0.000794	-0.001827
39.6000	34.009	31.517	10.727	23.569	-0.535	9.842	64.745	-0.002206	-0.000751	-0.001650
39.8000	36.669	31.210	10.977	23.474	-0.564	9.842	69.809	-0.002185	-0.000768	-0.001643
40.0000	43.117	31.724	10.828	24.284	-0.556	9.841	82.083	-0.002221	-0.000758	-0.001700
40.2000	54.553	33.837	11.342	24.851	-0.543	9.842	103.855	-0.002369	-0.000794	-0.001740
40.4000	65.719	34.849	11.147	26.143	-0.568	9.841	125.113	-0.002439	-0.000780	-0.001830
40.6000	89.960	38.631	11.493	28.332	-0.554	9.843	171.261	-0.002704	-0.000804	-0.001983
40.8000	119.401	43.369	11.895	30.394	-0.553	9.843	227.308	-0.003036	-0.000833	-0.002128
41.0000	146.813	47.246	12.244	33.901	-0.549	9.843	279.493	-0.003307	-0.000857	-0.002373
41.2000	179.770	52.846	12.826	36.820	-0.574	9.843	342.236	-0.003699	-0.000898	-0.002577
41.4000	229.529	60.437	13.983	41.308	-0.560	9.843	436.964	-0.004231	-0.000979	-0.002892
41.6000	265.672	65.801	15.452	44.941	-0.563	9.844	505.772	-0.004606	-0.001082	-0.003146
41.8000	315.912	73.149	17.428	49.164	-0.555	9.843	601.416	-0.005120	-0.001220	-0.003442
42.0000	374.628	82.183	20.249	54.407	-0.557	9.844	713.196	-0.005753	-0.001417	-0.003808
42.2000	417.730	88.259	22.346	58.631	-0.552	9.843	795.250	-0.006178	-0.001564	-0.004104
42.4000	461.568	94.869	24.363	64.327	-0.550	9.844	878.706	-0.006641	-0.001705	-0.004503
42.6000	510.124	101.777	26.860	67.782	-0.568	9.844	971.146	-0.007124	-0.001880	-0.004745
42.8000	565.369	109.239	29.658	73.931	-0.546	9.845	1076.317	-0.007647	-0.002076	-0.005175
43.0000	606.877	115.286	31.695	78.183	-0.561	9.846	1155.338	-0.008070	-0.002219	-0.005473
43.2000	647.845	120.814	34.004	81.681	-0.556	9.845	1233.330	-0.008457	-0.002380	-0.005718
43.4000	703.074	128.624	36.827	88.173	-0.549	9.846	1338.472	-0.009004	-0.002578	-0.006172
43.6000	727.585	132.710	38.465	90.074	-0.553	9.847	1385.136	-0.009290	-0.002693	-0.006305
43.8000	761.084	137.421	40.093	93.361	-0.548	9.847	1448.908	-0.009619	-0.002806	-0.006535
44.0000	779.223	140.170	41.691	95.822	-0.558	9.847	1483.440	-0.009812	-0.002918	-0.006708
44.2000	805.463	143.745	43.357	98.577	-0.547	9.848	1533.394	-0.010062	-0.003035	-0.006900
44.4000	821.483	146.410	44.286	101.204	-0.546	9.849	1563.892	-0.010249	-0.003100	-0.007084
44.6000	829.343	147.786	45.042	101.535	-0.554	9.848	1578.856	-0.010345	-0.003153	-0.007107
44.8000	832.529	148.509	45.207	102.196	-0.536	9.849	1584.921	-0.010396	-0.003164	-0.007154
45.0000	824.744	147.883	45.359	102.221	-0.553	9.849	1570.101	-0.010352	-0.003175	-0.007155
45.2000	817.891	147.300	44.817	102.333	-0.545	9.848	1557.055	-0.010311	-0.003137	-0.007163
45.4000	796.476	145.034	44.413	99.990	-0.552	9.850	1516.285	-0.010152	-0.003109	-0.006999
45.6000	777.780	142.591	43.259	98.357	-0.556	9.849	1480.694	-0.009981	-0.003028	-0.006885
45.8000	747.423	139.143	41.762	96.650	-0.544	9.850	1422.901	-0.009740	-0.002923	-0.006765
46.0000	720.432	136.253	40.564	93.526	-0.549	9.850	1371.517	-0.009538	-0.002840	-0.006547
46.2000	676.789	130.792	38.466	90.140	-0.549	9.851	1288.433	-0.009155	-0.002693	-0.006310
46.4000	639.444	126.442	36.340	86.909	-0.541	9.850	1217.337	-0.008851	-0.002544	-0.006084
46.6000	600.761	121.024	34.520	82.738	-0.532	9.851	1143.694	-0.008472	-0.002416	-0.005792
46.8000	553.797	114.339	32.211	78.335	-0.570	9.851	1054.287	-0.008004	-0.002255	-0.005483
47.0000	495.998	106.904	29.239	73.643	-0.548	9.851	944.252	-0.007483	-0.002047	-0.005155
47.2000	441.444	99.374	26.528	67.947	-0.536	9.852	840.397	-0.006956	-0.001857	-0.004756
47.4000	399.966	92.980	24.307	63.847	-0.552	9.852	761.433	-0.006509	-0.001701	-0.004469
47.6000	344.000	84.766	21.511	58.370	-0.532	9.851	654.888	-0.005934	-0.001506	-0.004086
47.8000	305.573	78.931	19.650	55.081	-0.547	9.853	581.732	-0.005525	-0.001375	-0.003856
48.0000	255.678	71.150	17.565	48.860	-0.546	9.852	486.746	-0.004981	-0.001230	-0.003420
48.2000	205.694	63.226	15.494	43.950	-0.536	9.853	391.588	-0.004426	-0.001085	-0.003076
48.4000	175.682	57.806	14.482	40.441	-0.553	9.853	334.454	-0.004046	-0.001014	-0.002831
48.6000	136.683	50.581	13.677	36.739	-0.523	9.853	260.210	-0.003541	-0.000957	-0.002572
48.8000	108.640	45.524	13.189	33.960	-0.546	9.854	206.823	-0.003187	-0.000923	-0.002377
49.0000	78.553	39.936	12.369	31.040	-0.539	9.854	149.546	-0.002796	-0.000866	-0.002173
49.2000	61.496	36.699	11.842	28.317	-0.545	9.855	117.073	-0.002569	-0.000829	-0.001982
49.4000	48.677	33.781	11.729	26.582	-0.548	9.854	92.669	-0.002365	-0.000821	-0.001861
49.6000	41.268	31.975	11.354	24.962	-0.540	9.856	78.564	-0.002238	-0.000795	-0.001747
49.8000	41.193	31.126	11.215	23.887	-0.556	9.854	78.421	-0.002179	-0.000785	-0.001672
50.0000	56.056	32.366	10.895	25.526	-0.549	9.842	106.716	-0.002266	-0.000763	-0.001787
50.2000	64.442	33.669	11.270	25.194	-0.538	9.844	122.681	-0.002357	-0.000789	-0.001764
50.4000	92.229	38.172	11.479	28.772	-0.540	9.843	175.581	-0.002672	-0.000804	-0.002014
50.6000	117.282	41.757	11.784	30.478	-0.543	9.844	223.274	-0.002923	-0.000825	-0.002133
50.8000	153.290	47.873	12.399	34.606	-0.557	9.843	291.824	-0.003351	-0.000868	-0.002422
51.0000	193.371	53.735	12.940	38.157	-0.536	9.844	368.128	-0.003761	-0.000906	-0.002671
51.2000	241.236	61.769	14.220	41.773	-0.562	9.844	459.251	-0.004324	-0.000995	-0.002924
51.4000	293.009	69.077	16.454	46.481	-0.538	9.844	557.814	-0.004835	-0.001152	-0.003254
51.6000	350.342	77.653	19.069	52.203	-0.549	9.845	666.962	-0.005436	-0.001335	-0.003654
51.8000	412.139	86.546	21.871	58.615	-0.541	9.844	784.607	-0.006058	-0.001531	-0.004103
52.0000	471.381	95.203	24.403	64.589	-0.542	9.845	897.388	-0.006664	-0.001708	-0.004521
52.2000	549.378	105.751	28.531	71.715	-0.542	9.845	1045.876	-0.007403	-0.001997	-0.005020
52.4000	605.224	114.129	31.753	77.552	-0.526	9.846	1152.191	-0.007989	-0.002223	-0.005429
52.6000	665.308	122.356	34.729	83.826	-0.542	9.845	1266.575	-0.008565	-0.002431	-0.005868
52.8000	731.102	131.501	38.465	89.467	-0.524	9.846	1391.830	-0.009205	-0.002693	-0.006263
53.0000	799.797	140.531	41.943	97.020	-0.544	9.846	1522.608	-0.009837	-0.002936	-0.006791
53.2000	860.301	149.025	45.569	102.938	-0.536	9.846	1637.793	-0.010432	-0.003190	-0.007206
53.4000	895.633	154.722	48.235	107.466	-0.557	9.847	1705.055	-0.010831	-0.003376	-0.007523
53.6000	957.430	162.446	51.418	113.342	-0.529	9.846	1822.701	-0.011371	-0.003599	-0.007934
53.8000	989.125	167.160	53.725	117.207	-0.550	9.848	1883.039	-0.011701	-0.003761	-0.008204
54.0000	1021.721	172.192	55.808	121.115	-0.544	9.847	1945.095	-0.012053	-0.003907	-0.008478
54.2000	1044.429	175.288	57.560	123.675	-0.536	9.847	1988.325	-0.012270	-0.004029	-0.008657
54.4000	1072.968	179.387	59.241	126.123	-0.553	9.848	2042.656	-0.012557	-0.004147	-0.008829
54.6000	1082.782	180.971	60.047	128.630	-0.529	9.848	2061.338	-0.012668	-0.004203	-0.009004
54.8000	1082.647	181.388	59.976	128.766	-0.545	9.848	2061.081	-0.012697	-0.004198	-0.009014
55.0000	1077.597	181.304	60.074	128.365	-0.529	9.847	2051.468	-0.012691	-0.004205	-0.008986
55.2000	1066.716	181.000	59.936	127.539	-0.554	9.849	2030.754	-0.012670	-0.004196	-0.008928
55.4000	1050.411	179.097	59.507	127.471	-0.549	9.848	1999.712	-0.012537	-0.004165	-0.008923
55.6000	1014.763	175.385	58.465	123.758	-0.549	9.850	1931.849	-0.012277	-0.004093	-0.008663
55.8000	964.358	169.965	55.711	120.207	-0.536	9.849	1835.890	-0.011898	-0.003900	-0.008415
56.0000	932.588	165.703	53.930	117.276	-0.546	9.850	1775.408	-0.011599	-0.003775	-0.008209
56.2000	886.240	160.364	51.529	113.203	-0.551	9.849	1687.174	-0.011225	-0.003607	-0.007924
56.4000	830.815	153.777	48.344	107.522	-0.545	9.850	1581.659	-0.010764	-0.003384	-0.007527
56.6000	768.688	146.256	45.108	102.979	-0.550	9.850	1463.385	-0.010238	-0.003158	-0.007209
56.8000	716.585	139.574	41.944	97.736	-0.528	9.850	1364.193	-0.009770	-0.002936	-0.006842
57.0000	658.304	131.599	39.385	92.166	-0.550	9.851	1253.242	-0.009212	-0.002757	-0.006452
57.2000	586.619	122.371	35.272	84.912	-0.531	9.850	1116.772	-0.008566	-0.002469	-0.005944
57.4000	518.796	112.712	31.918	79.147	-0.543	9.852	987.654	-0.007890	-0.002234	-0.005540
57.6000	461.207	104.126	28.447	73.078	-0.537	9.851	878.019	-0.007289	-0.001991	-0.005115
57.8000	395.307	94.787	25.210	66.997	-0.538	9.852	752.563	-0.006635	-0.001765	-0.004690
58.0000	336.982	86.072	22.667	60.874	-0.548	9.852	641.527	-0.006025	-0.001587	-0.004261
58.2000	272.871	76.207	19.707	53.374	-0.537	9.852	519.476	-0.005334	-0.001379	-0.003736
58.4000	212.652	65.996	16.747	47.153	-0.553	9.853	404.835	-0.004620	-0.001172	-0.003301
58.6000	190.139	61.478	15.995	44.663	-0.541	9.853	361.977	-0.004303	-0.001120	-0.003126
58.8000	125.127	51.152	14.454	37.645	-0.541	9.854	238.209	-0.003581	-0.001012	-0.002635
59.0000	114.306	47.427	13.858	36.351	-0.553	9.854	217.609	-0.003320	-0.000970	-0.002545
59.2000	74.195	39.894	13.162	31.181	-0.547	9.855	141.249	-0.002793	-0.000921	-0.002183
59.4000	76.570	39.382	12.634	30.421	-0.544	9.855	145.769	-0.002757	-0.000884	-0.002129
59.6000	43.237	33.962	11.994	26.473	-0.544	9.856	82.312	-0.002377	-0.000840	-0.001853
59.8000	68.755	36.785	12.008	29.279	-0.535	9.855	130.892	-0.002575	-0.000841	-0.002050
60.0000	58.746	34.976	11.966	27.824	-0.526	9.857	111.837	-0.002448	-0.000838	-0.001948
60.2000	73.279	36.743	12.313	28.082	-0.544	9.857	139.503	-0.002572	-0.000862	-0.001966
60.4000	100.841	40.644	12.229	30.614	-0.528	9.857	191.975	-0.002845	-0.000856	-0.002143
60.6000	126.599	44.497	12.507	32.790	-0.537	9.858	241.013	-0.003115	-0.000875	-0.002295
60.8000	158.099	49.554	12.425	35.885	-0.540	9.858	300.980	-0.003469	-0.000870	-0.002512
61.0000	197.669	55.946	13.356	39.190	-0.546	9.859	376.310	-0.003916	-0.000935	-0.002743
61.2000	243.295	63.170	14.925	43.358	-0.548	9.858	463.171	-0.004422	-0.001045	-0.003035
61.4000	302.522	71.720	17.480	49.178	-0.546	9.860	575.924	-0.005020	-0.001224	-0.003442
61.6000	353.258	79.192	19.568	53.346	-0.554	9.859	672.512	-0.005543	-0.001370	-0.003734
61.8000	424.988	89.034	22.943	60.461	-0.528	9.860	809.069	-0.006232	-0.001606	-0.004232
62.0000	486.379	98.054	26.028	66.543	-0.546	9.860	925.941	-0.006864	-0.001822	-0.004658
62.2000	541.263	106.057	28.587	72.545	-0.545	9.860	1030.426	-0.007424	-0.002001	-0.005078
62.4000	606.667	115.340	32.280	78.406	-0.557	9.859	1154.938	-0.008074	-0.002260	-0.005488
62.6000	677.601	125.039	36.119	86.055	-0.537	9.860	1289.978	-0.008753	-0.002528	-0.006024
62.8000	735.400	133.350	39.437	91.283	-0.557	9.860	1400.013	-0.009335	-0.002761	-0.006390
63.0000	800.097	142.118	43.108	98.934	-0.542	9.860	1523.180	-0.009948	-0.003018	-0.006925
63.2000	853.809	149.358	46.291	103.254	-0.570	9.860	1625.433	-0.010455	-0.003240	-0.007228
63.4000	902.636	156.142	49.415	108.744	-0.539	9.861	1718.388	-0.010930	-0.003459	-0.007612
63.6000	944.716	162.159	51.626	113.382	-0.555	9.861	1798.496	-0.011351	-0.003614	-0.007937
63.8000	992.461	168.729	54.778	118.638	-0.535	9.861	1889.391	-0.011811	-0.003834	-0.008305
64.0000	1021.210	173.220	56.922	121.762	-0.564	9.861	1944.122	-0.012125	-0.003985	-0.008523
64.2000	1050.922	177.124	58.439	125.684	-0.542	9.861	2000.685	-0.012399	-0.004091	-0.008798
64.4000	1075.162	180.555	59.948	127.983	-0.540	9.862	2046.833	-0.012639	-0.004196	-0.008959
64.6000	1081.519	181.834	60.699	129.965	-0.549	9.861	2058.935	-0.012728	-0.004249	-0.009098
64.8000	1081.189	182.614	60.687	130.088	-0.537	9.862	2058.306	-0.012783	-0.004248	-0.009106
65.0000	1083.608	183.501	61.575	131.023	-0.560	9.862	2062.912	-0.012845	-0.004310	-0.009172
65.2000	1058.210	180.776	61.048	129.372	-0.538	9.862	2014.561	-0.012654	-0.004273	-0.009056
65.4000	1044.489	179.292	60.739	127.966	-0.553	9.861	1988.440	-0.012550	-0.004252	-0.008958
65.6000	1006.663	175.261	58.700	124.817	-0.550	9.862	1916.428	-0.012268	-0.004109	-0.008737
65.8000	979.431	172.151	56.865	123.028	-0.561	9.862	1864.586	-0.012051	-0.003981	-0.008612
66.0000	930.334	166.717	54.961	118.692	-0.553	9.862	1771.116	-0.011670	-0.003847	-0.008308
66.2000	880.890	161.031	52.323	114.787	-0.570	9.862	1676.989	-0.011272	-0.003663	-0.008035
66.4000	831.116	154.513	49.361	108.951	-0.553	9.862	1582.232	-0.010816	-0.003455	-0.007627
66.6000	769.770	147.149	45.899	103.352	-0.553	9.862	1465.445	-0.010300	-0.003213	-0.007235
66.8000	709.401	139.741	42.386	98.287	-0.562	9.863	1350.517	-0.009782	-0.002967	-0.006880
67.0000	640.285	130.612	39.119	91.765	-0.551	9.862	1218.939	-0.009143	-0.002738	-0.006424
67.2000	592.871	123.538	36.340	86.577	-0.542	9.863	1128.674	-0.008648	-0.002544	-0.006060
67.4000	515.565	113.142	32.240	79.035	-0.560	9.862	981.503	-0.007920	-0.002257	-0.005532
67.6000	457.855	105.112	29.337	74.001	-0.535	9.863	871.639	-0.007358	-0.002054	-0.005180
67.8000	398.253	96.162	26.248	67.382	-0.549	9.863	758.171	-0.006731	-0.001837	-0.004717
68.0000	323.667	84.752	22.276	61.052	-0.537	9.862	616.179	-0.005933	-0.001559	-0.004274
68.2000	289.477	78.806	20.607	56.788	-0.538	9.863	551.090	-0.005516	-0.001442	-0.003975
68.4000	225.787	68.813	18.180	49.645	-0.548	9.863	429.840	-0.004817	-0.001273	-0.003475
68.6000	178.132	60.380	16.342	44.292	-0.546	9.862	339.117	-0.004227	-0.001144	-0.003100
68.8000	137.871	52.581	15.008	40.260	-0.559	9.863	262.470	-0.003681	-0.001051	-0.002818
69.0000	101.923	46.550	14.274	36.504	-0.550	9.862	194.035	-0.003259	-0.000999	-0.002555
69.2000	77.036	41.395	13.454	33.132	-0.544	9.863	146.656	-0.002898	-0.000942	-0.002319
69.4000	55.350	37.075	13.079	29.996	-0.552	9.862	105.371	-0.002595	-0.000916	-0.002100
69.6000	48.226	34.919	12.508	27.783	-0.552	9.863	91.810	-0.002444	-0.000876	-0.001945
69.8000	54.433	35.713	12.273	29.239	-0.542	9.862	103.626	-0.002500	-0.000859	-0.002047
70.0000	61.000	36.298	12.646	29.102	-0.556	9.862	116.129	-0.002541	-0.000885	-0.002037
70.2000	71.610	37.076	12.801	29.308	-0.534	9.863	136.328	-0.002595	-0.000896	-0.002052
70.4000	88.547	39.368	12.772	31.344	-0.550	9.862	168.571	-0.002756	-0.000894	-0.002194
70.6000	127.366	45.273	13.176	34.535	-0.548	9.862	242.472	-0.003169	-0.000922	-0.002417
70.8000	157.377	50.096	13.941	37.674	-0.545	9.861	299.606	-0.003507	-0.000976	-0.002637
71.0000	197.083	56.334	14.343	40.013	-0.550	9.862	375.195	-0.003943	-0.001004	-0.002801
71.2000	247.292	64.020	15.509	44.294	-0.553	9.862	470.781	-0.004481	-0.001086	-0.003101
71.4000	296.661	71.387	17.887	49.686	-0.524	9.861	564.766	-0.004997	-0.001252	-0.003478
71.6000	356.294	80.125	20.331	55.025	-0.540	9.862	678.291	-0.005609	-0.001423	-0.003852
71.8000	411.688	87.993	22.932	60.460	-0.542	9.861	783.749	-0.006160	-0.001605	-0.004232
72.0000	478.610	98.039	26.389	67.451	-0.535	9.861	911.150	-0.006863	-0.001847	-0.004722
72.2000	544.599	107.210	29.614	73.134	-0.543	9.861	1036.777	-0.007505	-0.002073	-0.005119
72.4000	601.392	115.005	32.544	79.560	-0.547	9.860	1144.896	-0.008050	-0.002278	-0.005569
72.6000	668.343	124.288	35.938	85.340	-0.549	9.861	1272.354	-0.008700	-0.002516	-0.005974
72.8000	738.286	134.266	39.938	93.293	-0.532	9.860	1405.506	-0.009399	-0.002796	-0.006531
73.0000	794.732	141.532	43.369	98.619	-0.556	9.861	1512.966	-0.009907	-0.003036	-0.006903
73.2000	851.825	149.108	46.360	104.673	-0.534	9.861	1621.656	-0.010438	-0.003245	-0.007327
73.4000	900.172	156.529	49.359	109.241	-0.548	9.860	1713.696	-0.010957	-0.003455	-0.007647
73.6000	961.998	164.197	53.072	115.941	-0.531	9.860	1831.398	-0.011494	-0.003715	-0.008116
73.8000	995.677	169.201	55.375	119.505	-0.562	9.859	1895.514	-0.011844	-0.003876	-0.008365
74.0000	1020.549	173.107	57.129	122.589	-0.546	9.859	1942.863	-0.012118	-0.003999	-0.008581
74.2000	1049.223	177.096	58.950	125.465	-0.534	9.859	1997.452	-0.012397	-0.004126	-0.008783
74.4000	1069.842	180.054	60.294	128.173	-0.549	9.858	2036.705	-0.012604	-0.004221	-0.008972
74.6000	1079.911	181.806	60.852	129.345	-0.532	9.859	2055.874	-0.012726	-0.004260	-0.009054
74.8000	1076.350	182.364	61.589	129.512	-0.542	9.858	2049.093	-0.012765	-0.004311	-0.009066
75.0000	1075.944	182.626	61.438	129.786	-0.531	9.858	2048.321	-0.012784	-0.004301	-0.009085
75.2000	1065.063	181.542	60.993	129.372	-0.550	9.858	2027.607	-0.012708	-0.004270	-0.009056
75.4000	1037.501	179.138	60.270	127.364	-0.541	9.857	1975.136	-0.012540	-0.004219	-0.008915
75.6000	1015.935	176.581	59.379	125.987	-0.534	9.858	1934.080	-0.012361	-0.004157	-0.008819
75.8000	976.005	171.689	57.088	123.222	-0.549	9.858	1858.063	-0.012018	-0.003996	-0.008626
76.0000	938.449	167.314	55.156	119.642	-0.532	9.858	1786.566	-0.011712	-0.003861	-0.008375
76.2000	875.029	160.003	51.945	113.630	-0.549	9.858	1665.831	-0.011200	-0.003636	-0.007954
76.4000	824.819	153.748	49.013	108.841	-0.538	9.857	1570.244	-0.010762	-0.003431	-0.007619
76.6000	774.850	147.523	46.207	105.166	-0.540	9.857	1475.115	-0.010327	-0.003235	-0.007362
76.8000	707.492	139.033	42.747	98.150	-0.549	9.856	1346.884	-0.009732	-0.002992	-0.006871
77.0000	640.526	130.291	39.522	92.660	-0.549	9.857	1219.397	-0.009120	-0.002767	-0.006486
77.2000	585.101	122.218	35.757	86.976	-0.549	9.856	1113.882	-0.008555	-0.002503	-0.006088
77.4000	513.220	113.102	32.473	80.234	-0.538	9.856	977.039	-0.007917	-0.002273	-0.005616
77.6000	456.533	104.487	29.671	73.987	-0.544	9.856	869.122	-0.007314	-0.002077	-0.005179
77.8000	391.851	94.868	25.889	67.616	-0.541	9.855	745.983	-0.006641	-0.001812	-0.004733
78.0000	333.210	86.449	22.805	61.919	-0.536	9.856	634.346	-0.006051	-0.001596	-0.004334
78.2000	278.537	77.569	20.788	56.141	-0.547	9.854	530.262	-0.005430	-0.001455	-0.003930
78.4000	221.579	68.091	18.386	49.688	-0.553	9.854	421.829	-0.004766	-0.001287	-0.003478
78.6000	185.886	61.713	16.718	46.289	-0.546	9.855	353.880	-0.004320	-0.001170	-0.003240
78.8000	146.196	54.710	15.382	41.334	-0.545	9.855	278.320	-0.003830	-0.001077	-0.002893
79.0000	102.614	46.425	14.481	37.344	-0.553	9.855	195.351	-0.003250	-0.001014	-0.002614
79.2000	81.920	42.119	13.772	33.669	-0.541	9.855	155.954	-0.002948	-0.000964	-0.002357
79.4000	66.035	38.910	13.410	31.935	-0.546	9.855	125.713	-0.002724	-0.000939	-0.002235
79.6000	48.256	35.599	13.342	29.486	-0.552	9.855	91.867	-0.002492	-0.000934	-0.002064
79.8000	51.713	35.225	12.577	29.267	-0.539	9.854	98.448	-0.002466	-0.000880	-0.002049
80.0000	56.191	35.601	12.953	29.184	-0.540	9.855	106.974	-0.002492	-0.000907	-0.002043
80.2000	68.379	36.879	12.968	29.680	-0.532	9.855	130.177	-0.002582	-0.000908	-0.002078
80.4000	90.787	40.325	13.202	31.220	-0.551	9.855	172.834	-0.002823	-0.000924	-0.002185
80.6000	123.488	45.010	13.330	34.580	-0.542	9.855	235.090	-0.003151	-0.000933	-0.002421
80.8000	152.809	49.706	13.580	36.808	-0.530	9.855	290.909	-0.003479	-0.000951	-0.002577
81.0000	197.518	56.974	14.744	41.252	-0.546	9.855	376.024	-0.003988	-0.001032	-0.002888
81.2000	245.714	64.089	16.175	45.271	-0.549	9.855	467.777	-0.004486	-0.001132	-0.003169
81.4000	298.915	71.678	18.081	49.962	-0.540	9.855	569.057	-0.005017	-0.001266	-0.003497
81.6000	347.276	79.568	20.484	55.328	-0.540	9.855	661.125	-0.005570	-0.001434	-0.003873
81.8000	407.751	88.369	23.263	60.420	-0.552	9.856	776.253	-0.006186	-0.001628	-0.004229
82.0000	482.036	98.582	26.863	67.977	-0.537	9.855	917.673	-0.006901	-0.001880	-0.004758
82.2000	548.988	107.544	29.532	74.689	-0.528	9.856	1045.132	-0.007528	-0.002067	-0.005228
82.4000	607.884	116.007	33.311	80.356	-0.537	9.856	1157.255	-0.008120	-0.002332	-0.005625
82.6000	671.033	124.718	36.730	86.274	-0.536	9.856	1277.475	-0.008730	-0.002571	-0.006039
82.8000	731.748	133.349	39.841	92.276	-0.537	9.856	1393.061	-0.009334	-0.002789	-0.006459
83.0000	795.409	142.172	43.482	99.279	-0.534	9.857	1514.254	-0.009952	-0.003044	-0.006950
83.2000	860.256	150.719	47.180	105.527	-0.532	9.857	1637.707	-0.010550	-0.003303	-0.007387
83.4000	911.473	157.376	50.597	110.809	-0.538	9.857	1735.210	-0.011016	-0.003542	-0.007757
83.6000	950.637	163.072	52.696	115.063	-0.530	9.857	1809.769	-0.011415	-0.003689	-0.008054
83.8000	997.090	169.494	55.586	120.017	-0.537	9.858	1898.203	-0.011865	-0.003891	-0.008401
84.0000	1029.536	174.273	57.880	124.225	-0.530	9.857	1959.972	-0.012199	-0.004052	-0.008696
84.2000	1054.754	177.473	59.479	126.771	-0.544	9.857	2007.980	-0.012423	-0.004164	-0.008874
84.4000	1069.812	179.971	60.574	128.793	-0.541	9.857	2036.648	-0.012598	-0.004240	-0.009016
84.6000	1077.672	182.154	61.824	130.405	-0.540	9.858	2051.611	-0.012751	-0.004328	-0.009128
84.8000	1082.481	182.989	62.048	131.091	-0.537	9.858	2060.766	-0.012809	-0.004343	-0.009176
85.0000	1078.198	182.975	61.910	131.329	-0.541	9.858	2052.612	-0.012808	-0.004334	-0.009193
85.2000	1058.090	181.056	61.353	129.716	-0.541	9.858	2014.332	-0.012674	-0.004295	-0.009080
85.4000	1033.233	178.610	60.590	127.803	-0.538	9.858	1967.010	-0.012503	-0.004241	-0.008946
85.6000	1011.292	176.207	59.757	125.958	-0.533	9.859	1925.240	-0.012334	-0.004183	-0.008817
85.8000	971.707	171.397	57.601	123.262	-0.542	9.859	1849.880	-0.011998	-0.004032	-0.008628
86.0000	933.700	166.925	55.406	119.162	-0.534	9.858	1777.525	-0.011685	-0.003878	-0.008341
86.2000	881.296	160.893	52.614	114.868	-0.538	9.859	1677.761	-0.011263	-0.003683	-0.008041
86.4000	837.248	155.710	50.362	110.728	-0.535	9.859	1593.904	-0.010900	-0.003525	-0.007751
86.6000	780.891	148.453	47.500	106.020	-0.540	9.859	1486.616	-0.010392	-0.003325	-0.007421
86.8000	718.779	140.366	43.607	99.942	-0.537	9.859	1368.370	-0.009826	-0.003052	-0.006996
87.0000	651.001	131.683	39.967	93.555	-0.543	9.860	1239.338	-0.009218	-0.002798	-0.006549
87.2000	588.753	123.275	36.466	87.004	-0.534	9.860	1120.834	-0.008629	-0.002553	-0.006090
87.4000	514.107	113.476	32.978	80.167	-0.545	9.860	978.727	-0.007943	-0.002308	-0.005612
87.6000	455.631	104.725	29.782	74.111	-0.538	9.860	867.405	-0.007331	-0.002085	-0.005188
87.8000	394.676	95.258	26.373	68.456	-0.550	9.861	751.362	-0.006668	-0.001846	-0.004792
88.0000	331.437	85.781	23.208	62.030	-0.545	9.860	630.970	-0.006005	-0.001625	-0.004342
88.2000	288.636	79.041	21.359	56.967	-0.556	9.861	549.488	-0.005533	-0.001495	-0.003988
88.4000	231.994	70.578	19.263	51.186	-0.531	9.861	441.656	-0.004940	-0.001348	-0.003583
88.6000	181.393	61.116	17.064	46.028	-0.551	9.862	345.325	-0.004278	-0.001194	-0.003222
88.8000	140.756	54.057	16.023	40.852	-0.546	9.861	267.963	-0.003784	-0.001122	-0.002860
89.0000	110.504	47.886	14.801	38.018	-0.549	9.862	210.371	-0.003352	-0.001036	-0.002661
89.2000	77.441	41.744	14.331	33.932	-0.553	9.862	147.429	-0.002922	-0.001003	-0.002375
89.4000	62.699	38.423	13.718	31.385	-0.547	9.862	119.362	-0.002690	-0.000960	-0.002197
89.6000	54.748	36.337	13.651	30.229	-0.553	9.862	104.227	-0.002544	-0.000956	-0.002116
89.8000	51.593	35.364	13.299	29.237	-0.556	9.863	98.219	-0.002476	-0.000931	-0.002047
90.0000	57.544	35.310	13.494	29.157	-0.546	9.863	109.549	-0.002472	-0.000945	-0.002041
90.2000	66.170	36.531	13.271	30.230	-0.548	9.863	125.971	-0.002557	-0.000929	-0.002116
90.4000	90.306	40.284	13.161	31.773	-0.554	9.865	171.919	-0.002820	-0.000921	-0.002224
90.6000	114.336	43.759	13.593	33.961	-0.535	9.865	217.667	-0.003063	-0.000952	-0.002377
90.8000	148.045	48.763	13.968	36.768	-0.545	9.865	281.839	-0.003413	-0.000978	-0.002574
91.0000	193.356	56.613	14.884	40.963	-0.546	9.865	368.099	-0.003963	-0.001042	-0.002867
91.2000	235.195	62.600	15.857	45.038	-0.541	9.866	447.750	-0.004382	-0.001110	-0.003153
91.4000	299.727	71.802	18.581	50.416	-0.545	9.866	570.602	-0.005026	-0.001301	-0.003529
91.6000	353.363	79.625	21.053	55.080	-0.540	9.866	672.712	-0.005574	-0.001474	-0.003856
91.8000	414.228	88.479	23.625	61.631	-0.533	9.867	788.584	-0.006194	-0.001654	-0.004314
92.0000	480.398	97.956	26.681	67.630	-0.545	9.866	914.555	-0.006857	-0.001868	-0.004734
92.2000	535.357	105.600	29.503	73.107	-0.556	9.866	1019.182	-0.007392	-0.002065	-0.005117
92.4000	614.602	116.313	33.686	80.866	-0.550	9.867	1170.044	-0.008142	-0.002358	-0.005661
92.6000	686.903	126.303	37.658	88.285	-0.535	9.867	1307.688	-0.008841	-0.002636	-0.006180
92.8000	733.026	132.850	40.384	93.264	-0.550	9.867	1395.493	-0.009300	-0.002827	-0.006528
93.0000	794.056	141.158	43.648	98.767	-0.548	9.867	1511.679	-0.009881	-0.003055	-0.006914
93.2000	847.272	148.776	46.472	104.576	-0.553	9.867	1612.988	-0.010414	-0.003253	-0.007320
93.4000	908.572	157.125	50.416	111.141	-0.557	9.866	1729.689	-0.010999	-0.003529	-0.007780
93.6000	947.977	162.435	52.975	115.433	-0.548	9.867	1804.705	-0.011370	-0.003708	-0.008080
93.8000	986.961	168.355	55.684	120.194	-0.550	9.866	1878.920	-0.011785	-0.003898	-0.008414
94.0000	1024.336	173.512	57.852	123.867	-0.556	9.866	1950.073	-0.012146	-0.004050	-0.008671
94.2000	1045.376	176.679	59.629	126.650	-0.560	9.866	1990.128	-0.012368	-0.004174	-0.008865
94.4000	1066.446	179.332	60.756	129.041	-0.547	9.866	2030.239	-0.012553	-0.004253	-0.009033
94.6000	1073.855	181.347	61.645	130.074	-0.549	9.866	2044.344	-0.012694	-0.004315	-0.009105
94.8000	1080.993	182.600	62.089	131.298	-0.564	9.866	2057.934	-0.012782	-0.004346	-0.009191
95.0000	1077.732	182.614	62.187	131.395	-0.549	9.865	2051.725	-0.012783	-0.004353	-0.009198
95.2000	1063.080	181.097	61.685	130.485	-0.556	9.866	2023.830	-0.012677	-0.004318	-0.009134
95.4000	1044.805	179.235	61.046	129.372	-0.565	9.866	1989.040	-0.012546	-0.004273	-0.009056
95.6000	1009.789	175.999	59.795	126.290	-0.549	9.865	1922.379	-0.012320	-0.004186	-0.008840
95.8000	971.526	171.203	57.908	123.935	-0.546	9.866	1849.537	-0.011984	-0.004054	-0.008675
96.0000	939.771	167.882	56.043	121.075	-0.561	9.865	1789.083	-0.011752	-0.003923	-0.008475
96.2000	884.106	161.421	53.322	116.107	-0.560	9.865	1683.111	-0.011299	-0.003733	-0.008128
96.4000	829.673	154.807	50.236	111.141	-0.566	9.864	1579.485	-0.010836	-0.003516	-0.007780
96.6000	774.534	148.023	47.167	106.008	-0.544	9.864	1474.514	-0.010362	-0.003302	-0.007421
96.8000	704.381	139.296	43.745	99.512	-0.560	9.864	1340.961	-0.009751	-0.003062	-0.006966
97.0000	658.289	133.156	41.093	95.192	-0.566	9.864	1253.214	-0.009321	-0.002877	-0.006663
97.2000	576.460	122.051	36.854	87.376	-0.554	9.864	1097.431	-0.008544	-0.002580	-0.006116
97.4000	519.532	114.310	33.756	81.750	-0.560	9.863	989.056	-0.008002	-0.002363	-0.005723
97.6000	460.576	105.848	30.644	75.845	-0.548	9.863	876.818	-0.007409	-0.002145	-0.005309
97.8000	389.732	95.482	26.792	69.158	-0.544	9.864	741.949	-0.006684	-0.001875	-0.004841
98.0000	333.090	86.547	24.613	63.214	-0.554	9.863	634.117	-0.006058	-0.001723	-0.004425
98.2000	284.608	78.639	21.817	57.778	-0.560	9.864	541.821	-0.005505	-0.001527	-0.004044
98.4000	225.967	69.134	19.444	51.888	-0.556	9.864	430.183	-0.004839	-0.001361	-0.003632
98.6000	181.724	61.477	17.551	46.741	-0.544	9.863	345.955	-0.004303	-0.001229	-0.003272
98.8000	143.581	54.182	16.288	42.299	-0.549	9.864	273.342	-0.003793	-0.001140	-0.002961
99.0000	101.066	46.493	15.064	37.662	-0.556	9.864	192.404	-0.003255	-0.001054	-0.002636
99.2000	73.594	41.896	14.509	33.862	-0.542	9.864	140.104	-0.002933	-0.001016	-0.002370
99.4000	61.767	38.799	14.205	32.198	-0.558	9.864	117.588	-0.002716	-0.000994	-0.002254
99.6000	51.322	36.493	13.830	30.642	-0.553	9.865	97.704	-0.002554	-0.000968	-0.002145
99.8000	54.779	36.477	13.746	30.148	-0.550	9.864	104.284	-0.002553	-0.000962	-0.002110
Test Cycles
Time (sec)	Axial stress (kPa)	Axial micro-strain #1	Axial micro-strain #2	Axial micro-strain #3	Confining pressure (kPa)	Temperature (�C)	Load (N)	Displacement #1 (mm)	Displacement #2 (mm)	Displacement #3 (mm)
0.0000	54.463	35.782	13.733	29.911	-0.550	9.865	103.683	-0.002505	-0.000961	-0.002094
0.2000	68.995	37.715	13.900	30.753	-0.542	9.865	131.350	-0.002640	-0.000973	-0.002153
0.4000	89.780	40.521	14.038	32.720	-0.541	9.865	170.918	-0.002836	-0.000983	-0.002290
0.6000	123.639	45.648	14.246	35.155	-0.556	9.866	235.376	-0.003195	-0.000997	-0.002461
0.8000	152.223	50.208	14.786	38.100	-0.546	9.865	289.793	-0.003515	-0.001035	-0.002667
1.0000	187.960	55.795	15.285	41.085	-0.550	9.866	357.828	-0.003906	-0.001070	-0.002876
1.2000	245.143	64.353	16.912	46.343	-0.546	9.866	466.690	-0.004505	-0.001184	-0.003244
1.4000	292.002	71.373	19.249	51.187	-0.552	9.866	555.897	-0.004996	-0.001347	-0.003583
1.6000	365.296	81.904	21.983	57.447	-0.558	9.866	695.429	-0.005733	-0.001539	-0.004021
1.8000	415.881	89.478	24.807	62.924	-0.562	9.866	791.731	-0.006263	-0.001736	-0.004405
2.0000	477.167	98.317	27.725	68.413	-0.560	9.866	908.403	-0.006882	-0.001941	-0.004789
2.2000	538.844	106.709	30.977	74.909	-0.558	9.867	1025.820	-0.007470	-0.002168	-0.005244
2.4000	600.685	115.507	33.781	80.978	-0.560	9.867	1143.551	-0.008085	-0.002365	-0.005668
2.6000	668.824	124.803	37.631	87.582	-0.558	9.867	1273.270	-0.008736	-0.002634	-0.006131
2.8000	736.152	134.335	41.316	94.077	-0.570	9.867	1401.443	-0.009403	-0.002892	-0.006585
3.0000	794.807	142.522	44.649	99.979	-0.560	9.867	1513.109	-0.009977	-0.003125	-0.006999
3.2000	854.906	150.081	48.247	106.198	-0.553	9.868	1627.522	-0.010506	-0.003377	-0.007434
3.4000	905.116	157.543	51.418	111.153	-0.564	9.868	1723.108	-0.011028	-0.003599	-0.007781
3.6000	945.122	162.754	53.627	115.447	-0.569	9.868	1799.269	-0.011393	-0.003754	-0.008081
3.8000	997.015	169.992	56.877	121.681	-0.554	9.868	1898.060	-0.011899	-0.003981	-0.008518
4.0000	1020.414	173.483	58.549	124.570	-0.561	9.868	1942.606	-0.012144	-0.004098	-0.008720
4.2000	1059.518	178.610	60.881	127.610	-0.565	9.868	2017.050	-0.012503	-0.004262	-0.008933
4.4000	1075.478	181.264	62.049	130.336	-0.573	9.868	2047.434	-0.012688	-0.004343	-0.009124
4.6000	1081.730	182.724	62.604	130.913	-0.566	9.868	2059.336	-0.012791	-0.004382	-0.009164
4.8000	1085.307	183.642	63.396	132.552	-0.570	9.868	2066.145	-0.012855	-0.004438	-0.009279
5.0000	1074.471	182.850	63.134	131.477	-0.579	9.868	2045.517	-0.012800	-0.004419	-0.009203
5.2000	1065.664	182.223	62.966	131.272	-0.576	9.869	2028.751	-0.012756	-0.004408	-0.009189
5.4000	1046.338	180.040	61.966	130.404	-0.578	9.869	1991.959	-0.012603	-0.004338	-0.009128
5.6000	1009.022	175.913	60.588	127.033	-0.567	9.869	1920.919	-0.012314	-0.004241	-0.008892
5.8000	981.956	172.704	59.338	125.175	-0.575	9.870	1869.392	-0.012089	-0.004154	-0.008762
6.0000	938.359	168.020	56.989	121.046	-0.568	9.869	1786.394	-0.011761	-0.003989	-0.008473
6.2000	897.767	162.809	54.348	117.977	-0.568	9.869	1709.118	-0.011397	-0.003804	-0.008258
6.4000	837.849	156.182	51.418	112.047	-0.577	9.869	1595.049	-0.010933	-0.003599	-0.007843
6.6000	787.684	149.635	48.774	107.535	-0.566	9.870	1499.548	-0.010474	-0.003414	-0.007527
6.8000	717.697	140.712	44.749	100.682	-0.566	9.870	1366.310	-0.009850	-0.003132	-0.007048
7.0000	654.096	132.516	41.180	95.481	-0.570	9.870	1245.232	-0.009276	-0.002883	-0.006684
7.2000	586.348	123.482	37.465	88.986	-0.570	9.870	1116.257	-0.008644	-0.002623	-0.006229
7.4000	523.019	114.880	34.215	82.354	-0.577	9.871	995.693	-0.008042	-0.002395	-0.005765
7.6000	459.388	105.750	31.047	75.957	-0.573	9.870	874.557	-0.007402	-0.002173	-0.005317
7.8000	393.188	96.453	27.614	70.175	-0.581	9.870	748.529	-0.006752	-0.001933	-0.004912
8.0000	341.385	88.147	24.808	64.037	-0.566	9.871	649.910	-0.006170	-0.001737	-0.004483
8.2000	276.808	77.890	21.873	58.093	-0.570	9.871	526.972	-0.005452	-0.001531	-0.004067
8.4000	233.572	70.411	19.859	52.811	-0.569	9.871	444.660	-0.004929	-0.001390	-0.003697
8.6000	184.879	61.866	17.898	47.567	-0.573	9.872	351.963	-0.004331	-0.001253	-0.003330
8.8000	139.298	54.097	16.565	41.952	-0.573	9.872	265.188	-0.003787	-0.001160	-0.002937
9.0000	111.270	48.428	16.023	38.844	-0.569	9.872	211.830	-0.003390	-0.001122	-0.002719
9.2000	82.716	42.606	15.356	35.734	-0.566	9.873	157.471	-0.002982	-0.001075	-0.002501
9.4000	65.870	39.505	14.843	33.822	-0.565	9.872	125.399	-0.002765	-0.001039	-0.002368
9.6000	46.964	35.933	14.537	30.670	-0.560	9.873	89.407	-0.002515	-0.001018	-0.002147
9.8000	51.758	35.836	14.635	30.945	-0.585	9.873	98.534	-0.002509	-0.001024	-0.002166
10.0000	54.658	35.655	14.343	30.050	-0.561	9.873	104.055	-0.002496	-0.001004	-0.002104
10.2000	74.331	38.576	14.550	31.634	-0.567	9.873	141.506	-0.002700	-0.001019	-0.002214
10.4000	77.396	38.589	14.288	32.349	-0.576	9.873	147.343	-0.002701	-0.001000	-0.002264
10.6000	112.518	43.758	14.592	35.707	-0.568	9.874	214.205	-0.003063	-0.001021	-0.002500
10.8000	148.240	49.567	15.024	38.060	-0.568	9.874	282.211	-0.003470	-0.001052	-0.002664
11.0000	187.705	55.571	15.911	41.596	-0.578	9.875	357.342	-0.003890	-0.001114	-0.002912
11.2000	240.334	63.685	17.300	46.288	-0.583	9.875	457.535	-0.004458	-0.001211	-0.003240
11.4000	289.462	71.149	19.442	51.200	-0.564	9.876	551.062	-0.004980	-0.001361	-0.003584
11.6000	347.231	79.471	22.416	56.886	-0.577	9.876	661.039	-0.005563	-0.001569	-0.003982
11.8000	417.399	89.617	25.542	62.580	-0.574	9.876	794.621	-0.006273	-0.001788	-0.004381
12.0000	473.846	97.663	28.268	69.886	-0.573	9.877	902.081	-0.006836	-0.001979	-0.004892
12.2000	533.974	106.599	31.435	74.345	-0.581	9.877	1016.550	-0.007462	-0.002200	-0.005204
12.4000	598.461	115.298	34.394	82.036	-0.585	9.878	1139.317	-0.008071	-0.002408	-0.005742
12.6000	669.035	125.289	38.327	88.863	-0.567	9.879	1273.670	-0.008770	-0.002683	-0.006220
12.8000	733.717	134.223	41.844	96.058	-0.585	9.879	1396.809	-0.009396	-0.002929	-0.006724
13.0000	796.671	142.867	45.471	100.432	-0.585	9.879	1516.657	-0.010001	-0.003183	-0.007030
13.2000	846.355	149.511	48.344	107.658	-0.572	9.880	1611.242	-0.010466	-0.003384	-0.007536
13.4000	897.031	156.501	51.906	111.579	-0.577	9.881	1707.716	-0.010955	-0.003633	-0.007811
13.6000	949.435	163.573	54.557	117.938	-0.576	9.880	1807.480	-0.011450	-0.003819	-0.008256
13.8000	997.826	170.342	57.616	122.256	-0.577	9.881	1899.605	-0.011924	-0.004033	-0.008558
14.0000	1018.280	173.288	59.157	124.735	-0.575	9.882	1938.543	-0.012130	-0.004141	-0.008731
14.2000	1053.371	178.331	61.450	128.130	-0.569	9.882	2005.348	-0.012483	-0.004301	-0.008969
14.4000	1062.043	180.429	62.423	130.363	-0.578	9.882	2021.856	-0.012630	-0.004370	-0.009125
14.6000	1080.182	182.836	63.258	132.620	-0.578	9.883	2056.389	-0.012798	-0.004428	-0.009283
14.8000	1081.685	183.641	63.396	133.872	-0.561	9.884	2059.250	-0.012855	-0.004438	-0.009371
15.0000	1077.176	183.295	63.494	133.226	-0.574	9.884	2050.667	-0.012831	-0.004445	-0.009326
15.2000	1049.449	180.444	62.702	130.238	-0.566	9.885	1997.881	-0.012631	-0.004389	-0.009117
15.4000	1044.534	180.055	62.520	131.490	-0.572	9.886	1988.525	-0.012604	-0.004376	-0.009204
15.6000	1020.880	177.527	61.658	128.022	-0.574	9.887	1943.493	-0.012427	-0.004316	-0.008962
15.8000	962.780	171.314	58.783	123.880	-0.581	9.888	1832.886	-0.011992	-0.004115	-0.008672
16.0000	943.258	168.659	57.212	121.185	-0.567	9.888	1795.721	-0.011806	-0.004005	-0.008483
16.2000	888.194	161.921	54.515	118.282	-0.577	9.889	1690.893	-0.011334	-0.003816	-0.008280
16.4000	825.676	154.917	51.251	112.599	-0.580	9.889	1571.875	-0.010844	-0.003588	-0.007882
16.6000	779.298	148.816	48.525	106.212	-0.570	9.891	1483.583	-0.010417	-0.003397	-0.007435
16.8000	716.930	140.851	44.844	100.973	-0.568	9.891	1364.851	-0.009860	-0.003139	-0.007068
17.0000	665.518	134.127	41.676	96.553	-0.577	9.891	1266.975	-0.009389	-0.002917	-0.006759
17.2000	585.943	123.842	37.743	88.712	-0.566	9.891	1115.484	-0.008669	-0.002642	-0.006210
17.4000	532.517	115.799	34.979	82.793	-0.573	9.892	1013.775	-0.008106	-0.002448	-0.005796
17.6000	474.026	107.892	31.975	78.419	-0.567	9.892	902.424	-0.007552	-0.002238	-0.005489
17.8000	358.668	92.774	26.667	67.163	-0.566	9.893	682.812	-0.006494	-0.001867	-0.004701
18.0000	343.910	88.672	25.360	65.225	-0.584	9.893	654.716	-0.006207	-0.001775	-0.004566
18.2000	298.224	81.392	22.960	60.639	-0.576	9.894	567.741	-0.005697	-0.001607	-0.004245
18.4000	233.511	70.705	19.945	51.253	-0.571	9.894	444.546	-0.004949	-0.001396	-0.003588
18.6000	185.315	62.559	18.359	47.788	-0.577	9.895	352.793	-0.004379	-0.001285	-0.003345
18.8000	136.443	53.903	17.343	41.582	-0.572	9.896	259.752	-0.003773	-0.001214	-0.002911
19.0000	109.843	48.608	16.704	39.793	-0.579	9.896	209.112	-0.003403	-0.001169	-0.002786
19.2000	75.668	42.649	15.731	34.222	-0.585	9.896	144.053	-0.002985	-0.001101	-0.002396
19.4000	58.971	39.132	15.202	31.882	-0.593	9.896	112.267	-0.002739	-0.001064	-0.002232
19.6000	51.608	36.797	14.523	32.170	-0.574	9.897	98.248	-0.002576	-0.001017	-0.002252
19.8000	51.142	36.172	14.593	29.569	-0.574	9.897	97.361	-0.002532	-0.001022	-0.002070
20.0000	55.169	35.948	14.483	31.635	-0.578	9.898	105.028	-0.002516	-0.001014	-0.002214
20.2000	82.491	40.034	14.676	34.236	-0.574	9.898	157.042	-0.002802	-0.001027	-0.002397
20.4000	89.449	40.798	14.994	33.243	-0.577	9.899	170.288	-0.002856	-0.001050	-0.002327
20.6000	118.454	45.552	15.453	34.730	-0.593	9.900	225.506	-0.003189	-0.001082	-0.002431
20.8000	153.906	50.832	15.732	40.301	-0.566	9.899	292.997	-0.003558	-0.001101	-0.002821
21.0000	198.495	57.778	16.606	42.023	-0.590	9.900	377.884	-0.004044	-0.001162	-0.002942
21.2000	244.227	64.618	17.914	48.559	-0.587	9.901	464.945	-0.004523	-0.001254	-0.003399
21.4000	297.908	72.704	20.013	51.406	-0.594	9.901	567.141	-0.005089	-0.001401	-0.003598
21.6000	360.862	81.473	22.541	57.750	-0.593	9.901	686.989	-0.005703	-0.001578	-0.004043
21.8000	429.512	91.103	26.263	65.540	-0.592	9.902	817.680	-0.006377	-0.001838	-0.004588
22.0000	490.512	99.861	29.392	69.420	-0.581	9.902	933.809	-0.006990	-0.002057	-0.004859
22.2000	547.966	108.461	32.254	74.951	-0.594	9.902	1043.186	-0.007592	-0.002258	-0.005247
22.4000	610.334	117.131	35.076	81.486	-0.589	9.903	1161.919	-0.008199	-0.002455	-0.005704
22.6000	680.847	126.541	38.771	90.912	-0.600	9.903	1296.158	-0.008858	-0.002714	-0.006364
22.8000	742.403	134.737	42.040	94.364	-0.589	9.903	1413.345	-0.009432	-0.002943	-0.006606
23.0000	792.373	142.105	45.540	100.407	-0.598	9.904	1508.474	-0.009947	-0.003188	-0.007028
23.2000	846.926	149.721	48.817	107.368	-0.609	9.904	1612.329	-0.010480	-0.003417	-0.007516
23.4000	900.683	157.223	52.098	110.630	-0.607	9.905	1714.668	-0.011006	-0.003647	-0.007744
23.6000	953.147	164.018	54.988	117.498	-0.605	9.906	1814.547	-0.011481	-0.003849	-0.008225
23.8000	984.782	168.785	56.865	121.294	-0.589	9.905	1874.771	-0.011815	-0.003981	-0.008491
24.0000	1031.309	174.899	59.352	125.355	-0.601	9.906	1963.348	-0.012243	-0.004155	-0.008775
24.2000	1047.450	177.652	61.422	126.387	-0.600	9.906	1994.076	-0.012436	-0.004300	-0.008847
24.4000	1077.357	181.473	63.343	132.992	-0.592	9.907	2051.010	-0.012703	-0.004434	-0.009309
24.6000	1086.764	183.308	63.951	131.603	-0.589	9.907	2068.920	-0.012832	-0.004477	-0.009212
24.8000	1084.630	183.656	63.841	132.538	-0.588	9.908	2064.857	-0.012856	-0.004469	-0.009278
25.0000	1076.755	182.988	63.843	131.162	-0.608	9.907	2049.866	-0.012809	-0.004469	-0.009181
25.2000	1067.137	182.139	63.496	132.165	-0.592	9.908	2031.555	-0.012750	-0.004445	-0.009252
25.4000	1043.362	179.751	62.884	130.981	-0.589	9.909	1986.294	-0.012583	-0.004402	-0.009169
25.6000	1013.741	176.444	61.507	129.677	-0.586	9.909	1929.903	-0.012351	-0.004305	-0.009077
25.8000	976.185	172.580	59.242	123.055	-0.600	9.910	1858.406	-0.012081	-0.004147	-0.008614
26.0000	936.946	167.939	57.087	123.125	-0.585	9.910	1783.705	-0.011756	-0.003996	-0.008619
26.2000	876.502	160.727	53.556	116.051	-0.594	9.909	1668.634	-0.011251	-0.003749	-0.008124
26.4000	830.049	155.098	51.320	111.734	-0.583	9.910	1580.200	-0.010857	-0.003592	-0.007821
26.6000	763.173	146.828	47.902	105.072	-0.590	9.910	1452.885	-0.010278	-0.003353	-0.007355
26.8000	705.283	139.436	44.497	98.452	-0.583	9.910	1342.678	-0.009760	-0.003115	-0.006892
27.0000	655.043	133.059	41.734	94.106	-0.588	9.910	1247.034	-0.009314	-0.002921	-0.006587
27.2000	597.980	124.789	38.354	90.129	-0.588	9.910	1138.401	-0.008735	-0.002685	-0.006309
27.4000	517.804	114.450	34.324	80.856	-0.602	9.910	985.765	-0.008012	-0.002403	-0.005660
27.6000	449.440	104.225	30.810	74.853	-0.599	9.910	855.618	-0.007296	-0.002157	-0.005240
27.8000	385.674	94.926	27.849	67.822	-0.595	9.909	734.224	-0.006645	-0.001949	-0.004748
28.0000	329.513	86.683	25.183	64.783	-0.598	9.909	627.308	-0.006068	-0.001763	-0.004535
28.2000	272.991	77.958	22.736	56.733	-0.611	9.909	519.705	-0.005457	-0.001592	-0.003971
28.4000	229.424	70.148	20.261	52.110	-0.587	9.909	436.764	-0.004910	-0.001418	-0.003648
28.6000	182.520	61.853	18.513	49.755	-0.593	9.908	347.471	-0.004330	-0.001296	-0.003483
28.8000	140.230	54.376	17.344	45.420	-0.608	9.909	266.962	-0.003806	-0.001214	-0.003179
29.0000	100.239	47.259	16.467	39.136	-0.593	9.908	190.830	-0.003308	-0.001153	-0.002739
29.2000	78.253	42.869	16.092	35.059	-0.588	9.908	148.973	-0.003001	-0.001126	-0.002454
29.4000	63.856	39.159	15.175	34.964	-0.600	9.908	121.565	-0.002741	-0.001062	-0.002447
29.6000	55.665	37.535	14.899	32.624	-0.595	9.908	105.972	-0.002627	-0.001043	-0.002284
29.8000	60.459	37.324	14.634	30.724	-0.604	9.908	115.099	-0.002613	-0.001024	-0.002151
30.0000	54.989	36.423	15.007	32.018	-0.590	9.908	104.685	-0.002550	-0.001050	-0.002241
30.2000	70.754	38.200	14.870	32.062	-0.592	9.907	134.697	-0.002674	-0.001041	-0.002244
30.4000	86.894	41.075	14.994	35.625	-0.591	9.907	165.424	-0.002875	-0.001050	-0.002494
30.6000	116.500	45.148	15.272	38.182	-0.604	9.906	221.786	-0.003160	-0.001069	-0.002673
30.8000	148.300	50.235	15.438	41.460	-0.597	9.906	282.326	-0.003516	-0.001081	-0.002902
31.0000	198.555	57.722	16.510	45.313	-0.591	9.906	377.998	-0.004041	-0.001156	-0.003172
31.2000	245.549	64.995	18.219	45.670	-0.576	9.906	467.463	-0.004550	-0.001275	-0.003197
31.4000	286.426	71.331	19.968	52.053	-0.598	9.905	545.282	-0.004993	-0.001398	-0.003644
31.6000	356.774	81.306	22.569	58.590	-0.596	9.905	679.207	-0.005691	-0.001580	-0.004101
31.8000	412.019	88.853	25.433	64.464	-0.578	9.905	784.378	-0.006220	-0.001780	-0.004512
32.0000	484.771	99.512	29.073	71.937	-0.581	9.905	922.880	-0.006966	-0.002035	-0.005036
32.2000	552.925	109.212	32.699	75.031	-0.596	9.905	1052.628	-0.007645	-0.002289	-0.005252
32.4000	610.980	117.201	35.538	82.959	-0.592	9.904	1163.149	-0.008204	-0.002488	-0.005807
32.6000	670.267	125.527	38.549	87.075	-0.588	9.904	1276.016	-0.008787	-0.002698	-0.006095
32.8000	724.925	133.017	42.012	94.890	-0.576	9.903	1380.072	-0.009311	-0.002941	-0.006642
33.0000	785.340	141.478	45.734	99.636	-0.587	9.903	1495.085	-0.009903	-0.003201	-0.006975
33.2000	855.282	150.623	49.137	106.832	-0.588	9.904	1628.237	-0.010544	-0.003440	-0.007478
33.4000	908.392	158.097	52.404	111.277	-0.586	9.903	1729.345	-0.011067	-0.003668	-0.007789
33.6000	950.607	163.504	54.932	118.721	-0.603	9.903	1809.711	-0.011445	-0.003845	-0.008310
33.8000	985.488	168.673	57.949	123.317	-0.586	9.902	1876.116	-0.011807	-0.004056	-0.008632
34.0000	1021.631	173.773	59.950	126.374	-0.597	9.902	1944.923	-0.012164	-0.004196	-0.008846
34.2000	1051.793	178.181	61.771	130.708	-0.586	9.901	2002.344	-0.012473	-0.004324	-0.009150
34.4000	1069.286	180.846	62.784	133.336	-0.584	9.902	2035.646	-0.012659	-0.004395	-0.009334
34.6000	1080.978	182.640	63.494	131.273	-0.589	9.901	2057.905	-0.012785	-0.004445	-0.009189
34.8000	1086.704	183.864	64.257	134.644	-0.586	9.901	2068.806	-0.012870	-0.004498	-0.009425
35.0000	1075.358	183.281	64.021	133.307	-0.593	9.901	2047.205	-0.012830	-0.004481	-0.009332
35.2000	1061.261	182.237	63.509	130.458	-0.604	9.901	2020.369	-0.012757	-0.004446	-0.009132
35.4000	1043.407	180.167	62.743	131.368	-0.581	9.900	1986.380	-0.012612	-0.004392	-0.009196
35.6000	1014.718	177.027	61.950	129.304	-0.583	9.899	1931.763	-0.012392	-0.004336	-0.009051
35.8000	980.889	172.913	59.933	124.059	-0.584	9.900	1867.361	-0.012104	-0.004195	-0.008684
36.0000	924.878	166.800	57.226	122.132	-0.585	9.899	1760.731	-0.011676	-0.004006	-0.008549
36.2000	885.173	162.366	55.184	116.422	-0.593	9.899	1685.143	-0.011366	-0.003863	-0.008150
36.4000	825.931	154.806	51.294	114.428	-0.601	9.899	1572.361	-0.010836	-0.003591	-0.008010
36.6000	772.100	147.827	48.705	105.842	-0.595	9.898	1469.879	-0.010348	-0.003409	-0.007409
36.8000	712.557	140.617	45.443	100.255	-0.595	9.898	1356.525	-0.009843	-0.003181	-0.007018
37.0000	653.661	133.142	42.444	96.566	-0.592	9.898	1244.402	-0.009320	-0.002971	-0.006760
37.2000	585.642	123.842	38.382	88.243	-0.593	9.898	1114.912	-0.008669	-0.002687	-0.006177
37.4000	517.398	114.060	34.281	82.850	-0.601	9.897	984.993	-0.007984	-0.002400	-0.005799
37.6000	449.590	104.903	31.298	76.726	-0.590	9.897	855.904	-0.007343	-0.002191	-0.005371
37.8000	393.339	96.245	28.809	72.913	-0.599	9.897	748.816	-0.006737	-0.002017	-0.005104
38.0000	336.907	88.118	25.805	67.220	-0.602	9.897	641.384	-0.006168	-0.001806	-0.004705
38.2000	268.633	77.041	22.263	59.648	-0.607	9.896	511.408	-0.005393	-0.001558	-0.004175
38.4000	223.548	69.424	20.759	50.553	-0.609	9.896	425.577	-0.004860	-0.001453	-0.003539
38.6000	183.752	62.700	19.039	47.252	-0.609	9.896	349.817	-0.004389	-0.001333	-0.003308
38.8000	145.099	55.224	17.926	43.936	-0.599	9.895	276.232	-0.003866	-0.001255	-0.003076
39.0000	101.577	47.705	16.955	40.564	-0.606	9.896	193.377	-0.003339	-0.001187	-0.002840
39.2000	82.897	42.953	16.149	37.920	-0.613	9.895	157.814	-0.003007	-0.001130	-0.002654
39.4000	61.932	39.423	15.815	32.777	-0.603	9.895	117.903	-0.002760	-0.001107	-0.002294
39.6000	49.594	36.297	15.634	34.633	-0.599	9.894	94.414	-0.002541	-0.001094	-0.002424
39.8000	52.134	36.184	15.802	31.372	-0.613	9.895	99.249	-0.002533	-0.001106	-0.002196
40.0000	56.086	36.351	15.174	31.041	-0.616	9.894	106.773	-0.002545	-0.001062	-0.002173
40.2000	66.531	37.423	14.787	31.854	-0.591	9.894	126.657	-0.002620	-0.001035	-0.002230
40.4000	92.079	41.035	15.341	35.266	-0.605	9.894	175.295	-0.002872	-0.001074	-0.002469
40.6000	121.234	45.483	15.731	37.057	-0.603	9.894	230.799	-0.003184	-0.001101	-0.002594
40.8000	153.590	50.930	16.107	39.793	-0.595	9.894	292.397	-0.003565	-0.001127	-0.002786
41.0000	193.295	56.960	16.551	43.948	-0.596	9.894	367.985	-0.003987	-0.001159	-0.003076
41.2000	244.227	64.617	18.149	45.876	-0.603	9.893	464.945	-0.004523	-0.001270	-0.003211
41.4000	301.124	72.676	20.662	51.586	-0.593	9.893	573.263	-0.005087	-0.001446	-0.003611
41.6000	359.419	81.821	23.167	60.941	-0.588	9.893	684.242	-0.005727	-0.001622	-0.004266
41.8000	415.235	89.771	25.861	61.949	-0.594	9.893	790.501	-0.006284	-0.001810	-0.004336
42.0000	475.604	98.247	28.781	72.197	-0.594	9.892	905.428	-0.006877	-0.002015	-0.005054
42.2000	550.596	108.029	32.602	78.061	-0.595	9.892	1048.193	-0.007562	-0.002282	-0.005464
42.4000	610.334	116.548	35.411	85.601	-0.594	9.892	1161.919	-0.008158	-0.002479	-0.005992
42.6000	669.335	124.982	39.090	88.175	-0.595	9.892	1274.242	-0.008749	-0.002736	-0.006172
42.8000	731.733	134.072	42.650	97.105	-0.596	9.891	1393.032	-0.009385	-0.002985	-0.006797
43.0000	800.669	142.855	46.111	105.112	-0.603	9.891	1524.267	-0.010000	-0.003228	-0.007358
43.2000	847.046	149.622	48.888	105.292	-0.588	9.891	1612.558	-0.010474	-0.003422	-0.007370
43.4000	900.878	156.916	52.404	110.713	-0.604	9.891	1715.040	-0.010984	-0.003668	-0.007750
43.6000	962.600	165.006	55.976	120.704	-0.597	9.891	1832.542	-0.011550	-0.003918	-0.008449
43.8000	977.959	168.175	57.713	123.388	-0.620	9.891	1861.782	-0.011772	-0.004040	-0.008637
44.0000	1019.632	173.137	59.325	125.479	-0.615	9.891	1941.118	-0.012120	-0.004153	-0.008784
44.2000	1047.630	177.235	61.353	131.421	-0.612	9.891	1994.419	-0.012406	-0.004295	-0.009199
44.4000	1065.574	180.235	63.022	129.236	-0.606	9.891	2028.580	-0.012616	-0.004412	-0.009046
44.6000	1082.647	183.114	64.092	132.057	-0.596	9.892	2061.081	-0.012818	-0.004486	-0.009244
44.8000	1086.960	184.321	64.520	132.165	-0.611	9.891	2069.292	-0.012902	-0.004516	-0.009252
45.0000	1084.615	183.683	64.798	132.785	-0.616	9.891	2064.829	-0.012858	-0.004536	-0.009295
45.2000	1069.452	182.835	64.118	132.317	-0.613	9.892	2035.961	-0.012798	-0.004488	-0.009262
45.4000	1040.702	179.775	63.661	130.596	-0.607	9.892	1981.230	-0.012584	-0.004456	-0.009142
45.6000	1004.228	175.887	61.518	127.074	-0.616	9.891	1911.793	-0.012312	-0.004306	-0.008895
45.8000	975.314	172.355	59.450	124.170	-0.617	9.892	1856.747	-0.012065	-0.004161	-0.008692
46.0000	907.701	164.714	56.587	123.522	-0.605	9.892	1728.029	-0.011530	-0.003961	-0.008647
46.2000	880.875	161.462	55.238	120.344	-0.605	9.892	1676.960	-0.011302	-0.003867	-0.008424
46.4000	838.420	156.613	52.570	116.243	-0.609	9.892	1596.136	-0.010963	-0.003680	-0.008137
46.6000	775.496	148.829	48.928	107.329	-0.616	9.892	1476.345	-0.010418	-0.003425	-0.007513
46.8000	713.654	140.588	45.678	101.399	-0.606	9.893	1358.614	-0.009841	-0.003197	-0.007098
47.0000	655.704	132.892	42.817	97.448	-0.607	9.893	1248.293	-0.009302	-0.002997	-0.006821
47.2000	590.526	124.995	39.035	91.325	-0.606	9.894	1124.210	-0.008750	-0.002732	-0.006393
47.4000	524.071	115.493	35.146	86.870	-0.611	9.894	997.696	-0.008084	-0.002460	-0.006081
47.6000	452.851	104.918	31.655	77.689	-0.604	9.894	862.112	-0.007344	-0.002216	-0.005438
47.8000	397.772	96.967	28.740	72.362	-0.600	9.895	757.256	-0.006788	-0.002012	-0.005065
48.0000	331.902	86.991	25.765	62.938	-0.606	9.895	631.857	-0.006089	-0.001804	-0.004406
48.2000	274.118	78.110	22.958	57.144	-0.609	9.896	521.851	-0.005468	-0.001607	-0.004000
48.4000	231.963	70.660	21.315	53.732	-0.603	9.896	441.599	-0.004946	-0.001492	-0.003761
48.6000	184.414	62.825	19.262	48.518	-0.604	9.896	351.076	-0.004398	-0.001348	-0.003396
48.8000	141.913	55.292	18.330	46.619	-0.595	9.897	270.166	-0.003870	-0.001283	-0.003263
49.0000	109.557	48.901	17.385	42.642	-0.601	9.897	208.569	-0.003423	-0.001217	-0.002985
49.2000	76.525	43.136	16.330	39.366	-0.600	9.897	145.683	-0.003020	-0.001143	-0.002756
49.4000	57.965	39.117	15.647	31.977	-0.607	9.898	110.350	-0.002738	-0.001095	-0.002238
49.6000	48.331	36.616	15.607	32.844	-0.603	9.898	92.010	-0.002563	-0.001092	-0.002299
49.8000	56.807	37.381	15.593	33.092	-0.599	9.898	108.147	-0.002617	-0.001092	-0.002316
50.0000	57.198	36.854	15.539	30.327	-0.591	9.899	108.891	-0.002580	-0.001088	-0.002123
50.2000	67.989	37.978	15.342	35.019	-0.611	9.899	129.433	-0.002658	-0.001074	-0.002451
50.4000	86.263	40.477	15.496	33.612	-0.616	9.899	164.223	-0.002833	-0.001085	-0.002353
50.6000	129.815	47.067	16.329	36.039	-0.603	9.900	247.135	-0.003295	-0.001143	-0.002523
50.8000	152.508	50.985	16.579	41.693	-0.623	9.900	290.337	-0.003569	-0.001161	-0.002919
51.0000	194.543	57.615	16.871	46.275	-0.616	9.900	370.359	-0.004033	-0.001181	-0.003239
51.2000	237.749	63.337	18.302	45.351	-0.617	9.900	452.614	-0.004434	-0.001281	-0.003175
51.4000	294.031	72.274	20.886	54.628	-0.626	9.901	559.759	-0.005059	-0.001462	-0.003824
51.6000	358.277	81.249	23.460	61.188	-0.615	9.901	682.068	-0.005687	-0.001642	-0.004283
51.8000	416.197	89.867	26.138	63.901	-0.618	9.901	792.332	-0.006291	-0.001830	-0.004473
52.0000	470.194	97.621	29.017	72.155	-0.610	9.901	895.128	-0.006833	-0.002031	-0.005051
52.2000	542.285	107.960	32.642	76.933	-0.608	9.903	1032.372	-0.007557	-0.002285	-0.005385
52.4000	615.188	117.603	36.468	84.502	-0.598	9.903	1171.160	-0.008232	-0.002553	-0.005915
52.6000	696.717	128.777	40.410	89.524	-0.607	9.903	1326.370	-0.009014	-0.002829	-0.006267
52.8000	732.575	133.779	42.346	98.217	-0.600	9.903	1394.634	-0.009365	-0.002964	-0.006875
53.0000	797.017	142.409	46.346	105.084	-0.604	9.903	1517.315	-0.009969	-0.003244	-0.007356
53.2000	863.006	151.483	50.222	110.962	-0.596	9.903	1642.942	-0.010604	-0.003516	-0.007767
53.4000	901.058	157.210	52.612	115.474	-0.605	9.904	1715.384	-0.011005	-0.003683	-0.008083
53.6000	946.309	162.797	55.489	115.722	-0.599	9.904	1801.529	-0.011396	-0.003884	-0.008101
53.8000	986.961	168.800	58.395	120.014	-0.598	9.904	1878.920	-0.011816	-0.004088	-0.008401
54.0000	1015.154	173.023	60.407	127.832	-0.607	9.905	1932.592	-0.012112	-0.004228	-0.008948
54.2000	1062.989	179.000	62.562	132.207	-0.607	9.906	2023.659	-0.012530	-0.004379	-0.009254
54.4000	1075.027	181.456	63.538	134.227	-0.606	9.905	2046.576	-0.012702	-0.004448	-0.009396
54.6000	1069.752	181.236	63.952	130.213	-0.595	9.905	2036.533	-0.012687	-0.004477	-0.009115
54.8000	1079.956	182.836	64.519	131.394	-0.615	9.906	2055.960	-0.012798	-0.004516	-0.009198
55.0000	1074.832	183.030	64.631	134.820	-0.609	9.907	2046.204	-0.012812	-0.004524	-0.009437
55.2000	1064.026	182.085	64.355	135.248	-0.621	9.906	2025.633	-0.012746	-0.004505	-0.009467
55.4000	1041.514	179.583	63.384	133.543	-0.617	9.907	1982.775	-0.012571	-0.004437	-0.009348
55.6000	1013.726	176.651	62.369	127.074	-0.614	9.907	1929.874	-0.012366	-0.004366	-0.008895
55.8000	982.482	173.370	60.643	124.418	-0.605	9.908	1870.394	-0.012136	-0.004245	-0.008709
56.0000	935.353	168.228	58.088	125.326	-0.597	9.909	1780.672	-0.011776	-0.004066	-0.008773
56.2000	869.664	159.820	53.988	114.757	-0.605	9.908	1655.617	-0.011187	-0.003779	-0.008033
56.4000	835.595	155.640	52.697	111.398	-0.613	9.908	1590.757	-0.010895	-0.003689	-0.007798
56.6000	778.381	149.066	49.319	110.642	-0.600	9.908	1481.838	-0.010435	-0.003452	-0.007745
56.8000	713.188	140.268	45.819	100.201	-0.604	9.909	1357.727	-0.009819	-0.003207	-0.007014
57.0000	641.127	130.723	41.901	98.217	-0.612	9.909	1220.541	-0.009151	-0.002933	-0.006875
57.2000	582.531	122.885	38.937	92.713	-0.611	9.909	1108.990	-0.008602	-0.002726	-0.006490
57.4000	519.622	114.684	35.340	86.607	-0.607	9.909	989.227	-0.008028	-0.002474	-0.006063
57.6000	450.296	104.918	32.086	80.057	-0.608	9.909	857.248	-0.007344	-0.002246	-0.005604
57.8000	392.707	96.190	28.961	69.598	-0.605	9.909	747.614	-0.006733	-0.002027	-0.004872
58.0000	329.333	86.824	26.085	67.878	-0.616	9.908	626.965	-0.006078	-0.001826	-0.004751
58.2000	272.856	77.988	23.598	57.462	-0.616	9.908	519.447	-0.005459	-0.001652	-0.004022
58.4000	226.117	70.356	21.401	56.786	-0.609	9.909	430.470	-0.004925	-0.001498	-0.003975
58.6000	180.491	62.004	19.277	47.211	-0.602	9.908	343.609	-0.004340	-0.001349	-0.003305
58.8000	137.495	54.388	18.302	42.188	-0.608	9.908	261.755	-0.003807	-0.001281	-0.002953
59.0000	105.950	48.372	17.649	41.458	-0.604	9.908	201.702	-0.003386	-0.001235	-0.002902
59.2000	78.839	42.855	16.647	39.779	-0.618	9.908	150.089	-0.003000	-0.001165	-0.002785
59.4000	57.529	38.422	16.051	33.696	-0.604	9.908	109.520	-0.002690	-0.001124	-0.002359
59.6000	56.597	37.422	16.065	36.341	-0.606	9.907	107.746	-0.002620	-0.001125	-0.002544
59.8000	52.239	36.588	15.605	35.199	-0.612	9.907	99.449	-0.002561	-0.001092	-0.002464
60.0000	60.895	36.948	15.799	35.461	-0.620	9.907	115.929	-0.002586	-0.001106	-0.002482
60.2000	70.994	38.227	15.703	31.826	-0.619	9.907	135.155	-0.002676	-0.001099	-0.002228
60.4000	96.633	42.272	16.231	38.512	-0.605	9.906	183.964	-0.002959	-0.001136	-0.002696
60.6000	114.486	45.150	16.343	35.652	-0.599	9.907	217.953	-0.003160	-0.001144	-0.002496
60.8000	151.396	50.511	16.592	39.091	-0.617	9.907	288.219	-0.003536	-0.001161	-0.002736
61.0000	193.386	57.126	17.468	47.321	-0.621	9.906	368.156	-0.003999	-0.001223	-0.003312
61.2000	245.474	65.479	19.194	47.170	-0.616	9.906	467.319	-0.004584	-0.001344	-0.003302
61.4000	296.811	72.538	21.218	56.498	-0.605	9.906	565.052	-0.005078	-0.001485	-0.003955
61.6000	346.570	80.027	23.001	61.274	-0.617	9.905	659.781	-0.005602	-0.001610	-0.004289
61.8000	418.436	90.158	26.848	68.043	-0.615	9.905	796.595	-0.006311	-0.001879	-0.004763
62.0000	477.438	99.206	29.406	73.779	-0.612	9.906	908.918	-0.006944	-0.002058	-0.005165
62.2000	537.371	107.126	32.573	77.359	-0.622	9.905	1023.016	-0.007499	-0.002280	-0.005415
62.4000	610.003	116.742	35.994	82.077	-0.604	9.905	1161.289	-0.008172	-0.002520	-0.005745
62.6000	662.077	124.691	39.565	91.960	-0.607	9.905	1260.424	-0.008728	-0.002770	-0.006437
62.8000	738.316	135.072	43.551	94.877	-0.609	9.905	1405.563	-0.009455	-0.003049	-0.006641
63.0000	803.148	143.855	46.388	105.981	-0.601	9.905	1528.988	-0.010070	-0.003247	-0.007419
63.2000	851.029	149.968	49.554	111.043	-0.603	9.905	1620.140	-0.010498	-0.003469	-0.007773
63.4000	910.181	158.112	53.557	117.179	-0.608	9.905	1732.750	-0.011068	-0.003749	-0.008203
63.6000	949.269	163.601	55.641	121.171	-0.608	9.905	1807.165	-0.011452	-0.003895	-0.008482
63.8000	1000.546	170.508	58.938	121.624	-0.608	9.904	1904.783	-0.011936	-0.004126	-0.008514
64.0000	1031.866	174.928	60.630	129.907	-0.593	9.905	1964.407	-0.012245	-0.004244	-0.009094
64.2000	1052.710	178.193	62.409	132.576	-0.605	9.904	2004.089	-0.012474	-0.004369	-0.009280
64.4000	1068.234	181.333	63.771	129.715	-0.608	9.904	2033.644	-0.012693	-0.004464	-0.009080
64.6000	1080.933	182.668	64.037	131.368	-0.606	9.904	2057.819	-0.012787	-0.004483	-0.009196
64.8000	1082.151	183.461	64.784	132.247	-0.605	9.903	2060.137	-0.012842	-0.004535	-0.009257
65.0000	1082.256	183.960	65.061	132.577	-0.604	9.903	2060.337	-0.012877	-0.004554	-0.009280
65.2000	1068.700	183.099	64.645	131.768	-0.593	9.902	2034.531	-0.012817	-0.004525	-0.009224
65.4000	1041.799	179.470	63.438	129.235	-0.601	9.902	1983.318	-0.012563	-0.004441	-0.009046
65.6000	1020.895	177.625	62.603	127.830	-0.604	9.902	1943.522	-0.012434	-0.004382	-0.008948
65.8000	977.553	172.703	60.728	124.609	-0.599	9.902	1861.010	-0.012089	-0.004251	-0.008723
66.0000	925.164	166.480	57.670	124.972	-0.599	9.901	1761.274	-0.011654	-0.004037	-0.008748
66.2000	878.576	160.880	55.433	120.827	-0.598	9.901	1672.583	-0.011262	-0.003880	-0.008458
66.4000	823.316	154.570	52.322	115.640	-0.609	9.901	1567.383	-0.010820	-0.003663	-0.008095
66.6000	775.376	148.690	49.708	111.181	-0.611	9.900	1476.116	-0.010408	-0.003480	-0.007783
66.8000	714.556	140.687	45.956	105.496	-0.615	9.900	1360.331	-0.009848	-0.003217	-0.007385
67.0000	643.081	131.779	42.288	98.795	-0.597	9.899	1224.260	-0.009225	-0.002960	-0.006916
67.2000	586.228	123.968	39.203	93.488	-0.596	9.898	1116.028	-0.008678	-0.002744	-0.006544
67.4000	520.193	114.713	35.535	86.895	-0.598	9.899	990.314	-0.008030	-0.002487	-0.006083
67.6000	431.886	102.777	31.613	78.625	-0.603	9.897	822.201	-0.007194	-0.002213	-0.005504
67.8000	393.609	96.441	29.419	74.484	-0.615	9.897	749.331	-0.006751	-0.002059	-0.005214
68.0000	341.851	88.477	26.568	68.883	-0.602	9.897	650.797	-0.006193	-0.001860	-0.004822
68.2000	285.134	79.319	23.724	63.103	-0.600	9.896	542.822	-0.005552	-0.001661	-0.004417
68.4000	218.588	69.006	21.482	56.322	-0.616	9.896	416.136	-0.004830	-0.001504	-0.003943
68.6000	172.962	61.281	19.527	51.418	-0.610	9.896	329.275	-0.004290	-0.001367	-0.003599
68.8000	142.950	55.126	18.388	47.678	-0.613	9.896	272.141	-0.003859	-0.001287	-0.003337
69.0000	113.900	49.094	17.370	44.293	-0.611	9.894	216.837	-0.003437	-0.001216	-0.003101
69.2000	82.656	43.440	16.952	40.247	-0.620	9.895	157.356	-0.003041	-0.001187	-0.002817
69.4000	62.443	39.310	16.564	38.085	-0.628	9.894	118.876	-0.002752	-0.001159	-0.002666
69.6000	54.222	37.018	16.148	36.382	-0.615	9.893	103.226	-0.002591	-0.001130	-0.002547
69.8000	50.465	35.742	16.038	35.556	-0.607	9.893	96.073	-0.002502	-0.001123	-0.002489
70.0000	52.990	36.449	16.107	35.280	-0.620	9.892	100.880	-0.002551	-0.001127	-0.002470
70.2000	72.016	38.840	16.010	36.740	-0.613	9.892	137.100	-0.002719	-0.001121	-0.002572
70.4000	89.675	41.312	15.995	38.141	-0.628	9.892	170.717	-0.002892	-0.001120	-0.002670
70.6000	121.204	45.511	16.649	40.590	-0.604	9.892	230.742	-0.003186	-0.001165	-0.002841
70.8000	158.565	51.610	16.969	44.239	-0.616	9.892	301.867	-0.003613	-0.001188	-0.003097
71.0000	192.409	56.768	17.107	46.962	-0.613	9.891	366.297	-0.003974	-0.001198	-0.003287
71.2000	242.664	63.909	19.109	51.366	-0.614	9.890	461.969	-0.004474	-0.001338	-0.003596
71.4000	294.166	72.260	21.010	56.224	-0.602	9.891	560.017	-0.005058	-0.001471	-0.003936
71.6000	348.674	80.123	23.515	61.191	-0.605	9.891	663.786	-0.005609	-0.001646	-0.004283
71.8000	411.823	88.687	26.332	67.604	-0.615	9.890	784.006	-0.006208	-0.001843	-0.004732
72.0000	474.342	97.718	29.518	73.451	-0.631	9.890	903.025	-0.006840	-0.002066	-0.005142
72.2000	548.311	107.807	32.922	80.743	-0.629	9.890	1043.844	-0.007546	-0.002305	-0.005652
72.4000	602.233	115.782	35.883	86.097	-0.616	9.890	1146.498	-0.008105	-0.002512	-0.006027
72.6000	668.794	124.678	39.507	92.975	-0.620	9.889	1273.212	-0.008727	-0.002765	-0.006508
72.8000	732.890	133.989	43.483	99.404	-0.624	9.889	1395.235	-0.009379	-0.003044	-0.006958
73.0000	792.854	142.311	46.680	105.552	-0.616	9.888	1509.390	-0.009962	-0.003268	-0.007389
73.2000	848.279	149.565	49.555	111.678	-0.625	9.888	1614.904	-0.010470	-0.003469	-0.007817
73.4000	894.731	156.237	52.794	116.437	-0.615	9.888	1703.339	-0.010937	-0.003696	-0.008151
73.6000	946.624	163.256	56.142	121.626	-0.603	9.888	1802.130	-0.011428	-0.003930	-0.008514
73.8000	988.689	168.954	58.339	126.385	-0.626	9.887	1882.210	-0.011827	-0.004084	-0.008847
74.0000	1024.547	173.844	60.630	130.157	-0.627	9.888	1950.474	-0.012169	-0.004244	-0.009111
74.2000	1049.539	177.374	62.381	133.472	-0.621	9.887	1998.053	-0.012416	-0.004367	-0.009343
74.4000	1067.543	180.554	63.952	135.524	-0.625	9.887	2032.328	-0.012639	-0.004477	-0.009487
74.6000	1080.497	182.348	64.353	136.884	-0.619	9.887	2056.990	-0.012764	-0.004505	-0.009582
74.8000	1077.552	182.695	64.728	137.503	-0.635	9.887	2051.382	-0.012789	-0.004531	-0.009625
75.0000	1079.686	183.294	65.216	137.777	-0.636	9.887	2055.445	-0.012831	-0.004565	-0.009644
75.2000	1046.894	180.764	64.078	136.169	-0.617	9.888	1993.017	-0.012653	-0.004485	-0.009532
75.4000	1040.462	179.596	63.774	135.579	-0.623	9.887	1980.772	-0.012572	-0.004464	-0.009491
75.6000	1007.264	176.109	62.312	127.266	-0.628	9.887	1917.572	-0.012328	-0.004362	-0.008909
75.8000	967.980	171.551	60.701	124.336	-0.624	9.888	1842.785	-0.012009	-0.004249	-0.008704
76.0000	940.899	168.632	58.562	121.515	-0.627	9.887	1791.229	-0.011804	-0.004099	-0.008506
76.2000	888.419	161.946	55.961	122.576	-0.629	9.888	1691.322	-0.011336	-0.003917	-0.008580
76.4000	842.808	157.013	53.475	118.598	-0.613	9.887	1604.490	-0.010991	-0.003743	-0.008302
76.6000	780.245	149.454	50.263	106.873	-0.627	9.887	1485.386	-0.010462	-0.003518	-0.007481
76.8000	701.721	138.921	45.344	99.994	-0.625	9.887	1335.897	-0.009724	-0.003174	-0.007000
77.0000	635.762	130.542	42.401	99.981	-0.628	9.888	1210.327	-0.009138	-0.002968	-0.006999
77.2000	589.444	124.095	39.841	93.954	-0.616	9.888	1122.150	-0.008687	-0.002789	-0.006577
77.4000	517.413	114.604	35.758	81.911	-0.612	9.888	985.022	-0.008022	-0.002503	-0.005734
77.6000	459.403	106.027	32.644	76.381	-0.629	9.888	874.586	-0.007422	-0.002285	-0.005347
77.8000	401.304	97.665	29.935	70.191	-0.619	9.889	763.979	-0.006837	-0.002095	-0.004913
78.0000	343.008	89.060	27.084	64.455	-0.622	9.890	653.000	-0.006234	-0.001896	-0.004512
78.2000	281.978	79.471	23.959	57.903	-0.603	9.889	536.814	-0.005563	-0.001677	-0.004053
78.4000	222.496	69.341	21.900	54.503	-0.594	9.890	423.574	-0.004854	-0.001533	-0.003815
78.6000	181.784	62.686	19.971	46.936	-0.604	9.890	346.069	-0.004388	-0.001398	-0.003286
78.8000	143.040	55.448	18.471	48.805	-0.608	9.890	272.312	-0.003881	-0.001293	-0.003416
79.0000	101.547	47.678	17.676	44.486	-0.599	9.890	193.319	-0.003337	-0.001237	-0.003114
79.2000	81.394	43.689	17.426	35.359	-0.601	9.890	154.953	-0.003058	-0.001220	-0.002475
79.4000	50.901	38.075	16.482	31.700	-0.604	9.890	96.903	-0.002665	-0.001154	-0.002219
79.6000	54.824	37.769	16.329	37.591	-0.607	9.890	104.370	-0.002644	-0.001143	-0.002631
79.8000	52.269	36.101	16.162	35.971	-0.599	9.891	99.506	-0.002527	-0.001131	-0.002518
80.0000	60.955	37.421	16.063	30.987	-0.608	9.891	116.043	-0.002620	-0.001124	-0.002169
80.2000	66.035	37.632	15.898	36.507	-0.601	9.891	125.713	-0.002634	-0.001113	-0.002555
80.4000	82.566	39.895	16.441	33.392	-0.617	9.891	157.185	-0.002793	-0.001151	-0.002337
80.6000	120.949	45.925	16.538	42.175	-0.602	9.891	230.255	-0.003215	-0.001158	-0.002952
80.8000	152.418	50.695	16.885	44.184	-0.607	9.892	290.165	-0.003549	-0.001182	-0.003093
81.0000	192.935	57.222	17.648	44.969	-0.613	9.892	367.298	-0.004006	-0.001235	-0.003148
81.2000	263.884	67.536	20.482	54.405	-0.600	9.891	502.367	-0.004728	-0.001434	-0.003808
81.4000	287.824	71.592	21.038	51.008	-0.617	9.892	547.943	-0.005011	-0.001473	-0.003571
81.6000	345.293	79.611	23.710	62.564	-0.620	9.891	657.349	-0.005573	-0.001660	-0.004380
81.8000	406.654	88.824	26.597	62.139	-0.620	9.892	774.164	-0.006218	-0.001862	-0.004350
82.0000	479.752	99.262	29.880	74.757	-0.616	9.892	913.324	-0.006948	-0.002092	-0.005233
82.2000	549.258	108.072	33.090	75.225	-0.607	9.892	1045.647	-0.007565	-0.002316	-0.005266
82.4000	607.508	116.341	36.479	81.282	-0.613	9.893	1156.540	-0.008144	-0.002554	-0.005690
82.6000	670.027	125.777	40.050	87.294	-0.611	9.892	1275.558	-0.008804	-0.002804	-0.006111
82.8000	744.853	134.905	43.885	94.779	-0.620	9.893	1418.009	-0.009443	-0.003072	-0.006635
83.0000	793.695	142.076	46.917	106.296	-0.616	9.893	1510.992	-0.009945	-0.003284	-0.007441
83.2000	853.914	150.010	50.711	106.037	-0.618	9.893	1625.633	-0.010501	-0.003550	-0.007423
83.4000	902.170	156.864	53.447	116.547	-0.621	9.893	1717.501	-0.010980	-0.003741	-0.008158
83.6000	944.100	162.296	55.989	120.993	-0.613	9.893	1797.323	-0.011361	-0.003919	-0.008470
83.8000	991.680	169.326	58.879	120.772	-0.615	9.894	1887.903	-0.011853	-0.004122	-0.008454
84.0000	1017.709	173.370	60.394	130.005	-0.611	9.894	1937.456	-0.012136	-0.004228	-0.009100
84.2000	1052.635	177.250	62.548	132.412	-0.631	9.894	2003.946	-0.012407	-0.004378	-0.009269
84.4000	1069.812	180.582	64.284	131.754	-0.621	9.894	2036.648	-0.012641	-0.004500	-0.009223
84.6000	1079.025	182.864	64.589	137.284	-0.632	9.894	2054.186	-0.012800	-0.004521	-0.009610
84.8000	1080.648	183.017	64.839	136.828	-0.632	9.894	2057.276	-0.012811	-0.004539	-0.009578
85.0000	1074.336	182.655	65.230	131.970	-0.628	9.894	2045.259	-0.012786	-0.004566	-0.009238
85.2000	1064.207	181.918	64.894	137.062	-0.624	9.895	2025.976	-0.012734	-0.004543	-0.009594
85.4000	1046.353	180.416	64.215	134.959	-0.631	9.895	1991.987	-0.012629	-0.004495	-0.009447
85.6000	1009.458	176.012	62.686	127.611	-0.622	9.895	1921.749	-0.012321	-0.004388	-0.008933
85.8000	978.334	172.676	60.907	129.566	-0.628	9.895	1862.497	-0.012087	-0.004263	-0.009070
86.0000	934.451	167.480	58.297	125.697	-0.625	9.896	1778.955	-0.011724	-0.004081	-0.008799
86.2000	881.807	161.003	55.823	120.716	-0.616	9.896	1678.734	-0.011270	-0.003908	-0.008450
86.4000	832.514	155.194	53.128	112.199	-0.619	9.896	1584.892	-0.010864	-0.003719	-0.007854
86.6000	771.919	147.980	49.417	112.282	-0.612	9.897	1469.536	-0.010359	-0.003459	-0.007860
86.8000	710.919	139.868	46.388	105.747	-0.611	9.896	1353.407	-0.009791	-0.003247	-0.007402
87.0000	650.024	132.264	43.067	100.435	-0.608	9.896	1237.478	-0.009258	-0.003015	-0.007030
87.2000	581.494	122.815	39.034	94.379	-0.608	9.897	1107.016	-0.008597	-0.002732	-0.006607
87.4000	524.281	114.268	35.953	84.294	-0.613	9.896	998.096	-0.007999	-0.002517	-0.005901
87.6000	454.790	105.293	32.977	76.326	-0.615	9.896	865.803	-0.007371	-0.002308	-0.005343
87.8000	400.567	96.939	29.559	69.915	-0.618	9.897	762.577	-0.006786	-0.002069	-0.004894
88.0000	337.568	87.394	26.791	69.559	-0.617	9.896	642.643	-0.006118	-0.001875	-0.004869
88.2000	282.354	78.567	24.361	60.407	-0.597	9.896	537.529	-0.005500	-0.001705	-0.004228
88.4000	224.134	69.591	21.692	57.809	-0.617	9.896	426.693	-0.004871	-0.001518	-0.004047
88.6000	176.749	60.924	19.652	52.688	-0.623	9.895	336.485	-0.004265	-0.001376	-0.003688
88.8000	145.730	55.487	18.999	47.182	-0.606	9.895	277.433	-0.003884	-0.001330	-0.003303
89.0000	112.202	48.859	17.929	43.606	-0.606	9.895	213.604	-0.003420	-0.001255	-0.003052
89.2000	84.204	43.298	17.106	40.082	-0.617	9.895	160.303	-0.003031	-0.001197	-0.002806
89.4000	62.308	39.115	17.094	39.161	-0.609	9.894	118.618	-0.002738	-0.001197	-0.002741
89.6000	47.385	36.491	16.341	32.747	-0.604	9.894	90.208	-0.002554	-0.001144	-0.002292
89.8000	50.285	35.753	16.203	33.383	-0.621	9.894	95.730	-0.002503	-0.001134	-0.002337
90.0000	57.694	36.672	16.495	36.229	-0.629	9.894	109.835	-0.002567	-0.001155	-0.002536
90.2000	74.496	39.034	16.092	32.542	-0.607	9.893	141.821	-0.002732	-0.001126	-0.002278
90.4000	94.123	41.076	16.342	34.784	-0.602	9.893	179.186	-0.002875	-0.001144	-0.002435
90.6000	124.901	46.134	16.746	36.932	-0.615	9.893	237.780	-0.003229	-0.001172	-0.002585
90.8000	151.967	50.638	17.233	39.725	-0.599	9.893	289.307	-0.003545	-0.001206	-0.002781
91.0000	199.217	57.834	17.594	48.792	-0.599	9.892	379.257	-0.004048	-0.001232	-0.003415
91.2000	247.548	65.243	19.610	53.032	-0.608	9.893	471.268	-0.004567	-0.001373	-0.003712
91.4000	301.214	73.011	21.747	54.255	-0.600	9.892	573.435	-0.005111	-0.001522	-0.003798
91.6000	363.763	81.697	24.295	63.462	-0.587	9.891	692.511	-0.005719	-0.001701	-0.004442
91.8000	421.066	90.172	27.306	64.921	-0.604	9.891	801.601	-0.006312	-0.001911	-0.004544
92.0000	479.466	98.579	30.325	72.984	-0.603	9.890	912.781	-0.006901	-0.002123	-0.005109
92.2000	549.243	108.003	33.603	81.403	-0.606	9.889	1045.618	-0.007560	-0.002352	-0.005698
92.4000	614.151	117.465	36.895	87.224	-0.599	9.890	1169.186	-0.008223	-0.002583	-0.006106
92.6000	673.513	125.928	40.050	94.214	-0.596	9.890	1282.196	-0.008815	-0.002804	-0.006595
92.8000	739.368	134.794	43.287	97.805	-0.604	9.889	1407.566	-0.009436	-0.003030	-0.006846
93.0000	804.396	143.396	47.528	107.412	-0.587	9.888	1531.363	-0.010038	-0.003327	-0.007519
93.2000	859.009	151.053	50.973	111.224	-0.585	9.888	1635.332	-0.010574	-0.003568	-0.007786
93.4000	902.035	157.112	53.142	118.393	-0.593	9.888	1717.243	-0.010998	-0.003720	-0.008287
93.6000	950.412	163.463	56.338	119.838	-0.596	9.887	1809.340	-0.011442	-0.003944	-0.008389
93.8000	990.823	169.160	58.963	125.904	-0.596	9.887	1886.272	-0.011841	-0.004127	-0.008813
94.0000	1026.846	174.067	60.659	130.914	-0.589	9.886	1954.851	-0.012185	-0.004246	-0.009164
94.2000	1052.800	177.720	62.633	133.294	-0.584	9.885	2004.261	-0.012440	-0.004384	-0.009331
94.4000	1072.638	181.000	64.144	131.133	-0.590	9.886	2042.027	-0.012670	-0.004490	-0.009179
94.6000	1083.849	182.681	64.743	135.206	-0.591	9.885	2063.370	-0.012788	-0.004532	-0.009464
94.8000	1081.895	183.071	65.145	134.490	-0.580	9.885	2059.650	-0.012815	-0.004560	-0.009414
95.0000	1084.856	184.127	65.534	133.664	-0.595	9.884	2065.287	-0.012889	-0.004587	-0.009356
95.2000	1063.936	181.890	64.896	135.742	-0.584	9.883	2025.461	-0.012732	-0.004543	-0.009502
95.4000	1042.205	179.750	64.299	135.771	-0.599	9.883	1984.091	-0.012582	-0.004501	-0.009504
95.6000	1007.279	175.845	62.812	132.948	-0.595	9.883	1917.601	-0.012309	-0.004397	-0.009306
95.8000	976.922	172.413	60.685	129.704	-0.592	9.883	1859.808	-0.012069	-0.004248	-0.009079
96.0000	936.691	167.563	58.994	122.450	-0.589	9.881	1783.218	-0.011729	-0.004130	-0.008572
96.2000	889.516	162.005	56.379	119.974	-0.610	9.881	1693.411	-0.011340	-0.003947	-0.008398
96.4000	821.919	154.180	52.252	112.545	-0.600	9.881	1564.722	-0.010793	-0.003658	-0.007878
96.6000	771.078	147.412	49.931	112.075	-0.595	9.881	1467.934	-0.010319	-0.003495	-0.007845
96.8000	710.228	140.240	46.820	103.076	-0.605	9.880	1352.091	-0.009817	-0.003277	-0.007215
97.0000	649.152	132.431	43.093	99.057	-0.615	9.880	1235.819	-0.009270	-0.003017	-0.006934
97.2000	583.042	122.939	39.481	89.496	-0.593	9.879	1109.962	-0.008606	-0.002764	-0.006265
97.4000	513.145	113.672	36.120	87.721	-0.594	9.879	976.896	-0.007957	-0.002528	-0.006140
97.6000	457.961	105.570	32.644	76.519	-0.611	9.879	871.840	-0.007390	-0.002285	-0.005356
97.8000	399.290	96.371	29.642	74.399	-0.593	9.878	760.145	-0.006746	-0.002075	-0.005208
98.0000	333.691	87.407	26.876	64.439	-0.593	9.878	635.262	-0.006118	-0.001881	-0.004511
98.2000	279.183	78.220	23.987	58.425	-0.603	9.877	531.492	-0.005475	-0.001679	-0.004090
98.4000	215.087	68.395	21.651	56.567	-0.611	9.877	409.470	-0.004788	-0.001516	-0.003960
98.6000	183.016	62.268	20.816	49.274	-0.607	9.877	348.415	-0.004359	-0.001457	-0.003449
98.8000	135.361	54.015	18.471	47.401	-0.596	9.875	257.692	-0.003781	-0.001293	-0.003318
99.0000	109.843	48.844	17.859	42.737	-0.592	9.875	209.112	-0.003419	-0.001250	-0.002992
99.2000	83.979	43.745	17.676	38.597	-0.609	9.875	159.874	-0.003062	-0.001237	-0.002702
99.4000	67.297	39.768	16.510	35.954	-0.615	9.874	128.117	-0.002784	-0.001156	-0.002517
99.6000	55.876	37.242	16.677	34.193	-0.605	9.874	106.373	-0.002607	-0.001167	-0.002393
99.8000	54.132	36.448	16.551	35.320	-0.598	9.873	103.054	-0.002551	-0.001159	-0.002472
