# Supplementary material for: Evaluation of a Cold-Mixed High-Performance Polyurethane Mixture
Source: Hindawi journal article supplement (doi:10.1155/2019/1507971), 2019-11-07
Supplement: f1 [file 1507971.f1.zip › 1507971.f1/dynamic modulus data/PUM/specimen2/temp10/zhs-2-10_0.2Hz.csv]

Test Information
****************
Project name	zhs
Operator name	2
Target test temperature	10
Target confining stress	0
Average dynamic strain range from 75 to 125 micro-strain
Contact stress	5
Initial modulus	4000
Axial gauge length	70
Comments	Run at High Pressure
Specimen information
********************
Identification	zhs-2-10
Dimensions	Point 1	Point 2	Point 3	Point 4	Point 5	Point 6	Average	Std Dev.
Diameter (mm)	49.2	49.3	49.2				49.23	0.058
Height (mm)	100.8	101.0	100.8				100.87	0.115
Cross-sectional area (mm�)	1903.7
Conditioning time
Properties/Comments
Test Data	0.2Hz
*********
Test date and time	Fri	Mar 29	2019	11:20 AM
Dynamic modulus (MPa)	10545
Phase angle (Degrees)	4.72
Average temperature (�C)	9.8
Average confining pressure (kPa)	-0.6
Average micro-strain	100
Load drift (%)	0.1
Load standard error (%)	1.0
Average deformation drift (%)	-4.6
Average deformation standard error (%)	3.8
Deformation uniformity (%)	39.5
Phase uniformity (Degrees)	0.5
Conditioning Cycles
Time (sec)	Axial stress (kPa)	Axial micro-strain #1	Axial micro-strain #2	Axial micro-strain #3	Confining pressure (kPa)	Temperature (�C)	Load (N)	Displacement #1 (mm)	Displacement #2 (mm)	Displacement #3 (mm)
0.0000	44.634	33.668	8.395	21.010	-0.633	9.874	84.972	-0.002357	-0.000588	-0.001471
0.1000	55.244	34.753	8.896	21.368	-0.633	9.874	105.171	-0.002433	-0.000623	-0.001496
0.2000	70.573	36.784	8.465	22.635	-0.643	9.874	134.354	-0.002575	-0.000593	-0.001584
0.3000	88.502	39.342	9.131	24.190	-0.640	9.874	168.486	-0.002754	-0.000639	-0.001693
0.4000	119.566	44.648	9.091	27.353	-0.641	9.874	227.623	-0.003125	-0.000636	-0.001915
0.5000	147.699	48.775	9.437	29.625	-0.645	9.874	281.181	-0.003414	-0.000661	-0.002074
0.6000	194.663	55.959	9.716	34.209	-0.649	9.875	370.588	-0.003917	-0.000680	-0.002395
0.7000	227.335	61.532	11.199	36.819	-0.645	9.874	432.787	-0.004307	-0.000784	-0.002577
0.8000	275.846	68.383	12.426	41.058	-0.643	9.873	525.141	-0.004787	-0.000870	-0.002874
0.9000	323.396	75.594	14.038	45.475	-0.642	9.874	615.664	-0.005292	-0.000983	-0.003183
1.0000	380.309	84.100	17.150	51.173	-0.635	9.874	724.010	-0.005887	-0.001200	-0.003582
1.1000	428.174	90.492	19.013	55.686	-0.633	9.873	815.134	-0.006334	-0.001331	-0.003898
1.2000	469.743	96.967	21.122	59.954	-0.648	9.874	894.270	-0.006788	-0.001479	-0.004197
1.3000	523.890	104.587	23.740	65.029	-0.642	9.874	997.353	-0.007321	-0.001662	-0.004552
1.4000	576.219	111.754	26.598	69.696	-0.643	9.873	1096.973	-0.007823	-0.001862	-0.004879
1.5000	629.330	119.422	29.434	75.623	-0.639	9.874	1198.082	-0.008360	-0.002060	-0.005294
1.6000	670.958	125.066	31.614	80.000	-0.639	9.874	1277.332	-0.008755	-0.002213	-0.005600
1.7000	708.439	130.291	33.241	83.868	-0.642	9.874	1348.686	-0.009120	-0.002327	-0.005871
1.8000	758.424	136.976	36.035	88.122	-0.650	9.874	1443.844	-0.009588	-0.002522	-0.006169
1.9000	768.808	139.505	37.201	90.224	-0.643	9.874	1463.614	-0.009765	-0.002604	-0.006316
2.0000	799.331	143.354	39.035	93.059	-0.644	9.873	1521.721	-0.010035	-0.002732	-0.006514
2.1000	830.350	148.177	40.884	96.279	-0.643	9.873	1580.772	-0.010372	-0.002862	-0.006739
2.2000	849.015	150.886	42.176	98.838	-0.642	9.873	1616.306	-0.010562	-0.002952	-0.006919
2.3000	859.309	152.163	42.385	100.008	-0.635	9.873	1635.904	-0.010651	-0.002967	-0.007001
2.4000	866.433	153.485	43.121	101.151	-0.633	9.873	1649.466	-0.010744	-0.003018	-0.007081
2.5000	850.803	151.858	43.093	99.938	-0.642	9.873	1619.711	-0.010630	-0.003017	-0.006996
2.6000	826.818	149.804	41.997	98.287	-0.655	9.873	1574.049	-0.010486	-0.002940	-0.006880
2.7000	822.415	149.456	42.289	98.068	-0.648	9.872	1565.666	-0.010462	-0.002960	-0.006865
2.8000	789.998	145.854	40.497	95.631	-0.645	9.873	1503.954	-0.010210	-0.002835	-0.006694
2.9000	777.480	144.383	39.881	94.338	-0.647	9.872	1480.122	-0.010107	-0.002792	-0.006604
3.0000	737.745	139.865	38.076	91.285	-0.652	9.872	1404.476	-0.009791	-0.002665	-0.006390
3.1000	707.132	135.669	36.258	88.010	-0.634	9.872	1346.197	-0.009497	-0.002538	-0.006161
3.2000	671.124	131.167	34.131	84.911	-0.629	9.872	1277.647	-0.009182	-0.002389	-0.005944
3.3000	609.853	124.079	31.658	79.492	-0.627	9.871	1161.003	-0.008686	-0.002216	-0.005564
3.4000	566.346	117.436	29.227	75.970	-0.629	9.871	1078.176	-0.008220	-0.002046	-0.005318
3.5000	510.771	110.366	26.710	70.740	-0.644	9.871	972.376	-0.007726	-0.001870	-0.004952
3.6000	460.020	103.347	24.139	65.994	-0.635	9.871	875.759	-0.007234	-0.001690	-0.004620
3.7000	412.695	96.106	21.775	61.740	-0.639	9.871	785.666	-0.006727	-0.001524	-0.004322
3.8000	363.838	89.754	19.442	56.457	-0.627	9.871	692.654	-0.006283	-0.001361	-0.003952
3.9000	314.860	81.961	17.161	51.103	-0.638	9.871	599.413	-0.005737	-0.001201	-0.003577
4.0000	259.556	73.163	14.996	45.655	-0.635	9.870	494.127	-0.005121	-0.001050	-0.003196
4.1000	230.596	68.021	13.188	42.353	-0.648	9.870	438.995	-0.004761	-0.000923	-0.002965
4.2000	180.506	60.019	11.828	37.660	-0.639	9.870	343.637	-0.004201	-0.000828	-0.002636
4.3000	156.701	54.864	10.950	34.676	-0.636	9.870	298.319	-0.003840	-0.000767	-0.002427
4.4000	111.841	47.606	9.867	29.996	-0.632	9.870	212.917	-0.003332	-0.000691	-0.002100
4.5000	92.350	43.731	9.575	27.544	-0.644	9.869	175.810	-0.003061	-0.000670	-0.001928
4.6000	78.193	40.855	9.131	25.524	-0.632	9.868	148.859	-0.002860	-0.000639	-0.001787
4.7000	55.199	36.533	8.713	22.567	-0.639	9.868	105.085	-0.002557	-0.000610	-0.001580
4.8000	43.642	33.947	8.255	20.763	-0.647	9.869	83.084	-0.002376	-0.000578	-0.001453
4.9000	36.369	32.309	7.714	19.759	-0.638	9.868	69.237	-0.002262	-0.000540	-0.001383
5.0000	42.140	33.100	8.159	20.213	-0.633	9.868	80.223	-0.002317	-0.000571	-0.001415
5.1000	53.381	34.154	8.186	20.516	-0.640	9.868	101.624	-0.002391	-0.000573	-0.001436
5.2000	67.733	36.086	7.950	21.919	-0.645	9.867	128.946	-0.002526	-0.000557	-0.001534
5.3000	89.720	39.436	8.672	24.038	-0.631	9.867	170.803	-0.002761	-0.000607	-0.001683
5.4000	121.294	43.939	8.782	27.052	-0.641	9.866	230.913	-0.003076	-0.000615	-0.001894
5.5000	164.832	50.512	9.075	30.931	-0.636	9.866	313.797	-0.003536	-0.000635	-0.002165
5.6000	197.173	55.904	9.784	33.325	-0.633	9.865	375.366	-0.003913	-0.000685	-0.002333
5.7000	236.006	62.086	10.632	37.456	-0.639	9.865	449.295	-0.004346	-0.000744	-0.002622
5.8000	278.491	68.688	12.215	40.564	-0.643	9.865	530.176	-0.004808	-0.000855	-0.002840
5.9000	333.030	76.514	14.967	45.408	-0.643	9.864	634.003	-0.005356	-0.001048	-0.003179
6.0000	384.186	83.628	17.024	50.718	-0.636	9.864	731.392	-0.005854	-0.001192	-0.003550
6.1000	430.970	90.726	19.166	55.481	-0.637	9.863	820.456	-0.006351	-0.001342	-0.003884
6.2000	474.282	97.579	21.552	59.429	-0.642	9.863	902.910	-0.006831	-0.001509	-0.004160
6.3000	538.062	105.335	24.251	66.186	-0.636	9.863	1024.332	-0.007373	-0.001698	-0.004633
6.4000	577.572	111.768	26.321	69.668	-0.642	9.863	1099.548	-0.007824	-0.001842	-0.004877
6.5000	627.737	118.827	29.477	74.811	-0.640	9.862	1195.049	-0.008318	-0.002063	-0.005237
6.6000	673.513	124.804	31.573	79.106	-0.639	9.862	1282.196	-0.008736	-0.002210	-0.005537
6.7000	704.141	129.763	33.562	82.352	-0.640	9.862	1340.504	-0.009083	-0.002349	-0.005765
6.8000	752.307	136.211	36.370	87.308	-0.636	9.861	1432.199	-0.009535	-0.002546	-0.006112
6.9000	780.185	140.338	37.645	90.692	-0.647	9.861	1485.271	-0.009824	-0.002635	-0.006348
7.0000	810.768	144.438	39.119	93.349	-0.645	9.860	1543.493	-0.010111	-0.002738	-0.006534
7.1000	824.879	146.799	40.622	95.301	-0.650	9.860	1570.358	-0.010276	-0.002844	-0.006671
7.2000	855.853	150.927	42.123	98.053	-0.659	9.860	1629.324	-0.010565	-0.002949	-0.006864
7.3000	847.016	150.900	41.970	98.371	-0.645	9.860	1612.501	-0.010563	-0.002938	-0.006886
7.4000	850.007	151.788	43.135	99.099	-0.644	9.860	1618.195	-0.010625	-0.003019	-0.006937
7.5000	831.597	149.720	42.497	97.929	-0.652	9.859	1583.147	-0.010480	-0.002975	-0.006855
7.6000	840.930	150.997	43.037	98.646	-0.642	9.859	1600.914	-0.010570	-0.003013	-0.006905
7.7000	821.468	148.858	42.273	97.202	-0.641	9.859	1563.864	-0.010420	-0.002959	-0.006804
7.8000	797.377	145.968	41.150	95.412	-0.648	9.858	1518.002	-0.010218	-0.002881	-0.006679
7.9000	777.224	143.800	39.854	93.664	-0.645	9.858	1479.635	-0.010066	-0.002790	-0.006556
8.0000	730.245	138.310	37.771	89.728	-0.646	9.858	1390.200	-0.009682	-0.002644	-0.006281
8.1000	704.081	134.640	36.090	87.294	-0.648	9.858	1340.389	-0.009425	-0.002526	-0.006111
8.2000	660.168	129.555	34.285	83.703	-0.651	9.857	1256.790	-0.009069	-0.002400	-0.005859
8.3000	610.724	123.411	31.780	79.093	-0.649	9.857	1162.663	-0.008639	-0.002225	-0.005536
8.4000	554.323	116.105	28.546	73.891	-0.643	9.857	1055.288	-0.008127	-0.001998	-0.005172
8.5000	516.106	110.630	26.848	70.230	-0.646	9.856	982.533	-0.007744	-0.001879	-0.004916
8.6000	463.521	103.068	24.141	65.800	-0.646	9.856	882.425	-0.007215	-0.001690	-0.004606
8.7000	413.462	96.453	21.830	60.915	-0.635	9.855	787.125	-0.006752	-0.001528	-0.004264
8.8000	354.851	88.200	19.374	55.135	-0.640	9.855	675.545	-0.006174	-0.001356	-0.003859
8.9000	310.622	80.752	16.814	50.692	-0.643	9.855	591.345	-0.005653	-0.001177	-0.003548
9.0000	263.208	73.649	14.884	45.806	-0.643	9.855	501.080	-0.005155	-0.001042	-0.003206
9.1000	219.971	67.008	13.453	41.571	-0.646	9.854	418.768	-0.004691	-0.000942	-0.002910
9.2000	173.939	58.756	11.689	36.738	-0.640	9.854	331.135	-0.004113	-0.000818	-0.002572
9.3000	137.149	52.638	10.980	32.942	-0.642	9.853	261.097	-0.003685	-0.000769	-0.002306
9.4000	113.720	48.012	10.241	29.843	-0.639	9.853	216.494	-0.003361	-0.000717	-0.002089
9.5000	82.341	41.730	9.231	26.584	-0.651	9.853	156.755	-0.002921	-0.000646	-0.001861
9.6000	67.989	39.381	9.171	24.657	-0.652	9.853	129.433	-0.002757	-0.000642	-0.001726
9.7000	54.493	36.575	8.867	22.581	-0.635	9.852	103.741	-0.002560	-0.000621	-0.001581
9.8000	40.967	33.740	7.589	20.737	-0.644	9.852	77.991	-0.002362	-0.000531	-0.001452
9.9000	40.562	33.504	8.285	20.667	-0.643	9.852	77.219	-0.002345	-0.000580	-0.001447
10.0000	45.070	33.352	8.161	20.213	-0.645	9.851	85.802	-0.002335	-0.000571	-0.001415
10.1000	58.506	34.946	7.866	21.505	-0.642	9.852	111.380	-0.002446	-0.000551	-0.001505
10.2000	71.836	36.672	8.242	22.249	-0.636	9.851	136.757	-0.002567	-0.000577	-0.001557
10.3000	82.010	38.160	8.560	23.542	-0.638	9.852	156.126	-0.002671	-0.000599	-0.001648
10.4000	120.513	44.344	8.604	27.065	-0.650	9.851	229.425	-0.003104	-0.000602	-0.001895
10.5000	154.222	49.765	9.590	29.980	-0.647	9.850	293.598	-0.003484	-0.000671	-0.002099
10.6000	195.655	55.752	9.825	33.424	-0.641	9.851	372.477	-0.003903	-0.000688	-0.002340
10.7000	234.278	62.157	10.576	36.724	-0.636	9.850	446.005	-0.004351	-0.000740	-0.002571
10.8000	281.076	69.090	12.855	41.102	-0.639	9.849	535.097	-0.004836	-0.000900	-0.002877
10.9000	333.916	76.137	14.899	45.752	-0.632	9.850	635.691	-0.005330	-0.001043	-0.003203
11.0000	378.701	83.297	16.677	50.237	-0.635	9.849	720.949	-0.005831	-0.001167	-0.003517
11.1000	425.364	90.033	18.998	54.957	-0.635	9.849	809.784	-0.006302	-0.001330	-0.003847
11.2000	485.373	98.245	21.774	60.627	-0.640	9.849	924.025	-0.006877	-0.001524	-0.004244
11.3000	524.882	104.140	23.765	64.740	-0.633	9.849	999.241	-0.007290	-0.001664	-0.004532
11.4000	586.844	112.853	27.125	70.712	-0.641	9.848	1117.201	-0.007900	-0.001899	-0.004950
11.5000	630.036	118.688	29.309	74.976	-0.637	9.848	1199.427	-0.008308	-0.002052	-0.005248
11.6000	670.553	124.650	31.379	78.956	-0.629	9.849	1276.560	-0.008726	-0.002197	-0.005527
11.7000	707.372	129.902	33.505	82.767	-0.641	9.848	1346.655	-0.009093	-0.002345	-0.005794
11.8000	748.956	135.695	35.619	87.157	-0.629	9.848	1425.819	-0.009499	-0.002493	-0.006101
11.9000	777.344	139.422	37.048	90.457	-0.632	9.848	1479.864	-0.009760	-0.002593	-0.006332
12.0000	804.636	143.675	39.426	92.962	-0.638	9.847	1531.820	-0.010057	-0.002760	-0.006507
12.1000	824.984	146.659	40.356	95.632	-0.637	9.847	1570.559	-0.010266	-0.002825	-0.006694
12.2000	850.172	150.400	42.038	98.177	-0.620	9.847	1618.509	-0.010528	-0.002943	-0.006872
12.3000	851.975	150.957	42.347	98.755	-0.631	9.846	1621.943	-0.010567	-0.002964	-0.006913
12.4000	853.839	151.066	42.232	99.292	-0.637	9.847	1625.490	-0.010575	-0.002956	-0.006950
12.5000	848.459	151.426	42.552	99.167	-0.641	9.846	1615.248	-0.010600	-0.002979	-0.006942
12.6000	835.985	149.957	42.053	98.261	-0.640	9.846	1591.501	-0.010497	-0.002944	-0.006878
12.7000	821.783	148.704	41.526	97.119	-0.644	9.846	1564.465	-0.010409	-0.002907	-0.006798
12.8000	798.024	145.910	40.942	95.397	-0.627	9.846	1519.232	-0.010214	-0.002866	-0.006678
12.9000	762.917	141.826	39.466	92.646	-0.626	9.845	1452.398	-0.009928	-0.002763	-0.006485
13.0000	721.394	136.948	37.146	89.289	-0.626	9.845	1373.348	-0.009586	-0.002600	-0.006250
13.1000	704.261	135.154	36.076	87.569	-0.627	9.845	1340.733	-0.009461	-0.002525	-0.006130
13.2000	655.239	128.372	34.018	83.632	-0.628	9.845	1247.406	-0.008986	-0.002381	-0.005854
13.3000	608.290	122.563	30.990	79.122	-0.634	9.845	1158.028	-0.008579	-0.002169	-0.005539
13.4000	553.586	115.660	28.586	74.136	-0.635	9.844	1053.886	-0.008096	-0.002001	-0.005190
13.5000	516.030	110.213	26.431	70.218	-0.628	9.844	982.389	-0.007715	-0.001850	-0.004915
13.6000	469.998	104.042	24.140	66.572	-0.628	9.844	894.756	-0.007283	-0.001690	-0.004660
13.7000	407.315	95.730	21.720	60.943	-0.636	9.844	775.423	-0.006701	-0.001520	-0.004266
13.8000	358.127	88.299	19.234	55.712	-0.643	9.843	681.782	-0.006181	-0.001346	-0.003900
13.9000	311.494	80.903	17.078	51.034	-0.645	9.842	593.004	-0.005663	-0.001195	-0.003572
14.0000	267.446	74.386	15.150	46.302	-0.635	9.843	509.148	-0.005207	-0.001060	-0.003241
14.1000	222.826	66.925	13.523	41.994	-0.633	9.841	424.204	-0.004685	-0.000947	-0.002940
14.2000	181.799	59.866	11.660	37.635	-0.634	9.842	346.098	-0.004191	-0.000816	-0.002634
14.3000	144.243	53.181	11.047	33.506	-0.640	9.841	274.601	-0.003723	-0.000773	-0.002345
14.4000	106.777	46.634	9.977	29.734	-0.635	9.841	203.276	-0.003264	-0.000698	-0.002081
14.5000	86.579	42.507	9.326	27.134	-0.637	9.841	164.824	-0.002976	-0.000653	-0.001899
14.6000	64.502	38.631	9.143	24.547	-0.634	9.840	122.795	-0.002704	-0.000640	-0.001718
14.7000	53.261	35.766	9.048	22.924	-0.633	9.840	101.395	-0.002504	-0.000633	-0.001605
14.8000	43.522	33.878	8.035	21.533	-0.622	9.840	82.855	-0.002371	-0.000562	-0.001507
14.9000	36.940	32.795	8.201	20.336	-0.645	9.839	70.324	-0.002296	-0.000574	-0.001424
15.0000	42.019	32.642	8.103	20.544	-0.637	9.839	79.994	-0.002285	-0.000567	-0.001438
15.1000	52.554	34.268	7.700	21.272	-0.627	9.840	100.050	-0.002399	-0.000539	-0.001489
15.2000	68.575	36.825	8.632	22.648	-0.636	9.839	130.548	-0.002578	-0.000604	-0.001585
15.3000	89.675	39.617	8.741	24.589	-0.635	9.839	170.717	-0.002773	-0.000612	-0.001721
15.4000	116.500	43.078	8.646	26.652	-0.646	9.839	221.786	-0.003015	-0.000605	-0.001866
15.5000	147.609	48.387	9.144	29.750	-0.638	9.839	281.010	-0.003387	-0.000640	-0.002082
15.6000	195.039	55.613	9.756	33.683	-0.636	9.839	371.304	-0.003893	-0.000683	-0.002358
15.7000	232.234	61.297	10.506	37.139	-0.628	9.839	442.114	-0.004291	-0.000735	-0.002600
15.8000	289.868	69.815	12.967	41.928	-0.636	9.838	551.834	-0.004887	-0.000908	-0.002935
15.9000	328.100	75.094	14.497	45.656	-0.634	9.839	624.619	-0.005257	-0.001015	-0.003196
16.0000	381.661	83.032	16.357	50.788	-0.639	9.838	726.585	-0.005812	-0.001145	-0.003555
16.1000	426.687	90.310	19.415	55.454	-0.647	9.838	812.302	-0.006322	-0.001359	-0.003882
16.2000	479.241	96.827	21.636	60.255	-0.639	9.838	912.352	-0.006778	-0.001515	-0.004218
16.3000	520.825	103.180	23.555	65.070	-0.641	9.838	991.516	-0.007223	-0.001649	-0.004555
16.4000	578.113	111.449	26.543	70.218	-0.645	9.838	1100.578	-0.007801	-0.001858	-0.004915
16.5000	626.594	118.004	29.198	75.060	-0.640	9.838	1192.875	-0.008260	-0.002044	-0.005254
16.6000	674.159	124.983	31.518	79.601	-0.636	9.838	1283.426	-0.008749	-0.002206	-0.005572
16.7000	707.853	129.429	33.631	83.235	-0.651	9.838	1347.570	-0.009060	-0.002354	-0.005826
16.8000	751.180	135.267	35.855	87.626	-0.636	9.838	1430.054	-0.009469	-0.002510	-0.006134
16.9000	776.848	139.421	37.313	90.266	-0.643	9.837	1478.920	-0.009759	-0.002612	-0.006319
17.0000	802.382	143.327	39.190	93.071	-0.638	9.837	1527.529	-0.010033	-0.002743	-0.006515
17.1000	828.201	146.272	40.775	96.072	-0.645	9.837	1576.681	-0.010239	-0.002854	-0.006725
17.2000	844.101	149.150	41.429	97.544	-0.637	9.837	1606.951	-0.010440	-0.002900	-0.006828
17.3000	848.113	150.122	42.123	98.783	-0.637	9.837	1614.590	-0.010509	-0.002949	-0.006915
17.4000	845.047	150.109	42.302	98.935	-0.639	9.837	1608.753	-0.010508	-0.002961	-0.006925
17.5000	848.008	150.787	42.440	99.222	-0.645	9.837	1614.389	-0.010555	-0.002971	-0.006946
17.6000	837.939	150.067	42.484	98.797	-0.632	9.837	1595.221	-0.010505	-0.002974	-0.006916
17.7000	811.098	146.896	41.067	96.635	-0.645	9.837	1544.123	-0.010283	-0.002875	-0.006764
17.8000	794.236	145.438	40.593	95.398	-0.635	9.836	1512.022	-0.010181	-0.002842	-0.006678
17.9000	769.004	142.298	39.619	93.515	-0.639	9.836	1463.985	-0.009961	-0.002773	-0.006546
18.0000	740.510	138.823	37.825	91.050	-0.645	9.837	1409.740	-0.009718	-0.002648	-0.006373
18.1000	703.179	134.321	35.995	87.735	-0.639	9.836	1338.673	-0.009402	-0.002520	-0.006141
18.2000	658.755	128.540	34.048	83.687	-0.634	9.836	1254.101	-0.008998	-0.002383	-0.005858
18.3000	617.547	123.079	31.670	80.001	-0.636	9.836	1175.652	-0.008616	-0.002217	-0.005600
18.4000	566.481	116.771	29.171	75.488	-0.650	9.836	1078.434	-0.008174	-0.002042	-0.005284
18.5000	517.203	109.990	26.929	70.725	-0.644	9.836	984.621	-0.007699	-0.001885	-0.004951
18.6000	460.786	102.832	23.848	65.815	-0.642	9.836	877.218	-0.007198	-0.001669	-0.004607
18.7000	393.699	93.327	21.096	59.361	-0.633	9.836	749.502	-0.006533	-0.001477	-0.004155
18.8000	368.752	89.090	19.637	56.348	-0.649	9.835	702.009	-0.006236	-0.001375	-0.003944
18.9000	307.541	80.641	16.801	50.663	-0.648	9.835	585.480	-0.005645	-0.001176	-0.003546
19.0000	274.734	74.844	15.440	46.962	-0.643	9.835	523.024	-0.005239	-0.001081	-0.003287
19.1000	212.772	64.784	12.703	40.783	-0.639	9.836	405.064	-0.004535	-0.000889	-0.002855
19.2000	172.060	58.475	11.729	37.027	-0.644	9.835	327.559	-0.004093	-0.000821	-0.002592
19.3000	167.071	56.002	11.382	35.225	-0.647	9.836	318.060	-0.003920	-0.000797	-0.002466
19.4000	111.751	46.760	9.728	29.886	-0.643	9.836	212.746	-0.003273	-0.000681	-0.002092
19.5000	74.391	40.604	9.285	25.786	-0.641	9.836	141.621	-0.002842	-0.000650	-0.001805
19.6000	75.277	39.687	9.062	25.262	-0.633	9.836	143.309	-0.002778	-0.000634	-0.001768
19.7000	62.067	36.742	8.535	23.337	-0.636	9.836	118.160	-0.002572	-0.000597	-0.001634
19.8000	45.942	34.238	8.396	21.246	-0.643	9.836	87.461	-0.002397	-0.000588	-0.001487
19.9000	40.487	32.141	8.035	20.310	-0.645	9.836	77.076	-0.002250	-0.000562	-0.001422
20.0000	44.995	32.864	7.756	20.679	-0.647	9.836	85.659	-0.002301	-0.000543	-0.001448
20.1000	50.510	33.449	8.076	20.640	-0.645	9.836	96.159	-0.002341	-0.000565	-0.001445
20.2000	68.920	35.392	7.854	22.264	-0.639	9.836	131.207	-0.002477	-0.000550	-0.001558
20.3000	86.504	38.964	8.352	23.750	-0.648	9.837	164.680	-0.002728	-0.000585	-0.001662
20.4000	123.969	43.871	8.686	26.995	-0.637	9.837	236.006	-0.003071	-0.000608	-0.001890
20.5000	152.659	48.137	8.867	29.789	-0.648	9.836	290.623	-0.003370	-0.000621	-0.002085
20.6000	191.041	54.558	9.741	33.478	-0.648	9.837	363.693	-0.003819	-0.000682	-0.002343
20.7000	228.642	60.116	10.451	36.451	-0.653	9.837	435.276	-0.004208	-0.000732	-0.002552
20.8000	273.262	66.979	11.812	40.412	-0.650	9.837	520.220	-0.004689	-0.000827	-0.002829
20.9000	327.755	75.346	14.553	45.531	-0.653	9.837	623.960	-0.005274	-0.001019	-0.003187
21.0000	381.120	83.128	16.773	50.322	-0.638	9.837	725.555	-0.005819	-0.001174	-0.003523
21.1000	427.949	89.796	18.763	54.818	-0.647	9.837	814.705	-0.006286	-0.001313	-0.003837
21.2000	478.384	96.955	21.430	59.938	-0.641	9.837	910.721	-0.006787	-0.001500	-0.004196
21.3000	525.198	103.154	23.417	64.851	-0.644	9.837	999.842	-0.007221	-0.001639	-0.004540
21.4000	570.028	110.017	25.890	69.144	-0.652	9.837	1085.186	-0.007701	-0.001812	-0.004840
21.5000	635.476	118.562	29.572	75.224	-0.636	9.837	1209.784	-0.008299	-0.002070	-0.005266
21.6000	676.669	124.136	31.588	79.437	-0.643	9.837	1288.204	-0.008690	-0.002211	-0.005561
21.7000	710.348	129.707	33.727	82.985	-0.642	9.837	1352.320	-0.009080	-0.002361	-0.005809
21.8000	744.447	134.086	35.564	86.454	-0.647	9.837	1417.236	-0.009386	-0.002489	-0.006052
21.9000	781.973	139.407	37.285	90.458	-0.642	9.837	1488.676	-0.009758	-0.002610	-0.006332
22.0000	805.433	143.382	38.964	93.169	-0.643	9.837	1533.337	-0.010037	-0.002728	-0.006522
22.1000	833.250	146.563	40.662	95.948	-0.643	9.837	1586.294	-0.010259	-0.002846	-0.006716
22.2000	847.572	149.081	41.483	97.642	-0.638	9.837	1613.560	-0.010436	-0.002904	-0.006835
22.3000	858.648	150.982	42.582	99.085	-0.644	9.837	1634.645	-0.010569	-0.002981	-0.006936
22.4000	854.079	150.648	42.343	99.209	-0.640	9.837	1625.948	-0.010545	-0.002964	-0.006945
22.5000	851.359	150.818	42.427	99.085	-0.641	9.838	1620.770	-0.010557	-0.002970	-0.006936
22.6000	837.413	149.706	42.287	98.357	-0.648	9.837	1594.219	-0.010479	-0.002960	-0.006885
22.7000	821.483	147.689	41.540	97.201	-0.652	9.838	1563.892	-0.010338	-0.002908	-0.006804
22.8000	796.926	145.272	40.955	95.317	-0.642	9.838	1517.143	-0.010169	-0.002867	-0.006672
22.9000	761.790	141.047	39.468	92.466	-0.644	9.838	1450.253	-0.009873	-0.002763	-0.006473
23.0000	741.472	138.728	37.757	90.761	-0.644	9.838	1411.572	-0.009711	-0.002643	-0.006353
23.1000	703.480	134.169	36.174	87.529	-0.634	9.838	1339.245	-0.009392	-0.002532	-0.006127
23.2000	651.992	127.250	33.727	82.765	-0.639	9.838	1241.226	-0.008907	-0.002361	-0.005794
23.3000	612.513	122.467	31.421	79.559	-0.645	9.838	1166.067	-0.008573	-0.002199	-0.005569
23.4000	554.638	115.199	29.087	74.124	-0.644	9.838	1055.889	-0.008064	-0.002036	-0.005189
23.5000	520.314	110.297	27.124	71.182	-0.645	9.838	990.543	-0.007721	-0.001899	-0.004983
23.6000	457.299	101.872	24.210	65.444	-0.650	9.838	870.581	-0.007131	-0.001695	-0.004581
23.7000	418.872	96.552	21.874	61.741	-0.651	9.838	797.424	-0.006759	-0.001531	-0.004322
23.8000	363.612	88.342	19.486	56.455	-0.644	9.838	692.225	-0.006184	-0.001364	-0.003952
23.9000	300.343	79.221	16.983	49.895	-0.652	9.838	571.775	-0.005545	-0.001189	-0.003493
24.0000	264.590	73.441	15.120	46.248	-0.657	9.838	503.712	-0.005141	-0.001058	-0.003237
24.1000	227.620	66.994	13.579	42.077	-0.641	9.838	433.331	-0.004690	-0.000951	-0.002945
24.2000	179.995	59.589	11.828	37.689	-0.656	9.838	342.665	-0.004171	-0.000828	-0.002638
24.3000	142.379	52.596	10.797	33.848	-0.645	9.839	271.053	-0.003682	-0.000756	-0.002369
24.4000	108.926	46.523	10.060	30.119	-0.643	9.838	207.367	-0.003257	-0.000704	-0.002108
24.5000	89.915	42.549	9.769	27.575	-0.649	9.839	171.175	-0.002978	-0.000684	-0.001930
24.6000	68.665	38.505	9.048	24.780	-0.639	9.839	130.720	-0.002695	-0.000633	-0.001735
24.7000	49.158	35.002	8.563	22.717	-0.639	9.839	93.584	-0.002450	-0.000599	-0.001590
24.8000	42.049	33.448	8.423	21.066	-0.645	9.839	80.051	-0.002341	-0.000590	-0.001475
24.9000	42.350	32.739	7.923	20.872	-0.645	9.839	80.624	-0.002292	-0.000555	-0.001461
25.0000	54.944	33.684	7.658	20.391	-0.651	9.851	104.599	-0.002358	-0.000536	-0.001427
25.1000	69.251	35.529	8.006	21.904	-0.639	9.851	131.836	-0.002487	-0.000560	-0.001533
25.2000	94.724	38.576	7.828	23.929	-0.643	9.851	180.330	-0.002700	-0.000548	-0.001675
25.3000	116.666	42.495	8.590	26.280	-0.643	9.851	222.101	-0.002975	-0.000601	-0.001840
25.4000	148.135	47.259	8.992	28.716	-0.643	9.851	282.011	-0.003308	-0.000629	-0.002010
25.5000	196.662	54.795	9.435	33.148	-0.641	9.851	374.393	-0.003836	-0.000660	-0.002320
25.6000	244.798	62.282	11.062	37.413	-0.649	9.851	466.032	-0.004360	-0.000774	-0.002619
25.7000	304.415	70.329	13.202	42.105	-0.641	9.850	579.529	-0.004923	-0.000924	-0.002947
25.8000	352.296	77.806	15.065	47.320	-0.644	9.851	670.681	-0.005446	-0.001055	-0.003312
25.9000	421.186	87.923	18.486	53.717	-0.649	9.851	801.830	-0.006155	-0.001294	-0.003760
26.0000	480.263	96.132	21.457	59.565	-0.649	9.851	914.297	-0.006729	-0.001502	-0.004170
26.1000	548.913	105.600	24.669	65.827	-0.647	9.851	1044.989	-0.007392	-0.001727	-0.004608
26.2000	623.454	116.132	28.851	73.051	-0.645	9.851	1186.895	-0.008129	-0.002020	-0.005114
26.3000	685.821	124.288	31.683	79.216	-0.645	9.850	1305.628	-0.008700	-0.002218	-0.005545
26.4000	753.404	134.030	35.620	85.711	-0.644	9.850	1434.288	-0.009382	-0.002493	-0.006000
26.5000	810.227	141.686	38.771	91.807	-0.640	9.850	1542.463	-0.009918	-0.002714	-0.006427
26.6000	864.254	148.872	41.455	97.379	-0.648	9.850	1645.317	-0.010421	-0.002902	-0.006817
26.7000	920.265	156.293	45.109	102.580	-0.649	9.850	1751.947	-0.010940	-0.003158	-0.007181
26.8000	973.300	163.238	48.095	108.317	-0.651	9.850	1852.913	-0.011427	-0.003367	-0.007582
26.9000	1010.751	168.589	50.041	112.227	-0.648	9.850	1924.210	-0.011801	-0.003503	-0.007856
27.0000	1049.178	174.175	53.002	116.398	-0.645	9.850	1997.366	-0.012192	-0.003710	-0.008148
27.1000	1069.963	177.250	54.168	119.218	-0.651	9.850	2036.934	-0.012407	-0.003792	-0.008345
27.2000	1082.842	179.791	55.613	120.840	-0.656	9.850	2061.453	-0.012585	-0.003893	-0.008459
27.3000	1104.348	182.710	56.809	123.812	-0.649	9.849	2102.394	-0.012790	-0.003977	-0.008667
27.4000	1099.899	182.363	56.962	123.482	-0.647	9.850	2093.925	-0.012765	-0.003987	-0.008644
27.5000	1093.948	182.767	56.684	123.469	-0.655	9.849	2082.596	-0.012794	-0.003968	-0.008643
27.6000	1081.189	181.808	56.865	122.740	-0.652	9.849	2058.306	-0.012727	-0.003981	-0.008592
27.7000	1055.761	178.874	55.752	121.005	-0.641	9.849	2009.897	-0.012521	-0.003903	-0.008470
27.8000	1034.676	177.208	55.016	119.546	-0.641	9.849	1969.757	-0.012405	-0.003851	-0.008368
27.9000	991.394	172.205	53.184	116.024	-0.648	9.849	1887.360	-0.012054	-0.003723	-0.008122
28.0000	947.316	166.632	50.348	112.598	-0.649	9.849	1803.446	-0.011664	-0.003524	-0.007882
28.1000	897.737	161.255	47.874	108.070	-0.639	9.849	1709.061	-0.011288	-0.003351	-0.007565
28.2000	851.720	156.016	45.649	104.108	-0.635	9.848	1621.456	-0.010921	-0.003195	-0.007288
28.3000	797.092	148.636	42.456	99.389	-0.642	9.849	1517.458	-0.010405	-0.002972	-0.006957
28.4000	722.987	139.991	38.577	92.328	-0.651	9.849	1376.381	-0.009799	-0.002700	-0.006463
28.5000	668.734	132.711	35.606	87.293	-0.650	9.849	1273.098	-0.009290	-0.002492	-0.006110
28.6000	603.496	124.025	32.129	80.950	-0.653	9.849	1148.901	-0.008682	-0.002249	-0.005666
28.7000	526.039	113.866	28.586	73.863	-0.649	9.848	1001.444	-0.007971	-0.002001	-0.005170
28.8000	476.596	106.320	25.961	69.171	-0.647	9.849	907.316	-0.007442	-0.001817	-0.004842
28.9000	393.324	94.927	21.524	61.438	-0.655	9.848	748.787	-0.006645	-0.001507	-0.004301
29.0000	339.792	86.907	19.387	56.002	-0.652	9.848	646.877	-0.006083	-0.001357	-0.003920
29.1000	289.207	78.360	17.288	50.486	-0.643	9.848	550.575	-0.005485	-0.001210	-0.003534
29.2000	227.695	69.077	14.148	44.156	-0.643	9.848	433.474	-0.004835	-0.000990	-0.003091
29.3000	184.489	61.395	13.036	39.710	-0.649	9.847	351.219	-0.004298	-0.000912	-0.002780
29.4000	137.961	52.874	11.257	34.442	-0.655	9.848	262.642	-0.003701	-0.000788	-0.002411
29.5000	103.441	47.066	10.308	30.381	-0.653	9.848	196.924	-0.003295	-0.000722	-0.002127
29.6000	81.950	42.562	10.020	27.655	-0.646	9.847	156.012	-0.002979	-0.000701	-0.001936
29.7000	59.528	37.964	9.075	25.332	-0.651	9.847	113.325	-0.002657	-0.000635	-0.001773
29.8000	47.670	35.809	8.936	22.827	-0.647	9.847	90.752	-0.002507	-0.000625	-0.001598
29.9000	49.068	34.751	9.019	22.898	-0.649	9.847	93.412	-0.002433	-0.000631	-0.001603
30.0000	49.489	34.641	8.644	22.195	-0.649	9.847	94.213	-0.002425	-0.000605	-0.001554
30.1000	74.120	37.894	8.981	24.162	-0.648	9.847	141.106	-0.002653	-0.000629	-0.001691
30.2000	88.653	39.658	9.074	25.249	-0.657	9.848	168.772	-0.002776	-0.000635	-0.001767
30.3000	120.122	44.621	9.119	27.945	-0.645	9.847	228.682	-0.003123	-0.000638	-0.001956
30.4000	165.733	51.540	9.922	31.992	-0.657	9.847	315.514	-0.003608	-0.000695	-0.002239
30.5000	202.959	56.973	10.062	35.418	-0.651	9.847	386.381	-0.003988	-0.000704	-0.002479
30.6000	249.036	64.004	11.840	39.106	-0.652	9.847	474.100	-0.004480	-0.000829	-0.002737
30.7000	307.376	72.524	14.301	44.017	-0.640	9.846	585.165	-0.005077	-0.001001	-0.003081
30.8000	357.361	79.901	16.287	49.094	-0.655	9.846	680.323	-0.005593	-0.001140	-0.003437
30.9000	425.319	89.865	19.469	55.397	-0.655	9.846	809.698	-0.006291	-0.001363	-0.003878
31.0000	481.570	97.926	22.041	61.081	-0.646	9.846	916.786	-0.006855	-0.001543	-0.004276
31.1000	555.270	107.697	25.599	67.823	-0.652	9.846	1057.091	-0.007539	-0.001792	-0.004748
31.2000	620.192	116.798	29.225	74.577	-0.658	9.846	1180.687	-0.008176	-0.002046	-0.005220
31.3000	685.521	125.457	32.364	80.633	-0.647	9.846	1305.056	-0.008782	-0.002265	-0.005644
31.4000	750.834	134.850	36.135	87.019	-0.651	9.846	1429.396	-0.009440	-0.002529	-0.006091
31.5000	806.409	141.853	39.076	92.605	-0.631	9.845	1535.196	-0.009930	-0.002735	-0.006482
31.6000	864.088	150.012	42.456	98.396	-0.653	9.845	1645.002	-0.010501	-0.002972	-0.006888
31.7000	922.188	157.847	45.873	103.985	-0.647	9.845	1755.610	-0.011049	-0.003211	-0.007279
31.8000	968.836	164.031	48.539	109.337	-0.649	9.845	1844.416	-0.011482	-0.003398	-0.007654
31.9000	1005.370	169.423	50.943	113.025	-0.648	9.846	1913.967	-0.011860	-0.003566	-0.007912
32.0000	1043.047	174.816	53.459	117.538	-0.644	9.846	1985.693	-0.012237	-0.003742	-0.008228
32.1000	1069.857	178.055	54.987	120.113	-0.653	9.845	2036.734	-0.012464	-0.003849	-0.008408
32.2000	1084.149	180.818	56.227	122.311	-0.638	9.845	2063.942	-0.012657	-0.003936	-0.008562
32.3000	1100.485	183.171	57.213	124.102	-0.650	9.845	2095.041	-0.012822	-0.004005	-0.008687
32.4000	1096.217	183.599	57.002	124.447	-0.643	9.845	2086.916	-0.012852	-0.003990	-0.008711
32.5000	1093.527	183.657	57.838	124.735	-0.654	9.844	2081.795	-0.012856	-0.004049	-0.008731
32.6000	1084.044	182.698	57.574	124.060	-0.648	9.845	2063.742	-0.012789	-0.004030	-0.008684
32.7000	1056.828	179.999	56.420	122.232	-0.648	9.845	2011.929	-0.012600	-0.003949	-0.008556
32.8000	1038.568	178.056	55.770	120.470	-0.655	9.844	1977.167	-0.012464	-0.003904	-0.008433
32.9000	995.602	173.148	53.530	117.414	-0.651	9.844	1895.370	-0.012120	-0.003747	-0.008219
33.0000	949.961	168.313	51.376	113.715	-0.643	9.844	1808.481	-0.011782	-0.003596	-0.007960
33.1000	900.878	162.143	48.734	109.062	-0.660	9.844	1715.040	-0.011350	-0.003411	-0.007634
33.2000	851.525	156.114	45.582	104.811	-0.644	9.844	1621.084	-0.010928	-0.003191	-0.007337
33.3000	780.035	147.717	42.303	98.715	-0.653	9.845	1484.985	-0.010340	-0.002961	-0.006910
33.4000	727.871	140.978	39.160	94.062	-0.646	9.844	1385.679	-0.009868	-0.002741	-0.006584
33.5000	666.465	133.101	35.798	87.705	-0.650	9.845	1268.778	-0.009317	-0.002506	-0.006139
33.6000	597.875	123.705	32.657	81.266	-0.647	9.844	1138.201	-0.008659	-0.002286	-0.005689
33.7000	533.629	114.601	28.572	75.047	-0.641	9.844	1015.892	-0.008022	-0.002000	-0.005253
33.8000	464.288	105.570	25.335	68.607	-0.635	9.844	883.884	-0.007390	-0.001773	-0.004802
33.9000	402.476	96.149	22.402	62.675	-0.649	9.844	766.211	-0.006730	-0.001568	-0.004387
34.0000	335.705	86.726	19.207	55.810	-0.647	9.844	639.095	-0.006071	-0.001345	-0.003907
34.1000	275.260	77.209	16.900	49.990	-0.652	9.843	524.025	-0.005405	-0.001183	-0.003499
34.2000	235.360	70.369	14.481	44.955	-0.656	9.844	448.065	-0.004926	-0.001014	-0.003147
34.3000	180.266	61.408	12.743	39.655	-0.648	9.843	343.180	-0.004299	-0.000892	-0.002776
34.4000	143.070	54.154	11.714	35.142	-0.644	9.843	272.369	-0.003791	-0.000820	-0.002460
34.5000	104.988	47.218	10.576	31.316	-0.641	9.843	199.871	-0.003305	-0.000740	-0.002192
34.6000	81.935	42.854	10.242	28.634	-0.648	9.843	155.983	-0.003000	-0.000717	-0.002004
34.7000	60.790	38.187	9.562	26.171	-0.648	9.843	115.728	-0.002673	-0.000669	-0.001832
34.8000	50.165	36.352	9.104	24.260	-0.648	9.843	95.501	-0.002545	-0.000637	-0.001698
34.9000	55.365	36.477	9.131	23.804	-0.649	9.842	105.400	-0.002553	-0.000639	-0.001666
35.0000	58.926	36.212	8.937	23.709	-0.655	9.843	112.181	-0.002535	-0.000626	-0.001660
35.1000	64.201	36.672	8.716	24.176	-0.650	9.842	122.223	-0.002567	-0.000610	-0.001692
35.2000	86.008	39.909	9.326	26.143	-0.649	9.843	163.736	-0.002794	-0.000653	-0.001830
35.3000	110.233	43.592	9.379	28.070	-0.656	9.842	209.856	-0.003051	-0.000657	-0.001965
35.4000	148.856	49.443	9.727	31.180	-0.644	9.842	283.384	-0.003461	-0.000681	-0.002183
35.5000	191.176	55.724	10.770	35.268	-0.652	9.842	363.951	-0.003901	-0.000754	-0.002469
35.6000	243.400	63.727	12.147	39.848	-0.655	9.843	463.371	-0.004461	-0.000850	-0.002789
35.7000	288.080	70.870	13.537	43.371	-0.648	9.842	548.429	-0.004961	-0.000948	-0.003036
35.8000	362.305	81.405	16.969	50.360	-0.652	9.842	689.735	-0.005698	-0.001188	-0.003525
35.9000	423.936	89.492	19.319	55.961	-0.647	9.841	807.066	-0.006264	-0.001352	-0.003917
36.0000	491.624	99.720	22.736	62.815	-0.646	9.842	935.926	-0.006980	-0.001592	-0.004397
36.1000	550.506	107.487	25.943	68.194	-0.652	9.842	1048.021	-0.007524	-0.001816	-0.004774
36.2000	620.523	117.368	29.085	75.198	-0.649	9.842	1181.316	-0.008216	-0.002036	-0.005264
36.3000	686.017	126.205	32.908	81.570	-0.652	9.842	1306.000	-0.008834	-0.002304	-0.005710
36.4000	761.174	136.237	36.869	89.233	-0.652	9.841	1449.080	-0.009537	-0.002581	-0.006246
36.5000	803.374	142.466	39.189	92.976	-0.656	9.842	1529.417	-0.009973	-0.002743	-0.006508
36.6000	866.207	150.968	43.081	99.718	-0.654	9.841	1649.036	-0.010568	-0.003016	-0.006980
36.7000	921.512	157.916	46.112	105.319	-0.650	9.841	1754.322	-0.011054	-0.003228	-0.007372
36.8000	966.973	164.407	48.622	109.570	-0.658	9.841	1840.868	-0.011508	-0.003404	-0.007670
36.9000	1010.255	170.272	51.586	114.689	-0.662	9.841	1923.265	-0.011919	-0.003611	-0.008028
37.0000	1036.374	173.897	53.086	117.428	-0.652	9.841	1972.990	-0.012173	-0.003716	-0.008220
37.1000	1072.217	178.931	55.655	121.322	-0.656	9.841	2041.225	-0.012525	-0.003896	-0.008493
37.2000	1084.630	181.082	56.684	123.153	-0.662	9.841	2064.857	-0.012676	-0.003968	-0.008621
37.3000	1101.808	183.682	57.242	125.284	-0.653	9.841	2097.559	-0.012858	-0.004007	-0.008770
37.4000	1098.697	184.169	57.698	125.188	-0.661	9.841	2091.637	-0.012892	-0.004039	-0.008763
37.5000	1095.315	184.001	57.686	125.216	-0.646	9.841	2085.199	-0.012880	-0.004038	-0.008765
37.6000	1085.517	183.502	57.309	124.432	-0.659	9.842	2066.545	-0.012845	-0.004012	-0.008710
37.7000	1064.086	181.486	56.838	123.553	-0.653	9.841	2025.747	-0.012704	-0.003979	-0.008649
37.8000	1023.314	176.583	55.473	120.358	-0.660	9.841	1948.128	-0.012361	-0.003883	-0.008425
37.9000	999.389	174.064	54.153	118.363	-0.652	9.841	1902.580	-0.012185	-0.003791	-0.008285
38.0000	950.877	168.452	51.724	114.319	-0.651	9.841	1810.226	-0.011792	-0.003621	-0.008002
38.1000	901.239	162.143	48.693	110.384	-0.656	9.841	1715.727	-0.011350	-0.003408	-0.007727
38.2000	851.059	157.000	46.277	105.278	-0.660	9.841	1620.197	-0.010990	-0.003239	-0.007369
38.3000	792.433	149.219	43.398	100.422	-0.655	9.841	1508.589	-0.010445	-0.003038	-0.007030
38.4000	723.964	140.865	39.201	93.843	-0.656	9.841	1378.241	-0.009861	-0.002744	-0.006569
38.5000	657.869	132.850	36.036	87.817	-0.652	9.842	1252.413	-0.009300	-0.002523	-0.006147
38.6000	602.008	124.539	32.837	82.503	-0.648	9.842	1146.069	-0.008718	-0.002299	-0.005775
38.7000	537.401	116.508	29.281	76.353	-0.650	9.841	1023.073	-0.008156	-0.002050	-0.005345
38.8000	458.817	105.403	26.140	69.392	-0.654	9.841	873.470	-0.007378	-0.001830	-0.004857
38.9000	396.224	96.134	22.791	62.771	-0.644	9.841	754.309	-0.006729	-0.001595	-0.004394
39.0000	338.755	87.824	19.902	56.900	-0.654	9.841	644.903	-0.006148	-0.001393	-0.003983
39.1000	274.479	77.695	17.163	50.375	-0.668	9.841	522.537	-0.005439	-0.001201	-0.003526
39.2000	226.899	69.647	14.745	45.558	-0.655	9.841	431.957	-0.004875	-0.001032	-0.003189
39.3000	183.692	62.186	13.121	40.908	-0.657	9.841	349.703	-0.004353	-0.000918	-0.002864
39.4000	144.709	54.837	12.147	36.135	-0.651	9.841	275.488	-0.003839	-0.000850	-0.002529
39.5000	107.122	48.025	10.882	31.980	-0.657	9.841	203.934	-0.003362	-0.000762	-0.002239
39.6000	78.208	42.995	10.742	28.441	-0.651	9.841	148.888	-0.003010	-0.000752	-0.001991
39.7000	67.523	39.659	9.951	27.107	-0.647	9.841	128.546	-0.002776	-0.000697	-0.001898
39.8000	57.844	37.561	9.575	25.553	-0.648	9.842	110.121	-0.002629	-0.000670	-0.001789
39.9000	48.902	35.656	9.396	23.942	-0.650	9.842	93.098	-0.002496	-0.000658	-0.001676
40.0000	55.094	36.240	9.241	24.230	-0.645	9.841	104.885	-0.002537	-0.000647	-0.001696
40.1000	72.722	38.436	9.478	25.856	-0.641	9.842	138.445	-0.002691	-0.000663	-0.001810
40.2000	88.127	40.588	9.504	26.679	-0.657	9.841	167.770	-0.002841	-0.000665	-0.001868
40.3000	122.301	45.411	9.617	29.431	-0.644	9.842	232.830	-0.003179	-0.000673	-0.002060
40.4000	149.953	49.943	10.325	31.384	-0.648	9.842	285.473	-0.003496	-0.000723	-0.002197
40.5000	202.342	57.667	10.770	36.655	-0.647	9.842	385.208	-0.004037	-0.000754	-0.002566
40.6000	244.708	64.436	12.118	39.573	-0.647	9.842	465.860	-0.004511	-0.000848	-0.002770
40.7000	302.342	72.634	14.467	45.242	-0.650	9.841	575.581	-0.005084	-0.001013	-0.003167
40.8000	358.443	80.640	16.620	50.472	-0.655	9.842	682.383	-0.005645	-0.001163	-0.003533
40.9000	422.328	89.949	19.360	56.417	-0.663	9.842	804.005	-0.006296	-0.001355	-0.003949
41.0000	487.492	99.207	22.902	62.925	-0.655	9.843	928.059	-0.006944	-0.001603	-0.004405
41.1000	551.212	107.612	25.890	68.703	-0.654	9.842	1049.366	-0.007533	-0.001812	-0.004809
41.2000	615.879	116.839	29.169	75.253	-0.662	9.843	1172.476	-0.008179	-0.002042	-0.005268
41.3000	681.884	125.789	33.198	81.198	-0.651	9.842	1298.132	-0.008805	-0.002324	-0.005684
41.4000	746.551	134.500	36.078	88.132	-0.646	9.842	1421.242	-0.009415	-0.002525	-0.006169
41.5000	811.429	143.381	39.691	93.816	-0.649	9.842	1544.752	-0.010037	-0.002778	-0.006567
41.6000	863.653	150.456	43.122	99.746	-0.648	9.842	1644.173	-0.010532	-0.003019	-0.006982
41.7000	916.402	157.640	45.498	104.384	-0.652	9.842	1744.595	-0.011035	-0.003185	-0.007307
41.8000	974.111	165.174	49.290	111.017	-0.651	9.843	1854.458	-0.011562	-0.003450	-0.007771
41.9000	1018.054	170.662	51.918	114.910	-0.654	9.842	1938.114	-0.011946	-0.003634	-0.008044
42.0000	1042.250	174.998	53.350	118.101	-0.637	9.843	1984.177	-0.012250	-0.003734	-0.008267
42.1000	1061.261	177.904	55.489	120.510	-0.652	9.843	2020.369	-0.012453	-0.003884	-0.008436
42.2000	1089.845	181.655	56.602	123.468	-0.638	9.843	2074.785	-0.012716	-0.003962	-0.008643
42.3000	1093.647	183.156	57.644	124.653	-0.635	9.843	2082.024	-0.012821	-0.004035	-0.008726
42.4000	1098.547	184.378	58.047	125.410	-0.638	9.843	2091.351	-0.012906	-0.004063	-0.008779
42.5000	1097.600	184.003	57.615	125.588	-0.644	9.843	2089.548	-0.012880	-0.004033	-0.008791
42.6000	1073.088	182.489	57.325	123.675	-0.637	9.843	2042.885	-0.012774	-0.004013	-0.008657
42.7000	1054.979	180.331	56.921	122.851	-0.637	9.843	2008.410	-0.012623	-0.003984	-0.008600
42.8000	1036.329	178.096	55.879	122.080	-0.639	9.843	1972.904	-0.012467	-0.003911	-0.008546
42.9000	1001.027	174.385	54.544	118.583	-0.635	9.843	1905.699	-0.012207	-0.003818	-0.008301
43.0000	945.152	167.895	51.377	114.497	-0.644	9.843	1799.326	-0.011753	-0.003596	-0.008015
43.1000	892.928	162.087	48.484	110.150	-0.638	9.843	1699.905	-0.011346	-0.003394	-0.007711
43.2000	836.181	155.429	45.568	104.274	-0.641	9.843	1591.873	-0.010880	-0.003190	-0.007299
43.3000	792.373	149.635	43.372	100.628	-0.635	9.843	1508.474	-0.010474	-0.003036	-0.007044
43.4000	726.624	141.754	39.593	94.517	-0.641	9.843	1383.305	-0.009923	-0.002771	-0.006616
43.5000	659.582	133.294	36.229	88.037	-0.640	9.843	1255.674	-0.009331	-0.002536	-0.006163
43.6000	596.958	124.343	32.672	81.871	-0.645	9.843	1136.456	-0.008704	-0.002287	-0.005731
43.7000	528.309	115.312	29.059	76.493	-0.639	9.844	1005.764	-0.008072	-0.002034	-0.005355
43.8000	468.330	106.640	26.389	69.777	-0.633	9.843	891.581	-0.007465	-0.001847	-0.004884
43.9000	398.734	96.412	22.401	63.185	-0.635	9.844	759.087	-0.006749	-0.001568	-0.004423
44.0000	332.744	87.618	19.486	57.227	-0.628	9.843	633.459	-0.006133	-0.001364	-0.004006
44.1000	285.179	79.456	17.315	51.929	-0.629	9.844	542.908	-0.005562	-0.001212	-0.003635
44.2000	234.383	70.759	14.827	46.290	-0.645	9.843	446.205	-0.004953	-0.001038	-0.003240
44.3000	184.323	62.822	13.314	40.867	-0.645	9.843	350.904	-0.004398	-0.000932	-0.002861
44.4000	143.326	54.766	12.078	36.326	-0.648	9.843	272.856	-0.003834	-0.000845	-0.002543
44.5000	108.370	49.025	10.908	32.748	-0.648	9.843	206.308	-0.003432	-0.000764	-0.002292
44.6000	72.136	42.202	10.742	28.371	-0.651	9.844	137.329	-0.002954	-0.000752	-0.001986
44.7000	65.223	39.701	9.783	26.943	-0.647	9.843	124.168	-0.002779	-0.000685	-0.001886
44.8000	56.958	37.936	9.602	25.346	-0.657	9.843	108.433	-0.002656	-0.000672	-0.001774
44.9000	51.547	36.073	9.742	24.217	-0.641	9.844	98.133	-0.002525	-0.000682	-0.001695
45.0000	54.177	36.058	9.187	23.901	-0.641	9.843	103.140	-0.002524	-0.000643	-0.001673
45.1000	73.850	38.632	9.686	25.208	-0.648	9.843	140.591	-0.002704	-0.000678	-0.001765
45.2000	87.976	40.867	9.644	27.300	-0.651	9.844	167.484	-0.002861	-0.000675	-0.001911
45.3000	130.537	46.940	9.811	30.531	-0.653	9.843	248.508	-0.003286	-0.000687	-0.002137
45.4000	159.737	51.527	10.645	33.313	-0.639	9.843	304.098	-0.003607	-0.000745	-0.002332
45.5000	190.305	56.376	10.771	36.132	-0.647	9.843	362.291	-0.003946	-0.000754	-0.002529
45.6000	249.652	65.162	12.118	40.605	-0.647	9.843	475.273	-0.004561	-0.000848	-0.002842
45.7000	296.405	72.498	14.522	45.478	-0.649	9.843	564.280	-0.005075	-0.001017	-0.003183
45.8000	352.010	80.042	16.452	50.238	-0.656	9.843	670.137	-0.005603	-0.001152	-0.003517
45.9000	424.628	90.227	19.596	57.352	-0.652	9.842	808.382	-0.006316	-0.001372	-0.004015
46.0000	483.749	99.304	22.944	63.310	-0.664	9.842	920.935	-0.006951	-0.001606	-0.004432
46.1000	547.425	107.654	25.902	68.758	-0.649	9.842	1042.156	-0.007536	-0.001813	-0.004813
46.2000	615.579	117.270	29.392	75.818	-0.654	9.843	1171.904	-0.008209	-0.002057	-0.005307
46.3000	675.467	125.247	32.823	81.280	-0.656	9.843	1285.915	-0.008767	-0.002298	-0.005690
46.4000	746.040	134.489	36.298	88.300	-0.652	9.843	1420.269	-0.009414	-0.002541	-0.006181
46.5000	813.097	144.356	40.218	95.425	-0.657	9.843	1547.928	-0.010105	-0.002815	-0.006680
46.6000	865.351	150.788	43.455	100.557	-0.656	9.842	1647.406	-0.010555	-0.003042	-0.007039
46.7000	913.457	157.736	45.718	105.788	-0.645	9.843	1738.987	-0.011042	-0.003200	-0.007405
46.8000	964.027	164.783	49.304	110.190	-0.644	9.842	1835.260	-0.011535	-0.003451	-0.007713
46.9000	998.713	169.201	51.236	114.800	-0.651	9.843	1901.293	-0.011844	-0.003587	-0.008036
47.0000	1034.330	174.413	53.488	117.593	-0.644	9.842	1969.099	-0.012209	-0.003744	-0.008232
47.1000	1066.656	178.986	55.740	121.914	-0.644	9.842	2030.640	-0.012529	-0.003902	-0.008534
47.2000	1084.119	181.529	56.739	123.304	-0.641	9.842	2063.885	-0.012707	-0.003972	-0.008631
47.3000	1106.301	184.696	58.379	125.959	-0.648	9.843	2106.113	-0.012929	-0.004087	-0.008817
47.4000	1099.478	184.293	58.144	125.794	-0.645	9.843	2093.124	-0.012901	-0.004070	-0.008806
47.5000	1097.179	184.849	58.005	126.261	-0.643	9.842	2088.747	-0.012939	-0.004060	-0.008838
47.6000	1087.801	184.099	58.325	126.509	-0.651	9.842	2070.894	-0.012887	-0.004083	-0.008856
47.7000	1064.642	181.333	57.130	123.702	-0.645	9.843	2026.806	-0.012693	-0.003999	-0.008659
47.8000	1025.779	177.974	56.002	121.115	-0.638	9.842	1952.820	-0.012458	-0.003920	-0.008478
47.9000	1007.084	175.372	55.154	119.588	-0.655	9.842	1917.229	-0.012276	-0.003861	-0.008371
48.0000	952.771	169.354	51.764	115.928	-0.647	9.843	1813.831	-0.011855	-0.003623	-0.008115
48.1000	896.384	162.669	48.803	111.070	-0.642	9.842	1706.486	-0.011387	-0.003416	-0.007775
48.2000	847.482	156.737	46.472	106.435	-0.644	9.842	1613.388	-0.010972	-0.003253	-0.007450
48.3000	790.660	150.176	43.371	100.433	-0.645	9.842	1505.213	-0.010512	-0.003036	-0.007030
48.4000	721.394	141.768	39.787	95.234	-0.653	9.842	1373.348	-0.009924	-0.002785	-0.006666
48.5000	668.434	134.266	36.771	90.128	-0.648	9.842	1272.526	-0.009399	-0.002574	-0.006309
48.6000	609.627	126.526	33.325	83.578	-0.646	9.842	1160.574	-0.008857	-0.002333	-0.005850
48.7000	530.307	115.869	29.837	76.397	-0.657	9.841	1009.569	-0.008111	-0.002089	-0.005348
48.8000	477.678	107.863	26.834	71.152	-0.657	9.841	909.376	-0.007550	-0.001878	-0.004981
48.9000	400.883	97.735	23.167	64.685	-0.653	9.841	763.178	-0.006841	-0.001622	-0.004528
49.0000	350.012	89.560	20.622	58.632	-0.648	9.841	666.332	-0.006269	-0.001444	-0.004104
49.1000	282.113	79.347	17.221	52.699	-0.647	9.841	537.071	-0.005554	-0.001205	-0.003689
49.2000	239.658	72.205	15.550	47.018	-0.643	9.840	456.247	-0.005054	-0.001089	-0.003291
49.3000	189.974	63.644	13.898	41.749	-0.645	9.841	361.662	-0.004455	-0.000973	-0.002922
49.4000	148.135	56.196	12.354	38.073	-0.649	9.840	282.011	-0.003934	-0.000865	-0.002665
49.5000	105.484	48.886	11.841	33.256	-0.647	9.841	200.815	-0.003422	-0.000829	-0.002328
49.6000	83.107	43.747	10.840	30.586	-0.652	9.840	158.215	-0.003062	-0.000759	-0.002141
49.7000	69.116	41.117	10.242	28.316	-0.648	9.840	131.578	-0.002878	-0.000717	-0.001982
49.8000	49.173	37.240	10.395	25.207	-0.657	9.840	93.613	-0.002607	-0.000728	-0.001764
49.9000	51.502	36.686	9.728	25.222	-0.645	9.840	98.047	-0.002568	-0.000681	-0.001766
Test Cycles
Time (sec)	Axial stress (kPa)	Axial micro-strain #1	Axial micro-strain #2	Axial micro-strain #3	Confining pressure (kPa)	Temperature (�C)	Load (N)	Displacement #1 (mm)	Displacement #2 (mm)	Displacement #3 (mm)
0.0000	58.010	37.560	10.105	25.552	-0.642	9.840	110.435	-0.002629	-0.000707	-0.001789
0.1000	65.268	38.020	9.948	26.074	-0.649	9.840	124.254	-0.002661	-0.000696	-0.001825
0.2000	94.303	42.158	9.852	28.746	-0.645	9.840	179.529	-0.002951	-0.000690	-0.002012
0.3000	114.381	45.108	10.244	30.355	-0.636	9.840	217.752	-0.003158	-0.000717	-0.002125
0.4000	153.741	50.959	10.338	33.312	-0.638	9.840	292.683	-0.003567	-0.000724	-0.002332
0.5000	192.724	57.251	10.868	36.505	-0.643	9.840	366.898	-0.004008	-0.000761	-0.002555
0.6000	246.751	65.551	12.689	41.815	-0.640	9.840	469.751	-0.004589	-0.000888	-0.002927
0.7000	295.038	72.204	14.232	45.078	-0.640	9.840	561.676	-0.005054	-0.000996	-0.003155
0.8000	356.324	81.361	16.842	51.805	-0.645	9.840	678.349	-0.005695	-0.001179	-0.003626
0.9000	414.048	89.742	19.665	56.264	-0.641	9.839	788.240	-0.006282	-0.001377	-0.003938
1.0000	468.541	97.080	21.831	62.620	-0.643	9.840	891.981	-0.006796	-0.001528	-0.004383
1.1000	549.724	108.056	26.249	69.393	-0.644	9.840	1046.534	-0.007564	-0.001837	-0.004857
1.2000	614.316	116.769	29.420	75.115	-0.642	9.839	1169.500	-0.008174	-0.002059	-0.005258
1.3000	675.512	125.192	32.504	81.956	-0.642	9.840	1286.001	-0.008763	-0.002275	-0.005737
1.4000	743.350	135.056	36.229	88.684	-0.631	9.839	1415.148	-0.009454	-0.002536	-0.006208
1.5000	808.288	143.328	39.858	94.530	-0.647	9.839	1538.773	-0.010033	-0.002790	-0.006617
1.6000	863.773	151.025	42.941	99.788	-0.632	9.839	1644.402	-0.010572	-0.003006	-0.006985
1.7000	920.325	158.890	46.568	106.862	-0.636	9.839	1752.062	-0.011122	-0.003260	-0.007480
1.8000	966.913	164.505	48.982	111.636	-0.625	9.839	1840.754	-0.011515	-0.003429	-0.007815
1.9000	1005.310	170.176	51.390	115.172	-0.629	9.838	1913.853	-0.011912	-0.003597	-0.008062
2.0000	1042.791	175.135	54.221	119.271	-0.634	9.838	1985.207	-0.012259	-0.003796	-0.008349
2.1000	1070.654	179.277	55.600	122.889	-0.629	9.838	2038.250	-0.012549	-0.003892	-0.008602
2.2000	1084.660	181.735	56.808	123.991	-0.637	9.838	2064.915	-0.012721	-0.003977	-0.008679
2.3000	1095.556	183.280	57.616	124.873	-0.634	9.838	2085.657	-0.012830	-0.004033	-0.008741
2.4000	1097.404	184.459	57.894	126.153	-0.634	9.837	2089.176	-0.012912	-0.004053	-0.008831
2.5000	1094.609	184.918	58.422	126.000	-0.639	9.838	2083.855	-0.012944	-0.004090	-0.008820
2.6000	1082.872	183.587	57.880	126.374	-0.643	9.837	2061.510	-0.012851	-0.004052	-0.008846
2.7000	1059.142	181.610	57.197	124.061	-0.639	9.837	2016.335	-0.012713	-0.004004	-0.008684
2.8000	1037.817	179.401	56.656	122.822	-0.641	9.838	1975.737	-0.012558	-0.003966	-0.008598
2.9000	998.052	174.258	54.223	119.808	-0.641	9.837	1900.034	-0.012198	-0.003796	-0.008387
3.0000	956.333	169.908	52.170	115.929	-0.632	9.837	1820.612	-0.011894	-0.003652	-0.008115
3.1000	905.492	163.295	49.540	111.856	-0.633	9.837	1723.824	-0.011431	-0.003468	-0.007830
3.2000	852.321	157.612	46.555	106.311	-0.641	9.835	1622.601	-0.011033	-0.003259	-0.007442
3.3000	798.880	150.970	44.274	101.396	-0.625	9.837	1520.863	-0.010568	-0.003099	-0.007098
3.4000	719.365	141.116	39.634	93.953	-0.650	9.837	1369.486	-0.009878	-0.002774	-0.006577
3.5000	661.475	133.446	36.173	89.372	-0.635	9.837	1259.279	-0.009341	-0.002532	-0.006256
3.6000	596.583	125.206	33.199	83.744	-0.643	9.836	1135.740	-0.008764	-0.002324	-0.005862
3.7000	537.130	116.674	29.810	77.373	-0.644	9.836	1022.558	-0.008167	-0.002087	-0.005416
3.8000	466.211	107.307	26.445	70.697	-0.628	9.836	887.547	-0.007511	-0.001851	-0.004949
3.9000	408.172	98.470	23.681	64.989	-0.642	9.835	777.054	-0.006893	-0.001658	-0.004549
4.0000	341.445	88.770	19.956	57.943	-0.646	9.835	650.024	-0.006214	-0.001397	-0.004056
4.1000	274.584	78.707	17.412	51.859	-0.640	9.835	522.738	-0.005509	-0.001219	-0.003630
4.2000	237.524	71.760	15.397	47.016	-0.640	9.835	452.185	-0.005023	-0.001078	-0.003291
4.3000	185.826	63.367	13.357	41.309	-0.635	9.835	353.765	-0.004436	-0.000935	-0.002892
4.4000	146.091	56.086	12.703	37.731	-0.640	9.834	278.120	-0.003926	-0.000889	-0.002641
4.5000	111.947	49.457	11.675	33.588	-0.641	9.835	213.118	-0.003462	-0.000817	-0.002351
4.6000	83.077	44.524	11.048	31.014	-0.643	9.835	158.157	-0.003117	-0.000773	-0.002171
4.7000	59.212	39.394	10.174	27.628	-0.645	9.834	112.724	-0.002758	-0.000712	-0.001934
4.8000	52.013	37.478	9.795	26.143	-0.648	9.833	99.020	-0.002623	-0.000686	-0.001830
4.9000	44.830	35.962	9.671	24.354	-0.641	9.833	85.344	-0.002517	-0.000677	-0.001705
5.0000	58.190	37.200	9.657	25.085	-0.639	9.834	110.779	-0.002604	-0.000676	-0.001756
5.1000	74.346	39.618	9.756	25.951	-0.634	9.833	141.535	-0.002773	-0.000683	-0.001817
5.2000	100.224	42.869	10.522	28.936	-0.636	9.833	190.802	-0.003001	-0.000737	-0.002026
5.3000	124.601	46.246	10.146	30.339	-0.640	9.833	237.207	-0.003237	-0.000710	-0.002124
5.4000	155.754	51.430	10.853	32.997	-0.635	9.832	296.516	-0.003600	-0.000760	-0.002310
5.5000	206.009	59.143	11.577	37.979	-0.635	9.832	392.189	-0.004140	-0.000810	-0.002659
5.6000	253.920	66.035	12.716	42.477	-0.631	9.832	483.398	-0.004622	-0.000890	-0.002973
5.7000	301.199	73.470	14.565	46.344	-0.632	9.832	573.406	-0.005143	-0.001020	-0.003244
5.8000	367.099	82.671	17.454	51.502	-0.623	9.832	698.862	-0.005787	-0.001222	-0.003605
5.9000	422.554	90.451	19.721	57.956	-0.618	9.832	804.434	-0.006332	-0.001380	-0.004057
6.0000	489.235	100.052	23.292	64.686	-0.632	9.832	931.377	-0.007004	-0.001630	-0.004528
6.1000	553.106	108.753	26.473	69.654	-0.631	9.832	1052.971	-0.007613	-0.001853	-0.004876
6.2000	613.204	117.284	29.489	76.231	-0.628	9.831	1167.383	-0.008210	-0.002064	-0.005336
6.3000	685.957	126.845	33.395	82.369	-0.642	9.831	1305.885	-0.008879	-0.002338	-0.005766
6.4000	740.194	134.572	36.384	88.518	-0.625	9.831	1409.140	-0.009420	-0.002547	-0.006196
6.5000	810.963	143.814	40.244	95.259	-0.629	9.830	1543.865	-0.010067	-0.002817	-0.006668
6.6000	891.530	154.012	44.873	103.145	-0.636	9.830	1697.245	-0.010781	-0.003141	-0.007220
6.7000	915.020	158.169	46.235	106.049	-0.625	9.831	1741.962	-0.011072	-0.003236	-0.007423
6.8000	962.585	164.895	49.081	110.920	-0.637	9.831	1832.514	-0.011543	-0.003436	-0.007764
6.9000	1010.225	170.788	52.211	115.352	-0.628	9.830	1923.208	-0.011955	-0.003655	-0.008075
7.0000	1043.663	175.565	54.056	119.189	-0.629	9.830	1986.866	-0.012290	-0.003784	-0.008343
7.1000	1062.313	178.513	55.586	122.231	-0.640	9.830	2022.371	-0.012496	-0.003891	-0.008556
7.2000	1091.889	182.474	57.323	124.625	-0.636	9.829	2078.676	-0.012773	-0.004013	-0.008724
7.3000	1101.507	184.614	58.369	126.303	-0.635	9.829	2096.987	-0.012923	-0.004086	-0.008841
7.4000	1102.439	185.057	58.591	126.828	-0.625	9.829	2098.761	-0.012954	-0.004101	-0.008878
7.5000	1097.525	184.960	58.424	127.240	-0.624	9.829	2089.405	-0.012947	-0.004090	-0.008907
7.6000	1086.088	184.073	58.492	125.975	-0.635	9.829	2067.633	-0.012885	-0.004094	-0.008818
7.7000	1061.607	181.317	57.269	124.707	-0.623	9.829	2021.027	-0.012692	-0.004009	-0.008730
7.8000	1027.868	177.792	56.211	122.576	-0.636	9.829	1956.797	-0.012445	-0.003935	-0.008580
7.9000	993.228	173.966	54.669	118.887	-0.639	9.829	1890.850	-0.012178	-0.003827	-0.008322
8.0000	952.380	169.034	52.182	115.654	-0.639	9.829	1813.087	-0.011832	-0.003653	-0.008096
8.1000	892.056	162.393	49.194	110.563	-0.651	9.828	1698.246	-0.011367	-0.003444	-0.007739
8.2000	841.155	156.405	46.429	106.350	-0.641	9.828	1601.343	-0.010948	-0.003250	-0.007445
8.3000	789.067	149.677	43.591	100.943	-0.636	9.828	1502.180	-0.010477	-0.003051	-0.007066
8.4000	722.806	141.685	40.105	95.259	-0.637	9.828	1376.038	-0.009918	-0.002807	-0.006668
8.5000	664.256	133.864	36.745	89.261	-0.641	9.828	1264.572	-0.009370	-0.002572	-0.006248
8.6000	596.823	125.262	33.283	82.671	-0.637	9.828	1136.198	-0.008768	-0.002330	-0.005787
8.7000	524.011	115.243	29.434	76.052	-0.651	9.827	997.581	-0.008067	-0.002060	-0.005324
8.8000	448.327	104.723	25.960	69.515	-0.648	9.828	853.500	-0.007331	-0.001817	-0.004866
8.9000	401.289	97.678	23.236	64.147	-0.649	9.827	763.950	-0.006837	-0.001626	-0.004490
9.0000	341.070	88.576	20.804	58.961	-0.642	9.827	649.309	-0.006200	-0.001456	-0.004127
9.1000	279.258	79.083	17.497	52.892	-0.643	9.827	531.635	-0.005536	-0.001225	-0.003702
9.2000	237.734	72.150	15.744	47.817	-0.628	9.827	452.585	-0.005050	-0.001102	-0.003347
9.3000	184.038	63.255	13.828	42.175	-0.640	9.827	350.361	-0.004428	-0.000968	-0.002952
9.4000	144.528	55.723	12.439	38.058	-0.634	9.827	275.145	-0.003901	-0.000871	-0.002664
9.5000	110.684	49.887	11.856	33.491	-0.635	9.827	210.714	-0.003492	-0.000830	-0.002344
9.6000	81.198	43.981	11.105	30.092	-0.637	9.826	154.581	-0.003079	-0.000777	-0.002106
9.7000	60.204	39.826	10.254	28.195	-0.633	9.827	114.613	-0.002788	-0.000718	-0.001974
9.8000	54.643	38.173	10.215	25.593	-0.632	9.826	104.027	-0.002672	-0.000715	-0.001791
9.9000	48.647	36.631	9.618	24.451	-0.638	9.827	92.611	-0.002564	-0.000673	-0.001712
10.0000	54.899	37.201	9.658	25.195	-0.632	9.826	104.513	-0.002604	-0.000676	-0.001764
10.1000	73.248	39.463	9.922	26.750	-0.631	9.826	139.446	-0.002762	-0.000695	-0.001872
10.2000	94.138	42.481	9.936	28.909	-0.621	9.826	179.214	-0.002974	-0.000696	-0.002024
10.3000	118.754	45.896	10.200	30.243	-0.632	9.827	226.078	-0.003213	-0.000714	-0.002117
10.4000	156.851	51.542	10.993	33.847	-0.624	9.826	298.605	-0.003608	-0.000769	-0.002369
10.5000	199.487	57.862	11.438	37.798	-0.628	9.826	379.772	-0.004050	-0.000801	-0.002646
10.6000	241.491	64.674	12.635	41.171	-0.632	9.826	459.738	-0.004527	-0.000884	-0.002882
10.7000	292.663	71.802	14.524	46.164	-0.619	9.825	557.156	-0.005026	-0.001017	-0.003231
10.8000	364.845	82.170	17.623	52.274	-0.616	9.826	694.571	-0.005752	-0.001234	-0.003659
10.9000	414.348	90.173	20.220	57.668	-0.625	9.825	788.813	-0.006312	-0.001415	-0.004037
11.0000	487.086	99.526	23.417	63.585	-0.623	9.825	927.286	-0.006967	-0.001639	-0.004451
11.1000	553.451	108.961	26.653	69.557	-0.626	9.826	1053.629	-0.007627	-0.001866	-0.004869
11.2000	622.747	118.105	30.229	76.356	-0.620	9.825	1185.551	-0.008267	-0.002116	-0.005345
11.3000	687.174	126.748	33.338	83.412	-0.631	9.825	1308.203	-0.008872	-0.002334	-0.005839
11.4000	746.596	135.418	36.964	89.634	-0.610	9.825	1421.328	-0.009479	-0.002587	-0.006274
11.5000	799.286	142.603	39.675	94.874	-0.622	9.825	1521.635	-0.009982	-0.002777	-0.006641
11.6000	860.166	150.969	43.066	100.917	-0.634	9.825	1637.535	-0.010568	-0.003015	-0.007064
11.7000	912.991	158.291	46.597	105.400	-0.633	9.824	1738.100	-0.011080	-0.003262	-0.007378
11.8000	963.441	164.297	49.651	110.809	-0.634	9.824	1834.145	-0.011501	-0.003476	-0.007757
11.9000	1013.651	171.371	52.156	116.121	-0.632	9.823	1929.731	-0.011996	-0.003651	-0.008128
12.0000	1040.717	175.664	54.377	118.914	-0.629	9.824	1981.258	-0.012296	-0.003806	-0.008324
12.1000	1072.427	179.902	56.323	123.072	-0.617	9.823	2041.626	-0.012593	-0.003943	-0.008615
12.2000	1083.473	181.903	57.477	124.185	-0.616	9.824	2062.654	-0.012733	-0.004023	-0.008693
12.3000	1099.058	184.017	58.297	127.184	-0.625	9.823	2092.323	-0.012881	-0.004081	-0.008903
12.4000	1099.869	185.030	58.199	126.482	-0.623	9.823	2093.868	-0.012952	-0.004074	-0.008854
12.5000	1095.225	185.278	58.618	126.744	-0.621	9.823	2085.028	-0.012969	-0.004103	-0.008872
12.6000	1083.323	183.711	58.520	126.125	-0.628	9.823	2062.368	-0.012860	-0.004096	-0.008829
12.7000	1051.718	180.693	57.185	123.580	-0.626	9.823	2002.201	-0.012649	-0.004003	-0.008651
12.8000	1028.108	178.209	56.780	122.822	-0.632	9.824	1957.254	-0.012475	-0.003975	-0.008598
12.9000	986.555	173.455	54.071	118.651	-0.629	9.823	1878.147	-0.012142	-0.003785	-0.008306
13.0000	948.263	169.353	52.141	115.929	-0.631	9.823	1805.248	-0.011855	-0.003650	-0.008115
13.1000	896.835	162.852	49.678	111.113	-0.625	9.823	1707.344	-0.011400	-0.003477	-0.007778
13.2000	840.960	156.363	46.457	107.315	-0.629	9.823	1600.971	-0.010945	-0.003252	-0.007512
13.3000	788.345	150.332	43.745	101.781	-0.622	9.823	1500.807	-0.010523	-0.003062	-0.007125
13.4000	729.269	142.604	40.525	95.549	-0.638	9.823	1388.340	-0.009982	-0.002837	-0.006688
13.5000	657.974	133.544	36.370	89.163	-0.625	9.823	1252.613	-0.009348	-0.002546	-0.006241
13.6000	590.481	124.970	33.298	83.813	-0.635	9.823	1124.125	-0.008748	-0.002331	-0.005867
13.7000	527.272	115.870	29.781	76.780	-0.633	9.823	1003.790	-0.008111	-0.002085	-0.005375
13.8000	467.188	107.459	26.791	71.456	-0.623	9.823	889.406	-0.007522	-0.001875	-0.005002
13.9000	407.706	99.149	23.778	65.388	-0.636	9.823	776.167	-0.006940	-0.001664	-0.004577
14.0000	342.407	88.853	20.346	59.732	-0.635	9.824	651.855	-0.006220	-0.001424	-0.004181
14.1000	269.099	78.141	17.619	52.258	-0.631	9.823	512.295	-0.005470	-0.001233	-0.003658
14.2000	227.365	71.316	16.065	46.836	-0.623	9.823	432.844	-0.004992	-0.001125	-0.003278
14.3000	185.436	63.380	14.106	42.146	-0.631	9.823	353.022	-0.004437	-0.000987	-0.002950
14.4000	144.904	56.252	12.716	37.756	-0.628	9.823	275.860	-0.003938	-0.000890	-0.002643
14.5000	107.664	49.486	11.978	33.795	-0.635	9.823	204.964	-0.003464	-0.000838	-0.002366
14.6000	82.220	44.231	11.145	31.220	-0.637	9.823	156.527	-0.003096	-0.000780	-0.002185
14.7000	55.846	39.784	10.978	27.326	-0.640	9.823	106.316	-0.002785	-0.000768	-0.001913
14.8000	55.380	38.436	10.563	27.410	-0.633	9.823	105.429	-0.002691	-0.000739	-0.001919
14.9000	55.440	37.881	10.034	26.707	-0.624	9.823	105.543	-0.002652	-0.000702	-0.001869
15.0000	56.777	37.686	10.548	25.937	-0.637	9.823	108.089	-0.002638	-0.000738	-0.001816
15.1000	72.918	39.394	10.172	28.167	-0.627	9.823	138.817	-0.002758	-0.000712	-0.001972
15.2000	94.198	42.313	10.450	29.293	-0.631	9.823	179.329	-0.002962	-0.000731	-0.002051
15.3000	114.577	45.746	10.895	30.477	-0.633	9.823	218.124	-0.003202	-0.000763	-0.002133
15.4000	157.903	52.027	11.133	34.552	-0.629	9.823	300.608	-0.003642	-0.000779	-0.002419
15.5000	199.457	58.419	11.855	37.635	-0.628	9.823	379.715	-0.004089	-0.000830	-0.002634
15.6000	249.021	66.023	13.175	42.780	-0.626	9.823	474.072	-0.004622	-0.000922	-0.002995
15.7000	303.694	73.747	15.036	46.616	-0.635	9.823	578.156	-0.005162	-0.001052	-0.003263
15.8000	359.735	82.225	18.024	53.016	-0.628	9.823	684.843	-0.005756	-0.001262	-0.003711
15.9000	418.782	90.394	20.400	57.931	-0.638	9.823	797.253	-0.006328	-0.001428	-0.004055
16.0000	491.173	100.650	23.764	65.167	-0.619	9.823	935.068	-0.007046	-0.001664	-0.004562
16.1000	552.775	108.824	27.083	71.221	-0.635	9.823	1052.341	-0.007618	-0.001896	-0.004985
16.2000	611.265	117.490	29.767	76.217	-0.647	9.823	1163.692	-0.008224	-0.002084	-0.005335
16.3000	686.032	127.389	33.908	84.253	-0.648	9.823	1306.028	-0.008917	-0.002374	-0.005898
16.4000	746.972	135.654	37.395	89.233	-0.648	9.823	1422.043	-0.009496	-0.002618	-0.006246
16.5000	806.695	143.926	40.231	95.785	-0.639	9.823	1535.740	-0.010075	-0.002816	-0.006705
16.6000	860.887	151.108	43.926	101.933	-0.631	9.823	1638.908	-0.010578	-0.003075	-0.007135
16.7000	911.233	157.807	46.610	106.696	-0.634	9.823	1734.753	-0.011046	-0.003263	-0.007469
16.8000	965.786	165.214	49.735	112.448	-0.637	9.824	1838.608	-0.011565	-0.003481	-0.007871
16.9000	1007.580	170.854	52.765	116.865	-0.642	9.823	1918.173	-0.011960	-0.003694	-0.008181
17.0000	1030.543	174.551	53.724	119.120	-0.637	9.824	1961.889	-0.012219	-0.003761	-0.008338
17.1000	1064.793	179.220	56.114	122.258	-0.634	9.824	2027.092	-0.012545	-0.003928	-0.008558
17.2000	1084.360	181.946	57.281	124.735	-0.617	9.824	2064.342	-0.012736	-0.004010	-0.008731
17.3000	1106.872	185.210	58.852	128.149	-0.643	9.824	2107.201	-0.012965	-0.004120	-0.008970
17.4000	1103.476	185.557	58.992	127.527	-0.626	9.824	2100.735	-0.012989	-0.004129	-0.008927
17.5000	1094.955	184.849	59.033	127.364	-0.627	9.825	2084.513	-0.012939	-0.004132	-0.008915
17.6000	1082.782	184.004	58.185	126.345	-0.623	9.824	2061.338	-0.012880	-0.004073	-0.008844
17.7000	1072.232	183.072	58.533	125.630	-0.627	9.824	2041.254	-0.012815	-0.004097	-0.008794
17.8000	1037.561	179.138	57.242	123.895	-0.628	9.825	1975.250	-0.012540	-0.004007	-0.008673
17.9000	994.129	174.217	54.905	119.438	-0.632	9.825	1892.567	-0.012195	-0.003843	-0.008361
18.0000	951.584	169.673	52.681	116.932	-0.614	9.825	1811.571	-0.011877	-0.003688	-0.008185
18.1000	893.875	162.781	49.598	110.687	-0.618	9.825	1701.708	-0.011395	-0.003472	-0.007748
18.2000	846.701	157.252	47.098	107.632	-0.607	9.825	1611.900	-0.011008	-0.003297	-0.007534
18.3000	785.340	150.039	43.982	101.702	-0.620	9.825	1495.085	-0.010503	-0.003079	-0.007119
18.4000	721.905	141.949	40.008	96.650	-0.625	9.826	1374.321	-0.009936	-0.002801	-0.006765
18.5000	655.975	133.448	36.826	89.552	-0.623	9.825	1248.808	-0.009341	-0.002578	-0.006269
18.6000	596.688	125.443	33.589	84.347	-0.621	9.826	1135.941	-0.008781	-0.002351	-0.005904
18.7000	514.092	114.631	29.268	77.124	-0.613	9.826	978.699	-0.008024	-0.002049	-0.005399
18.8000	469.683	107.919	26.903	72.806	-0.627	9.825	894.156	-0.007554	-0.001883	-0.005096
18.9000	403.498	97.927	23.750	65.304	-0.609	9.826	768.156	-0.006855	-0.001662	-0.004571
19.0000	332.894	88.214	20.262	58.521	-0.617	9.826	633.745	-0.006175	-0.001418	-0.004096
19.1000	289.387	80.832	18.693	54.365	-0.618	9.826	550.919	-0.005658	-0.001309	-0.003806
19.2000	225.261	70.634	15.580	46.702	-0.625	9.826	428.839	-0.004944	-0.001091	-0.003269
19.3000	189.343	64.549	14.386	43.344	-0.607	9.827	360.460	-0.004518	-0.001007	-0.003034
19.4000	141.147	55.795	13.248	38.128	-0.612	9.826	268.707	-0.003906	-0.000927	-0.002669
19.5000	111.240	50.236	12.008	35.006	-0.621	9.827	211.773	-0.003516	-0.000841	-0.002450
19.6000	80.657	44.009	11.424	30.507	-0.616	9.826	153.551	-0.003081	-0.000800	-0.002136
19.7000	64.953	40.728	10.576	28.758	-0.616	9.826	123.653	-0.002851	-0.000740	-0.002013
19.8000	52.870	38.547	10.409	26.516	-0.609	9.826	100.651	-0.002698	-0.000729	-0.001856
19.9000	44.589	36.409	10.311	25.621	-0.606	9.827	84.887	-0.002549	-0.000722	-0.001793
20.0000	56.702	37.520	10.061	26.571	-0.615	9.827	107.946	-0.002626	-0.000704	-0.001860
20.1000	67.387	38.548	10.492	27.587	-0.618	9.827	128.288	-0.002698	-0.000734	-0.001931
20.2000	89.479	41.798	10.437	28.825	-0.609	9.827	170.345	-0.002926	-0.000731	-0.002018
20.3000	115.719	45.925	10.952	31.357	-0.605	9.827	220.299	-0.003215	-0.000767	-0.002195
20.4000	148.766	50.666	11.284	34.084	-0.607	9.827	283.213	-0.003547	-0.000790	-0.002386
20.5000	200.599	58.892	11.743	38.870	-0.610	9.827	381.889	-0.004122	-0.000822	-0.002721
20.6000	247.052	65.758	13.299	42.050	-0.607	9.827	470.324	-0.004603	-0.000931	-0.002944
20.7000	302.041	73.579	15.133	46.744	-0.617	9.827	575.008	-0.005151	-0.001059	-0.003272
20.8000	352.281	81.210	17.774	51.269	-0.597	9.827	670.652	-0.005685	-0.001244	-0.003589
20.9000	425.740	91.216	20.844	58.659	-0.611	9.828	810.499	-0.006385	-0.001459	-0.004106
21.0000	492.646	100.748	23.640	65.966	-0.628	9.828	937.872	-0.007052	-0.001655	-0.004618
21.1000	549.604	108.528	26.861	70.300	-0.609	9.828	1046.305	-0.007597	-0.001880	-0.004921
21.2000	606.742	116.311	29.434	76.452	-0.609	9.828	1155.081	-0.008142	-0.002060	-0.005352
21.3000	679.029	126.665	33.686	83.110	-0.618	9.828	1292.696	-0.008867	-0.002358	-0.005818
21.4000	741.892	134.835	36.869	89.042	-0.628	9.828	1412.373	-0.009438	-0.002581	-0.006233
21.5000	808.378	143.785	40.494	95.550	-0.623	9.828	1538.944	-0.010065	-0.002835	-0.006688
21.6000	862.375	151.164	43.941	100.668	-0.609	9.828	1641.741	-0.010581	-0.003076	-0.007047
21.7000	918.732	158.599	46.777	107.837	-0.620	9.829	1749.029	-0.011102	-0.003274	-0.007549
21.8000	959.594	164.532	49.611	111.098	-0.611	9.829	1826.820	-0.011517	-0.003473	-0.007777
21.9000	1000.757	169.895	52.252	115.997	-0.609	9.829	1905.184	-0.011893	-0.003658	-0.008120
22.0000	1043.392	175.886	54.445	119.908	-0.616	9.829	1986.351	-0.012312	-0.003811	-0.008394
22.1000	1069.707	179.415	56.268	123.732	-0.613	9.828	2036.448	-0.012559	-0.003939	-0.008661
22.2000	1091.979	182.795	57.351	126.083	-0.618	9.829	2078.848	-0.012796	-0.004015	-0.008826
22.3000	1095.150	183.920	58.367	127.140	-0.621	9.830	2084.885	-0.012874	-0.004086	-0.008900
22.4000	1106.797	185.516	59.157	127.665	-0.615	9.829	2107.058	-0.012986	-0.004141	-0.008937
22.5000	1099.584	185.640	59.130	128.754	-0.614	9.829	2093.325	-0.012995	-0.004139	-0.009013
22.6000	1083.563	184.239	58.841	127.666	-0.610	9.830	2062.826	-0.012897	-0.004119	-0.008937
22.7000	1067.408	182.237	58.298	125.643	-0.603	9.830	2032.070	-0.012757	-0.004081	-0.008795
22.8000	1027.477	178.403	56.963	122.616	-0.628	9.830	1956.053	-0.012488	-0.003987	-0.008583
22.9000	1000.306	174.676	55.435	120.470	-0.619	9.830	1904.325	-0.012227	-0.003880	-0.008433
23.0000	948.608	169.396	52.530	116.353	-0.620	9.831	1805.906	-0.011858	-0.003677	-0.008145
23.1000	901.028	163.960	50.362	111.760	-0.617	9.830	1715.326	-0.011477	-0.003525	-0.007823
23.2000	846.265	157.072	46.791	106.859	-0.617	9.830	1611.071	-0.010995	-0.003275	-0.007480
23.3000	787.669	150.009	44.246	101.506	-0.615	9.830	1499.519	-0.010501	-0.003097	-0.007105
23.4000	732.485	142.521	40.856	96.442	-0.612	9.831	1394.463	-0.009976	-0.002860	-0.006751
23.5000	662.903	134.390	37.118	90.788	-0.615	9.831	1261.997	-0.009407	-0.002598	-0.006355
23.6000	595.245	125.081	33.922	83.523	-0.623	9.831	1133.194	-0.008756	-0.002375	-0.005847
23.7000	529.526	115.938	29.879	78.047	-0.605	9.831	1008.081	-0.008116	-0.002092	-0.005463
23.8000	469.382	108.237	27.251	71.691	-0.600	9.832	893.583	-0.007577	-0.001908	-0.005018
23.9000	402.160	97.886	23.780	65.277	-0.608	9.832	765.610	-0.006852	-0.001665	-0.004569
24.0000	347.457	89.893	21.163	59.635	-0.617	9.832	661.469	-0.006293	-0.001481	-0.004174
24.1000	287.854	80.820	18.511	53.169	-0.613	9.832	548.000	-0.005657	-0.001296	-0.003722
24.2000	228.101	70.842	15.925	47.321	-0.596	9.832	434.246	-0.004959	-0.001115	-0.003312
24.3000	186.998	64.297	14.344	43.399	-0.592	9.832	355.997	-0.004501	-0.001004	-0.003038
24.4000	142.469	56.044	13.190	39.022	-0.609	9.832	271.225	-0.003923	-0.000923	-0.002732
24.5000	120.558	51.053	12.203	36.270	-0.608	9.833	229.511	-0.003574	-0.000854	-0.002539
24.6000	93.161	46.162	11.701	31.854	-0.600	9.833	177.355	-0.003231	-0.000819	-0.002230
24.7000	61.947	40.285	10.910	28.567	-0.595	9.833	117.931	-0.002820	-0.000764	-0.002000
24.8000	48.016	37.645	10.800	26.062	-0.605	9.833	91.410	-0.002635	-0.000756	-0.001824
24.9000	53.922	37.701	10.393	26.762	-0.595	9.833	102.654	-0.002639	-0.000728	-0.001873
25.0000	64.246	38.588	10.117	27.479	-0.607	9.833	122.309	-0.002701	-0.000708	-0.001924
25.1000	81.484	41.257	10.771	28.042	-0.611	9.833	155.125	-0.002888	-0.000754	-0.001963
25.2000	91.643	41.952	10.408	29.364	-0.587	9.833	174.465	-0.002937	-0.000729	-0.002055
25.3000	124.676	47.246	10.995	32.322	-0.597	9.833	237.350	-0.003307	-0.000770	-0.002263
25.4000	149.593	51.040	11.396	34.578	-0.608	9.834	284.786	-0.003573	-0.000798	-0.002420
25.5000	198.240	58.334	11.605	38.886	-0.609	9.833	377.398	-0.004083	-0.000812	-0.002722
25.6000	240.470	65.020	13.189	41.762	-0.604	9.834	457.792	-0.004551	-0.000923	-0.002923
25.7000	300.057	73.204	15.398	47.486	-0.607	9.834	571.232	-0.005124	-0.001078	-0.003324
25.8000	362.140	82.698	17.914	52.450	-0.610	9.834	689.421	-0.005789	-0.001254	-0.003672
25.9000	413.777	90.006	20.426	57.916	-0.604	9.834	787.725	-0.006300	-0.001430	-0.004054
26.0000	483.449	99.082	23.458	64.698	-0.597	9.834	920.362	-0.006936	-0.001642	-0.004529
26.1000	549.138	108.780	26.848	71.111	-0.595	9.835	1045.418	-0.007615	-0.001879	-0.004978
26.2000	611.807	117.229	30.297	76.725	-0.621	9.834	1164.722	-0.008206	-0.002121	-0.005371
26.3000	674.670	125.997	33.533	83.248	-0.596	9.834	1284.399	-0.008820	-0.002347	-0.005827
26.4000	739.939	135.085	37.106	88.573	-0.599	9.834	1408.653	-0.009456	-0.002597	-0.006200
26.5000	805.267	143.230	40.426	95.550	-0.586	9.835	1533.022	-0.010026	-0.002830	-0.006688
26.6000	862.976	151.538	44.302	102.265	-0.589	9.835	1642.885	-0.010608	-0.003101	-0.007159
26.7000	931.491	159.806	47.708	108.058	-0.590	9.835	1773.319	-0.011186	-0.003340	-0.007564
26.8000	961.953	164.671	49.415	112.089	-0.599	9.836	1831.312	-0.011527	-0.003459	-0.007846
26.9000	998.322	169.714	52.238	115.226	-0.595	9.836	1900.549	-0.011880	-0.003657	-0.008066
27.0000	1037.231	174.956	54.404	119.960	-0.586	9.836	1974.621	-0.012247	-0.003808	-0.008397
27.1000	1069.437	179.777	56.504	123.056	-0.579	9.836	2035.933	-0.012584	-0.003955	-0.008614
27.2000	1083.368	181.707	57.268	125.534	-0.593	9.836	2062.454	-0.012720	-0.004009	-0.008787
27.3000	1093.647	183.919	58.019	127.255	-0.578	9.836	2082.024	-0.012874	-0.004061	-0.008908
27.4000	1101.086	185.226	59.159	127.252	-0.591	9.836	2096.186	-0.012966	-0.004141	-0.008908
27.5000	1088.958	184.142	58.395	126.578	-0.587	9.837	2073.097	-0.012890	-0.004088	-0.008860
27.6000	1077.011	183.420	58.713	125.905	-0.594	9.836	2050.352	-0.012839	-0.004110	-0.008813
27.7000	1059.999	181.167	57.922	125.383	-0.584	9.836	2017.965	-0.012682	-0.004055	-0.008777
27.8000	1042.175	179.722	57.045	124.403	-0.600	9.837	1984.034	-0.012581	-0.003993	-0.008708
27.9000	994.189	174.218	55.196	120.057	-0.581	9.837	1892.681	-0.012195	-0.003864	-0.008404
28.0000	946.609	168.812	52.642	116.671	-0.593	9.837	1802.101	-0.011817	-0.003685	-0.008167
28.1000	885.819	162.281	49.567	110.865	-0.589	9.837	1686.373	-0.011360	-0.003470	-0.007761
28.2000	847.873	157.140	47.221	107.068	-0.597	9.837	1614.132	-0.011000	-0.003305	-0.007495
28.3000	798.880	151.510	44.468	102.334	-0.589	9.837	1520.863	-0.010606	-0.003113	-0.007163
28.4000	736.512	143.438	41.219	97.214	-0.581	9.838	1402.130	-0.010041	-0.002885	-0.006805
28.5000	673.198	135.127	37.380	91.876	-0.589	9.837	1281.595	-0.009459	-0.002617	-0.006431
28.6000	587.070	124.608	33.672	82.972	-0.600	9.837	1117.630	-0.008723	-0.002357	-0.005808
28.7000	538.318	117.230	30.658	79.229	-0.596	9.836	1024.818	-0.008206	-0.002146	-0.005546
28.8000	473.169	108.154	27.265	72.736	-0.589	9.837	900.793	-0.007571	-0.001909	-0.005092
28.9000	406.083	98.609	24.405	66.805	-0.592	9.837	773.077	-0.006903	-0.001708	-0.004676
29.0000	342.062	89.365	20.858	59.210	-0.596	9.837	651.197	-0.006256	-0.001460	-0.004145
29.1000	289.026	80.819	18.680	53.225	-0.597	9.837	550.232	-0.005657	-0.001308	-0.003726
29.2000	239.282	72.553	16.607	49.577	-0.603	9.836	455.532	-0.005079	-0.001162	-0.003470
29.3000	188.336	64.172	14.441	43.385	-0.593	9.837	358.543	-0.004492	-0.001011	-0.003037
29.4000	143.762	56.279	13.272	39.382	-0.607	9.837	273.685	-0.003940	-0.000929	-0.002757
29.5000	115.478	50.761	12.272	35.128	-0.605	9.837	219.841	-0.003553	-0.000859	-0.002459
29.6000	89.554	45.925	12.063	31.704	-0.593	9.837	170.488	-0.003215	-0.000844	-0.002219
29.7000	57.694	39.784	11.258	28.592	-0.598	9.837	109.835	-0.002785	-0.000788	-0.002001
29.8000	56.101	39.076	10.812	27.285	-0.605	9.836	106.802	-0.002735	-0.000757	-0.001910
29.9000	58.400	38.465	10.784	27.284	-0.600	9.837	111.179	-0.002693	-0.000755	-0.001910
30.0000	59.227	37.992	10.450	26.940	-0.599	9.837	112.753	-0.002659	-0.000731	-0.001886
30.1000	73.279	39.991	10.771	27.933	-0.611	9.837	139.503	-0.002799	-0.000754	-0.001955
30.2000	89.765	42.396	10.882	29.280	-0.607	9.837	170.889	-0.002968	-0.000762	-0.002050
30.3000	128.072	47.440	11.354	33.092	-0.593	9.837	243.816	-0.003321	-0.000795	-0.002316
30.4000	160.548	52.901	12.050	35.900	-0.589	9.837	305.643	-0.003703	-0.000844	-0.002513
30.5000	189.133	57.611	11.898	38.211	-0.597	9.837	360.060	-0.004033	-0.000833	-0.002675
30.6000	254.581	67.216	14.232	42.891	-0.591	9.836	484.657	-0.004705	-0.000996	-0.003002
30.7000	302.266	73.595	15.480	48.559	-0.600	9.837	575.438	-0.005152	-0.001084	-0.003399
30.8000	359.179	82.253	18.138	53.003	-0.597	9.837	683.784	-0.005758	-0.001270	-0.003710
30.9000	430.173	92.133	21.705	59.649	-0.609	9.837	818.939	-0.006449	-0.001519	-0.004175
31.0000	484.862	100.068	23.890	65.553	-0.593	9.837	923.052	-0.007005	-0.001672	-0.004589
31.1000	555.525	109.766	27.530	72.117	-0.585	9.837	1057.577	-0.007684	-0.001927	-0.005048
31.2000	619.802	118.172	30.879	77.868	-0.590	9.838	1179.943	-0.008272	-0.002162	-0.005451
31.3000	684.409	127.570	34.158	84.307	-0.583	9.838	1302.938	-0.008930	-0.002391	-0.005902
31.4000	738.661	134.835	37.271	90.102	-0.600	9.838	1406.221	-0.009438	-0.002609	-0.006307
31.5000	809.490	144.356	41.051	96.884	-0.592	9.837	1541.061	-0.010105	-0.002874	-0.006782
31.6000	862.195	151.662	44.566	101.824	-0.603	9.838	1641.397	-0.010616	-0.003120	-0.007128
31.7000	923.165	159.628	47.637	107.754	-0.589	9.838	1757.469	-0.011174	-0.003335	-0.007543
31.8000	965.560	165.645	50.250	112.570	-0.585	9.838	1838.179	-0.011595	-0.003518	-0.007880
31.9000	1006.302	170.815	53.140	117.069	-0.589	9.838	1915.741	-0.011957	-0.003720	-0.008195
32.0000	1042.626	175.970	54.766	121.267	-0.589	9.838	1984.892	-0.012318	-0.003834	-0.008489
32.1000	1064.958	179.443	56.838	122.998	-0.591	9.838	2027.407	-0.012561	-0.003979	-0.008610
32.2000	1094.729	183.586	58.185	127.528	-0.588	9.838	2084.084	-0.012851	-0.004073	-0.008927
32.3000	1096.939	184.143	59.200	128.187	-0.590	9.838	2088.289	-0.012890	-0.004144	-0.008973
32.4000	1098.441	184.670	59.560	127.846	-0.592	9.838	2091.150	-0.012927	-0.004169	-0.008949
32.5000	1086.268	184.421	58.990	127.720	-0.598	9.838	2067.976	-0.012909	-0.004129	-0.008940
32.6000	1075.042	183.587	58.991	127.280	-0.593	9.838	2046.604	-0.012851	-0.004129	-0.008910
32.7000	1055.866	181.389	58.448	125.932	-0.602	9.838	2010.098	-0.012697	-0.004091	-0.008815
32.8000	1024.472	178.181	57.117	123.813	-0.591	9.837	1950.331	-0.012473	-0.003998	-0.008667
32.9000	997.360	175.233	55.961	121.777	-0.589	9.837	1898.718	-0.012266	-0.003917	-0.008524
33.0000	942.897	168.785	52.822	117.002	-0.598	9.838	1795.034	-0.011815	-0.003698	-0.008190
33.1000	889.186	163.018	50.262	112.681	-0.588	9.837	1692.781	-0.011411	-0.003518	-0.007888
33.2000	850.833	157.473	47.693	108.868	-0.593	9.837	1619.768	-0.011023	-0.003339	-0.007621
33.3000	792.493	151.178	45.011	103.090	-0.607	9.838	1508.703	-0.010582	-0.003151	-0.007216
33.4000	726.233	142.436	41.470	97.696	-0.601	9.838	1382.561	-0.009970	-0.002903	-0.006839
33.5000	660.123	134.003	37.300	91.173	-0.603	9.838	1256.704	-0.009380	-0.002611	-0.006382
33.6000	593.171	125.317	34.339	85.188	-0.601	9.838	1129.246	-0.008772	-0.002404	-0.005963
33.7000	533.869	116.938	31.257	78.872	-0.610	9.838	1016.350	-0.008186	-0.002188	-0.005521
33.8000	460.320	107.236	27.263	71.716	-0.599	9.838	876.331	-0.007506	-0.001908	-0.005020
33.9000	403.723	98.942	24.515	66.022	-0.589	9.837	768.585	-0.006926	-0.001716	-0.004622
34.0000	343.099	89.560	21.413	59.952	-0.599	9.837	653.172	-0.006269	-0.001499	-0.004197
34.1000	283.000	80.778	19.207	54.833	-0.599	9.837	538.759	-0.005654	-0.001345	-0.003838
34.2000	233.000	71.817	16.704	49.276	-0.601	9.838	443.573	-0.005027	-0.001169	-0.003449
34.3000	183.046	63.907	14.660	43.648	-0.599	9.838	348.473	-0.004474	-0.001026	-0.003055
34.4000	144.709	56.725	13.956	39.532	-0.598	9.837	275.488	-0.003971	-0.000977	-0.002767
34.5000	112.908	50.346	12.620	36.037	-0.599	9.838	214.949	-0.003524	-0.000883	-0.002523
34.6000	84.956	45.384	12.370	32.806	-0.600	9.837	161.734	-0.003177	-0.000866	-0.002296
34.7000	66.065	41.215	11.714	29.472	-0.599	9.837	125.771	-0.002885	-0.000820	-0.002063
34.8000	51.082	38.464	11.160	27.972	-0.599	9.837	97.246	-0.002692	-0.000781	-0.001958
34.9000	53.862	37.923	11.117	28.153	-0.590	9.837	102.539	-0.002655	-0.000778	-0.001971
35.0000	60.745	38.270	10.784	26.706	-0.593	9.838	115.643	-0.002679	-0.000755	-0.001869
35.1000	72.046	39.964	11.077	28.484	-0.599	9.838	137.157	-0.002797	-0.000775	-0.001994
35.2000	92.124	42.674	11.285	30.684	-0.599	9.838	175.381	-0.002987	-0.000790	-0.002148
35.3000	122.046	47.190	11.272	32.197	-0.581	9.838	232.344	-0.003303	-0.000789	-0.002254
35.4000	157.377	52.721	11.953	35.942	-0.589	9.838	299.606	-0.003690	-0.000837	-0.002516
35.5000	201.215	59.199	12.439	38.845	-0.586	9.838	383.062	-0.004144	-0.000871	-0.002719
35.6000	248.585	66.466	13.787	43.097	-0.587	9.837	473.242	-0.004653	-0.000965	-0.003017
35.7000	298.900	73.636	15.760	47.444	-0.583	9.838	569.029	-0.005154	-0.001103	-0.003321
35.8000	352.642	81.308	17.748	53.580	-0.592	9.838	671.339	-0.005692	-0.001242	-0.003751
35.9000	422.584	90.935	21.483	59.924	-0.605	9.838	804.491	-0.006365	-0.001504	-0.004195
36.0000	483.719	99.622	24.014	65.127	-0.603	9.838	920.877	-0.006974	-0.001681	-0.004559
36.1000	554.789	109.392	27.473	71.881	-0.587	9.838	1056.175	-0.007657	-0.001923	-0.005032
36.2000	622.537	118.743	31.171	78.707	-0.594	9.838	1185.150	-0.008312	-0.002182	-0.005509
36.3000	689.894	127.637	34.437	85.203	-0.582	9.838	1313.381	-0.008935	-0.002411	-0.005964
36.4000	741.832	135.378	37.535	90.073	-0.583	9.838	1412.258	-0.009476	-0.002627	-0.006305
36.5000	816.058	144.688	41.330	97.668	-0.586	9.837	1553.564	-0.010128	-0.002893	-0.006837
36.6000	853.388	150.872	44.190	101.357	-0.593	9.837	1624.632	-0.010561	-0.003093	-0.007095
36.7000	925.164	159.348	48.232	108.937	-0.585	9.838	1761.274	-0.011154	-0.003376	-0.007626
36.8000	982.137	167.050	50.987	113.698	-0.588	9.837	1869.736	-0.011693	-0.003569	-0.007959
36.9000	1007.910	171.261	53.100	116.714	-0.581	9.838	1918.802	-0.011988	-0.003717	-0.008170
37.0000	1038.132	175.303	54.835	120.635	-0.587	9.837	1976.337	-0.012271	-0.003838	-0.008444
37.1000	1072.097	180.319	57.074	124.404	-0.578	9.837	2040.997	-0.012622	-0.003995	-0.008708
37.2000	1092.190	182.877	58.619	126.138	-0.602	9.837	2079.248	-0.012801	-0.004103	-0.008830
37.3000	1096.623	184.057	58.769	127.516	-0.586	9.838	2087.688	-0.012884	-0.004114	-0.008926
37.4000	1100.876	185.141	59.518	128.917	-0.588	9.837	2095.785	-0.012960	-0.004166	-0.009024
37.5000	1098.246	184.723	59.379	128.657	-0.589	9.837	2090.778	-0.012931	-0.004157	-0.009006
37.6000	1085.382	184.474	59.243	127.749	-0.593	9.836	2066.288	-0.012913	-0.004147	-0.008942
37.7000	1061.502	181.779	58.605	125.781	-0.565	9.837	2020.826	-0.012725	-0.004102	-0.008805
37.8000	1020.729	177.346	56.865	123.303	-0.585	9.836	1943.207	-0.012414	-0.003981	-0.008631
37.9000	993.017	174.246	55.821	120.662	-0.586	9.837	1890.450	-0.012197	-0.003908	-0.008446
38.0000	947.616	168.950	52.640	117.386	-0.576	9.836	1804.018	-0.011827	-0.003685	-0.008217
38.1000	897.767	163.754	50.487	113.298	-0.578	9.837	1709.118	-0.011463	-0.003534	-0.007931
38.2000	848.549	157.225	47.501	109.116	-0.586	9.836	1615.419	-0.011006	-0.003325	-0.007638
38.3000	794.011	150.732	44.844	102.978	-0.580	9.836	1511.593	-0.010551	-0.003139	-0.007208
38.4000	733.356	142.868	41.623	97.324	-0.590	9.836	1396.122	-0.010001	-0.002914	-0.006813
38.5000	657.057	133.641	37.215	90.238	-0.572	9.836	1250.868	-0.009355	-0.002605	-0.006317
38.6000	594.043	125.149	34.073	84.156	-0.590	9.836	1130.905	-0.008760	-0.002385	-0.005891
38.7000	530.728	116.146	30.671	79.370	-0.593	9.836	1010.370	-0.008130	-0.002147	-0.005556
38.8000	472.478	108.570	27.766	73.644	-0.581	9.835	899.477	-0.007600	-0.001944	-0.005155
38.9000	398.268	97.775	24.390	65.580	-0.578	9.836	758.200	-0.006844	-0.001707	-0.004591
39.0000	341.761	89.547	21.551	60.751	-0.578	9.835	650.625	-0.006268	-0.001509	-0.004253
39.1000	285.495	80.583	18.998	53.911	-0.584	9.835	543.509	-0.005641	-0.001330	-0.003774
39.2000	240.229	73.011	16.955	49.232	-0.591	9.835	457.335	-0.005111	-0.001187	-0.003446
39.3000	173.683	62.642	14.690	43.302	-0.580	9.835	330.648	-0.004385	-0.001028	-0.003031
39.4000	148.285	56.932	13.521	40.220	-0.579	9.835	282.297	-0.003985	-0.000946	-0.002815
39.5000	102.584	48.916	12.996	34.923	-0.568	9.835	195.293	-0.003424	-0.000910	-0.002445
39.6000	77.096	43.884	11.840	32.446	-0.573	9.834	146.770	-0.003072	-0.000829	-0.002271
39.7000	71.911	42.300	11.506	30.973	-0.588	9.834	136.900	-0.002961	-0.000805	-0.002168
39.8000	53.742	38.255	11.146	28.234	-0.589	9.834	102.310	-0.002678	-0.000780	-0.001976
39.9000	48.617	37.272	10.701	26.817	-0.588	9.834	92.554	-0.002609	-0.000749	-0.001877
40.0000	57.950	38.256	11.132	26.871	-0.571	9.834	110.321	-0.002678	-0.000779	-0.001881
40.1000	76.495	40.409	10.868	28.426	-0.578	9.834	145.626	-0.002829	-0.000761	-0.001990
40.2000	96.332	43.454	11.506	30.753	-0.587	9.833	183.392	-0.003042	-0.000805	-0.002153
40.3000	118.544	45.953	11.287	32.680	-0.590	9.834	225.677	-0.003217	-0.000790	-0.002288
40.4000	155.980	52.401	12.021	35.610	-0.593	9.833	296.946	-0.003668	-0.000841	-0.002493
40.5000	202.959	59.254	12.579	39.490	-0.591	9.833	386.381	-0.004148	-0.000881	-0.002764
40.6000	244.317	65.688	13.690	42.943	-0.581	9.833	465.117	-0.004598	-0.000958	-0.003006
40.7000	292.453	72.970	15.884	47.086	-0.588	9.833	556.755	-0.005108	-0.001112	-0.003296
40.8000	354.024	81.809	18.289	52.975	-0.580	9.833	673.971	-0.005727	-0.001280	-0.003708
40.9000	413.687	90.201	21.234	59.334	-0.581	9.833	787.554	-0.006314	-0.001486	-0.004153
41.0000	484.907	99.733	24.404	66.131	-0.587	9.832	923.138	-0.006981	-0.001708	-0.004629
41.1000	548.507	109.057	27.377	71.151	-0.574	9.832	1044.216	-0.007634	-0.001916	-0.004981
41.2000	612.783	117.827	30.948	77.979	-0.580	9.832	1166.582	-0.008248	-0.002166	-0.005459
41.3000	680.141	127.167	34.478	84.238	-0.578	9.832	1294.813	-0.008902	-0.002413	-0.005897
41.4000	740.134	135.560	37.897	89.949	-0.584	9.832	1409.025	-0.009489	-0.002653	-0.006296
41.5000	808.543	143.731	41.287	96.789	-0.577	9.831	1539.259	-0.010061	-0.002890	-0.006775
41.6000	861.068	151.496	44.650	102.115	-0.591	9.831	1639.252	-0.010605	-0.003125	-0.007148
41.7000	916.417	158.334	47.514	108.691	-0.594	9.831	1744.623	-0.011083	-0.003326	-0.007608
41.8000	974.502	166.382	51.194	113.865	-0.589	9.831	1855.202	-0.011647	-0.003584	-0.007971
41.9000	1008.286	170.941	53.532	117.332	-0.578	9.831	1919.518	-0.011966	-0.003747	-0.008213
42.0000	1035.352	175.287	55.140	121.321	-0.592	9.831	1971.045	-0.012270	-0.003860	-0.008492
42.1000	1069.046	179.804	57.239	124.462	-0.595	9.830	2035.189	-0.012586	-0.004007	-0.008712
42.2000	1087.861	182.641	58.381	126.702	-0.588	9.831	2071.009	-0.012785	-0.004087	-0.008869
42.3000	1108.856	185.376	59.755	129.195	-0.584	9.830	2110.977	-0.012976	-0.004183	-0.009044
42.4000	1094.098	184.932	59.450	128.615	-0.584	9.830	2082.882	-0.012945	-0.004161	-0.009003
42.5000	1096.367	185.390	59.824	128.434	-0.584	9.830	2087.202	-0.012977	-0.004188	-0.008990
42.6000	1081.309	183.849	59.338	127.846	-0.589	9.830	2058.535	-0.012869	-0.004154	-0.008949
42.7000	1058.240	181.402	58.730	126.675	-0.590	9.830	2014.618	-0.012698	-0.004111	-0.008867
42.8000	1032.752	178.789	57.824	124.722	-0.602	9.830	1966.095	-0.012515	-0.004048	-0.008731
42.9000	989.260	173.774	55.545	121.322	-0.578	9.830	1883.297	-0.012164	-0.003888	-0.008493
43.0000	949.375	169.506	53.600	117.180	-0.584	9.830	1807.365	-0.011865	-0.003752	-0.008203
43.1000	915.921	165.046	51.236	113.947	-0.571	9.830	1743.679	-0.011553	-0.003587	-0.007976
43.2000	845.483	157.556	48.054	107.976	-0.587	9.829	1609.583	-0.011029	-0.003364	-0.007558
43.3000	788.000	150.191	44.775	103.556	-0.579	9.829	1500.149	-0.010513	-0.003134	-0.007249
43.4000	723.287	142.034	40.997	97.806	-0.592	9.829	1376.953	-0.009942	-0.002870	-0.006846
43.5000	655.479	133.240	38.008	91.792	-0.596	9.830	1247.864	-0.009327	-0.002661	-0.006425
43.6000	592.014	125.038	34.019	85.188	-0.590	9.829	1127.043	-0.008753	-0.002381	-0.005963
43.7000	519.141	115.033	30.380	78.734	-0.588	9.829	988.312	-0.008052	-0.002127	-0.005511
43.8000	461.568	106.932	27.224	73.243	-0.581	9.829	878.706	-0.007485	-0.001906	-0.005127
43.9000	409.118	99.373	25.017	67.547	-0.587	9.829	778.856	-0.006956	-0.001751	-0.004728
44.0000	342.618	89.325	21.803	60.943	-0.597	9.829	652.256	-0.006253	-0.001526	-0.004266
44.1000	276.778	79.373	19.098	54.476	-0.589	9.829	526.915	-0.005556	-0.001337	-0.003813
44.2000	235.961	72.289	17.063	49.523	-0.584	9.828	449.209	-0.005060	-0.001194	-0.003467
44.3000	186.668	63.949	14.550	44.775	-0.580	9.829	355.368	-0.004476	-0.001019	-0.003134
44.4000	147.925	57.084	14.177	40.070	-0.593	9.829	281.610	-0.003996	-0.000992	-0.002805
44.5000	112.037	50.111	12.841	36.601	-0.584	9.829	213.289	-0.003508	-0.000899	-0.002562
44.6000	89.795	45.649	12.327	33.367	-0.579	9.829	170.946	-0.003195	-0.000863	-0.002336
44.7000	62.503	40.449	11.755	29.610	-0.573	9.829	118.990	-0.002831	-0.000823	-0.002073
44.8000	54.192	38.534	11.132	28.523	-0.578	9.829	103.168	-0.002697	-0.000779	-0.001997
44.9000	54.553	37.813	11.340	27.479	-0.584	9.828	103.855	-0.002647	-0.000794	-0.001924
45.0000	55.079	37.854	10.784	27.134	-0.590	9.829	104.856	-0.002650	-0.000755	-0.001899
45.1000	71.460	40.130	11.505	28.758	-0.588	9.828	136.042	-0.002809	-0.000805	-0.002013
45.2000	86.954	41.940	11.146	29.761	-0.580	9.828	165.539	-0.002936	-0.000780	-0.002083
45.3000	125.262	47.468	11.786	32.431	-0.579	9.828	238.466	-0.003323	-0.000825	-0.002270
45.4000	154.657	52.137	11.937	35.844	-0.580	9.828	294.428	-0.003650	-0.000836	-0.002509
45.5000	197.308	58.766	12.633	39.560	-0.588	9.828	375.624	-0.004114	-0.000884	-0.002769
45.6000	249.697	66.204	13.994	44.017	-0.583	9.828	475.359	-0.004634	-0.000980	-0.003081
45.7000	305.663	74.275	16.314	48.724	-0.594	9.828	581.903	-0.005199	-0.001142	-0.003411
45.8000	355.737	81.807	18.594	53.155	-0.588	9.829	677.233	-0.005726	-0.001302	-0.003721
45.9000	417.399	90.365	21.052	58.824	-0.574	9.828	794.621	-0.006326	-0.001474	-0.004118
46.0000	478.520	99.263	24.182	65.827	-0.587	9.828	910.978	-0.006948	-0.001693	-0.004608
46.1000	551.107	108.571	27.488	72.130	-0.572	9.828	1049.166	-0.007600	-0.001924	-0.005049
46.2000	617.172	118.131	31.365	78.182	-0.566	9.828	1174.936	-0.008269	-0.002196	-0.005473
46.3000	683.838	127.055	34.631	85.008	-0.587	9.828	1301.851	-0.008894	-0.002424	-0.005951
46.4000	741.201	135.251	37.716	90.499	-0.580	9.828	1411.057	-0.009468	-0.002640	-0.006335
46.5000	797.843	143.105	41.286	96.717	-0.589	9.828	1518.888	-0.010017	-0.002890	-0.006770
46.6000	860.061	151.151	44.663	102.209	-0.589	9.827	1637.335	-0.010581	-0.003126	-0.007155
46.7000	913.847	158.568	47.886	107.686	-0.589	9.827	1739.731	-0.011100	-0.003352	-0.007538
46.8000	964.012	164.587	50.849	113.575	-0.579	9.827	1835.232	-0.011521	-0.003559	-0.007950
46.9000	997.481	170.063	52.961	117.209	-0.574	9.827	1898.947	-0.011904	-0.003707	-0.008205
47.0000	1035.202	174.843	55.460	120.773	-0.556	9.827	1970.758	-0.012239	-0.003882	-0.008454
47.1000	1062.629	178.874	57.031	123.675	-0.581	9.827	2022.972	-0.012521	-0.003992	-0.008657
47.2000	1085.081	182.279	58.700	127.020	-0.593	9.827	2065.716	-0.012760	-0.004109	-0.008891
47.3000	1109.247	185.251	59.686	129.427	-0.597	9.827	2111.721	-0.012968	-0.004178	-0.009060
47.4000	1103.957	185.570	60.213	129.701	-0.591	9.827	2101.650	-0.012990	-0.004215	-0.009079
47.5000	1095.811	185.030	60.074	128.395	-0.598	9.827	2086.143	-0.012952	-0.004205	-0.008988
47.6000	1078.919	183.850	59.491	128.037	-0.597	9.827	2053.986	-0.012869	-0.004164	-0.008963
47.7000	1055.986	181.374	59.046	125.822	-0.595	9.827	2010.326	-0.012696	-0.004133	-0.008808
47.8000	1020.880	177.389	56.934	123.222	-0.598	9.827	1943.493	-0.012417	-0.003985	-0.008626
47.9000	999.735	175.455	56.405	122.243	-0.595	9.826	1903.238	-0.012282	-0.003948	-0.008557
48.0000	944.550	168.603	52.890	117.731	-0.584	9.827	1798.182	-0.011802	-0.003702	-0.008241
48.1000	908.648	164.588	51.572	114.770	-0.587	9.827	1729.832	-0.011521	-0.003610	-0.008034
48.2000	851.119	157.584	48.221	109.861	-0.580	9.827	1620.312	-0.011031	-0.003375	-0.007690
48.3000	788.285	150.386	44.636	103.625	-0.577	9.827	1500.692	-0.010527	-0.003125	-0.007254
48.4000	723.603	142.673	41.624	97.311	-0.567	9.828	1377.554	-0.009987	-0.002914	-0.006812
48.5000	665.683	134.460	37.978	92.384	-0.561	9.827	1267.290	-0.009412	-0.002658	-0.006467
48.6000	584.380	124.675	34.311	85.340	-0.558	9.828	1112.509	-0.008727	-0.002402	-0.005974
48.7000	547.109	118.103	31.919	79.903	-0.553	9.827	1041.555	-0.008267	-0.002234	-0.005593
48.8000	463.882	108.031	27.833	73.174	-0.569	9.828	883.112	-0.007562	-0.001948	-0.005122
48.9000	401.875	98.067	25.072	66.503	-0.565	9.827	765.066	-0.006865	-0.001755	-0.004655
49.0000	338.244	89.228	21.651	60.915	-0.597	9.828	643.930	-0.006246	-0.001516	-0.004264
49.1000	284.833	80.375	19.445	54.930	-0.600	9.827	542.250	-0.005626	-0.001361	-0.003845
49.2000	235.074	72.247	16.775	49.302	-0.597	9.827	447.521	-0.005057	-0.001174	-0.003451
49.3000	189.523	65.064	15.247	45.119	-0.595	9.828	360.804	-0.004554	-0.001067	-0.003158
49.4000	155.604	58.195	14.063	40.578	-0.583	9.827	296.230	-0.004074	-0.000984	-0.002840
49.5000	106.221	50.082	13.078	36.463	-0.588	9.827	202.217	-0.003506	-0.000915	-0.002552
49.6000	88.517	45.870	12.606	32.928	-0.564	9.828	168.514	-0.003211	-0.000882	-0.002305
49.7000	69.281	41.868	11.910	31.372	-0.568	9.827	131.893	-0.002931	-0.000834	-0.002196
49.8000	53.125	39.172	11.828	28.717	-0.552	9.827	101.137	-0.002742	-0.000828	-0.002010
49.9000	55.485	38.326	11.353	28.126	-0.570	9.828	105.629	-0.002683	-0.000795	-0.001969
