# Supplementary material for: Evaluation of a Cold-Mixed High-Performance Polyurethane Mixture
Source: Hindawi journal article supplement (doi:10.1155/2019/1507971), 2019-11-07
Supplement: f1 [file 1507971.f1.zip › 1507971.f1/dynamic modulus data/PUM/specimen2/temp10/zhs-2-10_0.5Hz.csv]

Test Information
****************
Project name	zhs
Operator name	2
Target test temperature	10
Target confining stress	0
Average dynamic strain range from 75 to 125 micro-strain
Contact stress	5
Initial modulus	4000
Axial gauge length	70
Comments	Run at High Pressure
Specimen information
********************
Identification	zhs-2-10
Dimensions	Point 1	Point 2	Point 3	Point 4	Point 5	Point 6	Average	Std Dev.
Diameter (mm)	49.2	49.3	49.2				49.23	0.058
Height (mm)	100.8	101.0	100.8				100.87	0.115
Cross-sectional area (mm�)	1903.7
Conditioning time
Properties/Comments
Test Data	0.5Hz
*********
Test date and time	Fri	Mar 29	2019	11:20 AM
Dynamic modulus (MPa)	10842
Phase angle (Degrees)	4.78
Average temperature (�C)	9.9
Average confining pressure (kPa)	-0.6
Average micro-strain	100
Load drift (%)	-0.1
Load standard error (%)	1.1
Average deformation drift (%)	-1.6
Average deformation standard error (%)	3.8
Deformation uniformity (%)	39.6
Phase uniformity (Degrees)	0.6
Conditioning Cycles
Time (sec)	Axial stress (kPa)	Axial micro-strain #1	Axial micro-strain #2	Axial micro-strain #3	Confining pressure (kPa)	Temperature (�C)	Load (N)	Displacement #1 (mm)	Displacement #2 (mm)	Displacement #3 (mm)
0.0000	37.316	32.282	9.324	18.313	-0.613	9.894	71.039	-0.002260	-0.000653	-0.001282
0.0400	44.845	32.433	9.087	18.698	-0.616	9.894	85.373	-0.002270	-0.000636	-0.001309
0.0800	68.289	35.644	9.533	20.845	-0.604	9.894	130.005	-0.002495	-0.000667	-0.001459
0.1200	93.206	39.645	8.171	22.896	-0.612	9.894	177.441	-0.002775	-0.000572	-0.001603
0.1600	120.994	43.245	10.143	25.277	-0.619	9.894	230.341	-0.003027	-0.000710	-0.001769
0.2000	155.724	48.832	10.172	28.276	-0.612	9.894	296.459	-0.003418	-0.000712	-0.001979
0.2400	193.070	54.905	8.981	31.883	-0.606	9.894	367.556	-0.003843	-0.000629	-0.002232
0.2800	237.689	61.463	10.590	35.558	-0.607	9.895	452.499	-0.004302	-0.000741	-0.002489
0.3200	281.723	68.020	13.203	39.325	-0.609	9.894	536.327	-0.004761	-0.000924	-0.002753
0.3600	332.248	75.635	13.063	43.797	-0.611	9.894	632.515	-0.005294	-0.000914	-0.003066
0.4000	374.733	81.808	17.455	47.708	-0.616	9.894	713.396	-0.005727	-0.001222	-0.003340
0.4400	436.545	90.769	18.358	53.678	-0.607	9.894	831.070	-0.006354	-0.001285	-0.003757
0.4800	487.221	97.678	22.889	58.192	-0.607	9.894	927.544	-0.006837	-0.001602	-0.004073
0.5200	541.443	104.626	22.554	63.710	-0.610	9.893	1030.769	-0.007324	-0.001579	-0.004460
0.5600	585.627	111.060	26.736	68.166	-0.615	9.894	1114.883	-0.007774	-0.001872	-0.004772
0.6000	639.278	118.437	29.893	72.941	-0.616	9.894	1217.022	-0.008291	-0.002092	-0.005106
0.6400	688.451	125.081	30.658	77.812	-0.610	9.894	1310.635	-0.008756	-0.002146	-0.005447
0.6800	729.103	130.708	34.785	81.679	-0.617	9.894	1388.025	-0.009150	-0.002435	-0.005718
0.7200	766.058	136.253	34.435	85.449	-0.610	9.894	1458.378	-0.009538	-0.002410	-0.005981
0.7600	798.054	140.615	38.590	89.178	-0.611	9.894	1519.289	-0.009843	-0.002701	-0.006242
0.8000	824.008	144.425	37.784	91.780	-0.621	9.894	1568.699	-0.010110	-0.002645	-0.006425
0.8400	846.731	148.012	42.236	93.939	-0.609	9.894	1611.958	-0.010361	-0.002957	-0.006576
0.8800	855.462	149.359	40.773	95.355	-0.605	9.893	1628.580	-0.010455	-0.002854	-0.006675
0.9200	875.104	151.927	43.705	97.627	-0.616	9.894	1665.974	-0.010635	-0.003059	-0.006834
0.9600	870.596	152.024	44.094	97.532	-0.608	9.894	1657.391	-0.010642	-0.003087	-0.006827
1.0000	881.281	153.373	41.996	98.728	-0.608	9.893	1677.732	-0.010736	-0.002940	-0.006911
1.0400	859.505	151.801	43.689	97.336	-0.620	9.894	1636.276	-0.010626	-0.003058	-0.006814
1.0800	843.995	150.010	43.107	96.526	-0.600	9.893	1606.750	-0.010501	-0.003017	-0.006757
1.1200	823.497	147.661	40.341	94.931	-0.616	9.893	1567.726	-0.010336	-0.002824	-0.006645
1.1600	796.821	145.090	39.815	92.687	-0.609	9.894	1516.943	-0.010156	-0.002787	-0.006488
1.2000	758.875	140.462	37.213	89.811	-0.603	9.894	1444.702	-0.009832	-0.002605	-0.006287
1.2400	725.677	136.294	36.285	86.866	-0.601	9.893	1381.502	-0.009541	-0.002540	-0.006081
1.2800	670.718	129.970	34.670	82.149	-0.615	9.894	1276.875	-0.009098	-0.002427	-0.005750
1.3200	625.708	124.190	32.128	78.017	-0.607	9.893	1191.187	-0.008693	-0.002249	-0.005461
1.3600	582.276	118.755	29.490	74.387	-0.596	9.894	1108.503	-0.008313	-0.002064	-0.005207
1.4000	526.565	111.505	28.031	69.611	-0.620	9.894	1002.445	-0.007805	-0.001962	-0.004873
1.4400	479.331	105.028	25.197	65.318	-0.610	9.893	912.523	-0.007352	-0.001764	-0.004572
1.4800	418.496	96.578	22.305	59.829	-0.606	9.893	796.709	-0.006760	-0.001561	-0.004188
1.5200	377.108	90.909	19.943	55.660	-0.609	9.893	717.916	-0.006364	-0.001396	-0.003896
1.5600	327.649	83.197	17.093	50.443	-0.615	9.893	623.760	-0.005824	-0.001197	-0.003531
1.6000	277.740	76.124	14.996	45.724	-0.604	9.893	528.746	-0.005329	-0.001050	-0.003201
1.6400	232.925	68.854	14.121	41.363	-0.608	9.893	443.430	-0.004820	-0.000988	-0.002895
1.6800	195.805	62.629	13.580	37.730	-0.619	9.894	372.763	-0.004384	-0.000951	-0.002641
1.7200	149.548	54.709	11.604	33.353	-0.613	9.893	284.700	-0.003830	-0.000812	-0.002335
1.7600	119.175	49.415	9.214	29.995	-0.604	9.893	226.879	-0.003459	-0.000645	-0.002100
1.8000	87.946	43.607	9.951	26.281	-0.628	9.893	167.427	-0.003052	-0.000697	-0.001840
1.8400	71.896	41.062	9.590	24.382	-0.609	9.893	136.871	-0.002874	-0.000671	-0.001707
1.8800	54.162	37.186	8.867	22.195	-0.621	9.893	103.111	-0.002603	-0.000621	-0.001554
1.9200	43.327	34.794	7.033	20.322	-0.619	9.893	82.483	-0.002436	-0.000492	-0.001423
1.9600	37.240	33.752	9.101	19.592	-0.621	9.893	70.896	-0.002363	-0.000637	-0.001371
2.0000	39.149	33.448	7.854	19.223	-0.608	9.893	74.530	-0.002341	-0.000550	-0.001346
2.0400	49.158	34.417	8.034	19.966	-0.620	9.893	93.584	-0.002409	-0.000562	-0.001398
2.0800	66.681	37.019	9.229	21.287	-0.631	9.893	126.944	-0.002591	-0.000646	-0.001490
2.1200	92.830	40.867	9.075	23.597	-0.612	9.893	176.725	-0.002861	-0.000635	-0.001652
2.1600	120.107	44.331	9.561	25.993	-0.601	9.893	228.653	-0.003103	-0.000669	-0.001819
2.2000	152.538	49.530	8.464	28.689	-0.614	9.893	290.394	-0.003467	-0.000592	-0.002008
2.2400	195.625	56.224	9.742	32.557	-0.610	9.893	372.419	-0.003936	-0.000682	-0.002279
2.2800	231.994	61.589	11.243	35.749	-0.625	9.893	441.656	-0.004311	-0.000787	-0.002502
2.3200	283.105	69.190	12.689	40.098	-0.603	9.893	538.960	-0.004843	-0.000888	-0.002807
2.3600	335.209	76.681	13.426	44.749	-0.607	9.892	638.151	-0.005368	-0.000940	-0.003132
2.4000	374.538	82.322	16.397	48.323	-0.615	9.893	713.024	-0.005763	-0.001148	-0.003383
2.4400	428.685	90.100	19.206	53.223	-0.599	9.893	816.107	-0.006307	-0.001344	-0.003726
2.4800	489.505	98.456	22.692	58.866	-0.599	9.892	931.892	-0.006892	-0.001588	-0.004121
2.5200	544.539	105.305	23.736	64.368	-0.605	9.893	1036.663	-0.007371	-0.001662	-0.004506
2.5600	571.530	109.934	26.666	67.163	-0.608	9.893	1088.047	-0.007695	-0.001867	-0.004701
2.6000	646.056	119.647	31.228	73.767	-0.593	9.892	1229.925	-0.008375	-0.002186	-0.005164
2.6400	682.575	124.678	32.893	77.647	-0.614	9.892	1299.448	-0.008727	-0.002303	-0.005435
2.6800	730.847	131.501	32.588	82.023	-0.608	9.893	1391.344	-0.009205	-0.002281	-0.005742
2.7200	762.587	135.890	36.424	85.657	-0.604	9.892	1451.769	-0.009512	-0.002550	-0.005996
2.7600	810.181	142.007	38.270	89.922	-0.609	9.892	1542.377	-0.009941	-0.002679	-0.006295
2.8000	820.055	143.978	38.563	91.600	-0.620	9.892	1561.174	-0.010078	-0.002699	-0.006412
2.8400	840.839	147.023	39.830	93.747	-0.618	9.892	1600.742	-0.010292	-0.002788	-0.006562
2.8800	857.671	149.384	39.885	95.714	-0.613	9.892	1632.786	-0.010457	-0.002792	-0.006700
2.9200	869.739	151.759	41.301	97.253	-0.610	9.892	1655.760	-0.010623	-0.002891	-0.006808
2.9600	887.503	153.637	44.552	99.016	-0.610	9.892	1689.577	-0.010755	-0.003119	-0.006931
3.0000	878.005	153.400	44.510	98.714	-0.605	9.893	1671.495	-0.010738	-0.003116	-0.006910
3.0400	862.661	152.107	41.928	97.861	-0.608	9.893	1642.284	-0.010647	-0.002935	-0.006850
3.0800	849.210	150.539	42.953	96.732	-0.615	9.892	1616.678	-0.010538	-0.003007	-0.006771
3.1200	824.023	147.995	40.078	94.860	-0.608	9.892	1568.727	-0.010360	-0.002805	-0.006640
3.1600	786.407	143.800	38.230	91.902	-0.607	9.893	1497.116	-0.010066	-0.002676	-0.006433
3.2000	751.270	139.185	38.217	89.152	-0.608	9.892	1430.225	-0.009743	-0.002675	-0.006241
3.2400	727.856	136.852	36.603	87.073	-0.602	9.892	1385.651	-0.009580	-0.002562	-0.006095
3.2800	673.408	130.333	33.743	82.201	-0.609	9.892	1281.996	-0.009123	-0.002362	-0.005754
3.3200	640.120	125.525	33.491	79.494	-0.603	9.892	1218.624	-0.008787	-0.002344	-0.005565
3.3600	576.445	118.075	29.030	74.000	-0.611	9.892	1097.403	-0.008265	-0.002032	-0.005180
3.4000	533.073	112.295	29.004	70.065	-0.602	9.892	1014.833	-0.007861	-0.002030	-0.004905
3.4400	484.110	105.529	24.265	65.595	-0.611	9.892	921.621	-0.007387	-0.001699	-0.004592
3.4800	428.956	98.303	23.319	60.626	-0.615	9.892	816.622	-0.006881	-0.001632	-0.004244
3.5200	376.417	90.979	20.664	55.618	-0.603	9.892	716.600	-0.006369	-0.001446	-0.003893
3.5600	319.519	82.059	18.832	50.387	-0.604	9.891	608.282	-0.005744	-0.001318	-0.003527
3.6000	284.743	76.736	15.927	46.467	-0.600	9.892	542.078	-0.005372	-0.001115	-0.003253
3.6400	233.466	69.231	15.356	41.583	-0.614	9.892	444.460	-0.004846	-0.001075	-0.002911
3.6800	184.474	60.923	11.132	36.876	-0.605	9.892	351.191	-0.004265	-0.000779	-0.002581
3.7200	151.652	54.920	10.341	33.174	-0.617	9.892	288.706	-0.003844	-0.000724	-0.002322
3.7600	117.342	49.359	10.295	29.638	-0.608	9.892	223.389	-0.003455	-0.000721	-0.002075
3.8000	87.345	43.816	9.825	26.722	-0.605	9.892	166.283	-0.003067	-0.000688	-0.001871
3.8400	71.280	40.674	9.466	24.438	-0.605	9.892	135.698	-0.002847	-0.000663	-0.001711
3.8800	46.723	36.630	8.811	21.327	-0.595	9.891	88.949	-0.002564	-0.000617	-0.001493
3.9200	46.122	35.531	8.075	20.983	-0.598	9.891	87.805	-0.002487	-0.000565	-0.001469
3.9600	35.347	33.712	7.617	19.526	-0.613	9.892	67.291	-0.002360	-0.000533	-0.001367
4.0000	41.629	34.253	8.284	19.525	-0.597	9.891	79.250	-0.002398	-0.000580	-0.001367
4.0400	55.755	35.434	7.631	20.792	-0.604	9.892	106.144	-0.002480	-0.000534	-0.001455
4.0800	66.531	37.075	8.826	21.616	-0.605	9.891	126.657	-0.002595	-0.000618	-0.001513
4.1200	95.205	40.978	9.423	23.680	-0.602	9.891	181.246	-0.002868	-0.000660	-0.001658
4.1600	115.027	43.911	8.864	25.701	-0.618	9.891	218.983	-0.003074	-0.000620	-0.001799
4.2000	153.064	49.737	8.810	28.936	-0.606	9.892	291.395	-0.003482	-0.000617	-0.002026
4.2400	188.847	55.392	10.089	31.881	-0.601	9.891	359.516	-0.003877	-0.000706	-0.002232
4.2800	237.554	62.433	10.826	36.023	-0.597	9.891	452.242	-0.004370	-0.000758	-0.002522
4.3200	272.645	68.021	12.884	39.285	-0.604	9.891	519.047	-0.004761	-0.000902	-0.002750
4.3600	326.327	75.554	14.787	43.923	-0.597	9.891	621.243	-0.005289	-0.001035	-0.003075
4.4000	380.745	83.046	15.176	48.944	-0.598	9.890	724.840	-0.005813	-0.001062	-0.003426
4.4400	433.014	90.462	20.042	53.856	-0.597	9.890	824.347	-0.006332	-0.001403	-0.003770
4.4800	474.597	96.467	21.302	57.559	-0.604	9.891	903.511	-0.006753	-0.001491	-0.004029
4.5200	535.026	104.654	24.363	63.461	-0.606	9.891	1018.553	-0.007326	-0.001705	-0.004442
4.5600	590.586	112.144	25.336	68.719	-0.605	9.891	1124.325	-0.007850	-0.001774	-0.004810
4.6000	637.340	118.812	29.491	73.714	-0.599	9.891	1213.331	-0.008317	-0.002064	-0.005160
4.6400	691.307	125.511	32.004	78.295	-0.596	9.891	1316.071	-0.008786	-0.002240	-0.005481
4.6800	716.750	130.056	33.477	81.073	-0.602	9.891	1364.508	-0.009104	-0.002343	-0.005675
4.7200	770.386	136.905	36.063	85.974	-0.595	9.891	1466.618	-0.009583	-0.002524	-0.006018
4.7600	795.198	140.741	37.814	88.876	-0.605	9.891	1513.853	-0.009852	-0.002647	-0.006221
4.8000	828.306	145.090	39.870	92.357	-0.609	9.891	1576.881	-0.010156	-0.002791	-0.006465
4.8400	856.394	148.426	40.522	95.081	-0.604	9.891	1630.354	-0.010390	-0.002837	-0.006656
4.8800	861.699	149.693	42.205	96.169	-0.600	9.890	1640.453	-0.010478	-0.002954	-0.006732
4.9200	873.166	152.163	42.984	97.545	-0.606	9.890	1662.283	-0.010651	-0.003009	-0.006828
4.9600	887.683	153.318	42.498	98.767	-0.599	9.891	1689.920	-0.010732	-0.002975	-0.006914
5.0000	873.346	152.497	42.843	98.329	-0.596	9.890	1662.626	-0.010675	-0.002999	-0.006883
5.0400	858.994	151.413	41.706	97.269	-0.613	9.890	1635.303	-0.010599	-0.002919	-0.006809
5.0800	836.406	149.219	42.066	95.781	-0.615	9.890	1592.302	-0.010445	-0.002945	-0.006705
5.1200	827.795	147.551	42.192	94.929	-0.609	9.890	1575.909	-0.010329	-0.002953	-0.006645
5.1600	787.368	143.967	39.773	92.208	-0.600	9.891	1498.947	-0.010078	-0.002784	-0.006455
5.2000	759.806	140.212	38.270	89.659	-0.611	9.890	1446.476	-0.009815	-0.002679	-0.006276
5.2400	723.633	135.974	36.367	86.398	-0.614	9.890	1377.611	-0.009518	-0.002546	-0.006048
5.2800	685.882	131.361	35.035	83.332	-0.599	9.890	1305.742	-0.009195	-0.002452	-0.005833
5.3200	625.768	124.024	31.906	78.253	-0.603	9.890	1191.301	-0.008682	-0.002233	-0.005478
5.3600	579.015	117.921	29.601	74.055	-0.606	9.891	1102.295	-0.008254	-0.002072	-0.005184
5.4000	530.277	111.727	26.388	69.764	-0.613	9.890	1009.512	-0.007821	-0.001847	-0.004883
5.4400	488.814	105.725	24.224	65.760	-0.610	9.890	930.576	-0.007401	-0.001696	-0.004603
5.4800	435.508	98.969	22.777	61.024	-0.593	9.890	829.096	-0.006928	-0.001594	-0.004272
5.5200	373.351	90.158	20.318	55.205	-0.596	9.889	710.764	-0.006311	-0.001422	-0.003864
5.5600	318.738	81.990	17.788	49.922	-0.615	9.890	606.794	-0.005739	-0.001245	-0.003495
5.6000	277.289	75.902	15.148	45.862	-0.601	9.890	527.887	-0.005313	-0.001060	-0.003210
5.6400	231.167	68.895	13.842	41.030	-0.596	9.889	440.083	-0.004823	-0.000969	-0.002872
5.6800	185.796	60.993	11.507	36.930	-0.615	9.890	353.708	-0.004269	-0.000805	-0.002585
5.7200	147.323	54.574	10.504	32.914	-0.598	9.890	280.466	-0.003820	-0.000735	-0.002304
5.7600	118.499	49.151	10.797	29.667	-0.599	9.890	225.592	-0.003441	-0.000756	-0.002077
5.8000	87.165	43.591	8.951	26.487	-0.607	9.889	165.939	-0.003051	-0.000627	-0.001854
5.8400	68.049	40.185	8.730	24.067	-0.608	9.889	129.547	-0.002813	-0.000611	-0.001685
5.8800	51.457	36.852	9.464	21.962	-0.613	9.889	97.961	-0.002580	-0.000662	-0.001537
5.9200	39.254	34.503	8.200	20.170	-0.614	9.889	74.730	-0.002415	-0.000574	-0.001412
5.9600	42.591	34.751	8.256	19.952	-0.612	9.889	81.081	-0.002433	-0.000578	-0.001397
6.0000	36.910	33.307	8.076	19.114	-0.612	9.889	70.267	-0.002331	-0.000565	-0.001338
6.0400	53.697	35.101	8.241	20.047	-0.621	9.889	102.224	-0.002457	-0.000577	-0.001403
6.0800	74.781	38.508	8.061	22.059	-0.626	9.889	142.365	-0.002696	-0.000564	-0.001544
6.1200	96.001	41.269	8.563	23.970	-0.616	9.889	182.762	-0.002889	-0.000599	-0.001678
6.1600	115.974	43.955	8.660	25.773	-0.626	9.889	220.785	-0.003077	-0.000606	-0.001804
6.2000	164.005	51.555	9.423	29.791	-0.616	9.889	312.223	-0.003609	-0.000660	-0.002085
6.2400	207.182	58.015	10.228	33.201	-0.609	9.889	394.421	-0.004061	-0.000716	-0.002324
6.2800	233.737	62.184	9.561	35.997	-0.605	9.889	444.975	-0.004353	-0.000669	-0.002520
6.3200	295.368	71.024	13.620	40.923	-0.604	9.888	562.305	-0.004972	-0.000953	-0.002865
6.3600	340.123	77.570	14.550	44.830	-0.621	9.889	647.507	-0.005430	-0.001019	-0.003138
6.4000	386.471	84.112	16.441	49.439	-0.609	9.888	735.741	-0.005888	-0.001151	-0.003461
6.4400	431.931	90.616	19.178	53.746	-0.624	9.888	822.287	-0.006343	-0.001342	-0.003762
6.4800	494.074	99.111	21.442	59.210	-0.597	9.888	940.590	-0.006938	-0.001501	-0.004145
6.5200	542.541	105.391	23.306	63.956	-0.612	9.888	1032.858	-0.007377	-0.001631	-0.004477
6.5600	604.923	114.018	26.778	69.776	-0.610	9.888	1151.619	-0.007981	-0.001874	-0.004884
6.6000	632.050	118.240	28.837	72.816	-0.608	9.888	1203.260	-0.008277	-0.002019	-0.005097
6.6400	695.680	126.416	31.782	78.514	-0.608	9.888	1324.396	-0.008849	-0.002225	-0.005496
6.6800	717.531	129.846	33.019	81.076	-0.604	9.887	1365.995	-0.009089	-0.002311	-0.005675
6.7200	769.109	137.032	35.203	86.042	-0.609	9.887	1464.186	-0.009592	-0.002464	-0.006023
6.7600	803.073	141.146	37.479	89.673	-0.600	9.888	1528.845	-0.009880	-0.002624	-0.006277
6.8000	843.004	146.492	39.619	93.236	-0.595	9.888	1604.862	-0.010254	-0.002773	-0.006527
6.8400	839.457	146.940	39.246	93.735	-0.597	9.888	1598.110	-0.010286	-0.002747	-0.006561
6.8800	861.879	150.136	40.552	96.142	-0.604	9.888	1640.797	-0.010510	-0.002839	-0.006730
6.9200	877.058	152.568	41.968	97.930	-0.611	9.888	1669.693	-0.010680	-0.002938	-0.006855
6.9600	873.406	152.122	42.901	98.054	-0.616	9.887	1662.741	-0.010649	-0.003003	-0.006864
7.0000	875.194	152.901	41.497	98.509	-0.609	9.887	1666.145	-0.010703	-0.002905	-0.006896
7.0400	862.616	151.692	41.969	97.669	-0.611	9.888	1642.199	-0.010618	-0.002938	-0.006837
7.0800	849.030	150.082	42.080	96.594	-0.615	9.887	1616.335	-0.010506	-0.002946	-0.006762
7.1200	810.993	146.507	39.717	93.789	-0.608	9.887	1543.922	-0.010256	-0.002780	-0.006565
7.1600	787.218	143.772	40.247	91.822	-0.627	9.888	1498.661	-0.010064	-0.002817	-0.006428
7.2000	751.300	139.072	37.618	89.165	-0.615	9.887	1430.283	-0.009735	-0.002633	-0.006242
7.2400	724.700	136.141	37.008	86.785	-0.612	9.886	1379.642	-0.009530	-0.002591	-0.006075
7.2800	668.554	129.429	33.226	82.147	-0.611	9.887	1272.755	-0.009060	-0.002326	-0.005750
7.3200	621.830	123.023	31.503	77.991	-0.598	9.887	1183.805	-0.008612	-0.002205	-0.005459
7.3600	578.158	117.823	28.962	74.165	-0.607	9.887	1100.664	-0.008248	-0.002027	-0.005192
7.4000	530.593	111.935	26.777	69.652	-0.614	9.886	1010.113	-0.007835	-0.001874	-0.004876
7.4400	472.568	103.805	24.320	64.494	-0.603	9.886	899.649	-0.007266	-0.001702	-0.004515
7.4800	419.172	96.843	21.763	59.746	-0.600	9.886	797.997	-0.006779	-0.001523	-0.004182
7.5200	362.170	88.785	19.122	54.365	-0.599	9.886	689.478	-0.006215	-0.001339	-0.003806
7.5600	319.203	81.891	16.774	50.224	-0.607	9.886	607.681	-0.005732	-0.001174	-0.003516
7.6000	265.161	74.217	14.745	45.064	-0.608	9.886	504.799	-0.005195	-0.001032	-0.003154
7.6400	230.881	68.647	13.495	41.334	-0.613	9.886	439.539	-0.004805	-0.000945	-0.002893
7.6800	184.113	60.728	12.037	36.601	-0.613	9.886	350.504	-0.004251	-0.000843	-0.002562
7.7200	146.392	54.001	10.534	32.817	-0.625	9.886	278.692	-0.003780	-0.000737	-0.002297
7.7600	112.247	48.162	9.784	28.992	-0.620	9.887	213.690	-0.003371	-0.000685	-0.002029
7.8000	86.008	43.051	9.590	26.103	-0.619	9.886	163.736	-0.003014	-0.000671	-0.001827
7.8400	74.030	40.618	8.381	24.423	-0.601	9.886	140.934	-0.002843	-0.000587	-0.001710
7.8800	47.054	36.061	8.381	21.464	-0.604	9.886	89.579	-0.002524	-0.000587	-0.001502
7.9200	43.537	34.767	8.032	20.679	-0.597	9.886	82.884	-0.002434	-0.000562	-0.001447
7.9600	40.667	34.530	7.950	19.993	-0.604	9.885	77.419	-0.002417	-0.000557	-0.001400
8.0000	42.275	33.934	8.145	20.061	-0.607	9.886	80.481	-0.002375	-0.000570	-0.001404
8.0400	60.805	35.852	7.865	21.134	-0.616	9.886	115.757	-0.002510	-0.000551	-0.001479
8.0800	66.396	37.174	8.087	21.671	-0.615	9.885	126.400	-0.002602	-0.000566	-0.001517
8.1200	91.854	40.255	8.214	23.474	-0.615	9.885	174.866	-0.002818	-0.000575	-0.001643
8.1600	129.921	45.953	8.798	26.887	-0.605	9.886	247.335	-0.003217	-0.000616	-0.001882
8.2000	161.330	50.804	9.727	29.734	-0.616	9.885	307.131	-0.003556	-0.000681	-0.002081
8.2400	192.664	55.490	9.910	32.157	-0.619	9.885	366.783	-0.003884	-0.000694	-0.002251
8.2800	239.162	62.185	10.478	36.243	-0.600	9.885	455.303	-0.004353	-0.000733	-0.002537
8.3200	278.521	68.673	12.302	39.779	-0.607	9.885	530.233	-0.004807	-0.000861	-0.002785
8.3600	332.428	76.026	14.828	44.498	-0.617	9.885	632.858	-0.005322	-0.001038	-0.003115
8.4000	387.868	83.573	15.842	49.248	-0.614	9.885	738.401	-0.005850	-0.001109	-0.003447
8.4400	441.459	91.603	18.872	54.256	-0.607	9.885	840.425	-0.006412	-0.001321	-0.003798
8.4800	471.531	96.118	20.874	57.763	-0.624	9.885	897.675	-0.006728	-0.001461	-0.004043
8.5200	550.506	106.264	23.945	64.698	-0.612	9.885	1048.021	-0.007438	-0.001676	-0.004529
8.5600	591.593	112.532	26.195	68.966	-0.607	9.885	1126.242	-0.007877	-0.001834	-0.004828
8.6000	650.084	119.744	29.879	74.291	-0.603	9.884	1237.593	-0.008382	-0.002092	-0.005200
8.6400	691.217	125.621	31.200	78.445	-0.608	9.885	1315.899	-0.008793	-0.002184	-0.005491
8.6800	734.273	131.780	33.575	82.381	-0.608	9.885	1397.867	-0.009225	-0.002350	-0.005767
8.7200	767.561	136.170	35.896	86.069	-0.598	9.885	1461.239	-0.009532	-0.002513	-0.006025
8.7600	798.474	140.352	36.785	89.289	-0.612	9.884	1520.090	-0.009825	-0.002575	-0.006250
8.8000	823.331	144.425	39.245	92.000	-0.625	9.885	1567.411	-0.010110	-0.002747	-0.006440
8.8400	845.573	147.232	40.176	94.366	-0.607	9.884	1609.755	-0.010306	-0.002812	-0.006606
8.8800	856.619	149.123	40.413	95.769	-0.623	9.884	1630.783	-0.010439	-0.002829	-0.006704
8.9200	879.658	152.567	42.901	98.273	-0.617	9.884	1674.643	-0.010680	-0.003003	-0.006879
8.9600	872.159	151.803	41.843	97.916	-0.616	9.884	1660.366	-0.010626	-0.002929	-0.006854
9.0000	870.370	151.971	42.233	98.042	-0.616	9.884	1656.961	-0.010638	-0.002956	-0.006863
9.0400	866.237	152.178	42.913	97.517	-0.617	9.884	1649.094	-0.010652	-0.003004	-0.006826
9.0800	836.962	148.565	40.873	95.921	-0.623	9.884	1593.361	-0.010400	-0.002861	-0.006714
9.1200	834.708	148.497	41.564	95.481	-0.612	9.883	1589.069	-0.010395	-0.002909	-0.006684
9.1600	789.848	143.703	39.732	91.985	-0.604	9.883	1503.668	-0.010059	-0.002781	-0.006439
9.2000	752.367	138.812	37.687	89.042	-0.615	9.883	1432.314	-0.009717	-0.002638	-0.006233
9.2400	718.238	134.863	35.811	86.040	-0.611	9.883	1367.340	-0.009440	-0.002507	-0.006023
9.2800	672.191	129.569	33.213	81.898	-0.613	9.883	1279.678	-0.009070	-0.002325	-0.005733
9.3200	628.338	124.009	32.603	78.543	-0.617	9.883	1196.194	-0.008681	-0.002282	-0.005498
9.3600	580.728	117.769	28.809	74.290	-0.627	9.883	1105.556	-0.008244	-0.002017	-0.005200
9.4000	532.126	111.866	27.196	69.956	-0.599	9.883	1013.031	-0.007831	-0.001904	-0.004897
9.4400	475.108	103.777	24.098	64.767	-0.599	9.883	904.484	-0.007264	-0.001687	-0.004534
9.4800	419.548	96.703	21.039	59.967	-0.603	9.883	798.712	-0.006769	-0.001473	-0.004198
9.5200	371.983	89.672	19.095	55.137	-0.602	9.883	708.160	-0.006277	-0.001337	-0.003860
9.5600	322.299	82.404	17.150	50.320	-0.611	9.883	613.575	-0.005768	-0.001200	-0.003522
9.6000	270.271	74.467	14.857	45.298	-0.612	9.883	514.526	-0.005213	-0.001040	-0.003171
9.6400	224.269	67.687	13.328	40.867	-0.605	9.883	426.950	-0.004738	-0.000933	-0.002861
9.6800	184.654	60.852	11.521	37.014	-0.609	9.883	351.534	-0.004260	-0.000806	-0.002591
9.7200	150.074	54.613	10.978	33.271	-0.608	9.883	285.702	-0.003823	-0.000768	-0.002329
9.7600	121.775	49.665	10.158	29.968	-0.620	9.883	231.829	-0.003477	-0.000711	-0.002098
9.8000	85.707	42.869	9.005	26.211	-0.616	9.883	163.164	-0.003001	-0.000630	-0.001835
9.8400	65.449	39.700	9.407	23.954	-0.625	9.882	124.598	-0.002779	-0.000659	-0.001677
9.8800	51.728	36.865	8.644	22.017	-0.620	9.882	98.476	-0.002581	-0.000605	-0.001541
9.9200	45.626	35.489	8.061	21.120	-0.612	9.882	86.861	-0.002484	-0.000564	-0.001478
9.9600	40.607	34.226	7.602	19.552	-0.611	9.882	77.305	-0.002396	-0.000532	-0.001369
10.0000	74.857	42.619	9.354	25.758	-0.617	9.887	142.508	-0.002983	-0.000655	-0.001803
10.0400	65.839	38.991	9.297	23.295	-0.606	9.887	125.341	-0.002729	-0.000651	-0.001631
10.0800	94.664	41.980	8.936	25.235	-0.608	9.888	180.216	-0.002939	-0.000626	-0.001766
10.1200	116.019	44.898	8.797	26.293	-0.616	9.888	220.871	-0.003143	-0.000616	-0.001841
10.1600	152.538	50.140	9.158	29.542	-0.609	9.888	290.394	-0.003510	-0.000641	-0.002068
10.2000	205.513	57.474	9.714	33.326	-0.624	9.887	391.245	-0.004023	-0.000680	-0.002333
10.2400	252.597	65.118	11.479	37.344	-0.636	9.887	480.881	-0.004558	-0.000804	-0.002614
10.2800	321.142	74.483	13.217	43.549	-0.624	9.887	611.372	-0.005214	-0.000925	-0.003048
10.3200	365.837	80.820	15.301	47.405	-0.628	9.888	696.459	-0.005657	-0.001071	-0.003318
10.3600	418.752	88.340	18.262	52.589	-0.617	9.887	797.195	-0.006184	-0.001278	-0.003681
10.4000	493.518	98.635	21.803	59.210	-0.620	9.888	939.531	-0.006904	-0.001526	-0.004145
10.4400	567.127	108.169	24.931	66.074	-0.613	9.887	1079.664	-0.007572	-0.001745	-0.004625
10.4800	626.474	116.645	28.072	71.869	-0.622	9.887	1192.646	-0.008165	-0.001965	-0.005031
10.5200	703.510	126.274	32.282	78.719	-0.620	9.887	1339.302	-0.008839	-0.002260	-0.005510
10.5600	760.738	133.850	34.824	84.101	-0.615	9.888	1448.250	-0.009369	-0.002438	-0.005887
10.6000	832.378	143.703	38.452	90.941	-0.626	9.887	1584.635	-0.010059	-0.002692	-0.006366
10.6400	893.364	151.386	41.608	96.898	-0.614	9.888	1700.735	-0.010597	-0.002913	-0.006783
10.6800	945.092	157.820	44.872	101.936	-0.613	9.888	1799.212	-0.011047	-0.003141	-0.007136
10.7200	996.008	165.213	47.914	107.190	-0.609	9.887	1896.143	-0.011565	-0.003354	-0.007503
10.7600	1040.161	170.984	51.055	111.662	-0.606	9.888	1980.200	-0.011969	-0.003574	-0.007816
10.8000	1075.298	175.623	53.225	115.792	-0.616	9.888	2047.091	-0.012294	-0.003726	-0.008105
10.8400	1096.082	179.346	54.600	118.267	-0.609	9.887	2086.658	-0.012554	-0.003822	-0.008279
10.8800	1119.857	182.389	55.600	120.360	-0.601	9.888	2131.920	-0.012767	-0.003892	-0.008425
10.9200	1139.589	184.822	57.352	122.741	-0.604	9.888	2169.485	-0.012938	-0.004015	-0.008592
10.9600	1134.495	185.736	57.046	123.208	-0.597	9.887	2159.786	-0.013002	-0.003993	-0.008625
11.0000	1130.572	185.528	57.421	123.249	-0.597	9.887	2152.319	-0.012987	-0.004019	-0.008627
11.0400	1106.241	183.142	55.710	121.307	-0.589	9.888	2105.999	-0.012820	-0.003900	-0.008491
11.0800	1095.902	182.417	56.726	121.100	-0.601	9.887	2086.315	-0.012769	-0.003971	-0.008477
11.1200	1059.112	178.570	55.073	118.570	-0.612	9.888	2016.277	-0.012500	-0.003855	-0.008300
11.1600	1030.859	175.163	53.309	115.984	-0.613	9.888	1962.490	-0.012261	-0.003732	-0.008119
11.2000	979.221	169.590	49.944	112.117	-0.618	9.888	1864.185	-0.011871	-0.003496	-0.007848
11.2400	913.938	162.284	47.666	106.475	-0.615	9.888	1739.902	-0.011360	-0.003337	-0.007453
11.2800	879.072	158.223	45.764	103.614	-0.615	9.888	1673.527	-0.011076	-0.003203	-0.007253
11.3200	808.333	149.942	41.859	97.655	-0.621	9.888	1538.858	-0.010496	-0.002930	-0.006836
11.3600	754.141	143.327	39.274	92.714	-0.608	9.888	1435.690	-0.010033	-0.002749	-0.006490
11.4000	690.435	134.834	36.131	87.006	-0.609	9.888	1314.411	-0.009438	-0.002529	-0.006090
11.4400	617.532	125.774	31.740	79.959	-0.607	9.889	1175.623	-0.008804	-0.002222	-0.005597
11.4800	557.449	117.770	29.531	74.730	-0.613	9.888	1061.239	-0.008244	-0.002067	-0.005231
11.5200	484.621	107.987	25.154	67.863	-0.605	9.888	922.594	-0.007559	-0.001761	-0.004750
11.5600	418.180	98.511	22.735	61.561	-0.612	9.888	796.108	-0.006896	-0.001591	-0.004309
11.6000	362.109	90.686	19.609	56.043	-0.619	9.888	689.363	-0.006348	-0.001373	-0.003923
11.6400	295.684	80.373	16.370	49.467	-0.608	9.888	562.906	-0.005626	-0.001146	-0.003463
11.6800	234.338	71.149	14.647	43.439	-0.604	9.888	446.119	-0.004980	-0.001025	-0.003041
11.7200	190.485	63.575	12.537	38.803	-0.615	9.888	362.635	-0.004450	-0.000878	-0.002716
11.7600	148.090	55.850	10.298	34.359	-0.610	9.889	281.925	-0.003910	-0.000721	-0.002405
11.8000	118.905	50.373	10.686	31.014	-0.612	9.889	226.364	-0.003526	-0.000748	-0.002171
11.8400	90.937	45.024	10.603	27.629	-0.607	9.888	173.120	-0.003152	-0.000742	-0.001934
11.8800	65.298	40.658	9.243	25.112	-0.605	9.888	124.311	-0.002846	-0.000647	-0.001758
11.9200	57.228	38.215	9.380	23.200	-0.604	9.888	108.948	-0.002675	-0.000657	-0.001624
11.9600	56.492	37.533	9.325	22.965	-0.607	9.888	107.546	-0.002627	-0.000653	-0.001608
12.0000	57.544	37.174	8.575	22.388	-0.596	9.888	109.549	-0.002602	-0.000600	-0.001567
12.0400	61.977	37.882	8.478	22.525	-0.615	9.889	117.989	-0.002652	-0.000593	-0.001577
12.0800	95.746	42.328	9.048	25.262	-0.601	9.889	182.276	-0.002963	-0.000633	-0.001768
12.1200	120.017	45.911	8.520	27.326	-0.611	9.888	228.481	-0.003214	-0.000596	-0.001913
12.1600	158.505	51.319	9.855	30.408	-0.613	9.888	301.752	-0.003592	-0.000690	-0.002129
12.2000	199.833	57.558	10.298	34.386	-0.616	9.888	380.430	-0.004029	-0.000721	-0.002407
12.2400	246.631	64.714	11.046	37.758	-0.609	9.889	469.522	-0.004530	-0.000773	-0.002643
12.2800	313.147	74.441	13.369	43.742	-0.608	9.888	596.151	-0.005211	-0.000936	-0.003062
12.3200	369.038	81.487	15.564	48.626	-0.603	9.888	702.553	-0.005704	-0.001090	-0.003404
12.3600	430.834	90.227	18.387	54.160	-0.599	9.888	820.198	-0.006316	-0.001287	-0.003791
12.4000	490.873	99.208	21.459	60.021	-0.611	9.889	934.496	-0.006945	-0.001502	-0.004201
12.4400	558.636	108.113	25.375	66.379	-0.611	9.888	1063.499	-0.007568	-0.001776	-0.004647
12.4800	628.187	117.603	28.391	73.094	-0.614	9.888	1195.908	-0.008232	-0.001987	-0.005117
12.5200	702.683	127.178	31.935	79.120	-0.611	9.889	1337.729	-0.008902	-0.002235	-0.005538
12.5600	753.539	134.501	35.174	84.954	-0.611	9.888	1434.546	-0.009415	-0.002462	-0.005947
12.6000	826.247	143.439	38.425	91.519	-0.611	9.889	1572.962	-0.010041	-0.002690	-0.006406
12.6400	882.859	151.469	41.802	97.160	-0.600	9.888	1680.737	-0.010603	-0.002926	-0.006801
12.6800	945.527	159.336	44.955	103.199	-0.601	9.888	1800.041	-0.011154	-0.003147	-0.007224
12.7200	992.401	165.075	48.068	108.028	-0.597	9.888	1889.277	-0.011555	-0.003365	-0.007562
12.7600	1048.201	172.720	50.443	113.356	-0.603	9.888	1995.506	-0.012090	-0.003531	-0.007935
12.8000	1068.114	175.902	53.350	115.720	-0.594	9.889	2033.415	-0.012313	-0.003734	-0.008100
12.8400	1098.066	179.693	54.807	119.173	-0.602	9.889	2090.435	-0.012578	-0.003837	-0.008342
12.8800	1118.985	183.309	55.682	121.322	-0.619	9.888	2130.260	-0.012832	-0.003898	-0.008493
12.9200	1137.575	185.918	56.724	123.634	-0.609	9.888	2165.651	-0.013014	-0.003971	-0.008654
12.9600	1134.915	186.014	57.186	124.101	-0.627	9.888	2160.587	-0.013021	-0.004003	-0.008687
13.0000	1129.971	186.111	58.227	124.005	-0.620	9.888	2151.175	-0.013028	-0.004076	-0.008680
13.0400	1117.422	185.156	58.088	123.635	-0.627	9.889	2127.285	-0.012961	-0.004066	-0.008654
13.0800	1096.322	182.809	56.463	121.693	-0.620	9.888	2087.116	-0.012797	-0.003952	-0.008519
13.1200	1074.321	180.720	55.919	120.223	-0.612	9.888	2045.231	-0.012650	-0.003914	-0.008416
13.1600	1025.674	175.664	54.016	116.780	-0.617	9.888	1952.620	-0.012296	-0.003781	-0.008175
13.2000	988.418	171.053	52.016	113.466	-0.603	9.889	1881.695	-0.011974	-0.003641	-0.007943
13.2400	935.503	165.311	49.083	108.926	-0.603	9.888	1780.958	-0.011572	-0.003436	-0.007625
13.2800	873.571	158.221	46.277	103.820	-0.607	9.888	1663.055	-0.011075	-0.003239	-0.007267
13.3200	821.152	151.899	42.691	99.319	-0.603	9.889	1563.263	-0.010633	-0.002988	-0.006952
13.3600	757.657	144.494	39.232	93.883	-0.612	9.889	1442.385	-0.010115	-0.002746	-0.006572
13.4000	683.868	135.000	35.619	87.004	-0.617	9.888	1301.908	-0.009450	-0.002493	-0.006090
13.4400	612.633	125.539	32.449	80.964	-0.613	9.888	1166.296	-0.008788	-0.002271	-0.005667
13.4800	552.444	117.699	29.225	75.089	-0.615	9.888	1051.712	-0.008239	-0.002046	-0.005256
13.5200	485.598	108.767	25.778	68.825	-0.596	9.888	924.454	-0.007614	-0.001804	-0.004818
13.5600	420.720	99.455	22.750	63.145	-0.619	9.888	800.943	-0.006962	-0.001593	-0.004420
13.6000	353.739	90.129	19.539	55.990	-0.622	9.889	673.428	-0.006309	-0.001368	-0.003919
13.6400	293.460	81.462	17.107	50.153	-0.603	9.888	558.672	-0.005702	-0.001198	-0.003511
13.6800	243.836	72.471	14.509	45.007	-0.616	9.888	464.201	-0.005073	-0.001016	-0.003151
13.7200	189.072	64.159	12.286	39.532	-0.613	9.888	359.945	-0.004491	-0.000860	-0.002767
13.7600	148.721	57.042	11.912	35.351	-0.619	9.889	283.127	-0.003993	-0.000834	-0.002475
13.8000	120.287	51.028	10.864	32.047	-0.623	9.889	228.996	-0.003572	-0.000760	-0.002243
13.8400	93.657	46.510	9.742	28.991	-0.597	9.888	178.299	-0.003256	-0.000682	-0.002029
13.8800	68.094	41.772	9.812	25.719	-0.628	9.888	129.633	-0.002924	-0.000687	-0.001800
13.9200	48.076	37.451	8.756	23.462	-0.611	9.888	91.524	-0.002622	-0.000613	-0.001642
13.9600	45.536	36.936	9.129	22.375	-0.622	9.888	86.689	-0.002586	-0.000639	-0.001566
14.0000	52.374	37.423	9.089	22.456	-0.611	9.889	99.707	-0.002620	-0.000636	-0.001572
14.0400	75.548	39.977	9.367	24.204	-0.617	9.889	143.824	-0.002798	-0.000656	-0.001694
14.0800	94.288	42.606	8.796	25.951	-0.604	9.889	179.501	-0.002982	-0.000616	-0.001817
14.1200	116.109	45.760	9.951	27.520	-0.613	9.889	221.043	-0.003203	-0.000697	-0.001926
14.1600	158.986	52.012	9.869	31.193	-0.617	9.888	302.668	-0.003641	-0.000691	-0.002183
14.2000	207.317	59.407	10.353	35.338	-0.613	9.889	394.678	-0.004158	-0.000725	-0.002474
14.2400	251.831	65.995	11.826	39.117	-0.616	9.888	479.422	-0.004620	-0.000828	-0.002738
14.2800	310.712	74.384	13.314	43.839	-0.611	9.888	591.516	-0.005207	-0.000932	-0.003069
14.3200	373.215	83.504	16.273	49.521	-0.603	9.888	710.506	-0.005845	-0.001139	-0.003466
14.3600	429.121	91.186	19.651	54.777	-0.618	9.888	816.936	-0.006383	-0.001376	-0.003834
14.4000	499.649	100.470	22.346	61.398	-0.609	9.888	951.204	-0.007033	-0.001564	-0.004298
14.4400	570.163	110.269	25.320	68.084	-0.615	9.889	1085.443	-0.007719	-0.001772	-0.004766
14.4800	627.827	118.187	28.976	73.257	-0.619	9.888	1195.221	-0.008273	-0.002028	-0.005128
14.5200	701.436	127.654	32.199	80.402	-0.604	9.888	1335.354	-0.008936	-0.002254	-0.005628
14.5600	765.727	136.392	35.298	86.345	-0.615	9.889	1457.748	-0.009547	-0.002471	-0.006044
14.6000	829.478	144.979	39.284	92.619	-0.612	9.888	1579.113	-0.010149	-0.002750	-0.006483
14.6400	889.637	153.040	42.399	98.825	-0.609	9.889	1693.640	-0.010713	-0.002968	-0.006918
14.6800	942.852	159.821	45.597	103.820	-0.620	9.889	1794.949	-0.011187	-0.003192	-0.007267
14.7200	993.784	166.161	48.540	108.897	-0.618	9.889	1891.909	-0.011631	-0.003398	-0.007623
14.7600	1033.474	171.566	51.029	112.765	-0.612	9.889	1967.468	-0.012010	-0.003572	-0.007894
14.8000	1083.097	178.320	53.766	117.895	-0.610	9.888	2061.939	-0.012482	-0.003764	-0.008253
14.8400	1095.646	180.471	55.169	119.851	-0.612	9.889	2085.829	-0.012633	-0.003862	-0.008390
14.8800	1119.962	183.767	56.420	122.313	-0.611	9.888	2132.120	-0.012864	-0.003949	-0.008562
14.9200	1132.977	186.015	57.173	124.213	-0.620	9.888	2156.897	-0.013021	-0.004002	-0.008695
14.9600	1140.446	187.282	58.769	125.532	-0.624	9.888	2171.116	-0.013110	-0.004114	-0.008787
15.0000	1127.326	186.250	57.741	124.351	-0.612	9.887	2146.139	-0.013038	-0.004042	-0.008705
15.0400	1113.951	185.502	57.451	123.675	-0.609	9.888	2120.676	-0.012985	-0.004022	-0.008657
15.0800	1093.151	183.434	57.394	122.245	-0.637	9.888	2081.079	-0.012840	-0.004018	-0.008557
15.1200	1062.103	179.623	55.599	120.181	-0.620	9.888	2021.971	-0.012574	-0.003892	-0.008413
15.1600	1017.423	175.121	53.906	116.780	-0.631	9.887	1936.913	-0.012258	-0.003773	-0.008175
15.2000	980.859	170.773	51.765	114.056	-0.638	9.888	1867.304	-0.011954	-0.003624	-0.007984
15.2400	933.670	165.326	49.136	109.942	-0.626	9.887	1777.468	-0.011573	-0.003439	-0.007696
15.2800	874.172	159.168	46.485	104.906	-0.635	9.888	1664.200	-0.011142	-0.003254	-0.007343
15.3200	803.885	150.955	42.525	98.729	-0.635	9.888	1530.390	-0.010567	-0.002977	-0.006911
15.3600	749.632	143.466	39.411	93.929	-0.631	9.888	1427.107	-0.010043	-0.002759	-0.006575
15.4000	678.217	134.655	35.883	87.732	-0.633	9.888	1291.151	-0.009426	-0.002512	-0.006141
15.4400	611.656	126.358	32.726	81.529	-0.629	9.888	1164.436	-0.008845	-0.002291	-0.005707
15.4800	545.216	117.021	28.947	75.226	-0.619	9.888	1037.951	-0.008191	-0.002026	-0.005266
15.5200	481.781	108.515	25.558	69.198	-0.620	9.888	917.187	-0.007596	-0.001789	-0.004844
15.5600	436.921	101.969	23.765	64.712	-0.627	9.887	831.785	-0.007138	-0.001664	-0.004530
15.6000	349.185	89.519	19.818	56.141	-0.623	9.887	664.759	-0.006266	-0.001387	-0.003930
15.6400	315.702	83.836	18.345	52.466	-0.623	9.887	601.015	-0.005868	-0.001284	-0.003673
15.6800	229.709	71.427	14.497	44.776	-0.630	9.888	437.307	-0.005000	-0.001015	-0.003134
15.7200	193.566	64.632	13.660	40.619	-0.615	9.888	368.500	-0.004524	-0.000956	-0.002843
15.7600	142.424	56.377	12.134	35.747	-0.637	9.888	271.139	-0.003946	-0.000849	-0.002502
15.8000	116.771	51.220	11.632	32.362	-0.622	9.888	222.301	-0.003585	-0.000814	-0.002265
15.8400	85.572	45.314	10.493	28.882	-0.631	9.887	162.907	-0.003172	-0.000735	-0.002022
15.8800	68.590	42.021	9.645	26.365	-0.620	9.888	130.577	-0.002941	-0.000675	-0.001846
15.9200	49.984	38.700	9.353	23.817	-0.625	9.888	95.158	-0.002709	-0.000655	-0.001667
15.9600	51.638	38.062	9.563	23.929	-0.635	9.888	98.305	-0.002664	-0.000669	-0.001675
16.0000	60.069	38.645	9.089	24.010	-0.620	9.888	114.355	-0.002705	-0.000636	-0.001681
16.0400	69.627	39.938	9.784	24.505	-0.631	9.888	132.551	-0.002796	-0.000685	-0.001715
16.0800	82.686	41.382	9.007	25.637	-0.626	9.888	157.413	-0.002897	-0.000630	-0.001795
16.1200	129.229	48.552	9.868	29.610	-0.625	9.888	246.019	-0.003399	-0.000691	-0.002073
16.1600	155.349	52.026	10.186	31.497	-0.633	9.889	295.744	-0.003642	-0.000713	-0.002205
16.2000	211.570	60.171	10.328	36.147	-0.632	9.888	402.775	-0.004212	-0.000723	-0.002530
16.2400	252.342	66.633	11.912	40.041	-0.645	9.888	480.394	-0.004664	-0.000834	-0.002803
16.2800	301.785	73.776	13.635	44.130	-0.624	9.888	574.522	-0.005164	-0.000954	-0.003089
16.3200	374.283	83.338	17.037	50.197	-0.623	9.889	712.538	-0.005834	-0.001193	-0.003514
16.3600	427.137	91.103	19.234	55.604	-0.606	9.888	813.160	-0.006377	-0.001346	-0.003892
16.4000	500.792	100.706	22.527	61.948	-0.630	9.888	953.379	-0.007049	-0.001577	-0.004336
16.4400	562.513	109.196	25.140	68.194	-0.620	9.888	1070.881	-0.007644	-0.001760	-0.004774
16.4800	635.867	119.606	29.171	75.169	-0.612	9.889	1210.527	-0.008372	-0.002042	-0.005262
16.5200	706.906	128.638	33.062	81.323	-0.611	9.889	1345.768	-0.009005	-0.002314	-0.005693
16.5600	765.667	136.530	36.008	87.115	-0.618	9.889	1457.634	-0.009557	-0.002521	-0.006098
16.6000	826.577	145.341	39.175	93.239	-0.628	9.889	1573.591	-0.010174	-0.002742	-0.006527
16.6400	887.984	153.082	42.551	99.154	-0.612	9.889	1690.493	-0.010716	-0.002979	-0.006941
16.6800	946.023	160.295	46.081	104.657	-0.620	9.889	1800.985	-0.011221	-0.003226	-0.007326
16.7200	993.799	166.814	48.778	109.846	-0.619	9.889	1891.937	-0.011677	-0.003414	-0.007689
16.7600	1030.122	171.956	51.223	113.411	-0.620	9.889	1961.088	-0.012037	-0.003586	-0.007939
16.8000	1079.611	177.890	53.267	118.144	-0.621	9.889	2055.302	-0.012452	-0.003729	-0.008270
16.8400	1092.926	180.638	55.071	119.946	-0.629	9.890	2080.650	-0.012645	-0.003855	-0.008396
16.8800	1128.303	184.931	57.143	123.978	-0.636	9.889	2147.999	-0.012945	-0.004000	-0.008678
16.9200	1125.688	185.347	57.059	124.269	-0.637	9.889	2143.021	-0.012974	-0.003994	-0.008699
16.9600	1133.067	187.199	57.826	125.078	-0.624	9.889	2157.068	-0.013104	-0.004048	-0.008755
17.0000	1138.131	187.629	58.227	126.180	-0.621	9.889	2166.710	-0.013134	-0.004076	-0.008833
17.0400	1117.918	186.001	57.518	124.762	-0.629	9.889	2128.229	-0.013020	-0.004026	-0.008733
17.0800	1092.190	183.421	57.323	122.892	-0.640	9.889	2079.248	-0.012839	-0.004013	-0.008602
17.1200	1058.736	179.998	56.256	120.249	-0.636	9.889	2015.562	-0.012600	-0.003938	-0.008417
17.1600	1027.823	176.499	53.919	118.143	-0.628	9.890	1956.711	-0.012355	-0.003774	-0.008270
17.2000	995.542	172.676	51.709	115.255	-0.632	9.890	1895.256	-0.012087	-0.003620	-0.008068
17.2400	949.179	167.728	50.345	111.610	-0.625	9.889	1806.993	-0.011741	-0.003524	-0.007813
17.2800	884.722	159.961	46.471	105.910	-0.614	9.889	1684.284	-0.011197	-0.003253	-0.007414
17.3200	810.076	151.634	43.065	99.595	-0.618	9.889	1542.177	-0.010614	-0.003015	-0.006972
17.3600	738.902	142.967	39.716	93.291	-0.617	9.890	1406.679	-0.010008	-0.002780	-0.006530
17.4000	677.886	135.085	35.936	87.885	-0.623	9.889	1290.522	-0.009456	-0.002516	-0.006152
17.4400	615.984	126.818	33.088	81.956	-0.620	9.889	1172.676	-0.008877	-0.002316	-0.005737
17.4800	547.951	117.786	29.142	75.749	-0.605	9.889	1043.158	-0.008245	-0.002040	-0.005302
17.5200	478.309	108.364	25.613	69.392	-0.619	9.890	910.578	-0.007585	-0.001793	-0.004857
17.5600	408.277	99.025	22.513	63.007	-0.621	9.889	777.254	-0.006932	-0.001576	-0.004411
17.6000	357.811	90.727	20.193	57.076	-0.616	9.890	681.181	-0.006351	-0.001414	-0.003995
17.6400	282.534	79.930	16.732	50.362	-0.624	9.889	537.872	-0.005595	-0.001171	-0.003525
17.6800	239.778	72.845	14.952	45.270	-0.609	9.890	456.476	-0.005099	-0.001047	-0.003169
17.7200	193.265	64.798	13.606	40.895	-0.626	9.890	367.928	-0.004536	-0.000952	-0.002863
17.7600	141.583	56.584	11.744	35.446	-0.621	9.890	269.537	-0.003961	-0.000822	-0.002481
17.8000	116.125	51.205	11.507	32.087	-0.619	9.890	221.071	-0.003584	-0.000805	-0.002246
17.8400	85.452	45.648	10.685	28.936	-0.631	9.890	162.678	-0.003195	-0.000748	-0.002025
17.8800	79.846	43.745	9.645	27.615	-0.621	9.890	152.006	-0.003062	-0.000675	-0.001933
17.9200	50.360	38.852	9.647	24.161	-0.627	9.890	95.873	-0.002720	-0.000675	-0.001691
17.9600	42.260	36.604	8.812	22.897	-0.637	9.890	80.452	-0.002562	-0.000617	-0.001603
18.0000	81.860	42.245	9.492	25.772	-0.628	9.890	155.840	-0.002957	-0.000664	-0.001804
18.0400	74.421	40.617	9.547	25.250	-0.631	9.890	141.678	-0.002843	-0.000668	-0.001768
18.0800	83.152	41.131	9.062	25.566	-0.632	9.890	158.300	-0.002879	-0.000634	-0.001790
18.1200	121.941	47.107	9.922	28.908	-0.644	9.890	232.143	-0.003298	-0.000695	-0.002024
18.1600	166.019	53.804	10.646	32.789	-0.636	9.890	316.057	-0.003766	-0.000745	-0.002295
18.2000	200.915	58.892	10.785	35.542	-0.634	9.890	382.490	-0.004122	-0.000755	-0.002488
18.2400	273.502	69.661	13.036	41.349	-0.633	9.890	520.678	-0.004876	-0.000912	-0.002894
18.2800	304.160	74.011	13.941	44.459	-0.641	9.890	579.042	-0.005181	-0.000976	-0.003112
18.3200	372.269	82.865	16.662	50.073	-0.635	9.890	708.704	-0.005801	-0.001166	-0.003505
18.3600	422.899	90.576	18.914	55.288	-0.640	9.889	805.092	-0.006340	-0.001324	-0.003870
18.4000	488.904	99.735	21.847	61.080	-0.628	9.890	930.748	-0.006981	-0.001529	-0.004276
18.4400	567.307	109.252	25.957	68.647	-0.638	9.890	1080.008	-0.007648	-0.001817	-0.004805
18.4800	637.310	119.579	29.532	74.909	-0.643	9.889	1213.274	-0.008371	-0.002067	-0.005244
18.5200	700.775	128.222	32.313	80.523	-0.635	9.890	1334.095	-0.008976	-0.002262	-0.005637
18.5600	763.488	136.320	36.146	87.005	-0.649	9.890	1453.485	-0.009542	-0.002530	-0.006090
18.6000	828.982	144.969	39.579	93.196	-0.645	9.889	1578.169	-0.010148	-0.002771	-0.006524
18.6400	883.956	152.497	42.621	98.494	-0.640	9.890	1682.825	-0.010675	-0.002983	-0.006895
18.6800	946.219	160.058	46.123	104.616	-0.639	9.890	1801.357	-0.011204	-0.003229	-0.007323
18.7200	991.695	166.523	48.776	109.296	-0.643	9.890	1887.932	-0.011657	-0.003414	-0.007651
18.7600	1035.953	172.567	51.237	113.851	-0.636	9.890	1972.189	-0.012080	-0.003587	-0.007970
18.8000	1062.899	176.108	52.556	116.753	-0.641	9.890	2023.487	-0.012328	-0.003679	-0.008173
18.8400	1098.471	181.097	54.946	120.454	-0.652	9.890	2091.208	-0.012677	-0.003846	-0.008432
18.8800	1119.707	184.169	56.421	122.797	-0.639	9.890	2131.634	-0.012892	-0.003949	-0.008596
18.9200	1126.169	185.375	57.422	124.102	-0.636	9.890	2143.936	-0.012976	-0.004020	-0.008687
18.9600	1137.455	187.296	57.645	126.123	-0.641	9.890	2165.422	-0.013111	-0.004035	-0.008829
19.0000	1132.691	187.463	58.504	125.367	-0.636	9.890	2156.353	-0.013122	-0.004095	-0.008776
19.0400	1115.198	185.737	58.115	124.598	-0.635	9.890	2123.051	-0.013002	-0.004068	-0.008722
19.0800	1091.168	183.239	57.518	122.863	-0.635	9.890	2077.303	-0.012827	-0.004026	-0.008600
19.1200	1059.758	179.914	55.782	120.292	-0.626	9.890	2017.508	-0.012594	-0.003905	-0.008420
19.1600	1024.937	176.360	54.265	117.372	-0.630	9.890	1951.218	-0.012345	-0.003799	-0.008216
19.2000	978.034	171.428	51.433	113.919	-0.639	9.890	1861.925	-0.012000	-0.003600	-0.007974
19.2400	935.083	166.160	49.651	110.399	-0.629	9.890	1780.157	-0.011631	-0.003476	-0.007728
19.2800	877.659	159.238	46.193	105.540	-0.638	9.891	1670.837	-0.011147	-0.003233	-0.007388
19.3200	819.033	152.401	43.427	100.310	-0.628	9.890	1559.229	-0.010668	-0.003040	-0.007022
19.3600	750.519	144.385	39.941	94.007	-0.625	9.890	1428.795	-0.010107	-0.002796	-0.006580
19.4000	679.239	135.252	36.214	87.873	-0.633	9.890	1293.097	-0.009468	-0.002535	-0.006151
19.4400	618.494	127.540	32.907	82.273	-0.624	9.890	1177.454	-0.008928	-0.002303	-0.005759
19.4800	544.660	118.020	29.713	75.433	-0.621	9.890	1036.892	-0.008261	-0.002080	-0.005280
19.5200	488.994	110.005	26.112	69.901	-0.627	9.890	930.920	-0.007700	-0.001828	-0.004893
19.5600	410.531	99.860	22.598	62.925	-0.634	9.890	781.546	-0.006990	-0.001582	-0.004405
19.6000	325.410	87.451	19.068	54.944	-0.629	9.890	619.497	-0.006122	-0.001335	-0.003846
19.6400	282.203	79.806	16.676	50.335	-0.629	9.890	537.243	-0.005586	-0.001167	-0.003523
19.6800	247.743	74.594	15.273	46.179	-0.637	9.891	471.640	-0.005222	-0.001069	-0.003233
19.7200	182.851	63.699	13.523	39.932	-0.637	9.890	348.101	-0.004459	-0.000947	-0.002795
19.7600	146.302	56.959	12.147	35.845	-0.636	9.891	278.521	-0.003987	-0.000850	-0.002509
19.8000	112.097	50.707	11.061	32.240	-0.634	9.891	213.404	-0.003549	-0.000774	-0.002257
19.8400	88.382	46.399	10.576	29.309	-0.637	9.890	168.257	-0.003248	-0.000740	-0.002052
19.8800	71.084	42.204	9.561	26.859	-0.641	9.891	135.326	-0.002954	-0.000669	-0.001880
19.9200	58.971	40.214	9.451	25.442	-0.640	9.891	112.267	-0.002815	-0.000662	-0.001781
19.9600	52.209	38.131	9.048	23.805	-0.642	9.890	99.392	-0.002669	-0.000633	-0.001666
Test Cycles
Time (sec)	Axial stress (kPa)	Axial micro-strain #1	Axial micro-strain #2	Axial micro-strain #3	Confining pressure (kPa)	Temperature (�C)	Load (N)	Displacement #1 (mm)	Displacement #2 (mm)	Displacement #3 (mm)
0.0000	57.589	38.381	9.186	23.982	-0.632	9.891	109.634	-0.002687	-0.000643	-0.001679
0.0400	71.881	40.202	9.090	24.658	-0.639	9.891	136.843	-0.002814	-0.000636	-0.001726
0.0800	97.414	43.441	10.049	26.928	-0.632	9.890	185.452	-0.003041	-0.000703	-0.001885
0.1200	122.016	46.967	9.130	28.838	-0.634	9.891	232.286	-0.003288	-0.000639	-0.002019
0.1600	158.009	52.763	10.019	31.910	-0.627	9.890	300.808	-0.003693	-0.000701	-0.002234
0.2000	197.383	58.753	10.729	35.476	-0.626	9.891	375.767	-0.004113	-0.000751	-0.002483
0.2400	250.494	66.188	12.008	39.737	-0.632	9.891	476.875	-0.004633	-0.000841	-0.002782
0.2800	312.170	74.984	13.994	44.818	-0.631	9.891	594.292	-0.005249	-0.000980	-0.003137
0.3200	366.212	82.767	17.414	49.783	-0.624	9.891	697.174	-0.005794	-0.001219	-0.003485
0.3600	432.037	91.618	19.498	56.251	-0.627	9.890	822.487	-0.006413	-0.001365	-0.003938
0.4000	492.015	100.220	22.319	61.396	-0.622	9.890	936.670	-0.007015	-0.001562	-0.004298
0.4400	557.885	108.890	25.556	67.534	-0.620	9.890	1062.069	-0.007622	-0.001789	-0.004727
0.4800	638.527	119.608	29.325	74.839	-0.611	9.891	1215.591	-0.008373	-0.002053	-0.005239
0.5200	703.540	128.790	32.865	80.948	-0.620	9.890	1339.359	-0.009015	-0.002301	-0.005666
0.5600	766.840	136.892	35.980	87.431	-0.619	9.890	1459.866	-0.009582	-0.002519	-0.006120
0.6000	830.560	145.202	39.092	93.638	-0.631	9.890	1581.173	-0.010164	-0.002736	-0.006555
0.6400	891.801	153.275	42.872	99.113	-0.627	9.891	1697.760	-0.010729	-0.003001	-0.006938
0.6800	937.863	159.333	45.833	103.835	-0.628	9.891	1785.450	-0.011153	-0.003208	-0.007268
0.7200	999.539	166.982	48.916	110.163	-0.629	9.890	1902.866	-0.011689	-0.003424	-0.007711
0.7600	1032.887	171.982	51.348	113.329	-0.620	9.890	1966.352	-0.012039	-0.003594	-0.007933
0.8000	1073.088	177.401	53.696	117.539	-0.620	9.890	2042.885	-0.012418	-0.003759	-0.008228
0.8400	1096.984	180.984	54.875	120.648	-0.629	9.890	2088.375	-0.012669	-0.003841	-0.008445
0.8800	1128.618	185.057	57.282	123.525	-0.622	9.890	2148.600	-0.012954	-0.004010	-0.008647
0.9200	1135.351	186.155	57.559	124.472	-0.625	9.890	2161.417	-0.013031	-0.004029	-0.008713
0.9600	1134.660	186.793	58.172	125.177	-0.631	9.889	2160.101	-0.013076	-0.004072	-0.008762
1.0000	1128.814	187.157	57.811	125.380	-0.626	9.890	2148.972	-0.013101	-0.004047	-0.008777
1.0400	1119.166	186.406	57.908	124.431	-0.635	9.889	2130.604	-0.013048	-0.004054	-0.008710
1.0800	1091.694	183.184	57.131	122.989	-0.633	9.890	2078.304	-0.012823	-0.003999	-0.008609
1.1200	1062.914	180.541	56.129	120.580	-0.627	9.889	2023.516	-0.012638	-0.003929	-0.008441
1.1600	1027.492	176.359	54.586	117.964	-0.623	9.890	1956.081	-0.012345	-0.003821	-0.008258
1.2000	982.648	171.176	51.764	114.386	-0.631	9.890	1870.708	-0.011982	-0.003623	-0.008007
1.2400	937.036	166.645	49.513	110.302	-0.627	9.890	1783.876	-0.011665	-0.003466	-0.007721
1.2800	881.161	159.697	46.567	105.429	-0.633	9.889	1677.504	-0.011179	-0.003260	-0.007380
1.3200	817.996	152.400	43.066	100.255	-0.629	9.889	1557.255	-0.010668	-0.003015	-0.007018
1.3600	747.273	143.980	39.565	94.160	-0.636	9.889	1422.615	-0.010079	-0.002770	-0.006591
1.4000	692.780	136.809	36.924	88.985	-0.630	9.889	1318.874	-0.009577	-0.002585	-0.006229
1.4400	611.776	126.511	32.559	81.830	-0.631	9.889	1164.665	-0.008856	-0.002279	-0.005728
1.4800	540.632	117.380	29.796	75.572	-0.618	9.889	1029.224	-0.008217	-0.002086	-0.005290
1.5200	481.736	109.157	26.421	69.681	-0.630	9.889	917.101	-0.007641	-0.001849	-0.004878
1.5600	414.303	99.830	23.183	63.214	-0.637	9.889	788.727	-0.006988	-0.001623	-0.004425
1.6000	352.311	90.810	20.040	57.698	-0.631	9.888	670.710	-0.006357	-0.001403	-0.004039
1.6400	290.003	81.795	17.386	51.187	-0.635	9.888	552.092	-0.005726	-0.001217	-0.003583
1.6800	244.602	73.997	15.289	46.316	-0.625	9.888	465.660	-0.005180	-0.001070	-0.003242
1.7200	190.515	65.438	13.563	41.128	-0.636	9.888	362.692	-0.004581	-0.000949	-0.002879
1.7600	152.057	58.098	12.661	36.944	-0.639	9.888	289.478	-0.004067	-0.000886	-0.002586
1.8000	112.984	51.246	10.800	32.582	-0.629	9.888	215.092	-0.003587	-0.000756	-0.002281
1.8400	89.780	47.051	10.465	29.707	-0.632	9.888	170.918	-0.003294	-0.000733	-0.002079
1.8800	72.467	42.730	10.422	27.215	-0.621	9.888	137.959	-0.002991	-0.000730	-0.001905
1.9200	47.520	38.772	9.701	24.340	-0.633	9.888	90.466	-0.002714	-0.000679	-0.001704
1.9600	39.870	37.006	8.991	23.404	-0.631	9.888	75.903	-0.002590	-0.000629	-0.001638
2.0000	48.677	37.312	8.840	23.652	-0.633	9.888	92.669	-0.002612	-0.000619	-0.001656
2.0400	76.029	41.147	8.852	25.717	-0.617	9.888	144.739	-0.002880	-0.000620	-0.001800
2.0800	88.322	42.689	9.728	26.997	-0.625	9.888	168.142	-0.002988	-0.000681	-0.001890
2.1200	119.070	47.010	10.492	28.910	-0.624	9.887	226.679	-0.003291	-0.000734	-0.002024
2.1600	158.099	52.610	9.882	32.155	-0.636	9.887	300.980	-0.003683	-0.000692	-0.002251
2.2000	196.121	58.625	11.132	35.775	-0.640	9.887	373.363	-0.004104	-0.000779	-0.002504
2.2400	235.495	64.325	11.591	39.050	-0.630	9.887	448.322	-0.004503	-0.000811	-0.002734
2.2800	302.792	74.135	13.775	44.898	-0.633	9.887	576.439	-0.005189	-0.000964	-0.003143
2.3200	370.646	83.767	17.205	50.375	-0.618	9.887	705.614	-0.005864	-0.001204	-0.003526
2.3600	430.308	91.852	19.859	56.017	-0.618	9.887	819.197	-0.006430	-0.001390	-0.003921
2.4000	491.970	100.678	22.207	61.863	-0.625	9.887	936.584	-0.007047	-0.001554	-0.004330
2.4400	562.769	110.419	25.724	68.304	-0.631	9.887	1071.367	-0.007729	-0.001801	-0.004781
2.4800	630.878	119.145	29.046	74.800	-0.635	9.887	1201.029	-0.008340	-0.002033	-0.005236
2.5200	703.209	128.611	32.420	81.390	-0.633	9.887	1338.730	-0.009003	-0.002269	-0.005697
2.5600	767.140	137.392	36.286	87.624	-0.635	9.887	1460.438	-0.009617	-0.002540	-0.006134
2.6000	834.512	146.035	39.896	93.776	-0.634	9.887	1588.697	-0.010222	-0.002793	-0.006564
2.6400	890.674	153.235	42.789	99.581	-0.639	9.887	1695.614	-0.010726	-0.002995	-0.006971
2.6800	940.538	159.907	46.319	104.699	-0.635	9.887	1790.543	-0.011194	-0.003242	-0.007329
2.7200	993.874	166.896	49.875	110.068	-0.621	9.886	1892.080	-0.011683	-0.003491	-0.007705
2.7600	1028.214	171.580	51.349	112.900	-0.632	9.886	1957.455	-0.012011	-0.003594	-0.007903
2.8000	1068.535	177.317	53.390	117.661	-0.636	9.886	2034.216	-0.012412	-0.003737	-0.008236
2.8400	1096.698	181.054	55.642	120.524	-0.632	9.886	2087.831	-0.012674	-0.003895	-0.008437
2.8800	1113.785	183.879	56.282	122.574	-0.632	9.886	2120.361	-0.012872	-0.003940	-0.008580
2.9200	1137.996	187.279	58.699	125.449	-0.628	9.886	2166.452	-0.013110	-0.004109	-0.008781
2.9600	1128.648	186.419	58.101	124.735	-0.620	9.885	2148.657	-0.013049	-0.004067	-0.008731
3.0000	1126.740	186.976	57.908	124.982	-0.610	9.886	2145.023	-0.013088	-0.004054	-0.008749
3.0400	1123.945	187.101	58.463	125.601	-0.624	9.886	2139.702	-0.013097	-0.004092	-0.008792
3.0800	1103.656	184.751	57.712	123.758	-0.627	9.886	2101.078	-0.012933	-0.004040	-0.008663
3.1200	1061.171	180.805	56.028	120.840	-0.630	9.886	2020.197	-0.012656	-0.003922	-0.008459
3.1600	1024.201	176.791	54.836	117.951	-0.634	9.885	1949.816	-0.012375	-0.003839	-0.008257
3.2000	982.813	171.913	52.725	114.208	-0.640	9.886	1871.023	-0.012034	-0.003691	-0.007995
3.2400	926.937	165.451	49.137	109.805	-0.636	9.886	1764.650	-0.011582	-0.003440	-0.007686
3.2800	882.799	160.114	46.639	105.829	-0.629	9.886	1680.622	-0.011208	-0.003265	-0.007408
3.3200	824.098	152.791	43.774	100.586	-0.641	9.886	1568.871	-0.010695	-0.003064	-0.007041
3.3600	755.899	144.870	39.981	95.343	-0.634	9.886	1439.037	-0.010141	-0.002799	-0.006674
3.4000	691.081	137.143	37.562	88.725	-0.636	9.885	1315.641	-0.009600	-0.002629	-0.006211
3.4400	627.241	128.333	33.381	83.647	-0.639	9.885	1194.105	-0.008983	-0.002337	-0.005855
3.4800	556.036	119.454	30.323	76.435	-0.637	9.885	1058.550	-0.008362	-0.002123	-0.005350
3.5200	480.744	109.489	26.612	69.805	-0.629	9.885	915.213	-0.007664	-0.001863	-0.004886
3.5600	421.186	100.512	23.556	64.508	-0.628	9.884	801.830	-0.007036	-0.001649	-0.004516
3.6000	346.209	90.254	19.763	56.980	-0.634	9.885	659.094	-0.006318	-0.001383	-0.003989
3.6400	292.122	81.767	17.775	51.062	-0.635	9.885	556.126	-0.005724	-0.001244	-0.003574
3.6800	235.856	72.484	15.135	45.848	-0.635	9.884	449.009	-0.005074	-0.001059	-0.003209
3.7200	195.099	66.205	13.327	41.774	-0.630	9.885	371.418	-0.004634	-0.000933	-0.002924
3.7600	155.424	58.947	12.634	37.083	-0.626	9.885	295.887	-0.004126	-0.000884	-0.002596
3.8000	124.240	52.261	11.298	33.546	-0.636	9.884	236.521	-0.003658	-0.000791	-0.002348
3.8400	84.745	46.315	10.394	29.336	-0.636	9.884	161.333	-0.003242	-0.000728	-0.002053
3.8800	69.852	43.120	10.243	27.313	-0.633	9.884	132.980	-0.003018	-0.000717	-0.001912
3.9200	60.640	40.340	9.952	25.621	-0.635	9.884	115.442	-0.002824	-0.000697	-0.001793
3.9600	51.908	38.923	9.423	24.326	-0.627	9.885	98.820	-0.002725	-0.000660	-0.001703
4.0000	56.462	39.119	9.618	24.589	-0.633	9.884	107.489	-0.002738	-0.000673	-0.001721
4.0400	73.233	40.674	9.562	25.662	-0.637	9.884	139.418	-0.002847	-0.000669	-0.001796
4.0800	92.590	43.523	9.438	26.819	-0.643	9.884	176.268	-0.003047	-0.000661	-0.001877
4.1200	119.341	47.678	10.312	29.473	-0.645	9.884	227.194	-0.003337	-0.000722	-0.002063
4.1600	158.414	52.874	10.186	32.777	-0.638	9.884	301.580	-0.003701	-0.000713	-0.002294
4.2000	199.081	59.072	10.561	35.802	-0.641	9.884	379.000	-0.004135	-0.000739	-0.002506
4.2400	253.349	67.938	12.537	40.853	-0.637	9.884	482.311	-0.004756	-0.000878	-0.002860
4.2800	305.903	74.692	14.036	44.968	-0.636	9.884	582.361	-0.005228	-0.000983	-0.003148
4.3200	360.261	82.627	16.302	49.742	-0.623	9.883	685.844	-0.005784	-0.001141	-0.003482
4.3600	430.955	92.341	19.998	56.276	-0.631	9.884	820.427	-0.006464	-0.001400	-0.003939
4.4000	495.517	101.012	22.445	62.084	-0.628	9.883	943.336	-0.007071	-0.001571	-0.004346
4.4400	559.958	109.657	25.514	68.510	-0.640	9.884	1066.017	-0.007676	-0.001786	-0.004796
4.4800	634.665	119.827	29.447	74.880	-0.635	9.883	1208.239	-0.008388	-0.002061	-0.005242
4.5200	707.522	129.151	32.880	81.911	-0.635	9.883	1346.941	-0.009041	-0.002302	-0.005734
4.5600	762.421	136.669	35.382	87.459	-0.635	9.883	1451.454	-0.009567	-0.002477	-0.006122
4.6000	830.620	146.216	39.857	93.636	-0.636	9.883	1581.287	-0.010235	-0.002790	-0.006555
4.6400	890.989	153.499	43.316	99.788	-0.641	9.883	1696.215	-0.010745	-0.003032	-0.006985
4.6800	940.433	160.239	46.359	104.853	-0.637	9.883	1790.342	-0.011217	-0.003245	-0.007340
4.7200	989.365	167.187	48.929	109.544	-0.639	9.883	1883.497	-0.011703	-0.003425	-0.007668
4.7600	1031.730	172.442	51.627	113.561	-0.636	9.883	1964.149	-0.012071	-0.003614	-0.007949
4.8000	1072.367	177.763	53.696	117.580	-0.639	9.883	2041.512	-0.012443	-0.003759	-0.008231
4.8400	1098.727	181.917	55.865	120.826	-0.636	9.883	2091.694	-0.012734	-0.003911	-0.008458
4.8800	1123.449	184.975	56.629	123.677	-0.630	9.883	2138.758	-0.012948	-0.003964	-0.008657
4.9200	1132.180	186.697	57.811	125.437	-0.636	9.883	2155.380	-0.013069	-0.004047	-0.008781
4.9600	1132.541	187.379	58.062	125.560	-0.641	9.882	2156.067	-0.013117	-0.004064	-0.008789
5.0000	1127.010	187.282	58.325	125.699	-0.636	9.883	2145.538	-0.013110	-0.004083	-0.008799
5.0400	1115.108	186.572	57.645	124.900	-0.643	9.883	2122.879	-0.013060	-0.004035	-0.008743
5.0800	1077.717	182.765	56.767	122.353	-0.632	9.882	2051.697	-0.012794	-0.003974	-0.008565
5.1200	1072.983	182.222	56.726	121.914	-0.631	9.882	2042.685	-0.012756	-0.003971	-0.008534
5.1600	1026.996	177.318	54.170	118.116	-0.624	9.882	1955.137	-0.012412	-0.003792	-0.008268
5.2000	992.431	173.177	53.224	115.419	-0.639	9.882	1889.334	-0.012122	-0.003726	-0.008079
5.2400	931.611	166.063	49.708	110.163	-0.644	9.882	1773.548	-0.011624	-0.003480	-0.007711
5.2800	876.322	159.849	46.291	105.841	-0.640	9.882	1668.291	-0.011189	-0.003240	-0.007409
5.3200	815.532	152.819	43.901	100.930	-0.636	9.882	1552.563	-0.010697	-0.003073	-0.007065
5.3600	768.658	146.896	41.274	96.428	-0.635	9.882	1463.327	-0.010283	-0.002889	-0.006750
5.4000	681.854	136.475	36.383	88.836	-0.635	9.882	1298.075	-0.009553	-0.002547	-0.006218
5.4400	621.455	128.332	33.338	83.278	-0.632	9.882	1183.090	-0.008983	-0.002334	-0.005829
5.4800	552.655	119.145	29.810	76.258	-0.634	9.882	1052.113	-0.008340	-0.002087	-0.005338
5.5200	483.284	109.796	26.711	69.970	-0.642	9.882	920.048	-0.007686	-0.001870	-0.004898
5.5600	419.398	101.066	23.473	64.106	-0.633	9.882	798.426	-0.007075	-0.001643	-0.004487
5.6000	356.594	91.255	20.610	58.603	-0.623	9.882	678.864	-0.006388	-0.001443	-0.004102
5.6400	297.262	82.766	17.594	52.451	-0.633	9.882	565.910	-0.005794	-0.001232	-0.003672
5.6800	243.851	74.357	15.746	46.481	-0.631	9.881	464.230	-0.005205	-0.001102	-0.003254
5.7200	189.749	65.133	13.632	40.990	-0.633	9.882	361.233	-0.004559	-0.000954	-0.002869
5.7600	148.977	58.210	12.176	36.780	-0.633	9.882	283.613	-0.004075	-0.000852	-0.002575
5.8000	114.742	52.110	12.008	33.671	-0.633	9.882	218.439	-0.003648	-0.000841	-0.002357
5.8400	86.383	46.260	10.603	30.039	-0.629	9.881	164.452	-0.003238	-0.000742	-0.002103
5.8800	61.090	42.077	9.853	26.626	-0.629	9.881	116.301	-0.002945	-0.000690	-0.001864
5.9200	54.207	40.033	10.020	25.553	-0.639	9.882	103.197	-0.002802	-0.000701	-0.001789
5.9600	55.380	39.021	9.285	24.521	-0.629	9.881	105.429	-0.002731	-0.000650	-0.001716
6.0000	56.236	39.131	9.144	24.340	-0.630	9.882	107.059	-0.002739	-0.000640	-0.001704
6.0400	70.979	40.936	9.576	25.333	-0.627	9.881	135.126	-0.002866	-0.000670	-0.001773
6.0800	98.451	44.176	9.700	27.806	-0.615	9.881	187.426	-0.003092	-0.000679	-0.001946
6.1200	117.101	47.148	9.743	29.790	-0.637	9.881	222.931	-0.003300	-0.000682	-0.002085
6.1600	157.468	53.488	10.632	32.829	-0.631	9.881	299.778	-0.003744	-0.000744	-0.002298
6.2000	208.309	60.659	11.201	37.041	-0.627	9.881	396.566	-0.004246	-0.000784	-0.002593
6.2400	246.240	66.688	11.924	40.220	-0.624	9.881	468.779	-0.004668	-0.000835	-0.002815
6.2800	318.181	76.222	14.454	46.111	-0.631	9.881	605.736	-0.005336	-0.001012	-0.003228
6.3200	367.520	83.641	16.843	50.718	-0.635	9.880	699.663	-0.005855	-0.001179	-0.003550
6.3600	439.551	93.843	20.096	57.695	-0.633	9.880	836.792	-0.006569	-0.001407	-0.004039
6.4000	505.796	102.652	23.015	63.144	-0.635	9.880	962.906	-0.007186	-0.001611	-0.004420
6.4400	575.287	111.547	26.209	69.694	-0.628	9.881	1095.200	-0.007808	-0.001835	-0.004879
6.4800	628.713	119.384	29.142	75.102	-0.624	9.880	1196.909	-0.008357	-0.002040	-0.005257
6.5200	704.832	129.221	33.225	81.597	-0.627	9.881	1341.820	-0.009045	-0.002326	-0.005712
6.5600	772.625	138.341	36.410	88.670	-0.619	9.881	1470.881	-0.009684	-0.002549	-0.006207
6.6000	829.673	145.813	39.870	94.174	-0.614	9.881	1579.485	-0.010207	-0.002791	-0.006592
6.6400	887.443	153.680	43.343	99.663	-0.621	9.880	1689.463	-0.010758	-0.003034	-0.006976
6.6800	941.845	160.101	45.942	105.154	-0.634	9.880	1793.032	-0.011207	-0.003216	-0.007361
6.7200	993.378	167.799	49.291	110.439	-0.625	9.880	1891.136	-0.011746	-0.003450	-0.007731
6.7600	1034.345	172.608	52.015	114.484	-0.625	9.880	1969.128	-0.012083	-0.003641	-0.008014
6.8000	1068.535	177.458	53.321	117.757	-0.632	9.880	2034.216	-0.012422	-0.003733	-0.008243
6.8400	1105.760	182.599	56.156	121.584	-0.629	9.880	2105.083	-0.012782	-0.003931	-0.008511
6.8800	1114.266	184.143	56.768	122.878	-0.632	9.880	2121.277	-0.012890	-0.003974	-0.008601
6.9200	1129.340	186.460	57.170	124.929	-0.624	9.880	2149.973	-0.013052	-0.004002	-0.008745
6.9600	1137.290	187.782	58.103	126.001	-0.636	9.880	2165.108	-0.013145	-0.004067	-0.008820
7.0000	1129.325	187.199	58.353	126.057	-0.619	9.880	2149.944	-0.013104	-0.004085	-0.008824
7.0400	1116.310	186.697	57.727	125.203	-0.621	9.880	2125.168	-0.013069	-0.004041	-0.008764
7.0800	1084.901	183.533	57.366	123.112	-0.624	9.880	2065.372	-0.012847	-0.004016	-0.008618
7.1200	1062.584	180.720	56.519	121.238	-0.620	9.880	2022.886	-0.012650	-0.003956	-0.008487
7.1600	1026.681	176.944	54.182	118.570	-0.626	9.880	1954.536	-0.012386	-0.003793	-0.008300
7.2000	983.128	172.386	52.043	115.019	-0.632	9.880	1871.624	-0.012067	-0.003643	-0.008051
7.2400	925.855	165.382	49.652	110.865	-0.636	9.880	1762.590	-0.011577	-0.003476	-0.007761
7.2800	862.540	158.432	46.401	105.114	-0.633	9.880	1642.056	-0.011090	-0.003248	-0.007358
7.3200	815.592	152.916	43.456	100.395	-0.623	9.880	1552.677	-0.010704	-0.003042	-0.007028
7.3600	748.956	144.274	39.926	94.794	-0.627	9.879	1425.819	-0.010099	-0.002795	-0.006636
7.4000	679.645	135.820	36.258	88.215	-0.628	9.879	1293.869	-0.009507	-0.002538	-0.006175
7.4400	612.828	127.373	33.352	82.159	-0.627	9.879	1166.668	-0.008916	-0.002335	-0.005751
7.4800	549.243	118.755	29.628	76.711	-0.633	9.879	1045.618	-0.008313	-0.002074	-0.005370
7.5200	475.829	108.877	25.806	70.162	-0.631	9.879	905.857	-0.007621	-0.001806	-0.004911
7.5600	411.358	100.027	23.251	64.233	-0.641	9.879	783.119	-0.007002	-0.001628	-0.004496
7.6000	351.965	91.242	19.888	57.943	-0.626	9.879	670.052	-0.006387	-0.001392	-0.004056
7.6400	290.995	82.168	17.371	52.108	-0.621	9.878	553.980	-0.005752	-0.001216	-0.003648
7.6800	218.799	71.274	14.773	44.557	-0.618	9.878	416.536	-0.004989	-0.001034	-0.003119
7.7200	189.959	65.729	13.759	41.732	-0.632	9.879	361.633	-0.004601	-0.000963	-0.002921
7.7600	145.144	57.737	12.216	36.395	-0.632	9.879	276.318	-0.004042	-0.000855	-0.002548
7.8000	128.824	54.028	11.868	34.400	-0.628	9.878	245.247	-0.003782	-0.000831	-0.002408
7.8400	78.463	45.162	10.897	29.693	-0.624	9.879	149.374	-0.003161	-0.000763	-0.002079
7.8800	53.877	40.882	10.005	25.992	-0.631	9.879	102.568	-0.002862	-0.000700	-0.001819
7.9200	43.447	38.646	9.867	24.176	-0.628	9.879	82.712	-0.002705	-0.000691	-0.001692
7.9600	69.822	41.756	9.855	26.350	-0.620	9.878	132.923	-0.002923	-0.000690	-0.001844
8.0000	57.664	39.993	9.727	24.849	-0.628	9.879	109.777	-0.002800	-0.000681	-0.001739
8.0400	63.495	39.853	9.729	25.301	-0.628	9.878	120.878	-0.002790	-0.000681	-0.001771
8.0800	98.571	44.956	9.784	27.341	-0.625	9.878	187.654	-0.003147	-0.000685	-0.001914
8.1200	125.743	48.718	10.298	30.174	-0.617	9.878	239.382	-0.003410	-0.000721	-0.002112
8.1600	160.518	53.333	10.410	32.803	-0.618	9.878	305.586	-0.003733	-0.000729	-0.002296
8.2000	215.417	61.769	11.258	37.249	-0.623	9.878	410.099	-0.004324	-0.000788	-0.002607
8.2400	238.471	65.994	12.510	39.862	-0.626	9.878	453.987	-0.004620	-0.000876	-0.002790
8.2800	313.493	76.067	14.883	45.902	-0.626	9.878	596.809	-0.005325	-0.001042	-0.003213
8.3200	367.805	83.765	16.677	50.869	-0.635	9.877	700.207	-0.005864	-0.001167	-0.003561
8.3600	439.626	94.120	20.180	57.187	-0.611	9.877	836.935	-0.006588	-0.001413	-0.004003
8.4000	497.395	101.413	22.525	63.021	-0.617	9.878	946.913	-0.007099	-0.001577	-0.004411
8.4400	567.578	111.254	26.127	69.404	-0.635	9.878	1080.523	-0.007788	-0.001829	-0.004858
8.4800	638.828	120.633	29.893	75.832	-0.634	9.878	1216.164	-0.008444	-0.002092	-0.005308
8.5200	706.140	129.209	33.088	81.996	-0.636	9.878	1344.309	-0.009045	-0.002316	-0.005740
8.5600	780.125	139.075	36.827	89.302	-0.637	9.878	1485.157	-0.009735	-0.002578	-0.006251
8.6000	859.084	149.482	40.787	96.719	-0.632	9.877	1635.475	-0.010464	-0.002855	-0.006770
8.6400	891.350	154.319	43.371	100.048	-0.624	9.877	1696.901	-0.010802	-0.003036	-0.007003
8.6800	942.477	160.530	46.333	105.430	-0.615	9.877	1794.233	-0.011237	-0.003243	-0.007380
8.7200	992.596	167.314	49.580	110.410	-0.633	9.877	1889.648	-0.011712	-0.003471	-0.007729
8.7600	1042.235	173.509	51.987	114.868	-0.627	9.878	1984.148	-0.012146	-0.003639	-0.008041
8.8000	1073.675	178.098	54.417	118.542	-0.633	9.877	2044.001	-0.012467	-0.003809	-0.008298
8.8400	1099.538	181.973	55.613	121.460	-0.635	9.876	2093.239	-0.012738	-0.003893	-0.008502
8.8800	1114.552	184.212	56.948	123.797	-0.635	9.877	2121.820	-0.012895	-0.003986	-0.008666
8.9200	1127.597	186.488	57.491	124.927	-0.630	9.877	2146.654	-0.013054	-0.004024	-0.008745
8.9600	1138.838	188.172	58.798	126.662	-0.620	9.876	2168.055	-0.013172	-0.004116	-0.008866
9.0000	1142.640	189.131	59.102	127.142	-0.625	9.877	2175.293	-0.013239	-0.004137	-0.008900
9.0400	1110.494	185.920	58.187	124.694	-0.630	9.876	2114.096	-0.013014	-0.004073	-0.008729
9.0800	1100.230	184.917	57.838	124.666	-0.626	9.876	2094.555	-0.012944	-0.004049	-0.008727
9.1200	1056.738	180.762	55.946	121.295	-0.623	9.876	2011.757	-0.012653	-0.003916	-0.008491
9.1600	1019.257	176.526	54.170	118.239	-0.632	9.876	1940.403	-0.012357	-0.003792	-0.008277
9.2000	972.007	171.078	51.974	114.871	-0.623	9.876	1850.452	-0.011975	-0.003638	-0.008041
9.2400	935.458	166.813	49.360	110.797	-0.617	9.876	1780.872	-0.011677	-0.003455	-0.007756
9.2800	867.800	159.181	46.348	105.831	-0.624	9.876	1652.069	-0.011143	-0.003244	-0.007408
9.3200	806.785	151.692	43.385	99.952	-0.630	9.875	1535.912	-0.010618	-0.003037	-0.006997
9.3600	760.603	145.770	40.564	96.032	-0.615	9.876	1447.992	-0.010204	-0.002840	-0.006722
9.4000	682.245	136.503	36.508	88.793	-0.629	9.876	1298.819	-0.009555	-0.002556	-0.006216
9.4400	611.837	127.223	32.907	82.601	-0.621	9.876	1164.780	-0.008906	-0.002303	-0.005782
9.4800	541.759	118.062	29.337	76.327	-0.632	9.876	1031.370	-0.008264	-0.002054	-0.005343
9.5200	475.890	109.002	26.058	70.079	-0.620	9.876	905.972	-0.007630	-0.001824	-0.004906
9.5600	409.539	99.860	22.902	63.778	-0.623	9.875	779.657	-0.006990	-0.001603	-0.004464
9.6000	359.675	92.286	20.303	58.521	-0.633	9.876	684.729	-0.006460	-0.001421	-0.004096
9.6400	295.729	82.781	17.927	52.478	-0.631	9.875	562.992	-0.005795	-0.001255	-0.003673
9.6800	243.716	74.536	15.773	46.687	-0.636	9.876	463.972	-0.005218	-0.001104	-0.003268
9.7200	191.146	65.926	13.382	42.037	-0.634	9.875	363.894	-0.004615	-0.000937	-0.002943
9.7600	151.261	58.935	12.495	37.524	-0.643	9.875	287.962	-0.004125	-0.000875	-0.002627
9.8000	113.885	51.693	11.855	33.394	-0.626	9.875	216.808	-0.003618	-0.000830	-0.002338
9.8400	89.149	46.996	11.006	30.161	-0.638	9.875	169.716	-0.003290	-0.000770	-0.002111
9.8800	69.506	43.732	10.311	27.836	-0.635	9.875	132.322	-0.003061	-0.000722	-0.001949
9.9200	51.788	39.813	10.033	26.006	-0.629	9.875	98.591	-0.002787	-0.000702	-0.001820
9.9600	55.725	39.783	9.589	25.165	-0.628	9.876	106.087	-0.002785	-0.000671	-0.001762
10.0000	53.772	39.451	9.645	25.071	-0.627	9.874	102.367	-0.002762	-0.000675	-0.001755
10.0400	57.679	38.977	9.866	25.085	-0.620	9.875	109.806	-0.002728	-0.000691	-0.001756
10.0800	102.659	45.218	9.673	28.055	-0.636	9.875	195.436	-0.003165	-0.000677	-0.001964
10.1200	120.964	48.413	10.365	29.515	-0.641	9.875	230.284	-0.003389	-0.000726	-0.002066
10.1600	149.908	52.332	10.672	32.059	-0.634	9.874	285.387	-0.003663	-0.000747	-0.002244
10.2000	204.507	60.713	11.034	36.890	-0.635	9.874	389.328	-0.004250	-0.000772	-0.002582
10.2400	253.965	68.285	12.786	40.989	-0.640	9.874	483.484	-0.004780	-0.000895	-0.002869
10.2800	310.667	75.873	14.412	46.194	-0.641	9.875	591.431	-0.005311	-0.001009	-0.003234
10.3200	366.904	83.726	16.398	51.269	-0.637	9.874	698.490	-0.005861	-0.001148	-0.003589
10.3600	428.655	92.856	19.581	56.859	-0.641	9.874	816.050	-0.006500	-0.001371	-0.003980
10.4000	495.862	101.707	22.693	62.772	-0.644	9.874	943.995	-0.007119	-0.001589	-0.004394
10.4400	570.809	111.518	26.055	70.204	-0.637	9.874	1086.674	-0.007806	-0.001824	-0.004914
10.4800	635.837	120.690	29.671	75.955	-0.631	9.874	1210.470	-0.008448	-0.002077	-0.005317
10.5200	706.440	129.554	33.061	82.462	-0.635	9.873	1344.881	-0.009069	-0.002314	-0.005772
10.5600	769.620	138.422	36.075	89.042	-0.638	9.873	1465.158	-0.009690	-0.002525	-0.006233
10.6000	813.142	144.356	38.980	93.377	-0.649	9.873	1548.014	-0.010105	-0.002729	-0.006536
10.6400	883.114	152.859	42.748	99.706	-0.639	9.873	1681.223	-0.010700	-0.002992	-0.006979
10.6800	942.431	160.825	46.137	106.145	-0.633	9.873	1794.147	-0.011258	-0.003230	-0.007430
10.7200	998.427	168.117	49.749	111.634	-0.632	9.873	1900.749	-0.011768	-0.003482	-0.007814
10.7600	1034.105	172.927	51.416	114.908	-0.629	9.873	1968.670	-0.012105	-0.003599	-0.008044
10.8000	1063.681	177.610	53.655	117.937	-0.632	9.873	2024.975	-0.012433	-0.003756	-0.008256
10.8400	1097.600	181.764	56.016	121.996	-0.632	9.873	2089.548	-0.012723	-0.003921	-0.008540
10.8800	1128.483	185.680	57.352	124.586	-0.629	9.872	2148.342	-0.012998	-0.004015	-0.008721
10.9200	1126.034	186.627	57.589	125.740	-0.643	9.872	2143.679	-0.013064	-0.004031	-0.008802
10.9600	1139.123	188.409	59.102	127.390	-0.625	9.872	2168.598	-0.013189	-0.004137	-0.008917
11.0000	1123.689	187.171	58.517	125.918	-0.649	9.872	2139.215	-0.013102	-0.004096	-0.008814
11.0400	1120.293	187.240	58.852	125.834	-0.637	9.872	2132.750	-0.013107	-0.004120	-0.008808
11.0800	1087.185	183.503	57.463	124.089	-0.636	9.872	2069.721	-0.012845	-0.004022	-0.008686
11.1200	1056.572	180.484	56.114	121.337	-0.638	9.872	2011.442	-0.012634	-0.003928	-0.008494
11.1600	1006.377	175.359	53.571	117.692	-0.631	9.872	1915.884	-0.012275	-0.003750	-0.008238
11.2000	986.780	172.581	52.709	116.356	-0.639	9.872	1878.576	-0.012081	-0.003690	-0.008145
11.2400	947.752	168.354	50.459	112.915	-0.628	9.872	1804.276	-0.011785	-0.003532	-0.007904
11.2800	881.897	160.990	46.985	107.247	-0.635	9.872	1678.905	-0.011269	-0.003289	-0.007507
11.3200	805.553	151.636	43.248	100.422	-0.635	9.872	1533.566	-0.010615	-0.003027	-0.007030
11.3600	747.543	145.090	39.925	95.163	-0.647	9.872	1423.130	-0.010156	-0.002795	-0.006661
11.4000	678.518	136.323	36.647	89.054	-0.637	9.871	1291.723	-0.009543	-0.002565	-0.006234
11.4400	632.891	129.402	33.868	84.488	-0.640	9.871	1204.863	-0.009058	-0.002371	-0.005914
11.4800	542.886	118.548	29.545	76.739	-0.641	9.871	1033.516	-0.008298	-0.002068	-0.005372
11.5200	485.493	110.866	26.848	71.359	-0.644	9.871	924.253	-0.007761	-0.001879	-0.004995
11.5600	427.062	101.901	23.650	65.705	-0.652	9.871	813.017	-0.007133	-0.001656	-0.004599
11.6000	381.676	95.174	21.163	61.095	-0.641	9.871	726.614	-0.006662	-0.001481	-0.004277
11.6400	291.987	82.642	18.108	52.495	-0.647	9.871	555.868	-0.005785	-0.001268	-0.003675
11.6800	234.999	73.232	15.329	46.729	-0.645	9.871	447.378	-0.005126	-0.001073	-0.003271
11.7200	173.473	63.464	13.259	40.495	-0.648	9.871	330.248	-0.004442	-0.000928	-0.002835
11.7600	146.091	58.238	12.563	37.219	-0.645	9.871	278.120	-0.004077	-0.000879	-0.002605
11.8000	128.027	53.901	11.757	35.322	-0.641	9.870	243.731	-0.003773	-0.000823	-0.002473
11.8400	91.162	47.204	10.855	30.616	-0.648	9.871	173.550	-0.003304	-0.000760	-0.002143
11.8800	68.304	43.564	10.574	28.288	-0.648	9.870	130.033	-0.003049	-0.000740	-0.001980
11.9200	40.622	38.076	9.617	25.208	-0.635	9.871	77.333	-0.002665	-0.000673	-0.001765
11.9600	57.814	39.979	9.728	25.826	-0.654	9.871	110.064	-0.002799	-0.000681	-0.001808
12.0000	48.527	38.700	9.799	24.285	-0.644	9.871	92.382	-0.002709	-0.000686	-0.001700
12.0400	70.303	40.950	9.868	26.363	-0.642	9.870	133.839	-0.002867	-0.000691	-0.001845
12.0800	101.848	45.370	10.074	28.331	-0.640	9.870	193.892	-0.003176	-0.000705	-0.001983
12.1200	111.436	46.497	10.215	29.321	-0.648	9.870	212.145	-0.003255	-0.000715	-0.002052
12.1600	155.243	52.691	10.687	33.436	-0.633	9.870	295.544	-0.003688	-0.000748	-0.002340
12.2000	201.245	60.464	11.340	37.233	-0.640	9.870	383.120	-0.004232	-0.000794	-0.002606
12.2400	256.610	68.148	12.841	41.405	-0.645	9.870	488.520	-0.004770	-0.000899	-0.002898
12.2800	302.191	74.538	14.163	45.683	-0.645	9.870	575.294	-0.005218	-0.000991	-0.003198
12.3200	367.640	84.211	17.162	51.311	-0.641	9.870	699.892	-0.005895	-0.001201	-0.003592
12.3600	439.340	93.148	20.290	57.999	-0.639	9.869	836.391	-0.006520	-0.001420	-0.004060
12.4000	507.329	102.540	23.152	64.423	-0.635	9.870	965.824	-0.007178	-0.001621	-0.004510
12.4400	579.931	112.088	26.596	70.632	-0.650	9.870	1104.040	-0.007846	-0.001862	-0.004944
12.4800	632.681	119.882	29.767	75.998	-0.654	9.870	1204.462	-0.008392	-0.002084	-0.005320
12.5200	694.884	128.069	32.434	81.915	-0.642	9.870	1322.880	-0.008965	-0.002270	-0.005734
12.5600	765.472	137.797	36.395	88.491	-0.643	9.869	1457.262	-0.009646	-0.002548	-0.006194
12.6000	829.388	145.867	40.190	94.737	-0.645	9.870	1578.941	-0.010211	-0.002813	-0.006632
12.6400	891.605	153.985	42.914	100.683	-0.634	9.869	1697.388	-0.010779	-0.003004	-0.007048
12.6800	948.082	161.338	46.736	106.737	-0.637	9.869	1804.905	-0.011294	-0.003272	-0.007472
12.7200	991.244	166.968	49.221	111.264	-0.640	9.869	1887.074	-0.011688	-0.003445	-0.007788
12.7600	1033.834	172.857	51.281	115.296	-0.630	9.869	1968.155	-0.012100	-0.003590	-0.008071
12.8000	1070.218	178.180	53.974	118.818	-0.636	9.869	2037.420	-0.012473	-0.003778	-0.008317
12.8400	1095.541	181.374	55.655	121.859	-0.627	9.870	2085.629	-0.012696	-0.003896	-0.008530
12.8800	1111.501	183.851	56.613	123.496	-0.640	9.869	2116.013	-0.012870	-0.003963	-0.008645
12.9200	1129.565	187.101	57.880	126.068	-0.626	9.869	2150.402	-0.013097	-0.004052	-0.008825
12.9600	1131.925	187.448	58.672	126.262	-0.640	9.869	2154.894	-0.013121	-0.004107	-0.008838
13.0000	1131.369	187.673	58.142	126.991	-0.634	9.869	2153.835	-0.013137	-0.004070	-0.008889
13.0400	1114.943	186.683	58.295	126.277	-0.642	9.869	2122.564	-0.013068	-0.004081	-0.008839
13.0800	1094.068	184.156	57.406	123.979	-0.641	9.869	2082.825	-0.012891	-0.004018	-0.008678
13.1200	1066.341	181.541	56.210	122.162	-0.644	9.869	2030.039	-0.012708	-0.003935	-0.008551
13.1600	1030.303	177.639	54.669	119.878	-0.638	9.869	1961.432	-0.012435	-0.003827	-0.008391
13.2000	978.695	171.815	52.264	115.227	-0.635	9.869	1863.184	-0.012027	-0.003658	-0.008066
13.2400	927.403	166.202	49.165	110.921	-0.639	9.868	1765.537	-0.011634	-0.003442	-0.007764
13.2800	874.037	159.751	46.778	106.764	-0.643	9.869	1663.942	-0.011183	-0.003274	-0.007473
13.3200	817.290	152.969	43.662	101.331	-0.627	9.869	1555.910	-0.010708	-0.003056	-0.007093
13.3600	748.805	145.383	40.037	95.383	-0.637	9.869	1425.533	-0.010177	-0.002803	-0.006677
13.4000	686.182	136.754	36.730	89.771	-0.626	9.869	1306.314	-0.009573	-0.002571	-0.006284
13.4400	620.613	128.361	33.296	84.060	-0.635	9.869	1181.488	-0.008985	-0.002331	-0.005884
13.4800	543.878	118.589	29.575	77.042	-0.633	9.868	1035.404	-0.008301	-0.002070	-0.005393
13.5200	472.238	109.072	26.114	70.299	-0.629	9.869	899.019	-0.007635	-0.001828	-0.004921
13.5600	416.828	100.858	23.278	64.519	-0.630	9.868	793.533	-0.007060	-0.001629	-0.004516
13.6000	345.263	90.740	20.025	57.738	-0.636	9.868	657.291	-0.006352	-0.001402	-0.004042
13.6400	291.506	82.406	17.871	51.903	-0.627	9.868	554.953	-0.005768	-0.001251	-0.003633
13.6800	254.386	75.986	16.023	48.242	-0.624	9.869	484.285	-0.005319	-0.001122	-0.003377
13.7200	189.704	65.843	13.633	41.996	-0.628	9.868	361.147	-0.004609	-0.000954	-0.002940
13.7600	146.226	58.085	12.814	37.233	-0.645	9.868	278.378	-0.004066	-0.000897	-0.002606
13.8000	105.890	50.999	11.159	32.679	-0.643	9.868	201.588	-0.003570	-0.000781	-0.002288
13.8400	98.707	48.734	11.034	31.385	-0.636	9.868	187.912	-0.003411	-0.000772	-0.002197
13.8800	66.816	42.703	10.534	27.628	-0.643	9.868	127.201	-0.002989	-0.000737	-0.001934
13.9200	55.590	40.687	9.713	25.800	-0.644	9.869	105.829	-0.002848	-0.000680	-0.001806
13.9600	53.817	39.951	9.647	25.662	-0.644	9.868	102.453	-0.002797	-0.000675	-0.001796
14.0000	58.445	39.729	9.618	25.496	-0.647	9.868	111.265	-0.002781	-0.000673	-0.001785
14.0400	70.047	40.714	9.312	25.921	-0.649	9.868	133.352	-0.002850	-0.000652	-0.001814
14.0800	94.469	44.371	9.715	28.098	-0.647	9.868	179.844	-0.003106	-0.000680	-0.001967
14.1200	145.685	51.681	10.633	32.416	-0.642	9.868	277.348	-0.003618	-0.000744	-0.002269
14.1600	153.635	52.790	10.117	33.368	-0.640	9.868	292.482	-0.003695	-0.000708	-0.002336
14.2000	203.139	60.519	11.354	37.070	-0.642	9.868	386.724	-0.004236	-0.000795	-0.002595
14.2400	249.968	67.161	12.635	41.183	-0.646	9.867	475.874	-0.004701	-0.000884	-0.002883
14.2800	304.040	74.970	14.134	46.260	-0.636	9.868	578.814	-0.005248	-0.000989	-0.003238
14.3200	356.474	82.476	16.592	50.306	-0.640	9.867	678.635	-0.005773	-0.001161	-0.003521
14.3600	429.602	92.286	19.997	57.366	-0.642	9.868	817.852	-0.006460	-0.001400	-0.004016
14.4000	493.698	100.844	22.583	63.185	-0.646	9.867	939.875	-0.007059	-0.001581	-0.004423
14.4400	563.625	110.642	26.252	69.376	-0.638	9.867	1072.998	-0.007745	-0.001838	-0.004856
14.4800	622.161	118.577	29.115	74.758	-0.633	9.868	1184.435	-0.008300	-0.002038	-0.005233
14.5200	705.268	129.180	32.978	82.271	-0.636	9.867	1342.649	-0.009043	-0.002308	-0.005759
14.5600	767.260	137.768	36.216	88.822	-0.628	9.868	1460.667	-0.009644	-0.002535	-0.006218
14.6000	831.341	146.174	40.272	94.432	-0.643	9.868	1582.661	-0.010232	-0.002819	-0.006610
14.6400	884.798	152.930	43.024	100.556	-0.636	9.867	1684.427	-0.010705	-0.003012	-0.007039
14.6800	939.967	160.170	46.220	105.511	-0.642	9.867	1789.455	-0.011212	-0.003235	-0.007386
14.7200	988.914	166.605	49.222	110.190	-0.642	9.867	1882.639	-0.011662	-0.003446	-0.007713
14.7600	1033.774	172.553	51.527	115.063	-0.642	9.867	1968.040	-0.012079	-0.003607	-0.008054
14.8000	1062.163	177.235	53.545	117.895	-0.644	9.867	2022.085	-0.012406	-0.003748	-0.008253
14.8400	1097.705	181.333	55.672	121.542	-0.642	9.867	2089.748	-0.012693	-0.003897	-0.008508
14.8800	1119.737	184.544	56.767	124.211	-0.639	9.868	2131.691	-0.012918	-0.003974	-0.008695
14.9200	1136.614	187.282	58.102	125.876	-0.636	9.867	2163.820	-0.013110	-0.004067	-0.008811
14.9600	1133.488	187.461	58.338	126.113	-0.644	9.867	2157.869	-0.013122	-0.004084	-0.008828
15.0000	1133.593	187.922	58.560	127.170	-0.640	9.867	2158.070	-0.013155	-0.004099	-0.008902
15.0400	1109.607	185.820	57.894	124.995	-0.628	9.867	2112.408	-0.013007	-0.004053	-0.008750
15.0800	1099.043	184.821	57.770	124.417	-0.637	9.867	2092.295	-0.012937	-0.004044	-0.008709
15.1200	1067.242	181.681	56.170	122.010	-0.638	9.868	2031.755	-0.012718	-0.003932	-0.008541
15.1600	1038.057	178.360	55.030	119.781	-0.636	9.867	1976.194	-0.012485	-0.003852	-0.008385
15.2000	983.519	172.191	52.321	115.762	-0.624	9.868	1872.368	-0.012053	-0.003662	-0.008103
15.2400	926.051	165.661	49.136	111.167	-0.642	9.868	1762.962	-0.011596	-0.003440	-0.007782
15.2800	876.412	160.156	46.901	106.929	-0.638	9.868	1668.463	-0.011211	-0.003283	-0.007485
15.3200	815.757	152.734	43.662	100.944	-0.629	9.867	1552.992	-0.010691	-0.003056	-0.007066
15.3600	753.690	145.285	40.162	95.247	-0.638	9.868	1434.832	-0.010170	-0.002811	-0.006667
15.4000	675.903	135.779	36.440	88.326	-0.643	9.867	1286.745	-0.009504	-0.002551	-0.006183
15.4400	611.055	127.555	32.950	83.000	-0.650	9.868	1163.292	-0.008929	-0.002307	-0.005810
15.4800	552.595	119.104	29.588	77.261	-0.638	9.867	1051.998	-0.008337	-0.002071	-0.005408
15.5200	488.063	111.019	26.695	71.345	-0.633	9.867	929.146	-0.007771	-0.001869	-0.004994
15.5600	417.369	100.733	23.224	64.961	-0.639	9.867	794.563	-0.007051	-0.001626	-0.004547
15.6000	347.126	90.699	19.648	57.818	-0.637	9.867	660.839	-0.006349	-0.001375	-0.004047
15.6400	293.760	82.476	17.915	52.343	-0.633	9.867	559.244	-0.005773	-0.001254	-0.003664
15.6800	239.778	73.774	15.441	47.377	-0.643	9.867	456.476	-0.005164	-0.001081	-0.003316
15.7200	187.239	65.508	13.052	41.596	-0.645	9.868	356.455	-0.004586	-0.000914	-0.002912
15.7600	150.960	58.725	12.662	38.101	-0.637	9.868	287.390	-0.004111	-0.000886	-0.002667
15.8000	109.918	51.457	11.493	33.092	-0.644	9.868	209.255	-0.003602	-0.000805	-0.002316
15.8400	86.744	47.037	10.325	30.313	-0.643	9.868	165.138	-0.003293	-0.000723	-0.002122
15.8800	67.583	43.245	10.352	28.207	-0.647	9.868	128.660	-0.003027	-0.000725	-0.001974
15.9200	53.486	40.019	9.656	25.840	-0.643	9.868	101.824	-0.002801	-0.000676	-0.001809
15.9600	53.681	39.367	9.212	25.220	-0.636	9.868	102.196	-0.002756	-0.000645	-0.001765
16.0000	52.524	38.561	9.185	24.698	-0.633	9.868	99.993	-0.002699	-0.000643	-0.001729
16.0400	73.474	41.743	9.436	25.895	-0.628	9.868	139.875	-0.002922	-0.000661	-0.001813
16.0800	92.425	43.927	9.326	28.043	-0.636	9.868	175.953	-0.003075	-0.000653	-0.001963
16.1200	123.083	48.581	9.924	30.340	-0.629	9.868	234.318	-0.003401	-0.000695	-0.002124
16.1600	152.839	52.485	10.171	32.542	-0.629	9.868	290.966	-0.003674	-0.000712	-0.002278
16.2000	207.572	60.896	10.742	37.275	-0.637	9.867	395.164	-0.004263	-0.000752	-0.002609
16.2400	254.927	67.604	12.299	40.992	-0.638	9.868	485.315	-0.004732	-0.000861	-0.002869
16.2800	303.183	74.470	14.038	45.367	-0.643	9.868	577.183	-0.005213	-0.000983	-0.003176
16.3200	361.523	83.102	16.384	50.896	-0.634	9.868	688.248	-0.005817	-0.001147	-0.003563
16.3600	427.573	92.383	19.581	57.048	-0.630	9.867	813.990	-0.006467	-0.001371	-0.003993
16.4000	490.362	100.373	22.416	62.237	-0.644	9.867	933.523	-0.007026	-0.001569	-0.004357
16.4400	563.926	110.587	25.834	69.295	-0.644	9.868	1073.570	-0.007741	-0.001808	-0.004851
16.4800	633.087	120.080	29.463	75.543	-0.636	9.868	1205.235	-0.008406	-0.002062	-0.005288
16.5200	696.236	128.153	32.769	81.843	-0.629	9.868	1325.455	-0.008971	-0.002294	-0.005729
16.5600	763.113	137.185	35.508	87.927	-0.638	9.868	1452.770	-0.009603	-0.002486	-0.006155
16.6000	832.393	146.284	39.912	94.903	-0.643	9.868	1584.663	-0.010240	-0.002794	-0.006643
16.6400	887.142	153.400	42.733	99.940	-0.643	9.868	1688.890	-0.010738	-0.002991	-0.006996
16.6800	944.611	160.795	45.943	105.401	-0.633	9.868	1798.296	-0.011256	-0.003216	-0.007378
16.7200	988.193	166.896	49.040	110.384	-0.640	9.868	1881.266	-0.011683	-0.003433	-0.007727
16.7600	1028.725	171.982	51.515	114.194	-0.643	9.868	1958.427	-0.012039	-0.003606	-0.007994
16.8000	1069.376	177.320	53.543	118.734	-0.641	9.867	2035.818	-0.012412	-0.003748	-0.008311
16.8400	1105.775	182.503	56.489	122.411	-0.633	9.867	2105.112	-0.012775	-0.003954	-0.008569
16.8800	1112.132	183.934	56.727	123.525	-0.641	9.867	2117.214	-0.012875	-0.003971	-0.008647
16.9200	1129.971	186.460	57.616	125.520	-0.627	9.867	2151.175	-0.013052	-0.004033	-0.008786
16.9600	1141.197	188.686	58.894	127.185	-0.625	9.867	2172.546	-0.013208	-0.004123	-0.008903
17.0000	1134.434	187.768	58.854	126.619	-0.628	9.868	2159.672	-0.013144	-0.004120	-0.008863
17.0400	1113.770	186.057	57.850	125.270	-0.637	9.868	2120.333	-0.013024	-0.004049	-0.008769
17.0800	1092.370	184.448	57.588	123.703	-0.643	9.868	2079.592	-0.012911	-0.004031	-0.008659
17.1200	1066.311	181.220	56.753	122.024	-0.631	9.867	2029.982	-0.012685	-0.003973	-0.008542
17.1600	1026.320	177.110	54.489	119.436	-0.635	9.867	1953.850	-0.012398	-0.003814	-0.008361
17.2000	982.798	172.622	52.557	115.253	-0.632	9.868	1870.995	-0.012084	-0.003679	-0.008068
17.2400	929.206	166.326	49.792	111.003	-0.643	9.868	1768.970	-0.011643	-0.003485	-0.007770
17.2800	882.032	160.755	46.928	107.218	-0.633	9.868	1679.163	-0.011253	-0.003285	-0.007505
17.3200	819.619	153.108	43.996	101.260	-0.636	9.867	1560.345	-0.010718	-0.003080	-0.007088
17.3600	757.958	145.870	40.495	95.588	-0.637	9.867	1442.957	-0.010211	-0.002835	-0.006691
17.4000	685.325	136.876	36.550	90.047	-0.637	9.867	1304.684	-0.009581	-0.002559	-0.006303
17.4400	617.547	128.526	33.602	83.482	-0.642	9.868	1175.652	-0.008997	-0.002352	-0.005844
17.4800	551.257	119.118	29.739	76.904	-0.640	9.867	1049.452	-0.008338	-0.002082	-0.005383
17.5200	485.057	110.365	26.543	71.153	-0.642	9.868	923.424	-0.007726	-0.001858	-0.004981
17.5600	417.083	101.165	23.416	64.547	-0.647	9.867	794.020	-0.007082	-0.001639	-0.004518
17.6000	356.053	91.841	20.567	58.218	-0.639	9.866	677.834	-0.006429	-0.001440	-0.004075
17.6400	303.424	83.780	17.887	53.705	-0.643	9.867	577.641	-0.005865	-0.001252	-0.003759
17.6800	245.835	74.802	16.064	47.197	-0.647	9.868	468.006	-0.005236	-0.001125	-0.003304
17.7200	196.782	66.619	13.759	42.229	-0.648	9.868	374.622	-0.004663	-0.000963	-0.002956
17.7600	152.613	59.309	12.563	37.729	-0.643	9.867	290.537	-0.004152	-0.000879	-0.002641
17.8000	116.034	52.179	11.605	33.999	-0.652	9.867	220.900	-0.003653	-0.000812	-0.002380
17.8400	86.804	46.704	10.756	30.697	-0.647	9.867	165.253	-0.003269	-0.000753	-0.002149
17.8800	66.636	43.149	10.423	27.629	-0.642	9.867	126.858	-0.003020	-0.000730	-0.001934
17.9200	51.728	39.964	10.227	25.759	-0.645	9.867	98.476	-0.002797	-0.000716	-0.001803
17.9600	56.116	39.714	9.840	25.841	-0.637	9.867	106.831	-0.002780	-0.000689	-0.001809
18.0000	55.305	39.507	9.409	25.372	-0.642	9.867	105.286	-0.002765	-0.000659	-0.001776
18.0400	63.811	40.337	9.813	26.268	-0.644	9.867	121.479	-0.002824	-0.000687	-0.001839
18.0800	95.055	44.330	9.574	28.222	-0.648	9.867	180.960	-0.003103	-0.000670	-0.001976
18.1200	121.430	48.093	9.771	30.258	-0.643	9.867	231.171	-0.003367	-0.000684	-0.002118
18.1600	162.262	54.225	10.757	33.368	-0.642	9.867	308.905	-0.003796	-0.000753	-0.002336
18.2000	202.433	60.367	11.159	36.932	-0.639	9.867	385.380	-0.004226	-0.000781	-0.002585
18.2400	239.898	65.911	11.993	39.876	-0.647	9.867	456.705	-0.004614	-0.000840	-0.002791
18.2800	310.216	75.901	14.649	46.329	-0.644	9.867	590.572	-0.005313	-0.001025	-0.003243
18.3200	372.569	84.473	17.053	51.859	-0.642	9.866	709.276	-0.005913	-0.001194	-0.003630
18.3600	418.782	90.922	19.234	55.781	-0.635	9.867	797.253	-0.006365	-0.001346	-0.003905
18.4000	492.917	101.302	22.955	62.567	-0.634	9.867	938.387	-0.007091	-0.001607	-0.004380
18.4400	557.960	109.961	25.751	68.716	-0.635	9.867	1062.212	-0.007697	-0.001803	-0.004810
18.4800	638.046	120.785	29.754	76.520	-0.640	9.868	1214.676	-0.008455	-0.002083	-0.005356
18.5200	691.337	127.761	32.643	81.390	-0.640	9.867	1316.128	-0.008943	-0.002285	-0.005697
18.5600	762.316	136.961	36.048	88.106	-0.645	9.867	1451.254	-0.009587	-0.002523	-0.006167
18.6000	814.765	144.453	39.120	93.842	-0.644	9.867	1551.104	-0.010112	-0.002738	-0.006569
18.6400	885.098	153.193	43.066	100.406	-0.641	9.868	1684.999	-0.010724	-0.003015	-0.007028
18.6800	936.420	160.001	46.011	104.823	-0.644	9.867	1782.703	-0.011200	-0.003221	-0.007338
18.7200	982.512	166.579	48.872	109.817	-0.643	9.867	1870.451	-0.011661	-0.003421	-0.007687
18.7600	1029.762	172.525	51.349	114.442	-0.641	9.867	1960.402	-0.012077	-0.003594	-0.008011
18.8000	1072.217	177.791	53.960	118.570	-0.639	9.867	2041.225	-0.012445	-0.003777	-0.008300
18.8400	1097.525	181.875	55.640	121.598	-0.643	9.867	2089.405	-0.012731	-0.003895	-0.008512
18.8800	1124.967	185.709	57.368	124.488	-0.645	9.867	2141.647	-0.013000	-0.004016	-0.008714
18.9200	1136.854	187.418	58.046	125.864	-0.640	9.867	2164.278	-0.013119	-0.004063	-0.008810
18.9600	1129.956	187.338	58.338	126.358	-0.635	9.867	2151.146	-0.013114	-0.004084	-0.008845
19.0000	1127.446	187.421	58.644	125.972	-0.634	9.867	2146.368	-0.013119	-0.004105	-0.008818
19.0400	1127.942	188.128	59.005	126.620	-0.634	9.867	2147.312	-0.013169	-0.004130	-0.008863
19.0800	1090.777	184.515	57.921	123.592	-0.633	9.868	2076.559	-0.012916	-0.004054	-0.008651
19.1200	1064.132	181.374	57.170	121.789	-0.633	9.868	2025.833	-0.012696	-0.004002	-0.008525
19.1600	1024.156	176.901	54.267	118.775	-0.640	9.867	1949.730	-0.012383	-0.003799	-0.008314
19.2000	977.868	172.038	52.419	115.034	-0.647	9.868	1861.610	-0.012043	-0.003669	-0.008052
19.2400	936.225	166.827	50.265	111.568	-0.637	9.868	1782.331	-0.011678	-0.003519	-0.007810
19.2800	878.230	160.491	46.916	106.405	-0.635	9.868	1671.925	-0.011234	-0.003284	-0.007448
19.3200	813.758	153.094	43.566	101.080	-0.633	9.868	1549.187	-0.010717	-0.003050	-0.007076
19.3600	758.544	146.285	40.800	96.224	-0.638	9.868	1444.073	-0.010240	-0.002856	-0.006736
19.4000	684.454	136.919	36.854	89.507	-0.632	9.868	1303.024	-0.009584	-0.002580	-0.006266
19.4400	617.157	128.402	33.798	83.015	-0.640	9.867	1174.908	-0.008988	-0.002366	-0.005811
19.4800	554.578	119.660	30.532	77.564	-0.637	9.868	1055.775	-0.008376	-0.002137	-0.005429
19.5200	486.650	110.353	26.527	70.851	-0.636	9.868	926.456	-0.007725	-0.001857	-0.004960
19.5600	421.577	101.524	23.848	65.111	-0.642	9.867	802.574	-0.007107	-0.001669	-0.004558
19.6000	350.327	90.991	20.358	58.314	-0.629	9.868	666.933	-0.006369	-0.001425	-0.004082
19.6400	299.261	83.544	17.638	52.811	-0.636	9.867	569.716	-0.005848	-0.001235	-0.003697
19.6800	233.541	73.372	15.440	46.561	-0.638	9.868	444.603	-0.005136	-0.001081	-0.003259
19.7200	197.443	67.049	13.913	42.807	-0.630	9.867	375.881	-0.004693	-0.000974	-0.002997
19.7600	141.087	57.278	12.105	37.082	-0.634	9.868	268.593	-0.004009	-0.000847	-0.002596
19.8000	119.791	53.291	11.897	34.290	-0.629	9.868	228.052	-0.003730	-0.000833	-0.002400
19.8400	91.824	47.593	11.077	31.331	-0.636	9.868	174.809	-0.003331	-0.000775	-0.002193
19.8800	69.747	43.648	10.465	28.578	-0.638	9.868	132.780	-0.003055	-0.000733	-0.002000
19.9200	59.107	41.466	10.256	26.404	-0.631	9.868	112.524	-0.002903	-0.000718	-0.001848
19.9600	51.908	39.604	9.562	25.234	-0.635	9.868	98.820	-0.002772	-0.000669	-0.001766
