# Supplementary material for: Evaluation of a Cold-Mixed High-Performance Polyurethane Mixture
Source: Hindawi journal article supplement (doi:10.1155/2019/1507971), 2019-11-07
Supplement: f1 [file 1507971.f1.zip › 1507971.f1/dynamic modulus data/PUM/specimen2/temp10/zhs-2-10_1Hz.csv]

Test Information
****************
Project name	zhs
Operator name	2
Target test temperature	10
Target confining stress	0
Average dynamic strain range from 75 to 125 micro-strain
Contact stress	5
Initial modulus	4000
Axial gauge length	70
Comments	Run at High Pressure
Specimen information
********************
Identification	zhs-2-10
Dimensions	Point 1	Point 2	Point 3	Point 4	Point 5	Point 6	Average	Std Dev.
Diameter (mm)	49.2	49.3	49.2				49.23	0.058
Height (mm)	100.8	101.0	100.8				100.87	0.115
Cross-sectional area (mm�)	1903.7
Conditioning time
Properties/Comments
Test Data	1Hz
*********
Test date and time	Fri	Mar 29	2019	11:20 AM
Dynamic modulus (MPa)	11105
Phase angle (Degrees)	4.89
Average temperature (�C)	9.9
Average confining pressure (kPa)	-0.6
Average micro-strain	100
Load drift (%)	0.2
Load standard error (%)	1.0
Average deformation drift (%)	-3.7
Average deformation standard error (%)	4.0
Deformation uniformity (%)	39.9
Phase uniformity (Degrees)	0.6
Conditioning Cycles
Time (sec)	Axial stress (kPa)	Axial micro-strain #1	Axial micro-strain #2	Axial micro-strain #3	Confining pressure (kPa)	Temperature (�C)	Load (N)	Displacement #1 (mm)	Displacement #2 (mm)	Displacement #3 (mm)
0.0000	37.646	29.528	6.213	15.243	-0.569	9.874	71.669	-0.002067	-0.000435	-0.001067
0.0200	41.103	29.598	7.450	15.437	-0.559	9.875	78.249	-0.002072	-0.000521	-0.001081
0.0400	71.355	33.545	6.992	18.299	-0.572	9.874	135.841	-0.002348	-0.000489	-0.001281
0.0600	95.460	37.381	7.422	20.295	-0.568	9.874	181.732	-0.002617	-0.000520	-0.001421
0.0800	117.567	40.255	7.020	22.799	-0.561	9.875	223.818	-0.002818	-0.000491	-0.001596
0.1000	146.948	44.858	8.216	24.740	-0.562	9.875	279.751	-0.003140	-0.000575	-0.001732
0.1200	196.632	52.513	8.033	28.978	-0.574	9.875	374.336	-0.003676	-0.000562	-0.002028
0.1400	238.892	58.852	8.575	32.967	-0.558	9.875	454.788	-0.004120	-0.000600	-0.002308
0.1600	289.462	66.315	10.922	36.686	-0.565	9.875	551.062	-0.004642	-0.000765	-0.002568
0.1800	339.176	73.745	13.382	41.157	-0.560	9.875	645.704	-0.005162	-0.000937	-0.002881
0.2000	394.075	80.834	15.189	46.383	-0.572	9.875	750.217	-0.005658	-0.001063	-0.003247
0.2200	429.482	86.420	17.594	49.948	-0.564	9.875	817.623	-0.006049	-0.001232	-0.003496
0.2400	493.022	95.120	21.080	55.246	-0.562	9.875	938.587	-0.006658	-0.001476	-0.003867
0.2600	546.613	102.291	21.831	60.929	-0.566	9.874	1040.611	-0.007160	-0.001528	-0.004265
0.2800	605.284	109.656	25.196	65.952	-0.573	9.874	1152.306	-0.007676	-0.001764	-0.004617
0.3000	672.476	119.091	28.252	71.882	-0.570	9.875	1280.222	-0.008336	-0.001978	-0.005032
0.3200	701.286	122.996	29.727	75.115	-0.561	9.875	1335.068	-0.008610	-0.002081	-0.005258
0.3400	742.418	128.723	32.560	79.122	-0.561	9.874	1413.374	-0.009011	-0.002279	-0.005539
0.3600	780.200	134.309	34.952	82.574	-0.570	9.874	1485.300	-0.009402	-0.002447	-0.005780
0.3800	819.890	139.462	36.160	87.074	-0.558	9.874	1560.860	-0.009762	-0.002531	-0.006095
0.4000	847.647	143.133	38.146	89.495	-0.561	9.874	1613.703	-0.010019	-0.002670	-0.006265
0.4200	859.490	145.618	39.493	91.422	-0.552	9.874	1636.248	-0.010193	-0.002765	-0.006400
0.4400	884.903	148.995	40.564	93.871	-0.548	9.874	1684.628	-0.010430	-0.002840	-0.006571
0.4600	894.025	150.720	40.997	95.343	-0.559	9.875	1701.994	-0.010550	-0.002870	-0.006674
0.4800	893.724	150.927	41.636	95.741	-0.562	9.874	1701.422	-0.010565	-0.002914	-0.006702
0.5000	892.056	151.692	41.636	95.797	-0.555	9.874	1698.246	-0.010618	-0.002914	-0.006706
0.5200	894.716	151.997	41.234	96.443	-0.568	9.874	1703.310	-0.010640	-0.002886	-0.006751
0.5400	877.960	150.163	42.136	95.299	-0.555	9.874	1671.410	-0.010511	-0.002950	-0.006671
0.5600	870.100	150.066	40.954	94.765	-0.564	9.874	1656.446	-0.010505	-0.002867	-0.006634
0.5800	809.069	143.259	39.093	90.377	-0.557	9.874	1540.260	-0.010028	-0.002737	-0.006326
0.6000	792.959	140.865	38.285	88.876	-0.561	9.874	1509.590	-0.009861	-0.002680	-0.006221
0.6200	750.609	136.447	36.436	85.614	-0.561	9.874	1428.967	-0.009551	-0.002551	-0.005993
0.6400	703.314	130.737	34.339	81.721	-0.563	9.874	1338.930	-0.009152	-0.002404	-0.005720
0.6600	652.263	124.401	31.713	77.853	-0.561	9.874	1241.741	-0.008708	-0.002220	-0.005450
0.6800	601.888	118.312	29.378	73.050	-0.557	9.874	1145.840	-0.008282	-0.002056	-0.005113
0.7000	552.474	111.852	26.570	68.705	-0.573	9.874	1051.769	-0.007830	-0.001860	-0.004809
0.7200	498.928	104.544	24.405	64.548	-0.565	9.874	949.831	-0.007318	-0.001708	-0.004518
0.7400	450.401	98.302	22.400	59.829	-0.561	9.874	857.449	-0.006881	-0.001568	-0.004188
0.7600	376.928	88.604	18.970	53.431	-0.562	9.874	717.573	-0.006202	-0.001328	-0.003740
0.7800	335.209	81.879	16.245	49.148	-0.565	9.874	638.151	-0.005732	-0.001137	-0.003440
0.8000	284.548	74.760	15.174	44.309	-0.562	9.874	541.706	-0.005233	-0.001062	-0.003102
0.8200	234.368	67.411	12.675	39.653	-0.566	9.874	446.177	-0.004719	-0.000887	-0.002776
0.8400	196.932	60.936	11.633	35.859	-0.562	9.874	374.908	-0.004266	-0.000814	-0.002510
0.8600	152.974	53.499	10.799	31.702	-0.564	9.874	291.224	-0.003745	-0.000756	-0.002219
0.8800	123.428	48.499	9.478	28.551	-0.566	9.874	234.976	-0.003395	-0.000663	-0.001999
0.9000	96.122	43.342	9.062	25.372	-0.569	9.874	182.991	-0.003034	-0.000634	-0.001776
0.9200	72.602	39.050	8.896	22.786	-0.562	9.874	138.216	-0.002733	-0.000623	-0.001595
0.9400	46.588	35.114	7.964	20.007	-0.572	9.873	88.692	-0.002458	-0.000557	-0.001400
0.9600	40.487	33.031	6.810	18.576	-0.576	9.873	77.076	-0.002312	-0.000477	-0.001300
0.9800	36.609	32.210	7.256	18.206	-0.568	9.873	69.695	-0.002255	-0.000508	-0.001274
1.0000	39.269	32.336	7.506	17.669	-0.582	9.874	74.759	-0.002264	-0.000525	-0.001237
1.0200	44.229	32.673	7.200	18.286	-0.572	9.873	84.200	-0.002287	-0.000504	-0.001280
1.0400	67.342	35.282	6.742	19.744	-0.566	9.873	128.202	-0.002470	-0.000472	-0.001382
1.0600	93.071	38.908	8.393	22.400	-0.574	9.874	177.183	-0.002724	-0.000588	-0.001568
1.0800	120.813	42.869	8.047	24.259	-0.571	9.873	229.998	-0.003001	-0.000563	-0.001698
1.1000	159.992	48.456	8.353	27.932	-0.561	9.873	304.585	-0.003392	-0.000585	-0.001955
1.1200	187.930	52.749	9.090	30.163	-0.568	9.873	357.771	-0.003692	-0.000636	-0.002111
1.1400	232.820	60.173	9.366	33.750	-0.565	9.873	443.230	-0.004212	-0.000656	-0.002362
1.1600	282.534	66.744	10.631	37.841	-0.578	9.874	537.872	-0.004672	-0.000744	-0.002649
1.1800	332.714	73.830	13.478	42.146	-0.568	9.873	633.402	-0.005168	-0.000943	-0.002950
1.2000	389.717	82.101	15.091	47.086	-0.568	9.874	741.920	-0.005747	-0.001056	-0.003296
1.2200	441.865	89.242	17.859	51.916	-0.574	9.874	841.198	-0.006247	-0.001250	-0.003634
1.2400	489.535	95.575	20.733	56.706	-0.582	9.874	931.950	-0.006690	-0.001451	-0.003969
1.2600	549.348	103.624	23.153	61.521	-0.562	9.873	1045.818	-0.007254	-0.001621	-0.004306
1.2800	601.542	110.714	25.277	66.832	-0.578	9.874	1145.182	-0.007750	-0.001769	-0.004678
1.3000	647.228	116.645	28.112	70.853	-0.578	9.873	1232.157	-0.008165	-0.001968	-0.004960
1.3200	701.601	123.982	30.531	76.203	-0.583	9.873	1335.669	-0.008679	-0.002137	-0.005334
1.3400	738.797	129.389	32.838	79.366	-0.580	9.874	1406.479	-0.009057	-0.002299	-0.005556
1.3600	787.278	135.556	35.161	84.294	-0.577	9.873	1498.775	-0.009489	-0.002461	-0.005901
1.3800	814.930	139.615	36.687	87.130	-0.578	9.873	1551.418	-0.009773	-0.002568	-0.006099
1.4000	848.474	144.093	38.981	90.540	-0.577	9.874	1615.276	-0.010086	-0.002729	-0.006338
1.4200	880.199	148.386	39.855	93.540	-0.562	9.873	1675.673	-0.010387	-0.002790	-0.006548
1.4400	874.413	148.356	40.176	93.842	-0.585	9.874	1664.658	-0.010385	-0.002812	-0.006569
1.4600	891.380	150.828	41.372	95.327	-0.581	9.873	1696.959	-0.010558	-0.002896	-0.006673
1.4800	894.837	151.676	41.831	96.514	-0.572	9.873	1703.539	-0.010617	-0.002928	-0.006756
1.5000	890.734	151.440	42.191	96.443	-0.575	9.873	1695.728	-0.010601	-0.002953	-0.006751
1.5200	891.575	152.012	41.830	96.595	-0.579	9.873	1697.330	-0.010641	-0.002928	-0.006762
1.5400	877.824	150.967	41.359	96.086	-0.565	9.873	1671.152	-0.010568	-0.002895	-0.006726
1.5600	846.475	147.175	40.008	93.664	-0.574	9.873	1611.471	-0.010302	-0.002801	-0.006557
1.5800	816.058	143.899	39.910	91.478	-0.570	9.873	1553.564	-0.010073	-0.002794	-0.006403
1.6000	782.409	140.448	37.940	88.340	-0.581	9.873	1489.506	-0.009831	-0.002656	-0.006184
1.6200	734.453	134.752	35.908	85.050	-0.577	9.873	1398.211	-0.009433	-0.002514	-0.005953
1.6400	700.369	130.638	33.951	81.763	-0.587	9.874	1333.323	-0.009145	-0.002377	-0.005723
1.6600	647.754	124.692	31.628	77.305	-0.571	9.873	1233.158	-0.008728	-0.002214	-0.005411
1.6800	612.017	119.495	29.795	74.703	-0.573	9.873	1165.123	-0.008365	-0.002086	-0.005229
1.7000	551.467	111.753	26.361	69.132	-0.579	9.873	1049.852	-0.007823	-0.001845	-0.004839
1.7200	506.082	106.152	24.625	65.331	-0.573	9.873	963.449	-0.007431	-0.001724	-0.004573
1.7400	440.678	97.288	22.012	59.279	-0.584	9.874	838.938	-0.006810	-0.001541	-0.004149
1.7600	386.320	89.769	19.986	54.627	-0.568	9.873	735.455	-0.006284	-0.001399	-0.003824
1.7800	337.613	83.115	17.355	50.002	-0.577	9.873	642.729	-0.005818	-0.001215	-0.003500
1.8000	284.247	75.122	14.288	44.872	-0.581	9.873	541.134	-0.005259	-0.001000	-0.003141
1.8200	245.760	68.812	13.314	40.838	-0.578	9.873	467.863	-0.004817	-0.000932	-0.002859
1.8400	198.630	61.615	11.938	36.367	-0.570	9.873	378.141	-0.004313	-0.000836	-0.002546
1.8600	149.953	53.541	11.340	32.020	-0.572	9.873	285.473	-0.003748	-0.000794	-0.002241
1.8800	122.977	48.483	9.853	28.620	-0.570	9.873	234.118	-0.003394	-0.000690	-0.002003
1.9000	100.209	44.497	9.256	26.171	-0.570	9.873	190.773	-0.003115	-0.000648	-0.001832
1.9200	69.747	39.325	8.270	23.129	-0.568	9.873	132.780	-0.002753	-0.000579	-0.001619
1.9400	51.427	35.672	8.047	20.722	-0.558	9.873	97.904	-0.002497	-0.000563	-0.001451
1.9600	41.268	33.893	8.130	19.456	-0.572	9.873	78.564	-0.002373	-0.000569	-0.001362
1.9800	43.928	33.656	8.229	18.823	-0.567	9.873	83.628	-0.002356	-0.000576	-0.001318
2.0000	38.924	32.545	7.285	18.368	-0.582	9.873	74.100	-0.002278	-0.000510	-0.001286
2.0200	41.539	32.489	7.784	18.108	-0.570	9.873	79.079	-0.002274	-0.000545	-0.001268
2.0400	49.263	33.420	7.617	18.507	-0.580	9.873	93.784	-0.002339	-0.000533	-0.001296
2.0600	91.132	38.964	7.354	21.931	-0.573	9.873	173.492	-0.002728	-0.000515	-0.001535
2.0800	118.574	42.870	8.601	24.561	-0.580	9.873	225.735	-0.003001	-0.000602	-0.001719
2.1000	152.238	47.788	8.618	27.505	-0.584	9.873	289.822	-0.003345	-0.000603	-0.001925
2.1200	194.979	54.362	9.910	30.601	-0.580	9.873	371.189	-0.003805	-0.000694	-0.002142
2.1400	246.316	61.893	9.714	35.446	-0.577	9.873	468.922	-0.004333	-0.000680	-0.002481
2.1600	278.657	66.562	11.493	38.129	-0.576	9.873	530.491	-0.004659	-0.000805	-0.002669
2.1800	340.514	75.566	14.495	42.874	-0.580	9.873	648.251	-0.005290	-0.001015	-0.003001
2.2000	386.681	81.961	15.523	47.128	-0.573	9.873	736.141	-0.005737	-0.001087	-0.003299
2.2200	440.408	89.036	18.150	52.027	-0.580	9.873	838.423	-0.006233	-0.001271	-0.003642
2.2400	504.654	98.192	20.998	58.190	-0.574	9.873	960.732	-0.006873	-0.001470	-0.004073
2.2600	545.561	103.486	22.637	62.002	-0.574	9.873	1038.609	-0.007244	-0.001585	-0.004340
2.2800	601.121	110.852	25.195	66.916	-0.574	9.872	1144.381	-0.007760	-0.001764	-0.004684
2.3000	652.158	117.852	28.335	71.839	-0.573	9.873	1241.541	-0.008250	-0.001983	-0.005029
2.3200	702.864	124.705	30.432	76.617	-0.582	9.872	1338.072	-0.008729	-0.002130	-0.005363
2.3400	744.252	130.014	33.434	80.275	-0.569	9.873	1416.864	-0.009101	-0.002340	-0.005619
2.3600	786.497	135.851	36.215	84.610	-0.574	9.873	1497.288	-0.009510	-0.002535	-0.005923
2.3800	811.173	139.586	36.757	87.447	-0.577	9.873	1544.266	-0.009771	-0.002573	-0.006121
2.4000	844.882	143.925	37.686	90.143	-0.571	9.873	1608.438	-0.010075	-0.002638	-0.006310
2.4200	872.444	147.523	39.939	93.390	-0.570	9.873	1660.910	-0.010327	-0.002796	-0.006537
2.4400	876.592	148.787	40.565	94.242	-0.570	9.872	1668.806	-0.010415	-0.002840	-0.006597
2.4600	891.155	150.996	42.232	95.672	-0.573	9.872	1696.529	-0.010570	-0.002956	-0.006697
2.4800	900.066	152.235	42.110	97.133	-0.585	9.872	1713.495	-0.010656	-0.002948	-0.006799
2.5000	896.895	152.470	42.205	97.159	-0.577	9.873	1707.458	-0.010673	-0.002954	-0.006801
2.5200	886.045	151.443	41.884	95.990	-0.572	9.873	1686.802	-0.010601	-0.002932	-0.006719
2.5400	867.365	149.499	41.259	95.218	-0.589	9.873	1651.239	-0.010465	-0.002888	-0.006665
2.5600	839.757	146.702	41.038	93.181	-0.583	9.872	1598.682	-0.010269	-0.002873	-0.006523
2.5800	815.607	144.314	39.592	91.158	-0.578	9.873	1552.706	-0.010102	-0.002771	-0.006381
2.6000	769.244	138.798	36.842	87.913	-0.581	9.872	1464.443	-0.009716	-0.002579	-0.006154
2.6200	733.416	134.626	35.047	84.624	-0.589	9.872	1396.236	-0.009424	-0.002453	-0.005924
2.6400	698.656	130.708	34.603	81.901	-0.584	9.873	1330.061	-0.009150	-0.002422	-0.005733
2.6600	650.580	124.523	32.170	77.991	-0.588	9.873	1238.537	-0.008717	-0.002252	-0.005459
2.6800	606.877	119.036	30.268	74.207	-0.582	9.872	1155.338	-0.008333	-0.002119	-0.005194
2.7000	564.632	114.116	26.820	70.190	-0.584	9.873	1074.915	-0.007988	-0.001877	-0.004913
2.7200	499.048	105.292	24.375	65.098	-0.579	9.872	950.060	-0.007370	-0.001706	-0.004557
2.7400	435.628	96.898	21.970	59.072	-0.587	9.872	829.325	-0.006783	-0.001538	-0.004135
2.7600	381.737	90.006	19.177	54.104	-0.577	9.873	726.728	-0.006300	-0.001342	-0.003787
2.7800	331.061	82.128	16.579	49.535	-0.582	9.872	630.255	-0.005749	-0.001161	-0.003467
2.8000	282.835	74.858	14.121	44.554	-0.576	9.872	538.445	-0.005240	-0.000988	-0.003119
2.8200	235.691	67.965	13.466	40.138	-0.580	9.872	448.694	-0.004758	-0.000943	-0.002810
2.8400	187.434	59.658	10.227	35.405	-0.585	9.872	356.827	-0.004176	-0.000716	-0.002478
2.8600	150.675	53.333	10.158	32.018	-0.579	9.873	286.846	-0.003733	-0.000711	-0.002241
2.8800	113.975	47.441	10.117	28.428	-0.583	9.873	216.980	-0.003321	-0.000708	-0.001990
2.9000	94.213	43.799	8.936	25.965	-0.582	9.873	179.358	-0.003066	-0.000625	-0.001818
2.9200	67.252	38.561	8.965	22.760	-0.580	9.873	128.031	-0.002699	-0.000628	-0.001593
2.9400	60.760	37.296	9.242	21.644	-0.576	9.872	115.671	-0.002611	-0.000647	-0.001515
2.9600	44.153	34.515	7.282	19.649	-0.584	9.872	84.057	-0.002416	-0.000510	-0.001375
2.9800	31.590	32.088	7.617	17.899	-0.586	9.872	60.139	-0.002246	-0.000533	-0.001253
3.0000	30.102	31.183	7.018	17.542	-0.580	9.873	57.306	-0.002183	-0.000491	-0.001228
3.0200	32.987	31.544	7.938	17.336	-0.584	9.872	62.799	-0.002208	-0.000556	-0.001214
3.0400	58.100	34.336	6.852	19.456	-0.585	9.873	110.607	-0.002403	-0.000480	-0.001362
3.0600	90.711	38.924	8.533	21.975	-0.592	9.872	172.691	-0.002725	-0.000597	-0.001538
3.0800	124.060	43.551	7.631	25.002	-0.585	9.872	236.177	-0.003049	-0.000534	-0.001750
3.1000	150.284	47.815	7.713	27.174	-0.582	9.872	286.102	-0.003347	-0.000540	-0.001902
3.1200	187.149	52.666	8.506	30.175	-0.576	9.873	356.283	-0.003687	-0.000595	-0.002112
3.1400	225.095	58.946	10.646	33.630	-0.583	9.873	428.524	-0.004126	-0.000745	-0.002354
3.1600	295.038	68.883	12.090	39.036	-0.578	9.872	561.676	-0.004822	-0.000846	-0.002733
3.1800	332.308	74.009	13.299	42.821	-0.585	9.872	632.629	-0.005181	-0.000931	-0.002997
3.2000	389.536	81.907	15.690	47.651	-0.581	9.872	741.577	-0.005733	-0.001098	-0.003336
3.2200	428.926	88.118	17.428	50.994	-0.580	9.873	816.565	-0.006168	-0.001220	-0.003570
3.2400	500.927	97.175	20.719	57.668	-0.571	9.873	953.636	-0.006802	-0.001450	-0.004037
3.2600	553.106	104.306	24.556	62.689	-0.577	9.872	1052.971	-0.007301	-0.001719	-0.004388
3.2800	606.366	111.754	26.112	67.423	-0.577	9.872	1154.366	-0.007823	-0.001828	-0.004720
3.3000	642.449	116.521	27.112	71.097	-0.578	9.872	1223.059	-0.008156	-0.001898	-0.004977
3.3200	698.145	124.010	31.046	76.010	-0.591	9.872	1329.088	-0.008681	-0.002173	-0.005321
3.3400	741.381	130.097	33.492	80.263	-0.582	9.873	1411.400	-0.009107	-0.002344	-0.005618
3.3600	775.481	134.391	34.699	83.619	-0.584	9.873	1476.316	-0.009407	-0.002429	-0.005853
3.3800	820.446	140.213	36.702	87.777	-0.582	9.872	1561.918	-0.009815	-0.002569	-0.006144
3.4000	849.030	144.424	39.105	90.692	-0.572	9.872	1616.335	-0.010110	-0.002737	-0.006348
3.4200	864.855	146.690	39.592	92.714	-0.577	9.873	1646.461	-0.010268	-0.002771	-0.006490
3.4400	890.659	149.985	40.870	95.316	-0.574	9.872	1695.585	-0.010499	-0.002861	-0.006672
3.4600	890.012	151.094	41.665	95.824	-0.572	9.873	1694.355	-0.010577	-0.002917	-0.006708
3.4800	888.930	150.996	41.414	95.975	-0.567	9.873	1692.295	-0.010570	-0.002899	-0.006718
3.5000	897.707	152.093	41.356	97.407	-0.570	9.873	1709.003	-0.010647	-0.002895	-0.006818
3.5200	897.121	152.566	42.955	97.282	-0.571	9.872	1707.888	-0.010680	-0.003007	-0.006810
3.5400	871.542	150.261	41.554	95.822	-0.562	9.873	1659.193	-0.010518	-0.002909	-0.006708
3.5600	841.921	146.702	40.927	93.266	-0.569	9.872	1602.802	-0.010269	-0.002865	-0.006529
3.5800	814.344	143.926	39.787	91.339	-0.571	9.873	1550.303	-0.010075	-0.002785	-0.006394
3.6000	778.667	140.154	38.562	88.698	-0.577	9.873	1482.382	-0.009811	-0.002699	-0.006209
3.6200	741.922	135.710	35.271	85.572	-0.578	9.873	1412.430	-0.009500	-0.002469	-0.005990
3.6400	701.120	130.486	33.741	82.284	-0.576	9.872	1334.753	-0.009134	-0.002362	-0.005760
3.6600	651.421	124.830	31.546	77.909	-0.585	9.872	1240.139	-0.008738	-0.002208	-0.005454
3.6800	607.914	119.158	30.032	74.096	-0.575	9.873	1157.312	-0.008341	-0.002102	-0.005187
3.7000	553.286	112.283	27.460	69.776	-0.591	9.872	1053.314	-0.007860	-0.001922	-0.004884
3.7200	508.546	106.376	24.780	65.223	-0.575	9.872	968.142	-0.007446	-0.001735	-0.004566
3.7400	445.773	98.275	22.847	59.938	-0.585	9.873	848.637	-0.006879	-0.001599	-0.004196
3.7600	391.235	90.479	19.401	55.300	-0.580	9.872	744.810	-0.006334	-0.001358	-0.003871
3.7800	338.004	83.447	17.482	50.444	-0.572	9.872	643.473	-0.005841	-0.001224	-0.003531
3.8000	283.857	75.190	14.773	45.091	-0.583	9.873	540.390	-0.005263	-0.001034	-0.003156
3.8200	236.217	67.826	12.646	40.372	-0.580	9.873	449.696	-0.004748	-0.000885	-0.002826
3.8400	194.152	61.269	12.147	36.326	-0.579	9.872	369.616	-0.004289	-0.000850	-0.002543
3.8600	159.782	55.252	9.920	32.857	-0.577	9.872	304.184	-0.003868	-0.000694	-0.002300
3.8800	113.224	47.037	9.215	28.289	-0.583	9.872	215.549	-0.003293	-0.000645	-0.001980
3.9000	92.365	43.496	9.521	26.225	-0.587	9.873	175.838	-0.003045	-0.000666	-0.001836
3.9200	71.836	39.812	8.326	23.473	-0.584	9.872	136.757	-0.002787	-0.000583	-0.001643
3.9400	49.023	35.506	8.465	20.613	-0.577	9.872	93.327	-0.002485	-0.000593	-0.001443
3.9600	42.711	33.863	8.742	19.800	-0.578	9.873	81.310	-0.002370	-0.000612	-0.001386
3.9800	39.720	33.572	8.491	18.947	-0.580	9.872	75.617	-0.002350	-0.000594	-0.001326
4.0000	42.485	32.795	7.839	18.409	-0.581	9.873	80.881	-0.002296	-0.000549	-0.001289
4.0200	48.226	33.322	7.199	19.097	-0.591	9.873	91.810	-0.002333	-0.000504	-0.001337
4.0400	70.168	36.589	8.394	20.708	-0.578	9.872	133.581	-0.002561	-0.000588	-0.001450
4.0600	93.432	39.561	7.589	22.729	-0.578	9.873	177.870	-0.002769	-0.000531	-0.001591
4.0800	123.038	43.494	8.854	25.071	-0.585	9.873	234.232	-0.003045	-0.000620	-0.001755
4.1000	165.252	49.945	10.104	28.563	-0.585	9.873	314.598	-0.003496	-0.000707	-0.001999
4.1200	192.995	54.015	9.367	31.262	-0.589	9.873	367.413	-0.003781	-0.000656	-0.002188
4.1400	239.192	60.812	9.436	34.813	-0.577	9.872	455.360	-0.004257	-0.000661	-0.002437
4.1600	285.961	68.076	11.967	38.720	-0.580	9.873	544.395	-0.004765	-0.000838	-0.002710
4.1800	336.561	75.136	12.884	43.137	-0.579	9.873	640.726	-0.005260	-0.000902	-0.003020
4.2000	394.992	82.810	16.760	48.105	-0.581	9.873	751.963	-0.005797	-0.001173	-0.003367
4.2200	435.824	88.604	18.177	52.149	-0.582	9.873	829.697	-0.006202	-0.001272	-0.003650
4.2400	467.459	93.287	19.289	54.750	-0.576	9.873	889.921	-0.006530	-0.001350	-0.003833
4.2600	547.590	103.136	22.208	62.070	-0.587	9.872	1042.471	-0.007220	-0.001555	-0.004345
4.2800	607.959	111.755	25.570	67.878	-0.586	9.873	1157.398	-0.007823	-0.001790	-0.004751
4.3000	656.291	118.394	28.505	72.573	-0.593	9.872	1249.409	-0.008288	-0.001995	-0.005080
4.3200	698.731	124.022	30.336	76.147	-0.585	9.873	1330.204	-0.008682	-0.002124	-0.005330
4.3400	731.342	128.347	31.490	79.245	-0.603	9.873	1392.288	-0.008984	-0.002204	-0.005547
4.3600	777.735	135.072	34.798	84.044	-0.589	9.873	1480.608	-0.009455	-0.002436	-0.005883
4.3800	816.809	139.738	36.980	87.391	-0.592	9.872	1554.995	-0.009782	-0.002589	-0.006117
4.4000	840.028	143.369	38.216	89.976	-0.587	9.873	1599.197	-0.010036	-0.002675	-0.006298
4.4200	867.124	147.176	40.066	93.031	-0.587	9.873	1650.782	-0.010302	-0.002805	-0.006512
4.4400	878.471	148.759	40.316	94.450	-0.587	9.873	1672.382	-0.010413	-0.002822	-0.006611
4.4600	892.567	150.872	41.928	96.181	-0.590	9.873	1699.219	-0.010561	-0.002935	-0.006733
4.4800	892.237	151.552	41.567	96.525	-0.589	9.873	1698.589	-0.010609	-0.002910	-0.006757
4.5000	904.830	153.318	42.274	97.641	-0.583	9.872	1722.565	-0.010732	-0.002959	-0.006835
4.5200	892.943	151.955	41.623	97.339	-0.590	9.872	1699.934	-0.010637	-0.002914	-0.006814
4.5400	867.650	149.624	41.372	95.400	-0.579	9.873	1651.783	-0.010474	-0.002896	-0.006678
4.5600	839.818	146.745	40.690	93.198	-0.581	9.873	1598.797	-0.010272	-0.002848	-0.006524
4.5800	809.791	143.410	38.884	90.898	-0.585	9.873	1541.634	-0.010039	-0.002722	-0.006363
4.6000	766.404	138.560	37.079	87.830	-0.575	9.873	1459.036	-0.009699	-0.002596	-0.006148
4.6200	739.067	135.515	35.757	85.176	-0.576	9.873	1406.994	-0.009486	-0.002503	-0.005962
4.6400	700.579	130.445	33.631	82.147	-0.574	9.873	1333.723	-0.009131	-0.002354	-0.005750
4.6600	653.540	124.886	32.629	78.170	-0.573	9.873	1244.173	-0.008742	-0.002284	-0.005472
4.6800	592.615	117.409	30.046	73.120	-0.574	9.873	1128.187	-0.008219	-0.002103	-0.005118
4.7000	542.766	111.130	25.999	68.720	-0.573	9.873	1033.287	-0.007779	-0.001820	-0.004810
4.7200	494.179	104.474	24.405	64.383	-0.571	9.874	940.790	-0.007313	-0.001708	-0.004507
4.7400	434.757	97.121	21.372	59.184	-0.561	9.873	827.665	-0.006798	-0.001496	-0.004143
4.7600	387.733	90.616	18.301	54.806	-0.573	9.873	738.144	-0.006343	-0.001281	-0.003836
4.7800	330.730	81.864	16.065	49.465	-0.578	9.873	629.625	-0.005731	-0.001125	-0.003463
4.8000	291.446	75.985	15.467	45.462	-0.578	9.873	554.838	-0.005319	-0.001083	-0.003182
4.8200	234.654	67.409	13.177	40.080	-0.573	9.873	446.720	-0.004719	-0.000922	-0.002806
4.8400	199.652	61.867	12.314	36.627	-0.564	9.873	380.087	-0.004331	-0.000862	-0.002564
4.8600	157.393	54.905	10.603	32.733	-0.567	9.873	299.635	-0.003843	-0.000742	-0.002291
4.8800	116.275	47.803	9.104	28.261	-0.565	9.873	221.357	-0.003346	-0.000637	-0.001978
4.9000	91.042	43.093	9.729	25.442	-0.566	9.873	173.321	-0.003017	-0.000681	-0.001781
4.9200	64.397	38.616	8.632	22.732	-0.562	9.873	122.595	-0.002703	-0.000604	-0.001591
4.9400	52.419	36.422	7.549	21.298	-0.568	9.873	99.792	-0.002550	-0.000528	-0.001491
4.9600	51.112	35.142	7.158	20.516	-0.573	9.873	97.303	-0.002460	-0.000501	-0.001436
4.9800	36.609	32.504	6.991	18.920	-0.578	9.873	69.695	-0.002275	-0.000489	-0.001324
5.0000	60.174	43.689	9.867	26.927	-0.592	9.889	114.555	-0.003058	-0.000691	-0.001885
5.0200	61.797	41.173	9.060	24.479	-0.589	9.890	117.645	-0.002882	-0.000634	-0.001714
5.0400	71.490	41.147	9.561	24.849	-0.592	9.889	136.099	-0.002880	-0.000669	-0.001739
5.0600	106.852	45.036	10.491	26.709	-0.581	9.890	203.419	-0.003153	-0.000734	-0.001870
5.0800	150.134	50.942	9.533	30.340	-0.588	9.890	285.816	-0.003566	-0.000667	-0.002124
5.1000	199.968	58.127	9.716	34.153	-0.585	9.889	380.688	-0.004069	-0.000680	-0.002391
5.1200	251.020	65.535	11.186	38.211	-0.597	9.889	477.877	-0.004587	-0.000783	-0.002675
5.1400	310.532	73.495	13.467	42.573	-0.592	9.889	591.173	-0.005145	-0.000943	-0.002980
5.1600	365.611	81.586	15.341	47.665	-0.592	9.889	696.030	-0.005711	-0.001074	-0.003337
5.1800	435.613	90.326	18.274	53.677	-0.589	9.889	829.296	-0.006323	-0.001279	-0.003757
5.2000	499.033	99.152	21.401	59.195	-0.590	9.889	950.031	-0.006941	-0.001498	-0.004144
5.2200	570.854	108.517	24.377	65.595	-0.585	9.889	1086.760	-0.007596	-0.001706	-0.004592
5.2400	641.984	117.229	28.377	72.089	-0.584	9.889	1222.172	-0.008206	-0.001986	-0.005046
5.2600	707.898	125.969	31.808	78.200	-0.578	9.889	1347.656	-0.008818	-0.002227	-0.005474
5.2800	774.504	135.072	34.994	84.444	-0.570	9.889	1474.457	-0.009455	-0.002450	-0.005911
5.3000	838.931	142.701	37.341	90.307	-0.575	9.889	1597.109	-0.009989	-0.002614	-0.006321
5.3200	895.017	150.248	41.067	95.947	-0.570	9.889	1703.882	-0.010517	-0.002875	-0.006716
5.3400	965.275	159.085	45.205	102.099	-0.574	9.889	1837.635	-0.011136	-0.003164	-0.007147
5.3600	1009.473	164.686	46.973	106.683	-0.574	9.890	1921.778	-0.011528	-0.003288	-0.007468
5.3800	1054.694	170.649	50.236	111.070	-0.576	9.890	2007.866	-0.011945	-0.003517	-0.007775
5.4000	1082.075	174.940	51.863	113.878	-0.578	9.890	2059.994	-0.012246	-0.003630	-0.007971
5.4200	1129.746	180.596	55.015	118.624	-0.585	9.890	2150.745	-0.012642	-0.003851	-0.008304
5.4400	1139.950	182.626	55.988	120.098	-0.582	9.889	2170.172	-0.012784	-0.003919	-0.008407
5.4600	1158.330	185.708	57.102	122.121	-0.585	9.889	2205.162	-0.013000	-0.003997	-0.008548
5.4800	1160.719	186.306	56.531	122.780	-0.586	9.889	2209.711	-0.013041	-0.003957	-0.008595
5.5000	1155.835	185.918	57.312	122.836	-0.591	9.889	2200.413	-0.013014	-0.004012	-0.008599
5.5200	1147.269	185.932	56.781	122.354	-0.576	9.889	2184.105	-0.013015	-0.003975	-0.008565
5.5400	1122.562	183.546	56.490	121.171	-0.577	9.889	2137.070	-0.012848	-0.003954	-0.008482
5.5600	1076.545	178.404	54.114	117.566	-0.581	9.890	2049.465	-0.012488	-0.003788	-0.008230
5.5800	1048.096	175.886	53.557	115.364	-0.588	9.889	1995.306	-0.012312	-0.003749	-0.008075
5.6000	1007.294	171.579	51.014	112.431	-0.578	9.889	1917.629	-0.012011	-0.003571	-0.007870
5.6200	952.305	164.728	48.194	108.360	-0.587	9.890	1812.944	-0.011531	-0.003374	-0.007585
5.6400	895.858	158.764	45.582	103.090	-0.584	9.890	1705.484	-0.011113	-0.003191	-0.007216
5.6600	835.640	151.691	42.815	98.329	-0.583	9.889	1590.843	-0.010618	-0.002997	-0.006883
5.6800	761.730	143.035	39.161	91.874	-0.584	9.889	1450.138	-0.010012	-0.002741	-0.006431
5.7000	694.613	134.626	35.492	86.261	-0.596	9.889	1322.365	-0.009424	-0.002484	-0.006038
5.7200	636.528	127.195	32.519	80.373	-0.588	9.889	1211.786	-0.008904	-0.002276	-0.005626
5.7400	567.954	118.408	29.004	74.577	-0.595	9.889	1081.238	-0.008289	-0.002030	-0.005220
5.7600	501.528	109.613	26.500	68.319	-0.593	9.890	954.781	-0.007673	-0.001855	-0.004782
5.7800	433.810	100.444	23.652	62.400	-0.593	9.890	825.863	-0.007031	-0.001656	-0.004368
5.8000	369.759	91.158	19.555	56.043	-0.600	9.889	703.926	-0.006381	-0.001369	-0.003923
5.8200	302.311	81.194	17.345	49.424	-0.591	9.889	575.523	-0.005684	-0.001214	-0.003460
5.8400	254.251	74.011	15.106	44.348	-0.582	9.890	484.028	-0.005181	-0.001057	-0.003104
5.8600	198.014	64.466	12.898	39.119	-0.582	9.889	376.968	-0.004513	-0.000903	-0.002738
5.8800	157.272	57.488	10.980	35.226	-0.582	9.890	299.406	-0.004024	-0.000769	-0.002466
5.9000	118.785	50.735	10.228	31.055	-0.586	9.889	226.135	-0.003551	-0.000716	-0.002174
5.9200	89.780	45.134	9.547	27.216	-0.580	9.890	170.918	-0.003159	-0.000668	-0.001905
5.9400	71.836	41.521	10.311	25.237	-0.588	9.890	136.757	-0.002906	-0.000722	-0.001767
5.9600	55.380	38.840	9.728	23.198	-0.585	9.890	105.429	-0.002719	-0.000681	-0.001624
5.9800	49.128	36.715	7.784	22.014	-0.585	9.890	93.527	-0.002570	-0.000545	-0.001541
6.0000	51.923	36.659	7.646	21.808	-0.580	9.890	98.848	-0.002566	-0.000535	-0.001527
6.0200	57.484	37.604	8.908	21.615	-0.584	9.890	109.434	-0.002632	-0.000624	-0.001513
6.0400	86.999	40.853	7.826	24.314	-0.581	9.890	165.625	-0.002860	-0.000548	-0.001702
6.0600	117.267	44.899	7.938	26.529	-0.583	9.890	223.246	-0.003143	-0.000556	-0.001857
6.0800	153.861	50.472	9.657	29.708	-0.583	9.890	292.912	-0.003533	-0.000676	-0.002080
6.1000	195.595	56.404	10.438	33.092	-0.592	9.890	372.362	-0.003948	-0.000731	-0.002316
6.1200	250.433	64.450	10.840	37.691	-0.593	9.890	476.761	-0.004511	-0.000759	-0.002638
6.1400	309.285	73.108	12.688	42.310	-0.595	9.890	588.799	-0.005118	-0.000888	-0.002962
6.1600	359.164	80.263	15.091	46.768	-0.581	9.891	683.756	-0.005618	-0.001056	-0.003274
6.1800	435.057	90.020	18.135	53.539	-0.587	9.890	828.238	-0.006301	-0.001269	-0.003748
6.2000	499.229	98.818	21.191	59.195	-0.579	9.890	950.403	-0.006917	-0.001483	-0.004144
6.2200	565.684	107.737	24.876	65.372	-0.583	9.890	1076.918	-0.007542	-0.001741	-0.004576
6.2400	637.400	116.535	26.654	71.883	-0.584	9.890	1213.446	-0.008157	-0.001866	-0.005032
6.2600	705.869	125.830	31.338	78.047	-0.581	9.890	1343.794	-0.008808	-0.002194	-0.005463
6.2800	776.413	135.112	34.560	84.321	-0.577	9.890	1478.090	-0.009458	-0.002419	-0.005902
6.3000	836.662	142.745	38.258	90.556	-0.577	9.890	1592.789	-0.009992	-0.002678	-0.006339
6.3200	894.371	150.512	40.870	95.758	-0.585	9.890	1702.652	-0.010536	-0.002861	-0.006703
6.3400	955.732	158.083	44.093	101.467	-0.586	9.890	1819.468	-0.011066	-0.003087	-0.007103
6.3600	1011.367	164.671	47.874	106.997	-0.573	9.891	1925.383	-0.011527	-0.003351	-0.007490
6.3800	1063.140	171.483	51.141	111.829	-0.581	9.890	2023.945	-0.012004	-0.003580	-0.007828
6.4000	1094.940	176.748	52.904	115.461	-0.584	9.890	2084.484	-0.012372	-0.003703	-0.008082
6.4200	1121.375	180.108	54.059	118.405	-0.576	9.890	2134.809	-0.012608	-0.003784	-0.008288
6.4400	1146.427	183.420	56.197	121.226	-0.581	9.891	2182.503	-0.012839	-0.003934	-0.008486
6.4600	1149.358	185.072	55.669	122.037	-0.585	9.890	2188.082	-0.012955	-0.003897	-0.008543
6.4800	1168.429	187.170	56.934	123.691	-0.587	9.890	2224.388	-0.013102	-0.003985	-0.008658
6.5000	1161.756	187.281	57.268	123.784	-0.586	9.890	2211.685	-0.013110	-0.004009	-0.008665
6.5200	1151.371	186.893	58.172	123.332	-0.580	9.890	2191.916	-0.013083	-0.004072	-0.008633
6.5400	1110.690	182.446	56.267	120.359	-0.589	9.890	2114.468	-0.012771	-0.003939	-0.008425
6.5600	1092.250	180.611	55.837	119.368	-0.580	9.890	2079.363	-0.012643	-0.003909	-0.008356
6.5800	1057.354	177.109	54.420	116.561	-0.589	9.890	2012.930	-0.012398	-0.003809	-0.008159
6.6000	1019.076	172.804	51.265	113.919	-0.587	9.891	1940.060	-0.012096	-0.003589	-0.007974
6.6200	953.928	165.728	49.151	108.525	-0.582	9.891	1816.034	-0.011601	-0.003441	-0.007597
6.6400	910.767	160.796	46.722	104.782	-0.582	9.891	1733.866	-0.011256	-0.003271	-0.007335
6.6600	841.621	152.748	43.551	99.196	-0.582	9.891	1602.230	-0.010692	-0.003049	-0.006944
6.6800	783.461	145.604	38.993	93.884	-0.592	9.891	1491.508	-0.010192	-0.002729	-0.006572
6.7000	713.068	137.449	37.215	87.955	-0.590	9.891	1357.498	-0.009621	-0.002605	-0.006157
6.7200	649.332	129.166	32.907	81.636	-0.592	9.891	1236.162	-0.009042	-0.002303	-0.005715
6.7400	571.816	119.356	28.683	75.514	-0.590	9.891	1088.591	-0.008355	-0.002008	-0.005286
6.7600	495.051	109.267	26.278	68.512	-0.591	9.891	942.450	-0.007649	-0.001839	-0.004796
6.7800	428.535	100.331	22.191	62.524	-0.591	9.891	815.821	-0.007023	-0.001553	-0.004377
6.8000	369.473	91.310	19.736	56.511	-0.591	9.890	703.382	-0.006392	-0.001382	-0.003956
6.8200	306.489	82.309	17.718	50.418	-0.583	9.891	583.477	-0.005762	-0.001240	-0.003529
6.8400	258.909	74.788	15.134	45.243	-0.583	9.890	492.897	-0.005235	-0.001059	-0.003167
6.8600	204.101	65.815	12.816	40.523	-0.581	9.891	388.556	-0.004607	-0.000897	-0.002837
6.8800	157.017	58.071	11.575	35.350	-0.576	9.891	298.920	-0.004065	-0.000810	-0.002474
6.9000	119.701	51.749	10.771	31.481	-0.576	9.891	227.880	-0.003622	-0.000754	-0.002204
6.9200	90.651	45.730	9.992	28.261	-0.578	9.891	172.577	-0.003201	-0.000699	-0.001978
6.9400	67.523	41.326	10.022	24.933	-0.578	9.891	128.546	-0.002893	-0.000702	-0.001745
6.9600	50.826	38.604	8.214	23.322	-0.585	9.891	96.760	-0.002702	-0.000575	-0.001633
6.9800	51.157	37.213	8.896	22.264	-0.577	9.891	97.389	-0.002605	-0.000623	-0.001558
7.0000	55.094	37.576	8.936	22.731	-0.577	9.891	104.885	-0.002630	-0.000625	-0.001591
7.0200	64.246	38.730	8.840	22.758	-0.575	9.891	122.309	-0.002711	-0.000619	-0.001593
7.0400	99.969	43.189	8.813	25.526	-0.575	9.891	190.315	-0.003023	-0.000617	-0.001787
7.0600	114.652	45.177	8.908	26.929	-0.583	9.891	218.267	-0.003162	-0.000624	-0.001885
7.0800	152.809	50.792	10.617	29.899	-0.590	9.891	290.909	-0.003555	-0.000743	-0.002093
7.1000	201.741	57.891	11.327	33.780	-0.576	9.891	384.064	-0.004052	-0.000793	-0.002365
7.1200	251.711	64.967	11.173	38.321	-0.585	9.891	479.193	-0.004548	-0.000782	-0.002682
7.1400	305.513	72.981	13.384	42.450	-0.576	9.891	581.617	-0.005109	-0.000937	-0.002971
7.1600	365.852	81.071	15.815	47.733	-0.576	9.892	696.487	-0.005675	-0.001107	-0.003341
7.1800	435.553	90.380	17.692	53.814	-0.583	9.892	829.182	-0.006327	-0.001238	-0.003767
7.2000	501.483	99.692	20.999	59.938	-0.580	9.891	954.695	-0.006978	-0.001470	-0.004196
7.2200	565.068	108.070	24.279	65.772	-0.579	9.891	1075.745	-0.007565	-0.001700	-0.004604
7.2400	636.468	117.424	28.782	72.158	-0.574	9.891	1211.672	-0.008220	-0.002015	-0.005051
7.2600	708.018	126.681	30.879	78.501	-0.574	9.892	1347.885	-0.008868	-0.002162	-0.005495
7.2800	765.006	133.947	34.702	84.184	-0.577	9.892	1456.375	-0.009376	-0.002429	-0.005893
7.3000	837.067	143.298	38.037	90.637	-0.577	9.892	1593.561	-0.010031	-0.002663	-0.006345
7.3200	892.357	150.676	41.400	96.197	-0.574	9.891	1698.818	-0.010547	-0.002898	-0.006734
7.3400	957.385	158.710	45.053	102.334	-0.581	9.892	1822.615	-0.011110	-0.003154	-0.007163
7.3600	1009.699	165.199	48.248	107.299	-0.578	9.891	1922.207	-0.011564	-0.003377	-0.007511
7.3800	1059.262	172.010	51.124	112.407	-0.580	9.891	2016.563	-0.012041	-0.003579	-0.007868
7.4000	1103.671	178.041	53.767	116.314	-0.568	9.891	2101.107	-0.012463	-0.003764	-0.008142
7.4200	1120.428	180.441	53.877	118.639	-0.577	9.892	2133.007	-0.012631	-0.003771	-0.008305
7.4400	1148.050	184.211	56.755	121.597	-0.588	9.891	2185.593	-0.012895	-0.003973	-0.008512
7.4600	1151.116	185.682	57.131	122.589	-0.588	9.891	2191.429	-0.012998	-0.003999	-0.008581
7.4800	1152.559	186.042	56.865	123.235	-0.588	9.892	2194.176	-0.013023	-0.003981	-0.008626
7.5000	1165.844	187.853	57.463	124.555	-0.579	9.891	2219.467	-0.013150	-0.004022	-0.008719
7.5200	1154.557	187.364	57.144	124.034	-0.591	9.892	2197.981	-0.013115	-0.004000	-0.008682
7.5400	1132.902	185.307	57.616	122.794	-0.584	9.892	2156.754	-0.012971	-0.004033	-0.008596
7.5600	1090.957	180.789	55.627	119.491	-0.590	9.892	2076.902	-0.012655	-0.003894	-0.008364
7.5800	1058.376	177.624	55.071	116.835	-0.577	9.892	2014.875	-0.012434	-0.003855	-0.008178
7.6000	1007.129	171.998	52.044	113.451	-0.583	9.892	1917.315	-0.012040	-0.003643	-0.007942
7.6200	961.608	166.354	49.207	109.488	-0.584	9.892	1830.654	-0.011645	-0.003444	-0.007664
7.6400	895.693	159.404	46.527	104.025	-0.577	9.892	1705.170	-0.011158	-0.003257	-0.007282
7.6600	838.991	152.804	42.274	99.306	-0.576	9.891	1597.223	-0.010696	-0.002959	-0.006951
7.6800	772.656	144.856	40.092	93.430	-0.583	9.892	1470.938	-0.010140	-0.002806	-0.006540
7.7000	702.653	136.504	35.438	87.184	-0.571	9.892	1337.671	-0.009555	-0.002481	-0.006103
7.7200	633.327	127.680	31.921	81.033	-0.572	9.891	1205.692	-0.008938	-0.002234	-0.005672
7.7400	581.900	120.746	29.447	76.133	-0.574	9.892	1107.788	-0.008452	-0.002061	-0.005329
7.7600	500.115	110.185	26.652	69.283	-0.578	9.892	952.091	-0.007713	-0.001866	-0.004850
7.7800	430.819	100.722	22.638	62.733	-0.579	9.892	820.169	-0.007051	-0.001585	-0.004391
7.8000	357.887	89.880	18.638	55.808	-0.583	9.892	681.324	-0.006292	-0.001305	-0.003907
7.8200	308.293	83.129	18.471	50.787	-0.570	9.892	586.910	-0.005819	-0.001293	-0.003555
7.8400	246.917	73.453	13.580	44.733	-0.588	9.892	470.066	-0.005142	-0.000951	-0.003131
7.8600	196.752	65.214	13.689	40.107	-0.581	9.892	374.565	-0.004565	-0.000958	-0.002807
7.8800	157.498	58.724	12.231	35.819	-0.585	9.892	299.835	-0.004111	-0.000856	-0.002507
7.9000	120.167	51.623	10.047	31.867	-0.590	9.892	228.767	-0.003614	-0.000703	-0.002231
7.9200	92.470	46.355	10.172	28.660	-0.585	9.892	176.039	-0.003245	-0.000712	-0.002006
7.9400	72.422	42.480	10.255	26.132	-0.583	9.892	137.873	-0.002974	-0.000718	-0.001829
7.9600	49.819	38.797	10.228	23.157	-0.592	9.892	94.843	-0.002716	-0.000716	-0.001621
7.9800	51.262	38.160	8.200	22.704	-0.583	9.892	97.589	-0.002671	-0.000574	-0.001589
8.0000	51.472	37.604	9.520	22.346	-0.585	9.892	97.990	-0.002632	-0.000666	-0.001564
8.0200	59.197	38.075	9.202	22.814	-0.583	9.892	112.696	-0.002665	-0.000644	-0.001597
8.0400	83.197	41.173	9.573	24.465	-0.583	9.892	158.386	-0.002882	-0.000670	-0.001713
8.0600	119.461	45.759	8.950	27.395	-0.576	9.892	227.423	-0.003203	-0.000627	-0.001918
8.0800	159.091	52.109	10.227	30.697	-0.583	9.892	302.868	-0.003648	-0.000716	-0.002149
8.1000	203.695	58.168	11.534	34.247	-0.578	9.892	387.783	-0.004072	-0.000807	-0.002397
8.1200	250.253	65.564	11.939	38.130	-0.577	9.893	476.418	-0.004589	-0.000836	-0.002669
8.1400	296.075	72.012	12.760	42.008	-0.590	9.892	563.650	-0.005041	-0.000893	-0.002941
8.1600	363.627	81.376	14.900	47.910	-0.580	9.892	692.253	-0.005696	-0.001043	-0.003354
8.1800	428.490	90.018	17.552	53.443	-0.585	9.892	815.735	-0.006301	-0.001229	-0.003741
8.2000	499.454	99.790	20.928	60.295	-0.591	9.892	950.832	-0.006985	-0.001465	-0.004221
8.2200	562.363	107.404	24.403	65.621	-0.584	9.893	1070.595	-0.007518	-0.001708	-0.004593
8.2400	641.397	117.938	27.598	72.625	-0.582	9.892	1221.056	-0.008256	-0.001932	-0.005084
8.2600	707.838	126.817	32.378	79.163	-0.586	9.892	1347.542	-0.008877	-0.002266	-0.005541
8.2800	776.052	135.668	34.798	85.023	-0.577	9.892	1477.404	-0.009497	-0.002436	-0.005952
8.3000	834.558	143.468	38.048	90.625	-0.585	9.892	1588.783	-0.010043	-0.002663	-0.006344
8.3200	902.095	152.428	41.663	97.160	-0.586	9.892	1717.358	-0.010670	-0.002916	-0.006801
8.3400	943.063	157.652	43.858	101.220	-0.573	9.893	1795.349	-0.011036	-0.003070	-0.007085
8.3600	1007.324	164.977	47.069	107.190	-0.572	9.893	1917.686	-0.011548	-0.003295	-0.007503
8.3800	1060.299	172.455	51.667	112.707	-0.578	9.892	2018.538	-0.012072	-0.003617	-0.007890
8.4000	1088.312	176.720	51.613	115.668	-0.573	9.893	2071.867	-0.012370	-0.003613	-0.008097
8.4200	1124.110	180.720	54.766	119.217	-0.573	9.892	2140.017	-0.012650	-0.003834	-0.008345
8.4400	1143.031	184.169	55.531	121.557	-0.581	9.892	2176.037	-0.012892	-0.003887	-0.008509
8.4600	1149.824	185.461	56.727	122.477	-0.577	9.892	2188.969	-0.012982	-0.003971	-0.008573
8.4800	1162.462	187.212	57.714	123.990	-0.594	9.892	2213.030	-0.013105	-0.004040	-0.008679
8.5000	1158.254	187.463	56.880	124.060	-0.578	9.892	2205.019	-0.013122	-0.003982	-0.008684
8.5200	1147.840	186.962	56.991	123.758	-0.584	9.893	2185.192	-0.013087	-0.003989	-0.008663
8.5400	1121.390	184.252	56.407	122.245	-0.578	9.893	2134.838	-0.012898	-0.003949	-0.008557
8.5600	1082.902	180.111	55.502	119.574	-0.572	9.892	2061.567	-0.012608	-0.003885	-0.008370
8.5800	1045.196	176.499	53.682	116.671	-0.582	9.892	1989.784	-0.012355	-0.003758	-0.008167
8.6000	1005.160	171.759	50.735	113.191	-0.592	9.892	1913.567	-0.012023	-0.003551	-0.007923
8.6200	966.793	167.660	49.554	110.204	-0.580	9.893	1840.525	-0.011736	-0.003469	-0.007714
8.6400	906.634	161.296	46.150	105.140	-0.584	9.892	1725.998	-0.011291	-0.003231	-0.007360
8.6600	842.447	153.387	43.717	99.679	-0.578	9.892	1603.804	-0.010737	-0.003060	-0.006977
8.6800	776.578	145.646	40.942	94.107	-0.588	9.892	1478.405	-0.010195	-0.002866	-0.006588
8.7000	708.980	137.643	36.258	87.969	-0.583	9.892	1349.716	-0.009635	-0.002538	-0.006158
8.7200	635.251	128.180	32.990	81.652	-0.582	9.892	1209.354	-0.008973	-0.002309	-0.005716
8.7400	574.476	119.980	29.893	75.985	-0.595	9.893	1093.655	-0.008399	-0.002093	-0.005319
8.7600	507.645	111.478	26.125	70.215	-0.585	9.892	966.425	-0.007803	-0.001829	-0.004915
8.7800	431.481	101.025	22.875	63.256	-0.585	9.892	821.428	-0.007072	-0.001601	-0.004428
8.8000	373.035	92.648	20.109	57.545	-0.596	9.893	710.163	-0.006485	-0.001408	-0.004028
8.8200	326.116	85.433	18.652	52.495	-0.589	9.893	620.842	-0.005980	-0.001306	-0.003675
8.8400	257.001	75.386	14.940	46.000	-0.591	9.892	489.264	-0.005277	-0.001046	-0.003220
8.8600	201.215	66.313	14.162	40.426	-0.590	9.892	383.062	-0.004642	-0.000991	-0.002830
8.8800	161.180	59.517	12.703	36.395	-0.597	9.892	306.845	-0.004166	-0.000889	-0.002548
8.9000	121.129	51.941	11.465	32.225	-0.600	9.892	230.598	-0.003636	-0.000803	-0.002256
8.9200	87.510	46.204	10.312	28.165	-0.605	9.893	166.597	-0.003234	-0.000722	-0.001972
8.9400	67.493	42.147	8.980	25.828	-0.594	9.893	128.489	-0.002950	-0.000629	-0.001808
8.9600	48.422	38.521	9.714	23.653	-0.595	9.892	92.182	-0.002696	-0.000680	-0.001656
8.9800	53.110	38.368	9.171	23.103	-0.589	9.892	101.109	-0.002686	-0.000642	-0.001617
9.0000	59.723	38.867	9.242	23.405	-0.594	9.892	113.697	-0.002721	-0.000647	-0.001638
9.0200	64.186	39.116	7.925	23.515	-0.581	9.892	122.194	-0.002738	-0.000555	-0.001646
9.0400	92.365	42.272	9.008	25.552	-0.578	9.892	175.838	-0.002959	-0.000631	-0.001789
9.0600	114.607	45.885	9.547	27.546	-0.586	9.893	218.182	-0.003212	-0.000668	-0.001928
9.0800	159.496	52.499	10.770	30.876	-0.585	9.893	303.640	-0.003675	-0.000754	-0.002161
9.1000	199.833	58.557	11.063	34.331	-0.583	9.892	380.430	-0.004099	-0.000774	-0.002403
9.1200	256.851	66.439	10.619	39.136	-0.592	9.893	488.977	-0.004651	-0.000743	-0.002739
9.1400	307.316	73.734	13.369	42.984	-0.581	9.893	585.051	-0.005161	-0.000936	-0.003009
9.1600	373.170	82.433	15.968	48.860	-0.587	9.892	710.421	-0.005770	-0.001118	-0.003420
9.1800	431.345	90.756	19.639	54.117	-0.587	9.893	821.171	-0.006353	-0.001375	-0.003788
9.2000	504.278	100.471	21.636	60.859	-0.586	9.893	960.016	-0.007033	-0.001514	-0.004260
9.2200	568.495	108.626	25.375	66.997	-0.593	9.892	1082.268	-0.007604	-0.001776	-0.004690
9.2400	644.343	118.370	29.726	73.314	-0.604	9.892	1226.664	-0.008286	-0.002081	-0.005132
9.2600	711.460	127.929	31.642	79.768	-0.595	9.893	1354.437	-0.008955	-0.002215	-0.005584
9.2800	763.022	134.100	34.768	84.322	-0.595	9.893	1452.599	-0.009387	-0.002434	-0.005903
9.3000	840.118	144.050	39.091	91.574	-0.588	9.893	1599.369	-0.010083	-0.002736	-0.006410
9.3200	900.517	151.954	42.484	97.285	-0.589	9.893	1714.354	-0.010637	-0.002974	-0.006810
9.3400	960.676	159.585	44.219	103.062	-0.580	9.893	1828.880	-0.011171	-0.003095	-0.007214
9.3600	1008.902	165.673	49.053	107.672	-0.593	9.892	1920.691	-0.011597	-0.003434	-0.007537
9.3800	1048.818	171.358	50.137	111.829	-0.596	9.893	1996.679	-0.011995	-0.003510	-0.007828
9.4000	1091.017	176.860	53.585	115.804	-0.576	9.892	2077.017	-0.012380	-0.003751	-0.008106
9.4200	1118.038	180.666	54.737	119.341	-0.600	9.892	2128.458	-0.012647	-0.003832	-0.008354
9.4400	1145.315	184.500	56.878	121.789	-0.584	9.892	2180.386	-0.012915	-0.003981	-0.008525
9.4600	1154.588	186.293	57.645	123.511	-0.585	9.892	2198.038	-0.013040	-0.004035	-0.008646
9.4800	1162.357	187.323	59.171	124.473	-0.592	9.892	2212.830	-0.013113	-0.004142	-0.008713
9.5000	1159.712	188.186	57.589	124.789	-0.590	9.893	2207.794	-0.013173	-0.004031	-0.008735
9.5200	1151.747	187.504	57.256	124.487	-0.583	9.893	2192.631	-0.013125	-0.004008	-0.008714
9.5400	1130.287	185.347	56.590	123.181	-0.587	9.892	2151.775	-0.012974	-0.003961	-0.008623
9.5600	1098.321	182.446	55.586	120.976	-0.589	9.892	2090.921	-0.012771	-0.003891	-0.008468
9.5800	1050.696	177.278	53.307	117.042	-0.583	9.893	2000.256	-0.012409	-0.003731	-0.008193
9.6000	1008.166	172.205	52.362	114.180	-0.587	9.893	1919.289	-0.012054	-0.003665	-0.007993
9.6200	954.544	166.661	48.623	109.614	-0.596	9.892	1817.207	-0.011666	-0.003404	-0.007673
9.6400	902.035	160.420	46.444	104.948	-0.585	9.893	1717.243	-0.011229	-0.003251	-0.007346
9.6600	835.084	152.818	43.425	99.072	-0.590	9.893	1589.785	-0.010697	-0.003040	-0.006935
9.6800	769.004	145.520	39.077	93.402	-0.583	9.893	1463.985	-0.010186	-0.002735	-0.006538
9.7000	693.486	135.987	36.814	87.156	-0.591	9.893	1320.219	-0.009519	-0.002577	-0.006101
9.7200	636.423	128.498	33.980	81.859	-0.598	9.893	1211.586	-0.008995	-0.002379	-0.005730
9.7400	566.932	119.438	29.114	75.541	-0.601	9.892	1079.292	-0.008361	-0.002038	-0.005288
9.7600	488.574	109.254	24.795	68.359	-0.590	9.893	930.119	-0.007648	-0.001736	-0.004785
9.7800	424.778	99.985	21.623	62.511	-0.595	9.892	808.668	-0.006999	-0.001514	-0.004376
9.8000	364.003	91.548	19.318	56.979	-0.605	9.893	692.968	-0.006408	-0.001352	-0.003989
9.8200	299.201	82.505	16.815	50.568	-0.600	9.893	569.601	-0.005775	-0.001177	-0.003540
9.8400	253.033	74.829	14.356	45.876	-0.594	9.893	481.710	-0.005238	-0.001005	-0.003211
9.8600	193.942	65.300	13.482	40.056	-0.599	9.893	369.215	-0.004571	-0.000944	-0.002804
9.8800	155.454	59.072	12.330	35.857	-0.588	9.892	295.944	-0.004135	-0.000863	-0.002510
9.9000	117.793	51.748	11.216	31.963	-0.592	9.892	224.247	-0.003622	-0.000785	-0.002237
9.9200	92.500	46.855	10.199	29.170	-0.589	9.893	176.096	-0.003280	-0.000714	-0.002042
9.9400	65.479	42.410	9.035	25.924	-0.593	9.893	124.655	-0.002969	-0.000632	-0.001815
9.9600	55.710	39.811	8.950	24.190	-0.600	9.893	106.058	-0.002787	-0.000627	-0.001693
9.9800	54.117	38.676	9.326	23.268	-0.575	9.893	103.025	-0.002707	-0.000653	-0.001629
Test Cycles
Time (sec)	Axial stress (kPa)	Axial micro-strain #1	Axial micro-strain #2	Axial micro-strain #3	Confining pressure (kPa)	Temperature (�C)	Load (N)	Displacement #1 (mm)	Displacement #2 (mm)	Displacement #3 (mm)
0.0000	56.342	38.993	9.866	23.432	-0.593	9.893	107.260	-0.002729	-0.000691	-0.001640
0.0200	64.562	38.979	9.605	23.914	-0.588	9.893	122.910	-0.002729	-0.000672	-0.001674
0.0400	96.497	43.342	10.256	26.048	-0.585	9.893	183.706	-0.003034	-0.000718	-0.001823
0.0600	114.411	46.413	10.116	27.436	-0.587	9.893	217.810	-0.003249	-0.000708	-0.001921
0.0800	151.005	51.178	9.409	30.532	-0.586	9.894	287.476	-0.003582	-0.000659	-0.002137
0.1000	199.953	58.195	10.353	34.729	-0.583	9.893	380.659	-0.004074	-0.000725	-0.002431
0.1200	249.487	65.812	12.857	38.788	-0.593	9.893	474.958	-0.004607	-0.000900	-0.002715
0.1400	312.290	74.648	12.813	43.990	-0.595	9.893	594.521	-0.005225	-0.000897	-0.003079
0.1600	365.476	81.653	17.038	48.516	-0.578	9.893	695.772	-0.005716	-0.001193	-0.003396
0.1800	433.555	91.228	19.763	54.709	-0.586	9.893	825.377	-0.006386	-0.001383	-0.003830
0.2000	493.833	99.414	20.385	59.885	-0.595	9.893	940.132	-0.006959	-0.001427	-0.004192
0.2200	571.876	109.697	26.002	67.065	-0.583	9.893	1088.705	-0.007679	-0.001820	-0.004695
0.2400	648.190	119.981	29.004	73.902	-0.578	9.893	1233.988	-0.008399	-0.002030	-0.005173
0.2600	696.537	126.457	32.170	78.281	-0.576	9.893	1326.027	-0.008852	-0.002252	-0.005480
0.2800	770.296	135.584	34.146	85.311	-0.573	9.893	1466.446	-0.009491	-0.002390	-0.005972
0.3000	839.397	144.452	38.646	91.656	-0.586	9.893	1597.996	-0.010112	-0.002705	-0.006416
0.3200	902.711	152.844	42.399	97.862	-0.574	9.893	1718.531	-0.010699	-0.002968	-0.006850
0.3400	959.579	159.614	45.500	103.366	-0.582	9.893	1826.792	-0.011173	-0.003185	-0.007236
0.3600	1007.745	166.397	48.053	108.002	-0.585	9.893	1918.488	-0.011648	-0.003364	-0.007560
0.3800	1053.777	172.442	51.418	112.917	-0.591	9.893	2006.121	-0.012071	-0.003599	-0.007904
0.4000	1090.476	176.972	52.974	116.630	-0.601	9.893	2075.987	-0.012388	-0.003708	-0.008164
0.4200	1127.536	181.972	55.671	120.222	-0.588	9.893	2146.540	-0.012738	-0.003897	-0.008416
0.4400	1148.200	185.086	56.615	122.479	-0.595	9.893	2185.879	-0.012956	-0.003963	-0.008574
0.4600	1152.619	186.293	57.004	123.400	-0.585	9.893	2194.290	-0.013041	-0.003990	-0.008638
0.4800	1163.830	187.978	57.993	124.776	-0.595	9.893	2215.633	-0.013158	-0.004059	-0.008734
0.5000	1162.297	188.368	58.977	124.916	-0.592	9.894	2212.715	-0.013186	-0.004128	-0.008744
0.5200	1149.959	187.518	57.283	124.529	-0.578	9.893	2189.226	-0.013126	-0.004010	-0.008717
0.5400	1129.565	185.555	57.977	123.098	-0.589	9.893	2150.402	-0.012989	-0.004058	-0.008617
0.5600	1080.948	180.790	55.420	119.920	-0.574	9.893	2057.848	-0.012655	-0.003879	-0.008394
0.5800	1055.114	178.111	54.807	117.855	-0.583	9.893	2008.667	-0.012468	-0.003837	-0.008250
0.6000	1007.925	172.652	51.766	114.306	-0.588	9.893	1918.831	-0.012086	-0.003624	-0.008001
0.6200	951.614	166.607	48.706	109.544	-0.584	9.893	1811.628	-0.011662	-0.003409	-0.007668
0.6400	906.709	161.423	47.553	105.813	-0.585	9.893	1726.141	-0.011300	-0.003329	-0.007407
0.6600	849.195	154.471	44.705	100.792	-0.587	9.894	1616.650	-0.010813	-0.003129	-0.007055
0.6800	777.570	146.662	40.649	94.957	-0.588	9.894	1480.293	-0.010266	-0.002845	-0.006647
0.7000	704.427	137.713	36.884	88.175	-0.585	9.893	1341.047	-0.009640	-0.002582	-0.006172
0.7200	640.210	129.000	33.351	82.312	-0.590	9.894	1218.796	-0.009030	-0.002335	-0.005762
0.7400	571.395	120.288	30.323	76.657	-0.593	9.893	1087.790	-0.008420	-0.002123	-0.005366
0.7600	493.818	110.171	26.292	69.792	-0.587	9.893	940.104	-0.007712	-0.001840	-0.004885
0.7800	429.527	100.761	22.916	63.557	-0.591	9.893	817.709	-0.007053	-0.001604	-0.004449
0.8000	369.954	93.177	21.096	58.095	-0.589	9.894	704.298	-0.006522	-0.001477	-0.004067
0.8200	310.968	84.238	16.940	51.901	-0.595	9.894	592.003	-0.005897	-0.001186	-0.003633
0.8400	258.579	75.456	14.523	46.769	-0.588	9.893	492.268	-0.005282	-0.001017	-0.003274
0.8600	195.745	66.218	12.577	40.963	-0.597	9.894	372.648	-0.004635	-0.000880	-0.002867
0.8800	156.070	59.211	12.493	36.477	-0.596	9.893	297.117	-0.004145	-0.000875	-0.002553
0.9000	119.867	52.221	11.688	32.610	-0.590	9.894	228.195	-0.003655	-0.000818	-0.002283
0.9200	90.291	47.288	10.159	29.348	-0.584	9.894	171.890	-0.003310	-0.000711	-0.002054
0.9400	72.422	43.580	9.978	26.982	-0.592	9.894	137.873	-0.003051	-0.000698	-0.001889
0.9600	52.945	39.824	10.339	24.479	-0.592	9.894	100.794	-0.002788	-0.000724	-0.001714
0.9800	51.698	38.743	8.493	23.626	-0.587	9.894	98.419	-0.002712	-0.000594	-0.001654
1.0000	53.546	38.671	9.867	23.529	-0.579	9.893	101.938	-0.002707	-0.000691	-0.001647
1.0200	65.885	39.768	9.257	24.175	-0.590	9.894	125.427	-0.002784	-0.000648	-0.001692
1.0400	89.013	42.702	8.494	26.171	-0.595	9.893	169.458	-0.002989	-0.000595	-0.001832
1.0600	130.176	48.482	10.033	29.196	-0.587	9.894	247.822	-0.003394	-0.000702	-0.002044
1.0800	158.550	52.818	10.963	31.481	-0.583	9.894	301.838	-0.003697	-0.000767	-0.002204
1.1000	206.220	59.393	10.020	35.817	-0.583	9.893	392.590	-0.004157	-0.000701	-0.002507
1.1200	256.490	67.201	12.176	39.285	-0.592	9.893	488.291	-0.004704	-0.000852	-0.002750
1.1400	311.960	74.955	13.786	44.543	-0.572	9.894	593.891	-0.005247	-0.000965	-0.003118
1.1600	370.465	82.476	15.064	49.108	-0.580	9.894	705.271	-0.005773	-0.001054	-0.003438
1.1800	434.321	91.549	19.360	54.888	-0.574	9.894	826.836	-0.006408	-0.001355	-0.003842
1.2000	501.829	100.665	20.926	61.273	-0.584	9.894	955.353	-0.007047	-0.001465	-0.004289
1.2200	570.869	109.600	23.890	67.726	-0.579	9.894	1086.788	-0.007672	-0.001672	-0.004741
1.2400	648.821	120.134	28.739	74.290	-0.591	9.894	1235.189	-0.008409	-0.002012	-0.005200
1.2600	719.034	128.958	33.491	80.798	-0.591	9.894	1368.856	-0.009027	-0.002344	-0.005656
1.2800	778.487	137.059	35.786	86.151	-0.576	9.894	1482.038	-0.009594	-0.002505	-0.006031
1.3000	842.733	145.049	38.869	92.535	-0.588	9.895	1604.347	-0.010153	-0.002721	-0.006477
1.3200	903.824	153.318	41.441	98.136	-0.593	9.894	1720.648	-0.010732	-0.002901	-0.006870
1.3400	960.676	160.073	45.776	103.874	-0.588	9.894	1828.880	-0.011205	-0.003204	-0.007271
1.3600	1007.595	166.216	49.151	108.306	-0.581	9.894	1918.201	-0.011635	-0.003441	-0.007581
1.3800	1054.423	172.595	51.390	112.846	-0.585	9.894	2007.351	-0.012082	-0.003597	-0.007899
1.4000	1092.941	177.709	53.197	116.823	-0.590	9.894	2080.679	-0.012440	-0.003724	-0.008178
1.4200	1122.592	181.792	56.016	119.877	-0.597	9.894	2137.127	-0.012725	-0.003921	-0.008391
1.4400	1147.043	185.445	57.490	122.258	-0.592	9.894	2183.676	-0.012981	-0.004024	-0.008558
1.4600	1157.984	187.045	57.604	123.925	-0.586	9.894	2204.504	-0.013093	-0.004032	-0.008675
1.4800	1160.373	187.978	58.075	124.998	-0.584	9.894	2209.053	-0.013158	-0.004065	-0.008750
1.5000	1156.646	188.173	57.018	125.160	-0.594	9.894	2201.958	-0.013172	-0.003991	-0.008761
1.5200	1142.895	187.046	57.115	124.335	-0.584	9.894	2175.779	-0.013093	-0.003998	-0.008703
1.5400	1114.341	184.184	56.727	122.270	-0.593	9.894	2121.420	-0.012893	-0.003971	-0.008559
1.5600	1086.283	181.946	56.351	120.277	-0.590	9.894	2068.005	-0.012736	-0.003945	-0.008419
1.5800	1052.319	177.710	53.752	117.594	-0.597	9.894	2003.345	-0.012440	-0.003763	-0.008232
1.6000	1002.605	172.483	53.058	114.002	-0.600	9.894	1908.703	-0.012074	-0.003714	-0.007980
1.6200	956.573	167.106	49.347	109.957	-0.600	9.894	1821.070	-0.011697	-0.003454	-0.007697
1.6400	899.540	161.047	46.096	105.470	-0.589	9.894	1712.494	-0.011273	-0.003227	-0.007383
1.6600	837.127	153.874	42.386	100.229	-0.587	9.894	1593.676	-0.010771	-0.002967	-0.007016
1.6800	772.175	145.868	39.453	94.365	-0.593	9.894	1470.022	-0.010211	-0.002762	-0.006606
1.7000	709.115	137.963	37.480	88.589	-0.596	9.894	1349.974	-0.009657	-0.002624	-0.006201
1.7200	637.340	128.819	32.852	82.713	-0.595	9.894	1213.331	-0.009017	-0.002300	-0.005790
1.7400	563.475	120.078	30.559	75.957	-0.597	9.894	1072.712	-0.008405	-0.002139	-0.005317
1.7600	497.470	110.657	26.891	70.134	-0.600	9.894	947.056	-0.007746	-0.001882	-0.004909
1.7800	424.132	101.011	21.734	63.504	-0.599	9.894	807.438	-0.007071	-0.001521	-0.004445
1.8000	364.770	92.454	20.775	57.685	-0.594	9.894	694.427	-0.006472	-0.001454	-0.004038
1.8200	301.139	82.601	16.843	51.215	-0.600	9.894	573.292	-0.005782	-0.001179	-0.003585
1.8400	239.327	73.149	13.996	45.243	-0.596	9.894	455.618	-0.005120	-0.000980	-0.003167
1.8600	195.970	65.940	12.801	40.825	-0.603	9.895	373.077	-0.004616	-0.000896	-0.002858
1.8800	160.819	59.852	12.675	37.454	-0.605	9.894	306.158	-0.004190	-0.000887	-0.002622
1.9000	120.302	52.790	11.687	32.570	-0.608	9.895	229.025	-0.003695	-0.000818	-0.002280
1.9200	85.842	46.760	10.312	29.142	-0.598	9.895	163.422	-0.003273	-0.000722	-0.002040
1.9400	69.071	42.994	10.186	26.653	-0.613	9.895	131.493	-0.003010	-0.000713	-0.001866
1.9600	54.643	40.297	9.603	24.945	-0.602	9.894	104.027	-0.002821	-0.000672	-0.001746
1.9800	50.345	38.770	9.339	23.681	-0.609	9.894	95.844	-0.002714	-0.000654	-0.001658
2.0000	54.012	39.188	9.477	23.707	-0.607	9.894	102.825	-0.002743	-0.000663	-0.001660
2.0200	60.910	39.492	8.784	24.025	-0.607	9.895	115.957	-0.002764	-0.000615	-0.001682
2.0400	94.228	43.440	9.991	26.528	-0.591	9.895	179.386	-0.003041	-0.000699	-0.001857
2.0600	110.714	46.593	10.866	28.153	-0.585	9.895	210.772	-0.003262	-0.000761	-0.001971
2.0800	154.071	51.971	9.076	31.496	-0.605	9.895	293.312	-0.003638	-0.000635	-0.002205
2.1000	215.703	60.812	11.951	36.603	-0.599	9.894	410.643	-0.004257	-0.000837	-0.002562
2.1200	254.356	67.589	12.397	39.862	-0.591	9.894	484.228	-0.004731	-0.000868	-0.002790
2.1400	307.391	74.537	13.565	43.798	-0.605	9.894	585.194	-0.005218	-0.000950	-0.003066
2.1600	370.736	82.989	15.995	49.287	-0.601	9.894	705.786	-0.005809	-0.001120	-0.003450
2.1800	429.557	91.340	18.414	54.806	-0.603	9.894	817.766	-0.006394	-0.001289	-0.003836
2.2000	495.006	100.178	21.149	60.778	-0.594	9.894	942.364	-0.007012	-0.001480	-0.004254
2.2200	571.380	109.350	26.180	67.603	-0.603	9.894	1087.761	-0.007654	-0.001833	-0.004732
2.2400	643.817	119.578	28.266	74.055	-0.591	9.894	1225.662	-0.008370	-0.001979	-0.005184
2.2600	701.241	127.264	32.101	79.161	-0.596	9.895	1334.982	-0.008909	-0.002247	-0.005541
2.2800	771.228	136.071	35.103	86.026	-0.593	9.895	1468.220	-0.009525	-0.002457	-0.006022
2.3000	841.741	145.535	38.285	92.521	-0.597	9.894	1602.459	-0.010187	-0.002680	-0.006476
2.3200	906.844	153.483	43.969	98.412	-0.601	9.894	1726.398	-0.010744	-0.003078	-0.006889
2.3400	954.304	159.294	45.638	103.532	-0.588	9.895	1816.750	-0.011151	-0.003195	-0.007247
2.3600	1008.827	167.064	49.235	108.649	-0.593	9.895	1920.547	-0.011694	-0.003446	-0.007605
2.3800	1057.053	173.177	50.890	113.233	-0.599	9.895	2012.358	-0.012122	-0.003562	-0.007926
2.4000	1095.376	177.666	52.794	117.290	-0.593	9.895	2085.314	-0.012437	-0.003696	-0.008210
2.4200	1118.174	181.960	55.294	119.725	-0.591	9.894	2128.716	-0.012737	-0.003871	-0.008381
2.4400	1155.068	186.458	56.740	123.484	-0.595	9.895	2198.954	-0.013052	-0.003972	-0.008644
2.4600	1156.000	186.752	56.685	124.351	-0.600	9.895	2200.727	-0.013073	-0.003968	-0.008705
2.4800	1164.747	188.672	57.657	125.628	-0.589	9.894	2217.379	-0.013207	-0.004036	-0.008794
2.5000	1159.592	188.741	58.935	125.491	-0.616	9.895	2207.565	-0.013212	-0.004125	-0.008784
2.5200	1146.668	187.783	58.087	124.569	-0.613	9.895	2182.961	-0.013145	-0.004066	-0.008720
2.5400	1118.129	184.892	56.963	122.988	-0.611	9.895	2128.630	-0.012942	-0.003987	-0.008609
2.5600	1090.326	182.321	56.226	120.839	-0.615	9.895	2075.701	-0.012762	-0.003936	-0.008459
2.5800	1050.411	177.652	53.268	118.059	-0.605	9.895	1999.712	-0.012436	-0.003729	-0.008264
2.6000	1005.761	172.552	51.779	114.427	-0.609	9.895	1914.711	-0.012079	-0.003624	-0.008010
2.6200	957.039	167.438	48.817	110.741	-0.599	9.895	1821.957	-0.011721	-0.003417	-0.007752
2.6400	899.360	160.852	46.515	105.857	-0.604	9.895	1712.151	-0.011260	-0.003256	-0.007410
2.6600	842.267	154.333	43.717	100.889	-0.605	9.895	1603.460	-0.010803	-0.003060	-0.007062
2.6800	779.554	147.163	40.967	95.344	-0.599	9.895	1484.070	-0.010301	-0.002868	-0.006674
2.7000	708.890	138.017	37.297	89.510	-0.600	9.895	1349.545	-0.009661	-0.002611	-0.006266
2.7200	644.027	130.013	32.962	83.167	-0.602	9.895	1226.063	-0.009101	-0.002307	-0.005822
2.7400	556.201	119.105	29.877	75.735	-0.599	9.895	1058.865	-0.008337	-0.002091	-0.005301
2.7600	487.206	109.559	25.154	69.310	-0.587	9.895	927.515	-0.007669	-0.001761	-0.004852
2.7800	422.824	100.761	23.252	63.310	-0.595	9.895	804.949	-0.007053	-0.001628	-0.004432
2.8000	362.335	92.341	20.345	57.614	-0.608	9.894	689.793	-0.006464	-0.001424	-0.004033
2.8200	307.121	84.015	17.399	51.930	-0.597	9.895	584.679	-0.005881	-0.001218	-0.003635
2.8400	261.464	76.654	16.134	47.143	-0.598	9.895	497.761	-0.005366	-0.001129	-0.003300
2.8600	197.729	66.993	12.843	41.211	-0.592	9.895	376.425	-0.004690	-0.000899	-0.002885
2.8800	157.302	59.628	12.396	37.070	-0.599	9.895	299.463	-0.004174	-0.000868	-0.002595
2.9000	121.805	53.111	11.798	32.899	-0.600	9.895	231.886	-0.003718	-0.000826	-0.002303
2.9200	88.082	47.274	9.851	29.363	-0.612	9.895	167.685	-0.003309	-0.000690	-0.002055
2.9400	69.025	43.897	10.212	26.969	-0.605	9.895	131.407	-0.003073	-0.000715	-0.001888
2.9600	51.968	39.950	10.630	24.810	-0.603	9.895	98.934	-0.002797	-0.000744	-0.001737
2.9800	51.863	39.436	9.754	24.175	-0.607	9.895	98.734	-0.002761	-0.000683	-0.001692
3.0000	54.132	39.145	9.684	23.901	-0.605	9.895	103.054	-0.002740	-0.000678	-0.001673
3.0200	61.616	39.366	9.366	24.136	-0.607	9.895	117.302	-0.002756	-0.000656	-0.001689
3.0400	92.425	43.857	9.962	26.568	-0.607	9.895	175.953	-0.003070	-0.000697	-0.001860
3.0600	117.116	47.483	10.075	28.703	-0.609	9.895	222.960	-0.003324	-0.000705	-0.002009
3.0800	159.557	52.873	10.144	31.951	-0.604	9.895	303.755	-0.003701	-0.000710	-0.002237
3.1000	184.579	57.209	11.050	33.998	-0.603	9.895	351.391	-0.004005	-0.000773	-0.002380
3.1200	247.803	66.494	11.842	39.407	-0.601	9.896	471.754	-0.004655	-0.000829	-0.002759
3.1400	303.018	73.858	13.734	43.908	-0.609	9.896	576.868	-0.005170	-0.000961	-0.003074
3.1600	366.348	82.838	16.621	49.770	-0.600	9.895	697.432	-0.005799	-0.001163	-0.003484
3.1800	425.740	90.810	19.165	55.069	-0.600	9.895	810.499	-0.006357	-0.001342	-0.003855
3.2000	495.066	99.901	21.220	60.997	-0.592	9.895	942.478	-0.006993	-0.001485	-0.004270
3.2200	569.441	109.558	25.611	67.547	-0.596	9.895	1084.070	-0.007669	-0.001793	-0.004728
3.2400	639.068	119.273	29.392	73.890	-0.589	9.895	1216.621	-0.008349	-0.002057	-0.005172
3.2600	710.303	128.304	32.614	80.399	-0.603	9.895	1352.234	-0.008981	-0.002283	-0.005628
3.2800	772.039	136.364	35.856	86.150	-0.601	9.895	1469.765	-0.009545	-0.002510	-0.006030
3.3000	840.404	145.314	38.618	92.798	-0.596	9.895	1599.913	-0.010172	-0.002703	-0.006496
3.3200	903.718	153.387	41.482	98.727	-0.605	9.896	1720.448	-0.010737	-0.002904	-0.006911
3.3400	956.483	160.143	44.915	103.764	-0.601	9.896	1820.898	-0.011210	-0.003144	-0.007263
3.3600	1006.573	167.008	48.747	108.484	-0.595	9.895	1916.256	-0.011691	-0.003412	-0.007594
3.3800	1061.006	173.302	51.905	114.083	-0.600	9.895	2019.882	-0.012131	-0.003633	-0.007986
3.4000	1103.145	178.821	53.877	118.142	-0.601	9.895	2100.105	-0.012517	-0.003771	-0.008270
3.4200	1126.725	182.462	56.560	120.249	-0.604	9.895	2144.995	-0.012772	-0.003959	-0.008417
3.4400	1140.190	185.139	56.197	122.561	-0.596	9.896	2170.630	-0.012960	-0.003934	-0.008579
3.4600	1159.367	187.629	57.770	124.775	-0.604	9.895	2207.136	-0.013134	-0.004044	-0.008734
3.4800	1155.414	187.921	58.367	125.120	-0.605	9.895	2199.612	-0.013154	-0.004086	-0.008758
3.5000	1163.815	189.286	60.506	126.233	-0.597	9.896	2215.605	-0.013250	-0.004235	-0.008836
3.5200	1156.316	188.799	57.603	125.918	-0.596	9.896	2201.328	-0.013216	-0.004032	-0.008814
3.5400	1134.164	186.947	58.143	124.391	-0.599	9.895	2159.157	-0.013086	-0.004070	-0.008707
3.5600	1098.982	183.489	56.796	121.737	-0.610	9.896	2092.180	-0.012844	-0.003976	-0.008522
3.5800	1048.352	177.625	54.696	118.255	-0.608	9.896	1995.792	-0.012434	-0.003829	-0.008278
3.6000	1017.574	174.704	52.504	116.011	-0.607	9.896	1937.199	-0.012229	-0.003675	-0.008121
3.6200	969.407	168.811	50.139	111.649	-0.605	9.896	1845.503	-0.011817	-0.003510	-0.007815
3.6400	900.142	161.158	48.027	105.911	-0.610	9.896	1713.638	-0.011281	-0.003362	-0.007414
3.6600	838.450	154.361	43.427	100.710	-0.607	9.896	1596.193	-0.010805	-0.003040	-0.007050
3.6800	785.400	147.633	41.108	96.030	-0.589	9.896	1495.199	-0.010334	-0.002878	-0.006722
3.7000	716.615	139.087	37.452	90.115	-0.608	9.896	1364.250	-0.009736	-0.002622	-0.006308
3.7200	643.411	130.486	34.924	83.976	-0.603	9.896	1224.890	-0.009134	-0.002445	-0.005878
3.7400	568.450	120.953	29.893	76.987	-0.599	9.896	1082.182	-0.008467	-0.002093	-0.005389
3.7600	501.378	111.478	26.444	70.767	-0.604	9.896	954.494	-0.007803	-0.001851	-0.004954
3.7800	430.534	102.249	23.431	64.619	-0.591	9.896	819.626	-0.007157	-0.001640	-0.004523
3.8000	365.942	93.370	20.581	58.137	-0.596	9.896	696.659	-0.006536	-0.001441	-0.004070
3.8200	309.796	84.211	17.789	52.878	-0.600	9.895	589.771	-0.005895	-0.001245	-0.003701
3.8400	260.247	76.805	15.885	47.637	-0.605	9.896	495.443	-0.005376	-0.001112	-0.003335
3.8600	203.650	67.910	15.483	41.980	-0.601	9.896	387.697	-0.004754	-0.001084	-0.002939
3.8800	154.206	59.462	11.757	37.290	-0.606	9.896	293.570	-0.004162	-0.000823	-0.002610
3.9000	108.340	51.637	11.675	32.541	-0.590	9.896	206.251	-0.003615	-0.000817	-0.002278
3.9200	82.266	46.384	11.341	29.349	-0.591	9.896	156.612	-0.003247	-0.000794	-0.002054
3.9400	81.755	45.452	10.463	28.414	-0.595	9.896	155.640	-0.003182	-0.000732	-0.001989
3.9600	60.038	41.728	10.284	25.702	-0.601	9.896	114.298	-0.002921	-0.000720	-0.001799
3.9800	51.803	39.686	10.284	24.920	-0.589	9.896	98.619	-0.002778	-0.000720	-0.001744
4.0000	53.937	39.520	9.450	24.064	-0.591	9.896	102.682	-0.002766	-0.000661	-0.001684
4.0200	58.566	39.243	9.560	23.927	-0.583	9.896	111.494	-0.002747	-0.000669	-0.001675
4.0400	83.618	43.121	10.632	26.143	-0.596	9.896	159.187	-0.003018	-0.000744	-0.001830
4.0600	119.596	47.579	9.230	28.838	-0.593	9.896	227.680	-0.003331	-0.000646	-0.002019
4.0800	144.483	51.303	10.352	31.151	-0.584	9.896	275.059	-0.003591	-0.000725	-0.002181
4.1000	199.487	59.700	9.740	35.171	-0.587	9.896	379.772	-0.004179	-0.000682	-0.002462
4.1200	252.402	67.077	11.812	39.669	-0.583	9.896	480.509	-0.004695	-0.000827	-0.002777
4.1400	314.605	75.497	14.317	45.202	-0.592	9.896	598.927	-0.005285	-0.001002	-0.003164
4.1600	364.905	83.325	16.747	49.289	-0.599	9.896	694.685	-0.005833	-0.001172	-0.003450
4.1800	430.444	91.437	18.927	55.190	-0.597	9.896	819.454	-0.006401	-0.001325	-0.003863
4.2000	498.643	101.151	22.291	61.437	-0.601	9.896	949.287	-0.007081	-0.001560	-0.004301
4.2200	562.558	109.517	26.820	67.507	-0.586	9.897	1070.967	-0.007666	-0.001877	-0.004726
4.2400	643.366	119.575	27.794	74.687	-0.601	9.896	1224.804	-0.008370	-0.001946	-0.005228
4.2600	705.809	128.027	32.352	80.467	-0.595	9.896	1343.679	-0.008962	-0.002265	-0.005633
4.2800	775.180	136.977	35.661	86.757	-0.601	9.896	1475.744	-0.009588	-0.002496	-0.006073
4.3000	837.924	144.952	40.218	92.729	-0.603	9.896	1595.192	-0.010147	-0.002815	-0.006491
4.3200	911.067	154.403	43.273	99.457	-0.593	9.896	1734.438	-0.010808	-0.003029	-0.006962
4.3400	962.539	161.463	45.803	104.205	-0.601	9.897	1832.428	-0.011302	-0.003206	-0.007294
4.3600	1012.314	167.689	48.651	109.157	-0.589	9.896	1927.185	-0.011738	-0.003406	-0.007641
4.3800	1060.705	173.564	51.280	114.237	-0.591	9.896	2019.310	-0.012150	-0.003590	-0.007997
4.4000	1087.831	177.722	52.459	117.071	-0.596	9.896	2070.951	-0.012441	-0.003672	-0.008195
4.4200	1122.427	182.154	55.489	120.580	-0.595	9.897	2136.812	-0.012751	-0.003884	-0.008441
4.4400	1141.543	184.861	56.045	122.617	-0.596	9.896	2173.204	-0.012940	-0.003923	-0.008583
4.4600	1153.235	186.947	58.254	124.363	-0.597	9.897	2195.463	-0.013086	-0.004078	-0.008705
4.4800	1160.298	188.409	57.476	125.423	-0.594	9.896	2208.910	-0.013189	-0.004023	-0.008780
4.5000	1156.556	188.743	59.365	125.381	-0.593	9.897	2201.786	-0.013212	-0.004156	-0.008777
4.5200	1144.654	187.434	58.674	124.843	-0.601	9.897	2179.127	-0.013120	-0.004107	-0.008739
4.5400	1123.900	185.737	57.629	124.045	-0.600	9.897	2139.616	-0.013002	-0.004034	-0.008683
4.5600	1088.147	182.027	55.961	120.910	-0.605	9.896	2071.552	-0.012742	-0.003917	-0.008464
4.5800	1055.686	178.721	55.516	118.653	-0.592	9.896	2009.754	-0.012510	-0.003886	-0.008306
4.6000	1011.607	173.926	52.336	115.089	-0.596	9.896	1925.840	-0.012175	-0.003664	-0.008056
4.6200	957.340	167.521	49.804	110.849	-0.600	9.897	1822.529	-0.011726	-0.003486	-0.007759
4.6400	898.293	160.948	46.859	105.747	-0.604	9.897	1710.119	-0.011266	-0.003280	-0.007402
4.6600	843.620	155.028	44.149	101.109	-0.612	9.896	1606.035	-0.010852	-0.003090	-0.007078
4.6800	773.317	145.882	39.967	95.109	-0.616	9.897	1472.197	-0.010212	-0.002798	-0.006658
4.7000	697.994	137.199	36.813	88.174	-0.593	9.896	1328.802	-0.009604	-0.002577	-0.006172
4.7200	639.354	130.111	33.754	83.358	-0.593	9.897	1217.165	-0.009108	-0.002363	-0.005835
4.7400	570.448	120.816	30.907	76.905	-0.593	9.897	1085.987	-0.008457	-0.002163	-0.005383
4.7600	495.517	111.186	26.972	70.395	-0.590	9.897	943.336	-0.007783	-0.001888	-0.004928
4.7800	427.483	101.539	23.764	64.176	-0.591	9.896	813.818	-0.007108	-0.001664	-0.004492
4.8000	364.379	92.661	20.482	58.164	-0.596	9.897	693.684	-0.006486	-0.001434	-0.004071
4.8200	304.731	83.767	18.567	52.412	-0.589	9.896	580.130	-0.005864	-0.001300	-0.003669
4.8400	247.548	75.430	17.371	46.358	-0.594	9.896	471.268	-0.005280	-0.001216	-0.003245
4.8600	206.641	68.187	13.762	41.858	-0.594	9.897	393.391	-0.004773	-0.000963	-0.002930
4.8800	153.245	58.959	13.512	36.820	-0.597	9.897	291.739	-0.004127	-0.000946	-0.002577
4.9000	116.681	52.861	11.952	33.133	-0.584	9.897	222.130	-0.003700	-0.000837	-0.002319
4.9200	90.306	48.024	10.812	29.968	-0.585	9.897	171.919	-0.003362	-0.000757	-0.002098
4.9400	69.822	43.830	10.950	27.657	-0.591	9.897	132.923	-0.003068	-0.000767	-0.001936
4.9600	56.582	41.313	9.963	25.483	-0.581	9.897	107.718	-0.002892	-0.000697	-0.001784
4.9800	55.049	40.186	9.617	24.713	-0.588	9.897	104.799	-0.002813	-0.000673	-0.001730
5.0000	55.425	39.548	9.657	24.354	-0.593	9.897	105.515	-0.002768	-0.000676	-0.001705
5.0200	59.873	40.297	9.739	24.355	-0.591	9.896	113.983	-0.002821	-0.000682	-0.001705
5.0400	83.633	42.577	8.826	26.183	-0.595	9.897	159.216	-0.002980	-0.000618	-0.001833
5.0600	124.075	48.568	12.216	30.023	-0.592	9.897	236.206	-0.003400	-0.000855	-0.002102
5.0800	160.669	54.223	11.145	32.598	-0.595	9.897	305.872	-0.003796	-0.000780	-0.002282
5.1000	200.915	59.867	10.979	35.954	-0.609	9.897	382.490	-0.004191	-0.000769	-0.002517
5.1200	262.125	68.201	12.841	40.880	-0.596	9.896	499.020	-0.004774	-0.000899	-0.002862
5.1400	318.362	76.568	13.244	45.764	-0.600	9.896	606.079	-0.005360	-0.000927	-0.003204
5.1600	373.336	84.003	16.689	50.305	-0.600	9.897	710.735	-0.005880	-0.001168	-0.003521
5.1800	434.351	92.231	19.859	55.756	-0.598	9.897	826.893	-0.006456	-0.001390	-0.003903
5.2000	514.047	102.666	22.708	63.062	-0.598	9.896	978.613	-0.007187	-0.001590	-0.004414
5.2200	577.346	111.505	25.307	68.608	-0.581	9.897	1099.119	-0.007805	-0.001772	-0.004803
5.2400	642.690	120.189	30.102	74.441	-0.596	9.897	1223.516	-0.008413	-0.002107	-0.005211
5.2600	713.384	129.721	31.561	81.075	-0.607	9.897	1358.099	-0.009080	-0.002209	-0.005675
5.2800	781.192	138.240	35.451	87.431	-0.601	9.897	1487.188	-0.009677	-0.002482	-0.006120
5.3000	842.778	145.800	39.759	93.047	-0.600	9.897	1604.433	-0.010206	-0.002783	-0.006513
5.3200	904.815	154.168	42.163	98.838	-0.604	9.897	1722.536	-0.010792	-0.002951	-0.006919
5.3400	964.764	161.685	45.624	104.604	-0.613	9.897	1836.662	-0.011318	-0.003194	-0.007322
5.3600	1021.120	168.532	49.445	110.177	-0.596	9.897	1943.951	-0.011797	-0.003461	-0.007712
5.3800	1059.668	174.106	51.948	114.015	-0.591	9.897	2017.336	-0.012187	-0.003636	-0.007981
5.4000	1097.450	179.040	53.932	117.909	-0.604	9.897	2089.262	-0.012533	-0.003775	-0.008254
5.4200	1122.562	182.446	54.684	120.372	-0.593	9.897	2137.070	-0.012771	-0.003828	-0.008426
5.4400	1149.448	185.752	57.339	123.277	-0.593	9.897	2188.253	-0.013003	-0.004014	-0.008629
5.4600	1154.317	187.322	57.852	124.488	-0.592	9.898	2197.523	-0.013113	-0.004050	-0.008714
5.4800	1162.357	188.727	58.266	125.808	-0.600	9.897	2212.830	-0.013211	-0.004079	-0.008807
5.5000	1154.633	188.727	57.782	125.395	-0.605	9.897	2198.124	-0.013211	-0.004045	-0.008778
5.5200	1141.408	187.393	59.589	124.982	-0.605	9.897	2172.947	-0.013117	-0.004171	-0.008749
5.5400	1126.364	186.044	57.450	123.841	-0.596	9.897	2144.308	-0.013023	-0.004021	-0.008669
5.5600	1091.573	182.294	56.170	121.061	-0.598	9.897	2078.075	-0.012761	-0.003932	-0.008474
5.5800	1052.334	178.736	55.155	118.321	-0.600	9.897	2003.374	-0.012512	-0.003861	-0.008282
5.6000	1005.025	173.427	52.501	114.733	-0.595	9.897	1913.309	-0.012140	-0.003675	-0.008031
5.6200	954.785	167.450	50.014	110.590	-0.599	9.897	1817.665	-0.011721	-0.003501	-0.007741
5.6400	901.284	161.936	47.277	105.855	-0.595	9.897	1715.813	-0.011336	-0.003309	-0.007410
5.6600	832.904	153.886	43.453	100.393	-0.597	9.897	1585.636	-0.010772	-0.003042	-0.007028
5.6800	773.888	146.702	40.928	95.302	-0.587	9.897	1473.284	-0.010269	-0.002865	-0.006671
5.7000	699.061	137.616	37.160	88.767	-0.602	9.898	1330.833	-0.009633	-0.002601	-0.006214
5.7200	632.921	129.333	33.352	82.683	-0.595	9.897	1204.920	-0.009053	-0.002335	-0.005788
5.7400	564.181	120.272	30.548	76.727	-0.590	9.897	1074.057	-0.008419	-0.002138	-0.005371
5.7600	497.260	111.602	28.573	70.809	-0.592	9.897	946.655	-0.007812	-0.002000	-0.004957
5.7800	425.349	101.789	23.961	63.763	-0.599	9.897	809.755	-0.007125	-0.001677	-0.004463
5.8000	359.960	92.257	20.317	57.531	-0.591	9.897	685.272	-0.006458	-0.001422	-0.004027
5.8200	304.055	84.613	18.413	52.520	-0.589	9.897	578.842	-0.005923	-0.001289	-0.003676
5.8400	250.749	75.595	16.885	46.728	-0.601	9.897	477.362	-0.005292	-0.001182	-0.003271
5.8600	199.592	67.397	14.412	41.830	-0.590	9.897	379.972	-0.004718	-0.001009	-0.002928
5.8800	154.357	60.144	14.274	37.137	-0.590	9.897	293.856	-0.004210	-0.000999	-0.002600
5.9000	115.208	52.721	12.399	32.953	-0.596	9.897	219.326	-0.003690	-0.000868	-0.002307
5.9200	82.416	46.523	10.925	29.721	-0.588	9.898	156.898	-0.003257	-0.000765	-0.002081
5.9400	68.124	43.954	10.841	27.327	-0.600	9.897	129.690	-0.003077	-0.000759	-0.001913
5.9600	56.161	41.395	10.115	25.592	-0.595	9.897	106.916	-0.002898	-0.000708	-0.001791
5.9800	44.199	38.700	9.767	23.955	-0.595	9.897	84.143	-0.002709	-0.000684	-0.001677
6.0000	47.174	38.893	10.227	23.666	-0.594	9.897	89.808	-0.002723	-0.000716	-0.001657
6.0200	63.330	40.506	9.463	24.783	-0.595	9.897	120.564	-0.002835	-0.000662	-0.001735
6.0400	92.996	44.386	10.909	27.243	-0.587	9.897	177.040	-0.003107	-0.000764	-0.001907
6.0600	117.853	47.886	10.924	28.977	-0.583	9.897	224.361	-0.003352	-0.000765	-0.002028
6.0800	157.242	53.639	9.519	32.155	-0.600	9.897	299.349	-0.003755	-0.000666	-0.002251
6.1000	205.153	60.768	12.078	36.437	-0.588	9.897	390.558	-0.004254	-0.000845	-0.002551
6.1200	247.398	66.939	12.133	39.682	-0.594	9.897	470.982	-0.004686	-0.000849	-0.002778
6.1400	314.409	75.721	15.925	45.242	-0.600	9.898	598.555	-0.005300	-0.001115	-0.003167
6.1600	373.741	84.544	17.508	50.320	-0.591	9.897	711.508	-0.005918	-0.001226	-0.003522
6.1800	437.928	93.272	19.665	56.098	-0.602	9.897	833.702	-0.006529	-0.001377	-0.003927
6.2000	499.063	101.359	22.303	62.113	-0.598	9.897	950.089	-0.007095	-0.001561	-0.004348
6.2200	574.130	110.935	26.681	68.704	-0.595	9.897	1092.997	-0.007765	-0.001868	-0.004809
6.2400	641.653	120.104	29.434	74.771	-0.598	9.897	1221.542	-0.008407	-0.002060	-0.005234
6.2600	718.373	129.624	32.783	81.335	-0.586	9.897	1367.598	-0.009074	-0.002295	-0.005693
6.2800	773.497	136.976	36.022	86.566	-0.605	9.898	1472.540	-0.009588	-0.002522	-0.006060
6.3000	847.061	146.868	39.953	93.720	-0.602	9.897	1612.587	-0.010281	-0.002797	-0.006560
6.3200	905.386	153.970	42.648	99.264	-0.592	9.897	1723.623	-0.010778	-0.002985	-0.006948
6.3400	967.860	161.616	46.693	104.920	-0.599	9.898	1842.556	-0.011313	-0.003269	-0.007344
6.3600	1010.029	167.950	49.025	109.298	-0.607	9.898	1922.836	-0.011756	-0.003432	-0.007651
6.3800	1060.329	173.828	50.736	113.892	-0.609	9.897	2018.595	-0.012168	-0.003552	-0.007972
6.4000	1096.082	178.639	53.988	118.047	-0.609	9.898	2086.658	-0.012505	-0.003779	-0.008263
6.4200	1126.184	183.032	55.169	121.060	-0.605	9.897	2143.965	-0.012812	-0.003862	-0.008474
6.4400	1149.403	186.654	57.379	123.744	-0.603	9.898	2188.168	-0.013066	-0.004017	-0.008662
6.4600	1155.309	187.489	57.797	124.652	-0.604	9.898	2199.411	-0.013124	-0.004046	-0.008726
6.4800	1160.884	188.493	59.881	125.851	-0.605	9.898	2210.026	-0.013195	-0.004192	-0.008810
6.5000	1157.488	188.950	59.004	125.630	-0.600	9.898	2203.560	-0.013227	-0.004130	-0.008794
6.5200	1149.628	188.408	58.185	125.325	-0.592	9.897	2188.597	-0.013189	-0.004073	-0.008773
6.5400	1117.978	185.569	57.950	123.303	-0.601	9.898	2128.344	-0.012990	-0.004057	-0.008631
6.5600	1092.731	182.891	56.768	121.955	-0.598	9.898	2080.278	-0.012802	-0.003974	-0.008537
6.5800	1046.248	177.903	54.625	117.869	-0.611	9.898	1991.787	-0.012453	-0.003824	-0.008251
6.6000	1007.399	173.748	51.835	115.129	-0.589	9.898	1917.830	-0.012162	-0.003628	-0.008059
6.6200	960.496	168.630	50.362	111.401	-0.595	9.897	1828.537	-0.011804	-0.003525	-0.007798
6.6400	903.418	161.824	47.347	106.654	-0.610	9.898	1719.875	-0.011328	-0.003314	-0.007466
6.6600	838.179	154.138	44.509	101.070	-0.596	9.897	1595.678	-0.010790	-0.003116	-0.007075
6.6800	777.029	147.161	42.441	95.602	-0.592	9.897	1479.263	-0.010301	-0.002971	-0.006692
6.7000	701.842	138.103	36.827	89.070	-0.599	9.899	1336.126	-0.009667	-0.002578	-0.006235
6.7200	632.215	128.875	33.631	82.850	-0.602	9.898	1203.575	-0.009021	-0.002354	-0.005800
6.7400	563.550	120.676	31.948	76.644	-0.604	9.898	1072.855	-0.008447	-0.002236	-0.005365
6.7600	493.202	110.768	25.987	70.396	-0.608	9.898	938.931	-0.007754	-0.001819	-0.004928
6.7800	425.665	101.499	25.694	64.383	-0.604	9.898	810.356	-0.007105	-0.001799	-0.004507
6.8000	372.945	94.509	22.441	59.055	-0.603	9.897	709.991	-0.006616	-0.001571	-0.004134
6.8200	307.707	84.280	18.136	52.412	-0.590	9.898	585.794	-0.005900	-0.001270	-0.003669
6.8400	247.232	75.345	16.204	46.661	-0.594	9.898	470.667	-0.005274	-0.001134	-0.003266
6.8600	204.687	68.688	14.618	42.548	-0.596	9.898	389.671	-0.004808	-0.001023	-0.002978
6.8800	158.760	60.519	12.995	37.785	-0.607	9.897	302.238	-0.004236	-0.000910	-0.002645
6.9000	125.292	54.252	12.634	34.400	-0.601	9.898	238.523	-0.003798	-0.000884	-0.002408
6.9200	89.840	48.648	9.977	30.312	-0.596	9.898	171.032	-0.003405	-0.000698	-0.002122
6.9400	66.771	43.536	10.492	27.367	-0.608	9.898	127.115	-0.003048	-0.000734	-0.001916
6.9600	58.175	41.493	10.951	26.021	-0.609	9.898	110.750	-0.002905	-0.000767	-0.001821
6.9800	59.708	41.355	10.117	25.566	-0.597	9.897	113.668	-0.002895	-0.000708	-0.001790
7.0000	52.750	39.783	9.547	24.452	-0.604	9.898	100.422	-0.002785	-0.000668	-0.001712
7.0200	60.610	40.020	10.132	24.739	-0.601	9.899	115.385	-0.002801	-0.000709	-0.001732
7.0400	87.465	44.051	11.811	26.886	-0.603	9.898	166.512	-0.003084	-0.000827	-0.001882
7.0600	107.964	46.439	10.408	28.041	-0.613	9.898	205.536	-0.003251	-0.000729	-0.001963
7.0800	159.977	54.113	11.786	32.430	-0.611	9.898	304.556	-0.003788	-0.000825	-0.002270
7.1000	205.003	60.991	10.383	36.229	-0.596	9.898	390.272	-0.004269	-0.000727	-0.002536
7.1200	251.515	67.243	14.051	40.081	-0.603	9.898	478.821	-0.004707	-0.000984	-0.002806
7.1400	311.704	75.427	16.037	45.133	-0.597	9.898	593.405	-0.005280	-0.001123	-0.003159
7.1600	369.263	83.823	18.276	49.798	-0.595	9.898	702.982	-0.005868	-0.001279	-0.003486
7.1800	436.726	92.745	20.332	56.058	-0.597	9.898	831.413	-0.006492	-0.001423	-0.003924
7.2000	501.468	101.332	23.792	62.359	-0.604	9.898	954.666	-0.007093	-0.001665	-0.004365
7.2200	547.575	108.142	25.210	66.750	-0.593	9.898	1042.442	-0.007570	-0.001765	-0.004672
7.2400	641.518	120.120	30.046	74.538	-0.600	9.898	1221.285	-0.008408	-0.002103	-0.005218
7.2600	707.673	128.708	33.783	80.745	-0.597	9.899	1347.227	-0.009010	-0.002365	-0.005652
7.2800	778.832	138.017	36.441	87.252	-0.601	9.898	1482.697	-0.009661	-0.002551	-0.006108
7.3000	848.804	146.730	39.675	93.665	-0.600	9.898	1615.906	-0.010271	-0.002777	-0.006557
7.3200	891.816	152.789	42.192	98.494	-0.606	9.899	1697.788	-0.010695	-0.002953	-0.006895
7.3400	960.946	161.116	46.485	104.823	-0.609	9.899	1829.395	-0.011278	-0.003254	-0.007338
7.3600	1006.032	167.592	49.957	109.117	-0.602	9.899	1915.226	-0.011731	-0.003497	-0.007638
7.3800	1052.755	173.248	51.600	113.837	-0.609	9.898	2004.175	-0.012127	-0.003612	-0.007969
7.4000	1094.233	178.320	53.070	117.853	-0.610	9.897	2083.139	-0.012482	-0.003715	-0.008250
7.4200	1121.375	182.515	55.974	120.704	-0.607	9.898	2134.809	-0.012776	-0.003918	-0.008449
7.4400	1143.451	185.654	57.171	122.935	-0.603	9.898	2176.838	-0.012996	-0.004002	-0.008605
7.4600	1155.640	187.629	58.241	124.747	-0.609	9.898	2200.041	-0.013134	-0.004077	-0.008732
7.4800	1157.127	188.506	58.549	125.381	-0.604	9.898	2202.873	-0.013195	-0.004098	-0.008777
7.5000	1161.696	188.937	58.604	126.137	-0.597	9.898	2211.571	-0.013226	-0.004102	-0.008830
7.5200	1155.219	188.963	60.296	126.083	-0.602	9.898	2199.240	-0.013227	-0.004221	-0.008826
7.5400	1123.148	186.112	58.075	124.213	-0.588	9.898	2138.186	-0.013028	-0.004065	-0.008695
7.5600	1096.292	183.225	56.950	122.066	-0.597	9.898	2087.059	-0.012826	-0.003986	-0.008545
7.5800	1055.310	178.568	55.962	119.135	-0.592	9.898	2009.039	-0.012500	-0.003917	-0.008339
7.6000	1007.985	173.856	52.349	115.267	-0.586	9.898	1918.945	-0.012170	-0.003664	-0.008069
7.6200	953.267	168.090	51.153	110.851	-0.593	9.899	1814.775	-0.011766	-0.003581	-0.007760
7.6400	903.463	161.713	48.999	106.792	-0.584	9.898	1719.961	-0.011320	-0.003430	-0.007475
7.6600	843.379	154.987	44.550	101.909	-0.607	9.899	1605.577	-0.010849	-0.003119	-0.007134
7.6800	774.279	147.120	41.580	95.811	-0.593	9.898	1474.028	-0.010298	-0.002911	-0.006707
7.7000	709.221	138.519	37.993	89.990	-0.591	9.898	1350.174	-0.009696	-0.002659	-0.006299
7.7200	634.499	130.138	34.075	83.440	-0.599	9.898	1207.924	-0.009110	-0.002385	-0.005841
7.7400	568.870	121.009	30.408	77.427	-0.596	9.898	1082.983	-0.008471	-0.002129	-0.005420
7.7600	511.732	113.212	27.419	72.128	-0.592	9.899	974.207	-0.007925	-0.001919	-0.005049
7.7800	433.224	103.153	24.543	65.346	-0.589	9.898	824.747	-0.007221	-0.001718	-0.004574
7.8000	368.872	94.188	19.999	58.809	-0.600	9.898	702.238	-0.006593	-0.001400	-0.004117
7.8200	301.936	83.640	17.732	52.287	-0.596	9.898	574.808	-0.005855	-0.001241	-0.003660
7.8400	254.160	76.458	16.428	47.622	-0.603	9.898	483.856	-0.005352	-0.001150	-0.003334
7.8600	200.434	67.910	12.996	42.284	-0.605	9.899	381.575	-0.004754	-0.000910	-0.002960
7.8800	155.319	59.977	14.217	37.634	-0.597	9.898	295.687	-0.004198	-0.000995	-0.002634
7.9000	118.078	53.736	12.842	33.640	-0.603	9.898	224.791	-0.003762	-0.000899	-0.002355
7.9200	95.040	49.526	10.312	31.054	-0.599	9.899	180.931	-0.003467	-0.000722	-0.002174
7.9400	67.012	43.912	11.646	27.588	-0.593	9.898	127.573	-0.003074	-0.000815	-0.001931
7.9600	51.292	41.090	12.106	25.785	-0.612	9.898	97.647	-0.002876	-0.000847	-0.001805
7.9800	52.945	40.560	11.660	25.251	-0.598	9.899	100.794	-0.002839	-0.000816	-0.001768
8.0000	55.485	39.700	10.060	24.670	-0.599	9.899	105.629	-0.002779	-0.000704	-0.001727
8.0200	60.880	40.464	11.562	25.262	-0.613	9.899	115.900	-0.002832	-0.000809	-0.001768
8.0400	89.735	44.273	10.924	26.995	-0.601	9.899	170.832	-0.003099	-0.000765	-0.001890
8.0600	118.093	48.206	8.924	29.458	-0.603	9.898	224.819	-0.003374	-0.000625	-0.002062
8.0800	167.973	55.392	10.798	33.614	-0.603	9.899	319.777	-0.003877	-0.000756	-0.002353
8.1000	199.592	60.088	12.772	36.147	-0.592	9.899	379.972	-0.004206	-0.000894	-0.002530
8.1200	250.644	67.217	10.925	40.151	-0.605	9.899	477.161	-0.004705	-0.000765	-0.002811
8.1400	311.870	75.775	14.955	45.174	-0.605	9.899	593.719	-0.005304	-0.001047	-0.003162
8.1600	379.512	84.974	16.563	50.663	-0.596	9.899	722.494	-0.005948	-0.001159	-0.003546
8.1800	437.943	92.673	19.499	56.485	-0.606	9.899	833.731	-0.006487	-0.001365	-0.003954
8.2000	503.572	102.026	24.155	62.304	-0.606	9.899	958.672	-0.007142	-0.001691	-0.004361
8.2200	574.220	111.392	27.363	68.484	-0.600	9.899	1093.168	-0.007797	-0.001915	-0.004794
8.2400	645.335	120.343	30.632	75.197	-0.613	9.899	1228.552	-0.008424	-0.002144	-0.005264
8.2600	711.580	129.334	34.407	80.948	-0.600	9.898	1354.666	-0.009053	-0.002409	-0.005666
8.2800	781.477	138.544	36.507	87.569	-0.600	9.898	1487.732	-0.009698	-0.002555	-0.006130
8.3000	835.880	145.478	38.757	93.182	-0.614	9.899	1591.301	-0.010183	-0.002713	-0.006523
8.3200	906.844	153.984	44.469	99.649	-0.604	9.899	1726.398	-0.010779	-0.003113	-0.006975
8.3400	963.907	162.072	45.233	105.028	-0.611	9.899	1835.032	-0.011345	-0.003166	-0.007352
8.3600	1010.450	167.564	49.025	109.736	-0.607	9.899	1923.637	-0.011729	-0.003432	-0.007681
8.3800	1059.037	174.119	52.918	114.537	-0.608	9.899	2016.134	-0.012188	-0.003704	-0.008018
8.4000	1096.112	179.279	54.363	118.142	-0.615	9.899	2086.716	-0.012550	-0.003805	-0.008270
8.4200	1123.644	182.779	55.196	121.267	-0.606	9.899	2139.130	-0.012795	-0.003864	-0.008489
8.4400	1149.673	186.446	57.753	123.774	-0.593	9.899	2188.683	-0.013051	-0.004043	-0.008664
8.4600	1145.886	186.946	58.046	124.200	-0.597	9.899	2181.473	-0.013086	-0.004063	-0.008694
8.4800	1157.413	188.171	57.005	125.422	-0.598	9.899	2203.417	-0.013172	-0.003990	-0.008780
8.5000	1158.480	189.312	58.853	126.098	-0.596	9.899	2205.448	-0.013252	-0.004120	-0.008827
8.5200	1152.003	188.922	59.949	125.685	-0.585	9.899	2193.117	-0.013225	-0.004196	-0.008798
8.5400	1123.043	186.126	59.158	124.143	-0.597	9.899	2137.985	-0.013029	-0.004141	-0.008690
8.5600	1075.403	181.291	57.227	120.799	-0.599	9.899	2047.291	-0.012690	-0.004006	-0.008456
8.5800	1054.213	178.891	54.391	118.887	-0.594	9.899	2006.950	-0.012522	-0.003807	-0.008322
8.6000	1010.841	174.315	54.514	115.762	-0.602	9.898	1924.381	-0.012202	-0.003816	-0.008103
8.6200	965.169	168.730	51.416	111.677	-0.596	9.899	1837.435	-0.011811	-0.003599	-0.007817
8.6400	901.539	162.144	46.334	106.737	-0.595	9.899	1716.299	-0.011350	-0.003243	-0.007472
8.6600	834.678	154.305	45.427	100.998	-0.611	9.899	1589.012	-0.010801	-0.003180	-0.007070
8.6800	766.389	145.437	40.885	94.655	-0.601	9.899	1459.007	-0.010181	-0.002862	-0.006626
8.7000	708.980	139.087	39.175	89.524	-0.594	9.899	1349.716	-0.009736	-0.002742	-0.006267
8.7200	626.790	128.375	33.270	82.505	-0.602	9.899	1193.247	-0.008986	-0.002329	-0.005775
8.7400	580.668	122.092	31.519	78.267	-0.599	9.899	1105.442	-0.008546	-0.002206	-0.005479
8.7600	499.995	111.990	27.530	71.277	-0.600	9.899	951.862	-0.007839	-0.001927	-0.004989
8.7800	423.215	101.859	22.068	64.218	-0.594	9.898	805.693	-0.007130	-0.001545	-0.004495
8.8000	357.856	92.327	21.763	57.958	-0.595	9.900	681.267	-0.006463	-0.001523	-0.004057
8.8200	305.888	84.489	18.345	52.920	-0.590	9.899	582.333	-0.005914	-0.001284	-0.003704
8.8400	248.525	75.595	16.164	47.169	-0.583	9.899	473.127	-0.005292	-0.001131	-0.003302
8.8600	200.208	67.604	14.164	42.255	-0.591	9.899	381.145	-0.004732	-0.000991	-0.002958
8.8800	151.096	59.726	12.590	37.673	-0.597	9.899	287.647	-0.004181	-0.000881	-0.002637
8.9000	121.279	54.015	11.047	33.972	-0.598	9.899	230.885	-0.003781	-0.000773	-0.002378
8.9200	82.596	46.830	12.732	29.749	-0.603	9.899	157.242	-0.003278	-0.000891	-0.002082
8.9400	63.961	43.870	11.770	27.229	-0.601	9.899	121.765	-0.003071	-0.000824	-0.001906
8.9600	57.273	41.743	11.618	26.063	-0.605	9.899	109.034	-0.002922	-0.000813	-0.001824
8.9800	53.246	40.367	8.839	25.251	-0.604	9.899	101.366	-0.002826	-0.000619	-0.001768
9.0000	52.885	39.783	10.422	24.561	-0.615	9.899	100.679	-0.002785	-0.000730	-0.001719
9.0200	57.063	40.046	9.116	24.480	-0.611	9.900	108.633	-0.002803	-0.000638	-0.001714
9.0400	89.705	44.038	11.384	27.313	-0.611	9.899	170.774	-0.003083	-0.000797	-0.001912
9.0600	117.657	48.066	10.673	29.515	-0.608	9.899	223.989	-0.003365	-0.000747	-0.002066
9.0800	153.004	53.111	12.256	32.363	-0.615	9.899	291.281	-0.003718	-0.000858	-0.002265
9.1000	194.513	58.751	10.868	35.694	-0.600	9.899	370.302	-0.004113	-0.000761	-0.002499
9.1200	244.212	66.813	14.248	39.917	-0.599	9.899	464.916	-0.004677	-0.000997	-0.002794
9.1400	305.783	74.872	13.453	44.982	-0.600	9.899	582.132	-0.005241	-0.000942	-0.003149
9.1600	369.519	83.849	18.067	50.457	-0.607	9.899	703.468	-0.005869	-0.001265	-0.003532
9.1800	429.737	92.383	18.568	55.629	-0.603	9.899	818.110	-0.006467	-0.001300	-0.003894
9.2000	502.986	101.915	21.384	62.290	-0.602	9.899	957.556	-0.007134	-0.001497	-0.004360
9.2200	594.133	113.504	27.321	70.286	-0.603	9.899	1131.077	-0.007945	-0.001912	-0.004920
9.2400	651.707	121.787	30.354	75.803	-0.605	9.899	1240.683	-0.008525	-0.002125	-0.005306
9.2600	717.020	129.817	33.672	81.253	-0.607	9.899	1365.023	-0.009087	-0.002357	-0.005688
9.2800	771.724	137.073	37.258	87.668	-0.613	9.899	1469.164	-0.009595	-0.002608	-0.006137
9.3000	852.832	147.356	41.134	94.325	-0.615	9.899	1623.573	-0.010315	-0.002879	-0.006603
9.3200	898.804	153.846	43.872	99.169	-0.623	9.899	1711.092	-0.010769	-0.003071	-0.006942
9.3400	968.521	162.088	48.094	105.579	-0.622	9.899	1843.815	-0.011346	-0.003367	-0.007390
9.3600	1010.089	167.814	49.888	109.683	-0.608	9.899	1922.951	-0.011747	-0.003492	-0.007678
9.3800	1045.391	172.370	52.822	113.480	-0.615	9.898	1990.156	-0.012066	-0.003698	-0.007944
9.4000	1084.796	177.597	53.309	117.112	-0.611	9.900	2065.172	-0.012432	-0.003732	-0.008198
9.4200	1124.260	182.558	55.724	120.607	-0.611	9.899	2140.303	-0.012779	-0.003901	-0.008442
9.4400	1141.212	185.779	58.395	123.510	-0.591	9.899	2172.575	-0.013005	-0.004088	-0.008646
9.4600	1156.361	187.546	59.021	125.039	-0.600	9.899	2201.414	-0.013128	-0.004131	-0.008753
9.4800	1157.999	188.896	58.591	125.629	-0.597	9.899	2204.533	-0.013223	-0.004101	-0.008794
9.5000	1163.499	189.769	60.687	126.565	-0.606	9.900	2215.004	-0.013284	-0.004248	-0.008860
9.5200	1155.700	189.397	58.869	126.537	-0.595	9.899	2200.155	-0.013258	-0.004121	-0.008858
9.5400	1130.963	187.560	58.577	124.765	-0.594	9.899	2153.063	-0.013129	-0.004100	-0.008734
9.5600	1090.071	183.169	56.990	121.941	-0.593	9.899	2075.214	-0.012822	-0.003989	-0.008536
9.5800	1050.381	178.779	54.848	119.078	-0.606	9.899	1999.655	-0.012515	-0.003839	-0.008335
9.6000	1007.249	174.275	52.905	115.640	-0.600	9.900	1917.543	-0.012199	-0.003703	-0.008095
9.6200	959.233	168.534	51.263	111.662	-0.601	9.900	1826.134	-0.011797	-0.003588	-0.007816
9.6400	908.888	162.364	47.622	107.315	-0.597	9.899	1730.289	-0.011365	-0.003334	-0.007512
9.6600	841.921	155.308	44.566	101.674	-0.604	9.899	1602.802	-0.010872	-0.003120	-0.007117
9.6800	771.859	146.717	41.204	95.770	-0.607	9.899	1469.421	-0.010270	-0.002884	-0.006704
9.7000	708.364	138.563	37.326	89.826	-0.610	9.899	1348.543	-0.009699	-0.002613	-0.006288
9.7200	644.012	130.876	34.630	84.073	-0.613	9.899	1226.034	-0.009161	-0.002424	-0.005885
9.7400	567.292	121.274	31.742	77.440	-0.609	9.899	1079.979	-0.008489	-0.002222	-0.005421
9.7600	504.459	112.435	27.347	71.744	-0.609	9.899	960.360	-0.007870	-0.001914	-0.005022
9.7800	431.195	102.847	24.555	65.251	-0.614	9.900	820.885	-0.007199	-0.001719	-0.004568
9.8000	365.521	93.732	22.346	58.974	-0.609	9.900	695.858	-0.006561	-0.001564	-0.004128
9.8200	307.090	84.947	18.095	53.030	-0.617	9.899	584.621	-0.005946	-0.001267	-0.003712
9.8400	256.760	76.709	15.410	47.788	-0.616	9.899	488.806	-0.005370	-0.001079	-0.003345
9.8600	196.121	67.590	14.246	41.844	-0.611	9.900	373.363	-0.004731	-0.000997	-0.002929
9.8800	158.505	60.797	14.107	38.061	-0.612	9.899	301.752	-0.004256	-0.000987	-0.002664
9.9000	119.671	53.751	12.731	34.096	-0.618	9.899	227.823	-0.003763	-0.000891	-0.002387
9.9200	90.727	48.986	9.962	30.806	-0.601	9.899	172.720	-0.003429	-0.000697	-0.002156
9.9400	65.719	43.940	12.050	27.795	-0.605	9.899	125.113	-0.003076	-0.000843	-0.001946
9.9600	56.582	41.422	11.981	26.252	-0.612	9.900	107.718	-0.002900	-0.000839	-0.001838
9.9800	55.004	40.880	9.729	25.730	-0.617	9.899	104.713	-0.002862	-0.000681	-0.001801
