# Supplementary material for: Evaluation of a Cold-Mixed High-Performance Polyurethane Mixture
Source: Hindawi journal article supplement (doi:10.1155/2019/1507971), 2019-11-07
Supplement: f1 [file 1507971.f1.zip › 1507971.f1/dynamic modulus data/PUM/specimen2/temp10/zhs-2-10_2Hz.csv]

Test Information
****************
Project name	zhs
Operator name	2
Target test temperature	10
Target confining stress	0
Average dynamic strain range from 75 to 125 micro-strain
Contact stress	5
Initial modulus	4000
Axial gauge length	70
Comments	Run at High Pressure
Specimen information
********************
Identification	zhs-2-10
Dimensions	Point 1	Point 2	Point 3	Point 4	Point 5	Point 6	Average	Std Dev.
Diameter (mm)	49.2	49.3	49.2				49.23	0.058
Height (mm)	100.8	101.0	100.8				100.87	0.115
Cross-sectional area (mm�)	1903.7
Conditioning time
Properties/Comments
Test Data	2Hz
*********
Test date and time	Fri	Mar 29	2019	11:20 AM
Dynamic modulus (MPa)	11362
Phase angle (Degrees)	5.03
Average temperature (�C)	9.9
Average confining pressure (kPa)	-0.6
Average micro-strain	102
Load drift (%)	0.6
Load standard error (%)	1.7
Average deformation drift (%)	-3.6
Average deformation standard error (%)	4.3
Deformation uniformity (%)	40.1
Phase uniformity (Degrees)	0.6
Conditioning Cycles
Time (sec)	Axial stress (kPa)	Axial micro-strain #1	Axial micro-strain #2	Axial micro-strain #3	Confining pressure (kPa)	Temperature (�C)	Load (N)	Displacement #1 (mm)	Displacement #2 (mm)	Displacement #3 (mm)
0.0000	57.484	29.307	6.156	14.406	-0.541	9.877	109.434	-0.002051	-0.000431	-0.001008
0.0100	53.501	28.513	6.102	14.184	-0.541	9.892	101.852	-0.001996	-0.000427	-0.000993
0.0200	52.028	28.555	6.158	13.896	-0.546	9.877	99.049	-0.001999	-0.000431	-0.000973
0.0300	55.770	28.929	5.921	14.090	-0.538	9.891	106.173	-0.002025	-0.000414	-0.000986
0.0400	72.497	30.780	5.808	15.521	-0.549	9.877	138.016	-0.002155	-0.000407	-0.001086
0.0500	127.561	38.160	6.630	19.993	-0.553	9.892	242.844	-0.002671	-0.000464	-0.001400
0.0600	170.137	44.663	7.187	23.845	-0.543	9.876	323.896	-0.003126	-0.000503	-0.001669
0.0700	202.418	49.764	8.088	26.624	-0.544	9.891	385.351	-0.003483	-0.000566	-0.001864
0.0800	259.781	58.142	8.813	30.988	-0.546	9.877	494.556	-0.004070	-0.000617	-0.002169
0.0900	313.778	65.868	10.673	35.694	-0.545	9.891	597.353	-0.004611	-0.000747	-0.002499
0.1000	364.168	72.885	12.271	39.766	-0.544	9.877	693.283	-0.005102	-0.000859	-0.002784
0.1100	422.899	80.820	14.744	45.037	-0.535	9.892	805.092	-0.005657	-0.001032	-0.003153
0.1200	485.042	89.174	17.607	50.305	-0.546	9.877	923.395	-0.006242	-0.001233	-0.003521
0.1300	549.318	97.985	20.885	56.389	-0.545	9.892	1045.761	-0.006859	-0.001462	-0.003947
0.1400	601.332	105.001	23.277	61.189	-0.544	9.877	1144.781	-0.007350	-0.001629	-0.004283
0.1500	647.619	111.519	25.654	65.773	-0.546	9.891	1232.901	-0.007806	-0.001796	-0.004604
0.1600	703.600	119.019	28.558	70.670	-0.552	9.877	1339.474	-0.008331	-0.001999	-0.004947
0.1700	756.921	126.012	30.587	75.928	-0.548	9.892	1440.983	-0.008821	-0.002141	-0.005315
0.1800	801.195	131.306	33.103	79.754	-0.562	9.876	1525.269	-0.009191	-0.002317	-0.005583
0.1900	832.228	136.182	35.091	83.248	-0.545	9.891	1584.349	-0.009533	-0.002456	-0.005827
0.2000	877.223	142.258	37.812	87.280	-0.544	9.877	1670.008	-0.009958	-0.002647	-0.006110
0.2100	905.732	145.966	39.174	90.460	-0.550	9.891	1724.281	-0.010218	-0.002742	-0.006332
0.2200	919.904	148.717	40.371	91.862	-0.550	9.877	1751.261	-0.010410	-0.002826	-0.006430
0.2300	928.771	150.526	40.788	93.609	-0.550	9.891	1768.141	-0.010537	-0.002855	-0.006553
0.2400	927.944	150.720	40.969	93.953	-0.548	9.876	1766.567	-0.010550	-0.002868	-0.006577
0.2500	933.535	151.665	41.011	94.944	-0.541	9.892	1777.210	-0.010617	-0.002871	-0.006646
0.2600	928.019	151.246	41.315	94.284	-0.534	9.877	1766.710	-0.010587	-0.002892	-0.006600
0.2700	916.973	150.790	41.234	94.172	-0.546	9.891	1745.682	-0.010555	-0.002886	-0.006592
0.2800	897.436	148.981	41.148	92.535	-0.549	9.876	1708.488	-0.010429	-0.002880	-0.006477
0.2900	864.524	145.647	40.162	90.912	-0.550	9.892	1645.832	-0.010195	-0.002811	-0.006364
0.3000	828.110	141.561	38.243	87.968	-0.549	9.876	1576.509	-0.009909	-0.002677	-0.006158
0.3100	786.963	136.726	35.979	84.734	-0.551	9.892	1498.175	-0.009571	-0.002519	-0.005931
0.3200	747.829	132.265	34.396	81.721	-0.541	9.877	1423.674	-0.009259	-0.002408	-0.005720
0.3300	709.341	127.872	32.713	78.776	-0.548	9.891	1350.403	-0.008951	-0.002290	-0.005514
0.3400	644.118	120.466	30.044	73.520	-0.540	9.876	1226.234	-0.008433	-0.002103	-0.005146
0.3500	597.980	114.813	27.669	69.680	-0.548	9.891	1138.401	-0.008037	-0.001937	-0.004878
0.3600	534.891	106.863	25.043	64.436	-0.553	9.876	1018.295	-0.007480	-0.001753	-0.004511
0.3700	485.282	100.122	22.403	60.255	-0.548	9.891	923.853	-0.007009	-0.001568	-0.004218
0.3800	424.087	92.132	19.567	54.546	-0.547	9.876	807.352	-0.006449	-0.001370	-0.003818
0.3900	369.293	84.586	17.134	49.988	-0.548	9.891	703.039	-0.005921	-0.001199	-0.003499
0.4000	311.584	76.221	15.052	44.086	-0.551	9.876	593.176	-0.005335	-0.001054	-0.003086
0.4100	261.795	68.911	13.203	39.931	-0.557	9.891	498.390	-0.004824	-0.000924	-0.002795
0.4200	213.659	61.366	11.423	35.337	-0.561	9.876	406.752	-0.004296	-0.000800	-0.002474
0.4300	174.390	54.724	10.324	31.771	-0.552	9.891	331.993	-0.003831	-0.000723	-0.002224
0.4400	126.960	47.440	8.952	27.038	-0.559	9.876	241.699	-0.003321	-0.000627	-0.001893
0.4500	101.487	42.550	8.297	24.190	-0.550	9.892	193.205	-0.002979	-0.000581	-0.001693
0.4600	72.707	37.645	7.797	20.641	-0.548	9.876	138.416	-0.002635	-0.000546	-0.001445
0.4700	47.294	33.379	7.256	18.064	-0.550	9.891	90.036	-0.002337	-0.000508	-0.001265
0.4800	35.527	31.434	6.964	15.973	-0.549	9.876	67.635	-0.002200	-0.000487	-0.001118
0.4900	27.247	29.474	6.838	14.942	-0.552	9.892	51.870	-0.002063	-0.000479	-0.001046
0.5000	25.714	28.542	5.920	14.572	-0.553	9.876	48.952	-0.001998	-0.000414	-0.001020
0.5100	26.240	28.002	6.018	14.214	-0.557	9.891	49.953	-0.001960	-0.000421	-0.000995
0.5200	28.599	27.989	5.671	14.337	-0.550	9.877	54.445	-0.001959	-0.000397	-0.001004
0.5300	34.926	28.474	6.325	14.776	-0.546	9.891	66.490	-0.001993	-0.000443	-0.001034
0.5400	65.659	32.224	6.784	17.158	-0.546	9.876	124.998	-0.002256	-0.000475	-0.001201
0.5500	101.817	37.369	6.840	19.910	-0.546	9.892	193.834	-0.002616	-0.000479	-0.001394
0.5600	141.598	43.107	7.480	23.323	-0.542	9.876	269.566	-0.003017	-0.000524	-0.001633
0.5700	190.455	49.957	7.951	27.450	-0.550	9.892	362.577	-0.003497	-0.000557	-0.001921
0.5800	240.605	57.251	8.838	31.635	-0.553	9.876	458.050	-0.004008	-0.000619	-0.002214
0.5900	298.434	65.703	10.186	36.229	-0.550	9.891	568.142	-0.004599	-0.000713	-0.002536
0.6000	362.756	74.649	13.077	41.652	-0.546	9.876	690.594	-0.005225	-0.000915	-0.002916
0.6100	419.443	82.518	15.689	46.426	-0.548	9.891	798.512	-0.005776	-0.001098	-0.003250
0.6200	461.568	88.325	17.385	50.291	-0.553	9.876	878.706	-0.006183	-0.001217	-0.003520
0.6300	545.997	99.594	20.692	57.655	-0.544	9.892	1039.438	-0.006972	-0.001448	-0.004036
0.6400	584.861	104.765	23.055	61.726	-0.546	9.875	1113.424	-0.007334	-0.001614	-0.004321
0.6500	644.884	112.532	26.057	66.998	-0.553	9.891	1227.694	-0.007877	-0.001824	-0.004690
0.6600	694.989	119.076	28.279	71.716	-0.540	9.875	1323.080	-0.008335	-0.001980	-0.005020
0.6700	746.912	126.026	31.309	76.492	-0.542	9.892	1421.928	-0.008822	-0.002192	-0.005354
0.6800	795.920	132.920	33.310	80.880	-0.549	9.876	1515.226	-0.009304	-0.002332	-0.005662
0.6900	826.998	136.823	35.102	83.606	-0.543	9.891	1574.392	-0.009578	-0.002457	-0.005852
0.7000	865.336	142.189	37.243	87.966	-0.541	9.876	1647.377	-0.009953	-0.002607	-0.006158
0.7100	896.895	145.854	38.771	90.665	-0.548	9.892	1707.458	-0.010210	-0.002714	-0.006347
0.7200	910.376	148.496	40.148	92.563	-0.554	9.876	1733.122	-0.010395	-0.002810	-0.006479
0.7300	924.022	150.177	40.856	93.719	-0.548	9.891	1759.100	-0.010512	-0.002860	-0.006560
0.7400	944.851	153.667	42.443	96.071	-0.543	9.876	1798.754	-0.010757	-0.002971	-0.006725
0.7500	939.260	153.638	42.717	96.127	-0.544	9.891	1788.111	-0.010755	-0.002990	-0.006729
0.7600	926.486	152.649	41.898	95.509	-0.566	9.876	1763.792	-0.010685	-0.002933	-0.006686
0.7700	919.468	151.775	41.885	95.013	-0.543	9.892	1750.431	-0.010624	-0.002932	-0.006651
0.7800	914.449	151.372	41.913	95.164	-0.551	9.875	1740.875	-0.010596	-0.002934	-0.006661
0.7900	866.748	146.885	40.231	91.778	-0.544	9.892	1650.066	-0.010282	-0.002816	-0.006424
0.8000	829.072	142.799	38.409	89.358	-0.542	9.875	1578.341	-0.009996	-0.002689	-0.006255
0.8100	796.746	138.727	37.232	86.055	-0.540	9.892	1516.800	-0.009711	-0.002606	-0.006024
0.8200	761.204	134.864	35.771	83.579	-0.550	9.876	1449.137	-0.009440	-0.002504	-0.005851
0.8300	711.174	129.042	32.852	79.219	-0.550	9.891	1353.893	-0.009033	-0.002300	-0.005545
0.8400	650.460	121.746	30.282	74.717	-0.548	9.875	1238.308	-0.008522	-0.002120	-0.005230
0.8500	596.478	115.173	27.266	70.204	-0.552	9.891	1135.540	-0.008062	-0.001909	-0.004914
0.8600	541.985	108.308	25.695	65.702	-0.549	9.875	1031.799	-0.007582	-0.001799	-0.004599
0.8700	482.697	101.011	22.650	60.406	-0.540	9.892	918.932	-0.007071	-0.001585	-0.004228
0.8800	422.133	92.702	19.805	54.943	-0.546	9.876	803.633	-0.006489	-0.001386	-0.003846
0.8900	367.309	85.377	17.150	49.963	-0.548	9.892	699.263	-0.005976	-0.001200	-0.003497
0.9000	317.400	77.487	15.373	45.173	-0.541	9.875	604.248	-0.005424	-0.001076	-0.003162
0.9100	254.536	68.674	12.590	40.041	-0.550	9.892	484.571	-0.004807	-0.000881	-0.002803
0.9200	209.887	61.242	11.241	35.461	-0.547	9.876	399.570	-0.004287	-0.000787	-0.002482
0.9300	174.405	55.919	10.463	31.907	-0.544	9.891	332.022	-0.003914	-0.000732	-0.002234
0.9400	132.445	48.637	9.811	28.012	-0.550	9.875	252.142	-0.003405	-0.000687	-0.001961
0.9500	106.732	44.021	8.617	24.960	-0.552	9.892	203.190	-0.003082	-0.000603	-0.001747
0.9600	82.731	39.673	7.617	22.594	-0.549	9.875	157.499	-0.002777	-0.000533	-0.001582
0.9700	59.963	35.739	7.170	19.730	-0.545	9.892	114.155	-0.002502	-0.000502	-0.001381
0.9800	43.207	32.753	7.256	17.845	-0.553	9.875	82.254	-0.002293	-0.000508	-0.001249
0.9900	32.597	30.682	6.477	16.236	-0.549	9.891	62.056	-0.002148	-0.000453	-0.001137
1.0000	32.837	30.433	7.103	15.673	-0.553	9.875	62.513	-0.002130	-0.000497	-0.001097
1.0100	34.776	30.237	6.977	15.879	-0.558	9.891	66.204	-0.002117	-0.000488	-0.001112
1.0200	37.361	30.111	6.214	15.756	-0.546	9.875	71.125	-0.002108	-0.000435	-0.001103
1.0300	46.994	30.641	6.408	16.787	-0.550	9.891	89.464	-0.002145	-0.000449	-0.001175
1.0400	87.255	36.169	6.671	19.660	-0.545	9.875	166.111	-0.002532	-0.000467	-0.001376
1.0500	127.862	41.716	8.297	23.032	-0.545	9.891	243.416	-0.002920	-0.000581	-0.001612
1.0600	166.996	47.316	8.132	26.145	-0.550	9.875	317.917	-0.003312	-0.000569	-0.001830
1.0700	206.115	53.529	8.575	29.541	-0.549	9.891	392.389	-0.003747	-0.000600	-0.002068
1.0800	257.632	61.047	9.228	33.601	-0.547	9.875	490.465	-0.004273	-0.000646	-0.002352
1.0900	312.681	68.659	11.439	37.825	-0.549	9.891	595.264	-0.004806	-0.000801	-0.002648
1.1000	364.183	75.414	13.384	42.188	-0.554	9.875	693.312	-0.005279	-0.000937	-0.002953
1.1100	416.918	82.656	15.773	46.909	-0.553	9.891	793.705	-0.005786	-0.001104	-0.003284
1.1200	482.697	91.605	18.471	53.069	-0.555	9.875	918.932	-0.006412	-0.001293	-0.003715
1.1300	544.374	100.206	21.208	58.245	-0.554	9.891	1036.348	-0.007014	-0.001485	-0.004077
1.1400	602.549	107.710	24.223	63.749	-0.560	9.875	1147.099	-0.007540	-0.001696	-0.004462
1.1500	654.111	114.422	26.445	68.565	-0.560	9.891	1245.260	-0.008010	-0.001851	-0.004800
1.1600	710.152	121.620	29.072	73.052	-0.550	9.875	1351.948	-0.008513	-0.002035	-0.005114
1.1700	744.447	126.458	31.005	77.027	-0.553	9.891	1417.236	-0.008852	-0.002170	-0.005392
1.1800	795.439	133.058	33.630	81.404	-0.559	9.874	1514.311	-0.009314	-0.002354	-0.005698
1.1900	830.214	137.866	35.909	84.568	-0.554	9.891	1580.515	-0.009651	-0.002514	-0.005920
1.2000	871.242	143.089	37.867	88.435	-0.553	9.874	1658.621	-0.010016	-0.002651	-0.006190
1.2100	884.707	145.743	38.856	90.584	-0.564	9.892	1684.256	-0.010202	-0.002720	-0.006341
1.2200	906.453	148.120	39.551	92.619	-0.555	9.875	1725.655	-0.010368	-0.002769	-0.006483
1.2300	929.868	151.787	41.260	94.984	-0.553	9.891	1770.229	-0.010625	-0.002888	-0.006649
1.2400	929.763	152.011	41.246	95.536	-0.561	9.875	1770.029	-0.010641	-0.002887	-0.006688
1.2500	937.352	153.304	42.232	96.498	-0.558	9.891	1784.477	-0.010731	-0.002956	-0.006755
1.2600	945.137	154.710	42.788	97.600	-0.558	9.874	1799.297	-0.010830	-0.002995	-0.006832
1.2700	937.637	154.598	42.151	96.841	-0.556	9.891	1785.021	-0.010822	-0.002951	-0.006779
1.2800	919.543	152.943	41.817	95.989	-0.559	9.874	1750.574	-0.010706	-0.002927	-0.006719
1.2900	870.460	147.689	40.288	92.812	-0.560	9.891	1657.133	-0.010338	-0.002820	-0.006497
1.3000	837.879	143.896	39.036	89.949	-0.550	9.874	1595.106	-0.010073	-0.002733	-0.006296
1.3100	780.876	137.588	36.603	86.086	-0.555	9.891	1486.588	-0.009631	-0.002562	-0.006026
1.3200	751.375	134.448	34.977	82.986	-0.548	9.874	1430.426	-0.009411	-0.002448	-0.005809
1.3300	712.527	129.497	33.534	80.262	-0.549	9.890	1356.468	-0.009065	-0.002347	-0.005618
1.3400	656.997	123.262	31.268	75.460	-0.546	9.874	1250.753	-0.008628	-0.002189	-0.005282
1.3500	604.097	116.603	28.156	71.289	-0.546	9.891	1150.045	-0.008162	-0.001971	-0.004990
1.3600	535.643	107.918	25.222	65.636	-0.545	9.874	1019.726	-0.007554	-0.001766	-0.004595
1.3700	489.896	101.860	22.568	61.823	-0.549	9.891	932.636	-0.007130	-0.001580	-0.004328
1.3800	438.694	95.201	20.817	56.635	-0.545	9.874	835.161	-0.006664	-0.001457	-0.003964
1.3900	385.779	88.061	18.789	52.314	-0.556	9.891	734.425	-0.006164	-0.001315	-0.003662
1.4000	325.951	79.694	16.007	46.453	-0.560	9.873	620.527	-0.005579	-0.001121	-0.003252
1.4100	267.656	71.135	13.621	41.417	-0.551	9.891	509.548	-0.004979	-0.000953	-0.002899
1.4200	228.387	64.855	11.840	37.755	-0.553	9.874	434.790	-0.004540	-0.000829	-0.002643
1.4300	182.400	57.223	10.535	33.216	-0.556	9.890	347.242	-0.004006	-0.000737	-0.002325
1.4400	142.605	50.374	10.021	29.595	-0.552	9.874	271.482	-0.003526	-0.000701	-0.002072
1.4500	108.024	44.606	9.228	25.937	-0.553	9.891	205.650	-0.003122	-0.000646	-0.001816
1.4600	73.774	39.228	8.200	22.483	-0.556	9.874	140.448	-0.002746	-0.000574	-0.001574
1.4700	62.804	36.878	7.713	20.433	-0.556	9.891	119.562	-0.002581	-0.000540	-0.001430
1.4800	42.290	33.225	7.131	18.353	-0.556	9.874	80.509	-0.002326	-0.000499	-0.001285
1.4900	31.259	30.779	6.700	16.262	-0.556	9.891	59.509	-0.002155	-0.000469	-0.001138
1.5000	28.419	29.987	6.297	15.631	-0.554	9.874	54.102	-0.002099	-0.000441	-0.001094
1.5100	30.838	30.111	6.366	15.768	-0.556	9.891	58.708	-0.002108	-0.000446	-0.001104
1.5200	33.859	29.988	6.741	15.702	-0.555	9.873	64.459	-0.002099	-0.000472	-0.001099
1.5300	49.188	31.209	6.658	16.993	-0.556	9.891	93.641	-0.002185	-0.000466	-0.001190
1.5400	89.299	36.865	7.227	20.350	-0.565	9.874	170.002	-0.002581	-0.000506	-0.001424
1.5500	127.847	42.230	7.131	23.791	-0.561	9.891	243.387	-0.002956	-0.000499	-0.001665
1.5600	166.515	47.565	8.020	26.308	-0.553	9.874	317.001	-0.003330	-0.000561	-0.001842
1.5700	207.572	53.805	8.507	30.120	-0.560	9.891	395.164	-0.003766	-0.000596	-0.002108
1.5800	260.172	61.408	9.452	34.537	-0.553	9.874	495.300	-0.004299	-0.000662	-0.002418
1.5900	318.632	69.439	11.729	38.828	-0.545	9.890	606.594	-0.004861	-0.000821	-0.002718
1.6000	372.284	77.432	13.605	43.331	-0.551	9.873	708.733	-0.005420	-0.000952	-0.003033
1.6100	419.518	84.056	15.633	47.293	-0.562	9.890	798.655	-0.005884	-0.001094	-0.003311
1.6200	487.732	92.634	18.122	53.650	-0.559	9.873	928.516	-0.006484	-0.001269	-0.003756
1.6300	535.643	99.292	20.581	57.943	-0.556	9.890	1019.726	-0.006950	-0.001441	-0.004056
1.6400	604.413	107.667	24.085	64.052	-0.560	9.873	1150.646	-0.007537	-0.001686	-0.004484
1.6500	663.760	115.493	27.376	69.379	-0.558	9.890	1263.628	-0.008085	-0.001916	-0.004857
1.6600	716.810	122.845	30.310	74.426	-0.559	9.873	1364.622	-0.008599	-0.002122	-0.005210
1.6700	758.243	128.721	31.934	78.240	-0.552	9.891	1443.501	-0.009010	-0.002235	-0.005477
1.6800	798.685	133.697	34.117	81.694	-0.551	9.873	1520.491	-0.009359	-0.002388	-0.005719
1.6900	836.992	138.506	35.702	85.740	-0.552	9.891	1593.418	-0.009695	-0.002499	-0.006002
1.7000	866.027	142.951	37.382	88.492	-0.562	9.873	1648.693	-0.010007	-0.002617	-0.006194
1.7100	903.884	147.481	39.647	92.372	-0.552	9.890	1720.762	-0.010324	-0.002775	-0.006466
1.7200	921.377	150.416	40.759	94.476	-0.554	9.874	1754.065	-0.010529	-0.002853	-0.006613
1.7300	933.099	152.623	41.385	95.782	-0.553	9.890	1776.381	-0.010684	-0.002897	-0.006705
1.7400	940.643	153.833	42.414	97.022	-0.558	9.873	1790.743	-0.010768	-0.002969	-0.006792
1.7500	940.267	154.249	42.371	97.408	-0.551	9.891	1790.028	-0.010797	-0.002966	-0.006819
1.7600	934.421	153.762	42.276	96.939	-0.552	9.873	1778.898	-0.010763	-0.002959	-0.006786
1.7700	922.880	152.678	42.372	96.306	-0.552	9.890	1756.926	-0.010687	-0.002966	-0.006741
1.7800	895.167	150.542	41.455	94.737	-0.559	9.873	1704.168	-0.010538	-0.002902	-0.006632
1.7900	858.002	146.454	40.300	91.915	-0.557	9.891	1633.415	-0.010252	-0.002821	-0.006434
1.8000	832.018	143.535	38.729	89.909	-0.560	9.873	1583.948	-0.010047	-0.002711	-0.006294
1.8100	778.441	137.298	36.355	85.613	-0.558	9.890	1481.953	-0.009611	-0.002545	-0.005993
1.8200	737.143	132.695	34.201	82.367	-0.555	9.873	1403.332	-0.009289	-0.002394	-0.005766
1.8300	691.247	127.318	32.604	78.736	-0.555	9.891	1315.956	-0.008912	-0.002282	-0.005512
1.8400	653.661	122.579	30.768	75.296	-0.553	9.873	1244.402	-0.008581	-0.002154	-0.005271
1.8500	593.953	115.326	28.015	70.615	-0.549	9.890	1130.733	-0.008073	-0.001961	-0.004943
1.8600	548.913	109.475	25.654	66.763	-0.558	9.873	1044.989	-0.007663	-0.001796	-0.004673
1.8700	475.003	100.526	22.512	60.516	-0.557	9.890	904.284	-0.007037	-0.001576	-0.004236
1.8800	419.293	92.705	19.733	55.768	-0.563	9.873	798.225	-0.006489	-0.001381	-0.003904
1.8900	364.259	85.390	16.829	50.678	-0.558	9.891	693.455	-0.005977	-0.001178	-0.003547
1.9000	300.899	76.010	14.426	44.801	-0.560	9.873	572.834	-0.005321	-0.001010	-0.003136
1.9100	250.569	68.604	13.105	39.862	-0.564	9.890	477.018	-0.004802	-0.000917	-0.002790
1.9200	215.252	63.045	11.355	36.476	-0.562	9.873	409.784	-0.004413	-0.000795	-0.002553
1.9300	174.029	56.280	10.490	32.789	-0.550	9.890	331.306	-0.003940	-0.000734	-0.002295
1.9400	134.820	49.695	9.437	28.827	-0.561	9.872	256.662	-0.003479	-0.000661	-0.002018
1.9500	102.659	44.177	8.963	25.690	-0.556	9.891	195.436	-0.003092	-0.000627	-0.001798
1.9600	93.356	41.549	8.632	23.874	-0.557	9.872	177.727	-0.002908	-0.000604	-0.001671
1.9700	66.185	37.338	7.951	21.396	-0.561	9.890	125.999	-0.002614	-0.000557	-0.001498
1.9800	44.229	33.517	7.407	18.437	-0.553	9.873	84.200	-0.002346	-0.000519	-0.001291
1.9900	34.130	32.032	7.296	17.393	-0.553	9.890	64.974	-0.002242	-0.000511	-0.001217
2.0000	33.258	31.349	6.992	16.691	-0.558	9.873	63.314	-0.002194	-0.000489	-0.001168
2.0100	33.994	30.683	6.742	16.648	-0.557	9.891	64.716	-0.002148	-0.000472	-0.001165
2.0200	36.519	30.765	6.880	15.920	-0.552	9.873	69.523	-0.002154	-0.000482	-0.001114
2.0300	39.991	30.738	6.407	16.551	-0.552	9.890	76.132	-0.002152	-0.000448	-0.001159
2.0400	58.971	32.489	7.021	17.446	-0.557	9.872	112.267	-0.002274	-0.000491	-0.001221
2.0500	105.034	39.327	7.256	21.616	-0.548	9.890	199.957	-0.002753	-0.000508	-0.001513
2.0600	139.689	44.038	7.716	24.450	-0.554	9.872	265.932	-0.003083	-0.000540	-0.001711
2.0700	195.459	52.289	8.409	29.103	-0.550	9.890	372.105	-0.003660	-0.000589	-0.002037
2.0800	250.644	60.130	9.784	34.013	-0.549	9.872	477.161	-0.004209	-0.000685	-0.002381
2.0900	300.328	66.968	10.605	37.689	-0.559	9.890	571.747	-0.004688	-0.000742	-0.002638
2.1000	348.644	74.234	12.690	41.969	-0.558	9.873	663.729	-0.005196	-0.000888	-0.002938
2.1100	405.707	81.974	15.218	46.701	-0.553	9.889	772.362	-0.005738	-0.001065	-0.003269
2.1200	471.020	90.631	18.512	52.342	-0.557	9.872	896.702	-0.006344	-0.001296	-0.003664
2.1300	528.218	98.554	21.069	57.201	-0.561	9.890	1005.592	-0.006899	-0.001475	-0.004004
2.1400	581.599	105.557	23.056	62.538	-0.552	9.872	1107.216	-0.007389	-0.001614	-0.004378
2.1500	639.654	112.838	25.697	67.659	-0.556	9.890	1217.737	-0.007899	-0.001799	-0.004736
2.1600	687.880	119.423	28.378	72.418	-0.567	9.872	1309.547	-0.008360	-0.001986	-0.005069
2.1700	746.506	126.791	31.269	77.192	-0.565	9.890	1421.156	-0.008875	-0.002189	-0.005403
2.1800	789.848	132.907	33.477	81.665	-0.560	9.872	1503.668	-0.009304	-0.002343	-0.005717
2.1900	831.251	138.393	35.910	85.422	-0.553	9.890	1582.489	-0.009688	-0.002514	-0.005980
2.2000	869.514	143.159	37.882	89.055	-0.561	9.872	1655.331	-0.010021	-0.002652	-0.006234
2.2100	891.666	146.591	38.952	91.657	-0.566	9.890	1697.502	-0.010261	-0.002727	-0.006416
2.2200	911.728	149.080	40.313	93.569	-0.560	9.872	1735.697	-0.010436	-0.002822	-0.006550
2.2300	926.501	151.412	41.178	95.441	-0.566	9.890	1763.821	-0.010599	-0.002882	-0.006681
2.2400	936.721	153.192	42.026	96.594	-0.562	9.872	1783.276	-0.010723	-0.002942	-0.006762
2.2500	934.406	153.346	42.248	97.173	-0.561	9.890	1778.870	-0.010734	-0.002957	-0.006802
2.2600	931.295	153.596	42.663	97.063	-0.564	9.872	1772.947	-0.010752	-0.002986	-0.006794
2.2700	923.285	153.192	42.095	96.692	-0.549	9.890	1757.698	-0.010723	-0.002947	-0.006768
2.2800	905.627	151.317	41.733	95.757	-0.556	9.873	1724.081	-0.010592	-0.002921	-0.006703
2.2900	857.671	146.158	39.703	91.835	-0.560	9.890	1632.786	-0.010231	-0.002779	-0.006428
2.3000	824.158	142.826	38.411	89.579	-0.562	9.872	1568.985	-0.009998	-0.002689	-0.006271
2.3100	787.158	138.366	37.077	86.787	-0.551	9.890	1498.547	-0.009686	-0.002595	-0.006075
2.3200	745.364	133.808	35.185	83.290	-0.549	9.872	1418.982	-0.009367	-0.002463	-0.005830
2.3300	691.006	127.514	32.545	78.968	-0.545	9.889	1315.498	-0.008926	-0.002278	-0.005528
2.3400	641.142	121.677	30.601	74.922	-0.539	9.872	1220.570	-0.008517	-0.002142	-0.005245
2.3500	592.675	115.424	27.753	70.972	-0.551	9.890	1128.302	-0.008080	-0.001943	-0.004968
2.3600	525.348	106.778	24.472	65.086	-0.549	9.872	1000.128	-0.007474	-0.001713	-0.004556
2.3700	478.474	100.680	22.762	61.068	-0.553	9.890	910.892	-0.007048	-0.001593	-0.004275
2.3800	421.006	93.299	20.108	55.824	-0.547	9.872	801.487	-0.006531	-0.001408	-0.003908
2.3900	373.501	86.363	18.096	51.504	-0.548	9.889	711.050	-0.006045	-0.001267	-0.003605
2.4000	305.197	77.390	14.912	45.242	-0.544	9.872	581.017	-0.005417	-0.001044	-0.003167
2.4100	262.231	70.508	13.494	41.404	-0.541	9.889	499.220	-0.004936	-0.000945	-0.002898
2.4200	207.632	62.032	11.201	36.161	-0.541	9.872	395.279	-0.004342	-0.000784	-0.002531
2.4300	173.443	55.864	10.422	33.009	-0.547	9.889	330.191	-0.003910	-0.000730	-0.002311
2.4400	142.154	50.721	9.699	29.625	-0.549	9.871	270.624	-0.003550	-0.000679	-0.002074
2.4500	103.621	44.607	8.787	26.131	-0.550	9.890	197.268	-0.003123	-0.000615	-0.001829
2.4600	71.129	39.187	8.172	22.235	-0.549	9.872	135.412	-0.002743	-0.000572	-0.001556
2.4700	55.094	35.919	7.730	20.281	-0.551	9.889	104.885	-0.002514	-0.000541	-0.001420
2.4800	46.723	34.237	7.436	18.810	-0.547	9.872	88.949	-0.002397	-0.000521	-0.001317
2.4900	37.105	32.032	6.852	17.544	-0.556	9.889	70.639	-0.002242	-0.000480	-0.001228
2.5000	40.126	28.196	5.600	14.310	-0.549	9.873	76.389	-0.001974	-0.000392	-0.001002
2.5100	46.919	29.042	5.992	14.614	-0.551	9.889	89.321	-0.002033	-0.000419	-0.001023
2.5200	71.054	32.254	7.018	16.731	-0.538	9.873	135.269	-0.002258	-0.000491	-0.001171
2.5300	101.787	36.533	6.895	19.664	-0.556	9.889	193.777	-0.002557	-0.000483	-0.001377
2.5400	138.908	42.009	7.078	22.690	-0.551	9.873	264.444	-0.002941	-0.000495	-0.001588
2.5500	180.777	48.135	7.507	25.990	-0.549	9.889	344.152	-0.003369	-0.000525	-0.001819
2.5600	234.022	55.976	8.313	30.504	-0.547	9.873	445.518	-0.003918	-0.000582	-0.002135
2.5700	288.801	63.631	9.617	34.950	-0.555	9.888	549.803	-0.004454	-0.000673	-0.002446
2.5800	343.730	71.358	12.577	39.519	-0.548	9.872	654.373	-0.004995	-0.000880	-0.002766
2.5900	420.239	81.752	15.731	45.999	-0.547	9.889	800.028	-0.005723	-0.001101	-0.003220
2.6000	489.265	91.672	18.638	52.259	-0.542	9.873	931.435	-0.006417	-0.001305	-0.003658
2.6100	562.453	100.957	21.609	58.725	-0.540	9.888	1070.766	-0.007067	-0.001513	-0.004111
2.6200	627.030	109.418	25.056	64.699	-0.529	9.872	1193.705	-0.007659	-0.001754	-0.004529
2.6300	705.899	119.563	28.363	71.991	-0.548	9.889	1343.851	-0.008369	-0.001985	-0.005039
2.6400	779.794	129.040	32.060	78.487	-0.552	9.872	1484.528	-0.009033	-0.002244	-0.005494
2.6500	847.136	137.587	35.508	84.818	-0.550	9.889	1612.730	-0.009631	-0.002486	-0.005937
2.6600	918.010	146.981	39.703	91.297	-0.552	9.873	1747.656	-0.010289	-0.002779	-0.006391
2.6700	976.366	154.654	42.733	96.773	-0.555	9.889	1858.749	-0.010826	-0.002991	-0.006774
2.6800	1028.499	161.422	45.346	101.895	-0.556	9.873	1957.998	-0.011300	-0.003174	-0.007133
2.6900	1073.269	166.715	48.401	106.227	-0.558	9.888	2043.228	-0.011670	-0.003388	-0.007436
2.7000	1119.842	172.954	51.166	111.044	-0.557	9.872	2131.891	-0.012107	-0.003582	-0.007773
2.7100	1151.988	177.055	52.933	114.016	-0.556	9.888	2193.089	-0.012394	-0.003705	-0.007981
2.7200	1170.292	180.359	54.572	116.933	-0.565	9.872	2227.936	-0.012625	-0.003820	-0.008185
2.7300	1187.139	182.878	56.073	118.556	-0.553	9.889	2260.008	-0.012801	-0.003925	-0.008299
2.7400	1195.375	184.653	56.532	119.948	-0.555	9.872	2275.686	-0.012926	-0.003957	-0.008396
2.7500	1192.159	184.751	55.904	119.781	-0.560	9.889	2269.564	-0.012933	-0.003913	-0.008385
2.7600	1184.193	184.462	55.962	119.961	-0.552	9.872	2254.400	-0.012912	-0.003917	-0.008397
2.7700	1174.711	183.518	55.850	119.341	-0.553	9.889	2236.347	-0.012846	-0.003910	-0.008354
2.7800	1146.427	181.387	55.168	117.471	-0.553	9.872	2182.503	-0.012697	-0.003862	-0.008223
2.7900	1093.317	176.177	53.601	114.167	-0.560	9.888	2081.394	-0.012332	-0.003752	-0.007992
2.8000	1049.644	171.633	51.320	110.893	-0.554	9.872	1998.253	-0.012014	-0.003592	-0.007762
2.8100	997.916	165.784	48.792	106.269	-0.547	9.889	1899.776	-0.011605	-0.003415	-0.007439
2.8200	944.535	159.572	45.718	102.568	-0.541	9.872	1798.153	-0.011170	-0.003200	-0.007180
2.8300	879.402	152.164	42.372	97.064	-0.545	9.889	1674.156	-0.010651	-0.002966	-0.006794
2.8400	813.743	144.758	39.940	91.600	-0.547	9.872	1549.158	-0.010133	-0.002796	-0.006412
2.8500	751.571	137.379	36.577	86.178	-0.553	9.888	1430.798	-0.009617	-0.002560	-0.006032
2.8600	675.557	128.083	32.837	79.629	-0.553	9.873	1286.087	-0.008966	-0.002299	-0.005574
2.8700	603.887	119.353	29.282	73.643	-0.550	9.889	1149.645	-0.008355	-0.002050	-0.005155
2.8800	532.066	110.030	25.721	67.382	-0.553	9.872	1012.917	-0.007702	-0.001800	-0.004717
2.8900	460.816	100.609	22.222	61.191	-0.547	9.888	877.275	-0.007043	-0.001556	-0.004283
2.9000	397.201	91.674	19.735	55.150	-0.568	9.872	756.168	-0.006417	-0.001381	-0.003861
2.9100	337.658	83.031	17.276	49.685	-0.554	9.889	642.815	-0.005812	-0.001209	-0.003478
2.9200	275.020	73.844	15.051	43.523	-0.564	9.872	523.567	-0.005169	-0.001054	-0.003047
2.9300	218.288	65.146	12.326	38.555	-0.555	9.889	415.564	-0.004560	-0.000863	-0.002699
2.9400	169.205	56.724	10.493	33.325	-0.553	9.872	322.123	-0.003971	-0.000735	-0.002333
2.9500	129.590	49.930	9.728	29.747	-0.557	9.889	246.706	-0.003495	-0.000681	-0.002082
2.9600	92.199	43.453	8.867	25.374	-0.562	9.872	175.524	-0.003042	-0.000621	-0.001776
2.9700	66.546	38.757	8.687	22.621	-0.560	9.888	126.686	-0.002713	-0.000608	-0.001583
2.9800	54.854	36.296	8.103	20.846	-0.560	9.872	104.427	-0.002541	-0.000567	-0.001459
2.9900	41.223	33.822	7.839	18.934	-0.567	9.888	78.478	-0.002368	-0.000549	-0.001325
3.0000	37.571	32.782	7.518	18.080	-0.568	9.872	71.526	-0.002295	-0.000526	-0.001266
3.0100	38.999	32.307	6.976	17.720	-0.560	9.889	74.244	-0.002262	-0.000488	-0.001240
3.0200	44.875	32.504	6.783	18.150	-0.568	9.872	85.430	-0.002275	-0.000475	-0.001271
3.0300	71.911	35.477	6.810	19.704	-0.560	9.888	136.900	-0.002483	-0.000477	-0.001379
3.0400	107.378	40.104	7.893	22.910	-0.558	9.871	204.420	-0.002807	-0.000553	-0.001604
3.0500	154.763	47.371	8.383	26.405	-0.557	9.888	294.628	-0.003316	-0.000587	-0.001848
3.0600	208.249	55.070	9.146	31.235	-0.555	9.871	396.452	-0.003855	-0.000640	-0.002186
3.0700	262.952	63.005	9.672	35.170	-0.550	9.888	500.593	-0.004410	-0.000677	-0.002462
3.0800	328.461	72.025	12.302	40.482	-0.562	9.871	625.305	-0.005042	-0.000861	-0.002834
3.0900	398.042	81.322	15.344	46.645	-0.566	9.888	757.771	-0.005693	-0.001074	-0.003265
3.1000	469.472	90.713	18.291	52.921	-0.574	9.871	893.755	-0.006350	-0.001280	-0.003704
3.1100	541.684	100.733	21.568	59.512	-0.569	9.888	1031.227	-0.007051	-0.001510	-0.004166
3.1200	605.975	109.059	24.584	65.002	-0.573	9.871	1153.622	-0.007634	-0.001721	-0.004550
3.1300	688.662	119.870	28.404	72.625	-0.560	9.888	1311.035	-0.008391	-0.001988	-0.005084
3.1400	761.084	128.597	32.449	78.831	-0.565	9.872	1448.908	-0.009002	-0.002271	-0.005518
3.1500	827.329	136.879	35.576	84.913	-0.556	9.889	1575.022	-0.009582	-0.002490	-0.005944
3.1600	894.371	145.631	38.896	90.845	-0.551	9.871	1702.652	-0.010194	-0.002723	-0.006359
3.1700	954.334	153.401	42.691	96.472	-0.553	9.889	1816.807	-0.010738	-0.002988	-0.006753
3.1800	1013.230	160.587	45.652	102.251	-0.552	9.871	1928.930	-0.011241	-0.003196	-0.007158
3.1900	1058.135	166.674	48.595	106.213	-0.549	9.889	2014.418	-0.011667	-0.003402	-0.007435
3.2000	1103.792	172.566	50.972	111.279	-0.554	9.872	2101.336	-0.012080	-0.003568	-0.007790
3.2100	1138.943	177.247	52.490	114.457	-0.549	9.888	2168.255	-0.012407	-0.003674	-0.008012
3.2200	1167.948	180.707	54.530	117.746	-0.543	9.871	2223.473	-0.012649	-0.003817	-0.008242
3.2300	1185.245	183.726	56.085	119.311	-0.548	9.888	2256.403	-0.012861	-0.003926	-0.008352
3.2400	1185.651	184.767	56.114	120.166	-0.546	9.871	2257.175	-0.012934	-0.003928	-0.008412
3.2500	1190.250	186.044	56.865	121.101	-0.545	9.887	2265.930	-0.013023	-0.003981	-0.008477
3.2600	1189.183	185.891	57.003	121.830	-0.549	9.871	2263.899	-0.013012	-0.003990	-0.008528
3.2700	1178.949	185.322	56.365	121.348	-0.542	9.888	2244.415	-0.012973	-0.003946	-0.008494
3.2800	1157.082	183.461	56.157	119.437	-0.549	9.871	2202.787	-0.012842	-0.003931	-0.008361
3.2900	1102.138	177.860	54.266	116.094	-0.549	9.888	2098.188	-0.012450	-0.003799	-0.008127
3.3000	1068.039	174.370	52.459	113.479	-0.543	9.871	2033.272	-0.012206	-0.003672	-0.007944
3.3100	1010.435	168.160	50.081	108.704	-0.547	9.888	1923.609	-0.011771	-0.003506	-0.007609
3.3200	947.241	161.226	46.831	103.792	-0.551	9.871	1803.303	-0.011286	-0.003278	-0.007265
3.3300	885.744	154.444	43.260	98.699	-0.555	9.888	1686.230	-0.010811	-0.003028	-0.006909
3.3400	817.335	146.202	39.885	93.209	-0.545	9.871	1555.996	-0.010234	-0.002792	-0.006525
3.3500	749.797	137.866	36.965	87.003	-0.548	9.888	1427.422	-0.009651	-0.002588	-0.006090
3.3600	679.419	129.722	33.532	81.280	-0.550	9.871	1293.440	-0.009081	-0.002347	-0.005690
3.3700	620.027	122.218	30.433	76.054	-0.553	9.888	1180.372	-0.008555	-0.002130	-0.005324
3.3800	539.099	112.144	26.652	69.255	-0.549	9.871	1026.306	-0.007850	-0.001866	-0.004848
3.3900	474.507	103.278	23.959	63.600	-0.560	9.888	903.339	-0.007229	-0.001677	-0.004452
3.4000	403.979	93.897	20.277	56.911	-0.560	9.871	769.072	-0.006573	-0.001419	-0.003984
3.4100	342.482	84.975	17.775	51.297	-0.552	9.888	651.999	-0.005948	-0.001244	-0.003591
3.4200	278.582	75.526	14.689	44.926	-0.554	9.871	530.348	-0.005287	-0.001028	-0.003145
3.4300	224.314	67.008	13.092	40.041	-0.551	9.888	427.036	-0.004691	-0.000916	-0.002803
3.4400	173.939	58.877	11.688	35.005	-0.541	9.870	331.135	-0.004121	-0.000818	-0.002450
3.4500	134.144	51.860	10.478	31.138	-0.555	9.888	255.375	-0.003630	-0.000733	-0.002180
3.4600	102.043	46.357	9.506	27.752	-0.552	9.871	194.263	-0.003245	-0.000665	-0.001943
3.4700	77.066	41.520	8.560	24.547	-0.557	9.887	146.713	-0.002906	-0.000599	-0.001718
3.4800	57.213	37.811	8.394	21.946	-0.553	9.871	108.919	-0.002647	-0.000588	-0.001536
3.4900	44.710	35.280	8.173	20.226	-0.557	9.888	85.115	-0.002470	-0.000572	-0.001416
3.5000	44.559	34.556	8.241	19.524	-0.558	9.870	84.829	-0.002419	-0.000577	-0.001367
3.5100	45.055	34.211	8.062	19.181	-0.560	9.888	85.773	-0.002395	-0.000564	-0.001343
3.5200	48.271	34.001	7.243	19.333	-0.560	9.870	91.896	-0.002380	-0.000507	-0.001353
3.5300	62.759	35.434	7.783	20.019	-0.554	9.888	119.476	-0.002480	-0.000545	-0.001401
3.5400	111.691	41.814	7.879	24.217	-0.559	9.871	212.631	-0.002927	-0.000552	-0.001695
3.5500	155.604	48.011	8.799	27.780	-0.555	9.888	296.230	-0.003361	-0.000616	-0.001945
3.5600	202.523	55.029	9.395	31.798	-0.558	9.871	385.551	-0.003852	-0.000658	-0.002226
3.5700	261.089	63.975	10.187	36.326	-0.555	9.888	497.046	-0.004478	-0.000713	-0.002543
3.5800	327.123	72.844	12.996	41.389	-0.550	9.871	622.759	-0.005099	-0.000910	-0.002897
3.5900	403.107	82.863	15.371	47.584	-0.557	9.889	767.412	-0.005800	-0.001076	-0.003331
3.6000	468.556	91.423	18.790	53.608	-0.552	9.872	892.010	-0.006400	-0.001315	-0.003753
3.6100	542.946	101.358	21.623	59.954	-0.556	9.891	1033.630	-0.007095	-0.001514	-0.004197
3.6200	610.514	110.379	25.193	66.612	-0.552	9.873	1162.262	-0.007727	-0.001764	-0.004663
3.6300	690.285	120.424	29.254	73.023	-0.563	9.890	1314.125	-0.008430	-0.002048	-0.005112
3.6400	758.679	129.710	32.714	79.146	-0.558	9.873	1444.330	-0.009080	-0.002290	-0.005540
3.6500	827.479	138.172	35.743	85.878	-0.557	9.890	1575.308	-0.009672	-0.002502	-0.006011
3.6600	894.461	146.535	39.090	91.795	-0.554	9.872	1702.824	-0.010257	-0.002736	-0.006426
3.6700	962.089	154.333	42.705	97.832	-0.555	9.889	1831.570	-0.010803	-0.002989	-0.006848
3.6800	1012.719	161.311	46.124	103.119	-0.555	9.871	1927.958	-0.011292	-0.003229	-0.007218
3.6900	1064.973	168.217	49.221	108.113	-0.560	9.888	2027.435	-0.011775	-0.003445	-0.007568
3.7000	1112.884	174.398	51.419	112.434	-0.562	9.871	2118.645	-0.012208	-0.003599	-0.007870
3.7100	1147.374	178.986	53.211	116.369	-0.557	9.888	2184.305	-0.012529	-0.003725	-0.008146
3.7200	1167.482	182.027	54.918	118.490	-0.564	9.870	2222.586	-0.012742	-0.003844	-0.008294
3.7300	1179.895	183.879	55.571	120.138	-0.554	9.888	2246.218	-0.012872	-0.003890	-0.008410
3.7400	1199.477	186.670	57.239	122.218	-0.551	9.871	2283.497	-0.013067	-0.004007	-0.008555
3.7500	1195.750	187.116	57.670	122.562	-0.555	9.887	2276.402	-0.013098	-0.004037	-0.008579
3.7600	1190.280	187.227	57.449	122.135	-0.561	9.870	2265.987	-0.013106	-0.004021	-0.008549
3.7700	1176.890	186.349	57.409	121.969	-0.554	9.888	2240.496	-0.013044	-0.004019	-0.008538
3.7800	1147.209	183.559	56.225	119.904	-0.564	9.870	2183.990	-0.012849	-0.003936	-0.008393
3.7900	1098.321	177.889	54.044	116.450	-0.559	9.888	2090.921	-0.012452	-0.003783	-0.008151
3.8000	1061.697	174.079	52.710	113.906	-0.558	9.870	2021.198	-0.012186	-0.003690	-0.007973
3.8100	1006.197	168.352	49.847	109.298	-0.561	9.888	1915.541	-0.011785	-0.003489	-0.007651
3.8200	954.304	162.796	47.471	105.527	-0.564	9.871	1816.750	-0.011396	-0.003323	-0.007387
3.8300	888.239	155.709	44.038	99.292	-0.563	9.888	1690.979	-0.010900	-0.003083	-0.006950
3.8400	825.856	148.065	41.221	94.765	-0.554	9.870	1572.218	-0.010365	-0.002885	-0.006634
3.8500	747.122	138.755	37.301	88.134	-0.550	9.887	1422.329	-0.009713	-0.002611	-0.006169
3.8600	679.179	130.041	33.254	82.133	-0.554	9.870	1292.982	-0.009103	-0.002328	-0.005749
3.8700	605.389	121.148	30.421	75.873	-0.548	9.888	1152.506	-0.008480	-0.002129	-0.005311
3.8800	532.952	111.822	26.848	69.378	-0.549	9.870	1014.605	-0.007828	-0.001879	-0.004856
3.8900	469.082	103.472	23.500	63.488	-0.557	9.887	893.011	-0.007243	-0.001645	-0.004444
3.9000	401.123	94.272	20.539	57.505	-0.557	9.870	763.636	-0.006599	-0.001438	-0.004025
3.9100	333.315	84.364	17.497	50.994	-0.555	9.887	634.546	-0.005906	-0.001225	-0.003570
3.9200	278.026	75.859	14.939	45.821	-0.557	9.870	529.289	-0.005310	-0.001046	-0.003208
3.9300	219.024	66.842	13.093	40.481	-0.569	9.887	416.965	-0.004679	-0.000917	-0.002834
3.9400	175.231	59.672	11.603	35.803	-0.567	9.870	333.595	-0.004177	-0.000812	-0.002506
3.9500	135.346	52.484	10.771	31.785	-0.565	9.887	257.664	-0.003674	-0.000754	-0.002225
3.9600	94.709	45.632	9.993	27.491	-0.563	9.870	180.302	-0.003194	-0.000700	-0.001924
3.9700	66.095	40.950	8.588	24.135	-0.556	9.887	125.828	-0.002867	-0.000601	-0.001689
3.9800	52.870	37.531	8.423	22.222	-0.570	9.870	100.651	-0.002627	-0.000590	-0.001556
3.9900	45.611	35.935	8.477	20.599	-0.565	9.888	86.832	-0.002515	-0.000593	-0.001442
4.0000	39.930	34.348	7.979	19.911	-0.561	9.870	76.017	-0.002404	-0.000559	-0.001394
4.0100	41.899	34.210	7.796	19.498	-0.558	9.888	79.765	-0.002395	-0.000546	-0.001365
4.0200	46.122	34.474	7.991	19.444	-0.560	9.870	87.805	-0.002413	-0.000559	-0.001361
4.0300	72.136	36.994	8.341	21.492	-0.562	9.888	137.329	-0.002590	-0.000584	-0.001504
4.0400	114.622	43.203	7.978	25.030	-0.561	9.870	218.210	-0.003024	-0.000558	-0.001752
4.0500	156.867	48.734	9.034	28.359	-0.565	9.887	298.634	-0.003411	-0.000632	-0.001985
4.0600	206.370	56.211	10.020	32.527	-0.558	9.869	392.876	-0.003935	-0.000701	-0.002277
4.0700	259.661	63.782	10.561	37.056	-0.559	9.887	494.328	-0.004465	-0.000739	-0.002594
4.0800	327.108	73.148	13.202	42.051	-0.559	9.870	622.730	-0.005120	-0.000924	-0.002944
4.0900	394.315	82.586	15.550	48.104	-0.561	9.887	750.675	-0.005781	-0.001089	-0.003367
4.1000	459.929	91.312	18.357	53.457	-0.558	9.870	875.587	-0.006392	-0.001285	-0.003742
4.1100	532.712	100.510	21.385	59.594	-0.554	9.887	1014.147	-0.007036	-0.001497	-0.004172
4.1200	612.573	110.435	25.347	66.859	-0.560	9.870	1166.182	-0.007730	-0.001774	-0.004680
4.1300	681.403	120.021	28.919	73.106	-0.554	9.888	1297.216	-0.008401	-0.002024	-0.005117
4.1400	751.390	128.596	32.462	79.547	-0.556	9.869	1430.454	-0.009002	-0.002272	-0.005568
4.1500	815.171	137.281	35.159	85.202	-0.563	9.887	1551.876	-0.009610	-0.002461	-0.005964
4.1600	896.655	147.036	39.342	92.164	-0.560	9.869	1707.001	-0.010293	-0.002754	-0.006451
4.1700	955.747	154.792	42.607	97.765	-0.561	9.887	1819.496	-0.010835	-0.002982	-0.006844
4.1800	1009.608	160.893	45.707	102.924	-0.560	9.869	1922.035	-0.011263	-0.003199	-0.007205
4.1900	1064.898	167.868	49.428	108.566	-0.565	9.887	2027.292	-0.011751	-0.003460	-0.007600
4.2000	1113.981	174.578	52.238	113.026	-0.558	9.869	2120.733	-0.012220	-0.003657	-0.007912
4.2100	1144.218	179.221	54.365	116.285	-0.558	9.888	2178.297	-0.012545	-0.003806	-0.008140
4.2200	1168.684	182.475	55.349	119.396	-0.552	9.870	2224.874	-0.012773	-0.003874	-0.008358
4.2300	1177.882	184.032	56.046	120.085	-0.562	9.887	2242.384	-0.012882	-0.003923	-0.008406
4.2400	1195.645	186.237	57.018	122.367	-0.546	9.870	2276.201	-0.013037	-0.003991	-0.008566
4.2500	1196.427	187.130	57.157	122.795	-0.552	9.888	2277.689	-0.013099	-0.004001	-0.008596
4.2600	1191.542	187.183	57.784	122.890	-0.549	9.870	2268.391	-0.013103	-0.004045	-0.008602
4.2700	1178.768	186.628	57.408	122.397	-0.562	9.887	2244.072	-0.013064	-0.004019	-0.008568
4.2800	1138.793	182.823	56.852	119.727	-0.562	9.870	2167.969	-0.012798	-0.003980	-0.008381
4.2900	1096.743	178.363	54.490	116.863	-0.544	9.887	2087.917	-0.012485	-0.003814	-0.008180
4.3000	1063.455	174.872	52.599	114.111	-0.548	9.869	2024.546	-0.012241	-0.003682	-0.007988
4.3100	1015.590	169.562	51.028	110.465	-0.552	9.887	1933.422	-0.011869	-0.003572	-0.007733
4.3200	951.058	162.393	46.985	105.155	-0.546	9.870	1810.570	-0.011367	-0.003289	-0.007361
4.3300	887.352	155.264	44.761	100.132	-0.552	9.887	1689.291	-0.010868	-0.003133	-0.007009
4.3400	805.012	146.577	40.134	93.376	-0.550	9.870	1532.536	-0.010260	-0.002809	-0.006536
4.3500	780.335	142.799	38.341	90.857	-0.550	9.887	1485.558	-0.009996	-0.002684	-0.006360
4.3600	693.230	132.404	34.423	83.607	-0.552	9.870	1319.733	-0.009268	-0.002410	-0.005853
4.3700	621.289	123.093	30.796	77.317	-0.557	9.887	1182.775	-0.008617	-0.002156	-0.005412
4.3800	548.597	114.144	27.182	71.193	-0.552	9.870	1044.388	-0.007990	-0.001903	-0.004984
4.3900	480.458	104.889	24.458	65.003	-0.558	9.888	914.669	-0.007342	-0.001712	-0.004550
4.4000	408.848	95.703	21.261	58.303	-0.559	9.869	778.341	-0.006699	-0.001488	-0.004081
4.4100	345.233	86.601	17.551	52.770	-0.553	9.887	657.234	-0.006062	-0.001229	-0.003694
4.4200	286.111	77.638	15.342	46.535	-0.553	9.869	544.682	-0.005435	-0.001074	-0.003257
4.4300	233.992	69.467	13.621	41.749	-0.560	9.886	445.461	-0.004863	-0.000953	-0.002922
4.4400	183.512	61.338	11.702	36.903	-0.550	9.869	349.360	-0.004294	-0.000819	-0.002583
4.4500	140.981	53.667	10.924	32.570	-0.569	9.887	268.393	-0.003757	-0.000765	-0.002280
4.4600	101.096	47.119	10.715	28.632	-0.558	9.869	192.461	-0.003298	-0.000750	-0.002004
4.4700	74.331	42.244	9.647	25.139	-0.558	9.887	141.506	-0.002957	-0.000675	-0.001760
4.4800	54.298	38.380	8.728	22.538	-0.558	9.869	103.369	-0.002687	-0.000611	-0.001578
4.4900	45.010	36.060	8.087	21.368	-0.561	9.887	85.688	-0.002524	-0.000566	-0.001496
4.5000	44.484	35.308	7.784	20.597	-0.553	9.869	84.686	-0.002472	-0.000545	-0.001442
4.5100	44.018	34.669	8.285	20.351	-0.553	9.887	83.799	-0.002427	-0.000580	-0.001425
4.5200	48.978	34.990	8.395	20.269	-0.552	9.869	93.241	-0.002449	-0.000588	-0.001419
4.5300	61.406	36.269	8.271	21.161	-0.561	9.886	116.901	-0.002539	-0.000579	-0.001481
4.5400	112.232	42.912	8.602	25.110	-0.558	9.869	213.661	-0.003004	-0.000602	-0.001758
4.5500	155.319	49.108	8.687	28.427	-0.560	9.887	295.687	-0.003438	-0.000608	-0.001990
4.5600	201.396	55.695	9.242	32.322	-0.554	9.869	383.406	-0.003899	-0.000647	-0.002263
4.5700	262.276	64.603	10.673	37.276	-0.558	9.886	499.306	-0.004522	-0.000747	-0.002609
4.5800	322.254	73.136	12.855	41.789	-0.561	9.869	613.489	-0.005120	-0.000900	-0.002925
4.5900	390.393	82.253	15.608	47.898	-0.568	9.887	743.208	-0.005758	-0.001093	-0.003353
4.6000	464.573	91.993	19.081	54.378	-0.556	9.869	884.428	-0.006440	-0.001336	-0.003806
4.6100	529.691	100.680	21.803	60.007	-0.561	9.887	1008.396	-0.007048	-0.001526	-0.004200
4.6200	610.063	111.018	25.182	67.175	-0.560	9.869	1161.404	-0.007771	-0.001763	-0.004702
4.6300	682.545	120.176	28.545	73.435	-0.562	9.887	1299.391	-0.008412	-0.001998	-0.005140
4.6400	753.239	129.055	32.393	79.628	-0.554	9.869	1433.973	-0.009034	-0.002267	-0.005574
4.6500	819.033	137.671	35.800	85.794	-0.566	9.887	1559.229	-0.009637	-0.002506	-0.006006
4.6600	894.401	147.064	39.870	92.646	-0.564	9.869	1702.709	-0.010294	-0.002791	-0.006485
4.6700	953.703	154.944	42.859	98.232	-0.566	9.887	1815.605	-0.010846	-0.003000	-0.006876
4.6800	1004.514	161.170	46.080	103.378	-0.560	9.869	1912.336	-0.011282	-0.003226	-0.007236
4.6900	1058.090	167.547	48.692	108.360	-0.565	9.887	2014.332	-0.011728	-0.003408	-0.007585
4.7000	1103.205	173.745	50.958	112.873	-0.568	9.869	2100.220	-0.012162	-0.003567	-0.007901
4.7100	1142.745	178.501	53.975	116.753	-0.559	9.886	2175.493	-0.012495	-0.003778	-0.008173
4.7200	1174.876	183.641	55.934	119.795	-0.566	9.869	2236.662	-0.012855	-0.003915	-0.008386
4.7300	1177.611	184.420	55.962	120.825	-0.557	9.886	2241.869	-0.012909	-0.003917	-0.008458
4.7400	1188.086	186.516	56.920	122.038	-0.554	9.869	2261.810	-0.013056	-0.003984	-0.008543
4.7500	1195.209	187.239	57.284	123.413	-0.548	9.887	2275.372	-0.013107	-0.004010	-0.008639
4.7600	1191.302	187.239	57.492	123.496	-0.553	9.869	2267.933	-0.013107	-0.004024	-0.008645
4.7700	1181.278	186.836	57.672	122.837	-0.548	9.886	2248.850	-0.013079	-0.004037	-0.008599
4.7800	1151.131	184.267	56.489	120.937	-0.566	9.868	2191.458	-0.012899	-0.003954	-0.008466
4.7900	1099.148	178.930	54.961	116.905	-0.559	9.887	2092.495	-0.012525	-0.003847	-0.008183
4.8000	1056.512	174.803	52.792	114.428	-0.556	9.869	2011.328	-0.012236	-0.003695	-0.008010
4.8100	1005.310	168.798	50.057	110.163	-0.551	9.887	1913.853	-0.011816	-0.003504	-0.007711
4.8200	954.559	163.087	47.389	106.201	-0.550	9.869	1817.236	-0.011416	-0.003317	-0.007434
4.8300	894.596	156.280	44.621	101.110	-0.558	9.886	1703.081	-0.010940	-0.003123	-0.007078
4.8400	828.471	148.803	41.802	95.424	-0.562	9.869	1577.196	-0.010416	-0.002926	-0.006680
4.8500	751.511	139.879	37.381	88.834	-0.557	9.886	1430.683	-0.009792	-0.002617	-0.006218
4.8600	686.678	132.126	34.312	83.441	-0.557	9.869	1307.259	-0.009249	-0.002402	-0.005841
4.8700	621.530	123.927	30.587	77.976	-0.562	9.886	1183.233	-0.008675	-0.002141	-0.005458
4.8800	550.250	114.311	27.209	71.427	-0.563	9.869	1047.535	-0.008002	-0.001905	-0.005000
4.8900	475.469	104.472	24.000	65.387	-0.557	9.886	905.170	-0.007313	-0.001680	-0.004577
4.9000	412.966	96.244	21.359	59.155	-0.561	9.869	786.180	-0.006737	-0.001495	-0.004141
4.9100	345.939	87.129	18.207	52.949	-0.562	9.886	658.579	-0.006099	-0.001274	-0.003706
4.9200	287.358	78.347	15.771	47.292	-0.573	9.869	547.056	-0.005484	-0.001104	-0.003310
4.9300	229.078	69.314	13.426	41.486	-0.568	9.886	436.106	-0.004852	-0.000940	-0.002904
4.9400	181.092	61.115	11.897	37.112	-0.561	9.869	344.753	-0.004278	-0.000833	-0.002598
4.9500	136.202	53.235	10.506	32.747	-0.559	9.886	259.295	-0.003726	-0.000735	-0.002292
4.9600	97.745	46.664	9.978	28.481	-0.554	9.868	186.081	-0.003266	-0.000698	-0.001994
4.9700	72.602	42.202	9.630	25.552	-0.558	9.886	138.216	-0.002954	-0.000674	-0.001789
4.9800	57.138	39.145	8.840	23.404	-0.557	9.869	108.776	-0.002740	-0.000619	-0.001638
4.9900	45.326	36.838	8.729	21.808	-0.556	9.887	86.288	-0.002579	-0.000611	-0.001527
Test Cycles
Time (sec)	Axial stress (kPa)	Axial micro-strain #1	Axial micro-strain #2	Axial micro-strain #3	Confining pressure (kPa)	Temperature (�C)	Load (N)	Displacement #1 (mm)	Displacement #2 (mm)	Displacement #3 (mm)
0.0000	44.710	35.794	7.977	21.190	-0.560	9.869	85.115	-0.002506	-0.000558	-0.001483
0.0100	48.482	35.712	7.767	20.901	-0.561	9.886	92.297	-0.002500	-0.000544	-0.001463
0.0200	53.967	35.811	7.185	21.204	-0.566	9.869	102.739	-0.002507	-0.000503	-0.001484
0.0300	84.550	39.811	9.187	23.228	-0.553	9.886	160.961	-0.002787	-0.000643	-0.001626
0.0400	123.203	45.092	8.908	26.282	-0.563	9.869	234.547	-0.003156	-0.000624	-0.001840
0.0500	163.614	50.873	9.408	29.733	-0.560	9.886	311.480	-0.003561	-0.000659	-0.002081
0.0600	210.698	57.613	9.491	33.425	-0.564	9.869	401.115	-0.004033	-0.000664	-0.002340
0.0700	272.375	66.395	11.228	38.486	-0.559	9.886	518.532	-0.004648	-0.000786	-0.002694
0.0800	334.683	74.956	12.870	43.592	-0.564	9.869	637.150	-0.005247	-0.000901	-0.003051
0.0900	404.445	84.169	16.190	49.316	-0.561	9.886	769.958	-0.005892	-0.001133	-0.003452
0.1000	473.019	93.133	19.180	55.177	-0.552	9.868	900.507	-0.006519	-0.001343	-0.003862
0.1100	548.101	103.165	22.790	61.919	-0.557	9.886	1043.444	-0.007222	-0.001595	-0.004334
0.1200	617.818	112.393	26.013	68.647	-0.557	9.869	1176.167	-0.007868	-0.001821	-0.004805
0.1300	682.741	121.131	29.031	74.071	-0.559	9.886	1299.763	-0.008479	-0.002032	-0.005185
0.1400	758.063	130.292	32.576	80.730	-0.563	9.868	1443.157	-0.009120	-0.002280	-0.005651
0.1500	831.807	139.506	36.146	87.156	-0.554	9.886	1583.548	-0.009765	-0.002530	-0.006101
0.1600	900.983	148.401	39.716	93.994	-0.553	9.869	1715.240	-0.010388	-0.002780	-0.006580
0.1700	958.542	155.807	43.287	99.290	-0.552	9.886	1824.818	-0.010906	-0.003030	-0.006950
0.1800	1018.385	163.130	46.958	104.412	-0.553	9.869	1938.744	-0.011419	-0.003287	-0.007309
0.1900	1067.528	169.799	48.929	109.350	-0.550	9.886	2032.299	-0.011886	-0.003425	-0.007654
0.2000	1111.817	175.288	51.694	113.686	-0.550	9.869	2116.613	-0.012270	-0.003619	-0.007958
0.2100	1141.573	179.042	53.698	117.179	-0.553	9.886	2173.262	-0.012533	-0.003759	-0.008203
0.2200	1168.068	182.515	55.543	119.781	-0.549	9.869	2223.701	-0.012776	-0.003888	-0.008385
0.2300	1186.763	185.405	56.837	121.930	-0.549	9.885	2259.293	-0.012978	-0.003979	-0.008535
0.2400	1201.176	188.033	58.242	123.675	-0.552	9.868	2286.730	-0.013162	-0.004077	-0.008657
0.2500	1195.450	188.242	57.741	123.567	-0.560	9.886	2275.829	-0.013177	-0.004042	-0.008650
0.2600	1188.266	187.992	57.799	123.319	-0.560	9.869	2262.154	-0.013159	-0.004046	-0.008632
0.2700	1174.425	186.597	57.659	122.877	-0.552	9.885	2235.804	-0.013062	-0.004036	-0.008601
0.2800	1131.309	182.154	55.862	120.000	-0.550	9.868	2153.721	-0.012751	-0.003910	-0.008400
0.2900	1098.321	178.973	54.710	117.457	-0.553	9.885	2090.921	-0.012528	-0.003830	-0.008222
0.3000	1064.011	175.663	53.406	114.993	-0.552	9.868	2025.604	-0.012296	-0.003738	-0.008049
0.3100	1007.670	169.856	50.250	110.934	-0.550	9.885	1918.344	-0.011890	-0.003518	-0.007765
0.3200	948.939	163.141	47.180	106.006	-0.542	9.869	1806.536	-0.011420	-0.003303	-0.007420
0.3300	886.330	155.948	44.149	100.571	-0.556	9.885	1687.346	-0.010916	-0.003090	-0.007040
0.3400	816.929	147.703	40.329	95.042	-0.552	9.868	1555.223	-0.010339	-0.002823	-0.006653
0.3500	758.679	140.812	37.299	90.035	-0.552	9.886	1444.330	-0.009857	-0.002611	-0.006302
0.3600	679.945	131.556	34.062	83.109	-0.548	9.868	1294.441	-0.009209	-0.002384	-0.005818
0.3700	612.107	122.760	30.934	77.192	-0.549	9.886	1165.295	-0.008593	-0.002165	-0.005403
0.3800	531.615	112.823	26.515	70.436	-0.553	9.868	1012.058	-0.007898	-0.001856	-0.004930
0.3900	466.181	103.736	23.695	64.466	-0.546	9.885	887.489	-0.007262	-0.001659	-0.004513
0.4000	393.804	94.076	20.095	57.736	-0.552	9.868	749.702	-0.006585	-0.001407	-0.004042
0.4100	332.443	84.973	17.760	52.259	-0.551	9.885	632.887	-0.005948	-0.001243	-0.003658
0.4200	275.290	76.639	15.231	46.467	-0.548	9.868	524.082	-0.005365	-0.001066	-0.003253
0.4300	219.325	68.174	13.621	41.018	-0.550	9.885	417.538	-0.004772	-0.000953	-0.002871
0.4400	173.368	60.435	11.799	36.422	-0.546	9.869	330.048	-0.004230	-0.000826	-0.002550
0.4500	129.229	52.777	10.394	31.854	-0.565	9.886	246.019	-0.003694	-0.000728	-0.002230
0.4600	95.956	46.607	10.075	28.524	-0.552	9.868	182.676	-0.003262	-0.000705	-0.001997
0.4700	85.917	44.217	9.951	27.065	-0.544	9.885	163.565	-0.003095	-0.000697	-0.001895
0.4800	57.664	39.480	9.491	23.914	-0.547	9.869	109.777	-0.002764	-0.000664	-0.001674
0.4900	37.917	36.324	8.726	21.479	-0.548	9.886	72.184	-0.002543	-0.000611	-0.001504
0.5000	36.624	35.031	8.673	20.559	-0.558	9.868	69.723	-0.002452	-0.000607	-0.001439
0.5100	39.194	34.835	8.075	20.006	-0.556	9.885	74.615	-0.002438	-0.000565	-0.001400
0.5200	41.584	34.682	7.686	19.786	-0.559	9.869	79.165	-0.002428	-0.000538	-0.001385
0.5300	60.309	36.394	7.841	21.341	-0.553	9.885	114.813	-0.002548	-0.000549	-0.001494
0.5400	104.658	42.105	8.202	24.851	-0.557	9.869	199.242	-0.002947	-0.000574	-0.001740
0.5500	148.000	48.832	9.478	28.427	-0.561	9.885	281.754	-0.003418	-0.000663	-0.001990
0.5600	185.105	54.141	9.743	31.731	-0.558	9.868	352.392	-0.003790	-0.000682	-0.002221
0.5700	247.488	63.201	10.254	36.464	-0.558	9.885	471.153	-0.004424	-0.000718	-0.002552
0.5800	300.688	70.481	11.881	40.950	-0.551	9.868	572.433	-0.004934	-0.000832	-0.002867
0.5900	363.192	78.859	14.398	45.793	-0.552	9.886	691.423	-0.005520	-0.001008	-0.003206
0.6000	446.088	89.895	17.468	52.867	-0.556	9.868	849.237	-0.006293	-0.001223	-0.003701
0.6100	547.214	102.831	22.582	61.740	-0.550	9.885	1041.756	-0.007198	-0.001581	-0.004322
0.6200	610.604	111.365	25.515	67.782	-0.560	9.868	1162.434	-0.007796	-0.001786	-0.004745
0.6300	678.457	120.049	29.128	73.521	-0.554	9.885	1291.609	-0.008403	-0.002039	-0.005146
0.6400	749.812	129.764	32.283	80.096	-0.557	9.868	1427.450	-0.009083	-0.002260	-0.005607
0.6500	830.996	139.601	35.827	87.378	-0.548	9.886	1582.003	-0.009772	-0.002508	-0.006116
0.6600	886.300	146.357	39.203	92.440	-0.543	9.868	1687.288	-0.010245	-0.002744	-0.006471
0.6700	948.022	154.458	42.871	98.370	-0.548	9.885	1804.790	-0.010812	-0.003001	-0.006886
0.6800	1005.806	162.004	45.567	104.039	-0.546	9.868	1914.797	-0.011340	-0.003190	-0.007283
0.6900	1062.629	168.536	49.319	109.132	-0.545	9.885	2022.972	-0.011797	-0.003452	-0.007639
0.7000	1097.134	173.620	51.639	113.107	-0.553	9.868	2088.661	-0.012153	-0.003615	-0.007918
0.7100	1138.913	178.876	53.473	117.002	-0.547	9.885	2168.198	-0.012521	-0.003743	-0.008190
0.7200	1165.739	182.446	54.947	119.518	-0.549	9.868	2219.267	-0.012771	-0.003846	-0.008366
0.7300	1182.195	184.862	56.450	121.583	-0.545	9.884	2250.595	-0.012940	-0.003951	-0.008511
0.7400	1200.514	187.755	58.101	123.510	-0.549	9.868	2285.471	-0.013143	-0.004067	-0.008646
0.7500	1195.825	188.130	57.853	123.924	-0.544	9.885	2276.545	-0.013169	-0.004050	-0.008675
0.7600	1190.776	188.145	57.963	124.004	-0.540	9.868	2266.932	-0.013170	-0.004057	-0.008680
0.7700	1177.851	187.086	57.226	123.525	-0.549	9.885	2242.327	-0.013096	-0.004006	-0.008647
0.7800	1148.576	184.475	56.615	121.198	-0.548	9.868	2186.594	-0.012913	-0.003963	-0.008484
0.7900	1093.632	178.637	54.474	117.235	-0.540	9.885	2081.995	-0.012505	-0.003813	-0.008206
0.8000	1063.034	175.177	52.947	115.212	-0.532	9.868	2023.745	-0.012262	-0.003706	-0.008065
0.8100	1002.891	169.366	50.624	110.769	-0.544	9.885	1909.246	-0.011856	-0.003544	-0.007754
0.8200	950.667	163.196	47.832	106.171	-0.549	9.868	1809.826	-0.011424	-0.003348	-0.007432
0.8300	888.104	156.420	44.652	100.957	-0.538	9.884	1690.722	-0.010949	-0.003126	-0.007067
0.8400	824.879	148.998	41.261	96.156	-0.546	9.868	1570.358	-0.010430	-0.002888	-0.006731
0.8500	757.597	140.783	37.686	89.963	-0.545	9.885	1442.270	-0.009855	-0.002638	-0.006297
0.8600	680.321	131.361	34.841	83.745	-0.546	9.868	1295.156	-0.009195	-0.002439	-0.005862
0.8700	622.897	124.385	31.490	78.706	-0.534	9.885	1185.837	-0.008707	-0.002204	-0.005509
0.8800	544.825	114.339	27.614	71.690	-0.546	9.868	1037.207	-0.008004	-0.001933	-0.005018
0.8900	477.753	105.487	24.014	65.717	-0.546	9.884	909.519	-0.007384	-0.001681	-0.004600
0.9000	404.354	95.884	20.956	59.155	-0.545	9.867	769.787	-0.006712	-0.001467	-0.004141
0.9100	340.424	86.365	18.039	53.002	-0.545	9.884	648.079	-0.006046	-0.001263	-0.003710
0.9200	274.809	76.749	15.357	47.005	-0.554	9.868	523.167	-0.005372	-0.001075	-0.003290
0.9300	219.264	68.145	13.621	41.554	-0.548	9.884	417.423	-0.004770	-0.000953	-0.002909
0.9400	169.551	60.062	11.940	36.767	-0.554	9.868	322.781	-0.004204	-0.000836	-0.002574
0.9500	127.336	52.625	11.549	32.433	-0.553	9.885	242.414	-0.003684	-0.000808	-0.002270
0.9600	84.625	45.495	9.618	27.876	-0.546	9.868	161.104	-0.003185	-0.000673	-0.001951
0.9700	70.002	42.146	9.160	25.427	-0.548	9.885	133.266	-0.002950	-0.000641	-0.001780
0.9800	56.146	39.271	8.728	23.790	-0.552	9.868	106.888	-0.002749	-0.000611	-0.001665
0.9900	42.095	36.408	8.770	21.877	-0.540	9.885	80.137	-0.002549	-0.000614	-0.001531
1.0000	36.744	35.224	8.298	20.639	-0.539	9.868	69.952	-0.002466	-0.000581	-0.001445
1.0100	36.354	34.836	8.270	20.433	-0.535	9.885	69.208	-0.002439	-0.000579	-0.001430
1.0200	40.652	34.710	8.158	20.338	-0.540	9.869	77.391	-0.002430	-0.000571	-0.001424
1.0300	62.248	36.893	8.408	21.698	-0.537	9.885	118.504	-0.002582	-0.000589	-0.001519
1.0400	115.794	44.150	8.575	26.308	-0.544	9.868	220.442	-0.003091	-0.000600	-0.001842
1.0500	152.087	49.483	9.617	29.045	-0.547	9.884	289.536	-0.003464	-0.000673	-0.002033
1.0600	206.205	57.307	10.048	33.616	-0.542	9.868	392.561	-0.004012	-0.000703	-0.002353
1.0700	271.007	66.744	11.521	38.612	-0.552	9.884	515.928	-0.004672	-0.000806	-0.002703
1.0800	326.462	74.553	13.105	43.082	-0.543	9.869	621.500	-0.005219	-0.000917	-0.003016
1.0900	396.374	83.725	15.732	49.192	-0.540	9.885	754.595	-0.005861	-0.001101	-0.003443
1.1000	464.017	92.675	18.956	54.753	-0.542	9.868	883.369	-0.006487	-0.001327	-0.003833
1.1100	542.315	102.693	22.431	62.031	-0.545	9.885	1032.429	-0.007188	-0.001570	-0.004342
1.1200	611.987	111.782	25.986	68.072	-0.548	9.868	1165.066	-0.007825	-0.001819	-0.004765
1.1300	686.573	121.703	29.185	74.537	-0.545	9.884	1307.058	-0.008519	-0.002043	-0.005218
1.1400	751.736	129.959	32.518	80.371	-0.549	9.868	1431.112	-0.009097	-0.002276	-0.005626
1.1500	828.456	139.560	36.244	87.582	-0.544	9.884	1577.168	-0.009769	-0.002537	-0.006131
1.1600	898.128	148.273	39.996	93.803	-0.556	9.868	1709.805	-0.010379	-0.002800	-0.006566
1.1700	942.567	154.207	42.399	98.205	-0.553	9.885	1794.405	-0.010794	-0.002968	-0.006874
1.1800	1000.952	160.893	46.108	103.711	-0.566	9.868	1905.556	-0.011263	-0.003228	-0.007260
1.1900	1061.396	168.923	49.501	108.994	-0.560	9.884	2020.626	-0.011825	-0.003465	-0.007630
1.2000	1098.952	174.359	51.695	113.094	-0.550	9.868	2092.123	-0.012205	-0.003619	-0.007917
1.2100	1135.441	179.138	53.932	116.877	-0.555	9.884	2161.589	-0.012540	-0.003775	-0.008181
1.2200	1162.538	182.433	55.141	119.863	-0.549	9.868	2213.173	-0.012770	-0.003860	-0.008390
1.2300	1179.971	184.891	56.491	121.062	-0.552	9.884	2246.361	-0.012942	-0.003954	-0.008474
1.2400	1192.670	187.211	57.506	123.444	-0.547	9.868	2270.536	-0.013105	-0.004025	-0.008641
1.2500	1202.228	188.145	58.088	124.652	-0.549	9.884	2288.733	-0.013170	-0.004066	-0.008726
1.2600	1203.475	189.395	59.033	124.804	-0.546	9.867	2291.107	-0.013258	-0.004132	-0.008736
1.2700	1193.180	189.145	58.603	124.558	-0.556	9.883	2271.509	-0.013240	-0.004102	-0.008719
1.2800	1158.630	185.961	57.380	122.559	-0.545	9.867	2205.734	-0.013017	-0.004017	-0.008579
1.2900	1112.884	180.889	55.987	119.547	-0.556	9.884	2118.645	-0.012662	-0.003919	-0.008368
1.3000	1078.935	177.445	53.878	116.685	-0.550	9.868	2054.014	-0.012421	-0.003771	-0.008168
1.3100	1026.651	171.607	51.585	112.600	-0.555	9.884	1954.479	-0.012012	-0.003611	-0.007882
1.3200	969.723	165.646	48.999	108.236	-0.557	9.868	1846.104	-0.011595	-0.003430	-0.007577
1.3300	911.127	159.250	46.068	103.172	-0.549	9.884	1734.552	-0.011147	-0.003225	-0.007222
1.3400	842.387	151.524	42.427	97.683	-0.544	9.868	1603.689	-0.010607	-0.002970	-0.006838
1.3500	781.102	144.189	38.826	92.275	-0.553	9.884	1487.017	-0.010093	-0.002718	-0.006459
1.3600	704.472	134.628	35.410	85.973	-0.549	9.868	1341.133	-0.009424	-0.002479	-0.006018
1.3700	629.570	125.190	31.518	79.587	-0.545	9.884	1198.540	-0.008763	-0.002206	-0.005571
1.3800	563.385	116.827	28.821	73.409	-0.556	9.868	1072.540	-0.008178	-0.002017	-0.005139
1.3900	496.974	108.251	25.403	67.342	-0.550	9.883	946.112	-0.007578	-0.001778	-0.004714
1.4000	425.995	99.206	22.219	61.258	-0.541	9.867	810.986	-0.006944	-0.001555	-0.004288
1.4100	362.260	89.964	19.122	55.564	-0.554	9.883	689.650	-0.006297	-0.001339	-0.003890
1.4200	302.326	80.945	16.273	49.699	-0.550	9.868	575.552	-0.005666	-0.001139	-0.003479
1.4300	251.410	72.803	14.065	44.430	-0.545	9.884	478.621	-0.005096	-0.000985	-0.003110
1.4400	187.825	63.086	12.716	38.871	-0.550	9.868	357.571	-0.004416	-0.000890	-0.002721
1.4500	148.345	56.377	11.438	34.455	-0.550	9.884	282.412	-0.003946	-0.000801	-0.002412
1.4600	114.547	50.734	10.547	31.057	-0.553	9.868	218.067	-0.003551	-0.000738	-0.002174
1.4700	83.498	44.870	10.659	27.726	-0.553	9.884	158.958	-0.003141	-0.000746	-0.001941
1.4800	61.361	40.630	9.229	24.781	-0.548	9.868	116.816	-0.002844	-0.000646	-0.001735
1.4900	52.629	38.368	8.561	23.500	-0.549	9.883	100.193	-0.002686	-0.000599	-0.001645
1.5000	49.323	37.256	8.796	22.675	-0.549	9.868	93.899	-0.002608	-0.000616	-0.001587
1.5100	51.472	37.172	9.118	22.319	-0.554	9.883	97.990	-0.002602	-0.000638	-0.001562
1.5200	55.560	37.506	8.798	22.112	-0.552	9.868	105.772	-0.002625	-0.000616	-0.001548
1.5300	70.528	39.397	7.715	23.309	-0.549	9.883	134.268	-0.002758	-0.000540	-0.001632
1.5400	123.008	46.066	9.145	27.394	-0.541	9.868	234.175	-0.003225	-0.000640	-0.001918
1.5500	167.672	52.137	9.561	31.427	-0.548	9.884	319.204	-0.003650	-0.000669	-0.002200
1.5600	220.978	59.950	10.269	35.488	-0.548	9.868	420.685	-0.004197	-0.000719	-0.002484
1.5700	277.049	68.230	11.493	39.726	-0.542	9.884	527.430	-0.004776	-0.000805	-0.002781
1.5800	339.567	76.960	14.119	44.939	-0.546	9.868	646.448	-0.005387	-0.000988	-0.003146
1.5900	406.398	85.573	16.495	50.593	-0.550	9.883	773.678	-0.005990	-0.001155	-0.003542
1.6000	478.895	95.260	19.746	56.966	-0.551	9.867	911.694	-0.006668	-0.001382	-0.003988
1.6100	547.440	103.944	22.611	63.048	-0.539	9.884	1042.185	-0.007276	-0.001583	-0.004413
1.6200	623.589	113.727	26.405	69.599	-0.550	9.868	1187.153	-0.007961	-0.001848	-0.004872
1.6300	699.046	123.135	29.641	76.204	-0.554	9.884	1330.805	-0.008619	-0.002075	-0.005334
1.6400	772.641	133.184	33.434	82.672	-0.544	9.868	1470.909	-0.009323	-0.002340	-0.005787
1.6500	831.176	140.601	36.536	88.244	-0.538	9.883	1582.346	-0.009842	-0.002558	-0.006177
1.6600	897.722	149.177	40.078	94.559	-0.550	9.868	1709.032	-0.010442	-0.002805	-0.006619
1.6700	967.303	157.487	43.539	100.791	-0.552	9.883	1841.497	-0.011024	-0.003048	-0.007055
1.6800	1020.459	164.171	46.707	105.800	-0.552	9.868	1942.692	-0.011492	-0.003269	-0.007406
1.6900	1076.560	171.079	50.168	110.989	-0.547	9.884	2049.494	-0.011976	-0.003512	-0.007769
1.7000	1112.673	175.970	52.280	114.977	-0.552	9.868	2118.244	-0.012318	-0.003660	-0.008048
1.7100	1148.381	180.555	54.348	118.320	-0.541	9.883	2186.222	-0.012639	-0.003804	-0.008282
1.7200	1175.146	184.516	56.587	121.391	-0.550	9.868	2237.177	-0.012916	-0.003961	-0.008497
1.7300	1187.199	186.587	57.211	122.782	-0.544	9.883	2260.122	-0.013061	-0.004005	-0.008595
1.7400	1186.899	187.086	57.254	123.772	-0.551	9.868	2259.550	-0.013096	-0.004008	-0.008664
1.7500	1195.495	188.076	58.172	124.667	-0.556	9.884	2275.915	-0.013165	-0.004072	-0.008727
1.7600	1189.363	188.310	58.103	124.254	-0.538	9.867	2264.242	-0.013182	-0.004067	-0.008698
1.7700	1178.813	187.546	57.823	123.771	-0.537	9.884	2244.158	-0.013128	-0.004048	-0.008664
1.7800	1142.354	184.390	57.115	121.653	-0.551	9.867	2174.749	-0.012907	-0.003998	-0.008516
1.7900	1093.031	179.070	54.795	118.046	-0.543	9.883	2080.851	-0.012535	-0.003836	-0.008263
1.8000	1054.017	175.040	52.766	115.473	-0.542	9.868	2006.578	-0.012253	-0.003694	-0.008083
1.8100	1000.757	169.284	50.514	110.797	-0.539	9.883	1905.184	-0.011850	-0.003536	-0.007756
1.8200	944.596	162.615	47.428	106.214	-0.544	9.868	1798.267	-0.011383	-0.003320	-0.007435
1.8300	886.826	156.626	45.025	101.342	-0.548	9.883	1688.290	-0.010964	-0.003152	-0.007094
1.8400	818.552	148.983	41.524	95.962	-0.547	9.867	1558.313	-0.010429	-0.002907	-0.006717
1.8500	740.209	139.782	37.646	89.260	-0.537	9.883	1409.168	-0.009785	-0.002635	-0.006248
1.8600	675.587	131.669	33.755	83.701	-0.548	9.868	1286.144	-0.009217	-0.002363	-0.005859
1.8700	606.532	122.538	30.644	77.717	-0.556	9.883	1154.680	-0.008578	-0.002145	-0.005440
1.8800	540.361	113.976	27.573	71.922	-0.549	9.868	1028.709	-0.007978	-0.001930	-0.005035
1.8900	470.419	105.167	24.446	65.523	-0.534	9.883	895.557	-0.007362	-0.001711	-0.004587
1.9000	394.496	94.927	20.720	58.906	-0.542	9.867	751.019	-0.006645	-0.001450	-0.004123
1.9100	332.579	86.211	18.190	52.880	-0.540	9.883	633.144	-0.006035	-0.001273	-0.003702
1.9200	274.299	77.306	16.759	47.403	-0.549	9.868	522.194	-0.005411	-0.001173	-0.003318
1.9300	218.423	68.576	13.328	41.955	-0.549	9.883	415.821	-0.004800	-0.000933	-0.002937
1.9400	167.416	59.657	11.409	36.931	-0.550	9.868	318.718	-0.004176	-0.000799	-0.002585
1.9500	127.441	52.845	11.549	33.050	-0.549	9.883	242.615	-0.003699	-0.000808	-0.002313
1.9600	96.618	47.412	10.423	29.186	-0.554	9.867	183.935	-0.003319	-0.000730	-0.002043
1.9700	73.805	43.772	10.049	26.557	-0.549	9.883	140.505	-0.003064	-0.000703	-0.001859
1.9800	52.780	40.007	9.395	24.189	-0.549	9.868	100.479	-0.002801	-0.000658	-0.001693
1.9900	40.141	36.908	8.506	22.085	-0.550	9.883	76.418	-0.002584	-0.000595	-0.001546
2.0000	39.765	35.936	7.616	21.533	-0.554	9.868	75.703	-0.002515	-0.000533	-0.001507
2.0100	42.080	35.530	7.824	21.590	-0.555	9.883	80.109	-0.002487	-0.000548	-0.001511
2.0200	46.919	36.017	8.616	21.576	-0.554	9.867	89.321	-0.002521	-0.000603	-0.001510
2.0300	72.031	39.355	9.160	23.322	-0.562	9.882	137.129	-0.002755	-0.000641	-0.001633
2.0400	102.449	43.247	9.395	25.621	-0.563	9.867	195.036	-0.003027	-0.000658	-0.001794
2.0500	160.518	51.358	9.548	29.997	-0.565	9.883	305.586	-0.003595	-0.000668	-0.002100
2.0600	216.680	59.602	10.187	35.225	-0.553	9.867	412.502	-0.004172	-0.000713	-0.002466
2.0700	269.354	66.827	11.339	39.147	-0.554	9.883	512.781	-0.004678	-0.000794	-0.002740
2.0800	333.991	75.722	13.579	44.224	-0.557	9.868	635.834	-0.005301	-0.000951	-0.003096
2.0900	399.650	84.699	16.564	50.084	-0.552	9.882	760.832	-0.005929	-0.001159	-0.003506
2.1000	468.420	94.259	19.623	55.990	-0.556	9.867	891.752	-0.006598	-0.001374	-0.003919
2.1100	542.015	103.637	22.789	62.374	-0.558	9.882	1031.857	-0.007255	-0.001595	-0.004366
2.1200	618.194	113.155	26.183	69.005	-0.558	9.868	1176.882	-0.007921	-0.001833	-0.004830
2.1300	682.680	121.622	29.559	75.488	-0.562	9.882	1299.648	-0.008514	-0.002069	-0.005284
2.1400	761.264	131.430	33.823	81.955	-0.557	9.868	1449.251	-0.009200	-0.002368	-0.005737
2.1500	832.333	140.574	36.660	88.338	-0.562	9.882	1584.549	-0.009840	-0.002566	-0.006184
2.1600	890.734	148.038	40.009	94.131	-0.560	9.868	1695.728	-0.010363	-0.002801	-0.006589
2.1700	955.957	156.254	43.261	99.911	-0.556	9.883	1819.897	-0.010938	-0.003028	-0.006994
2.1800	1014.357	163.532	46.679	105.390	-0.557	9.867	1931.076	-0.011447	-0.003268	-0.007377
2.1900	1068.039	170.106	49.539	110.782	-0.558	9.883	2033.272	-0.011907	-0.003468	-0.007755
2.2000	1108.315	175.025	52.266	114.552	-0.550	9.868	2109.947	-0.012252	-0.003659	-0.008019
2.2100	1141.979	180.262	54.072	118.171	-0.553	9.883	2174.034	-0.012618	-0.003785	-0.008272
2.2200	1164.942	183.323	55.808	120.952	-0.557	9.868	2217.751	-0.012833	-0.003907	-0.008467
2.2300	1184.975	186.473	57.045	122.643	-0.553	9.882	2255.888	-0.013053	-0.003993	-0.008585
2.2400	1195.961	187.950	57.629	124.172	-0.553	9.868	2276.802	-0.013157	-0.004034	-0.008692
2.2500	1194.503	188.799	58.063	124.859	-0.562	9.882	2274.027	-0.013216	-0.004064	-0.008740
2.2600	1189.949	188.449	57.895	124.543	-0.557	9.867	2265.358	-0.013191	-0.004053	-0.008718
2.2700	1176.213	187.490	57.977	124.130	-0.558	9.882	2239.208	-0.013124	-0.004058	-0.008689
2.2800	1137.996	183.962	57.032	121.555	-0.557	9.867	2166.452	-0.012877	-0.003992	-0.008509
2.2900	1095.466	179.596	55.224	118.145	-0.557	9.882	2085.485	-0.012572	-0.003866	-0.008270
2.3000	1047.195	174.873	52.641	115.170	-0.556	9.867	1993.589	-0.012241	-0.003685	-0.008062
2.3100	1000.486	169.423	50.737	111.512	-0.558	9.883	1904.669	-0.011860	-0.003552	-0.007806
2.3200	932.663	161.727	47.013	105.539	-0.553	9.867	1775.551	-0.011321	-0.003291	-0.007388
2.3300	879.658	155.698	44.357	100.972	-0.547	9.882	1674.643	-0.010899	-0.003105	-0.007068
2.3400	814.149	148.232	40.953	95.661	-0.545	9.867	1549.931	-0.010376	-0.002867	-0.006696
2.3500	745.289	140.394	38.147	89.922	-0.561	9.883	1418.839	-0.009828	-0.002670	-0.006295
2.3600	679.870	132.127	34.784	84.045	-0.560	9.867	1294.298	-0.009249	-0.002435	-0.005883
2.3700	606.276	123.052	31.227	77.979	-0.553	9.883	1154.194	-0.008614	-0.002186	-0.005459
2.3800	531.284	113.394	26.903	71.453	-0.557	9.867	1011.429	-0.007938	-0.001883	-0.005002
2.3900	456.668	103.208	23.626	64.783	-0.549	9.882	869.379	-0.007225	-0.001654	-0.004535
2.4000	393.564	94.438	20.152	58.616	-0.552	9.867	749.245	-0.006611	-0.001411	-0.004103
2.4100	330.204	85.598	18.580	53.029	-0.557	9.882	628.624	-0.005992	-0.001301	-0.003712
2.4200	266.619	76.526	15.662	46.853	-0.547	9.868	507.574	-0.005357	-0.001096	-0.003280
2.4300	208.760	67.160	13.454	41.320	-0.561	9.882	397.425	-0.004701	-0.000942	-0.002892
2.4400	166.455	60.158	12.244	37.055	-0.549	9.868	316.887	-0.004211	-0.000857	-0.002594
2.4500	123.684	52.625	11.034	32.542	-0.557	9.882	235.462	-0.003684	-0.000772	-0.002278
2.4600	97.444	47.567	10.171	29.389	-0.558	9.868	185.509	-0.003330	-0.000712	-0.002057
2.4700	73.023	43.315	9.492	26.516	-0.558	9.882	139.017	-0.003032	-0.000664	-0.001856
2.4800	59.573	40.799	9.826	24.810	-0.560	9.867	113.411	-0.002856	-0.000688	-0.001737
2.4900	49.053	39.006	8.686	23.448	-0.566	9.882	93.384	-0.002730	-0.000608	-0.001641
2.5000	42.681	37.158	8.519	22.195	-0.565	9.868	81.253	-0.002601	-0.000596	-0.001554
2.5100	44.439	36.434	8.214	21.588	-0.569	9.882	84.600	-0.002550	-0.000575	-0.001511
2.5200	50.450	36.617	8.687	22.195	-0.564	9.867	96.045	-0.002563	-0.000608	-0.001554
2.5300	78.118	39.811	8.813	24.162	-0.565	9.882	148.716	-0.002787	-0.000617	-0.001691
2.5400	114.697	45.287	9.366	26.665	-0.562	9.868	218.353	-0.003170	-0.000656	-0.001867
2.5500	159.512	51.803	9.492	30.560	-0.568	9.882	303.669	-0.003626	-0.000664	-0.002139
2.5600	215.357	59.587	9.770	35.008	-0.570	9.867	409.985	-0.004171	-0.000684	-0.002451
2.5700	266.679	66.924	11.298	39.076	-0.561	9.882	507.689	-0.004685	-0.000791	-0.002735
2.5800	338.861	76.887	13.549	45.078	-0.555	9.868	645.103	-0.005382	-0.000948	-0.003155
2.5900	407.330	85.931	16.689	50.966	-0.558	9.882	775.452	-0.006015	-0.001168	-0.003568
2.6000	478.399	95.396	19.941	57.298	-0.569	9.867	910.749	-0.006678	-0.001396	-0.004011
2.6100	545.140	104.306	23.333	63.172	-0.559	9.882	1037.807	-0.007301	-0.001633	-0.004422
2.6200	614.076	113.325	25.960	69.308	-0.562	9.867	1169.043	-0.007933	-0.001817	-0.004852
2.6300	693.681	123.468	29.809	76.064	-0.559	9.881	1320.591	-0.008643	-0.002087	-0.005324
2.6400	755.794	131.042	32.449	81.749	-0.560	9.867	1438.837	-0.009173	-0.002271	-0.005722
2.6500	827.629	139.878	37.036	88.286	-0.562	9.882	1575.594	-0.009791	-0.002593	-0.006180
2.6600	895.257	149.024	40.997	94.392	-0.560	9.868	1704.340	-0.010432	-0.002870	-0.006607
2.6700	966.462	157.349	43.997	101.177	-0.565	9.882	1839.895	-0.011014	-0.003080	-0.007082
2.6800	1021.797	164.769	47.236	106.335	-0.556	9.867	1945.238	-0.011534	-0.003307	-0.007443
2.6900	1078.138	171.845	50.389	111.441	-0.553	9.882	2052.498	-0.012029	-0.003527	-0.007801
2.7000	1116.250	176.722	52.960	115.514	-0.560	9.867	2125.053	-0.012371	-0.003707	-0.008086
2.7100	1137.425	179.844	54.126	117.786	-0.566	9.882	2165.365	-0.012589	-0.003789	-0.008245
2.7200	1180.917	184.975	56.380	121.801	-0.561	9.868	2248.163	-0.012948	-0.003947	-0.008526
2.7300	1188.852	186.975	57.421	123.346	-0.552	9.882	2263.269	-0.013088	-0.004019	-0.008634
2.7400	1195.886	188.395	58.227	124.281	-0.562	9.868	2276.659	-0.013188	-0.004076	-0.008700
2.7500	1195.194	189.005	58.130	124.788	-0.550	9.882	2275.343	-0.013230	-0.004069	-0.008735
2.7600	1191.903	189.229	57.811	124.900	-0.549	9.868	2269.077	-0.013246	-0.004047	-0.008743
2.7700	1179.955	188.131	57.893	124.569	-0.550	9.882	2246.332	-0.013169	-0.004053	-0.008720
2.7800	1148.997	185.545	57.116	122.202	-0.553	9.867	2187.395	-0.012988	-0.003998	-0.008554
2.7900	1096.277	179.776	55.656	118.500	-0.554	9.881	2087.030	-0.012584	-0.003896	-0.008295
2.8000	1058.676	175.887	53.545	115.913	-0.565	9.867	2015.448	-0.012312	-0.003748	-0.008114
2.8100	1001.163	169.896	50.530	111.430	-0.554	9.881	1905.956	-0.011893	-0.003537	-0.007800
2.8200	945.362	163.571	48.122	106.696	-0.554	9.867	1799.726	-0.011450	-0.003369	-0.007469
2.8300	892.372	157.460	44.678	102.058	-0.548	9.882	1698.847	-0.011022	-0.003127	-0.007144
2.8400	819.364	149.122	41.454	96.307	-0.553	9.868	1559.858	-0.010439	-0.002902	-0.006742
2.8500	742.509	139.866	37.576	89.840	-0.556	9.882	1413.546	-0.009791	-0.002630	-0.006289
2.8600	671.800	131.363	34.379	83.441	-0.564	9.868	1278.934	-0.009195	-0.002407	-0.005841
2.8700	609.282	123.591	31.198	78.157	-0.563	9.882	1159.916	-0.008651	-0.002184	-0.005471
2.8800	540.452	115.047	28.311	71.979	-0.558	9.868	1028.881	-0.008053	-0.001982	-0.005038
2.8900	467.068	105.238	24.807	65.842	-0.555	9.881	889.177	-0.007367	-0.001736	-0.004609
2.9000	403.257	96.260	21.540	59.592	-0.549	9.867	767.698	-0.006738	-0.001508	-0.004171
2.9100	339.913	87.005	18.317	53.856	-0.553	9.881	647.106	-0.006090	-0.001282	-0.003770
2.9200	276.027	77.500	16.664	47.954	-0.557	9.867	525.484	-0.005425	-0.001166	-0.003357
2.9300	221.338	69.299	13.621	42.283	-0.552	9.881	421.371	-0.004851	-0.000953	-0.002960
2.9400	164.426	60.616	12.675	37.165	-0.568	9.867	313.025	-0.004243	-0.000887	-0.002602
2.9500	119.175	52.568	11.187	32.596	-0.558	9.882	226.879	-0.003680	-0.000783	-0.002282
2.9600	88.082	46.719	9.965	28.881	-0.573	9.867	167.685	-0.003270	-0.000698	-0.002022
2.9700	70.468	42.897	10.131	26.528	-0.564	9.882	134.153	-0.003003	-0.000709	-0.001857
2.9800	67.568	41.716	9.242	26.047	-0.566	9.867	128.632	-0.002920	-0.000647	-0.001823
2.9900	48.256	38.730	9.785	23.515	-0.566	9.882	91.867	-0.002711	-0.000685	-0.001646
3.0000	40.216	36.783	8.798	21.852	-0.572	9.868	76.561	-0.002575	-0.000616	-0.001530
3.0100	42.230	36.991	7.950	21.823	-0.562	9.882	80.395	-0.002589	-0.000556	-0.001528
3.0200	46.513	36.825	8.019	21.755	-0.561	9.867	88.549	-0.002578	-0.000561	-0.001523
3.0300	66.906	39.034	8.339	23.214	-0.565	9.881	127.373	-0.002732	-0.000584	-0.001625
3.0400	108.535	44.078	9.158	26.653	-0.565	9.868	206.623	-0.003085	-0.000641	-0.001866
3.0500	157.498	51.288	8.758	30.669	-0.561	9.882	299.835	-0.003590	-0.000613	-0.002147
3.0600	205.904	58.711	9.618	34.646	-0.553	9.868	391.989	-0.004110	-0.000673	-0.002425
3.0700	264.049	66.840	11.814	39.064	-0.568	9.881	502.682	-0.004679	-0.000827	-0.002734
3.0800	328.100	75.414	13.691	44.360	-0.562	9.868	624.619	-0.005279	-0.000958	-0.003105
3.0900	403.558	85.476	16.662	50.360	-0.564	9.882	768.270	-0.005983	-0.001166	-0.003525
3.1000	470.449	94.425	19.556	56.374	-0.559	9.867	895.615	-0.006610	-0.001369	-0.003946
3.1100	538.979	103.457	22.624	62.788	-0.560	9.881	1026.077	-0.007242	-0.001584	-0.004395
3.1200	609.207	112.548	25.874	68.881	-0.557	9.868	1159.773	-0.007878	-0.001811	-0.004822
3.1300	681.448	121.842	29.616	75.170	-0.564	9.881	1297.302	-0.008529	-0.002073	-0.005262
3.1400	759.145	131.834	33.299	81.582	-0.557	9.868	1445.217	-0.009228	-0.002331	-0.005711
3.1500	824.564	140.422	36.229	88.146	-0.558	9.881	1569.757	-0.009830	-0.002536	-0.006170
3.1600	896.309	148.747	40.399	94.503	-0.556	9.867	1706.343	-0.010412	-0.002828	-0.006615
3.1700	960.556	156.819	43.677	100.792	-0.554	9.882	1828.651	-0.010977	-0.003057	-0.007055
3.1800	1021.120	164.576	47.387	106.544	-0.552	9.867	1943.951	-0.011520	-0.003317	-0.007458
3.1900	1065.574	170.801	50.014	110.575	-0.549	9.881	2028.580	-0.011956	-0.003501	-0.007740
3.2000	1111.576	176.263	52.502	114.896	-0.550	9.867	2116.156	-0.012338	-0.003675	-0.008043
3.2100	1137.320	180.249	54.155	118.228	-0.558	9.881	2165.165	-0.012617	-0.003791	-0.008276
3.2200	1164.657	183.864	55.794	120.772	-0.557	9.868	2217.207	-0.012870	-0.003906	-0.008454
3.2300	1182.450	186.403	56.794	122.795	-0.550	9.881	2251.081	-0.013048	-0.003976	-0.008596
3.2400	1202.483	189.063	58.464	124.886	-0.553	9.867	2289.219	-0.013234	-0.004092	-0.008742
3.2500	1199.462	189.786	58.908	125.091	-0.553	9.882	2283.468	-0.013285	-0.004124	-0.008756
3.2600	1189.844	189.452	58.894	124.885	-0.564	9.867	2265.158	-0.013262	-0.004123	-0.008742
3.2700	1178.633	188.366	58.116	124.678	-0.559	9.881	2243.814	-0.013186	-0.004068	-0.008727
3.2800	1148.651	185.290	57.100	122.506	-0.561	9.867	2186.737	-0.012970	-0.003997	-0.008575
3.2900	1100.966	180.525	54.932	119.052	-0.565	9.881	2095.957	-0.012637	-0.003845	-0.008334
3.3000	1058.451	176.041	53.115	116.065	-0.567	9.868	2015.018	-0.012323	-0.003718	-0.008125
3.3100	1005.641	170.063	50.959	111.785	-0.554	9.881	1914.482	-0.011904	-0.003567	-0.007825
3.3200	948.743	163.697	47.805	107.355	-0.543	9.868	1806.164	-0.011459	-0.003346	-0.007515
3.3300	890.418	157.583	45.400	102.223	-0.554	9.881	1695.127	-0.011031	-0.003178	-0.007156
3.3400	836.256	151.538	42.373	97.627	-0.550	9.867	1592.016	-0.010608	-0.002966	-0.006834
3.3500	768.072	143.175	38.494	92.205	-0.554	9.882	1462.212	-0.010022	-0.002695	-0.006454
3.3600	691.893	133.835	34.909	85.491	-0.552	9.867	1317.186	-0.009368	-0.002444	-0.005984
3.3700	617.232	124.162	31.781	78.844	-0.556	9.881	1175.051	-0.008691	-0.002225	-0.005519
3.3800	548.161	115.659	28.030	72.859	-0.562	9.867	1043.558	-0.008096	-0.001962	-0.005100
3.3900	482.712	107.154	25.266	67.219	-0.561	9.881	918.961	-0.007501	-0.001769	-0.004705
3.4000	407.976	97.219	21.983	60.639	-0.570	9.868	776.682	-0.006805	-0.001539	-0.004245
3.4100	343.174	88.021	18.679	54.172	-0.567	9.881	653.315	-0.006161	-0.001308	-0.003792
3.4200	281.692	78.848	15.884	48.245	-0.564	9.868	536.270	-0.005519	-0.001112	-0.003377
3.4300	228.432	70.233	14.773	43.207	-0.560	9.881	434.875	-0.004916	-0.001034	-0.003024
3.4400	183.377	62.753	13.162	38.735	-0.565	9.868	349.102	-0.004393	-0.000921	-0.002711
3.4500	141.823	55.750	12.021	34.275	-0.556	9.881	269.995	-0.003902	-0.000841	-0.002399
3.4600	105.740	49.806	10.632	30.753	-0.567	9.868	201.302	-0.003486	-0.000744	-0.002153
3.4700	74.766	44.287	9.465	27.600	-0.556	9.881	142.336	-0.003100	-0.000663	-0.001932
3.4800	56.071	40.615	9.062	24.752	-0.554	9.868	106.745	-0.002843	-0.000634	-0.001733
3.4900	38.999	37.493	8.730	22.633	-0.557	9.881	74.244	-0.002625	-0.000611	-0.001584
3.5000	37.015	36.324	8.159	21.576	-0.552	9.868	70.467	-0.002543	-0.000571	-0.001510
3.5100	39.585	36.061	9.133	21.477	-0.548	9.881	75.359	-0.002524	-0.000639	-0.001503
3.5200	45.145	36.642	8.716	22.044	-0.557	9.868	85.945	-0.002565	-0.000610	-0.001543
3.5300	75.593	40.088	8.689	24.148	-0.554	9.882	143.909	-0.002806	-0.000608	-0.001690
3.5400	119.220	45.995	9.173	27.779	-0.556	9.868	226.965	-0.003220	-0.000642	-0.001945
3.5500	162.803	52.207	9.395	31.550	-0.560	9.881	309.935	-0.003654	-0.000658	-0.002209
3.5600	224.900	61.186	11.410	36.270	-0.562	9.868	428.152	-0.004283	-0.000799	-0.002539
3.5700	279.528	69.063	12.467	40.179	-0.566	9.882	532.150	-0.004834	-0.000873	-0.002813
3.5800	338.470	77.334	14.649	44.996	-0.556	9.868	644.360	-0.005413	-0.001025	-0.003150
3.5900	404.790	86.421	16.928	51.104	-0.561	9.881	770.617	-0.006049	-0.001185	-0.003577
3.6000	473.650	95.481	19.428	57.132	-0.560	9.868	901.709	-0.006684	-0.001360	-0.003999
3.6100	546.147	104.459	22.749	63.268	-0.553	9.881	1039.724	-0.007312	-0.001592	-0.004429
3.6200	620.733	114.226	26.987	70.093	-0.558	9.868	1181.717	-0.007996	-0.001889	-0.004907
3.6300	699.813	124.177	30.100	76.945	-0.560	9.881	1332.264	-0.008692	-0.002107	-0.005386
3.6400	771.649	133.517	33.881	83.068	-0.555	9.868	1469.021	-0.009346	-0.002372	-0.005815
3.6500	834.512	141.547	37.230	88.848	-0.545	9.881	1588.697	-0.009908	-0.002606	-0.006219
3.6600	896.144	149.804	40.689	95.164	-0.552	9.868	1706.028	-0.010486	-0.002848	-0.006661
3.6700	960.315	157.487	43.663	101.177	-0.548	9.881	1828.194	-0.011024	-0.003056	-0.007082
3.6800	1014.282	164.101	46.568	106.130	-0.544	9.868	1930.933	-0.011487	-0.003260	-0.007429
3.6900	1074.080	171.511	50.070	111.318	-0.553	9.881	2044.773	-0.012006	-0.003505	-0.007792
3.7000	1109.683	176.109	53.070	114.786	-0.547	9.868	2112.551	-0.012328	-0.003715	-0.008035
3.7100	1138.462	180.540	54.322	118.184	-0.550	9.881	2167.339	-0.012638	-0.003803	-0.008273
3.7200	1165.077	184.185	55.741	121.129	-0.562	9.868	2218.008	-0.012893	-0.003902	-0.008479
3.7300	1184.043	186.726	57.407	123.181	-0.549	9.881	2254.114	-0.013071	-0.004018	-0.008623
3.7400	1199.703	188.922	57.988	124.846	-0.548	9.868	2283.926	-0.013225	-0.004059	-0.008739
3.7500	1200.439	189.508	59.019	125.602	-0.560	9.881	2285.328	-0.013266	-0.004131	-0.008792
3.7600	1194.834	189.477	58.741	125.699	-0.566	9.868	2274.656	-0.013263	-0.004112	-0.008799
3.7700	1183.232	188.798	58.491	125.161	-0.550	9.881	2252.569	-0.013216	-0.004094	-0.008761
3.7800	1153.881	186.433	57.851	122.878	-0.546	9.868	2196.693	-0.013050	-0.004050	-0.008601
3.7900	1092.340	179.692	55.086	118.625	-0.552	9.881	2079.535	-0.012578	-0.003856	-0.008304
3.8000	1049.629	175.400	53.072	115.225	-0.557	9.868	1998.224	-0.012278	-0.003715	-0.008066
3.8100	1004.063	169.841	50.403	111.663	-0.545	9.881	1911.478	-0.011889	-0.003528	-0.007816
3.8200	958.963	164.951	48.846	108.085	-0.562	9.868	1825.619	-0.011547	-0.003419	-0.007566
3.8300	898.609	158.320	45.775	103.103	-0.561	9.881	1710.720	-0.011082	-0.003204	-0.007217
3.8400	815.802	148.816	41.621	96.101	-0.556	9.868	1553.078	-0.010417	-0.002913	-0.006727
3.8500	758.724	142.241	38.717	91.174	-0.556	9.881	1444.416	-0.009957	-0.002710	-0.006382
3.8600	691.141	133.780	35.328	85.190	-0.557	9.868	1315.756	-0.009365	-0.002473	-0.005963
3.8700	612.332	124.275	31.114	78.764	-0.556	9.881	1165.724	-0.008699	-0.002178	-0.005513
3.8800	539.941	114.576	27.196	72.405	-0.554	9.868	1027.908	-0.008020	-0.001904	-0.005068
3.8900	486.079	106.989	25.599	67.381	-0.562	9.881	925.369	-0.007489	-0.001792	-0.004717
3.9000	414.919	97.872	22.261	60.970	-0.557	9.868	789.900	-0.006851	-0.001558	-0.004268
3.9100	347.787	88.673	19.595	54.751	-0.560	9.881	662.098	-0.006207	-0.001372	-0.003833
3.9200	283.631	79.499	16.758	48.724	-0.567	9.868	539.961	-0.005565	-0.001173	-0.003411
3.9300	224.825	70.425	14.108	42.820	-0.558	9.881	428.009	-0.004930	-0.000988	-0.002997
3.9400	176.794	61.978	12.661	38.115	-0.552	9.868	336.571	-0.004338	-0.000886	-0.002668
3.9500	139.764	55.655	12.009	34.302	-0.549	9.881	266.075	-0.003896	-0.000841	-0.002401
3.9600	102.900	49.514	11.006	30.793	-0.544	9.869	195.894	-0.003466	-0.000770	-0.002156
3.9700	72.527	44.206	9.992	27.135	-0.552	9.881	138.073	-0.003094	-0.000699	-0.001899
3.9800	57.258	41.200	9.910	25.250	-0.551	9.868	109.005	-0.002884	-0.000694	-0.001768
3.9900	47.385	38.797	9.726	23.472	-0.553	9.881	90.208	-0.002716	-0.000681	-0.001643
4.0000	46.543	37.909	8.228	22.565	-0.556	9.869	88.606	-0.002654	-0.000576	-0.001580
4.0100	49.368	37.492	8.351	22.620	-0.560	9.881	93.985	-0.002624	-0.000585	-0.001583
4.0200	54.388	37.743	8.673	22.994	-0.558	9.869	103.540	-0.002642	-0.000607	-0.001610
4.0300	76.179	40.936	9.881	24.301	-0.553	9.881	145.025	-0.002866	-0.000692	-0.001701
4.0400	115.448	46.371	9.632	27.339	-0.561	9.869	219.784	-0.003246	-0.000674	-0.001914
4.0500	162.352	53.012	9.160	31.180	-0.563	9.881	309.076	-0.003711	-0.000641	-0.002183
4.0600	217.326	60.423	10.812	35.323	-0.555	9.869	413.733	-0.004230	-0.000757	-0.002473
4.0700	275.711	68.675	12.411	40.385	-0.553	9.881	524.883	-0.004807	-0.000869	-0.002827
4.0800	341.280	77.638	14.730	45.655	-0.556	9.869	649.710	-0.005435	-0.001031	-0.003196
4.0900	412.319	87.215	16.774	51.544	-0.555	9.881	784.950	-0.006105	-0.001174	-0.003608
4.1000	476.175	95.954	20.152	57.518	-0.562	9.869	906.515	-0.006717	-0.001411	-0.004026
4.1100	563.370	106.919	24.721	64.880	-0.558	9.881	1072.512	-0.007484	-0.001731	-0.004542
4.1200	616.075	114.157	26.596	69.761	-0.556	9.869	1172.848	-0.007991	-0.001862	-0.004883
4.1300	699.392	124.760	30.560	77.056	-0.562	9.881	1331.463	-0.008733	-0.002139	-0.005394
4.1400	769.199	133.072	33.657	83.069	-0.543	9.869	1464.357	-0.009315	-0.002356	-0.005815
4.1500	829.779	140.991	36.909	88.574	-0.548	9.882	1579.685	-0.009869	-0.002584	-0.006200
4.1600	890.734	149.443	40.746	94.587	-0.552	9.869	1695.728	-0.010461	-0.002852	-0.006621
4.1700	965.320	158.224	44.123	101.301	-0.549	9.881	1837.721	-0.011076	-0.003089	-0.007091
4.1800	1011.547	164.058	47.261	105.663	-0.558	9.869	1925.726	-0.011484	-0.003308	-0.007396
4.1900	1079.461	172.288	50.793	111.622	-0.553	9.881	2055.016	-0.012060	-0.003555	-0.007814
4.2000	1107.338	176.207	52.361	114.732	-0.547	9.869	2108.088	-0.012334	-0.003665	-0.008031
4.2100	1151.822	181.806	54.628	119.287	-0.552	9.881	2192.774	-0.012726	-0.003824	-0.008350
4.2200	1177.791	185.668	56.752	121.582	-0.549	9.869	2242.212	-0.012997	-0.003973	-0.008511
4.2300	1184.013	186.948	57.560	123.111	-0.557	9.881	2254.057	-0.013086	-0.004029	-0.008618
4.2400	1187.530	188.228	58.352	123.951	-0.552	9.869	2260.752	-0.013176	-0.004085	-0.008677
4.2500	1193.060	189.353	58.034	125.065	-0.545	9.881	2271.280	-0.013255	-0.004062	-0.008755
4.2600	1189.408	189.172	58.325	124.804	-0.545	9.869	2264.328	-0.013242	-0.004083	-0.008736
4.2700	1174.921	188.199	58.129	123.950	-0.553	9.881	2236.748	-0.013174	-0.004069	-0.008677
4.2800	1124.486	183.059	56.949	120.470	-0.557	9.868	2140.732	-0.012814	-0.003986	-0.008433
4.2900	1093.512	179.833	55.670	118.445	-0.561	9.881	2081.766	-0.012588	-0.003897	-0.008291
4.3000	1053.371	175.636	53.516	115.557	-0.563	9.869	2005.348	-0.012295	-0.003746	-0.008089
4.3100	1013.967	171.454	50.820	112.710	-0.554	9.881	1930.332	-0.012002	-0.003557	-0.007890
4.3200	960.721	165.422	48.332	107.975	-0.543	9.869	1828.966	-0.011580	-0.003383	-0.007558
4.3300	893.679	157.723	44.997	102.775	-0.558	9.881	1701.336	-0.011041	-0.003150	-0.007194
4.3400	822.880	149.635	41.592	96.774	-0.558	9.869	1566.553	-0.010474	-0.002911	-0.006774
4.3500	756.214	141.991	38.855	90.941	-0.551	9.881	1439.638	-0.009939	-0.002720	-0.006366
4.3600	687.460	133.864	35.784	84.816	-0.552	9.869	1308.746	-0.009370	-0.002505	-0.005937
4.3700	614.602	124.524	31.700	78.653	-0.550	9.881	1170.044	-0.008717	-0.002219	-0.005506
4.3800	536.274	114.269	27.446	72.102	-0.549	9.869	1020.927	-0.007999	-0.001921	-0.005047
4.3900	467.819	105.544	24.264	66.102	-0.542	9.880	890.608	-0.007388	-0.001698	-0.004627
4.4000	399.996	96.204	20.915	59.800	-0.553	9.869	761.490	-0.006734	-0.001464	-0.004186
4.4100	350.207	88.853	18.774	54.943	-0.555	9.881	666.704	-0.006220	-0.001314	-0.003846
4.4200	288.951	80.138	16.634	49.041	-0.556	9.869	550.089	-0.005610	-0.001164	-0.003433
4.4300	219.385	69.605	14.289	42.931	-0.561	9.881	417.652	-0.004872	-0.001000	-0.003005
4.4400	167.431	61.200	12.522	37.565	-0.561	9.869	318.747	-0.004284	-0.000877	-0.002630
4.4500	130.026	54.362	11.549	33.423	-0.557	9.881	247.536	-0.003805	-0.000808	-0.002340
4.4600	101.216	48.888	10.755	30.466	-0.551	9.869	192.690	-0.003422	-0.000753	-0.002133
4.4700	69.521	43.510	9.978	26.831	-0.556	9.880	132.351	-0.003046	-0.000698	-0.001878
4.4800	53.516	40.366	9.173	24.602	-0.560	9.869	101.881	-0.002826	-0.000642	-0.001722
4.4900	43.162	38.563	9.229	23.351	-0.556	9.881	82.169	-0.002699	-0.000646	-0.001635
4.5000	40.006	37.227	9.379	22.606	-0.558	9.869	76.160	-0.002606	-0.000657	-0.001582
4.5100	41.809	36.617	9.186	21.988	-0.554	9.881	79.594	-0.002563	-0.000643	-0.001539
4.5200	46.798	36.966	9.020	21.850	-0.549	9.869	89.092	-0.002588	-0.000631	-0.001530
4.5300	78.478	40.896	9.008	24.217	-0.542	9.881	149.403	-0.002863	-0.000631	-0.001695
4.5400	114.111	45.761	9.103	27.300	-0.561	9.869	217.237	-0.003203	-0.000637	-0.001911
4.5500	161.044	52.513	9.923	31.482	-0.556	9.881	306.587	-0.003676	-0.000695	-0.002204
4.5600	214.260	60.644	9.977	35.377	-0.552	9.869	407.896	-0.004245	-0.000698	-0.002476
4.5700	267.776	67.937	11.549	39.310	-0.544	9.881	509.777	-0.004756	-0.000808	-0.002752
4.5800	331.632	76.402	14.176	44.570	-0.552	9.870	631.342	-0.005348	-0.000992	-0.003120
4.5900	404.354	85.962	16.149	50.720	-0.550	9.881	769.787	-0.006017	-0.001130	-0.003550
4.6000	469.923	95.052	20.248	56.775	-0.554	9.869	894.613	-0.006654	-0.001417	-0.003974
4.6100	540.842	104.460	23.222	63.117	-0.550	9.881	1029.625	-0.007312	-0.001626	-0.004418
4.6200	614.677	113.892	26.336	69.118	-0.561	9.869	1170.187	-0.007972	-0.001844	-0.004838
4.6300	691.863	123.803	30.364	76.217	-0.558	9.881	1317.129	-0.008666	-0.002126	-0.005335
4.6400	756.966	132.057	33.756	82.135	-0.549	9.869	1441.069	-0.009244	-0.002363	-0.005749
4.6500	829.944	141.283	36.647	88.654	-0.552	9.881	1580.000	-0.009890	-0.002565	-0.006206
4.6600	896.895	149.735	40.733	95.025	-0.561	9.869	1707.458	-0.010481	-0.002851	-0.006652
4.6700	967.319	158.029	44.636	101.313	-0.552	9.881	1841.526	-0.011062	-0.003125	-0.007092
4.6800	1009.699	164.255	47.026	105.334	-0.560	9.870	1922.207	-0.011498	-0.003292	-0.007373
4.6900	1066.957	171.231	50.248	110.811	-0.565	9.881	2031.212	-0.011986	-0.003517	-0.007757
4.7000	1118.850	177.624	52.641	115.846	-0.549	9.869	2130.003	-0.012434	-0.003685	-0.008109
4.7100	1138.838	180.499	54.211	118.460	-0.565	9.880	2168.055	-0.012635	-0.003795	-0.008292
4.7200	1174.981	185.099	55.766	121.735	-0.562	9.869	2236.862	-0.012957	-0.003904	-0.008521
4.7300	1184.795	187.031	57.171	123.125	-0.558	9.880	2255.545	-0.013092	-0.004002	-0.008619
4.7400	1198.606	189.464	58.200	124.596	-0.551	9.870	2281.837	-0.013263	-0.004074	-0.008722
4.7500	1198.591	189.882	59.005	125.052	-0.552	9.881	2281.809	-0.013292	-0.004130	-0.008754
4.7600	1194.939	190.060	58.727	125.491	-0.549	9.870	2274.857	-0.013304	-0.004111	-0.008784
4.7700	1186.688	189.563	57.852	125.150	-0.546	9.881	2259.150	-0.013269	-0.004050	-0.008761
4.7800	1158.254	186.849	57.046	123.663	-0.546	9.870	2205.019	-0.013079	-0.003993	-0.008656
4.7900	1103.611	181.068	55.808	119.271	-0.545	9.880	2100.992	-0.012675	-0.003907	-0.008349
4.8000	1048.397	175.484	53.056	114.978	-0.547	9.870	1995.878	-0.012284	-0.003714	-0.008048
4.8100	1010.691	171.178	50.862	112.268	-0.549	9.881	1924.095	-0.011982	-0.003560	-0.007859
4.8200	953.387	164.850	48.180	107.837	-0.554	9.869	1815.004	-0.011540	-0.003373	-0.007549
4.8300	884.933	157.403	44.871	102.307	-0.557	9.881	1684.685	-0.011018	-0.003141	-0.007161
4.8400	828.501	150.456	41.997	97.173	-0.549	9.870	1577.253	-0.010532	-0.002940	-0.006802
4.8500	747.197	141.005	38.132	90.470	-0.554	9.881	1422.472	-0.009870	-0.002669	-0.006333
4.8600	685.611	133.212	35.063	85.189	-0.551	9.870	1305.227	-0.009325	-0.002454	-0.005963
4.8700	607.118	123.761	31.131	78.458	-0.552	9.880	1155.796	-0.008663	-0.002179	-0.005492
4.8800	533.839	114.281	28.405	71.977	-0.552	9.869	1016.293	-0.008000	-0.001988	-0.005038
4.8900	469.472	105.655	24.376	65.953	-0.551	9.881	893.755	-0.007396	-0.001706	-0.004617
4.9000	393.774	95.550	20.900	59.319	-0.549	9.869	749.645	-0.006688	-0.001463	-0.004152
4.9100	331.031	86.463	18.608	53.414	-0.549	9.880	630.198	-0.006052	-0.001303	-0.003739
4.9200	269.535	77.194	15.731	47.319	-0.548	9.870	513.124	-0.005404	-0.001101	-0.003312
4.9300	223.127	69.855	13.245	42.903	-0.554	9.881	424.776	-0.004890	-0.000927	-0.003003
4.9400	182.039	63.142	13.439	38.789	-0.556	9.870	346.556	-0.004420	-0.000941	-0.002715
4.9500	136.578	55.695	11.869	34.180	-0.552	9.881	260.010	-0.003899	-0.000831	-0.002393
4.9600	98.376	49.068	10.520	30.092	-0.540	9.869	187.283	-0.003435	-0.000736	-0.002106
4.9700	72.332	44.314	9.353	27.191	-0.546	9.880	137.701	-0.003102	-0.000655	-0.001903
4.9800	49.053	39.825	9.254	23.998	-0.546	9.870	93.384	-0.002788	-0.000648	-0.001680
4.9900	39.810	37.645	9.504	22.525	-0.541	9.880	75.788	-0.002635	-0.000665	-0.001577
