# Supplementary material for: Evaluation of a Cold-Mixed High-Performance Polyurethane Mixture
Source: Hindawi journal article supplement (doi:10.1155/2019/1507971), 2019-11-07
Supplement: f1 [file 1507971.f1.zip › 1507971.f1/dynamic modulus data/PUM/specimen2/temp10/zhs-2-10_5Hz.csv]

Test Information
****************
Project name	zhs
Operator name	2
Target test temperature	10
Target confining stress	0
Average dynamic strain range from 75 to 125 micro-strain
Contact stress	5
Initial modulus	4000
Axial gauge length	70
Comments	Run at High Pressure
Specimen information
********************
Identification	zhs-2-10
Dimensions	Point 1	Point 2	Point 3	Point 4	Point 5	Point 6	Average	Std Dev.
Diameter (mm)	49.2	49.3	49.2				49.23	0.058
Height (mm)	100.8	101.0	100.8				100.87	0.115
Cross-sectional area (mm�)	1903.7
Conditioning time
Properties/Comments
Test Data	5Hz
*********
Test date and time	Fri	Mar 29	2019	11:20 AM
Dynamic modulus (MPa)	11804
Phase angle (Degrees)	5.08
Average temperature (�C)	9.9
Average confining pressure (kPa)	-0.5
Average micro-strain	100
Load drift (%)	1.7
Load standard error (%)	3.0
Average deformation drift (%)	-5.1
Average deformation standard error (%)	4.9
Deformation uniformity (%)	40.3
Phase uniformity (Degrees)	0.5
Conditioning Cycles
Time (sec)	Axial stress (kPa)	Axial micro-strain #1	Axial micro-strain #2	Axial micro-strain #3	Confining pressure (kPa)	Temperature (�C)	Load (N)	Displacement #1 (mm)	Displacement #2 (mm)	Displacement #3 (mm)
0.0000	57.874	27.195	5.547	12.604	-0.539	9.890	110.178	-0.001904	-0.000388	-0.000882
0.0040	56.492	26.820	5.252	12.536	-0.548	9.882	107.546	-0.001877	-0.000368	-0.000877
0.0080	55.305	26.680	5.657	12.330	-0.549	9.887	105.286	-0.001868	-0.000396	-0.000863
0.0120	55.350	26.375	5.503	12.026	-0.552	9.898	105.371	-0.001846	-0.000385	-0.000842
0.0160	57.514	26.890	5.628	12.617	-0.550	9.897	109.491	-0.001882	-0.000394	-0.000883
0.0200	63.630	27.502	5.713	12.948	-0.544	9.890	121.136	-0.001925	-0.000400	-0.000906
0.0240	87.105	30.238	5.421	14.943	-0.550	9.882	165.825	-0.002117	-0.000379	-0.001046
0.0280	143.611	38.229	6.449	18.987	-0.547	9.887	273.399	-0.002676	-0.000451	-0.001329
0.0320	193.987	45.009	7.325	23.074	-0.552	9.897	369.301	-0.003151	-0.000513	-0.001615
0.0360	244.317	52.792	7.825	27.766	-0.549	9.897	465.117	-0.003695	-0.000548	-0.001944
0.0400	302.342	61.100	9.214	31.397	-0.535	9.891	575.581	-0.004277	-0.000645	-0.002198
0.0440	358.262	68.494	11.102	36.670	-0.550	9.882	682.039	-0.004795	-0.000777	-0.002567
0.0480	414.934	76.929	13.314	41.377	-0.546	9.888	789.928	-0.005385	-0.000932	-0.002896
0.0520	470.389	83.919	15.773	45.767	-0.554	9.898	895.500	-0.005874	-0.001104	-0.003204
0.0560	543.803	93.439	18.998	52.341	-0.551	9.897	1035.261	-0.006541	-0.001330	-0.003664
0.0600	600.039	101.152	21.706	57.075	-0.539	9.890	1142.321	-0.007081	-0.001519	-0.003995
0.0640	648.326	107.252	23.877	62.002	-0.551	9.882	1234.245	-0.007508	-0.001671	-0.004340
0.0680	714.090	115.881	26.572	67.644	-0.543	9.887	1359.444	-0.008112	-0.001860	-0.004735
0.0720	753.314	120.801	28.600	71.291	-0.547	9.897	1434.116	-0.008456	-0.002002	-0.004990
0.0760	796.596	126.567	31.254	75.694	-0.547	9.897	1516.514	-0.008860	-0.002188	-0.005299
0.0800	838.014	132.001	33.437	78.762	-0.550	9.890	1595.364	-0.009240	-0.002341	-0.005513
0.0840	866.553	135.422	34.589	81.818	-0.553	9.881	1649.694	-0.009480	-0.002421	-0.005727
0.0880	911.518	141.549	37.036	85.904	-0.546	9.887	1735.296	-0.009908	-0.002593	-0.006013
0.0920	928.635	144.287	38.257	87.443	-0.548	9.897	1767.883	-0.010100	-0.002678	-0.006121
0.0960	939.080	146.314	39.328	89.895	-0.543	9.897	1787.767	-0.010242	-0.002753	-0.006293
0.1000	950.862	148.121	40.134	90.692	-0.534	9.890	1810.198	-0.010368	-0.002809	-0.006348
0.1040	951.193	148.940	40.467	91.905	-0.549	9.882	1810.827	-0.010426	-0.002833	-0.006433
0.1080	950.366	149.469	40.747	91.820	-0.536	9.887	1809.254	-0.010463	-0.002852	-0.006427
0.1120	946.098	149.414	40.231	91.311	-0.546	9.897	1801.128	-0.010459	-0.002816	-0.006392
0.1160	936.826	148.872	40.301	91.778	-0.553	9.897	1783.476	-0.010421	-0.002821	-0.006424
0.1200	924.112	147.982	39.883	90.527	-0.543	9.890	1759.272	-0.010359	-0.002792	-0.006337
0.1240	892.793	145.203	39.091	89.026	-0.552	9.882	1699.648	-0.010164	-0.002736	-0.006232
0.1280	831.597	138.213	36.814	84.584	-0.543	9.888	1583.147	-0.009675	-0.002577	-0.005921
0.1320	775.090	132.183	34.284	79.988	-0.552	9.898	1475.573	-0.009253	-0.002400	-0.005599
0.1360	730.381	127.123	31.739	77.001	-0.541	9.897	1390.457	-0.008899	-0.002222	-0.005390
0.1400	684.138	121.522	30.323	72.898	-0.537	9.891	1302.423	-0.008507	-0.002123	-0.005103
0.1440	617.983	114.004	27.224	68.070	-0.536	9.882	1176.481	-0.007980	-0.001906	-0.004765
0.1480	568.284	107.282	24.515	63.791	-0.529	9.888	1081.867	-0.007510	-0.001716	-0.004465
0.1520	503.061	99.623	22.247	58.687	-0.543	9.897	957.699	-0.006974	-0.001557	-0.004108
0.1560	455.120	93.258	19.845	54.860	-0.546	9.897	866.432	-0.006528	-0.001389	-0.003840
0.1600	407.946	86.879	17.788	50.003	-0.541	9.890	776.625	-0.006082	-0.001245	-0.003500
0.1640	349.395	78.834	15.551	45.299	-0.542	9.881	665.159	-0.005518	-0.001089	-0.003171
0.1680	308.353	72.538	13.982	41.253	-0.538	9.887	587.025	-0.005078	-0.000979	-0.002888
0.1720	254.130	65.408	12.258	36.822	-0.543	9.898	483.799	-0.004579	-0.000858	-0.002578
0.1760	209.631	58.656	10.980	33.423	-0.542	9.897	399.084	-0.004106	-0.000769	-0.002340
0.1800	179.259	53.597	10.269	30.036	-0.541	9.890	341.263	-0.003752	-0.000719	-0.002103
0.1840	143.131	47.747	9.367	26.527	-0.548	9.882	272.484	-0.003342	-0.000656	-0.001857
0.1880	115.809	43.274	8.491	23.750	-0.538	9.887	220.470	-0.003029	-0.000594	-0.001662
0.1920	88.592	38.381	7.755	21.109	-0.555	9.898	168.657	-0.002687	-0.000543	-0.001478
0.1960	69.822	35.113	7.589	19.359	-0.554	9.897	132.923	-0.002458	-0.000531	-0.001355
0.2000	58.220	32.767	6.796	17.474	-0.549	9.890	110.836	-0.002294	-0.000476	-0.001223
0.2040	49.834	31.433	6.463	16.235	-0.556	9.882	94.872	-0.002200	-0.000452	-0.001136
0.2080	48.887	30.445	6.380	15.604	-0.545	9.887	93.069	-0.002131	-0.000447	-0.001092
0.2120	50.240	30.169	6.311	15.411	-0.547	9.898	95.644	-0.002112	-0.000442	-0.001079
0.2160	53.411	30.780	6.590	16.114	-0.543	9.897	101.681	-0.002155	-0.000461	-0.001128
0.2200	60.279	30.819	6.463	15.986	-0.547	9.890	114.756	-0.002157	-0.000452	-0.001119
0.2240	87.390	34.032	6.881	18.176	-0.548	9.882	166.368	-0.002382	-0.000482	-0.001272
0.2280	142.139	41.773	7.618	22.084	-0.545	9.887	270.596	-0.002924	-0.000533	-0.001546
0.2320	188.952	47.706	8.353	25.429	-0.552	9.897	359.716	-0.003339	-0.000585	-0.001780
0.2360	241.446	55.875	9.172	30.437	-0.552	9.896	459.652	-0.003911	-0.000642	-0.002131
0.2400	295.789	63.852	10.353	34.110	-0.550	9.890	563.107	-0.004470	-0.000725	-0.002388
0.2440	355.933	71.481	12.077	39.038	-0.552	9.882	677.605	-0.005004	-0.000845	-0.002733
0.2480	418.331	80.252	14.830	43.852	-0.541	9.887	796.394	-0.005618	-0.001038	-0.003070
0.2520	469.533	86.503	17.162	48.162	-0.553	9.897	893.869	-0.006055	-0.001201	-0.003371
0.2560	538.423	95.843	19.968	54.641	-0.549	9.896	1025.019	-0.006709	-0.001398	-0.003825
0.2600	599.754	103.543	22.511	59.664	-0.546	9.890	1141.777	-0.007248	-0.001576	-0.004176
0.2640	649.242	109.809	24.819	64.411	-0.552	9.881	1235.991	-0.007687	-0.001737	-0.004509
0.2680	715.563	118.342	27.557	69.651	-0.544	9.887	1362.247	-0.008284	-0.001929	-0.004876
0.2720	760.077	123.706	30.129	73.547	-0.548	9.897	1446.991	-0.008659	-0.002109	-0.005148
0.2760	806.740	129.986	32.018	78.253	-0.551	9.897	1535.826	-0.009099	-0.002241	-0.005478
0.2800	845.979	135.073	34.464	81.445	-0.545	9.890	1610.527	-0.009455	-0.002412	-0.005701
0.2840	873.707	138.324	35.508	84.541	-0.546	9.882	1663.313	-0.009683	-0.002486	-0.005918
0.2880	910.977	143.520	37.674	87.666	-0.540	9.887	1734.266	-0.010046	-0.002637	-0.006137
0.2920	924.292	145.659	38.867	89.014	-0.553	9.898	1759.615	-0.010196	-0.002721	-0.006231
0.2960	937.818	147.912	39.313	91.159	-0.549	9.896	1785.364	-0.010354	-0.002752	-0.006381
0.3000	950.757	150.138	40.301	92.041	-0.545	9.890	1809.998	-0.010510	-0.002821	-0.006443
0.3040	949.239	150.206	40.593	93.043	-0.553	9.881	1807.108	-0.010514	-0.002842	-0.006513
0.3080	947.721	150.916	40.996	93.071	-0.542	9.888	1804.218	-0.010564	-0.002870	-0.006515
0.3120	943.964	150.650	40.898	92.878	-0.559	9.898	1797.066	-0.010545	-0.002863	-0.006501
0.3160	937.788	150.594	40.941	93.195	-0.556	9.896	1785.307	-0.010542	-0.002866	-0.006524
0.3200	925.795	149.511	40.635	91.933	-0.550	9.890	1762.476	-0.010466	-0.002844	-0.006435
0.3240	897.391	146.841	39.676	90.639	-0.560	9.882	1708.403	-0.010279	-0.002777	-0.006345
0.3280	839.833	140.546	37.577	86.166	-0.549	9.887	1598.825	-0.009838	-0.002630	-0.006032
0.3320	783.747	134.546	34.910	81.899	-0.556	9.897	1492.052	-0.009418	-0.002444	-0.005733
0.3360	734.844	129.168	32.544	78.899	-0.545	9.896	1398.954	-0.009042	-0.002278	-0.005523
0.3400	681.959	122.803	30.337	74.112	-0.542	9.890	1298.275	-0.008596	-0.002124	-0.005188
0.3440	625.933	115.811	27.753	69.982	-0.546	9.881	1191.616	-0.008107	-0.001943	-0.004899
0.3480	580.202	109.738	25.903	66.104	-0.541	9.887	1104.555	-0.007682	-0.001813	-0.004627
0.3520	515.730	102.443	22.917	60.434	-0.546	9.898	981.817	-0.007171	-0.001604	-0.004230
0.3560	462.409	95.287	20.831	56.773	-0.544	9.896	880.308	-0.006670	-0.001458	-0.003974
0.3600	411.869	88.659	18.804	51.765	-0.544	9.889	784.092	-0.006206	-0.001316	-0.003624
0.3640	348.900	80.431	15.802	46.480	-0.548	9.881	664.215	-0.005630	-0.001106	-0.003254
0.3680	308.413	74.456	14.176	42.366	-0.546	9.887	587.139	-0.005212	-0.000992	-0.002966
0.3720	254.506	66.813	12.356	37.840	-0.548	9.898	484.514	-0.004677	-0.000865	-0.002649
0.3760	212.802	60.380	11.145	34.566	-0.549	9.897	405.121	-0.004227	-0.000780	-0.002420
0.3800	183.993	55.293	10.534	31.456	-0.545	9.890	350.275	-0.003870	-0.000737	-0.002202
0.3840	146.467	49.456	9.533	28.082	-0.545	9.882	278.835	-0.003462	-0.000667	-0.001966
0.3880	118.679	44.787	9.005	25.140	-0.538	9.888	225.935	-0.003135	-0.000630	-0.001760
0.3920	93.597	40.591	8.034	22.084	-0.546	9.897	178.185	-0.002841	-0.000562	-0.001546
0.3960	76.404	37.381	8.019	20.693	-0.549	9.896	145.454	-0.002617	-0.000561	-0.001449
0.4000	62.052	34.905	7.186	18.947	-0.552	9.890	118.132	-0.002443	-0.000503	-0.001326
0.4040	51.217	32.532	6.727	17.696	-0.555	9.882	97.504	-0.002277	-0.000471	-0.001239
0.4080	50.180	31.573	6.739	16.745	-0.544	9.887	95.530	-0.002210	-0.000472	-0.001172
0.4120	52.209	31.696	6.643	16.649	-0.545	9.898	99.392	-0.002219	-0.000465	-0.001165
0.4160	55.094	31.698	6.672	16.965	-0.553	9.897	104.885	-0.002219	-0.000467	-0.001188
0.4200	60.429	32.282	6.892	16.839	-0.553	9.889	115.042	-0.002260	-0.000482	-0.001179
0.4240	81.800	34.559	7.159	18.755	-0.550	9.882	155.725	-0.002419	-0.000501	-0.001313
0.4280	137.765	42.231	7.574	22.828	-0.537	9.887	262.270	-0.002956	-0.000530	-0.001598
0.4320	189.478	49.220	8.437	26.445	-0.559	9.897	360.718	-0.003445	-0.000591	-0.001851
0.4360	241.491	57.182	9.422	31.178	-0.550	9.896	459.738	-0.004003	-0.000660	-0.002182
0.4400	300.418	65.047	10.532	34.951	-0.552	9.890	571.918	-0.004553	-0.000737	-0.002447
0.4440	359.765	72.511	12.327	39.876	-0.554	9.881	684.900	-0.005076	-0.000863	-0.002791
0.4480	423.696	81.847	14.968	45.380	-0.545	9.887	806.608	-0.005729	-0.001048	-0.003177
0.4520	467.564	87.547	17.191	49.260	-0.552	9.898	890.121	-0.006128	-0.001203	-0.003448
0.4560	536.229	96.537	19.844	54.999	-0.554	9.896	1020.842	-0.006758	-0.001389	-0.003850
0.4600	601.166	104.793	22.861	60.254	-0.548	9.889	1144.466	-0.007336	-0.001600	-0.004218
0.4640	652.503	111.032	24.986	65.277	-0.545	9.881	1242.199	-0.007772	-0.001749	-0.004569
0.4680	719.109	119.618	27.946	71.058	-0.536	9.887	1368.999	-0.008373	-0.001956	-0.004974
0.4720	760.227	124.386	30.128	74.538	-0.548	9.897	1447.277	-0.008707	-0.002109	-0.005218
0.4760	814.930	131.293	32.574	79.725	-0.540	9.897	1551.418	-0.009190	-0.002280	-0.005581
0.4800	855.657	136.989	35.311	82.724	-0.538	9.890	1628.952	-0.009589	-0.002472	-0.005791
0.4840	875.615	139.658	35.979	85.175	-0.550	9.882	1666.946	-0.009776	-0.002519	-0.005962
0.4880	918.581	145.148	38.050	88.973	-0.541	9.887	1748.743	-0.010160	-0.002663	-0.006228
0.4920	934.286	147.231	39.118	90.652	-0.545	9.898	1778.641	-0.010306	-0.002738	-0.006346
0.4960	944.686	149.415	40.052	92.742	-0.548	9.896	1798.439	-0.010459	-0.002804	-0.006492
0.5000	959.910	152.108	40.899	93.733	-0.541	9.889	1827.421	-0.010648	-0.002863	-0.006561
0.5040	956.874	152.247	41.357	94.407	-0.546	9.881	1821.642	-0.010657	-0.002895	-0.006608
0.5080	956.002	152.454	41.776	94.365	-0.533	9.887	1819.983	-0.010672	-0.002924	-0.006606
0.5120	949.901	151.859	41.218	94.119	-0.539	9.898	1808.367	-0.010630	-0.002885	-0.006588
0.5160	941.259	151.650	41.356	94.586	-0.544	9.896	1791.916	-0.010615	-0.002895	-0.006621
0.5200	925.585	150.232	40.802	92.893	-0.545	9.889	1762.075	-0.010516	-0.002856	-0.006503
0.5240	878.080	145.632	39.078	90.236	-0.544	9.881	1671.638	-0.010194	-0.002735	-0.006317
0.5280	821.017	139.074	36.577	85.683	-0.533	9.887	1563.005	-0.009735	-0.002560	-0.005998
0.5320	764.931	132.765	34.284	81.224	-0.533	9.897	1456.232	-0.009294	-0.002400	-0.005686
0.5360	720.732	127.666	32.254	78.006	-0.534	9.896	1372.089	-0.008937	-0.002258	-0.005460
0.5400	672.852	121.886	30.019	73.892	-0.536	9.889	1280.937	-0.008532	-0.002101	-0.005172
0.5440	614.256	114.770	27.306	69.296	-0.542	9.881	1169.386	-0.008034	-0.001911	-0.004851
0.5480	564.722	108.642	25.348	64.974	-0.532	9.887	1075.087	-0.007605	-0.001774	-0.004548
0.5520	506.668	101.665	22.124	60.529	-0.540	9.898	964.565	-0.007117	-0.001549	-0.004237
0.5560	453.933	94.994	20.775	56.567	-0.536	9.896	864.172	-0.006650	-0.001454	-0.003960
0.5600	402.987	88.006	18.637	51.269	-0.541	9.889	767.183	-0.006160	-0.001305	-0.003589
0.5640	346.570	80.516	16.258	46.647	-0.548	9.881	659.781	-0.005636	-0.001138	-0.003265
0.5680	297.728	73.332	14.939	42.215	-0.540	9.887	566.797	-0.005133	-0.001046	-0.002955
0.5720	245.730	65.895	12.508	37.868	-0.548	9.898	467.806	-0.004613	-0.000876	-0.002651
0.5760	208.940	60.504	11.437	34.770	-0.548	9.896	397.768	-0.004235	-0.000801	-0.002434
0.5800	175.923	54.834	10.230	31.535	-0.542	9.890	334.911	-0.003838	-0.000716	-0.002207
0.5840	135.135	48.398	9.311	27.780	-0.546	9.881	257.263	-0.003388	-0.000652	-0.001945
0.5880	107.183	43.343	8.785	24.520	-0.532	9.887	204.048	-0.003034	-0.000615	-0.001716
0.5920	84.565	39.282	8.006	22.084	-0.537	9.897	160.990	-0.002750	-0.000560	-0.001546
0.5960	70.198	36.811	8.451	20.749	-0.539	9.896	133.638	-0.002577	-0.000592	-0.001452
0.6000	60.414	34.669	7.506	19.111	-0.541	9.889	115.013	-0.002427	-0.000525	-0.001338
0.6040	54.884	33.461	7.159	18.148	-0.540	9.881	104.485	-0.002342	-0.000501	-0.001270
0.6080	55.305	32.989	7.296	17.585	-0.528	9.888	105.286	-0.002309	-0.000511	-0.001231
0.6120	57.003	32.712	7.032	17.294	-0.541	9.897	108.519	-0.002290	-0.000492	-0.001211
0.6160	60.008	32.907	7.089	18.148	-0.540	9.896	114.241	-0.002303	-0.000496	-0.001270
0.6200	65.779	33.504	7.020	18.230	-0.541	9.889	125.227	-0.002345	-0.000491	-0.001276
0.6240	87.030	35.711	7.547	19.620	-0.545	9.881	165.682	-0.002500	-0.000528	-0.001373
0.6280	137.916	43.175	7.963	23.158	-0.538	9.887	262.556	-0.003022	-0.000557	-0.001621
0.6320	184.669	48.846	8.185	26.610	-0.551	9.897	351.563	-0.003419	-0.000573	-0.001863
0.6360	244.362	57.977	9.465	31.661	-0.550	9.896	465.202	-0.004058	-0.000663	-0.002216
0.6400	305.798	66.661	10.867	36.063	-0.550	9.889	582.161	-0.004666	-0.000761	-0.002524
0.6440	368.136	74.289	13.343	41.541	-0.560	9.881	700.836	-0.005200	-0.000934	-0.002908
0.6480	438.138	84.209	15.969	47.046	-0.546	9.887	834.103	-0.005895	-0.001118	-0.003293
0.6520	483.644	89.671	17.996	50.623	-0.553	9.897	920.734	-0.006277	-0.001260	-0.003544
0.6560	534.170	96.869	19.790	55.700	-0.550	9.895	1016.922	-0.006781	-0.001385	-0.003899
0.6600	575.828	102.400	21.470	58.987	-0.546	9.889	1096.230	-0.007168	-0.001503	-0.004129
0.6640	641.322	110.030	24.000	64.851	-0.544	9.881	1220.913	-0.007702	-0.001680	-0.004540
0.6680	713.729	119.607	27.668	70.713	-0.537	9.887	1358.757	-0.008372	-0.001937	-0.004950
0.6720	744.598	123.440	29.559	73.395	-0.543	9.897	1417.522	-0.008641	-0.002069	-0.005138
0.6760	801.540	130.596	32.088	79.090	-0.546	9.896	1525.927	-0.009142	-0.002246	-0.005536
0.6800	847.076	136.420	34.853	82.616	-0.554	9.889	1612.616	-0.009549	-0.002440	-0.005783
0.6840	869.814	138.964	35.758	85.424	-0.546	9.881	1655.903	-0.009727	-0.002503	-0.005980
0.6880	913.998	145.033	38.158	88.780	-0.538	9.887	1740.017	-0.010152	-0.002671	-0.006215
0.6920	930.544	147.370	39.189	90.582	-0.538	9.898	1771.517	-0.010316	-0.002743	-0.006341
0.6960	934.256	148.703	40.009	92.000	-0.540	9.896	1778.584	-0.010409	-0.002801	-0.006440
0.7000	947.165	150.816	41.010	92.523	-0.547	9.889	1803.160	-0.010557	-0.002871	-0.006477
0.7040	950.953	151.635	41.010	93.982	-0.541	9.881	1810.369	-0.010614	-0.002871	-0.006579
0.7080	950.802	152.414	41.220	94.474	-0.531	9.887	1810.083	-0.010669	-0.002885	-0.006613
0.7120	945.287	151.718	40.829	93.938	-0.541	9.898	1799.583	-0.010620	-0.002858	-0.006576
0.7160	937.021	151.385	41.011	94.048	-0.542	9.896	1783.848	-0.010597	-0.002871	-0.006583
0.7200	921.377	150.123	40.649	92.398	-0.547	9.889	1754.065	-0.010509	-0.002845	-0.006468
0.7240	872.835	145.036	38.936	89.855	-0.549	9.881	1661.654	-0.010153	-0.002726	-0.006290
0.7280	822.505	139.394	37.146	85.808	-0.536	9.887	1565.838	-0.009758	-0.002600	-0.006007
0.7320	776.954	134.390	34.853	82.023	-0.535	9.897	1479.120	-0.009407	-0.002440	-0.005742
0.7360	744.477	130.694	33.143	79.822	-0.532	9.895	1417.294	-0.009149	-0.002320	-0.005588
0.7400	690.120	124.346	30.990	75.226	-0.538	9.889	1313.810	-0.008704	-0.002169	-0.005266
0.7440	628.308	117.076	28.211	70.603	-0.548	9.881	1196.136	-0.008195	-0.001975	-0.004942
0.7480	584.876	111.407	26.708	67.260	-0.534	9.887	1113.453	-0.007798	-0.001870	-0.004708
0.7520	515.730	103.306	23.403	61.725	-0.546	9.898	981.817	-0.007231	-0.001638	-0.004321
0.7560	463.055	96.580	20.845	56.967	-0.544	9.896	881.538	-0.006761	-0.001459	-0.003988
0.7600	412.229	89.756	19.205	52.522	-0.544	9.889	784.779	-0.006283	-0.001344	-0.003677
0.7640	351.019	81.572	16.564	47.335	-0.549	9.881	668.249	-0.005710	-0.001159	-0.003313
0.7680	305.723	75.290	14.661	42.916	-0.538	9.887	582.018	-0.005270	-0.001026	-0.003004
0.7720	250.959	67.202	12.883	38.087	-0.536	9.897	477.762	-0.004704	-0.000902	-0.002666
0.7760	209.421	61.241	11.700	35.252	-0.545	9.896	398.684	-0.004287	-0.000819	-0.002468
0.7800	172.857	54.861	10.284	31.192	-0.548	9.889	329.075	-0.003840	-0.000720	-0.002183
0.7840	135.722	48.886	9.549	27.628	-0.541	9.881	258.379	-0.003422	-0.000668	-0.001934
0.7880	112.052	44.606	9.256	25.306	-0.533	9.888	213.318	-0.003122	-0.000648	-0.001771
0.7920	92.395	41.006	8.422	23.020	-0.544	9.898	175.896	-0.002870	-0.000590	-0.001611
0.7960	79.726	38.574	7.798	22.057	-0.545	9.896	151.777	-0.002700	-0.000546	-0.001544
0.8000	69.882	36.407	8.103	20.391	-0.545	9.889	133.038	-0.002548	-0.000567	-0.001427
0.8040	63.209	34.767	7.074	19.263	-0.549	9.881	120.335	-0.002434	-0.000495	-0.001348
0.8080	60.129	34.183	7.130	18.616	-0.544	9.887	114.470	-0.002393	-0.000499	-0.001303
0.8120	58.911	33.435	6.895	17.915	-0.548	9.898	112.152	-0.002340	-0.000483	-0.001254
0.8160	61.271	33.698	7.227	18.355	-0.547	9.896	116.644	-0.002359	-0.000506	-0.001285
0.8200	65.704	34.100	7.256	18.067	-0.543	9.888	125.084	-0.002387	-0.000508	-0.001265
0.8240	81.048	35.631	7.270	19.140	-0.543	9.881	154.295	-0.002494	-0.000509	-0.001340
0.8280	135.090	43.077	7.784	23.020	-0.538	9.887	257.177	-0.003015	-0.000545	-0.001611
0.8320	189.148	50.375	8.423	26.997	-0.542	9.898	360.088	-0.003526	-0.000590	-0.001890
0.8360	245.730	58.961	9.492	32.279	-0.552	9.896	467.806	-0.004127	-0.000664	-0.002260
0.8400	302.071	66.452	11.230	36.024	-0.546	9.888	575.066	-0.004652	-0.000786	-0.002522
0.8440	362.936	74.332	13.008	41.017	-0.548	9.881	690.937	-0.005203	-0.000911	-0.002871
0.8480	434.366	84.169	15.662	46.538	-0.546	9.887	826.921	-0.005892	-0.001096	-0.003258
0.8520	482.743	90.312	17.761	50.924	-0.549	9.897	919.018	-0.006322	-0.001243	-0.003565
0.8560	544.269	98.538	20.178	56.635	-0.553	9.896	1036.148	-0.006898	-0.001412	-0.003964
0.8600	605.389	106.140	23.125	61.480	-0.548	9.888	1152.506	-0.007430	-0.001619	-0.004304
0.8640	649.077	111.323	24.958	66.118	-0.549	9.881	1235.676	-0.007793	-0.001747	-0.004628
0.8680	712.181	119.770	27.946	70.933	-0.538	9.887	1355.810	-0.008384	-0.001956	-0.004965
0.8720	754.742	124.735	30.045	74.222	-0.541	9.898	1436.834	-0.008731	-0.002103	-0.005196
0.8760	804.441	131.153	32.393	79.326	-0.544	9.896	1531.448	-0.009181	-0.002268	-0.005553
0.8800	850.533	137.046	35.160	83.249	-0.553	9.889	1619.196	-0.009593	-0.002461	-0.005827
0.8840	876.682	140.520	36.493	86.014	-0.553	9.881	1668.978	-0.009836	-0.002555	-0.006021
0.8880	914.659	145.562	38.827	89.456	-0.545	9.888	1741.276	-0.010189	-0.002718	-0.006262
0.8920	934.632	148.023	40.007	91.365	-0.552	9.898	1779.299	-0.010362	-0.002801	-0.006396
0.8960	947.015	150.788	40.523	92.989	-0.547	9.896	1802.874	-0.010555	-0.002837	-0.006509
0.9000	958.392	152.289	41.538	93.610	-0.542	9.889	1824.532	-0.010660	-0.002908	-0.006553
0.9040	956.423	152.705	41.607	94.955	-0.549	9.881	1820.784	-0.010689	-0.002912	-0.006647
0.9080	954.635	152.775	41.692	94.834	-0.538	9.887	1817.379	-0.010694	-0.002918	-0.006638
0.9120	949.630	152.358	41.816	94.255	-0.546	9.898	1807.852	-0.010665	-0.002927	-0.006598
0.9160	942.401	152.566	41.636	94.887	-0.534	9.896	1794.090	-0.010680	-0.002914	-0.006642
0.9200	925.119	150.594	40.787	93.019	-0.551	9.888	1761.189	-0.010542	-0.002855	-0.006511
0.9240	877.118	146.077	38.827	90.265	-0.559	9.881	1669.807	-0.010225	-0.002718	-0.006319
0.9280	833.130	141.199	37.299	86.883	-0.550	9.887	1586.065	-0.009884	-0.002611	-0.006082
0.9320	765.397	133.779	34.492	81.652	-0.546	9.898	1457.119	-0.009365	-0.002414	-0.005716
0.9360	702.939	126.220	32.101	77.056	-0.542	9.895	1338.215	-0.008835	-0.002247	-0.005394
0.9400	673.904	122.329	30.754	74.096	-0.542	9.888	1282.940	-0.008563	-0.002153	-0.005187
0.9440	616.540	115.742	28.058	70.079	-0.553	9.881	1173.735	-0.008102	-0.001964	-0.004906
0.9480	567.713	109.753	25.586	65.855	-0.549	9.887	1080.780	-0.007683	-0.001791	-0.004610
0.9520	510.395	102.846	23.236	61.040	-0.548	9.897	971.661	-0.007199	-0.001626	-0.004273
0.9560	456.803	95.927	21.192	57.295	-0.547	9.896	869.637	-0.006715	-0.001483	-0.004011
0.9600	401.078	88.423	18.844	52.068	-0.543	9.888	763.550	-0.006190	-0.001319	-0.003645
0.9640	345.263	80.890	16.356	47.209	-0.554	9.881	657.291	-0.005662	-0.001145	-0.003305
0.9680	302.116	75.026	14.441	42.916	-0.537	9.887	575.151	-0.005252	-0.001011	-0.003004
0.9720	241.507	66.034	12.035	37.344	-0.542	9.897	459.766	-0.004622	-0.000842	-0.002614
0.9760	196.902	59.463	11.270	34.180	-0.551	9.896	374.851	-0.004162	-0.000789	-0.002393
0.9800	167.026	53.986	10.063	30.960	-0.547	9.888	317.974	-0.003779	-0.000704	-0.002167
0.9840	132.205	48.358	9.326	27.986	-0.560	9.881	251.684	-0.003385	-0.000653	-0.001959
0.9880	111.466	44.595	8.978	25.580	-0.553	9.887	212.202	-0.003122	-0.000628	-0.001791
0.9920	89.284	40.631	8.604	23.090	-0.552	9.898	169.973	-0.002844	-0.000602	-0.001616
0.9960	70.333	37.465	8.050	21.204	-0.550	9.896	133.896	-0.002623	-0.000564	-0.001484
1.0000	45.942	25.444	5.476	11.819	-0.539	9.880	87.461	-0.001781	-0.000383	-0.000827
1.0040	46.363	25.763	5.601	12.148	-0.536	9.885	88.263	-0.001803	-0.000392	-0.000850
1.0080	47.430	25.488	5.629	11.832	-0.541	9.896	90.294	-0.001784	-0.000394	-0.000828
1.0120	52.284	26.876	5.684	12.273	-0.538	9.895	99.535	-0.001881	-0.000398	-0.000859
1.0160	73.429	29.348	5.461	13.774	-0.532	9.888	139.790	-0.002054	-0.000382	-0.000964
1.0200	109.662	33.781	5.532	16.991	-0.548	9.880	208.769	-0.002365	-0.000387	-0.001189
1.0240	156.175	40.730	6.852	20.544	-0.541	9.885	297.318	-0.002851	-0.000480	-0.001438
1.0280	206.370	47.536	6.728	24.423	-0.544	9.896	392.876	-0.003328	-0.000471	-0.001710
1.0320	272.255	56.989	8.326	30.077	-0.540	9.895	518.303	-0.003989	-0.000583	-0.002105
1.0360	339.867	66.146	10.548	34.731	-0.537	9.888	647.020	-0.004630	-0.000738	-0.002431
1.0400	404.084	74.416	12.827	40.580	-0.542	9.880	769.272	-0.005209	-0.000898	-0.002841
1.0440	480.353	85.269	16.063	46.935	-0.518	9.886	914.469	-0.005969	-0.001124	-0.003285
1.0480	544.539	93.202	18.956	52.218	-0.522	9.896	1036.663	-0.006524	-0.001327	-0.003655
1.0520	631.148	104.207	23.029	60.173	-0.534	9.894	1201.544	-0.007294	-0.001612	-0.004212
1.0560	703.630	113.894	26.529	66.159	-0.536	9.888	1339.531	-0.007973	-0.001857	-0.004631
1.0600	771.498	122.301	29.406	72.516	-0.545	9.879	1468.735	-0.008561	-0.002058	-0.005076
1.0640	858.543	133.641	34.033	80.001	-0.532	9.885	1634.445	-0.009355	-0.002382	-0.005600
1.0680	914.629	140.491	36.770	84.911	-0.541	9.896	1741.219	-0.009834	-0.002574	-0.005944
1.0720	978.740	148.635	40.079	91.505	-0.542	9.895	1863.270	-0.010404	-0.002806	-0.006405
1.0760	1036.239	156.291	43.525	95.893	-0.546	9.888	1972.733	-0.010940	-0.003047	-0.006712
1.0800	1085.787	162.003	46.317	101.122	-0.545	9.879	2067.060	-0.011340	-0.003242	-0.007079
1.0840	1152.634	170.426	49.706	106.750	-0.538	9.885	2194.319	-0.011930	-0.003479	-0.007473
1.0880	1173.448	173.524	50.458	109.227	-0.545	9.896	2233.944	-0.012147	-0.003532	-0.007646
1.0920	1191.107	176.248	52.169	112.186	-0.544	9.895	2267.561	-0.012337	-0.003652	-0.007853
1.0960	1223.538	180.375	54.446	114.484	-0.540	9.888	2329.302	-0.012626	-0.003811	-0.008014
1.1000	1226.303	181.708	54.405	115.997	-0.544	9.880	2334.566	-0.012720	-0.003808	-0.008120
1.1040	1226.664	182.446	54.835	116.395	-0.526	9.885	2335.253	-0.012771	-0.003838	-0.008148
1.1080	1224.319	182.598	54.765	116.271	-0.535	9.896	2330.790	-0.012782	-0.003834	-0.008139
1.1120	1218.744	182.725	55.350	117.306	-0.530	9.895	2320.175	-0.012791	-0.003874	-0.008211
1.1160	1206.931	181.946	55.029	116.106	-0.538	9.888	2297.688	-0.012736	-0.003852	-0.008127
1.1200	1181.564	179.568	54.391	115.224	-0.544	9.880	2249.393	-0.012570	-0.003807	-0.008066
1.1240	1115.949	173.246	52.266	110.618	-0.534	9.885	2124.481	-0.012127	-0.003659	-0.007743
1.1280	1044.550	165.881	49.109	104.741	-0.541	9.896	1988.554	-0.011612	-0.003438	-0.007332
1.1320	995.993	160.809	46.622	101.754	-0.545	9.894	1896.114	-0.011257	-0.003264	-0.007123
1.1360	938.073	154.556	44.205	96.883	-0.540	9.888	1785.851	-0.010819	-0.003094	-0.006782
1.1400	863.292	146.272	40.648	91.215	-0.541	9.880	1643.486	-0.010239	-0.002845	-0.006385
1.1440	800.879	139.004	37.049	85.516	-0.534	9.886	1524.668	-0.009730	-0.002593	-0.005986
1.1480	727.465	130.418	33.478	79.492	-0.536	9.896	1384.907	-0.009129	-0.002343	-0.005564
1.1520	656.095	122.094	30.561	74.371	-0.533	9.895	1249.037	-0.008547	-0.002139	-0.005206
1.1560	583.733	112.990	27.307	67.713	-0.535	9.888	1111.279	-0.007909	-0.001912	-0.004740
1.1600	509.027	103.694	23.152	62.057	-0.541	9.880	969.057	-0.007259	-0.001621	-0.004344
1.1640	447.666	95.426	20.553	56.469	-0.533	9.885	852.242	-0.006680	-0.001439	-0.003953
1.1680	382.082	86.198	17.732	50.403	-0.539	9.896	727.386	-0.006034	-0.001241	-0.003528
1.1720	330.069	78.555	15.858	46.193	-0.544	9.895	628.366	-0.005499	-0.001110	-0.003233
1.1760	277.394	70.772	13.774	40.908	-0.544	9.887	528.088	-0.004954	-0.000964	-0.002864
1.1800	218.528	62.256	11.618	35.734	-0.547	9.880	416.021	-0.004358	-0.000813	-0.002501
1.1840	182.325	56.183	10.868	31.934	-0.536	9.886	347.099	-0.003933	-0.000761	-0.002235
1.1880	142.154	49.525	9.881	28.468	-0.543	9.896	270.624	-0.003467	-0.000692	-0.001993
1.1920	114.021	44.703	9.465	26.074	-0.538	9.895	217.066	-0.003129	-0.000663	-0.001825
1.1960	93.702	40.880	8.782	22.854	-0.540	9.888	178.385	-0.002862	-0.000615	-0.001600
1.2000	77.907	37.881	8.785	21.313	-0.553	9.880	148.315	-0.002652	-0.000615	-0.001492
1.2040	72.332	36.546	8.257	20.131	-0.538	9.885	137.701	-0.002558	-0.000578	-0.001409
1.2080	67.748	35.213	7.492	19.277	-0.542	9.896	128.975	-0.002465	-0.000524	-0.001349
1.2120	68.454	35.323	7.769	19.262	-0.542	9.895	130.320	-0.002473	-0.000544	-0.001348
1.2160	73.805	35.573	7.935	19.043	-0.544	9.888	140.505	-0.002490	-0.000555	-0.001333
1.2200	85.978	36.464	7.325	19.690	-0.555	9.880	163.679	-0.002552	-0.000513	-0.001378
1.2240	135.631	43.551	7.757	23.378	-0.549	9.886	258.207	-0.003049	-0.000543	-0.001636
1.2280	190.410	50.067	8.089	27.410	-0.551	9.897	362.492	-0.003505	-0.000566	-0.001919
1.2320	257.903	59.990	9.659	32.982	-0.545	9.895	490.980	-0.004199	-0.000676	-0.002309
1.2360	323.441	68.534	11.256	37.385	-0.543	9.887	615.749	-0.004797	-0.000788	-0.002617
1.2400	385.434	76.331	14.038	43.152	-0.548	9.880	733.767	-0.005343	-0.000983	-0.003021
1.2440	473.545	88.353	17.206	49.906	-0.540	9.885	901.508	-0.006185	-0.001204	-0.003493
1.2480	547.545	97.523	20.553	55.575	-0.543	9.896	1042.385	-0.006827	-0.001439	-0.003890
1.2520	624.941	107.308	24.280	63.022	-0.540	9.894	1189.728	-0.007512	-0.001700	-0.004412
1.2560	704.201	117.451	28.086	69.447	-0.534	9.887	1340.618	-0.008222	-0.001966	-0.004861
1.2600	773.708	126.123	31.018	75.776	-0.542	9.879	1472.940	-0.008829	-0.002171	-0.005304
1.2640	858.017	136.892	34.979	82.753	-0.536	9.885	1633.444	-0.009582	-0.002448	-0.005793
1.2680	913.276	143.451	37.813	87.692	-0.548	9.895	1738.644	-0.010042	-0.002647	-0.006138
1.2720	977.448	151.638	41.539	93.595	-0.542	9.894	1860.809	-0.010615	-0.002908	-0.006552
1.2760	1039.846	159.113	44.566	98.699	-0.544	9.887	1979.599	-0.011138	-0.003120	-0.006909
1.2800	1075.313	163.449	47.014	103.007	-0.555	9.879	2047.119	-0.011441	-0.003291	-0.007210
1.2840	1126.424	170.411	49.583	107.205	-0.535	9.885	2144.423	-0.011929	-0.003471	-0.007504
1.2880	1160.193	174.426	51.223	110.342	-0.545	9.895	2208.710	-0.012210	-0.003586	-0.007724
1.2920	1187.906	178.223	52.738	113.934	-0.541	9.895	2261.467	-0.012476	-0.003692	-0.007975
1.2960	1211.139	181.528	54.712	115.543	-0.538	9.887	2305.698	-0.012707	-0.003830	-0.008088
1.3000	1220.622	182.878	54.920	117.400	-0.545	9.879	2323.751	-0.012801	-0.003844	-0.008218
1.3040	1230.631	184.808	55.585	118.899	-0.537	9.885	2342.806	-0.012937	-0.003891	-0.008323
1.3080	1227.866	184.946	56.197	118.901	-0.539	9.895	2337.542	-0.012946	-0.003934	-0.008323
1.3120	1220.457	184.876	56.073	119.258	-0.543	9.894	2323.437	-0.012941	-0.003925	-0.008348
1.3160	1209.817	184.114	56.461	117.826	-0.541	9.887	2303.181	-0.012888	-0.003952	-0.008248
1.3200	1181.849	181.764	55.155	116.889	-0.546	9.879	2249.937	-0.012724	-0.003861	-0.008182
1.3240	1107.849	174.368	52.710	111.676	-0.545	9.885	2109.060	-0.012206	-0.003690	-0.007817
1.3280	1029.371	166.325	48.915	105.705	-0.537	9.895	1959.658	-0.011643	-0.003424	-0.007399
1.3320	966.131	159.333	46.317	101.176	-0.544	9.894	1839.266	-0.011153	-0.003242	-0.007082
1.3360	912.570	153.290	43.511	96.071	-0.543	9.887	1737.299	-0.010730	-0.003046	-0.006725
1.3400	844.566	146.190	40.177	91.353	-0.543	9.879	1607.838	-0.010233	-0.002812	-0.006395
1.3440	778.517	138.268	37.175	85.724	-0.542	9.885	1482.096	-0.009679	-0.002602	-0.006001
1.3480	706.936	129.971	33.532	79.670	-0.538	9.896	1345.825	-0.009098	-0.002347	-0.005577
1.3520	640.586	122.121	29.893	74.317	-0.538	9.894	1219.511	-0.008548	-0.002092	-0.005202
1.3560	569.156	112.699	27.308	68.112	-0.534	9.887	1083.527	-0.007889	-0.001912	-0.004768
1.3600	494.630	103.402	23.583	62.166	-0.540	9.879	941.648	-0.007238	-0.001651	-0.004352
1.3640	437.282	95.397	20.747	57.090	-0.531	9.885	832.472	-0.006678	-0.001452	-0.003996
1.3680	369.834	86.213	17.525	50.513	-0.536	9.896	704.069	-0.006035	-0.001227	-0.003536
1.3720	310.652	77.790	15.412	45.353	-0.531	9.895	591.402	-0.005445	-0.001079	-0.003175
1.3760	268.663	71.135	13.952	41.306	-0.527	9.887	511.465	-0.004979	-0.000977	-0.002891
1.3800	221.233	64.200	12.285	37.221	-0.538	9.879	421.171	-0.004494	-0.000860	-0.002605
1.3840	179.815	57.015	10.853	33.437	-0.533	9.885	342.321	-0.003991	-0.000760	-0.002341
1.3880	140.786	50.386	10.145	29.515	-0.539	9.896	268.021	-0.003527	-0.000710	-0.002066
1.3920	113.464	45.953	9.508	26.802	-0.530	9.894	216.007	-0.003217	-0.000666	-0.001876
1.3960	92.139	42.188	9.297	23.957	-0.534	9.887	175.409	-0.002953	-0.000651	-0.001677
1.4000	74.977	39.147	8.798	22.208	-0.542	9.880	142.736	-0.002740	-0.000616	-0.001555
1.4040	68.830	37.590	8.119	21.315	-0.540	9.886	131.035	-0.002631	-0.000568	-0.001492
1.4080	67.252	36.698	8.047	20.243	-0.541	9.896	128.031	-0.002569	-0.000563	-0.001417
1.4120	68.590	36.840	8.352	20.419	-0.536	9.895	130.577	-0.002579	-0.000585	-0.001429
1.4160	72.332	36.545	7.645	20.200	-0.537	9.887	137.701	-0.002558	-0.000535	-0.001414
1.4200	83.137	37.369	8.075	21.011	-0.534	9.879	158.272	-0.002616	-0.000565	-0.001471
1.4240	130.131	43.870	8.272	23.929	-0.536	9.885	247.736	-0.003071	-0.000579	-0.001675
1.4280	186.998	51.206	8.631	28.207	-0.540	9.896	355.997	-0.003584	-0.000604	-0.001975
1.4320	252.898	60.602	10.102	33.533	-0.540	9.895	481.453	-0.004242	-0.000707	-0.002347
1.4360	323.607	69.982	11.952	38.568	-0.541	9.887	616.064	-0.004899	-0.000837	-0.002700
1.4400	398.103	79.348	14.092	45.079	-0.544	9.879	757.885	-0.005554	-0.000986	-0.003156
1.4440	479.557	90.326	18.302	51.584	-0.532	9.885	912.952	-0.006323	-0.001281	-0.003611
1.4480	541.579	97.885	20.540	56.855	-0.534	9.895	1031.027	-0.006852	-0.001438	-0.003980
1.4520	624.010	108.612	24.820	64.009	-0.537	9.894	1187.954	-0.007603	-0.001737	-0.004481
1.4560	705.479	118.798	28.127	70.368	-0.548	9.886	1343.050	-0.008316	-0.001969	-0.004926
1.4600	771.829	126.623	31.657	76.850	-0.552	9.879	1469.364	-0.008864	-0.002216	-0.005379
1.4640	846.731	136.630	35.395	82.849	-0.541	9.885	1611.958	-0.009564	-0.002478	-0.005799
1.4680	906.559	143.785	38.147	88.010	-0.548	9.895	1725.855	-0.010065	-0.002670	-0.006161
1.4720	983.865	153.346	42.498	95.316	-0.542	9.893	1873.026	-0.010734	-0.002975	-0.006672
1.4760	1033.729	159.642	44.997	99.816	-0.537	9.886	1967.955	-0.011175	-0.003150	-0.006987
1.4800	1073.164	164.244	46.707	103.930	-0.548	9.879	2043.028	-0.011497	-0.003269	-0.007275
1.4840	1141.002	172.814	50.540	109.515	-0.536	9.885	2172.174	-0.012097	-0.003538	-0.007666
1.4880	1154.708	174.857	51.779	111.043	-0.544	9.895	2198.267	-0.012240	-0.003624	-0.007773
1.4920	1183.908	179.054	52.975	114.442	-0.536	9.894	2253.857	-0.012534	-0.003708	-0.008011
1.4960	1219.585	183.281	55.460	117.413	-0.538	9.886	2321.777	-0.012830	-0.003882	-0.008219
1.5000	1220.818	184.115	55.738	118.542	-0.537	9.879	2324.123	-0.012888	-0.003902	-0.008298
1.5040	1223.823	185.072	55.752	118.942	-0.532	9.885	2329.845	-0.012955	-0.003903	-0.008326
1.5080	1221.509	185.072	55.989	119.093	-0.532	9.895	2325.439	-0.012955	-0.003919	-0.008337
1.5120	1216.024	185.210	56.198	119.698	-0.534	9.894	2314.997	-0.012965	-0.003934	-0.008379
1.5160	1205.263	184.544	56.196	118.969	-0.538	9.887	2294.512	-0.012918	-0.003934	-0.008328
1.5200	1179.955	182.349	55.571	117.717	-0.542	9.879	2246.332	-0.012764	-0.003890	-0.008240
1.5240	1124.741	176.679	53.792	113.383	-0.525	9.885	2141.218	-0.012368	-0.003765	-0.007937
1.5280	1055.099	169.841	50.472	108.223	-0.534	9.896	2008.638	-0.011889	-0.003533	-0.007576
1.5320	995.737	163.559	47.680	104.424	-0.538	9.894	1895.628	-0.011449	-0.003338	-0.007310
1.5360	939.426	157.140	45.277	99.415	-0.527	9.886	1788.425	-0.011000	-0.003169	-0.006959
1.5400	863.247	149.107	41.287	93.967	-0.526	9.879	1643.400	-0.010437	-0.002890	-0.006578
1.5440	806.965	142.395	38.855	88.779	-0.517	9.884	1536.255	-0.009968	-0.002720	-0.006215
1.5480	718.869	132.264	33.977	81.142	-0.521	9.895	1368.542	-0.009259	-0.002378	-0.005680
1.5520	652.518	124.261	31.089	76.080	-0.520	9.894	1242.228	-0.008698	-0.002176	-0.005326
1.5560	590.526	116.408	28.364	71.043	-0.527	9.886	1124.210	-0.008149	-0.001985	-0.004973
1.5600	514.738	106.821	24.917	64.726	-0.540	9.879	979.929	-0.007477	-0.001744	-0.004531
1.5640	446.915	97.915	21.567	58.507	-0.526	9.885	850.811	-0.006854	-0.001510	-0.004095
1.5680	378.806	88.532	18.179	52.466	-0.532	9.895	721.149	-0.006197	-0.001272	-0.003673
1.5720	319.880	80.265	16.258	47.636	-0.526	9.894	608.969	-0.005619	-0.001138	-0.003335
1.5760	267.821	72.065	13.897	42.478	-0.521	9.887	509.863	-0.005045	-0.000973	-0.002973
1.5800	223.397	65.439	12.579	38.513	-0.538	9.879	425.291	-0.004581	-0.000881	-0.002696
1.5840	184.804	58.754	11.591	34.166	-0.521	9.885	351.820	-0.004113	-0.000811	-0.002392
1.5880	146.362	52.472	10.451	30.489	-0.526	9.896	278.635	-0.003673	-0.000732	-0.002134
1.5920	118.274	47.955	10.174	28.014	-0.531	9.894	225.163	-0.003357	-0.000712	-0.001961
1.5960	94.363	43.620	9.797	25.568	-0.530	9.886	179.644	-0.003053	-0.000686	-0.001790
1.6000	74.361	40.075	8.590	22.950	-0.542	9.879	141.563	-0.002805	-0.000601	-0.001607
1.6040	68.695	38.186	8.646	21.728	-0.528	9.885	130.777	-0.002673	-0.000605	-0.001521
1.6080	65.268	37.507	8.159	21.023	-0.534	9.896	124.254	-0.002625	-0.000571	-0.001472
1.6120	65.524	37.020	8.631	21.050	-0.533	9.894	124.741	-0.002591	-0.000604	-0.001473
1.6160	69.551	37.394	8.299	20.612	-0.536	9.887	132.408	-0.002618	-0.000581	-0.001443
1.6200	80.297	37.909	8.047	21.260	-0.543	9.879	152.864	-0.002654	-0.000563	-0.001488
1.6240	128.538	44.719	8.464	24.534	-0.538	9.885	244.703	-0.003130	-0.000592	-0.001717
1.6280	190.726	52.457	9.423	29.279	-0.545	9.896	363.092	-0.003672	-0.000660	-0.002050
1.6320	260.998	62.561	9.896	35.237	-0.548	9.894	496.874	-0.004379	-0.000693	-0.002467
1.6360	340.769	72.969	12.784	41.033	-0.540	9.886	648.737	-0.005108	-0.000895	-0.002872
1.6400	410.035	81.751	15.176	46.605	-0.550	9.879	780.602	-0.005723	-0.001062	-0.003262
1.6440	486.665	92.105	18.443	52.398	-0.541	9.884	926.485	-0.006447	-0.001291	-0.003668
1.6480	554.954	100.291	21.401	58.479	-0.540	9.896	1056.490	-0.007020	-0.001498	-0.004094
1.6520	627.496	109.919	25.182	65.253	-0.537	9.894	1194.592	-0.007694	-0.001763	-0.004568
1.6560	697.048	118.799	28.627	70.794	-0.539	9.886	1327.000	-0.008316	-0.002004	-0.004956
1.6600	764.255	126.816	31.183	76.945	-0.544	9.879	1454.945	-0.008877	-0.002183	-0.005386
1.6640	852.757	138.073	35.479	84.045	-0.527	9.885	1623.430	-0.009665	-0.002484	-0.005883
1.6680	906.243	144.384	38.660	88.862	-0.541	9.896	1725.254	-0.010107	-0.002706	-0.006220
1.6720	982.377	153.932	42.360	96.279	-0.542	9.894	1870.193	-0.010775	-0.002965	-0.006739
1.6760	1042.776	161.226	45.733	100.917	-0.544	9.886	1985.178	-0.011286	-0.003201	-0.007064
1.6800	1077.883	165.769	47.539	105.030	-0.549	9.879	2052.011	-0.011604	-0.003328	-0.007352
1.6840	1130.302	172.342	50.569	109.020	-0.529	9.885	2151.804	-0.012064	-0.003540	-0.007631
1.6880	1160.163	176.276	51.962	111.911	-0.538	9.896	2208.652	-0.012339	-0.003637	-0.007834
1.6920	1187.830	179.761	53.612	115.240	-0.534	9.894	2261.324	-0.012583	-0.003753	-0.008067
1.6960	1205.594	182.503	55.058	116.988	-0.536	9.886	2295.141	-0.012775	-0.003854	-0.008189
1.7000	1212.071	183.419	54.906	118.750	-0.551	9.879	2307.472	-0.012839	-0.003843	-0.008313
1.7040	1222.486	185.486	56.171	119.119	-0.536	9.885	2327.299	-0.012984	-0.003932	-0.008338
1.7080	1220.262	185.820	56.071	119.395	-0.544	9.896	2323.065	-0.013007	-0.003925	-0.008358
1.7120	1214.220	185.668	56.518	119.976	-0.546	9.894	2311.563	-0.012997	-0.003956	-0.008398
1.7160	1202.363	184.861	56.588	119.188	-0.539	9.886	2288.990	-0.012940	-0.003961	-0.008343
1.7200	1172.922	182.321	55.879	117.662	-0.548	9.879	2232.943	-0.012762	-0.003912	-0.008236
1.7240	1104.753	175.248	52.752	112.930	-0.535	9.885	2103.167	-0.012267	-0.003693	-0.007905
1.7280	1026.696	167.173	49.388	106.668	-0.536	9.896	1954.565	-0.011702	-0.003457	-0.007467
1.7320	978.034	161.975	47.402	103.242	-0.528	9.894	1861.925	-0.011338	-0.003318	-0.007227
1.7360	915.516	155.237	44.510	97.930	-0.538	9.887	1742.907	-0.010867	-0.003116	-0.006855
1.7400	845.408	147.384	40.370	92.962	-0.541	9.879	1609.440	-0.010317	-0.002826	-0.006507
1.7440	792.478	141.241	37.993	88.119	-0.529	9.884	1508.675	-0.009887	-0.002659	-0.006168
1.7480	708.018	131.501	34.062	80.717	-0.534	9.895	1347.885	-0.009205	-0.002384	-0.005650
1.7520	644.042	123.425	30.726	76.409	-0.534	9.894	1226.091	-0.008640	-0.002151	-0.005349
1.7560	573.589	114.658	27.333	69.847	-0.538	9.886	1091.967	-0.008026	-0.001913	-0.004889
1.7600	499.905	105.182	23.960	64.148	-0.536	9.879	951.691	-0.007363	-0.001677	-0.004490
1.7640	438.033	96.857	21.458	58.260	-0.536	9.885	833.902	-0.006780	-0.001502	-0.004078
1.7680	366.919	87.422	17.970	51.613	-0.535	9.896	698.519	-0.006120	-0.001258	-0.003613
1.7720	310.577	79.166	16.176	46.976	-0.537	9.894	591.259	-0.005542	-0.001132	-0.003288
1.7760	260.142	71.566	14.119	42.215	-0.538	9.886	495.243	-0.005010	-0.000988	-0.002955
1.7800	209.526	63.923	12.176	37.497	-0.542	9.879	398.884	-0.004475	-0.000852	-0.002625
1.7840	170.933	57.295	11.632	33.767	-0.533	9.885	325.413	-0.004011	-0.000814	-0.002364
1.7880	130.071	50.274	10.020	29.760	-0.532	9.896	247.622	-0.003519	-0.000701	-0.002083
1.7920	101.983	45.535	9.923	27.244	-0.534	9.894	194.149	-0.003187	-0.000695	-0.001907
1.7960	78.584	41.478	9.436	24.313	-0.537	9.886	149.603	-0.002903	-0.000661	-0.001702
1.8000	65.539	39.035	9.160	22.304	-0.538	9.879	124.769	-0.002732	-0.000641	-0.001561
1.8040	63.690	37.979	8.717	21.588	-0.521	9.885	121.250	-0.002659	-0.000610	-0.001511
1.8080	63.901	37.298	8.409	20.915	-0.525	9.896	121.651	-0.002611	-0.000589	-0.001464
1.8120	65.930	37.506	8.380	21.451	-0.526	9.894	125.513	-0.002625	-0.000587	-0.001502
1.8160	69.371	37.325	7.978	21.328	-0.529	9.886	132.065	-0.002613	-0.000558	-0.001493
1.8200	81.529	38.492	8.686	21.837	-0.534	9.879	155.210	-0.002694	-0.000608	-0.001529
1.8240	132.355	45.273	9.103	25.137	-0.517	9.885	251.970	-0.003169	-0.000637	-0.001760
1.8280	193.220	53.389	9.255	29.597	-0.524	9.895	367.842	-0.003737	-0.000648	-0.002072
1.8320	257.241	62.644	10.257	35.444	-0.526	9.894	489.721	-0.004385	-0.000718	-0.002481
1.8360	324.569	71.635	12.732	39.847	-0.525	9.886	617.895	-0.005014	-0.000891	-0.002789
1.8400	400.808	80.986	15.094	46.246	-0.539	9.879	763.035	-0.005669	-0.001057	-0.003237
1.8440	479.421	91.467	18.775	52.782	-0.525	9.885	912.695	-0.006403	-0.001314	-0.003695
1.8480	545.531	99.594	21.136	57.957	-0.533	9.896	1038.551	-0.006972	-0.001480	-0.004057
1.8520	630.727	110.240	24.917	65.979	-0.529	9.894	1200.743	-0.007717	-0.001744	-0.004619
1.8560	704.472	119.690	28.767	71.964	-0.532	9.886	1341.133	-0.008378	-0.002014	-0.005037
1.8600	764.946	127.235	31.269	77.041	-0.539	9.879	1456.261	-0.008906	-0.002189	-0.005393
1.8640	847.016	137.724	35.397	83.591	-0.528	9.885	1612.501	-0.009641	-0.002478	-0.005851
1.8680	907.415	144.940	38.786	89.014	-0.528	9.896	1727.486	-0.010146	-0.002715	-0.006231
1.8720	973.089	153.263	42.037	95.852	-0.526	9.893	1852.512	-0.010728	-0.002943	-0.006710
1.8760	1032.978	160.477	45.162	100.544	-0.534	9.886	1966.524	-0.011233	-0.003161	-0.007038
1.8800	1078.348	165.783	47.997	105.293	-0.532	9.878	2052.898	-0.011605	-0.003360	-0.007371
1.8840	1127.146	172.288	50.097	109.144	-0.532	9.885	2145.796	-0.012060	-0.003507	-0.007640
1.8880	1160.990	176.346	51.905	112.310	-0.541	9.896	2210.226	-0.012344	-0.003633	-0.007862
1.8920	1194.623	180.875	54.460	116.327	-0.537	9.893	2274.256	-0.012661	-0.003812	-0.008143
1.8960	1216.309	184.169	55.683	118.006	-0.549	9.886	2315.540	-0.012892	-0.003898	-0.008260
1.9000	1217.091	184.850	55.738	118.968	-0.551	9.878	2317.028	-0.012940	-0.003902	-0.008328
1.9040	1218.669	185.819	56.170	119.741	-0.541	9.885	2320.032	-0.013007	-0.003932	-0.008382
1.9080	1216.429	185.597	56.366	119.835	-0.542	9.895	2315.769	-0.012992	-0.003946	-0.008388
1.9120	1211.876	185.765	56.309	120.553	-0.548	9.893	2307.100	-0.013004	-0.003942	-0.008439
1.9160	1202.273	185.055	56.491	119.134	-0.539	9.885	2288.818	-0.012954	-0.003954	-0.008339
1.9200	1177.836	182.782	55.821	118.543	-0.537	9.879	2242.298	-0.012795	-0.003908	-0.008298
1.9240	1106.752	176.081	53.390	113.369	-0.530	9.885	2106.972	-0.012326	-0.003737	-0.007936
1.9280	1042.431	169.216	50.641	108.553	-0.532	9.895	1984.520	-0.011845	-0.003545	-0.007599
1.9320	996.970	164.201	48.235	105.112	-0.540	9.893	1897.974	-0.011494	-0.003376	-0.007358
1.9360	925.479	156.723	44.830	99.113	-0.537	9.886	1761.875	-0.010971	-0.003138	-0.006938
1.9400	853.268	148.774	40.719	94.228	-0.539	9.878	1624.403	-0.010414	-0.002850	-0.006596
1.9440	800.653	142.491	39.049	89.027	-0.534	9.884	1524.239	-0.009974	-0.002733	-0.006232
1.9480	716.449	133.002	34.187	82.354	-0.536	9.895	1363.935	-0.009310	-0.002393	-0.005765
1.9520	646.237	124.373	31.506	76.960	-0.543	9.893	1230.268	-0.008706	-0.002205	-0.005387
1.9560	576.730	115.559	28.600	70.315	-0.537	9.886	1097.946	-0.008089	-0.002002	-0.004922
1.9600	508.892	107.139	24.723	65.332	-0.541	9.878	968.800	-0.007500	-0.001731	-0.004573
1.9640	444.600	98.344	22.096	59.594	-0.538	9.885	846.405	-0.006884	-0.001547	-0.004172
1.9680	371.051	88.435	18.859	52.384	-0.541	9.896	706.387	-0.006190	-0.001320	-0.003667
1.9720	316.769	80.681	15.926	47.954	-0.544	9.893	603.046	-0.005648	-0.001115	-0.003357
1.9760	262.456	72.329	14.427	42.891	-0.553	9.885	499.649	-0.005063	-0.001010	-0.003002
1.9800	208.339	64.353	12.327	38.239	-0.552	9.878	396.624	-0.004505	-0.000863	-0.002677
1.9840	168.949	57.517	11.396	34.331	-0.541	9.884	321.636	-0.004026	-0.000798	-0.002403
1.9880	129.996	50.943	10.188	29.899	-0.538	9.895	247.478	-0.003566	-0.000713	-0.002093
1.9920	109.392	47.122	10.018	28.263	-0.532	9.893	208.254	-0.003299	-0.000701	-0.001978
1.9960	91.403	43.745	9.382	25.881	-0.537	9.886	174.007	-0.003062	-0.000657	-0.001812
Test Cycles
Time (sec)	Axial stress (kPa)	Axial micro-strain #1	Axial micro-strain #2	Axial micro-strain #3	Confining pressure (kPa)	Temperature (�C)	Load (N)	Displacement #1 (mm)	Displacement #2 (mm)	Displacement #3 (mm)
0.0000	75.262	40.673	9.119	24.039	-0.548	9.879	143.280	-0.002847	-0.000638	-0.001683
0.0040	70.543	39.325	9.049	22.757	-0.544	9.885	134.296	-0.002753	-0.000633	-0.001593
0.0080	66.471	38.395	8.603	22.099	-0.546	9.896	126.543	-0.002688	-0.000602	-0.001547
0.0120	61.782	37.604	8.590	21.671	-0.547	9.894	117.617	-0.002632	-0.000601	-0.001517
0.0160	65.464	37.367	8.533	20.900	-0.546	9.886	124.626	-0.002616	-0.000597	-0.001463
0.0200	76.900	38.674	8.394	21.975	-0.551	9.878	146.399	-0.002707	-0.000588	-0.001538
0.0240	129.049	45.579	9.256	25.634	-0.544	9.885	245.676	-0.003191	-0.000648	-0.001794
0.0280	191.702	53.639	9.449	30.299	-0.549	9.895	364.952	-0.003755	-0.000661	-0.002121
0.0320	256.430	62.978	10.645	35.419	-0.554	9.893	488.176	-0.004408	-0.000745	-0.002479
0.0360	328.807	72.468	12.523	40.591	-0.548	9.885	625.963	-0.005073	-0.000877	-0.002841
0.0400	403.483	82.002	15.399	47.363	-0.557	9.878	768.127	-0.005740	-0.001078	-0.003315
0.0440	484.651	92.953	18.913	53.829	-0.541	9.884	922.651	-0.006507	-0.001324	-0.003768
0.0480	549.213	100.484	21.261	58.452	-0.546	9.895	1045.561	-0.007034	-0.001488	-0.004092
0.0520	629.796	111.045	25.168	66.131	-0.545	9.893	1198.969	-0.007773	-0.001762	-0.004629
0.0560	699.272	119.854	28.866	71.482	-0.543	9.885	1331.234	-0.008390	-0.002021	-0.005004
0.0600	775.045	128.999	31.780	78.597	-0.553	9.879	1475.487	-0.009030	-0.002225	-0.005502
0.0640	856.138	139.378	35.980	85.008	-0.543	9.885	1629.868	-0.009756	-0.002519	-0.005951
0.0680	914.328	146.286	39.078	90.347	-0.547	9.895	1740.646	-0.010240	-0.002735	-0.006324
0.0720	976.411	154.375	42.609	96.401	-0.546	9.893	1858.835	-0.010806	-0.002983	-0.006748
0.0760	1035.683	161.297	45.861	101.565	-0.546	9.885	1971.674	-0.011291	-0.003210	-0.007110
0.0800	1085.427	167.174	48.249	106.311	-0.540	9.879	2066.374	-0.011702	-0.003377	-0.007442
0.0840	1131.639	173.370	50.583	110.011	-0.538	9.885	2154.350	-0.012136	-0.003541	-0.007701
0.0880	1157.668	176.387	52.391	112.860	-0.548	9.895	2203.903	-0.012347	-0.003667	-0.007900
0.0920	1188.296	180.931	54.641	116.301	-0.541	9.893	2262.211	-0.012665	-0.003825	-0.008141
0.0960	1210.117	183.726	55.794	117.786	-0.554	9.885	2303.753	-0.012861	-0.003906	-0.008245
0.1000	1215.092	184.821	56.031	119.397	-0.556	9.878	2313.223	-0.012937	-0.003922	-0.008358
0.1040	1225.672	186.515	56.254	120.235	-0.541	9.884	2333.364	-0.013056	-0.003938	-0.008416
0.1080	1222.306	186.919	56.518	120.510	-0.548	9.895	2326.956	-0.013084	-0.003956	-0.008436
0.1120	1213.814	186.669	56.670	121.267	-0.542	9.893	2310.791	-0.013067	-0.003967	-0.008489
0.1160	1199.733	185.404	56.670	119.755	-0.543	9.884	2283.983	-0.012978	-0.003967	-0.008383
0.1200	1158.555	181.459	55.446	117.345	-0.548	9.878	2205.591	-0.012702	-0.003881	-0.008214
0.1240	1095.796	175.025	53.046	112.847	-0.541	9.884	2086.115	-0.012252	-0.003713	-0.007899
0.1280	1033.338	168.188	49.986	108.291	-0.548	9.895	1967.211	-0.011773	-0.003499	-0.007580
0.1320	986.855	163.463	47.750	104.755	-0.537	9.893	1878.719	-0.011442	-0.003343	-0.007333
0.1360	920.791	156.250	45.316	99.197	-0.544	9.885	1752.949	-0.010938	-0.003172	-0.006944
0.1400	848.113	148.342	40.705	93.610	-0.548	9.878	1614.590	-0.010384	-0.002849	-0.006553
0.1440	793.365	141.994	38.259	88.893	-0.536	9.884	1510.363	-0.009940	-0.002678	-0.006222
0.1480	704.862	131.863	33.799	81.624	-0.535	9.895	1341.877	-0.009230	-0.002366	-0.005714
0.1520	635.642	123.135	31.213	76.410	-0.530	9.893	1210.098	-0.008619	-0.002185	-0.005349
0.1560	572.327	115.046	27.654	70.285	-0.544	9.884	1089.563	-0.008053	-0.001936	-0.004920
0.1600	503.647	106.613	24.292	65.058	-0.546	9.878	958.815	-0.007463	-0.001700	-0.004554
0.1640	439.866	98.106	21.859	59.222	-0.545	9.885	837.393	-0.006867	-0.001530	-0.004146
0.1680	367.249	88.130	18.581	52.727	-0.546	9.896	699.148	-0.006169	-0.001301	-0.003691
0.1720	305.828	79.694	15.994	47.291	-0.540	9.893	582.218	-0.005579	-0.001120	-0.003310
0.1760	248.931	70.941	13.966	41.734	-0.540	9.884	473.900	-0.004966	-0.000978	-0.002921
0.1800	201.035	63.379	12.576	37.978	-0.543	9.878	382.719	-0.004437	-0.000880	-0.002658
0.1840	172.857	57.920	11.576	34.621	-0.538	9.884	329.075	-0.004054	-0.000810	-0.002423
0.1880	131.333	51.304	10.492	30.421	-0.536	9.895	250.025	-0.003591	-0.000734	-0.002129
0.1920	105.124	46.915	9.894	27.780	-0.532	9.893	200.129	-0.003284	-0.000693	-0.001945
0.1960	87.315	43.258	9.727	25.538	-0.537	9.884	166.225	-0.003028	-0.000681	-0.001788
0.2000	71.340	40.799	9.077	24.065	-0.540	9.878	135.813	-0.002856	-0.000635	-0.001685
0.2040	68.124	39.450	9.171	22.785	-0.527	9.885	129.690	-0.002761	-0.000642	-0.001595
0.2080	68.244	38.757	9.049	22.152	-0.531	9.896	129.919	-0.002713	-0.000633	-0.001551
0.2120	69.551	38.908	8.756	22.416	-0.538	9.894	132.408	-0.002724	-0.000613	-0.001569
0.2160	72.722	38.826	8.880	22.277	-0.545	9.885	138.445	-0.002718	-0.000622	-0.001559
0.2200	82.987	39.560	9.118	22.869	-0.550	9.878	157.986	-0.002769	-0.000638	-0.001601
0.2240	129.214	45.788	8.895	25.743	-0.539	9.884	245.991	-0.003205	-0.000623	-0.001802
0.2280	188.712	53.695	9.853	30.079	-0.541	9.895	359.259	-0.003759	-0.000690	-0.002106
0.2320	248.931	62.701	10.159	35.459	-0.533	9.893	473.900	-0.004389	-0.000711	-0.002482
0.2360	317.415	71.302	12.272	40.191	-0.532	9.884	604.277	-0.004991	-0.000859	-0.002813
0.2400	389.371	80.836	14.829	46.191	-0.533	9.878	741.262	-0.005659	-0.001038	-0.003233
0.2440	467.173	91.188	17.885	52.341	-0.538	9.884	889.378	-0.006383	-0.001252	-0.003664
0.2480	532.051	98.704	20.888	57.792	-0.541	9.895	1012.888	-0.006909	-0.001462	-0.004045
0.2520	620.403	109.890	24.848	65.814	-0.542	9.892	1181.087	-0.007692	-0.001739	-0.004607
0.2560	694.027	119.243	28.668	71.277	-0.547	9.884	1321.249	-0.008347	-0.002007	-0.004989
0.2600	760.573	127.387	31.711	77.330	-0.548	9.878	1447.935	-0.008917	-0.002220	-0.005413
0.2640	847.452	138.531	35.994	84.652	-0.543	9.884	1613.331	-0.009697	-0.002520	-0.005926
0.2680	911.323	146.105	38.815	90.253	-0.544	9.895	1734.924	-0.010227	-0.002717	-0.006318
0.2720	974.547	154.416	42.190	96.347	-0.533	9.893	1855.288	-0.010809	-0.002953	-0.006744
0.2760	1024.832	160.462	45.413	100.462	-0.543	9.884	1951.017	-0.011232	-0.003179	-0.007032
0.2800	1082.196	167.131	48.081	106.283	-0.542	9.878	2060.223	-0.011699	-0.003366	-0.007440
0.2840	1128.453	173.469	50.890	110.121	-0.534	9.884	2148.285	-0.012143	-0.003562	-0.007708
0.2880	1152.919	176.567	52.071	112.391	-0.539	9.895	2194.862	-0.012360	-0.003645	-0.007867
0.2920	1192.880	181.486	54.475	116.643	-0.534	9.893	2270.937	-0.012704	-0.003813	-0.008165
0.2960	1214.446	184.419	56.377	118.778	-0.531	9.885	2311.993	-0.012909	-0.003946	-0.008314
0.3000	1214.536	185.072	55.783	119.905	-0.537	9.878	2312.164	-0.012955	-0.003905	-0.008393
0.3040	1222.877	186.810	56.463	120.401	-0.541	9.885	2328.043	-0.013077	-0.003952	-0.008428
0.3080	1221.975	187.004	56.739	120.511	-0.545	9.895	2326.326	-0.013090	-0.003972	-0.008436
0.3120	1216.760	187.030	56.768	120.923	-0.538	9.893	2316.399	-0.013092	-0.003974	-0.008465
0.3160	1206.405	186.098	56.781	120.303	-0.538	9.885	2296.686	-0.013027	-0.003975	-0.008421
0.3200	1179.204	183.670	56.032	119.699	-0.541	9.878	2244.902	-0.012857	-0.003922	-0.008379
0.3240	1112.508	176.999	54.153	114.264	-0.536	9.885	2117.929	-0.012390	-0.003791	-0.007998
0.3280	1036.780	169.342	49.847	108.470	-0.538	9.895	1973.763	-0.011854	-0.003489	-0.007593
0.3320	992.717	164.339	48.277	105.376	-0.526	9.893	1889.877	-0.011504	-0.003379	-0.007376
0.3360	929.567	157.584	45.330	99.966	-0.536	9.884	1769.657	-0.011031	-0.003173	-0.006998
0.3400	850.743	149.135	41.470	94.462	-0.542	9.878	1619.596	-0.010439	-0.002903	-0.006612
0.3440	793.440	142.062	38.660	89.316	-0.538	9.885	1510.506	-0.009944	-0.002706	-0.006252
0.3480	715.548	133.461	34.840	82.421	-0.542	9.896	1362.219	-0.009342	-0.002439	-0.005769
0.3520	645.966	125.028	31.573	77.249	-0.533	9.893	1229.753	-0.008752	-0.002210	-0.005407
0.3560	572.868	115.950	27.919	70.918	-0.541	9.884	1090.593	-0.008116	-0.001954	-0.004964
0.3600	502.580	106.946	25.043	65.414	-0.530	9.878	956.783	-0.007486	-0.001753	-0.004579
0.3640	444.120	98.886	22.375	59.429	-0.522	9.885	845.490	-0.006922	-0.001566	-0.004160
0.3680	369.579	89.061	19.177	53.113	-0.534	9.895	703.583	-0.006234	-0.001342	-0.003718
0.3720	315.056	81.113	15.926	48.601	-0.528	9.893	599.785	-0.005678	-0.001115	-0.003402
0.3760	262.621	73.316	14.662	43.440	-0.528	9.884	499.964	-0.005132	-0.001026	-0.003041
0.3800	209.090	65.019	12.618	39.022	-0.533	9.878	398.054	-0.004551	-0.000883	-0.002732
0.3840	177.425	59.365	11.576	35.377	-0.536	9.885	337.772	-0.004156	-0.000810	-0.002476
0.3880	138.336	52.986	10.715	31.689	-0.540	9.896	263.357	-0.003709	-0.000750	-0.002218
0.3920	112.037	48.304	10.563	28.990	-0.541	9.893	213.289	-0.003381	-0.000739	-0.002029
0.3960	87.345	43.746	9.395	26.005	-0.537	9.884	166.283	-0.003062	-0.000658	-0.001820
0.4000	68.454	40.520	9.325	23.982	-0.538	9.879	130.320	-0.002836	-0.000653	-0.001679
0.4040	62.052	38.827	8.799	22.662	-0.536	9.885	118.132	-0.002718	-0.000616	-0.001586
0.4080	59.828	38.159	8.826	22.071	-0.548	9.896	113.897	-0.002671	-0.000618	-0.001545
0.4120	63.194	38.187	9.159	22.056	-0.538	9.893	120.306	-0.002673	-0.000641	-0.001544
0.4160	68.710	38.591	8.520	21.864	-0.541	9.884	130.806	-0.002701	-0.000596	-0.001530
0.4200	88.277	40.548	9.062	23.336	-0.540	9.878	168.056	-0.002838	-0.000634	-0.001634
0.4240	143.867	48.053	9.228	27.437	-0.533	9.884	273.886	-0.003364	-0.000646	-0.001921
0.4280	198.826	55.265	9.769	31.262	-0.533	9.895	378.513	-0.003869	-0.000684	-0.002188
0.4320	265.702	64.908	10.644	36.655	-0.529	9.893	505.829	-0.004544	-0.000745	-0.002566
0.4360	330.655	73.663	12.385	41.210	-0.532	9.884	629.482	-0.005156	-0.000867	-0.002885
0.4400	402.536	82.626	15.134	47.401	-0.535	9.878	766.325	-0.005784	-0.001059	-0.003318
0.4440	485.418	93.509	18.582	54.515	-0.536	9.884	924.110	-0.006546	-0.001301	-0.003816
0.4480	554.578	101.665	21.401	59.842	-0.547	9.895	1055.775	-0.007117	-0.001498	-0.004189
0.4520	644.914	113.130	26.097	68.045	-0.541	9.892	1227.751	-0.007919	-0.001827	-0.004763
0.4560	708.109	121.772	29.170	73.134	-0.544	9.884	1348.057	-0.008524	-0.002042	-0.005119
0.4600	771.423	128.792	32.185	78.928	-0.541	9.878	1468.592	-0.009015	-0.002253	-0.005525
0.4640	863.352	140.478	36.951	86.290	-0.529	9.884	1643.600	-0.009833	-0.002587	-0.006040
0.4680	928.485	148.065	39.912	91.862	-0.536	9.895	1767.597	-0.010365	-0.002794	-0.006430
0.4720	993.167	156.598	43.274	97.971	-0.534	9.892	1890.736	-0.010962	-0.003029	-0.006858
0.4760	1044.474	162.879	46.290	102.428	-0.541	9.884	1988.411	-0.011402	-0.003240	-0.007170
0.4800	1093.407	168.645	48.358	107.548	-0.538	9.878	2081.566	-0.011805	-0.003385	-0.007528
0.4840	1146.953	175.734	51.932	112.242	-0.528	9.884	2183.504	-0.012301	-0.003635	-0.007857
0.4880	1169.451	178.446	53.447	114.139	-0.537	9.894	2226.334	-0.012491	-0.003741	-0.007990
0.4920	1202.964	182.961	54.780	118.075	-0.534	9.892	2290.134	-0.012807	-0.003835	-0.008265
0.4960	1223.177	185.876	56.768	119.987	-0.548	9.883	2328.615	-0.013011	-0.003974	-0.008399
0.5000	1225.687	186.474	56.724	121.158	-0.540	9.877	2333.393	-0.013053	-0.003971	-0.008481
0.5040	1227.024	187.490	56.823	121.404	-0.526	9.884	2335.939	-0.013124	-0.003978	-0.008498
0.5080	1223.403	187.337	57.130	121.212	-0.532	9.895	2329.044	-0.013114	-0.003999	-0.008485
0.5120	1218.068	187.379	57.339	121.760	-0.533	9.893	2318.888	-0.013117	-0.004014	-0.008523
0.5160	1204.061	186.696	57.157	120.607	-0.538	9.884	2292.223	-0.013069	-0.004001	-0.008442
0.5200	1163.575	182.698	55.850	118.707	-0.539	9.878	2215.147	-0.012789	-0.003910	-0.008309
0.5240	1093.722	175.330	52.780	113.246	-0.537	9.884	2082.167	-0.012273	-0.003695	-0.007927
0.5280	1033.894	169.132	49.791	108.609	-0.537	9.895	1968.269	-0.011839	-0.003485	-0.007603
0.5320	988.193	163.933	48.166	105.580	-0.538	9.893	1881.266	-0.011475	-0.003372	-0.007391
0.5360	920.490	156.792	44.830	99.941	-0.541	9.884	1752.377	-0.010975	-0.003138	-0.006996
0.5400	846.129	148.537	40.942	94.077	-0.542	9.878	1610.813	-0.010398	-0.002866	-0.006585
0.5440	787.669	141.824	38.673	88.917	-0.531	9.884	1499.519	-0.009928	-0.002707	-0.006224
0.5480	711.069	133.101	34.993	82.435	-0.533	9.895	1353.693	-0.009317	-0.002450	-0.005770
0.5520	643.577	124.803	31.713	77.524	-0.535	9.892	1225.204	-0.008736	-0.002220	-0.005427
0.5560	569.532	115.464	28.114	71.042	-0.546	9.884	1084.242	-0.008083	-0.001968	-0.004973
0.5600	496.554	106.459	24.919	65.098	-0.544	9.878	945.311	-0.007452	-0.001744	-0.004557
0.5640	432.548	97.761	21.345	58.879	-0.538	9.884	823.460	-0.006843	-0.001494	-0.004122
0.5680	357.406	87.407	18.219	52.398	-0.537	9.895	680.408	-0.006118	-0.001275	-0.003668
0.5720	306.745	79.903	16.272	48.366	-0.536	9.893	583.963	-0.005593	-0.001139	-0.003386
0.5760	257.827	72.536	14.384	43.494	-0.545	9.884	490.837	-0.005078	-0.001007	-0.003045
0.5800	204.401	64.494	12.423	38.334	-0.543	9.877	389.128	-0.004515	-0.000870	-0.002683
0.5840	167.146	58.268	11.897	34.622	-0.534	9.885	318.203	-0.004079	-0.000833	-0.002424
0.5880	128.673	51.374	10.701	31.206	-0.544	9.895	244.961	-0.003596	-0.000749	-0.002184
0.5920	101.442	46.634	10.145	28.152	-0.544	9.893	193.119	-0.003264	-0.000710	-0.001971
0.5960	80.763	43.162	9.645	25.525	-0.544	9.884	153.751	-0.003021	-0.000675	-0.001787
0.6000	65.614	40.519	9.355	23.776	-0.546	9.878	124.912	-0.002836	-0.000655	-0.001664
0.6040	60.925	39.200	8.991	22.703	-0.535	9.884	115.986	-0.002744	-0.000629	-0.001589
0.6080	58.085	37.811	8.786	22.193	-0.539	9.895	110.579	-0.002647	-0.000615	-0.001554
0.6120	60.204	37.687	8.979	22.016	-0.540	9.892	114.613	-0.002638	-0.000629	-0.001541
0.6160	64.382	38.021	8.505	21.685	-0.550	9.884	122.566	-0.002661	-0.000595	-0.001518
0.6200	74.225	38.799	8.783	22.538	-0.544	9.878	141.306	-0.002716	-0.000615	-0.001578
0.6240	116.981	44.383	8.757	25.636	-0.534	9.884	222.702	-0.003107	-0.000613	-0.001795
0.6280	175.336	52.027	9.061	29.679	-0.545	9.895	333.796	-0.003642	-0.000634	-0.002078
0.6320	247.262	62.659	10.547	35.212	-0.530	9.892	470.724	-0.004386	-0.000738	-0.002465
0.6360	315.131	71.622	12.273	40.316	-0.544	9.883	599.928	-0.005014	-0.000859	-0.002822
0.6400	379.482	79.668	14.566	46.068	-0.536	9.878	722.437	-0.005577	-0.001020	-0.003225
0.6440	459.253	90.494	18.065	52.301	-0.541	9.884	874.300	-0.006335	-0.001265	-0.003661
0.6480	532.952	99.163	21.124	58.465	-0.546	9.895	1014.605	-0.006941	-0.001479	-0.004093
0.6520	615.038	109.795	24.502	65.608	-0.544	9.892	1170.874	-0.007686	-0.001715	-0.004593
0.6560	689.834	118.869	28.919	71.291	-0.557	9.883	1313.267	-0.008321	-0.002024	-0.004990
0.6600	758.890	127.512	31.518	77.978	-0.549	9.878	1444.731	-0.008926	-0.002206	-0.005458
0.6640	836.241	137.447	35.201	84.430	-0.541	9.885	1591.988	-0.009621	-0.002464	-0.005910
0.6680	904.109	145.662	38.785	90.059	-0.542	9.895	1721.191	-0.010196	-0.002715	-0.006304
0.6720	968.340	153.886	42.177	96.058	-0.541	9.892	1843.472	-0.010772	-0.002952	-0.006724
0.6760	1019.392	160.364	45.165	100.503	-0.551	9.883	1940.660	-0.011225	-0.003162	-0.007035
0.6800	1072.848	166.422	47.622	105.814	-0.542	9.877	2042.427	-0.011650	-0.003334	-0.007407
0.6840	1129.265	173.841	51.264	110.659	-0.536	9.884	2149.830	-0.012169	-0.003588	-0.007746
0.6880	1154.963	176.930	52.627	113.479	-0.534	9.894	2198.753	-0.012385	-0.003684	-0.007944
0.6920	1188.657	181.472	54.308	116.713	-0.530	9.892	2262.897	-0.012703	-0.003802	-0.008170
0.6960	1207.277	184.351	56.045	118.306	-0.540	9.884	2298.346	-0.012905	-0.003923	-0.008281
0.7000	1211.425	185.099	55.877	120.097	-0.541	9.877	2306.242	-0.012957	-0.003911	-0.008407
0.7040	1219.661	186.739	56.629	120.936	-0.532	9.884	2321.920	-0.013072	-0.003964	-0.008466
0.7080	1218.864	186.669	56.613	120.965	-0.538	9.894	2320.404	-0.013067	-0.003963	-0.008468
0.7120	1213.875	186.780	56.656	121.239	-0.535	9.892	2310.905	-0.013075	-0.003966	-0.008487
0.7160	1203.971	186.460	57.033	120.745	-0.542	9.883	2292.051	-0.013052	-0.003992	-0.008452
0.7200	1182.570	184.460	55.976	119.753	-0.535	9.878	2251.310	-0.012912	-0.003918	-0.008383
0.7240	1119.196	178.318	53.863	115.570	-0.529	9.884	2130.661	-0.012482	-0.003770	-0.008090
0.7280	1048.863	170.620	50.890	110.329	-0.535	9.895	1996.765	-0.011943	-0.003562	-0.007723
0.7320	1003.071	166.022	48.861	106.542	-0.530	9.893	1909.590	-0.011622	-0.003420	-0.007458
0.7360	935.594	158.725	45.748	100.805	-0.549	9.883	1781.130	-0.011111	-0.003202	-0.007056
0.7400	864.224	151.274	41.650	95.894	-0.549	9.877	1645.260	-0.010589	-0.002916	-0.006713
0.7440	806.094	144.201	39.063	90.609	-0.541	9.884	1534.595	-0.010094	-0.002734	-0.006343
0.7480	727.766	134.948	35.537	84.336	-0.537	9.895	1385.479	-0.009446	-0.002488	-0.005904
0.7520	663.249	127.346	32.533	79.107	-0.539	9.892	1262.655	-0.008914	-0.002277	-0.005538
0.7560	588.122	118.300	28.920	72.529	-0.549	9.883	1119.633	-0.008281	-0.002024	-0.005077
0.7600	516.767	109.350	25.378	67.149	-0.552	9.878	983.791	-0.007654	-0.001776	-0.004700
0.7640	452.881	100.916	22.791	61.300	-0.540	9.884	862.169	-0.007064	-0.001595	-0.004291
0.7680	373.155	89.949	19.218	54.282	-0.546	9.895	710.392	-0.006296	-0.001345	-0.003800
0.7720	318.422	82.516	17.190	48.889	-0.539	9.892	606.194	-0.005776	-0.001203	-0.003422
0.7760	266.123	74.137	14.729	44.088	-0.548	9.883	506.630	-0.005190	-0.001031	-0.003086
0.7800	214.440	66.602	12.967	39.904	-0.546	9.877	408.239	-0.004662	-0.000908	-0.002793
0.7840	174.480	59.670	11.826	35.762	-0.544	9.884	332.165	-0.004177	-0.000828	-0.002503
0.7880	135.812	53.057	10.589	31.716	-0.541	9.894	258.551	-0.003714	-0.000741	-0.002220
0.7920	110.023	48.639	10.381	29.005	-0.540	9.892	209.455	-0.003405	-0.000727	-0.002030
0.7960	87.616	44.357	9.881	26.790	-0.547	9.883	166.798	-0.003105	-0.000692	-0.001875
0.8000	69.491	41.034	9.394	24.520	-0.549	9.877	132.294	-0.002872	-0.000658	-0.001716
0.8040	65.178	39.796	9.186	23.391	-0.545	9.884	124.083	-0.002786	-0.000643	-0.001637
0.8080	61.496	38.644	8.951	22.208	-0.544	9.894	117.073	-0.002705	-0.000627	-0.001555
0.8120	61.436	38.742	8.521	22.691	-0.538	9.892	116.959	-0.002712	-0.000596	-0.001588
0.8160	65.193	38.491	9.118	22.291	-0.557	9.883	124.111	-0.002694	-0.000638	-0.001560
0.8200	74.541	39.353	8.950	22.829	-0.551	9.878	141.907	-0.002755	-0.000627	-0.001598
0.8240	118.890	45.204	9.452	25.799	-0.550	9.884	226.336	-0.003164	-0.000662	-0.001806
0.8280	179.589	52.527	9.519	30.449	-0.545	9.894	341.892	-0.003677	-0.000666	-0.002131
0.8320	246.421	62.449	10.396	35.775	-0.536	9.892	469.122	-0.004371	-0.000728	-0.002504
0.8360	315.431	71.774	12.590	40.194	-0.550	9.883	600.500	-0.005024	-0.000881	-0.002814
0.8400	387.207	81.238	14.605	46.853	-0.547	9.877	737.143	-0.005687	-0.001022	-0.003280
0.8440	460.380	91.118	17.914	52.481	-0.540	9.884	876.446	-0.006378	-0.001254	-0.003674
0.8480	533.569	99.734	20.721	58.533	-0.537	9.894	1015.778	-0.006981	-0.001450	-0.004097
0.8520	625.212	111.407	25.293	66.639	-0.537	9.892	1190.243	-0.007798	-0.001770	-0.004665
0.8560	691.818	119.786	28.433	71.964	-0.544	9.882	1317.043	-0.008385	-0.001990	-0.005037
0.8600	759.385	127.832	31.602	78.458	-0.550	9.877	1445.675	-0.008948	-0.002212	-0.005492
0.8640	844.236	138.393	35.771	85.145	-0.540	9.884	1607.208	-0.009687	-0.002504	-0.005960
0.8680	904.049	145.911	39.023	90.225	-0.540	9.894	1721.077	-0.010214	-0.002732	-0.006316
0.8720	968.070	154.041	41.830	96.238	-0.532	9.892	1842.957	-0.010783	-0.002928	-0.006737
0.8760	1018.686	160.226	45.234	100.627	-0.544	9.882	1939.316	-0.011216	-0.003166	-0.007044
0.8800	1074.261	166.936	48.053	106.419	-0.542	9.877	2045.116	-0.011686	-0.003364	-0.007449
0.8840	1128.423	174.120	51.392	110.893	-0.538	9.884	2148.228	-0.012188	-0.003597	-0.007762
0.8880	1146.487	176.207	51.975	112.930	-0.552	9.894	2182.617	-0.012334	-0.003638	-0.007905
0.8920	1189.874	181.764	54.489	117.564	-0.543	9.892	2265.215	-0.012724	-0.003814	-0.008229
0.8960	1213.454	184.945	56.004	119.202	-0.550	9.883	2310.104	-0.012946	-0.003920	-0.008344
0.9000	1213.319	185.654	56.504	120.263	-0.549	9.878	2309.847	-0.012996	-0.003955	-0.008418
0.9040	1213.484	186.460	56.321	120.333	-0.549	9.884	2310.162	-0.013052	-0.003942	-0.008423
0.9080	1210.133	186.585	56.642	120.592	-0.547	9.895	2303.782	-0.013061	-0.003965	-0.008441
0.9120	1204.512	186.113	56.949	120.978	-0.538	9.892	2293.081	-0.013028	-0.003986	-0.008468
0.9160	1192.534	185.431	56.321	119.810	-0.550	9.883	2270.279	-0.012980	-0.003942	-0.008387
0.9200	1165.558	182.878	55.391	118.872	-0.541	9.878	2218.924	-0.012801	-0.003877	-0.008321
0.9240	1101.883	176.357	53.391	114.277	-0.547	9.885	2097.702	-0.012345	-0.003737	-0.007999
0.9280	1035.487	169.465	49.916	109.103	-0.546	9.894	1971.302	-0.011863	-0.003494	-0.007637
0.9320	988.028	164.268	48.053	105.676	-0.545	9.892	1880.951	-0.011499	-0.003364	-0.007397
0.9360	918.642	156.765	44.774	99.898	-0.556	9.883	1748.857	-0.010974	-0.003134	-0.006993
0.9400	856.694	149.887	41.567	95.453	-0.546	9.877	1630.926	-0.010492	-0.002910	-0.006682
0.9440	789.713	142.491	39.162	89.537	-0.538	9.884	1503.410	-0.009974	-0.002741	-0.006268
0.9480	708.604	133.015	34.798	82.740	-0.541	9.895	1349.001	-0.009311	-0.002436	-0.005792
0.9520	647.469	125.499	31.642	77.894	-0.531	9.892	1232.615	-0.008785	-0.002215	-0.005453
0.9560	575.423	116.881	28.990	71.497	-0.549	9.883	1095.457	-0.008182	-0.002029	-0.005005
0.9600	503.752	107.725	24.973	66.391	-0.554	9.877	959.015	-0.007541	-0.001748	-0.004647
0.9640	440.573	99.234	21.985	60.185	-0.550	9.884	838.737	-0.006946	-0.001539	-0.004213
0.9680	368.331	89.438	19.054	53.499	-0.553	9.895	701.208	-0.006261	-0.001334	-0.003745
0.9720	311.359	81.528	16.761	48.655	-0.535	9.892	592.747	-0.005707	-0.001173	-0.003406
0.9760	255.964	72.982	14.162	43.398	-0.548	9.883	487.289	-0.005109	-0.000991	-0.003038
0.9800	216.244	66.632	12.802	40.041	-0.551	9.877	411.673	-0.004664	-0.000896	-0.002803
0.9840	181.243	60.574	12.175	36.298	-0.552	9.884	345.039	-0.004240	-0.000852	-0.002541
0.9880	138.036	53.541	10.632	32.226	-0.548	9.894	262.785	-0.003748	-0.000744	-0.002256
0.9920	109.076	48.318	10.421	29.253	-0.542	9.892	207.653	-0.003382	-0.000730	-0.002048
0.9960	85.962	44.218	9.743	26.488	-0.556	9.883	163.651	-0.003095	-0.000682	-0.001854
1.0000	71.205	41.785	9.242	25.030	-0.554	9.878	135.555	-0.002925	-0.000647	-0.001752
1.0040	69.221	40.686	9.241	23.832	-0.554	9.884	131.779	-0.002848	-0.000647	-0.001668
1.0080	70.002	39.910	9.006	23.307	-0.555	9.895	133.266	-0.002794	-0.000630	-0.001631
1.0120	71.806	39.922	9.227	23.391	-0.545	9.892	136.700	-0.002795	-0.000646	-0.001637
1.0160	76.029	40.062	8.978	23.129	-0.551	9.882	144.739	-0.002804	-0.000628	-0.001619
1.0200	88.893	41.465	9.158	24.245	-0.553	9.877	169.230	-0.002903	-0.000641	-0.001697
1.0240	143.025	48.830	9.702	27.961	-0.544	9.884	272.284	-0.003418	-0.000679	-0.001957
1.0280	198.405	55.960	9.812	31.713	-0.545	9.894	377.712	-0.003917	-0.000687	-0.002220
1.0320	261.344	65.450	11.340	37.030	-0.538	9.892	497.532	-0.004582	-0.000794	-0.002592
1.0360	329.453	74.386	13.118	42.023	-0.553	9.882	627.193	-0.005207	-0.000918	-0.002942
1.0400	403.378	83.642	15.622	48.367	-0.562	9.877	767.927	-0.005855	-0.001094	-0.003386
1.0440	483.073	94.231	19.360	54.282	-0.559	9.884	919.647	-0.006596	-0.001355	-0.003800
1.0480	551.948	102.334	22.276	60.613	-0.552	9.894	1050.768	-0.007163	-0.001559	-0.004243
1.0520	639.955	113.200	25.751	68.263	-0.545	9.892	1218.309	-0.007924	-0.001803	-0.004778
1.0560	711.084	122.302	29.879	73.918	-0.556	9.882	1353.722	-0.008561	-0.002092	-0.005174
1.0600	777.961	130.681	32.394	79.779	-0.550	9.877	1481.037	-0.009148	-0.002268	-0.005585
1.0640	866.493	141.591	36.994	87.214	-0.546	9.884	1649.580	-0.009911	-0.002590	-0.006105
1.0680	922.699	148.107	39.939	92.343	-0.549	9.894	1756.582	-0.010368	-0.002796	-0.006464
1.0720	993.799	157.097	43.954	99.059	-0.541	9.892	1891.937	-0.010997	-0.003077	-0.006934
1.0760	1047.059	163.698	46.943	103.241	-0.549	9.882	1993.332	-0.011459	-0.003286	-0.007227
1.0800	1096.292	169.952	49.124	108.113	-0.550	9.877	2087.059	-0.011897	-0.003439	-0.007568
1.0840	1148.636	176.707	52.404	112.956	-0.542	9.884	2186.708	-0.012370	-0.003668	-0.007907
1.0880	1164.942	178.874	53.557	115.063	-0.546	9.894	2217.751	-0.012521	-0.003749	-0.008054
1.0920	1207.983	184.294	55.878	119.078	-0.541	9.892	2299.690	-0.012901	-0.003911	-0.008335
1.0960	1226.513	187.101	57.214	120.756	-0.550	9.882	2334.967	-0.013097	-0.004005	-0.008453
1.1000	1227.055	187.573	57.197	121.789	-0.550	9.877	2335.997	-0.013130	-0.004004	-0.008525
1.1040	1239.964	189.354	58.311	122.849	-0.545	9.884	2360.573	-0.013255	-0.004082	-0.008599
1.1080	1237.755	189.451	58.045	123.277	-0.548	9.894	2356.367	-0.013262	-0.004063	-0.008629
1.1120	1230.631	189.312	58.380	123.318	-0.544	9.892	2342.806	-0.013252	-0.004087	-0.008632
1.1160	1214.536	188.337	58.116	122.258	-0.559	9.882	2312.164	-0.013184	-0.004068	-0.008558
1.1200	1171.479	184.543	56.421	119.672	-0.554	9.877	2230.196	-0.012918	-0.003949	-0.008377
1.1240	1097.194	176.691	53.779	114.058	-0.540	9.884	2088.776	-0.012368	-0.003765	-0.007984
1.1280	1029.416	169.300	50.169	109.339	-0.537	9.895	1959.744	-0.011851	-0.003512	-0.007654
1.1320	985.247	164.269	48.109	105.705	-0.536	9.892	1875.658	-0.011499	-0.003368	-0.007399
1.1360	927.944	158.280	45.791	101.068	-0.546	9.882	1766.567	-0.011080	-0.003205	-0.007075
1.1400	857.807	150.664	41.788	95.975	-0.550	9.877	1633.043	-0.010547	-0.002925	-0.006718
1.1440	796.506	143.452	39.552	90.017	-0.550	9.884	1516.342	-0.010042	-0.002769	-0.006301
1.1480	716.615	134.224	35.117	83.866	-0.549	9.895	1364.250	-0.009396	-0.002458	-0.005871
1.1520	642.960	125.706	31.711	78.157	-0.539	9.892	1224.031	-0.008799	-0.002220	-0.005471
1.1560	566.421	116.227	28.545	71.318	-0.554	9.882	1078.320	-0.008136	-0.001998	-0.004992
1.1600	498.673	107.348	25.042	65.661	-0.557	9.877	949.345	-0.007514	-0.001753	-0.004596
1.1640	431.421	98.607	22.275	59.512	-0.544	9.885	821.314	-0.006903	-0.001559	-0.004166
1.1680	370.465	90.021	19.166	54.271	-0.556	9.895	705.271	-0.006301	-0.001342	-0.003799
1.1720	316.498	82.431	16.884	49.537	-0.539	9.892	602.531	-0.005770	-0.001182	-0.003468
1.1760	256.340	73.220	14.441	43.851	-0.548	9.882	488.005	-0.005125	-0.001011	-0.003070
1.1800	212.036	66.605	12.732	39.794	-0.553	9.877	403.662	-0.004662	-0.000891	-0.002786
1.1840	176.434	60.463	12.077	36.204	-0.541	9.884	335.884	-0.004232	-0.000845	-0.002534
1.1880	130.041	52.945	10.800	32.101	-0.542	9.895	247.564	-0.003706	-0.000756	-0.002247
1.1920	109.166	49.083	10.199	29.595	-0.533	9.892	207.825	-0.003436	-0.000714	-0.002072
1.1960	88.983	45.038	9.645	26.680	-0.542	9.882	169.401	-0.003153	-0.000675	-0.001868
1.2000	74.210	42.398	9.728	25.317	-0.549	9.877	141.277	-0.002968	-0.000681	-0.001772
1.2040	71.550	41.216	9.550	24.148	-0.542	9.884	136.213	-0.002885	-0.000668	-0.001690
1.2080	68.695	40.465	9.544	23.474	-0.543	9.894	130.777	-0.002833	-0.000668	-0.001643
1.2120	69.446	40.201	9.216	23.309	-0.536	9.891	132.208	-0.002814	-0.000645	-0.001632
1.2160	73.188	40.215	8.659	23.378	-0.546	9.882	139.332	-0.002815	-0.000606	-0.001636
1.2200	80.988	40.948	9.187	24.245	-0.539	9.877	154.181	-0.002866	-0.000643	-0.001697
1.2240	121.565	46.121	8.993	26.486	-0.536	9.884	231.428	-0.003228	-0.000629	-0.001854
1.2280	189.042	54.651	9.728	31.026	-0.542	9.894	359.888	-0.003826	-0.000681	-0.002172
1.2320	260.052	65.146	11.118	36.808	-0.538	9.891	495.071	-0.004560	-0.000778	-0.002577
1.2360	322.600	73.387	13.010	41.816	-0.549	9.882	614.147	-0.005137	-0.000911	-0.002927
1.2400	391.430	82.293	15.467	47.776	-0.548	9.877	745.182	-0.005760	-0.001083	-0.003344
1.2440	457.735	91.215	18.747	52.342	-0.544	9.884	871.410	-0.006385	-0.001312	-0.003664
1.2480	535.823	100.374	21.233	59.084	-0.538	9.894	1020.069	-0.007026	-0.001486	-0.004136
1.2520	625.137	111.906	25.375	66.997	-0.534	9.891	1190.100	-0.007833	-0.001776	-0.004690
1.2560	676.910	118.757	28.308	71.332	-0.538	9.882	1288.662	-0.008313	-0.001982	-0.004993
1.2600	751.225	127.347	31.447	78.184	-0.545	9.877	1430.140	-0.008914	-0.002201	-0.005473
1.2640	839.322	138.227	35.938	85.038	-0.532	9.884	1597.853	-0.009676	-0.002516	-0.005953
1.2680	892.687	144.884	38.618	89.851	-0.537	9.895	1699.448	-0.010142	-0.002703	-0.006290
1.2720	971.722	154.582	42.539	96.898	-0.525	9.891	1849.909	-0.010821	-0.002978	-0.006783
1.2760	1023.119	160.990	45.859	101.714	-0.541	9.882	1947.756	-0.011269	-0.003210	-0.007120
1.2800	1076.320	167.312	48.610	106.929	-0.538	9.876	2049.036	-0.011712	-0.003403	-0.007485
1.2840	1135.141	175.289	52.111	111.567	-0.531	9.884	2161.016	-0.012270	-0.003648	-0.007810
1.2880	1151.281	177.179	52.709	113.632	-0.536	9.894	2191.744	-0.012403	-0.003690	-0.007954
1.2920	1194.323	182.752	54.961	117.894	-0.532	9.891	2273.684	-0.012793	-0.003847	-0.008253
1.2960	1213.694	185.584	56.767	119.684	-0.539	9.882	2310.562	-0.012991	-0.003974	-0.008378
1.3000	1218.052	186.364	56.742	121.335	-0.537	9.876	2318.859	-0.013045	-0.003972	-0.008493
1.3040	1225.942	188.214	57.157	121.885	-0.533	9.884	2333.879	-0.013175	-0.004001	-0.008532
1.3080	1222.907	188.226	57.422	121.720	-0.538	9.894	2328.100	-0.013176	-0.004020	-0.008520
1.3120	1218.158	188.075	57.351	122.327	-0.518	9.892	2319.059	-0.013165	-0.004015	-0.008563
1.3160	1207.022	187.255	57.838	121.803	-0.537	9.882	2297.859	-0.013108	-0.004049	-0.008526
1.3200	1180.827	185.057	56.865	120.772	-0.540	9.877	2247.992	-0.012954	-0.003981	-0.008454
1.3240	1113.680	178.262	54.250	115.804	-0.540	9.884	2120.161	-0.012478	-0.003798	-0.008106
1.3280	1051.508	171.538	51.418	110.865	-0.538	9.894	2001.801	-0.012008	-0.003599	-0.007761
1.3320	1000.141	166.298	48.915	106.848	-0.533	9.891	1904.011	-0.011641	-0.003424	-0.007479
1.3360	929.417	158.656	45.386	100.780	-0.541	9.881	1769.371	-0.011106	-0.003177	-0.007055
1.3400	871.242	152.065	43.038	97.117	-0.544	9.876	1658.621	-0.010645	-0.003013	-0.006798
1.3440	811.309	145.493	39.912	91.669	-0.548	9.884	1544.523	-0.010185	-0.002794	-0.006417
1.3480	723.573	135.169	35.229	84.556	-0.545	9.895	1377.497	-0.009462	-0.002466	-0.005919
1.3520	666.149	128.305	32.920	79.656	-0.536	9.892	1268.177	-0.008981	-0.002304	-0.005576
1.3560	590.631	119.355	29.725	73.093	-0.541	9.882	1124.411	-0.008355	-0.002081	-0.005117
1.3600	515.429	109.474	26.098	67.699	-0.541	9.877	981.245	-0.007663	-0.001827	-0.004739
1.3640	459.238	102.124	23.405	62.168	-0.530	9.884	874.271	-0.007149	-0.001638	-0.004352
1.3680	382.864	92.022	19.663	55.372	-0.540	9.894	728.874	-0.006442	-0.001376	-0.003876
1.3720	323.607	83.627	17.273	50.003	-0.530	9.891	616.064	-0.005854	-0.001209	-0.003500
1.3760	266.333	75.319	15.203	44.870	-0.545	9.881	507.030	-0.005272	-0.001064	-0.003141
1.3800	218.318	67.730	13.176	40.908	-0.540	9.877	415.621	-0.004741	-0.000922	-0.002864
1.3840	179.424	61.004	12.216	36.602	-0.539	9.884	341.578	-0.004270	-0.000855	-0.002562
1.3880	143.371	54.682	11.047	33.065	-0.544	9.894	272.942	-0.003828	-0.000773	-0.002315
1.3920	118.544	50.361	10.215	30.627	-0.535	9.891	225.677	-0.003525	-0.000715	-0.002144
1.3960	93.657	46.161	10.730	27.519	-0.540	9.882	178.299	-0.003231	-0.000751	-0.001926
1.4000	76.930	43.216	9.368	25.964	-0.536	9.877	146.456	-0.003025	-0.000656	-0.001817
1.4040	71.565	41.535	9.922	24.342	-0.537	9.884	136.242	-0.002907	-0.000695	-0.001704
1.4080	68.635	40.450	9.103	24.080	-0.544	9.894	130.663	-0.002832	-0.000637	-0.001686
1.4120	69.326	40.354	9.298	23.748	-0.536	9.891	131.979	-0.002825	-0.000651	-0.001662
1.4160	73.339	40.338	9.213	23.475	-0.537	9.881	139.618	-0.002824	-0.000645	-0.001643
1.4200	84.505	41.424	9.284	24.273	-0.541	9.877	160.875	-0.002900	-0.000650	-0.001699
1.4240	132.370	47.886	9.550	27.407	-0.538	9.884	251.999	-0.003352	-0.000668	-0.001918
1.4280	195.369	55.891	9.965	32.293	-0.541	9.894	371.933	-0.003912	-0.000698	-0.002261
1.4320	263.749	66.203	11.437	37.413	-0.540	9.891	502.110	-0.004634	-0.000801	-0.002619
1.4360	327.935	74.651	13.843	42.050	-0.546	9.881	624.304	-0.005226	-0.000969	-0.002944
1.4400	393.895	82.835	15.454	47.967	-0.548	9.876	749.874	-0.005798	-0.001082	-0.003358
1.4440	466.782	92.604	18.719	53.623	-0.540	9.884	888.634	-0.006482	-0.001310	-0.003754
1.4480	540.166	101.275	21.345	59.812	-0.552	9.894	1028.337	-0.007089	-0.001494	-0.004187
1.4520	623.589	111.879	25.445	67.025	-0.542	9.891	1187.153	-0.007832	-0.001781	-0.004692
1.4560	697.393	121.204	29.031	72.900	-0.555	9.882	1327.658	-0.008484	-0.002032	-0.005103
1.4600	772.430	130.086	32.338	79.917	-0.561	9.877	1470.509	-0.009106	-0.002264	-0.005594
1.4640	848.549	139.643	36.424	86.137	-0.551	9.884	1615.419	-0.009775	-0.002550	-0.006030
1.4680	910.676	147.008	39.440	91.671	-0.558	9.894	1733.694	-0.010291	-0.002761	-0.006417
1.4720	987.051	156.556	43.330	98.549	-0.545	9.890	1879.091	-0.010959	-0.003033	-0.006898
1.4760	1031.760	162.200	46.332	102.539	-0.550	9.881	1964.207	-0.011354	-0.003243	-0.007178
1.4800	1084.690	168.479	49.261	107.769	-0.547	9.876	2064.972	-0.011794	-0.003448	-0.007544
1.4840	1142.159	175.929	51.986	112.613	-0.541	9.883	2174.377	-0.012315	-0.003639	-0.007883
1.4880	1166.791	178.862	53.629	115.239	-0.547	9.894	2221.270	-0.012520	-0.003754	-0.008067
1.4920	1203.355	183.919	55.377	118.887	-0.548	9.891	2290.878	-0.012874	-0.003876	-0.008322
1.4960	1221.840	186.947	56.864	120.524	-0.552	9.881	2326.069	-0.013086	-0.003980	-0.008437
1.5000	1221.404	187.171	57.058	121.983	-0.549	9.877	2325.239	-0.013102	-0.003994	-0.008539
1.5040	1224.755	188.214	57.644	122.230	-0.546	9.884	2331.619	-0.013175	-0.004035	-0.008556
1.5080	1223.598	187.965	57.587	122.258	-0.546	9.894	2329.416	-0.013158	-0.004031	-0.008558
1.5120	1219.435	188.283	57.908	122.561	-0.535	9.890	2321.491	-0.013180	-0.004054	-0.008579
1.5160	1209.426	187.838	57.601	121.747	-0.552	9.881	2302.437	-0.013149	-0.004032	-0.008522
1.5200	1186.628	185.807	56.838	120.881	-0.543	9.877	2259.035	-0.013007	-0.003979	-0.008462
1.5240	1122.983	179.571	54.710	116.559	-0.537	9.884	2137.871	-0.012570	-0.003830	-0.008159
1.5280	1051.267	172.036	51.223	111.473	-0.535	9.894	2001.343	-0.012043	-0.003586	-0.007803
1.5320	1004.183	166.687	49.167	107.960	-0.533	9.891	1911.707	-0.011668	-0.003442	-0.007557
1.5360	933.880	159.448	45.983	101.976	-0.547	9.881	1777.868	-0.011161	-0.003219	-0.007138
1.5400	861.759	151.552	41.971	96.485	-0.534	9.876	1640.568	-0.010609	-0.002938	-0.006754
1.5440	802.818	144.452	39.730	90.981	-0.538	9.883	1528.358	-0.010112	-0.002781	-0.006369
1.5480	721.183	135.087	35.605	84.457	-0.540	9.894	1372.948	-0.009456	-0.002492	-0.005912
1.5520	655.389	127.276	32.601	79.175	-0.530	9.891	1247.692	-0.008909	-0.002282	-0.005542
1.5560	579.180	118.160	29.184	72.678	-0.552	9.881	1102.610	-0.008271	-0.002043	-0.005087
1.5600	508.531	109.213	25.640	67.025	-0.554	9.876	968.113	-0.007645	-0.001795	-0.004692
1.5640	448.147	101.083	22.945	61.410	-0.540	9.883	853.157	-0.007076	-0.001606	-0.004299
1.5680	377.408	91.285	19.317	55.330	-0.540	9.894	718.489	-0.006390	-0.001352	-0.003873
1.5720	324.944	83.752	17.345	50.498	-0.537	9.891	618.610	-0.005863	-0.001214	-0.003535
1.5760	271.879	76.067	15.343	45.476	-0.544	9.881	517.588	-0.005325	-0.001074	-0.003183
1.5800	225.682	68.855	13.260	41.252	-0.542	9.876	429.640	-0.004820	-0.000928	-0.002888
1.5840	187.194	62.353	12.843	37.605	-0.534	9.884	356.369	-0.004365	-0.000899	-0.002632
1.5880	147.684	55.695	11.105	33.739	-0.541	9.894	281.153	-0.003899	-0.000777	-0.002362
1.5920	121.805	51.318	10.811	30.850	-0.533	9.891	231.886	-0.003592	-0.000757	-0.002159
1.5960	98.616	46.968	10.491	28.387	-0.549	9.881	187.740	-0.003288	-0.000734	-0.001987
1.6000	80.447	43.702	9.911	26.556	-0.552	9.877	153.151	-0.003059	-0.000694	-0.001859
1.6040	70.784	41.575	9.575	24.934	-0.548	9.884	134.754	-0.002910	-0.000670	-0.001745
1.6080	67.553	40.644	9.285	23.859	-0.546	9.894	128.603	-0.002845	-0.000650	-0.001670
1.6120	69.536	40.420	8.977	23.803	-0.540	9.891	132.380	-0.002829	-0.000628	-0.001666
1.6160	74.556	40.879	9.452	23.734	-0.550	9.881	141.935	-0.002862	-0.000662	-0.001661
1.6200	91.177	42.828	9.409	25.455	-0.553	9.877	173.578	-0.002998	-0.000659	-0.001782
1.6240	146.737	50.082	9.854	29.048	-0.543	9.884	279.350	-0.003506	-0.000690	-0.002033
1.6280	205.814	57.640	10.352	33.354	-0.554	9.894	391.817	-0.004035	-0.000725	-0.002335
1.6320	274.749	67.633	11.744	38.444	-0.540	9.891	523.052	-0.004734	-0.000822	-0.002691
1.6360	338.876	75.970	13.690	43.495	-0.545	9.881	645.132	-0.005318	-0.000958	-0.003045
1.6400	408.878	84.962	16.121	49.661	-0.549	9.876	778.399	-0.005947	-0.001128	-0.003476
1.6440	485.102	95.233	19.749	55.508	-0.541	9.884	923.510	-0.006666	-0.001382	-0.003886
1.6480	553.045	103.304	22.416	61.258	-0.541	9.894	1052.856	-0.007231	-0.001569	-0.004288
1.6520	633.402	113.617	25.974	68.318	-0.530	9.891	1205.835	-0.007953	-0.001818	-0.004782
1.6560	704.682	122.080	29.449	74.055	-0.547	9.882	1341.534	-0.008546	-0.002061	-0.005184
1.6600	785.926	131.918	33.367	81.526	-0.553	9.877	1496.201	-0.009234	-0.002336	-0.005707
1.6640	861.819	141.491	37.394	87.459	-0.553	9.884	1640.682	-0.009904	-0.002618	-0.006122
1.6680	918.446	147.982	40.162	92.482	-0.552	9.894	1748.486	-0.010359	-0.002811	-0.006474
1.6720	988.073	156.931	43.720	99.071	-0.541	9.891	1881.037	-0.010985	-0.003060	-0.006935
1.6760	1036.960	163.018	47.067	103.325	-0.544	9.881	1974.106	-0.011411	-0.003295	-0.007233
1.6800	1086.990	169.077	49.153	108.402	-0.548	9.876	2069.349	-0.011835	-0.003441	-0.007588
1.6840	1139.709	176.054	52.140	112.778	-0.548	9.884	2169.714	-0.012324	-0.003650	-0.007894
1.6880	1162.147	178.861	53.349	115.143	-0.545	9.894	2212.429	-0.012520	-0.003734	-0.008060
1.6920	1197.809	183.599	55.655	118.940	-0.546	9.890	2280.321	-0.012852	-0.003896	-0.008326
1.6960	1219.661	186.807	56.878	120.991	-0.546	9.881	2321.920	-0.013076	-0.003981	-0.008469
1.7000	1221.689	187.267	57.199	122.300	-0.545	9.877	2325.783	-0.013109	-0.004004	-0.008561
1.7040	1226.228	188.562	57.880	122.409	-0.539	9.884	2334.423	-0.013199	-0.004052	-0.008569
1.7080	1224.304	188.687	58.297	122.658	-0.551	9.893	2330.761	-0.013208	-0.004081	-0.008586
1.7120	1219.390	188.478	57.588	122.947	-0.540	9.891	2321.405	-0.013193	-0.004031	-0.008606
1.7160	1207.533	187.853	57.798	122.132	-0.556	9.880	2298.832	-0.013150	-0.004046	-0.008549
1.7200	1175.672	184.836	56.740	121.117	-0.552	9.876	2238.178	-0.012938	-0.003972	-0.008478
1.7240	1095.766	176.735	53.753	114.636	-0.548	9.884	2086.058	-0.012371	-0.003763	-0.008025
1.7280	1037.697	170.537	50.764	110.135	-0.555	9.894	1975.508	-0.011938	-0.003553	-0.007709
1.7320	995.722	165.895	48.694	107.163	-0.540	9.891	1895.599	-0.011613	-0.003409	-0.007501
1.7360	920.204	157.807	45.302	101.000	-0.546	9.880	1751.833	-0.011046	-0.003171	-0.007070
1.7400	849.766	150.274	41.804	96.182	-0.553	9.876	1617.737	-0.010519	-0.002926	-0.006733
1.7440	795.439	143.700	39.591	90.663	-0.548	9.885	1514.311	-0.010059	-0.002771	-0.006346
1.7480	709.912	134.059	35.481	83.895	-0.545	9.894	1351.490	-0.009384	-0.002484	-0.005873
1.7520	648.250	126.304	32.020	78.872	-0.531	9.890	1234.102	-0.008841	-0.002241	-0.005521
1.7560	575.378	117.230	29.157	72.651	-0.544	9.881	1095.371	-0.008206	-0.002041	-0.005086
1.7600	503.812	108.362	25.278	66.929	-0.549	9.876	959.129	-0.007585	-0.001769	-0.004685
1.7640	446.509	100.803	23.429	61.217	-0.542	9.884	850.039	-0.007056	-0.001640	-0.004285
1.7680	371.773	90.799	19.414	54.875	-0.551	9.894	707.760	-0.006356	-0.001359	-0.003841
1.7720	315.867	82.793	17.330	50.072	-0.539	9.890	601.330	-0.005795	-0.001213	-0.003505
1.7760	260.668	74.580	15.163	44.830	-0.556	9.881	496.244	-0.005221	-0.001061	-0.003138
1.7800	211.946	67.145	13.204	40.246	-0.545	9.876	403.490	-0.004700	-0.000924	-0.002817
1.7840	177.200	60.726	12.204	36.986	-0.544	9.884	337.343	-0.004251	-0.000854	-0.002589
1.7880	138.547	54.431	10.936	33.120	-0.545	9.893	263.758	-0.003810	-0.000766	-0.002318
1.7920	115.103	50.305	10.730	30.587	-0.537	9.890	219.126	-0.003521	-0.000751	-0.002141
1.7960	92.966	46.092	10.396	27.779	-0.556	9.881	176.983	-0.003226	-0.000728	-0.001945
1.8000	75.954	43.411	9.853	26.213	-0.555	9.876	144.596	-0.003039	-0.000690	-0.001835
1.8040	73.098	41.992	9.423	25.084	-0.542	9.884	139.160	-0.002939	-0.000660	-0.001756
1.8080	70.829	40.908	9.145	24.710	-0.552	9.894	134.840	-0.002864	-0.000640	-0.001730
1.8120	72.016	41.120	9.505	24.411	-0.539	9.890	137.100	-0.002878	-0.000665	-0.001709
1.8160	76.329	40.825	9.258	24.149	-0.555	9.881	145.311	-0.002858	-0.000648	-0.001690
1.8200	87.886	42.090	9.493	25.140	-0.552	9.877	167.313	-0.002946	-0.000665	-0.001760
1.8240	133.107	48.499	9.923	27.863	-0.554	9.884	253.401	-0.003395	-0.000695	-0.001950
1.8280	192.845	55.864	10.243	32.336	-0.555	9.893	367.126	-0.003910	-0.000717	-0.002263
1.8320	258.293	65.507	11.883	37.274	-0.541	9.891	491.724	-0.004586	-0.000832	-0.002609
1.8360	323.051	74.053	13.551	42.077	-0.553	9.881	615.005	-0.005184	-0.000949	-0.002945
1.8400	396.840	83.655	15.981	48.806	-0.551	9.877	755.482	-0.005856	-0.001119	-0.003416
1.8440	469.668	93.314	19.555	54.269	-0.543	9.884	894.127	-0.006532	-0.001369	-0.003799
1.8480	541.789	101.903	22.026	60.405	-0.559	9.893	1031.427	-0.007133	-0.001542	-0.004228
1.8520	633.252	113.727	25.652	67.864	-0.552	9.890	1205.549	-0.007961	-0.001796	-0.004750
1.8560	700.204	122.080	29.449	73.630	-0.555	9.880	1333.008	-0.008546	-0.002061	-0.005154
1.8600	768.027	130.319	32.241	80.426	-0.555	9.876	1462.126	-0.009122	-0.002257	-0.005630
1.8640	840.013	139.477	36.549	85.532	-0.554	9.884	1599.169	-0.009763	-0.002558	-0.005987
1.8680	903.418	146.341	39.090	91.326	-0.549	9.893	1719.875	-0.010244	-0.002736	-0.006393
1.8720	976.125	155.612	43.094	98.234	-0.538	9.890	1858.292	-0.010893	-0.003017	-0.006876
1.8760	1029.085	161.515	46.279	102.431	-0.554	9.880	1959.114	-0.011306	-0.003240	-0.007170
1.8800	1087.245	168.979	49.222	108.276	-0.560	9.876	2069.836	-0.011829	-0.003446	-0.007579
1.8840	1132.811	175.177	51.515	111.979	-0.550	9.884	2156.582	-0.012262	-0.003606	-0.007839
1.8880	1158.224	178.249	53.488	114.718	-0.549	9.894	2204.962	-0.012477	-0.003744	-0.008030
1.8920	1192.579	182.933	55.197	118.226	-0.541	9.890	2270.365	-0.012805	-0.003864	-0.008276
1.8960	1205.895	185.182	56.448	120.015	-0.552	9.880	2295.713	-0.012963	-0.003951	-0.008401
1.9000	1223.327	187.406	57.297	122.589	-0.554	9.876	2328.901	-0.013118	-0.004011	-0.008581
1.9040	1236.222	189.439	58.602	123.359	-0.557	9.884	2353.449	-0.013261	-0.004102	-0.008635
1.9080	1230.812	189.604	58.046	123.206	-0.552	9.894	2343.149	-0.013272	-0.004063	-0.008624
1.9120	1225.401	189.465	58.115	123.069	-0.539	9.890	2332.850	-0.013263	-0.004068	-0.008615
1.9160	1212.762	188.685	57.910	122.341	-0.549	9.880	2308.788	-0.013208	-0.004054	-0.008564
1.9200	1177.265	185.559	57.045	120.951	-0.552	9.876	2241.211	-0.012989	-0.003993	-0.008467
1.9240	1111.291	178.638	54.726	115.859	-0.548	9.884	2115.612	-0.012505	-0.003831	-0.008110
1.9280	1049.599	172.009	51.350	111.071	-0.549	9.894	1998.167	-0.012041	-0.003595	-0.007775
1.9320	996.474	166.271	48.624	107.149	-0.540	9.891	1897.030	-0.011639	-0.003404	-0.007500
1.9360	926.171	158.625	46.110	101.589	-0.546	9.880	1763.191	-0.011104	-0.003228	-0.007111
1.9400	866.703	151.983	42.108	97.408	-0.551	9.876	1649.981	-0.010639	-0.002948	-0.006819
1.9440	811.459	145.535	39.925	92.162	-0.550	9.884	1544.809	-0.010187	-0.002795	-0.006451
1.9480	719.395	135.253	35.340	84.568	-0.542	9.894	1369.543	-0.009468	-0.002474	-0.005920
1.9520	665.789	128.402	33.072	80.042	-0.533	9.890	1267.490	-0.008988	-0.002315	-0.005603
1.9560	590.226	119.383	30.351	73.986	-0.534	9.880	1123.638	-0.008357	-0.002125	-0.005179
1.9600	511.792	109.919	26.264	67.879	-0.548	9.876	974.321	-0.007694	-0.001839	-0.004752
1.9640	446.960	101.235	23.082	61.300	-0.542	9.884	850.897	-0.007086	-0.001616	-0.004291
1.9680	377.258	91.813	20.277	55.660	-0.545	9.893	718.203	-0.006427	-0.001419	-0.003896
1.9720	323.306	83.975	17.511	50.801	-0.527	9.890	615.492	-0.005878	-0.001226	-0.003556
1.9760	271.623	76.305	15.663	46.290	-0.545	9.880	517.101	-0.005341	-0.001096	-0.003240
1.9800	221.098	68.884	13.579	41.638	-0.546	9.876	420.914	-0.004822	-0.000951	-0.002915
1.9840	178.568	61.922	12.064	37.097	-0.545	9.884	339.947	-0.004335	-0.000844	-0.002597
1.9880	141.357	55.070	11.103	33.271	-0.542	9.893	269.108	-0.003855	-0.000777	-0.002329
1.9920	115.779	50.694	10.226	30.752	-0.534	9.890	220.413	-0.003549	-0.000716	-0.002153
1.9960	93.251	46.178	9.979	28.427	-0.549	9.880	177.526	-0.003232	-0.000699	-0.001990
