# Supplementary material for: Evaluation of a Cold-Mixed High-Performance Polyurethane Mixture
Source: Hindawi journal article supplement (doi:10.1155/2019/1507971), 2019-11-07
Supplement: f1 [file 1507971.f1.zip › 1507971.f1/dynamic modulus data/PUM/specimen2/temp10/zhs-2-10_10Hz.csv]

Test Information
****************
Project name	zhs
Operator name	2
Target test temperature	10
Target confining stress	0
Average dynamic strain range from 75 to 125 micro-strain
Contact stress	5
Initial modulus	4000
Axial gauge length	70
Comments	Run at High Pressure
Specimen information
********************
Identification	zhs-2-10
Dimensions	Point 1	Point 2	Point 3	Point 4	Point 5	Point 6	Average	Std Dev.
Diameter (mm)	49.2	49.3	49.2				49.23	0.058
Height (mm)	100.8	101.0	100.8				100.87	0.115
Cross-sectional area (mm�)	1903.7
Conditioning time
Properties/Comments
Test Data	10Hz
*********
Test date and time	Fri	Mar 29	2019	11:20 AM
Dynamic modulus (MPa)	12148
Phase angle (Degrees)	5.17
Average temperature (�C)	9.9
Average confining pressure (kPa)	-0.5
Average micro-strain	100
Load drift (%)	-0.4
Load standard error (%)	4.7
Average deformation drift (%)	-3.3
Average deformation standard error (%)	6.1
Deformation uniformity (%)	40.8
Phase uniformity (Degrees)	0.4
Conditioning Cycles
Time (sec)	Axial stress (kPa)	Axial micro-strain #1	Axial micro-strain #2	Axial micro-strain #3	Confining pressure (kPa)	Temperature (�C)	Load (N)	Displacement #1 (mm)	Displacement #2 (mm)	Displacement #3 (mm)
0.0000	61.075	24.373	5.252	11.255	-0.536	9.902	116.272	-0.001706	-0.000368	-0.000788
0.0020	60.775	24.553	5.281	11.378	-0.541	9.901	115.700	-0.001719	-0.000370	-0.000796
0.0040	60.279	24.788	5.379	10.897	-0.532	9.899	114.756	-0.001735	-0.000377	-0.000763
0.0060	59.543	24.665	5.240	10.884	-0.532	9.895	113.354	-0.001727	-0.000367	-0.000762
0.0080	59.618	24.318	5.449	10.786	-0.538	9.890	113.497	-0.001702	-0.000381	-0.000755
0.0100	61.090	24.595	5.238	11.117	-0.542	9.886	116.301	-0.001722	-0.000367	-0.000778
0.0120	64.201	25.082	5.433	12.014	-0.545	9.884	122.223	-0.001756	-0.000380	-0.000841
0.0140	72.813	26.471	5.615	12.107	-0.539	9.888	138.617	-0.001853	-0.000393	-0.000848
0.0160	96.993	29.571	5.531	13.703	-0.538	9.892	184.650	-0.002070	-0.000387	-0.000959
0.0180	140.155	35.380	6.031	16.827	-0.544	9.897	266.819	-0.002477	-0.000422	-0.001178
0.0200	194.843	42.370	6.505	20.970	-0.545	9.902	370.932	-0.002966	-0.000455	-0.001468
0.0220	258.338	51.416	7.674	26.541	-0.544	9.901	491.810	-0.003599	-0.000537	-0.001858
0.0240	326.627	60.838	9.131	31.675	-0.536	9.899	621.815	-0.004259	-0.000639	-0.002217
0.0260	390.468	69.774	11.090	36.533	-0.536	9.895	743.351	-0.004884	-0.000776	-0.002557
0.0280	451.123	77.555	13.466	41.487	-0.536	9.890	858.822	-0.005429	-0.000943	-0.002904
0.0300	511.958	84.865	15.633	46.660	-0.538	9.886	974.636	-0.005941	-0.001094	-0.003266
0.0320	576.339	93.188	18.620	52.783	-0.534	9.884	1097.202	-0.006523	-0.001303	-0.003695
0.0340	641.803	102.013	21.330	58.217	-0.530	9.888	1221.828	-0.007141	-0.001493	-0.004075
0.0360	697.589	109.226	24.374	62.553	-0.537	9.892	1328.030	-0.007646	-0.001706	-0.004379
0.0380	745.469	115.186	26.627	66.683	-0.544	9.897	1419.182	-0.008063	-0.001864	-0.004668
0.0400	792.929	121.092	28.419	71.002	-0.536	9.902	1509.533	-0.008476	-0.001989	-0.004970
0.0420	842.012	127.359	31.032	75.788	-0.539	9.901	1602.974	-0.008915	-0.002172	-0.005305
0.0440	886.977	133.474	32.936	79.958	-0.526	9.899	1688.576	-0.009343	-0.002306	-0.005597
0.0460	917.154	137.768	34.993	82.502	-0.532	9.895	1746.025	-0.009644	-0.002450	-0.005775
0.0480	936.074	140.657	36.189	84.457	-0.541	9.891	1782.045	-0.009846	-0.002533	-0.005912
0.0500	951.418	142.437	36.785	86.041	-0.543	9.886	1811.256	-0.009971	-0.002575	-0.006023
0.0520	967.364	144.647	38.047	88.107	-0.541	9.884	1841.612	-0.010125	-0.002663	-0.006167
0.0540	982.332	147.315	39.064	89.633	-0.531	9.888	1870.108	-0.010312	-0.002734	-0.006274
0.0560	987.306	148.829	39.870	90.334	-0.530	9.893	1879.578	-0.010418	-0.002791	-0.006323
0.0580	983.594	148.815	39.690	90.569	-0.538	9.898	1872.511	-0.010417	-0.002778	-0.006340
0.0600	976.411	148.594	39.313	90.336	-0.533	9.903	1858.835	-0.010402	-0.002752	-0.006324
0.0620	965.861	148.301	39.787	90.666	-0.532	9.901	1838.751	-0.010381	-0.002785	-0.006347
0.0640	950.682	146.911	39.342	89.633	-0.525	9.899	1809.855	-0.010284	-0.002754	-0.006274
0.0660	915.471	143.534	38.161	87.388	-0.522	9.895	1742.821	-0.010047	-0.002671	-0.006117
0.0680	849.556	137.241	35.826	82.723	-0.530	9.890	1617.336	-0.009607	-0.002508	-0.005791
0.0700	774.354	129.097	32.629	77.165	-0.529	9.886	1474.171	-0.009037	-0.002284	-0.005402
0.0720	713.489	122.344	29.824	72.941	-0.534	9.884	1358.299	-0.008564	-0.002088	-0.005106
0.0740	667.847	116.828	28.115	69.047	-0.531	9.888	1271.410	-0.008178	-0.001968	-0.004833
0.0760	620.403	110.767	26.071	65.030	-0.532	9.892	1181.087	-0.007754	-0.001825	-0.004552
0.0780	563.114	104.195	23.402	60.433	-0.537	9.897	1072.025	-0.007294	-0.001638	-0.004230
0.0800	500.401	96.427	20.707	55.674	-0.540	9.902	952.635	-0.006750	-0.001449	-0.003897
0.0820	443.594	89.559	18.513	51.407	-0.544	9.901	844.488	-0.006269	-0.001296	-0.003599
0.0840	396.479	82.932	16.817	47.183	-0.534	9.899	754.795	-0.005805	-0.001177	-0.003303
0.0860	348.960	76.207	14.621	43.056	-0.537	9.895	664.330	-0.005334	-0.001023	-0.003014
0.0880	300.493	69.134	12.869	38.706	-0.537	9.890	572.062	-0.004839	-0.000901	-0.002709
0.0900	255.333	62.827	11.034	34.550	-0.533	9.886	486.088	-0.004398	-0.000772	-0.002419
0.0920	217.145	57.266	10.395	31.441	-0.537	9.884	413.389	-0.004009	-0.000728	-0.002201
0.0940	183.617	51.414	9.645	28.399	-0.528	9.888	349.560	-0.003599	-0.000675	-0.001988
0.0960	151.366	46.357	8.881	25.579	-0.537	9.892	288.162	-0.003245	-0.000622	-0.001791
0.0980	123.383	41.591	8.311	22.909	-0.541	9.897	234.890	-0.002911	-0.000582	-0.001604
0.1000	101.757	37.894	7.588	20.530	-0.534	9.902	193.720	-0.002653	-0.000531	-0.001437
0.1020	87.014	35.378	7.312	19.028	-0.539	9.902	165.653	-0.002476	-0.000512	-0.001332
0.1040	79.575	33.614	7.047	17.902	-0.530	9.900	151.491	-0.002353	-0.000493	-0.001253
0.1060	75.578	32.783	7.034	17.090	-0.534	9.896	143.881	-0.002295	-0.000492	-0.001196
0.1080	73.789	31.755	6.784	16.566	-0.540	9.891	140.476	-0.002223	-0.000475	-0.001160
0.1100	74.751	31.517	6.715	16.277	-0.545	9.887	142.307	-0.002206	-0.000470	-0.001139
0.1120	77.502	31.811	6.631	16.677	-0.540	9.885	147.543	-0.002227	-0.000464	-0.001167
0.1140	82.701	32.282	6.907	16.758	-0.530	9.888	157.442	-0.002260	-0.000484	-0.001173
0.1160	93.882	33.601	6.896	17.445	-0.541	9.893	178.728	-0.002352	-0.000483	-0.001221
0.1180	125.953	37.199	7.228	19.634	-0.542	9.898	239.782	-0.002604	-0.000506	-0.001374
0.1200	182.129	44.510	7.519	23.157	-0.537	9.902	346.727	-0.003116	-0.000526	-0.001621
0.1220	250.133	53.918	8.603	28.978	-0.540	9.902	476.189	-0.003774	-0.000602	-0.002028
0.1240	319.835	63.742	10.312	34.248	-0.526	9.899	608.883	-0.004462	-0.000722	-0.002397
0.1260	384.847	72.344	12.661	39.245	-0.534	9.895	732.651	-0.005064	-0.000886	-0.002747
0.1280	451.183	80.778	15.315	44.527	-0.537	9.890	858.936	-0.005654	-0.001072	-0.003117
0.1300	518.119	88.826	17.427	50.086	-0.537	9.885	986.366	-0.006218	-0.001220	-0.003506
0.1320	584.335	97.802	20.179	56.208	-0.542	9.884	1112.423	-0.006846	-0.001413	-0.003935
0.1340	647.589	106.072	23.041	61.326	-0.536	9.888	1232.843	-0.007425	-0.001613	-0.004293
0.1360	701.045	113.089	25.790	65.539	-0.541	9.892	1334.610	-0.007916	-0.001805	-0.004588
0.1380	750.609	119.022	27.987	69.586	-0.548	9.897	1428.967	-0.008332	-0.001959	-0.004871
0.1400	799.737	124.497	30.046	73.932	-0.543	9.903	1522.493	-0.008715	-0.002103	-0.005175
0.1420	847.948	131.181	32.615	78.833	-0.545	9.902	1614.275	-0.009183	-0.002283	-0.005518
0.1440	890.854	137.101	34.561	82.574	-0.530	9.900	1695.957	-0.009597	-0.002419	-0.005780
0.1460	920.370	140.825	36.465	85.022	-0.533	9.896	1752.148	-0.009858	-0.002553	-0.005952
0.1480	940.418	143.161	37.702	86.577	-0.542	9.891	1790.314	-0.010021	-0.002639	-0.006060
0.1500	956.603	145.287	38.230	88.504	-0.541	9.886	1821.127	-0.010170	-0.002676	-0.006195
0.1520	972.368	147.788	39.148	90.500	-0.540	9.884	1851.139	-0.010345	-0.002740	-0.006335
0.1540	986.570	150.107	39.689	91.985	-0.535	9.888	1878.176	-0.010507	-0.002778	-0.006439
0.1560	990.943	151.357	40.273	92.563	-0.534	9.893	1886.501	-0.010595	-0.002819	-0.006479
0.1580	987.066	151.245	40.495	92.592	-0.535	9.897	1879.120	-0.010587	-0.002835	-0.006481
0.1600	980.393	150.927	40.008	92.579	-0.532	9.902	1866.417	-0.010565	-0.002801	-0.006481
0.1620	970.940	150.568	40.025	92.646	-0.536	9.901	1848.421	-0.010540	-0.002802	-0.006485
0.1640	956.152	149.179	39.981	91.670	-0.524	9.899	1820.269	-0.010443	-0.002799	-0.006417
0.1660	920.430	146.036	39.146	89.110	-0.530	9.895	1752.262	-0.010223	-0.002740	-0.006238
0.1680	853.839	139.143	36.714	84.570	-0.538	9.890	1625.490	-0.009740	-0.002570	-0.005920
0.1700	781.041	131.209	33.255	78.997	-0.538	9.885	1486.902	-0.009185	-0.002328	-0.005530
0.1720	722.371	124.442	30.839	75.144	-0.537	9.885	1375.208	-0.008711	-0.002159	-0.005260
0.1740	673.994	118.730	28.920	71.276	-0.531	9.889	1283.112	-0.008311	-0.002024	-0.004989
0.1760	620.598	112.170	26.822	67.080	-0.534	9.892	1181.459	-0.007852	-0.001878	-0.004696
0.1780	561.026	105.166	24.181	62.470	-0.538	9.897	1068.048	-0.007362	-0.001693	-0.004373
0.1800	498.567	97.455	21.401	57.088	-0.540	9.902	949.144	-0.006822	-0.001498	-0.003996
0.1820	441.009	90.244	18.775	52.741	-0.546	9.901	839.567	-0.006317	-0.001314	-0.003692
0.1840	391.911	83.574	16.745	48.186	-0.534	9.899	746.098	-0.005850	-0.001172	-0.003373
0.1860	344.571	76.778	14.979	43.757	-0.536	9.895	655.975	-0.005374	-0.001049	-0.003063
0.1880	298.765	70.454	13.563	39.451	-0.539	9.890	568.771	-0.004932	-0.000949	-0.002762
0.1900	254.822	64.075	12.078	35.901	-0.537	9.886	485.115	-0.004485	-0.000845	-0.002513
0.1920	215.838	58.461	10.937	32.860	-0.541	9.884	410.900	-0.004092	-0.000766	-0.002300
0.1940	182.595	52.930	10.381	29.557	-0.532	9.888	347.614	-0.003705	-0.000727	-0.002069
0.1960	151.005	47.579	9.617	26.941	-0.533	9.892	287.476	-0.003331	-0.000673	-0.001886
0.1980	123.729	43.632	9.091	24.147	-0.539	9.897	235.548	-0.003054	-0.000636	-0.001690
0.2000	103.260	39.784	8.189	21.850	-0.533	9.902	196.581	-0.002785	-0.000573	-0.001530
0.2020	90.381	37.576	8.217	20.571	-0.532	9.901	172.062	-0.002630	-0.000575	-0.001440
0.2040	83.633	36.033	7.922	19.303	-0.529	9.899	159.216	-0.002522	-0.000555	-0.001351
0.2060	78.974	35.142	7.686	18.616	-0.532	9.896	150.347	-0.002460	-0.000538	-0.001303
0.2080	76.615	34.308	7.632	17.927	-0.537	9.891	145.855	-0.002402	-0.000534	-0.001255
0.2100	77.126	33.712	7.479	17.322	-0.538	9.886	146.828	-0.002360	-0.000524	-0.001213
0.2120	79.741	33.823	7.659	18.147	-0.542	9.885	151.806	-0.002368	-0.000536	-0.001270
0.2140	84.475	34.265	7.256	18.520	-0.528	9.889	160.818	-0.002399	-0.000508	-0.001296
0.2160	95.370	35.489	7.645	18.782	-0.525	9.893	181.561	-0.002484	-0.000535	-0.001315
0.2180	127.636	39.061	7.854	20.956	-0.537	9.897	242.987	-0.002734	-0.000550	-0.001467
0.2200	185.360	46.621	8.229	24.795	-0.537	9.902	352.879	-0.003263	-0.000576	-0.001736
0.2220	253.319	56.141	9.131	30.107	-0.542	9.902	482.254	-0.003930	-0.000639	-0.002108
0.2240	323.982	65.813	10.409	35.556	-0.536	9.899	616.779	-0.004607	-0.000729	-0.002489
0.2260	389.672	74.442	12.745	40.467	-0.537	9.895	741.835	-0.005211	-0.000892	-0.002833
0.2280	451.408	82.239	15.191	45.368	-0.541	9.890	859.365	-0.005757	-0.001063	-0.003176
0.2300	511.928	89.450	17.568	50.471	-0.534	9.885	974.579	-0.006261	-0.001230	-0.003533
0.2320	574.536	97.621	19.956	56.194	-0.534	9.884	1093.769	-0.006833	-0.001397	-0.003934
0.2340	637.881	105.820	22.803	61.466	-0.522	9.888	1214.361	-0.007407	-0.001596	-0.004303
0.2360	693.696	112.658	25.348	66.090	-0.530	9.892	1320.620	-0.007886	-0.001774	-0.004626
0.2380	746.206	119.121	27.835	70.174	-0.532	9.898	1420.584	-0.008338	-0.001948	-0.004912
0.2400	797.918	125.318	30.295	74.372	-0.534	9.902	1519.032	-0.008772	-0.002121	-0.005206
0.2420	846.535	131.722	32.784	79.300	-0.544	9.901	1611.586	-0.009221	-0.002295	-0.005551
0.2440	889.246	137.600	34.715	82.519	-0.532	9.899	1692.896	-0.009632	-0.002430	-0.005776
0.2460	916.823	141.186	36.215	85.132	-0.537	9.895	1745.396	-0.009883	-0.002535	-0.005959
0.2480	934.016	143.562	37.576	87.225	-0.538	9.890	1778.126	-0.010049	-0.002630	-0.006106
0.2500	948.879	145.327	38.049	88.918	-0.530	9.886	1806.421	-0.010173	-0.002663	-0.006224
0.2520	965.410	147.802	39.329	90.939	-0.534	9.885	1837.893	-0.010346	-0.002753	-0.006366
0.2540	980.213	150.041	40.135	92.315	-0.526	9.889	1866.074	-0.010503	-0.002809	-0.006462
0.2560	984.225	151.248	40.858	92.810	-0.522	9.892	1873.713	-0.010587	-0.002860	-0.006497
0.2580	980.483	151.454	41.051	92.991	-0.531	9.897	1866.589	-0.010602	-0.002874	-0.006509
0.2600	972.699	151.010	40.607	92.688	-0.537	9.902	1851.768	-0.010571	-0.002842	-0.006488
0.2620	962.089	150.456	40.538	92.426	-0.539	9.901	1831.570	-0.010532	-0.002838	-0.006470
0.2640	945.197	148.748	40.036	91.326	-0.523	9.899	1799.412	-0.010412	-0.002802	-0.006393
0.2660	903.192	144.842	38.673	88.367	-0.524	9.895	1719.446	-0.010139	-0.002707	-0.006186
0.2680	833.581	137.878	36.131	83.770	-0.528	9.890	1586.924	-0.009651	-0.002529	-0.005864
0.2700	763.233	130.219	32.990	78.542	-0.532	9.886	1452.999	-0.009115	-0.002309	-0.005498
0.2720	709.807	123.968	30.642	74.703	-0.528	9.885	1351.290	-0.008678	-0.002145	-0.005229
0.2740	667.382	118.647	28.627	71.345	-0.516	9.889	1270.523	-0.008305	-0.002004	-0.004994
0.2760	615.579	112.686	26.641	67.065	-0.531	9.892	1171.904	-0.007888	-0.001865	-0.004695
0.2780	552.700	105.180	24.112	61.836	-0.538	9.897	1052.198	-0.007363	-0.001688	-0.004329
0.2800	490.963	97.593	21.026	56.691	-0.533	9.903	934.668	-0.006832	-0.001472	-0.003968
0.2820	439.145	91.007	18.984	52.687	-0.539	9.902	836.020	-0.006370	-0.001329	-0.003688
0.2840	392.798	84.725	17.095	48.339	-0.529	9.899	747.786	-0.005931	-0.001197	-0.003384
0.2860	343.655	77.610	15.176	44.170	-0.533	9.895	654.230	-0.005433	-0.001062	-0.003092
0.2880	293.790	70.509	13.383	39.891	-0.536	9.890	559.301	-0.004936	-0.000937	-0.002792
0.2900	247.984	63.852	11.535	35.969	-0.535	9.885	472.097	-0.004470	-0.000807	-0.002518
0.2920	211.480	58.420	10.702	33.259	-0.540	9.885	402.603	-0.004089	-0.000749	-0.002328
0.2940	183.196	53.405	10.103	30.424	-0.536	9.888	348.759	-0.003738	-0.000707	-0.002130
0.2960	153.665	48.470	9.646	27.355	-0.536	9.892	292.540	-0.003393	-0.000675	-0.001915
0.2980	124.060	43.884	8.952	24.604	-0.536	9.897	236.177	-0.003072	-0.000627	-0.001722
0.3000	99.413	39.798	8.118	21.989	-0.538	9.902	189.257	-0.002786	-0.000568	-0.001539
0.3020	82.641	37.032	7.841	20.667	-0.545	9.901	157.328	-0.002592	-0.000549	-0.001447
0.3040	74.255	35.198	7.828	19.154	-0.536	9.899	141.363	-0.002464	-0.000548	-0.001341
0.3060	69.777	33.700	7.451	18.301	-0.537	9.895	132.837	-0.002359	-0.000522	-0.001281
0.3080	68.439	33.061	7.505	17.846	-0.541	9.890	130.291	-0.002314	-0.000525	-0.001249
0.3100	69.010	32.908	7.283	17.502	-0.540	9.886	131.378	-0.002304	-0.000510	-0.001225
0.3120	70.904	33.169	7.450	17.845	-0.540	9.884	134.983	-0.002322	-0.000521	-0.001249
0.3140	75.142	33.045	7.535	17.789	-0.535	9.888	143.051	-0.002313	-0.000527	-0.001245
0.3160	84.024	33.893	7.728	18.037	-0.536	9.892	159.960	-0.002373	-0.000541	-0.001263
0.3180	111.992	37.186	8.297	19.635	-0.545	9.898	213.203	-0.002603	-0.000581	-0.001374
0.3200	168.003	44.107	8.395	23.763	-0.546	9.902	319.834	-0.003087	-0.000588	-0.001663
0.3220	240.334	54.667	9.200	29.927	-0.548	9.901	457.535	-0.003827	-0.000644	-0.002095
0.3240	316.198	65.061	10.589	35.747	-0.541	9.899	601.959	-0.004554	-0.000741	-0.002502
0.3260	382.428	74.094	12.910	40.647	-0.540	9.895	728.045	-0.005187	-0.000904	-0.002845
0.3280	440.197	81.334	15.244	44.926	-0.546	9.890	838.022	-0.005693	-0.001067	-0.003145
0.3300	499.499	88.741	17.204	49.784	-0.548	9.886	950.918	-0.006212	-0.001204	-0.003485
0.3320	567.773	97.719	19.789	55.906	-0.554	9.884	1080.894	-0.006840	-0.001385	-0.003913
0.3340	639.534	106.822	23.375	61.824	-0.544	9.889	1217.508	-0.007478	-0.001636	-0.004328
0.3360	699.061	114.354	26.405	66.930	-0.541	9.892	1330.833	-0.008005	-0.001848	-0.004685
0.3380	745.589	119.925	28.614	71.208	-0.548	9.897	1419.411	-0.008395	-0.002003	-0.004985
0.3400	786.797	125.136	30.071	74.511	-0.551	9.903	1497.860	-0.008759	-0.002105	-0.005216
0.3420	830.770	130.861	32.337	78.804	-0.551	9.901	1581.573	-0.009160	-0.002264	-0.005516
0.3440	874.653	136.725	34.463	82.284	-0.537	9.899	1665.115	-0.009571	-0.002412	-0.005760
0.3460	907.220	140.909	36.074	84.858	-0.542	9.895	1727.114	-0.009864	-0.002525	-0.005940
0.3480	930.048	143.757	37.353	87.130	-0.549	9.890	1770.573	-0.010063	-0.002615	-0.006099
0.3500	946.249	145.492	38.117	88.739	-0.551	9.886	1801.414	-0.010184	-0.002668	-0.006212
0.3520	958.737	147.648	38.716	90.915	-0.556	9.885	1825.190	-0.010335	-0.002710	-0.006364
0.3540	969.888	149.552	39.675	92.124	-0.557	9.889	1846.418	-0.010469	-0.002777	-0.006449
0.3560	972.849	150.441	39.816	92.441	-0.556	9.892	1852.055	-0.010531	-0.002787	-0.006471
0.3580	969.498	150.595	39.968	92.386	-0.557	9.897	1845.675	-0.010542	-0.002798	-0.006467
0.3600	963.321	149.955	39.815	92.137	-0.552	9.902	1833.916	-0.010497	-0.002787	-0.006450
0.3620	954.875	149.749	39.954	92.220	-0.549	9.901	1817.837	-0.010482	-0.002797	-0.006455
0.3640	941.304	148.622	39.606	91.451	-0.541	9.899	1792.002	-0.010404	-0.002772	-0.006402
0.3660	904.891	144.939	38.591	88.863	-0.540	9.895	1722.679	-0.010146	-0.002701	-0.006220
0.3680	836.737	137.949	36.243	83.868	-0.548	9.890	1592.932	-0.009656	-0.002537	-0.005871
0.3700	762.000	129.917	32.714	78.667	-0.545	9.885	1450.653	-0.009094	-0.002290	-0.005507
0.3720	704.442	123.607	30.518	74.785	-0.548	9.884	1341.076	-0.008653	-0.002136	-0.005235
0.3740	662.843	118.410	28.628	71.139	-0.541	9.888	1261.883	-0.008289	-0.002004	-0.004980
0.3760	614.632	112.477	26.849	67.163	-0.548	9.892	1170.101	-0.007873	-0.001879	-0.004701
0.3780	551.648	105.196	24.293	62.100	-0.555	9.897	1050.196	-0.007364	-0.001701	-0.004347
0.3800	485.944	97.260	21.097	56.691	-0.549	9.902	925.112	-0.006808	-0.001477	-0.003968
0.3820	431.556	90.214	19.150	52.534	-0.544	9.901	821.571	-0.006315	-0.001341	-0.003677
0.3840	385.419	83.739	16.926	48.641	-0.534	9.899	733.738	-0.005862	-0.001185	-0.003405
0.3860	335.269	77.208	15.315	44.073	-0.542	9.895	638.266	-0.005405	-0.001072	-0.003085
0.3880	283.436	69.705	13.231	39.573	-0.552	9.890	539.589	-0.004879	-0.000926	-0.002770
0.3900	237.569	63.145	11.840	35.501	-0.548	9.885	452.271	-0.004420	-0.000829	-0.002485
0.3920	200.193	57.266	11.034	32.253	-0.546	9.884	381.117	-0.004009	-0.000772	-0.002258
0.3940	169.400	52.152	10.355	29.337	-0.532	9.888	322.495	-0.003651	-0.000725	-0.002054
0.3960	140.636	47.525	9.729	26.750	-0.534	9.893	267.735	-0.003327	-0.000681	-0.001872
0.3980	115.012	43.091	9.256	24.507	-0.539	9.898	218.954	-0.003016	-0.000648	-0.001715
0.4000	94.183	39.645	8.629	22.100	-0.539	9.902	179.300	-0.002775	-0.000604	-0.001547
0.4020	79.575	37.103	8.171	20.337	-0.541	9.901	151.491	-0.002597	-0.000572	-0.001424
0.4040	72.151	35.572	7.783	19.222	-0.535	9.899	137.358	-0.002490	-0.000545	-0.001346
0.4060	67.898	34.392	7.783	18.355	-0.532	9.895	129.261	-0.002407	-0.000545	-0.001285
0.4080	65.689	33.517	7.201	17.941	-0.541	9.890	125.055	-0.002346	-0.000504	-0.001256
0.4100	65.809	33.100	7.006	17.873	-0.553	9.886	125.284	-0.002317	-0.000490	-0.001251
0.4120	67.583	33.169	7.381	17.983	-0.557	9.884	128.660	-0.002322	-0.000517	-0.001259
0.4140	71.340	33.501	6.895	17.666	-0.548	9.889	135.813	-0.002345	-0.000483	-0.001237
0.4160	78.538	34.155	7.033	18.132	-0.552	9.893	149.517	-0.002391	-0.000492	-0.001269
0.4180	103.260	36.949	7.239	19.730	-0.548	9.898	196.581	-0.002586	-0.000507	-0.001381
0.4200	158.339	43.802	7.506	23.405	-0.542	9.902	301.437	-0.003066	-0.000525	-0.001638
0.4220	231.588	54.030	8.659	29.528	-0.554	9.901	440.884	-0.003782	-0.000606	-0.002067
0.4240	307.226	64.422	10.243	34.935	-0.542	9.899	584.879	-0.004510	-0.000717	-0.002445
0.4260	372.013	73.094	12.175	39.683	-0.541	9.895	708.218	-0.005117	-0.000852	-0.002778
0.4280	429.873	80.362	14.232	44.376	-0.546	9.890	818.367	-0.005625	-0.000996	-0.003106
0.4300	490.121	87.575	16.456	49.700	-0.549	9.885	933.065	-0.006130	-0.001152	-0.003479
0.4320	559.387	96.635	19.581	55.989	-0.552	9.884	1064.930	-0.006764	-0.001371	-0.003919
0.4340	632.636	105.848	22.499	61.781	-0.544	9.888	1204.376	-0.007409	-0.001575	-0.004325
0.4360	694.493	113.629	25.792	66.845	-0.551	9.892	1322.136	-0.007954	-0.001805	-0.004679
0.4380	741.757	119.454	28.045	70.574	-0.555	9.897	1412.115	-0.008362	-0.001963	-0.004940
0.4400	781.958	124.206	29.796	73.932	-0.549	9.902	1488.647	-0.008694	-0.002086	-0.005175
0.4420	826.517	130.026	31.921	77.991	-0.550	9.900	1573.477	-0.009102	-0.002234	-0.005459
0.4440	875.345	136.364	34.589	81.996	-0.541	9.899	1666.431	-0.009545	-0.002421	-0.005740
0.4460	910.135	141.422	36.687	85.052	-0.545	9.895	1732.664	-0.009900	-0.002568	-0.005954
0.4480	928.365	143.618	37.563	87.006	-0.541	9.890	1767.368	-0.010053	-0.002629	-0.006090
0.4500	939.366	144.952	37.979	88.559	-0.540	9.886	1788.311	-0.010147	-0.002659	-0.006199
0.4520	951.178	147.065	38.620	90.554	-0.541	9.884	1810.799	-0.010295	-0.002703	-0.006339
0.4540	965.230	149.399	39.760	91.862	-0.528	9.888	1837.549	-0.010458	-0.002783	-0.006430
0.4560	970.429	150.622	40.400	92.481	-0.532	9.893	1847.448	-0.010544	-0.002828	-0.006474
0.4580	967.574	150.886	40.426	92.221	-0.534	9.898	1842.012	-0.010562	-0.002830	-0.006455
0.4600	961.262	150.415	40.148	92.015	-0.536	9.902	1829.996	-0.010529	-0.002810	-0.006441
0.4620	952.050	149.984	40.093	92.248	-0.536	9.901	1812.458	-0.010499	-0.002806	-0.006457
0.4640	938.569	148.816	39.772	91.545	-0.530	9.899	1786.795	-0.010417	-0.002784	-0.006408
0.4660	903.899	145.620	38.618	89.220	-0.533	9.895	1720.791	-0.010193	-0.002703	-0.006245
0.4680	837.623	138.936	36.423	84.679	-0.542	9.890	1594.620	-0.009726	-0.002550	-0.005928
0.4700	763.203	130.416	33.214	79.203	-0.542	9.885	1452.942	-0.009129	-0.002325	-0.005544
0.4720	705.539	123.844	30.769	75.184	-0.543	9.884	1343.164	-0.008669	-0.002154	-0.005263
0.4740	663.970	118.841	28.836	71.139	-0.537	9.888	1264.029	-0.008319	-0.002019	-0.004980
0.4760	614.767	113.102	26.653	67.425	-0.538	9.892	1170.359	-0.007917	-0.001866	-0.004720
0.4780	551.693	105.820	24.012	62.222	-0.533	9.897	1050.282	-0.007407	-0.001681	-0.004356
0.4800	485.914	97.564	20.901	56.978	-0.533	9.902	925.055	-0.006830	-0.001463	-0.003988
0.4820	429.527	90.770	18.775	52.837	-0.536	9.901	817.709	-0.006354	-0.001314	-0.003699
0.4840	379.873	83.710	16.717	48.230	-0.534	9.899	723.181	-0.005860	-0.001170	-0.003376
0.4860	328.010	76.206	15.162	43.634	-0.538	9.895	624.447	-0.005334	-0.001061	-0.003054
0.4880	279.047	69.257	13.231	39.463	-0.542	9.890	531.235	-0.004848	-0.000926	-0.002762
0.4900	236.788	62.948	11.255	35.968	-0.543	9.885	450.783	-0.004406	-0.000788	-0.002518
0.4920	202.583	57.962	10.894	33.355	-0.542	9.884	385.666	-0.004057	-0.000763	-0.002335
0.4940	173.834	52.861	10.074	30.158	-0.530	9.888	330.935	-0.003700	-0.000705	-0.002111
0.4960	144.814	48.275	9.659	27.351	-0.536	9.892	275.688	-0.003379	-0.000676	-0.001915
0.4980	117.868	43.757	8.965	24.589	-0.542	9.897	224.390	-0.003063	-0.000628	-0.001721
0.5000	44.845	22.512	4.584	9.424	-0.549	9.899	85.373	-0.001576	-0.000321	-0.000660
0.5020	45.205	22.413	4.808	9.671	-0.550	9.901	86.060	-0.001569	-0.000337	-0.000677
0.5040	45.536	22.814	5.073	10.126	-0.552	9.899	86.689	-0.001597	-0.000355	-0.000709
0.5060	46.633	22.814	4.976	9.990	-0.545	9.897	88.778	-0.001597	-0.000348	-0.000699
0.5080	48.031	22.748	5.045	9.961	-0.552	9.893	91.438	-0.001592	-0.000353	-0.000697
0.5100	51.472	23.302	4.852	10.016	-0.549	9.887	97.990	-0.001631	-0.000340	-0.000701
0.5120	61.376	24.317	5.364	11.186	-0.551	9.883	116.844	-0.001702	-0.000375	-0.000783
0.5140	90.576	28.708	5.934	13.361	-0.551	9.884	172.434	-0.002010	-0.000415	-0.000935
0.5160	139.869	35.225	6.184	16.512	-0.544	9.889	266.275	-0.002466	-0.000433	-0.001156
0.5180	201.351	43.786	6.657	21.355	-0.550	9.893	383.320	-0.003065	-0.000466	-0.001495
0.5200	272.721	53.389	7.519	26.707	-0.550	9.899	519.190	-0.003737	-0.000526	-0.001869
0.5220	350.973	64.200	9.687	33.147	-0.553	9.901	668.163	-0.004494	-0.000678	-0.002320
0.5240	436.771	75.581	12.788	40.632	-0.549	9.899	831.499	-0.005291	-0.000895	-0.002844
0.5260	522.448	86.671	16.206	47.527	-0.543	9.897	994.606	-0.006067	-0.001134	-0.003327
0.5280	601.993	96.801	19.816	53.843	-0.545	9.893	1146.040	-0.006776	-0.001387	-0.003769
0.5300	678.052	106.041	23.361	60.666	-0.538	9.887	1290.836	-0.007423	-0.001635	-0.004247
0.5320	754.907	115.601	26.933	67.671	-0.537	9.883	1437.149	-0.008092	-0.001885	-0.004737
0.5340	836.571	125.595	30.685	74.718	-0.540	9.885	1592.617	-0.008792	-0.002148	-0.005230
0.5360	915.651	135.627	34.507	80.936	-0.534	9.890	1743.164	-0.009494	-0.002415	-0.005666
0.5380	983.339	144.076	38.314	86.509	-0.540	9.894	1872.025	-0.010085	-0.002682	-0.006056
0.5400	1039.244	151.053	41.011	91.682	-0.541	9.900	1978.455	-0.010574	-0.002871	-0.006418
0.5420	1090.176	157.043	43.428	96.388	-0.545	9.901	2075.415	-0.010993	-0.003040	-0.006747
0.5440	1142.565	163.742	46.444	101.370	-0.544	9.899	2175.150	-0.011462	-0.003251	-0.007096
0.5460	1188.897	169.997	48.819	105.291	-0.534	9.898	2263.355	-0.011900	-0.003417	-0.007370
0.5480	1220.066	174.081	51.070	108.332	-0.548	9.893	2322.693	-0.012186	-0.003575	-0.007583
0.5500	1238.551	176.721	52.391	110.604	-0.550	9.887	2357.883	-0.012370	-0.003667	-0.007742
0.5520	1248.365	178.430	52.821	112.723	-0.552	9.884	2376.566	-0.012490	-0.003697	-0.007891
0.5540	1257.171	180.055	53.627	114.347	-0.546	9.885	2393.332	-0.012604	-0.003754	-0.008004
0.5560	1263.784	181.765	54.100	114.869	-0.542	9.889	2405.920	-0.012724	-0.003787	-0.008041
0.5580	1260.853	182.238	54.682	114.896	-0.542	9.894	2400.341	-0.012757	-0.003828	-0.008043
0.5600	1251.641	181.945	54.488	114.841	-0.540	9.899	2382.803	-0.012736	-0.003814	-0.008039
0.5620	1236.973	180.833	54.252	114.401	-0.547	9.901	2354.879	-0.012658	-0.003798	-0.008008
0.5640	1211.109	178.748	53.863	113.354	-0.542	9.899	2305.641	-0.012512	-0.003770	-0.007935
0.5660	1147.629	172.565	51.544	108.800	-0.534	9.897	2184.792	-0.012080	-0.003608	-0.007616
0.5680	1051.297	163.171	47.249	101.729	-0.545	9.893	2001.400	-0.011422	-0.003307	-0.007121
0.5700	963.201	154.126	42.955	95.012	-0.551	9.887	1833.687	-0.010789	-0.003007	-0.006651
0.5720	901.133	147.080	39.954	90.459	-0.550	9.883	1715.527	-0.010296	-0.002797	-0.006332
0.5740	851.540	141.243	37.897	86.936	-0.553	9.884	1621.113	-0.009887	-0.002653	-0.006086
0.5760	784.934	133.517	35.021	81.143	-0.541	9.889	1494.312	-0.009346	-0.002451	-0.005680
0.5780	699.512	123.941	31.602	74.481	-0.539	9.893	1331.692	-0.008676	-0.002212	-0.005214
0.5800	619.651	114.325	27.585	68.030	-0.540	9.899	1179.657	-0.008003	-0.001931	-0.004762
0.5820	553.496	105.987	24.347	62.678	-0.553	9.901	1053.715	-0.007419	-0.001704	-0.004387
0.5840	499.454	99.040	21.846	58.162	-0.553	9.899	950.832	-0.006933	-0.001529	-0.004071
0.5860	441.610	91.437	19.472	52.727	-0.542	9.896	840.712	-0.006401	-0.001363	-0.003691
0.5880	371.487	82.238	16.316	46.756	-0.547	9.892	707.216	-0.005757	-0.001142	-0.003273
0.5900	305.482	72.970	13.857	41.099	-0.551	9.887	581.560	-0.005108	-0.000970	-0.002877
0.5920	252.162	65.145	12.244	36.560	-0.548	9.883	480.051	-0.004560	-0.000857	-0.002559
0.5940	212.156	58.670	11.007	33.051	-0.547	9.884	403.891	-0.004107	-0.000771	-0.002314
0.5960	178.898	53.069	10.130	29.281	-0.540	9.889	340.576	-0.003715	-0.000709	-0.002050
0.5980	147.744	47.761	9.587	26.500	-0.542	9.893	281.267	-0.003343	-0.000671	-0.001855
0.6000	121.204	43.092	8.825	23.899	-0.541	9.899	230.742	-0.003016	-0.000618	-0.001673
0.6020	101.622	40.020	8.535	22.098	-0.550	9.901	193.462	-0.002801	-0.000597	-0.001547
0.6040	90.937	37.755	8.214	20.915	-0.553	9.899	173.120	-0.002643	-0.000575	-0.001464
0.6060	87.556	36.602	8.103	19.896	-0.542	9.897	166.683	-0.002562	-0.000567	-0.001393
0.6080	87.105	35.655	7.827	19.483	-0.549	9.892	165.825	-0.002496	-0.000548	-0.001364
0.6100	88.938	35.712	7.771	18.850	-0.545	9.887	169.315	-0.002500	-0.000544	-0.001319
0.6120	92.861	35.880	7.577	19.236	-0.550	9.883	176.783	-0.002512	-0.000530	-0.001347
0.6140	101.111	36.741	7.563	19.786	-0.543	9.884	192.490	-0.002572	-0.000529	-0.001385
0.6160	127.651	39.825	7.535	21.203	-0.530	9.889	243.015	-0.002788	-0.000527	-0.001484
0.6180	186.172	47.176	8.326	25.292	-0.537	9.894	354.424	-0.003302	-0.000583	-0.001770
0.6200	265.777	57.557	9.493	30.988	-0.537	9.899	505.972	-0.004029	-0.000665	-0.002169
0.6220	351.935	68.689	11.660	37.771	-0.544	9.901	669.994	-0.004808	-0.000816	-0.002644
0.6240	440.813	80.600	14.633	44.925	-0.542	9.899	839.195	-0.005642	-0.001024	-0.003145
0.6260	526.565	91.537	17.956	51.324	-0.532	9.897	1002.445	-0.006408	-0.001257	-0.003593
0.6280	605.149	101.250	21.638	57.915	-0.537	9.893	1152.048	-0.007087	-0.001515	-0.004054
0.6300	677.826	110.200	24.917	64.039	-0.538	9.887	1290.407	-0.007714	-0.001744	-0.004483
0.6320	749.948	119.148	28.156	70.631	-0.545	9.884	1427.708	-0.008340	-0.001971	-0.004944
0.6340	827.599	128.666	31.825	77.195	-0.547	9.885	1575.537	-0.009007	-0.002228	-0.005404
0.6360	903.087	137.769	35.686	83.003	-0.537	9.890	1719.246	-0.009644	-0.002498	-0.005810
0.6380	970.940	146.203	39.216	88.726	-0.543	9.894	1848.421	-0.010234	-0.002745	-0.006211
0.6400	1031.866	153.471	42.203	94.215	-0.550	9.900	1964.407	-0.010743	-0.002954	-0.006595
0.6420	1087.876	160.337	44.886	99.526	-0.550	9.901	2071.037	-0.011224	-0.003142	-0.006967
0.6440	1139.409	166.811	47.792	104.507	-0.548	9.900	2169.142	-0.011677	-0.003345	-0.007316
0.6460	1176.604	171.772	49.957	107.342	-0.540	9.897	2239.952	-0.012024	-0.003497	-0.007514
0.6480	1197.268	174.843	51.500	109.380	-0.545	9.892	2279.291	-0.012239	-0.003605	-0.007657
0.6500	1214.160	176.874	52.418	111.568	-0.550	9.887	2311.449	-0.012381	-0.003669	-0.007810
0.6520	1231.954	179.473	53.446	113.918	-0.552	9.884	2345.324	-0.012563	-0.003741	-0.007974
0.6540	1246.321	181.959	54.420	116.023	-0.551	9.885	2372.675	-0.012737	-0.003809	-0.008122
0.6560	1252.137	183.197	55.268	116.381	-0.545	9.889	2383.747	-0.012824	-0.003869	-0.008147
0.6580	1249.071	183.600	55.238	116.077	-0.549	9.894	2377.911	-0.012852	-0.003867	-0.008125
0.6600	1241.166	183.376	55.099	115.708	-0.549	9.899	2362.862	-0.012836	-0.003857	-0.008100
0.6620	1228.648	182.417	55.030	115.638	-0.556	9.901	2339.029	-0.012769	-0.003852	-0.008095
0.6640	1206.691	180.554	54.532	114.798	-0.553	9.899	2297.230	-0.012639	-0.003817	-0.008036
0.6660	1151.702	175.148	52.364	110.851	-0.546	9.897	2192.545	-0.012260	-0.003665	-0.007760
0.6680	1059.969	165.895	48.499	104.439	-0.552	9.892	2017.908	-0.011613	-0.003395	-0.007311
0.6700	966.762	156.403	44.346	97.449	-0.551	9.887	1840.467	-0.010948	-0.003104	-0.006821
0.6720	893.168	148.426	40.370	91.918	-0.549	9.883	1700.363	-0.010390	-0.002826	-0.006434
0.6740	841.471	142.589	37.966	87.803	-0.549	9.885	1601.944	-0.009981	-0.002658	-0.006146
0.6760	784.498	135.586	35.230	82.781	-0.544	9.890	1493.483	-0.009491	-0.002466	-0.005795
0.6780	704.442	126.278	32.129	76.520	-0.552	9.893	1341.076	-0.008839	-0.002249	-0.005356
0.6800	618.659	115.978	28.167	69.695	-0.553	9.899	1177.769	-0.008118	-0.001972	-0.004879
0.6820	545.156	106.709	24.612	64.038	-0.562	9.900	1037.836	-0.007470	-0.001723	-0.004483
0.6840	487.627	99.524	22.165	59.303	-0.558	9.899	928.316	-0.006967	-0.001552	-0.004151
0.6860	428.791	91.533	19.607	53.442	-0.544	9.897	816.307	-0.006407	-0.001373	-0.003741
0.6880	361.418	82.586	17.176	47.624	-0.553	9.892	688.047	-0.005781	-0.001202	-0.003334
0.6900	298.660	73.734	14.925	42.257	-0.561	9.887	568.571	-0.005161	-0.001045	-0.002958
0.6920	249.517	66.396	13.411	38.019	-0.564	9.883	475.016	-0.004648	-0.000939	-0.002661
0.6940	214.305	60.781	12.203	34.757	-0.560	9.884	407.982	-0.004255	-0.000854	-0.002433
0.6960	183.106	55.265	11.090	31.591	-0.545	9.889	348.587	-0.003869	-0.000776	-0.002211
0.6980	150.885	49.802	10.533	28.510	-0.546	9.893	287.247	-0.003486	-0.000737	-0.001996
0.7000	122.767	45.078	9.909	25.771	-0.548	9.899	233.717	-0.003155	-0.000694	-0.001804
0.7020	103.035	41.854	9.341	23.941	-0.550	9.901	196.152	-0.002930	-0.000654	-0.001676
0.7040	92.335	39.549	9.008	22.622	-0.550	9.899	175.781	-0.002768	-0.000631	-0.001584
0.7060	87.751	38.021	8.535	21.467	-0.545	9.897	167.055	-0.002661	-0.000597	-0.001503
0.7080	86.774	37.770	8.480	20.585	-0.556	9.893	165.195	-0.002644	-0.000594	-0.001441
0.7100	88.352	37.393	8.258	20.048	-0.560	9.887	168.200	-0.002618	-0.000578	-0.001403
0.7120	92.019	37.658	8.312	20.351	-0.562	9.883	175.180	-0.002636	-0.000582	-0.001425
0.7140	99.638	38.341	8.672	21.040	-0.557	9.884	189.686	-0.002684	-0.000607	-0.001473
0.7160	125.728	41.732	8.521	22.429	-0.545	9.889	239.353	-0.002921	-0.000596	-0.001570
0.7180	184.233	49.234	8.965	26.708	-0.550	9.893	350.733	-0.003446	-0.000628	-0.001870
0.7200	264.545	59.586	10.187	32.557	-0.558	9.899	503.626	-0.004171	-0.000713	-0.002279
0.7220	352.942	71.093	12.312	39.189	-0.557	9.901	671.911	-0.004977	-0.000862	-0.002743
0.7240	442.481	82.891	15.815	46.509	-0.554	9.899	842.371	-0.005802	-0.001107	-0.003256
0.7260	525.078	93.425	19.360	52.618	-0.538	9.896	999.613	-0.006540	-0.001355	-0.003683
0.7280	601.061	102.723	22.456	58.825	-0.547	9.892	1144.266	-0.007191	-0.001572	-0.004118
0.7300	679.690	112.074	25.570	65.209	-0.550	9.887	1293.955	-0.007845	-0.001790	-0.004565
0.7320	763.128	121.910	29.322	72.529	-0.553	9.883	1452.799	-0.008534	-0.002053	-0.005077
0.7340	849.826	132.710	33.631	79.863	-0.554	9.885	1617.851	-0.009290	-0.002354	-0.005590
0.7360	928.124	142.188	37.063	86.276	-0.543	9.889	1766.911	-0.009953	-0.002594	-0.006039
0.7380	989.470	149.872	40.315	91.641	-0.549	9.893	1883.698	-0.010491	-0.002822	-0.006415
0.7400	1040.943	156.181	42.746	96.127	-0.558	9.899	1981.688	-0.010933	-0.002992	-0.006729
0.7420	1091.994	162.087	45.496	101.081	-0.559	9.901	2078.876	-0.011346	-0.003185	-0.007076
0.7440	1147.299	168.840	48.539	105.953	-0.551	9.899	2184.162	-0.011819	-0.003398	-0.007417
0.7460	1191.828	174.525	50.986	109.421	-0.537	9.896	2268.934	-0.012217	-0.003569	-0.007659
0.7480	1216.790	177.916	52.903	111.842	-0.546	9.892	2316.456	-0.012454	-0.003703	-0.007829
0.7500	1230.451	179.762	53.889	113.698	-0.550	9.887	2342.463	-0.012583	-0.003772	-0.007959
0.7520	1240.325	181.292	54.434	115.762	-0.556	9.883	2361.259	-0.012690	-0.003810	-0.008103
0.7540	1250.574	183.338	55.210	117.208	-0.552	9.884	2380.772	-0.012834	-0.003865	-0.008205
0.7560	1256.420	184.518	55.779	117.798	-0.539	9.889	2391.901	-0.012916	-0.003905	-0.008246
0.7580	1253.625	184.795	55.960	117.715	-0.552	9.893	2386.580	-0.012936	-0.003917	-0.008240
0.7600	1245.013	184.629	55.711	117.316	-0.552	9.899	2370.186	-0.012924	-0.003900	-0.008212
0.7620	1230.751	183.615	55.684	117.399	-0.553	9.901	2343.035	-0.012853	-0.003898	-0.008218
0.7640	1202.693	181.236	55.170	116.176	-0.550	9.899	2289.619	-0.012687	-0.003862	-0.008132
0.7660	1138.237	174.954	52.739	111.168	-0.540	9.896	2166.910	-0.012247	-0.003692	-0.007782
0.7680	1046.804	165.673	48.707	104.466	-0.548	9.892	1992.846	-0.011597	-0.003410	-0.007313
0.7700	962.209	157.000	44.664	98.163	-0.551	9.887	1831.799	-0.010990	-0.003127	-0.006871
0.7720	898.969	150.066	41.412	93.429	-0.555	9.883	1711.407	-0.010505	-0.002899	-0.006540
0.7740	850.548	144.285	39.258	89.451	-0.552	9.884	1619.225	-0.010100	-0.002748	-0.006262
0.7760	790.915	137.252	36.590	84.335	-0.541	9.888	1505.699	-0.009608	-0.002561	-0.005903
0.7780	705.779	127.595	32.879	77.674	-0.547	9.894	1343.622	-0.008932	-0.002302	-0.005437
0.7800	617.743	117.633	28.767	70.465	-0.548	9.899	1176.023	-0.008234	-0.002014	-0.004933
0.7820	546.914	108.613	25.598	65.110	-0.547	9.901	1041.183	-0.007603	-0.001792	-0.004558
0.7840	490.617	101.444	23.097	60.655	-0.542	9.899	934.010	-0.007101	-0.001617	-0.004246
0.7860	431.646	93.355	20.456	55.014	-0.530	9.897	821.743	-0.006535	-0.001432	-0.003851
0.7880	364.529	84.571	17.665	49.316	-0.534	9.892	693.970	-0.005920	-0.001237	-0.003452
0.7900	301.290	75.762	14.942	43.357	-0.538	9.887	573.578	-0.005303	-0.001046	-0.003035
0.7920	249.396	68.051	13.066	39.119	-0.542	9.883	474.787	-0.004764	-0.000915	-0.002738
0.7940	212.171	62.200	12.285	35.965	-0.544	9.884	403.919	-0.004354	-0.000860	-0.002518
0.7960	182.355	56.668	11.076	32.610	-0.536	9.889	347.157	-0.003967	-0.000775	-0.002283
0.7980	153.034	51.831	10.438	29.844	-0.540	9.893	291.338	-0.003628	-0.000731	-0.002089
0.8000	126.419	47.315	9.938	26.803	-0.545	9.899	240.669	-0.003312	-0.000696	-0.001876
0.8020	104.673	43.562	9.422	24.713	-0.544	9.901	199.270	-0.003049	-0.000660	-0.001730
0.8040	91.929	41.256	8.993	23.309	-0.542	9.899	175.009	-0.002888	-0.000629	-0.001632
0.8060	86.714	39.326	8.813	22.152	-0.538	9.896	165.081	-0.002753	-0.000617	-0.001551
0.8080	85.271	38.701	8.646	21.562	-0.550	9.892	162.334	-0.002709	-0.000605	-0.001509
0.8100	86.624	38.339	8.242	21.161	-0.550	9.887	164.909	-0.002684	-0.000577	-0.001481
0.8120	90.471	38.339	8.116	21.493	-0.551	9.883	172.234	-0.002684	-0.000568	-0.001504
0.8140	98.692	39.035	8.255	22.112	-0.548	9.884	187.883	-0.002732	-0.000578	-0.001548
0.8160	124.721	42.189	8.311	23.432	-0.541	9.889	237.436	-0.002953	-0.000582	-0.001640
0.8180	182.866	49.705	8.798	27.187	-0.545	9.893	348.129	-0.003479	-0.000616	-0.001903
0.8200	262.907	59.863	10.146	33.189	-0.547	9.899	500.507	-0.004190	-0.000710	-0.002323
0.8220	350.973	71.161	12.564	40.014	-0.552	9.901	668.163	-0.004981	-0.000879	-0.002801
0.8240	439.716	82.821	15.897	46.934	-0.542	9.899	837.107	-0.005797	-0.001113	-0.003285
0.8260	522.688	93.786	19.330	53.112	-0.528	9.896	995.064	-0.006565	-0.001353	-0.003718
0.8280	597.800	103.069	22.582	59.083	-0.537	9.892	1138.058	-0.007215	-0.001581	-0.004136
0.8300	671.274	111.823	25.779	65.414	-0.546	9.887	1277.933	-0.007828	-0.001805	-0.004579
0.8320	748.340	121.202	29.183	72.199	-0.549	9.884	1424.646	-0.008484	-0.002043	-0.005054
0.8340	832.469	131.542	33.213	79.561	-0.545	9.884	1584.806	-0.009208	-0.002325	-0.005569
0.8360	913.502	141.548	37.036	86.001	-0.540	9.889	1739.073	-0.009908	-0.002593	-0.006020
0.8380	979.987	149.706	40.746	91.600	-0.552	9.893	1865.644	-0.010479	-0.002852	-0.006412
0.8400	1036.239	156.264	43.428	96.718	-0.552	9.899	1972.733	-0.010938	-0.003040	-0.006770
0.8420	1089.665	162.670	46.316	101.726	-0.548	9.901	2074.442	-0.011387	-0.003242	-0.007121
0.8440	1143.031	169.505	49.414	106.516	-0.553	9.898	2176.037	-0.011865	-0.003459	-0.007456
0.8460	1185.140	174.732	51.458	109.971	-0.543	9.896	2256.203	-0.012231	-0.003602	-0.007698
0.8480	1211.154	178.221	53.029	112.186	-0.545	9.892	2305.727	-0.012475	-0.003712	-0.007853
0.8500	1228.993	180.597	53.861	114.154	-0.537	9.886	2339.687	-0.012642	-0.003770	-0.007991
0.8520	1244.713	182.569	54.973	116.740	-0.544	9.883	2369.614	-0.012780	-0.003848	-0.008172
0.8540	1258.795	185.307	56.282	118.527	-0.545	9.884	2396.421	-0.012971	-0.003940	-0.008297
0.8560	1263.483	186.405	56.630	118.996	-0.530	9.889	2405.348	-0.013048	-0.003964	-0.008330
0.8580	1258.749	186.475	56.712	118.623	-0.534	9.894	2396.336	-0.013053	-0.003970	-0.008304
0.8600	1249.672	186.154	56.530	118.417	-0.541	9.899	2379.055	-0.013031	-0.003957	-0.008289
0.8620	1235.080	185.154	56.003	118.239	-0.544	9.901	2351.274	-0.012961	-0.003920	-0.008277
0.8640	1204.332	182.264	55.265	116.451	-0.538	9.899	2292.738	-0.012758	-0.003869	-0.008152
0.8660	1133.082	175.204	52.654	111.678	-0.536	9.897	2157.097	-0.012264	-0.003686	-0.007817
0.8680	1037.892	165.812	48.552	104.439	-0.549	9.892	1975.880	-0.011607	-0.003399	-0.007311
0.8700	955.672	156.932	44.330	97.766	-0.550	9.887	1819.353	-0.010985	-0.003103	-0.006844
0.8720	896.384	150.260	41.218	93.403	-0.548	9.884	1706.486	-0.010518	-0.002885	-0.006538
0.8740	848.083	144.340	38.967	89.923	-0.548	9.885	1614.532	-0.010104	-0.002728	-0.006295
0.8760	784.934	137.435	36.214	84.859	-0.536	9.890	1494.312	-0.009620	-0.002535	-0.005940
0.8780	700.715	128.014	32.451	77.991	-0.539	9.894	1333.981	-0.008961	-0.002272	-0.005459
0.8800	616.360	117.939	28.657	71.263	-0.539	9.899	1173.391	-0.008256	-0.002006	-0.004988
0.8820	545.366	109.072	25.432	65.471	-0.545	9.901	1038.237	-0.007635	-0.001780	-0.004583
0.8840	488.513	101.737	23.070	60.804	-0.544	9.898	930.004	-0.007122	-0.001615	-0.004256
0.8860	431.511	93.955	20.679	55.672	-0.536	9.896	821.486	-0.006577	-0.001447	-0.003897
0.8880	365.010	84.727	17.760	49.838	-0.542	9.892	694.885	-0.005931	-0.001243	-0.003489
0.8900	300.568	75.875	15.482	44.182	-0.546	9.887	572.205	-0.005311	-0.001084	-0.003093
0.8920	247.142	67.787	13.511	39.187	-0.546	9.883	470.495	-0.004745	-0.000946	-0.002743
0.8940	209.060	61.616	12.315	36.175	-0.549	9.884	397.997	-0.004313	-0.000862	-0.002532
0.8960	178.823	56.504	11.688	32.774	-0.541	9.889	340.433	-0.003955	-0.000818	-0.002294
0.8980	149.097	51.472	11.117	29.830	-0.540	9.894	283.842	-0.003603	-0.000778	-0.002088
0.9000	122.917	47.190	10.616	27.368	-0.544	9.899	234.003	-0.003303	-0.000743	-0.001916
0.9020	102.358	43.523	9.923	25.360	-0.545	9.901	194.864	-0.003047	-0.000695	-0.001775
0.9040	90.321	41.507	9.534	23.915	-0.538	9.899	171.947	-0.002905	-0.000667	-0.001674
0.9060	85.872	40.019	9.062	22.635	-0.537	9.896	163.479	-0.002801	-0.000634	-0.001584
0.9080	84.685	39.285	8.993	21.755	-0.549	9.892	161.219	-0.002750	-0.000630	-0.001523
0.9100	86.669	39.174	8.854	21.467	-0.556	9.887	164.995	-0.002742	-0.000620	-0.001503
0.9120	90.411	39.410	8.726	21.906	-0.552	9.883	172.119	-0.002759	-0.000611	-0.001533
0.9140	98.511	40.352	9.198	22.415	-0.550	9.885	187.540	-0.002825	-0.000644	-0.001569
0.9160	126.254	43.549	9.060	23.943	-0.545	9.890	240.355	-0.003048	-0.000634	-0.001676
0.9180	187.630	51.554	9.908	28.249	-0.548	9.894	357.199	-0.003609	-0.000694	-0.001977
0.9200	268.498	61.728	11.230	34.069	-0.549	9.899	511.150	-0.004321	-0.000786	-0.002385
0.9220	355.061	73.178	13.494	41.129	-0.547	9.900	675.945	-0.005122	-0.000945	-0.002879
0.9240	441.444	84.419	16.481	47.966	-0.547	9.899	840.397	-0.005909	-0.001154	-0.003358
0.9260	521.636	94.537	19.442	53.967	-0.541	9.896	993.061	-0.006618	-0.001361	-0.003778
0.9280	596.417	103.903	22.582	60.021	-0.554	9.892	1135.426	-0.007273	-0.001581	-0.004201
0.9300	672.401	112.767	25.849	66.226	-0.554	9.886	1280.079	-0.007894	-0.001809	-0.004636
0.9320	754.306	122.662	29.628	73.080	-0.553	9.883	1436.005	-0.008586	-0.002074	-0.005116
0.9340	840.629	133.209	33.672	80.471	-0.546	9.885	1600.342	-0.009325	-0.002357	-0.005633
0.9360	917.424	142.728	37.466	86.743	-0.538	9.890	1746.540	-0.009991	-0.002623	-0.006072
0.9380	978.710	150.122	40.829	92.135	-0.549	9.894	1863.213	-0.010509	-0.002858	-0.006449
0.9400	1032.722	156.085	43.233	97.089	-0.551	9.899	1966.038	-0.010926	-0.003026	-0.006796
0.9420	1085.772	162.532	45.762	101.976	-0.550	9.900	2067.032	-0.011377	-0.003203	-0.007138
0.9440	1140.686	169.397	48.832	106.875	-0.549	9.898	2171.574	-0.011858	-0.003418	-0.007481
0.9460	1187.845	175.332	51.307	110.715	-0.540	9.896	2261.353	-0.012273	-0.003591	-0.007750
0.9480	1216.640	179.111	53.308	113.426	-0.545	9.891	2316.170	-0.012538	-0.003732	-0.007940
0.9500	1233.877	181.556	54.571	115.158	-0.554	9.886	2348.986	-0.012709	-0.003820	-0.008061
0.9520	1247.478	183.502	55.350	117.125	-0.550	9.883	2374.878	-0.012845	-0.003874	-0.008199
0.9540	1260.087	185.766	55.988	118.802	-0.546	9.884	2398.882	-0.013004	-0.003919	-0.008316
0.9560	1265.422	187.058	56.767	119.271	-0.542	9.889	2409.039	-0.013094	-0.003974	-0.008349
0.9580	1261.470	187.101	56.628	119.436	-0.544	9.893	2401.514	-0.013097	-0.003964	-0.008361
0.9600	1252.573	186.795	56.851	119.258	-0.545	9.899	2384.577	-0.013076	-0.003980	-0.008348
0.9620	1238.176	185.724	56.392	119.203	-0.549	9.900	2357.168	-0.013001	-0.003947	-0.008344
0.9640	1209.997	183.725	55.849	117.922	-0.551	9.898	2303.524	-0.012861	-0.003909	-0.008255
0.9660	1144.398	177.082	53.378	113.188	-0.540	9.896	2178.640	-0.012396	-0.003736	-0.007923
0.9680	1053.537	167.895	49.752	106.349	-0.545	9.892	2005.663	-0.011753	-0.003483	-0.007444
0.9700	971.662	159.155	45.775	99.829	-0.547	9.886	1849.794	-0.011141	-0.003204	-0.006988
0.9720	906.469	152.108	42.579	94.958	-0.547	9.883	1725.683	-0.010648	-0.002981	-0.006647
0.9740	853.719	145.994	40.272	90.871	-0.545	9.884	1625.261	-0.010220	-0.002819	-0.006361
0.9760	793.635	138.892	37.395	85.422	-0.536	9.889	1510.878	-0.009722	-0.002618	-0.005980
0.9780	713.444	129.972	33.866	78.968	-0.543	9.893	1358.213	-0.009098	-0.002371	-0.005528
0.9800	629.254	119.912	29.907	72.557	-0.541	9.899	1197.939	-0.008394	-0.002093	-0.005079
0.9820	557.404	110.975	26.111	67.065	-0.538	9.901	1061.153	-0.007768	-0.001828	-0.004695
0.9840	498.778	103.597	23.722	62.317	-0.533	9.898	949.545	-0.007252	-0.001661	-0.004362
0.9860	437.642	95.468	21.109	56.882	-0.529	9.895	833.158	-0.006683	-0.001478	-0.003982
0.9880	369.849	86.531	18.553	50.857	-0.540	9.891	704.098	-0.006057	-0.001299	-0.003560
0.9900	306.865	77.651	15.954	44.898	-0.540	9.886	584.192	-0.005436	-0.001117	-0.003143
0.9920	255.288	70.315	14.328	40.564	-0.542	9.883	486.002	-0.004922	-0.001003	-0.002840
0.9940	217.130	64.064	13.063	37.331	-0.546	9.884	413.361	-0.004484	-0.000914	-0.002613
0.9960	186.247	58.686	11.867	34.276	-0.542	9.890	354.567	-0.004108	-0.000831	-0.002399
0.9980	156.265	53.584	11.228	31.385	-0.546	9.893	297.489	-0.003751	-0.000786	-0.002197
Test Cycles
Time (sec)	Axial stress (kPa)	Axial micro-strain #1	Axial micro-strain #2	Axial micro-strain #3	Confining pressure (kPa)	Temperature (�C)	Load (N)	Displacement #1 (mm)	Displacement #2 (mm)	Displacement #3 (mm)
0.0000	129.109	48.789	10.352	28.908	-0.542	9.899	245.790	-0.003415	-0.000725	-0.002024
0.0020	108.235	45.344	10.006	26.609	-0.550	9.901	206.051	-0.003174	-0.000700	-0.001863
0.0040	96.527	42.910	9.561	25.111	-0.541	9.899	183.764	-0.003004	-0.000669	-0.001758
0.0060	92.184	41.882	9.077	23.940	-0.530	9.896	175.495	-0.002932	-0.000635	-0.001676
0.0080	91.403	40.936	8.674	23.529	-0.541	9.891	174.007	-0.002865	-0.000607	-0.001647
0.0100	93.387	40.602	8.672	23.130	-0.546	9.886	177.784	-0.002842	-0.000607	-0.001619
0.0120	97.414	40.562	8.632	23.268	-0.547	9.883	185.452	-0.002839	-0.000604	-0.001629
0.0140	104.973	41.562	8.785	23.735	-0.543	9.884	199.842	-0.002909	-0.000615	-0.001661
0.0160	128.583	44.261	8.826	24.753	-0.540	9.889	244.789	-0.003098	-0.000618	-0.001733
0.0180	182.565	51.097	9.508	28.606	-0.549	9.893	347.557	-0.003577	-0.000666	-0.002002
0.0200	257.512	60.545	10.771	33.821	-0.555	9.899	490.236	-0.004238	-0.000754	-0.002367
0.0220	340.739	71.259	12.855	40.632	-0.545	9.900	648.680	-0.004988	-0.000900	-0.002844
0.0240	429.407	82.960	15.760	47.609	-0.545	9.898	817.480	-0.005807	-0.001103	-0.003333
0.0260	515.234	93.731	19.191	53.733	-0.536	9.896	980.873	-0.006561	-0.001343	-0.003761
0.0280	594.764	103.723	22.889	60.160	-0.544	9.891	1132.278	-0.007261	-0.001602	-0.004211
0.0300	674.219	113.353	26.226	66.420	-0.550	9.886	1283.541	-0.007935	-0.001836	-0.004649
0.0320	756.921	123.468	30.019	73.863	-0.557	9.883	1440.983	-0.008643	-0.002101	-0.005170
0.0340	843.229	134.280	34.118	81.599	-0.557	9.884	1605.291	-0.009400	-0.002388	-0.005712
0.0360	918.852	143.452	37.883	87.694	-0.545	9.889	1749.258	-0.010042	-0.002652	-0.006139
0.0380	976.230	150.526	41.120	92.454	-0.548	9.893	1858.492	-0.010537	-0.002878	-0.006472
0.0400	1026.065	156.251	43.399	96.747	-0.546	9.899	1953.363	-0.010938	-0.003038	-0.006772
0.0420	1080.002	162.768	46.262	101.743	-0.546	9.901	2056.046	-0.011394	-0.003238	-0.007122
0.0440	1140.401	170.286	49.542	107.232	-0.542	9.899	2171.030	-0.011920	-0.003468	-0.007506
0.0460	1187.890	176.248	52.070	111.293	-0.530	9.896	2261.438	-0.012337	-0.003645	-0.007791
0.0480	1213.379	179.652	53.820	113.521	-0.536	9.891	2309.961	-0.012576	-0.003767	-0.007946
0.0500	1227.611	181.446	54.516	115.322	-0.542	9.887	2337.055	-0.012701	-0.003816	-0.008073
0.0520	1239.002	183.573	55.210	116.837	-0.550	9.883	2358.742	-0.012850	-0.003865	-0.008179
0.0540	1251.175	185.655	56.240	118.557	-0.552	9.884	2381.916	-0.012996	-0.003937	-0.008299
0.0560	1257.457	187.018	56.767	119.382	-0.542	9.889	2393.875	-0.013091	-0.003974	-0.008357
0.0580	1254.541	186.989	56.877	119.546	-0.545	9.894	2388.325	-0.013089	-0.003981	-0.008368
0.0600	1246.997	186.695	56.807	119.436	-0.548	9.899	2373.962	-0.013069	-0.003976	-0.008361
0.0620	1234.659	185.944	56.614	119.395	-0.549	9.901	2350.473	-0.013016	-0.003963	-0.008358
0.0640	1211.425	183.862	55.615	118.198	-0.549	9.898	2306.242	-0.012870	-0.003893	-0.008274
0.0660	1152.243	178.318	53.571	113.808	-0.538	9.896	2193.575	-0.012482	-0.003750	-0.007967
0.0680	1057.775	168.826	49.668	106.710	-0.541	9.891	2013.731	-0.011818	-0.003477	-0.007470
0.0700	966.492	159.362	45.235	99.638	-0.542	9.886	1839.952	-0.011155	-0.003166	-0.006975
0.0720	898.503	151.524	41.829	94.682	-0.548	9.883	1710.520	-0.010607	-0.002928	-0.006628
0.0740	850.698	146.121	39.341	91.285	-0.549	9.884	1619.511	-0.010228	-0.002754	-0.006390
0.0760	793.229	139.256	36.716	86.206	-0.539	9.889	1510.105	-0.009748	-0.002570	-0.006034
0.0780	712.467	129.860	33.131	79.959	-0.548	9.894	1356.354	-0.009090	-0.002319	-0.005597
0.0800	628.112	120.327	29.503	73.066	-0.553	9.899	1195.765	-0.008423	-0.002065	-0.005115
0.0820	556.096	111.419	26.085	67.507	-0.553	9.900	1058.664	-0.007799	-0.001826	-0.004725
0.0840	498.928	104.027	23.307	62.814	-0.546	9.898	949.831	-0.007282	-0.001631	-0.004397
0.0860	441.790	96.122	21.000	57.475	-0.539	9.896	841.055	-0.006729	-0.001470	-0.004023
0.0880	374.748	87.228	18.277	51.615	-0.540	9.891	713.425	-0.006106	-0.001279	-0.003613
0.0900	310.818	78.484	16.107	45.698	-0.541	9.886	591.717	-0.005494	-0.001127	-0.003199
0.0920	258.218	70.843	14.383	41.238	-0.546	9.883	491.581	-0.004959	-0.001007	-0.002887
0.0940	216.484	64.313	13.355	37.785	-0.547	9.885	412.130	-0.004502	-0.000935	-0.002645
0.0960	179.905	57.960	12.022	34.167	-0.533	9.889	342.493	-0.004057	-0.000842	-0.002392
0.0980	146.933	52.374	11.327	31.057	-0.546	9.893	279.722	-0.003666	-0.000793	-0.002174
0.1000	119.791	47.816	10.436	28.304	-0.546	9.899	228.052	-0.003347	-0.000731	-0.001981
0.1020	99.713	44.523	10.074	26.349	-0.544	9.901	189.829	-0.003117	-0.000705	-0.001844
0.1040	88.337	42.452	9.464	24.807	-0.544	9.899	168.171	-0.002972	-0.000663	-0.001737
0.1060	82.942	40.657	9.116	23.488	-0.534	9.896	157.900	-0.002846	-0.000638	-0.001644
0.1080	81.168	40.005	9.102	22.800	-0.547	9.892	154.524	-0.002800	-0.000637	-0.001596
0.1100	83.047	39.645	8.867	22.606	-0.550	9.887	158.100	-0.002775	-0.000621	-0.001582
0.1120	87.435	39.963	9.283	22.815	-0.550	9.883	166.454	-0.002797	-0.000650	-0.001597
0.1140	96.302	40.699	9.270	23.502	-0.554	9.885	183.334	-0.002849	-0.000649	-0.001645
0.1160	125.893	44.564	9.342	24.905	-0.550	9.890	239.668	-0.003119	-0.000654	-0.001743
0.1180	185.360	52.096	9.951	29.005	-0.556	9.893	352.879	-0.003647	-0.000697	-0.002030
0.1200	260.848	61.909	10.853	34.441	-0.557	9.899	496.588	-0.004334	-0.000760	-0.002411
0.1220	341.941	72.288	12.801	40.729	-0.560	9.900	650.969	-0.005060	-0.000896	-0.002851
0.1240	425.154	83.334	15.843	47.459	-0.555	9.899	809.383	-0.005833	-0.001109	-0.003322
0.1260	505.150	93.687	19.219	53.196	-0.539	9.896	961.676	-0.006558	-0.001345	-0.003724
0.1280	579.931	103.250	22.456	59.168	-0.548	9.892	1104.040	-0.007227	-0.001572	-0.004142
0.1300	654.863	111.740	25.500	65.732	-0.550	9.887	1246.691	-0.007822	-0.001785	-0.004601
0.1320	736.723	121.147	28.891	72.886	-0.552	9.883	1402.531	-0.008480	-0.002022	-0.005102
0.1340	827.554	132.251	33.228	80.441	-0.547	9.885	1575.451	-0.009258	-0.002326	-0.005631
0.1360	909.354	142.281	37.077	86.797	-0.538	9.889	1731.176	-0.009960	-0.002595	-0.006076
0.1380	970.264	149.912	40.300	92.053	-0.544	9.894	1847.134	-0.010494	-0.002821	-0.006444
0.1400	1018.686	155.652	42.843	96.113	-0.545	9.899	1939.316	-0.010896	-0.002999	-0.006728
0.1420	1070.203	161.574	45.191	101.107	-0.553	9.901	2037.392	-0.011310	-0.003163	-0.007077
0.1440	1131.714	169.328	48.873	106.667	-0.552	9.899	2154.493	-0.011853	-0.003421	-0.007467
0.1460	1183.322	175.513	51.558	110.989	-0.538	9.896	2252.741	-0.012286	-0.003609	-0.007769
0.1480	1212.086	179.138	53.378	113.728	-0.544	9.891	2307.501	-0.012540	-0.003736	-0.007961
0.1500	1224.650	181.083	54.181	115.446	-0.549	9.886	2331.419	-0.012676	-0.003793	-0.008081
0.1520	1230.241	182.613	54.863	117.124	-0.546	9.883	2342.062	-0.012783	-0.003840	-0.008199
0.1540	1237.860	184.127	55.377	118.157	-0.542	9.884	2356.567	-0.012889	-0.003876	-0.008271
0.1560	1245.179	185.404	56.044	118.433	-0.532	9.889	2370.501	-0.012978	-0.003923	-0.008290
0.1580	1244.563	185.986	56.697	118.832	-0.537	9.893	2369.328	-0.013019	-0.003969	-0.008318
0.1600	1237.514	185.515	56.309	118.515	-0.535	9.899	2355.909	-0.012986	-0.003942	-0.008296
0.1620	1225.341	184.917	56.435	118.392	-0.544	9.901	2332.735	-0.012944	-0.003950	-0.008287
0.1640	1200.379	183.237	55.989	117.194	-0.542	9.899	2285.213	-0.012827	-0.003919	-0.008204
0.1660	1137.936	177.193	53.307	112.735	-0.529	9.896	2166.338	-0.012403	-0.003731	-0.007891
0.1680	1046.518	167.785	49.611	105.896	-0.538	9.892	1992.302	-0.011745	-0.003473	-0.007413
0.1700	961.863	158.932	45.179	99.731	-0.541	9.887	1831.141	-0.011125	-0.003163	-0.006981
0.1720	896.099	151.844	42.066	94.944	-0.552	9.883	1705.942	-0.010629	-0.002945	-0.006646
0.1740	844.837	145.452	39.980	91.216	-0.555	9.885	1608.353	-0.010182	-0.002799	-0.006385
0.1760	785.820	138.865	37.173	86.001	-0.544	9.890	1496.000	-0.009721	-0.002602	-0.006020
0.1780	705.178	129.609	33.574	79.409	-0.552	9.895	1342.478	-0.009073	-0.002350	-0.005559
0.1800	618.900	119.715	29.281	72.610	-0.553	9.900	1178.226	-0.008380	-0.002050	-0.005083
0.1820	545.411	110.406	26.000	67.079	-0.561	9.901	1038.322	-0.007728	-0.001820	-0.004696
0.1840	489.175	103.181	23.667	62.318	-0.551	9.899	931.263	-0.007223	-0.001657	-0.004362
0.1860	428.986	95.120	20.693	56.415	-0.539	9.896	816.679	-0.006658	-0.001449	-0.003949
0.1880	356.098	85.518	17.815	49.990	-0.545	9.892	677.919	-0.005986	-0.001247	-0.003499
0.1900	291.130	76.318	15.188	44.444	-0.540	9.887	554.237	-0.005342	-0.001063	-0.003111
0.1920	243.009	68.996	13.370	40.660	-0.542	9.883	462.627	-0.004830	-0.000936	-0.002846
0.1940	207.693	63.269	12.371	37.591	-0.545	9.885	395.393	-0.004429	-0.000866	-0.002631
0.1960	174.780	57.502	11.632	34.083	-0.542	9.890	332.737	-0.004025	-0.000814	-0.002386
0.1980	141.733	52.168	10.783	30.795	-0.551	9.894	269.823	-0.003652	-0.000755	-0.002156
0.2000	114.486	47.331	10.006	27.766	-0.553	9.900	217.953	-0.003313	-0.000700	-0.001944
0.2020	95.220	43.732	9.437	25.868	-0.545	9.901	181.274	-0.003061	-0.000661	-0.001811
0.2040	84.415	42.007	9.421	24.340	-0.544	9.899	160.704	-0.002940	-0.000659	-0.001704
0.2060	79.410	40.409	8.976	23.185	-0.535	9.896	151.176	-0.002829	-0.000628	-0.001623
0.2080	78.358	39.729	8.952	22.812	-0.546	9.892	149.174	-0.002781	-0.000627	-0.001597
0.2100	80.207	39.325	8.743	22.566	-0.548	9.887	152.693	-0.002753	-0.000612	-0.001580
0.2120	84.189	39.229	8.589	22.787	-0.545	9.883	160.275	-0.002746	-0.000601	-0.001595
0.2140	92.485	39.992	8.964	23.362	-0.551	9.885	176.067	-0.002799	-0.000627	-0.001635
0.2160	119.566	43.216	8.548	24.891	-0.548	9.890	227.623	-0.003025	-0.000598	-0.001742
0.2180	178.222	50.942	9.507	28.524	-0.552	9.894	339.289	-0.003566	-0.000665	-0.001997
0.2200	257.121	60.977	10.450	34.359	-0.553	9.900	489.492	-0.004268	-0.000732	-0.002405
0.2220	345.834	72.720	12.953	41.266	-0.554	9.901	658.379	-0.005090	-0.000907	-0.002889
0.2240	436.470	84.588	16.164	48.367	-0.552	9.898	830.927	-0.005921	-0.001131	-0.003386
0.2260	520.464	95.426	19.873	54.669	-0.545	9.895	990.829	-0.006680	-0.001391	-0.003827
0.2280	597.635	104.806	23.416	61.054	-0.553	9.891	1137.743	-0.007336	-0.001639	-0.004274
0.2300	671.590	113.629	26.529	67.492	-0.554	9.886	1278.534	-0.007954	-0.001857	-0.004724
0.2320	747.212	123.174	29.905	74.193	-0.553	9.882	1422.501	-0.008622	-0.002093	-0.005194
0.2340	827.644	132.959	33.643	81.088	-0.546	9.884	1575.623	-0.009307	-0.002355	-0.005676
0.2360	902.772	142.157	37.467	86.798	-0.544	9.889	1718.645	-0.009951	-0.002623	-0.006076
0.2380	968.130	150.247	40.731	92.220	-0.553	9.894	1843.071	-0.010517	-0.002851	-0.006455
0.2400	1026.981	157.085	43.761	97.422	-0.554	9.899	1955.109	-0.010996	-0.003063	-0.006820
0.2420	1084.345	163.769	46.610	102.844	-0.557	9.901	2064.314	-0.011464	-0.003263	-0.007199
0.2440	1142.640	171.037	49.750	108.210	-0.551	9.898	2175.293	-0.011973	-0.003483	-0.007575
0.2460	1186.057	176.651	52.266	111.690	-0.545	9.896	2257.948	-0.012366	-0.003659	-0.007818
0.2480	1207.848	179.500	53.364	114.013	-0.547	9.891	2299.433	-0.012565	-0.003735	-0.007981
0.2500	1219.180	181.416	54.085	115.486	-0.549	9.886	2321.005	-0.012699	-0.003786	-0.008084
0.2520	1228.587	182.822	54.904	117.180	-0.554	9.883	2338.915	-0.012798	-0.003843	-0.008203
0.2540	1240.174	184.959	55.753	118.804	-0.553	9.884	2360.973	-0.012947	-0.003903	-0.008316
0.2560	1246.306	186.112	56.504	119.175	-0.545	9.889	2372.646	-0.013028	-0.003955	-0.008342
0.2580	1243.901	186.322	56.670	119.258	-0.550	9.894	2368.069	-0.013043	-0.003967	-0.008348
0.2600	1236.537	185.724	56.309	119.011	-0.544	9.899	2354.050	-0.013001	-0.003942	-0.008331
0.2620	1223.853	185.016	55.878	118.860	-0.551	9.900	2329.903	-0.012951	-0.003911	-0.008320
0.2640	1201.341	183.392	55.531	117.829	-0.545	9.898	2287.045	-0.012837	-0.003887	-0.008248
0.2660	1143.346	177.778	53.447	113.631	-0.540	9.895	2176.638	-0.012444	-0.003741	-0.007954
0.2680	1048.893	168.424	49.319	106.763	-0.546	9.891	1996.822	-0.011790	-0.003452	-0.007473
0.2700	954.695	158.278	44.887	99.593	-0.547	9.886	1817.493	-0.011079	-0.003142	-0.006972
0.2720	881.356	150.427	41.259	94.201	-0.550	9.883	1677.876	-0.010530	-0.002888	-0.006594
0.2740	827.840	143.923	38.826	90.128	-0.545	9.884	1575.994	-0.010075	-0.002718	-0.006309
0.2760	768.177	136.961	36.284	84.762	-0.541	9.890	1462.412	-0.009587	-0.002540	-0.005933
0.2780	688.827	127.721	32.531	78.224	-0.548	9.894	1311.350	-0.008940	-0.002277	-0.005476
0.2800	603.841	117.380	28.696	71.663	-0.544	9.900	1149.559	-0.008217	-0.002009	-0.005016
0.2820	531.780	108.543	25.294	66.215	-0.547	9.901	1012.373	-0.007598	-0.001771	-0.004635
0.2840	477.032	101.205	22.861	61.399	-0.542	9.898	908.146	-0.007084	-0.001600	-0.004298
0.2860	422.268	94.049	20.748	56.389	-0.536	9.895	803.890	-0.006583	-0.001452	-0.003947
0.2880	359.810	85.836	18.317	51.227	-0.543	9.891	684.986	-0.006009	-0.001282	-0.003586
0.2900	299.772	77.374	15.554	45.683	-0.544	9.886	570.688	-0.005416	-0.001089	-0.003198
0.2920	248.600	69.911	13.678	41.238	-0.550	9.882	473.270	-0.004894	-0.000957	-0.002887
0.2940	210.443	64.005	12.758	37.880	-0.543	9.884	400.629	-0.004480	-0.000893	-0.002652
0.2960	178.087	58.434	11.939	34.577	-0.530	9.889	339.031	-0.004090	-0.000836	-0.002420
0.2980	145.430	52.890	11.187	31.536	-0.536	9.894	276.861	-0.003702	-0.000783	-0.002208
0.3000	116.921	48.206	10.452	28.551	-0.544	9.899	222.588	-0.003374	-0.000732	-0.001999
0.3020	95.851	44.522	9.798	26.184	-0.554	9.901	182.476	-0.003117	-0.000686	-0.001833
0.3040	84.850	42.506	9.743	24.837	-0.556	9.898	161.533	-0.002975	-0.000682	-0.001739
0.3060	80.297	41.158	9.366	23.875	-0.547	9.896	152.864	-0.002881	-0.000656	-0.001671
0.3080	78.794	40.048	9.045	23.448	-0.554	9.891	150.003	-0.002803	-0.000633	-0.001641
0.3100	80.642	39.771	9.019	22.912	-0.552	9.886	153.522	-0.002784	-0.000631	-0.001604
0.3120	84.219	39.922	8.851	23.158	-0.557	9.883	160.332	-0.002795	-0.000620	-0.001621
0.3140	92.605	40.730	8.825	23.626	-0.554	9.885	176.296	-0.002851	-0.000618	-0.001654
0.3160	119.371	44.078	8.701	25.001	-0.549	9.890	227.251	-0.003085	-0.000609	-0.001750
0.3180	176.809	51.598	9.533	28.757	-0.551	9.894	336.599	-0.003612	-0.000667	-0.002013
0.3200	255.753	61.588	10.755	34.593	-0.548	9.900	486.889	-0.004311	-0.000753	-0.002421
0.3220	344.316	72.885	13.133	41.762	-0.554	9.901	655.489	-0.005102	-0.000919	-0.002923
0.3240	434.141	84.920	16.384	48.929	-0.557	9.898	826.492	-0.005944	-0.001147	-0.003425
0.3260	516.902	95.607	19.664	55.341	-0.549	9.895	984.049	-0.006692	-0.001377	-0.003874
0.3280	588.903	104.542	22.930	61.011	-0.561	9.891	1121.120	-0.007318	-0.001605	-0.004271
0.3300	654.592	112.282	25.445	66.323	-0.558	9.886	1246.176	-0.007860	-0.001781	-0.004643
0.3320	730.847	121.425	29.116	72.914	-0.559	9.883	1391.344	-0.008500	-0.002038	-0.005104
0.3340	821.257	132.126	33.242	80.482	-0.554	9.885	1563.463	-0.009249	-0.002327	-0.005634
0.3360	906.348	142.521	37.353	87.059	-0.546	9.890	1725.454	-0.009976	-0.002615	-0.006094
0.3380	975.208	150.816	40.760	92.741	-0.550	9.894	1856.546	-0.010557	-0.002853	-0.006492
0.3400	1031.204	157.252	43.442	97.861	-0.546	9.900	1963.148	-0.011008	-0.003041	-0.006850
0.3420	1083.638	163.547	46.221	102.913	-0.553	9.900	2062.969	-0.011448	-0.003235	-0.007204
0.3440	1137.575	170.384	49.180	108.334	-0.550	9.898	2165.651	-0.011927	-0.003443	-0.007583
0.3460	1182.270	176.344	51.681	111.938	-0.540	9.896	2250.738	-0.012344	-0.003618	-0.007836
0.3480	1213.739	180.082	53.751	114.387	-0.553	9.891	2310.648	-0.012606	-0.003763	-0.008007
0.3500	1235.666	182.738	55.278	116.685	-0.554	9.887	2352.390	-0.012792	-0.003869	-0.008168
0.3520	1247.764	184.641	56.197	118.709	-0.551	9.883	2375.422	-0.012925	-0.003934	-0.008310
0.3540	1254.376	186.640	56.837	119.961	-0.554	9.885	2388.010	-0.013065	-0.003979	-0.008397
0.3560	1255.578	187.153	57.283	120.263	-0.549	9.889	2390.299	-0.013101	-0.004010	-0.008418
0.3580	1251.070	187.309	57.157	120.085	-0.559	9.894	2381.716	-0.013112	-0.004001	-0.008406
0.3600	1243.120	187.087	56.920	119.741	-0.552	9.899	2366.581	-0.013096	-0.003984	-0.008382
0.3620	1229.700	186.125	56.906	119.836	-0.559	9.900	2341.032	-0.013029	-0.003983	-0.008389
0.3640	1202.122	183.847	56.141	118.541	-0.561	9.898	2288.532	-0.012869	-0.003930	-0.008298
0.3660	1135.426	177.222	53.640	113.755	-0.556	9.896	2161.560	-0.012406	-0.003755	-0.007963
0.3680	1044.099	168.076	49.595	106.792	-0.555	9.892	1987.696	-0.011765	-0.003472	-0.007475
0.3700	963.907	159.517	45.511	100.255	-0.551	9.886	1835.032	-0.011166	-0.003186	-0.007018
0.3720	902.756	152.915	42.593	96.169	-0.554	9.883	1718.616	-0.010704	-0.002982	-0.006732
0.3740	850.157	147.203	40.329	91.998	-0.548	9.885	1618.481	-0.010304	-0.002823	-0.006440
0.3760	782.184	139.185	37.467	85.999	-0.542	9.890	1489.077	-0.009743	-0.002623	-0.006020
0.3780	695.274	129.554	33.672	79.066	-0.547	9.894	1323.624	-0.009069	-0.002357	-0.005535
0.3800	610.815	119.200	29.682	72.186	-0.550	9.899	1162.834	-0.008344	-0.002078	-0.005053
0.3820	543.232	110.711	26.668	67.452	-0.554	9.900	1034.174	-0.007750	-0.001867	-0.004722
0.3840	491.188	103.986	24.305	63.228	-0.549	9.898	935.097	-0.007279	-0.001701	-0.004426
0.3860	434.096	96.289	21.636	57.765	-0.540	9.896	826.406	-0.006740	-0.001514	-0.004044
0.3880	364.063	87.226	18.538	51.464	-0.549	9.891	693.083	-0.006106	-0.001298	-0.003603
0.3900	297.322	77.791	15.802	45.546	-0.552	9.886	566.025	-0.005445	-0.001106	-0.003188
0.3920	245.068	70.093	14.093	41.086	-0.556	9.883	466.547	-0.004906	-0.000987	-0.002876
0.3940	208.549	64.076	12.966	37.937	-0.551	9.884	397.024	-0.004485	-0.000908	-0.002656
0.3960	178.522	58.823	11.992	34.771	-0.543	9.889	339.861	-0.004118	-0.000839	-0.002434
0.3980	148.120	53.638	11.354	31.385	-0.551	9.894	281.982	-0.003755	-0.000795	-0.002197
0.4000	119.416	49.025	10.368	28.647	-0.546	9.899	227.337	-0.003432	-0.000726	-0.002005
0.4020	97.399	45.232	9.617	26.831	-0.551	9.901	185.423	-0.003166	-0.000673	-0.001878
0.4040	84.956	42.620	9.421	25.469	-0.550	9.899	161.734	-0.002983	-0.000659	-0.001783
0.4060	80.312	41.229	8.840	24.162	-0.545	9.896	152.893	-0.002886	-0.000619	-0.001691
0.4080	80.071	40.380	8.909	23.667	-0.557	9.891	152.435	-0.002827	-0.000624	-0.001657
0.4100	82.596	40.146	8.797	23.447	-0.556	9.886	157.242	-0.002810	-0.000616	-0.001641
0.4120	86.909	40.313	9.075	23.625	-0.560	9.883	165.453	-0.002822	-0.000635	-0.001654
0.4140	96.167	41.424	8.936	24.053	-0.548	9.885	183.077	-0.002900	-0.000626	-0.001684
0.4160	125.577	45.151	8.977	25.524	-0.545	9.890	239.067	-0.003161	-0.000628	-0.001787
0.4180	183.301	52.250	9.951	29.612	-0.550	9.895	348.959	-0.003658	-0.000697	-0.002073
0.4200	259.195	62.018	11.285	34.841	-0.550	9.900	493.441	-0.004341	-0.000790	-0.002439
0.4220	345.278	73.121	13.480	41.802	-0.552	9.901	657.320	-0.005118	-0.000944	-0.002926
0.4240	437.717	85.573	16.704	49.273	-0.554	9.898	833.302	-0.005990	-0.001169	-0.003449
0.4260	525.138	96.649	20.386	55.878	-0.542	9.896	999.727	-0.006765	-0.001427	-0.003911
0.4280	602.534	106.139	23.819	62.209	-0.550	9.891	1147.070	-0.007430	-0.001667	-0.004355
0.4300	674.971	114.853	27.002	68.113	-0.550	9.886	1284.971	-0.008040	-0.001890	-0.004768
0.4320	749.692	123.997	30.379	74.469	-0.552	9.883	1427.221	-0.008680	-0.002127	-0.005213
0.4340	831.492	134.155	34.505	81.446	-0.550	9.885	1582.947	-0.009391	-0.002415	-0.005701
0.4360	910.722	143.813	38.340	87.707	-0.544	9.890	1733.780	-0.010067	-0.002684	-0.006139
0.4380	978.500	151.999	41.884	93.377	-0.548	9.894	1862.812	-0.010640	-0.002932	-0.006536
0.4400	1035.337	158.405	44.566	98.467	-0.546	9.900	1971.016	-0.011088	-0.003120	-0.006893
0.4420	1087.531	164.866	46.778	103.738	-0.549	9.901	2070.379	-0.011541	-0.003274	-0.007262
0.4440	1141.693	171.718	49.734	108.841	-0.545	9.898	2173.491	-0.012020	-0.003481	-0.007619
0.4460	1186.282	177.304	52.266	112.364	-0.537	9.895	2258.377	-0.012411	-0.003659	-0.007865
0.4480	1213.319	180.958	53.987	114.812	-0.546	9.890	2309.847	-0.012667	-0.003779	-0.008037
0.4500	1229.189	182.822	54.988	116.562	-0.545	9.885	2340.059	-0.012798	-0.003849	-0.008159
0.4520	1239.799	184.600	55.655	118.308	-0.551	9.883	2360.258	-0.012922	-0.003896	-0.008282
0.4540	1248.335	186.168	56.393	119.533	-0.542	9.884	2376.509	-0.013032	-0.003947	-0.008367
0.4560	1251.866	187.378	56.739	119.808	-0.536	9.889	2383.232	-0.013116	-0.003972	-0.008387
0.4580	1248.139	187.629	57.143	120.042	-0.542	9.894	2376.137	-0.013134	-0.004000	-0.008403
0.4600	1240.385	187.046	56.865	119.988	-0.543	9.900	2361.374	-0.013093	-0.003981	-0.008399
0.4620	1228.798	186.517	56.614	119.962	-0.544	9.901	2339.315	-0.013056	-0.003963	-0.008397
0.4640	1207.142	184.780	56.280	119.120	-0.544	9.898	2298.088	-0.012935	-0.003940	-0.008338
0.4660	1149.793	179.028	54.085	114.813	-0.535	9.896	2188.911	-0.012532	-0.003786	-0.008037
0.4680	1059.292	169.744	50.195	107.976	-0.541	9.891	2016.621	-0.011882	-0.003514	-0.007558
0.4700	973.180	160.739	45.651	101.440	-0.545	9.886	1852.684	-0.011252	-0.003196	-0.007101
0.4720	907.400	153.499	42.538	97.036	-0.546	9.883	1727.457	-0.010745	-0.002978	-0.006792
0.4740	851.329	147.036	40.217	92.715	-0.541	9.884	1620.712	-0.010293	-0.002815	-0.006490
0.4760	778.381	138.684	37.118	86.111	-0.530	9.889	1481.838	-0.009708	-0.002598	-0.006028
0.4780	691.427	128.763	33.157	78.928	-0.542	9.894	1316.299	-0.009013	-0.002321	-0.005525
0.4800	610.800	119.299	29.336	72.323	-0.541	9.900	1162.806	-0.008351	-0.002053	-0.005063
0.4820	544.299	111.016	26.237	67.438	-0.548	9.901	1036.205	-0.007771	-0.001837	-0.004721
0.4840	490.678	103.986	23.807	63.103	-0.541	9.898	934.124	-0.007279	-0.001666	-0.004417
0.4860	430.203	95.913	21.373	57.681	-0.526	9.895	818.996	-0.006714	-0.001496	-0.004038
0.4880	358.037	86.532	18.483	51.599	-0.538	9.891	681.610	-0.006057	-0.001294	-0.003612
0.4900	292.122	77.152	15.580	45.779	-0.542	9.886	556.126	-0.005401	-0.001091	-0.003205
0.4920	241.131	69.410	14.108	41.361	-0.544	9.883	459.051	-0.004859	-0.000988	-0.002895
0.4940	204.266	63.546	13.065	37.881	-0.543	9.884	388.870	-0.004448	-0.000915	-0.002652
0.4960	171.534	58.017	12.259	34.277	-0.535	9.889	326.557	-0.004061	-0.000858	-0.002399
0.4980	139.914	52.834	11.480	31.125	-0.543	9.894	266.361	-0.003698	-0.000804	-0.002179
0.5000	113.510	48.247	10.617	28.494	-0.545	9.900	216.093	-0.003377	-0.000743	-0.001995
0.5020	95.355	45.233	10.186	26.568	-0.549	9.901	181.532	-0.003166	-0.000713	-0.001860
0.5040	86.669	43.287	10.186	25.304	-0.550	9.899	164.995	-0.003030	-0.000713	-0.001771
0.5060	83.137	41.981	9.881	24.258	-0.541	9.896	158.272	-0.002939	-0.000692	-0.001698
0.5080	81.875	41.550	9.631	23.968	-0.544	9.891	155.869	-0.002908	-0.000674	-0.001678
0.5100	82.401	40.937	9.188	23.612	-0.547	9.887	156.870	-0.002866	-0.000643	-0.001653
0.5120	84.911	40.908	9.102	23.764	-0.549	9.883	161.648	-0.002864	-0.000637	-0.001664
0.5140	90.922	41.160	9.312	24.232	-0.548	9.885	173.092	-0.002881	-0.000652	-0.001696
0.5160	113.495	43.870	9.216	24.878	-0.539	9.890	216.064	-0.003071	-0.000645	-0.001741
0.5180	171.189	51.247	9.952	28.647	-0.544	9.894	325.899	-0.003587	-0.000697	-0.002005
0.5200	253.905	62.017	10.757	34.784	-0.545	9.899	483.370	-0.004341	-0.000753	-0.002435
0.5220	345.473	73.957	13.160	41.968	-0.541	9.901	657.692	-0.005177	-0.000921	-0.002938
0.5240	437.778	86.130	16.177	49.604	-0.537	9.899	833.416	-0.006029	-0.001132	-0.003472
0.5260	522.718	96.731	19.984	56.016	-0.530	9.895	995.121	-0.006771	-0.001399	-0.003921
0.5280	599.077	106.071	23.138	62.196	-0.541	9.891	1140.490	-0.007425	-0.001620	-0.004354
0.5300	672.206	115.117	26.390	68.251	-0.545	9.886	1279.707	-0.008058	-0.001847	-0.004778
0.5320	746.762	123.954	29.851	75.129	-0.551	9.883	1421.642	-0.008677	-0.002090	-0.005259
0.5340	825.120	133.725	33.492	81.927	-0.548	9.885	1570.816	-0.009361	-0.002344	-0.005735
0.5360	901.194	142.508	37.257	87.650	-0.542	9.889	1715.641	-0.009976	-0.002608	-0.006136
0.5380	971.797	151.039	40.940	93.196	-0.546	9.894	1850.052	-0.010573	-0.002866	-0.006524
0.5400	1035.848	158.294	44.274	98.440	-0.552	9.900	1971.989	-0.011081	-0.003099	-0.006891
0.5420	1091.453	164.866	47.095	103.888	-0.552	9.901	2077.847	-0.011541	-0.003297	-0.007272
0.5440	1141.287	171.383	49.985	108.801	-0.545	9.898	2172.718	-0.011997	-0.003499	-0.007616
0.5460	1179.009	176.289	51.932	112.130	-0.535	9.896	2244.530	-0.012340	-0.003635	-0.007849
0.5480	1204.016	179.665	53.627	114.372	-0.549	9.891	2292.137	-0.012577	-0.003754	-0.008006
0.5500	1224.470	182.071	54.850	116.547	-0.548	9.886	2331.076	-0.012745	-0.003839	-0.008158
0.5520	1242.429	184.836	55.615	119.119	-0.546	9.883	2365.265	-0.012938	-0.003893	-0.008338
0.5540	1254.256	186.893	56.755	120.522	-0.540	9.884	2387.781	-0.013083	-0.003973	-0.008437
0.5560	1255.608	187.602	57.310	120.635	-0.531	9.889	2390.356	-0.013132	-0.004012	-0.008444
0.5580	1250.409	187.588	57.256	120.401	-0.540	9.894	2380.457	-0.013131	-0.004008	-0.008428
0.5600	1241.632	187.129	57.020	120.318	-0.541	9.900	2363.749	-0.013099	-0.003991	-0.008422
0.5620	1227.986	186.531	56.976	120.139	-0.541	9.900	2337.770	-0.013057	-0.003988	-0.008410
0.5640	1199.748	184.030	56.489	118.748	-0.542	9.898	2284.012	-0.012882	-0.003954	-0.008312
0.5660	1133.488	177.776	53.837	113.862	-0.532	9.896	2157.869	-0.012444	-0.003769	-0.007970
0.5680	1044.985	168.742	49.972	107.150	-0.538	9.891	1989.384	-0.011812	-0.003498	-0.007500
0.5700	965.320	160.308	46.054	101.219	-0.536	9.886	1837.721	-0.011222	-0.003224	-0.007085
0.5720	899.976	153.390	42.871	96.484	-0.537	9.883	1713.324	-0.010737	-0.003001	-0.006754
0.5740	840.178	146.454	39.953	92.163	-0.530	9.885	1599.483	-0.010252	-0.002797	-0.006451
0.5760	768.808	138.131	36.631	85.710	-0.520	9.889	1463.614	-0.009669	-0.002564	-0.006000
0.5780	688.797	128.792	33.226	78.941	-0.531	9.894	1311.293	-0.009015	-0.002326	-0.005526
0.5800	612.408	119.731	29.237	72.776	-0.529	9.900	1165.867	-0.008381	-0.002047	-0.005094
0.5820	543.322	111.059	26.306	67.506	-0.533	9.900	1034.346	-0.007774	-0.001841	-0.004725
0.5840	480.819	103.429	23.652	62.552	-0.530	9.898	915.356	-0.007240	-0.001656	-0.004379
0.5860	415.641	94.676	20.763	56.732	-0.531	9.895	791.273	-0.006627	-0.001453	-0.003971
0.5880	349.185	85.448	18.249	51.062	-0.542	9.891	664.759	-0.005981	-0.001277	-0.003574
0.5900	291.837	77.609	15.857	45.627	-0.543	9.886	555.582	-0.005433	-0.001110	-0.003194
0.5920	245.760	70.786	14.231	41.707	-0.549	9.883	467.863	-0.004955	-0.000996	-0.002919
0.5940	210.232	65.116	13.037	38.515	-0.546	9.885	400.229	-0.004558	-0.000913	-0.002696
0.5960	176.449	59.031	12.062	34.826	-0.535	9.889	335.913	-0.004132	-0.000844	-0.002438
0.5980	142.139	53.403	11.410	31.661	-0.537	9.894	270.596	-0.003738	-0.000799	-0.002216
0.6000	112.773	48.511	10.355	28.689	-0.540	9.899	214.691	-0.003396	-0.000725	-0.002008
0.6020	92.094	44.606	9.716	26.721	-0.548	9.900	175.323	-0.003122	-0.000680	-0.001870
0.6040	82.250	42.688	9.464	25.718	-0.548	9.898	156.584	-0.002988	-0.000663	-0.001800
0.6060	78.523	41.326	9.131	24.480	-0.537	9.896	149.488	-0.002893	-0.000639	-0.001714
0.6080	77.261	40.504	9.229	23.983	-0.546	9.891	147.085	-0.002835	-0.000646	-0.001679
0.6100	78.283	40.004	8.813	23.391	-0.551	9.886	149.031	-0.002800	-0.000617	-0.001637
0.6120	81.664	40.186	8.827	23.806	-0.550	9.883	155.468	-0.002813	-0.000618	-0.001666
0.6140	89.584	41.189	9.076	24.258	-0.545	9.885	170.546	-0.002883	-0.000635	-0.001698
0.6160	115.644	44.205	9.395	25.317	-0.537	9.890	220.156	-0.003094	-0.000658	-0.001772
0.6180	173.353	51.693	10.339	29.018	-0.539	9.894	330.019	-0.003619	-0.000724	-0.002031
0.6200	253.018	61.714	11.255	34.949	-0.540	9.900	481.682	-0.004320	-0.000788	-0.002446
0.6220	344.286	73.498	13.356	42.354	-0.545	9.900	655.432	-0.005145	-0.000935	-0.002965
0.6240	439.446	85.850	16.691	49.990	-0.539	9.898	836.592	-0.006010	-0.001168	-0.003499
0.6260	524.747	97.272	20.234	56.443	-0.533	9.895	998.983	-0.006809	-0.001416	-0.003951
0.6280	596.778	106.292	23.612	62.318	-0.542	9.890	1136.112	-0.007440	-0.001653	-0.004362
0.6300	666.720	114.393	26.223	67.988	-0.544	9.885	1269.264	-0.008008	-0.001836	-0.004759
0.6320	744.582	123.816	30.059	74.594	-0.550	9.883	1417.494	-0.008667	-0.002104	-0.005222
0.6340	830.229	134.405	34.062	82.093	-0.545	9.884	1580.544	-0.009408	-0.002384	-0.005746
0.6360	908.482	144.022	37.786	88.392	-0.540	9.889	1729.517	-0.010082	-0.002645	-0.006187
0.6380	970.414	151.790	41.051	93.443	-0.546	9.894	1847.420	-0.010625	-0.002874	-0.006541
0.6400	1023.269	157.655	43.704	97.986	-0.545	9.899	1948.042	-0.011036	-0.003059	-0.006859
0.6420	1076.695	164.283	46.512	103.006	-0.546	9.900	2049.751	-0.011500	-0.003256	-0.007210
0.6440	1134.975	171.536	49.515	108.125	-0.536	9.898	2160.702	-0.012008	-0.003466	-0.007569
0.6460	1183.577	177.471	52.446	112.377	-0.529	9.895	2253.227	-0.012423	-0.003671	-0.007866
0.6480	1213.860	181.126	54.404	115.350	-0.536	9.891	2310.877	-0.012679	-0.003808	-0.008075
0.6500	1228.437	183.197	55.083	117.252	-0.538	9.886	2338.629	-0.012824	-0.003856	-0.008208
0.6520	1234.118	184.391	55.335	118.805	-0.537	9.883	2349.443	-0.012907	-0.003873	-0.008316
0.6540	1238.476	185.806	55.838	119.727	-0.533	9.885	2357.740	-0.013006	-0.003909	-0.008381
0.6560	1239.904	186.475	56.058	119.671	-0.525	9.889	2360.458	-0.013053	-0.003924	-0.008377
0.6580	1236.943	186.365	56.168	119.506	-0.534	9.894	2354.822	-0.013046	-0.003932	-0.008365
0.6600	1230.676	186.224	56.324	119.574	-0.523	9.900	2342.892	-0.013036	-0.003943	-0.008370
0.6620	1220.187	185.571	56.407	119.727	-0.530	9.900	2322.922	-0.012990	-0.003949	-0.008381
0.6640	1202.273	184.127	55.934	118.914	-0.529	9.898	2288.818	-0.012889	-0.003915	-0.008324
0.6660	1149.313	179.013	53.918	115.103	-0.528	9.896	2187.996	-0.012531	-0.003774	-0.008057
0.6680	1053.627	169.508	50.028	107.783	-0.538	9.890	2005.835	-0.011866	-0.003502	-0.007545
0.6700	956.318	159.046	45.636	100.448	-0.535	9.885	1820.583	-0.011133	-0.003195	-0.007031
0.6720	883.565	151.235	42.108	95.372	-0.538	9.882	1682.081	-0.010586	-0.002948	-0.006676
0.6740	830.575	145.314	39.370	91.353	-0.540	9.884	1581.202	-0.010172	-0.002756	-0.006395
0.6760	768.883	137.878	36.506	85.903	-0.532	9.890	1463.757	-0.009651	-0.002555	-0.006013
0.6780	691.352	128.944	33.199	79.532	-0.537	9.894	1316.156	-0.009026	-0.002324	-0.005567
0.6800	612.317	119.452	29.446	72.995	-0.534	9.899	1165.695	-0.008362	-0.002061	-0.005110
0.6820	543.337	111.198	26.057	67.562	-0.540	9.900	1034.374	-0.007784	-0.001824	-0.004729
0.6840	484.456	103.738	23.903	62.855	-0.537	9.898	922.279	-0.007262	-0.001673	-0.004400
0.6860	421.051	95.539	21.138	57.046	-0.530	9.895	801.573	-0.006688	-0.001480	-0.003993
0.6880	352.191	86.252	18.385	50.993	-0.544	9.890	670.481	-0.006038	-0.001287	-0.003570
0.6900	290.304	77.541	15.856	45.668	-0.546	9.885	552.664	-0.005428	-0.001110	-0.003197
0.6920	240.695	70.260	13.995	41.706	-0.547	9.883	458.221	-0.004918	-0.000980	-0.002919
0.6940	203.334	64.244	13.244	38.225	-0.542	9.885	387.096	-0.004497	-0.000927	-0.002676
0.6960	170.407	58.573	12.410	34.731	-0.537	9.889	324.411	-0.004100	-0.000869	-0.002431
0.6980	137.600	53.028	11.590	31.593	-0.541	9.894	261.955	-0.003712	-0.000811	-0.002212
0.7000	109.722	48.400	10.645	28.731	-0.538	9.900	208.883	-0.003388	-0.000745	-0.002011
0.7020	89.720	44.856	10.297	26.515	-0.541	9.900	170.803	-0.003140	-0.000721	-0.001856
0.7040	78.854	42.759	9.951	25.249	-0.545	9.898	150.118	-0.002993	-0.000697	-0.001767
0.7060	74.210	41.311	9.590	23.805	-0.541	9.895	141.277	-0.002892	-0.000671	-0.001666
0.7080	73.083	40.380	9.311	23.241	-0.552	9.891	139.132	-0.002827	-0.000652	-0.001627
0.7100	74.616	40.061	9.395	23.047	-0.549	9.886	142.050	-0.002804	-0.000658	-0.001613
0.7120	78.043	40.103	9.340	23.610	-0.553	9.883	148.573	-0.002807	-0.000654	-0.001653
0.7140	86.413	41.034	9.381	24.132	-0.552	9.885	164.509	-0.002872	-0.000657	-0.001689
0.7160	115.268	44.384	9.200	25.770	-0.546	9.889	219.440	-0.003107	-0.000644	-0.001804
0.7180	174.194	51.985	9.838	29.859	-0.554	9.894	331.621	-0.003639	-0.000689	-0.002090
0.7200	251.035	61.796	10.813	35.034	-0.546	9.900	477.905	-0.004326	-0.000757	-0.002452
0.7220	336.742	73.288	13.106	42.009	-0.548	9.900	641.069	-0.005130	-0.000917	-0.002941
0.7240	427.228	85.157	16.522	49.070	-0.545	9.898	813.332	-0.005961	-0.001157	-0.003435
0.7260	512.138	95.926	19.747	55.303	-0.533	9.895	974.979	-0.006715	-0.001382	-0.003871
0.7280	588.302	105.251	23.069	61.399	-0.542	9.891	1119.976	-0.007368	-0.001615	-0.004298
0.7300	663.234	113.893	26.043	67.823	-0.548	9.886	1262.627	-0.007973	-0.001823	-0.004748
0.7320	742.644	123.732	29.794	74.784	-0.546	9.883	1413.803	-0.008661	-0.002086	-0.005235
0.7340	826.743	133.904	33.768	81.789	-0.541	9.885	1573.906	-0.009373	-0.002364	-0.005725
0.7360	904.845	143.493	37.465	88.091	-0.542	9.890	1722.593	-0.010045	-0.002623	-0.006166
0.7380	971.031	151.345	40.856	93.635	-0.547	9.894	1848.593	-0.010594	-0.002860	-0.006554
0.7400	1028.409	157.737	43.691	98.949	-0.548	9.899	1957.827	-0.011042	-0.003058	-0.006926
0.7420	1082.722	164.367	46.552	104.082	-0.549	9.900	2061.224	-0.011506	-0.003259	-0.007286
0.7440	1139.063	171.328	49.928	109.270	-0.548	9.898	2168.484	-0.011993	-0.003495	-0.007649
0.7460	1184.990	177.248	52.626	112.669	-0.542	9.895	2255.917	-0.012407	-0.003684	-0.007887
0.7480	1210.794	180.611	54.293	115.240	-0.551	9.890	2305.040	-0.012643	-0.003801	-0.008067
0.7500	1222.636	182.278	54.834	117.001	-0.554	9.885	2327.585	-0.012759	-0.003838	-0.008190
0.7520	1230.736	183.724	55.711	118.349	-0.556	9.882	2343.006	-0.012861	-0.003900	-0.008284
0.7540	1242.684	186.058	56.240	119.560	-0.552	9.885	2365.751	-0.013024	-0.003937	-0.008369
0.7560	1250.213	187.673	56.835	120.427	-0.547	9.890	2380.085	-0.013137	-0.003978	-0.008430
0.7580	1247.734	187.812	57.491	120.440	-0.552	9.894	2375.364	-0.013147	-0.004024	-0.008431
0.7600	1240.310	187.407	57.214	120.140	-0.551	9.899	2361.231	-0.013119	-0.004005	-0.008410
0.7620	1227.656	186.627	57.017	120.291	-0.553	9.900	2337.141	-0.013064	-0.003991	-0.008420
0.7640	1202.693	184.739	56.308	119.187	-0.548	9.897	2289.619	-0.012932	-0.003942	-0.008343
0.7660	1139.830	178.570	53.974	114.784	-0.543	9.895	2169.943	-0.012500	-0.003778	-0.008035
0.7680	1049.719	169.411	50.099	108.250	-0.546	9.890	1998.396	-0.011859	-0.003507	-0.007577
0.7700	968.340	160.864	45.957	101.811	-0.548	9.885	1843.472	-0.011260	-0.003217	-0.007127
0.7720	903.808	153.804	42.788	97.118	-0.549	9.883	1720.619	-0.010766	-0.002995	-0.006798
0.7740	846.114	147.481	40.245	92.330	-0.550	9.884	1610.785	-0.010324	-0.002817	-0.006463
0.7760	775.616	139.283	36.728	86.234	-0.550	9.889	1476.574	-0.009750	-0.002571	-0.006036
0.7780	693.306	130.056	32.920	79.822	-0.557	9.894	1319.876	-0.009104	-0.002304	-0.005588
0.7800	616.150	120.690	29.350	73.576	-0.552	9.899	1172.991	-0.008448	-0.002055	-0.005150
0.7820	552.023	112.451	26.600	68.814	-0.552	9.900	1050.911	-0.007872	-0.001862	-0.004817
0.7840	496.974	105.516	24.461	64.299	-0.546	9.898	946.112	-0.007386	-0.001712	-0.004501
0.7860	432.728	96.746	21.763	58.328	-0.538	9.895	823.803	-0.006772	-0.001523	-0.004083
0.7880	360.516	87.366	18.510	52.289	-0.547	9.890	686.331	-0.006116	-0.001296	-0.003660
0.7900	297.562	78.583	15.868	46.633	-0.546	9.885	566.483	-0.005501	-0.001111	-0.003264
0.7920	250.418	71.719	14.148	42.559	-0.553	9.883	476.732	-0.005020	-0.000990	-0.002979
0.7940	215.177	65.799	12.871	39.256	-0.549	9.884	409.641	-0.004606	-0.000901	-0.002748
0.7960	180.867	60.075	11.952	35.667	-0.546	9.889	344.324	-0.004205	-0.000837	-0.002497
0.7980	145.460	54.391	11.160	32.169	-0.554	9.894	276.918	-0.003807	-0.000781	-0.002252
0.8000	116.019	49.345	10.478	29.375	-0.543	9.900	220.871	-0.003454	-0.000733	-0.002056
0.8020	96.092	45.662	9.979	27.628	-0.544	9.900	182.934	-0.003196	-0.000699	-0.001934
0.8040	86.669	43.495	10.145	26.418	-0.541	9.898	164.995	-0.003045	-0.000710	-0.001849
0.8060	83.678	42.508	9.922	25.042	-0.534	9.895	159.302	-0.002976	-0.000695	-0.001753
0.8080	83.212	42.049	9.561	24.437	-0.545	9.891	158.415	-0.002943	-0.000669	-0.001711
0.8100	84.835	41.671	9.521	24.064	-0.544	9.886	161.505	-0.002917	-0.000666	-0.001684
0.8120	88.607	41.825	9.314	24.628	-0.551	9.883	168.686	-0.002928	-0.000652	-0.001724
0.8140	96.422	42.758	9.466	25.180	-0.552	9.885	183.563	-0.002993	-0.000663	-0.001763
0.8160	123.458	46.079	9.646	26.350	-0.553	9.889	235.033	-0.003226	-0.000675	-0.001845
0.8180	181.934	53.638	10.271	30.535	-0.562	9.894	346.355	-0.003755	-0.000719	-0.002137
0.8200	260.307	63.436	11.342	36.107	-0.556	9.900	495.558	-0.004440	-0.000794	-0.002527
0.8220	346.330	74.373	13.494	43.069	-0.556	9.900	659.323	-0.005206	-0.000945	-0.003015
0.8240	434.682	86.212	16.705	50.185	-0.554	9.897	827.522	-0.006035	-0.001169	-0.003513
0.8260	519.442	96.982	20.387	56.238	-0.550	9.895	988.884	-0.006789	-0.001427	-0.003937
0.8280	598.086	106.725	23.946	62.731	-0.553	9.890	1138.601	-0.007471	-0.001676	-0.004391
0.8300	671.725	115.464	26.835	68.786	-0.553	9.885	1278.791	-0.008083	-0.001878	-0.004815
0.8320	746.025	124.344	30.311	75.115	-0.555	9.883	1420.240	-0.008704	-0.002122	-0.005258
0.8340	829.448	134.669	34.229	82.228	-0.548	9.884	1579.056	-0.009427	-0.002396	-0.005756
0.8360	909.339	144.311	38.300	88.641	-0.549	9.889	1731.148	-0.010102	-0.002681	-0.006205
0.8380	974.427	152.108	41.538	94.037	-0.553	9.894	1855.059	-0.010648	-0.002908	-0.006583
0.8400	1026.200	157.919	43.663	98.619	-0.552	9.900	1953.621	-0.011054	-0.003056	-0.006903
0.8420	1075.658	164.214	46.664	103.696	-0.554	9.900	2047.777	-0.011495	-0.003266	-0.007259
0.8440	1130.813	171.162	49.626	108.303	-0.550	9.897	2152.777	-0.011981	-0.003474	-0.007581
0.8460	1176.890	176.943	52.015	112.075	-0.546	9.894	2240.496	-0.012386	-0.003641	-0.007845
0.8480	1205.098	180.610	53.641	114.924	-0.553	9.890	2294.197	-0.012643	-0.003755	-0.008045
0.8500	1221.975	182.723	54.475	117.001	-0.549	9.885	2326.326	-0.012791	-0.003813	-0.008190
0.8520	1236.282	185.238	55.433	118.968	-0.552	9.882	2353.563	-0.012967	-0.003880	-0.008328
0.8540	1250.138	187.226	56.642	120.771	-0.548	9.884	2379.942	-0.013106	-0.003965	-0.008454
0.8560	1255.443	188.408	56.947	121.431	-0.548	9.889	2390.041	-0.013189	-0.003986	-0.008500
0.8580	1251.205	188.575	57.336	121.142	-0.554	9.894	2381.973	-0.013200	-0.004014	-0.008480
0.8600	1242.128	187.698	57.266	120.769	-0.553	9.899	2364.693	-0.013139	-0.004009	-0.008454
0.8620	1227.460	186.891	57.155	120.716	-0.556	9.900	2336.769	-0.013082	-0.004001	-0.008450
0.8640	1196.186	183.904	56.364	119.039	-0.550	9.897	2277.231	-0.012873	-0.003945	-0.008333
0.8660	1126.003	176.955	53.586	113.935	-0.541	9.895	2143.621	-0.012387	-0.003751	-0.007975
0.8680	1036.194	167.950	49.612	107.368	-0.548	9.891	1972.647	-0.011756	-0.003473	-0.007516
0.8700	959.684	160.183	45.735	101.259	-0.548	9.886	1826.992	-0.011213	-0.003201	-0.007088
0.8720	899.225	153.497	43.038	96.829	-0.549	9.882	1711.893	-0.010745	-0.003013	-0.006778
0.8740	841.260	146.994	40.649	92.535	-0.548	9.884	1601.543	-0.010290	-0.002845	-0.006477
0.8760	767.606	138.226	37.299	86.124	-0.542	9.889	1461.325	-0.009676	-0.002611	-0.006029
0.8780	685.551	128.694	33.616	79.505	-0.549	9.894	1305.113	-0.009009	-0.002353	-0.005565
0.8800	610.319	120.009	29.907	73.146	-0.552	9.900	1161.890	-0.008401	-0.002093	-0.005120
0.8820	546.253	111.990	26.862	68.525	-0.553	9.900	1039.925	-0.007839	-0.001880	-0.004797
0.8840	488.498	104.736	24.196	63.682	-0.546	9.897	929.976	-0.007332	-0.001694	-0.004458
0.8860	424.883	96.495	21.304	57.709	-0.546	9.895	808.868	-0.006755	-0.001491	-0.004040
0.8880	359.945	87.670	18.511	52.122	-0.554	9.890	685.244	-0.006137	-0.001296	-0.003649
0.8900	303.980	79.486	16.259	47.031	-0.550	9.885	578.699	-0.005564	-0.001138	-0.003292
0.8920	256.445	72.734	14.578	43.413	-0.554	9.883	488.205	-0.005091	-0.001020	-0.003039
0.8940	215.327	66.631	13.536	39.698	-0.548	9.885	409.927	-0.004664	-0.000948	-0.002779
0.8960	176.794	60.045	12.508	35.681	-0.540	9.889	336.571	-0.004203	-0.000876	-0.002498
0.8980	145.084	54.847	11.717	32.323	-0.541	9.894	276.203	-0.003839	-0.000820	-0.002263
0.9000	122.346	50.540	10.896	29.679	-0.540	9.900	232.916	-0.003538	-0.000763	-0.002078
0.9020	105.484	47.509	10.589	28.235	-0.534	9.900	200.815	-0.003326	-0.000741	-0.001976
0.9040	94.423	45.369	10.394	26.941	-0.530	9.898	179.758	-0.003176	-0.000728	-0.001886
0.9060	87.045	43.704	9.950	25.662	-0.530	9.895	165.710	-0.003059	-0.000696	-0.001796
0.9080	83.302	42.425	9.367	24.780	-0.543	9.891	158.587	-0.002970	-0.000656	-0.001735
0.9100	83.798	41.911	8.950	24.465	-0.540	9.886	159.531	-0.002934	-0.000627	-0.001713
0.9120	87.090	42.119	9.021	24.767	-0.542	9.883	165.796	-0.002948	-0.000631	-0.001734
0.9140	94.574	42.523	8.978	25.495	-0.542	9.885	180.044	-0.002977	-0.000628	-0.001785
0.9160	120.603	45.666	9.188	26.872	-0.533	9.890	229.597	-0.003197	-0.000643	-0.001881
0.9180	179.680	52.903	9.757	30.519	-0.542	9.894	342.064	-0.003703	-0.000683	-0.002136
0.9200	260.127	63.337	10.868	36.312	-0.545	9.900	495.214	-0.004434	-0.000761	-0.002542
0.9220	349.891	74.914	13.621	42.985	-0.548	9.900	666.103	-0.005244	-0.000953	-0.003009
0.9240	440.648	87.116	17.095	50.237	-0.547	9.898	838.881	-0.006098	-0.001197	-0.003517
0.9260	520.825	97.259	20.331	56.362	-0.539	9.895	991.516	-0.006808	-0.001423	-0.003945
0.9280	592.856	106.043	23.305	62.526	-0.541	9.891	1128.645	-0.007423	-0.001631	-0.004377
0.9300	668.073	115.118	26.336	68.705	-0.545	9.886	1271.839	-0.008058	-0.001844	-0.004809
0.9320	749.933	124.955	30.048	75.872	-0.547	9.883	1427.679	-0.008747	-0.002103	-0.005311
0.9340	835.790	135.503	34.229	83.291	-0.544	9.885	1591.129	-0.009485	-0.002396	-0.005830
0.9360	913.216	144.941	38.273	89.220	-0.542	9.890	1738.529	-0.010146	-0.002679	-0.006245
0.9380	976.726	152.458	41.414	94.710	-0.545	9.894	1859.436	-0.010672	-0.002899	-0.006630
0.9400	1029.296	158.268	44.206	99.333	-0.538	9.900	1959.515	-0.011079	-0.003094	-0.006953
0.9420	1081.489	164.534	46.736	104.604	-0.541	9.900	2058.878	-0.011517	-0.003272	-0.007322
0.9440	1140.265	172.176	50.237	109.696	-0.539	9.897	2170.773	-0.012052	-0.003517	-0.007679
0.9460	1187.560	177.998	52.753	113.452	-0.532	9.895	2260.809	-0.012460	-0.003693	-0.007942
0.9480	1214.851	181.556	54.708	115.819	-0.537	9.890	2312.765	-0.012709	-0.003830	-0.008107
0.9500	1229.038	183.335	55.655	117.414	-0.540	9.885	2339.773	-0.012833	-0.003896	-0.008219
0.9520	1239.137	185.321	56.255	119.244	-0.541	9.883	2358.999	-0.012972	-0.003938	-0.008347
0.9540	1251.085	187.448	57.047	120.814	-0.540	9.885	2381.744	-0.013121	-0.003993	-0.008457
0.9560	1256.886	188.659	57.267	121.364	-0.534	9.890	2392.788	-0.013206	-0.004009	-0.008495
0.9580	1253.700	189.187	58.017	121.445	-0.538	9.894	2386.723	-0.013243	-0.004061	-0.008501
0.9600	1244.623	188.422	57.700	121.307	-0.536	9.899	2369.442	-0.013190	-0.004039	-0.008492
0.9620	1229.805	187.796	57.518	120.923	-0.543	9.900	2341.232	-0.013146	-0.004026	-0.008465
0.9640	1199.613	185.129	57.172	119.465	-0.538	9.897	2283.754	-0.012959	-0.004002	-0.008363
0.9660	1130.332	178.252	54.211	114.704	-0.536	9.895	2151.861	-0.012478	-0.003795	-0.008029
0.9680	1037.757	168.688	50.069	107.837	-0.543	9.890	1975.622	-0.011808	-0.003505	-0.007549
0.9700	955.957	160.170	45.944	101.328	-0.545	9.884	1819.897	-0.011212	-0.003216	-0.007093
0.9720	895.558	153.763	42.719	96.718	-0.547	9.882	1704.912	-0.010763	-0.002990	-0.006770
0.9740	842.778	147.467	39.939	92.549	-0.542	9.884	1604.433	-0.010323	-0.002796	-0.006478
0.9760	775.571	139.798	37.161	86.950	-0.539	9.889	1476.488	-0.009786	-0.002601	-0.006087
0.9780	694.312	130.097	33.714	80.044	-0.544	9.894	1321.793	-0.009107	-0.002360	-0.005603
0.9800	614.797	120.674	29.948	73.848	-0.544	9.899	1170.416	-0.008447	-0.002096	-0.005169
0.9820	547.485	112.393	27.015	68.688	-0.545	9.900	1042.271	-0.007868	-0.001891	-0.004808
0.9840	493.277	105.043	24.166	64.078	-0.542	9.897	939.074	-0.007353	-0.001692	-0.004485
0.9860	435.102	97.399	21.831	58.617	-0.538	9.894	828.323	-0.006818	-0.001528	-0.004103
0.9880	366.272	88.338	18.900	52.976	-0.547	9.890	697.289	-0.006184	-0.001323	-0.003708
0.9900	299.186	79.404	15.815	47.223	-0.540	9.885	569.572	-0.005558	-0.001107	-0.003306
0.9920	244.572	71.358	14.037	42.752	-0.549	9.882	465.603	-0.004995	-0.000983	-0.002993
0.9940	207.632	65.215	13.078	39.271	-0.548	9.884	395.279	-0.004565	-0.000915	-0.002749
0.9960	177.816	59.767	12.216	36.023	-0.541	9.890	338.516	-0.004184	-0.000855	-0.002522
0.9980	147.970	54.863	11.493	33.120	-0.548	9.894	281.696	-0.003840	-0.000804	-0.002318
