# Supplementary material for: Evaluation of a Cold-Mixed High-Performance Polyurethane Mixture
Source: Hindawi journal article supplement (doi:10.1155/2019/1507971), 2019-11-07
Supplement: f1 [file 1507971.f1.zip › 1507971.f1/dynamic modulus data/PUM/specimen2/temp10/zhs-2-10_20Hz.csv]

Test Information
****************
Project name	zhs
Operator name	2
Target test temperature	10
Target confining stress	0
Average dynamic strain range from 75 to 125 micro-strain
Contact stress	5
Initial modulus	4000
Axial gauge length	70
Comments	Run at High Pressure
Specimen information
********************
Identification	zhs-2-10
Dimensions	Point 1	Point 2	Point 3	Point 4	Point 5	Point 6	Average	Std Dev.
Diameter (mm)	49.2	49.3	49.2				49.23	0.058
Height (mm)	100.8	101.0	100.8				100.87	0.115
Cross-sectional area (mm�)	1903.7
Conditioning time
Properties/Comments
Test Data	20Hz
*********
Test date and time	Fri	Mar 29	2019	11:20 AM
Dynamic modulus (MPa)	12499
Phase angle (Degrees)	5.27
Average temperature (�C)	9.9
Average confining pressure (kPa)	-0.5
Average micro-strain	98
Load drift (%)	-2.5
Load standard error (%)	7.3
Average deformation drift (%)	-3.0
Average deformation standard error (%)	8.2
Deformation uniformity (%)	41.1
Phase uniformity (Degrees)	0.3
Conditioning Cycles
Time (sec)	Axial stress (kPa)	Axial micro-strain #1	Axial micro-strain #2	Axial micro-strain #3	Confining pressure (kPa)	Temperature (�C)	Load (N)	Displacement #1 (mm)	Displacement #2 (mm)	Displacement #3 (mm)
0.0000	67.042	19.746	4.321	10.387	-0.542	9.889	127.630	-0.001382	-0.000302	-0.000727
0.0010	67.177	19.830	4.350	10.676	-0.546	9.887	127.888	-0.001388	-0.000305	-0.000747
0.0020	67.132	20.009	4.670	10.717	-0.547	9.886	127.802	-0.001401	-0.000327	-0.000750
0.0030	66.967	20.092	4.435	10.897	-0.550	9.886	127.487	-0.001406	-0.000310	-0.000763
0.0040	66.816	20.119	4.670	10.801	-0.549	9.888	127.201	-0.001408	-0.000327	-0.000756
0.0050	66.801	19.980	4.114	10.526	-0.544	9.891	127.172	-0.001399	-0.000288	-0.000737
0.0060	66.846	19.953	4.280	10.472	-0.544	9.892	127.258	-0.001397	-0.000300	-0.000733
0.0070	67.057	19.911	4.183	10.499	-0.545	9.895	127.659	-0.001394	-0.000293	-0.000735
0.0080	67.688	19.911	4.294	10.431	-0.544	9.897	128.860	-0.001394	-0.000301	-0.000730
0.0090	69.476	20.105	4.337	10.471	-0.545	9.900	132.265	-0.001407	-0.000304	-0.000733
0.0100	73.414	20.426	4.198	10.525	-0.541	9.903	139.761	-0.001430	-0.000294	-0.000737
0.0110	83.678	21.705	4.516	11.405	-0.546	9.904	159.302	-0.001519	-0.000316	-0.000798
0.0120	104.793	24.555	4.780	13.414	-0.550	9.903	199.499	-0.001719	-0.000335	-0.000939
0.0130	140.125	29.182	5.322	16.180	-0.554	9.902	266.762	-0.002043	-0.000373	-0.001133
0.0140	188.727	35.850	6.003	19.841	-0.550	9.901	359.287	-0.002509	-0.000420	-0.001389
0.0150	247.713	43.494	6.574	24.160	-0.543	9.900	471.582	-0.003045	-0.000460	-0.001691
0.0160	314.094	52.208	7.893	29.348	-0.547	9.898	597.954	-0.003655	-0.000552	-0.002054
0.0170	386.140	61.490	9.504	35.071	-0.547	9.895	735.111	-0.004304	-0.000665	-0.002455
0.0180	461.868	71.064	11.839	41.072	-0.546	9.893	879.278	-0.004974	-0.000829	-0.002875
0.0190	538.257	80.763	14.870	47.072	-0.542	9.890	1024.704	-0.005653	-0.001041	-0.003295
0.0200	611.957	89.784	17.610	52.660	-0.535	9.889	1165.009	-0.006285	-0.001233	-0.003686
0.0210	680.051	98.359	20.918	58.535	-0.538	9.886	1294.641	-0.006885	-0.001464	-0.004097
0.0220	741.697	106.558	23.460	63.929	-0.541	9.886	1412.001	-0.007459	-0.001642	-0.004475
0.0230	796.160	113.672	26.195	68.868	-0.545	9.887	1515.684	-0.007957	-0.001834	-0.004821
0.0240	842.748	119.911	28.334	73.078	-0.544	9.889	1604.376	-0.008394	-0.001983	-0.005115
0.0250	879.943	124.581	30.210	75.996	-0.537	9.891	1675.186	-0.008721	-0.002115	-0.005320
0.0260	907.986	128.471	31.865	78.734	-0.542	9.893	1728.573	-0.008993	-0.002231	-0.005511
0.0270	928.440	131.418	32.893	80.826	-0.540	9.895	1767.511	-0.009199	-0.002303	-0.005658
0.0280	943.544	133.752	33.880	82.628	-0.541	9.898	1796.265	-0.009363	-0.002372	-0.005784
0.0290	954.364	135.601	34.394	84.129	-0.539	9.900	1816.864	-0.009492	-0.002408	-0.005889
0.0300	961.112	136.880	34.910	84.927	-0.536	9.903	1829.710	-0.009582	-0.002444	-0.005945
0.0310	963.997	137.645	35.244	85.946	-0.545	9.904	1835.203	-0.009635	-0.002467	-0.006016
0.0320	963.381	138.075	35.536	86.249	-0.551	9.903	1834.030	-0.009665	-0.002488	-0.006037
0.0330	960.075	138.158	35.828	86.454	-0.555	9.902	1827.736	-0.009671	-0.002508	-0.006052
0.0340	954.229	138.089	35.660	86.193	-0.549	9.901	1816.607	-0.009666	-0.002496	-0.006033
0.0350	945.512	137.727	35.549	85.792	-0.541	9.900	1800.013	-0.009641	-0.002488	-0.006005
0.0360	931.791	136.976	35.133	85.215	-0.538	9.898	1773.891	-0.009588	-0.002459	-0.005965
0.0370	906.559	135.029	34.577	83.798	-0.537	9.896	1725.855	-0.009452	-0.002420	-0.005866
0.0380	862.766	130.666	33.186	80.978	-0.536	9.893	1642.485	-0.009147	-0.002323	-0.005668
0.0390	798.249	123.871	30.935	76.603	-0.537	9.891	1519.661	-0.008671	-0.002165	-0.005362
0.0400	718.794	115.257	27.766	70.672	-0.537	9.889	1368.399	-0.008068	-0.001944	-0.004947
0.0410	635.627	106.099	24.445	64.603	-0.544	9.886	1210.070	-0.007427	-0.001711	-0.004522
0.0420	558.095	97.219	21.249	58.631	-0.546	9.886	1062.469	-0.006805	-0.001487	-0.004104
0.0430	491.459	88.936	18.665	53.471	-0.547	9.887	935.612	-0.006226	-0.001307	-0.003743
0.0440	436.094	81.876	16.428	48.903	-0.547	9.889	830.212	-0.005731	-0.001150	-0.003423
0.0450	390.273	75.483	14.566	44.830	-0.541	9.891	742.979	-0.005284	-0.001020	-0.003138
0.0460	350.478	69.995	13.079	41.251	-0.544	9.893	667.219	-0.004900	-0.000916	-0.002888
0.0470	314.650	64.964	11.702	37.893	-0.542	9.895	599.012	-0.004547	-0.000819	-0.002653
0.0480	280.761	59.976	10.937	35.087	-0.546	9.897	534.496	-0.004198	-0.000766	-0.002456
0.0490	248.224	55.334	9.813	32.197	-0.544	9.900	472.555	-0.003873	-0.000687	-0.002254
0.0500	217.160	50.638	9.256	29.294	-0.541	9.903	413.418	-0.003545	-0.000648	-0.002051
0.0510	188.471	46.261	8.394	26.694	-0.545	9.904	358.801	-0.003238	-0.000588	-0.001869
0.0520	163.148	42.315	8.380	24.658	-0.549	9.903	310.593	-0.002962	-0.000587	-0.001726
0.0530	142.334	38.813	7.838	22.840	-0.555	9.902	270.967	-0.002717	-0.000549	-0.001599
0.0540	125.968	35.867	7.686	21.380	-0.552	9.901	239.811	-0.002511	-0.000538	-0.001497
0.0550	113.495	33.545	7.005	20.019	-0.551	9.900	216.064	-0.002348	-0.000490	-0.001401
0.0560	104.673	32.017	7.089	18.947	-0.550	9.898	199.270	-0.002241	-0.000496	-0.001326
0.0570	99.338	30.932	6.714	18.355	-0.550	9.896	189.114	-0.002165	-0.000470	-0.001285
0.0580	97.309	30.042	6.644	17.818	-0.549	9.894	185.251	-0.002103	-0.000465	-0.001247
0.0590	97.835	29.916	6.366	17.569	-0.548	9.891	186.253	-0.002094	-0.000446	-0.001230
0.0600	100.330	29.889	6.310	17.294	-0.542	9.889	191.002	-0.002092	-0.000442	-0.001211
0.0610	104.928	30.237	6.436	17.474	-0.550	9.887	199.757	-0.002117	-0.000450	-0.001223
0.0620	114.351	30.849	6.436	18.024	-0.554	9.886	217.695	-0.002159	-0.000450	-0.001262
0.0630	134.579	33.267	6.589	19.304	-0.556	9.886	256.205	-0.002329	-0.000461	-0.001351
0.0640	170.708	37.674	6.728	21.712	-0.551	9.889	324.984	-0.002637	-0.000471	-0.001520
0.0650	223.548	44.497	7.339	25.401	-0.544	9.891	425.577	-0.003115	-0.000514	-0.001778
0.0660	289.567	53.099	8.435	30.466	-0.546	9.893	551.262	-0.003717	-0.000590	-0.002133
0.0670	363.943	62.535	10.283	36.436	-0.542	9.895	692.854	-0.004377	-0.000720	-0.002551
0.0680	443.113	72.497	12.604	42.685	-0.542	9.898	843.573	-0.005075	-0.000882	-0.002988
0.0690	522.493	82.432	15.314	48.944	-0.546	9.900	994.692	-0.005770	-0.001072	-0.003426
0.0700	597.319	91.646	18.149	54.710	-0.542	9.903	1137.142	-0.006415	-0.001270	-0.003830
0.0710	664.737	100.206	21.095	60.310	-0.550	9.903	1265.488	-0.007014	-0.001477	-0.004222
0.0720	723.918	107.516	23.792	65.265	-0.550	9.903	1378.155	-0.007526	-0.001665	-0.004569
0.0730	775.526	114.019	26.142	69.544	-0.553	9.902	1476.402	-0.007981	-0.001830	-0.004868
0.0740	819.830	119.647	28.311	73.136	-0.550	9.901	1560.745	-0.008375	-0.001982	-0.005120
0.0750	857.431	124.330	30.117	76.217	-0.545	9.900	1632.328	-0.008703	-0.002108	-0.005335
0.0760	889.021	128.624	31.839	79.147	-0.550	9.898	1692.467	-0.009004	-0.002229	-0.005540
0.0770	915.651	132.167	33.159	81.665	-0.544	9.896	1743.164	-0.009252	-0.002321	-0.005717
0.0780	937.217	135.071	34.005	83.745	-0.544	9.893	1784.220	-0.009455	-0.002380	-0.005862
0.0790	952.996	137.322	34.936	85.367	-0.540	9.891	1814.260	-0.009613	-0.002446	-0.005976
0.0800	962.660	138.684	35.296	86.440	-0.539	9.890	1832.657	-0.009708	-0.002471	-0.006051
0.0810	966.657	139.615	35.798	87.362	-0.541	9.888	1840.267	-0.009773	-0.002506	-0.006115
0.0820	966.492	140.240	35.993	88.077	-0.545	9.886	1839.952	-0.009817	-0.002519	-0.006165
0.0830	963.516	140.380	36.383	88.243	-0.546	9.886	1834.288	-0.009827	-0.002547	-0.006177
0.0840	958.151	140.380	36.438	88.271	-0.545	9.889	1824.074	-0.009827	-0.002551	-0.006179
0.0850	949.720	139.810	36.175	87.721	-0.536	9.891	1808.023	-0.009787	-0.002532	-0.006140
0.0860	935.263	138.795	35.828	87.143	-0.533	9.893	1780.500	-0.009716	-0.002508	-0.006100
0.0870	907.280	136.281	35.021	85.518	-0.533	9.895	1727.228	-0.009540	-0.002451	-0.005986
0.0880	859.595	131.389	33.394	82.325	-0.537	9.898	1636.448	-0.009197	-0.002338	-0.005763
0.0890	792.177	124.260	31.183	77.687	-0.541	9.901	1508.102	-0.008698	-0.002183	-0.005438
0.0900	713.023	115.518	27.918	71.730	-0.538	9.903	1357.412	-0.008086	-0.001954	-0.005021
0.0910	633.462	106.793	24.972	65.827	-0.544	9.904	1205.950	-0.007475	-0.001748	-0.004608
0.0920	560.695	98.511	21.775	60.103	-0.544	9.903	1067.419	-0.006896	-0.001524	-0.004207
0.0930	497.921	90.895	19.427	55.218	-0.548	9.902	947.914	-0.006363	-0.001360	-0.003865
0.0940	444.450	84.127	17.134	50.717	-0.546	9.901	846.119	-0.005889	-0.001199	-0.003550
0.0950	397.877	77.831	15.383	46.534	-0.544	9.900	757.456	-0.005448	-0.001077	-0.003257
0.0960	355.903	72.217	14.244	42.873	-0.548	9.898	677.547	-0.005055	-0.000997	-0.003001
0.0970	316.724	67.021	12.675	39.448	-0.549	9.896	602.961	-0.004691	-0.000887	-0.002761
0.0980	279.498	61.491	11.603	36.258	-0.545	9.893	532.093	-0.004304	-0.000812	-0.002538
0.0990	243.836	56.307	10.575	33.423	-0.541	9.891	464.201	-0.003941	-0.000740	-0.002340
0.1000	210.232	51.137	9.881	30.285	-0.533	9.889	400.229	-0.003580	-0.000692	-0.002120
0.1010	180.221	46.635	9.451	27.903	-0.541	9.887	343.094	-0.003264	-0.000662	-0.001953
0.1020	155.108	42.577	8.658	25.551	-0.545	9.887	295.286	-0.002980	-0.000606	-0.001789
0.1030	135.646	39.298	8.409	23.721	-0.549	9.887	258.236	-0.002751	-0.000589	-0.001660
0.1040	121.054	36.685	7.741	21.987	-0.548	9.889	230.455	-0.002568	-0.000542	-0.001539
0.1050	110.233	34.573	7.588	20.432	-0.544	9.891	209.856	-0.002420	-0.000531	-0.001430
0.1060	102.704	33.086	7.463	19.414	-0.550	9.893	195.522	-0.002316	-0.000522	-0.001359
0.1070	98.346	31.934	7.101	18.809	-0.553	9.896	187.225	-0.002235	-0.000497	-0.001317
0.1080	96.813	31.043	6.963	18.506	-0.553	9.898	184.307	-0.002173	-0.000487	-0.001295
0.1090	97.549	30.891	6.658	18.396	-0.554	9.901	185.709	-0.002162	-0.000466	-0.001288
0.1100	100.179	31.003	6.838	18.299	-0.549	9.904	190.716	-0.002170	-0.000479	-0.001281
0.1110	105.244	31.462	6.796	18.810	-0.554	9.904	200.357	-0.002202	-0.000476	-0.001317
0.1120	116.004	32.559	6.963	19.498	-0.552	9.904	220.842	-0.002279	-0.000487	-0.001365
0.1130	138.517	35.380	7.158	21.039	-0.555	9.902	263.700	-0.002477	-0.000501	-0.001473
0.1140	177.170	40.314	7.783	23.583	-0.550	9.902	337.286	-0.002822	-0.000545	-0.001651
0.1150	231.994	47.443	8.366	27.353	-0.547	9.900	441.656	-0.003321	-0.000586	-0.001915
0.1160	299.020	56.045	9.700	32.266	-0.547	9.899	569.258	-0.003923	-0.000679	-0.002259
0.1170	373.907	65.466	11.132	37.989	-0.543	9.896	711.823	-0.004583	-0.000779	-0.002659
0.1180	453.167	75.319	13.563	44.209	-0.541	9.894	862.713	-0.005272	-0.000949	-0.003095
0.1190	532.396	85.144	16.121	50.498	-0.538	9.891	1013.546	-0.005960	-0.001128	-0.003535
0.1200	607.148	94.287	18.831	56.485	-0.532	9.889	1155.853	-0.006600	-0.001318	-0.003954
0.1210	674.355	102.540	22.055	61.976	-0.538	9.887	1283.798	-0.007178	-0.001544	-0.004338
0.1220	733.612	109.767	24.625	67.026	-0.546	9.886	1396.608	-0.007684	-0.001724	-0.004692
0.1230	785.204	116.229	27.433	71.331	-0.553	9.887	1494.827	-0.008136	-0.001920	-0.004993
0.1240	829.959	121.927	29.266	74.909	-0.552	9.889	1580.029	-0.008535	-0.002049	-0.005244
0.1250	867.680	126.763	30.934	78.115	-0.542	9.891	1651.840	-0.008873	-0.002165	-0.005468
0.1260	898.654	130.960	32.434	81.045	-0.544	9.893	1710.806	-0.009167	-0.002270	-0.005673
0.1270	923.255	134.253	33.798	83.700	-0.541	9.895	1757.641	-0.009398	-0.002366	-0.005859
0.1280	941.936	136.934	34.965	85.462	-0.547	9.898	1793.203	-0.009585	-0.002448	-0.005982
0.1290	954.785	138.643	35.675	86.798	-0.543	9.900	1817.665	-0.009705	-0.002497	-0.006076
0.1300	961.833	139.852	36.051	87.515	-0.540	9.903	1831.083	-0.009790	-0.002524	-0.006126
0.1310	964.012	140.547	36.357	88.229	-0.547	9.904	1835.232	-0.009838	-0.002545	-0.006176
0.1320	962.675	141.130	36.466	88.684	-0.554	9.903	1832.685	-0.009879	-0.002553	-0.006208
0.1330	958.797	141.172	36.603	88.876	-0.554	9.902	1825.304	-0.009882	-0.002562	-0.006221
0.1340	952.410	140.949	36.423	88.808	-0.551	9.901	1813.145	-0.009866	-0.002550	-0.006217
0.1350	942.071	140.199	36.091	88.133	-0.543	9.901	1793.461	-0.009814	-0.002526	-0.006169
0.1360	923.195	138.738	35.813	87.142	-0.545	9.898	1757.526	-0.009712	-0.002507	-0.006100
0.1370	888.495	135.571	34.839	84.817	-0.549	9.896	1691.465	-0.009490	-0.002439	-0.005937
0.1380	833.911	129.888	33.087	81.033	-0.553	9.894	1587.553	-0.009092	-0.002316	-0.005672
0.1390	762.692	122.343	30.211	75.792	-0.552	9.891	1451.969	-0.008564	-0.002115	-0.005305
0.1400	684.769	113.463	26.848	70.013	-0.542	9.889	1303.625	-0.007942	-0.001879	-0.004901
0.1410	610.048	105.000	23.887	64.468	-0.545	9.887	1161.375	-0.007350	-0.001672	-0.004513
0.1420	544.720	97.426	21.205	59.637	-0.544	9.886	1037.006	-0.006820	-0.001484	-0.004175
0.1430	490.076	90.770	19.384	55.370	-0.545	9.887	932.980	-0.006354	-0.001357	-0.003876
0.1440	443.609	84.642	17.426	51.476	-0.542	9.888	844.517	-0.005925	-0.001220	-0.003603
0.1450	401.048	78.861	15.967	47.666	-0.541	9.891	763.493	-0.005520	-0.001118	-0.003337
0.1460	359.449	73.329	13.982	44.156	-0.549	9.893	684.299	-0.005133	-0.000979	-0.003091
0.1470	318.106	67.688	12.828	40.674	-0.549	9.895	605.593	-0.004738	-0.000898	-0.002847
0.1480	277.755	62.088	11.355	37.026	-0.550	9.897	528.774	-0.004346	-0.000795	-0.002592
0.1490	239.403	56.320	10.757	33.558	-0.549	9.900	455.761	-0.003942	-0.000753	-0.002349
0.1500	204.161	50.845	9.479	30.174	-0.542	9.903	388.670	-0.003559	-0.000664	-0.002112
0.1510	173.638	45.953	9.201	27.464	-0.548	9.903	330.563	-0.003217	-0.000644	-0.001922
0.1520	148.932	41.966	8.493	25.263	-0.550	9.903	283.527	-0.002938	-0.000594	-0.001768
0.1530	130.432	38.867	8.465	23.529	-0.553	9.902	248.308	-0.002721	-0.000593	-0.001647
0.1540	117.146	36.324	7.743	22.180	-0.556	9.901	223.017	-0.002543	-0.000542	-0.001553
0.1550	107.904	34.601	7.507	20.873	-0.552	9.900	205.421	-0.002422	-0.000525	-0.001461
0.1560	101.953	33.224	7.033	20.267	-0.554	9.898	194.092	-0.002326	-0.000492	-0.001419
0.1570	98.827	32.781	7.033	19.730	-0.557	9.895	188.141	-0.002295	-0.000492	-0.001381
0.1580	98.271	32.351	6.978	19.482	-0.556	9.893	187.082	-0.002265	-0.000488	-0.001364
0.1590	99.413	32.227	7.075	19.429	-0.560	9.890	189.257	-0.002256	-0.000495	-0.001360
0.1600	102.208	32.032	6.811	19.236	-0.554	9.889	194.578	-0.002242	-0.000477	-0.001347
0.1610	107.122	32.310	7.103	19.513	-0.561	9.886	203.934	-0.002262	-0.000497	-0.001366
0.1620	118.138	33.379	7.158	19.979	-0.559	9.886	224.905	-0.002337	-0.000501	-0.001399
0.1630	141.117	36.255	7.561	21.424	-0.566	9.886	268.650	-0.002538	-0.000529	-0.001500
0.1640	180.431	41.145	7.852	24.053	-0.564	9.888	343.494	-0.002880	-0.000550	-0.001684
0.1650	235.871	48.481	8.368	27.838	-0.559	9.891	449.038	-0.003394	-0.000586	-0.001949
0.1660	303.679	57.278	9.771	32.928	-0.563	9.892	578.127	-0.004009	-0.000684	-0.002305
0.1670	379.422	66.700	11.647	38.804	-0.561	9.894	722.322	-0.004669	-0.000815	-0.002716
0.1680	459.313	76.638	14.301	45.119	-0.558	9.897	874.414	-0.005365	-0.001001	-0.003158
0.1690	538.648	86.506	16.954	51.572	-0.553	9.900	1025.448	-0.006055	-0.001187	-0.003610
0.1700	612.934	95.663	19.761	57.117	-0.547	9.903	1166.868	-0.006696	-0.001383	-0.003998
0.1710	679.044	103.917	22.721	62.483	-0.549	9.903	1292.725	-0.007274	-0.001590	-0.004374
0.1720	736.452	111.059	25.432	67.408	-0.552	9.903	1402.016	-0.007774	-0.001780	-0.004719
0.1730	785.535	117.284	27.807	71.865	-0.557	9.902	1495.457	-0.008210	-0.001947	-0.005031
0.1740	827.254	122.760	29.780	75.594	-0.552	9.901	1574.879	-0.008593	-0.002085	-0.005292
0.1750	862.270	127.194	31.378	78.471	-0.546	9.900	1641.541	-0.008904	-0.002196	-0.005493
0.1760	891.861	131.404	32.949	81.170	-0.548	9.898	1697.874	-0.009198	-0.002306	-0.005682
0.1770	917.800	134.725	34.032	83.510	-0.545	9.895	1747.255	-0.009431	-0.002382	-0.005846
0.1780	940.733	137.560	35.380	85.684	-0.543	9.893	1790.915	-0.009629	-0.002477	-0.005998
0.1790	960.075	139.964	36.269	87.500	-0.544	9.890	1827.736	-0.009797	-0.002539	-0.006125
0.1800	974.036	141.617	36.894	88.685	-0.541	9.889	1854.315	-0.009913	-0.002583	-0.006208
0.1810	981.851	143.161	37.673	89.799	-0.542	9.886	1869.192	-0.010021	-0.002637	-0.006286
0.1820	983.654	143.800	37.827	90.390	-0.546	9.886	1872.625	-0.010066	-0.002648	-0.006327
0.1830	980.994	144.161	38.174	90.596	-0.551	9.887	1867.561	-0.010091	-0.002672	-0.006342
0.1840	974.592	143.995	37.771	90.390	-0.553	9.889	1855.373	-0.010080	-0.002644	-0.006327
0.1850	963.907	143.355	37.813	89.907	-0.548	9.891	1835.032	-0.010035	-0.002647	-0.006293
0.1860	944.836	141.868	37.063	88.917	-0.550	9.893	1798.725	-0.009931	-0.002594	-0.006224
0.1870	910.226	138.712	36.549	86.894	-0.548	9.895	1732.836	-0.009710	-0.002558	-0.006083
0.1880	856.138	133.250	34.590	83.454	-0.548	9.898	1629.868	-0.009328	-0.002421	-0.005842
0.1890	784.949	125.789	32.004	78.527	-0.548	9.900	1494.341	-0.008805	-0.002240	-0.005497
0.1900	705.644	117.091	28.739	72.694	-0.544	9.903	1343.365	-0.008196	-0.002012	-0.005089
0.1910	627.872	108.280	25.528	66.791	-0.546	9.904	1195.307	-0.007580	-0.001787	-0.004675
0.1920	558.080	100.080	22.762	61.315	-0.553	9.903	1062.441	-0.007006	-0.001593	-0.004292
0.1930	498.808	92.896	20.038	56.484	-0.553	9.901	949.602	-0.006503	-0.001403	-0.003954
0.1940	448.538	86.308	17.885	52.150	-0.552	9.901	853.901	-0.006042	-0.001252	-0.003650
0.1950	403.498	80.209	16.134	48.283	-0.544	9.899	768.156	-0.005615	-0.001129	-0.003380
0.1960	360.862	74.150	14.467	44.803	-0.545	9.898	686.989	-0.005190	-0.001013	-0.003136
0.1970	319.910	68.619	13.105	41.307	-0.542	9.895	609.026	-0.004803	-0.000917	-0.002891
0.1980	281.392	63.213	11.660	37.908	-0.544	9.893	535.698	-0.004425	-0.000816	-0.002654
0.1990	245.850	58.031	10.785	34.606	-0.544	9.890	468.035	-0.004062	-0.000755	-0.002422
0.2000	213.403	52.874	9.604	31.565	-0.536	9.888	406.265	-0.003701	-0.000672	-0.002210
0.2010	184.564	48.470	9.286	28.936	-0.542	9.886	351.362	-0.003393	-0.000650	-0.002026
0.2020	159.767	44.508	8.590	26.775	-0.542	9.886	304.155	-0.003116	-0.000601	-0.001874
0.2030	139.539	41.215	8.395	25.015	-0.546	9.887	265.646	-0.002885	-0.000588	-0.001751
0.2040	123.398	38.269	7.978	23.461	-0.542	9.889	234.919	-0.002679	-0.000558	-0.001642
0.2050	111.030	36.114	7.672	21.961	-0.541	9.891	211.372	-0.002528	-0.000537	-0.001537
0.2060	102.389	34.419	7.451	20.971	-0.543	9.893	194.921	-0.002409	-0.000522	-0.001468
0.2070	97.519	33.280	7.146	20.365	-0.545	9.895	185.652	-0.002330	-0.000500	-0.001426
0.2080	95.971	32.670	7.354	19.979	-0.543	9.898	182.705	-0.002287	-0.000515	-0.001399
0.2090	96.813	32.310	7.216	19.801	-0.546	9.901	184.307	-0.002262	-0.000505	-0.001386
0.2100	99.413	32.284	7.159	19.676	-0.542	9.903	189.257	-0.002260	-0.000501	-0.001377
0.2110	104.252	32.533	7.021	19.841	-0.552	9.904	198.469	-0.002277	-0.000491	-0.001389
0.2120	114.832	33.574	6.936	20.323	-0.552	9.903	218.611	-0.002350	-0.000486	-0.001423
0.2130	137.555	36.351	7.366	21.754	-0.557	9.902	261.869	-0.002545	-0.000516	-0.001523
0.2140	176.990	41.395	7.505	24.533	-0.554	9.901	336.943	-0.002898	-0.000525	-0.001717
0.2150	233.511	48.816	8.462	28.537	-0.550	9.900	444.546	-0.003417	-0.000592	-0.001998
0.2160	303.243	57.794	9.422	33.643	-0.552	9.898	577.297	-0.004046	-0.000660	-0.002355
0.2170	381.286	67.535	11.729	39.641	-0.548	9.895	725.870	-0.004727	-0.000821	-0.002775
0.2180	463.010	77.860	14.119	46.040	-0.548	9.893	881.453	-0.005450	-0.000988	-0.003223
0.2190	542.375	87.656	17.330	52.507	-0.545	9.890	1032.543	-0.006136	-0.001213	-0.003676
0.2200	614.542	96.703	20.109	58.039	-0.537	9.889	1169.930	-0.006769	-0.001408	-0.004063
0.2210	676.940	104.570	22.805	63.143	-0.538	9.886	1288.719	-0.007320	-0.001596	-0.004420
0.2220	730.501	111.031	25.460	67.684	-0.539	9.886	1390.686	-0.007772	-0.001782	-0.004738
0.2230	777.029	116.839	27.571	71.687	-0.542	9.886	1479.263	-0.008179	-0.001930	-0.005018
0.2240	818.297	122.147	29.601	75.224	-0.540	9.889	1557.827	-0.008550	-0.002072	-0.005266
0.2250	855.222	126.845	31.184	78.154	-0.537	9.891	1628.122	-0.008879	-0.002183	-0.005471
0.2260	888.434	131.041	32.880	81.142	-0.540	9.893	1691.351	-0.009173	-0.002302	-0.005680
0.2270	917.785	134.835	34.354	83.773	-0.538	9.895	1747.227	-0.009438	-0.002405	-0.005864
0.2280	942.326	138.129	35.674	86.098	-0.536	9.897	1793.947	-0.009669	-0.002497	-0.006027
0.2290	960.571	140.838	36.565	87.804	-0.533	9.900	1828.680	-0.009859	-0.002560	-0.006146
0.2300	971.662	142.381	36.814	88.862	-0.529	9.903	1849.794	-0.009967	-0.002577	-0.006220
0.2310	976.140	143.299	37.424	89.880	-0.536	9.903	1858.320	-0.010031	-0.002620	-0.006292
0.2320	975.569	143.758	37.687	90.568	-0.540	9.903	1857.233	-0.010063	-0.002638	-0.006340
0.2330	972.098	144.008	37.952	90.886	-0.544	9.902	1850.624	-0.010081	-0.002657	-0.006362
0.2340	966.297	143.994	37.884	90.940	-0.541	9.901	1839.581	-0.010080	-0.002652	-0.006366
0.2350	957.295	143.605	37.787	90.376	-0.539	9.900	1822.443	-0.010052	-0.002645	-0.006326
0.2360	940.643	142.258	37.245	89.440	-0.541	9.898	1790.743	-0.009958	-0.002607	-0.006261
0.2370	908.122	139.201	36.565	87.253	-0.542	9.896	1728.830	-0.009744	-0.002560	-0.006108
0.2380	855.041	133.586	34.618	83.607	-0.541	9.893	1627.779	-0.009351	-0.002423	-0.005852
0.2390	783.581	126.095	32.046	78.418	-0.541	9.891	1491.737	-0.008827	-0.002243	-0.005489
0.2400	703.705	117.202	28.558	72.336	-0.536	9.889	1339.674	-0.008204	-0.001999	-0.005064
0.2410	626.369	108.475	25.488	66.625	-0.541	9.886	1192.446	-0.007593	-0.001784	-0.004664
0.2420	557.960	100.512	22.528	61.423	-0.538	9.886	1062.212	-0.007036	-0.001577	-0.004300
0.2430	500.686	93.549	20.263	56.896	-0.541	9.886	953.178	-0.006548	-0.001418	-0.003983
0.2440	451.979	87.169	18.429	52.741	-0.538	9.888	860.453	-0.006102	-0.001290	-0.003692
0.2450	408.397	81.361	16.566	48.998	-0.541	9.891	777.483	-0.005695	-0.001160	-0.003430
0.2460	366.904	75.788	15.008	45.407	-0.546	9.892	698.490	-0.005305	-0.001051	-0.003178
0.2470	326.477	70.273	13.437	41.843	-0.543	9.895	621.529	-0.004919	-0.000941	-0.002929
0.2480	287.133	64.755	12.074	38.512	-0.534	9.898	546.627	-0.004533	-0.000845	-0.002696
0.2490	249.607	59.212	10.990	35.156	-0.533	9.900	475.187	-0.004145	-0.000769	-0.002461
0.2500	46.949	17.647	4.487	8.544	-0.559	9.894	89.378	-0.001235	-0.000314	-0.000598
0.2510	46.934	17.329	4.737	8.558	-0.561	9.896	89.350	-0.001213	-0.000332	-0.000599
0.2520	47.054	17.189	4.320	8.529	-0.565	9.899	89.579	-0.001203	-0.000302	-0.000597
0.2530	47.309	17.258	4.459	8.172	-0.556	9.902	90.065	-0.001208	-0.000312	-0.000572
0.2540	47.850	17.411	4.309	8.282	-0.561	9.903	91.095	-0.001219	-0.000302	-0.000580
0.2550	48.346	17.410	4.615	8.489	-0.564	9.903	92.039	-0.001219	-0.000323	-0.000594
0.2560	49.173	17.479	4.449	8.846	-0.564	9.902	93.613	-0.001224	-0.000311	-0.000619
0.2570	50.721	17.909	4.406	8.942	-0.560	9.901	96.560	-0.001254	-0.000308	-0.000626
0.2580	53.832	18.383	4.129	8.749	-0.558	9.900	102.482	-0.001287	-0.000289	-0.000612
0.2590	61.481	19.217	4.490	8.997	-0.561	9.898	117.044	-0.001345	-0.000314	-0.000630
0.2600	78.328	21.037	4.546	10.291	-0.565	9.896	149.117	-0.001473	-0.000318	-0.000720
0.2610	109.737	24.721	5.046	12.726	-0.565	9.893	208.912	-0.001730	-0.000353	-0.000891
0.2620	157.828	31.237	5.407	16.442	-0.569	9.890	300.465	-0.002187	-0.000378	-0.001151
0.2630	221.218	39.617	6.130	21.107	-0.565	9.889	421.143	-0.002773	-0.000429	-0.001477
0.2640	297.683	49.469	7.589	27.149	-0.572	9.886	566.711	-0.003463	-0.000531	-0.001900
0.2650	386.155	60.893	9.756	34.428	-0.570	9.885	735.140	-0.004263	-0.000683	-0.002410
0.2660	484.516	73.414	13.188	42.589	-0.572	9.885	922.394	-0.005139	-0.000923	-0.002981
0.2670	588.197	86.699	17.093	50.928	-0.563	9.887	1119.776	-0.006069	-0.001197	-0.003565
0.2680	690.255	99.346	21.221	58.811	-0.557	9.890	1314.068	-0.006954	-0.001485	-0.004117
0.2690	784.648	110.739	25.350	66.268	-0.554	9.892	1493.769	-0.007752	-0.001774	-0.004639
0.2700	868.266	121.024	29.226	73.080	-0.559	9.894	1652.956	-0.008472	-0.002046	-0.005116
0.2710	940.252	130.041	32.630	79.134	-0.563	9.896	1789.999	-0.009103	-0.002284	-0.005539
0.2720	1001.914	137.642	35.659	84.542	-0.565	9.899	1907.387	-0.009635	-0.002496	-0.005918
0.2730	1055.806	144.311	38.258	89.358	-0.562	9.902	2009.983	-0.010102	-0.002678	-0.006255
0.2740	1104.753	150.468	40.912	94.037	-0.562	9.903	2103.167	-0.010533	-0.002864	-0.006583
0.2750	1151.702	156.500	43.385	98.481	-0.562	9.903	2192.545	-0.010955	-0.003037	-0.006894
0.2760	1196.998	162.309	46.013	102.912	-0.558	9.902	2278.776	-0.011362	-0.003221	-0.007204
0.2770	1237.680	167.271	48.320	106.764	-0.553	9.901	2356.224	-0.011709	-0.003382	-0.007473
0.2780	1268.578	171.385	50.209	109.584	-0.546	9.900	2415.047	-0.011997	-0.003515	-0.007671
0.2790	1286.507	174.151	51.445	111.622	-0.545	9.898	2449.179	-0.012191	-0.003601	-0.007814
0.2800	1292.278	175.762	52.168	112.503	-0.549	9.896	2460.165	-0.012303	-0.003652	-0.007875
0.2810	1289.888	176.485	52.376	112.861	-0.550	9.893	2455.616	-0.012354	-0.003666	-0.007900
0.2820	1282.630	176.402	52.238	112.889	-0.553	9.890	2441.797	-0.012348	-0.003657	-0.007902
0.2830	1271.554	175.845	51.918	112.599	-0.548	9.889	2420.712	-0.012309	-0.003634	-0.007882
0.2840	1254.466	174.718	51.502	112.077	-0.544	9.887	2388.182	-0.012230	-0.003605	-0.007845
0.2850	1224.725	172.452	51.211	110.659	-0.544	9.886	2331.562	-0.012072	-0.003585	-0.007746
0.2860	1175.357	167.936	49.293	107.810	-0.545	9.886	2237.577	-0.011756	-0.003451	-0.007547
0.2870	1103.266	160.725	46.471	103.035	-0.543	9.888	2100.334	-0.011251	-0.003253	-0.007212
0.2880	1013.245	151.442	42.441	96.471	-0.536	9.890	1928.959	-0.010601	-0.002971	-0.006753
0.2890	915.786	141.255	38.216	88.972	-0.537	9.892	1743.422	-0.009888	-0.002675	-0.006228
0.2900	821.002	131.070	34.352	81.472	-0.542	9.894	1562.977	-0.009175	-0.002405	-0.005703
0.2910	735.340	121.413	30.461	74.785	-0.542	9.896	1399.899	-0.008499	-0.002132	-0.005235
0.2920	660.814	112.589	27.222	68.977	-0.545	9.899	1258.020	-0.007881	-0.001906	-0.004828
0.2930	595.786	104.764	24.109	63.762	-0.544	9.902	1134.224	-0.007333	-0.001688	-0.004463
0.2940	537.686	97.566	21.595	59.029	-0.548	9.903	1023.617	-0.006830	-0.001512	-0.004132
0.2950	483.900	90.798	19.608	54.653	-0.553	9.903	921.221	-0.006356	-0.001373	-0.003826
0.2960	432.578	84.059	17.414	50.526	-0.556	9.902	823.517	-0.005884	-0.001219	-0.003537
0.2970	382.293	77.013	15.719	46.302	-0.550	9.901	727.787	-0.005391	-0.001100	-0.003241
0.2980	332.579	70.107	13.606	41.857	-0.540	9.900	633.144	-0.004907	-0.000952	-0.002930
0.2990	284.518	63.215	12.521	37.358	-0.540	9.898	541.649	-0.004425	-0.000876	-0.002615
0.3000	240.124	56.822	11.049	33.270	-0.541	9.895	457.134	-0.003978	-0.000773	-0.002329
0.3010	201.696	50.902	10.353	29.858	-0.540	9.893	383.978	-0.003563	-0.000725	-0.002090
0.3020	170.212	45.815	9.313	26.968	-0.542	9.890	324.039	-0.003207	-0.000652	-0.001888
0.3030	146.001	41.730	8.965	24.561	-0.537	9.888	277.948	-0.002921	-0.000628	-0.001719
0.3040	128.748	38.660	8.353	22.731	-0.542	9.887	245.104	-0.002706	-0.000585	-0.001591
0.3050	117.763	36.491	8.131	21.658	-0.549	9.886	224.190	-0.002554	-0.000569	-0.001516
0.3060	112.247	35.280	7.686	20.750	-0.550	9.886	213.690	-0.002470	-0.000538	-0.001453
0.3070	110.940	34.612	7.589	20.214	-0.546	9.888	211.201	-0.002423	-0.000531	-0.001415
0.3080	112.458	34.434	7.658	19.938	-0.540	9.890	214.090	-0.002410	-0.000536	-0.001396
0.3090	115.764	34.503	7.603	20.062	-0.548	9.892	220.385	-0.002415	-0.000532	-0.001404
0.3100	121.384	34.531	7.770	20.352	-0.550	9.894	231.085	-0.002417	-0.000544	-0.001425
0.3110	134.564	35.684	7.395	20.820	-0.557	9.896	256.176	-0.002498	-0.000518	-0.001457
0.3120	162.758	38.950	7.728	22.444	-0.560	9.899	309.849	-0.002726	-0.000541	-0.001571
0.3130	211.435	44.801	8.019	25.594	-0.556	9.902	402.517	-0.003136	-0.000561	-0.001792
0.3140	281.257	53.723	9.338	30.616	-0.555	9.903	535.440	-0.003761	-0.000654	-0.002143
0.3150	368.887	64.522	11.326	37.593	-0.557	9.903	702.267	-0.004517	-0.000793	-0.002631
0.3160	469.067	77.181	14.634	45.299	-0.557	9.902	892.982	-0.005403	-0.001024	-0.003171
0.3170	575.363	90.562	18.693	53.926	-0.553	9.901	1095.343	-0.006339	-0.001309	-0.003775
0.3180	679.585	103.277	22.666	61.893	-0.545	9.900	1293.755	-0.007229	-0.001587	-0.004333
0.3190	774.850	114.880	26.904	69.585	-0.543	9.898	1475.115	-0.008042	-0.001883	-0.004871
0.3200	857.942	124.706	30.518	76.258	-0.548	9.896	1633.301	-0.008729	-0.002136	-0.005338
0.3210	928.425	133.141	33.853	82.106	-0.549	9.893	1767.483	-0.009320	-0.002370	-0.005747
0.3220	988.704	140.645	37.146	87.348	-0.555	9.890	1882.238	-0.009845	-0.002600	-0.006114
0.3230	1041.935	146.939	39.688	91.792	-0.549	9.888	1983.576	-0.010286	-0.002778	-0.006425
0.3240	1091.453	152.860	42.370	96.279	-0.554	9.886	2077.847	-0.010700	-0.002966	-0.006739
0.3250	1139.890	158.904	44.497	100.833	-0.556	9.885	2170.057	-0.011123	-0.003115	-0.007058
0.3260	1187.094	164.755	46.970	105.114	-0.553	9.886	2259.922	-0.011533	-0.003288	-0.007358
0.3270	1229.234	170.272	49.360	108.842	-0.545	9.887	2340.145	-0.011919	-0.003455	-0.007619
0.3280	1260.914	174.303	51.000	111.443	-0.538	9.890	2400.455	-0.012201	-0.003570	-0.007801
0.3290	1278.948	176.847	52.363	113.437	-0.539	9.892	2434.788	-0.012379	-0.003665	-0.007941
0.3300	1285.109	178.153	52.821	114.427	-0.540	9.894	2446.518	-0.012471	-0.003697	-0.008010
0.3310	1283.591	178.694	53.070	114.676	-0.545	9.896	2443.628	-0.012509	-0.003715	-0.008027
0.3320	1277.835	178.707	53.056	114.870	-0.546	9.899	2432.671	-0.012510	-0.003714	-0.008041
0.3330	1268.999	178.222	52.932	114.746	-0.545	9.902	2415.848	-0.012476	-0.003705	-0.008032
0.3340	1255.654	177.360	52.683	114.800	-0.540	9.903	2390.442	-0.012415	-0.003688	-0.008036
0.3350	1231.969	175.651	52.211	113.836	-0.543	9.903	2345.352	-0.012296	-0.003655	-0.007968
0.3360	1189.423	172.064	51.014	111.455	-0.538	9.902	2264.357	-0.012044	-0.003571	-0.007802
0.3370	1122.397	165.602	48.444	106.846	-0.536	9.901	2136.755	-0.011592	-0.003391	-0.007479
0.3380	1032.572	156.415	44.511	100.049	-0.530	9.900	1965.752	-0.010949	-0.003116	-0.007003
0.3390	930.860	145.605	40.037	92.316	-0.532	9.898	1772.118	-0.010192	-0.002803	-0.006462
0.3400	829.313	134.419	35.617	84.361	-0.537	9.895	1578.798	-0.009409	-0.002493	-0.005905
0.3410	737.715	124.066	31.657	77.191	-0.541	9.893	1404.419	-0.008685	-0.002216	-0.005403
0.3420	660.108	115.005	28.363	70.945	-0.540	9.890	1256.676	-0.008050	-0.001985	-0.004966
0.3430	595.486	107.140	25.140	65.593	-0.538	9.889	1133.652	-0.007500	-0.001760	-0.004592
0.3440	539.896	100.234	22.693	61.136	-0.536	9.887	1027.822	-0.007016	-0.001589	-0.004279
0.3450	489.175	93.757	20.443	57.035	-0.540	9.886	931.263	-0.006563	-0.001431	-0.003992
0.3460	439.085	87.239	18.719	52.906	-0.536	9.886	835.905	-0.006107	-0.001310	-0.003703
0.3470	387.583	80.318	16.705	48.501	-0.534	9.887	737.858	-0.005622	-0.001169	-0.003395
0.3480	334.517	72.912	14.842	43.712	-0.527	9.890	636.835	-0.005104	-0.001039	-0.003060
0.3490	282.760	65.645	12.772	39.282	-0.527	9.892	538.301	-0.004595	-0.000894	-0.002750
0.3500	235.826	58.726	11.826	35.044	-0.533	9.894	448.952	-0.004111	-0.000828	-0.002453
0.3510	196.121	52.501	10.381	31.302	-0.533	9.896	373.363	-0.003675	-0.000727	-0.002191
0.3520	164.576	46.970	10.019	28.232	-0.538	9.899	313.311	-0.003288	-0.000701	-0.001976
0.3530	140.921	42.731	9.019	25.797	-0.538	9.903	268.278	-0.002991	-0.000631	-0.001806
0.3540	124.420	39.785	8.950	24.353	-0.542	9.904	236.864	-0.002785	-0.000627	-0.001705
0.3550	114.036	37.992	8.548	23.267	-0.545	9.903	217.094	-0.002659	-0.000598	-0.001629
0.3560	108.971	36.825	8.703	22.554	-0.545	9.902	207.453	-0.002578	-0.000609	-0.001579
0.3570	107.799	36.102	8.382	21.825	-0.544	9.901	205.221	-0.002527	-0.000587	-0.001528
0.3580	109.287	35.754	8.632	21.384	-0.541	9.900	208.054	-0.002503	-0.000604	-0.001497
0.3590	112.593	35.823	8.200	21.315	-0.545	9.898	214.348	-0.002508	-0.000574	-0.001492
0.3600	118.589	36.117	8.506	21.410	-0.550	9.896	225.763	-0.002528	-0.000595	-0.001499
0.3610	132.475	37.395	8.256	22.182	-0.553	9.893	252.199	-0.002618	-0.000578	-0.001553
0.3620	161.375	40.799	8.603	23.874	-0.555	9.891	307.217	-0.002856	-0.000602	-0.001671
0.3630	210.293	46.746	8.812	27.190	-0.552	9.889	400.343	-0.003272	-0.000617	-0.001903
0.3640	279.634	55.820	10.077	32.198	-0.558	9.887	532.351	-0.003907	-0.000705	-0.002254
0.3650	365.822	66.715	12.258	39.064	-0.565	9.886	696.430	-0.004670	-0.000858	-0.002734
0.3660	463.852	78.972	15.510	46.921	-0.564	9.886	883.055	-0.005528	-0.001086	-0.003284
0.3670	567.337	91.868	19.067	55.134	-0.554	9.887	1080.065	-0.006431	-0.001335	-0.003859
0.3680	669.230	104.208	23.082	62.839	-0.545	9.890	1274.042	-0.007295	-0.001616	-0.004399
0.3690	764.180	115.687	27.195	70.037	-0.548	9.892	1454.802	-0.008098	-0.001904	-0.004903
0.3700	849.616	125.762	31.350	76.754	-0.549	9.894	1617.451	-0.008803	-0.002195	-0.005373
0.3710	925.344	134.614	34.770	82.741	-0.549	9.897	1761.618	-0.009423	-0.002434	-0.005792
0.3720	992.641	142.854	37.940	88.451	-0.554	9.899	1889.734	-0.010000	-0.002656	-0.006192
0.3730	1052.770	149.802	40.692	93.583	-0.549	9.903	2004.204	-0.010486	-0.002848	-0.006551
0.3740	1106.707	156.224	43.123	98.632	-0.547	9.904	2106.886	-0.010936	-0.003019	-0.006904
0.3750	1155.730	162.102	45.942	103.296	-0.549	9.903	2200.212	-0.011347	-0.003216	-0.007231
0.3760	1199.793	167.730	48.386	107.645	-0.544	9.902	2284.098	-0.011741	-0.003387	-0.007535
0.3770	1236.718	172.580	50.695	111.209	-0.540	9.901	2354.393	-0.012081	-0.003549	-0.007785
0.3780	1262.522	176.179	52.029	113.452	-0.534	9.900	2403.517	-0.012333	-0.003642	-0.007942
0.3790	1275.431	178.250	53.252	114.718	-0.538	9.898	2428.093	-0.012478	-0.003728	-0.008030
0.3800	1277.790	179.306	53.780	115.228	-0.541	9.896	2432.585	-0.012551	-0.003765	-0.008066
0.3810	1274.244	179.555	53.918	115.448	-0.540	9.893	2425.833	-0.012569	-0.003774	-0.008081
0.3820	1267.601	179.624	53.890	115.531	-0.540	9.890	2413.187	-0.012574	-0.003772	-0.008087
0.3830	1258.509	179.040	53.447	115.282	-0.540	9.889	2395.878	-0.012533	-0.003741	-0.008070
0.3840	1244.803	178.041	53.196	114.925	-0.544	9.887	2369.785	-0.012463	-0.003724	-0.008045
0.3850	1220.562	176.192	52.420	113.824	-0.545	9.886	2323.637	-0.012333	-0.003669	-0.007968
0.3860	1177.867	172.343	51.210	111.225	-0.542	9.886	2242.355	-0.012064	-0.003585	-0.007786
0.3870	1111.937	165.950	48.527	106.973	-0.540	9.887	2116.842	-0.011617	-0.003397	-0.007488
0.3880	1026.170	157.015	45.025	100.436	-0.534	9.890	1953.564	-0.010991	-0.003152	-0.007031
0.3890	931.581	147.063	40.649	93.405	-0.538	9.892	1773.491	-0.010294	-0.002845	-0.006538
0.3900	839.216	137.058	37.023	86.055	-0.544	9.894	1597.652	-0.009594	-0.002592	-0.006024
0.3910	755.989	127.832	32.839	79.506	-0.545	9.896	1439.209	-0.008948	-0.002299	-0.005565
0.3920	682.756	119.217	29.934	73.699	-0.554	9.899	1299.791	-0.008345	-0.002095	-0.005159
0.3930	617.217	111.408	26.279	68.208	-0.552	9.902	1175.022	-0.007799	-0.001840	-0.004775
0.3940	556.487	104.084	23.888	63.475	-0.555	9.903	1059.408	-0.007286	-0.001672	-0.004443
0.3950	498.643	97.024	21.040	58.975	-0.551	9.903	949.287	-0.006792	-0.001473	-0.004128
0.3960	441.940	89.729	19.191	54.324	-0.554	9.902	841.341	-0.006281	-0.001343	-0.003803
0.3970	385.854	82.031	16.884	49.522	-0.550	9.900	734.568	-0.005742	-0.001182	-0.003467
0.3980	331.031	74.082	14.702	44.473	-0.546	9.900	630.198	-0.005186	-0.001029	-0.003113
0.3990	279.814	66.729	13.076	40.014	-0.545	9.898	532.694	-0.004671	-0.000915	-0.002801
0.4000	235.119	60.141	11.979	35.995	-0.550	9.895	447.607	-0.004210	-0.000839	-0.002520
0.4010	198.074	54.347	11.215	32.720	-0.552	9.893	377.083	-0.003804	-0.000785	-0.002290
0.4020	168.468	49.331	10.396	29.885	-0.552	9.890	320.721	-0.003453	-0.000728	-0.002092
0.4030	145.475	45.120	9.465	27.450	-0.546	9.888	276.947	-0.003158	-0.000663	-0.001921
0.4040	128.643	42.244	8.813	25.716	-0.546	9.886	244.904	-0.002957	-0.000617	-0.001800
0.4050	117.582	40.146	8.397	24.286	-0.548	9.886	223.846	-0.002810	-0.000588	-0.001700
0.4060	111.871	38.744	8.521	23.544	-0.547	9.886	212.975	-0.002712	-0.000596	-0.001648
0.4070	110.324	37.784	8.160	22.967	-0.545	9.888	210.028	-0.002645	-0.000571	-0.001608
0.4080	111.646	37.340	8.466	22.525	-0.537	9.890	212.545	-0.002614	-0.000593	-0.001577
0.4090	115.193	37.410	8.271	22.456	-0.542	9.892	219.297	-0.002619	-0.000579	-0.001572
0.4100	122.001	37.910	8.632	22.552	-0.546	9.894	232.258	-0.002654	-0.000604	-0.001579
0.4110	138.111	39.466	8.602	23.570	-0.553	9.897	262.928	-0.002763	-0.000602	-0.001650
0.4120	170.602	43.315	8.741	25.895	-0.557	9.900	324.783	-0.003032	-0.000612	-0.001813
0.4130	223.923	49.831	9.115	29.459	-0.554	9.903	426.292	-0.003488	-0.000638	-0.002062
0.4140	297.728	59.405	10.297	34.935	-0.554	9.903	566.797	-0.004158	-0.000721	-0.002445
0.4150	388.034	70.481	12.826	41.692	-0.550	9.903	738.716	-0.004934	-0.000898	-0.002918
0.4160	489.505	83.098	15.967	49.824	-0.548	9.902	931.892	-0.005817	-0.001118	-0.003488
0.4170	595.501	96.147	20.318	58.314	-0.546	9.901	1133.680	-0.006730	-0.001422	-0.004082
0.4180	698.250	108.584	24.432	66.418	-0.540	9.900	1329.288	-0.007601	-0.001710	-0.004649
0.4190	791.651	120.063	28.768	73.642	-0.542	9.898	1507.101	-0.008404	-0.002014	-0.005155
0.4200	873.015	129.623	32.518	79.861	-0.546	9.895	1661.997	-0.009074	-0.002276	-0.005590
0.4210	942.642	137.878	35.977	85.436	-0.549	9.893	1794.548	-0.009651	-0.002518	-0.005980
0.4220	1003.282	145.118	38.883	90.692	-0.551	9.890	1909.990	-0.010158	-0.002722	-0.006348
0.4230	1057.639	151.512	41.593	95.124	-0.549	9.888	2013.474	-0.010606	-0.002912	-0.006659
0.4240	1107.954	157.668	44.192	99.568	-0.548	9.886	2109.261	-0.011037	-0.003093	-0.006970
0.4250	1156.015	163.366	46.483	104.012	-0.550	9.885	2200.756	-0.011436	-0.003254	-0.007281
0.4260	1201.401	168.772	49.040	108.484	-0.548	9.886	2287.159	-0.011814	-0.003433	-0.007594
0.4270	1240.775	173.747	51.291	112.212	-0.541	9.887	2362.118	-0.012162	-0.003590	-0.007855
0.4280	1269.375	177.443	52.959	114.564	-0.532	9.890	2416.563	-0.012421	-0.003707	-0.008020
0.4290	1284.854	179.998	53.972	116.078	-0.532	9.892	2446.032	-0.012600	-0.003778	-0.008125
0.4300	1289.347	181.179	54.486	116.835	-0.540	9.894	2454.586	-0.012682	-0.003814	-0.008178
0.4310	1286.838	181.581	54.668	117.138	-0.541	9.896	2449.808	-0.012711	-0.003827	-0.008200
0.4320	1280.225	181.555	54.641	117.234	-0.544	9.899	2437.220	-0.012709	-0.003825	-0.008206
0.4330	1269.976	180.957	54.738	116.945	-0.542	9.902	2417.707	-0.012667	-0.003832	-0.008186
0.4340	1252.858	179.637	54.183	116.395	-0.543	9.903	2385.120	-0.012575	-0.003793	-0.008148
0.4350	1221.494	177.010	53.308	114.937	-0.544	9.903	2325.411	-0.012391	-0.003732	-0.008046
0.4360	1169.360	172.398	51.584	111.910	-0.542	9.902	2226.162	-0.012068	-0.003611	-0.007834
0.4370	1094.699	165.144	48.611	106.669	-0.539	9.901	2084.026	-0.011560	-0.003403	-0.007467
0.4380	1003.988	155.709	44.762	99.735	-0.534	9.900	1911.335	-0.010900	-0.003133	-0.006981
0.4390	907.881	145.494	40.525	92.290	-0.538	9.898	1728.373	-0.010185	-0.002837	-0.006460
0.4400	815.832	135.489	36.411	85.051	-0.544	9.895	1553.135	-0.009484	-0.002549	-0.005954
0.4410	733.867	126.345	32.380	78.336	-0.550	9.893	1397.095	-0.008844	-0.002267	-0.005484
0.4420	662.362	118.008	29.391	72.570	-0.558	9.890	1260.967	-0.008261	-0.002057	-0.005080
0.4430	598.912	110.282	26.155	67.286	-0.552	9.888	1140.175	-0.007720	-0.001831	-0.004710
0.4440	540.346	103.001	23.515	62.772	-0.549	9.886	1028.681	-0.007210	-0.001646	-0.004394
0.4450	484.741	95.969	21.140	58.452	-0.552	9.885	922.823	-0.006718	-0.001480	-0.004092
0.4460	430.414	89.062	18.791	54.105	-0.550	9.886	819.397	-0.006234	-0.001315	-0.003787
0.4470	376.732	81.654	16.872	49.564	-0.547	9.888	717.201	-0.005716	-0.001181	-0.003469
0.4480	324.028	74.067	14.744	44.720	-0.541	9.890	616.865	-0.005185	-0.001032	-0.003130
0.4490	274.764	66.966	13.603	40.399	-0.545	9.892	523.081	-0.004688	-0.000952	-0.002828
0.4500	231.362	60.628	12.172	36.547	-0.548	9.894	440.454	-0.004244	-0.000852	-0.002558
0.4510	194.964	55.055	11.492	33.203	-0.548	9.897	371.161	-0.003854	-0.000804	-0.002324
0.4520	165.808	50.040	10.450	30.464	-0.552	9.899	315.657	-0.003503	-0.000732	-0.002132
0.4530	143.085	45.677	9.853	28.042	-0.548	9.902	272.398	-0.003197	-0.000690	-0.001963
0.4540	126.674	42.467	9.131	26.460	-0.550	9.903	241.156	-0.002973	-0.000639	-0.001852
0.4550	116.034	40.451	9.326	25.263	-0.549	9.903	220.900	-0.002832	-0.000653	-0.001768
0.4560	110.850	39.312	8.867	24.424	-0.548	9.902	211.029	-0.002752	-0.000621	-0.001710
0.4570	109.692	38.741	9.257	23.792	-0.547	9.901	208.826	-0.002712	-0.000648	-0.001665
0.4580	111.180	38.256	8.534	23.323	-0.545	9.900	211.658	-0.002678	-0.000597	-0.001633
0.4590	114.531	38.228	8.827	23.171	-0.548	9.898	218.039	-0.002676	-0.000618	-0.001622
0.4600	120.438	38.465	8.674	23.130	-0.551	9.895	229.282	-0.002693	-0.000607	-0.001619
0.4610	134.264	39.854	8.729	23.776	-0.554	9.893	255.604	-0.002790	-0.000611	-0.001664
0.4620	163.329	43.342	8.770	25.773	-0.560	9.890	310.936	-0.003034	-0.000614	-0.001804
0.4630	213.148	49.442	9.102	29.239	-0.554	9.888	405.779	-0.003461	-0.000637	-0.002047
0.4640	284.638	58.738	10.270	34.675	-0.557	9.886	541.878	-0.004112	-0.000719	-0.002427
0.4650	374.012	69.771	12.673	41.528	-0.554	9.886	712.023	-0.004884	-0.000887	-0.002907
0.4660	475.469	82.250	15.980	49.359	-0.551	9.886	905.170	-0.005758	-0.001119	-0.003455
0.4670	581.825	95.356	20.330	57.710	-0.546	9.888	1107.645	-0.006675	-0.001423	-0.004040
0.4680	685.100	107.528	24.154	65.456	-0.538	9.890	1304.255	-0.007527	-0.001691	-0.004582
0.4690	779.058	119.145	28.628	72.886	-0.540	9.892	1483.126	-0.008340	-0.002004	-0.005102
0.4700	860.391	128.776	31.908	79.120	-0.544	9.894	1637.964	-0.009014	-0.002234	-0.005538
0.4710	929.191	136.989	35.450	84.763	-0.548	9.897	1768.942	-0.009589	-0.002482	-0.005933
0.4720	988.433	144.354	38.217	89.978	-0.547	9.899	1881.723	-0.010105	-0.002675	-0.006298
0.4730	1041.799	150.413	40.759	94.630	-0.540	9.902	1983.318	-0.010529	-0.002853	-0.006624
0.4740	1092.355	156.501	43.289	99.281	-0.539	9.903	2079.563	-0.010955	-0.003030	-0.006950
0.4750	1142.054	162.323	45.915	103.848	-0.542	9.903	2174.177	-0.011363	-0.003214	-0.007269
0.4760	1190.040	168.187	48.569	108.224	-0.544	9.902	2265.530	-0.011773	-0.003400	-0.007576
0.4770	1232.615	173.650	50.903	111.911	-0.541	9.901	2346.582	-0.012155	-0.003563	-0.007834
0.4780	1264.460	177.930	52.725	114.403	-0.532	9.900	2407.207	-0.012455	-0.003691	-0.008008
0.4790	1282.840	180.542	54.017	116.204	-0.533	9.898	2442.198	-0.012638	-0.003781	-0.008134
0.4800	1289.287	181.778	54.892	117.031	-0.532	9.895	2454.472	-0.012724	-0.003842	-0.008192
0.4810	1287.844	181.930	55.238	117.498	-0.538	9.893	2451.725	-0.012735	-0.003867	-0.008225
0.4820	1281.713	181.971	55.334	117.553	-0.545	9.890	2440.052	-0.012738	-0.003873	-0.008229
0.4830	1272.110	181.624	54.694	117.442	-0.548	9.888	2421.770	-0.012714	-0.003829	-0.008221
0.4840	1256.585	180.834	54.598	117.237	-0.547	9.886	2392.216	-0.012658	-0.003822	-0.008207
0.4850	1228.182	178.667	53.876	116.067	-0.547	9.885	2338.142	-0.012507	-0.003771	-0.008125
0.4860	1179.730	174.316	52.542	113.412	-0.543	9.885	2245.903	-0.012202	-0.003678	-0.007939
0.4870	1108.270	167.382	49.486	108.471	-0.538	9.887	2109.861	-0.011717	-0.003464	-0.007593
0.4880	1018.460	158.057	45.609	101.550	-0.532	9.890	1938.887	-0.011064	-0.003193	-0.007109
0.4890	920.655	147.774	41.287	93.994	-0.533	9.892	1752.691	-0.010344	-0.002890	-0.006580
0.4900	825.105	137.184	37.161	86.412	-0.539	9.894	1570.787	-0.009603	-0.002601	-0.006049
0.4910	738.917	127.637	33.201	79.546	-0.542	9.896	1406.708	-0.008935	-0.002324	-0.005568
0.4920	664.842	119.077	29.727	73.492	-0.549	9.899	1265.688	-0.008335	-0.002081	-0.005144
0.4930	601.166	111.351	26.795	68.057	-0.538	9.902	1144.466	-0.007795	-0.001876	-0.004764
0.4940	544.524	104.335	24.166	63.613	-0.541	9.903	1036.634	-0.007303	-0.001692	-0.004453
0.4950	491.444	97.664	21.985	59.527	-0.539	9.903	935.583	-0.006836	-0.001539	-0.004167
0.4960	438.995	90.939	19.788	55.399	-0.541	9.902	835.733	-0.006366	-0.001385	-0.003878
0.4970	385.749	83.962	17.732	50.762	-0.536	9.900	734.367	-0.005877	-0.001241	-0.003553
0.4980	331.978	76.179	15.523	45.987	-0.532	9.900	632.000	-0.005333	-0.001087	-0.003219
0.4990	280.265	68.758	13.995	41.665	-0.529	9.897	533.552	-0.004813	-0.000980	-0.002917
Test Cycles
Time (sec)	Axial stress (kPa)	Axial micro-strain #1	Axial micro-strain #2	Axial micro-strain #3	Confining pressure (kPa)	Temperature (�C)	Load (N)	Displacement #1 (mm)	Displacement #2 (mm)	Displacement #3 (mm)
0.0000	234.278	61.796	12.703	37.508	-0.531	9.895	446.005	-0.004326	-0.000889	-0.002626
0.0010	195.895	55.931	11.757	33.794	-0.534	9.893	372.934	-0.003915	-0.000823	-0.002366
0.0020	165.373	51.068	10.728	30.712	-0.538	9.890	314.827	-0.003575	-0.000751	-0.002150
0.0030	141.868	46.720	10.173	28.195	-0.540	9.889	270.081	-0.003270	-0.000712	-0.001974
0.0040	124.871	43.564	9.673	26.641	-0.542	9.887	237.722	-0.003049	-0.000677	-0.001865
0.0050	114.051	41.480	9.506	25.554	-0.545	9.886	217.123	-0.002904	-0.000665	-0.001789
0.0060	108.791	40.380	9.200	24.783	-0.541	9.886	207.109	-0.002827	-0.000644	-0.001735
0.0070	107.724	39.909	8.922	24.190	-0.542	9.888	205.078	-0.002794	-0.000625	-0.001693
0.0080	109.166	39.451	8.992	23.460	-0.543	9.890	207.825	-0.002762	-0.000629	-0.001642
0.0090	112.412	39.284	8.659	23.474	-0.547	9.892	214.005	-0.002750	-0.000606	-0.001643
0.0100	118.439	39.382	9.048	23.516	-0.553	9.895	225.477	-0.002757	-0.000633	-0.001646
0.0110	133.092	40.840	8.771	24.162	-0.554	9.897	253.372	-0.002859	-0.000614	-0.001691
0.0120	163.193	44.565	9.257	26.116	-0.555	9.900	310.678	-0.003120	-0.000648	-0.001828
0.0130	213.494	50.387	9.493	29.515	-0.549	9.903	406.437	-0.003527	-0.000665	-0.002066
0.0140	284.473	59.600	10.758	34.963	-0.549	9.903	541.563	-0.004172	-0.000753	-0.002447
0.0150	373.095	70.662	12.996	41.953	-0.550	9.903	710.278	-0.004946	-0.000910	-0.002937
0.0160	473.741	83.279	16.109	49.674	-0.550	9.902	901.880	-0.005830	-0.001128	-0.003477
0.0170	579.345	96.272	19.902	58.054	-0.545	9.901	1102.924	-0.006739	-0.001393	-0.004064
0.0180	681.553	108.389	23.945	65.746	-0.534	9.900	1297.503	-0.007587	-0.001676	-0.004602
0.0190	774.654	119.716	28.322	73.245	-0.536	9.898	1474.743	-0.008380	-0.001983	-0.005127
0.0200	856.394	129.430	32.296	79.697	-0.542	9.896	1630.354	-0.009060	-0.002261	-0.005579
0.0210	927.418	137.713	35.478	85.380	-0.546	9.893	1765.566	-0.009640	-0.002483	-0.005977
0.0220	990.327	145.439	38.551	90.637	-0.555	9.891	1885.328	-0.010181	-0.002699	-0.006345
0.0230	1047.721	152.164	41.010	95.453	-0.546	9.889	1994.591	-0.010651	-0.002871	-0.006682
0.0240	1101.207	158.583	43.830	100.418	-0.549	9.887	2096.415	-0.011101	-0.003068	-0.007029
0.0250	1152.378	164.698	46.359	104.822	-0.548	9.886	2193.832	-0.011529	-0.003245	-0.007338
0.0260	1200.124	170.424	49.055	109.129	-0.548	9.886	2284.727	-0.011930	-0.003434	-0.007639
0.0270	1241.046	175.704	51.306	112.584	-0.542	9.888	2362.633	-0.012299	-0.003591	-0.007881
0.0280	1270.306	179.555	53.294	115.226	-0.538	9.890	2418.337	-0.012569	-0.003731	-0.008066
0.0290	1285.981	181.932	54.364	116.986	-0.535	9.892	2448.177	-0.012735	-0.003805	-0.008189
0.0300	1290.610	183.100	55.087	117.838	-0.540	9.894	2456.989	-0.012817	-0.003856	-0.008249
0.0310	1288.310	183.295	55.212	118.183	-0.541	9.897	2452.612	-0.012831	-0.003865	-0.008273
0.0320	1282.043	183.169	55.307	118.321	-0.542	9.899	2440.681	-0.012822	-0.003872	-0.008282
0.0330	1272.380	182.711	54.987	117.937	-0.537	9.902	2422.285	-0.012790	-0.003849	-0.008256
0.0340	1256.615	181.654	54.722	117.607	-0.536	9.903	2392.273	-0.012716	-0.003831	-0.008232
0.0350	1227.806	179.235	53.765	116.355	-0.535	9.903	2337.427	-0.012546	-0.003764	-0.008145
0.0360	1179.550	174.580	52.197	113.879	-0.530	9.902	2245.560	-0.012221	-0.003654	-0.007972
0.0370	1109.307	167.744	49.543	109.199	-0.527	9.901	2111.835	-0.011742	-0.003468	-0.007644
0.0380	1022.473	158.851	45.930	102.485	-0.523	9.900	1946.526	-0.011120	-0.003215	-0.007174
0.0390	928.831	149.081	41.594	95.260	-0.526	9.898	1768.255	-0.010436	-0.002912	-0.006668
0.0400	837.744	139.144	37.689	87.941	-0.529	9.896	1594.849	-0.009740	-0.002638	-0.006156
0.0410	755.433	130.056	33.672	81.486	-0.531	9.893	1438.150	-0.009104	-0.002357	-0.005704
0.0420	682.650	121.870	30.782	75.651	-0.538	9.891	1299.591	-0.008531	-0.002155	-0.005296
0.0430	617.502	114.004	27.586	70.244	-0.537	9.889	1175.566	-0.007980	-0.001931	-0.004917
0.0440	556.652	106.459	25.237	65.374	-0.539	9.887	1059.723	-0.007452	-0.001767	-0.004576
0.0450	498.387	98.985	22.624	60.696	-0.540	9.886	948.801	-0.006929	-0.001584	-0.004249
0.0460	441.414	91.744	20.346	56.045	-0.538	9.886	840.340	-0.006422	-0.001424	-0.003923
0.0470	385.704	84.559	18.039	51.228	-0.539	9.888	734.282	-0.005919	-0.001263	-0.003586
0.0480	331.812	76.945	15.928	46.137	-0.532	9.891	631.685	-0.005386	-0.001115	-0.003230
0.0490	281.572	69.580	14.427	41.734	-0.533	9.892	536.041	-0.004871	-0.001010	-0.002921
0.0500	237.374	62.951	12.869	37.744	-0.538	9.894	451.899	-0.004407	-0.000901	-0.002642
0.0510	200.599	57.211	12.021	34.550	-0.543	9.897	381.889	-0.004005	-0.000841	-0.002419
0.0520	171.279	52.570	11.006	31.688	-0.542	9.899	326.071	-0.003680	-0.000770	-0.002218
0.0530	148.721	48.677	10.283	29.335	-0.531	9.903	283.127	-0.003407	-0.000720	-0.002053
0.0540	132.235	45.606	9.880	27.794	-0.529	9.904	251.741	-0.003192	-0.000692	-0.001946
0.0550	121.625	43.660	9.671	26.556	-0.530	9.904	231.543	-0.003056	-0.000677	-0.001859
0.0560	116.305	42.327	9.768	25.993	-0.534	9.902	221.415	-0.002963	-0.000684	-0.001819
0.0570	115.238	41.869	9.713	25.250	-0.532	9.901	219.383	-0.002931	-0.000680	-0.001768
0.0580	116.816	41.452	9.561	24.699	-0.525	9.900	222.387	-0.002902	-0.000669	-0.001729
0.0590	120.272	41.367	9.437	24.562	-0.532	9.898	228.968	-0.002896	-0.000661	-0.001719
0.0600	126.705	41.452	9.326	24.687	-0.542	9.896	241.213	-0.002902	-0.000653	-0.001728
0.0610	142.244	43.161	9.395	25.278	-0.546	9.893	270.796	-0.003021	-0.000658	-0.001769
0.0620	174.029	47.344	9.534	27.190	-0.553	9.891	331.306	-0.003314	-0.000667	-0.001903
0.0630	226.523	53.555	10.006	30.863	-0.548	9.889	431.242	-0.003749	-0.000700	-0.002160
0.0640	299.712	62.879	11.438	36.834	-0.556	9.887	570.574	-0.004402	-0.000801	-0.002578
0.0650	389.747	73.928	13.579	43.906	-0.557	9.886	741.978	-0.005175	-0.000951	-0.003073
0.0660	491.429	86.629	17.233	51.984	-0.556	9.887	935.555	-0.006064	-0.001206	-0.003639
0.0670	597.770	99.664	21.109	60.130	-0.549	9.888	1138.000	-0.006976	-0.001478	-0.004209
0.0680	701.361	111.920	25.458	67.904	-0.548	9.891	1335.211	-0.007834	-0.001782	-0.004753
0.0690	796.025	123.454	29.669	75.184	-0.549	9.892	1515.427	-0.008642	-0.002077	-0.005263
0.0700	878.831	133.376	33.686	81.514	-0.552	9.894	1673.069	-0.009336	-0.002358	-0.005706
0.0710	949.720	141.547	37.118	87.032	-0.549	9.897	1808.023	-0.009908	-0.002598	-0.006092
0.0720	1010.841	148.857	40.051	92.274	-0.547	9.899	1924.381	-0.010420	-0.002804	-0.006459
0.0730	1064.853	155.014	42.621	96.939	-0.539	9.902	2027.206	-0.010851	-0.002983	-0.006786
0.0740	1114.296	161.129	45.039	101.577	-0.541	9.903	2121.334	-0.011279	-0.003153	-0.007110
0.0750	1161.365	166.799	47.736	106.091	-0.543	9.903	2210.941	-0.011676	-0.003341	-0.007426
0.0760	1206.150	172.288	50.127	110.149	-0.542	9.902	2296.200	-0.012060	-0.003509	-0.007710
0.0770	1245.570	177.251	52.335	113.741	-0.537	9.901	2371.244	-0.012408	-0.003663	-0.007962
0.0780	1274.785	180.933	53.961	116.204	-0.528	9.900	2426.863	-0.012665	-0.003777	-0.008134
0.0790	1291.316	183.474	55.016	118.104	-0.525	9.898	2458.334	-0.012843	-0.003851	-0.008267
0.0800	1296.576	184.697	56.017	119.177	-0.530	9.896	2468.348	-0.012929	-0.003921	-0.008342
0.0810	1294.277	184.932	56.101	119.425	-0.535	9.893	2463.970	-0.012945	-0.003927	-0.008360
0.0820	1287.364	184.780	56.157	119.478	-0.538	9.890	2450.809	-0.012935	-0.003931	-0.008363
0.0830	1276.468	184.141	55.544	119.093	-0.537	9.888	2430.067	-0.012890	-0.003888	-0.008336
0.0840	1257.983	182.849	55.071	118.391	-0.536	9.886	2394.876	-0.012799	-0.003855	-0.008287
0.0850	1224.680	179.847	54.097	116.782	-0.536	9.886	2331.476	-0.012589	-0.003787	-0.008175
0.0860	1170.247	174.483	52.320	113.383	-0.532	9.886	2227.850	-0.012214	-0.003662	-0.007937
0.0870	1094.008	166.965	49.276	108.180	-0.528	9.887	2082.710	-0.011688	-0.003449	-0.007573
0.0880	1002.740	157.570	45.247	101.122	-0.525	9.890	1908.960	-0.011030	-0.003167	-0.007079
0.0890	906.589	147.537	40.856	93.541	-0.525	9.892	1725.912	-0.010328	-0.002860	-0.006548
0.0900	814.269	137.462	36.634	86.236	-0.532	9.894	1550.159	-0.009622	-0.002564	-0.006037
0.0910	730.982	128.055	32.966	79.548	-0.534	9.897	1391.602	-0.008964	-0.002308	-0.005568
0.0920	657.328	119.453	29.755	73.850	-0.539	9.899	1251.383	-0.008362	-0.002083	-0.005170
0.0930	591.488	111.490	26.628	68.414	-0.534	9.902	1126.041	-0.007804	-0.001864	-0.004789
0.0940	530.593	103.959	23.848	63.625	-0.534	9.903	1010.113	-0.007277	-0.001669	-0.004454
0.0950	472.929	96.678	21.359	59.071	-0.534	9.902	900.335	-0.006767	-0.001495	-0.004135
0.0960	417.850	89.424	19.079	54.558	-0.533	9.901	795.479	-0.006260	-0.001336	-0.003819
0.0970	365.130	82.380	17.092	50.030	-0.532	9.900	695.114	-0.005767	-0.001196	-0.003502
0.0980	315.311	75.111	15.231	45.230	-0.521	9.899	600.271	-0.005258	-0.001066	-0.003166
0.0990	269.339	68.372	13.841	40.895	-0.522	9.897	512.753	-0.004786	-0.000969	-0.002863
0.1000	228.717	62.104	12.897	37.180	-0.531	9.895	435.419	-0.004347	-0.000903	-0.002603
0.1010	194.137	56.656	11.618	34.015	-0.534	9.893	369.587	-0.003966	-0.000813	-0.002381
0.1020	165.778	52.110	11.201	31.566	-0.536	9.891	315.599	-0.003648	-0.000784	-0.002210
0.1030	143.356	48.121	10.048	29.089	-0.534	9.889	272.913	-0.003368	-0.000703	-0.002036
0.1040	126.780	45.105	9.938	27.533	-0.541	9.887	241.356	-0.003157	-0.000696	-0.001927
0.1050	115.734	42.952	9.355	26.404	-0.544	9.886	220.327	-0.003007	-0.000655	-0.001848
0.1060	109.813	41.561	9.451	25.688	-0.540	9.886	209.055	-0.002909	-0.000662	-0.001798
0.1070	107.964	40.992	9.075	25.054	-0.538	9.888	205.536	-0.002869	-0.000635	-0.001754
0.1080	108.911	40.604	9.131	24.258	-0.534	9.891	207.338	-0.002842	-0.000639	-0.001698
0.1090	111.902	40.410	9.089	24.093	-0.542	9.892	213.032	-0.002829	-0.000636	-0.001687
0.1100	117.282	40.632	9.394	24.341	-0.546	9.894	223.274	-0.002844	-0.000658	-0.001704
0.1110	130.537	41.911	9.143	25.015	-0.553	9.897	248.508	-0.002934	-0.000640	-0.001751
0.1120	159.106	45.649	9.546	26.927	-0.556	9.900	302.896	-0.003195	-0.000668	-0.001885
0.1130	208.865	51.596	9.756	30.243	-0.553	9.902	397.625	-0.003612	-0.000683	-0.002117
0.1140	280.656	60.642	11.148	35.844	-0.551	9.903	534.296	-0.004245	-0.000780	-0.002509
0.1150	370.961	71.870	13.328	42.862	-0.550	9.903	706.215	-0.005031	-0.000933	-0.003000
0.1160	473.545	84.683	16.734	50.705	-0.549	9.902	901.508	-0.005928	-0.001171	-0.003549
0.1170	580.833	98.010	20.638	59.002	-0.548	9.901	1105.757	-0.006861	-0.001445	-0.004130
0.1180	684.424	110.183	24.807	66.681	-0.546	9.900	1302.967	-0.007713	-0.001736	-0.004668
0.1190	778.231	121.565	29.170	74.195	-0.545	9.897	1481.552	-0.008510	-0.002042	-0.005194
0.1200	859.279	131.389	32.825	80.497	-0.545	9.895	1635.847	-0.009197	-0.002298	-0.005635
0.1210	927.959	139.477	36.313	86.055	-0.544	9.892	1766.596	-0.009763	-0.002542	-0.006024
0.1220	986.931	146.731	39.190	90.954	-0.551	9.890	1878.862	-0.010271	-0.002743	-0.006367
0.1230	1040.086	152.762	41.801	95.454	-0.549	9.888	1980.057	-0.010693	-0.002926	-0.006682
0.1240	1091.108	158.932	44.289	100.326	-0.552	9.886	2077.188	-0.011125	-0.003100	-0.007023
0.1250	1141.979	165.073	46.845	104.935	-0.553	9.885	2174.034	-0.011555	-0.003279	-0.007345
0.1260	1191.061	170.979	49.208	109.475	-0.553	9.886	2267.475	-0.011969	-0.003445	-0.007663
0.1270	1233.412	176.274	51.710	113.121	-0.550	9.888	2348.099	-0.012339	-0.003620	-0.007918
0.1280	1263.528	179.986	53.558	115.817	-0.541	9.890	2405.434	-0.012599	-0.003749	-0.008107
0.1290	1279.624	182.530	54.851	117.482	-0.539	9.892	2436.075	-0.012777	-0.003840	-0.008224
0.1300	1284.298	183.891	55.697	118.389	-0.541	9.894	2444.973	-0.012872	-0.003899	-0.008287
0.1310	1282.134	184.350	56.101	118.639	-0.546	9.896	2440.853	-0.012905	-0.003927	-0.008305
0.1320	1276.137	184.017	55.891	118.585	-0.551	9.899	2429.438	-0.012881	-0.003912	-0.008301
0.1330	1266.850	183.489	55.614	118.268	-0.548	9.902	2411.757	-0.012844	-0.003893	-0.008279
0.1340	1251.836	182.459	55.336	117.773	-0.550	9.903	2383.175	-0.012772	-0.003874	-0.008244
0.1350	1223.733	180.360	54.503	116.368	-0.548	9.903	2329.674	-0.012625	-0.003815	-0.008146
0.1360	1175.297	175.789	52.766	113.493	-0.547	9.902	2237.463	-0.012305	-0.003694	-0.007945
0.1370	1103.326	168.508	49.666	108.677	-0.543	9.900	2100.449	-0.011796	-0.003477	-0.007607
0.1380	1012.975	159.198	45.816	102.018	-0.537	9.899	1928.444	-0.011144	-0.003207	-0.007141
0.1390	915.185	149.025	41.744	94.394	-0.536	9.898	1742.277	-0.010432	-0.002922	-0.006608
0.1400	820.566	139.116	37.451	86.896	-0.537	9.895	1562.147	-0.009738	-0.002622	-0.006083
0.1410	736.182	129.429	33.839	80.222	-0.537	9.893	1401.501	-0.009060	-0.002369	-0.005616
0.1420	664.090	120.980	30.198	74.662	-0.546	9.890	1264.257	-0.008469	-0.002114	-0.005226
0.1430	602.263	113.254	27.278	69.652	-0.541	9.888	1146.555	-0.007928	-0.001909	-0.004876
0.1440	546.944	106.445	24.596	65.304	-0.546	9.886	1041.241	-0.007451	-0.001722	-0.004571
0.1450	494.555	99.816	22.388	61.148	-0.544	9.885	941.505	-0.006987	-0.001567	-0.004280
0.1460	441.865	93.119	20.331	56.760	-0.548	9.886	841.198	-0.006518	-0.001423	-0.003973
0.1470	387.613	85.976	18.066	52.041	-0.545	9.888	737.915	-0.006018	-0.001265	-0.003643
0.1480	332.609	78.263	16.121	47.059	-0.541	9.890	633.202	-0.005478	-0.001128	-0.003294
0.1490	279.874	70.647	14.203	42.503	-0.546	9.892	532.808	-0.004945	-0.000994	-0.002975
0.1500	233.226	63.754	12.812	38.472	-0.545	9.894	444.002	-0.004463	-0.000897	-0.002693
0.1510	194.618	57.515	11.674	34.950	-0.548	9.897	370.502	-0.004026	-0.000817	-0.002446
0.1520	164.651	52.666	10.854	32.227	-0.548	9.899	313.454	-0.003687	-0.000760	-0.002256
0.1530	142.274	48.859	10.118	29.845	-0.548	9.903	270.853	-0.003420	-0.000708	-0.002089
0.1540	126.720	46.079	9.618	28.193	-0.549	9.903	241.241	-0.003226	-0.000673	-0.001974
0.1550	116.951	44.022	9.604	27.105	-0.551	9.903	222.645	-0.003082	-0.000672	-0.001897
0.1560	112.202	42.605	9.326	26.280	-0.549	9.901	213.604	-0.002982	-0.000653	-0.001840
0.1570	111.421	42.007	9.325	25.675	-0.543	9.901	212.116	-0.002940	-0.000653	-0.001797
0.1580	112.969	41.743	8.867	24.989	-0.538	9.900	215.063	-0.002922	-0.000621	-0.001749
0.1590	116.125	41.701	8.936	24.728	-0.538	9.898	221.071	-0.002919	-0.000625	-0.001731
0.1600	121.490	41.980	8.798	24.933	-0.546	9.896	231.285	-0.002939	-0.000616	-0.001745
0.1610	134.234	43.121	8.894	25.442	-0.550	9.893	255.547	-0.003018	-0.000623	-0.001781
0.1620	161.691	46.541	9.005	27.339	-0.559	9.891	307.817	-0.003258	-0.000630	-0.001914
0.1630	209.225	52.211	9.478	30.256	-0.553	9.889	398.312	-0.003655	-0.000663	-0.002118
0.1640	277.845	60.854	10.702	35.568	-0.556	9.886	528.946	-0.004260	-0.000749	-0.002490
0.1650	363.793	71.441	13.064	42.339	-0.553	9.886	692.568	-0.005001	-0.000915	-0.002964
0.1660	461.898	83.821	16.413	50.155	-0.549	9.886	879.335	-0.005867	-0.001149	-0.003511
0.1670	565.714	96.703	20.221	58.259	-0.542	9.888	1076.975	-0.006769	-0.001415	-0.004078
0.1680	668.584	108.751	24.528	65.937	-0.539	9.891	1272.812	-0.007613	-0.001717	-0.004616
0.1690	764.931	120.202	28.586	73.299	-0.548	9.892	1456.232	-0.008414	-0.002001	-0.005131
0.1700	851.810	130.570	32.712	80.111	-0.549	9.895	1621.628	-0.009140	-0.002290	-0.005608
0.1710	928.109	139.395	36.395	85.973	-0.553	9.897	1766.882	-0.009758	-0.002548	-0.006018
0.1720	994.790	147.385	39.828	91.614	-0.555	9.900	1893.826	-0.010317	-0.002788	-0.006413
0.1730	1053.296	154.082	42.663	96.526	-0.550	9.903	2005.205	-0.010786	-0.002986	-0.006757
0.1740	1105.490	160.515	45.219	101.701	-0.551	9.903	2104.568	-0.011236	-0.003165	-0.007119
0.1750	1153.265	166.408	47.818	106.146	-0.552	9.903	2195.520	-0.011649	-0.003347	-0.007430
0.1760	1196.487	171.898	50.306	110.205	-0.549	9.902	2277.803	-0.012033	-0.003521	-0.007714
0.1770	1233.096	176.456	52.336	113.493	-0.541	9.901	2347.498	-0.012352	-0.003664	-0.007945
0.1780	1259.862	179.958	53.893	115.625	-0.537	9.900	2398.453	-0.012597	-0.003772	-0.008094
0.1790	1275.160	182.196	55.003	117.290	-0.536	9.898	2427.578	-0.012754	-0.003850	-0.008210
0.1800	1280.901	183.587	55.780	117.950	-0.540	9.896	2438.507	-0.012851	-0.003905	-0.008256
0.1810	1280.150	184.046	55.974	118.391	-0.542	9.893	2437.077	-0.012883	-0.003918	-0.008287
0.1820	1275.281	184.129	56.127	118.543	-0.546	9.890	2427.807	-0.012889	-0.003929	-0.008298
0.1830	1266.835	183.795	55.683	118.282	-0.546	9.888	2411.728	-0.012866	-0.003898	-0.008280
0.1840	1252.994	183.002	55.544	118.075	-0.545	9.886	2385.378	-0.012810	-0.003888	-0.008265
0.1850	1226.859	181.083	54.710	116.809	-0.544	9.885	2335.625	-0.012676	-0.003830	-0.008177
0.1860	1181.038	176.775	53.112	114.236	-0.539	9.886	2248.392	-0.012374	-0.003718	-0.007996
0.1870	1111.757	169.855	50.305	109.529	-0.540	9.888	2116.499	-0.011890	-0.003521	-0.007667
0.1880	1024.051	160.893	46.360	102.897	-0.532	9.890	1949.530	-0.011262	-0.003245	-0.007203
0.1890	928.936	150.902	42.204	95.715	-0.534	9.892	1768.456	-0.010563	-0.002954	-0.006700
0.1900	836.286	141.133	38.243	88.437	-0.534	9.894	1592.073	-0.009879	-0.002677	-0.006191
0.1910	752.502	131.641	34.644	81.818	-0.536	9.897	1432.571	-0.009215	-0.002425	-0.005727
0.1920	678.518	123.080	31.155	76.066	-0.539	9.899	1291.723	-0.008616	-0.002181	-0.005325
0.1930	612.663	115.242	28.127	70.713	-0.536	9.903	1166.353	-0.008067	-0.001969	-0.004950
0.1940	551.678	108.002	25.237	66.062	-0.539	9.904	1050.253	-0.007560	-0.001767	-0.004624
0.1950	493.788	100.915	22.708	61.354	-0.534	9.904	940.046	-0.007064	-0.001590	-0.004295
0.1960	437.432	93.566	20.609	56.800	-0.536	9.902	832.758	-0.006550	-0.001443	-0.003976
0.1970	382.278	86.032	18.053	51.969	-0.536	9.901	727.758	-0.006022	-0.001264	-0.003638
0.1980	328.596	78.638	16.316	47.196	-0.534	9.900	625.563	-0.005505	-0.001142	-0.003304
0.1990	278.356	71.453	14.205	42.753	-0.534	9.898	529.919	-0.005002	-0.000994	-0.002993
0.2000	233.962	64.935	13.078	38.694	-0.537	9.896	445.404	-0.004545	-0.000915	-0.002709
0.2010	196.872	58.877	11.952	35.308	-0.541	9.893	374.794	-0.004121	-0.000837	-0.002472
0.2020	167.326	53.833	11.047	32.280	-0.544	9.890	318.546	-0.003768	-0.000773	-0.002260
0.2030	144.739	49.983	10.616	29.789	-0.539	9.888	275.545	-0.003499	-0.000743	-0.002085
0.2040	128.628	46.912	10.101	27.890	-0.543	9.886	244.875	-0.003284	-0.000707	-0.001952
0.2050	118.244	44.827	10.284	26.914	-0.541	9.886	225.105	-0.003138	-0.000720	-0.001884
0.2060	113.239	43.287	9.769	26.255	-0.541	9.886	215.578	-0.003030	-0.000684	-0.001838
0.2070	112.217	42.523	9.728	25.829	-0.535	9.888	213.633	-0.002977	-0.000681	-0.001808
0.2080	113.990	42.412	9.520	25.388	-0.533	9.890	217.009	-0.002969	-0.000666	-0.001777
0.2090	117.537	42.410	9.408	25.277	-0.537	9.892	223.761	-0.002969	-0.000659	-0.001769
0.2100	124.225	42.715	9.521	25.759	-0.544	9.894	236.492	-0.002990	-0.000666	-0.001803
0.2110	140.215	44.411	9.200	26.556	-0.548	9.897	266.933	-0.003109	-0.000644	-0.001859
0.2120	172.782	48.485	9.701	28.812	-0.552	9.900	328.932	-0.003394	-0.000679	-0.002017
0.2130	226.373	54.961	9.798	32.363	-0.547	9.903	430.956	-0.003847	-0.000686	-0.002265
0.2140	300.418	64.006	11.590	38.005	-0.550	9.903	571.918	-0.004480	-0.000811	-0.002660
0.2150	391.159	75.095	13.965	45.064	-0.554	9.903	744.667	-0.005257	-0.000978	-0.003154
0.2160	493.608	87.755	17.743	53.004	-0.556	9.902	939.703	-0.006143	-0.001242	-0.003710
0.2170	600.836	101.012	21.664	61.259	-0.552	9.901	1143.837	-0.007071	-0.001516	-0.004288
0.2180	705.253	113.365	26.000	68.799	-0.542	9.900	1342.621	-0.007936	-0.001820	-0.004816
0.2190	800.533	124.829	30.338	76.119	-0.550	9.898	1524.010	-0.008738	-0.002124	-0.005328
0.2200	883.325	134.473	34.563	82.560	-0.549	9.895	1681.623	-0.009413	-0.002419	-0.005779
0.2210	953.207	142.713	37.815	88.423	-0.552	9.893	1814.661	-0.009990	-0.002647	-0.006190
0.2220	1011.788	149.898	40.802	93.499	-0.546	9.890	1926.184	-0.010493	-0.002856	-0.006545
0.2230	1062.058	155.778	43.011	97.861	-0.546	9.888	2021.885	-0.010904	-0.003011	-0.006850
0.2240	1107.504	161.464	45.580	101.988	-0.549	9.886	2108.402	-0.011302	-0.003191	-0.007139
0.2250	1151.296	166.827	47.748	106.241	-0.553	9.885	2191.772	-0.011678	-0.003342	-0.007437
0.2260	1194.142	172.023	50.139	110.149	-0.548	9.885	2273.340	-0.012042	-0.003510	-0.007710
0.2270	1232.871	176.983	52.224	113.618	-0.544	9.887	2347.069	-0.012389	-0.003656	-0.007953
0.2280	1262.386	180.819	53.780	115.957	-0.539	9.890	2403.259	-0.012657	-0.003765	-0.008117
0.2290	1279.759	183.418	55.197	117.677	-0.543	9.892	2436.333	-0.012839	-0.003864	-0.008237
0.2300	1286.221	184.766	55.669	118.776	-0.550	9.894	2448.635	-0.012934	-0.003897	-0.008314
0.2310	1285.275	185.238	56.058	119.215	-0.552	9.896	2446.833	-0.012967	-0.003924	-0.008345
0.2320	1279.759	185.238	56.086	119.435	-0.555	9.899	2436.333	-0.012967	-0.003926	-0.008360
0.2330	1270.321	184.556	55.821	119.160	-0.550	9.902	2418.365	-0.012919	-0.003908	-0.008341
0.2340	1254.511	183.431	55.530	118.554	-0.549	9.903	2388.268	-0.012840	-0.003887	-0.008299
0.2350	1225.131	181.179	54.557	117.097	-0.549	9.903	2332.335	-0.012683	-0.003819	-0.008197
0.2360	1175.297	176.733	53.208	114.002	-0.549	9.901	2237.463	-0.012371	-0.003725	-0.007980
0.2370	1102.198	169.591	50.208	109.020	-0.541	9.900	2098.303	-0.011871	-0.003515	-0.007631
0.2380	1011.367	160.115	46.136	102.182	-0.532	9.899	1925.383	-0.011208	-0.003229	-0.007153
0.2390	913.412	149.650	41.787	94.709	-0.531	9.897	1738.901	-0.010476	-0.002925	-0.006630
0.2400	818.101	139.353	37.353	87.294	-0.536	9.895	1557.455	-0.009755	-0.002615	-0.006111
0.2410	732.034	129.527	33.645	80.537	-0.538	9.893	1393.604	-0.009067	-0.002355	-0.005638
0.2420	656.937	120.911	30.157	74.662	-0.537	9.890	1250.639	-0.008464	-0.002111	-0.005226
0.2430	591.353	112.976	27.226	69.309	-0.533	9.888	1125.784	-0.007908	-0.001906	-0.004852
0.2440	532.306	105.848	24.543	64.645	-0.536	9.886	1013.374	-0.007409	-0.001718	-0.004525
0.2450	477.242	98.997	22.375	60.268	-0.536	9.885	908.546	-0.006930	-0.001566	-0.004219
0.2460	424.192	92.020	20.040	56.166	-0.537	9.885	807.552	-0.006441	-0.001403	-0.003932
0.2470	372.179	84.752	17.887	51.708	-0.533	9.887	708.532	-0.005933	-0.001252	-0.003620
0.2480	321.217	77.332	15.969	46.893	-0.529	9.890	611.515	-0.005413	-0.001118	-0.003282
0.2490	273.156	70.384	14.329	42.518	-0.528	9.892	520.020	-0.004927	-0.001003	-0.002976
0.2500	230.145	64.283	13.329	38.348	-0.529	9.894	438.137	-0.004500	-0.000933	-0.002684
0.2510	193.897	58.642	12.229	35.031	-0.530	9.897	369.129	-0.004105	-0.000856	-0.002452
0.2520	164.771	53.835	11.534	32.294	-0.538	9.900	313.683	-0.003768	-0.000807	-0.002261
0.2530	142.469	49.847	10.825	29.927	-0.540	9.903	271.225	-0.003489	-0.000758	-0.002095
0.2540	126.494	46.942	10.423	28.414	-0.542	9.903	240.812	-0.003286	-0.000730	-0.001989
0.2550	116.155	45.038	10.381	27.202	-0.544	9.903	221.128	-0.003153	-0.000727	-0.001904
0.2560	110.804	43.579	10.089	26.431	-0.540	9.901	210.943	-0.003051	-0.000706	-0.001850
0.2570	109.302	42.828	10.077	25.908	-0.533	9.900	208.082	-0.002998	-0.000705	-0.001814
0.2580	110.399	42.369	9.604	25.455	-0.528	9.899	210.171	-0.002966	-0.000672	-0.001782
0.2590	113.314	42.424	9.395	25.524	-0.536	9.897	215.721	-0.002970	-0.000658	-0.001787
0.2600	118.454	42.578	9.340	25.621	-0.541	9.895	225.506	-0.002980	-0.000654	-0.001794
0.2610	131.018	43.606	9.466	26.090	-0.544	9.893	249.424	-0.003052	-0.000663	-0.001826
0.2620	158.625	46.942	9.799	27.754	-0.546	9.890	301.981	-0.003286	-0.000686	-0.001943
0.2630	207.512	52.874	9.951	30.808	-0.541	9.888	395.050	-0.003701	-0.000697	-0.002157
0.2640	279.213	62.117	11.465	36.036	-0.541	9.886	531.549	-0.004348	-0.000803	-0.002523
0.2650	370.075	73.359	13.411	42.945	-0.540	9.885	704.527	-0.005135	-0.000939	-0.003006
0.2660	473.485	86.171	17.067	50.982	-0.541	9.886	901.394	-0.006032	-0.001195	-0.003569
0.2670	581.058	99.512	21.041	59.473	-0.537	9.888	1106.186	-0.006966	-0.001473	-0.004163
0.2680	682.861	111.769	25.169	67.370	-0.536	9.890	1299.992	-0.007824	-0.001762	-0.004716
0.2690	772.280	122.651	29.185	74.360	-0.536	9.892	1470.222	-0.008586	-0.002043	-0.005205
0.2700	848.008	131.586	32.770	80.207	-0.541	9.894	1614.389	-0.009211	-0.002294	-0.005615
0.2710	913.697	139.297	36.354	85.491	-0.543	9.896	1739.445	-0.009751	-0.002545	-0.005984
0.2720	974.457	146.607	39.050	90.802	-0.546	9.899	1855.116	-0.010262	-0.002734	-0.006356
0.2730	1034.000	153.334	41.899	96.100	-0.536	9.902	1968.470	-0.010733	-0.002933	-0.006727
0.2740	1093.662	160.380	44.581	101.384	-0.532	9.902	2082.052	-0.011227	-0.003121	-0.007097
0.2750	1152.438	167.230	47.887	106.571	-0.532	9.902	2193.947	-0.011706	-0.003352	-0.007460
0.2760	1206.556	173.663	50.736	111.332	-0.528	9.901	2296.972	-0.012156	-0.003552	-0.007793
0.2770	1250.063	179.055	53.086	115.130	-0.530	9.900	2379.799	-0.012534	-0.003716	-0.008059
0.2780	1278.196	182.890	54.656	117.704	-0.521	9.899	2433.357	-0.012802	-0.003826	-0.008239
0.2790	1290.835	184.848	55.698	118.997	-0.522	9.897	2457.418	-0.012939	-0.003899	-0.008330
0.2800	1292.593	185.766	56.171	119.727	-0.526	9.895	2460.766	-0.013004	-0.003932	-0.008381
0.2810	1288.686	185.919	56.281	119.780	-0.533	9.892	2453.327	-0.013014	-0.003940	-0.008385
0.2820	1281.818	185.946	56.114	119.670	-0.530	9.890	2440.252	-0.013016	-0.003928	-0.008377
0.2830	1272.004	185.336	55.947	119.450	-0.530	9.888	2421.570	-0.012974	-0.003916	-0.008362
0.2840	1255.864	184.045	55.544	118.969	-0.532	9.886	2390.842	-0.012883	-0.003888	-0.008328
0.2850	1226.423	181.433	54.697	117.704	-0.535	9.885	2334.795	-0.012700	-0.003829	-0.008239
0.2860	1176.649	176.888	53.224	114.621	-0.536	9.886	2240.038	-0.012382	-0.003726	-0.008023
0.2870	1104.122	169.689	50.391	109.586	-0.534	9.888	2101.965	-0.011878	-0.003527	-0.007671
0.2880	1014.102	160.519	46.333	102.650	-0.530	9.890	1930.590	-0.011236	-0.003243	-0.007186
0.2890	917.319	150.165	41.969	95.330	-0.534	9.892	1746.340	-0.010512	-0.002938	-0.006673
0.2900	824.173	140.354	37.577	88.160	-0.540	9.894	1569.014	-0.009825	-0.002630	-0.006171
0.2910	741.712	131.028	34.200	81.638	-0.541	9.897	1412.029	-0.009172	-0.002394	-0.005715
0.2920	671.379	122.871	30.976	76.188	-0.543	9.899	1278.133	-0.008601	-0.002168	-0.005333
0.2930	610.454	115.283	28.225	71.111	-0.538	9.902	1162.148	-0.008070	-0.001976	-0.004978
0.2940	554.608	108.391	25.626	66.873	-0.541	9.903	1055.832	-0.007587	-0.001794	-0.004681
0.2950	500.416	101.749	23.445	62.608	-0.538	9.902	952.663	-0.007122	-0.001641	-0.004383
0.2960	445.217	94.828	21.236	57.931	-0.536	9.901	847.578	-0.006638	-0.001487	-0.004055
0.2970	388.154	87.337	18.804	52.989	-0.532	9.900	738.945	-0.006114	-0.001316	-0.003709
0.2980	330.580	79.166	16.733	47.760	-0.529	9.899	629.339	-0.005542	-0.001171	-0.003343
0.2990	276.042	71.302	14.412	42.929	-0.533	9.897	525.513	-0.004991	-0.001009	-0.003005
0.3000	228.432	64.395	13.397	38.554	-0.538	9.894	434.875	-0.004508	-0.000938	-0.002699
0.3010	189.463	58.337	12.022	34.853	-0.536	9.892	360.689	-0.004084	-0.000842	-0.002440
0.3020	159.046	53.265	11.632	32.046	-0.538	9.890	302.782	-0.003729	-0.000814	-0.002243
0.3030	136.157	49.110	10.492	29.859	-0.534	9.889	259.209	-0.003438	-0.000734	-0.002090
0.3040	120.408	46.331	10.645	28.469	-0.537	9.886	229.225	-0.003243	-0.000745	-0.001993
0.3050	110.880	44.761	9.963	27.409	-0.538	9.886	211.086	-0.003133	-0.000697	-0.001919
0.3060	106.747	43.664	10.186	26.446	-0.540	9.886	203.218	-0.003056	-0.000713	-0.001851
0.3070	106.161	42.899	9.964	25.910	-0.538	9.888	202.103	-0.003003	-0.000697	-0.001814
0.3080	107.799	42.593	9.715	25.470	-0.538	9.890	205.221	-0.002981	-0.000680	-0.001783
0.3090	111.000	42.703	9.867	25.430	-0.542	9.892	211.315	-0.002989	-0.000691	-0.001780
0.3100	116.756	43.175	9.630	25.401	-0.546	9.894	222.273	-0.003022	-0.000674	-0.001778
0.3110	130.371	44.216	9.964	25.952	-0.546	9.897	248.194	-0.003095	-0.000697	-0.001817
0.3120	158.835	47.538	9.839	27.726	-0.549	9.899	302.382	-0.003328	-0.000689	-0.001941
0.3130	207.497	53.445	10.590	30.850	-0.546	9.902	395.021	-0.003741	-0.000741	-0.002159
0.3140	276.959	62.589	11.673	35.982	-0.548	9.903	527.258	-0.004381	-0.000817	-0.002519
0.3150	363.703	73.303	14.174	42.614	-0.549	9.903	692.396	-0.005131	-0.000992	-0.002983
0.3160	462.154	85.407	17.051	50.566	-0.548	9.902	879.822	-0.005978	-0.001194	-0.003540
0.3170	565.714	98.038	20.872	58.933	-0.542	9.901	1076.975	-0.006863	-0.001461	-0.004125
0.3180	667.457	110.518	24.916	66.777	-0.537	9.900	1270.666	-0.007736	-0.001744	-0.004674
0.3190	762.331	121.899	29.268	73.974	-0.538	9.898	1451.283	-0.008533	-0.002049	-0.005178
0.3200	848.474	131.987	33.270	80.634	-0.541	9.895	1615.276	-0.009239	-0.002329	-0.005644
0.3210	925.359	140.909	36.855	86.812	-0.541	9.893	1761.646	-0.009864	-0.002580	-0.006077
0.3220	993.829	149.023	40.007	92.783	-0.542	9.890	1891.994	-0.010432	-0.002801	-0.006495
0.3230	1054.483	155.944	42.857	97.901	-0.538	9.888	2007.465	-0.010916	-0.003000	-0.006853
0.3240	1108.465	162.420	45.664	102.758	-0.540	9.886	2110.233	-0.011369	-0.003196	-0.007193
0.3250	1156.932	168.355	48.235	107.231	-0.540	9.886	2202.501	-0.011785	-0.003376	-0.007506
0.3260	1199.613	173.636	50.374	111.250	-0.540	9.886	2283.754	-0.012155	-0.003526	-0.007787
0.3270	1234.854	178.180	52.444	114.428	-0.533	9.888	2350.845	-0.012473	-0.003671	-0.008010
0.3280	1259.756	181.597	53.946	116.465	-0.527	9.891	2398.252	-0.012712	-0.003776	-0.008153
0.3290	1273.492	183.849	55.086	117.661	-0.528	9.892	2424.402	-0.012869	-0.003856	-0.008236
0.3300	1278.121	185.043	55.752	118.460	-0.534	9.894	2433.214	-0.012953	-0.003903	-0.008292
0.3310	1276.738	185.321	55.780	118.831	-0.536	9.896	2430.582	-0.012972	-0.003905	-0.008318
0.3320	1271.704	185.224	55.764	118.996	-0.537	9.899	2420.998	-0.012966	-0.003904	-0.008330
0.3330	1263.348	184.794	55.445	118.749	-0.533	9.902	2405.090	-0.012936	-0.003881	-0.008312
0.3340	1249.687	183.683	55.321	118.543	-0.536	9.903	2379.084	-0.012858	-0.003872	-0.008298
0.3350	1224.124	181.599	54.809	117.648	-0.534	9.902	2330.418	-0.012712	-0.003837	-0.008235
0.3360	1179.099	177.652	53.419	115.158	-0.532	9.901	2244.701	-0.012436	-0.003739	-0.008061
0.3370	1110.449	170.954	50.862	110.300	-0.521	9.900	2114.010	-0.011967	-0.003560	-0.007721
0.3380	1022.518	162.017	46.832	103.750	-0.520	9.899	1946.611	-0.011341	-0.003278	-0.007262
0.3390	926.020	151.637	42.719	96.361	-0.519	9.897	1762.905	-0.010615	-0.002990	-0.006745
0.3400	831.357	141.562	38.382	89.026	-0.528	9.895	1582.689	-0.009909	-0.002687	-0.006232
0.3410	745.048	132.169	34.476	82.133	-0.532	9.892	1418.381	-0.009252	-0.002413	-0.005749
0.3420	669.080	123.414	30.974	75.845	-0.538	9.890	1273.756	-0.008639	-0.002168	-0.005309
0.3430	602.188	115.187	28.001	70.492	-0.534	9.888	1146.412	-0.008063	-0.001960	-0.004934
0.3440	541.579	107.473	25.236	65.594	-0.536	9.886	1031.027	-0.007523	-0.001767	-0.004592
0.3450	484.892	100.497	22.721	61.217	-0.532	9.885	923.109	-0.007035	-0.001590	-0.004285
0.3460	429.737	93.437	20.415	56.567	-0.536	9.886	818.110	-0.006541	-0.001429	-0.003960
0.3470	375.274	85.961	18.011	51.779	-0.532	9.888	714.426	-0.006017	-0.001261	-0.003624
0.3480	322.074	78.235	16.011	47.087	-0.532	9.890	613.146	-0.005476	-0.001121	-0.003296
0.3490	272.345	71.246	14.453	42.739	-0.532	9.892	518.475	-0.004987	-0.001012	-0.002992
0.3500	229.048	64.868	13.078	38.982	-0.533	9.894	436.049	-0.004541	-0.000915	-0.002729
0.3510	193.325	59.211	12.397	35.501	-0.536	9.897	368.042	-0.004145	-0.000868	-0.002485
0.3520	164.952	54.404	11.479	32.830	-0.538	9.899	314.026	-0.003808	-0.000804	-0.002298
0.3530	142.950	50.470	10.965	30.628	-0.536	9.902	272.141	-0.003533	-0.000768	-0.002144
0.3540	127.005	47.677	10.478	29.073	-0.537	9.903	241.785	-0.003337	-0.000733	-0.002035
0.3550	116.771	45.704	10.091	28.070	-0.541	9.903	222.301	-0.003199	-0.000706	-0.001965
0.3560	111.811	44.676	9.911	27.133	-0.540	9.901	212.860	-0.003127	-0.000694	-0.001899
0.3570	110.804	43.746	9.673	26.391	-0.537	9.901	210.943	-0.003062	-0.000677	-0.001847
0.3580	112.397	43.508	9.812	25.897	-0.532	9.899	213.976	-0.003046	-0.000687	-0.001813
0.3590	116.049	43.536	9.478	25.622	-0.533	9.898	220.928	-0.003048	-0.000663	-0.001794
0.3600	122.962	44.066	9.853	25.884	-0.540	9.895	234.089	-0.003085	-0.000690	-0.001812
0.3610	139.313	45.844	9.479	26.544	-0.544	9.892	265.217	-0.003209	-0.000664	-0.001858
0.3620	171.865	49.637	10.160	28.786	-0.549	9.890	327.187	-0.003475	-0.000711	-0.002015
0.3630	224.900	56.070	10.354	32.473	-0.544	9.888	428.152	-0.003925	-0.000725	-0.002273
0.3640	298.149	65.296	12.146	38.377	-0.549	9.886	567.598	-0.004571	-0.000850	-0.002686
0.3650	387.673	76.220	14.299	45.395	-0.546	9.885	738.029	-0.005335	-0.001001	-0.003178
0.3660	488.724	88.741	17.703	53.239	-0.550	9.886	930.405	-0.006212	-0.001239	-0.003727
0.3670	594.359	101.666	21.678	61.494	-0.548	9.888	1131.506	-0.007117	-0.001517	-0.004305
0.3680	697.258	114.034	26.252	69.173	-0.545	9.891	1327.400	-0.007982	-0.001838	-0.004842
0.3690	791.321	125.443	30.421	76.520	-0.545	9.892	1506.472	-0.008781	-0.002129	-0.005356
0.3700	873.511	135.282	34.437	82.712	-0.548	9.894	1662.941	-0.009470	-0.002411	-0.005790
0.3710	943.514	143.508	38.034	88.436	-0.549	9.897	1796.207	-0.010046	-0.002662	-0.006191
0.3720	1003.417	150.635	40.952	93.499	-0.553	9.899	1910.248	-0.010544	-0.002867	-0.006545
0.3730	1056.242	156.792	43.398	98.069	-0.544	9.902	2010.813	-0.010975	-0.003038	-0.006865
0.3740	1105.114	162.698	45.970	102.471	-0.550	9.903	2103.853	-0.011389	-0.003218	-0.007173
0.3750	1152.694	168.424	48.389	106.807	-0.551	9.902	2194.433	-0.011790	-0.003387	-0.007477
0.3760	1198.891	173.746	51.195	111.058	-0.549	9.901	2282.381	-0.012162	-0.003584	-0.007774
0.3770	1239.603	178.901	53.502	114.636	-0.541	9.900	2359.886	-0.012523	-0.003745	-0.008025
0.3780	1269.540	182.778	55.197	117.208	-0.534	9.899	2416.878	-0.012794	-0.003864	-0.008205
0.3790	1285.921	185.389	56.295	118.942	-0.536	9.897	2448.063	-0.012977	-0.003941	-0.008326
0.3800	1290.850	186.529	56.935	119.713	-0.539	9.895	2457.447	-0.013057	-0.003985	-0.008380
0.3810	1288.596	186.779	57.074	120.057	-0.538	9.892	2453.156	-0.013075	-0.003995	-0.008404
0.3820	1282.179	186.514	57.116	120.015	-0.537	9.889	2440.939	-0.013056	-0.003998	-0.008401
0.3830	1272.200	185.958	56.685	119.780	-0.536	9.888	2421.942	-0.013017	-0.003968	-0.008385
0.3840	1255.173	184.765	56.422	119.367	-0.540	9.886	2389.526	-0.012934	-0.003950	-0.008356
0.3850	1223.237	182.112	55.407	117.798	-0.538	9.885	2328.730	-0.012748	-0.003878	-0.008246
0.3860	1169.120	177.124	53.682	114.605	-0.536	9.886	2225.704	-0.012399	-0.003758	-0.008022
0.3870	1090.822	169.410	50.416	109.088	-0.528	9.888	2076.645	-0.011859	-0.003529	-0.007636
0.3880	995.241	159.738	46.178	101.878	-0.514	9.890	1894.684	-0.011182	-0.003232	-0.007131
0.3890	894.025	149.011	41.607	94.104	-0.513	9.892	1701.994	-0.010431	-0.002913	-0.006587
0.3900	797.588	138.491	37.272	86.383	-0.517	9.894	1518.402	-0.009694	-0.002609	-0.006047
0.3910	712.842	128.930	33.451	79.697	-0.520	9.897	1357.069	-0.009025	-0.002342	-0.005579
0.3920	641.052	120.424	30.129	73.725	-0.521	9.899	1220.398	-0.008430	-0.002109	-0.005161
0.3930	579.931	112.766	26.975	68.827	-0.520	9.902	1104.040	-0.007894	-0.001888	-0.004818
0.3940	525.604	106.124	24.640	64.603	-0.529	9.903	1000.614	-0.007429	-0.001725	-0.004522
0.3950	475.033	99.690	22.014	60.503	-0.534	9.902	904.341	-0.006978	-0.001541	-0.004235
0.3960	425.665	93.481	20.430	56.443	-0.537	9.901	810.356	-0.006544	-0.001430	-0.003951
0.3970	375.665	86.531	17.942	51.929	-0.536	9.900	715.170	-0.006057	-0.001256	-0.003635
0.3980	324.463	79.333	16.469	47.360	-0.532	9.899	617.695	-0.005553	-0.001153	-0.003315
0.3990	274.028	72.065	14.565	43.026	-0.530	9.897	521.679	-0.005045	-0.001020	-0.003012
0.4000	227.801	65.271	13.523	38.996	-0.532	9.895	433.674	-0.004569	-0.000947	-0.002730
0.4010	188.396	59.004	12.383	35.583	-0.533	9.892	358.658	-0.004130	-0.000867	-0.002491
0.4020	156.987	53.807	11.493	32.487	-0.536	9.889	298.862	-0.003766	-0.000804	-0.002274
0.4030	133.152	49.568	10.533	29.899	-0.532	9.888	253.487	-0.003470	-0.000737	-0.002093
0.4040	116.996	46.581	9.991	28.302	-0.537	9.885	222.731	-0.003261	-0.000699	-0.001981
0.4050	107.618	44.677	9.742	27.106	-0.536	9.885	204.878	-0.003127	-0.000682	-0.001897
0.4060	103.891	43.593	9.770	26.405	-0.536	9.886	197.783	-0.003052	-0.000684	-0.001848
0.4070	103.756	43.009	9.700	25.621	-0.529	9.888	197.525	-0.003011	-0.000679	-0.001793
0.4080	105.755	42.662	9.533	25.305	-0.531	9.891	201.330	-0.002986	-0.000667	-0.001771
0.4090	109.106	42.702	9.354	25.387	-0.537	9.892	207.710	-0.002989	-0.000655	-0.001777
0.4100	115.568	42.981	9.590	25.648	-0.544	9.894	220.013	-0.003009	-0.000671	-0.001795
0.4110	131.183	44.759	9.729	26.516	-0.541	9.897	249.739	-0.003133	-0.000681	-0.001856
0.4120	163.163	48.413	9.840	28.455	-0.547	9.899	310.621	-0.003389	-0.000689	-0.001992
0.4130	216.048	54.889	10.395	32.323	-0.544	9.902	411.301	-0.003842	-0.000728	-0.002263
0.4140	290.093	64.340	11.910	37.855	-0.553	9.903	552.263	-0.004504	-0.000834	-0.002650
0.4150	381.256	75.889	14.383	44.913	-0.552	9.903	725.813	-0.005312	-0.001007	-0.003144
0.4160	483.359	88.674	17.858	52.661	-0.550	9.901	920.191	-0.006207	-0.001250	-0.003686
0.4170	588.377	101.445	21.581	60.654	-0.542	9.900	1120.119	-0.007101	-0.001511	-0.004246
0.4180	688.527	113.326	25.765	68.332	-0.534	9.899	1310.778	-0.007933	-0.001804	-0.004783
0.4190	779.493	124.276	29.781	75.239	-0.532	9.897	1483.955	-0.008699	-0.002085	-0.005267
0.4200	859.415	133.585	33.893	81.582	-0.531	9.894	1636.105	-0.009351	-0.002373	-0.005711
0.4210	928.831	141.838	37.366	87.046	-0.534	9.892	1768.255	-0.009929	-0.002616	-0.006093
0.4220	989.320	149.050	40.563	92.137	-0.535	9.889	1883.411	-0.010433	-0.002839	-0.006450
0.4230	1043.467	155.401	43.023	97.104	-0.530	9.887	1986.494	-0.010878	-0.003012	-0.006797
0.4240	1094.233	161.449	45.483	101.809	-0.536	9.885	2083.139	-0.011301	-0.003184	-0.007127
0.4250	1143.061	167.396	48.096	106.542	-0.537	9.885	2176.094	-0.011718	-0.003367	-0.007458
0.4260	1188.567	172.912	50.403	110.546	-0.537	9.885	2262.726	-0.012104	-0.003528	-0.007738
0.4270	1226.964	177.984	52.446	113.890	-0.531	9.888	2335.825	-0.012459	-0.003671	-0.007972
0.4280	1254.030	181.554	53.988	116.078	-0.526	9.890	2387.352	-0.012709	-0.003779	-0.008125
0.4290	1268.653	183.778	55.294	117.523	-0.528	9.892	2415.190	-0.012864	-0.003871	-0.008227
0.4300	1273.117	184.834	56.004	118.199	-0.530	9.894	2423.687	-0.012938	-0.003920	-0.008274
0.4310	1271.208	185.042	56.254	118.502	-0.530	9.896	2420.053	-0.012953	-0.003938	-0.008295
0.4320	1265.422	185.043	56.295	118.460	-0.533	9.899	2409.039	-0.012953	-0.003941	-0.008292
0.4330	1256.615	184.710	55.989	118.226	-0.529	9.902	2392.273	-0.012930	-0.003919	-0.008276
0.4340	1242.669	183.878	55.822	117.826	-0.535	9.902	2365.723	-0.012871	-0.003908	-0.008248
0.4350	1217.061	181.834	54.863	116.765	-0.540	9.902	2316.971	-0.012728	-0.003840	-0.008174
0.4360	1172.276	177.637	53.389	114.357	-0.543	9.901	2231.712	-0.012435	-0.003737	-0.008005
0.4370	1103.927	170.980	50.971	109.928	-0.538	9.900	2101.593	-0.011969	-0.003568	-0.007695
0.4380	1015.364	162.157	46.928	103.420	-0.533	9.899	1932.993	-0.011351	-0.003285	-0.007239
0.4390	916.808	151.721	42.704	95.976	-0.534	9.897	1745.367	-0.010620	-0.002989	-0.006718
0.4400	819.003	141.186	38.216	88.339	-0.534	9.894	1559.172	-0.009883	-0.002675	-0.006184
0.4410	730.275	131.069	34.145	81.405	-0.533	9.892	1390.257	-0.009175	-0.002390	-0.005698
0.4420	653.991	122.301	30.754	75.212	-0.535	9.889	1245.031	-0.008561	-0.002153	-0.005265
0.4430	589.038	114.449	27.684	69.708	-0.532	9.887	1121.378	-0.008011	-0.001938	-0.004880
0.4440	532.366	107.335	25.237	65.208	-0.537	9.885	1013.489	-0.007513	-0.001767	-0.004565
0.4450	480.488	100.678	22.889	60.943	-0.536	9.885	914.726	-0.007047	-0.001602	-0.004266
0.4460	430.248	94.134	20.833	57.214	-0.536	9.885	819.082	-0.006589	-0.001458	-0.004005
0.4470	379.437	87.477	18.775	52.672	-0.532	9.887	722.351	-0.006123	-0.001314	-0.003687
0.4480	327.439	80.237	16.817	47.868	-0.530	9.890	623.360	-0.005617	-0.001177	-0.003351
0.4490	275.907	72.789	15.150	43.122	-0.530	9.892	525.255	-0.005095	-0.001060	-0.003019
0.4500	228.537	65.673	13.607	38.967	-0.534	9.894	435.076	-0.004597	-0.000952	-0.002728
0.4510	188.066	59.531	12.606	35.486	-0.534	9.897	358.028	-0.004167	-0.000882	-0.002484
0.4520	155.935	54.445	11.562	32.458	-0.536	9.899	296.860	-0.003811	-0.000809	-0.002272
0.4530	131.604	50.165	10.881	29.830	-0.533	9.902	250.540	-0.003512	-0.000762	-0.002088
0.4540	114.697	46.984	10.200	28.194	-0.539	9.902	218.353	-0.003289	-0.000714	-0.001974
0.4550	104.297	44.787	10.061	26.969	-0.543	9.902	198.555	-0.003135	-0.000704	-0.001888
0.4560	99.548	43.675	9.631	26.447	-0.542	9.901	189.514	-0.003057	-0.000674	-0.001851
0.4570	98.782	42.994	9.756	25.814	-0.538	9.900	188.055	-0.003010	-0.000683	-0.001807
0.4580	100.390	42.660	9.576	25.414	-0.533	9.899	191.116	-0.002986	-0.000670	-0.001779
0.4590	103.486	42.508	9.716	25.429	-0.537	9.897	197.010	-0.002976	-0.000680	-0.001780
0.4600	109.241	42.745	9.674	25.402	-0.538	9.895	207.968	-0.002992	-0.000677	-0.001778
0.4610	122.917	44.093	9.535	26.118	-0.542	9.892	234.003	-0.003087	-0.000667	-0.001828
0.4620	151.336	47.358	9.769	27.713	-0.546	9.890	288.105	-0.003315	-0.000684	-0.001940
0.4630	199.141	52.999	9.978	30.877	-0.543	9.888	379.114	-0.003710	-0.000698	-0.002161
0.4640	267.551	61.656	11.522	36.104	-0.549	9.886	509.348	-0.004316	-0.000807	-0.002527
0.4650	354.099	72.510	13.397	42.640	-0.548	9.885	674.114	-0.005076	-0.000938	-0.002985
0.4660	453.633	85.016	16.733	50.277	-0.552	9.886	863.600	-0.005951	-0.001171	-0.003519
0.4670	558.771	98.218	20.442	58.094	-0.544	9.888	1063.757	-0.006875	-0.001431	-0.004067
0.4680	661.490	110.432	24.611	66.102	-0.542	9.891	1259.308	-0.007730	-0.001723	-0.004627
0.4690	756.004	122.079	28.933	73.518	-0.537	9.892	1439.238	-0.008546	-0.002025	-0.005146
0.4700	840.028	131.917	32.698	80.289	-0.538	9.895	1599.197	-0.009234	-0.002289	-0.005620
0.4710	913.397	140.630	36.354	86.302	-0.540	9.897	1738.873	-0.009844	-0.002545	-0.006041
0.4720	978.034	148.246	39.092	91.656	-0.548	9.900	1861.925	-0.010377	-0.002736	-0.006416
0.4730	1035.983	154.792	42.080	96.733	-0.542	9.903	1972.246	-0.010835	-0.002946	-0.006771
0.4740	1089.379	161.240	45.012	101.686	-0.546	9.903	2073.898	-0.011287	-0.003151	-0.007118
0.4750	1139.800	167.479	47.722	106.339	-0.542	9.902	2169.886	-0.011724	-0.003341	-0.007444
0.4760	1186.688	173.342	50.293	110.768	-0.541	9.901	2259.150	-0.012134	-0.003520	-0.007754
0.4770	1226.709	178.304	52.530	114.099	-0.536	9.900	2335.339	-0.012481	-0.003677	-0.007987
0.4780	1255.639	181.973	54.364	116.562	-0.530	9.899	2390.413	-0.012738	-0.003805	-0.008159
0.4790	1271.644	184.487	55.517	117.883	-0.530	9.897	2420.883	-0.012914	-0.003886	-0.008252
0.4800	1277.039	185.640	56.142	118.665	-0.530	9.895	2431.154	-0.012995	-0.003930	-0.008307
0.4810	1275.581	185.972	56.226	118.981	-0.533	9.892	2428.379	-0.013018	-0.003936	-0.008329
0.4820	1270.036	185.821	56.282	118.927	-0.536	9.890	2417.822	-0.013007	-0.003940	-0.008325
0.4830	1261.124	185.433	55.975	118.804	-0.534	9.888	2400.856	-0.012980	-0.003918	-0.008316
0.4840	1246.787	184.766	55.891	118.542	-0.532	9.885	2373.562	-0.012934	-0.003912	-0.008298
0.4850	1220.652	182.389	55.113	117.675	-0.534	9.885	2323.809	-0.012767	-0.003858	-0.008237
0.4860	1175.477	178.220	53.711	115.336	-0.530	9.885	2237.806	-0.012475	-0.003760	-0.008074
0.4870	1107.143	171.481	51.167	110.617	-0.523	9.888	2107.716	-0.012004	-0.003582	-0.007743
0.4880	1019.437	162.711	47.472	104.054	-0.520	9.890	1940.746	-0.011390	-0.003323	-0.007284
0.4890	921.918	152.539	42.955	96.431	-0.528	9.892	1755.095	-0.010678	-0.003007	-0.006750
0.4900	825.571	142.006	38.702	88.710	-0.535	9.894	1571.674	-0.009940	-0.002709	-0.006210
0.4910	738.286	132.126	34.700	81.939	-0.536	9.897	1405.506	-0.009249	-0.002429	-0.005736
0.4920	662.557	123.357	31.309	75.871	-0.541	9.899	1261.339	-0.008635	-0.002192	-0.005311
0.4930	596.132	115.298	28.183	70.560	-0.538	9.902	1134.882	-0.008071	-0.001973	-0.004939
0.4940	535.132	107.919	25.640	65.704	-0.545	9.903	1018.753	-0.007554	-0.001795	-0.004599
0.4950	477.588	100.734	23.193	61.163	-0.546	9.902	909.204	-0.007051	-0.001624	-0.004281
0.4960	422.103	93.716	20.733	56.677	-0.545	9.901	803.576	-0.006560	-0.001451	-0.003967
0.4970	368.436	86.433	18.703	52.066	-0.535	9.900	701.408	-0.006050	-0.001309	-0.003645
0.4980	316.378	79.192	16.300	47.292	-0.533	9.899	602.303	-0.005543	-0.001141	-0.003310
0.4990	267.506	72.078	14.925	42.806	-0.536	9.897	509.262	-0.005045	-0.001045	-0.002996
