# Supplementary material for: Evaluation of a Cold-Mixed High-Performance Polyurethane Mixture
Source: Hindawi journal article supplement (doi:10.1155/2019/1507971), 2019-11-07
Supplement: f1 [file 1507971.f1.zip › 1507971.f1/dynamic modulus data/PUM/specimen2/temp10/zhs-2-10_25Hz.csv]

Test Information
****************
Project name	zhs
Operator name	2
Target test temperature	10
Target confining stress	0
Average dynamic strain range from 75 to 125 micro-strain
Contact stress	5
Initial modulus	4000
Axial gauge length	70
Comments	Run at High Pressure
Specimen information
********************
Identification	zhs-2-10
Dimensions	Point 1	Point 2	Point 3	Point 4	Point 5	Point 6	Average	Std Dev.
Diameter (mm)	49.2	49.3	49.2				49.23	0.058
Height (mm)	100.8	101.0	100.8				100.87	0.115
Cross-sectional area (mm�)	1903.7
Conditioning time
Properties/Comments
Test Data	25Hz
*********
Test date and time	Fri	Mar 29	2019	11:20 AM
Dynamic modulus (MPa)	12630
Phase angle (Degrees)	5.26
Average temperature (�C)	9.9
Average confining pressure (kPa)	-0.5
Average micro-strain	100
Load drift (%)	-1.4
Load standard error (%)	8.5
Average deformation drift (%)	-6.8
Average deformation standard error (%)	9.2
Deformation uniformity (%)	40.7
Phase uniformity (Degrees)	0.1
Conditioning Cycles
Time (sec)	Axial stress (kPa)	Axial micro-strain #1	Axial micro-strain #2	Axial micro-strain #3	Confining pressure (kPa)	Temperature (�C)	Load (N)	Displacement #1 (mm)	Displacement #2 (mm)	Displacement #3 (mm)
0.0000	19.206	-0.056	-0.514	-0.042	-0.552	9.901	36.564	0.000004	0.000036	0.000003
0.0008	19.402	-0.222	-0.445	-0.303	-0.546	9.901	36.936	0.000016	0.000031	0.000021
0.0016	19.612	-0.208	-0.501	-0.205	-0.542	9.899	37.336	0.000015	0.000035	0.000014
0.0024	19.657	-0.221	-0.292	-0.151	-0.545	9.898	37.422	0.000015	0.000020	0.000011
0.0032	19.657	-0.193	-0.167	0.071	-0.542	9.896	37.422	0.000014	0.000012	-0.000005
0.0040	19.672	-0.263	-0.152	0.236	-0.543	9.894	37.451	0.000018	0.000011	-0.000017
0.0048	19.657	-0.223	-0.362	0.083	-0.546	9.892	37.422	0.000016	0.000025	-0.000006
0.0056	19.792	-0.126	-0.473	-0.041	-0.545	9.890	37.680	0.000009	0.000033	0.000003
0.0064	20.033	-0.335	-0.431	-0.262	-0.544	9.889	38.137	0.000023	0.000030	0.000018
0.0072	20.499	-0.155	-0.792	-0.235	-0.543	9.887	39.024	0.000011	0.000055	0.000016
0.0080	21.220	-0.169	-0.304	0.068	-0.545	9.887	40.398	0.000012	0.000021	-0.000005
0.0088	22.197	-0.154	-0.681	0.302	-0.542	9.887	42.257	0.000011	0.000048	-0.000021
0.0096	24.030	0.124	-0.444	0.550	-0.546	9.888	45.748	-0.000009	0.000031	-0.000039
0.0104	26.961	0.264	-0.293	0.439	-0.543	9.890	51.327	-0.000018	0.000021	-0.000031
0.0112	31.980	0.570	-0.293	0.576	-0.542	9.891	60.883	-0.000040	0.000021	-0.000040
0.0120	39.750	1.195	-0.083	0.974	-0.546	9.893	75.674	-0.000084	0.000006	-0.000068
0.0128	50.601	2.237	0.153	1.965	-0.545	9.894	96.331	-0.000157	-0.000011	-0.000138
0.0136	65.058	3.793	0.544	3.411	-0.548	9.896	123.854	-0.000266	-0.000038	-0.000239
0.0144	82.912	6.239	0.641	5.036	-0.547	9.898	157.843	-0.000437	-0.000045	-0.000353
0.0152	104.132	9.019	1.406	6.798	-0.543	9.900	198.240	-0.000631	-0.000098	-0.000476
0.0160	128.237	12.215	1.724	8.532	-0.542	9.903	244.131	-0.000855	-0.000121	-0.000597
0.0168	154.267	15.717	2.349	10.320	-0.541	9.904	293.684	-0.001100	-0.000164	-0.000722
0.0176	181.648	19.386	3.184	12.507	-0.546	9.904	345.812	-0.001357	-0.000223	-0.000875
0.0184	209.195	23.179	3.795	14.804	-0.549	9.904	398.254	-0.001623	-0.000266	-0.001036
0.0192	236.247	26.917	4.463	17.129	-0.549	9.903	449.753	-0.001884	-0.000312	-0.001199
0.0200	261.660	30.543	5.158	19.317	-0.549	9.902	498.133	-0.002138	-0.000361	-0.001352
0.0208	284.428	33.670	5.448	21.148	-0.540	9.901	541.477	-0.002357	-0.000381	-0.001480
0.0216	303.784	36.559	5.962	22.785	-0.538	9.899	578.327	-0.002559	-0.000417	-0.001595
0.0224	319.248	38.977	6.213	24.135	-0.536	9.898	607.767	-0.002728	-0.000435	-0.001689
0.0232	331.346	40.867	6.490	25.207	-0.535	9.896	630.798	-0.002861	-0.000454	-0.001764
0.0240	340.679	42.422	7.159	26.265	-0.538	9.894	648.565	-0.002970	-0.000501	-0.001839
0.0248	347.968	43.535	7.215	27.037	-0.541	9.892	662.441	-0.003047	-0.000505	-0.001893
0.0256	353.664	44.536	7.507	27.737	-0.546	9.890	673.285	-0.003118	-0.000525	-0.001942
0.0264	357.962	45.397	7.368	28.413	-0.548	9.889	681.467	-0.003178	-0.000516	-0.001989
0.0272	360.967	46.036	7.090	28.840	-0.552	9.887	687.189	-0.003223	-0.000496	-0.002019
0.0280	362.560	46.578	7.422	29.404	-0.552	9.887	690.222	-0.003260	-0.000520	-0.002058
0.0288	362.666	46.829	7.394	29.432	-0.550	9.887	690.422	-0.003278	-0.000518	-0.002060
0.0296	361.553	46.996	7.547	29.555	-0.552	9.887	688.305	-0.003290	-0.000528	-0.002069
0.0304	358.984	47.010	7.714	29.322	-0.549	9.889	683.413	-0.003291	-0.000540	-0.002053
0.0312	355.226	46.815	7.423	29.033	-0.550	9.891	676.260	-0.003277	-0.000520	-0.002032
0.0320	350.342	46.551	7.382	28.978	-0.551	9.893	666.962	-0.003259	-0.000517	-0.002028
0.0328	343.760	46.022	7.159	28.676	-0.546	9.894	654.430	-0.003222	-0.000501	-0.002007
0.0336	334.683	45.133	6.978	28.221	-0.546	9.896	637.150	-0.003159	-0.000488	-0.001975
0.0344	321.969	43.785	6.740	27.300	-0.544	9.898	612.946	-0.003065	-0.000472	-0.001911
0.0352	304.806	41.714	6.769	26.143	-0.543	9.900	580.273	-0.002920	-0.000474	-0.001830
0.0360	282.985	38.894	6.213	24.602	-0.543	9.903	538.731	-0.002723	-0.000435	-0.001722
0.0368	257.482	35.712	5.809	22.759	-0.540	9.904	490.179	-0.002500	-0.000407	-0.001593
0.0376	230.115	32.226	5.406	21.080	-0.542	9.904	438.080	-0.002256	-0.000378	-0.001476
0.0384	202.733	28.626	4.947	19.182	-0.540	9.904	385.952	-0.002004	-0.000346	-0.001343
0.0392	177.200	25.195	4.601	17.159	-0.537	9.903	337.343	-0.001764	-0.000322	-0.001201
0.0400	154.402	21.831	4.365	15.288	-0.534	9.902	293.941	-0.001528	-0.000306	-0.001070
0.0408	134.655	18.815	3.782	13.458	-0.532	9.901	256.348	-0.001317	-0.000265	-0.000942
0.0416	117.823	16.397	3.420	11.820	-0.534	9.900	224.304	-0.001148	-0.000239	-0.000827
0.0424	103.561	14.312	3.170	10.678	-0.541	9.899	197.153	-0.001002	-0.000222	-0.000747
0.0432	91.809	12.576	2.753	9.728	-0.542	9.897	174.780	-0.000880	-0.000193	-0.000681
0.0440	82.296	11.256	2.446	8.724	-0.541	9.895	156.670	-0.000788	-0.000171	-0.000611
0.0448	74.872	10.019	2.294	8.007	-0.541	9.893	142.536	-0.000701	-0.000161	-0.000561
0.0456	69.221	9.226	2.015	7.195	-0.538	9.891	131.779	-0.000646	-0.000141	-0.000504
0.0464	65.118	8.614	1.808	6.342	-0.534	9.890	123.968	-0.000603	-0.000127	-0.000444
0.0472	62.638	8.168	1.934	6.218	-0.536	9.888	119.247	-0.000572	-0.000135	-0.000435
0.0480	61.286	8.057	1.670	6.109	-0.537	9.887	116.673	-0.000564	-0.000117	-0.000428
0.0488	61.060	7.835	1.657	6.218	-0.536	9.888	116.243	-0.000548	-0.000116	-0.000435
0.0496	61.932	7.974	1.670	6.672	-0.542	9.888	117.903	-0.000558	-0.000117	-0.000467
0.0504	63.435	7.974	1.529	6.562	-0.534	9.890	120.764	-0.000558	-0.000107	-0.000459
0.0512	65.734	7.961	1.362	6.409	-0.534	9.892	125.141	-0.000557	-0.000095	-0.000449
0.0520	69.131	8.059	1.765	6.382	-0.536	9.893	131.607	-0.000564	-0.000124	-0.000447
0.0528	74.315	8.253	1.613	6.368	-0.532	9.895	141.478	-0.000578	-0.000113	-0.000446
0.0536	82.671	9.114	1.892	6.975	-0.540	9.897	157.385	-0.000638	-0.000132	-0.000488
0.0544	95.460	10.560	2.073	8.076	-0.534	9.899	181.732	-0.000739	-0.000145	-0.000565
0.0552	113.284	12.839	2.252	9.425	-0.534	9.901	215.664	-0.000899	-0.000158	-0.000660
0.0560	135.827	15.687	2.489	10.980	-0.530	9.903	258.579	-0.001098	-0.000174	-0.000769
0.0568	162.232	18.995	2.905	12.714	-0.528	9.905	308.847	-0.001330	-0.000203	-0.000890
0.0576	191.582	22.928	3.407	15.012	-0.536	9.904	364.723	-0.001605	-0.000238	-0.001051
0.0584	222.315	26.930	3.936	17.352	-0.537	9.904	423.231	-0.001885	-0.000275	-0.001215
0.0592	253.364	31.058	4.616	19.980	-0.540	9.903	482.340	-0.002174	-0.000323	-0.001399
0.0600	282.940	35.046	5.255	22.429	-0.539	9.902	538.645	-0.002453	-0.000368	-0.001570
0.0608	309.405	38.409	5.838	24.383	-0.530	9.901	589.027	-0.002689	-0.000409	-0.001707
0.0616	331.887	41.647	6.491	26.281	-0.529	9.900	631.828	-0.002915	-0.000454	-0.001840
0.0624	349.876	44.399	6.908	27.698	-0.530	9.898	666.075	-0.003108	-0.000484	-0.001939
0.0632	363.748	46.527	7.256	28.841	-0.534	9.896	692.482	-0.003257	-0.000508	-0.002019
0.0640	373.922	48.292	7.451	29.887	-0.536	9.894	711.851	-0.003380	-0.000522	-0.002092
0.0648	380.895	49.279	7.658	30.685	-0.540	9.892	725.126	-0.003449	-0.000536	-0.002148
0.0656	385.193	49.806	7.867	31.249	-0.541	9.891	733.309	-0.003486	-0.000551	-0.002187
0.0664	386.997	50.265	7.979	31.689	-0.538	9.890	736.742	-0.003519	-0.000558	-0.002218
0.0672	387.057	50.569	8.311	31.840	-0.540	9.888	736.856	-0.003540	-0.000582	-0.002229
0.0680	385.990	50.778	7.964	31.937	-0.542	9.887	734.825	-0.003554	-0.000557	-0.002236
0.0688	383.976	50.917	8.380	32.020	-0.541	9.887	730.991	-0.003564	-0.000587	-0.002241
0.0696	381.556	50.876	8.047	32.169	-0.542	9.888	726.385	-0.003561	-0.000563	-0.002252
0.0704	378.370	50.585	8.048	32.004	-0.542	9.890	720.320	-0.003541	-0.000563	-0.002240
0.0712	374.147	50.265	8.145	31.853	-0.537	9.892	712.280	-0.003519	-0.000570	-0.002230
0.0720	368.542	49.876	8.021	31.784	-0.539	9.893	701.609	-0.003491	-0.000561	-0.002225
0.0728	360.652	49.153	8.021	31.166	-0.538	9.894	686.588	-0.003441	-0.000561	-0.002182
0.0736	349.260	47.984	7.715	30.535	-0.535	9.896	664.902	-0.003359	-0.000540	-0.002137
0.0744	333.090	46.219	7.756	29.432	-0.536	9.898	634.117	-0.003235	-0.000543	-0.002060
0.0752	311.539	43.592	7.103	27.726	-0.533	9.900	593.090	-0.003051	-0.000497	-0.001941
0.0760	285.044	40.202	6.880	25.826	-0.529	9.903	542.650	-0.002814	-0.000482	-0.001808
0.0768	255.513	36.450	6.255	23.719	-0.531	9.904	486.431	-0.002551	-0.000438	-0.001660
0.0776	225.456	32.726	5.783	21.573	-0.532	9.904	429.211	-0.002291	-0.000405	-0.001510
0.0784	196.917	28.987	5.281	19.454	-0.532	9.904	374.880	-0.002029	-0.000370	-0.001362
0.0792	171.429	25.512	4.988	17.418	-0.536	9.903	326.357	-0.001786	-0.000349	-0.001219
0.0800	149.352	22.330	4.628	15.548	-0.533	9.902	284.328	-0.001563	-0.000324	-0.001088
0.0808	130.447	19.274	4.057	13.925	-0.529	9.901	248.337	-0.001349	-0.000284	-0.000975
0.0816	114.321	16.856	3.656	12.578	-0.533	9.900	217.638	-0.001180	-0.000256	-0.000880
0.0824	100.705	14.800	3.157	11.449	-0.533	9.898	191.717	-0.001036	-0.000221	-0.000801
0.0832	89.314	13.229	2.824	10.429	-0.534	9.896	170.031	-0.000926	-0.000198	-0.000730
0.0840	80.086	11.936	2.616	9.411	-0.537	9.894	152.464	-0.000836	-0.000183	-0.000659
0.0848	72.858	10.840	2.643	8.584	-0.534	9.892	138.702	-0.000759	-0.000185	-0.000601
0.0856	67.297	9.922	2.241	7.910	-0.538	9.891	128.117	-0.000695	-0.000157	-0.000554
0.0864	63.300	9.103	2.353	7.306	-0.538	9.890	120.506	-0.000637	-0.000165	-0.000511
0.0872	60.940	8.713	2.130	7.058	-0.544	9.888	116.014	-0.000610	-0.000149	-0.000494
0.0880	59.903	8.531	2.187	7.099	-0.549	9.887	114.040	-0.000597	-0.000153	-0.000497
0.0888	59.993	8.684	2.324	7.100	-0.550	9.888	114.212	-0.000608	-0.000163	-0.000497
0.0896	61.301	8.863	2.225	7.279	-0.554	9.888	116.701	-0.000620	-0.000156	-0.000510
0.0904	63.149	8.739	2.142	7.210	-0.549	9.890	120.220	-0.000612	-0.000150	-0.000505
0.0912	65.779	8.865	2.127	6.935	-0.547	9.892	125.227	-0.000621	-0.000149	-0.000485
0.0920	69.897	9.031	2.100	7.100	-0.545	9.893	133.066	-0.000632	-0.000147	-0.000497
0.0928	76.389	9.504	2.337	7.361	-0.544	9.894	145.426	-0.000665	-0.000164	-0.000515
0.0936	86.714	10.629	2.296	8.173	-0.546	9.896	165.081	-0.000744	-0.000161	-0.000572
0.0944	101.697	12.241	2.392	9.370	-0.545	9.898	193.605	-0.000857	-0.000167	-0.000656
0.0952	121.354	14.674	2.572	10.706	-0.542	9.900	231.028	-0.001027	-0.000180	-0.000749
0.0960	145.235	17.646	2.669	12.370	-0.541	9.903	276.489	-0.001235	-0.000187	-0.000866
0.0968	172.406	21.275	3.363	14.131	-0.543	9.904	328.217	-0.001489	-0.000235	-0.000989
0.0976	202.177	25.318	3.918	16.470	-0.549	9.904	384.893	-0.001772	-0.000274	-0.001153
0.0984	233.361	29.445	4.779	18.974	-0.553	9.904	444.260	-0.002061	-0.000335	-0.001328
0.0992	264.485	33.892	5.307	21.534	-0.554	9.903	503.511	-0.002372	-0.000372	-0.001507
0.1000	293.881	37.880	5.920	24.066	-0.547	9.902	559.473	-0.002652	-0.000414	-0.001685
0.1008	319.820	41.200	6.281	26.103	-0.538	9.901	608.854	-0.002884	-0.000440	-0.001827
0.1016	341.340	44.119	6.740	27.862	-0.538	9.900	649.824	-0.003088	-0.000472	-0.001950
0.1024	358.052	46.356	7.185	29.292	-0.537	9.898	681.639	-0.003245	-0.000503	-0.002050
0.1032	370.255	48.231	7.796	30.392	-0.539	9.896	704.870	-0.003376	-0.000546	-0.002127
0.1040	378.596	49.732	8.019	31.136	-0.538	9.895	720.749	-0.003481	-0.000561	-0.002180
0.1048	383.916	50.621	8.326	31.839	-0.536	9.892	730.877	-0.003543	-0.000583	-0.002229
0.1056	386.666	51.246	8.395	32.238	-0.532	9.891	736.113	-0.003587	-0.000588	-0.002257
0.1064	387.643	51.483	8.019	32.336	-0.532	9.889	737.972	-0.003604	-0.000561	-0.002263
0.1072	387.387	51.802	8.242	32.817	-0.539	9.888	737.486	-0.003626	-0.000577	-0.002297
0.1080	386.125	52.011	7.992	32.748	-0.540	9.887	735.083	-0.003641	-0.000559	-0.002292
0.1088	384.337	51.984	8.047	32.623	-0.545	9.887	731.678	-0.003639	-0.000563	-0.002284
0.1096	381.962	51.956	8.020	32.776	-0.546	9.888	727.158	-0.003637	-0.000561	-0.002294
0.1104	378.656	51.638	7.991	32.432	-0.541	9.890	720.863	-0.003615	-0.000559	-0.002270
0.1112	374.192	51.208	7.810	32.266	-0.540	9.891	712.366	-0.003585	-0.000547	-0.002259
0.1120	367.941	50.653	8.060	32.169	-0.536	9.893	700.464	-0.003546	-0.000564	-0.002252
0.1128	358.503	49.749	7.795	31.715	-0.533	9.894	682.497	-0.003482	-0.000546	-0.002220
0.1136	344.331	48.165	7.588	30.711	-0.531	9.896	655.518	-0.003372	-0.000531	-0.002150
0.1144	324.493	45.954	7.255	29.322	-0.530	9.898	617.752	-0.003217	-0.000508	-0.002053
0.1152	298.900	42.926	6.615	27.299	-0.534	9.900	569.029	-0.003005	-0.000463	-0.001911
0.1160	269.264	39.090	6.213	24.670	-0.533	9.903	512.609	-0.002736	-0.000435	-0.001727
0.1168	238.366	35.088	5.517	22.386	-0.536	9.904	453.787	-0.002456	-0.000386	-0.001567
0.1176	208.700	31.115	5.169	20.404	-0.540	9.904	397.310	-0.002178	-0.000362	-0.001428
0.1184	181.904	27.251	4.766	18.382	-0.537	9.904	346.298	-0.001908	-0.000334	-0.001287
0.1192	158.910	24.069	4.377	16.827	-0.538	9.903	302.525	-0.001685	-0.000306	-0.001178
0.1200	139.494	21.122	4.238	15.162	-0.532	9.902	265.560	-0.001479	-0.000297	-0.001061
0.1208	122.917	18.536	3.711	13.373	-0.526	9.901	234.003	-0.001298	-0.000260	-0.000936
0.1216	108.896	16.367	3.475	12.300	-0.527	9.900	207.310	-0.001146	-0.000243	-0.000861
0.1224	96.753	14.490	3.045	11.213	-0.528	9.898	184.193	-0.001014	-0.000213	-0.000785
0.1232	86.473	13.018	2.739	10.224	-0.530	9.896	164.623	-0.000911	-0.000192	-0.000716
0.1240	77.967	11.851	2.642	9.605	-0.532	9.894	148.430	-0.000830	-0.000185	-0.000672
0.1248	71.144	10.908	2.281	8.848	-0.532	9.892	135.441	-0.000764	-0.000160	-0.000619
0.1256	65.915	10.061	2.337	8.145	-0.535	9.890	125.484	-0.000704	-0.000164	-0.000570
0.1264	62.082	9.337	1.893	7.622	-0.535	9.890	118.189	-0.000654	-0.000133	-0.000534
0.1272	59.813	9.045	2.060	7.306	-0.544	9.888	113.869	-0.000633	-0.000144	-0.000511
0.1280	58.836	8.907	1.892	7.099	-0.547	9.887	112.009	-0.000623	-0.000132	-0.000497
0.1288	58.941	8.907	2.142	7.113	-0.542	9.887	112.209	-0.000623	-0.000150	-0.000498
0.1296	60.129	8.907	2.392	7.401	-0.548	9.888	114.470	-0.000624	-0.000167	-0.000518
0.1304	61.992	8.698	2.099	7.400	-0.539	9.890	118.017	-0.000609	-0.000147	-0.000518
0.1312	64.442	8.698	2.294	7.332	-0.535	9.891	122.681	-0.000609	-0.000161	-0.000513
0.1320	68.214	8.893	1.835	7.497	-0.538	9.893	129.862	-0.000623	-0.000128	-0.000525
0.1328	74.240	9.366	2.085	7.457	-0.537	9.894	141.335	-0.000656	-0.000146	-0.000522
0.1336	83.964	10.311	2.170	7.897	-0.540	9.896	159.845	-0.000722	-0.000152	-0.000553
0.1344	98.451	11.992	2.489	9.120	-0.544	9.899	187.426	-0.000839	-0.000174	-0.000638
0.1352	117.838	14.395	2.893	10.539	-0.540	9.901	224.333	-0.001008	-0.000202	-0.000738
0.1360	141.568	17.424	2.753	12.492	-0.542	9.903	269.508	-0.001220	-0.000193	-0.000874
0.1368	168.604	21.066	3.460	14.638	-0.541	9.905	320.978	-0.001475	-0.000242	-0.001025
0.1376	198.150	25.095	3.767	16.826	-0.542	9.904	377.226	-0.001757	-0.000264	-0.001178
0.1384	228.868	29.209	4.601	19.041	-0.546	9.904	435.705	-0.002045	-0.000322	-0.001333
0.1392	259.405	33.461	5.254	21.451	-0.543	9.903	493.841	-0.002342	-0.000368	-0.001502
0.1400	288.034	37.283	5.811	23.832	-0.542	9.902	548.344	-0.002610	-0.000407	-0.001668
0.1408	313.267	40.729	6.172	25.799	-0.538	9.901	596.380	-0.002851	-0.000432	-0.001806
0.1416	334.517	43.563	6.769	27.642	-0.536	9.899	636.835	-0.003049	-0.000474	-0.001935
0.1424	351.499	45.982	7.242	28.962	-0.538	9.898	669.165	-0.003219	-0.000507	-0.002027
0.1432	364.559	47.969	7.784	29.842	-0.539	9.896	694.027	-0.003358	-0.000545	-0.002089
0.1440	374.057	49.179	8.242	30.724	-0.538	9.894	712.109	-0.003443	-0.000577	-0.002151
0.1448	380.189	50.277	8.144	31.399	-0.540	9.892	723.782	-0.003519	-0.000570	-0.002198
0.1456	383.420	50.889	8.672	31.716	-0.538	9.890	729.933	-0.003562	-0.000607	-0.002220
0.1464	384.532	51.277	8.214	32.033	-0.536	9.889	732.050	-0.003589	-0.000575	-0.002242
0.1472	384.096	51.595	8.604	32.307	-0.538	9.888	731.220	-0.003612	-0.000602	-0.002262
0.1480	382.789	51.707	8.798	32.363	-0.537	9.887	728.731	-0.003619	-0.000616	-0.002265
0.1488	380.730	51.665	8.713	32.473	-0.540	9.887	724.812	-0.003617	-0.000610	-0.002273
0.1496	377.874	51.680	8.810	32.445	-0.542	9.887	719.376	-0.003618	-0.000617	-0.002271
0.1504	374.072	51.486	8.463	32.184	-0.537	9.889	712.137	-0.003604	-0.000592	-0.002253
0.1512	368.932	51.152	8.075	32.060	-0.537	9.891	702.353	-0.003581	-0.000565	-0.002244
0.1520	361.854	50.666	8.062	31.798	-0.536	9.893	688.877	-0.003547	-0.000564	-0.002226
0.1528	351.214	49.470	7.854	31.220	-0.532	9.894	668.621	-0.003463	-0.000550	-0.002185
0.1536	335.584	47.706	7.785	30.257	-0.538	9.896	638.866	-0.003339	-0.000545	-0.002118
0.1544	314.289	45.121	7.604	28.702	-0.539	9.898	598.326	-0.003158	-0.000532	-0.002009
0.1552	288.034	41.772	6.922	26.872	-0.540	9.900	548.344	-0.002924	-0.000485	-0.001881
0.1560	258.639	38.062	6.574	24.602	-0.541	9.903	492.382	-0.002664	-0.000460	-0.001722
0.1568	228.597	34.128	5.615	22.345	-0.536	9.904	435.190	-0.002389	-0.000393	-0.001564
0.1576	200.043	30.335	5.462	20.392	-0.540	9.904	380.831	-0.002123	-0.000382	-0.001427
0.1584	174.224	26.610	4.836	18.259	-0.537	9.904	331.678	-0.001863	-0.000339	-0.001278
0.1592	152.012	23.371	4.682	16.526	-0.541	9.903	289.392	-0.001636	-0.000328	-0.001157
0.1600	133.092	20.621	4.433	14.819	-0.540	9.902	253.372	-0.001443	-0.000310	-0.001037
0.1608	116.951	18.175	4.072	13.140	-0.536	9.901	222.645	-0.001272	-0.000285	-0.000920
0.1616	102.945	16.189	3.671	12.079	-0.537	9.899	195.980	-0.001133	-0.000257	-0.000846
0.1624	90.666	14.411	3.116	10.978	-0.538	9.898	172.606	-0.001009	-0.000218	-0.000768
0.1632	80.177	12.799	2.949	10.167	-0.536	9.896	152.636	-0.000896	-0.000206	-0.000712
0.1640	71.370	11.478	2.434	9.272	-0.539	9.894	135.870	-0.000803	-0.000170	-0.000649
0.1648	64.246	10.587	2.405	8.351	-0.535	9.892	122.309	-0.000741	-0.000168	-0.000585
0.1656	58.761	9.601	2.294	7.595	-0.530	9.891	111.866	-0.000672	-0.000161	-0.000532
0.1664	54.688	8.850	2.031	6.701	-0.531	9.890	104.113	-0.000619	-0.000142	-0.000469
0.1672	52.058	8.405	2.033	6.550	-0.529	9.888	99.106	-0.000588	-0.000142	-0.000458
0.1680	50.721	8.030	2.005	6.522	-0.537	9.887	96.560	-0.000562	-0.000140	-0.000457
0.1688	50.390	7.850	1.838	6.480	-0.536	9.887	95.930	-0.000549	-0.000129	-0.000454
0.1696	51.142	7.933	1.921	6.630	-0.540	9.888	97.361	-0.000555	-0.000134	-0.000464
0.1704	52.660	7.807	1.614	6.327	-0.538	9.890	100.250	-0.000547	-0.000113	-0.000443
0.1712	54.914	7.876	1.920	6.300	-0.535	9.891	104.542	-0.000551	-0.000134	-0.000441
0.1720	58.476	8.210	1.850	6.603	-0.537	9.893	111.322	-0.000575	-0.000130	-0.000462
0.1728	64.201	8.614	2.059	7.017	-0.532	9.894	122.223	-0.000603	-0.000144	-0.000491
0.1736	73.534	9.463	2.198	7.870	-0.526	9.896	139.990	-0.000662	-0.000154	-0.000551
0.1744	87.811	11.034	2.211	8.751	-0.524	9.899	167.170	-0.000772	-0.000155	-0.000613
0.1752	107.393	13.368	2.573	9.947	-0.523	9.901	204.449	-0.000936	-0.000180	-0.000696
0.1760	131.784	16.356	2.573	11.407	-0.522	9.904	250.883	-0.001145	-0.000180	-0.000798
0.1768	160.007	20.135	3.019	13.402	-0.527	9.905	304.613	-0.001409	-0.000211	-0.000938
0.1776	190.966	24.249	3.575	16.084	-0.530	9.904	363.550	-0.001697	-0.000250	-0.001126
0.1784	223.442	28.542	4.103	18.727	-0.530	9.904	425.377	-0.001998	-0.000287	-0.001311
0.1792	255.829	33.016	4.992	21.505	-0.534	9.903	487.032	-0.002311	-0.000349	-0.001505
0.1800	286.186	37.144	5.659	23.803	-0.528	9.902	544.825	-0.002600	-0.000396	-0.001666
0.1808	312.636	40.577	6.075	25.580	-0.523	9.901	595.179	-0.002840	-0.000425	-0.001791
0.1816	334.066	43.538	6.617	27.272	-0.523	9.899	635.977	-0.003048	-0.000463	-0.001909
0.1824	350.643	45.844	7.130	28.772	-0.522	9.898	667.534	-0.003209	-0.000499	-0.002014
0.1832	363.011	47.735	7.784	29.969	-0.528	9.896	691.080	-0.003341	-0.000545	-0.002098
0.1840	371.848	49.165	7.894	30.807	-0.532	9.894	707.903	-0.003442	-0.000553	-0.002156
0.1848	377.964	50.138	8.506	31.413	-0.532	9.892	719.547	-0.003510	-0.000595	-0.002199
0.1856	381.601	50.667	8.271	31.675	-0.530	9.890	726.471	-0.003547	-0.000579	-0.002217
0.1864	383.224	50.846	8.201	31.702	-0.523	9.889	729.561	-0.003559	-0.000574	-0.002219
0.1872	383.495	51.193	8.618	31.949	-0.522	9.887	730.076	-0.003583	-0.000603	-0.002236
0.1880	382.578	51.458	8.549	32.222	-0.518	9.887	728.331	-0.003602	-0.000598	-0.002256
0.1888	380.850	51.608	8.867	32.497	-0.520	9.887	725.040	-0.003613	-0.000621	-0.002275
0.1896	378.385	51.679	8.770	32.650	-0.520	9.887	720.348	-0.003618	-0.000614	-0.002285
0.1904	374.793	51.470	8.437	32.445	-0.517	9.889	713.511	-0.003603	-0.000591	-0.002271
0.1912	369.984	50.970	8.132	32.032	-0.519	9.891	704.355	-0.003568	-0.000569	-0.002242
0.1920	362.966	50.472	8.299	31.469	-0.520	9.892	690.994	-0.003533	-0.000581	-0.002203
0.1928	352.146	49.416	8.105	30.918	-0.522	9.894	670.395	-0.003459	-0.000567	-0.002164
0.1936	336.155	47.554	8.021	29.968	-0.522	9.896	639.954	-0.003329	-0.000561	-0.002098
0.1944	314.184	44.941	7.590	28.634	-0.525	9.898	598.125	-0.003146	-0.000531	-0.002004
0.1952	287.058	41.535	6.937	26.817	-0.524	9.900	546.484	-0.002907	-0.000486	-0.001877
0.1960	257.016	37.616	6.241	24.410	-0.522	9.903	489.292	-0.002633	-0.000437	-0.001709
0.1968	226.598	33.643	5.949	21.961	-0.525	9.904	431.385	-0.002355	-0.000416	-0.001537
0.1976	198.029	29.987	5.573	19.827	-0.527	9.904	376.997	-0.002099	-0.000390	-0.001388
0.1984	172.541	26.445	5.031	17.708	-0.528	9.904	328.474	-0.001851	-0.000352	-0.001240
0.1992	150.615	23.220	4.753	16.153	-0.530	9.902	286.732	-0.001625	-0.000333	-0.001131
0.2000	20.363	1.110	0.848	0.384	-0.546	9.904	38.767	-0.000078	-0.000059	-0.000027
0.2008	20.499	1.166	0.737	0.605	-0.545	9.903	39.024	-0.000082	-0.000052	-0.000042
0.2016	20.634	1.249	1.016	0.784	-0.541	9.903	39.282	-0.000087	-0.000071	-0.000055
0.2024	20.995	1.403	0.960	1.073	-0.543	9.902	39.968	-0.000098	-0.000067	-0.000075
0.2032	21.581	1.375	0.932	1.101	-0.533	9.901	41.084	-0.000096	-0.000065	-0.000077
0.2040	22.437	1.431	0.918	0.894	-0.530	9.900	42.715	-0.000100	-0.000064	-0.000063
0.2048	23.985	1.444	0.877	0.824	-0.536	9.898	45.662	-0.000101	-0.000061	-0.000058
0.2056	26.645	1.528	0.960	0.783	-0.536	9.897	50.726	-0.000107	-0.000067	-0.000055
0.2064	31.139	2.027	1.141	1.058	-0.542	9.895	59.280	-0.000142	-0.000080	-0.000074
0.2072	38.909	2.736	1.155	1.829	-0.545	9.893	74.072	-0.000192	-0.000081	-0.000128
0.2080	51.232	4.029	1.196	2.806	-0.548	9.891	97.532	-0.000282	-0.000084	-0.000196
0.2088	69.942	6.058	1.405	4.208	-0.548	9.889	133.152	-0.000424	-0.000098	-0.000295
0.2096	97.610	9.296	1.766	6.203	-0.549	9.888	185.823	-0.000651	-0.000124	-0.000434
0.2104	135.797	14.368	2.642	9.120	-0.552	9.887	258.522	-0.001006	-0.000185	-0.000638
0.2112	185.781	21.038	3.475	12.946	-0.552	9.887	353.680	-0.001473	-0.000243	-0.000906
0.2120	247.593	29.194	4.615	17.942	-0.555	9.887	471.354	-0.002044	-0.000323	-0.001256
0.2128	319.534	38.534	6.185	23.625	-0.556	9.889	608.311	-0.002697	-0.000433	-0.001654
0.2136	399.185	48.525	8.006	29.955	-0.552	9.891	759.945	-0.003397	-0.000560	-0.002097
0.2144	483.734	59.239	10.715	36.780	-0.554	9.892	920.906	-0.004147	-0.000750	-0.002575
0.2152	570.478	70.356	13.647	43.538	-0.551	9.893	1086.044	-0.004925	-0.000955	-0.003048
0.2160	657.433	81.444	16.788	50.776	-0.550	9.895	1251.583	-0.005701	-0.001175	-0.003554
0.2168	743.065	92.270	20.137	57.988	-0.551	9.897	1414.604	-0.006459	-0.001410	-0.004059
0.2176	826.322	102.568	23.487	65.115	-0.547	9.899	1573.105	-0.007180	-0.001644	-0.004558
0.2184	905.687	112.530	26.892	71.939	-0.545	9.901	1724.195	-0.007877	-0.001882	-0.005036
0.2192	979.597	121.885	30.227	78.296	-0.542	9.903	1864.901	-0.008532	-0.002116	-0.005481
0.2200	1047.074	130.625	33.562	84.116	-0.543	9.904	1993.361	-0.009144	-0.002349	-0.005888
0.2208	1107.158	138.713	36.480	89.345	-0.544	9.903	2107.744	-0.009710	-0.002554	-0.006254
0.2216	1159.261	145.787	39.439	94.354	-0.545	9.903	2206.936	-0.010205	-0.002761	-0.006605
0.2224	1202.273	151.762	41.759	98.440	-0.545	9.902	2288.818	-0.010623	-0.002923	-0.006891
0.2232	1235.035	156.515	43.664	101.880	-0.542	9.901	2351.189	-0.010956	-0.003056	-0.007132
0.2240	1256.766	159.934	45.095	104.549	-0.543	9.900	2392.559	-0.011195	-0.003157	-0.007318
0.2248	1268.112	162.171	46.041	106.076	-0.544	9.899	2414.160	-0.011352	-0.003223	-0.007425
0.2256	1271.043	163.532	46.611	106.956	-0.544	9.897	2419.739	-0.011447	-0.003263	-0.007487
0.2264	1268.037	164.018	46.763	107.259	-0.545	9.895	2414.017	-0.011481	-0.003273	-0.007508
0.2272	1261.079	164.156	46.874	107.163	-0.543	9.893	2400.770	-0.011491	-0.003281	-0.007501
0.2280	1250.754	163.795	46.567	107.053	-0.544	9.891	2381.115	-0.011466	-0.003260	-0.007494
0.2288	1235.170	162.920	46.178	106.490	-0.538	9.890	2351.446	-0.011404	-0.003232	-0.007454
0.2296	1210.779	161.378	45.650	105.266	-0.538	9.888	2305.012	-0.011296	-0.003196	-0.007369
0.2304	1174.455	158.335	44.470	103.380	-0.543	9.886	2235.861	-0.011083	-0.003113	-0.007237
0.2312	1124.200	153.861	42.775	100.159	-0.541	9.887	2140.188	-0.010770	-0.002994	-0.007011
0.2320	1060.119	147.538	40.288	95.797	-0.547	9.887	2018.194	-0.010328	-0.002820	-0.006706
0.2328	984.120	139.632	37.160	90.320	-0.544	9.889	1873.512	-0.009774	-0.002601	-0.006322
0.2336	899.375	130.681	33.602	83.977	-0.540	9.891	1712.179	-0.009148	-0.002352	-0.005878
0.2344	809.716	120.732	29.698	77.208	-0.539	9.892	1541.491	-0.008451	-0.002079	-0.005405
0.2352	719.635	110.643	26.210	70.259	-0.540	9.893	1370.001	-0.007745	-0.001835	-0.004918
0.2360	633.417	100.595	22.570	63.516	-0.543	9.895	1205.864	-0.007042	-0.001580	-0.004446
0.2368	553.962	90.881	19.498	56.898	-0.544	9.897	1054.602	-0.006362	-0.001365	-0.003983
0.2376	482.863	81.890	16.718	50.787	-0.546	9.899	919.247	-0.005732	-0.001170	-0.003555
0.2384	420.510	73.608	14.328	45.352	-0.541	9.901	800.543	-0.005153	-0.001003	-0.003175
0.2392	366.513	66.104	12.342	40.564	-0.537	9.904	697.746	-0.004627	-0.000864	-0.002840
0.2400	320.225	59.405	10.910	36.821	-0.541	9.904	609.627	-0.004158	-0.000764	-0.002577
0.2408	280.671	53.638	9.855	33.491	-0.540	9.904	534.325	-0.003755	-0.000690	-0.002344
0.2416	247.473	48.510	8.925	30.560	-0.546	9.903	471.125	-0.003396	-0.000625	-0.002139
0.2424	219.926	44.091	8.327	27.876	-0.546	9.902	418.682	-0.003086	-0.000583	-0.001951
0.2432	197.278	40.340	7.687	25.317	-0.539	9.901	375.566	-0.002824	-0.000538	-0.001772
0.2440	179.289	37.129	7.089	23.406	-0.534	9.900	341.320	-0.002599	-0.000496	-0.001638
0.2448	165.388	34.712	6.907	22.030	-0.529	9.899	314.856	-0.002430	-0.000484	-0.001542
0.2456	155.604	32.753	6.782	21.026	-0.532	9.897	296.230	-0.002293	-0.000475	-0.001472
0.2464	149.863	31.447	6.464	20.420	-0.534	9.895	285.301	-0.002201	-0.000452	-0.001429
0.2472	147.594	30.724	6.477	19.786	-0.538	9.893	280.981	-0.002151	-0.000453	-0.001385
0.2480	148.375	30.319	6.240	19.388	-0.542	9.891	282.469	-0.002122	-0.000437	-0.001357
0.2488	151.907	30.305	5.949	19.236	-0.541	9.890	289.192	-0.002121	-0.000416	-0.001347
0.2496	159.692	30.765	6.115	19.388	-0.540	9.888	304.012	-0.002154	-0.000428	-0.001357
0.2504	175.787	32.405	6.339	20.502	-0.549	9.887	334.654	-0.002268	-0.000444	-0.001435
0.2512	205.003	35.852	6.603	22.469	-0.547	9.887	390.272	-0.002510	-0.000462	-0.001573
0.2520	251.170	41.716	7.201	25.689	-0.554	9.887	478.163	-0.002920	-0.000504	-0.001798
0.2528	315.521	49.651	8.409	30.188	-0.556	9.889	600.672	-0.003476	-0.000589	-0.002113
0.2536	396.389	59.475	10.231	36.050	-0.547	9.891	754.623	-0.004163	-0.000716	-0.002523
0.2544	489.866	70.829	12.982	43.122	-0.552	9.893	932.579	-0.004958	-0.000909	-0.003019
0.2552	591.653	82.989	16.650	51.076	-0.548	9.894	1126.356	-0.005809	-0.001166	-0.003575
0.2560	697.408	95.662	20.624	59.607	-0.548	9.896	1327.686	-0.006696	-0.001444	-0.004173
0.2568	802.141	108.030	24.889	68.042	-0.548	9.898	1527.071	-0.007562	-0.001742	-0.004763
0.2576	901.524	119.508	29.238	76.106	-0.546	9.900	1716.270	-0.008366	-0.002047	-0.005327
0.2584	991.845	130.153	33.282	83.385	-0.543	9.902	1888.218	-0.009111	-0.002330	-0.005837
0.2592	1070.158	139.574	36.799	89.840	-0.541	9.904	2037.306	-0.009770	-0.002576	-0.006289
0.2600	1135.501	147.607	40.231	95.537	-0.544	9.904	2161.703	-0.010333	-0.002816	-0.006688
0.2608	1188.116	154.431	42.970	100.326	-0.545	9.904	2261.868	-0.010810	-0.003008	-0.007023
0.2616	1229.249	159.865	45.206	104.344	-0.548	9.903	2340.174	-0.011191	-0.003164	-0.007304
0.2624	1260.478	164.145	47.178	107.577	-0.549	9.902	2399.626	-0.011490	-0.003302	-0.007530
0.2632	1282.915	167.438	48.358	109.778	-0.544	9.902	2442.341	-0.011721	-0.003385	-0.007684
0.2640	1297.508	169.814	49.400	111.541	-0.540	9.901	2470.121	-0.011887	-0.003458	-0.007808
0.2648	1305.368	171.412	50.082	112.559	-0.543	9.899	2485.085	-0.011999	-0.003506	-0.007879
0.2656	1307.832	172.413	50.500	113.083	-0.544	9.897	2489.777	-0.012069	-0.003535	-0.007916
0.2664	1306.149	173.038	50.695	113.634	-0.548	9.895	2486.572	-0.012113	-0.003549	-0.007954
0.2672	1301.130	173.149	50.473	113.755	-0.550	9.893	2477.016	-0.012120	-0.003533	-0.007963
0.2680	1292.939	172.983	50.626	113.823	-0.549	9.891	2461.424	-0.012109	-0.003544	-0.007968
0.2688	1280.120	172.246	50.056	113.437	-0.546	9.890	2437.019	-0.012057	-0.003504	-0.007941
0.2696	1259.125	170.856	49.791	112.213	-0.544	9.888	2397.051	-0.011960	-0.003485	-0.007855
0.2704	1225.176	168.105	48.748	110.135	-0.548	9.887	2332.420	-0.011767	-0.003412	-0.007709
0.2712	1174.004	163.268	46.844	106.861	-0.546	9.887	2235.003	-0.011429	-0.003279	-0.007480
0.2720	1103.656	156.472	44.149	102.003	-0.547	9.887	2101.078	-0.010953	-0.003090	-0.007140
0.2728	1016.597	147.342	40.564	95.866	-0.551	9.889	1935.339	-0.010314	-0.002840	-0.006711
0.2736	918.461	136.878	36.242	88.614	-0.543	9.891	1748.514	-0.009581	-0.002537	-0.006203
0.2744	816.088	125.622	31.837	80.854	-0.547	9.892	1553.621	-0.008794	-0.002229	-0.005660
0.2752	716.585	114.214	27.543	73.217	-0.550	9.894	1364.193	-0.007995	-0.001928	-0.005125
0.2760	624.941	103.444	23.375	65.870	-0.548	9.895	1189.728	-0.007241	-0.001636	-0.004611
0.2768	544.449	93.591	20.041	59.333	-0.549	9.897	1036.491	-0.006551	-0.001403	-0.004153
0.2776	476.100	84.780	17.302	53.443	-0.543	9.899	906.372	-0.005935	-0.001211	-0.003741
0.2784	418.586	77.123	15.023	48.310	-0.533	9.901	796.881	-0.005399	-0.001052	-0.003382
0.2792	370.135	70.287	13.244	44.072	-0.530	9.903	704.641	-0.004920	-0.000927	-0.003085
0.2800	328.641	64.089	11.882	40.454	-0.538	9.904	625.648	-0.004486	-0.000832	-0.002832
0.2808	292.618	58.821	10.577	37.123	-0.540	9.903	557.070	-0.004117	-0.000740	-0.002599
0.2816	261.404	53.943	9.660	34.234	-0.546	9.903	497.646	-0.003776	-0.000676	-0.002396
0.2824	234.158	49.414	8.896	31.482	-0.544	9.902	445.776	-0.003459	-0.000623	-0.002204
0.2832	210.413	45.495	8.368	28.910	-0.538	9.901	400.572	-0.003185	-0.000586	-0.002024
0.2840	190.004	42.009	7.881	26.984	-0.536	9.900	361.719	-0.002941	-0.000552	-0.001889
0.2848	173.278	39.022	7.450	25.306	-0.537	9.899	329.876	-0.002732	-0.000521	-0.001771
0.2856	160.849	36.728	7.172	24.121	-0.538	9.897	306.215	-0.002571	-0.000502	-0.001688
0.2864	153.004	35.088	6.838	23.213	-0.541	9.895	291.281	-0.002456	-0.000479	-0.001625
0.2872	149.397	34.100	6.727	22.497	-0.543	9.892	284.414	-0.002387	-0.000471	-0.001575
0.2880	149.427	33.627	6.685	22.167	-0.545	9.890	284.472	-0.002354	-0.000468	-0.001552
0.2888	152.403	33.655	6.421	21.797	-0.546	9.889	290.136	-0.002356	-0.000449	-0.001526
0.2896	159.061	33.893	6.700	22.030	-0.546	9.888	302.811	-0.002373	-0.000469	-0.001542
0.2904	173.232	35.102	6.658	22.925	-0.553	9.887	329.790	-0.002457	-0.000466	-0.001605
0.2912	199.968	38.270	7.227	24.604	-0.550	9.887	380.688	-0.002679	-0.000506	-0.001722
0.2920	243.836	43.662	8.019	27.699	-0.553	9.887	464.201	-0.003056	-0.000561	-0.001939
0.2928	306.504	51.360	8.921	31.910	-0.552	9.889	583.506	-0.003595	-0.000624	-0.002234
0.2936	386.350	61.004	10.923	37.716	-0.545	9.891	735.512	-0.004270	-0.000765	-0.002640
0.2944	479.526	72.134	13.313	44.774	-0.550	9.893	912.895	-0.005049	-0.000932	-0.003134
0.2952	580.983	84.071	17.065	52.645	-0.548	9.894	1106.043	-0.005885	-0.001195	-0.003685
0.2960	686.347	96.703	20.955	61.094	-0.546	9.896	1306.629	-0.006769	-0.001467	-0.004277
0.2968	790.765	109.153	25.388	69.296	-0.549	9.898	1505.413	-0.007641	-0.001777	-0.004851
0.2976	889.712	120.757	29.531	77.153	-0.541	9.900	1693.783	-0.008453	-0.002067	-0.005401
0.2984	980.123	131.486	33.589	84.377	-0.539	9.903	1865.902	-0.009204	-0.002351	-0.005906
0.2992	1059.187	140.978	37.286	90.803	-0.537	9.905	2016.420	-0.009868	-0.002610	-0.006356
0.3000	1126.184	149.052	40.523	96.802	-0.540	9.905	2143.965	-0.010434	-0.002837	-0.006776
0.3008	1181.804	155.973	43.733	101.812	-0.546	9.904	2249.851	-0.010918	-0.003061	-0.007127
0.3016	1226.814	161.907	45.914	106.049	-0.545	9.903	2335.539	-0.011333	-0.003214	-0.007423
0.3024	1262.612	166.520	48.318	109.393	-0.546	9.902	2403.688	-0.011656	-0.003382	-0.007658
0.3032	1289.648	170.369	49.778	111.746	-0.541	9.901	2455.158	-0.011926	-0.003484	-0.007822
0.3040	1307.967	173.023	51.168	113.602	-0.541	9.900	2490.034	-0.012112	-0.003582	-0.007952
0.3048	1318.307	174.719	52.002	114.909	-0.542	9.898	2509.718	-0.012230	-0.003640	-0.008044
0.3056	1322.019	175.844	52.418	115.804	-0.542	9.896	2516.785	-0.012309	-0.003669	-0.008106
0.3064	1320.847	176.400	52.794	116.368	-0.542	9.895	2514.553	-0.012348	-0.003696	-0.008146
0.3072	1315.933	176.692	52.627	116.438	-0.538	9.892	2505.198	-0.012368	-0.003684	-0.008151
0.3080	1307.727	176.358	52.530	116.327	-0.537	9.890	2489.576	-0.012345	-0.003677	-0.008143
0.3088	1294.547	175.609	52.113	115.749	-0.536	9.889	2464.485	-0.012293	-0.003648	-0.008102
0.3096	1271.659	174.080	51.292	114.497	-0.537	9.888	2420.912	-0.012186	-0.003590	-0.008015
0.3104	1233.291	170.869	50.305	112.528	-0.541	9.886	2347.870	-0.011961	-0.003521	-0.007877
0.3112	1175.567	165.686	48.151	108.964	-0.534	9.887	2237.978	-0.011598	-0.003371	-0.007627
0.3120	1097.885	158.112	45.108	103.652	-0.535	9.887	2090.092	-0.011068	-0.003158	-0.007256
0.3128	1004.409	148.289	41.232	96.923	-0.532	9.889	1912.136	-0.010380	-0.002886	-0.006785
0.3136	902.967	137.435	36.606	89.094	-0.528	9.891	1719.017	-0.009620	-0.002562	-0.006237
0.3144	801.089	126.123	32.339	81.100	-0.534	9.893	1525.068	-0.008829	-0.002264	-0.005677
0.3152	705.373	115.228	27.975	73.573	-0.533	9.894	1342.850	-0.008066	-0.001958	-0.005150
0.3160	619.787	105.195	24.403	66.625	-0.535	9.896	1179.914	-0.007364	-0.001708	-0.004664
0.3168	545.651	96.093	21.011	60.639	-0.535	9.898	1038.780	-0.006727	-0.001471	-0.004245
0.3176	482.292	87.936	18.427	55.315	-0.533	9.900	918.159	-0.006155	-0.001290	-0.003872
0.3184	427.784	80.431	16.177	50.609	-0.532	9.902	814.390	-0.005630	-0.001132	-0.003543
0.3192	380.384	73.789	14.343	46.218	-0.525	9.904	724.154	-0.005165	-0.001004	-0.003235
0.3200	338.770	67.814	13.121	42.379	-0.531	9.904	644.932	-0.004747	-0.000918	-0.002967
0.3208	302.071	62.381	11.940	38.966	-0.530	9.904	575.066	-0.004367	-0.000836	-0.002728
0.3216	269.745	57.503	10.925	36.008	-0.533	9.904	513.525	-0.004025	-0.000765	-0.002521
0.3224	241.431	52.931	10.298	33.629	-0.538	9.902	459.623	-0.003705	-0.000721	-0.002354
0.3232	216.604	48.719	9.479	31.154	-0.531	9.902	412.359	-0.003410	-0.000664	-0.002181
0.3240	195.369	45.008	8.895	29.104	-0.534	9.901	371.933	-0.003151	-0.000623	-0.002037
0.3248	178.132	42.105	8.604	27.301	-0.534	9.899	339.117	-0.002947	-0.000602	-0.001911
0.3256	165.508	39.784	8.201	25.622	-0.538	9.897	315.084	-0.002785	-0.000574	-0.001794
0.3264	157.678	38.186	7.812	24.686	-0.543	9.895	300.179	-0.002673	-0.000547	-0.001728
0.3272	154.206	37.171	7.548	24.038	-0.544	9.893	293.570	-0.002602	-0.000528	-0.001683
0.3280	154.297	36.518	7.352	23.775	-0.546	9.891	293.741	-0.002556	-0.000515	-0.001664
0.3288	157.302	36.310	7.130	23.830	-0.545	9.890	299.463	-0.002542	-0.000499	-0.001668
0.3296	164.276	36.644	7.309	24.051	-0.543	9.888	312.738	-0.002565	-0.000512	-0.001684
0.3304	179.424	38.244	7.324	24.905	-0.549	9.887	341.578	-0.002677	-0.000513	-0.001743
0.3312	208.008	41.716	7.616	26.515	-0.547	9.887	395.994	-0.002920	-0.000533	-0.001856
0.3320	254.671	47.387	8.213	29.693	-0.552	9.888	484.829	-0.003317	-0.000575	-0.002079
0.3328	320.992	55.334	9.576	34.440	-0.553	9.889	611.086	-0.003873	-0.000670	-0.002411
0.3336	404.940	65.408	11.619	40.700	-0.545	9.891	770.903	-0.004579	-0.000813	-0.002849
0.3344	502.400	76.916	14.733	48.283	-0.550	9.892	956.440	-0.005384	-0.001031	-0.003380
0.3352	607.824	89.283	18.513	56.332	-0.545	9.894	1157.141	-0.006250	-0.001296	-0.003943
0.3360	716.419	102.040	22.723	64.754	-0.545	9.895	1363.878	-0.007143	-0.001591	-0.004533
0.3368	822.790	114.491	27.086	73.065	-0.545	9.897	1566.381	-0.008014	-0.001896	-0.005115
0.3376	922.188	126.053	31.616	80.991	-0.541	9.899	1755.610	-0.008824	-0.002213	-0.005669
0.3384	1011.337	136.767	35.438	88.297	-0.540	9.902	1925.325	-0.009574	-0.002481	-0.006181
0.3392	1087.711	146.036	39.147	94.600	-0.539	9.904	2070.723	-0.010223	-0.002740	-0.006622
0.3400	1150.665	153.708	42.621	100.132	-0.542	9.904	2190.571	-0.010760	-0.002983	-0.007009
0.3408	1200.935	160.032	45.093	104.575	-0.543	9.904	2286.272	-0.011202	-0.003157	-0.007320
0.3416	1239.799	165.118	47.705	108.264	-0.543	9.903	2360.258	-0.011558	-0.003339	-0.007578
0.3424	1269.089	168.898	49.123	111.194	-0.541	9.902	2416.019	-0.011823	-0.003439	-0.007784
0.3432	1290.159	171.941	50.416	113.217	-0.540	9.902	2456.131	-0.012036	-0.003529	-0.007925
0.3440	1303.940	174.247	51.208	114.772	-0.538	9.901	2482.367	-0.012197	-0.003585	-0.008034
0.3448	1311.529	175.678	51.891	115.804	-0.542	9.899	2496.815	-0.012297	-0.003632	-0.008106
0.3456	1314.174	176.664	52.280	116.493	-0.542	9.897	2501.850	-0.012366	-0.003660	-0.008155
0.3464	1313.047	177.095	52.530	117.043	-0.542	9.895	2499.704	-0.012397	-0.003677	-0.008193
0.3472	1308.779	177.206	52.697	117.292	-0.546	9.892	2491.579	-0.012404	-0.003689	-0.008210
0.3480	1301.490	176.859	52.460	117.126	-0.544	9.891	2477.703	-0.012380	-0.003672	-0.008199
0.3488	1289.618	176.164	52.418	116.589	-0.540	9.889	2455.101	-0.012331	-0.003669	-0.008161
0.3496	1268.292	174.705	51.527	115.447	-0.538	9.888	2414.503	-0.012229	-0.003607	-0.008081
0.3504	1231.413	171.606	50.596	113.327	-0.539	9.887	2344.294	-0.012012	-0.003542	-0.007933
0.3512	1174.996	166.422	48.415	109.805	-0.540	9.887	2236.891	-0.011650	-0.003389	-0.007686
0.3520	1098.486	158.918	45.317	104.755	-0.545	9.887	2091.236	-0.011124	-0.003172	-0.007333
0.3528	1006.422	149.510	41.412	97.930	-0.548	9.889	1915.970	-0.010466	-0.002899	-0.006855
0.3536	906.514	138.796	36.911	90.198	-0.542	9.891	1725.769	-0.009716	-0.002584	-0.006314
0.3544	805.568	127.610	32.617	82.575	-0.542	9.892	1533.594	-0.008933	-0.002283	-0.005780
0.3552	709.611	116.660	28.294	75.006	-0.544	9.894	1350.918	-0.008166	-0.001981	-0.005250
0.3560	622.597	106.363	24.807	68.071	-0.539	9.895	1185.265	-0.007445	-0.001736	-0.004765
0.3568	546.733	97.065	21.499	61.962	-0.541	9.897	1040.840	-0.006795	-0.001505	-0.004337
0.3576	482.232	88.784	18.776	56.403	-0.539	9.899	918.045	-0.006215	-0.001314	-0.003948
0.3584	427.213	81.432	16.762	51.560	-0.538	9.902	813.303	-0.005700	-0.001173	-0.003609
0.3592	379.798	74.761	14.677	47.252	-0.535	9.904	723.038	-0.005233	-0.001027	-0.003308
0.3600	338.064	68.787	13.426	43.620	-0.542	9.904	643.587	-0.004815	-0.000940	-0.003053
0.3608	300.809	63.409	12.119	40.042	-0.545	9.904	572.662	-0.004439	-0.000848	-0.002803
0.3616	267.521	58.559	11.341	36.999	-0.544	9.903	509.291	-0.004099	-0.000794	-0.002590
0.3624	237.779	53.918	10.633	34.261	-0.546	9.902	452.671	-0.003774	-0.000744	-0.002398
0.3632	211.495	49.567	9.826	31.521	-0.538	9.901	402.632	-0.003470	-0.000688	-0.002207
0.3640	189.117	45.647	9.368	29.637	-0.535	9.900	360.031	-0.003195	-0.000656	-0.002075
0.3648	171.234	42.396	8.660	27.835	-0.535	9.899	325.985	-0.002968	-0.000606	-0.001948
0.3656	158.550	39.936	8.381	26.475	-0.534	9.897	301.838	-0.002796	-0.000587	-0.001853
0.3664	151.051	38.380	8.298	25.470	-0.537	9.895	287.561	-0.002687	-0.000581	-0.001783
0.3672	147.985	37.561	7.978	24.574	-0.537	9.893	281.725	-0.002629	-0.000558	-0.001720
0.3680	148.496	37.158	8.019	24.134	-0.542	9.891	282.698	-0.002601	-0.000561	-0.001689
0.3688	151.892	36.951	7.824	23.885	-0.544	9.890	289.164	-0.002587	-0.000548	-0.001672
0.3696	159.121	37.242	7.838	24.203	-0.542	9.888	302.925	-0.002607	-0.000549	-0.001694
0.3704	174.780	38.770	8.061	25.209	-0.552	9.886	332.737	-0.002714	-0.000564	-0.001765
0.3712	203.981	42.300	8.282	26.997	-0.549	9.887	388.327	-0.002961	-0.000580	-0.001890
0.3720	251.004	48.135	8.881	30.189	-0.554	9.887	477.848	-0.003369	-0.000622	-0.002113
0.3728	317.400	56.070	10.118	34.922	-0.556	9.889	604.248	-0.003925	-0.000708	-0.002445
0.3736	400.733	66.159	12.132	40.976	-0.544	9.891	762.892	-0.004631	-0.000849	-0.002868
0.3744	496.749	77.498	14.939	48.573	-0.551	9.892	945.683	-0.005425	-0.001046	-0.003400
0.3752	600.445	89.782	18.899	56.774	-0.548	9.894	1143.093	-0.006285	-0.001323	-0.003974
0.3760	707.177	102.665	22.859	65.208	-0.545	9.895	1346.283	-0.007187	-0.001600	-0.004565
0.3768	812.376	115.033	27.557	73.602	-0.549	9.897	1546.555	-0.008052	-0.001929	-0.005152
0.3776	911.443	126.566	32.060	81.267	-0.543	9.900	1735.153	-0.008860	-0.002244	-0.005689
0.3784	1000.937	137.211	36.047	88.449	-0.538	9.902	1905.527	-0.009605	-0.002523	-0.006191
0.3792	1078.303	146.438	39.674	94.684	-0.539	9.904	2052.813	-0.010251	-0.002777	-0.006628
0.3800	1142.685	154.261	42.911	100.284	-0.542	9.904	2175.379	-0.010798	-0.003004	-0.007020
0.3808	1195.209	160.876	45.634	104.908	-0.545	9.904	2275.372	-0.011261	-0.003194	-0.007344
0.3816	1237.048	166.116	48.137	108.732	-0.546	9.903	2355.022	-0.011628	-0.003370	-0.007611
0.3824	1269.630	170.370	49.903	111.897	-0.544	9.902	2417.049	-0.011926	-0.003493	-0.007833
0.3832	1293.555	173.427	51.195	114.098	-0.539	9.902	2462.597	-0.012140	-0.003584	-0.007987
0.3840	1309.200	175.957	52.002	115.817	-0.538	9.900	2492.380	-0.012317	-0.003640	-0.008107
0.3848	1317.721	177.735	52.530	116.946	-0.537	9.899	2508.602	-0.012441	-0.003677	-0.008186
0.3856	1320.576	178.652	53.196	117.730	-0.537	9.897	2514.038	-0.012506	-0.003724	-0.008241
0.3864	1319.314	179.332	53.280	118.144	-0.538	9.895	2511.635	-0.012553	-0.003730	-0.008270
0.3872	1314.805	179.263	53.529	118.420	-0.534	9.893	2503.052	-0.012548	-0.003747	-0.008289
0.3880	1307.156	178.888	53.349	118.365	-0.540	9.891	2488.489	-0.012522	-0.003734	-0.008286
0.3888	1294.637	178.179	52.960	117.621	-0.537	9.889	2464.657	-0.012473	-0.003707	-0.008233
0.3896	1271.944	176.596	52.376	116.519	-0.537	9.888	2421.455	-0.012362	-0.003666	-0.008156
0.3904	1232.810	173.414	51.321	114.304	-0.544	9.886	2346.954	-0.012139	-0.003592	-0.008001
0.3912	1173.072	167.800	49.000	110.546	-0.539	9.887	2233.229	-0.011746	-0.003430	-0.007738
0.3920	1092.490	159.712	45.874	105.249	-0.542	9.887	2079.821	-0.011180	-0.003211	-0.007367
0.3928	996.459	149.775	41.691	98.205	-0.540	9.888	1897.001	-0.010484	-0.002918	-0.006874
0.3936	893.439	138.686	36.952	90.099	-0.536	9.891	1700.878	-0.009708	-0.002587	-0.006307
0.3944	791.080	127.290	32.408	81.982	-0.542	9.892	1506.014	-0.008910	-0.002269	-0.005739
0.3952	695.620	116.437	28.253	74.496	-0.543	9.893	1324.282	-0.008151	-0.001978	-0.005215
0.3960	610.664	106.265	24.335	67.781	-0.548	9.895	1162.548	-0.007439	-0.001703	-0.004745
0.3968	537.686	97.136	21.361	61.918	-0.547	9.897	1023.617	-0.006800	-0.001495	-0.004334
0.3976	475.980	89.284	18.817	56.950	-0.549	9.899	906.143	-0.006250	-0.001317	-0.003986
0.3984	423.350	82.253	16.567	52.106	-0.546	9.902	805.950	-0.005758	-0.001160	-0.003647
0.3992	377.378	75.861	14.898	47.606	-0.543	9.904	718.431	-0.005310	-0.001043	-0.003332
Test Cycles
Time (sec)	Axial stress (kPa)	Axial micro-strain #1	Axial micro-strain #2	Axial micro-strain #3	Confining pressure (kPa)	Temperature (�C)	Load (N)	Displacement #1 (mm)	Displacement #2 (mm)	Displacement #3 (mm)
0.0000	336.396	70.024	13.438	44.057	-0.553	9.904	640.411	-0.004902	-0.000941	-0.003084
0.0008	299.621	64.659	12.270	40.576	-0.548	9.904	570.402	-0.004526	-0.000859	-0.002840
0.0016	266.799	59.712	11.241	37.771	-0.550	9.903	507.917	-0.004180	-0.000787	-0.002644
0.0024	238.065	55.126	10.657	35.404	-0.548	9.902	453.215	-0.003859	-0.000746	-0.002478
0.0032	213.223	50.901	9.990	32.693	-0.540	9.902	405.922	-0.003563	-0.000699	-0.002289
0.0040	192.334	47.260	9.352	30.382	-0.539	9.901	366.154	-0.003308	-0.000655	-0.002127
0.0048	175.712	44.314	9.143	28.469	-0.540	9.899	334.511	-0.003102	-0.000640	-0.001993
0.0056	163.644	42.091	8.685	26.860	-0.538	9.897	311.537	-0.002946	-0.000608	-0.001880
0.0064	156.190	40.466	8.368	26.075	-0.541	9.895	297.346	-0.002833	-0.000586	-0.001825
0.0072	152.989	39.382	8.201	25.813	-0.538	9.893	291.252	-0.002757	-0.000574	-0.001807
0.0080	153.200	38.743	7.966	25.606	-0.538	9.891	291.653	-0.002712	-0.000558	-0.001792
0.0088	156.265	38.452	7.785	25.538	-0.543	9.890	297.489	-0.002692	-0.000545	-0.001788
0.0096	162.908	38.840	7.936	25.635	-0.539	9.888	310.135	-0.002719	-0.000556	-0.001794
0.0104	177.140	40.425	8.214	26.310	-0.549	9.887	337.229	-0.002830	-0.000575	-0.001842
0.0112	204.281	43.732	8.477	27.949	-0.544	9.887	388.899	-0.003061	-0.000593	-0.001956
0.0120	249.081	49.248	9.116	31.029	-0.543	9.887	474.186	-0.003447	-0.000638	-0.002172
0.0128	313.162	56.779	10.187	35.638	-0.541	9.889	596.180	-0.003975	-0.000713	-0.002495
0.0136	394.571	66.423	12.104	41.596	-0.532	9.891	751.162	-0.004650	-0.000847	-0.002912
0.0144	489.145	77.555	15.065	48.668	-0.540	9.892	931.206	-0.005429	-0.001055	-0.003407
0.0152	591.683	89.659	18.874	56.553	-0.540	9.894	1126.413	-0.006276	-0.001321	-0.003959
0.0160	697.769	102.333	23.001	64.686	-0.539	9.895	1328.373	-0.007163	-0.001610	-0.004528
0.0168	802.472	114.562	27.364	72.928	-0.541	9.897	1527.700	-0.008019	-0.001916	-0.005105
0.0176	901.404	126.026	31.630	80.922	-0.538	9.900	1716.042	-0.008822	-0.002214	-0.005665
0.0184	991.379	136.643	35.742	88.188	-0.531	9.902	1887.331	-0.009565	-0.002502	-0.006173
0.0192	1069.857	145.968	39.509	94.875	-0.533	9.904	2036.734	-0.010218	-0.002766	-0.006641
0.0200	1136.433	154.013	42.927	100.723	-0.539	9.904	2163.477	-0.010781	-0.003005	-0.007051
0.0208	1191.708	161.059	46.013	105.582	-0.539	9.904	2268.705	-0.011274	-0.003221	-0.007391
0.0216	1236.102	166.700	48.376	109.656	-0.546	9.903	2353.220	-0.011669	-0.003386	-0.007676
0.0224	1270.442	171.173	50.489	112.752	-0.546	9.901	2418.594	-0.011982	-0.003534	-0.007893
0.0232	1295.088	174.593	51.877	114.927	-0.538	9.901	2465.515	-0.012222	-0.003631	-0.008045
0.0240	1310.432	176.858	52.710	116.701	-0.537	9.900	2494.726	-0.012380	-0.003690	-0.008169
0.0248	1318.021	178.374	53.669	117.952	-0.533	9.899	2509.174	-0.012486	-0.003757	-0.008257
0.0256	1320.050	179.292	53.710	118.667	-0.530	9.897	2513.037	-0.012550	-0.003760	-0.008307
0.0264	1318.097	179.722	54.363	119.010	-0.530	9.895	2509.317	-0.012581	-0.003805	-0.008331
0.0272	1313.438	179.873	54.223	118.969	-0.526	9.893	2500.448	-0.012591	-0.003796	-0.008328
0.0280	1306.014	179.499	54.028	118.681	-0.528	9.891	2486.315	-0.012565	-0.003782	-0.008308
0.0288	1294.006	178.553	53.696	118.102	-0.522	9.889	2463.455	-0.012499	-0.003759	-0.008267
0.0296	1272.485	177.053	52.933	117.139	-0.525	9.888	2422.485	-0.012394	-0.003705	-0.008200
0.0304	1235.200	174.039	51.864	115.200	-0.532	9.886	2351.503	-0.012183	-0.003630	-0.008064
0.0312	1178.122	168.911	49.793	111.636	-0.530	9.887	2242.842	-0.011824	-0.003486	-0.007815
0.0320	1100.245	161.532	46.735	106.491	-0.537	9.887	2094.584	-0.011307	-0.003271	-0.007454
0.0328	1006.077	151.776	42.454	99.596	-0.536	9.889	1915.312	-0.010624	-0.002972	-0.006972
0.0336	903.718	140.673	38.090	91.780	-0.530	9.891	1720.448	-0.009847	-0.002666	-0.006425
0.0344	801.074	129.318	33.310	83.840	-0.530	9.893	1525.040	-0.009052	-0.002332	-0.005869
0.0352	704.938	118.354	29.265	76.216	-0.529	9.894	1342.020	-0.008285	-0.002049	-0.005335
0.0360	619.561	108.377	25.638	69.502	-0.525	9.896	1179.485	-0.007586	-0.001795	-0.004865
0.0368	546.358	99.315	22.414	63.530	-0.530	9.897	1040.125	-0.006952	-0.001569	-0.004447
0.0376	484.576	91.242	19.884	58.328	-0.529	9.899	922.508	-0.006387	-0.001392	-0.004083
0.0384	432.142	84.140	17.800	53.664	-0.529	9.902	822.687	-0.005890	-0.001246	-0.003756
0.0392	386.606	77.748	15.925	49.233	-0.530	9.904	735.998	-0.005442	-0.001115	-0.003446
0.0400	345.984	72.191	14.271	45.504	-0.537	9.904	658.665	-0.005053	-0.000999	-0.003185
0.0408	309.014	67.048	13.133	42.243	-0.540	9.904	588.284	-0.004693	-0.000919	-0.002957
0.0416	275.245	62.117	11.673	39.242	-0.541	9.903	523.996	-0.004348	-0.000817	-0.002747
0.0424	244.647	57.474	11.144	36.573	-0.544	9.902	465.746	-0.004023	-0.000780	-0.002560
0.0432	217.536	52.958	10.533	33.889	-0.537	9.902	414.133	-0.003707	-0.000737	-0.002372
0.0440	194.588	48.985	9.616	31.329	-0.536	9.900	370.445	-0.003429	-0.000673	-0.002193
0.0448	176.298	45.871	9.575	29.156	-0.540	9.899	335.627	-0.003211	-0.000670	-0.002041
0.0456	163.224	43.342	8.826	27.629	-0.542	9.897	310.736	-0.003034	-0.000618	-0.001934
0.0464	155.379	41.508	8.714	26.612	-0.545	9.895	295.801	-0.002906	-0.000610	-0.001863
0.0472	152.057	40.410	8.604	26.241	-0.548	9.893	289.478	-0.002829	-0.000602	-0.001837
0.0480	152.373	39.772	8.395	26.158	-0.549	9.891	290.079	-0.002784	-0.000588	-0.001831
0.0488	155.905	39.577	8.242	26.006	-0.549	9.890	296.803	-0.002770	-0.000577	-0.001820
0.0496	163.780	40.105	8.006	26.240	-0.547	9.888	311.794	-0.002807	-0.000560	-0.001837
0.0504	180.476	41.980	8.172	27.025	-0.552	9.887	343.580	-0.002939	-0.000572	-0.001892
0.0512	211.405	45.620	8.297	28.937	-0.545	9.887	402.460	-0.003193	-0.000581	-0.002026
0.0520	260.502	51.539	9.088	32.486	-0.549	9.887	495.930	-0.003608	-0.000636	-0.002274
0.0528	328.957	59.766	10.533	37.619	-0.552	9.888	626.249	-0.004184	-0.000737	-0.002633
0.0536	414.138	69.883	12.951	44.003	-0.545	9.890	788.412	-0.004892	-0.000907	-0.003080
0.0544	511.462	81.681	16.023	51.296	-0.553	9.892	973.692	-0.005718	-0.001122	-0.003591
0.0552	615.999	94.104	19.859	59.360	-0.551	9.893	1172.705	-0.006587	-0.001390	-0.004155
0.0560	722.987	106.750	24.028	67.561	-0.552	9.895	1376.381	-0.007473	-0.001682	-0.004729
0.0568	827.614	118.840	28.155	75.860	-0.554	9.897	1575.565	-0.008319	-0.001971	-0.005310
0.0576	925.810	130.111	32.685	83.937	-0.555	9.899	1762.505	-0.009108	-0.002288	-0.005876
0.0584	1014.478	140.617	36.743	90.968	-0.550	9.902	1931.305	-0.009843	-0.002572	-0.006368
0.0592	1091.528	149.746	40.661	97.188	-0.549	9.904	2077.990	-0.010482	-0.002846	-0.006803
0.0600	1156.135	157.765	44.233	102.787	-0.551	9.904	2200.985	-0.011044	-0.003096	-0.007195
0.0608	1208.509	164.198	47.039	107.369	-0.549	9.904	2300.692	-0.011494	-0.003293	-0.007516
0.0616	1249.507	169.326	49.235	111.208	-0.553	9.903	2378.740	-0.011853	-0.003446	-0.007785
0.0624	1280.120	173.439	50.945	114.248	-0.550	9.902	2437.019	-0.012141	-0.003566	-0.007997
0.0632	1301.505	176.316	52.084	116.313	-0.544	9.901	2477.732	-0.012342	-0.003646	-0.008142
0.0640	1314.730	178.262	52.724	117.813	-0.544	9.900	2502.909	-0.012478	-0.003691	-0.008247
0.0648	1321.192	179.458	53.613	118.914	-0.543	9.898	2515.211	-0.012562	-0.003753	-0.008324
0.0656	1322.770	180.249	53.696	119.588	-0.545	9.897	2518.215	-0.012617	-0.003759	-0.008371
0.0664	1320.772	180.651	54.015	119.753	-0.549	9.895	2514.410	-0.012646	-0.003781	-0.008383
0.0672	1316.023	180.860	54.085	119.835	-0.546	9.893	2505.369	-0.012660	-0.003786	-0.008388
0.0680	1308.418	180.706	53.863	119.685	-0.546	9.891	2490.892	-0.012649	-0.003770	-0.008378
0.0688	1295.779	179.846	53.780	118.956	-0.539	9.890	2466.831	-0.012589	-0.003765	-0.008327
0.0696	1272.576	178.054	52.988	118.076	-0.539	9.888	2422.657	-0.012464	-0.003709	-0.008265
0.0704	1232.510	174.538	51.987	115.930	-0.546	9.887	2346.382	-0.012218	-0.003639	-0.008115
0.0712	1172.096	168.814	49.680	111.966	-0.544	9.887	2231.369	-0.011817	-0.003478	-0.007838
0.0720	1091.543	160.962	46.636	106.531	-0.548	9.887	2078.018	-0.011267	-0.003265	-0.007457
0.0728	996.459	151.233	42.621	99.237	-0.543	9.889	1897.001	-0.010586	-0.002983	-0.006947
0.0736	895.062	140.450	37.952	91.393	-0.534	9.891	1703.968	-0.009831	-0.002657	-0.006397
0.0744	794.311	129.248	33.700	83.825	-0.536	9.892	1512.165	-0.009047	-0.002359	-0.005868
0.0752	699.978	118.381	29.253	76.628	-0.537	9.894	1332.579	-0.008287	-0.002048	-0.005364
0.0760	615.669	108.418	25.569	70.037	-0.537	9.896	1172.075	-0.007589	-0.001790	-0.004903
0.0768	542.751	99.427	22.415	64.106	-0.542	9.898	1033.258	-0.006960	-0.001569	-0.004487
0.0776	480.624	91.437	19.761	58.657	-0.543	9.900	914.984	-0.006401	-0.001383	-0.004106
0.0784	427.122	84.280	17.399	53.758	-0.541	9.902	813.131	-0.005900	-0.001218	-0.003763
0.0792	379.978	77.581	15.845	49.520	-0.542	9.904	723.381	-0.005431	-0.001109	-0.003466
0.0800	337.643	71.594	14.426	45.819	-0.547	9.904	642.786	-0.005012	-0.001010	-0.003207
0.0808	299.426	66.188	13.494	42.421	-0.545	9.904	570.030	-0.004633	-0.000945	-0.002969
0.0816	265.281	61.172	12.618	39.353	-0.548	9.903	505.028	-0.004282	-0.000883	-0.002755
0.0824	235.240	56.601	11.757	36.449	-0.545	9.902	447.836	-0.003962	-0.000823	-0.002551
0.0832	209.346	52.279	10.811	33.574	-0.536	9.901	398.540	-0.003660	-0.000757	-0.002350
0.0840	187.840	48.542	10.228	31.275	-0.536	9.900	357.599	-0.003398	-0.000716	-0.002189
0.0848	170.933	45.483	9.881	29.583	-0.536	9.899	325.413	-0.003184	-0.000692	-0.002071
0.0856	159.196	43.161	9.520	28.399	-0.540	9.897	303.068	-0.003021	-0.000666	-0.001988
0.0864	152.418	41.842	9.340	27.628	-0.546	9.895	290.165	-0.002929	-0.000654	-0.001934
0.0872	149.803	41.035	8.951	27.078	-0.547	9.893	285.187	-0.002872	-0.000627	-0.001895
0.0880	150.570	40.577	8.757	26.652	-0.548	9.891	286.646	-0.002840	-0.000613	-0.001866
0.0888	154.071	40.494	8.673	26.309	-0.546	9.889	293.312	-0.002835	-0.000607	-0.001842
0.0896	161.480	40.813	8.645	26.323	-0.543	9.887	307.417	-0.002857	-0.000605	-0.001843
0.0904	177.425	42.618	8.867	27.244	-0.549	9.886	337.772	-0.002983	-0.000621	-0.001907
0.0912	207.076	46.342	8.977	29.115	-0.548	9.886	394.220	-0.003244	-0.000628	-0.002038
0.0920	254.701	52.164	9.617	32.513	-0.550	9.887	484.886	-0.003651	-0.000673	-0.002276
0.0928	321.788	60.167	11.020	37.480	-0.550	9.889	612.602	-0.004212	-0.000771	-0.002624
0.0936	405.587	70.104	13.105	43.714	-0.545	9.891	772.133	-0.004907	-0.000917	-0.003060
0.0944	501.588	81.417	16.288	50.827	-0.547	9.892	954.895	-0.005699	-0.001140	-0.003558
0.0952	604.428	93.772	20.109	58.631	-0.545	9.894	1150.675	-0.006564	-0.001408	-0.004104
0.0960	709.371	106.293	24.278	66.804	-0.544	9.896	1350.460	-0.007441	-0.001699	-0.004676
0.0968	812.105	118.230	28.641	74.840	-0.542	9.898	1546.040	-0.008276	-0.002005	-0.005239
0.0976	908.527	129.542	32.810	82.946	-0.541	9.900	1729.603	-0.009068	-0.002297	-0.005806
0.0984	995.888	139.701	36.923	90.252	-0.533	9.903	1895.914	-0.009779	-0.002585	-0.006318
0.0992	1071.976	148.609	40.605	96.485	-0.533	9.904	2040.768	-0.010403	-0.002842	-0.006754
0.1000	1136.178	156.307	43.871	101.990	-0.542	9.905	2162.991	-0.010942	-0.003071	-0.007139
0.1008	1189.408	162.825	46.802	106.310	-0.540	9.904	2264.328	-0.011398	-0.003276	-0.007442
0.1016	1232.465	168.313	49.027	110.108	-0.546	9.903	2346.296	-0.011782	-0.003432	-0.007708
0.1024	1266.188	172.635	50.778	113.492	-0.545	9.902	2410.498	-0.012084	-0.003554	-0.007944
0.1032	1290.820	176.054	52.278	115.873	-0.537	9.901	2457.390	-0.012324	-0.003659	-0.008111
0.1040	1306.645	178.444	53.349	117.731	-0.537	9.900	2487.516	-0.012491	-0.003734	-0.008241
0.1048	1314.760	179.987	53.919	118.805	-0.536	9.899	2502.966	-0.012599	-0.003774	-0.008316
0.1056	1317.090	181.070	54.474	119.301	-0.534	9.897	2507.401	-0.012675	-0.003813	-0.008351
0.1064	1315.391	181.418	54.460	119.479	-0.535	9.895	2504.168	-0.012699	-0.003812	-0.008364
0.1072	1310.748	181.501	54.473	119.575	-0.536	9.893	2495.327	-0.012705	-0.003813	-0.008370
0.1080	1303.384	181.167	54.361	119.534	-0.537	9.891	2481.308	-0.012682	-0.003805	-0.008367
0.1088	1291.406	180.500	54.084	119.121	-0.538	9.890	2458.506	-0.012635	-0.003786	-0.008338
0.1096	1269.840	179.041	53.306	118.254	-0.538	9.888	2417.450	-0.012533	-0.003731	-0.008278
0.1104	1232.450	175.789	52.404	116.286	-0.542	9.887	2346.268	-0.012305	-0.003668	-0.008140
0.1112	1175.417	170.454	50.110	112.530	-0.543	9.887	2237.692	-0.011932	-0.003508	-0.007877
0.1120	1098.261	162.768	47.235	107.122	-0.546	9.887	2090.807	-0.011394	-0.003306	-0.007499
0.1128	1005.446	153.221	43.233	100.270	-0.544	9.889	1914.110	-0.010725	-0.003026	-0.007019
0.1136	904.560	142.367	38.689	92.510	-0.538	9.891	1722.050	-0.009966	-0.002708	-0.006476
0.1144	802.427	131.096	34.172	84.611	-0.537	9.892	1527.615	-0.009177	-0.002392	-0.005923
0.1152	705.223	119.994	29.849	77.181	-0.537	9.894	1342.564	-0.008400	-0.002089	-0.005403
0.1160	617.232	109.627	26.013	70.191	-0.534	9.896	1175.051	-0.007674	-0.001821	-0.004913
0.1168	540.767	100.206	22.707	63.848	-0.536	9.897	1029.482	-0.007014	-0.001589	-0.004469
0.1176	476.010	91.938	20.011	58.440	-0.537	9.900	906.200	-0.006436	-0.001401	-0.004091
0.1184	421.171	84.572	17.774	53.513	-0.530	9.902	801.802	-0.005920	-0.001244	-0.003746
0.1192	374.057	77.874	16.023	49.082	-0.530	9.904	712.109	-0.005451	-0.001122	-0.003436
0.1200	332.924	72.024	14.508	45.697	-0.535	9.904	633.802	-0.005042	-0.001016	-0.003199
0.1208	296.450	66.660	13.423	42.547	-0.534	9.903	564.365	-0.004666	-0.000940	-0.002978
0.1216	264.199	61.727	12.130	39.698	-0.538	9.902	502.968	-0.004321	-0.000849	-0.002779
0.1224	235.600	57.306	11.465	37.112	-0.538	9.902	448.523	-0.004011	-0.000803	-0.002598
0.1232	210.232	53.235	10.547	34.372	-0.529	9.901	400.229	-0.003726	-0.000738	-0.002406
0.1240	188.456	49.483	10.104	31.868	-0.530	9.900	358.772	-0.003464	-0.000707	-0.002231
0.1248	170.452	46.329	9.659	29.887	-0.531	9.899	324.497	-0.003243	-0.000676	-0.002092
0.1256	157.227	43.647	9.395	28.675	-0.533	9.897	299.320	-0.003055	-0.000658	-0.002007
0.1264	148.992	41.868	9.076	27.711	-0.538	9.895	283.642	-0.002931	-0.000635	-0.001940
0.1272	145.295	40.659	8.991	27.298	-0.538	9.892	276.604	-0.002846	-0.000629	-0.001911
0.1280	145.370	40.159	8.839	27.009	-0.537	9.891	276.747	-0.002811	-0.000619	-0.001891
0.1288	148.391	40.063	8.701	26.473	-0.537	9.890	282.497	-0.002804	-0.000609	-0.001853
0.1296	155.138	40.341	8.783	26.569	-0.533	9.888	295.343	-0.002824	-0.000615	-0.001860
0.1304	169.415	41.981	8.811	27.381	-0.538	9.886	322.523	-0.002939	-0.000617	-0.001917
0.1312	196.361	45.288	9.074	28.893	-0.535	9.886	373.821	-0.003170	-0.000635	-0.002023
0.1320	240.379	50.888	9.504	32.141	-0.537	9.887	457.621	-0.003562	-0.000665	-0.002250
0.1328	303.048	58.488	10.894	36.669	-0.538	9.889	576.925	-0.004094	-0.000763	-0.002567
0.1336	382.804	67.938	12.577	42.517	-0.530	9.891	728.760	-0.004756	-0.000880	-0.002976
0.1344	475.799	78.903	15.565	49.646	-0.536	9.892	905.800	-0.005523	-0.001090	-0.003475
0.1352	577.376	90.965	19.012	57.408	-0.538	9.894	1099.176	-0.006368	-0.001331	-0.004019
0.1360	683.372	103.501	22.904	65.333	-0.538	9.895	1300.964	-0.007245	-0.001603	-0.004573
0.1368	788.721	115.770	27.322	73.410	-0.540	9.897	1501.522	-0.008104	-0.001913	-0.005139
0.1376	889.186	127.512	31.616	81.486	-0.540	9.899	1692.781	-0.008926	-0.002213	-0.005704
0.1384	981.355	138.170	35.993	88.791	-0.534	9.902	1868.248	-0.009672	-0.002519	-0.006215
0.1392	1062.463	147.759	39.841	95.617	-0.532	9.904	2022.657	-0.010343	-0.002789	-0.006693
0.1400	1131.564	156.278	43.649	101.588	-0.538	9.904	2154.207	-0.010939	-0.003055	-0.007111
0.1408	1188.702	163.352	46.636	106.282	-0.536	9.904	2262.983	-0.011435	-0.003264	-0.007440
0.1416	1234.118	169.146	49.346	110.355	-0.537	9.902	2349.443	-0.011840	-0.003454	-0.007725
0.1424	1268.653	173.690	51.514	113.714	-0.541	9.901	2415.190	-0.012158	-0.003606	-0.007960
0.1432	1293.134	176.901	52.584	116.123	-0.536	9.901	2461.796	-0.012383	-0.003681	-0.008129
0.1440	1308.418	179.110	53.892	118.063	-0.536	9.900	2490.892	-0.012538	-0.003772	-0.008264
0.1448	1316.053	180.611	54.141	119.288	-0.538	9.898	2505.426	-0.012643	-0.003790	-0.008350
0.1456	1318.187	181.500	54.586	119.810	-0.537	9.897	2509.489	-0.012705	-0.003821	-0.008387
0.1464	1316.428	182.000	54.807	120.043	-0.537	9.895	2506.142	-0.012740	-0.003837	-0.008403
0.1472	1311.755	182.070	54.806	119.932	-0.538	9.892	2497.244	-0.012745	-0.003836	-0.008395
0.1480	1304.331	181.708	54.904	119.863	-0.538	9.890	2483.110	-0.012720	-0.003843	-0.008390
0.1488	1292.022	180.930	54.585	119.327	-0.534	9.889	2459.679	-0.012665	-0.003821	-0.008353
0.1496	1269.720	179.374	54.169	118.350	-0.537	9.888	2417.221	-0.012556	-0.003792	-0.008285
0.1504	1231.563	176.261	52.780	116.354	-0.543	9.886	2344.580	-0.012338	-0.003695	-0.008145
0.1512	1173.779	170.843	50.724	112.488	-0.544	9.887	2234.573	-0.011959	-0.003551	-0.007874
0.1520	1095.766	163.171	47.569	107.093	-0.546	9.887	2086.058	-0.011422	-0.003330	-0.007497
0.1528	1002.230	153.499	43.511	100.213	-0.541	9.889	1907.988	-0.010745	-0.003046	-0.007015
0.1536	901.073	142.631	39.133	92.535	-0.535	9.891	1715.412	-0.009984	-0.002739	-0.006477
0.1544	799.722	131.513	34.616	84.940	-0.533	9.892	1522.465	-0.009206	-0.002423	-0.005946
0.1552	704.832	120.716	30.335	77.717	-0.534	9.894	1341.820	-0.008450	-0.002123	-0.005440
0.1560	620.252	110.794	26.611	70.947	-0.535	9.896	1180.801	-0.007756	-0.001863	-0.004966
0.1568	547.094	101.762	23.457	64.989	-0.532	9.898	1041.527	-0.007123	-0.001642	-0.004549
0.1576	484.726	93.661	20.860	59.540	-0.533	9.900	922.794	-0.006556	-0.001460	-0.004168
0.1584	431.075	86.504	18.499	54.681	-0.527	9.902	820.656	-0.006055	-0.001295	-0.003828
0.1592	384.171	79.987	16.678	50.402	-0.528	9.904	731.363	-0.005599	-0.001167	-0.003528
0.1600	342.798	74.275	15.135	46.727	-0.536	9.904	652.599	-0.005199	-0.001059	-0.003271
0.1608	305.648	69.134	13.799	43.522	-0.536	9.904	581.875	-0.004839	-0.000966	-0.003047
0.1616	272.420	64.174	12.937	40.619	-0.542	9.903	518.618	-0.004492	-0.000906	-0.002843
0.1624	242.679	59.448	11.923	37.936	-0.541	9.902	461.998	-0.004161	-0.000835	-0.002656
0.1632	216.078	54.989	11.144	35.116	-0.536	9.902	411.358	-0.003849	-0.000780	-0.002458
0.1640	193.325	51.069	10.284	32.596	-0.534	9.901	368.042	-0.003575	-0.000720	-0.002282
0.1648	174.720	47.914	9.813	30.463	-0.533	9.899	332.623	-0.003354	-0.000687	-0.002132
0.1656	161.180	45.426	9.340	28.991	-0.535	9.898	306.845	-0.003180	-0.000654	-0.002029
0.1664	152.764	43.604	9.285	28.097	-0.538	9.895	290.823	-0.003052	-0.000650	-0.001967
0.1672	148.856	42.507	9.062	27.644	-0.540	9.893	283.384	-0.002975	-0.000634	-0.001935
0.1680	148.691	41.923	8.992	27.492	-0.544	9.891	283.070	-0.002935	-0.000629	-0.001924
0.1688	151.637	41.770	8.728	27.094	-0.543	9.890	288.677	-0.002924	-0.000611	-0.001897
0.1696	158.790	42.174	8.506	27.161	-0.540	9.888	302.296	-0.002952	-0.000595	-0.001901
0.1704	174.540	43.813	8.672	27.959	-0.545	9.887	332.279	-0.003067	-0.000607	-0.001957
0.1712	204.236	47.439	8.756	29.845	-0.541	9.887	388.813	-0.003321	-0.000613	-0.002089
0.1720	252.282	53.387	9.548	33.353	-0.545	9.887	480.280	-0.003737	-0.000668	-0.002335
0.1728	320.165	61.614	10.979	38.459	-0.544	9.889	609.512	-0.004313	-0.000769	-0.002692
0.1736	405.451	71.760	13.160	44.830	-0.536	9.891	771.875	-0.005023	-0.000921	-0.003138
0.1744	503.617	83.085	16.356	52.053	-0.541	9.892	958.757	-0.005816	-0.001145	-0.003644
0.1752	609.222	95.579	20.386	60.144	-0.538	9.894	1159.801	-0.006691	-0.001427	-0.004210
0.1760	717.336	108.336	24.764	68.523	-0.538	9.896	1365.623	-0.007583	-0.001733	-0.004797
0.1768	822.941	120.564	29.184	76.682	-0.541	9.898	1566.668	-0.008439	-0.002043	-0.005368
0.1776	921.752	132.140	33.658	84.650	-0.536	9.900	1754.780	-0.009250	-0.002356	-0.005925
0.1784	1010.540	142.508	37.536	91.889	-0.530	9.902	1923.809	-0.009976	-0.002627	-0.006432
0.1792	1087.215	151.553	41.093	97.944	-0.530	9.904	2069.778	-0.010609	-0.002877	-0.006856
0.1800	1151.191	159.322	44.566	103.532	-0.537	9.904	2191.572	-0.011153	-0.003120	-0.007247
0.1808	1203.250	165.881	47.444	108.196	-0.537	9.904	2290.678	-0.011612	-0.003321	-0.007574
0.1816	1244.638	171.202	49.832	111.800	-0.540	9.903	2369.471	-0.011984	-0.003488	-0.007826
0.1824	1276.438	175.441	51.555	115.033	-0.539	9.902	2430.010	-0.012281	-0.003609	-0.008052
0.1832	1299.386	178.734	52.917	117.317	-0.532	9.901	2473.698	-0.012511	-0.003704	-0.008212
0.1840	1313.949	180.819	53.583	118.968	-0.530	9.900	2501.421	-0.012657	-0.003751	-0.008328
0.1848	1321.268	182.182	54.474	120.084	-0.532	9.899	2515.354	-0.012753	-0.003813	-0.008406
0.1856	1323.011	182.947	54.696	120.676	-0.534	9.897	2518.673	-0.012806	-0.003829	-0.008447
0.1864	1320.832	183.185	55.001	120.951	-0.535	9.895	2514.524	-0.012823	-0.003850	-0.008467
0.1872	1315.617	183.169	54.932	120.925	-0.540	9.893	2504.597	-0.012822	-0.003845	-0.008465
0.1880	1307.306	182.626	54.765	120.952	-0.537	9.891	2488.775	-0.012784	-0.003834	-0.008467
0.1888	1293.270	181.666	54.363	120.333	-0.533	9.890	2462.053	-0.012717	-0.003805	-0.008423
0.1896	1267.331	179.707	53.697	119.012	-0.540	9.888	2412.672	-0.012580	-0.003759	-0.008331
0.1904	1223.373	175.955	52.489	116.630	-0.540	9.887	2328.987	-0.012317	-0.003674	-0.008164
0.1912	1158.179	169.814	50.182	112.007	-0.541	9.887	2204.876	-0.011887	-0.003513	-0.007841
0.1920	1073.073	161.406	46.874	105.897	-0.546	9.887	2042.856	-0.011298	-0.003281	-0.007413
0.1928	974.908	151.122	42.524	98.481	-0.541	9.889	1855.974	-0.010579	-0.002977	-0.006894
0.1936	872.384	139.977	37.743	90.487	-0.539	9.891	1660.795	-0.009798	-0.002642	-0.006334
0.1944	772.686	128.694	33.116	83.014	-0.539	9.892	1470.995	-0.009009	-0.002318	-0.005811
0.1952	681.072	118.119	29.171	76.011	-0.538	9.894	1296.587	-0.008268	-0.002042	-0.005321
0.1960	600.325	108.627	25.655	69.571	-0.538	9.896	1142.864	-0.007604	-0.001796	-0.004870
0.1968	531.059	99.955	22.820	63.737	-0.536	9.898	1011.000	-0.006997	-0.001597	-0.004462
0.1976	472.072	92.340	20.347	58.687	-0.536	9.900	898.705	-0.006464	-0.001424	-0.004108
0.1984	420.795	85.378	17.944	53.980	-0.532	9.902	801.086	-0.005976	-0.001256	-0.003779
0.1992	375.199	78.888	16.276	49.921	-0.529	9.904	714.283	-0.005522	-0.001139	-0.003494
0.2000	333.931	73.150	14.733	46.549	-0.538	9.904	635.719	-0.005121	-0.001031	-0.003258
0.2008	296.450	67.954	13.677	43.151	-0.540	9.903	564.365	-0.004757	-0.000957	-0.003021
0.2016	263.027	62.965	12.814	40.124	-0.541	9.902	500.736	-0.004408	-0.000897	-0.002809
0.2024	233.421	58.407	11.994	37.262	-0.544	9.901	444.374	-0.004088	-0.000840	-0.002608
0.2032	207.632	54.126	11.188	34.566	-0.536	9.901	395.279	-0.003789	-0.000783	-0.002420
0.2040	185.977	50.248	10.562	32.364	-0.534	9.900	354.052	-0.003517	-0.000739	-0.002266
0.2048	168.784	47.358	10.062	30.631	-0.539	9.898	321.321	-0.003315	-0.000704	-0.002144
0.2056	156.686	45.038	9.548	29.556	-0.537	9.896	298.290	-0.003153	-0.000668	-0.002069
0.2064	149.563	43.481	9.410	28.579	-0.545	9.894	284.729	-0.003044	-0.000659	-0.002001
0.2072	146.587	42.647	9.257	28.083	-0.548	9.892	279.064	-0.002985	-0.000648	-0.001966
0.2080	147.008	42.077	9.160	27.780	-0.549	9.890	279.865	-0.002945	-0.000641	-0.001945
0.2088	150.134	41.855	9.285	27.354	-0.549	9.889	285.816	-0.002930	-0.000650	-0.001915
0.2096	157.257	42.189	9.312	27.478	-0.543	9.887	299.377	-0.002953	-0.000652	-0.001923
0.2104	172.902	43.898	9.437	28.249	-0.544	9.886	329.161	-0.003073	-0.000661	-0.001977
0.2112	202.222	47.581	9.756	30.149	-0.542	9.887	384.979	-0.003331	-0.000683	-0.002110
0.2120	249.667	53.361	10.354	33.521	-0.545	9.887	475.302	-0.003735	-0.000725	-0.002346
0.2128	316.649	61.519	11.563	38.447	-0.546	9.889	602.818	-0.004306	-0.000809	-0.002691
0.2136	400.477	71.594	13.633	44.541	-0.541	9.891	762.405	-0.005012	-0.000954	-0.003118
0.2144	496.554	82.863	16.815	51.572	-0.544	9.893	945.311	-0.005800	-0.001177	-0.003610
0.2152	599.438	95.190	20.399	59.277	-0.548	9.894	1141.176	-0.006663	-0.001428	-0.004149
0.2160	704.472	107.683	24.749	67.245	-0.546	9.896	1341.133	-0.007538	-0.001732	-0.004707
0.2168	807.642	119.592	28.779	75.571	-0.553	9.898	1537.542	-0.008371	-0.002015	-0.005290
0.2176	905.071	130.862	33.283	83.552	-0.546	9.900	1723.022	-0.009160	-0.002330	-0.005849
0.2184	994.144	141.312	37.217	90.900	-0.540	9.902	1892.595	-0.009892	-0.002605	-0.006363
0.2192	1072.472	150.553	40.927	97.421	-0.533	9.904	2041.712	-0.010539	-0.002865	-0.006819
0.2200	1139.018	158.626	44.540	102.884	-0.539	9.904	2168.398	-0.011104	-0.003118	-0.007202
0.2208	1194.368	165.408	47.041	107.617	-0.542	9.904	2273.769	-0.011579	-0.003293	-0.007533
0.2216	1238.897	171.036	49.819	111.581	-0.544	9.903	2358.541	-0.011972	-0.003487	-0.007811
0.2224	1273.297	175.525	51.751	114.827	-0.547	9.902	2424.030	-0.012287	-0.003623	-0.008038
0.2232	1298.169	178.805	53.086	117.290	-0.537	9.902	2471.380	-0.012516	-0.003716	-0.008210
0.2240	1313.874	181.210	54.587	119.175	-0.534	9.900	2501.278	-0.012685	-0.003821	-0.008342
0.2248	1321.869	182.628	55.157	120.275	-0.536	9.899	2516.499	-0.012784	-0.003861	-0.008419
0.2256	1324.168	183.544	55.505	120.799	-0.538	9.897	2520.876	-0.012848	-0.003885	-0.008456
0.2264	1322.410	184.127	55.643	121.048	-0.538	9.895	2517.529	-0.012889	-0.003895	-0.008473
0.2272	1317.811	184.239	55.559	121.034	-0.543	9.893	2508.774	-0.012897	-0.003889	-0.008472
0.2280	1310.417	183.947	55.212	121.103	-0.541	9.891	2494.698	-0.012876	-0.003865	-0.008477
0.2288	1298.560	183.086	55.059	120.772	-0.537	9.889	2472.124	-0.012816	-0.003854	-0.008454
0.2296	1276.708	181.488	54.405	119.766	-0.537	9.888	2430.525	-0.012704	-0.003808	-0.008384
0.2304	1238.206	178.223	53.169	117.648	-0.536	9.886	2357.225	-0.012476	-0.003722	-0.008235
0.2312	1179.084	172.705	50.862	113.782	-0.533	9.887	2244.673	-0.012089	-0.003560	-0.007965
0.2320	1098.757	164.811	47.610	108.169	-0.537	9.887	2091.751	-0.011537	-0.003333	-0.007572
0.2328	1002.575	154.958	43.511	101.262	-0.537	9.889	1908.646	-0.010847	-0.003046	-0.007088
0.2336	898.969	143.951	38.842	93.445	-0.537	9.891	1711.407	-0.010077	-0.002719	-0.006541
0.2344	795.183	132.459	34.366	85.491	-0.541	9.892	1513.824	-0.009272	-0.002406	-0.005984
0.2352	697.423	121.370	30.087	77.881	-0.540	9.894	1327.715	-0.008496	-0.002106	-0.005452
0.2360	609.883	110.891	26.153	70.780	-0.540	9.896	1161.060	-0.007762	-0.001831	-0.004955
0.2368	534.440	101.469	22.831	64.382	-0.538	9.898	1017.437	-0.007103	-0.001598	-0.004507
0.2376	471.186	93.368	20.163	58.932	-0.536	9.900	897.017	-0.006536	-0.001411	-0.004125
0.2384	418.256	86.199	17.995	54.281	-0.532	9.902	796.251	-0.006034	-0.001260	-0.003800
0.2392	372.870	79.696	16.134	50.181	-0.530	9.904	709.848	-0.005579	-0.001129	-0.003513
0.2400	332.969	74.026	14.814	46.893	-0.534	9.904	633.888	-0.005182	-0.001037	-0.003282
0.2408	297.052	68.774	13.523	43.769	-0.534	9.903	565.510	-0.004814	-0.000947	-0.003064
0.2416	264.575	63.867	12.397	40.713	-0.534	9.902	503.683	-0.004471	-0.000868	-0.002850
0.2424	235.540	59.380	11.715	37.975	-0.536	9.901	448.408	-0.004157	-0.000820	-0.002658
0.2432	209.917	55.225	10.784	35.237	-0.530	9.901	399.628	-0.003866	-0.000755	-0.002467
0.2440	188.201	51.471	10.423	32.939	-0.532	9.900	358.286	-0.003603	-0.000730	-0.002306
0.2448	170.918	48.455	9.812	31.344	-0.534	9.899	325.384	-0.003392	-0.000687	-0.002194
0.2456	158.565	46.120	9.687	29.982	-0.534	9.897	301.867	-0.003228	-0.000678	-0.002099
0.2464	151.141	44.355	9.395	29.047	-0.539	9.895	287.733	-0.003105	-0.000658	-0.002033
0.2472	148.045	43.509	9.229	28.291	-0.538	9.893	281.839	-0.003046	-0.000646	-0.001980
0.2480	148.300	43.051	9.228	27.754	-0.540	9.891	282.326	-0.003014	-0.000646	-0.001943
0.2488	151.321	42.745	8.896	27.354	-0.542	9.890	288.076	-0.002992	-0.000623	-0.001915
0.2496	157.873	43.051	9.243	27.409	-0.544	9.888	300.550	-0.003014	-0.000647	-0.001919
0.2504	172.271	44.440	9.257	28.536	-0.553	9.886	327.959	-0.003111	-0.000648	-0.001998
0.2512	199.682	47.774	9.522	30.312	-0.554	9.887	380.144	-0.003344	-0.000667	-0.002122
0.2520	244.542	53.637	10.189	33.464	-0.554	9.887	465.546	-0.003755	-0.000713	-0.002342
0.2528	308.668	61.350	11.230	38.184	-0.554	9.889	587.626	-0.004295	-0.000786	-0.002673
0.2536	389.792	71.009	13.259	43.951	-0.546	9.891	742.064	-0.004971	-0.000928	-0.003077
0.2544	484.170	82.084	16.121	51.009	-0.548	9.893	921.736	-0.005746	-0.001128	-0.003571
0.2552	586.919	93.952	20.025	58.990	-0.546	9.894	1117.344	-0.006577	-0.001402	-0.004129
0.2560	693.306	106.570	24.235	67.149	-0.542	9.895	1319.876	-0.007460	-0.001696	-0.004700
0.2568	798.715	118.910	28.530	75.488	-0.541	9.897	1520.548	-0.008324	-0.001997	-0.005284
0.2576	898.669	130.445	33.172	83.662	-0.538	9.900	1710.835	-0.009131	-0.002322	-0.005856
0.2584	989.696	141.227	37.133	91.064	-0.533	9.902	1884.127	-0.009886	-0.002599	-0.006374
0.2592	1069.572	150.705	41.011	97.586	-0.533	9.904	2036.190	-0.010549	-0.002871	-0.006831
0.2600	1137.395	158.947	44.706	103.173	-0.540	9.904	2165.308	-0.011126	-0.003129	-0.007222
0.2608	1193.511	165.867	47.667	107.824	-0.536	9.904	2272.139	-0.011611	-0.003337	-0.007548
0.2616	1238.551	171.483	50.224	111.801	-0.542	9.903	2357.883	-0.012004	-0.003516	-0.007826
0.2624	1273.492	175.831	52.197	115.228	-0.540	9.902	2424.402	-0.012308	-0.003654	-0.008066
0.2632	1298.845	179.166	53.601	117.911	-0.534	9.901	2472.668	-0.012542	-0.003752	-0.008254
0.2640	1315.211	181.640	54.474	119.810	-0.536	9.900	2503.824	-0.012715	-0.003813	-0.008387
0.2648	1323.852	183.168	55.391	121.033	-0.533	9.898	2520.275	-0.012822	-0.003877	-0.008472
0.2656	1326.558	184.390	55.654	121.514	-0.532	9.896	2525.425	-0.012907	-0.003896	-0.008506
0.2664	1325.055	184.905	55.946	121.596	-0.531	9.894	2522.564	-0.012943	-0.003916	-0.008512
0.2672	1320.276	184.890	56.252	121.554	-0.532	9.892	2513.466	-0.012942	-0.003938	-0.008509
0.2680	1312.476	184.600	56.003	121.417	-0.531	9.890	2498.617	-0.012922	-0.003920	-0.008499
0.2688	1299.371	183.697	55.837	121.006	-0.530	9.889	2473.669	-0.012859	-0.003909	-0.008470
0.2696	1275.206	182.003	55.114	119.837	-0.532	9.887	2427.664	-0.012740	-0.003858	-0.008389
0.2704	1234.358	178.639	53.780	117.621	-0.539	9.886	2349.901	-0.012505	-0.003765	-0.008233
0.2712	1173.674	172.885	51.349	113.617	-0.538	9.886	2234.373	-0.012102	-0.003594	-0.007953
0.2720	1093.181	164.728	48.236	107.837	-0.544	9.887	2081.137	-0.011531	-0.003377	-0.007549
0.2728	998.457	154.887	43.970	100.971	-0.544	9.889	1900.806	-0.010842	-0.003078	-0.007068
0.2736	897.406	144.158	39.329	93.196	-0.537	9.891	1708.431	-0.010091	-0.002753	-0.006524
0.2744	797.152	133.166	34.979	85.546	-0.542	9.892	1517.572	-0.009322	-0.002449	-0.005988
0.2752	704.036	122.578	30.532	78.583	-0.541	9.894	1340.303	-0.008580	-0.002137	-0.005501
0.2760	621.380	112.879	27.044	72.087	-0.540	9.895	1182.947	-0.007902	-0.001893	-0.005046
0.2768	550.010	103.861	23.792	66.308	-0.540	9.898	1047.077	-0.007270	-0.001665	-0.004642
0.2776	488.634	96.038	21.430	61.190	-0.540	9.900	930.233	-0.006723	-0.001500	-0.004283
0.2784	435.027	89.173	19.039	56.209	-0.539	9.902	828.180	-0.006242	-0.001333	-0.003935
0.2792	387.523	82.586	17.302	51.779	-0.538	9.904	737.743	-0.005781	-0.001211	-0.003625
0.2800	344.767	76.749	15.719	47.898	-0.545	9.903	656.347	-0.005372	-0.001100	-0.003353
0.2808	305.993	71.192	14.218	44.443	-0.546	9.903	582.533	-0.004983	-0.000995	-0.003111
0.2816	271.022	65.938	13.190	41.514	-0.546	9.903	515.957	-0.004616	-0.000923	-0.002906
0.2824	239.688	61.020	12.176	38.596	-0.550	9.902	456.305	-0.004271	-0.000852	-0.002702
0.2832	212.291	56.545	11.216	35.885	-0.546	9.902	404.148	-0.003958	-0.000785	-0.002512
0.2840	189.358	52.681	10.744	33.437	-0.542	9.900	360.489	-0.003688	-0.000752	-0.002341
0.2848	171.399	49.513	10.231	31.426	-0.542	9.899	326.300	-0.003466	-0.000716	-0.002200
0.2856	158.986	47.205	9.896	30.161	-0.542	9.896	302.668	-0.003304	-0.000693	-0.002111
0.2864	151.742	45.566	9.813	29.473	-0.541	9.894	288.877	-0.003190	-0.000687	-0.002063
0.2872	148.901	44.635	9.451	29.019	-0.545	9.892	283.470	-0.003124	-0.000662	-0.002031
0.2880	149.638	44.205	9.602	28.743	-0.546	9.890	284.872	-0.003094	-0.000672	-0.002012
0.2888	153.335	44.067	9.214	28.536	-0.545	9.889	291.910	-0.003085	-0.000645	-0.001998
0.2896	161.871	44.483	9.408	28.605	-0.546	9.887	308.161	-0.003114	-0.000659	-0.002002
0.2904	179.875	46.442	9.546	29.472	-0.551	9.886	342.436	-0.003251	-0.000668	-0.002063
0.2912	212.381	50.443	9.504	31.633	-0.548	9.887	404.320	-0.003531	-0.000665	-0.002214
0.2920	263.238	56.627	10.673	35.197	-0.552	9.887	501.137	-0.003964	-0.000747	-0.002464
0.2928	332.999	65.117	11.869	40.151	-0.550	9.889	633.945	-0.004558	-0.000831	-0.002811
0.2936	418.812	75.276	14.246	46.482	-0.540	9.891	797.310	-0.005269	-0.000997	-0.003254
0.2944	516.166	86.560	17.526	53.747	-0.544	9.893	982.647	-0.006059	-0.001227	-0.003762
0.2952	620.433	98.831	21.333	61.701	-0.540	9.894	1181.145	-0.006918	-0.001493	-0.004319
0.2960	726.984	111.366	25.639	70.163	-0.539	9.896	1383.991	-0.007796	-0.001795	-0.004911
0.2968	831.432	123.483	30.128	78.569	-0.543	9.898	1582.832	-0.008644	-0.002109	-0.005500
0.2976	929.717	134.975	34.450	86.482	-0.541	9.900	1769.943	-0.009448	-0.002411	-0.006054
0.2984	1018.716	145.452	38.551	93.733	-0.536	9.902	1939.373	-0.010182	-0.002699	-0.006561
0.2992	1096.367	154.624	42.512	100.007	-0.536	9.904	2087.202	-0.010824	-0.002976	-0.007001
0.3000	1161.981	162.546	45.721	105.581	-0.540	9.904	2212.114	-0.011378	-0.003200	-0.007391
0.3008	1215.994	169.287	48.723	110.327	-0.540	9.903	2314.939	-0.011850	-0.003411	-0.007723
0.3016	1259.170	174.539	51.126	114.139	-0.543	9.902	2397.137	-0.012218	-0.003579	-0.007990
0.3024	1292.037	178.931	52.834	117.194	-0.540	9.901	2459.707	-0.012525	-0.003698	-0.008204
0.3032	1315.211	182.085	54.365	119.396	-0.529	9.901	2503.824	-0.012746	-0.003806	-0.008358
0.3040	1329.383	184.197	55.391	120.897	-0.528	9.900	2530.804	-0.012894	-0.003877	-0.008463
0.3048	1336.056	185.614	55.808	121.792	-0.525	9.898	2543.507	-0.012993	-0.003907	-0.008525
0.3056	1337.423	186.378	56.378	122.383	-0.529	9.897	2546.110	-0.013046	-0.003946	-0.008567
0.3064	1334.913	186.711	56.239	122.602	-0.534	9.894	2541.332	-0.013070	-0.003937	-0.008582
0.3072	1329.293	186.529	56.406	122.600	-0.535	9.892	2530.632	-0.013057	-0.003948	-0.008582
0.3080	1320.201	186.030	56.155	122.724	-0.536	9.891	2513.323	-0.013022	-0.003931	-0.008591
0.3088	1304.150	184.890	55.835	122.132	-0.534	9.890	2482.767	-0.012942	-0.003908	-0.008549
0.3096	1274.770	182.612	54.945	120.687	-0.534	9.888	2426.834	-0.012783	-0.003846	-0.008448
0.3104	1226.934	178.485	53.418	117.992	-0.541	9.887	2335.768	-0.012494	-0.003739	-0.008259
0.3112	1158.916	172.108	50.889	113.176	-0.541	9.887	2206.278	-0.012048	-0.003562	-0.007922
0.3120	1073.509	163.645	47.277	106.998	-0.540	9.887	2043.686	-0.011455	-0.003309	-0.007490
0.3128	978.034	153.598	43.247	99.885	-0.540	9.889	1861.925	-0.010752	-0.003027	-0.006992
0.3136	880.034	142.843	38.729	92.289	-0.530	9.891	1675.358	-0.009999	-0.002711	-0.006460
0.3144	784.663	132.017	34.505	85.092	-0.533	9.893	1493.797	-0.009241	-0.002415	-0.005956
0.3152	695.951	121.636	30.669	78.309	-0.533	9.894	1324.911	-0.008515	-0.002147	-0.005482
0.3160	616.060	112.213	27.153	71.745	-0.533	9.895	1172.819	-0.007855	-0.001901	-0.005022
0.3168	545.621	103.610	24.124	65.856	-0.536	9.898	1038.723	-0.007253	-0.001689	-0.004610
0.3176	483.975	95.911	21.414	60.448	-0.537	9.900	921.364	-0.006714	-0.001499	-0.004231
0.3184	429.377	88.698	18.969	55.592	-0.533	9.903	817.423	-0.006209	-0.001328	-0.003891
0.3192	380.264	81.944	16.926	51.395	-0.534	9.904	723.925	-0.005736	-0.001185	-0.003598
0.3200	335.780	75.719	15.119	47.760	-0.540	9.904	639.238	-0.005300	-0.001058	-0.003343
0.3208	295.654	69.953	14.174	44.307	-0.540	9.903	562.849	-0.004897	-0.000992	-0.003101
0.3216	260.112	64.672	12.965	41.059	-0.545	9.902	495.186	-0.004527	-0.000908	-0.002874
0.3224	229.228	59.949	12.437	38.018	-0.545	9.901	436.392	-0.004196	-0.000871	-0.002661
0.3232	203.049	55.696	11.673	35.006	-0.540	9.901	386.553	-0.003899	-0.000817	-0.002450
0.3240	181.678	52.097	10.937	32.846	-0.538	9.900	345.869	-0.003647	-0.000766	-0.002299
0.3248	165.267	49.208	10.658	31.002	-0.538	9.898	314.627	-0.003445	-0.000746	-0.002170
0.3256	154.041	46.873	10.074	29.779	-0.536	9.896	293.255	-0.003281	-0.000705	-0.002085
0.3264	147.489	45.275	9.977	29.159	-0.537	9.894	280.781	-0.003169	-0.000698	-0.002041
0.3272	144.979	44.329	9.617	28.608	-0.539	9.893	276.003	-0.003103	-0.000673	-0.002003
0.3280	145.505	43.855	9.590	28.427	-0.542	9.891	277.004	-0.003070	-0.000671	-0.001990
0.3288	148.661	43.757	9.410	28.082	-0.541	9.889	283.012	-0.003063	-0.000659	-0.001966
0.3296	155.739	44.187	9.563	28.110	-0.539	9.888	296.488	-0.003093	-0.000669	-0.001968
0.3304	170.963	45.745	9.798	28.964	-0.542	9.886	325.470	-0.003202	-0.000686	-0.002028
0.3312	199.848	49.274	9.993	30.726	-0.539	9.887	380.459	-0.003449	-0.000700	-0.002151
0.3320	246.706	55.083	10.660	34.125	-0.546	9.888	469.666	-0.003856	-0.000746	-0.002389
0.3328	313.297	63.200	12.021	39.024	-0.545	9.889	596.437	-0.004424	-0.000841	-0.002732
0.3336	397.396	73.344	13.953	45.106	-0.539	9.892	756.540	-0.005134	-0.000977	-0.003157
0.3344	494.359	84.699	17.191	52.372	-0.539	9.893	941.133	-0.005929	-0.001203	-0.003666
0.3352	599.017	96.927	21.027	60.271	-0.532	9.894	1140.375	-0.006785	-0.001472	-0.004219
0.3360	706.531	109.782	25.127	68.539	-0.531	9.895	1345.053	-0.007685	-0.001759	-0.004798
0.3368	812.331	122.038	29.643	76.988	-0.530	9.897	1546.469	-0.008543	-0.002075	-0.005389
0.3376	912.405	133.612	33.910	85.092	-0.530	9.900	1736.984	-0.009353	-0.002374	-0.005956
0.3384	1003.342	144.397	38.148	92.467	-0.524	9.902	1910.105	-0.010108	-0.002670	-0.006473
0.3392	1082.496	153.568	41.858	98.811	-0.526	9.904	2060.795	-0.010750	-0.002930	-0.006917
0.3400	1148.892	161.599	45.624	104.410	-0.533	9.904	2187.195	-0.011312	-0.003194	-0.007309
0.3408	1202.693	168.479	48.347	109.089	-0.534	9.904	2289.619	-0.011794	-0.003384	-0.007636
0.3416	1244.953	173.801	50.833	113.093	-0.543	9.903	2370.071	-0.012166	-0.003558	-0.007917
0.3424	1276.753	177.928	52.487	116.423	-0.541	9.902	2430.611	-0.012455	-0.003674	-0.008150
0.3432	1298.845	181.056	53.570	118.583	-0.536	9.902	2472.668	-0.012674	-0.003750	-0.008301
0.3440	1312.281	183.042	54.514	120.028	-0.531	9.900	2498.245	-0.012813	-0.003816	-0.008402
0.3448	1318.683	184.348	55.223	120.814	-0.526	9.898	2510.433	-0.012904	-0.003866	-0.008457
0.3456	1319.945	185.125	55.709	121.157	-0.524	9.896	2512.836	-0.012959	-0.003900	-0.008481
0.3464	1317.841	185.458	55.918	121.419	-0.527	9.894	2508.831	-0.012982	-0.003914	-0.008499
0.3472	1313.333	185.459	55.918	121.584	-0.529	9.892	2500.248	-0.012982	-0.003914	-0.008511
0.3480	1306.134	185.127	55.668	121.720	-0.536	9.890	2486.544	-0.012959	-0.003897	-0.008520
0.3488	1294.397	184.420	55.307	121.322	-0.533	9.889	2464.199	-0.012909	-0.003872	-0.008493
0.3496	1272.470	182.780	54.655	120.179	-0.531	9.888	2422.457	-0.012795	-0.003826	-0.008413
0.3504	1234.223	179.569	53.725	117.868	-0.534	9.887	2349.644	-0.012570	-0.003761	-0.008251
0.3512	1175.943	174.178	51.459	114.015	-0.532	9.887	2238.693	-0.012192	-0.003602	-0.007981
0.3520	1096.924	166.297	48.485	108.579	-0.537	9.888	2088.261	-0.011641	-0.003394	-0.007601
0.3528	1002.260	156.515	44.343	101.755	-0.537	9.890	1908.045	-0.010956	-0.003104	-0.007123
0.3536	899.616	145.482	39.674	94.174	-0.534	9.891	1712.637	-0.010184	-0.002777	-0.006592
0.3544	796.115	133.822	35.185	86.262	-0.536	9.892	1515.598	-0.009368	-0.002463	-0.006038
0.3552	698.355	122.677	30.726	78.584	-0.538	9.894	1329.489	-0.008587	-0.002151	-0.005501
0.3560	610.634	112.505	26.988	71.537	-0.541	9.895	1162.491	-0.007875	-0.001889	-0.005008
0.3568	535.297	103.291	23.543	65.194	-0.544	9.898	1019.068	-0.007230	-0.001648	-0.004564
0.3576	471.907	95.287	20.652	59.759	-0.543	9.900	898.390	-0.006670	-0.001446	-0.004183
0.3584	418.346	88.144	18.455	55.026	-0.535	9.902	796.423	-0.006170	-0.001292	-0.003852
0.3592	372.404	81.433	16.413	51.077	-0.533	9.904	708.961	-0.005700	-0.001149	-0.003575
0.3600	331.932	75.609	15.218	47.679	-0.536	9.904	631.914	-0.005293	-0.001065	-0.003338
0.3608	295.819	70.440	14.010	44.239	-0.534	9.904	563.164	-0.004931	-0.000981	-0.003097
0.3616	263.734	65.716	13.134	41.321	-0.539	9.903	502.081	-0.004600	-0.000919	-0.002892
0.3624	234.909	61.311	12.256	38.336	-0.539	9.902	447.206	-0.004292	-0.000858	-0.002684
0.3632	209.271	57.087	11.270	35.899	-0.536	9.902	398.397	-0.003996	-0.000789	-0.002513
0.3640	187.164	53.209	10.727	33.958	-0.538	9.900	356.312	-0.003725	-0.000751	-0.002377
0.3648	169.085	49.887	10.157	31.990	-0.538	9.898	321.894	-0.003492	-0.000711	-0.002239
0.3656	156.070	47.301	9.909	30.683	-0.541	9.897	297.117	-0.003311	-0.000694	-0.002148
0.3664	148.000	45.592	9.769	29.376	-0.544	9.894	281.754	-0.003191	-0.000684	-0.002056
0.3672	144.498	44.704	9.423	28.509	-0.546	9.892	275.087	-0.003129	-0.000660	-0.001996
0.3680	144.618	44.288	9.338	28.207	-0.549	9.891	275.316	-0.003100	-0.000654	-0.001974
0.3688	147.534	44.092	9.046	28.053	-0.544	9.889	280.867	-0.003086	-0.000633	-0.001964
0.3696	154.237	44.439	9.047	28.370	-0.545	9.888	293.627	-0.003111	-0.000633	-0.001986
0.3704	168.994	45.841	9.268	29.320	-0.552	9.887	321.722	-0.003209	-0.000649	-0.002052
0.3712	196.842	49.329	9.476	31.095	-0.552	9.887	374.737	-0.003453	-0.000663	-0.002177
0.3720	241.972	54.930	10.129	33.958	-0.559	9.888	460.653	-0.003845	-0.000709	-0.002377
0.3728	305.993	62.477	11.491	38.333	-0.553	9.889	582.533	-0.004373	-0.000804	-0.002683
0.3736	386.636	72.177	13.577	44.388	-0.544	9.891	736.055	-0.005052	-0.000950	-0.003107
0.3744	480.037	82.974	16.551	51.544	-0.545	9.892	913.868	-0.005808	-0.001159	-0.003608
0.3752	581.705	94.939	20.581	59.623	-0.542	9.893	1107.416	-0.006646	-0.001441	-0.004174
0.3760	687.174	107.598	24.472	67.976	-0.549	9.896	1308.203	-0.007532	-0.001713	-0.004758
0.3768	791.997	119.688	28.724	75.929	-0.552	9.898	1507.759	-0.008378	-0.002011	-0.005315
0.3776	892.146	131.306	33.144	83.745	-0.551	9.900	1698.418	-0.009191	-0.002320	-0.005862
0.3784	984.466	142.146	37.187	91.037	-0.549	9.902	1874.170	-0.009950	-0.002603	-0.006373
0.3792	1066.641	151.833	41.190	97.792	-0.544	9.904	2030.611	-0.010628	-0.002883	-0.006845
0.3800	1137.470	160.365	45.039	104.025	-0.548	9.904	2165.451	-0.011226	-0.003153	-0.007282
0.3808	1196.397	167.675	48.264	109.214	-0.546	9.904	2277.632	-0.011737	-0.003378	-0.007645
0.3816	1243.360	173.510	50.946	113.258	-0.548	9.902	2367.039	-0.012146	-0.003566	-0.007928
0.3824	1278.467	177.984	53.017	116.300	-0.548	9.901	2433.872	-0.012459	-0.003711	-0.008141
0.3832	1302.332	181.402	54.239	118.487	-0.542	9.901	2479.305	-0.012698	-0.003797	-0.008294
0.3840	1316.413	183.639	55.045	120.137	-0.541	9.900	2506.113	-0.012855	-0.003853	-0.008410
0.3848	1322.605	185.126	55.572	121.376	-0.541	9.898	2517.900	-0.012959	-0.003890	-0.008496
0.3856	1323.627	185.989	55.835	122.133	-0.541	9.897	2519.846	-0.013019	-0.003908	-0.008549
0.3864	1321.253	186.224	56.114	122.450	-0.535	9.895	2515.326	-0.013036	-0.003928	-0.008572
0.3872	1316.278	186.321	55.974	122.382	-0.539	9.892	2505.856	-0.013042	-0.003918	-0.008567
0.3880	1308.704	185.973	56.142	122.134	-0.539	9.891	2491.436	-0.013018	-0.003930	-0.008549
0.3888	1296.260	185.264	55.573	121.419	-0.540	9.890	2467.747	-0.012968	-0.003890	-0.008499
0.3896	1273.267	183.625	55.294	120.056	-0.546	9.888	2423.973	-0.012854	-0.003871	-0.008404
0.3904	1233.938	180.138	54.225	117.772	-0.548	9.887	2349.100	-0.012610	-0.003796	-0.008244
0.3912	1174.801	174.539	51.876	114.139	-0.545	9.887	2236.519	-0.012218	-0.003631	-0.007990
0.3920	1095.616	166.521	48.945	108.800	-0.545	9.887	2085.772	-0.011656	-0.003426	-0.007616
0.3928	1001.749	156.946	44.651	102.100	-0.545	9.889	1907.072	-0.010986	-0.003126	-0.007147
0.3936	900.923	146.260	40.023	94.491	-0.541	9.891	1715.126	-0.010238	-0.002802	-0.006614
0.3944	800.067	135.266	35.451	86.552	-0.543	9.892	1523.123	-0.009469	-0.002482	-0.006059
0.3952	705.223	124.608	31.406	79.245	-0.543	9.894	1342.564	-0.008723	-0.002198	-0.005547
0.3960	619.967	114.519	27.571	72.695	-0.541	9.896	1180.258	-0.008016	-0.001930	-0.005089
0.3968	545.396	105.249	24.333	66.915	-0.543	9.898	1038.294	-0.007367	-0.001703	-0.004684
0.3976	481.104	96.981	21.665	61.673	-0.542	9.900	915.899	-0.006789	-0.001517	-0.004317
0.3984	425.424	89.616	19.303	56.609	-0.540	9.902	809.898	-0.006273	-0.001351	-0.003963
0.3992	376.777	82.946	17.177	52.027	-0.541	9.904	717.287	-0.005806	-0.001202	-0.003642
