# Supplementary material for: Evaluation of a Cold-Mixed High-Performance Polyurethane Mixture
Source: Hindawi journal article supplement (doi:10.1155/2019/1507971), 2019-11-07
Supplement: f1 [file 1507971.f1.zip › 1507971.f1/dynamic modulus data/PUM/specimen2/temp10/zhs-2-10_Runtime.csv]

Time (sec)	Load (kN)	Confining Pressure (kPa)	Axial LVDT #1 (mm)	Axial LVDT #2 (mm)	Axial LVDT #3 (mm)	Temperature (�C)
0.0008	0.036564	-0.552	0.16064632	0.19824314	-0.01235753	9.90
0.0016	0.036936	-0.546	0.16065794	0.19823831	-0.01233923	9.90
0.0024	0.037336	-0.542	0.16065693	0.19824219	-0.01234609	9.90
0.0032	0.037422	-0.545	0.16065788	0.19822758	-0.01234990	9.90
0.0040	0.037422	-0.542	0.16065592	0.19821882	-0.01236540	9.90
0.0048	0.037451	-0.543	0.16066080	0.19821781	-0.01237696	9.89
0.0056	0.037422	-0.546	0.16065800	0.19823247	-0.01236629	9.89
0.0064	0.037680	-0.545	0.16065121	0.19824022	-0.01235759	9.89
0.0072	0.038137	-0.544	0.16066581	0.19823730	-0.01234210	9.89
0.0080	0.039024	-0.543	0.16065323	0.19826257	-0.01234400	9.89
0.0088	0.040398	-0.545	0.16065419	0.19822842	-0.01236522	9.89
0.0096	0.042257	-0.542	0.16065317	0.19825482	-0.01238161	9.89
0.0104	0.045748	-0.546	0.16063368	0.19823825	-0.01239896	9.89
0.0112	0.051327	-0.543	0.16062391	0.19822764	-0.01239121	9.89
0.0120	0.060883	-0.542	0.16060251	0.19822764	-0.01240081	9.89
0.0128	0.075674	-0.546	0.16055876	0.19821298	-0.01242864	9.89
0.0136	0.096331	-0.545	0.16048580	0.19819641	-0.01249802	9.89
0.0144	0.123854	-0.548	0.16037685	0.19816905	-0.01259923	9.90
0.0152	0.157843	-0.547	0.16020566	0.19816226	-0.01271296	9.90
0.0160	0.198240	-0.543	0.16001105	0.19810873	-0.01283634	9.90
0.0168	0.244131	-0.542	0.15978736	0.19808644	-0.01295769	9.90
0.0176	0.293684	-0.541	0.15954220	0.19804269	-0.01308286	9.90
0.0184	0.345812	-0.546	0.15928537	0.19798428	-0.01323593	9.90
0.0192	0.398254	-0.549	0.15901983	0.19794148	-0.01339674	9.90
0.0200	0.449753	-0.549	0.15875822	0.19789475	-0.01355946	9.90
0.0208	0.498133	-0.549	0.15850437	0.19784611	-0.01371264	9.90
0.0216	0.541477	-0.540	0.15828550	0.19782579	-0.01384079	9.90
0.0224	0.578327	-0.538	0.15808326	0.19778979	-0.01395541	9.90
0.0232	0.607767	-0.536	0.15791398	0.19777226	-0.01404989	9.90
0.0240	0.630798	-0.535	0.15778172	0.19775283	-0.01412493	9.90
0.0248	0.648565	-0.538	0.15767282	0.19770604	-0.01419902	9.89
0.0256	0.662441	-0.541	0.15759492	0.19770211	-0.01425302	9.89
0.0264	0.673285	-0.546	0.15752488	0.19768167	-0.01430207	9.89
0.0272	0.681467	-0.548	0.15746456	0.19769138	-0.01434934	9.89
0.0280	0.687189	-0.552	0.15741986	0.19771087	-0.01437926	9.89
0.0288	0.690222	-0.552	0.15738195	0.19768763	-0.01441872	9.89
0.0296	0.690422	-0.550	0.15736437	0.19768959	-0.01442069	9.89
0.0304	0.688305	-0.552	0.15735269	0.19767886	-0.01442933	9.89
0.0312	0.683413	-0.549	0.15735167	0.19766718	-0.01441300	9.89
0.0320	0.676260	-0.550	0.15736532	0.19768751	-0.01439273	9.89
0.0328	0.666962	-0.551	0.15738380	0.19769043	-0.01438892	9.89
0.0336	0.654430	-0.546	0.15742081	0.19770604	-0.01436776	9.89
0.0344	0.637150	-0.546	0.15748304	0.19771868	-0.01433593	9.90
0.0352	0.612946	-0.544	0.15757746	0.19773531	-0.01427144	9.90
0.0360	0.580273	-0.543	0.15772241	0.19773334	-0.01419050	9.90
0.0368	0.538731	-0.543	0.15791982	0.19777226	-0.01408261	9.90
0.0376	0.490179	-0.540	0.15814257	0.19780052	-0.01395357	9.90
0.0384	0.438080	-0.542	0.15838659	0.19782871	-0.01383603	9.90
0.0392	0.385952	-0.540	0.15863854	0.19786084	-0.01370317	9.90
0.0400	0.337343	-0.537	0.15887874	0.19788510	-0.01356161	9.90
0.0408	0.293941	-0.534	0.15911418	0.19790161	-0.01343060	9.90
0.0416	0.256348	-0.532	0.15932530	0.19794238	-0.01330251	9.90
0.0424	0.224304	-0.534	0.15949458	0.19796771	-0.01318783	9.90
0.0432	0.197153	-0.541	0.15964055	0.19798523	-0.01310790	9.90
0.0440	0.174780	-0.542	0.15976208	0.19801444	-0.01304144	9.90
0.0448	0.156670	-0.541	0.15985447	0.19803590	-0.01297110	9.89
0.0456	0.142536	-0.541	0.15994108	0.19804657	-0.01292098	9.89
0.0464	0.131779	-0.538	0.15999657	0.19806606	-0.01286411	9.89
0.0472	0.123968	-0.534	0.16003942	0.19808060	-0.01280439	9.89
0.0480	0.119247	-0.536	0.16007060	0.19807178	-0.01279575	9.89
0.0488	0.116673	-0.537	0.16007841	0.19809026	-0.01278812	9.89
0.0496	0.116243	-0.536	0.16009396	0.19809115	-0.01279575	9.89
0.0504	0.117903	-0.542	0.16008419	0.19809026	-0.01282752	9.89
0.0512	0.120764	-0.534	0.16008419	0.19810009	-0.01281977	9.89
0.0520	0.125141	-0.534	0.16008514	0.19811177	-0.01280910	9.89
0.0528	0.131607	-0.536	0.16007829	0.19808358	-0.01280719	9.89
0.0536	0.141478	-0.532	0.16006470	0.19809425	-0.01280624	9.89
0.0544	0.157385	-0.540	0.16000438	0.19807470	-0.01284868	9.90
0.0552	0.181732	-0.534	0.15990317	0.19806206	-0.01292574	9.90
0.0560	0.215664	-0.534	0.15974367	0.19804949	-0.01302022	9.90
0.0568	0.258579	-0.530	0.15954429	0.19803292	-0.01312906	9.90
0.0576	0.308847	-0.528	0.15931273	0.19800377	-0.01325041	9.90
0.0584	0.364723	-0.536	0.15903741	0.19796866	-0.01341128	9.90
0.0592	0.423231	-0.537	0.15875727	0.19793165	-0.01357508	9.90
0.0600	0.482340	-0.540	0.15846831	0.19788402	-0.01375908	9.90
0.0608	0.538645	-0.539	0.15818918	0.19783932	-0.01393050	9.90
0.0616	0.589027	-0.530	0.15795374	0.19779849	-0.01406729	9.90
0.0624	0.631828	-0.529	0.15772706	0.19775277	-0.01420009	9.90
0.0632	0.666075	-0.530	0.15753442	0.19772357	-0.01429933	9.90
0.0640	0.692482	-0.534	0.15738553	0.19769925	-0.01437932	9.90
0.0648	0.711851	-0.536	0.15726197	0.19768560	-0.01445252	9.89
0.0656	0.725126	-0.540	0.15719289	0.19767106	-0.01450843	9.89
0.0664	0.733309	-0.541	0.15715593	0.19765645	-0.01454788	9.89
0.0672	0.736742	-0.538	0.15712386	0.19764864	-0.01457870	9.89
0.0680	0.736856	-0.540	0.15710253	0.19762540	-0.01458925	9.89
0.0688	0.734825	-0.542	0.15708792	0.19764966	-0.01459605	9.89
0.0696	0.730991	-0.541	0.15707821	0.19762051	-0.01460183	9.89
0.0704	0.726385	-0.542	0.15708107	0.19764382	-0.01461232	9.89
0.0712	0.720320	-0.542	0.15710145	0.19764376	-0.01460075	9.89
0.0720	0.712280	-0.537	0.15712380	0.19763696	-0.01459014	9.89
0.0728	0.701609	-0.539	0.15715104	0.19764566	-0.01458532	9.89
0.0736	0.686588	-0.538	0.15720171	0.19764566	-0.01454210	9.89
0.0744	0.664902	-0.535	0.15728348	0.19766712	-0.01449788	9.90
0.0752	0.634117	-0.536	0.15740705	0.19766420	-0.01442069	9.90
0.0760	0.593090	-0.533	0.15759093	0.19770992	-0.01430124	9.90
0.0768	0.542650	-0.529	0.15782827	0.19772553	-0.01416826	9.90
0.0776	0.486431	-0.531	0.15809089	0.19776928	-0.01402080	9.90
0.0784	0.429211	-0.532	0.15835160	0.19780236	-0.01387060	9.90
0.0792	0.374880	-0.532	0.15861332	0.19783747	-0.01372224	9.90
0.0800	0.326357	-0.536	0.15885651	0.19785798	-0.01357973	9.90
0.0808	0.284328	-0.533	0.15907925	0.19788319	-0.01344883	9.90
0.0816	0.248337	-0.529	0.15929323	0.19792312	-0.01333523	9.90
0.0824	0.217638	-0.533	0.15946245	0.19795120	-0.01324093	9.90
0.0832	0.191717	-0.533	0.15960640	0.19798613	-0.01316190	9.90
0.0840	0.170031	-0.534	0.15971637	0.19800949	-0.01309049	9.90
0.0848	0.152464	-0.537	0.15980685	0.19802403	-0.01301920	9.89
0.0856	0.138702	-0.534	0.15988362	0.19802213	-0.01296133	9.89
0.0864	0.128117	-0.538	0.15994781	0.19805026	-0.01291412	9.89
0.0872	0.120506	-0.538	0.16000515	0.19804245	-0.01287186	9.89
0.0880	0.116014	-0.544	0.16003245	0.19805801	-0.01285452	9.89
0.0888	0.114040	-0.549	0.16004521	0.19805408	-0.01285738	9.89
0.0896	0.114212	-0.550	0.16003454	0.19804448	-0.01285744	9.89
0.0904	0.116701	-0.554	0.16002196	0.19805139	-0.01286995	9.89
0.0912	0.120220	-0.549	0.16003066	0.19805723	-0.01286513	9.89
0.0920	0.125227	-0.547	0.16002184	0.19805825	-0.01284593	9.89
0.0928	0.133066	-0.545	0.16001022	0.19806015	-0.01285744	9.89
0.0936	0.145426	-0.544	0.15997708	0.19804353	-0.01287574	9.89
0.0944	0.165081	-0.546	0.15989834	0.19804645	-0.01293260	9.90
0.0952	0.193605	-0.545	0.15978551	0.19803971	-0.01301634	9.90
0.0960	0.231028	-0.542	0.15961522	0.19802707	-0.01310986	9.90
0.0968	0.276489	-0.541	0.15940714	0.19802034	-0.01322633	9.90
0.0976	0.328217	-0.543	0.15915316	0.19797176	-0.01334959	9.90
0.0984	0.384893	-0.549	0.15887010	0.19793290	-0.01351333	9.90
0.0992	0.444260	-0.553	0.15858126	0.19787258	-0.01368862	9.90
0.1000	0.503511	-0.554	0.15826994	0.19783562	-0.01386786	9.90
0.1008	0.559473	-0.547	0.15799081	0.19779277	-0.01404506	9.90
0.1016	0.608854	-0.538	0.15775836	0.19776744	-0.01418763	9.90
0.1024	0.649824	-0.538	0.15755409	0.19773537	-0.01431078	9.90
0.1032	0.681639	-0.537	0.15739745	0.19770420	-0.01441091	9.90
0.1040	0.704870	-0.539	0.15726620	0.19766140	-0.01448792	9.90
0.1048	0.720749	-0.538	0.15716118	0.19764578	-0.01453996	9.89
0.1056	0.730877	-0.536	0.15709889	0.19762433	-0.01458919	9.89
0.1064	0.736113	-0.532	0.15705520	0.19761950	-0.01461715	9.89
0.1072	0.737972	-0.532	0.15703857	0.19764578	-0.01462394	9.89
0.1080	0.737486	-0.539	0.15701622	0.19763017	-0.01465762	9.89
0.1088	0.735083	-0.540	0.15700161	0.19764769	-0.01465279	9.89
0.1096	0.731678	-0.545	0.15700352	0.19764382	-0.01464409	9.89
0.1104	0.727158	-0.546	0.15700549	0.19764572	-0.01465476	9.89
0.1112	0.720863	-0.541	0.15702772	0.19764775	-0.01463068	9.89
0.1120	0.712366	-0.540	0.15705782	0.19766045	-0.01461905	9.89
0.1128	0.700464	-0.536	0.15709668	0.19764292	-0.01461232	9.89
0.1136	0.682497	-0.533	0.15715992	0.19766146	-0.01458049	9.89
0.1144	0.655518	-0.531	0.15727085	0.19767600	-0.01451021	9.90
0.1152	0.617752	-0.530	0.15742558	0.19769931	-0.01441300	9.90
0.1160	0.569029	-0.534	0.15763760	0.19774407	-0.01427138	9.90
0.1168	0.512609	-0.533	0.15790606	0.19777226	-0.01408738	9.90
0.1176	0.453787	-0.536	0.15818620	0.19782096	-0.01392746	9.90
0.1184	0.397310	-0.540	0.15846431	0.19784534	-0.01378876	9.90
0.1192	0.346298	-0.537	0.15873480	0.19787353	-0.01364720	9.90
0.1200	0.302525	-0.538	0.15895754	0.19790077	-0.01353836	9.90
0.1208	0.265560	-0.532	0.15916383	0.19791049	-0.01342177	9.90
0.1216	0.234003	-0.526	0.15934485	0.19794738	-0.01329654	9.90
0.1224	0.207310	-0.527	0.15949667	0.19796389	-0.01322144	9.90
0.1232	0.184193	-0.528	0.15962809	0.19799399	-0.01314539	9.90
0.1240	0.164623	-0.530	0.15973115	0.19801539	-0.01307613	9.90
0.1248	0.148430	-0.532	0.15981281	0.19802219	-0.01303279	9.89
0.1256	0.135441	-0.532	0.15987885	0.19804746	-0.01297981	9.89
0.1264	0.125484	-0.535	0.15993810	0.19804353	-0.01293063	9.89
0.1272	0.118189	-0.535	0.15998876	0.19807464	-0.01289397	9.89
0.1280	0.113869	-0.544	0.16000921	0.19806296	-0.01287186	9.89
0.1288	0.112009	-0.547	0.16001892	0.19807470	-0.01285738	9.89
0.1296	0.112209	-0.542	0.16001892	0.19805723	-0.01285833	9.89
0.1304	0.114470	-0.548	0.16001886	0.19803971	-0.01287854	9.89
0.1312	0.118017	-0.539	0.16003352	0.19806021	-0.01287848	9.89
0.1320	0.122681	-0.535	0.16003352	0.19804657	-0.01287371	9.89
0.1328	0.129862	-0.538	0.16001987	0.19807869	-0.01288527	9.89
0.1336	0.141335	-0.537	0.15998679	0.19806117	-0.01288241	9.89
0.1344	0.159845	-0.540	0.15992063	0.19805527	-0.01291323	9.90
0.1352	0.187426	-0.544	0.15980291	0.19803292	-0.01299888	9.90
0.1360	0.224333	-0.540	0.15963471	0.19800466	-0.01309818	9.90
0.1368	0.269508	-0.542	0.15942270	0.19801444	-0.01323491	9.90
0.1376	0.320978	-0.541	0.15916777	0.19796491	-0.01338512	9.90
0.1384	0.377226	-0.542	0.15888572	0.19794345	-0.01353830	9.90
0.1392	0.435705	-0.546	0.15859777	0.19788510	-0.01369333	9.90
0.1400	0.493841	-0.543	0.15830010	0.19783938	-0.01386201	9.90
0.1408	0.548344	-0.542	0.15803260	0.19780040	-0.01402867	9.90
0.1416	0.596380	-0.538	0.15779138	0.19777513	-0.01416636	9.90
0.1424	0.636835	-0.536	0.15759295	0.19773328	-0.01429540	9.90
0.1432	0.669165	-0.538	0.15742368	0.19770020	-0.01438779	9.90
0.1440	0.694027	-0.539	0.15728456	0.19766229	-0.01444942	9.90
0.1448	0.712109	-0.538	0.15719986	0.19763023	-0.01451117	9.89
0.1456	0.723782	-0.540	0.15712297	0.19763708	-0.01455837	9.89
0.1464	0.729933	-0.538	0.15708017	0.19760007	-0.01458055	9.89
0.1472	0.732050	-0.536	0.15705299	0.19763213	-0.01460278	9.89
0.1480	0.731220	-0.538	0.15703070	0.19760489	-0.01462197	9.89
0.1488	0.728731	-0.537	0.15702289	0.19759130	-0.01462585	9.89
0.1496	0.724812	-0.540	0.15702581	0.19759721	-0.01463354	9.89
0.1504	0.719376	-0.542	0.15702480	0.19759041	-0.01463157	9.89
0.1512	0.712137	-0.537	0.15703839	0.19761473	-0.01461333	9.89
0.1520	0.702353	-0.537	0.15706176	0.19764191	-0.01460463	9.89
0.1528	0.688877	-0.536	0.15709579	0.19764280	-0.01458633	9.89
0.1536	0.668621	-0.532	0.15717947	0.19765735	-0.01454586	9.89
0.1544	0.638866	-0.538	0.15730298	0.19766217	-0.01447845	9.90
0.1552	0.598326	-0.539	0.15748394	0.19767487	-0.01436961	9.90
0.1560	0.548344	-0.540	0.15771836	0.19772261	-0.01424152	9.90
0.1568	0.492382	-0.541	0.15797806	0.19774693	-0.01408261	9.90
0.1576	0.435190	-0.536	0.15825343	0.19781411	-0.01392460	9.90
0.1584	0.380831	-0.540	0.15851897	0.19782478	-0.01378787	9.90
0.1592	0.331678	-0.537	0.15877968	0.19786859	-0.01363862	9.90
0.1600	0.289392	-0.541	0.15900642	0.19787937	-0.01351726	9.90
0.1608	0.253372	-0.540	0.15919894	0.19789684	-0.01339781	9.90
0.1616	0.222645	-0.536	0.15937012	0.19792211	-0.01328027	9.90
0.1624	0.195980	-0.537	0.15950918	0.19795018	-0.01320601	9.90
0.1632	0.172606	-0.538	0.15963364	0.19798905	-0.01312894	9.90
0.1640	0.152636	-0.536	0.15974647	0.19800073	-0.01307213	9.90
0.1648	0.135870	-0.539	0.15983891	0.19803679	-0.01300949	9.89
0.1656	0.122309	-0.535	0.15990126	0.19803882	-0.01294506	9.89
0.1664	0.111866	-0.530	0.15997034	0.19804657	-0.01289213	9.89
0.1672	0.104113	-0.531	0.16002291	0.19806498	-0.01282954	9.89
0.1680	0.099106	-0.529	0.16005403	0.19806486	-0.01281893	9.89
0.1688	0.096560	-0.537	0.16008025	0.19806677	-0.01281697	9.89
0.1696	0.095930	-0.536	0.16009289	0.19807845	-0.01281404	9.89
0.1704	0.097361	-0.540	0.16008705	0.19807267	-0.01282454	9.89
0.1712	0.100250	-0.538	0.16009587	0.19809413	-0.01280338	9.89
0.1720	0.104542	-0.535	0.16009104	0.19807273	-0.01280147	9.89
0.1728	0.111322	-0.537	0.16006768	0.19807762	-0.01282269	9.89
0.1736	0.122223	-0.532	0.16003942	0.19806302	-0.01285166	9.89
0.1744	0.139990	-0.526	0.15998000	0.19805330	-0.01291138	9.90
0.1752	0.167170	-0.524	0.15987003	0.19805235	-0.01297301	9.90
0.1760	0.204449	-0.523	0.15970659	0.19802701	-0.01305676	9.90
0.1768	0.250883	-0.522	0.15949744	0.19802701	-0.01315892	9.90
0.1776	0.304613	-0.527	0.15923291	0.19799584	-0.01329857	9.90
0.1784	0.363550	-0.530	0.15894496	0.19795692	-0.01348633	9.90
0.1792	0.425377	-0.530	0.15864444	0.19791996	-0.01367134	9.90
0.1800	0.487032	-0.534	0.15833128	0.19785768	-0.01386583	9.90
0.1808	0.544825	-0.528	0.15804231	0.19781101	-0.01402664	9.90
0.1816	0.595179	-0.523	0.15780199	0.19778186	-0.01415104	9.90
0.1824	0.635977	-0.523	0.15759474	0.19774395	-0.01426947	9.90
0.1832	0.667534	-0.522	0.15743327	0.19770801	-0.01437449	9.90
0.1840	0.691080	-0.528	0.15730095	0.19766229	-0.01445830	9.90
0.1848	0.707903	-0.532	0.15720081	0.19765455	-0.01451695	9.89
0.1856	0.719547	-0.532	0.15713274	0.19761175	-0.01455939	9.89
0.1864	0.726471	-0.530	0.15709573	0.19762820	-0.01457769	9.89
0.1872	0.729561	-0.523	0.15708315	0.19763309	-0.01457959	9.89
0.1880	0.730076	-0.522	0.15705889	0.19760388	-0.01459688	9.89
0.1888	0.728331	-0.518	0.15704036	0.19760871	-0.01461601	9.89
0.1896	0.725040	-0.520	0.15702981	0.19758642	-0.01463526	9.89
0.1904	0.720348	-0.520	0.15702486	0.19759327	-0.01464593	9.89
0.1912	0.713511	-0.517	0.15703946	0.19761652	-0.01463157	9.89
0.1920	0.704355	-0.519	0.15707445	0.19763792	-0.01460272	9.89
0.1928	0.690994	-0.520	0.15710932	0.19762623	-0.01456326	9.89
0.1936	0.670395	-0.522	0.15718329	0.19763976	-0.01452470	9.89
0.1944	0.639954	-0.522	0.15731359	0.19764566	-0.01445824	9.90
0.1952	0.598125	-0.525	0.15749651	0.19767582	-0.01436484	9.90
0.1960	0.546484	-0.524	0.15773493	0.19772154	-0.01423764	9.90
0.1968	0.489292	-0.522	0.15800923	0.19777030	-0.01406914	9.90
0.1976	0.431385	-0.525	0.15828741	0.19779068	-0.01389772	9.90
0.1984	0.376997	-0.527	0.15854329	0.19781703	-0.01374835	9.90
0.1992	0.328474	-0.528	0.15879124	0.19785500	-0.01359999	9.90
0.2000	0.286732	-0.530	0.15901697	0.19787443	-0.01349115	9.90
0.2008	0.038767	-0.546	0.16056466	0.19814777	-0.01238734	9.90
0.2016	0.039024	-0.545	0.16056079	0.19815552	-0.01240277	9.90
0.2024	0.039282	-0.541	0.16055495	0.19813603	-0.01241535	9.90
0.2032	0.039968	-0.543	0.16054416	0.19813991	-0.01243556	9.90
0.2040	0.041084	-0.533	0.16054612	0.19814187	-0.01243752	9.90
0.2048	0.042715	-0.530	0.16054225	0.19814289	-0.01242304	9.90
0.2056	0.045662	-0.536	0.16054130	0.19814575	-0.01241815	9.90
0.2064	0.050726	-0.536	0.16053545	0.19813991	-0.01241529	9.90
0.2072	0.059280	-0.542	0.16050047	0.19812727	-0.01243454	9.89
0.2080	0.074072	-0.545	0.16045088	0.19812632	-0.01248848	9.89
0.2088	0.097532	-0.548	0.16036034	0.19812340	-0.01255685	9.89
0.2096	0.133152	-0.548	0.16021836	0.19810879	-0.01265502	9.89
0.2104	0.185823	-0.549	0.15999168	0.19808352	-0.01279467	9.89
0.2112	0.258522	-0.552	0.15963662	0.19802219	-0.01299888	9.89
0.2120	0.353680	-0.552	0.15916973	0.19796389	-0.01326668	9.89
0.2128	0.471354	-0.555	0.15859878	0.19788408	-0.01361638	9.89
0.2136	0.608311	-0.556	0.15794504	0.19777417	-0.01401418	9.89
0.2144	0.759945	-0.552	0.15724564	0.19764674	-0.01445729	9.89
0.2152	0.920906	-0.554	0.15649569	0.19745708	-0.01493508	9.89
0.2160	1.086044	-0.551	0.15571743	0.19725186	-0.01540810	9.89
0.2168	1.251583	-0.550	0.15494132	0.19703197	-0.01591480	9.90
0.2176	1.414604	-0.551	0.15418351	0.19679755	-0.01641959	9.90
0.2184	1.573105	-0.547	0.15346265	0.19656307	-0.01691848	9.90
0.2192	1.724195	-0.545	0.15276527	0.19632471	-0.01739615	9.90
0.2200	1.864901	-0.542	0.15211046	0.19609123	-0.01784116	9.90
0.2208	1.993361	-0.543	0.15149862	0.19585782	-0.01824856	9.90
0.2216	2.107744	-0.544	0.15093249	0.19565356	-0.01861459	9.90
0.2224	2.206936	-0.545	0.15043730	0.19544643	-0.01896524	9.90
0.2232	2.288818	-0.545	0.15001905	0.19528401	-0.01925129	9.90
0.2240	2.351189	-0.542	0.14968634	0.19515067	-0.01949203	9.90
0.2248	2.392559	-0.543	0.14944702	0.19505048	-0.01967889	9.90
0.2256	2.414160	-0.544	0.14929044	0.19498426	-0.01978576	9.90
0.2264	2.419739	-0.544	0.14919513	0.19494438	-0.01984739	9.90
0.2272	2.414017	-0.545	0.14916116	0.19493371	-0.01986855	9.89
0.2280	2.400770	-0.543	0.14915144	0.19492596	-0.01986188	9.89
0.2288	2.381115	-0.544	0.14917672	0.19494742	-0.01985419	9.89
0.2296	2.351446	-0.538	0.14923799	0.19497466	-0.01981473	9.89
0.2304	2.305012	-0.538	0.14934593	0.19501162	-0.01972908	9.89
0.2312	2.235861	-0.543	0.14955890	0.19509423	-0.01959705	9.89
0.2320	2.140188	-0.541	0.14987212	0.19521290	-0.01937157	9.89
0.2328	2.018194	-0.547	0.15031475	0.19538701	-0.01906627	9.89
0.2336	1.873512	-0.544	0.15086818	0.19560593	-0.01868284	9.89
0.2344	1.712179	-0.540	0.15149468	0.19585502	-0.01823884	9.89
0.2352	1.541491	-0.539	0.15219116	0.19612831	-0.01776505	9.89
0.2360	1.370001	-0.540	0.15289736	0.19637245	-0.01727855	9.89
0.2368	1.205864	-0.543	0.15360075	0.19662726	-0.01680660	9.89
0.2376	1.054602	-0.544	0.15428072	0.19684225	-0.01634330	9.90
0.2384	0.919247	-0.546	0.15491009	0.19703686	-0.01591557	9.90
0.2392	0.800543	-0.541	0.15548980	0.19720417	-0.01553512	9.90
0.2400	0.697746	-0.537	0.15601510	0.19734323	-0.01519996	9.90
0.2408	0.609627	-0.541	0.15648401	0.19744343	-0.01493794	9.90
0.2416	0.534325	-0.540	0.15688771	0.19751728	-0.01470482	9.90
0.2424	0.471125	-0.546	0.15724671	0.19758236	-0.01449966	9.90
0.2432	0.418682	-0.546	0.15755600	0.19762427	-0.01431179	9.90
0.2440	0.375566	-0.539	0.15781862	0.19766903	-0.01413268	9.90
0.2448	0.341320	-0.534	0.15804332	0.19771093	-0.01399887	9.90
0.2456	0.314856	-0.529	0.15821254	0.19772363	-0.01390254	9.90
0.2464	0.296230	-0.532	0.15834969	0.19773239	-0.01383227	9.90
0.2472	0.285301	-0.534	0.15844113	0.19775468	-0.01378983	9.89
0.2480	0.280981	-0.538	0.15849173	0.19775373	-0.01374549	9.89
0.2488	0.282469	-0.542	0.15852004	0.19777036	-0.01371759	9.89
0.2496	0.289192	-0.541	0.15852106	0.19779074	-0.01370698	9.89
0.2504	0.304012	-0.540	0.15848887	0.19777906	-0.01371759	9.89
0.2512	0.334654	-0.549	0.15837401	0.19776344	-0.01379561	9.89
0.2520	0.390272	-0.547	0.15813273	0.19774491	-0.01393330	9.89
0.2528	0.478163	-0.554	0.15772223	0.19770306	-0.01415867	9.89
0.2536	0.600672	-0.556	0.15716684	0.19761848	-0.01447362	9.89
0.2544	0.754623	-0.547	0.15647912	0.19749099	-0.01488394	9.89
0.2552	0.932579	-0.552	0.15568435	0.19729841	-0.01537901	9.89
0.2560	1.126356	-0.548	0.15483314	0.19704163	-0.01593578	9.89
0.2568	1.327686	-0.548	0.15394604	0.19676346	-0.01653296	9.90
0.2576	1.527071	-0.548	0.15308028	0.19646490	-0.01712340	9.90
0.2584	1.716270	-0.546	0.15227681	0.19616050	-0.01768786	9.90
0.2592	1.888218	-0.543	0.15153170	0.19587737	-0.01819742	9.90
0.2600	2.037306	-0.541	0.15087217	0.19563121	-0.01864922	9.90
0.2608	2.161703	-0.544	0.15030986	0.19539094	-0.01904804	9.90
0.2616	2.261868	-0.545	0.14983225	0.19519925	-0.01938325	9.90
0.2624	2.340174	-0.548	0.14945185	0.19504273	-0.01966453	9.90
0.2632	2.399626	-0.549	0.14915222	0.19490469	-0.01989084	9.90
0.2640	2.442341	-0.544	0.14892173	0.19482207	-0.02004492	9.90
0.2648	2.470121	-0.540	0.14875537	0.19474912	-0.02016830	9.90
0.2656	2.485085	-0.543	0.14864355	0.19470143	-0.02023959	9.90
0.2664	2.489777	-0.544	0.14857346	0.19467217	-0.02027625	9.90
0.2672	2.486572	-0.548	0.14852971	0.19465852	-0.02031481	9.89
0.2680	2.477016	-0.550	0.14852196	0.19467402	-0.02032334	9.89
0.2688	2.461424	-0.549	0.14853358	0.19466329	-0.02032804	9.89
0.2696	2.437019	-0.546	0.14858520	0.19470322	-0.02030104	9.89
0.2704	2.397051	-0.544	0.14868248	0.19472176	-0.02021533	9.89
0.2712	2.332420	-0.548	0.14887506	0.19479477	-0.02006990	9.89
0.2720	2.235003	-0.546	0.14921361	0.19492805	-0.01984072	9.89
0.2728	2.101078	-0.547	0.14968932	0.19511670	-0.01950067	9.89
0.2736	1.935339	-0.551	0.15032846	0.19536763	-0.01907104	9.89
0.2744	1.748514	-0.543	0.15106094	0.19567019	-0.01856345	9.89
0.2752	1.553621	-0.547	0.15184885	0.19597852	-0.01802021	9.89
0.2760	1.364193	-0.550	0.15264744	0.19627911	-0.01748568	9.89
0.2768	1.189728	-0.548	0.15340132	0.19657087	-0.01697135	9.90
0.2776	1.036491	-0.549	0.15409100	0.19680429	-0.01651376	9.90
0.2784	0.906372	-0.543	0.15470779	0.19699597	-0.01610148	9.90
0.2792	0.796881	-0.533	0.15524375	0.19715554	-0.01574218	9.90
0.2800	0.704641	-0.530	0.15572232	0.19728005	-0.01544547	9.90
0.2808	0.625648	-0.538	0.15615618	0.19737542	-0.01519221	9.90
0.2816	0.557070	-0.540	0.15652490	0.19746673	-0.01495910	9.90
0.2824	0.497646	-0.546	0.15686637	0.19753093	-0.01475680	9.90
0.2832	0.445776	-0.544	0.15718341	0.19758445	-0.01456422	9.90
0.2840	0.400572	-0.538	0.15745771	0.19762135	-0.01438415	9.90
0.2848	0.361719	-0.536	0.15770173	0.19765550	-0.01424932	9.90
0.2856	0.329876	-0.537	0.15791082	0.19768566	-0.01413184	9.90
0.2864	0.306215	-0.538	0.15807146	0.19770509	-0.01404893	9.90
0.2872	0.291281	-0.541	0.15818626	0.19772851	-0.01398534	9.89
0.2880	0.284414	-0.543	0.15825540	0.19773626	-0.01393527	9.89
0.2888	0.284472	-0.545	0.15828848	0.19773918	-0.01391214	9.89
0.2896	0.290136	-0.546	0.15828651	0.19775766	-0.01388621	9.89
0.2904	0.302811	-0.546	0.15826988	0.19773811	-0.01390254	9.89
0.2912	0.329790	-0.553	0.15818524	0.19774109	-0.01396519	9.89
0.2920	0.380688	-0.550	0.15796345	0.19770128	-0.01408273	9.89
0.2928	0.464201	-0.553	0.15758604	0.19764584	-0.01429939	9.89
0.2936	0.583506	-0.552	0.15704721	0.19758266	-0.01459414	9.89
0.2944	0.735512	-0.545	0.15637213	0.19744253	-0.01500058	9.89
0.2952	0.912895	-0.550	0.15559304	0.19727522	-0.01549464	9.89
0.2960	1.106043	-0.548	0.15475744	0.19701260	-0.01604563	9.89
0.2968	1.306629	-0.546	0.15387321	0.19674027	-0.01663703	9.90
0.2976	1.505413	-0.549	0.15300167	0.19642997	-0.01721114	9.90
0.2984	1.693783	-0.541	0.15218937	0.19613999	-0.01776117	9.90
0.2992	1.865902	-0.539	0.15143836	0.19585592	-0.01826686	9.90
0.3000	2.016420	-0.537	0.15077394	0.19559711	-0.01871669	9.90
0.3008	2.143965	-0.540	0.15020871	0.19537050	-0.01913661	9.90
0.3016	2.249851	-0.546	0.14972425	0.19514585	-0.01948726	9.90
0.3024	2.335539	-0.545	0.14930892	0.19499314	-0.01978391	9.90
0.3032	2.403688	-0.546	0.14898598	0.19482487	-0.02001798	9.90
0.3040	2.455158	-0.541	0.14871657	0.19472271	-0.02018267	9.90
0.3048	2.490034	-0.541	0.14853078	0.19462538	-0.02031261	9.90
0.3056	2.509718	-0.542	0.14841205	0.19456702	-0.02040410	9.90
0.3064	2.516785	-0.542	0.14833331	0.19453788	-0.02046674	9.90
0.3072	2.514553	-0.542	0.14829439	0.19451159	-0.02050620	9.89
0.3080	2.505198	-0.538	0.14827394	0.19452327	-0.02051109	9.89
0.3088	2.489576	-0.537	0.14829731	0.19453007	-0.02050334	9.89
0.3096	2.464485	-0.536	0.14834976	0.19455922	-0.02046287	9.89
0.3104	2.420912	-0.537	0.14845681	0.19461668	-0.02037525	9.89
0.3112	2.347870	-0.541	0.14868152	0.19468582	-0.02023739	9.89
0.3120	2.237978	-0.534	0.14904433	0.19483656	-0.01998794	9.89
0.3128	2.090092	-0.535	0.14957452	0.19504958	-0.01961613	9.89
0.3136	1.912136	-0.532	0.15026218	0.19532090	-0.01914507	9.89
0.3144	1.719017	-0.528	0.15102196	0.19564474	-0.01859707	9.89
0.3152	1.525068	-0.534	0.15181381	0.19594342	-0.01803744	9.89
0.3160	1.342850	-0.533	0.15257645	0.19624889	-0.01751053	9.89
0.3168	1.179914	-0.535	0.15327877	0.19649893	-0.01702422	9.90
0.3176	1.038780	-0.535	0.15391588	0.19673634	-0.01660520	9.90
0.3184	0.918159	-0.533	0.15448689	0.19691724	-0.01623249	9.90
0.3192	0.814390	-0.532	0.15501219	0.19707477	-0.01590312	9.90
0.3200	0.724154	-0.525	0.15547717	0.19720310	-0.01559573	9.90
0.3208	0.644932	-0.531	0.15589541	0.19728869	-0.01532698	9.90
0.3216	0.575066	-0.530	0.15627575	0.19737136	-0.01508808	9.90
0.3224	0.513525	-0.533	0.15661716	0.19744241	-0.01488101	9.90
0.3232	0.459623	-0.538	0.15693724	0.19748628	-0.01471448	9.90
0.3240	0.412359	-0.531	0.15723205	0.19754362	-0.01454121	9.90
0.3248	0.371933	-0.534	0.15749180	0.19758451	-0.01439774	9.90
0.3256	0.339117	-0.534	0.15769506	0.19760489	-0.01427156	9.90
0.3264	0.315084	-0.538	0.15785754	0.19763309	-0.01415402	9.90
0.3272	0.300179	-0.543	0.15796936	0.19766033	-0.01408845	9.90
0.3280	0.293570	-0.544	0.15804040	0.19767880	-0.01404309	9.89
0.3288	0.293741	-0.546	0.15808612	0.19769251	-0.01402473	9.89
0.3296	0.299463	-0.545	0.15810066	0.19770807	-0.01402855	9.89
0.3304	0.312738	-0.543	0.15807730	0.19769549	-0.01404405	9.89
0.3312	0.341578	-0.549	0.15796530	0.19769448	-0.01410383	9.89
0.3320	0.395994	-0.547	0.15772223	0.19767404	-0.01421648	9.89
0.3328	0.484829	-0.552	0.15732533	0.19763225	-0.01443899	9.89
0.3336	0.611086	-0.553	0.15676898	0.19753683	-0.01477122	9.89
0.3344	0.770903	-0.545	0.15606380	0.19739383	-0.01520944	9.89
0.3352	0.956440	-0.550	0.15525830	0.19717586	-0.01574028	9.89
0.3360	1.157141	-0.545	0.15439260	0.19691122	-0.01630372	9.89
0.3368	1.363878	-0.545	0.15349960	0.19661653	-0.01689321	9.90
0.3376	1.566381	-0.545	0.15262800	0.19631112	-0.01747501	9.90
0.3384	1.755610	-0.541	0.15181869	0.19599402	-0.01802981	9.90
0.3392	1.925325	-0.540	0.15106869	0.19572651	-0.01854128	9.90
0.3400	2.070723	-0.539	0.15041983	0.19546682	-0.01898247	9.90
0.3408	2.190571	-0.542	0.14988285	0.19522369	-0.01936966	9.90
0.3416	2.286272	-0.543	0.14944017	0.19505060	-0.01968074	9.90
0.3424	2.360258	-0.543	0.14908415	0.19486779	-0.01993895	9.90
0.3432	2.416019	-0.541	0.14881951	0.19476855	-0.02014405	9.90
0.3440	2.456131	-0.540	0.14860654	0.19467801	-0.02028567	9.90
0.3448	2.482367	-0.538	0.14844513	0.19462258	-0.02039450	9.90
0.3456	2.496815	-0.542	0.14834493	0.19457477	-0.02046674	9.90
0.3464	2.501850	-0.542	0.14827591	0.19454753	-0.02051497	9.90
0.3472	2.499704	-0.542	0.14824575	0.19453001	-0.02055347	9.89
0.3480	2.491579	-0.546	0.14823794	0.19451833	-0.02057087	9.89
0.3488	2.477703	-0.544	0.14826226	0.19453496	-0.02055925	9.89
0.3496	2.455101	-0.540	0.14831090	0.19453788	-0.02052170	9.89
0.3504	2.414503	-0.538	0.14841300	0.19460022	-0.02044177	9.89
0.3512	2.344294	-0.539	0.14862996	0.19466543	-0.02029335	9.89
0.3520	2.236891	-0.540	0.14899284	0.19481808	-0.02004683	9.89
0.3528	2.091236	-0.545	0.14951813	0.19503498	-0.01969332	9.89
0.3536	1.915970	-0.548	0.15017670	0.19530827	-0.01921558	9.89
0.3544	1.725769	-0.542	0.15092665	0.19562334	-0.01867431	9.89
0.3552	1.533594	-0.542	0.15170968	0.19592398	-0.01814067	9.89
0.3560	1.350918	-0.544	0.15247619	0.19622654	-0.01761091	9.89
0.3568	1.185265	-0.539	0.15319699	0.19647068	-0.01712543	9.90
0.3576	1.040840	-0.541	0.15384781	0.19670218	-0.01669776	9.90
0.3584	0.918045	-0.539	0.15442753	0.19689280	-0.01630867	9.90
0.3592	0.813303	-0.538	0.15494215	0.19703382	-0.01596963	9.90
0.3600	0.723038	-0.535	0.15540910	0.19717973	-0.01566809	9.90
0.3608	0.643587	-0.542	0.15582728	0.19726729	-0.01541382	9.90
0.3616	0.572662	-0.545	0.15620375	0.19735879	-0.01516336	9.90
0.3624	0.509291	-0.544	0.15654325	0.19741327	-0.01495039	9.90
0.3632	0.452671	-0.546	0.15686810	0.19746286	-0.01475871	9.90
0.3640	0.402632	-0.538	0.15717268	0.19751930	-0.01456696	9.90
0.3648	0.360031	-0.535	0.15744710	0.19755137	-0.01443505	9.90
0.3656	0.325985	-0.535	0.15767467	0.19760096	-0.01430893	9.90
0.3664	0.301838	-0.534	0.15784687	0.19762045	-0.01421368	9.90
0.3672	0.287561	-0.537	0.15795577	0.19762629	-0.01414335	9.89
0.3680	0.281725	-0.537	0.15801311	0.19764870	-0.01408064	9.89
0.3688	0.282698	-0.542	0.15804130	0.19764578	-0.01404983	9.89
0.3696	0.289164	-0.544	0.15805584	0.19765943	-0.01403242	9.89
0.3704	0.302925	-0.542	0.15803546	0.19765848	-0.01405466	9.89
0.3712	0.332737	-0.552	0.15792847	0.19764286	-0.01412505	9.89
0.3720	0.388327	-0.549	0.15768141	0.19762737	-0.01425022	9.89
0.3728	0.477848	-0.554	0.15727293	0.19758546	-0.01447368	9.89
0.3736	0.604248	-0.556	0.15671748	0.19749886	-0.01480502	9.89
0.3744	0.762892	-0.544	0.15601122	0.19735789	-0.01522881	9.89
0.3752	0.945683	-0.551	0.15521753	0.19716138	-0.01576054	9.89
0.3760	1.143093	-0.548	0.15435761	0.19688421	-0.01633465	9.89
0.3768	1.346283	-0.545	0.15345585	0.19660699	-0.01692504	9.90
0.3776	1.546555	-0.549	0.15259010	0.19627815	-0.01751262	9.90
0.3784	1.735153	-0.543	0.15178275	0.19596297	-0.01804912	9.90
0.3792	1.905527	-0.538	0.15103763	0.19568384	-0.01855189	9.90
0.3800	2.052813	-0.539	0.15039176	0.19542998	-0.01898831	9.90
0.3808	2.175379	-0.542	0.14984411	0.19520336	-0.01938033	9.90
0.3816	2.275372	-0.545	0.14938104	0.19501275	-0.01970398	9.90
0.3824	2.355022	-0.546	0.14901423	0.19483757	-0.01997173	9.90
0.3832	2.417049	-0.544	0.14871651	0.19471395	-0.02019322	9.90
0.3840	2.462597	-0.539	0.14850247	0.19462347	-0.02034730	9.90
0.3848	2.492380	-0.538	0.14832538	0.19456702	-0.02046764	9.90
0.3856	2.508602	-0.537	0.14820093	0.19453001	-0.02054667	9.90
0.3864	2.514038	-0.537	0.14813673	0.19448340	-0.02060157	9.90
0.3872	2.511635	-0.538	0.14808911	0.19447756	-0.02063054	9.89
0.3880	2.503052	-0.534	0.14809400	0.19446009	-0.02064985	9.89
0.3888	2.488489	-0.540	0.14812022	0.19447273	-0.02064598	9.89
0.3896	2.464657	-0.537	0.14816988	0.19449997	-0.02059394	9.89
0.3904	2.421455	-0.537	0.14828068	0.19454080	-0.02051675	9.89
0.3912	2.346954	-0.544	0.14850342	0.19461465	-0.02036172	9.89
0.3920	2.233229	-0.539	0.14889640	0.19477713	-0.02009869	9.89
0.3928	2.079821	-0.542	0.14946252	0.19499594	-0.01972789	9.89
0.3936	1.897001	-0.540	0.15015811	0.19528878	-0.01923478	9.89
0.3944	1.700878	-0.536	0.15093440	0.19562048	-0.01866740	9.89
0.3952	1.506014	-0.542	0.15173209	0.19593859	-0.01809919	9.89
0.3960	1.324282	-0.543	0.15249181	0.19622946	-0.01757514	9.89
0.3968	1.162548	-0.548	0.15320385	0.19650370	-0.01710510	9.90
0.3976	1.023617	-0.547	0.15384287	0.19671190	-0.01669472	9.90
0.3984	0.906143	-0.549	0.15439248	0.19688994	-0.01634693	9.90
0.3992	0.805950	-0.546	0.15488470	0.19704747	-0.01600784	9.90
0.4000	0.718431	-0.543	0.15533215	0.19716430	-0.01569289	9.90
0.4008	0.640411	-0.553	0.15574074	0.19726646	-0.01544446	9.90
0.4016	0.570402	-0.548	0.15611625	0.19734824	-0.01520079	9.90
0.4024	0.507917	-0.550	0.15646255	0.19742030	-0.01500446	9.90
0.4032	0.453215	-0.548	0.15678358	0.19746113	-0.01483876	9.90
0.4040	0.405922	-0.540	0.15707934	0.19750786	-0.01464897	9.90
0.4048	0.366154	-0.539	0.15733421	0.19755250	-0.01448721	9.90
0.4056	0.334511	-0.540	0.15754038	0.19756711	-0.01435328	9.90
0.4064	0.311537	-0.538	0.15769601	0.19759917	-0.01424062	9.90
0.4072	0.297346	-0.541	0.15780973	0.19762141	-0.01418573	9.89
0.4080	0.291252	-0.538	0.15788561	0.19763309	-0.01416737	9.89
0.4088	0.291653	-0.538	0.15793037	0.19764954	-0.01415288	9.89
0.4096	0.297489	-0.543	0.15795076	0.19766217	-0.01414812	9.89
0.4104	0.310135	-0.539	0.15792358	0.19765162	-0.01415491	9.89
0.4112	0.337229	-0.549	0.15781266	0.19763213	-0.01420218	9.89
0.4120	0.388899	-0.544	0.15758115	0.19761372	-0.01431686	9.89
0.4128	0.474186	-0.543	0.15719503	0.19756901	-0.01453251	9.89
0.4136	0.596180	-0.541	0.15666783	0.19749403	-0.01485509	9.89
0.4144	0.751162	-0.532	0.15599275	0.19735986	-0.01527214	9.89
0.4152	0.931206	-0.540	0.15521353	0.19715256	-0.01576722	9.89
0.4160	1.126413	-0.540	0.15436625	0.19688594	-0.01631916	9.89
0.4168	1.328373	-0.539	0.15347910	0.19659710	-0.01688844	9.90
0.4176	1.527700	-0.541	0.15262306	0.19629163	-0.01746541	9.90
0.4184	1.716042	-0.538	0.15182054	0.19599307	-0.01802498	9.90
0.4192	1.887331	-0.531	0.15107739	0.19570518	-0.01853359	9.90
0.4200	2.036734	-0.533	0.15042466	0.19544154	-0.01900172	9.90
0.4208	2.163477	-0.539	0.14986145	0.19520223	-0.01941109	9.90
0.4216	2.268705	-0.539	0.14936829	0.19498622	-0.01975119	9.90
0.4224	2.353220	-0.546	0.14897341	0.19482082	-0.02003634	9.90
0.4232	2.418594	-0.546	0.14866024	0.19467294	-0.02025312	9.90
0.4240	2.465515	-0.538	0.14842087	0.19457573	-0.02040535	9.90
0.4248	2.494726	-0.537	0.14826232	0.19451743	-0.02052951	9.90
0.4256	2.509174	-0.533	0.14815623	0.19445032	-0.02061713	9.90
0.4264	2.513037	-0.530	0.14809191	0.19444746	-0.02066714	9.90
0.4272	2.509317	-0.530	0.14806187	0.19440174	-0.02069116	9.90
0.4280	2.500448	-0.526	0.14805126	0.19441152	-0.02068830	9.89
0.4288	2.486315	-0.528	0.14807749	0.19442517	-0.02066809	9.89
0.4296	2.463455	-0.522	0.14814365	0.19444841	-0.02062762	9.89
0.4304	2.422485	-0.525	0.14824867	0.19450182	-0.02056020	9.89
0.4312	2.351503	-0.532	0.14845967	0.19457668	-0.02042443	9.89
0.4320	2.242842	-0.530	0.14881861	0.19472164	-0.02017498	9.89
0.4328	2.094584	-0.537	0.14933515	0.19493568	-0.01981479	9.89
0.4336	1.915312	-0.536	0.15001804	0.19523537	-0.01933217	9.89
0.4344	1.720448	-0.530	0.15079528	0.19554085	-0.01878506	9.89
0.4352	1.525040	-0.530	0.15159011	0.19587547	-0.01822925	9.89
0.4360	1.342020	-0.529	0.15235764	0.19615859	-0.01769561	9.89
0.4368	1.179485	-0.525	0.15305603	0.19641250	-0.01722562	9.90
0.4376	1.040125	-0.530	0.15369034	0.19663817	-0.01680756	9.90
0.4384	0.922508	-0.529	0.15425545	0.19681525	-0.01644343	9.90
0.4392	0.822687	-0.529	0.15475255	0.19696116	-0.01611692	9.90
0.4400	0.735998	-0.530	0.15520000	0.19709241	-0.01580673	9.90
0.4408	0.658665	-0.537	0.15558904	0.19720817	-0.01554573	9.90
0.4416	0.588284	-0.540	0.15594900	0.19728786	-0.01531744	9.90
0.4424	0.523996	-0.541	0.15629423	0.19739002	-0.01510739	9.90
0.4432	0.465746	-0.544	0.15661919	0.19742703	-0.01492053	9.90
0.4440	0.414133	-0.537	0.15693533	0.19746983	-0.01473266	9.90
0.4448	0.370445	-0.536	0.15721345	0.19753402	-0.01455349	9.90
0.4456	0.335627	-0.540	0.15743142	0.19753689	-0.01440138	9.90
0.4464	0.310736	-0.542	0.15760845	0.19758934	-0.01429451	9.90
0.4472	0.295801	-0.545	0.15773684	0.19759715	-0.01422328	9.89
0.4480	0.289478	-0.548	0.15781367	0.19760489	-0.01419729	9.89
0.4488	0.290079	-0.549	0.15785837	0.19761950	-0.01419151	9.89
0.4496	0.296803	-0.549	0.15787196	0.19763023	-0.01418090	9.89
0.4504	0.311794	-0.547	0.15783501	0.19764674	-0.01419723	9.89
0.4512	0.343580	-0.552	0.15770382	0.19763511	-0.01425219	9.89
0.4520	0.402460	-0.545	0.15744901	0.19762635	-0.01438606	9.89
0.4528	0.495930	-0.549	0.15703464	0.19757098	-0.01463449	9.89
0.4536	0.626249	-0.552	0.15645880	0.19746983	-0.01499379	9.89
0.4544	0.788412	-0.545	0.15575057	0.19730055	-0.01544064	9.89
0.4552	0.973692	-0.553	0.15492475	0.19708556	-0.01595116	9.89
0.4560	1.172705	-0.551	0.15405512	0.19681704	-0.01651567	9.89
0.4568	1.376381	-0.552	0.15316987	0.19652516	-0.01708972	9.90
0.4576	1.575565	-0.554	0.15232360	0.19623631	-0.01767063	9.90
0.4584	1.762505	-0.555	0.15153462	0.19591922	-0.01823604	9.90
0.4592	1.931305	-0.550	0.15079921	0.19563514	-0.01872820	9.90
0.4600	2.077990	-0.549	0.15016013	0.19536090	-0.01916361	9.90
0.4608	2.200985	-0.551	0.14959884	0.19511086	-0.01955557	9.90
0.4616	2.300692	-0.549	0.14914852	0.19491440	-0.01987630	9.90
0.4624	2.378740	-0.553	0.14878958	0.19476068	-0.02014500	9.90
0.4632	2.437019	-0.550	0.14850163	0.19464099	-0.02035785	9.90
0.4640	2.477732	-0.544	0.14830023	0.19456124	-0.02050233	9.90
0.4648	2.502909	-0.544	0.14816403	0.19451648	-0.02060735	9.90
0.4656	2.515211	-0.543	0.14808035	0.19445425	-0.02068442	9.90
0.4664	2.518215	-0.545	0.14802498	0.19444841	-0.02073163	9.90
0.4672	2.514410	-0.549	0.14799684	0.19442606	-0.02074319	9.89
0.4680	2.505369	-0.546	0.14798218	0.19442117	-0.02074891	9.89
0.4688	2.490892	-0.546	0.14799297	0.19443673	-0.02073842	9.89
0.4696	2.466831	-0.539	0.14805317	0.19444257	-0.02068740	9.89
0.4704	2.422657	-0.539	0.14817858	0.19449800	-0.02062577	9.89
0.4712	2.346382	-0.546	0.14842474	0.19456804	-0.02047557	9.89
0.4720	2.231369	-0.544	0.14882541	0.19472957	-0.02019811	9.89
0.4728	2.078018	-0.548	0.14937502	0.19494259	-0.01981759	9.89
0.4736	1.897001	-0.543	0.15005606	0.19522369	-0.01930702	9.89
0.4744	1.703968	-0.534	0.15081090	0.19555050	-0.01875794	9.89
0.4752	1.512165	-0.536	0.15159500	0.19584817	-0.01822817	9.89
0.4760	1.332579	-0.537	0.15235573	0.19615942	-0.01772439	9.89
0.4768	1.172075	-0.537	0.15305310	0.19641733	-0.01726305	9.90
0.4776	1.033258	-0.542	0.15368253	0.19663811	-0.01684791	9.90
0.4784	0.914984	-0.543	0.15424180	0.19682384	-0.01646644	9.90
0.4792	0.813131	-0.541	0.15474278	0.19698918	-0.01612353	9.90
0.4800	0.723381	-0.542	0.15521169	0.19709802	-0.01582688	9.90
0.4808	0.642786	-0.547	0.15563083	0.19719732	-0.01556778	9.90
0.4816	0.570030	-0.545	0.15600926	0.19726253	-0.01532990	9.90
0.4824	0.505028	-0.548	0.15636033	0.19732386	-0.01511514	9.90
0.4832	0.447836	-0.545	0.15668029	0.19738418	-0.01491189	9.90
0.4840	0.398540	-0.536	0.15698284	0.19745034	-0.01471061	9.90
0.4848	0.357599	-0.536	0.15724444	0.19749117	-0.01454973	9.90
0.4856	0.325413	-0.536	0.15745854	0.19751549	-0.01443124	9.90
0.4864	0.303068	-0.540	0.15762109	0.19754076	-0.01434839	9.90
0.4872	0.290165	-0.546	0.15771347	0.19755334	-0.01429439	9.89
0.4880	0.285187	-0.547	0.15776992	0.19758058	-0.01425588	9.89
0.4888	0.286646	-0.548	0.15780199	0.19759417	-0.01422608	9.89
0.4896	0.293312	-0.546	0.15780783	0.19760001	-0.01420206	9.89
0.4904	0.307417	-0.543	0.15778548	0.19760197	-0.01420307	9.89
0.4912	0.337772	-0.549	0.15765911	0.19758648	-0.01426756	9.89
0.4920	0.394220	-0.548	0.15739846	0.19757873	-0.01439852	9.89
0.4928	0.484886	-0.550	0.15699089	0.19753397	-0.01463640	9.89
0.4936	0.612602	-0.550	0.15643066	0.19743574	-0.01498407	9.89
0.4944	0.772133	-0.545	0.15573508	0.19728976	-0.01542044	9.89
0.4952	0.954895	-0.547	0.15494323	0.19706696	-0.01591837	9.89
0.4960	1.150675	-0.545	0.15407836	0.19679952	-0.01646459	9.89
0.4968	1.350460	-0.544	0.15320188	0.19650769	-0.01703674	9.90
0.4976	1.546040	-0.542	0.15236628	0.19620228	-0.01759928	9.90
0.4984	1.729603	-0.541	0.15157443	0.19591045	-0.01816666	9.90
0.4992	1.895914	-0.533	0.15086335	0.19562256	-0.01867807	9.90
0.5000	2.040768	-0.533	0.15023977	0.19536477	-0.01911443	9.90
0.5008	2.162991	-0.542	0.14970088	0.19513619	-0.01949972	9.90
0.5016	2.264328	-0.540	0.14924467	0.19493097	-0.01980215	9.90
0.5024	2.346296	-0.546	0.14886045	0.19477528	-0.02006799	9.90
0.5032	2.410498	-0.545	0.14855790	0.19465268	-0.02030492	9.90
0.5040	2.457390	-0.537	0.14831859	0.19454765	-0.02047157	9.90
0.5048	2.487516	-0.537	0.14815128	0.19447273	-0.02060163	9.90
0.5056	2.502966	-0.536	0.14804327	0.19443280	-0.02067679	9.90
0.5064	2.507401	-0.534	0.14796746	0.19439399	-0.02071154	9.90
0.5072	2.504168	-0.535	0.14794314	0.19439495	-0.02072400	9.90
0.5080	2.495327	-0.536	0.14793730	0.19439405	-0.02073073	9.89
0.5088	2.481308	-0.537	0.14796072	0.19440186	-0.02072781	9.89
0.5096	2.458506	-0.538	0.14800739	0.19442129	-0.02069890	9.89
0.5104	2.417450	-0.538	0.14810950	0.19447571	-0.02063823	9.89
0.5112	2.346268	-0.542	0.14833713	0.19453889	-0.02050048	9.89
0.5120	2.237692	-0.543	0.14871061	0.19469941	-0.02023757	9.89
0.5128	2.090807	-0.546	0.14924860	0.19490069	-0.01985902	9.89
0.5136	1.914110	-0.544	0.14991695	0.19518083	-0.01937938	9.89
0.5144	1.722050	-0.538	0.15067673	0.19549894	-0.01883614	9.89
0.5152	1.527615	-0.537	0.15146565	0.19581509	-0.01828325	9.89
0.5160	1.342564	-0.537	0.15224284	0.19611770	-0.01776314	9.89
0.5168	1.175051	-0.534	0.15296847	0.19638622	-0.01727384	9.90
0.5176	1.029482	-0.536	0.15362793	0.19661766	-0.01682985	9.90
0.5184	0.906200	-0.537	0.15420675	0.19680637	-0.01645124	9.90
0.5192	0.801802	-0.530	0.15472233	0.19696295	-0.01610637	9.90
0.5200	0.712109	-0.530	0.15519118	0.19708556	-0.01579618	9.90
0.5208	0.633802	-0.535	0.15560073	0.19719160	-0.01555926	9.90
0.5216	0.564365	-0.534	0.15597618	0.19726753	-0.01533872	9.90
0.5224	0.502968	-0.538	0.15632153	0.19735801	-0.01513934	9.90
0.5232	0.448523	-0.538	0.15663093	0.19740462	-0.01495826	9.90
0.5240	0.400229	-0.529	0.15691596	0.19746888	-0.01476651	9.90
0.5248	0.358772	-0.530	0.15717858	0.19749987	-0.01459122	9.90
0.5256	0.324497	-0.531	0.15739936	0.19753098	-0.01445252	9.90
0.5264	0.299320	-0.533	0.15758711	0.19754952	-0.01436770	9.90
0.5272	0.283642	-0.538	0.15771163	0.19757181	-0.01430023	9.89
0.5280	0.276604	-0.538	0.15779626	0.19757777	-0.01427132	9.89
0.5288	0.276747	-0.537	0.15783125	0.19758838	-0.01425111	9.89
0.5296	0.282497	-0.537	0.15783799	0.19759810	-0.01421356	9.89
0.5304	0.295343	-0.533	0.15781850	0.19759232	-0.01422030	9.89
0.5312	0.322523	-0.538	0.15770370	0.19759035	-0.01427710	9.89
0.5320	0.373821	-0.535	0.15747225	0.19757199	-0.01438296	9.89
0.5328	0.457621	-0.537	0.15708023	0.19754183	-0.01461029	9.89
0.5336	0.576925	-0.538	0.15654820	0.19744456	-0.01492727	9.89
0.5344	0.728760	-0.530	0.15588671	0.19732678	-0.01533663	9.89
0.5352	0.905800	-0.536	0.15511918	0.19711757	-0.01583564	9.89
0.5360	1.099176	-0.538	0.15427482	0.19687629	-0.01637900	9.89
0.5368	1.300964	-0.538	0.15339732	0.19660389	-0.01693374	9.90
0.5376	1.501522	-0.540	0.15253848	0.19629461	-0.01749915	9.90
0.5384	1.692781	-0.540	0.15171653	0.19599402	-0.01806450	9.90
0.5392	1.868248	-0.534	0.15097046	0.19568765	-0.01857585	9.90
0.5400	2.022657	-0.532	0.15029925	0.19541824	-0.01905364	9.90
0.5408	2.154207	-0.538	0.14970291	0.19515169	-0.01947165	9.90
0.5416	2.262983	-0.536	0.14920777	0.19494265	-0.01980019	9.90
0.5424	2.349443	-0.537	0.14880216	0.19475293	-0.02008533	9.90
0.5432	2.415190	-0.541	0.14848405	0.19460118	-0.02032042	9.90
0.5440	2.461796	-0.536	0.14825934	0.19452626	-0.02048904	9.90
0.5448	2.490892	-0.536	0.14810467	0.19443470	-0.02062488	9.90
0.5456	2.505426	-0.538	0.14799958	0.19441724	-0.02071059	9.90
0.5464	2.509489	-0.537	0.14793736	0.19438612	-0.02074713	9.90
0.5472	2.506142	-0.537	0.14790237	0.19437063	-0.02076346	9.89
0.5480	2.497244	-0.538	0.14789748	0.19437069	-0.02075571	9.89
0.5488	2.483110	-0.538	0.14792281	0.19436389	-0.02075088	9.89
0.5496	2.459679	-0.534	0.14797729	0.19438618	-0.02071333	9.89
0.5504	2.417221	-0.537	0.14808619	0.19441533	-0.02064496	9.89
0.5512	2.344580	-0.543	0.14830410	0.19451255	-0.02050525	9.89
0.5520	2.234573	-0.544	0.14868337	0.19465643	-0.02023458	9.89
0.5528	2.086058	-0.546	0.14922041	0.19487733	-0.01985699	9.89
0.5536	1.907988	-0.541	0.14989746	0.19516134	-0.01937538	9.89
0.5544	1.715412	-0.535	0.15065819	0.19546783	-0.01883793	9.89
0.5552	1.522465	-0.533	0.15143651	0.19578403	-0.01830626	9.89
0.5560	1.341820	-0.534	0.15219229	0.19608366	-0.01780063	9.89
0.5568	1.180801	-0.535	0.15288681	0.19634438	-0.01732671	9.90
0.5576	1.041527	-0.532	0.15351903	0.19656515	-0.01690966	9.90
0.5584	0.922794	-0.533	0.15408611	0.19674695	-0.01652825	9.90
0.5592	0.820656	-0.527	0.15458709	0.19691223	-0.01618814	9.90
0.5600	0.731363	-0.528	0.15504330	0.19703966	-0.01588857	9.90
0.5608	0.652599	-0.536	0.15544313	0.19714767	-0.01563138	9.90
0.5616	0.581875	-0.536	0.15580302	0.19724119	-0.01540697	9.90
0.5624	0.518618	-0.542	0.15615022	0.19730157	-0.01520377	9.90
0.5632	0.461998	-0.541	0.15648103	0.19737256	-0.01501596	9.90
0.5640	0.411358	-0.536	0.15679318	0.19742703	-0.01481855	9.90
0.5648	0.368042	-0.534	0.15706754	0.19748724	-0.01464218	9.90
0.5656	0.332623	-0.533	0.15728843	0.19752026	-0.01449287	9.90
0.5664	0.306845	-0.535	0.15746254	0.19755334	-0.01438981	9.90
0.5672	0.290823	-0.538	0.15759009	0.19755721	-0.01432723	9.90
0.5680	0.283384	-0.540	0.15766692	0.19757277	-0.01429552	9.89
0.5688	0.283070	-0.544	0.15770775	0.19757771	-0.01428491	9.89
0.5696	0.288677	-0.543	0.15771848	0.19759619	-0.01425701	9.89
0.5704	0.302296	-0.540	0.15769023	0.19761175	-0.01426172	9.89
0.5712	0.332279	-0.545	0.15757549	0.19760013	-0.01431757	9.89
0.5720	0.388813	-0.541	0.15732163	0.19759423	-0.01444960	9.89
0.5728	0.480280	-0.545	0.15690529	0.19753879	-0.01469517	9.89
0.5736	0.609512	-0.544	0.15632939	0.19743860	-0.01505256	9.89
0.5744	0.771875	-0.536	0.15561920	0.19728595	-0.01549852	9.89
0.5752	0.958757	-0.541	0.15482640	0.19706219	-0.01600415	9.89
0.5760	1.159801	-0.538	0.15395188	0.19678009	-0.01657051	9.89
0.5768	1.365623	-0.538	0.15305889	0.19647366	-0.01715708	9.90
0.5776	1.566668	-0.541	0.15220290	0.19616425	-0.01772821	9.90
0.5784	1.754780	-0.536	0.15139258	0.19585109	-0.01828593	9.90
0.5792	1.923809	-0.530	0.15066683	0.19557965	-0.01879269	9.90
0.5800	2.069778	-0.530	0.15003365	0.19533062	-0.01921654	9.90
0.5808	2.191572	-0.537	0.14948988	0.19508749	-0.01960766	9.90
0.5816	2.290678	-0.537	0.14903075	0.19488609	-0.01993418	9.90
0.5824	2.369471	-0.540	0.14865822	0.19471890	-0.02018642	9.90
0.5832	2.430010	-0.539	0.14836150	0.19459832	-0.02041274	9.90
0.5840	2.473698	-0.532	0.14813101	0.19450295	-0.02057266	9.90
0.5848	2.501421	-0.530	0.14798504	0.19445634	-0.02068824	9.90
0.5856	2.515354	-0.532	0.14788967	0.19439399	-0.02076632	9.90
0.5864	2.518673	-0.534	0.14783609	0.19437844	-0.02080780	9.90
0.5872	2.514524	-0.535	0.14781946	0.19435704	-0.02082705	9.89
0.5880	2.504597	-0.540	0.14782053	0.19436187	-0.02082521	9.89
0.5888	2.488775	-0.537	0.14785856	0.19437361	-0.02082711	9.89
0.5896	2.462053	-0.533	0.14792573	0.19440174	-0.02078378	9.89
0.5904	2.412672	-0.540	0.14806288	0.19444835	-0.02069128	9.89
0.5912	2.328987	-0.540	0.14832550	0.19453293	-0.02052456	9.89
0.5920	2.204876	-0.541	0.14875543	0.19469440	-0.02020097	9.89
0.5928	2.042856	-0.546	0.14934397	0.19492596	-0.01977324	9.89
0.5936	1.855974	-0.541	0.15006387	0.19523048	-0.01925415	9.89
0.5944	1.660795	-0.539	0.15084398	0.19556510	-0.01869452	9.89
0.5952	1.470995	-0.539	0.15163380	0.19588900	-0.01817143	9.89
0.5960	1.296587	-0.538	0.15237409	0.19616520	-0.01768124	9.89
0.5968	1.142864	-0.538	0.15303850	0.19641131	-0.01723039	9.90
0.5976	1.011000	-0.536	0.15364552	0.19660974	-0.01682204	9.90
0.5984	0.898705	-0.536	0.15417862	0.19678283	-0.01646852	9.90
0.5992	0.801086	-0.532	0.15466595	0.19695109	-0.01613903	9.90
0.6000	0.714283	-0.529	0.15512019	0.19706780	-0.01585490	9.90
0.6008	0.635719	-0.538	0.15552187	0.19717580	-0.01561886	9.90
0.6016	0.564365	-0.540	0.15588564	0.19724977	-0.01538104	9.90
0.6024	0.500736	-0.541	0.15623486	0.19731015	-0.01516914	9.90
0.6032	0.444374	-0.544	0.15655392	0.19736755	-0.01496881	9.90
0.6040	0.395279	-0.536	0.15685356	0.19742399	-0.01478010	9.90
0.6048	0.354052	-0.534	0.15712500	0.19746780	-0.01462597	9.90
0.6056	0.321321	-0.539	0.15732729	0.19750279	-0.01450461	9.90
0.6064	0.298290	-0.537	0.15748972	0.19753879	-0.01442939	9.90
0.6072	0.284729	-0.545	0.15759873	0.19754845	-0.01436096	9.89
0.6080	0.279064	-0.548	0.15765709	0.19755912	-0.01432627	9.89
0.6088	0.279865	-0.549	0.15769696	0.19756591	-0.01430506	9.89
0.6096	0.285816	-0.549	0.15771252	0.19755721	-0.01427525	9.89
0.6104	0.299377	-0.543	0.15768915	0.19755530	-0.01428390	9.89
0.6112	0.329161	-0.544	0.15756953	0.19754654	-0.01433790	9.89
0.6120	0.384979	-0.542	0.15731174	0.19752425	-0.01447088	9.89
0.6128	0.475302	-0.545	0.15690714	0.19748235	-0.01470691	9.89
0.6136	0.602818	-0.546	0.15633607	0.19739771	-0.01505172	9.89
0.6144	0.762405	-0.541	0.15563083	0.19725281	-0.01547831	9.89
0.6152	0.945311	-0.544	0.15484196	0.19703007	-0.01597047	9.89
0.6160	1.141176	-0.548	0.15397906	0.19677919	-0.01650983	9.89
0.6168	1.341133	-0.546	0.15310460	0.19647473	-0.01706761	9.90
0.6176	1.537542	-0.553	0.15227091	0.19619262	-0.01765043	9.90
0.6184	1.723022	-0.546	0.15148205	0.19587731	-0.01820910	9.90
0.6192	1.892595	-0.540	0.15075052	0.19560194	-0.01872343	9.90
0.6200	2.041712	-0.533	0.15010369	0.19534224	-0.01917994	9.90
0.6208	2.168398	-0.539	0.14953858	0.19508934	-0.01956230	9.90
0.6216	2.273769	-0.542	0.14906383	0.19491428	-0.01989365	9.90
0.6224	2.358541	-0.544	0.14866990	0.19471979	-0.02017111	9.90
0.6232	2.424030	-0.547	0.14835560	0.19458455	-0.02039838	9.90
0.6240	2.471380	-0.537	0.14812601	0.19449109	-0.02057076	9.90
0.6248	2.501278	-0.534	0.14795768	0.19438607	-0.02070272	9.90
0.6256	2.516499	-0.536	0.14785844	0.19434613	-0.02077973	9.90
0.6264	2.520876	-0.538	0.14779431	0.19432181	-0.02081639	9.90
0.6272	2.517529	-0.538	0.14775348	0.19431210	-0.02083379	9.89
0.6280	2.508774	-0.543	0.14774567	0.19431800	-0.02083284	9.89
0.6288	2.494698	-0.541	0.14776611	0.19434232	-0.02083766	9.89
0.6296	2.472124	-0.537	0.14782637	0.19435304	-0.02081448	9.89
0.6304	2.430525	-0.537	0.14793819	0.19439882	-0.02074409	9.89
0.6312	2.357225	-0.536	0.14816678	0.19448531	-0.02059579	9.89
0.6320	2.244673	-0.533	0.14855301	0.19464678	-0.02032518	9.89
0.6328	2.091751	-0.537	0.14910561	0.19487441	-0.01993227	9.89
0.6336	1.908646	-0.537	0.14979529	0.19516134	-0.01944882	9.89
0.6344	1.711407	-0.537	0.15056580	0.19548821	-0.01890159	9.89
0.6352	1.513824	-0.541	0.15137023	0.19580150	-0.01834482	9.89
0.6360	1.327715	-0.540	0.15214652	0.19610107	-0.01781213	9.89
0.6368	1.161060	-0.540	0.15288001	0.19637644	-0.01731503	9.90
0.6376	1.017437	-0.538	0.15353954	0.19660896	-0.01686716	9.90
0.6384	0.897017	-0.536	0.15410662	0.19679576	-0.01648569	9.90
0.6392	0.796251	-0.532	0.15460843	0.19694752	-0.01616013	9.90
0.6400	0.709848	-0.530	0.15506369	0.19707775	-0.01587313	9.90
0.6408	0.633888	-0.534	0.15546060	0.19717014	-0.01564294	9.90
0.6416	0.565510	-0.534	0.15582824	0.19726056	-0.01542425	9.90
0.6424	0.503683	-0.534	0.15617168	0.19733936	-0.01521039	9.90
0.6432	0.448408	-0.536	0.15648580	0.19738710	-0.01501870	9.90
0.6440	0.399628	-0.530	0.15677661	0.19745225	-0.01482701	9.90
0.6448	0.358286	-0.532	0.15703940	0.19747752	-0.01466620	9.90
0.6456	0.325384	-0.534	0.15725052	0.19752032	-0.01455450	9.90
0.6464	0.301867	-0.534	0.15741396	0.19752908	-0.01445919	9.90
0.6472	0.287733	-0.539	0.15753752	0.19754946	-0.01439375	9.89
0.6480	0.281839	-0.538	0.15759677	0.19756114	-0.01434082	9.89
0.6488	0.282326	-0.540	0.15762883	0.19756120	-0.01430321	9.89
0.6496	0.288076	-0.542	0.15765023	0.19758445	-0.01427525	9.89
0.6504	0.300550	-0.544	0.15762883	0.19756013	-0.01427907	9.89
0.6512	0.327959	-0.553	0.15753162	0.19755918	-0.01435798	9.89
0.6520	0.380144	-0.554	0.15729821	0.19754058	-0.01448232	9.89
0.6528	0.465546	-0.554	0.15688777	0.19749391	-0.01470292	9.89
0.6536	0.587626	-0.554	0.15634787	0.19742101	-0.01503336	9.89
0.6544	0.742064	-0.546	0.15567178	0.19727898	-0.01543701	9.89
0.6552	0.921736	-0.548	0.15489650	0.19707865	-0.01593107	9.89
0.6560	1.117344	-0.546	0.15406573	0.19680536	-0.01648974	9.89
0.6568	1.319876	-0.542	0.15318251	0.19651067	-0.01706088	9.90
0.6576	1.520548	-0.541	0.15231872	0.19621003	-0.01764458	9.90
0.6584	1.710835	-0.538	0.15151125	0.19588512	-0.01821679	9.90
0.6592	1.884127	-0.533	0.15075648	0.19560784	-0.01873493	9.90
0.6600	2.036190	-0.533	0.15009302	0.19533640	-0.01919150	9.90
0.6608	2.165308	-0.540	0.14951611	0.19507772	-0.01958257	9.90
0.6616	2.272139	-0.536	0.14903170	0.19487047	-0.01990813	9.90
0.6624	2.357883	-0.542	0.14863861	0.19469148	-0.02018654	9.90
0.6632	2.424402	-0.540	0.14833421	0.19455332	-0.02042639	9.90
0.6640	2.472668	-0.534	0.14810079	0.19445509	-0.02061421	9.90
0.6648	2.503824	-0.536	0.14792758	0.19439393	-0.02074713	9.90
0.6656	2.520275	-0.533	0.14782065	0.19432980	-0.02083278	9.90
0.6664	2.525425	-0.532	0.14773506	0.19431138	-0.02086645	9.90
0.6672	2.522564	-0.531	0.14769906	0.19429094	-0.02087218	9.89
0.6680	2.513466	-0.532	0.14770007	0.19426948	-0.02086926	9.89
0.6688	2.498617	-0.531	0.14772040	0.19428694	-0.02085966	9.89
0.6696	2.473669	-0.530	0.14778358	0.19429857	-0.02083087	9.89
0.6704	2.427664	-0.532	0.14790219	0.19434917	-0.02074903	9.89
0.6712	2.349901	-0.539	0.14813763	0.19444251	-0.02059394	9.89
0.6720	2.234373	-0.538	0.14854044	0.19461274	-0.02031362	9.89
0.6728	2.081137	-0.544	0.14911145	0.19483060	-0.01990902	9.89
0.6736	1.900806	-0.544	0.14980030	0.19512922	-0.01942843	9.89
0.6744	1.708431	-0.537	0.15055132	0.19545412	-0.01888418	9.89
0.6752	1.517572	-0.542	0.15132076	0.19575858	-0.01834869	9.89
0.6760	1.340303	-0.541	0.15206194	0.19606990	-0.01786125	9.89
0.6768	1.182947	-0.540	0.15274084	0.19631404	-0.01740652	9.90
0.6776	1.047077	-0.540	0.15337211	0.19654173	-0.01700205	9.90
0.6784	0.930233	-0.540	0.15391976	0.19670707	-0.01664376	9.90
0.6792	0.828180	-0.539	0.15440029	0.19687438	-0.01629508	9.90
0.6800	0.737743	-0.538	0.15486139	0.19699597	-0.01598501	9.90
0.6808	0.656347	-0.545	0.15526992	0.19710678	-0.01571333	9.90
0.6816	0.582533	-0.546	0.15565896	0.19721186	-0.01547146	9.90
0.6824	0.515957	-0.546	0.15602672	0.19728386	-0.01526642	9.90
0.6832	0.456305	-0.550	0.15637100	0.19735485	-0.01506215	9.90
0.6840	0.404148	-0.546	0.15668422	0.19742203	-0.01487243	9.90
0.6848	0.360489	-0.542	0.15695471	0.19745505	-0.01470101	9.90
0.6856	0.326300	-0.542	0.15717649	0.19749099	-0.01456028	9.90
0.6864	0.302668	-0.542	0.15733802	0.19751441	-0.01447171	9.90
0.6872	0.288877	-0.541	0.15745276	0.19752026	-0.01442355	9.89
0.6880	0.283470	-0.545	0.15751791	0.19754559	-0.01439178	9.89
0.6888	0.284872	-0.546	0.15754801	0.19753498	-0.01437247	9.89
0.6896	0.291910	-0.545	0.15755773	0.19756216	-0.01435798	9.89
0.6904	0.308161	-0.546	0.15752858	0.19754857	-0.01436281	9.89
0.6912	0.342436	-0.551	0.15739143	0.19753891	-0.01442349	9.89
0.6920	0.404320	-0.548	0.15711135	0.19754183	-0.01457477	9.89
0.6928	0.501137	-0.552	0.15667850	0.19746006	-0.01482427	9.89
0.6936	0.633945	-0.550	0.15608418	0.19737631	-0.01517105	9.89
0.6944	0.797310	-0.540	0.15537310	0.19720995	-0.01561421	9.89
0.6952	0.982647	-0.544	0.15458316	0.19698030	-0.01612276	9.89
0.6960	1.181145	-0.540	0.15372419	0.19671386	-0.01667953	9.89
0.6968	1.383991	-0.539	0.15284675	0.19641238	-0.01727188	9.90
0.6976	1.582832	-0.543	0.15199858	0.19609815	-0.01786029	9.90
0.6984	1.769943	-0.541	0.15119416	0.19579566	-0.01841420	9.90
0.6992	1.939373	-0.536	0.15046072	0.19550860	-0.01892173	9.90
0.7000	2.087202	-0.536	0.14981872	0.19523132	-0.01936096	9.90
0.7008	2.212114	-0.540	0.14926416	0.19500667	-0.01975113	9.90
0.7016	2.314939	-0.540	0.14879233	0.19479650	-0.02008337	9.90
0.7024	2.397137	-0.543	0.14842463	0.19462830	-0.02035016	9.90
0.7032	2.459707	-0.540	0.14811718	0.19450873	-0.02056402	9.90
0.7040	2.503824	-0.529	0.14789641	0.19440162	-0.02071816	9.90
0.7048	2.530804	-0.528	0.14774859	0.19432974	-0.02082324	9.90
0.7056	2.543507	-0.525	0.14764941	0.19430059	-0.02088588	9.90
0.7064	2.546110	-0.529	0.14759594	0.19426066	-0.02092725	9.90
0.7072	2.541332	-0.534	0.14757264	0.19427043	-0.02094257	9.89
0.7080	2.530632	-0.535	0.14758533	0.19425875	-0.02094245	9.89
0.7088	2.513323	-0.536	0.14762032	0.19427627	-0.02095115	9.89
0.7096	2.482767	-0.534	0.14770007	0.19429868	-0.02090973	9.89
0.7104	2.426834	-0.534	0.14785957	0.19436097	-0.02080858	9.89
0.7112	2.335768	-0.541	0.14814842	0.19446790	-0.02061987	9.89
0.7120	2.206278	-0.541	0.14859486	0.19464493	-0.02028275	9.89
0.7128	2.043686	-0.540	0.14918727	0.19489777	-0.01985031	9.89
0.7136	1.861925	-0.540	0.14989054	0.19517988	-0.01935238	9.89
0.7144	1.675358	-0.530	0.15064341	0.19549608	-0.01882070	9.89
0.7152	1.493797	-0.533	0.15140122	0.19579178	-0.01831692	9.89
0.7160	1.324911	-0.533	0.15212786	0.19606030	-0.01784205	9.89
0.7168	1.172819	-0.533	0.15278745	0.19630641	-0.01738262	9.90
0.7176	1.038723	-0.536	0.15338969	0.19651848	-0.01697040	9.90
0.7184	0.921364	-0.537	0.15392864	0.19670814	-0.01659185	9.90
0.7192	0.817423	-0.533	0.15443355	0.19687933	-0.01625186	9.90
0.7200	0.723925	-0.534	0.15490633	0.19702232	-0.01595807	9.90
0.7208	0.639238	-0.540	0.15534204	0.19714880	-0.01570368	9.90
0.7216	0.562849	-0.540	0.15574569	0.19721496	-0.01546192	9.90
0.7224	0.495186	-0.545	0.15611535	0.19729960	-0.01523459	9.90
0.7232	0.436392	-0.545	0.15644598	0.19733655	-0.01502168	9.90
0.7240	0.386553	-0.540	0.15674365	0.19739002	-0.01481086	9.90
0.7248	0.345869	-0.538	0.15699559	0.19744158	-0.01465964	9.90
0.7256	0.314627	-0.538	0.15719783	0.19746107	-0.01453060	9.90
0.7264	0.293255	-0.536	0.15736127	0.19750196	-0.01444501	9.90
0.7272	0.280781	-0.537	0.15747315	0.19750875	-0.01440156	9.89
0.7280	0.276003	-0.539	0.15753937	0.19753397	-0.01436299	9.89
0.7288	0.277004	-0.542	0.15757251	0.19753587	-0.01435035	9.89
0.7296	0.283012	-0.541	0.15757936	0.19754845	-0.01432621	9.89
0.7304	0.296488	-0.539	0.15754926	0.19753772	-0.01432818	9.89
0.7312	0.325470	-0.542	0.15744025	0.19752127	-0.01438797	9.89
0.7320	0.380459	-0.539	0.15719318	0.19750762	-0.01451129	9.89
0.7328	0.469666	-0.546	0.15678656	0.19746095	-0.01474917	9.89
0.7336	0.596437	-0.545	0.15621841	0.19736564	-0.01509213	9.89
0.7344	0.756540	-0.539	0.15550828	0.19723040	-0.01551789	9.89
0.7352	0.941133	-0.539	0.15471345	0.19700378	-0.01602650	9.89
0.7360	1.140375	-0.532	0.15385747	0.19673526	-0.01657939	9.89
0.7368	1.345053	-0.531	0.15295768	0.19644827	-0.01715821	9.90
0.7376	1.546469	-0.530	0.15209973	0.19613212	-0.01774961	9.90
0.7384	1.736984	-0.530	0.15128952	0.19583344	-0.01831692	9.90
0.7392	1.910105	-0.524	0.15053463	0.19553679	-0.01883316	9.90
0.7400	2.060795	-0.526	0.14989263	0.19527709	-0.01927722	9.90
0.7408	2.187195	-0.533	0.14933044	0.19501346	-0.01966918	9.90
0.7416	2.289619	-0.534	0.14884883	0.19482285	-0.01999670	9.90
0.7424	2.370071	-0.543	0.14847630	0.19464880	-0.02027696	9.90
0.7432	2.430611	-0.541	0.14818740	0.19453305	-0.02051008	9.90
0.7440	2.472668	-0.536	0.14796847	0.19445723	-0.02066129	9.90
0.7448	2.498245	-0.531	0.14782947	0.19439119	-0.02076238	9.90
0.7456	2.510433	-0.526	0.14773804	0.19434154	-0.02081740	9.90
0.7464	2.512836	-0.524	0.14768362	0.19430751	-0.02084142	9.90
0.7472	2.508831	-0.527	0.14766032	0.19429290	-0.02085978	9.89
0.7480	2.500248	-0.529	0.14766026	0.19429290	-0.02087134	9.89
0.7488	2.486544	-0.536	0.14768350	0.19431037	-0.02088088	9.89
0.7496	2.464199	-0.533	0.14773297	0.19433564	-0.02085298	9.89
0.7504	2.422457	-0.531	0.14784777	0.19438130	-0.02077299	9.89
0.7512	2.349644	-0.534	0.14807254	0.19444638	-0.02061123	9.89
0.7520	2.238693	-0.532	0.14844996	0.19460499	-0.02034152	9.89
0.7528	2.088261	-0.537	0.14900160	0.19481319	-0.01996100	9.89
0.7536	1.908045	-0.537	0.14968634	0.19510311	-0.01948333	9.89
0.7544	1.712637	-0.534	0.15045863	0.19542998	-0.01895261	9.89
0.7552	1.515598	-0.536	0.15127486	0.19574416	-0.01839882	9.89
0.7560	1.329489	-0.538	0.15205497	0.19605631	-0.01786131	9.89
0.7568	1.162491	-0.541	0.15276706	0.19631797	-0.01736808	9.90
0.7576	1.019068	-0.544	0.15341198	0.19655913	-0.01692402	9.90
0.7584	0.898390	-0.543	0.15397227	0.19676149	-0.01654357	9.90
0.7592	0.796423	-0.535	0.15447229	0.19691527	-0.01621228	9.90
0.7600	0.708961	-0.533	0.15494210	0.19705820	-0.01593584	9.90
0.7608	0.631914	-0.536	0.15534973	0.19714189	-0.01569796	9.90
0.7616	0.563164	-0.534	0.15571159	0.19722646	-0.01545715	9.90
0.7624	0.502081	-0.539	0.15604228	0.19728774	-0.01525295	9.90
0.7632	0.447206	-0.539	0.15635061	0.19734919	-0.01504397	9.90
0.7640	0.398397	-0.536	0.15664631	0.19741827	-0.01487339	9.90
0.7648	0.356312	-0.538	0.15691775	0.19745624	-0.01473749	9.90
0.7656	0.321894	-0.538	0.15715033	0.19749612	-0.01459974	9.90
0.7664	0.297117	-0.541	0.15733129	0.19751352	-0.01450825	9.90
0.7672	0.281754	-0.544	0.15745091	0.19752330	-0.01441675	9.89
0.7680	0.275087	-0.546	0.15751308	0.19754756	-0.01435608	9.89
0.7688	0.275316	-0.549	0.15754223	0.19755346	-0.01433492	9.89
0.7696	0.280867	-0.544	0.15755594	0.19757390	-0.01432419	9.89
0.7704	0.293627	-0.545	0.15753168	0.19757384	-0.01434636	9.89
0.7712	0.321722	-0.552	0.15743351	0.19755840	-0.01441288	9.89
0.7720	0.374737	-0.552	0.15718937	0.19754380	-0.01453710	9.89
0.7728	0.460653	-0.559	0.15679729	0.19749808	-0.01473749	9.89
0.7736	0.582533	-0.553	0.15626901	0.19740278	-0.01504380	9.89
0.7744	0.736055	-0.544	0.15559000	0.19725674	-0.01546764	9.89
0.7752	0.913868	-0.545	0.15483421	0.19704854	-0.01596850	9.89
0.7760	1.107416	-0.542	0.15399665	0.19676644	-0.01653403	9.89
0.7768	1.308203	-0.549	0.15311050	0.19649410	-0.01711875	9.90
0.7776	1.507759	-0.552	0.15226424	0.19619644	-0.01767546	9.90
0.7784	1.698418	-0.551	0.15145093	0.19588709	-0.01822257	9.90
0.7792	1.874170	-0.549	0.15069216	0.19560403	-0.01873302	9.90
0.7800	2.030611	-0.544	0.15001410	0.19532382	-0.01920587	9.90
0.7808	2.165451	-0.548	0.14941680	0.19505441	-0.01964223	9.90
0.7816	2.277632	-0.546	0.14890516	0.19482869	-0.02000540	9.90
0.7824	2.367039	-0.548	0.14849669	0.19464093	-0.02028853	9.90
0.7832	2.433872	-0.548	0.14818352	0.19449598	-0.02050143	9.90
0.7840	2.479305	-0.542	0.14794427	0.19441038	-0.02065456	9.90
0.7848	2.506113	-0.541	0.14778763	0.19435400	-0.02077007	9.90
0.7856	2.517900	-0.541	0.14768356	0.19431710	-0.02085680	9.90
0.7864	2.519846	-0.541	0.14762318	0.19429868	-0.02090979	9.90
0.7872	2.515326	-0.535	0.14760667	0.19427919	-0.02093196	9.89
0.7880	2.505856	-0.539	0.14759994	0.19428897	-0.02092719	9.89
0.7888	2.491436	-0.539	0.14762425	0.19427717	-0.02090985	9.89
0.7896	2.467747	-0.540	0.14767390	0.19431704	-0.02085978	9.89
0.7904	2.423973	-0.546	0.14778864	0.19433653	-0.02076435	9.89
0.7912	2.349100	-0.548	0.14803272	0.19441140	-0.02060449	9.89
0.7920	2.236519	-0.545	0.14842463	0.19457585	-0.02035016	9.89
0.7928	2.085772	-0.545	0.14898592	0.19478101	-0.01997644	9.89
0.7936	1.907072	-0.545	0.14965618	0.19508159	-0.01950747	9.89
0.7944	1.715126	-0.541	0.15040421	0.19540554	-0.01897484	9.89
0.7952	1.523123	-0.543	0.15117377	0.19572556	-0.01841909	9.89
0.7960	1.342564	-0.543	0.15191984	0.19600874	-0.01790762	9.89
0.7968	1.180258	-0.541	0.15262604	0.19627720	-0.01744908	9.90
0.7976	1.038294	-0.543	0.15327495	0.19650382	-0.01704448	9.90
0.7984	0.915899	-0.542	0.15385371	0.19669056	-0.01667756	9.90
0.7992	0.809898	-0.540	0.15436929	0.19685590	-0.01632309	9.90
0.8000	0.717287	-0.541	0.15483618	0.19700474	-0.01600236	9.90
0.8010	0.127630	-0.542	0.15926015	0.19790465	-0.01308757	9.89
0.8020	0.127888	-0.546	0.15925431	0.19790262	-0.01310778	9.89
0.8030	0.127802	-0.547	0.15924174	0.19788027	-0.01311064	9.89
0.8040	0.127487	-0.550	0.15923595	0.19789672	-0.01312321	9.89
0.8050	0.127201	-0.549	0.15923405	0.19788027	-0.01311654	9.89
0.8060	0.127172	-0.544	0.15924376	0.19791919	-0.01309729	9.89
0.8070	0.127258	-0.544	0.15924567	0.19790757	-0.01309347	9.89
0.8080	0.127659	-0.545	0.15924859	0.19791436	-0.01309538	9.89
0.8090	0.128860	-0.544	0.15924859	0.19790655	-0.01309061	9.90
0.8100	0.132265	-0.545	0.15923500	0.19790357	-0.01309341	9.90
0.8110	0.139761	-0.541	0.15921259	0.19791329	-0.01309723	9.90
0.8120	0.159302	-0.546	0.15912300	0.19789100	-0.01315880	9.90
0.8130	0.199499	-0.550	0.15892357	0.19787252	-0.01329941	9.90
0.8140	0.266762	-0.554	0.15859967	0.19783461	-0.01349306	9.90
0.8150	0.359287	-0.550	0.15813291	0.19778693	-0.01374930	9.90
0.8160	0.471582	-0.543	0.15759784	0.19774699	-0.01405168	9.90
0.8170	0.597954	-0.547	0.15698785	0.19765466	-0.01441479	9.90
0.8180	0.735111	-0.547	0.15633810	0.19754183	-0.01481545	9.90
0.8190	0.879278	-0.546	0.15566790	0.19737840	-0.01523548	9.89
0.8200	1.024704	-0.542	0.15498894	0.19716626	-0.01565552	9.89
0.8210	1.165009	-0.535	0.15435749	0.19697446	-0.01604664	9.89
0.8220	1.294641	-0.538	0.15375727	0.19674289	-0.01645792	9.89
0.8230	1.412001	-0.541	0.15318334	0.19656491	-0.01683545	9.89
0.8240	1.515684	-0.545	0.15268534	0.19637346	-0.01718122	9.89
0.8250	1.604376	-0.544	0.15224862	0.19622374	-0.01747590	9.89
0.8260	1.675186	-0.537	0.15192175	0.19609243	-0.01768017	9.89
0.8270	1.728573	-0.542	0.15164942	0.19597661	-0.01787186	9.89
0.8280	1.767511	-0.540	0.15144312	0.19590461	-0.01801825	9.89
0.8290	1.796265	-0.541	0.15127975	0.19583553	-0.01814443	9.90
0.8300	1.816864	-0.539	0.15115029	0.19579953	-0.01824945	9.90
0.8310	1.829710	-0.536	0.15106076	0.19576347	-0.01830536	9.90
0.8320	1.835203	-0.545	0.15100724	0.19574004	-0.01837671	9.90
0.8330	1.834030	-0.551	0.15097713	0.19571960	-0.01839787	9.90
0.8340	1.827736	-0.555	0.15097135	0.19569921	-0.01841223	9.90
0.8350	1.816607	-0.549	0.15097618	0.19571096	-0.01839393	9.90
0.8360	1.800013	-0.541	0.15100151	0.19571871	-0.01836592	9.90
0.8370	1.773891	-0.538	0.15105408	0.19574785	-0.01832551	9.90
0.8380	1.725855	-0.537	0.15119034	0.19578677	-0.01822633	9.90
0.8390	1.642485	-0.536	0.15149575	0.19588411	-0.01802891	9.89
0.8400	1.519661	-0.537	0.15197140	0.19604170	-0.01772267	9.89
0.8410	1.368399	-0.537	0.15257442	0.19626355	-0.01730746	9.89
0.8420	1.210070	-0.544	0.15321547	0.19649601	-0.01688266	9.89
0.8430	1.062469	-0.546	0.15383703	0.19671971	-0.01646459	9.89
0.8440	0.935612	-0.547	0.15441686	0.19690061	-0.01610345	9.89
0.8450	0.830212	-0.547	0.15491104	0.19705719	-0.01578367	9.89
0.8460	0.742979	-0.541	0.15535855	0.19718754	-0.01549852	9.89
0.8470	0.667219	-0.544	0.15574276	0.19729161	-0.01524800	9.89
0.8480	0.599012	-0.542	0.15609491	0.19738799	-0.01501298	9.89
0.8490	0.534496	-0.546	0.15644407	0.19744152	-0.01481652	9.90
0.8500	0.472555	-0.544	0.15676904	0.19752026	-0.01461422	9.90
0.8510	0.413418	-0.541	0.15709776	0.19755924	-0.01441103	9.90
0.8520	0.358801	-0.545	0.15740412	0.19761956	-0.01422906	9.90
0.8530	0.310593	-0.549	0.15768033	0.19762057	-0.01408654	9.90
0.8540	0.270967	-0.555	0.15792549	0.19765848	-0.01395929	9.90
0.8550	0.239811	-0.552	0.15813172	0.19766915	-0.01385707	9.90
0.8560	0.216064	-0.551	0.15829420	0.19771677	-0.01376176	9.90
0.8570	0.199270	-0.550	0.15840119	0.19771093	-0.01368672	9.90
0.8580	0.189114	-0.550	0.15847713	0.19773716	-0.01364529	9.90
0.8590	0.185251	-0.549	0.15853947	0.19774204	-0.01360768	9.89
0.8600	0.186253	-0.548	0.15854824	0.19776154	-0.01359028	9.89
0.8610	0.191002	-0.542	0.15855014	0.19776541	-0.01357102	9.89
0.8620	0.199757	-0.550	0.15852582	0.19775665	-0.01358360	9.89
0.8630	0.217695	-0.554	0.15848297	0.19775665	-0.01362211	9.89
0.8640	0.256205	-0.556	0.15831369	0.19774592	-0.01371175	9.89
0.8650	0.324984	-0.551	0.15800524	0.19773620	-0.01388031	9.89
0.8660	0.425577	-0.544	0.15752757	0.19769341	-0.01413852	9.89
0.8670	0.551262	-0.546	0.15692544	0.19761670	-0.01449305	9.89
0.8680	0.692854	-0.542	0.15626490	0.19748735	-0.01491100	9.90
0.8690	0.843573	-0.542	0.15556759	0.19732487	-0.01534837	9.90
0.8700	0.994692	-0.546	0.15487212	0.19713515	-0.01578653	9.90
0.8710	1.137142	-0.542	0.15422720	0.19693673	-0.01619017	9.90
0.8720	1.265488	-0.550	0.15362793	0.19673049	-0.01658213	9.90
0.8730	1.378155	-0.550	0.15311629	0.19654173	-0.01692897	9.90
0.8740	1.476402	-0.553	0.15266109	0.19637722	-0.01722854	9.90
0.8750	1.560745	-0.550	0.15226710	0.19622540	-0.01747996	9.90
0.8760	1.632328	-0.545	0.15193927	0.19609892	-0.01769567	9.90
0.8770	1.692467	-0.550	0.15163869	0.19597840	-0.01790076	9.90
0.8780	1.743164	-0.544	0.15139067	0.19588602	-0.01807702	9.90
0.8790	1.784220	-0.544	0.15118742	0.19582677	-0.01822257	9.89
0.8800	1.814260	-0.540	0.15102983	0.19576162	-0.01833618	9.89
0.8810	1.832657	-0.539	0.15093452	0.19573641	-0.01841128	9.89
0.8820	1.840267	-0.541	0.15086931	0.19570130	-0.01847577	9.89
0.8830	1.839952	-0.545	0.15082556	0.19568765	-0.01852584	9.89
0.8840	1.834288	-0.546	0.15081578	0.19566035	-0.01853746	9.89
0.8850	1.824074	-0.545	0.15081578	0.19565648	-0.01853943	9.89
0.8860	1.808023	-0.536	0.15085572	0.19567490	-0.01850092	9.89
0.8870	1.780500	-0.533	0.15092671	0.19569916	-0.01846045	9.89
0.8880	1.727228	-0.533	0.15110272	0.19575566	-0.01834673	9.90
0.8890	1.636448	-0.537	0.15144515	0.19586957	-0.01812321	9.90
0.8900	1.508102	-0.541	0.15194422	0.19602430	-0.01779854	9.90
0.8910	1.357412	-0.538	0.15255612	0.19625288	-0.01738155	9.90
0.8920	1.205950	-0.544	0.15316689	0.19645911	-0.01696837	9.90
0.8930	1.067419	-0.544	0.15374660	0.19668287	-0.01656765	9.90
0.8940	0.947914	-0.548	0.15427971	0.19684726	-0.01622570	9.90
0.8950	0.846119	-0.546	0.15475351	0.19700778	-0.01591063	9.90
0.8960	0.757456	-0.544	0.15519422	0.19713032	-0.01561785	9.90
0.8970	0.677547	-0.548	0.15558720	0.19721007	-0.01536155	9.90
0.8980	0.602961	-0.549	0.15595090	0.19731992	-0.01512182	9.90
0.8990	0.532093	-0.545	0.15633804	0.19739491	-0.01489848	9.89
0.9000	0.464201	-0.541	0.15670091	0.19746691	-0.01470006	9.89
0.9010	0.400229	-0.533	0.15706277	0.19751549	-0.01448041	9.89
0.9020	0.343094	-0.541	0.15737796	0.19754559	-0.01431370	9.89
0.9030	0.295286	-0.545	0.15766197	0.19760108	-0.01414901	9.89
0.9040	0.258236	-0.549	0.15789151	0.19761854	-0.01402092	9.89
0.9050	0.230455	-0.548	0.15807444	0.19766527	-0.01389956	9.89
0.9060	0.209856	-0.544	0.15822226	0.19767600	-0.01379073	9.89
0.9070	0.195522	-0.550	0.15832639	0.19768476	-0.01371944	9.89
0.9080	0.187225	-0.553	0.15840703	0.19771010	-0.01367706	9.90
0.9090	0.184307	-0.553	0.15846938	0.19771975	-0.01365584	9.90
0.9100	0.185709	-0.554	0.15847999	0.19774109	-0.01364815	9.90
0.9110	0.190716	-0.549	0.15847218	0.19772846	-0.01364142	9.90
0.9120	0.200357	-0.554	0.15844005	0.19773144	-0.01367712	9.90
0.9130	0.220842	-0.552	0.15836322	0.19771975	-0.01372528	9.90
0.9140	0.263700	-0.555	0.15816575	0.19770610	-0.01383317	9.90
0.9150	0.337286	-0.550	0.15782040	0.19766235	-0.01401126	9.90
0.9160	0.441656	-0.547	0.15732139	0.19762152	-0.01427519	9.90
0.9170	0.569258	-0.547	0.15671927	0.19752812	-0.01461905	9.90
0.9180	0.711823	-0.543	0.15605974	0.19742793	-0.01501971	9.90
0.9190	0.862713	-0.541	0.15537006	0.19725770	-0.01545507	9.89
0.9200	1.013546	-0.538	0.15468234	0.19707865	-0.01589531	9.89
0.9210	1.155853	-0.532	0.15404230	0.19688898	-0.01631439	9.89
0.9220	1.283798	-0.538	0.15346456	0.19666326	-0.01669878	9.89
0.9230	1.396608	-0.546	0.15295869	0.19648337	-0.01705229	9.89
0.9240	1.494827	-0.553	0.15250635	0.19628686	-0.01735365	9.89
0.9250	1.580029	-0.552	0.15210748	0.19615853	-0.01760405	9.89
0.9260	1.651840	-0.542	0.15176898	0.19604176	-0.01782852	9.89
0.9270	1.710806	-0.544	0.15147519	0.19593674	-0.01803362	9.89
0.9280	1.757641	-0.541	0.15124470	0.19584131	-0.01821947	9.90
0.9290	1.793203	-0.547	0.15105700	0.19575959	-0.01834279	9.90
0.9300	1.817665	-0.543	0.15093738	0.19570988	-0.01843631	9.90
0.9310	1.831083	-0.540	0.15085274	0.19568354	-0.01848650	9.90
0.9320	1.835232	-0.547	0.15080410	0.19566214	-0.01853651	9.90
0.9330	1.832685	-0.554	0.15076327	0.19565451	-0.01856834	9.90
0.9340	1.825304	-0.554	0.15076035	0.19564492	-0.01858175	9.90
0.9350	1.813145	-0.551	0.15077597	0.19565755	-0.01857698	9.90
0.9360	1.793461	-0.543	0.15082848	0.19568080	-0.01852977	9.90
0.9370	1.757526	-0.545	0.15093070	0.19570023	-0.01846039	9.90
0.9380	1.691465	-0.549	0.15115243	0.19576842	-0.01829761	9.90
0.9390	1.587553	-0.553	0.15155023	0.19589102	-0.01803279	9.89
0.9400	1.451969	-0.552	0.15207839	0.19609237	-0.01766586	9.89
0.9410	1.303625	-0.542	0.15270001	0.19632781	-0.01726139	9.89
0.9420	1.161375	-0.545	0.15329242	0.19653505	-0.01687318	9.89
0.9430	1.037006	-0.544	0.15382254	0.19672281	-0.01653504	9.89
0.9440	0.932980	-0.545	0.15428847	0.19685024	-0.01623636	9.89
0.9450	0.844517	-0.542	0.15471745	0.19698733	-0.01596379	9.89
0.9460	0.763493	-0.541	0.15512210	0.19708943	-0.01569706	9.89
0.9470	0.684299	-0.549	0.15550935	0.19722843	-0.01545137	9.89
0.9480	0.605593	-0.549	0.15590423	0.19730920	-0.01520765	9.89
0.9490	0.528774	-0.550	0.15629625	0.19741231	-0.01495224	9.90
0.9500	0.455761	-0.549	0.15669996	0.19745415	-0.01470953	9.90
0.9510	0.388670	-0.542	0.15708321	0.19754362	-0.01447260	9.90
0.9520	0.330563	-0.548	0.15742564	0.19756305	-0.01428294	9.90
0.9530	0.283527	-0.550	0.15770477	0.19761264	-0.01412886	9.90
0.9540	0.248308	-0.553	0.15792167	0.19761461	-0.01400751	9.90
0.9550	0.223017	-0.556	0.15809971	0.19766515	-0.01391304	9.90
0.9560	0.205421	-0.552	0.15822029	0.19768167	-0.01382154	9.90
0.9570	0.194092	-0.554	0.15831667	0.19771481	-0.01377916	9.90
0.9580	0.188141	-0.557	0.15834773	0.19771481	-0.01374155	9.90
0.9590	0.187082	-0.556	0.15837783	0.19771868	-0.01372421	9.89
0.9600	0.189257	-0.560	0.15838653	0.19771189	-0.01372045	9.89
0.9610	0.194578	-0.554	0.15840012	0.19773036	-0.01370698	9.89
0.9620	0.203934	-0.561	0.15838069	0.19770992	-0.01372635	9.89
0.9630	0.224905	-0.559	0.15830588	0.19770610	-0.01375902	9.89
0.9640	0.268650	-0.566	0.15810454	0.19767785	-0.01386017	9.89
0.9650	0.343494	-0.564	0.15776223	0.19765747	-0.01404417	9.89
0.9660	0.449038	-0.559	0.15724874	0.19762141	-0.01430911	9.89
0.9670	0.578127	-0.563	0.15663296	0.19752318	-0.01466542	9.89
0.9680	0.722322	-0.561	0.15597337	0.19739187	-0.01507676	9.89
0.9690	0.874414	-0.558	0.15527773	0.19720608	-0.01551878	9.90
0.9700	1.025448	-0.553	0.15458697	0.19702035	-0.01597053	9.90
0.9710	1.166868	-0.547	0.15394598	0.19682384	-0.01635867	9.90
0.9720	1.292725	-0.549	0.15336818	0.19661665	-0.01673424	9.90
0.9730	1.402016	-0.552	0.15286827	0.19642693	-0.01707900	9.90
0.9740	1.495457	-0.557	0.15243250	0.19626063	-0.01739103	9.90
0.9750	1.574879	-0.552	0.15204918	0.19612253	-0.01765203	9.90
0.9760	1.641541	-0.546	0.15173882	0.19601065	-0.01785344	9.90
0.9770	1.697874	-0.548	0.15144408	0.19590074	-0.01804233	9.90
0.9780	1.747255	-0.545	0.15121162	0.19582492	-0.01820612	9.90
0.9790	1.790915	-0.543	0.15101320	0.19573057	-0.01835835	9.89
0.9800	1.827736	-0.544	0.15084493	0.19566834	-0.01848549	9.89
0.9810	1.854315	-0.541	0.15072918	0.19562453	-0.01856840	9.89
0.9820	1.869192	-0.542	0.15062112	0.19557005	-0.01864636	9.89
0.9830	1.872625	-0.546	0.15057635	0.19555926	-0.01868778	9.89
0.9840	1.867561	-0.551	0.15055108	0.19553494	-0.01870215	9.89
0.9850	1.855373	-0.553	0.15056276	0.19556314	-0.01868773	9.89
0.9860	1.835032	-0.548	0.15060753	0.19556022	-0.01865393	9.89
0.9870	1.798725	-0.550	0.15071166	0.19561273	-0.01858467	9.89
0.9880	1.732836	-0.548	0.15093255	0.19564873	-0.01844305	9.89
0.9890	1.629868	-0.548	0.15131485	0.19578582	-0.01820225	9.90
0.9900	1.494341	-0.548	0.15183717	0.19596684	-0.01785737	9.90
0.9910	1.343365	-0.544	0.15244603	0.19619542	-0.01744902	9.90
0.9920	1.195307	-0.546	0.15306276	0.19642019	-0.01703584	9.90
0.9930	1.062441	-0.553	0.15363675	0.19661379	-0.01665252	9.90
0.9940	0.949602	-0.553	0.15413970	0.19680446	-0.01631433	9.90
0.9950	0.853901	-0.552	0.15460080	0.19695520	-0.01601094	9.90
0.9960	0.768156	-0.544	0.15502775	0.19707775	-0.01574028	9.90
0.9970	0.686989	-0.545	0.15545189	0.19719446	-0.01549667	9.90
0.9980	0.609026	-0.542	0.15583903	0.19728976	-0.01525193	9.90
0.9990	0.535698	-0.544	0.15621746	0.19739091	-0.01501399	9.89
1.0000	0.468035	-0.544	0.15658021	0.19745219	-0.01478285	9.89
1.0010	0.406265	-0.536	0.15694118	0.19753486	-0.01457000	9.89
1.0020	0.351362	-0.542	0.15724951	0.19755715	-0.01438600	9.89
1.0030	0.304155	-0.542	0.15752679	0.19760585	-0.01423472	9.89
1.0040	0.265646	-0.546	0.15775734	0.19761950	-0.01411152	9.89
1.0050	0.234919	-0.542	0.15796357	0.19764870	-0.01400274	9.89
1.0060	0.211372	-0.541	0.15811437	0.19767010	-0.01389772	9.89
1.0070	0.194921	-0.543	0.15823305	0.19768560	-0.01382840	9.89
1.0080	0.185652	-0.545	0.15831280	0.19770694	-0.01378602	9.90
1.0090	0.182705	-0.543	0.15835547	0.19769233	-0.01375902	9.90
1.0100	0.184307	-0.546	0.15838069	0.19770205	-0.01374650	9.90
1.0110	0.189257	-0.542	0.15838254	0.19770598	-0.01373780	9.90
1.0120	0.198469	-0.552	0.15836507	0.19771570	-0.01374930	9.90
1.0130	0.218611	-0.552	0.15829223	0.19772160	-0.01378310	9.90
1.0140	0.261869	-0.557	0.15809780	0.19769150	-0.01388323	9.90
1.0150	0.336943	-0.554	0.15774471	0.19768178	-0.01407778	9.90
1.0160	0.444546	-0.550	0.15722525	0.19761479	-0.01435804	9.90
1.0170	0.577297	-0.552	0.15659684	0.19754761	-0.01471543	9.90
1.0180	0.725870	-0.548	0.15591496	0.19738609	-0.01513535	9.90
1.0190	0.881453	-0.548	0.15519220	0.19721878	-0.01558328	9.89
1.0200	1.032543	-0.545	0.15450644	0.19699407	-0.01603597	9.89
1.0210	1.169930	-0.537	0.15387315	0.19679952	-0.01642317	9.89
1.0220	1.288719	-0.538	0.15332252	0.19661081	-0.01678050	9.89
1.0230	1.390686	-0.539	0.15287024	0.19642496	-0.01709831	9.89
1.0240	1.479263	-0.542	0.15246367	0.19627714	-0.01737857	9.89
1.0250	1.557827	-0.540	0.15209210	0.19613510	-0.01762611	9.89
1.0260	1.628122	-0.537	0.15176326	0.19602424	-0.01783127	9.89
1.0270	1.691351	-0.540	0.15146953	0.19590557	-0.01804042	9.89
1.0280	1.747227	-0.538	0.15120393	0.19580233	-0.01822454	9.89
1.0290	1.793947	-0.536	0.15097338	0.19570994	-0.01838732	9.90
1.0300	1.828680	-0.533	0.15078372	0.19564760	-0.01850671	9.90
1.0310	1.849794	-0.529	0.15067571	0.19563019	-0.01858079	9.90
1.0320	1.858320	-0.536	0.15061146	0.19558746	-0.01865208	9.90
1.0330	1.857233	-0.540	0.15057933	0.19556904	-0.01870024	9.90
1.0340	1.850624	-0.544	0.15056181	0.19555050	-0.01872247	9.90
1.0350	1.839581	-0.541	0.15056282	0.19555527	-0.01872623	9.90
1.0360	1.822443	-0.539	0.15059000	0.19556206	-0.01868677	9.90
1.0370	1.790743	-0.541	0.15068436	0.19559997	-0.01862127	9.90
1.0380	1.728830	-0.542	0.15089834	0.19564760	-0.01846814	9.90
1.0390	1.627779	-0.541	0.15129137	0.19578385	-0.01821291	9.89
1.0400	1.491737	-0.541	0.15181571	0.19596392	-0.01784974	9.89
1.0410	1.339674	-0.536	0.15243822	0.19620806	-0.01742399	9.89
1.0420	1.192446	-0.541	0.15304911	0.19642299	-0.01702422	9.89
1.0430	1.062212	-0.538	0.15360653	0.19663018	-0.01666009	9.89
1.0440	0.953178	-0.541	0.15409398	0.19678873	-0.01634318	9.89
1.0450	0.860453	-0.538	0.15454054	0.19691712	-0.01605231	9.89
1.0460	0.777483	-0.541	0.15494710	0.19704753	-0.01579034	9.89
1.0470	0.698490	-0.546	0.15533721	0.19715655	-0.01553893	9.89
1.0480	0.621529	-0.543	0.15572327	0.19726658	-0.01528949	9.89
1.0490	0.546627	-0.534	0.15610951	0.19736195	-0.01505631	9.90
1.0500	0.475187	-0.533	0.15649754	0.19743782	-0.01482135	9.90
1.0510	0.089378	-0.559	0.15940708	0.19789302	-0.01295853	9.89
1.0520	0.089350	-0.561	0.15942937	0.19787556	-0.01295948	9.90
1.0530	0.089579	-0.565	0.15943915	0.19790477	-0.01295751	9.90
1.0540	0.090065	-0.556	0.15943432	0.19789499	-0.01293248	9.90
1.0550	0.091095	-0.561	0.15942365	0.19790554	-0.01294017	9.90
1.0560	0.092039	-0.564	0.15942371	0.19788408	-0.01295465	9.90
1.0570	0.093613	-0.564	0.15941882	0.19789571	-0.01297969	9.90
1.0580	0.096560	-0.560	0.15938872	0.19789869	-0.01298642	9.90
1.0590	0.102482	-0.558	0.15935558	0.19791812	-0.01297289	9.90
1.0600	0.117044	-0.561	0.15929723	0.19789284	-0.01299024	9.90
1.0610	0.149117	-0.565	0.15916979	0.19788891	-0.01308084	9.90
1.0620	0.208912	-0.565	0.15891194	0.19785392	-0.01325130	9.89
1.0630	0.300465	-0.569	0.15845579	0.19782865	-0.01351142	9.89
1.0640	0.421143	-0.565	0.15786922	0.19777805	-0.01383793	9.89
1.0650	0.566711	-0.572	0.15717953	0.19767588	-0.01426089	9.89
1.0660	0.735140	-0.570	0.15637988	0.19752419	-0.01477039	9.89
1.0670	0.922394	-0.572	0.15550339	0.19728398	-0.01534170	9.89
1.0680	1.119776	-0.563	0.15457344	0.19701064	-0.01592541	9.89
1.0690	1.314068	-0.557	0.15368819	0.19672167	-0.01647723	9.89
1.0700	1.493769	-0.554	0.15289062	0.19643265	-0.01699924	9.89
1.0710	1.652956	-0.559	0.15217072	0.19616133	-0.01747602	9.89
1.0720	1.789999	-0.563	0.15153950	0.19592303	-0.01789981	9.90
1.0730	1.907387	-0.565	0.15100747	0.19571102	-0.01827836	9.90
1.0740	2.009983	-0.562	0.15054059	0.19552910	-0.01861548	9.90
1.0750	2.103167	-0.562	0.15010965	0.19534332	-0.01894307	9.90
1.0760	2.192545	-0.562	0.14968741	0.19517016	-0.01925415	9.90
1.0770	2.278776	-0.558	0.14928073	0.19498622	-0.01956427	9.90
1.0780	2.356224	-0.553	0.14893341	0.19482476	-0.01983392	9.90
1.0790	2.415047	-0.546	0.14864546	0.19469249	-0.02003133	9.90
1.0800	2.449179	-0.545	0.14845181	0.19460601	-0.02017397	9.90
1.0810	2.460165	-0.549	0.14833903	0.19455540	-0.02023566	9.90
1.0820	2.455616	-0.550	0.14828843	0.19454080	-0.02026069	9.89
1.0830	2.441797	-0.553	0.14829427	0.19455051	-0.02026266	9.89
1.0840	2.420712	-0.548	0.14833325	0.19457287	-0.02024239	9.89
1.0850	2.388182	-0.544	0.14841211	0.19460201	-0.02020586	9.89
1.0860	2.331562	-0.544	0.14857078	0.19462240	-0.02010661	9.89
1.0870	2.237577	-0.545	0.14888686	0.19475663	-0.01990718	9.89
1.0880	2.100334	-0.543	0.14939165	0.19495416	-0.01957291	9.89
1.0890	1.928959	-0.536	0.15004146	0.19523627	-0.01911342	9.89
1.0900	1.743422	-0.537	0.15075451	0.19553202	-0.01858848	9.89
1.0910	1.562977	-0.542	0.15146750	0.19580251	-0.01806349	9.89
1.0920	1.399899	-0.542	0.15214348	0.19607490	-0.01759541	9.90
1.0930	1.258020	-0.545	0.15276116	0.19630158	-0.01718885	9.90
1.0940	1.134224	-0.544	0.15330893	0.19651949	-0.01682383	9.90
1.0950	1.023617	-0.548	0.15381277	0.19669551	-0.01649249	9.90
1.0960	0.921221	-0.553	0.15428650	0.19683456	-0.01618618	9.90
1.0970	0.823517	-0.556	0.15475827	0.19698817	-0.01589727	9.90
1.0980	0.727787	-0.550	0.15525144	0.19710684	-0.01560158	9.90
1.0990	0.633144	-0.540	0.15573490	0.19725472	-0.01529044	9.90
1.1000	0.541649	-0.540	0.15621734	0.19733065	-0.01497549	9.90
1.1010	0.457134	-0.541	0.15666485	0.19743371	-0.01468933	9.90
1.1020	0.383978	-0.540	0.15707928	0.19748241	-0.01445049	9.89
1.1030	0.324039	-0.542	0.15743536	0.19755524	-0.01424819	9.89
1.1040	0.277948	-0.537	0.15772128	0.19757956	-0.01407969	9.89
1.1050	0.245104	-0.542	0.15793622	0.19762242	-0.01395160	9.89
1.1060	0.224190	-0.549	0.15808803	0.19763798	-0.01387650	9.89
1.1070	0.213690	-0.550	0.15817279	0.19766915	-0.01381296	9.89
1.1080	0.211201	-0.546	0.15821952	0.19767588	-0.01377541	9.89
1.1090	0.214090	-0.540	0.15823203	0.19767106	-0.01375610	9.89
1.1100	0.220385	-0.548	0.15822715	0.19767493	-0.01376480	9.89
1.1110	0.231085	-0.550	0.15822524	0.19766325	-0.01378506	9.89
1.1120	0.256176	-0.557	0.15814447	0.19768947	-0.01381785	9.90
1.1130	0.309849	-0.560	0.15791589	0.19766617	-0.01393151	9.90
1.1140	0.402517	-0.556	0.15750629	0.19764584	-0.01415205	9.90
1.1150	0.535440	-0.555	0.15688175	0.19755346	-0.01450360	9.90
1.1160	0.702267	-0.557	0.15612584	0.19741434	-0.01499194	9.90
1.1170	0.892982	-0.557	0.15523970	0.19718277	-0.01553136	9.90
1.1180	1.095343	-0.553	0.15430301	0.19689864	-0.01613528	9.90
1.1190	1.293755	-0.545	0.15341300	0.19662052	-0.01669300	9.90
1.1200	1.475115	-0.543	0.15260077	0.19632387	-0.01723140	9.90
1.1210	1.633301	-0.548	0.15191299	0.19607091	-0.01769853	9.90
1.1220	1.767483	-0.549	0.15132254	0.19583744	-0.01810789	9.89
1.1230	1.882238	-0.555	0.15079725	0.19560695	-0.01847482	9.89
1.1240	1.983576	-0.549	0.15035665	0.19542897	-0.01878589	9.89
1.1250	2.077847	-0.554	0.14994222	0.19524121	-0.01909995	9.89
1.1260	2.170057	-0.556	0.14951909	0.19509238	-0.01941878	9.89
1.1270	2.259922	-0.553	0.14910954	0.19491923	-0.01971841	9.89
1.1280	2.340145	-0.545	0.14872336	0.19475192	-0.01997942	9.89
1.1290	2.400455	-0.538	0.14844120	0.19463712	-0.02016145	9.89
1.1300	2.434788	-0.539	0.14826310	0.19454175	-0.02030104	9.89
1.1310	2.446518	-0.540	0.14817166	0.19450969	-0.02037036	9.89
1.1320	2.443628	-0.545	0.14813381	0.19449222	-0.02038777	9.90
1.1330	2.432671	-0.546	0.14813286	0.19449323	-0.02040136	9.90
1.1340	2.415848	-0.545	0.14816684	0.19450188	-0.02039266	9.90
1.1350	2.390442	-0.540	0.14822721	0.19451934	-0.02039647	9.90
1.1360	2.345352	-0.543	0.14834678	0.19455236	-0.02032894	9.90
1.1370	2.264357	-0.538	0.14859790	0.19463617	-0.02016228	9.90
1.1380	2.136755	-0.536	0.14905024	0.19481605	-0.01983964	9.90
1.1390	1.965752	-0.530	0.14969331	0.19509137	-0.01936388	9.90
1.1400	1.772118	-0.532	0.15045005	0.19540453	-0.01882255	9.90
1.1410	1.578798	-0.537	0.15123308	0.19571394	-0.01826572	9.90
1.1420	1.404419	-0.541	0.15195775	0.19599116	-0.01776385	9.89
1.1430	1.256676	-0.540	0.15259200	0.19622171	-0.01732659	9.89
1.1440	1.133652	-0.538	0.15314257	0.19644731	-0.01695198	9.89
1.1450	1.027822	-0.536	0.15362602	0.19661862	-0.01663995	9.89
1.1460	0.931263	-0.540	0.15407938	0.19677615	-0.01635289	9.89
1.1470	0.835905	-0.536	0.15453565	0.19689679	-0.01606387	9.89
1.1480	0.737858	-0.534	0.15502012	0.19703782	-0.01575553	9.89
1.1490	0.636835	-0.527	0.15553856	0.19716823	-0.01542032	9.89
1.1500	0.538301	-0.527	0.15604723	0.19731313	-0.01511019	9.89
1.1510	0.448952	-0.533	0.15653157	0.19737935	-0.01481354	9.89
1.1520	0.373363	-0.533	0.15696734	0.19748050	-0.01455158	9.90
1.1530	0.313311	-0.538	0.15735447	0.19750583	-0.01433671	9.90
1.1540	0.268278	-0.538	0.15765125	0.19757581	-0.01416624	9.90
1.1550	0.236864	-0.542	0.15785742	0.19758064	-0.01406515	9.90
1.1560	0.217094	-0.545	0.15798295	0.19760877	-0.01398915	9.90
1.1570	0.207453	-0.545	0.15806466	0.19759792	-0.01393920	9.90
1.1580	0.205221	-0.544	0.15811527	0.19762039	-0.01388818	9.90
1.1590	0.208054	-0.541	0.15813959	0.19760287	-0.01385731	9.90
1.1600	0.214348	-0.545	0.15813476	0.19763315	-0.01385248	9.90
1.1610	0.225763	-0.550	0.15811419	0.19761175	-0.01385915	9.90
1.1620	0.252199	-0.553	0.15802473	0.19762921	-0.01391321	9.89
1.1630	0.307217	-0.555	0.15778643	0.19760495	-0.01403165	9.89
1.1640	0.400343	-0.552	0.15737015	0.19759029	-0.01426375	9.89
1.1650	0.532351	-0.558	0.15673500	0.19750178	-0.01461428	9.89
1.1660	0.696430	-0.565	0.15597230	0.19734907	-0.01509494	9.89
1.1670	0.883055	-0.564	0.15511435	0.19712144	-0.01564491	9.89
1.1680	1.080065	-0.554	0.15421164	0.19687247	-0.01621985	9.89
1.1690	1.274042	-0.545	0.15334785	0.19659138	-0.01675922	9.89
1.1700	1.454802	-0.548	0.15254432	0.19630349	-0.01726305	9.89
1.1710	1.617451	-0.549	0.15183902	0.19601262	-0.01773322	9.89
1.1720	1.761618	-0.549	0.15121943	0.19577324	-0.01815230	9.90
1.1730	1.889734	-0.554	0.15064263	0.19555134	-0.01855201	9.90
1.1740	2.004204	-0.549	0.15015626	0.19535869	-0.01891124	9.90
1.1750	2.106886	-0.547	0.14970672	0.19518852	-0.01926470	9.90
1.1760	2.200212	-0.549	0.14929521	0.19499117	-0.01959115	9.90
1.1770	2.284098	-0.544	0.14890128	0.19482011	-0.01989561	9.90
1.1780	2.354393	-0.540	0.14856178	0.19465852	-0.02014506	9.90
1.1790	2.403517	-0.534	0.14830983	0.19456512	-0.02030212	9.90
1.1800	2.428093	-0.538	0.14816487	0.19447947	-0.02039069	9.90
1.1810	2.432585	-0.541	0.14809096	0.19444257	-0.02042639	9.90
1.1820	2.425833	-0.540	0.14807355	0.19443285	-0.02044183	9.89
1.1830	2.413187	-0.540	0.14806873	0.19443482	-0.02044761	9.89
1.1840	2.395878	-0.540	0.14810956	0.19446588	-0.02043021	9.89
1.1850	2.369785	-0.544	0.14817953	0.19448340	-0.02040517	9.89
1.1860	2.323637	-0.545	0.14830893	0.19453776	-0.02032810	9.89
1.1870	2.242355	-0.542	0.14857835	0.19462246	-0.02014619	9.89
1.1880	2.116842	-0.540	0.14902586	0.19481027	-0.01984859	9.89
1.1890	1.953564	-0.534	0.14965135	0.19505537	-0.01939100	9.89
1.1900	1.773491	-0.538	0.15034795	0.19536173	-0.01889879	9.89
1.1910	1.597652	-0.544	0.15104830	0.19561553	-0.01838434	9.89
1.1920	1.439209	-0.545	0.15169418	0.19590843	-0.01792586	9.90
1.1930	1.299791	-0.554	0.15229720	0.19611174	-0.01751935	9.90
1.1940	1.175022	-0.552	0.15284383	0.19636762	-0.01713502	9.90
1.1950	1.059408	-0.555	0.15335649	0.19653499	-0.01680368	9.90
1.1960	0.949287	-0.551	0.15385067	0.19673437	-0.01648873	9.90
1.1970	0.841341	-0.554	0.15436137	0.19686377	-0.01616311	9.90
1.1980	0.734568	-0.550	0.15490019	0.19702524	-0.01582700	9.90
1.1990	0.630198	-0.546	0.15545666	0.19717801	-0.01547354	9.90
1.2000	0.532694	-0.545	0.15597135	0.19729179	-0.01516145	9.90
1.2010	0.447607	-0.550	0.15643251	0.19736862	-0.01488012	9.90
1.2020	0.377083	-0.552	0.15683812	0.19742209	-0.01465082	9.89
1.2030	0.320721	-0.552	0.15718925	0.19747943	-0.01445240	9.89
1.2040	0.276947	-0.546	0.15748399	0.19754457	-0.01428193	9.89
1.2050	0.244904	-0.546	0.15768528	0.19759023	-0.01416057	9.89
1.2060	0.223846	-0.548	0.15783215	0.19761938	-0.01406050	9.89
1.2070	0.212975	-0.547	0.15793031	0.19761068	-0.01400852	9.89
1.2080	0.210028	-0.545	0.15799749	0.19763595	-0.01396811	9.89
1.2090	0.212545	-0.537	0.15802860	0.19761449	-0.01393723	9.89
1.2100	0.219297	-0.542	0.15802372	0.19762814	-0.01393241	9.89
1.2110	0.232258	-0.546	0.15798867	0.19760293	-0.01393908	9.89
1.2120	0.262928	-0.553	0.15787977	0.19760501	-0.01401037	9.90
1.2130	0.324783	-0.557	0.15761036	0.19759524	-0.01417309	9.90
1.2140	0.426292	-0.554	0.15715420	0.19756907	-0.01442260	9.90
1.2150	0.566797	-0.554	0.15648401	0.19748634	-0.01480591	9.90
1.2160	0.738716	-0.550	0.15570873	0.19730932	-0.01527888	9.90
1.2170	0.931892	-0.548	0.15482551	0.19708943	-0.01584810	9.90
1.2180	1.133680	-0.546	0.15391207	0.19678485	-0.01644242	9.90
1.2190	1.329288	-0.540	0.15304148	0.19649690	-0.01700974	9.90
1.2200	1.507101	-0.542	0.15223795	0.19619340	-0.01751542	9.90
1.2210	1.661997	-0.546	0.15156877	0.19593090	-0.01795071	9.90
1.2220	1.794548	-0.549	0.15099090	0.19568872	-0.01834095	9.89
1.2230	1.909990	-0.551	0.15048414	0.19548535	-0.01870888	9.89
1.2240	2.013474	-0.549	0.15003657	0.19529563	-0.01901913	9.89
1.2250	2.109261	-0.548	0.14960563	0.19511372	-0.01933020	9.89
1.2260	2.200756	-0.550	0.14920676	0.19495332	-0.01964128	9.89
1.2270	2.287159	-0.548	0.14882833	0.19477433	-0.01995432	9.89
1.2280	2.362118	-0.541	0.14848012	0.19461674	-0.02021527	9.89
1.2290	2.416563	-0.532	0.14822137	0.19450003	-0.02037996	9.89
1.2300	2.446032	-0.532	0.14804250	0.19442910	-0.02048594	9.89
1.2310	2.454586	-0.540	0.14795989	0.19439310	-0.02053893	9.89
1.2320	2.449808	-0.541	0.14793170	0.19438040	-0.02056015	9.90
1.2330	2.437220	-0.544	0.14793354	0.19438225	-0.02056682	9.90
1.2340	2.417707	-0.542	0.14797539	0.19437546	-0.02054662	9.90
1.2350	2.385120	-0.543	0.14806777	0.19441432	-0.02050811	9.90
1.2360	2.325411	-0.544	0.14825165	0.19447559	-0.02040607	9.90
1.2370	2.226162	-0.542	0.14857453	0.19459623	-0.02019417	9.90
1.2380	2.084026	-0.539	0.14908230	0.19480437	-0.01982731	9.90
1.2390	1.911335	-0.534	0.14974278	0.19507378	-0.01934189	9.90
1.2400	1.728373	-0.538	0.15045780	0.19537038	-0.01882076	9.90
1.2410	1.553135	-0.544	0.15115815	0.19565839	-0.01831400	9.90
1.2420	1.397095	-0.550	0.15179825	0.19594055	-0.01784396	9.89
1.2430	1.260967	-0.558	0.15238184	0.19614977	-0.01744032	9.89
1.2440	1.140175	-0.552	0.15292263	0.19637632	-0.01707047	9.89
1.2450	1.028681	-0.549	0.15343231	0.19656110	-0.01675451	9.89
1.2460	0.922823	-0.552	0.15392452	0.19672734	-0.01645207	9.89
1.2470	0.819397	-0.550	0.15440804	0.19689178	-0.01614779	9.89
1.2480	0.717201	-0.547	0.15492660	0.19702613	-0.01582992	9.89
1.2490	0.616865	-0.541	0.15545768	0.19717503	-0.01549083	9.89
1.2500	0.523081	-0.545	0.15595478	0.19725490	-0.01518840	9.89
1.2510	0.440454	-0.548	0.15639842	0.19735509	-0.01491874	9.89
1.2520	0.371161	-0.548	0.15678853	0.19740272	-0.01468468	9.90
1.2530	0.315657	-0.552	0.15713960	0.19747561	-0.01449293	9.90
1.2540	0.272398	-0.548	0.15744501	0.19751740	-0.01432341	9.90
1.2550	0.241156	-0.550	0.15766972	0.19756794	-0.01421267	9.90
1.2560	0.220900	-0.549	0.15781081	0.19755429	-0.01412886	9.90
1.2570	0.211029	-0.548	0.15789056	0.19758642	-0.01407015	9.90
1.2580	0.208826	-0.547	0.15793049	0.19755918	-0.01402587	9.90
1.2590	0.211658	-0.545	0.15796447	0.19760978	-0.01399308	9.90
1.2600	0.218039	-0.548	0.15796643	0.19758928	-0.01398242	9.90
1.2610	0.229282	-0.551	0.15794986	0.19759995	-0.01397955	9.90
1.2620	0.255604	-0.554	0.15785259	0.19759613	-0.01402479	9.89
1.2630	0.310936	-0.560	0.15760845	0.19759321	-0.01416457	9.89
1.2640	0.405779	-0.554	0.15718144	0.19756997	-0.01440722	9.89
1.2650	0.541878	-0.557	0.15653074	0.19748825	-0.01478773	9.89
1.2660	0.712023	-0.554	0.15575844	0.19732004	-0.01526743	9.89
1.2670	0.905170	-0.551	0.15488487	0.19708854	-0.01581562	9.89
1.2680	1.107645	-0.546	0.15396750	0.19678402	-0.01640016	9.89
1.2690	1.304255	-0.538	0.15311539	0.19651639	-0.01694238	9.89
1.2700	1.483126	-0.540	0.15230221	0.19620317	-0.01746249	9.89
1.2710	1.637964	-0.544	0.15162808	0.19597358	-0.01789886	9.89
1.2720	1.768942	-0.548	0.15105319	0.19572562	-0.01829386	9.90
1.2730	1.881723	-0.547	0.15053761	0.19553196	-0.01865894	9.90
1.2740	1.983318	-0.540	0.15011346	0.19535398	-0.01898456	9.90
1.2750	2.079563	-0.539	0.14968735	0.19517690	-0.01931012	9.90
1.2760	2.174177	-0.542	0.14927977	0.19499308	-0.01962984	9.90
1.2770	2.265530	-0.544	0.14886928	0.19480729	-0.01993614	9.90
1.2780	2.346582	-0.541	0.14848691	0.19464391	-0.02019423	9.90
1.2790	2.407207	-0.532	0.14818728	0.19451642	-0.02036864	9.90
1.2800	2.442198	-0.533	0.14800447	0.19442594	-0.02049476	9.90
1.2810	2.454472	-0.532	0.14791793	0.19436467	-0.02055264	9.90
1.2820	2.451725	-0.538	0.14790732	0.19434047	-0.02058530	9.89
1.2830	2.440052	-0.545	0.14790440	0.19433373	-0.02058917	9.89
1.2840	2.421770	-0.548	0.14792871	0.19437855	-0.02058142	9.89
1.2850	2.392216	-0.547	0.14798403	0.19438529	-0.02056706	9.89
1.2860	2.338142	-0.547	0.14813572	0.19443583	-0.02048516	9.89
1.2870	2.245903	-0.543	0.14844024	0.19452918	-0.02029932	9.89
1.2880	2.109861	-0.538	0.14892566	0.19474310	-0.01995343	9.89
1.2890	1.938887	-0.532	0.14957839	0.19501454	-0.01946896	9.89
1.2900	1.752691	-0.533	0.15029824	0.19531703	-0.01894003	9.89
1.2910	1.570787	-0.539	0.15103948	0.19560587	-0.01840931	9.89
1.2920	1.406708	-0.542	0.15170777	0.19588304	-0.01792866	9.90
1.2930	1.265688	-0.549	0.15230697	0.19612628	-0.01750487	9.90
1.2940	1.144466	-0.538	0.15284783	0.19633150	-0.01712447	9.90
1.2950	1.036634	-0.541	0.15333897	0.19651550	-0.01681340	9.90
1.2960	0.935583	-0.539	0.15380591	0.19666821	-0.01652735	9.90
1.2970	0.835733	-0.541	0.15427667	0.19682199	-0.01623839	9.90
1.2980	0.734367	-0.536	0.15476507	0.19696593	-0.01591378	9.90
1.2990	0.632000	-0.532	0.15530986	0.19712055	-0.01557952	9.90
1.3000	0.533552	-0.529	0.15582931	0.19722748	-0.01527703	9.90
1.3010	0.446005	-0.531	0.15631670	0.19731796	-0.01498604	9.90
1.3020	0.372934	-0.534	0.15672719	0.19738412	-0.01472604	9.89
1.3030	0.314827	-0.538	0.15706760	0.19745618	-0.01451027	9.89
1.3040	0.270081	-0.540	0.15737200	0.19749504	-0.01433408	9.89
1.3050	0.237722	-0.542	0.15759289	0.19753003	-0.01422530	9.89
1.3060	0.217123	-0.545	0.15773880	0.19754171	-0.01414925	9.89
1.3070	0.207109	-0.541	0.15781575	0.19756311	-0.01409525	9.89
1.3080	0.205078	-0.542	0.15784878	0.19758260	-0.01405376	9.89
1.3090	0.207825	-0.543	0.15788084	0.19757771	-0.01400268	9.89
1.3100	0.214005	-0.547	0.15789253	0.19760102	-0.01400363	9.89
1.3110	0.225477	-0.553	0.15788567	0.19757378	-0.01400656	9.89
1.3120	0.253372	-0.554	0.15778357	0.19759315	-0.01405180	9.90
1.3130	0.310678	-0.555	0.15752286	0.19755912	-0.01418859	9.90
1.3140	0.406437	-0.549	0.15711528	0.19754261	-0.01442647	9.90
1.3150	0.541563	-0.549	0.15647036	0.19745409	-0.01480788	9.90
1.3160	0.710278	-0.550	0.15569603	0.19729745	-0.01529717	9.90
1.3170	0.901880	-0.550	0.15481287	0.19707954	-0.01583761	9.90
1.3180	1.102924	-0.545	0.15390337	0.19681400	-0.01642424	9.90
1.3190	1.297503	-0.534	0.15305513	0.19653100	-0.01696265	9.90
1.3200	1.474743	-0.536	0.15226227	0.19622463	-0.01748759	9.90
1.3210	1.630354	-0.542	0.15158230	0.19594640	-0.01793921	9.90
1.3220	1.765566	-0.546	0.15100247	0.19572365	-0.01833707	9.89
1.3230	1.885328	-0.555	0.15046167	0.19550860	-0.01870501	9.89
1.3240	1.994591	-0.546	0.14999092	0.19533646	-0.01904213	9.89
1.3250	2.096415	-0.549	0.14954156	0.19513905	-0.01938975	9.89
1.3260	2.193832	-0.548	0.14911354	0.19496202	-0.01969796	9.89
1.3270	2.284727	-0.548	0.14871269	0.19477332	-0.01999950	9.89
1.3280	2.362633	-0.542	0.14834309	0.19461572	-0.02024132	9.89
1.3290	2.418337	-0.538	0.14807355	0.19447654	-0.02042627	9.89
1.3300	2.448177	-0.535	0.14790714	0.19440168	-0.02054948	9.89
1.3310	2.456989	-0.540	0.14782536	0.19435108	-0.02060914	9.89
1.3320	2.452612	-0.541	0.14781171	0.19434232	-0.02063328	9.90
1.3330	2.440681	-0.542	0.14782053	0.19433564	-0.02064294	9.90
1.3340	2.422285	-0.537	0.14785260	0.19435805	-0.02061605	9.90
1.3350	2.392273	-0.536	0.14792663	0.19437659	-0.02059293	9.90
1.3360	2.337427	-0.535	0.14809591	0.19444358	-0.02050531	9.90
1.3370	2.245560	-0.530	0.14842176	0.19455338	-0.02033198	9.90
1.3380	2.111835	-0.527	0.14890033	0.19473916	-0.02000439	9.90
1.3390	1.946526	-0.523	0.14952284	0.19499207	-0.01953441	9.90
1.3400	1.768255	-0.526	0.15020674	0.19529557	-0.01902866	9.90
1.3410	1.594849	-0.529	0.15090227	0.19556892	-0.01851630	9.90
1.3420	1.438150	-0.531	0.15153843	0.19585007	-0.01806450	9.89
1.3430	1.299591	-0.538	0.15211147	0.19605243	-0.01765603	9.89
1.3440	1.175566	-0.537	0.15266210	0.19627613	-0.01727754	9.89
1.3450	1.059723	-0.539	0.15319026	0.19644052	-0.01693660	9.89
1.3460	0.948801	-0.540	0.15371346	0.19662344	-0.01660919	9.89
1.3470	0.840340	-0.538	0.15422028	0.19678295	-0.01628363	9.89
1.3480	0.734282	-0.539	0.15472323	0.19694442	-0.01594645	9.89
1.3490	0.631685	-0.532	0.15525621	0.19709218	-0.01559007	9.89
1.3500	0.536041	-0.533	0.15577179	0.19719726	-0.01528186	9.89
1.3510	0.451899	-0.538	0.15623581	0.19730628	-0.01500255	9.89
1.3520	0.381889	-0.543	0.15663761	0.19736570	-0.01477897	9.90
1.3530	0.326071	-0.542	0.15696251	0.19743675	-0.01457858	9.90
1.3540	0.283127	-0.531	0.15723503	0.19748735	-0.01441389	9.90
1.3550	0.251741	-0.529	0.15744996	0.19751555	-0.01430601	9.90
1.3560	0.231543	-0.530	0.15758616	0.19753015	-0.01421940	9.90
1.3570	0.221415	-0.534	0.15767950	0.19752336	-0.01417994	9.90
1.3580	0.219383	-0.532	0.15771157	0.19752723	-0.01412797	9.90
1.3590	0.222387	-0.525	0.15774077	0.19753784	-0.01408941	9.90
1.3600	0.228968	-0.532	0.15774667	0.19754654	-0.01407981	9.90
1.3610	0.241213	-0.542	0.15774077	0.19755429	-0.01408851	9.90
1.3620	0.270796	-0.546	0.15762109	0.19754946	-0.01412994	9.89
1.3630	0.331306	-0.553	0.15732831	0.19753975	-0.01426375	9.89
1.3640	0.431242	-0.548	0.15689355	0.19750673	-0.01452088	9.89
1.3650	0.570574	-0.556	0.15624082	0.19740647	-0.01493883	9.89
1.3660	0.741978	-0.557	0.15546745	0.19725662	-0.01543391	9.89
1.3670	0.935555	-0.556	0.15457833	0.19700086	-0.01599932	9.89
1.3680	1.138000	-0.549	0.15366590	0.19672954	-0.01656955	9.89
1.3690	1.335211	-0.548	0.15280795	0.19642508	-0.01711375	9.89
1.3700	1.515427	-0.549	0.15200061	0.19613034	-0.01762336	9.89
1.3710	1.673069	-0.552	0.15130609	0.19584912	-0.01806641	9.89
1.3720	1.808023	-0.549	0.15073407	0.19560885	-0.01845270	9.90
1.3730	1.924381	-0.547	0.15022236	0.19540358	-0.01881963	9.90
1.3740	2.027206	-0.539	0.14979142	0.19522369	-0.01914620	9.90
1.3750	2.121334	-0.541	0.14936334	0.19505441	-0.01947081	9.90
1.3760	2.210941	-0.543	0.14896643	0.19486564	-0.01978683	9.90
1.3770	2.296200	-0.542	0.14858222	0.19469827	-0.02007091	9.90
1.3780	2.371244	-0.537	0.14823484	0.19454366	-0.02032232	9.90
1.3790	2.426863	-0.528	0.14797705	0.19442987	-0.02049476	9.90
1.3800	2.458334	-0.525	0.14779919	0.19435602	-0.02062774	9.90
1.3810	2.468348	-0.530	0.14771360	0.19428593	-0.02070284	9.90
1.3820	2.463970	-0.535	0.14769715	0.19428009	-0.02072018	9.89
1.3830	2.450809	-0.538	0.14770776	0.19427615	-0.02072394	9.89
1.3840	2.430067	-0.537	0.14775252	0.19431907	-0.02069694	9.89
1.3850	2.394876	-0.536	0.14784294	0.19435215	-0.02064782	9.89
1.3860	2.331476	-0.536	0.14805311	0.19442034	-0.02053517	9.89
1.3870	2.227850	-0.532	0.14842856	0.19454473	-0.02029723	9.89
1.3880	2.082710	-0.528	0.14895481	0.19475782	-0.01993304	9.89
1.3890	1.908960	-0.525	0.14961249	0.19503987	-0.01943898	9.89
1.3900	1.725912	-0.525	0.15031481	0.19534719	-0.01890832	9.89
1.3910	1.550159	-0.532	0.15102005	0.19564277	-0.01839697	9.89
1.3920	1.391602	-0.534	0.15167856	0.19589955	-0.01792878	9.90
1.3930	1.251383	-0.539	0.15228069	0.19612432	-0.01752996	9.90
1.3940	1.126041	-0.534	0.15283805	0.19634318	-0.01714945	9.90
1.3950	1.010113	-0.534	0.15336525	0.19653779	-0.01681423	9.90
1.3960	0.900335	-0.534	0.15387493	0.19671202	-0.01649541	9.90
1.3970	0.795479	-0.533	0.15438271	0.19687164	-0.01617950	9.90
1.3980	0.695114	-0.532	0.15487581	0.19701070	-0.01586258	9.90
1.3990	0.600271	-0.521	0.15538460	0.19714099	-0.01552653	9.90
1.4000	0.512753	-0.522	0.15585637	0.19723827	-0.01522309	9.90
1.4010	0.435419	-0.531	0.15629512	0.19730437	-0.01496303	9.89
1.4020	0.369587	-0.534	0.15667647	0.19739389	-0.01474148	9.89
1.4030	0.315599	-0.536	0.15699470	0.19742304	-0.01457006	9.89
1.4040	0.272913	-0.534	0.15727389	0.19750381	-0.01439667	9.89
1.4050	0.241356	-0.541	0.15748501	0.19751149	-0.01428777	9.89
1.4060	0.220327	-0.544	0.15763575	0.19755232	-0.01420873	9.89
1.4070	0.209055	-0.540	0.15773308	0.19754559	-0.01415861	9.89
1.4080	0.205536	-0.538	0.15777296	0.19757187	-0.01411426	9.89
1.4090	0.207338	-0.534	0.15780014	0.19756800	-0.01405853	9.89
1.4100	0.213032	-0.542	0.15781367	0.19757092	-0.01404697	9.89
1.4110	0.223274	-0.546	0.15779811	0.19754958	-0.01406431	9.89
1.4120	0.248508	-0.553	0.15770859	0.19756711	-0.01411152	9.90
1.4130	0.302896	-0.556	0.15744692	0.19753891	-0.01424533	9.90
1.4140	0.397625	-0.553	0.15703064	0.19752419	-0.01447749	9.90
1.4150	0.534296	-0.551	0.15639746	0.19742680	-0.01486951	9.90
1.4160	0.706215	-0.550	0.15561146	0.19727415	-0.01536077	9.90
1.4170	0.901508	-0.549	0.15471458	0.19703579	-0.01590979	9.90
1.4180	1.105757	-0.548	0.15378165	0.19676250	-0.01649058	9.90
1.4190	1.302967	-0.546	0.15292954	0.19647068	-0.01702809	9.90
1.4200	1.481552	-0.545	0.15213287	0.19616526	-0.01755410	9.90
1.4210	1.635847	-0.545	0.15144515	0.19590938	-0.01799524	9.89
1.4220	1.766596	-0.544	0.15087903	0.19566524	-0.01838434	9.89
1.4230	1.878862	-0.551	0.15037119	0.19546384	-0.01872724	9.89
1.4240	1.980057	-0.549	0.14994901	0.19528109	-0.01904225	9.89
1.4250	2.077188	-0.552	0.14951712	0.19510692	-0.01938325	9.89
1.4260	2.174034	-0.553	0.14908731	0.19492799	-0.01970589	9.88
1.4270	2.267475	-0.553	0.14867383	0.19476259	-0.02002370	9.89
1.4280	2.348099	-0.550	0.14830321	0.19458747	-0.02027893	9.89
1.4290	2.405434	-0.541	0.14804333	0.19445807	-0.02046764	9.89
1.4300	2.436075	-0.539	0.14786530	0.19436759	-0.02058417	9.89
1.4310	2.444973	-0.541	0.14776999	0.19430834	-0.02064770	9.89
1.4320	2.440853	-0.546	0.14773786	0.19428009	-0.02066517	9.90
1.4330	2.429438	-0.551	0.14776123	0.19429475	-0.02066141	9.90
1.4340	2.411757	-0.548	0.14779818	0.19431418	-0.02063924	9.90
1.4350	2.383175	-0.550	0.14787024	0.19433361	-0.02060455	9.90
1.4360	2.329674	-0.548	0.14801717	0.19439191	-0.02050620	9.90
1.4370	2.237463	-0.547	0.14833713	0.19451350	-0.02030498	9.90
1.4380	2.100449	-0.543	0.14884681	0.19473052	-0.01996785	9.90
1.4390	1.928444	-0.537	0.14949852	0.19500005	-0.01950169	9.90
1.4400	1.742277	-0.536	0.15021062	0.19528508	-0.01896805	9.90
1.4410	1.562147	-0.537	0.15090424	0.19558555	-0.01844317	9.90
1.4420	1.401501	-0.537	0.15158236	0.19583839	-0.01797599	9.89
1.4430	1.264257	-0.546	0.15217382	0.19609326	-0.01758683	9.89
1.4440	1.146555	-0.541	0.15271461	0.19629765	-0.01723611	9.89
1.4450	1.041241	-0.546	0.15319127	0.19648540	-0.01693171	9.89
1.4460	0.941505	-0.544	0.15365523	0.19664001	-0.01664084	9.89
1.4470	0.841198	-0.548	0.15412408	0.19678396	-0.01633364	9.89
1.4480	0.737915	-0.545	0.15462404	0.19694251	-0.01600331	9.89
1.4490	0.633202	-0.541	0.15516394	0.19707870	-0.01565456	9.89
1.4500	0.532808	-0.546	0.15569711	0.19721293	-0.01533568	9.89
1.4510	0.444002	-0.545	0.15617961	0.19731027	-0.01505351	9.89
1.4520	0.370502	-0.548	0.15661633	0.19738996	-0.01480693	9.90
1.4530	0.313454	-0.548	0.15695578	0.19744736	-0.01461631	9.90
1.4540	0.270853	-0.548	0.15722227	0.19749886	-0.01444960	9.90
1.4550	0.241241	-0.549	0.15741682	0.19753385	-0.01433396	9.90
1.4560	0.222645	-0.551	0.15756083	0.19753486	-0.01425779	9.90
1.4570	0.213604	-0.549	0.15766007	0.19755435	-0.01420003	9.90
1.4580	0.212116	-0.543	0.15770191	0.19755441	-0.01415771	9.90
1.4590	0.215063	-0.538	0.15772039	0.19758648	-0.01410967	9.90
1.4600	0.221071	-0.538	0.15772331	0.19758165	-0.01409143	9.90
1.4610	0.231285	-0.546	0.15770382	0.19759130	-0.01410580	9.90
1.4620	0.255547	-0.550	0.15762395	0.19758457	-0.01414138	9.89
1.4630	0.307817	-0.559	0.15738451	0.19757676	-0.01427418	9.89
1.4640	0.398312	-0.553	0.15698761	0.19754368	-0.01447839	9.89
1.4650	0.528946	-0.556	0.15638262	0.19745803	-0.01485020	9.89
1.4660	0.692568	-0.553	0.15564150	0.19729263	-0.01532418	9.89
1.4670	0.879335	-0.549	0.15477490	0.19705820	-0.01587129	9.89
1.4680	1.076975	-0.542	0.15387321	0.19679165	-0.01643860	9.89
1.4690	1.272812	-0.539	0.15302980	0.19649017	-0.01697606	9.89
1.4700	1.456232	-0.548	0.15222824	0.19620615	-0.01749140	9.89
1.4710	1.621628	-0.549	0.15150249	0.19591731	-0.01796824	9.89
1.4720	1.766882	-0.553	0.15088475	0.19565952	-0.01837856	9.90
1.4730	1.893826	-0.555	0.15032542	0.19541919	-0.01877344	9.90
1.4740	2.005205	-0.550	0.14985663	0.19522071	-0.01911730	9.90
1.4750	2.104568	-0.551	0.14940631	0.19504178	-0.01947951	9.90
1.4760	2.195520	-0.552	0.14899385	0.19485986	-0.01979065	9.90
1.4770	2.277803	-0.549	0.14860952	0.19468570	-0.02007478	9.90
1.4780	2.347498	-0.541	0.14829046	0.19454360	-0.02030498	9.90
1.4790	2.398453	-0.537	0.14804530	0.19443464	-0.02045423	9.90
1.4800	2.427578	-0.536	0.14788866	0.19435692	-0.02057076	9.90
1.4810	2.438507	-0.540	0.14779133	0.19430256	-0.02061695	9.90
1.4820	2.437077	-0.542	0.14775920	0.19428897	-0.02064782	9.89
1.4830	2.427807	-0.546	0.14775336	0.19427824	-0.02065843	9.89
1.4840	2.411728	-0.546	0.14777672	0.19430935	-0.02064019	9.89
1.4850	2.385378	-0.545	0.14783221	0.19431907	-0.02062571	9.89
1.4860	2.335625	-0.544	0.14796656	0.19437742	-0.02053708	9.89
1.4870	2.248392	-0.539	0.14826816	0.19448930	-0.02035695	9.89
1.4880	2.116499	-0.540	0.14875257	0.19468576	-0.02002746	9.89
1.4890	1.949530	-0.532	0.14937991	0.19496197	-0.01956326	9.89
1.4900	1.768456	-0.534	0.15007925	0.19525284	-0.01906049	9.89
1.4910	1.592073	-0.534	0.15076309	0.19553012	-0.01855105	9.89
1.4920	1.432571	-0.536	0.15142751	0.19578207	-0.01808769	9.90
1.4930	1.291723	-0.539	0.15202677	0.19602627	-0.01768506	9.90
1.4940	1.166353	-0.536	0.15257543	0.19623822	-0.01731038	9.90
1.4950	1.050253	-0.539	0.15308225	0.19644058	-0.01698476	9.90
1.4960	0.940046	-0.534	0.15357834	0.19661760	-0.01665527	9.90
1.4970	0.832758	-0.536	0.15409279	0.19676453	-0.01633644	9.90
1.4980	0.727758	-0.536	0.15462011	0.19694340	-0.01599830	9.90
1.4990	0.625563	-0.534	0.15513772	0.19706500	-0.01566416	9.90
1.5000	0.529919	-0.534	0.15564066	0.19721282	-0.01535314	9.90
1.5010	0.445404	-0.537	0.15609694	0.19729167	-0.01506901	9.90
1.5020	0.374794	-0.541	0.15652096	0.19737047	-0.01483202	9.89
1.5030	0.318546	-0.544	0.15687406	0.19743383	-0.01462007	9.89
1.5040	0.275545	-0.539	0.15714359	0.19746399	-0.01444566	9.89
1.5050	0.244875	-0.543	0.15735853	0.19750005	-0.01431274	9.89
1.5060	0.225105	-0.541	0.15750450	0.19748729	-0.01424444	9.89
1.5070	0.215578	-0.541	0.15761232	0.19752330	-0.01419830	9.89
1.5080	0.213633	-0.535	0.15766579	0.19752616	-0.01416850	9.89
1.5090	0.217009	-0.533	0.15767354	0.19754076	-0.01413763	9.89
1.5100	0.223761	-0.537	0.15767366	0.19754857	-0.01412988	9.89
1.5110	0.236492	-0.544	0.15765232	0.19754070	-0.01416355	9.89
1.5120	0.266933	-0.548	0.15753359	0.19756311	-0.01421940	9.90
1.5130	0.328932	-0.552	0.15724844	0.19752806	-0.01437730	9.90
1.5140	0.430956	-0.547	0.15679514	0.19752127	-0.01462585	9.90
1.5150	0.571918	-0.550	0.15616196	0.19739586	-0.01502079	9.90
1.5160	0.744667	-0.554	0.15538573	0.19722956	-0.01551491	9.90
1.5170	0.939703	-0.556	0.15449953	0.19696510	-0.01607072	9.90
1.5180	1.143837	-0.552	0.15357155	0.19669068	-0.01664859	9.90
1.5190	1.342621	-0.542	0.15270680	0.19638711	-0.01717639	9.90
1.5200	1.524010	-0.550	0.15190434	0.19608349	-0.01768881	9.90
1.5210	1.681623	-0.549	0.15122926	0.19578773	-0.01813966	9.89
1.5220	1.814661	-0.552	0.15065247	0.19556010	-0.01855010	9.89
1.5230	1.926184	-0.546	0.15014952	0.19535100	-0.01890540	9.89
1.5240	2.021885	-0.546	0.14973789	0.19519639	-0.01921070	9.89
1.5250	2.108402	-0.549	0.14933991	0.19501656	-0.01949960	9.89
1.5260	2.191772	-0.553	0.14896446	0.19486481	-0.01979733	9.89
1.5270	2.273340	-0.548	0.14860076	0.19469744	-0.02007091	9.89
1.5280	2.347069	-0.544	0.14825356	0.19455147	-0.02031368	9.89
1.5290	2.403259	-0.539	0.14798504	0.19444251	-0.02047747	9.89
1.5300	2.436333	-0.543	0.14780313	0.19434333	-0.02059782	9.89
1.5310	2.448635	-0.550	0.14770877	0.19431031	-0.02067477	9.89
1.5320	2.446833	-0.552	0.14767575	0.19428307	-0.02070552	9.90
1.5330	2.436333	-0.555	0.14767575	0.19428110	-0.02072090	9.90
1.5340	2.418365	-0.550	0.14772344	0.19429964	-0.02070165	9.90
1.5350	2.388268	-0.549	0.14780223	0.19432002	-0.02065927	9.90
1.5360	2.332335	-0.549	0.14795983	0.19438815	-0.02055722	9.90
1.5370	2.237463	-0.549	0.14827108	0.19448256	-0.02034056	9.90
1.5380	2.098303	-0.541	0.14877105	0.19469261	-0.01999187	9.90
1.5390	1.925383	-0.532	0.14943433	0.19497764	-0.01951319	9.90
1.5400	1.738901	-0.531	0.15016687	0.19528204	-0.01899010	9.90
1.5410	1.557455	-0.536	0.15088767	0.19559240	-0.01847100	9.90
1.5420	1.393604	-0.538	0.15157551	0.19585198	-0.01799804	9.89
1.5430	1.250639	-0.537	0.15217865	0.19609612	-0.01758677	9.89
1.5440	1.125784	-0.533	0.15273404	0.19630134	-0.01721209	9.89
1.5450	1.013374	-0.536	0.15323305	0.19648916	-0.01688558	9.89
1.5460	0.908546	-0.536	0.15371263	0.19664091	-0.01657921	9.89
1.5470	0.807552	-0.537	0.15420097	0.19680434	-0.01629210	9.89
1.5480	0.708532	-0.533	0.15470976	0.19695508	-0.01598001	9.89
1.5490	0.611515	-0.529	0.15522915	0.19708931	-0.01564294	9.89
1.5500	0.520020	-0.528	0.15571553	0.19720411	-0.01533669	9.89
1.5510	0.438137	-0.529	0.15614259	0.19727409	-0.01504481	9.89
1.5520	0.369129	-0.530	0.15653741	0.19735110	-0.01481265	9.90
1.5530	0.313683	-0.538	0.15687394	0.19739974	-0.01462102	9.90
1.5540	0.271225	-0.540	0.15715313	0.19744939	-0.01445532	9.90
1.5550	0.240812	-0.542	0.15735644	0.19747752	-0.01434946	9.90
1.5560	0.221128	-0.544	0.15748972	0.19748044	-0.01426458	9.90
1.5570	0.210943	-0.540	0.15759188	0.19750088	-0.01421064	9.90
1.5580	0.208082	-0.533	0.15764445	0.19750178	-0.01417398	9.90
1.5590	0.210171	-0.528	0.15767658	0.19753486	-0.01414227	9.90
1.5600	0.215721	-0.536	0.15767270	0.19754946	-0.01414710	9.90
1.5610	0.225506	-0.541	0.15766191	0.19755334	-0.01415396	9.90
1.5620	0.249424	-0.544	0.15758997	0.19754452	-0.01418674	9.89
1.5630	0.301981	-0.546	0.15735644	0.19752121	-0.01430321	9.89
1.5640	0.395050	-0.541	0.15694118	0.19751060	-0.01451701	9.89
1.5650	0.531549	-0.541	0.15629423	0.19740456	-0.01488298	9.89
1.5660	0.704527	-0.540	0.15550727	0.19726837	-0.01536661	9.89
1.5670	0.901394	-0.541	0.15461040	0.19701248	-0.01592916	9.89
1.5680	1.106186	-0.537	0.15367657	0.19673425	-0.01652354	9.89
1.5690	1.299992	-0.536	0.15281856	0.19644529	-0.01707637	9.89
1.5700	1.470222	-0.536	0.15205681	0.19616419	-0.01756567	9.89
1.5710	1.614389	-0.541	0.15143138	0.19591326	-0.01797497	9.89
1.5720	1.739445	-0.543	0.15089160	0.19566238	-0.01834482	9.90
1.5730	1.855116	-0.546	0.15037990	0.19547361	-0.01871657	9.90
1.5740	1.968470	-0.536	0.14990902	0.19527423	-0.01908743	9.90
1.5750	2.082052	-0.532	0.14941579	0.19508648	-0.01945734	9.90
1.5760	2.193947	-0.532	0.14893627	0.19485503	-0.01982045	9.90
1.5770	2.296972	-0.528	0.14848596	0.19465560	-0.02015370	9.90
1.5780	2.379799	-0.530	0.14810854	0.19449115	-0.02041954	9.90
1.5790	2.433357	-0.521	0.14784008	0.19438124	-0.02059972	9.90
1.5800	2.457418	-0.522	0.14770299	0.19430828	-0.02069026	9.90
1.5810	2.460766	-0.526	0.14763874	0.19427520	-0.02074134	9.89
1.5820	2.453327	-0.533	0.14762807	0.19426745	-0.02074504	9.89
1.5830	2.440252	-0.530	0.14762616	0.19427913	-0.02073735	9.89
1.5840	2.421570	-0.530	0.14766884	0.19429088	-0.02072197	9.89
1.5850	2.390842	-0.532	0.14775926	0.19431907	-0.02068830	9.89
1.5860	2.334795	-0.535	0.14794207	0.19437832	-0.02059972	9.88
1.5870	2.240038	-0.536	0.14826024	0.19448143	-0.02038389	9.89
1.5880	2.101965	-0.534	0.14876413	0.19467980	-0.02003145	9.89
1.5890	1.930590	-0.530	0.14940608	0.19496381	-0.01954597	9.89
1.5900	1.746340	-0.534	0.15013081	0.19526929	-0.01903355	9.89
1.5910	1.569014	-0.540	0.15081757	0.19557673	-0.01853168	9.89
1.5920	1.412029	-0.541	0.15147042	0.19581312	-0.01807511	9.90
1.5930	1.278133	-0.543	0.15204144	0.19603884	-0.01769364	9.90
1.5940	1.162148	-0.538	0.15257257	0.19623142	-0.01733822	9.90
1.5950	1.055832	-0.541	0.15305501	0.19641334	-0.01704156	9.90
1.5960	0.952663	-0.538	0.15351999	0.19656599	-0.01674300	9.90
1.5970	0.847578	-0.536	0.15400445	0.19672060	-0.01641560	9.90
1.5980	0.738945	-0.532	0.15452880	0.19689089	-0.01606971	9.90
1.5990	0.629339	-0.529	0.15510076	0.19703585	-0.01570368	9.90
1.6000	0.525513	-0.533	0.15565127	0.19719833	-0.01536548	9.90
1.6010	0.434875	-0.538	0.15613472	0.19726932	-0.01505923	9.89
1.6020	0.360689	-0.536	0.15655881	0.19736558	-0.01480013	9.89
1.6030	0.302782	-0.538	0.15691382	0.19739288	-0.01460367	9.89
1.6040	0.259209	-0.534	0.15720469	0.19747269	-0.01445055	9.89
1.6050	0.229225	-0.537	0.15739924	0.19746202	-0.01435328	9.89
1.6060	0.211086	-0.538	0.15750915	0.19750971	-0.01427907	9.89
1.6070	0.203218	-0.540	0.15758592	0.19749415	-0.01421165	9.89
1.6080	0.202103	-0.538	0.15763944	0.19750965	-0.01417416	9.89
1.6090	0.205221	-0.538	0.15766090	0.19752711	-0.01414335	9.89
1.6100	0.211315	-0.542	0.15765315	0.19751644	-0.01414055	9.89
1.6110	0.222273	-0.546	0.15762013	0.19753301	-0.01413852	9.89
1.6120	0.248194	-0.546	0.15754724	0.19750965	-0.01417708	9.90
1.6130	0.302382	-0.549	0.15731472	0.19751841	-0.01430124	9.90
1.6140	0.395021	-0.546	0.15690124	0.19746584	-0.01451993	9.90
1.6150	0.527258	-0.548	0.15626115	0.19739002	-0.01487917	9.90
1.6160	0.692396	-0.549	0.15551120	0.19721496	-0.01534343	9.90
1.6170	0.879822	-0.548	0.15466392	0.19701356	-0.01590008	9.90
1.6180	1.076975	-0.542	0.15377975	0.19674611	-0.01648575	9.90
1.6190	1.270666	-0.537	0.15290612	0.19646299	-0.01703483	9.90
1.6200	1.451283	-0.538	0.15210944	0.19615841	-0.01753867	9.90
1.6210	1.615276	-0.541	0.15140331	0.19587827	-0.01800483	9.90
1.6220	1.761646	-0.541	0.15077877	0.19562727	-0.01843727	9.89
1.6230	1.891994	-0.542	0.15021080	0.19540662	-0.01885527	9.89
1.6240	2.007465	-0.538	0.14972633	0.19520712	-0.01921356	9.89
1.6250	2.110233	-0.540	0.14927298	0.19501066	-0.01955354	9.89
1.6260	2.202501	-0.540	0.14885753	0.19483066	-0.01986665	9.89
1.6270	2.283754	-0.540	0.14848787	0.19468093	-0.02014792	9.89
1.6280	2.350845	-0.533	0.14816976	0.19453603	-0.02037042	9.89
1.6290	2.398252	-0.527	0.14793056	0.19443095	-0.02051300	9.89
1.6300	2.424402	-0.528	0.14777297	0.19435114	-0.02059674	9.89
1.6310	2.433214	-0.534	0.14768934	0.19430447	-0.02065265	9.89
1.6320	2.430582	-0.536	0.14766991	0.19430256	-0.02067864	9.90
1.6330	2.420998	-0.537	0.14767671	0.19430363	-0.02069014	9.90
1.6340	2.405090	-0.533	0.14770681	0.19432598	-0.02067286	9.90
1.6350	2.379084	-0.536	0.14778459	0.19433469	-0.02065843	9.90
1.6360	2.330418	-0.534	0.14793044	0.19437051	-0.02059579	9.90
1.6370	2.244701	-0.532	0.14820671	0.19446778	-0.02042150	9.90
1.6380	2.114010	-0.521	0.14867562	0.19464678	-0.02008146	9.90
1.6390	1.946611	-0.520	0.14930117	0.19492888	-0.01962292	9.90
1.6400	1.762905	-0.519	0.15002781	0.19521683	-0.01910573	9.90
1.6410	1.582689	-0.528	0.15073305	0.19552040	-0.01859230	9.89
1.6420	1.418381	-0.532	0.15139055	0.19579381	-0.01810980	9.89
1.6430	1.273756	-0.538	0.15200341	0.19603896	-0.01766962	9.89
1.6440	1.146412	-0.534	0.15257931	0.19624710	-0.01729488	9.89
1.6450	1.031027	-0.536	0.15311927	0.19644064	-0.01695204	9.89
1.6460	0.923109	-0.532	0.15360761	0.19661665	-0.01664567	9.89
1.6470	0.818110	-0.536	0.15410179	0.19677806	-0.01632017	9.89
1.6480	0.714426	-0.532	0.15462512	0.19694638	-0.01598495	9.89
1.6490	0.613146	-0.532	0.15516591	0.19708639	-0.01565653	9.89
1.6500	0.518475	-0.532	0.15565515	0.19719541	-0.01535219	9.89
1.6510	0.436049	-0.533	0.15610164	0.19729167	-0.01508921	9.89
1.6520	0.368042	-0.536	0.15649760	0.19733936	-0.01484549	9.90
1.6530	0.314026	-0.538	0.15683413	0.19740361	-0.01465857	9.90
1.6540	0.272141	-0.536	0.15710950	0.19743961	-0.01450443	9.90
1.6550	0.241785	-0.537	0.15730500	0.19747365	-0.01439559	9.90
1.6560	0.222301	-0.541	0.15744311	0.19750077	-0.01432532	9.90
1.6570	0.212860	-0.540	0.15751505	0.19751340	-0.01425976	9.90
1.6580	0.210943	-0.537	0.15758020	0.19753003	-0.01420784	9.90
1.6590	0.213976	-0.532	0.15759683	0.19752032	-0.01417321	9.90
1.6600	0.220928	-0.533	0.15759486	0.19754368	-0.01415402	9.90
1.6610	0.234089	-0.540	0.15755779	0.19751740	-0.01417232	9.89
1.6620	0.265217	-0.544	0.15743327	0.19754362	-0.01421851	9.89
1.6630	0.327187	-0.549	0.15716779	0.19749594	-0.01437545	9.89
1.6640	0.428152	-0.544	0.15671748	0.19748235	-0.01463360	9.89
1.6650	0.567598	-0.549	0.15607166	0.19735694	-0.01504683	9.89
1.6660	0.738029	-0.546	0.15530699	0.19720620	-0.01553810	9.89
1.6670	0.930405	-0.550	0.15443051	0.19696790	-0.01608717	9.89
1.6680	1.131506	-0.548	0.15352577	0.19668967	-0.01666504	9.89
1.6690	1.327400	-0.545	0.15266001	0.19636953	-0.01720256	9.89
1.6700	1.506472	-0.545	0.15186137	0.19607770	-0.01771683	9.89
1.6710	1.662941	-0.548	0.15117264	0.19579655	-0.01815027	9.89
1.6720	1.796207	-0.549	0.15059686	0.19554478	-0.01855099	9.90
1.6730	1.910248	-0.553	0.15009791	0.19534051	-0.01890540	9.90
1.6740	2.010813	-0.544	0.14966697	0.19516927	-0.01922530	9.90
1.6750	2.103853	-0.550	0.14925355	0.19498926	-0.01953346	9.90
1.6760	2.194433	-0.551	0.14885271	0.19481993	-0.01983696	9.90
1.6770	2.282381	-0.549	0.14848018	0.19462347	-0.02013451	9.90
1.6780	2.359886	-0.541	0.14811933	0.19446200	-0.02038497	9.90
1.6790	2.416878	-0.534	0.14784795	0.19434333	-0.02056503	9.90
1.6800	2.448063	-0.536	0.14766514	0.19426650	-0.02068639	9.90
1.6810	2.457447	-0.539	0.14758533	0.19422168	-0.02074033	9.89
1.6820	2.453156	-0.538	0.14756787	0.19421196	-0.02076441	9.89
1.6830	2.440939	-0.537	0.14758641	0.19420904	-0.02076149	9.89
1.6840	2.421942	-0.536	0.14762533	0.19423920	-0.02074504	9.89
1.6850	2.389526	-0.540	0.14770883	0.19425762	-0.02071613	9.89
1.6860	2.328730	-0.538	0.14789456	0.19432867	-0.02060628	9.89
1.6870	2.225704	-0.536	0.14824373	0.19444937	-0.02038282	9.89
1.6880	2.076645	-0.528	0.14878368	0.19467801	-0.01999664	9.89
1.6890	1.894684	-0.514	0.14946073	0.19497466	-0.01949191	9.89
1.6900	1.701994	-0.513	0.15021163	0.19529462	-0.01894772	9.89
1.6910	1.518402	-0.517	0.15094799	0.19559807	-0.01840729	9.89
1.6920	1.357069	-0.520	0.15161729	0.19586557	-0.01793921	9.90
1.6930	1.220398	-0.521	0.15221268	0.19609809	-0.01752120	9.90
1.6940	1.104040	-0.520	0.15274876	0.19631892	-0.01717836	9.90
1.6950	1.000614	-0.529	0.15321368	0.19648236	-0.01688266	9.90
1.6960	0.904341	-0.534	0.15366405	0.19666618	-0.01659566	9.90
1.6970	0.810356	-0.537	0.15409875	0.19677705	-0.01631147	9.90
1.6980	0.715170	-0.536	0.15458518	0.19695121	-0.01599550	9.90
1.6990	0.617695	-0.532	0.15508908	0.19705433	-0.01567566	9.90
1.7000	0.521679	-0.530	0.15559781	0.19718760	-0.01537228	9.90
1.7010	0.433674	-0.532	0.15607339	0.19726050	-0.01509017	9.89
1.7020	0.358658	-0.533	0.15651208	0.19734031	-0.01485127	9.89
1.7030	0.298862	-0.536	0.15687591	0.19740266	-0.01463455	9.89
1.7040	0.253487	-0.532	0.15717262	0.19746983	-0.01445335	9.89
1.7050	0.222731	-0.537	0.15738171	0.19750774	-0.01434159	9.89
1.7060	0.204878	-0.536	0.15751499	0.19752520	-0.01425785	9.89
1.7070	0.197783	-0.536	0.15759087	0.19752324	-0.01420879	9.89
1.7080	0.197525	-0.529	0.15763175	0.19752812	-0.01415390	9.89
1.7090	0.201330	-0.531	0.15765607	0.19753981	-0.01413178	9.89
1.7100	0.207710	-0.537	0.15765321	0.19755238	-0.01413757	9.89
1.7110	0.220013	-0.544	0.15763372	0.19753581	-0.01415581	9.89
1.7120	0.249739	-0.541	0.15750927	0.19752610	-0.01421654	9.90
1.7130	0.310621	-0.547	0.15725344	0.19751835	-0.01435232	9.90
1.7140	0.411301	-0.544	0.15680015	0.19747949	-0.01462305	9.90
1.7150	0.552263	-0.553	0.15613860	0.19737345	-0.01501030	9.90
1.7160	0.725813	-0.552	0.15533018	0.19720030	-0.01550436	9.90
1.7170	0.920191	-0.550	0.15443522	0.19695711	-0.01604670	9.90
1.7180	1.120119	-0.542	0.15354127	0.19669646	-0.01660621	9.90
1.7190	1.310778	-0.534	0.15270954	0.19640362	-0.01714367	9.90
1.7200	1.483955	-0.532	0.15194309	0.19612247	-0.01762718	9.90
1.7210	1.636105	-0.531	0.15129143	0.19583464	-0.01807117	9.89
1.7220	1.768255	-0.534	0.15071374	0.19559151	-0.01845366	9.89
1.7230	1.883411	-0.535	0.15020889	0.19536775	-0.01881003	9.89
1.7240	1.986494	-0.530	0.14976430	0.19519550	-0.01915771	9.89
1.7250	2.083139	-0.536	0.14934099	0.19502336	-0.01948708	9.88
1.7260	2.176094	-0.537	0.14892465	0.19484043	-0.01981843	9.88
1.7270	2.262726	-0.537	0.14853853	0.19467890	-0.02009869	9.89
1.7280	2.335825	-0.531	0.14818352	0.19453591	-0.02033275	9.89
1.7290	2.387352	-0.526	0.14793360	0.19442797	-0.02048594	9.89
1.7300	2.415190	-0.528	0.14777792	0.19433653	-0.02058709	9.89
1.7310	2.423687	-0.530	0.14770401	0.19428688	-0.02063435	9.89
1.7320	2.420053	-0.530	0.14768946	0.19426936	-0.02065557	9.90
1.7330	2.409039	-0.533	0.14768940	0.19426650	-0.02065265	9.90
1.7340	2.392273	-0.529	0.14771271	0.19428790	-0.02063626	9.90
1.7350	2.365723	-0.535	0.14777094	0.19429958	-0.02060825	9.90
1.7360	2.316971	-0.540	0.14791399	0.19436675	-0.02053404	9.90
1.7370	2.231712	-0.543	0.14820778	0.19446993	-0.02036548	9.90
1.7380	2.101593	-0.538	0.14867377	0.19463915	-0.02005541	9.90
1.7390	1.932993	-0.533	0.14929140	0.19492215	-0.01959985	9.90
1.7400	1.745367	-0.534	0.15002191	0.19521785	-0.01907879	9.90
1.7410	1.559172	-0.534	0.15075934	0.19553202	-0.01854420	9.89
1.7420	1.390257	-0.533	0.15146756	0.19581699	-0.01805878	9.89
1.7430	1.245031	-0.535	0.15208131	0.19605434	-0.01762527	9.89
1.7440	1.121378	-0.532	0.15263093	0.19626927	-0.01723999	9.89
1.7450	1.013489	-0.537	0.15312892	0.19644052	-0.01692504	9.89
1.7460	0.914726	-0.536	0.15359491	0.19660491	-0.01662648	9.88
1.7470	0.819082	-0.536	0.15405303	0.19674885	-0.01636541	9.89
1.7480	0.722351	-0.532	0.15451896	0.19689286	-0.01604748	9.89
1.7490	0.623360	-0.530	0.15502578	0.19702995	-0.01571125	9.89
1.7500	0.525255	-0.530	0.15554714	0.19714665	-0.01537901	9.89
1.7510	0.435076	-0.534	0.15604526	0.19725466	-0.01508814	9.89
1.7520	0.358028	-0.534	0.15647525	0.19732469	-0.01484448	9.90
1.7530	0.296860	-0.536	0.15683120	0.19739777	-0.01463252	9.90
1.7540	0.250540	-0.533	0.15713084	0.19744545	-0.01444852	9.90
1.7550	0.218353	-0.539	0.15735352	0.19749314	-0.01433402	9.90
1.7560	0.198555	-0.543	0.15750730	0.19750285	-0.01424831	9.90
1.7570	0.189514	-0.542	0.15758514	0.19753295	-0.01421171	9.90
1.7580	0.188055	-0.538	0.15763283	0.19752419	-0.01416743	9.90
1.7590	0.191116	-0.533	0.15765619	0.19753683	-0.01413941	9.90
1.7600	0.197010	-0.537	0.15766680	0.19752705	-0.01414049	9.90
1.7610	0.207968	-0.538	0.15765023	0.19752997	-0.01413858	9.89
1.7620	0.234003	-0.542	0.15755588	0.19753969	-0.01418871	9.89
1.7630	0.288105	-0.546	0.15732735	0.19752330	-0.01430035	9.89
1.7640	0.379114	-0.543	0.15693247	0.19750869	-0.01452184	9.89
1.7650	0.509348	-0.549	0.15632647	0.19740063	-0.01488775	9.89
1.7660	0.674114	-0.548	0.15556669	0.19726932	-0.01534528	9.88
1.7670	0.863600	-0.552	0.15469128	0.19703585	-0.01587987	9.89
1.7680	1.063757	-0.544	0.15376711	0.19677621	-0.01642704	9.89
1.7690	1.259308	-0.542	0.15291214	0.19648439	-0.01698756	9.89
1.7700	1.439238	-0.537	0.15209687	0.19618183	-0.01750672	9.89
1.7710	1.599197	-0.538	0.15140820	0.19591826	-0.01798069	9.89
1.7720	1.738873	-0.540	0.15079826	0.19566238	-0.01840162	9.90
1.7730	1.861925	-0.548	0.15026516	0.19547069	-0.01877636	9.90
1.7740	1.972246	-0.542	0.14980692	0.19526154	-0.01913178	9.90
1.7750	2.073898	-0.546	0.14935559	0.19505632	-0.01947850	9.90
1.7760	2.169886	-0.542	0.14891887	0.19486660	-0.01980418	9.90
1.7770	2.259150	-0.541	0.14850843	0.19468665	-0.02011424	9.90
1.7780	2.335339	-0.536	0.14816111	0.19453001	-0.02034742	9.90
1.7790	2.390413	-0.530	0.14790428	0.19440168	-0.02051979	9.90
1.7800	2.420883	-0.530	0.14772832	0.19432098	-0.02061224	9.90
1.7810	2.431154	-0.530	0.14764762	0.19427717	-0.02066702	9.89
1.7820	2.428379	-0.533	0.14762437	0.19427133	-0.02068913	9.89
1.7830	2.417822	-0.536	0.14763492	0.19426739	-0.02068537	9.89
1.7840	2.400856	-0.534	0.14766210	0.19428891	-0.02067673	9.89
1.7850	2.373562	-0.532	0.14770877	0.19429475	-0.02065837	9.89
1.7860	2.323809	-0.534	0.14787513	0.19434923	-0.02059770	9.89
1.7870	2.237806	-0.530	0.14816695	0.19444740	-0.02043396	9.89
1.7880	2.107716	-0.523	0.14863873	0.19462544	-0.02010363	9.89
1.7890	1.940746	-0.520	0.14925259	0.19488412	-0.01964420	9.89
1.7900	1.755095	-0.528	0.14996463	0.19520032	-0.01911062	9.89
1.7910	1.571674	-0.535	0.15070200	0.19549799	-0.01857018	9.89
1.7920	1.405506	-0.536	0.15139359	0.19577813	-0.01809621	9.90
1.7930	1.261339	-0.541	0.15200740	0.19601548	-0.01767141	9.90
1.7940	1.134882	-0.538	0.15257150	0.19623435	-0.01729965	9.90
1.7950	1.018753	-0.545	0.15308803	0.19641232	-0.01695973	9.90
1.7960	0.909204	-0.546	0.15359098	0.19658363	-0.01664186	9.90
1.7970	0.803576	-0.545	0.15408230	0.19675583	-0.01632786	9.90
1.7980	0.701408	-0.535	0.15459210	0.19689792	-0.01600510	9.90
1.7990	0.602303	-0.533	0.15509892	0.19706613	-0.01567090	9.90
[truncated: 7,001 more rows]
