# Supplementary material for: Evaluation of a Cold-Mixed High-Performance Polyurethane Mixture
Source: Hindawi journal article supplement (doi:10.1155/2019/1507971), 2019-11-07
Supplement: f1 [file 1507971.f1.zip › 1507971.f1/dynamic modulus data/PUM/specimen2/temp10/zhs-2-10_Sum.csv]

Test Information
****************
Project name	zhs
Operator name	2
Target test temperature	10
Target confining stress	0
Average dynamic strain range from 75 to 125 micro-strain
Contact stress	5
Initial modulus	4000
Axial gauge length	70
Comments	Run at High Pressure
Specimen information
********************
Identification	zhs-2-10
Dimensions	Point 1	Point 2	Point 3	Point 4	Point 5	Point 6	Average	Std Dev.
Diameter (mm)	49.2	49.3	49.2				49.23	0.058
Height (mm)	100.8	101.0	100.8				100.87	0.115
Cross-sectional area (mm�)	1903.7
Conditioning time
Properties/Comments
*********
Test date and time	Fri	Mar 29	2019	11:20 AM
Test results summary
	25 Hz	20 Hz	10 Hz	5 Hz	2 Hz	1 Hz	0.5 Hz	0.2 Hz	0.1 Hz
Dynamic modulus (MPa)	12630	12499	12148	11804	11362	11105	10842	10545	10363
Phase angle (Degrees)	5.26	5.27	5.17	5.08	5.03	4.89	4.78	4.72	4.45
Average temperature (�C)	9.9	9.9	9.9	9.9	9.9	9.9	9.9	9.8	9.9
Average confining pressure (kPa)	-0.5	-0.5	-0.5	-0.5	-0.6	-0.6	-0.6	-0.6	-0.6
Average micro-strain	100	98	100	100	102	100	100	100	100
Load drift (%)	-1.4	-2.5	-0.4	1.7	0.6	0.2	-0.1	0.1	0.0
Load standard error (%)	8.5	7.3	4.7	3.0	1.7	1.0	1.1	1.0	1.2
Average deformation drift (%)	-6.8	-3.0	-3.3	-5.1	-3.6	-3.7	-1.6	-4.6	-6.3
Average deformation standard error (%)	9.2	8.2	6.1	4.9	4.3	4.0	3.8	3.8	4.6
Deformation uniformity (%)	40.7	41.1	40.8	40.3	40.1	39.9	39.6	39.5	39.2
Phase uniformity (Degrees)	0.1	0.3	0.4	0.5	0.6	0.6	0.6	0.5	0.4
