# Supplementary material for: Evaluation of a Cold-Mixed High-Performance Polyurethane Mixture
Source: Hindawi journal article supplement (doi:10.1155/2019/1507971), 2019-11-07
Supplement: f1 [file 1507971.f1.zip › 1507971.f1/dynamic modulus data/PUM/specimen2/temp20/zhs-2-20_0.1Hz.csv]

Test Information
****************
Project name	zhs
Operator name	2
Target test temperature	20
Target confining stress	0
Average dynamic strain range from 75 to 125 micro-strain
Contact stress	5
Initial modulus	1000
Axial gauge length	70
Comments
Specimen information
********************
Identification	zhs-2-20
Dimensions	Point 1	Point 2	Point 3	Point 4	Point 5	Point 6	Average	Std Dev.
Diameter (mm)	49.2	49.3	49.2				49.23	0.058
Height (mm)	100.8	101.0	100.8				100.87	0.115
Cross-sectional area (mm�)	1903.7
Conditioning time
Properties/Comments
Test Data	0.1Hz
*********
Test date and time	Mon	Apr 1	2019	2:34 PM
Dynamic modulus (MPa)	11585
Phase angle (Degrees)	3.70
Average temperature (�C)	20.2
Average confining pressure (kPa)	-0.6
Average micro-strain	98
Load drift (%)	0.1
Load standard error (%)	1.9
Average deformation drift (%)	3.5
Average deformation standard error (%)	2.0
Deformation uniformity (%)	31.8
Phase uniformity (Degrees)	0.3
Conditioning Cycles
Time (sec)	Axial stress (kPa)	Axial micro-strain #1	Axial micro-strain #2	Axial micro-strain #3	Confining pressure (kPa)	Temperature (�C)	Load (N)	Displacement #1 (mm)	Displacement #2 (mm)	Displacement #3 (mm)
0.0000	210.743	1.149	13.768	-1.474	-0.569	20.257	401.201	-0.000080	-0.000964	0.000103
0.2000	218.182	1.303	13.394	-1.460	-0.574	20.258	415.363	-0.000091	-0.000938	0.000102
0.4000	238.756	2.075	14.799	-0.829	-0.559	20.257	454.531	-0.000145	-0.001036	0.000058
0.6000	257.166	2.933	16.604	0.112	-0.577	20.258	489.578	-0.000205	-0.001162	-0.000008
0.8000	279.153	4.671	19.187	1.022	-0.573	20.258	531.435	-0.000327	-0.001343	-0.000072
1.0000	319.519	7.422	24.288	3.154	-0.595	20.258	608.282	-0.000520	-0.001700	-0.000221
1.2000	357.466	10.088	29.457	5.094	-0.580	20.259	680.523	-0.000706	-0.002062	-0.000357
1.4000	395.307	12.629	34.099	7.295	-0.582	20.258	752.563	-0.000884	-0.002387	-0.000511
1.6000	449.755	16.908	41.701	10.297	-0.592	20.259	856.218	-0.001184	-0.002919	-0.000721
1.8000	506.548	20.979	48.007	13.145	-0.586	20.259	964.336	-0.001469	-0.003361	-0.000920
2.0000	553.586	25.033	54.485	16.135	-0.579	20.259	1053.886	-0.001752	-0.003814	-0.001129
2.2000	597.124	28.162	60.379	18.614	-0.590	20.259	1136.770	-0.001971	-0.004227	-0.001303
2.4000	687.475	34.463	69.784	23.545	-0.577	20.260	1308.775	-0.002412	-0.004885	-0.001648
2.6000	718.373	37.464	74.370	25.676	-0.577	20.259	1367.598	-0.002622	-0.005206	-0.001797
2.8000	777.089	41.802	81.417	29.033	-0.573	20.260	1479.378	-0.002926	-0.005699	-0.002032
3.0000	828.035	45.674	87.477	32.399	-0.574	20.260	1576.366	-0.003197	-0.006123	-0.002268
3.2000	864.359	48.608	93.313	34.561	-0.565	20.261	1645.517	-0.003403	-0.006532	-0.002419
3.4000	907.085	52.369	98.593	37.100	-0.577	20.261	1726.856	-0.003666	-0.006902	-0.002597
3.6000	952.245	56.171	103.428	39.866	-0.572	20.262	1812.830	-0.003932	-0.007240	-0.002791
3.8000	994.204	59.202	108.304	42.123	-0.578	20.262	1892.710	-0.004144	-0.007581	-0.002949
4.0000	1028.619	62.036	112.683	44.092	-0.584	20.262	1958.227	-0.004342	-0.007888	-0.003086
4.2000	1030.197	62.332	114.185	44.680	-0.573	20.262	1961.231	-0.004363	-0.007993	-0.003128
4.4000	1056.136	65.081	117.630	46.374	-0.566	20.263	2010.612	-0.004556	-0.008234	-0.003246
4.6000	1060.991	65.741	118.532	47.003	-0.577	20.263	2019.854	-0.004602	-0.008297	-0.003290
4.8000	1094.429	67.693	121.354	48.396	-0.573	20.264	2083.511	-0.004739	-0.008495	-0.003388
5.0000	1066.731	66.415	120.019	47.439	-0.569	20.263	2030.783	-0.004649	-0.008401	-0.003321
5.2000	1058.977	65.741	119.255	47.300	-0.572	20.263	2016.020	-0.004602	-0.008348	-0.003311
5.4000	1055.565	65.741	118.658	46.922	-0.588	20.264	2009.525	-0.004602	-0.008306	-0.003285
5.6000	1011.427	62.598	114.893	44.721	-0.576	20.264	1925.497	-0.004382	-0.008043	-0.003130
5.8000	974.337	60.410	111.184	42.784	-0.569	20.265	1854.887	-0.004229	-0.007783	-0.002995
6.0000	940.523	57.141	107.110	40.775	-0.581	20.265	1790.514	-0.004000	-0.007498	-0.002854
6.2000	907.551	54.906	103.539	39.304	-0.577	20.266	1727.743	-0.003843	-0.007248	-0.002751
6.4000	861.068	51.528	98.007	36.622	-0.579	20.265	1639.252	-0.003607	-0.006860	-0.002564
6.6000	822.986	49.129	93.354	34.479	-0.578	20.265	1566.753	-0.003439	-0.006535	-0.002414
6.8000	773.903	45.478	87.601	31.710	-0.579	20.265	1473.312	-0.003183	-0.006132	-0.002220
7.0000	712.467	40.877	79.802	27.895	-0.586	20.266	1356.354	-0.002861	-0.005586	-0.001953
7.2000	681.944	37.970	75.538	25.887	-0.571	20.266	1298.246	-0.002658	-0.005288	-0.001812
7.4000	594.389	31.643	65.993	21.034	-0.572	20.266	1131.563	-0.002215	-0.004620	-0.001472
7.6000	555.285	28.512	60.572	18.658	-0.573	20.267	1057.119	-0.001996	-0.004240	-0.001306
7.8000	499.484	24.121	53.303	15.475	-0.575	20.267	950.890	-0.001688	-0.003731	-0.001083
8.0000	446.193	20.262	46.397	12.136	-0.582	20.267	849.438	-0.001418	-0.003248	-0.000850
8.2000	407.796	16.558	40.602	9.398	-0.588	20.267	776.339	-0.001159	-0.002842	-0.000658
8.4000	359.495	12.994	34.599	7.209	-0.579	20.268	684.385	-0.000910	-0.002422	-0.000505
8.6000	322.329	9.441	28.776	4.432	-0.581	20.268	613.632	-0.000661	-0.002014	-0.000310
8.8000	285.720	6.482	23.592	2.817	-0.578	20.268	543.938	-0.000454	-0.001651	-0.000197
9.0000	262.576	4.613	19.659	1.092	-0.589	20.268	499.878	-0.000323	-0.001376	-0.000076
9.2000	198.600	0.054	11.754	-2.107	-0.580	20.269	378.084	-0.000004	-0.000823	0.000148
9.4000	212.712	0.548	12.214	-1.869	-0.585	20.268	404.949	-0.000038	-0.000855	0.000131
9.6000	202.282	-0.154	10.641	-2.585	-0.587	20.268	385.094	0.000011	-0.000745	0.000181
9.8000	192.334	-0.688	9.293	-3.304	-0.580	20.269	366.154	0.000048	-0.000651	0.000231
10.0000	206.806	-0.858	9.974	-2.895	-0.587	20.269	393.705	0.000060	-0.000698	0.000203
10.2000	221.579	0.349	11.476	-2.291	-0.579	20.269	421.829	-0.000024	-0.000803	0.000160
10.4000	249.577	1.683	13.588	-0.982	-0.587	20.269	475.130	-0.000118	-0.000951	0.000069
10.6000	258.849	2.118	14.908	-0.758	-0.578	20.269	492.783	-0.000148	-0.001044	0.000053
10.8000	290.229	4.432	18.784	1.064	-0.581	20.269	552.521	-0.000310	-0.001315	-0.000074
11.0000	341.460	7.941	25.013	3.675	-0.580	20.270	650.053	-0.000556	-0.001751	-0.000257
11.2000	357.706	9.400	27.819	4.630	-0.585	20.270	680.981	-0.000658	-0.001947	-0.000324
11.4000	395.893	12.179	33.558	6.901	-0.590	20.270	753.679	-0.000853	-0.002349	-0.000483
11.6000	454.745	16.290	40.201	9.861	-0.569	20.270	865.717	-0.001140	-0.002814	-0.000690
11.8000	501.738	19.993	45.897	12.722	-0.577	20.270	955.181	-0.001400	-0.003213	-0.000891
12.0000	563.145	24.909	54.595	15.912	-0.593	20.270	1072.083	-0.001744	-0.003822	-0.001114
12.2000	610.529	27.895	59.054	18.885	-0.586	20.270	1162.291	-0.001953	-0.004134	-0.001322
12.4000	662.137	31.923	66.491	21.904	-0.591	20.270	1260.538	-0.002235	-0.004654	-0.001533
12.6000	713.609	36.638	72.704	25.058	-0.581	20.270	1358.528	-0.002565	-0.005089	-0.001754
12.8000	785.760	41.378	81.137	29.117	-0.584	20.271	1495.886	-0.002896	-0.005680	-0.002038
13.0000	821.363	44.609	85.876	31.514	-0.578	20.270	1563.663	-0.003123	-0.006011	-0.002206
13.2000	875.690	48.595	92.297	34.602	-0.580	20.270	1667.089	-0.003402	-0.006461	-0.002422
13.4000	917.454	52.172	97.382	36.733	-0.591	20.270	1746.597	-0.003652	-0.006817	-0.002571
13.6000	960.676	55.848	103.234	39.569	-0.596	20.271	1828.880	-0.003909	-0.007226	-0.002770
13.8000	991.108	58.488	107.194	41.589	-0.584	20.271	1886.816	-0.004094	-0.007504	-0.002911
14.0000	1031.790	61.870	112.167	43.922	-0.583	20.271	1964.264	-0.004331	-0.007852	-0.003075
14.2000	1049.374	63.201	115.642	45.437	-0.579	20.271	1997.738	-0.004424	-0.008095	-0.003181
14.4000	1052.349	64.030	115.810	45.688	-0.581	20.271	2003.403	-0.004482	-0.008107	-0.003198
14.6000	1070.308	65.150	117.519	46.515	-0.578	20.271	2037.592	-0.004561	-0.008226	-0.003256
14.8000	1072.683	65.994	118.142	47.158	-0.582	20.271	2042.112	-0.004620	-0.008270	-0.003301
15.0000	1066.070	65.614	117.977	46.935	-0.572	20.271	2029.524	-0.004593	-0.008258	-0.003285
15.2000	1061.291	64.912	117.615	46.696	-0.578	20.271	2020.426	-0.004544	-0.008233	-0.003269
15.4000	1041.724	63.862	116.603	46.024	-0.589	20.271	1983.175	-0.004470	-0.008162	-0.003222
15.6000	1009.864	61.701	113.640	44.484	-0.579	20.271	1922.522	-0.004319	-0.007955	-0.003114
15.8000	980.123	59.680	110.503	42.502	-0.567	20.271	1865.902	-0.004178	-0.007735	-0.002975
16.0000	954.394	57.673	107.306	41.053	-0.566	20.271	1816.921	-0.004037	-0.007511	-0.002874
16.2000	924.142	56.045	103.664	39.332	-0.578	20.271	1759.329	-0.003923	-0.007256	-0.002753
16.4000	845.108	50.278	95.270	35.273	-0.589	20.271	1608.868	-0.003519	-0.006669	-0.002469
16.6000	804.846	47.290	90.364	33.059	-0.590	20.271	1532.221	-0.003310	-0.006325	-0.002314
16.8000	761.354	43.849	85.291	30.390	-0.580	20.270	1449.423	-0.003069	-0.005970	-0.002127
17.0000	677.736	37.873	75.552	25.719	-0.580	20.270	1290.236	-0.002651	-0.005289	-0.001800
17.2000	660.649	35.868	71.773	24.160	-0.593	20.270	1257.706	-0.002511	-0.005024	-0.001691
17.4000	581.840	30.956	63.625	20.178	-0.589	20.270	1107.674	-0.002167	-0.004454	-0.001412
17.6000	553.030	27.951	59.487	17.833	-0.583	20.270	1052.828	-0.001957	-0.004164	-0.001248
17.8000	503.482	24.078	52.650	14.956	-0.590	20.270	958.500	-0.001685	-0.003686	-0.001047
18.0000	439.596	18.944	45.080	11.283	-0.590	20.270	836.878	-0.001326	-0.003156	-0.000790
18.2000	375.034	14.493	36.807	7.462	-0.595	20.270	713.968	-0.001015	-0.002576	-0.000522
18.4000	360.847	12.236	33.572	6.510	-0.601	20.270	686.960	-0.000857	-0.002350	-0.000456
18.6000	314.364	8.333	27.095	3.560	-0.595	20.269	598.469	-0.000583	-0.001897	-0.000249
18.8000	275.546	5.794	22.081	1.751	-0.596	20.269	524.569	-0.000406	-0.001546	-0.000123
19.0000	263.839	4.193	19.438	0.714	-0.587	20.269	502.281	-0.000293	-0.001361	-0.000050
19.2000	235.480	2.566	15.048	-0.911	-0.600	20.268	448.294	-0.000180	-0.001053	0.000064
19.4000	226.929	1.052	13.172	-1.728	-0.591	20.268	432.014	-0.000074	-0.000922	0.000121
19.6000	206.686	-0.745	10.142	-2.824	-0.595	20.268	393.476	0.000052	-0.000710	0.000198
19.8000	214.320	-0.464	9.697	-2.657	-0.597	20.268	408.010	0.000032	-0.000679	0.000186
20.0000	204.537	-0.716	9.544	-3.162	-0.589	20.268	389.385	0.000050	-0.000668	0.000221
20.2000	207.903	-1.052	9.100	-3.288	-0.602	20.268	395.794	0.000074	-0.000637	0.000230
20.4000	237.464	0.027	11.740	-1.841	-0.591	20.268	452.070	-0.000002	-0.000822	0.000129
20.6000	258.173	1.614	14.087	-0.940	-0.589	20.268	491.495	-0.000113	-0.000986	0.000066
20.8000	290.845	4.322	18.867	0.602	-0.597	20.267	553.694	-0.000303	-0.001321	-0.000042
21.0000	314.605	6.033	22.023	2.029	-0.590	20.268	598.927	-0.000422	-0.001542	-0.000142
21.2000	375.425	10.664	28.959	4.938	-0.591	20.267	714.712	-0.000746	-0.002027	-0.000346
21.4000	422.869	13.724	34.836	7.727	-0.586	20.267	805.035	-0.000961	-0.002438	-0.000541
21.6000	464.107	16.275	39.771	10.129	-0.591	20.267	883.541	-0.001139	-0.002784	-0.000709
21.8000	495.922	19.321	45.077	12.276	-0.591	20.267	944.109	-0.001352	-0.003155	-0.000859
22.0000	569.802	24.990	54.124	16.163	-0.594	20.267	1084.757	-0.001749	-0.003789	-0.001131
22.2000	649.633	30.759	62.572	20.316	-0.607	20.266	1236.734	-0.002153	-0.004380	-0.001422
22.4000	668.554	32.877	67.213	22.227	-0.595	20.267	1272.755	-0.002301	-0.004705	-0.001556
22.6000	722.340	37.114	72.910	25.268	-0.597	20.267	1375.151	-0.002598	-0.005104	-0.001769
22.8000	777.615	40.975	79.486	28.064	-0.595	20.267	1480.379	-0.002868	-0.005564	-0.001965
23.0000	846.911	45.562	87.738	32.386	-0.593	20.267	1612.301	-0.003189	-0.006142	-0.002267
23.2000	867.650	47.751	91.669	34.168	-0.592	20.267	1651.783	-0.003343	-0.006417	-0.002392
23.4000	925.855	52.508	97.827	37.268	-0.586	20.266	1762.590	-0.003676	-0.006848	-0.002609
23.6000	965.575	55.553	102.511	39.291	-0.599	20.267	1838.207	-0.003889	-0.007176	-0.002750
23.8000	997.721	58.079	106.581	41.643	-0.588	20.266	1899.405	-0.004066	-0.007461	-0.002915
24.0000	1019.242	60.634	110.239	43.177	-0.597	20.266	1940.374	-0.004244	-0.007717	-0.003022
24.2000	1041.033	62.094	112.794	44.342	-0.589	20.266	1981.859	-0.004347	-0.007896	-0.003104
24.4000	1063.696	63.930	114.990	45.746	-0.596	20.267	2025.003	-0.004475	-0.008049	-0.003202
24.6000	1069.076	64.886	116.393	46.360	-0.585	20.266	2035.246	-0.004542	-0.008147	-0.003245
24.8000	1076.710	65.993	117.505	46.612	-0.597	20.266	2049.780	-0.004620	-0.008225	-0.003263
25.0000	1073.720	65.940	117.712	46.808	-0.587	20.266	2044.086	-0.004616	-0.008240	-0.003277
25.2000	1062.073	65.517	117.352	46.388	-0.593	20.266	2021.914	-0.004586	-0.008215	-0.003247
25.4000	1031.911	63.118	114.867	45.255	-0.585	20.266	1964.493	-0.004418	-0.008041	-0.003168
25.6000	1017.709	62.836	113.821	44.594	-0.591	20.266	1937.456	-0.004399	-0.007967	-0.003122
25.8000	992.762	60.802	110.085	42.824	-0.588	20.266	1889.963	-0.004256	-0.007706	-0.002998
26.0000	944.671	57.659	105.470	40.076	-0.581	20.266	1798.410	-0.004036	-0.007383	-0.002805
26.2000	912.735	54.991	101.164	38.322	-0.585	20.266	1737.614	-0.003849	-0.007081	-0.002683
26.4000	862.420	50.938	96.159	36.074	-0.592	20.266	1641.827	-0.003566	-0.006731	-0.002525
26.6000	815.787	47.332	90.934	33.523	-0.590	20.265	1553.049	-0.003313	-0.006365	-0.002347
26.8000	775.000	44.201	85.668	30.770	-0.593	20.265	1475.401	-0.003094	-0.005997	-0.002154
27.0000	713.338	40.455	78.469	27.291	-0.585	20.265	1358.013	-0.002832	-0.005493	-0.001910
27.2000	660.273	35.627	72.191	24.020	-0.585	20.264	1256.990	-0.002494	-0.005053	-0.001681
27.4000	601.993	31.305	65.087	20.738	-0.576	20.265	1146.040	-0.002191	-0.004556	-0.001452
27.6000	551.302	27.699	57.278	17.664	-0.587	20.265	1049.538	-0.001939	-0.004009	-0.001236
27.8000	506.277	24.739	51.871	15.138	-0.588	20.265	963.821	-0.001732	-0.003631	-0.001060
28.0000	438.304	18.579	44.105	11.380	-0.579	20.265	834.417	-0.001301	-0.003087	-0.000797
28.2000	413.176	16.781	39.241	9.271	-0.597	20.264	786.581	-0.001175	-0.002747	-0.000649
28.4000	354.971	11.576	32.432	6.371	-0.599	20.264	675.774	-0.000810	-0.002270	-0.000446
28.6000	306.159	8.615	25.735	3.646	-0.593	20.264	582.848	-0.000603	-0.001801	-0.000255
28.8000	290.995	6.158	22.387	2.494	-0.584	20.264	553.980	-0.000431	-0.001567	-0.000175
29.0000	261.269	4.504	18.118	0.659	-0.591	20.264	497.389	-0.000315	-0.001268	-0.000046
29.2000	241.461	2.611	14.796	-0.533	-0.590	20.264	459.681	-0.000183	-0.001036	0.000037
29.4000	219.971	0.266	11.963	-1.855	-0.595	20.264	418.768	-0.000019	-0.000837	0.000130
29.6000	215.643	-0.014	10.797	-1.925	-0.602	20.264	410.528	0.000001	-0.000756	0.000135
29.8000	208.474	-1.503	9.281	-2.895	-0.593	20.264	396.881	0.000105	-0.000650	0.000203
30.0000	216.349	-0.477	9.698	-2.727	-0.585	20.264	411.873	0.000033	-0.000679	0.000191
30.2000	218.137	-0.493	9.641	-2.640	-0.596	20.265	415.277	0.000035	-0.000675	0.000185
30.4000	235.660	0.477	11.587	-2.107	-0.592	20.264	448.637	-0.000033	-0.000811	0.000147
30.6000	264.831	1.740	15.087	-0.211	-0.590	20.264	504.169	-0.000122	-0.001056	0.000015
30.8000	287.899	3.646	17.395	0.769	-0.591	20.264	548.086	-0.000255	-0.001218	-0.000054
31.0000	341.641	7.841	23.608	3.267	-0.596	20.265	650.396	-0.000549	-0.001653	-0.000229
31.2000	354.159	8.756	25.942	4.013	-0.592	20.264	674.229	-0.000613	-0.001816	-0.000281
31.4000	421.276	12.965	33.793	7.405	-0.589	20.265	802.002	-0.000908	-0.002366	-0.000518
31.6000	457.450	16.092	38.491	9.596	-0.593	20.265	870.867	-0.001126	-0.002694	-0.000672
31.8000	515.850	21.145	46.830	13.354	-0.591	20.265	982.046	-0.001480	-0.003278	-0.000935
32.0000	552.249	23.096	50.540	15.433	-0.588	20.265	1051.340	-0.001617	-0.003538	-0.001080
32.2000	621.755	28.907	59.571	19.403	-0.583	20.264	1183.662	-0.002023	-0.004170	-0.001358
32.4000	688.166	33.565	68.030	23.098	-0.582	20.264	1310.091	-0.002350	-0.004762	-0.001617
32.6000	724.775	36.456	72.215	25.493	-0.580	20.264	1379.786	-0.002552	-0.005055	-0.001785
32.8000	780.320	40.862	79.136	28.415	-0.583	20.265	1485.529	-0.002860	-0.005540	-0.001989
33.0000	824.834	45.169	84.653	31.458	-0.581	20.264	1570.272	-0.003162	-0.005926	-0.002202
33.2000	900.397	50.011	93.673	35.794	-0.584	20.265	1714.125	-0.003501	-0.006557	-0.002506
33.4000	915.591	51.878	96.105	36.861	-0.577	20.264	1743.050	-0.003631	-0.006727	-0.002580
33.6000	961.908	55.397	101.745	39.669	-0.578	20.264	1831.226	-0.003878	-0.007122	-0.002777
33.8000	998.142	58.164	106.835	41.966	-0.578	20.265	1900.206	-0.004071	-0.007478	-0.002938
34.0000	1020.985	60.830	110.142	43.232	-0.591	20.265	1943.693	-0.004258	-0.007710	-0.003026
34.2000	1045.166	62.346	112.961	45.115	-0.588	20.265	1989.727	-0.004364	-0.007907	-0.003158
34.4000	1063.350	64.508	114.933	45.745	-0.583	20.265	2024.345	-0.004516	-0.008045	-0.003202
34.6000	1079.325	65.366	117.393	47.032	-0.589	20.265	2054.758	-0.004576	-0.008218	-0.003292
34.8000	1071.195	65.742	116.950	46.739	-0.585	20.264	2039.280	-0.004602	-0.008187	-0.003272
35.0000	1068.385	64.759	116.810	46.893	-0.588	20.265	2033.930	-0.004533	-0.008177	-0.003282
35.2000	1053.131	64.577	116.409	46.178	-0.585	20.265	2004.890	-0.004520	-0.008149	-0.003232
35.4000	1045.992	63.232	115.588	46.081	-0.572	20.265	1991.301	-0.004426	-0.008091	-0.003226
35.6000	1013.366	61.811	112.446	44.497	-0.573	20.265	1929.188	-0.004327	-0.007871	-0.003115
35.8000	997.105	60.677	109.708	43.077	-0.584	20.266	1898.232	-0.004247	-0.007680	-0.003015
36.0000	956.468	57.745	105.886	40.971	-0.582	20.265	1820.869	-0.004042	-0.007412	-0.002868
36.2000	918.611	55.173	101.636	38.871	-0.588	20.266	1748.800	-0.003862	-0.007115	-0.002721
36.4000	865.306	50.881	95.813	36.299	-0.581	20.266	1647.320	-0.003562	-0.006707	-0.002541
36.6000	833.445	49.410	91.351	34.364	-0.573	20.266	1586.666	-0.003459	-0.006395	-0.002405
36.8000	768.493	43.754	84.057	30.602	-0.578	20.266	1463.013	-0.003063	-0.005884	-0.002142
37.0000	720.868	40.821	78.943	27.939	-0.592	20.266	1372.347	-0.002857	-0.005526	-0.001956
37.2000	662.377	36.286	71.423	24.776	-0.593	20.265	1260.996	-0.002540	-0.005000	-0.001734
37.4000	622.447	33.411	65.950	21.959	-0.589	20.266	1184.978	-0.002339	-0.004616	-0.001537
37.6000	527.963	27.179	55.569	16.753	-0.583	20.266	1005.106	-0.001903	-0.003890	-0.001173
37.8000	492.932	23.210	49.553	14.324	-0.580	20.267	938.416	-0.001625	-0.003469	-0.001003
38.0000	444.270	19.490	44.492	12.010	-0.588	20.267	845.776	-0.001364	-0.003114	-0.000841
38.2000	409.013	16.513	39.353	9.681	-0.588	20.267	778.656	-0.001156	-0.002755	-0.000678
38.4000	358.262	11.871	32.488	6.746	-0.584	20.266	682.039	-0.000831	-0.002274	-0.000472
38.6000	326.582	10.142	27.804	4.532	-0.587	20.267	621.729	-0.000710	-0.001946	-0.000317
38.8000	281.106	6.229	21.522	2.128	-0.600	20.267	535.154	-0.000436	-0.001507	-0.000149
39.0000	262.050	4.195	17.340	0.740	-0.595	20.268	498.877	-0.000294	-0.001214	-0.000052
39.2000	228.988	1.851	13.128	-1.039	-0.592	20.268	435.934	-0.000130	-0.000919	0.000073
39.4000	224.810	0.953	12.285	-0.914	-0.592	20.268	427.980	-0.000067	-0.000860	0.000064
39.6000	206.205	-0.058	8.919	-2.629	-0.592	20.269	392.561	0.000004	-0.000624	0.000184
39.8000	208.098	-0.773	8.974	-2.698	-0.588	20.268	396.166	0.000054	-0.000628	0.000189
40.0000	208.189	-0.662	8.932	-2.516	-0.591	20.269	396.338	0.000046	-0.000625	0.000176
40.2000	227.425	0.560	10.365	-1.757	-0.589	20.270	432.959	-0.000039	-0.000726	0.000123
40.4000	280.595	3.184	15.713	0.197	-0.585	20.270	534.182	-0.000223	-0.001100	-0.000014
40.6000	266.559	2.510	14.673	-0.308	-0.593	20.270	507.460	-0.000176	-0.001027	0.000022
40.8000	284.773	3.677	16.465	0.560	-0.576	20.270	542.135	-0.000257	-0.001153	-0.000039
41.0000	333.616	6.875	22.428	3.168	-0.584	20.271	635.118	-0.000481	-0.001570	-0.000222
41.2000	367.189	9.753	27.443	5.303	-0.587	20.271	699.034	-0.000683	-0.001921	-0.000371
41.4000	407.255	12.824	32.210	7.068	-0.578	20.271	775.309	-0.000898	-0.002255	-0.000495
41.6000	442.857	15.478	38.448	9.555	-0.585	20.272	843.086	-0.001083	-0.002691	-0.000669
41.8000	493.247	18.733	43.717	12.108	-0.587	20.272	939.016	-0.001311	-0.003060	-0.000848
42.0000	559.913	24.234	51.039	15.798	-0.584	20.273	1065.931	-0.001696	-0.003573	-0.001106
42.2000	610.875	28.246	58.016	19.038	-0.576	20.272	1162.949	-0.001977	-0.004061	-0.001333
42.4000	660.634	31.768	64.393	21.876	-0.581	20.273	1257.677	-0.002224	-0.004507	-0.001531
42.6000	713.714	36.343	70.841	24.918	-0.591	20.272	1358.728	-0.002544	-0.004959	-0.001744
42.8000	768.267	41.002	78.303	28.304	-0.580	20.273	1462.584	-0.002870	-0.005481	-0.001981
43.0000	815.862	44.778	84.166	31.021	-0.584	20.273	1553.192	-0.003134	-0.005892	-0.002171
43.2000	885.639	49.546	91.435	35.232	-0.583	20.273	1686.029	-0.003468	-0.006400	-0.002466
43.4000	906.664	51.624	95.521	36.692	-0.589	20.274	1726.055	-0.003614	-0.006686	-0.002568
43.6000	970.520	56.677	102.844	40.159	-0.589	20.274	1847.620	-0.003967	-0.007199	-0.002811
43.8000	990.733	58.360	105.581	41.687	-0.587	20.274	1886.101	-0.004085	-0.007391	-0.002918
44.0000	1011.322	60.242	108.971	43.149	-0.597	20.274	1925.297	-0.004217	-0.007628	-0.003020
44.2000	1055.099	63.470	113.129	45.632	-0.582	20.275	2008.638	-0.004443	-0.007919	-0.003194
44.4000	1052.650	63.608	113.862	45.717	-0.589	20.275	2003.975	-0.004453	-0.007970	-0.003200
44.6000	1064.823	64.465	116.143	46.681	-0.588	20.274	2027.149	-0.004513	-0.008130	-0.003268
44.8000	1072.713	65.322	116.324	46.866	-0.583	20.275	2042.170	-0.004573	-0.008143	-0.003281
45.0000	1067.723	65.192	116.685	47.243	-0.585	20.275	2032.671	-0.004563	-0.008168	-0.003307
45.2000	1067.783	65.405	116.628	47.186	-0.592	20.275	2032.785	-0.004578	-0.008164	-0.003303
45.4000	1037.847	63.665	114.139	45.466	-0.581	20.275	1975.794	-0.004457	-0.007990	-0.003183
45.6000	1003.928	61.515	111.376	43.952	-0.585	20.276	1911.221	-0.004306	-0.007796	-0.003077
45.8000	990.327	60.661	109.681	43.246	-0.578	20.275	1885.328	-0.004246	-0.007678	-0.003027
46.0000	944.205	56.901	104.707	40.913	-0.593	20.276	1797.523	-0.003983	-0.007329	-0.002864
46.2000	918.085	55.469	101.440	39.008	-0.584	20.276	1747.799	-0.003883	-0.007101	-0.002731
46.4000	873.376	52.215	96.284	36.692	-0.586	20.276	1662.683	-0.003655	-0.006740	-0.002568
46.6000	819.499	48.131	90.366	33.889	-0.582	20.275	1560.116	-0.003369	-0.006326	-0.002372
46.8000	768.793	44.327	83.903	30.894	-0.601	20.276	1463.585	-0.003103	-0.005873	-0.002163
47.0000	713.384	40.244	77.900	27.982	-0.583	20.276	1358.099	-0.002817	-0.005453	-0.001959
47.2000	658.395	36.258	70.770	24.343	-0.595	20.276	1253.414	-0.002538	-0.004954	-0.001704
47.4000	611.521	32.695	65.227	21.455	-0.606	20.275	1164.179	-0.002289	-0.004566	-0.001502
47.6000	535.718	27.223	56.055	17.887	-0.612	20.276	1019.869	-0.001906	-0.003924	-0.001252
47.8000	489.791	23.181	49.984	14.408	-0.584	20.276	932.436	-0.001623	-0.003499	-0.001009
48.0000	449.620	20.093	43.993	11.660	-0.597	20.276	855.961	-0.001406	-0.003080	-0.000816
48.2000	400.522	15.744	37.657	9.483	-0.603	20.276	762.491	-0.001102	-0.002636	-0.000664
48.4000	352.672	12.054	31.418	6.901	-0.601	20.276	671.396	-0.000844	-0.002199	-0.000483
48.6000	315.942	8.966	25.664	3.926	-0.600	20.276	601.473	-0.000628	-0.001796	-0.000275
48.8000	280.896	6.327	20.814	1.904	-0.603	20.276	534.754	-0.000443	-0.001457	-0.000133
49.0000	258.323	4.196	17.577	0.995	-0.593	20.276	491.781	-0.000294	-0.001230	-0.000070
49.2000	232.474	1.925	13.309	-0.970	-0.588	20.276	442.572	-0.000135	-0.000932	0.000068
49.4000	212.667	0.603	10.433	-1.826	-0.592	20.276	404.863	-0.000042	-0.000730	0.000128
49.6000	207.272	0.083	9.475	-2.740	-0.604	20.276	394.592	-0.000006	-0.000663	0.000192
49.8000	204.882	-0.463	8.600	-3.148	-0.603	20.276	390.043	0.000032	-0.000602	0.000220
50.0000	224.434	0.041	9.266	-1.952	-0.603	20.279	427.265	-0.000003	-0.000649	0.000137
50.2000	235.871	0.379	10.268	-1.574	-0.602	20.279	449.038	-0.000027	-0.000719	0.000110
50.4000	271.593	2.806	13.838	0.112	-0.603	20.279	517.044	-0.000196	-0.000969	-0.000008
50.6000	296.030	4.432	16.883	0.770	-0.603	20.278	563.564	-0.000310	-0.001182	-0.000054
50.8000	319.774	6.523	20.926	2.480	-0.611	20.279	608.768	-0.000457	-0.001465	-0.000174
51.0000	370.555	10.030	27.764	4.784	-0.597	20.278	705.442	-0.000702	-0.001943	-0.000335
51.2000	423.320	13.612	33.156	8.094	-0.599	20.279	805.893	-0.000953	-0.002321	-0.000567
51.4000	478.054	17.821	40.784	10.606	-0.607	20.278	910.091	-0.001247	-0.002855	-0.000742
51.6000	540.196	22.436	48.106	14.452	-0.613	20.278	1028.395	-0.001571	-0.003367	-0.001012
51.8000	603.676	27.361	56.167	18.504	-0.605	20.279	1149.244	-0.001915	-0.003932	-0.001295
52.0000	679.254	32.596	65.463	22.437	-0.602	20.279	1293.125	-0.002282	-0.004582	-0.001571
52.2000	749.076	38.098	74.355	26.998	-0.593	20.278	1426.048	-0.002667	-0.005205	-0.001890
52.4000	826.412	44.018	83.042	31.346	-0.593	20.279	1573.277	-0.003081	-0.005813	-0.002194
52.6000	895.648	49.674	91.587	35.134	-0.596	20.278	1705.084	-0.003477	-0.006411	-0.002459
52.8000	965.485	55.495	100.259	39.375	-0.591	20.279	1838.036	-0.003885	-0.007018	-0.002756
53.0000	1040.913	61.166	109.152	43.358	-0.595	20.279	1981.630	-0.004282	-0.007641	-0.003035
53.2000	1087.606	65.460	115.686	46.613	-0.601	20.279	2070.522	-0.004582	-0.008098	-0.003263
53.4000	1151.296	70.330	123.773	50.447	-0.598	20.279	2191.772	-0.004923	-0.008664	-0.003531
53.6000	1206.496	74.681	129.483	53.854	-0.583	20.279	2296.858	-0.005228	-0.009064	-0.003770
53.8000	1239.483	77.740	134.750	56.145	-0.595	20.279	2359.657	-0.005442	-0.009432	-0.003930
54.0000	1281.833	81.503	140.281	59.089	-0.599	20.278	2440.281	-0.005705	-0.009820	-0.004136
54.2000	1313.017	83.998	144.645	61.025	-0.597	20.279	2499.647	-0.005880	-0.010125	-0.004272
54.4000	1333.606	86.440	147.200	62.428	-0.605	20.279	2538.843	-0.006051	-0.010304	-0.004370
54.6000	1345.734	87.689	149.174	63.298	-0.600	20.278	2561.932	-0.006138	-0.010442	-0.004431
54.8000	1351.655	87.884	150.550	63.759	-0.593	20.278	2573.204	-0.006152	-0.010539	-0.004463
55.0000	1348.454	88.206	150.843	63.732	-0.603	20.278	2567.110	-0.006174	-0.010559	-0.004461
55.2000	1333.576	87.323	149.981	63.270	-0.613	20.278	2538.786	-0.006113	-0.010499	-0.004429
55.4000	1318.262	86.201	148.021	62.135	-0.601	20.278	2509.632	-0.006034	-0.010361	-0.004349
55.6000	1282.419	83.828	145.659	61.056	-0.602	20.278	2441.397	-0.005868	-0.010196	-0.004274
55.8000	1243.435	81.275	140.878	58.877	-0.586	20.277	2367.182	-0.005689	-0.009861	-0.004121
56.0000	1196.742	78.172	136.251	56.635	-0.596	20.278	2278.290	-0.005472	-0.009538	-0.003964
56.2000	1153.596	74.807	130.400	54.049	-0.609	20.278	2196.150	-0.005237	-0.009128	-0.003783
56.4000	1074.591	69.628	122.466	49.843	-0.600	20.278	2045.746	-0.004874	-0.008573	-0.003489
56.6000	1019.903	65.629	116.256	46.781	-0.605	20.278	1941.633	-0.004594	-0.008138	-0.003275
56.8000	957.791	61.209	109.223	43.177	-0.611	20.277	1823.387	-0.004285	-0.007646	-0.003022
57.0000	880.845	55.187	100.078	38.054	-0.612	20.278	1676.903	-0.003863	-0.007005	-0.002664
57.2000	809.550	50.219	91.836	34.629	-0.596	20.277	1541.176	-0.003515	-0.006429	-0.002424
57.4000	747.483	44.973	83.570	30.827	-0.601	20.277	1423.016	-0.003148	-0.005850	-0.002158
57.6000	677.931	39.656	74.884	26.421	-0.604	20.277	1290.607	-0.002776	-0.005242	-0.001849
57.8000	605.089	33.816	66.268	22.198	-0.588	20.277	1151.934	-0.002367	-0.004639	-0.001554
58.0000	541.323	28.792	58.085	18.380	-0.593	20.278	1030.540	-0.002015	-0.004066	-0.001287
58.2000	477.152	23.601	49.399	14.354	-0.597	20.277	908.375	-0.001652	-0.003458	-0.001005
58.4000	413.747	18.213	41.048	11.057	-0.599	20.278	787.668	-0.001275	-0.002873	-0.000774
58.6000	367.445	14.524	34.044	7.377	-0.610	20.277	699.520	-0.001017	-0.002383	-0.000516
58.8000	326.041	11.098	28.220	4.953	-0.596	20.278	620.699	-0.000777	-0.001975	-0.000347
59.0000	273.863	6.566	20.717	2.620	-0.607	20.278	521.364	-0.000460	-0.001450	-0.000183
59.2000	255.318	4.614	17.565	0.615	-0.597	20.278	486.059	-0.000323	-0.001230	-0.000043
59.4000	235.345	3.142	14.255	0.043	-0.607	20.278	448.036	-0.000220	-0.000998	-0.000003
59.6000	223.938	1.991	12.616	-0.702	-0.619	20.278	426.321	-0.000139	-0.000883	0.000049
59.8000	221.609	1.291	11.561	-1.081	-0.611	20.278	421.886	-0.000090	-0.000809	0.000076
60.0000	226.178	1.502	11.614	-0.969	-0.604	20.278	430.584	-0.000105	-0.000813	0.000068
60.2000	238.215	2.035	12.103	-0.561	-0.611	20.278	453.501	-0.000142	-0.000847	0.000039
60.4000	257.677	3.212	14.200	-0.223	-0.600	20.279	490.551	-0.000225	-0.000994	0.000016
60.6000	293.580	5.499	17.938	1.807	-0.602	20.279	558.901	-0.000385	-0.001256	-0.000126
60.8000	327.214	8.013	22.082	2.944	-0.607	20.278	622.931	-0.000561	-0.001546	-0.000206
61.0000	380.955	11.631	28.943	5.865	-0.590	20.278	725.241	-0.000814	-0.002026	-0.000411
61.2000	424.102	14.649	34.420	8.290	-0.604	20.279	807.381	-0.001025	-0.002409	-0.000580
61.4000	496.148	20.134	42.865	12.346	-0.605	20.279	944.538	-0.001409	-0.003001	-0.000864
61.6000	552.309	24.065	49.995	15.602	-0.588	20.279	1051.455	-0.001685	-0.003500	-0.001092
61.8000	609.417	28.358	57.514	19.220	-0.591	20.279	1160.173	-0.001985	-0.004026	-0.001345
62.0000	680.396	33.508	66.534	23.461	-0.592	20.279	1295.300	-0.002346	-0.004657	-0.001642
62.2000	759.070	39.879	75.830	27.672	-0.601	20.279	1445.074	-0.002792	-0.005308	-0.001937
62.4000	828.997	45.225	83.683	31.823	-0.594	20.278	1578.197	-0.003166	-0.005858	-0.002228
62.6000	905.086	51.584	93.463	35.850	-0.613	20.278	1723.051	-0.003611	-0.006542	-0.002509
62.8000	985.037	57.226	102.454	40.062	-0.595	20.279	1875.257	-0.004006	-0.007172	-0.002804
63.0000	1034.856	62.010	109.334	43.261	-0.593	20.279	1970.100	-0.004341	-0.007653	-0.003028
63.2000	1097.705	66.975	116.838	47.748	-0.589	20.278	2089.748	-0.004688	-0.008179	-0.003342
63.4000	1149.117	70.962	123.467	50.965	-0.595	20.278	2187.624	-0.004967	-0.008643	-0.003568
63.6000	1206.015	75.423	130.665	54.444	-0.604	20.278	2295.942	-0.005280	-0.009147	-0.003811
63.8000	1248.455	78.820	136.155	57.251	-0.600	20.279	2376.738	-0.005517	-0.009531	-0.004008
64.0000	1287.935	82.259	141.198	59.046	-0.608	20.278	2451.897	-0.005758	-0.009884	-0.004133
64.2000	1313.814	84.587	144.560	61.336	-0.579	20.278	2501.163	-0.005921	-0.010119	-0.004294
64.4000	1337.108	86.594	147.937	62.430	-0.603	20.278	2545.509	-0.006062	-0.010356	-0.004370
64.6000	1344.111	87.687	149.966	62.987	-0.585	20.278	2558.842	-0.006138	-0.010498	-0.004409
64.8000	1354.480	88.726	150.772	64.250	-0.592	20.278	2578.583	-0.006211	-0.010554	-0.004498
65.0000	1348.439	88.517	150.688	64.420	-0.596	20.278	2567.081	-0.006196	-0.010548	-0.004509
65.2000	1336.446	88.038	150.035	63.506	-0.595	20.278	2544.250	-0.006163	-0.010502	-0.004445
65.4000	1308.614	86.090	148.102	61.966	-0.583	20.278	2491.264	-0.006026	-0.010367	-0.004338
65.6000	1280.661	84.882	145.852	61.138	-0.595	20.278	2438.049	-0.005942	-0.010210	-0.004280
65.8000	1237.003	81.571	141.101	58.329	-0.589	20.278	2354.937	-0.005710	-0.009877	-0.004083
66.0000	1190.310	78.130	135.918	56.173	-0.582	20.278	2266.045	-0.005469	-0.009514	-0.003932
66.2000	1134.059	74.274	129.135	53.293	-0.592	20.278	2158.957	-0.005199	-0.009039	-0.003730
66.4000	1078.529	70.178	122.814	49.912	-0.590	20.278	2053.242	-0.004912	-0.008597	-0.003494
66.6000	1025.298	66.022	116.101	47.243	-0.595	20.278	1951.904	-0.004622	-0.008127	-0.003307
66.8000	946.745	60.326	107.236	41.729	-0.593	20.278	1802.359	-0.004223	-0.007507	-0.002921
67.0000	878.170	55.159	99.288	37.857	-0.587	20.277	1671.810	-0.003861	-0.006950	-0.002650
67.2000	807.582	49.841	91.073	34.197	-0.592	20.277	1537.428	-0.003489	-0.006375	-0.002394
67.4000	732.740	44.550	82.346	29.761	-0.595	20.277	1394.949	-0.003119	-0.005764	-0.002083
67.6000	666.525	39.317	73.856	25.901	-0.591	20.277	1268.892	-0.002752	-0.005170	-0.001813
67.8000	605.645	33.958	65.769	22.229	-0.578	20.276	1152.992	-0.002377	-0.004604	-0.001556
68.0000	527.151	28.416	56.109	17.720	-0.585	20.276	1003.561	-0.001989	-0.003928	-0.001240
68.2000	462.740	23.057	47.718	13.523	-0.571	20.276	880.938	-0.001614	-0.003340	-0.000947
68.4000	412.304	18.467	40.644	10.369	-0.581	20.276	784.922	-0.001293	-0.002845	-0.000726
68.6000	368.902	14.830	34.822	7.910	-0.584	20.276	702.295	-0.001038	-0.002438	-0.000554
68.8000	307.917	10.060	26.401	5.049	-0.593	20.276	586.195	-0.000704	-0.001848	-0.000353
69.0000	279.017	7.283	21.982	2.858	-0.599	20.276	531.178	-0.000510	-0.001539	-0.000200
69.2000	254.912	5.091	18.118	1.037	-0.591	20.275	485.287	-0.000356	-0.001268	-0.000073
69.4000	229.649	2.736	13.725	-0.085	-0.591	20.276	437.193	-0.000192	-0.000961	0.000006
69.6000	220.422	2.005	11.447	-0.885	-0.589	20.276	419.626	-0.000140	-0.000801	0.000062
69.8000	223.217	1.907	11.671	-1.068	-0.586	20.276	424.948	-0.000134	-0.000817	0.000075
70.0000	223.187	1.683	11.464	-1.236	-0.595	20.275	424.891	-0.000118	-0.000802	0.000086
70.2000	234.293	2.314	12.060	-0.914	-0.580	20.275	446.033	-0.000162	-0.000844	0.000064
70.4000	265.086	4.011	14.435	0.700	-0.587	20.275	504.656	-0.000281	-0.001010	-0.000049
70.6000	292.438	5.723	18.064	2.171	-0.591	20.275	556.726	-0.000401	-0.001265	-0.000152
70.8000	334.006	8.644	22.745	3.604	-0.595	20.274	635.862	-0.000605	-0.001592	-0.000252
71.0000	383.405	11.700	28.749	6.201	-0.574	20.275	729.904	-0.000819	-0.002012	-0.000434
71.2000	423.170	14.703	34.031	8.472	-0.587	20.275	805.607	-0.001029	-0.002382	-0.000593
71.4000	488.964	19.572	42.075	12.290	-0.585	20.275	930.862	-0.001370	-0.002945	-0.000860
71.6000	550.446	24.613	49.566	15.673	-0.579	20.275	1047.907	-0.001723	-0.003470	-0.001097
71.8000	623.393	29.876	58.959	20.049	-0.562	20.275	1186.781	-0.002091	-0.004127	-0.001403
72.0000	683.853	34.886	66.561	23.767	-0.578	20.274	1301.880	-0.002442	-0.004659	-0.001664
72.2000	745.048	39.908	74.399	27.433	-0.579	20.275	1418.381	-0.002794	-0.005208	-0.001920
72.4000	831.417	46.182	84.502	32.357	-0.578	20.275	1582.804	-0.003233	-0.005915	-0.002265
72.6000	893.619	50.995	92.380	35.863	-0.578	20.274	1701.221	-0.003570	-0.006467	-0.002510
72.8000	964.899	56.832	101.120	40.187	-0.577	20.274	1836.920	-0.003978	-0.007078	-0.002813
73.0000	1036.795	62.150	109.584	44.638	-0.586	20.275	1973.791	-0.004350	-0.007671	-0.003125
73.2000	1093.858	66.765	116.797	48.297	-0.583	20.275	2082.424	-0.004674	-0.008176	-0.003381
73.4000	1150.710	71.131	123.857	51.749	-0.574	20.275	2190.657	-0.004979	-0.008670	-0.003622
73.6000	1210.809	76.097	130.972	55.173	-0.587	20.276	2305.069	-0.005327	-0.009168	-0.003862
73.8000	1245.705	79.072	135.763	57.612	-0.594	20.276	2371.502	-0.005535	-0.009503	-0.004033
74.0000	1283.531	82.820	141.351	59.901	-0.583	20.275	2443.514	-0.005797	-0.009895	-0.004193
74.2000	1317.090	85.627	145.505	62.162	-0.585	20.276	2507.401	-0.005994	-0.010185	-0.004351
74.4000	1339.617	87.743	148.300	63.323	-0.585	20.276	2550.287	-0.006142	-0.010381	-0.004433
74.6000	1350.077	88.684	149.952	64.111	-0.585	20.277	2570.200	-0.006208	-0.010497	-0.004488
74.8000	1350.002	89.063	150.647	64.799	-0.582	20.276	2570.057	-0.006234	-0.010545	-0.004536
75.0000	1344.502	89.187	150.760	64.573	-0.590	20.276	2559.586	-0.006243	-0.010553	-0.004520
75.2000	1328.842	88.671	150.176	63.788	-0.587	20.277	2529.774	-0.006207	-0.010512	-0.004465
75.4000	1312.521	87.394	149.201	63.185	-0.591	20.277	2498.703	-0.006118	-0.010444	-0.004423
75.6000	1289.287	85.472	146.271	62.289	-0.580	20.277	2454.472	-0.005983	-0.010239	-0.004360
75.8000	1236.057	81.879	141.088	59.300	-0.573	20.278	2353.134	-0.005732	-0.009876	-0.004151
76.0000	1189.318	78.665	135.056	56.635	-0.588	20.278	2264.156	-0.005507	-0.009454	-0.003964
76.2000	1146.668	76.001	131.220	54.487	-0.584	20.277	2182.961	-0.005320	-0.009185	-0.003814
76.4000	1083.157	71.355	123.772	50.826	-0.585	20.278	2062.054	-0.004995	-0.008664	-0.003558
76.6000	1017.123	66.539	116.059	47.158	-0.592	20.279	1936.340	-0.004658	-0.008124	-0.003301
76.8000	950.021	61.504	108.666	43.316	-0.592	20.279	1808.596	-0.004305	-0.007607	-0.003032
77.0000	883.205	56.185	100.731	39.038	-0.583	20.279	1681.395	-0.003933	-0.007051	-0.002733
77.2000	804.591	50.036	91.310	34.796	-0.580	20.279	1531.734	-0.003503	-0.006392	-0.002436
77.4000	741.697	45.296	83.140	31.261	-0.584	20.279	1412.001	-0.003171	-0.005820	-0.002188
77.6000	670.793	39.443	74.272	26.969	-0.572	20.279	1277.018	-0.002761	-0.005199	-0.001888
77.8000	581.599	33.074	63.280	22.002	-0.587	20.280	1107.216	-0.002315	-0.004430	-0.001540
78.0000	533.283	29.004	56.916	18.310	-0.576	20.279	1015.234	-0.002030	-0.003984	-0.001282
78.2000	473.169	24.262	49.246	15.153	-0.580	20.280	900.793	-0.001698	-0.003447	-0.001061
78.4000	414.574	19.925	41.465	11.365	-0.578	20.280	789.242	-0.001395	-0.002903	-0.000796
78.6000	357.871	14.790	33.446	8.163	-0.577	20.280	681.295	-0.001035	-0.002341	-0.000571
78.8000	317.220	11.548	27.817	5.640	-0.587	20.281	603.905	-0.000808	-0.001947	-0.000395
79.0000	279.063	8.322	21.857	3.336	-0.576	20.281	531.263	-0.000583	-0.001530	-0.000234
79.2000	257.857	6.312	18.284	1.960	-0.567	20.281	490.894	-0.000442	-0.001280	-0.000137
79.4000	238.035	3.957	14.837	0.727	-0.573	20.281	453.157	-0.000277	-0.001039	-0.000051
79.6000	223.773	2.820	12.489	-0.183	-0.569	20.282	426.006	-0.000197	-0.000874	0.000013
79.8000	218.723	2.118	10.434	-0.450	-0.575	20.282	416.393	-0.000148	-0.000730	0.000031
80.0000	221.985	2.048	10.964	-0.577	-0.593	20.283	422.602	-0.000143	-0.000767	0.000040
80.2000	246.736	3.463	12.601	0.265	-0.575	20.284	469.723	-0.000242	-0.000882	-0.000019
80.4000	259.435	4.277	13.757	0.701	-0.583	20.283	493.898	-0.000299	-0.000963	-0.000049
80.6000	288.290	6.511	17.644	2.228	-0.576	20.283	548.830	-0.000456	-0.001235	-0.000156
80.8000	327.319	9.246	22.872	4.152	-0.583	20.284	623.131	-0.000647	-0.001601	-0.000291
81.0000	375.124	12.488	28.346	6.678	-0.576	20.285	714.140	-0.000874	-0.001984	-0.000467
81.2000	424.958	16.347	35.044	9.371	-0.591	20.284	809.011	-0.001144	-0.002453	-0.000656
81.4000	481.240	20.430	41.965	12.640	-0.575	20.285	916.157	-0.001430	-0.002938	-0.000885
81.6000	550.491	24.992	49.884	16.401	-0.583	20.285	1047.993	-0.001749	-0.003492	-0.001148
81.8000	608.801	29.930	57.780	20.092	-0.577	20.286	1159.000	-0.002095	-0.004045	-0.001406
82.0000	690.946	35.418	67.408	24.595	-0.580	20.286	1315.384	-0.002479	-0.004719	-0.001722
82.2000	744.883	40.162	74.594	27.994	-0.591	20.286	1418.066	-0.002811	-0.005222	-0.001960
82.4000	825.691	46.322	84.474	32.891	-0.576	20.287	1571.903	-0.003243	-0.005913	-0.002302
82.6000	905.462	52.299	94.004	37.394	-0.586	20.288	1723.766	-0.003661	-0.006580	-0.002618
82.8000	977.192	57.941	102.913	41.546	-0.588	20.288	1860.323	-0.004056	-0.007204	-0.002908
83.0000	1039.831	62.627	110.167	45.283	-0.595	20.289	1979.570	-0.004384	-0.007712	-0.003170
83.2000	1082.481	66.878	116.645	48.297	-0.585	20.289	2060.766	-0.004681	-0.008165	-0.003381
83.4000	1143.226	71.886	124.107	51.902	-0.591	20.289	2176.409	-0.005032	-0.008687	-0.003633
83.6000	1203.295	76.141	130.748	55.216	-0.593	20.290	2290.764	-0.005330	-0.009152	-0.003865
83.8000	1247.057	79.987	136.306	58.005	-0.578	20.291	2374.077	-0.005599	-0.009541	-0.004060
84.0000	1292.007	83.928	142.338	60.900	-0.573	20.291	2459.650	-0.005875	-0.009964	-0.004263
84.2000	1310.086	85.669	145.048	62.234	-0.577	20.293	2494.068	-0.005997	-0.010153	-0.004356
84.4000	1336.987	88.193	148.909	64.194	-0.586	20.292	2545.280	-0.006173	-0.010424	-0.004494
84.6000	1347.162	89.161	150.258	64.772	-0.574	20.293	2564.650	-0.006241	-0.010518	-0.004534
84.8000	1359.320	90.932	152.095	65.558	-0.570	20.294	2587.795	-0.006365	-0.010647	-0.004589
85.0000	1354.931	90.692	152.246	65.782	-0.591	20.294	2579.441	-0.006348	-0.010657	-0.004605
85.2000	1339.978	89.876	151.052	65.023	-0.569	20.295	2550.974	-0.006291	-0.010574	-0.004552
85.4000	1309.004	88.039	148.869	63.914	-0.580	20.296	2492.008	-0.006163	-0.010421	-0.004474
85.6000	1283.201	86.104	146.466	62.667	-0.579	20.295	2442.884	-0.006027	-0.010253	-0.004387
85.8000	1248.951	83.774	142.824	60.632	-0.580	20.297	2377.682	-0.005864	-0.009998	-0.004244
86.0000	1185.140	79.479	135.945	57.375	-0.565	20.297	2256.203	-0.005564	-0.009516	-0.004016
86.2000	1135.201	75.637	129.970	54.442	-0.565	20.297	2161.131	-0.005295	-0.009098	-0.003811
86.4000	1077.717	71.199	123.537	51.288	-0.567	20.298	2051.697	-0.004984	-0.008648	-0.003590
86.6000	1026.801	67.932	117.422	48.424	-0.568	20.298	1954.765	-0.004755	-0.008220	-0.003390
86.8000	956.453	62.543	109.889	44.133	-0.555	20.299	1820.841	-0.004378	-0.007692	-0.003089
87.0000	884.151	57.226	100.996	39.964	-0.564	20.299	1683.197	-0.004006	-0.007070	-0.002797
87.2000	806.199	51.303	91.645	35.427	-0.560	20.299	1534.796	-0.003591	-0.006415	-0.002480
87.4000	739.668	45.913	83.307	31.767	-0.555	20.300	1408.138	-0.003214	-0.005831	-0.002224
87.6000	664.135	40.397	74.315	27.292	-0.552	20.299	1264.343	-0.002828	-0.005202	-0.001910
87.8000	605.389	35.502	66.601	23.796	-0.571	20.300	1152.506	-0.002485	-0.004662	-0.001666
88.0000	535.297	30.087	57.654	19.458	-0.563	20.301	1019.068	-0.002106	-0.004036	-0.001362
88.2000	463.972	24.780	48.482	15.223	-0.566	20.301	883.284	-0.001735	-0.003394	-0.001066
88.4000	422.073	21.118	42.937	12.458	-0.565	20.301	803.518	-0.001478	-0.003006	-0.000872
88.6000	359.284	16.023	34.279	8.852	-0.575	20.302	683.985	-0.001122	-0.002400	-0.000620
88.8000	309.766	11.730	26.958	5.934	-0.580	20.303	589.714	-0.000821	-0.001887	-0.000415
89.0000	279.123	8.896	22.398	3.885	-0.576	20.303	531.378	-0.000623	-0.001568	-0.000272
89.2000	259.601	7.044	18.773	2.845	-0.589	20.303	494.213	-0.000493	-0.001314	-0.000199
89.4000	232.219	4.516	14.741	1.218	-0.585	20.303	442.085	-0.000316	-0.001032	-0.000085
89.6000	226.704	3.926	12.866	0.604	-0.583	20.304	431.585	-0.000275	-0.000901	-0.000042
89.8000	221.714	3.171	11.698	0.197	-0.577	20.304	422.087	-0.000222	-0.000819	-0.000014
90.0000	227.305	3.269	12.030	0.140	-0.576	20.304	432.730	-0.000229	-0.000842	-0.000010
90.2000	237.028	3.492	12.573	0.404	-0.588	20.304	451.241	-0.000244	-0.000880	-0.000028
90.4000	255.663	4.657	14.572	1.149	-0.576	20.305	486.717	-0.000326	-0.001020	-0.000080
90.6000	303.664	7.648	19.580	3.533	-0.592	20.305	578.098	-0.000535	-0.001371	-0.000247
90.8000	327.319	9.539	23.038	4.461	-0.585	20.306	623.131	-0.000668	-0.001613	-0.000312
91.0000	378.941	13.387	29.013	7.419	-0.589	20.306	721.407	-0.000937	-0.002031	-0.000519
91.2000	430.474	17.147	36.544	10.256	-0.577	20.306	819.511	-0.001200	-0.002558	-0.000718
91.4000	479.015	20.123	41.744	12.667	-0.572	20.306	911.922	-0.001409	-0.002922	-0.000887
91.6000	541.939	25.216	49.080	16.164	-0.569	20.308	1031.713	-0.001765	-0.003436	-0.001131
91.8000	614.376	30.492	58.029	20.443	-0.577	20.307	1169.615	-0.002134	-0.004062	-0.001431
92.0000	687.505	35.879	67.477	24.833	-0.577	20.307	1308.832	-0.002512	-0.004723	-0.001738
92.2000	751.511	40.779	74.998	28.458	-0.581	20.308	1430.683	-0.002855	-0.005250	-0.001992
92.4000	817.019	45.971	83.194	32.569	-0.569	20.308	1555.395	-0.003218	-0.005824	-0.002280
92.6000	912.345	53.211	94.423	37.817	-0.581	20.309	1736.870	-0.003725	-0.006610	-0.002647
92.8000	963.456	57.393	101.455	40.971	-0.585	20.309	1834.173	-0.004018	-0.007102	-0.002868
93.0000	1049.223	63.917	111.210	46.108	-0.577	20.309	1997.452	-0.004474	-0.007785	-0.003228
93.2000	1085.412	67.496	116.729	48.494	-0.593	20.309	2066.345	-0.004725	-0.008171	-0.003395
93.4000	1134.825	71.312	123.453	51.764	-0.578	20.310	2160.416	-0.004992	-0.008642	-0.003623
93.6000	1209.456	77.094	131.431	55.764	-0.583	20.310	2302.494	-0.005397	-0.009200	-0.003904
93.8000	1246.561	80.379	136.043	58.259	-0.590	20.310	2373.133	-0.005626	-0.009523	-0.004078
94.0000	1297.012	84.222	142.350	61.350	-0.586	20.310	2469.177	-0.005896	-0.009965	-0.004295
94.2000	1316.864	86.118	145.118	62.655	-0.605	20.310	2506.971	-0.006028	-0.010158	-0.004386
94.4000	1342.112	88.376	149.020	64.645	-0.591	20.311	2555.037	-0.006186	-0.010431	-0.004525
94.6000	1358.869	89.835	151.718	65.349	-0.591	20.312	2586.937	-0.006288	-0.010620	-0.004574
94.8000	1356.584	90.004	151.259	65.557	-0.585	20.312	2582.588	-0.006300	-0.010588	-0.004589
95.0000	1344.456	89.920	150.925	65.236	-0.578	20.312	2559.500	-0.006294	-0.010565	-0.004566
95.2000	1334.012	89.412	150.468	64.855	-0.592	20.312	2539.616	-0.006259	-0.010533	-0.004540
95.4000	1318.112	88.192	148.453	64.109	-0.596	20.313	2509.346	-0.006173	-0.010392	-0.004488
95.6000	1290.129	85.964	145.659	62.457	-0.577	20.313	2456.074	-0.006017	-0.010196	-0.004372
95.8000	1242.639	83.155	140.989	60.337	-0.570	20.313	2365.665	-0.005821	-0.009869	-0.004224
96.0000	1199.763	79.958	136.724	57.850	-0.586	20.313	2284.040	-0.005597	-0.009571	-0.004049
96.2000	1148.877	76.071	130.694	54.907	-0.578	20.314	2187.166	-0.005325	-0.009149	-0.003843
96.4000	1084.390	71.509	123.244	51.302	-0.568	20.315	2064.400	-0.005006	-0.008627	-0.003591
96.6000	1012.990	66.624	115.352	47.272	-0.572	20.314	1928.473	-0.004664	-0.008075	-0.003309
96.8000	959.759	62.614	108.791	43.612	-0.581	20.315	1827.135	-0.004383	-0.007615	-0.003053
97.0000	884.076	56.733	100.355	39.767	-0.581	20.315	1683.054	-0.003971	-0.007025	-0.002784
97.2000	808.273	51.036	91.728	35.357	-0.576	20.314	1538.744	-0.003573	-0.006421	-0.002475
97.4000	734.138	45.521	82.735	31.066	-0.571	20.315	1397.610	-0.003186	-0.005791	-0.002175
97.6000	670.808	40.329	73.802	27.292	-0.575	20.315	1277.046	-0.002823	-0.005166	-0.001910
97.8000	588.182	34.141	64.199	22.397	-0.575	20.315	1119.747	-0.002390	-0.004494	-0.001568
98.0000	544.645	30.087	57.946	19.937	-0.572	20.315	1036.863	-0.002106	-0.004056	-0.001396
98.2000	454.639	23.771	47.024	14.465	-0.574	20.315	865.517	-0.001664	-0.003292	-0.001013
98.4000	424.988	20.697	41.811	12.290	-0.577	20.316	809.069	-0.001449	-0.002927	-0.000860
98.6000	366.287	15.953	33.959	8.457	-0.583	20.316	697.317	-0.001117	-0.002377	-0.000592
98.8000	328.596	12.965	28.887	6.510	-0.589	20.316	625.563	-0.000908	-0.002022	-0.000456
99.0000	294.016	9.834	23.650	4.125	-0.576	20.316	559.731	-0.000688	-0.001656	-0.000289
99.2000	252.177	6.132	17.382	2.211	-0.578	20.317	480.080	-0.000429	-0.001217	-0.000155
99.4000	247.413	5.315	15.731	1.342	-0.584	20.316	471.010	-0.000372	-0.001101	-0.000094
99.6000	227.245	3.941	12.589	0.211	-0.589	20.317	432.615	-0.000276	-0.000881	-0.000015
99.8000	220.557	2.933	11.685	-0.155	-0.587	20.317	419.884	-0.000205	-0.000818	0.000011
Test Cycles
Time (sec)	Axial stress (kPa)	Axial micro-strain #1	Axial micro-strain #2	Axial micro-strain #3	Confining pressure (kPa)	Temperature (�C)	Load (N)	Displacement #1 (mm)	Displacement #2 (mm)	Displacement #3 (mm)
0.0000	222.781	3.045	11.752	-0.169	-0.591	20.316	424.118	-0.000213	-0.000823	0.000012
0.2000	241.086	3.943	12.726	0.421	-0.599	20.316	458.965	-0.000276	-0.000891	-0.000029
0.4000	260.653	4.895	14.324	0.992	-0.578	20.317	496.216	-0.000343	-0.001003	-0.000069
0.6000	289.733	6.567	17.519	2.535	-0.577	20.316	551.577	-0.000460	-0.001226	-0.000177
0.8000	337.839	9.876	23.553	4.940	-0.580	20.316	643.158	-0.000691	-0.001649	-0.000346
1.0000	384.246	13.500	29.000	7.251	-0.577	20.317	731.506	-0.000945	-0.002030	-0.000508
1.2000	429.347	16.641	34.796	9.567	-0.579	20.317	817.366	-0.001165	-0.002436	-0.000670
1.4000	482.472	20.346	41.269	12.863	-0.582	20.317	918.503	-0.001424	-0.002889	-0.000900
1.6000	551.543	25.552	49.636	16.290	-0.582	20.317	1049.995	-0.001789	-0.003475	-0.001140
1.8000	617.908	30.563	58.376	20.598	-0.580	20.317	1176.338	-0.002139	-0.004086	-0.001442
2.0000	689.083	35.993	66.670	24.539	-0.593	20.317	1311.836	-0.002519	-0.004667	-0.001718
2.2000	749.752	40.429	74.524	28.219	-0.588	20.317	1427.336	-0.002830	-0.005217	-0.001975
2.4000	832.333	46.828	84.780	33.283	-0.578	20.318	1584.549	-0.003278	-0.005935	-0.002330
2.6000	901.269	52.020	92.727	36.819	-0.581	20.318	1715.784	-0.003641	-0.006491	-0.002577
2.8000	976.862	58.221	102.456	41.728	-0.591	20.318	1859.694	-0.004075	-0.007172	-0.002921
3.0000	1034.165	62.668	109.459	44.877	-0.592	20.318	1968.784	-0.004387	-0.007662	-0.003141
3.2000	1104.498	68.466	117.643	48.999	-0.577	20.318	2102.680	-0.004793	-0.008235	-0.003430
3.4000	1192.504	74.498	127.567	53.740	-0.580	20.318	2270.222	-0.005215	-0.008930	-0.003762
3.6000	1220.908	77.822	132.373	56.411	-0.574	20.318	2324.295	-0.005448	-0.009266	-0.003949
3.8000	1248.184	80.197	136.473	58.160	-0.580	20.318	2376.223	-0.005614	-0.009553	-0.004071
4.0000	1294.051	83.970	141.754	60.661	-0.577	20.317	2463.541	-0.005878	-0.009923	-0.004246
4.2000	1320.201	86.442	145.090	62.487	-0.573	20.318	2513.323	-0.006051	-0.010156	-0.004374
4.4000	1337.859	88.318	148.188	63.956	-0.588	20.318	2546.940	-0.006182	-0.010373	-0.004477
4.6000	1349.386	89.442	150.063	64.770	-0.581	20.318	2568.884	-0.006261	-0.010504	-0.004534
4.8000	1353.789	90.131	151.844	65.472	-0.572	20.318	2577.267	-0.006309	-0.010629	-0.004583
5.0000	1350.618	90.425	152.203	65.348	-0.566	20.318	2571.230	-0.006330	-0.010654	-0.004574
5.2000	1337.528	89.597	151.189	64.996	-0.562	20.318	2546.310	-0.006272	-0.010583	-0.004550
5.4000	1312.987	88.235	149.259	63.901	-0.566	20.317	2499.590	-0.006176	-0.010448	-0.004473
5.6000	1287.303	86.385	144.632	62.318	-0.571	20.318	2450.695	-0.006047	-0.010124	-0.004362
5.8000	1244.593	83.843	141.559	60.099	-0.577	20.318	2369.385	-0.005869	-0.009909	-0.004207
6.0000	1201.867	80.465	136.154	57.921	-0.577	20.319	2288.046	-0.005633	-0.009531	-0.004054
6.2000	1160.554	77.753	131.346	55.329	-0.575	20.318	2209.396	-0.005443	-0.009194	-0.003873
6.4000	1085.322	71.985	123.133	50.995	-0.575	20.317	2066.174	-0.005039	-0.008619	-0.003570
6.6000	1023.329	67.552	115.710	47.581	-0.578	20.318	1948.156	-0.004729	-0.008100	-0.003331
6.8000	955.732	62.404	107.749	43.767	-0.566	20.318	1819.468	-0.004368	-0.007542	-0.003064
7.0000	885.895	57.465	99.439	39.712	-0.568	20.318	1686.516	-0.004023	-0.006961	-0.002780
7.2000	814.074	51.696	91.115	35.412	-0.580	20.317	1549.788	-0.003619	-0.006378	-0.002479
7.4000	738.706	45.983	82.374	31.486	-0.583	20.317	1406.307	-0.003219	-0.005766	-0.002204
7.6000	687.715	41.791	75.386	28.121	-0.577	20.317	1309.233	-0.002925	-0.005277	-0.001969
7.8000	585.176	34.338	63.573	22.353	-0.571	20.317	1114.025	-0.002404	-0.004450	-0.001565
8.0000	536.184	30.031	56.347	19.291	-0.570	20.317	1020.756	-0.002102	-0.003944	-0.001350
8.2000	480.383	25.776	49.399	15.828	-0.578	20.316	914.526	-0.001804	-0.003458	-0.001108
8.4000	420.780	20.780	41.729	12.330	-0.584	20.316	801.058	-0.001455	-0.002921	-0.000863
8.6000	366.453	16.557	34.557	9.062	-0.577	20.316	697.632	-0.001159	-0.002419	-0.000634
8.8000	312.831	12.136	26.986	5.738	-0.588	20.316	595.551	-0.000850	-0.001889	-0.000402
9.0000	291.731	9.722	23.064	4.503	-0.583	20.315	555.382	-0.000681	-0.001615	-0.000315
9.2000	249.096	6.455	17.437	2.228	-0.600	20.315	474.215	-0.000452	-0.001221	-0.000156
9.4000	233.842	4.810	14.782	0.994	-0.594	20.315	445.175	-0.000337	-0.001035	-0.000070
9.6000	221.909	3.326	11.878	0.042	-0.567	20.316	422.459	-0.000233	-0.000831	-0.000003
9.8000	221.128	3.128	11.519	-0.112	-0.579	20.315	420.971	-0.000219	-0.000806	0.000008
10.0000	212.321	2.457	9.643	-0.969	-0.585	20.315	404.205	-0.000172	-0.000675	0.000068
10.2000	234.924	3.437	11.447	0.280	-0.587	20.316	447.235	-0.000241	-0.000801	-0.000020
10.4000	251.365	4.432	13.031	0.658	-0.578	20.315	478.535	-0.000310	-0.000912	-0.000046
10.6000	282.519	6.511	16.518	1.680	-0.583	20.316	537.844	-0.000456	-0.001156	-0.000118
10.8000	326.973	9.457	21.857	3.844	-0.587	20.315	622.473	-0.000662	-0.001530	-0.000269
11.0000	365.671	12.321	27.332	6.315	-0.585	20.315	696.144	-0.000862	-0.001913	-0.000442
11.2000	420.690	16.318	33.780	9.131	-0.583	20.314	800.886	-0.001142	-0.002365	-0.000639
11.4000	510.094	22.422	44.174	13.903	-0.575	20.314	971.088	-0.001570	-0.003092	-0.000973
11.6000	534.786	24.543	48.453	15.673	-0.587	20.314	1018.095	-0.001718	-0.003392	-0.001097
11.8000	611.281	30.519	57.432	20.063	-0.591	20.314	1163.721	-0.002136	-0.004020	-0.001404
12.0000	691.652	36.385	67.048	24.511	-0.586	20.314	1316.729	-0.002547	-0.004693	-0.001716
12.2000	754.636	41.286	74.147	28.402	-0.578	20.313	1436.634	-0.002890	-0.005190	-0.001988
12.4000	816.223	46.251	82.346	32.173	-0.611	20.314	1553.879	-0.003238	-0.005764	-0.002252
12.6000	911.293	53.015	92.714	37.184	-0.573	20.314	1734.867	-0.003711	-0.006490	-0.002603
12.8000	962.750	57.688	100.052	40.593	-0.595	20.313	1832.829	-0.004038	-0.007004	-0.002842
13.0000	1018.761	61.924	107.221	44.147	-0.589	20.313	1939.459	-0.004335	-0.007505	-0.003090
13.2000	1092.445	67.453	115.449	48.171	-0.587	20.313	2079.735	-0.004722	-0.008081	-0.003372
13.4000	1163.559	73.094	124.133	52.435	-0.583	20.312	2215.118	-0.005117	-0.008689	-0.003670
13.6000	1200.244	76.364	129.524	54.979	-0.587	20.313	2284.956	-0.005345	-0.009067	-0.003849
13.8000	1242.489	79.859	134.901	58.020	-0.576	20.312	2365.379	-0.005590	-0.009443	-0.004061
14.0000	1285.560	83.421	140.684	60.508	-0.585	20.311	2447.376	-0.005839	-0.009848	-0.004236
14.2000	1310.658	85.626	143.893	62.151	-0.599	20.311	2495.155	-0.005994	-0.010073	-0.004351
14.4000	1338.836	88.138	147.633	63.730	-0.595	20.311	2548.800	-0.006170	-0.010334	-0.004461
14.6000	1351.490	89.427	149.718	64.926	-0.603	20.311	2572.889	-0.006260	-0.010480	-0.004545
14.8000	1346.500	89.582	150.382	64.798	-0.591	20.310	2563.391	-0.006271	-0.010527	-0.004536
15.0000	1359.395	90.539	151.439	65.628	-0.602	20.310	2587.938	-0.006338	-0.010601	-0.004594
15.2000	1331.607	89.133	150.064	64.588	-0.613	20.310	2535.038	-0.006239	-0.010504	-0.004521
15.4000	1310.026	88.094	148.326	63.590	-0.605	20.309	2493.954	-0.006167	-0.010383	-0.004451
15.6000	1287.198	86.216	145.992	62.263	-0.607	20.309	2450.495	-0.006035	-0.010219	-0.004358
15.8000	1243.826	83.282	141.045	60.115	-0.603	20.308	2367.926	-0.005830	-0.009873	-0.004208
16.0000	1197.749	80.323	136.042	57.639	-0.593	20.307	2280.207	-0.005623	-0.009523	-0.004035
16.2000	1133.548	75.760	129.372	54.148	-0.601	20.308	2157.984	-0.005303	-0.009056	-0.003790
16.4000	1089.665	72.069	123.437	51.482	-0.607	20.307	2074.442	-0.005045	-0.008641	-0.003604
16.6000	1019.858	67.257	116.032	47.593	-0.600	20.306	1941.547	-0.004708	-0.008122	-0.003332
16.8000	958.692	62.613	108.611	44.525	-0.616	20.307	1825.104	-0.004383	-0.007603	-0.003117
17.0000	875.254	56.876	99.439	39.489	-0.600	20.306	1666.260	-0.003981	-0.006961	-0.002764
17.2000	794.747	50.503	90.184	35.218	-0.593	20.305	1512.995	-0.003535	-0.006313	-0.002465
17.4000	745.514	46.785	83.237	31.795	-0.605	20.304	1419.268	-0.003275	-0.005827	-0.002226
17.6000	679.885	41.663	74.482	27.686	-0.602	20.305	1294.327	-0.002916	-0.005214	-0.001938
17.8000	607.869	35.545	65.589	23.251	-0.600	20.304	1157.227	-0.002488	-0.004591	-0.001628
18.0000	526.400	29.791	55.916	18.715	-0.604	20.304	1002.131	-0.002085	-0.003914	-0.001310
18.2000	478.550	25.582	48.523	15.588	-0.617	20.304	911.036	-0.001791	-0.003397	-0.001091
18.4000	412.274	20.513	40.465	11.283	-0.608	20.303	784.864	-0.001436	-0.002833	-0.000790
18.6000	368.587	16.556	33.543	8.682	-0.619	20.302	701.694	-0.001159	-0.002348	-0.000608
18.8000	308.909	11.746	26.347	5.502	-0.621	20.302	588.083	-0.000822	-0.001844	-0.000385
19.0000	288.666	9.679	22.345	4.068	-0.599	20.301	549.545	-0.000678	-0.001564	-0.000285
19.2000	247.518	6.117	16.367	1.849	-0.611	20.301	471.210	-0.000428	-0.001146	-0.000129
19.4000	237.238	4.910	13.560	0.882	-0.619	20.301	451.641	-0.000344	-0.000949	-0.000062
19.6000	225.501	3.802	11.934	0.139	-0.601	20.300	429.296	-0.000266	-0.000835	-0.000010
19.8000	223.923	3.353	10.668	-0.352	-0.620	20.299	426.292	-0.000235	-0.000747	0.000025
20.0000	223.427	2.764	10.431	-0.238	-0.617	20.299	425.348	-0.000193	-0.000730	0.000017
20.2000	231.257	3.423	10.976	0.125	-0.619	20.298	440.254	-0.000240	-0.000768	-0.000009
20.4000	258.519	4.797	13.421	1.034	-0.616	20.298	492.153	-0.000336	-0.000939	-0.000072
20.6000	288.004	6.918	17.214	2.368	-0.617	20.297	548.286	-0.000484	-0.001205	-0.000166
20.8000	325.110	9.343	21.368	4.068	-0.605	20.297	618.925	-0.000654	-0.001496	-0.000285
21.0000	372.750	12.756	27.680	6.551	-0.606	20.296	709.620	-0.000893	-0.001938	-0.000459
21.2000	425.274	16.501	33.751	9.470	-0.611	20.296	809.612	-0.001155	-0.002363	-0.000663
21.4000	489.520	21.326	41.492	12.749	-0.602	20.295	931.921	-0.001493	-0.002904	-0.000892
21.6000	555.645	25.946	49.787	16.726	-0.611	20.296	1057.806	-0.001816	-0.003485	-0.001171
21.8000	619.426	30.521	57.598	20.315	-0.599	20.294	1179.228	-0.002136	-0.004032	-0.001422
22.0000	692.299	36.218	66.616	24.863	-0.613	20.294	1317.959	-0.002535	-0.004663	-0.001740
22.2000	751.871	40.681	73.843	28.178	-0.610	20.294	1431.370	-0.002848	-0.005169	-0.001972
22.4000	820.611	46.236	82.861	32.753	-0.623	20.293	1562.233	-0.003237	-0.005800	-0.002293
22.6000	923.631	53.757	94.338	37.858	-0.616	20.293	1758.356	-0.003763	-0.006604	-0.002650
22.8000	963.111	57.605	99.759	40.718	-0.616	20.293	1833.515	-0.004032	-0.006983	-0.002850
23.0000	1031.685	62.893	108.013	44.736	-0.619	20.292	1964.064	-0.004403	-0.007561	-0.003132
23.2000	1097.930	67.959	117.156	49.197	-0.623	20.292	2090.178	-0.004757	-0.008201	-0.003444
23.4000	1146.637	72.167	122.257	51.890	-0.601	20.291	2182.903	-0.005052	-0.008558	-0.003632
23.6000	1204.782	77.162	129.999	55.331	-0.613	20.290	2293.596	-0.005401	-0.009100	-0.003873
23.8000	1244.698	80.436	134.598	57.865	-0.594	20.290	2369.585	-0.005631	-0.009422	-0.004051
24.0000	1290.399	84.095	140.850	60.731	-0.615	20.290	2456.589	-0.005887	-0.009860	-0.004251
24.2000	1316.008	86.090	144.434	62.513	-0.619	20.289	2505.341	-0.006026	-0.010110	-0.004376
24.4000	1347.823	88.964	147.661	63.970	-0.608	20.288	2565.908	-0.006227	-0.010336	-0.004478
24.6000	1348.634	89.484	148.798	64.800	-0.611	20.288	2567.453	-0.006264	-0.010416	-0.004536
24.8000	1347.718	89.638	149.465	64.884	-0.621	20.288	2565.708	-0.006275	-0.010463	-0.004542
25.0000	1333.441	89.146	149.270	64.321	-0.604	20.287	2538.528	-0.006240	-0.010449	-0.004502
25.2000	1333.230	89.146	149.299	64.251	-0.607	20.286	2538.128	-0.006240	-0.010451	-0.004498
25.4000	1319.795	88.684	147.632	63.648	-0.617	20.286	2512.550	-0.006208	-0.010334	-0.004455
25.6000	1274.093	85.614	143.336	61.516	-0.616	20.285	2425.547	-0.005993	-0.010034	-0.004306
25.8000	1243.571	83.282	139.961	59.692	-0.621	20.285	2367.439	-0.005830	-0.009797	-0.004178
26.0000	1179.354	79.129	133.235	56.230	-0.611	20.284	2245.188	-0.005539	-0.009326	-0.003936
26.2000	1127.612	75.425	126.787	53.207	-0.615	20.283	2146.683	-0.005280	-0.008875	-0.003725
26.4000	1075.027	71.942	121.381	50.179	-0.605	20.283	2046.576	-0.005036	-0.008497	-0.003513
26.6000	1021.165	67.341	114.892	47.158	-0.620	20.282	1944.036	-0.004714	-0.008042	-0.003301
26.8000	927.613	60.464	104.844	41.813	-0.626	20.282	1765.938	-0.004232	-0.007339	-0.002927
27.0000	872.594	56.227	97.980	38.448	-0.625	20.281	1661.196	-0.003936	-0.006859	-0.002691
27.2000	819.409	51.950	91.004	35.595	-0.629	20.280	1559.944	-0.003636	-0.006370	-0.002492
27.4000	736.693	45.746	81.430	30.742	-0.628	20.280	1402.473	-0.003202	-0.005700	-0.002152
27.6000	651.106	39.430	71.105	25.650	-0.621	20.279	1239.538	-0.002760	-0.004977	-0.001795
27.8000	597.725	34.648	63.588	22.423	-0.619	20.279	1137.915	-0.002425	-0.004451	-0.001570
28.0000	520.569	28.710	54.181	18.072	-0.618	20.278	991.030	-0.002010	-0.003793	-0.001265
28.2000	473.635	24.936	47.467	14.618	-0.622	20.277	901.680	-0.001746	-0.003323	-0.001023
28.4000	422.118	20.963	40.575	11.662	-0.624	20.277	803.604	-0.001467	-0.002840	-0.000816
28.6000	366.798	15.953	32.155	8.318	-0.617	20.276	698.290	-0.001117	-0.002251	-0.000582
28.8000	313.943	11.940	25.123	5.373	-0.620	20.275	597.668	-0.000836	-0.001759	-0.000376
29.0000	277.004	8.798	19.883	3.127	-0.639	20.275	527.344	-0.000616	-0.001392	-0.000219
29.2000	249.517	6.017	15.395	1.525	-0.640	20.274	475.016	-0.000421	-0.001078	-0.000107
29.4000	238.831	4.755	13.380	0.852	-0.640	20.274	454.674	-0.000333	-0.000937	-0.000060
29.6000	221.579	3.128	10.017	-0.900	-0.641	20.273	421.829	-0.000219	-0.000701	0.000063
29.8000	216.890	2.568	9.073	-1.024	-0.632	20.273	412.903	-0.000180	-0.000635	0.000072
30.0000	223.578	2.807	9.449	-0.687	-0.634	20.272	425.634	-0.000197	-0.000661	0.000048
30.2000	233.121	3.116	10.489	-0.409	-0.636	20.272	443.802	-0.000218	-0.000734	0.000029
30.4000	251.726	4.278	11.822	0.295	-0.627	20.271	479.221	-0.000299	-0.000828	-0.000021
30.6000	285.615	6.650	16.464	1.877	-0.626	20.271	543.737	-0.000466	-0.001152	-0.000131
30.8000	331.993	9.876	21.132	4.053	-0.624	20.270	632.029	-0.000691	-0.001479	-0.000284
31.0000	368.962	12.376	26.317	5.909	-0.625	20.269	702.410	-0.000866	-0.001842	-0.000414
31.2000	429.978	16.754	33.335	8.809	-0.633	20.269	818.567	-0.001173	-0.002333	-0.000617
31.4000	482.036	20.850	40.019	12.193	-0.627	20.268	917.673	-0.001459	-0.002801	-0.000853
31.6000	548.342	25.609	48.400	15.884	-0.627	20.267	1043.901	-0.001793	-0.003388	-0.001112
31.8000	623.889	31.081	57.584	20.401	-0.628	20.266	1187.725	-0.002176	-0.004031	-0.001428
32.0000	692.118	36.106	65.504	24.174	-0.630	20.266	1317.616	-0.002527	-0.004585	-0.001692
32.2000	743.455	40.456	72.689	27.489	-0.623	20.265	1415.348	-0.002832	-0.005088	-0.001924
32.4000	827.209	46.897	82.876	32.639	-0.630	20.265	1574.793	-0.003283	-0.005801	-0.002285
32.6000	895.423	51.823	91.644	35.948	-0.629	20.264	1704.655	-0.003628	-0.006415	-0.002516
32.8000	983.279	58.375	101.037	41.054	-0.623	20.264	1871.910	-0.004086	-0.007073	-0.002874
33.0000	1044.084	63.244	108.709	44.693	-0.609	20.263	1987.667	-0.004427	-0.007610	-0.003129
33.2000	1109.938	68.507	117.296	49.141	-0.621	20.263	2113.037	-0.004795	-0.008211	-0.003440
33.4000	1149.733	72.069	122.104	51.329	-0.625	20.261	2188.797	-0.005045	-0.008547	-0.003593
33.6000	1200.875	76.646	128.622	54.458	-0.623	20.261	2286.158	-0.005365	-0.009004	-0.003812
33.8000	1261.019	81.389	135.377	57.908	-0.628	20.260	2400.656	-0.005697	-0.009476	-0.004054
34.0000	1289.317	84.126	139.932	59.791	-0.622	20.260	2454.529	-0.005889	-0.009795	-0.004185
34.2000	1325.025	86.875	144.950	62.303	-0.634	20.259	2522.507	-0.006081	-0.010146	-0.004361
34.4000	1340.985	88.417	147.046	63.352	-0.624	20.258	2552.891	-0.006189	-0.010293	-0.004435
34.6000	1348.619	89.274	148.660	63.774	-0.624	20.257	2567.425	-0.006249	-0.010406	-0.004464
34.8000	1350.693	89.470	149.536	64.433	-0.630	20.257	2571.373	-0.006263	-0.010468	-0.004510
35.0000	1346.590	89.638	149.160	64.545	-0.636	20.256	2563.562	-0.006275	-0.010441	-0.004518
35.2000	1328.331	88.556	148.118	63.729	-0.635	20.256	2528.801	-0.006199	-0.010368	-0.004461
35.4000	1313.889	87.631	146.243	63.071	-0.652	20.255	2501.307	-0.006134	-0.010237	-0.004415
35.6000	1277.941	85.134	143.352	61.266	-0.631	20.254	2432.871	-0.005959	-0.010035	-0.004289
35.8000	1243.961	82.944	139.349	59.258	-0.635	20.254	2368.183	-0.005806	-0.009754	-0.004148
36.0000	1193.932	79.649	133.414	56.270	-0.644	20.253	2272.940	-0.005575	-0.009339	-0.003939
36.2000	1138.417	75.831	128.109	53.502	-0.632	20.253	2167.253	-0.005308	-0.008968	-0.003745
36.4000	1089.680	72.126	121.535	50.406	-0.637	20.253	2074.471	-0.005049	-0.008507	-0.003528
36.6000	996.323	65.545	111.862	45.338	-0.633	20.252	1896.744	-0.004588	-0.007830	-0.003174
36.8000	970.715	62.852	107.904	43.711	-0.631	20.251	1847.992	-0.004400	-0.007553	-0.003060
37.0000	875.871	56.073	97.203	38.082	-0.635	20.251	1667.433	-0.003925	-0.006804	-0.002666
37.2000	809.430	50.811	88.487	34.325	-0.627	20.249	1540.947	-0.003557	-0.006194	-0.002403
37.4000	743.606	46.028	81.027	30.825	-0.636	20.249	1415.634	-0.003222	-0.005672	-0.002158
37.6000	672.626	40.385	71.826	26.322	-0.651	20.248	1280.508	-0.002827	-0.005028	-0.001843
37.8000	594.554	34.281	63.184	21.904	-0.636	20.247	1131.878	-0.002400	-0.004423	-0.001533
38.0000	518.104	28.653	52.721	17.301	-0.643	20.247	986.338	-0.002006	-0.003690	-0.001211
38.2000	469.908	24.797	46.704	14.085	-0.635	20.246	894.585	-0.001736	-0.003269	-0.000986
38.4000	383.795	18.017	35.907	9.440	-0.629	20.246	730.648	-0.001261	-0.002513	-0.000661
38.6000	368.647	15.771	32.763	7.867	-0.639	20.245	701.809	-0.001104	-0.002293	-0.000551
38.8000	315.356	11.464	24.568	4.897	-0.637	20.244	600.357	-0.000802	-0.001720	-0.000343
39.0000	275.982	7.900	19.160	2.620	-0.643	20.244	525.398	-0.000553	-0.001341	-0.000183
39.2000	263.478	6.889	16.476	1.442	-0.633	20.244	501.595	-0.000482	-0.001153	-0.000101
39.4000	233.046	4.180	12.267	-0.281	-0.636	20.243	443.659	-0.000293	-0.000859	0.000020
39.6000	225.937	3.564	10.822	-0.422	-0.643	20.243	430.126	-0.000249	-0.000758	0.000030
39.8000	229.003	2.933	9.697	-0.802	-0.634	20.242	435.963	-0.000205	-0.000679	0.000056
40.0000	217.882	1.895	8.336	-1.757	-0.629	20.241	414.791	-0.000133	-0.000584	0.000123
40.2000	242.453	3.493	10.435	-0.282	-0.631	20.241	461.569	-0.000244	-0.000730	0.000020
40.4000	270.707	4.965	12.753	0.350	-0.639	20.240	515.356	-0.000348	-0.000893	-0.000024
40.6000	295.819	6.833	16.270	1.874	-0.640	20.240	563.164	-0.000478	-0.001139	-0.000131
40.8000	327.499	9.245	20.259	3.437	-0.632	20.239	623.474	-0.000647	-0.001418	-0.000241
41.0000	364.604	11.899	25.483	5.387	-0.639	20.239	694.113	-0.000833	-0.001784	-0.000377
41.2000	432.367	16.500	32.876	8.794	-0.632	20.238	823.116	-0.001155	-0.002301	-0.000616
41.4000	499.364	21.241	41.034	12.501	-0.635	20.238	950.661	-0.001487	-0.002872	-0.000875
41.6000	563.084	25.552	48.814	15.913	-0.641	20.238	1071.968	-0.001789	-0.003417	-0.001114
41.8000	612.257	29.595	56.068	19.501	-0.645	20.237	1165.581	-0.002072	-0.003925	-0.001365
42.0000	688.376	35.124	64.267	23.515	-0.636	20.236	1310.492	-0.002459	-0.004499	-0.001646
42.2000	750.639	40.442	72.828	27.405	-0.635	20.236	1429.024	-0.002831	-0.005098	-0.001918
42.4000	823.076	46.195	82.207	31.836	-0.641	20.235	1566.925	-0.003234	-0.005754	-0.002228
42.6000	910.616	52.804	92.075	36.425	-0.645	20.235	1733.580	-0.003696	-0.006445	-0.002550
42.8000	974.502	57.816	99.618	40.133	-0.648	20.235	1855.202	-0.004047	-0.006973	-0.002809
43.0000	1038.583	62.542	107.386	44.273	-0.649	20.234	1977.196	-0.004378	-0.007517	-0.003099
43.2000	1098.577	67.383	114.781	47.932	-0.644	20.233	2091.408	-0.004717	-0.008035	-0.003355
43.4000	1166.159	72.716	123.063	52.127	-0.643	20.233	2220.068	-0.005090	-0.008614	-0.003649
43.6000	1200.830	76.113	127.817	54.261	-0.652	20.232	2286.072	-0.005328	-0.008947	-0.003798
43.8000	1242.053	79.678	134.235	57.055	-0.648	20.232	2364.550	-0.005577	-0.009396	-0.003994
44.0000	1284.223	83.128	139.281	59.594	-0.648	20.231	2444.830	-0.005819	-0.009750	-0.004172
44.2000	1311.589	85.471	142.781	61.405	-0.639	20.232	2496.929	-0.005983	-0.009995	-0.004298
44.4000	1334.027	87.001	145.590	62.554	-0.643	20.232	2539.644	-0.006090	-0.010191	-0.004379
44.6000	1353.203	89.021	147.827	64.012	-0.649	20.231	2576.151	-0.006231	-0.010348	-0.004481
44.8000	1349.220	89.371	148.009	63.813	-0.644	20.231	2568.569	-0.006256	-0.010361	-0.004467
45.0000	1348.183	89.484	149.091	63.844	-0.657	20.230	2566.595	-0.006264	-0.010436	-0.004469
45.2000	1335.935	88.446	147.980	63.547	-0.646	20.230	2543.278	-0.006191	-0.010359	-0.004448
45.4000	1314.730	87.155	145.408	62.501	-0.649	20.229	2502.909	-0.006101	-0.010179	-0.004375
45.6000	1275.777	84.883	142.130	60.548	-0.649	20.229	2428.751	-0.005942	-0.009949	-0.004238
45.8000	1240.204	82.664	138.681	58.625	-0.656	20.228	2361.031	-0.005786	-0.009708	-0.004104
46.0000	1195.134	79.312	133.554	56.326	-0.652	20.227	2275.229	-0.005552	-0.009349	-0.003943
46.2000	1146.607	75.706	128.261	53.614	-0.654	20.227	2182.846	-0.005299	-0.008978	-0.003753
46.4000	1082.271	71.200	120.284	49.967	-0.650	20.226	2060.366	-0.004984	-0.008420	-0.003498
46.6000	1014.838	66.779	113.127	46.094	-0.653	20.225	1931.992	-0.004675	-0.007919	-0.003227
46.8000	956.062	62.217	106.610	42.700	-0.664	20.225	1820.097	-0.004355	-0.007463	-0.002989
47.0000	884.888	56.775	97.675	38.448	-0.662	20.224	1684.599	-0.003974	-0.006837	-0.002691
47.2000	814.329	51.234	89.490	34.797	-0.653	20.223	1550.274	-0.003586	-0.006264	-0.002436
47.4000	745.304	46.166	80.985	30.616	-0.660	20.223	1418.867	-0.003232	-0.005669	-0.002143
47.6000	655.975	39.501	70.022	25.522	-0.652	20.222	1248.808	-0.002765	-0.004902	-0.001787
47.8000	595.170	34.352	62.280	21.412	-0.651	20.222	1133.051	-0.002405	-0.004360	-0.001499
48.0000	533.854	29.357	54.055	17.875	-0.656	20.221	1016.321	-0.002055	-0.003784	-0.001251
48.2000	453.467	23.504	43.380	12.976	-0.651	20.220	863.285	-0.001645	-0.003037	-0.000908
48.4000	421.351	20.683	38.920	11.058	-0.655	20.219	802.145	-0.001448	-0.002724	-0.000774
48.6000	363.627	15.966	31.544	7.587	-0.644	20.219	692.253	-0.001118	-0.002208	-0.000531
48.8000	318.963	11.912	24.773	5.248	-0.655	20.218	607.224	-0.000834	-0.001734	-0.000367
49.0000	250.539	6.706	15.617	1.162	-0.656	20.217	476.961	-0.000469	-0.001093	-0.000081
49.2000	236.878	5.175	12.643	0.335	-0.656	20.217	450.954	-0.000362	-0.000885	-0.000023
49.4000	241.702	4.838	11.839	-0.099	-0.658	20.216	460.138	-0.000339	-0.000829	0.000007
49.6000	214.365	2.665	8.266	-1.334	-0.649	20.215	408.096	-0.000187	-0.000579	0.000093
49.8000	223.097	2.862	8.376	-1.461	-0.661	20.214	424.719	-0.000200	-0.000586	0.000102
50.0000	209.391	2.147	7.031	-2.220	-0.656	20.213	398.626	-0.000150	-0.000492	0.000155
50.2000	241.041	3.661	9.836	-1.012	-0.649	20.212	458.879	-0.000256	-0.000689	0.000071
50.4000	249.051	3.632	10.656	-0.364	-0.660	20.212	474.129	-0.000254	-0.000746	0.000026
50.6000	287.133	6.186	14.770	1.328	-0.652	20.211	546.627	-0.000433	-0.001034	-0.000093
50.8000	322.014	9.007	20.604	2.858	-0.639	20.211	613.031	-0.000630	-0.001442	-0.000200
51.0000	367.625	11.843	25.012	5.374	-0.652	20.210	699.863	-0.000829	-0.001751	-0.000376
51.2000	414.874	15.194	30.820	7.980	-0.657	20.209	789.814	-0.001064	-0.002157	-0.000559
51.4000	507.179	21.973	41.269	12.877	-0.647	20.209	965.538	-0.001538	-0.002889	-0.000901
51.6000	540.632	24.811	45.604	14.857	-0.647	20.208	1029.224	-0.001737	-0.003192	-0.001040
51.8000	622.777	30.645	55.917	19.150	-0.645	20.207	1185.608	-0.002145	-0.003914	-0.001341
52.0000	682.861	35.292	63.225	23.000	-0.644	20.207	1299.992	-0.002470	-0.004426	-0.001610
52.2000	772.370	41.986	75.134	28.291	-0.654	20.206	1470.394	-0.002939	-0.005259	-0.001980
52.4000	825.676	46.393	81.331	31.556	-0.656	20.205	1571.875	-0.003247	-0.005693	-0.002209
52.6000	895.242	51.823	90.516	35.694	-0.651	20.204	1704.311	-0.003628	-0.006336	-0.002499
52.8000	964.854	57.226	97.896	39.317	-0.639	20.203	1836.834	-0.004006	-0.006853	-0.002752
53.0000	1031.565	62.402	106.318	43.485	-0.639	20.202	1963.835	-0.004368	-0.007442	-0.003044
53.2000	1106.572	68.183	115.143	47.973	-0.648	20.202	2106.628	-0.004773	-0.008060	-0.003358
53.4000	1152.348	72.252	121.424	51.079	-0.645	20.200	2193.775	-0.005058	-0.008500	-0.003576
53.6000	1197.614	75.692	127.272	53.882	-0.647	20.200	2279.949	-0.005298	-0.008909	-0.003772
53.8000	1244.593	79.467	132.262	56.413	-0.647	20.199	2369.385	-0.005563	-0.009258	-0.003949
54.0000	1288.280	83.085	138.125	59.228	-0.645	20.198	2452.555	-0.005816	-0.009669	-0.004146
54.2000	1327.670	86.217	143.475	61.684	-0.655	20.197	2527.542	-0.006035	-0.010043	-0.004318
54.4000	1343.540	87.799	144.839	62.836	-0.657	20.196	2557.755	-0.006146	-0.010139	-0.004399
54.6000	1356.389	89.387	147.187	63.674	-0.643	20.194	2582.216	-0.006257	-0.010303	-0.004457
54.8000	1355.818	89.469	148.425	63.941	-0.656	20.194	2581.129	-0.006263	-0.010390	-0.004476
55.0000	1346.666	89.134	147.716	63.858	-0.645	20.193	2563.705	-0.006239	-0.010340	-0.004470
55.2000	1340.173	89.203	147.312	63.506	-0.651	20.191	2551.346	-0.006244	-0.010312	-0.004445
55.4000	1311.063	87.225	145.521	62.459	-0.649	20.190	2495.928	-0.006106	-0.010186	-0.004372
55.6000	1241.903	82.776	138.141	58.792	-0.642	20.190	2364.264	-0.005794	-0.009670	-0.004115
55.8000	1209.952	80.605	134.778	56.830	-0.655	20.189	2303.438	-0.005642	-0.009434	-0.003978
56.0000	1189.003	78.890	132.263	55.582	-0.641	20.188	2263.556	-0.005522	-0.009258	-0.003891
56.2000	1145.691	75.663	126.718	53.137	-0.649	20.187	2181.101	-0.005296	-0.008870	-0.003720
56.4000	1081.399	71.241	120.020	49.561	-0.643	20.187	2058.706	-0.004987	-0.008401	-0.003469
56.6000	1021.736	66.977	113.268	46.205	-0.649	20.186	1945.124	-0.004688	-0.007929	-0.003234
56.8000	952.410	61.616	105.399	42.389	-0.656	20.185	1813.145	-0.004313	-0.007378	-0.002967
57.0000	876.427	55.805	96.202	38.168	-0.661	20.184	1668.491	-0.003906	-0.006734	-0.002672
57.2000	818.492	51.416	89.461	34.548	-0.659	20.183	1558.199	-0.003599	-0.006262	-0.002418
57.4000	755.042	46.194	81.124	30.826	-0.657	20.182	1437.407	-0.003234	-0.005679	-0.002158
57.6000	678.533	40.428	71.214	26.350	-0.655	20.181	1291.752	-0.002830	-0.004985	-0.001845
57.8000	560.229	31.893	57.598	19.712	-0.667	20.180	1066.532	-0.002232	-0.004032	-0.001380
58.0000	533.148	29.116	53.831	17.750	-0.669	20.179	1014.977	-0.002038	-0.003768	-0.001243
58.2000	474.267	24.320	45.869	14.464	-0.665	20.179	902.882	-0.001702	-0.003211	-0.001013
58.4000	417.384	19.910	38.310	10.721	-0.663	20.178	794.592	-0.001394	-0.002682	-0.000750
58.6000	368.076	15.672	31.195	7.670	-0.666	20.177	700.722	-0.001097	-0.002184	-0.000537
58.8000	333.405	12.293	25.707	5.542	-0.669	20.177	634.718	-0.000861	-0.001799	-0.000388
59.0000	288.230	8.783	19.257	2.970	-0.657	20.176	548.716	-0.000615	-0.001348	-0.000208
59.2000	263.208	6.595	15.645	1.021	-0.660	20.175	501.080	-0.000462	-0.001095	-0.000071
59.4000	237.404	4.137	11.656	-0.211	-0.664	20.174	451.956	-0.000290	-0.000816	0.000015
59.6000	237.900	3.730	10.058	-0.478	-0.659	20.173	452.900	-0.000261	-0.000704	0.000033
59.8000	223.728	2.695	8.351	-1.293	-0.659	20.173	425.920	-0.000189	-0.000585	0.000091
60.0000	225.772	2.246	7.918	-1.391	-0.665	20.171	429.811	-0.000157	-0.000554	0.000097
60.2000	231.543	2.471	8.044	-1.319	-0.662	20.171	440.798	-0.000173	-0.000563	0.000092
60.4000	263.884	4.629	11.616	-0.084	-0.654	20.171	502.367	-0.000324	-0.000813	0.000006
60.6000	291.371	6.032	14.575	1.162	-0.666	20.170	554.695	-0.000422	-0.001020	-0.000081
60.8000	340.378	9.175	20.105	3.518	-0.661	20.170	647.993	-0.000642	-0.001407	-0.000246
61.0000	375.365	12.448	24.191	5.444	-0.667	20.169	714.598	-0.000871	-0.001693	-0.000381
61.2000	435.253	16.501	32.834	8.669	-0.663	20.169	828.609	-0.001155	-0.002298	-0.000607
61.4000	479.602	19.798	37.866	11.227	-0.654	20.168	913.038	-0.001386	-0.002651	-0.000786
61.6000	548.387	25.104	46.535	15.111	-0.659	20.168	1043.987	-0.001757	-0.003257	-0.001058
61.8000	620.433	30.438	54.973	19.108	-0.662	20.167	1181.145	-0.002131	-0.003848	-0.001338
62.0000	680.937	34.562	63.893	23.069	-0.659	20.166	1296.329	-0.002419	-0.004472	-0.001615
62.2000	764.285	41.535	72.424	27.896	-0.657	20.166	1455.002	-0.002907	-0.005070	-0.001953
62.4000	833.866	47.192	81.542	31.808	-0.651	20.166	1587.467	-0.003303	-0.005708	-0.002227
62.6000	885.594	51.035	88.848	35.274	-0.652	20.165	1685.944	-0.003572	-0.006219	-0.002469
62.8000	962.254	56.916	97.063	39.543	-0.664	20.164	1831.884	-0.003984	-0.006794	-0.002768
63.0000	1030.708	62.641	106.167	43.500	-0.661	20.164	1962.204	-0.004385	-0.007432	-0.003045
63.2000	1084.480	66.946	113.129	47.020	-0.648	20.164	2064.571	-0.004686	-0.007919	-0.003291
63.4000	1141.393	71.773	120.716	50.672	-0.666	20.163	2172.918	-0.005024	-0.008450	-0.003547
63.6000	1202.693	76.756	127.039	54.134	-0.661	20.163	2289.619	-0.005373	-0.008893	-0.003789
63.8000	1246.712	80.014	132.624	56.872	-0.668	20.163	2373.419	-0.005601	-0.009284	-0.003981
64.0000	1293.585	84.306	138.446	59.554	-0.676	20.162	2462.654	-0.005901	-0.009691	-0.004169
64.2000	1309.425	85.710	141.407	60.775	-0.677	20.162	2492.809	-0.006000	-0.009898	-0.004254
64.4000	1334.372	87.913	145.199	62.599	-0.666	20.162	2540.302	-0.006154	-0.010164	-0.004382
64.6000	1356.780	89.794	147.091	63.927	-0.673	20.162	2582.960	-0.006286	-0.010296	-0.004475
64.8000	1358.298	90.201	148.132	64.139	-0.667	20.161	2585.850	-0.006314	-0.010369	-0.004490
65.0000	1324.378	87.913	146.103	62.724	-0.660	20.161	2521.276	-0.006154	-0.010227	-0.004391
65.2000	1342.503	89.668	147.063	63.660	-0.668	20.161	2555.780	-0.006277	-0.010294	-0.004456
65.4000	1319.088	88.345	145.951	62.836	-0.668	20.161	2511.206	-0.006184	-0.010217	-0.004399
65.6000	1277.535	85.416	141.616	60.774	-0.672	20.160	2432.098	-0.005979	-0.009913	-0.004254
65.8000	1243.616	83.294	138.002	58.821	-0.669	20.160	2367.525	-0.005831	-0.009660	-0.004117
66.0000	1195.720	79.958	132.470	56.130	-0.665	20.160	2276.344	-0.005597	-0.009273	-0.003929
66.2000	1113.936	73.923	123.715	51.819	-0.661	20.159	2120.647	-0.005175	-0.008660	-0.003627
66.4000	1087.065	72.083	119.923	49.870	-0.666	20.160	2069.492	-0.005046	-0.008395	-0.003491
66.6000	1022.894	67.326	113.044	46.529	-0.663	20.160	1947.327	-0.004713	-0.007913	-0.003257
66.8000	957.204	62.220	104.860	42.656	-0.656	20.159	1822.271	-0.004355	-0.007340	-0.002986
67.0000	882.153	56.986	96.187	38.279	-0.660	20.159	1679.392	-0.003989	-0.006733	-0.002680
67.2000	809.671	51.555	88.142	34.701	-0.666	20.159	1541.405	-0.003609	-0.006170	-0.002429
67.4000	728.382	45.002	78.177	30.025	-0.663	20.159	1386.652	-0.003150	-0.005472	-0.002102
67.6000	685.851	41.523	72.300	27.024	-0.660	20.159	1305.685	-0.002907	-0.005061	-0.001892
67.8000	601.768	35.390	62.431	22.368	-0.661	20.159	1145.611	-0.002477	-0.004370	-0.001566
68.0000	538.919	29.891	54.178	18.223	-0.654	20.159	1025.963	-0.002092	-0.003792	-0.001276
68.2000	471.291	24.784	45.300	14.283	-0.663	20.159	897.217	-0.001735	-0.003171	-0.001000
68.4000	419.773	20.597	38.434	11.224	-0.665	20.159	799.141	-0.001442	-0.002690	-0.000786
68.6000	369.999	16.220	31.362	7.870	-0.667	20.159	704.384	-0.001135	-0.002195	-0.000551
68.8000	319.218	11.897	23.662	4.488	-0.653	20.159	607.710	-0.000833	-0.001656	-0.000314
69.0000	285.314	9.162	18.701	2.563	-0.665	20.159	543.165	-0.000641	-0.001309	-0.000179
69.2000	249.171	5.723	13.784	0.507	-0.654	20.159	474.358	-0.000401	-0.000965	-0.000035
69.4000	237.764	4.558	10.753	-0.238	-0.655	20.159	452.642	-0.000319	-0.000753	0.000017
69.6000	221.564	3.254	8.727	-1.391	-0.658	20.160	421.801	-0.000228	-0.000611	0.000097
69.8000	226.117	2.918	8.307	-1.138	-0.650	20.160	430.470	-0.000204	-0.000582	0.000080
70.0000	235.270	3.590	8.627	-0.983	-0.649	20.160	447.893	-0.000251	-0.000604	0.000069
70.2000	241.416	3.674	8.309	-1.012	-0.651	20.160	459.595	-0.000257	-0.000582	0.000071
70.4000	253.349	4.361	9.866	-0.462	-0.663	20.161	482.311	-0.000305	-0.000691	0.000032
70.6000	295.263	7.282	14.478	1.190	-0.659	20.160	562.105	-0.000510	-0.001013	-0.000083
70.8000	329.859	9.553	19.813	3.337	-0.650	20.160	627.966	-0.000669	-0.001387	-0.000234
71.0000	374.192	12.671	24.845	5.783	-0.655	20.161	712.366	-0.000887	-0.001739	-0.000405
71.2000	423.966	16.092	31.154	8.543	-0.650	20.161	807.123	-0.001126	-0.002181	-0.000598
71.4000	472.944	20.092	37.892	11.226	-0.658	20.161	900.364	-0.001406	-0.002652	-0.000786
71.6000	539.069	24.418	45.896	15.067	-0.656	20.161	1026.249	-0.001709	-0.003213	-0.001055
71.8000	613.129	30.465	54.944	19.288	-0.659	20.161	1167.240	-0.002133	-0.003846	-0.001350
72.0000	689.083	36.177	63.560	23.655	-0.659	20.161	1311.836	-0.002532	-0.004449	-0.001656
72.2000	742.058	40.271	71.021	27.307	-0.657	20.161	1412.687	-0.002819	-0.004971	-0.001912
72.4000	830.755	46.981	81.181	32.089	-0.677	20.163	1581.545	-0.003289	-0.005683	-0.002246
72.6000	895.363	52.272	89.337	35.834	-0.662	20.163	1704.540	-0.003659	-0.006254	-0.002508
72.8000	961.623	57.069	96.785	39.556	-0.668	20.162	1830.683	-0.003995	-0.006775	-0.002769
73.0000	1031.760	62.908	105.734	44.021	-0.683	20.163	1964.207	-0.004404	-0.007401	-0.003081
73.2000	1100.440	68.338	114.184	48.115	-0.671	20.164	2094.955	-0.004784	-0.007993	-0.003368
73.4000	1149.658	72.266	120.284	51.245	-0.680	20.164	2188.654	-0.005059	-0.008420	-0.003587
73.6000	1196.712	75.889	126.760	54.416	-0.672	20.165	2278.233	-0.005312	-0.008873	-0.003809
73.8000	1255.022	80.759	133.722	57.627	-0.680	20.165	2389.240	-0.005653	-0.009361	-0.004034
74.0000	1283.862	82.958	137.625	59.553	-0.653	20.165	2444.143	-0.005807	-0.009634	-0.004169
74.2000	1316.879	86.218	141.114	61.475	-0.668	20.165	2507.000	-0.006035	-0.009878	-0.004303
74.4000	1332.118	87.744	143.684	62.918	-0.677	20.166	2536.011	-0.006142	-0.010058	-0.004404
74.6000	1344.276	88.951	146.383	63.718	-0.677	20.166	2559.156	-0.006227	-0.010247	-0.004460
74.8000	1360.958	90.061	148.091	64.799	-0.680	20.166	2590.914	-0.006304	-0.010366	-0.004536
75.0000	1354.465	90.343	148.035	64.617	-0.668	20.167	2578.554	-0.006324	-0.010362	-0.004523
75.2000	1332.599	89.246	147.049	63.969	-0.671	20.167	2536.926	-0.006247	-0.010293	-0.004478
75.4000	1314.294	88.262	145.034	62.863	-0.672	20.168	2502.079	-0.006178	-0.010152	-0.004400
75.6000	1280.586	85.486	141.366	61.588	-0.660	20.168	2437.906	-0.005984	-0.009896	-0.004311
75.8000	1249.026	83.409	137.822	59.509	-0.678	20.169	2377.825	-0.005839	-0.009648	-0.004166
76.0000	1200.048	80.001	132.872	57.054	-0.670	20.169	2284.584	-0.005600	-0.009301	-0.003994
76.2000	1144.158	76.027	126.633	53.740	-0.678	20.169	2178.183	-0.005322	-0.008864	-0.003762
76.4000	1080.017	71.215	119.035	50.150	-0.671	20.170	2056.074	-0.004985	-0.008332	-0.003511
76.6000	1030.633	67.707	113.364	47.203	-0.665	20.170	1962.061	-0.004739	-0.007935	-0.003304
76.8000	953.237	61.966	105.249	42.880	-0.683	20.170	1814.718	-0.004338	-0.007367	-0.003002
77.0000	881.807	56.423	96.228	38.474	-0.677	20.171	1678.734	-0.003950	-0.006736	-0.002693
77.2000	817.636	51.654	88.598	35.035	-0.670	20.171	1556.568	-0.003616	-0.006202	-0.002452
77.4000	743.290	46.097	79.955	30.966	-0.669	20.172	1415.033	-0.003227	-0.005597	-0.002168
77.6000	667.712	40.007	70.383	26.617	-0.664	20.172	1271.152	-0.002800	-0.004927	-0.001863
77.8000	601.828	35.139	61.822	22.549	-0.668	20.172	1145.725	-0.002460	-0.004328	-0.001578
78.0000	540.016	29.989	53.957	18.420	-0.667	20.173	1028.051	-0.002099	-0.003777	-0.001289
78.2000	471.321	24.501	44.926	14.521	-0.669	20.174	897.274	-0.001715	-0.003145	-0.001016
78.4000	409.013	19.602	36.740	10.819	-0.672	20.173	778.656	-0.001372	-0.002572	-0.000757
78.6000	363.672	15.941	30.499	7.699	-0.673	20.173	692.339	-0.001116	-0.002135	-0.000539
78.8000	321.337	12.250	24.580	5.404	-0.671	20.174	611.744	-0.000857	-0.001721	-0.000378
79.0000	285.254	8.952	19.106	3.238	-0.669	20.175	543.051	-0.000627	-0.001337	-0.000227
79.2000	260.067	6.820	14.879	1.257	-0.681	20.174	495.100	-0.000477	-0.001042	-0.000088
79.4000	237.374	4.628	11.600	0.114	-0.668	20.175	451.899	-0.000324	-0.000812	-0.000008
79.6000	229.273	3.563	8.933	-0.674	-0.671	20.175	436.478	-0.000249	-0.000625	0.000047
79.8000	221.909	2.807	7.904	-1.420	-0.671	20.175	422.459	-0.000196	-0.000553	0.000099
80.0000	220.091	2.512	7.086	-1.728	-0.672	20.175	418.997	-0.000176	-0.000496	0.000121
80.2000	236.487	2.988	7.904	-0.857	-0.671	20.175	450.211	-0.000209	-0.000553	0.000060
80.4000	261.284	4.909	10.157	0.139	-0.674	20.176	497.417	-0.000344	-0.000711	-0.000010
80.6000	294.677	6.960	14.340	1.764	-0.685	20.176	560.989	-0.000487	-0.001004	-0.000124
80.8000	324.088	9.106	18.035	3.336	-0.675	20.176	616.980	-0.000637	-0.001262	-0.000234
81.0000	368.421	12.041	23.371	5.346	-0.667	20.176	701.380	-0.000843	-0.001636	-0.000374
81.2000	425.725	16.304	30.376	8.570	-0.674	20.176	810.471	-0.001141	-0.002126	-0.000600
81.4000	488.318	20.988	38.533	12.094	-0.680	20.175	929.632	-0.001469	-0.002697	-0.000847
81.6000	540.256	24.938	44.646	15.097	-0.671	20.175	1028.509	-0.001746	-0.003125	-0.001057
81.8000	608.260	30.226	53.483	19.192	-0.675	20.175	1157.970	-0.002116	-0.003744	-0.001343
82.0000	683.312	35.911	62.975	23.391	-0.677	20.175	1300.850	-0.002514	-0.004408	-0.001637
82.2000	748.896	40.793	71.159	27.376	-0.667	20.175	1425.705	-0.002855	-0.004981	-0.001916
82.4000	821.813	46.589	79.790	31.612	-0.681	20.175	1564.522	-0.003261	-0.005585	-0.002213
82.6000	894.431	52.047	88.765	36.004	-0.682	20.175	1702.766	-0.003643	-0.006214	-0.002520
82.8000	962.900	57.380	96.731	39.892	-0.675	20.175	1833.115	-0.004017	-0.006771	-0.002792
83.0000	1028.514	62.739	105.066	43.654	-0.664	20.176	1958.027	-0.004392	-0.007355	-0.003056
83.2000	1085.757	67.145	112.516	47.441	-0.665	20.175	2067.003	-0.004700	-0.007876	-0.003321
83.4000	1138.011	71.480	118.549	50.701	-0.680	20.175	2166.481	-0.005004	-0.008298	-0.003549
83.6000	1214.791	77.373	127.662	55.077	-0.675	20.175	2312.651	-0.005416	-0.008936	-0.003855
83.8000	1241.181	79.887	131.803	57.069	-0.669	20.175	2362.890	-0.005592	-0.009226	-0.003995
84.0000	1287.243	83.899	137.403	59.791	-0.668	20.174	2450.581	-0.005873	-0.009618	-0.004185
84.2000	1321.673	86.864	141.644	61.910	-0.675	20.174	2516.127	-0.006080	-0.009915	-0.004334
84.4000	1338.129	88.599	144.532	62.920	-0.669	20.174	2547.455	-0.006202	-0.010117	-0.004404
84.6000	1346.741	89.484	145.798	63.998	-0.676	20.174	2563.848	-0.006264	-0.010206	-0.004480
84.8000	1359.365	90.904	147.923	64.870	-0.671	20.174	2587.881	-0.006363	-0.010355	-0.004541
85.0000	1350.949	90.777	147.437	64.588	-0.677	20.174	2571.859	-0.006354	-0.010321	-0.004521
85.2000	1337.183	89.568	146.729	64.039	-0.669	20.173	2545.652	-0.006270	-0.010271	-0.004483
85.4000	1310.177	88.023	144.336	63.030	-0.681	20.173	2494.240	-0.006162	-0.010104	-0.004412
85.6000	1279.098	86.259	141.881	61.503	-0.670	20.173	2435.074	-0.006038	-0.009932	-0.004305
85.8000	1230.226	82.397	135.890	58.695	-0.671	20.173	2342.033	-0.005768	-0.009512	-0.004109
86.0000	1205.173	80.871	132.819	57.140	-0.684	20.173	2294.340	-0.005661	-0.009297	-0.004000
86.2000	1134.675	75.959	125.620	53.460	-0.676	20.173	2160.130	-0.005317	-0.008793	-0.003742
86.4000	1080.768	71.536	119.534	50.404	-0.676	20.173	2057.505	-0.005008	-0.008367	-0.003528
86.6000	1025.373	67.848	112.931	46.962	-0.673	20.172	1952.047	-0.004749	-0.007905	-0.003287
86.8000	952.936	62.037	104.552	42.668	-0.686	20.172	1814.146	-0.004343	-0.007319	-0.002987
87.0000	880.544	56.691	95.994	38.349	-0.674	20.172	1676.331	-0.003968	-0.006720	-0.002684
87.2000	814.510	52.245	88.462	35.007	-0.671	20.171	1550.617	-0.003657	-0.006192	-0.002450
87.4000	745.199	46.601	79.679	30.588	-0.680	20.172	1418.667	-0.003262	-0.005578	-0.002141
87.6000	670.598	40.611	70.119	26.518	-0.681	20.171	1276.646	-0.002843	-0.004908	-0.001856
87.8000	598.236	35.068	61.141	21.862	-0.670	20.170	1138.887	-0.002455	-0.004280	-0.001530
88.0000	547.906	30.717	54.303	18.729	-0.663	20.171	1043.072	-0.002150	-0.003801	-0.001311
88.2000	474.537	25.329	45.426	14.606	-0.680	20.169	903.397	-0.001773	-0.003180	-0.001022
88.4000	430.399	21.565	37.797	11.351	-0.675	20.170	819.368	-0.001510	-0.002646	-0.000795
88.6000	364.980	16.344	29.803	7.557	-0.675	20.169	694.828	-0.001144	-0.002086	-0.000529
88.8000	314.319	12.195	23.357	4.896	-0.675	20.169	598.383	-0.000854	-0.001635	-0.000343
89.0000	284.247	8.895	18.425	2.999	-0.673	20.168	541.134	-0.000623	-0.001290	-0.000210
89.2000	259.195	6.580	14.131	1.147	-0.679	20.168	493.441	-0.000461	-0.000989	-0.000080
89.4000	242.228	5.148	11.436	0.152	-0.683	20.167	461.140	-0.000360	-0.000800	-0.000011
89.6000	232.474	3.690	9.087	-0.548	-0.677	20.167	442.572	-0.000258	-0.000636	0.000038
89.8000	220.647	2.735	7.154	-1.292	-0.676	20.167	420.055	-0.000191	-0.000501	0.000090
90.0000	224.780	3.059	7.235	-1.504	-0.683	20.166	427.923	-0.000214	-0.000506	0.000105
90.2000	241.056	3.478	8.281	-0.533	-0.680	20.166	458.908	-0.000243	-0.000580	0.000037
90.4000	265.387	5.078	11.156	0.225	-0.676	20.165	505.228	-0.000355	-0.000781	-0.000016
90.6000	291.792	6.861	14.062	1.400	-0.682	20.164	555.496	-0.000480	-0.000984	-0.000098
90.8000	341.776	10.101	19.563	4.040	-0.689	20.164	650.654	-0.000707	-0.001369	-0.000283
91.0000	377.559	12.841	24.760	5.866	-0.683	20.164	718.775	-0.000899	-0.001733	-0.000411
91.2000	428.565	16.163	30.722	8.753	-0.677	20.163	815.878	-0.001131	-0.002151	-0.000613
91.4000	483.389	20.680	37.698	11.856	-0.669	20.162	920.248	-0.001448	-0.002639	-0.000830
91.6000	552.850	25.566	45.881	15.645	-0.672	20.162	1052.485	-0.001790	-0.003212	-0.001095
91.8000	611.791	29.749	53.373	19.418	-0.678	20.161	1164.694	-0.002082	-0.003736	-0.001359
92.0000	682.876	35.713	63.101	23.418	-0.685	20.161	1300.020	-0.002500	-0.004417	-0.001639
92.2000	751.465	40.357	70.632	27.405	-0.680	20.159	1430.597	-0.002825	-0.004944	-0.001918
92.4000	830.770	47.123	80.122	31.992	-0.668	20.160	1581.573	-0.003299	-0.005609	-0.002239
92.6000	897.031	51.977	88.419	35.891	-0.673	20.158	1707.716	-0.003638	-0.006189	-0.002512
92.8000	961.698	57.100	97.536	39.837	-0.683	20.158	1830.826	-0.003997	-0.006828	-0.002789
93.0000	1038.328	63.399	106.221	44.526	-0.681	20.158	1976.709	-0.004438	-0.007436	-0.003117
93.2000	1100.485	67.777	113.392	47.835	-0.673	20.157	2095.041	-0.004744	-0.007937	-0.003348
93.4000	1155.339	72.559	120.480	51.247	-0.675	20.156	2199.469	-0.005079	-0.008434	-0.003587
93.6000	1203.250	76.278	125.842	54.388	-0.670	20.155	2290.678	-0.005339	-0.008809	-0.003807
93.8000	1256.781	80.716	133.071	57.488	-0.678	20.155	2392.588	-0.005650	-0.009315	-0.004024
94.0000	1286.657	83.464	137.268	59.412	-0.685	20.154	2449.465	-0.005842	-0.009609	-0.004159
94.2000	1321.628	86.273	141.920	62.319	-0.672	20.154	2516.041	-0.006039	-0.009934	-0.004362
94.4000	1339.076	88.206	144.298	63.016	-0.676	20.153	2549.257	-0.006174	-0.010101	-0.004411
94.6000	1360.296	89.765	147.216	64.645	-0.690	20.152	2589.655	-0.006284	-0.010305	-0.004525
94.8000	1354.045	89.877	147.077	64.236	-0.686	20.153	2577.753	-0.006291	-0.010295	-0.004497
95.0000	1349.987	89.919	147.409	64.390	-0.692	20.151	2570.028	-0.006294	-0.010319	-0.004507
95.2000	1330.285	88.613	145.866	63.731	-0.669	20.151	2532.520	-0.006203	-0.010211	-0.004461
95.4000	1312.356	87.770	143.824	62.527	-0.684	20.150	2498.388	-0.006144	-0.010068	-0.004377
95.6000	1279.639	85.698	141.462	60.956	-0.673	20.150	2436.104	-0.005999	-0.009902	-0.004267
95.8000	1242.474	82.523	137.016	58.877	-0.685	20.150	2365.351	-0.005777	-0.009591	-0.004121
96.0000	1193.286	79.509	131.873	56.146	-0.667	20.149	2271.709	-0.005566	-0.009231	-0.003930
96.2000	1132.045	74.935	123.771	52.673	-0.679	20.148	2155.123	-0.005245	-0.008664	-0.003687
96.4000	1078.333	71.032	117.310	49.660	-0.679	20.149	2052.870	-0.004972	-0.008212	-0.003476
96.6000	1016.281	66.710	111.029	45.969	-0.668	20.148	1934.738	-0.004670	-0.007772	-0.003218
96.8000	957.310	61.644	104.263	42.514	-0.677	20.147	1822.472	-0.004315	-0.007298	-0.002976
97.0000	860.542	55.244	93.131	37.507	-0.669	20.147	1638.250	-0.003867	-0.006519	-0.002625
97.2000	799.436	50.784	86.586	33.931	-0.667	20.146	1521.921	-0.003555	-0.006061	-0.002375
97.4000	737.384	45.437	77.790	30.095	-0.672	20.146	1403.790	-0.003181	-0.005445	-0.002107
97.6000	669.516	40.343	69.394	26.126	-0.676	20.146	1274.586	-0.002824	-0.004858	-0.001829
97.8000	602.955	34.984	61.613	22.113	-0.676	20.146	1147.871	-0.002449	-0.004313	-0.001548
98.0000	533.689	29.623	52.442	17.721	-0.670	20.144	1016.006	-0.002074	-0.003671	-0.001240
98.2000	471.141	24.670	44.911	14.240	-0.681	20.144	896.931	-0.001727	-0.003144	-0.000997
98.4000	404.895	19.154	34.891	10.003	-0.676	20.144	770.817	-0.001341	-0.002442	-0.000700
98.6000	357.616	15.870	29.220	7.448	-0.687	20.144	680.809	-0.001111	-0.002045	-0.000521
98.8000	319.279	12.209	23.093	4.980	-0.689	20.143	607.824	-0.000855	-0.001617	-0.000349
99.0000	288.545	9.315	19.174	3.155	-0.691	20.143	549.316	-0.000652	-0.001342	-0.000221
99.2000	253.905	6.188	12.977	0.812	-0.692	20.142	483.370	-0.000433	-0.000908	-0.000057
99.4000	235.405	4.614	10.769	-0.295	-0.689	20.142	448.151	-0.000323	-0.000754	0.000021
99.6000	215.838	2.989	7.182	-1.322	-0.680	20.142	410.900	-0.000209	-0.000503	0.000093
99.8000	367.820	12.854	23.524	5.655	-0.693	20.143	700.235	-0.000900	-0.001647	-0.000396
