# Supplementary material for: Evaluation of a Cold-Mixed High-Performance Polyurethane Mixture
Source: Hindawi journal article supplement (doi:10.1155/2019/1507971), 2019-11-07
Supplement: f1 [file 1507971.f1.zip › 1507971.f1/dynamic modulus data/PUM/specimen2/temp20/zhs-2-20_0.2Hz.csv]

Test Information
****************
Project name	zhs
Operator name	2
Target test temperature	20
Target confining stress	0
Average dynamic strain range from 75 to 125 micro-strain
Contact stress	5
Initial modulus	1000
Axial gauge length	70
Comments
Specimen information
********************
Identification	zhs-2-20
Dimensions	Point 1	Point 2	Point 3	Point 4	Point 5	Point 6	Average	Std Dev.
Diameter (mm)	49.2	49.3	49.2				49.23	0.058
Height (mm)	100.8	101.0	100.8				100.87	0.115
Cross-sectional area (mm�)	1903.7
Conditioning time
Properties/Comments
Test Data	0.2Hz
*********
Test date and time	Mon	Apr 1	2019	2:34 PM
Dynamic modulus (MPa)	11771
Phase angle (Degrees)	3.76
Average temperature (�C)	20.3
Average confining pressure (kPa)	-0.6
Average micro-strain	98
Load drift (%)	0.2
Load standard error (%)	1.8
Average deformation drift (%)	-0.7
Average deformation standard error (%)	1.7
Deformation uniformity (%)	31.9
Phase uniformity (Degrees)	0.3
Conditioning Cycles
Time (sec)	Axial stress (kPa)	Axial micro-strain #1	Axial micro-strain #2	Axial micro-strain #3	Confining pressure (kPa)	Temperature (�C)	Load (N)	Displacement #1 (mm)	Displacement #2 (mm)	Displacement #3 (mm)
0.0000	197.353	-0.858	16.534	-2.346	-0.555	20.219	375.710	0.000060	-0.001157	0.000164
0.1000	218.062	-0.408	18.021	-1.841	-0.554	20.219	415.134	0.000029	-0.001261	0.000129
0.2000	225.847	0.464	18.978	-0.956	-0.562	20.219	429.955	-0.000032	-0.001328	0.000067
0.3000	264.245	2.567	22.802	0.418	-0.545	20.218	503.054	-0.000180	-0.001596	-0.000029
0.4000	283.015	3.621	24.829	0.813	-0.548	20.218	538.788	-0.000253	-0.001738	-0.000057
0.5000	343.114	8.025	31.472	4.067	-0.553	20.218	653.200	-0.000562	-0.002203	-0.000285
0.6000	376.988	10.200	36.183	6.018	-0.555	20.218	717.688	-0.000714	-0.002533	-0.000421
0.7000	408.472	12.531	40.604	8.135	-0.552	20.218	777.626	-0.000877	-0.002842	-0.000569
0.8000	456.834	15.771	45.592	9.679	-0.546	20.218	869.694	-0.001104	-0.003191	-0.000678
0.9000	516.466	20.235	52.375	13.594	-0.563	20.217	983.219	-0.001416	-0.003666	-0.000952
1.0000	575.167	24.512	59.724	16.768	-0.553	20.218	1094.971	-0.001716	-0.004181	-0.001174
1.1000	612.768	27.363	64.767	18.185	-0.554	20.218	1166.553	-0.001915	-0.004534	-0.001273
1.2000	665.052	31.038	71.037	21.931	-0.552	20.218	1266.088	-0.002173	-0.004973	-0.001535
1.3000	734.589	36.272	79.370	25.873	-0.555	20.217	1398.468	-0.002539	-0.005556	-0.001811
1.4000	782.138	40.159	85.445	28.652	-0.542	20.217	1488.991	-0.002811	-0.005981	-0.002006
1.5000	833.415	44.175	92.072	32.021	-0.553	20.217	1586.609	-0.003092	-0.006445	-0.002241
1.6000	881.642	47.890	97.563	34.714	-0.542	20.217	1678.419	-0.003352	-0.006829	-0.002430
1.7000	941.981	52.129	104.652	37.634	-0.549	20.217	1793.289	-0.003649	-0.007326	-0.002634
1.8000	967.965	54.684	108.599	39.290	-0.558	20.217	1842.756	-0.003828	-0.007602	-0.002750
1.9000	1003.387	57.323	113.404	42.052	-0.560	20.216	1910.191	-0.004013	-0.007938	-0.002944
2.0000	1043.332	60.593	117.658	44.300	-0.552	20.216	1986.237	-0.004242	-0.008236	-0.003101
2.1000	1070.158	62.933	121.159	45.969	-0.552	20.216	2037.306	-0.004405	-0.008481	-0.003218
2.2000	1096.593	65.025	124.328	47.229	-0.552	20.216	2087.631	-0.004552	-0.008703	-0.003306
2.3000	1092.971	65.306	125.175	47.904	-0.556	20.216	2080.736	-0.004571	-0.008762	-0.003353
2.4000	1091.979	65.308	125.257	47.834	-0.552	20.216	2078.848	-0.004572	-0.008768	-0.003348
2.5000	1089.770	65.797	124.814	47.945	-0.551	20.216	2074.642	-0.004606	-0.008737	-0.003356
2.6000	1082.060	65.039	124.633	47.176	-0.554	20.216	2059.965	-0.004553	-0.008724	-0.003302
2.7000	1064.387	63.917	123.371	46.419	-0.558	20.216	2026.320	-0.004474	-0.008636	-0.003249
2.8000	1040.717	62.935	121.022	45.926	-0.553	20.217	1981.258	-0.004405	-0.008472	-0.003215
2.9000	1000.922	60.017	117.144	43.666	-0.551	20.215	1905.499	-0.004201	-0.008200	-0.003057
3.0000	960.120	56.914	112.821	40.931	-0.550	20.215	1827.822	-0.003984	-0.007897	-0.002865
3.1000	931.626	54.824	110.197	39.457	-0.532	20.215	1773.577	-0.003838	-0.007714	-0.002762
3.2000	894.536	52.102	105.513	37.662	-0.550	20.215	1702.967	-0.003647	-0.007386	-0.002636
3.3000	838.735	48.551	99.274	35.064	-0.550	20.214	1596.737	-0.003399	-0.006949	-0.002454
3.4000	786.662	44.805	93.550	32.188	-0.538	20.214	1497.602	-0.003136	-0.006549	-0.002253
3.5000	733.957	40.818	86.627	28.695	-0.550	20.214	1397.266	-0.002857	-0.006064	-0.002009
3.6000	667.066	36.245	78.787	25.088	-0.564	20.214	1269.922	-0.002537	-0.005515	-0.001756
3.7000	618.028	32.372	72.829	21.803	-0.537	20.214	1176.567	-0.002266	-0.005098	-0.001526
3.8000	548.281	27.265	64.739	18.519	-0.558	20.215	1043.787	-0.001909	-0.004532	-0.001296
3.9000	506.217	23.783	58.610	15.645	-0.544	20.214	963.707	-0.001665	-0.004103	-0.001095
4.0000	469.503	20.599	53.887	13.497	-0.539	20.214	893.812	-0.001442	-0.003772	-0.000945
4.1000	396.645	15.380	44.829	9.021	-0.556	20.214	755.110	-0.001077	-0.003138	-0.000631
4.2000	341.641	11.310	37.504	5.834	-0.547	20.214	650.396	-0.000792	-0.002625	-0.000408
4.3000	326.252	9.202	34.767	5.375	-0.544	20.213	621.099	-0.000644	-0.002434	-0.000376
4.4000	283.556	5.934	28.679	2.901	-0.545	20.214	539.818	-0.000415	-0.002008	-0.000203
4.5000	258.819	3.690	25.079	1.329	-0.550	20.213	492.725	-0.000258	-0.001756	-0.000093
4.6000	227.936	1.345	20.092	-0.209	-0.550	20.213	433.931	-0.000094	-0.001406	0.000015
4.7000	207.182	-0.450	17.605	-1.574	-0.553	20.213	394.421	0.000031	-0.001232	0.000110
4.8000	209.917	-0.295	17.147	-2.192	-0.560	20.213	399.628	0.000021	-0.001200	0.000153
4.9000	201.516	-1.207	15.283	-2.712	-0.546	20.214	383.635	0.000085	-0.001070	0.000190
5.0000	204.777	-1.390	15.172	-2.234	-0.545	20.213	389.843	0.000097	-0.001062	0.000156
5.1000	214.515	-0.771	15.797	-2.276	-0.534	20.213	408.382	0.000054	-0.001106	0.000159
5.2000	238.095	0.126	17.772	-1.503	-0.549	20.214	453.272	-0.000009	-0.001244	0.000105
5.3000	257.933	1.417	19.784	-0.551	-0.548	20.214	491.037	-0.000099	-0.001385	0.000039
5.4000	289.537	3.423	23.941	1.668	-0.541	20.214	551.205	-0.000240	-0.001676	-0.000117
5.5000	333.540	6.243	29.015	3.180	-0.549	20.214	634.975	-0.000437	-0.002031	-0.000223
5.6000	368.451	8.713	33.767	5.612	-0.544	20.213	701.437	-0.000610	-0.002364	-0.000393
5.7000	413.011	12.107	39.547	7.560	-0.560	20.213	786.266	-0.000848	-0.002768	-0.000529
5.8000	469.953	16.431	46.563	10.901	-0.540	20.213	894.670	-0.001150	-0.003259	-0.000763
5.9000	502.535	18.985	50.497	12.905	-0.536	20.213	956.697	-0.001329	-0.003535	-0.000903
6.0000	558.335	23.207	57.847	16.236	-0.554	20.213	1062.927	-0.001625	-0.004049	-0.001137
6.1000	620.027	27.645	64.809	19.417	-0.556	20.213	1180.372	-0.001935	-0.004537	-0.001359
6.2000	683.071	32.176	72.619	22.745	-0.536	20.213	1300.392	-0.002252	-0.005083	-0.001592
6.3000	732.349	36.567	78.748	25.480	-0.545	20.214	1394.205	-0.002560	-0.005512	-0.001784
6.4000	791.892	40.467	85.946	29.494	-0.544	20.214	1507.559	-0.002833	-0.006016	-0.002065
6.5000	845.318	44.539	92.755	32.525	-0.549	20.214	1609.268	-0.003118	-0.006493	-0.002277
6.6000	891.079	48.230	98.606	34.643	-0.545	20.214	1696.386	-0.003376	-0.006902	-0.002425
6.7000	931.836	51.231	103.219	37.536	-0.540	20.214	1773.977	-0.003586	-0.007225	-0.002628
6.8000	986.780	56.059	109.709	41.476	-0.539	20.214	1878.576	-0.003924	-0.007680	-0.002903
6.9000	1016.987	58.303	113.767	42.783	-0.538	20.214	1936.083	-0.004081	-0.007964	-0.002995
7.0000	1040.642	60.620	116.783	43.808	-0.546	20.214	1981.115	-0.004243	-0.008175	-0.003067
7.1000	1064.432	62.823	119.283	45.617	-0.544	20.214	2026.405	-0.004398	-0.008350	-0.003193
7.2000	1080.362	64.114	122.009	46.796	-0.546	20.214	2056.732	-0.004488	-0.008541	-0.003276
7.3000	1093.497	65.194	123.744	47.668	-0.538	20.214	2081.738	-0.004564	-0.008662	-0.003337
7.4000	1091.017	65.334	123.785	47.679	-0.538	20.214	2077.017	-0.004573	-0.008665	-0.003338
7.5000	1087.005	65.195	123.842	47.736	-0.544	20.214	2069.378	-0.004564	-0.008669	-0.003341
7.6000	1081.534	64.774	123.760	47.411	-0.549	20.214	2058.964	-0.004534	-0.008663	-0.003319
7.7000	1056.768	63.132	121.827	46.658	-0.545	20.214	2011.814	-0.004419	-0.008528	-0.003266
7.8000	1045.091	62.555	121.340	45.618	-0.536	20.214	1989.584	-0.004379	-0.008494	-0.003193
7.9000	1029.296	61.363	118.963	45.015	-0.546	20.214	1959.515	-0.004295	-0.008327	-0.003151
8.0000	975.479	57.587	114.517	42.685	-0.530	20.214	1857.061	-0.004031	-0.008016	-0.002988
8.1000	929.507	54.965	109.209	39.711	-0.544	20.214	1769.543	-0.003848	-0.007645	-0.002780
8.2000	881.551	51.696	103.788	37.535	-0.538	20.214	1678.247	-0.003619	-0.007265	-0.002627
8.3000	842.312	48.369	99.342	34.996	-0.548	20.214	1603.546	-0.003386	-0.006954	-0.002450
8.4000	797.723	45.269	92.879	32.386	-0.556	20.214	1518.660	-0.003169	-0.006502	-0.002267
8.5000	722.401	39.837	85.042	28.357	-0.542	20.214	1375.265	-0.002789	-0.005953	-0.001985
8.6000	673.528	36.161	79.037	25.552	-0.554	20.214	1282.225	-0.002531	-0.005533	-0.001789
8.7000	617.592	31.825	71.967	22.380	-0.554	20.214	1175.737	-0.002228	-0.005038	-0.001567
8.8000	542.300	26.268	63.309	18.714	-0.550	20.215	1032.400	-0.001839	-0.004432	-0.001310
8.9000	505.481	23.167	57.848	15.716	-0.544	20.215	962.305	-0.001622	-0.004049	-0.001100
9.0000	455.075	19.407	51.718	13.047	-0.538	20.214	866.346	-0.001359	-0.003620	-0.000913
9.1000	395.758	15.057	44.078	9.146	-0.545	20.215	753.422	-0.001054	-0.003085	-0.000640
9.2000	361.433	12.067	39.560	6.917	-0.530	20.215	688.076	-0.000845	-0.002769	-0.000484
9.3000	330.174	9.654	34.365	4.995	-0.541	20.215	628.567	-0.000676	-0.002406	-0.000350
9.4000	290.078	6.538	29.277	4.039	-0.550	20.214	552.235	-0.000458	-0.002049	-0.000283
9.5000	259.751	3.760	24.594	2.074	-0.548	20.215	494.499	-0.000263	-0.001722	-0.000145
9.6000	225.486	1.051	19.730	0.235	-0.545	20.215	429.268	-0.000074	-0.001381	-0.000016
9.7000	215.477	-0.169	17.937	-1.194	-0.544	20.215	410.213	0.000012	-0.001256	0.000084
9.8000	209.827	-0.771	16.535	-1.503	-0.540	20.215	399.456	0.000054	-0.001157	0.000105
9.9000	204.266	-1.532	15.368	-1.729	-0.549	20.215	388.870	0.000107	-0.001076	0.000121
10.0000	211.405	-1.657	15.271	-1.279	-0.548	20.215	402.460	0.000116	-0.001069	0.000090
10.1000	211.510	-1.318	15.354	-2.179	-0.551	20.215	402.660	0.000092	-0.001075	0.000153
10.2000	235.029	-0.210	17.021	-0.899	-0.541	20.215	447.435	0.000015	-0.001191	0.000063
10.3000	263.703	1.766	20.370	0.054	-0.551	20.216	502.024	-0.000124	-0.001426	-0.000004
10.4000	291.822	4.055	24.177	1.007	-0.546	20.216	555.553	-0.000284	-0.001692	-0.000071
10.5000	325.500	6.046	27.723	4.095	-0.548	20.216	619.669	-0.000423	-0.001941	-0.000287
10.6000	369.338	9.148	33.989	4.643	-0.538	20.216	703.125	-0.000640	-0.002379	-0.000325
10.7000	405.752	11.731	38.492	7.546	-0.557	20.217	772.448	-0.000821	-0.002694	-0.000528
10.8000	460.891	15.661	44.385	10.271	-0.557	20.216	877.419	-0.001096	-0.003107	-0.000719
10.9000	522.989	20.346	52.663	13.678	-0.549	20.216	995.636	-0.001424	-0.003686	-0.000957
11.0000	567.623	23.672	58.041	15.307	-0.553	20.216	1080.608	-0.001657	-0.004063	-0.001072
11.1000	625.993	27.881	65.351	19.908	-0.546	20.216	1191.730	-0.001952	-0.004575	-0.001394
11.2000	686.423	32.708	72.440	23.265	-0.546	20.217	1306.772	-0.002290	-0.005071	-0.001629
11.3000	725.406	35.513	77.582	26.268	-0.548	20.217	1380.987	-0.002486	-0.005431	-0.001839
11.4000	792.508	40.721	86.306	30.378	-0.542	20.217	1508.732	-0.002850	-0.006041	-0.002126
11.5000	841.185	44.442	92.338	32.413	-0.546	20.217	1601.400	-0.003111	-0.006464	-0.002269
11.6000	895.663	49.127	98.368	35.444	-0.554	20.217	1705.112	-0.003439	-0.006886	-0.002481
11.7000	938.659	52.215	103.443	37.971	-0.546	20.218	1786.966	-0.003655	-0.007241	-0.002658
11.8000	982.602	55.540	109.112	41.337	-0.561	20.218	1870.623	-0.003888	-0.007638	-0.002894
11.9000	1017.679	58.614	113.627	43.261	-0.555	20.218	1937.399	-0.004103	-0.007954	-0.003028
12.0000	1052.785	61.126	117.534	45.184	-0.552	20.218	2004.232	-0.004279	-0.008227	-0.003163
12.1000	1060.525	62.081	119.380	46.850	-0.548	20.218	2018.967	-0.004346	-0.008357	-0.003280
12.2000	1091.468	64.534	122.148	48.326	-0.553	20.218	2077.875	-0.004517	-0.008550	-0.003383
12.3000	1086.283	64.605	123.425	47.805	-0.562	20.218	2068.005	-0.004522	-0.008640	-0.003346
12.4000	1094.594	65.659	123.536	48.310	-0.560	20.219	2083.826	-0.004596	-0.008648	-0.003382
12.5000	1087.741	65.124	123.799	48.282	-0.551	20.218	2070.780	-0.004559	-0.008666	-0.003380
12.6000	1082.151	65.279	123.618	47.721	-0.565	20.218	2060.137	-0.004570	-0.008653	-0.003340
12.7000	1057.369	63.747	122.440	46.699	-0.562	20.219	2012.959	-0.004462	-0.008571	-0.003269
12.8000	1037.231	62.766	120.186	47.187	-0.569	20.219	1974.621	-0.004394	-0.008413	-0.003303
12.9000	1009.623	60.606	116.907	44.355	-0.561	20.219	1922.064	-0.004242	-0.008183	-0.003105
13.0000	967.619	57.729	112.530	42.853	-0.560	20.219	1842.098	-0.004041	-0.007877	-0.003000
13.1000	909.309	53.631	106.567	39.149	-0.551	20.220	1731.091	-0.003754	-0.007460	-0.002740
13.2000	883.129	51.217	103.412	37.198	-0.558	20.220	1681.252	-0.003585	-0.007239	-0.002604
13.3000	834.032	47.724	97.242	35.261	-0.557	20.220	1587.782	-0.003341	-0.006807	-0.002468
13.4000	766.900	43.290	89.936	32.119	-0.547	20.220	1459.980	-0.003030	-0.006296	-0.002248
13.5000	724.625	40.105	85.000	29.801	-0.560	20.220	1379.499	-0.002807	-0.005950	-0.002086
13.6000	675.271	36.358	79.540	24.848	-0.558	20.220	1285.543	-0.002545	-0.005568	-0.001739
13.7000	615.744	31.739	72.011	22.496	-0.560	20.221	1172.218	-0.002222	-0.005041	-0.001575
13.8000	563.445	28.163	65.672	19.685	-0.558	20.221	1072.655	-0.001971	-0.004597	-0.001378
13.9000	503.076	23.769	58.654	16.150	-0.550	20.221	957.727	-0.001664	-0.004106	-0.001131
14.0000	455.301	20.024	51.913	11.912	-0.549	20.221	866.776	-0.001402	-0.003634	-0.000834
14.1000	405.106	15.912	45.521	9.693	-0.548	20.221	771.217	-0.001114	-0.003186	-0.000679
14.2000	361.914	12.264	38.615	7.311	-0.548	20.222	688.992	-0.000858	-0.002703	-0.000512
14.3000	326.116	9.345	34.001	6.694	-0.546	20.222	620.842	-0.000654	-0.002380	-0.000469
14.4000	280.054	5.555	27.541	4.011	-0.546	20.222	533.152	-0.000389	-0.001928	-0.000281
14.5000	260.758	4.084	23.941	1.918	-0.542	20.222	496.416	-0.000286	-0.001676	-0.000134
14.6000	226.719	1.247	19.979	0.729	-0.541	20.222	431.614	-0.000087	-0.001399	-0.000051
14.7000	218.784	0.209	17.884	-0.702	-0.549	20.223	416.508	-0.000015	-0.001252	0.000049
14.8000	208.294	-0.843	15.785	-2.138	-0.548	20.223	396.538	0.000059	-0.001105	0.000150
14.9000	207.227	-1.138	15.048	-2.881	-0.553	20.223	394.506	0.000080	-0.001053	0.000202
15.0000	207.798	-0.997	15.088	-2.149	-0.542	20.224	395.594	0.000070	-0.001056	0.000150
15.1000	220.151	-0.338	16.632	-0.647	-0.547	20.224	419.111	0.000024	-0.001164	0.000045
15.2000	234.608	0.223	17.257	-0.267	-0.558	20.224	446.634	-0.000016	-0.001208	0.000019
15.3000	259.616	1.837	19.772	-0.437	-0.552	20.224	494.242	-0.000129	-0.001384	0.000031
15.4000	296.916	3.971	24.161	2.047	-0.549	20.225	565.252	-0.000278	-0.001691	-0.000143
15.5000	326.868	6.383	28.265	2.818	-0.545	20.225	622.272	-0.000447	-0.001979	-0.000197
15.6000	369.008	8.924	32.947	6.678	-0.564	20.225	702.496	-0.000625	-0.002306	-0.000467
15.7000	405.887	12.163	37.739	6.833	-0.549	20.226	772.705	-0.000851	-0.002642	-0.000478
15.8000	461.492	15.604	43.883	11.128	-0.546	20.225	878.563	-0.001092	-0.003072	-0.000779
15.9000	509.613	19.391	50.149	14.129	-0.552	20.226	970.173	-0.001357	-0.003510	-0.000989
16.0000	557.809	23.011	56.292	17.020	-0.557	20.226	1061.926	-0.001611	-0.003940	-0.001191
16.1000	616.961	27.602	64.113	20.163	-0.553	20.226	1174.536	-0.001932	-0.004488	-0.001411
16.2000	670.342	31.447	71.314	21.567	-0.540	20.227	1276.159	-0.002201	-0.004992	-0.001510
16.3000	761.985	38.392	81.346	26.447	-0.539	20.227	1450.624	-0.002687	-0.005694	-0.001851
16.4000	792.809	40.735	85.806	28.177	-0.537	20.227	1509.304	-0.002851	-0.006006	-0.001972
16.5000	855.718	45.801	93.450	33.425	-0.544	20.228	1629.066	-0.003206	-0.006541	-0.002340
16.6000	888.855	48.314	97.299	34.392	-0.552	20.228	1692.152	-0.003382	-0.006811	-0.002407
16.7000	928.966	51.314	102.300	38.504	-0.552	20.228	1768.513	-0.003592	-0.007161	-0.002695
16.8000	981.205	55.568	107.915	40.886	-0.545	20.229	1867.962	-0.003890	-0.007554	-0.002862
16.9000	1018.626	58.402	113.235	44.105	-0.538	20.229	1939.201	-0.004088	-0.007926	-0.003087
17.0000	1038.147	60.325	115.476	43.866	-0.543	20.229	1976.366	-0.004223	-0.008083	-0.003071
17.1000	1063.861	62.333	118.756	46.123	-0.542	20.229	2025.318	-0.004363	-0.008313	-0.003229
17.2000	1077.146	63.635	121.592	47.370	-0.541	20.229	2050.610	-0.004454	-0.008511	-0.003316
17.3000	1087.125	64.522	122.746	47.456	-0.540	20.229	2069.607	-0.004517	-0.008592	-0.003322
17.4000	1105.700	66.052	124.898	49.829	-0.552	20.230	2104.969	-0.004624	-0.008743	-0.003488
17.5000	1079.611	64.491	122.925	47.989	-0.541	20.229	2055.302	-0.004514	-0.008605	-0.003359
17.6000	1084.345	65.209	122.982	47.132	-0.540	20.230	2064.314	-0.004565	-0.008609	-0.003299
17.7000	1059.232	63.931	122.729	46.503	-0.534	20.230	2016.506	-0.004475	-0.008591	-0.003255
17.8000	1033.489	62.249	119.951	46.683	-0.535	20.230	1967.497	-0.004357	-0.008397	-0.003268
17.9000	1009.969	60.312	116.602	42.698	-0.540	20.231	1922.722	-0.004222	-0.008162	-0.002989
18.0000	974.021	57.588	113.417	41.517	-0.545	20.231	1854.286	-0.004031	-0.007939	-0.002906
18.1000	934.662	54.755	108.498	40.130	-0.552	20.231	1779.356	-0.003833	-0.007595	-0.002809
18.2000	888.960	51.133	103.050	36.510	-0.552	20.231	1692.352	-0.003579	-0.007213	-0.002556
18.3000	838.510	47.879	97.730	35.695	-0.539	20.231	1596.308	-0.003352	-0.006841	-0.002499
18.4000	789.532	44.496	91.434	31.921	-0.542	20.232	1503.067	-0.003115	-0.006400	-0.002234
18.5000	735.385	40.511	85.862	29.452	-0.554	20.232	1399.984	-0.002836	-0.006010	-0.002062
18.6000	671.980	35.824	78.581	26.842	-0.536	20.232	1279.278	-0.002508	-0.005501	-0.001879
18.7000	622.597	32.021	72.690	23.895	-0.552	20.232	1185.265	-0.002241	-0.005088	-0.001673
18.8000	562.378	27.770	64.990	20.288	-0.548	20.232	1070.623	-0.001944	-0.004549	-0.001420
18.9000	509.208	23.684	57.151	17.021	-0.539	20.232	969.400	-0.001658	-0.004001	-0.001191
19.0000	462.439	20.290	52.220	14.268	-0.548	20.232	880.365	-0.001420	-0.003655	-0.000999
19.1000	404.595	15.647	44.299	8.821	-0.544	20.232	770.245	-0.001095	-0.003101	-0.000618
19.2000	371.532	12.908	39.560	7.516	-0.551	20.233	707.302	-0.000904	-0.002769	-0.000526
19.3000	309.781	8.153	31.515	5.794	-0.546	20.233	589.743	-0.000571	-0.002206	-0.000406
19.4000	282.805	5.778	26.819	3.619	-0.554	20.234	538.387	-0.000404	-0.001877	-0.000253
19.5000	263.403	4.054	24.149	2.145	-0.553	20.233	501.451	-0.000284	-0.001690	-0.000150
19.6000	228.086	1.107	19.603	0.824	-0.547	20.233	434.217	-0.000077	-0.001372	-0.000058
19.7000	220.737	0.378	17.716	0.267	-0.545	20.234	420.227	-0.000026	-0.001240	-0.000019
19.8000	208.790	-0.785	16.242	-0.381	-0.542	20.234	397.482	0.000055	-0.001137	0.000027
19.9000	209.872	-0.800	15.826	-0.520	-0.533	20.234	399.542	0.000056	-0.001108	0.000036
20.0000	211.104	-1.095	15.255	-2.234	-0.540	20.234	401.888	0.000077	-0.001068	0.000156
20.1000	220.587	-0.365	15.922	-1.701	-0.535	20.234	419.941	0.000026	-0.001115	0.000119
20.2000	234.548	0.210	17.064	-0.563	-0.546	20.234	446.520	-0.000015	-0.001194	0.000039
20.3000	258.759	1.488	18.908	0.603	-0.548	20.234	492.611	-0.000104	-0.001324	-0.000042
20.4000	286.051	3.257	22.109	2.017	-0.551	20.235	544.567	-0.000228	-0.001548	-0.000141
20.5000	320.421	6.215	26.886	2.958	-0.553	20.235	609.999	-0.000435	-0.001882	-0.000207
20.6000	361.869	8.545	31.805	5.318	-0.540	20.235	688.906	-0.000598	-0.002226	-0.000372
20.7000	413.266	11.995	37.880	7.952	-0.554	20.235	786.753	-0.000840	-0.002652	-0.000557
20.8000	456.608	15.126	43.120	9.130	-0.548	20.235	869.265	-0.001059	-0.003018	-0.000639
20.9000	509.583	18.942	50.012	14.197	-0.557	20.236	970.116	-0.001326	-0.003501	-0.000994
21.0000	567.488	23.573	57.388	17.315	-0.545	20.236	1080.351	-0.001650	-0.004017	-0.001212
21.1000	620.763	27.491	63.948	19.388	-0.552	20.236	1181.774	-0.001924	-0.004476	-0.001357
21.2000	672.010	31.292	69.965	21.765	-0.538	20.236	1279.335	-0.002190	-0.004898	-0.001524
21.3000	731.388	36.049	77.747	26.069	-0.530	20.236	1392.374	-0.002523	-0.005442	-0.001825
21.4000	792.298	40.468	85.359	29.773	-0.537	20.236	1508.331	-0.002833	-0.005975	-0.002084
21.5000	835.369	44.330	90.434	32.118	-0.537	20.236	1590.328	-0.003103	-0.006330	-0.002248
21.6000	899.616	48.986	98.286	36.595	-0.540	20.237	1712.637	-0.003429	-0.006880	-0.002562
21.7000	928.034	51.974	102.830	37.410	-0.543	20.237	1766.739	-0.003638	-0.007198	-0.002619
21.8000	966.447	54.840	107.276	40.942	-0.534	20.237	1839.867	-0.003839	-0.007509	-0.002866
21.9000	1004.018	57.729	111.321	42.290	-0.525	20.237	1911.392	-0.004041	-0.007792	-0.002960
22.0000	1047.796	60.719	116.296	45.746	-0.533	20.238	1994.734	-0.004250	-0.008141	-0.003202
22.1000	1063.545	62.415	117.852	46.851	-0.533	20.237	2024.717	-0.004369	-0.008250	-0.003280
22.2000	1091.498	64.548	121.578	46.135	-0.532	20.237	2077.932	-0.004518	-0.008510	-0.003229
22.3000	1098.592	65.025	122.383	48.436	-0.546	20.238	2091.436	-0.004552	-0.008567	-0.003390
22.4000	1097.194	65.391	123.398	48.310	-0.533	20.238	2088.776	-0.004577	-0.008638	-0.003382
22.5000	1085.592	64.760	122.896	48.381	-0.545	20.238	2066.689	-0.004533	-0.008603	-0.003387
22.6000	1073.614	64.238	122.177	47.608	-0.533	20.238	2043.886	-0.004497	-0.008552	-0.003333
22.7000	1060.930	63.831	121.883	47.033	-0.540	20.238	2019.739	-0.004468	-0.008532	-0.003292
22.8000	1037.351	62.134	119.437	44.861	-0.546	20.238	1974.850	-0.004349	-0.008361	-0.003140
22.9000	1014.568	60.861	117.326	45.352	-0.542	20.238	1931.477	-0.004260	-0.008213	-0.003175
23.0000	971.046	57.687	112.597	41.166	-0.543	20.239	1848.621	-0.004038	-0.007882	-0.002882
23.1000	930.965	55.007	108.401	40.244	-0.547	20.238	1772.318	-0.003851	-0.007588	-0.002817
23.2000	880.124	51.513	101.759	36.496	-0.543	20.239	1675.529	-0.003606	-0.007123	-0.002555
23.3000	840.629	48.538	97.659	34.394	-0.539	20.239	1600.342	-0.003398	-0.006836	-0.002408
23.4000	787.639	44.622	91.405	32.597	-0.540	20.239	1499.462	-0.003124	-0.006398	-0.002282
23.5000	726.203	39.723	84.000	28.333	-0.553	20.239	1382.504	-0.002781	-0.005880	-0.001983
23.6000	674.655	36.286	78.179	24.189	-0.546	20.239	1284.370	-0.002540	-0.005473	-0.001693
23.7000	614.842	31.601	70.757	22.971	-0.549	20.239	1170.502	-0.002212	-0.004953	-0.001608
23.8000	561.942	27.560	64.253	20.374	-0.532	20.240	1069.794	-0.001929	-0.004498	-0.001426
23.9000	503.587	23.222	57.083	17.005	-0.550	20.239	958.700	-0.001626	-0.003996	-0.001190
24.0000	463.206	20.065	51.275	11.438	-0.540	20.239	881.824	-0.001405	-0.003589	-0.000801
24.1000	406.233	15.674	44.382	8.695	-0.543	20.239	773.363	-0.001097	-0.003107	-0.000609
24.2000	363.267	12.124	38.381	5.782	-0.540	20.239	691.566	-0.000849	-0.002687	-0.000405
24.3000	316.077	8.627	32.224	3.956	-0.537	20.239	601.730	-0.000604	-0.002256	-0.000277
24.4000	287.989	6.172	27.734	4.390	-0.544	20.240	548.258	-0.000432	-0.001941	-0.000307
24.5000	250.418	3.170	22.663	0.140	-0.552	20.240	476.732	-0.000222	-0.001586	-0.000010
24.6000	233.556	1.683	19.563	1.049	-0.555	20.240	444.632	-0.000118	-0.001369	-0.000073
24.7000	217.521	0.253	17.243	-1.898	-0.552	20.240	414.104	-0.000018	-0.001207	0.000133
24.8000	208.669	-0.351	15.255	-3.191	-0.561	20.240	397.253	0.000025	-0.001068	0.000223
24.9000	206.716	-1.165	14.853	-0.634	-0.544	20.240	393.534	0.000082	-0.001040	0.000044
25.0000	220.527	-0.563	15.536	-2.588	-0.552	20.234	419.827	0.000039	-0.001087	0.000181
25.1000	233.316	-0.393	16.439	-1.210	-0.551	20.234	444.174	0.000028	-0.001151	0.000085
25.2000	258.474	1.065	18.548	0.574	-0.558	20.234	492.067	-0.000075	-0.001298	-0.000040
25.3000	290.108	3.199	21.635	0.337	-0.557	20.234	552.292	-0.000224	-0.001514	-0.000024
25.4000	321.833	4.953	26.220	3.363	-0.556	20.234	612.688	-0.000347	-0.001835	-0.000235
25.5000	373.531	9.189	32.404	5.542	-0.550	20.234	711.107	-0.000643	-0.002268	-0.000388
25.6000	439.521	13.497	40.575	7.559	-0.552	20.235	836.735	-0.000945	-0.002840	-0.000529
25.7000	468.075	15.816	44.897	11.858	-0.550	20.235	891.094	-0.001107	-0.003143	-0.000830
25.8000	533.448	20.599	52.637	14.647	-0.550	20.235	1015.549	-0.001442	-0.003685	-0.001025
25.9000	611.281	26.394	62.072	17.006	-0.551	20.235	1163.721	-0.001848	-0.004345	-0.001190
26.0000	686.182	32.203	70.967	22.087	-0.559	20.236	1306.314	-0.002254	-0.004968	-0.001546
26.1000	753.494	37.270	79.261	25.494	-0.555	20.236	1434.460	-0.002609	-0.005548	-0.001785
26.2000	837.729	43.853	90.172	30.770	-0.554	20.235	1594.820	-0.003070	-0.006312	-0.002154
26.3000	919.709	50.306	100.315	36.313	-0.553	20.236	1750.889	-0.003521	-0.007022	-0.002542
26.4000	977.388	54.376	105.929	40.212	-0.557	20.236	1860.695	-0.003806	-0.007415	-0.002815
26.5000	1042.941	59.426	114.099	43.641	-0.566	20.236	1985.493	-0.004160	-0.007987	-0.003055
26.6000	1092.836	63.651	120.315	45.255	-0.545	20.237	2080.479	-0.004456	-0.008422	-0.003168
26.7000	1172.231	69.587	130.249	49.956	-0.558	20.236	2231.627	-0.004871	-0.009117	-0.003497
26.8000	1208.825	72.814	134.763	54.782	-0.540	20.237	2301.292	-0.005097	-0.009433	-0.003835
26.9000	1266.264	77.558	141.684	56.284	-0.553	20.237	2410.641	-0.005429	-0.009918	-0.003940
27.0000	1298.034	79.998	145.687	58.441	-0.540	20.237	2471.123	-0.005600	-0.010198	-0.004091
27.1000	1335.169	83.241	151.094	60.408	-0.543	20.238	2541.819	-0.005827	-0.010577	-0.004229
27.2000	1356.599	85.218	153.387	62.051	-0.554	20.238	2582.617	-0.005965	-0.010737	-0.004344
27.3000	1367.450	86.325	155.513	63.453	-0.556	20.238	2603.273	-0.006043	-0.010886	-0.004442
27.4000	1370.441	86.651	156.346	63.352	-0.565	20.238	2608.967	-0.006066	-0.010944	-0.004435
27.5000	1366.443	86.664	156.497	64.208	-0.558	20.238	2601.357	-0.006067	-0.010955	-0.004495
27.6000	1351.294	86.411	155.663	62.921	-0.562	20.238	2572.517	-0.006049	-0.010896	-0.004404
27.7000	1331.848	85.373	154.832	61.869	-0.568	20.238	2535.496	-0.005976	-0.010838	-0.004331
27.8000	1297.959	82.793	151.120	62.332	-0.552	20.239	2470.980	-0.005796	-0.010578	-0.004363
27.9000	1256.330	80.716	147.213	57.797	-0.560	20.239	2391.729	-0.005650	-0.010305	-0.004046
28.0000	1207.728	76.590	141.546	57.193	-0.548	20.239	2299.204	-0.005361	-0.009908	-0.004004
28.1000	1169.932	74.398	137.709	53.180	-0.552	20.239	2227.249	-0.005208	-0.009640	-0.003723
28.2000	1116.025	70.161	131.220	52.675	-0.554	20.239	2124.624	-0.004911	-0.009185	-0.003687
28.3000	1024.937	63.833	121.327	46.445	-0.551	20.239	1951.218	-0.004468	-0.008493	-0.003251
28.4000	977.117	60.537	115.435	43.329	-0.564	20.239	1860.180	-0.004238	-0.008080	-0.003033
28.5000	905.672	55.048	107.248	38.712	-0.558	20.239	1724.167	-0.003853	-0.007507	-0.002710
28.6000	828.426	49.548	98.426	33.890	-0.552	20.239	1577.110	-0.003468	-0.006890	-0.002372
28.7000	755.463	43.795	89.392	30.152	-0.545	20.239	1438.208	-0.003066	-0.006257	-0.002111
28.8000	674.280	37.523	79.454	27.333	-0.544	20.240	1283.655	-0.002627	-0.005562	-0.001913
28.9000	610.259	32.627	71.006	22.393	-0.552	20.239	1161.776	-0.002284	-0.004970	-0.001568
29.0000	556.532	28.176	64.712	18.856	-0.552	20.240	1059.494	-0.001972	-0.004530	-0.001320
29.1000	487.642	22.773	55.666	13.903	-0.540	20.239	928.345	-0.001594	-0.003897	-0.000973
29.2000	415.701	17.539	46.800	11.843	-0.549	20.240	791.388	-0.001228	-0.003276	-0.000829
29.3000	366.152	13.302	39.993	6.958	-0.553	20.240	697.060	-0.000931	-0.002800	-0.000487
29.4000	315.296	9.274	32.725	5.290	-0.553	20.240	600.243	-0.000649	-0.002291	-0.000370
29.5000	292.904	6.972	29.223	3.294	-0.556	20.240	557.613	-0.000488	-0.002046	-0.000231
29.6000	256.475	3.987	24.149	0.939	-0.552	20.240	488.262	-0.000279	-0.001690	-0.000066
29.7000	235.525	2.175	20.677	0.068	-0.553	20.241	448.380	-0.000152	-0.001447	-0.000005
29.8000	216.349	1.022	17.092	-0.113	-0.537	20.240	411.873	-0.000072	-0.001196	0.000008
29.9000	212.922	0.393	16.616	-0.380	-0.544	20.240	405.350	-0.000027	-0.001163	0.000027
30.0000	217.311	0.462	16.634	-0.786	-0.542	20.241	413.704	-0.000032	-0.001164	0.000055
30.1000	228.928	0.407	17.049	-1.940	-0.550	20.241	435.820	-0.000028	-0.001193	0.000136
30.2000	262.712	2.734	19.923	1.050	-0.539	20.240	500.135	-0.000191	-0.001395	-0.000073
30.3000	289.703	3.873	23.094	0.351	-0.543	20.240	551.519	-0.000271	-0.001617	-0.000025
30.4000	325.230	6.564	27.138	2.972	-0.534	20.241	619.154	-0.000459	-0.001900	-0.000208
30.5000	380.745	10.088	34.155	5.135	-0.545	20.241	724.840	-0.000706	-0.002391	-0.000359
30.6000	426.807	13.553	39.728	9.316	-0.542	20.241	812.531	-0.000949	-0.002781	-0.000652
30.7000	502.971	18.647	48.703	12.096	-0.539	20.240	957.527	-0.001305	-0.003409	-0.000847
30.8000	568.269	23.474	56.765	16.502	-0.536	20.240	1081.839	-0.001643	-0.003974	-0.001155
30.9000	615.188	27.180	63.266	18.194	-0.541	20.241	1171.160	-0.001903	-0.004429	-0.001274
31.0000	712.587	34.098	74.328	24.933	-0.540	20.241	1356.583	-0.002387	-0.005203	-0.001745
31.1000	764.630	38.477	81.137	26.308	-0.550	20.241	1455.660	-0.002693	-0.005680	-0.001842
31.2000	833.671	43.783	89.642	31.331	-0.546	20.241	1587.095	-0.003065	-0.006275	-0.002193
31.3000	928.906	50.981	100.830	36.424	-0.544	20.241	1768.398	-0.003569	-0.007058	-0.002550
31.4000	973.495	54.755	107.111	39.837	-0.538	20.241	1853.285	-0.003833	-0.007498	-0.002789
31.5000	1039.350	60.101	114.449	44.679	-0.544	20.241	1978.655	-0.004207	-0.008011	-0.003128
31.6000	1119.090	66.067	123.938	47.161	-0.537	20.241	2130.461	-0.004625	-0.008676	-0.003301
31.7000	1165.979	70.076	129.594	50.362	-0.542	20.241	2219.725	-0.004905	-0.009072	-0.003525
31.8000	1212.221	73.475	136.015	53.558	-0.546	20.241	2307.758	-0.005143	-0.009521	-0.003749
31.9000	1257.637	77.333	141.364	56.913	-0.541	20.241	2394.218	-0.005413	-0.009896	-0.003984
32.0000	1312.130	81.529	148.174	59.834	-0.540	20.241	2497.959	-0.005707	-0.010372	-0.004188
32.1000	1335.274	83.676	150.996	62.205	-0.532	20.241	2542.019	-0.005857	-0.010570	-0.004354
32.2000	1359.695	85.371	154.080	63.859	-0.533	20.241	2588.511	-0.005976	-0.010786	-0.004470
32.3000	1369.133	86.496	155.971	62.849	-0.537	20.241	2606.478	-0.006055	-0.010918	-0.004399
32.4000	1369.704	87.128	157.121	64.855	-0.545	20.241	2607.565	-0.006099	-0.010998	-0.004540
32.5000	1368.802	87.730	157.400	64.743	-0.545	20.241	2605.848	-0.006141	-0.011018	-0.004532
32.6000	1363.182	87.367	157.219	63.155	-0.543	20.242	2595.148	-0.006116	-0.011005	-0.004421
32.7000	1324.394	84.924	154.316	61.912	-0.544	20.241	2521.305	-0.005945	-0.010802	-0.004334
32.8000	1302.632	83.914	152.133	60.506	-0.536	20.242	2479.877	-0.005874	-0.010649	-0.004235
32.9000	1255.684	80.867	147.630	58.400	-0.536	20.242	2390.499	-0.005661	-0.010334	-0.004088
33.0000	1213.905	77.852	142.963	57.013	-0.544	20.242	2310.963	-0.005450	-0.010007	-0.003991
33.1000	1157.638	73.966	136.376	54.135	-0.544	20.242	2203.846	-0.005178	-0.009546	-0.003789
33.2000	1101.147	69.840	130.357	50.586	-0.529	20.242	2096.300	-0.004889	-0.009125	-0.003541
33.3000	1026.395	64.535	121.662	46.601	-0.534	20.242	1953.993	-0.004517	-0.008516	-0.003262
33.4000	965.906	59.735	114.600	43.821	-0.546	20.241	1838.837	-0.004181	-0.008022	-0.003067
33.5000	903.162	55.202	106.944	40.116	-0.540	20.242	1719.389	-0.003864	-0.007486	-0.002808
33.6000	825.045	49.113	97.923	35.415	-0.548	20.241	1570.673	-0.003438	-0.006855	-0.002479
33.7000	752.983	43.724	89.433	30.208	-0.548	20.241	1433.487	-0.003061	-0.006260	-0.002115
33.8000	676.203	38.280	80.219	26.140	-0.543	20.242	1287.317	-0.002680	-0.005615	-0.001830
33.9000	615.098	33.481	71.996	23.291	-0.549	20.242	1170.988	-0.002344	-0.005040	-0.001630
34.0000	544.915	28.276	63.960	18.800	-0.550	20.242	1037.378	-0.001979	-0.004477	-0.001316
34.1000	460.230	21.568	53.191	14.577	-0.554	20.242	876.160	-0.001510	-0.003723	-0.001020
34.2000	413.221	17.889	46.882	11.152	-0.542	20.242	786.667	-0.001252	-0.003282	-0.000781
34.3000	365.341	14.033	40.132	8.669	-0.540	20.242	695.515	-0.000982	-0.002809	-0.000607
34.4000	317.716	9.976	33.364	5.457	-0.543	20.242	604.849	-0.000698	-0.002335	-0.000382
34.5000	282.008	6.622	28.305	3.492	-0.545	20.242	536.871	-0.000464	-0.001981	-0.000244
34.6000	240.319	3.732	21.942	1.148	-0.552	20.242	457.506	-0.000261	-0.001536	-0.000080
34.7000	240.259	2.680	20.982	0.954	-0.550	20.242	457.392	-0.000188	-0.001469	-0.000067
34.8000	216.860	1.052	17.230	-1.571	-0.547	20.242	412.846	-0.000074	-0.001206	0.000110
34.9000	214.951	0.433	16.799	-1.827	-0.540	20.242	409.212	-0.000030	-0.001176	0.000128
35.0000	223.487	0.477	16.940	-0.592	-0.535	20.241	425.463	-0.000033	-0.001186	0.000041
35.1000	244.347	1.374	18.353	-0.507	-0.532	20.242	465.174	-0.000096	-0.001285	0.000035
35.2000	249.517	1.697	18.216	-0.997	-0.541	20.242	475.016	-0.000119	-0.001275	0.000070
35.3000	296.315	4.729	24.413	2.131	-0.541	20.242	564.108	-0.000331	-0.001709	-0.000149
35.4000	323.982	6.566	27.250	2.860	-0.533	20.242	616.779	-0.000460	-0.001907	-0.000200
35.5000	367.610	9.836	32.612	4.797	-0.544	20.242	699.835	-0.000688	-0.002283	-0.000336
35.6000	421.983	13.540	39.284	8.642	-0.532	20.242	803.347	-0.000948	-0.002750	-0.000605
35.7000	481.285	18.114	46.924	11.897	-0.545	20.242	916.243	-0.001268	-0.003285	-0.000833
35.8000	548.266	22.999	55.291	15.209	-0.540	20.242	1043.758	-0.001610	-0.003870	-0.001065
35.9000	621.845	28.696	64.407	19.936	-0.545	20.242	1183.834	-0.002009	-0.004508	-0.001396
36.0000	692.479	34.111	72.773	23.264	-0.538	20.242	1318.302	-0.002388	-0.005094	-0.001628
36.1000	766.479	39.291	81.402	28.245	-0.544	20.242	1459.179	-0.002750	-0.005698	-0.001977
36.2000	858.077	45.718	92.172	33.270	-0.542	20.242	1633.558	-0.003200	-0.006452	-0.002329
36.3000	895.708	48.944	97.173	34.799	-0.551	20.242	1705.198	-0.003426	-0.006802	-0.002436
36.4000	989.576	56.032	107.986	39.485	-0.556	20.243	1883.898	-0.003922	-0.007559	-0.002764
36.5000	1042.521	60.339	114.989	43.204	-0.553	20.242	1984.692	-0.004224	-0.008049	-0.003024
36.6000	1115.844	66.207	124.328	48.958	-0.560	20.242	2124.281	-0.004634	-0.008703	-0.003427
36.7000	1163.229	70.219	129.830	50.755	-0.548	20.241	2214.489	-0.004915	-0.009088	-0.003553
36.8000	1210.538	73.584	135.349	54.599	-0.545	20.242	2304.554	-0.005151	-0.009474	-0.003822
36.9000	1263.378	78.302	142.004	57.392	-0.550	20.242	2405.148	-0.005481	-0.009940	-0.004017
37.0000	1300.859	81.064	147.159	59.538	-0.539	20.242	2476.501	-0.005674	-0.010301	-0.004168
37.1000	1337.919	83.858	151.827	62.064	-0.539	20.242	2547.054	-0.005870	-0.010628	-0.004344
37.2000	1362.040	86.342	154.830	64.336	-0.536	20.242	2592.974	-0.006044	-0.010838	-0.004503
37.3000	1362.611	87.338	156.288	63.914	-0.548	20.242	2594.061	-0.006114	-0.010940	-0.004474
37.4000	1369.013	87.547	156.789	63.479	-0.539	20.242	2606.249	-0.006128	-0.010975	-0.004444
37.5000	1367.675	87.675	156.984	63.732	-0.548	20.242	2603.703	-0.006137	-0.010989	-0.004461
37.6000	1346.110	86.959	156.109	63.242	-0.548	20.242	2562.647	-0.006087	-0.010928	-0.004427
37.7000	1331.893	86.075	155.261	63.242	-0.541	20.242	2535.582	-0.006025	-0.010868	-0.004427
37.8000	1298.980	84.055	152.219	61.026	-0.534	20.242	2472.925	-0.005884	-0.010655	-0.004272
37.9000	1254.827	81.277	148.033	59.284	-0.549	20.242	2388.868	-0.005689	-0.010362	-0.004150
38.0000	1215.122	78.315	143.103	57.223	-0.545	20.242	2313.280	-0.005482	-0.010017	-0.004006
38.1000	1164.596	75.016	137.544	54.724	-0.550	20.242	2217.093	-0.005251	-0.009628	-0.003831
38.2000	1086.103	69.460	128.525	50.080	-0.554	20.242	2067.661	-0.004862	-0.008997	-0.003506
38.3000	1033.744	65.644	122.565	47.245	-0.541	20.242	1967.983	-0.004595	-0.008580	-0.003307
38.4000	968.115	60.326	114.946	43.456	-0.552	20.242	1843.042	-0.004223	-0.008046	-0.003042
38.5000	897.106	55.106	106.831	39.248	-0.558	20.242	1707.859	-0.003857	-0.007478	-0.002747
38.6000	810.723	48.819	96.895	34.364	-0.553	20.241	1543.407	-0.003417	-0.006783	-0.002405
38.7000	754.817	44.187	89.603	31.401	-0.538	20.242	1436.977	-0.003093	-0.006272	-0.002198
38.8000	675.647	38.408	80.233	26.954	-0.540	20.241	1286.259	-0.002689	-0.005616	-0.001887
38.9000	601.737	32.499	71.300	22.787	-0.546	20.242	1145.554	-0.002275	-0.004991	-0.001595
39.0000	534.771	27.600	62.780	18.367	-0.542	20.242	1018.066	-0.001932	-0.004395	-0.001286
39.1000	474.191	22.886	55.013	14.687	-0.550	20.241	902.739	-0.001602	-0.003851	-0.001028
39.2000	429.256	19.166	48.912	12.613	-0.561	20.241	817.194	-0.001342	-0.003424	-0.000883
39.3000	357.646	13.177	39.380	8.487	-0.546	20.241	680.866	-0.000922	-0.002757	-0.000594
39.4000	321.728	10.468	34.029	6.104	-0.550	20.242	612.488	-0.000733	-0.002382	-0.000427
39.5000	285.645	7.619	29.027	2.704	-0.544	20.242	543.795	-0.000533	-0.002032	-0.000189
39.6000	259.586	5.205	24.704	1.401	-0.548	20.242	494.184	-0.000364	-0.001729	-0.000098
39.7000	235.074	3.171	20.730	0.364	-0.556	20.241	447.521	-0.000222	-0.001451	-0.000025
39.8000	227.034	2.329	19.118	-0.266	-0.561	20.241	432.215	-0.000163	-0.001338	0.000019
39.9000	217.085	1.387	17.396	-1.587	-0.549	20.242	413.275	-0.000097	-0.001218	0.000111
40.0000	224.404	1.724	17.550	-0.858	-0.552	20.241	427.208	-0.000121	-0.001229	0.000060
40.1000	229.484	1.445	17.673	-0.914	-0.541	20.242	436.878	-0.000101	-0.001237	0.000064
40.2000	264.891	3.368	20.284	0.714	-0.549	20.241	504.284	-0.000236	-0.001420	-0.000050
40.3000	280.460	4.265	22.009	1.317	-0.552	20.242	533.924	-0.000299	-0.001541	-0.000092
40.4000	321.954	7.280	27.139	3.252	-0.561	20.242	612.917	-0.000510	-0.001900	-0.000228
40.5000	373.366	10.678	33.306	5.568	-0.548	20.242	710.793	-0.000747	-0.002331	-0.000390
40.6000	432.082	14.876	40.880	8.893	-0.556	20.241	822.573	-0.001041	-0.002862	-0.000623
40.7000	464.949	17.583	45.120	10.804	-0.548	20.241	885.143	-0.001231	-0.003158	-0.000756
40.8000	535.552	22.774	53.456	14.565	-0.550	20.242	1019.554	-0.001594	-0.003742	-0.001020
40.9000	623.889	28.584	64.156	19.825	-0.548	20.242	1187.725	-0.002001	-0.004491	-0.001388
41.0000	673.934	32.430	70.438	22.913	-0.552	20.241	1282.997	-0.002270	-0.004931	-0.001604
41.1000	747.107	38.559	79.816	27.066	-0.553	20.242	1422.300	-0.002699	-0.005587	-0.001895
41.2000	837.218	44.638	89.961	31.710	-0.555	20.241	1593.847	-0.003125	-0.006297	-0.002220
41.3000	903.538	50.334	98.103	36.116	-0.544	20.242	1720.104	-0.003523	-0.006867	-0.002528
41.4000	971.241	55.246	106.513	40.257	-0.550	20.241	1848.993	-0.003867	-0.007456	-0.002818
41.5000	1047.510	60.747	115.590	43.922	-0.553	20.242	1994.190	-0.004252	-0.008091	-0.003075
41.6000	1103.055	65.321	121.938	47.736	-0.544	20.241	2099.934	-0.004572	-0.008536	-0.003341
41.7000	1165.588	70.148	130.303	51.790	-0.548	20.242	2218.981	-0.004910	-0.009121	-0.003625
41.8000	1229.940	75.436	137.682	55.259	-0.549	20.242	2341.490	-0.005281	-0.009638	-0.003868
41.9000	1257.307	78.005	141.808	57.208	-0.542	20.242	2393.589	-0.005460	-0.009927	-0.004005
42.0000	1308.734	82.595	148.201	60.085	-0.552	20.242	2491.493	-0.005782	-0.010374	-0.004206
42.1000	1330.720	84.010	151.357	61.433	-0.559	20.242	2533.350	-0.005881	-0.010595	-0.004300
42.2000	1350.979	85.933	154.163	63.088	-0.564	20.242	2571.917	-0.006015	-0.010791	-0.004416
42.3000	1359.425	87.142	156.427	64.294	-0.552	20.242	2587.996	-0.006100	-0.010950	-0.004501
42.4000	1373.912	88.420	157.846	64.688	-0.553	20.242	2615.576	-0.006189	-0.011049	-0.004528
42.5000	1367.826	88.530	157.415	64.448	-0.541	20.242	2603.989	-0.006197	-0.011019	-0.004511
42.6000	1355.758	87.449	157.192	64.140	-0.552	20.242	2581.015	-0.006121	-0.011003	-0.004490
42.7000	1308.148	84.379	153.052	61.714	-0.550	20.242	2490.377	-0.005907	-0.010714	-0.004320
42.8000	1303.264	84.463	152.454	61.941	-0.554	20.242	2481.079	-0.005912	-0.010672	-0.004336
42.9000	1257.352	81.009	147.673	59.607	-0.554	20.242	2393.675	-0.005671	-0.010337	-0.004173
43.0000	1216.625	78.092	143.211	57.434	-0.542	20.242	2316.141	-0.005466	-0.010025	-0.004020
43.1000	1150.515	73.487	135.612	53.671	-0.553	20.242	2190.285	-0.005144	-0.009493	-0.003757
43.2000	1110.149	70.528	130.873	51.089	-0.562	20.242	2113.438	-0.004937	-0.009161	-0.003576
43.3000	1040.913	65.406	123.201	47.133	-0.555	20.242	1981.630	-0.004578	-0.008624	-0.003299
43.4000	962.675	60.424	114.585	42.643	-0.540	20.242	1832.685	-0.004230	-0.008021	-0.002985
43.5000	911.097	56.213	108.109	39.598	-0.549	20.242	1734.495	-0.003935	-0.007568	-0.002772
43.6000	823.241	49.732	98.370	35.037	-0.553	20.242	1567.240	-0.003481	-0.006886	-0.002453
43.7000	747.137	43.964	89.060	30.672	-0.562	20.242	1422.358	-0.003077	-0.006234	-0.002147
43.8000	672.341	38.477	80.302	26.814	-0.557	20.242	1279.964	-0.002693	-0.005621	-0.001877
43.9000	595.350	33.033	70.993	22.057	-0.547	20.241	1133.394	-0.002312	-0.004969	-0.001544
44.0000	545.110	28.696	63.724	18.506	-0.554	20.242	1037.750	-0.002009	-0.004461	-0.001295
44.1000	471.772	23.182	54.695	14.521	-0.556	20.242	898.132	-0.001623	-0.003829	-0.001016
44.2000	425.274	18.970	48.274	11.715	-0.562	20.242	809.612	-0.001328	-0.003379	-0.000820
44.3000	366.768	14.985	40.797	8.374	-0.553	20.241	698.233	-0.001049	-0.002856	-0.000586
44.4000	319.624	10.327	33.460	5.317	-0.554	20.242	608.482	-0.000723	-0.002342	-0.000372
44.5000	281.662	7.409	27.692	3.168	-0.557	20.242	536.213	-0.000519	-0.001938	-0.000222
44.6000	255.092	4.881	23.786	1.401	-0.562	20.242	485.630	-0.000342	-0.001665	-0.000098
44.7000	237.749	3.452	20.856	0.084	-0.546	20.242	452.614	-0.000242	-0.001460	-0.000006
44.8000	223.818	1.626	18.202	-0.548	-0.552	20.241	426.092	-0.000114	-0.001274	0.000038
44.9000	214.125	0.841	16.744	-1.181	-0.541	20.242	407.639	-0.000059	-0.001172	0.000083
45.0000	222.616	1.122	17.049	-0.703	-0.536	20.241	423.803	-0.000079	-0.001193	0.000049
45.1000	233.196	1.487	17.437	-0.381	-0.556	20.242	443.945	-0.000104	-0.001221	0.000027
45.2000	260.337	3.185	19.909	0.504	-0.535	20.241	495.615	-0.000223	-0.001394	-0.000035
45.3000	282.249	4.533	22.511	1.092	-0.550	20.241	537.329	-0.000317	-0.001576	-0.000076
45.4000	330.460	7.520	28.138	4.054	-0.544	20.241	629.110	-0.000526	-0.001970	-0.000284
45.5000	371.848	10.285	33.282	5.586	-0.546	20.242	707.903	-0.000720	-0.002330	-0.000391
45.6000	424.808	14.383	39.826	8.191	-0.541	20.241	808.725	-0.001007	-0.002788	-0.000573
45.7000	494.284	18.942	47.995	12.361	-0.543	20.242	940.990	-0.001326	-0.003360	-0.000865
45.8000	545.441	23.026	55.249	15.110	-0.548	20.241	1038.380	-0.001612	-0.003867	-0.001058
45.9000	617.863	28.765	63.390	19.011	-0.546	20.241	1176.252	-0.002014	-0.004437	-0.001331
46.0000	682.620	32.823	71.161	23.447	-0.545	20.242	1299.534	-0.002298	-0.004981	-0.001641
46.1000	778.922	40.271	82.833	28.177	-0.545	20.242	1482.868	-0.002819	-0.005798	-0.001972
46.2000	837.638	45.156	89.685	32.567	-0.545	20.241	1594.648	-0.003161	-0.006278	-0.002280
46.3000	907.686	50.405	98.399	35.496	-0.542	20.242	1728.001	-0.003528	-0.006888	-0.002485
46.4000	967.875	55.020	105.735	39.360	-0.546	20.242	1842.585	-0.003851	-0.007401	-0.002755
46.5000	1044.204	60.437	114.490	43.780	-0.544	20.242	1987.896	-0.004231	-0.008014	-0.003065
46.6000	1101.913	65.194	121.745	47.652	-0.544	20.242	2097.759	-0.004564	-0.008522	-0.003336
46.7000	1158.645	69.811	128.678	51.203	-0.537	20.242	2205.763	-0.004887	-0.009007	-0.003584
46.8000	1211.245	74.228	135.082	53.769	-0.545	20.242	2305.899	-0.005196	-0.009456	-0.003764
46.9000	1260.643	77.908	141.349	56.970	-0.552	20.242	2399.940	-0.005454	-0.009894	-0.003988
47.0000	1303.835	81.558	147.091	59.370	-0.550	20.242	2482.166	-0.005709	-0.010296	-0.004156
47.1000	1333.290	84.013	150.885	60.983	-0.552	20.242	2538.242	-0.005881	-0.010562	-0.004269
47.2000	1358.779	86.384	154.289	62.697	-0.538	20.242	2586.765	-0.006047	-0.010800	-0.004389
47.3000	1371.237	87.592	156.081	64.026	-0.548	20.242	2610.483	-0.006131	-0.010926	-0.004482
47.4000	1368.547	87.352	156.455	63.803	-0.546	20.242	2605.362	-0.006115	-0.010952	-0.004466
47.5000	1368.712	87.913	156.801	63.900	-0.548	20.242	2605.677	-0.006154	-0.010976	-0.004473
47.6000	1352.076	87.241	156.095	63.440	-0.532	20.242	2574.005	-0.006107	-0.010927	-0.004441
47.7000	1328.992	85.920	154.442	63.003	-0.544	20.242	2530.060	-0.006014	-0.010811	-0.004410
47.8000	1294.216	84.266	151.438	61.377	-0.545	20.242	2463.856	-0.005899	-0.010601	-0.004296
47.9000	1260.838	81.752	147.632	59.214	-0.545	20.242	2400.312	-0.005723	-0.010334	-0.004145
48.0000	1218.022	78.373	142.810	56.452	-0.542	20.242	2318.802	-0.005486	-0.009997	-0.003952
48.1000	1157.082	74.134	136.165	53.700	-0.553	20.242	2202.787	-0.005189	-0.009532	-0.003759
48.2000	1103.942	70.301	129.956	50.684	-0.543	20.242	2101.622	-0.004921	-0.009097	-0.003548
48.3000	1041.033	65.435	122.369	46.922	-0.544	20.242	1981.859	-0.004580	-0.008566	-0.003285
48.4000	962.840	60.058	114.128	42.388	-0.541	20.242	1833.000	-0.004204	-0.007989	-0.002967
48.5000	903.433	55.317	107.276	39.302	-0.550	20.242	1719.904	-0.003872	-0.007509	-0.002751
48.6000	828.095	49.786	98.257	35.037	-0.551	20.242	1576.481	-0.003485	-0.006878	-0.002453
48.7000	764.014	45.100	90.407	31.696	-0.548	20.242	1454.487	-0.003157	-0.006328	-0.002219
48.8000	682.620	38.813	80.636	26.618	-0.549	20.242	1299.534	-0.002717	-0.005645	-0.001863
48.9000	615.729	33.622	72.345	22.845	-0.555	20.242	1172.190	-0.002354	-0.005064	-0.001599
49.0000	542.030	28.149	63.057	18.478	-0.546	20.242	1031.885	-0.001970	-0.004414	-0.001293
49.1000	479.361	23.488	54.928	14.676	-0.548	20.242	912.580	-0.001644	-0.003845	-0.001027
49.2000	429.046	19.320	48.441	11.407	-0.541	20.242	816.793	-0.001352	-0.003391	-0.000799
49.3000	374.974	14.957	40.825	8.079	-0.538	20.242	713.854	-0.001047	-0.002858	-0.000566
49.4000	325.064	10.719	34.406	5.556	-0.538	20.242	618.839	-0.000750	-0.002408	-0.000389
49.5000	282.955	7.183	27.263	2.845	-0.546	20.242	538.673	-0.000503	-0.001908	-0.000199
49.6000	261.013	5.051	24.261	1.373	-0.532	20.242	496.902	-0.000354	-0.001698	-0.000096
49.7000	233.481	2.706	20.243	0.152	-0.549	20.242	444.489	-0.000189	-0.001417	-0.000011
49.8000	217.160	2.006	17.772	-0.998	-0.552	20.242	413.418	-0.000140	-0.001244	0.000070
49.9000	222.511	1.570	17.452	-0.983	-0.552	20.242	423.603	-0.000110	-0.001222	0.000069
Test Cycles
Time (sec)	Axial stress (kPa)	Axial micro-strain #1	Axial micro-strain #2	Axial micro-strain #3	Confining pressure (kPa)	Temperature (�C)	Load (N)	Displacement #1 (mm)	Displacement #2 (mm)	Displacement #3 (mm)
0.0000	220.001	1.303	16.563	-1.448	-0.549	20.242	418.825	-0.000091	-0.001159	0.000101
0.1000	233.256	1.641	17.243	-0.716	-0.545	20.242	444.059	-0.000115	-0.001207	0.000050
0.2000	251.606	2.721	18.619	-0.492	-0.555	20.242	478.992	-0.000190	-0.001303	0.000034
0.3000	285.254	4.673	22.218	1.247	-0.545	20.242	543.051	-0.000327	-0.001555	-0.000087
0.4000	320.225	7.155	26.525	3.085	-0.555	20.242	609.627	-0.000501	-0.001857	-0.000216
0.5000	388.499	11.660	34.585	6.270	-0.546	20.242	739.603	-0.000816	-0.002421	-0.000439
0.6000	421.923	13.877	39.061	7.995	-0.551	20.242	803.232	-0.000971	-0.002734	-0.000560
0.7000	482.217	18.284	46.176	11.632	-0.546	20.242	918.016	-0.001280	-0.003232	-0.000814
0.8000	547.545	23.574	54.762	15.632	-0.551	20.243	1042.385	-0.001650	-0.003833	-0.001094
0.9000	607.088	27.770	61.709	18.575	-0.549	20.242	1155.739	-0.001944	-0.004320	-0.001300
1.0000	689.368	33.453	71.607	23.672	-0.550	20.243	1312.380	-0.002342	-0.005013	-0.001657
1.1000	759.295	39.010	80.287	27.559	-0.560	20.243	1445.503	-0.002731	-0.005620	-0.001929
1.2000	824.984	44.202	88.588	31.317	-0.545	20.243	1570.559	-0.003094	-0.006201	-0.002192
1.3000	904.515	50.489	98.008	35.711	-0.551	20.243	1721.964	-0.003534	-0.006861	-0.002500
1.4000	983.925	56.466	107.803	40.271	-0.550	20.243	1873.140	-0.003953	-0.007546	-0.002819
1.5000	1031.475	60.144	114.031	43.429	-0.550	20.243	1963.663	-0.004210	-0.007982	-0.003040
1.6000	1101.913	65.783	121.645	46.991	-0.545	20.243	2097.759	-0.004605	-0.008515	-0.003289
1.7000	1162.883	70.863	130.288	51.148	-0.549	20.243	2213.831	-0.004960	-0.009120	-0.003580
1.8000	1236.252	76.265	138.056	55.554	-0.545	20.244	2353.506	-0.005339	-0.009664	-0.003889
1.9000	1271.433	79.311	143.006	58.022	-0.552	20.243	2420.483	-0.005552	-0.010010	-0.004062
2.0000	1304.962	82.105	146.867	59.608	-0.545	20.243	2484.312	-0.005747	-0.010281	-0.004173
2.1000	1339.963	84.783	151.506	62.065	-0.553	20.243	2550.945	-0.005935	-0.010605	-0.004345
2.2000	1354.375	86.705	154.955	63.396	-0.546	20.244	2578.382	-0.006069	-0.010847	-0.004438
2.3000	1373.281	88.250	157.011	64.095	-0.545	20.244	2614.374	-0.006177	-0.010991	-0.004487
2.4000	1379.367	89.049	157.441	64.812	-0.550	20.244	2625.961	-0.006233	-0.011021	-0.004537
2.5000	1373.521	88.756	157.456	64.898	-0.540	20.244	2614.832	-0.006213	-0.011022	-0.004543
2.6000	1359.921	88.180	156.426	64.743	-0.546	20.244	2588.940	-0.006173	-0.010950	-0.004532
2.7000	1331.577	86.454	153.927	62.793	-0.547	20.244	2534.981	-0.006052	-0.010775	-0.004395
2.8000	1303.609	84.896	152.192	61.910	-0.553	20.244	2481.737	-0.005943	-0.010653	-0.004334
2.9000	1259.711	81.738	147.590	59.749	-0.551	20.245	2398.167	-0.005722	-0.010331	-0.004182
3.0000	1223.823	79.255	143.616	57.587	-0.550	20.245	2329.845	-0.005548	-0.010053	-0.004031
3.1000	1163.484	74.989	136.750	54.754	-0.555	20.245	2214.975	-0.005249	-0.009573	-0.003833
3.2000	1098.156	70.232	129.440	51.314	-0.556	20.245	2090.607	-0.004916	-0.009061	-0.003592
3.3000	1051.357	67.004	123.898	47.877	-0.552	20.245	2001.514	-0.004690	-0.008673	-0.003351
3.4000	975.118	61.575	115.422	43.948	-0.550	20.245	1856.375	-0.004310	-0.008080	-0.003076
3.5000	898.819	55.696	106.692	38.981	-0.552	20.245	1711.121	-0.003899	-0.007468	-0.002729
3.6000	825.631	50.489	98.425	35.400	-0.537	20.245	1571.789	-0.003534	-0.006890	-0.002478
3.7000	763.759	45.353	90.461	32.105	-0.545	20.245	1454.000	-0.003175	-0.006332	-0.002247
3.8000	687.309	39.864	81.278	27.376	-0.545	20.246	1308.460	-0.002790	-0.005689	-0.001916
3.9000	612.378	34.084	71.383	22.605	-0.550	20.246	1165.810	-0.002386	-0.004997	-0.001582
4.0000	543.322	28.387	63.196	18.688	-0.529	20.246	1034.346	-0.001987	-0.004424	-0.001308
4.1000	469.157	23.292	53.749	14.099	-0.542	20.246	893.154	-0.001630	-0.003762	-0.000987
4.2000	430.744	19.685	48.469	12.107	-0.552	20.246	820.026	-0.001378	-0.003393	-0.000848
4.3000	380.790	15.295	41.714	8.923	-0.542	20.246	724.926	-0.001071	-0.002920	-0.000625
4.4000	329.468	11.337	34.143	6.017	-0.546	20.247	627.222	-0.000794	-0.002390	-0.000421
4.5000	287.448	7.633	28.639	3.379	-0.548	20.247	547.228	-0.000534	-0.002005	-0.000237
4.6000	252.552	4.770	23.607	1.611	-0.541	20.247	480.795	-0.000334	-0.001652	-0.000113
4.7000	226.313	2.875	19.423	-0.366	-0.542	20.247	430.841	-0.000201	-0.001360	0.000026
4.8000	227.740	2.426	18.187	-0.154	-0.546	20.247	433.559	-0.000170	-0.001273	0.000011
4.9000	221.248	2.033	17.090	-0.789	-0.550	20.248	421.200	-0.000142	-0.001196	0.000055
5.0000	222.646	1.599	16.802	-0.886	-0.555	20.248	423.861	-0.000112	-0.001176	0.000062
5.1000	238.711	2.229	18.284	-0.507	-0.548	20.248	454.445	-0.000156	-0.001280	0.000035
5.2000	259.315	3.325	20.007	0.209	-0.558	20.248	493.670	-0.000233	-0.001400	-0.000015
5.3000	284.052	4.953	22.454	1.359	-0.548	20.248	540.762	-0.000347	-0.001572	-0.000095
5.4000	320.706	7.617	27.055	3.618	-0.553	20.248	610.542	-0.000533	-0.001894	-0.000253
5.5000	389.807	12.024	35.116	6.679	-0.554	20.249	742.092	-0.000842	-0.002458	-0.000468
5.6000	427.408	14.999	39.826	8.626	-0.558	20.249	813.675	-0.001050	-0.002788	-0.000604
5.7000	486.229	19.252	47.104	11.672	-0.544	20.249	925.655	-0.001348	-0.003297	-0.000817
5.8000	547.816	23.771	54.846	15.757	-0.553	20.249	1042.900	-0.001664	-0.003839	-0.001103
5.9000	620.207	29.030	63.432	19.278	-0.552	20.249	1180.716	-0.002032	-0.004440	-0.001349
6.0000	690.300	34.644	72.329	23.700	-0.564	20.249	1314.154	-0.002425	-0.005063	-0.001659
6.1000	763.128	39.922	81.181	27.938	-0.562	20.249	1452.799	-0.002795	-0.005683	-0.001956
6.2000	842.372	45.786	90.337	32.441	-0.562	20.249	1603.661	-0.003205	-0.006324	-0.002271
6.3000	910.947	51.245	98.857	36.396	-0.551	20.250	1734.209	-0.003587	-0.006920	-0.002548
6.4000	995.632	57.475	108.417	40.845	-0.550	20.250	1895.428	-0.004023	-0.007589	-0.002859
6.5000	1042.340	61.434	114.713	43.907	-0.557	20.250	1984.348	-0.004300	-0.008030	-0.003074
6.6000	1113.785	66.796	123.579	48.508	-0.554	20.251	2120.361	-0.004676	-0.008651	-0.003396
6.7000	1160.584	70.991	129.317	51.146	-0.544	20.250	2209.454	-0.004969	-0.009052	-0.003580
6.8000	1214.446	75.198	136.292	54.669	-0.557	20.251	2311.993	-0.005264	-0.009540	-0.003827
6.9000	1267.646	79.577	142.116	57.684	-0.551	20.251	2413.273	-0.005570	-0.009948	-0.004038
7.0000	1310.297	82.678	147.464	60.437	-0.552	20.251	2494.469	-0.005787	-0.010323	-0.004231
7.1000	1338.250	85.218	150.952	62.119	-0.554	20.252	2547.684	-0.005965	-0.010567	-0.004348
7.2000	1352.963	86.621	154.635	63.283	-0.560	20.251	2575.693	-0.006063	-0.010824	-0.004430
7.3000	1371.102	88.573	156.248	64.138	-0.552	20.251	2610.226	-0.006200	-0.010937	-0.004490
7.4000	1370.816	88.503	156.832	64.349	-0.560	20.251	2609.682	-0.006195	-0.010978	-0.004504
7.5000	1364.579	88.994	157.190	64.728	-0.549	20.252	2597.809	-0.006230	-0.011003	-0.004531
7.6000	1355.112	87.873	156.623	64.167	-0.557	20.252	2579.784	-0.006151	-0.010964	-0.004492
7.7000	1337.108	87.155	155.302	63.634	-0.549	20.252	2545.509	-0.006101	-0.010871	-0.004454
7.8000	1300.679	84.784	151.994	61.783	-0.552	20.253	2476.158	-0.005935	-0.010640	-0.004325
7.9000	1262.702	82.019	147.352	60.017	-0.553	20.253	2403.860	-0.005741	-0.010315	-0.004201
8.0000	1208.359	78.470	141.991	56.677	-0.550	20.253	2300.406	-0.005493	-0.009939	-0.003967
8.1000	1167.978	75.606	137.445	54.669	-0.542	20.253	2223.530	-0.005292	-0.009621	-0.003827
8.2000	1116.881	71.706	131.456	51.540	-0.542	20.253	2126.255	-0.005019	-0.009202	-0.003608
8.3000	1042.415	66.387	122.993	47.553	-0.550	20.253	1984.491	-0.004647	-0.008610	-0.003329
8.4000	963.982	60.944	114.338	43.204	-0.557	20.253	1835.175	-0.004266	-0.008004	-0.003024
8.5000	899.014	56.297	106.720	39.501	-0.562	20.253	1711.493	-0.003941	-0.007470	-0.002765
8.6000	825.616	50.475	98.008	35.332	-0.553	20.253	1571.760	-0.003533	-0.006861	-0.002473
8.7000	761.399	45.466	89.908	31.571	-0.548	20.254	1449.509	-0.003183	-0.006294	-0.002210
8.8000	686.122	40.034	80.886	27.164	-0.561	20.253	1306.200	-0.002802	-0.005662	-0.001901
8.9000	601.437	33.579	70.715	21.875	-0.547	20.252	1144.981	-0.002351	-0.004950	-0.001531
9.0000	535.492	28.317	62.059	18.294	-0.561	20.254	1019.440	-0.001982	-0.004344	-0.001281
9.1000	468.210	23.587	53.738	14.535	-0.554	20.254	891.352	-0.001651	-0.003762	-0.001017
9.2000	412.064	18.887	46.424	11.000	-0.556	20.254	784.464	-0.001322	-0.003250	-0.000770
9.3000	372.674	15.295	40.590	8.584	-0.542	20.254	709.476	-0.001071	-0.002841	-0.000601
9.4000	332.128	11.729	34.809	5.680	-0.548	20.254	632.286	-0.000821	-0.002437	-0.000398
9.5000	292.573	8.460	29.165	3.801	-0.556	20.255	556.984	-0.000592	-0.002042	-0.000266
9.6000	254.686	5.585	23.274	1.611	-0.561	20.254	484.858	-0.000391	-0.001629	-0.000113
9.7000	239.403	4.013	20.635	0.616	-0.555	20.254	455.761	-0.000281	-0.001444	-0.000043
9.8000	225.967	2.918	18.742	-0.478	-0.561	20.254	430.183	-0.000204	-0.001312	0.000033
9.9000	218.904	2.188	16.244	-1.054	-0.555	20.254	416.737	-0.000153	-0.001137	0.000074
10.0000	227.410	1.712	16.675	-0.689	-0.555	20.254	432.930	-0.000120	-0.001167	0.000048
10.1000	235.916	2.370	17.090	-0.617	-0.556	20.255	449.123	-0.000166	-0.001196	0.000043
10.2000	198.886	0.099	13.615	-2.262	-0.554	20.255	378.628	-0.000007	-0.000953	0.000158
10.3000	296.571	6.102	25.178	2.118	-0.558	20.255	564.594	-0.000427	-0.001762	-0.000148
10.4000	327.589	7.842	27.346	3.982	-0.548	20.255	623.646	-0.000549	-0.001914	-0.000279
10.5000	377.544	11.462	33.878	6.242	-0.567	20.255	718.746	-0.000802	-0.002371	-0.000437
10.6000	437.943	15.928	40.964	9.062	-0.559	20.255	833.731	-0.001115	-0.002867	-0.000634
10.7000	468.946	18.563	45.841	11.126	-0.561	20.255	892.754	-0.001299	-0.003209	-0.000779
10.8000	543.908	23.559	54.403	15.013	-0.552	20.256	1035.461	-0.001649	-0.003808	-0.001051
10.9000	623.198	29.593	64.489	19.866	-0.547	20.255	1186.409	-0.002071	-0.004514	-0.001391
11.0000	696.747	34.898	73.036	23.951	-0.548	20.256	1326.427	-0.002443	-0.005113	-0.001677
11.1000	772.250	40.385	81.973	28.260	-0.551	20.255	1470.165	-0.002827	-0.005738	-0.001978
11.2000	836.241	45.283	89.737	32.202	-0.558	20.255	1591.988	-0.003170	-0.006282	-0.002254
11.3000	912.435	51.077	98.719	36.481	-0.550	20.255	1737.041	-0.003575	-0.006910	-0.002554
11.4000	972.368	56.186	106.734	40.160	-0.563	20.256	1851.139	-0.003933	-0.007471	-0.002811
11.5000	1046.383	61.462	115.143	44.539	-0.557	20.256	1992.044	-0.004302	-0.008060	-0.003118
11.6000	1095.451	66.065	122.592	47.692	-0.556	20.256	2085.457	-0.004625	-0.008581	-0.003338
11.7000	1174.049	71.635	130.177	51.890	-0.560	20.256	2235.088	-0.005014	-0.009112	-0.003632
11.8000	1224.349	75.452	136.640	54.850	-0.552	20.256	2330.847	-0.005282	-0.009565	-0.003839
11.9000	1267.917	79.298	142.253	57.432	-0.556	20.256	2413.788	-0.005551	-0.009958	-0.004020
12.0000	1302.197	81.992	146.965	59.721	-0.555	20.256	2479.048	-0.005739	-0.010288	-0.004180
12.1000	1346.801	85.528	152.133	62.569	-0.555	20.256	2563.963	-0.005987	-0.010649	-0.004380
12.2000	1361.874	87.449	154.276	63.607	-0.556	20.257	2592.659	-0.006121	-0.010799	-0.004452
12.3000	1373.461	88.167	156.222	64.504	-0.555	20.256	2614.717	-0.006172	-0.010936	-0.004515
12.4000	1388.610	89.864	158.136	65.318	-0.560	20.257	2643.557	-0.006290	-0.011070	-0.004572
12.5000	1367.705	88.869	157.096	64.657	-0.553	20.256	2603.760	-0.006221	-0.010997	-0.004526
12.6000	1361.469	88.797	157.206	64.742	-0.549	20.257	2591.887	-0.006216	-0.011004	-0.004532
12.7000	1336.056	86.916	154.706	63.269	-0.548	20.256	2543.507	-0.006084	-0.010829	-0.004429
12.8000	1294.983	84.265	151.260	61.477	-0.547	20.257	2465.315	-0.005899	-0.010588	-0.004303
12.9000	1255.969	81.950	147.005	59.694	-0.560	20.257	2391.043	-0.005737	-0.010290	-0.004179
13.0000	1187.815	77.233	139.405	55.709	-0.546	20.257	2261.295	-0.005406	-0.009758	-0.003900
13.1000	1172.592	75.970	136.848	54.470	-0.550	20.256	2232.313	-0.005318	-0.009579	-0.003813
13.2000	1092.205	70.204	128.525	50.699	-0.550	20.257	2079.277	-0.004914	-0.008997	-0.003549
13.3000	1021.481	65.672	120.894	46.473	-0.562	20.257	1944.637	-0.004597	-0.008463	-0.003253
13.4000	967.950	61.252	114.795	43.401	-0.554	20.257	1842.728	-0.004288	-0.008036	-0.003038
13.5000	898.654	56.172	106.554	39.360	-0.570	20.257	1710.806	-0.003932	-0.007459	-0.002755
13.6000	821.107	50.347	97.591	35.232	-0.551	20.257	1563.177	-0.003524	-0.006831	-0.002466
13.7000	763.909	45.887	89.796	31.866	-0.552	20.257	1454.287	-0.003212	-0.006286	-0.002231
13.8000	659.116	37.915	77.860	25.326	-0.551	20.257	1254.787	-0.002654	-0.005450	-0.001773
13.9000	601.437	33.356	70.632	22.169	-0.555	20.257	1144.981	-0.002335	-0.004944	-0.001552
14.0000	539.520	28.948	62.573	18.478	-0.546	20.257	1027.107	-0.002026	-0.004380	-0.001293
14.1000	470.810	23.546	53.902	14.702	-0.550	20.256	896.301	-0.001648	-0.003773	-0.001029
14.2000	419.368	19.181	47.258	11.743	-0.550	20.257	798.368	-0.001343	-0.003308	-0.000822
14.3000	377.228	15.844	40.798	8.739	-0.557	20.257	718.145	-0.001109	-0.002856	-0.000612
14.4000	326.026	11.337	34.183	5.668	-0.554	20.257	620.670	-0.000794	-0.002393	-0.000397
14.5000	289.868	8.797	28.681	3.827	-0.553	20.257	551.834	-0.000616	-0.002008	-0.000268
14.6000	258.579	5.794	23.970	1.990	-0.548	20.257	492.268	-0.000406	-0.001678	-0.000139
14.7000	234.864	3.772	20.159	0.377	-0.559	20.257	447.121	-0.000264	-0.001411	-0.000026
14.8000	223.382	2.427	18.380	-0.323	-0.552	20.257	425.262	-0.000170	-0.001287	0.000023
14.9000	218.017	1.515	16.854	-0.702	-0.573	20.257	415.049	-0.000106	-0.001180	0.000049
15.0000	223.172	1.849	16.786	-0.914	-0.554	20.257	424.862	-0.000129	-0.001175	0.000064
15.1000	233.346	2.329	17.424	-0.379	-0.546	20.257	444.231	-0.000163	-0.001220	0.000027
15.2000	262.186	4.308	20.131	0.812	-0.554	20.257	499.134	-0.000302	-0.001409	-0.000057
15.3000	285.254	5.401	22.454	1.751	-0.558	20.257	543.051	-0.000378	-0.001572	-0.000123
15.4000	339.837	9.148	28.777	4.235	-0.558	20.257	646.963	-0.000640	-0.002014	-0.000296
15.5000	371.442	11.379	32.948	5.977	-0.573	20.257	707.130	-0.000797	-0.002306	-0.000418
15.6000	428.250	15.393	39.864	9.175	-0.557	20.257	815.277	-0.001078	-0.002791	-0.000642
15.7000	484.426	19.181	46.773	11.896	-0.560	20.257	922.222	-0.001343	-0.003274	-0.000833
15.8000	548.221	24.444	55.806	15.743	-0.554	20.257	1043.673	-0.001711	-0.003906	-0.001102
15.9000	611.671	28.822	63.613	19.304	-0.568	20.257	1164.465	-0.002018	-0.004453	-0.001351
16.0000	688.091	34.771	72.313	23.839	-0.567	20.257	1309.948	-0.002434	-0.005062	-0.001669
16.1000	791.125	41.999	83.917	29.368	-0.562	20.258	1506.100	-0.002940	-0.005874	-0.002056
16.2000	820.416	44.637	88.380	31.598	-0.587	20.258	1561.861	-0.003125	-0.006187	-0.002212
16.3000	897.376	50.671	96.881	35.655	-0.570	20.258	1708.374	-0.003547	-0.006782	-0.002496
16.4000	981.160	56.958	107.221	40.775	-0.570	20.258	1867.876	-0.003987	-0.007505	-0.002854
16.5000	1065.604	63.061	116.880	45.309	-0.578	20.258	2028.637	-0.004414	-0.008182	-0.003172
16.6000	1130.677	68.268	125.034	49.378	-0.561	20.258	2152.519	-0.004779	-0.008752	-0.003456
16.7000	1184.810	72.618	131.553	52.506	-0.572	20.257	2255.573	-0.005083	-0.009209	-0.003675
16.8000	1236.477	76.954	138.059	56.102	-0.581	20.258	2353.935	-0.005387	-0.009664	-0.003927
16.9000	1280.435	80.293	143.519	58.428	-0.576	20.257	2437.620	-0.005620	-0.010046	-0.004090
17.0000	1306.720	83.129	147.494	60.241	-0.574	20.259	2487.659	-0.005819	-0.010325	-0.004217
17.1000	1338.175	85.360	151.162	62.135	-0.583	20.258	2547.541	-0.005975	-0.010581	-0.004349
17.2000	1353.879	86.999	153.886	63.648	-0.572	20.258	2577.438	-0.006090	-0.010772	-0.004455
17.3000	1367.540	88.194	155.887	64.096	-0.570	20.258	2603.445	-0.006174	-0.010912	-0.004487
17.4000	1372.980	89.317	157.611	64.857	-0.576	20.259	2613.802	-0.006252	-0.011033	-0.004540
17.5000	1368.367	89.543	157.594	64.869	-0.580	20.259	2605.019	-0.006268	-0.011032	-0.004541
17.6000	1353.083	88.672	156.706	64.700	-0.572	20.258	2575.922	-0.006207	-0.010969	-0.004529
17.7000	1314.911	86.283	153.496	62.876	-0.573	20.258	2503.252	-0.006040	-0.010745	-0.004401
17.8000	1303.790	85.345	152.607	62.219	-0.565	20.258	2482.080	-0.005974	-0.010682	-0.004355
17.9000	1262.326	82.271	147.174	60.156	-0.565	20.259	2403.145	-0.005759	-0.010302	-0.004211
18.0000	1223.087	79.926	143.325	58.177	-0.568	20.258	2328.444	-0.005595	-0.010033	-0.004072
18.1000	1166.310	75.901	136.973	54.795	-0.570	20.259	2220.354	-0.005313	-0.009588	-0.003836
18.2000	1112.959	71.932	130.788	51.848	-0.566	20.259	2118.788	-0.005035	-0.009155	-0.003629
18.3000	1057.294	67.776	123.646	48.565	-0.561	20.259	2012.815	-0.004744	-0.008655	-0.003400
18.4000	990.552	62.780	115.393	44.313	-0.566	20.259	1885.757	-0.004395	-0.008078	-0.003102
18.5000	882.363	55.510	105.429	38.982	-0.560	20.259	1679.792	-0.003886	-0.007380	-0.002729
18.6000	822.129	50.979	98.160	35.485	-0.556	20.258	1565.123	-0.003569	-0.006871	-0.002484
18.7000	746.446	45.465	88.878	31.374	-0.564	20.259	1421.041	-0.003183	-0.006221	-0.002196
18.8000	671.469	39.317	79.774	27.152	-0.567	20.258	1278.305	-0.002752	-0.005584	-0.001901
18.9000	603.300	34.463	70.965	22.352	-0.562	20.259	1148.529	-0.002412	-0.004968	-0.001565
19.0000	546.794	29.578	63.225	19.472	-0.554	20.259	1040.955	-0.002070	-0.004426	-0.001363
19.1000	477.933	24.527	54.946	15.251	-0.557	20.259	909.863	-0.001717	-0.003846	-0.001068
19.2000	417.294	19.503	46.757	11.561	-0.566	20.259	794.420	-0.001365	-0.003273	-0.000809
19.3000	377.514	16.277	41.227	8.921	-0.562	20.260	718.689	-0.001139	-0.002886	-0.000624
19.4000	327.018	12.262	34.045	6.200	-0.561	20.259	622.559	-0.000858	-0.002383	-0.000434
19.5000	274.118	7.743	26.526	3.195	-0.557	20.260	521.851	-0.000542	-0.001857	-0.000224
19.6000	248.359	5.445	22.469	1.526	-0.564	20.259	472.813	-0.000381	-0.001573	-0.000107
19.7000	242.979	4.448	20.702	1.051	-0.564	20.260	462.570	-0.000311	-0.001449	-0.000074
19.8000	229.228	3.197	18.576	0.378	-0.576	20.259	436.392	-0.000224	-0.001300	-0.000026
19.9000	189.403	0.701	13.406	-2.079	-0.562	20.259	360.575	-0.000049	-0.000938	0.000146
20.0000	212.637	1.261	15.283	-1.180	-0.566	20.259	404.806	-0.000088	-0.001070	0.000083
20.1000	229.544	2.301	16.410	-0.409	-0.568	20.259	436.993	-0.000161	-0.001149	0.000029
20.2000	260.367	3.605	19.327	0.601	-0.568	20.260	495.672	-0.000252	-0.001353	-0.000042
20.3000	300.313	6.384	23.581	2.676	-0.565	20.260	571.718	-0.000447	-0.001651	-0.000187
20.4000	332.383	8.501	27.875	4.474	-0.567	20.260	632.772	-0.000595	-0.001951	-0.000313
20.5000	398.358	12.894	35.752	7.378	-0.565	20.260	758.371	-0.000903	-0.002503	-0.000516
20.6000	423.470	14.945	39.769	9.176	-0.572	20.260	806.179	-0.001046	-0.002784	-0.000642
20.7000	479.587	19.363	46.772	11.969	-0.562	20.261	913.010	-0.001355	-0.003274	-0.000838
20.8000	552.655	24.684	55.054	15.882	-0.564	20.260	1052.113	-0.001728	-0.003854	-0.001112
20.9000	615.714	29.117	62.627	19.725	-0.572	20.261	1172.161	-0.002038	-0.004384	-0.001381
21.0000	684.409	34.239	70.814	23.515	-0.572	20.260	1302.938	-0.002397	-0.004957	-0.001646
21.1000	762.511	39.990	80.206	27.769	-0.560	20.260	1451.626	-0.002799	-0.005614	-0.001944
21.2000	838.435	45.562	89.698	32.581	-0.570	20.260	1596.165	-0.003189	-0.006279	-0.002281
21.3000	888.044	50.124	96.699	35.500	-0.562	20.260	1690.607	-0.003509	-0.006769	-0.002485
21.4000	969.858	56.004	105.929	40.340	-0.555	20.260	1846.361	-0.003920	-0.007415	-0.002824
21.5000	1037.020	61.195	113.572	44.174	-0.577	20.260	1974.220	-0.004284	-0.007950	-0.003092
21.6000	1133.653	68.015	124.313	49.377	-0.572	20.261	2158.184	-0.004761	-0.008702	-0.003456
21.7000	1164.942	71.242	129.122	51.637	-0.575	20.261	2217.751	-0.004987	-0.009039	-0.003615
21.8000	1215.438	75.144	135.778	54.682	-0.566	20.261	2313.881	-0.005260	-0.009504	-0.003828
21.9000	1285.410	80.813	144.615	59.089	-0.560	20.261	2447.090	-0.005657	-0.010123	-0.004136
22.0000	1297.057	82.343	146.477	60.212	-0.566	20.261	2469.263	-0.005764	-0.010253	-0.004215
22.1000	1344.021	85.501	151.885	62.680	-0.556	20.261	2558.670	-0.005985	-0.010632	-0.004388
22.2000	1366.668	87.647	154.706	64.363	-0.569	20.261	2601.786	-0.006135	-0.010829	-0.004505
22.3000	1375.325	88.475	156.415	65.024	-0.572	20.261	2618.265	-0.006193	-0.010949	-0.004552
22.4000	1370.170	88.503	156.123	64.967	-0.566	20.261	2608.452	-0.006195	-0.010929	-0.004548
22.5000	1372.364	89.049	157.026	65.319	-0.574	20.261	2612.629	-0.006233	-0.010992	-0.004572
22.6000	1364.970	88.911	157.108	64.840	-0.574	20.261	2598.553	-0.006224	-0.010998	-0.004539
22.7000	1329.804	86.663	153.552	63.158	-0.579	20.260	2531.605	-0.006066	-0.010749	-0.004421
22.8000	1304.571	85.050	151.523	61.979	-0.576	20.261	2483.568	-0.005953	-0.010607	-0.004339
22.9000	1265.332	82.048	146.547	60.156	-0.574	20.261	2408.867	-0.005743	-0.010258	-0.004211
23.0000	1213.499	78.692	140.989	57.209	-0.577	20.261	2310.190	-0.005508	-0.009869	-0.004005
23.1000	1163.169	75.339	136.501	54.529	-0.565	20.261	2214.375	-0.005274	-0.009555	-0.003817
23.2000	1107.158	71.369	129.414	51.525	-0.567	20.262	2107.744	-0.004996	-0.009059	-0.003607
23.3000	1052.710	67.077	122.438	47.918	-0.560	20.261	2004.089	-0.004695	-0.008571	-0.003354
23.4000	974.472	61.686	114.880	43.764	-0.560	20.260	1855.145	-0.004318	-0.008042	-0.003063
23.5000	899.105	56.338	106.443	39.669	-0.575	20.261	1711.664	-0.003944	-0.007451	-0.002777
23.6000	842.718	51.808	99.260	36.243	-0.577	20.261	1604.319	-0.003627	-0.006948	-0.002537
23.7000	749.707	44.973	88.852	31.317	-0.571	20.260	1427.250	-0.003148	-0.006220	-0.002192
23.8000	654.773	38.378	77.666	25.776	-0.579	20.261	1246.519	-0.002686	-0.005437	-0.001804
23.9000	618.073	34.772	71.980	23.265	-0.587	20.261	1176.653	-0.002434	-0.005039	-0.001629
24.0000	547.154	29.579	63.531	19.178	-0.574	20.261	1041.641	-0.002071	-0.004447	-0.001342
24.1000	504.474	25.693	57.181	16.571	-0.563	20.261	960.388	-0.001799	-0.004003	-0.001160
24.2000	404.159	18.550	45.174	10.901	-0.568	20.260	769.415	-0.001298	-0.003162	-0.000763
24.3000	385.674	16.374	40.826	9.103	-0.573	20.262	734.224	-0.001146	-0.002858	-0.000637
24.4000	324.974	11.869	33.767	6.047	-0.575	20.261	618.668	-0.000831	-0.002364	-0.000423
24.5000	282.173	7.982	27.040	3.323	-0.569	20.261	537.186	-0.000559	-0.001893	-0.000233
24.6000	254.852	5.765	22.773	2.061	-0.573	20.261	485.172	-0.000404	-0.001594	-0.000144
24.7000	220.918	2.988	18.339	-0.211	-0.571	20.261	420.570	-0.000209	-0.001284	0.000015
24.8000	238.170	3.296	18.606	0.376	-0.578	20.261	453.415	-0.000231	-0.001302	-0.000026
24.9000	225.832	1.907	16.174	-0.605	-0.572	20.262	429.926	-0.000134	-0.001132	0.000042
25.0000	220.196	2.119	15.576	-0.901	-0.580	20.261	419.197	-0.000148	-0.001090	0.000063
25.1000	232.595	2.384	16.562	-0.562	-0.569	20.261	442.801	-0.000167	-0.001159	0.000039
25.2000	262.156	3.998	19.537	0.449	-0.580	20.262	499.077	-0.000280	-0.001368	-0.000031
25.3000	295.218	5.864	23.107	1.989	-0.574	20.262	562.019	-0.000410	-0.001617	-0.000139
25.4000	328.521	8.376	27.402	3.870	-0.576	20.262	625.420	-0.000586	-0.001918	-0.000271
25.5000	374.102	11.098	32.903	6.271	-0.576	20.262	712.194	-0.000777	-0.002303	-0.000439
25.6000	415.535	14.438	38.421	8.529	-0.584	20.261	791.073	-0.001011	-0.002689	-0.000597
25.7000	511.582	21.328	49.648	13.791	-0.585	20.262	973.921	-0.001493	-0.003475	-0.000965
25.8000	555.766	24.822	55.041	16.178	-0.575	20.261	1058.035	-0.001738	-0.003853	-0.001132
25.9000	605.660	28.961	61.933	19.530	-0.582	20.261	1153.021	-0.002027	-0.004335	-0.001367
26.0000	696.942	35.040	72.244	24.148	-0.570	20.262	1326.799	-0.002453	-0.005057	-0.001690
26.1000	762.091	39.612	80.247	28.093	-0.565	20.262	1450.825	-0.002773	-0.005617	-0.001966
26.2000	831.372	45.351	89.255	32.287	-0.569	20.262	1582.718	-0.003175	-0.006248	-0.002260
26.3000	908.888	51.470	97.882	36.425	-0.576	20.262	1730.289	-0.003603	-0.006852	-0.002550
26.4000	987.607	57.195	107.748	40.762	-0.574	20.261	1880.150	-0.004004	-0.007542	-0.002853
26.5000	1063.530	62.625	115.964	45.297	-0.585	20.262	2024.689	-0.004384	-0.008117	-0.003171
26.6000	1128.092	68.169	124.121	49.237	-0.578	20.262	2147.598	-0.004772	-0.008688	-0.003447
26.7000	1161.681	71.244	129.608	51.693	-0.582	20.262	2211.542	-0.004987	-0.009073	-0.003618
26.8000	1223.312	75.802	136.460	55.090	-0.576	20.262	2328.873	-0.005306	-0.009552	-0.003856
26.9000	1272.065	79.705	142.282	58.120	-0.566	20.262	2421.684	-0.005579	-0.009960	-0.004068
27.0000	1301.280	82.314	146.742	60.099	-0.573	20.262	2477.303	-0.005762	-0.010272	-0.004207
27.1000	1330.735	84.967	149.981	62.022	-0.572	20.262	2533.379	-0.005948	-0.010499	-0.004342
27.2000	1374.754	88.264	155.721	64.474	-0.578	20.262	2617.178	-0.006178	-0.010900	-0.004513
27.3000	1357.125	87.253	154.775	64.267	-0.576	20.262	2583.618	-0.006108	-0.010834	-0.004499
27.4000	1369.839	88.800	156.387	64.897	-0.574	20.262	2607.822	-0.006216	-0.010947	-0.004543
27.5000	1378.045	89.458	156.804	65.166	-0.576	20.262	2623.444	-0.006262	-0.010976	-0.004562
27.6000	1339.602	87.169	154.511	63.688	-0.584	20.262	2550.259	-0.006102	-0.010816	-0.004458
27.7000	1329.834	86.805	154.093	63.407	-0.576	20.262	2531.662	-0.006076	-0.010787	-0.004439
27.8000	1295.238	84.966	150.620	61.897	-0.573	20.262	2465.801	-0.005948	-0.010543	-0.004333
27.9000	1258.569	82.117	146.408	59.399	-0.579	20.262	2395.992	-0.005748	-0.010249	-0.004158
28.0000	1198.095	78.426	140.377	56.326	-0.577	20.262	2280.865	-0.005490	-0.009826	-0.003943
28.1000	1152.333	74.918	134.638	53.966	-0.577	20.261	2193.747	-0.005244	-0.009425	-0.003778
28.2000	1084.735	69.698	127.080	50.319	-0.584	20.262	2065.058	-0.004879	-0.008896	-0.003522
28.3000	1039.169	66.668	121.744	47.582	-0.582	20.261	1978.312	-0.004667	-0.008522	-0.003331
28.4000	973.240	61.573	114.392	43.682	-0.582	20.262	1852.798	-0.004310	-0.008007	-0.003058
28.5000	888.314	55.456	104.651	38.713	-0.573	20.262	1691.122	-0.003882	-0.007326	-0.002710
28.6000	815.487	49.858	96.327	34.769	-0.577	20.262	1552.477	-0.003490	-0.006743	-0.002434
28.7000	749.602	45.171	88.796	30.908	-0.568	20.262	1427.050	-0.003162	-0.006216	-0.002164
28.8000	682.365	39.921	79.804	27.082	-0.574	20.262	1299.047	-0.002795	-0.005586	-0.001896
28.9000	610.379	34.463	71.023	22.941	-0.576	20.261	1162.004	-0.002412	-0.004972	-0.001606
29.0000	540.407	29.146	62.253	18.756	-0.563	20.261	1028.795	-0.002040	-0.004358	-0.001313
29.1000	467.143	23.448	52.942	14.774	-0.560	20.262	889.320	-0.001641	-0.003706	-0.001034
29.2000	413.537	19.307	46.356	11.282	-0.570	20.261	787.268	-0.001351	-0.003245	-0.000790
29.3000	367.430	15.419	39.312	8.542	-0.577	20.262	699.492	-0.001079	-0.002752	-0.000598
29.4000	312.891	10.705	31.862	5.444	-0.563	20.261	595.665	-0.000749	-0.002230	-0.000381
29.5000	287.133	8.616	27.777	3.758	-0.566	20.262	546.627	-0.000603	-0.001944	-0.000263
29.6000	249.682	5.247	22.191	1.500	-0.566	20.261	475.330	-0.000367	-0.001553	-0.000105
29.7000	232.730	3.691	19.173	0.125	-0.572	20.261	443.058	-0.000258	-0.001342	-0.000009
29.8000	227.064	3.140	17.728	-0.183	-0.573	20.262	432.272	-0.000220	-0.001241	0.000013
29.9000	213.884	1.696	15.771	-1.012	-0.569	20.261	407.181	-0.000119	-0.001104	0.000071
30.0000	216.454	1.781	15.271	-0.886	-0.561	20.261	412.073	-0.000125	-0.001069	0.000062
30.1000	230.160	2.286	16.411	-0.520	-0.560	20.261	438.166	-0.000160	-0.001149	0.000036
30.2000	254.461	3.674	18.577	0.084	-0.553	20.262	484.428	-0.000257	-0.001300	-0.000006
30.3000	287.088	5.809	21.900	1.809	-0.580	20.261	546.541	-0.000407	-0.001533	-0.000127
30.4000	330.490	8.726	27.264	3.942	-0.569	20.262	629.168	-0.000611	-0.001908	-0.000276
30.5000	361.584	10.846	31.375	5.515	-0.554	20.261	688.362	-0.000759	-0.002196	-0.000386
30.6000	434.111	16.109	40.118	9.258	-0.565	20.261	826.435	-0.001128	-0.002808	-0.000648
30.7000	485.703	19.771	46.480	12.080	-0.569	20.261	924.654	-0.001384	-0.003254	-0.000846
30.8000	548.402	24.500	54.916	15.688	-0.572	20.261	1044.016	-0.001715	-0.003844	-0.001098
30.9000	630.878	30.450	64.142	20.091	-0.566	20.261	1201.029	-0.002132	-0.004490	-0.001406
31.0000	688.181	34.702	71.258	23.586	-0.556	20.260	1310.120	-0.002429	-0.004988	-0.001651
31.1000	769.004	40.652	80.706	28.134	-0.565	20.260	1463.985	-0.002846	-0.005649	-0.001969
31.2000	824.789	45.226	88.281	31.753	-0.572	20.261	1570.187	-0.003166	-0.006180	-0.002223
31.3000	907.611	51.161	97.868	36.145	-0.564	20.260	1727.858	-0.003581	-0.006851	-0.002530
31.4000	976.501	56.495	106.109	40.356	-0.555	20.261	1859.007	-0.003955	-0.007428	-0.002825
31.5000	1044.219	61.617	114.002	44.116	-0.568	20.260	1987.925	-0.004313	-0.007980	-0.003088
31.6000	1123.569	67.889	123.161	48.648	-0.566	20.260	2138.987	-0.004752	-0.008621	-0.003405
31.7000	1184.088	72.505	130.944	52.576	-0.554	20.260	2254.200	-0.005075	-0.009166	-0.003680
31.8000	1227.505	76.366	136.404	55.189	-0.557	20.260	2336.855	-0.005346	-0.009548	-0.003863
31.9000	1292.849	81.359	144.643	59.256	-0.568	20.259	2461.252	-0.005695	-0.010125	-0.004148
32.0000	1314.264	83.423	147.604	60.494	-0.557	20.259	2502.022	-0.005840	-0.010332	-0.004235
32.1000	1333.546	85.022	150.521	61.770	-0.556	20.260	2538.729	-0.005952	-0.010536	-0.004324
32.2000	1347.567	86.622	153.385	63.172	-0.558	20.260	2565.422	-0.006064	-0.010737	-0.004422
32.3000	1375.655	88.712	155.984	64.489	-0.568	20.260	2618.895	-0.006210	-0.010919	-0.004514
32.4000	1377.594	89.457	156.776	64.758	-0.569	20.260	2622.585	-0.006262	-0.010974	-0.004533
32.5000	1370.786	89.513	156.359	64.841	-0.565	20.259	2609.625	-0.006266	-0.010945	-0.004539
32.6000	1355.547	88.658	155.664	64.363	-0.576	20.259	2580.614	-0.006206	-0.010897	-0.004505
32.7000	1349.160	87.901	154.929	63.704	-0.572	20.259	2568.455	-0.006153	-0.010845	-0.004459
32.8000	1290.985	84.446	150.133	61.433	-0.558	20.258	2457.705	-0.005911	-0.010509	-0.004300
32.9000	1248.771	81.487	145.727	59.118	-0.556	20.259	2377.338	-0.005704	-0.010201	-0.004138
33.0000	1220.472	79.565	142.476	57.418	-0.566	20.259	2323.465	-0.005570	-0.009973	-0.004019
33.1000	1153.521	74.820	135.165	53.812	-0.573	20.260	2196.007	-0.005237	-0.009462	-0.003767
33.2000	1097.600	71.102	128.956	50.642	-0.572	20.259	2089.548	-0.004977	-0.009027	-0.003545
33.3000	1025.028	65.642	120.034	46.810	-0.566	20.259	1951.389	-0.004595	-0.008402	-0.003277
33.4000	959.925	60.801	113.448	42.993	-0.575	20.259	1827.450	-0.004256	-0.007941	-0.003009
33.5000	876.622	55.104	103.887	38.250	-0.561	20.259	1668.863	-0.003857	-0.007272	-0.002678
33.6000	835.519	51.750	98.591	35.738	-0.565	20.258	1590.614	-0.003623	-0.006901	-0.002502
33.7000	747.859	44.959	88.183	31.192	-0.567	20.258	1423.731	-0.003147	-0.006173	-0.002183
33.8000	677.962	39.344	79.484	27.038	-0.575	20.258	1290.665	-0.002754	-0.005564	-0.001893
33.9000	600.761	33.664	70.298	22.549	-0.577	20.258	1143.694	-0.002356	-0.004921	-0.001578
34.0000	542.360	29.410	62.405	18.743	-0.570	20.258	1032.515	-0.002059	-0.004368	-0.001312
34.1000	482.457	24.430	55.082	15.392	-0.583	20.258	918.474	-0.001710	-0.003856	-0.001077
34.2000	421.968	19.800	47.146	11.618	-0.569	20.258	803.318	-0.001386	-0.003300	-0.000813
34.3000	369.984	15.604	39.715	8.486	-0.574	20.258	704.355	-0.001092	-0.002780	-0.000594
34.4000	319.579	11.631	33.056	5.627	-0.568	20.258	608.397	-0.000814	-0.002314	-0.000394
34.5000	295.985	8.965	28.748	4.068	-0.577	20.258	563.478	-0.000628	-0.002012	-0.000285
34.6000	263.944	6.245	24.010	2.071	-0.556	20.257	502.481	-0.000437	-0.001681	-0.000145
34.7000	235.781	3.941	19.395	0.714	-0.571	20.258	448.866	-0.000276	-0.001358	-0.000050
34.8000	220.331	2.791	16.603	-0.310	-0.585	20.258	419.455	-0.000195	-0.001162	0.000022
34.9000	222.030	2.399	16.367	-0.703	-0.587	20.258	422.688	-0.000168	-0.001146	0.000049
35.0000	222.330	1.907	16.383	-0.745	-0.583	20.258	423.260	-0.000134	-0.001147	0.000052
35.1000	233.917	2.298	16.743	-0.495	-0.572	20.258	445.318	-0.000161	-0.001172	0.000035
35.2000	253.770	3.550	18.439	-0.057	-0.580	20.258	483.112	-0.000248	-0.001291	0.000004
35.3000	293.610	6.189	22.899	2.170	-0.577	20.258	558.958	-0.000433	-0.001603	-0.000152
35.4000	331.557	8.446	26.929	3.716	-0.576	20.257	631.199	-0.000591	-0.001885	-0.000260
35.5000	368.151	10.930	32.043	5.962	-0.568	20.257	700.865	-0.000765	-0.002243	-0.000417
35.6000	414.709	14.326	37.588	8.317	-0.574	20.258	789.499	-0.001003	-0.002631	-0.000582
35.7000	482.833	19.377	46.091	11.980	-0.577	20.257	919.189	-0.001356	-0.003226	-0.000839
35.8000	561.161	24.738	55.305	16.136	-0.572	20.257	1068.306	-0.001732	-0.003871	-0.001130
35.9000	620.117	29.552	62.782	19.712	-0.570	20.258	1180.544	-0.002069	-0.004395	-0.001380
36.0000	694.343	34.927	71.200	23.993	-0.574	20.257	1321.850	-0.002445	-0.004984	-0.001679
36.1000	777.615	40.834	81.512	28.624	-0.569	20.257	1480.379	-0.002858	-0.005706	-0.002004
36.2000	824.504	45.059	88.003	31.767	-0.568	20.257	1569.643	-0.003154	-0.006160	-0.002224
36.3000	914.839	52.073	99.065	36.790	-0.565	20.257	1741.619	-0.003645	-0.006935	-0.002575
36.4000	969.423	56.186	105.458	39.964	-0.560	20.257	1845.531	-0.003933	-0.007382	-0.002797
36.5000	1044.775	61.322	113.767	44.497	-0.576	20.257	1988.983	-0.004293	-0.007964	-0.003115
36.6000	1118.384	67.257	122.258	48.648	-0.579	20.258	2129.116	-0.004708	-0.008558	-0.003405
36.7000	1184.419	72.477	130.525	52.464	-0.569	20.257	2254.829	-0.005073	-0.009137	-0.003672
36.8000	1219.375	75.591	135.110	54.935	-0.574	20.257	2321.377	-0.005291	-0.009458	-0.003845
36.9000	1260.207	78.877	140.962	57.615	-0.573	20.257	2399.111	-0.005521	-0.009867	-0.004033
37.0000	1302.392	82.595	146.131	59.931	-0.581	20.257	2479.420	-0.005782	-0.010229	-0.004195
37.1000	1326.543	84.559	149.551	61.840	-0.570	20.257	2525.396	-0.005919	-0.010469	-0.004329
37.2000	1368.021	87.787	154.206	63.943	-0.573	20.257	2604.361	-0.006145	-0.010794	-0.004476
37.3000	1370.516	88.600	155.427	64.743	-0.565	20.257	2609.110	-0.006202	-0.010880	-0.004532
37.4000	1387.152	89.877	157.262	65.403	-0.561	20.257	2640.781	-0.006291	-0.011008	-0.004578
37.5000	1359.304	88.628	155.790	64.701	-0.567	20.257	2587.767	-0.006204	-0.010905	-0.004529
37.6000	1345.538	87.730	155.388	64.054	-0.578	20.257	2561.560	-0.006141	-0.010877	-0.004484
37.7000	1339.046	87.380	154.540	63.734	-0.580	20.256	2549.200	-0.006117	-0.010818	-0.004461
37.8000	1297.568	84.925	150.758	61.742	-0.567	20.257	2470.236	-0.005945	-0.010553	-0.004322
37.9000	1253.820	82.005	145.910	59.313	-0.583	20.257	2386.951	-0.005740	-0.010214	-0.004152
38.0000	1220.562	79.226	141.862	57.530	-0.569	20.256	2323.637	-0.005546	-0.009930	-0.004027
38.1000	1163.905	75.788	136.266	54.726	-0.572	20.256	2215.776	-0.005305	-0.009539	-0.003831
38.2000	1083.263	70.091	127.012	50.265	-0.581	20.257	2062.254	-0.004906	-0.008891	-0.003519
38.3000	1038.583	66.710	121.800	47.342	-0.575	20.256	1977.196	-0.004670	-0.008526	-0.003314
38.4000	973.390	61.924	114.212	43.696	-0.576	20.257	1853.085	-0.004335	-0.007995	-0.003059
38.5000	899.661	56.537	106.193	39.655	-0.576	20.257	1712.723	-0.003958	-0.007434	-0.002776
38.6000	822.024	50.517	97.021	35.090	-0.576	20.256	1564.922	-0.003536	-0.006791	-0.002456
38.7000	763.894	46.110	89.463	31.823	-0.556	20.256	1454.258	-0.003228	-0.006262	-0.002228
38.8000	671.409	39.501	78.483	26.646	-0.581	20.256	1278.191	-0.002765	-0.005494	-0.001865
38.9000	612.738	34.687	70.812	23.110	-0.571	20.256	1166.496	-0.002428	-0.004957	-0.001618
39.0000	548.251	29.763	62.696	19.093	-0.584	20.257	1043.730	-0.002083	-0.004389	-0.001337
39.1000	484.591	24.808	54.570	15.166	-0.573	20.256	922.537	-0.001737	-0.003820	-0.001062
39.2000	428.595	20.460	47.300	12.151	-0.564	20.257	815.935	-0.001432	-0.003311	-0.000851
39.3000	362.305	15.278	38.686	8.203	-0.566	20.256	689.735	-0.001069	-0.002708	-0.000574
39.4000	320.496	11.801	32.614	5.697	-0.572	20.256	610.142	-0.000826	-0.002283	-0.000399
39.5000	299.005	9.653	28.625	4.278	-0.566	20.256	569.229	-0.000676	-0.002004	-0.000299
39.6000	253.364	5.794	22.663	1.737	-0.570	20.256	482.340	-0.000406	-0.001586	-0.000122
39.7000	241.642	4.250	20.188	0.771	-0.564	20.255	460.024	-0.000297	-0.001413	-0.000054
39.8000	224.690	2.791	17.452	-0.129	-0.576	20.256	427.752	-0.000195	-0.001222	0.000009
39.9000	217.401	2.399	16.242	-0.983	-0.581	20.256	413.876	-0.000168	-0.001137	0.000069
40.0000	225.080	2.356	15.576	-0.872	-0.574	20.256	428.495	-0.000165	-0.001090	0.000061
40.1000	233.046	2.286	15.948	-0.550	-0.574	20.256	443.659	-0.000160	-0.001116	0.000039
40.2000	257.121	3.662	18.257	0.477	-0.571	20.256	489.492	-0.000256	-0.001278	-0.000033
40.3000	289.793	6.287	22.220	1.765	-0.572	20.256	551.691	-0.000440	-0.001555	-0.000124
40.4000	338.289	9.275	27.708	4.180	-0.563	20.256	644.016	-0.000649	-0.001940	-0.000293
40.5000	386.846	12.950	34.126	6.789	-0.561	20.256	736.456	-0.000907	-0.002389	-0.000475
40.6000	419.608	15.350	38.532	8.416	-0.562	20.256	798.826	-0.001074	-0.002697	-0.000589
40.7000	481.660	19.798	45.758	11.870	-0.565	20.257	916.958	-0.001386	-0.003203	-0.000831
40.8000	548.357	24.627	53.803	15.461	-0.564	20.257	1043.930	-0.001724	-0.003766	-0.001082
40.9000	642.284	31.012	64.558	20.765	-0.573	20.257	1222.744	-0.002171	-0.004519	-0.001454
41.0000	686.408	35.123	70.702	23.362	-0.576	20.257	1306.744	-0.002459	-0.004949	-0.001635
41.1000	766.509	40.638	80.163	28.247	-0.570	20.256	1459.236	-0.002845	-0.005611	-0.001977
41.2000	834.918	45.954	88.434	32.119	-0.575	20.256	1589.470	-0.003217	-0.006190	-0.002248
41.3000	915.997	52.157	97.966	36.411	-0.565	20.256	1743.822	-0.003651	-0.006858	-0.002549
41.4000	982.648	57.490	106.610	40.565	-0.569	20.257	1870.708	-0.004024	-0.007463	-0.002840
41.5000	1056.798	62.923	115.018	45.016	-0.564	20.257	2011.871	-0.004405	-0.008051	-0.003151
41.6000	1104.197	66.794	121.327	48.157	-0.561	20.257	2102.108	-0.004676	-0.008493	-0.003371
41.7000	1159.442	71.580	128.832	51.624	-0.570	20.256	2207.279	-0.005011	-0.009018	-0.003614
41.8000	1221.404	76.056	135.320	55.006	-0.559	20.257	2325.239	-0.005324	-0.009472	-0.003850
41.9000	1269.149	80.181	141.530	57.683	-0.565	20.256	2416.134	-0.005613	-0.009907	-0.004038
42.0000	1290.054	82.034	144.144	59.202	-0.569	20.257	2455.931	-0.005742	-0.010090	-0.004144
42.1000	1328.782	85.359	150.467	62.331	-0.557	20.256	2529.659	-0.005975	-0.010533	-0.004363
42.2000	1356.164	87.336	152.956	63.648	-0.572	20.257	2581.787	-0.006114	-0.010707	-0.004455
42.3000	1363.077	88.447	154.818	64.238	-0.570	20.256	2594.948	-0.006191	-0.010837	-0.004497
42.4000	1375.490	89.624	156.817	65.276	-0.569	20.257	2618.580	-0.006274	-0.010977	-0.004569
42.5000	1370.636	89.778	156.733	65.165	-0.570	20.257	2609.339	-0.006284	-0.010971	-0.004562
42.6000	1363.392	89.357	156.220	65.347	-0.577	20.257	2595.549	-0.006255	-0.010935	-0.004574
42.7000	1338.310	88.039	154.317	63.886	-0.575	20.257	2547.798	-0.006163	-0.010802	-0.004472
42.8000	1300.108	85.431	150.829	62.133	-0.581	20.257	2475.071	-0.005980	-0.010558	-0.004349
42.9000	1258.404	82.287	146.185	60.043	-0.572	20.257	2395.678	-0.005760	-0.010233	-0.004203
43.0000	1201.191	78.694	139.947	56.759	-0.576	20.257	2286.758	-0.005509	-0.009796	-0.003973
43.1000	1163.229	75.606	135.847	54.501	-0.581	20.257	2214.489	-0.005292	-0.009509	-0.003815
43.2000	1087.666	70.723	126.857	50.502	-0.589	20.258	2070.637	-0.004951	-0.008880	-0.003535
43.3000	1026.230	66.191	120.035	46.865	-0.583	20.257	1953.678	-0.004633	-0.008402	-0.003281
43.4000	964.193	61.601	113.640	43.597	-0.573	20.257	1835.575	-0.004312	-0.007955	-0.003052
43.5000	903.418	56.790	106.511	40.089	-0.576	20.257	1719.875	-0.003975	-0.007456	-0.002806
43.6000	819.334	51.063	96.633	35.624	-0.576	20.258	1559.801	-0.003574	-0.006764	-0.002494
43.7000	759.280	46.264	89.047	31.979	-0.585	20.257	1445.475	-0.003238	-0.006233	-0.002239
43.8000	670.462	39.404	78.165	26.758	-0.577	20.257	1276.388	-0.002758	-0.005472	-0.001873
43.9000	614.797	34.744	71.258	23.488	-0.591	20.258	1170.416	-0.002432	-0.004988	-0.001644
44.0000	539.866	29.551	61.920	18.924	-0.581	20.257	1027.765	-0.002069	-0.004334	-0.001325
44.1000	476.431	24.247	53.427	15.364	-0.572	20.257	907.001	-0.001697	-0.003740	-0.001076
44.2000	433.419	20.867	47.218	12.331	-0.578	20.258	825.119	-0.001461	-0.003305	-0.000863
44.3000	367.850	15.437	38.866	8.540	-0.589	20.258	700.293	-0.001081	-0.002721	-0.000598
44.4000	310.637	11.197	31.515	5.472	-0.576	20.257	591.373	-0.000784	-0.002206	-0.000383
44.5000	293.340	9.202	28.181	4.110	-0.591	20.258	558.443	-0.000644	-0.001973	-0.000288
44.6000	263.523	6.722	23.162	2.550	-0.583	20.258	501.680	-0.000471	-0.001621	-0.000179
44.7000	225.141	3.663	17.924	0.210	-0.579	20.258	428.610	-0.000256	-0.001255	-0.000015
44.8000	224.089	3.283	17.133	0.056	-0.582	20.258	426.607	-0.000230	-0.001199	-0.000004
44.9000	227.725	2.692	16.745	-0.478	-0.586	20.258	433.531	-0.000188	-0.001172	0.000033
45.0000	229.679	2.566	16.577	-0.336	-0.582	20.258	437.250	-0.000180	-0.001160	0.000024
45.1000	233.121	2.861	16.467	-0.309	-0.574	20.258	443.802	-0.000200	-0.001153	0.000022
45.2000	258.744	4.572	18.826	0.800	-0.583	20.259	492.582	-0.000320	-0.001318	-0.000056
45.3000	303.213	7.128	23.246	2.804	-0.581	20.259	577.240	-0.000499	-0.001627	-0.000196
45.4000	317.460	7.983	25.788	3.251	-0.573	20.259	604.362	-0.000559	-0.001805	-0.000228
45.5000	385.494	12.642	33.475	6.733	-0.580	20.259	733.881	-0.000885	-0.002343	-0.000471
45.6000	416.437	15.098	37.725	8.626	-0.591	20.259	792.789	-0.001057	-0.002641	-0.000604
45.7000	494.660	20.529	47.381	12.963	-0.581	20.259	941.706	-0.001437	-0.003317	-0.000907
45.8000	543.187	24.386	53.386	15.546	-0.577	20.259	1034.088	-0.001707	-0.003737	-0.001088
45.9000	634.499	30.772	63.878	20.780	-0.575	20.259	1207.924	-0.002154	-0.004471	-0.001455
46.0000	695.455	35.150	71.451	24.119	-0.578	20.259	1323.967	-0.002460	-0.005002	-0.001688
46.1000	770.296	40.987	80.638	28.821	-0.579	20.259	1466.446	-0.002869	-0.005645	-0.002017
46.2000	836.647	45.913	88.699	32.259	-0.571	20.259	1592.760	-0.003214	-0.006209	-0.002258
46.3000	897.917	51.105	96.243	35.765	-0.583	20.259	1709.404	-0.003577	-0.006737	-0.002504
46.4000	974.036	57.196	106.015	40.299	-0.587	20.259	1854.315	-0.004004	-0.007421	-0.002821
46.5000	1049.614	62.682	114.198	44.790	-0.573	20.260	1998.196	-0.004388	-0.007994	-0.003135
46.6000	1110.103	67.791	121.466	48.295	-0.573	20.260	2113.352	-0.004745	-0.008503	-0.003381
46.7000	1165.077	71.679	128.581	51.916	-0.584	20.260	2218.008	-0.005018	-0.009001	-0.003634
46.8000	1222.291	76.561	135.555	55.173	-0.583	20.259	2326.927	-0.005359	-0.009489	-0.003862
46.9000	1260.673	79.663	140.878	57.951	-0.568	20.260	2399.998	-0.005576	-0.009861	-0.004057
47.0000	1304.421	83.408	147.021	60.535	-0.571	20.259	2483.282	-0.005839	-0.010291	-0.004237
47.1000	1338.160	85.668	150.288	62.330	-0.569	20.260	2547.512	-0.005997	-0.010520	-0.004363
47.2000	1365.511	88.179	153.969	64.083	-0.573	20.260	2599.583	-0.006173	-0.010778	-0.004486
47.3000	1367.465	89.261	155.705	64.744	-0.566	20.260	2603.302	-0.006248	-0.010899	-0.004532
47.4000	1377.579	89.751	156.775	65.347	-0.570	20.260	2622.557	-0.006283	-0.010974	-0.004574
47.5000	1371.177	89.570	156.483	64.940	-0.575	20.260	2610.369	-0.006270	-0.010954	-0.004546
47.6000	1355.788	89.302	155.666	64.629	-0.571	20.260	2581.072	-0.006251	-0.010897	-0.004524
47.7000	1341.962	88.517	154.539	64.181	-0.572	20.260	2554.750	-0.006196	-0.010818	-0.004493
47.8000	1289.858	84.811	149.357	61.799	-0.576	20.260	2455.559	-0.005937	-0.010455	-0.004326
47.9000	1257.382	82.890	146.324	60.086	-0.573	20.260	2393.732	-0.005802	-0.010243	-0.004206
48.0000	1218.068	79.844	141.949	57.557	-0.578	20.260	2318.888	-0.005589	-0.009936	-0.004029
48.1000	1165.333	75.888	135.931	54.683	-0.567	20.261	2218.494	-0.005312	-0.009515	-0.003828
48.2000	1098.216	71.426	128.275	51.356	-0.563	20.261	2090.721	-0.005000	-0.008979	-0.003595
48.3000	1040.747	67.174	121.632	47.806	-0.573	20.261	1981.316	-0.004702	-0.008514	-0.003346
48.4000	972.473	62.163	113.947	43.852	-0.556	20.261	1851.339	-0.004351	-0.007976	-0.003070
48.5000	902.140	57.140	105.819	39.783	-0.568	20.261	1717.443	-0.004000	-0.007407	-0.002785
48.6000	822.610	51.009	96.758	35.821	-0.562	20.261	1566.038	-0.003571	-0.006773	-0.002507
48.7000	761.249	46.112	88.615	32.048	-0.568	20.261	1449.223	-0.003228	-0.006203	-0.002243
48.8000	672.176	39.683	78.386	27.152	-0.574	20.261	1279.650	-0.002778	-0.005487	-0.001901
48.9000	619.937	35.458	72.051	23.811	-0.573	20.261	1180.201	-0.002482	-0.005044	-0.001667
49.0000	542.901	29.243	62.058	19.094	-0.565	20.261	1033.545	-0.002047	-0.004344	-0.001337
49.1000	486.169	25.117	54.861	15.615	-0.570	20.261	925.541	-0.001758	-0.003840	-0.001093
49.2000	433.810	20.625	47.593	12.414	-0.570	20.261	825.863	-0.001444	-0.003331	-0.000869
49.3000	359.224	14.999	37.895	8.093	-0.562	20.261	683.870	-0.001050	-0.002653	-0.000566
49.4000	315.597	11.505	32.002	5.753	-0.572	20.261	600.815	-0.000805	-0.002240	-0.000403
49.5000	281.768	8.194	26.485	3.490	-0.556	20.261	536.413	-0.000574	-0.001854	-0.000244
49.6000	242.498	5.498	20.787	1.401	-0.559	20.261	461.655	-0.000385	-0.001455	-0.000098
49.7000	239.042	4.279	20.021	0.925	-0.570	20.261	455.074	-0.000300	-0.001401	-0.000065
49.8000	225.997	3.492	16.855	0.126	-0.562	20.261	430.241	-0.000244	-0.001180	-0.000009
49.9000	320.977	8.390	26.234	3.998	-0.573	20.262	611.057	-0.000587	-0.001836	-0.000280
