# Supplementary material for: Evaluation of a Cold-Mixed High-Performance Polyurethane Mixture
Source: Hindawi journal article supplement (doi:10.1155/2019/1507971), 2019-11-07
Supplement: f1 [file 1507971.f1.zip › 1507971.f1/dynamic modulus data/PUM/specimen2/temp20/zhs-2-20_0.5Hz.csv]

Test Information
****************
Project name	zhs
Operator name	2
Target test temperature	20
Target confining stress	0
Average dynamic strain range from 75 to 125 micro-strain
Contact stress	5
Initial modulus	1000
Axial gauge length	70
Comments
Specimen information
********************
Identification	zhs-2-20
Dimensions	Point 1	Point 2	Point 3	Point 4	Point 5	Point 6	Average	Std Dev.
Diameter (mm)	49.2	49.3	49.2				49.23	0.058
Height (mm)	100.8	101.0	100.8				100.87	0.115
Cross-sectional area (mm�)	1903.7
Conditioning time
Properties/Comments
Test Data	0.5Hz
*********
Test date and time	Mon	Apr 1	2019	2:34 PM
Dynamic modulus (MPa)	12064
Phase angle (Degrees)	3.88
Average temperature (�C)	20.2
Average confining pressure (kPa)	-0.6
Average micro-strain	98
Load drift (%)	0.5
Load standard error (%)	1.7
Average deformation drift (%)	0.2
Average deformation standard error (%)	1.8
Deformation uniformity (%)	32.1
Phase uniformity (Degrees)	0.2
Conditioning Cycles
Time (sec)	Axial stress (kPa)	Axial micro-strain #1	Axial micro-strain #2	Axial micro-strain #3	Confining pressure (kPa)	Temperature (�C)	Load (N)	Displacement #1 (mm)	Displacement #2 (mm)	Displacement #3 (mm)
0.0000	191.642	-1.164	17.757	-1.574	-0.554	20.188	364.838	0.000081	-0.001243	0.000110
0.0400	197.909	-0.997	17.953	-1.813	-0.561	20.189	376.768	0.000070	-0.001257	0.000127
0.0800	249.231	1.178	22.066	-0.084	-0.569	20.188	474.472	-0.000082	-0.001545	0.000006
0.1200	250.884	1.319	21.858	0.253	-0.565	20.188	477.619	-0.000092	-0.001530	-0.000018
0.1600	269.384	2.229	24.676	0.938	-0.562	20.188	512.838	-0.000156	-0.001727	-0.000066
0.2000	312.290	5.712	29.417	2.732	-0.544	20.188	594.521	-0.000400	-0.002059	-0.000191
0.2400	391.761	10.033	38.396	6.916	-0.551	20.188	745.811	-0.000702	-0.002688	-0.000484
0.2800	386.726	10.146	38.839	6.803	-0.560	20.187	736.227	-0.000710	-0.002719	-0.000476
0.3200	466.542	15.646	47.938	10.917	-0.551	20.187	888.176	-0.001095	-0.003356	-0.000764
0.3600	516.511	19.361	54.471	13.666	-0.555	20.188	983.305	-0.001355	-0.003813	-0.000957
0.4000	567.638	23.224	60.501	15.995	-0.561	20.187	1080.637	-0.001626	-0.004235	-0.001120
0.4400	612.934	26.774	66.576	18.911	-0.566	20.187	1166.868	-0.001874	-0.004660	-0.001324
0.4800	702.202	32.863	75.926	23.461	-0.572	20.187	1336.813	-0.002300	-0.005315	-0.001642
0.5200	725.481	34.618	79.927	25.353	-0.558	20.187	1381.130	-0.002423	-0.005595	-0.001775
0.5600	790.269	39.681	88.142	29.088	-0.549	20.187	1504.469	-0.002778	-0.006170	-0.002036
0.6000	831.477	42.897	92.533	31.472	-0.566	20.187	1582.918	-0.003003	-0.006477	-0.002203
0.6400	887.337	47.148	99.219	34.758	-0.562	20.187	1689.262	-0.003300	-0.006945	-0.002433
0.6800	931.581	50.081	104.151	37.254	-0.554	20.187	1773.491	-0.003506	-0.007291	-0.002608
0.7200	993.438	54.587	111.835	40.494	-0.562	20.187	1891.251	-0.003821	-0.007828	-0.002835
0.7600	1021.045	57.351	115.281	42.431	-0.564	20.187	1943.808	-0.004015	-0.008070	-0.002970
0.8000	1042.355	59.289	118.323	43.793	-0.550	20.187	1984.377	-0.004150	-0.008283	-0.003066
0.8400	1105.820	63.342	124.871	47.230	-0.549	20.186	2105.198	-0.004434	-0.008741	-0.003306
0.8800	1091.153	62.680	124.565	46.976	-0.549	20.187	2077.274	-0.004388	-0.008720	-0.003288
0.9200	1093.677	63.216	125.035	47.175	-0.564	20.187	2082.081	-0.004425	-0.008752	-0.003302
0.9600	1133.382	66.316	129.415	49.422	-0.550	20.186	2157.669	-0.004642	-0.009059	-0.003460
1.0000	1118.820	65.982	128.456	48.789	-0.553	20.186	2129.946	-0.004619	-0.008992	-0.003415
1.0400	1085.712	64.058	126.301	47.610	-0.551	20.186	2066.917	-0.004484	-0.008841	-0.003333
1.0800	1083.007	63.722	126.216	47.593	-0.557	20.186	2061.768	-0.004461	-0.008835	-0.003332
1.1200	1023.780	60.295	120.785	44.679	-0.546	20.186	1949.015	-0.004221	-0.008455	-0.003128
1.1600	1026.996	60.552	120.645	44.905	-0.558	20.186	1955.137	-0.004239	-0.008445	-0.003143
1.2000	976.290	57.070	115.394	42.108	-0.552	20.186	1858.606	-0.003995	-0.008078	-0.002948
1.2400	957.956	55.428	112.626	40.955	-0.546	20.186	1823.702	-0.003880	-0.007884	-0.002867
1.2800	906.814	51.921	107.580	38.251	-0.549	20.185	1726.341	-0.003634	-0.007531	-0.002678
1.3200	839.141	47.315	100.539	34.699	-0.556	20.185	1597.509	-0.003312	-0.007038	-0.002429
1.3600	815.847	45.676	97.479	33.494	-0.562	20.185	1553.164	-0.003197	-0.006824	-0.002345
1.4000	732.981	40.049	88.129	28.712	-0.560	20.185	1395.407	-0.002803	-0.006169	-0.002010
1.4400	693.366	36.412	83.238	26.631	-0.550	20.185	1319.990	-0.002549	-0.005827	-0.001864
1.4800	624.145	31.980	75.230	22.789	-0.545	20.186	1188.211	-0.002239	-0.005266	-0.001595
1.5200	556.006	27.572	67.618	19.037	-0.556	20.185	1058.493	-0.001930	-0.004733	-0.001333
1.5600	505.946	22.913	61.072	15.939	-0.550	20.185	963.192	-0.001604	-0.004275	-0.001116
1.6000	462.650	19.966	54.805	13.579	-0.551	20.185	880.766	-0.001398	-0.003836	-0.000951
1.6400	399.290	14.761	47.203	10.115	-0.558	20.185	760.145	-0.001033	-0.003304	-0.000708
1.6800	350.417	11.603	41.005	7.489	-0.562	20.185	667.105	-0.000812	-0.002870	-0.000524
1.7200	320.736	8.908	36.684	5.514	-0.554	20.185	610.600	-0.000624	-0.002568	-0.000386
1.7600	283.421	5.991	31.318	3.224	-0.562	20.185	539.560	-0.000419	-0.002192	-0.000226
1.8000	259.871	3.635	27.331	1.863	-0.557	20.184	494.728	-0.000254	-0.001913	-0.000130
1.8400	229.829	1.838	23.248	0.519	-0.552	20.184	437.536	-0.000129	-0.001627	-0.000036
1.8800	211.600	0.100	20.925	-0.338	-0.545	20.184	402.832	-0.000007	-0.001465	0.000024
1.9200	206.175	-0.396	19.840	-0.800	-0.558	20.184	392.504	0.000028	-0.001389	0.000056
1.9600	199.262	-1.697	17.993	-1.798	-0.541	20.184	379.343	0.000119	-0.001260	0.000126
2.0000	199.081	-1.911	17.426	-1.925	-0.545	20.185	379.000	0.000134	-0.001220	0.000135
2.0400	212.261	-0.912	18.188	-1.674	-0.545	20.184	404.091	0.000064	-0.001273	0.000117
2.0800	240.515	0.477	20.579	-0.630	-0.554	20.184	457.878	-0.000033	-0.001441	0.000044
2.1200	250.193	1.459	21.717	-0.238	-0.556	20.184	476.303	-0.000102	-0.001520	0.000017
2.1600	287.328	3.478	26.262	1.582	-0.548	20.184	546.999	-0.000243	-0.001838	-0.000111
2.2000	300.779	4.391	27.331	1.959	-0.553	20.184	572.605	-0.000307	-0.001913	-0.000137
2.2400	354.655	7.843	34.546	4.854	-0.540	20.184	675.173	-0.000549	-0.002418	-0.000340
2.2800	400.657	10.789	40.091	7.042	-0.554	20.184	762.749	-0.000755	-0.002806	-0.000493
2.3200	442.737	14.664	45.147	9.370	-0.544	20.184	842.857	-0.001026	-0.003160	-0.000656
2.3600	511.477	18.954	53.206	13.031	-0.546	20.183	973.721	-0.001327	-0.003724	-0.000912
2.4000	551.497	22.056	58.348	15.404	-0.544	20.183	1049.910	-0.001544	-0.004084	-0.001078
2.4400	614.271	26.451	65.822	18.729	-0.547	20.183	1169.415	-0.001852	-0.004608	-0.001311
2.4800	675.707	31.221	73.606	22.508	-0.547	20.183	1286.373	-0.002185	-0.005152	-0.001576
2.5200	727.600	35.207	79.705	25.227	-0.559	20.183	1385.164	-0.002464	-0.005579	-0.001766
2.5600	783.912	38.981	86.224	28.331	-0.554	20.183	1492.367	-0.002729	-0.006036	-0.001983
2.6000	827.464	41.940	91.643	30.953	-0.554	20.183	1575.279	-0.002936	-0.006415	-0.002167
2.6400	898.819	47.444	100.261	35.315	-0.556	20.183	1711.121	-0.003321	-0.007018	-0.002472
2.6800	928.590	50.024	103.942	36.777	-0.554	20.183	1767.797	-0.003502	-0.007276	-0.002574
2.7200	967.664	53.181	108.708	39.306	-0.553	20.183	1842.184	-0.003723	-0.007610	-0.002751
2.7600	1024.186	57.616	114.906	42.346	-0.553	20.183	1949.787	-0.004033	-0.008043	-0.002964
2.8000	1031.129	57.897	116.559	43.022	-0.546	20.183	1963.005	-0.004053	-0.008159	-0.003012
2.8400	1091.032	62.596	123.273	46.684	-0.562	20.182	2077.045	-0.004382	-0.008629	-0.003268
2.8800	1080.798	62.220	123.204	46.359	-0.567	20.183	2057.562	-0.004355	-0.008624	-0.003245
2.9200	1115.439	65.081	126.773	48.296	-0.548	20.183	2123.508	-0.004556	-0.008874	-0.003381
2.9600	1097.810	63.496	125.704	47.496	-0.554	20.183	2089.949	-0.004445	-0.008799	-0.003325
3.0000	1121.270	65.532	127.997	48.914	-0.542	20.183	2134.609	-0.004587	-0.008960	-0.003424
3.0400	1090.882	64.212	126.565	47.609	-0.552	20.183	2076.759	-0.004495	-0.008860	-0.003333
3.0800	1088.643	63.986	126.828	47.778	-0.546	20.182	2072.496	-0.004479	-0.008878	-0.003344
3.1200	1033.954	60.661	121.159	45.282	-0.540	20.182	1968.384	-0.004246	-0.008481	-0.003170
3.1600	1031.309	60.185	120.200	44.652	-0.545	20.183	1963.348	-0.004213	-0.008414	-0.003126
3.2000	976.862	56.495	115.143	42.192	-0.539	20.182	1859.694	-0.003955	-0.008060	-0.002953
3.2400	942.942	54.291	111.336	40.117	-0.551	20.182	1795.120	-0.003800	-0.007793	-0.002808
3.2800	875.435	49.774	104.623	36.750	-0.549	20.182	1666.603	-0.003484	-0.007324	-0.002572
3.3200	846.280	47.807	100.677	35.091	-0.540	20.182	1611.099	-0.003347	-0.007047	-0.002456
3.3600	793.755	43.358	94.688	32.525	-0.556	20.182	1511.106	-0.003035	-0.006628	-0.002277
3.4000	741.998	40.119	88.907	29.426	-0.541	20.182	1412.573	-0.002808	-0.006223	-0.002060
3.4400	686.618	36.231	82.919	26.405	-0.538	20.182	1307.144	-0.002536	-0.005804	-0.001848
3.4800	631.103	32.204	75.939	22.970	-0.545	20.182	1201.458	-0.002254	-0.005316	-0.001608
3.5200	543.623	26.213	65.577	18.419	-0.547	20.182	1034.918	-0.001835	-0.004590	-0.001289
3.5600	532.186	25.089	63.447	17.104	-0.545	20.182	1013.145	-0.001756	-0.004441	-0.001197
3.6000	450.026	18.605	53.750	12.780	-0.542	20.181	856.733	-0.001302	-0.003762	-0.000895
3.6400	426.281	17.063	50.317	11.350	-0.545	20.181	811.529	-0.001194	-0.003522	-0.000795
3.6800	343.730	11.296	40.076	7.085	-0.540	20.181	654.373	-0.000791	-0.002805	-0.000496
3.7200	325.711	8.937	36.378	5.486	-0.543	20.181	620.070	-0.000626	-0.002546	-0.000384
3.7600	288.681	6.047	31.918	3.589	-0.548	20.182	549.574	-0.000423	-0.002234	-0.000251
3.8000	268.257	3.899	28.250	2.240	-0.551	20.181	510.693	-0.000273	-0.001978	-0.000157
3.8400	248.044	2.710	24.884	1.246	-0.553	20.181	472.212	-0.000190	-0.001742	-0.000087
3.8800	220.016	0.799	21.149	-0.688	-0.542	20.181	418.854	-0.000056	-0.001480	0.000048
3.9200	196.572	-1.362	17.867	-1.603	-0.554	20.181	374.222	0.000095	-0.001251	0.000112
3.9600	208.684	-1.110	18.231	-1.293	-0.549	20.181	397.282	0.000078	-0.001276	0.000090
4.0000	205.078	-1.040	17.967	-1.363	-0.551	20.182	390.415	0.000073	-0.001258	0.000095
4.0400	208.790	-0.971	18.242	-1.321	-0.556	20.181	397.482	0.000068	-0.001277	0.000092
4.0800	245.564	0.995	21.357	-0.000	-0.552	20.181	467.491	-0.000070	-0.001495	0.000000
4.1200	241.146	0.575	20.662	-0.043	-0.548	20.181	459.080	-0.000040	-0.001446	0.000003
4.1600	306.309	3.830	27.610	2.464	-0.538	20.180	583.134	-0.000268	-0.001933	-0.000172
4.2000	332.428	6.285	31.542	3.787	-0.537	20.180	632.858	-0.000440	-0.002208	-0.000265
4.2400	333.405	6.889	31.737	4.011	-0.553	20.181	634.718	-0.000482	-0.002222	-0.000281
4.2800	387.162	10.271	38.339	6.971	-0.542	20.181	737.057	-0.000719	-0.002684	-0.000488
4.3200	450.191	14.241	45.494	9.933	-0.537	20.180	857.048	-0.000997	-0.003185	-0.000695
4.3600	495.216	17.791	50.846	12.389	-0.534	20.181	942.764	-0.001245	-0.003559	-0.000867
4.4000	558.260	22.492	59.127	15.841	-0.534	20.180	1062.784	-0.001574	-0.004139	-0.001109
4.4400	599.573	25.552	64.227	18.491	-0.533	20.180	1141.434	-0.001789	-0.004496	-0.001294
4.4800	675.993	31.222	72.954	22.170	-0.532	20.180	1286.917	-0.002186	-0.005107	-0.001552
4.5200	715.457	34.194	79.040	25.031	-0.535	20.180	1362.047	-0.002394	-0.005533	-0.001752
4.5600	775.796	38.324	85.126	27.869	-0.538	20.181	1476.917	-0.002683	-0.005959	-0.001951
4.6000	846.129	43.937	93.631	32.188	-0.535	20.180	1610.813	-0.003076	-0.006554	-0.002253
4.6400	896.475	47.444	99.719	35.065	-0.548	20.180	1706.657	-0.003321	-0.006980	-0.002455
4.6800	936.555	50.754	105.084	37.522	-0.539	20.181	1782.961	-0.003553	-0.007356	-0.002627
4.7200	993.438	54.784	111.308	40.734	-0.538	20.180	1891.251	-0.003835	-0.007792	-0.002851
4.7600	1016.266	56.425	113.862	42.304	-0.546	20.180	1934.710	-0.003950	-0.007970	-0.002961
4.8000	1064.177	60.213	119.660	44.778	-0.548	20.181	2025.919	-0.004215	-0.008376	-0.003134
4.8400	1078.919	62.220	122.218	45.969	-0.543	20.180	2053.986	-0.004355	-0.008555	-0.003218
4.8800	1119.331	64.884	126.175	47.933	-0.544	20.180	2130.919	-0.004542	-0.008832	-0.003355
4.9200	1080.407	62.795	124.607	46.877	-0.550	20.180	2056.818	-0.004396	-0.008722	-0.003281
4.9600	1117.092	65.279	126.873	48.494	-0.547	20.180	2126.656	-0.004570	-0.008881	-0.003395
5.0000	1106.647	64.689	126.817	48.269	-0.546	20.180	2106.771	-0.004528	-0.008877	-0.003379
5.0400	1113.244	65.293	127.317	48.661	-0.545	20.180	2119.331	-0.004571	-0.008912	-0.003406
5.0800	1065.469	62.360	124.120	46.710	-0.544	20.180	2028.379	-0.004365	-0.008688	-0.003270
5.1200	1066.190	62.767	123.645	47.048	-0.547	20.180	2029.753	-0.004394	-0.008655	-0.003293
5.1600	1018.355	59.287	119.104	44.118	-0.548	20.180	1938.686	-0.004150	-0.008337	-0.003088
5.2000	994.415	57.699	116.964	42.951	-0.533	20.179	1893.110	-0.004039	-0.008187	-0.003007
5.2400	967.769	56.369	113.559	41.053	-0.544	20.179	1842.384	-0.003946	-0.007949	-0.002874
5.2800	892.192	51.316	105.763	37.662	-0.564	20.180	1698.503	-0.003592	-0.007403	-0.002636
5.3200	873.451	48.973	103.063	36.552	-0.559	20.179	1662.827	-0.003428	-0.007214	-0.002559
5.3600	810.557	44.862	96.073	33.116	-0.552	20.179	1543.093	-0.003140	-0.006725	-0.002318
5.4000	739.277	40.231	88.557	29.481	-0.556	20.179	1407.394	-0.002816	-0.006199	-0.002064
5.4400	685.416	36.512	82.208	26.631	-0.555	20.179	1304.855	-0.002556	-0.005755	-0.001864
5.4800	625.588	31.671	75.174	23.279	-0.550	20.179	1190.958	-0.002217	-0.005262	-0.001630
5.5200	556.532	27.027	66.634	19.107	-0.553	20.179	1059.494	-0.001892	-0.004664	-0.001337
5.5600	530.503	24.415	63.057	17.286	-0.563	20.178	1009.941	-0.001709	-0.004414	-0.001210
5.6000	477.828	21.021	56.433	14.114	-0.557	20.179	909.662	-0.001471	-0.003950	-0.000988
5.6400	408.367	16.065	48.412	10.509	-0.556	20.179	777.426	-0.001125	-0.003389	-0.000736
5.6800	369.188	12.529	42.797	8.248	-0.555	20.179	702.839	-0.000877	-0.002996	-0.000577
5.7200	333.480	9.528	37.559	6.216	-0.561	20.179	634.861	-0.000667	-0.002629	-0.000435
5.7600	295.819	6.748	32.848	4.194	-0.554	20.178	563.164	-0.000472	-0.002299	-0.000294
5.8000	263.147	3.915	27.875	2.228	-0.560	20.178	500.965	-0.000274	-0.001951	-0.000156
5.8400	243.415	2.875	24.980	0.966	-0.550	20.178	463.400	-0.000201	-0.001749	-0.000068
5.8800	222.946	0.657	20.244	-0.280	-0.554	20.179	424.433	-0.000046	-0.001417	0.000020
5.9200	184.083	-2.119	16.575	-1.911	-0.558	20.178	350.447	0.000148	-0.001160	0.000134
5.9600	186.518	-2.190	16.076	-2.079	-0.548	20.178	355.082	0.000153	-0.001125	0.000146
6.0000	208.865	-1.122	17.703	-1.644	-0.544	20.178	397.625	0.000079	-0.001239	0.000115
6.0400	213.148	-0.857	17.758	-1.615	-0.539	20.178	405.779	0.000060	-0.001243	0.000113
6.0800	227.470	-0.549	18.688	-0.998	-0.549	20.178	433.044	0.000038	-0.001308	0.000070
6.1200	250.343	1.233	21.871	0.112	-0.548	20.178	476.589	-0.000086	-0.001531	-0.000008
6.1600	274.389	2.582	24.231	1.161	-0.556	20.178	522.366	-0.000181	-0.001696	-0.000081
6.2000	312.486	5.275	29.112	3.126	-0.552	20.178	594.893	-0.000369	-0.002038	-0.000219
6.2400	350.898	8.067	34.308	5.178	-0.558	20.178	668.020	-0.000565	-0.002402	-0.000362
6.2800	435.809	13.231	43.575	9.091	-0.560	20.177	829.668	-0.000926	-0.003050	-0.000636
6.3200	471.411	15.827	47.995	11.154	-0.559	20.177	897.446	-0.001108	-0.003360	-0.000781
6.3600	523.064	19.772	55.097	14.269	-0.558	20.177	995.779	-0.001384	-0.003857	-0.000999
6.4000	541.729	21.272	57.237	15.196	-0.558	20.177	1031.313	-0.001489	-0.004007	-0.001064
6.4400	618.269	26.731	66.366	19.628	-0.558	20.178	1177.025	-0.001871	-0.004646	-0.001374
6.4800	682.109	31.336	73.924	23.194	-0.562	20.177	1298.561	-0.002194	-0.005175	-0.001624
6.5200	734.814	35.362	80.538	26.000	-0.557	20.178	1398.897	-0.002475	-0.005638	-0.001820
6.5600	780.606	39.189	86.124	28.487	-0.556	20.178	1486.073	-0.002743	-0.006029	-0.001994
6.6000	841.937	44.103	94.035	32.316	-0.562	20.178	1602.831	-0.003087	-0.006582	-0.002262
6.6400	902.606	47.905	100.510	35.680	-0.551	20.178	1718.330	-0.003353	-0.007036	-0.002498
6.6800	933.880	50.629	104.041	37.394	-0.561	20.178	1777.868	-0.003544	-0.007283	-0.002618
6.7200	982.422	54.069	110.406	40.634	-0.553	20.178	1870.279	-0.003785	-0.007728	-0.002844
6.7600	1045.091	58.808	117.102	43.656	-0.545	20.178	1989.584	-0.004117	-0.008197	-0.003056
6.8000	1047.195	59.709	118.365	44.272	-0.557	20.178	1993.589	-0.004180	-0.008286	-0.003099
6.8400	1096.352	63.204	124.191	47.230	-0.554	20.178	2087.173	-0.004424	-0.008693	-0.003306
6.8800	1084.720	63.147	123.425	46.880	-0.560	20.178	2065.029	-0.004420	-0.008640	-0.003282
6.9200	1094.504	63.032	124.287	47.567	-0.560	20.178	2083.654	-0.004412	-0.008700	-0.003330
6.9600	1102.634	64.337	125.328	47.792	-0.541	20.178	2099.133	-0.004504	-0.008773	-0.003345
7.0000	1109.592	64.998	127.872	48.690	-0.546	20.178	2112.379	-0.004550	-0.008951	-0.003408
7.0400	1100.831	64.634	127.121	48.254	-0.561	20.178	2095.699	-0.004524	-0.008898	-0.003378
7.0800	1065.529	62.611	122.882	46.626	-0.555	20.178	2028.494	-0.004383	-0.008602	-0.003264
7.1200	1056.557	61.868	122.952	46.502	-0.563	20.178	2011.414	-0.004331	-0.008607	-0.003255
7.1600	1037.501	60.787	120.980	45.409	-0.569	20.179	1975.136	-0.004255	-0.008469	-0.003179
7.2000	1000.546	58.544	117.615	43.485	-0.565	20.178	1904.783	-0.004098	-0.008233	-0.003044
7.2400	944.265	54.713	111.433	40.507	-0.574	20.178	1797.638	-0.003830	-0.007800	-0.002836
7.2800	892.537	51.190	105.584	37.451	-0.574	20.178	1699.162	-0.003583	-0.007391	-0.002622
7.3200	852.366	47.429	100.249	35.359	-0.562	20.178	1622.686	-0.003320	-0.007017	-0.002475
7.3600	789.127	43.838	94.217	32.328	-0.556	20.178	1502.295	-0.003069	-0.006595	-0.002263
7.4000	727.901	39.836	87.253	29.046	-0.558	20.178	1385.736	-0.002789	-0.006108	-0.002033
7.4400	678.337	35.921	81.206	26.182	-0.561	20.178	1291.380	-0.002514	-0.005684	-0.001833
7.4800	616.435	31.643	74.009	22.703	-0.555	20.178	1173.534	-0.002215	-0.005181	-0.001589
7.5200	577.752	28.246	68.270	20.063	-0.563	20.178	1099.892	-0.001977	-0.004779	-0.001404
7.5600	501.949	23.154	59.947	16.332	-0.554	20.178	955.582	-0.001621	-0.004196	-0.001143
7.6000	466.542	20.120	55.070	13.580	-0.554	20.178	888.176	-0.001408	-0.003855	-0.000951
7.6400	424.162	16.461	48.941	11.365	-0.565	20.178	807.495	-0.001152	-0.003426	-0.000796
7.6800	357.150	11.801	41.115	7.644	-0.550	20.178	679.922	-0.000826	-0.002878	-0.000535
7.7200	341.491	10.018	38.157	6.440	-0.553	20.178	650.110	-0.000701	-0.002671	-0.000451
7.7600	283.406	5.920	31.014	3.365	-0.561	20.178	539.532	-0.000414	-0.002171	-0.000236
7.8000	251.380	3.480	26.694	2.045	-0.555	20.178	478.563	-0.000244	-0.001869	-0.000143
7.8400	236.878	2.384	23.288	0.798	-0.564	20.179	450.954	-0.000167	-0.001630	-0.000056
7.8800	233.857	1.753	22.510	0.293	-0.556	20.178	445.204	-0.000123	-0.001576	-0.000021
7.9200	192.424	-1.586	17.245	-1.742	-0.559	20.178	366.325	0.000111	-0.001207	0.000122
7.9600	205.513	-0.577	18.104	-1.109	-0.563	20.178	391.245	0.000040	-0.001267	0.000078
8.0000	207.678	-0.702	17.884	-1.334	-0.553	20.178	395.365	0.000049	-0.001252	0.000093
8.0400	203.530	-1.207	17.313	-1.419	-0.560	20.178	387.468	0.000085	-0.001212	0.000099
8.0800	218.438	-0.939	18.116	-1.138	-0.566	20.178	415.850	0.000066	-0.001268	0.000080
8.1200	274.614	2.721	24.675	1.218	-0.554	20.178	522.795	-0.000190	-0.001727	-0.000085
8.1600	285.630	3.255	25.971	1.751	-0.556	20.178	543.766	-0.000228	-0.001818	-0.000123
8.2000	312.050	5.245	29.388	3.225	-0.559	20.178	594.063	-0.000367	-0.002057	-0.000226
8.2400	357.255	7.857	34.463	5.388	-0.558	20.179	680.122	-0.000550	-0.002412	-0.000377
8.2800	393.429	10.804	39.339	7.321	-0.558	20.179	748.987	-0.000756	-0.002754	-0.000512
8.3200	466.031	15.645	47.548	10.707	-0.555	20.179	887.203	-0.001095	-0.003328	-0.000749
8.3600	512.950	18.942	53.511	13.735	-0.557	20.179	976.524	-0.001326	-0.003746	-0.000961
8.4000	546.072	22.170	57.319	15.322	-0.561	20.179	1039.581	-0.001552	-0.004012	-0.001073
8.4400	628.202	27.181	67.132	19.993	-0.566	20.179	1195.936	-0.001903	-0.004699	-0.001400
8.4800	667.276	30.323	71.939	22.045	-0.556	20.178	1270.323	-0.002123	-0.005036	-0.001543
8.5200	745.875	35.852	81.262	26.449	-0.557	20.179	1419.954	-0.002510	-0.005688	-0.001851
8.5600	809.280	40.751	89.016	30.279	-0.550	20.179	1540.661	-0.002853	-0.006231	-0.002120
8.6000	836.391	43.248	92.379	31.879	-0.564	20.179	1592.274	-0.003027	-0.006467	-0.002232
8.6400	877.043	45.926	97.507	34.086	-0.554	20.179	1669.664	-0.003215	-0.006826	-0.002386
8.6800	931.927	49.828	103.678	36.763	-0.548	20.179	1774.149	-0.003488	-0.007257	-0.002573
8.7200	1006.543	55.556	112.307	40.942	-0.550	20.179	1916.199	-0.003889	-0.007861	-0.002866
8.7600	1020.910	57.375	114.656	42.306	-0.548	20.179	1943.550	-0.004016	-0.008026	-0.002961
8.8000	1050.185	59.623	117.753	44.090	-0.562	20.179	1999.283	-0.004174	-0.008243	-0.003086
8.8400	1073.614	61.169	120.602	45.226	-0.560	20.179	2043.886	-0.004282	-0.008442	-0.003166
8.8800	1097.224	62.963	123.966	47.398	-0.553	20.179	2088.833	-0.004407	-0.008678	-0.003318
8.9200	1111.711	64.674	125.911	48.185	-0.554	20.180	2116.413	-0.004527	-0.008814	-0.003373
8.9600	1075.764	62.795	124.049	46.627	-0.553	20.180	2047.977	-0.004396	-0.008683	-0.003264
9.0000	1099.223	64.674	126.551	48.185	-0.534	20.180	2092.638	-0.004527	-0.008859	-0.003373
9.0400	1083.383	63.299	124.730	47.398	-0.555	20.180	2062.483	-0.004431	-0.008731	-0.003318
9.0800	1078.393	63.581	124.701	47.259	-0.557	20.180	2052.984	-0.004451	-0.008729	-0.003308
9.1200	1056.377	61.782	123.147	46.332	-0.544	20.180	2011.070	-0.004325	-0.008620	-0.003243
9.1600	1009.338	59.132	118.366	43.807	-0.544	20.180	1921.520	-0.004139	-0.008286	-0.003066
9.2000	1000.426	58.375	117.018	43.385	-0.546	20.180	1904.554	-0.004086	-0.008191	-0.003037
9.2400	952.636	55.020	111.751	40.510	-0.562	20.180	1813.574	-0.003851	-0.007823	-0.002836
9.2800	901.825	51.203	106.278	37.788	-0.552	20.179	1716.843	-0.003584	-0.007439	-0.002645
9.3200	843.635	47.681	99.719	34.979	-0.552	20.179	1606.064	-0.003338	-0.006980	-0.002449
9.3600	788.315	43.656	93.869	31.964	-0.558	20.180	1500.750	-0.003056	-0.006571	-0.002237
9.4000	739.473	39.557	87.961	29.312	-0.568	20.180	1407.766	-0.002769	-0.006157	-0.002052
9.4400	680.772	35.292	81.068	26.266	-0.559	20.179	1296.015	-0.002470	-0.005675	-0.001839
9.4800	637.220	32.653	76.037	23.502	-0.562	20.180	1213.102	-0.002286	-0.005323	-0.001645
9.5200	550.250	26.872	65.573	18.309	-0.561	20.179	1047.535	-0.001881	-0.004590	-0.001282
9.5600	515.144	23.378	60.934	16.402	-0.558	20.180	980.701	-0.001636	-0.004265	-0.001148
9.6000	427.784	17.426	50.622	11.672	-0.561	20.179	814.390	-0.001220	-0.003544	-0.000817
9.6400	393.143	14.383	45.688	9.976	-0.562	20.180	748.444	-0.001007	-0.003198	-0.000698
9.6800	368.031	12.108	42.214	8.009	-0.559	20.180	700.636	-0.000848	-0.002955	-0.000561
9.7200	333.796	9.766	37.657	6.299	-0.561	20.180	635.462	-0.000684	-0.002636	-0.000441
9.7600	303.439	6.622	32.862	4.139	-0.561	20.180	577.669	-0.000464	-0.002300	-0.000290
9.8000	268.528	4.179	28.000	2.410	-0.565	20.180	511.208	-0.000293	-0.001960	-0.000169
9.8400	220.016	0.937	20.997	0.111	-0.570	20.180	418.854	-0.000066	-0.001470	-0.000008
9.8800	226.102	0.714	21.510	-0.099	-0.565	20.180	430.441	-0.000050	-0.001506	0.000007
9.9200	215.402	-0.310	19.939	-0.588	-0.577	20.180	410.070	0.000022	-0.001396	0.000041
9.9600	214.876	0.095	19.173	-0.801	-0.558	20.181	409.069	-0.000007	-0.001342	0.000056
10.0000	213.238	1.345	19.505	-0.589	-0.550	20.186	405.951	-0.000094	-0.001365	0.000041
10.0400	264.680	3.241	24.218	1.093	-0.548	20.186	503.883	-0.000227	-0.001695	-0.000077
10.0800	253.169	2.330	23.414	0.490	-0.552	20.186	481.968	-0.000163	-0.001639	-0.000034
10.1200	264.966	2.118	23.746	0.700	-0.550	20.186	504.427	-0.000148	-0.001662	-0.000049
10.1600	325.275	6.006	30.472	3.505	-0.551	20.187	619.240	-0.000420	-0.002133	-0.000245
10.2000	361.824	8.854	35.697	5.331	-0.550	20.186	688.820	-0.000620	-0.002499	-0.000373
10.2400	459.674	14.859	46.799	10.071	-0.553	20.186	875.101	-0.001040	-0.003276	-0.000705
10.2800	475.318	16.542	48.968	11.255	-0.558	20.186	904.884	-0.001158	-0.003428	-0.000788
10.3200	557.283	21.791	58.141	15.630	-0.551	20.186	1060.925	-0.001525	-0.004070	-0.001094
10.3600	624.190	26.801	66.146	19.192	-0.539	20.186	1188.297	-0.001876	-0.004630	-0.001343
10.4000	697.979	32.554	75.856	23.488	-0.552	20.186	1328.773	-0.002279	-0.005310	-0.001644
10.4400	786.797	38.520	85.793	28.416	-0.547	20.186	1497.860	-0.002696	-0.006006	-0.001989
10.4800	842.447	42.909	92.212	31.823	-0.552	20.186	1603.804	-0.003004	-0.006455	-0.002228
10.5200	928.094	49.240	101.995	36.200	-0.560	20.186	1766.853	-0.003447	-0.007140	-0.002534
10.5600	1004.754	54.894	111.129	40.329	-0.550	20.187	1912.794	-0.003843	-0.007779	-0.002823
10.6000	1070.083	59.806	118.352	44.497	-0.557	20.186	2037.163	-0.004186	-0.008285	-0.003115
10.6400	1130.332	64.368	125.884	47.820	-0.559	20.187	2151.861	-0.004506	-0.008812	-0.003347
10.6800	1196.291	69.599	134.221	52.113	-0.550	20.187	2277.431	-0.004872	-0.009395	-0.003648
10.7200	1234.584	72.615	138.295	54.289	-0.556	20.186	2350.330	-0.005083	-0.009681	-0.003800
10.7600	1260.222	75.241	143.324	56.396	-0.553	20.186	2399.139	-0.005267	-0.010033	-0.003948
10.8000	1337.093	80.489	151.355	60.607	-0.545	20.186	2545.481	-0.005634	-0.010595	-0.004242
10.8400	1361.123	82.920	154.719	62.135	-0.554	20.187	2591.228	-0.005804	-0.010830	-0.004349
10.8800	1370.065	83.676	156.428	62.904	-0.560	20.187	2608.252	-0.005857	-0.010950	-0.004403
10.9200	1403.969	86.173	159.932	64.757	-0.549	20.187	2672.796	-0.006032	-0.011195	-0.004533
10.9600	1394.892	86.074	161.376	64.869	-0.548	20.186	2655.516	-0.006025	-0.011296	-0.004541
11.0000	1393.765	86.761	161.487	65.081	-0.555	20.186	2653.370	-0.006073	-0.011304	-0.004556
11.0400	1366.668	85.569	159.527	64.250	-0.550	20.186	2601.786	-0.005990	-0.011167	-0.004498
11.0800	1362.145	85.009	158.651	64.084	-0.550	20.187	2593.174	-0.005951	-0.011106	-0.004486
11.1200	1338.821	83.831	156.747	62.781	-0.559	20.186	2548.771	-0.005868	-0.010972	-0.004395
11.1600	1281.728	79.971	150.483	59.749	-0.544	20.187	2440.081	-0.005598	-0.010534	-0.004182
11.2000	1225.341	76.099	145.257	56.970	-0.541	20.186	2332.735	-0.005327	-0.010168	-0.003988
11.2400	1191.497	73.937	141.490	55.302	-0.538	20.186	2268.305	-0.005176	-0.009904	-0.003871
11.2800	1134.029	70.093	134.444	51.961	-0.541	20.187	2158.899	-0.004906	-0.009411	-0.003637
11.3200	1058.075	64.424	126.580	48.085	-0.545	20.187	2014.303	-0.004510	-0.008861	-0.003366
11.3600	977.583	59.075	117.712	43.276	-0.552	20.187	1861.067	-0.004135	-0.008240	-0.003029
11.4000	911.293	54.489	110.628	39.808	-0.554	20.187	1734.867	-0.003814	-0.007744	-0.002787
11.4400	862.901	51.007	104.654	37.197	-0.555	20.187	1642.742	-0.003570	-0.007326	-0.002604
11.4800	756.560	42.771	92.156	31.259	-0.554	20.187	1440.296	-0.002994	-0.006451	-0.002188
11.5200	714.571	39.207	86.835	28.780	-0.554	20.187	1360.359	-0.002744	-0.006078	-0.002015
11.5600	617.592	32.401	75.439	23.362	-0.554	20.187	1175.737	-0.002268	-0.005281	-0.001635
11.6000	531.480	26.915	65.712	18.409	-0.558	20.187	1011.801	-0.001884	-0.004600	-0.001289
11.6400	480.263	22.212	58.611	15.405	-0.561	20.186	914.297	-0.001555	-0.004103	-0.001078
11.6800	448.132	19.629	53.692	13.229	-0.559	20.187	853.128	-0.001374	-0.003758	-0.000926
11.7200	372.765	13.402	43.840	9.159	-0.558	20.187	709.648	-0.000938	-0.003069	-0.000641
11.7600	328.266	10.748	38.156	6.119	-0.548	20.187	624.933	-0.000752	-0.002671	-0.000428
11.8000	280.776	6.719	31.529	3.786	-0.552	20.186	534.525	-0.000470	-0.002207	-0.000265
11.8400	260.262	4.827	27.971	2.397	-0.564	20.187	495.472	-0.000338	-0.001958	-0.000168
11.8800	240.229	2.413	24.272	1.189	-0.560	20.187	457.335	-0.000169	-0.001699	-0.000083
11.9200	237.359	2.046	23.636	0.854	-0.561	20.186	451.870	-0.000143	-0.001655	-0.000060
11.9600	216.289	1.248	21.039	-0.129	-0.557	20.187	411.758	-0.000087	-0.001473	0.000009
12.0000	225.456	0.954	21.134	-0.043	-0.565	20.186	429.211	-0.000067	-0.001479	0.000003
12.0400	230.987	0.840	21.148	0.083	-0.565	20.187	439.739	-0.000059	-0.001480	-0.000006
12.0800	237.704	1.459	21.274	0.127	-0.560	20.187	452.528	-0.000102	-0.001489	-0.000009
12.1200	287.358	4.138	26.638	2.226	-0.562	20.187	547.056	-0.000290	-0.001865	-0.000156
12.1600	334.487	7.114	32.349	4.545	-0.558	20.187	636.778	-0.000498	-0.002264	-0.000318
12.2000	350.958	8.586	34.086	5.135	-0.545	20.186	668.135	-0.000601	-0.002386	-0.000359
12.2400	429.677	14.185	43.437	9.637	-0.558	20.187	817.995	-0.000993	-0.003041	-0.000675
12.2800	476.055	16.723	49.094	11.729	-0.556	20.187	906.286	-0.001171	-0.003437	-0.000821
12.3200	557.749	22.620	58.903	16.136	-0.549	20.187	1061.811	-0.001583	-0.004123	-0.001130
12.3600	595.020	26.071	64.002	18.521	-0.570	20.187	1132.765	-0.001825	-0.004480	-0.001296
12.4000	693.095	32.401	75.175	23.783	-0.565	20.187	1319.475	-0.002268	-0.005262	-0.001665
12.4400	752.112	36.653	82.904	27.208	-0.559	20.187	1431.828	-0.002566	-0.005803	-0.001905
12.4800	812.857	41.408	90.585	30.812	-0.565	20.186	1547.470	-0.002899	-0.006341	-0.002157
12.5200	891.425	47.232	99.512	34.939	-0.562	20.187	1697.044	-0.003306	-0.006966	-0.002446
12.5600	1020.249	57.167	113.626	41.769	-0.560	20.187	1942.291	-0.004002	-0.007954	-0.002924
12.6000	1078.484	61.588	120.436	45.520	-0.561	20.187	2053.156	-0.004311	-0.008431	-0.003186
12.6400	1134.660	65.897	127.233	48.815	-0.562	20.187	2160.101	-0.004613	-0.008906	-0.003417
12.6800	1208.329	71.062	135.639	52.956	-0.567	20.187	2300.348	-0.004974	-0.009495	-0.003707
12.7200	1242.023	73.953	140.294	55.371	-0.572	20.188	2364.492	-0.005177	-0.009821	-0.003876
12.7600	1288.881	77.741	146.630	58.202	-0.564	20.187	2453.699	-0.005442	-0.010264	-0.004074
12.8000	1306.976	79.478	149.300	59.468	-0.560	20.187	2488.146	-0.005563	-0.010451	-0.004163
12.8400	1361.213	83.464	156.163	62.935	-0.557	20.187	2591.400	-0.005843	-0.010931	-0.004405
12.8800	1391.285	85.569	158.917	64.476	-0.556	20.187	2648.649	-0.005990	-0.011124	-0.004513
12.9200	1373.055	85.878	159.054	63.957	-0.556	20.187	2613.945	-0.006011	-0.011134	-0.004477
12.9600	1398.138	86.889	161.210	65.334	-0.561	20.187	2661.695	-0.006082	-0.011285	-0.004573
13.0000	1402.511	88.391	162.376	66.218	-0.564	20.187	2670.021	-0.006187	-0.011366	-0.004635
13.0400	1364.594	86.216	159.654	64.730	-0.565	20.187	2597.837	-0.006035	-0.011176	-0.004531
13.0800	1360.266	85.849	159.569	64.335	-0.570	20.187	2589.598	-0.006009	-0.011170	-0.004503
13.1200	1324.183	84.039	156.138	62.849	-0.562	20.187	2520.905	-0.005883	-0.010930	-0.004399
13.1600	1291.571	81.921	152.787	61.138	-0.559	20.187	2458.820	-0.005735	-0.010695	-0.004280
13.2000	1252.392	78.665	147.603	59.045	-0.563	20.187	2384.233	-0.005507	-0.010332	-0.004133
13.2400	1213.799	75.748	143.576	56.620	-0.560	20.187	2310.762	-0.005302	-0.010050	-0.003963
13.2800	1116.130	69.335	134.167	51.693	-0.561	20.187	2124.825	-0.004853	-0.009392	-0.003618
13.3200	1043.122	64.536	125.427	47.622	-0.569	20.188	1985.836	-0.004517	-0.008780	-0.003334
13.3600	964.824	59.089	116.713	43.162	-0.565	20.188	1836.777	-0.004136	-0.008170	-0.003021
13.4000	930.965	56.494	112.878	41.055	-0.562	20.188	1772.318	-0.003955	-0.007901	-0.002874
13.4400	856.289	51.048	104.205	37.015	-0.556	20.188	1630.154	-0.003573	-0.007294	-0.002591
13.4800	781.522	45.549	95.980	33.087	-0.566	20.188	1487.818	-0.003188	-0.006719	-0.002316
13.5200	695.890	39.484	85.499	27.839	-0.562	20.188	1324.797	-0.002764	-0.005985	-0.001949
13.5600	625.753	33.861	77.039	24.119	-0.568	20.188	1191.273	-0.002370	-0.005393	-0.001688
13.6000	555.255	28.792	68.145	20.006	-0.560	20.188	1057.062	-0.002015	-0.004770	-0.001400
13.6400	465.024	22.156	57.457	15.054	-0.567	20.187	885.286	-0.001551	-0.004022	-0.001054
13.6800	460.185	21.597	55.709	14.100	-0.566	20.187	876.074	-0.001512	-0.003900	-0.000987
13.7200	356.489	13.526	43.201	8.541	-0.570	20.188	678.663	-0.000947	-0.003024	-0.000598
13.7600	326.567	11.042	38.477	6.887	-0.566	20.188	621.700	-0.000773	-0.002693	-0.000482
13.8000	296.165	7.394	33.599	4.826	-0.570	20.188	563.822	-0.000518	-0.002352	-0.000338
13.8400	229.424	3.168	24.412	1.415	-0.558	20.188	436.764	-0.000222	-0.001709	-0.000099
13.8800	228.206	2.862	23.983	0.826	-0.561	20.188	434.446	-0.000200	-0.001679	-0.000058
13.9200	228.432	2.386	23.525	0.812	-0.562	20.188	434.875	-0.000167	-0.001647	-0.000057
13.9600	214.185	0.265	19.479	-0.364	-0.563	20.189	407.753	-0.000019	-0.001364	0.000026
14.0000	215.147	0.757	19.812	-0.519	-0.567	20.188	409.584	-0.000053	-0.001387	0.000036
14.0400	263.313	3.014	24.425	1.413	-0.561	20.189	501.280	-0.000211	-0.001710	-0.000099
14.0800	280.024	4.532	26.137	2.256	-0.569	20.188	533.094	-0.000317	-0.001830	-0.000158
14.1200	270.571	3.620	25.384	1.990	-0.565	20.188	515.099	-0.000253	-0.001777	-0.000139
14.1600	340.965	7.870	34.543	5.626	-0.553	20.188	649.109	-0.000551	-0.002418	-0.000394
14.2000	411.463	12.474	41.492	8.641	-0.562	20.188	783.319	-0.000873	-0.002904	-0.000605
14.2400	410.411	13.246	42.244	8.640	-0.553	20.188	781.317	-0.000927	-0.002957	-0.000605
14.2800	493.368	18.534	51.872	12.852	-0.553	20.189	939.245	-0.001297	-0.003631	-0.000900
14.3200	527.963	21.527	57.209	15.295	-0.554	20.189	1005.106	-0.001507	-0.004005	-0.001071
14.3600	625.903	27.796	67.661	20.133	-0.552	20.189	1191.559	-0.001946	-0.004736	-0.001409
14.4000	689.188	32.851	75.495	23.642	-0.558	20.188	1312.037	-0.002300	-0.005285	-0.001655
14.4400	774.880	39.627	85.918	28.849	-0.556	20.189	1475.172	-0.002774	-0.006014	-0.002019
14.4800	857.822	44.933	94.842	33.257	-0.554	20.189	1633.072	-0.003145	-0.006639	-0.002328
14.5200	891.470	48.511	100.929	35.849	-0.557	20.188	1697.130	-0.003396	-0.007065	-0.002509
14.5600	1007.640	55.582	112.460	41.572	-0.560	20.189	1918.287	-0.003891	-0.007872	-0.002910
14.6000	1063.065	60.703	119.450	45.113	-0.560	20.189	2023.802	-0.004249	-0.008362	-0.003158
14.6400	1107.263	64.336	125.148	47.987	-0.569	20.189	2107.944	-0.004504	-0.008760	-0.003359
14.6800	1181.939	69.307	133.250	51.918	-0.562	20.189	2250.109	-0.004851	-0.009327	-0.003634
14.7200	1235.561	73.782	139.822	55.231	-0.554	20.189	2352.190	-0.005165	-0.009788	-0.003866
14.7600	1298.875	78.483	147.450	59.257	-0.570	20.189	2472.725	-0.005494	-0.010321	-0.004148
14.8000	1342.037	82.118	152.857	61.517	-0.564	20.189	2554.893	-0.005748	-0.010700	-0.004306
14.8400	1340.113	82.902	153.455	62.050	-0.553	20.189	2551.231	-0.005803	-0.010742	-0.004344
14.8800	1377.309	85.471	158.261	64.238	-0.566	20.190	2622.042	-0.005983	-0.011078	-0.004497
14.9200	1444.981	89.992	165.128	67.552	-0.568	20.190	2750.874	-0.006299	-0.011559	-0.004729
14.9600	1380.359	85.934	159.708	64.982	-0.565	20.190	2627.850	-0.006015	-0.011180	-0.004549
15.0000	1396.710	88.740	163.321	66.134	-0.558	20.190	2658.978	-0.006212	-0.011432	-0.004629
15.0400	1396.094	87.914	162.848	66.374	-0.565	20.190	2657.804	-0.006154	-0.011399	-0.004646
15.0800	1383.230	87.620	161.862	65.685	-0.563	20.190	2633.314	-0.006133	-0.011330	-0.004598
15.1200	1295.960	81.849	153.024	61.433	-0.555	20.190	2467.175	-0.005729	-0.010712	-0.004300
15.1600	1305.623	82.635	153.772	61.938	-0.560	20.190	2485.571	-0.005784	-0.010764	-0.004336
15.2000	1196.517	76.026	143.118	56.634	-0.562	20.190	2277.861	-0.005322	-0.010018	-0.003964
15.2400	1191.858	74.904	142.337	55.818	-0.556	20.190	2268.991	-0.005243	-0.009964	-0.003907
15.2800	1097.299	68.435	130.957	50.670	-0.554	20.190	2088.976	-0.004790	-0.009167	-0.003547
15.3200	1082.526	66.499	129.468	49.547	-0.548	20.190	2060.852	-0.004655	-0.009063	-0.003468
15.3600	991.124	60.886	119.463	44.596	-0.546	20.189	1886.845	-0.004262	-0.008362	-0.003122
15.4000	931.536	56.945	113.196	41.224	-0.556	20.190	1773.405	-0.003986	-0.007924	-0.002886
15.4400	829.673	49.031	101.554	36.200	-0.548	20.190	1579.485	-0.003432	-0.007109	-0.002534
15.4800	776.864	44.523	94.091	32.596	-0.561	20.190	1478.949	-0.003117	-0.006586	-0.002282
15.5200	708.304	39.685	86.668	29.073	-0.560	20.190	1348.429	-0.002778	-0.006067	-0.002035
15.5600	640.766	35.192	78.541	24.791	-0.561	20.191	1219.854	-0.002463	-0.005498	-0.001735
15.6000	571.125	29.678	70.341	20.822	-0.566	20.190	1087.275	-0.002077	-0.004924	-0.001458
15.6400	485.072	23.391	58.528	15.393	-0.568	20.191	923.452	-0.001637	-0.004097	-0.001078
15.6800	431.601	18.493	51.025	12.555	-0.562	20.190	821.657	-0.001294	-0.003572	-0.000879
15.7200	388.559	16.080	46.646	10.327	-0.548	20.191	739.717	-0.001126	-0.003265	-0.000723
15.7600	343.594	11.562	40.048	7.714	-0.550	20.191	654.116	-0.000809	-0.002803	-0.000540
15.8000	276.463	6.510	30.680	3.717	-0.551	20.190	526.314	-0.000456	-0.002148	-0.000260
15.8400	286.562	7.155	31.194	3.941	-0.553	20.191	545.540	-0.000501	-0.002184	-0.000276
15.8800	237.870	3.397	24.940	1.148	-0.552	20.191	452.843	-0.000238	-0.001746	-0.000080
15.9200	222.496	1.910	22.427	0.393	-0.562	20.191	423.574	-0.000134	-0.001570	-0.000028
15.9600	210.112	1.207	20.731	-0.128	-0.557	20.190	400.000	-0.000084	-0.001451	0.000009
16.0000	241.371	2.495	21.635	0.587	-0.559	20.191	459.509	-0.000175	-0.001514	-0.000041
16.0400	227.154	1.150	20.954	0.140	-0.558	20.191	432.444	-0.000081	-0.001467	-0.000010
16.0800	245.309	2.103	21.927	0.575	-0.562	20.191	467.005	-0.000147	-0.001535	-0.000040
16.1200	278.266	4.336	26.679	2.101	-0.554	20.191	529.747	-0.000304	-0.001868	-0.000147
16.1600	322.870	6.820	30.819	3.857	-0.550	20.191	614.662	-0.000477	-0.002157	-0.000270
16.2000	375.214	10.832	37.545	6.621	-0.561	20.192	714.312	-0.000758	-0.002628	-0.000463
16.2400	426.251	13.527	43.798	9.230	-0.556	20.191	811.472	-0.000947	-0.003066	-0.000646
16.2800	491.204	18.549	51.511	12.879	-0.560	20.191	935.125	-0.001298	-0.003606	-0.000902
16.3200	558.771	23.671	59.780	16.711	-0.564	20.192	1063.757	-0.001657	-0.004185	-0.001170
16.3600	633.237	28.609	68.659	20.457	-0.557	20.192	1205.521	-0.002003	-0.004806	-0.001432
16.4000	697.213	33.829	76.706	24.245	-0.558	20.191	1327.314	-0.002368	-0.005369	-0.001697
16.4400	774.895	38.771	85.792	29.017	-0.561	20.191	1475.201	-0.002714	-0.006005	-0.002031
16.4800	885.098	47.219	98.299	34.603	-0.553	20.192	1684.999	-0.003305	-0.006881	-0.002422
16.5200	926.126	50.502	103.845	37.197	-0.560	20.192	1763.105	-0.003535	-0.007269	-0.002604
16.5600	987.141	55.274	110.710	40.636	-0.565	20.192	1879.263	-0.003869	-0.007750	-0.002845
16.6000	1062.043	59.934	118.921	45.128	-0.556	20.192	2021.856	-0.004195	-0.008325	-0.003159
16.6400	1134.525	65.645	127.956	49.027	-0.556	20.192	2159.843	-0.004595	-0.008957	-0.003432
16.6800	1165.438	69.250	132.138	51.372	-0.554	20.192	2218.695	-0.004848	-0.009250	-0.003596
16.7200	1239.678	74.455	140.363	55.161	-0.564	20.192	2360.029	-0.005212	-0.009825	-0.003861
16.7600	1298.424	78.514	147.867	59.045	-0.564	20.193	2471.867	-0.005496	-0.010351	-0.004133
16.8000	1325.551	81.233	152.077	61.263	-0.561	20.192	2523.508	-0.005686	-0.010645	-0.004288
16.8400	1336.371	81.893	153.079	61.349	-0.565	20.193	2544.107	-0.005732	-0.010716	-0.004294
16.8800	1378.406	85.711	158.358	64.111	-0.559	20.193	2624.130	-0.006000	-0.011085	-0.004488
16.9200	1401.715	88.042	161.556	65.755	-0.570	20.193	2668.505	-0.006163	-0.011309	-0.004603
16.9600	1394.666	87.844	161.126	65.446	-0.549	20.193	2655.087	-0.006149	-0.011279	-0.004581
17.0000	1392.187	87.575	161.292	65.558	-0.554	20.193	2650.366	-0.006130	-0.011290	-0.004589
17.0400	1391.616	87.646	161.460	65.614	-0.562	20.193	2649.279	-0.006135	-0.011302	-0.004593
17.0800	1361.739	86.579	159.931	64.295	-0.546	20.193	2592.402	-0.006061	-0.011195	-0.004501
17.1200	1313.603	83.058	155.346	62.543	-0.565	20.192	2500.763	-0.005814	-0.010874	-0.004378
17.1600	1290.955	81.514	152.495	60.915	-0.561	20.193	2457.647	-0.005706	-0.010675	-0.004264
17.2000	1215.603	76.700	145.061	57.236	-0.554	20.194	2314.196	-0.005369	-0.010154	-0.004007
17.2400	1203.385	76.238	143.312	56.368	-0.560	20.194	2290.936	-0.005337	-0.010032	-0.003946
17.2800	1114.221	70.036	133.875	51.876	-0.556	20.194	2121.191	-0.004903	-0.009371	-0.003631
17.3200	1061.742	66.176	127.565	48.549	-0.558	20.194	2021.284	-0.004632	-0.008930	-0.003398
17.3600	972.894	59.918	117.755	43.514	-0.558	20.194	1852.140	-0.004194	-0.008243	-0.003046
17.4000	900.743	54.474	110.169	39.893	-0.556	20.194	1714.783	-0.003813	-0.007712	-0.002793
17.4400	856.649	51.429	104.722	37.073	-0.558	20.193	1630.840	-0.003600	-0.007331	-0.002595
17.4800	776.668	45.283	95.453	33.115	-0.564	20.194	1478.577	-0.003170	-0.006682	-0.002318
17.5200	693.230	39.292	85.029	27.728	-0.563	20.194	1319.733	-0.002750	-0.005952	-0.001941
17.5600	629.239	34.250	77.498	23.964	-0.558	20.194	1197.910	-0.002397	-0.005425	-0.001678
17.6000	568.239	30.071	69.743	20.471	-0.562	20.194	1081.781	-0.002105	-0.004882	-0.001433
17.6400	508.080	25.203	62.472	17.118	-0.564	20.194	967.255	-0.001764	-0.004373	-0.001198
17.6800	442.271	20.012	54.250	13.510	-0.568	20.194	841.970	-0.001401	-0.003797	-0.000946
17.7200	380.129	15.183	46.035	9.819	-0.558	20.194	723.667	-0.001063	-0.003222	-0.000687
17.7600	339.913	11.575	39.979	7.336	-0.562	20.195	647.106	-0.000810	-0.002799	-0.000514
17.8000	291.431	8.378	33.615	4.713	-0.558	20.194	554.810	-0.000586	-0.002353	-0.000330
17.8400	254.461	4.784	28.305	2.480	-0.550	20.195	484.428	-0.000335	-0.001981	-0.000174
17.8800	241.146	3.943	25.858	2.170	-0.552	20.195	459.080	-0.000276	-0.001810	-0.000152
17.9200	230.070	2.720	23.066	0.700	-0.551	20.194	437.994	-0.000190	-0.001615	-0.000049
17.9600	198.210	0.575	19.215	-0.828	-0.556	20.194	377.340	-0.000040	-0.001345	0.000058
18.0000	215.673	0.785	20.048	-0.266	-0.557	20.195	410.585	-0.000055	-0.001403	0.000019
18.0400	235.585	2.342	21.565	0.278	-0.562	20.194	448.494	-0.000164	-0.001510	-0.000019
18.0800	251.425	3.523	23.914	1.133	-0.561	20.195	478.649	-0.000247	-0.001674	-0.000079
18.1200	291.686	5.179	27.041	2.466	-0.563	20.195	555.296	-0.000363	-0.001893	-0.000173
18.1600	333.450	8.165	32.475	5.066	-0.546	20.195	634.804	-0.000572	-0.002273	-0.000355
18.2000	366.723	9.976	36.378	6.088	-0.566	20.196	698.147	-0.000698	-0.002546	-0.000426
18.2400	424.177	13.990	43.758	9.260	-0.545	20.196	807.524	-0.000979	-0.003063	-0.000648
18.2800	481.405	18.747	50.262	12.276	-0.558	20.195	916.471	-0.001312	-0.003518	-0.000859
18.3200	544.870	22.719	58.153	15.826	-0.556	20.196	1037.292	-0.001590	-0.004071	-0.001108
18.3600	614.301	27.463	66.337	19.627	-0.557	20.196	1169.472	-0.001922	-0.004644	-0.001374
18.4000	693.952	33.914	75.856	24.078	-0.560	20.196	1321.106	-0.002374	-0.005310	-0.001685
18.4400	764.796	38.756	84.362	28.275	-0.562	20.196	1455.975	-0.002713	-0.005905	-0.001979
18.4800	832.799	43.811	92.004	31.823	-0.553	20.195	1585.436	-0.003067	-0.006440	-0.002228
18.5200	912.600	49.520	101.592	36.214	-0.560	20.196	1737.356	-0.003466	-0.007111	-0.002535
18.5600	973.450	54.292	109.208	39.781	-0.554	20.196	1853.199	-0.003800	-0.007645	-0.002785
18.6000	1080.392	62.065	121.244	46.010	-0.560	20.196	2056.789	-0.004345	-0.008487	-0.003221
18.6400	1143.301	67.354	128.748	49.420	-0.556	20.197	2176.552	-0.004715	-0.009012	-0.003459
18.6800	1180.376	70.188	133.554	52.028	-0.563	20.197	2247.133	-0.004913	-0.009349	-0.003642
18.7200	1232.284	73.741	140.059	55.007	-0.557	20.197	2345.953	-0.005162	-0.009804	-0.003851
18.7600	1274.905	77.740	145.631	57.840	-0.560	20.196	2427.092	-0.005442	-0.010194	-0.004049
18.8000	1339.918	82.413	152.732	61.195	-0.558	20.196	2550.859	-0.005769	-0.010691	-0.004284
18.8400	1354.090	83.509	154.803	62.330	-0.560	20.197	2577.839	-0.005846	-0.010836	-0.004363
18.8800	1401.339	87.772	160.613	65.375	-0.561	20.196	2667.789	-0.006144	-0.011243	-0.004576
18.9200	1401.760	87.632	161.015	65.431	-0.564	20.197	2668.591	-0.006134	-0.011271	-0.004580
18.9600	1398.108	87.856	162.418	65.811	-0.556	20.197	2661.638	-0.006150	-0.011369	-0.004607
19.0000	1399.505	88.504	162.696	66.317	-0.554	20.197	2664.299	-0.006195	-0.011389	-0.004642
19.0400	1384.778	87.996	162.111	65.714	-0.557	20.198	2636.261	-0.006160	-0.011348	-0.004600
19.0800	1374.724	87.535	161.307	65.290	-0.567	20.197	2617.121	-0.006127	-0.011292	-0.004570
19.1200	1333.170	84.517	156.761	62.667	-0.562	20.197	2538.013	-0.005916	-0.010973	-0.004387
19.1600	1311.559	82.650	154.762	62.189	-0.556	20.197	2496.872	-0.005785	-0.010833	-0.004353
19.2000	1241.106	78.371	147.605	58.471	-0.558	20.198	2362.747	-0.005486	-0.010332	-0.004093
19.2400	1184.314	74.358	140.948	55.173	-0.558	20.197	2254.629	-0.005205	-0.009866	-0.003862
19.2800	1150.124	72.154	137.764	53.377	-0.553	20.198	2189.541	-0.005051	-0.009643	-0.003736
19.3200	1062.794	65.895	128.040	48.914	-0.548	20.198	2023.287	-0.004613	-0.008963	-0.003424
19.3600	998.638	61.743	120.270	45.085	-0.548	20.198	1901.150	-0.004322	-0.008419	-0.003156
19.4000	921.046	55.919	112.307	40.649	-0.555	20.197	1753.435	-0.003914	-0.007861	-0.002845
19.4400	858.408	51.737	104.164	37.352	-0.558	20.198	1634.188	-0.003622	-0.007291	-0.002615
19.4800	768.883	45.284	94.008	32.021	-0.557	20.198	1463.757	-0.003170	-0.006581	-0.002241
19.5200	696.341	39.316	85.819	28.387	-0.552	20.198	1325.655	-0.002752	-0.006007	-0.001987
19.5600	640.977	35.151	78.928	25.369	-0.568	20.198	1220.255	-0.002461	-0.005525	-0.001776
19.6000	548.101	28.964	68.090	19.530	-0.562	20.197	1043.444	-0.002027	-0.004766	-0.001367
19.6400	491.639	24.332	60.432	16.500	-0.562	20.198	935.955	-0.001703	-0.004230	-0.001155
19.6800	431.285	19.040	52.805	12.753	-0.563	20.198	821.056	-0.001333	-0.003696	-0.000893
19.7200	382.263	14.817	45.994	10.187	-0.556	20.198	727.730	-0.001037	-0.003220	-0.000713
19.7600	331.887	11.843	39.493	7.069	-0.557	20.198	631.828	-0.000829	-0.002765	-0.000495
19.8000	295.819	9.177	34.226	5.403	-0.567	20.198	563.164	-0.000642	-0.002396	-0.000378
19.8400	267.415	6.172	29.289	3.197	-0.562	20.198	509.090	-0.000432	-0.002050	-0.000224
19.8800	227.169	3.576	24.205	1.290	-0.560	20.199	432.472	-0.000250	-0.001694	-0.000090
19.9200	222.886	2.651	22.859	0.770	-0.562	20.198	424.318	-0.000186	-0.001600	-0.000054
19.9600	210.728	1.459	20.788	-0.056	-0.557	20.199	401.173	-0.000102	-0.001455	0.000004
Test Cycles
Time (sec)	Axial stress (kPa)	Axial micro-strain #1	Axial micro-strain #2	Axial micro-strain #3	Confining pressure (kPa)	Temperature (�C)	Load (N)	Displacement #1 (mm)	Displacement #2 (mm)	Displacement #3 (mm)
0.0000	221.188	1.277	21.217	-0.127	-0.564	20.199	421.085	-0.000089	-0.001485	0.000009
0.0400	245.579	3.115	22.634	0.714	-0.562	20.199	467.520	-0.000218	-0.001584	-0.000050
0.0800	251.095	2.426	23.080	1.259	-0.562	20.199	478.020	-0.000170	-0.001616	-0.000088
0.1200	290.604	5.289	27.459	2.732	-0.564	20.199	553.236	-0.000370	-0.001922	-0.000191
0.1600	340.814	9.216	34.448	5.358	-0.560	20.199	648.823	-0.000645	-0.002411	-0.000375
0.2000	355.437	9.794	35.627	5.864	-0.559	20.199	676.661	-0.000686	-0.002494	-0.000410
0.2400	451.664	15.914	46.854	10.708	-0.559	20.199	859.852	-0.001114	-0.003280	-0.000750
0.2800	479.752	18.157	50.331	12.206	-0.562	20.199	913.324	-0.001271	-0.003523	-0.000854
0.3200	547.350	22.956	58.419	16.136	-0.562	20.199	1042.013	-0.001607	-0.004089	-0.001130
0.3600	630.186	28.920	68.895	20.837	-0.554	20.199	1199.713	-0.002024	-0.004823	-0.001459
0.4000	702.428	34.451	76.885	24.454	-0.549	20.199	1337.242	-0.002412	-0.005382	-0.001712
0.4400	763.188	38.547	84.140	28.260	-0.563	20.199	1452.913	-0.002698	-0.005890	-0.001978
0.4800	836.737	43.825	92.894	32.216	-0.561	20.200	1592.932	-0.003068	-0.006503	-0.002255
0.5200	918.416	49.999	102.315	36.707	-0.552	20.200	1748.428	-0.003500	-0.007162	-0.002569
0.5600	1009.338	56.103	112.767	41.492	-0.564	20.200	1921.520	-0.003927	-0.007894	-0.002904
0.6000	1045.902	60.086	117.670	44.314	-0.556	20.200	1991.129	-0.004206	-0.008237	-0.003102
0.6400	1119.887	65.546	126.412	48.717	-0.570	20.200	2131.977	-0.004588	-0.008849	-0.003410
0.6800	1167.076	68.548	132.165	51.372	-0.557	20.200	2221.813	-0.004798	-0.009252	-0.003596
0.7200	1218.578	73.756	140.061	54.867	-0.558	20.200	2319.860	-0.005163	-0.009804	-0.003841
0.7600	1299.762	78.917	148.451	59.144	-0.574	20.200	2474.413	-0.005524	-0.010392	-0.004140
0.8000	1308.418	80.533	149.687	60.015	-0.565	20.200	2490.892	-0.005637	-0.010478	-0.004201
0.8400	1357.140	84.280	156.055	62.974	-0.559	20.201	2583.647	-0.005900	-0.010924	-0.004408
0.8800	1405.577	87.257	160.959	65.305	-0.566	20.201	2675.858	-0.006108	-0.011267	-0.004571
0.9200	1387.302	87.308	161.460	65.375	-0.554	20.200	2641.068	-0.006112	-0.011302	-0.004576
0.9600	1419.644	89.903	163.792	66.837	-0.566	20.200	2702.637	-0.006293	-0.011465	-0.004679
1.0000	1395.012	87.885	162.390	65.994	-0.561	20.201	2655.745	-0.006152	-0.011367	-0.004620
1.0400	1351.986	85.625	159.501	64.267	-0.564	20.200	2573.833	-0.005994	-0.011165	-0.004499
1.0800	1369.824	87.139	160.487	64.897	-0.566	20.201	2607.794	-0.006100	-0.011234	-0.004543
1.1200	1326.723	84.840	156.861	62.961	-0.561	20.201	2525.740	-0.005939	-0.010980	-0.004407
1.1600	1288.415	82.230	152.899	61.433	-0.553	20.201	2452.812	-0.005756	-0.010703	-0.004300
1.2000	1251.927	79.127	148.938	59.115	-0.547	20.201	2383.347	-0.005539	-0.010426	-0.004138
1.2400	1187.214	74.681	142.172	55.398	-0.558	20.201	2260.151	-0.005228	-0.009952	-0.003878
1.2800	1117.828	69.909	134.375	51.610	-0.548	20.202	2128.057	-0.004894	-0.009406	-0.003613
1.3200	1056.302	65.995	127.943	48.410	-0.553	20.201	2010.927	-0.004620	-0.008956	-0.003389
1.3600	1013.080	62.598	122.173	45.898	-0.556	20.201	1928.644	-0.004382	-0.008552	-0.003213
1.4000	912.765	55.190	111.544	40.382	-0.553	20.201	1737.671	-0.003863	-0.007808	-0.002827
1.4400	840.404	50.517	103.107	36.439	-0.553	20.201	1599.913	-0.003536	-0.007217	-0.002551
1.4800	765.712	44.766	94.840	32.230	-0.540	20.202	1457.720	-0.003134	-0.006639	-0.002256
1.5200	702.458	39.977	87.224	28.864	-0.550	20.201	1337.299	-0.002798	-0.006106	-0.002020
1.5600	636.904	35.446	78.721	24.794	-0.550	20.201	1212.502	-0.002481	-0.005510	-0.001736
1.6000	555.570	29.228	68.603	20.455	-0.550	20.202	1057.663	-0.002046	-0.004802	-0.001432
1.6400	481.721	23.210	59.487	15.939	-0.558	20.201	917.072	-0.001625	-0.004164	-0.001116
1.6800	435.824	20.529	53.568	12.992	-0.553	20.201	829.697	-0.001437	-0.003750	-0.000909
1.7200	361.869	14.439	44.215	9.005	-0.554	20.202	688.906	-0.001011	-0.003095	-0.000630
1.7600	337.929	12.110	39.797	7.727	-0.550	20.202	643.330	-0.000848	-0.002786	-0.000541
1.8000	291.356	8.516	33.574	4.715	-0.557	20.202	554.667	-0.000596	-0.002350	-0.000330
1.8400	264.485	5.961	29.597	3.366	-0.561	20.202	503.511	-0.000417	-0.002072	-0.000236
1.8800	237.479	4.054	25.455	1.947	-0.552	20.202	452.099	-0.000284	-0.001782	-0.000136
1.9200	235.766	3.730	24.872	1.049	-0.560	20.202	448.837	-0.000261	-0.001741	-0.000073
1.9600	208.143	1.036	20.008	-0.113	-0.563	20.202	396.252	-0.000073	-0.001401	0.000008
2.0000	232.324	1.935	21.983	0.755	-0.563	20.202	442.286	-0.000135	-0.001539	-0.000053
2.0400	234.293	2.189	22.038	0.501	-0.553	20.202	446.033	-0.000153	-0.001543	-0.000035
2.0800	275.035	5.151	26.525	2.130	-0.561	20.202	523.596	-0.000361	-0.001857	-0.000149
2.1200	271.729	4.630	26.082	1.792	-0.559	20.202	517.302	-0.000324	-0.001826	-0.000125
2.1600	325.380	7.463	31.626	4.544	-0.556	20.202	619.440	-0.000522	-0.002214	-0.000318
2.2000	371.232	11.042	37.212	6.396	-0.556	20.202	706.730	-0.000773	-0.002605	-0.000448
2.2400	432.683	15.098	45.202	10.017	-0.556	20.202	823.717	-0.001057	-0.003164	-0.000701
2.2800	496.133	19.419	52.261	13.593	-0.560	20.202	944.510	-0.001359	-0.003658	-0.000952
2.3200	560.019	23.993	59.723	16.501	-0.558	20.203	1066.132	-0.001680	-0.004181	-0.001155
2.3600	614.872	28.039	66.590	19.825	-0.564	20.203	1170.559	-0.001963	-0.004661	-0.001388
2.4000	699.122	33.790	76.942	24.050	-0.557	20.202	1330.948	-0.002365	-0.005386	-0.001684
2.4400	774.609	40.217	85.472	28.429	-0.569	20.203	1474.657	-0.002815	-0.005983	-0.001990
2.4800	846.415	45.099	94.367	32.511	-0.553	20.203	1611.357	-0.003157	-0.006606	-0.002276
2.5200	906.408	49.071	100.829	35.977	-0.557	20.203	1725.569	-0.003435	-0.007058	-0.002518
2.5600	985.037	54.937	110.321	40.621	-0.557	20.203	1875.257	-0.003846	-0.007722	-0.002843
2.6000	1052.950	60.494	118.533	44.454	-0.557	20.203	2004.547	-0.004235	-0.008297	-0.003112
2.6400	1129.595	66.303	127.191	48.761	-0.545	20.204	2150.459	-0.004641	-0.008903	-0.003413
2.6800	1183.337	70.414	133.778	52.155	-0.559	20.204	2252.769	-0.004929	-0.009364	-0.003651
2.7200	1233.862	74.175	139.988	55.358	-0.562	20.204	2348.957	-0.005192	-0.009799	-0.003875
2.7600	1298.079	79.018	147.508	58.625	-0.560	20.203	2471.209	-0.005531	-0.010326	-0.004104
2.8000	1329.623	81.528	151.981	60.956	-0.559	20.204	2531.261	-0.005707	-0.010639	-0.004267
2.8400	1361.333	84.292	156.178	62.904	-0.552	20.204	2591.629	-0.005900	-0.010932	-0.004403
2.8800	1393.960	86.891	159.832	65.066	-0.560	20.204	2653.742	-0.006082	-0.011188	-0.004555
2.9200	1398.814	87.632	160.640	65.374	-0.561	20.204	2662.983	-0.006134	-0.011245	-0.004576
2.9600	1393.539	87.310	160.959	65.488	-0.556	20.204	2652.941	-0.006112	-0.011267	-0.004584
3.0000	1394.877	88.743	161.557	65.658	-0.554	20.204	2655.487	-0.006212	-0.011309	-0.004596
3.0400	1389.467	87.648	161.419	65.853	-0.555	20.204	2645.187	-0.006135	-0.011299	-0.004610
3.0800	1371.357	86.931	160.291	64.754	-0.560	20.205	2610.712	-0.006085	-0.011220	-0.004533
3.1200	1337.288	85.274	157.789	63.495	-0.555	20.205	2545.853	-0.005969	-0.011045	-0.004445
3.1600	1302.136	82.343	154.609	61.952	-0.566	20.204	2478.933	-0.005764	-0.010823	-0.004337
3.2000	1233.502	78.458	147.284	58.386	-0.565	20.204	2348.270	-0.005492	-0.010310	-0.004087
3.2400	1182.616	75.225	141.558	55.709	-0.560	20.204	2251.396	-0.005266	-0.009909	-0.003900
3.2800	1127.386	70.780	135.431	52.605	-0.570	20.204	2146.254	-0.004955	-0.009480	-0.003682
3.3200	1070.008	67.007	128.707	49.293	-0.563	20.204	2037.020	-0.004690	-0.009009	-0.003451
3.3600	977.868	60.299	118.755	43.977	-0.558	20.205	1861.610	-0.004221	-0.008313	-0.003078
3.4000	922.474	56.888	112.597	40.789	-0.561	20.204	1756.153	-0.003982	-0.007882	-0.002855
3.4400	839.051	50.347	103.246	36.791	-0.554	20.205	1597.338	-0.003524	-0.007227	-0.002575
3.4800	760.843	44.832	93.758	32.003	-0.553	20.205	1448.450	-0.003138	-0.006563	-0.002240
3.5200	685.882	39.036	84.958	27.629	-0.560	20.205	1305.742	-0.002733	-0.005947	-0.001934
3.5600	621.395	33.830	77.260	23.896	-0.555	20.205	1182.976	-0.002368	-0.005408	-0.001673
3.6000	571.876	30.449	70.826	20.935	-0.565	20.205	1088.705	-0.002131	-0.004958	-0.001465
3.6400	500.130	25.270	61.503	16.922	-0.554	20.205	952.120	-0.001769	-0.004305	-0.001185
3.6800	447.922	20.333	54.624	14.086	-0.552	20.205	852.728	-0.001423	-0.003824	-0.000986
3.7200	390.438	16.011	47.299	10.523	-0.557	20.205	743.294	-0.001121	-0.003311	-0.000737
3.7600	334.217	11.968	40.034	7.182	-0.556	20.205	636.263	-0.000838	-0.002802	-0.000503
3.8000	289.477	8.546	33.420	4.641	-0.556	20.205	551.090	-0.000598	-0.002339	-0.000325
3.8400	251.591	5.065	27.833	2.902	-0.556	20.206	478.964	-0.000355	-0.001948	-0.000203
3.8800	238.982	4.253	25.665	1.793	-0.544	20.206	454.960	-0.000298	-0.001797	-0.000126
3.9200	229.739	2.834	23.744	1.035	-0.549	20.205	437.365	-0.000198	-0.001662	-0.000072
3.9600	224.119	1.935	22.594	0.477	-0.551	20.205	426.664	-0.000135	-0.001582	-0.000033
4.0000	207.723	1.235	20.605	-0.422	-0.558	20.206	395.451	-0.000086	-0.001442	0.000030
4.0400	247.007	3.465	22.761	0.811	-0.557	20.205	470.238	-0.000243	-0.001593	-0.000057
4.0800	246.511	2.819	22.510	0.924	-0.544	20.205	469.294	-0.000197	-0.001576	-0.000065
4.1200	293.174	5.388	27.444	2.620	-0.545	20.206	558.128	-0.000377	-0.001921	-0.000183
4.1600	315.131	6.959	31.180	3.716	-0.547	20.206	599.928	-0.000487	-0.002183	-0.000260
4.2000	371.863	10.761	37.393	6.552	-0.550	20.206	707.932	-0.000753	-0.002617	-0.000459
4.2400	439.506	15.757	45.327	9.918	-0.548	20.206	836.706	-0.001103	-0.003173	-0.000694
4.2800	504.985	20.051	53.430	13.327	-0.542	20.205	961.361	-0.001404	-0.003740	-0.000933
4.3200	542.390	22.984	58.223	15.506	-0.554	20.205	1032.572	-0.001609	-0.004076	-0.001085
4.3600	616.661	28.219	66.672	19.698	-0.551	20.206	1173.964	-0.001975	-0.004667	-0.001379
4.4000	689.413	33.316	75.494	23.826	-0.539	20.206	1312.466	-0.002332	-0.005285	-0.001668
4.4400	764.991	39.164	84.694	28.247	-0.552	20.206	1456.347	-0.002741	-0.005929	-0.001977
4.4800	840.734	44.622	93.561	32.386	-0.552	20.206	1600.542	-0.003124	-0.006549	-0.002267
4.5200	901.825	48.903	100.886	35.989	-0.562	20.206	1716.843	-0.003423	-0.007062	-0.002519
4.5600	983.684	54.852	110.766	40.201	-0.544	20.206	1872.683	-0.003840	-0.007754	-0.002814
4.6000	1081.444	62.401	121.102	46.221	-0.556	20.206	2058.792	-0.004368	-0.008477	-0.003235
4.6400	1130.196	66.234	127.470	49.041	-0.552	20.207	2151.604	-0.004636	-0.008923	-0.003433
4.6800	1180.121	69.812	133.304	51.916	-0.557	20.206	2246.647	-0.004887	-0.009331	-0.003634
4.7200	1258.900	76.279	143.074	56.648	-0.554	20.206	2396.622	-0.005340	-0.010015	-0.003965
4.7600	1294.216	78.624	147.730	59.017	-0.564	20.207	2463.856	-0.005504	-0.010341	-0.004131
4.8000	1325.521	81.347	151.980	60.801	-0.544	20.207	2523.451	-0.005694	-0.010639	-0.004256
4.8400	1346.906	83.437	153.941	61.925	-0.564	20.207	2564.163	-0.005841	-0.010776	-0.004335
4.8800	1380.344	86.101	158.818	63.816	-0.550	20.206	2627.821	-0.006027	-0.011117	-0.004467
4.9200	1398.874	88.223	161.544	65.292	-0.552	20.206	2663.097	-0.006176	-0.011308	-0.004570
4.9600	1418.366	89.821	163.821	66.344	-0.550	20.206	2700.205	-0.006287	-0.011467	-0.004644
5.0000	1381.306	87.632	161.320	65.432	-0.555	20.207	2629.652	-0.006134	-0.011292	-0.004580
5.0400	1402.992	88.729	162.766	66.035	-0.557	20.207	2670.937	-0.006211	-0.011394	-0.004622
5.0800	1363.933	86.341	160.543	64.547	-0.560	20.207	2596.579	-0.006044	-0.011238	-0.004518
5.1200	1328.511	84.573	156.567	62.581	-0.547	20.207	2529.144	-0.005920	-0.010960	-0.004381
5.1600	1290.369	82.609	153.038	61.096	-0.544	20.206	2456.532	-0.005783	-0.010713	-0.004277
5.2000	1227.280	78.075	146.186	57.516	-0.548	20.207	2336.426	-0.005465	-0.010233	-0.004026
5.2400	1198.200	75.130	142.740	56.212	-0.553	20.206	2281.065	-0.005259	-0.009992	-0.003935
5.2800	1137.200	71.158	136.057	52.774	-0.550	20.208	2164.936	-0.004981	-0.009524	-0.003694
5.3200	1070.188	66.920	128.441	48.872	-0.556	20.207	2037.363	-0.004684	-0.008991	-0.003421
5.3600	979.822	60.327	118.613	44.061	-0.550	20.207	1865.330	-0.004223	-0.008303	-0.003084
5.4000	927.238	56.733	112.405	41.392	-0.553	20.207	1765.223	-0.003971	-0.007868	-0.002897
5.4400	862.796	51.624	105.222	37.578	-0.556	20.207	1642.542	-0.003614	-0.007366	-0.002630
5.4800	774.444	45.395	95.770	32.905	-0.550	20.207	1474.342	-0.003178	-0.006704	-0.002303
5.5200	718.914	41.016	88.379	29.453	-0.550	20.207	1368.628	-0.002871	-0.006187	-0.002062
5.5600	620.117	34.029	76.803	23.882	-0.553	20.207	1180.544	-0.002382	-0.005376	-0.001672
5.6000	550.656	28.766	67.699	19.880	-0.556	20.208	1048.307	-0.002014	-0.004739	-0.001392
5.6400	502.294	24.807	61.824	16.766	-0.554	20.207	956.240	-0.001737	-0.004328	-0.001174
5.6800	447.877	20.642	54.514	13.664	-0.553	20.208	852.642	-0.001445	-0.003816	-0.000956
5.7200	370.631	15.196	44.980	9.426	-0.562	20.207	705.585	-0.001064	-0.003149	-0.000660
5.7600	342.302	12.067	40.143	7.449	-0.552	20.207	651.655	-0.000845	-0.002810	-0.000521
5.8000	295.023	8.208	34.072	4.966	-0.553	20.208	561.647	-0.000575	-0.002385	-0.000348
5.8400	251.726	5.375	27.805	2.831	-0.553	20.208	479.221	-0.000376	-0.001946	-0.000198
5.8800	241.522	4.110	26.024	1.821	-0.555	20.208	459.795	-0.000288	-0.001822	-0.000127
5.9200	232.219	3.240	24.314	1.148	-0.557	20.208	442.085	-0.000227	-0.001702	-0.000080
5.9600	201.786	1.387	19.797	-0.591	-0.549	20.208	384.150	-0.000097	-0.001386	0.000041
6.0000	225.697	1.472	20.980	0.140	-0.551	20.208	429.668	-0.000103	-0.001469	-0.000010
6.0400	227.395	1.711	21.234	0.028	-0.545	20.208	432.901	-0.000120	-0.001486	-0.000002
6.0800	258.759	3.731	23.816	1.218	-0.541	20.208	492.611	-0.000261	-0.001667	-0.000085
6.1200	300.749	6.115	28.541	2.943	-0.546	20.208	572.548	-0.000428	-0.001998	-0.000206
6.1600	328.461	7.727	32.933	4.812	-0.550	20.208	625.305	-0.000541	-0.002305	-0.000337
6.2000	374.478	10.650	37.920	6.974	-0.553	20.209	712.910	-0.000746	-0.002654	-0.000488
6.2400	429.888	14.607	44.898	9.680	-0.548	20.209	818.396	-0.001022	-0.003143	-0.000678
6.2800	517.924	20.993	54.734	14.213	-0.553	20.208	985.994	-0.001469	-0.003831	-0.000995
6.3200	558.426	24.176	60.530	16.669	-0.561	20.208	1063.099	-0.001692	-0.004237	-0.001167
6.3600	638.482	29.468	69.034	20.977	-0.550	20.208	1215.506	-0.002063	-0.004832	-0.001468
6.4000	689.954	33.103	75.565	24.358	-0.566	20.209	1313.496	-0.002317	-0.005290	-0.001705
6.4400	770.807	39.527	85.514	28.498	-0.559	20.208	1467.419	-0.002767	-0.005986	-0.001995
6.4800	844.101	44.876	93.826	32.552	-0.556	20.209	1606.951	-0.003141	-0.006568	-0.002279
6.5200	918.025	49.981	102.426	36.806	-0.556	20.208	1747.684	-0.003499	-0.007170	-0.002576
6.5600	989.801	55.681	110.933	40.802	-0.560	20.209	1884.327	-0.003898	-0.007765	-0.002856
6.6000	1087.516	62.318	121.758	46.641	-0.559	20.209	2070.351	-0.004362	-0.008523	-0.003265
6.6400	1152.033	67.565	130.108	49.912	-0.554	20.208	2193.174	-0.004730	-0.009108	-0.003494
6.6800	1183.036	70.471	133.973	51.861	-0.553	20.209	2252.197	-0.004933	-0.009378	-0.003630
6.7200	1252.092	75.339	141.811	56.004	-0.560	20.210	2383.661	-0.005274	-0.009927	-0.003920
6.7600	1264.956	76.520	144.437	57.027	-0.555	20.209	2408.152	-0.005356	-0.010111	-0.003992
6.8000	1342.698	82.626	153.579	61.335	-0.558	20.209	2556.152	-0.005784	-0.010751	-0.004293
6.8400	1364.084	84.939	156.248	62.920	-0.552	20.209	2596.865	-0.005946	-0.010937	-0.004404
6.8800	1363.978	85.556	157.301	63.256	-0.546	20.209	2596.664	-0.005989	-0.011011	-0.004428
6.9200	1404.330	87.884	161.127	65.390	-0.549	20.209	2673.483	-0.006152	-0.011279	-0.004577
6.9600	1399.836	87.885	161.613	65.643	-0.551	20.209	2664.928	-0.006152	-0.011313	-0.004595
7.0000	1392.051	87.689	161.738	65.557	-0.547	20.209	2650.108	-0.006138	-0.011322	-0.004589
7.0400	1373.296	87.887	161.112	64.687	-0.554	20.209	2614.403	-0.006152	-0.011278	-0.004528
7.0800	1345.343	85.528	158.484	63.636	-0.550	20.209	2561.188	-0.005987	-0.011094	-0.004455
7.1200	1316.744	84.559	155.983	62.512	-0.550	20.209	2506.742	-0.005919	-0.010919	-0.004376
7.1600	1288.130	81.541	152.080	60.871	-0.553	20.210	2452.269	-0.005708	-0.010646	-0.004261
7.2000	1218.383	77.263	145.561	57.335	-0.541	20.210	2319.489	-0.005408	-0.010189	-0.004013
7.2400	1204.617	76.377	143.587	56.142	-0.542	20.209	2293.282	-0.005346	-0.010051	-0.003930
7.2800	1116.040	69.966	134.179	51.552	-0.541	20.210	2124.653	-0.004898	-0.009393	-0.003609
7.3200	1064.312	66.360	128.083	48.775	-0.545	20.209	2026.176	-0.004645	-0.008966	-0.003414
7.3600	987.051	61.377	119.437	44.468	-0.545	20.210	1879.091	-0.004296	-0.008361	-0.003113
7.4000	925.284	56.720	112.224	40.887	-0.551	20.210	1761.503	-0.003970	-0.007856	-0.002862
7.4400	828.982	49.857	101.857	35.486	-0.556	20.209	1578.169	-0.003490	-0.007130	-0.002484
7.4800	761.054	44.778	94.187	32.061	-0.557	20.209	1448.851	-0.003134	-0.006593	-0.002244
7.5200	694.312	39.023	85.223	27.951	-0.560	20.209	1321.793	-0.002732	-0.005966	-0.001957
7.5600	596.493	32.513	73.980	22.492	-0.554	20.210	1135.569	-0.002276	-0.005179	-0.001574
7.6000	540.301	28.104	66.856	19.263	-0.561	20.210	1028.595	-0.001967	-0.004680	-0.001348
7.6400	479.797	23.489	59.154	15.786	-0.551	20.210	913.410	-0.001644	-0.004141	-0.001105
7.6800	445.698	20.107	53.929	13.342	-0.549	20.210	848.494	-0.001408	-0.003775	-0.000934
7.7200	381.391	15.464	45.953	9.890	-0.548	20.210	726.070	-0.001082	-0.003217	-0.000692
7.7600	319.098	10.454	37.936	6.497	-0.557	20.210	607.481	-0.000732	-0.002656	-0.000455
7.8000	290.003	8.587	33.587	4.248	-0.554	20.210	552.092	-0.000601	-0.002351	-0.000297
7.8400	263.703	5.811	28.987	2.748	-0.558	20.210	502.024	-0.000407	-0.002029	-0.000192
7.8800	233.241	3.860	24.440	1.359	-0.553	20.210	444.031	-0.000270	-0.001711	-0.000095
7.9200	230.476	2.480	23.288	0.771	-0.550	20.210	438.766	-0.000174	-0.001630	-0.000054
7.9600	221.909	1.921	21.745	0.181	-0.543	20.210	422.459	-0.000134	-0.001522	-0.000013
8.0000	217.431	1.641	21.369	-0.380	-0.549	20.210	413.933	-0.000115	-0.001496	0.000027
8.0400	236.607	2.356	22.274	0.559	-0.542	20.210	450.439	-0.000165	-0.001559	-0.000039
8.0800	269.985	3.704	24.843	1.471	-0.550	20.211	513.983	-0.000259	-0.001739	-0.000103
8.1200	294.497	5.569	27.984	2.691	-0.549	20.210	560.646	-0.000390	-0.001959	-0.000188
8.1600	335.284	8.644	32.822	4.586	-0.537	20.210	638.294	-0.000605	-0.002298	-0.000321
8.2000	368.557	10.789	37.672	6.595	-0.541	20.211	701.637	-0.000755	-0.002637	-0.000462
8.2400	426.912	14.747	43.368	9.469	-0.553	20.211	812.731	-0.001032	-0.003036	-0.000663
8.2800	477.828	17.987	49.661	11.869	-0.545	20.210	909.662	-0.001259	-0.003476	-0.000831
8.3200	570.388	23.838	60.781	16.641	-0.553	20.211	1085.873	-0.001669	-0.004255	-0.001165
8.3600	620.433	28.500	67.383	19.558	-0.547	20.211	1181.145	-0.001995	-0.004717	-0.001369
8.4000	702.022	34.688	77.556	24.525	-0.545	20.210	1336.470	-0.002428	-0.005429	-0.001717
8.4400	773.948	39.093	85.125	28.204	-0.539	20.211	1473.398	-0.002737	-0.005959	-0.001974
8.4800	840.719	44.330	94.091	32.752	-0.544	20.211	1600.513	-0.003103	-0.006586	-0.002293
8.5200	913.667	49.914	102.064	36.200	-0.539	20.211	1739.388	-0.003494	-0.007144	-0.002534
8.5600	991.725	55.652	111.239	40.452	-0.554	20.211	1887.989	-0.003896	-0.007787	-0.002832
8.6000	1065.619	61.630	119.074	45.099	-0.544	20.211	2028.666	-0.004314	-0.008335	-0.003157
8.6400	1120.007	65.488	126.036	48.480	-0.548	20.211	2132.206	-0.004584	-0.008823	-0.003394
8.6800	1187.034	70.135	134.028	52.083	-0.545	20.211	2259.808	-0.004909	-0.009382	-0.003646
8.7200	1240.264	74.526	140.764	55.091	-0.552	20.211	2361.145	-0.005217	-0.009853	-0.003856
8.7600	1305.593	79.691	148.063	58.948	-0.545	20.211	2485.514	-0.005578	-0.010364	-0.004126
8.8000	1327.790	81.738	151.231	60.424	-0.542	20.211	2527.771	-0.005722	-0.010586	-0.004230
8.8400	1354.255	83.859	155.249	62.079	-0.559	20.211	2578.154	-0.005870	-0.010867	-0.004346
8.8800	1385.033	86.201	158.736	64.195	-0.556	20.211	2636.747	-0.006034	-0.011111	-0.004494
8.9200	1388.219	87.099	159.958	64.530	-0.557	20.211	2642.813	-0.006097	-0.011197	-0.004517
8.9600	1412.069	88.868	162.653	66.119	-0.550	20.211	2688.217	-0.006221	-0.011386	-0.004628
9.0000	1396.545	88.518	161.847	65.924	-0.557	20.212	2658.663	-0.006196	-0.011329	-0.004615
9.0400	1388.114	88.138	161.417	65.248	-0.563	20.211	2642.612	-0.006170	-0.011299	-0.004567
9.0800	1348.574	85.821	158.776	63.703	-0.556	20.211	2567.339	-0.006007	-0.011114	-0.004459
9.1200	1332.644	84.685	157.022	62.991	-0.554	20.211	2537.012	-0.005928	-0.010992	-0.004409
9.1600	1291.241	82.286	152.481	60.899	-0.550	20.212	2458.191	-0.005760	-0.010674	-0.004263
9.2000	1230.346	77.447	146.366	57.559	-0.540	20.211	2342.262	-0.005421	-0.010246	-0.004029
9.2400	1184.765	74.651	141.184	54.935	-0.543	20.212	2255.487	-0.005226	-0.009883	-0.003845
9.2800	1118.159	70.219	134.471	51.652	-0.548	20.212	2128.687	-0.004915	-0.009413	-0.003616
9.3200	1047.705	65.912	125.898	47.764	-0.551	20.212	1994.562	-0.004614	-0.008813	-0.003343
9.3600	984.030	60.692	119.030	44.312	-0.537	20.211	1873.341	-0.004248	-0.008332	-0.003102
9.4000	933.144	56.621	112.835	41.113	-0.541	20.212	1776.466	-0.003963	-0.007898	-0.002878
9.4400	832.228	49.801	102.050	35.779	-0.550	20.212	1584.349	-0.003486	-0.007143	-0.002505
9.4800	751.781	44.733	92.839	31.218	-0.547	20.211	1431.198	-0.003131	-0.006499	-0.002185
9.5200	705.764	40.214	86.919	28.454	-0.548	20.212	1343.594	-0.002815	-0.006084	-0.001992
9.5600	622.867	34.324	76.858	23.838	-0.554	20.212	1185.780	-0.002403	-0.005380	-0.001669
9.6000	555.796	28.540	68.214	19.725	-0.556	20.212	1058.092	-0.001998	-0.004775	-0.001381
9.6400	500.130	24.513	61.142	16.459	-0.551	20.211	952.120	-0.001716	-0.004280	-0.001152
9.6800	434.712	19.687	52.803	12.738	-0.545	20.212	827.579	-0.001378	-0.003696	-0.000892
9.7200	376.492	15.520	45.578	9.498	-0.550	20.211	716.743	-0.001086	-0.003190	-0.000665
9.7600	328.266	11.855	38.436	6.649	-0.548	20.211	624.933	-0.000830	-0.002690	-0.000465
9.8000	294.271	8.025	33.489	4.390	-0.542	20.211	560.217	-0.000562	-0.002344	-0.000307
9.8400	256.640	5.148	28.540	2.382	-0.557	20.212	488.577	-0.000360	-0.001998	-0.000167
9.8800	233.000	3.705	24.635	0.768	-0.558	20.212	443.573	-0.000259	-0.001724	-0.000054
9.9200	216.905	2.524	21.094	-0.282	-0.562	20.212	412.931	-0.000177	-0.001477	0.000020
9.9600	225.576	1.894	21.259	-0.002	-0.553	20.212	429.440	-0.000133	-0.001488	0.000000
10.0000	224.900	1.866	21.467	-0.086	-0.552	20.212	428.152	-0.000131	-0.001503	0.000006
10.0400	245.940	2.425	22.386	0.502	-0.551	20.212	468.206	-0.000170	-0.001567	-0.000035
10.0800	260.442	4.097	23.802	1.218	-0.558	20.211	495.815	-0.000287	-0.001666	-0.000085
10.1200	273.953	4.112	25.163	1.359	-0.556	20.212	521.536	-0.000288	-0.001761	-0.000095
10.1600	323.592	7.717	30.763	4.039	-0.550	20.212	616.035	-0.000540	-0.002153	-0.000283
10.2000	368.196	10.495	36.558	5.991	-0.546	20.212	700.951	-0.000735	-0.002559	-0.000419
10.2400	433.329	14.844	44.313	9.512	-0.553	20.212	824.947	-0.001039	-0.003102	-0.000666
10.2800	480.383	18.494	50.178	11.982	-0.548	20.212	914.526	-0.001295	-0.003512	-0.000839
10.3200	568.029	24.767	60.057	16.305	-0.553	20.212	1081.381	-0.001734	-0.004204	-0.001141
10.3600	630.321	28.878	67.964	20.176	-0.559	20.212	1199.970	-0.002021	-0.004757	-0.001412
10.4000	714.691	34.519	77.902	24.834	-0.538	20.213	1360.588	-0.002416	-0.005453	-0.001738
10.4400	778.772	39.893	85.764	28.597	-0.551	20.212	1482.582	-0.002792	-0.006003	-0.002002
10.4800	853.043	45.073	94.425	32.822	-0.557	20.212	1623.974	-0.003155	-0.006610	-0.002298
10.5200	923.796	50.685	102.745	36.862	-0.554	20.212	1758.671	-0.003548	-0.007192	-0.002580
10.5600	994.896	56.062	110.836	40.426	-0.549	20.213	1894.026	-0.003924	-0.007758	-0.002830
10.6000	1074.967	61.420	120.478	45.338	-0.563	20.213	2046.461	-0.004299	-0.008433	-0.003174
10.6400	1112.703	65.224	125.108	47.581	-0.558	20.213	2118.301	-0.004566	-0.008758	-0.003331
10.6800	1168.684	69.388	132.152	50.866	-0.548	20.212	2224.874	-0.004857	-0.009251	-0.003561
10.7200	1249.056	75.087	141.240	55.610	-0.543	20.212	2377.882	-0.005256	-0.009887	-0.003893
10.7600	1283.606	78.372	145.297	57.714	-0.540	20.212	2443.657	-0.005486	-0.010171	-0.004040
10.8000	1344.877	82.499	152.995	61.180	-0.540	20.213	2560.301	-0.005775	-0.010710	-0.004283
10.8400	1351.279	83.128	154.610	62.020	-0.553	20.213	2572.489	-0.005819	-0.010823	-0.004341
10.8800	1376.166	85.891	158.165	63.535	-0.549	20.212	2619.867	-0.006012	-0.011072	-0.004447
10.9200	1411.047	88.601	161.974	65.769	-0.556	20.213	2686.272	-0.006202	-0.011338	-0.004604
10.9600	1390.834	87.632	160.807	65.037	-0.546	20.212	2647.791	-0.006134	-0.011257	-0.004553
11.0000	1403.653	88.195	162.193	65.782	-0.553	20.212	2672.195	-0.006174	-0.011353	-0.004605
11.0400	1388.640	87.873	161.806	65.516	-0.555	20.212	2643.614	-0.006151	-0.011326	-0.004586
11.0800	1346.621	85.710	158.430	63.761	-0.541	20.212	2563.620	-0.006000	-0.011090	-0.004463
11.1200	1334.733	84.840	157.121	63.016	-0.546	20.212	2540.989	-0.005939	-0.010998	-0.004411
11.1600	1282.404	81.065	151.468	60.325	-0.541	20.212	2441.368	-0.005675	-0.010603	-0.004223
11.2000	1252.573	79.270	148.632	58.429	-0.549	20.213	2384.577	-0.005549	-0.010404	-0.004090
11.2400	1183.487	74.834	141.335	54.907	-0.553	20.213	2253.056	-0.005238	-0.009893	-0.003843
11.2800	1130.662	70.905	134.777	52.156	-0.553	20.212	2152.491	-0.004963	-0.009434	-0.003651
11.3200	1051.102	65.631	126.440	47.820	-0.554	20.213	2001.028	-0.004594	-0.008851	-0.003347
11.3600	986.946	60.789	119.006	44.457	-0.554	20.213	1878.891	-0.004255	-0.008330	-0.003112
11.4000	925.059	56.383	112.475	40.944	-0.556	20.213	1761.074	-0.003947	-0.007873	-0.002866
11.4400	832.544	49.927	101.910	35.736	-0.555	20.213	1584.949	-0.003495	-0.007134	-0.002502
11.4800	783.792	45.662	95.575	32.623	-0.561	20.212	1492.138	-0.003196	-0.006690	-0.002284
11.5200	702.157	40.316	86.097	28.695	-0.554	20.212	1336.727	-0.002822	-0.006027	-0.002009
11.5600	612.813	33.930	75.425	23.249	-0.556	20.213	1166.639	-0.002375	-0.005280	-0.001627
11.6000	557.990	29.229	68.602	19.796	-0.562	20.213	1062.269	-0.002046	-0.004802	-0.001386
11.6400	489.956	24.079	60.265	15.841	-0.554	20.212	932.751	-0.001686	-0.004219	-0.001109
11.6800	426.100	19.716	52.177	12.319	-0.553	20.213	811.186	-0.001380	-0.003652	-0.000862
11.7200	387.778	16.503	46.465	10.003	-0.557	20.213	738.230	-0.001155	-0.003253	-0.000700
11.7600	325.365	10.957	38.144	6.634	-0.546	20.213	619.411	-0.000767	-0.002670	-0.000464
11.8000	303.003	9.092	34.726	4.799	-0.543	20.212	576.839	-0.000636	-0.002431	-0.000336
11.8400	267.581	6.945	29.611	2.961	-0.554	20.213	509.405	-0.000486	-0.002073	-0.000207
11.8800	233.541	3.547	25.094	1.161	-0.539	20.212	444.603	-0.000248	-0.001757	-0.000081
11.9200	231.287	2.678	23.288	0.784	-0.545	20.212	440.311	-0.000187	-0.001630	-0.000055
11.9600	216.559	1.094	20.814	-0.547	-0.545	20.213	412.273	-0.000077	-0.001457	0.000038
12.0000	223.533	1.964	21.493	-0.198	-0.552	20.213	425.549	-0.000137	-0.001505	0.000014
12.0400	229.890	2.146	21.774	0.026	-0.552	20.213	437.651	-0.000150	-0.001524	-0.000002
12.0800	254.536	3.521	23.025	0.643	-0.544	20.212	484.571	-0.000246	-0.001612	-0.000045
12.1200	281.422	4.645	26.498	2.242	-0.533	20.212	535.755	-0.000325	-0.001855	-0.000157
12.1600	331.767	7.814	32.072	4.278	-0.549	20.213	631.599	-0.000547	-0.002245	-0.000299
12.2000	377.904	11.465	37.642	6.635	-0.548	20.213	719.433	-0.000803	-0.002635	-0.000464
12.2400	435.719	15.534	44.938	9.525	-0.552	20.213	829.496	-0.001087	-0.003146	-0.000667
12.2800	483.404	18.351	50.386	12.205	-0.554	20.212	920.277	-0.001285	-0.003527	-0.000854
12.3200	574.190	24.287	60.781	17.171	-0.547	20.213	1093.111	-0.001700	-0.004255	-0.001202
12.3600	636.799	29.257	68.283	20.710	-0.548	20.213	1212.301	-0.002048	-0.004780	-0.001450
12.4000	693.636	33.551	75.232	23.935	-0.556	20.213	1320.505	-0.002349	-0.005266	-0.001675
12.4400	784.949	39.877	85.903	28.583	-0.565	20.213	1494.341	-0.002791	-0.006013	-0.002001
12.4800	840.644	44.441	92.851	32.062	-0.552	20.213	1600.370	-0.003111	-0.006500	-0.002244
12.5200	909.038	49.113	100.760	36.114	-0.537	20.213	1730.576	-0.003438	-0.007053	-0.002528
12.5600	987.742	55.090	110.306	40.397	-0.555	20.213	1880.407	-0.003856	-0.007721	-0.002828
12.6000	1105.174	64.072	123.786	47.076	-0.573	20.213	2103.968	-0.004485	-0.008665	-0.003295
12.6400	1105.054	64.745	126.498	48.212	-0.563	20.212	2103.739	-0.004532	-0.008855	-0.003375
12.6800	1200.845	71.257	135.568	52.799	-0.540	20.213	2286.100	-0.004988	-0.009490	-0.003696
12.7200	1237.048	74.679	140.002	55.414	-0.545	20.213	2355.022	-0.005228	-0.009800	-0.003879
12.7600	1318.052	80.112	149.231	59.594	-0.553	20.213	2509.232	-0.005608	-0.010446	-0.004172
12.8000	1298.289	79.901	149.201	59.019	-0.535	20.213	2471.609	-0.005593	-0.010444	-0.004131
12.8400	1349.867	84.391	155.096	62.134	-0.555	20.213	2569.799	-0.005907	-0.010857	-0.004349
12.8800	1381.862	86.243	158.178	64.068	-0.548	20.213	2630.711	-0.006037	-0.011072	-0.004485
12.9200	1428.435	89.568	164.462	67.003	-0.540	20.213	2719.374	-0.006270	-0.011512	-0.004690
12.9600	1400.648	88.011	162.279	65.784	-0.550	20.213	2666.473	-0.006161	-0.011360	-0.004605
13.0000	1397.597	88.798	162.555	65.996	-0.546	20.213	2660.666	-0.006216	-0.011379	-0.004620
13.0400	1381.351	88.209	161.917	65.066	-0.545	20.212	2629.738	-0.006175	-0.011334	-0.004555
13.0800	1365.586	87.309	160.111	64.307	-0.544	20.213	2599.726	-0.006112	-0.011208	-0.004502
13.1200	1323.056	83.997	156.097	62.737	-0.552	20.212	2518.759	-0.005880	-0.010927	-0.004392
13.1600	1283.171	80.910	151.564	60.294	-0.557	20.213	2442.827	-0.005664	-0.010610	-0.004221
13.2000	1236.011	78.651	147.104	57.854	-0.553	20.213	2353.048	-0.005506	-0.010297	-0.004050
13.2400	1207.307	76.505	143.742	56.338	-0.552	20.213	2298.403	-0.005355	-0.010062	-0.003944
13.2800	1114.687	69.866	133.709	51.343	-0.556	20.213	2122.078	-0.004891	-0.009360	-0.003594
13.3200	1069.932	66.879	128.206	48.663	-0.546	20.213	2036.877	-0.004682	-0.008974	-0.003406
13.3600	993.167	60.986	119.993	44.594	-0.533	20.213	1890.736	-0.004269	-0.008399	-0.003122
13.4000	909.579	55.808	110.641	39.934	-0.558	20.213	1731.606	-0.003907	-0.007745	-0.002795
13.4400	854.500	51.652	104.583	36.917	-0.559	20.212	1626.749	-0.003616	-0.007321	-0.002584
13.4800	773.512	45.408	94.799	32.497	-0.546	20.213	1472.569	-0.003179	-0.006636	-0.002275
13.5200	698.235	39.738	85.945	28.233	-0.548	20.212	1329.260	-0.002782	-0.006016	-0.001976
13.5600	621.259	34.196	76.997	23.896	-0.545	20.213	1182.718	-0.002394	-0.005390	-0.001673
13.6000	544.028	28.429	67.186	19.516	-0.557	20.212	1035.690	-0.001990	-0.004703	-0.001366
13.6400	498.537	24.877	60.781	16.429	-0.556	20.213	949.087	-0.001741	-0.004255	-0.001150
13.6800	442.196	20.178	53.596	13.482	-0.549	20.213	841.827	-0.001412	-0.003752	-0.000944
13.7200	371.577	15.673	44.689	9.090	-0.544	20.213	707.388	-0.001097	-0.003128	-0.000636
13.7600	340.619	12.417	40.258	7.405	-0.553	20.213	648.451	-0.000869	-0.002818	-0.000518
13.8000	291.476	8.405	33.753	4.503	-0.553	20.212	554.895	-0.000588	-0.002363	-0.000315
13.8400	253.214	5.079	27.457	2.271	-0.554	20.212	482.054	-0.000356	-0.001922	-0.000159
13.8800	245.264	4.195	25.818	1.639	-0.562	20.213	466.919	-0.000294	-0.001807	-0.000115
13.9200	229.063	2.538	23.081	0.530	-0.565	20.212	436.077	-0.000178	-0.001616	-0.000037
13.9600	222.345	2.385	22.621	0.196	-0.552	20.212	423.288	-0.000167	-0.001583	-0.000014
14.0000	226.809	2.496	21.956	0.279	-0.557	20.212	431.786	-0.000175	-0.001537	-0.000020
14.0400	231.933	1.906	21.829	0.181	-0.554	20.212	441.542	-0.000133	-0.001528	-0.000013
14.0800	265.567	3.703	24.608	1.178	-0.553	20.213	505.571	-0.000259	-0.001723	-0.000082
14.1200	295.909	6.061	27.972	2.649	-0.549	20.212	563.335	-0.000424	-0.001958	-0.000185
14.1600	327.244	7.912	31.666	3.856	-0.547	20.212	622.988	-0.000554	-0.002217	-0.000270
14.2000	376.477	11.097	37.586	6.832	-0.556	20.212	716.715	-0.000777	-0.002631	-0.000478
14.2400	404.940	13.399	41.382	8.457	-0.562	20.212	770.903	-0.000938	-0.002897	-0.000592
14.2800	474.462	17.932	49.676	12.078	-0.561	20.213	903.254	-0.001255	-0.003477	-0.000845
14.3200	551.978	23.810	59.154	15.742	-0.567	20.212	1050.825	-0.001667	-0.004141	-0.001102
14.3600	619.772	28.710	66.757	19.571	-0.551	20.212	1179.886	-0.002010	-0.004673	-0.001370
14.4000	691.983	33.958	75.021	23.992	-0.551	20.213	1317.358	-0.002377	-0.005251	-0.001679
14.4400	751.841	37.760	82.627	27.066	-0.557	20.212	1431.313	-0.002643	-0.005784	-0.001895
14.4800	845.453	44.847	93.575	32.399	-0.559	20.212	1609.526	-0.003139	-0.006550	-0.002268
14.5200	924.503	51.079	103.051	36.805	-0.564	20.212	1760.015	-0.003576	-0.007214	-0.002576
14.5600	985.262	56.016	109.988	39.989	-0.555	20.213	1875.687	-0.003921	-0.007699	-0.002799
14.6000	1045.015	59.708	116.727	43.879	-0.553	20.212	1989.441	-0.004180	-0.008171	-0.003072
14.6400	1134.765	66.149	127.580	48.845	-0.550	20.212	2160.301	-0.004630	-0.008931	-0.003419
14.6800	1174.620	69.810	133.055	51.694	-0.545	20.212	2236.176	-0.004887	-0.009314	-0.003619
14.7200	1255.233	75.944	142.241	56.073	-0.541	20.212	2389.641	-0.005316	-0.009957	-0.003925
14.7600	1305.939	79.450	147.964	59.158	-0.544	20.212	2486.172	-0.005562	-0.010357	-0.004141
14.8000	1320.035	80.911	150.107	59.987	-0.549	20.212	2513.008	-0.005664	-0.010507	-0.004199
14.8400	1373.311	85.303	156.817	63.298	-0.558	20.212	2614.431	-0.005971	-0.010977	-0.004431
14.8800	1381.622	86.087	158.691	64.167	-0.549	20.212	2630.253	-0.006026	-0.011108	-0.004492
14.9200	1405.682	88.617	161.584	65.504	-0.556	20.212	2676.058	-0.006203	-0.011311	-0.004585
14.9600	1402.181	88.980	161.501	65.627	-0.553	20.212	2669.392	-0.006229	-0.011305	-0.004594
15.0000	1401.549	88.741	162.432	65.980	-0.559	20.212	2668.190	-0.006212	-0.011370	-0.004619
15.0400	1385.845	87.928	161.597	65.208	-0.561	20.211	2638.292	-0.006155	-0.011312	-0.004565
15.0800	1350.603	86.257	159.151	63.636	-0.555	20.212	2571.201	-0.006038	-0.011141	-0.004454
15.1200	1328.301	84.980	156.788	62.862	-0.553	20.212	2528.744	-0.005949	-0.010975	-0.004400
15.1600	1301.580	82.622	153.398	61.488	-0.541	20.212	2477.875	-0.005784	-0.010738	-0.004304
15.2000	1257.292	79.704	148.729	59.187	-0.555	20.211	2393.560	-0.005579	-0.010411	-0.004143
15.2400	1195.254	75.592	142.172	55.485	-0.558	20.212	2275.457	-0.005291	-0.009952	-0.003884
15.2800	1140.100	71.986	136.362	52.873	-0.565	20.212	2170.458	-0.005039	-0.009545	-0.003701
15.3200	1054.754	65.896	127.081	48.270	-0.549	20.212	2007.980	-0.004613	-0.008896	-0.003379
15.3600	1000.336	61.588	120.367	45.044	-0.554	20.212	1904.383	-0.004311	-0.008426	-0.003153
15.4000	900.187	54.671	109.696	39.472	-0.553	20.212	1713.724	-0.003827	-0.007679	-0.002763
15.4400	850.157	51.079	104.068	36.706	-0.556	20.212	1618.481	-0.003576	-0.007285	-0.002569
15.4800	772.160	45.619	94.882	32.287	-0.557	20.212	1469.994	-0.003193	-0.006642	-0.002260
15.5200	702.037	40.357	86.487	28.093	-0.561	20.212	1336.498	-0.002825	-0.006054	-0.001966
15.5600	644.553	35.754	79.083	24.779	-0.557	20.212	1227.064	-0.002503	-0.005536	-0.001734
15.6000	584.214	31.307	71.855	21.819	-0.563	20.211	1112.194	-0.002191	-0.005030	-0.001527
15.6400	490.617	24.583	60.570	16.261	-0.557	20.212	934.010	-0.001721	-0.004240	-0.001138
15.6800	443.548	20.712	53.568	13.313	-0.571	20.211	844.402	-0.001450	-0.003750	-0.000932
15.7200	384.742	15.954	46.091	10.129	-0.555	20.212	732.450	-0.001117	-0.003226	-0.000709
15.7600	325.651	11.155	38.256	6.468	-0.561	20.212	619.955	-0.000781	-0.002678	-0.000453
15.8000	307.346	9.625	35.529	5.485	-0.564	20.211	585.108	-0.000674	-0.002487	-0.000384
15.8400	252.132	5.333	27.790	2.088	-0.565	20.212	479.994	-0.000373	-0.001945	-0.000146
15.8800	229.394	3.632	24.065	0.785	-0.557	20.212	436.707	-0.000254	-0.001685	-0.000055
15.9200	217.671	2.497	21.954	0.069	-0.549	20.211	414.391	-0.000175	-0.001537	-0.000005
15.9600	223.773	2.298	21.579	-0.059	-0.547	20.212	426.006	-0.000161	-0.001511	0.000004
16.0000	227.350	1.723	21.497	0.264	-0.548	20.212	432.816	-0.000121	-0.001505	-0.000018
16.0400	228.387	2.273	21.801	-0.126	-0.541	20.211	434.790	-0.000159	-0.001526	0.000009
16.0800	256.204	3.522	23.802	1.191	-0.546	20.211	487.747	-0.000247	-0.001666	-0.000083
16.1200	282.188	5.136	26.247	2.551	-0.540	20.211	537.214	-0.000360	-0.001837	-0.000179
16.1600	337.929	8.136	33.001	4.699	-0.551	20.211	643.330	-0.000570	-0.002310	-0.000329
16.2000	367.309	10.553	36.613	5.849	-0.552	20.211	699.263	-0.000739	-0.002563	-0.000409
16.2400	411.207	14.186	42.742	8.668	-0.553	20.211	782.833	-0.000993	-0.002992	-0.000607
16.2800	479.917	18.437	49.900	12.037	-0.547	20.211	913.639	-0.001291	-0.003493	-0.000843
16.3200	543.863	22.998	57.694	15.349	-0.558	20.211	1035.376	-0.001610	-0.004039	-0.001074
16.3600	620.763	28.598	66.675	19.516	-0.548	20.211	1181.774	-0.002002	-0.004667	-0.001366
16.4000	694.929	33.915	75.912	23.754	-0.561	20.211	1322.966	-0.002374	-0.005314	-0.001663
16.4400	764.119	39.333	83.905	27.657	-0.550	20.211	1454.687	-0.002753	-0.005873	-0.001936
16.4800	839.667	44.594	92.645	32.089	-0.552	20.211	1598.511	-0.003122	-0.006485	-0.002246
16.5200	910.466	49.325	101.135	35.793	-0.559	20.211	1733.294	-0.003453	-0.007079	-0.002506
16.5600	986.059	55.202	110.459	40.145	-0.561	20.211	1877.203	-0.003864	-0.007732	-0.002810
16.6000	1051.898	60.156	117.660	44.033	-0.564	20.211	2002.544	-0.004211	-0.008236	-0.003082
16.6400	1128.453	66.515	126.857	48.621	-0.557	20.211	2148.285	-0.004656	-0.008880	-0.003403
16.6800	1181.804	70.512	132.889	51.693	-0.546	20.211	2249.851	-0.004936	-0.009302	-0.003618
16.7200	1246.396	74.878	140.891	55.666	-0.554	20.211	2372.818	-0.005241	-0.009862	-0.003897
16.7600	1285.575	78.006	145.856	57.713	-0.556	20.211	2447.405	-0.005460	-0.010210	-0.004040
16.8000	1323.402	81.348	150.772	59.790	-0.548	20.211	2519.417	-0.005694	-0.010554	-0.004185
16.8400	1371.312	85.302	156.332	62.988	-0.544	20.211	2610.626	-0.005971	-0.010943	-0.004409
16.8800	1376.572	85.276	157.457	63.746	-0.546	20.211	2620.640	-0.005969	-0.011022	-0.004462
16.9200	1399.836	87.873	160.361	65.010	-0.549	20.212	2664.928	-0.006151	-0.011225	-0.004551
16.9600	1404.916	88.810	161.849	65.545	-0.553	20.211	2674.599	-0.006217	-0.011329	-0.004588
17.0000	1398.454	88.378	161.947	65.769	-0.548	20.210	2662.296	-0.006186	-0.011336	-0.004604
17.0400	1391.450	88.448	161.570	65.559	-0.556	20.211	2648.964	-0.006191	-0.011310	-0.004589
17.0800	1359.485	86.566	159.528	64.462	-0.562	20.211	2588.110	-0.006060	-0.011167	-0.004512
17.1200	1329.563	84.307	156.595	62.695	-0.553	20.211	2531.147	-0.005902	-0.010962	-0.004389
17.1600	1277.400	81.640	151.619	60.705	-0.560	20.210	2431.841	-0.005715	-0.010613	-0.004249
17.2000	1243.315	79.031	147.939	58.554	-0.548	20.210	2366.953	-0.005532	-0.010356	-0.004099
17.2400	1186.628	75.046	140.974	55.400	-0.554	20.211	2259.035	-0.005253	-0.009868	-0.003878
17.2800	1142.610	71.539	135.930	52.381	-0.548	20.211	2175.236	-0.005008	-0.009515	-0.003667
17.3200	1057.759	66.205	127.526	48.185	-0.554	20.211	2013.702	-0.004634	-0.008927	-0.003373
17.3600	1016.567	63.018	121.616	45.872	-0.549	20.211	1935.282	-0.004411	-0.008513	-0.003211
17.4000	917.514	55.807	111.615	40.454	-0.542	20.211	1746.712	-0.003906	-0.007813	-0.002832
17.4400	859.490	51.681	104.470	37.297	-0.542	20.211	1636.248	-0.003618	-0.007313	-0.002611
17.4800	785.911	46.544	96.187	33.228	-0.556	20.210	1496.172	-0.003258	-0.006733	-0.002326
17.5200	715.923	40.776	87.544	28.655	-0.552	20.210	1362.934	-0.002854	-0.006128	-0.002006
17.5600	621.755	34.560	76.706	23.924	-0.550	20.210	1183.662	-0.002419	-0.005369	-0.001675
17.6000	552.084	29.102	68.173	19.922	-0.549	20.210	1051.025	-0.002037	-0.004772	-0.001395
17.6400	502.430	25.047	61.448	16.446	-0.546	20.210	956.497	-0.001753	-0.004301	-0.001151
17.6800	419.999	19.463	51.261	11.814	-0.548	20.210	799.570	-0.001362	-0.003588	-0.000827
17.7200	388.755	16.067	46.910	9.509	-0.547	20.210	740.089	-0.001125	-0.003284	-0.000666
17.7600	336.546	12.516	39.492	6.929	-0.547	20.209	640.697	-0.000876	-0.002764	-0.000485
17.8000	297.367	8.977	33.447	4.867	-0.552	20.210	566.111	-0.000628	-0.002341	-0.000341
17.8400	263.523	6.188	28.872	3.338	-0.551	20.210	501.680	-0.000433	-0.002021	-0.000234
17.8800	238.230	4.405	25.108	1.289	-0.553	20.210	453.529	-0.000308	-0.001758	-0.000090
17.9200	232.159	3.845	24.174	0.868	-0.543	20.210	441.971	-0.000269	-0.001692	-0.000061
17.9600	223.247	2.426	22.192	0.111	-0.542	20.210	425.005	-0.000170	-0.001553	-0.000008
18.0000	219.204	1.626	20.938	-0.535	-0.541	20.209	417.309	-0.000114	-0.001466	0.000037
18.0400	240.049	2.159	22.288	-0.015	-0.549	20.209	456.991	-0.000151	-0.001560	0.000001
18.0800	266.694	3.899	24.508	1.488	-0.543	20.209	507.717	-0.000273	-0.001716	-0.000104
18.1200	292.874	5.962	27.318	2.523	-0.542	20.209	557.556	-0.000417	-0.001912	-0.000177
18.1600	326.853	7.997	31.390	4.447	-0.546	20.209	622.244	-0.000560	-0.002197	-0.000311
18.2000	376.462	10.931	36.906	6.539	-0.550	20.209	716.686	-0.000765	-0.002583	-0.000458
18.2400	420.074	14.270	42.742	8.838	-0.554	20.209	799.713	-0.000999	-0.002992	-0.000619
18.2800	497.696	20.304	52.038	13.077	-0.549	20.209	947.485	-0.001421	-0.003643	-0.000915
18.3200	550.896	23.670	58.736	16.164	-0.554	20.209	1048.765	-0.001657	-0.004112	-0.001131
18.3600	618.299	28.540	66.825	19.684	-0.549	20.209	1177.082	-0.001998	-0.004678	-0.001378
18.4000	691.382	33.511	74.926	23.278	-0.557	20.209	1316.214	-0.002346	-0.005245	-0.001629
18.4400	759.821	38.491	83.252	27.615	-0.545	20.209	1446.505	-0.002694	-0.005828	-0.001933
18.4800	828.351	43.796	91.698	31.472	-0.551	20.209	1576.967	-0.003066	-0.006419	-0.002203
18.5200	926.336	50.797	102.732	36.649	-0.546	20.209	1763.506	-0.003556	-0.007191	-0.002565
18.5600	1000.201	56.145	111.211	41.084	-0.549	20.209	1904.125	-0.003930	-0.007785	-0.002876
18.6000	1063.921	60.930	118.491	44.636	-0.543	20.209	2025.433	-0.004265	-0.008294	-0.003125
18.6400	1127.792	66.233	126.538	48.199	-0.542	20.209	2147.026	-0.004636	-0.008858	-0.003374
18.6800	1190.911	71.047	134.236	51.861	-0.544	20.209	2267.189	-0.004973	-0.009396	-0.003630
18.7200	1243.105	74.413	140.196	55.287	-0.548	20.209	2366.552	-0.005209	-0.009814	-0.003870
18.7600	1296.831	78.974	146.810	58.176	-0.546	20.208	2468.834	-0.005528	-0.010277	-0.004072
18.8000	1333.320	82.230	151.605	60.536	-0.539	20.209	2538.300	-0.005756	-0.010612	-0.004238
18.8400	1357.561	84.530	154.915	62.064	-0.550	20.209	2584.448	-0.005917	-0.010844	-0.004344
18.8800	1376.242	86.045	157.360	63.746	-0.536	20.208	2620.010	-0.006023	-0.011015	-0.004462
18.9200	1397.326	87.070	160.113	64.911	-0.544	20.209	2660.151	-0.006095	-0.011208	-0.004544
18.9600	1408.793	88.546	162.279	65.939	-0.552	20.208	2681.980	-0.006198	-0.011360	-0.004616
19.0000	1395.658	88.308	161.557	65.600	-0.541	20.208	2656.975	-0.006182	-0.011309	-0.004592
19.0400	1394.441	88.755	161.988	65.558	-0.549	20.208	2654.657	-0.006213	-0.011339	-0.004589
19.0800	1365.737	87.169	159.304	63.929	-0.551	20.208	2600.012	-0.006102	-0.011151	-0.004475
19.1200	1338.160	84.909	156.954	62.934	-0.544	20.208	2547.512	-0.005944	-0.010987	-0.004405
19.1600	1280.496	81.316	151.495	60.213	-0.542	20.208	2437.735	-0.005692	-0.010605	-0.004215
19.2000	1244.518	79.381	147.674	58.622	-0.542	20.208	2369.242	-0.005557	-0.010337	-0.004104
19.2400	1185.952	75.339	141.598	55.287	-0.533	20.207	2257.748	-0.005274	-0.009912	-0.003870
19.2800	1132.856	71.130	135.110	51.834	-0.545	20.208	2156.668	-0.004979	-0.009458	-0.003628
19.3200	1070.083	67.103	127.763	48.915	-0.540	20.208	2037.163	-0.004697	-0.008943	-0.003424
19.3600	1001.734	62.444	120.645	44.776	-0.547	20.208	1907.043	-0.004371	-0.008445	-0.003134
19.4000	929.101	57.140	112.682	41.056	-0.545	20.208	1768.770	-0.004000	-0.007888	-0.002874
19.4400	865.546	51.848	104.958	37.422	-0.540	20.208	1647.778	-0.003629	-0.007347	-0.002620
19.4800	778.817	45.926	94.940	33.132	-0.542	20.207	1482.668	-0.003215	-0.006646	-0.002319
19.5200	702.608	40.567	86.460	28.443	-0.540	20.207	1337.585	-0.002840	-0.006052	-0.001991
19.5600	623.664	34.100	76.915	23.602	-0.536	20.208	1187.296	-0.002387	-0.005384	-0.001652
19.6000	578.068	31.207	70.688	21.202	-0.544	20.207	1100.492	-0.002185	-0.004948	-0.001484
19.6400	491.865	24.864	60.127	16.417	-0.550	20.207	936.384	-0.001740	-0.004209	-0.001149
19.6800	433.314	19.812	52.442	12.670	-0.545	20.207	824.919	-0.001387	-0.003671	-0.000887
19.7200	391.114	16.487	46.768	10.524	-0.542	20.207	744.581	-0.001154	-0.003274	-0.000737
19.7600	348.298	13.301	41.338	7.323	-0.539	20.207	663.071	-0.000931	-0.002894	-0.000513
19.8000	301.019	9.120	34.225	4.854	-0.537	20.207	573.063	-0.000638	-0.002396	-0.000340
19.8400	273.712	6.677	29.652	3.154	-0.538	20.207	521.078	-0.000467	-0.002076	-0.000221
19.8800	234.864	3.621	24.427	1.164	-0.533	20.207	447.121	-0.000253	-0.001710	-0.000081
19.9200	223.998	2.552	22.567	0.055	-0.548	20.207	426.435	-0.000179	-0.001580	-0.000004
19.9600	230.416	2.805	22.581	0.544	-0.554	20.207	438.652	-0.000196	-0.001581	-0.000038
