# Supplementary material for: Evaluation of a Cold-Mixed High-Performance Polyurethane Mixture
Source: Hindawi journal article supplement (doi:10.1155/2019/1507971), 2019-11-07
Supplement: f1 [file 1507971.f1.zip › 1507971.f1/dynamic modulus data/PUM/specimen2/temp20/zhs-2-20_1Hz.csv]

Test Information
****************
Project name	zhs
Operator name	2
Target test temperature	20
Target confining stress	0
Average dynamic strain range from 75 to 125 micro-strain
Contact stress	5
Initial modulus	1000
Axial gauge length	70
Comments
Specimen information
********************
Identification	zhs-2-20
Dimensions	Point 1	Point 2	Point 3	Point 4	Point 5	Point 6	Average	Std Dev.
Diameter (mm)	49.2	49.3	49.2				49.23	0.058
Height (mm)	100.8	101.0	100.8				100.87	0.115
Cross-sectional area (mm�)	1903.7
Conditioning time
Properties/Comments
Test Data	1Hz
*********
Test date and time	Mon	Apr 1	2019	2:34 PM
Dynamic modulus (MPa)	12303
Phase angle (Degrees)	3.99
Average temperature (�C)	20.2
Average confining pressure (kPa)	-0.6
Average micro-strain	98
Load drift (%)	0.3
Load standard error (%)	2.1
Average deformation drift (%)	-0.2
Average deformation standard error (%)	2.1
Deformation uniformity (%)	32.1
Phase uniformity (Degrees)	0.2
Conditioning Cycles
Time (sec)	Axial stress (kPa)	Axial micro-strain #1	Axial micro-strain #2	Axial micro-strain #3	Confining pressure (kPa)	Temperature (�C)	Load (N)	Displacement #1 (mm)	Displacement #2 (mm)	Displacement #3 (mm)
0.0000	191.372	-1.965	18.880	-0.802	-0.553	20.223	364.323	0.000138	-0.001322	0.000056
0.0200	203.560	-1.376	19.297	-0.519	-0.569	20.223	387.526	0.000096	-0.001351	0.000036
0.0400	213.990	-1.151	19.451	-0.605	-0.562	20.223	407.381	0.000081	-0.001362	0.000042
0.0600	251.876	1.838	23.442	0.841	-0.562	20.223	479.507	-0.000129	-0.001641	-0.000059
0.0800	296.135	3.197	27.693	2.929	-0.563	20.223	563.765	-0.000224	-0.001939	-0.000205
0.1000	324.554	5.062	31.458	3.997	-0.561	20.223	617.867	-0.000354	-0.002202	-0.000280
0.1200	348.960	7.044	34.613	5.556	-0.558	20.223	664.330	-0.000493	-0.002423	-0.000389
0.1400	406.774	10.748	41.339	8.401	-0.559	20.224	774.393	-0.000752	-0.002894	-0.000588
0.1600	455.165	13.975	47.243	11.016	-0.561	20.223	866.518	-0.000978	-0.003307	-0.000771
0.1800	511.657	18.257	53.844	13.959	-0.558	20.223	974.064	-0.001278	-0.003769	-0.000977
0.2000	579.571	23.828	62.140	17.440	-0.558	20.223	1103.354	-0.001668	-0.004350	-0.001221
0.2200	615.248	26.253	66.658	19.515	-0.563	20.224	1171.274	-0.001838	-0.004666	-0.001366
0.2400	668.313	29.384	72.802	22.760	-0.561	20.224	1272.297	-0.002057	-0.005096	-0.001593
0.2600	710.438	32.806	77.804	24.932	-0.564	20.223	1352.491	-0.002296	-0.005446	-0.001745
0.2800	799.541	38.896	87.640	29.661	-0.555	20.223	1522.121	-0.002723	-0.006135	-0.002076
0.3000	846.235	43.291	93.870	32.146	-0.552	20.223	1611.013	-0.003030	-0.006571	-0.002250
0.3200	909.880	47.486	101.148	35.962	-0.560	20.223	1732.178	-0.003324	-0.007080	-0.002517
0.3400	946.339	50.150	105.694	37.830	-0.562	20.223	1801.586	-0.003511	-0.007399	-0.002648
0.3600	1002.876	55.104	112.514	41.109	-0.564	20.224	1909.218	-0.003857	-0.007876	-0.002878
0.3800	1030.423	56.342	115.309	42.570	-0.561	20.223	1961.660	-0.003944	-0.008072	-0.002980
0.4000	1065.559	59.440	119.547	44.961	-0.561	20.224	2028.551	-0.004161	-0.008368	-0.003147
0.4200	1089.575	60.985	123.037	46.347	-0.560	20.223	2074.270	-0.004269	-0.008613	-0.003244
0.4400	1087.997	61.561	122.716	46.415	-0.556	20.224	2071.266	-0.004309	-0.008590	-0.003249
0.4600	1121.285	64.043	127.316	48.535	-0.564	20.223	2134.638	-0.004483	-0.008912	-0.003397
0.4800	1129.520	65.237	128.180	49.125	-0.557	20.224	2150.316	-0.004567	-0.008973	-0.003439
0.5000	1148.095	66.780	130.719	50.166	-0.558	20.224	2185.678	-0.004675	-0.009150	-0.003512
0.5200	1121.194	65.403	129.760	49.336	-0.556	20.224	2134.466	-0.004578	-0.009083	-0.003454
0.5400	1090.356	62.713	126.037	47.932	-0.561	20.224	2075.758	-0.004390	-0.008823	-0.003355
0.5600	1101.086	63.583	127.276	48.482	-0.558	20.224	2096.186	-0.004451	-0.008909	-0.003394
0.5800	1038.042	60.003	121.452	45.436	-0.566	20.224	1976.166	-0.004200	-0.008502	-0.003181
0.6000	1013.591	58.473	119.088	44.482	-0.567	20.224	1929.617	-0.004093	-0.008336	-0.003114
0.6200	969.573	55.118	114.936	42.249	-0.561	20.224	1845.818	-0.003858	-0.008045	-0.002957
0.6400	934.827	52.706	110.782	39.921	-0.561	20.223	1779.671	-0.003689	-0.007755	-0.002795
0.6600	859.895	47.991	102.940	36.256	-0.564	20.223	1637.020	-0.003359	-0.007206	-0.002538
0.6800	817.485	45.254	98.104	34.225	-0.557	20.224	1556.282	-0.003168	-0.006867	-0.002396
0.7000	753.945	40.341	90.921	30.602	-0.554	20.224	1435.318	-0.002824	-0.006364	-0.002142
0.7200	730.816	38.602	87.850	29.577	-0.550	20.224	1391.287	-0.002702	-0.006150	-0.002070
0.7400	648.671	32.542	78.720	24.821	-0.553	20.224	1234.903	-0.002278	-0.005510	-0.001737
0.7600	578.969	28.246	70.591	20.949	-0.553	20.224	1102.209	-0.001977	-0.004941	-0.001466
0.7800	537.371	24.865	65.294	18.488	-0.554	20.224	1023.016	-0.001741	-0.004571	-0.001294
0.8000	474.462	20.556	57.404	14.985	-0.565	20.224	903.254	-0.001439	-0.004018	-0.001049
0.8200	446.990	18.313	54.055	13.369	-0.566	20.223	850.954	-0.001282	-0.003784	-0.000936
0.8400	375.274	12.921	45.007	9.497	-0.560	20.224	714.426	-0.000905	-0.003151	-0.000665
0.8600	337.794	9.429	39.951	7.503	-0.565	20.224	643.072	-0.000660	-0.002797	-0.000525
0.8800	327.875	8.628	38.002	6.844	-0.560	20.224	624.189	-0.000604	-0.002660	-0.000479
0.9000	256.610	4.111	28.654	3.224	-0.554	20.224	488.520	-0.000288	-0.002006	-0.000226
0.9200	226.238	1.795	24.439	1.539	-0.562	20.224	430.698	-0.000126	-0.001711	-0.000108
0.9400	232.309	1.586	24.245	1.190	-0.562	20.224	442.257	-0.000111	-0.001697	-0.000083
0.9600	196.767	-1.124	19.716	-0.534	-0.562	20.224	374.594	0.000079	-0.001380	0.000037
0.9800	208.399	-0.872	20.174	-0.238	-0.564	20.224	396.738	0.000061	-0.001412	0.000017
1.0000	213.824	-0.437	20.259	-0.127	-0.557	20.224	407.066	0.000031	-0.001418	0.000009
1.0200	213.749	-0.295	20.381	-0.251	-0.562	20.224	406.923	0.000021	-0.001427	0.000018
1.0400	214.500	-0.421	19.896	-0.255	-0.560	20.224	408.354	0.000030	-0.001393	0.000018
1.0600	248.825	1.628	22.830	0.785	-0.565	20.223	473.700	-0.000114	-0.001598	-0.000055
1.0800	278.401	3.422	26.483	1.999	-0.575	20.224	530.005	-0.000240	-0.001854	-0.000140
1.1000	321.277	5.499	30.930	3.901	-0.558	20.224	611.629	-0.000385	-0.002165	-0.000273
1.1200	358.172	7.689	35.529	5.796	-0.562	20.224	681.868	-0.000538	-0.002487	-0.000406
1.1400	409.118	11.673	41.506	8.486	-0.572	20.224	778.856	-0.000817	-0.002905	-0.000594
1.1600	450.852	14.690	47.049	10.494	-0.556	20.224	858.307	-0.001028	-0.003293	-0.000735
1.1800	496.103	17.667	52.371	12.946	-0.561	20.224	944.452	-0.001237	-0.003666	-0.000906
1.2000	565.594	22.240	60.404	16.459	-0.564	20.224	1076.746	-0.001557	-0.004228	-0.001152
1.2200	621.906	26.380	67.145	19.837	-0.554	20.224	1183.949	-0.001847	-0.004700	-0.001389
1.2400	682.560	30.715	74.605	23.363	-0.560	20.224	1299.419	-0.002150	-0.005222	-0.001635
1.2600	734.318	34.968	80.861	26.000	-0.558	20.225	1397.953	-0.002448	-0.005660	-0.001820
1.2800	802.472	39.795	88.714	29.998	-0.549	20.224	1527.700	-0.002786	-0.006210	-0.002100
1.3000	846.821	42.995	93.631	32.032	-0.553	20.224	1612.129	-0.003010	-0.006554	-0.002242
1.3200	901.013	47.429	100.469	35.300	-0.554	20.224	1715.298	-0.003320	-0.007033	-0.002471
1.3400	958.918	51.443	107.151	38.392	-0.562	20.224	1825.533	-0.003601	-0.007501	-0.002687
1.3600	1013.441	55.231	113.265	41.813	-0.560	20.224	1929.331	-0.003866	-0.007929	-0.002927
1.3800	1024.442	56.003	114.963	42.347	-0.559	20.225	1950.274	-0.003920	-0.008047	-0.002964
1.4000	1061.396	59.160	119.283	44.538	-0.563	20.224	2020.626	-0.004141	-0.008350	-0.003118
1.4200	1089.740	61.165	123.022	46.738	-0.561	20.225	2074.585	-0.004282	-0.008612	-0.003272
1.4400	1112.538	62.585	125.343	47.849	-0.564	20.225	2117.987	-0.004381	-0.008774	-0.003349
1.4600	1124.005	64.944	127.456	48.369	-0.556	20.225	2139.816	-0.004546	-0.008922	-0.003386
1.4800	1138.597	66.161	129.886	49.786	-0.564	20.224	2167.597	-0.004631	-0.009092	-0.003485
1.5000	1116.055	64.633	128.250	49.168	-0.544	20.224	2124.681	-0.004524	-0.008977	-0.003442
1.5200	1116.220	65.026	128.844	49.308	-0.550	20.225	2124.996	-0.004552	-0.009019	-0.003452
1.5400	1112.027	63.875	128.832	48.789	-0.546	20.225	2117.014	-0.004471	-0.009018	-0.003415
1.5600	1072.472	61.867	125.286	47.411	-0.554	20.224	2041.712	-0.004331	-0.008770	-0.003319
1.5800	1054.378	60.268	123.480	46.529	-0.559	20.225	2007.265	-0.004219	-0.008644	-0.003257
1.6000	1021.751	58.614	119.839	44.748	-0.565	20.224	1945.152	-0.004103	-0.008389	-0.003132
1.6200	973.781	55.457	114.809	42.416	-0.562	20.224	1853.828	-0.003882	-0.008037	-0.002969
1.6400	936.435	52.944	110.974	40.258	-0.559	20.225	1782.732	-0.003706	-0.007768	-0.002818
1.6600	876.457	49.013	104.595	37.267	-0.569	20.225	1668.549	-0.003431	-0.007322	-0.002609
1.6800	822.355	44.945	98.705	34.350	-0.564	20.224	1565.552	-0.003146	-0.006909	-0.002405
1.7000	772.069	41.662	92.476	31.514	-0.556	20.225	1469.822	-0.002916	-0.006473	-0.002206
1.7200	719.726	38.294	86.669	28.303	-0.557	20.224	1370.173	-0.002681	-0.006067	-0.001981
1.7400	643.531	32.078	78.109	24.371	-0.561	20.225	1225.119	-0.002245	-0.005468	-0.001706
1.7600	583.328	28.429	70.855	21.062	-0.554	20.224	1110.506	-0.001990	-0.004960	-0.001474
1.7800	534.696	24.807	64.878	18.546	-0.560	20.225	1017.923	-0.001737	-0.004541	-0.001298
1.8000	490.167	21.594	59.056	15.856	-0.546	20.224	933.151	-0.001512	-0.004134	-0.001110
1.8200	432.097	17.021	52.288	12.554	-0.553	20.224	822.601	-0.001191	-0.003660	-0.000879
1.8400	384.201	12.658	45.787	9.961	-0.566	20.224	731.421	-0.000886	-0.003205	-0.000697
1.8600	350.733	10.777	41.435	8.036	-0.553	20.224	667.706	-0.000754	-0.002900	-0.000562
1.8800	300.749	7.353	35.044	5.388	-0.550	20.225	572.548	-0.000515	-0.002453	-0.000377
1.9000	261.645	4.573	29.165	2.971	-0.542	20.224	498.104	-0.000320	-0.002042	-0.000208
1.9200	244.257	2.946	26.902	2.032	-0.558	20.225	465.002	-0.000206	-0.001883	-0.000142
1.9400	220.557	0.421	23.136	0.798	-0.556	20.224	419.884	-0.000029	-0.001620	-0.000056
1.9600	214.230	-0.183	22.052	0.364	-0.559	20.225	407.839	0.000013	-0.001544	-0.000026
1.9800	217.085	-0.311	21.996	0.098	-0.570	20.224	413.275	0.000022	-0.001540	-0.000007
2.0000	214.110	-0.169	21.148	-0.280	-0.561	20.225	407.610	0.000012	-0.001480	0.000020
2.0200	213.268	-0.211	20.536	0.014	-0.574	20.225	406.008	0.000015	-0.001437	-0.000001
2.0400	218.678	-0.476	20.941	-0.154	-0.557	20.224	416.307	0.000033	-0.001466	0.000011
2.0600	245.639	0.673	22.803	0.729	-0.560	20.224	467.634	-0.000047	-0.001596	-0.000051
2.0800	279.363	2.610	26.360	2.228	-0.572	20.224	531.836	-0.000183	-0.001845	-0.000156
2.1000	310.757	5.416	29.610	3.505	-0.559	20.225	591.602	-0.000379	-0.002073	-0.000245
2.1200	365.235	8.883	36.836	6.510	-0.553	20.224	695.314	-0.000622	-0.002578	-0.000456
2.1400	401.604	10.874	40.923	8.135	-0.558	20.224	764.551	-0.000761	-0.002865	-0.000569
2.1600	450.792	14.171	47.022	10.398	-0.558	20.224	858.192	-0.000992	-0.003292	-0.000728
2.1800	528.624	20.360	56.208	14.802	-0.557	20.224	1006.365	-0.001425	-0.003935	-0.001036
2.2000	566.316	22.157	60.237	16.754	-0.552	20.225	1078.119	-0.001551	-0.004217	-0.001173
2.2200	625.167	27.095	67.921	19.767	-0.556	20.225	1190.157	-0.001897	-0.004754	-0.001384
2.2400	679.344	30.128	74.118	23.041	-0.553	20.225	1293.297	-0.002109	-0.005188	-0.001613
2.2600	747.919	35.810	82.181	26.702	-0.554	20.224	1423.845	-0.002507	-0.005753	-0.001869
2.2800	807.311	40.568	89.338	30.011	-0.556	20.224	1536.913	-0.002840	-0.006254	-0.002101
2.3000	864.825	43.867	95.743	33.384	-0.561	20.224	1646.404	-0.003071	-0.006702	-0.002337
2.3200	887.007	45.858	98.841	34.699	-0.551	20.225	1688.633	-0.003210	-0.006919	-0.002429
2.3400	932.964	49.562	104.082	37.183	-0.552	20.225	1776.123	-0.003469	-0.007286	-0.002603
2.3600	986.961	54.110	110.836	40.271	-0.550	20.225	1878.920	-0.003788	-0.007758	-0.002819
2.3800	1034.676	56.664	115.837	42.840	-0.550	20.225	1969.757	-0.003966	-0.008109	-0.002999
2.4000	1063.395	59.231	119.491	44.595	-0.562	20.225	2024.431	-0.004146	-0.008364	-0.003122
2.4200	1084.240	60.730	122.300	46.093	-0.562	20.225	2064.114	-0.004251	-0.008561	-0.003227
2.4400	1103.521	62.262	124.661	47.483	-0.560	20.225	2100.821	-0.004358	-0.008726	-0.003324
2.4600	1120.293	64.592	127.094	48.493	-0.551	20.225	2132.750	-0.004521	-0.008897	-0.003394
2.4800	1153.536	66.416	131.025	50.363	-0.552	20.225	2196.035	-0.004649	-0.009172	-0.003525
2.5000	1147.118	66.317	130.691	50.263	-0.552	20.225	2183.819	-0.004642	-0.009148	-0.003518
2.5200	1111.621	64.746	128.693	48.845	-0.560	20.225	2116.241	-0.004532	-0.009009	-0.003419
2.5400	1113.079	64.492	128.554	48.958	-0.556	20.225	2119.017	-0.004514	-0.008999	-0.003427
2.5600	1070.669	61.559	124.938	47.104	-0.559	20.225	2038.279	-0.004309	-0.008746	-0.003297
2.5800	1049.043	60.914	122.870	46.263	-0.557	20.225	1997.108	-0.004264	-0.008601	-0.003238
2.6000	1003.913	57.504	117.947	43.670	-0.556	20.225	1911.192	-0.004025	-0.008256	-0.003057
2.6200	970.084	55.063	114.421	41.982	-0.562	20.225	1846.790	-0.003854	-0.008009	-0.002939
2.6400	910.917	51.401	108.123	38.839	-0.562	20.225	1734.152	-0.003598	-0.007569	-0.002719
2.6600	865.140	48.046	103.123	36.523	-0.546	20.225	1647.005	-0.003363	-0.007219	-0.002557
2.6800	813.578	45.099	97.841	33.551	-0.554	20.225	1548.843	-0.003157	-0.006849	-0.002349
2.7000	765.096	41.550	91.640	31.063	-0.558	20.225	1456.547	-0.002909	-0.006415	-0.002174
2.7200	720.838	37.986	87.127	28.540	-0.548	20.225	1372.290	-0.002659	-0.006099	-0.001998
2.7400	642.374	32.484	77.763	24.456	-0.547	20.225	1222.916	-0.002274	-0.005443	-0.001712
2.7600	584.124	28.725	70.980	20.893	-0.542	20.225	1112.022	-0.002011	-0.004969	-0.001463
2.7800	528.324	24.022	64.169	17.862	-0.553	20.225	1005.793	-0.001682	-0.004492	-0.001250
2.8000	454.609	18.705	55.123	14.014	-0.553	20.225	865.459	-0.001309	-0.003859	-0.000981
2.8200	431.931	17.358	51.887	12.387	-0.560	20.225	822.287	-0.001215	-0.003632	-0.000867
2.8400	380.700	13.387	45.355	9.680	-0.550	20.225	724.754	-0.000937	-0.003175	-0.000678
2.8600	340.153	9.596	40.089	7.097	-0.550	20.225	647.564	-0.000672	-0.002806	-0.000497
2.8800	315.010	8.081	36.224	5.824	-0.565	20.225	599.699	-0.000566	-0.002536	-0.000408
2.9000	263.523	4.306	29.375	3.168	-0.555	20.225	501.680	-0.000301	-0.002056	-0.000222
2.9200	248.179	3.015	27.278	2.381	-0.544	20.225	472.469	-0.000211	-0.001909	-0.000167
2.9400	225.201	0.855	23.704	0.909	-0.549	20.225	428.724	-0.000060	-0.001659	-0.000064
2.9600	205.438	0.026	20.816	-0.057	-0.545	20.225	391.102	-0.000002	-0.001457	0.000004
2.9800	208.850	-0.576	20.591	-0.198	-0.548	20.225	397.596	0.000040	-0.001441	0.000014
3.0000	192.018	-1.445	18.271	-1.096	-0.552	20.225	365.553	0.000101	-0.001279	0.000077
3.0200	207.317	-1.333	19.504	-0.589	-0.551	20.225	394.678	0.000093	-0.001365	0.000041
3.0400	242.498	0.531	22.052	0.349	-0.553	20.225	461.655	-0.000037	-0.001544	-0.000024
3.0600	252.177	1.026	23.315	0.701	-0.556	20.225	480.080	-0.000072	-0.001632	-0.000049
3.0800	273.367	2.778	25.748	1.554	-0.553	20.226	520.420	-0.000194	-0.001802	-0.000109
3.1000	314.575	5.034	30.137	3.252	-0.553	20.225	598.869	-0.000352	-0.002110	-0.000228
3.1200	349.771	7.549	34.794	5.361	-0.553	20.226	665.874	-0.000528	-0.002436	-0.000375
3.1400	406.428	11.126	41.395	7.967	-0.560	20.225	773.735	-0.000779	-0.002898	-0.000558
3.1600	465.775	14.901	48.247	11.140	-0.567	20.226	886.717	-0.001043	-0.003377	-0.000780
3.1800	501.543	18.184	53.178	13.312	-0.548	20.225	954.809	-0.001273	-0.003722	-0.000932
3.2000	557.554	21.903	59.446	15.926	-0.557	20.225	1061.440	-0.001533	-0.004161	-0.001115
3.2200	605.419	25.357	65.588	18.741	-0.563	20.225	1152.563	-0.001775	-0.004591	-0.001312
3.2400	686.994	30.928	74.828	23.293	-0.557	20.225	1307.859	-0.002165	-0.005238	-0.001630
3.2600	727.751	34.463	79.553	25.507	-0.555	20.225	1385.450	-0.002412	-0.005569	-0.001785
3.2800	793.455	38.574	87.419	28.976	-0.554	20.225	1510.534	-0.002700	-0.006119	-0.002028
3.3000	875.765	44.735	96.520	33.832	-0.564	20.225	1667.233	-0.003131	-0.006756	-0.002368
3.3200	910.196	47.430	101.163	35.736	-0.569	20.225	1732.779	-0.003320	-0.007081	-0.002501
3.3400	935.563	49.912	104.487	37.439	-0.568	20.225	1781.073	-0.003494	-0.007314	-0.002621
3.3600	1004.619	54.336	112.015	41.014	-0.554	20.225	1912.537	-0.003803	-0.007841	-0.002871
3.3800	1033.053	56.916	115.727	42.797	-0.553	20.226	1966.667	-0.003984	-0.008101	-0.002996
3.4000	1067.618	59.566	119.757	44.876	-0.568	20.225	2032.471	-0.004170	-0.008383	-0.003141
3.4200	1095.331	61.475	123.399	46.471	-0.568	20.225	2085.228	-0.004303	-0.008638	-0.003253
3.4400	1115.799	63.231	126.245	48.002	-0.570	20.225	2124.195	-0.004426	-0.008837	-0.003360
3.4600	1113.229	63.455	125.817	47.819	-0.565	20.226	2119.303	-0.004442	-0.008807	-0.003347
3.4800	1132.436	65.195	128.707	49.055	-0.567	20.226	2155.867	-0.004564	-0.009009	-0.003434
3.5000	1124.756	64.325	127.970	48.733	-0.558	20.225	2141.247	-0.004503	-0.008958	-0.003411
3.5200	1117.738	65.154	128.111	48.691	-0.568	20.226	2127.886	-0.004561	-0.008968	-0.003408
3.5400	1109.232	64.100	127.485	48.563	-0.561	20.225	2111.692	-0.004487	-0.008924	-0.003399
3.5600	1094.925	63.470	126.399	48.212	-0.564	20.225	2084.455	-0.004443	-0.008848	-0.003375
3.5800	1056.076	61.486	122.924	46.163	-0.571	20.226	2010.498	-0.004304	-0.008605	-0.003231
3.6000	1009.248	57.307	118.046	43.625	-0.562	20.225	1921.349	-0.004012	-0.008263	-0.003054
3.6200	963.111	55.329	113.668	41.462	-0.574	20.225	1833.515	-0.003873	-0.007957	-0.002902
3.6400	919.814	51.483	108.473	38.911	-0.562	20.226	1751.089	-0.003604	-0.007593	-0.002724
3.6600	885.714	49.560	104.916	37.255	-0.560	20.225	1686.172	-0.003469	-0.007344	-0.002608
3.6800	827.103	45.859	98.773	34.434	-0.564	20.225	1574.593	-0.003210	-0.006914	-0.002410
3.7000	768.658	41.269	91.797	31.232	-0.572	20.225	1463.327	-0.002889	-0.006426	-0.002186
3.7200	708.394	37.269	85.209	28.036	-0.571	20.226	1348.600	-0.002609	-0.005965	-0.001963
3.7400	628.593	32.078	76.205	23.420	-0.563	20.226	1196.680	-0.002245	-0.005334	-0.001639
3.7600	604.232	29.187	72.247	21.678	-0.554	20.225	1150.303	-0.002043	-0.005057	-0.001517
3.7800	544.614	25.679	66.172	18.617	-0.558	20.225	1036.806	-0.001797	-0.004632	-0.001303
3.8000	496.509	21.580	59.668	15.926	-0.557	20.225	945.225	-0.001511	-0.004177	-0.001115
3.8200	422.208	16.669	51.191	12.260	-0.566	20.225	803.776	-0.001167	-0.003583	-0.000858
3.8400	364.033	11.984	43.172	8.753	-0.565	20.225	693.026	-0.000839	-0.003022	-0.000613
3.8600	340.183	10.255	39.520	7.223	-0.561	20.225	647.621	-0.000718	-0.002766	-0.000506
3.8800	317.129	7.829	36.754	5.962	-0.564	20.226	603.733	-0.000548	-0.002573	-0.000417
3.9000	284.848	5.149	31.861	4.153	-0.566	20.225	542.278	-0.000360	-0.002230	-0.000291
3.9200	251.380	2.960	27.514	2.451	-0.558	20.225	478.563	-0.000207	-0.001926	-0.000172
3.9400	220.797	0.966	22.818	0.673	-0.561	20.226	420.341	-0.000068	-0.001597	-0.000047
3.9600	219.415	0.054	22.482	0.406	-0.568	20.225	417.709	-0.000004	-0.001574	-0.000028
3.9800	195.535	-1.153	19.242	-0.996	-0.572	20.225	372.248	0.000081	-0.001347	0.000070
4.0000	198.886	-1.712	18.506	-0.744	-0.565	20.225	378.628	0.000120	-0.001295	0.000052
4.0200	214.410	-0.493	19.756	-0.393	-0.560	20.225	408.182	0.000035	-0.001383	0.000028
4.0400	233.602	-0.295	21.010	0.141	-0.566	20.226	444.717	0.000021	-0.001471	-0.000010
4.0600	242.033	0.966	21.621	0.281	-0.562	20.225	460.768	-0.000068	-0.001513	-0.000020
4.0800	282.669	3.044	26.527	2.114	-0.567	20.225	538.130	-0.000213	-0.001857	-0.000148
4.1000	327.274	6.173	31.598	4.517	-0.563	20.225	623.045	-0.000432	-0.002212	-0.000316
4.1200	365.867	8.376	36.851	6.118	-0.575	20.225	696.516	-0.000586	-0.002580	-0.000428
4.1400	407.886	11.339	41.519	8.402	-0.572	20.225	776.510	-0.000794	-0.002906	-0.000588
4.1600	447.441	14.045	46.466	10.299	-0.574	20.225	851.812	-0.000983	-0.003253	-0.000721
4.1800	505.721	18.480	53.482	13.411	-0.572	20.225	962.763	-0.001294	-0.003744	-0.000939
4.2000	558.861	21.779	59.362	16.389	-0.570	20.225	1063.929	-0.001525	-0.004155	-0.001147
4.2200	628.172	26.590	68.103	20.094	-0.574	20.225	1195.879	-0.001861	-0.004767	-0.001407
4.2400	672.611	30.379	73.273	22.594	-0.566	20.225	1280.479	-0.002127	-0.005129	-0.001582
4.2600	740.765	34.842	80.928	26.237	-0.560	20.225	1410.227	-0.002439	-0.005665	-0.001837
4.2800	810.497	40.370	89.312	30.041	-0.568	20.225	1542.978	-0.002826	-0.006252	-0.002103
4.3000	826.427	40.735	91.531	31.458	-0.562	20.225	1573.305	-0.002851	-0.006407	-0.002202
4.3200	886.075	46.573	98.744	34.475	-0.572	20.225	1686.859	-0.003260	-0.006912	-0.002413
4.3400	947.406	50.221	105.722	37.760	-0.573	20.225	1803.617	-0.003515	-0.007401	-0.002643
4.3600	995.347	54.024	111.072	40.565	-0.569	20.226	1894.884	-0.003782	-0.007775	-0.002840
4.3800	1042.581	57.743	117.062	43.134	-0.561	20.226	1984.806	-0.004042	-0.008194	-0.003019
4.4000	1071.135	59.553	119.964	44.748	-0.570	20.225	2039.165	-0.004169	-0.008397	-0.003132
4.4200	1100.260	61.715	123.660	46.781	-0.571	20.226	2094.612	-0.004320	-0.008656	-0.003275
4.4400	1131.579	64.943	127.484	48.872	-0.564	20.226	2154.236	-0.004546	-0.008924	-0.003421
4.4600	1127.356	64.016	127.416	48.634	-0.564	20.225	2146.196	-0.004481	-0.008919	-0.003404
4.4800	1127.581	64.760	127.998	49.181	-0.565	20.226	2146.626	-0.004533	-0.008960	-0.003443
4.5000	1125.523	64.619	127.650	48.746	-0.567	20.226	2142.706	-0.004523	-0.008936	-0.003412
4.5200	1120.007	64.520	127.706	49.126	-0.568	20.226	2132.206	-0.004516	-0.008939	-0.003439
4.5400	1106.376	64.072	127.358	48.184	-0.569	20.226	2106.256	-0.004485	-0.008915	-0.003373
4.5600	1073.795	61.659	124.522	47.215	-0.566	20.226	2044.230	-0.004316	-0.008717	-0.003305
4.5800	1034.225	59.384	120.855	45.226	-0.565	20.226	1968.899	-0.004157	-0.008460	-0.003166
4.6000	1004.514	57.559	117.672	43.458	-0.564	20.226	1912.336	-0.004029	-0.008237	-0.003042
4.6200	974.953	55.035	114.294	41.967	-0.566	20.226	1856.060	-0.003852	-0.008001	-0.002938
4.6400	934.602	52.662	110.613	39.893	-0.566	20.225	1779.242	-0.003686	-0.007743	-0.002792
4.6600	868.266	48.398	103.136	36.609	-0.572	20.225	1652.956	-0.003388	-0.007220	-0.002563
4.6800	818.192	44.663	97.729	33.975	-0.570	20.226	1557.627	-0.003126	-0.006841	-0.002378
4.7000	758.965	40.638	91.032	30.616	-0.569	20.226	1444.874	-0.002845	-0.006372	-0.002143
4.7200	692.464	36.176	83.335	27.221	-0.565	20.226	1318.274	-0.002532	-0.005833	-0.001906
4.7400	647.559	33.016	78.026	24.371	-0.576	20.226	1232.786	-0.002311	-0.005462	-0.001706
4.7600	599.889	29.131	72.109	21.833	-0.581	20.226	1142.035	-0.002039	-0.005048	-0.001528
4.7800	519.397	23.602	63.073	17.456	-0.566	20.226	988.798	-0.001652	-0.004415	-0.001222
4.8000	474.357	20.572	56.973	15.250	-0.547	20.226	903.053	-0.001440	-0.003988	-0.001068
4.8200	420.615	16.236	50.690	11.826	-0.556	20.226	800.743	-0.001137	-0.003548	-0.000828
4.8400	380.700	13.304	45.120	9.344	-0.565	20.226	724.754	-0.000931	-0.003158	-0.000654
4.8600	340.288	10.341	39.939	7.462	-0.566	20.226	647.821	-0.000724	-0.002796	-0.000522
4.8800	292.423	6.426	33.530	4.840	-0.559	20.225	556.698	-0.000450	-0.002347	-0.000339
4.9000	267.190	4.447	29.388	3.055	-0.559	20.225	508.661	-0.000311	-0.002057	-0.000214
4.9200	247.112	2.732	26.861	2.116	-0.561	20.225	470.438	-0.000191	-0.001880	-0.000148
4.9400	224.975	1.275	23.634	0.828	-0.560	20.225	428.295	-0.000089	-0.001654	-0.000058
4.9600	203.109	-1.054	19.743	-0.462	-0.556	20.225	386.667	0.000074	-0.001382	0.000032
4.9800	207.828	-0.253	20.146	-0.406	-0.555	20.226	395.651	0.000018	-0.001410	0.000028
5.0000	237.840	5.218	29.360	3.294	-0.571	20.219	452.785	-0.000365	-0.002055	-0.000231
5.0200	226.613	2.511	25.828	1.763	-0.577	20.219	431.414	-0.000176	-0.001808	-0.000123
5.0400	232.264	2.134	25.719	1.597	-0.581	20.219	442.171	-0.000149	-0.001800	-0.000112
5.0600	296.480	5.484	30.888	3.900	-0.573	20.219	564.423	-0.000384	-0.002162	-0.000273
5.0800	336.140	8.403	35.209	5.542	-0.574	20.219	639.925	-0.000588	-0.002465	-0.000388
5.1000	338.304	7.758	35.415	5.724	-0.580	20.219	644.045	-0.000543	-0.002479	-0.000401
5.1200	438.649	14.241	46.826	10.635	-0.566	20.218	835.075	-0.000997	-0.003278	-0.000744
5.1400	506.893	19.490	55.111	13.930	-0.577	20.219	964.994	-0.001364	-0.003858	-0.000975
5.1600	560.500	22.480	61.045	16.978	-0.569	20.219	1067.047	-0.001574	-0.004273	-0.001188
5.1800	590.075	25.088	64.921	18.519	-0.561	20.220	1123.352	-0.001756	-0.004544	-0.001296
5.2000	678.473	30.913	75.145	23.083	-0.564	20.219	1291.637	-0.002164	-0.005260	-0.001616
5.2200	753.254	36.693	83.696	27.446	-0.571	20.219	1434.002	-0.002569	-0.005859	-0.001921
5.2400	854.470	44.300	95.007	32.737	-0.568	20.219	1626.692	-0.003101	-0.006651	-0.002292
5.2600	888.765	46.294	99.427	34.827	-0.568	20.219	1691.980	-0.003241	-0.006960	-0.002438
5.2800	1025.148	55.569	114.379	42.009	-0.572	20.219	1951.618	-0.003890	-0.008007	-0.002941
5.3000	1043.032	57.674	117.005	43.261	-0.569	20.219	1985.664	-0.004037	-0.008190	-0.003028
5.3200	1103.055	61.897	124.411	46.725	-0.574	20.219	2099.934	-0.004333	-0.008709	-0.003271
5.3400	1197.839	68.508	134.470	52.000	-0.569	20.219	2280.378	-0.004796	-0.009413	-0.003640
5.3600	1262.206	74.035	142.475	55.876	-0.561	20.218	2402.916	-0.005182	-0.009973	-0.003911
5.3800	1324.228	77.866	149.479	59.214	-0.556	20.219	2520.990	-0.005451	-0.010464	-0.004145
5.4000	1334.463	79.705	151.633	60.382	-0.560	20.219	2540.474	-0.005579	-0.010614	-0.004227
5.4200	1377.158	83.015	156.330	62.808	-0.571	20.219	2621.756	-0.005811	-0.010943	-0.004397
5.4400	1411.799	85.331	160.571	64.729	-0.564	20.219	2687.702	-0.005973	-0.011240	-0.004531
5.4600	1431.035	87.030	163.318	66.246	-0.578	20.219	2724.323	-0.006092	-0.011432	-0.004637
5.4800	1422.379	87.015	162.998	65.838	-0.557	20.218	2707.844	-0.006091	-0.011410	-0.004609
5.5000	1420.485	87.253	163.486	66.035	-0.571	20.219	2704.239	-0.006108	-0.011444	-0.004622
5.5200	1416.082	87.057	162.902	66.091	-0.572	20.219	2695.856	-0.006094	-0.011403	-0.004626
5.5400	1400.663	86.300	162.598	65.529	-0.564	20.219	2666.502	-0.006041	-0.011382	-0.004587
5.5600	1359.289	83.661	157.929	63.563	-0.565	20.219	2587.738	-0.005856	-0.011055	-0.004449
5.5800	1337.603	82.117	156.817	62.850	-0.558	20.219	2546.453	-0.005748	-0.010977	-0.004399
5.6000	1282.074	79.114	151.799	60.169	-0.548	20.219	2440.739	-0.005538	-0.010626	-0.004212
5.6200	1211.605	74.175	143.673	56.664	-0.558	20.219	2306.585	-0.005192	-0.010057	-0.003966
5.6400	1165.408	71.411	139.127	54.275	-0.554	20.219	2218.637	-0.004999	-0.009739	-0.003799
5.6600	1053.101	63.565	126.690	47.989	-0.557	20.219	2004.833	-0.004450	-0.008868	-0.003359
5.6800	1002.320	60.171	121.035	45.241	-0.564	20.219	1908.159	-0.004212	-0.008472	-0.003167
5.7000	948.668	56.297	115.059	41.911	-0.560	20.219	1806.021	-0.003941	-0.008054	-0.002934
5.7200	866.358	50.460	105.695	37.590	-0.564	20.219	1649.323	-0.003532	-0.007399	-0.002631
5.7400	802.592	45.772	98.856	34.211	-0.564	20.219	1527.929	-0.003204	-0.006920	-0.002395
5.7600	731.373	40.720	89.892	30.321	-0.554	20.219	1392.345	-0.002850	-0.006292	-0.002122
5.7800	647.935	34.463	80.429	25.606	-0.568	20.218	1233.501	-0.002412	-0.005630	-0.001792
5.8000	583.102	29.482	72.273	21.933	-0.567	20.219	1110.077	-0.002064	-0.005059	-0.001535
5.8200	519.156	24.710	64.338	18.113	-0.562	20.219	988.340	-0.001730	-0.004504	-0.001268
5.8400	446.254	20.093	55.944	14.001	-0.566	20.218	849.552	-0.001406	-0.003916	-0.000980
5.8600	395.518	15.645	48.955	10.846	-0.562	20.219	752.964	-0.001095	-0.003427	-0.000759
5.8800	352.852	12.388	42.866	8.457	-0.556	20.218	671.740	-0.000867	-0.003001	-0.000592
5.9000	291.386	7.450	35.211	5.628	-0.559	20.218	554.724	-0.000521	-0.002465	-0.000394
5.9200	272.059	5.514	31.362	3.787	-0.564	20.219	517.931	-0.000386	-0.002195	-0.000265
5.9400	245.684	3.913	27.903	2.691	-0.545	20.219	467.720	-0.000274	-0.001953	-0.000188
5.9600	222.706	1.333	24.592	1.149	-0.565	20.219	423.975	-0.000093	-0.001721	-0.000080
5.9800	223.698	0.954	23.609	0.925	-0.562	20.218	425.863	-0.000067	-0.001653	-0.000065
6.0000	226.087	1.598	23.898	0.882	-0.562	20.219	430.412	-0.000112	-0.001673	-0.000062
6.0200	230.806	1.009	23.997	1.036	-0.552	20.219	439.396	-0.000071	-0.001680	-0.000073
6.0400	248.991	2.678	24.801	1.539	-0.562	20.219	474.014	-0.000187	-0.001736	-0.000108
6.0600	286.336	4.574	28.110	2.801	-0.568	20.219	545.111	-0.000320	-0.001968	-0.000196
6.0800	318.828	5.950	32.099	3.997	-0.564	20.218	606.966	-0.000417	-0.002247	-0.000280
6.1000	353.303	8.417	36.183	5.628	-0.560	20.219	672.598	-0.000589	-0.002533	-0.000394
6.1200	429.452	13.555	45.024	9.453	-0.572	20.219	817.566	-0.000949	-0.003152	-0.000662
6.1400	468.000	16.768	49.843	11.631	-0.573	20.219	890.951	-0.001174	-0.003489	-0.000814
6.1600	544.164	21.370	58.806	15.701	-0.560	20.219	1035.948	-0.001496	-0.004116	-0.001099
6.1800	626.609	27.643	68.061	20.120	-0.563	20.219	1192.904	-0.001935	-0.004764	-0.001408
6.2000	694.027	32.315	76.400	23.838	-0.560	20.219	1321.249	-0.002262	-0.005348	-0.001669
6.2200	778.081	37.816	85.710	28.288	-0.565	20.219	1481.266	-0.002647	-0.006000	-0.001980
6.2400	842.327	43.232	93.756	32.231	-0.561	20.219	1603.575	-0.003026	-0.006563	-0.002256
6.2600	922.278	48.328	103.191	36.341	-0.572	20.219	1755.781	-0.003383	-0.007223	-0.002544
6.2800	1006.693	54.473	112.016	40.998	-0.570	20.219	1916.485	-0.003813	-0.007841	-0.002870
6.3000	1029.356	57.040	115.811	42.728	-0.554	20.219	1959.629	-0.003993	-0.008107	-0.002991
6.3200	1139.649	64.648	127.970	48.774	-0.567	20.219	2169.600	-0.004525	-0.008958	-0.003414
6.3400	1227.821	71.521	137.960	53.517	-0.555	20.219	2337.456	-0.005006	-0.009657	-0.003746
6.3600	1254.737	73.501	142.157	55.624	-0.567	20.219	2388.697	-0.005145	-0.009951	-0.003894
6.3800	1280.976	75.511	144.799	57.307	-0.558	20.218	2438.650	-0.005286	-0.010136	-0.004012
6.4000	1317.796	78.947	149.928	59.538	-0.564	20.219	2508.745	-0.005526	-0.010495	-0.004168
6.4200	1389.482	82.903	157.567	63.368	-0.568	20.219	2645.216	-0.005803	-0.011030	-0.004436
6.4400	1391.706	84.643	158.944	63.814	-0.565	20.219	2649.450	-0.005925	-0.011126	-0.004467
6.4600	1421.823	86.762	162.487	65.783	-0.576	20.219	2706.785	-0.006073	-0.011374	-0.004605
6.4800	1423.942	86.651	162.931	65.980	-0.572	20.218	2710.819	-0.006066	-0.011405	-0.004619
6.5000	1425.850	87.787	163.570	66.416	-0.570	20.219	2714.453	-0.006145	-0.011450	-0.004649
6.5200	1411.739	86.525	163.571	66.287	-0.566	20.219	2687.588	-0.006057	-0.011450	-0.004640
6.5400	1397.477	86.608	162.626	65.558	-0.568	20.219	2660.437	-0.006063	-0.011384	-0.004589
6.5600	1367.330	84.952	160.417	64.644	-0.570	20.219	2603.045	-0.005947	-0.011229	-0.004525
6.5800	1331.772	82.849	156.677	62.904	-0.560	20.218	2535.353	-0.005799	-0.010967	-0.004403
6.6000	1274.785	78.763	151.147	59.720	-0.556	20.219	2426.863	-0.005513	-0.010580	-0.004180
6.6200	1178.708	72.239	140.878	54.838	-0.565	20.219	2243.958	-0.005057	-0.009861	-0.003839
6.6400	1132.781	69.910	135.472	52.590	-0.562	20.219	2156.525	-0.004894	-0.009483	-0.003681
6.6600	1102.349	67.258	132.360	50.686	-0.558	20.218	2098.589	-0.004708	-0.009265	-0.003548
6.6800	1027.778	61.855	123.592	46.599	-0.570	20.219	1956.625	-0.004330	-0.008651	-0.003262
6.7000	939.832	55.708	114.546	41.869	-0.552	20.219	1789.198	-0.003900	-0.008018	-0.002931
6.7200	876.367	50.531	106.569	38.084	-0.563	20.219	1668.377	-0.003537	-0.007460	-0.002666
6.7400	829.192	48.285	101.661	35.371	-0.565	20.219	1578.569	-0.003380	-0.007116	-0.002476
6.7600	737.549	41.155	91.309	30.489	-0.566	20.219	1404.104	-0.002881	-0.006392	-0.002134
6.7800	657.162	35.403	81.542	26.168	-0.578	20.219	1251.068	-0.002478	-0.005708	-0.001832
6.8000	605.239	31.374	75.539	23.237	-0.562	20.219	1152.220	-0.002196	-0.005288	-0.001627
6.8200	527.617	25.765	66.143	18.631	-0.568	20.219	1004.448	-0.001804	-0.004630	-0.001304
6.8400	433.915	19.140	54.347	13.156	-0.578	20.219	826.063	-0.001340	-0.003804	-0.000921
6.8600	405.091	16.473	50.083	11.450	-0.568	20.219	771.189	-0.001153	-0.003506	-0.000802
6.8800	352.101	12.095	42.909	8.655	-0.574	20.219	670.309	-0.000847	-0.003004	-0.000606
6.9000	297.067	8.265	35.835	5.739	-0.574	20.219	565.538	-0.000579	-0.002508	-0.000402
6.9200	248.134	4.546	29.016	2.930	-0.563	20.219	472.383	-0.000318	-0.002031	-0.000205
6.9400	242.604	3.604	27.026	2.214	-0.557	20.219	461.855	-0.000252	-0.001892	-0.000155
6.9600	246.857	3.704	27.514	2.128	-0.560	20.219	469.952	-0.000259	-0.001926	-0.000149
6.9800	220.707	1.991	23.788	0.869	-0.567	20.219	420.170	-0.000139	-0.001665	-0.000061
7.0000	212.472	0.884	22.290	0.196	-0.573	20.219	404.491	-0.000062	-0.001560	-0.000014
7.0200	239.733	1.684	23.692	1.245	-0.569	20.219	456.390	-0.000118	-0.001658	-0.000087
7.0400	257.812	2.764	25.455	1.653	-0.566	20.219	490.808	-0.000193	-0.001782	-0.000116
7.0600	272.660	3.211	26.944	1.988	-0.577	20.218	519.075	-0.000225	-0.001886	-0.000139
7.0800	295.669	5.611	30.610	3.294	-0.580	20.218	562.878	-0.000393	-0.002143	-0.000231
7.1000	372.614	10.354	38.645	6.720	-0.562	20.219	709.362	-0.000725	-0.002705	-0.000470
7.1200	411.373	12.293	43.188	9.033	-0.576	20.219	783.148	-0.000861	-0.003023	-0.000632
7.1400	484.155	17.652	51.676	12.374	-0.576	20.218	921.707	-0.001236	-0.003617	-0.000866
7.1600	543.262	21.721	59.043	15.616	-0.565	20.218	1034.231	-0.001520	-0.004133	-0.001093
7.1800	603.992	26.155	65.867	19.008	-0.570	20.219	1149.845	-0.001831	-0.004611	-0.001331
7.2000	688.572	32.120	75.871	23.446	-0.563	20.219	1310.863	-0.002248	-0.005311	-0.001641
7.2200	764.660	37.395	84.321	27.743	-0.561	20.219	1455.717	-0.002618	-0.005902	-0.001942
7.2400	837.413	43.037	93.160	31.934	-0.565	20.219	1594.219	-0.003013	-0.006521	-0.002235
7.2600	917.815	48.496	102.760	36.257	-0.558	20.219	1747.284	-0.003395	-0.007193	-0.002538
7.2800	989.365	53.940	110.669	40.115	-0.554	20.219	1883.497	-0.003776	-0.007747	-0.002808
7.3000	1072.998	59.917	120.340	45.030	-0.565	20.219	2042.713	-0.004194	-0.008424	-0.003152
7.3200	1110.690	62.587	124.522	47.440	-0.562	20.218	2114.468	-0.004381	-0.008717	-0.003321
7.3400	1213.574	70.149	136.277	52.771	-0.571	20.219	2310.333	-0.004910	-0.009539	-0.003694
7.3600	1231.293	72.238	139.629	54.359	-0.562	20.219	2344.065	-0.005057	-0.009774	-0.003805
7.3800	1301.175	77.362	147.214	58.160	-0.562	20.219	2477.102	-0.005415	-0.010305	-0.004071
7.4000	1337.318	80.280	152.606	60.746	-0.567	20.219	2545.910	-0.005620	-0.010682	-0.004252
7.4200	1374.243	82.890	156.276	62.753	-0.561	20.218	2616.205	-0.005802	-0.010939	-0.004393
7.4400	1397.161	85.205	160.041	64.390	-0.566	20.219	2659.836	-0.005964	-0.011203	-0.004507
7.4600	1408.357	85.625	161.139	64.955	-0.556	20.219	2681.150	-0.005994	-0.011280	-0.004547
7.4800	1428.871	87.760	164.014	66.457	-0.566	20.219	2720.203	-0.006143	-0.011481	-0.004652
7.5000	1427.624	87.884	164.265	66.374	-0.561	20.219	2717.829	-0.006152	-0.011499	-0.004646
7.5200	1413.046	87.059	163.808	66.135	-0.552	20.219	2690.077	-0.006094	-0.011467	-0.004629
7.5400	1391.540	86.594	162.529	65.515	-0.564	20.219	2649.136	-0.006062	-0.011377	-0.004586
7.5600	1370.215	85.318	160.973	64.786	-0.557	20.219	2608.538	-0.005972	-0.011268	-0.004535
7.5800	1322.800	81.600	155.762	62.264	-0.556	20.219	2518.272	-0.005712	-0.010903	-0.004358
7.6000	1264.626	78.149	149.619	59.187	-0.561	20.219	2407.522	-0.005470	-0.010473	-0.004143
7.6200	1226.709	75.032	145.506	57.194	-0.558	20.219	2335.339	-0.005252	-0.010185	-0.004004
7.6400	1162.267	71.032	138.892	54.107	-0.558	20.219	2212.658	-0.004972	-0.009722	-0.003787
7.6600	1099.478	66.696	131.846	50.293	-0.548	20.219	2093.124	-0.004669	-0.009229	-0.003520
7.6800	1023.540	61.573	123.230	46.206	-0.547	20.218	1948.557	-0.004310	-0.008626	-0.003234
7.7000	944.911	56.508	115.394	42.192	-0.554	20.218	1798.868	-0.003956	-0.008078	-0.002953
7.7200	889.802	52.467	108.972	38.897	-0.556	20.218	1693.954	-0.003673	-0.007628	-0.002723
7.7400	797.317	46.180	98.398	33.859	-0.556	20.219	1517.887	-0.003233	-0.006888	-0.002370
7.7600	723.528	40.539	90.088	30.054	-0.562	20.219	1377.411	-0.002838	-0.006306	-0.002104
7.7800	621.966	33.311	77.945	24.259	-0.561	20.218	1184.063	-0.002332	-0.005456	-0.001698
7.8000	578.699	29.735	72.455	21.384	-0.565	20.218	1101.694	-0.002081	-0.005072	-0.001497
7.8200	512.574	24.893	64.601	17.791	-0.557	20.218	975.809	-0.001742	-0.004522	-0.001245
7.8400	452.986	20.221	56.529	14.451	-0.567	20.219	862.370	-0.001415	-0.003957	-0.001012
7.8600	398.553	16.025	49.511	11.240	-0.554	20.219	758.743	-0.001122	-0.003466	-0.000787
7.8800	326.237	10.523	40.298	7.462	-0.552	20.219	621.071	-0.000737	-0.002821	-0.000522
7.9000	274.870	6.693	33.474	4.462	-0.562	20.219	523.281	-0.000468	-0.002343	-0.000312
7.9200	287.283	6.678	33.586	4.447	-0.561	20.219	546.913	-0.000467	-0.002351	-0.000311
7.9400	265.011	5.147	30.193	3.240	-0.564	20.219	504.513	-0.000360	-0.002114	-0.000227
7.9600	207.648	1.346	23.289	0.477	-0.560	20.219	395.308	-0.000094	-0.001630	-0.000033
7.9800	205.739	0.307	21.051	-0.028	-0.556	20.219	391.674	-0.000022	-0.001474	0.000002
8.0000	216.439	1.261	21.622	0.168	-0.549	20.219	412.045	-0.000088	-0.001514	-0.000012
8.0200	221.669	1.109	21.900	0.084	-0.562	20.219	422.001	-0.000078	-0.001533	-0.000006
8.0400	258.564	2.525	25.078	1.486	-0.564	20.218	492.239	-0.000177	-0.001755	-0.000104
8.0600	282.249	4.125	27.736	2.633	-0.558	20.219	537.329	-0.000289	-0.001942	-0.000184
8.0800	318.978	6.146	32.069	4.208	-0.563	20.219	607.252	-0.000430	-0.002245	-0.000295
8.1000	363.612	9.554	37.463	6.482	-0.567	20.219	692.225	-0.000669	-0.002622	-0.000454
8.1200	422.208	13.021	44.466	9.428	-0.564	20.219	803.776	-0.000911	-0.003113	-0.000660
8.1400	503.031	19.042	54.220	13.551	-0.546	20.218	957.642	-0.001333	-0.003795	-0.000949
8.1600	556.367	22.900	60.515	16.445	-0.565	20.218	1059.179	-0.001603	-0.004236	-0.001151
8.1800	605.014	25.931	66.575	19.430	-0.560	20.218	1151.791	-0.001815	-0.004660	-0.001360
8.2000	692.900	32.456	76.887	24.132	-0.552	20.218	1319.103	-0.002272	-0.005382	-0.001689
8.2200	768.808	37.327	85.209	27.994	-0.552	20.219	1463.614	-0.002613	-0.005965	-0.001960
8.2400	857.160	43.696	95.035	33.075	-0.558	20.218	1631.813	-0.003059	-0.006652	-0.002315
8.2600	901.344	47.779	101.537	35.736	-0.548	20.218	1715.927	-0.003345	-0.007108	-0.002502
8.2800	975.464	53.309	110.071	39.853	-0.549	20.219	1857.033	-0.003732	-0.007705	-0.002790
8.3000	1054.168	59.454	119.214	44.146	-0.540	20.218	2006.865	-0.004162	-0.008345	-0.003090
8.3200	1126.439	64.184	126.788	48.184	-0.540	20.218	2144.451	-0.004493	-0.008875	-0.003373
8.3400	1240.715	72.042	139.517	54.499	-0.540	20.219	2362.003	-0.005043	-0.009766	-0.003815
8.3600	1263.979	74.638	143.783	56.538	-0.549	20.218	2406.292	-0.005225	-0.010065	-0.003958
8.3800	1272.966	75.173	144.479	57.154	-0.547	20.219	2423.401	-0.005262	-0.010114	-0.004001
8.4000	1365.902	81.977	155.193	62.234	-0.554	20.219	2600.327	-0.005738	-0.010863	-0.004356
8.4200	1361.363	81.712	155.443	62.329	-0.546	20.219	2591.686	-0.005720	-0.010881	-0.004363
8.4400	1410.386	85.654	161.167	65.108	-0.557	20.219	2685.013	-0.005996	-0.011282	-0.004558
8.4600	1406.389	86.200	161.514	65.150	-0.549	20.218	2677.402	-0.006034	-0.011306	-0.004561
8.4800	1437.557	88.138	164.780	66.795	-0.553	20.218	2736.740	-0.006170	-0.011535	-0.004676
8.5000	1428.585	87.998	164.695	66.781	-0.554	20.218	2719.660	-0.006160	-0.011529	-0.004675
8.5200	1401.474	86.538	163.152	65.811	-0.557	20.219	2668.047	-0.006058	-0.011421	-0.004607
8.5400	1382.704	86.034	161.862	65.333	-0.553	20.218	2632.313	-0.006022	-0.011330	-0.004573
8.5600	1347.056	83.816	158.583	63.688	-0.549	20.218	2564.449	-0.005867	-0.011101	-0.004458
8.5800	1280.120	79.269	151.870	60.325	-0.552	20.218	2437.019	-0.005549	-0.010631	-0.004223
8.6000	1273.192	78.624	150.494	59.607	-0.552	20.218	2423.830	-0.005504	-0.010535	-0.004173
8.6200	1210.087	74.147	144.271	56.566	-0.560	20.218	2303.696	-0.005190	-0.010099	-0.003960
8.6400	1148.291	70.652	137.445	52.913	-0.569	20.219	2186.050	-0.004946	-0.009621	-0.003704
8.6600	1097.299	66.681	131.916	50.335	-0.559	20.218	2088.976	-0.004668	-0.009234	-0.003523
8.6800	1024.637	61.491	123.422	46.544	-0.558	20.218	1950.645	-0.004304	-0.008640	-0.003258
8.7000	951.358	57.307	115.851	42.668	-0.562	20.218	1811.142	-0.004012	-0.008110	-0.002987
8.7200	880.890	51.821	107.915	38.826	-0.554	20.218	1676.989	-0.003627	-0.007554	-0.002718
8.7400	796.115	45.603	98.425	34.194	-0.564	20.218	1515.598	-0.003192	-0.006890	-0.002394
8.7600	745.274	41.999	92.658	31.317	-0.564	20.218	1418.810	-0.002940	-0.006486	-0.002192
8.7800	611.265	32.428	76.777	23.600	-0.565	20.218	1163.692	-0.002270	-0.005374	-0.001652
8.8000	570.959	29.201	71.051	20.682	-0.563	20.218	1086.960	-0.002044	-0.004974	-0.001448
8.8200	494.209	23.111	62.393	17.146	-0.569	20.218	940.847	-0.001618	-0.004368	-0.001200
8.8400	458.938	20.697	57.057	14.817	-0.566	20.218	873.699	-0.001449	-0.003994	-0.001037
8.8600	387.042	15.392	48.398	10.735	-0.565	20.218	736.828	-0.001077	-0.003388	-0.000751
8.8800	341.911	11.548	41.923	7.938	-0.570	20.218	650.911	-0.000808	-0.002935	-0.000556
8.9000	304.626	9.177	36.739	5.810	-0.566	20.218	579.929	-0.000642	-0.002572	-0.000407
8.9200	268.272	5.515	31.737	3.912	-0.561	20.218	510.721	-0.000386	-0.002222	-0.000274
8.9400	222.601	2.118	25.106	1.399	-0.561	20.218	423.775	-0.000148	-0.001757	-0.000098
8.9600	230.911	2.834	25.468	1.415	-0.578	20.218	439.596	-0.000198	-0.001783	-0.000099
8.9800	231.468	2.244	24.830	1.120	-0.566	20.218	440.655	-0.000157	-0.001738	-0.000078
9.0000	229.228	2.018	24.483	1.190	-0.559	20.218	436.392	-0.000141	-0.001714	-0.000083
9.0200	229.364	1.163	23.941	0.757	-0.568	20.218	436.649	-0.000081	-0.001676	-0.000053
9.0400	242.228	1.850	24.689	1.331	-0.560	20.218	461.140	-0.000130	-0.001728	-0.000093
9.0600	284.097	4.236	28.581	2.887	-0.556	20.218	540.848	-0.000297	-0.002001	-0.000202
9.0800	324.238	7.281	32.626	4.713	-0.569	20.218	617.266	-0.000510	-0.002284	-0.000330
9.1000	375.124	10.243	39.021	7.279	-0.559	20.218	714.140	-0.000717	-0.002731	-0.000510
9.1200	437.763	14.213	46.229	10.229	-0.556	20.218	833.387	-0.000995	-0.003236	-0.000716
9.1400	470.554	16.656	50.289	12.024	-0.567	20.218	895.815	-0.001166	-0.003520	-0.000842
9.1600	549.123	22.479	59.709	15.953	-0.556	20.218	1045.389	-0.001574	-0.004180	-0.001117
9.1800	625.813	27.697	68.506	20.245	-0.557	20.217	1191.387	-0.001939	-0.004795	-0.001417
9.2000	673.588	31.321	74.576	22.955	-0.560	20.217	1282.339	-0.002192	-0.005220	-0.001607
9.2200	775.766	38.210	86.195	28.233	-0.556	20.217	1476.860	-0.002675	-0.006034	-0.001976
9.2400	860.181	43.894	95.562	33.201	-0.553	20.217	1637.564	-0.003073	-0.006689	-0.002324
9.2600	929.702	49.730	103.956	36.579	-0.557	20.217	1769.915	-0.003481	-0.007277	-0.002561
9.2800	997.225	54.067	111.474	40.760	-0.558	20.218	1898.460	-0.003785	-0.007803	-0.002853
9.3000	1063.876	59.639	119.519	44.511	-0.559	20.218	2025.347	-0.004175	-0.008366	-0.003116
9.3200	1134.434	64.198	127.663	48.789	-0.557	20.218	2159.672	-0.004494	-0.008936	-0.003415
9.3400	1207.472	70.483	136.013	52.842	-0.565	20.218	2298.717	-0.004934	-0.009521	-0.003699
9.3600	1249.477	73.601	141.530	55.470	-0.552	20.218	2378.683	-0.005152	-0.009907	-0.003883
9.3800	1287.890	76.084	146.157	57.810	-0.556	20.217	2451.811	-0.005326	-0.010231	-0.004047
9.4000	1365.797	82.303	155.177	62.008	-0.553	20.218	2600.126	-0.005761	-0.010862	-0.004341
9.4200	1355.562	81.978	155.124	61.981	-0.554	20.217	2580.643	-0.005738	-0.010859	-0.004339
9.4400	1402.211	85.556	160.252	64.842	-0.565	20.218	2669.449	-0.005989	-0.011218	-0.004539
9.4600	1422.048	87.338	162.903	65.909	-0.561	20.217	2707.214	-0.006114	-0.011403	-0.004614
9.4800	1420.726	87.001	163.166	66.107	-0.562	20.217	2704.697	-0.006090	-0.011422	-0.004627
9.5000	1459.063	90.551	167.975	68.211	-0.558	20.217	2777.681	-0.006339	-0.011758	-0.004775
9.5200	1416.773	88.461	165.544	67.062	-0.561	20.218	2697.172	-0.006192	-0.011588	-0.004694
9.5400	1353.489	84.238	159.179	63.803	-0.564	20.218	2576.694	-0.005897	-0.011143	-0.004466
9.5600	1341.676	83.607	157.970	63.312	-0.560	20.218	2554.207	-0.005852	-0.011058	-0.004432
9.5800	1319.494	82.048	156.011	62.527	-0.565	20.218	2511.978	-0.005743	-0.010921	-0.004377
9.6000	1302.317	81.402	153.468	60.969	-0.569	20.218	2479.277	-0.005698	-0.010743	-0.004268
9.6200	1201.732	74.315	143.393	56.087	-0.567	20.218	2287.788	-0.005202	-0.010037	-0.003926
9.6400	1163.424	71.876	139.099	53.923	-0.566	20.218	2214.861	-0.005031	-0.009737	-0.003775
9.6600	1099.599	67.467	132.611	50.644	-0.567	20.218	2093.353	-0.004723	-0.009283	-0.003545
9.6800	1043.798	63.426	125.786	47.707	-0.570	20.218	1987.123	-0.004440	-0.008805	-0.003339
9.7000	948.187	56.818	115.533	42.249	-0.575	20.218	1805.105	-0.003977	-0.008087	-0.002957
9.7200	882.648	51.820	108.402	38.532	-0.577	20.217	1680.336	-0.003627	-0.007588	-0.002697
9.7400	794.597	45.703	98.271	33.817	-0.568	20.217	1512.709	-0.003199	-0.006879	-0.002367
9.7600	721.258	40.764	90.046	29.801	-0.570	20.217	1373.091	-0.002853	-0.006303	-0.002086
9.7800	642.615	34.771	80.608	25.295	-0.571	20.217	1223.373	-0.002434	-0.005643	-0.001771
9.8000	576.700	29.959	72.426	21.343	-0.560	20.218	1097.889	-0.002097	-0.005070	-0.001494
9.8200	518.405	25.818	65.408	18.111	-0.562	20.217	986.910	-0.001807	-0.004579	-0.001268
9.8400	441.970	19.573	55.429	14.029	-0.560	20.217	841.398	-0.001370	-0.003880	-0.000982
9.8600	382.638	15.602	48.189	10.663	-0.561	20.217	728.445	-0.001092	-0.003373	-0.000746
9.8800	348.313	12.543	42.783	8.444	-0.559	20.217	663.099	-0.000878	-0.002995	-0.000591
9.9000	308.668	9.177	37.474	6.173	-0.563	20.217	587.626	-0.000642	-0.002623	-0.000432
9.9200	258.504	5.218	30.040	3.056	-0.558	20.217	492.125	-0.000365	-0.002103	-0.000214
9.9400	248.795	4.756	28.570	2.676	-0.564	20.217	473.642	-0.000333	-0.002000	-0.000187
9.9600	222.601	2.721	24.663	1.161	-0.554	20.217	423.775	-0.000190	-0.001726	-0.000081
9.9800	221.353	1.768	23.844	1.036	-0.561	20.217	421.400	-0.000124	-0.001669	-0.000073
Test Cycles
Time (sec)	Axial stress (kPa)	Axial micro-strain #1	Axial micro-strain #2	Axial micro-strain #3	Confining pressure (kPa)	Temperature (�C)	Load (N)	Displacement #1 (mm)	Displacement #2 (mm)	Displacement #3 (mm)
0.0000	228.086	2.372	24.370	1.050	-0.551	20.217	434.217	-0.000166	-0.001706	-0.000073
0.0200	228.447	1.543	24.354	0.938	-0.556	20.216	434.904	-0.000108	-0.001705	-0.000066
0.0400	235.675	1.963	24.160	0.825	-0.548	20.217	448.666	-0.000137	-0.001691	-0.000058
0.0600	300.147	5.542	30.136	3.718	-0.554	20.217	571.404	-0.000388	-0.002110	-0.000260
0.0800	310.908	6.258	31.612	4.011	-0.553	20.217	591.888	-0.000438	-0.002213	-0.000281
0.1000	355.121	9.247	36.600	6.201	-0.554	20.217	676.060	-0.000647	-0.002562	-0.000434
0.1200	418.436	13.134	44.342	9.118	-0.557	20.216	796.595	-0.000919	-0.003104	-0.000638
0.1400	473.079	17.105	50.567	11.785	-0.561	20.217	900.621	-0.001197	-0.003540	-0.000825
0.1600	553.286	22.787	60.278	16.390	-0.557	20.216	1053.314	-0.001595	-0.004219	-0.001147
0.1800	621.695	27.628	68.395	20.021	-0.557	20.217	1183.548	-0.001934	-0.004788	-0.001401
0.2000	694.508	32.276	76.721	23.781	-0.561	20.216	1322.165	-0.002259	-0.005370	-0.001665
0.2200	759.250	37.172	84.306	27.811	-0.561	20.216	1445.417	-0.002602	-0.005901	-0.001947
0.2400	851.750	43.750	94.799	32.667	-0.565	20.217	1621.513	-0.003062	-0.006636	-0.002287
0.2600	938.103	50.107	104.888	37.367	-0.565	20.217	1785.908	-0.003507	-0.007342	-0.002616
0.2800	1003.522	54.516	112.319	40.902	-0.560	20.216	1910.448	-0.003816	-0.007862	-0.002863
0.3000	1061.216	59.383	119.352	44.329	-0.560	20.216	2020.283	-0.004157	-0.008355	-0.003103
0.3200	1115.469	63.694	126.205	47.891	-0.574	20.217	2123.566	-0.004459	-0.008834	-0.003352
0.3400	1183.472	68.521	133.333	51.456	-0.569	20.217	2253.027	-0.004796	-0.009333	-0.003602
0.3600	1280.901	75.396	145.049	57.096	-0.572	20.216	2438.507	-0.005278	-0.010153	-0.003997
0.3800	1285.680	76.280	146.019	57.670	-0.563	20.217	2447.605	-0.005340	-0.010221	-0.004037
0.4000	1330.886	79.802	151.578	60.422	-0.557	20.216	2533.665	-0.005586	-0.010610	-0.004230
0.4200	1368.878	82.891	156.263	62.556	-0.570	20.216	2605.991	-0.005802	-0.010938	-0.004379
0.4400	1424.798	86.439	162.223	65.754	-0.569	20.217	2712.450	-0.006051	-0.011356	-0.004603
0.4600	1421.282	87.589	163.502	65.924	-0.564	20.217	2705.755	-0.006131	-0.011445	-0.004615
0.4800	1419.343	87.438	163.529	66.373	-0.552	20.216	2702.065	-0.006121	-0.011447	-0.004646
0.5000	1419.929	87.788	164.070	66.444	-0.558	20.216	2703.180	-0.006145	-0.011485	-0.004651
0.5200	1427.188	88.727	165.017	66.753	-0.561	20.216	2716.999	-0.006211	-0.011551	-0.004673
0.5400	1407.471	87.549	163.639	66.344	-0.560	20.216	2679.462	-0.006128	-0.011455	-0.004644
0.5600	1348.168	84.307	158.860	63.605	-0.563	20.216	2566.566	-0.005902	-0.011120	-0.004452
0.5800	1332.359	82.863	157.568	63.227	-0.566	20.216	2536.469	-0.005800	-0.011030	-0.004426
0.6000	1277.941	79.930	152.022	60.185	-0.561	20.216	2432.871	-0.005595	-0.010642	-0.004213
0.6200	1221.419	75.606	145.715	57.420	-0.570	20.216	2325.268	-0.005292	-0.010200	-0.004019
0.6400	1132.315	69.909	135.901	52.955	-0.575	20.216	2155.638	-0.004894	-0.009513	-0.003707
0.6600	1090.551	67.227	131.373	50.277	-0.580	20.216	2076.130	-0.004706	-0.009196	-0.003519
0.6800	1019.317	61.825	123.135	46.194	-0.573	20.216	1940.517	-0.004328	-0.008619	-0.003234
0.7000	936.796	56.408	114.476	41.882	-0.570	20.216	1783.419	-0.003949	-0.008013	-0.002932
0.7200	902.080	53.912	110.321	39.543	-0.579	20.216	1717.329	-0.003774	-0.007722	-0.002768
0.7400	829.177	48.383	101.910	35.708	-0.573	20.215	1578.541	-0.003387	-0.007134	-0.002500
0.7600	724.474	41.184	90.533	30.293	-0.568	20.216	1379.213	-0.002883	-0.006337	-0.002120
0.7800	624.220	33.958	78.819	24.693	-0.578	20.216	1188.354	-0.002377	-0.005517	-0.001728
0.8000	571.756	29.873	72.023	21.258	-0.568	20.216	1088.476	-0.002091	-0.005042	-0.001488
0.8200	513.551	25.465	64.725	18.240	-0.559	20.215	977.669	-0.001783	-0.004531	-0.001277
0.8400	462.559	21.062	57.667	15.252	-0.564	20.215	880.594	-0.001474	-0.004037	-0.001068
0.8600	381.707	15.939	48.328	10.522	-0.557	20.215	726.671	-0.001116	-0.003383	-0.000737
0.8800	330.114	11.465	41.284	7.769	-0.560	20.215	628.452	-0.000803	-0.002890	-0.000544
0.9000	304.806	9.176	37.086	6.189	-0.553	20.215	580.273	-0.000642	-0.002596	-0.000433
0.9200	271.203	6.718	32.391	4.292	-0.558	20.215	516.300	-0.000470	-0.002267	-0.000300
0.9400	253.199	4.854	29.347	3.139	-0.556	20.215	482.025	-0.000340	-0.002054	-0.000220
0.9600	223.668	2.904	25.399	1.401	-0.569	20.215	425.806	-0.000203	-0.001778	-0.000098
0.9800	214.110	1.220	23.399	0.924	-0.576	20.215	407.610	-0.000085	-0.001638	-0.000065
1.0000	224.615	2.021	23.623	0.743	-0.565	20.215	427.608	-0.000141	-0.001654	-0.000052
1.0200	229.694	1.920	23.856	1.079	-0.572	20.215	437.279	-0.000134	-0.001670	-0.000076
1.0400	243.160	2.259	24.647	1.499	-0.566	20.215	462.914	-0.000158	-0.001725	-0.000105
1.0600	277.620	4.236	27.846	2.676	-0.565	20.215	528.517	-0.000297	-0.001949	-0.000187
1.0800	325.816	7.365	33.516	5.078	-0.569	20.215	620.270	-0.000516	-0.002346	-0.000355
1.1000	375.154	10.496	39.073	7.391	-0.572	20.215	714.197	-0.000735	-0.002735	-0.000517
1.1200	427.513	14.296	45.482	9.962	-0.573	20.215	813.875	-0.001001	-0.003184	-0.000697
1.1400	485.102	18.060	52.205	12.794	-0.576	20.215	923.510	-0.001264	-0.003654	-0.000896
1.1600	548.582	23.013	59.849	16.264	-0.554	20.215	1044.359	-0.001611	-0.004189	-0.001138
1.1800	620.763	27.543	68.158	20.008	-0.569	20.215	1181.774	-0.001928	-0.004771	-0.001401
1.2000	694.237	32.919	76.732	23.923	-0.566	20.214	1321.650	-0.002304	-0.005371	-0.001675
1.2200	763.188	37.733	85.252	27.799	-0.569	20.215	1452.913	-0.002641	-0.005968	-0.001946
1.2400	833.476	42.981	92.948	31.934	-0.569	20.215	1586.723	-0.003009	-0.006506	-0.002235
1.2600	929.462	49.928	104.193	37.014	-0.574	20.214	1769.457	-0.003495	-0.007294	-0.002591
1.2800	1000.005	54.572	112.446	40.859	-0.572	20.215	1903.753	-0.003820	-0.007871	-0.002860
1.3000	1067.002	60.507	119.937	44.835	-0.573	20.215	2031.298	-0.004236	-0.008396	-0.003138
1.3200	1133.803	65.307	127.985	48.760	-0.575	20.215	2158.470	-0.004571	-0.008959	-0.003413
1.3400	1167.722	67.651	131.916	50.840	-0.584	20.215	2223.043	-0.004736	-0.009234	-0.003559
1.3600	1254.842	74.218	142.309	55.638	-0.564	20.214	2388.897	-0.005195	-0.009962	-0.003895
1.3800	1302.407	77.248	147.770	58.806	-0.569	20.214	2479.448	-0.005407	-0.010344	-0.004116
1.4000	1354.375	81.864	154.164	61.561	-0.564	20.214	2578.382	-0.005731	-0.010791	-0.004309
1.4200	1369.464	83.338	156.512	62.847	-0.570	20.214	2607.107	-0.005834	-0.010956	-0.004399
1.4400	1397.567	85.302	159.986	64.727	-0.559	20.214	2660.608	-0.005971	-0.011199	-0.004531
1.4600	1401.369	86.242	160.779	64.843	-0.568	20.214	2667.847	-0.006037	-0.011255	-0.004539
1.4800	1428.796	87.675	164.363	66.515	-0.556	20.214	2720.060	-0.006137	-0.011505	-0.004656
1.5000	1426.752	88.404	164.682	66.667	-0.564	20.214	2716.169	-0.006188	-0.011528	-0.004667
1.5200	1423.040	88.601	164.446	66.837	-0.564	20.214	2709.103	-0.006202	-0.011511	-0.004679
1.5400	1404.886	87.477	163.611	66.218	-0.571	20.214	2674.541	-0.006123	-0.011453	-0.004635
1.5600	1356.810	84.727	159.860	64.363	-0.568	20.214	2583.017	-0.005931	-0.011190	-0.004505
1.5800	1318.036	82.300	155.985	62.457	-0.577	20.214	2509.203	-0.005761	-0.010919	-0.004372
1.6000	1261.575	78.877	150.287	59.495	-0.583	20.214	2401.714	-0.005521	-0.010520	-0.004165
1.6200	1250.243	77.740	148.909	58.749	-0.583	20.215	2380.142	-0.005442	-0.010424	-0.004112
1.6400	1163.349	71.859	139.365	54.514	-0.580	20.213	2214.718	-0.005030	-0.009756	-0.003816
1.6600	1093.181	67.369	132.012	50.279	-0.581	20.215	2081.137	-0.004716	-0.009241	-0.003520
1.6800	1026.500	62.485	124.105	46.569	-0.574	20.214	1954.193	-0.004374	-0.008687	-0.003260
1.7000	925.705	55.385	113.391	40.987	-0.576	20.214	1762.304	-0.003877	-0.007937	-0.002869
1.7200	870.100	51.542	107.427	38.097	-0.572	20.214	1656.446	-0.003608	-0.007520	-0.002667
1.7400	803.404	46.448	99.414	34.491	-0.577	20.214	1529.474	-0.003251	-0.006959	-0.002414
1.7600	698.791	39.544	87.739	28.723	-0.588	20.214	1330.318	-0.002768	-0.006142	-0.002011
1.7800	655.464	35.725	81.681	26.069	-0.574	20.214	1247.835	-0.002501	-0.005718	-0.001825
1.8000	577.331	30.084	72.580	21.665	-0.583	20.213	1099.091	-0.002106	-0.005081	-0.001517
1.8200	509.553	25.411	64.351	18.155	-0.578	20.214	970.058	-0.001779	-0.004505	-0.001271
1.8400	447.035	20.446	56.154	14.141	-0.568	20.213	851.040	-0.001431	-0.003931	-0.000990
1.8600	380.910	15.559	47.856	10.481	-0.580	20.213	725.155	-0.001089	-0.003350	-0.000734
1.8800	329.663	11.212	41.131	7.490	-0.579	20.214	627.594	-0.000785	-0.002879	-0.000524
1.9000	303.183	9.544	36.949	6.287	-0.574	20.214	577.183	-0.000668	-0.002586	-0.000440
1.9200	266.183	6.060	32.043	4.067	-0.573	20.214	506.744	-0.000424	-0.002243	-0.000285
1.9400	245.745	4.321	28.151	2.651	-0.567	20.213	467.834	-0.000302	-0.001971	-0.000186
1.9600	247.082	4.138	28.055	2.270	-0.576	20.213	470.381	-0.000290	-0.001964	-0.000159
1.9800	222.375	1.697	24.594	1.203	-0.568	20.214	423.346	-0.000119	-0.001722	-0.000084
2.0000	224.164	2.160	24.231	1.036	-0.569	20.214	426.750	-0.000151	-0.001696	-0.000073
2.0200	229.634	2.468	24.841	1.149	-0.578	20.214	437.164	-0.000173	-0.001739	-0.000080
2.0400	242.859	2.623	24.911	1.708	-0.579	20.214	462.341	-0.000184	-0.001744	-0.000120
2.0600	283.240	5.377	28.848	3.042	-0.577	20.213	539.217	-0.000376	-0.002019	-0.000213
2.0800	322.450	6.958	33.029	4.588	-0.575	20.213	613.861	-0.000487	-0.002312	-0.000321
2.1000	350.598	8.896	36.322	6.202	-0.574	20.214	667.448	-0.000623	-0.002543	-0.000434
2.1200	427.724	14.354	45.702	9.651	-0.576	20.213	814.276	-0.001005	-0.003199	-0.000676
2.1400	468.451	16.780	50.500	12.095	-0.566	20.214	891.809	-0.001175	-0.003535	-0.000847
2.1600	548.206	22.912	60.016	16.149	-0.569	20.213	1043.644	-0.001604	-0.004201	-0.001130
2.1800	600.265	26.520	65.921	19.136	-0.575	20.213	1142.750	-0.001856	-0.004614	-0.001340
2.2000	683.252	32.079	75.607	23.599	-0.573	20.213	1300.735	-0.002246	-0.005292	-0.001652
2.2200	766.419	38.561	85.362	28.161	-0.566	20.213	1459.064	-0.002699	-0.005975	-0.001971
2.2400	842.733	43.780	94.189	32.341	-0.571	20.214	1604.347	-0.003065	-0.006593	-0.002264
2.2600	927.779	49.531	104.096	36.875	-0.569	20.213	1766.253	-0.003467	-0.007287	-0.002581
2.2800	980.769	53.364	110.307	39.950	-0.566	20.213	1867.132	-0.003735	-0.007721	-0.002796
2.3000	1085.697	60.930	121.255	45.885	-0.569	20.214	2066.889	-0.004265	-0.008488	-0.003212
2.3200	1119.361	64.070	126.607	48.058	-0.574	20.213	2130.976	-0.004485	-0.008862	-0.003364
2.3400	1203.956	69.925	135.750	52.647	-0.574	20.213	2292.023	-0.004895	-0.009503	-0.003685
2.3600	1257.427	74.371	142.671	55.582	-0.578	20.213	2393.818	-0.005206	-0.009987	-0.003891
2.3800	1298.244	77.361	147.703	58.303	-0.574	20.213	2471.523	-0.005415	-0.010339	-0.004081
2.4000	1336.010	80.672	152.051	60.563	-0.568	20.214	2543.421	-0.005647	-0.010644	-0.004239
2.4200	1371.177	83.338	156.580	62.725	-0.570	20.213	2610.369	-0.005834	-0.010961	-0.004391
2.4400	1407.380	85.795	160.944	64.826	-0.569	20.213	2679.291	-0.006006	-0.011266	-0.004538
2.4600	1403.804	86.651	161.154	64.926	-0.566	20.214	2672.482	-0.006066	-0.011281	-0.004545
2.4800	1430.148	87.970	164.684	66.809	-0.567	20.213	2722.635	-0.006158	-0.011528	-0.004677
2.5000	1424.047	88.236	164.293	66.486	-0.569	20.213	2711.020	-0.006177	-0.011501	-0.004654
2.5200	1416.232	88.279	164.336	66.372	-0.568	20.213	2696.142	-0.006180	-0.011504	-0.004646
2.5400	1392.968	86.933	162.734	65.686	-0.576	20.213	2651.854	-0.006085	-0.011391	-0.004598
2.5600	1354.751	84.841	159.806	63.955	-0.564	20.213	2579.098	-0.005939	-0.011186	-0.004477
2.5800	1328.151	83.281	157.234	62.848	-0.560	20.213	2528.458	-0.005830	-0.011006	-0.004399
2.6000	1256.195	78.300	149.452	59.005	-0.553	20.214	2391.472	-0.005481	-0.010462	-0.004130
2.6200	1213.799	75.341	144.993	56.635	-0.562	20.214	2310.762	-0.005274	-0.010150	-0.003964
2.6400	1158.901	71.608	138.990	53.715	-0.561	20.213	2206.249	-0.005013	-0.009729	-0.003760
2.6600	1087.771	67.315	131.082	49.870	-0.554	20.213	2070.837	-0.004712	-0.009176	-0.003491
2.6800	1021.992	62.274	123.703	46.389	-0.562	20.213	1945.610	-0.004359	-0.008659	-0.003247
2.7000	934.992	55.849	114.254	41.447	-0.561	20.213	1779.985	-0.003909	-0.007998	-0.002901
2.7200	874.413	51.906	107.581	38.068	-0.570	20.213	1664.658	-0.003633	-0.007531	-0.002665
2.7400	796.130	46.391	98.313	33.932	-0.562	20.213	1515.627	-0.003247	-0.006882	-0.002375
2.7600	733.492	41.913	91.253	30.403	-0.571	20.213	1396.379	-0.002934	-0.006388	-0.002128
2.7800	663.775	36.807	83.197	26.533	-0.569	20.213	1263.657	-0.002576	-0.005824	-0.001857
2.8000	586.544	30.661	73.564	22.143	-0.559	20.213	1116.629	-0.002146	-0.005149	-0.001550
2.8200	510.094	25.636	64.738	17.903	-0.570	20.213	971.088	-0.001795	-0.004532	-0.001253
2.8400	464.588	21.441	58.361	15.083	-0.567	20.213	884.457	-0.001501	-0.004085	-0.001056
2.8600	394.796	16.922	49.484	11.169	-0.554	20.213	751.591	-0.001185	-0.003464	-0.000782
2.8800	338.981	12.110	42.228	8.022	-0.561	20.213	645.332	-0.000848	-0.002956	-0.000562
2.9000	305.392	9.176	36.907	5.991	-0.569	20.213	581.388	-0.000642	-0.002584	-0.000419
2.9200	257.286	5.879	31.084	3.294	-0.565	20.213	489.807	-0.000412	-0.002176	-0.000231
2.9400	250.734	4.252	29.138	2.732	-0.562	20.213	477.333	-0.000298	-0.002040	-0.000191
2.9600	230.476	3.253	26.166	1.554	-0.557	20.213	438.766	-0.000228	-0.001832	-0.000109
2.9800	212.772	1.949	23.288	0.533	-0.568	20.213	405.064	-0.000136	-0.001630	-0.000037
3.0000	218.483	1.262	22.995	0.588	-0.554	20.213	415.936	-0.000088	-0.001610	-0.000041
3.0200	224.585	1.825	23.317	0.421	-0.557	20.213	427.551	-0.000128	-0.001632	-0.000029
3.0400	249.502	2.650	24.690	1.317	-0.560	20.213	474.987	-0.000185	-0.001728	-0.000092
3.0600	281.632	4.883	27.874	2.565	-0.561	20.213	536.156	-0.000342	-0.001951	-0.000180
3.0800	322.720	7.253	33.099	4.447	-0.568	20.213	614.376	-0.000508	-0.002317	-0.000311
3.1000	374.959	10.763	38.895	7.196	-0.568	20.213	713.825	-0.000753	-0.002723	-0.000504
3.1200	416.603	13.485	44.161	9.202	-0.557	20.212	793.104	-0.000944	-0.003091	-0.000644
3.1400	492.782	18.074	52.915	13.006	-0.568	20.213	938.129	-0.001265	-0.003704	-0.000910
3.1600	541.128	22.689	58.917	15.616	-0.557	20.212	1030.169	-0.001588	-0.004124	-0.001093
3.1800	624.205	27.825	68.381	19.711	-0.566	20.212	1188.326	-0.001948	-0.004787	-0.001380
3.2000	697.634	32.513	76.818	23.866	-0.561	20.213	1328.115	-0.002276	-0.005377	-0.001671
3.2200	772.009	38.885	85.916	28.276	-0.568	20.213	1469.707	-0.002722	-0.006014	-0.001979
3.2400	854.094	44.301	94.909	32.962	-0.558	20.212	1625.977	-0.003101	-0.006644	-0.002307
3.2600	912.841	48.664	102.523	35.990	-0.564	20.212	1737.814	-0.003406	-0.007177	-0.002519
3.2800	984.827	54.151	110.738	40.005	-0.569	20.213	1874.857	-0.003791	-0.007752	-0.002800
3.3000	1054.047	59.075	118.268	43.836	-0.562	20.212	2006.636	-0.004135	-0.008279	-0.003069
3.3200	1119.707	63.987	126.523	48.015	-0.571	20.212	2131.634	-0.004479	-0.008857	-0.003361
3.3400	1198.516	69.922	135.319	52.210	-0.570	20.212	2281.666	-0.004895	-0.009472	-0.003655
3.3600	1241.286	73.024	140.432	54.754	-0.573	20.212	2363.091	-0.005112	-0.009830	-0.003833
3.3800	1302.166	77.234	147.785	58.286	-0.572	20.212	2478.991	-0.005406	-0.010345	-0.004080
3.4000	1348.875	81.317	152.844	61.111	-0.564	20.213	2567.911	-0.005692	-0.010699	-0.004278
3.4200	1382.749	84.249	157.734	63.169	-0.560	20.213	2632.399	-0.005897	-0.011041	-0.004422
3.4400	1417.389	86.299	161.919	65.205	-0.577	20.212	2698.345	-0.006041	-0.011334	-0.004564
3.4600	1412.174	87.073	161.945	65.164	-0.568	20.212	2688.417	-0.006095	-0.011336	-0.004561
3.4800	1417.810	87.365	162.944	65.770	-0.571	20.212	2699.146	-0.006116	-0.011406	-0.004604
3.5000	1427.428	88.658	164.434	66.626	-0.568	20.212	2717.457	-0.006206	-0.011510	-0.004664
3.5200	1406.899	88.263	163.823	66.094	-0.557	20.212	2678.375	-0.006178	-0.011468	-0.004627
3.5400	1382.163	85.725	161.988	65.263	-0.562	20.211	2631.283	-0.006001	-0.011339	-0.004568
3.5600	1379.878	86.315	161.933	64.869	-0.576	20.212	2626.934	-0.006042	-0.011335	-0.004541
3.5800	1326.768	82.902	156.804	62.692	-0.566	20.212	2525.826	-0.005803	-0.010976	-0.004388
3.6000	1262.717	79.044	150.245	59.086	-0.566	20.212	2403.889	-0.005533	-0.010517	-0.004136
3.6200	1216.610	75.717	145.479	56.816	-0.565	20.212	2316.113	-0.005300	-0.010184	-0.003977
3.6400	1157.503	71.579	138.558	53.700	-0.557	20.212	2203.588	-0.005011	-0.009699	-0.003759
3.6600	1078.844	66.134	129.872	49.139	-0.554	20.212	2053.843	-0.004629	-0.009091	-0.003440
3.6800	1015.560	61.925	123.121	45.784	-0.569	20.211	1933.365	-0.004335	-0.008618	-0.003205
3.7000	949.495	57.166	115.630	41.952	-0.566	20.211	1807.594	-0.004002	-0.008094	-0.002937
3.7200	856.033	50.894	105.848	37.269	-0.564	20.211	1629.667	-0.003563	-0.007409	-0.002609
3.7400	820.356	47.696	101.189	34.756	-0.573	20.211	1561.747	-0.003339	-0.007083	-0.002433
3.7600	736.933	42.125	91.684	30.571	-0.572	20.211	1402.931	-0.002949	-0.006418	-0.002140
3.7800	659.477	36.510	82.405	26.280	-0.572	20.212	1255.474	-0.002556	-0.005768	-0.001840
3.8000	571.666	29.666	71.690	21.130	-0.572	20.211	1088.305	-0.002077	-0.005018	-0.001479
3.8200	509.313	25.398	64.547	17.622	-0.576	20.211	969.601	-0.001778	-0.004518	-0.001234
3.8400	473.425	22.436	59.306	15.546	-0.574	20.211	901.279	-0.001571	-0.004151	-0.001088
3.8600	393.218	16.347	49.317	11.240	-0.576	20.211	748.587	-0.001144	-0.003452	-0.000787
3.8800	349.921	12.950	43.464	8.374	-0.559	20.211	666.161	-0.000907	-0.003042	-0.000586
3.9000	303.288	8.994	36.933	5.878	-0.564	20.211	577.383	-0.000630	-0.002585	-0.000411
3.9200	265.807	6.216	31.916	3.731	-0.560	20.211	506.029	-0.000435	-0.002234	-0.000261
3.9400	223.608	2.846	25.679	1.780	-0.562	20.211	425.692	-0.000199	-0.001797	-0.000125
3.9600	231.032	3.169	25.525	1.303	-0.568	20.211	439.825	-0.000222	-0.001787	-0.000091
3.9800	231.212	3.353	25.385	1.190	-0.562	20.211	440.168	-0.000235	-0.001777	-0.000083
4.0000	185.631	-0.170	19.381	-0.870	-0.560	20.211	353.394	0.000012	-0.001357	0.000061
4.0200	238.125	2.273	23.273	0.671	-0.561	20.211	453.329	-0.000159	-0.001629	-0.000047
4.0400	250.509	2.860	24.440	1.302	-0.560	20.211	476.904	-0.000200	-0.001711	-0.000091
4.0600	283.721	4.630	28.012	2.381	-0.569	20.211	540.133	-0.000324	-0.001961	-0.000167
4.0800	332.669	8.097	34.226	4.798	-0.554	20.210	633.316	-0.000567	-0.002396	-0.000336
4.1000	386.110	11.211	40.285	7.644	-0.564	20.210	735.054	-0.000785	-0.002820	-0.000535
4.1200	417.639	13.809	44.521	9.315	-0.566	20.210	795.078	-0.000967	-0.003116	-0.000652
4.1400	485.508	18.493	52.387	12.640	-0.568	20.211	924.282	-0.001294	-0.003667	-0.000885
4.1600	542.646	22.030	58.792	15.770	-0.568	20.210	1033.058	-0.001542	-0.004115	-0.001104
4.1800	618.629	28.064	68.171	19.796	-0.577	20.211	1177.711	-0.001965	-0.004772	-0.001386
4.2000	688.196	31.951	75.897	23.672	-0.576	20.211	1310.148	-0.002237	-0.005313	-0.001657
4.2200	749.482	37.058	83.389	26.953	-0.570	20.211	1426.821	-0.002594	-0.005837	-0.001887
4.2400	853.493	44.116	95.409	32.877	-0.572	20.210	1624.832	-0.003088	-0.006679	-0.002301
4.2600	893.259	47.303	100.276	35.078	-0.576	20.210	1700.535	-0.003311	-0.007019	-0.002455
4.2800	986.825	54.486	111.018	40.242	-0.570	20.210	1878.662	-0.003814	-0.007771	-0.002817
4.3000	1069.677	59.933	119.896	44.567	-0.570	20.210	2036.390	-0.004195	-0.008393	-0.003120
4.3200	1134.044	65.026	128.095	48.719	-0.578	20.211	2158.928	-0.004552	-0.008967	-0.003410
4.3400	1225.446	71.621	138.224	53.895	-0.574	20.210	2332.935	-0.005013	-0.009676	-0.003773
4.3600	1266.474	74.889	143.199	56.131	-0.569	20.210	2411.041	-0.005242	-0.010024	-0.003929
4.3800	1283.952	76.321	146.019	57.559	-0.570	20.210	2444.315	-0.005342	-0.010221	-0.004029
4.4000	1368.457	82.875	155.596	62.302	-0.570	20.210	2605.190	-0.005801	-0.010892	-0.004361
4.4200	1370.200	83.688	156.566	62.541	-0.572	20.210	2608.509	-0.005858	-0.010960	-0.004378
4.4400	1397.522	85.500	159.848	64.363	-0.570	20.209	2660.522	-0.005985	-0.011189	-0.004505
4.4600	1406.614	86.497	161.127	64.994	-0.560	20.210	2677.832	-0.006055	-0.011279	-0.004550
4.4800	1416.698	87.493	162.930	65.784	-0.560	20.210	2697.029	-0.006124	-0.011405	-0.004605
4.5000	1434.131	88.883	164.683	66.668	-0.559	20.210	2730.217	-0.006222	-0.011528	-0.004667
4.5200	1427.248	89.051	165.157	66.710	-0.565	20.210	2717.113	-0.006234	-0.011561	-0.004670
4.5400	1365.211	85.402	160.555	64.531	-0.561	20.209	2599.010	-0.005978	-0.011239	-0.004517
4.5600	1380.179	86.245	161.140	65.026	-0.562	20.210	2627.506	-0.006037	-0.011280	-0.004552
4.5800	1282.434	80.196	152.245	60.255	-0.566	20.210	2441.425	-0.005614	-0.010657	-0.004218
4.6000	1275.446	79.479	151.010	59.693	-0.552	20.209	2428.122	-0.005564	-0.010571	-0.004179
4.6200	1230.661	76.841	146.353	57.389	-0.556	20.209	2342.863	-0.005379	-0.010245	-0.004017
4.6400	1142.971	70.526	137.126	52.885	-0.557	20.209	2175.922	-0.004937	-0.009599	-0.003702
4.6600	1093.993	67.173	131.458	50.178	-0.562	20.209	2082.682	-0.004702	-0.009202	-0.003512
4.6800	1001.613	61.278	121.883	45.213	-0.557	20.209	1906.815	-0.004289	-0.008532	-0.003165
4.7000	942.131	56.382	115.005	41.828	-0.565	20.209	1793.575	-0.003947	-0.008050	-0.002928
4.7200	863.562	51.316	106.360	37.674	-0.564	20.209	1644.001	-0.003592	-0.007445	-0.002637
4.7400	787.939	45.548	98.120	33.172	-0.561	20.209	1500.034	-0.003188	-0.006868	-0.002322
4.7600	710.363	40.033	88.364	28.989	-0.564	20.209	1352.348	-0.002802	-0.006185	-0.002029
4.7800	661.746	36.779	82.488	26.252	-0.556	20.210	1259.794	-0.002575	-0.005774	-0.001838
4.8000	599.408	31.811	74.689	22.732	-0.559	20.209	1141.119	-0.002227	-0.005228	-0.001591
4.8200	509.223	25.385	64.281	17.509	-0.556	20.209	969.429	-0.001777	-0.004500	-0.001226
4.8400	434.757	19.687	54.805	13.636	-0.550	20.209	827.665	-0.001378	-0.003836	-0.000955
4.8600	400.071	17.326	49.260	11.072	-0.551	20.209	761.633	-0.001213	-0.003448	-0.000775
4.8800	357.841	13.624	44.204	8.781	-0.560	20.208	681.238	-0.000954	-0.003094	-0.000615
4.9000	286.637	7.844	34.712	5.066	-0.564	20.209	545.683	-0.000549	-0.002430	-0.000355
4.9200	262.441	5.823	30.876	3.519	-0.561	20.209	499.620	-0.000408	-0.002161	-0.000246
4.9400	256.986	4.937	29.526	2.831	-0.568	20.209	489.235	-0.000346	-0.002067	-0.000198
4.9600	224.089	2.484	24.940	1.038	-0.562	20.208	426.607	-0.000174	-0.001746	-0.000073
4.9800	223.367	2.188	24.371	0.685	-0.571	20.209	425.234	-0.000153	-0.001706	-0.000048
5.0000	222.781	1.696	23.538	0.545	-0.552	20.209	424.118	-0.000119	-0.001648	-0.000038
5.0200	229.273	2.048	23.970	0.743	-0.563	20.209	436.478	-0.000143	-0.001678	-0.000052
5.0400	240.274	2.315	24.745	1.260	-0.570	20.208	457.420	-0.000162	-0.001732	-0.000088
5.0600	323.396	7.156	32.932	4.277	-0.563	20.208	615.664	-0.000501	-0.002305	-0.000299
5.0800	320.331	7.649	33.001	4.266	-0.573	20.208	609.827	-0.000535	-0.002310	-0.000299
5.1000	354.325	9.416	36.543	5.892	-0.568	20.208	674.543	-0.000659	-0.002558	-0.000412
5.1200	421.457	14.213	45.550	9.286	-0.564	20.208	802.345	-0.000995	-0.003188	-0.000650
5.1400	485.868	18.016	52.205	12.457	-0.565	20.208	924.969	-0.001261	-0.003654	-0.000872
5.1600	555.179	23.012	60.308	16.164	-0.566	20.208	1056.919	-0.001611	-0.004222	-0.001131
5.1800	607.764	27.169	66.924	19.193	-0.570	20.209	1157.026	-0.001902	-0.004685	-0.001343
5.2000	686.648	32.204	75.482	23.417	-0.564	20.208	1307.201	-0.002254	-0.005284	-0.001639
5.2200	762.361	37.775	84.889	27.628	-0.557	20.208	1451.340	-0.002644	-0.005942	-0.001934
5.2400	837.368	43.050	93.465	31.865	-0.554	20.208	1594.133	-0.003013	-0.006543	-0.002231
5.2600	929.748	49.604	103.818	36.860	-0.569	20.208	1770.000	-0.003472	-0.007267	-0.002580
5.2800	995.301	54.867	111.821	40.356	-0.568	20.208	1894.798	-0.003841	-0.007827	-0.002825
5.3000	1078.829	60.325	120.811	44.932	-0.562	20.207	2053.814	-0.004223	-0.008457	-0.003145
5.3200	1106.902	63.033	124.772	46.937	-0.574	20.208	2107.258	-0.004412	-0.008734	-0.003286
5.3400	1177.942	68.324	133.097	50.895	-0.569	20.208	2242.498	-0.004783	-0.009317	-0.003563
5.3600	1250.469	73.655	141.100	55.174	-0.562	20.208	2380.571	-0.005156	-0.009877	-0.003862
5.3800	1304.150	77.907	147.909	58.369	-0.557	20.208	2482.767	-0.005453	-0.010354	-0.004086
5.4000	1334.793	80.209	151.635	60.269	-0.572	20.208	2541.103	-0.005615	-0.010614	-0.004219
5.4200	1378.556	83.759	157.177	62.834	-0.560	20.208	2624.416	-0.005863	-0.011002	-0.004398
5.4400	1392.397	85.023	159.487	63.871	-0.555	20.207	2650.766	-0.005952	-0.011164	-0.004471
5.4600	1422.574	87.184	162.624	65.360	-0.565	20.208	2708.216	-0.006103	-0.011384	-0.004575
5.4800	1420.756	87.605	163.569	65.810	-0.557	20.207	2704.754	-0.006132	-0.011450	-0.004607
5.5000	1440.007	88.783	165.808	67.117	-0.556	20.207	2741.404	-0.006215	-0.011607	-0.004698
5.5200	1410.506	88.026	164.236	66.220	-0.553	20.207	2685.242	-0.006162	-0.011497	-0.004635
5.5400	1376.632	85.542	161.737	64.798	-0.561	20.207	2620.754	-0.005988	-0.011322	-0.004536
5.5600	1373.506	85.836	160.945	64.615	-0.559	20.207	2614.803	-0.006009	-0.011266	-0.004523
5.5800	1309.050	81.893	155.068	61.532	-0.552	20.207	2492.094	-0.005732	-0.010855	-0.004307
5.6000	1263.754	78.019	149.732	58.976	-0.561	20.207	2405.863	-0.005461	-0.010481	-0.004128
5.6200	1223.733	76.098	145.866	56.912	-0.553	20.207	2329.674	-0.005327	-0.010211	-0.003984
5.6400	1152.123	71.187	138.211	53.135	-0.548	20.207	2193.346	-0.004983	-0.009675	-0.003719
5.6600	1068.805	65.531	129.262	48.900	-0.558	20.207	2034.731	-0.004587	-0.009048	-0.003423
5.6800	1052.830	64.198	127.038	47.623	-0.566	20.207	2004.318	-0.004494	-0.008893	-0.003334
5.7000	890.088	53.296	110.084	39.317	-0.567	20.207	1694.498	-0.003731	-0.007706	-0.002752
5.7200	910.015	54.192	110.584	39.487	-0.571	20.207	1732.435	-0.003793	-0.007741	-0.002764
5.7400	769.439	44.356	95.701	32.328	-0.563	20.206	1464.815	-0.003105	-0.006699	-0.002263
5.7600	731.944	41.240	90.809	30.041	-0.564	20.207	1393.433	-0.002887	-0.006357	-0.002103
5.7800	650.039	35.445	81.264	25.451	-0.569	20.207	1237.507	-0.002481	-0.005688	-0.001782
5.8000	583.989	30.535	72.842	21.735	-0.569	20.207	1111.765	-0.002137	-0.005099	-0.001521
5.8200	469.623	22.944	59.515	15.168	-0.551	20.207	894.041	-0.001606	-0.004166	-0.001062
5.8400	460.906	21.692	57.943	14.562	-0.547	20.206	877.447	-0.001518	-0.004056	-0.001019
5.8600	386.891	15.645	48.384	10.381	-0.558	20.206	736.542	-0.001095	-0.003387	-0.000727
5.8800	352.717	13.204	43.883	8.274	-0.549	20.206	671.482	-0.000924	-0.003072	-0.000579
5.9000	311.539	9.584	37.920	5.909	-0.549	20.206	593.090	-0.000671	-0.002654	-0.000414
5.9200	260.187	5.611	30.875	3.433	-0.547	20.206	495.329	-0.000393	-0.002161	-0.000240
5.9400	244.182	3.858	28.334	2.073	-0.544	20.206	464.859	-0.000270	-0.001983	-0.000145
5.9600	226.749	2.469	25.163	0.980	-0.552	20.206	431.671	-0.000173	-0.001761	-0.000069
5.9800	208.339	1.584	22.858	0.055	-0.551	20.207	396.624	-0.000111	-0.001600	-0.000004
6.0000	221.038	1.178	22.844	0.336	-0.546	20.206	420.799	-0.000082	-0.001599	-0.000024
6.0200	225.667	1.390	22.888	0.266	-0.554	20.206	429.611	-0.000097	-0.001602	-0.000019
6.0400	267.701	3.803	26.777	1.736	-0.537	20.206	509.634	-0.000266	-0.001874	-0.000122
6.0600	290.304	5.147	28.999	2.915	-0.547	20.205	552.664	-0.000360	-0.002030	-0.000204
6.0800	304.626	6.187	30.888	3.365	-0.544	20.206	579.929	-0.000433	-0.002162	-0.000236
6.1000	375.500	10.198	39.130	7.040	-0.546	20.206	714.855	-0.000714	-0.002739	-0.000493
6.1200	408.307	13.035	43.380	8.345	-0.561	20.205	777.311	-0.000912	-0.003037	-0.000584
6.1400	489.054	18.649	53.123	12.835	-0.557	20.205	931.034	-0.001305	-0.003719	-0.000898
6.1600	547.650	22.535	59.264	15.743	-0.556	20.205	1042.585	-0.001577	-0.004148	-0.001102
6.1800	649.347	30.016	71.383	21.089	-0.562	20.205	1236.191	-0.002101	-0.004997	-0.001476
6.2000	697.303	32.904	77.277	23.697	-0.558	20.205	1327.486	-0.002303	-0.005409	-0.001659
6.2200	772.505	38.351	85.861	27.937	-0.558	20.206	1470.652	-0.002685	-0.006010	-0.001956
6.2400	849.541	43.723	94.380	32.330	-0.556	20.205	1617.308	-0.003061	-0.006607	-0.002263
6.2600	924.548	49.618	103.330	36.523	-0.559	20.205	1760.101	-0.003473	-0.007233	-0.002557
6.2800	992.461	54.601	112.320	40.355	-0.557	20.205	1889.391	-0.003822	-0.007862	-0.002825
6.3000	1109.803	62.220	123.744	46.641	-0.564	20.205	2112.780	-0.004355	-0.008662	-0.003265
6.3200	1117.182	63.749	126.079	47.623	-0.553	20.205	2126.827	-0.004462	-0.008826	-0.003334
6.3400	1205.068	70.007	136.054	52.561	-0.557	20.205	2294.140	-0.004901	-0.009524	-0.003679
6.3600	1262.251	73.853	142.545	55.738	-0.554	20.205	2403.002	-0.005170	-0.009978	-0.003902
6.3800	1295.058	77.542	148.008	58.148	-0.553	20.205	2465.458	-0.005428	-0.010361	-0.004070
6.4000	1358.343	81.977	154.512	61.433	-0.557	20.205	2585.936	-0.005738	-0.010816	-0.004300
6.4200	1358.779	82.412	155.054	61.630	-0.558	20.205	2586.765	-0.005769	-0.010854	-0.004314
6.4400	1432.388	87.717	163.751	66.063	-0.557	20.204	2726.898	-0.006140	-0.011463	-0.004624
6.4600	1417.239	86.944	162.638	65.405	-0.556	20.204	2698.059	-0.006086	-0.011385	-0.004578
6.4800	1421.988	87.576	163.361	65.840	-0.558	20.204	2707.100	-0.006130	-0.011435	-0.004609
6.5000	1416.127	87.437	163.389	65.712	-0.551	20.204	2695.942	-0.006121	-0.011437	-0.004600
6.5200	1412.715	87.506	163.290	65.687	-0.555	20.204	2689.447	-0.006125	-0.011430	-0.004598
6.5400	1397.101	87.058	162.932	65.206	-0.563	20.204	2659.721	-0.006094	-0.011405	-0.004564
6.5600	1341.090	83.507	157.663	62.960	-0.562	20.204	2553.091	-0.005845	-0.011036	-0.004407
6.5800	1308.073	81.569	154.900	61.265	-0.564	20.204	2490.234	-0.005710	-0.010843	-0.004289
6.6000	1273.522	78.722	151.078	59.566	-0.565	20.204	2424.459	-0.005511	-0.010575	-0.004170
6.6200	1213.709	75.143	144.660	56.535	-0.564	20.204	2310.591	-0.005260	-0.010126	-0.003957
6.6400	1137.125	69.853	136.097	52.253	-0.559	20.204	2164.793	-0.004890	-0.009527	-0.003658
6.6600	1075.448	65.700	129.372	48.970	-0.555	20.203	2047.377	-0.004599	-0.009056	-0.003428
6.6800	1017.228	62.234	123.316	45.632	-0.565	20.203	1936.541	-0.004356	-0.008632	-0.003194
6.7000	945.768	56.818	115.170	41.630	-0.562	20.203	1800.499	-0.003977	-0.008062	-0.002914
6.7200	877.208	52.047	107.499	37.748	-0.558	20.203	1669.979	-0.003643	-0.007525	-0.002642
6.7400	811.384	46.840	99.943	34.394	-0.560	20.203	1544.666	-0.003279	-0.006996	-0.002408
6.7600	721.394	40.988	90.240	29.578	-0.555	20.203	1373.348	-0.002869	-0.006317	-0.002070
6.7800	639.955	35.039	80.373	24.694	-0.553	20.203	1218.309	-0.002453	-0.005626	-0.001729
6.8000	541.218	28.092	68.604	19.431	-0.552	20.203	1030.340	-0.001966	-0.004802	-0.001360
6.8200	485.493	23.376	60.891	15.966	-0.557	20.203	924.253	-0.001636	-0.004262	-0.001118
6.8400	445.517	20.682	56.208	13.932	-0.563	20.203	848.150	-0.001448	-0.003935	-0.000975
6.8600	401.274	16.317	49.748	10.679	-0.560	20.203	763.922	-0.001142	-0.003482	-0.000748
6.8800	361.343	13.569	44.898	8.739	-0.559	20.203	687.904	-0.000950	-0.003143	-0.000612
6.9000	309.255	9.302	37.615	5.836	-0.552	20.203	588.741	-0.000651	-0.002633	-0.000409
6.9200	276.658	6.734	32.417	3.983	-0.548	20.203	526.686	-0.000471	-0.002269	-0.000279
6.9400	237.584	3.759	27.346	1.918	-0.551	20.202	452.299	-0.000263	-0.001914	-0.000134
6.9600	234.684	3.015	26.165	1.582	-0.557	20.203	446.777	-0.000211	-0.001832	-0.000111
6.9800	200.299	0.954	21.510	-0.520	-0.560	20.203	381.317	-0.000067	-0.001506	0.000036
7.0000	207.347	0.433	21.719	-0.267	-0.562	20.203	394.735	-0.000030	-0.001520	0.000019
7.0200	229.258	1.739	22.677	0.279	-0.562	20.202	436.449	-0.000122	-0.001587	-0.000020
7.0400	252.462	3.044	24.968	1.120	-0.568	20.202	480.623	-0.000213	-0.001748	-0.000078
7.0600	290.394	5.178	28.988	3.097	-0.564	20.202	552.835	-0.000362	-0.002029	-0.000217
7.0800	334.562	8.136	34.239	4.672	-0.553	20.201	636.921	-0.000570	-0.002397	-0.000327
7.1000	378.445	11.084	39.618	7.040	-0.569	20.202	720.463	-0.000776	-0.002773	-0.000493
7.1200	436.154	14.832	46.132	9.960	-0.567	20.201	830.326	-0.001038	-0.003229	-0.000697
7.1400	479.136	18.116	51.997	12.233	-0.568	20.202	912.151	-0.001268	-0.003640	-0.000856
7.1600	564.332	23.096	60.976	16.544	-0.571	20.202	1074.343	-0.001617	-0.004268	-0.001158
7.1800	604.908	26.774	66.199	18.856	-0.559	20.202	1151.590	-0.001874	-0.004634	-0.001320
7.2000	667.532	31.011	73.995	22.353	-0.561	20.202	1270.809	-0.002171	-0.005180	-0.001565
7.2200	785.565	39.501	87.084	28.710	-0.562	20.201	1495.514	-0.002765	-0.006096	-0.002010
7.2400	853.223	44.734	95.576	32.595	-0.553	20.201	1624.317	-0.003131	-0.006690	-0.002282
7.2600	918.912	49.028	102.786	36.144	-0.548	20.201	1749.372	-0.003432	-0.007195	-0.002530
7.2800	1001.538	55.005	112.335	40.664	-0.554	20.202	1906.672	-0.003850	-0.007863	-0.002846
7.3000	1065.664	59.370	119.490	44.118	-0.551	20.202	2028.751	-0.004156	-0.008364	-0.003088
7.3200	1132.932	64.564	127.303	48.409	-0.551	20.202	2156.811	-0.004519	-0.008911	-0.003389
7.3400	1204.151	70.316	136.266	52.409	-0.547	20.202	2292.395	-0.004922	-0.009539	-0.003669
7.3600	1266.579	74.834	143.393	56.018	-0.552	20.201	2411.242	-0.005238	-0.010037	-0.003921
7.3800	1303.294	77.909	148.007	58.471	-0.557	20.202	2481.136	-0.005454	-0.010360	-0.004093
7.4000	1360.387	81.667	154.582	61.630	-0.555	20.202	2589.827	-0.005717	-0.010821	-0.004314
7.4200	1360.747	82.720	156.025	62.514	-0.550	20.201	2590.513	-0.005790	-0.010922	-0.004376
7.4400	1403.007	85.471	160.278	64.307	-0.553	20.201	2670.965	-0.005983	-0.011219	-0.004502
7.4600	1429.322	87.687	163.474	66.206	-0.549	20.200	2721.062	-0.006138	-0.011443	-0.004634
7.4800	1438.594	89.119	165.376	67.132	-0.564	20.200	2738.714	-0.006238	-0.011576	-0.004699
7.5000	1423.656	88.643	165.030	66.472	-0.567	20.201	2710.276	-0.006205	-0.011552	-0.004653
7.5200	1408.613	87.409	164.265	66.064	-0.560	20.200	2681.637	-0.006119	-0.011499	-0.004624
7.5400	1364.489	85.752	160.640	64.350	-0.556	20.200	2597.637	-0.006003	-0.011245	-0.004505
7.5600	1367.345	84.967	160.042	64.221	-0.562	20.201	2603.073	-0.005948	-0.011203	-0.004496
7.5800	1312.055	82.089	154.955	61.756	-0.553	20.200	2497.816	-0.005746	-0.010847	-0.004323
7.6000	1254.797	78.244	149.494	58.877	-0.547	20.201	2388.811	-0.005477	-0.010465	-0.004121
7.6200	1219.676	75.620	145.159	56.760	-0.548	20.200	2321.949	-0.005293	-0.010161	-0.003973
7.6400	1171.059	72.577	140.280	54.247	-0.553	20.200	2229.395	-0.005080	-0.009820	-0.003797
7.6600	1102.589	67.383	132.334	50.420	-0.553	20.200	2099.047	-0.004717	-0.009263	-0.003529
7.6800	1027.628	62.893	124.369	46.569	-0.544	20.199	1956.339	-0.004403	-0.008706	-0.003260
7.7000	967.769	58.291	117.533	43.006	-0.546	20.199	1842.384	-0.004080	-0.008227	-0.003010
7.7200	862.766	51.175	106.195	37.238	-0.557	20.199	1642.485	-0.003582	-0.007434	-0.002607
7.7400	815.246	47.737	100.595	34.672	-0.557	20.199	1552.019	-0.003342	-0.007042	-0.002427
7.7600	729.088	41.310	90.489	30.264	-0.552	20.199	1387.997	-0.002892	-0.006334	-0.002118
7.7800	651.692	36.020	81.178	25.507	-0.568	20.199	1240.654	-0.002521	-0.005682	-0.001786
7.8000	579.991	30.532	73.204	21.552	-0.562	20.199	1104.155	-0.002137	-0.005124	-0.001509
7.8200	518.645	25.960	65.172	18.153	-0.554	20.199	987.368	-0.001817	-0.004562	-0.001271
7.8400	467.609	22.042	58.835	14.802	-0.561	20.199	890.207	-0.001543	-0.004118	-0.001036
7.8600	381.812	15.772	48.178	10.397	-0.556	20.199	726.871	-0.001104	-0.003372	-0.000728
7.8800	344.797	12.432	42.757	8.120	-0.562	20.199	656.404	-0.000870	-0.002993	-0.000568
7.9000	284.863	7.787	35.042	4.840	-0.562	20.199	542.307	-0.000545	-0.002453	-0.000339
7.9200	267.926	6.300	31.667	3.730	-0.559	20.198	510.063	-0.000441	-0.002217	-0.000261
7.9400	241.011	4.533	27.916	2.114	-0.559	20.199	458.822	-0.000317	-0.001954	-0.000148
7.9600	235.360	3.352	26.542	1.624	-0.557	20.199	448.065	-0.000235	-0.001858	-0.000114
7.9800	216.559	2.019	23.607	0.320	-0.560	20.199	412.273	-0.000141	-0.001652	-0.000022
8.0000	223.067	2.061	23.856	0.575	-0.552	20.198	424.662	-0.000144	-0.001670	-0.000040
8.0200	238.982	2.201	24.300	1.287	-0.553	20.198	454.960	-0.000154	-0.001701	-0.000090
8.0400	243.370	2.859	24.955	1.037	-0.551	20.197	463.314	-0.000200	-0.001747	-0.000073
8.0600	272.615	4.460	27.070	2.423	-0.550	20.198	518.990	-0.000312	-0.001895	-0.000170
8.0800	324.764	7.434	32.975	4.406	-0.561	20.197	618.267	-0.000520	-0.002308	-0.000308
8.1000	371.998	10.618	38.727	6.831	-0.578	20.197	708.189	-0.000743	-0.002711	-0.000478
8.1200	417.429	13.483	44.230	9.173	-0.565	20.197	794.678	-0.000944	-0.003096	-0.000642
8.1400	493.232	19.125	53.080	13.059	-0.569	20.198	938.988	-0.001339	-0.003716	-0.000914
8.1600	573.409	24.612	62.320	17.370	-0.560	20.197	1091.623	-0.001723	-0.004362	-0.001216
8.1800	635.296	28.991	69.507	20.612	-0.568	20.198	1209.440	-0.002029	-0.004865	-0.001443
8.2000	711.249	34.434	78.692	24.932	-0.555	20.197	1354.036	-0.002410	-0.005508	-0.001745
8.2200	796.040	39.979	88.183	29.228	-0.557	20.197	1515.455	-0.002798	-0.006173	-0.002046
8.2400	816.704	42.069	91.700	31.022	-0.562	20.197	1554.794	-0.002945	-0.006419	-0.002172
8.2600	933.144	50.192	104.695	36.917	-0.562	20.197	1776.466	-0.003513	-0.007329	-0.002584
8.2800	994.325	55.106	111.614	40.356	-0.570	20.197	1892.939	-0.003857	-0.007813	-0.002825
8.3000	1062.869	59.735	119.686	44.457	-0.568	20.197	2023.430	-0.004181	-0.008378	-0.003112
8.3200	1135.832	65.210	127.723	48.383	-0.576	20.197	2162.333	-0.004565	-0.008941	-0.003387
8.3400	1187.605	69.263	134.262	51.875	-0.572	20.197	2260.895	-0.004848	-0.009398	-0.003631
8.3600	1224.890	72.366	139.085	54.119	-0.567	20.197	2331.877	-0.005066	-0.009736	-0.003788
8.3800	1310.703	78.146	148.368	58.808	-0.571	20.197	2495.241	-0.005470	-0.010386	-0.004117
8.4000	1373.010	83.168	155.943	62.191	-0.565	20.196	2613.859	-0.005822	-0.010916	-0.004353
8.4200	1370.546	83.605	156.719	62.541	-0.562	20.196	2609.167	-0.005852	-0.010970	-0.004378
8.4400	1426.271	87.969	163.433	65.838	-0.564	20.196	2715.254	-0.006158	-0.011440	-0.004609
8.4600	1414.278	87.365	162.958	65.601	-0.569	20.196	2692.423	-0.006116	-0.011407	-0.004592
8.4800	1421.868	87.677	163.307	65.895	-0.553	20.196	2706.871	-0.006137	-0.011432	-0.004613
8.5000	1434.462	89.289	165.420	66.865	-0.566	20.196	2730.846	-0.006250	-0.011579	-0.004681
8.5200	1419.538	88.337	164.529	66.429	-0.560	20.196	2702.436	-0.006184	-0.011517	-0.004650
8.5400	1397.522	87.226	163.460	65.700	-0.562	20.196	2660.522	-0.006106	-0.011442	-0.004599
8.5600	1324.694	83.113	156.816	62.219	-0.559	20.196	2521.877	-0.005818	-0.010977	-0.004355
8.5800	1326.452	82.834	156.068	62.219	-0.565	20.196	2525.225	-0.005798	-0.010925	-0.004355
8.6000	1252.483	78.567	149.383	58.598	-0.573	20.196	2384.405	-0.005500	-0.010457	-0.004102
8.6200	1237.244	76.911	146.560	57.490	-0.576	20.195	2355.394	-0.005384	-0.010259	-0.004024
8.6400	1158.194	71.596	138.698	53.375	-0.555	20.195	2204.905	-0.005012	-0.009709	-0.003736
8.6600	1097.600	67.721	132.096	50.181	-0.569	20.195	2089.548	-0.004740	-0.009247	-0.003513
8.6800	1025.584	62.582	123.967	46.333	-0.564	20.195	1952.448	-0.004381	-0.008678	-0.003243
8.7000	966.116	58.654	117.683	42.994	-0.554	20.196	1839.237	-0.004106	-0.008238	-0.003010
8.7200	875.720	52.004	107.623	38.140	-0.559	20.195	1667.147	-0.003640	-0.007534	-0.002670
8.7400	788.060	46.082	97.799	33.440	-0.566	20.195	1500.263	-0.003226	-0.006846	-0.002341
8.7600	727.240	41.029	90.530	30.070	-0.543	20.195	1384.478	-0.002872	-0.006337	-0.002105
8.7800	651.151	35.430	81.206	25.760	-0.556	20.195	1239.624	-0.002480	-0.005684	-0.001803
8.8000	598.371	31.839	74.703	22.410	-0.550	20.194	1139.145	-0.002229	-0.005229	-0.001569
8.8200	512.318	25.665	64.684	17.833	-0.556	20.194	975.323	-0.001797	-0.004528	-0.001248
8.8400	455.030	21.539	57.347	14.592	-0.550	20.194	866.261	-0.001508	-0.004014	-0.001021
8.8600	389.431	16.304	48.996	10.890	-0.554	20.195	741.377	-0.001141	-0.003430	-0.000762
8.8800	339.462	12.320	42.171	7.712	-0.554	20.195	646.248	-0.000862	-0.002952	-0.000540
8.9000	302.747	9.514	37.169	6.018	-0.561	20.195	576.353	-0.000666	-0.002602	-0.000421
8.9200	270.316	6.608	32.043	3.660	-0.574	20.195	514.612	-0.000463	-0.002243	-0.000256
8.9400	240.184	4.529	27.847	2.199	-0.559	20.194	457.249	-0.000317	-0.001949	-0.000154
8.9600	218.603	2.765	24.759	0.840	-0.557	20.194	416.164	-0.000194	-0.001733	-0.000059
8.9800	221.023	2.077	24.176	0.840	-0.556	20.194	420.771	-0.000145	-0.001692	-0.000059
9.0000	221.594	1.977	24.050	0.769	-0.553	20.193	421.858	-0.000138	-0.001684	-0.000054
9.0200	232.865	2.497	24.508	0.897	-0.556	20.194	443.316	-0.000175	-0.001716	-0.000063
9.0400	243.145	2.635	24.870	1.092	-0.572	20.194	462.885	-0.000184	-0.001741	-0.000076
9.0600	281.422	5.416	28.472	2.509	-0.556	20.194	535.755	-0.000379	-0.001993	-0.000176
9.0800	326.162	7.451	33.210	4.475	-0.562	20.194	620.928	-0.000522	-0.002325	-0.000313
9.1000	369.098	10.634	38.616	6.873	-0.564	20.193	702.667	-0.000744	-0.002703	-0.000481
9.1200	425.184	14.088	45.245	9.933	-0.565	20.193	809.441	-0.000986	-0.003167	-0.000695
9.1400	485.838	18.185	52.358	12.724	-0.566	20.194	924.911	-0.001273	-0.003665	-0.000891
9.1600	536.589	22.130	58.682	15.475	-0.560	20.193	1021.528	-0.001549	-0.004108	-0.001083
9.1800	627.752	28.119	68.850	20.274	-0.568	20.194	1195.078	-0.001968	-0.004820	-0.001419
9.2000	689.128	32.865	76.440	23.728	-0.558	20.193	1311.922	-0.002301	-0.005351	-0.001661
9.2200	762.902	38.014	84.943	27.712	-0.566	20.193	1452.370	-0.002661	-0.005946	-0.001940
9.2400	850.533	43.991	94.897	32.638	-0.570	20.193	1619.196	-0.003079	-0.006643	-0.002285
9.2600	909.880	49.224	102.412	35.863	-0.562	20.193	1732.178	-0.003446	-0.007169	-0.002510
9.2800	976.847	53.899	109.903	39.670	-0.562	20.193	1859.665	-0.003773	-0.007693	-0.002777
9.3000	1054.228	59.721	118.268	44.133	-0.560	20.193	2006.979	-0.004180	-0.008279	-0.003089
9.3200	1116.896	63.876	125.926	47.946	-0.553	20.193	2126.284	-0.004471	-0.008815	-0.003356
9.3400	1201.311	69.782	135.347	52.309	-0.553	20.193	2286.987	-0.004885	-0.009474	-0.003662
9.3600	1266.414	75.397	143.421	56.228	-0.556	20.193	2410.927	-0.005278	-0.010039	-0.003936
9.3800	1303.444	78.175	147.731	58.483	-0.564	20.193	2481.422	-0.005472	-0.010341	-0.004094
9.4000	1342.037	81.416	152.591	60.689	-0.564	20.193	2554.893	-0.005699	-0.010681	-0.004248
9.4200	1378.315	84.251	157.330	63.018	-0.557	20.193	2623.959	-0.005898	-0.011013	-0.004411
9.4400	1382.283	84.602	157.831	63.268	-0.562	20.193	2631.512	-0.005922	-0.011048	-0.004429
9.4600	1430.509	88.742	164.307	66.107	-0.550	20.193	2723.322	-0.006212	-0.011501	-0.004627
9.4800	1416.473	87.311	163.361	65.867	-0.557	20.192	2696.600	-0.006112	-0.011435	-0.004611
9.5000	1435.574	89.401	165.114	66.893	-0.566	20.193	2732.964	-0.006258	-0.011558	-0.004682
9.5200	1415.391	88.337	164.641	66.515	-0.567	20.193	2694.540	-0.006184	-0.011525	-0.004656
9.5400	1384.898	86.692	162.125	65.180	-0.568	20.192	2636.490	-0.006068	-0.011349	-0.004563
9.5600	1376.196	86.497	161.905	65.081	-0.566	20.192	2619.925	-0.006055	-0.011333	-0.004556
9.5800	1314.415	82.116	155.637	62.233	-0.563	20.192	2502.308	-0.005748	-0.010895	-0.004356
9.6000	1260.538	78.919	149.856	59.060	-0.562	20.192	2399.740	-0.005524	-0.010490	-0.004134
9.6200	1206.466	75.661	144.353	56.565	-0.566	20.192	2296.801	-0.005296	-0.010105	-0.003960
9.6400	1157.954	71.945	138.783	53.798	-0.565	20.192	2204.447	-0.005036	-0.009715	-0.003766
9.6600	1116.836	69.110	134.152	51.498	-0.569	20.192	2126.169	-0.004838	-0.009391	-0.003605
9.6800	1028.965	63.104	124.536	46.487	-0.557	20.192	1958.885	-0.004417	-0.008718	-0.003254
9.7000	937.051	56.354	114.310	41.868	-0.559	20.192	1783.905	-0.003945	-0.008002	-0.002931
9.7200	875.254	52.622	107.471	38.166	-0.559	20.192	1666.260	-0.003684	-0.007523	-0.002672
9.7400	764.630	44.439	95.132	32.316	-0.564	20.191	1455.660	-0.003111	-0.006659	-0.002262
9.7600	712.737	40.525	88.630	29.116	-0.570	20.191	1356.869	-0.002837	-0.006204	-0.002038
9.7800	649.167	36.117	81.233	25.662	-0.556	20.191	1235.847	-0.002528	-0.005686	-0.001796
9.8000	601.061	32.036	74.909	22.577	-0.566	20.191	1144.266	-0.002243	-0.005244	-0.001580
9.8200	516.045	26.112	65.115	18.142	-0.568	20.191	982.418	-0.001828	-0.004558	-0.001270
9.8400	461.928	21.680	57.748	14.802	-0.562	20.190	879.393	-0.001518	-0.004042	-0.001036
9.8600	409.389	18.017	51.579	11.940	-0.560	20.191	779.371	-0.001261	-0.003611	-0.000836
9.8800	315.206	10.946	39.549	6.957	-0.560	20.191	600.071	-0.000766	-0.002768	-0.000487
9.9000	310.487	10.048	37.558	6.229	-0.561	20.191	591.087	-0.000703	-0.002629	-0.000436
9.9200	260.998	6.621	31.263	3.378	-0.564	20.191	496.874	-0.000463	-0.002188	-0.000236
9.9400	246.661	4.588	28.486	2.593	-0.562	20.191	469.580	-0.000321	-0.001994	-0.000181
9.9600	215.447	2.413	23.996	0.743	-0.551	20.191	410.156	-0.000169	-0.001680	-0.000052
9.9800	222.766	2.302	24.244	0.601	-0.548	20.191	424.089	-0.000161	-0.001697	-0.000042
