# Supplementary material for: Evaluation of a Cold-Mixed High-Performance Polyurethane Mixture
Source: Hindawi journal article supplement (doi:10.1155/2019/1507971), 2019-11-07
Supplement: f1 [file 1507971.f1.zip › 1507971.f1/dynamic modulus data/PUM/specimen2/temp20/zhs-2-20_2Hz.csv]

Test Information
****************
Project name	zhs
Operator name	2
Target test temperature	20
Target confining stress	0
Average dynamic strain range from 75 to 125 micro-strain
Contact stress	5
Initial modulus	1000
Axial gauge length	70
Comments
Specimen information
********************
Identification	zhs-2-20
Dimensions	Point 1	Point 2	Point 3	Point 4	Point 5	Point 6	Average	Std Dev.
Diameter (mm)	49.2	49.3	49.2				49.23	0.058
Height (mm)	100.8	101.0	100.8				100.87	0.115
Cross-sectional area (mm�)	1903.7
Conditioning time
Properties/Comments
Test Data	2Hz
*********
Test date and time	Mon	Apr 1	2019	2:34 PM
Dynamic modulus (MPa)	12565
Phase angle (Degrees)	4.02
Average temperature (�C)	20.2
Average confining pressure (kPa)	-0.6
Average micro-strain	98
Load drift (%)	0.0
Load standard error (%)	1.7
Average deformation drift (%)	-2.0
Average deformation standard error (%)	1.9
Deformation uniformity (%)	32.2
Phase uniformity (Degrees)	0.1
Conditioning Cycles
Time (sec)	Axial stress (kPa)	Axial micro-strain #1	Axial micro-strain #2	Axial micro-strain #3	Confining pressure (kPa)	Temperature (�C)	Load (N)	Displacement #1 (mm)	Displacement #2 (mm)	Displacement #3 (mm)
0.0000	234.954	-0.072	24.331	1.724	-0.576	20.229	447.292	0.000005	-0.001703	-0.000121
0.0100	208.760	-1.349	19.800	0.198	-0.569	20.234	397.425	0.000094	-0.001386	-0.000014
0.0200	214.936	-0.912	19.827	-0.140	-0.554	20.230	409.184	0.000064	-0.001388	0.000010
0.0300	222.526	-1.095	19.658	-0.014	-0.561	20.234	423.632	0.000077	-0.001376	0.000001
0.0400	266.003	0.727	24.024	1.524	-0.562	20.230	506.401	-0.000051	-0.001682	-0.000107
0.0500	308.248	3.982	29.153	3.421	-0.558	20.235	586.824	-0.000279	-0.002041	-0.000239
0.0600	356.339	6.987	33.866	5.683	-0.565	20.230	678.377	-0.000489	-0.002371	-0.000398
0.0700	381.105	8.432	37.713	6.677	-0.570	20.235	725.527	-0.000590	-0.002640	-0.000467
0.0800	433.975	11.869	43.827	9.343	-0.562	20.230	826.178	-0.000831	-0.003068	-0.000654
0.0900	507.630	16.767	52.467	13.411	-0.558	20.235	966.396	-0.001174	-0.003673	-0.000939
0.1000	555.991	19.673	57.708	16.023	-0.556	20.230	1058.464	-0.001377	-0.004040	-0.001122
0.1100	615.293	23.445	65.421	18.813	-0.572	20.234	1171.360	-0.001641	-0.004579	-0.001317
0.1200	679.284	28.709	72.618	22.480	-0.556	20.230	1293.182	-0.002010	-0.005083	-0.001574
0.1300	735.265	32.932	79.080	25.565	-0.566	20.235	1399.755	-0.002305	-0.005536	-0.001790
0.1400	799.075	37.550	86.503	28.907	-0.568	20.230	1521.235	-0.002629	-0.006055	-0.002023
0.1500	847.362	41.930	92.129	31.823	-0.560	20.235	1613.159	-0.002935	-0.006449	-0.002228
0.1600	910.932	46.026	99.288	34.950	-0.559	20.230	1734.180	-0.003222	-0.006950	-0.002447
0.1700	951.433	49.101	104.318	37.352	-0.575	20.235	1811.285	-0.003437	-0.007302	-0.002615
0.1800	1010.104	53.098	111.154	40.537	-0.570	20.230	1922.979	-0.003717	-0.007781	-0.002838
0.1900	1043.422	55.259	115.004	42.585	-0.562	20.234	1986.408	-0.003868	-0.008050	-0.002981
0.2000	1085.051	57.910	119.770	45.100	-0.568	20.230	2065.659	-0.004054	-0.008384	-0.003157
0.2100	1095.255	59.860	121.061	45.675	-0.568	20.235	2085.085	-0.004190	-0.008474	-0.003197
0.2200	1138.763	63.778	126.663	48.213	-0.566	20.230	2167.912	-0.004464	-0.008866	-0.003375
0.2300	1135.592	63.034	126.482	48.577	-0.567	20.235	2161.875	-0.004412	-0.008854	-0.003400
0.2400	1142.820	63.917	127.734	48.592	-0.577	20.230	2175.636	-0.004474	-0.008941	-0.003401
0.2500	1177.686	66.541	131.608	50.924	-0.570	20.235	2242.012	-0.004658	-0.009213	-0.003565
0.2600	1162.027	65.867	130.887	50.670	-0.566	20.230	2212.200	-0.004611	-0.009162	-0.003547
0.2700	1145.841	64.059	129.621	50.208	-0.561	20.235	2181.387	-0.004484	-0.009073	-0.003515
0.2800	1113.966	62.627	127.539	48.872	-0.562	20.230	2120.705	-0.004384	-0.008928	-0.003421
0.2900	1082.782	61.433	124.537	47.524	-0.568	20.235	2061.338	-0.004300	-0.008718	-0.003327
0.3000	1051.733	59.258	121.382	45.870	-0.563	20.229	2002.230	-0.004148	-0.008497	-0.003211
0.3100	997.631	56.001	115.963	43.204	-0.556	20.235	1899.233	-0.003920	-0.008117	-0.003024
0.3200	966.116	53.872	112.583	41.504	-0.561	20.230	1839.237	-0.003771	-0.007881	-0.002905
0.3300	920.129	50.236	108.041	39.065	-0.552	20.234	1751.690	-0.003517	-0.007563	-0.002735
0.3400	861.248	46.194	101.495	35.947	-0.554	20.229	1639.595	-0.003234	-0.007105	-0.002516
0.3500	806.364	42.686	95.422	33.187	-0.566	20.234	1535.110	-0.002988	-0.006680	-0.002323
0.3600	743.470	38.461	87.574	29.828	-0.562	20.230	1415.377	-0.002692	-0.006130	-0.002088
0.3700	668.103	33.058	79.955	25.663	-0.564	20.234	1271.896	-0.002314	-0.005597	-0.001796
0.3800	617.953	29.649	73.830	23.139	-0.558	20.230	1176.424	-0.002075	-0.005168	-0.001620
0.3900	573.409	26.492	68.589	20.288	-0.564	20.234	1091.623	-0.001854	-0.004801	-0.001420
0.4000	508.110	22.100	60.946	17.106	-0.564	20.229	967.312	-0.001547	-0.004266	-0.001197
0.4100	454.234	18.563	54.553	13.750	-0.569	20.234	864.744	-0.001299	-0.003819	-0.000962
0.4200	397.051	14.774	47.064	10.651	-0.573	20.229	755.882	-0.001034	-0.003294	-0.000746
0.4300	351.545	10.411	41.421	8.330	-0.577	20.235	669.250	-0.000729	-0.002899	-0.000583
0.4400	320.992	8.447	36.698	6.398	-0.562	20.229	611.086	-0.000591	-0.002569	-0.000448
0.4500	283.135	5.498	31.681	4.319	-0.578	20.234	539.017	-0.000385	-0.002218	-0.000302
0.4600	254.311	3.157	27.694	3.013	-0.558	20.230	484.142	-0.000221	-0.001939	-0.000211
0.4700	233.947	1.135	25.010	1.721	-0.565	20.235	445.375	-0.000079	-0.001751	-0.000120
0.4800	211.134	-0.718	21.774	0.393	-0.568	20.230	401.945	0.000050	-0.001524	-0.000028
0.4900	205.889	-1.586	20.619	0.014	-0.566	20.235	391.960	0.000111	-0.001443	-0.000001
0.5000	207.212	-1.896	19.979	0.112	-0.553	20.229	394.478	0.000133	-0.001399	-0.000008
0.5100	208.925	-1.433	20.398	0.098	-0.563	20.234	397.739	0.000100	-0.001428	-0.000007
0.5200	217.837	-0.617	20.870	0.099	-0.563	20.229	414.705	0.000043	-0.001461	-0.000007
0.5300	231.167	-0.548	21.287	0.406	-0.556	20.234	440.083	0.000038	-0.001490	-0.000028
0.5400	273.247	2.736	25.359	2.199	-0.552	20.230	520.191	-0.000192	-0.001775	-0.000154
0.5500	304.987	4.615	29.501	3.139	-0.563	20.235	580.616	-0.000323	-0.002065	-0.000220
0.5600	328.476	5.375	31.710	4.630	-0.560	20.230	625.334	-0.000376	-0.002220	-0.000324
0.5700	385.554	9.819	39.103	7.434	-0.568	20.234	733.995	-0.000687	-0.002737	-0.000520
0.5800	432.442	13.119	44.757	9.738	-0.568	20.230	823.259	-0.000918	-0.003133	-0.000682
0.5900	496.839	16.993	51.414	12.892	-0.566	20.235	945.854	-0.001190	-0.003599	-0.000902
0.6000	546.628	20.587	57.390	15.475	-0.566	20.230	1040.640	-0.001441	-0.004017	-0.001083
0.6100	624.415	25.383	66.588	19.953	-0.565	20.235	1188.726	-0.001777	-0.004661	-0.001397
0.6200	651.587	27.629	70.188	21.343	-0.572	20.230	1240.454	-0.001934	-0.004913	-0.001494
0.6300	733.657	32.554	79.677	25.760	-0.563	20.235	1396.694	-0.002279	-0.005577	-0.001803
0.6400	800.774	37.507	87.684	29.325	-0.570	20.230	1524.467	-0.002625	-0.006138	-0.002053
0.6500	858.062	41.802	94.118	32.525	-0.570	20.235	1633.530	-0.002926	-0.006588	-0.002277
0.6600	892.041	44.060	97.910	34.533	-0.570	20.230	1698.217	-0.003084	-0.006854	-0.002417
0.6700	973.766	49.814	106.567	38.798	-0.561	20.235	1853.800	-0.003487	-0.007460	-0.002716
0.6800	1000.231	52.733	110.905	40.369	-0.557	20.230	1904.182	-0.003691	-0.007763	-0.002826
0.6900	1027.613	54.965	113.975	42.488	-0.557	20.235	1956.310	-0.003848	-0.007978	-0.002974
0.7000	1071.931	58.052	119.061	44.552	-0.560	20.230	2040.682	-0.004064	-0.008334	-0.003119
0.7100	1097.600	60.663	121.688	46.249	-0.562	20.235	2089.548	-0.004246	-0.008518	-0.003237
0.7200	1125.207	62.318	125.467	47.889	-0.555	20.230	2142.105	-0.004362	-0.008783	-0.003352
0.7300	1141.723	63.272	127.553	49.182	-0.559	20.235	2173.548	-0.004429	-0.008929	-0.003443
0.7400	1153.536	64.522	129.593	49.787	-0.552	20.230	2196.035	-0.004517	-0.009072	-0.003485
0.7500	1154.768	64.956	129.817	49.828	-0.561	20.235	2198.381	-0.004547	-0.009087	-0.003488
0.7600	1156.226	65.153	130.067	50.293	-0.573	20.230	2201.157	-0.004561	-0.009105	-0.003520
0.7700	1143.181	64.816	130.136	49.870	-0.558	20.235	2176.323	-0.004537	-0.009109	-0.003491
0.7800	1136.042	64.648	129.551	49.928	-0.553	20.230	2162.733	-0.004525	-0.009069	-0.003495
0.7900	1062.373	60.283	122.537	46.768	-0.558	20.235	2022.486	-0.004220	-0.008578	-0.003274
0.8000	1029.356	58.207	119.521	44.582	-0.554	20.230	1959.629	-0.004075	-0.008366	-0.003121
0.8100	1017.228	57.884	118.130	43.879	-0.569	20.236	1936.541	-0.004052	-0.008269	-0.003072
0.8200	967.078	53.953	112.918	41.575	-0.561	20.230	1841.068	-0.003777	-0.007904	-0.002910
0.8300	900.923	49.899	105.722	38.011	-0.564	20.235	1715.126	-0.003493	-0.007401	-0.002661
0.8400	860.136	46.588	101.495	36.045	-0.558	20.230	1637.478	-0.003261	-0.007105	-0.002523
0.8500	817.560	43.695	96.354	33.622	-0.557	20.235	1556.425	-0.003059	-0.006745	-0.002354
0.8600	761.790	40.119	90.240	30.796	-0.554	20.230	1450.253	-0.002808	-0.006317	-0.002156
0.8700	693.606	35.151	83.211	27.207	-0.556	20.235	1320.448	-0.002461	-0.005825	-0.001904
0.8800	634.785	31.432	76.358	24.132	-0.556	20.230	1208.467	-0.002200	-0.005345	-0.001689
0.8900	580.713	27.095	69.770	21.158	-0.557	20.235	1105.528	-0.001897	-0.004884	-0.001481
0.9000	514.227	22.297	61.977	17.510	-0.550	20.230	978.956	-0.001561	-0.004338	-0.001226
0.9100	452.851	18.282	54.666	14.171	-0.543	20.234	862.112	-0.001280	-0.003827	-0.000992
0.9200	401.965	13.723	48.092	11.099	-0.552	20.229	765.238	-0.000961	-0.003366	-0.000777
0.9300	372.299	11.322	44.147	9.581	-0.559	20.235	708.761	-0.000793	-0.003090	-0.000671
0.9400	322.164	7.761	37.781	7.139	-0.564	20.230	613.317	-0.000543	-0.002645	-0.000500
0.9500	277.214	4.488	31.571	4.263	-0.561	20.234	527.744	-0.000314	-0.002210	-0.000298
0.9600	253.800	2.707	27.595	3.181	-0.560	20.230	483.170	-0.000189	-0.001932	-0.000223
0.9700	218.588	0.418	23.622	1.119	-0.562	20.235	416.136	-0.000029	-0.001654	-0.000078
0.9800	213.058	-0.212	22.009	0.715	-0.562	20.230	405.607	0.000015	-0.001541	-0.000050
0.9900	202.237	-1.489	20.341	0.141	-0.564	20.235	385.008	0.000104	-0.001424	-0.000010
1.0000	203.800	-1.671	19.589	-0.099	-0.565	20.230	387.983	0.000117	-0.001371	0.000007
1.0100	206.596	-0.956	19.967	-0.084	-0.566	20.235	393.305	0.000067	-0.001398	0.000006
1.0200	214.651	-0.366	20.147	-0.042	-0.559	20.230	408.640	0.000026	-0.001410	0.000003
1.0300	268.437	2.105	24.355	2.241	-0.552	20.235	511.036	-0.000147	-0.001705	-0.000157
1.0400	291.416	4.223	28.027	3.237	-0.563	20.230	554.781	-0.000296	-0.001962	-0.000227
1.0500	305.227	4.488	29.401	3.617	-0.565	20.235	581.074	-0.000314	-0.002058	-0.000253
1.0600	354.655	7.829	35.197	5.837	-0.566	20.230	675.173	-0.000548	-0.002464	-0.000409
1.0700	390.799	10.031	39.869	7.685	-0.560	20.235	743.980	-0.000702	-0.002791	-0.000538
1.0800	437.086	13.329	44.703	10.061	-0.554	20.230	832.100	-0.000933	-0.003129	-0.000704
1.0900	490.632	16.320	51.290	12.668	-0.562	20.235	934.038	-0.001142	-0.003590	-0.000887
1.1000	550.896	20.613	58.307	15.969	-0.565	20.230	1048.765	-0.001443	-0.004081	-0.001118
1.1100	602.459	24.653	64.644	18.546	-0.569	20.235	1146.927	-0.001726	-0.004525	-0.001298
1.1200	671.109	29.158	72.078	22.690	-0.558	20.230	1277.618	-0.002041	-0.005045	-0.001588
1.1300	691.758	30.955	75.177	23.587	-0.570	20.235	1316.929	-0.002167	-0.005262	-0.001651
1.1400	777.420	37.200	84.794	28.318	-0.552	20.230	1480.007	-0.002604	-0.005936	-0.001982
1.1500	843.575	41.676	92.449	31.909	-0.557	20.235	1605.949	-0.002917	-0.006471	-0.002234
1.1600	880.334	44.369	96.672	34.057	-0.553	20.230	1675.930	-0.003106	-0.006767	-0.002384
1.1700	948.413	48.791	104.025	37.506	-0.558	20.235	1805.534	-0.003415	-0.007282	-0.002625
1.1800	994.340	52.678	109.736	40.187	-0.549	20.231	1892.967	-0.003687	-0.007682	-0.002813
1.1900	1040.973	55.483	115.019	42.754	-0.553	20.235	1981.745	-0.003884	-0.008051	-0.002993
1.2000	1089.364	58.894	120.480	45.535	-0.558	20.230	2073.870	-0.004123	-0.008434	-0.003187
1.2100	1104.843	61.320	123.023	46.695	-0.561	20.235	2103.338	-0.004292	-0.008612	-0.003269
1.2200	1119.075	62.065	124.869	47.610	-0.565	20.230	2130.432	-0.004345	-0.008741	-0.003333
1.2300	1144.428	63.189	127.998	49.112	-0.568	20.235	2178.698	-0.004423	-0.008960	-0.003438
1.2400	1143.767	63.608	127.943	49.308	-0.568	20.230	2177.439	-0.004453	-0.008956	-0.003452
1.2500	1162.192	65.376	130.274	50.460	-0.568	20.235	2212.515	-0.004576	-0.009119	-0.003532
1.2600	1156.135	65.319	130.526	50.489	-0.572	20.231	2200.985	-0.004572	-0.009137	-0.003534
1.2700	1144.113	64.773	130.123	50.082	-0.570	20.235	2178.097	-0.004534	-0.009109	-0.003506
1.2800	1125.252	63.848	128.941	49.422	-0.568	20.231	2142.191	-0.004469	-0.009026	-0.003460
1.2900	1090.236	61.671	125.677	47.903	-0.560	20.236	2075.529	-0.004317	-0.008797	-0.003353
1.3000	1036.179	58.978	120.270	45.311	-0.564	20.230	1972.618	-0.004128	-0.008419	-0.003172
1.3100	1019.798	57.814	118.405	44.680	-0.568	20.235	1941.433	-0.004047	-0.008288	-0.003128
1.3200	977.778	54.852	114.128	41.938	-0.564	20.230	1861.439	-0.003840	-0.007989	-0.002936
1.3300	931.025	51.386	109.237	39.738	-0.552	20.235	1772.432	-0.003597	-0.007647	-0.002782
1.3400	868.101	47.331	102.705	36.200	-0.556	20.230	1652.641	-0.003313	-0.007189	-0.002534
1.3500	803.283	42.714	95.549	33.482	-0.556	20.234	1529.245	-0.002990	-0.006688	-0.002344
1.3600	749.422	38.659	88.825	30.405	-0.558	20.230	1426.706	-0.002706	-0.006218	-0.002128
1.3700	684.334	34.056	82.026	26.884	-0.565	20.235	1302.795	-0.002384	-0.005742	-0.001882
1.3800	620.929	30.338	74.480	23.264	-0.561	20.230	1182.089	-0.002124	-0.005214	-0.001628
1.3900	576.625	26.297	69.033	20.989	-0.572	20.235	1097.746	-0.001841	-0.004832	-0.001469
1.4000	515.039	21.987	61.947	17.678	-0.568	20.231	980.501	-0.001539	-0.004336	-0.001237
1.4100	449.184	18.087	53.943	14.028	-0.565	20.235	855.131	-0.001266	-0.003776	-0.000982
1.4200	413.206	14.650	48.703	11.576	-0.562	20.231	786.638	-0.001025	-0.003409	-0.000810
1.4300	364.604	11.491	43.631	9.441	-0.581	20.235	694.113	-0.000804	-0.003054	-0.000661
1.4400	334.758	9.343	39.325	7.391	-0.560	20.230	637.293	-0.000654	-0.002753	-0.000517
1.4500	286.682	4.994	32.419	4.854	-0.574	20.235	545.769	-0.000350	-0.002269	-0.000340
1.4600	258.759	3.070	28.235	3.518	-0.570	20.230	492.611	-0.000215	-0.001976	-0.000246
1.4700	231.182	0.926	24.927	2.228	-0.578	20.235	440.111	-0.000065	-0.001745	-0.000156
1.4800	219.580	0.406	22.886	1.178	-0.571	20.231	418.024	-0.000028	-0.001602	-0.000082
1.4900	210.082	-1.151	21.538	0.629	-0.581	20.235	399.942	0.000081	-0.001508	-0.000044
1.5000	205.589	-1.405	20.674	0.181	-0.568	20.231	391.388	0.000098	-0.001447	-0.000013
1.5100	205.634	-1.699	20.341	0.124	-0.578	20.235	391.474	0.000119	-0.001424	-0.000009
1.5200	210.728	-1.838	20.340	0.322	-0.566	20.230	401.173	0.000129	-0.001424	-0.000023
1.5300	216.003	-1.587	20.897	0.393	-0.576	20.235	411.215	0.000111	-0.001463	-0.000028
1.5400	249.472	0.659	23.233	1.091	-0.574	20.230	474.930	-0.000046	-0.001626	-0.000076
1.5500	312.531	4.658	30.207	3.984	-0.574	20.235	594.978	-0.000326	-0.002114	-0.000279
1.5600	343.820	6.481	34.085	5.557	-0.568	20.230	654.545	-0.000454	-0.002386	-0.000389
1.5700	379.933	8.573	38.478	7.448	-0.569	20.235	723.295	-0.000600	-0.002693	-0.000521
1.5800	446.479	13.063	45.661	10.496	-0.561	20.231	849.981	-0.000914	-0.003196	-0.000735
1.5900	489.761	15.925	51.469	12.750	-0.558	20.235	932.379	-0.001115	-0.003603	-0.000893
1.6000	555.179	21.498	58.999	16.290	-0.570	20.230	1056.919	-0.001505	-0.004130	-0.001140
1.6100	600.475	24.416	64.100	18.800	-0.581	20.234	1143.150	-0.001709	-0.004487	-0.001316
1.6200	673.663	29.537	72.635	22.704	-0.569	20.230	1282.482	-0.002068	-0.005084	-0.001589
1.6300	715.563	32.724	77.345	24.905	-0.573	20.235	1362.247	-0.002291	-0.005414	-0.001743
1.6400	795.108	38.573	87.265	29.396	-0.572	20.230	1513.681	-0.002700	-0.006109	-0.002058
1.6500	836.481	41.452	91.503	31.794	-0.565	20.236	1592.445	-0.002902	-0.006405	-0.002226
1.6600	919.829	46.994	100.872	35.960	-0.560	20.230	1751.118	-0.003290	-0.007061	-0.002517
1.6700	962.179	50.810	106.235	38.223	-0.578	20.235	1831.741	-0.003557	-0.007436	-0.002676
1.6800	1011.126	53.785	112.043	41.306	-0.571	20.231	1924.925	-0.003765	-0.007843	-0.002891
1.6900	1036.885	55.862	115.088	42.628	-0.562	20.235	1973.963	-0.003910	-0.008056	-0.002984
1.7000	1076.740	59.104	119.480	44.792	-0.567	20.230	2049.837	-0.004137	-0.008364	-0.003135
1.7100	1090.627	60.647	121.771	46.137	-0.573	20.236	2076.273	-0.004245	-0.008524	-0.003230
1.7200	1118.760	62.458	124.884	47.763	-0.554	20.231	2129.831	-0.004372	-0.008742	-0.003343
1.7300	1135.291	62.486	127.138	48.677	-0.566	20.235	2161.303	-0.004374	-0.008900	-0.003407
1.7400	1147.765	64.646	128.664	49.533	-0.558	20.231	2185.049	-0.004525	-0.009007	-0.003467
1.7500	1151.386	64.845	129.372	49.913	-0.557	20.235	2191.944	-0.004539	-0.009056	-0.003494
1.7600	1149.598	65.027	129.636	50.039	-0.553	20.231	2188.540	-0.004552	-0.009075	-0.003503
1.7700	1145.991	65.351	130.011	50.110	-0.570	20.235	2181.673	-0.004575	-0.009101	-0.003508
1.7800	1138.642	65.041	129.093	49.603	-0.566	20.231	2167.683	-0.004553	-0.009037	-0.003472
1.7900	1106.241	62.782	127.023	48.479	-0.564	20.235	2105.999	-0.004395	-0.008892	-0.003394
1.8000	1049.689	59.427	122.008	46.360	-0.558	20.230	1998.339	-0.004160	-0.008541	-0.003245
1.8100	992.145	55.820	115.950	42.711	-0.556	20.235	1888.790	-0.003907	-0.008116	-0.002990
1.8200	977.057	54.304	113.934	42.165	-0.556	20.231	1860.065	-0.003801	-0.007975	-0.002952
1.8300	904.199	49.688	106.415	38.195	-0.555	20.235	1721.363	-0.003478	-0.007449	-0.002674
1.8400	864.344	46.922	102.606	35.976	-0.554	20.230	1645.489	-0.003285	-0.007182	-0.002518
1.8500	789.517	41.943	93.882	32.692	-0.561	20.236	1503.038	-0.002936	-0.006572	-0.002288
1.8600	753.750	39.515	90.073	30.347	-0.552	20.231	1434.946	-0.002766	-0.006305	-0.002124
1.8700	699.963	35.392	83.792	27.545	-0.560	20.235	1332.550	-0.002477	-0.005865	-0.001928
1.8800	642.179	31.446	77.151	24.595	-0.557	20.231	1222.544	-0.002201	-0.005401	-0.001722
1.8900	580.412	26.717	69.518	21.089	-0.572	20.235	1104.956	-0.001870	-0.004866	-0.001476
1.9000	514.948	22.477	62.073	17.722	-0.560	20.230	980.330	-0.001573	-0.004345	-0.001241
1.9100	436.515	17.385	52.691	13.242	-0.568	20.235	831.013	-0.001217	-0.003688	-0.000927
1.9200	413.086	15.462	48.760	11.549	-0.565	20.230	786.409	-0.001082	-0.003413	-0.000808
1.9300	360.021	11.814	42.853	8.963	-0.566	20.235	685.387	-0.000827	-0.003000	-0.000627
1.9400	324.298	9.358	37.836	6.789	-0.563	20.230	617.380	-0.000655	-0.002649	-0.000475
1.9500	270.752	5.233	30.778	3.884	-0.561	20.235	515.442	-0.000366	-0.002154	-0.000272
1.9600	257.842	3.677	28.805	2.928	-0.560	20.230	490.866	-0.000257	-0.002016	-0.000205
1.9700	241.897	2.835	26.344	2.157	-0.555	20.235	460.510	-0.000198	-0.001844	-0.000151
1.9800	215.102	0.660	22.497	0.882	-0.570	20.231	409.498	-0.000046	-0.001575	-0.000062
1.9900	209.210	-0.590	21.093	0.378	-0.570	20.235	398.283	0.000041	-0.001477	-0.000026
2.0000	209.316	-0.634	20.897	0.140	-0.553	20.231	398.483	0.000044	-0.001463	-0.000010
2.0100	211.059	-0.829	20.814	0.491	-0.557	20.235	401.802	0.000058	-0.001457	-0.000034
2.0200	217.401	-0.646	20.621	0.604	-0.552	20.231	413.876	0.000045	-0.001443	-0.000042
2.0300	231.753	-0.478	21.969	0.842	-0.559	20.235	441.198	0.000033	-0.001538	-0.000059
2.0400	275.952	2.245	26.025	2.312	-0.558	20.231	525.341	-0.000157	-0.001822	-0.000162
2.0500	300.162	3.800	28.167	3.409	-0.572	20.235	571.432	-0.000266	-0.001972	-0.000239
2.0600	335.239	6.188	32.972	4.813	-0.562	20.231	638.208	-0.000433	-0.002308	-0.000337
2.0700	385.839	9.612	38.882	7.573	-0.570	20.235	734.539	-0.000673	-0.002722	-0.000530
2.0800	434.862	12.726	44.563	10.004	-0.573	20.231	827.866	-0.000891	-0.003119	-0.000700
2.0900	491.143	16.809	51.290	12.875	-0.574	20.235	935.011	-0.001177	-0.003590	-0.000901
2.1000	547.831	20.570	57.776	15.644	-0.569	20.230	1042.929	-0.001440	-0.004044	-0.001095
2.1100	610.244	25.299	65.629	19.121	-0.565	20.235	1161.747	-0.001771	-0.004594	-0.001338
2.1200	680.291	30.226	73.509	22.661	-0.567	20.230	1295.099	-0.002116	-0.005146	-0.001586
2.1300	734.108	33.522	79.859	25.760	-0.568	20.235	1397.552	-0.002347	-0.005590	-0.001803
2.1400	778.306	36.990	85.346	28.079	-0.564	20.231	1481.695	-0.002589	-0.005974	-0.001966
2.1500	847.211	42.112	92.922	32.230	-0.552	20.235	1612.873	-0.002948	-0.006505	-0.002256
2.1600	905.747	46.250	99.468	35.372	-0.548	20.231	1724.310	-0.003237	-0.006963	-0.002476
2.1700	972.022	51.539	107.830	38.658	-0.562	20.235	1850.481	-0.003608	-0.007548	-0.002706
2.1800	990.492	52.816	109.667	39.597	-0.558	20.230	1885.643	-0.003697	-0.007677	-0.002772
2.1900	1048.006	56.676	115.726	43.344	-0.557	20.235	1995.134	-0.003967	-0.008101	-0.003034
2.2000	1082.571	59.317	120.423	45.480	-0.558	20.230	2060.938	-0.004152	-0.008430	-0.003184
2.2100	1104.408	61.810	123.229	46.373	-0.559	20.235	2102.509	-0.004327	-0.008626	-0.003246
2.2200	1113.064	61.894	124.145	47.105	-0.561	20.230	2118.988	-0.004333	-0.008690	-0.003297
2.2300	1139.995	64.536	127.929	48.845	-0.568	20.235	2170.258	-0.004517	-0.008955	-0.003419
2.2400	1153.445	65.557	129.566	50.012	-0.566	20.231	2195.864	-0.004589	-0.009070	-0.003501
2.2500	1150.665	65.489	129.275	49.602	-0.569	20.235	2190.571	-0.004584	-0.009049	-0.003472
2.2600	1145.961	64.818	129.233	49.743	-0.553	20.231	2181.616	-0.004537	-0.009046	-0.003482
2.2700	1142.505	65.178	129.067	49.772	-0.564	20.235	2175.035	-0.004562	-0.009035	-0.003484
2.2800	1128.934	64.268	128.067	49.379	-0.564	20.231	2149.200	-0.004499	-0.008965	-0.003457
2.2900	1097.134	62.249	126.119	48.171	-0.560	20.236	2088.661	-0.004357	-0.008828	-0.003372
2.3000	1051.327	59.314	122.133	45.939	-0.563	20.231	2001.457	-0.004152	-0.008549	-0.003216
2.3100	1020.624	57.518	118.907	44.286	-0.558	20.235	1943.007	-0.004026	-0.008323	-0.003100
2.3200	973.691	53.826	113.432	42.022	-0.550	20.231	1853.657	-0.003768	-0.007940	-0.002942
2.3300	904.830	49.801	106.886	38.433	-0.549	20.235	1722.565	-0.003486	-0.007482	-0.002690
2.3400	867.710	47.767	102.564	36.285	-0.552	20.231	1651.897	-0.003344	-0.007179	-0.002540
2.3500	797.528	43.234	95.009	33.172	-0.554	20.235	1518.288	-0.003026	-0.006651	-0.002322
2.3600	744.222	39.459	89.144	30.461	-0.551	20.231	1416.807	-0.002762	-0.006240	-0.002132
2.3700	677.661	34.982	81.291	26.562	-0.556	20.235	1290.092	-0.002449	-0.005690	-0.001859
2.3800	635.777	31.586	75.690	24.174	-0.555	20.231	1210.356	-0.002211	-0.005298	-0.001692
2.3900	576.520	27.474	69.157	20.976	-0.558	20.235	1097.546	-0.001923	-0.004841	-0.001468
2.4000	524.882	23.993	63.044	17.930	-0.553	20.231	999.241	-0.001680	-0.004413	-0.001255
2.4100	464.032	19.447	55.695	14.562	-0.572	20.235	883.398	-0.001361	-0.003899	-0.001019
2.4200	402.055	15.125	48.440	11.114	-0.564	20.231	765.409	-0.001059	-0.003391	-0.000778
2.4300	354.986	11.730	42.353	8.500	-0.558	20.235	675.802	-0.000821	-0.002965	-0.000595
2.4400	313.568	8.264	36.586	6.790	-0.558	20.230	596.952	-0.000578	-0.002561	-0.000475
2.4500	293.835	6.329	32.806	5.289	-0.568	20.235	559.387	-0.000443	-0.002296	-0.000370
2.4600	262.276	4.223	29.360	3.352	-0.556	20.230	499.306	-0.000296	-0.002055	-0.000235
2.4700	243.220	2.973	26.539	2.606	-0.564	20.235	463.028	-0.000208	-0.001858	-0.000182
2.4800	228.747	1.500	24.288	1.553	-0.557	20.231	435.476	-0.000105	-0.001700	-0.000109
2.4900	208.143	0.027	21.176	0.478	-0.559	20.235	396.252	-0.000002	-0.001482	-0.000033
2.5000	213.343	-2.164	17.953	-0.983	-0.559	20.229	406.151	0.000151	-0.001257	0.000069
2.5100	222.120	-2.191	19.061	-0.687	-0.561	20.237	422.859	0.000153	-0.001334	0.000048
2.5200	249.351	-0.690	21.189	0.069	-0.553	20.230	474.701	0.000048	-0.001483	-0.000005
2.5300	267.160	0.307	23.275	1.304	-0.557	20.237	508.604	-0.000022	-0.001629	-0.000091
2.5400	306.519	2.707	28.027	2.830	-0.556	20.229	583.534	-0.000189	-0.001962	-0.000198
2.5500	349.200	6.215	32.932	5.177	-0.557	20.238	664.787	-0.000435	-0.002305	-0.000362
2.5600	399.861	9.568	38.880	7.461	-0.554	20.229	761.232	-0.000670	-0.002722	-0.000522
2.5700	468.856	14.116	47.216	11.112	-0.552	20.237	892.582	-0.000988	-0.003305	-0.000778
2.5800	535.537	18.479	55.054	14.606	-0.546	20.229	1019.526	-0.001294	-0.003854	-0.001022
2.5900	615.849	23.756	64.295	18.534	-0.556	20.237	1172.419	-0.001663	-0.004501	-0.001297
2.6000	665.052	27.097	70.438	21.258	-0.564	20.229	1266.088	-0.001897	-0.004931	-0.001488
2.6100	761.414	34.325	81.680	26.618	-0.565	20.237	1449.537	-0.002403	-0.005718	-0.001863
2.6200	819.589	38.588	88.254	30.083	-0.564	20.229	1560.287	-0.002701	-0.006178	-0.002106
2.6300	922.864	46.027	99.746	35.190	-0.555	20.237	1756.897	-0.003222	-0.006982	-0.002463
2.6400	1016.281	52.802	110.960	40.089	-0.554	20.229	1934.738	-0.003696	-0.007767	-0.002806
2.6500	1047.119	55.483	114.713	42.516	-0.551	20.237	1993.446	-0.003884	-0.008030	-0.002976
2.6600	1143.917	61.572	125.371	47.735	-0.553	20.229	2177.725	-0.004310	-0.008776	-0.003341
2.6700	1199.583	65.628	132.194	51.063	-0.558	20.237	2283.697	-0.004594	-0.009254	-0.003574
2.6800	1244.728	69.320	137.668	53.670	-0.561	20.230	2369.642	-0.004852	-0.009637	-0.003757
2.6900	1312.912	74.498	145.451	57.753	-0.556	20.237	2499.447	-0.005215	-0.010182	-0.004043
2.7000	1352.482	76.954	150.162	59.846	-0.560	20.229	2574.778	-0.005387	-0.010511	-0.004189
2.7100	1394.095	80.912	155.428	62.416	-0.557	20.237	2653.999	-0.005664	-0.010880	-0.004369
2.7200	1419.779	83.367	158.568	64.026	-0.560	20.229	2702.894	-0.005836	-0.011100	-0.004482
2.7300	1432.643	84.728	160.096	65.320	-0.558	20.237	2727.385	-0.005931	-0.011207	-0.004572
2.7400	1446.484	86.468	162.640	66.218	-0.556	20.229	2753.735	-0.006053	-0.011385	-0.004635
2.7500	1444.140	86.300	163.166	66.077	-0.556	20.237	2749.271	-0.006041	-0.011422	-0.004625
2.7600	1440.969	85.769	162.957	66.373	-0.550	20.229	2743.235	-0.006004	-0.011407	-0.004646
2.7700	1434.597	85.964	163.306	66.164	-0.547	20.237	2731.104	-0.006017	-0.011431	-0.004631
2.7800	1405.306	84.391	161.779	65.334	-0.555	20.229	2675.343	-0.005907	-0.011325	-0.004573
2.7900	1347.973	80.729	156.165	62.555	-0.556	20.237	2566.195	-0.005651	-0.010932	-0.004379
2.8000	1306.134	78.791	152.231	60.466	-0.542	20.229	2486.544	-0.005515	-0.010656	-0.004233
2.8100	1249.402	75.257	145.743	57.767	-0.547	20.237	2378.540	-0.005268	-0.010202	-0.004044
2.8200	1194.142	70.723	139.781	55.033	-0.552	20.229	2273.340	-0.004951	-0.009785	-0.003852
2.8300	1139.619	66.934	133.874	52.352	-0.552	20.238	2169.542	-0.004685	-0.009371	-0.003665
2.8400	1050.050	61.169	124.828	46.950	-0.549	20.229	1999.025	-0.004282	-0.008738	-0.003286
2.8500	990.207	57.282	117.727	44.174	-0.554	20.237	1885.099	-0.004010	-0.008241	-0.003092
2.8600	914.704	52.047	109.904	39.698	-0.555	20.229	1741.362	-0.003643	-0.007693	-0.002779
2.8700	836.992	46.685	101.497	35.765	-0.561	20.237	1593.418	-0.003268	-0.007105	-0.002504
2.8800	745.800	40.679	91.183	31.079	-0.548	20.228	1419.811	-0.002848	-0.006383	-0.002176
2.8900	700.564	37.157	85.168	27.954	-0.552	20.237	1333.694	-0.002601	-0.005962	-0.001957
2.9000	598.972	30.198	73.550	22.914	-0.546	20.229	1140.289	-0.002114	-0.005148	-0.001604
2.9100	532.006	25.005	64.962	18.980	-0.553	20.237	1012.802	-0.001750	-0.004547	-0.001329
2.9200	474.101	20.557	58.306	15.645	-0.547	20.229	902.567	-0.001439	-0.004081	-0.001095
2.9300	409.374	14.969	50.207	12.361	-0.547	20.238	779.343	-0.001048	-0.003514	-0.000865
2.9400	373.516	12.600	45.562	9.946	-0.545	20.228	711.079	-0.000882	-0.003189	-0.000696
2.9500	310.246	8.137	37.267	6.564	-0.549	20.237	590.630	-0.000570	-0.002609	-0.000459
2.9600	303.484	7.267	35.044	5.783	-0.546	20.229	577.755	-0.000509	-0.002453	-0.000405
2.9700	240.244	3.268	27.401	2.718	-0.547	20.237	457.363	-0.000229	-0.001918	-0.000190
2.9800	244.602	3.550	26.999	2.746	-0.552	20.229	465.660	-0.000248	-0.001890	-0.000192
2.9900	233.196	2.470	25.317	1.820	-0.550	20.237	443.945	-0.000173	-0.001772	-0.000127
3.0000	221.323	1.007	23.594	1.316	-0.541	20.230	421.343	-0.000071	-0.001652	-0.000092
3.0100	227.831	1.121	23.677	1.247	-0.549	20.238	433.731	-0.000078	-0.001657	-0.000087
3.0200	233.722	0.727	23.692	1.442	-0.557	20.229	444.946	-0.000051	-0.001658	-0.000101
3.0300	258.293	1.585	25.065	2.382	-0.548	20.237	491.724	-0.000111	-0.001755	-0.000167
3.0400	284.863	3.872	28.057	3.265	-0.562	20.228	542.307	-0.000271	-0.001964	-0.000229
3.0500	345.774	7.913	34.920	5.685	-0.565	20.237	658.264	-0.000554	-0.002444	-0.000398
3.0600	407.360	11.321	41.671	8.933	-0.560	20.229	775.509	-0.000793	-0.002917	-0.000625
3.0700	468.030	15.111	49.026	11.717	-0.554	20.237	891.008	-0.001058	-0.003432	-0.000820
3.0800	498.102	17.722	52.692	13.747	-0.564	20.229	948.257	-0.001241	-0.003688	-0.000962
3.0900	594.028	24.358	63.101	18.351	-0.560	20.237	1130.877	-0.001705	-0.004417	-0.001285
3.1000	653.495	28.471	70.884	21.763	-0.561	20.229	1244.087	-0.001993	-0.004962	-0.001523
3.1100	745.439	34.479	81.667	26.562	-0.560	20.237	1419.125	-0.002414	-0.005717	-0.001859
3.1200	833.250	40.035	91.323	31.416	-0.560	20.229	1586.294	-0.002802	-0.006393	-0.002199
3.1300	897.316	44.960	98.927	34.740	-0.555	20.238	1708.260	-0.003147	-0.006925	-0.002432
3.1400	976.185	51.358	107.970	39.038	-0.564	20.229	1858.406	-0.003595	-0.007558	-0.002733
3.1500	1048.577	57.168	116.117	42.966	-0.569	20.238	1996.222	-0.004002	-0.008128	-0.003008
3.1600	1129.250	62.403	124.869	47.441	-0.558	20.229	2149.801	-0.004368	-0.008741	-0.003321
3.1700	1188.732	66.737	132.278	51.217	-0.560	20.238	2263.041	-0.004672	-0.009259	-0.003585
3.1800	1254.526	70.780	139.809	54.683	-0.557	20.229	2388.296	-0.004955	-0.009787	-0.003828
3.1900	1292.293	73.755	144.368	57.291	-0.553	20.237	2460.194	-0.005163	-0.010106	-0.004010
3.2000	1340.790	77.951	149.828	59.903	-0.567	20.229	2552.519	-0.005457	-0.010488	-0.004193
3.2100	1395.132	82.285	156.443	63.046	-0.557	20.237	2655.973	-0.005760	-0.010951	-0.004413
3.2200	1402.616	83.240	157.538	63.492	-0.546	20.229	2670.221	-0.005827	-0.011028	-0.004444
3.2300	1445.477	86.090	162.651	66.093	-0.564	20.237	2751.818	-0.006026	-0.011386	-0.004627
3.2400	1444.425	86.301	163.418	66.499	-0.556	20.229	2749.815	-0.006041	-0.011439	-0.004655
3.2500	1456.148	87.437	164.753	66.965	-0.549	20.237	2772.131	-0.006121	-0.011533	-0.004688
3.2600	1448.739	87.674	164.878	67.174	-0.546	20.229	2758.026	-0.006137	-0.011541	-0.004702
3.2700	1434.807	87.437	164.530	66.318	-0.549	20.237	2731.504	-0.006121	-0.011517	-0.004642
3.2800	1404.390	85.232	162.375	65.726	-0.551	20.229	2673.597	-0.005966	-0.011366	-0.004601
3.2900	1350.889	81.431	157.150	63.311	-0.564	20.238	2571.745	-0.005700	-0.011001	-0.004432
3.3000	1322.064	80.126	153.955	61.882	-0.556	20.229	2516.870	-0.005609	-0.010777	-0.004332
3.3100	1248.094	75.944	146.854	58.357	-0.553	20.238	2376.051	-0.005316	-0.010280	-0.004085
3.3200	1202.543	72.588	141.696	55.666	-0.557	20.229	2289.333	-0.005081	-0.009919	-0.003897
3.3300	1139.304	68.602	135.082	52.325	-0.558	20.238	2168.941	-0.004802	-0.009456	-0.003663
3.3400	1074.471	64.002	128.109	49.265	-0.550	20.229	2045.517	-0.004480	-0.008968	-0.003449
3.3500	1008.992	59.216	120.674	45.421	-0.553	20.238	1920.862	-0.004145	-0.008447	-0.003179
3.3600	911.202	52.075	110.210	39.877	-0.561	20.229	1734.695	-0.003645	-0.007715	-0.002791
3.3700	828.952	47.190	101.453	35.821	-0.546	20.237	1578.112	-0.003303	-0.007102	-0.002507
3.3800	755.809	42.322	92.602	31.935	-0.559	20.229	1438.866	-0.002963	-0.006482	-0.002235
3.3900	674.174	35.320	82.808	27.280	-0.564	20.237	1283.455	-0.002472	-0.005797	-0.001910
3.4000	623.559	32.006	77.122	24.076	-0.568	20.229	1187.096	-0.002240	-0.005399	-0.001685
3.4100	556.742	27.222	69.366	20.908	-0.562	20.237	1059.895	-0.001906	-0.004856	-0.001464
3.4200	483.058	21.862	60.155	16.880	-0.560	20.228	919.619	-0.001530	-0.004211	-0.001182
3.4300	413.146	17.329	50.913	12.627	-0.565	20.237	786.524	-0.001213	-0.003564	-0.000884
3.4400	350.162	12.460	43.412	9.328	-0.560	20.229	666.618	-0.000872	-0.003039	-0.000653
3.4500	326.537	9.666	39.423	7.686	-0.555	20.237	621.643	-0.000677	-0.002760	-0.000538
3.4600	278.702	6.129	33.391	5.261	-0.557	20.229	530.577	-0.000429	-0.002337	-0.000368
3.4700	253.920	4.895	29.775	3.757	-0.568	20.237	483.398	-0.000343	-0.002084	-0.000263
3.4800	239.342	3.551	27.473	2.887	-0.570	20.229	455.647	-0.000249	-0.001923	-0.000202
3.4900	223.788	1.585	24.412	2.086	-0.569	20.238	426.035	-0.000111	-0.001709	-0.000146
3.5000	222.315	0.814	24.302	1.792	-0.569	20.229	423.231	-0.000057	-0.001701	-0.000125
3.5100	222.901	1.401	23.746	1.401	-0.559	20.237	424.347	-0.000098	-0.001662	-0.000098
3.5200	230.250	1.486	24.148	1.288	-0.561	20.228	438.337	-0.000104	-0.001690	-0.000090
3.5300	245.384	1.909	24.855	2.059	-0.565	20.237	467.148	-0.000134	-0.001740	-0.000144
3.5400	295.338	4.629	29.376	3.534	-0.564	20.229	562.248	-0.000324	-0.002056	-0.000247
3.5500	341.130	7.758	34.920	5.977	-0.556	20.237	649.424	-0.000543	-0.002444	-0.000418
3.5600	396.359	11.253	41.326	8.529	-0.564	20.229	754.566	-0.000788	-0.002893	-0.000597
3.5700	461.793	15.673	49.176	11.465	-0.562	20.238	879.135	-0.001097	-0.003442	-0.000803
3.5800	536.153	20.345	57.461	15.701	-0.557	20.229	1020.699	-0.001424	-0.004022	-0.001099
3.5900	590.226	24.375	63.654	18.253	-0.564	20.238	1123.638	-0.001706	-0.004456	-0.001278
3.6000	670.688	29.959	73.357	22.746	-0.569	20.229	1276.817	-0.002097	-0.005135	-0.001592
3.6100	742.013	35.122	81.596	26.545	-0.569	20.237	1412.601	-0.002459	-0.005712	-0.001858
3.6200	832.258	40.807	91.726	31.262	-0.572	20.229	1584.406	-0.002856	-0.006421	-0.002188
3.6300	899.285	45.563	99.384	34.966	-0.572	20.237	1712.008	-0.003189	-0.006957	-0.002448
3.6400	988.388	53.279	109.849	39.949	-0.570	20.229	1881.638	-0.003730	-0.007689	-0.002796
3.6500	1075.628	59.133	118.810	44.834	-0.568	20.237	2047.720	-0.004139	-0.008317	-0.003138
3.6600	1121.405	62.122	124.577	47.497	-0.561	20.229	2134.867	-0.004349	-0.008720	-0.003325
3.6700	1185.531	66.568	132.653	51.160	-0.572	20.238	2256.947	-0.004660	-0.009286	-0.003581
3.6800	1249.853	70.808	139.184	54.613	-0.566	20.228	2379.398	-0.004957	-0.009743	-0.003823
3.6900	1315.316	76.449	146.991	58.287	-0.563	20.238	2504.025	-0.005351	-0.010289	-0.004080
3.7000	1332.930	78.133	149.815	59.762	-0.577	20.229	2537.556	-0.005469	-0.010487	-0.004183
3.7100	1381.952	81.795	155.037	62.147	-0.566	20.238	2630.882	-0.005726	-0.010853	-0.004350
3.7200	1422.739	84.574	160.723	64.911	-0.564	20.229	2708.530	-0.005920	-0.011251	-0.004544
3.7300	1421.898	84.530	160.960	65.417	-0.571	20.238	2706.928	-0.005917	-0.011267	-0.004579
3.7400	1474.422	89.513	167.187	67.861	-0.570	20.229	2806.921	-0.006266	-0.011703	-0.004750
3.7500	1453.022	88.433	166.324	67.833	-0.568	20.237	2766.180	-0.006190	-0.011643	-0.004748
3.7600	1440.894	87.042	165.975	67.327	-0.569	20.229	2743.092	-0.006093	-0.011618	-0.004713
3.7700	1409.139	85.837	163.628	66.008	-0.564	20.237	2682.638	-0.006009	-0.011454	-0.004621
3.7800	1390.203	85.050	161.056	65.431	-0.560	20.229	2646.589	-0.005953	-0.011274	-0.004580
3.7900	1357.321	82.804	158.302	63.801	-0.554	20.238	2583.990	-0.005796	-0.011081	-0.004466
3.8000	1302.617	78.848	153.078	61.167	-0.563	20.229	2479.849	-0.005519	-0.010715	-0.004282
3.8100	1258.855	76.504	147.603	59.285	-0.554	20.238	2396.536	-0.005355	-0.010332	-0.004150
3.8200	1186.373	71.957	140.614	55.315	-0.555	20.229	2258.549	-0.005037	-0.009843	-0.003872
3.8300	1142.009	69.026	135.832	52.787	-0.559	20.238	2174.091	-0.004832	-0.009508	-0.003695
3.8400	1060.450	62.977	127.330	48.493	-0.549	20.229	2018.824	-0.004408	-0.008913	-0.003395
3.8500	993.408	58.642	119.032	44.509	-0.561	20.237	1891.193	-0.004105	-0.008332	-0.003116
3.8600	921.782	53.521	111.642	40.914	-0.557	20.229	1754.837	-0.003746	-0.007815	-0.002864
3.8700	838.991	47.737	102.970	36.369	-0.565	20.237	1597.223	-0.003342	-0.007208	-0.002546
3.8800	761.925	42.784	93.577	32.553	-0.562	20.229	1450.510	-0.002995	-0.006550	-0.002279
3.8900	684.424	37.255	84.819	28.260	-0.568	20.237	1302.967	-0.002608	-0.005937	-0.001978
3.9000	620.583	32.653	77.429	24.414	-0.556	20.229	1181.431	-0.002286	-0.005420	-0.001709
3.9100	544.990	26.324	68.117	20.471	-0.554	20.238	1037.521	-0.001843	-0.004768	-0.001433
3.9200	489.265	22.646	60.919	16.963	-0.560	20.228	931.435	-0.001585	-0.004264	-0.001187
3.9300	428.851	18.872	53.900	13.662	-0.558	20.237	816.422	-0.001321	-0.003773	-0.000956
3.9400	367.490	13.555	45.730	10.398	-0.556	20.228	699.606	-0.000949	-0.003201	-0.000728
3.9500	330.460	9.905	40.605	8.050	-0.561	20.237	629.110	-0.000693	-0.002842	-0.000564
3.9600	295.759	7.772	35.780	6.258	-0.549	20.228	563.049	-0.000544	-0.002505	-0.000438
3.9700	263.643	5.752	31.570	4.587	-0.559	20.237	501.909	-0.000403	-0.002210	-0.000321
3.9800	243.220	3.425	27.985	3.139	-0.572	20.229	463.028	-0.000240	-0.001959	-0.000220
3.9900	227.635	2.091	25.385	2.199	-0.564	20.237	433.359	-0.000146	-0.001777	-0.000154
4.0000	220.377	2.090	24.191	1.736	-0.562	20.229	419.540	-0.000146	-0.001693	-0.000122
4.0100	222.766	1.557	23.718	1.442	-0.561	20.238	424.089	-0.000109	-0.001660	-0.000101
4.0200	225.276	0.531	23.663	1.540	-0.562	20.228	428.867	-0.000037	-0.001656	-0.000108
4.0300	241.567	2.076	25.162	1.834	-0.564	20.237	459.881	-0.000145	-0.001761	-0.000128
4.0400	298.043	5.063	30.358	4.068	-0.569	20.229	567.398	-0.000354	-0.002125	-0.000285
4.0500	349.410	7.325	35.891	6.244	-0.569	20.238	665.188	-0.000513	-0.002512	-0.000437
4.0600	397.531	11.222	41.868	8.556	-0.562	20.229	756.798	-0.000786	-0.002931	-0.000599
4.0700	455.421	15.743	48.247	11.534	-0.558	20.238	867.004	-0.001102	-0.003377	-0.000807
4.0800	535.372	20.683	57.650	15.811	-0.578	20.228	1019.211	-0.001448	-0.004036	-0.001107
4.0900	588.107	23.405	64.239	18.715	-0.573	20.238	1119.604	-0.001638	-0.004497	-0.001310
4.1000	680.817	30.998	75.035	23.403	-0.571	20.229	1296.101	-0.002170	-0.005252	-0.001638
4.1100	756.214	36.287	83.013	27.686	-0.572	20.238	1439.638	-0.002540	-0.005811	-0.001938
4.1200	824.263	40.497	91.586	31.315	-0.557	20.229	1569.185	-0.002835	-0.006411	-0.002192
4.1300	896.775	46.026	99.678	35.134	-0.554	20.237	1707.230	-0.003222	-0.006977	-0.002459
4.1400	994.400	52.776	110.544	40.132	-0.568	20.228	1893.082	-0.003694	-0.007738	-0.002809
4.1500	1036.599	56.339	114.643	43.120	-0.574	20.238	1973.419	-0.003944	-0.008025	-0.003018
4.1600	1126.620	62.599	125.190	47.707	-0.565	20.229	2144.794	-0.004382	-0.008763	-0.003339
4.1700	1187.665	67.383	132.833	51.526	-0.560	20.238	2261.009	-0.004717	-0.009298	-0.003607
4.1800	1243.060	70.864	139.322	54.599	-0.569	20.229	2366.467	-0.004960	-0.009753	-0.003822
4.1900	1303.775	75.651	145.979	58.006	-0.566	20.237	2482.052	-0.005296	-0.010219	-0.004060
4.2000	1365.181	80.659	153.411	61.448	-0.558	20.228	2598.953	-0.005646	-0.010739	-0.004301
4.2100	1394.170	82.707	157.095	63.590	-0.565	20.237	2654.142	-0.005790	-0.010997	-0.004451
4.2200	1404.570	83.028	158.874	64.588	-0.568	20.229	2673.941	-0.005812	-0.011121	-0.004521
4.2300	1443.494	87.115	163.640	66.429	-0.554	20.238	2748.041	-0.006098	-0.011455	-0.004650
4.2400	1438.925	87.550	163.639	66.753	-0.566	20.228	2739.344	-0.006128	-0.011455	-0.004673
4.2500	1465.405	88.475	166.406	67.945	-0.562	20.238	2789.755	-0.006193	-0.011648	-0.004756
4.2600	1462.444	88.740	166.756	67.999	-0.562	20.229	2784.119	-0.006212	-0.011673	-0.004760
4.2700	1434.822	87.367	165.405	67.385	-0.555	20.237	2731.533	-0.006116	-0.011578	-0.004717
4.2800	1413.722	87.241	163.555	66.288	-0.564	20.229	2691.364	-0.006107	-0.011449	-0.004640
4.2900	1344.592	82.103	157.318	63.476	-0.558	20.238	2559.757	-0.005747	-0.011012	-0.004443
4.3000	1302.858	79.550	152.968	61.377	-0.551	20.229	2480.307	-0.005569	-0.010708	-0.004296
4.3100	1260.012	77.110	148.326	59.146	-0.564	20.238	2398.739	-0.005398	-0.010383	-0.004140
4.3200	1182.916	71.313	140.418	55.175	-0.569	20.229	2251.968	-0.004992	-0.009829	-0.003862
4.3300	1137.951	68.660	135.027	52.547	-0.558	20.238	2166.367	-0.004806	-0.009452	-0.003678
4.3400	1062.088	63.145	127.080	48.648	-0.562	20.229	2021.942	-0.004420	-0.008896	-0.003405
4.3500	1000.411	59.651	120.590	45.059	-0.565	20.238	1904.526	-0.004176	-0.008441	-0.003154
4.3600	924.533	53.814	112.239	41.504	-0.561	20.229	1760.073	-0.003767	-0.007857	-0.002905
4.3700	842.508	48.144	102.968	36.903	-0.558	20.238	1603.918	-0.003370	-0.007208	-0.002583
4.3800	759.701	42.448	93.617	32.597	-0.565	20.229	1446.276	-0.002971	-0.006553	-0.002282
4.3900	690.044	37.775	85.431	28.219	-0.556	20.237	1313.667	-0.002644	-0.005980	-0.001975
4.4000	620.283	32.989	77.554	24.526	-0.556	20.228	1180.859	-0.002309	-0.005429	-0.001717
4.4100	542.060	26.395	67.895	20.330	-0.564	20.238	1031.942	-0.001848	-0.004753	-0.001423
4.4200	475.003	22.072	60.030	16.402	-0.566	20.228	904.284	-0.001545	-0.004202	-0.001148
4.4300	410.080	17.330	52.067	12.626	-0.565	20.237	780.687	-0.001213	-0.003645	-0.000884
4.4400	361.659	13.386	45.397	10.200	-0.558	20.228	688.505	-0.000937	-0.003178	-0.000714
4.4500	313.102	9.259	38.729	7.363	-0.549	20.237	596.066	-0.000648	-0.002711	-0.000515
4.4600	296.045	8.151	35.933	6.217	-0.554	20.229	563.593	-0.000571	-0.002515	-0.000435
4.4700	261.780	5.528	31.347	4.545	-0.555	20.238	498.362	-0.000387	-0.002194	-0.000318
4.4800	232.219	2.147	26.984	2.845	-0.566	20.228	442.085	-0.000150	-0.001889	-0.000199
4.4900	230.310	2.807	26.040	2.594	-0.558	20.238	438.452	-0.000196	-0.001823	-0.000182
4.5000	230.190	2.749	25.886	2.296	-0.562	20.229	438.223	-0.000192	-0.001812	-0.000161
4.5100	229.905	1.543	24.982	2.143	-0.566	20.238	437.679	-0.000108	-0.001749	-0.000150
4.5200	233.301	1.893	25.497	2.017	-0.565	20.229	444.145	-0.000133	-0.001785	-0.000141
4.5300	245.158	2.792	25.678	2.282	-0.573	20.238	466.719	-0.000195	-0.001797	-0.000160
4.5400	293.249	4.728	29.916	4.082	-0.567	20.229	558.271	-0.000331	-0.002094	-0.000286
4.5500	346.285	8.053	35.960	6.440	-0.558	20.238	659.237	-0.000564	-0.002517	-0.000451
4.5600	403.378	12.291	43.005	9.104	-0.565	20.228	767.927	-0.000860	-0.003010	-0.000637
4.5700	446.344	15.447	47.993	11.381	-0.573	20.238	849.724	-0.001081	-0.003359	-0.000797
4.5800	525.333	20.205	56.819	15.404	-0.568	20.228	1000.099	-0.001414	-0.003977	-0.001078
4.5900	591.052	24.443	65.226	18.969	-0.567	20.237	1125.212	-0.001711	-0.004566	-0.001328
4.6000	658.605	29.131	72.231	22.351	-0.570	20.228	1253.815	-0.002039	-0.005056	-0.001565
4.6100	746.837	35.432	82.460	27.010	-0.570	20.238	1421.785	-0.002480	-0.005772	-0.001891
4.6200	833.445	41.759	92.226	31.865	-0.564	20.228	1586.666	-0.002923	-0.006456	-0.002231
4.6300	904.184	46.631	100.926	35.638	-0.568	20.238	1721.334	-0.003264	-0.007065	-0.002495
4.6400	979.041	51.961	109.127	39.598	-0.558	20.229	1863.842	-0.003637	-0.007639	-0.002772
4.6500	1042.566	56.942	116.130	43.275	-0.564	20.238	1984.777	-0.003986	-0.008129	-0.003029
4.6600	1126.725	63.090	126.038	48.128	-0.562	20.229	2144.995	-0.004416	-0.008823	-0.003369
4.6700	1191.843	66.922	133.097	51.944	-0.564	20.238	2268.963	-0.004685	-0.009317	-0.003636
4.6800	1253.610	72.225	140.142	55.329	-0.564	20.228	2386.551	-0.005056	-0.009810	-0.003873
4.6900	1305.548	76.955	146.826	58.583	-0.554	20.237	2485.428	-0.005387	-0.010278	-0.004101
4.7000	1348.694	79.170	152.187	61.152	-0.554	20.228	2567.568	-0.005542	-0.010653	-0.004281
4.7100	1398.318	82.313	157.234	64.012	-0.554	20.238	2662.039	-0.005762	-0.011006	-0.004481
4.7200	1424.873	85.557	160.696	65.333	-0.553	20.228	2712.593	-0.005989	-0.011249	-0.004573
4.7300	1426.091	86.229	162.056	65.838	-0.564	20.238	2714.911	-0.006036	-0.011344	-0.004609
4.7400	1445.703	86.763	163.529	66.739	-0.562	20.227	2752.247	-0.006073	-0.011447	-0.004672
4.7500	1460.656	88.798	166.350	68.002	-0.566	20.237	2780.714	-0.006216	-0.011644	-0.004760
4.7600	1451.744	88.528	166.116	67.932	-0.560	20.228	2763.748	-0.006197	-0.011628	-0.004755
4.7700	1436.986	87.942	164.960	67.538	-0.558	20.238	2735.653	-0.006156	-0.011547	-0.004728
4.7800	1409.304	85.667	163.668	66.612	-0.562	20.228	2682.953	-0.005997	-0.011457	-0.004663
4.7900	1356.524	82.763	158.874	64.138	-0.560	20.238	2582.474	-0.005793	-0.011121	-0.004490
4.8000	1325.686	81.416	155.680	62.639	-0.561	20.228	2523.766	-0.005699	-0.010898	-0.004385
4.8100	1249.853	76.127	147.339	58.907	-0.554	20.237	2379.398	-0.005329	-0.010314	-0.004124
4.8200	1182.450	71.650	140.601	55.232	-0.554	20.228	2251.081	-0.005015	-0.009842	-0.003866
4.8300	1130.858	68.241	135.194	52.717	-0.564	20.238	2152.863	-0.004777	-0.009464	-0.003690
4.8400	1064.612	63.805	127.497	48.817	-0.558	20.228	2026.749	-0.004466	-0.008925	-0.003417
4.8500	994.234	59.302	119.589	45.059	-0.552	20.237	1892.767	-0.004151	-0.008371	-0.003154
4.8600	921.377	53.984	112.419	41.364	-0.554	20.228	1754.065	-0.003779	-0.007869	-0.002895
4.8700	834.452	47.625	102.288	36.355	-0.556	20.238	1588.583	-0.003334	-0.007160	-0.002545
4.8800	757.838	42.547	93.576	32.258	-0.554	20.228	1442.728	-0.002978	-0.006550	-0.002258
4.8900	685.476	37.565	85.917	28.597	-0.556	20.237	1304.970	-0.002630	-0.006014	-0.002002
4.9000	622.522	32.455	77.719	24.693	-0.551	20.228	1185.122	-0.002272	-0.005440	-0.001728
4.9100	538.558	26.900	67.729	20.119	-0.552	20.238	1025.276	-0.001883	-0.004741	-0.001408
4.9200	469.352	22.071	60.001	16.446	-0.556	20.228	893.526	-0.001545	-0.004200	-0.001151
4.9300	430.864	18.620	54.444	13.987	-0.555	20.238	820.255	-0.001303	-0.003811	-0.000979
4.9400	364.304	13.358	45.884	10.440	-0.552	20.228	693.541	-0.000935	-0.003212	-0.000731
4.9500	307.827	9.962	38.644	7.292	-0.549	20.237	586.023	-0.000697	-0.002705	-0.000510
4.9600	286.772	8.011	35.101	6.033	-0.546	20.228	545.940	-0.000561	-0.002457	-0.000422
4.9700	246.406	4.645	29.528	3.955	-0.545	20.237	469.093	-0.000325	-0.002067	-0.000277
4.9800	234.924	3.380	27.430	2.872	-0.556	20.227	447.235	-0.000237	-0.001920	-0.000201
4.9900	233.316	3.466	26.902	2.788	-0.553	20.237	444.174	-0.000243	-0.001883	-0.000195
Test Cycles
Time (sec)	Axial stress (kPa)	Axial micro-strain #1	Axial micro-strain #2	Axial micro-strain #3	Confining pressure (kPa)	Temperature (�C)	Load (N)	Displacement #1 (mm)	Displacement #2 (mm)	Displacement #3 (mm)
0.0000	213.073	1.795	23.774	1.524	-0.550	20.228	405.636	-0.000126	-0.001664	-0.000107
0.0100	213.343	0.800	23.303	1.386	-0.547	20.238	406.151	-0.000056	-0.001631	-0.000097
0.0200	226.824	1.500	23.924	1.763	-0.558	20.228	431.814	-0.000105	-0.001675	-0.000123
0.0300	274.704	5.036	27.917	3.437	-0.548	20.238	522.966	-0.000353	-0.001954	-0.000241
0.0400	300.223	5.724	31.041	4.166	-0.558	20.228	571.547	-0.000401	-0.002173	-0.000292
0.0500	338.981	7.520	35.905	6.608	-0.558	20.237	645.332	-0.000526	-0.002513	-0.000463
0.0600	401.875	12.388	43.035	9.399	-0.565	20.228	765.066	-0.000867	-0.003012	-0.000658
0.0700	456.037	15.855	49.109	11.662	-0.566	20.238	868.177	-0.001110	-0.003438	-0.000816
0.0800	526.265	20.192	57.197	15.378	-0.562	20.228	1001.873	-0.001413	-0.004004	-0.001076
0.0900	589.234	24.992	64.809	19.064	-0.557	20.237	1121.750	-0.001749	-0.004537	-0.001334
0.1000	685.761	31.685	75.467	23.712	-0.552	20.228	1305.513	-0.002218	-0.005283	-0.001660
0.1100	737.279	34.913	81.722	26.940	-0.565	20.238	1403.589	-0.002444	-0.005721	-0.001886
0.1200	829.989	41.241	92.574	31.863	-0.555	20.227	1580.086	-0.002887	-0.006480	-0.002230
0.1300	904.860	46.742	100.744	35.793	-0.548	20.237	1722.622	-0.003272	-0.007052	-0.002505
0.1400	977.297	52.398	109.111	39.753	-0.555	20.228	1860.523	-0.003668	-0.007638	-0.002783
0.1500	1059.578	57.771	118.255	44.258	-0.553	20.238	2017.164	-0.004044	-0.008278	-0.003098
0.1600	1127.431	62.754	126.232	48.071	-0.552	20.228	2146.339	-0.004393	-0.008836	-0.003365
0.1700	1190.851	67.594	132.986	51.579	-0.553	20.238	2267.075	-0.004732	-0.009309	-0.003611
0.1800	1231.683	71.131	138.642	54.261	-0.558	20.227	2344.809	-0.004979	-0.009705	-0.003798
0.1900	1300.138	75.522	146.312	58.063	-0.561	20.238	2475.128	-0.005287	-0.010242	-0.004064
0.2000	1369.930	80.098	153.467	62.177	-0.556	20.228	2607.994	-0.005607	-0.010743	-0.004352
0.2100	1401.624	83.366	157.872	64.012	-0.562	20.238	2668.333	-0.005836	-0.011051	-0.004481
0.2200	1409.590	84.685	159.613	64.518	-0.556	20.228	2683.496	-0.005928	-0.011173	-0.004516
0.2300	1428.916	86.090	162.028	66.022	-0.553	20.238	2720.289	-0.006026	-0.011342	-0.004622
0.2400	1436.250	86.188	163.096	66.568	-0.555	20.228	2734.251	-0.006033	-0.011417	-0.004660
0.2500	1466.547	89.567	166.950	68.083	-0.554	20.238	2791.929	-0.006270	-0.011687	-0.004766
0.2600	1454.479	89.020	166.851	68.002	-0.559	20.228	2768.955	-0.006231	-0.011680	-0.004760
0.2700	1436.926	87.856	165.919	67.679	-0.547	20.238	2735.538	-0.006150	-0.011614	-0.004737
0.2800	1375.595	83.661	160.711	64.996	-0.549	20.228	2618.780	-0.005856	-0.011250	-0.004550
0.2900	1351.730	83.296	158.611	63.870	-0.549	20.238	2573.347	-0.005831	-0.011103	-0.004471
0.3000	1323.116	81.471	154.872	62.431	-0.549	20.228	2518.873	-0.005703	-0.010841	-0.004370
0.3100	1253.580	76.590	147.939	58.780	-0.555	20.237	2386.494	-0.005361	-0.010356	-0.004115
0.3200	1194.563	72.548	142.226	55.625	-0.554	20.228	2274.141	-0.005078	-0.009956	-0.003894
0.3300	1134.570	68.774	135.667	52.406	-0.559	20.238	2159.929	-0.004814	-0.009497	-0.003668
0.3400	1082.827	65.755	129.847	49.941	-0.554	20.228	2061.424	-0.004603	-0.009089	-0.003496
0.3500	1005.205	60.449	121.588	45.593	-0.568	20.238	1913.652	-0.004231	-0.008511	-0.003192
0.3600	908.332	53.575	110.628	40.647	-0.562	20.228	1729.231	-0.003750	-0.007744	-0.002845
0.3700	854.711	49.492	104.833	37.463	-0.555	20.238	1627.150	-0.003464	-0.007338	-0.002622
0.3800	762.992	43.766	94.702	32.680	-0.558	20.228	1452.541	-0.003064	-0.006629	-0.002288
0.3900	695.890	38.362	87.099	28.781	-0.553	20.238	1324.797	-0.002685	-0.006097	-0.002015
0.4000	602.564	31.585	75.800	23.823	-0.562	20.228	1147.127	-0.002211	-0.005306	-0.001668
0.4100	541.564	27.135	68.213	20.569	-0.553	20.238	1030.998	-0.001899	-0.004775	-0.001440
0.4200	465.430	22.605	59.042	16.052	-0.558	20.227	886.059	-0.001582	-0.004133	-0.001124
0.4300	413.672	17.610	52.385	13.312	-0.556	20.237	787.525	-0.001233	-0.003667	-0.000932
0.4400	355.843	12.853	44.827	9.750	-0.553	20.227	677.433	-0.000900	-0.003138	-0.000682
0.4500	315.086	10.452	39.799	7.558	-0.565	20.238	599.842	-0.000732	-0.002786	-0.000529
0.4600	291.897	8.758	35.781	6.230	-0.566	20.228	555.696	-0.000613	-0.002505	-0.000436
0.4700	258.744	5.372	30.541	4.264	-0.556	20.238	492.582	-0.000376	-0.002138	-0.000299
0.4800	244.106	4.196	28.902	3.408	-0.561	20.227	464.716	-0.000294	-0.002023	-0.000239
0.4900	223.097	2.498	25.930	2.255	-0.569	20.237	424.719	-0.000175	-0.001815	-0.000158
0.5000	224.269	2.146	24.996	1.961	-0.565	20.228	426.950	-0.000150	-0.001750	-0.000137
0.5100	227.906	2.793	25.358	2.044	-0.566	20.238	433.874	-0.000196	-0.001775	-0.000143
0.5200	230.641	2.596	25.776	2.058	-0.565	20.227	439.081	-0.000182	-0.001804	-0.000144
0.5300	241.281	2.665	25.662	2.255	-0.562	20.238	459.337	-0.000187	-0.001796	-0.000158
0.5400	291.190	4.826	30.084	4.039	-0.549	20.228	554.352	-0.000338	-0.002106	-0.000283
0.5500	334.998	8.109	35.377	6.060	-0.553	20.238	637.751	-0.000568	-0.002476	-0.000424
0.5600	399.305	13.076	42.480	9.217	-0.548	20.227	760.174	-0.000915	-0.002974	-0.000645
0.5700	463.130	16.683	50.150	11.985	-0.550	20.237	881.681	-0.001168	-0.003510	-0.000839
0.5800	535.567	21.117	58.682	15.954	-0.545	20.227	1019.583	-0.001478	-0.004108	-0.001117
0.5900	601.196	25.664	66.131	19.305	-0.546	20.238	1144.524	-0.001796	-0.004629	-0.001351
0.6000	669.561	30.925	73.745	23.390	-0.554	20.228	1274.672	-0.002165	-0.005162	-0.001637
0.6100	753.524	36.372	83.583	27.699	-0.548	20.238	1434.517	-0.002546	-0.005851	-0.001939
0.6200	812.331	40.427	90.337	30.896	-0.561	20.227	1546.469	-0.002830	-0.006324	-0.002163
0.6300	889.742	46.448	99.149	35.078	-0.560	20.237	1693.840	-0.003251	-0.006940	-0.002455
0.6400	976.516	52.452	109.250	39.585	-0.559	20.227	1859.035	-0.003672	-0.007648	-0.002771
0.6500	1068.039	58.963	119.214	44.764	-0.554	20.238	2033.272	-0.004127	-0.008345	-0.003133
0.6600	1129.731	63.359	126.397	48.254	-0.555	20.227	2150.717	-0.004435	-0.008848	-0.003378
0.6700	1175.988	67.227	131.901	51.049	-0.554	20.238	2238.779	-0.004706	-0.009233	-0.003573
0.6800	1248.064	72.745	140.321	55.259	-0.551	20.227	2375.994	-0.005092	-0.009822	-0.003868
0.6900	1309.230	76.575	147.298	58.470	-0.558	20.238	2492.437	-0.005360	-0.010311	-0.004093
0.7000	1349.972	79.353	152.383	60.773	-0.559	20.227	2570.000	-0.005555	-0.010667	-0.004254
0.7100	1365.526	80.995	154.415	62.151	-0.556	20.238	2599.611	-0.005670	-0.010809	-0.004351
0.7200	1421.778	85.895	160.974	65.206	-0.554	20.228	2706.699	-0.006013	-0.011268	-0.004564
0.7300	1441.435	87.099	162.985	66.625	-0.551	20.239	2744.122	-0.006097	-0.011409	-0.004664
0.7400	1455.652	87.701	165.824	67.681	-0.547	20.228	2771.187	-0.006139	-0.011608	-0.004738
0.7500	1456.358	89.372	166.839	67.596	-0.557	20.237	2772.532	-0.006256	-0.011679	-0.004732
0.7600	1448.438	88.965	165.892	67.650	-0.556	20.228	2757.454	-0.006228	-0.011612	-0.004736
0.7700	1437.813	88.013	165.518	67.496	-0.558	20.238	2737.226	-0.006161	-0.011586	-0.004725
0.7800	1402.962	86.567	163.794	66.204	-0.552	20.227	2670.879	-0.006060	-0.011466	-0.004634
0.7900	1355.773	84.083	158.623	64.349	-0.549	20.237	2581.043	-0.005886	-0.011104	-0.004504
0.8000	1300.709	80.293	152.786	61.208	-0.564	20.227	2476.215	-0.005621	-0.010695	-0.004285
0.8100	1264.490	77.430	149.481	59.386	-0.562	20.238	2407.265	-0.005420	-0.010464	-0.004157
0.8200	1196.682	73.166	142.477	55.738	-0.561	20.227	2278.175	-0.005122	-0.009973	-0.003902
0.8300	1132.345	69.081	134.888	52.337	-0.550	20.238	2155.695	-0.004836	-0.009442	-0.003664
0.8400	1058.947	63.820	127.372	48.690	-0.560	20.228	2015.963	-0.004467	-0.008916	-0.003408
0.8500	989.020	58.921	119.867	45.015	-0.556	20.238	1882.839	-0.004124	-0.008391	-0.003151
0.8600	915.576	53.785	112.099	40.802	-0.560	20.226	1743.021	-0.003765	-0.007847	-0.002856
0.8700	830.545	48.257	102.481	36.284	-0.558	20.238	1581.144	-0.003378	-0.007174	-0.002540
0.8800	757.943	43.416	94.564	32.496	-0.564	20.227	1442.928	-0.003039	-0.006619	-0.002275
0.8900	688.256	37.984	85.930	28.401	-0.568	20.237	1310.263	-0.002659	-0.006015	-0.001988
0.9000	605.495	31.628	76.260	24.006	-0.573	20.227	1152.706	-0.002214	-0.005338	-0.001680
0.9100	548.311	27.545	69.450	20.711	-0.563	20.238	1043.844	-0.001928	-0.004862	-0.001450
0.9200	477.212	23.351	60.711	16.711	-0.565	20.227	908.489	-0.001635	-0.004250	-0.001170
0.9300	430.399	18.436	54.594	14.100	-0.561	20.238	819.368	-0.001291	-0.003822	-0.000987
0.9400	370.540	14.227	47.063	11.015	-0.563	20.227	705.414	-0.000996	-0.003294	-0.000771
0.9500	328.807	12.124	41.826	8.219	-0.558	20.238	625.963	-0.000849	-0.002928	-0.000575
0.9600	299.681	9.020	37.075	6.481	-0.560	20.227	570.517	-0.000631	-0.002595	-0.000454
0.9700	247.533	4.839	30.222	3.732	-0.554	20.238	471.239	-0.000339	-0.002116	-0.000261
0.9800	225.697	3.337	27.124	2.692	-0.556	20.227	429.668	-0.000234	-0.001899	-0.000188
0.9900	216.018	2.315	24.799	1.862	-0.564	20.237	411.243	-0.000162	-0.001736	-0.000130
1.0000	219.505	2.230	24.857	2.059	-0.565	20.227	417.881	-0.000156	-0.001740	-0.000144
1.0100	221.098	2.105	24.647	1.413	-0.568	20.238	420.914	-0.000147	-0.001725	-0.000099
1.0200	226.208	2.203	24.912	1.877	-0.561	20.227	430.641	-0.000154	-0.001744	-0.000131
1.0300	241.507	2.257	25.707	2.396	-0.561	20.238	459.766	-0.000158	-0.001799	-0.000168
1.0400	308.323	6.833	32.196	4.952	-0.569	20.226	586.967	-0.000478	-0.002254	-0.000347
1.0500	352.386	10.284	37.434	7.000	-0.568	20.238	670.853	-0.000720	-0.002620	-0.000490
1.0600	392.903	11.969	41.951	8.853	-0.567	20.227	747.986	-0.000838	-0.002937	-0.000620
1.0700	461.492	15.939	50.068	12.026	-0.558	20.238	878.563	-0.001116	-0.003505	-0.000842
1.0800	529.060	21.229	58.221	15.869	-0.557	20.227	1007.195	-0.001486	-0.004075	-0.001111
1.0900	580.788	25.132	63.420	18.295	-0.557	20.238	1105.671	-0.001759	-0.004439	-0.001281
1.1000	656.050	29.412	72.869	22.676	-0.564	20.226	1248.951	-0.002059	-0.005101	-0.001587
1.1100	755.147	36.218	83.654	27.841	-0.556	20.238	1437.607	-0.002535	-0.005856	-0.001949
1.1200	825.946	41.255	92.115	31.541	-0.561	20.226	1572.390	-0.002888	-0.006448	-0.002208
1.1300	914.689	48.034	102.008	36.339	-0.556	20.238	1741.333	-0.003362	-0.007141	-0.002544
1.1400	979.972	52.679	109.751	39.796	-0.558	20.226	1865.616	-0.003688	-0.007683	-0.002786
1.1500	1058.526	58.263	118.629	44.356	-0.557	20.238	2015.162	-0.004078	-0.008304	-0.003105
1.1600	1127.612	62.935	125.968	48.282	-0.569	20.227	2146.683	-0.004405	-0.008818	-0.003380
1.1700	1191.437	68.618	133.763	51.749	-0.566	20.238	2268.190	-0.004803	-0.009363	-0.003622
1.1800	1252.422	72.393	141.029	55.413	-0.573	20.227	2384.291	-0.005068	-0.009872	-0.003879
1.1900	1307.877	76.731	147.632	58.526	-0.563	20.238	2489.862	-0.005371	-0.010334	-0.004097
1.2000	1358.703	80.912	153.008	61.390	-0.558	20.226	2586.622	-0.005664	-0.010711	-0.004297
1.2100	1397.897	84.180	158.123	64.053	-0.557	20.238	2661.238	-0.005893	-0.011069	-0.004484
1.2200	1411.453	85.822	160.487	64.939	-0.564	20.227	2687.044	-0.006008	-0.011234	-0.004546
1.2300	1410.611	85.035	160.333	65.221	-0.562	20.237	2685.442	-0.005952	-0.011223	-0.004565
1.2400	1457.966	88.320	165.296	67.651	-0.566	20.227	2775.593	-0.006182	-0.011571	-0.004736
1.2500	1451.369	88.350	165.864	67.511	-0.567	20.237	2763.033	-0.006185	-0.011611	-0.004726
1.2600	1449.595	88.966	165.906	67.832	-0.562	20.226	2759.657	-0.006228	-0.011613	-0.004748
1.2700	1434.627	88.670	165.418	67.369	-0.554	20.238	2731.161	-0.006207	-0.011579	-0.004716
1.2800	1387.453	85.851	162.487	65.487	-0.562	20.226	2641.354	-0.006010	-0.011374	-0.004584
1.2900	1345.043	82.791	157.469	63.212	-0.573	20.237	2560.616	-0.005795	-0.011023	-0.004425
1.3000	1311.529	80.842	154.359	61.968	-0.550	20.226	2496.815	-0.005659	-0.010805	-0.004338
1.3100	1262.882	77.288	149.801	59.650	-0.557	20.238	2404.203	-0.005410	-0.010486	-0.004175
1.3200	1203.535	73.587	143.296	56.369	-0.552	20.227	2291.222	-0.005151	-0.010031	-0.003946
1.3300	1142.820	69.726	136.153	53.221	-0.552	20.239	2175.636	-0.004881	-0.009531	-0.003725
1.3400	1068.159	64.815	128.761	48.943	-0.549	20.227	2033.501	-0.004537	-0.009013	-0.003426
1.3500	1001.328	59.456	120.840	45.338	-0.548	20.238	1906.271	-0.004162	-0.008459	-0.003174
1.3600	899.871	52.704	110.432	40.131	-0.555	20.226	1713.123	-0.003689	-0.007730	-0.002809
1.3700	822.565	47.851	101.995	36.087	-0.565	20.237	1565.952	-0.003350	-0.007140	-0.002526
1.3800	762.812	43.905	94.424	33.188	-0.557	20.226	1452.198	-0.003073	-0.006610	-0.002323
1.3900	682.560	37.242	85.377	28.415	-0.553	20.237	1299.419	-0.002607	-0.005976	-0.001989
1.4000	611.761	31.937	77.289	24.497	-0.564	20.226	1164.637	-0.002236	-0.005410	-0.001715
1.4100	545.531	27.980	69.311	20.598	-0.558	20.238	1038.551	-0.001959	-0.004852	-0.001442
1.4200	468.496	22.283	59.361	16.207	-0.568	20.226	891.895	-0.001560	-0.004155	-0.001134
1.4300	421.562	18.649	53.332	13.651	-0.560	20.238	802.546	-0.001305	-0.003733	-0.000956
1.4400	360.652	14.284	45.995	10.495	-0.564	20.227	686.588	-0.001000	-0.003220	-0.000735
1.4500	325.185	10.858	41.104	8.275	-0.573	20.238	619.068	-0.000760	-0.002877	-0.000579
1.4600	288.726	7.759	35.684	6.413	-0.572	20.226	549.660	-0.000543	-0.002498	-0.000449
1.4700	261.239	6.315	32.042	4.687	-0.560	20.237	497.332	-0.000442	-0.002243	-0.000328
1.4800	235.931	4.194	28.220	3.253	-0.563	20.226	449.152	-0.000294	-0.001975	-0.000228
1.4900	226.418	2.526	26.137	2.536	-0.555	20.238	431.042	-0.000177	-0.001830	-0.000178
1.5000	228.357	2.554	26.456	2.410	-0.562	20.226	434.732	-0.000179	-0.001852	-0.000169
1.5100	233.166	3.634	26.151	2.325	-0.556	20.238	443.888	-0.000254	-0.001831	-0.000163
1.5200	239.598	3.619	26.442	2.662	-0.560	20.227	456.133	-0.000253	-0.001851	-0.000186
1.5300	254.461	3.087	27.181	2.873	-0.557	20.238	484.428	-0.000216	-0.001903	-0.000201
1.5400	320.796	7.508	34.115	5.571	-0.562	20.226	610.714	-0.000526	-0.002388	-0.000390
1.5500	380.700	11.506	40.812	8.444	-0.555	20.238	724.754	-0.000805	-0.002857	-0.000591
1.5600	419.293	14.242	45.424	10.142	-0.557	20.226	798.225	-0.000997	-0.003180	-0.000710
1.5700	462.875	16.795	50.775	12.682	-0.555	20.238	881.195	-0.001176	-0.003554	-0.000888
1.5800	529.180	20.754	58.348	15.799	-0.557	20.226	1007.423	-0.001453	-0.004084	-0.001106
1.5900	591.774	25.075	65.225	19.261	-0.552	20.238	1126.585	-0.001755	-0.004566	-0.001348
1.6000	677.120	31.558	75.398	23.529	-0.554	20.226	1289.063	-0.002209	-0.005278	-0.001647
1.6100	754.156	36.960	84.416	27.869	-0.553	20.237	1435.719	-0.002587	-0.005909	-0.001951
1.6200	830.740	42.237	92.186	32.020	-0.549	20.226	1581.516	-0.002957	-0.006453	-0.002241
1.6300	911.263	47.318	101.508	36.131	-0.560	20.238	1734.810	-0.003312	-0.007106	-0.002529
1.6400	980.799	52.888	110.210	40.229	-0.557	20.226	1867.189	-0.003702	-0.007715	-0.002816
1.6500	1056.662	58.585	118.311	44.091	-0.552	20.238	2011.614	-0.004101	-0.008282	-0.003086
1.6600	1132.646	64.213	126.954	48.367	-0.561	20.226	2156.267	-0.004495	-0.008887	-0.003386
1.6700	1189.694	68.070	134.013	51.847	-0.562	20.238	2264.872	-0.004765	-0.009381	-0.003629
1.6800	1263.168	73.235	142.323	55.904	-0.555	20.226	2404.747	-0.005126	-0.009963	-0.003913
1.6900	1297.568	75.705	146.354	57.895	-0.550	20.238	2470.236	-0.005299	-0.010245	-0.004053
1.7000	1354.165	80.589	153.343	61.237	-0.552	20.226	2577.982	-0.005641	-0.010734	-0.004287
1.7100	1385.995	83.015	157.137	63.183	-0.553	20.238	2638.578	-0.005811	-0.011000	-0.004423
1.7200	1397.356	83.829	158.581	64.223	-0.554	20.227	2660.208	-0.005868	-0.011101	-0.004496
1.7300	1432.478	86.147	162.876	66.093	-0.548	20.238	2727.070	-0.006030	-0.011401	-0.004627
1.7400	1439.466	87.674	164.782	66.738	-0.554	20.226	2740.374	-0.006137	-0.011535	-0.004672
1.7500	1437.813	88.277	164.516	66.978	-0.553	20.238	2737.226	-0.006179	-0.011516	-0.004688
1.7600	1438.865	88.095	164.724	67.412	-0.545	20.226	2739.229	-0.006167	-0.011531	-0.004719
1.7700	1431.576	87.522	164.392	67.032	-0.544	20.238	2725.353	-0.006127	-0.011507	-0.004692
1.7800	1407.245	86.496	163.528	66.387	-0.542	20.226	2679.033	-0.006055	-0.011447	-0.004647
1.7900	1369.043	84.504	160.000	64.926	-0.537	20.237	2606.306	-0.005915	-0.011200	-0.004545
1.8000	1304.992	80.757	153.955	61.868	-0.552	20.226	2484.369	-0.005653	-0.010777	-0.004331
1.8100	1244.563	76.674	147.743	58.555	-0.545	20.238	2369.328	-0.005367	-0.010342	-0.004099
1.8200	1203.580	73.195	143.072	56.089	-0.548	20.225	2291.307	-0.005124	-0.010015	-0.003926
1.8300	1125.823	68.351	134.580	52.280	-0.554	20.238	2143.278	-0.004785	-0.009421	-0.003660
1.8400	1073.419	65.446	129.345	49.603	-0.555	20.226	2043.514	-0.004581	-0.009054	-0.003472
1.8500	984.391	59.244	119.590	44.721	-0.554	20.238	1874.027	-0.004147	-0.008371	-0.003130
1.8600	892.161	52.158	109.627	39.740	-0.566	20.226	1698.446	-0.003651	-0.007674	-0.002782
1.8700	836.842	49.099	103.079	36.524	-0.561	20.237	1593.132	-0.003437	-0.007216	-0.002557
1.8800	757.011	43.837	94.256	32.427	-0.564	20.225	1441.154	-0.003069	-0.006598	-0.002270
1.8900	670.417	36.708	83.959	27.476	-0.557	20.238	1276.302	-0.002570	-0.005877	-0.001923
1.9000	607.854	31.963	76.844	24.201	-0.558	20.226	1157.198	-0.002237	-0.005379	-0.001694
1.9100	537.671	27.726	68.660	20.064	-0.554	20.238	1023.588	-0.001941	-0.004806	-0.001404
1.9200	480.098	23.349	61.225	17.064	-0.560	20.226	913.982	-0.001634	-0.004286	-0.001194
1.9300	413.627	18.213	52.832	13.228	-0.557	20.238	787.439	-0.001275	-0.003698	-0.000926
1.9400	380.459	15.364	48.426	11.239	-0.552	20.226	724.297	-0.001076	-0.003390	-0.000787
1.9500	313.448	10.272	39.937	7.938	-0.566	20.238	596.724	-0.000719	-0.002796	-0.000556
1.9600	277.605	7.801	34.390	5.684	-0.566	20.226	528.488	-0.000546	-0.002407	-0.000398
1.9700	253.830	5.094	31.223	4.194	-0.556	20.238	483.227	-0.000357	-0.002186	-0.000294
1.9800	243.039	5.330	29.223	3.521	-0.558	20.225	462.685	-0.000373	-0.002046	-0.000246
1.9900	237.404	4.125	27.667	3.056	-0.554	20.238	451.956	-0.000289	-0.001937	-0.000214
2.0000	223.277	3.142	25.775	2.213	-0.554	20.226	425.062	-0.000220	-0.001804	-0.000155
2.0100	223.157	2.385	25.581	1.820	-0.564	20.238	424.833	-0.000167	-0.001791	-0.000127
2.0200	231.633	2.512	25.204	2.395	-0.550	20.226	440.969	-0.000176	-0.001764	-0.000168
2.0300	246.225	3.649	26.442	2.312	-0.557	20.238	468.750	-0.000255	-0.001851	-0.000162
2.0400	309.074	6.721	32.862	5.149	-0.565	20.225	588.398	-0.000470	-0.002300	-0.000360
2.0500	355.377	9.542	38.144	7.069	-0.552	20.238	676.546	-0.000668	-0.002670	-0.000495
2.0600	414.003	13.429	44.953	9.932	-0.555	20.225	788.155	-0.000940	-0.003147	-0.000695
2.0700	459.629	17.047	50.596	12.623	-0.562	20.237	875.015	-0.001193	-0.003542	-0.000884
2.0800	540.181	22.072	59.583	16.388	-0.558	20.225	1028.366	-0.001545	-0.004171	-0.001147
2.0900	602.684	25.510	66.658	20.090	-0.548	20.238	1147.356	-0.001786	-0.004666	-0.001406
2.1000	677.931	31.504	75.690	23.684	-0.560	20.226	1290.607	-0.002205	-0.005298	-0.001658
2.1100	744.868	37.031	83.154	27.446	-0.569	20.238	1418.037	-0.002592	-0.005821	-0.001921
2.1200	828.441	42.406	92.574	32.146	-0.566	20.225	1577.139	-0.002968	-0.006480	-0.002250
2.1300	901.043	47.037	101.244	35.850	-0.561	20.237	1715.355	-0.003293	-0.007087	-0.002509
2.1400	988.193	53.492	111.224	40.173	-0.564	20.226	1881.266	-0.003744	-0.007786	-0.002812
2.1500	1063.786	59.231	118.781	44.904	-0.561	20.238	2025.175	-0.004146	-0.008315	-0.003143
2.1600	1146.021	64.324	128.455	49.195	-0.558	20.226	2181.730	-0.004503	-0.008992	-0.003444
2.1700	1201.341	68.969	135.237	52.520	-0.554	20.238	2287.045	-0.004828	-0.009467	-0.003676
2.1800	1244.728	72.575	140.557	54.978	-0.551	20.226	2369.642	-0.005080	-0.009839	-0.003848
2.1900	1309.125	77.541	147.478	58.823	-0.570	20.238	2492.237	-0.005428	-0.010323	-0.004118
2.2000	1334.402	79.283	151.244	60.058	-0.561	20.225	2540.359	-0.005550	-0.010587	-0.004204
2.2100	1397.447	83.927	158.331	63.899	-0.561	20.238	2660.379	-0.005875	-0.011083	-0.004473
2.2200	1405.938	84.195	158.942	64.713	-0.570	20.225	2676.544	-0.005894	-0.011126	-0.004530
2.2300	1440.293	87.704	163.847	66.766	-0.568	20.238	2741.947	-0.006139	-0.011469	-0.004674
2.2400	1439.316	88.615	164.879	66.879	-0.555	20.225	2740.088	-0.006203	-0.011542	-0.004682
2.2500	1443.975	88.699	165.113	67.512	-0.552	20.238	2748.957	-0.006209	-0.011558	-0.004726
2.2600	1446.334	88.054	165.655	67.873	-0.565	20.225	2753.448	-0.006164	-0.011596	-0.004751
2.2700	1426.812	87.463	165.170	67.048	-0.561	20.237	2716.284	-0.006122	-0.011562	-0.004693
2.2800	1410.927	87.128	164.072	66.697	-0.557	20.224	2686.043	-0.006099	-0.011485	-0.004669
2.2900	1346.110	83.606	157.844	63.705	-0.555	20.238	2562.647	-0.005852	-0.011049	-0.004459
2.3000	1301.069	80.574	153.385	61.645	-0.557	20.225	2476.902	-0.005640	-0.010737	-0.004315
2.3100	1235.245	75.984	147.115	58.258	-0.555	20.238	2351.589	-0.005319	-0.010298	-0.004078
2.3200	1204.918	73.601	143.337	56.492	-0.559	20.225	2293.854	-0.005152	-0.010034	-0.003954
2.3300	1138.552	69.404	136.556	53.096	-0.560	20.238	2167.511	-0.004858	-0.009559	-0.003717
2.3400	1052.379	64.228	127.190	48.425	-0.558	20.225	2003.460	-0.004496	-0.008903	-0.003390
2.3500	982.106	58.711	119.464	44.764	-0.556	20.238	1869.678	-0.004110	-0.008362	-0.003133
2.3600	912.254	53.533	111.738	40.971	-0.559	20.225	1736.698	-0.003747	-0.007822	-0.002868
2.3700	820.446	47.949	101.994	36.089	-0.560	20.238	1561.918	-0.003356	-0.007140	-0.002526
2.3800	752.623	43.218	94.215	32.103	-0.557	20.225	1432.800	-0.003025	-0.006595	-0.002247
2.3900	681.358	37.410	85.404	28.471	-0.545	20.238	1297.131	-0.002619	-0.005978	-0.001993
2.4000	611.190	32.105	77.248	24.328	-0.557	20.225	1163.549	-0.002247	-0.005407	-0.001703
2.4100	539.460	27.389	69.171	20.372	-0.558	20.238	1026.993	-0.001917	-0.004842	-0.001426
2.4200	475.799	23.125	60.671	16.711	-0.565	20.225	905.800	-0.001619	-0.004247	-0.001170
2.4300	410.771	18.521	52.593	13.271	-0.556	20.238	782.003	-0.001296	-0.003682	-0.000929
2.4400	367.640	14.566	46.909	10.467	-0.566	20.225	699.892	-0.001020	-0.003284	-0.000733
2.4500	328.235	11.070	41.701	8.529	-0.559	20.238	624.876	-0.000775	-0.002919	-0.000597
2.4600	287.073	8.070	35.919	6.356	-0.557	20.225	546.513	-0.000565	-0.002514	-0.000445
2.4700	250.313	5.611	31.068	4.123	-0.572	20.237	476.532	-0.000393	-0.002175	-0.000289
2.4800	230.521	4.378	27.707	2.943	-0.563	20.225	438.852	-0.000306	-0.001939	-0.000206
2.4900	227.846	2.496	26.860	2.577	-0.570	20.238	433.760	-0.000175	-0.001880	-0.000180
2.5000	217.070	2.399	25.274	2.031	-0.569	20.225	413.246	-0.000168	-0.001769	-0.000142
2.5100	221.203	2.652	25.190	1.835	-0.566	20.238	421.114	-0.000186	-0.001763	-0.000128
2.5200	238.997	2.709	25.983	2.480	-0.566	20.225	454.988	-0.000190	-0.001819	-0.000174
2.5300	269.550	4.475	28.682	3.294	-0.564	20.238	513.153	-0.000313	-0.002008	-0.000231
2.5400	304.536	7.297	32.363	4.659	-0.568	20.224	579.758	-0.000511	-0.002265	-0.000326
2.5500	375.770	11.238	40.409	8.050	-0.570	20.238	715.370	-0.000787	-0.002829	-0.000564
2.5600	399.230	12.208	43.354	9.160	-0.573	20.224	760.031	-0.000855	-0.003035	-0.000641
2.5700	454.519	16.416	50.108	12.052	-0.565	20.237	865.288	-0.001149	-0.003508	-0.000844
2.5800	532.682	22.169	58.625	15.785	-0.568	20.224	1014.090	-0.001552	-0.004104	-0.001105
2.5900	609.522	26.701	67.770	19.895	-0.561	20.238	1160.374	-0.001869	-0.004744	-0.001393
2.6000	676.549	31.992	75.605	23.545	-0.555	20.224	1287.975	-0.002239	-0.005292	-0.001648
2.6100	734.093	35.713	82.460	26.884	-0.557	20.237	1397.524	-0.002500	-0.005772	-0.001882
2.6200	832.544	43.192	93.143	32.341	-0.561	20.224	1584.949	-0.003023	-0.006520	-0.002264
2.6300	904.274	47.737	101.772	36.061	-0.557	20.237	1721.506	-0.003342	-0.007124	-0.002524
2.6400	990.537	53.632	111.183	40.397	-0.553	20.225	1885.729	-0.003754	-0.007783	-0.002828
2.6500	1073.584	59.370	120.380	45.213	-0.565	20.238	2043.829	-0.004156	-0.008427	-0.003165
2.6600	1135.547	64.548	128.055	48.900	-0.561	20.224	2161.789	-0.004518	-0.008964	-0.003423
2.6700	1193.286	68.395	135.055	52.029	-0.554	20.237	2271.709	-0.004788	-0.009454	-0.003642
2.6800	1250.935	72.673	141.168	55.638	-0.553	20.224	2381.458	-0.005087	-0.009882	-0.003895
2.6900	1303.023	76.548	147.143	58.429	-0.555	20.238	2480.621	-0.005358	-0.010300	-0.004090
2.7000	1352.211	80.660	153.121	61.391	-0.543	20.225	2574.263	-0.005646	-0.010718	-0.004297
2.7100	1392.442	82.944	158.331	63.675	-0.553	20.238	2650.852	-0.005806	-0.011083	-0.004457
2.7200	1421.657	85.205	161.556	65.419	-0.558	20.224	2706.470	-0.005964	-0.011309	-0.004579
2.7300	1439.541	86.875	164.392	66.767	-0.559	20.238	2740.517	-0.006081	-0.011507	-0.004674
2.7400	1438.204	88.418	165.002	66.906	-0.562	20.224	2737.970	-0.006189	-0.011550	-0.004683
2.7500	1441.675	88.504	165.017	67.581	-0.562	20.238	2744.579	-0.006195	-0.011551	-0.004731
2.7600	1448.558	88.615	165.823	67.805	-0.561	20.225	2757.683	-0.006203	-0.011608	-0.004746
2.7700	1435.273	88.362	165.614	67.145	-0.558	20.237	2732.391	-0.006185	-0.011593	-0.004700
2.7800	1411.273	87.436	164.294	66.598	-0.557	20.224	2686.701	-0.006121	-0.011501	-0.004662
2.7900	1351.971	84.040	159.069	63.970	-0.552	20.237	2573.805	-0.005883	-0.011135	-0.004478
2.8000	1312.701	81.037	155.096	61.826	-0.557	20.224	2499.046	-0.005673	-0.010857	-0.004328
2.8100	1231.277	75.663	146.617	58.077	-0.566	20.237	2344.036	-0.005296	-0.010263	-0.004065
2.8200	1187.530	72.800	142.045	55.513	-0.569	20.224	2260.752	-0.005096	-0.009943	-0.003886
2.8300	1142.490	70.470	136.905	53.419	-0.562	20.237	2175.007	-0.004933	-0.009583	-0.003739
2.8400	1059.969	64.717	128.345	48.929	-0.560	20.224	2017.908	-0.004530	-0.008984	-0.003425
2.8500	990.507	59.651	119.921	45.396	-0.570	20.237	1885.672	-0.004176	-0.008394	-0.003178
2.8600	907.881	53.448	111.641	40.621	-0.565	20.224	1728.373	-0.003741	-0.007815	-0.002843
2.8700	834.242	48.958	103.526	36.580	-0.562	20.237	1588.182	-0.003427	-0.007247	-0.002561
2.8800	767.486	44.483	96.005	32.976	-0.559	20.223	1461.096	-0.003114	-0.006720	-0.002308
2.8900	672.161	37.271	84.374	28.092	-0.549	20.237	1279.621	-0.002609	-0.005906	-0.001966
2.9000	596.478	31.869	76.065	23.558	-0.552	20.224	1135.540	-0.002231	-0.005325	-0.001649
2.9100	530.999	27.644	67.631	19.810	-0.565	20.237	1010.885	-0.001935	-0.004734	-0.001387
2.9200	457.871	22.297	58.390	15.786	-0.556	20.224	871.668	-0.001561	-0.004087	-0.001105
2.9300	408.457	17.386	52.679	12.891	-0.553	20.237	777.597	-0.001217	-0.003688	-0.000902
2.9400	378.611	15.264	48.677	11.310	-0.556	20.223	720.778	-0.001068	-0.003407	-0.000792
2.9500	311.629	10.131	39.784	7.827	-0.558	20.237	593.262	-0.000709	-0.002785	-0.000548
2.9600	256.249	6.411	32.224	4.713	-0.554	20.224	487.833	-0.000449	-0.002256	-0.000330
2.9700	250.614	5.807	31.084	4.152	-0.559	20.237	477.104	-0.000407	-0.002176	-0.000291
2.9800	249.727	5.022	30.179	3.702	-0.559	20.224	475.416	-0.000352	-0.002113	-0.000259
2.9900	225.020	2.765	26.848	2.733	-0.561	20.237	428.381	-0.000194	-0.001879	-0.000191
3.0000	224.915	2.792	25.887	2.185	-0.559	20.224	428.181	-0.000195	-0.001812	-0.000153
3.0100	227.680	3.226	26.332	2.368	-0.566	20.237	433.445	-0.000226	-0.001843	-0.000166
3.0200	235.450	3.579	26.110	2.480	-0.560	20.223	448.236	-0.000251	-0.001828	-0.000174
3.0300	272.886	4.657	28.902	3.563	-0.565	20.237	519.505	-0.000326	-0.002023	-0.000249
3.0400	300.523	6.453	31.929	4.813	-0.569	20.224	572.119	-0.000452	-0.002235	-0.000337
3.0500	353.438	10.411	38.115	7.139	-0.567	20.237	672.855	-0.000729	-0.002668	-0.000500
3.0600	408.547	12.964	44.301	9.848	-0.562	20.224	777.769	-0.000907	-0.003101	-0.000689
3.0700	481.195	18.522	53.247	13.621	-0.565	20.237	916.071	-0.001297	-0.003727	-0.000953
3.0800	526.205	22.212	58.416	15.616	-0.565	20.224	1001.759	-0.001555	-0.004089	-0.001093
3.0900	604.878	26.255	67.159	19.782	-0.561	20.237	1151.533	-0.001838	-0.004701	-0.001385
3.1000	681.027	32.512	76.482	23.866	-0.550	20.223	1296.501	-0.002276	-0.005354	-0.001671
3.1100	745.950	36.764	83.792	27.673	-0.558	20.237	1420.097	-0.002573	-0.005865	-0.001937
3.1200	819.980	41.452	92.031	31.851	-0.561	20.223	1561.031	-0.002902	-0.006442	-0.002230
3.1300	910.571	48.187	102.191	36.496	-0.553	20.237	1733.494	-0.003373	-0.007153	-0.002555
3.1400	984.150	53.645	111.058	40.466	-0.556	20.224	1873.569	-0.003755	-0.007774	-0.002833
3.1500	1065.153	58.725	119.631	44.975	-0.557	20.238	2027.779	-0.004111	-0.008374	-0.003148
3.1600	1139.770	64.747	128.178	48.913	-0.563	20.223	2169.828	-0.004532	-0.008972	-0.003424
3.1700	1210.914	70.259	136.751	53.250	-0.557	20.237	2305.269	-0.004918	-0.009573	-0.003727
3.1800	1252.603	73.557	141.642	55.540	-0.566	20.223	2384.634	-0.005149	-0.009915	-0.003888
3.1900	1304.015	76.827	147.354	58.681	-0.566	20.237	2482.510	-0.005378	-0.010315	-0.004108
3.2000	1350.738	79.632	152.980	61.603	-0.564	20.223	2571.459	-0.005574	-0.010709	-0.004312
3.2100	1380.224	83.310	156.845	63.045	-0.566	20.237	2627.592	-0.005832	-0.010979	-0.004413
3.2200	1423.671	86.412	161.472	65.474	-0.564	20.223	2710.304	-0.006049	-0.011303	-0.004583
3.2300	1448.904	87.704	165.154	67.187	-0.558	20.237	2758.341	-0.006139	-0.011561	-0.004703
3.2400	1444.005	88.364	165.684	67.466	-0.564	20.223	2749.014	-0.006185	-0.011598	-0.004723
3.2500	1442.637	89.048	165.698	67.077	-0.566	20.237	2746.410	-0.006233	-0.011599	-0.004695
3.2600	1440.187	88.742	165.712	67.693	-0.564	20.223	2741.747	-0.006212	-0.011600	-0.004739
3.2700	1428.014	87.899	165.392	67.215	-0.560	20.237	2718.573	-0.006153	-0.011577	-0.004705
3.2800	1408.523	87.226	163.765	66.626	-0.565	20.223	2681.465	-0.006106	-0.011464	-0.004664
3.2900	1339.617	82.847	157.596	63.590	-0.558	20.237	2550.287	-0.005799	-0.011032	-0.004451
3.3000	1320.501	81.865	155.956	62.780	-0.574	20.223	2513.895	-0.005731	-0.010917	-0.004395
3.3100	1238.987	76.618	147.688	58.372	-0.574	20.236	2358.713	-0.005363	-0.010338	-0.004086
3.3200	1195.149	73.431	142.712	56.143	-0.565	20.223	2275.257	-0.005140	-0.009990	-0.003930
3.3300	1133.292	69.897	136.167	52.799	-0.564	20.237	2157.497	-0.004893	-0.009532	-0.003696
3.3400	1050.846	64.297	126.996	48.635	-0.557	20.223	2000.542	-0.004501	-0.008890	-0.003404
3.3500	985.668	59.568	119.826	44.875	-0.562	20.237	1876.459	-0.004170	-0.008388	-0.003141
3.3600	906.003	53.702	111.196	40.411	-0.565	20.223	1724.796	-0.003759	-0.007784	-0.002829
3.3700	819.905	47.723	101.939	36.061	-0.558	20.237	1560.888	-0.003341	-0.007136	-0.002524
3.3800	745.995	42.672	93.407	32.103	-0.560	20.223	1420.183	-0.002987	-0.006539	-0.002247
3.3900	688.917	37.579	86.471	28.920	-0.564	20.236	1311.522	-0.002631	-0.006053	-0.002024
3.4000	615.684	33.200	78.055	24.708	-0.565	20.223	1172.104	-0.002324	-0.005464	-0.001730
3.4100	559.778	29.805	71.327	21.568	-0.566	20.237	1065.674	-0.002086	-0.004993	-0.001510
3.4200	469.938	22.984	60.251	16.796	-0.573	20.223	894.642	-0.001609	-0.004218	-0.001176
3.4300	398.193	17.216	51.372	12.501	-0.568	20.237	758.057	-0.001205	-0.003596	-0.000875
3.4400	378.716	16.179	48.900	11.421	-0.568	20.223	720.978	-0.001133	-0.003423	-0.000799
3.4500	322.540	11.939	41.741	8.345	-0.569	20.237	614.033	-0.000836	-0.002922	-0.000584
3.4600	279.724	7.687	35.448	6.158	-0.573	20.222	532.522	-0.000538	-0.002481	-0.000431
3.4700	245.564	4.939	30.847	4.067	-0.558	20.237	467.491	-0.000346	-0.002159	-0.000285
3.4800	239.418	4.854	28.974	3.534	-0.568	20.223	455.790	-0.000340	-0.002028	-0.000247
3.4900	230.566	3.942	27.207	2.845	-0.559	20.237	438.938	-0.000276	-0.001904	-0.000199
3.5000	221.353	2.665	25.816	2.382	-0.557	20.223	421.400	-0.000187	-0.001807	-0.000167
3.5100	226.448	3.395	25.874	2.228	-0.550	20.237	431.099	-0.000238	-0.001811	-0.000156
3.5200	231.979	2.694	25.984	2.535	-0.557	20.223	441.628	-0.000189	-0.001819	-0.000177
3.5300	266.980	4.487	28.445	3.294	-0.556	20.238	508.261	-0.000314	-0.001991	-0.000231
3.5400	311.584	7.815	33.697	5.317	-0.556	20.223	593.176	-0.000547	-0.002359	-0.000372
3.5500	354.625	9.948	38.254	7.545	-0.559	20.237	675.116	-0.000696	-0.002678	-0.000528
3.5600	392.752	12.544	42.437	8.907	-0.557	20.223	747.700	-0.000878	-0.002971	-0.000624
3.5700	462.604	17.370	51.288	12.557	-0.561	20.237	880.680	-0.001216	-0.003590	-0.000879
3.5800	542.556	22.997	60.251	16.740	-0.559	20.223	1032.887	-0.001610	-0.004218	-0.001172
3.5900	608.410	27.054	67.799	20.303	-0.573	20.237	1158.257	-0.001894	-0.004746	-0.001421
3.6000	664.316	30.954	74.552	23.153	-0.560	20.223	1264.687	-0.002167	-0.005219	-0.001621
3.6100	752.998	37.450	84.513	27.770	-0.566	20.237	1433.516	-0.002622	-0.005916	-0.001944
3.6200	823.617	42.840	92.378	32.076	-0.563	20.223	1567.955	-0.002999	-0.006466	-0.002245
3.6300	919.859	48.930	103.317	37.000	-0.556	20.237	1751.175	-0.003425	-0.007232	-0.002590
3.6400	995.737	54.150	112.513	41.223	-0.550	20.223	1895.628	-0.003790	-0.007876	-0.002886
3.6500	1060.269	59.733	118.950	44.736	-0.560	20.238	2018.480	-0.004181	-0.008327	-0.003132
3.6600	1115.318	63.076	125.605	47.863	-0.552	20.224	2123.280	-0.004415	-0.008792	-0.003350
3.6700	1194.563	68.605	134.875	52.324	-0.552	20.237	2274.141	-0.004802	-0.009441	-0.003663
3.6800	1234.974	73.081	140.223	54.485	-0.553	20.223	2351.074	-0.005116	-0.009816	-0.003814
3.6900	1314.159	77.586	148.022	59.411	-0.553	20.237	2501.822	-0.005431	-0.010362	-0.004159
3.7000	1342.668	79.914	152.370	60.943	-0.550	20.223	2556.095	-0.005594	-0.010666	-0.004266
3.7100	1398.213	84.459	158.569	64.293	-0.560	20.237	2661.839	-0.005912	-0.011100	-0.004501
3.7200	1406.719	84.349	160.097	64.994	-0.557	20.222	2678.032	-0.005904	-0.011207	-0.004550
3.7300	1439.406	87.940	164.155	66.992	-0.563	20.237	2740.259	-0.006156	-0.011491	-0.004689
3.7400	1442.592	88.041	164.862	67.134	-0.563	20.223	2746.325	-0.006163	-0.011540	-0.004699
3.7500	1458.026	89.484	167.171	68.587	-0.560	20.237	2775.707	-0.006264	-0.011702	-0.004801
3.7600	1449.054	89.541	166.489	68.381	-0.560	20.223	2758.627	-0.006268	-0.011654	-0.004787
3.7700	1442.727	89.834	167.130	68.083	-0.557	20.237	2746.582	-0.006288	-0.011699	-0.004766
3.7800	1383.590	85.976	162.403	65.953	-0.558	20.222	2634.001	-0.006018	-0.011368	-0.004617
3.7900	1360.387	83.774	159.654	64.728	-0.561	20.237	2589.827	-0.005864	-0.011176	-0.004531
3.8000	1308.358	81.669	155.124	62.471	-0.559	20.223	2490.778	-0.005717	-0.010859	-0.004373
3.8100	1260.883	78.230	150.093	59.651	-0.557	20.237	2400.398	-0.005476	-0.010507	-0.004176
3.8200	1192.985	73.334	142.865	56.241	-0.561	20.223	2271.137	-0.005133	-0.010001	-0.003937
3.8300	1114.913	68.184	134.290	51.874	-0.558	20.237	2122.507	-0.004773	-0.009400	-0.003631
3.8400	1042.896	63.384	126.566	47.875	-0.557	20.223	1985.407	-0.004437	-0.008860	-0.003351
3.8500	989.936	59.666	120.478	45.295	-0.554	20.237	1884.584	-0.004177	-0.008433	-0.003171
3.8600	912.014	54.502	112.070	41.027	-0.558	20.223	1736.240	-0.003815	-0.007845	-0.002872
3.8700	845.694	49.378	104.789	37.423	-0.557	20.237	1609.983	-0.003456	-0.007335	-0.002620
3.8800	745.018	42.658	93.853	32.090	-0.560	20.222	1418.324	-0.002986	-0.006570	-0.002246
3.8900	685.325	38.477	86.403	28.695	-0.565	20.237	1304.684	-0.002693	-0.006048	-0.002009
3.9000	655.163	36.314	82.195	26.898	-0.556	20.223	1247.263	-0.002542	-0.005754	-0.001883
3.9100	531.495	27.319	68.409	20.162	-0.561	20.237	1011.829	-0.001912	-0.004789	-0.001411
3.9200	479.391	23.349	62.100	17.439	-0.567	20.222	912.638	-0.001634	-0.004347	-0.001221
3.9300	415.566	18.749	53.665	13.776	-0.561	20.237	791.130	-0.001312	-0.003757	-0.000964
3.9400	355.918	14.256	46.286	10.311	-0.558	20.222	677.576	-0.000998	-0.003240	-0.000722
3.9500	319.173	11.744	40.838	8.080	-0.560	20.237	607.624	-0.000822	-0.002859	-0.000566
3.9600	276.989	7.576	34.782	5.836	-0.567	20.222	527.315	-0.000530	-0.002435	-0.000409
3.9700	243.009	5.485	30.431	3.898	-0.560	20.236	462.627	-0.000384	-0.002130	-0.000273
3.9800	232.685	4.743	28.360	3.237	-0.558	20.222	442.972	-0.000332	-0.001985	-0.000227
3.9900	220.993	2.736	26.082	2.227	-0.562	20.236	420.713	-0.000192	-0.001826	-0.000156
4.0000	224.404	3.394	26.248	2.522	-0.564	20.222	427.208	-0.000238	-0.001837	-0.000177
4.0100	225.291	3.269	26.052	2.354	-0.568	20.237	428.896	-0.000229	-0.001824	-0.000165
4.0200	227.500	2.497	25.845	2.410	-0.559	20.222	433.102	-0.000175	-0.001809	-0.000169
4.0300	239.538	2.484	26.485	2.397	-0.561	20.236	456.018	-0.000174	-0.001854	-0.000168
4.0400	299.937	7.199	32.154	4.869	-0.550	20.222	571.003	-0.000504	-0.002251	-0.000341
4.0500	350.162	9.919	37.937	7.111	-0.568	20.236	666.618	-0.000694	-0.002656	-0.000498
4.0600	394.436	12.138	43.020	9.230	-0.561	20.222	750.904	-0.000850	-0.003011	-0.000646
4.0700	466.061	17.427	51.580	12.779	-0.554	20.237	887.260	-0.001220	-0.003611	-0.000895
4.0800	531.510	21.819	58.847	16.319	-0.573	20.222	1011.858	-0.001527	-0.004119	-0.001142
4.0900	583.207	25.188	65.004	18.997	-0.562	20.237	1110.277	-0.001763	-0.004550	-0.001330
4.1000	670.462	31.362	75.271	23.838	-0.559	20.222	1276.388	-0.002195	-0.005269	-0.001669
4.1100	739.578	36.079	83.070	27.517	-0.567	20.237	1407.967	-0.002526	-0.005815	-0.001926
4.1200	831.507	42.756	93.188	32.244	-0.567	20.222	1582.975	-0.002993	-0.006523	-0.002257
4.1300	893.709	47.515	100.775	35.638	-0.569	20.237	1701.393	-0.003326	-0.007054	-0.002495
4.1400	978.334	53.238	110.321	40.158	-0.568	20.222	1862.497	-0.003727	-0.007722	-0.002811
4.1500	1049.419	57.940	118.115	44.244	-0.568	20.236	1997.824	-0.004056	-0.008268	-0.003097
4.1600	1126.665	64.198	126.662	48.395	-0.561	20.222	2144.880	-0.004494	-0.008866	-0.003388
4.1700	1198.741	69.714	135.292	52.295	-0.562	20.237	2282.095	-0.004880	-0.009470	-0.003661
4.1800	1244.082	72.254	140.404	55.373	-0.567	20.222	2368.412	-0.005058	-0.009828	-0.003876
4.1900	1297.478	76.602	146.868	58.398	-0.560	20.237	2470.064	-0.005362	-0.010281	-0.004088
4.2000	1354.135	81.052	153.580	61.671	-0.566	20.222	2577.925	-0.005674	-0.010751	-0.004317
4.2100	1383.455	83.129	157.596	63.493	-0.570	20.237	2633.743	-0.005819	-0.011032	-0.004444
4.2200	1412.430	86.102	160.599	65.039	-0.561	20.222	2688.904	-0.006027	-0.011242	-0.004553
4.2300	1440.142	87.367	164.267	66.993	-0.568	20.236	2741.661	-0.006116	-0.011499	-0.004690
4.2400	1432.944	88.278	164.545	66.950	-0.562	20.222	2727.957	-0.006179	-0.011518	-0.004686
4.2500	1431.381	87.562	164.097	67.019	-0.554	20.236	2724.981	-0.006129	-0.011487	-0.004691
4.2600	1436.040	88.558	164.837	67.161	-0.566	20.222	2733.850	-0.006199	-0.011539	-0.004701
4.2700	1437.933	89.261	165.642	67.454	-0.555	20.237	2737.455	-0.006248	-0.011595	-0.004722
4.2800	1416.172	87.814	164.627	67.089	-0.552	20.222	2696.028	-0.006147	-0.011524	-0.004696
4.2900	1361.995	85.035	159.861	65.108	-0.552	20.237	2592.888	-0.005952	-0.011190	-0.004558
4.3000	1304.676	81.163	154.162	61.981	-0.558	20.222	2483.768	-0.005681	-0.010791	-0.004339
4.3100	1258.299	77.571	149.454	59.551	-0.569	20.237	2395.477	-0.005430	-0.010462	-0.004169
4.3200	1185.456	73.332	141.907	55.792	-0.565	20.222	2256.804	-0.005133	-0.009933	-0.003905
4.3300	1140.686	69.853	137.224	53.501	-0.560	20.237	2171.574	-0.004890	-0.009606	-0.003745
4.3400	1072.968	65.248	129.734	49.829	-0.566	20.222	2042.656	-0.004567	-0.009081	-0.003488
4.3500	984.947	59.777	120.117	45.323	-0.564	20.237	1875.086	-0.004184	-0.008408	-0.003173
4.3600	912.405	54.740	112.293	41.349	-0.565	20.222	1736.984	-0.003832	-0.007861	-0.002894
4.3700	847.692	49.716	104.942	37.604	-0.557	20.237	1613.789	-0.003480	-0.007346	-0.002632
4.3800	753.690	44.018	94.730	32.611	-0.562	20.222	1434.832	-0.003081	-0.006631	-0.002283
4.3900	694.327	38.940	87.057	29.521	-0.560	20.237	1321.821	-0.002726	-0.006094	-0.002066
4.4000	608.861	32.540	77.427	24.905	-0.569	20.222	1159.115	-0.002278	-0.005420	-0.001743
4.4100	547.365	29.159	70.088	21.173	-0.565	20.236	1042.042	-0.002041	-0.004906	-0.001482
4.4200	467.414	22.717	60.099	16.600	-0.574	20.221	889.835	-0.001590	-0.004207	-0.001162
4.4300	420.194	19.644	54.193	13.579	-0.565	20.236	799.942	-0.001375	-0.003794	-0.000951
4.4400	361.869	14.789	47.215	10.845	-0.575	20.221	688.906	-0.001035	-0.003305	-0.000759
4.4500	320.165	11.758	41.131	8.331	-0.574	20.237	609.512	-0.000823	-0.002879	-0.000583
4.4600	285.705	8.631	35.946	6.370	-0.572	20.222	543.909	-0.000604	-0.002516	-0.000446
4.4700	266.469	6.832	33.252	5.094	-0.567	20.236	507.288	-0.000478	-0.002328	-0.000357
4.4800	233.962	5.020	29.014	3.363	-0.568	20.221	445.404	-0.000351	-0.002031	-0.000235
4.4900	221.519	3.003	26.513	2.592	-0.564	20.236	421.715	-0.000210	-0.001856	-0.000181
4.5000	218.693	3.060	25.635	2.242	-0.571	20.222	416.336	-0.000214	-0.001794	-0.000157
4.5100	223.698	3.325	25.581	2.213	-0.566	20.237	425.863	-0.000233	-0.001791	-0.000155
4.5200	232.625	3.114	25.720	2.578	-0.569	20.221	442.858	-0.000218	-0.001800	-0.000180
4.5300	278.041	5.725	29.610	3.925	-0.565	20.236	529.318	-0.000401	-0.002073	-0.000275
4.5400	293.971	6.343	31.528	4.699	-0.574	20.221	559.645	-0.000444	-0.002207	-0.000329
4.5500	353.844	10.494	38.270	7.364	-0.568	20.237	673.628	-0.000735	-0.002679	-0.000515
4.5600	403.919	12.866	43.800	9.808	-0.575	20.221	768.957	-0.000901	-0.003066	-0.000687
4.5700	463.792	17.060	51.429	12.905	-0.576	20.236	882.940	-0.001194	-0.003600	-0.000903
4.5800	506.307	20.991	56.043	15.082	-0.573	20.221	963.879	-0.001469	-0.003923	-0.001056
4.5900	591.668	25.762	65.589	19.205	-0.578	20.237	1126.385	-0.001803	-0.004591	-0.001344
4.6000	664.165	31.487	74.064	23.279	-0.576	20.221	1264.400	-0.002204	-0.005184	-0.001630
4.6100	734.348	35.951	82.682	27.067	-0.578	20.237	1398.010	-0.002517	-0.005788	-0.001895
4.6200	818.627	41.733	92.032	31.413	-0.567	20.221	1558.456	-0.002921	-0.006442	-0.002199
4.6300	906.739	48.286	102.009	36.200	-0.576	20.237	1726.198	-0.003380	-0.007141	-0.002534
4.6400	974.487	52.860	109.903	40.116	-0.572	20.221	1855.173	-0.003700	-0.007693	-0.002808
4.6500	1049.088	58.711	118.031	44.048	-0.561	20.237	1997.194	-0.004110	-0.008262	-0.003083
4.6600	1126.695	63.835	126.552	48.648	-0.562	20.222	2144.938	-0.004468	-0.008859	-0.003405
4.6700	1189.018	68.087	134.777	52.043	-0.581	20.237	2263.584	-0.004766	-0.009434	-0.003643
4.6800	1265.001	74.176	142.797	56.129	-0.572	20.222	2408.237	-0.005192	-0.009996	-0.003929
4.6900	1286.251	75.325	145.256	58.006	-0.566	20.237	2448.692	-0.005273	-0.010168	-0.004060
4.7000	1345.719	80.364	152.397	61.154	-0.567	20.222	2561.903	-0.005625	-0.010668	-0.004281
4.7100	1387.738	83.788	157.413	63.829	-0.566	20.237	2641.897	-0.005865	-0.011019	-0.004468
4.7200	1408.132	84.811	160.014	65.096	-0.570	20.221	2680.721	-0.005937	-0.011201	-0.004557
4.7300	1433.620	87.337	163.473	66.543	-0.572	20.237	2729.244	-0.006114	-0.011443	-0.004658
4.7400	1434.116	87.591	164.390	67.160	-0.558	20.221	2730.188	-0.006131	-0.011507	-0.004701
4.7500	1442.156	89.049	165.308	67.426	-0.565	20.237	2745.495	-0.006233	-0.011572	-0.004720
4.7600	1464.639	90.395	167.741	68.687	-0.570	20.221	2788.296	-0.006328	-0.011742	-0.004808
4.7700	1448.333	89.653	167.504	68.393	-0.560	20.237	2757.254	-0.006276	-0.011725	-0.004788
4.7800	1405.321	87.730	164.599	67.146	-0.558	20.221	2675.371	-0.006141	-0.011522	-0.004700
4.7900	1345.493	83.043	158.624	64.152	-0.556	20.237	2561.474	-0.005813	-0.011104	-0.004491
4.8000	1317.736	81.894	155.347	62.738	-0.562	20.221	2508.631	-0.005733	-0.010874	-0.004392
4.8100	1257.968	78.103	149.580	59.554	-0.562	20.237	2394.848	-0.005467	-0.010471	-0.004169
4.8200	1209.772	74.834	144.503	57.082	-0.561	20.221	2303.095	-0.005238	-0.010115	-0.003996
4.8300	1139.965	69.881	136.780	53.418	-0.564	20.236	2170.200	-0.004892	-0.009575	-0.003739
4.8400	1064.567	65.223	128.845	49.393	-0.561	20.222	2026.663	-0.004566	-0.009019	-0.003457
4.8500	990.673	60.410	120.645	45.632	-0.562	20.237	1885.986	-0.004229	-0.008445	-0.003194
4.8600	919.964	54.909	112.724	41.475	-0.557	20.222	1751.375	-0.003844	-0.007891	-0.002903
4.8700	831.266	49.336	103.552	36.834	-0.564	20.237	1582.518	-0.003454	-0.007249	-0.002578
4.8800	773.061	44.328	96.463	33.775	-0.564	20.221	1471.710	-0.003103	-0.006752	-0.002364
4.8900	675.437	37.494	85.418	28.204	-0.570	20.237	1285.858	-0.002625	-0.005979	-0.001974
4.9000	623.048	33.648	79.110	25.142	-0.557	20.222	1186.123	-0.002355	-0.005538	-0.001760
4.9100	546.418	28.878	70.104	21.160	-0.556	20.237	1040.239	-0.002021	-0.004907	-0.001481
4.9200	476.836	22.942	61.278	17.047	-0.567	20.221	907.774	-0.001606	-0.004289	-0.001193
4.9300	415.776	18.565	54.011	13.831	-0.565	20.237	791.531	-0.001300	-0.003781	-0.000968
4.9400	350.087	13.821	45.856	10.200	-0.558	20.221	666.475	-0.000967	-0.003210	-0.000714
4.9500	325.365	12.152	41.422	8.430	-0.568	20.237	619.411	-0.000851	-0.002900	-0.000590
4.9600	298.780	9.108	37.741	7.210	-0.566	20.221	568.800	-0.000638	-0.002642	-0.000505
4.9700	250.163	5.920	31.723	4.335	-0.561	20.237	476.246	-0.000414	-0.002221	-0.000303
4.9800	237.073	4.657	28.680	3.449	-0.564	20.221	451.326	-0.000326	-0.002008	-0.000241
4.9900	220.722	3.562	26.458	2.661	-0.567	20.237	420.198	-0.000249	-0.001852	-0.000186
