# Supplementary material for: Evaluation of a Cold-Mixed High-Performance Polyurethane Mixture
Source: Hindawi journal article supplement (doi:10.1155/2019/1507971), 2019-11-07
Supplement: f1 [file 1507971.f1.zip › 1507971.f1/dynamic modulus data/PUM/specimen2/temp20/zhs-2-20_5Hz.csv]

Test Information
****************
Project name	zhs
Operator name	2
Target test temperature	20
Target confining stress	0
Average dynamic strain range from 75 to 125 micro-strain
Contact stress	5
Initial modulus	1000
Axial gauge length	70
Comments
Specimen information
********************
Identification	zhs-2-20
Dimensions	Point 1	Point 2	Point 3	Point 4	Point 5	Point 6	Average	Std Dev.
Diameter (mm)	49.2	49.3	49.2				49.23	0.058
Height (mm)	100.8	101.0	100.8				100.87	0.115
Cross-sectional area (mm�)	1903.7
Conditioning time
Properties/Comments
Test Data	5Hz
*********
Test date and time	Mon	Apr 1	2019	2:34 PM
Dynamic modulus (MPa)	12918
Phase angle (Degrees)	4.04
Average temperature (�C)	20.2
Average confining pressure (kPa)	-0.6
Average micro-strain	99
Load drift (%)	0.1
Load standard error (%)	2.3
Average deformation drift (%)	-2.3
Average deformation standard error (%)	2.4
Deformation uniformity (%)	32.3
Phase uniformity (Degrees)	0.0
Conditioning Cycles
Time (sec)	Axial stress (kPa)	Axial micro-strain #1	Axial micro-strain #2	Axial micro-strain #3	Confining pressure (kPa)	Temperature (�C)	Load (N)	Displacement #1 (mm)	Displacement #2 (mm)	Displacement #3 (mm)
0.0000	380.955	8.796	38.338	7.336	-0.570	20.224	725.241	-0.000616	-0.002684	-0.000513
0.0040	316.093	4.840	31.666	5.135	-0.578	20.222	601.759	-0.000339	-0.002217	-0.000359
0.0080	236.262	-0.955	22.038	0.714	-0.568	20.230	449.781	0.000067	-0.001543	-0.000050
0.0120	228.913	-0.127	20.620	0.027	-0.563	20.239	435.791	0.000009	-0.001443	-0.000002
0.0160	233.106	-1.250	20.842	0.224	-0.557	20.235	443.773	0.000087	-0.001459	-0.000016
0.0200	241.341	-0.282	21.064	0.267	-0.557	20.225	459.452	0.000020	-0.001474	-0.000019
0.0240	258.699	0.209	22.108	1.260	-0.568	20.221	492.496	-0.000015	-0.001548	-0.000088
0.0280	322.660	3.690	28.763	3.744	-0.567	20.230	614.262	-0.000258	-0.002013	-0.000262
0.0320	394.901	8.546	36.796	6.887	-0.575	20.239	751.791	-0.000598	-0.002576	-0.000482
0.0360	446.915	11.367	43.230	9.441	-0.576	20.235	850.811	-0.000796	-0.003026	-0.000661
0.0400	502.174	15.925	49.775	12.151	-0.573	20.225	956.011	-0.001115	-0.003484	-0.000851
0.0440	561.236	19.377	56.362	15.450	-0.577	20.221	1068.449	-0.001356	-0.003945	-0.001081
0.0480	614.016	22.900	62.863	17.958	-0.572	20.230	1168.928	-0.001603	-0.004400	-0.001257
0.0520	680.742	28.121	69.951	21.440	-0.576	20.240	1295.958	-0.001969	-0.004897	-0.001501
0.0560	757.823	32.988	77.857	25.411	-0.574	20.235	1442.699	-0.002309	-0.005450	-0.001779
0.0600	810.587	36.188	84.515	28.528	-0.576	20.225	1543.150	-0.002533	-0.005916	-0.001997
0.0640	867.830	40.834	91.281	31.894	-0.580	20.221	1652.126	-0.002858	-0.006390	-0.002233
0.0680	915.831	44.046	96.660	34.223	-0.578	20.230	1743.507	-0.003083	-0.006766	-0.002396
0.0720	971.752	48.030	103.413	37.016	-0.578	20.239	1849.966	-0.003362	-0.007239	-0.002591
0.0760	1031.670	52.875	109.931	40.340	-0.570	20.235	1964.035	-0.003701	-0.007695	-0.002824
0.0800	1070.879	55.218	114.560	42.445	-0.573	20.225	2038.679	-0.003865	-0.008019	-0.002971
0.0840	1087.606	57.899	117.062	44.005	-0.577	20.221	2070.522	-0.004053	-0.008194	-0.003080
0.0880	1120.864	59.342	120.355	45.493	-0.573	20.230	2133.837	-0.004154	-0.008425	-0.003184
0.0920	1157.578	61.589	124.077	47.708	-0.581	20.239	2203.732	-0.004311	-0.008685	-0.003340
0.0960	1166.625	62.949	126.007	48.464	-0.570	20.235	2220.955	-0.004406	-0.008820	-0.003392
0.1000	1170.698	63.076	127.081	48.620	-0.570	20.225	2228.708	-0.004415	-0.008896	-0.003403
0.1040	1168.023	63.779	127.442	49.113	-0.576	20.221	2223.616	-0.004465	-0.008921	-0.003438
0.1080	1165.198	63.328	127.304	48.915	-0.577	20.230	2218.237	-0.004433	-0.008911	-0.003424
0.1120	1159.021	63.750	127.387	48.790	-0.582	20.239	2206.478	-0.004462	-0.008917	-0.003415
0.1160	1147.599	63.173	126.427	48.550	-0.580	20.235	2184.734	-0.004422	-0.008850	-0.003398
0.1200	1128.859	61.813	124.994	47.861	-0.577	20.224	2149.057	-0.004327	-0.008750	-0.003350
0.1240	1098.532	60.408	122.897	46.977	-0.587	20.221	2091.322	-0.004229	-0.008603	-0.003288
0.1280	1038.598	56.354	116.978	43.697	-0.573	20.230	1977.224	-0.003945	-0.008188	-0.003059
0.1320	978.394	52.511	110.667	40.650	-0.580	20.239	1862.612	-0.003676	-0.007747	-0.002845
0.1360	928.816	49.422	105.457	38.293	-0.577	20.235	1768.227	-0.003460	-0.007382	-0.002681
0.1400	877.298	45.578	100.579	35.948	-0.566	20.224	1670.151	-0.003190	-0.007041	-0.002516
0.1440	816.298	42.461	94.213	32.863	-0.573	20.221	1554.022	-0.002972	-0.006595	-0.002300
0.1480	751.330	37.985	86.348	29.452	-0.564	20.229	1430.340	-0.002659	-0.006044	-0.002062
0.1520	693.952	33.370	80.442	26.464	-0.574	20.239	1321.106	-0.002336	-0.005631	-0.001852
0.1560	632.245	30.057	73.078	23.196	-0.574	20.235	1203.632	-0.002104	-0.005115	-0.001624
0.1600	575.753	25.384	66.506	19.823	-0.573	20.225	1096.087	-0.001777	-0.004655	-0.001388
0.1640	512.228	21.875	59.417	16.752	-0.572	20.221	975.151	-0.001531	-0.004159	-0.001173
0.1680	463.115	18.086	53.277	13.818	-0.575	20.230	881.653	-0.001266	-0.003729	-0.000967
0.1720	414.078	14.030	47.522	11.365	-0.577	20.239	788.298	-0.000982	-0.003327	-0.000796
0.1760	372.720	12.122	42.215	9.089	-0.574	20.235	709.562	-0.000849	-0.002955	-0.000636
0.1800	330.956	7.899	37.475	7.043	-0.573	20.225	630.054	-0.000553	-0.002623	-0.000493
0.1840	294.512	5.850	32.404	5.137	-0.570	20.221	560.675	-0.000409	-0.002268	-0.000360
0.1880	273.337	4.431	29.291	3.450	-0.561	20.230	520.363	-0.000310	-0.002050	-0.000242
0.1920	243.205	1.121	24.693	2.143	-0.570	20.239	462.999	-0.000078	-0.001729	-0.000150
0.1960	218.348	0.335	21.498	0.867	-0.561	20.235	415.678	-0.000023	-0.001505	-0.000061
0.2000	209.210	-1.378	20.243	0.238	-0.572	20.225	398.283	0.000096	-0.001417	-0.000017
0.2040	208.339	-0.535	19.784	0.183	-0.570	20.222	396.624	0.000037	-0.001385	-0.000013
0.2080	210.578	-1.264	19.546	-0.043	-0.568	20.231	400.887	0.000088	-0.001368	0.000003
0.2120	215.477	-0.968	19.813	0.181	-0.568	20.240	410.213	0.000068	-0.001387	-0.000013
0.2160	223.487	-0.562	19.923	0.266	-0.564	20.235	425.463	0.000039	-0.001395	-0.000019
0.2200	237.855	0.152	20.925	0.603	-0.565	20.225	452.814	-0.000011	-0.001465	-0.000042
0.2240	284.488	2.708	24.996	2.718	-0.572	20.221	541.592	-0.000190	-0.001750	-0.000190
0.2280	350.102	6.046	32.266	5.291	-0.564	20.230	666.504	-0.000423	-0.002259	-0.000370
0.2320	404.805	10.272	38.908	7.923	-0.565	20.240	770.645	-0.000719	-0.002724	-0.000555
0.2360	446.208	12.376	44.050	10.045	-0.569	20.235	849.466	-0.000866	-0.003084	-0.000703
0.2400	496.839	15.420	50.193	12.428	-0.576	20.225	945.854	-0.001079	-0.003514	-0.000870
0.2440	561.957	21.132	57.624	15.799	-0.573	20.222	1069.822	-0.001479	-0.004034	-0.001106
0.2480	622.477	24.233	64.545	18.714	-0.562	20.230	1185.036	-0.001696	-0.004518	-0.001310
0.2520	680.441	29.004	70.937	21.946	-0.580	20.239	1295.385	-0.002030	-0.004966	-0.001536
0.2560	748.234	32.734	78.762	25.607	-0.573	20.235	1424.446	-0.002291	-0.005513	-0.001792
0.2600	799.857	36.427	84.334	28.654	-0.578	20.225	1522.722	-0.002550	-0.005903	-0.002006
0.2640	857.281	41.028	91.281	31.641	-0.584	20.222	1632.042	-0.002872	-0.006390	-0.002215
0.2680	917.635	44.425	98.134	34.616	-0.574	20.230	1746.941	-0.003110	-0.006869	-0.002423
0.2720	968.701	48.960	103.916	37.394	-0.588	20.239	1844.158	-0.003427	-0.007274	-0.002618
0.2760	1015.755	52.284	109.252	39.852	-0.578	20.236	1933.737	-0.003660	-0.007648	-0.002790
0.2800	1061.156	54.921	114.253	42.461	-0.572	20.225	2020.168	-0.003844	-0.007998	-0.002972
0.2840	1096.743	58.376	118.365	44.778	-0.580	20.222	2087.917	-0.004086	-0.008286	-0.003134
0.2880	1129.280	60.717	121.981	46.388	-0.564	20.230	2149.858	-0.004250	-0.008539	-0.003247
0.2920	1155.399	61.448	125.063	47.972	-0.572	20.240	2199.583	-0.004301	-0.008754	-0.003358
0.2960	1170.022	64.282	127.023	49.084	-0.562	20.235	2227.421	-0.004500	-0.008892	-0.003436
0.3000	1170.112	63.117	127.582	49.167	-0.568	20.225	2227.592	-0.004418	-0.008931	-0.003442
0.3040	1169.375	64.929	128.262	49.533	-0.572	20.221	2226.191	-0.004545	-0.008978	-0.003467
0.3080	1168.278	63.919	128.443	49.576	-0.567	20.230	2224.102	-0.004474	-0.008991	-0.003470
0.3120	1164.206	64.997	128.108	49.252	-0.568	20.240	2216.349	-0.004550	-0.008968	-0.003448
0.3160	1153.866	64.577	127.566	49.000	-0.554	20.236	2196.665	-0.004520	-0.008930	-0.003430
0.3200	1135.291	62.669	126.426	48.620	-0.561	20.225	2161.303	-0.004387	-0.008850	-0.003403
0.3240	1094.774	61.040	122.676	47.286	-0.571	20.222	2084.169	-0.004273	-0.008587	-0.003310
0.3280	1035.517	56.466	116.990	44.102	-0.564	20.231	1971.359	-0.003953	-0.008189	-0.003087
0.3320	987.396	53.268	112.667	41.391	-0.568	20.240	1879.749	-0.003729	-0.007887	-0.002897
0.3360	934.421	50.334	106.652	38.868	-0.561	20.236	1778.898	-0.003523	-0.007466	-0.002721
0.3400	871.107	45.716	100.329	35.753	-0.565	20.224	1658.363	-0.003200	-0.007023	-0.002503
0.3440	819.484	43.318	94.518	33.242	-0.572	20.221	1560.087	-0.003032	-0.006616	-0.002327
0.3480	774.053	39.261	89.477	30.854	-0.570	20.230	1473.598	-0.002748	-0.006263	-0.002160
0.3520	699.723	34.844	81.193	26.914	-0.564	20.239	1332.092	-0.002439	-0.005683	-0.001884
0.3560	635.642	29.568	74.191	23.530	-0.558	20.235	1210.098	-0.002070	-0.005193	-0.001647
0.3600	580.427	26.505	67.146	20.569	-0.567	20.225	1104.984	-0.001855	-0.004700	-0.001440
0.3640	517.699	21.987	60.641	17.524	-0.570	20.221	985.565	-0.001539	-0.004245	-0.001227
0.3680	458.682	17.806	53.691	14.227	-0.566	20.230	873.213	-0.001246	-0.003758	-0.000996
0.3720	407.631	14.944	46.955	11.324	-0.567	20.239	776.024	-0.001046	-0.003287	-0.000793
0.3760	364.048	11.016	41.798	9.091	-0.562	20.235	693.054	-0.000771	-0.002926	-0.000636
0.3800	322.795	8.868	36.461	6.636	-0.566	20.225	614.519	-0.000621	-0.002552	-0.000464
0.3840	285.284	5.179	30.946	4.785	-0.570	20.222	543.108	-0.000363	-0.002166	-0.000335
0.3880	258.939	3.604	27.248	3.238	-0.567	20.230	492.954	-0.000252	-0.001907	-0.000227
0.3920	238.486	1.851	24.788	2.199	-0.570	20.239	454.016	-0.000130	-0.001735	-0.000154
0.3960	224.975	0.589	22.371	1.203	-0.557	20.235	428.295	-0.000041	-0.001566	-0.000084
0.4000	209.015	-0.606	20.674	0.462	-0.562	20.225	397.911	0.000042	-0.001447	-0.000032
0.4040	201.561	-1.223	19.604	0.223	-0.572	20.222	383.720	0.000086	-0.001372	-0.000016
0.4080	204.146	-0.956	19.159	-0.013	-0.565	20.231	388.641	0.000067	-0.001341	0.000001
0.4120	208.174	-0.914	19.020	-0.140	-0.572	20.240	396.309	0.000064	-0.001331	0.000010
0.4160	215.868	-0.408	19.535	0.055	-0.559	20.235	410.957	0.000029	-0.001367	-0.000004
0.4200	234.082	-0.634	20.649	0.421	-0.559	20.224	445.633	0.000044	-0.001445	-0.000029
0.4240	284.924	2.920	25.691	2.705	-0.560	20.222	542.421	-0.000204	-0.001798	-0.000189
0.4280	342.663	6.287	32.627	5.442	-0.561	20.230	652.342	-0.000440	-0.002284	-0.000381
0.4320	388.875	9.050	37.643	7.560	-0.566	20.240	740.318	-0.000633	-0.002635	-0.000529
0.4360	439.386	12.950	44.119	9.624	-0.557	20.235	836.477	-0.000907	-0.003088	-0.000674
0.4400	510.755	16.783	52.177	13.090	-0.562	20.225	972.347	-0.001175	-0.003652	-0.000916
0.4440	570.644	21.862	59.097	16.501	-0.566	20.222	1086.359	-0.001530	-0.004137	-0.001155
0.4480	627.827	24.893	65.491	19.053	-0.564	20.231	1195.221	-0.001742	-0.004584	-0.001334
0.4520	686.858	29.550	72.131	22.451	-0.566	20.239	1307.602	-0.002069	-0.005049	-0.001572
0.4560	745.244	32.948	78.665	25.436	-0.561	20.235	1418.753	-0.002306	-0.005507	-0.001781
0.4600	810.542	37.661	85.864	29.145	-0.564	20.225	1543.064	-0.002636	-0.006010	-0.002040
0.4640	873.271	42.112	93.464	32.891	-0.570	20.222	1662.483	-0.002948	-0.006543	-0.002302
0.4680	932.408	46.137	100.120	35.655	-0.568	20.230	1775.064	-0.003230	-0.007008	-0.002496
0.4720	980.513	49.617	105.485	38.154	-0.568	20.240	1866.646	-0.003473	-0.007384	-0.002671
0.4760	1021.105	52.551	110.085	40.452	-0.561	20.236	1943.922	-0.003679	-0.007706	-0.002832
0.4800	1061.021	56.254	114.699	42.488	-0.564	20.225	2019.911	-0.003938	-0.008029	-0.002974
0.4840	1104.708	58.220	119.381	45.225	-0.569	20.222	2103.081	-0.004075	-0.008357	-0.003166
0.4880	1138.928	61.180	123.576	47.146	-0.563	20.231	2168.226	-0.004283	-0.008650	-0.003300
0.4920	1150.139	61.940	125.063	48.072	-0.570	20.240	2189.569	-0.004336	-0.008754	-0.003365
0.4960	1158.991	63.202	126.399	48.663	-0.575	20.235	2206.421	-0.004424	-0.008848	-0.003406
0.5000	1168.308	63.876	127.705	49.125	-0.567	20.225	2224.159	-0.004471	-0.008939	-0.003439
0.5040	1174.906	65.039	128.887	50.039	-0.576	20.222	2236.719	-0.004553	-0.009022	-0.003503
0.5080	1177.416	65.631	129.747	50.277	-0.576	20.230	2241.497	-0.004594	-0.009082	-0.003519
0.5120	1172.877	65.265	129.386	49.968	-0.576	20.239	2232.857	-0.004569	-0.009057	-0.003498
0.5160	1163.229	64.508	128.998	49.858	-0.566	20.235	2214.489	-0.004516	-0.009030	-0.003490
0.5200	1145.330	63.709	127.453	49.392	-0.569	20.225	2180.414	-0.004460	-0.008922	-0.003457
0.5240	1101.823	60.871	124.147	47.948	-0.576	20.222	2097.588	-0.004261	-0.008690	-0.003356
0.5280	1036.359	57.645	117.463	44.340	-0.565	20.231	1972.961	-0.004035	-0.008222	-0.003104
0.5320	978.800	53.170	112.056	41.489	-0.571	20.240	1863.384	-0.003722	-0.007844	-0.002904
0.5360	926.141	49.744	106.305	38.546	-0.562	20.235	1763.134	-0.003482	-0.007441	-0.002698
0.5400	870.566	46.265	100.536	35.975	-0.564	20.225	1657.333	-0.003239	-0.007038	-0.002518
0.5440	815.246	43.330	94.880	33.369	-0.569	20.222	1552.019	-0.003033	-0.006642	-0.002336
0.5480	768.628	39.655	89.100	30.616	-0.560	20.231	1463.270	-0.002776	-0.006237	-0.002143
0.5520	699.016	34.406	81.792	27.026	-0.567	20.239	1330.748	-0.002408	-0.005725	-0.001892
0.5560	628.037	30.646	73.397	23.361	-0.561	20.235	1195.621	-0.002145	-0.005138	-0.001635
0.5600	578.489	26.308	67.922	20.457	-0.560	20.225	1101.294	-0.001842	-0.004755	-0.001432
0.5640	521.456	22.522	61.458	17.565	-0.573	20.222	992.718	-0.001577	-0.004302	-0.001230
0.5680	462.830	18.872	54.221	14.450	-0.570	20.231	881.109	-0.001321	-0.003795	-0.001011
0.5720	409.765	14.298	48.092	11.350	-0.558	20.239	780.087	-0.001001	-0.003366	-0.000794
0.5760	368.211	12.193	43.019	9.202	-0.560	20.235	700.979	-0.000854	-0.003011	-0.000644
0.5800	330.415	8.348	37.644	7.237	-0.563	20.225	629.025	-0.000584	-0.002635	-0.000507
0.5840	290.815	6.944	32.238	5.402	-0.568	20.222	553.637	-0.000486	-0.002257	-0.000378
0.5880	259.165	3.269	27.763	3.239	-0.564	20.231	493.383	-0.000229	-0.001943	-0.000227
0.5920	240.064	1.881	25.442	2.228	-0.565	20.240	457.020	-0.000132	-0.001781	-0.000156
0.5960	221.068	0.870	22.689	1.328	-0.557	20.235	420.856	-0.000061	-0.001588	-0.000093
0.6000	205.814	-1.095	19.882	0.448	-0.557	20.225	391.817	0.000077	-0.001392	-0.000031
0.6040	200.494	-1.012	19.855	0.645	-0.565	20.223	381.689	0.000071	-0.001390	-0.000045
0.6080	202.057	-1.446	19.339	0.028	-0.561	20.231	384.665	0.000101	-0.001354	-0.000002
0.6120	206.400	-0.564	19.326	0.057	-0.566	20.240	392.933	0.000039	-0.001353	-0.000004
0.6160	215.207	-1.139	19.645	0.308	-0.565	20.236	409.698	0.000080	-0.001375	-0.000022
0.6200	232.760	0.097	20.841	0.869	-0.565	20.225	443.115	-0.000007	-0.001459	-0.000061
0.6240	279.634	2.216	25.219	2.521	-0.570	20.222	532.351	-0.000155	-0.001765	-0.000176
0.6280	339.822	5.681	32.015	5.092	-0.565	20.231	646.935	-0.000398	-0.002241	-0.000356
0.6320	389.070	9.176	38.337	7.463	-0.568	20.240	740.690	-0.000642	-0.002684	-0.000522
0.6360	449.440	13.022	44.800	10.452	-0.570	20.236	855.618	-0.000912	-0.003136	-0.000732
0.6400	507.705	17.301	52.177	13.371	-0.572	20.224	966.539	-0.001211	-0.003652	-0.000936
0.6440	569.471	20.935	59.140	16.444	-0.586	20.222	1084.127	-0.001465	-0.004140	-0.001151
0.6480	634.920	26.183	66.255	19.837	-0.582	20.231	1208.725	-0.001833	-0.004638	-0.001389
0.6520	693.020	29.903	73.230	22.984	-0.578	20.240	1319.332	-0.002093	-0.005126	-0.001609
0.6560	749.271	32.961	79.110	26.041	-0.568	20.235	1426.420	-0.002307	-0.005538	-0.001823
0.6600	806.905	37.857	85.958	29.087	-0.570	20.225	1536.140	-0.002650	-0.006017	-0.002036
0.6640	866.162	41.395	92.866	32.583	-0.585	20.222	1648.951	-0.002898	-0.006501	-0.002281
0.6680	922.594	46.028	99.203	35.429	-0.565	20.232	1756.382	-0.003222	-0.006944	-0.002480
0.6720	979.371	49.479	105.526	38.280	-0.565	20.240	1864.471	-0.003464	-0.007387	-0.002680
0.6760	1022.969	53.070	110.434	40.733	-0.558	20.235	1947.470	-0.003715	-0.007730	-0.002851
0.6800	1066.536	56.564	115.171	42.993	-0.575	20.226	2030.411	-0.003959	-0.008062	-0.003009
0.6840	1102.364	58.545	119.632	45.043	-0.572	20.222	2098.618	-0.004098	-0.008374	-0.003153
0.6880	1122.863	60.661	121.689	46.627	-0.566	20.231	2137.642	-0.004246	-0.008518	-0.003264
0.6920	1151.432	61.938	125.328	48.142	-0.575	20.240	2192.030	-0.004336	-0.008773	-0.003370
0.6960	1179.850	64.887	128.371	49.828	-0.565	20.236	2246.132	-0.004542	-0.008986	-0.003488
0.7000	1186.222	64.578	129.968	50.446	-0.568	20.225	2258.263	-0.004520	-0.009098	-0.003531
0.7040	1180.947	65.840	130.164	50.574	-0.583	20.222	2248.220	-0.004609	-0.009111	-0.003540
0.7080	1173.193	64.577	129.497	50.153	-0.577	20.231	2233.458	-0.004520	-0.009065	-0.003511
0.7120	1164.176	65.110	129.470	49.856	-0.581	20.240	2216.291	-0.004558	-0.009063	-0.003490
0.7160	1148.501	63.524	128.249	49.589	-0.566	20.235	2186.451	-0.004447	-0.008977	-0.003471
0.7200	1120.849	62.177	126.120	48.044	-0.570	20.225	2133.808	-0.004352	-0.008828	-0.003363
0.7240	1078.904	59.848	121.869	46.881	-0.577	20.222	2053.957	-0.004189	-0.008531	-0.003282
0.7280	1025.659	55.906	116.616	43.654	-0.573	20.231	1952.591	-0.003913	-0.008163	-0.003056
0.7320	987.351	54.220	113.000	41.700	-0.583	20.240	1879.663	-0.003795	-0.007910	-0.002919
0.7360	942.341	50.993	108.113	39.442	-0.572	20.236	1793.976	-0.003569	-0.007568	-0.002761
0.7400	881.867	47.908	101.817	36.510	-0.569	20.225	1678.848	-0.003354	-0.007127	-0.002556
0.7440	822.445	43.162	95.964	33.872	-0.576	20.222	1565.723	-0.003021	-0.006718	-0.002371
0.7480	765.983	39.543	89.017	30.433	-0.573	20.231	1458.235	-0.002768	-0.006231	-0.002130
0.7520	695.500	34.703	81.541	26.799	-0.574	20.239	1324.053	-0.002429	-0.005708	-0.001876
0.7560	636.438	30.590	74.690	23.993	-0.557	20.235	1211.615	-0.002141	-0.005228	-0.001680
0.7600	579.751	26.843	67.979	20.611	-0.560	20.224	1103.697	-0.001879	-0.004759	-0.001443
0.7640	520.088	22.451	61.641	17.510	-0.569	20.222	990.114	-0.001572	-0.004315	-0.001226
0.7680	465.986	19.043	55.123	14.338	-0.560	20.231	887.117	-0.001333	-0.003859	-0.001004
0.7720	418.616	15.153	48.717	12.150	-0.566	20.240	796.938	-0.001061	-0.003410	-0.000850
0.7760	372.043	12.290	43.313	9.750	-0.565	20.235	708.275	-0.000860	-0.003032	-0.000682
0.7800	322.314	8.741	36.698	7.013	-0.562	20.225	613.604	-0.000612	-0.002569	-0.000491
0.7840	281.677	5.416	31.737	4.923	-0.567	20.222	536.242	-0.000379	-0.002222	-0.000345
0.7880	251.035	3.323	27.108	3.379	-0.562	20.231	477.905	-0.000233	-0.001898	-0.000237
0.7920	231.272	0.952	24.400	2.017	-0.574	20.240	440.283	-0.000067	-0.001708	-0.000141
0.7960	217.341	-0.199	22.496	1.470	-0.561	20.235	413.761	0.000014	-0.001575	-0.000103
0.8000	209.331	0.433	21.065	0.575	-0.564	20.226	398.512	-0.000030	-0.001475	-0.000040
0.8040	205.844	-0.872	20.132	0.477	-0.565	20.223	391.874	0.000061	-0.001409	-0.000033
0.8080	208.023	-0.113	20.105	0.127	-0.565	20.231	396.023	0.000008	-0.001407	-0.000009
0.8120	212.877	-0.662	20.357	0.407	-0.568	20.240	405.264	0.000046	-0.001425	-0.000028
0.8160	219.670	-0.367	20.479	0.393	-0.568	20.235	418.196	0.000026	-0.001434	-0.000027
0.8200	235.270	0.043	20.981	1.064	-0.570	20.225	447.893	-0.000003	-0.001469	-0.000075
0.8240	288.170	2.792	26.693	2.916	-0.568	20.222	548.601	-0.000195	-0.001868	-0.000204
0.8280	348.208	6.483	33.265	5.753	-0.571	20.231	662.899	-0.000454	-0.002329	-0.000403
0.8320	399.485	10.004	39.865	7.728	-0.579	20.240	760.517	-0.000700	-0.002791	-0.000541
0.8360	459.554	13.907	46.481	11.068	-0.573	20.235	874.872	-0.000973	-0.003254	-0.000775
0.8400	522.763	17.918	53.985	14.085	-0.569	20.225	995.207	-0.001254	-0.003779	-0.000986
0.8440	576.911	22.085	60.170	17.006	-0.576	20.222	1098.289	-0.001546	-0.004212	-0.001190
0.8480	623.889	25.145	65.464	19.401	-0.563	20.231	1187.725	-0.001760	-0.004582	-0.001358
0.8520	677.811	28.920	71.187	22.280	-0.576	20.240	1290.379	-0.002024	-0.004983	-0.001560
0.8560	749.271	33.665	79.290	25.803	-0.562	20.235	1426.420	-0.002357	-0.005550	-0.001806
0.8600	815.111	37.817	87.045	29.675	-0.561	20.225	1551.762	-0.002647	-0.006093	-0.002077
0.8640	865.561	42.125	93.005	32.427	-0.568	20.222	1647.806	-0.002949	-0.006510	-0.002270
0.8680	923.285	44.946	99.607	35.259	-0.559	20.231	1757.698	-0.003146	-0.006972	-0.002468
0.8720	975.689	50.207	105.721	37.999	-0.561	20.239	1857.462	-0.003514	-0.007400	-0.002660
0.8760	1023.179	52.608	111.156	40.494	-0.547	20.235	1947.870	-0.003683	-0.007781	-0.002835
0.8800	1061.682	56.158	115.114	42.825	-0.550	20.225	2021.170	-0.003931	-0.008058	-0.002998
0.8840	1090.852	58.136	118.506	44.736	-0.560	20.222	2076.702	-0.004070	-0.008295	-0.003132
0.8880	1121.570	60.198	121.619	46.360	-0.554	20.231	2135.181	-0.004214	-0.008513	-0.003245
0.8920	1145.105	61.953	125.079	47.735	-0.560	20.240	2179.985	-0.004337	-0.008756	-0.003341
0.8960	1171.299	63.849	127.858	49.139	-0.561	20.235	2229.853	-0.004469	-0.008950	-0.003440
0.9000	1185.336	65.251	129.788	50.138	-0.560	20.225	2256.575	-0.004568	-0.009085	-0.003510
0.9040	1183.773	65.307	130.428	50.826	-0.566	20.222	2253.599	-0.004571	-0.009130	-0.003558
0.9080	1178.723	65.699	130.457	50.250	-0.564	20.231	2243.986	-0.004599	-0.009132	-0.003518
0.9120	1173.208	65.305	130.108	50.278	-0.572	20.239	2233.486	-0.004571	-0.009108	-0.003519
0.9160	1164.672	65.347	129.276	50.068	-0.563	20.235	2217.236	-0.004574	-0.009049	-0.003505
0.9200	1131.804	62.922	127.164	48.675	-0.567	20.225	2154.665	-0.004405	-0.008901	-0.003407
0.9240	1060.104	58.447	120.327	45.731	-0.576	20.222	2018.166	-0.004091	-0.008423	-0.003201
0.9280	1014.673	55.498	115.615	43.107	-0.562	20.231	1931.677	-0.003885	-0.008093	-0.003017
0.9320	978.650	53.195	111.974	41.323	-0.568	20.240	1863.098	-0.003724	-0.007838	-0.002893
0.9360	930.243	51.133	107.070	38.940	-0.567	20.235	1770.945	-0.003579	-0.007495	-0.002726
0.9400	866.568	45.772	100.619	35.933	-0.568	20.225	1649.723	-0.003204	-0.007043	-0.002515
0.9440	813.608	43.500	94.631	33.578	-0.570	20.222	1548.901	-0.003045	-0.006624	-0.002350
0.9480	765.247	39.051	89.475	30.462	-0.557	20.231	1456.833	-0.002734	-0.006263	-0.002132
0.9520	702.443	34.605	82.611	27.502	-0.570	20.239	1337.271	-0.002422	-0.005783	-0.001925
0.9560	647.409	31.277	75.663	24.595	-0.564	20.235	1232.500	-0.002189	-0.005296	-0.001722
0.9600	583.237	26.535	68.785	21.005	-0.564	20.224	1110.334	-0.001857	-0.004815	-0.001470
0.9640	519.216	23.560	61.433	17.509	-0.576	20.222	988.455	-0.001649	-0.004300	-0.001226
0.9680	467.864	18.593	55.110	14.872	-0.571	20.231	890.694	-0.001302	-0.003858	-0.001041
0.9720	410.095	15.294	48.732	11.550	-0.570	20.239	780.716	-0.001071	-0.003411	-0.000808
0.9760	368.256	11.672	42.826	9.188	-0.566	20.235	701.065	-0.000817	-0.002998	-0.000643
0.9800	333.480	9.289	38.266	7.448	-0.569	20.225	634.861	-0.000650	-0.002679	-0.000521
0.9840	294.872	6.777	33.446	5.682	-0.574	20.221	561.361	-0.000474	-0.002341	-0.000398
0.9880	259.375	3.564	27.943	3.548	-0.569	20.231	493.784	-0.000249	-0.001956	-0.000248
0.9920	235.645	2.105	24.997	2.354	-0.573	20.240	448.608	-0.000147	-0.001750	-0.000165
0.9960	225.246	0.658	23.483	1.526	-0.572	20.235	428.810	-0.000046	-0.001644	-0.000107
1.0000	211.916	-4.280	15.868	-1.574	-0.581	20.239	403.433	0.000300	-0.001111	0.000110
1.0040	215.072	-3.255	15.548	-1.573	-0.569	20.234	409.441	0.000228	-0.001088	0.000110
1.0080	218.829	-4.421	15.658	-1.756	-0.570	20.224	416.594	0.000309	-0.001096	0.000123
1.0120	227.064	-2.807	16.495	-1.321	-0.569	20.223	432.272	0.000197	-0.001155	0.000092
1.0160	247.563	-2.120	18.215	-0.519	-0.569	20.233	471.296	0.000148	-0.001275	0.000036
1.0200	292.167	1.052	23.483	1.304	-0.576	20.239	556.211	-0.000074	-0.001644	-0.000091
1.0240	344.947	3.478	29.234	3.787	-0.573	20.234	656.691	-0.000243	-0.002046	-0.000265
1.0280	400.642	7.661	36.115	6.243	-0.572	20.224	762.720	-0.000536	-0.002528	-0.000437
1.0320	472.598	12.111	44.924	9.905	-0.584	20.223	899.706	-0.000848	-0.003145	-0.000693
1.0360	545.381	17.330	52.693	13.481	-0.578	20.233	1038.265	-0.001213	-0.003689	-0.000944
1.0400	608.636	21.245	59.889	17.090	-0.581	20.240	1158.686	-0.001487	-0.004192	-0.001196
1.0440	693.847	26.983	70.034	21.258	-0.570	20.234	1320.906	-0.001889	-0.004902	-0.001488
1.0480	777.044	32.526	78.956	25.930	-0.566	20.224	1479.292	-0.002277	-0.005527	-0.001815
1.0520	854.966	37.928	88.614	30.055	-0.585	20.223	1627.636	-0.002655	-0.006203	-0.002104
1.0560	932.618	44.552	97.369	34.337	-0.584	20.233	1775.465	-0.003119	-0.006816	-0.002404
1.0600	1011.547	49.169	106.221	38.448	-0.584	20.240	1925.726	-0.003442	-0.007435	-0.002691
1.0640	1085.547	55.162	114.476	42.348	-0.569	20.234	2066.603	-0.003861	-0.008013	-0.002964
1.0680	1159.938	59.863	122.536	46.445	-0.569	20.224	2208.223	-0.004190	-0.008578	-0.003251
1.0720	1236.357	65.334	131.415	50.881	-0.568	20.223	2353.706	-0.004573	-0.009199	-0.003562
1.0760	1293.555	70.107	137.958	54.024	-0.570	20.234	2462.597	-0.004907	-0.009657	-0.003782
1.0800	1340.714	72.913	143.686	56.954	-0.577	20.240	2552.376	-0.005104	-0.010058	-0.003987
1.0840	1403.263	78.327	150.813	60.493	-0.564	20.234	2671.452	-0.005483	-0.010557	-0.004234
1.0880	1447.837	80.562	156.483	63.016	-0.565	20.224	2756.310	-0.005639	-0.010954	-0.004411
1.0920	1466.758	83.323	159.320	64.714	-0.576	20.223	2792.330	-0.005833	-0.011152	-0.004530
1.0960	1474.437	83.716	160.487	65.164	-0.573	20.234	2806.950	-0.005860	-0.011234	-0.004561
1.1000	1492.035	86.357	162.874	66.190	-0.583	20.240	2840.452	-0.006045	-0.011401	-0.004633
1.1040	1499.414	86.188	163.904	66.948	-0.568	20.234	2854.500	-0.006033	-0.011473	-0.004686
1.1080	1488.940	86.118	163.280	66.794	-0.570	20.224	2834.558	-0.006028	-0.011430	-0.004676
1.1120	1475.700	86.258	163.417	66.528	-0.581	20.223	2809.353	-0.006038	-0.011439	-0.004657
1.1160	1464.098	85.557	162.500	66.234	-0.578	20.233	2787.266	-0.005989	-0.011375	-0.004636
1.1200	1425.204	83.619	159.513	64.925	-0.579	20.240	2713.223	-0.005853	-0.011166	-0.004545
1.1240	1357.441	78.947	153.066	61.672	-0.562	20.234	2584.219	-0.005526	-0.010715	-0.004317
1.1280	1295.223	75.846	146.937	58.384	-0.564	20.224	2465.773	-0.005309	-0.010286	-0.004087
1.1320	1233.772	71.200	140.364	55.707	-0.574	20.224	2348.785	-0.004984	-0.009825	-0.003899
1.1360	1163.304	66.920	133.081	51.876	-0.568	20.234	2214.632	-0.004684	-0.009316	-0.003631
1.1400	1085.983	60.886	124.702	48.115	-0.577	20.240	2067.432	-0.004262	-0.008729	-0.003368
1.1440	1014.688	56.662	116.991	43.988	-0.569	20.234	1931.705	-0.003966	-0.008189	-0.003079
1.1480	940.403	51.050	109.153	39.793	-0.565	20.224	1790.285	-0.003573	-0.007641	-0.002786
1.1520	850.908	46.110	100.134	35.598	-0.579	20.224	1619.911	-0.003228	-0.007009	-0.002492
1.1560	772.505	40.345	91.185	31.319	-0.583	20.234	1470.652	-0.002824	-0.006383	-0.002192
1.1600	702.743	35.753	83.417	27.615	-0.580	20.240	1337.843	-0.002503	-0.005839	-0.001933
1.1640	629.149	30.493	74.454	23.431	-0.565	20.234	1197.739	-0.002135	-0.005212	-0.001640
1.1680	553.451	24.654	65.810	19.432	-0.575	20.224	1053.629	-0.001726	-0.004607	-0.001360
1.1720	490.858	21.356	58.209	16.051	-0.577	20.223	934.467	-0.001495	-0.004075	-0.001124
1.1760	435.719	16.304	51.123	13.118	-0.575	20.233	829.496	-0.001141	-0.003579	-0.000918
1.1800	382.187	13.036	44.881	10.130	-0.586	20.240	727.587	-0.000912	-0.003142	-0.000709
1.1840	331.256	8.896	38.477	7.531	-0.581	20.234	630.627	-0.000623	-0.002693	-0.000527
1.1880	291.025	5.639	32.723	4.841	-0.570	20.224	554.037	-0.000395	-0.002291	-0.000339
1.1920	262.471	3.983	29.070	3.701	-0.575	20.223	499.678	-0.000279	-0.002035	-0.000259
1.1960	248.420	2.749	26.344	2.774	-0.569	20.233	472.927	-0.000192	-0.001844	-0.000194
1.2000	239.703	2.173	25.051	2.002	-0.579	20.240	456.333	-0.000152	-0.001754	-0.000140
1.2040	228.883	0.405	22.442	1.540	-0.566	20.235	435.734	-0.000028	-0.001571	-0.000108
1.2080	225.561	-0.170	22.345	1.234	-0.560	20.224	429.411	0.000012	-0.001564	-0.000086
1.2120	229.349	0.196	22.052	1.315	-0.564	20.224	436.621	-0.000014	-0.001544	-0.000092
1.2160	238.351	0.490	22.637	1.259	-0.562	20.233	453.758	-0.000034	-0.001585	-0.000088
1.2200	263.162	1.908	24.287	1.904	-0.576	20.240	500.994	-0.000134	-0.001700	-0.000133
1.2240	336.020	6.468	32.266	5.078	-0.566	20.234	639.696	-0.000453	-0.002259	-0.000355
1.2280	409.915	10.186	40.436	8.290	-0.565	20.224	780.373	-0.000713	-0.002831	-0.000580
1.2320	470.539	15.266	47.758	11.575	-0.564	20.223	895.786	-0.001069	-0.003343	-0.000810
1.2360	540.437	18.145	55.472	14.663	-0.562	20.233	1028.852	-0.001270	-0.003883	-0.001026
1.2400	610.995	24.218	63.740	18.744	-0.570	20.240	1163.177	-0.001695	-0.004462	-0.001312
1.2440	684.649	28.597	71.522	22.142	-0.566	20.234	1303.396	-0.002002	-0.005007	-0.001550
1.2480	768.823	34.617	81.332	26.476	-0.565	20.224	1463.642	-0.002423	-0.005693	-0.001853
1.2520	857.205	40.341	91.436	31.641	-0.572	20.224	1631.899	-0.002824	-0.006401	-0.002215
1.2560	931.761	46.349	99.550	35.346	-0.565	20.234	1773.834	-0.003244	-0.006968	-0.002474
1.2600	1009.308	51.147	108.667	39.302	-0.572	20.240	1921.463	-0.003580	-0.007607	-0.002751
1.2640	1088.102	57.099	117.102	43.851	-0.558	20.234	2071.466	-0.003997	-0.008197	-0.003070
1.2680	1158.615	61.588	124.466	47.553	-0.556	20.224	2205.706	-0.004311	-0.008713	-0.003329
1.2720	1225.041	66.400	132.442	51.443	-0.569	20.224	2332.163	-0.004648	-0.009271	-0.003601
1.2760	1296.065	70.668	140.197	55.272	-0.564	20.234	2467.375	-0.004947	-0.009814	-0.003869
1.2800	1341.661	74.794	145.727	58.121	-0.570	20.240	2554.178	-0.005236	-0.010201	-0.004068
1.2840	1370.245	77.569	149.479	59.722	-0.555	20.234	2608.595	-0.005430	-0.010464	-0.004181
1.2880	1427.203	80.770	155.468	62.821	-0.561	20.225	2717.028	-0.005654	-0.010883	-0.004397
1.2920	1449.490	83.899	159.360	64.771	-0.564	20.224	2759.457	-0.005873	-0.011155	-0.004534
1.2960	1459.814	83.871	160.655	65.305	-0.556	20.234	2779.112	-0.005871	-0.011246	-0.004571
1.3000	1471.446	85.585	162.154	65.965	-0.565	20.240	2801.256	-0.005991	-0.011351	-0.004618
1.3040	1483.093	86.119	163.014	66.808	-0.565	20.234	2823.429	-0.006028	-0.011411	-0.004677
1.3080	1485.754	87.044	164.184	66.796	-0.562	20.224	2828.493	-0.006093	-0.011493	-0.004676
1.3120	1475.038	86.371	164.404	67.031	-0.567	20.224	2808.094	-0.006046	-0.011508	-0.004692
1.3160	1460.100	86.175	163.501	66.612	-0.564	20.233	2779.655	-0.006032	-0.011445	-0.004663
1.3200	1428.570	83.829	161.279	65.615	-0.567	20.240	2719.631	-0.005868	-0.011290	-0.004593
1.3240	1357.636	80.111	154.386	62.192	-0.557	20.234	2584.591	-0.005608	-0.010807	-0.004353
1.3280	1279.368	74.948	146.325	58.009	-0.560	20.224	2435.589	-0.005246	-0.010243	-0.004061
1.3320	1227.956	71.467	141.489	55.668	-0.569	20.223	2337.713	-0.005003	-0.009904	-0.003897
1.3360	1180.211	69.250	135.528	53.306	-0.564	20.233	2246.819	-0.004847	-0.009487	-0.003731
1.3400	1106.917	63.665	128.302	49.407	-0.566	20.239	2107.286	-0.004457	-0.008981	-0.003458
1.3440	1026.741	59.089	119.466	45.059	-0.558	20.233	1954.651	-0.004136	-0.008363	-0.003154
1.3480	941.425	52.171	110.763	40.439	-0.568	20.224	1792.231	-0.003652	-0.007753	-0.002831
1.3520	865.005	48.033	102.928	36.665	-0.570	20.224	1646.748	-0.003362	-0.007205	-0.002567
1.3560	798.519	42.293	95.356	33.411	-0.569	20.233	1520.176	-0.002961	-0.006675	-0.002339
1.3600	706.080	37.760	85.252	28.361	-0.565	20.239	1344.194	-0.002643	-0.005968	-0.001985
1.3640	626.099	31.096	75.620	24.062	-0.554	20.234	1191.931	-0.002177	-0.005293	-0.001684
1.3680	554.097	25.918	67.019	19.755	-0.554	20.224	1054.859	-0.001814	-0.004691	-0.001383
1.3720	480.083	21.133	58.528	16.107	-0.566	20.223	913.954	-0.001479	-0.004097	-0.001127
1.3760	424.748	16.641	51.010	12.907	-0.556	20.233	808.611	-0.001165	-0.003571	-0.000903
1.3800	372.133	12.797	44.216	10.116	-0.565	20.240	708.447	-0.000896	-0.003095	-0.000708
1.3840	330.805	8.936	38.893	7.799	-0.570	20.234	629.768	-0.000626	-0.002723	-0.000546
1.3880	291.987	6.988	33.808	5.543	-0.566	20.224	555.868	-0.000489	-0.002367	-0.000388
1.3920	260.563	4.588	30.041	4.039	-0.574	20.224	496.044	-0.000321	-0.002103	-0.000283
1.3960	244.828	3.592	27.445	2.958	-0.575	20.234	466.089	-0.000251	-0.001921	-0.000207
1.4000	238.937	2.414	25.788	2.493	-0.578	20.240	454.874	-0.000169	-0.001805	-0.000175
1.4040	233.572	1.669	24.579	2.157	-0.564	20.235	444.660	-0.000117	-0.001721	-0.000151
1.4080	232.850	1.080	23.678	1.555	-0.562	20.224	443.287	-0.000076	-0.001657	-0.000109
1.4120	238.305	1.402	24.551	2.115	-0.566	20.224	453.672	-0.000098	-0.001719	-0.000148
1.4160	248.164	2.047	25.024	1.959	-0.569	20.234	472.441	-0.000143	-0.001752	-0.000137
1.4200	275.816	2.863	27.124	2.888	-0.584	20.240	525.084	-0.000200	-0.001899	-0.000202
1.4240	351.995	8.363	35.129	6.089	-0.571	20.234	670.109	-0.000585	-0.002459	-0.000426
1.4280	408.743	11.113	41.729	8.682	-0.570	20.224	778.141	-0.000778	-0.002921	-0.000608
1.4320	462.755	15.350	47.635	11.927	-0.573	20.224	880.966	-0.001074	-0.003334	-0.000835
1.4360	538.798	19.716	56.346	15.434	-0.570	20.234	1025.734	-0.001380	-0.003944	-0.001080
1.4400	612.182	24.892	64.754	18.970	-0.568	20.240	1165.438	-0.001742	-0.004533	-0.001328
1.4440	682.094	28.993	72.646	22.760	-0.558	20.234	1298.532	-0.002029	-0.005085	-0.001593
1.4480	768.748	35.066	81.667	27.039	-0.559	20.224	1463.499	-0.002455	-0.005717	-0.001893
1.4520	853.824	41.114	92.339	31.767	-0.572	20.223	1625.462	-0.002878	-0.006464	-0.002224
1.4560	934.106	46.615	101.440	35.893	-0.567	20.233	1778.297	-0.003263	-0.007101	-0.002513
1.4600	1018.565	52.928	110.221	40.087	-0.569	20.241	1939.087	-0.003705	-0.007715	-0.002806
1.4640	1085.186	57.041	117.339	43.907	-0.556	20.234	2065.916	-0.003993	-0.008214	-0.003074
1.4680	1144.879	61.853	124.119	47.371	-0.553	20.224	2179.556	-0.004330	-0.008688	-0.003316
1.4720	1230.436	67.454	133.638	52.059	-0.556	20.224	2342.434	-0.004722	-0.009355	-0.003644
1.4760	1302.963	72.757	141.795	56.142	-0.562	20.234	2480.507	-0.005093	-0.009926	-0.003930
1.4800	1344.607	75.046	146.964	58.261	-0.557	20.240	2559.786	-0.005253	-0.010287	-0.004078
1.4840	1395.117	79.563	152.621	61.263	-0.553	20.234	2655.945	-0.005569	-0.010683	-0.004288
1.4880	1440.804	82.187	158.192	63.787	-0.557	20.224	2742.920	-0.005753	-0.011073	-0.004465
1.4920	1450.512	85.008	160.015	65.095	-0.563	20.224	2761.402	-0.005951	-0.011201	-0.004557
1.4960	1457.515	84.433	161.141	65.334	-0.560	20.234	2774.734	-0.005910	-0.011280	-0.004573
1.5000	1481.095	86.427	163.668	66.738	-0.563	20.240	2819.624	-0.006050	-0.011457	-0.004672
1.5040	1492.080	88.010	165.073	67.649	-0.553	20.234	2840.538	-0.006161	-0.011555	-0.004735
1.5080	1487.963	86.989	165.114	67.426	-0.557	20.224	2832.699	-0.006089	-0.011558	-0.004720
1.5120	1478.104	87.941	165.099	67.664	-0.562	20.225	2813.931	-0.006156	-0.011557	-0.004736
1.5160	1460.912	85.992	163.974	67.232	-0.551	20.234	2781.200	-0.006019	-0.011478	-0.004706
1.5200	1421.928	84.772	161.666	65.474	-0.566	20.240	2706.985	-0.005934	-0.011317	-0.004583
1.5240	1352.346	80.223	154.664	62.246	-0.558	20.234	2574.520	-0.005616	-0.010826	-0.004357
1.5280	1283.005	76.309	147.299	58.655	-0.561	20.224	2442.513	-0.005342	-0.010311	-0.004106
1.5320	1232.780	72.364	142.407	56.355	-0.565	20.224	2346.897	-0.005066	-0.009969	-0.003945
1.5360	1168.880	68.646	135.181	53.195	-0.559	20.234	2225.246	-0.004805	-0.009463	-0.003724
1.5400	1100.651	63.593	128.386	49.717	-0.560	20.240	2095.356	-0.004452	-0.008987	-0.003480
1.5440	1015.379	58.501	119.006	44.989	-0.557	20.234	1933.022	-0.004095	-0.008330	-0.003149
1.5480	931.521	52.353	110.611	40.508	-0.554	20.224	1773.376	-0.003665	-0.007743	-0.002836
1.5520	851.314	47.501	101.915	36.341	-0.572	20.224	1620.684	-0.003325	-0.007134	-0.002544
1.5560	778.892	42.490	93.603	32.764	-0.561	20.233	1482.811	-0.002974	-0.006552	-0.002293
1.5600	703.976	37.662	85.530	28.358	-0.569	20.240	1340.189	-0.002636	-0.005987	-0.001985
1.5640	621.109	31.374	76.148	24.022	-0.565	20.234	1182.432	-0.002196	-0.005330	-0.001682
1.5680	547.425	25.860	66.809	19.937	-0.552	20.224	1042.156	-0.001810	-0.004677	-0.001396
1.5720	486.935	21.734	59.543	16.752	-0.561	20.223	927.000	-0.001521	-0.004168	-0.001173
1.5760	426.852	17.806	52.387	13.256	-0.557	20.233	812.616	-0.001246	-0.003667	-0.000928
1.5800	372.840	14.031	45.300	10.803	-0.560	20.239	709.791	-0.000982	-0.003171	-0.000756
1.5840	324.418	9.429	39.213	7.896	-0.553	20.233	617.609	-0.000660	-0.002745	-0.000553
1.5880	288.410	7.127	33.932	5.402	-0.550	20.224	549.059	-0.000499	-0.002375	-0.000378
1.5920	258.624	4.727	29.958	4.026	-0.565	20.224	492.353	-0.000331	-0.002097	-0.000282
1.5960	240.725	3.885	27.332	3.153	-0.562	20.234	458.279	-0.000272	-0.001913	-0.000221
1.6000	232.174	2.217	25.427	2.677	-0.561	20.240	441.999	-0.000155	-0.001780	-0.000187
1.6040	231.573	2.273	25.038	2.381	-0.556	20.235	440.855	-0.000159	-0.001753	-0.000167
1.6080	231.528	0.784	24.578	2.073	-0.552	20.224	440.769	-0.000055	-0.001720	-0.000145
1.6120	235.766	1.838	25.175	2.156	-0.564	20.225	448.837	-0.000129	-0.001762	-0.000151
1.6160	245.714	1.487	25.426	2.255	-0.556	20.234	467.777	-0.000104	-0.001780	-0.000158
1.6200	272.044	3.618	27.777	3.182	-0.574	20.240	517.902	-0.000253	-0.001944	-0.000223
1.6240	341.611	7.044	34.474	5.894	-0.565	20.234	650.339	-0.000493	-0.002413	-0.000413
1.6280	409.194	12.010	42.577	8.851	-0.558	20.224	778.999	-0.000841	-0.002980	-0.000620
1.6320	464.814	15.462	48.719	11.981	-0.561	20.224	884.886	-0.001082	-0.003410	-0.000839
1.6360	536.574	20.038	56.346	15.377	-0.561	20.234	1021.500	-0.001403	-0.003944	-0.001076
1.6400	622.011	25.736	66.242	19.670	-0.559	20.240	1184.149	-0.001801	-0.004637	-0.001377
1.6440	699.753	30.774	75.537	23.993	-0.554	20.233	1332.150	-0.002154	-0.005288	-0.001680
1.6480	766.734	35.544	82.749	27.081	-0.557	20.224	1459.665	-0.002488	-0.005792	-0.001896
1.6520	845.603	40.651	92.075	31.865	-0.562	20.224	1609.812	-0.002846	-0.006445	-0.002231
1.6560	943.498	47.512	102.259	36.580	-0.564	20.234	1796.179	-0.003326	-0.007158	-0.002561
1.6600	1026.801	53.350	111.736	41.028	-0.561	20.240	1954.765	-0.003734	-0.007822	-0.002872
1.6640	1091.949	58.120	118.784	44.426	-0.552	20.234	2078.791	-0.004068	-0.008315	-0.003110
1.6680	1136.358	61.124	123.828	47.104	-0.551	20.224	2163.334	-0.004279	-0.008668	-0.003297
1.6720	1224.545	67.733	133.111	52.185	-0.549	20.224	2331.219	-0.004741	-0.009318	-0.003653
1.6760	1320.306	73.601	144.130	57.179	-0.544	20.234	2513.523	-0.005152	-0.010089	-0.004003
1.6800	1348.469	76.927	148.034	59.061	-0.553	20.240	2567.139	-0.005385	-0.010362	-0.004134
1.6840	1373.732	78.132	151.203	60.577	-0.546	20.234	2615.232	-0.005469	-0.010584	-0.004240
1.6880	1426.932	82.397	157.372	63.380	-0.554	20.224	2716.513	-0.005768	-0.011016	-0.004437
1.6920	1453.668	84.349	160.778	65.431	-0.554	20.224	2767.410	-0.005904	-0.011254	-0.004580
1.6960	1463.136	85.235	162.055	66.050	-0.556	20.234	2785.435	-0.005966	-0.011344	-0.004623
1.7000	1487.557	87.547	164.919	67.271	-0.552	20.240	2831.926	-0.006128	-0.011544	-0.004709
1.7040	1487.737	87.294	165.269	67.847	-0.544	20.234	2832.270	-0.006111	-0.011569	-0.004749
1.7080	1481.651	87.169	165.143	67.425	-0.550	20.224	2820.683	-0.006102	-0.011560	-0.004720
1.7120	1476.210	87.772	165.393	67.805	-0.561	20.224	2810.326	-0.006144	-0.011577	-0.004746
1.7160	1460.235	87.352	165.057	67.231	-0.547	20.234	2779.913	-0.006115	-0.011554	-0.004706
1.7200	1411.438	84.165	160.765	65.404	-0.557	20.240	2687.016	-0.005892	-0.011254	-0.004578
1.7240	1340.459	80.306	154.150	62.092	-0.550	20.234	2551.889	-0.005621	-0.010790	-0.004346
1.7280	1291.707	76.097	148.258	59.537	-0.548	20.224	2459.078	-0.005327	-0.010378	-0.004168
1.7320	1233.577	73.417	142.991	56.762	-0.558	20.224	2348.413	-0.005139	-0.010009	-0.003973
1.7360	1162.417	68.183	134.959	52.661	-0.554	20.233	2212.944	-0.004773	-0.009447	-0.003686
1.7400	1082.812	63.397	127.137	48.732	-0.556	20.240	2061.396	-0.004438	-0.008900	-0.003411
1.7440	1010.796	58.472	119.073	44.930	-0.548	20.234	1924.295	-0.004093	-0.008335	-0.003145
1.7480	931.536	52.957	110.724	40.397	-0.550	20.224	1773.405	-0.003707	-0.007751	-0.002828
1.7520	850.924	47.512	102.845	36.524	-0.559	20.224	1619.940	-0.003326	-0.007199	-0.002557
1.7560	776.864	42.222	94.256	32.638	-0.558	20.234	1478.949	-0.002956	-0.006598	-0.002285
1.7600	701.511	37.845	85.751	28.527	-0.561	20.239	1335.497	-0.002649	-0.006003	-0.001997
1.7640	633.057	32.358	77.762	24.806	-0.557	20.234	1205.177	-0.002265	-0.005443	-0.001736
1.7680	566.180	28.023	69.451	21.004	-0.565	20.224	1077.862	-0.001962	-0.004862	-0.001470
1.7720	494.435	22.295	61.361	17.511	-0.569	20.223	941.277	-0.001561	-0.004295	-0.001226
1.7760	436.019	18.143	53.927	14.100	-0.570	20.233	830.069	-0.001270	-0.003775	-0.000987
1.7800	384.066	14.804	47.578	11.069	-0.569	20.240	731.163	-0.001036	-0.003330	-0.000775
1.7840	335.810	10.116	41.172	8.612	-0.551	20.233	639.296	-0.000708	-0.002882	-0.000603
1.7880	294.422	7.956	35.698	6.131	-0.560	20.223	560.503	-0.000557	-0.002499	-0.000429
1.7920	267.340	5.668	31.695	4.855	-0.561	20.224	508.947	-0.000397	-0.002219	-0.000340
1.7960	254.266	4.838	29.417	4.011	-0.564	20.234	484.056	-0.000339	-0.002059	-0.000281
1.8000	241.071	3.085	27.638	2.944	-0.562	20.240	458.937	-0.000216	-0.001935	-0.000206
1.8040	232.805	2.569	26.069	2.466	-0.557	20.234	443.201	-0.000180	-0.001825	-0.000173
1.8080	229.574	1.416	25.218	2.199	-0.558	20.224	437.050	-0.000099	-0.001765	-0.000154
1.8120	232.730	2.174	25.482	2.465	-0.565	20.224	443.058	-0.000152	-0.001784	-0.000173
1.8160	242.348	2.116	25.427	2.352	-0.564	20.233	461.369	-0.000148	-0.001780	-0.000165
1.8200	268.528	4.013	27.485	3.279	-0.565	20.240	511.208	-0.000281	-0.001924	-0.000230
1.8240	346.345	8.364	35.741	6.313	-0.553	20.234	659.351	-0.000585	-0.002502	-0.000442
1.8280	412.875	12.250	43.090	9.343	-0.549	20.224	786.009	-0.000857	-0.003016	-0.000654
1.8320	465.219	15.926	48.746	12.150	-0.559	20.224	885.658	-0.001115	-0.003412	-0.000850
1.8360	542.811	20.654	57.278	16.068	-0.561	20.234	1033.373	-0.001446	-0.004009	-0.001125
1.8400	614.587	24.936	65.908	19.585	-0.563	20.240	1170.015	-0.001746	-0.004614	-0.001371
1.8440	690.615	30.857	74.579	23.670	-0.564	20.234	1314.754	-0.002160	-0.005221	-0.001657
1.8480	762.602	34.886	82.764	27.390	-0.556	20.224	1451.797	-0.002442	-0.005793	-0.001917
1.8520	841.501	41.044	91.658	31.568	-0.568	20.224	1602.001	-0.002873	-0.006416	-0.002210
1.8560	926.141	46.756	100.842	35.738	-0.564	20.235	1763.134	-0.003273	-0.007059	-0.002502
1.8600	1011.923	53.421	110.166	40.564	-0.570	20.240	1926.441	-0.003739	-0.007712	-0.002840
1.8640	1091.002	57.295	119.173	44.483	-0.560	20.234	2076.988	-0.004011	-0.008342	-0.003114
1.8680	1162.177	62.684	126.566	48.661	-0.557	20.224	2212.486	-0.004388	-0.008860	-0.003406
1.8720	1247.673	69.025	136.432	53.432	-0.559	20.224	2375.250	-0.004832	-0.009550	-0.003740
1.8760	1309.110	73.699	143.047	56.479	-0.557	20.234	2492.208	-0.005159	-0.010013	-0.003954
1.8800	1347.778	76.646	148.326	59.187	-0.563	20.241	2565.823	-0.005365	-0.010383	-0.004143
1.8840	1403.353	80.462	154.427	62.176	-0.550	20.234	2671.623	-0.005632	-0.010810	-0.004352
1.8880	1439.316	83.690	159.028	64.124	-0.550	20.224	2740.088	-0.005858	-0.011132	-0.004489
1.8920	1460.476	85.107	161.529	65.853	-0.561	20.224	2780.371	-0.005957	-0.011307	-0.004610
1.8960	1472.664	86.679	163.627	66.429	-0.561	20.235	2803.574	-0.006068	-0.011454	-0.004650
1.9000	1488.669	87.478	165.336	67.426	-0.571	20.240	2834.044	-0.006123	-0.011574	-0.004720
1.9040	1494.891	88.768	166.476	68.294	-0.568	20.234	2845.888	-0.006214	-0.011653	-0.004781
1.9080	1488.970	87.897	166.294	67.959	-0.565	20.224	2834.616	-0.006153	-0.011641	-0.004757
1.9120	1482.042	88.771	166.796	68.517	-0.563	20.224	2821.426	-0.006214	-0.011676	-0.004796
1.9160	1467.629	87.451	165.851	67.848	-0.561	20.234	2793.989	-0.006122	-0.011610	-0.004749
1.9200	1427.774	85.853	162.738	66.274	-0.568	20.240	2718.115	-0.006010	-0.011392	-0.004639
1.9240	1349.927	79.972	155.580	62.541	-0.559	20.234	2569.914	-0.005598	-0.010891	-0.004378
1.9280	1296.125	77.642	149.174	59.903	-0.555	20.224	2467.489	-0.005435	-0.010442	-0.004193
1.9320	1247.418	73.993	144.952	57.587	-0.562	20.224	2374.763	-0.005180	-0.010147	-0.004031
1.9360	1159.953	68.774	135.458	52.955	-0.562	20.234	2208.252	-0.004814	-0.009482	-0.003707
1.9400	1073.254	62.541	126.454	48.536	-0.572	20.240	2043.200	-0.004378	-0.008852	-0.003398
1.9440	1009.684	58.879	119.229	45.240	-0.566	20.235	1922.178	-0.004122	-0.008346	-0.003167
1.9480	928.741	52.874	111.168	40.621	-0.565	20.224	1768.084	-0.003701	-0.007782	-0.002843
1.9520	846.220	47.906	101.995	36.469	-0.558	20.224	1610.985	-0.003353	-0.007140	-0.002553
1.9560	784.994	42.951	95.452	33.439	-0.560	20.234	1494.427	-0.003007	-0.006682	-0.002341
1.9600	708.875	38.335	86.308	29.311	-0.571	20.240	1349.516	-0.002683	-0.006042	-0.002052
1.9640	625.227	32.429	76.719	24.498	-0.567	20.234	1190.271	-0.002270	-0.005370	-0.001715
1.9680	557.659	27.054	68.727	21.003	-0.561	20.224	1061.640	-0.001894	-0.004811	-0.001470
1.9720	496.448	22.619	61.529	17.649	-0.563	20.224	945.110	-0.001583	-0.004307	-0.001235
1.9760	437.552	19.027	54.304	14.550	-0.561	20.234	832.987	-0.001332	-0.003801	-0.001019
1.9800	360.532	13.329	45.244	10.243	-0.566	20.239	686.359	-0.000933	-0.003167	-0.000717
1.9840	317.220	9.555	39.061	7.968	-0.561	20.234	603.905	-0.000669	-0.002734	-0.000558
1.9880	287.298	7.478	34.683	5.880	-0.561	20.223	546.942	-0.000523	-0.002428	-0.000412
1.9920	253.469	5.289	30.638	4.332	-0.557	20.224	482.540	-0.000370	-0.002145	-0.000303
1.9960	240.545	4.292	28.054	3.112	-0.563	20.234	457.935	-0.000300	-0.001964	-0.000218
Test Cycles
Time (sec)	Axial stress (kPa)	Axial micro-strain #1	Axial micro-strain #2	Axial micro-strain #3	Confining pressure (kPa)	Temperature (�C)	Load (N)	Displacement #1 (mm)	Displacement #2 (mm)	Displacement #3 (mm)
0.0000	229.905	2.665	26.344	2.719	-0.567	20.240	437.679	-0.000187	-0.001844	-0.000190
0.0040	227.831	2.497	25.415	2.380	-0.549	20.234	433.731	-0.000175	-0.001779	-0.000167
0.0080	230.055	1.023	25.329	2.016	-0.552	20.224	437.965	-0.000072	-0.001773	-0.000141
0.0120	234.143	2.342	25.733	2.228	-0.566	20.224	445.747	-0.000164	-0.001801	-0.000156
0.0160	243.565	2.357	25.956	2.411	-0.562	20.234	463.686	-0.000165	-0.001817	-0.000169
0.0200	279.634	4.684	28.583	3.870	-0.569	20.240	532.351	-0.000328	-0.002001	-0.000271
0.0240	360.276	8.926	37.032	7.364	-0.562	20.234	685.873	-0.000625	-0.002592	-0.000515
0.0280	424.147	13.329	44.604	10.016	-0.557	20.224	807.467	-0.000933	-0.003122	-0.000701
0.0320	473.260	16.249	50.288	12.920	-0.560	20.225	900.965	-0.001137	-0.003520	-0.000904
0.0360	550.791	21.581	58.959	16.640	-0.559	20.235	1048.565	-0.001511	-0.004127	-0.001165
0.0400	626.594	26.281	67.825	20.554	-0.561	20.240	1192.875	-0.001840	-0.004748	-0.001439
0.0440	690.766	30.927	75.176	23.714	-0.558	20.234	1315.041	-0.002165	-0.005262	-0.001660
0.0480	765.186	35.446	83.112	27.475	-0.556	20.224	1456.718	-0.002481	-0.005818	-0.001923
0.0520	845.769	41.424	92.436	32.159	-0.567	20.224	1610.126	-0.002900	-0.006471	-0.002251
0.0560	931.295	47.051	101.776	36.343	-0.554	20.235	1772.947	-0.003294	-0.007124	-0.002544
0.0600	1015.530	53.294	110.735	40.902	-0.559	20.240	1933.308	-0.003731	-0.007751	-0.002863
0.0640	1091.468	58.249	119.409	44.932	-0.550	20.234	2077.875	-0.004077	-0.008359	-0.003145
0.0680	1170.337	63.651	127.927	49.028	-0.553	20.224	2228.022	-0.004456	-0.008955	-0.003432
0.0720	1237.454	68.758	135.708	53.165	-0.557	20.225	2355.795	-0.004813	-0.009500	-0.003722
0.0760	1299.221	72.912	143.240	56.439	-0.565	20.235	2473.383	-0.005104	-0.010027	-0.003951
0.0800	1356.629	77.936	149.481	59.524	-0.565	20.240	2582.674	-0.005455	-0.010464	-0.004167
0.0840	1388.670	79.691	153.342	61.715	-0.556	20.234	2643.671	-0.005578	-0.010734	-0.004320
0.0880	1410.476	82.260	156.498	62.736	-0.557	20.224	2685.184	-0.005758	-0.010955	-0.004392
0.0920	1452.315	84.378	160.889	65.488	-0.568	20.225	2764.835	-0.005906	-0.011262	-0.004584
0.0960	1475.805	87.030	163.834	66.892	-0.567	20.235	2809.553	-0.006092	-0.011468	-0.004682
0.1000	1487.016	87.634	165.322	67.594	-0.568	20.240	2830.896	-0.006134	-0.011573	-0.004732
0.1040	1492.471	88.867	166.629	68.099	-0.553	20.234	2841.282	-0.006221	-0.011664	-0.004767
0.1080	1491.028	87.674	166.420	68.057	-0.554	20.224	2838.535	-0.006137	-0.011649	-0.004764
0.1120	1483.093	89.133	166.922	68.197	-0.556	20.225	2823.429	-0.006239	-0.011685	-0.004774
0.1160	1465.405	86.986	165.726	67.805	-0.558	20.235	2789.755	-0.006089	-0.011601	-0.004746
0.1200	1412.340	85.178	161.751	65.810	-0.559	20.241	2688.732	-0.005962	-0.011323	-0.004607
0.1240	1338.205	80.029	154.176	62.219	-0.563	20.234	2547.598	-0.005602	-0.010792	-0.004355
0.1280	1286.447	76.251	148.966	59.609	-0.562	20.224	2449.064	-0.005338	-0.010428	-0.004173
0.1320	1223.267	72.772	141.795	56.213	-0.572	20.225	2328.787	-0.005094	-0.009926	-0.003935
0.1360	1168.384	68.983	136.752	53.447	-0.575	20.235	2224.302	-0.004829	-0.009573	-0.003741
0.1400	1091.363	64.703	128.150	49.575	-0.577	20.240	2077.675	-0.004529	-0.008970	-0.003470
0.1440	1012.464	58.487	119.938	45.478	-0.571	20.234	1927.471	-0.004094	-0.008396	-0.003183
0.1480	942.266	54.319	112.557	41.351	-0.564	20.224	1793.833	-0.003802	-0.007879	-0.002895
0.1520	846.881	47.330	102.999	36.677	-0.560	20.225	1612.244	-0.003313	-0.007210	-0.002567
0.1560	776.503	43.358	94.325	33.018	-0.560	20.234	1478.262	-0.003035	-0.006603	-0.002311
0.1600	704.652	37.872	86.515	29.158	-0.565	20.240	1341.476	-0.002651	-0.006056	-0.002041
0.1640	628.338	33.115	77.650	24.779	-0.564	20.234	1196.194	-0.002318	-0.005436	-0.001734
0.1680	561.176	27.432	69.285	21.076	-0.559	20.224	1068.335	-0.001920	-0.004850	-0.001475
0.1720	499.815	23.489	62.197	18.001	-0.565	20.224	951.519	-0.001644	-0.004354	-0.001260
0.1760	436.094	18.508	54.693	14.311	-0.557	20.234	830.212	-0.001296	-0.003829	-0.001002
0.1800	381.150	14.678	48.065	11.365	-0.565	20.240	725.613	-0.001027	-0.003365	-0.000796
0.1840	330.535	11.463	41.034	8.360	-0.568	20.234	629.253	-0.000802	-0.002872	-0.000585
0.1880	293.730	7.635	35.879	6.439	-0.562	20.224	559.187	-0.000534	-0.002512	-0.000451
0.1920	271.563	6.763	33.087	5.220	-0.569	20.224	516.987	-0.000473	-0.002316	-0.000365
0.1960	246.872	4.194	29.443	3.660	-0.574	20.234	469.980	-0.000294	-0.002061	-0.000256
0.2000	229.168	2.738	26.665	2.929	-0.573	20.240	436.277	-0.000192	-0.001867	-0.000205
0.2040	224.194	2.161	25.218	2.424	-0.569	20.234	426.807	-0.000151	-0.001765	-0.000170
0.2080	225.396	1.992	24.858	2.088	-0.562	20.224	429.096	-0.000139	-0.001740	-0.000146
0.2120	231.498	2.385	25.399	2.494	-0.558	20.224	440.712	-0.000167	-0.001778	-0.000175
0.2160	245.143	2.765	25.859	2.662	-0.563	20.233	466.690	-0.000194	-0.001810	-0.000186
0.2200	288.575	4.981	29.459	3.926	-0.569	20.240	549.374	-0.000349	-0.002062	-0.000275
0.2240	357.796	8.908	37.047	7.140	-0.560	20.233	681.152	-0.000624	-0.002593	-0.000500
0.2280	408.367	11.856	42.616	9.286	-0.558	20.224	777.426	-0.000830	-0.002983	-0.000650
0.2320	460.801	16.165	49.094	12.038	-0.563	20.225	877.247	-0.001132	-0.003437	-0.000843
0.2360	536.529	20.375	57.375	15.968	-0.562	20.234	1021.414	-0.001426	-0.004016	-0.001118
0.2400	619.907	26.254	67.158	20.347	-0.569	20.240	1180.143	-0.001838	-0.004701	-0.001424
0.2440	691.096	30.660	74.732	23.951	-0.562	20.233	1315.670	-0.002146	-0.005231	-0.001677
0.2480	767.185	36.327	83.194	27.491	-0.558	20.223	1460.524	-0.002543	-0.005824	-0.001924
0.2520	854.515	41.872	93.658	32.680	-0.564	20.224	1626.778	-0.002931	-0.006556	-0.002288
0.2560	929.492	47.780	101.732	36.384	-0.566	20.235	1769.514	-0.003345	-0.007121	-0.002547
0.2600	1000.772	52.467	109.805	39.962	-0.568	20.240	1905.212	-0.003673	-0.007686	-0.002797
0.2640	1086.298	58.418	118.602	44.566	-0.560	20.234	2068.033	-0.004089	-0.008302	-0.003120
0.2680	1172.862	63.736	128.150	49.422	-0.563	20.224	2232.828	-0.004462	-0.008970	-0.003460
0.2720	1235.741	68.521	135.500	53.038	-0.552	20.225	2352.533	-0.004797	-0.009485	-0.003713
0.2760	1298.800	73.165	142.906	56.424	-0.557	20.234	2472.582	-0.005122	-0.010003	-0.003950
0.2800	1345.493	76.701	148.717	59.271	-0.568	20.240	2561.474	-0.005369	-0.010410	-0.004149
0.2840	1381.997	80.222	152.552	61.138	-0.563	20.234	2630.968	-0.005616	-0.010679	-0.004280
0.2880	1426.977	82.609	158.318	63.702	-0.562	20.223	2716.599	-0.005783	-0.011082	-0.004459
0.2920	1465.360	86.384	162.307	66.316	-0.570	20.224	2789.669	-0.006047	-0.011361	-0.004642
0.2960	1484.717	86.777	165.170	67.511	-0.564	20.235	2826.519	-0.006074	-0.011562	-0.004726
0.3000	1489.360	88.585	165.990	67.933	-0.562	20.240	2835.360	-0.006201	-0.011619	-0.004755
0.3040	1488.684	87.829	166.490	67.862	-0.556	20.233	2834.072	-0.006148	-0.011654	-0.004750
0.3080	1485.047	88.333	166.378	67.847	-0.556	20.224	2827.148	-0.006183	-0.011646	-0.004749
0.3120	1476.195	88.307	166.672	68.057	-0.566	20.225	2810.297	-0.006181	-0.011667	-0.004764
0.3160	1460.957	87.197	165.309	67.524	-0.554	20.234	2781.286	-0.006104	-0.011572	-0.004727
0.3200	1410.085	85.415	161.653	65.560	-0.564	20.240	2684.441	-0.005979	-0.011316	-0.004589
0.3240	1337.408	80.084	154.608	62.386	-0.553	20.234	2546.082	-0.005606	-0.010823	-0.004367
0.3280	1291.030	77.473	149.314	59.875	-0.554	20.223	2457.790	-0.005423	-0.010452	-0.004191
0.3320	1213.860	71.916	141.171	56.297	-0.557	20.225	2310.877	-0.005034	-0.009882	-0.003941
0.3360	1143.151	68.269	133.805	52.297	-0.551	20.234	2176.266	-0.004779	-0.009366	-0.003661
0.3400	1089.920	63.680	128.052	49.492	-0.560	20.240	2074.928	-0.004458	-0.008964	-0.003464
0.3440	1016.401	59.706	120.603	45.505	-0.553	20.234	1934.967	-0.004179	-0.008442	-0.003185
0.3480	933.264	52.719	111.514	41.126	-0.551	20.224	1776.695	-0.003690	-0.007806	-0.002879
0.3520	856.619	48.931	103.928	37.169	-0.568	20.224	1630.783	-0.003425	-0.007275	-0.002602
0.3560	773.467	42.125	94.716	32.849	-0.567	20.234	1472.483	-0.002949	-0.006630	-0.002299
0.3600	706.501	38.547	87.240	29.283	-0.570	20.239	1344.995	-0.002698	-0.006107	-0.002050
0.3640	641.548	33.144	79.235	25.688	-0.561	20.234	1221.342	-0.002320	-0.005546	-0.001798
0.3680	564.332	28.443	69.882	21.413	-0.558	20.223	1074.343	-0.001991	-0.004892	-0.001499
0.3720	491.684	22.941	61.974	17.890	-0.562	20.224	936.041	-0.001606	-0.004338	-0.001252
0.3760	431.090	19.377	54.443	14.480	-0.568	20.234	820.684	-0.001356	-0.003811	-0.001014
0.3800	375.725	13.919	47.467	11.253	-0.568	20.240	715.284	-0.000974	-0.003323	-0.000788
0.3840	325.696	11.211	40.922	8.429	-0.564	20.233	620.041	-0.000785	-0.002865	-0.000590
0.3880	301.485	8.390	37.324	7.152	-0.560	20.224	573.950	-0.000587	-0.002613	-0.000501
0.3920	282.068	7.481	34.657	5.808	-0.570	20.224	536.985	-0.000524	-0.002426	-0.000407
0.3960	250.043	4.517	30.153	4.110	-0.564	20.234	476.017	-0.000316	-0.002111	-0.000288
0.4000	222.225	3.242	25.872	2.436	-0.569	20.240	423.059	-0.000227	-0.001811	-0.000171
0.4040	219.595	1.697	24.954	2.113	-0.556	20.234	418.053	-0.000119	-0.001747	-0.000148
0.4080	223.502	1.207	24.621	1.820	-0.554	20.224	425.491	-0.000085	-0.001723	-0.000127
0.4120	228.627	2.623	25.497	2.535	-0.564	20.225	435.247	-0.000184	-0.001785	-0.000177
0.4160	239.327	1.991	25.761	2.689	-0.568	20.234	455.618	-0.000139	-0.001803	-0.000188
0.4200	273.247	4.882	28.443	3.478	-0.565	20.240	520.191	-0.000342	-0.001991	-0.000243
0.4240	336.967	7.468	34.641	6.564	-0.554	20.234	641.499	-0.000523	-0.002425	-0.000459
0.4280	398.959	12.177	41.964	8.795	-0.554	20.224	759.516	-0.000852	-0.002937	-0.000616
0.4320	449.485	13.975	47.856	11.606	-0.559	20.225	855.703	-0.000978	-0.003350	-0.000812
0.4360	517.293	19.870	55.513	15.195	-0.558	20.235	984.793	-0.001391	-0.003886	-0.001064
0.4400	595.185	23.982	64.338	18.912	-0.569	20.241	1133.080	-0.001679	-0.004504	-0.001324
0.4440	693.591	31.389	75.345	24.064	-0.558	20.234	1320.419	-0.002197	-0.005274	-0.001684
0.4480	792.764	37.508	86.824	28.962	-0.559	20.224	1509.218	-0.002626	-0.006078	-0.002027
0.4520	867.500	43.892	95.341	33.299	-0.562	20.225	1651.497	-0.003072	-0.006674	-0.002331
0.4560	943.889	48.436	103.567	37.197	-0.570	20.235	1796.923	-0.003391	-0.007250	-0.002604
0.4600	1016.251	54.419	111.765	41.071	-0.569	20.241	1934.681	-0.003809	-0.007824	-0.002875
0.4640	1092.926	58.163	119.729	45.042	-0.558	20.234	2080.650	-0.004071	-0.008381	-0.003153
0.4680	1165.709	64.256	127.872	49.140	-0.557	20.224	2219.210	-0.004498	-0.008951	-0.003440
0.4720	1238.010	68.760	136.320	52.955	-0.569	20.225	2356.853	-0.004813	-0.009542	-0.003707
0.4760	1299.822	73.840	143.601	56.773	-0.558	20.235	2474.527	-0.005169	-0.010052	-0.003974
0.4800	1359.650	77.346	150.383	60.084	-0.564	20.240	2588.425	-0.005414	-0.010527	-0.004206
0.4840	1418.622	82.888	157.039	63.200	-0.554	20.234	2700.691	-0.005802	-0.010993	-0.004424
0.4880	1446.725	84.418	159.945	64.909	-0.557	20.224	2754.192	-0.005909	-0.011196	-0.004544
0.4920	1455.802	85.935	162.042	65.924	-0.564	20.225	2771.473	-0.006015	-0.011343	-0.004615
0.4960	1474.858	86.807	164.321	67.006	-0.562	20.234	2807.751	-0.006076	-0.011502	-0.004690
0.5000	1494.530	89.021	166.434	68.590	-0.565	20.240	2845.201	-0.006231	-0.011650	-0.004801
0.5040	1497.145	88.560	167.241	69.050	-0.548	20.234	2850.180	-0.006199	-0.011707	-0.004834
0.5080	1490.773	88.979	167.102	68.309	-0.552	20.224	2838.049	-0.006229	-0.011697	-0.004782
0.5120	1479.532	88.222	167.311	68.378	-0.553	20.225	2816.648	-0.006176	-0.011712	-0.004786
0.5160	1461.933	88.207	166.505	68.044	-0.549	20.234	2783.146	-0.006175	-0.011655	-0.004763
0.5200	1412.761	84.967	162.418	66.331	-0.554	20.240	2689.533	-0.005948	-0.011369	-0.004643
0.5240	1330.300	80.096	154.302	62.107	-0.551	20.234	2532.549	-0.005607	-0.010801	-0.004348
0.5280	1268.578	75.637	147.102	58.722	-0.553	20.224	2415.047	-0.005295	-0.010297	-0.004111
0.5320	1232.675	74.049	143.450	57.237	-0.553	20.225	2346.697	-0.005183	-0.010042	-0.004007
0.5360	1155.489	67.693	135.418	53.138	-0.557	20.235	2199.755	-0.004739	-0.009479	-0.003720
0.5400	1063.846	63.103	125.592	48.425	-0.562	20.240	2025.290	-0.004417	-0.008791	-0.003390
0.5440	1002.530	58.235	119.060	45.099	-0.553	20.234	1908.560	-0.004076	-0.008334	-0.003157
0.5480	934.376	53.688	112.460	41.294	-0.549	20.224	1778.812	-0.003758	-0.007872	-0.002891
0.5520	860.707	49.267	104.180	37.506	-0.554	20.225	1638.565	-0.003449	-0.007293	-0.002625
0.5560	767.035	43.203	94.104	32.791	-0.564	20.235	1460.238	-0.003024	-0.006587	-0.002295
0.5600	687.369	36.987	85.085	28.303	-0.568	20.240	1308.575	-0.002589	-0.005956	-0.001981
0.5640	630.126	32.668	77.816	25.186	-0.555	20.234	1199.598	-0.002287	-0.005447	-0.001763
0.5680	557.734	27.938	69.423	21.482	-0.554	20.224	1061.783	-0.001956	-0.004860	-0.001504
0.5720	486.890	22.466	61.167	17.274	-0.561	20.225	926.914	-0.001573	-0.004282	-0.001209
0.5760	430.519	18.942	54.470	14.143	-0.557	20.235	819.597	-0.001326	-0.003813	-0.000990
0.5800	380.309	14.759	48.107	11.577	-0.563	20.240	724.010	-0.001033	-0.003367	-0.000810
0.5840	338.500	12.388	42.437	8.836	-0.559	20.234	644.417	-0.000867	-0.002971	-0.000619
0.5880	293.865	8.125	36.266	6.482	-0.561	20.224	559.444	-0.000569	-0.002539	-0.000454
0.5920	261.419	6.565	31.918	5.248	-0.561	20.225	497.675	-0.000460	-0.002234	-0.000367
0.5960	239.087	3.677	28.693	3.729	-0.568	20.235	455.160	-0.000257	-0.002008	-0.000261
0.6000	209.992	2.692	24.232	2.030	-0.569	20.240	399.771	-0.000188	-0.001696	-0.000142
0.6040	200.689	0.378	22.913	1.805	-0.558	20.235	382.061	-0.000026	-0.001604	-0.000126
0.6080	208.219	1.373	22.636	1.386	-0.552	20.225	396.395	-0.000096	-0.001585	-0.000097
0.6120	224.269	1.191	23.996	1.947	-0.556	20.226	426.950	-0.000083	-0.001680	-0.000136
0.6160	267.881	5.035	27.568	3.408	-0.558	20.236	509.977	-0.000352	-0.001930	-0.000239
0.6200	312.140	6.608	33.016	5.683	-0.560	20.240	594.234	-0.000463	-0.002311	-0.000398
0.6240	346.300	9.065	36.655	7.055	-0.550	20.234	659.266	-0.000635	-0.002566	-0.000494
0.6280	419.413	13.455	44.617	9.905	-0.553	20.224	798.454	-0.000942	-0.003123	-0.000693
0.6320	488.844	17.482	52.859	13.706	-0.555	20.225	930.634	-0.001224	-0.003700	-0.000959
0.6360	542.330	21.370	58.891	16.458	-0.549	20.235	1032.457	-0.001496	-0.004122	-0.001152
0.6400	608.560	25.510	66.199	19.727	-0.560	20.241	1158.543	-0.001786	-0.004634	-0.001381
0.6440	699.182	31.755	76.107	24.386	-0.545	20.234	1331.062	-0.002223	-0.005328	-0.001707
0.6480	781.056	37.381	85.974	28.485	-0.550	20.224	1486.931	-0.002617	-0.006018	-0.001994
0.6520	845.318	41.871	93.061	32.356	-0.565	20.225	1609.268	-0.002931	-0.006514	-0.002265
0.6560	921.392	47.359	101.469	36.202	-0.561	20.235	1754.093	-0.003315	-0.007103	-0.002534
0.6600	1014.613	53.463	111.697	40.931	-0.554	20.240	1931.562	-0.003742	-0.007819	-0.002865
0.6640	1080.753	58.037	118.394	44.763	-0.546	20.234	2057.476	-0.004063	-0.008288	-0.003133
0.6680	1139.739	61.911	125.356	47.581	-0.541	20.224	2169.771	-0.004334	-0.008775	-0.003331
0.6720	1224.770	68.225	134.861	52.955	-0.546	20.225	2331.648	-0.004776	-0.009440	-0.003707
0.6760	1301.836	73.039	143.227	56.759	-0.547	20.235	2478.361	-0.005113	-0.010026	-0.003973
0.6800	1353.113	78.104	149.661	59.973	-0.554	20.241	2575.979	-0.005467	-0.010476	-0.004198
0.6840	1383.711	79.576	153.537	61.699	-0.541	20.234	2634.230	-0.005570	-0.010748	-0.004319
0.6880	1402.902	81.699	156.094	62.933	-0.538	20.224	2670.765	-0.005719	-0.010927	-0.004405
0.6920	1442.592	83.929	160.542	65.374	-0.542	20.225	2746.325	-0.005875	-0.011238	-0.004576
0.6960	1475.023	87.380	163.971	67.074	-0.551	20.235	2808.065	-0.006117	-0.011478	-0.004695
0.7000	1482.673	87.632	165.781	67.749	-0.555	20.240	2822.628	-0.006134	-0.011605	-0.004742
0.7040	1488.083	88.741	166.198	68.170	-0.546	20.234	2832.928	-0.006212	-0.011634	-0.004772
0.7080	1493.448	88.699	167.490	68.282	-0.552	20.224	2843.142	-0.006209	-0.011724	-0.004780
0.7120	1488.549	89.318	167.727	68.757	-0.549	20.225	2833.815	-0.006252	-0.011741	-0.004813
0.7160	1476.676	88.390	167.423	68.235	-0.556	20.235	2811.213	-0.006187	-0.011720	-0.004776
0.7200	1440.428	87.479	164.960	67.317	-0.561	20.240	2742.205	-0.006124	-0.011547	-0.004712
0.7240	1355.247	81.726	156.802	63.312	-0.559	20.234	2580.042	-0.005721	-0.010976	-0.004432
0.7280	1285.846	76.926	149.356	59.706	-0.560	20.224	2447.920	-0.005385	-0.010455	-0.004179
0.7320	1231.308	73.292	143.727	57.264	-0.560	20.225	2344.093	-0.005130	-0.010061	-0.004008
0.7360	1172.712	69.152	137.334	54.149	-0.564	20.235	2232.542	-0.004841	-0.009613	-0.003790
0.7400	1094.759	65.069	129.720	50.151	-0.569	20.240	2084.141	-0.004555	-0.009080	-0.003511
0.7440	999.870	57.982	119.631	44.931	-0.548	20.234	1903.496	-0.004059	-0.008374	-0.003145
0.7480	920.460	53.391	111.003	40.382	-0.551	20.224	1752.319	-0.003737	-0.007770	-0.002827
0.7520	853.298	48.075	103.914	37.338	-0.555	20.226	1624.460	-0.003365	-0.007274	-0.002614
0.7560	793.260	44.721	96.812	34.027	-0.557	20.235	1510.162	-0.003130	-0.006777	-0.002382
0.7600	716.615	38.757	88.142	29.984	-0.566	20.240	1364.250	-0.002713	-0.006170	-0.002099
0.7640	629.916	32.989	78.013	25.159	-0.558	20.234	1199.198	-0.002309	-0.005461	-0.001761
0.7680	578.398	28.613	72.203	22.017	-0.558	20.224	1101.122	-0.002003	-0.005054	-0.001541
0.7720	515.550	24.836	65.156	19.038	-0.562	20.226	981.474	-0.001739	-0.004561	-0.001333
0.7760	428.460	18.550	55.013	14.309	-0.559	20.234	815.678	-0.001298	-0.003851	-0.001002
0.7800	369.263	14.872	47.232	11.198	-0.562	20.240	702.982	-0.001041	-0.003306	-0.000784
0.7840	326.342	10.987	41.172	8.781	-0.553	20.234	621.271	-0.000769	-0.002882	-0.000615
0.7880	287.629	8.375	35.879	6.566	-0.561	20.224	547.571	-0.000586	-0.002512	-0.000460
0.7920	258.744	5.765	31.835	4.968	-0.558	20.225	492.582	-0.000404	-0.002228	-0.000348
0.7960	247.458	5.330	29.609	3.957	-0.564	20.235	471.096	-0.000373	-0.002073	-0.000277
0.8000	246.436	3.872	29.277	3.799	-0.564	20.240	469.151	-0.000271	-0.002049	-0.000266
0.8040	232.985	3.255	27.054	3.042	-0.560	20.235	443.544	-0.000228	-0.001894	-0.000213
0.8080	227.575	2.160	26.388	2.507	-0.552	20.224	433.245	-0.000151	-0.001847	-0.000175
0.8120	232.940	2.807	26.417	2.676	-0.554	20.224	443.459	-0.000196	-0.001849	-0.000187
0.8160	239.853	2.580	27.054	2.887	-0.557	20.235	456.619	-0.000181	-0.001894	-0.000202
0.8200	264.876	4.531	28.541	3.323	-0.564	20.240	504.255	-0.000317	-0.001998	-0.000233
0.8240	344.707	8.461	36.600	6.916	-0.558	20.234	656.233	-0.000592	-0.002562	-0.000484
0.8280	414.814	13.385	44.008	9.779	-0.550	20.224	789.700	-0.000937	-0.003081	-0.000685
0.8320	471.456	15.800	50.984	13.019	-0.552	20.225	897.532	-0.001106	-0.003569	-0.000911
0.8360	532.351	21.215	57.543	15.897	-0.557	20.236	1013.460	-0.001485	-0.004028	-0.001113
0.8400	602.354	25.312	65.936	19.599	-0.556	20.241	1146.727	-0.001772	-0.004615	-0.001372
0.8440	696.747	31.780	76.469	24.680	-0.552	20.234	1326.427	-0.002225	-0.005353	-0.001728
0.8480	781.628	37.465	85.374	28.555	-0.550	20.224	1488.018	-0.002623	-0.005976	-0.001999
0.8520	855.056	43.008	94.186	33.031	-0.550	20.226	1627.808	-0.003011	-0.006593	-0.002312
0.8560	942.056	48.592	103.914	37.056	-0.556	20.235	1793.432	-0.003401	-0.007274	-0.002594
0.8600	1025.794	55.188	113.128	41.534	-0.569	20.241	1952.848	-0.003863	-0.007919	-0.002907
0.8640	1095.917	58.922	120.312	45.549	-0.556	20.234	2086.344	-0.004125	-0.008422	-0.003188
0.8680	1166.565	64.170	128.428	49.590	-0.553	20.224	2220.840	-0.004492	-0.008990	-0.003471
0.8720	1239.017	68.912	136.557	53.504	-0.549	20.226	2358.770	-0.004824	-0.009559	-0.003745
0.8760	1296.260	73.937	143.325	56.705	-0.549	20.235	2467.747	-0.005176	-0.010033	-0.003969
0.8800	1328.977	76.337	147.619	58.879	-0.557	20.240	2530.031	-0.005344	-0.010333	-0.004122
0.8840	1393.765	80.855	154.663	62.302	-0.553	20.234	2653.370	-0.005660	-0.010826	-0.004361
0.8880	1456.133	84.643	161.489	65.628	-0.552	20.224	2772.102	-0.005925	-0.011304	-0.004594
0.8920	1478.209	87.620	164.599	67.047	-0.542	20.225	2814.131	-0.006133	-0.011522	-0.004693
0.8960	1481.245	87.676	165.421	67.441	-0.550	20.235	2819.910	-0.006137	-0.011579	-0.004721
0.9000	1482.477	88.615	165.684	67.749	-0.552	20.241	2822.256	-0.006203	-0.011598	-0.004742
0.9040	1486.535	88.124	166.851	68.227	-0.541	20.235	2829.981	-0.006169	-0.011680	-0.004776
0.9080	1484.461	88.698	167.200	68.098	-0.541	20.224	2826.033	-0.006209	-0.011704	-0.004767
0.9120	1475.730	88.853	167.185	68.240	-0.552	20.225	2809.410	-0.006220	-0.011703	-0.004777
0.9160	1460.476	87.789	166.142	67.890	-0.548	20.235	2780.371	-0.006145	-0.011630	-0.004752
0.9200	1426.241	86.524	164.029	66.514	-0.564	20.240	2715.197	-0.006057	-0.011482	-0.004656
0.9240	1348.965	81.275	155.915	62.875	-0.544	20.234	2568.083	-0.005689	-0.010914	-0.004401
0.9280	1281.022	77.685	149.035	59.539	-0.548	20.224	2438.736	-0.005438	-0.010432	-0.004168
0.9320	1225.492	72.295	143.296	56.944	-0.553	20.226	2333.021	-0.005061	-0.010031	-0.003986
0.9360	1163.379	69.628	136.808	53.685	-0.544	20.235	2214.775	-0.004874	-0.009577	-0.003758
0.9400	1085.231	64.281	128.803	49.702	-0.559	20.240	2066.002	-0.004500	-0.009016	-0.003479
0.9440	1002.425	59.244	120.158	45.128	-0.553	20.234	1908.360	-0.004147	-0.008411	-0.003159
0.9480	927.869	53.124	111.834	40.902	-0.543	20.224	1766.424	-0.003719	-0.007828	-0.002863
0.9520	858.197	49.578	104.470	37.536	-0.547	20.226	1633.787	-0.003470	-0.007313	-0.002627
0.9560	771.438	42.644	94.812	33.185	-0.550	20.235	1468.620	-0.002985	-0.006637	-0.002323
0.9600	693.125	38.434	85.557	29.142	-0.561	20.240	1319.532	-0.002690	-0.005989	-0.002040
0.9640	623.168	32.290	77.691	25.157	-0.551	20.234	1186.352	-0.002260	-0.005438	-0.001761
0.9680	548.958	27.349	68.798	21.005	-0.550	20.224	1045.074	-0.001914	-0.004816	-0.001470
0.9720	484.621	22.788	61.601	17.440	-0.564	20.225	922.594	-0.001595	-0.004312	-0.001221
0.9760	435.087	19.127	55.625	14.648	-0.556	20.235	828.295	-0.001339	-0.003894	-0.001025
0.9800	375.680	15.252	47.968	11.436	-0.556	20.240	715.199	-0.001068	-0.003358	-0.000800
0.9840	327.093	11.646	41.868	8.933	-0.552	20.234	622.702	-0.000815	-0.002931	-0.000625
0.9880	293.745	8.615	37.100	6.440	-0.548	20.224	559.216	-0.000603	-0.002597	-0.000451
0.9920	269.219	6.215	33.488	5.626	-0.558	20.225	512.524	-0.000435	-0.002344	-0.000394
0.9960	251.245	4.615	30.386	4.153	-0.561	20.235	478.306	-0.000323	-0.002127	-0.000291
1.0000	240.725	4.292	28.918	3.942	-0.562	20.241	458.279	-0.000300	-0.002024	-0.000276
1.0040	237.689	3.521	27.832	3.449	-0.554	20.235	452.499	-0.000246	-0.001948	-0.000241
1.0080	237.960	3.689	27.526	2.775	-0.556	20.224	453.014	-0.000258	-0.001927	-0.000194
1.0120	240.620	3.296	27.708	3.182	-0.558	20.225	458.078	-0.000231	-0.001940	-0.000223
1.0160	248.329	4.223	27.860	3.209	-0.560	20.236	472.755	-0.000296	-0.001950	-0.000225
1.0200	269.369	4.377	29.000	3.745	-0.562	20.241	512.810	-0.000306	-0.002030	-0.000262
1.0240	332.879	7.690	35.335	6.538	-0.560	20.234	633.717	-0.000538	-0.002473	-0.000458
1.0280	406.098	12.234	43.797	9.286	-0.560	20.224	773.106	-0.000856	-0.003066	-0.000650
1.0320	465.806	15.981	50.414	12.640	-0.551	20.225	886.774	-0.001119	-0.003529	-0.000885
1.0360	529.676	20.977	57.667	15.855	-0.558	20.235	1008.368	-0.001468	-0.004037	-0.001110
1.0400	610.890	25.748	66.922	19.840	-0.562	20.241	1162.977	-0.001802	-0.004685	-0.001389
1.0440	702.864	32.977	77.204	24.779	-0.558	20.234	1338.072	-0.002308	-0.005404	-0.001734
1.0480	770.416	36.063	84.863	28.203	-0.557	20.224	1466.675	-0.002524	-0.005940	-0.001974
1.0520	840.719	42.179	93.005	32.202	-0.562	20.226	1600.513	-0.002953	-0.006510	-0.002254
1.0560	922.128	47.275	101.484	36.129	-0.554	20.235	1755.495	-0.003309	-0.007104	-0.002529
1.0600	998.007	53.212	110.293	40.369	-0.556	20.241	1899.948	-0.003725	-0.007721	-0.002826
1.0640	1085.923	58.178	119.328	44.987	-0.553	20.234	2067.318	-0.004072	-0.008353	-0.003149
1.0680	1158.645	64.099	127.526	48.913	-0.545	20.224	2205.763	-0.004487	-0.008927	-0.003424
1.0720	1216.790	67.875	134.820	52.492	-0.550	20.225	2316.456	-0.004751	-0.009437	-0.003674
1.0760	1277.325	72.237	141.490	55.694	-0.559	20.235	2431.698	-0.005057	-0.009904	-0.003899
1.0800	1354.014	77.781	150.133	60.099	-0.557	20.240	2577.696	-0.005445	-0.010509	-0.004207
1.0840	1396.079	81.095	154.567	62.597	-0.554	20.234	2657.776	-0.005677	-0.010820	-0.004382
1.0880	1419.403	82.901	158.095	63.857	-0.556	20.224	2702.179	-0.005803	-0.011067	-0.004470
1.0920	1459.935	85.079	162.403	66.275	-0.564	20.226	2779.341	-0.005956	-0.011368	-0.004639
1.0960	1482.883	87.871	165.516	67.594	-0.564	20.235	2823.029	-0.006151	-0.011586	-0.004732
1.1000	1485.934	88.192	166.156	68.198	-0.566	20.240	2828.836	-0.006173	-0.011631	-0.004774
1.1040	1486.986	88.713	167.032	68.196	-0.565	20.234	2830.839	-0.006210	-0.011692	-0.004774
1.1080	1485.859	88.600	167.129	68.155	-0.566	20.224	2828.693	-0.006202	-0.011699	-0.004771
1.1120	1479.682	88.825	167.438	68.574	-0.563	20.226	2816.935	-0.006218	-0.011721	-0.004800
1.1160	1466.773	88.516	166.630	67.819	-0.557	20.235	2792.358	-0.006196	-0.011664	-0.004747
1.1200	1430.840	86.835	164.448	66.836	-0.560	20.240	2723.951	-0.006078	-0.011511	-0.004679
1.1240	1351.204	81.600	156.665	63.327	-0.549	20.234	2572.346	-0.005712	-0.010967	-0.004433
1.1280	1282.224	77.037	149.259	59.621	-0.552	20.224	2441.025	-0.005393	-0.010448	-0.004173
1.1320	1226.273	73.306	143.213	57.222	-0.561	20.226	2334.509	-0.005131	-0.010025	-0.004006
1.1360	1167.001	69.475	137.654	53.826	-0.568	20.235	2221.670	-0.004863	-0.009636	-0.003768
1.1400	1093.302	64.605	129.386	49.885	-0.580	20.240	2081.366	-0.004522	-0.009057	-0.003492
1.1440	1014.102	59.680	121.256	46.068	-0.568	20.234	1930.590	-0.004178	-0.008488	-0.003225
1.1480	937.848	54.445	113.253	41.420	-0.565	20.224	1785.421	-0.003811	-0.007928	-0.002899
1.1520	865.246	49.436	105.304	37.926	-0.570	20.225	1647.205	-0.003461	-0.007371	-0.002655
1.1560	788.285	43.866	97.007	33.902	-0.565	20.235	1500.692	-0.003071	-0.006791	-0.002373
1.1600	706.335	38.742	87.473	29.423	-0.568	20.240	1344.681	-0.002712	-0.006123	-0.002060
1.1640	636.408	33.648	79.665	25.887	-0.552	20.234	1211.557	-0.002355	-0.005577	-0.001812
1.1680	576.354	29.060	72.104	22.113	-0.553	20.224	1097.231	-0.002034	-0.005047	-0.001548
1.1720	503.752	23.910	63.891	18.518	-0.563	20.225	959.015	-0.001674	-0.004472	-0.001296
1.1760	437.312	19.658	55.609	15.040	-0.568	20.235	832.529	-0.001376	-0.003893	-0.001053
1.1800	380.354	14.942	48.455	11.534	-0.569	20.240	724.096	-0.001046	-0.003392	-0.000807
1.1840	334.367	11.870	42.340	9.062	-0.558	20.234	636.549	-0.000831	-0.002964	-0.000634
1.1880	298.554	8.448	37.434	7.239	-0.557	20.224	568.371	-0.000591	-0.002620	-0.000507
1.1920	274.539	7.632	33.877	5.949	-0.567	20.225	522.652	-0.000534	-0.002371	-0.000416
1.1960	249.246	4.559	30.443	4.378	-0.567	20.236	474.501	-0.000319	-0.002131	-0.000306
1.2000	229.469	4.068	27.763	3.069	-0.569	20.241	436.850	-0.000285	-0.001943	-0.000215
1.2040	223.292	2.497	26.276	2.888	-0.565	20.234	425.091	-0.000175	-0.001839	-0.000202
1.2080	227.740	3.143	26.387	2.901	-0.560	20.224	433.559	-0.000220	-0.001847	-0.000203
1.2120	234.849	2.680	27.066	2.843	-0.569	20.226	447.092	-0.000188	-0.001895	-0.000199
1.2160	246.271	4.026	27.570	3.225	-0.565	20.236	468.836	-0.000282	-0.001930	-0.000226
1.2200	283.796	4.923	30.696	4.434	-0.567	20.240	540.276	-0.000345	-0.002149	-0.000310
1.2240	355.873	10.086	37.754	7.700	-0.554	20.234	677.490	-0.000706	-0.002643	-0.000539
1.2280	417.204	12.544	44.328	10.115	-0.554	20.224	794.249	-0.000878	-0.003103	-0.000708
1.2320	467.774	17.135	50.608	13.409	-0.558	20.225	890.522	-0.001199	-0.003543	-0.000939
1.2360	536.259	20.965	58.459	16.444	-0.549	20.236	1020.899	-0.001468	-0.004092	-0.001151
1.2400	613.910	25.805	67.700	20.149	-0.559	20.240	1168.728	-0.001806	-0.004739	-0.001410
1.2440	693.546	32.062	76.996	24.245	-0.552	20.234	1320.333	-0.002244	-0.005390	-0.001697
1.2480	764.690	36.120	84.737	27.924	-0.550	20.224	1455.774	-0.002528	-0.005932	-0.001955
1.2520	842.898	41.999	93.687	32.245	-0.557	20.225	1604.662	-0.002940	-0.006558	-0.002257
1.2560	937.006	47.934	103.692	37.043	-0.563	20.235	1783.819	-0.003355	-0.007258	-0.002593
1.2600	1020.865	54.586	112.724	41.884	-0.576	20.240	1943.464	-0.003821	-0.007891	-0.002932
1.2640	1095.045	59.175	120.631	45.354	-0.570	20.234	2084.684	-0.004142	-0.008444	-0.003175
1.2680	1162.913	63.903	128.136	49.153	-0.569	20.224	2213.888	-0.004473	-0.008969	-0.003441
1.2720	1231.894	68.828	136.195	53.207	-0.567	20.225	2345.209	-0.004818	-0.009534	-0.003724
1.2760	1294.141	73.868	143.407	56.563	-0.563	20.235	2463.713	-0.005171	-0.010038	-0.003959
1.2800	1341.150	76.421	148.662	59.649	-0.573	20.240	2553.205	-0.005349	-0.010406	-0.004175
1.2840	1404.194	82.105	155.595	62.948	-0.568	20.234	2673.225	-0.005747	-0.010892	-0.004406
1.2880	1457.530	85.009	161.917	65.910	-0.563	20.224	2774.763	-0.005951	-0.011334	-0.004614
1.2920	1463.737	87.323	163.402	66.907	-0.567	20.225	2786.579	-0.006113	-0.011438	-0.004683
1.2960	1468.832	86.103	164.029	67.314	-0.565	20.235	2796.278	-0.006027	-0.011482	-0.004712
1.3000	1490.728	89.078	167.170	68.378	-0.564	20.240	2837.963	-0.006235	-0.011702	-0.004786
1.3040	1499.354	89.345	168.697	69.204	-0.556	20.234	2854.385	-0.006254	-0.011809	-0.004844
1.3080	1493.493	90.441	168.238	68.910	-0.556	20.224	2843.227	-0.006331	-0.011777	-0.004824
1.3120	1480.599	89.064	167.962	68.630	-0.554	20.225	2818.680	-0.006234	-0.011757	-0.004804
1.3160	1459.048	88.447	167.019	67.988	-0.557	20.235	2777.653	-0.006191	-0.011691	-0.004759
1.3200	1399.926	84.574	161.475	65.558	-0.562	20.240	2665.100	-0.005920	-0.011303	-0.004589
1.3240	1333.681	81.051	154.983	62.331	-0.555	20.234	2538.986	-0.005674	-0.010849	-0.004363
1.3280	1284.854	76.491	149.481	59.663	-0.553	20.224	2446.032	-0.005354	-0.010464	-0.004176
1.3320	1227.235	73.529	144.103	57.333	-0.555	20.225	2336.340	-0.005147	-0.010087	-0.004013
1.3360	1154.031	68.407	136.139	53.124	-0.550	20.236	2196.980	-0.004789	-0.009530	-0.003719
1.3400	1083.503	64.733	128.581	49.590	-0.559	20.241	2062.712	-0.004531	-0.009001	-0.003471
1.3440	1011.803	59.132	121.466	45.729	-0.557	20.234	1926.212	-0.004139	-0.008503	-0.003201
1.3480	933.234	54.741	112.517	41.238	-0.562	20.224	1776.638	-0.003832	-0.007876	-0.002887
1.3520	855.162	48.565	104.164	37.408	-0.560	20.226	1628.008	-0.003400	-0.007291	-0.002619
1.3560	776.488	43.373	95.368	33.213	-0.556	20.235	1478.233	-0.003036	-0.006676	-0.002325
1.3600	700.579	37.886	86.767	29.436	-0.559	20.240	1333.723	-0.002652	-0.006074	-0.002061
1.3640	621.936	33.088	77.732	24.807	-0.557	20.234	1184.006	-0.002316	-0.005441	-0.001736
1.3680	544.464	26.674	69.034	20.736	-0.553	20.224	1036.520	-0.001867	-0.004832	-0.001452
1.3720	485.914	23.798	62.323	17.539	-0.557	20.225	925.055	-0.001666	-0.004363	-0.001228
1.3760	435.042	19.167	55.778	14.760	-0.557	20.235	828.209	-0.001342	-0.003904	-0.001033
1.3800	380.880	15.660	49.205	11.728	-0.566	20.240	725.098	-0.001096	-0.003444	-0.000821
1.3840	334.878	12.277	42.884	9.162	-0.561	20.233	637.522	-0.000859	-0.003002	-0.000641
1.3880	305.272	8.980	38.268	7.167	-0.557	20.224	581.160	-0.000629	-0.002679	-0.000502
1.3920	272.465	7.199	33.878	5.289	-0.561	20.225	518.703	-0.000504	-0.002371	-0.000370
1.3960	240.950	4.684	29.360	3.829	-0.562	20.235	458.708	-0.000328	-0.002055	-0.000268
1.4000	223.878	2.961	27.068	3.056	-0.566	20.241	426.207	-0.000207	-0.001895	-0.000214
1.4040	222.976	3.267	26.721	2.565	-0.554	20.235	424.490	-0.000229	-0.001870	-0.000180
1.4080	225.967	2.554	26.651	2.397	-0.549	20.224	430.183	-0.000179	-0.001866	-0.000168
1.4120	231.332	3.184	26.846	2.619	-0.557	20.226	440.397	-0.000223	-0.001879	-0.000183
1.4160	241.101	3.156	27.081	2.874	-0.554	20.236	458.994	-0.000221	-0.001896	-0.000201
1.4200	267.987	5.625	28.763	3.871	-0.552	20.241	510.178	-0.000394	-0.002013	-0.000271
1.4240	335.134	7.954	35.559	6.384	-0.545	20.234	638.008	-0.000557	-0.002489	-0.000447
1.4280	406.759	12.950	43.730	9.541	-0.546	20.224	774.364	-0.000907	-0.003061	-0.000668
1.4320	466.001	15.673	50.289	12.935	-0.552	20.226	887.146	-0.001097	-0.003520	-0.000905
1.4360	535.943	21.371	58.111	16.263	-0.555	20.236	1020.298	-0.001496	-0.004068	-0.001138
1.4400	615.744	26.477	67.813	20.318	-0.561	20.240	1172.218	-0.001853	-0.004747	-0.001422
1.4440	693.892	32.258	76.690	24.455	-0.548	20.234	1320.992	-0.002258	-0.005368	-0.001712
1.4480	764.074	36.682	84.820	27.839	-0.548	20.224	1454.601	-0.002568	-0.005937	-0.001949
1.4520	843.154	42.545	93.129	32.399	-0.554	20.226	1605.148	-0.002978	-0.006519	-0.002268
1.4560	927.989	47.640	102.691	36.580	-0.556	20.236	1766.653	-0.003335	-0.007188	-0.002561
1.4600	1011.667	53.729	111.892	41.100	-0.562	20.240	1925.955	-0.003761	-0.007832	-0.002877
1.4640	1079.746	58.066	119.117	44.807	-0.545	20.234	2055.559	-0.004065	-0.008338	-0.003136
1.4680	1138.973	62.837	126.288	48.059	-0.552	20.224	2168.312	-0.004399	-0.008840	-0.003364
1.4720	1216.595	67.972	134.902	52.339	-0.546	20.226	2316.084	-0.004758	-0.009443	-0.003664
1.4760	1284.523	73.669	142.643	56.115	-0.551	20.236	2445.402	-0.005157	-0.009985	-0.003928
1.4800	1335.785	76.631	148.660	59.271	-0.553	20.240	2542.992	-0.005364	-0.010406	-0.004149
1.4840	1389.061	81.249	154.316	62.303	-0.546	20.234	2644.415	-0.005687	-0.010802	-0.004361
1.4880	1427.579	82.889	158.428	64.404	-0.550	20.224	2717.743	-0.005802	-0.011090	-0.004508
1.4920	1458.041	86.201	162.960	66.543	-0.554	20.225	2775.736	-0.006034	-0.011407	-0.004658
1.4960	1475.895	86.595	165.210	67.385	-0.561	20.235	2809.725	-0.006062	-0.011565	-0.004717
1.5000	1480.569	88.882	166.308	67.917	-0.569	20.240	2818.623	-0.006222	-0.011642	-0.004754
1.5040	1482.282	87.941	166.838	68.212	-0.557	20.234	2821.884	-0.006156	-0.011679	-0.004775
1.5080	1484.912	89.415	167.159	68.393	-0.552	20.224	2826.891	-0.006259	-0.011701	-0.004788
1.5120	1479.547	89.190	167.255	68.449	-0.547	20.225	2816.677	-0.006243	-0.011708	-0.004791
1.5160	1467.434	88.516	166.964	68.142	-0.552	20.235	2793.617	-0.006196	-0.011687	-0.004770
1.5200	1443.869	87.494	165.683	67.356	-0.563	20.240	2748.756	-0.006125	-0.011598	-0.004715
1.5240	1368.517	82.721	158.236	64.141	-0.553	20.234	2605.305	-0.005790	-0.011077	-0.004490
1.5280	1281.247	77.359	149.565	59.748	-0.554	20.224	2439.165	-0.005415	-0.010470	-0.004182
1.5320	1227.235	73.207	143.532	56.999	-0.558	20.226	2336.340	-0.005125	-0.010047	-0.003990
1.5360	1171.044	70.807	138.170	54.289	-0.556	20.235	2229.366	-0.004956	-0.009672	-0.003800
1.5400	1098.321	64.886	131.083	50.179	-0.561	20.240	2090.921	-0.004542	-0.009176	-0.003513
1.5440	1016.867	60.424	121.757	46.459	-0.548	20.234	1935.854	-0.004230	-0.008523	-0.003252
1.5480	934.692	53.954	113.226	41.533	-0.545	20.224	1779.413	-0.003777	-0.007926	-0.002907
1.5520	866.478	50.335	105.762	38.012	-0.553	20.226	1649.551	-0.003523	-0.007403	-0.002661
1.5560	790.855	44.187	97.064	34.140	-0.554	20.236	1505.585	-0.003093	-0.006795	-0.002390
1.5600	707.628	39.473	88.196	29.815	-0.552	20.240	1347.141	-0.002763	-0.006174	-0.002087
1.5640	632.891	33.103	78.983	25.607	-0.545	20.234	1204.863	-0.002317	-0.005529	-0.001792
1.5680	565.444	29.130	71.245	21.889	-0.544	20.224	1076.460	-0.002039	-0.004987	-0.001532
1.5720	497.080	23.827	62.879	18.396	-0.552	20.226	946.312	-0.001668	-0.004402	-0.001288
1.5760	435.042	19.351	55.264	14.816	-0.554	20.235	828.209	-0.001355	-0.003868	-0.001037
1.5800	384.111	15.953	49.288	11.843	-0.557	20.240	731.249	-0.001117	-0.003450	-0.000829
1.5840	346.315	13.413	44.230	9.709	-0.546	20.233	659.294	-0.000939	-0.003096	-0.000680
1.5880	308.368	9.597	39.004	7.588	-0.552	20.223	587.053	-0.000672	-0.002730	-0.000531
1.5920	271.578	7.438	34.224	5.893	-0.561	20.226	517.015	-0.000521	-0.002396	-0.000413
1.5960	241.702	4.588	30.222	3.942	-0.550	20.235	460.138	-0.000321	-0.002116	-0.000276
1.6000	226.178	3.829	27.512	3.168	-0.560	20.240	430.584	-0.000268	-0.001926	-0.000222
1.6040	225.501	2.623	26.916	2.857	-0.554	20.234	429.296	-0.000184	-0.001884	-0.000200
1.6080	229.769	3.255	27.014	2.438	-0.554	20.224	437.422	-0.000228	-0.001891	-0.000171
1.6120	235.901	2.875	27.471	2.929	-0.560	20.225	449.095	-0.000201	-0.001923	-0.000205
1.6160	248.946	3.925	27.861	3.265	-0.562	20.236	473.928	-0.000275	-0.001950	-0.000229
1.6200	285.630	6.006	30.140	4.320	-0.566	20.240	543.766	-0.000420	-0.002110	-0.000302
1.6240	352.551	9.905	37.935	7.153	-0.556	20.234	671.167	-0.000693	-0.002655	-0.000501
1.6280	417.098	13.050	45.242	10.215	-0.557	20.224	794.048	-0.000914	-0.003167	-0.000715
1.6320	472.553	17.793	51.509	12.989	-0.563	20.225	899.620	-0.001245	-0.003606	-0.000909
1.6360	534.305	20.977	58.419	16.149	-0.557	20.235	1017.179	-0.001468	-0.004089	-0.001130
1.6400	618.209	27.336	67.938	20.568	-0.560	20.240	1176.910	-0.001913	-0.004756	-0.001440
1.6440	692.554	31.587	76.858	24.400	-0.558	20.233	1318.445	-0.002211	-0.005380	-0.001708
1.6480	763.503	36.891	84.543	28.007	-0.553	20.223	1453.514	-0.002582	-0.005918	-0.001961
1.6520	845.183	42.139	93.935	32.484	-0.549	20.225	1609.011	-0.002950	-0.006575	-0.002274
1.6560	932.212	48.480	103.081	36.931	-0.550	20.235	1774.693	-0.003394	-0.007216	-0.002585
1.6600	1014.643	53.166	112.112	41.110	-0.553	20.240	1931.620	-0.003722	-0.007848	-0.002878
1.6640	1123.869	61.853	124.286	46.992	-0.538	20.234	2139.559	-0.004330	-0.008700	-0.003289
1.6680	1174.410	64.773	129.942	49.982	-0.536	20.223	2235.775	-0.004534	-0.009096	-0.003499
1.6720	1219.931	69.362	135.056	52.395	-0.544	20.225	2322.435	-0.004855	-0.009454	-0.003668
1.6760	1303.684	73.755	144.630	57.251	-0.548	20.235	2481.880	-0.005163	-0.010124	-0.004008
1.6800	1345.313	78.917	149.663	59.819	-0.554	20.240	2561.131	-0.005524	-0.010476	-0.004187
1.6840	1387.302	80.393	154.359	62.036	-0.537	20.233	2641.068	-0.005628	-0.010805	-0.004342
1.6880	1438.309	84.055	160.361	64.968	-0.537	20.224	2738.171	-0.005884	-0.011225	-0.004548
1.6920	1466.682	86.945	163.555	66.781	-0.542	20.225	2792.187	-0.006086	-0.011449	-0.004675
1.6960	1475.940	87.196	165.336	67.300	-0.548	20.235	2809.811	-0.006104	-0.011573	-0.004711
1.7000	1480.854	87.927	166.616	68.309	-0.557	20.240	2819.166	-0.006155	-0.011663	-0.004782
1.7040	1485.273	88.615	167.269	68.114	-0.546	20.234	2827.578	-0.006203	-0.011709	-0.004768
1.7080	1484.040	89.442	167.671	67.972	-0.556	20.224	2825.232	-0.006261	-0.011737	-0.004758
1.7120	1475.654	88.474	167.131	68.281	-0.554	20.226	2809.267	-0.006193	-0.011699	-0.004780
1.7160	1459.364	88.531	166.615	67.861	-0.547	20.235	2778.254	-0.006197	-0.011663	-0.004750
1.7200	1415.541	85.641	162.934	66.318	-0.545	20.240	2694.826	-0.005995	-0.011405	-0.004642
1.7240	1331.622	80.742	154.898	62.443	-0.542	20.234	2535.067	-0.005652	-0.010843	-0.004371
1.7280	1273.252	76.152	148.577	59.075	-0.550	20.224	2423.944	-0.005331	-0.010400	-0.004135
1.7320	1231.743	74.106	144.729	57.279	-0.554	20.225	2344.923	-0.005187	-0.010131	-0.004010
1.7360	1164.326	69.643	137.890	53.797	-0.560	20.235	2216.578	-0.004875	-0.009652	-0.003766
1.7400	1083.398	64.731	128.566	49.703	-0.558	20.240	2062.511	-0.004531	-0.009000	-0.003479
1.7440	1007.069	59.187	120.922	45.702	-0.547	20.235	1917.200	-0.004143	-0.008465	-0.003199
1.7480	924.037	54.262	112.155	41.100	-0.549	20.224	1759.129	-0.003798	-0.007851	-0.002877
1.7520	856.244	48.649	104.387	37.353	-0.556	20.226	1630.068	-0.003405	-0.007307	-0.002615
1.7560	765.066	43.303	94.549	33.074	-0.557	20.236	1456.490	-0.003031	-0.006618	-0.002315
1.7600	684.018	36.887	85.195	28.653	-0.563	20.240	1302.195	-0.002582	-0.005964	-0.002006
1.7640	632.726	33.832	78.607	25.747	-0.549	20.233	1204.548	-0.002368	-0.005503	-0.001802
1.7680	567.217	28.231	71.240	21.651	-0.549	20.224	1079.836	-0.001976	-0.004987	-0.001516
1.7720	483.915	23.546	62.045	17.454	-0.553	20.225	921.249	-0.001648	-0.004343	-0.001222
1.7760	414.514	18.184	53.193	13.776	-0.548	20.235	789.127	-0.001273	-0.003724	-0.000964
1.7800	376.582	15.335	48.719	11.505	-0.560	20.240	716.915	-0.001073	-0.003410	-0.000805
1.7840	347.998	12.586	44.549	9.848	-0.552	20.233	662.498	-0.000881	-0.003118	-0.000689
1.7880	299.486	9.316	37.948	7.223	-0.557	20.223	570.145	-0.000652	-0.002656	-0.000506
1.7920	266.784	6.678	33.321	5.445	-0.550	20.225	507.889	-0.000467	-0.002332	-0.000381
1.7960	249.983	5.513	30.917	4.391	-0.559	20.234	475.903	-0.000386	-0.002164	-0.000307
1.8000	236.758	3.831	28.736	3.884	-0.560	20.241	450.726	-0.000268	-0.002012	-0.000272
1.8040	225.156	3.717	26.804	3.125	-0.554	20.234	428.638	-0.000260	-0.001876	-0.000219
1.8080	223.998	2.679	26.358	2.522	-0.556	20.224	426.435	-0.000188	-0.001845	-0.000177
1.8120	229.183	3.271	26.831	2.719	-0.550	20.226	436.306	-0.000229	-0.001878	-0.000190
1.8160	238.471	3.185	27.027	2.858	-0.553	20.236	453.987	-0.000223	-0.001892	-0.000200
1.8200	265.221	4.602	28.917	3.701	-0.559	20.240	504.913	-0.000322	-0.002024	-0.000259
1.8240	342.332	9.051	36.516	7.098	-0.550	20.234	651.712	-0.000634	-0.002556	-0.000497
1.8280	416.061	13.499	44.882	10.199	-0.557	20.224	792.074	-0.000945	-0.003142	-0.000714
1.8320	471.456	17.357	51.775	13.256	-0.552	20.226	897.532	-0.001215	-0.003624	-0.000928
1.8360	534.981	21.329	59.127	16.344	-0.556	20.236	1018.467	-0.001493	-0.004139	-0.001144
1.8400	614.361	26.464	68.074	20.414	-0.562	20.240	1169.586	-0.001853	-0.004765	-0.001429
1.8440	677.451	31.516	75.024	23.630	-0.548	20.234	1289.692	-0.002206	-0.005252	-0.001654
1.8480	753.299	35.868	83.334	27.320	-0.550	20.224	1434.088	-0.002511	-0.005833	-0.001912
1.8520	846.129	42.870	93.785	32.554	-0.551	20.225	1610.813	-0.003001	-0.006565	-0.002279
1.8560	930.619	48.103	102.830	36.834	-0.550	20.236	1771.660	-0.003367	-0.007198	-0.002578
1.8600	1008.466	54.082	111.682	41.338	-0.554	20.240	1919.861	-0.003786	-0.007818	-0.002894
1.8640	1085.908	58.487	120.298	45.366	-0.553	20.234	2067.289	-0.004094	-0.008421	-0.003176
1.8680	1157.022	63.861	128.066	48.986	-0.550	20.224	2202.673	-0.004470	-0.008965	-0.003429
1.8720	1231.758	68.941	136.821	53.293	-0.553	20.226	2344.952	-0.004826	-0.009577	-0.003731
1.8760	1292.939	73.980	143.463	56.664	-0.558	20.236	2461.424	-0.005179	-0.010042	-0.003966
1.8800	1339.978	77.387	149.619	59.481	-0.563	20.240	2550.974	-0.005417	-0.010473	-0.004164
1.8840	1388.580	80.812	154.288	62.163	-0.559	20.234	2643.499	-0.005657	-0.010800	-0.004351
1.8880	1421.372	83.676	158.499	64.194	-0.546	20.224	2705.927	-0.005857	-0.011095	-0.004494
1.8920	1440.503	84.504	161.113	65.699	-0.557	20.226	2742.348	-0.005915	-0.011278	-0.004599
1.8960	1463.511	86.749	164.250	66.850	-0.557	20.236	2786.150	-0.006072	-0.011497	-0.004680
1.9000	1479.306	87.634	166.210	67.734	-0.576	20.240	2816.219	-0.006134	-0.011635	-0.004741
1.9040	1485.678	88.755	167.574	68.378	-0.554	20.234	2828.350	-0.006213	-0.011730	-0.004786
1.9080	1483.154	88.628	167.491	68.351	-0.552	20.224	2823.544	-0.006204	-0.011724	-0.004785
1.9120	1476.075	88.545	167.504	68.377	-0.560	20.225	2810.068	-0.006198	-0.011725	-0.004786
1.9160	1466.607	88.938	166.880	68.169	-0.562	20.236	2792.044	-0.006226	-0.011682	-0.004772
1.9200	1436.100	87.240	164.821	67.160	-0.565	20.240	2733.965	-0.006107	-0.011537	-0.004701
1.9240	1344.021	81.415	156.248	62.878	-0.554	20.234	2558.670	-0.005699	-0.010937	-0.004401
1.9280	1276.844	76.532	148.910	59.256	-0.554	20.224	2430.782	-0.005357	-0.010424	-0.004148
1.9320	1241.407	74.766	145.643	57.713	-0.557	20.226	2363.319	-0.005234	-0.010195	-0.004040
1.9360	1178.438	70.723	139.406	54.879	-0.555	20.236	2243.443	-0.004951	-0.009758	-0.003842
1.9400	1097.675	66.232	130.318	50.248	-0.562	20.240	2089.691	-0.004636	-0.009122	-0.003517
1.9440	1020.264	59.678	122.356	46.275	-0.556	20.234	1942.320	-0.004177	-0.008565	-0.003239
1.9480	952.801	56.437	115.086	42.559	-0.553	20.224	1813.889	-0.003951	-0.008056	-0.002979
1.9520	879.267	50.347	107.138	38.729	-0.550	20.226	1673.899	-0.003524	-0.007500	-0.002711
1.9560	797.167	45.307	98.549	34.560	-0.549	20.235	1517.601	-0.003172	-0.006898	-0.002419
1.9600	707.507	38.938	88.265	29.998	-0.560	20.240	1346.912	-0.002726	-0.006179	-0.002100
1.9640	631.328	33.930	79.165	25.761	-0.560	20.233	1201.887	-0.002375	-0.005542	-0.001803
1.9680	561.206	28.035	71.395	21.777	-0.552	20.223	1068.392	-0.001962	-0.004998	-0.001524
1.9720	497.500	24.697	63.656	18.351	-0.557	20.226	947.113	-0.001729	-0.004456	-0.001285
1.9760	437.492	19.925	56.680	14.872	-0.556	20.235	832.872	-0.001395	-0.003968	-0.001041
1.9800	372.539	15.364	48.244	11.645	-0.569	20.240	709.219	-0.001075	-0.003377	-0.000815
1.9840	327.454	11.310	41.934	8.753	-0.555	20.234	623.388	-0.000792	-0.002935	-0.000613
1.9880	302.447	9.611	38.519	7.279	-0.551	20.224	575.781	-0.000673	-0.002696	-0.000510
1.9920	268.257	6.511	33.878	5.670	-0.558	20.225	510.693	-0.000456	-0.002371	-0.000397
1.9960	243.295	5.497	30.236	4.195	-0.553	20.236	463.171	-0.000385	-0.002117	-0.000294
