# Supplementary material for: Evaluation of a Cold-Mixed High-Performance Polyurethane Mixture
Source: Hindawi journal article supplement (doi:10.1155/2019/1507971), 2019-11-07
Supplement: f1 [file 1507971.f1.zip › 1507971.f1/dynamic modulus data/PUM/specimen2/temp20/zhs-2-20_10Hz.csv]

Test Information
****************
Project name	zhs
Operator name	2
Target test temperature	20
Target confining stress	0
Average dynamic strain range from 75 to 125 micro-strain
Contact stress	5
Initial modulus	1000
Axial gauge length	70
Comments
Specimen information
********************
Identification	zhs-2-20
Dimensions	Point 1	Point 2	Point 3	Point 4	Point 5	Point 6	Average	Std Dev.
Diameter (mm)	49.2	49.3	49.2				49.23	0.058
Height (mm)	100.8	101.0	100.8				100.87	0.115
Cross-sectional area (mm�)	1903.7
Conditioning time
Properties/Comments
Test Data	10Hz
*********
Test date and time	Mon	Apr 1	2019	2:34 PM
Dynamic modulus (MPa)	13183
Phase angle (Degrees)	4.05
Average temperature (�C)	20.2
Average confining pressure (kPa)	-0.6
Average micro-strain	100
Load drift (%)	0.1
Load standard error (%)	3.4
Average deformation drift (%)	-2.9
Average deformation standard error (%)	3.4
Deformation uniformity (%)	32.5
Phase uniformity (Degrees)	0.0
Conditioning Cycles
Time (sec)	Axial stress (kPa)	Axial micro-strain #1	Axial micro-strain #2	Axial micro-strain #3	Confining pressure (kPa)	Temperature (�C)	Load (N)	Displacement #1 (mm)	Displacement #2 (mm)	Displacement #3 (mm)
0.0000	388.469	8.138	35.543	6.467	-0.577	20.224	739.546	-0.000570	-0.002488	-0.000453
0.0020	385.854	7.409	35.334	6.326	-0.568	20.220	734.568	-0.000519	-0.002473	-0.000443
0.0040	373.997	8.165	34.989	6.396	-0.576	20.218	711.994	-0.000572	-0.002449	-0.000448
0.0060	340.664	5.836	31.613	5.203	-0.571	20.221	648.537	-0.000409	-0.002213	-0.000364
0.0080	289.237	2.245	25.817	2.720	-0.567	20.225	550.632	-0.000157	-0.001807	-0.000190
0.0100	255.919	0.193	21.912	1.135	-0.574	20.230	487.204	-0.000014	-0.001534	-0.000079
0.0120	248.765	-1.545	20.341	0.295	-0.568	20.236	473.585	0.000108	-0.001424	-0.000021
0.0140	254.055	-0.829	20.814	0.588	-0.572	20.236	483.656	0.000058	-0.001457	-0.000041
0.0160	265.116	0.490	21.399	0.868	-0.577	20.233	504.713	-0.000034	-0.001498	-0.000061
0.0180	292.543	1.415	23.845	1.638	-0.574	20.229	556.927	-0.000099	-0.001669	-0.000115
0.0200	358.608	5.654	30.902	4.515	-0.579	20.224	682.697	-0.000396	-0.002163	-0.000316
0.0220	448.327	10.973	40.464	8.614	-0.565	20.220	853.500	-0.000768	-0.002832	-0.000603
0.0240	532.291	16.291	49.956	12.962	-0.578	20.218	1013.346	-0.001140	-0.003497	-0.000907
0.0260	604.262	21.344	58.278	16.585	-0.581	20.221	1150.360	-0.001494	-0.004079	-0.001161
0.0280	666.795	25.174	65.393	19.434	-0.582	20.225	1269.407	-0.001762	-0.004578	-0.001360
0.0300	722.070	28.837	71.883	22.464	-0.585	20.230	1374.636	-0.002019	-0.005032	-0.001572
0.0320	776.112	33.257	77.871	24.973	-0.573	20.236	1477.518	-0.002328	-0.005451	-0.001748
0.0340	836.211	37.115	84.359	28.398	-0.579	20.236	1591.930	-0.002598	-0.005905	-0.001988
0.0360	901.524	41.367	91.560	32.118	-0.579	20.233	1716.270	-0.002896	-0.006409	-0.002248
0.0380	969.137	46.460	98.716	35.499	-0.574	20.230	1844.988	-0.003252	-0.006910	-0.002485
0.0400	1032.091	50.474	105.845	38.699	-0.569	20.225	1964.836	-0.003533	-0.007409	-0.002709
0.0420	1078.484	53.927	110.946	41.180	-0.570	20.220	2053.156	-0.003775	-0.007766	-0.002883
0.0440	1105.971	56.284	114.684	43.246	-0.578	20.218	2105.484	-0.003940	-0.008028	-0.003027
0.0460	1125.703	57.182	117.270	44.428	-0.571	20.221	2143.049	-0.004003	-0.008209	-0.003110
0.0480	1142.475	58.924	119.159	45.227	-0.573	20.225	2174.978	-0.004125	-0.008341	-0.003166
0.0500	1157.563	60.577	121.105	46.178	-0.564	20.230	2203.703	-0.004240	-0.008477	-0.003232
0.0520	1172.757	61.237	122.621	46.949	-0.564	20.236	2232.628	-0.004287	-0.008583	-0.003286
0.0540	1184.209	62.767	124.482	48.227	-0.568	20.236	2254.429	-0.004394	-0.008714	-0.003376
0.0560	1188.296	63.203	125.564	48.720	-0.565	20.233	2262.211	-0.004424	-0.008789	-0.003410
0.0580	1185.892	63.203	125.467	48.648	-0.565	20.230	2257.633	-0.004424	-0.008783	-0.003405
0.0600	1179.955	63.384	125.551	48.451	-0.568	20.225	2246.332	-0.004437	-0.008789	-0.003392
0.0620	1171.434	62.485	125.036	47.932	-0.570	20.220	2230.110	-0.004374	-0.008753	-0.003355
0.0640	1159.953	62.583	124.716	47.932	-0.579	20.218	2208.252	-0.004381	-0.008730	-0.003355
0.0660	1139.168	61.363	123.467	47.469	-0.572	20.220	2168.684	-0.004295	-0.008643	-0.003323
0.0680	1085.442	57.742	118.491	44.999	-0.574	20.225	2066.402	-0.004042	-0.008294	-0.003150
0.0700	994.805	52.845	109.500	40.551	-0.577	20.230	1893.854	-0.003699	-0.007665	-0.002839
0.0720	902.155	46.741	99.759	35.781	-0.574	20.236	1717.472	-0.003272	-0.006983	-0.002505
0.0740	827.614	41.677	92.311	32.204	-0.580	20.235	1575.565	-0.002917	-0.006462	-0.002254
0.0760	766.855	37.859	85.516	29.285	-0.578	20.232	1459.894	-0.002650	-0.005986	-0.002050
0.0780	712.812	33.270	79.235	26.590	-0.573	20.229	1357.012	-0.002329	-0.005546	-0.001861
0.0800	658.560	29.565	73.330	23.574	-0.573	20.224	1253.729	-0.002070	-0.005133	-0.001650
0.0820	599.664	26.183	66.310	20.177	-0.568	20.220	1141.605	-0.001833	-0.004642	-0.001412
0.0840	538.573	21.454	60.057	17.228	-0.572	20.218	1025.305	-0.001502	-0.004204	-0.001206
0.0860	481.976	18.340	53.458	14.492	-0.570	20.220	917.559	-0.001284	-0.003742	-0.001014
0.0880	432.442	14.733	47.356	11.981	-0.575	20.224	823.259	-0.001031	-0.003315	-0.000839
0.0900	387.027	11.169	41.867	9.413	-0.568	20.230	736.799	-0.000782	-0.002931	-0.000659
0.0920	343.159	8.475	36.504	6.914	-0.565	20.236	653.286	-0.000593	-0.002555	-0.000484
0.0940	301.470	5.347	31.265	4.882	-0.571	20.236	573.921	-0.000374	-0.002189	-0.000342
0.0960	267.596	3.031	26.847	3.224	-0.565	20.233	509.434	-0.000212	-0.001879	-0.000226
0.0980	243.671	1.712	23.665	1.780	-0.566	20.229	463.886	-0.000120	-0.001657	-0.000125
0.1000	226.298	-0.212	20.954	0.616	-0.566	20.225	430.813	0.000015	-0.001467	-0.000043
0.1020	213.223	-0.775	19.062	-0.057	-0.567	20.220	405.922	0.000054	-0.001334	0.000004
0.1040	201.832	-1.757	17.746	-0.493	-0.572	20.219	384.235	0.000123	-0.001242	0.000035
0.1060	194.648	-2.948	16.508	-0.800	-0.570	20.221	370.560	0.000206	-0.001156	0.000056
0.1080	194.513	-2.484	15.506	-1.081	-0.569	20.224	370.302	0.000174	-0.001085	0.000076
0.1100	198.375	-2.806	15.186	-1.054	-0.567	20.230	377.655	0.000196	-0.001063	0.000074
0.1120	204.852	-2.582	15.575	-1.264	-0.575	20.236	389.986	0.000181	-0.001090	0.000089
0.1140	218.814	-1.500	16.535	-0.716	-0.583	20.236	416.565	0.000105	-0.001157	0.000050
0.1160	261.074	-0.114	20.385	0.910	-0.578	20.233	497.017	0.000008	-0.001427	-0.000064
0.1180	339.672	5.148	29.209	4.055	-0.572	20.230	646.648	-0.000360	-0.002045	-0.000284
0.1200	424.297	10.286	39.076	8.012	-0.569	20.224	807.753	-0.000720	-0.002735	-0.000561
0.1220	496.238	14.550	46.772	11.407	-0.575	20.220	944.710	-0.001019	-0.003274	-0.000798
0.1240	553.662	19.082	53.817	14.395	-0.569	20.218	1054.029	-0.001336	-0.003767	-0.001008
0.1260	600.821	21.777	59.807	16.865	-0.568	20.221	1143.808	-0.001524	-0.004187	-0.001181
0.1280	648.401	25.440	64.975	19.349	-0.569	20.225	1234.388	-0.001781	-0.004548	-0.001354
0.1300	702.743	29.383	71.065	22.255	-0.567	20.230	1337.843	-0.002057	-0.004975	-0.001558
0.1320	762.211	32.442	77.236	25.059	-0.569	20.236	1451.054	-0.002271	-0.005406	-0.001754
0.1340	823.617	37.367	84.587	28.527	-0.576	20.236	1567.955	-0.002616	-0.005921	-0.001997
0.1360	883.520	41.270	91.172	31.809	-0.573	20.233	1681.995	-0.002889	-0.006382	-0.002227
0.1380	936.195	44.692	96.856	34.587	-0.566	20.229	1782.274	-0.003128	-0.006780	-0.002421
0.1400	986.224	48.425	102.344	36.960	-0.568	20.224	1877.518	-0.003390	-0.007164	-0.002587
0.1420	1040.402	51.498	108.320	39.780	-0.569	20.220	1980.658	-0.003605	-0.007582	-0.002785
0.1440	1093.737	55.946	114.254	42.868	-0.580	20.218	2082.195	-0.003916	-0.007998	-0.003001
0.1460	1132.917	59.075	118.491	45.056	-0.574	20.221	2156.782	-0.004135	-0.008294	-0.003154
0.1480	1152.724	59.929	121.174	46.192	-0.577	20.225	2194.490	-0.004195	-0.008482	-0.003233
0.1500	1164.116	61.417	122.854	46.881	-0.575	20.230	2216.177	-0.004299	-0.008600	-0.003282
0.1520	1176.860	62.373	124.451	47.945	-0.571	20.236	2240.438	-0.004366	-0.008712	-0.003356
0.1540	1188.221	63.328	126.052	48.675	-0.578	20.236	2262.068	-0.004433	-0.008824	-0.003407
0.1560	1194.488	64.410	127.222	49.068	-0.573	20.233	2273.998	-0.004509	-0.008906	-0.003435
0.1580	1196.787	64.003	127.581	49.208	-0.567	20.229	2278.376	-0.004480	-0.008931	-0.003445
0.1600	1194.172	64.493	127.442	49.560	-0.567	20.223	2273.397	-0.004515	-0.008921	-0.003469
0.1620	1185.937	64.494	127.081	49.253	-0.564	20.220	2257.719	-0.004515	-0.008896	-0.003448
0.1640	1171.314	63.202	127.121	48.915	-0.571	20.218	2229.881	-0.004424	-0.008898	-0.003424
0.1660	1144.534	61.995	125.063	47.947	-0.564	20.221	2178.898	-0.004340	-0.008754	-0.003356
0.1680	1086.163	59.299	119.478	45.563	-0.568	20.225	2067.776	-0.004151	-0.008363	-0.003189
0.1700	1001.163	52.956	111.015	41.437	-0.573	20.230	1905.956	-0.003707	-0.007771	-0.002901
0.1720	919.378	47.751	102.511	36.974	-0.574	20.236	1750.259	-0.003343	-0.007176	-0.002588
0.1740	853.493	44.286	95.701	33.901	-0.579	20.235	1624.832	-0.003100	-0.006699	-0.002373
0.1760	798.745	39.992	89.850	31.065	-0.577	20.233	1520.605	-0.002799	-0.006289	-0.002175
0.1780	742.929	36.498	83.457	28.035	-0.577	20.229	1414.347	-0.002555	-0.005842	-0.001962
0.1800	682.590	32.176	76.940	24.904	-0.571	20.224	1299.477	-0.002252	-0.005386	-0.001743
0.1820	622.477	27.995	69.771	21.720	-0.564	20.220	1185.036	-0.001960	-0.004884	-0.001520
0.1840	564.632	24.739	63.808	18.982	-0.572	20.218	1074.915	-0.001732	-0.004467	-0.001329
0.1860	507.825	20.095	57.096	15.924	-0.575	20.221	966.768	-0.001407	-0.003997	-0.001115
0.1880	454.038	16.811	50.927	13.091	-0.572	20.225	864.372	-0.001177	-0.003565	-0.000916
0.1900	403.603	13.387	44.994	10.635	-0.573	20.230	768.356	-0.000937	-0.003150	-0.000744
0.1920	356.970	9.767	38.949	8.036	-0.571	20.236	679.579	-0.000684	-0.002726	-0.000563
0.1940	315.732	7.760	34.056	6.088	-0.580	20.236	601.072	-0.000543	-0.002384	-0.000426
0.1960	281.136	4.616	29.446	4.250	-0.584	20.233	535.212	-0.000323	-0.002061	-0.000297
0.1980	251.861	2.358	25.443	2.647	-0.580	20.230	479.479	-0.000165	-0.001781	-0.000185
0.2000	226.764	1.178	21.912	1.568	-0.580	20.224	431.700	-0.000082	-0.001534	-0.000110
0.2020	209.030	-1.195	19.493	0.280	-0.580	20.220	397.940	0.000084	-0.001365	-0.000020
0.2040	200.885	-1.377	17.952	-0.210	-0.585	20.219	382.433	0.000096	-0.001257	0.000015
0.2060	200.088	-1.223	17.300	-0.337	-0.583	20.221	380.917	0.000086	-0.001211	0.000024
0.2080	202.312	-1.992	17.326	-0.463	-0.578	20.225	385.151	0.000139	-0.001213	0.000032
0.2100	206.190	-1.740	17.384	-0.280	-0.577	20.231	392.532	0.000122	-0.001217	0.000020
0.2120	213.193	-1.658	17.398	-0.267	-0.572	20.236	405.865	0.000116	-0.001218	0.000019
0.2140	228.131	-0.926	18.632	0.209	-0.580	20.236	434.303	0.000065	-0.001304	-0.000015
0.2160	265.026	1.795	22.063	1.568	-0.581	20.233	504.541	-0.000126	-0.001544	-0.000110
0.2180	325.891	4.601	28.458	3.967	-0.580	20.230	620.413	-0.000322	-0.001992	-0.000278
0.2200	394.661	8.432	36.338	7.239	-0.577	20.225	751.333	-0.000590	-0.002544	-0.000507
0.2220	461.312	13.191	43.577	10.186	-0.574	20.220	878.220	-0.000923	-0.003050	-0.000713
0.2240	526.851	17.456	51.455	13.651	-0.583	20.219	1002.989	-0.001222	-0.003602	-0.000956
0.2260	593.021	21.821	59.181	17.075	-0.579	20.221	1128.960	-0.001527	-0.004143	-0.001195
0.2280	656.651	26.493	66.004	20.134	-0.579	20.225	1250.095	-0.001855	-0.004620	-0.001409
0.2300	718.117	30.393	73.092	23.362	-0.583	20.231	1367.111	-0.002128	-0.005116	-0.001635
0.2320	783.311	34.518	80.179	26.757	-0.582	20.236	1491.222	-0.002416	-0.005613	-0.001873
0.2340	851.104	39.936	87.906	30.448	-0.588	20.236	1620.283	-0.002796	-0.006153	-0.002131
0.2360	917.274	43.852	95.311	33.873	-0.583	20.233	1746.254	-0.003070	-0.006672	-0.002371
0.2380	980.228	48.187	101.954	36.975	-0.581	20.230	1866.102	-0.003373	-0.007137	-0.002588
0.2400	1033.729	51.836	108.181	39.767	-0.578	20.224	1967.955	-0.003628	-0.007573	-0.002784
0.2420	1075.012	54.713	112.626	41.940	-0.576	20.220	2046.547	-0.003830	-0.007884	-0.002936
0.2440	1108.495	58.025	116.504	44.187	-0.577	20.218	2110.291	-0.004062	-0.008155	-0.003093
0.2460	1134.660	59.484	119.561	45.758	-0.580	20.221	2160.101	-0.004164	-0.008369	-0.003203
0.2480	1151.988	60.815	121.702	46.668	-0.580	20.225	2193.089	-0.004257	-0.008519	-0.003267
0.2500	1163.695	61.939	123.411	47.442	-0.582	20.231	2215.376	-0.004336	-0.008639	-0.003321
0.2520	1174.215	62.107	124.827	47.849	-0.580	20.237	2235.403	-0.004348	-0.008738	-0.003349
0.2540	1180.872	63.750	125.857	48.803	-0.585	20.236	2248.077	-0.004462	-0.008810	-0.003416
0.2560	1182.721	64.018	126.439	49.111	-0.580	20.234	2251.596	-0.004481	-0.008851	-0.003438
0.2580	1181.323	63.428	126.578	49.068	-0.576	20.230	2248.936	-0.004440	-0.008860	-0.003435
0.2600	1175.853	63.848	126.593	48.817	-0.577	20.225	2238.522	-0.004469	-0.008861	-0.003417
0.2620	1166.235	63.273	126.134	48.354	-0.580	20.221	2220.211	-0.004429	-0.008829	-0.003385
0.2640	1151.116	62.404	125.495	48.059	-0.588	20.219	2191.429	-0.004368	-0.008785	-0.003364
0.2660	1120.112	61.463	122.910	47.119	-0.582	20.221	2132.406	-0.004302	-0.008604	-0.003298
0.2680	1054.904	57.168	116.714	44.004	-0.576	20.225	2008.266	-0.004002	-0.008170	-0.003080
0.2700	969.798	51.175	108.223	39.892	-0.574	20.231	1846.247	-0.003582	-0.007576	-0.002792
0.2720	895.408	46.782	100.259	36.019	-0.574	20.236	1704.626	-0.003275	-0.007018	-0.002521
0.2740	838.931	43.023	94.215	33.311	-0.581	20.236	1597.109	-0.003012	-0.006595	-0.002332
0.2760	792.373	39.641	89.114	30.980	-0.580	20.233	1508.474	-0.002775	-0.006238	-0.002169
0.2780	742.208	37.089	83.636	28.554	-0.580	20.229	1412.973	-0.002596	-0.005855	-0.001999
0.2800	679.900	32.177	76.996	25.298	-0.575	20.224	1294.355	-0.002252	-0.005390	-0.001771
0.2820	608.515	27.322	69.020	21.396	-0.576	20.220	1158.457	-0.001913	-0.004831	-0.001498
0.2840	539.475	23.253	61.225	17.986	-0.578	20.219	1027.021	-0.001628	-0.004286	-0.001259
0.2860	483.028	18.846	54.789	14.886	-0.576	20.221	919.561	-0.001319	-0.003835	-0.001042
0.2880	437.357	16.023	49.176	12.359	-0.577	20.225	832.615	-0.001122	-0.003442	-0.000865
0.2900	394.496	12.740	44.036	10.158	-0.582	20.231	751.019	-0.000892	-0.003083	-0.000711
0.2920	351.650	9.372	38.631	7.575	-0.578	20.236	669.451	-0.000656	-0.002704	-0.000530
0.2940	312.230	7.576	33.906	5.836	-0.583	20.236	594.406	-0.000530	-0.002373	-0.000409
0.2960	278.341	4.307	29.264	4.250	-0.583	20.233	529.890	-0.000301	-0.002048	-0.000297
0.2980	250.268	2.540	25.009	2.858	-0.582	20.230	476.446	-0.000178	-0.001751	-0.000200
0.3000	229.138	1.529	22.274	1.778	-0.580	20.224	436.220	-0.000107	-0.001559	-0.000124
0.3020	214.320	-0.437	20.287	0.829	-0.574	20.220	408.010	0.000031	-0.001420	-0.000058
0.3040	203.560	-0.745	18.908	0.071	-0.582	20.219	387.526	0.000052	-0.001324	-0.000005
0.3060	198.270	-1.195	17.521	-0.182	-0.582	20.222	377.455	0.000084	-0.001226	0.000013
0.3080	199.081	-1.853	16.912	-0.447	-0.578	20.226	379.000	0.000130	-0.001184	0.000031
0.3100	203.259	-1.502	17.258	-0.308	-0.574	20.231	386.953	0.000105	-0.001208	0.000022
0.3120	210.458	-2.302	17.564	-0.098	-0.572	20.236	400.658	0.000161	-0.001229	0.000007
0.3140	223.337	-1.264	18.352	0.141	-0.574	20.236	425.177	0.000089	-0.001285	-0.000010
0.3160	256.986	1.780	21.424	1.081	-0.581	20.234	489.235	-0.000125	-0.001500	-0.000076
0.3180	322.194	4.391	28.151	3.772	-0.583	20.229	613.375	-0.000307	-0.001971	-0.000264
0.3200	398.704	9.288	37.085	7.295	-0.586	20.224	759.029	-0.000650	-0.002596	-0.000511
0.3220	469.818	13.554	45.493	10.509	-0.577	20.220	894.413	-0.000949	-0.003184	-0.000736
0.3240	535.958	17.680	53.040	14.073	-0.577	20.218	1020.327	-0.001238	-0.003713	-0.000985
0.3260	600.024	22.886	60.253	17.482	-0.572	20.221	1142.292	-0.001602	-0.004218	-0.001224
0.3280	661.430	26.717	67.131	20.612	-0.571	20.225	1259.193	-0.001870	-0.004699	-0.001443
0.3300	720.943	30.126	73.912	23.728	-0.567	20.230	1372.490	-0.002109	-0.005174	-0.001661
0.3320	783.266	35.235	80.638	26.898	-0.567	20.236	1491.137	-0.002466	-0.005645	-0.001883
0.3340	847.933	39.486	88.225	30.392	-0.578	20.236	1614.246	-0.002764	-0.006176	-0.002127
0.3360	911.142	43.375	95.006	33.675	-0.576	20.233	1734.581	-0.003036	-0.006650	-0.002357
0.3380	968.355	47.640	101.078	36.691	-0.572	20.230	1843.500	-0.003335	-0.007075	-0.002568
0.3400	1015.515	50.629	106.500	39.092	-0.572	20.225	1933.279	-0.003544	-0.007455	-0.002736
0.3420	1057.083	53.969	111.307	40.985	-0.568	20.220	2012.415	-0.003778	-0.007791	-0.002869
0.3440	1101.778	57.169	116.142	43.654	-0.576	20.218	2097.502	-0.004002	-0.008130	-0.003056
0.3460	1144.939	59.412	120.922	46.235	-0.565	20.221	2179.670	-0.004159	-0.008465	-0.003236
0.3480	1175.011	62.541	124.426	47.960	-0.567	20.225	2236.919	-0.004378	-0.008710	-0.003357
0.3500	1188.747	63.806	126.261	48.789	-0.565	20.231	2263.069	-0.004466	-0.008838	-0.003415
0.3520	1193.887	64.044	127.276	49.196	-0.568	20.236	2272.854	-0.004483	-0.008909	-0.003444
0.3540	1197.103	64.843	128.042	49.560	-0.577	20.236	2278.976	-0.004539	-0.008963	-0.003469
0.3560	1197.734	65.053	128.528	49.857	-0.566	20.234	2280.178	-0.004554	-0.008997	-0.003490
0.3580	1194.473	64.969	128.623	49.772	-0.570	20.230	2273.970	-0.004548	-0.009004	-0.003484
0.3600	1186.523	64.479	127.995	49.702	-0.575	20.225	2258.835	-0.004514	-0.008960	-0.003479
0.3620	1173.478	63.425	127.190	49.041	-0.573	20.221	2234.001	-0.004440	-0.008903	-0.003433
0.3640	1150.395	62.822	125.940	48.579	-0.578	20.219	2190.056	-0.004398	-0.008816	-0.003401
0.3660	1100.034	59.944	121.202	46.558	-0.574	20.222	2094.183	-0.004196	-0.008484	-0.003259
0.3680	1024.532	54.698	113.976	42.852	-0.576	20.226	1950.445	-0.003829	-0.007978	-0.003000
0.3700	949.931	50.727	106.554	39.091	-0.576	20.231	1808.424	-0.003551	-0.007459	-0.002736
0.3720	893.739	46.447	100.565	35.851	-0.573	20.237	1701.450	-0.003251	-0.007040	-0.002510
0.3740	847.497	43.697	95.325	33.887	-0.582	20.236	1613.417	-0.003059	-0.006673	-0.002372
0.3760	790.750	40.218	89.253	31.065	-0.571	20.233	1505.384	-0.002815	-0.006248	-0.002175
0.3780	721.514	34.856	81.709	27.502	-0.572	20.230	1373.577	-0.002440	-0.005720	-0.001925
0.3800	654.307	30.954	74.674	23.897	-0.574	20.224	1245.632	-0.002167	-0.005227	-0.001673
0.3820	598.672	27.069	68.156	20.710	-0.576	20.220	1139.717	-0.001895	-0.004771	-0.001450
0.3840	548.281	23.363	62.447	18.435	-0.585	20.219	1043.787	-0.001635	-0.004371	-0.001290
0.3860	495.577	20.429	56.515	15.743	-0.574	20.221	943.451	-0.001430	-0.003956	-0.001102
0.3880	444.044	16.601	50.373	12.796	-0.572	20.226	845.346	-0.001162	-0.003526	-0.000896
0.3900	395.172	12.881	44.688	10.297	-0.574	20.231	752.306	-0.000902	-0.003128	-0.000721
0.3920	348.719	9.739	38.505	7.980	-0.575	20.237	663.872	-0.000682	-0.002695	-0.000559
0.3940	307.211	6.538	33.377	6.089	-0.575	20.236	584.850	-0.000458	-0.002336	-0.000426
0.3960	270.767	4.192	28.916	4.011	-0.570	20.233	515.471	-0.000293	-0.002024	-0.000281
0.3980	238.846	2.103	24.457	2.565	-0.566	20.229	454.702	-0.000147	-0.001712	-0.000180
0.4000	214.621	-0.198	21.496	1.052	-0.564	20.224	408.583	0.000014	-0.001505	-0.000074
0.4020	201.501	-0.731	18.785	0.042	-0.565	20.220	383.606	0.000051	-0.001315	-0.000003
0.4040	198.390	-1.194	17.994	0.096	-0.577	20.219	377.684	0.000084	-0.001260	-0.000007
0.4060	200.479	-1.193	17.646	-0.072	-0.577	20.222	381.660	0.000084	-0.001235	0.000005
0.4080	204.176	-0.995	17.533	-0.169	-0.577	20.226	388.699	0.000070	-0.001227	0.000012
0.4100	208.730	-1.222	17.966	-0.268	-0.577	20.231	397.367	0.000086	-0.001258	0.000019
0.4120	215.297	-0.971	17.983	-0.238	-0.571	20.237	409.870	0.000068	-0.001259	0.000017
0.4140	231.107	-0.702	19.230	0.531	-0.577	20.236	439.968	0.000049	-0.001346	-0.000037
0.4160	275.396	1.796	23.565	2.059	-0.573	20.233	524.282	-0.000126	-0.001650	-0.000144
0.4180	345.052	5.935	31.390	5.273	-0.570	20.230	656.891	-0.000415	-0.002197	-0.000369
0.4200	414.979	10.075	39.422	8.500	-0.568	20.224	790.014	-0.000705	-0.002760	-0.000595
0.4220	478.309	14.412	46.341	11.071	-0.574	20.220	910.578	-0.001009	-0.003244	-0.000775
0.4240	542.495	18.844	53.763	14.538	-0.586	20.219	1032.772	-0.001319	-0.003763	-0.001018
0.4260	614.076	23.587	62.128	18.282	-0.576	20.222	1169.043	-0.001651	-0.004349	-0.001280
0.4280	689.263	28.893	70.590	21.958	-0.572	20.226	1312.180	-0.002023	-0.004941	-0.001537
0.4300	756.650	33.328	78.261	25.425	-0.575	20.231	1440.468	-0.002333	-0.005478	-0.001780
0.4320	810.692	36.653	84.057	28.035	-0.572	20.236	1543.350	-0.002566	-0.005884	-0.001962
0.4340	857.506	40.890	89.461	30.954	-0.583	20.236	1632.471	-0.002862	-0.006262	-0.002167
0.4360	907.821	43.894	94.950	33.692	-0.576	20.234	1728.258	-0.003073	-0.006647	-0.002358
0.4380	960.992	47.204	100.870	36.357	-0.576	20.230	1829.481	-0.003304	-0.007061	-0.002545
0.4400	1013.546	51.233	106.444	39.176	-0.575	20.225	1929.531	-0.003586	-0.007451	-0.002742
0.4420	1068.144	54.108	112.462	41.967	-0.571	20.220	2033.472	-0.003788	-0.007872	-0.002938
0.4440	1120.203	58.149	118.119	45.126	-0.578	20.219	2132.578	-0.004070	-0.008268	-0.003159
0.4460	1159.397	61.519	122.730	47.370	-0.578	20.221	2207.193	-0.004306	-0.008591	-0.003316
0.4480	1180.436	62.767	125.412	48.520	-0.584	20.226	2247.248	-0.004394	-0.008779	-0.003396
0.4500	1186.703	63.427	126.552	49.069	-0.580	20.231	2259.178	-0.004440	-0.008859	-0.003435
0.4520	1186.658	63.736	126.942	48.929	-0.571	20.237	2259.092	-0.004462	-0.008886	-0.003425
0.4540	1185.486	63.681	127.553	49.477	-0.578	20.236	2256.861	-0.004458	-0.008929	-0.003463
0.4560	1183.968	64.551	127.413	49.618	-0.572	20.234	2253.971	-0.004519	-0.008919	-0.003473
0.4580	1181.443	63.876	127.497	49.435	-0.566	20.230	2249.165	-0.004471	-0.008925	-0.003460
0.4600	1176.123	63.679	127.388	49.462	-0.568	20.225	2239.037	-0.004458	-0.008917	-0.003462
0.4620	1166.670	63.778	126.971	48.858	-0.566	20.221	2221.041	-0.004464	-0.008888	-0.003420
0.4640	1151.251	62.851	126.232	48.732	-0.572	20.219	2191.687	-0.004400	-0.008836	-0.003411
0.4660	1117.377	61.321	123.161	47.413	-0.571	20.222	2127.199	-0.004292	-0.008621	-0.003319
0.4680	1045.301	57.029	116.393	44.003	-0.568	20.226	1989.985	-0.003992	-0.008147	-0.003080
0.4700	950.036	50.770	106.944	39.203	-0.574	20.231	1808.624	-0.003554	-0.007486	-0.002744
0.4720	869.123	45.631	98.204	35.037	-0.564	20.236	1654.587	-0.003194	-0.006874	-0.002453
0.4740	821.573	42.263	93.311	33.047	-0.568	20.235	1564.064	-0.002958	-0.006532	-0.002313
0.4760	793.019	40.090	89.795	31.570	-0.565	20.233	1509.705	-0.002806	-0.006286	-0.002210
0.4780	743.756	36.876	84.473	28.874	-0.566	20.230	1415.920	-0.002581	-0.005913	-0.002021
0.4800	657.132	31.068	75.372	24.386	-0.565	20.224	1251.011	-0.002175	-0.005276	-0.001707
0.4820	571.545	25.581	65.588	19.475	-0.563	20.220	1088.076	-0.001791	-0.004591	-0.001363
0.4840	518.089	21.989	59.488	16.922	-0.571	20.218	986.309	-0.001539	-0.004164	-0.001185
0.4860	486.575	18.833	55.458	15.434	-0.565	20.221	926.313	-0.001318	-0.003882	-0.001080
0.4880	452.325	17.163	51.552	13.609	-0.572	20.226	861.111	-0.001201	-0.003609	-0.000953
0.4900	401.183	13.373	45.620	10.801	-0.575	20.231	763.750	-0.000936	-0.003193	-0.000756
0.4920	343.745	9.470	38.379	7.589	-0.567	20.236	654.402	-0.000663	-0.002687	-0.000531
0.4940	296.420	6.931	32.502	5.459	-0.578	20.236	564.308	-0.000485	-0.002275	-0.000382
0.4960	264.229	3.690	28.112	3.885	-0.577	20.234	503.025	-0.000258	-0.001968	-0.000272
0.4980	243.986	2.470	25.094	3.000	-0.570	20.230	464.487	-0.000173	-0.001757	-0.000210
0.5000	209.872	-4.619	12.198	-2.684	-0.584	20.237	399.542	0.000323	-0.000854	0.000188
0.5020	210.293	-4.732	12.657	-2.474	-0.587	20.234	400.343	0.000331	-0.000886	0.000173
0.5040	211.420	-5.026	12.118	-2.474	-0.570	20.231	402.489	0.000352	-0.000848	0.000173
0.5060	214.365	-4.505	12.353	-2.389	-0.574	20.226	408.096	0.000315	-0.000865	0.000167
0.5080	221.414	-4.715	13.073	-2.164	-0.563	20.221	421.515	0.000330	-0.000915	0.000151
0.5100	238.471	-3.607	14.908	-1.448	-0.571	20.219	453.987	0.000252	-0.001044	0.000101
0.5120	273.938	-1.222	18.911	0.054	-0.576	20.221	521.507	0.000086	-0.001324	-0.000004
0.5140	325.455	1.346	24.275	2.172	-0.573	20.225	619.583	-0.000094	-0.001699	-0.000152
0.5160	380.549	5.021	30.682	4.854	-0.575	20.230	724.468	-0.000351	-0.002148	-0.000340
0.5180	433.690	8.811	36.906	7.196	-0.570	20.236	825.634	-0.000617	-0.002583	-0.000504
0.5200	492.661	12.501	43.841	10.198	-0.584	20.237	937.901	-0.000875	-0.003069	-0.000714
0.5220	563.716	17.624	51.970	13.917	-0.585	20.235	1073.170	-0.001234	-0.003638	-0.000974
0.5240	644.989	22.577	60.961	17.803	-0.581	20.232	1227.894	-0.001580	-0.004267	-0.001246
0.5260	734.288	28.259	70.883	22.421	-0.587	20.227	1397.896	-0.001978	-0.004962	-0.001569
0.5280	825.015	34.632	80.860	27.036	-0.585	20.222	1570.616	-0.002424	-0.005660	-0.001893
0.5300	910.797	40.498	90.503	31.780	-0.593	20.219	1733.923	-0.002835	-0.006335	-0.002225
0.5320	990.793	45.999	99.536	35.991	-0.592	20.221	1886.215	-0.003220	-0.006968	-0.002519
0.5340	1065.003	51.752	107.749	39.723	-0.586	20.225	2027.493	-0.003623	-0.007542	-0.002781
0.5360	1133.848	56.142	115.253	43.372	-0.592	20.230	2158.556	-0.003930	-0.008068	-0.003036
0.5380	1201.867	60.675	122.717	46.964	-0.584	20.236	2288.046	-0.004247	-0.008590	-0.003287
0.5400	1270.276	66.164	130.985	50.936	-0.587	20.237	2418.280	-0.004631	-0.009169	-0.003565
0.5420	1337.378	70.247	138.640	55.173	-0.587	20.234	2546.024	-0.004917	-0.009705	-0.003862
0.5440	1399.055	74.666	145.367	58.458	-0.576	20.232	2663.441	-0.005227	-0.010176	-0.004092
0.5460	1443.659	78.441	150.911	60.718	-0.572	20.226	2748.356	-0.005491	-0.010564	-0.004250
0.5480	1468.591	79.931	154.053	62.177	-0.561	20.221	2795.820	-0.005595	-0.010784	-0.004352
0.5500	1481.290	82.245	156.261	63.438	-0.578	20.219	2819.996	-0.005757	-0.010938	-0.004441
0.5520	1489.571	83.465	157.816	64.264	-0.578	20.221	2835.760	-0.005843	-0.011047	-0.004498
0.5540	1496.829	83.492	158.790	64.797	-0.573	20.225	2849.579	-0.005844	-0.011115	-0.004536
0.5560	1499.715	84.433	159.638	65.136	-0.580	20.231	2855.072	-0.005910	-0.011175	-0.004560
0.5580	1498.317	84.391	159.903	65.067	-0.572	20.237	2852.411	-0.005907	-0.011193	-0.004555
0.5600	1492.156	84.195	160.001	65.291	-0.584	20.237	2840.681	-0.005894	-0.011200	-0.004570
0.5620	1478.284	84.307	159.598	65.207	-0.589	20.235	2814.274	-0.005901	-0.011172	-0.004564
0.5640	1447.461	81.893	157.194	63.970	-0.584	20.232	2755.594	-0.005732	-0.011004	-0.004478
0.5660	1370.861	77.542	150.232	60.646	-0.582	20.227	2609.768	-0.005428	-0.010516	-0.004245
0.5680	1258.569	70.626	138.891	55.007	-0.573	20.222	2395.992	-0.004944	-0.009722	-0.003850
0.5700	1166.430	64.171	129.636	50.529	-0.581	20.219	2220.583	-0.004492	-0.009075	-0.003537
0.5720	1109.006	60.857	123.620	47.720	-0.587	20.221	2111.263	-0.004260	-0.008653	-0.003340
0.5740	1050.366	57.490	117.658	44.425	-0.584	20.226	1999.626	-0.004024	-0.008236	-0.003110
0.5760	964.253	51.387	108.957	39.949	-0.577	20.231	1835.690	-0.003597	-0.007627	-0.002796
0.5780	864.855	45.239	98.521	34.702	-0.572	20.236	1646.461	-0.003167	-0.006896	-0.002429
0.5800	776.007	39.305	88.641	30.392	-0.578	20.237	1477.318	-0.002751	-0.006205	-0.002127
0.5820	704.096	33.973	80.763	26.854	-0.577	20.234	1340.418	-0.002378	-0.005653	-0.001880
0.5840	639.865	30.267	73.343	23.488	-0.579	20.231	1218.138	-0.002119	-0.005134	-0.001644
0.5860	577.121	25.594	66.019	20.064	-0.575	20.226	1098.690	-0.001792	-0.004621	-0.001404
0.5880	515.504	21.020	58.710	16.444	-0.570	20.221	981.388	-0.001471	-0.004110	-0.001151
0.5900	455.947	17.876	51.705	13.609	-0.577	20.219	868.006	-0.001251	-0.003619	-0.000953
0.5920	401.078	13.386	44.896	10.831	-0.575	20.220	763.550	-0.000937	-0.003143	-0.000758
0.5940	352.326	9.836	38.615	8.067	-0.574	20.225	670.738	-0.000688	-0.002703	-0.000565
0.5960	311.404	7.463	33.251	5.640	-0.578	20.230	592.833	-0.000522	-0.002328	-0.000395
0.5980	277.755	4.125	28.223	3.730	-0.572	20.237	528.774	-0.000289	-0.001976	-0.000261
0.6000	251.095	2.314	24.859	2.618	-0.580	20.237	478.020	-0.000162	-0.001740	-0.000183
0.6020	232.204	0.952	21.982	1.637	-0.580	20.235	442.057	-0.000067	-0.001539	-0.000115
0.6040	221.188	-0.844	19.922	0.600	-0.583	20.232	421.085	0.000059	-0.001395	-0.000042
0.6060	216.619	-1.250	19.159	0.295	-0.581	20.227	412.388	0.000087	-0.001341	-0.000021
0.6080	217.777	-0.885	18.896	0.099	-0.578	20.222	414.591	0.000062	-0.001323	-0.000007
0.6100	223.247	-1.446	18.895	0.282	-0.584	20.220	425.005	0.000101	-0.001323	-0.000020
0.6120	234.233	-0.885	20.006	0.658	-0.582	20.221	445.919	0.000062	-0.001400	-0.000046
0.6140	267.791	1.094	22.953	1.358	-0.578	20.226	509.806	-0.000077	-0.001607	-0.000095
0.6160	341.536	5.277	30.430	4.501	-0.583	20.230	650.196	-0.000369	-0.002130	-0.000315
0.6180	431.270	10.721	40.437	8.558	-0.581	20.236	821.028	-0.000750	-0.002831	-0.000599
0.6200	511.507	16.810	49.343	12.865	-0.587	20.237	973.778	-0.001177	-0.003454	-0.000901
0.6220	577.467	20.513	56.680	16.051	-0.585	20.235	1099.348	-0.001436	-0.003968	-0.001124
0.6240	641.127	24.484	63.893	19.180	-0.580	20.232	1220.541	-0.001714	-0.004472	-0.001343
0.6260	716.705	29.972	71.993	23.012	-0.584	20.227	1364.422	-0.002098	-0.005040	-0.001611
0.6280	808.649	35.277	81.944	27.809	-0.581	20.222	1539.459	-0.002469	-0.005736	-0.001947
0.6300	904.936	42.098	92.825	32.973	-0.584	20.220	1722.765	-0.002947	-0.006498	-0.002308
0.6320	992.476	48.215	102.329	37.491	-0.587	20.221	1889.420	-0.003375	-0.007163	-0.002624
0.6340	1074.666	53.195	111.433	41.491	-0.581	20.225	2045.889	-0.003724	-0.007800	-0.002904
0.6360	1156.526	59.526	120.173	45.883	-0.583	20.231	2201.729	-0.004167	-0.008412	-0.003212
0.6380	1234.313	64.942	128.732	49.940	-0.582	20.236	2349.815	-0.004546	-0.009011	-0.003496
0.6400	1298.935	68.911	136.375	54.040	-0.587	20.238	2472.839	-0.004824	-0.009546	-0.003783
0.6420	1347.477	73.150	142.420	56.859	-0.581	20.234	2565.250	-0.005121	-0.009969	-0.003980
0.6440	1381.426	75.481	146.283	58.443	-0.572	20.231	2629.881	-0.005284	-0.010240	-0.004091
0.6460	1411.288	77.558	150.105	60.352	-0.570	20.227	2686.729	-0.005429	-0.010507	-0.004225
0.6480	1446.529	80.335	154.232	62.220	-0.566	20.222	2753.820	-0.005623	-0.010796	-0.004355
0.6500	1488.323	83.169	159.110	64.899	-0.578	20.219	2833.385	-0.005822	-0.011138	-0.004543
0.6520	1518.485	86.020	162.721	66.754	-0.589	20.221	2890.806	-0.006021	-0.011390	-0.004673
0.6540	1523.505	87.072	163.793	67.077	-0.573	20.225	2900.362	-0.006095	-0.011465	-0.004695
0.6560	1517.869	86.497	163.807	67.145	-0.568	20.230	2889.633	-0.006055	-0.011467	-0.004700
0.6580	1509.543	86.734	163.082	66.962	-0.559	20.237	2873.783	-0.006071	-0.011416	-0.004687
0.6600	1498.242	86.315	162.959	66.851	-0.568	20.238	2852.268	-0.006042	-0.011407	-0.004680
0.6620	1479.261	85.094	161.795	66.486	-0.577	20.235	2816.133	-0.005957	-0.011326	-0.004654
0.6640	1428.931	82.441	157.570	64.337	-0.570	20.232	2720.318	-0.005771	-0.011030	-0.004504
0.6660	1337.649	76.842	148.508	59.903	-0.572	20.227	2546.539	-0.005379	-0.010396	-0.004193
0.6680	1249.537	70.976	139.683	55.187	-0.560	20.221	2378.798	-0.004968	-0.009778	-0.003863
0.6700	1190.085	68.070	133.651	52.239	-0.574	20.219	2265.615	-0.004765	-0.009356	-0.003657
0.6720	1137.395	64.210	127.955	50.024	-0.583	20.221	2165.308	-0.004495	-0.008957	-0.003502
0.6740	1065.830	58.922	120.828	46.096	-0.576	20.226	2029.066	-0.004125	-0.008458	-0.003227
0.6760	974.893	53.730	111.350	41.325	-0.574	20.231	1855.946	-0.003761	-0.007794	-0.002893
0.6780	877.343	46.685	100.996	36.286	-0.568	20.237	1670.237	-0.003268	-0.007070	-0.002540
0.6800	789.698	41.130	91.422	31.977	-0.582	20.237	1503.382	-0.002879	-0.006400	-0.002238
0.6820	720.958	36.919	84.155	28.357	-0.576	20.235	1372.519	-0.002584	-0.005891	-0.001985
0.6840	660.979	32.189	77.138	24.848	-0.572	20.231	1258.335	-0.002253	-0.005400	-0.001739
0.6860	594.930	28.290	69.508	21.242	-0.579	20.226	1132.593	-0.001980	-0.004866	-0.001487
0.6880	521.501	23.167	61.155	17.650	-0.570	20.221	992.804	-0.001622	-0.004281	-0.001235
0.6900	451.694	17.440	52.943	14.071	-0.580	20.219	859.909	-0.001221	-0.003706	-0.000985
0.6920	391.370	13.357	45.230	10.802	-0.589	20.221	745.068	-0.000935	-0.003166	-0.000756
0.6940	341.100	10.185	38.588	7.841	-0.581	20.226	649.366	-0.000713	-0.002701	-0.000549
0.6960	306.610	7.268	33.780	6.004	-0.576	20.231	583.706	-0.000509	-0.002365	-0.000420
0.6980	283.751	5.541	30.333	4.559	-0.572	20.236	540.190	-0.000388	-0.002123	-0.000319
0.7000	262.742	4.125	27.680	3.449	-0.587	20.238	500.193	-0.000289	-0.001938	-0.000241
0.7020	242.844	1.754	24.691	2.663	-0.585	20.235	462.313	-0.000123	-0.001728	-0.000186
0.7040	228.838	1.109	22.704	1.665	-0.575	20.232	435.648	-0.000078	-0.001589	-0.000117
0.7060	223.037	0.307	21.675	1.245	-0.580	20.227	424.604	-0.000022	-0.001517	-0.000087
0.7080	224.494	-0.380	20.815	0.714	-0.577	20.222	427.380	0.000027	-0.001457	-0.000050
0.7100	230.957	0.672	21.372	1.064	-0.584	20.220	439.682	-0.000047	-0.001496	-0.000074
0.7120	242.994	1.417	22.401	1.678	-0.585	20.221	462.599	-0.000099	-0.001568	-0.000117
0.7140	275.366	2.314	25.054	2.494	-0.581	20.225	524.225	-0.000162	-0.001754	-0.000175
0.7160	339.537	6.511	31.458	5.148	-0.584	20.231	646.391	-0.000456	-0.002202	-0.000360
0.7180	416.753	11.321	40.242	8.431	-0.578	20.237	793.390	-0.000793	-0.002817	-0.000590
0.7200	496.478	16.234	49.384	12.485	-0.584	20.238	945.168	-0.001136	-0.003457	-0.000874
0.7220	573.649	21.580	58.014	16.458	-0.592	20.235	1092.081	-0.001511	-0.004061	-0.001152
0.7240	647.138	26.197	66.115	19.939	-0.588	20.232	1231.985	-0.001834	-0.004628	-0.001396
0.7260	731.357	30.982	75.344	24.303	-0.590	20.227	1392.317	-0.002169	-0.005274	-0.001701
0.7280	835.399	38.082	86.377	29.467	-0.584	20.222	1590.385	-0.002666	-0.006046	-0.002063
0.7300	945.497	45.969	98.356	35.262	-0.591	20.220	1799.984	-0.003218	-0.006885	-0.002468
0.7320	1039.305	51.822	108.724	40.495	-0.598	20.222	1978.569	-0.003628	-0.007611	-0.002835
0.7340	1099.734	56.285	115.378	43.344	-0.595	20.226	2093.611	-0.003940	-0.008076	-0.003034
0.7360	1139.018	59.413	119.922	45.772	-0.590	20.231	2168.398	-0.004159	-0.008395	-0.003204
0.7380	1189.499	62.023	125.522	48.410	-0.579	20.238	2264.500	-0.004342	-0.008787	-0.003389
0.7400	1259.967	67.791	133.278	52.213	-0.580	20.238	2398.653	-0.004745	-0.009329	-0.003655
0.7420	1337.994	73.558	142.324	56.786	-0.576	20.235	2547.197	-0.005149	-0.009963	-0.003975
0.7440	1404.164	77.530	149.340	60.464	-0.570	20.232	2673.168	-0.005427	-0.010454	-0.004232
0.7460	1440.398	80.997	153.663	62.190	-0.578	20.226	2742.147	-0.005670	-0.010756	-0.004353
0.7480	1455.892	81.991	155.984	63.100	-0.570	20.222	2771.645	-0.005739	-0.010919	-0.004417
0.7500	1474.948	82.916	158.539	64.307	-0.577	20.219	2807.922	-0.005804	-0.011098	-0.004502
0.7520	1503.893	85.978	162.030	66.262	-0.578	20.221	2863.026	-0.006018	-0.011342	-0.004638
0.7540	1529.907	87.816	165.129	67.706	-0.575	20.226	2912.550	-0.006147	-0.011559	-0.004739
0.7560	1537.376	88.502	166.295	68.420	-0.585	20.231	2926.769	-0.006195	-0.011641	-0.004789
0.7580	1529.080	88.938	166.184	68.126	-0.576	20.237	2910.976	-0.006226	-0.011633	-0.004769
0.7600	1514.578	88.026	165.738	67.944	-0.585	20.238	2883.368	-0.006162	-0.011602	-0.004756
0.7620	1491.434	86.778	164.126	67.481	-0.584	20.234	2839.308	-0.006074	-0.011489	-0.004724
0.7640	1439.646	84.180	159.470	65.290	-0.581	20.231	2740.717	-0.005893	-0.011163	-0.004570
0.7660	1356.464	78.371	151.452	61.403	-0.582	20.227	2582.359	-0.005486	-0.010602	-0.004298
0.7680	1270.682	73.178	142.434	56.985	-0.579	20.222	2419.052	-0.005122	-0.009970	-0.003989
0.7700	1194.819	68.912	135.000	53.306	-0.588	20.220	2274.628	-0.004824	-0.009450	-0.003731
0.7720	1123.464	63.623	127.386	49.616	-0.585	20.221	2138.786	-0.004454	-0.008917	-0.003473
0.7740	1050.335	58.544	119.938	45.816	-0.578	20.225	1999.569	-0.004098	-0.008396	-0.003207
0.7760	973.841	54.053	112.281	41.745	-0.583	20.231	1853.943	-0.003784	-0.007860	-0.002922
0.7780	891.094	48.104	103.275	37.227	-0.575	20.237	1696.415	-0.003367	-0.007229	-0.002606
0.7800	807.762	43.178	94.799	33.213	-0.578	20.237	1537.771	-0.003022	-0.006636	-0.002325
0.7820	731.162	37.959	86.335	29.466	-0.580	20.234	1391.945	-0.002657	-0.006043	-0.002063
0.7840	658.530	32.471	77.663	25.453	-0.569	20.231	1253.672	-0.002273	-0.005436	-0.001782
0.7860	587.085	28.359	69.700	21.636	-0.569	20.226	1117.659	-0.001985	-0.004879	-0.001514
0.7880	516.677	23.378	61.197	17.747	-0.567	20.221	983.620	-0.001636	-0.004284	-0.001242
0.7900	451.664	18.408	53.346	14.154	-0.577	20.219	859.852	-0.001289	-0.003734	-0.000991
0.7920	395.322	14.802	46.774	11.277	-0.577	20.221	752.592	-0.001036	-0.003274	-0.000789
0.7940	344.872	10.564	39.979	8.444	-0.575	20.225	656.548	-0.000740	-0.002798	-0.000591
0.7960	299.171	7.056	33.654	6.048	-0.577	20.231	569.544	-0.000494	-0.002356	-0.000423
0.7980	261.765	5.245	28.624	3.816	-0.574	20.237	498.333	-0.000367	-0.002004	-0.000267
0.8000	236.953	3.128	25.329	2.775	-0.581	20.238	451.097	-0.000219	-0.001773	-0.000194
0.8020	224.494	1.403	23.357	2.172	-0.587	20.235	427.380	-0.000098	-0.001635	-0.000152
0.8040	221.549	1.333	21.996	1.540	-0.578	20.232	421.772	-0.000093	-0.001540	-0.000108
0.8060	223.923	0.995	21.954	1.581	-0.577	20.227	426.292	-0.000070	-0.001537	-0.000111
0.8080	228.056	-0.113	22.066	1.105	-0.576	20.222	434.160	0.000008	-0.001545	-0.000077
0.8100	233.737	1.039	22.704	1.709	-0.586	20.220	444.975	-0.000073	-0.001589	-0.000120
0.8120	243.926	1.669	23.190	2.073	-0.588	20.221	464.373	-0.000117	-0.001623	-0.000145
0.8140	272.916	2.286	25.025	2.663	-0.587	20.226	519.562	-0.000160	-0.001752	-0.000186
0.8160	339.537	6.328	32.209	5.358	-0.586	20.231	646.391	-0.000443	-0.002255	-0.000375
0.8180	425.214	11.660	41.590	9.372	-0.583	20.237	809.498	-0.000816	-0.002911	-0.000656
0.8200	499.394	16.333	50.288	13.203	-0.587	20.237	950.718	-0.001143	-0.003520	-0.000924
0.8220	561.131	21.385	57.639	16.220	-0.595	20.235	1068.249	-0.001497	-0.004035	-0.001135
0.8240	630.487	25.748	65.115	19.518	-0.585	20.232	1200.285	-0.001802	-0.004558	-0.001366
0.8260	718.719	30.589	74.188	23.825	-0.584	20.227	1368.256	-0.002141	-0.005193	-0.001668
0.8280	819.168	37.200	84.848	28.861	-0.583	20.222	1559.486	-0.002604	-0.005939	-0.002020
0.8300	915.395	44.062	95.854	34.069	-0.583	20.219	1742.678	-0.003084	-0.006710	-0.002385
0.8320	1001.523	49.689	105.457	38.784	-0.587	20.221	1906.643	-0.003478	-0.007382	-0.002715
0.8340	1079.400	55.513	113.641	42.713	-0.582	20.226	2054.901	-0.003886	-0.007955	-0.002990
0.8360	1151.717	60.228	121.578	46.658	-0.589	20.231	2192.574	-0.004216	-0.008510	-0.003266
0.8380	1223.282	64.927	129.582	50.235	-0.580	20.237	2328.815	-0.004545	-0.009071	-0.003516
0.8400	1291.767	70.372	137.432	54.151	-0.582	20.237	2459.192	-0.004926	-0.009620	-0.003791
0.8420	1348.018	73.853	144.060	57.616	-0.581	20.234	2566.280	-0.005170	-0.010084	-0.004033
0.8440	1387.393	76.715	148.521	60.001	-0.577	20.232	2641.239	-0.005370	-0.010396	-0.004200
0.8460	1414.308	79.213	151.815	61.320	-0.577	20.226	2692.480	-0.005545	-0.010627	-0.004292
0.8480	1443.118	80.645	155.331	62.863	-0.581	20.221	2747.326	-0.005645	-0.010873	-0.004400
0.8500	1480.073	84.054	159.805	65.166	-0.589	20.219	2817.678	-0.005884	-0.011186	-0.004562
0.8520	1509.513	87.183	163.223	66.922	-0.587	20.221	2873.726	-0.006103	-0.011426	-0.004685
0.8540	1517.914	87.716	164.571	67.414	-0.576	20.225	2889.719	-0.006140	-0.011520	-0.004719
0.8560	1513.331	87.464	164.571	67.399	-0.584	20.231	2880.993	-0.006122	-0.011520	-0.004718
0.8580	1505.786	87.478	164.127	67.341	-0.570	20.237	2866.631	-0.006123	-0.011489	-0.004714
0.8600	1495.808	86.972	163.946	67.314	-0.581	20.237	2847.633	-0.006088	-0.011476	-0.004712
0.8620	1479.637	86.511	163.056	66.795	-0.583	20.235	2816.849	-0.006056	-0.011414	-0.004676
0.8640	1436.926	83.971	159.388	65.291	-0.573	20.232	2735.538	-0.005878	-0.011157	-0.004570
0.8660	1347.778	77.924	150.980	61.222	-0.577	20.227	2565.823	-0.005455	-0.010569	-0.004286
0.8680	1246.922	72.084	140.822	55.833	-0.572	20.222	2373.819	-0.005046	-0.009858	-0.003908
0.8700	1170.217	67.452	132.930	51.790	-0.583	20.219	2227.793	-0.004722	-0.009305	-0.003625
0.8720	1114.792	63.061	126.732	49.348	-0.577	20.221	2122.278	-0.004414	-0.008871	-0.003454
0.8740	1056.662	59.706	120.771	46.416	-0.573	20.226	2011.614	-0.004179	-0.008454	-0.003249
0.8760	981.175	54.628	113.308	42.473	-0.584	20.231	1867.905	-0.003824	-0.007932	-0.002973
0.8780	899.270	48.987	104.597	37.926	-0.572	20.237	1711.979	-0.003429	-0.007322	-0.002655
0.8800	824.714	45.030	96.814	34.294	-0.577	20.237	1570.044	-0.003152	-0.006777	-0.002401
0.8820	754.080	39.810	89.073	30.871	-0.581	20.235	1435.575	-0.002787	-0.006235	-0.002161
0.8840	680.246	34.687	80.193	26.688	-0.574	20.232	1295.013	-0.002428	-0.005614	-0.001868
0.8860	602.910	30.014	71.758	22.702	-0.578	20.226	1147.785	-0.002101	-0.005023	-0.001589
0.8880	528.354	23.643	63.211	18.492	-0.572	20.222	1005.850	-0.001655	-0.004425	-0.001294
0.8900	460.425	19.154	54.970	15.054	-0.578	20.220	876.532	-0.001341	-0.003848	-0.001054
0.8920	401.935	15.714	48.105	11.897	-0.577	20.222	765.181	-0.001100	-0.003367	-0.000833
0.8940	351.935	11.476	41.255	9.006	-0.573	20.226	669.994	-0.000803	-0.002888	-0.000630
0.8960	311.464	8.320	35.753	7.140	-0.576	20.231	592.947	-0.000582	-0.002503	-0.000500
0.8980	281.302	6.623	31.320	5.302	-0.570	20.237	535.526	-0.000464	-0.002192	-0.000371
0.9000	256.610	4.447	28.235	3.927	-0.581	20.237	488.520	-0.000311	-0.001976	-0.000275
0.9020	236.863	2.778	25.524	3.139	-0.581	20.235	450.926	-0.000194	-0.001787	-0.000220
0.9040	224.464	1.698	23.066	2.017	-0.568	20.232	427.322	-0.000119	-0.001615	-0.000141
0.9060	219.821	0.702	22.107	1.553	-0.567	20.227	418.482	-0.000049	-0.001548	-0.000109
0.9080	221.474	0.869	21.954	1.259	-0.563	20.222	421.629	-0.000061	-0.001537	-0.000088
0.9100	227.365	0.939	22.511	1.695	-0.572	20.220	432.844	-0.000066	-0.001576	-0.000119
0.9120	238.095	1.023	23.107	2.046	-0.573	20.222	453.272	-0.000072	-0.001617	-0.000143
0.9140	266.529	3.156	24.843	2.606	-0.571	20.226	507.402	-0.000221	-0.001739	-0.000182
0.9160	331.151	6.929	31.708	5.174	-0.576	20.231	630.426	-0.000485	-0.002220	-0.000362
0.9180	416.618	11.547	41.436	9.062	-0.573	20.237	793.133	-0.000808	-0.002901	-0.000634
0.9200	504.203	17.891	51.206	13.371	-0.581	20.238	959.873	-0.001252	-0.003584	-0.000936
0.9220	589.204	22.930	60.642	17.887	-0.580	20.236	1121.693	-0.001605	-0.004245	-0.001252
0.9240	670.462	27.938	69.743	21.605	-0.566	20.232	1276.388	-0.001956	-0.004882	-0.001512
0.9260	751.766	33.607	78.651	25.914	-0.565	20.227	1431.170	-0.002352	-0.005506	-0.001814
0.9280	833.025	38.630	87.321	30.221	-0.566	20.222	1585.865	-0.002704	-0.006112	-0.002115
0.9300	914.644	44.636	96.340	34.505	-0.580	20.220	1741.247	-0.003125	-0.006744	-0.002415
0.9320	996.203	50.348	105.361	38.981	-0.581	20.222	1896.515	-0.003524	-0.007375	-0.002729
0.9340	1074.757	54.936	113.629	42.658	-0.570	20.226	2046.061	-0.003846	-0.007954	-0.002986
0.9360	1145.901	60.100	121.285	46.418	-0.574	20.232	2181.501	-0.004207	-0.008490	-0.003249
0.9380	1208.179	64.941	128.443	49.812	-0.565	20.237	2300.062	-0.004546	-0.008991	-0.003487
0.9400	1268.428	68.646	135.460	53.363	-0.577	20.237	2414.761	-0.004805	-0.009482	-0.003735
0.9420	1333.561	73.557	142.519	56.928	-0.570	20.234	2538.757	-0.005149	-0.009976	-0.003985
0.9440	1404.946	78.665	150.411	60.576	-0.563	20.231	2674.656	-0.005507	-0.010529	-0.004240
0.9460	1464.203	82.217	157.180	64.071	-0.570	20.226	2787.466	-0.005755	-0.011003	-0.004485
0.9480	1489.616	84.714	160.459	65.557	-0.570	20.222	2835.846	-0.005930	-0.011232	-0.004589
0.9500	1495.327	86.636	162.014	66.429	-0.577	20.220	2846.718	-0.006065	-0.011341	-0.004650
0.9520	1501.473	86.764	163.001	67.062	-0.578	20.222	2858.419	-0.006073	-0.011410	-0.004694
0.9540	1505.381	87.072	163.890	67.161	-0.570	20.226	2865.858	-0.006095	-0.011472	-0.004701
0.9560	1501.458	87.535	163.944	67.273	-0.577	20.231	2858.391	-0.006127	-0.011476	-0.004709
0.9580	1494.124	86.623	163.417	66.838	-0.577	20.237	2844.429	-0.006064	-0.011439	-0.004679
0.9600	1484.882	86.875	163.139	66.751	-0.589	20.237	2826.834	-0.006081	-0.011420	-0.004673
0.9620	1467.780	86.215	162.250	66.515	-0.584	20.235	2794.275	-0.006035	-0.011357	-0.004656
0.9640	1418.411	82.721	158.067	64.380	-0.576	20.232	2700.291	-0.005790	-0.011065	-0.004507
0.9660	1330.149	77.822	149.410	60.254	-0.578	20.226	2532.263	-0.005448	-0.010459	-0.004218
0.9680	1243.090	72.056	140.462	55.708	-0.572	20.222	2366.524	-0.005044	-0.009832	-0.003900
0.9700	1175.327	67.341	133.860	52.605	-0.577	20.219	2237.520	-0.004714	-0.009370	-0.003682
0.9720	1112.839	63.876	127.455	49.602	-0.577	20.221	2118.559	-0.004471	-0.008922	-0.003472
0.9740	1040.327	59.371	119.451	45.645	-0.574	20.226	1980.515	-0.004156	-0.008362	-0.003195
0.9760	954.559	53.253	111.196	41.354	-0.576	20.231	1817.236	-0.003728	-0.007784	-0.002895
0.9780	863.262	47.555	101.468	36.428	-0.567	20.237	1643.429	-0.003329	-0.007103	-0.002550
0.9800	779.223	41.633	92.282	32.146	-0.575	20.237	1483.440	-0.002914	-0.006460	-0.002250
0.9820	707.613	36.833	84.209	28.527	-0.574	20.235	1347.113	-0.002578	-0.005895	-0.001997
0.9840	643.501	32.821	77.079	25.157	-0.570	20.232	1225.061	-0.002297	-0.005396	-0.001761
0.9860	579.465	28.105	69.925	21.804	-0.566	20.226	1103.153	-0.001967	-0.004895	-0.001526
0.9880	515.670	23.628	61.990	18.127	-0.557	20.222	981.703	-0.001654	-0.004339	-0.001269
0.9900	469.638	20.443	56.263	15.786	-0.570	20.220	894.070	-0.001431	-0.003938	-0.001105
0.9920	443.368	17.664	52.760	14.395	-0.573	20.221	844.059	-0.001236	-0.003693	-0.001008
0.9940	403.753	14.997	47.954	12.164	-0.571	20.225	768.642	-0.001050	-0.003357	-0.000852
0.9960	334.803	10.734	39.575	8.530	-0.577	20.231	637.379	-0.000751	-0.002770	-0.000597
0.9980	270.647	5.725	30.932	4.882	-0.570	20.237	515.242	-0.000401	-0.002165	-0.000342
Test Cycles
Time (sec)	Axial stress (kPa)	Axial micro-strain #1	Axial micro-strain #2	Axial micro-strain #3	Confining pressure (kPa)	Temperature (�C)	Load (N)	Displacement #1 (mm)	Displacement #2 (mm)	Displacement #3 (mm)
0.0000	240.785	3.479	26.945	3.294	-0.579	20.237	458.393	-0.000244	-0.001886	-0.000231
0.0020	237.043	3.283	25.846	3.127	-0.584	20.235	451.269	-0.000230	-0.001809	-0.000219
0.0040	239.463	2.835	25.553	3.197	-0.570	20.232	455.875	-0.000198	-0.001789	-0.000224
0.0060	240.394	2.497	25.511	2.902	-0.562	20.227	457.649	-0.000175	-0.001786	-0.000203
0.0080	241.522	2.329	25.469	2.382	-0.557	20.222	459.795	-0.000163	-0.001783	-0.000167
0.0100	245.249	2.385	25.358	2.675	-0.566	20.220	466.890	-0.000167	-0.001775	-0.000187
0.0120	254.251	2.468	25.636	3.126	-0.565	20.222	484.028	-0.000173	-0.001795	-0.000219
0.0140	278.567	4.178	27.319	3.478	-0.563	20.226	530.319	-0.000292	-0.001912	-0.000243
0.0160	340.003	7.167	33.698	6.073	-0.564	20.231	647.278	-0.000502	-0.002359	-0.000425
0.0180	423.936	12.149	42.744	9.681	-0.565	20.237	807.066	-0.000850	-0.002992	-0.000678
0.0200	504.158	18.070	51.595	13.766	-0.568	20.238	959.787	-0.001265	-0.003612	-0.000964
0.0220	584.109	23.067	60.391	17.847	-0.570	20.235	1111.994	-0.001615	-0.004227	-0.001249
0.0240	669.801	28.626	70.271	21.861	-0.570	20.232	1275.129	-0.002004	-0.004919	-0.001530
0.0260	750.970	34.435	79.066	25.946	-0.574	20.227	1429.653	-0.002410	-0.005535	-0.001816
0.0280	832.153	38.434	87.765	30.058	-0.574	20.222	1584.206	-0.002690	-0.006144	-0.002104
0.0300	915.801	44.343	97.340	34.771	-0.573	20.220	1743.450	-0.003104	-0.006814	-0.002434
0.0320	986.555	50.026	105.054	38.448	-0.583	20.222	1878.147	-0.003502	-0.007354	-0.002691
0.0340	1044.444	54.010	111.265	41.310	-0.579	20.226	1988.354	-0.003781	-0.007789	-0.002892
0.0360	1112.989	57.967	118.519	45.099	-0.577	20.232	2118.845	-0.004058	-0.008296	-0.003157
0.0380	1194.804	64.256	127.109	49.350	-0.566	20.238	2274.599	-0.004498	-0.008898	-0.003455
0.0400	1269.390	69.406	135.597	53.321	-0.572	20.238	2416.592	-0.004858	-0.009492	-0.003733
0.0420	1330.345	73.361	142.811	56.858	-0.576	20.235	2532.635	-0.005135	-0.009997	-0.003980
0.0440	1378.451	77.205	148.328	59.341	-0.563	20.232	2624.216	-0.005404	-0.010383	-0.004154
0.0460	1415.285	79.746	152.814	61.586	-0.565	20.226	2694.340	-0.005582	-0.010697	-0.004311
0.0480	1445.027	82.034	156.387	62.891	-0.560	20.222	2750.959	-0.005742	-0.010947	-0.004402
0.0500	1470.425	84.461	159.458	64.800	-0.566	20.220	2799.311	-0.005912	-0.011162	-0.004536
0.0520	1492.546	85.625	162.042	66.316	-0.570	20.222	2841.425	-0.005994	-0.011343	-0.004642
0.0540	1507.019	87.226	164.112	67.160	-0.571	20.226	2868.977	-0.006106	-0.011488	-0.004701
0.0560	1508.882	87.800	164.683	67.468	-0.570	20.232	2872.524	-0.006146	-0.011528	-0.004723
0.0580	1501.278	87.059	164.376	67.467	-0.567	20.238	2858.047	-0.006094	-0.011506	-0.004723
0.0600	1487.827	87.268	164.321	67.329	-0.573	20.238	2832.441	-0.006109	-0.011503	-0.004713
0.0620	1465.661	86.147	162.682	66.501	-0.578	20.235	2790.241	-0.006030	-0.011388	-0.004655
0.0640	1417.555	82.483	158.372	64.563	-0.574	20.232	2698.660	-0.005774	-0.011086	-0.004519
0.0660	1342.337	78.104	151.077	61.053	-0.574	20.227	2555.466	-0.005467	-0.010575	-0.004274
0.0680	1268.879	74.371	143.450	57.225	-0.571	20.222	2415.619	-0.005206	-0.010042	-0.004006
0.0700	1203.460	69.657	136.810	54.220	-0.580	20.220	2291.079	-0.004876	-0.009577	-0.003795
0.0720	1133.758	65.110	129.970	50.907	-0.574	20.222	2158.384	-0.004558	-0.009098	-0.003563
0.0740	1056.873	60.481	121.812	46.866	-0.577	20.226	2012.014	-0.004234	-0.008527	-0.003281
0.0760	973.345	54.402	113.404	42.601	-0.578	20.232	1852.999	-0.003808	-0.007938	-0.002982
0.0780	880.484	48.116	103.498	37.549	-0.567	20.237	1676.216	-0.003368	-0.007245	-0.002628
0.0800	788.886	43.162	94.033	32.920	-0.574	20.238	1501.837	-0.003021	-0.006582	-0.002304
0.0820	713.819	37.564	85.460	29.088	-0.571	20.235	1358.929	-0.002629	-0.005982	-0.002036
0.0840	651.917	33.271	78.290	25.719	-0.568	20.232	1241.083	-0.002329	-0.005480	-0.001800
0.0860	590.616	29.637	71.411	22.281	-0.573	20.227	1124.382	-0.002075	-0.004999	-0.001560
0.0880	526.220	24.526	63.573	18.493	-0.567	20.222	1001.787	-0.001717	-0.004450	-0.001294
0.0900	463.732	20.471	56.446	15.433	-0.574	20.220	882.826	-0.001433	-0.003951	-0.001080
0.0920	407.059	16.727	49.273	12.711	-0.581	20.222	774.937	-0.001171	-0.003449	-0.000890
0.0940	355.362	12.181	42.505	9.694	-0.578	20.226	676.517	-0.000853	-0.002975	-0.000679
0.0960	309.600	8.476	36.877	7.434	-0.577	20.232	589.399	-0.000593	-0.002581	-0.000520
0.0980	271.894	6.034	31.485	5.245	-0.574	20.237	517.616	-0.000422	-0.002204	-0.000367
0.1000	244.437	3.605	27.804	3.660	-0.587	20.238	465.345	-0.000252	-0.001946	-0.000256
0.1020	228.988	2.470	25.068	2.705	-0.588	20.235	435.934	-0.000173	-0.001755	-0.000189
0.1040	224.885	2.385	23.956	2.368	-0.580	20.232	428.123	-0.000167	-0.001677	-0.000166
0.1060	226.027	1.359	24.147	2.410	-0.580	20.226	430.298	-0.000095	-0.001690	-0.000169
0.1080	228.687	1.206	24.022	2.088	-0.572	20.222	435.362	-0.000084	-0.001682	-0.000146
0.1100	232.925	1.839	23.996	2.382	-0.580	20.220	443.430	-0.000129	-0.001680	-0.000167
0.1120	240.500	1.627	24.204	2.662	-0.583	20.222	457.850	-0.000114	-0.001694	-0.000186
0.1140	262.065	3.297	25.900	2.915	-0.578	20.226	498.905	-0.000231	-0.001813	-0.000204
0.1160	324.343	7.057	32.016	5.190	-0.580	20.232	617.466	-0.000494	-0.002241	-0.000363
0.1180	418.271	12.052	42.173	9.204	-0.577	20.238	796.280	-0.000844	-0.002952	-0.000644
0.1200	506.938	18.353	52.455	13.666	-0.574	20.238	965.080	-0.001285	-0.003672	-0.000957
0.1220	583.809	23.656	60.975	17.832	-0.576	20.235	1111.422	-0.001656	-0.004268	-0.001248
0.1240	660.003	28.120	69.187	21.579	-0.576	20.232	1256.475	-0.001968	-0.004843	-0.001511
0.1260	740.149	33.551	78.331	25.775	-0.574	20.226	1409.054	-0.002349	-0.005483	-0.001804
0.1280	825.135	38.477	87.336	30.042	-0.569	20.221	1570.845	-0.002693	-0.006114	-0.002103
0.1300	910.075	44.258	96.813	34.518	-0.574	20.220	1732.550	-0.003098	-0.006777	-0.002416
0.1320	988.704	50.305	105.526	38.728	-0.574	20.222	1882.238	-0.003521	-0.007387	-0.002711
0.1340	1059.653	54.250	113.183	42.248	-0.577	20.226	2017.307	-0.003797	-0.007923	-0.002957
0.1360	1135.231	59.595	121.451	46.319	-0.580	20.231	2161.188	-0.004172	-0.008502	-0.003242
0.1380	1221.840	66.135	130.400	50.741	-0.579	20.237	2326.069	-0.004629	-0.009128	-0.003552
0.1400	1304.240	71.270	139.822	55.244	-0.578	20.238	2482.939	-0.004989	-0.009788	-0.003867
0.1420	1365.376	75.901	146.855	59.003	-0.578	20.235	2599.325	-0.005313	-0.010280	-0.004130
0.1440	1403.052	79.030	151.219	61.026	-0.568	20.232	2671.051	-0.005532	-0.010585	-0.004272
0.1460	1430.975	80.671	154.941	62.680	-0.567	20.226	2724.209	-0.005647	-0.010846	-0.004388
0.1480	1462.309	83.619	158.497	64.364	-0.571	20.222	2783.861	-0.005853	-0.011095	-0.004505
0.1500	1490.788	86.273	162.279	66.386	-0.573	20.220	2838.078	-0.006039	-0.011360	-0.004647
0.1520	1505.005	87.142	164.086	67.510	-0.573	20.222	2865.143	-0.006100	-0.011486	-0.004726
0.1540	1505.937	87.743	164.712	67.540	-0.574	20.226	2866.917	-0.006142	-0.011530	-0.004728
0.1560	1502.270	87.618	164.531	67.343	-0.578	20.232	2859.936	-0.006133	-0.011517	-0.004714
0.1580	1497.851	87.115	164.530	67.161	-0.576	20.238	2851.524	-0.006098	-0.011517	-0.004701
0.1600	1490.142	87.788	164.419	67.312	-0.583	20.238	2836.847	-0.006145	-0.011509	-0.004712
0.1620	1474.332	87.410	163.433	66.934	-0.572	20.235	2806.749	-0.006119	-0.011440	-0.004685
0.1640	1436.490	84.517	160.556	65.487	-0.568	20.232	2734.709	-0.005916	-0.011239	-0.004584
0.1660	1358.207	80.026	153.261	61.936	-0.566	20.227	2585.678	-0.005602	-0.010728	-0.004336
0.1680	1261.319	73.599	143.283	57.026	-0.566	20.222	2401.228	-0.005152	-0.010030	-0.003992
0.1700	1178.633	67.960	134.695	52.914	-0.572	20.220	2243.814	-0.004757	-0.009429	-0.003704
0.1720	1120.518	64.857	128.651	49.925	-0.570	20.222	2133.179	-0.004540	-0.009006	-0.003495
0.1740	1072.758	61.095	123.466	47.468	-0.569	20.227	2042.255	-0.004277	-0.008643	-0.003323
0.1760	1008.677	56.591	117.200	44.157	-0.570	20.232	1920.261	-0.003961	-0.008204	-0.003091
0.1780	915.846	51.527	107.555	39.231	-0.559	20.238	1743.536	-0.003607	-0.007529	-0.002746
0.1800	814.855	45.184	96.729	34.600	-0.572	20.237	1551.275	-0.003163	-0.006771	-0.002422
0.1820	730.215	38.700	87.505	30.237	-0.574	20.235	1390.142	-0.002709	-0.006125	-0.002117
0.1840	664.376	34.659	79.916	26.309	-0.567	20.232	1264.801	-0.002426	-0.005594	-0.001842
0.1860	603.977	30.252	73.023	23.026	-0.573	20.226	1149.817	-0.002118	-0.005112	-0.001612
0.1880	536.319	25.046	65.380	19.179	-0.576	20.222	1021.013	-0.001753	-0.004577	-0.001343
0.1900	464.092	21.538	56.917	15.587	-0.579	20.220	883.512	-0.001508	-0.003984	-0.001091
0.1920	399.981	16.360	48.621	12.248	-0.572	20.222	761.461	-0.001145	-0.003403	-0.000857
0.1940	347.727	11.182	41.908	9.426	-0.573	20.226	661.983	-0.000783	-0.002934	-0.000660
0.1960	305.152	8.558	36.240	7.434	-0.577	20.231	580.931	-0.000599	-0.002537	-0.000520
0.1980	269.535	6.087	31.237	5.190	-0.577	20.238	513.124	-0.000426	-0.002187	-0.000363
0.2000	241.116	3.829	27.624	3.617	-0.581	20.238	459.023	-0.000268	-0.001934	-0.000253
0.2020	223.788	2.721	24.747	2.802	-0.578	20.236	426.035	-0.000190	-0.001732	-0.000196
0.2040	217.130	1.586	23.317	2.128	-0.572	20.232	413.361	-0.000111	-0.001632	-0.000149
0.2060	216.499	1.010	23.053	1.890	-0.567	20.227	412.159	-0.000071	-0.001614	-0.000132
0.2080	219.054	1.558	22.510	1.694	-0.567	20.222	417.023	-0.000109	-0.001576	-0.000119
0.2100	225.381	1.599	22.968	1.918	-0.569	20.220	429.068	-0.000112	-0.001608	-0.000134
0.2120	237.073	1.809	24.022	2.353	-0.569	20.222	451.326	-0.000127	-0.001682	-0.000165
0.2140	268.753	3.886	26.622	3.197	-0.578	20.227	511.637	-0.000272	-0.001864	-0.000224
0.2160	336.486	7.633	33.516	5.948	-0.577	20.232	640.583	-0.000534	-0.002346	-0.000416
0.2180	427.513	12.416	43.578	9.808	-0.573	20.238	813.875	-0.000869	-0.003050	-0.000687
0.2200	517.924	19.068	54.012	14.468	-0.577	20.238	985.994	-0.001335	-0.003781	-0.001013
0.2220	589.880	23.728	61.946	18.255	-0.576	20.235	1122.980	-0.001661	-0.004336	-0.001278
0.2240	649.888	27.209	68.508	21.383	-0.577	20.232	1237.221	-0.001905	-0.004796	-0.001497
0.2260	719.906	32.555	76.123	25.102	-0.583	20.226	1370.516	-0.002279	-0.005329	-0.001757
0.2280	812.466	38.643	85.682	29.676	-0.582	20.222	1546.726	-0.002705	-0.005998	-0.002077
0.2300	912.450	45.084	97.090	34.994	-0.590	20.220	1737.070	-0.003156	-0.006796	-0.002450
0.2320	998.728	50.558	106.790	39.316	-0.583	20.222	1901.321	-0.003539	-0.007475	-0.002752
0.2340	1069.452	55.736	114.225	42.811	-0.576	20.227	2035.961	-0.003902	-0.007996	-0.002997
0.2360	1134.480	60.072	121.187	46.164	-0.580	20.232	2159.758	-0.004205	-0.008483	-0.003231
0.2380	1201.296	64.352	128.608	49.603	-0.573	20.238	2286.959	-0.004505	-0.009003	-0.003472
0.2400	1272.290	70.385	136.959	53.743	-0.577	20.238	2422.113	-0.004927	-0.009587	-0.003762
0.2420	1340.384	74.485	144.533	57.518	-0.576	20.235	2551.746	-0.005214	-0.010117	-0.004026
0.2440	1397.417	78.063	151.076	60.689	-0.575	20.232	2660.322	-0.005464	-0.010575	-0.004248
0.2460	1441.570	82.314	156.081	63.102	-0.572	20.226	2744.379	-0.005762	-0.010926	-0.004417
0.2480	1474.903	84.333	160.124	65.109	-0.565	20.222	2807.837	-0.005903	-0.011209	-0.004558
0.2500	1496.364	86.369	163.029	66.626	-0.576	20.220	2848.692	-0.006046	-0.011412	-0.004664
0.2520	1505.786	87.885	164.557	67.328	-0.578	20.222	2866.631	-0.006152	-0.011519	-0.004713
0.2540	1507.560	87.787	164.961	67.581	-0.577	20.227	2870.007	-0.006145	-0.011547	-0.004731
0.2560	1505.411	88.011	165.212	67.455	-0.571	20.232	2865.915	-0.006161	-0.011565	-0.004722
0.2580	1500.451	87.801	164.794	67.594	-0.562	20.237	2856.474	-0.006146	-0.011536	-0.004732
0.2600	1491.930	87.170	164.474	67.679	-0.574	20.238	2840.252	-0.006102	-0.011513	-0.004737
0.2620	1476.195	86.456	163.821	67.356	-0.575	20.235	2810.297	-0.006052	-0.011467	-0.004715
0.2640	1434.326	84.994	160.638	65.516	-0.570	20.232	2730.589	-0.005950	-0.011245	-0.004586
0.2660	1347.372	79.606	152.301	61.572	-0.574	20.227	2565.050	-0.005572	-0.010661	-0.004310
0.2680	1246.922	72.211	141.920	56.591	-0.568	20.222	2373.819	-0.005055	-0.009934	-0.003961
0.2700	1168.128	67.874	134.220	52.410	-0.577	20.220	2223.816	-0.004751	-0.009395	-0.003669
0.2720	1114.026	64.410	128.318	49.659	-0.568	20.222	2120.819	-0.004509	-0.008982	-0.003476
0.2740	1064.177	60.620	123.106	47.160	-0.563	20.226	2025.919	-0.004243	-0.008617	-0.003301
0.2760	994.851	56.733	115.990	43.638	-0.569	20.232	1893.940	-0.003971	-0.008119	-0.003055
0.2780	902.336	50.318	106.583	38.532	-0.573	20.238	1717.815	-0.003522	-0.007461	-0.002697
0.2800	809.986	44.467	96.883	34.153	-0.583	20.238	1542.006	-0.003113	-0.006782	-0.002391
0.2820	733.807	39.977	88.196	30.225	-0.582	20.235	1396.980	-0.002798	-0.006174	-0.002116
0.2840	664.301	34.700	80.374	26.281	-0.573	20.232	1264.658	-0.002429	-0.005626	-0.001840
0.2860	590.692	29.452	72.107	22.324	-0.570	20.226	1124.525	-0.002062	-0.005048	-0.001563
0.2880	519.562	24.726	63.629	18.604	-0.564	20.222	989.113	-0.001731	-0.004454	-0.001302
0.2900	458.231	20.332	56.068	15.447	-0.577	20.220	872.355	-0.001423	-0.003925	-0.001081
0.2920	405.572	16.572	49.425	12.668	-0.574	20.222	772.104	-0.001160	-0.003460	-0.000887
0.2940	357.210	13.190	43.562	10.170	-0.573	20.226	680.037	-0.000923	-0.003049	-0.000712
0.2960	315.146	9.414	37.935	7.533	-0.574	20.231	599.957	-0.000659	-0.002655	-0.000527
0.2980	281.437	6.777	33.252	5.529	-0.569	20.237	535.784	-0.000474	-0.002328	-0.000387
0.3000	256.159	5.626	29.930	4.476	-0.573	20.238	487.661	-0.000394	-0.002095	-0.000313
0.3020	239.027	3.633	27.652	3.674	-0.573	20.235	455.046	-0.000254	-0.001936	-0.000257
0.3040	228.221	2.314	25.495	2.985	-0.573	20.232	434.475	-0.000162	-0.001785	-0.000209
0.3060	222.931	2.428	24.314	2.241	-0.572	20.227	424.404	-0.000170	-0.001702	-0.000157
0.3080	223.472	1.657	23.650	1.834	-0.566	20.222	425.434	-0.000116	-0.001656	-0.000128
0.3100	228.251	1.640	23.998	2.228	-0.574	20.220	434.532	-0.000115	-0.001680	-0.000156
0.3120	237.779	2.286	24.968	2.622	-0.571	20.222	452.671	-0.000160	-0.001748	-0.000184
0.3140	262.742	3.618	26.496	3.099	-0.575	20.227	500.193	-0.000253	-0.001855	-0.000217
0.3160	320.947	6.691	32.141	5.332	-0.572	20.232	611.000	-0.000468	-0.002250	-0.000373
0.3180	400.522	11.912	40.895	8.726	-0.575	20.238	762.491	-0.000834	-0.002863	-0.000611
0.3200	485.463	17.343	50.316	13.118	-0.584	20.238	924.196	-0.001214	-0.003522	-0.000918
0.3220	571.140	22.157	59.904	17.144	-0.578	20.235	1087.303	-0.001551	-0.004193	-0.001200
0.3240	653.420	28.092	69.298	21.452	-0.570	20.231	1243.944	-0.001966	-0.004851	-0.001502
0.3260	729.584	32.511	77.719	25.606	-0.577	20.226	1388.941	-0.002276	-0.005440	-0.001792
0.3280	806.379	38.152	85.836	29.159	-0.576	20.222	1535.139	-0.002671	-0.006009	-0.002041
0.3300	890.599	44.159	95.202	33.506	-0.581	20.220	1695.471	-0.003091	-0.006664	-0.002345
0.3320	981.716	49.463	104.873	38.347	-0.579	20.222	1868.935	-0.003462	-0.007341	-0.002684
0.3340	1070.413	55.118	114.226	43.021	-0.571	20.227	2037.792	-0.003858	-0.007996	-0.003011
0.3360	1144.759	61.210	122.758	46.894	-0.571	20.232	2179.327	-0.004285	-0.008593	-0.003283
0.3380	1207.277	65.027	129.526	50.249	-0.565	20.238	2298.346	-0.004552	-0.009067	-0.003517
0.3400	1271.764	69.712	137.001	53.868	-0.573	20.238	2421.112	-0.004880	-0.009590	-0.003771
0.3420	1339.302	74.736	144.631	57.530	-0.572	20.235	2549.686	-0.005231	-0.010124	-0.004027
0.3440	1395.974	77.965	151.036	60.661	-0.570	20.232	2657.576	-0.005458	-0.010573	-0.004246
0.3460	1433.410	81.516	155.400	62.819	-0.573	20.226	2728.844	-0.005706	-0.010878	-0.004397
0.3480	1456.974	83.717	158.151	64.138	-0.564	20.222	2773.705	-0.005860	-0.011071	-0.004490
0.3500	1475.234	85.121	160.960	65.543	-0.573	20.220	2808.466	-0.005958	-0.011267	-0.004588
0.3520	1492.231	87.169	162.932	66.822	-0.573	20.222	2840.824	-0.006102	-0.011405	-0.004678
0.3540	1504.840	87.828	164.711	67.329	-0.564	20.226	2864.828	-0.006148	-0.011530	-0.004713
0.3560	1508.446	87.746	165.560	67.735	-0.561	20.232	2871.695	-0.006142	-0.011589	-0.004741
0.3580	1504.644	88.292	165.296	67.805	-0.560	20.238	2864.456	-0.006180	-0.011571	-0.004746
0.3600	1496.634	88.011	165.114	67.987	-0.569	20.238	2849.207	-0.006161	-0.011558	-0.004759
0.3620	1482.883	87.099	164.738	67.509	-0.572	20.235	2823.029	-0.006097	-0.011532	-0.004726
0.3640	1448.648	85.457	162.028	66.245	-0.564	20.232	2757.854	-0.005982	-0.011342	-0.004637
0.3660	1370.561	80.488	154.537	62.931	-0.573	20.226	2609.196	-0.005634	-0.010818	-0.004405
0.3680	1271.599	74.049	144.838	57.981	-0.572	20.222	2420.797	-0.005183	-0.010139	-0.004059
0.3700	1184.795	69.332	136.335	53.533	-0.582	20.220	2255.545	-0.004853	-0.009543	-0.003747
0.3720	1110.870	63.803	128.428	49.940	-0.578	20.222	2114.811	-0.004466	-0.008990	-0.003496
0.3740	1039.665	59.497	120.785	46.178	-0.568	20.227	1979.256	-0.004165	-0.008455	-0.003232
0.3760	965.109	55.135	113.128	42.249	-0.569	20.233	1837.320	-0.003859	-0.007919	-0.002957
0.3780	885.429	49.282	104.860	37.927	-0.565	20.238	1685.629	-0.003450	-0.007340	-0.002655
0.3800	803.749	44.314	96.201	34.098	-0.567	20.238	1530.132	-0.003102	-0.006734	-0.002387
0.3820	725.782	39.388	87.586	29.960	-0.568	20.235	1381.702	-0.002757	-0.006131	-0.002097
0.3840	656.366	33.999	79.318	26.098	-0.569	20.232	1249.552	-0.002380	-0.005552	-0.001827
0.3860	592.600	30.071	72.217	22.757	-0.569	20.227	1128.159	-0.002105	-0.005055	-0.001593
0.3880	528.234	25.285	64.642	19.080	-0.570	20.222	1005.621	-0.001770	-0.004525	-0.001336
0.3900	462.845	20.853	56.876	15.811	-0.574	20.220	881.138	-0.001460	-0.003981	-0.001107
0.3920	401.890	17.146	49.176	12.640	-0.571	20.223	765.095	-0.001200	-0.003442	-0.000885
0.3940	349.395	12.559	42.687	9.595	-0.568	20.227	665.159	-0.000879	-0.002988	-0.000672
0.3960	306.354	9.291	36.934	7.378	-0.577	20.232	583.220	-0.000650	-0.002585	-0.000516
0.3980	273.247	6.974	32.015	5.444	-0.572	20.237	520.191	-0.000488	-0.002241	-0.000381
0.4000	251.275	4.644	28.944	4.334	-0.577	20.238	478.363	-0.000325	-0.002026	-0.000303
0.4020	240.034	3.593	27.276	3.701	-0.574	20.235	456.963	-0.000252	-0.001909	-0.000259
0.4040	235.240	3.650	26.375	2.984	-0.569	20.232	447.836	-0.000255	-0.001846	-0.000209
0.4060	233.602	2.876	25.998	2.691	-0.574	20.226	444.717	-0.000201	-0.001820	-0.000188
0.4080	234.563	2.441	25.760	2.424	-0.575	20.222	446.548	-0.000171	-0.001803	-0.000170
0.4100	238.305	3.270	25.970	2.635	-0.580	20.220	453.672	-0.000229	-0.001818	-0.000184
0.4120	246.556	3.087	26.540	2.985	-0.583	20.223	469.379	-0.000216	-0.001858	-0.000209
0.4140	267.115	3.408	27.639	3.351	-0.573	20.227	508.518	-0.000239	-0.001935	-0.000235
0.4160	324.088	7.548	32.948	5.245	-0.574	20.232	616.980	-0.000528	-0.002306	-0.000367
0.4180	414.649	13.302	42.840	9.483	-0.573	20.238	789.385	-0.000931	-0.002999	-0.000664
0.4200	509.478	18.987	53.651	14.171	-0.576	20.238	969.915	-0.001329	-0.003756	-0.000992
0.4220	593.893	24.726	62.948	18.591	-0.568	20.235	1130.619	-0.001731	-0.004406	-0.001301
0.4240	666.675	29.045	70.923	22.042	-0.570	20.232	1269.178	-0.002033	-0.004965	-0.001543
0.4260	738.060	33.156	78.511	25.675	-0.577	20.226	1405.077	-0.002321	-0.005496	-0.001797
0.4280	817.485	39.470	87.142	29.520	-0.588	20.222	1556.282	-0.002763	-0.006100	-0.002066
0.4300	905.927	45.519	97.188	34.108	-0.591	20.220	1724.653	-0.003186	-0.006803	-0.002388
0.4320	994.595	50.460	106.651	39.090	-0.588	20.222	1893.454	-0.003532	-0.007466	-0.002736
0.4340	1074.697	56.186	115.129	43.428	-0.585	20.227	2045.946	-0.003933	-0.008059	-0.003040
0.4360	1145.841	61.154	122.966	47.175	-0.580	20.233	2181.387	-0.004281	-0.008608	-0.003302
0.4380	1209.216	64.844	129.928	50.403	-0.566	20.238	2302.036	-0.004539	-0.009095	-0.003528
0.4400	1272.095	70.007	137.226	54.009	-0.577	20.238	2421.741	-0.004900	-0.009606	-0.003781
0.4420	1340.429	75.016	144.741	57.869	-0.576	20.235	2551.832	-0.005251	-0.010132	-0.004051
0.4440	1404.916	79.266	152.329	61.377	-0.566	20.232	2674.599	-0.005549	-0.010663	-0.004296
0.4460	1451.759	83.142	157.568	63.887	-0.569	20.226	2763.777	-0.005820	-0.011030	-0.004472
0.4480	1477.217	85.488	160.625	65.165	-0.572	20.222	2812.243	-0.005984	-0.011244	-0.004562
0.4500	1488.940	86.050	162.736	66.317	-0.581	20.220	2834.558	-0.006023	-0.011392	-0.004642
0.4520	1497.175	87.451	164.182	67.117	-0.575	20.222	2850.237	-0.006122	-0.011493	-0.004698
0.4540	1505.591	88.194	165.085	67.593	-0.570	20.227	2866.259	-0.006174	-0.011556	-0.004732
0.4560	1510.671	88.139	165.934	68.028	-0.566	20.232	2875.929	-0.006170	-0.011615	-0.004762
0.4580	1509.754	88.435	165.850	68.056	-0.562	20.238	2874.184	-0.006190	-0.011609	-0.004764
0.4600	1502.420	88.853	165.933	68.182	-0.576	20.238	2860.222	-0.006220	-0.011615	-0.004773
0.4620	1486.866	87.928	165.295	67.902	-0.573	20.235	2830.610	-0.006155	-0.011571	-0.004753
0.4640	1451.684	86.259	162.778	66.696	-0.571	20.232	2763.634	-0.006038	-0.011394	-0.004669
0.4660	1375.746	81.334	155.692	63.116	-0.576	20.226	2619.066	-0.005693	-0.010898	-0.004418
0.4680	1278.196	74.862	145.799	58.416	-0.578	20.222	2433.357	-0.005240	-0.010206	-0.004089
0.4700	1189.213	69.726	136.932	54.249	-0.589	20.220	2263.956	-0.004881	-0.009585	-0.003797
0.4720	1114.732	64.829	128.899	50.291	-0.580	20.223	2122.164	-0.004538	-0.009023	-0.003520
0.4740	1051.793	60.171	122.173	46.740	-0.579	20.227	2002.344	-0.004212	-0.008552	-0.003272
0.4760	990.703	56.607	115.782	43.373	-0.577	20.232	1886.044	-0.003962	-0.008105	-0.003036
0.4780	911.458	51.540	107.442	39.204	-0.572	20.238	1735.182	-0.003608	-0.007521	-0.002744
0.4800	811.309	44.875	97.422	34.474	-0.580	20.238	1544.523	-0.003141	-0.006820	-0.002413
0.4820	716.119	38.856	87.016	29.592	-0.574	20.235	1363.306	-0.002720	-0.006091	-0.002071
0.4840	642.885	33.579	78.428	25.633	-0.569	20.232	1223.888	-0.002351	-0.005490	-0.001794
0.4860	583.553	28.472	71.728	22.336	-0.572	20.226	1110.935	-0.001993	-0.005021	-0.001564
0.4880	521.230	24.740	64.085	18.815	-0.566	20.222	992.289	-0.001732	-0.004486	-0.001317
0.4900	455.571	20.893	56.222	15.489	-0.580	20.221	867.290	-0.001463	-0.003936	-0.001084
0.4920	396.720	15.587	49.273	12.305	-0.580	20.223	755.253	-0.001091	-0.003449	-0.000861
0.4940	346.781	12.066	42.576	9.625	-0.578	20.227	660.181	-0.000845	-0.002980	-0.000674
0.4960	301.861	9.456	36.474	7.365	-0.576	20.232	574.665	-0.000662	-0.002553	-0.000516
0.4980	264.094	6.397	31.431	4.993	-0.568	20.238	502.768	-0.000448	-0.002200	-0.000350
0.5000	236.607	3.844	27.846	3.492	-0.585	20.238	450.439	-0.000269	-0.001949	-0.000244
0.5020	221.248	2.708	25.164	2.537	-0.581	20.236	421.200	-0.000190	-0.001761	-0.000178
0.5040	216.695	2.191	24.024	2.268	-0.577	20.232	412.531	-0.000153	-0.001682	-0.000159
0.5060	216.935	1.545	23.483	2.212	-0.579	20.227	412.989	-0.000108	-0.001644	-0.000155
0.5080	219.144	2.033	23.551	2.044	-0.576	20.222	417.194	-0.000142	-0.001649	-0.000143
0.5100	223.548	2.159	24.039	2.240	-0.583	20.220	425.577	-0.000151	-0.001683	-0.000157
0.5120	231.873	1.935	24.635	2.437	-0.585	20.222	441.427	-0.000135	-0.001724	-0.000171
0.5140	254.927	3.409	26.178	2.691	-0.581	20.227	485.315	-0.000239	-0.001832	-0.000188
0.5160	315.251	6.553	31.820	5.078	-0.577	20.233	600.157	-0.000459	-0.002227	-0.000355
0.5180	405.572	11.631	41.618	9.218	-0.572	20.239	772.104	-0.000814	-0.002913	-0.000645
0.5200	499.199	18.437	52.484	13.934	-0.585	20.238	950.346	-0.001291	-0.003674	-0.000975
0.5220	583.673	24.205	62.004	18.003	-0.584	20.236	1111.164	-0.001694	-0.004340	-0.001260
0.5240	659.462	28.163	70.425	21.736	-0.584	20.232	1255.445	-0.001971	-0.004930	-0.001522
0.5260	734.408	33.144	78.497	25.750	-0.585	20.226	1398.125	-0.002320	-0.005495	-0.001803
0.5280	817.155	38.685	87.209	29.860	-0.587	20.222	1555.653	-0.002708	-0.006105	-0.002090
0.5300	908.708	44.720	97.506	34.769	-0.591	20.220	1729.946	-0.003130	-0.006825	-0.002434
0.5320	999.269	51.230	107.402	39.443	-0.584	20.223	1902.351	-0.003586	-0.007518	-0.002761
0.5340	1080.798	56.661	115.923	43.557	-0.580	20.227	2057.562	-0.003966	-0.008115	-0.003049
0.5360	1153.160	61.490	123.981	47.598	-0.586	20.232	2195.320	-0.004304	-0.008679	-0.003332
0.5380	1220.998	66.542	131.566	51.203	-0.577	20.238	2324.467	-0.004658	-0.009210	-0.003584
0.5400	1288.190	71.200	139.293	55.173	-0.579	20.238	2452.383	-0.004984	-0.009750	-0.003862
0.5420	1350.287	75.003	146.035	58.583	-0.576	20.235	2570.601	-0.005250	-0.010222	-0.004101
0.5440	1397.702	79.605	151.524	61.013	-0.573	20.232	2660.866	-0.005572	-0.010607	-0.004271
0.5460	1430.479	81.612	155.635	62.988	-0.573	20.226	2723.265	-0.005713	-0.010894	-0.004409
0.5480	1456.298	83.493	158.887	64.533	-0.570	20.222	2772.417	-0.005845	-0.011122	-0.004517
0.5500	1481.080	86.510	162.016	66.234	-0.576	20.220	2819.595	-0.006056	-0.011341	-0.004636
0.5520	1501.052	87.788	164.307	67.524	-0.572	20.223	2857.618	-0.006145	-0.011501	-0.004727
0.5540	1509.634	87.690	165.558	68.028	-0.569	20.227	2873.955	-0.006138	-0.011589	-0.004762
0.5560	1508.597	88.418	166.003	68.016	-0.572	20.232	2871.981	-0.006189	-0.011620	-0.004761
0.5580	1503.051	88.838	165.657	67.805	-0.566	20.238	2861.423	-0.006219	-0.011596	-0.004746
0.5600	1494.365	87.534	165.546	67.931	-0.574	20.238	2844.887	-0.006127	-0.011588	-0.004755
0.5620	1480.193	87.395	164.615	67.524	-0.569	20.235	2817.907	-0.006118	-0.011523	-0.004727
0.5640	1447.852	86.144	162.349	66.303	-0.566	20.232	2756.338	-0.006030	-0.011364	-0.004641
0.5660	1373.416	80.954	155.594	63.369	-0.561	20.226	2614.632	-0.005667	-0.010892	-0.004436
0.5680	1273.597	74.584	145.546	58.134	-0.560	20.222	2424.603	-0.005221	-0.010188	-0.004069
0.5700	1185.516	70.416	136.429	53.940	-0.570	20.221	2256.918	-0.004929	-0.009550	-0.003776
0.5720	1118.655	65.322	129.496	50.472	-0.566	20.223	2129.631	-0.004573	-0.009065	-0.003533
0.5740	1059.187	60.733	123.132	47.146	-0.562	20.228	2016.420	-0.004251	-0.008619	-0.003300
0.5760	988.959	56.676	116.142	43.515	-0.569	20.233	1882.725	-0.003967	-0.008130	-0.003046
0.5780	898.323	50.293	106.861	38.560	-0.572	20.238	1710.176	-0.003520	-0.007480	-0.002699
0.5800	799.541	44.074	96.397	33.843	-0.578	20.238	1522.121	-0.003085	-0.006748	-0.002369
0.5820	715.127	38.911	87.140	29.565	-0.570	20.235	1361.418	-0.002724	-0.006100	-0.002070
0.5840	648.581	34.211	79.303	25.833	-0.562	20.232	1234.732	-0.002395	-0.005551	-0.001808
0.5860	589.925	29.832	72.411	22.605	-0.568	20.227	1123.066	-0.002088	-0.005069	-0.001582
0.5880	530.337	25.918	65.379	19.335	-0.569	20.222	1009.626	-0.001814	-0.004577	-0.001353
0.5900	466.782	21.426	57.596	16.263	-0.570	20.221	888.634	-0.001500	-0.004032	-0.001138
0.5920	404.384	16.486	49.871	12.825	-0.568	20.223	769.844	-0.001154	-0.003491	-0.000898
0.5940	350.913	12.699	43.353	9.751	-0.574	20.227	668.049	-0.000889	-0.003035	-0.000683
0.5960	308.263	9.751	37.823	7.617	-0.576	20.232	586.853	-0.000683	-0.002648	-0.000533
0.5980	273.562	6.440	32.476	5.429	-0.567	20.238	520.792	-0.000451	-0.002273	-0.000380
0.6000	245.158	4.841	28.710	4.166	-0.576	20.238	466.719	-0.000339	-0.002010	-0.000292
0.6020	225.411	3.618	26.124	2.999	-0.572	20.236	429.125	-0.000253	-0.001829	-0.000210
0.6040	215.477	2.216	24.648	2.550	-0.579	20.232	410.213	-0.000155	-0.001725	-0.000179
0.6060	213.539	1.725	23.969	1.975	-0.580	20.227	406.523	-0.000121	-0.001678	-0.000138
0.6080	216.214	1.866	23.788	1.653	-0.569	20.222	411.615	-0.000131	-0.001665	-0.000116
0.6100	221.594	1.529	23.996	2.101	-0.578	20.221	421.858	-0.000107	-0.001680	-0.000147
0.6120	230.942	2.398	23.953	2.339	-0.574	20.223	439.653	-0.000168	-0.001677	-0.000164
0.6140	258.879	4.237	26.051	3.000	-0.577	20.228	492.840	-0.000297	-0.001824	-0.000210
0.6160	325.996	7.129	33.557	5.583	-0.577	20.233	620.613	-0.000499	-0.002349	-0.000391
0.6180	417.384	12.600	43.119	9.527	-0.573	20.238	794.592	-0.000882	-0.003018	-0.000667
0.6200	506.983	19.194	53.318	14.087	-0.581	20.238	965.166	-0.001344	-0.003732	-0.000986
0.6220	587.941	23.855	62.696	18.197	-0.578	20.236	1119.289	-0.001670	-0.004389	-0.001274
0.6240	665.248	28.638	70.896	22.170	-0.581	20.232	1266.460	-0.002005	-0.004963	-0.001552
0.6260	743.876	34.406	79.387	26.293	-0.582	20.227	1416.149	-0.002408	-0.005557	-0.001841
0.6280	825.991	39.360	88.545	30.406	-0.574	20.222	1572.475	-0.002755	-0.006198	-0.002128
0.6300	911.112	45.128	97.925	34.828	-0.584	20.220	1734.524	-0.003159	-0.006855	-0.002438
0.6320	998.743	51.624	107.123	39.303	-0.582	20.223	1901.350	-0.003614	-0.007499	-0.002751
0.6340	1085.547	57.295	116.699	44.060	-0.586	20.228	2066.603	-0.004011	-0.008169	-0.003084
0.6360	1161.786	61.996	125.218	48.130	-0.583	20.233	2211.742	-0.004340	-0.008765	-0.003369
0.6380	1222.516	66.779	132.070	51.257	-0.573	20.238	2327.356	-0.004675	-0.009245	-0.003588
0.6400	1277.956	70.907	138.628	54.570	-0.581	20.238	2432.899	-0.004963	-0.009704	-0.003820
0.6420	1339.076	74.877	145.354	57.713	-0.574	20.236	2549.257	-0.005241	-0.010175	-0.004040
0.6440	1401.429	80.013	152.385	61.234	-0.570	20.232	2667.961	-0.005601	-0.010667	-0.004286
0.6460	1451.654	83.099	157.832	64.054	-0.578	20.227	2763.577	-0.005817	-0.011048	-0.004484
0.6480	1481.951	84.937	161.627	65.769	-0.573	20.222	2821.255	-0.005946	-0.011314	-0.004604
0.6500	1494.680	87.030	163.751	67.019	-0.582	20.221	2845.488	-0.006092	-0.011463	-0.004691
0.6520	1498.438	87.704	164.376	67.608	-0.579	20.223	2852.640	-0.006139	-0.011506	-0.004733
0.6540	1497.972	87.576	164.613	67.707	-0.576	20.227	2851.753	-0.006130	-0.011523	-0.004739
0.6560	1495.086	87.871	164.933	67.776	-0.575	20.232	2846.260	-0.006151	-0.011545	-0.004744
0.6580	1490.503	87.983	164.683	67.399	-0.568	20.238	2837.534	-0.006159	-0.011528	-0.004718
0.6600	1482.492	87.324	164.251	67.439	-0.578	20.238	2822.285	-0.006113	-0.011498	-0.004721
0.6620	1469.538	86.990	163.681	67.089	-0.575	20.236	2797.623	-0.006089	-0.011458	-0.004696
0.6640	1444.110	85.320	162.029	66.262	-0.572	20.232	2749.214	-0.005972	-0.011342	-0.004638
0.6660	1382.163	81.278	156.387	63.508	-0.573	20.226	2631.283	-0.005689	-0.010947	-0.004446
0.6680	1283.832	75.649	146.367	58.528	-0.572	20.222	2444.086	-0.005295	-0.010246	-0.004097
0.6700	1184.554	69.852	136.891	53.729	-0.588	20.221	2255.087	-0.004890	-0.009582	-0.003761
0.6720	1107.383	64.156	128.914	49.969	-0.580	20.223	2108.173	-0.004491	-0.009024	-0.003498
0.6740	1044.414	60.197	121.854	46.571	-0.575	20.227	1988.297	-0.004214	-0.008530	-0.003260
0.6760	976.922	55.777	114.962	43.104	-0.578	20.233	1859.808	-0.003904	-0.008047	-0.003017
0.6780	897.902	50.249	107.041	38.810	-0.571	20.239	1709.375	-0.003517	-0.007493	-0.002717
0.6800	813.833	45.394	98.050	34.630	-0.579	20.238	1549.330	-0.003178	-0.006864	-0.002424
0.6820	733.777	40.285	88.823	30.407	-0.579	20.235	1396.923	-0.002820	-0.006218	-0.002128
0.6840	658.560	34.253	80.526	26.618	-0.574	20.232	1253.729	-0.002398	-0.005637	-0.001863
0.6860	584.620	29.608	72.022	22.717	-0.576	20.227	1112.967	-0.002073	-0.005042	-0.001590
0.6880	514.768	25.033	63.754	18.493	-0.568	20.222	979.986	-0.001752	-0.004463	-0.001294
0.6900	453.167	20.109	56.695	15.531	-0.580	20.220	862.713	-0.001408	-0.003969	-0.001087
0.6920	401.604	16.907	50.316	12.824	-0.568	20.223	764.551	-0.001184	-0.003522	-0.000898
0.6940	356.579	13.609	44.188	10.341	-0.569	20.227	678.835	-0.000953	-0.003093	-0.000724
0.6960	314.545	9.765	38.464	7.953	-0.568	20.232	598.812	-0.000684	-0.002692	-0.000557
0.6980	276.944	6.608	33.447	5.794	-0.561	20.238	527.229	-0.000463	-0.002341	-0.000406
0.7000	247.052	5.541	29.278	4.504	-0.573	20.238	470.324	-0.000388	-0.002049	-0.000315
0.7020	228.687	3.451	26.596	3.365	-0.568	20.236	435.362	-0.000242	-0.001862	-0.000236
0.7040	221.368	2.118	25.399	2.549	-0.569	20.232	421.429	-0.000148	-0.001778	-0.000178
0.7060	221.083	2.580	24.968	2.507	-0.570	20.227	420.885	-0.000181	-0.001748	-0.000175
0.7080	224.164	2.175	24.953	2.284	-0.557	20.222	426.750	-0.000152	-0.001747	-0.000160
0.7100	229.439	2.147	25.302	2.536	-0.570	20.221	436.792	-0.000150	-0.001771	-0.000178
0.7120	238.215	3.296	25.456	2.704	-0.571	20.223	453.501	-0.000231	-0.001782	-0.000189
0.7140	262.772	4.237	26.777	3.099	-0.574	20.228	500.250	-0.000297	-0.001874	-0.000217
0.7160	324.689	7.268	33.627	5.472	-0.577	20.233	618.124	-0.000509	-0.002354	-0.000383
0.7180	412.139	12.896	43.020	9.387	-0.566	20.239	784.607	-0.000903	-0.003011	-0.000657
0.7200	500.401	18.228	52.874	13.836	-0.573	20.239	952.635	-0.001276	-0.003701	-0.000969
0.7220	581.329	23.489	62.169	18.099	-0.574	20.236	1106.701	-0.001644	-0.004352	-0.001267
0.7240	654.607	28.878	70.062	21.579	-0.572	20.232	1246.204	-0.002021	-0.004904	-0.001511
0.7260	730.381	33.201	78.457	25.564	-0.576	20.226	1390.457	-0.002324	-0.005492	-0.001790
0.7280	815.547	38.352	87.656	29.874	-0.577	20.222	1552.591	-0.002685	-0.006136	-0.002091
0.7300	907.761	45.494	97.703	34.799	-0.578	20.220	1728.144	-0.003185	-0.006839	-0.002436
0.7320	996.864	51.611	107.569	39.317	-0.578	20.223	1897.774	-0.003613	-0.007530	-0.002752
0.7340	1076.891	56.536	116.004	43.582	-0.578	20.228	2050.123	-0.003958	-0.008120	-0.003051
0.7360	1149.959	61.827	124.244	47.554	-0.577	20.233	2189.226	-0.004328	-0.008697	-0.003329
0.7380	1219.180	66.909	131.929	51.160	-0.574	20.238	2321.005	-0.004684	-0.009235	-0.003581
0.7400	1285.455	71.228	139.435	54.976	-0.580	20.238	2447.176	-0.004986	-0.009760	-0.003848
0.7420	1349.266	75.816	146.535	58.415	-0.569	20.236	2568.655	-0.005307	-0.010257	-0.004089
0.7440	1404.375	79.901	152.927	61.489	-0.566	20.232	2673.569	-0.005593	-0.010705	-0.004304
0.7460	1440.939	82.188	157.278	63.605	-0.575	20.226	2743.177	-0.005753	-0.011009	-0.004452
0.7480	1462.670	84.602	160.072	64.728	-0.573	20.222	2784.548	-0.005922	-0.011205	-0.004531
0.7500	1480.749	86.329	162.557	66.190	-0.577	20.221	2818.966	-0.006043	-0.011379	-0.004633
0.7520	1499.114	87.254	164.530	67.469	-0.571	20.223	2853.928	-0.006108	-0.011517	-0.004723
0.7540	1510.656	88.725	165.934	68.140	-0.570	20.228	2875.900	-0.006211	-0.011615	-0.004770
0.7560	1511.031	89.203	166.560	68.361	-0.574	20.233	2876.616	-0.006244	-0.011659	-0.004785
0.7580	1504.870	88.308	166.129	68.236	-0.565	20.238	2864.885	-0.006182	-0.011629	-0.004777
0.7600	1494.410	88.742	166.003	68.295	-0.573	20.238	2844.973	-0.006212	-0.011620	-0.004781
0.7620	1476.496	87.632	165.210	67.806	-0.566	20.235	2810.869	-0.006134	-0.011565	-0.004746
0.7640	1433.184	84.728	161.612	66.190	-0.562	20.232	2728.415	-0.005931	-0.011313	-0.004633
0.7660	1351.535	80.222	153.622	62.499	-0.566	20.227	2572.975	-0.005616	-0.010754	-0.004375
0.7680	1259.862	74.482	144.256	57.589	-0.566	20.222	2398.453	-0.005214	-0.010098	-0.004031
0.7700	1182.435	69.180	136.626	53.911	-0.581	20.220	2251.053	-0.004843	-0.009564	-0.003774
0.7720	1115.934	64.943	129.538	50.402	-0.582	20.223	2124.453	-0.004546	-0.009068	-0.003528
0.7740	1045.782	60.844	122.258	46.865	-0.584	20.227	1990.900	-0.004259	-0.008558	-0.003281
0.7760	966.297	55.091	113.988	42.587	-0.590	20.233	1839.581	-0.003856	-0.007979	-0.002981
0.7780	886.706	50.333	105.873	38.122	-0.577	20.238	1688.061	-0.003523	-0.007411	-0.002669
0.7800	811.775	45.718	98.245	34.641	-0.583	20.238	1545.410	-0.003200	-0.006877	-0.002425
0.7820	738.526	39.824	89.490	31.108	-0.573	20.235	1405.964	-0.002788	-0.006264	-0.002178
0.7840	665.909	35.473	81.193	27.080	-0.568	20.232	1267.719	-0.002483	-0.005684	-0.001896
0.7860	595.906	31.011	73.203	23.236	-0.577	20.226	1134.453	-0.002171	-0.005124	-0.001626
0.7880	529.541	25.903	65.588	19.375	-0.570	20.222	1008.110	-0.001813	-0.004591	-0.001356
0.7900	468.390	21.666	58.709	16.275	-0.579	20.220	891.695	-0.001517	-0.004110	-0.001139
0.7920	413.822	17.737	51.968	13.414	-0.580	20.223	787.811	-0.001242	-0.003638	-0.000939
0.7940	364.770	13.512	45.423	10.803	-0.577	20.227	694.427	-0.000946	-0.003180	-0.000756
0.7960	322.720	11.013	39.504	8.472	-0.579	20.233	614.376	-0.000771	-0.002765	-0.000593
0.7980	290.259	8.726	35.128	6.648	-0.569	20.239	552.578	-0.000611	-0.002459	-0.000465
0.8000	263.688	5.907	32.028	5.303	-0.580	20.238	501.995	-0.000413	-0.002242	-0.000371
0.8020	242.528	4.208	28.817	4.011	-0.578	20.236	461.712	-0.000295	-0.002017	-0.000281
0.8040	228.402	3.424	26.262	2.972	-0.576	20.232	434.818	-0.000240	-0.001838	-0.000208
0.8060	221.113	2.751	24.968	2.495	-0.582	20.227	420.942	-0.000193	-0.001748	-0.000175
0.8080	220.752	1.809	24.578	2.143	-0.571	20.222	420.256	-0.000127	-0.001720	-0.000150
0.8100	225.426	2.609	25.093	2.339	-0.576	20.220	429.153	-0.000183	-0.001756	-0.000164
0.8120	235.330	2.875	25.275	2.676	-0.582	20.223	448.008	-0.000201	-0.001769	-0.000187
0.8140	262.381	3.633	27.179	3.392	-0.588	20.228	499.506	-0.000254	-0.001903	-0.000237
0.8160	327.544	7.788	33.935	5.819	-0.585	20.233	623.560	-0.000545	-0.002375	-0.000407
0.8180	420.946	13.794	43.896	10.071	-0.585	20.239	801.373	-0.000966	-0.003073	-0.000705
0.8200	520.013	19.871	55.262	15.335	-0.588	20.239	989.971	-0.001391	-0.003868	-0.001073
0.8220	605.074	25.088	64.963	19.517	-0.580	20.236	1151.905	-0.001756	-0.004547	-0.001366
0.8240	668.749	30.099	71.939	22.492	-0.570	20.231	1273.127	-0.002107	-0.005036	-0.001574
0.8260	730.080	33.439	78.665	25.621	-0.581	20.226	1389.885	-0.002341	-0.005507	-0.001794
0.8280	810.512	38.644	87.225	29.705	-0.587	20.222	1543.007	-0.002705	-0.006106	-0.002079
0.8300	908.392	46.053	98.187	34.897	-0.591	20.221	1729.345	-0.003224	-0.006873	-0.002443
0.8320	1002.230	51.652	108.138	39.669	-0.592	20.223	1907.988	-0.003616	-0.007570	-0.002777
0.8340	1077.567	56.480	116.281	43.739	-0.588	20.228	2051.411	-0.003954	-0.008140	-0.003062
0.8360	1139.499	61.559	123.146	47.161	-0.589	20.233	2169.313	-0.004309	-0.008620	-0.003301
0.8380	1201.732	65.952	130.039	50.403	-0.586	20.239	2287.788	-0.004617	-0.009103	-0.003528
0.8400	1270.366	70.344	138.015	54.472	-0.593	20.238	2418.451	-0.004924	-0.009661	-0.003813
0.8420	1336.401	75.551	145.213	57.853	-0.589	20.236	2544.165	-0.005289	-0.010165	-0.004050
0.8440	1386.611	78.903	151.218	60.478	-0.580	20.232	2639.751	-0.005523	-0.010585	-0.004233
0.8460	1419.944	80.826	155.122	62.443	-0.580	20.226	2703.209	-0.005658	-0.010859	-0.004371
0.8480	1445.778	83.239	158.177	63.998	-0.569	20.222	2752.390	-0.005827	-0.011072	-0.004480
0.8500	1470.575	85.738	161.374	65.390	-0.577	20.220	2799.597	-0.006002	-0.011296	-0.004577
0.8520	1493.779	86.875	164.375	67.032	-0.573	20.223	2843.771	-0.006081	-0.011506	-0.004692
0.8540	1507.860	88.543	165.934	67.846	-0.570	20.228	2870.579	-0.006198	-0.011615	-0.004749
0.8560	1507.680	88.810	166.100	68.114	-0.573	20.233	2870.235	-0.006217	-0.011627	-0.004768
0.8580	1500.436	87.969	165.822	67.833	-0.570	20.238	2856.445	-0.006158	-0.011608	-0.004748
0.8600	1490.382	88.475	165.711	68.099	-0.581	20.238	2837.305	-0.006193	-0.011600	-0.004767
0.8620	1475.068	87.943	165.101	67.918	-0.576	20.236	2808.151	-0.006156	-0.011557	-0.004754
0.8640	1436.190	84.673	161.903	66.401	-0.569	20.232	2734.137	-0.005927	-0.011333	-0.004648
0.8660	1353.954	79.801	154.178	62.695	-0.576	20.226	2577.581	-0.005586	-0.010792	-0.004389
0.8680	1256.255	74.219	144.184	57.645	-0.578	20.222	2391.586	-0.005195	-0.010093	-0.004035
0.8700	1178.573	69.125	136.291	53.771	-0.590	20.221	2243.700	-0.004839	-0.009540	-0.003764
0.8720	1123.900	65.168	130.440	50.952	-0.580	20.223	2139.616	-0.004562	-0.009131	-0.003567
0.8740	1069.632	62.583	124.953	48.003	-0.580	20.227	2036.304	-0.004381	-0.008747	-0.003360
0.8760	995.452	57.336	117.380	44.130	-0.582	20.232	1895.084	-0.004014	-0.008217	-0.003089
0.8780	902.381	51.289	107.694	39.106	-0.581	20.238	1717.901	-0.003590	-0.007539	-0.002737
0.8800	809.475	45.913	97.855	34.714	-0.585	20.237	1541.033	-0.003214	-0.006850	-0.002430
0.8820	731.688	40.088	89.491	30.644	-0.578	20.235	1392.946	-0.002806	-0.006264	-0.002145
0.8840	664.722	35.262	81.820	27.010	-0.568	20.231	1265.459	-0.002468	-0.005727	-0.001891
0.8860	600.220	31.011	73.900	23.546	-0.569	20.226	1142.664	-0.002171	-0.005173	-0.001648
0.8880	535.237	25.902	66.116	20.037	-0.568	20.222	1018.953	-0.001813	-0.004628	-0.001403
0.8900	468.766	22.170	58.959	16.655	-0.580	20.220	892.410	-0.001552	-0.004127	-0.001166
0.8920	404.054	17.708	51.051	13.217	-0.577	20.223	769.215	-0.001240	-0.003574	-0.000925
0.8940	346.255	12.612	43.160	10.100	-0.565	20.227	659.180	-0.000883	-0.003021	-0.000707
0.8960	301.770	9.540	37.310	7.589	-0.573	20.232	574.493	-0.000668	-0.002612	-0.000531
0.8980	271.173	7.297	32.932	5.753	-0.576	20.238	516.243	-0.000511	-0.002305	-0.000403
0.9000	250.494	5.036	30.140	4.728	-0.583	20.237	476.875	-0.000353	-0.002110	-0.000331
0.9020	236.562	3.997	27.833	3.774	-0.579	20.236	450.354	-0.000280	-0.001948	-0.000264
0.9040	228.056	4.096	26.540	3.197	-0.577	20.232	434.160	-0.000287	-0.001858	-0.000224
0.9060	225.231	2.650	26.122	2.761	-0.574	20.226	428.782	-0.000185	-0.001829	-0.000193
0.9080	227.380	2.652	25.524	2.649	-0.572	20.222	432.873	-0.000186	-0.001787	-0.000185
0.9100	232.444	3.872	25.509	2.776	-0.580	20.220	442.514	-0.000271	-0.001786	-0.000194
0.9120	240.740	3.183	26.359	2.960	-0.579	20.223	458.307	-0.000223	-0.001845	-0.000207
0.9140	261.675	3.717	27.834	3.451	-0.587	20.228	498.161	-0.000260	-0.001948	-0.000242
0.9160	319.955	7.731	33.390	5.570	-0.586	20.233	609.112	-0.000541	-0.002337	-0.000390
0.9180	411.643	13.190	42.993	9.568	-0.581	20.239	783.663	-0.000923	-0.003009	-0.000670
0.9200	505.856	18.521	53.692	14.464	-0.593	20.239	963.020	-0.001296	-0.003758	-0.001013
0.9220	587.896	24.119	63.252	18.520	-0.583	20.236	1119.204	-0.001688	-0.004428	-0.001296
0.9240	658.635	29.045	71.145	22.086	-0.578	20.232	1253.872	-0.002033	-0.004980	-0.001546
0.9260	729.284	33.340	78.609	25.817	-0.581	20.226	1388.369	-0.002334	-0.005503	-0.001807
0.9280	809.896	38.084	87.462	30.026	-0.577	20.222	1541.834	-0.002666	-0.006122	-0.002102
0.9300	902.937	45.353	97.703	34.715	-0.586	20.220	1718.960	-0.003175	-0.006839	-0.002430
0.9320	1001.178	51.512	108.070	39.697	-0.580	20.223	1905.985	-0.003606	-0.007565	-0.002779
0.9340	1092.280	57.307	118.132	44.635	-0.583	20.227	2079.420	-0.004012	-0.008269	-0.003124
0.9360	1165.964	63.189	126.316	48.815	-0.581	20.233	2219.696	-0.004423	-0.008842	-0.003417
0.9380	1223.493	66.965	132.415	51.704	-0.580	20.238	2329.216	-0.004688	-0.009269	-0.003619
0.9400	1276.423	70.669	139.141	54.779	-0.587	20.238	2429.981	-0.004947	-0.009740	-0.003835
0.9420	1335.439	75.356	145.701	57.923	-0.579	20.235	2542.334	-0.005275	-0.010199	-0.004055
0.9440	1394.050	78.779	151.872	61.082	-0.577	20.232	2653.913	-0.005515	-0.010631	-0.004276
0.9460	1438.339	82.242	157.277	63.789	-0.578	20.227	2738.228	-0.005757	-0.011009	-0.004465
0.9480	1464.563	85.134	160.196	65.248	-0.574	20.222	2788.153	-0.005959	-0.011214	-0.004567
0.9500	1481.846	86.551	162.959	66.457	-0.580	20.221	2821.054	-0.006059	-0.011407	-0.004652
0.9520	1496.288	87.393	164.682	67.399	-0.573	20.223	2848.549	-0.006118	-0.011528	-0.004718
0.9540	1504.629	88.657	166.031	68.114	-0.580	20.228	2864.428	-0.006206	-0.011622	-0.004768
0.9560	1504.855	88.658	166.574	68.364	-0.583	20.233	2864.857	-0.006206	-0.011660	-0.004785
0.9580	1499.640	88.546	165.948	68.140	-0.576	20.239	2854.929	-0.006198	-0.011616	-0.004770
0.9600	1489.901	88.376	165.657	68.057	-0.588	20.238	2836.390	-0.006186	-0.011596	-0.004764
0.9620	1473.490	87.492	164.963	67.637	-0.585	20.236	2805.147	-0.006124	-0.011547	-0.004735
0.9640	1434.026	84.881	161.930	66.218	-0.580	20.232	2730.017	-0.005942	-0.011335	-0.004635
0.9660	1351.189	79.886	154.079	62.358	-0.580	20.226	2572.317	-0.005592	-0.010786	-0.004365
0.9680	1251.506	74.257	144.005	57.208	-0.570	20.222	2382.545	-0.005198	-0.010080	-0.004005
0.9700	1167.677	68.926	135.473	53.251	-0.577	20.221	2222.958	-0.004825	-0.009483	-0.003728
0.9720	1107.744	64.718	129.317	50.305	-0.573	20.224	2108.860	-0.004530	-0.009052	-0.003521
0.9740	1057.955	61.828	123.717	47.567	-0.574	20.228	2014.074	-0.004328	-0.008660	-0.003330
0.9760	992.581	57.111	117.200	44.116	-0.579	20.233	1889.620	-0.003998	-0.008204	-0.003088
0.9780	900.337	50.348	107.638	39.119	-0.576	20.238	1714.010	-0.003524	-0.007535	-0.002738
0.9800	798.129	45.002	96.688	34.363	-0.586	20.238	1519.432	-0.003150	-0.006768	-0.002405
0.9820	715.487	39.458	87.670	29.790	-0.582	20.236	1362.104	-0.002762	-0.006137	-0.002085
0.9840	653.345	34.348	80.416	26.307	-0.577	20.232	1243.801	-0.002404	-0.005629	-0.001841
0.9860	591.714	30.744	73.135	22.983	-0.577	20.226	1126.471	-0.002152	-0.005119	-0.001609
0.9880	522.297	25.565	65.187	19.068	-0.578	20.222	994.320	-0.001790	-0.004563	-0.001335
0.9900	450.957	20.430	56.474	15.685	-0.584	20.221	858.507	-0.001430	-0.003953	-0.001098
0.9920	387.673	16.222	48.397	12.332	-0.580	20.223	738.029	-0.001136	-0.003388	-0.000863
0.9940	335.810	11.844	41.604	9.539	-0.579	20.228	639.296	-0.000829	-0.002912	-0.000668
0.9960	296.180	8.924	36.768	7.267	-0.584	20.233	563.850	-0.000625	-0.002574	-0.000509
0.9980	266.364	7.253	32.737	5.513	-0.577	20.239	507.088	-0.000508	-0.002292	-0.000386
