# Supplementary material for: Evaluation of a Cold-Mixed High-Performance Polyurethane Mixture
Source: Hindawi journal article supplement (doi:10.1155/2019/1507971), 2019-11-07
Supplement: f1 [file 1507971.f1.zip › 1507971.f1/dynamic modulus data/PUM/specimen2/temp20/zhs-2-20_20Hz.csv]

Test Information
****************
Project name	zhs
Operator name	2
Target test temperature	20
Target confining stress	0
Average dynamic strain range from 75 to 125 micro-strain
Contact stress	5
Initial modulus	1000
Axial gauge length	70
Comments
Specimen information
********************
Identification	zhs-2-20
Dimensions	Point 1	Point 2	Point 3	Point 4	Point 5	Point 6	Average	Std Dev.
Diameter (mm)	49.2	49.3	49.2				49.23	0.058
Height (mm)	100.8	101.0	100.8				100.87	0.115
Cross-sectional area (mm�)	1903.7
Conditioning time
Properties/Comments
Test Data	20Hz
*********
Test date and time	Mon	Apr 1	2019	2:34 PM
Dynamic modulus (MPa)	13487
Phase angle (Degrees)	4.10
Average temperature (�C)	20.2
Average confining pressure (kPa)	-0.6
Average micro-strain	100
Load drift (%)	-0.4
Load standard error (%)	6.0
Average deformation drift (%)	-2.7
Average deformation standard error (%)	5.8
Deformation uniformity (%)	32.3
Phase uniformity (Degrees)	0.2
Conditioning Cycles
Time (sec)	Axial stress (kPa)	Axial micro-strain #1	Axial micro-strain #2	Axial micro-strain #3	Confining pressure (kPa)	Temperature (�C)	Load (N)	Displacement #1 (mm)	Displacement #2 (mm)	Displacement #3 (mm)
0.0000	404.655	9.062	35.347	7.263	-0.576	20.226	770.359	-0.000634	-0.002474	-0.000508
0.0010	404.129	9.329	35.306	7.153	-0.577	20.224	769.358	-0.000653	-0.002471	-0.000501
0.0020	402.671	9.078	35.460	7.125	-0.574	20.221	766.582	-0.000635	-0.002482	-0.000499
0.0030	399.245	8.531	35.377	6.803	-0.569	20.219	760.059	-0.000597	-0.002476	-0.000476
0.0040	391.640	8.573	34.892	6.467	-0.570	20.217	745.583	-0.000600	-0.002442	-0.000453
0.0050	376.567	7.997	33.835	6.159	-0.573	20.216	716.887	-0.000560	-0.002368	-0.000431
0.0060	352.642	5.906	31.432	5.191	-0.570	20.216	671.339	-0.000413	-0.002200	-0.000363
0.0070	323.862	4.181	28.513	4.222	-0.571	20.217	616.550	-0.000293	-0.001996	-0.000296
0.0080	298.329	2.988	25.178	2.804	-0.566	20.220	567.942	-0.000209	-0.001762	-0.000196
0.0090	282.624	1.768	23.385	1.892	-0.569	20.221	538.044	-0.000124	-0.001637	-0.000132
0.0100	277.695	1.220	22.483	1.513	-0.573	20.223	528.660	-0.000085	-0.001574	-0.000106
0.0110	281.302	1.388	22.484	1.443	-0.573	20.226	535.526	-0.000097	-0.001574	-0.000101
0.0120	293.700	1.936	23.040	1.962	-0.570	20.229	559.130	-0.000136	-0.001613	-0.000137
0.0130	322.630	3.101	25.416	2.874	-0.569	20.232	614.204	-0.000217	-0.001779	-0.000201
0.0140	374.628	6.623	30.821	4.993	-0.574	20.234	713.196	-0.000464	-0.002157	-0.000350
0.0150	449.515	11.618	38.894	8.515	-0.581	20.234	855.761	-0.000813	-0.002723	-0.000596
0.0160	539.640	17.063	48.440	12.906	-0.578	20.233	1027.336	-0.001194	-0.003391	-0.000903
0.0170	633.928	23.083	58.487	17.692	-0.579	20.231	1206.837	-0.001616	-0.004094	-0.001238
0.0180	724.910	28.991	68.131	22.001	-0.572	20.230	1380.043	-0.002029	-0.004769	-0.001540
0.0190	806.079	34.070	77.107	26.224	-0.574	20.228	1534.567	-0.002385	-0.005397	-0.001836
0.0200	874.218	38.419	84.693	29.761	-0.575	20.226	1664.286	-0.002689	-0.005929	-0.002083
0.0210	929.793	42.785	90.891	32.580	-0.573	20.223	1770.086	-0.002995	-0.006362	-0.002281
0.0220	975.810	45.999	96.089	34.924	-0.571	20.220	1857.691	-0.003220	-0.006726	-0.002445
0.0230	1016.356	48.609	100.591	36.749	-0.569	20.219	1934.881	-0.003403	-0.007041	-0.002572
0.0240	1054.664	51.373	105.011	38.868	-0.570	20.217	2007.809	-0.003596	-0.007351	-0.002721
0.0250	1092.445	54.601	109.458	40.932	-0.580	20.216	2079.735	-0.003822	-0.007662	-0.002865
0.0260	1129.415	56.804	113.641	42.953	-0.581	20.216	2150.116	-0.003976	-0.007955	-0.003007
0.0270	1163.725	59.190	117.532	45.056	-0.588	20.217	2215.433	-0.004143	-0.008227	-0.003154
0.0280	1192.234	61.366	120.631	46.584	-0.578	20.220	2269.707	-0.004296	-0.008444	-0.003261
0.0290	1212.267	62.488	123.216	48.000	-0.577	20.222	2307.844	-0.004374	-0.008625	-0.003360
0.0300	1222.651	63.273	124.716	48.717	-0.578	20.224	2327.614	-0.004429	-0.008730	-0.003410
0.0310	1224.695	64.142	125.326	49.084	-0.583	20.227	2331.505	-0.004490	-0.008773	-0.003436
0.0320	1220.833	64.198	125.590	49.449	-0.585	20.230	2324.152	-0.004494	-0.008791	-0.003461
0.0330	1212.778	63.694	125.063	48.957	-0.581	20.233	2308.817	-0.004459	-0.008754	-0.003427
0.0340	1200.454	63.637	124.605	48.591	-0.576	20.235	2285.357	-0.004455	-0.008722	-0.003401
0.0350	1179.940	62.837	123.577	47.833	-0.580	20.234	2246.304	-0.004399	-0.008650	-0.003348
0.0360	1143.812	60.549	120.854	46.655	-0.578	20.233	2177.525	-0.004238	-0.008460	-0.003266
0.0370	1087.275	57.082	115.769	44.437	-0.580	20.231	2069.893	-0.003996	-0.008104	-0.003111
0.0380	1011.547	52.663	108.015	40.762	-0.571	20.231	1925.726	-0.003686	-0.007561	-0.002853
0.0390	925.795	47.513	99.439	36.510	-0.568	20.229	1762.476	-0.003326	-0.006961	-0.002556
0.0400	840.283	41.704	90.656	32.160	-0.569	20.226	1599.684	-0.002919	-0.006346	-0.002251
0.0410	762.241	36.596	82.749	28.189	-0.568	20.224	1451.111	-0.002562	-0.005792	-0.001973
0.0420	694.523	32.526	75.509	24.793	-0.569	20.221	1322.193	-0.002277	-0.005286	-0.001736
0.0430	636.919	28.345	68.951	21.749	-0.565	20.219	1212.530	-0.001984	-0.004827	-0.001522
0.0440	587.430	24.893	63.323	19.167	-0.568	20.217	1118.317	-0.001742	-0.004433	-0.001342
0.0450	543.067	22.436	58.418	16.991	-0.573	20.216	1033.859	-0.001571	-0.004089	-0.001189
0.0460	500.701	19.531	53.693	14.746	-0.574	20.217	953.207	-0.001367	-0.003758	-0.001032
0.0470	457.991	16.346	48.648	12.515	-0.576	20.218	871.897	-0.001144	-0.003405	-0.000876
0.0480	413.702	13.877	43.077	10.004	-0.572	20.220	787.582	-0.000971	-0.003015	-0.000700
0.0490	368.947	10.861	37.673	7.815	-0.572	20.222	702.381	-0.000760	-0.002637	-0.000547
0.0500	326.177	7.422	32.518	5.794	-0.576	20.224	620.956	-0.000520	-0.002276	-0.000406
0.0510	288.696	4.840	27.819	4.125	-0.578	20.227	549.603	-0.000339	-0.001947	-0.000289
0.0520	258.849	2.847	23.746	2.539	-0.579	20.230	492.783	-0.000199	-0.001662	-0.000178
0.0530	237.148	0.954	20.619	1.150	-0.577	20.233	451.469	-0.000067	-0.001443	-0.000080
0.0540	223.262	-0.548	18.661	0.126	-0.577	20.235	425.034	0.000038	-0.001306	-0.000009
0.0550	215.763	-0.620	17.633	-0.253	-0.586	20.235	410.757	0.000043	-0.001234	0.000018
0.0560	213.223	-1.335	16.883	-0.267	-0.587	20.233	405.922	0.000093	-0.001182	0.000019
0.0570	213.929	-1.687	16.382	-0.210	-0.585	20.232	407.267	0.000118	-0.001147	0.000015
0.0580	216.905	-1.027	16.118	-0.322	-0.578	20.231	412.931	0.000072	-0.001128	0.000023
0.0590	221.774	-0.983	16.577	-0.126	-0.577	20.229	422.201	0.000069	-0.001160	0.000009
0.0600	229.228	-1.207	17.091	-0.155	-0.581	20.226	436.392	0.000085	-0.001196	0.000011
0.0610	243.295	-0.281	17.828	0.279	-0.584	20.223	463.171	0.000020	-0.001248	-0.000020
0.0620	271.789	1.416	20.288	1.064	-0.587	20.221	517.416	-0.000099	-0.001420	-0.000074
0.0630	321.383	3.717	25.276	2.846	-0.584	20.219	611.830	-0.000260	-0.001769	-0.000199
0.0640	392.196	8.223	33.237	6.101	-0.583	20.217	746.641	-0.000576	-0.002327	-0.000427
0.0650	477.768	13.919	42.700	10.087	-0.588	20.216	909.548	-0.000974	-0.002989	-0.000706
0.0660	569.336	19.292	53.011	14.773	-0.589	20.216	1083.870	-0.001350	-0.003711	-0.001034
0.0670	659.988	25.072	62.948	19.237	-0.592	20.218	1256.447	-0.001755	-0.004406	-0.001347
0.0680	743.696	30.587	72.118	23.236	-0.588	20.220	1415.806	-0.002141	-0.005048	-0.001627
0.0690	816.418	35.541	79.943	27.080	-0.591	20.222	1554.251	-0.002488	-0.005596	-0.001896
0.0700	876.998	39.472	86.445	30.182	-0.592	20.224	1669.579	-0.002763	-0.006051	-0.002113
0.0710	927.583	43.557	92.019	32.974	-0.592	20.227	1765.881	-0.003049	-0.006441	-0.002308
0.0720	972.443	47.037	97.092	35.318	-0.595	20.230	1851.282	-0.003293	-0.006796	-0.002472
0.0730	1015.409	49.675	102.039	37.296	-0.593	20.233	1933.079	-0.003477	-0.007143	-0.002611
0.0740	1059.097	52.496	106.931	39.681	-0.591	20.234	2016.249	-0.003675	-0.007485	-0.002778
0.0750	1103.025	55.976	111.850	42.124	-0.600	20.234	2099.876	-0.003918	-0.007829	-0.002949
0.0760	1144.864	58.754	116.547	44.831	-0.601	20.233	2179.527	-0.004113	-0.008158	-0.003138
0.0770	1181.068	61.154	120.700	46.740	-0.601	20.231	2248.449	-0.004281	-0.008449	-0.003272
0.0780	1207.548	63.287	123.646	48.213	-0.592	20.231	2298.861	-0.004430	-0.008655	-0.003375
0.0790	1222.426	64.773	125.495	49.140	-0.591	20.228	2327.185	-0.004534	-0.008785	-0.003440
0.0800	1226.679	64.844	126.260	49.575	-0.593	20.226	2335.281	-0.004539	-0.008838	-0.003470
0.0810	1223.748	65.489	126.482	49.505	-0.591	20.223	2329.702	-0.004584	-0.008854	-0.003465
0.0820	1217.031	65.420	126.301	49.380	-0.591	20.221	2316.914	-0.004579	-0.008841	-0.003457
0.0830	1207.262	64.424	125.968	48.987	-0.585	20.219	2298.317	-0.004510	-0.008818	-0.003429
0.0840	1193.541	63.708	125.246	48.508	-0.587	20.217	2272.196	-0.004460	-0.008767	-0.003396
0.0850	1170.878	62.936	123.648	47.903	-0.590	20.216	2229.052	-0.004405	-0.008655	-0.003353
0.0860	1132.120	60.127	120.494	46.599	-0.590	20.216	2155.266	-0.004209	-0.008435	-0.003262
0.0870	1073.524	56.451	115.088	44.059	-0.590	20.218	2043.715	-0.003952	-0.008056	-0.003084
0.0880	997.631	52.311	107.584	40.426	-0.580	20.220	1899.233	-0.003662	-0.007531	-0.002830
0.0890	914.328	46.881	99.107	36.187	-0.581	20.222	1740.646	-0.003282	-0.006938	-0.002533
0.0900	833.731	41.521	90.755	32.315	-0.581	20.224	1587.210	-0.002906	-0.006353	-0.002262
0.0910	762.211	37.381	83.209	28.821	-0.581	20.226	1451.054	-0.002617	-0.005825	-0.002017
0.0920	701.827	32.933	76.677	25.636	-0.581	20.229	1336.098	-0.002305	-0.005367	-0.001795
0.0930	650.460	29.130	70.993	22.801	-0.581	20.233	1238.308	-0.002039	-0.004970	-0.001596
0.0940	604.322	26.422	65.700	20.037	-0.579	20.234	1150.475	-0.001850	-0.004599	-0.001403
0.0950	558.756	23.602	60.586	17.734	-0.590	20.234	1063.728	-0.001652	-0.004241	-0.001241
0.0960	510.365	20.248	54.971	15.503	-0.590	20.233	971.603	-0.001417	-0.003848	-0.001085
0.0970	458.727	17.245	48.912	13.090	-0.596	20.231	873.299	-0.001207	-0.003424	-0.000916
0.0980	406.443	14.087	42.645	10.367	-0.587	20.231	773.764	-0.000986	-0.002985	-0.000726
0.0990	358.007	9.977	36.893	7.857	-0.585	20.228	681.553	-0.000698	-0.002582	-0.000550
0.1000	316.603	6.904	31.986	5.611	-0.587	20.226	602.732	-0.000483	-0.002239	-0.000393
0.1010	284.277	4.743	27.969	4.039	-0.590	20.223	541.191	-0.000332	-0.001958	-0.000283
0.1020	260.638	2.835	25.121	2.704	-0.596	20.221	496.187	-0.000198	-0.001758	-0.000189
0.1030	244.632	1.600	22.730	1.792	-0.593	20.219	465.717	-0.000112	-0.001591	-0.000125
0.1040	235.089	1.236	21.035	1.273	-0.592	20.217	447.550	-0.000086	-0.001472	-0.000089
0.1050	230.145	1.023	20.230	0.965	-0.593	20.216	438.137	-0.000072	-0.001416	-0.000068
0.1060	228.657	0.322	19.868	0.881	-0.596	20.217	435.305	-0.000023	-0.001391	-0.000062
0.1070	229.424	0.209	19.702	0.783	-0.596	20.218	436.764	-0.000015	-0.001379	-0.000055
0.1080	232.099	0.377	19.354	0.672	-0.594	20.221	441.856	-0.000026	-0.001355	-0.000047
0.1090	236.607	-0.016	19.534	0.910	-0.592	20.222	450.439	0.000001	-0.001367	-0.000064
0.1100	243.550	0.112	19.964	1.050	-0.596	20.225	463.657	-0.000008	-0.001397	-0.000073
0.1110	256.911	1.037	20.827	1.316	-0.594	20.227	489.092	-0.000073	-0.001458	-0.000092
0.1120	284.608	2.680	23.177	2.018	-0.597	20.230	541.821	-0.000188	-0.001622	-0.000141
0.1130	332.789	5.037	27.972	3.717	-0.597	20.233	633.545	-0.000353	-0.001958	-0.000260
0.1140	400.973	9.443	35.296	6.860	-0.596	20.234	763.350	-0.000661	-0.002471	-0.000480
0.1150	482.367	14.664	44.397	11.070	-0.599	20.234	918.303	-0.001027	-0.003108	-0.000775
0.1160	568.314	19.800	53.624	15.293	-0.596	20.233	1081.924	-0.001386	-0.003754	-0.001070
0.1170	653.044	25.287	62.864	19.389	-0.600	20.231	1243.229	-0.001770	-0.004400	-0.001357
0.1180	731.433	30.661	71.257	23.080	-0.593	20.230	1392.460	-0.002146	-0.004988	-0.001616
0.1190	799.992	34.955	78.760	26.518	-0.593	20.228	1522.980	-0.002447	-0.005513	-0.001856
0.1200	857.671	38.869	85.221	29.592	-0.591	20.226	1632.786	-0.002721	-0.005965	-0.002071
0.1210	906.754	42.812	90.433	32.202	-0.588	20.223	1726.227	-0.002997	-0.006330	-0.002254
0.1220	950.998	45.674	95.478	34.433	-0.589	20.220	1810.455	-0.003197	-0.006683	-0.002410
0.1230	993.708	48.158	100.162	36.524	-0.585	20.219	1891.766	-0.003371	-0.007011	-0.002557
0.1240	1036.855	51.680	104.914	38.586	-0.583	20.217	1973.906	-0.003618	-0.007344	-0.002701
0.1250	1080.437	54.809	110.000	41.143	-0.583	20.216	2056.875	-0.003837	-0.007700	-0.002880
0.1260	1122.577	57.237	114.599	43.528	-0.582	20.216	2137.098	-0.004007	-0.008022	-0.003047
0.1270	1160.343	60.253	118.866	45.731	-0.581	20.217	2208.996	-0.004218	-0.008321	-0.003201
0.1280	1190.160	62.473	122.035	47.190	-0.576	20.220	2265.759	-0.004373	-0.008542	-0.003303
0.1290	1210.538	63.414	124.549	48.396	-0.577	20.222	2304.554	-0.004439	-0.008718	-0.003388
0.1300	1221.208	64.775	126.022	49.323	-0.581	20.224	2324.867	-0.004534	-0.008822	-0.003453
0.1310	1224.079	65.335	126.773	49.617	-0.582	20.227	2330.332	-0.004573	-0.008874	-0.003473
0.1320	1220.983	65.320	126.912	49.632	-0.581	20.230	2324.438	-0.004572	-0.008884	-0.003474
0.1330	1213.830	65.096	126.467	49.491	-0.580	20.233	2310.820	-0.004557	-0.008853	-0.003464
0.1340	1202.513	64.674	126.133	49.252	-0.580	20.234	2289.276	-0.004527	-0.008829	-0.003448
0.1350	1183.217	63.636	125.091	48.942	-0.588	20.234	2252.541	-0.004455	-0.008756	-0.003426
0.1360	1147.870	61.405	122.314	47.554	-0.584	20.233	2185.249	-0.004298	-0.008562	-0.003329
0.1370	1090.612	58.079	117.131	44.986	-0.584	20.231	2076.244	-0.004066	-0.008199	-0.003149
0.1380	1012.779	53.505	109.432	40.988	-0.579	20.231	1928.072	-0.003745	-0.007660	-0.002869
0.1390	924.908	47.640	100.843	36.665	-0.582	20.228	1760.788	-0.003335	-0.007059	-0.002567
0.1400	839.757	42.097	92.310	32.471	-0.581	20.226	1598.682	-0.002947	-0.006462	-0.002273
0.1410	765.742	37.788	84.555	28.781	-0.573	20.223	1457.777	-0.002645	-0.005919	-0.002015
0.1420	705.358	33.508	78.094	25.721	-0.573	20.220	1342.821	-0.002346	-0.005467	-0.001800
0.1430	656.185	29.538	72.424	23.054	-0.565	20.218	1249.208	-0.002068	-0.005070	-0.001614
0.1440	613.234	27.292	67.435	20.976	-0.569	20.217	1167.440	-0.001910	-0.004720	-0.001468
0.1450	571.019	24.584	62.849	18.927	-0.575	20.216	1087.074	-0.001721	-0.004399	-0.001325
0.1460	526.520	21.371	57.694	16.737	-0.581	20.216	1002.359	-0.001496	-0.004039	-0.001172
0.1470	479.256	18.677	52.345	14.281	-0.581	20.218	912.380	-0.001307	-0.003664	-0.001000
0.1480	430.804	15.632	46.383	11.657	-0.578	20.220	820.141	-0.001094	-0.003247	-0.000816
0.1490	383.420	12.136	40.783	9.412	-0.574	20.222	729.933	-0.000850	-0.002855	-0.000659
0.1500	340.093	8.881	35.474	7.070	-0.570	20.224	647.449	-0.000622	-0.002483	-0.000495
0.1510	303.348	6.342	30.721	5.134	-0.568	20.226	577.497	-0.000444	-0.002150	-0.000359
0.1520	274.659	4.194	26.970	3.548	-0.569	20.230	522.881	-0.000294	-0.001888	-0.000248
0.1530	253.725	2.342	23.983	2.229	-0.569	20.233	483.027	-0.000164	-0.001679	-0.000156
0.1540	239.448	1.373	22.025	1.625	-0.571	20.235	455.847	-0.000096	-0.001542	-0.000114
0.1550	230.776	1.163	20.703	1.316	-0.577	20.234	439.339	-0.000081	-0.001449	-0.000092
0.1560	226.538	0.406	19.883	0.979	-0.573	20.232	431.271	-0.000028	-0.001392	-0.000069
0.1570	225.877	0.182	19.744	0.880	-0.572	20.231	430.012	-0.000013	-0.001382	-0.000062
0.1580	227.786	0.449	19.425	0.503	-0.566	20.230	433.645	-0.000031	-0.001360	-0.000035
0.1590	232.024	0.238	19.355	0.686	-0.573	20.228	441.713	-0.000017	-0.001355	-0.000048
0.1600	239.012	-0.127	19.425	0.658	-0.579	20.226	455.017	0.000009	-0.001360	-0.000046
0.1610	252.673	0.841	20.078	0.995	-0.580	20.224	481.024	-0.000059	-0.001405	-0.000070
0.1620	281.166	2.693	22.815	2.061	-0.576	20.221	535.269	-0.000189	-0.001597	-0.000144
0.1630	331.166	4.940	27.707	4.025	-0.574	20.219	630.455	-0.000346	-0.001939	-0.000282
0.1640	402.912	9.527	35.655	7.210	-0.578	20.217	767.040	-0.000667	-0.002496	-0.000505
0.1650	489.340	14.986	45.202	11.420	-0.583	20.216	931.578	-0.001049	-0.003164	-0.000799
0.1660	580.623	20.375	55.360	15.854	-0.585	20.217	1105.356	-0.001426	-0.003875	-0.001110
0.1670	668.704	26.507	64.795	20.330	-0.582	20.218	1273.041	-0.001855	-0.004536	-0.001423
0.1680	747.408	32.190	73.189	24.090	-0.576	20.221	1422.873	-0.002253	-0.005123	-0.001686
0.1690	813.743	36.105	80.597	27.514	-0.574	20.222	1549.158	-0.002527	-0.005642	-0.001926
0.1700	868.567	39.992	86.864	30.547	-0.580	20.224	1653.528	-0.002799	-0.006081	-0.002138
0.1710	915.756	43.627	92.159	32.875	-0.580	20.227	1743.364	-0.003054	-0.006451	-0.002301
0.1720	960.165	46.111	96.884	35.303	-0.580	20.230	1827.908	-0.003228	-0.006782	-0.002471
0.1730	1005.401	49.282	101.915	37.254	-0.574	20.233	1914.024	-0.003450	-0.007134	-0.002608
0.1740	1052.605	53.126	107.110	39.753	-0.576	20.234	2003.889	-0.003719	-0.007498	-0.002783
0.1750	1100.200	55.989	112.599	42.420	-0.585	20.234	2094.498	-0.003919	-0.007882	-0.002969
0.1760	1144.203	58.978	117.546	44.847	-0.585	20.233	2178.268	-0.004128	-0.008228	-0.003139
0.1770	1179.986	62.066	121.521	46.866	-0.585	20.232	2246.389	-0.004345	-0.008506	-0.003281
0.1780	1204.181	63.189	124.078	48.200	-0.574	20.231	2292.452	-0.004423	-0.008685	-0.003374
0.1790	1216.264	64.101	125.815	49.210	-0.577	20.229	2315.454	-0.004487	-0.008807	-0.003445
0.1800	1218.428	64.998	126.524	49.590	-0.580	20.226	2319.574	-0.004550	-0.008857	-0.003471
0.1810	1214.401	65.123	126.579	49.562	-0.584	20.223	2311.907	-0.004559	-0.008861	-0.003469
0.1820	1207.127	64.661	126.272	49.225	-0.585	20.221	2298.059	-0.004526	-0.008839	-0.003446
0.1830	1197.464	64.353	125.688	48.846	-0.587	20.219	2279.663	-0.004505	-0.008798	-0.003419
0.1840	1183.698	63.975	125.077	48.368	-0.589	20.217	2253.456	-0.004478	-0.008755	-0.003386
0.1850	1160.539	62.696	123.354	47.834	-0.593	20.216	2209.368	-0.004389	-0.008635	-0.003348
0.1860	1121.781	60.477	120.090	46.432	-0.589	20.217	2135.582	-0.004233	-0.008406	-0.003250
0.1870	1065.664	57.264	114.739	44.088	-0.584	20.218	2028.751	-0.004008	-0.008032	-0.003086
0.1880	995.226	52.381	107.763	40.609	-0.572	20.220	1894.655	-0.003667	-0.007543	-0.002843
0.1890	917.770	47.036	100.050	36.890	-0.570	20.222	1747.198	-0.003293	-0.007003	-0.002582
0.1900	839.697	42.560	92.046	32.976	-0.571	20.224	1598.568	-0.002979	-0.006443	-0.002308
0.1910	766.539	38.140	84.458	29.285	-0.573	20.227	1459.293	-0.002670	-0.005912	-0.002050
0.1920	701.571	33.663	77.608	26.042	-0.573	20.230	1335.611	-0.002356	-0.005433	-0.001823
0.1930	645.605	29.846	71.354	22.744	-0.570	20.233	1229.067	-0.002089	-0.004995	-0.001592
0.1940	596.447	26.590	65.755	20.330	-0.569	20.234	1135.483	-0.001861	-0.004603	-0.001423
0.1950	550.716	22.957	60.405	17.931	-0.576	20.234	1048.422	-0.001607	-0.004228	-0.001255
0.1960	505.886	19.996	55.388	15.910	-0.578	20.233	963.078	-0.001400	-0.003877	-0.001114
0.1970	460.621	17.428	50.302	13.653	-0.581	20.231	876.904	-0.001220	-0.003521	-0.000956
0.1980	414.724	14.187	44.938	11.098	-0.572	20.230	789.528	-0.000993	-0.003146	-0.000777
0.1990	369.293	11.000	39.351	8.895	-0.573	20.228	703.039	-0.000770	-0.002755	-0.000623
0.2000	326.297	8.180	33.987	6.648	-0.575	20.225	621.185	-0.000573	-0.002379	-0.000465
0.2010	288.906	5.725	29.250	4.614	-0.574	20.223	550.003	-0.000401	-0.002047	-0.000323
0.2020	258.924	3.002	25.415	3.084	-0.570	20.221	492.926	-0.000210	-0.001779	-0.000216
0.2030	236.637	1.290	22.261	1.766	-0.564	20.219	450.497	-0.000090	-0.001558	-0.000124
0.2040	221.774	0.826	20.161	1.121	-0.564	20.218	422.201	-0.000058	-0.001411	-0.000078
0.2050	213.328	0.266	18.742	0.743	-0.566	20.216	406.122	-0.000019	-0.001312	-0.000052
0.2060	209.992	-0.381	18.242	0.448	-0.568	20.217	399.771	0.000027	-0.001277	-0.000031
0.2070	210.338	-0.393	17.978	0.433	-0.564	20.218	400.429	0.000028	-0.001258	-0.000030
0.2080	213.283	-0.788	17.868	0.110	-0.560	20.221	406.036	0.000055	-0.001251	-0.000008
0.2090	218.243	-1.053	18.022	0.377	-0.561	20.222	415.478	0.000074	-0.001262	-0.000026
0.2100	226.087	-0.169	18.245	0.421	-0.569	20.224	430.412	0.000012	-0.001277	-0.000029
0.2110	241.522	0.729	19.329	0.856	-0.575	20.227	459.795	-0.000051	-0.001353	-0.000060
0.2120	272.931	1.809	22.163	1.809	-0.580	20.230	519.590	-0.000127	-0.001551	-0.000127
0.2130	326.297	4.882	27.610	3.758	-0.582	20.233	621.185	-0.000342	-0.001933	-0.000263
0.2140	401.289	9.934	35.642	7.125	-0.584	20.235	763.950	-0.000695	-0.002495	-0.000499
0.2150	490.392	15.223	45.591	11.448	-0.584	20.234	933.580	-0.001066	-0.003191	-0.000801
0.2160	584.064	21.550	55.901	16.317	-0.583	20.233	1111.908	-0.001509	-0.003913	-0.001142
0.2170	674.295	27.641	65.699	20.780	-0.579	20.232	1283.684	-0.001935	-0.004599	-0.001455
0.2180	755.223	32.608	74.315	24.680	-0.574	20.231	1437.750	-0.002283	-0.005202	-0.001728
0.2190	824.248	37.072	81.986	28.160	-0.569	20.229	1569.157	-0.002595	-0.005739	-0.001971
0.2200	881.822	41.184	88.421	31.051	-0.573	20.226	1678.762	-0.002883	-0.006189	-0.002174
0.2210	930.830	44.749	93.770	33.745	-0.572	20.224	1772.060	-0.003132	-0.006564	-0.002362
0.2220	975.043	47.008	98.509	35.893	-0.582	20.221	1856.232	-0.003291	-0.006896	-0.002513
0.2230	1017.724	50.122	103.191	37.872	-0.582	20.219	1937.485	-0.003509	-0.007223	-0.002651
0.2240	1060.645	53.420	108.209	40.175	-0.583	20.217	2019.196	-0.003739	-0.007575	-0.002812
0.2250	1102.935	55.907	113.128	42.603	-0.581	20.216	2099.705	-0.003913	-0.007919	-0.002982
0.2260	1142.159	58.924	117.436	45.043	-0.578	20.217	2174.377	-0.004125	-0.008221	-0.003153
0.2270	1174.936	61.659	121.175	46.882	-0.579	20.218	2236.776	-0.004316	-0.008482	-0.003282
0.2280	1198.170	63.229	123.731	48.158	-0.568	20.221	2281.008	-0.004426	-0.008661	-0.003371
0.2290	1210.899	64.085	125.412	49.015	-0.570	20.222	2305.241	-0.004486	-0.008779	-0.003431
0.2300	1214.356	65.068	126.025	49.477	-0.572	20.225	2311.821	-0.004555	-0.008822	-0.003463
0.2310	1211.590	64.704	126.066	49.548	-0.574	20.227	2306.557	-0.004529	-0.008825	-0.003468
0.2320	1205.188	64.199	125.787	49.449	-0.576	20.231	2294.369	-0.004494	-0.008805	-0.003461
0.2330	1196.366	64.326	125.453	49.055	-0.578	20.234	2277.575	-0.004503	-0.008782	-0.003434
0.2340	1184.329	63.848	125.063	48.802	-0.581	20.235	2254.658	-0.004469	-0.008754	-0.003416
0.2350	1164.972	62.529	123.924	48.241	-0.588	20.234	2217.808	-0.004377	-0.008675	-0.003377
0.2360	1132.210	60.998	121.284	47.134	-0.587	20.233	2155.437	-0.004270	-0.008490	-0.003299
0.2370	1081.820	58.445	116.810	44.916	-0.583	20.232	2059.507	-0.004091	-0.008177	-0.003144
0.2380	1014.703	53.871	110.167	41.619	-0.569	20.231	1931.734	-0.003771	-0.007712	-0.002913
0.2390	936.600	48.988	102.621	37.858	-0.569	20.228	1783.047	-0.003429	-0.007183	-0.002650
0.2400	854.485	44.245	94.158	33.706	-0.573	20.226	1626.720	-0.003097	-0.006591	-0.002359
0.2410	774.384	38.590	85.918	29.761	-0.574	20.223	1474.228	-0.002701	-0.006014	-0.002083
0.2420	700.865	33.747	77.955	26.014	-0.575	20.220	1334.267	-0.002362	-0.005457	-0.001821
0.2430	636.799	29.735	71.050	22.674	-0.570	20.219	1212.301	-0.002081	-0.004974	-0.001587
0.2440	582.712	26.017	64.852	19.911	-0.574	20.217	1109.333	-0.001821	-0.004540	-0.001394
0.2450	537.010	22.775	59.750	17.594	-0.574	20.216	1022.329	-0.001594	-0.004183	-0.001232
0.2460	496.343	20.417	54.929	15.644	-0.577	20.216	944.910	-0.001429	-0.003845	-0.001095
0.2470	457.179	17.708	50.288	13.749	-0.573	20.218	870.352	-0.001240	-0.003520	-0.000962
0.2480	417.204	14.269	45.327	11.433	-0.570	20.220	794.249	-0.000999	-0.003173	-0.000800
0.2490	376.702	11.757	40.449	9.216	-0.570	20.222	717.144	-0.000823	-0.002831	-0.000645
0.2500	198.120	-6.219	9.697	-3.430	-0.583	20.235	377.169	0.000435	-0.000679	0.000240
0.2510	197.458	-6.232	9.711	-3.120	-0.587	20.233	375.910	0.000436	-0.000680	0.000218
0.2520	196.662	-6.484	9.462	-3.344	-0.580	20.232	374.393	0.000454	-0.000662	0.000234
0.2530	196.076	-6.428	9.114	-3.582	-0.578	20.230	373.278	0.000450	-0.000638	0.000251
0.2540	195.700	-6.413	9.143	-3.667	-0.580	20.227	372.562	0.000449	-0.000640	0.000257
0.2550	195.670	-6.792	9.102	-3.583	-0.583	20.225	372.505	0.000475	-0.000637	0.000251
0.2560	196.316	-6.651	9.156	-3.486	-0.589	20.222	373.735	0.000466	-0.000641	0.000244
0.2570	198.195	-6.120	9.003	-3.585	-0.593	20.220	377.312	0.000428	-0.000630	0.000251
0.2580	202.087	-6.458	9.197	-3.529	-0.595	20.219	384.722	0.000452	-0.000644	0.000247
0.2590	210.608	-5.925	9.809	-3.149	-0.601	20.217	400.944	0.000415	-0.000687	0.000220
0.2600	230.461	-4.464	11.644	-2.474	-0.592	20.217	438.738	0.000313	-0.000815	0.000173
0.2610	271.263	-2.218	15.591	-0.705	-0.593	20.218	516.415	0.000155	-0.001091	0.000049
0.2620	337.809	0.897	22.511	1.751	-0.584	20.220	643.101	-0.000063	-0.001576	-0.000123
0.2630	427.032	7.015	32.474	5.806	-0.584	20.222	812.960	-0.000491	-0.002273	-0.000406
0.2640	529.902	13.036	43.772	10.675	-0.583	20.224	1008.797	-0.000912	-0.003064	-0.000747
0.2650	637.881	19.757	55.723	16.007	-0.582	20.227	1214.361	-0.001383	-0.003901	-0.001121
0.2660	745.169	27.026	67.409	21.453	-0.580	20.229	1418.610	-0.001892	-0.004719	-0.001502
0.2670	847.377	34.141	78.956	26.645	-0.575	20.232	1613.188	-0.002390	-0.005527	-0.001865
0.2680	941.770	40.006	89.475	31.473	-0.573	20.235	1792.889	-0.002800	-0.006263	-0.002203
0.2690	1028.033	46.081	99.161	36.257	-0.577	20.235	1957.111	-0.003226	-0.006941	-0.002538
0.2700	1107.368	51.805	107.973	40.369	-0.580	20.235	2108.145	-0.003626	-0.007558	-0.002826
0.2710	1182.270	56.773	116.256	44.635	-0.581	20.233	2250.738	-0.003974	-0.008138	-0.003124
0.2720	1253.805	61.544	123.927	48.144	-0.578	20.232	2386.923	-0.004308	-0.008675	-0.003370
0.2730	1323.011	66.974	131.805	51.836	-0.577	20.230	2518.673	-0.004688	-0.009226	-0.003628
0.2740	1388.790	71.592	139.294	55.357	-0.583	20.228	2643.900	-0.005011	-0.009751	-0.003875
0.2750	1448.934	75.649	146.368	58.768	-0.585	20.225	2758.398	-0.005295	-0.010246	-0.004114
0.2760	1498.738	79.522	152.149	61.600	-0.583	20.222	2853.212	-0.005567	-0.010650	-0.004312
0.2770	1534.370	82.553	156.205	63.900	-0.583	20.220	2921.047	-0.005779	-0.010934	-0.004473
0.2780	1554.614	83.760	158.888	65.093	-0.581	20.219	2959.585	-0.005863	-0.011122	-0.004557
0.2790	1562.068	85.303	160.458	66.078	-0.593	20.217	2973.776	-0.005971	-0.011232	-0.004625
0.2800	1561.121	86.145	160.946	66.374	-0.597	20.217	2971.973	-0.006030	-0.011266	-0.004646
0.2810	1555.876	85.892	161.043	66.514	-0.605	20.218	2961.988	-0.006012	-0.011273	-0.004656
0.2820	1548.031	85.865	160.669	66.275	-0.597	20.220	2947.054	-0.006011	-0.011247	-0.004639
0.2830	1537.226	85.753	160.349	66.008	-0.596	20.222	2926.483	-0.006003	-0.011224	-0.004621
0.2840	1519.177	84.519	159.390	65.390	-0.592	20.224	2892.122	-0.005916	-0.011157	-0.004577
0.2850	1484.656	82.286	156.763	64.042	-0.594	20.226	2826.405	-0.005760	-0.010973	-0.004483
0.2860	1424.483	79.185	151.564	61.389	-0.589	20.229	2711.849	-0.005543	-0.010610	-0.004297
0.2870	1336.927	74.021	143.282	57.518	-0.591	20.232	2545.166	-0.005181	-0.010030	-0.004026
0.2880	1230.526	67.188	132.747	52.325	-0.586	20.235	2342.606	-0.004703	-0.009292	-0.003663
0.2890	1119.992	60.999	121.854	47.049	-0.593	20.235	2132.177	-0.004270	-0.008530	-0.003293
0.2900	1016.987	54.544	111.279	41.772	-0.593	20.234	1936.083	-0.003818	-0.007790	-0.002924
0.2910	928.410	48.637	102.039	37.366	-0.597	20.233	1767.454	-0.003405	-0.007143	-0.002616
0.2920	854.861	43.445	93.979	33.480	-0.591	20.232	1627.436	-0.003041	-0.006579	-0.002344
0.2930	792.042	39.642	86.947	30.239	-0.584	20.230	1507.845	-0.002775	-0.006086	-0.002117
0.2940	733.281	35.292	80.556	26.885	-0.584	20.228	1395.979	-0.002470	-0.005639	-0.001882
0.2950	672.506	30.633	73.955	23.755	-0.584	20.225	1280.279	-0.002144	-0.005177	-0.001663
0.2960	607.148	26.913	66.618	20.330	-0.584	20.222	1155.853	-0.001884	-0.004663	-0.001423
0.2970	538.513	22.002	58.795	16.751	-0.584	20.220	1025.190	-0.001540	-0.004116	-0.001173
0.2980	470.615	17.302	50.609	12.978	-0.582	20.219	895.929	-0.001211	-0.003543	-0.000908
0.2990	408.021	13.373	43.396	9.848	-0.593	20.217	776.768	-0.000936	-0.003038	-0.000689
0.3000	354.295	9.613	36.753	7.310	-0.593	20.217	674.486	-0.000673	-0.002573	-0.000512
0.3010	311.554	5.767	31.390	5.274	-0.597	20.218	593.119	-0.000404	-0.002197	-0.000369
0.3020	279.919	3.690	27.068	3.645	-0.587	20.220	532.894	-0.000258	-0.001895	-0.000255
0.3030	258.444	1.950	24.080	2.395	-0.587	20.222	492.010	-0.000136	-0.001686	-0.000168
0.3040	245.234	0.476	22.273	1.637	-0.585	20.224	466.862	-0.000033	-0.001559	-0.000115
0.3050	238.516	0.196	21.035	1.107	-0.587	20.227	454.073	-0.000014	-0.001472	-0.000077
0.3060	236.532	-0.001	20.215	0.840	-0.588	20.230	450.296	0.000000	-0.001415	-0.000059
0.3070	237.975	-0.477	19.714	0.659	-0.592	20.233	453.043	0.000033	-0.001380	-0.000046
0.3080	242.108	-0.462	19.547	0.547	-0.589	20.235	460.911	0.000032	-0.001368	-0.000038
0.3090	249.201	0.729	20.271	0.714	-0.592	20.235	474.415	-0.000051	-0.001419	-0.000050
0.3100	263.583	0.897	21.176	1.177	-0.589	20.234	501.795	-0.000063	-0.001482	-0.000082
0.3110	294.407	2.440	23.956	2.369	-0.593	20.232	560.474	-0.000171	-0.001677	-0.000166
0.3120	349.471	5.893	29.236	4.376	-0.589	20.232	665.302	-0.000413	-0.002047	-0.000306
0.3130	429.482	10.060	37.782	7.870	-0.585	20.230	817.623	-0.000704	-0.002645	-0.000551
0.3140	527.106	15.828	48.565	12.444	-0.588	20.229	1003.475	-0.001108	-0.003400	-0.000871
0.3150	632.591	22.858	59.778	17.524	-0.587	20.226	1204.290	-0.001600	-0.004184	-0.001227
0.3160	739.187	29.734	71.256	22.885	-0.588	20.223	1407.223	-0.002081	-0.004988	-0.001602
0.3170	842.523	36.217	82.415	28.121	-0.589	20.220	1603.947	-0.002535	-0.005769	-0.001968
0.3180	939.771	42.840	92.978	32.904	-0.587	20.219	1789.083	-0.002999	-0.006508	-0.002303
0.3190	1030.047	49.113	102.693	37.858	-0.596	20.217	1960.945	-0.003438	-0.007188	-0.002650
0.3200	1112.027	54.502	111.558	42.067	-0.601	20.217	2117.014	-0.003815	-0.007809	-0.002945
0.3210	1185.441	59.919	119.590	46.053	-0.605	20.218	2256.775	-0.004194	-0.008371	-0.003224
0.3220	1250.469	64.970	126.593	49.294	-0.598	20.220	2380.571	-0.004548	-0.008862	-0.003451
0.3230	1309.065	68.282	132.999	52.493	-0.595	20.222	2492.123	-0.004780	-0.009310	-0.003675
0.3240	1363.152	71.916	138.933	55.357	-0.589	20.224	2595.091	-0.005034	-0.009725	-0.003875
0.3250	1413.873	75.775	144.700	58.247	-0.591	20.227	2691.650	-0.005304	-0.010129	-0.004077
0.3260	1459.950	78.651	149.968	60.632	-0.587	20.229	2779.369	-0.005506	-0.010498	-0.004244
0.3270	1498.678	81.344	154.414	62.975	-0.589	20.232	2853.098	-0.005694	-0.010809	-0.004408
0.3280	1527.082	83.702	157.540	64.617	-0.587	20.234	2907.171	-0.005859	-0.011028	-0.004523
0.3290	1544.169	85.413	160.055	66.162	-0.594	20.234	2939.701	-0.005979	-0.011204	-0.004631
0.3300	1550.902	85.948	161.167	66.922	-0.595	20.234	2952.518	-0.006016	-0.011282	-0.004685
0.3310	1550.180	86.777	161.959	67.174	-0.595	20.232	2951.145	-0.006074	-0.011337	-0.004702
0.3320	1544.244	86.960	161.878	67.048	-0.592	20.232	2939.844	-0.006087	-0.011331	-0.004693
0.3330	1533.965	86.313	161.377	66.557	-0.587	20.230	2920.275	-0.006042	-0.011296	-0.004659
0.3340	1515.810	85.457	160.555	66.249	-0.583	20.228	2885.714	-0.005982	-0.011239	-0.004637
0.3350	1480.103	83.675	157.900	65.026	-0.581	20.226	2817.736	-0.005857	-0.011053	-0.004552
0.3360	1417.735	79.788	152.453	62.415	-0.581	20.223	2699.003	-0.005585	-0.010672	-0.004369
0.3370	1328.271	74.134	143.893	58.332	-0.582	20.220	2528.687	-0.005189	-0.010073	-0.004083
0.3380	1222.771	67.834	133.278	52.903	-0.580	20.219	2327.843	-0.004748	-0.009329	-0.003703
0.3390	1116.986	61.940	122.925	47.682	-0.584	20.217	2126.455	-0.004336	-0.008605	-0.003338
0.3400	1021.736	55.541	113.212	42.882	-0.578	20.217	1945.124	-0.003888	-0.007925	-0.003002
0.3410	940.688	50.475	105.040	38.784	-0.581	20.217	1790.829	-0.003533	-0.007353	-0.002715
0.3420	871.633	46.068	97.647	35.094	-0.574	20.220	1659.365	-0.003225	-0.006835	-0.002457
0.3430	809.039	41.577	90.908	31.613	-0.577	20.222	1540.203	-0.002910	-0.006364	-0.002213
0.3440	747.032	37.493	84.113	28.442	-0.577	20.224	1422.157	-0.002625	-0.005888	-0.001991
0.3450	681.448	33.846	76.858	25.019	-0.581	20.226	1297.302	-0.002369	-0.005380	-0.001751
0.3460	611.326	28.682	69.034	21.622	-0.579	20.229	1163.807	-0.002008	-0.004832	-0.001514
0.3470	538.678	23.210	60.597	17.763	-0.581	20.232	1025.505	-0.001625	-0.004242	-0.001243
0.3480	467.804	18.593	52.357	13.931	-0.576	20.234	890.579	-0.001302	-0.003665	-0.000975
0.3490	403.242	14.355	44.895	10.619	-0.583	20.234	767.670	-0.001005	-0.003143	-0.000743
0.3500	349.110	10.257	38.198	7.812	-0.581	20.233	664.616	-0.000718	-0.002674	-0.000547
0.3510	307.436	7.534	32.932	5.876	-0.585	20.232	585.279	-0.000527	-0.002305	-0.000411
0.3520	277.890	5.106	28.736	4.221	-0.579	20.231	529.032	-0.000357	-0.002012	-0.000295
0.3530	258.203	3.058	25.845	3.112	-0.580	20.230	491.552	-0.000214	-0.001809	-0.000218
0.3540	246.105	2.258	23.761	2.368	-0.580	20.228	468.521	-0.000158	-0.001663	-0.000166
0.3550	239.403	2.078	22.371	1.792	-0.583	20.225	455.761	-0.000145	-0.001566	-0.000125
0.3560	236.923	0.787	21.328	1.441	-0.584	20.222	451.040	-0.000055	-0.001493	-0.000101
0.3570	237.449	0.618	20.883	1.258	-0.581	20.220	452.042	-0.000043	-0.001462	-0.000088
0.3580	240.815	0.911	20.689	1.075	-0.580	20.218	458.450	-0.000064	-0.001448	-0.000075
0.3590	247.428	0.925	21.384	1.455	-0.589	20.217	471.039	-0.000065	-0.001497	-0.000102
0.3600	261.209	1.345	22.122	1.834	-0.591	20.217	497.274	-0.000094	-0.001549	-0.000128
0.3610	291.807	3.745	24.817	2.971	-0.590	20.218	555.525	-0.000262	-0.001737	-0.000208
0.3620	346.901	6.327	30.099	4.922	-0.582	20.220	660.410	-0.000443	-0.002107	-0.000345
0.3630	427.859	10.972	38.671	8.375	-0.584	20.222	814.533	-0.000768	-0.002707	-0.000586
0.3640	527.046	17.429	49.497	13.189	-0.590	20.224	1003.361	-0.001220	-0.003465	-0.000923
0.3650	634.635	23.785	61.058	18.549	-0.588	20.226	1208.181	-0.001665	-0.004274	-0.001298
0.3660	743.020	30.632	72.759	24.049	-0.588	20.229	1414.518	-0.002144	-0.005093	-0.001683
0.3670	845.724	38.055	83.792	29.184	-0.587	20.232	1610.041	-0.002664	-0.005865	-0.002043
0.3680	938.599	43.992	93.797	33.660	-0.585	20.235	1786.852	-0.003079	-0.006566	-0.002356
0.3690	1020.699	49.394	102.872	38.053	-0.593	20.234	1943.150	-0.003458	-0.007201	-0.002664
0.3700	1094.143	54.782	110.779	41.745	-0.591	20.234	2082.968	-0.003835	-0.007755	-0.002922
0.3710	1162.553	59.497	118.380	45.534	-0.595	20.233	2213.202	-0.004165	-0.008287	-0.003187
0.3720	1228.197	63.565	125.439	48.943	-0.589	20.232	2338.171	-0.004450	-0.008781	-0.003426
0.3730	1292.669	68.140	132.540	52.311	-0.585	20.230	2460.909	-0.004770	-0.009278	-0.003662
0.3740	1354.751	72.687	139.419	55.580	-0.583	20.228	2579.098	-0.005088	-0.009759	-0.003891
0.3750	1412.535	76.729	145.824	58.766	-0.581	20.225	2689.104	-0.005371	-0.010208	-0.004114
0.3760	1462.414	80.054	151.647	61.670	-0.581	20.222	2784.061	-0.005604	-0.010615	-0.004317
0.3770	1500.977	83.240	156.081	63.916	-0.580	20.220	2857.475	-0.005827	-0.010926	-0.004474
0.3780	1525.985	84.951	158.986	65.305	-0.579	20.218	2905.083	-0.005947	-0.011129	-0.004571
0.3790	1538.293	85.976	160.917	66.345	-0.579	20.216	2928.514	-0.006018	-0.011264	-0.004644
0.3800	1540.863	86.762	161.611	66.767	-0.583	20.217	2933.407	-0.006073	-0.011313	-0.004674
0.3810	1537.812	87.070	162.112	67.062	-0.585	20.217	2927.599	-0.006095	-0.011348	-0.004694
0.3820	1531.380	86.200	161.905	66.908	-0.583	20.220	2915.354	-0.006034	-0.011333	-0.004684
0.3830	1522.137	86.200	161.558	66.726	-0.578	20.222	2897.758	-0.006034	-0.011309	-0.004671
0.3840	1506.748	85.835	160.751	66.388	-0.580	20.223	2868.462	-0.006008	-0.011253	-0.004647
0.3850	1476.000	83.914	158.555	65.334	-0.581	20.226	2809.925	-0.005874	-0.011099	-0.004573
0.3860	1419.614	80.293	153.774	62.765	-0.580	20.229	2702.579	-0.005621	-0.010764	-0.004394
0.3870	1334.628	75.538	145.742	58.736	-0.580	20.232	2540.789	-0.005288	-0.010202	-0.004112
0.3880	1229.925	69.055	135.320	53.293	-0.576	20.235	2341.461	-0.004834	-0.009472	-0.003730
0.3890	1121.690	62.374	124.550	48.101	-0.585	20.235	2135.410	-0.004366	-0.008718	-0.003367
0.3900	1022.894	56.114	114.601	42.950	-0.585	20.234	1947.327	-0.003928	-0.008022	-0.003007
0.3910	940.177	51.006	106.207	39.021	-0.586	20.232	1789.856	-0.003570	-0.007434	-0.002732
0.3920	872.579	45.942	98.773	35.430	-0.576	20.231	1661.167	-0.003216	-0.006914	-0.002480
0.3930	814.765	41.873	92.254	32.639	-0.572	20.229	1551.104	-0.002931	-0.006458	-0.002285
0.3940	759.115	38.589	85.974	29.733	-0.573	20.227	1445.160	-0.002701	-0.006018	-0.002081
0.3950	699.016	34.701	79.387	26.533	-0.577	20.225	1330.748	-0.002429	-0.005557	-0.001857
0.3960	631.764	30.211	71.953	23.053	-0.577	20.222	1202.717	-0.002115	-0.005037	-0.001614
0.3970	558.786	25.328	63.740	19.266	-0.577	20.220	1063.786	-0.001773	-0.004462	-0.001349
0.3980	485.523	20.402	55.248	15.462	-0.572	20.218	924.311	-0.001428	-0.003867	-0.001082
0.3990	418.000	15.266	47.272	12.262	-0.572	20.216	795.765	-0.001069	-0.003309	-0.000858
0.4000	361.027	11.254	40.295	9.230	-0.573	20.217	687.304	-0.000788	-0.002821	-0.000646
0.4010	317.114	8.588	34.917	7.099	-0.576	20.217	603.704	-0.000601	-0.002444	-0.000497
0.4020	286.201	5.640	30.693	5.120	-0.571	20.220	544.853	-0.000395	-0.002149	-0.000358
0.4030	266.634	4.154	27.748	4.025	-0.566	20.222	507.603	-0.000291	-0.001942	-0.000282
0.4040	255.889	3.675	25.856	3.294	-0.569	20.224	487.146	-0.000257	-0.001810	-0.000231
0.4050	251.380	2.834	24.940	2.718	-0.573	20.226	478.563	-0.000198	-0.001746	-0.000190
0.4060	251.230	2.187	24.440	2.480	-0.576	20.229	478.277	-0.000153	-0.001711	-0.000174
0.4070	253.589	2.567	24.066	2.394	-0.576	20.232	482.769	-0.000180	-0.001685	-0.000168
0.4080	257.737	2.526	24.010	2.339	-0.580	20.235	490.665	-0.000177	-0.001681	-0.000164
0.4090	264.169	2.371	24.649	2.620	-0.590	20.235	502.911	-0.000166	-0.001725	-0.000183
0.4100	276.267	3.465	25.524	2.859	-0.592	20.234	525.942	-0.000243	-0.001787	-0.000200
0.4110	302.492	4.882	27.719	3.787	-0.590	20.232	575.867	-0.000342	-0.001940	-0.000265
0.4120	351.139	7.128	32.041	5.456	-0.581	20.231	668.478	-0.000499	-0.002243	-0.000382
0.4130	424.372	12.082	39.670	8.741	-0.584	20.230	807.896	-0.000846	-0.002777	-0.000612
0.4140	515.745	17.920	49.663	13.006	-0.588	20.228	981.846	-0.001254	-0.003476	-0.000910
0.4150	614.692	23.673	60.544	17.861	-0.585	20.225	1170.216	-0.001657	-0.004238	-0.001250
0.4160	712.752	29.945	70.869	22.604	-0.581	20.222	1356.897	-0.002096	-0.004961	-0.001582
0.4170	804.771	35.909	80.792	27.262	-0.579	20.220	1532.078	-0.002514	-0.005655	-0.001908
0.4180	890.088	40.891	89.920	31.542	-0.578	20.219	1694.498	-0.002862	-0.006294	-0.002208
0.4190	970.925	46.672	98.772	35.864	-0.590	20.217	1848.392	-0.003267	-0.006914	-0.002510
0.4200	1050.561	52.593	107.123	39.906	-0.587	20.217	1999.998	-0.003682	-0.007499	-0.002793
0.4210	1131.068	57.404	115.768	44.073	-0.592	20.217	2153.263	-0.004018	-0.008104	-0.003085
0.4220	1212.176	62.779	124.259	48.101	-0.585	20.220	2307.673	-0.004395	-0.008698	-0.003367
0.4230	1291.481	68.659	132.695	52.465	-0.590	20.222	2458.649	-0.004806	-0.009289	-0.003673
0.4240	1363.858	73.037	140.601	56.521	-0.585	20.224	2596.436	-0.005113	-0.009842	-0.003956
0.4250	1424.152	77.093	147.424	59.987	-0.583	20.226	2711.220	-0.005396	-0.010320	-0.004199
0.4260	1468.321	80.909	152.661	62.528	-0.580	20.229	2795.305	-0.005664	-0.010686	-0.004377
0.4270	1496.108	82.719	155.858	64.043	-0.580	20.232	2848.206	-0.005790	-0.010910	-0.004483
0.4280	1510.190	83.983	157.929	64.913	-0.576	20.235	2875.013	-0.005879	-0.011055	-0.004544
0.4290	1515.059	85.541	159.180	65.447	-0.584	20.234	2884.283	-0.005988	-0.011143	-0.004581
0.4300	1514.518	85.218	159.723	65.713	-0.585	20.234	2883.253	-0.005965	-0.011181	-0.004600
0.4310	1511.317	85.093	159.974	65.882	-0.585	20.232	2877.159	-0.005957	-0.011198	-0.004612
0.4320	1506.147	85.052	159.765	65.699	-0.576	20.231	2867.317	-0.005954	-0.011184	-0.004599
0.4330	1498.347	84.939	159.444	65.628	-0.576	20.230	2852.468	-0.005946	-0.011161	-0.004594
0.4340	1485.002	84.055	158.846	65.417	-0.576	20.228	2827.063	-0.005884	-0.011119	-0.004579
0.4350	1458.402	83.325	157.095	64.477	-0.575	20.225	2776.423	-0.005833	-0.010997	-0.004513
0.4360	1408.853	80.546	152.940	62.371	-0.573	20.222	2682.095	-0.005638	-0.010706	-0.004366
0.4370	1332.749	75.591	145.839	58.863	-0.573	20.220	2537.212	-0.005291	-0.010209	-0.004120
0.4380	1235.666	69.655	136.140	54.232	-0.574	20.219	2352.390	-0.004876	-0.009530	-0.003796
0.4390	1130.692	63.945	125.940	49.208	-0.582	20.217	2152.548	-0.004476	-0.008816	-0.003445
0.4400	1029.987	57.167	115.934	44.003	-0.578	20.217	1960.831	-0.004002	-0.008115	-0.003080
0.4410	941.515	51.555	106.984	39.597	-0.577	20.218	1792.402	-0.003609	-0.007489	-0.002772
0.4420	867.590	46.685	98.979	35.627	-0.573	20.220	1651.669	-0.003268	-0.006929	-0.002494
0.4430	805.072	41.957	92.157	32.427	-0.570	20.222	1532.650	-0.002937	-0.006451	-0.002270
0.4440	746.987	37.914	85.584	29.353	-0.569	20.224	1422.071	-0.002654	-0.005991	-0.002055
0.4450	686.979	34.336	79.067	26.264	-0.571	20.226	1307.831	-0.002403	-0.005535	-0.001839
0.4460	621.891	30.294	71.715	22.952	-0.572	20.229	1183.920	-0.002121	-0.005020	-0.001607
0.4470	552.504	25.271	63.934	19.248	-0.572	20.232	1051.826	-0.001769	-0.004475	-0.001347
0.4480	482.998	20.542	55.763	15.503	-0.569	20.235	919.504	-0.001438	-0.003903	-0.001085
0.4490	418.256	16.501	48.106	12.107	-0.576	20.235	796.251	-0.001155	-0.003367	-0.000848
0.4500	362.726	12.193	41.199	9.259	-0.572	20.234	690.536	-0.000854	-0.002884	-0.000648
0.4510	318.903	9.050	35.683	7.015	-0.577	20.232	607.109	-0.000633	-0.002498	-0.000491
0.4520	287.073	6.637	31.304	5.177	-0.570	20.231	546.513	-0.000465	-0.002191	-0.000362
0.4530	265.988	4.981	28.457	3.858	-0.571	20.230	506.372	-0.000349	-0.001992	-0.000270
0.4540	253.454	3.466	26.275	2.973	-0.570	20.228	482.512	-0.000243	-0.001839	-0.000208
0.4550	247.518	3.298	25.038	2.620	-0.570	20.225	471.210	-0.000231	-0.001753	-0.000183
0.4560	246.045	2.694	24.217	2.451	-0.569	20.222	468.407	-0.000189	-0.001695	-0.000172
0.4570	247.849	1.655	24.036	2.507	-0.570	20.220	471.840	-0.000116	-0.001683	-0.000175
0.4580	252.372	1.964	23.856	2.409	-0.571	20.219	480.452	-0.000137	-0.001670	-0.000169
0.4590	261.329	2.636	24.051	2.761	-0.584	20.217	497.503	-0.000185	-0.001684	-0.000193
0.4600	281.677	3.465	25.317	3.520	-0.591	20.217	536.242	-0.000243	-0.001772	-0.000246
0.4610	323.727	6.145	29.513	5.050	-0.593	20.218	616.293	-0.000430	-0.002066	-0.000354
0.4620	391.941	10.314	36.711	7.954	-0.585	20.220	746.155	-0.000722	-0.002570	-0.000557
0.4630	482.502	15.156	46.522	12.050	-0.585	20.222	918.560	-0.001061	-0.003257	-0.000844
0.4640	584.274	21.610	57.403	16.906	-0.588	20.224	1112.309	-0.001513	-0.004018	-0.001183
0.4650	687.655	28.738	68.410	22.085	-0.587	20.227	1309.118	-0.002012	-0.004789	-0.001546
0.4660	786.978	34.589	79.180	26.856	-0.585	20.230	1498.203	-0.002421	-0.005543	-0.001880
0.4670	879.417	40.806	89.074	31.416	-0.580	20.233	1674.185	-0.002856	-0.006235	-0.002199
0.4680	964.658	46.770	98.162	35.485	-0.577	20.235	1836.462	-0.003274	-0.006871	-0.002484
0.4690	1044.249	52.257	107.110	39.725	-0.586	20.235	1987.982	-0.003658	-0.007498	-0.002781
0.4700	1120.082	57.238	115.543	43.906	-0.589	20.235	2132.349	-0.004007	-0.008088	-0.003073
0.4710	1193.466	62.515	123.755	47.863	-0.590	20.233	2272.053	-0.004376	-0.008663	-0.003350
0.4720	1263.874	67.398	131.009	51.412	-0.585	20.232	2406.092	-0.004718	-0.009171	-0.003599
0.4730	1330.570	71.285	138.153	54.976	-0.584	20.230	2533.064	-0.004990	-0.009671	-0.003848
0.4740	1391.706	75.831	144.881	58.206	-0.585	20.227	2649.450	-0.005308	-0.010142	-0.004074
0.4750	1445.718	79.830	151.094	61.180	-0.585	20.225	2752.275	-0.005588	-0.010577	-0.004283
0.4760	1490.037	82.342	155.929	63.581	-0.586	20.222	2836.647	-0.005764	-0.010915	-0.004451
0.4770	1522.753	85.568	159.735	65.432	-0.587	20.220	2898.932	-0.005990	-0.011181	-0.004580
0.4780	1543.598	87.351	162.181	66.640	-0.583	20.219	2938.614	-0.006115	-0.011353	-0.004665
0.4790	1553.817	87.842	164.014	67.580	-0.581	20.217	2958.069	-0.006149	-0.011481	-0.004731
0.4800	1556.011	88.446	164.836	68.141	-0.581	20.217	2962.246	-0.006191	-0.011539	-0.004770
0.4810	1552.840	88.965	165.156	68.338	-0.586	20.218	2956.209	-0.006228	-0.011561	-0.004784
0.4820	1545.852	88.348	164.823	68.240	-0.580	20.220	2942.905	-0.006184	-0.011538	-0.004777
0.4830	1534.596	88.110	164.364	67.890	-0.579	20.222	2921.476	-0.006168	-0.011505	-0.004752
0.4840	1513.240	87.394	163.350	67.426	-0.576	20.224	2880.821	-0.006118	-0.011434	-0.004720
0.4850	1470.920	84.209	159.862	65.812	-0.577	20.226	2800.255	-0.005895	-0.011190	-0.004607
0.4860	1400.828	80.434	153.511	62.583	-0.576	20.229	2666.817	-0.005630	-0.010746	-0.004381
0.4870	1305.999	75.158	144.061	57.925	-0.576	20.232	2486.286	-0.005261	-0.010084	-0.004055
0.4880	1200.018	68.648	133.346	52.382	-0.570	20.235	2284.527	-0.004805	-0.009334	-0.003667
0.4890	1098.351	61.983	123.244	47.610	-0.574	20.234	2090.979	-0.004339	-0.008627	-0.003333
0.4900	1010.420	56.665	114.281	43.163	-0.574	20.234	1923.580	-0.003967	-0.008000	-0.003021
0.4910	939.531	51.850	107.056	39.752	-0.578	20.232	1788.626	-0.003630	-0.007494	-0.002783
0.4920	881.010	47.303	100.705	36.679	-0.572	20.231	1677.217	-0.003311	-0.007049	-0.002568
0.4930	826.773	43.710	94.673	33.759	-0.572	20.230	1573.963	-0.003060	-0.006627	-0.002363
0.4940	768.057	40.244	88.128	30.729	-0.570	20.227	1462.183	-0.002817	-0.006169	-0.002151
0.4950	700.053	35.122	80.666	27.150	-0.573	20.225	1332.722	-0.002459	-0.005647	-0.001900
0.4960	623.619	30.506	72.022	23.276	-0.573	20.222	1187.210	-0.002135	-0.005042	-0.001629
0.4970	544.088	25.412	63.115	19.123	-0.576	20.220	1035.805	-0.001779	-0.004418	-0.001339
0.4980	469.052	19.406	54.554	14.998	-0.573	20.218	892.954	-0.001358	-0.003819	-0.001050
0.4990	404.550	15.057	47.065	11.658	-0.577	20.216	770.159	-0.001054	-0.003295	-0.000816
Test Cycles
Time (sec)	Axial stress (kPa)	Axial micro-strain #1	Axial micro-strain #2	Axial micro-strain #3	Confining pressure (kPa)	Temperature (�C)	Load (N)	Displacement #1 (mm)	Displacement #2 (mm)	Displacement #3 (mm)
0.0000	354.084	11.815	40.546	8.978	-0.577	20.217	674.086	-0.000827	-0.002838	-0.000628
0.0010	318.016	9.092	35.891	7.238	-0.578	20.217	605.421	-0.000636	-0.002512	-0.000507
0.0020	294.346	7.099	32.708	5.836	-0.574	20.220	560.360	-0.000497	-0.002290	-0.000409
0.0030	279.859	6.186	30.667	4.980	-0.569	20.222	532.780	-0.000433	-0.002147	-0.000349
0.0040	271.488	5.343	29.166	4.320	-0.572	20.224	516.844	-0.000374	-0.002042	-0.000302
0.0050	267.400	4.333	27.931	3.829	-0.572	20.227	509.062	-0.000303	-0.001955	-0.000268
0.0060	266.394	4.279	27.429	3.478	-0.576	20.230	507.145	-0.000300	-0.001920	-0.000243
0.0070	267.701	4.434	27.233	3.435	-0.573	20.233	509.634	-0.000310	-0.001906	-0.000240
0.0080	270.902	3.747	27.330	3.392	-0.578	20.235	515.728	-0.000262	-0.001913	-0.000237
0.0090	276.342	4.335	27.636	3.716	-0.583	20.234	526.085	-0.000303	-0.001935	-0.000260
0.0100	286.351	5.050	28.053	3.983	-0.588	20.234	545.139	-0.000354	-0.001964	-0.000279
0.0110	309.179	5.695	29.778	4.743	-0.589	20.232	588.598	-0.000399	-0.002084	-0.000332
0.0120	354.610	8.305	33.821	6.328	-0.582	20.232	675.087	-0.000581	-0.002367	-0.000443
0.0130	427.167	12.979	41.256	9.332	-0.578	20.230	813.217	-0.000909	-0.002888	-0.000653
0.0140	522.778	18.761	51.650	13.735	-0.579	20.228	995.235	-0.001313	-0.003615	-0.000961
0.0150	631.373	25.006	63.365	19.208	-0.581	20.226	1201.973	-0.001750	-0.004436	-0.001345
0.0160	743.771	32.668	75.302	24.791	-0.578	20.223	1415.949	-0.002287	-0.005271	-0.001735
0.0170	851.765	39.501	86.599	30.237	-0.574	20.220	1621.542	-0.002765	-0.006062	-0.002117
0.0180	949.149	45.449	97.008	35.021	-0.570	20.219	1806.936	-0.003181	-0.006791	-0.002451
0.0190	1033.579	51.989	106.430	39.555	-0.583	20.217	1967.669	-0.003639	-0.007450	-0.002769
0.0200	1105.700	57.027	114.254	43.429	-0.581	20.217	2104.969	-0.003992	-0.007998	-0.003040
0.0210	1169.541	60.831	121.269	46.993	-0.581	20.218	2226.505	-0.004258	-0.008489	-0.003290
0.0220	1228.768	64.984	127.453	50.023	-0.572	20.221	2339.258	-0.004549	-0.008922	-0.003502
0.0230	1287.303	69.066	133.777	53.026	-0.574	20.222	2450.695	-0.004835	-0.009364	-0.003712
0.0240	1346.440	72.799	140.363	56.071	-0.576	20.224	2563.276	-0.005096	-0.009825	-0.003925
0.0250	1405.337	76.883	146.742	59.313	-0.577	20.227	2675.400	-0.005382	-0.010272	-0.004152
0.0260	1460.401	81.290	152.981	62.470	-0.576	20.229	2780.228	-0.005690	-0.010709	-0.004373
0.0270	1507.109	83.843	158.152	65.137	-0.574	20.233	2869.148	-0.005869	-0.011071	-0.004560
0.0280	1541.253	86.369	162.015	66.821	-0.572	20.235	2934.151	-0.006046	-0.011341	-0.004677
0.0290	1561.196	88.558	164.780	68.378	-0.577	20.234	2972.116	-0.006199	-0.011535	-0.004786
0.0300	1568.259	89.203	166.046	68.855	-0.576	20.234	2985.563	-0.006244	-0.011623	-0.004820
0.0310	1566.171	89.329	166.616	69.486	-0.579	20.232	2981.586	-0.006253	-0.011663	-0.004864
0.0320	1558.160	89.259	166.270	69.192	-0.573	20.231	2966.337	-0.006248	-0.011639	-0.004843
0.0330	1545.191	88.698	165.865	68.940	-0.574	20.230	2941.647	-0.006209	-0.011611	-0.004826
0.0340	1522.438	87.535	164.600	68.212	-0.573	20.228	2898.331	-0.006127	-0.011522	-0.004775
0.0350	1480.343	85.319	161.333	66.543	-0.577	20.225	2818.193	-0.005972	-0.011293	-0.004658
0.0360	1412.986	81.474	155.024	63.539	-0.579	20.222	2689.962	-0.005703	-0.010852	-0.004448
0.0370	1322.816	75.719	146.283	59.216	-0.577	20.219	2518.301	-0.005300	-0.010240	-0.004145
0.0380	1221.479	69.473	136.043	54.009	-0.577	20.218	2325.382	-0.004863	-0.009523	-0.003781
0.0390	1122.036	63.932	126.330	49.252	-0.581	20.216	2136.068	-0.004475	-0.008843	-0.003448
0.0400	1032.572	58.024	117.146	44.593	-0.581	20.216	1965.752	-0.004062	-0.008200	-0.003121
0.0410	955.070	52.902	109.239	40.733	-0.578	20.217	1818.209	-0.003703	-0.007647	-0.002851
0.0420	885.985	48.424	101.886	36.987	-0.571	20.219	1686.687	-0.003390	-0.007132	-0.002589
0.0430	818.958	44.409	94.743	33.591	-0.568	20.221	1559.086	-0.003109	-0.006632	-0.002351
0.0440	749.722	39.021	87.086	30.042	-0.569	20.223	1427.279	-0.002732	-0.006096	-0.002103
0.0450	677.270	34.251	79.012	26.225	-0.575	20.226	1289.349	-0.002398	-0.005531	-0.001836
0.0460	603.902	29.832	70.618	22.381	-0.572	20.229	1149.673	-0.002088	-0.004943	-0.001567
0.0470	533.223	24.893	62.489	18.788	-0.573	20.232	1015.120	-0.001742	-0.004374	-0.001315
0.0480	468.511	19.952	54.804	15.210	-0.570	20.234	891.924	-0.001397	-0.003836	-0.001065
0.0490	412.410	15.885	48.134	12.432	-0.574	20.234	785.122	-0.001112	-0.003369	-0.000870
0.0500	366.137	12.642	42.437	9.820	-0.572	20.233	697.031	-0.000885	-0.002971	-0.000687
0.0510	330.114	9.879	38.074	8.122	-0.577	20.232	628.452	-0.000692	-0.002665	-0.000569
0.0520	303.063	7.816	34.293	6.453	-0.576	20.231	576.954	-0.000547	-0.002401	-0.000452
0.0530	283.346	6.764	31.347	5.360	-0.578	20.230	539.417	-0.000473	-0.002194	-0.000375
0.0540	269.219	5.473	28.984	4.377	-0.578	20.227	512.524	-0.000383	-0.002029	-0.000306
0.0550	259.766	4.125	27.152	3.575	-0.578	20.225	494.528	-0.000289	-0.001901	-0.000250
0.0560	254.686	3.773	26.262	3.168	-0.574	20.222	484.858	-0.000264	-0.001838	-0.000222
0.0570	253.619	3.421	25.582	2.972	-0.574	20.219	482.826	-0.000239	-0.001791	-0.000208
0.0580	255.934	2.678	25.623	3.000	-0.575	20.218	487.232	-0.000187	-0.001794	-0.000210
0.0590	261.449	3.239	25.858	3.449	-0.584	20.216	497.732	-0.000227	-0.001810	-0.000241
0.0600	272.285	4.068	26.331	3.604	-0.583	20.216	518.360	-0.000285	-0.001843	-0.000252
0.0610	296.931	5.358	28.166	4.517	-0.584	20.217	565.281	-0.000375	-0.001972	-0.000316
0.0620	345.007	8.179	32.710	5.976	-0.582	20.219	656.805	-0.000573	-0.002290	-0.000418
0.0630	420.510	12.711	40.742	9.469	-0.586	20.221	800.543	-0.000890	-0.002852	-0.000663
0.0640	518.285	18.015	51.247	14.001	-0.593	20.223	986.681	-0.001261	-0.003587	-0.000980
0.0650	627.782	24.738	62.865	19.291	-0.592	20.226	1195.135	-0.001732	-0.004401	-0.001350
0.0660	739.037	32.527	74.636	24.890	-0.590	20.229	1406.937	-0.002277	-0.005225	-0.001742
0.0670	843.890	38.757	85.933	29.956	-0.583	20.232	1606.550	-0.002713	-0.006015	-0.002097
0.0680	937.818	44.763	96.077	34.629	-0.581	20.234	1785.364	-0.003133	-0.006725	-0.002424
0.0690	1020.369	50.853	105.192	38.924	-0.587	20.234	1942.520	-0.003560	-0.007363	-0.002725
0.0700	1094.669	56.073	113.239	42.812	-0.589	20.234	2083.969	-0.003925	-0.007927	-0.002997
0.0710	1165.107	60.339	120.993	46.756	-0.588	20.232	2218.065	-0.004224	-0.008470	-0.003273
0.0720	1234.193	65.419	128.385	50.362	-0.580	20.231	2349.586	-0.004579	-0.008987	-0.003525
0.0730	1302.738	70.064	135.972	54.107	-0.576	20.229	2480.078	-0.004904	-0.009518	-0.003787
0.0740	1368.833	74.105	143.240	57.643	-0.574	20.227	2605.906	-0.005187	-0.010027	-0.004035
0.0750	1429.502	79.156	150.091	60.632	-0.570	20.224	2721.405	-0.005541	-0.010506	-0.004244
0.0760	1480.163	82.510	155.748	63.383	-0.568	20.222	2817.850	-0.005776	-0.010902	-0.004437
0.0770	1516.937	84.770	159.777	65.433	-0.571	20.220	2887.859	-0.005934	-0.011184	-0.004580
0.0780	1538.413	86.902	162.542	66.893	-0.574	20.218	2928.743	-0.006083	-0.011378	-0.004683
0.0790	1547.235	88.207	164.112	67.945	-0.583	20.216	2945.538	-0.006175	-0.011488	-0.004756
0.0800	1547.656	88.208	164.878	68.352	-0.581	20.216	2946.339	-0.006175	-0.011541	-0.004785
0.0810	1543.959	88.643	164.975	68.562	-0.581	20.217	2939.301	-0.006205	-0.011548	-0.004799
0.0820	1537.526	88.812	164.599	68.282	-0.573	20.220	2927.055	-0.006217	-0.011522	-0.004780
0.0830	1528.359	87.898	164.055	67.960	-0.576	20.221	2909.603	-0.006153	-0.011484	-0.004757
0.0840	1512.324	87.182	163.264	67.454	-0.573	20.223	2879.076	-0.006103	-0.011428	-0.004722
0.0850	1480.043	85.792	160.943	66.260	-0.575	20.226	2817.621	-0.006005	-0.011266	-0.004638
0.0860	1422.319	82.467	155.886	63.860	-0.569	20.229	2707.729	-0.005773	-0.010912	-0.004470
0.0870	1337.588	77.179	147.728	59.929	-0.568	20.232	2546.425	-0.005403	-0.010341	-0.004195
0.0880	1234.794	71.369	137.528	54.948	-0.562	20.234	2350.731	-0.004996	-0.009627	-0.003846
0.0890	1128.363	64.647	127.065	49.799	-0.570	20.234	2148.113	-0.004525	-0.008895	-0.003486
0.0900	1029.446	58.037	117.199	44.805	-0.576	20.233	1959.801	-0.004063	-0.008204	-0.003136
0.0910	944.791	52.426	108.542	40.594	-0.576	20.232	1798.639	-0.003670	-0.007598	-0.002842
0.0920	874.924	48.006	100.900	36.735	-0.568	20.231	1665.630	-0.003360	-0.007063	-0.002571
0.0930	815.171	43.430	94.243	33.689	-0.560	20.230	1551.876	-0.003040	-0.006597	-0.002358
0.0940	757.792	39.557	87.864	30.533	-0.563	20.227	1442.642	-0.002769	-0.006150	-0.002137
0.0950	696.251	36.104	80.999	27.250	-0.561	20.224	1325.483	-0.002527	-0.005670	-0.001907
0.0960	627.631	31.150	73.398	23.728	-0.568	20.221	1194.849	-0.002181	-0.005138	-0.001661
0.0970	554.022	25.818	65.130	19.939	-0.576	20.219	1054.716	-0.001807	-0.004559	-0.001396
0.0980	480.954	21.174	56.639	16.122	-0.578	20.218	915.613	-0.001482	-0.003965	-0.001129
0.0990	414.529	16.585	48.941	12.669	-0.583	20.216	789.156	-0.001161	-0.003426	-0.000887
0.1000	359.780	12.376	42.229	9.876	-0.580	20.216	684.929	-0.000866	-0.002956	-0.000691
0.1010	318.647	9.624	36.892	7.785	-0.581	20.217	606.623	-0.000674	-0.002582	-0.000545
0.1020	290.454	7.435	32.819	6.018	-0.572	20.220	552.950	-0.000520	-0.002297	-0.000421
0.1030	272.465	5.696	30.249	4.825	-0.573	20.221	518.703	-0.000399	-0.002117	-0.000338
0.1040	261.900	4.727	28.665	4.123	-0.572	20.224	498.590	-0.000331	-0.002007	-0.000289
0.1050	256.144	4.909	27.568	3.815	-0.575	20.226	487.633	-0.000344	-0.001930	-0.000267
0.1060	254.371	4.264	26.540	3.534	-0.576	20.230	484.257	-0.000299	-0.001858	-0.000247
0.1070	255.438	3.576	26.192	3.351	-0.577	20.233	486.288	-0.000250	-0.001833	-0.000235
0.1080	259.255	4.307	26.246	3.254	-0.577	20.235	493.555	-0.000301	-0.001837	-0.000228
0.1090	265.928	4.306	26.900	3.478	-0.583	20.235	506.258	-0.000301	-0.001883	-0.000243
0.1100	279.378	4.418	27.539	3.886	-0.584	20.234	531.864	-0.000309	-0.001928	-0.000272
0.1110	308.924	6.580	30.124	5.092	-0.587	20.232	588.112	-0.000461	-0.002109	-0.000356
0.1120	361.899	9.161	35.209	7.000	-0.580	20.232	688.963	-0.000641	-0.002465	-0.000490
0.1130	439.686	13.666	43.311	10.550	-0.584	20.230	837.049	-0.000957	-0.003032	-0.000739
0.1140	535.402	20.134	53.622	14.913	-0.584	20.227	1019.268	-0.001409	-0.003754	-0.001044
0.1150	640.075	26.534	64.921	20.175	-0.580	20.225	1218.538	-0.001857	-0.004544	-0.001412
0.1160	747.528	33.172	76.509	25.550	-0.578	20.222	1423.101	-0.002322	-0.005356	-0.001788
0.1170	851.900	40.089	87.640	30.757	-0.578	20.220	1621.799	-0.002806	-0.006135	-0.002153
0.1180	948.668	46.768	97.827	35.485	-0.577	20.218	1806.021	-0.003274	-0.006848	-0.002484
0.1190	1034.916	52.130	107.123	39.905	-0.584	20.216	1970.215	-0.003649	-0.007499	-0.002793
0.1200	1110.629	57.492	115.309	43.947	-0.582	20.216	2114.353	-0.004024	-0.008072	-0.003076
0.1210	1178.573	62.656	122.688	47.708	-0.585	20.217	2243.700	-0.004386	-0.008588	-0.003340
0.1220	1241.226	66.486	129.400	51.006	-0.584	20.220	2362.976	-0.004654	-0.009058	-0.003570
0.1230	1301.190	70.668	136.029	54.149	-0.589	20.221	2477.131	-0.004947	-0.009522	-0.003790
0.1240	1358.553	74.863	142.379	57.222	-0.588	20.223	2586.336	-0.005240	-0.009967	-0.004006
0.1250	1412.986	78.174	148.411	60.184	-0.588	20.225	2689.962	-0.005472	-0.010389	-0.004213
0.1260	1461.453	80.952	153.733	62.837	-0.581	20.228	2782.230	-0.005667	-0.010761	-0.004399
0.1270	1500.376	84.221	158.124	65.209	-0.584	20.232	2856.331	-0.005895	-0.011069	-0.004565
0.1280	1526.496	86.341	161.139	66.613	-0.577	20.234	2906.055	-0.006044	-0.011280	-0.004663
0.1290	1539.375	87.225	163.279	67.679	-0.584	20.234	2930.574	-0.006106	-0.011430	-0.004737
0.1300	1541.915	88.122	164.001	68.042	-0.582	20.233	2935.410	-0.006169	-0.011480	-0.004763
0.1310	1538.203	88.656	164.349	68.294	-0.587	20.232	2928.343	-0.006206	-0.011504	-0.004781
0.1320	1530.568	87.575	164.000	68.057	-0.577	20.231	2913.809	-0.006130	-0.011480	-0.004764
0.1330	1518.576	87.547	163.445	67.720	-0.570	20.229	2890.978	-0.006128	-0.011441	-0.004740
0.1340	1495.838	86.551	162.167	66.906	-0.576	20.227	2847.691	-0.006059	-0.011352	-0.004683
0.1350	1451.338	83.478	158.611	65.166	-0.576	20.224	2762.976	-0.005843	-0.011103	-0.004562
0.1360	1378.661	79.339	152.093	61.965	-0.573	20.221	2624.617	-0.005554	-0.010647	-0.004338
0.1370	1281.532	73.866	142.588	57.461	-0.570	20.219	2439.709	-0.005171	-0.009981	-0.004022
0.1380	1174.170	67.048	131.707	52.016	-0.570	20.218	2235.317	-0.004693	-0.009219	-0.003641
0.1390	1072.036	60.452	121.632	47.007	-0.578	20.216	2040.882	-0.004232	-0.008514	-0.003290
0.1400	984.135	55.105	112.695	42.544	-0.581	20.216	1873.541	-0.003857	-0.007889	-0.002978
0.1410	913.096	50.277	105.539	38.854	-0.581	20.217	1738.300	-0.003519	-0.007388	-0.002720
0.1420	854.110	46.039	99.008	35.711	-0.571	20.220	1626.005	-0.003223	-0.006931	-0.002500
0.1430	799.136	43.219	92.936	32.819	-0.565	20.221	1521.349	-0.003025	-0.006506	-0.002297
0.1440	740.540	38.926	86.460	29.844	-0.566	20.223	1409.798	-0.002725	-0.006052	-0.002089
0.1450	674.265	34.001	79.095	26.461	-0.570	20.226	1283.627	-0.002380	-0.005537	-0.001852
0.1460	601.632	29.777	70.993	22.729	-0.576	20.229	1145.353	-0.002084	-0.004970	-0.001591
0.1470	527.677	24.472	62.613	18.729	-0.576	20.232	1004.562	-0.001713	-0.004383	-0.001311
0.1480	459.764	19.981	54.526	14.928	-0.570	20.234	875.273	-0.001399	-0.003817	-0.001045
0.1490	403.002	16.797	47.842	12.151	-0.569	20.234	767.212	-0.001176	-0.003349	-0.000851
0.1500	359.074	13.008	42.312	9.892	-0.573	20.233	683.584	-0.000911	-0.002962	-0.000692
0.1510	326.748	10.287	38.240	8.417	-0.578	20.232	622.044	-0.000720	-0.002677	-0.000589
0.1520	303.093	8.785	34.864	6.846	-0.571	20.231	577.011	-0.000615	-0.002441	-0.000479
0.1530	285.329	7.213	32.072	5.751	-0.564	20.229	543.194	-0.000505	-0.002245	-0.000403
0.1540	271.413	5.892	29.794	4.784	-0.561	20.227	516.701	-0.000412	-0.002086	-0.000335
0.1550	261.359	5.246	27.890	4.165	-0.565	20.225	497.561	-0.000367	-0.001952	-0.000292
0.1560	255.528	4.475	26.805	3.687	-0.566	20.222	486.460	-0.000313	-0.001876	-0.000258
0.1570	254.085	3.564	26.151	3.392	-0.566	20.220	483.713	-0.000249	-0.001831	-0.000237
0.1580	256.370	3.424	25.999	3.225	-0.566	20.218	488.062	-0.000240	-0.001820	-0.000226
0.1590	262.321	4.041	26.346	3.590	-0.573	20.217	499.392	-0.000283	-0.001844	-0.000251
0.1600	274.464	4.041	27.069	3.829	-0.579	20.217	522.509	-0.000283	-0.001895	-0.000268
0.1610	301.921	5.964	29.458	4.995	-0.584	20.218	574.780	-0.000417	-0.002062	-0.000350
0.1620	353.348	9.107	34.434	6.790	-0.583	20.220	672.684	-0.000637	-0.002410	-0.000475
0.1630	432.052	13.246	42.660	10.326	-0.583	20.222	822.515	-0.000927	-0.002986	-0.000723
0.1640	532.006	19.238	53.472	15.054	-0.587	20.224	1012.802	-0.001347	-0.003743	-0.001054
0.1650	642.374	26.941	65.213	20.429	-0.589	20.226	1222.916	-0.001886	-0.004565	-0.001430
0.1660	754.141	33.494	77.080	26.057	-0.592	20.229	1435.690	-0.002345	-0.005396	-0.001824
0.1670	859.475	40.089	88.432	31.403	-0.588	20.232	1636.219	-0.002806	-0.006190	-0.002198
0.1680	953.613	46.727	98.604	35.822	-0.584	20.235	1815.434	-0.003271	-0.006902	-0.002508
0.1690	1035.142	52.101	107.596	40.088	-0.586	20.234	1970.644	-0.003647	-0.007532	-0.002806
0.1700	1105.670	56.802	115.169	43.736	-0.588	20.234	2104.912	-0.003976	-0.008062	-0.003062
0.1710	1169.375	61.364	122.285	47.286	-0.591	20.232	2226.191	-0.004295	-0.008560	-0.003310
0.1720	1229.805	65.462	128.748	50.388	-0.587	20.232	2341.232	-0.004582	-0.009012	-0.003527
0.1730	1289.543	69.349	135.169	53.462	-0.585	20.230	2454.958	-0.004854	-0.009462	-0.003742
0.1740	1348.785	73.488	141.672	56.733	-0.583	20.227	2567.739	-0.005144	-0.009917	-0.003971
0.1750	1406.133	78.034	148.021	59.961	-0.583	20.225	2676.916	-0.005462	-0.010361	-0.004197
0.1760	1458.612	81.388	153.941	62.837	-0.581	20.222	2776.823	-0.005697	-0.010776	-0.004399
0.1770	1502.345	84.390	158.957	65.377	-0.581	20.220	2860.079	-0.005907	-0.011127	-0.004576
0.1780	1533.890	87.239	162.543	67.089	-0.579	20.218	2920.132	-0.006107	-0.011378	-0.004696
0.1790	1552.420	89.049	165.156	68.435	-0.585	20.217	2955.408	-0.006233	-0.011561	-0.004790
0.1800	1559.453	89.387	166.198	68.940	-0.586	20.217	2968.798	-0.006257	-0.011634	-0.004826
0.1810	1558.987	89.962	166.615	69.500	-0.590	20.218	2967.911	-0.006297	-0.011663	-0.004865
0.1820	1553.487	90.074	166.433	69.206	-0.583	20.220	2957.439	-0.006305	-0.011650	-0.004844
0.1830	1544.064	89.387	166.141	69.108	-0.586	20.222	2939.501	-0.006257	-0.011630	-0.004838
0.1840	1527.457	88.476	165.279	68.533	-0.586	20.224	2907.887	-0.006193	-0.011570	-0.004797
0.1850	1493.959	86.583	162.877	67.410	-0.588	20.226	2844.114	-0.006061	-0.011401	-0.004719
0.1860	1433.470	82.709	157.610	64.997	-0.581	20.229	2728.958	-0.005790	-0.011033	-0.004550
0.1870	1343.645	77.207	149.133	60.913	-0.575	20.233	2557.955	-0.005404	-0.010439	-0.004264
0.1880	1233.727	71.383	138.098	55.271	-0.564	20.235	2348.700	-0.004997	-0.009667	-0.003869
0.1890	1120.578	64.128	126.731	49.772	-0.566	20.235	2133.293	-0.004489	-0.008871	-0.003484
0.1900	1017.964	57.336	116.239	44.272	-0.565	20.234	1937.943	-0.004014	-0.008137	-0.003099
0.1910	933.099	52.255	107.708	40.131	-0.570	20.232	1776.381	-0.003658	-0.007540	-0.002809
0.1920	865.261	47.681	100.232	36.370	-0.564	20.231	1647.234	-0.003338	-0.007016	-0.002546
0.1930	807.717	42.994	93.910	33.591	-0.559	20.230	1537.685	-0.003010	-0.006574	-0.002351
0.1940	752.533	39.822	87.810	30.729	-0.558	20.227	1432.629	-0.002788	-0.006147	-0.002151
0.1950	693.606	35.879	81.264	27.487	-0.562	20.225	1320.448	-0.002512	-0.005688	-0.001924
0.1960	628.819	30.996	73.871	24.176	-0.565	20.222	1197.109	-0.002170	-0.005171	-0.001692
0.1970	559.643	26.619	65.811	20.512	-0.567	20.220	1065.416	-0.001863	-0.004607	-0.001436
0.1980	490.663	22.030	58.086	17.059	-0.566	20.218	934.095	-0.001542	-0.004066	-0.001194
0.1990	426.717	17.610	50.915	13.916	-0.570	20.217	812.359	-0.001233	-0.003564	-0.000974
0.2000	372.073	13.723	44.314	10.899	-0.569	20.217	708.332	-0.000961	-0.003102	-0.000763
0.2010	328.927	10.901	38.825	8.655	-0.569	20.218	626.192	-0.000763	-0.002718	-0.000606
0.2020	297.247	8.137	34.363	6.607	-0.564	20.220	565.882	-0.000570	-0.002405	-0.000462
0.2030	275.756	6.481	31.473	5.276	-0.566	20.222	524.969	-0.000454	-0.002203	-0.000369
0.2040	262.110	5.513	29.431	4.462	-0.573	20.225	498.991	-0.000386	-0.002060	-0.000312
0.2050	254.506	4.544	28.014	3.787	-0.576	20.227	484.514	-0.000318	-0.001961	-0.000265
0.2060	251.350	3.970	27.055	3.519	-0.573	20.230	478.506	-0.000278	-0.001894	-0.000246
0.2070	251.500	3.746	26.512	3.308	-0.569	20.233	478.792	-0.000262	-0.001856	-0.000232
0.2080	254.386	4.181	26.430	3.153	-0.569	20.235	484.285	-0.000293	-0.001850	-0.000221
0.2090	260.067	4.377	26.804	3.561	-0.580	20.234	495.100	-0.000306	-0.001876	-0.000249
0.2100	271.714	4.292	27.304	3.744	-0.585	20.234	517.273	-0.000300	-0.001911	-0.000262
0.2110	299.231	6.720	29.596	4.797	-0.582	20.232	569.658	-0.000470	-0.002072	-0.000336
0.2120	352.386	9.638	34.571	6.522	-0.575	20.231	670.853	-0.000675	-0.002420	-0.000457
0.2130	434.156	13.919	43.326	10.326	-0.576	20.229	826.521	-0.000974	-0.003033	-0.000723
0.2140	537.236	20.415	54.359	15.195	-0.583	20.227	1022.758	-0.001429	-0.003805	-0.001064
0.2150	649.543	27.363	66.281	20.823	-0.580	20.225	1236.563	-0.001915	-0.004640	-0.001458
0.2160	760.392	33.943	78.107	26.309	-0.578	20.222	1447.592	-0.002376	-0.005467	-0.001842
0.2170	861.549	40.849	88.904	31.388	-0.576	20.220	1640.167	-0.002859	-0.006223	-0.002197
0.2180	948.323	47.008	98.312	35.639	-0.575	20.219	1805.363	-0.003291	-0.006882	-0.002495
0.2190	1021.676	51.653	106.288	39.554	-0.587	20.217	1945.009	-0.003616	-0.007440	-0.002769
0.2200	1086.374	56.422	113.335	42.840	-0.587	20.217	2068.176	-0.003950	-0.007933	-0.002999
0.2210	1148.937	60.844	120.103	46.194	-0.587	20.218	2187.281	-0.004259	-0.008407	-0.003234
0.2220	1213.409	64.926	126.982	49.434	-0.577	20.220	2310.019	-0.004545	-0.008889	-0.003460
0.2230	1281.442	69.054	134.304	53.223	-0.576	20.222	2439.537	-0.004834	-0.009401	-0.003726
0.2240	1350.813	74.147	141.806	56.941	-0.575	20.224	2571.602	-0.005190	-0.009926	-0.003986
0.2250	1416.984	78.470	148.896	60.408	-0.571	20.227	2697.573	-0.005493	-0.010423	-0.004229
0.2260	1473.520	81.910	155.302	63.553	-0.565	20.229	2805.204	-0.005734	-0.010871	-0.004449
0.2270	1514.879	84.898	159.945	65.784	-0.566	20.232	2883.940	-0.005943	-0.011196	-0.004605
0.2280	1539.225	87.228	163.085	67.468	-0.568	20.234	2930.288	-0.006106	-0.011416	-0.004723
0.2290	1549.173	87.774	164.752	68.253	-0.576	20.234	2949.228	-0.006144	-0.011533	-0.004778
0.2300	1549.654	88.320	165.308	68.492	-0.574	20.234	2950.144	-0.006182	-0.011572	-0.004794
0.2310	1545.386	88.755	165.447	68.757	-0.575	20.232	2942.019	-0.006213	-0.011581	-0.004813
0.2320	1538.128	87.996	165.225	68.520	-0.567	20.231	2928.200	-0.006160	-0.011566	-0.004796
0.2330	1527.668	87.744	164.850	68.507	-0.570	20.229	2908.287	-0.006142	-0.011540	-0.004795
0.2340	1508.972	87.562	163.820	68.003	-0.568	20.227	2872.696	-0.006129	-0.011467	-0.004760
0.2350	1472.724	85.541	160.972	66.627	-0.572	20.224	2803.688	-0.005988	-0.011268	-0.004664
0.2360	1411.213	81.457	155.428	63.876	-0.571	20.222	2686.586	-0.005702	-0.010880	-0.004471
0.2370	1324.634	76.673	147.077	59.665	-0.572	20.220	2521.763	-0.005367	-0.010295	-0.004177
0.2380	1222.982	70.135	137.114	54.628	-0.569	20.218	2328.243	-0.004909	-0.009598	-0.003824
0.2390	1119.631	63.653	126.899	49.687	-0.577	20.216	2131.491	-0.004456	-0.008883	-0.003478
0.2400	1024.532	58.208	117.533	44.847	-0.574	20.216	1950.445	-0.004075	-0.008227	-0.003139
0.2410	943.153	53.212	109.279	40.776	-0.573	20.217	1795.521	-0.003725	-0.007650	-0.002854
0.2420	874.518	47.809	101.955	37.087	-0.565	20.220	1664.858	-0.003347	-0.007137	-0.002596
0.2430	813.352	43.906	95.216	33.930	-0.561	20.222	1548.414	-0.003073	-0.006665	-0.002375
0.2440	752.367	40.189	88.406	30.718	-0.560	20.224	1432.314	-0.002813	-0.006188	-0.002150
0.2450	686.347	35.431	81.056	27.181	-0.563	20.226	1306.629	-0.002480	-0.005674	-0.001903
0.2460	614.091	30.787	72.941	23.489	-0.566	20.229	1169.071	-0.002155	-0.005106	-0.001644
0.2470	538.904	26.057	64.312	19.406	-0.569	20.232	1025.934	-0.001824	-0.004502	-0.001358
0.2480	467.429	20.444	56.056	15.519	-0.570	20.235	889.864	-0.001431	-0.003924	-0.001086
0.2490	406.278	16.516	48.969	12.390	-0.576	20.234	773.449	-0.001156	-0.003428	-0.000867
0.2500	358.954	13.654	43.091	9.863	-0.575	20.233	683.355	-0.000956	-0.003016	-0.000690
0.2510	325.365	10.482	38.449	8.234	-0.575	20.232	619.411	-0.000734	-0.002691	-0.000576
0.2520	302.747	8.432	34.990	6.775	-0.565	20.231	576.353	-0.000590	-0.002449	-0.000474
0.2530	287.839	7.519	32.709	5.864	-0.562	20.230	547.972	-0.000526	-0.002290	-0.000410
0.2540	277.665	6.412	31.167	5.050	-0.560	20.227	528.603	-0.000449	-0.002182	-0.000354
0.2550	270.752	5.246	29.750	4.461	-0.566	20.225	515.442	-0.000367	-0.002082	-0.000312
0.2560	266.799	5.162	28.694	4.068	-0.570	20.222	507.917	-0.000361	-0.002009	-0.000285
0.2570	265.853	5.091	28.070	3.997	-0.570	20.220	506.115	-0.000356	-0.001965	-0.000280
0.2580	267.806	4.096	27.904	3.898	-0.567	20.218	509.834	-0.000287	-0.001953	-0.000273
0.2590	272.901	4.699	28.084	4.137	-0.570	20.217	519.533	-0.000329	-0.001966	-0.000290
0.2600	282.940	5.121	28.625	4.447	-0.570	20.217	538.645	-0.000358	-0.002004	-0.000311
0.2610	306.835	6.314	30.389	5.443	-0.571	20.218	584.135	-0.000442	-0.002127	-0.000381
0.2620	354.415	9.149	34.948	6.917	-0.568	20.221	674.715	-0.000640	-0.002446	-0.000484
0.2630	430.218	14.286	43.036	10.284	-0.570	20.222	819.025	-0.001000	-0.003013	-0.000720
0.2640	529.120	19.702	53.652	14.817	-0.571	20.225	1007.309	-0.001379	-0.003756	-0.001037
0.2650	639.850	26.144	65.365	20.416	-0.575	20.227	1218.109	-0.001830	-0.004576	-0.001429
0.2660	752.908	33.805	77.260	26.127	-0.579	20.230	1433.344	-0.002366	-0.005408	-0.001829
0.2670	861.083	40.470	88.906	31.374	-0.579	20.233	1639.280	-0.002833	-0.006223	-0.002196
0.2680	959.879	46.980	99.510	36.383	-0.577	20.236	1827.364	-0.003289	-0.006966	-0.002547
0.2690	1047.225	53.155	109.168	40.914	-0.578	20.235	1993.647	-0.003721	-0.007642	-0.002864
0.2700	1123.374	58.347	117.505	45.124	-0.577	20.235	2138.615	-0.004084	-0.008225	-0.003159
0.2710	1190.941	63.104	124.996	48.648	-0.575	20.233	2267.246	-0.004417	-0.008750	-0.003405
0.2720	1253.129	67.243	131.623	51.792	-0.573	20.232	2385.635	-0.004707	-0.009214	-0.003625
0.2730	1312.686	71.861	138.237	54.852	-0.569	20.230	2499.018	-0.005030	-0.009677	-0.003840
0.2740	1369.869	75.368	144.572	58.023	-0.570	20.227	2607.880	-0.005276	-0.010120	-0.004062
0.2750	1423.040	79.046	150.604	60.955	-0.566	20.225	2709.103	-0.005533	-0.010542	-0.004267
0.2760	1468.862	82.820	155.775	63.538	-0.571	20.222	2796.335	-0.005797	-0.010904	-0.004448
0.2770	1503.908	85.472	159.735	65.335	-0.570	20.220	2863.054	-0.005983	-0.011181	-0.004573
0.2780	1526.360	86.314	162.528	66.864	-0.571	20.218	2905.798	-0.006042	-0.011377	-0.004681
0.2790	1537.121	87.816	164.183	68.057	-0.574	20.217	2926.283	-0.006147	-0.011493	-0.004764
0.2800	1539.029	88.504	164.780	68.350	-0.576	20.217	2929.916	-0.006195	-0.011535	-0.004785
0.2810	1535.828	88.545	164.933	68.504	-0.580	20.218	2923.822	-0.006198	-0.011545	-0.004795
0.2820	1529.606	88.448	164.696	68.070	-0.574	20.220	2911.978	-0.006191	-0.011529	-0.004765
0.2830	1520.905	88.208	164.419	67.887	-0.572	20.222	2895.412	-0.006175	-0.011509	-0.004752
0.2840	1506.838	86.932	163.765	67.496	-0.568	20.224	2868.633	-0.006085	-0.011464	-0.004725
0.2850	1478.660	85.430	161.750	66.486	-0.575	20.227	2814.989	-0.005980	-0.011322	-0.004654
0.2860	1424.753	82.989	156.929	64.325	-0.576	20.230	2712.364	-0.005809	-0.010985	-0.004503
0.2870	1339.813	77.867	148.966	60.339	-0.578	20.233	2550.659	-0.005451	-0.010428	-0.004224
0.2880	1229.880	70.653	137.961	54.837	-0.573	20.235	2341.375	-0.004946	-0.009657	-0.003839
0.2890	1111.396	63.847	126.329	49.139	-0.577	20.235	2115.812	-0.004469	-0.008843	-0.003440
0.2900	1000.005	56.887	115.003	43.498	-0.577	20.234	1903.753	-0.003982	-0.008050	-0.003045
0.2910	906.093	50.333	105.442	38.783	-0.574	20.232	1724.968	-0.003523	-0.007381	-0.002715
0.2920	830.725	45.365	97.174	34.868	-0.561	20.232	1581.488	-0.003176	-0.006802	-0.002441
0.2930	768.913	41.352	90.281	31.641	-0.557	20.229	1463.814	-0.002895	-0.006320	-0.002215
0.2940	713.308	36.693	84.014	28.736	-0.562	20.227	1357.956	-0.002569	-0.005881	-0.002012
0.2950	658.199	33.270	77.705	25.971	-0.561	20.224	1253.042	-0.002329	-0.005439	-0.001818
0.2960	600.896	29.748	71.216	22.785	-0.561	20.222	1143.951	-0.002082	-0.004985	-0.001595
0.2970	540.692	25.272	64.337	19.755	-0.557	20.219	1029.339	-0.001769	-0.004504	-0.001383
0.2980	479.316	21.132	57.278	16.232	-0.561	20.218	912.495	-0.001479	-0.004009	-0.001136
0.2990	419.939	17.456	50.427	13.413	-0.565	20.216	799.456	-0.001222	-0.003530	-0.000939
0.3000	366.272	13.191	43.799	10.536	-0.570	20.217	697.289	-0.000923	-0.003066	-0.000737
0.3010	321.728	9.991	38.269	8.235	-0.569	20.218	612.488	-0.000699	-0.002679	-0.000576
0.3020	287.974	8.152	33.627	6.341	-0.562	20.221	548.229	-0.000571	-0.002354	-0.000444
0.3030	265.221	6.146	30.556	4.996	-0.562	20.223	504.913	-0.000430	-0.002139	-0.000350
0.3040	252.177	4.995	28.401	4.125	-0.561	20.225	480.080	-0.000350	-0.001988	-0.000289
0.3050	246.601	4.743	26.969	3.618	-0.571	20.228	469.465	-0.000332	-0.001888	-0.000253
0.3060	245.940	4.223	26.330	3.294	-0.574	20.230	468.206	-0.000296	-0.001843	-0.000231
0.3070	248.074	3.632	26.080	3.222	-0.573	20.233	472.269	-0.000254	-0.001826	-0.000226
0.3080	252.162	3.998	26.330	3.210	-0.569	20.235	480.051	-0.000280	-0.001843	-0.000225
0.3090	258.383	4.308	26.874	3.575	-0.579	20.235	491.896	-0.000302	-0.001881	-0.000250
0.3100	269.715	4.252	27.527	3.942	-0.584	20.234	513.468	-0.000298	-0.001927	-0.000276
0.3110	294.286	6.315	29.543	4.714	-0.585	20.232	560.246	-0.000442	-0.002068	-0.000330
0.3120	340.874	8.882	33.808	6.300	-0.581	20.232	648.937	-0.000622	-0.002367	-0.000441
0.3130	413.642	12.727	41.520	9.429	-0.582	20.230	787.468	-0.000891	-0.002906	-0.000660
0.3140	508.952	19.168	51.927	13.961	-0.586	20.228	968.914	-0.001342	-0.003635	-0.000977
0.3150	617.983	25.622	63.697	19.363	-0.585	20.225	1176.481	-0.001794	-0.004459	-0.001355
0.3160	731.868	32.484	75.731	25.059	-0.583	20.222	1393.290	-0.002274	-0.005301	-0.001754
0.3170	841.952	39.655	87.432	30.432	-0.581	20.220	1602.859	-0.002776	-0.006120	-0.002130
0.3180	941.905	46.784	98.034	35.287	-0.584	20.218	1793.146	-0.003275	-0.006862	-0.002470
0.3190	1028.785	52.328	107.457	39.947	-0.594	20.216	1958.542	-0.003663	-0.007522	-0.002796
0.3200	1102.559	57.211	115.211	44.031	-0.596	20.217	2098.989	-0.004005	-0.008065	-0.003082
0.3210	1166.911	62.052	122.104	47.694	-0.596	20.218	2221.498	-0.004344	-0.008547	-0.003339
0.3220	1225.537	65.714	128.302	50.541	-0.584	20.220	2333.107	-0.004600	-0.008981	-0.003538
0.3230	1282.810	69.546	134.500	53.644	-0.581	20.222	2442.141	-0.004868	-0.009415	-0.003755
0.3240	1340.248	74.164	140.961	56.604	-0.579	20.224	2551.489	-0.005191	-0.009867	-0.003962
0.3250	1397.567	77.376	147.200	59.691	-0.578	20.227	2660.608	-0.005416	-0.010304	-0.004178
0.3260	1451.774	80.953	153.344	62.650	-0.574	20.229	2763.805	-0.005667	-0.010734	-0.004386
0.3270	1498.558	84.728	158.723	65.248	-0.572	20.232	2852.869	-0.005931	-0.011111	-0.004567
0.3280	1533.078	86.553	162.891	67.256	-0.570	20.234	2918.587	-0.006059	-0.011402	-0.004708
0.3290	1553.111	88.377	165.629	68.829	-0.573	20.234	2956.724	-0.006186	-0.011594	-0.004818
0.3300	1560.039	89.765	166.796	69.361	-0.573	20.234	2969.913	-0.006284	-0.011676	-0.004855
0.3310	1557.965	89.555	167.159	69.361	-0.573	20.232	2965.965	-0.006269	-0.011701	-0.004855
0.3320	1550.240	89.232	166.810	68.870	-0.569	20.232	2951.260	-0.006246	-0.011677	-0.004821
0.3330	1537.602	89.344	166.338	68.519	-0.572	20.230	2927.198	-0.006254	-0.011644	-0.004796
0.3340	1515.254	88.193	165.031	68.223	-0.574	20.227	2884.655	-0.006173	-0.011552	-0.004776
0.3350	1474.663	85.892	161.848	66.820	-0.574	20.225	2807.379	-0.006012	-0.011329	-0.004677
0.3360	1409.950	82.439	156.095	64.084	-0.568	20.222	2684.183	-0.005771	-0.010927	-0.004486
0.3370	1322.109	76.672	147.647	59.789	-0.564	20.220	2516.956	-0.005367	-0.010335	-0.004185
0.3380	1220.126	69.964	137.390	54.640	-0.564	20.218	2322.807	-0.004897	-0.009617	-0.003825
0.3390	1115.333	64.422	127.037	49.629	-0.567	20.217	2123.308	-0.004510	-0.008893	-0.003474
0.3400	1017.063	58.486	117.101	44.507	-0.575	20.217	1936.226	-0.004094	-0.008197	-0.003115
0.3410	931.085	52.353	108.403	40.059	-0.574	20.218	1772.547	-0.003665	-0.007588	-0.002804
0.3420	858.317	47.652	100.385	36.173	-0.568	20.220	1634.016	-0.003336	-0.007027	-0.002532
0.3430	795.363	43.373	93.436	33.003	-0.563	20.222	1514.168	-0.003036	-0.006541	-0.002310
0.3440	737.008	38.854	87.140	30.057	-0.562	20.224	1403.074	-0.002720	-0.006100	-0.002104
0.3450	678.277	35.220	80.567	27.054	-0.561	20.227	1291.265	-0.002465	-0.005640	-0.001894
0.3460	616.255	31.291	73.729	23.839	-0.558	20.230	1173.191	-0.002190	-0.005161	-0.001669
0.3470	550.926	26.297	65.989	20.458	-0.561	20.233	1048.822	-0.001841	-0.004619	-0.001432
0.3480	484.816	22.340	58.333	16.893	-0.560	20.235	922.966	-0.001564	-0.004083	-0.001182
0.3490	422.388	18.438	50.789	13.820	-0.573	20.234	804.119	-0.001291	-0.003555	-0.000967
0.3500	367.850	14.285	44.078	10.704	-0.574	20.234	700.293	-0.001000	-0.003085	-0.000749
0.3510	324.569	11.042	38.769	8.460	-0.581	20.233	617.895	-0.000773	-0.002714	-0.000592
0.3520	292.859	8.953	34.434	6.341	-0.571	20.232	557.528	-0.000627	-0.002410	-0.000444
0.3530	271.518	6.511	31.458	5.276	-0.575	20.231	516.901	-0.000456	-0.002202	-0.000369
0.3540	258.053	5.163	29.235	4.546	-0.573	20.228	491.266	-0.000361	-0.002046	-0.000318
0.3550	250.524	4.882	27.721	3.928	-0.578	20.225	476.933	-0.000342	-0.001940	-0.000275
0.3560	247.262	4.110	26.749	3.619	-0.575	20.222	470.724	-0.000288	-0.001872	-0.000253
0.3570	247.187	3.479	26.137	3.240	-0.577	20.220	470.581	-0.000244	-0.001830	-0.000227
0.3580	249.712	3.832	25.860	3.141	-0.575	20.219	475.388	-0.000268	-0.001810	-0.000220
0.3590	255.137	3.678	26.181	3.296	-0.584	20.217	485.716	-0.000257	-0.001833	-0.000231
0.3600	265.958	3.999	26.778	3.534	-0.584	20.218	506.315	-0.000280	-0.001874	-0.000247
0.3610	291.416	5.977	29.070	4.489	-0.581	20.218	554.781	-0.000418	-0.002035	-0.000314
0.3620	340.754	8.530	33.571	6.214	-0.573	20.221	648.708	-0.000597	-0.002350	-0.000435
0.3630	418.030	12.657	41.672	9.681	-0.570	20.222	795.822	-0.000886	-0.002917	-0.000678
0.3640	517.669	19.141	52.427	14.382	-0.574	20.224	985.508	-0.001340	-0.003670	-0.001007
0.3650	629.390	26.311	64.600	19.798	-0.575	20.227	1198.196	-0.001842	-0.004522	-0.001386
0.3660	743.621	33.215	76.940	25.593	-0.575	20.230	1415.663	-0.002325	-0.005386	-0.001792
0.3670	851.945	40.469	88.364	31.010	-0.570	20.233	1621.885	-0.002833	-0.006185	-0.002171
0.3680	948.834	47.372	98.619	36.089	-0.564	20.235	1806.335	-0.003316	-0.006903	-0.002526
0.3690	1032.106	52.831	107.763	40.636	-0.570	20.235	1964.865	-0.003698	-0.007543	-0.002845
0.3700	1104.062	57.743	115.670	44.284	-0.569	20.234	2101.851	-0.004042	-0.008097	-0.003100
0.3710	1169.526	62.725	123.090	47.736	-0.567	20.232	2226.477	-0.004391	-0.008616	-0.003341
0.3720	1232.825	66.570	129.830	50.781	-0.559	20.232	2346.983	-0.004660	-0.009088	-0.003555
0.3730	1296.411	70.414	137.000	54.065	-0.562	20.230	2468.033	-0.004929	-0.009590	-0.003785
0.3740	1358.959	75.170	143.656	57.504	-0.565	20.228	2587.109	-0.005262	-0.010056	-0.004025
0.3750	1417.705	79.169	150.216	60.676	-0.566	20.225	2698.946	-0.005542	-0.010515	-0.004247
0.3760	1469.057	82.243	155.887	63.707	-0.564	20.222	2796.707	-0.005757	-0.010912	-0.004460
0.3770	1509.754	85.808	160.500	65.981	-0.569	20.220	2874.184	-0.006007	-0.011235	-0.004619
0.3780	1537.406	87.885	163.849	67.525	-0.566	20.218	2926.826	-0.006152	-0.011469	-0.004727
0.3790	1552.044	88.630	166.099	68.716	-0.571	20.216	2954.693	-0.006204	-0.011627	-0.004810
0.3800	1555.981	89.626	167.046	69.164	-0.570	20.217	2962.189	-0.006274	-0.011693	-0.004841
0.3810	1552.931	89.989	167.284	69.528	-0.572	20.218	2956.381	-0.006299	-0.011710	-0.004867
0.3820	1545.431	89.623	166.853	69.178	-0.563	20.220	2942.104	-0.006274	-0.011680	-0.004842
0.3830	1533.844	89.076	166.491	68.940	-0.568	20.222	2920.046	-0.006235	-0.011654	-0.004826
0.3840	1512.865	88.320	165.185	68.127	-0.570	20.224	2880.106	-0.006182	-0.011563	-0.004769
0.3850	1473.671	85.878	162.140	66.555	-0.570	20.227	2805.490	-0.006011	-0.011350	-0.004659
0.3860	1410.581	81.880	156.346	63.986	-0.567	20.230	2685.385	-0.005732	-0.010944	-0.004479
0.3870	1325.235	77.052	147.952	59.916	-0.569	20.233	2522.907	-0.005394	-0.010357	-0.004194
0.3880	1227.611	71.270	138.114	55.370	-0.566	20.235	2337.055	-0.004989	-0.009668	-0.003876
0.3890	1128.558	64.618	128.164	50.374	-0.573	20.235	2148.485	-0.004523	-0.008972	-0.003526
0.3900	1036.359	59.329	118.993	45.827	-0.570	20.234	1972.961	-0.004153	-0.008330	-0.003208
0.3910	955.536	54.234	110.738	41.703	-0.572	20.232	1819.096	-0.003796	-0.007752	-0.002919
0.3920	884.963	48.832	103.039	37.760	-0.556	20.232	1684.742	-0.003418	-0.007213	-0.002643
0.3930	820.341	44.453	96.104	34.476	-0.554	20.230	1561.718	-0.003112	-0.006727	-0.002413
0.3940	755.358	40.580	89.197	30.968	-0.554	20.227	1438.007	-0.002841	-0.006244	-0.002168
0.3950	686.543	35.570	81.694	27.613	-0.557	20.225	1307.001	-0.002490	-0.005719	-0.001933
0.3960	613.850	30.631	73.454	23.825	-0.560	20.222	1168.613	-0.002144	-0.005142	-0.001668
0.3970	541.173	26.170	65.131	19.811	-0.560	20.220	1030.254	-0.001832	-0.004559	-0.001387
0.3980	474.627	21.104	57.180	16.330	-0.560	20.218	903.568	-0.001477	-0.004003	-0.001143
0.3990	418.571	17.021	50.621	13.286	-0.563	20.216	796.852	-0.001191	-0.003543	-0.000930
0.4000	374.478	14.354	44.979	10.998	-0.569	20.217	712.910	-0.001005	-0.003148	-0.000770
0.4010	340.694	12.121	40.603	9.315	-0.566	20.218	648.594	-0.000848	-0.002842	-0.000652
0.4020	314.980	9.694	36.922	7.743	-0.560	20.220	599.642	-0.000679	-0.002585	-0.000542
0.4030	295.654	8.376	34.282	6.719	-0.556	20.222	562.849	-0.000586	-0.002400	-0.000470
0.4040	281.723	7.409	32.238	5.822	-0.560	20.225	536.327	-0.000519	-0.002257	-0.000408
0.4050	272.886	5.949	30.847	5.079	-0.566	20.227	519.505	-0.000416	-0.002159	-0.000356
0.4060	269.024	5.330	29.930	4.742	-0.569	20.230	512.152	-0.000373	-0.002095	-0.000332
0.4070	269.324	5.569	29.402	4.335	-0.572	20.233	512.724	-0.000390	-0.002058	-0.000303
0.4080	273.231	5.428	29.513	4.390	-0.573	20.235	520.163	-0.000380	-0.002066	-0.000307
0.4090	280.956	5.906	30.068	4.658	-0.577	20.234	534.868	-0.000413	-0.002105	-0.000326
0.4100	297.067	7.100	31.152	5.192	-0.578	20.234	565.538	-0.000497	-0.002181	-0.000363
0.4110	330.400	9.065	34.125	6.524	-0.575	20.232	628.996	-0.000635	-0.002389	-0.000457
0.4120	386.816	11.814	39.476	8.558	-0.570	20.232	736.399	-0.000827	-0.002763	-0.000599
0.4130	466.241	17.160	47.968	12.179	-0.574	20.230	887.604	-0.001201	-0.003358	-0.000853
0.4140	561.386	23.095	58.126	16.572	-0.577	20.227	1068.735	-0.001617	-0.004069	-0.001160
0.4150	664.451	28.723	69.159	21.791	-0.580	20.225	1264.944	-0.002011	-0.004841	-0.001525
0.4160	769.154	35.640	80.358	26.983	-0.582	20.222	1464.272	-0.002495	-0.005625	-0.001889
0.4170	870.536	42.362	91.018	32.034	-0.585	20.220	1657.276	-0.002965	-0.006371	-0.002242
0.4180	966.026	48.634	101.163	36.678	-0.583	20.219	1839.066	-0.003404	-0.007081	-0.002567
0.4190	1054.964	54.710	110.765	41.476	-0.589	20.217	2008.381	-0.003830	-0.007754	-0.002903
0.4200	1137.094	60.520	119.798	45.828	-0.587	20.217	2164.736	-0.004236	-0.008386	-0.003208
0.4210	1211.906	64.886	127.718	49.870	-0.591	20.218	2307.158	-0.004542	-0.008940	-0.003491
0.4220	1278.452	68.970	134.735	53.350	-0.578	20.221	2433.844	-0.004828	-0.009431	-0.003734
0.4230	1336.747	73.264	141.031	56.436	-0.578	20.223	2544.823	-0.005129	-0.009872	-0.003951
0.4240	1386.055	76.968	146.882	59.243	-0.576	20.225	2638.693	-0.005388	-0.010282	-0.004147
0.4250	1426.481	79.662	151.621	61.389	-0.576	20.227	2715.654	-0.005576	-0.010613	-0.004297
0.4260	1458.191	82.384	155.331	63.354	-0.577	20.230	2776.022	-0.005767	-0.010873	-0.004435
0.4270	1482.462	84.461	157.888	64.926	-0.577	20.233	2822.227	-0.005912	-0.011052	-0.004545
0.4280	1500.451	84.968	159.888	66.119	-0.574	20.235	2856.474	-0.005948	-0.011192	-0.004628
0.4290	1512.414	86.583	161.875	66.933	-0.578	20.235	2879.248	-0.006061	-0.011331	-0.004685
0.4300	1518.200	87.690	163.014	67.426	-0.576	20.234	2890.263	-0.006138	-0.011411	-0.004720
0.4310	1518.606	87.661	163.654	67.692	-0.576	20.232	2891.035	-0.006136	-0.011456	-0.004738
0.4320	1514.383	87.366	163.431	67.595	-0.571	20.231	2882.996	-0.006116	-0.011440	-0.004732
0.4330	1506.177	87.675	163.153	67.524	-0.564	20.230	2867.374	-0.006137	-0.011421	-0.004727
0.4340	1491.735	86.552	162.555	67.005	-0.560	20.227	2839.880	-0.006059	-0.011379	-0.004690
0.4350	1462.204	84.840	160.555	65.965	-0.557	20.225	2783.661	-0.005939	-0.011239	-0.004618
0.4360	1407.546	81.979	155.830	63.692	-0.558	20.222	2679.605	-0.005738	-0.010908	-0.004458
0.4370	1324.859	76.885	148.036	59.972	-0.561	20.220	2522.192	-0.005382	-0.010363	-0.004198
0.4380	1222.471	70.823	137.961	55.117	-0.561	20.218	2327.271	-0.004958	-0.009657	-0.003858
0.4390	1116.911	64.774	127.677	49.841	-0.562	20.217	2126.312	-0.004534	-0.008937	-0.003489
0.4400	1021.225	59.302	117.991	44.959	-0.565	20.217	1944.151	-0.004151	-0.008259	-0.003147
0.4410	941.334	53.071	109.793	40.679	-0.564	20.218	1792.059	-0.003715	-0.007685	-0.002848
0.4420	874.774	48.468	102.594	37.241	-0.561	20.221	1665.344	-0.003393	-0.007182	-0.002607
0.4430	814.149	44.678	95.868	34.322	-0.561	20.222	1549.931	-0.003127	-0.006711	-0.002403
0.4440	751.691	39.992	89.114	31.108	-0.564	20.225	1431.026	-0.002799	-0.006238	-0.002178
0.4450	682.711	35.362	81.486	27.417	-0.565	20.227	1299.706	-0.002475	-0.005704	-0.001919
0.4460	607.508	30.759	73.217	23.389	-0.568	20.230	1156.540	-0.002153	-0.005125	-0.001637
0.4470	530.593	25.300	64.214	19.249	-0.570	20.234	1010.113	-0.001771	-0.004495	-0.001347
0.4480	458.216	20.009	55.722	15.475	-0.571	20.235	872.326	-0.001401	-0.003901	-0.001083
0.4490	395.548	16.458	48.344	12.459	-0.574	20.235	753.021	-0.001152	-0.003384	-0.000872
0.4500	344.662	12.221	42.437	10.017	-0.581	20.234	656.147	-0.000855	-0.002971	-0.000701
0.4510	306.008	9.429	37.421	8.039	-0.583	20.233	582.561	-0.000660	-0.002620	-0.000563
0.4520	278.041	7.843	33.600	6.214	-0.577	20.232	529.318	-0.000549	-0.002352	-0.000435
0.4530	258.985	6.145	30.390	4.924	-0.574	20.230	493.040	-0.000430	-0.002127	-0.000345
0.4540	246.736	4.939	28.125	4.152	-0.572	20.227	469.723	-0.000346	-0.001969	-0.000291
0.4550	239.974	4.868	26.583	3.689	-0.572	20.225	456.848	-0.000341	-0.001861	-0.000258
0.4560	237.584	3.856	25.748	3.379	-0.572	20.222	452.299	-0.000270	-0.001802	-0.000237
0.4570	238.546	3.183	25.371	3.111	-0.574	20.220	454.130	-0.000223	-0.001776	-0.000218
0.4580	242.528	3.365	25.358	3.027	-0.576	20.219	461.712	-0.000236	-0.001775	-0.000212
0.4590	250.118	4.166	25.970	3.463	-0.589	20.217	476.160	-0.000292	-0.001818	-0.000242
0.4600	267.250	4.320	27.193	4.025	-0.592	20.217	508.776	-0.000302	-0.001904	-0.000282
0.4610	303.318	6.706	30.529	5.232	-0.593	20.218	577.440	-0.000469	-0.002137	-0.000366
0.4620	364.319	10.116	36.462	7.604	-0.581	20.221	693.569	-0.000708	-0.002552	-0.000532
0.4630	449.485	14.945	45.551	11.435	-0.578	20.222	855.703	-0.001046	-0.003189	-0.000800
0.4640	549.920	21.133	56.612	16.402	-0.580	20.224	1046.906	-0.001479	-0.003963	-0.001148
0.4650	655.990	28.333	67.839	21.580	-0.582	20.227	1248.837	-0.001983	-0.004749	-0.001511
0.4660	759.836	34.603	78.872	26.660	-0.580	20.230	1446.533	-0.002422	-0.005521	-0.001866
0.4670	855.718	40.694	88.988	31.318	-0.573	20.234	1629.066	-0.002849	-0.006229	-0.002192
0.4680	941.379	46.740	98.230	35.429	-0.574	20.236	1792.145	-0.003272	-0.006876	-0.002480
0.4690	1018.009	51.988	106.805	39.485	-0.580	20.235	1938.028	-0.003639	-0.007476	-0.002764
0.4700	1088.703	56.452	114.518	43.372	-0.586	20.234	2072.611	-0.003952	-0.008016	-0.003036
0.4710	1156.917	61.448	122.022	46.993	-0.583	20.233	2202.473	-0.004301	-0.008542	-0.003290
0.4720	1224.214	66.193	129.318	50.558	-0.573	20.232	2330.589	-0.004633	-0.009052	-0.003539
0.4730	1291.060	70.683	136.571	54.136	-0.570	20.230	2457.848	-0.004948	-0.009560	-0.003790
0.4740	1355.698	75.017	143.853	57.799	-0.572	20.227	2580.900	-0.005251	-0.010070	-0.004046
0.4750	1415.481	79.703	150.356	61.054	-0.574	20.225	2694.712	-0.005579	-0.010525	-0.004274
0.4760	1466.682	82.539	156.068	63.804	-0.574	20.222	2792.187	-0.005778	-0.010925	-0.004466
0.4770	1505.967	85.277	160.417	65.952	-0.574	20.220	2866.974	-0.005969	-0.011229	-0.004617
0.4780	1531.981	87.789	163.529	67.384	-0.568	20.218	2916.498	-0.006145	-0.011447	-0.004717
0.4790	1545.597	88.756	165.641	68.534	-0.573	20.217	2942.419	-0.006213	-0.011595	-0.004797
0.4800	1549.714	89.203	166.726	69.136	-0.573	20.217	2950.258	-0.006244	-0.011671	-0.004840
0.4810	1547.776	89.947	167.004	69.332	-0.575	20.218	2946.568	-0.006296	-0.011690	-0.004853
0.4820	1541.915	89.583	166.867	69.009	-0.568	20.221	2935.410	-0.006271	-0.011681	-0.004831
0.4830	1533.093	88.967	166.490	68.896	-0.570	20.223	2918.615	-0.006228	-0.011654	-0.004823
0.4840	1518.275	88.490	165.697	68.644	-0.571	20.225	2890.406	-0.006194	-0.011599	-0.004805
0.4850	1487.858	87.016	163.486	67.633	-0.578	20.227	2832.499	-0.006091	-0.011444	-0.004734
0.4860	1431.125	83.253	158.609	65.360	-0.575	20.230	2724.495	-0.005828	-0.011103	-0.004575
0.4870	1344.862	78.327	150.327	61.178	-0.572	20.233	2560.272	-0.005483	-0.010523	-0.004282
0.4880	1237.199	71.929	139.613	55.861	-0.566	20.235	2355.309	-0.005035	-0.009773	-0.003910
0.4890	1124.606	64.815	128.287	50.446	-0.572	20.235	2140.961	-0.004537	-0.008980	-0.003531
0.4900	1020.714	57.799	117.865	45.100	-0.575	20.234	1943.178	-0.004046	-0.008251	-0.003157
0.4910	933.670	53.055	108.889	40.776	-0.576	20.232	1777.468	-0.003714	-0.007622	-0.002854
0.4920	863.562	47.764	101.411	36.860	-0.564	20.232	1644.001	-0.003343	-0.007099	-0.002580
0.4930	803.794	43.624	94.840	33.786	-0.561	20.229	1530.218	-0.003054	-0.006639	-0.002365
0.4940	745.770	40.341	88.573	30.799	-0.561	20.227	1419.754	-0.002824	-0.006200	-0.002156
0.4950	683.387	35.838	81.500	27.473	-0.561	20.225	1300.993	-0.002509	-0.005705	-0.001923
0.4960	615.473	30.968	73.843	23.910	-0.560	20.222	1171.703	-0.002168	-0.005169	-0.001674
0.4970	544.720	26.435	65.672	20.106	-0.560	20.220	1037.006	-0.001850	-0.004597	-0.001407
0.4980	475.409	21.735	57.903	16.361	-0.561	20.219	905.056	-0.001521	-0.004053	-0.001145
0.4990	412.214	16.895	50.747	13.273	-0.565	20.217	784.750	-0.001183	-0.003552	-0.000929
