# Supplementary material for: Evaluation of a Cold-Mixed High-Performance Polyurethane Mixture
Source: Hindawi journal article supplement (doi:10.1155/2019/1507971), 2019-11-07
Supplement: f1 [file 1507971.f1.zip › 1507971.f1/dynamic modulus data/PUM/specimen2/temp20/zhs-2-20_25Hz.csv]

Test Information
****************
Project name	zhs
Operator name	2
Target test temperature	20
Target confining stress	0
Average dynamic strain range from 75 to 125 micro-strain
Contact stress	5
Initial modulus	1000
Axial gauge length	70
Comments
Specimen information
********************
Identification	zhs-2-20
Dimensions	Point 1	Point 2	Point 3	Point 4	Point 5	Point 6	Average	Std Dev.
Diameter (mm)	49.2	49.3	49.2				49.23	0.058
Height (mm)	100.8	101.0	100.8				100.87	0.115
Cross-sectional area (mm�)	1903.7
Conditioning time
Properties/Comments
Test Data	25Hz
*********
Test date and time	Mon	Apr 1	2019	2:34 PM
Dynamic modulus (MPa)	13599
Phase angle (Degrees)	4.23
Average temperature (�C)	20.2
Average confining pressure (kPa)	-0.6
Average micro-strain	114
Load drift (%)	-0.1
Load standard error (%)	6.6
Average deformation drift (%)	-6.3
Average deformation standard error (%)	6.5
Deformation uniformity (%)	31.6
Phase uniformity (Degrees)	0.2
Conditioning Cycles
Time (sec)	Axial stress (kPa)	Axial micro-strain #1	Axial micro-strain #2	Axial micro-strain #3	Confining pressure (kPa)	Temperature (�C)	Load (N)	Displacement #1 (mm)	Displacement #2 (mm)	Displacement #3 (mm)
0.0000	320.646	0.026	1.401	-0.491	-0.572	20.219	610.428	-0.000002	-0.000098	0.000034
0.0008	320.346	-0.198	1.275	-0.660	-0.566	20.218	609.856	0.000014	-0.000089	0.000046
0.0016	319.759	-0.185	1.081	-0.590	-0.573	20.217	608.740	0.000013	-0.000076	0.000041
0.0024	318.392	-0.100	1.082	-0.380	-0.576	20.215	606.136	0.000007	-0.000076	0.000027
0.0032	316.002	-0.436	0.972	-0.338	-0.574	20.216	601.587	0.000031	-0.000068	0.000024
0.0040	312.305	-0.661	0.888	-0.141	-0.581	20.216	594.549	0.000046	-0.000062	0.000010
0.0048	306.730	-0.998	0.402	-0.408	-0.573	20.218	583.935	0.000070	-0.000028	0.000029
0.0056	298.705	-1.629	-0.376	-0.773	-0.569	20.220	568.657	0.000114	0.000026	0.000054
0.0064	287.569	-2.191	-1.419	-1.208	-0.574	20.221	547.457	0.000153	0.000099	0.000085
0.0072	273.171	-3.256	-2.877	-1.994	-0.573	20.223	520.048	0.000228	0.000201	0.000140
0.0080	256.219	-4.237	-4.532	-2.584	-0.577	20.225	487.776	0.000297	0.000317	0.000181
0.0088	238.245	-5.403	-6.575	-3.300	-0.580	20.227	453.558	0.000378	0.000460	0.000231
0.0096	221.128	-6.539	-8.340	-4.045	-0.575	20.229	420.971	0.000458	0.000584	0.000283
0.0104	206.325	-7.565	-9.994	-4.663	-0.573	20.232	392.790	0.000530	0.000700	0.000326
0.0112	194.918	-8.575	-11.424	-5.307	-0.570	20.233	371.075	0.000600	0.000800	0.000372
0.0120	187.314	-9.080	-12.159	-5.488	-0.575	20.233	356.598	0.000636	0.000851	0.000384
0.0128	182.941	-9.515	-12.674	-5.669	-0.577	20.233	348.272	0.000666	0.000887	0.000397
0.0136	181.393	-9.430	-12.743	-5.684	-0.580	20.232	345.325	0.000660	0.000892	0.000398
0.0144	181.693	-9.388	-12.661	-5.642	-0.582	20.231	345.898	0.000657	0.000886	0.000395
0.0152	183.031	-9.571	-12.662	-5.923	-0.574	20.230	348.444	0.000670	0.000886	0.000415
0.0160	185.210	-9.276	-12.621	-5.937	-0.573	20.229	352.592	0.000649	0.000883	0.000416
0.0168	187.735	-9.444	-12.635	-5.880	-0.572	20.227	357.399	0.000661	0.000884	0.000412
0.0176	190.440	-9.234	-12.454	-5.783	-0.570	20.225	362.549	0.000646	0.000872	0.000405
0.0184	193.446	-9.022	-12.302	-5.644	-0.569	20.223	368.271	0.000632	0.000861	0.000395
0.0192	196.572	-8.839	-12.190	-5.559	-0.571	20.221	374.222	0.000619	0.000853	0.000389
0.0200	199.818	-8.587	-12.009	-5.602	-0.571	20.219	380.402	0.000601	0.000841	0.000392
0.0208	203.500	-8.658	-11.912	-5.672	-0.568	20.218	387.411	0.000606	0.000834	0.000397
0.0216	207.648	-8.266	-11.508	-5.420	-0.574	20.216	395.308	0.000579	0.000806	0.000379
0.0224	212.216	-8.154	-10.868	-5.209	-0.577	20.215	404.005	0.000571	0.000761	0.000365
0.0232	217.236	-7.578	-10.353	-4.970	-0.577	20.215	413.561	0.000530	0.000725	0.000348
0.0240	222.496	-6.863	-9.840	-4.647	-0.578	20.216	423.574	0.000480	0.000689	0.000325
0.0248	227.575	-6.779	-9.479	-4.563	-0.573	20.217	433.245	0.000475	0.000664	0.000319
0.0256	232.324	-6.612	-9.022	-4.549	-0.569	20.219	442.286	0.000463	0.000632	0.000318
0.0264	236.232	-6.316	-8.619	-4.381	-0.571	20.221	449.724	0.000442	0.000603	0.000307
0.0272	239.012	-6.386	-8.300	-4.228	-0.576	20.222	455.017	0.000447	0.000581	0.000296
0.0280	240.815	-6.274	-8.231	-4.283	-0.573	20.224	458.450	0.000439	0.000576	0.000300
0.0288	241.537	-6.218	-8.327	-4.186	-0.573	20.227	459.824	0.000435	0.000583	0.000293
0.0296	241.702	-6.596	-8.202	-4.214	-0.569	20.229	460.138	0.000462	0.000574	0.000295
0.0304	241.431	-6.680	-8.286	-4.395	-0.560	20.232	459.623	0.000468	0.000580	0.000308
0.0312	240.740	-6.694	-8.244	-4.326	-0.562	20.234	458.307	0.000469	0.000577	0.000303
0.0320	239.868	-6.552	-8.161	-4.214	-0.564	20.234	456.648	0.000459	0.000571	0.000295
0.0328	238.456	-6.301	-8.300	-4.285	-0.564	20.234	453.959	0.000441	0.000581	0.000300
0.0336	236.773	-6.328	-8.202	-4.144	-0.572	20.232	450.754	0.000443	0.000574	0.000290
0.0344	234.774	-6.356	-8.412	-4.270	-0.574	20.231	446.949	0.000445	0.000589	0.000299
0.0352	232.474	-6.470	-8.857	-4.481	-0.570	20.230	442.572	0.000453	0.000620	0.000314
0.0360	230.085	-6.652	-9.011	-4.369	-0.575	20.229	438.023	0.000466	0.000631	0.000306
0.0368	227.335	-6.653	-9.329	-4.412	-0.575	20.227	432.787	0.000466	0.000653	0.000309
0.0376	224.239	-6.863	-9.495	-4.398	-0.576	20.225	426.893	0.000480	0.000665	0.000308
0.0384	220.677	-7.130	-9.662	-4.493	-0.576	20.223	420.113	0.000499	0.000676	0.000315
0.0392	216.529	-7.648	-10.035	-4.772	-0.577	20.221	412.216	0.000535	0.000702	0.000334
0.0400	211.510	-8.054	-10.368	-5.010	-0.577	20.219	402.660	0.000564	0.000726	0.000351
0.0408	205.544	-8.377	-10.937	-5.458	-0.572	20.218	391.302	0.000586	0.000766	0.000382
0.0416	198.796	-8.867	-11.631	-5.783	-0.574	20.217	378.456	0.000621	0.000814	0.000405
0.0424	191.417	-8.980	-12.299	-5.853	-0.572	20.216	364.408	0.000629	0.000861	0.000410
0.0432	183.843	-9.388	-13.048	-6.106	-0.572	20.216	349.989	0.000657	0.000913	0.000427
0.0440	176.839	-9.866	-13.696	-6.218	-0.577	20.217	336.657	0.000691	0.000959	0.000435
0.0448	170.482	-10.330	-14.357	-6.302	-0.574	20.218	324.554	0.000723	0.001005	0.000441
0.0456	164.982	-10.626	-15.073	-6.568	-0.572	20.220	314.083	0.000744	0.001055	0.000460
0.0464	160.579	-10.935	-15.788	-6.778	-0.573	20.222	305.700	0.000765	0.001105	0.000474
0.0472	156.957	-11.216	-16.312	-6.905	-0.569	20.223	298.805	0.000785	0.001142	0.000483
0.0480	154.507	-11.327	-16.588	-7.116	-0.572	20.225	294.142	0.000793	0.001161	0.000498
0.0488	153.230	-11.468	-16.725	-7.369	-0.574	20.228	291.710	0.000803	0.001171	0.000516
0.0496	152.944	-11.832	-16.740	-7.327	-0.574	20.230	291.166	0.000828	0.001172	0.000513
0.0504	153.575	-11.929	-16.753	-7.313	-0.573	20.233	292.368	0.000835	0.001173	0.000512
0.0512	154.868	-11.803	-16.863	-7.256	-0.570	20.235	294.828	0.000826	0.001180	0.000508
0.0520	156.686	-11.915	-16.671	-6.990	-0.576	20.235	298.290	0.000834	0.001167	0.000489
0.0528	158.971	-11.591	-16.423	-6.822	-0.574	20.235	302.639	0.000811	0.001150	0.000478
0.0536	161.676	-11.241	-16.120	-6.668	-0.577	20.233	307.789	0.000787	0.001128	0.000467
0.0544	164.666	-11.423	-15.734	-6.597	-0.576	20.232	313.482	0.000800	0.001101	0.000462
0.0552	167.957	-11.436	-15.720	-6.654	-0.567	20.231	319.748	0.000801	0.001100	0.000466
0.0560	171.775	-11.198	-15.569	-6.639	-0.563	20.230	327.015	0.000784	0.001090	0.000465
0.0568	176.238	-10.819	-15.418	-6.555	-0.562	20.228	335.512	0.000757	0.001079	0.000459
0.0576	181.558	-10.146	-14.937	-6.471	-0.564	20.226	345.640	0.000710	0.001046	0.000453
0.0584	187.975	-9.695	-14.206	-6.402	-0.565	20.224	357.857	0.000679	0.000994	0.000448
0.0592	195.399	-9.303	-13.516	-6.345	-0.568	20.222	371.990	0.000651	0.000946	0.000444
0.0600	203.650	-9.107	-12.561	-6.149	-0.563	20.219	387.697	0.000637	0.000879	0.000430
0.0608	212.336	-8.714	-11.784	-5.994	-0.560	20.218	404.234	0.000610	0.000825	0.000420
0.0616	221.173	-7.985	-10.951	-5.544	-0.563	20.217	421.057	0.000559	0.000767	0.000388
0.0624	229.664	-7.410	-9.896	-5.110	-0.568	20.216	437.222	0.000519	0.000693	0.000358
0.0632	237.419	-6.735	-9.021	-4.871	-0.571	20.217	451.984	0.000471	0.000631	0.000341
0.0640	244.512	-6.300	-8.118	-4.521	-0.573	20.217	465.488	0.000441	0.000568	0.000317
0.0648	250.358	-6.118	-7.325	-4.256	-0.573	20.219	476.618	0.000428	0.000513	0.000298
0.0656	254.852	-5.782	-6.935	-4.045	-0.568	20.220	485.172	0.000405	0.000485	0.000283
0.0664	258.098	-5.586	-6.589	-3.709	-0.566	20.222	491.352	0.000391	0.000461	0.000260
0.0672	259.886	-5.502	-6.324	-3.443	-0.568	20.223	494.757	0.000385	0.000443	0.000241
0.0680	260.487	-5.307	-6.296	-3.443	-0.565	20.226	495.901	0.000371	0.000441	0.000241
0.0688	260.232	-5.250	-6.269	-3.485	-0.568	20.228	495.415	0.000368	0.000439	0.000244
0.0696	259.165	-5.152	-6.282	-3.569	-0.568	20.230	493.383	0.000361	0.000440	0.000250
0.0704	257.602	-5.195	-6.590	-3.821	-0.561	20.233	490.408	0.000364	0.000461	0.000267
0.0712	255.678	-5.448	-6.772	-3.933	-0.561	20.235	486.746	0.000381	0.000474	0.000275
0.0720	253.454	-5.433	-6.675	-3.793	-0.565	20.235	482.512	0.000380	0.000467	0.000265
0.0728	250.809	-5.714	-6.855	-3.850	-0.566	20.234	477.476	0.000400	0.000480	0.000269
0.0736	247.833	-6.078	-7.021	-3.822	-0.570	20.233	471.811	0.000425	0.000491	0.000268
0.0744	244.482	-6.092	-7.035	-4.003	-0.567	20.232	465.431	0.000426	0.000492	0.000280
0.0752	240.440	-6.303	-7.369	-4.297	-0.557	20.231	457.735	0.000441	0.000516	0.000301
0.0760	235.751	-6.653	-7.814	-4.436	-0.554	20.230	448.809	0.000466	0.000547	0.000311
0.0768	229.724	-6.639	-8.175	-4.590	-0.555	20.228	437.336	0.000465	0.000572	0.000321
0.0776	222.225	-7.059	-9.022	-4.561	-0.556	20.226	423.059	0.000494	0.000632	0.000319
0.0784	213.448	-7.886	-9.910	-4.772	-0.563	20.224	406.351	0.000552	0.000694	0.000334
0.0792	203.575	-8.560	-10.674	-5.081	-0.562	20.221	387.554	0.000599	0.000747	0.000356
0.0800	193.431	-9.584	-11.716	-5.391	-0.567	20.219	368.242	0.000671	0.000820	0.000377
0.0808	183.497	-10.385	-12.920	-6.050	-0.561	20.218	349.331	0.000727	0.000904	0.000423
0.0816	174.555	-11.004	-13.792	-6.499	-0.561	20.217	332.308	0.000770	0.000965	0.000455
0.0824	166.951	-11.242	-14.659	-6.612	-0.569	20.216	317.831	0.000787	0.001026	0.000463
0.0832	160.909	-11.341	-15.415	-6.935	-0.568	20.216	306.330	0.000794	0.001079	0.000485
0.0840	156.806	-11.594	-15.760	-6.964	-0.576	20.217	298.519	0.000812	0.001103	0.000488
0.0848	154.252	-11.664	-16.312	-7.104	-0.575	20.218	293.655	0.000816	0.001142	0.000497
0.0856	153.049	-11.804	-16.561	-7.539	-0.566	20.220	291.367	0.000826	0.001159	0.000528
0.0864	152.794	-11.944	-16.505	-7.594	-0.566	20.222	290.880	0.000836	0.001155	0.000532
0.0872	152.959	-11.804	-16.353	-7.538	-0.568	20.224	291.195	0.000826	0.001145	0.000528
0.0880	153.245	-11.664	-16.201	-7.510	-0.563	20.226	291.739	0.000816	0.001134	0.000526
0.0888	153.635	-11.818	-16.254	-7.412	-0.568	20.228	292.482	0.000827	0.001138	0.000519
0.0896	154.116	-11.607	-16.338	-7.328	-0.569	20.231	293.398	0.000812	0.001144	0.000513
0.0904	154.687	-11.493	-16.545	-7.553	-0.563	20.233	294.485	0.000805	0.001158	0.000529
0.0912	155.574	-11.452	-16.614	-7.594	-0.567	20.235	296.173	0.000802	0.001163	0.000532
0.0920	156.641	-11.270	-16.256	-7.453	-0.568	20.234	298.204	0.000789	0.001138	0.000522
0.0928	157.934	-11.256	-16.270	-7.298	-0.565	20.234	300.665	0.000788	0.001139	0.000511
0.0936	159.617	-11.298	-16.091	-6.947	-0.570	20.233	303.869	0.000791	0.001126	0.000486
0.0944	161.691	-11.298	-16.021	-6.906	-0.569	20.232	307.817	0.000791	0.001121	0.000483
0.0952	164.170	-11.255	-16.022	-7.020	-0.568	20.231	312.538	0.000788	0.001122	0.000491
0.0960	167.056	-11.058	-15.747	-7.118	-0.569	20.229	318.031	0.000774	0.001102	0.000498
0.0968	170.317	-11.185	-15.637	-7.217	-0.564	20.227	324.240	0.000783	0.001095	0.000505
0.0976	174.179	-11.172	-15.375	-6.992	-0.566	20.225	331.593	0.000782	0.001076	0.000489
0.0984	178.958	-11.017	-15.059	-6.878	-0.562	20.223	340.691	0.000771	0.001054	0.000481
0.0992	184.789	-10.806	-14.645	-6.752	-0.564	20.221	351.791	0.000756	0.001025	0.000473
0.1000	191.582	-10.342	-13.914	-6.554	-0.565	20.220	364.723	0.000724	0.000974	0.000459
0.1008	198.976	-9.710	-13.294	-6.694	-0.557	20.218	378.799	0.000680	0.000931	0.000469
0.1016	206.626	-9.148	-12.449	-6.400	-0.559	20.217	393.362	0.000640	0.000871	0.000448
0.1024	213.854	-8.505	-11.437	-5.951	-0.561	20.216	407.124	0.000595	0.000801	0.000417
0.1032	220.301	-7.901	-10.799	-5.656	-0.559	20.216	419.397	0.000553	0.000756	0.000396
0.1040	225.877	-7.550	-10.077	-5.137	-0.564	20.216	430.012	0.000529	0.000705	0.000360
0.1048	230.145	-7.243	-9.813	-4.955	-0.564	20.218	438.137	0.000507	0.000687	0.000347
0.1056	233.481	-7.285	-9.590	-4.913	-0.561	20.220	444.489	0.000510	0.000671	0.000344
0.1064	235.916	-6.893	-9.285	-4.871	-0.564	20.221	449.123	0.000482	0.000650	0.000341
0.1072	237.269	-6.740	-8.952	-4.761	-0.562	20.223	451.698	0.000472	0.000627	0.000333
0.1080	238.110	-6.724	-8.827	-4.691	-0.561	20.225	453.300	0.000471	0.000618	0.000328
0.1088	238.260	-6.402	-8.883	-4.705	-0.560	20.227	453.587	0.000448	0.000622	0.000329
0.1096	237.870	-6.752	-8.897	-4.550	-0.558	20.229	452.843	0.000473	0.000623	0.000319
0.1104	237.223	-7.143	-9.133	-4.675	-0.553	20.232	451.612	0.000500	0.000639	0.000327
0.1112	236.367	-7.046	-9.230	-4.913	-0.551	20.234	449.982	0.000493	0.000646	0.000344
0.1120	235.420	-7.158	-9.051	-4.592	-0.554	20.234	448.179	0.000501	0.000634	0.000321
0.1128	234.398	-7.171	-9.050	-4.634	-0.554	20.234	446.234	0.000502	0.000633	0.000324
0.1136	233.391	-7.074	-8.911	-4.578	-0.561	20.232	444.317	0.000495	0.000624	0.000320
0.1144	232.099	-7.242	-8.744	-4.367	-0.561	20.231	441.856	0.000507	0.000612	0.000306
0.1152	230.536	-7.551	-8.896	-4.591	-0.559	20.230	438.881	0.000529	0.000623	0.000321
0.1160	228.717	-7.663	-9.105	-4.716	-0.557	20.229	435.419	0.000536	0.000637	0.000330
0.1168	226.418	-7.663	-9.313	-4.842	-0.557	20.227	431.042	0.000536	0.000652	0.000339
0.1176	223.803	-7.833	-9.452	-4.842	-0.561	20.225	426.064	0.000548	0.000662	0.000339
0.1184	220.842	-7.973	-9.618	-4.953	-0.560	20.223	420.427	0.000558	0.000673	0.000347
0.1192	217.566	-8.015	-9.674	-5.066	-0.564	20.221	414.190	0.000561	0.000677	0.000355
0.1200	213.869	-8.155	-9.882	-5.080	-0.562	20.219	407.152	0.000571	0.000692	0.000356
0.1208	209.676	-8.364	-10.479	-5.417	-0.558	20.218	399.170	0.000585	0.000734	0.000379
0.1216	205.123	-8.561	-10.673	-5.641	-0.564	20.216	390.501	0.000599	0.000747	0.000395
0.1224	199.863	-8.925	-11.007	-5.642	-0.566	20.215	380.487	0.000625	0.000771	0.000395
0.1232	194.272	-9.318	-11.522	-5.810	-0.568	20.216	369.844	0.000652	0.000807	0.000407
0.1240	188.546	-9.726	-11.883	-5.852	-0.572	20.216	358.944	0.000681	0.000832	0.000410
0.1248	182.851	-10.175	-12.604	-6.021	-0.566	20.218	348.101	0.000712	0.000882	0.000421
0.1256	177.681	-10.596	-13.379	-6.301	-0.565	20.220	338.259	0.000742	0.000937	0.000441
0.1264	173.142	-11.045	-13.780	-6.428	-0.564	20.221	329.618	0.000773	0.000965	0.000450
0.1272	169.355	-11.269	-14.192	-6.624	-0.566	20.223	322.409	0.000789	0.000993	0.000464
0.1280	166.380	-11.212	-14.716	-6.723	-0.565	20.225	316.744	0.000785	0.001030	0.000471
0.1288	164.306	-11.171	-14.894	-6.808	-0.566	20.227	312.796	0.000782	0.001043	0.000477
0.1296	162.983	-11.074	-15.100	-6.878	-0.566	20.230	310.278	0.000775	0.001057	0.000481
0.1304	162.442	-11.087	-15.375	-6.963	-0.560	20.232	309.248	0.000776	0.001076	0.000487
0.1312	162.607	-11.017	-15.321	-7.103	-0.560	20.234	309.563	0.000771	0.001072	0.000497
0.1320	163.404	-10.708	-15.294	-6.878	-0.565	20.234	311.079	0.000750	0.001071	0.000481
0.1328	164.636	-10.622	-15.418	-6.920	-0.562	20.234	313.425	0.000744	0.001079	0.000484
0.1336	166.319	-10.524	-15.033	-6.765	-0.566	20.233	316.629	0.000737	0.001052	0.000474
0.1344	168.514	-10.623	-14.963	-6.555	-0.562	20.232	320.807	0.000744	0.001047	0.000459
0.1352	171.219	-10.862	-14.977	-6.738	-0.553	20.231	325.956	0.000760	0.001048	0.000472
0.1360	174.660	-10.806	-14.771	-6.752	-0.556	20.229	332.508	0.000756	0.001034	0.000473
0.1368	178.808	-10.736	-14.606	-6.711	-0.556	20.227	340.405	0.000752	0.001022	0.000470
0.1376	183.888	-10.610	-14.372	-6.752	-0.562	20.225	350.075	0.000743	0.001006	0.000473
0.1384	190.034	-10.385	-13.779	-6.514	-0.563	20.223	361.776	0.000727	0.000965	0.000456
0.1392	197.443	-10.033	-13.185	-6.064	-0.565	20.221	375.881	0.000702	0.000923	0.000425
0.1400	206.130	-9.514	-12.660	-5.797	-0.567	20.220	392.418	0.000666	0.000886	0.000406
0.1408	215.552	-8.827	-11.704	-5.726	-0.561	20.218	410.357	0.000618	0.000819	0.000401
0.1416	225.351	-7.984	-10.565	-5.473	-0.562	20.217	429.010	0.000559	0.000740	0.000383
0.1424	234.819	-7.284	-9.383	-5.123	-0.566	20.216	447.035	0.000510	0.000657	0.000359
0.1432	243.160	-6.638	-8.355	-4.773	-0.562	20.216	462.914	0.000465	0.000585	0.000334
0.1440	250.178	-6.539	-7.341	-4.157	-0.566	20.217	476.274	0.000458	0.000514	0.000291
0.1448	255.423	-6.610	-6.895	-3.934	-0.561	20.218	486.259	0.000463	0.000483	0.000275
0.1456	258.894	-6.540	-6.631	-3.934	-0.554	20.220	492.868	0.000458	0.000464	0.000275
0.1464	260.818	-6.555	-6.422	-3.794	-0.558	20.221	496.531	0.000459	0.000450	0.000266
0.1472	261.374	-6.331	-6.422	-3.724	-0.557	20.223	497.589	0.000443	0.000450	0.000261
0.1480	261.058	-6.246	-6.423	-3.612	-0.557	20.225	496.988	0.000437	0.000450	0.000253
0.1488	260.247	-6.189	-6.339	-3.612	-0.559	20.227	495.443	0.000433	0.000444	0.000253
0.1496	259.240	-6.062	-6.228	-3.654	-0.556	20.229	493.526	0.000424	0.000436	0.000256
0.1504	258.053	-5.963	-6.408	-3.863	-0.553	20.232	491.266	0.000417	0.000449	0.000270
0.1512	256.851	-5.977	-6.436	-4.031	-0.555	20.234	488.977	0.000418	0.000450	0.000282
0.1520	255.573	-5.670	-6.256	-3.878	-0.558	20.234	486.546	0.000397	0.000438	0.000271
0.1528	253.965	-5.784	-6.298	-3.920	-0.561	20.233	483.484	0.000405	0.000441	0.000274
0.1536	252.267	-5.657	-6.339	-3.739	-0.565	20.232	480.251	0.000396	0.000444	0.000262
0.1544	250.373	-5.616	-6.228	-3.739	-0.565	20.231	476.646	0.000393	0.000436	0.000262
0.1552	248.134	-6.077	-6.548	-4.033	-0.560	20.230	472.383	0.000425	0.000458	0.000282
0.1560	245.805	-6.077	-6.700	-4.130	-0.558	20.229	467.949	0.000425	0.000469	0.000289
0.1568	242.964	-6.401	-6.784	-4.269	-0.559	20.227	462.542	0.000448	0.000475	0.000299
0.1576	239.643	-6.344	-7.131	-4.381	-0.561	20.225	456.219	0.000444	0.000499	0.000307
0.1584	235.841	-6.359	-7.298	-4.521	-0.562	20.223	448.980	0.000445	0.000511	0.000316
0.1592	231.347	-6.792	-7.521	-4.619	-0.566	20.221	440.426	0.000475	0.000526	0.000323
0.1600	226.042	-7.044	-7.938	-4.801	-0.564	20.219	430.326	0.000493	0.000556	0.000336
0.1608	219.610	-7.634	-8.661	-5.066	-0.562	20.218	418.081	0.000534	0.000606	0.000355
0.1616	212.186	-8.110	-9.410	-5.123	-0.565	20.217	403.948	0.000568	0.000659	0.000359
0.1624	203.830	-8.476	-10.284	-5.264	-0.568	20.216	388.041	0.000593	0.000720	0.000368
0.1632	195.009	-9.065	-11.228	-5.531	-0.567	20.216	371.246	0.000635	0.000786	0.000387
0.1640	186.217	-9.599	-12.061	-5.756	-0.569	20.217	354.509	0.000672	0.000844	0.000403
0.1648	177.921	-10.146	-13.045	-6.289	-0.566	20.218	338.717	0.000710	0.000913	0.000440
0.1656	170.663	-10.750	-13.970	-6.738	-0.561	20.220	324.898	0.000753	0.000978	0.000472
0.1664	164.832	-11.242	-14.578	-7.047	-0.565	20.221	313.797	0.000787	0.001020	0.000493
0.1672	160.744	-11.509	-15.252	-7.202	-0.562	20.223	306.015	0.000806	0.001068	0.000504
0.1680	158.354	-11.775	-15.899	-7.174	-0.564	20.225	301.466	0.000824	0.001113	0.000502
0.1688	157.438	-11.831	-15.900	-7.258	-0.563	20.227	299.721	0.000828	0.001113	0.000508
0.1696	157.633	-12.000	-15.996	-7.244	-0.561	20.230	300.093	0.000840	0.001120	0.000507
0.1704	158.610	-12.014	-16.010	-7.383	-0.557	20.232	301.952	0.000841	0.001121	0.000517
0.1712	159.977	-12.098	-15.804	-7.497	-0.557	20.234	304.556	0.000847	0.001106	0.000525
0.1720	161.706	-12.071	-15.830	-7.187	-0.565	20.234	307.846	0.000845	0.001108	0.000503
0.1728	163.464	-11.831	-15.693	-7.118	-0.569	20.234	311.193	0.000828	0.001099	0.000498
0.1736	165.237	-11.761	-15.321	-7.049	-0.574	20.232	314.569	0.000823	0.001072	0.000493
0.1744	167.161	-11.522	-15.251	-6.838	-0.572	20.231	318.232	0.000807	0.001068	0.000479
0.1752	169.025	-11.353	-15.389	-7.076	-0.568	20.231	321.779	0.000795	0.001077	0.000495
0.1760	171.279	-10.834	-15.389	-7.145	-0.563	20.230	326.071	0.000758	0.001077	0.000500
0.1768	173.939	-10.567	-15.306	-7.088	-0.564	20.228	331.135	0.000740	0.001071	0.000496
0.1776	177.155	-10.512	-15.114	-7.115	-0.564	20.226	337.257	0.000736	0.001058	0.000498
0.1784	181.243	-10.287	-14.756	-6.960	-0.562	20.224	345.039	0.000720	0.001033	0.000487
0.1792	186.382	-10.497	-14.494	-6.751	-0.563	20.221	354.824	0.000735	0.001015	0.000473
0.1800	192.739	-10.244	-13.999	-6.582	-0.558	20.220	366.926	0.000717	0.000980	0.000461
0.1808	200.223	-9.836	-13.308	-6.513	-0.556	20.218	381.174	0.000689	0.000932	0.000456
0.1816	208.669	-9.205	-12.380	-6.134	-0.560	20.217	397.253	0.000644	0.000867	0.000429
0.1824	217.446	-8.545	-11.270	-5.714	-0.566	20.216	413.961	0.000598	0.000789	0.000400
0.1832	225.907	-8.027	-10.271	-5.335	-0.564	20.216	430.069	0.000562	0.000719	0.000373
0.1840	233.737	-7.537	-9.146	-4.815	-0.568	20.217	444.975	0.000528	0.000640	0.000337
0.1848	240.409	-7.342	-8.369	-4.676	-0.564	20.218	457.678	0.000514	0.000586	0.000327
0.1856	245.699	-7.061	-7.732	-4.507	-0.558	20.220	467.749	0.000494	0.000541	0.000315
0.1864	249.532	-6.779	-7.342	-4.200	-0.566	20.221	475.044	0.000475	0.000514	0.000294
0.1872	251.681	-6.371	-7.106	-4.214	-0.567	20.223	479.136	0.000446	0.000497	0.000295
0.1880	252.387	-6.371	-6.827	-4.257	-0.565	20.225	480.480	0.000446	0.000478	0.000298
0.1888	252.041	-6.427	-6.813	-4.286	-0.568	20.227	479.822	0.000450	0.000477	0.000300
0.1896	250.914	-6.456	-6.937	-4.356	-0.564	20.229	477.676	0.000452	0.000486	0.000305
0.1904	249.381	-6.709	-7.007	-4.412	-0.557	20.232	474.758	0.000470	0.000490	0.000309
0.1912	247.849	-6.653	-7.187	-4.298	-0.560	20.234	471.840	0.000466	0.000503	0.000301
0.1920	246.150	-6.540	-7.090	-4.060	-0.561	20.234	468.607	0.000458	0.000496	0.000284
0.1928	244.257	-6.568	-7.091	-4.143	-0.563	20.233	465.002	0.000460	0.000496	0.000290
0.1936	242.303	-6.569	-7.273	-4.115	-0.570	20.232	461.283	0.000460	0.000509	0.000288
0.1944	239.989	-6.499	-7.328	-4.338	-0.569	20.231	456.877	0.000455	0.000513	0.000304
0.1952	237.494	-6.386	-7.620	-4.647	-0.566	20.230	452.127	0.000447	0.000533	0.000325
0.1960	234.774	-6.681	-7.703	-4.633	-0.562	20.229	446.949	0.000468	0.000539	0.000324
0.1968	231.407	-6.723	-7.856	-4.676	-0.562	20.227	440.540	0.000471	0.000550	0.000327
0.1976	227.305	-6.948	-8.218	-4.551	-0.564	20.225	432.730	0.000486	0.000575	0.000319
0.1984	222.225	-7.426	-8.607	-4.732	-0.561	20.223	423.059	0.000520	0.000602	0.000331
0.1992	216.199	-7.609	-9.080	-5.111	-0.566	20.221	411.587	0.000533	0.000636	0.000358
0.2000	162.172	-12.743	-16.077	-7.945	-0.571	20.234	308.733	0.000892	0.001125	0.000556
0.2008	162.472	-12.519	-15.691	-7.637	-0.572	20.232	309.305	0.000876	0.001098	0.000535
0.2016	163.163	-12.673	-15.472	-7.749	-0.566	20.231	310.621	0.000887	0.001083	0.000542
0.2024	164.621	-12.645	-15.418	-7.736	-0.561	20.230	313.396	0.000885	0.001079	0.000542
0.2032	167.281	-12.364	-15.225	-7.539	-0.562	20.228	318.460	0.000865	0.001066	0.000528
0.2040	171.654	-12.364	-15.156	-7.412	-0.562	20.226	326.786	0.000865	0.001061	0.000519
0.2048	178.462	-11.900	-14.563	-7.313	-0.566	20.224	339.746	0.000833	0.001019	0.000512
0.2056	188.531	-11.380	-13.443	-7.032	-0.568	20.222	358.915	0.000797	0.000941	0.000492
0.2064	202.658	-10.736	-12.170	-6.528	-0.572	20.220	385.809	0.000751	0.000852	0.000457
0.2072	221.909	-9.515	-10.201	-6.035	-0.572	20.219	422.459	0.000666	0.000714	0.000422
0.2080	247.683	-7.860	-7.394	-5.068	-0.572	20.217	471.525	0.000550	0.000518	0.000355
0.2088	281.692	-5.518	-3.559	-3.580	-0.581	20.216	536.270	0.000386	0.000249	0.000251
0.2096	325.440	-2.709	1.346	-1.910	-0.577	20.216	619.555	0.000190	-0.000094	0.000134
0.2104	380.038	0.813	7.571	0.643	-0.582	20.216	723.495	-0.000057	-0.000530	-0.000045
0.2112	445.803	4.827	14.797	3.717	-0.581	20.217	848.694	-0.000338	-0.001036	-0.000260
0.2120	521.756	9.599	23.011	7.126	-0.568	20.219	993.290	-0.000672	-0.001611	-0.000499
0.2128	606.577	15.267	32.431	11.224	-0.567	20.221	1154.766	-0.001069	-0.002270	-0.000786
0.2136	698.505	21.245	42.394	15.475	-0.567	20.222	1329.775	-0.001487	-0.002968	-0.001083
0.2144	795.379	27.966	52.969	20.162	-0.564	20.224	1514.196	-0.001958	-0.003708	-0.001411
0.2152	895.378	34.686	63.988	25.199	-0.568	20.226	1704.569	-0.002428	-0.004479	-0.001764
0.2160	996.233	41.253	75.107	30.279	-0.572	20.229	1896.572	-0.002888	-0.005257	-0.002120
0.2168	1095.571	48.003	86.016	35.514	-0.568	20.231	2085.686	-0.003360	-0.006021	-0.002486
0.2176	1191.317	54.599	96.647	40.566	-0.574	20.233	2267.962	-0.003822	-0.006765	-0.002840
0.2184	1281.097	60.844	106.722	45.266	-0.580	20.234	2438.879	-0.004259	-0.007471	-0.003169
0.2192	1363.182	66.725	115.879	49.828	-0.583	20.234	2595.148	-0.004671	-0.008112	-0.003488
0.2200	1435.874	71.904	124.341	53.953	-0.587	20.233	2733.536	-0.005033	-0.008704	-0.003777
0.2208	1498.167	76.309	131.665	57.657	-0.589	20.232	2852.125	-0.005342	-0.009217	-0.004036
0.2216	1550.030	80.239	137.723	60.619	-0.583	20.231	2950.859	-0.005617	-0.009641	-0.004243
0.2224	1591.719	83.493	142.796	63.215	-0.580	20.230	3030.224	-0.005845	-0.009996	-0.004425
0.2232	1623.774	86.074	147.075	65.419	-0.578	20.228	3091.249	-0.006025	-0.010295	-0.004579
0.2240	1646.512	88.068	150.271	66.836	-0.574	20.227	3134.537	-0.006165	-0.010519	-0.004679
0.2248	1660.278	89.288	152.536	68.086	-0.573	20.224	3160.744	-0.006250	-0.010678	-0.004766
0.2256	1665.704	90.102	154.106	68.856	-0.572	20.222	3171.072	-0.006307	-0.010787	-0.004820
0.2264	1663.990	90.665	154.551	69.093	-0.570	20.220	3167.810	-0.006347	-0.010819	-0.004836
0.2272	1656.401	90.791	154.511	68.982	-0.565	20.219	3153.362	-0.006355	-0.010816	-0.004829
0.2280	1643.116	90.623	154.150	68.660	-0.566	20.218	3128.071	-0.006344	-0.010790	-0.004806
0.2288	1621.821	90.089	153.232	68.100	-0.569	20.216	3087.530	-0.006306	-0.010726	-0.004767
0.2296	1588.398	88.488	151.162	66.683	-0.569	20.216	3023.901	-0.006194	-0.010581	-0.004668
0.2304	1538.413	85.739	147.521	64.788	-0.573	20.216	2928.743	-0.006002	-0.010326	-0.004535
0.2312	1468.817	81.808	141.587	61.756	-0.573	20.217	2796.249	-0.005727	-0.009911	-0.004323
0.2320	1381.111	76.519	133.416	57.348	-0.570	20.219	2629.280	-0.005356	-0.009339	-0.004014
0.2328	1279.549	70.500	123.980	52.368	-0.573	20.221	2435.932	-0.004935	-0.008679	-0.003666
0.2336	1170.037	63.750	113.515	46.895	-0.574	20.222	2227.449	-0.004462	-0.007946	-0.003283
0.2344	1059.097	56.369	102.857	41.366	-0.576	20.224	2016.249	-0.003946	-0.007200	-0.002896
0.2352	951.298	49.170	92.100	36.063	-0.579	20.226	1811.028	-0.003442	-0.006447	-0.002524
0.2360	850.428	42.405	81.486	31.319	-0.578	20.229	1618.996	-0.002968	-0.005704	-0.002192
0.2368	758.634	36.356	71.704	26.716	-0.580	20.231	1444.244	-0.002545	-0.005019	-0.001870
0.2376	676.654	30.968	62.644	22.422	-0.573	20.233	1288.176	-0.002168	-0.004385	-0.001570
0.2384	604.413	26.168	54.640	18.815	-0.575	20.234	1150.646	-0.001832	-0.003825	-0.001317
0.2392	540.782	21.650	47.552	15.476	-0.578	20.233	1029.510	-0.001516	-0.003329	-0.001083
0.2400	484.711	17.497	40.909	12.543	-0.575	20.233	922.766	-0.001225	-0.002864	-0.000878
0.2408	435.268	13.919	34.780	10.184	-0.584	20.231	828.638	-0.000974	-0.002435	-0.000713
0.2416	391.776	10.607	29.235	7.841	-0.576	20.231	745.840	-0.000742	-0.002046	-0.000549
0.2424	354.370	7.422	24.151	5.834	-0.572	20.230	674.629	-0.000520	-0.001691	-0.000408
0.2432	323.502	4.967	20.065	4.361	-0.576	20.228	615.864	-0.000348	-0.001405	-0.000305
0.2440	299.742	2.847	17.049	2.901	-0.573	20.226	570.631	-0.000199	-0.001193	-0.000203
0.2448	283.481	1.430	14.645	1.947	-0.573	20.224	539.675	-0.000100	-0.001025	-0.000136
0.2456	274.404	0.713	13.269	1.358	-0.577	20.222	522.394	-0.000050	-0.000929	-0.000095
0.2464	271.623	0.082	12.325	1.007	-0.573	20.220	517.101	-0.000006	-0.000863	-0.000071
0.2472	273.697	-0.100	11.743	0.811	-0.570	20.219	521.049	0.000007	-0.000822	-0.000057
0.2480	280.520	0.041	11.909	0.798	-0.568	20.218	534.039	-0.000003	-0.000834	-0.000056
0.2488	294.617	0.771	12.700	1.359	-0.574	20.216	560.875	-0.000054	-0.000889	-0.000095
0.2496	321.818	2.258	14.922	2.258	-0.576	20.216	612.659	-0.000158	-0.001045	-0.000158
0.2504	369.068	5.008	19.494	4.251	-0.578	20.216	702.610	-0.000351	-0.001365	-0.000298
0.2512	439.912	9.077	26.443	7.323	-0.582	20.217	837.479	-0.000635	-0.001851	-0.000513
0.2520	533.614	14.620	36.045	11.365	-0.572	20.219	1015.863	-0.001023	-0.002523	-0.000796
0.2528	644.749	21.608	47.719	16.585	-0.571	20.221	1227.436	-0.001513	-0.003340	-0.001161
0.2536	765.472	29.257	60.253	22.380	-0.573	20.222	1457.262	-0.002048	-0.004218	-0.001567
0.2544	889.021	37.592	73.231	28.372	-0.572	20.224	1692.467	-0.002631	-0.005126	-0.001986
0.2552	1010.270	45.632	86.141	34.490	-0.572	20.227	1923.294	-0.003194	-0.006030	-0.002414
0.2560	1125.132	53.476	98.160	40.313	-0.573	20.229	2141.962	-0.003743	-0.006871	-0.002822
0.2568	1230.887	60.774	109.194	45.687	-0.565	20.232	2343.292	-0.004254	-0.007644	-0.003198
0.2576	1326.227	67.033	119.311	50.810	-0.561	20.234	2524.796	-0.004692	-0.008352	-0.003557
0.2584	1410.266	72.997	128.260	55.286	-0.568	20.234	2684.784	-0.005110	-0.008978	-0.003870
0.2592	1483.424	78.161	136.404	59.398	-0.569	20.234	2824.059	-0.005471	-0.009548	-0.004158
0.2600	1546.904	82.749	143.504	63.104	-0.573	20.233	2944.908	-0.005792	-0.010045	-0.004417
0.2608	1601.683	86.705	149.786	66.064	-0.577	20.231	3049.192	-0.006069	-0.010485	-0.004624
0.2616	1648.286	89.821	155.316	68.575	-0.573	20.231	3137.913	-0.006287	-0.010872	-0.004800
0.2624	1686.608	92.529	159.748	70.735	-0.569	20.230	3210.869	-0.006477	-0.011182	-0.004951
0.2632	1716.019	94.761	163.611	72.473	-0.567	20.228	3266.859	-0.006633	-0.011453	-0.005073
0.2640	1736.127	96.516	166.418	73.835	-0.565	20.226	3305.140	-0.006756	-0.011649	-0.005168
0.2648	1747.293	97.891	168.156	74.915	-0.561	20.224	3326.397	-0.006852	-0.011771	-0.005244
0.2656	1750.674	98.452	169.227	75.364	-0.561	20.222	3332.834	-0.006892	-0.011846	-0.005275
0.2664	1747.804	98.578	169.658	75.449	-0.562	20.220	3327.370	-0.006900	-0.011876	-0.005281
0.2672	1739.658	98.493	169.588	75.392	-0.558	20.219	3311.863	-0.006895	-0.011871	-0.005277
0.2680	1725.607	98.045	169.005	74.986	-0.561	20.217	3285.112	-0.006863	-0.011830	-0.005249
0.2688	1700.209	97.035	167.782	74.174	-0.565	20.216	3236.761	-0.006792	-0.011745	-0.005192
0.2696	1654.327	94.678	164.392	72.505	-0.565	20.216	3149.414	-0.006627	-0.011507	-0.005075
0.2704	1582.236	90.622	158.431	69.433	-0.567	20.216	3012.171	-0.006344	-0.011090	-0.004860
0.2712	1483.078	84.798	149.565	64.719	-0.562	20.217	2823.400	-0.005936	-0.010470	-0.004530
0.2720	1363.648	77.570	138.170	58.964	-0.555	20.220	2596.035	-0.005430	-0.009672	-0.004128
0.2728	1236.522	69.865	125.831	52.704	-0.552	20.221	2354.021	-0.004891	-0.008808	-0.003689
0.2736	1112.252	62.036	113.532	46.332	-0.554	20.223	2117.443	-0.004342	-0.007947	-0.003243
0.2744	998.382	54.766	102.234	40.776	-0.556	20.225	1900.663	-0.003834	-0.007156	-0.002854
0.2752	898.699	48.285	91.867	35.668	-0.555	20.227	1710.892	-0.003380	-0.006431	-0.002497
0.2760	814.179	42.504	82.833	31.137	-0.556	20.229	1549.988	-0.002975	-0.005798	-0.002180
0.2768	743.350	37.719	75.024	27.559	-0.554	20.231	1415.148	-0.002640	-0.005252	-0.001929
0.2776	682.560	33.412	67.811	23.994	-0.547	20.233	1299.419	-0.002339	-0.004747	-0.001680
0.2784	627.797	29.552	61.474	21.117	-0.552	20.234	1195.164	-0.002069	-0.004303	-0.001478
0.2792	575.047	25.875	55.416	18.591	-0.553	20.234	1094.742	-0.001811	-0.003879	-0.001301
0.2800	522.342	21.918	49.246	15.839	-0.552	20.233	994.406	-0.001534	-0.003447	-0.001109
0.2808	469.968	18.143	43.146	13.341	-0.560	20.232	894.699	-0.001270	-0.003020	-0.000934
0.2816	419.097	14.481	36.949	10.731	-0.554	20.231	797.853	-0.001014	-0.002586	-0.000751
0.2824	372.539	10.903	30.972	8.108	-0.548	20.230	709.219	-0.000763	-0.002168	-0.000568
0.2832	332.819	7.899	25.844	5.989	-0.551	20.228	633.602	-0.000553	-0.001809	-0.000419
0.2840	301.695	5.443	21.786	4.361	-0.549	20.226	574.350	-0.000381	-0.001525	-0.000305
0.2848	280.505	3.436	18.590	3.014	-0.551	20.224	534.010	-0.000241	-0.001301	-0.000211
0.2856	268.753	2.327	16.728	2.354	-0.557	20.222	511.637	-0.000163	-0.001171	-0.000165
0.2864	264.981	1.808	15.673	2.044	-0.561	20.220	504.456	-0.000127	-0.001097	-0.000143
0.2872	267.536	1.415	15.145	1.848	-0.565	20.219	509.319	-0.000099	-0.001060	-0.000129
0.2880	275.816	1.654	15.536	1.932	-0.572	20.217	525.084	-0.000116	-0.001087	-0.000135
0.2888	293.189	2.482	16.702	2.381	-0.577	20.215	558.157	-0.000174	-0.001169	-0.000167
0.2896	325.651	4.068	19.412	3.546	-0.575	20.215	619.955	-0.000285	-0.001359	-0.000248
0.2904	378.475	7.184	24.622	5.568	-0.574	20.216	720.520	-0.000503	-0.001724	-0.000390
0.2912	453.377	11.521	32.069	8.964	-0.572	20.217	863.113	-0.000806	-0.002245	-0.000627
0.2920	547.199	17.134	41.741	13.202	-0.564	20.220	1041.727	-0.001199	-0.002922	-0.000924
0.2928	653.706	23.701	53.095	18.112	-0.564	20.221	1244.488	-0.001659	-0.003717	-0.001268
0.2936	766.674	30.885	65.059	23.768	-0.565	20.223	1459.551	-0.002162	-0.004554	-0.001664
0.2944	881.176	38.534	77.302	29.297	-0.562	20.224	1677.532	-0.002697	-0.005411	-0.002051
0.2952	993.633	45.955	89.142	34.869	-0.565	20.227	1891.623	-0.003217	-0.006240	-0.002441
0.2960	1101.267	53.280	100.328	40.356	-0.567	20.229	2096.529	-0.003730	-0.007023	-0.002825
0.2968	1202.167	60.057	110.793	45.449	-0.566	20.232	2288.618	-0.004204	-0.007756	-0.003181
0.2976	1296.215	66.217	120.520	50.191	-0.566	20.234	2467.661	-0.004635	-0.008436	-0.003513
0.2984	1383.200	72.225	129.858	54.822	-0.570	20.234	2633.257	-0.005056	-0.009090	-0.003838
0.2992	1463.301	77.880	138.656	59.270	-0.570	20.234	2785.749	-0.005452	-0.009706	-0.004149
0.3000	1536.850	83.045	146.617	63.255	-0.568	20.233	2925.768	-0.005813	-0.010263	-0.004428
0.3008	1602.915	87.577	154.164	67.043	-0.570	20.232	3051.538	-0.006130	-0.010791	-0.004693
0.3016	1660.414	91.476	160.709	70.186	-0.562	20.231	3161.001	-0.006403	-0.011250	-0.004913
0.3024	1707.633	94.690	166.030	72.782	-0.554	20.230	3250.895	-0.006628	-0.011622	-0.005095
0.3032	1742.604	97.369	170.520	75.043	-0.553	20.228	3317.471	-0.006816	-0.011936	-0.005253
0.3040	1764.816	99.377	173.450	76.490	-0.552	20.226	3359.756	-0.006956	-0.012142	-0.005354
0.3048	1775.426	100.682	175.188	77.319	-0.557	20.224	3379.955	-0.007048	-0.012263	-0.005412
0.3056	1776.809	101.342	176.077	77.544	-0.562	20.222	3382.587	-0.007094	-0.012325	-0.005428
0.3064	1771.684	101.524	176.105	77.488	-0.564	20.220	3372.831	-0.007107	-0.012327	-0.005424
0.3072	1761.284	101.397	175.564	77.220	-0.561	20.218	3353.033	-0.007098	-0.012289	-0.005405
0.3080	1743.461	100.906	174.770	76.728	-0.560	20.217	3319.101	-0.007063	-0.012234	-0.005371
0.3088	1711.495	99.559	172.755	75.746	-0.565	20.216	3258.247	-0.006969	-0.012093	-0.005302
0.3096	1657.694	96.627	168.571	73.416	-0.565	20.216	3155.823	-0.006764	-0.011800	-0.005139
0.3104	1578.900	92.375	161.971	70.006	-0.565	20.216	3005.819	-0.006466	-0.011338	-0.004900
0.3112	1476.421	85.963	152.439	65.249	-0.566	20.218	2810.726	-0.006017	-0.010671	-0.004567
0.3120	1358.568	78.372	140.947	59.356	-0.556	20.220	2586.365	-0.005486	-0.009866	-0.004155
0.3128	1236.402	70.723	128.761	53.209	-0.552	20.221	2353.792	-0.004951	-0.009013	-0.003725
0.3136	1118.459	62.781	116.949	47.329	-0.551	20.223	2129.259	-0.004395	-0.008186	-0.003313
0.3144	1011.247	55.974	105.984	41.828	-0.543	20.224	1925.154	-0.003918	-0.007419	-0.002928
0.3152	917.184	50.094	96.131	37.070	-0.542	20.227	1746.082	-0.003507	-0.006729	-0.002595
0.3160	835.685	44.679	87.613	33.086	-0.542	20.229	1590.929	-0.003128	-0.006133	-0.002316
0.3168	764.180	39.824	79.720	29.297	-0.544	20.231	1454.802	-0.002788	-0.005580	-0.002051
0.3176	699.152	35.363	72.118	25.817	-0.541	20.233	1331.005	-0.002475	-0.005048	-0.001807
0.3184	637.746	30.969	65.296	22.800	-0.549	20.234	1214.104	-0.002168	-0.004571	-0.001596
0.3192	578.008	26.717	58.403	19.641	-0.551	20.234	1100.378	-0.001870	-0.004088	-0.001375
0.3200	519.412	22.647	51.441	16.527	-0.550	20.233	988.827	-0.001585	-0.003601	-0.001157
0.3208	462.980	18.535	44.910	13.665	-0.554	20.232	881.395	-0.001297	-0.003144	-0.000957
0.3216	410.441	14.495	38.294	10.747	-0.549	20.231	781.374	-0.001015	-0.002681	-0.000752
0.3224	364.379	11.043	32.360	8.237	-0.543	20.230	693.684	-0.000773	-0.002265	-0.000577
0.3232	326.898	8.110	27.497	6.286	-0.544	20.228	622.330	-0.000568	-0.001925	-0.000440
0.3240	298.930	5.570	23.732	4.784	-0.543	20.226	569.086	-0.000390	-0.001661	-0.000335
0.3248	280.791	4.097	21.036	3.758	-0.540	20.224	534.554	-0.000287	-0.001473	-0.000263
0.3256	271.353	3.045	19.370	3.126	-0.544	20.222	516.586	-0.000213	-0.001356	-0.000219
0.3264	268.858	2.511	18.619	2.887	-0.543	20.220	511.837	-0.000176	-0.001303	-0.000202
0.3272	271.654	2.511	18.174	2.564	-0.546	20.219	517.159	-0.000176	-0.001272	-0.000179
0.3280	279.108	2.610	18.439	2.676	-0.552	20.217	531.349	-0.000183	-0.001291	-0.000187
0.3288	293.625	3.269	19.313	3.182	-0.559	20.216	558.987	-0.000229	-0.001352	-0.000223
0.3296	320.887	4.911	21.509	3.828	-0.564	20.216	610.886	-0.000344	-0.001506	-0.000268
0.3304	366.843	7.578	26.122	5.596	-0.565	20.216	698.376	-0.000530	-0.001829	-0.000392
0.3312	434.321	11.704	32.847	8.403	-0.567	20.218	826.836	-0.000819	-0.002299	-0.000588
0.3320	522.147	16.993	41.964	12.276	-0.560	20.220	994.034	-0.001190	-0.002937	-0.000859
0.3328	625.182	22.957	52.845	17.244	-0.561	20.221	1190.186	-0.001607	-0.003699	-0.001207
0.3336	737.564	30.127	64.574	22.970	-0.558	20.223	1404.133	-0.002109	-0.004520	-0.001608
0.3344	854.605	37.647	76.846	28.695	-0.558	20.225	1626.949	-0.002635	-0.005379	-0.002009
0.3352	972.518	45.212	89.283	34.589	-0.558	20.227	1851.425	-0.003165	-0.006250	-0.002421
0.3360	1087.546	53.126	101.330	40.412	-0.556	20.229	2070.408	-0.003719	-0.007093	-0.002829
0.3368	1195.961	60.408	112.586	45.898	-0.557	20.231	2276.802	-0.004229	-0.007881	-0.003213
0.3376	1294.968	67.004	123.049	50.979	-0.549	20.233	2465.286	-0.004690	-0.008613	-0.003569
0.3384	1382.508	73.445	132.511	55.638	-0.558	20.234	2631.941	-0.005141	-0.009276	-0.003895
0.3392	1457.711	78.848	140.793	59.846	-0.562	20.234	2775.106	-0.005519	-0.009856	-0.004189
0.3400	1521.010	83.507	147.881	63.271	-0.565	20.233	2895.613	-0.005845	-0.010352	-0.004429
0.3408	1573.399	87.646	153.955	66.217	-0.572	20.232	2995.348	-0.006135	-0.010777	-0.004635
0.3416	1616.050	90.453	158.916	68.504	-0.560	20.231	3076.544	-0.006332	-0.011124	-0.004795
0.3424	1650.420	92.937	162.863	70.371	-0.554	20.230	3141.975	-0.006506	-0.011400	-0.004926
0.3432	1677.471	94.916	166.254	72.151	-0.555	20.228	3193.474	-0.006644	-0.011638	-0.005051
0.3440	1697.684	96.278	168.935	73.485	-0.554	20.226	3231.955	-0.006739	-0.011825	-0.005144
0.3448	1711.345	97.624	170.659	74.551	-0.561	20.224	3257.961	-0.006834	-0.011946	-0.005219
0.3456	1718.544	98.578	171.953	75.224	-0.563	20.221	3271.666	-0.006900	-0.012037	-0.005266
0.3464	1719.611	99.013	172.509	75.534	-0.563	20.220	3273.697	-0.006931	-0.012076	-0.005287
0.3472	1715.192	99.111	172.453	75.477	-0.562	20.218	3265.285	-0.006938	-0.012072	-0.005283
0.3480	1705.198	98.773	172.300	75.309	-0.562	20.217	3246.260	-0.006914	-0.012061	-0.005272
0.3488	1686.022	97.777	171.340	75.056	-0.570	20.215	3209.753	-0.006844	-0.011994	-0.005254
0.3496	1649.308	95.785	168.741	73.681	-0.572	20.215	3139.858	-0.006705	-0.011812	-0.005158
0.3504	1588.623	92.586	163.794	71.254	-0.571	20.216	3024.330	-0.006481	-0.011466	-0.004988
0.3512	1501.669	87.534	155.802	67.186	-0.573	20.217	2858.791	-0.006127	-0.010906	-0.004703
0.3520	1392.622	81.036	145.325	61.658	-0.562	20.219	2651.196	-0.005673	-0.010173	-0.004316
0.3528	1272.260	73.500	133.693	55.596	-0.562	20.221	2422.056	-0.005145	-0.009359	-0.003892
0.3536	1150.635	65.643	121.520	49.350	-0.564	20.222	2190.514	-0.004595	-0.008506	-0.003455
0.3544	1035.608	58.121	109.960	43.428	-0.561	20.224	1971.531	-0.004068	-0.007697	-0.003040
0.3552	931.776	51.134	99.147	38.067	-0.562	20.226	1773.863	-0.003579	-0.006940	-0.002665
0.3560	840.704	45.128	89.253	33.506	-0.559	20.228	1600.485	-0.003159	-0.006248	-0.002345
0.3568	761.610	39.683	80.512	29.382	-0.554	20.231	1449.909	-0.002778	-0.005636	-0.002057
0.3576	691.577	34.744	72.479	25.691	-0.549	20.233	1316.586	-0.002432	-0.005074	-0.001798
0.3584	627.767	30.520	65.435	22.436	-0.554	20.233	1195.107	-0.002136	-0.004580	-0.001571
0.3592	567.638	26.338	58.722	19.194	-0.560	20.233	1080.637	-0.001844	-0.004111	-0.001344
0.3600	510.049	22.284	51.968	16.192	-0.565	20.232	971.003	-0.001560	-0.003638	-0.001133
0.3608	455.226	18.565	45.535	13.441	-0.571	20.231	866.632	-0.001300	-0.003187	-0.000941
0.3616	404.099	14.579	39.185	10.621	-0.565	20.230	769.300	-0.001021	-0.002743	-0.000743
0.3624	358.533	11.212	33.378	8.123	-0.558	20.229	682.554	-0.000785	-0.002336	-0.000569
0.3632	320.270	8.474	28.598	6.270	-0.557	20.228	609.713	-0.000593	-0.002002	-0.000439
0.3640	290.785	6.116	24.610	4.769	-0.556	20.226	553.579	-0.000428	-0.001723	-0.000334
0.3648	270.692	4.532	21.539	3.645	-0.555	20.224	515.327	-0.000317	-0.001508	-0.000255
0.3656	259.450	3.423	19.704	2.943	-0.557	20.222	493.927	-0.000240	-0.001379	-0.000206
0.3664	255.859	2.862	18.675	2.480	-0.561	20.220	487.089	-0.000200	-0.001307	-0.000174
0.3672	258.203	2.623	18.272	2.157	-0.556	20.219	491.552	-0.000184	-0.001279	-0.000151
0.3680	266.318	2.960	18.647	2.410	-0.564	20.217	507.002	-0.000207	-0.001305	-0.000169
0.3688	283.902	3.970	19.800	3.126	-0.574	20.216	540.476	-0.000278	-0.001386	-0.000219
0.3696	317.175	5.809	22.648	4.221	-0.570	20.216	603.819	-0.000407	-0.001585	-0.000295
0.3704	371.502	9.036	28.053	6.299	-0.574	20.216	707.245	-0.000633	-0.001964	-0.000441
0.3712	448.388	13.526	35.863	9.470	-0.568	20.217	853.615	-0.000947	-0.002510	-0.000663
0.3720	544.795	19.211	45.883	13.666	-0.557	20.220	1037.149	-0.001345	-0.003212	-0.000957
0.3728	654.322	25.693	57.487	18.983	-0.557	20.221	1245.661	-0.001799	-0.004024	-0.001329
0.3736	770.582	32.977	69.744	24.961	-0.559	20.222	1466.990	-0.002308	-0.004882	-0.001747
0.3744	888.780	40.681	82.154	30.784	-0.558	20.224	1692.009	-0.002848	-0.005751	-0.002155
0.3752	1005.145	48.243	94.452	36.819	-0.559	20.226	1913.538	-0.003377	-0.006612	-0.002577
0.3760	1116.250	55.752	106.096	42.460	-0.559	20.228	2125.053	-0.003903	-0.007427	-0.002972
0.3768	1219.495	62.781	116.851	47.638	-0.553	20.231	2321.606	-0.004395	-0.008180	-0.003335
0.3776	1313.062	68.870	126.731	52.563	-0.551	20.233	2499.733	-0.004821	-0.008871	-0.003679
0.3784	1395.869	74.806	135.680	57.025	-0.556	20.234	2657.375	-0.005236	-0.009498	-0.003992
0.3792	1467.539	79.830	143.574	61.080	-0.559	20.233	2793.818	-0.005588	-0.010050	-0.004276
0.3800	1528.795	84.097	150.383	64.575	-0.563	20.233	2910.433	-0.005887	-0.010527	-0.004520
0.3808	1581.034	87.873	156.288	67.535	-0.566	20.231	3009.882	-0.006151	-0.010940	-0.004727
0.3816	1625.232	90.987	161.264	69.782	-0.559	20.231	3094.025	-0.006369	-0.011288	-0.004885
0.3824	1662.127	93.583	165.571	71.830	-0.556	20.230	3164.263	-0.006551	-0.011590	-0.005028
0.3832	1691.282	95.940	168.961	73.584	-0.556	20.228	3219.767	-0.006716	-0.011827	-0.005151
0.3840	1711.931	97.805	171.630	74.791	-0.556	20.226	3259.077	-0.006846	-0.012014	-0.005235
0.3848	1723.804	98.843	173.394	75.716	-0.558	20.224	3281.679	-0.006919	-0.012138	-0.005300
0.3856	1727.696	99.375	174.256	76.108	-0.561	20.222	3289.089	-0.006956	-0.012198	-0.005328
0.3864	1724.991	99.432	174.757	76.052	-0.563	20.220	3283.939	-0.006960	-0.012233	-0.005324
0.3872	1716.440	99.420	174.716	75.941	-0.558	20.219	3267.660	-0.006959	-0.012230	-0.005316
0.3880	1700.825	98.830	174.104	75.547	-0.561	20.217	3237.934	-0.006918	-0.012187	-0.005288
0.3888	1671.610	97.751	172.311	74.635	-0.564	20.216	3182.316	-0.006843	-0.012062	-0.005224
0.3896	1620.934	94.902	168.266	72.559	-0.561	20.216	3085.842	-0.006643	-0.011779	-0.005079
0.3904	1545.326	90.298	161.582	69.274	-0.569	20.216	2941.904	-0.006321	-0.011311	-0.004849
0.3912	1445.718	84.293	152.091	64.573	-0.570	20.217	2752.275	-0.005901	-0.010646	-0.004520
0.3920	1330.751	77.024	140.698	58.694	-0.564	20.220	2533.407	-0.005392	-0.009849	-0.004109
0.3928	1211.981	69.670	128.956	52.857	-0.565	20.221	2307.301	-0.004877	-0.009027	-0.003700
0.3936	1097.344	62.430	117.199	46.894	-0.561	20.222	2089.062	-0.004370	-0.008204	-0.003283
0.3944	992.416	55.680	106.416	41.605	-0.554	20.224	1889.305	-0.003898	-0.007449	-0.002912
0.3952	899.676	49.660	96.827	37.031	-0.555	20.226	1712.751	-0.003476	-0.006778	-0.002592
0.3960	819.259	44.131	88.127	32.919	-0.556	20.228	1559.658	-0.003089	-0.006169	-0.002304
0.3968	749.963	39.205	80.485	29.298	-0.556	20.231	1427.736	-0.002744	-0.005634	-0.002051
0.3976	688.677	34.799	73.550	25.847	-0.552	20.233	1311.064	-0.002436	-0.005149	-0.001809
0.3984	631.839	30.730	67.186	22.955	-0.553	20.233	1202.860	-0.002151	-0.004703	-0.001607
0.3992	576.204	27.164	60.795	19.980	-0.554	20.233	1096.945	-0.001902	-0.004256	-0.001399
Test Cycles
Time (sec)	Axial stress (kPa)	Axial micro-strain #1	Axial micro-strain #2	Axial micro-strain #3	Confining pressure (kPa)	Temperature (�C)	Load (N)	Displacement #1 (mm)	Displacement #2 (mm)	Displacement #3 (mm)
0.0000	520.524	23.419	54.402	17.131	-0.552	20.232	990.944	-0.001639	-0.003808	-0.001199
0.0008	465.610	19.587	47.885	14.324	-0.560	20.231	886.402	-0.001371	-0.003352	-0.001003
0.0016	413.597	15.981	41.521	11.447	-0.557	20.230	787.382	-0.001119	-0.002906	-0.000801
0.0024	367.565	12.151	35.892	8.993	-0.550	20.230	699.749	-0.000851	-0.002512	-0.000629
0.0032	329.738	9.077	31.057	7.098	-0.553	20.228	627.737	-0.000635	-0.002174	-0.000497
0.0040	301.545	6.874	27.319	5.611	-0.549	20.226	574.064	-0.000481	-0.001912	-0.000393
0.0048	283.195	5.316	24.623	4.474	-0.546	20.224	539.131	-0.000372	-0.001724	-0.000313
0.0056	273.607	4.670	22.871	3.897	-0.547	20.222	520.878	-0.000327	-0.001601	-0.000273
0.0064	271.052	4.348	21.912	3.533	-0.552	20.220	516.014	-0.000304	-0.001534	-0.000247
0.0072	273.682	4.222	21.522	3.252	-0.553	20.219	521.021	-0.000296	-0.001507	-0.000228
0.0080	280.746	4.250	21.551	3.224	-0.558	20.217	534.468	-0.000297	-0.001509	-0.000226
0.0088	294.963	5.122	22.468	3.616	-0.569	20.215	561.533	-0.000359	-0.001573	-0.000253
0.0096	322.795	6.538	24.859	4.458	-0.562	20.215	614.519	-0.000458	-0.001740	-0.000312
0.0104	370.570	9.232	29.348	6.536	-0.565	20.216	705.471	-0.000646	-0.002054	-0.000458
0.0112	440.964	13.443	36.435	9.835	-0.565	20.217	839.481	-0.000941	-0.002550	-0.000688
0.0120	532.261	18.649	45.787	13.904	-0.556	20.219	1013.288	-0.001305	-0.003205	-0.000973
0.0128	638.933	25.329	57.027	19.096	-0.558	20.221	1216.364	-0.001773	-0.003992	-0.001337
0.0136	754.441	32.738	69.284	24.752	-0.557	20.222	1436.262	-0.002292	-0.004850	-0.001733
0.0144	873.556	40.456	81.805	30.518	-0.554	20.224	1663.027	-0.002832	-0.005726	-0.002136
0.0152	991.499	48.314	94.201	36.426	-0.558	20.226	1887.560	-0.003382	-0.006594	-0.002550
0.0160	1103.822	55.598	105.972	42.079	-0.560	20.229	2101.393	-0.003892	-0.007418	-0.002946
0.0168	1208.074	62.375	116.852	47.298	-0.562	20.232	2299.862	-0.004366	-0.008180	-0.003311
0.0176	1303.053	68.590	126.954	52.126	-0.561	20.234	2480.679	-0.004801	-0.008887	-0.003649
0.0184	1388.475	74.413	136.139	56.772	-0.565	20.234	2643.299	-0.005209	-0.009530	-0.003974
0.0192	1464.113	79.900	144.225	60.983	-0.572	20.234	2787.294	-0.005593	-0.010096	-0.004269
0.0200	1530.162	84.573	151.606	64.716	-0.570	20.233	2913.036	-0.005920	-0.010612	-0.004530
0.0208	1587.631	88.770	157.928	67.874	-0.574	20.231	3022.442	-0.006214	-0.011055	-0.004751
0.0216	1637.661	91.969	163.460	70.527	-0.565	20.231	3117.685	-0.006438	-0.011442	-0.004937
0.0224	1681.018	94.762	168.421	72.729	-0.556	20.230	3200.226	-0.006633	-0.011789	-0.005091
0.0232	1716.785	97.288	172.561	74.694	-0.557	20.228	3268.318	-0.006810	-0.012079	-0.005229
0.0240	1743.641	99.125	175.966	76.476	-0.553	20.226	3319.445	-0.006939	-0.012318	-0.005353
0.0248	1760.488	100.641	178.216	77.712	-0.553	20.224	3351.517	-0.007045	-0.012475	-0.005440
0.0256	1767.536	101.609	179.606	78.471	-0.558	20.222	3364.935	-0.007113	-0.012572	-0.005493
0.0264	1765.913	102.016	180.135	78.837	-0.559	20.220	3361.845	-0.007141	-0.012609	-0.005519
0.0272	1756.626	102.002	179.663	78.527	-0.557	20.218	3344.164	-0.007140	-0.012576	-0.005497
0.0280	1738.216	101.356	178.927	78.133	-0.561	20.217	3309.116	-0.007095	-0.012525	-0.005469
0.0288	1704.687	99.980	176.816	77.149	-0.564	20.216	3245.287	-0.006999	-0.012377	-0.005400
0.0296	1650.089	97.006	172.424	74.847	-0.565	20.216	3141.346	-0.006790	-0.012070	-0.005239
0.0304	1572.212	92.446	165.837	71.465	-0.571	20.216	2993.088	-0.006471	-0.011609	-0.005003
0.0312	1473.295	86.749	156.485	66.555	-0.568	20.218	2804.775	-0.006072	-0.010954	-0.004659
0.0320	1361.529	79.536	145.395	60.830	-0.562	20.220	2592.001	-0.005568	-0.010178	-0.004258
0.0328	1245.900	72.450	133.916	55.048	-0.558	20.221	2371.874	-0.005072	-0.009374	-0.003853
0.0336	1132.646	65.406	122.425	49.154	-0.554	20.223	2156.267	-0.004578	-0.008570	-0.003441
0.0344	1026.380	58.249	111.585	43.680	-0.554	20.224	1953.964	-0.004077	-0.007811	-0.003058
0.0352	929.778	52.272	101.468	38.756	-0.553	20.226	1770.058	-0.003659	-0.007103	-0.002713
0.0360	843.695	46.462	92.173	34.377	-0.554	20.229	1606.178	-0.003252	-0.006452	-0.002406
0.0368	767.606	41.157	83.876	30.532	-0.557	20.231	1461.325	-0.002881	-0.005871	-0.002137
0.0376	699.768	36.766	76.079	26.955	-0.555	20.234	1332.178	-0.002574	-0.005325	-0.001887
0.0384	637.746	32.640	69.020	23.810	-0.562	20.234	1214.104	-0.002285	-0.004831	-0.001667
0.0392	579.751	28.781	62.501	20.751	-0.565	20.234	1103.697	-0.002015	-0.004375	-0.001453
0.0400	524.792	24.978	56.068	17.958	-0.562	20.233	999.069	-0.001748	-0.003925	-0.001257
0.0408	472.959	21.061	49.955	15.432	-0.564	20.232	900.393	-0.001474	-0.003497	-0.001080
0.0416	424.973	17.076	44.229	12.752	-0.556	20.231	809.040	-0.001195	-0.003096	-0.000893
0.0424	382.202	13.834	38.796	10.409	-0.550	20.229	727.615	-0.000968	-0.002716	-0.000729
0.0432	345.909	10.887	34.003	8.375	-0.553	20.228	658.522	-0.000762	-0.002380	-0.000586
0.0440	316.784	8.700	30.167	6.579	-0.552	20.226	603.075	-0.000609	-0.002112	-0.000461
0.0448	295.323	7.002	27.166	5.471	-0.554	20.224	562.220	-0.000490	-0.001902	-0.000383
0.0456	281.347	5.388	24.971	4.573	-0.559	20.222	535.612	-0.000377	-0.001748	-0.000320
0.0464	274.013	4.714	23.594	3.983	-0.560	20.220	521.650	-0.000330	-0.001652	-0.000279
0.0472	272.360	4.109	22.565	3.688	-0.561	20.219	518.503	-0.000288	-0.001580	-0.000258
0.0480	275.546	4.166	22.258	3.407	-0.566	20.218	524.569	-0.000292	-0.001558	-0.000238
0.0488	284.217	4.769	22.688	3.660	-0.573	20.216	541.077	-0.000334	-0.001588	-0.000256
0.0496	303.454	5.710	23.842	4.137	-0.573	20.216	577.698	-0.000400	-0.001669	-0.000290
0.0504	340.965	8.069	27.331	5.471	-0.577	20.216	649.109	-0.000565	-0.001913	-0.000383
0.0512	402.100	11.548	33.224	8.011	-0.578	20.218	765.495	-0.000808	-0.002326	-0.000561
0.0520	488.423	16.642	41.798	11.799	-0.574	20.220	929.832	-0.001165	-0.002926	-0.000826
0.0528	596.673	23.462	53.178	16.878	-0.576	20.221	1135.912	-0.001642	-0.003722	-0.001181
0.0536	719.560	30.997	66.240	23.038	-0.578	20.222	1369.858	-0.002170	-0.004637	-0.001613
0.0544	849.977	39.473	80.025	29.535	-0.576	20.224	1618.137	-0.002763	-0.005602	-0.002067
0.0552	981.130	47.781	93.811	36.033	-0.580	20.226	1867.819	-0.003345	-0.006567	-0.002522
0.0560	1105.895	55.680	107.027	42.571	-0.583	20.229	2105.341	-0.003898	-0.007492	-0.002980
0.0568	1218.894	62.948	118.769	48.157	-0.582	20.231	2320.461	-0.004406	-0.008314	-0.003371
0.0576	1316.549	69.039	129.053	53.110	-0.580	20.233	2506.371	-0.004833	-0.009034	-0.003718
0.0584	1398.243	74.721	138.084	57.559	-0.582	20.233	2661.896	-0.005230	-0.009666	-0.004029
0.0592	1465.150	79.676	145.561	61.181	-0.581	20.233	2789.268	-0.005577	-0.010189	-0.004283
0.0600	1519.943	83.845	151.675	64.324	-0.579	20.232	2893.581	-0.005869	-0.010617	-0.004503
0.0608	1566.411	87.226	157.108	67.019	-0.581	20.231	2982.044	-0.006106	-0.010998	-0.004691
0.0616	1607.694	90.327	161.750	69.250	-0.575	20.231	3060.637	-0.006323	-0.011322	-0.004847
0.0624	1646.197	92.908	165.932	71.424	-0.569	20.229	3133.936	-0.006504	-0.011615	-0.005000
0.0632	1681.889	95.518	170.296	73.389	-0.568	20.227	3201.885	-0.006686	-0.011921	-0.005137
0.0640	1713.043	97.932	174.048	75.213	-0.567	20.226	3261.194	-0.006855	-0.012183	-0.005265
0.0648	1736.983	99.828	176.953	76.546	-0.564	20.223	3306.770	-0.006988	-0.012387	-0.005358
0.0656	1751.756	101.329	179.052	77.431	-0.566	20.221	3334.894	-0.007093	-0.012534	-0.005420
0.0664	1757.061	102.100	180.107	78.091	-0.566	20.220	3344.994	-0.007147	-0.012607	-0.005466
0.0672	1753.590	102.620	180.147	78.148	-0.561	20.218	3338.385	-0.007183	-0.012610	-0.005470
0.0680	1741.612	102.578	179.855	78.106	-0.563	20.217	3315.582	-0.007180	-0.012590	-0.005467
0.0688	1716.785	101.765	178.743	77.698	-0.564	20.216	3268.318	-0.007124	-0.012512	-0.005439
0.0696	1671.264	99.548	175.284	75.943	-0.563	20.216	3181.658	-0.006968	-0.012270	-0.005316
0.0704	1600.360	95.367	169.296	72.967	-0.569	20.216	3046.675	-0.006676	-0.011851	-0.005108
0.0712	1504.133	89.415	160.361	68.407	-0.564	20.218	2863.483	-0.006259	-0.011225	-0.004788
0.0720	1389.136	82.160	149.064	62.625	-0.560	20.220	2644.558	-0.005751	-0.010434	-0.004384
0.0728	1266.594	74.399	136.904	56.464	-0.558	20.221	2411.270	-0.005208	-0.009583	-0.003953
0.0736	1145.976	66.738	124.800	50.319	-0.558	20.223	2181.644	-0.004672	-0.008736	-0.003522
0.0744	1033.579	59.330	113.280	44.537	-0.559	20.225	1967.669	-0.004153	-0.007930	-0.003118
0.0752	933.505	52.594	102.844	39.289	-0.557	20.227	1777.153	-0.003682	-0.007199	-0.002750
0.0760	846.535	46.756	93.588	34.910	-0.557	20.229	1611.586	-0.003273	-0.006551	-0.002444
0.0768	771.017	41.493	85.208	31.079	-0.552	20.232	1467.819	-0.002905	-0.005965	-0.002176
0.0776	704.036	36.819	77.648	27.473	-0.549	20.234	1340.303	-0.002577	-0.005435	-0.001923
0.0784	642.224	32.863	70.658	24.371	-0.557	20.234	1222.630	-0.002300	-0.004946	-0.001706
0.0792	583.538	28.836	63.865	21.187	-0.562	20.233	1110.907	-0.002019	-0.004471	-0.001483
0.0800	527.212	24.780	57.209	18.015	-0.564	20.233	1003.675	-0.001735	-0.004005	-0.001261
0.0808	473.665	20.936	50.859	15.321	-0.569	20.232	901.737	-0.001465	-0.003560	-0.001072
0.0816	423.666	16.726	44.773	12.529	-0.566	20.231	806.551	-0.001171	-0.003134	-0.000877
0.0824	378.806	13.189	39.102	10.031	-0.561	20.230	721.149	-0.000923	-0.002737	-0.000702
0.0832	340.378	10.411	34.405	8.152	-0.568	20.228	647.993	-0.000729	-0.002408	-0.000571
0.0840	309.495	8.152	30.249	6.496	-0.562	20.226	589.199	-0.000571	-0.002117	-0.000455
0.0848	287.118	6.511	26.969	5.106	-0.558	20.224	546.598	-0.000456	-0.001888	-0.000357
0.0856	272.901	5.599	24.899	4.334	-0.562	20.222	519.533	-0.000392	-0.001743	-0.000303
0.0864	266.123	4.826	23.566	3.828	-0.557	20.220	506.630	-0.000338	-0.001650	-0.000268
0.0872	265.402	4.391	22.774	3.379	-0.561	20.219	505.257	-0.000307	-0.001594	-0.000237
0.0880	269.580	4.516	22.635	3.449	-0.567	20.217	513.210	-0.000316	-0.001584	-0.000241
0.0888	279.573	4.657	23.011	3.856	-0.575	20.216	532.236	-0.000326	-0.001611	-0.000270
0.0896	300.072	5.766	24.206	4.377	-0.576	20.216	571.260	-0.000404	-0.001694	-0.000306
0.0904	337.598	7.884	27.860	5.808	-0.582	20.216	642.700	-0.000552	-0.001950	-0.000407
0.0912	396.570	11.435	33.711	8.208	-0.578	20.218	754.967	-0.000800	-0.002360	-0.000575
0.0920	478.144	16.191	41.825	11.463	-0.569	20.220	910.263	-0.001133	-0.002928	-0.000802
0.0928	578.729	22.393	52.609	16.051	-0.570	20.221	1101.751	-0.001568	-0.003683	-0.001124
0.0936	691.728	29.467	64.574	21.636	-0.568	20.223	1316.872	-0.002063	-0.004520	-0.001515
0.0944	811.654	36.947	77.164	27.614	-0.567	20.225	1545.181	-0.002586	-0.005401	-0.001933
0.0952	933.655	44.863	90.295	33.761	-0.561	20.227	1777.439	-0.003140	-0.006321	-0.002363
0.0960	1053.582	52.510	102.844	40.145	-0.562	20.230	2005.749	-0.003676	-0.007199	-0.002810
0.0968	1168.038	59.947	114.864	45.982	-0.557	20.232	2223.644	-0.004196	-0.008040	-0.003219
0.0976	1273.868	66.962	126.064	51.204	-0.558	20.234	2425.117	-0.004687	-0.008824	-0.003584
0.0984	1369.208	73.516	136.362	56.494	-0.568	20.234	2606.621	-0.005146	-0.009545	-0.003955
0.0992	1452.826	79.648	145.616	60.803	-0.568	20.234	2765.808	-0.005575	-0.010193	-0.004256
0.1000	1525.008	84.672	153.481	64.662	-0.572	20.233	2903.223	-0.005927	-0.010744	-0.004526
0.1008	1586.759	89.078	160.374	68.211	-0.572	20.232	3020.782	-0.006235	-0.011226	-0.004775
0.1016	1638.472	92.741	166.211	71.044	-0.564	20.231	3119.230	-0.006492	-0.011635	-0.004973
0.1024	1680.852	95.645	171.034	73.359	-0.555	20.230	3199.911	-0.006695	-0.011972	-0.005135
0.1032	1713.870	98.242	174.952	75.436	-0.554	20.228	3262.768	-0.006877	-0.012247	-0.005280
0.1040	1737.494	100.221	178.065	76.994	-0.550	20.226	3307.743	-0.007015	-0.012465	-0.005390
0.1048	1752.192	101.681	179.940	77.739	-0.552	20.224	3335.724	-0.007118	-0.012596	-0.005442
0.1056	1758.715	102.314	181.081	78.414	-0.554	20.222	3348.141	-0.007162	-0.012676	-0.005489
0.1064	1758.339	102.552	181.581	78.527	-0.551	20.220	3347.425	-0.007179	-0.012711	-0.005497
0.1072	1751.726	102.355	181.346	78.343	-0.550	20.219	3334.837	-0.007165	-0.012694	-0.005484
0.1080	1738.411	101.877	181.026	78.160	-0.549	20.217	3309.488	-0.007131	-0.012672	-0.005471
0.1088	1713.689	100.935	179.719	77.626	-0.556	20.215	3262.424	-0.007065	-0.012580	-0.005434
0.1096	1669.972	98.956	176.314	76.011	-0.556	20.216	3179.197	-0.006927	-0.012342	-0.005321
0.1104	1602.599	95.097	170.644	73.176	-0.559	20.216	3050.938	-0.006657	-0.011945	-0.005122
0.1112	1510.926	89.693	161.987	68.894	-0.559	20.218	2876.415	-0.006279	-0.011339	-0.004823
0.1120	1399.971	82.861	151.162	63.254	-0.557	20.220	2665.186	-0.005800	-0.010581	-0.004428
0.1128	1279.534	75.311	139.281	57.333	-0.558	20.221	2435.904	-0.005272	-0.009750	-0.004013
0.1136	1158.826	67.931	127.065	51.243	-0.561	20.223	2206.106	-0.004755	-0.008895	-0.003587
0.1144	1044.865	60.691	115.434	45.336	-0.561	20.225	1989.155	-0.004248	-0.008080	-0.003174
0.1152	943.153	54.081	104.802	40.173	-0.558	20.227	1795.521	-0.003786	-0.007336	-0.002812
0.1160	855.432	48.328	95.478	35.654	-0.557	20.229	1628.523	-0.003383	-0.006683	-0.002496
0.1168	780.380	43.137	87.183	31.571	-0.550	20.232	1485.643	-0.003020	-0.006103	-0.002210
0.1176	715.022	38.379	79.789	28.190	-0.546	20.234	1361.217	-0.002687	-0.005585	-0.001973
0.1184	655.359	34.225	72.938	25.144	-0.552	20.234	1247.635	-0.002396	-0.005106	-0.001760
0.1192	598.356	30.099	66.366	22.099	-0.555	20.234	1139.116	-0.002107	-0.004646	-0.001547
0.1200	542.465	26.071	59.972	19.475	-0.560	20.233	1032.715	-0.001825	-0.004198	-0.001363
0.1208	487.221	22.170	53.456	16.585	-0.563	20.231	927.544	-0.001552	-0.003742	-0.001161
0.1216	433.434	18.284	46.898	13.567	-0.557	20.231	825.148	-0.001280	-0.003283	-0.000950
0.1224	383.300	14.396	40.700	10.901	-0.552	20.230	729.704	-0.001008	-0.002849	-0.000763
0.1232	339.311	11.099	35.266	8.501	-0.553	20.228	645.962	-0.000777	-0.002469	-0.000595
0.1240	304.340	8.363	30.722	6.509	-0.554	20.226	579.386	-0.000585	-0.002151	-0.000456
0.1248	280.084	6.201	27.414	5.036	-0.553	20.224	533.209	-0.000434	-0.001919	-0.000353
0.1256	266.469	5.052	25.233	4.110	-0.560	20.222	507.288	-0.000354	-0.001766	-0.000288
0.1264	261.945	4.517	24.039	3.535	-0.564	20.220	498.676	-0.000316	-0.001683	-0.000247
0.1272	264.154	4.293	23.665	3.421	-0.564	20.219	502.882	-0.000301	-0.001657	-0.000239
0.1280	272.180	4.658	23.914	3.675	-0.573	20.217	518.160	-0.000326	-0.001674	-0.000257
0.1288	288.891	5.611	24.915	4.252	-0.580	20.216	549.974	-0.000393	-0.001744	-0.000298
0.1296	319.835	7.408	27.373	5.150	-0.578	20.216	608.883	-0.000519	-0.001916	-0.000360
0.1304	369.954	10.425	32.167	7.143	-0.578	20.216	704.298	-0.000730	-0.002252	-0.000500
0.1312	440.738	14.620	39.254	10.230	-0.574	20.218	839.052	-0.001023	-0.002748	-0.000716
0.1320	529.992	19.925	48.591	14.228	-0.566	20.220	1008.968	-0.001395	-0.003401	-0.000996
0.1328	632.501	25.776	59.514	19.349	-0.567	20.221	1204.119	-0.001804	-0.004166	-0.001354
0.1336	742.569	32.834	71.118	24.991	-0.569	20.223	1413.660	-0.002298	-0.004978	-0.001749
0.1344	856.033	40.019	83.069	30.603	-0.566	20.225	1629.667	-0.002801	-0.005815	-0.002142
0.1352	968.656	47.233	95.089	36.145	-0.565	20.227	1844.072	-0.003306	-0.006656	-0.002530
0.1360	1077.447	54.559	106.456	41.575	-0.566	20.229	2051.182	-0.003819	-0.007452	-0.002910
0.1368	1180.496	61.224	117.240	46.599	-0.563	20.232	2247.362	-0.004286	-0.008207	-0.003262
0.1376	1276.588	67.679	127.454	51.455	-0.565	20.233	2430.296	-0.004737	-0.008922	-0.003602
0.1384	1365.331	73.923	137.057	56.395	-0.576	20.234	2599.239	-0.005175	-0.009594	-0.003948
0.1392	1445.447	79.830	145.894	60.831	-0.580	20.234	2751.760	-0.005588	-0.010213	-0.004258
0.1400	1516.021	84.811	153.844	64.717	-0.586	20.233	2886.114	-0.005937	-0.010769	-0.004530
0.1408	1576.315	89.078	160.583	68.127	-0.586	20.232	3000.898	-0.006235	-0.011241	-0.004769
0.1416	1625.352	92.517	165.962	70.736	-0.576	20.231	3094.254	-0.006476	-0.011617	-0.004952
0.1424	1663.299	95.169	170.325	72.783	-0.569	20.230	3166.494	-0.006662	-0.011923	-0.005095
0.1432	1690.486	97.275	173.535	74.355	-0.568	20.228	3218.250	-0.006809	-0.012147	-0.005205
0.1440	1707.633	98.761	175.759	75.477	-0.566	20.226	3250.895	-0.006913	-0.012303	-0.005283
0.1448	1716.440	99.532	177.191	76.179	-0.569	20.224	3267.660	-0.006967	-0.012403	-0.005333
0.1456	1718.724	99.771	177.888	76.700	-0.569	20.222	3272.009	-0.006984	-0.012452	-0.005369
0.1464	1716.214	99.827	178.125	76.840	-0.567	20.220	3267.231	-0.006988	-0.012469	-0.005379
0.1472	1710.022	99.883	177.957	76.629	-0.565	20.218	3255.444	-0.006992	-0.012457	-0.005364
0.1480	1699.698	99.477	177.610	76.446	-0.563	20.217	3235.788	-0.006963	-0.012433	-0.005351
0.1488	1681.138	98.929	176.719	76.023	-0.574	20.216	3200.455	-0.006925	-0.012370	-0.005322
0.1496	1645.941	97.232	174.050	74.888	-0.576	20.216	3133.450	-0.006806	-0.012183	-0.005242
0.1504	1586.594	93.639	169.228	72.475	-0.579	20.217	3020.468	-0.006555	-0.011846	-0.005073
0.1512	1499.865	88.714	161.223	68.420	-0.583	20.218	2855.358	-0.006210	-0.011286	-0.004789
0.1520	1388.730	82.007	150.245	62.963	-0.574	20.220	2643.785	-0.005740	-0.010517	-0.004407
0.1528	1263.483	74.161	137.948	56.676	-0.572	20.222	2405.348	-0.005191	-0.009656	-0.003967
0.1536	1136.674	66.584	125.052	50.263	-0.575	20.223	2163.935	-0.004661	-0.008754	-0.003518
0.1544	1017.979	59.175	112.893	44.159	-0.573	20.225	1937.971	-0.004142	-0.007903	-0.003091
0.1552	914.343	52.171	102.234	38.770	-0.570	20.227	1740.675	-0.003652	-0.007156	-0.002714
0.1560	828.155	46.489	92.908	34.295	-0.573	20.229	1576.595	-0.003254	-0.006504	-0.002401
0.1568	757.312	41.156	84.988	30.491	-0.564	20.232	1441.727	-0.002881	-0.005949	-0.002134
0.1576	697.859	36.805	78.234	27.320	-0.563	20.234	1328.545	-0.002576	-0.005476	-0.001912
0.1584	644.418	33.185	72.203	24.499	-0.569	20.234	1226.807	-0.002323	-0.005054	-0.001715
0.1592	591.984	29.579	66.382	21.677	-0.568	20.233	1126.986	-0.002071	-0.004647	-0.001517
0.1600	537.897	26.156	60.129	19.067	-0.572	20.232	1024.017	-0.001831	-0.004209	-0.001335
0.1608	481.826	22.271	53.473	16.204	-0.569	20.231	917.273	-0.001559	-0.003743	-0.001134
0.1616	426.070	18.131	46.761	13.145	-0.560	20.231	811.129	-0.001269	-0.003273	-0.000920
0.1624	374.824	14.257	40.382	10.478	-0.553	20.230	713.568	-0.000998	-0.002827	-0.000733
0.1632	331.917	11.058	35.003	8.137	-0.552	20.228	631.886	-0.000774	-0.002450	-0.000570
0.1640	299.802	8.461	31.029	6.299	-0.549	20.226	570.745	-0.000592	-0.002172	-0.000441
0.1648	279.108	6.624	28.014	5.233	-0.550	20.224	531.349	-0.000464	-0.001961	-0.000366
0.1656	268.422	5.614	26.194	4.545	-0.553	20.222	511.007	-0.000393	-0.001834	-0.000318
0.1664	265.582	5.065	25.346	4.081	-0.554	20.220	505.600	-0.000355	-0.001774	-0.000286
0.1672	268.467	4.882	24.872	3.982	-0.554	20.219	511.093	-0.000342	-0.001741	-0.000279
0.1680	276.342	5.275	25.178	4.123	-0.557	20.217	526.085	-0.000369	-0.001762	-0.000289
0.1688	292.212	5.822	26.275	4.685	-0.565	20.216	556.297	-0.000408	-0.001839	-0.000328
0.1696	321.533	7.226	28.820	5.639	-0.563	20.216	612.116	-0.000506	-0.002017	-0.000395
0.1704	369.774	10.089	33.322	7.743	-0.566	20.216	703.955	-0.000706	-0.002333	-0.000542
0.1712	438.679	14.032	40.075	10.648	-0.565	20.218	835.133	-0.000982	-0.002805	-0.000745
0.1720	526.821	19.617	49.009	14.507	-0.558	20.220	1002.932	-0.001373	-0.003431	-0.001015
0.1728	629.555	26.100	59.792	19.515	-0.561	20.221	1198.511	-0.001827	-0.004185	-0.001366
0.1736	740.976	33.270	71.603	24.807	-0.565	20.223	1410.627	-0.002329	-0.005012	-0.001736
0.1744	856.815	41.015	83.860	30.448	-0.560	20.225	1631.155	-0.002871	-0.005870	-0.002131
0.1752	972.293	48.467	96.187	36.188	-0.560	20.227	1850.996	-0.003393	-0.006733	-0.002533
0.1760	1083.503	55.876	107.833	41.886	-0.560	20.229	2062.712	-0.003911	-0.007548	-0.002932
0.1768	1187.951	62.808	118.827	47.092	-0.558	20.232	2261.553	-0.004397	-0.008318	-0.003296
0.1776	1283.682	68.984	129.027	52.031	-0.562	20.234	2443.800	-0.004829	-0.009032	-0.003642
0.1784	1370.215	75.115	138.310	56.716	-0.569	20.233	2608.538	-0.005258	-0.009682	-0.003970
0.1792	1447.386	80.252	146.688	60.814	-0.573	20.233	2755.451	-0.005618	-0.010268	-0.004257
0.1800	1515.825	84.813	154.233	64.645	-0.574	20.232	2885.742	-0.005937	-0.010796	-0.004525
0.1808	1576.916	89.163	160.931	68.041	-0.573	20.231	3002.043	-0.006241	-0.011265	-0.004763
0.1816	1630.898	92.756	166.919	70.918	-0.566	20.231	3104.811	-0.006493	-0.011684	-0.004964
0.1824	1677.471	95.997	172.146	73.599	-0.562	20.230	3193.474	-0.006720	-0.012050	-0.005152
0.1832	1715.267	98.761	176.537	75.831	-0.565	20.228	3265.429	-0.006913	-0.012358	-0.005308
0.1840	1742.484	100.879	180.039	77.627	-0.570	20.226	3317.242	-0.007062	-0.012603	-0.005434
0.1848	1758.835	102.058	182.165	78.875	-0.573	20.224	3348.370	-0.007144	-0.012752	-0.005521
0.1856	1765.477	102.832	183.416	79.324	-0.578	20.222	3361.015	-0.007198	-0.012839	-0.005553
0.1864	1764.215	103.014	183.987	79.353	-0.575	20.219	3358.612	-0.007211	-0.012879	-0.005555
0.1872	1756.971	102.733	183.639	78.974	-0.567	20.218	3344.822	-0.007191	-0.012855	-0.005528
0.1880	1743.506	102.227	183.125	78.456	-0.566	20.217	3319.187	-0.007156	-0.012819	-0.005492
0.1888	1718.754	101.229	181.971	78.063	-0.568	20.216	3272.066	-0.007086	-0.012738	-0.005464
0.1896	1675.172	99.054	178.609	76.658	-0.571	20.216	3189.096	-0.006934	-0.012503	-0.005366
0.1904	1607.619	95.377	172.884	73.964	-0.576	20.217	3060.493	-0.006676	-0.012102	-0.005177
0.1912	1514.788	90.046	164.281	69.810	-0.573	20.218	2883.768	-0.006303	-0.011500	-0.004887
0.1920	1401.609	83.227	152.900	64.126	-0.569	20.220	2668.304	-0.005826	-0.010703	-0.004489
0.1928	1277.760	75.481	140.545	57.839	-0.567	20.221	2432.528	-0.005284	-0.009838	-0.004049
0.1936	1153.175	67.622	127.941	51.440	-0.565	20.223	2195.349	-0.004734	-0.008956	-0.003601
0.1944	1036.028	60.072	115.825	45.392	-0.571	20.225	1972.332	-0.004205	-0.008108	-0.003177
0.1952	932.257	53.126	105.069	40.019	-0.570	20.227	1774.778	-0.003719	-0.007355	-0.002801
0.1960	843.995	47.204	95.564	35.472	-0.572	20.229	1606.750	-0.003304	-0.006689	-0.002483
0.1968	769.500	42.012	87.336	31.684	-0.569	20.232	1464.930	-0.002941	-0.006114	-0.002218
0.1976	705.479	37.536	80.122	28.177	-0.563	20.233	1343.050	-0.002627	-0.005609	-0.001972
0.1984	647.830	33.802	73.633	25.089	-0.566	20.234	1233.301	-0.002366	-0.005154	-0.001756
0.1992	593.021	30.251	67.588	22.115	-0.566	20.233	1128.960	-0.002118	-0.004731	-0.001548
0.2000	539.189	26.898	61.433	19.167	-0.569	20.233	1026.478	-0.001883	-0.004300	-0.001342
0.2008	485.778	23.319	55.236	16.528	-0.572	20.231	924.797	-0.001632	-0.003867	-0.001157
0.2016	433.915	19.629	48.955	13.652	-0.568	20.231	826.063	-0.001374	-0.003427	-0.000956
0.2024	386.350	15.952	42.826	11.224	-0.562	20.230	735.512	-0.001117	-0.002998	-0.000786
0.2032	345.789	12.627	37.670	9.203	-0.565	20.228	658.293	-0.000884	-0.002637	-0.000644
0.2040	314.394	10.228	33.459	7.407	-0.562	20.226	598.526	-0.000716	-0.002342	-0.000519
0.2048	293.054	8.180	30.290	6.355	-0.562	20.224	557.899	-0.000573	-0.002120	-0.000445
0.2056	280.956	7.045	28.247	5.429	-0.566	20.222	534.868	-0.000493	-0.001977	-0.000380
0.2064	276.448	6.413	27.303	4.882	-0.566	20.220	526.285	-0.000449	-0.001911	-0.000342
0.2072	277.710	6.132	26.956	4.601	-0.566	20.219	528.688	-0.000429	-0.001887	-0.000322
0.2080	283.631	6.201	26.970	4.516	-0.571	20.217	539.961	-0.000434	-0.001888	-0.000316
0.2088	296.165	6.832	27.692	5.105	-0.580	20.216	563.822	-0.000478	-0.001938	-0.000357
0.2096	321.127	8.179	29.443	5.960	-0.578	20.216	611.343	-0.000573	-0.002061	-0.000417
0.2104	364.980	10.678	33.501	7.659	-0.579	20.217	694.828	-0.000747	-0.002345	-0.000536
0.2112	431.270	14.566	40.157	10.507	-0.576	20.218	821.028	-0.001020	-0.002811	-0.000736
0.2120	519.923	19.842	49.217	14.339	-0.568	20.220	989.799	-0.001389	-0.003445	-0.001004
0.2128	626.264	26.424	60.334	19.321	-0.569	20.221	1192.245	-0.001850	-0.004223	-0.001352
0.2136	743.440	33.510	72.673	25.256	-0.574	20.223	1415.319	-0.002346	-0.005087	-0.001768
0.2144	865.501	41.339	85.487	31.219	-0.574	20.225	1647.692	-0.002894	-0.005984	-0.002185
0.2152	986.615	49.295	98.244	37.155	-0.573	20.227	1878.262	-0.003451	-0.006877	-0.002601
0.2160	1101.868	56.871	110.361	43.062	-0.576	20.229	2097.673	-0.003981	-0.007725	-0.003014
0.2168	1207.998	64.056	121.423	48.310	-0.570	20.232	2299.719	-0.004484	-0.008500	-0.003382
0.2176	1303.279	70.484	131.442	53.223	-0.571	20.234	2481.108	-0.004934	-0.009201	-0.003726
0.2184	1387.588	76.266	140.656	58.078	-0.581	20.234	2641.611	-0.005339	-0.009846	-0.004065
0.2192	1461.212	81.458	148.675	62.204	-0.583	20.233	2781.773	-0.005702	-0.010407	-0.004354
0.2200	1525.353	86.005	155.706	65.726	-0.586	20.233	2903.881	-0.006020	-0.010899	-0.004601
0.2208	1581.334	89.933	162.015	68.841	-0.588	20.231	3010.454	-0.006295	-0.011341	-0.004819
0.2216	1629.651	93.343	167.461	71.423	-0.574	20.231	3102.436	-0.006534	-0.011722	-0.005000
0.2224	1670.663	95.814	172.171	73.514	-0.570	20.229	3180.513	-0.006707	-0.012052	-0.005146
0.2232	1703.891	98.045	176.091	75.465	-0.569	20.228	3243.771	-0.006863	-0.012326	-0.005283
0.2240	1728.613	99.995	179.275	76.967	-0.568	20.226	3290.834	-0.007000	-0.012549	-0.005388
0.2248	1744.693	101.104	181.444	77.866	-0.572	20.224	3321.447	-0.007077	-0.012701	-0.005451
0.2256	1752.718	102.114	182.820	78.511	-0.572	20.221	3336.725	-0.007148	-0.012797	-0.005496
0.2264	1753.815	102.676	183.530	78.890	-0.570	20.219	3338.814	-0.007187	-0.012847	-0.005522
0.2272	1749.096	102.550	183.460	78.933	-0.564	20.218	3329.830	-0.007178	-0.012842	-0.005525
0.2280	1738.817	102.311	183.125	78.709	-0.565	20.216	3310.261	-0.007162	-0.012819	-0.005510
0.2288	1719.085	101.609	182.291	78.610	-0.568	20.215	3272.696	-0.007113	-0.012760	-0.005503
0.2296	1681.213	99.771	179.595	77.150	-0.569	20.215	3200.598	-0.006984	-0.012572	-0.005400
0.2304	1618.364	96.121	174.299	74.539	-0.571	20.216	3080.950	-0.006728	-0.012201	-0.005218
0.2312	1528.314	90.830	165.892	70.525	-0.566	20.218	2909.517	-0.006358	-0.011612	-0.004937
0.2320	1415.090	83.954	154.705	64.730	-0.560	20.220	2693.968	-0.005877	-0.010829	-0.004531
0.2328	1289.543	75.982	142.171	58.486	-0.556	20.221	2454.958	-0.005319	-0.009952	-0.004094
0.2336	1163.274	68.364	129.524	52.129	-0.558	20.223	2214.575	-0.004785	-0.009067	-0.003649
0.2344	1044.279	61.110	117.588	45.912	-0.560	20.225	1988.039	-0.004278	-0.008231	-0.003214
0.2352	938.118	53.981	106.652	40.482	-0.557	20.227	1785.936	-0.003779	-0.007466	-0.002834
0.2360	847.392	48.144	97.064	35.809	-0.557	20.229	1613.216	-0.003370	-0.006795	-0.002507
0.2368	771.138	42.909	88.699	31.823	-0.551	20.232	1468.048	-0.003004	-0.006209	-0.002228
0.2376	706.696	38.335	81.194	28.498	-0.548	20.234	1345.367	-0.002683	-0.005684	-0.001995
0.2384	649.919	34.730	74.745	25.608	-0.558	20.234	1237.278	-0.002431	-0.005232	-0.001793
0.2392	596.237	31.166	68.450	22.872	-0.563	20.234	1135.082	-0.002182	-0.004791	-0.001601
0.2400	542.916	27.868	62.280	20.052	-0.563	20.233	1033.573	-0.001951	-0.004360	-0.001404
0.2408	489.054	24.037	56.027	17.203	-0.566	20.231	931.034	-0.001683	-0.003922	-0.001204
0.2416	435.583	20.276	49.399	14.100	-0.557	20.231	829.239	-0.001419	-0.003458	-0.000987
0.2424	385.103	16.361	43.299	11.405	-0.557	20.230	733.137	-0.001145	-0.003031	-0.000798
0.2432	340.273	12.699	37.671	8.978	-0.562	20.228	647.793	-0.000889	-0.002637	-0.000628
0.2440	303.589	9.977	32.920	6.944	-0.561	20.226	577.955	-0.000698	-0.002304	-0.000486
0.2448	276.898	7.732	29.250	5.611	-0.561	20.224	527.143	-0.000541	-0.002047	-0.000393
0.2456	260.563	6.552	26.747	4.503	-0.561	20.222	496.044	-0.000459	-0.001872	-0.000315
0.2464	253.409	5.528	25.343	3.996	-0.561	20.220	482.426	-0.000387	-0.001774	-0.000280
0.2472	253.514	5.106	24.620	3.688	-0.560	20.218	482.626	-0.000357	-0.001723	-0.000258
0.2480	259.661	5.220	24.607	3.660	-0.564	20.217	494.328	-0.000365	-0.001722	-0.000256
0.2488	273.697	5.515	25.344	4.278	-0.575	20.216	521.049	-0.000386	-0.001774	-0.000299
0.2496	301.064	6.932	27.165	5.008	-0.578	20.216	573.149	-0.000485	-0.001902	-0.000351
0.2504	347.878	9.402	31.556	6.860	-0.582	20.216	662.270	-0.000658	-0.002209	-0.000480
0.2512	416.437	13.373	38.588	9.850	-0.581	20.218	792.789	-0.000936	-0.002701	-0.000690
0.2520	505.465	18.677	47.648	13.765	-0.574	20.220	962.276	-0.001307	-0.003335	-0.000964
0.2528	609.417	25.048	58.904	18.844	-0.576	20.221	1160.173	-0.001753	-0.004123	-0.001319
0.2536	721.529	32.120	70.758	24.485	-0.576	20.223	1373.606	-0.002248	-0.004953	-0.001714
0.2544	837.804	39.291	82.959	30.013	-0.572	20.225	1594.963	-0.002750	-0.005807	-0.002101
0.2552	954.124	46.826	95.466	35.610	-0.570	20.227	1816.406	-0.003278	-0.006683	-0.002493
0.2560	1067.227	54.221	107.293	41.435	-0.566	20.229	2031.727	-0.003795	-0.007510	-0.002900
0.2568	1174.515	61.236	118.660	46.754	-0.566	20.232	2235.975	-0.004287	-0.008306	-0.003273
0.2576	1273.492	67.873	129.139	51.932	-0.564	20.234	2424.402	-0.004751	-0.009040	-0.003635
0.2584	1363.543	74.188	138.796	57.055	-0.568	20.234	2595.835	-0.005193	-0.009716	-0.003994
0.2592	1444.440	80.027	147.564	61.265	-0.568	20.234	2749.844	-0.005602	-0.010329	-0.004289
0.2600	1516.427	85.178	155.373	65.236	-0.569	20.233	2886.887	-0.005962	-0.010876	-0.004566
0.2608	1579.486	89.626	162.543	68.871	-0.569	20.232	3006.935	-0.006274	-0.011378	-0.004821
0.2616	1632.656	93.274	168.435	71.606	-0.564	20.231	3108.158	-0.006529	-0.011790	-0.005012
0.2624	1675.322	96.179	173.451	74.075	-0.564	20.230	3189.383	-0.006733	-0.012142	-0.005185
0.2632	1706.957	98.664	177.371	75.956	-0.566	20.228	3249.607	-0.006906	-0.012416	-0.005317
0.2640	1727.921	100.361	180.026	77.177	-0.570	20.226	3289.518	-0.007025	-0.012602	-0.005402
0.2648	1739.373	101.540	181.916	78.006	-0.570	20.224	3311.319	-0.007108	-0.012734	-0.005460
0.2656	1743.310	102.354	182.904	78.596	-0.569	20.222	3318.815	-0.007165	-0.012803	-0.005502
0.2664	1741.522	102.395	183.293	78.848	-0.567	20.220	3315.411	-0.007168	-0.012830	-0.005519
0.2672	1735.120	102.508	183.070	78.693	-0.565	20.219	3303.223	-0.007176	-0.012815	-0.005509
0.2680	1724.089	102.171	182.554	78.552	-0.566	20.218	3282.223	-0.007152	-0.012779	-0.005499
0.2688	1703.786	101.259	181.580	78.005	-0.574	20.216	3243.570	-0.007088	-0.012711	-0.005460
0.2696	1665.959	99.337	178.661	76.601	-0.574	20.216	3171.558	-0.006954	-0.012506	-0.005362
0.2704	1604.117	95.843	173.450	74.061	-0.573	20.216	3053.827	-0.006709	-0.012141	-0.005184
0.2712	1515.600	90.580	165.349	69.949	-0.573	20.218	2885.313	-0.006341	-0.011574	-0.004896
0.2720	1404.164	84.013	154.343	64.420	-0.565	20.220	2673.168	-0.005881	-0.010804	-0.004509
0.2728	1280.150	76.378	142.129	58.260	-0.566	20.222	2437.077	-0.005346	-0.009949	-0.004078
0.2736	1154.813	68.702	129.553	52.015	-0.568	20.223	2198.467	-0.004809	-0.009069	-0.003641
0.2744	1037.261	61.222	117.518	45.940	-0.568	20.225	1974.678	-0.004286	-0.008226	-0.003216
0.2752	934.181	53.995	106.777	40.538	-0.572	20.227	1778.440	-0.003780	-0.007474	-0.002838
0.2760	847.888	48.074	97.633	36.034	-0.569	20.229	1614.161	-0.003365	-0.006834	-0.002522
0.2768	776.608	42.826	89.726	32.161	-0.566	20.232	1478.462	-0.002998	-0.006281	-0.002251
0.2776	716.209	38.546	82.736	28.821	-0.561	20.234	1363.478	-0.002698	-0.005792	-0.002017
0.2784	661.430	35.037	76.497	26.126	-0.562	20.234	1259.193	-0.002453	-0.005355	-0.001829
0.2792	607.989	31.556	70.242	23.318	-0.568	20.234	1157.455	-0.002209	-0.004917	-0.001632
0.2800	553.977	28.047	64.045	20.610	-0.572	20.233	1054.630	-0.001963	-0.004483	-0.001443
0.2808	499.454	24.385	57.696	17.972	-0.574	20.232	950.832	-0.001707	-0.004039	-0.001258
0.2816	446.163	20.471	51.290	14.941	-0.570	20.231	849.380	-0.001433	-0.003590	-0.001046
0.2824	397.051	16.724	45.301	12.246	-0.564	20.230	755.882	-0.001171	-0.003171	-0.000857
0.2832	354.761	13.456	39.853	9.791	-0.565	20.228	675.373	-0.000942	-0.002790	-0.000685
0.2840	321.262	10.692	35.518	7.855	-0.566	20.226	611.601	-0.000748	-0.002486	-0.000550
0.2848	297.547	8.840	32.224	6.452	-0.564	20.224	566.454	-0.000619	-0.002256	-0.000452
0.2856	283.376	7.663	29.875	5.640	-0.568	20.222	539.474	-0.000536	-0.002091	-0.000395
0.2864	277.394	6.932	28.666	5.177	-0.568	20.220	528.088	-0.000485	-0.002007	-0.000362
0.2872	277.935	6.679	27.929	4.715	-0.567	20.219	529.118	-0.000468	-0.001955	-0.000330
0.2880	284.007	6.833	27.860	4.911	-0.572	20.217	540.676	-0.000478	-0.001950	-0.000344
0.2888	297.442	7.591	28.708	5.303	-0.578	20.216	566.254	-0.000531	-0.002010	-0.000371
0.2896	324.088	9.106	30.696	6.144	-0.575	20.216	616.980	-0.000637	-0.002149	-0.000430
0.2904	370.105	11.730	35.170	8.151	-0.579	20.216	704.584	-0.000821	-0.002462	-0.000571
0.2912	437.808	15.532	41.980	10.901	-0.576	20.218	833.473	-0.001087	-0.002939	-0.000763
0.2920	526.084	20.682	50.984	14.689	-0.572	20.220	1001.530	-0.001448	-0.003569	-0.001028
0.2928	629.360	26.647	62.002	19.685	-0.574	20.221	1198.139	-0.001865	-0.004340	-0.001378
0.2936	741.111	33.523	73.744	25.270	-0.574	20.223	1410.885	-0.002347	-0.005162	-0.001769
0.2944	857.521	40.891	85.888	31.080	-0.577	20.225	1632.500	-0.002862	-0.006012	-0.002176
0.2952	974.728	48.356	98.241	37.030	-0.579	20.227	1855.631	-0.003385	-0.006877	-0.002592
0.2960	1089.409	55.989	110.208	42.937	-0.581	20.230	2073.956	-0.003919	-0.007715	-0.003006
0.2968	1198.786	63.061	121.687	48.355	-0.581	20.233	2282.181	-0.004414	-0.008518	-0.003385
0.2976	1299.867	70.021	132.528	53.490	-0.578	20.234	2474.613	-0.004901	-0.009277	-0.003744
0.2984	1391.300	76.322	142.562	58.528	-0.585	20.234	2648.678	-0.005343	-0.009979	-0.004097
0.2992	1472.003	82.063	151.524	62.710	-0.585	20.234	2802.315	-0.005744	-0.010607	-0.004390
0.3000	1541.840	87.129	159.349	66.611	-0.583	20.233	2935.266	-0.006099	-0.011154	-0.004663
0.3008	1601.367	91.213	165.921	70.048	-0.587	20.232	3048.592	-0.006385	-0.011615	-0.004903
0.3016	1650.765	94.875	171.340	72.560	-0.577	20.231	3142.633	-0.006641	-0.011994	-0.005079
0.3024	1690.681	97.682	176.024	74.875	-0.574	20.230	3218.622	-0.006838	-0.012322	-0.005241
0.3032	1721.324	99.913	179.595	76.797	-0.576	20.228	3276.958	-0.006994	-0.012572	-0.005376
0.3040	1742.995	101.639	182.457	78.089	-0.571	20.226	3318.214	-0.007115	-0.012772	-0.005466
0.3048	1756.220	102.734	184.472	79.000	-0.570	20.224	3343.391	-0.007191	-0.012913	-0.005530
0.3056	1762.156	103.561	185.500	79.645	-0.570	20.222	3354.692	-0.007249	-0.012985	-0.005575
0.3064	1761.946	104.123	186.222	79.828	-0.570	20.220	3354.292	-0.007289	-0.013036	-0.005588
0.3072	1756.611	104.165	186.167	79.645	-0.569	20.219	3344.135	-0.007292	-0.013032	-0.005575
0.3080	1745.985	103.842	185.834	79.535	-0.570	20.217	3323.908	-0.007269	-0.013008	-0.005567
0.3088	1725.622	103.295	184.847	79.142	-0.576	20.215	3285.141	-0.007231	-0.012939	-0.005540
0.3096	1686.443	101.119	181.678	77.766	-0.576	20.216	3210.554	-0.007078	-0.012717	-0.005444
0.3104	1620.664	97.133	175.967	75.170	-0.581	20.216	3085.327	-0.006799	-0.012318	-0.005262
0.3112	1525.444	91.534	167.032	70.848	-0.579	20.218	2904.053	-0.006407	-0.011692	-0.004959
0.3120	1405.036	83.998	155.109	64.841	-0.574	20.220	2674.828	-0.005880	-0.010858	-0.004539
0.3128	1271.463	75.915	141.741	58.092	-0.575	20.221	2420.540	-0.005314	-0.009922	-0.004066
0.3136	1137.711	67.777	128.123	51.287	-0.573	20.223	2165.909	-0.004744	-0.008969	-0.003590
0.3144	1013.305	59.919	115.254	44.804	-0.578	20.225	1929.073	-0.004194	-0.008068	-0.003136
0.3152	904.936	52.776	103.817	39.149	-0.576	20.227	1722.765	-0.003694	-0.007267	-0.002740
0.3160	815.441	46.659	94.075	34.518	-0.575	20.230	1552.391	-0.003266	-0.006585	-0.002416
0.3168	743.816	41.663	86.098	30.756	-0.574	20.232	1416.035	-0.002916	-0.006027	-0.002153
0.3176	686.798	37.523	79.609	27.628	-0.568	20.234	1307.487	-0.002627	-0.005573	-0.001934
0.3184	638.617	34.085	74.037	25.159	-0.571	20.234	1215.763	-0.002386	-0.005183	-0.001761
0.3192	593.126	30.773	68.965	22.773	-0.573	20.233	1129.160	-0.002154	-0.004828	-0.001594
0.3200	546.207	27.349	63.532	20.402	-0.568	20.232	1039.839	-0.001914	-0.004447	-0.001428
0.3208	496.238	23.743	57.501	17.903	-0.572	20.231	944.710	-0.001662	-0.004025	-0.001253
0.3216	444.210	19.773	51.221	15.012	-0.568	20.230	845.661	-0.001384	-0.003585	-0.001051
0.3224	393.489	16.166	44.940	12.360	-0.560	20.229	749.102	-0.001132	-0.003146	-0.000865
0.3232	347.938	12.924	39.187	9.876	-0.562	20.228	662.384	-0.000905	-0.002743	-0.000691
0.3240	310.908	9.836	34.420	7.689	-0.556	20.226	591.888	-0.000689	-0.002409	-0.000538
0.3248	284.638	7.788	30.862	6.230	-0.556	20.224	541.878	-0.000545	-0.002160	-0.000436
0.3256	269.099	6.453	28.554	5.121	-0.560	20.221	512.295	-0.000452	-0.001999	-0.000358
0.3264	262.667	5.878	27.456	4.545	-0.564	20.219	500.050	-0.000411	-0.001922	-0.000318
0.3272	263.162	5.977	27.039	4.278	-0.565	20.218	500.994	-0.000418	-0.001893	-0.000299
0.3280	268.933	6.060	27.040	4.235	-0.567	20.217	511.980	-0.000424	-0.001893	-0.000296
0.3288	281.753	6.749	27.708	4.614	-0.574	20.216	536.385	-0.000472	-0.001940	-0.000323
0.3296	306.925	7.956	29.709	5.415	-0.570	20.216	584.307	-0.000557	-0.002080	-0.000379
0.3304	350.478	10.329	33.808	7.280	-0.573	20.216	667.219	-0.000723	-0.002367	-0.000510
0.3312	415.280	14.091	40.172	9.933	-0.573	20.218	790.586	-0.000986	-0.002812	-0.000695
0.3320	500.882	19.142	48.829	13.665	-0.567	20.220	953.550	-0.001340	-0.003418	-0.000957
0.3328	603.030	25.133	59.502	18.548	-0.568	20.221	1148.014	-0.001759	-0.004165	-0.001298
0.3336	715.472	32.063	71.411	24.049	-0.568	20.223	1362.076	-0.002244	-0.004999	-0.001683
0.3344	833.821	39.779	83.931	29.985	-0.566	20.225	1587.381	-0.002785	-0.005875	-0.002099
0.3352	953.462	47.146	96.633	36.047	-0.568	20.227	1815.147	-0.003300	-0.006764	-0.002523
0.3360	1070.203	54.852	108.860	41.997	-0.570	20.229	2037.392	-0.003840	-0.007620	-0.002940
0.3368	1181.098	62.079	120.395	47.471	-0.573	20.232	2248.507	-0.004346	-0.008428	-0.003323
0.3376	1283.802	68.619	131.400	52.817	-0.573	20.234	2444.029	-0.004803	-0.009198	-0.003697
0.3384	1377.068	75.144	141.585	57.826	-0.587	20.234	2621.584	-0.005260	-0.009911	-0.004048
0.3392	1459.875	80.954	150.716	62.134	-0.588	20.234	2779.226	-0.005667	-0.010550	-0.004349
0.3400	1532.176	85.866	158.679	66.217	-0.587	20.233	2916.870	-0.006011	-0.011108	-0.004635
0.3408	1594.454	90.566	165.516	69.668	-0.589	20.231	3035.431	-0.006340	-0.011586	-0.004877
0.3416	1647.008	94.551	171.243	72.503	-0.576	20.231	3135.481	-0.006619	-0.011987	-0.005075
0.3424	1690.531	97.511	176.162	75.015	-0.569	20.230	3218.336	-0.006826	-0.012331	-0.005251
0.3432	1724.570	100.331	180.149	77.023	-0.572	20.228	3283.138	-0.007023	-0.012610	-0.005392
0.3440	1748.766	102.169	183.277	78.385	-0.570	20.226	3329.201	-0.007152	-0.012829	-0.005487
0.3448	1763.403	103.039	185.375	79.381	-0.570	20.224	3357.067	-0.007213	-0.012976	-0.005557
0.3456	1769.460	103.910	186.472	79.898	-0.576	20.221	3368.597	-0.007274	-0.013053	-0.005593
0.3464	1768.738	104.304	187.043	80.065	-0.571	20.219	3367.224	-0.007301	-0.013093	-0.005605
0.3472	1762.562	104.388	186.945	80.009	-0.569	20.218	3355.465	-0.007307	-0.013086	-0.005601
0.3480	1750.840	104.248	186.555	79.842	-0.572	20.217	3333.149	-0.007297	-0.013059	-0.005589
0.3488	1728.748	103.321	185.541	79.605	-0.577	20.216	3291.092	-0.007232	-0.012988	-0.005572
0.3496	1687.886	101.061	182.316	78.118	-0.581	20.216	3213.301	-0.007074	-0.012762	-0.005468
0.3504	1622.302	97.328	176.702	75.395	-0.584	20.217	3088.446	-0.006813	-0.012369	-0.005278
0.3512	1530.493	91.898	168.239	71.030	-0.581	20.218	2913.666	-0.006433	-0.011777	-0.004972
0.3520	1417.269	85.190	156.941	65.303	-0.574	20.220	2698.116	-0.005963	-0.010986	-0.004571
0.3528	1293.134	77.642	144.517	59.157	-0.572	20.221	2461.796	-0.005435	-0.010116	-0.004141
0.3536	1168.008	69.770	131.760	52.967	-0.574	20.223	2223.587	-0.004884	-0.009223	-0.003708
0.3544	1049.073	62.318	119.392	46.905	-0.572	20.224	1997.166	-0.004362	-0.008357	-0.003283
0.3552	941.921	54.853	108.248	41.294	-0.570	20.227	1793.175	-0.003840	-0.007577	-0.002891
0.3560	849.045	48.496	98.396	36.467	-0.570	20.229	1616.364	-0.003395	-0.006888	-0.002553
0.3568	770.341	42.995	89.740	32.370	-0.566	20.232	1466.532	-0.003010	-0.006282	-0.002266
0.3576	703.735	38.225	82.223	28.834	-0.565	20.233	1339.731	-0.002676	-0.005756	-0.002018
0.3584	645.380	34.309	75.567	25.817	-0.575	20.234	1228.638	-0.002402	-0.005290	-0.001807
0.3592	591.037	30.590	69.383	22.983	-0.575	20.234	1125.183	-0.002141	-0.004857	-0.001609
0.3600	538.227	26.956	63.199	20.134	-0.577	20.233	1024.647	-0.001887	-0.004424	-0.001409
0.3608	485.643	23.236	57.042	17.273	-0.578	20.232	924.540	-0.001627	-0.003993	-0.001209
0.3616	433.645	19.841	50.816	14.367	-0.564	20.231	825.548	-0.001389	-0.003557	-0.001006
0.3624	384.352	16.109	44.701	11.673	-0.560	20.230	731.707	-0.001128	-0.003129	-0.000817
0.3632	339.762	12.881	39.017	9.176	-0.557	20.229	646.820	-0.000902	-0.002731	-0.000642
0.3640	302.747	10.019	34.348	7.324	-0.553	20.227	576.353	-0.000701	-0.002404	-0.000513
0.3648	275.456	7.801	30.681	5.851	-0.558	20.224	524.397	-0.000546	-0.002148	-0.000410
0.3656	258.534	6.511	28.264	4.785	-0.558	20.222	492.182	-0.000456	-0.001978	-0.000335
0.3664	251.140	5.443	27.138	4.266	-0.565	20.220	478.106	-0.000381	-0.001900	-0.000299
0.3672	251.230	5.232	26.318	3.901	-0.568	20.219	478.277	-0.000366	-0.001842	-0.000273
0.3680	257.842	5.456	26.262	3.943	-0.571	20.217	490.866	-0.000382	-0.001838	-0.000276
0.3688	273.562	6.340	27.039	4.462	-0.583	20.216	520.792	-0.000444	-0.001893	-0.000312
0.3696	304.415	8.179	29.652	5.429	-0.578	20.216	579.529	-0.000573	-0.002076	-0.000380
0.3704	356.068	11.239	34.655	7.520	-0.577	20.216	677.862	-0.000787	-0.002426	-0.000526
0.3712	430.248	15.351	42.103	10.592	-0.577	20.218	819.082	-0.001075	-0.002947	-0.000741
0.3720	524.221	20.795	51.956	14.760	-0.569	20.220	997.982	-0.001456	-0.003637	-0.001033
0.3728	631.419	27.278	63.212	19.952	-0.573	20.221	1202.059	-0.001909	-0.004425	-0.001397
0.3736	744.748	34.056	75.287	25.691	-0.581	20.223	1417.809	-0.002384	-0.005270	-0.001798
0.3744	859.610	41.394	87.543	31.389	-0.580	20.225	1636.477	-0.002898	-0.006128	-0.002197
0.3752	972.323	48.692	99.495	37.100	-0.583	20.227	1851.053	-0.003408	-0.006965	-0.002597
0.3760	1080.017	55.849	110.820	42.671	-0.583	20.229	2056.074	-0.003909	-0.007757	-0.002987
0.3768	1180.857	62.543	121.410	47.569	-0.576	20.232	2248.049	-0.004378	-0.008499	-0.003330
0.3776	1273.748	68.888	131.208	52.452	-0.577	20.234	2424.889	-0.004822	-0.009185	-0.003672
0.3784	1358.869	74.753	140.574	57.040	-0.585	20.234	2586.937	-0.005233	-0.009840	-0.003993
0.3792	1436.656	80.127	148.995	61.068	-0.585	20.233	2735.023	-0.005609	-0.010430	-0.004275
0.3800	1507.860	85.121	156.776	65.038	-0.592	20.232	2870.579	-0.005958	-0.010974	-0.004553
0.3808	1572.197	89.428	163.877	68.561	-0.588	20.231	2993.059	-0.006260	-0.011471	-0.004799
0.3816	1628.313	93.455	169.826	71.592	-0.580	20.231	3099.890	-0.006542	-0.011888	-0.005011
0.3824	1674.931	96.725	174.952	74.187	-0.576	20.229	3188.639	-0.006771	-0.012247	-0.005193
0.3832	1710.699	99.517	179.274	76.196	-0.576	20.228	3256.731	-0.006966	-0.012549	-0.005334
0.3840	1735.360	101.454	182.345	77.851	-0.576	20.226	3303.680	-0.007102	-0.012764	-0.005450
0.3848	1749.502	102.534	184.344	78.806	-0.575	20.223	3330.603	-0.007177	-0.012904	-0.005516
0.3856	1754.822	103.194	185.568	79.507	-0.572	20.221	3340.731	-0.007224	-0.012990	-0.005566
0.3864	1753.184	103.307	185.832	79.871	-0.572	20.220	3337.612	-0.007231	-0.013008	-0.005591
0.3872	1745.790	103.349	185.623	79.507	-0.570	20.218	3323.536	-0.007234	-0.012994	-0.005566
0.3880	1732.174	103.197	185.138	79.284	-0.573	20.217	3297.615	-0.007224	-0.012960	-0.005550
0.3888	1706.235	102.285	183.581	78.555	-0.580	20.215	3248.234	-0.007160	-0.012851	-0.005499
0.3896	1660.008	99.843	179.900	76.703	-0.577	20.216	3160.229	-0.006989	-0.012593	-0.005369
0.3904	1589.014	95.688	173.744	73.881	-0.578	20.216	3025.074	-0.006698	-0.012162	-0.005172
0.3912	1493.478	89.780	164.656	69.362	-0.576	20.218	2843.199	-0.006285	-0.011526	-0.004855
0.3920	1380.570	82.623	153.470	63.790	-0.573	20.220	2628.250	-0.005784	-0.010743	-0.004465
0.3928	1261.154	75.396	141.463	57.797	-0.578	20.222	2400.913	-0.005278	-0.009902	-0.004046
0.3936	1144.443	68.241	129.637	51.707	-0.580	20.223	2178.726	-0.004777	-0.009075	-0.003619
0.3944	1036.720	61.266	118.658	46.108	-0.578	20.225	1973.648	-0.004289	-0.008306	-0.003228
0.3952	941.695	55.062	108.680	40.987	-0.575	20.227	1792.746	-0.003854	-0.007608	-0.002869
0.3960	859.430	49.436	99.953	36.749	-0.571	20.229	1636.133	-0.003461	-0.006997	-0.002572
0.3968	787.158	44.411	91.963	33.142	-0.568	20.232	1498.547	-0.003109	-0.006437	-0.002320
0.3976	721.018	39.753	84.474	29.648	-0.562	20.234	1372.633	-0.002783	-0.005913	-0.002075
0.3984	657.192	35.530	77.484	26.602	-0.565	20.234	1251.125	-0.002487	-0.005424	-0.001862
0.3992	593.697	31.095	70.271	23.207	-0.565	20.234	1130.247	-0.002177	-0.004919	-0.001625
