# Supplementary material for: Evaluation of a Cold-Mixed High-Performance Polyurethane Mixture
Source: Hindawi journal article supplement (doi:10.1155/2019/1507971), 2019-11-07
Supplement: f1 [file 1507971.f1.zip › 1507971.f1/dynamic modulus data/PUM/specimen2/temp20/zhs-2-20_Runtime.csv]

Time (sec)	Load (kN)	Confining Pressure (kPa)	Axial LVDT #1 (mm)	Axial LVDT #2 (mm)	Axial LVDT #3 (mm)	Temperature (�C)
0.0008	0.610428	-0.572	0.01986575	0.14841211	0.14381307	20.22
0.0016	0.609856	-0.566	0.01988149	0.14842093	0.14382488	20.22
0.0024	0.608740	-0.573	0.01988053	0.14843446	0.14381999	20.22
0.0032	0.606136	-0.576	0.01987457	0.14843440	0.14380527	20.22
0.0040	0.601587	-0.574	0.01989812	0.14844215	0.14380234	20.22
0.0048	0.594549	-0.581	0.01991385	0.14844799	0.14378858	20.22
0.0056	0.583935	-0.573	0.01993746	0.14848202	0.14380723	20.22
0.0064	0.568657	-0.569	0.01998162	0.14853650	0.14383280	20.22
0.0072	0.547457	-0.574	0.02002096	0.14860946	0.14386326	20.22
0.0080	0.520048	-0.573	0.02009553	0.14871156	0.14391828	20.22
0.0088	0.487776	-0.577	0.02016419	0.14882737	0.14395958	20.22
0.0096	0.453558	-0.580	0.02024579	0.14897043	0.14400971	20.23
0.0104	0.420971	-0.575	0.02032536	0.14909393	0.14406186	20.23
0.0112	0.392790	-0.573	0.02039713	0.14920974	0.14410508	20.23
0.0120	0.371075	-0.570	0.02046788	0.14930981	0.14415020	20.23
0.0128	0.356598	-0.575	0.02050322	0.14936131	0.14416283	20.23
0.0136	0.348272	-0.577	0.02053362	0.14939731	0.14417553	20.23
0.0144	0.345325	-0.580	0.02052772	0.14940214	0.14417654	20.23
0.0152	0.345898	-0.582	0.02052474	0.14939642	0.14417362	20.23
0.0160	0.348444	-0.574	0.02053756	0.14939648	0.14419329	20.23
0.0168	0.352592	-0.573	0.02051693	0.14939362	0.14419430	20.23
0.0176	0.357399	-0.572	0.02052867	0.14939463	0.14419031	20.23
0.0184	0.362549	-0.570	0.02051395	0.14938194	0.14418346	20.22
0.0192	0.368271	-0.569	0.02049911	0.14937127	0.14417374	20.22
0.0200	0.374222	-0.571	0.02048630	0.14936346	0.14416784	20.22
0.0208	0.380402	-0.571	0.02046871	0.14935082	0.14417082	20.22
0.0216	0.387411	-0.568	0.02047366	0.14934397	0.14417571	20.22
0.0224	0.395308	-0.574	0.02044624	0.14931571	0.14415807	20.22
0.0232	0.404005	-0.577	0.02043837	0.14927095	0.14414334	20.22
0.0240	0.413561	-0.577	0.02039808	0.14923489	0.14412659	20.22
0.0248	0.423574	-0.578	0.02034801	0.14919895	0.14410400	20.22
0.0256	0.433245	-0.573	0.02034211	0.14917368	0.14409810	20.22
0.0264	0.442286	-0.569	0.02033043	0.14914167	0.14409709	20.22
0.0272	0.449724	-0.571	0.02030975	0.14911348	0.14408535	20.22
0.0280	0.455017	-0.576	0.02031463	0.14909118	0.14407462	20.22
0.0288	0.458450	-0.573	0.02030677	0.14908630	0.14407849	20.22
0.0296	0.459824	-0.573	0.02030283	0.14909303	0.14407170	20.23
0.0304	0.460138	-0.569	0.02032930	0.14908433	0.14407367	20.23
0.0312	0.459623	-0.560	0.02033520	0.14909017	0.14408636	20.23
0.0320	0.458307	-0.562	0.02033615	0.14908725	0.14408147	20.23
0.0328	0.456648	-0.564	0.02032626	0.14908141	0.14407367	20.23
0.0336	0.453959	-0.564	0.02030867	0.14909112	0.14407861	20.23
0.0344	0.450754	-0.572	0.02031058	0.14908433	0.14406878	20.23
0.0352	0.446949	-0.574	0.02031255	0.14909899	0.14407760	20.23
0.0360	0.442572	-0.570	0.02032048	0.14913017	0.14409232	20.23
0.0368	0.438023	-0.575	0.02033323	0.14914089	0.14408451	20.23
0.0376	0.432787	-0.575	0.02033329	0.14916319	0.14408749	20.23
0.0384	0.426893	-0.576	0.02034801	0.14917481	0.14408654	20.23
0.0392	0.420113	-0.576	0.02036667	0.14918649	0.14409322	20.22
0.0400	0.412216	-0.577	0.02040297	0.14921260	0.14411271	20.22
0.0408	0.402660	-0.577	0.02043140	0.14923590	0.14412940	20.22
0.0416	0.391302	-0.572	0.02045399	0.14927578	0.14416075	20.22
0.0424	0.378456	-0.574	0.02048832	0.14932436	0.14418346	20.22
0.0432	0.364408	-0.572	0.02049619	0.14937109	0.14418840	20.22
0.0440	0.349989	-0.572	0.02052474	0.14942354	0.14420611	20.22
0.0448	0.336657	-0.577	0.02055824	0.14946890	0.14421397	20.22
0.0456	0.324554	-0.574	0.02059072	0.14951515	0.14421982	20.22
0.0464	0.314083	-0.572	0.02061141	0.14956528	0.14423847	20.22
0.0472	0.305700	-0.573	0.02063304	0.14961535	0.14425313	20.22
0.0480	0.298805	-0.569	0.02065271	0.14965200	0.14426202	20.22
0.0488	0.294142	-0.572	0.02066052	0.14967132	0.14427680	20.23
0.0496	0.291710	-0.574	0.02067035	0.14968091	0.14429450	20.23
0.0504	0.291166	-0.574	0.02069587	0.14968193	0.14429158	20.23
0.0512	0.292368	-0.573	0.02070260	0.14968288	0.14429057	20.23
0.0520	0.294828	-0.570	0.02069378	0.14969057	0.14428663	20.23
0.0528	0.298290	-0.576	0.02070165	0.14967710	0.14426798	20.23
0.0536	0.302639	-0.574	0.02067900	0.14965975	0.14425623	20.23
0.0544	0.307789	-0.577	0.02065450	0.14963853	0.14424545	20.23
0.0552	0.313482	-0.576	0.02066720	0.14961153	0.14424050	20.23
0.0560	0.319748	-0.567	0.02066815	0.14961058	0.14424443	20.23
0.0568	0.327015	-0.563	0.02065146	0.14959997	0.14424342	20.23
0.0576	0.335512	-0.562	0.02062494	0.14958942	0.14423752	20.23
0.0584	0.345640	-0.564	0.02057779	0.14955574	0.14423168	20.23
0.0592	0.357857	-0.565	0.02054626	0.14950460	0.14422679	20.22
0.0600	0.371990	-0.568	0.02051878	0.14945626	0.14422286	20.22
0.0608	0.387697	-0.563	0.02050507	0.14938945	0.14420909	20.22
0.0616	0.404234	-0.560	0.02047759	0.14933503	0.14419824	20.22
0.0624	0.421057	-0.563	0.02042657	0.14927673	0.14416677	20.22
0.0632	0.437222	-0.568	0.02038628	0.14920288	0.14413637	20.22
0.0640	0.451984	-0.571	0.02033907	0.14914161	0.14411968	20.22
0.0648	0.465488	-0.573	0.02030861	0.14907843	0.14409518	20.22
0.0656	0.476618	-0.573	0.02029586	0.14902294	0.14407659	20.22
0.0664	0.485172	-0.568	0.02027231	0.14899564	0.14406180	20.22
0.0672	0.491352	-0.566	0.02025861	0.14897138	0.14403832	20.22
0.0680	0.494757	-0.568	0.02025276	0.14895284	0.14401966	20.22
0.0688	0.495901	-0.565	0.02023906	0.14895087	0.14401966	20.23
0.0696	0.495415	-0.568	0.02023512	0.14894897	0.14402264	20.23
0.0704	0.493383	-0.568	0.02022827	0.14894992	0.14402848	20.23
0.0712	0.490408	-0.561	0.02023125	0.14897144	0.14404613	20.23
0.0720	0.486746	-0.561	0.02024895	0.14898419	0.14405400	20.23
0.0728	0.482512	-0.565	0.02024794	0.14897740	0.14404416	20.23
0.0736	0.477476	-0.566	0.02026755	0.14899004	0.14404815	20.23
0.0744	0.471811	-0.570	0.02029306	0.14900166	0.14404619	20.23
0.0752	0.465431	-0.567	0.02029401	0.14900261	0.14405888	20.23
0.0760	0.457735	-0.557	0.02030879	0.14902598	0.14407951	20.23
0.0768	0.448809	-0.554	0.02033329	0.14905715	0.14408922	20.23
0.0776	0.437336	-0.555	0.02033234	0.14908242	0.14409995	20.23
0.0784	0.423059	-0.556	0.02036172	0.14914167	0.14409798	20.23
0.0792	0.406351	-0.563	0.02041960	0.14920384	0.14411271	20.22
0.0800	0.387554	-0.562	0.02046680	0.14925736	0.14413434	20.22
0.0808	0.368242	-0.567	0.02053851	0.14933026	0.14415604	20.22
0.0816	0.349331	-0.561	0.02059454	0.14941454	0.14420217	20.22
0.0824	0.332308	-0.561	0.02063787	0.14947557	0.14423364	20.22
0.0832	0.317831	-0.569	0.02065456	0.14953631	0.14424151	20.22
0.0840	0.306330	-0.568	0.02066147	0.14958924	0.14426416	20.22
0.0848	0.298519	-0.576	0.02067918	0.14961338	0.14426619	20.22
0.0856	0.293655	-0.575	0.02068406	0.14965200	0.14427596	20.22
0.0864	0.291367	-0.566	0.02069390	0.14966941	0.14430642	20.22
0.0872	0.290880	-0.566	0.02070367	0.14966553	0.14431030	20.22
0.0880	0.291195	-0.568	0.02069390	0.14965487	0.14430636	20.22
0.0888	0.291739	-0.563	0.02068406	0.14964420	0.14430439	20.23
0.0896	0.292482	-0.568	0.02069485	0.14964795	0.14429754	20.23
0.0904	0.293398	-0.569	0.02068007	0.14965379	0.14429164	20.23
0.0912	0.294485	-0.563	0.02067214	0.14966828	0.14430737	20.23
0.0920	0.296173	-0.567	0.02066922	0.14967310	0.14431030	20.23
0.0928	0.298204	-0.568	0.02065647	0.14964807	0.14430040	20.23
0.0936	0.300665	-0.565	0.02065551	0.14964902	0.14428955	20.23
0.0944	0.303869	-0.570	0.02065849	0.14963651	0.14426500	20.23
0.0952	0.307817	-0.569	0.02065843	0.14963162	0.14426214	20.23
0.0960	0.312538	-0.568	0.02065545	0.14963168	0.14427006	20.23
0.0968	0.318031	-0.569	0.02064168	0.14961243	0.14427698	20.23
0.0976	0.324240	-0.564	0.02065057	0.14960474	0.14428389	20.23
0.0984	0.331593	-0.566	0.02064961	0.14958644	0.14426810	20.23
0.0992	0.340691	-0.562	0.02063882	0.14956427	0.14426017	20.22
0.1000	0.351791	-0.564	0.02062404	0.14953530	0.14425129	20.22
0.1008	0.364723	-0.565	0.02059156	0.14948416	0.14423746	20.22
0.1016	0.378799	-0.557	0.02054733	0.14944077	0.14424729	20.22
0.1024	0.393362	-0.559	0.02050799	0.14938158	0.14422667	20.22
0.1032	0.407124	-0.561	0.02046293	0.14931077	0.14419526	20.22
0.1040	0.419397	-0.559	0.02042067	0.14926606	0.14417464	20.22
0.1048	0.430012	-0.564	0.02039611	0.14921552	0.14413828	20.22
0.1056	0.438137	-0.564	0.02037460	0.14919704	0.14412552	20.22
0.1064	0.444489	-0.561	0.02037752	0.14918149	0.14412260	20.22
0.1072	0.449123	-0.564	0.02035010	0.14916009	0.14411968	20.22
0.1080	0.451698	-0.562	0.02033937	0.14913678	0.14411193	20.22
0.1088	0.453300	-0.561	0.02033830	0.14912808	0.14410704	20.22
0.1096	0.453587	-0.560	0.02031571	0.14913195	0.14410800	20.23
0.1104	0.452843	-0.558	0.02034026	0.14913297	0.14409721	20.23
0.1112	0.451612	-0.553	0.02036762	0.14914948	0.14410591	20.23
0.1120	0.449982	-0.551	0.02036083	0.14915627	0.14412260	20.23
0.1128	0.448179	-0.554	0.02036864	0.14914370	0.14410013	20.23
0.1136	0.446234	-0.554	0.02036959	0.14914364	0.14410305	20.23
0.1144	0.444317	-0.561	0.02036279	0.14913392	0.14409912	20.23
0.1152	0.441856	-0.561	0.02037454	0.14912224	0.14408439	20.23
0.1160	0.438881	-0.559	0.02039617	0.14913291	0.14410007	20.23
0.1168	0.435419	-0.557	0.02040398	0.14914751	0.14410883	20.23
0.1176	0.431042	-0.557	0.02040404	0.14916205	0.14411765	20.23
0.1184	0.426064	-0.561	0.02041590	0.14917183	0.14411759	20.22
0.1192	0.420427	-0.560	0.02042568	0.14918345	0.14412540	20.22
0.1200	0.414190	-0.564	0.02042866	0.14918733	0.14413327	20.22
0.1208	0.407152	-0.562	0.02043843	0.14920193	0.14413428	20.22
0.1216	0.399170	-0.558	0.02045310	0.14924371	0.14415789	20.22
0.1224	0.390501	-0.564	0.02046686	0.14925730	0.14417356	20.22
0.1232	0.380487	-0.566	0.02049237	0.14928067	0.14417362	20.22
0.1240	0.369844	-0.568	0.02051985	0.14931667	0.14418536	20.22
0.1248	0.358944	-0.572	0.02054840	0.14934194	0.14418834	20.22
0.1256	0.348101	-0.566	0.02057981	0.14939243	0.14420015	20.22
0.1264	0.338259	-0.565	0.02060932	0.14944667	0.14421976	20.22
0.1272	0.329618	-0.564	0.02064073	0.14947474	0.14422864	20.22
0.1280	0.322409	-0.566	0.02065641	0.14950359	0.14424235	20.22
0.1288	0.316744	-0.565	0.02065247	0.14954025	0.14424926	20.22
0.1296	0.312796	-0.566	0.02064955	0.14955276	0.14425522	20.23
0.1304	0.310278	-0.566	0.02064276	0.14956713	0.14426011	20.23
0.1312	0.309248	-0.560	0.02064371	0.14958638	0.14426607	20.23
0.1320	0.309563	-0.560	0.02063876	0.14958262	0.14427590	20.23
0.1328	0.311079	-0.565	0.02061713	0.14958072	0.14426011	20.23
0.1336	0.313425	-0.562	0.02061117	0.14958942	0.14426309	20.23
0.1344	0.316629	-0.566	0.02060425	0.14956248	0.14425224	20.23
0.1352	0.320807	-0.562	0.02061123	0.14955759	0.14423752	20.23
0.1360	0.325956	-0.553	0.02062792	0.14955854	0.14425033	20.23
0.1368	0.332508	-0.556	0.02062404	0.14954412	0.14425135	20.23
0.1376	0.340405	-0.556	0.02061915	0.14953256	0.14424843	20.23
0.1384	0.350075	-0.562	0.02061027	0.14951617	0.14425135	20.23
0.1392	0.361776	-0.563	0.02059454	0.14947468	0.14423466	20.22
0.1400	0.375881	-0.565	0.02056992	0.14943314	0.14420319	20.22
0.1408	0.392418	-0.567	0.02053356	0.14939636	0.14418447	20.22
0.1416	0.410357	-0.561	0.02048546	0.14932942	0.14417952	20.22
0.1424	0.429010	-0.562	0.02042651	0.14924973	0.14416182	20.22
0.1432	0.447035	-0.566	0.02037746	0.14916700	0.14413732	20.22
0.1440	0.462914	-0.562	0.02033228	0.14909500	0.14411283	20.22
0.1448	0.476274	-0.566	0.02032536	0.14902401	0.14406967	20.22
0.1456	0.486259	-0.561	0.02033031	0.14899278	0.14405406	20.22
0.1464	0.492868	-0.554	0.02032542	0.14897430	0.14405406	20.22
0.1472	0.496531	-0.558	0.02032644	0.14895970	0.14404428	20.22
0.1480	0.497589	-0.557	0.02031076	0.14895970	0.14403939	20.22
0.1488	0.496988	-0.557	0.02030480	0.14895976	0.14403152	20.22
0.1496	0.495443	-0.559	0.02030081	0.14895386	0.14403152	20.23
0.1504	0.493526	-0.556	0.02029192	0.14894611	0.14403445	20.23
0.1512	0.491266	-0.553	0.02028501	0.14895874	0.14404911	20.23
0.1520	0.488977	-0.555	0.02028602	0.14896065	0.14406085	20.23
0.1528	0.486546	-0.558	0.02026451	0.14894807	0.14405012	20.23
0.1536	0.483484	-0.561	0.02027249	0.14895099	0.14405310	20.23
0.1544	0.480251	-0.565	0.02026361	0.14895391	0.14404041	20.23
0.1552	0.476646	-0.565	0.02026069	0.14894611	0.14404041	20.23
0.1560	0.472383	-0.560	0.02029300	0.14896852	0.14406097	20.23
0.1568	0.467949	-0.558	0.02029300	0.14897919	0.14406776	20.23
0.1576	0.462542	-0.559	0.02031565	0.14898503	0.14407748	20.23
0.1584	0.456219	-0.561	0.02031171	0.14900935	0.14408535	20.22
0.1592	0.448980	-0.562	0.02031273	0.14902103	0.14409512	20.22
0.1600	0.440426	-0.566	0.02034307	0.14903665	0.14410198	20.22
0.1608	0.430326	-0.564	0.02036071	0.14906585	0.14411473	20.22
0.1616	0.418081	-0.562	0.02040195	0.14911640	0.14413333	20.22
0.1624	0.403948	-0.565	0.02043533	0.14916885	0.14413726	20.22
0.1632	0.388041	-0.568	0.02046090	0.14923006	0.14414716	20.22
0.1640	0.371246	-0.567	0.02050215	0.14929610	0.14416587	20.22
0.1648	0.354509	-0.569	0.02053952	0.14935440	0.14418161	20.22
0.1656	0.338717	-0.566	0.02057785	0.14942330	0.14421892	20.22
0.1664	0.324898	-0.561	0.02062011	0.14948809	0.14425033	20.22
0.1672	0.313797	-0.565	0.02065456	0.14953059	0.14427197	20.22
0.1680	0.306015	-0.562	0.02067322	0.14957780	0.14428282	20.22
0.1688	0.301466	-0.564	0.02069187	0.14962310	0.14428085	20.23
0.1696	0.299721	-0.563	0.02069575	0.14962316	0.14428675	20.23
0.1704	0.300093	-0.561	0.02070761	0.14962989	0.14428574	20.23
0.1712	0.301952	-0.557	0.02070856	0.14963084	0.14429551	20.23
0.1720	0.304556	-0.557	0.02071446	0.14961642	0.14430344	20.23
0.1728	0.307846	-0.565	0.02071255	0.14961827	0.14428180	20.23
0.1736	0.311193	-0.569	0.02069575	0.14960867	0.14427692	20.23
0.1744	0.314569	-0.574	0.02069086	0.14958262	0.14427209	20.23
0.1752	0.318232	-0.572	0.02067411	0.14957774	0.14425731	20.23
0.1760	0.321779	-0.568	0.02066231	0.14958739	0.14427400	20.23
0.1768	0.326071	-0.563	0.02062601	0.14958739	0.14427882	20.23
0.1776	0.331135	-0.564	0.02060729	0.14958161	0.14427483	20.23
0.1784	0.337257	-0.564	0.02060342	0.14956814	0.14427674	20.23
0.1792	0.345039	-0.562	0.02058768	0.14954311	0.14426589	20.22
0.1800	0.354824	-0.563	0.02060241	0.14952475	0.14425123	20.22
0.1808	0.366926	-0.558	0.02058470	0.14949006	0.14423943	20.22
0.1816	0.381174	-0.556	0.02055615	0.14944172	0.14423460	20.22
0.1824	0.397253	-0.560	0.02051193	0.14937675	0.14420807	20.22
0.1832	0.413961	-0.566	0.02046573	0.14929909	0.14417863	20.22
0.1840	0.430069	-0.564	0.02042949	0.14922911	0.14415210	20.22
0.1848	0.444975	-0.568	0.02039522	0.14915037	0.14411575	20.22
0.1856	0.457678	-0.564	0.02038151	0.14909601	0.14410597	20.22
0.1864	0.467749	-0.558	0.02036184	0.14905137	0.14409417	20.22
0.1872	0.475044	-0.566	0.02034211	0.14902413	0.14407265	20.22
0.1880	0.479136	-0.567	0.02031356	0.14900756	0.14407367	20.22
0.1888	0.480480	-0.565	0.02031356	0.14898807	0.14407671	20.22
0.1896	0.479822	-0.568	0.02031749	0.14898705	0.14407867	20.23
0.1904	0.477676	-0.564	0.02031952	0.14899576	0.14408362	20.23
0.1912	0.474758	-0.557	0.02033722	0.14900064	0.14408749	20.23
0.1920	0.471840	-0.560	0.02033329	0.14901328	0.14407957	20.23
0.1928	0.468607	-0.561	0.02032542	0.14900649	0.14406288	20.23
0.1936	0.465002	-0.563	0.02032739	0.14900655	0.14406872	20.23
0.1944	0.461283	-0.570	0.02032745	0.14901924	0.14406675	20.23
0.1952	0.456877	-0.569	0.02032250	0.14902312	0.14408237	20.23
0.1960	0.452127	-0.566	0.02031463	0.14904356	0.14410400	20.23
0.1968	0.446949	-0.562	0.02033526	0.14904934	0.14410299	20.23
0.1976	0.440540	-0.562	0.02033818	0.14906007	0.14410597	20.23
0.1984	0.432730	-0.564	0.02035397	0.14908540	0.14409727	20.23
0.1992	0.423059	-0.561	0.02038741	0.14911264	0.14410990	20.22
0.2000	0.411587	-0.566	0.02040023	0.14914578	0.14413643	20.22
0.2008	0.308733	-0.571	0.02075958	0.14963555	0.14433485	20.23
0.2016	0.309305	-0.572	0.02074391	0.14960855	0.14431328	20.23
0.2024	0.310621	-0.566	0.02075469	0.14959317	0.14432114	20.23
0.2032	0.313396	-0.561	0.02075273	0.14958942	0.14432019	20.23
0.2040	0.318460	-0.562	0.02073306	0.14957589	0.14430642	20.23
0.2048	0.326786	-0.562	0.02073306	0.14957106	0.14429754	20.23
0.2056	0.339746	-0.566	0.02070063	0.14952958	0.14429063	20.22
0.2064	0.358915	-0.568	0.02066422	0.14945120	0.14427096	20.22
0.2072	0.385809	-0.572	0.02061909	0.14936203	0.14423561	20.22
0.2080	0.422459	-0.572	0.02053368	0.14922422	0.14420116	20.22
0.2088	0.471525	-0.572	0.02041781	0.14902776	0.14413345	20.22
0.2096	0.536270	-0.581	0.02025384	0.14875931	0.14402926	20.22
0.2104	0.619555	-0.577	0.02005726	0.14841592	0.14391238	20.22
0.2112	0.723495	-0.582	0.01981068	0.14798015	0.14373368	20.22
0.2120	0.848694	-0.581	0.01952970	0.14747435	0.14351851	20.22
0.2128	0.993290	-0.568	0.01919568	0.14689940	0.14327985	20.22
0.2136	1.154766	-0.567	0.01879889	0.14624000	0.14299303	20.22
0.2144	1.329775	-0.567	0.01838046	0.14554256	0.14269543	20.22
0.2152	1.514196	-0.564	0.01791000	0.14480233	0.14236736	20.22
0.2160	1.704569	-0.568	0.01743954	0.14403099	0.14201474	20.23
0.2168	1.896572	-0.572	0.01697987	0.14325267	0.14165914	20.23
0.2176	2.085686	-0.568	0.01650739	0.14248902	0.14129269	20.23
0.2184	2.267962	-0.574	0.01604569	0.14174485	0.14093906	20.23
0.2192	2.438879	-0.580	0.01560855	0.14103961	0.14061004	20.23
0.2200	2.595148	-0.583	0.01519686	0.14039862	0.14029074	20.23
0.2208	2.733536	-0.587	0.01483434	0.13980627	0.14000195	20.23
0.2216	2.852125	-0.589	0.01452595	0.13929361	0.13974267	20.23
0.2224	2.950859	-0.583	0.01425087	0.13886952	0.13953537	20.23
0.2232	3.030224	-0.580	0.01402307	0.13851446	0.13935363	20.23
0.2240	3.091249	-0.578	0.01384240	0.13821489	0.13919938	20.23
0.2248	3.134537	-0.574	0.01370287	0.13799119	0.13910013	20.23
0.2256	3.160744	-0.573	0.01361746	0.13783264	0.13901269	20.22
0.2264	3.171072	-0.572	0.01356047	0.13772273	0.13895875	20.22
0.2272	3.167810	-0.570	0.01352108	0.13769156	0.13894218	20.22
0.2280	3.153362	-0.565	0.01351225	0.13769442	0.13894993	20.22
0.2288	3.128071	-0.566	0.01352400	0.13771969	0.13897246	20.22
0.2296	3.087530	-0.569	0.01356137	0.13778389	0.13901168	20.22
0.2304	3.023901	-0.569	0.01367342	0.13792884	0.13911086	20.22
0.2312	2.928743	-0.573	0.01386589	0.13818371	0.13924354	20.22
0.2320	2.796249	-0.573	0.01414102	0.13859904	0.13945580	20.22
0.2328	2.629280	-0.570	0.01451129	0.13917100	0.13976431	20.22
0.2336	2.435932	-0.573	0.01493263	0.13983154	0.14011294	20.22
0.2344	2.227449	-0.574	0.01540512	0.14056408	0.14049602	20.22
0.2352	2.016249	-0.576	0.01592177	0.14131016	0.14088303	20.22
0.2360	1.811028	-0.579	0.01642567	0.14206314	0.14125431	20.23
0.2368	1.618996	-0.578	0.01689923	0.14280617	0.14158636	20.23
0.2376	1.444244	-0.580	0.01732266	0.14349091	0.14190859	20.23
0.2384	1.288176	-0.573	0.01769984	0.14412510	0.14220911	20.23
0.2392	1.150646	-0.575	0.01803583	0.14468533	0.14246160	20.23
0.2400	1.029510	-0.578	0.01835209	0.14518154	0.14269537	20.23
0.2408	0.922766	-0.575	0.01864284	0.14564651	0.14290071	20.23
0.2416	0.828638	-0.584	0.01889330	0.14607555	0.14306581	20.23
0.2424	0.745840	-0.576	0.01912510	0.14646369	0.14322984	20.23
0.2432	0.674629	-0.572	0.01934803	0.14681959	0.14337033	20.23
0.2440	0.615864	-0.576	0.01951993	0.14710563	0.14347345	20.23
0.2448	0.570631	-0.573	0.01966828	0.14731675	0.14357561	20.23
0.2456	0.539675	-0.573	0.01976752	0.14748502	0.14364237	20.22
0.2464	0.522394	-0.577	0.01981771	0.14758134	0.14368361	20.22
0.2472	0.517101	-0.573	0.01986188	0.14764738	0.14370817	20.22
0.2480	0.521049	-0.570	0.01987457	0.14768815	0.14372188	20.22
0.2488	0.534039	-0.568	0.01986474	0.14767653	0.14372283	20.22
0.2496	0.560875	-0.574	0.01981366	0.14762115	0.14368355	20.22
0.2504	0.612659	-0.576	0.01970953	0.14746559	0.14362061	20.22
0.2512	0.702610	-0.578	0.01951706	0.14714557	0.14348114	20.22
0.2520	0.837479	-0.582	0.01923221	0.14665914	0.14326608	20.22
0.2528	1.015863	-0.572	0.01884419	0.14598697	0.14298314	20.22
0.2536	1.227436	-0.571	0.01835501	0.14516985	0.14261776	20.22
0.2544	1.457262	-0.573	0.01781964	0.14429247	0.14221209	20.22
0.2552	1.692467	-0.572	0.01723617	0.14338398	0.14179266	20.22
0.2560	1.923294	-0.572	0.01667333	0.14248031	0.14136440	20.23
0.2568	2.141962	-0.573	0.01612425	0.14163893	0.14095676	20.23
0.2576	2.343292	-0.565	0.01561344	0.14086658	0.14058059	20.23
0.2584	2.524796	-0.561	0.01517528	0.14015841	0.14022201	20.23
0.2592	2.684784	-0.568	0.01475781	0.13953197	0.13990867	20.23
0.2600	2.824059	-0.569	0.01439631	0.13896191	0.13962084	20.23
0.2608	2.944908	-0.573	0.01407516	0.13846487	0.13936138	20.23
0.2616	3.049192	-0.577	0.01379824	0.13802516	0.13915420	20.23
0.2624	3.137913	-0.573	0.01358014	0.13763803	0.13897842	20.23
0.2632	3.210869	-0.569	0.01339054	0.13732779	0.13882720	20.23
0.2640	3.266859	-0.567	0.01323432	0.13705736	0.13870555	20.23
0.2648	3.305140	-0.565	0.01311147	0.13686091	0.13861024	20.23
0.2656	3.326397	-0.561	0.01301521	0.13673925	0.13853461	20.22
0.2664	3.332834	-0.561	0.01297599	0.13666427	0.13850319	20.22
0.2672	3.327370	-0.562	0.01296717	0.13663411	0.13849723	20.22
0.2680	3.311863	-0.558	0.01297307	0.13663900	0.13850123	20.22
0.2688	3.285112	-0.561	0.01300448	0.13667983	0.13852966	20.22
0.2696	3.236761	-0.565	0.01307517	0.13676542	0.13858652	20.22
0.2704	3.149414	-0.565	0.01324016	0.13700271	0.13870335	20.22
0.2712	3.012171	-0.567	0.01352406	0.13742000	0.13891834	20.22
0.2720	2.823400	-0.562	0.01393175	0.13804060	0.13924837	20.22
0.2728	2.596035	-0.555	0.01443768	0.13883823	0.13965118	20.22
0.2736	2.354021	-0.552	0.01497704	0.13970202	0.14008939	20.22
0.2744	2.117443	-0.554	0.01552510	0.14056289	0.14053541	20.22
0.2752	1.900663	-0.556	0.01603395	0.14135379	0.14092439	20.22
0.2760	1.710892	-0.555	0.01648766	0.14207947	0.14128190	20.23
0.2768	1.549988	-0.556	0.01689231	0.14271188	0.14159912	20.23
0.2776	1.415148	-0.554	0.01722729	0.14325851	0.14184952	20.23
0.2784	1.299419	-0.547	0.01752877	0.14376336	0.14209908	20.23
0.2792	1.195164	-0.552	0.01779896	0.14420700	0.14230049	20.23
0.2800	1.094742	-0.553	0.01805633	0.14463103	0.14247733	20.23
0.2808	0.994406	-0.552	0.01833332	0.14506292	0.14266998	20.23
0.2816	0.894699	-0.560	0.01859760	0.14548993	0.14284480	20.23
0.2824	0.797853	-0.554	0.01885396	0.14592373	0.14302754	20.23
0.2832	0.709219	-0.548	0.01910442	0.14634210	0.14321113	20.23
0.2840	0.633602	-0.551	0.01931465	0.14670110	0.14335942	20.23
0.2848	0.574350	-0.549	0.01948661	0.14698511	0.14347339	20.23
0.2856	0.534010	-0.551	0.01962709	0.14720887	0.14356768	20.22
0.2864	0.511637	-0.557	0.01970470	0.14733917	0.14361393	20.22
0.2872	0.504456	-0.561	0.01974106	0.14741308	0.14363557	20.22
0.2880	0.509319	-0.565	0.01976854	0.14745003	0.14364934	20.22
0.2888	0.525084	-0.572	0.01975185	0.14742267	0.14364344	20.22
0.2896	0.558157	-0.577	0.01969385	0.14734101	0.14361203	20.22
0.2904	0.619955	-0.575	0.01958287	0.14715135	0.14353043	20.22
0.2912	0.720520	-0.574	0.01936471	0.14678663	0.14338893	20.22
0.2920	0.863113	-0.572	0.01906115	0.14626533	0.14315122	20.22
0.2928	1.041727	-0.564	0.01866823	0.14558828	0.14285457	20.22
0.2936	1.244488	-0.564	0.01820850	0.14479351	0.14251083	20.22
0.2944	1.459551	-0.565	0.01770562	0.14395601	0.14211494	20.22
0.2952	1.677532	-0.562	0.01717025	0.14309901	0.14172786	20.22
0.2960	1.891623	-0.565	0.01665074	0.14227021	0.14133787	20.23
0.2968	2.096529	-0.567	0.01613802	0.14148718	0.14095378	20.23
0.2976	2.288618	-0.566	0.01566362	0.14075464	0.14059728	20.23
0.2984	2.467661	-0.566	0.01523244	0.14007378	0.14026529	20.23
0.2992	2.633257	-0.570	0.01481187	0.13942009	0.13994116	20.23
0.3000	2.785749	-0.570	0.01441598	0.13880426	0.13962978	20.23
0.3008	2.925768	-0.568	0.01405442	0.13824695	0.13935083	20.23
0.3016	3.051538	-0.570	0.01373720	0.13771868	0.13908565	20.23
0.3024	3.161001	-0.562	0.01346427	0.13726056	0.13886565	20.23
0.3032	3.250895	-0.554	0.01323932	0.13688803	0.13868392	20.23
0.3040	3.317471	-0.553	0.01305175	0.13657379	0.13852566	20.23
0.3048	3.359756	-0.552	0.01291120	0.13636863	0.13842440	20.23
0.3056	3.379955	-0.557	0.01281983	0.13624698	0.13836634	20.22
0.3064	3.382587	-0.562	0.01277369	0.13618475	0.13835061	20.22
0.3072	3.372831	-0.564	0.01276094	0.13618279	0.13835454	20.22
0.3080	3.353033	-0.561	0.01276982	0.13622069	0.13837326	20.22
0.3088	3.319101	-0.560	0.01280415	0.13627625	0.13840771	20.22
0.3096	3.258247	-0.565	0.01289845	0.13641733	0.13847649	20.22
0.3104	3.155823	-0.565	0.01310372	0.13671017	0.13863957	20.22
0.3112	3.005819	-0.565	0.01340133	0.13717222	0.13887829	20.22
0.3120	2.810726	-0.566	0.01385021	0.13783944	0.13921124	20.22
0.3128	2.586365	-0.556	0.01438159	0.13864386	0.13962376	20.22
0.3136	2.353792	-0.552	0.01491696	0.13949692	0.14005405	20.22
0.3144	2.129259	-0.551	0.01547295	0.14032376	0.14046562	20.22
0.3152	1.925154	-0.543	0.01594943	0.14109129	0.14085072	20.22
0.3160	1.746082	-0.542	0.01636100	0.14178097	0.14118379	20.23
0.3168	1.590929	-0.542	0.01674008	0.14237726	0.14146268	20.23
0.3176	1.454802	-0.544	0.01707995	0.14292979	0.14172786	20.23
0.3184	1.331005	-0.541	0.01739222	0.14346188	0.14197147	20.23
0.3192	1.214104	-0.549	0.01769978	0.14393944	0.14218265	20.23
0.3200	1.100378	-0.551	0.01799744	0.14442194	0.14240378	20.23
0.3208	0.988827	-0.550	0.01828229	0.14490926	0.14262182	20.23
0.3216	0.881395	-0.554	0.01857013	0.14536643	0.14282215	20.23
0.3224	0.781374	-0.549	0.01885295	0.14582956	0.14302641	20.23
0.3232	0.693684	-0.543	0.01909459	0.14624494	0.14320213	20.23
0.3240	0.622330	-0.544	0.01929986	0.14658535	0.14333868	20.23
0.3248	0.569086	-0.543	0.01947767	0.14684892	0.14344382	20.23
0.3256	0.534554	-0.540	0.01958078	0.14703763	0.14351559	20.22
0.3264	0.516586	-0.544	0.01965445	0.14715427	0.14355987	20.22
0.3272	0.511837	-0.543	0.01969182	0.14720684	0.14357662	20.22
0.3280	0.517159	-0.546	0.01969182	0.14723796	0.14359921	20.22
0.3288	0.531349	-0.552	0.01968491	0.14721942	0.14359134	20.22
0.3296	0.558987	-0.559	0.01963878	0.14715827	0.14355594	20.22
0.3304	0.610886	-0.564	0.01952380	0.14700454	0.14351070	20.22
0.3312	0.698376	-0.565	0.01933712	0.14668161	0.14338696	20.22
0.3320	0.826836	-0.567	0.01904833	0.14621085	0.14319044	20.22
0.3328	0.994034	-0.560	0.01867807	0.14557266	0.14291936	20.22
0.3336	1.190186	-0.561	0.01826060	0.14481097	0.14257163	20.22
0.3344	1.404133	-0.558	0.01775873	0.14398998	0.14217079	20.22
0.3352	1.626949	-0.558	0.01723230	0.14313096	0.14177006	20.22
0.3360	1.851425	-0.558	0.01670277	0.14226037	0.14135748	20.23
0.3368	2.070408	-0.556	0.01614881	0.14141703	0.14094985	20.23
0.3376	2.276802	-0.557	0.01563901	0.14062917	0.14056581	20.23
0.3384	2.465286	-0.549	0.01517731	0.13989675	0.14021015	20.23
0.3392	2.631941	-0.558	0.01472646	0.13923436	0.13988405	20.23
0.3400	2.775106	-0.562	0.01434827	0.13865465	0.13958943	20.23
0.3408	2.895613	-0.565	0.01402211	0.13815850	0.13934970	20.23
0.3416	2.995348	-0.572	0.01373237	0.13773334	0.13914353	20.23
0.3424	3.076544	-0.560	0.01353586	0.13738602	0.13898343	20.23
0.3432	3.141975	-0.554	0.01336199	0.13710976	0.13885272	20.23
0.3440	3.193474	-0.555	0.01322347	0.13687241	0.13872808	20.23
0.3448	3.231955	-0.554	0.01312816	0.13668472	0.13863474	20.23
0.3456	3.257961	-0.561	0.01303393	0.13656402	0.13856012	20.22
0.3464	3.271666	-0.563	0.01296711	0.13647348	0.13851303	20.22
0.3472	3.273697	-0.563	0.01293671	0.13643450	0.13849133	20.22
0.3480	3.265285	-0.562	0.01292986	0.13643843	0.13849527	20.22
0.3488	3.246260	-0.562	0.01295346	0.13644916	0.13850707	20.22
0.3496	3.209753	-0.570	0.01302320	0.13651633	0.13852477	20.22
0.3504	3.139858	-0.572	0.01316267	0.13669831	0.13862103	20.22
0.3512	3.024330	-0.571	0.01338661	0.13704461	0.13879091	20.22
0.3520	2.858791	-0.573	0.01374024	0.13760400	0.13907570	20.22
0.3528	2.651196	-0.562	0.01419508	0.13833743	0.13946265	20.22
0.3536	2.422056	-0.562	0.01472259	0.13915163	0.13988698	20.22
0.3544	2.190514	-0.564	0.01527262	0.14000374	0.14032418	20.22
0.3552	1.971531	-0.561	0.01579911	0.14081299	0.14073873	20.22
0.3560	1.773863	-0.562	0.01628822	0.14156985	0.14111400	20.23
0.3568	1.600485	-0.559	0.01670861	0.14226246	0.14143324	20.23
0.3576	1.449909	-0.554	0.01708978	0.14287430	0.14172196	20.23
0.3584	1.316586	-0.549	0.01743549	0.14343661	0.14198029	20.23
0.3592	1.195107	-0.554	0.01773119	0.14392972	0.14220816	20.23
0.3600	1.080637	-0.560	0.01802391	0.14439958	0.14243507	20.23
0.3608	0.971003	-0.565	0.01830775	0.14487237	0.14264524	20.23
0.3616	0.866632	-0.571	0.01856804	0.14532268	0.14283782	20.23
0.3624	0.769300	-0.565	0.01884705	0.14576721	0.14303523	20.23
0.3632	0.682554	-0.558	0.01908278	0.14617372	0.14321005	20.23
0.3640	0.609713	-0.557	0.01927441	0.14650828	0.14333975	20.23
0.3648	0.553579	-0.556	0.01943946	0.14678746	0.14344484	20.23
0.3656	0.515327	-0.555	0.01955038	0.14700246	0.14352351	20.22
0.3664	0.493927	-0.557	0.01962799	0.14713091	0.14357269	20.22
0.3672	0.487089	-0.561	0.01966727	0.14720291	0.14360511	20.22
0.3680	0.491552	-0.556	0.01968396	0.14723110	0.14362770	20.22
0.3688	0.507002	-0.564	0.01966041	0.14720488	0.14361000	20.22
0.3696	0.540476	-0.574	0.01958972	0.14712417	0.14355987	20.22
0.3704	0.603819	-0.570	0.01946098	0.14692479	0.14348322	20.22
0.3712	0.707245	-0.574	0.01923507	0.14654642	0.14333779	20.22
0.3720	0.853615	-0.568	0.01892078	0.14599973	0.14311576	20.22
0.3728	1.037149	-0.557	0.01852286	0.14529836	0.14282209	20.22
0.3736	1.245661	-0.557	0.01806909	0.14448607	0.14244986	20.22
0.3744	1.466990	-0.559	0.01755923	0.14362806	0.14203143	20.22
0.3752	1.692009	-0.558	0.01701993	0.14275938	0.14162380	20.22
0.3760	1.913538	-0.559	0.01649058	0.14189851	0.14120138	20.23
0.3768	2.125053	-0.559	0.01596498	0.14108342	0.14080650	20.23
0.3776	2.321606	-0.553	0.01547295	0.14033061	0.14044404	20.23
0.3784	2.499733	-0.551	0.01504672	0.13963902	0.14009929	20.23
0.3792	2.657375	-0.556	0.01463115	0.13901258	0.13978696	20.23
0.3800	2.793818	-0.559	0.01427948	0.13845998	0.13950306	20.23
0.3808	2.910433	-0.563	0.01398081	0.13798332	0.13925844	20.23
0.3816	3.009882	-0.566	0.01371652	0.13756996	0.13905120	20.23
0.3824	3.094025	-0.559	0.01349849	0.13722169	0.13889396	20.23
0.3832	3.164263	-0.556	0.01331681	0.13692021	0.13875055	20.23
0.3840	3.219767	-0.556	0.01315182	0.13668287	0.13862783	20.23
0.3848	3.259077	-0.556	0.01302123	0.13649607	0.13854331	20.23
0.3856	3.281679	-0.558	0.01294857	0.13637257	0.13847858	20.22
0.3864	3.289089	-0.561	0.01291132	0.13631225	0.13845110	20.22
0.3872	3.283939	-0.563	0.01290733	0.13627720	0.13845503	20.22
0.3880	3.267660	-0.558	0.01290822	0.13628006	0.13846284	20.22
0.3888	3.237934	-0.561	0.01294947	0.13632286	0.13849038	20.22
0.3896	3.182316	-0.564	0.01302505	0.13644838	0.13855422	20.22
0.3904	3.085842	-0.561	0.01322448	0.13673151	0.13869953	20.22
0.3912	2.941904	-0.569	0.01354671	0.13719940	0.13892949	20.22
0.3920	2.752275	-0.570	0.01396710	0.13786376	0.13925856	20.22
0.3928	2.533407	-0.564	0.01447594	0.13866133	0.13967013	20.22
0.3936	2.307301	-0.565	0.01499069	0.13948327	0.14007872	20.22
0.3944	2.089062	-0.561	0.01549751	0.14030623	0.14049608	20.22
0.3952	1.889305	-0.554	0.01596999	0.14106107	0.14086634	20.22
0.3960	1.712751	-0.555	0.01639140	0.14173228	0.14118654	20.23
0.3968	1.559658	-0.556	0.01677841	0.14234126	0.14147437	20.23
0.3976	1.427736	-0.556	0.01712328	0.14287621	0.14172781	20.23
0.3984	1.311064	-0.552	0.01743168	0.14336163	0.14196938	20.23
0.3992	1.202860	-0.553	0.01771653	0.14380717	0.14217180	20.23
0.4000	1.096945	-0.554	0.01796609	0.14425451	0.14238006	20.23
0.4008	0.990944	-0.552	0.01822829	0.14470202	0.14257950	20.23
0.4016	0.886402	-0.560	0.01849651	0.14515823	0.14277601	20.23
0.4024	0.787382	-0.557	0.01874894	0.14560372	0.14297736	20.23
0.4032	0.699749	-0.550	0.01901704	0.14599770	0.14314920	20.23
0.4040	0.627737	-0.553	0.01923221	0.14633620	0.14328182	20.23
0.4048	0.574064	-0.549	0.01938641	0.14659780	0.14338595	20.23
0.4056	0.539131	-0.546	0.01949549	0.14678657	0.14346552	20.22
0.4064	0.520878	-0.547	0.01954073	0.14690918	0.14350587	20.22
0.4072	0.516014	-0.552	0.01956326	0.14697629	0.14353138	20.22
0.4080	0.521021	-0.553	0.01957208	0.14700359	0.14355105	20.22
0.4088	0.534468	-0.558	0.01957011	0.14700156	0.14355302	20.22
0.4096	0.561533	-0.569	0.01950908	0.14693737	0.14352554	20.22
0.4104	0.614519	-0.562	0.01940995	0.14677000	0.14346659	20.22
0.4112	0.705471	-0.565	0.01922137	0.14645582	0.14332116	20.22
0.4120	0.839481	-0.565	0.01892662	0.14595973	0.14309025	20.22
0.4128	1.013288	-0.556	0.01856220	0.14530510	0.14280540	20.22
0.4136	1.216364	-0.558	0.01809460	0.14451826	0.14244193	20.22
0.4144	1.436262	-0.557	0.01757592	0.14366025	0.14204603	20.22
0.4152	1.663027	-0.554	0.01703566	0.14278382	0.14164239	20.22
0.4160	1.887560	-0.558	0.01648563	0.14191610	0.14122885	20.23
0.4168	2.101393	-0.560	0.01597577	0.14109212	0.14083314	20.23
0.4176	2.299862	-0.562	0.01550138	0.14033055	0.14046782	20.23
0.4184	2.480679	-0.561	0.01506633	0.13962340	0.14012986	20.23
0.4192	2.643299	-0.565	0.01465869	0.13898045	0.13980466	20.23
0.4200	2.787294	-0.572	0.01427460	0.13841438	0.13950986	20.23
0.4208	2.913036	-0.570	0.01394749	0.13789773	0.13924855	20.23
0.4216	3.022442	-0.574	0.01365370	0.13745517	0.13902748	20.23
0.4224	3.117685	-0.565	0.01342976	0.13706797	0.13884181	20.23
0.4232	3.200226	-0.556	0.01323426	0.13672072	0.13868767	20.23
0.4240	3.268318	-0.557	0.01305747	0.13643092	0.13855010	20.23
0.4248	3.319445	-0.553	0.01292884	0.13619256	0.13842535	20.23
0.4256	3.351517	-0.553	0.01282275	0.13603503	0.13833886	20.22
0.4264	3.364935	-0.558	0.01275498	0.13593775	0.13828570	20.22
0.4272	3.361845	-0.559	0.01272649	0.13590074	0.13826013	20.22
0.4280	3.344164	-0.557	0.01272744	0.13593376	0.13828176	20.22
0.4288	3.309116	-0.561	0.01277268	0.13598526	0.13830936	20.22
0.4296	3.245287	-0.564	0.01286900	0.13613302	0.13837826	20.22
0.4304	3.141346	-0.565	0.01307720	0.13644046	0.13853937	20.22
0.4312	2.993088	-0.571	0.01339638	0.13690156	0.13877612	20.22
0.4320	2.804775	-0.568	0.01379514	0.13755620	0.13911986	20.22
0.4328	2.592001	-0.562	0.01430005	0.13833249	0.13952059	20.22
0.4336	2.371874	-0.558	0.01479608	0.13913602	0.13992530	20.22
0.4344	2.156267	-0.554	0.01528919	0.13994044	0.14033788	20.22
0.4352	1.953964	-0.554	0.01579016	0.14069921	0.14072108	20.22
0.4360	1.770058	-0.553	0.01620859	0.14140737	0.14106578	20.23
0.4368	1.606178	-0.554	0.01661527	0.14205807	0.14137226	20.23
0.4376	1.461325	-0.557	0.01698661	0.14263886	0.14164144	20.23
0.4384	1.332178	-0.555	0.01729399	0.14318466	0.14189184	20.23
0.4392	1.214104	-0.562	0.01758277	0.14367878	0.14211196	20.23
0.4400	1.103697	-0.565	0.01785296	0.14413506	0.14232612	20.23
0.4408	0.999069	-0.562	0.01811916	0.14458543	0.14252162	20.23
0.4416	0.900393	-0.564	0.01839334	0.14501333	0.14269841	20.23
0.4424	0.809040	-0.556	0.01867229	0.14541411	0.14288604	20.23
0.4432	0.727615	-0.550	0.01889920	0.14579445	0.14305007	20.23
0.4440	0.658522	-0.553	0.01910549	0.14612997	0.14319241	20.23
0.4448	0.603075	-0.552	0.01925862	0.14639848	0.14331818	20.23
0.4456	0.562220	-0.554	0.01937747	0.14660853	0.14339572	20.22
0.4464	0.535612	-0.559	0.01949042	0.14676219	0.14345860	20.22
0.4472	0.521650	-0.560	0.01953763	0.14685857	0.14349985	20.22
0.4480	0.518503	-0.561	0.01957995	0.14693058	0.14352053	20.22
0.4488	0.524569	-0.566	0.01957601	0.14695209	0.14354020	20.22
0.4496	0.541077	-0.573	0.01953375	0.14692199	0.14352250	20.22
0.4504	0.577698	-0.573	0.01946789	0.14684123	0.14348912	20.22
0.4512	0.649109	-0.577	0.01930279	0.14659697	0.14339572	20.22
0.4520	0.765495	-0.578	0.01905924	0.14618450	0.14321792	20.22
0.4528	0.929832	-0.574	0.01870269	0.14558429	0.14295274	20.22
0.4536	1.135912	-0.576	0.01822525	0.14478767	0.14259720	20.22
0.4544	1.369858	-0.578	0.01769781	0.14387333	0.14216602	20.22
0.4552	1.618137	-0.576	0.01710451	0.14290839	0.14171124	20.22
0.4560	1.867819	-0.580	0.01652294	0.14194340	0.14125639	20.23
0.4568	2.105341	-0.583	0.01596999	0.14101827	0.14079869	20.23
0.4576	2.320461	-0.582	0.01546121	0.14019632	0.14040768	20.23
0.4584	2.506371	-0.580	0.01503485	0.13947648	0.14006096	20.23
0.4592	2.661896	-0.582	0.01463711	0.13884425	0.13974959	20.23
0.4600	2.789268	-0.581	0.01429027	0.13832086	0.13949603	20.23
0.4608	2.893581	-0.579	0.01399845	0.13789290	0.13927603	20.23
0.4616	2.982044	-0.581	0.01376176	0.13751256	0.13908738	20.23
0.4624	3.060637	-0.575	0.01354468	0.13718766	0.13893121	20.23
0.4632	3.133936	-0.569	0.01336402	0.13689494	0.13877898	20.23
0.4640	3.201885	-0.568	0.01318133	0.13658941	0.13864148	20.23
0.4648	3.261194	-0.567	0.01301235	0.13632679	0.13851380	20.23
0.4656	3.306770	-0.564	0.01287967	0.13612348	0.13842046	20.22
0.4664	3.334894	-0.566	0.01277459	0.13597655	0.13835853	20.22
0.4672	3.344994	-0.566	0.01272058	0.13590270	0.13831234	20.22
0.4680	3.338385	-0.561	0.01268423	0.13589984	0.13830835	20.22
0.4688	3.315582	-0.563	0.01268715	0.13592029	0.13831127	20.22
0.4696	3.268318	-0.564	0.01274407	0.13599813	0.13833982	20.22
0.4704	3.181658	-0.563	0.01289922	0.13624030	0.13846266	20.22
0.4712	3.046675	-0.569	0.01319194	0.13665944	0.13867098	20.22
0.4720	2.863483	-0.564	0.01360852	0.13728487	0.13899022	20.22
0.4728	2.644558	-0.560	0.01411641	0.13807571	0.13939494	20.22
0.4736	2.411270	-0.558	0.01465964	0.13892686	0.13982618	20.22
0.4744	2.181644	-0.558	0.01519597	0.13977414	0.14025635	20.22
0.4752	1.967669	-0.559	0.01571453	0.14058053	0.14066112	20.22
0.4760	1.777153	-0.557	0.01618600	0.14131111	0.14102846	20.23
0.4768	1.611586	-0.557	0.01659465	0.14195901	0.14133495	20.23
0.4776	1.467819	-0.552	0.01696306	0.14254558	0.14160317	20.23
0.4784	1.340303	-0.549	0.01729023	0.14307481	0.14185554	20.23
0.4792	1.222630	-0.557	0.01756722	0.14356411	0.14207268	20.23
0.4800	1.110907	-0.562	0.01784909	0.14403963	0.14229560	20.23
0.4808	1.003675	-0.564	0.01813298	0.14450556	0.14251763	20.23
0.4816	0.901737	-0.569	0.01840210	0.14495003	0.14270622	20.23
0.4824	0.806551	-0.566	0.01869678	0.14537603	0.14290166	20.23
0.4832	0.721149	-0.561	0.01894438	0.14577299	0.14307648	20.23
0.4840	0.647993	-0.568	0.01913881	0.14610183	0.14320803	20.23
0.4848	0.589199	-0.562	0.01929694	0.14639270	0.14332396	20.23
0.4856	0.546598	-0.558	0.01941186	0.14662230	0.14342123	20.22
0.4864	0.519533	-0.562	0.01947570	0.14676720	0.14347529	20.22
0.4872	0.506630	-0.557	0.01952976	0.14686054	0.14351070	20.22
0.4880	0.505257	-0.561	0.01956022	0.14691597	0.14354217	20.22
0.4888	0.513210	-0.567	0.01955146	0.14692569	0.14353722	20.22
0.4896	0.532236	-0.575	0.01954162	0.14689940	0.14350873	20.22
0.4904	0.571260	-0.576	0.01946396	0.14681572	0.14347231	20.22
0.4912	0.642700	-0.582	0.01931572	0.14655995	0.14337212	20.22
0.4920	0.754967	-0.578	0.01906717	0.14615041	0.14320415	20.22
0.4928	0.910263	-0.569	0.01873422	0.14558238	0.14297628	20.22
0.4936	1.101751	-0.570	0.01830006	0.14482754	0.14265513	20.22
0.4944	1.316872	-0.568	0.01780492	0.14398998	0.14226413	20.22
0.4952	1.545181	-0.567	0.01728129	0.14310867	0.14184570	20.22
0.4960	1.777439	-0.561	0.01672721	0.14218950	0.14141542	20.23
0.4968	2.005749	-0.562	0.01619190	0.14131111	0.14096850	20.23
0.4976	2.223644	-0.557	0.01567131	0.14046967	0.14055991	20.23
0.4984	2.425117	-0.558	0.01518023	0.13968569	0.14019442	20.23
0.4992	2.606621	-0.568	0.01472151	0.13896483	0.13982409	20.23
0.5000	2.765808	-0.568	0.01429224	0.13831705	0.13952249	20.23
0.5008	2.903223	-0.572	0.01394057	0.13776648	0.13925236	20.23
0.5016	3.020782	-0.572	0.01363212	0.13728398	0.13900393	20.23
0.5024	3.119230	-0.564	0.01337576	0.13687539	0.13880557	20.23
0.5032	3.199911	-0.555	0.01317245	0.13653779	0.13864356	20.23
0.5040	3.262768	-0.554	0.01299065	0.13626349	0.13849819	20.23
0.5048	3.307743	-0.550	0.01285213	0.13604563	0.13838911	20.23
0.5056	3.335724	-0.552	0.01274991	0.13591433	0.13833696	20.22
0.5064	3.348141	-0.554	0.01270562	0.13583452	0.13828969	20.22
0.5072	3.347425	-0.551	0.01268893	0.13579947	0.13828182	20.22
0.5080	3.334837	-0.550	0.01270276	0.13581592	0.13829464	20.22
0.5088	3.309488	-0.549	0.01273620	0.13583833	0.13830745	20.22
0.5096	3.262424	-0.556	0.01280212	0.13592982	0.13834488	20.22
0.5104	3.179197	-0.556	0.01294070	0.13616818	0.13845789	20.22
0.5112	3.050938	-0.559	0.01321083	0.13656509	0.13865638	20.22
0.5120	2.876415	-0.559	0.01358908	0.13717109	0.13895607	20.22
0.5128	2.665186	-0.557	0.01406735	0.13792878	0.13935089	20.22
0.5136	2.435904	-0.558	0.01459581	0.13876051	0.13976538	20.22
0.5144	2.206106	-0.561	0.01511240	0.13961560	0.14019167	20.22
0.5152	1.989155	-0.561	0.01561922	0.14042979	0.14060515	20.22
0.5160	1.795521	-0.558	0.01608193	0.14117402	0.14096659	20.23
0.5168	1.628523	-0.557	0.01648462	0.14182669	0.14128292	20.23
0.5176	1.485643	-0.550	0.01684803	0.14240736	0.14156872	20.23
0.5184	1.361217	-0.546	0.01718104	0.14292490	0.14180541	20.23
0.5192	1.247635	-0.552	0.01747185	0.14340448	0.14201862	20.23
0.5200	1.139116	-0.555	0.01776063	0.14386457	0.14223176	20.23
0.5208	1.032715	-0.560	0.01804262	0.14431208	0.14241540	20.23
0.5216	0.927544	-0.563	0.01831573	0.14476824	0.14261776	20.23
0.5224	0.825148	-0.557	0.01858771	0.14522731	0.14282900	20.23
0.5232	0.729704	-0.552	0.01885986	0.14566118	0.14301562	20.23
0.5240	0.645962	-0.553	0.01909065	0.14604151	0.14318359	20.23
0.5248	0.579386	-0.554	0.01928216	0.14635962	0.14332306	20.23
0.5256	0.533209	-0.553	0.01943350	0.14659119	0.14342618	20.22
0.5264	0.507288	-0.560	0.01951396	0.14674383	0.14349097	20.22
0.5272	0.498676	-0.564	0.01955140	0.14682740	0.14353126	20.22
0.5280	0.502882	-0.564	0.01956707	0.14685363	0.14353919	20.22
0.5288	0.518160	-0.573	0.01954156	0.14683616	0.14352143	20.22
0.5296	0.549974	-0.580	0.01947486	0.14676613	0.14348108	20.22
0.5304	0.608883	-0.578	0.01934904	0.14659405	0.14341819	20.22
0.5312	0.704298	-0.578	0.01913786	0.14625847	0.14327866	20.22
0.5320	0.839052	-0.574	0.01884419	0.14576238	0.14306259	20.22
0.5328	1.008968	-0.566	0.01847285	0.14510876	0.14278275	20.22
0.5336	1.204119	-0.567	0.01806331	0.14434415	0.14242423	20.22
0.5344	1.413660	-0.569	0.01756924	0.14353192	0.14202935	20.22
0.5352	1.629667	-0.566	0.01706624	0.14269531	0.14163649	20.22
0.5360	1.844072	-0.565	0.01656127	0.14185393	0.14124852	20.23
0.5368	2.051182	-0.566	0.01604849	0.14105821	0.14086843	20.23
0.5376	2.247362	-0.563	0.01558191	0.14030337	0.14051676	20.23
0.5384	2.430296	-0.565	0.01513010	0.13958836	0.14017683	20.23
0.5392	2.599239	-0.576	0.01469302	0.13891619	0.13983101	20.23
0.5400	2.751760	-0.580	0.01427948	0.13829756	0.13952053	20.23
0.5408	2.886114	-0.586	0.01393080	0.13774109	0.13924849	20.23
0.5416	3.000898	-0.586	0.01363212	0.13726932	0.13900977	20.23
0.5424	3.094254	-0.576	0.01339144	0.13689280	0.13882715	20.23
0.5432	3.166494	-0.569	0.01320577	0.13658738	0.13868386	20.23
0.5440	3.218250	-0.568	0.01305836	0.13636273	0.13857383	20.23
0.5448	3.250895	-0.566	0.01295429	0.13620704	0.13849533	20.23
0.5456	3.267660	-0.569	0.01290035	0.13610679	0.13844615	20.22
0.5464	3.272009	-0.569	0.01288360	0.13605803	0.13840967	20.22
0.5472	3.267231	-0.567	0.01287973	0.13604140	0.13839990	20.22
0.5480	3.255444	-0.565	0.01287580	0.13605314	0.13841462	20.22
0.5488	3.235788	-0.563	0.01290423	0.13607746	0.13842744	20.22
0.5496	3.200455	-0.574	0.01294255	0.13613981	0.13845706	20.22
0.5504	3.133450	-0.576	0.01306134	0.13632667	0.13853651	20.22
0.5512	3.020468	-0.579	0.01331288	0.13666421	0.13870543	20.22
0.5520	2.855358	-0.583	0.01365763	0.13722456	0.13898927	20.22
0.5528	2.643785	-0.574	0.01412714	0.13799298	0.13937128	20.22
0.5536	2.405348	-0.572	0.01467633	0.13885379	0.13981140	20.22
0.5544	2.163935	-0.575	0.01520669	0.13975650	0.14026028	20.22
0.5552	1.937971	-0.573	0.01572537	0.14060766	0.14068758	20.23
0.5560	1.740675	-0.570	0.01621562	0.14135379	0.14106476	20.23
0.5568	1.576595	-0.573	0.01661336	0.14200658	0.14137805	20.23
0.5576	1.441727	-0.564	0.01698667	0.14256102	0.14164430	20.23
0.5584	1.328545	-0.563	0.01729125	0.14303380	0.14186627	20.23
0.5592	1.226807	-0.569	0.01754463	0.14345592	0.14206374	20.23
0.5600	1.126986	-0.568	0.01779705	0.14386344	0.14226127	20.23
0.5608	1.024017	-0.572	0.01803666	0.14430112	0.14244401	20.23
0.5616	0.917273	-0.569	0.01830864	0.14476705	0.14264441	20.23
0.5624	0.811129	-0.560	0.01859844	0.14523691	0.14285856	20.23
0.5632	0.713568	-0.553	0.01886958	0.14568341	0.14304519	20.23
0.5640	0.631886	-0.552	0.01909351	0.14605993	0.14320910	20.23
0.5648	0.570745	-0.549	0.01927531	0.14633811	0.14333773	20.23
0.5656	0.531349	-0.550	0.01940393	0.14654917	0.14341235	20.22
0.5664	0.511007	-0.553	0.01947463	0.14667660	0.14346051	20.22
0.5672	0.505600	-0.554	0.01951307	0.14673597	0.14349300	20.22
0.5680	0.511093	-0.554	0.01952583	0.14676911	0.14349991	20.22
0.5688	0.526085	-0.557	0.01949835	0.14674771	0.14349008	20.22
0.5696	0.556297	-0.565	0.01946008	0.14667088	0.14345074	20.22
0.5704	0.612116	-0.563	0.01936179	0.14649278	0.14338392	20.22
0.5712	0.703955	-0.566	0.01916140	0.14617759	0.14323664	20.22
0.5720	0.835133	-0.565	0.01888537	0.14570493	0.14303333	20.22
0.5728	1.002932	-0.558	0.01849443	0.14507949	0.14276320	20.22
0.5736	1.198511	-0.561	0.01804060	0.14432472	0.14241260	20.22
0.5744	1.410627	-0.565	0.01753867	0.14349794	0.14204222	20.22
0.5752	1.631155	-0.560	0.01699656	0.14263994	0.14164734	20.22
0.5760	1.850996	-0.560	0.01647490	0.14177704	0.14124554	20.23
0.5768	2.062712	-0.560	0.01595628	0.14096183	0.14084667	20.23
0.5776	2.261553	-0.558	0.01547104	0.14019227	0.14048225	20.23
0.5784	2.443800	-0.562	0.01503873	0.13947827	0.14013654	20.23
0.5792	2.608538	-0.569	0.01460952	0.13882846	0.13980854	20.23
0.5800	2.755451	-0.573	0.01424998	0.13824201	0.13952172	20.23
0.5808	2.885742	-0.574	0.01393068	0.13771385	0.13925356	20.23
0.5816	3.002043	-0.573	0.01362616	0.13724500	0.13901579	20.23
0.5824	3.104811	-0.566	0.01337469	0.13682580	0.13881439	20.23
0.5832	3.193474	-0.562	0.01314783	0.13645995	0.13862675	20.23
0.5840	3.265429	-0.565	0.01295435	0.13615257	0.13847053	20.23
0.5848	3.317242	-0.570	0.01280606	0.13590741	0.13834482	20.23
0.5856	3.348370	-0.573	0.01272357	0.13575858	0.13825744	20.22
0.5864	3.361015	-0.578	0.01266938	0.13567102	0.13822597	20.22
0.5872	3.358612	-0.575	0.01265663	0.13563108	0.13822401	20.22
0.5880	3.344822	-0.567	0.01267630	0.13565546	0.13825047	20.22
0.5888	3.319187	-0.566	0.01271170	0.13569140	0.13828677	20.22
0.5896	3.272066	-0.568	0.01278156	0.13577217	0.13831431	20.22
0.5904	3.189096	-0.571	0.01293385	0.13600755	0.13841259	20.22
0.5912	3.060493	-0.576	0.01319122	0.13640827	0.13860118	20.22
0.5920	2.883768	-0.573	0.01356441	0.13701046	0.13889199	20.22
0.5928	2.668304	-0.569	0.01404172	0.13780713	0.13928986	20.22
0.5936	2.432528	-0.567	0.01458395	0.13867199	0.13972992	20.22
0.5944	2.195349	-0.565	0.01513404	0.13955426	0.14017791	20.22
0.5952	1.972332	-0.571	0.01566255	0.14040244	0.14060122	20.22
0.5960	1.774778	-0.570	0.01614881	0.14115536	0.14097738	20.23
0.5968	1.606750	-0.572	0.01656330	0.14182067	0.14129567	20.23
0.5976	1.464930	-0.569	0.01692677	0.14239663	0.14156079	20.23
0.5984	1.343050	-0.563	0.01724011	0.14290160	0.14180630	20.23
0.5992	1.233301	-0.566	0.01750147	0.14335585	0.14202243	20.23
0.6000	1.128960	-0.566	0.01775002	0.14377898	0.14223063	20.23
0.6008	1.026478	-0.569	0.01798475	0.14420986	0.14243698	20.23
0.6016	0.924797	-0.572	0.01823527	0.14464360	0.14262170	20.23
0.6024	0.826063	-0.568	0.01849359	0.14508331	0.14282304	20.23
0.6032	0.735512	-0.562	0.01875097	0.14551234	0.14299303	20.23
0.6040	0.658293	-0.565	0.01898372	0.14587325	0.14313447	20.23
0.6048	0.598526	-0.562	0.01915163	0.14616805	0.14326018	20.23
0.6056	0.557899	-0.562	0.01929498	0.14638984	0.14333385	20.22
0.6064	0.534868	-0.566	0.01937443	0.14653283	0.14339864	20.22
0.6072	0.526285	-0.566	0.01941866	0.14659894	0.14343697	20.22
0.6080	0.528688	-0.566	0.01943833	0.14662325	0.14345664	20.22
0.6088	0.539961	-0.571	0.01943350	0.14662224	0.14346254	20.22
0.6096	0.563822	-0.580	0.01938933	0.14657170	0.14342135	20.22
0.6104	0.611343	-0.578	0.01929504	0.14644915	0.14336145	20.22
0.6112	0.694828	-0.579	0.01912016	0.14616507	0.14324254	20.22
0.6120	0.821028	-0.576	0.01884800	0.14569920	0.14304316	20.22
0.6128	0.989799	-0.568	0.01847863	0.14506495	0.14277494	20.22
0.6136	1.192245	-0.569	0.01801789	0.14428675	0.14242619	20.22
0.6144	1.415319	-0.574	0.01752192	0.14342302	0.14201075	20.22
0.6152	1.647692	-0.574	0.01697385	0.14252609	0.14159334	20.22
0.6160	1.878262	-0.573	0.01641697	0.14163309	0.14117783	20.23
0.6168	2.097673	-0.576	0.01588660	0.14078492	0.14076436	20.23
0.6176	2.299719	-0.570	0.01538366	0.14001054	0.14039695	20.23
0.6184	2.481108	-0.571	0.01493371	0.13930923	0.14005309	20.23
0.6192	2.641611	-0.581	0.01452899	0.13866425	0.13971323	20.23
0.6200	2.781773	-0.583	0.01416552	0.13810289	0.13942438	20.23
0.6208	2.903881	-0.586	0.01384723	0.13761073	0.13917786	20.23
0.6216	3.010454	-0.588	0.01357228	0.13716912	0.13895983	20.23
0.6224	3.102436	-0.574	0.01333356	0.13678789	0.13877910	20.23
0.6232	3.180513	-0.570	0.01316065	0.13645816	0.13863271	20.23
0.6240	3.243771	-0.569	0.01300448	0.13618380	0.13849616	20.23
0.6248	3.290834	-0.568	0.01286793	0.13596094	0.13839102	20.23
0.6256	3.321447	-0.572	0.01279032	0.13580906	0.13832808	20.22
0.6264	3.336725	-0.572	0.01271963	0.13571274	0.13828290	20.22
0.6272	3.338814	-0.570	0.01268029	0.13566309	0.13825637	20.22
0.6280	3.329830	-0.564	0.01268911	0.13566798	0.13825339	20.22
0.6288	3.310261	-0.565	0.01270586	0.13569140	0.13826907	20.22
0.6296	3.272696	-0.568	0.01275498	0.13574976	0.13827598	20.22
0.6304	3.200598	-0.569	0.01288366	0.13593853	0.13837820	20.22
0.6312	3.080950	-0.571	0.01313913	0.13630921	0.13856095	20.22
0.6320	2.909517	-0.566	0.01350951	0.13689774	0.13884193	20.22
0.6328	2.693968	-0.560	0.01399082	0.13768083	0.13924760	20.22
0.6336	2.454958	-0.556	0.01454884	0.13855821	0.13968468	20.22
0.6344	2.214575	-0.558	0.01508212	0.13944346	0.14012963	20.22
0.6352	1.988039	-0.560	0.01558989	0.14027900	0.14056486	20.22
0.6360	1.785936	-0.557	0.01608896	0.14104450	0.14094496	20.23
0.6368	1.613216	-0.557	0.01649755	0.14171565	0.14127207	20.23
0.6376	1.468048	-0.551	0.01686394	0.14230120	0.14155108	20.23
0.6384	1.345367	-0.548	0.01718414	0.14282656	0.14178383	20.23
0.6392	1.237278	-0.558	0.01743650	0.14327800	0.14198613	20.23
0.6400	1.135082	-0.563	0.01768601	0.14371866	0.14217764	20.23
0.6408	1.033573	-0.563	0.01791686	0.14415056	0.14237505	20.23
0.6416	0.931034	-0.566	0.01818502	0.14458829	0.14257449	20.23
0.6424	0.829239	-0.557	0.01844829	0.14505219	0.14279169	20.23
0.6432	0.733137	-0.557	0.01872230	0.14547926	0.14298034	20.23
0.6440	0.647793	-0.562	0.01897866	0.14587319	0.14315021	20.23
0.6448	0.577955	-0.561	0.01916921	0.14620578	0.14329261	20.23
0.6456	0.527143	-0.561	0.01932639	0.14646268	0.14338589	20.22
0.6464	0.496044	-0.561	0.01940894	0.14663786	0.14346349	20.22
0.6472	0.482426	-0.561	0.01948065	0.14673615	0.14349896	20.22
0.6480	0.482626	-0.560	0.01951015	0.14678675	0.14352053	20.22
0.6488	0.494328	-0.564	0.01950222	0.14678770	0.14352250	20.22
0.6496	0.521049	-0.575	0.01948154	0.14673609	0.14347923	20.22
0.6504	0.573149	-0.578	0.01938236	0.14660859	0.14342809	20.22
0.6512	0.662270	-0.582	0.01920944	0.14630127	0.14329845	20.22
0.6520	0.792789	-0.581	0.01893151	0.14580899	0.14308918	20.22
0.6528	0.962276	-0.574	0.01856023	0.14517480	0.14281511	20.22
0.6536	1.160173	-0.576	0.01811427	0.14438689	0.14245957	20.22
0.6544	1.373606	-0.576	0.01761919	0.14355707	0.14206475	20.22
0.6552	1.594963	-0.572	0.01711720	0.14270306	0.14167780	20.22
0.6560	1.816406	-0.570	0.01658976	0.14182752	0.14128596	20.23
0.6568	2.031727	-0.566	0.01607215	0.14099967	0.14087826	20.23
0.6576	2.235975	-0.566	0.01558107	0.14020395	0.14050591	20.23
0.6584	2.424402	-0.564	0.01511651	0.13947046	0.14014345	20.23
0.6592	2.595835	-0.568	0.01467443	0.13879442	0.13978481	20.23
0.6600	2.749844	-0.568	0.01426572	0.13818067	0.13949013	20.23
0.6608	2.886887	-0.569	0.01390517	0.13763404	0.13921219	20.23
0.6616	3.006935	-0.569	0.01359379	0.13713217	0.13895774	20.23
0.6624	3.108158	-0.564	0.01333839	0.13671970	0.13876629	20.23
0.6632	3.189383	-0.564	0.01313508	0.13636857	0.13859344	20.23
0.6640	3.249607	-0.566	0.01296115	0.13609421	0.13846177	20.23
0.6648	3.289518	-0.570	0.01284230	0.13590837	0.13837630	20.23
0.6656	3.311319	-0.570	0.01275980	0.13577604	0.13831824	20.22
0.6664	3.318815	-0.569	0.01270282	0.13570690	0.13827699	20.22
0.6672	3.315411	-0.567	0.01269996	0.13567966	0.13825929	20.22
0.6680	3.303223	-0.565	0.01269203	0.13569528	0.13827014	20.22
0.6688	3.282223	-0.566	0.01271564	0.13573140	0.13828003	20.22
0.6696	3.243570	-0.574	0.01277947	0.13579953	0.13831830	20.22
0.6704	3.171558	-0.574	0.01291400	0.13600391	0.13841659	20.22
0.6712	3.053827	-0.573	0.01315862	0.13636869	0.13859439	20.22
0.6720	2.885313	-0.573	0.01352698	0.13693571	0.13888222	20.22
0.6728	2.673168	-0.565	0.01398671	0.13770616	0.13926929	20.22
0.6736	2.437077	-0.566	0.01452112	0.13856113	0.13970047	20.22
0.6744	2.198467	-0.568	0.01505846	0.13944143	0.14013761	20.22
0.6752	1.974678	-0.568	0.01558208	0.14028388	0.14056289	20.22
0.6760	1.778440	-0.572	0.01608795	0.14103580	0.14094102	20.23
0.6768	1.614161	-0.569	0.01650244	0.14167583	0.14125633	20.23
0.6776	1.478462	-0.566	0.01686978	0.14222932	0.14152741	20.23
0.6784	1.363478	-0.561	0.01716936	0.14271861	0.14176124	20.23
0.6792	1.259193	-0.562	0.01741499	0.14315540	0.14194989	20.23
0.6800	1.157455	-0.568	0.01765865	0.14359319	0.14214641	20.23
0.6808	1.054630	-0.572	0.01790428	0.14402699	0.14233601	20.23
0.6816	0.950832	-0.574	0.01816064	0.14447147	0.14252067	20.23
0.6824	0.849380	-0.570	0.01843464	0.14491987	0.14273280	20.23
0.6832	0.755882	-0.564	0.01869690	0.14533907	0.14292145	20.23
0.6840	0.675373	-0.565	0.01892567	0.14572042	0.14309329	20.23
0.6848	0.611601	-0.566	0.01911914	0.14602393	0.14322883	20.23
0.6856	0.566454	-0.564	0.01924878	0.14625448	0.14332706	20.22
0.6864	0.539474	-0.568	0.01933122	0.14641893	0.14338386	20.22
0.6872	0.528088	-0.568	0.01938236	0.14650357	0.14341629	20.22
0.6880	0.529118	-0.567	0.01940006	0.14655513	0.14344865	20.22
0.6888	0.540676	-0.572	0.01938927	0.14655995	0.14343488	20.22
0.6896	0.566254	-0.578	0.01933622	0.14650059	0.14340746	20.22
0.6904	0.616980	-0.575	0.01923019	0.14636147	0.14334857	20.22
0.6912	0.704584	-0.579	0.01904649	0.14604825	0.14320815	20.22
0.6920	0.833473	-0.576	0.01878035	0.14557159	0.14301562	20.22
0.6928	1.001530	-0.572	0.01841986	0.14494127	0.14275044	20.22
0.6936	1.198139	-0.574	0.01800233	0.14416999	0.14240074	20.22
0.6944	1.410885	-0.574	0.01752096	0.14334810	0.14200979	20.22
0.6952	1.632500	-0.577	0.01700521	0.14249802	0.14160311	20.23
0.6960	1.855631	-0.579	0.01648265	0.14163327	0.14118659	20.23
0.6968	2.073956	-0.581	0.01594836	0.14079559	0.14077306	20.23
0.6976	2.282181	-0.581	0.01545334	0.13999206	0.14039385	20.23
0.6984	2.474613	-0.578	0.01496613	0.13923323	0.14003438	20.23
0.6992	2.648678	-0.585	0.01452506	0.13853085	0.13968176	20.23
0.7000	2.802315	-0.585	0.01412320	0.13790345	0.13938898	20.23
0.7008	2.935266	-0.583	0.01376855	0.13735574	0.13911593	20.23
0.7016	3.048592	-0.587	0.01348269	0.13689566	0.13887531	20.23
0.7024	3.142633	-0.577	0.01322633	0.13651633	0.13869947	20.23
0.7032	3.218622	-0.574	0.01302987	0.13618851	0.13853747	20.23
0.7040	3.276958	-0.576	0.01287371	0.13593853	0.13840288	20.23
0.7048	3.318214	-0.571	0.01275289	0.13573819	0.13831246	20.23
0.7056	3.343391	-0.570	0.01267624	0.13559711	0.13824868	20.22
0.7064	3.354692	-0.570	0.01261836	0.13552517	0.13820350	20.22
0.7072	3.354292	-0.570	0.01257902	0.13547462	0.13819075	20.22
0.7080	3.344135	-0.569	0.01257604	0.13547850	0.13820350	20.22
0.7088	3.323908	-0.570	0.01259869	0.13550180	0.13821125	20.22
0.7096	3.285141	-0.576	0.01263696	0.13557088	0.13823873	20.22
0.7104	3.210554	-0.576	0.01278925	0.13579267	0.13833505	20.22
0.7112	3.085327	-0.581	0.01306832	0.13619244	0.13851678	20.22
0.7120	2.904053	-0.579	0.01346022	0.13681793	0.13881934	20.22
0.7128	2.674828	-0.574	0.01398772	0.13765252	0.13923979	20.22
0.7136	2.420540	-0.575	0.01455355	0.13858831	0.13971221	20.22
0.7144	2.165909	-0.573	0.01512319	0.13954157	0.14018857	20.22
0.7152	1.929073	-0.578	0.01567328	0.14044237	0.14064240	20.23
0.7160	1.722765	-0.576	0.01617330	0.14124298	0.14103824	20.23
0.7168	1.552391	-0.575	0.01660150	0.14192492	0.14136243	20.23
0.7176	1.416035	-0.574	0.01695120	0.14248329	0.14162576	20.23
0.7184	1.307487	-0.568	0.01724100	0.14293754	0.14184475	20.23
0.7192	1.215763	-0.571	0.01748163	0.14332759	0.14201754	20.23
0.7200	1.129160	-0.573	0.01771349	0.14368260	0.14218456	20.23
0.7208	1.039839	-0.568	0.01795316	0.14406294	0.14235055	20.23
0.7216	0.944710	-0.572	0.01820558	0.14448506	0.14252549	20.23
0.7224	0.845661	-0.568	0.01848352	0.14492470	0.14272785	20.23
0.7232	0.749102	-0.560	0.01873595	0.14536434	0.14291346	20.23
0.7240	0.662384	-0.562	0.01896292	0.14576709	0.14308733	20.23
0.7248	0.591888	-0.556	0.01917905	0.14610076	0.14324045	20.23
0.7256	0.541878	-0.556	0.01932245	0.14634985	0.14334261	20.22
0.7264	0.512295	-0.560	0.01941586	0.14651138	0.14342022	20.22
0.7272	0.500050	-0.564	0.01945615	0.14658821	0.14346051	20.22
0.7280	0.500994	-0.565	0.01944923	0.14661741	0.14347923	20.22
0.7288	0.511980	-0.567	0.01944339	0.14661735	0.14348221	20.22
0.7296	0.536385	-0.574	0.01939517	0.14657062	0.14345568	20.22
0.7304	0.584307	-0.570	0.01931065	0.14643055	0.14339966	20.22
0.7312	0.667219	-0.573	0.01914459	0.14614362	0.14326906	20.22
0.7320	0.790586	-0.573	0.01888126	0.14569813	0.14308339	20.22
0.7328	0.953550	-0.567	0.01852769	0.14509213	0.14282215	20.22
0.7336	1.148014	-0.568	0.01810831	0.14434505	0.14248031	20.22
0.7344	1.362076	-0.568	0.01762319	0.14351141	0.14209527	20.22
0.7352	1.587381	-0.566	0.01708305	0.14263499	0.14167976	20.22
0.7360	1.815147	-0.568	0.01656735	0.14174587	0.14125538	20.23
0.7368	2.037392	-0.570	0.01602799	0.14088994	0.14083892	20.23
0.7376	2.248507	-0.573	0.01552206	0.14008254	0.14045572	20.23
0.7384	2.444029	-0.573	0.01506424	0.13931215	0.14008152	20.23
0.7392	2.621584	-0.587	0.01460749	0.13859922	0.13973087	20.23
0.7400	2.779226	-0.588	0.01420081	0.13796002	0.13942927	20.23
0.7408	2.916870	-0.587	0.01385701	0.13740259	0.13914353	20.23
0.7416	3.035431	-0.589	0.01352799	0.13692403	0.13890189	20.23
0.7424	3.135481	-0.576	0.01324904	0.13652313	0.13870347	20.23
0.7432	3.218336	-0.569	0.01304185	0.13617879	0.13852763	20.23
0.7440	3.283138	-0.572	0.01284444	0.13589972	0.13838708	20.23
0.7448	3.329201	-0.570	0.01271576	0.13568079	0.13829172	20.23
0.7456	3.357067	-0.570	0.01265484	0.13553393	0.13822204	20.22
0.7464	3.368597	-0.576	0.01259387	0.13545710	0.13818580	20.22
0.7472	3.367224	-0.571	0.01256633	0.13541716	0.13817412	20.22
0.7480	3.355465	-0.569	0.01256043	0.13542402	0.13817805	20.22
0.7488	3.333149	-0.572	0.01257026	0.13545132	0.13818973	20.22
0.7496	3.291092	-0.577	0.01263511	0.13552231	0.13820630	20.22
0.7504	3.213301	-0.581	0.01279330	0.13574803	0.13831043	20.22
0.7512	3.088446	-0.584	0.01305461	0.13614100	0.13850105	20.22
0.7520	2.913666	-0.581	0.01343477	0.13673341	0.13880658	20.22
0.7528	2.698116	-0.574	0.01390427	0.13752431	0.13920748	20.22
0.7536	2.461796	-0.572	0.01443267	0.13839394	0.13963771	20.22
0.7544	2.223587	-0.574	0.01498371	0.13928694	0.14007097	20.22
0.7552	1.997166	-0.572	0.01550531	0.14015269	0.14049530	20.22
0.7560	1.793175	-0.570	0.01602787	0.14093280	0.14088809	20.23
0.7568	1.616364	-0.570	0.01647288	0.14162242	0.14122599	20.23
0.7576	1.466532	-0.566	0.01685792	0.14222836	0.14151275	20.23
0.7584	1.339731	-0.565	0.01719183	0.14275455	0.14176029	20.23
0.7592	1.228638	-0.575	0.01746595	0.14322048	0.14197147	20.23
0.7600	1.125183	-0.575	0.01772630	0.14365333	0.14216989	20.23
0.7608	1.024647	-0.577	0.01798069	0.14408624	0.14236927	20.23
0.7616	0.924540	-0.578	0.01824105	0.14451718	0.14256960	20.23
0.7624	0.825548	-0.564	0.01847875	0.14495301	0.14277297	20.23
0.7632	0.731707	-0.560	0.01874000	0.14538109	0.14296156	20.23
0.7640	0.646820	-0.557	0.01896590	0.14577895	0.14313638	20.23
0.7648	0.576353	-0.553	0.01916629	0.14610577	0.14326602	20.23
0.7656	0.524397	-0.558	0.01932150	0.14636248	0.14336914	20.22
0.7664	0.492182	-0.558	0.01941186	0.14653170	0.14344370	20.22
0.7672	0.478106	-0.565	0.01948661	0.14661050	0.14348006	20.22
0.7680	0.478277	-0.568	0.01950139	0.14666790	0.14350563	20.22
0.7688	0.490866	-0.571	0.01948565	0.14667183	0.14350265	20.22
0.7696	0.520792	-0.583	0.01942378	0.14661741	0.14346635	20.22
0.7704	0.579529	-0.578	0.01929510	0.14643449	0.14339864	20.22
0.7712	0.677862	-0.577	0.01908088	0.14608431	0.14325231	20.22
0.7720	0.819082	-0.577	0.01879305	0.14556295	0.14303726	20.22
0.7728	0.997982	-0.569	0.01841193	0.14487326	0.14274549	20.22
0.7736	1.202059	-0.573	0.01795810	0.14408535	0.14238203	20.22
0.7744	1.417809	-0.581	0.01748365	0.14324009	0.14198029	20.22
0.7752	1.636477	-0.580	0.01697004	0.14238214	0.14158148	20.22
0.7760	1.851053	-0.583	0.01645917	0.14154553	0.14118171	20.23
0.7768	2.056074	-0.583	0.01595819	0.14075279	0.14079171	20.23
0.7776	2.248049	-0.576	0.01548958	0.14001143	0.14044887	20.23
0.7784	2.424889	-0.577	0.01504546	0.13932562	0.14010704	20.23
0.7792	2.586937	-0.585	0.01463491	0.13866997	0.13978589	20.23
0.7800	2.735023	-0.585	0.01425874	0.13808048	0.13950396	20.23
0.7808	2.870579	-0.592	0.01390910	0.13753581	0.13922602	20.23
0.7816	2.993059	-0.588	0.01360762	0.13703877	0.13897943	20.23
0.7824	3.099890	-0.580	0.01332575	0.13662237	0.13876724	20.23
0.7832	3.188639	-0.576	0.01309687	0.13626349	0.13858557	20.23
0.7840	3.256731	-0.576	0.01290143	0.13596100	0.13844496	20.23
0.7848	3.303680	-0.576	0.01276582	0.13574600	0.13832909	20.23
0.7856	3.330603	-0.575	0.01269025	0.13560605	0.13826227	20.22
0.7864	3.340731	-0.572	0.01264399	0.13552040	0.13821316	20.22
0.7872	3.337612	-0.572	0.01263613	0.13550192	0.13818771	20.22
0.7880	3.323536	-0.570	0.01263314	0.13551652	0.13821316	20.22
0.7888	3.297615	-0.573	0.01264381	0.13555050	0.13822883	20.22
0.7896	3.248234	-0.580	0.01270765	0.13565946	0.13827986	20.22
0.7904	3.160229	-0.577	0.01287860	0.13591719	0.13840950	20.22
0.7912	3.025074	-0.578	0.01316941	0.13634807	0.13860703	20.22
0.7920	2.843199	-0.576	0.01358300	0.13698423	0.13892335	20.22
0.7928	2.628250	-0.573	0.01408398	0.13776726	0.13931340	20.22
0.7936	2.400913	-0.578	0.01458985	0.13860774	0.13973290	20.22
0.7944	2.178726	-0.580	0.01509076	0.13943559	0.14015919	20.22
0.7952	1.973648	-0.578	0.01557899	0.14020413	0.14055115	20.22
0.7960	1.792746	-0.575	0.01601326	0.14090258	0.14090961	20.23
0.7968	1.636133	-0.571	0.01640707	0.14151347	0.14120626	20.23
0.7976	1.498547	-0.568	0.01675880	0.14207274	0.14145875	20.23
0.7984	1.372633	-0.562	0.01708490	0.14259696	0.14170331	20.23
0.7992	1.251125	-0.565	0.01738048	0.14308625	0.14191651	20.23
0.8000	1.130247	-0.565	0.01769096	0.14359117	0.14215416	20.23
0.8010	0.770359	-0.576	0.01923323	0.14603585	0.14327025	20.23
0.8020	0.769358	-0.577	0.01921457	0.14603871	0.14327800	20.22
0.8030	0.766582	-0.574	0.01923215	0.14602798	0.14327991	20.22
0.8040	0.760059	-0.569	0.01927042	0.14603376	0.14330244	20.22
0.8050	0.745583	-0.570	0.01926750	0.14606774	0.14332598	20.22
0.8060	0.716887	-0.573	0.01930779	0.14614171	0.14334756	20.22
0.8070	0.671339	-0.570	0.01945418	0.14630991	0.14341533	20.22
0.8080	0.616550	-0.571	0.01957494	0.14651424	0.14348316	20.22
0.8090	0.567942	-0.566	0.01965845	0.14674771	0.14358240	20.22
0.8100	0.538044	-0.569	0.01974386	0.14687318	0.14364624	20.22
0.8110	0.528660	-0.573	0.01978219	0.14693636	0.14367276	20.22
0.8120	0.535526	-0.573	0.01977044	0.14693630	0.14367765	20.23
0.8130	0.559130	-0.570	0.01973206	0.14689738	0.14364135	20.23
0.8140	0.614204	-0.569	0.01965052	0.14673102	0.14357752	20.23
0.8150	0.713196	-0.574	0.01940399	0.14635271	0.14342916	20.23
0.8160	0.855761	-0.581	0.01905435	0.14578760	0.14318264	20.23
0.8170	1.027336	-0.578	0.01867318	0.14511937	0.14287525	20.23
0.8180	1.206837	-0.579	0.01825178	0.14441603	0.14254022	20.23
0.8190	1.380043	-0.572	0.01783824	0.14374101	0.14223862	20.23
0.8200	1.534567	-0.574	0.01748270	0.14311266	0.14194298	20.23
0.8210	1.664286	-0.575	0.01717824	0.14258164	0.14169544	20.23
0.8220	1.770086	-0.573	0.01687264	0.14214778	0.14149809	20.22
0.8230	1.857691	-0.571	0.01664770	0.14178395	0.14133400	20.22
0.8240	1.934881	-0.569	0.01646495	0.14146876	0.14120626	20.22
0.8250	2.007809	-0.570	0.01627147	0.14115936	0.14105791	20.22
0.8260	2.079735	-0.580	0.01604551	0.14084810	0.14091343	20.22
0.8270	2.150116	-0.581	0.01589131	0.14055526	0.14077199	20.22
0.8280	2.215433	-0.588	0.01572430	0.14028293	0.14062476	20.22
0.8290	2.269707	-0.578	0.01557201	0.14006597	0.14051777	20.22
0.8300	2.307844	-0.577	0.01549345	0.13988507	0.14041865	20.22
0.8310	2.327614	-0.578	0.01543850	0.13978004	0.14036846	20.22
0.8320	2.331505	-0.583	0.01537764	0.13973731	0.14034283	20.23
0.8330	2.324152	-0.585	0.01537371	0.13971883	0.14031726	20.23
0.8340	2.308817	-0.581	0.01540899	0.13975573	0.14035171	20.23
0.8350	2.285357	-0.576	0.01541299	0.13978779	0.14037728	20.23
0.8360	2.246304	-0.580	0.01546901	0.13985974	0.14043039	20.23
0.8370	2.177525	-0.578	0.01562917	0.14005041	0.14051282	20.23
0.8380	2.069893	-0.580	0.01587188	0.14040631	0.14066809	20.23
0.8390	1.925726	-0.571	0.01618117	0.14094913	0.14092535	20.23
0.8400	1.762476	-0.568	0.01654166	0.14154941	0.14122301	20.23
0.8410	1.599684	-0.569	0.01694834	0.14216423	0.14152747	20.23
0.8420	1.451111	-0.568	0.01730591	0.14271772	0.14180547	20.22
0.8430	1.322193	-0.569	0.01759076	0.14322454	0.14204317	20.22
0.8440	1.212530	-0.565	0.01788342	0.14368361	0.14225626	20.22
0.8450	1.118317	-0.568	0.01812512	0.14407754	0.14243698	20.22
0.8460	1.033859	-0.573	0.01829708	0.14442092	0.14258933	20.22
0.8470	0.953207	-0.574	0.01850045	0.14475167	0.14274645	20.22
0.8480	0.871897	-0.576	0.01872337	0.14510477	0.14290261	20.22
0.8490	0.787582	-0.572	0.01889622	0.14549476	0.14307839	20.22
0.8500	0.702381	-0.572	0.01910734	0.14587307	0.14323163	20.22
0.8510	0.620956	-0.576	0.01934808	0.14623392	0.14337307	20.22
0.8520	0.549603	-0.578	0.01952881	0.14656281	0.14348990	20.23
0.8530	0.492783	-0.579	0.01966828	0.14684790	0.14360094	20.23
0.8540	0.451469	-0.577	0.01980084	0.14706683	0.14369822	20.23
0.8550	0.425034	-0.577	0.01990598	0.14720392	0.14376986	20.23
0.8560	0.410757	-0.586	0.01991099	0.14727587	0.14379638	20.23
0.8570	0.405922	-0.587	0.01996106	0.14732838	0.14379734	20.23
0.8580	0.407267	-0.585	0.01998568	0.14736342	0.14379340	20.23
0.8590	0.412931	-0.578	0.01993948	0.14738190	0.14380121	20.23
0.8600	0.422201	-0.577	0.01993644	0.14734977	0.14378750	20.23
0.8610	0.436392	-0.581	0.01995212	0.14731377	0.14378953	20.23
0.8620	0.463171	-0.584	0.01988727	0.14726222	0.14375913	20.22
0.8630	0.517416	-0.587	0.01976848	0.14709002	0.14370424	20.22
0.8640	0.611830	-0.584	0.01960742	0.14674085	0.14357948	20.22
0.8650	0.746641	-0.583	0.01929200	0.14618355	0.14335161	20.22
0.8660	0.909548	-0.588	0.01889324	0.14552116	0.14307261	20.22
0.8670	1.083870	-0.589	0.01851714	0.14479941	0.14274454	20.22
0.8680	1.256447	-0.592	0.01811254	0.14410383	0.14243209	20.22
0.8690	1.415806	-0.588	0.01772648	0.14346188	0.14215213	20.22
0.8700	1.554251	-0.591	0.01737970	0.14291418	0.14188308	20.22
0.8710	1.669579	-0.592	0.01710457	0.14245898	0.14166594	20.22
0.8720	1.765881	-0.592	0.01681864	0.14206886	0.14147049	20.23
0.8730	1.851282	-0.595	0.01657504	0.14171374	0.14130640	20.23
0.8740	1.933079	-0.593	0.01639038	0.14136744	0.14116794	20.23
0.8750	2.016249	-0.591	0.01619291	0.14102501	0.14100099	20.23
0.8760	2.099876	-0.600	0.01594931	0.14068067	0.14082998	20.23
0.8770	2.179527	-0.601	0.01575482	0.14035189	0.14064050	20.23
0.8780	2.248449	-0.601	0.01558685	0.14006114	0.14050686	20.23
0.8790	2.298861	-0.592	0.01543754	0.13985491	0.14040375	20.23
0.8800	2.327185	-0.591	0.01533347	0.13972551	0.14033890	20.23
0.8810	2.335281	-0.593	0.01532853	0.13967198	0.14030844	20.23
0.8820	2.329702	-0.591	0.01528335	0.13965642	0.14031333	20.22
0.8830	2.316914	-0.591	0.01528823	0.13966906	0.14032209	20.22
0.8840	2.298317	-0.585	0.01535791	0.13969237	0.14034963	20.22
0.8850	2.272196	-0.587	0.01540804	0.13974297	0.14038312	20.22
0.8860	2.229052	-0.590	0.01546210	0.13985479	0.14042544	20.22
0.8870	2.155266	-0.590	0.01565868	0.14007556	0.14051676	20.22
0.8880	2.043715	-0.590	0.01591605	0.14045399	0.14069456	20.22
0.8890	1.899233	-0.580	0.01620585	0.14097929	0.14094889	20.22
0.8900	1.740646	-0.581	0.01658595	0.14157265	0.14124560	20.22
0.8910	1.587210	-0.581	0.01696116	0.14215732	0.14151663	20.22
0.8920	1.451054	-0.581	0.01725090	0.14268553	0.14176124	20.23
0.8930	1.336098	-0.581	0.01756227	0.14314276	0.14198416	20.23
0.8940	1.238308	-0.581	0.01782852	0.14354062	0.14218259	20.23
0.8950	1.150475	-0.579	0.01801807	0.14391118	0.14237612	20.23
0.8960	1.063728	-0.590	0.01821548	0.14426917	0.14253730	20.23
0.8970	0.971603	-0.590	0.01845026	0.14466220	0.14269346	20.23
0.8980	0.873299	-0.596	0.01866043	0.14508629	0.14286238	20.23
0.8990	0.773764	-0.587	0.01888150	0.14552498	0.14305300	20.23
0.9000	0.681553	-0.585	0.01916921	0.14592767	0.14322871	20.23
0.9010	0.602732	-0.587	0.01938432	0.14627111	0.14338589	20.23
0.9020	0.541191	-0.590	0.01953560	0.14655232	0.14349598	20.22
0.9030	0.496187	-0.596	0.01966918	0.14675170	0.14358938	20.22
0.9040	0.465717	-0.593	0.01975560	0.14691907	0.14365327	20.22
0.9050	0.447550	-0.592	0.01978111	0.14703768	0.14368957	20.22
0.9060	0.438137	-0.593	0.01979595	0.14709407	0.14371115	20.22
0.9070	0.435305	-0.596	0.01984507	0.14711940	0.14371699	20.22
0.9080	0.436764	-0.596	0.01985294	0.14713103	0.14372385	20.22
0.9090	0.441856	-0.594	0.01984119	0.14715540	0.14373165	20.22
0.9100	0.450439	-0.592	0.01986873	0.14714277	0.14371496	20.22
0.9110	0.463657	-0.596	0.01985979	0.14711267	0.14370519	20.22
0.9120	0.489092	-0.594	0.01979500	0.14705229	0.14368653	20.23
0.9130	0.541821	-0.597	0.01968002	0.14688778	0.14363742	20.23
0.9140	0.633545	-0.597	0.01951504	0.14655209	0.14351851	20.23
0.9150	0.763350	-0.596	0.01920658	0.14603943	0.14329851	20.23
0.9160	0.918303	-0.599	0.01884109	0.14540237	0.14300376	20.23
0.9170	1.081924	-0.596	0.01848161	0.14475650	0.14270818	20.23
0.9180	1.243229	-0.600	0.01809752	0.14410967	0.14242142	20.23
0.9190	1.392460	-0.593	0.01772135	0.14352220	0.14216310	20.23
0.9200	1.522980	-0.593	0.01742077	0.14299697	0.14192241	20.23
0.9210	1.632786	-0.591	0.01714677	0.14254469	0.14170724	20.23
0.9220	1.726227	-0.588	0.01687074	0.14217985	0.14152455	20.22
0.9230	1.810455	-0.589	0.01667041	0.14182669	0.14136839	20.22
0.9240	1.891766	-0.585	0.01649654	0.14149880	0.14122200	20.22
0.9250	1.973906	-0.583	0.01625001	0.14116615	0.14107764	20.22
0.9260	2.056875	-0.583	0.01603097	0.14081013	0.14089870	20.22
0.9270	2.137098	-0.582	0.01586097	0.14048821	0.14073175	20.22
0.9280	2.208996	-0.581	0.01564986	0.14018953	0.14057750	20.22
0.9290	2.265759	-0.576	0.01549447	0.13996774	0.14047539	20.22
0.9300	2.304554	-0.577	0.01542860	0.13979173	0.14039099	20.22
0.9310	2.324867	-0.581	0.01533335	0.13968861	0.14032608	20.22
0.9320	2.330332	-0.582	0.01529413	0.13963604	0.14030546	20.23
0.9330	2.324438	-0.581	0.01529521	0.13962632	0.14030445	20.23
0.9340	2.310820	-0.580	0.01531088	0.13965750	0.14031428	20.23
0.9350	2.289276	-0.580	0.01534039	0.13968086	0.14033103	20.23
0.9360	2.252541	-0.588	0.01541305	0.13975376	0.14035273	20.23
0.9370	2.185249	-0.584	0.01556927	0.13994819	0.14044988	20.23
0.9380	2.076244	-0.584	0.01580209	0.14031100	0.14062965	20.23
0.9390	1.928072	-0.579	0.01612228	0.14084995	0.14090955	20.23
0.9400	1.760788	-0.582	0.01653278	0.14145118	0.14121211	20.23
0.9410	1.598682	-0.581	0.01692080	0.14204848	0.14150572	20.23
0.9420	1.457777	-0.573	0.01722240	0.14259130	0.14176404	20.22
0.9430	1.342821	-0.573	0.01752204	0.14304358	0.14197820	20.22
0.9440	1.249208	-0.565	0.01779997	0.14344049	0.14216489	20.22
0.9450	1.167440	-0.569	0.01795715	0.14378971	0.14231038	20.22
0.9460	1.087074	-0.575	0.01814675	0.14411074	0.14245379	20.22
0.9470	1.002359	-0.581	0.01837164	0.14447159	0.14260709	20.22
0.9480	0.912380	-0.581	0.01856023	0.14484602	0.14277899	20.22
0.9490	0.820141	-0.578	0.01877338	0.14526331	0.14296269	20.22
0.9500	0.729933	-0.574	0.01901805	0.14565533	0.14311981	20.22
0.9510	0.647449	-0.570	0.01924592	0.14602697	0.14328378	20.22
0.9520	0.577497	-0.568	0.01942366	0.14635968	0.14341933	20.23
0.9530	0.522881	-0.569	0.01957399	0.14662224	0.14353031	20.23
0.9540	0.483027	-0.569	0.01970363	0.14683133	0.14362264	20.23
0.9550	0.455847	-0.571	0.01977146	0.14696842	0.14366496	20.23
0.9560	0.439339	-0.577	0.01978618	0.14706093	0.14368653	20.23
0.9570	0.431271	-0.573	0.01983917	0.14711833	0.14371014	20.23
0.9580	0.430012	-0.572	0.01985484	0.14712811	0.14371705	20.23
0.9590	0.433645	-0.566	0.01983619	0.14715040	0.14374346	20.23
0.9600	0.441713	-0.573	0.01985091	0.14715528	0.14373064	20.23
0.9610	0.455017	-0.579	0.01987648	0.14715040	0.14373261	20.23
0.9620	0.481024	-0.580	0.01980871	0.14710468	0.14370906	20.22
0.9630	0.535269	-0.576	0.01967907	0.14691311	0.14363444	20.22
0.9640	0.630455	-0.574	0.01952183	0.14657068	0.14349693	20.22
0.9650	0.767040	-0.578	0.01920068	0.14601427	0.14327395	20.22
0.9660	0.931578	-0.583	0.01881856	0.14534599	0.14297926	20.22
0.9670	1.105356	-0.585	0.01844138	0.14463496	0.14266890	20.22
0.9680	1.273041	-0.582	0.01801211	0.14397448	0.14235556	20.22
0.9690	1.422873	-0.576	0.01761431	0.14338696	0.14209235	20.22
0.9700	1.549158	-0.574	0.01734024	0.14286840	0.14185268	20.22
0.9710	1.653528	-0.580	0.01706815	0.14242965	0.14164042	20.22
0.9720	1.743364	-0.580	0.01681370	0.14205903	0.14147747	20.23
0.9730	1.827908	-0.580	0.01663983	0.14172828	0.14130747	20.23
0.9740	1.914024	-0.574	0.01641786	0.14137614	0.14117092	20.23
0.9750	2.003889	-0.576	0.01614875	0.14101243	0.14099598	20.23
0.9760	2.094498	-0.585	0.01594836	0.14062822	0.14080930	20.23
0.9770	2.178268	-0.585	0.01573914	0.14028192	0.14063942	20.23
0.9780	2.246389	-0.585	0.01552296	0.14000368	0.14049804	20.23
0.9790	2.292452	-0.574	0.01544434	0.13982469	0.14040470	20.23
0.9800	2.315454	-0.577	0.01538056	0.13970309	0.14033401	20.23
0.9810	2.319574	-0.580	0.01531774	0.13965350	0.14030737	20.23
0.9820	2.311907	-0.584	0.01530898	0.13964963	0.14030933	20.22
0.9830	2.298059	-0.585	0.01534134	0.13967109	0.14033294	20.22
0.9840	2.279663	-0.587	0.01536286	0.13971198	0.14035946	20.22
0.9850	2.253456	-0.589	0.01538932	0.13975477	0.14039290	20.22
0.9860	2.209368	-0.593	0.01547885	0.13987535	0.14043027	20.22
0.9870	2.135582	-0.589	0.01563418	0.14010388	0.14052844	20.22
0.9880	2.028751	-0.584	0.01585913	0.14047843	0.14069253	20.22
0.9890	1.894655	-0.572	0.01620096	0.14096677	0.14093608	20.22
0.9900	1.747198	-0.570	0.01657510	0.14150667	0.14119637	20.22
0.9910	1.598568	-0.571	0.01688838	0.14206696	0.14147037	20.22
0.9920	1.459293	-0.573	0.01719779	0.14259809	0.14172876	20.23
0.9930	1.335611	-0.573	0.01751119	0.14307761	0.14195573	20.23
0.9940	1.229067	-0.570	0.01777840	0.14351535	0.14218658	20.23
0.9950	1.135483	-0.569	0.01800627	0.14390731	0.14235556	20.23
0.9960	1.048422	-0.576	0.01826060	0.14428180	0.14252353	20.23
0.9970	0.963078	-0.578	0.01846790	0.14463300	0.14266497	20.23
0.9980	0.876904	-0.581	0.01864767	0.14498901	0.14282298	20.23
0.9990	0.789528	-0.572	0.01887453	0.14536452	0.14300185	20.23
1.0000	0.703039	-0.573	0.01909757	0.14575559	0.14315605	20.23
1.0010	0.621185	-0.575	0.01929498	0.14613104	0.14331329	20.23
1.0020	0.550003	-0.574	0.01946688	0.14646268	0.14345568	20.22
1.0030	0.492926	-0.570	0.01965743	0.14673114	0.14356279	20.22
1.0040	0.450497	-0.564	0.01977730	0.14695191	0.14365506	20.22
1.0050	0.422201	-0.564	0.01980978	0.14709890	0.14370018	20.22
1.0060	0.406122	-0.566	0.01984900	0.14719820	0.14372665	20.22
1.0070	0.399771	-0.568	0.01989424	0.14723325	0.14374733	20.22
1.0080	0.400429	-0.564	0.01989514	0.14725167	0.14374840	20.22
1.0090	0.406036	-0.560	0.01992273	0.14725941	0.14377099	20.22
1.0100	0.415478	-0.561	0.01994133	0.14724863	0.14375228	20.22
1.0110	0.430412	-0.569	0.01987946	0.14723301	0.14374924	20.22
1.0120	0.459795	-0.575	0.01981658	0.14715713	0.14371878	20.23
1.0130	0.519590	-0.580	0.01974094	0.14695877	0.14365202	20.23
1.0140	0.621185	-0.582	0.01952589	0.14657748	0.14351559	20.23
1.0150	0.763950	-0.584	0.01917225	0.14601523	0.14327991	20.23
1.0160	0.933580	-0.584	0.01880199	0.14531881	0.14297730	20.23
1.0170	1.111908	-0.583	0.01835907	0.14459705	0.14263648	20.23
1.0180	1.283684	-0.579	0.01793271	0.14391124	0.14232409	20.23
1.0190	1.437750	-0.574	0.01758504	0.14330810	0.14205110	20.23
1.0200	1.569157	-0.569	0.01727253	0.14277112	0.14180750	20.23
1.0210	1.678762	-0.573	0.01698470	0.14232069	0.14160508	20.23
1.0220	1.772060	-0.572	0.01673514	0.14194626	0.14141655	20.22
1.0230	1.856232	-0.582	0.01657706	0.14161456	0.14126617	20.22
1.0240	1.937485	-0.582	0.01635903	0.14128679	0.14112765	20.22
1.0250	2.019196	-0.583	0.01612818	0.14093554	0.14096642	20.22
1.0260	2.099705	-0.581	0.01595414	0.14059120	0.14079648	20.22
1.0270	2.174377	-0.578	0.01574290	0.14028960	0.14062566	20.22
1.0280	2.236776	-0.579	0.01555145	0.14002794	0.14049697	20.22
1.0290	2.281008	-0.568	0.01544154	0.13984901	0.14040762	20.22
1.0300	2.305241	-0.570	0.01538163	0.13973129	0.14034766	20.22
1.0310	2.311821	-0.572	0.01531285	0.13968843	0.14031529	20.22
1.0320	2.306557	-0.574	0.01533830	0.13968551	0.14031035	20.23
1.0330	2.294369	-0.576	0.01537365	0.13970506	0.14031726	20.23
1.0340	2.277575	-0.578	0.01536477	0.13972843	0.14034480	20.23
1.0350	2.254658	-0.581	0.01539820	0.13975573	0.14036256	20.23
1.0360	2.217808	-0.588	0.01549059	0.13983548	0.14040184	20.23
1.0370	2.155437	-0.587	0.01559776	0.14002025	0.14047933	20.23
1.0380	2.059507	-0.583	0.01577646	0.14033347	0.14063454	20.23
1.0390	1.931734	-0.569	0.01609665	0.14079845	0.14086533	20.23
1.0400	1.783047	-0.569	0.01643842	0.14132667	0.14112860	20.23
1.0410	1.626720	-0.573	0.01677048	0.14191908	0.14141929	20.23
1.0420	1.474228	-0.574	0.01716632	0.14249587	0.14169544	20.22
1.0430	1.334267	-0.575	0.01750529	0.14305329	0.14195770	20.22
1.0440	1.212301	-0.570	0.01778615	0.14353663	0.14219153	20.22
1.0450	1.109333	-0.574	0.01804644	0.14397055	0.14238495	20.22
1.0460	1.022329	-0.574	0.01827335	0.14432764	0.14254707	20.22
1.0470	0.944910	-0.577	0.01843840	0.14466512	0.14268363	20.22
1.0480	0.870352	-0.573	0.01862806	0.14499003	0.14281625	20.22
1.0490	0.794249	-0.570	0.01886880	0.14533728	0.14297837	20.22
1.0500	0.717144	-0.570	0.01904458	0.14567876	0.14313358	20.22
1.0510	0.377169	-0.583	0.02030295	0.14783138	0.14401877	20.23
1.0520	0.375910	-0.587	0.02030385	0.14783037	0.14399707	20.23
1.0530	0.374393	-0.580	0.02032149	0.14784783	0.14401275	20.23
1.0540	0.373278	-0.578	0.02031755	0.14787215	0.14402944	20.23
1.0550	0.372562	-0.580	0.02031654	0.14787018	0.14403540	20.23
1.0560	0.372505	-0.583	0.02034301	0.14787304	0.14402950	20.22
1.0570	0.373735	-0.589	0.02033317	0.14786923	0.14402270	20.22
1.0580	0.377312	-0.593	0.02029598	0.14787996	0.14402962	20.22
1.0590	0.384722	-0.595	0.02031964	0.14786637	0.14402568	20.22
1.0600	0.400944	-0.601	0.02028233	0.14782351	0.14399910	20.22
1.0610	0.438738	-0.592	0.02018011	0.14769506	0.14395189	20.22
1.0620	0.516415	-0.593	0.02002287	0.14741880	0.14382803	20.22
1.0630	0.643101	-0.584	0.01980478	0.14693439	0.14365613	20.22
1.0640	0.812960	-0.584	0.01937652	0.14623696	0.14337224	20.22
1.0650	1.008797	-0.583	0.01895511	0.14544612	0.14303142	20.22
1.0660	1.214361	-0.582	0.01848459	0.14460957	0.14265817	20.23
1.0670	1.418610	-0.580	0.01797581	0.14379156	0.14227700	20.23
1.0680	1.613188	-0.575	0.01747775	0.14298326	0.14191353	20.23
1.0690	1.792889	-0.573	0.01706719	0.14224690	0.14157557	20.23
1.0700	1.957111	-0.577	0.01664191	0.14156890	0.14124072	20.23
1.0710	2.108145	-0.580	0.01624125	0.14095205	0.14095289	20.23
1.0720	2.250738	-0.581	0.01589352	0.14037222	0.14065427	20.23
1.0730	2.386923	-0.578	0.01555949	0.13983530	0.14040864	20.23
1.0740	2.518673	-0.577	0.01517940	0.13928384	0.14015019	20.23
1.0750	2.643900	-0.583	0.01485616	0.13875955	0.13990366	20.23
1.0760	2.758398	-0.585	0.01457220	0.13826442	0.13966495	20.22
1.0770	2.853212	-0.583	0.01430106	0.13785976	0.13946670	20.22
1.0780	2.921047	-0.583	0.01408887	0.13757581	0.13930565	20.22
1.0790	2.959585	-0.581	0.01400441	0.13738799	0.13922215	20.22
1.0800	2.973776	-0.593	0.01389641	0.13727808	0.13915324	20.22
1.0810	2.971973	-0.597	0.01383746	0.13724393	0.13913250	20.22
1.0820	2.961988	-0.605	0.01385516	0.13723713	0.13912272	20.22
1.0830	2.947054	-0.597	0.01385707	0.13726336	0.13913941	20.22
1.0840	2.926483	-0.596	0.01386487	0.13728571	0.13915813	20.22
1.0850	2.892122	-0.592	0.01395130	0.13735288	0.13920140	20.22
1.0860	2.826405	-0.594	0.01410758	0.13753676	0.13929576	20.23
1.0870	2.711849	-0.589	0.01432467	0.13790065	0.13948143	20.23
1.0880	2.545166	-0.591	0.01468611	0.13848042	0.13975245	20.23
1.0890	2.342606	-0.586	0.01516443	0.13921785	0.14011592	20.23
1.0900	2.132177	-0.593	0.01559764	0.13998038	0.14048523	20.23
1.0910	1.936083	-0.593	0.01604950	0.14072061	0.14085466	20.23
1.0920	1.767454	-0.597	0.01646304	0.14136744	0.14116305	20.23
1.0930	1.627436	-0.591	0.01682645	0.14193165	0.14143509	20.23
1.0940	1.507845	-0.584	0.01709265	0.14242387	0.14166194	20.23
1.0950	1.395979	-0.584	0.01739717	0.14287126	0.14189672	20.23
1.0960	1.280279	-0.584	0.01772332	0.14333332	0.14211583	20.23
1.0970	1.155853	-0.584	0.01798368	0.14384693	0.14235556	20.22
1.0980	1.025190	-0.584	0.01832747	0.14439452	0.14260608	20.22
1.0990	0.895929	-0.582	0.01865649	0.14496750	0.14287025	20.22
1.1000	0.776768	-0.593	0.01893151	0.14547241	0.14308929	20.22
1.1010	0.674486	-0.593	0.01919472	0.14593744	0.14326698	20.22
1.1020	0.593119	-0.597	0.01946390	0.14631289	0.14340949	20.22
1.1030	0.532894	-0.587	0.01960927	0.14661539	0.14352351	20.22
1.1040	0.492010	-0.587	0.01973110	0.14682454	0.14361101	20.22
1.1050	0.466862	-0.585	0.01983428	0.14695108	0.14366406	20.22
1.1060	0.454073	-0.587	0.01985389	0.14703768	0.14370120	20.23
1.1070	0.450296	-0.588	0.01986766	0.14709508	0.14371985	20.23
1.1080	0.453043	-0.592	0.01990098	0.14713019	0.14373255	20.23
1.1090	0.460911	-0.589	0.01989996	0.14714187	0.14374042	20.23
1.1100	0.474415	-0.592	0.01981658	0.14709121	0.14372867	20.23
1.1110	0.501795	-0.589	0.01980478	0.14702785	0.14369631	20.23
1.1120	0.560474	-0.593	0.01969677	0.14683324	0.14361286	20.23
1.1130	0.665302	-0.589	0.01945508	0.14646363	0.14347237	20.23
1.1140	0.817623	-0.585	0.01916337	0.14586544	0.14322782	20.23
1.1150	1.003475	-0.588	0.01875967	0.14511061	0.14290762	20.23
1.1160	1.204290	-0.587	0.01826751	0.14432567	0.14255202	20.23
1.1170	1.407223	-0.588	0.01778620	0.14352226	0.14217675	20.22
1.1180	1.603947	-0.589	0.01733238	0.14274108	0.14181024	20.22
1.1190	1.789083	-0.587	0.01686877	0.14200169	0.14147538	20.22
1.1200	1.960945	-0.596	0.01642972	0.14132166	0.14112860	20.22
1.1210	2.117014	-0.601	0.01605248	0.14070112	0.14083397	20.22
1.1220	2.256775	-0.605	0.01567328	0.14013886	0.14055496	20.22
1.1230	2.380571	-0.598	0.01531971	0.13964862	0.14032811	20.22
1.1240	2.492123	-0.595	0.01508784	0.13920021	0.14010417	20.22
1.1250	2.595091	-0.589	0.01483351	0.13878483	0.13990372	20.22
1.1260	2.691650	-0.591	0.01456338	0.13838112	0.13970137	20.23
1.1270	2.779369	-0.587	0.01436204	0.13801241	0.13953441	20.23
1.1280	2.853098	-0.589	0.01417351	0.13770115	0.13937044	20.23
1.1290	2.907171	-0.587	0.01400846	0.13748235	0.13925552	20.23
1.1300	2.939701	-0.594	0.01388866	0.13730633	0.13914734	20.23
1.1310	2.952518	-0.595	0.01385123	0.13722849	0.13909417	20.23
1.1320	2.951145	-0.595	0.01379323	0.13717306	0.13907647	20.23
1.1330	2.939844	-0.592	0.01378042	0.13717872	0.13908529	20.23
1.1340	2.920275	-0.587	0.01382565	0.13721377	0.13911968	20.23
1.1350	2.885714	-0.583	0.01388562	0.13727129	0.13914126	20.23
1.1360	2.817736	-0.581	0.01401037	0.13745713	0.13922685	20.23
1.1370	2.699003	-0.581	0.01428241	0.13783848	0.13940960	20.22
1.1380	2.528687	-0.582	0.01467824	0.13843763	0.13969547	20.22
1.1390	2.327843	-0.580	0.01511919	0.13918072	0.14007550	20.22
1.1400	2.126455	-0.584	0.01553178	0.13990539	0.14044094	20.22
1.1410	1.945124	-0.578	0.01597971	0.14058530	0.14077693	20.22
1.1420	1.790829	-0.581	0.01633435	0.14115733	0.14106381	20.22
1.1430	1.659365	-0.574	0.01664281	0.14167488	0.14132214	20.22
1.1440	1.540203	-0.577	0.01695722	0.14214659	0.14156574	20.22
1.1450	1.422157	-0.577	0.01724309	0.14262223	0.14178771	20.22
1.1460	1.297302	-0.581	0.01749837	0.14313006	0.14202738	20.23
1.1470	1.163807	-0.579	0.01785988	0.14367777	0.14226514	20.23
1.1480	1.025505	-0.581	0.01824290	0.14426833	0.14253527	20.23
1.1490	0.890579	-0.576	0.01856607	0.14484519	0.14280349	20.23
1.1500	0.767670	-0.583	0.01886272	0.14536750	0.14303535	20.23
1.1510	0.664616	-0.581	0.01914960	0.14583629	0.14323181	20.23
1.1520	0.585279	-0.585	0.01934022	0.14620489	0.14336735	20.23
1.1530	0.529032	-0.579	0.01951015	0.14649862	0.14348322	20.23
1.1540	0.491552	-0.580	0.01965356	0.14670098	0.14356083	20.23
1.1550	0.468521	-0.580	0.01970953	0.14684689	0.14361292	20.23
1.1560	0.455761	-0.583	0.01972216	0.14694417	0.14365321	20.23
1.1570	0.451040	-0.584	0.01981252	0.14701718	0.14367783	20.22
1.1580	0.452042	-0.581	0.01982433	0.14704835	0.14369065	20.22
1.1590	0.458450	-0.580	0.01980382	0.14706194	0.14370340	20.22
1.1600	0.471039	-0.589	0.01980287	0.14701325	0.14367682	20.22
1.1610	0.497274	-0.591	0.01977342	0.14696163	0.14365029	20.22
1.1620	0.555525	-0.590	0.01960546	0.14677298	0.14357072	20.22
1.1630	0.660410	-0.582	0.01942468	0.14640325	0.14343417	20.22
1.1640	0.814533	-0.584	0.01909953	0.14580321	0.14319241	20.22
1.1650	1.003361	-0.590	0.01864755	0.14504540	0.14285547	20.22
1.1660	1.208181	-0.588	0.01820266	0.14423609	0.14248025	20.23
1.1670	1.414518	-0.588	0.01772338	0.14341700	0.14209527	20.23
1.1680	1.610041	-0.587	0.01720375	0.14264470	0.14173579	20.23
1.1690	1.786852	-0.585	0.01678818	0.14194435	0.14142245	20.23
1.1700	1.943150	-0.593	0.01640999	0.14130914	0.14111495	20.23
1.1710	2.082968	-0.591	0.01603287	0.14075565	0.14085656	20.23
1.1720	2.213202	-0.595	0.01570284	0.14022356	0.14059132	20.23
1.1730	2.338171	-0.589	0.01541805	0.13972944	0.14035267	20.23
1.1740	2.460909	-0.585	0.01509780	0.13923234	0.14011693	20.23
1.1750	2.579098	-0.583	0.01477951	0.13875085	0.13988805	20.23
1.1760	2.689104	-0.581	0.01449656	0.13830251	0.13966507	20.23
1.1770	2.784061	-0.581	0.01426381	0.13789487	0.13946182	20.22
1.1780	2.857475	-0.580	0.01404083	0.13758451	0.13930458	20.22
1.1790	2.905083	-0.579	0.01392102	0.13738114	0.13920730	20.22
1.1800	2.928514	-0.579	0.01384926	0.13724595	0.13913453	20.22
1.1810	2.933407	-0.583	0.01379424	0.13719738	0.13910502	20.22
1.1820	2.927599	-0.585	0.01377267	0.13716233	0.13908434	20.22
1.1830	2.915354	-0.583	0.01383358	0.13717681	0.13909513	20.22
1.1840	2.897758	-0.578	0.01383358	0.13720113	0.13910788	20.22
1.1850	2.868462	-0.580	0.01385915	0.13725758	0.13913155	20.22
1.1860	2.809925	-0.581	0.01399362	0.13741130	0.13920534	20.23
1.1870	2.702579	-0.580	0.01424706	0.13774598	0.13938516	20.23
1.1880	2.540789	-0.580	0.01457995	0.13830823	0.13966715	20.23
1.1890	2.341461	-0.576	0.01503378	0.13903779	0.14004821	20.23
1.1900	2.135410	-0.585	0.01550144	0.13979167	0.14041162	20.23
1.1910	1.947327	-0.585	0.01593965	0.14048809	0.14077216	20.23
1.1920	1.789856	-0.586	0.01629716	0.14107567	0.14104718	20.23
1.1930	1.661167	-0.576	0.01665163	0.14159608	0.14129859	20.23
1.1940	1.551104	-0.572	0.01693648	0.14205241	0.14149398	20.23
1.1950	1.445160	-0.573	0.01716638	0.14249200	0.14169735	20.23
1.1960	1.330748	-0.577	0.01743853	0.14295304	0.14192134	20.22
1.1970	1.202717	-0.577	0.01775283	0.14347345	0.14216495	20.22
1.1980	1.063786	-0.577	0.01809466	0.14404839	0.14243007	20.22
1.1990	0.924311	-0.572	0.01843947	0.14464277	0.14269632	20.22
1.2000	0.795765	-0.572	0.01879901	0.14520115	0.14292037	20.22
1.2010	0.687304	-0.573	0.01907980	0.14568949	0.14313257	20.22
1.2020	0.603704	-0.576	0.01926643	0.14606595	0.14328176	20.22
1.2030	0.544853	-0.571	0.01947278	0.14636165	0.14342028	20.22
1.2040	0.507603	-0.566	0.01957685	0.14656782	0.14349693	20.22
1.2050	0.487146	-0.569	0.01961035	0.14670020	0.14354807	20.22
1.2060	0.478563	-0.573	0.01966923	0.14676434	0.14358842	20.23
1.2070	0.478277	-0.576	0.01971447	0.14679933	0.14360511	20.23
1.2080	0.482769	-0.576	0.01968789	0.14682555	0.14361107	20.23
1.2090	0.490665	-0.580	0.01969081	0.14682943	0.14361495	20.23
1.2100	0.502911	-0.590	0.01970160	0.14678472	0.14359528	20.23
1.2110	0.525942	-0.592	0.01962507	0.14672345	0.14357853	20.23
1.2120	0.575867	-0.590	0.01952589	0.14656985	0.14351362	20.23
1.2130	0.668478	-0.581	0.01936865	0.14626729	0.14339674	20.23
1.2140	0.807896	-0.584	0.01902187	0.14573324	0.14316684	20.23
1.2150	0.981846	-0.588	0.01861322	0.14503378	0.14286828	20.23
1.2160	1.170216	-0.585	0.01821047	0.14427209	0.14252841	20.23
1.2170	1.356897	-0.581	0.01777142	0.14354932	0.14219642	20.22
1.2180	1.532078	-0.579	0.01735395	0.14285475	0.14187032	20.22
1.2190	1.694498	-0.578	0.01700521	0.14221573	0.14157075	20.22
1.2200	1.848392	-0.590	0.01660055	0.14159614	0.14126819	20.22
1.2210	1.999998	-0.587	0.01618606	0.14101154	0.14098525	20.22
1.2220	2.153263	-0.592	0.01584929	0.14040643	0.14069355	20.22
1.2230	2.307673	-0.585	0.01547307	0.13981205	0.14041162	20.22
1.2240	2.458649	-0.590	0.01506150	0.13922149	0.14010614	20.22
1.2250	2.596436	-0.585	0.01475501	0.13866806	0.13982219	20.22
1.2260	2.711220	-0.583	0.01447111	0.13819051	0.13957959	20.23
1.2270	2.795305	-0.580	0.01420397	0.13782388	0.13940173	20.23
1.2280	2.848206	-0.580	0.01407725	0.13760012	0.13929570	20.23
1.2290	2.875013	-0.576	0.01398879	0.13745511	0.13923478	20.23
1.2300	2.884283	-0.584	0.01387972	0.13736755	0.13919741	20.23
1.2310	2.883253	-0.585	0.01390231	0.13732958	0.13917875	20.23
1.2320	2.877159	-0.585	0.01391107	0.13731200	0.13916695	20.23
1.2330	2.867317	-0.576	0.01391399	0.13732660	0.13917977	20.23
1.2340	2.852468	-0.576	0.01392186	0.13734907	0.13918471	20.23
1.2350	2.827063	-0.576	0.01398373	0.13739097	0.13919950	20.23
1.2360	2.776423	-0.575	0.01403487	0.13751352	0.13926530	20.22
1.2370	2.682095	-0.573	0.01422936	0.13780433	0.13941270	20.22
1.2380	2.537212	-0.573	0.01457626	0.13830143	0.13965827	20.22
1.2390	2.352390	-0.574	0.01499176	0.13898039	0.13998246	20.22
1.2400	2.152548	-0.582	0.01539147	0.13969439	0.14033413	20.22
1.2410	1.960831	-0.578	0.01586592	0.14039481	0.14069849	20.22
1.2420	1.792402	-0.577	0.01625878	0.14102125	0.14100689	20.22
1.2430	1.651669	-0.573	0.01659966	0.14158159	0.14128482	20.22
1.2440	1.532650	-0.570	0.01693064	0.14205915	0.14150882	20.22
1.2450	1.422071	-0.569	0.01721364	0.14251930	0.14172399	20.22
1.2460	1.307831	-0.571	0.01746410	0.14297545	0.14194018	20.23
1.2470	1.183920	-0.572	0.01774704	0.14349008	0.14217204	20.23
1.2480	1.051826	-0.572	0.01809865	0.14403480	0.14243132	20.23
1.2490	0.919504	-0.569	0.01842964	0.14460677	0.14269346	20.23
1.2500	0.796251	-0.576	0.01871252	0.14514273	0.14293116	20.23
1.2510	0.690536	-0.572	0.01901406	0.14562625	0.14313054	20.23
1.2520	0.607109	-0.577	0.01923412	0.14601237	0.14328766	20.23
1.2530	0.546513	-0.570	0.01940304	0.14631885	0.14341629	20.23
1.2540	0.506372	-0.571	0.01951891	0.14651817	0.14350861	20.23
1.2550	0.482512	-0.570	0.01962501	0.14667088	0.14357060	20.23
1.2560	0.471210	-0.570	0.01963675	0.14675748	0.14359528	20.22
1.2570	0.468407	-0.569	0.01967901	0.14681494	0.14360708	20.22
1.2580	0.471840	-0.570	0.01975173	0.14682764	0.14360321	20.22
1.2590	0.480452	-0.571	0.01973015	0.14684021	0.14361006	20.22
1.2600	0.497503	-0.584	0.01968306	0.14682657	0.14358544	20.22
1.2610	0.536242	-0.591	0.01962507	0.14673799	0.14353228	20.22
1.2620	0.616293	-0.593	0.01943743	0.14644426	0.14342517	20.22
1.2630	0.746155	-0.585	0.01914561	0.14594036	0.14322191	20.22
1.2640	0.918560	-0.585	0.01880670	0.14525360	0.14293516	20.22
1.2650	1.112309	-0.588	0.01835489	0.14449197	0.14259523	20.22
1.2660	1.309118	-0.587	0.01785594	0.14372146	0.14223272	20.23
1.2670	1.498203	-0.585	0.01744634	0.14296758	0.14189875	20.23
1.2680	1.674185	-0.580	0.01701117	0.14227498	0.14157957	20.23
1.2690	1.836462	-0.577	0.01659369	0.14163882	0.14129472	20.24
1.2700	1.987982	-0.586	0.01620960	0.14101249	0.14099795	20.24
1.2710	2.132349	-0.589	0.01586092	0.14042217	0.14070523	20.23
1.2720	2.272053	-0.590	0.01549155	0.13984734	0.14042830	20.23
1.2730	2.406092	-0.585	0.01514977	0.13933951	0.14017981	20.23
1.2740	2.533064	-0.584	0.01487768	0.13883942	0.13993037	20.23
1.2750	2.649450	-0.585	0.01455945	0.13836849	0.13970429	20.23
1.2760	2.752275	-0.585	0.01427948	0.13793361	0.13949609	20.22
1.2770	2.836647	-0.586	0.01410365	0.13759512	0.13932800	20.22
1.2780	2.898932	-0.587	0.01387781	0.13732868	0.13919842	20.22
1.2790	2.938614	-0.583	0.01375300	0.13715750	0.13911390	20.22
1.2800	2.958069	-0.581	0.01371866	0.13702917	0.13904810	20.22
1.2810	2.962246	-0.581	0.01367640	0.13697165	0.13900882	20.22
1.2820	2.956209	-0.586	0.01364005	0.13694924	0.13899505	20.22
1.2830	2.942905	-0.580	0.01368326	0.13697255	0.13900191	20.22
1.2840	2.921476	-0.579	0.01369989	0.13700467	0.13902640	20.22
1.2850	2.880821	-0.576	0.01375002	0.13707566	0.13905883	20.22
1.2860	2.800255	-0.577	0.01397300	0.13731980	0.13917184	20.23
1.2870	2.666817	-0.576	0.01423723	0.13776439	0.13939786	20.23
1.2880	2.486286	-0.576	0.01460654	0.13842589	0.13972396	20.23
1.2890	2.284527	-0.570	0.01506221	0.13917595	0.14011192	20.23
1.2900	2.090979	-0.574	0.01552880	0.13988310	0.14044595	20.23
1.2910	1.923580	-0.574	0.01590103	0.14051050	0.14075726	20.23
1.2920	1.788626	-0.578	0.01623809	0.14101624	0.14099604	20.23
1.2930	1.677217	-0.572	0.01655638	0.14146084	0.14121115	20.23
1.2940	1.573963	-0.572	0.01680791	0.14188302	0.14141554	20.23
1.2950	1.462183	-0.570	0.01705050	0.14234120	0.14162767	20.23
1.2960	1.332722	-0.573	0.01740909	0.14286357	0.14187819	20.22
1.2970	1.187210	-0.573	0.01773220	0.14346862	0.14214933	20.22
1.2980	1.035805	-0.576	0.01808876	0.14409214	0.14244008	20.22
1.2990	0.892954	-0.573	0.01850915	0.14469135	0.14272881	20.22
1.3000	0.770159	-0.577	0.01881361	0.14521563	0.14296263	20.22
1.3010	0.674086	-0.577	0.01904052	0.14567190	0.14315021	20.22
1.3020	0.605421	-0.578	0.01923114	0.14599776	0.14327204	20.22
1.3030	0.560360	-0.574	0.01937068	0.14622062	0.14337015	20.22
1.3040	0.532780	-0.569	0.01943457	0.14636350	0.14343005	20.22
1.3050	0.516844	-0.572	0.01949358	0.14646852	0.14347625	20.22
1.3060	0.509062	-0.572	0.01956427	0.14655501	0.14351064	20.23
1.3070	0.507145	-0.576	0.01956809	0.14659011	0.14353526	20.23
1.3080	0.509634	-0.573	0.01955724	0.14660382	0.14353824	20.23
1.3090	0.515728	-0.578	0.01960534	0.14659703	0.14354122	20.23
1.3100	0.526085	-0.583	0.01956415	0.14657563	0.14351857	20.23
1.3110	0.545139	-0.588	0.01951408	0.14654642	0.14349985	20.23
1.3120	0.588598	-0.589	0.01946896	0.14642572	0.14344668	20.23
1.3130	0.675087	-0.582	0.01928622	0.14614266	0.14333570	20.23
1.3140	0.813217	-0.578	0.01895905	0.14562225	0.14312547	20.23
1.3150	0.995235	-0.579	0.01855433	0.14489466	0.14281720	20.23
1.3160	1.201973	-0.581	0.01811719	0.14407462	0.14243412	20.23
1.3170	1.415949	-0.578	0.01758087	0.14323902	0.14204329	20.22
1.3180	1.621542	-0.574	0.01710254	0.14244825	0.14166212	20.22
1.3190	1.806936	-0.570	0.01668614	0.14171958	0.14132720	20.22
1.3200	1.967669	-0.583	0.01622838	0.14106005	0.14100981	20.22
1.3210	2.104969	-0.581	0.01587570	0.14051241	0.14073867	20.22
1.3220	2.226505	-0.581	0.01560944	0.14002132	0.14048916	20.22
1.3230	2.339258	-0.572	0.01531875	0.13958848	0.14027709	20.22
1.3240	2.450695	-0.574	0.01503295	0.13914579	0.14006686	20.22
1.3250	2.563276	-0.576	0.01477164	0.13868475	0.13985372	20.22
1.3260	2.675400	-0.577	0.01448578	0.13823819	0.13962674	20.23
1.3270	2.780228	-0.576	0.01417732	0.13780147	0.13940579	20.23
1.3280	2.869148	-0.574	0.01399857	0.13743949	0.13921911	20.23
1.3290	2.934151	-0.572	0.01382178	0.13716912	0.13910121	20.23
1.3300	2.972116	-0.577	0.01366854	0.13697553	0.13899219	20.23
1.3310	2.985563	-0.576	0.01362336	0.13688695	0.13895881	20.23
1.3320	2.981586	-0.579	0.01361454	0.13684702	0.13891464	20.23
1.3330	2.966337	-0.573	0.01361948	0.13687128	0.13893527	20.23
1.3340	2.941647	-0.574	0.01365876	0.13689959	0.13895285	20.23
1.3350	2.898331	-0.573	0.01374018	0.13698816	0.13900381	20.23
1.3360	2.818193	-0.577	0.01389527	0.13721687	0.13912070	20.22
1.3370	2.689962	-0.579	0.01416445	0.13765848	0.13933098	20.22
1.3380	2.518301	-0.577	0.01456726	0.13827032	0.13963360	20.22
1.3390	2.325382	-0.577	0.01500446	0.13898712	0.13999802	20.22
1.3400	2.136068	-0.581	0.01539236	0.13966703	0.14033103	20.22
1.3410	1.965752	-0.581	0.01580590	0.14030993	0.14065719	20.22
1.3420	1.818209	-0.578	0.01616448	0.14086342	0.14092737	20.22
1.3430	1.686687	-0.571	0.01647794	0.14137810	0.14118958	20.22
1.3440	1.559086	-0.568	0.01675898	0.14187813	0.14142728	20.22
1.3450	1.427279	-0.569	0.01713610	0.14241415	0.14167577	20.22
1.3460	1.289349	-0.575	0.01747000	0.14297932	0.14194292	20.23
1.3470	1.149673	-0.572	0.01777935	0.14356691	0.14221203	20.23
1.3480	1.015120	-0.573	0.01812512	0.14413595	0.14246351	20.23
1.3490	0.891924	-0.570	0.01847094	0.14467388	0.14271396	20.23
1.3500	0.785122	-0.574	0.01875567	0.14514077	0.14290845	20.23
1.3510	0.697031	-0.572	0.01898265	0.14553958	0.14309126	20.23
1.3520	0.628452	-0.577	0.01917607	0.14584500	0.14321011	20.23
1.3530	0.576954	-0.576	0.01932049	0.14610964	0.14332694	20.23
1.3540	0.539417	-0.578	0.01939410	0.14631587	0.14340347	20.23
1.3550	0.512524	-0.578	0.01948452	0.14648128	0.14347231	20.23
1.3560	0.494528	-0.578	0.01957881	0.14660954	0.14352840	20.22
1.3570	0.484858	-0.574	0.01960349	0.14667183	0.14355695	20.22
1.3580	0.482826	-0.574	0.01962811	0.14671940	0.14357066	20.22
1.3590	0.487232	-0.575	0.01968014	0.14671654	0.14356869	20.22
1.3600	0.497732	-0.584	0.01964086	0.14670008	0.14353722	20.22
1.3610	0.518360	-0.583	0.01958287	0.14666700	0.14352643	20.22
1.3620	0.565281	-0.584	0.01949251	0.14653856	0.14346248	20.22
1.3630	0.656805	-0.582	0.01929504	0.14622045	0.14336038	20.22
1.3640	0.800543	-0.586	0.01897782	0.14565820	0.14311582	20.22
1.3650	0.986681	-0.593	0.01860654	0.14492285	0.14279860	20.22
1.3660	1.195135	-0.592	0.01813596	0.14410961	0.14242828	20.23
1.3670	1.406937	-0.590	0.01759070	0.14328563	0.14203638	20.23
1.3680	1.606550	-0.583	0.01715457	0.14249486	0.14168173	20.23
1.3690	1.785364	-0.581	0.01673418	0.14178479	0.14135462	20.23
1.3700	1.942520	-0.587	0.01630789	0.14114672	0.14105397	20.23
1.3710	2.083969	-0.589	0.01594251	0.14058340	0.14078182	20.23
1.3720	2.218065	-0.588	0.01564389	0.14004064	0.14050579	20.23
1.3730	2.349586	-0.580	0.01528829	0.13952321	0.14025337	20.23
1.3740	2.480078	-0.576	0.01496315	0.13899213	0.13999122	20.23
1.3750	2.605906	-0.574	0.01468027	0.13848335	0.13974369	20.23
1.3760	2.721405	-0.570	0.01432669	0.13800377	0.13953447	20.22
1.3770	2.817850	-0.568	0.01409191	0.13760781	0.13934189	20.22
1.3780	2.887859	-0.571	0.01393372	0.13732576	0.13919836	20.22
1.3790	2.928743	-0.574	0.01378447	0.13713223	0.13909614	20.22
1.3800	2.945538	-0.583	0.01369309	0.13702232	0.13902253	20.22
1.3810	2.946339	-0.581	0.01369303	0.13696873	0.13899404	20.22
1.3820	2.939301	-0.581	0.01366258	0.13696194	0.13897938	20.22
1.3830	2.927055	-0.573	0.01365077	0.13698822	0.13899893	20.22
1.3840	2.909603	-0.576	0.01371473	0.13702631	0.13902152	20.22
1.3850	2.879076	-0.573	0.01376486	0.13708168	0.13905692	20.22
1.3860	2.817621	-0.575	0.01386213	0.13724416	0.13914049	20.23
1.3870	2.707729	-0.569	0.01409489	0.13759816	0.13930851	20.23
1.3880	2.546425	-0.568	0.01446509	0.13816917	0.13958365	20.23
1.3890	2.350731	-0.562	0.01487178	0.13888317	0.13993233	20.23
1.3900	2.148113	-0.570	0.01534230	0.13961560	0.14029276	20.23
1.3910	1.959801	-0.576	0.01580501	0.14030623	0.14064234	20.23
1.3920	1.798639	-0.576	0.01619780	0.14091223	0.14093709	20.23
1.3930	1.665630	-0.568	0.01650721	0.14144719	0.14120722	20.23
1.3940	1.551876	-0.560	0.01682746	0.14191318	0.14142042	20.23
1.3950	1.442642	-0.563	0.01709861	0.14235967	0.14164138	20.23
1.3960	1.325483	-0.561	0.01734030	0.14284021	0.14187121	20.22
1.3970	1.194849	-0.568	0.01768708	0.14337230	0.14211774	20.22
1.3980	1.054716	-0.576	0.01806033	0.14395106	0.14238292	20.22
1.3990	0.915613	-0.578	0.01838541	0.14454544	0.14265013	20.22
1.4000	0.789156	-0.583	0.01870662	0.14508432	0.14289182	20.22
1.4010	0.684929	-0.580	0.01900131	0.14555413	0.14308739	20.22
1.4020	0.606623	-0.581	0.01919389	0.14592773	0.14323372	20.22
1.4030	0.552950	-0.572	0.01934713	0.14621282	0.14335746	20.22
1.4040	0.518703	-0.573	0.01946890	0.14639276	0.14344090	20.22
1.4050	0.498590	-0.572	0.01953673	0.14650363	0.14349008	20.22
1.4060	0.487633	-0.575	0.01952398	0.14658040	0.14351165	20.23
1.4070	0.484257	-0.576	0.01956910	0.14665234	0.14353132	20.23
1.4080	0.486288	-0.577	0.01961726	0.14667672	0.14354408	20.23
1.4090	0.493555	-0.577	0.01956612	0.14667290	0.14355087	20.24
1.4100	0.506258	-0.583	0.01956618	0.14662713	0.14353520	20.23
1.4110	0.531864	-0.584	0.01955831	0.14658242	0.14350665	20.23
1.4120	0.588112	-0.587	0.01940703	0.14640146	0.14342225	20.23
1.4130	0.688963	-0.580	0.01922631	0.14604551	0.14328867	20.23
1.4140	0.837049	-0.584	0.01891100	0.14547837	0.14304018	20.23
1.4150	1.019268	-0.584	0.01845819	0.14475662	0.14273477	20.23
1.4160	1.218538	-0.580	0.01801020	0.14396572	0.14236641	20.22
1.4170	1.423101	-0.578	0.01754558	0.14315450	0.14199018	20.22
1.4180	1.621799	-0.578	0.01706135	0.14237535	0.14162570	20.22
1.4190	1.806021	-0.577	0.01659381	0.14166230	0.14129472	20.22
1.4200	1.970215	-0.584	0.01621848	0.14101154	0.14098531	20.22
1.4210	2.114353	-0.582	0.01584315	0.14043856	0.14070243	20.22
1.4220	2.243700	-0.585	0.01548165	0.13992202	0.14043909	20.22
1.4230	2.362976	-0.584	0.01521355	0.13945216	0.14020824	20.22
1.4240	2.477131	-0.589	0.01492083	0.13898814	0.13998824	20.22
1.4250	2.586336	-0.588	0.01462716	0.13854361	0.13977313	20.22
1.4260	2.689962	-0.588	0.01439542	0.13812137	0.13956583	20.23
1.4270	2.782230	-0.581	0.01420099	0.13774884	0.13938010	20.23
1.4280	2.856331	-0.584	0.01397216	0.13744146	0.13921404	20.23
1.4290	2.906055	-0.577	0.01382375	0.13723046	0.13911575	20.23
1.4300	2.930574	-0.584	0.01376188	0.13708061	0.13904119	20.23
1.4310	2.935410	-0.582	0.01369905	0.13703007	0.13901573	20.23
1.4320	2.928343	-0.587	0.01366168	0.13700575	0.13899809	20.23
1.4330	2.913809	-0.577	0.01373732	0.13703012	0.13901472	20.23
1.4340	2.890978	-0.570	0.01373929	0.13706899	0.13903826	20.23
1.4350	2.847691	-0.576	0.01380903	0.13715845	0.13909525	20.23
1.4360	2.762976	-0.576	0.01402414	0.13740736	0.13921708	20.22
1.4370	2.624617	-0.573	0.01431388	0.13786364	0.13944113	20.22
1.4380	2.439709	-0.570	0.01469696	0.13852900	0.13975638	20.22
1.4390	2.235317	-0.570	0.01517427	0.13929069	0.14013755	20.22
1.4400	2.040882	-0.578	0.01563597	0.13999593	0.14048821	20.22
1.4410	1.873541	-0.581	0.01601022	0.14062148	0.14080060	20.22
1.4420	1.738300	-0.581	0.01634824	0.14112246	0.14105892	20.22
1.4430	1.626005	-0.571	0.01664484	0.14157957	0.14127892	20.22
1.4440	1.521349	-0.565	0.01684225	0.14200461	0.14148134	20.22
1.4450	1.409798	-0.566	0.01714277	0.14245796	0.14168960	20.22
1.4460	1.283627	-0.570	0.01748753	0.14297354	0.14192641	20.23
1.4470	1.145353	-0.576	0.01778322	0.14354062	0.14218766	20.23
1.4480	1.004562	-0.576	0.01815456	0.14412725	0.14246762	20.23
1.4490	0.875273	-0.570	0.01846892	0.14469332	0.14273369	20.23
1.4500	0.767212	-0.569	0.01869184	0.14516121	0.14292812	20.23
1.4510	0.683584	-0.573	0.01895702	0.14554834	0.14308625	20.23
1.4520	0.622044	-0.578	0.01914752	0.14583337	0.14318949	20.23
1.4530	0.577011	-0.571	0.01925266	0.14606965	0.14329946	20.23
1.4540	0.543194	-0.564	0.01936269	0.14626515	0.14337611	20.23
1.4550	0.516701	-0.561	0.01945513	0.14642459	0.14344382	20.23
1.4560	0.497561	-0.565	0.01950037	0.14655787	0.14348716	20.22
1.4570	0.486460	-0.566	0.01955438	0.14663380	0.14352059	20.22
1.4580	0.483713	-0.566	0.01961815	0.14667958	0.14354122	20.22
1.4590	0.488062	-0.566	0.01962793	0.14669025	0.14355296	20.22
1.4600	0.499392	-0.573	0.01958472	0.14666593	0.14352739	20.22
1.4610	0.522509	-0.579	0.01958472	0.14661533	0.14351064	20.22
1.4620	0.574780	-0.584	0.01945013	0.14644808	0.14342904	20.22
1.4630	0.672684	-0.583	0.01923013	0.14609981	0.14330339	20.22
1.4640	0.822515	-0.583	0.01894039	0.14552397	0.14305586	20.22
1.4650	1.012802	-0.587	0.01852095	0.14476711	0.14272493	20.22
1.4660	1.222916	-0.589	0.01798171	0.14394522	0.14234865	20.23
1.4670	1.435690	-0.592	0.01752299	0.14311457	0.14195472	20.23
1.4680	1.636219	-0.588	0.01706135	0.14231992	0.14158046	20.23
1.4690	1.815434	-0.584	0.01659673	0.14160788	0.14127111	20.23
1.4700	1.970644	-0.586	0.01622051	0.14097846	0.14097250	20.23
1.4710	2.104912	-0.588	0.01589143	0.14044833	0.14071715	20.23
1.4720	2.226191	-0.591	0.01557213	0.13995022	0.14046866	20.23
1.4730	2.341232	-0.587	0.01528525	0.13949782	0.14025152	20.23
1.4740	2.454958	-0.585	0.01501316	0.13904834	0.14003634	20.23
1.4750	2.567739	-0.583	0.01472342	0.13859314	0.13980740	20.23
1.4760	2.676916	-0.583	0.01440525	0.13814867	0.13958144	20.22
1.4770	2.776823	-0.581	0.01417047	0.13773429	0.13938010	20.22
1.4780	2.860079	-0.581	0.01396030	0.13738316	0.13920230	20.22
1.4790	2.920132	-0.579	0.01376086	0.13713217	0.13908243	20.22
1.4800	2.955408	-0.585	0.01363415	0.13694924	0.13898820	20.22
1.4810	2.968798	-0.586	0.01361054	0.13687629	0.13895291	20.22
1.4820	2.967911	-0.590	0.01357025	0.13684708	0.13891369	20.22
1.4830	2.957439	-0.583	0.01356244	0.13685983	0.13893425	20.22
1.4840	2.939501	-0.586	0.01361054	0.13688028	0.13894111	20.22
1.4850	2.907887	-0.586	0.01367426	0.13694060	0.13898134	20.22
1.4860	2.844114	-0.588	0.01380682	0.13710880	0.13905996	20.23
1.4870	2.728958	-0.581	0.01407796	0.13747746	0.13922888	20.23
1.4880	2.557955	-0.575	0.01446313	0.13807088	0.13951480	20.23
1.4890	2.348700	-0.564	0.01487076	0.13884330	0.13990968	20.23
1.4900	2.133293	-0.566	0.01537865	0.13963902	0.14029467	20.23
1.4910	1.937943	-0.565	0.01585406	0.14037341	0.14067966	20.23
1.4920	1.776381	-0.570	0.01620972	0.14097059	0.14096951	20.23
1.4930	1.647234	-0.564	0.01652992	0.14149392	0.14123279	20.23
1.4940	1.537685	-0.559	0.01685804	0.14193648	0.14142734	20.23
1.4950	1.432629	-0.558	0.01708007	0.14236349	0.14162767	20.23
1.4960	1.320448	-0.562	0.01735610	0.14282167	0.14185458	20.22
1.4970	1.197109	-0.565	0.01769787	0.14333916	0.14208639	20.22
1.4980	1.065416	-0.567	0.01800424	0.14390337	0.14234287	20.22
1.4990	0.934095	-0.566	0.01832551	0.14444417	0.14258456	20.22
1.5000	0.812359	-0.570	0.01863492	0.14494610	0.14280456	20.22
1.5010	0.708332	-0.569	0.01890701	0.14540815	0.14301574	20.22
1.5020	0.626192	-0.569	0.01910454	0.14579242	0.14317280	20.22
1.5030	0.565882	-0.564	0.01929802	0.14610475	0.14331621	20.22
1.5040	0.524969	-0.566	0.01941395	0.14630705	0.14340937	20.22
1.5050	0.498991	-0.573	0.01948166	0.14644998	0.14346635	20.22
1.5060	0.484514	-0.576	0.01954949	0.14654917	0.14351362	20.23
1.5070	0.478506	-0.573	0.01958972	0.14661628	0.14353234	20.23
1.5080	0.478792	-0.569	0.01960540	0.14665431	0.14354712	20.23
1.5090	0.484285	-0.569	0.01957494	0.14666009	0.14355797	20.23
1.5100	0.495100	-0.580	0.01956123	0.14663386	0.14352942	20.23
1.5110	0.517273	-0.585	0.01956713	0.14659888	0.14351660	20.23
1.5120	0.569658	-0.582	0.01939720	0.14643842	0.14344287	20.23
1.5130	0.670853	-0.575	0.01919293	0.14609021	0.14332211	20.23
1.5140	0.826521	-0.576	0.01889324	0.14547735	0.14305586	20.23
1.5150	1.022758	-0.583	0.01843852	0.14470500	0.14271504	20.23
1.5160	1.236563	-0.580	0.01795220	0.14387047	0.14232105	20.22
1.5170	1.447592	-0.578	0.01749158	0.14304268	0.14193708	20.22
1.5180	1.640167	-0.576	0.01700819	0.14228690	0.14158154	20.22
1.5190	1.805363	-0.575	0.01657706	0.14162833	0.14128393	20.22
1.5200	1.945009	-0.587	0.01625192	0.14107001	0.14100987	20.22
1.5210	2.068176	-0.587	0.01591808	0.14057672	0.14077985	20.22
1.5220	2.187281	-0.587	0.01560855	0.14010292	0.14054507	20.22
1.5230	2.310019	-0.577	0.01532274	0.13962144	0.14031827	20.22
1.5240	2.439537	-0.576	0.01503384	0.13910890	0.14005309	20.22
1.5250	2.571602	-0.575	0.01467729	0.13858372	0.13979280	20.22
1.5260	2.697573	-0.571	0.01437467	0.13808745	0.13955009	20.23
1.5270	2.805204	-0.565	0.01413393	0.13763905	0.13932997	20.23
1.5280	2.883940	-0.566	0.01392472	0.13731402	0.13917381	20.23
1.5290	2.930288	-0.568	0.01376164	0.13709420	0.13905591	20.23
1.5300	2.949228	-0.576	0.01372343	0.13697749	0.13900095	20.23
1.5310	2.950144	-0.574	0.01368517	0.13693863	0.13898426	20.23
1.5320	2.942019	-0.575	0.01365477	0.13692886	0.13896567	20.23
1.5330	2.928200	-0.567	0.01370788	0.13694441	0.13898230	20.23
1.5340	2.908287	-0.570	0.01372552	0.13697064	0.13898319	20.23
1.5350	2.872696	-0.568	0.01373827	0.13704276	0.13901848	20.23
1.5360	2.803688	-0.572	0.01387972	0.13724214	0.13911480	20.22
1.5370	2.686586	-0.571	0.01416558	0.13763022	0.13930738	20.22
1.5380	2.521763	-0.572	0.01450050	0.13821477	0.13960212	20.22
1.5390	2.328243	-0.569	0.01495814	0.13891220	0.13995475	20.22
1.5400	2.131491	-0.577	0.01541191	0.13962722	0.14030057	20.22
1.5410	1.950445	-0.574	0.01579303	0.14028287	0.14063942	20.22
1.5420	1.795521	-0.573	0.01614279	0.14086062	0.14092433	20.22
1.5430	1.664858	-0.565	0.01652098	0.14137334	0.14118260	20.22
1.5440	1.548414	-0.561	0.01679415	0.14184505	0.14140362	20.22
1.5450	1.432314	-0.560	0.01705438	0.14232171	0.14162844	20.22
1.5460	1.306629	-0.563	0.01738745	0.14283627	0.14187604	20.23
1.5470	1.169071	-0.566	0.01771253	0.14340431	0.14213443	20.23
1.5480	1.025934	-0.569	0.01804358	0.14400834	0.14242029	20.23
1.5490	0.889864	-0.570	0.01843649	0.14458621	0.14269233	20.23
1.5500	0.773449	-0.576	0.01871145	0.14508229	0.14291137	20.23
1.5510	0.683355	-0.575	0.01891184	0.14549381	0.14308828	20.23
1.5520	0.619411	-0.575	0.01913387	0.14581871	0.14320230	20.23
1.5530	0.576353	-0.565	0.01927739	0.14606088	0.14330441	20.23
1.5540	0.547972	-0.562	0.01934129	0.14622051	0.14336818	20.23
1.5550	0.528603	-0.560	0.01941878	0.14632845	0.14342517	20.23
1.5560	0.515442	-0.566	0.01950037	0.14642769	0.14346641	20.22
1.5570	0.507917	-0.570	0.01950628	0.14650160	0.14349395	20.22
1.5580	0.506115	-0.570	0.01951122	0.14654523	0.14349890	20.22
1.5590	0.509834	-0.567	0.01958090	0.14655685	0.14350581	20.22
1.5600	0.519533	-0.570	0.01953864	0.14654428	0.14348912	20.22
1.5610	0.538645	-0.570	0.01950914	0.14650643	0.14346743	20.22
1.5620	0.584135	-0.571	0.01942563	0.14638293	0.14339769	20.22
1.5630	0.674715	-0.568	0.01922715	0.14606380	0.14329451	20.22
1.5640	0.819025	-0.570	0.01886761	0.14549762	0.14305878	20.22
1.5650	1.007309	-0.571	0.01848847	0.14475453	0.14274150	20.22
1.5660	1.218109	-0.575	0.01803750	0.14393461	0.14234954	20.23
1.5670	1.433344	-0.579	0.01750124	0.14310193	0.14194977	20.23
1.5680	1.639280	-0.579	0.01703471	0.14228672	0.14158249	20.23
1.5690	1.827364	-0.577	0.01657903	0.14154446	0.14123189	20.24
1.5700	1.993647	-0.578	0.01614678	0.14086843	0.14091468	20.24
1.5710	2.138615	-0.577	0.01578331	0.14028478	0.14061999	20.23
1.5720	2.267246	-0.575	0.01545030	0.13976043	0.14037335	20.23
1.5730	2.385635	-0.573	0.01516056	0.13929653	0.14015323	20.23
1.5740	2.499018	-0.569	0.01483732	0.13883358	0.13993907	20.23
1.5750	2.607880	-0.570	0.01459181	0.13839012	0.13971710	20.23
1.5760	2.709103	-0.566	0.01433438	0.13796788	0.13951182	20.22
1.5770	2.796335	-0.571	0.01407021	0.13760591	0.13933104	20.22
1.5780	2.863054	-0.570	0.01388454	0.13732868	0.13920522	20.22
1.5790	2.905798	-0.571	0.01382560	0.13713318	0.13909817	20.22
1.5800	2.926283	-0.574	0.01372051	0.13701737	0.13901472	20.22
1.5810	2.929916	-0.576	0.01367229	0.13697559	0.13899416	20.22
1.5820	2.923822	-0.580	0.01366943	0.13696486	0.13898337	20.22
1.5830	2.911978	-0.574	0.01367623	0.13698143	0.13901377	20.22
1.5840	2.895412	-0.572	0.01369303	0.13700086	0.13902658	20.22
1.5850	2.868633	-0.568	0.01378238	0.13704658	0.13905394	20.22
1.5860	2.814989	-0.575	0.01388747	0.13718766	0.13912463	20.23
1.5870	2.712364	-0.576	0.01405835	0.13752514	0.13927591	20.23
1.5880	2.550659	-0.578	0.01441693	0.13808256	0.13955498	20.23
1.5890	2.341375	-0.573	0.01492190	0.13885289	0.13994008	20.23
1.5900	2.115812	-0.577	0.01539832	0.13966715	0.14033896	20.23
1.5910	1.903753	-0.577	0.01588553	0.14045995	0.14073384	20.23
1.5920	1.724968	-0.574	0.01634431	0.14112920	0.14106387	20.23
1.5930	1.581488	-0.561	0.01669204	0.14170796	0.14133793	20.23
1.5940	1.463814	-0.557	0.01697296	0.14219046	0.14156383	20.23
1.5950	1.357956	-0.562	0.01729906	0.14262921	0.14176714	20.23
1.5960	1.253042	-0.561	0.01753873	0.14307082	0.14196068	20.22
1.5970	1.143951	-0.561	0.01778525	0.14352506	0.14218372	20.22
1.5980	1.029339	-0.557	0.01809859	0.14400655	0.14239585	20.22
1.5990	0.912495	-0.561	0.01838833	0.14450067	0.14264244	20.22
1.6000	0.799456	-0.565	0.01864564	0.14498025	0.14283979	20.22
1.6010	0.697289	-0.570	0.01894426	0.14544421	0.14304119	20.22
1.6020	0.612488	-0.569	0.01916826	0.14583135	0.14320225	20.22
1.6030	0.548229	-0.562	0.01929694	0.14615625	0.14333481	20.22
1.6040	0.504913	-0.562	0.01943737	0.14637125	0.14342898	20.22
1.6050	0.480080	-0.561	0.01951796	0.14652210	0.14348996	20.23
1.6060	0.469465	-0.571	0.01953560	0.14662230	0.14352542	20.23
1.6070	0.468206	-0.574	0.01957202	0.14666706	0.14354813	20.23
1.6080	0.472269	-0.573	0.01961333	0.14668459	0.14355314	20.23
1.6090	0.480051	-0.569	0.01958776	0.14666706	0.14355397	20.24
1.6100	0.491896	-0.579	0.01956606	0.14662898	0.14352840	20.23
1.6110	0.513468	-0.584	0.01956993	0.14658326	0.14350277	20.23
1.6120	0.560246	-0.585	0.01942557	0.14644217	0.14344871	20.23
1.6130	0.648937	-0.581	0.01924586	0.14614362	0.14333767	20.23
1.6140	0.787468	-0.582	0.01897669	0.14560378	0.14311868	20.23
1.6150	0.968914	-0.586	0.01852584	0.14487529	0.14280140	20.23
1.6160	1.176481	-0.585	0.01807404	0.14405137	0.14242327	20.23
1.6170	1.393290	-0.583	0.01759374	0.14320898	0.14202452	20.22
1.6180	1.602859	-0.581	0.01709175	0.14238989	0.14164841	20.22
1.6190	1.793146	-0.584	0.01659274	0.14164776	0.14130861	20.22
1.6200	1.958542	-0.594	0.01620466	0.14098817	0.14098239	20.22
1.6210	2.098989	-0.596	0.01586282	0.14044541	0.14069653	20.22
1.6220	2.221498	-0.596	0.01552397	0.13996291	0.14044011	20.22
1.6230	2.333107	-0.584	0.01526761	0.13952899	0.14024079	20.22
1.6240	2.442141	-0.581	0.01499939	0.13909519	0.14002359	20.22
1.6250	2.551489	-0.579	0.01467615	0.13864291	0.13981640	20.22
1.6260	2.660608	-0.578	0.01445127	0.13820612	0.13960034	20.23
1.6270	2.763805	-0.574	0.01420087	0.13777608	0.13939315	20.23
1.6280	2.852869	-0.572	0.01393664	0.13739955	0.13921130	20.23
1.6290	2.918587	-0.570	0.01380891	0.13710779	0.13907075	20.23
1.6300	2.956724	-0.573	0.01368123	0.13691610	0.13896066	20.23
1.6310	2.969913	-0.573	0.01358402	0.13683444	0.13892341	20.23
1.6320	2.965965	-0.573	0.01359874	0.13680905	0.13892341	20.23
1.6330	2.951260	-0.569	0.01362139	0.13683343	0.13895780	20.23
1.6340	2.927198	-0.572	0.01361352	0.13686651	0.13898236	20.23
1.6350	2.884655	-0.574	0.01369411	0.13695800	0.13900304	20.23
1.6360	2.807379	-0.574	0.01385516	0.13718081	0.13910127	20.22
1.6370	2.684183	-0.568	0.01409686	0.13758349	0.13929278	20.22
1.6380	2.516956	-0.564	0.01450056	0.13817489	0.13959342	20.22
1.6390	2.322807	-0.564	0.01497012	0.13889283	0.13995391	20.22
1.6400	2.123308	-0.567	0.01535809	0.13961756	0.14030468	20.22
1.6410	1.936226	-0.575	0.01577359	0.14031309	0.14066321	20.22
1.6420	1.772547	-0.574	0.01620287	0.14092195	0.14097458	20.22
1.6430	1.634016	-0.568	0.01653194	0.14148319	0.14124656	20.22
1.6440	1.514168	-0.563	0.01683146	0.14196962	0.14146847	20.22
1.6450	1.403074	-0.562	0.01714784	0.14241034	0.14167470	20.22
1.6460	1.291265	-0.561	0.01740217	0.14287049	0.14188492	20.23
1.6470	1.173191	-0.558	0.01767725	0.14334911	0.14210993	20.23
1.6480	1.048822	-0.561	0.01802683	0.14389092	0.14234662	20.23
1.6490	0.922966	-0.560	0.01830381	0.14442682	0.14259619	20.23
1.6500	0.804119	-0.573	0.01857692	0.14495492	0.14281130	20.23
1.6510	0.700293	-0.574	0.01886767	0.14542466	0.14302939	20.23
1.6520	0.617895	-0.581	0.01909465	0.14579630	0.14318651	20.23
1.6530	0.557528	-0.571	0.01924092	0.14609981	0.14333481	20.23
1.6540	0.516901	-0.575	0.01941186	0.14630806	0.14340937	20.23
1.6550	0.491266	-0.573	0.01950616	0.14646369	0.14346045	20.23
1.6560	0.476933	-0.578	0.01952589	0.14656967	0.14350373	20.23
1.6570	0.470724	-0.575	0.01957989	0.14663774	0.14352536	20.22
1.6580	0.470581	-0.577	0.01962405	0.14668053	0.14355189	20.22
1.6590	0.475388	-0.575	0.01959938	0.14669997	0.14355880	20.22
1.6600	0.485716	-0.584	0.01961017	0.14667749	0.14354795	20.22
1.6610	0.506315	-0.584	0.01958764	0.14663571	0.14353132	20.22
1.6620	0.554781	-0.581	0.01944923	0.14647526	0.14346445	20.22
1.6630	0.648708	-0.573	0.01927048	0.14616019	0.14334369	20.22
1.6640	0.795822	-0.570	0.01898164	0.14559311	0.14310104	20.22
1.6650	0.985508	-0.574	0.01852775	0.14484030	0.14277196	20.22
1.6660	1.198196	-0.575	0.01802582	0.14398819	0.14239281	20.23
1.6670	1.415663	-0.575	0.01754254	0.14312434	0.14198714	20.23
1.6680	1.621885	-0.570	0.01703477	0.14232469	0.14160800	20.23
1.6690	1.806335	-0.564	0.01655155	0.14160681	0.14125246	20.24
1.6700	1.964865	-0.570	0.01616943	0.14096677	0.14093417	20.24
1.6710	2.101851	-0.569	0.01582557	0.14041328	0.14067882	20.23
1.6720	2.226477	-0.567	0.01547682	0.13989383	0.14043719	20.23
1.6730	2.346983	-0.559	0.01520771	0.13942206	0.14022404	20.23
1.6740	2.468033	-0.562	0.01493865	0.13892019	0.13999414	20.23
1.6750	2.587109	-0.565	0.01460570	0.13845426	0.13975340	20.23
1.6760	2.698946	-0.566	0.01432574	0.13799506	0.13953137	20.22
1.6770	2.796707	-0.564	0.01411057	0.13759804	0.13931918	20.22
1.6780	2.874184	-0.569	0.01386106	0.13727516	0.13916004	20.22
1.6790	2.926826	-0.566	0.01371562	0.13704073	0.13905191	20.22
1.6800	2.954693	-0.571	0.01366353	0.13688320	0.13896853	20.22
1.6810	2.962189	-0.570	0.01359379	0.13681692	0.13893723	20.22
1.6820	2.956381	-0.572	0.01356834	0.13680029	0.13891172	20.22
1.6830	2.942104	-0.563	0.01359397	0.13683045	0.13893622	20.22
1.6840	2.920046	-0.568	0.01363230	0.13685578	0.13895285	20.22
1.6850	2.880106	-0.570	0.01368523	0.13694721	0.13900977	20.22
1.6860	2.805490	-0.570	0.01385611	0.13716036	0.13911986	20.23
1.6870	2.685385	-0.567	0.01413602	0.13756597	0.13929963	20.23
1.6880	2.522907	-0.569	0.01447397	0.13815349	0.13958454	20.23
1.6890	2.337055	-0.566	0.01487869	0.13884217	0.13990277	20.24
1.6900	2.148485	-0.573	0.01534432	0.13953865	0.14025247	20.23
1.6910	1.972961	-0.570	0.01571459	0.14018065	0.14057076	20.23
1.6920	1.819096	-0.572	0.01607120	0.14075851	0.14085948	20.23
1.6930	1.684742	-0.556	0.01644939	0.14129746	0.14113545	20.23
1.6940	1.561718	-0.554	0.01675588	0.14178288	0.14136535	20.23
1.6950	1.438007	-0.554	0.01702702	0.14226633	0.14161092	20.23
1.6960	1.307001	-0.557	0.01737767	0.14279157	0.14184576	20.22
1.6970	1.168613	-0.560	0.01772344	0.14336836	0.14211094	20.22
1.6980	1.030254	-0.560	0.01803571	0.14395100	0.14239192	20.22
1.6990	0.903568	-0.560	0.01839030	0.14450753	0.14263558	20.22
1.7000	0.796852	-0.563	0.01867610	0.14496672	0.14284867	20.22
1.7010	0.712910	-0.569	0.01886284	0.14536166	0.14300883	20.22
1.7020	0.648594	-0.566	0.01901913	0.14566797	0.14312667	20.22
1.7030	0.599642	-0.560	0.01918900	0.14592564	0.14323670	20.22
1.7040	0.562849	-0.556	0.01928127	0.14611042	0.14330834	20.22
1.7050	0.536327	-0.560	0.01934898	0.14625347	0.14337116	20.22
1.7060	0.519505	-0.566	0.01945114	0.14635086	0.14342314	20.23
1.7070	0.512152	-0.569	0.01949447	0.14641505	0.14344674	20.23
1.7080	0.512724	-0.572	0.01947778	0.14645201	0.14347523	20.23
1.7090	0.520163	-0.573	0.01948762	0.14644426	0.14347136	20.23
1.7100	0.534868	-0.577	0.01945418	0.14640540	0.14345264	20.23
1.7110	0.565538	-0.578	0.01937062	0.14632952	0.14341527	20.23
1.7120	0.628996	-0.575	0.01923305	0.14612138	0.14332199	20.23
1.7130	0.736399	-0.570	0.01904058	0.14574683	0.14317960	20.23
1.7140	0.887604	-0.574	0.01866639	0.14515239	0.14292616	20.23
1.7150	1.068735	-0.577	0.01825094	0.14444131	0.14261866	20.23
1.7160	1.264944	-0.580	0.01785702	0.14366901	0.14225328	20.22
1.7170	1.464272	-0.582	0.01737279	0.14288509	0.14188987	20.22
1.7180	1.657276	-0.585	0.01690227	0.14213890	0.14153630	20.22
1.7190	1.839066	-0.583	0.01646322	0.14142877	0.14121121	20.22
1.7200	2.008381	-0.589	0.01603788	0.14075661	0.14087534	20.22
1.7210	2.164736	-0.587	0.01563120	0.14012432	0.14057070	20.22
1.7220	2.307158	-0.591	0.01532555	0.13956988	0.14028776	20.22
1.7230	2.433844	-0.578	0.01503968	0.13907868	0.14004421	20.22
1.7240	2.544823	-0.578	0.01473910	0.13863796	0.13982815	20.22
1.7250	2.638693	-0.576	0.01447982	0.13822842	0.13963169	20.22
1.7260	2.715654	-0.576	0.01429129	0.13789672	0.13948143	20.23
1.7270	2.776022	-0.577	0.01410073	0.13763696	0.13934392	20.23
1.7280	2.822227	-0.577	0.01395530	0.13745803	0.13923389	20.23
1.7290	2.856474	-0.574	0.01391983	0.13731802	0.13915038	20.23
1.7300	2.879248	-0.578	0.01380682	0.13717890	0.13909334	20.23
1.7310	2.890263	-0.576	0.01372927	0.13709915	0.13905889	20.23
1.7320	2.891035	-0.576	0.01373136	0.13705438	0.13904023	20.23
1.7330	2.882996	-0.571	0.01375198	0.13707000	0.13904703	20.23
1.7340	2.867374	-0.564	0.01373035	0.13708943	0.13905197	20.23
1.7350	2.839880	-0.560	0.01380897	0.13713127	0.13908833	20.23
1.7360	2.783661	-0.557	0.01392877	0.13727129	0.13916111	20.22
1.7370	2.679605	-0.558	0.01412910	0.13760203	0.13932025	20.22
1.7380	2.522192	-0.561	0.01448566	0.13814765	0.13958061	20.22
1.7390	2.327271	-0.561	0.01490998	0.13885289	0.13992047	20.22
1.7400	2.126312	-0.562	0.01533341	0.13957280	0.14028978	20.22
1.7410	1.944151	-0.565	0.01571649	0.14025080	0.14063156	20.22
1.7420	1.792059	-0.564	0.01615262	0.14082468	0.14093113	20.22
1.7430	1.665344	-0.561	0.01647484	0.14132857	0.14117181	20.22
1.7440	1.549931	-0.561	0.01674014	0.14179939	0.14137614	20.22
1.7450	1.431026	-0.564	0.01706815	0.14227217	0.14160115	20.22
1.7460	1.299706	-0.565	0.01739228	0.14280617	0.14185947	20.23
1.7470	1.156540	-0.568	0.01771444	0.14338493	0.14214146	20.23
1.7480	1.010113	-0.570	0.01809657	0.14401519	0.14243126	20.23
1.7490	0.872326	-0.571	0.01846695	0.14460963	0.14269543	20.24
1.7500	0.753021	-0.574	0.01871556	0.14512610	0.14290655	20.24
1.7510	0.656147	-0.581	0.01901215	0.14553958	0.14307749	20.23
1.7520	0.582561	-0.583	0.01920760	0.14589065	0.14321595	20.23
1.7530	0.529318	-0.577	0.01931858	0.14615816	0.14334369	20.23
1.7540	0.493040	-0.574	0.01943743	0.14638287	0.14343399	20.23
1.7550	0.469723	-0.572	0.01952189	0.14654142	0.14348805	20.23
1.7560	0.456848	-0.572	0.01952684	0.14664936	0.14352047	20.22
1.7570	0.452299	-0.572	0.01959765	0.14670777	0.14354217	20.22
1.7580	0.454130	-0.574	0.01964480	0.14673418	0.14356095	20.22
1.7590	0.461712	-0.576	0.01963204	0.14673507	0.14356679	20.22
1.7600	0.476160	-0.589	0.01957595	0.14669228	0.14353627	20.22
1.7610	0.508776	-0.592	0.01956522	0.14660662	0.14349693	20.22
1.7620	0.577440	-0.593	0.01939821	0.14637315	0.14341241	20.22
1.7630	0.693569	-0.581	0.01915950	0.14595783	0.14324641	20.22
1.7640	0.855703	-0.578	0.01882148	0.14532161	0.14297825	20.22
1.7650	1.046906	-0.580	0.01838827	0.14454734	0.14263052	20.22
1.7660	1.248837	-0.582	0.01788431	0.14376140	0.14226806	20.23
1.7670	1.446533	-0.580	0.01744539	0.14298910	0.14191246	20.23
1.7680	1.629066	-0.573	0.01701903	0.14228100	0.14158642	20.23
1.7690	1.792145	-0.574	0.01659578	0.14163405	0.14129865	20.24
1.7700	1.938028	-0.580	0.01622844	0.14103383	0.14101475	20.24
1.7710	2.072611	-0.586	0.01591599	0.14049387	0.14074266	20.23
1.7720	2.202473	-0.583	0.01556623	0.13996863	0.14048916	20.23
1.7730	2.330589	-0.573	0.01523411	0.13945788	0.14023960	20.23
1.7740	2.457848	-0.570	0.01491982	0.13895017	0.13998914	20.23
1.7750	2.580900	-0.572	0.01461643	0.13844043	0.13973278	20.23
1.7760	2.694712	-0.574	0.01428837	0.13798523	0.13950491	20.22
1.7770	2.792187	-0.574	0.01408988	0.13758540	0.13931239	20.22
1.7780	2.866974	-0.574	0.01389819	0.13728100	0.13916206	20.22
1.7790	2.916498	-0.568	0.01372236	0.13706315	0.13906181	20.22
1.7800	2.942419	-0.573	0.01365471	0.13691527	0.13898128	20.22
1.7810	2.950258	-0.573	0.01362342	0.13683933	0.13893914	20.22
1.7820	2.946568	-0.575	0.01357132	0.13681990	0.13892543	20.22
1.7830	2.935410	-0.568	0.01359677	0.13682950	0.13894802	20.22
1.7840	2.918615	-0.570	0.01363993	0.13685584	0.13895595	20.22
1.7850	2.890406	-0.571	0.01367331	0.13691139	0.13897359	20.22
1.7860	2.832499	-0.578	0.01377648	0.13706613	0.13904440	20.23
1.7870	2.724495	-0.575	0.01403987	0.13740754	0.13920349	20.23
1.7880	2.560272	-0.572	0.01438469	0.13798726	0.13949621	20.23
1.7890	2.355309	-0.566	0.01483256	0.13873726	0.13986838	20.23
1.7900	2.140961	-0.572	0.01533055	0.13953006	0.14024746	20.23
1.7910	1.943178	-0.575	0.01582164	0.14025962	0.14062166	20.23
1.7920	1.777468	-0.576	0.01615375	0.14088792	0.14092433	20.23
1.7930	1.644001	-0.564	0.01652414	0.14141136	0.14119846	20.23
1.7940	1.530218	-0.561	0.01681393	0.14187139	0.14141363	20.23
1.7950	1.419754	-0.561	0.01704371	0.14231008	0.14162278	20.23
1.7960	1.300993	-0.561	0.01735896	0.14280516	0.14185554	20.22
1.7970	1.171703	-0.560	0.01769984	0.14334112	0.14210498	20.22
1.7980	1.037006	-0.560	0.01801717	0.14391309	0.14237124	20.22
1.7990	0.905056	-0.561	0.01834613	0.14445692	0.14263344	20.22
[truncated: 7,001 more rows]
