# Supplementary material for: Evaluation of a Cold-Mixed High-Performance Polyurethane Mixture
Source: Hindawi journal article supplement (doi:10.1155/2019/1507971), 2019-11-07
Supplement: f1 [file 1507971.f1.zip › 1507971.f1/dynamic modulus data/PUM/specimen2/temp20/zhs-2-20_Sum.csv]

Test Information
****************
Project name	zhs
Operator name	2
Target test temperature	20
Target confining stress	0
Average dynamic strain range from 75 to 125 micro-strain
Contact stress	5
Initial modulus	1000
Axial gauge length	70
Comments
Specimen information
********************
Identification	zhs-2-20
Dimensions	Point 1	Point 2	Point 3	Point 4	Point 5	Point 6	Average	Std Dev.
Diameter (mm)	49.2	49.3	49.2				49.23	0.058
Height (mm)	100.8	101.0	100.8				100.87	0.115
Cross-sectional area (mm�)	1903.7
Conditioning time
Properties/Comments
*********
Test date and time	Mon	Apr 1	2019	2:34 PM
Test results summary
	25 Hz	20 Hz	10 Hz	5 Hz	2 Hz	1 Hz	0.5 Hz	0.2 Hz	0.1 Hz
Dynamic modulus (MPa)	13599	13487	13183	12918	12565	12303	12064	11771	11585
Phase angle (Degrees)	4.23	4.10	4.05	4.04	4.02	3.99	3.88	3.76	3.70
Average temperature (�C)	20.2	20.2	20.2	20.2	20.2	20.2	20.2	20.3	20.2
Average confining pressure (kPa)	-0.6	-0.6	-0.6	-0.6	-0.6	-0.6	-0.6	-0.6	-0.6
Average micro-strain	114	100	100	99	98	98	98	98	98
Load drift (%)	-0.1	-0.4	0.1	0.1	0.0	0.3	0.5	0.2	0.1
Load standard error (%)	6.6	6.0	3.4	2.3	1.7	2.1	1.7	1.8	1.9
Average deformation drift (%)	-6.3	-2.7	-2.9	-2.3	-2.0	-0.2	0.2	-0.7	3.5
Average deformation standard error (%)	6.5	5.8	3.4	2.4	1.9	2.1	1.8	1.7	2.0
Deformation uniformity (%)	31.6	32.3	32.5	32.3	32.2	32.1	32.1	31.9	31.8
Phase uniformity (Degrees)	0.2	0.2	0.0	0.0	0.1	0.2	0.2	0.3	0.3
