# Supplementary material for: Evaluation of a Cold-Mixed High-Performance Polyurethane Mixture
Source: Hindawi journal article supplement (doi:10.1155/2019/1507971), 2019-11-07
Supplement: f1 [file 1507971.f1.zip › 1507971.f1/dynamic modulus data/PUM/specimen2/temp35/zhs-2-35_0.1Hz.csv]

Test Information
****************
Project name	zhs
Operator name	1
Target test temperature	35
Target confining stress	0
Average dynamic strain range from 75 to 125 micro-strain
Contact stress	5
Initial modulus	1000
Axial gauge length	70
Comments
Specimen information
********************
Identification	zhs-2-35
Dimensions	Point 1	Point 2	Point 3	Point 4	Point 5	Point 6	Average	Std Dev.
Diameter (mm)	49.2	49.3	49.2				49.23	0.058
Height (mm)	100.8	101.0	100.8				100.87	0.115
Cross-sectional area (mm�)	1903.7
Conditioning time
Properties/Comments
Test Data	0.1Hz
*********
Test date and time	Tue	Apr 2	2019	12:59 PM
Dynamic modulus (MPa)	9787
Phase angle (Degrees)	4.33
Average temperature (�C)	35.3
Average confining pressure (kPa)	-0.8
Average micro-strain	98
Load drift (%)	0.2
Load standard error (%)	3.0
Average deformation drift (%)	0.8
Average deformation standard error (%)	2.6
Deformation uniformity (%)	29.6
Phase uniformity (Degrees)	0.3
Conditioning Cycles
Time (sec)	Axial stress (kPa)	Axial micro-strain #1	Axial micro-strain #2	Axial micro-strain #3	Confining pressure (kPa)	Temperature (�C)	Load (N)	Displacement #1 (mm)	Displacement #2 (mm)	Displacement #3 (mm)
0.0000	232.820	4.406	-6.838	8.571	-0.683	35.429	443.230	-0.000308	0.000479	-0.000600
0.2000	237.554	3.546	-7.128	8.448	-0.671	35.428	452.242	-0.000248	0.000499	-0.000591
0.4000	251.035	5.406	-6.301	9.259	-0.683	35.427	477.905	-0.000378	0.000441	-0.000648
0.6000	265.071	6.752	-5.781	10.004	-0.687	35.428	504.627	-0.000473	0.000405	-0.000700
0.8000	294.376	10.409	-4.705	12.452	-0.679	35.426	560.417	-0.000729	0.000329	-0.000872
1.0000	328.987	14.773	-2.131	15.853	-0.692	35.426	626.307	-0.001034	0.000149	-0.001110
1.2000	372.028	20.318	-0.152	19.607	-0.685	35.426	708.246	-0.001422	0.000011	-0.001373
1.4000	387.523	22.874	1.264	20.971	-0.669	35.425	737.743	-0.001601	-0.000088	-0.001468
1.6000	436.996	29.112	4.004	25.512	-0.679	35.424	831.928	-0.002038	-0.000280	-0.001786
1.8000	476.130	34.711	7.048	29.601	-0.667	35.424	906.429	-0.002430	-0.000493	-0.002072
2.0000	529.090	41.731	10.335	34.678	-0.663	35.424	1007.252	-0.002921	-0.000723	-0.002427
2.2000	587.776	50.039	14.244	39.932	-0.684	35.422	1118.975	-0.003503	-0.000997	-0.002795
2.4000	620.478	54.694	16.417	43.729	-0.680	35.422	1181.231	-0.003829	-0.001149	-0.003061
2.6000	667.201	61.447	20.008	48.147	-0.683	35.420	1270.180	-0.004301	-0.001401	-0.003370
2.8000	705.088	66.715	22.497	52.110	-0.702	35.420	1342.306	-0.004670	-0.001575	-0.003648
3.0000	753.239	73.846	25.897	57.148	-0.676	35.420	1433.973	-0.005169	-0.001813	-0.004000
3.2000	805.688	81.113	29.228	61.756	-0.686	35.418	1533.823	-0.005678	-0.002046	-0.004323
3.4000	846.114	86.825	31.429	66.076	-0.686	35.419	1610.785	-0.006078	-0.002200	-0.004625
3.6000	869.769	90.548	33.961	68.868	-0.688	35.418	1655.817	-0.006338	-0.002377	-0.004821
3.8000	904.620	95.466	35.598	72.394	-0.684	35.418	1722.164	-0.006683	-0.002492	-0.005068
4.0000	911.759	97.597	36.865	73.811	-0.664	35.417	1735.754	-0.006832	-0.002581	-0.005167
4.2000	931.566	100.124	38.213	76.191	-0.699	35.417	1773.462	-0.007009	-0.002675	-0.005333
4.4000	954.574	103.598	40.055	78.049	-0.681	35.417	1817.265	-0.007252	-0.002804	-0.005463
4.6000	967.183	105.626	40.444	79.219	-0.676	35.416	1841.269	-0.007394	-0.002831	-0.005545
4.8000	952.155	104.709	40.124	78.942	-0.678	35.416	1812.658	-0.007330	-0.002809	-0.005526
5.0000	958.136	105.042	40.499	79.452	-0.661	35.415	1824.045	-0.007353	-0.002835	-0.005562
5.2000	967.303	106.682	40.703	80.224	-0.676	35.415	1841.497	-0.007468	-0.002849	-0.005616
5.4000	922.429	101.514	39.397	76.947	-0.677	35.415	1756.067	-0.007106	-0.002758	-0.005386
5.6000	903.658	99.318	38.131	75.435	-0.668	35.414	1720.333	-0.006952	-0.002669	-0.005280
5.8000	906.198	99.286	38.378	75.322	-0.676	35.413	1725.168	-0.006950	-0.002686	-0.005273
6.0000	856.935	93.038	36.162	71.114	-0.677	35.413	1631.384	-0.006513	-0.002531	-0.004978
6.2000	832.168	89.602	34.193	68.967	-0.665	35.411	1584.234	-0.006272	-0.002393	-0.004828
6.4000	792.538	84.572	32.284	65.374	-0.688	35.412	1508.789	-0.005920	-0.002260	-0.004576
6.6000	746.266	78.458	28.471	60.669	-0.684	35.412	1420.698	-0.005492	-0.001993	-0.004247
6.8000	709.777	73.802	26.778	57.450	-0.676	35.411	1351.233	-0.005166	-0.001874	-0.004022
7.0000	669.876	67.242	23.187	53.486	-0.695	35.411	1275.272	-0.004707	-0.001623	-0.003744
7.2000	608.981	59.811	20.064	48.078	-0.656	35.411	1159.344	-0.004187	-0.001404	-0.003365
7.4000	544.660	50.831	15.867	42.313	-0.686	35.410	1036.892	-0.003558	-0.001111	-0.002962
7.6000	528.579	48.151	13.924	39.835	-0.671	35.410	1006.279	-0.003371	-0.000975	-0.002788
7.8000	496.719	42.927	11.049	35.970	-0.667	35.409	945.625	-0.003005	-0.000773	-0.002518
8.0000	415.596	32.255	5.960	28.732	-0.676	35.410	791.187	-0.002258	-0.000417	-0.002011
8.2000	378.265	26.820	4.074	24.741	-0.670	35.409	720.119	-0.001877	-0.000285	-0.001732
8.4000	343.129	20.874	0.756	20.955	-0.671	35.410	653.229	-0.001461	-0.000053	-0.001467
8.6000	310.607	16.146	-1.044	17.158	-0.646	35.410	591.316	-0.001130	0.000073	-0.001201
8.8000	287.208	11.866	-3.246	14.765	-0.681	35.409	546.770	-0.000831	0.000227	-0.001034
9.0000	272.736	9.310	-4.817	12.110	-0.669	35.410	519.218	-0.000652	0.000337	-0.000848
9.2000	249.802	5.725	-6.232	9.936	-0.652	35.409	475.559	-0.000401	0.000436	-0.000696
9.4000	242.243	3.684	-6.908	8.779	-0.686	35.409	461.168	-0.000258	0.000484	-0.000615
9.6000	217.191	0.388	-8.584	6.207	-0.668	35.409	413.475	-0.000027	0.000601	-0.000435
9.8000	231.663	1.013	-8.228	6.728	-0.677	35.408	441.027	-0.000071	0.000576	-0.000471
10.0000	229.754	0.903	-8.697	6.247	-0.671	35.409	437.393	-0.000063	0.000609	-0.000437
10.2000	236.156	1.710	-8.257	6.416	-0.661	35.409	449.581	-0.000120	0.000578	-0.000449
10.4000	248.780	2.890	-8.007	7.308	-0.658	35.408	473.614	-0.000202	0.000560	-0.000512
10.6000	274.840	6.252	-6.589	9.441	-0.671	35.409	523.224	-0.000438	0.000461	-0.000661
10.8000	304.956	9.687	-4.762	12.124	-0.672	35.409	580.559	-0.000678	0.000333	-0.000849
11.0000	318.692	11.866	-4.046	13.815	-0.671	35.408	606.709	-0.000831	0.000283	-0.000967
11.2000	387.943	20.845	0.110	19.760	-0.667	35.409	738.544	-0.001459	-0.000008	-0.001383
11.4000	389.581	21.259	0.373	20.517	-0.665	35.408	741.663	-0.001488	-0.000026	-0.001436
11.6000	438.679	28.306	3.578	25.209	-0.699	35.409	835.133	-0.001981	-0.000250	-0.001765
11.8000	486.710	34.560	6.716	29.134	-0.675	35.409	926.571	-0.002419	-0.000470	-0.002039
12.0000	534.515	41.078	9.773	34.236	-0.681	35.409	1017.580	-0.002875	-0.000684	-0.002397
12.2000	568.735	46.330	13.072	37.980	-0.687	35.410	1082.726	-0.003243	-0.000915	-0.002659
12.4000	624.175	54.031	16.401	43.439	-0.679	35.409	1188.269	-0.003782	-0.001148	-0.003041
12.6000	663.895	59.464	18.852	47.279	-0.695	35.410	1263.885	-0.004162	-0.001320	-0.003310
12.8000	707.462	66.159	22.349	51.644	-0.668	35.410	1346.827	-0.004631	-0.001564	-0.003615
13.0000	764.826	73.816	25.662	57.012	-0.688	35.410	1456.032	-0.005167	-0.001796	-0.003991
13.2000	796.385	78.932	28.374	60.890	-0.674	35.410	1516.113	-0.005525	-0.001986	-0.004262
13.4000	845.032	85.239	31.552	65.624	-0.676	35.410	1608.725	-0.005967	-0.002209	-0.004594
13.6000	867.440	89.295	32.789	68.210	-0.691	35.411	1651.382	-0.006251	-0.002295	-0.004775
13.8000	892.763	93.161	35.116	70.989	-0.684	35.411	1699.591	-0.006521	-0.002458	-0.004969
14.0000	921.797	97.540	36.973	74.043	-0.687	35.411	1754.866	-0.006828	-0.002588	-0.005183
14.2000	942.642	100.636	38.158	75.968	-0.673	35.412	1794.548	-0.007045	-0.002671	-0.005318
14.4000	953.207	102.347	39.630	77.443	-0.665	35.412	1814.661	-0.007164	-0.002774	-0.005421
14.6000	959.729	103.946	39.479	78.558	-0.690	35.412	1827.078	-0.007276	-0.002764	-0.005499
14.8000	960.360	104.323	40.264	78.888	-0.670	35.413	1828.279	-0.007303	-0.002818	-0.005522
15.0000	952.185	103.599	39.642	78.653	-0.677	35.412	1812.716	-0.007252	-0.002775	-0.005506
15.2000	947.571	103.543	39.738	78.475	-0.699	35.414	1803.932	-0.007248	-0.002782	-0.005493
15.4000	938.359	102.084	39.629	77.456	-0.672	35.413	1786.394	-0.007146	-0.002774	-0.005422
15.6000	916.658	99.718	38.391	75.955	-0.683	35.413	1745.081	-0.006980	-0.002687	-0.005317
15.8000	888.855	96.606	37.567	73.631	-0.668	35.414	1692.152	-0.006762	-0.002630	-0.005154
16.0000	853.012	91.760	35.279	70.357	-0.700	35.413	1623.917	-0.006423	-0.002470	-0.004925
16.2000	818.162	87.285	33.092	67.411	-0.671	35.415	1557.570	-0.006110	-0.002316	-0.004719
16.4000	787.308	83.016	31.168	64.493	-0.680	35.414	1498.833	-0.005811	-0.002182	-0.004515
16.6000	747.288	77.637	28.580	60.656	-0.696	35.415	1422.644	-0.005435	-0.002001	-0.004246
16.8000	696.462	70.914	25.320	55.977	-0.665	35.414	1325.884	-0.004964	-0.001772	-0.003918
17.0000	660.333	66.047	23.116	52.618	-0.683	35.415	1257.105	-0.004623	-0.001618	-0.003683
17.2000	622.281	60.436	19.473	48.642	-0.672	35.416	1184.664	-0.004230	-0.001363	-0.003405
17.4000	561.161	52.054	16.471	42.810	-0.670	35.415	1068.306	-0.003644	-0.001153	-0.002997
17.6000	514.377	45.397	13.100	38.459	-0.681	35.415	979.242	-0.003178	-0.000917	-0.002692
17.8000	483.299	41.174	10.800	34.965	-0.675	35.416	920.076	-0.002882	-0.000756	-0.002448
18.0000	425.755	33.058	7.130	29.846	-0.669	35.415	810.528	-0.002314	-0.000499	-0.002089
18.2000	394.210	27.527	4.377	26.131	-0.688	35.415	750.475	-0.001927	-0.000306	-0.001829
18.4000	352.506	22.192	1.651	21.796	-0.679	35.416	671.082	-0.001553	-0.000116	-0.001526
18.6000	329.844	18.343	-0.247	18.975	-0.661	35.415	627.937	-0.001284	0.000017	-0.001328
18.8000	283.601	11.228	-3.757	14.132	-0.685	35.416	539.904	-0.000786	0.000263	-0.000989
19.0000	285.660	11.173	-4.074	13.444	-0.663	35.417	543.823	-0.000782	0.000285	-0.000941
19.2000	247.353	5.600	-6.027	9.839	-0.695	35.416	470.896	-0.000392	0.000422	-0.000689
19.4000	226.403	2.376	-7.937	7.528	-0.672	35.417	431.013	-0.000166	0.000556	-0.000527
19.6000	233.030	2.237	-8.036	7.283	-0.680	35.416	443.630	-0.000157	0.000563	-0.000510
19.8000	235.510	1.821	-8.022	6.633	-0.685	35.417	448.351	-0.000127	0.000562	-0.000464
20.0000	226.869	0.416	-8.765	6.110	-0.673	35.417	431.900	-0.000029	0.000614	-0.000428
20.2000	249.051	3.239	-7.306	7.336	-0.690	35.417	474.129	-0.000227	0.000511	-0.000514
20.4000	257.286	3.795	-7.278	8.065	-0.668	35.419	489.807	-0.000266	0.000509	-0.000565
20.6000	269.595	5.281	-6.948	9.096	-0.691	35.418	513.239	-0.000370	0.000486	-0.000637
20.8000	290.905	8.102	-5.506	11.464	-0.688	35.419	553.808	-0.000567	0.000385	-0.000802
21.0000	350.943	16.105	-2.515	16.086	-0.674	35.419	668.106	-0.001127	0.000176	-0.001126
21.2000	356.804	17.090	-1.719	17.382	-0.690	35.419	679.264	-0.001196	0.000120	-0.001217
21.4000	404.099	23.540	1.487	21.784	-0.688	35.420	769.300	-0.001648	-0.000104	-0.001525
21.6000	447.396	28.821	3.895	25.679	-0.679	35.419	851.727	-0.002017	-0.000273	-0.001797
21.8000	480.593	33.879	6.342	29.200	-0.698	35.419	914.927	-0.002372	-0.000444	-0.002044
22.0000	539.670	41.719	10.363	34.429	-0.677	35.420	1027.393	-0.002920	-0.000725	-0.002410
22.2000	570.088	46.497	12.371	37.786	-0.689	35.419	1085.300	-0.003255	-0.000866	-0.002645
22.4000	625.573	54.294	16.512	43.455	-0.689	35.421	1190.929	-0.003801	-0.001156	-0.003042
22.6000	669.681	60.242	19.280	47.763	-0.674	35.420	1274.900	-0.004217	-0.001350	-0.003343
22.8000	734.904	68.939	23.487	53.582	-0.699	35.420	1399.069	-0.004826	-0.001644	-0.003751
23.0000	748.956	71.593	24.838	55.661	-0.683	35.422	1425.819	-0.005011	-0.001739	-0.003896
23.2000	791.381	77.915	27.548	60.148	-0.674	35.420	1506.586	-0.005454	-0.001928	-0.004210
23.4000	845.543	85.656	31.030	65.607	-0.686	35.421	1609.697	-0.005996	-0.002172	-0.004592
23.6000	868.281	88.629	32.762	68.072	-0.674	35.421	1652.985	-0.006204	-0.002293	-0.004765
23.8000	896.971	93.590	35.035	71.265	-0.691	35.421	1707.602	-0.006551	-0.002452	-0.004989
24.0000	922.414	97.138	37.320	73.865	-0.679	35.422	1756.039	-0.006800	-0.002612	-0.005171
24.2000	945.903	101.165	38.528	76.258	-0.692	35.421	1800.756	-0.007082	-0.002697	-0.005338
24.4000	954.349	102.333	38.982	77.401	-0.683	35.421	1816.835	-0.007163	-0.002729	-0.005418
24.6000	963.216	104.112	39.767	78.598	-0.675	35.421	1833.715	-0.007288	-0.002784	-0.005502
24.8000	956.904	104.016	40.166	78.613	-0.696	35.421	1821.699	-0.007281	-0.002812	-0.005503
25.0000	956.408	103.750	40.251	79.027	-0.664	35.421	1820.755	-0.007263	-0.002818	-0.005532
25.2000	938.870	102.638	39.382	77.526	-0.690	35.420	1787.367	-0.007185	-0.002757	-0.005427
25.4000	932.768	101.959	39.382	77.207	-0.696	35.420	1775.751	-0.007137	-0.002757	-0.005404
25.6000	921.181	100.120	38.639	76.216	-0.674	35.421	1753.693	-0.007008	-0.002705	-0.005335
25.8000	887.488	96.413	37.375	73.578	-0.677	35.420	1689.548	-0.006749	-0.002616	-0.005150
26.0000	862.225	92.426	35.651	71.207	-0.679	35.420	1641.455	-0.006470	-0.002496	-0.004984
26.2000	821.513	87.119	33.091	67.564	-0.668	35.420	1563.950	-0.006098	-0.002316	-0.004729
26.4000	789.698	83.430	31.565	64.767	-0.681	35.419	1503.382	-0.005840	-0.002210	-0.004534
26.6000	746.371	76.958	28.016	60.423	-0.686	35.420	1420.898	-0.005387	-0.001961	-0.004230
26.8000	702.368	71.788	25.635	56.473	-0.674	35.419	1337.128	-0.005025	-0.001794	-0.003953
27.0000	649.062	64.536	22.622	51.532	-0.695	35.419	1235.647	-0.004517	-0.001584	-0.003607
27.2000	619.456	59.963	20.187	48.518	-0.675	35.420	1179.285	-0.004197	-0.001413	-0.003396
27.4000	562.619	52.305	16.239	42.876	-0.690	35.418	1071.081	-0.003661	-0.001137	-0.003001
27.6000	507.524	44.440	12.798	37.816	-0.677	35.419	966.196	-0.003111	-0.000896	-0.002647
27.8000	472.042	39.450	10.074	34.265	-0.682	35.418	898.647	-0.002761	-0.000705	-0.002399
28.0000	447.396	35.936	7.678	30.948	-0.689	35.418	851.727	-0.002516	-0.000537	-0.002166
28.2000	387.628	26.942	3.604	25.290	-0.686	35.418	737.944	-0.001886	-0.000252	-0.001770
28.4000	356.233	22.928	1.831	21.920	-0.689	35.417	678.177	-0.001605	-0.000128	-0.001534
28.6000	312.726	15.564	-1.581	17.189	-0.684	35.419	595.350	-0.001089	0.000111	-0.001203
28.8000	291.641	12.256	-3.013	14.984	-0.676	35.417	555.210	-0.000858	0.000211	-0.001049
29.0000	296.345	11.643	-3.795	14.022	-0.688	35.417	564.165	-0.000815	0.000266	-0.000982
29.2000	253.304	5.559	-6.096	10.183	-0.670	35.417	482.225	-0.000389	0.000427	-0.000713
29.4000	241.101	2.989	-7.359	8.118	-0.683	35.417	458.994	-0.000209	0.000515	-0.000568
29.6000	230.911	1.347	-7.748	6.949	-0.684	35.417	439.596	-0.000094	0.000542	-0.000486
29.8000	226.208	-0.028	-8.516	6.385	-0.669	35.417	430.641	0.000002	0.000596	-0.000447
30.0000	238.997	2.445	-8.214	6.825	-0.681	35.417	454.988	-0.000171	0.000575	-0.000478
30.2000	239.508	2.266	-8.132	6.731	-0.671	35.417	455.961	-0.000159	0.000569	-0.000471
30.4000	261.615	3.908	-7.705	8.351	-0.693	35.416	498.047	-0.000274	0.000539	-0.000585
30.6000	270.136	5.364	-7.005	9.083	-0.704	35.417	514.269	-0.000375	0.000490	-0.000636
30.8000	300.162	9.271	-5.368	11.436	-0.670	35.416	571.432	-0.000649	0.000376	-0.000800
31.0000	332.263	13.579	-3.714	14.366	-0.692	35.416	632.544	-0.000951	0.000260	-0.001006
31.2000	360.817	17.008	-1.611	17.310	-0.674	35.416	686.903	-0.001191	0.000113	-0.001212
31.4000	403.603	22.789	1.072	21.244	-0.694	35.416	768.356	-0.001595	-0.000075	-0.001487
31.6000	430.639	27.110	3.001	24.369	-0.657	35.416	819.826	-0.001898	-0.000210	-0.001706
31.8000	468.826	32.669	6.083	28.209	-0.689	35.415	892.525	-0.002287	-0.000426	-0.001975
32.0000	526.761	39.897	8.960	33.590	-0.686	35.416	1002.817	-0.002793	-0.000627	-0.002351
32.2000	574.416	46.830	12.867	37.950	-0.680	35.415	1093.540	-0.003278	-0.000901	-0.002657
32.4000	648.581	56.739	17.571	45.023	-0.678	35.415	1234.732	-0.003972	-0.001230	-0.003152
32.6000	673.618	60.754	19.500	48.243	-0.672	35.415	1282.396	-0.004253	-0.001365	-0.003377
32.8000	713.293	66.825	22.732	52.083	-0.695	35.414	1357.927	-0.004678	-0.001591	-0.003646
33.0000	751.766	71.912	24.714	56.183	-0.694	35.413	1431.170	-0.005034	-0.001730	-0.003933
33.2000	796.355	78.694	28.058	60.781	-0.698	35.414	1516.056	-0.005509	-0.001964	-0.004255
33.4000	842.673	84.837	31.251	65.348	-0.696	35.413	1604.233	-0.005939	-0.002188	-0.004574
33.6000	859.926	88.355	32.694	67.619	-0.693	35.413	1637.077	-0.006185	-0.002289	-0.004733
33.8000	902.877	94.784	35.335	71.677	-0.715	35.414	1718.845	-0.006635	-0.002473	-0.005017
34.0000	919.107	96.650	36.630	73.990	-0.679	35.413	1749.744	-0.006765	-0.002564	-0.005179
34.2000	949.916	101.278	38.404	76.808	-0.714	35.413	1808.395	-0.007089	-0.002688	-0.005377
34.4000	943.018	101.332	38.723	76.549	-0.689	35.414	1795.263	-0.007093	-0.002711	-0.005358
34.6000	964.869	104.541	39.973	78.877	-0.707	35.413	1836.863	-0.007318	-0.002798	-0.005521
34.8000	953.117	103.987	40.346	78.460	-0.684	35.413	1814.489	-0.007279	-0.002824	-0.005492
35.0000	973.315	106.028	41.364	80.730	-0.690	35.412	1852.942	-0.007422	-0.002895	-0.005651
35.2000	971.241	105.819	40.936	80.029	-0.690	35.414	1848.993	-0.007407	-0.002865	-0.005602
35.4000	940.658	102.013	40.027	77.581	-0.685	35.412	1790.771	-0.007141	-0.002802	-0.005431
35.6000	934.902	102.153	38.928	77.497	-0.696	35.413	1779.814	-0.007151	-0.002725	-0.005425
35.8000	882.408	95.494	37.387	73.082	-0.681	35.413	1679.878	-0.006685	-0.002617	-0.005116
36.0000	866.162	92.816	36.422	71.774	-0.699	35.413	1648.951	-0.006497	-0.002550	-0.005024
36.2000	828.381	88.714	33.892	68.401	-0.704	35.414	1577.024	-0.006210	-0.002372	-0.004788
36.4000	795.799	83.822	31.208	65.016	-0.678	35.414	1514.997	-0.005868	-0.002185	-0.004551
36.6000	734.919	75.680	27.313	59.319	-0.707	35.414	1399.097	-0.005298	-0.001912	-0.004152
36.8000	707.026	72.650	26.351	56.940	-0.685	35.415	1345.997	-0.005085	-0.001845	-0.003986
37.0000	646.928	63.953	22.154	51.366	-0.676	35.414	1231.585	-0.004477	-0.001551	-0.003596
37.2000	594.404	56.793	18.728	46.344	-0.691	35.415	1131.592	-0.003976	-0.001311	-0.003244
37.4000	568.269	52.598	16.486	43.482	-0.687	35.414	1081.839	-0.003682	-0.001154	-0.003044
37.6000	517.638	45.245	12.990	38.914	-0.698	35.415	985.451	-0.003167	-0.000909	-0.002724
37.8000	476.851	40.145	9.964	34.498	-0.676	35.416	907.803	-0.002810	-0.000697	-0.002415
38.0000	428.219	32.697	6.564	29.450	-0.694	35.416	815.220	-0.002289	-0.000459	-0.002061
38.2000	393.865	28.279	3.948	25.677	-0.687	35.417	749.817	-0.001980	-0.000276	-0.001797
38.4000	363.778	22.344	2.338	22.445	-0.667	35.416	692.539	-0.001564	-0.000164	-0.001571
38.6000	323.952	16.201	-1.265	18.194	-0.710	35.417	616.722	-0.001134	0.000089	-0.001274
38.8000	298.404	12.507	-2.874	15.093	-0.690	35.418	568.085	-0.000875	0.000201	-0.001056
39.0000	248.720	6.126	-5.972	10.335	-0.699	35.417	473.499	-0.000429	0.000418	-0.000723
39.2000	254.055	6.349	-6.452	10.116	-0.675	35.418	483.656	-0.000444	0.000452	-0.000708
39.4000	238.816	2.862	-7.128	8.201	-0.711	35.418	454.645	-0.000200	0.000499	-0.000574
39.6000	234.323	2.500	-8.268	7.473	-0.675	35.419	446.091	-0.000175	0.000579	-0.000523
39.8000	230.055	0.471	-8.492	6.291	-0.688	35.418	437.965	-0.000033	0.000594	-0.000440
40.0000	217.431	-0.859	-8.820	5.574	-0.684	35.420	413.933	0.000060	0.000617	-0.000390
40.2000	234.428	1.515	-8.724	6.275	-0.688	35.420	446.291	-0.000106	0.000611	-0.000439
40.4000	254.837	3.087	-7.566	7.872	-0.698	35.420	485.144	-0.000216	0.000530	-0.000551
40.6000	261.329	3.976	-7.581	8.298	-0.687	35.422	497.503	-0.000278	0.000531	-0.000581
40.8000	305.092	9.478	-5.313	12.136	-0.679	35.421	580.816	-0.000663	0.000372	-0.000850
41.0000	327.694	12.869	-3.795	14.492	-0.691	35.422	623.846	-0.000901	0.000266	-0.001014
41.2000	375.515	18.413	-1.279	18.508	-0.687	35.423	714.884	-0.001289	0.000090	-0.001296
41.4000	397.577	22.649	1.018	20.778	-0.695	35.423	756.884	-0.001585	-0.000071	-0.001454
41.6000	453.452	29.613	4.527	26.393	-0.721	35.424	863.256	-0.002073	-0.000317	-0.001848
41.8000	484.035	34.353	7.130	29.847	-0.676	35.425	921.478	-0.002405	-0.000499	-0.002089
42.0000	524.792	39.716	9.678	33.300	-0.703	35.425	999.069	-0.002780	-0.000677	-0.002331
42.2000	592.059	49.456	13.787	40.002	-0.686	35.426	1127.129	-0.003462	-0.000965	-0.002800
42.4000	635.807	54.906	16.622	43.839	-0.690	35.426	1210.413	-0.003843	-0.001164	-0.003069
42.6000	657.929	58.991	18.494	46.837	-0.699	35.427	1252.527	-0.004129	-0.001295	-0.003279
42.8000	710.844	66.562	21.930	51.930	-0.677	35.427	1353.264	-0.004659	-0.001535	-0.003635
43.0000	748.550	71.397	24.673	55.963	-0.696	35.428	1425.047	-0.004998	-0.001727	-0.003917
43.2000	792.328	77.582	27.863	60.520	-0.681	35.428	1508.389	-0.005431	-0.001950	-0.004236
43.4000	832.153	84.085	30.769	64.548	-0.706	35.428	1584.206	-0.005886	-0.002154	-0.004518
43.6000	856.664	88.117	32.118	67.015	-0.687	35.429	1630.869	-0.006168	-0.002248	-0.004691
43.8000	891.996	92.413	34.565	70.963	-0.665	35.429	1698.132	-0.006469	-0.002420	-0.004967
44.0000	908.557	95.020	36.189	72.669	-0.690	35.430	1729.660	-0.006651	-0.002533	-0.005087
44.2000	930.078	98.790	37.321	74.733	-0.689	35.431	1770.630	-0.006915	-0.002612	-0.005231
44.4000	956.303	102.402	39.285	77.705	-0.684	35.430	1820.555	-0.007168	-0.002750	-0.005439
44.6000	965.816	103.778	39.477	79.011	-0.690	35.431	1838.665	-0.007264	-0.002763	-0.005531
44.8000	965.635	105.125	40.277	79.425	-0.669	35.432	1838.322	-0.007359	-0.002819	-0.005560
45.0000	961.112	103.973	40.167	79.111	-0.689	35.431	1829.710	-0.007278	-0.002812	-0.005538
45.2000	922.699	99.732	38.805	76.176	-0.682	35.433	1756.582	-0.006981	-0.002716	-0.005332
45.4000	929.206	100.665	39.463	77.085	-0.671	35.432	1768.970	-0.007047	-0.002762	-0.005396
45.6000	914.133	98.653	37.938	75.805	-0.700	35.434	1740.274	-0.006906	-0.002656	-0.005306
45.8000	904.064	97.137	36.975	74.347	-0.671	35.434	1721.106	-0.006800	-0.002588	-0.005204
46.0000	865.817	93.356	35.804	71.513	-0.697	35.433	1648.293	-0.006535	-0.002506	-0.005006
46.2000	827.509	88.074	33.630	68.195	-0.680	35.434	1575.365	-0.006165	-0.002354	-0.004774
46.4000	789.638	83.250	31.211	65.030	-0.680	35.435	1503.267	-0.005827	-0.002185	-0.004552
46.6000	743.095	76.669	28.442	60.670	-0.680	35.436	1414.661	-0.005367	-0.001991	-0.004247
46.8000	674.926	68.731	24.149	54.656	-0.683	35.434	1284.885	-0.004811	-0.001690	-0.003826
47.0000	656.411	65.452	22.608	52.371	-0.688	35.436	1249.638	-0.004582	-0.001583	-0.003666
47.2000	609.898	58.809	19.569	47.941	-0.672	35.435	1161.089	-0.004117	-0.001370	-0.003356
47.4000	554.563	51.277	15.249	42.244	-0.698	35.435	1055.746	-0.003589	-0.001067	-0.002957
47.6000	506.938	44.203	12.977	37.815	-0.690	35.436	965.080	-0.003094	-0.000908	-0.002647
47.8000	471.531	38.687	10.198	34.361	-0.674	35.435	897.675	-0.002708	-0.000714	-0.002405
48.0000	427.889	33.280	6.522	29.640	-0.707	35.435	814.590	-0.002330	-0.000457	-0.002075
48.2000	395.473	27.708	4.294	26.296	-0.711	35.436	752.878	-0.001940	-0.000301	-0.001841
48.4000	328.190	17.830	-0.057	19.978	-0.687	35.437	624.790	-0.001248	0.000004	-0.001398
48.6000	327.875	17.967	-0.536	19.125	-0.696	35.436	624.189	-0.001258	0.000038	-0.001339
48.8000	277.665	10.007	-4.459	13.116	-0.700	35.438	528.603	-0.000700	0.000312	-0.000918
49.0000	270.226	8.604	-4.940	12.042	-0.696	35.437	514.441	-0.000602	0.000346	-0.000843
49.2000	262.156	6.683	-5.628	10.623	-0.716	35.438	499.077	-0.000468	0.000394	-0.000744
49.4000	233.451	2.391	-8.022	7.666	-0.680	35.438	444.431	-0.000167	0.000562	-0.000537
49.6000	242.934	3.546	-7.788	7.804	-0.700	35.437	462.484	-0.000248	0.000545	-0.000546
49.8000	230.190	0.806	-8.460	6.757	-0.691	35.438	438.223	-0.000056	0.000592	-0.000473
50.0000	238.185	0.680	-8.697	6.496	-0.691	35.427	453.444	-0.000048	0.000609	-0.000455
50.2000	251.080	1.918	-8.116	7.255	-0.685	35.428	477.991	-0.000134	0.000568	-0.000508
50.4000	279.573	6.168	-6.864	9.576	-0.693	35.428	532.236	-0.000432	0.000480	-0.000670
50.6000	309.630	9.244	-5.656	12.042	-0.691	35.429	589.457	-0.000647	0.000396	-0.000843
50.8000	311.043	10.130	-4.664	12.164	-0.692	35.428	592.146	-0.000709	0.000327	-0.000851
51.0000	380.309	18.748	-0.427	18.920	-0.710	35.429	724.010	-0.001312	0.000030	-0.001324
51.2000	412.094	23.695	1.996	22.293	-0.683	35.429	784.521	-0.001659	-0.000140	-0.001561
51.4000	453.918	29.404	4.939	26.337	-0.681	35.429	864.143	-0.002058	-0.000346	-0.001844
51.6000	490.407	35.491	7.296	30.203	-0.687	35.430	933.609	-0.002484	-0.000511	-0.002114
51.8000	578.699	46.607	12.688	38.020	-0.686	35.430	1101.694	-0.003263	-0.000888	-0.002661
52.0000	625.257	52.916	15.536	42.724	-0.672	35.429	1190.329	-0.003704	-0.001087	-0.002991
52.2000	687.595	62.171	20.062	49.055	-0.678	35.430	1309.004	-0.004352	-0.001404	-0.003434
52.4000	738.917	69.259	23.433	54.300	-0.673	35.431	1406.708	-0.004848	-0.001640	-0.003801
52.6000	814.420	79.599	28.471	61.468	-0.676	35.430	1550.446	-0.005572	-0.001993	-0.004303
52.8000	869.439	88.435	32.297	67.122	-0.695	35.431	1655.188	-0.006190	-0.002261	-0.004699
53.0000	923.436	95.592	35.679	72.697	-0.664	35.431	1757.984	-0.006691	-0.002498	-0.005089
53.2000	973.721	103.614	39.450	78.074	-0.684	35.431	1853.714	-0.007253	-0.002761	-0.005465
53.4000	1014.267	108.908	42.216	82.480	-0.676	35.432	1930.904	-0.007624	-0.002955	-0.005774
53.6000	1072.142	117.198	45.850	88.257	-0.680	35.431	2041.082	-0.008204	-0.003209	-0.006178
53.8000	1111.381	123.261	48.493	92.250	-0.684	35.432	2115.784	-0.008628	-0.003394	-0.006458
54.0000	1136.914	126.996	51.246	95.361	-0.677	35.431	2164.392	-0.008890	-0.003587	-0.006675
54.2000	1200.559	135.686	54.340	101.301	-0.697	35.431	2285.557	-0.009498	-0.003804	-0.007091
54.4000	1188.416	135.475	54.643	100.877	-0.671	35.432	2262.440	-0.009483	-0.003825	-0.007061
54.6000	1189.318	136.323	54.849	102.047	-0.686	35.432	2264.156	-0.009543	-0.003839	-0.007143
54.8000	1195.976	137.715	55.578	103.063	-0.677	35.433	2276.831	-0.009640	-0.003890	-0.007214
55.0000	1179.745	136.103	55.373	102.308	-0.688	35.432	2245.932	-0.009527	-0.003876	-0.007162
55.2000	1181.503	136.659	55.045	102.459	-0.700	35.433	2249.279	-0.009566	-0.003853	-0.007172
55.4000	1166.926	135.825	54.753	101.250	-0.682	35.433	2221.527	-0.009508	-0.003833	-0.007087
55.6000	1138.672	131.656	53.470	98.882	-0.700	35.432	2167.740	-0.009216	-0.003743	-0.006922
55.8000	1082.376	125.110	51.160	94.466	-0.710	35.433	2060.566	-0.008758	-0.003581	-0.006613
56.0000	1065.033	122.368	49.566	92.648	-0.695	35.433	2027.550	-0.008566	-0.003470	-0.006485
56.2000	1020.549	117.562	47.033	88.852	-0.706	35.432	1942.863	-0.008229	-0.003292	-0.006220
56.4000	977.853	111.157	44.322	85.037	-0.710	35.433	1861.582	-0.007781	-0.003103	-0.005953
56.6000	911.127	102.918	39.807	79.041	-0.696	35.433	1734.552	-0.007204	-0.002787	-0.005533
56.8000	858.573	95.523	36.893	73.920	-0.702	35.433	1634.502	-0.006687	-0.002582	-0.005174
57.0000	796.896	87.451	32.857	67.862	-0.703	35.434	1517.086	-0.006122	-0.002300	-0.004750
57.2000	746.040	80.528	29.778	63.253	-0.687	35.432	1420.269	-0.005637	-0.002084	-0.004428
57.4000	680.546	71.830	25.045	57.066	-0.690	35.434	1295.586	-0.005028	-0.001753	-0.003995
57.6000	617.352	62.631	20.877	50.858	-0.688	35.433	1175.280	-0.004384	-0.001461	-0.003560
57.8000	567.277	54.417	17.325	45.479	-0.704	35.434	1079.950	-0.003809	-0.001213	-0.003184
58.0000	506.517	47.054	13.265	39.756	-0.683	35.434	964.279	-0.003294	-0.000929	-0.002783
58.2000	460.095	38.672	9.647	34.553	-0.702	35.434	875.902	-0.002707	-0.000675	-0.002419
58.4000	412.755	32.892	6.068	29.461	-0.676	35.435	785.780	-0.002302	-0.000425	-0.002062
58.6000	364.183	25.124	3.221	24.866	-0.684	35.434	693.312	-0.001759	-0.000225	-0.001741
58.8000	323.426	19.233	-0.095	20.283	-0.699	35.436	615.721	-0.001346	0.000007	-0.001420
59.0000	297.698	14.313	-2.228	16.872	-0.673	35.434	566.740	-0.001002	0.000156	-0.001181
59.2000	261.930	9.146	-4.803	12.991	-0.701	35.436	498.648	-0.000640	0.000336	-0.000909
59.4000	242.619	5.530	-6.316	10.623	-0.683	35.436	461.884	-0.000387	0.000442	-0.000744
59.6000	242.498	4.616	-6.990	10.045	-0.706	35.437	461.655	-0.000323	0.000489	-0.000703
59.8000	241.567	4.546	-7.374	8.915	-0.688	35.437	459.881	-0.000318	0.000516	-0.000624
60.0000	234.203	2.823	-7.347	8.230	-0.706	35.437	445.862	-0.000198	0.000514	-0.000576
60.2000	257.782	5.447	-6.975	9.618	-0.708	35.438	490.751	-0.000381	0.000488	-0.000673
60.4000	269.189	6.543	-6.081	10.610	-0.680	35.437	512.466	-0.000458	0.000426	-0.000743
60.6000	298.810	10.436	-4.858	13.416	-0.716	35.439	568.857	-0.000731	0.000340	-0.000939
60.8000	339.056	15.412	-2.491	16.584	-0.689	35.438	645.475	-0.001079	0.000174	-0.001161
61.0000	364.860	19.774	-0.646	19.499	-0.708	35.438	694.599	-0.001384	0.000045	-0.001365
61.2000	407.165	24.916	1.900	23.324	-0.702	35.439	775.137	-0.001744	-0.000133	-0.001633
61.4000	464.243	32.309	5.408	28.458	-0.703	35.438	883.799	-0.002262	-0.000379	-0.001992
61.6000	500.296	37.714	8.268	32.654	-0.700	35.439	952.435	-0.002640	-0.000579	-0.002286
61.8000	568.735	46.831	12.701	38.571	-0.687	35.439	1082.726	-0.003278	-0.000889	-0.002700
62.0000	641.848	56.236	17.145	45.409	-0.700	35.438	1221.914	-0.003937	-0.001200	-0.003179
62.2000	697.183	65.258	21.481	51.080	-0.716	35.439	1327.257	-0.004568	-0.001504	-0.003576
62.4000	741.817	71.079	24.521	55.894	-0.698	35.439	1412.230	-0.004976	-0.001716	-0.003913
62.6000	813.698	81.891	29.090	62.788	-0.703	35.439	1549.072	-0.005732	-0.002036	-0.004395
62.8000	870.265	88.546	32.801	68.610	-0.722	35.439	1656.761	-0.006198	-0.002296	-0.004803
63.0000	921.016	97.261	36.341	73.672	-0.692	35.440	1753.378	-0.006808	-0.002544	-0.005157
63.2000	971.977	104.736	39.712	79.080	-0.700	35.439	1850.395	-0.007332	-0.002780	-0.005536
63.4000	1025.463	112.184	43.140	84.379	-0.710	35.440	1952.219	-0.007853	-0.003020	-0.005907
63.6000	1068.610	118.745	46.398	88.878	-0.700	35.439	2034.359	-0.008312	-0.003248	-0.006221
63.8000	1107.038	123.984	48.601	93.074	-0.715	35.441	2107.515	-0.008679	-0.003402	-0.006515
64.0000	1146.968	130.181	51.917	97.132	-0.688	35.440	2183.533	-0.009113	-0.003634	-0.006799
64.2000	1162.598	133.515	52.894	99.195	-0.705	35.440	2213.287	-0.009346	-0.003703	-0.006944
64.4000	1192.339	137.768	55.441	102.639	-0.677	35.440	2269.907	-0.009644	-0.003881	-0.007185
64.6000	1200.559	137.921	55.098	103.216	-0.697	35.441	2285.557	-0.009654	-0.003857	-0.007225
64.8000	1206.105	139.698	56.211	104.508	-0.669	35.440	2296.114	-0.009779	-0.003935	-0.007316
65.0000	1202.588	139.574	56.251	104.703	-0.690	35.440	2289.419	-0.009770	-0.003938	-0.007329
65.2000	1173.148	136.409	55.111	102.610	-0.677	35.441	2233.372	-0.009549	-0.003858	-0.007183
65.4000	1149.012	134.710	54.245	100.613	-0.695	35.439	2187.424	-0.009430	-0.003797	-0.007043
65.6000	1133.908	131.961	53.298	99.226	-0.690	35.440	2158.670	-0.009237	-0.003731	-0.006946
65.8000	1094.985	127.414	51.738	96.020	-0.673	35.440	2084.570	-0.008919	-0.003622	-0.006721
66.0000	1060.540	122.551	49.276	92.703	-0.691	35.440	2018.995	-0.008579	-0.003449	-0.006489
66.2000	1021.120	117.770	47.129	89.261	-0.690	35.440	1943.951	-0.008244	-0.003299	-0.006248
66.4000	969.047	111.128	43.195	84.557	-0.681	35.439	1844.816	-0.007779	-0.003024	-0.005919
66.6000	916.222	104.779	39.987	79.714	-0.698	35.440	1744.251	-0.007335	-0.002799	-0.005580
66.8000	861.834	96.915	36.850	74.442	-0.687	35.439	1640.711	-0.006784	-0.002580	-0.005211
67.0000	801.525	88.686	32.817	68.800	-0.694	35.438	1525.898	-0.006208	-0.002297	-0.004816
67.2000	739.473	80.556	29.434	63.148	-0.704	35.440	1407.766	-0.005639	-0.002060	-0.004420
67.4000	679.765	72.247	24.853	57.188	-0.680	35.438	1294.098	-0.005057	-0.001740	-0.004003
67.6000	611.566	62.602	20.461	50.530	-0.703	35.438	1164.265	-0.004382	-0.001432	-0.003537
67.8000	554.924	53.486	16.665	45.119	-0.690	35.439	1056.433	-0.003744	-0.001167	-0.003158
68.0000	493.879	45.386	11.695	38.475	-0.687	35.437	940.218	-0.003177	-0.000819	-0.002693
68.2000	452.370	38.700	9.482	34.249	-0.712	35.437	861.197	-0.002709	-0.000664	-0.002397
68.4000	395.427	30.099	4.980	28.374	-0.676	35.437	752.792	-0.002107	-0.000349	-0.001986
68.6000	359.525	24.569	2.189	24.327	-0.709	35.436	684.443	-0.001720	-0.000153	-0.001703
68.8000	313.748	17.858	-0.632	19.538	-0.690	35.437	597.296	-0.001250	0.000044	-0.001368
69.0000	292.438	13.911	-2.833	16.528	-0.681	35.436	556.726	-0.000974	0.000198	-0.001157
69.2000	269.595	10.145	-4.226	13.665	-0.687	35.436	513.239	-0.000710	0.000296	-0.000957
69.4000	246.090	6.446	-6.191	11.077	-0.720	35.436	468.493	-0.000451	0.000433	-0.000775
69.6000	238.877	5.239	-6.931	9.797	-0.684	35.435	454.760	-0.000367	0.000485	-0.000686
69.8000	232.234	3.337	-7.855	8.460	-0.697	35.434	442.114	-0.000234	0.000550	-0.000592
70.0000	254.446	5.309	-7.690	9.728	-0.683	35.435	484.400	-0.000372	0.000538	-0.000681
70.2000	260.112	5.682	-6.754	10.058	-0.683	35.434	495.186	-0.000398	0.000473	-0.000704
70.4000	270.000	6.348	-6.657	10.694	-0.700	35.434	514.011	-0.000444	0.000466	-0.000749
70.6000	299.922	10.840	-5.120	13.349	-0.676	35.434	570.974	-0.000759	0.000358	-0.000934
70.8000	338.244	15.244	-2.681	16.679	-0.702	35.433	643.930	-0.001067	0.000188	-0.001168
71.0000	373.907	20.525	-0.686	19.966	-0.688	35.433	711.823	-0.001437	0.000048	-0.001398
71.2000	419.338	26.612	2.503	24.438	-0.688	35.432	798.311	-0.001863	-0.000175	-0.001711
71.4000	463.957	32.393	5.268	28.774	-0.684	35.432	883.255	-0.002268	-0.000369	-0.002014
71.6000	533.418	42.677	10.253	35.172	-0.695	35.431	1015.491	-0.002987	-0.000718	-0.002462
71.8000	578.053	48.706	13.141	39.878	-0.684	35.432	1100.464	-0.003409	-0.000920	-0.002791
72.0000	632.471	56.974	16.969	45.256	-0.682	35.430	1204.062	-0.003988	-0.001188	-0.003168
72.2000	684.634	62.713	20.931	50.130	-0.699	35.431	1303.368	-0.004390	-0.001465	-0.003509
72.4000	767.892	74.999	25.911	58.344	-0.675	35.430	1461.868	-0.005250	-0.001814	-0.004084
72.6000	816.644	81.448	29.599	63.572	-0.701	35.430	1554.680	-0.005701	-0.002072	-0.004450
72.8000	860.872	88.048	32.611	68.348	-0.687	35.430	1638.880	-0.006163	-0.002283	-0.004784
73.0000	923.120	97.708	36.396	74.235	-0.697	35.428	1757.383	-0.006840	-0.002548	-0.005196
73.2000	980.589	106.154	40.690	80.401	-0.681	35.429	1866.789	-0.007431	-0.002848	-0.005628
73.4000	1029.326	112.741	43.293	84.832	-0.691	35.427	1959.572	-0.007892	-0.003030	-0.005938
73.6000	1066.311	117.519	46.397	88.974	-0.689	35.428	2029.982	-0.008226	-0.003248	-0.006228
73.8000	1102.514	123.481	48.530	92.716	-0.681	35.427	2098.904	-0.008644	-0.003397	-0.006490
74.0000	1137.681	129.086	51.245	96.554	-0.686	35.427	2165.852	-0.009036	-0.003587	-0.006759
74.2000	1165.092	133.309	52.773	99.529	-0.677	35.427	2218.037	-0.009332	-0.003694	-0.006967
74.4000	1178.287	136.089	54.190	101.606	-0.682	35.426	2243.156	-0.009526	-0.003793	-0.007112
74.6000	1196.862	138.393	55.482	103.587	-0.689	35.426	2278.519	-0.009688	-0.003884	-0.007251
74.8000	1199.553	139.395	56.182	104.167	-0.663	35.425	2283.640	-0.009758	-0.003933	-0.007292
75.0000	1202.558	140.646	56.443	104.924	-0.698	35.426	2289.362	-0.009845	-0.003951	-0.007345
75.2000	1172.546	137.643	55.043	102.830	-0.667	35.425	2232.227	-0.009635	-0.003853	-0.007198
75.4000	1162.583	135.809	55.112	101.771	-0.688	35.424	2213.259	-0.009507	-0.003858	-0.007124
75.6000	1141.783	133.279	53.554	100.369	-0.702	35.424	2173.662	-0.009329	-0.003749	-0.007026
75.8000	1104.964	129.362	51.492	97.271	-0.682	35.424	2103.567	-0.009055	-0.003604	-0.006809
76.0000	1060.450	123.816	49.413	93.584	-0.696	35.422	2018.824	-0.008667	-0.003459	-0.006551
76.2000	1020.549	118.536	46.826	89.743	-0.681	35.424	1942.863	-0.008298	-0.003278	-0.006282
76.4000	974.502	112.643	43.689	85.755	-0.686	35.422	1855.202	-0.007885	-0.003058	-0.006003
76.6000	948.864	108.752	41.281	82.878	-0.706	35.422	1806.393	-0.007613	-0.002890	-0.005801
76.8000	855.071	96.052	36.438	74.538	-0.682	35.423	1627.836	-0.006724	-0.002551	-0.005218
77.0000	803.900	89.199	33.035	69.779	-0.686	35.421	1530.418	-0.006244	-0.002312	-0.004885
77.2000	744.793	81.532	29.284	63.930	-0.688	35.422	1417.894	-0.005707	-0.002050	-0.004475
77.4000	666.029	71.107	24.383	56.803	-0.673	35.421	1267.948	-0.004978	-0.001707	-0.003976
77.6000	612.182	62.631	20.296	51.175	-0.686	35.421	1165.438	-0.004384	-0.001421	-0.003582
77.8000	560.439	54.791	16.390	45.696	-0.691	35.421	1066.933	-0.003835	-0.001147	-0.003199
78.0000	505.961	46.997	12.662	40.112	-0.686	35.420	963.221	-0.003290	-0.000886	-0.002808
78.2000	456.383	39.365	9.057	35.077	-0.683	35.420	868.835	-0.002756	-0.000634	-0.002455
78.4000	405.346	31.990	5.475	29.738	-0.676	35.421	771.675	-0.002239	-0.000383	-0.002082
78.6000	373.396	27.098	2.810	25.802	-0.684	35.419	710.850	-0.001897	-0.000197	-0.001806
78.8000	328.566	19.790	0.095	21.370	-0.683	35.421	625.505	-0.001385	-0.000007	-0.001496
79.0000	288.110	13.800	-2.999	16.898	-0.679	35.419	548.487	-0.000966	0.000210	-0.001183
79.2000	270.286	10.618	-4.253	14.408	-0.702	35.419	514.555	-0.000743	0.000298	-0.001009
79.4000	234.007	5.282	-7.142	10.582	-0.679	35.419	445.490	-0.000370	0.000500	-0.000741
79.6000	242.258	5.393	-7.184	10.308	-0.684	35.419	461.197	-0.000377	0.000503	-0.000722
79.8000	233.000	3.477	-8.188	9.177	-0.681	35.420	443.573	-0.000243	0.000573	-0.000642
80.0000	237.749	4.228	-7.760	9.412	-0.668	35.419	452.614	-0.000296	0.000543	-0.000659
80.2000	257.782	5.823	-7.032	10.253	-0.683	35.419	490.751	-0.000408	0.000492	-0.000718
80.4000	269.279	7.543	-6.550	10.994	-0.671	35.419	512.638	-0.000528	0.000458	-0.000770
80.6000	296.390	10.605	-5.189	13.348	-0.694	35.419	564.251	-0.000742	0.000363	-0.000934
80.8000	323.997	14.065	-3.838	15.604	-0.682	35.419	616.808	-0.000985	0.000269	-0.001092
81.0000	360.892	19.178	-1.236	19.236	-0.668	35.419	687.046	-0.001342	0.000087	-0.001347
81.2000	406.023	25.236	1.527	23.654	-0.702	35.419	772.963	-0.001767	-0.000107	-0.001656
81.4000	476.866	34.517	5.945	30.024	-0.672	35.419	907.831	-0.002416	-0.000416	-0.002102
81.6000	520.960	40.826	8.793	34.664	-0.672	35.418	991.774	-0.002858	-0.000616	-0.002427
81.8000	574.266	48.012	13.047	39.947	-0.706	35.418	1093.254	-0.003361	-0.000913	-0.002796
82.0000	644.072	57.794	17.118	46.590	-0.675	35.419	1226.149	-0.004046	-0.001198	-0.003261
82.2000	685.776	64.120	20.615	50.915	-0.682	35.418	1305.542	-0.004488	-0.001443	-0.003564
82.4000	743.591	72.162	24.053	56.595	-0.700	35.419	1415.606	-0.005051	-0.001684	-0.003962
82.6000	814.059	82.351	29.172	63.808	-0.664	35.419	1549.759	-0.005765	-0.002042	-0.004467
82.8000	875.961	90.826	33.133	69.571	-0.684	35.418	1667.604	-0.006358	-0.002319	-0.004870
83.0000	937.517	99.428	36.961	76.024	-0.690	35.419	1784.792	-0.006960	-0.002587	-0.005322
83.2000	962.029	103.710	39.340	79.164	-0.681	35.418	1831.455	-0.007260	-0.002754	-0.005542
83.4000	1025.268	112.656	43.264	85.311	-0.699	35.419	1951.847	-0.007886	-0.003029	-0.005972
83.6000	1074.080	119.608	46.289	90.102	-0.663	35.418	2044.773	-0.008373	-0.003240	-0.006307
83.8000	1133.743	128.136	50.255	95.881	-0.688	35.418	2158.356	-0.008970	-0.003518	-0.006712
84.0000	1149.298	130.680	51.532	98.291	-0.686	35.418	2187.967	-0.009148	-0.003607	-0.006880
84.2000	1159.171	132.820	52.536	99.749	-0.703	35.418	2206.764	-0.009297	-0.003678	-0.006982
84.4000	1203.986	138.365	54.807	103.792	-0.701	35.418	2292.080	-0.009686	-0.003837	-0.007265
84.6000	1204.256	139.712	56.030	104.704	-0.673	35.418	2292.595	-0.009780	-0.003922	-0.007329
84.8000	1190.686	138.601	55.552	103.712	-0.683	35.418	2266.760	-0.009702	-0.003889	-0.007260
85.0000	1179.850	138.395	55.580	103.627	-0.673	35.419	2246.132	-0.009688	-0.003891	-0.007254
85.2000	1177.851	137.618	55.193	103.629	-0.703	35.418	2242.327	-0.009633	-0.003864	-0.007254
85.4000	1158.029	135.922	54.849	102.226	-0.695	35.419	2204.590	-0.009515	-0.003839	-0.007156
85.6000	1119.511	130.946	52.841	99.154	-0.692	35.418	2131.262	-0.009166	-0.003699	-0.006941
85.8000	1099.794	129.819	51.589	96.953	-0.708	35.419	2093.725	-0.009087	-0.003611	-0.006787
86.0000	1062.088	123.969	49.205	93.900	-0.690	35.419	2021.942	-0.008678	-0.003444	-0.006573
86.2000	1011.502	117.199	46.536	89.414	-0.689	35.419	1925.640	-0.008204	-0.003258	-0.006259
86.4000	971.812	112.198	43.978	85.821	-0.701	35.419	1850.080	-0.007854	-0.003078	-0.006007
86.6000	912.795	104.918	40.304	80.459	-0.695	35.419	1737.728	-0.007344	-0.002821	-0.005632
86.8000	861.504	97.748	37.097	75.598	-0.695	35.420	1640.081	-0.006842	-0.002597	-0.005292
87.0000	793.620	88.655	32.995	69.477	-0.686	35.419	1510.849	-0.006206	-0.002310	-0.004863
87.2000	720.312	78.487	28.085	62.472	-0.699	35.419	1371.288	-0.005494	-0.001966	-0.004373
87.4000	681.734	72.606	25.126	58.137	-0.694	35.420	1297.846	-0.005082	-0.001759	-0.004070
87.6000	606.607	62.312	20.063	51.163	-0.700	35.419	1154.823	-0.004362	-0.001404	-0.003581
87.8000	558.846	55.666	17.200	46.206	-0.700	35.420	1063.900	-0.003897	-0.001204	-0.003234
88.0000	494.825	45.926	12.011	39.686	-0.698	35.420	942.020	-0.003215	-0.000841	-0.002778
88.2000	457.179	40.661	9.345	35.447	-0.704	35.420	870.352	-0.002846	-0.000654	-0.002481
88.4000	398.148	31.697	4.873	29.532	-0.687	35.421	757.971	-0.002219	-0.000341	-0.002067
88.6000	367.820	26.570	2.891	25.747	-0.712	35.420	700.235	-0.001860	-0.000202	-0.001802
88.8000	323.441	19.968	-0.549	21.288	-0.703	35.421	615.749	-0.001398	0.000038	-0.001490
89.0000	290.484	14.509	-2.502	17.448	-0.692	35.421	553.007	-0.001016	0.000175	-0.001221
89.2000	266.574	10.493	-4.693	14.367	-0.702	35.420	507.488	-0.000735	0.000328	-0.001006
89.4000	255.273	7.963	-5.985	12.179	-0.714	35.421	485.973	-0.000557	0.000419	-0.000853
89.6000	228.762	4.214	-8.064	9.740	-0.716	35.421	435.505	-0.000295	0.000564	-0.000682
89.8000	243.430	5.102	-7.361	10.375	-0.720	35.421	463.428	-0.000357	0.000515	-0.000726
90.0000	247.909	5.295	-7.362	10.129	-0.703	35.421	471.954	-0.000371	0.000515	-0.000709
90.2000	275.335	8.282	-6.218	12.109	-0.699	35.422	524.168	-0.000580	0.000435	-0.000848
90.4000	267.370	7.893	-6.602	11.366	-0.698	35.420	509.005	-0.000552	0.000462	-0.000796
90.6000	304.430	12.117	-4.776	14.436	-0.728	35.422	579.557	-0.000848	0.000334	-0.001011
90.8000	335.209	15.618	-3.382	17.021	-0.692	35.421	638.151	-0.001093	0.000237	-0.001191
91.0000	369.203	20.609	-0.687	20.446	-0.735	35.421	702.868	-0.001443	0.000048	-0.001431
91.2000	403.332	25.305	1.417	23.681	-0.686	35.422	767.841	-0.001771	-0.000099	-0.001658
91.4000	452.250	31.963	4.692	28.114	-0.702	35.420	860.968	-0.002237	-0.000328	-0.001968
91.6000	516.872	40.508	8.751	34.386	-0.697	35.422	983.992	-0.002836	-0.000613	-0.002407
91.8000	564.557	46.957	12.123	39.094	-0.687	35.421	1074.772	-0.003287	-0.000849	-0.002737
92.0000	624.506	55.471	16.086	45.134	-0.730	35.421	1188.898	-0.003883	-0.001126	-0.003159
92.2000	701.226	65.520	20.599	52.219	-0.692	35.421	1334.953	-0.004586	-0.001442	-0.003655
92.4000	752.668	73.901	24.853	57.394	-0.712	35.420	1432.886	-0.005173	-0.001740	-0.004018
92.6000	809.084	81.476	28.401	63.396	-0.697	35.421	1540.289	-0.005703	-0.001988	-0.004438
92.8000	868.417	89.906	32.939	69.130	-0.726	35.420	1653.242	-0.006293	-0.002306	-0.004839
93.0000	935.954	99.123	36.630	75.722	-0.726	35.421	1781.816	-0.006939	-0.002564	-0.005301
93.2000	985.202	106.806	40.318	80.977	-0.695	35.419	1875.572	-0.007476	-0.002822	-0.005668
93.4000	1014.463	111.336	42.462	84.449	-0.703	35.421	1931.276	-0.007793	-0.002972	-0.005911
93.6000	1051.553	117.103	45.435	88.437	-0.693	35.419	2001.886	-0.008197	-0.003180	-0.006191
93.8000	1099.839	123.733	48.271	93.199	-0.714	35.419	2093.811	-0.008661	-0.003379	-0.006524
94.0000	1143.196	130.251	51.228	97.779	-0.692	35.419	2176.352	-0.009118	-0.003586	-0.006845
94.2000	1162.823	133.294	52.442	100.230	-0.726	35.418	2213.717	-0.009331	-0.003671	-0.007016
94.4000	1164.837	134.780	54.218	100.933	-0.712	35.419	2217.550	-0.009435	-0.003795	-0.007065
94.6000	1199.583	139.936	55.236	104.345	-0.722	35.418	2283.697	-0.009795	-0.003866	-0.007304
94.8000	1200.785	140.340	55.786	104.937	-0.725	35.419	2285.986	-0.009824	-0.003905	-0.007346
95.0000	1188.326	139.046	54.932	104.317	-0.703	35.417	2262.268	-0.009733	-0.003845	-0.007302
95.2000	1172.336	137.310	55.054	103.447	-0.746	35.418	2231.827	-0.009612	-0.003854	-0.007241
95.4000	1170.668	137.090	54.532	102.953	-0.720	35.417	2228.651	-0.009596	-0.003817	-0.007207
95.6000	1131.203	133.417	52.759	100.217	-0.724	35.417	2153.521	-0.009339	-0.003693	-0.007015
95.8000	1099.824	129.374	50.886	97.382	-0.706	35.418	2093.782	-0.009056	-0.003562	-0.006817
96.0000	1060.870	123.956	49.097	93.915	-0.723	35.416	2019.625	-0.008677	-0.003437	-0.006574
96.2000	1018.054	118.857	46.234	90.075	-0.714	35.416	1938.114	-0.008320	-0.003236	-0.006305
96.4000	983.128	113.242	43.907	86.922	-0.703	35.416	1871.624	-0.007927	-0.003074	-0.006085
96.6000	920.776	106.070	39.864	80.978	-0.720	35.415	1752.920	-0.007425	-0.002790	-0.005668
96.8000	845.318	95.482	35.239	74.263	-0.713	35.415	1609.268	-0.006684	-0.002467	-0.005198
97.0000	805.943	90.394	32.925	70.219	-0.733	35.414	1534.309	-0.006328	-0.002305	-0.004915
97.2000	739.548	80.905	28.223	64.163	-0.728	35.415	1407.909	-0.005663	-0.001976	-0.004491
97.4000	676.759	72.427	24.660	57.958	-0.721	35.414	1288.376	-0.005070	-0.001726	-0.004057
97.6000	615.038	63.241	20.130	51.959	-0.729	35.414	1170.874	-0.004427	-0.001409	-0.003637
97.8000	571.455	56.974	16.954	47.060	-0.712	35.413	1087.904	-0.003988	-0.001187	-0.003294
98.0000	503.106	47.053	12.454	40.578	-0.744	35.412	957.785	-0.003294	-0.000872	-0.002840
98.2000	446.103	39.340	8.919	34.939	-0.727	35.413	849.266	-0.002754	-0.000624	-0.002446
98.4000	388.559	30.099	3.908	28.460	-0.714	35.411	739.717	-0.002107	-0.000274	-0.001992
98.6000	365.235	26.390	2.589	25.732	-0.738	35.412	695.314	-0.001847	-0.000181	-0.001801
98.8000	319.609	19.372	-1.017	20.817	-0.728	35.411	608.454	-0.001356	0.000071	-0.001457
99.0000	298.329	15.716	-2.308	18.205	-0.740	35.410	567.942	-0.001100	0.000162	-0.001274
99.2000	261.720	9.979	-5.466	14.324	-0.736	35.410	498.247	-0.000699	0.000383	-0.001003
99.4000	225.967	4.727	-8.091	10.087	-0.732	35.409	430.183	-0.000331	0.000566	-0.000706
99.6000	242.513	5.709	-7.635	10.663	-0.753	35.409	461.683	-0.000400	0.000534	-0.000746
99.8000	231.948	3.852	-7.979	9.329	-0.734	35.409	441.570	-0.000270	0.000559	-0.000653
Test Cycles
Time (sec)	Axial stress (kPa)	Axial micro-strain #1	Axial micro-strain #2	Axial micro-strain #3	Confining pressure (kPa)	Temperature (�C)	Load (N)	Displacement #1 (mm)	Displacement #2 (mm)	Displacement #3 (mm)
0.0000	239.162	3.977	-8.215	9.605	-0.751	35.408	455.303	-0.000278	0.000575	-0.000672
0.2000	248.615	5.531	-7.690	10.184	-0.753	35.408	473.299	-0.000387	0.000538	-0.000713
0.4000	265.101	7.531	-7.443	11.229	-0.747	35.408	504.684	-0.000527	0.000521	-0.000786
0.6000	314.034	13.356	-4.198	15.564	-0.737	35.406	597.839	-0.000935	0.000294	-0.001090
0.8000	359.209	19.233	-1.608	19.855	-0.750	35.407	683.842	-0.001346	0.000113	-0.001390
1.0000	372.088	20.817	-0.372	20.900	-0.740	35.406	708.361	-0.001457	0.000026	-0.001463
1.2000	413.386	26.681	1.884	24.850	-0.754	35.405	786.982	-0.001868	-0.000132	-0.001740
1.4000	457.750	32.781	5.421	29.434	-0.751	35.405	871.439	-0.002295	-0.000379	-0.002060
1.6000	501.182	38.382	7.898	33.424	-0.735	35.405	954.123	-0.002687	-0.000553	-0.002340
1.8000	579.691	49.262	12.674	40.250	-0.743	35.404	1103.582	-0.003448	-0.000887	-0.002818
2.0000	639.579	57.308	16.856	46.399	-0.743	35.405	1217.594	-0.004012	-0.001180	-0.003248
2.2000	686.332	63.979	20.627	51.217	-0.756	35.403	1306.601	-0.004479	-0.001444	-0.003585
2.4000	743.921	72.080	23.723	56.707	-0.747	35.404	1416.235	-0.005046	-0.001661	-0.003969
2.6000	803.915	80.530	27.988	62.720	-0.749	35.402	1530.447	-0.005637	-0.001959	-0.004390
2.8000	886.060	92.301	33.038	70.768	-0.764	35.403	1686.831	-0.006461	-0.002313	-0.004954
3.0000	922.639	97.787	35.817	74.553	-0.731	35.401	1756.468	-0.006845	-0.002507	-0.005219
3.2000	979.942	106.209	39.572	80.333	-0.753	35.401	1865.559	-0.007435	-0.002770	-0.005623
3.4000	1023.059	111.988	42.478	84.846	-0.731	35.402	1947.641	-0.007839	-0.002973	-0.005939
3.6000	1067.137	118.982	45.655	89.826	-0.755	35.399	2031.555	-0.008329	-0.003196	-0.006288
3.8000	1117.272	125.500	48.587	94.506	-0.745	35.401	2126.999	-0.008785	-0.003401	-0.006615
4.0000	1138.973	129.474	51.023	97.393	-0.742	35.399	2168.312	-0.009063	-0.003572	-0.006818
4.2000	1164.596	133.516	52.220	100.132	-0.751	35.400	2217.093	-0.009346	-0.003655	-0.007009
4.4000	1192.459	137.367	54.010	103.010	-0.733	35.399	2270.136	-0.009616	-0.003781	-0.007211
4.6000	1189.153	138.075	54.436	103.475	-0.753	35.399	2263.842	-0.009665	-0.003811	-0.007243
4.8000	1189.499	138.339	54.779	103.671	-0.725	35.399	2264.500	-0.009684	-0.003835	-0.007257
5.0000	1191.723	139.602	55.029	104.399	-0.755	35.398	2268.734	-0.009772	-0.003852	-0.007308
5.2000	1184.479	138.463	54.932	104.057	-0.759	35.398	2254.944	-0.009692	-0.003845	-0.007284
5.4000	1163.379	136.559	54.149	102.198	-0.739	35.398	2214.775	-0.009559	-0.003790	-0.007154
5.6000	1144.218	133.960	52.868	100.629	-0.756	35.398	2178.297	-0.009377	-0.003701	-0.007044
5.8000	1096.668	128.457	50.804	96.554	-0.746	35.398	2087.774	-0.008992	-0.003556	-0.006759
6.0000	1068.279	124.761	48.850	94.134	-0.748	35.397	2033.730	-0.008733	-0.003420	-0.006589
6.2000	1013.170	117.770	46.083	89.536	-0.760	35.397	1928.816	-0.008244	-0.003226	-0.006268
6.4000	964.794	111.114	42.478	84.791	-0.730	35.397	1836.720	-0.007778	-0.002973	-0.005935
6.6000	914.388	104.210	39.725	80.223	-0.766	35.397	1740.761	-0.007295	-0.002781	-0.005616
6.8000	856.364	97.387	36.286	75.240	-0.758	35.397	1630.297	-0.006817	-0.002540	-0.005267
7.0000	787.774	87.284	31.568	68.553	-0.749	35.396	1499.720	-0.006110	-0.002210	-0.004799
7.2000	737.880	80.460	28.180	63.461	-0.754	35.397	1404.734	-0.005632	-0.001973	-0.004442
7.4000	673.378	71.288	23.776	57.435	-0.732	35.396	1281.939	-0.004990	-0.001664	-0.004020
7.6000	603.932	62.060	19.529	50.559	-0.760	35.396	1149.731	-0.004344	-0.001367	-0.003539
7.8000	567.142	55.958	16.167	46.495	-0.734	35.396	1079.693	-0.003917	-0.001132	-0.003255
8.0000	503.933	47.136	12.494	40.581	-0.766	35.396	959.358	-0.003300	-0.000875	-0.002841
8.2000	441.940	38.381	8.050	34.428	-0.747	35.397	841.341	-0.002687	-0.000564	-0.002410
8.4000	403.813	31.825	4.981	29.531	-0.747	35.396	768.757	-0.002228	-0.000349	-0.002067
8.6000	356.384	25.098	1.955	24.986	-0.752	35.397	678.463	-0.001757	-0.000137	-0.001749
8.8000	318.617	19.039	-1.374	20.461	-0.745	35.396	606.565	-0.001333	0.000096	-0.001432
9.0000	293.189	14.676	-3.191	17.325	-0.767	35.396	558.157	-0.001027	0.000223	-0.001213
9.2000	275.922	11.393	-4.912	15.000	-0.739	35.396	525.284	-0.000798	0.000344	-0.001050
9.4000	253.529	7.601	-6.617	12.054	-0.746	35.395	482.655	-0.000532	0.000463	-0.000844
9.6000	246.451	5.945	-7.703	10.677	-0.763	35.397	469.179	-0.000416	0.000539	-0.000747
9.8000	220.767	2.126	-9.232	8.256	-0.735	35.396	420.284	-0.000149	0.000646	-0.000578
10.0000	235.315	3.920	-8.848	9.190	-0.749	35.396	447.979	-0.000274	0.000619	-0.000643
10.2000	250.644	5.420	-8.339	9.868	-0.774	35.396	477.161	-0.000379	0.000584	-0.000691
10.4000	268.032	7.585	-7.279	11.339	-0.747	35.396	510.263	-0.000531	0.000510	-0.000794
10.6000	284.488	9.673	-6.935	12.674	-0.747	35.396	541.592	-0.000677	0.000485	-0.000887
10.8000	315.341	13.202	-4.776	15.466	-0.747	35.396	600.328	-0.000924	0.000334	-0.001083
11.0000	374.222	21.024	-1.485	20.736	-0.763	35.396	712.423	-0.001472	0.000104	-0.001452
11.2000	410.396	25.570	1.112	24.025	-0.754	35.396	781.288	-0.001790	-0.000078	-0.001682
11.4000	475.063	34.436	5.104	29.956	-0.752	35.395	904.398	-0.002411	-0.000357	-0.002097
11.6000	529.992	41.815	8.615	35.227	-0.755	35.396	1008.968	-0.002927	-0.000603	-0.002466
11.8000	567.443	47.637	11.488	39.232	-0.718	35.395	1080.265	-0.003335	-0.000804	-0.002746
12.0000	631.449	56.127	15.496	45.299	-0.764	35.395	1202.116	-0.003929	-0.001085	-0.003171
12.2000	688.647	64.174	19.804	50.900	-0.746	35.395	1311.007	-0.004492	-0.001386	-0.003563
12.4000	756.665	73.594	23.887	57.614	-0.740	35.394	1440.496	-0.005152	-0.001672	-0.004033
12.6000	810.873	81.600	27.877	63.241	-0.753	35.394	1543.694	-0.005712	-0.001951	-0.004427
12.8000	872.534	90.325	31.885	69.393	-0.741	35.395	1661.081	-0.006323	-0.002232	-0.004858
13.0000	929.237	98.625	36.107	75.501	-0.754	35.396	1769.028	-0.006904	-0.002527	-0.005285
13.2000	974.006	105.292	38.502	79.797	-0.763	35.395	1854.258	-0.007370	-0.002695	-0.005586
13.4000	1033.594	113.532	42.492	85.820	-0.739	35.393	1967.697	-0.007947	-0.002974	-0.006007
13.6000	1091.423	121.704	46.632	91.588	-0.766	35.394	2077.789	-0.008519	-0.003264	-0.006411
13.8000	1110.224	124.887	47.954	94.037	-0.728	35.394	2113.581	-0.008742	-0.003357	-0.006583
14.0000	1152.619	131.601	50.775	98.248	-0.745	35.392	2194.290	-0.009212	-0.003554	-0.006877
14.2000	1154.392	132.474	51.561	98.962	-0.759	35.393	2197.666	-0.009273	-0.003609	-0.006927
14.4000	1184.073	136.323	54.067	102.472	-0.734	35.392	2254.171	-0.009543	-0.003785	-0.007173
14.6000	1209.652	140.032	54.753	104.813	-0.754	35.392	2302.866	-0.009802	-0.003833	-0.007337
14.8000	1197.674	139.310	54.919	104.758	-0.736	35.392	2280.064	-0.009752	-0.003844	-0.007333
15.0000	1196.021	139.630	54.545	104.814	-0.751	35.390	2276.917	-0.009774	-0.003818	-0.007337
15.2000	1175.372	137.755	54.629	103.518	-0.745	35.391	2237.606	-0.009643	-0.003824	-0.007246
15.4000	1174.575	137.797	54.382	103.489	-0.755	35.390	2236.090	-0.009646	-0.003807	-0.007244
15.6000	1129.655	132.169	51.904	99.776	-0.775	35.389	2150.574	-0.009252	-0.003633	-0.006984
15.8000	1107.338	129.781	51.203	97.999	-0.767	35.389	2108.088	-0.009085	-0.003584	-0.006860
16.0000	1063.095	123.887	48.201	93.736	-0.772	35.388	2023.859	-0.008672	-0.003374	-0.006562
16.2000	1024.351	119.231	46.111	90.665	-0.772	35.388	1950.102	-0.008346	-0.003228	-0.006347
16.4000	969.377	112.089	42.437	85.409	-0.762	35.388	1845.446	-0.007846	-0.002971	-0.005979
16.6000	911.172	104.669	38.584	80.181	-0.783	35.388	1734.638	-0.007327	-0.002701	-0.005613
16.8000	851.765	96.567	35.128	74.404	-0.762	35.388	1621.542	-0.006760	-0.002459	-0.005208
17.0000	771.318	86.199	30.369	67.329	-0.768	35.386	1468.391	-0.006034	-0.002126	-0.004713
17.2000	735.100	79.916	27.298	63.187	-0.772	35.387	1399.441	-0.005594	-0.001911	-0.004423
17.4000	668.779	70.636	22.732	56.680	-0.760	35.386	1273.184	-0.004945	-0.001591	-0.003968
17.6000	612.453	62.532	19.362	51.132	-0.763	35.385	1165.953	-0.004377	-0.001355	-0.003579
17.8000	560.154	54.961	15.260	45.795	-0.775	35.385	1066.389	-0.003847	-0.001068	-0.003206
18.0000	489.445	45.024	10.554	39.092	-0.760	35.384	931.778	-0.003152	-0.000739	-0.002736
18.2000	458.502	40.536	8.214	35.048	-0.772	35.384	872.869	-0.002838	-0.000575	-0.002453
18.4000	389.777	30.476	3.360	28.568	-0.756	35.383	742.035	-0.002133	-0.000235	-0.002000
18.6000	365.942	26.264	1.142	24.975	-0.782	35.382	696.659	-0.001839	-0.000080	-0.001748
18.8000	327.379	20.012	-1.444	21.287	-0.760	35.381	623.245	-0.001401	0.000101	-0.001490
19.0000	302.552	15.786	-3.246	18.013	-0.774	35.381	575.981	-0.001105	0.000227	-0.001261
19.2000	268.332	10.631	-6.274	14.202	-0.762	35.381	510.836	-0.000744	0.000439	-0.000994
19.4000	252.808	7.753	-7.237	12.041	-0.776	35.379	481.281	-0.000543	0.000507	-0.000843
19.6000	259.375	7.628	-8.215	11.134	-0.773	35.379	493.784	-0.000534	0.000575	-0.000779
19.8000	238.831	4.117	-9.040	9.495	-0.752	35.378	454.674	-0.000288	0.000633	-0.000665
20.0000	247.127	4.919	-9.027	9.536	-0.775	35.377	470.467	-0.000344	0.000632	-0.000668
20.2000	250.283	4.907	-9.137	9.494	-0.771	35.378	476.475	-0.000344	0.000640	-0.000665
20.4000	263.538	6.642	-8.367	10.459	-0.754	35.376	501.709	-0.000465	0.000586	-0.000732
20.6000	290.830	9.646	-7.169	12.868	-0.786	35.375	553.665	-0.000675	0.000502	-0.000901
20.8000	328.446	14.800	-4.473	16.390	-0.768	35.375	625.277	-0.001036	0.000313	-0.001147
21.0000	379.227	21.054	-1.610	20.625	-0.761	35.373	721.951	-0.001474	0.000113	-0.001444
21.2000	421.126	26.792	0.894	24.767	-0.779	35.373	801.716	-0.001875	-0.000063	-0.001734
21.4000	460.350	32.394	3.852	28.981	-0.752	35.372	876.389	-0.002268	-0.000270	-0.002029
21.6000	531.314	41.690	8.394	35.515	-0.756	35.370	1011.486	-0.002918	-0.000588	-0.002486
21.8000	569.607	47.484	11.144	39.205	-0.771	35.369	1084.385	-0.003324	-0.000780	-0.002744
22.0000	636.408	56.374	15.661	45.932	-0.768	35.369	1211.557	-0.003946	-0.001096	-0.003215
22.2000	684.138	63.507	19.139	50.431	-0.775	35.366	1302.423	-0.004445	-0.001340	-0.003530
22.4000	772.355	74.956	24.396	59.098	-0.767	35.367	1470.366	-0.005247	-0.001708	-0.004137
22.6000	812.796	81.503	27.877	63.434	-0.775	35.364	1547.356	-0.005705	-0.001951	-0.004440
22.8000	894.491	92.538	32.665	71.085	-0.758	35.365	1702.881	-0.006478	-0.002287	-0.004976
23.0000	929.808	97.984	35.707	75.144	-0.763	35.362	1770.115	-0.006859	-0.002499	-0.005260
23.2000	995.752	107.559	39.587	81.514	-0.770	35.363	1895.657	-0.007529	-0.002771	-0.005706
23.4000	1044.610	114.048	42.783	86.428	-0.756	35.361	1988.668	-0.007983	-0.002995	-0.006050
23.6000	1077.567	119.789	45.641	90.459	-0.767	35.361	2051.411	-0.008385	-0.003195	-0.006332
23.8000	1111.862	124.902	47.734	93.983	-0.751	35.361	2116.699	-0.008743	-0.003341	-0.006579
24.0000	1155.294	131.626	50.983	98.771	-0.781	35.358	2199.383	-0.009214	-0.003569	-0.006914
24.2000	1170.908	134.268	51.860	100.590	-0.782	35.358	2229.109	-0.009399	-0.003630	-0.007041
24.4000	1189.694	136.701	53.500	102.913	-0.759	35.357	2264.872	-0.009569	-0.003745	-0.007204
24.6000	1192.339	138.323	54.163	103.463	-0.771	35.356	2269.907	-0.009683	-0.003791	-0.007242
24.8000	1202.904	139.838	55.208	105.088	-0.760	35.355	2290.020	-0.009789	-0.003865	-0.007356
25.0000	1186.252	138.491	54.697	104.082	-0.771	35.355	2258.320	-0.009694	-0.003829	-0.007286
25.2000	1189.784	139.142	54.724	104.510	-0.767	35.354	2265.043	-0.009740	-0.003831	-0.007316
25.4000	1155.655	135.419	53.653	102.226	-0.783	35.354	2200.069	-0.009479	-0.003756	-0.007156
25.6000	1133.142	132.820	52.648	100.050	-0.766	35.352	2157.211	-0.009297	-0.003685	-0.007003
25.8000	1102.845	129.058	49.980	97.765	-0.777	35.351	2099.533	-0.009034	-0.003499	-0.006844
26.0000	1064.838	123.943	48.284	94.066	-0.758	35.351	2027.178	-0.008676	-0.003380	-0.006585
26.2000	1021.812	118.562	45.518	89.977	-0.771	35.350	1945.267	-0.008299	-0.003186	-0.006298
26.4000	972.218	112.045	42.547	85.838	-0.754	35.350	1850.853	-0.007843	-0.002978	-0.006009
26.6000	907.551	104.209	38.776	79.960	-0.775	35.348	1727.743	-0.007295	-0.002714	-0.005597
26.8000	860.917	97.416	35.117	75.391	-0.756	35.349	1638.966	-0.006819	-0.002458	-0.005277
27.0000	796.611	88.644	31.195	69.117	-0.766	35.346	1516.542	-0.006205	-0.002184	-0.004838
27.2000	726.999	79.055	26.791	62.733	-0.760	35.347	1384.020	-0.005534	-0.001875	-0.004391
27.4000	689.579	73.302	24.258	58.813	-0.758	35.346	1312.780	-0.005131	-0.001698	-0.004117
27.6000	623.303	64.324	19.581	52.315	-0.768	35.345	1186.609	-0.004503	-0.001371	-0.003662
27.8000	542.015	52.930	14.146	44.585	-0.748	35.345	1031.857	-0.003705	-0.000990	-0.003121
28.0000	505.135	47.330	11.559	40.691	-0.761	35.343	961.647	-0.003313	-0.000809	-0.002848
28.2000	441.895	38.327	6.921	34.398	-0.755	35.344	841.255	-0.002683	-0.000484	-0.002408
28.4000	399.170	31.518	3.909	29.641	-0.747	35.343	759.916	-0.002206	-0.000274	-0.002075
28.6000	372.224	27.055	1.375	25.911	-0.770	35.342	708.618	-0.001894	-0.000096	-0.001814
28.8000	320.992	18.858	-1.844	20.721	-0.774	35.342	611.086	-0.001320	0.000129	-0.001450
29.0000	290.905	14.119	-4.460	16.789	-0.762	35.342	553.808	-0.000988	0.000312	-0.001175
29.2000	270.526	10.396	-6.615	14.231	-0.748	35.341	515.013	-0.000728	0.000463	-0.000996
29.4000	239.493	6.058	-8.091	11.353	-0.776	35.341	455.933	-0.000424	0.000566	-0.000795
29.6000	245.068	6.154	-8.437	10.937	-0.759	35.341	466.547	-0.000431	0.000591	-0.000766
29.8000	236.637	4.103	-9.068	9.907	-0.754	35.339	450.497	-0.000287	0.000635	-0.000694
30.0000	242.829	4.905	-8.477	10.155	-0.771	35.339	462.284	-0.000343	0.000593	-0.000711
30.2000	254.716	5.724	-8.408	10.788	-0.753	35.339	484.915	-0.000401	0.000589	-0.000755
30.4000	279.213	8.658	-6.975	12.494	-0.784	35.338	531.549	-0.000606	0.000488	-0.000875
30.6000	297.698	10.701	-6.397	14.035	-0.766	35.337	566.740	-0.000749	0.000448	-0.000982
30.8000	327.003	14.870	-4.693	16.830	-0.784	35.337	622.530	-0.001041	0.000328	-0.001178
31.0000	364.213	19.859	-2.353	19.980	-0.765	35.337	693.369	-0.001390	0.000165	-0.001399
31.2000	403.919	25.111	0.442	24.411	-0.777	35.336	768.957	-0.001758	-0.000031	-0.001709
31.4000	458.231	32.559	4.005	29.131	-0.776	35.337	872.355	-0.002279	-0.000280	-0.002039
31.6000	524.011	40.953	7.664	35.117	-0.772	35.336	997.581	-0.002867	-0.000537	-0.002458
31.8000	579.375	49.067	12.053	41.061	-0.778	35.336	1102.982	-0.003435	-0.000844	-0.002874
32.0000	630.487	56.182	15.041	45.959	-0.770	35.336	1200.285	-0.003933	-0.001053	-0.003217
32.2000	689.128	64.007	19.058	51.408	-0.767	35.335	1311.922	-0.004480	-0.001334	-0.003599
32.4000	747.708	72.982	23.433	57.078	-0.772	35.336	1423.445	-0.005109	-0.001640	-0.003995
32.6000	813.112	81.756	27.244	63.833	-0.763	35.335	1547.956	-0.005723	-0.001907	-0.004468
32.8000	890.313	92.621	32.942	71.183	-0.768	35.334	1694.927	-0.006483	-0.002306	-0.004983
33.0000	929.387	98.526	35.351	75.503	-0.787	35.335	1769.314	-0.006897	-0.002475	-0.005285
33.2000	975.840	105.361	38.569	80.347	-0.768	35.334	1857.748	-0.007375	-0.002700	-0.005624
33.4000	1025.629	112.657	42.175	85.423	-0.783	35.335	1952.534	-0.007886	-0.002952	-0.005980
33.6000	1072.202	119.231	45.202	90.637	-0.764	35.335	2041.197	-0.008346	-0.003164	-0.006345
33.8000	1123.479	126.624	49.043	95.689	-0.778	35.334	2138.815	-0.008864	-0.003433	-0.006698
34.0000	1143.857	130.056	49.758	97.753	-0.768	35.335	2177.610	-0.009104	-0.003483	-0.006843
34.2000	1160.644	132.503	51.119	99.748	-0.792	35.334	2209.568	-0.009275	-0.003578	-0.006982
34.4000	1182.691	136.186	52.593	102.265	-0.762	35.336	2251.539	-0.009533	-0.003682	-0.007159
34.6000	1188.311	137.326	53.474	103.420	-0.767	35.335	2262.239	-0.009613	-0.003743	-0.007239
34.8000	1216.444	141.535	55.167	106.229	-0.779	35.336	2315.798	-0.009907	-0.003862	-0.007436
35.0000	1191.708	139.087	54.216	104.317	-0.756	35.335	2268.705	-0.009736	-0.003795	-0.007302
35.2000	1183.457	137.935	53.998	103.547	-0.780	35.336	2252.998	-0.009655	-0.003780	-0.007248
35.4000	1177.521	137.991	53.985	103.614	-0.752	35.337	2241.697	-0.009659	-0.003779	-0.007253
35.6000	1122.141	130.920	51.257	98.867	-0.767	35.337	2136.269	-0.009164	-0.003588	-0.006921
35.8000	1102.499	128.986	50.570	97.256	-0.775	35.337	2098.875	-0.009029	-0.003540	-0.006808
36.0000	1058.361	123.121	47.817	93.665	-0.759	35.337	2014.847	-0.008618	-0.003347	-0.006557
36.2000	1011.096	117.103	45.065	89.468	-0.786	35.337	1924.868	-0.008197	-0.003155	-0.006263
36.4000	966.312	111.419	42.270	85.038	-0.776	35.339	1839.609	-0.007799	-0.002959	-0.005953
36.6000	915.170	104.433	38.749	80.664	-0.755	35.338	1742.249	-0.007310	-0.002712	-0.005646
36.8000	851.675	95.926	35.474	74.744	-0.774	35.337	1621.370	-0.006715	-0.002483	-0.005232
37.0000	797.227	88.852	31.788	69.503	-0.766	35.339	1517.715	-0.006220	-0.002225	-0.004865
37.2000	741.847	80.503	27.701	64.136	-0.761	35.338	1412.287	-0.005635	-0.001939	-0.004490
37.4000	676.128	71.830	23.694	57.931	-0.773	35.340	1287.174	-0.005028	-0.001659	-0.004055
37.6000	611.085	62.699	18.976	51.533	-0.759	35.339	1163.349	-0.004389	-0.001328	-0.003607
37.8000	554.578	54.392	15.123	45.588	-0.769	35.341	1055.775	-0.003807	-0.001059	-0.003191
38.0000	507.870	47.471	11.917	40.813	-0.751	35.340	966.854	-0.003323	-0.000834	-0.002857
38.2000	442.947	37.966	7.226	34.443	-0.775	35.342	843.258	-0.002658	-0.000506	-0.002411
38.4000	398.914	31.811	3.854	29.478	-0.753	35.341	759.430	-0.002227	-0.000270	-0.002063
38.6000	333.030	22.052	-0.633	23.090	-0.780	35.341	634.003	-0.001544	0.000044	-0.001616
38.8000	327.694	20.429	-1.181	21.631	-0.770	35.342	623.846	-0.001430	0.000083	-0.001514
39.0000	293.415	14.524	-4.280	17.353	-0.766	35.342	558.586	-0.001017	0.000300	-0.001215
39.2000	262.471	9.786	-5.782	14.133	-0.771	35.343	499.678	-0.000685	0.000405	-0.000989
39.4000	256.069	8.060	-7.168	12.439	-0.778	35.342	487.490	-0.000564	0.000502	-0.000871
39.6000	263.839	8.185	-7.469	12.689	-0.766	35.344	502.281	-0.000573	0.000523	-0.000888
39.8000	240.244	5.101	-8.506	10.143	-0.764	35.344	457.363	-0.000357	0.000595	-0.000710
40.0000	239.027	4.199	-8.862	9.950	-0.774	35.344	455.046	-0.000294	0.000620	-0.000696
40.2000	246.496	5.157	-8.463	10.130	-0.775	35.346	469.265	-0.000361	0.000592	-0.000709
40.4000	272.525	7.670	-7.706	11.766	-0.757	35.345	518.818	-0.000537	0.000539	-0.000824
40.6000	292.423	10.701	-6.659	13.787	-0.769	35.346	556.698	-0.000749	0.000466	-0.000965
40.8000	347.742	17.259	-4.004	18.344	-0.770	35.347	662.012	-0.001208	0.000280	-0.001284
41.0000	364.364	19.858	-2.268	20.144	-0.758	35.346	693.655	-0.001390	0.000159	-0.001410
41.2000	406.533	25.361	0.248	24.203	-0.776	35.347	773.935	-0.001775	-0.000017	-0.001694
41.4000	471.546	33.851	4.968	30.119	-0.763	35.348	897.703	-0.002370	-0.000348	-0.002108
41.6000	521.892	40.771	7.567	34.951	-0.772	35.348	993.547	-0.002854	-0.000530	-0.002447
41.8000	578.473	48.651	11.946	40.730	-0.761	35.348	1101.265	-0.003406	-0.000836	-0.002851
42.0000	629.931	56.070	14.931	45.629	-0.773	35.348	1199.226	-0.003925	-0.001045	-0.003194
42.2000	690.270	64.258	19.045	51.727	-0.771	35.349	1314.096	-0.004498	-0.001333	-0.003621
42.4000	736.572	71.511	22.567	56.458	-0.759	35.348	1402.245	-0.005006	-0.001580	-0.003952
42.6000	802.487	80.142	27.229	62.843	-0.762	35.350	1527.729	-0.005610	-0.001906	-0.004399
42.8000	880.980	91.535	31.718	70.452	-0.757	35.349	1677.160	-0.006407	-0.002220	-0.004932
43.0000	921.046	97.290	34.870	75.170	-0.758	35.350	1753.435	-0.006810	-0.002441	-0.005262
43.2000	988.448	107.322	38.997	81.334	-0.751	35.350	1881.752	-0.007513	-0.002730	-0.005693
43.4000	1029.401	113.144	41.805	86.222	-0.757	35.351	1959.715	-0.007920	-0.002926	-0.006036
43.6000	1065.454	118.969	45.050	90.033	-0.775	35.352	2028.351	-0.008328	-0.003154	-0.006302
43.8000	1133.322	127.958	48.545	96.389	-0.757	35.352	2157.555	-0.008957	-0.003398	-0.006747
44.0000	1153.205	131.240	50.927	99.250	-0.764	35.351	2195.406	-0.009187	-0.003565	-0.006948
44.2000	1159.953	132.918	51.327	100.410	-0.755	35.352	2208.252	-0.009304	-0.003593	-0.007029
44.4000	1182.826	136.351	53.376	102.830	-0.765	35.351	2251.797	-0.009545	-0.003736	-0.007198
44.6000	1197.704	139.171	53.942	104.811	-0.774	35.352	2280.121	-0.009742	-0.003776	-0.007337
44.8000	1197.734	139.660	54.451	105.266	-0.754	35.352	2280.178	-0.009776	-0.003812	-0.007369
45.0000	1189.574	139.060	53.985	105.034	-0.774	35.352	2264.643	-0.009734	-0.003779	-0.007352
45.2000	1179.189	138.159	53.859	104.249	-0.755	35.352	2244.873	-0.009671	-0.003770	-0.007297
45.4000	1155.609	135.560	52.619	102.488	-0.772	35.351	2199.984	-0.009489	-0.003683	-0.007174
45.6000	1122.562	131.782	51.078	99.970	-0.772	35.353	2137.070	-0.009225	-0.003575	-0.006998
45.8000	1094.579	128.346	49.759	97.078	-0.768	35.351	2083.797	-0.008984	-0.003483	-0.006795
46.0000	1054.198	123.176	47.307	93.556	-0.782	35.352	2006.922	-0.008622	-0.003312	-0.006549
46.2000	1022.428	119.174	45.297	90.543	-0.762	35.352	1946.440	-0.008342	-0.003171	-0.006338
46.4000	963.727	111.168	41.418	85.190	-0.791	35.352	1834.688	-0.007782	-0.002899	-0.005963
46.6000	887.893	101.513	37.486	78.791	-0.762	35.353	1690.321	-0.007106	-0.002624	-0.005515
46.8000	849.466	96.383	34.428	74.868	-0.768	35.352	1617.165	-0.006747	-0.002410	-0.005241
47.0000	795.784	88.601	31.212	69.902	-0.774	35.353	1514.969	-0.006202	-0.002185	-0.004893
47.2000	707.628	77.433	25.732	61.660	-0.768	35.352	1347.141	-0.005420	-0.001801	-0.004316
47.4000	667.351	70.593	22.719	57.285	-0.779	35.353	1270.466	-0.004942	-0.001590	-0.004010
47.6000	642.404	66.534	19.748	53.680	-0.766	35.353	1222.973	-0.004657	-0.001382	-0.003758
47.8000	552.970	54.043	14.519	45.821	-0.763	35.352	1052.713	-0.003783	-0.001016	-0.003208
48.0000	488.664	45.453	10.731	39.823	-0.779	35.353	930.290	-0.003182	-0.000751	-0.002788
48.2000	442.016	38.396	6.578	34.595	-0.771	35.352	841.484	-0.002688	-0.000460	-0.002422
48.4000	392.136	30.739	3.359	29.283	-0.786	35.352	746.527	-0.002152	-0.000235	-0.002050
48.6000	378.220	27.791	1.349	26.378	-0.769	35.353	720.034	-0.001945	-0.000094	-0.001846
48.8000	306.970	17.441	-2.888	19.968	-0.764	35.352	584.393	-0.001221	0.000202	-0.001398
49.0000	299.636	15.675	-4.034	17.764	-0.768	35.353	570.431	-0.001097	0.000282	-0.001243
49.2000	264.305	10.174	-6.619	14.352	-0.771	35.352	503.168	-0.000712	0.000463	-0.001005
49.4000	269.580	9.563	-6.918	13.500	-0.781	35.352	513.210	-0.000669	0.000484	-0.000945
49.6000	232.219	4.476	-8.972	10.129	-0.755	35.352	442.085	-0.000313	0.000628	-0.000709
49.8000	225.937	2.835	-9.578	9.038	-0.771	35.352	430.126	-0.000198	0.000670	-0.000633
50.0000	256.099	5.876	-9.134	10.363	-0.751	35.352	487.547	-0.000411	0.000639	-0.000725
50.2000	260.337	5.751	-9.136	10.391	-0.772	35.351	495.615	-0.000403	0.000639	-0.000727
50.4000	276.853	8.075	-7.829	11.905	-0.769	35.351	527.058	-0.000565	0.000548	-0.000833
50.6000	281.692	8.882	-7.636	12.689	-0.767	35.350	536.270	-0.000622	0.000535	-0.000888
50.8000	375.620	19.970	-2.558	20.309	-0.793	35.350	715.084	-0.001398	0.000179	-0.001422
51.0000	364.138	19.874	-2.736	19.980	-0.783	35.350	693.226	-0.001391	0.000192	-0.001399
51.2000	414.303	26.166	0.525	24.795	-0.777	35.348	788.727	-0.001832	-0.000037	-0.001736
51.4000	470.194	33.322	4.156	29.725	-0.801	35.348	895.128	-0.002333	-0.000291	-0.002081
51.6000	508.306	39.325	6.991	34.125	-0.784	35.348	967.684	-0.002753	-0.000489	-0.002389
51.8000	594.359	50.665	12.399	41.679	-0.780	35.347	1131.506	-0.003547	-0.000868	-0.002918
52.0000	626.053	55.612	15.195	45.298	-0.788	35.346	1191.845	-0.003893	-0.001064	-0.003171
52.2000	713.925	66.630	20.267	53.072	-0.772	35.346	1359.129	-0.004664	-0.001419	-0.003715
52.4000	754.516	73.526	23.626	57.806	-0.779	35.346	1436.405	-0.005147	-0.001654	-0.004046
52.6000	818.733	82.157	27.659	64.315	-0.794	35.345	1558.657	-0.005751	-0.001936	-0.004502
52.8000	889.967	91.871	32.419	70.976	-0.747	35.345	1694.269	-0.006431	-0.002269	-0.004968
53.0000	901.269	95.413	34.205	73.414	-0.787	35.344	1715.784	-0.006679	-0.002394	-0.005139
53.2000	986.344	106.238	38.529	81.296	-0.774	35.344	1877.747	-0.007437	-0.002697	-0.005691
53.4000	1019.016	111.475	41.695	85.037	-0.773	35.343	1939.945	-0.007803	-0.002919	-0.005953
53.6000	1072.247	119.065	44.763	90.542	-0.784	35.343	2041.283	-0.008335	-0.003133	-0.006338
53.8000	1104.964	124.192	47.337	93.983	-0.774	35.342	2103.567	-0.008693	-0.003314	-0.006579
54.0000	1136.899	129.374	49.277	97.517	-0.800	35.342	2164.364	-0.009056	-0.003449	-0.006826
54.2000	1124.591	128.903	50.103	97.643	-0.766	35.341	2140.932	-0.009023	-0.003507	-0.006835
54.4000	1216.910	140.618	55.234	105.817	-0.786	35.341	2316.685	-0.009843	-0.003866	-0.007407
54.6000	1191.317	138.047	54.025	104.083	-0.776	35.341	2267.962	-0.009663	-0.003782	-0.007286
54.8000	1225.732	142.385	56.141	107.549	-0.782	35.340	2333.479	-0.009967	-0.003930	-0.007528
55.0000	1180.992	137.644	54.094	104.014	-0.776	35.340	2248.306	-0.009635	-0.003787	-0.007281
55.2000	1185.546	138.380	53.860	104.633	-0.775	35.339	2256.975	-0.009687	-0.003770	-0.007324
55.4000	1168.278	136.868	53.720	103.188	-0.776	35.339	2224.102	-0.009581	-0.003760	-0.007223
55.6000	1145.014	134.213	51.820	101.359	-0.762	35.338	2179.813	-0.009395	-0.003627	-0.007095
55.8000	1095.706	127.857	49.525	96.955	-0.782	35.337	2085.943	-0.008950	-0.003467	-0.006787
56.0000	1072.833	125.306	47.968	95.206	-0.780	35.337	2042.398	-0.008771	-0.003358	-0.006664
56.2000	1006.437	116.878	44.198	89.716	-0.762	35.336	1915.998	-0.008181	-0.003094	-0.006280
56.4000	962.299	110.960	41.503	85.381	-0.780	35.337	1831.970	-0.007767	-0.002905	-0.005977
56.6000	905.912	104.029	37.623	80.029	-0.767	35.336	1724.625	-0.007282	-0.002634	-0.005602
56.8000	857.085	97.038	34.469	75.268	-0.784	35.334	1631.670	-0.006793	-0.002413	-0.005269
57.0000	797.317	89.060	31.223	70.001	-0.767	35.335	1517.887	-0.006234	-0.002186	-0.004900
57.2000	720.808	78.429	25.566	62.116	-0.769	35.334	1372.232	-0.005490	-0.001790	-0.004348
57.4000	679.585	72.051	22.525	58.150	-0.773	35.334	1293.755	-0.005044	-0.001577	-0.004071
57.6000	620.733	64.091	19.112	52.192	-0.773	35.333	1181.717	-0.004486	-0.001338	-0.003653
57.8000	567.337	56.309	15.152	46.934	-0.779	35.333	1080.065	-0.003942	-0.001061	-0.003285
58.0000	510.440	47.318	10.582	40.896	-0.770	35.331	971.746	-0.003312	-0.000741	-0.002863
58.2000	451.829	39.506	6.839	35.201	-0.769	35.331	860.167	-0.002765	-0.000479	-0.002464
58.4000	390.032	30.518	2.519	28.870	-0.761	35.331	742.521	-0.002136	-0.000176	-0.002021
58.6000	357.195	25.014	0.507	25.541	-0.764	35.330	680.008	-0.001751	-0.000036	-0.001788
58.8000	305.948	17.869	-3.163	20.268	-0.774	35.330	582.447	-0.001251	0.000221	-0.001419
59.0000	358.728	22.565	-2.379	22.691	-0.763	35.329	682.926	-0.001580	0.000167	-0.001588
59.2000	269.264	10.589	-6.769	14.943	-0.783	35.328	512.609	-0.000741	0.000474	-0.001046
59.4000	247.593	7.322	-8.119	12.467	-0.774	35.328	471.354	-0.000513	0.000568	-0.000873
59.6000	240.229	5.515	-9.672	10.857	-0.772	35.327	457.335	-0.000386	0.000677	-0.000760
59.8000	237.734	4.255	-9.566	10.142	-0.786	35.327	452.585	-0.000298	0.000670	-0.000710
60.0000	239.493	4.533	-9.385	10.250	-0.767	35.327	455.933	-0.000317	0.000657	-0.000718
60.2000	240.845	4.407	-9.865	10.056	-0.775	35.326	458.508	-0.000309	0.000691	-0.000704
60.4000	271.128	7.768	-8.215	12.330	-0.786	35.326	516.157	-0.000544	0.000575	-0.000863
60.6000	298.224	11.005	-6.837	14.354	-0.766	35.325	567.741	-0.000770	0.000479	-0.001005
60.8000	321.458	13.981	-5.796	16.624	-0.793	35.325	611.973	-0.000979	0.000406	-0.001164
61.0000	367.535	20.123	-2.793	20.543	-0.766	35.325	699.692	-0.001409	0.000196	-0.001438
61.2000	408.637	25.695	0.014	24.631	-0.787	35.324	777.941	-0.001799	-0.000001	-0.001724
61.4000	474.762	34.560	4.142	30.836	-0.760	35.324	903.826	-0.002419	-0.000290	-0.002159
61.6000	505.225	39.049	6.551	34.234	-0.786	35.323	961.819	-0.002733	-0.000459	-0.002396
61.8000	559.733	46.455	9.717	39.093	-0.798	35.324	1065.588	-0.003252	-0.000680	-0.002737
62.0000	630.367	55.862	14.628	46.041	-0.774	35.323	1200.056	-0.003910	-0.001024	-0.003223
62.2000	697.709	65.119	19.360	52.536	-0.787	35.323	1328.259	-0.004558	-0.001355	-0.003677
62.4000	766.193	75.026	23.406	58.991	-0.767	35.323	1458.635	-0.005252	-0.001638	-0.004129
62.6000	807.161	81.087	27.121	63.723	-0.785	35.322	1536.627	-0.005676	-0.001898	-0.004461
62.8000	880.154	91.049	31.786	70.480	-0.788	35.323	1675.587	-0.006373	-0.002225	-0.004934
63.0000	927.553	97.859	34.414	75.270	-0.782	35.322	1765.823	-0.006850	-0.002409	-0.005269
63.2000	968.701	104.031	37.375	79.948	-0.805	35.322	1844.158	-0.007282	-0.002616	-0.005596
63.4000	1014.763	111.168	40.854	84.764	-0.790	35.323	1931.849	-0.007782	-0.002860	-0.005933
63.6000	1074.982	119.385	44.624	90.596	-0.775	35.322	2046.490	-0.008357	-0.003124	-0.006342
63.8000	1087.696	121.605	45.615	92.151	-0.799	35.322	2070.694	-0.008512	-0.003193	-0.006451
64.0000	1139.544	129.403	49.303	97.504	-0.782	35.322	2169.399	-0.009058	-0.003451	-0.006825
64.2000	1162.823	133.001	50.789	100.146	-0.805	35.322	2213.717	-0.009310	-0.003555	-0.007010
64.4000	1197.013	137.562	53.102	103.713	-0.780	35.323	2278.805	-0.009629	-0.003717	-0.007260
64.6000	1191.452	137.825	53.722	103.946	-0.788	35.322	2268.219	-0.009648	-0.003761	-0.007276
64.8000	1197.434	139.559	53.681	104.483	-0.782	35.323	2279.606	-0.009769	-0.003758	-0.007314
65.0000	1195.510	139.211	54.232	105.198	-0.785	35.322	2275.944	-0.009745	-0.003796	-0.007364
65.2000	1185.516	138.324	54.329	104.578	-0.802	35.324	2256.918	-0.009683	-0.003803	-0.007320
65.4000	1158.495	135.671	52.840	102.377	-0.781	35.322	2205.477	-0.009497	-0.003699	-0.007166
65.6000	1116.806	130.461	50.404	98.907	-0.796	35.324	2126.112	-0.009132	-0.003528	-0.006923
65.8000	1099.779	128.193	49.399	97.436	-0.775	35.323	2093.697	-0.008973	-0.003458	-0.006820
66.0000	1066.716	124.330	47.763	94.576	-0.811	35.323	2030.754	-0.008703	-0.003343	-0.006620
66.2000	1027.192	118.717	44.844	90.953	-0.791	35.324	1955.509	-0.008310	-0.003139	-0.006367
66.4000	975.223	112.127	41.627	85.796	-0.787	35.323	1856.575	-0.007849	-0.002914	-0.006006
66.6000	926.035	105.918	38.820	81.652	-0.810	35.324	1762.934	-0.007414	-0.002717	-0.005716
66.8000	846.250	95.244	33.465	74.525	-0.795	35.325	1611.042	-0.006667	-0.002343	-0.005217
67.0000	812.285	90.632	31.485	71.346	-0.782	35.325	1546.383	-0.006344	-0.002204	-0.004994
67.2000	735.085	80.584	26.832	64.206	-0.800	35.325	1399.412	-0.005641	-0.001878	-0.004494
67.4000	675.332	71.302	22.362	57.903	-0.776	35.325	1285.658	-0.004991	-0.001565	-0.004053
67.6000	596.462	61.045	18.053	50.900	-0.783	35.326	1135.511	-0.004273	-0.001264	-0.003563
67.8000	558.020	54.834	14.683	46.632	-0.784	35.326	1062.326	-0.003838	-0.001028	-0.003264
68.0000	468.721	42.384	8.411	37.743	-0.794	35.326	892.324	-0.002967	-0.000589	-0.002642
68.2000	390.303	32.462	4.101	30.699	-0.781	35.327	743.036	-0.002272	-0.000287	-0.002149
68.4000	412.921	33.517	3.786	30.988	-0.789	35.326	786.095	-0.002346	-0.000265	-0.002169
68.6000	360.832	25.347	0.013	25.444	-0.775	35.328	686.932	-0.001774	-0.000001	-0.001781
68.8000	330.565	20.290	-2.118	21.740	-0.786	35.326	629.311	-0.001420	0.000148	-0.001522
69.0000	285.570	13.759	-5.093	17.188	-0.781	35.328	543.652	-0.000963	0.000356	-0.001203
69.2000	288.455	12.978	-5.945	16.224	-0.783	35.327	549.145	-0.000908	0.000416	-0.001136
69.4000	241.702	6.211	-9.286	11.642	-0.799	35.328	460.138	-0.000435	0.000650	-0.000815
69.6000	240.785	5.295	-9.204	10.869	-0.780	35.329	458.393	-0.000371	0.000644	-0.000761
69.8000	219.821	2.349	-10.471	9.055	-0.792	35.328	418.482	-0.000164	0.000733	-0.000634
70.0000	244.678	4.991	-9.962	10.226	-0.790	35.329	465.803	-0.000349	0.000697	-0.000716
70.2000	250.373	5.086	-9.647	10.527	-0.770	35.329	476.646	-0.000356	0.000675	-0.000737
70.4000	270.316	7.671	-8.490	12.176	-0.779	35.329	514.612	-0.000537	0.000594	-0.000852
70.6000	308.999	12.451	-6.396	15.189	-0.775	35.330	588.255	-0.000872	0.000448	-0.001063
70.8000	325.425	14.716	-5.287	17.379	-0.779	35.330	619.526	-0.001030	0.000370	-0.001217
71.0000	370.676	20.457	-2.859	20.886	-0.788	35.330	705.671	-0.001432	0.000200	-0.001462
71.2000	401.033	24.498	-0.454	23.930	-0.768	35.331	763.464	-0.001715	0.000032	-0.001675
71.4000	445.893	31.046	2.504	28.306	-0.780	35.329	848.866	-0.002173	-0.000175	-0.001981
71.6000	508.110	39.075	6.593	34.139	-0.777	35.331	967.312	-0.002735	-0.000462	-0.002390
71.8000	578.939	48.555	10.648	41.075	-0.789	35.330	1102.152	-0.003399	-0.000745	-0.002875
72.0000	637.926	56.751	15.165	46.796	-0.781	35.331	1214.447	-0.003973	-0.001062	-0.003276
72.2000	682.771	63.450	18.234	51.299	-0.787	35.330	1299.820	-0.004441	-0.001276	-0.003591
72.4000	744.703	72.315	22.153	57.408	-0.783	35.331	1417.723	-0.005062	-0.001551	-0.004019
72.6000	806.665	80.764	26.393	63.696	-0.778	35.330	1535.683	-0.005654	-0.001848	-0.004459
72.8000	876.231	90.659	30.616	70.330	-0.798	35.331	1668.119	-0.006346	-0.002143	-0.004923
73.0000	922.293	97.901	34.579	75.475	-0.775	35.332	1755.810	-0.006853	-0.002421	-0.005283
73.2000	982.888	106.430	38.088	81.279	-0.794	35.330	1871.166	-0.007450	-0.002666	-0.005690
73.4000	1013.260	111.227	40.512	84.820	-0.789	35.331	1928.988	-0.007786	-0.002836	-0.005937
73.6000	1087.020	120.789	44.667	91.740	-0.787	35.331	2069.407	-0.008455	-0.003127	-0.006422
73.8000	1115.198	125.636	47.143	95.112	-0.795	35.331	2123.051	-0.008795	-0.003300	-0.006658
74.0000	1136.418	129.696	49.594	98.247	-0.772	35.331	2163.448	-0.009079	-0.003472	-0.006877
74.2000	1149.057	131.600	50.379	99.622	-0.804	35.330	2187.510	-0.009212	-0.003527	-0.006974
74.4000	1168.970	134.670	52.028	101.963	-0.798	35.331	2225.418	-0.009427	-0.003642	-0.007137
74.6000	1181.233	136.826	52.814	103.670	-0.791	35.331	2248.764	-0.009578	-0.003697	-0.007257
74.8000	1214.235	141.438	54.452	106.822	-0.803	35.330	2311.592	-0.009901	-0.003812	-0.007478
75.0000	1175.732	137.116	52.883	104.043	-0.801	35.331	2238.293	-0.009598	-0.003702	-0.007283
75.2000	1175.176	137.381	53.060	104.138	-0.804	35.330	2237.234	-0.009617	-0.003714	-0.007290
75.4000	1174.440	137.284	53.115	104.027	-0.804	35.331	2235.832	-0.009610	-0.003718	-0.007282
75.6000	1138.898	133.766	51.670	101.031	-0.770	35.331	2168.169	-0.009364	-0.003617	-0.007072
75.8000	1105.805	129.528	49.388	98.316	-0.805	35.331	2105.169	-0.009067	-0.003457	-0.006882
76.0000	1064.703	124.109	46.951	94.892	-0.786	35.331	2026.920	-0.008688	-0.003287	-0.006642
76.2000	1027.703	119.065	44.555	91.353	-0.797	35.331	1956.482	-0.008335	-0.003119	-0.006395
76.4000	977.899	112.893	41.722	86.413	-0.776	35.331	1861.668	-0.007903	-0.002921	-0.006049
76.6000	912.284	104.529	37.746	80.813	-0.818	35.332	1736.755	-0.007317	-0.002642	-0.005657
76.8000	854.560	96.554	34.110	75.555	-0.791	35.331	1626.863	-0.006759	-0.002388	-0.005289
77.0000	801.119	88.754	30.713	70.232	-0.801	35.330	1525.126	-0.006213	-0.002150	-0.004916
77.2000	726.263	79.056	26.573	63.272	-0.805	35.331	1382.618	-0.005534	-0.001860	-0.004429
77.4000	691.713	73.998	23.131	59.431	-0.785	35.330	1316.843	-0.005180	-0.001619	-0.004160
77.6000	625.092	64.104	18.963	53.154	-0.805	35.331	1190.014	-0.004487	-0.001327	-0.003721
77.8000	559.703	54.793	13.775	46.427	-0.787	35.330	1065.531	-0.003835	-0.000964	-0.003250
78.0000	506.608	47.249	10.432	41.061	-0.799	35.329	964.451	-0.003307	-0.000730	-0.002874
78.2000	442.166	38.519	6.289	34.663	-0.797	35.330	841.770	-0.002696	-0.000440	-0.002426
78.4000	376.402	28.557	1.498	27.977	-0.786	35.330	716.572	-0.001999	-0.000105	-0.001958
78.6000	362.185	25.514	-0.056	26.117	-0.810	35.329	689.507	-0.001786	0.000004	-0.001828
78.8000	314.710	18.204	-3.466	20.242	-0.797	35.330	599.127	-0.001274	0.000243	-0.001417
79.0000	289.808	13.689	-5.381	17.327	-0.783	35.329	551.720	-0.000958	0.000377	-0.001213
79.2000	267.686	10.411	-7.004	14.422	-0.795	35.328	509.605	-0.000729	0.000490	-0.001010
79.4000	236.788	5.613	-9.453	11.518	-0.780	35.329	450.783	-0.000393	0.000662	-0.000806
79.6000	220.392	2.279	-11.132	9.190	-0.785	35.327	419.569	-0.000160	0.000779	-0.000643
79.8000	237.178	3.769	-10.197	9.978	-0.789	35.327	451.527	-0.000264	0.000714	-0.000698
80.0000	224.840	1.946	-10.926	8.656	-0.791	35.326	428.038	-0.000136	0.000765	-0.000606
80.2000	251.801	5.281	-9.728	10.678	-0.787	35.327	479.364	-0.000370	0.000681	-0.000747
80.4000	277.935	8.115	-8.737	12.577	-0.783	35.325	529.118	-0.000568	0.000612	-0.000880
80.6000	296.330	10.340	-7.607	14.351	-0.799	35.325	564.137	-0.000724	0.000533	-0.001005
80.8000	317.460	13.021	-5.876	16.652	-0.797	35.324	604.362	-0.000911	0.000411	-0.001166
81.0000	362.515	19.248	-3.081	20.542	-0.810	35.323	690.136	-0.001347	0.000216	-0.001438
81.2000	406.188	25.152	-0.441	24.354	-0.783	35.323	773.277	-0.001761	0.000031	-0.001705
81.4000	476.130	34.128	3.853	30.974	-0.805	35.321	906.429	-0.002389	-0.000270	-0.002168
81.6000	514.663	39.743	7.019	35.160	-0.804	35.322	979.786	-0.002782	-0.000491	-0.002461
81.8000	575.558	47.679	10.718	40.758	-0.795	35.321	1095.715	-0.003338	-0.000750	-0.002853
82.0000	621.996	54.765	14.079	45.423	-0.799	35.320	1184.120	-0.003834	-0.000986	-0.003180
82.2000	680.411	62.990	18.386	51.480	-0.786	35.320	1295.328	-0.004409	-0.001287	-0.003604
82.4000	768.493	74.844	23.448	59.527	-0.813	35.319	1463.013	-0.005239	-0.001641	-0.004167
82.6000	761.264	75.165	24.991	60.642	-0.788	35.319	1449.251	-0.005262	-0.001749	-0.004245
82.8000	857.581	88.532	30.825	69.212	-0.822	35.318	1632.614	-0.006197	-0.002158	-0.004845
83.0000	923.225	97.511	34.636	75.542	-0.788	35.319	1757.584	-0.006826	-0.002425	-0.005288
83.2000	963.231	103.890	37.347	79.976	-0.807	35.317	1833.744	-0.007272	-0.002614	-0.005598
83.4000	1024.381	112.170	41.226	85.918	-0.803	35.318	1950.159	-0.007852	-0.002886	-0.006014
83.6000	1064.507	118.187	43.824	90.404	-0.787	35.317	2026.548	-0.008273	-0.003068	-0.006328
83.8000	1071.330	119.856	45.587	91.422	-0.804	35.317	2039.537	-0.008390	-0.003191	-0.006400
84.0000	1129.400	128.639	49.371	97.463	-0.793	35.316	2150.087	-0.009005	-0.003456	-0.006822
84.2000	1179.565	135.322	51.491	102.087	-0.812	35.316	2245.588	-0.009473	-0.003604	-0.007146
84.4000	1187.184	136.839	52.220	103.242	-0.779	35.316	2260.094	-0.009579	-0.003655	-0.007227
84.6000	1194.413	138.171	53.062	104.811	-0.815	35.315	2273.855	-0.009672	-0.003714	-0.007337
84.8000	1216.910	141.438	54.451	106.917	-0.792	35.315	2316.685	-0.009901	-0.003812	-0.007484
85.0000	1192.204	139.351	53.929	105.609	-0.795	35.314	2269.650	-0.009755	-0.003775	-0.007393
85.2000	1230.030	144.145	56.169	108.746	-0.795	35.315	2341.661	-0.010090	-0.003932	-0.007612
85.4000	1142.925	133.919	51.670	101.578	-0.784	35.313	2175.837	-0.009374	-0.003617	-0.007110
85.6000	1137.155	132.929	51.133	101.305	-0.811	35.314	2164.850	-0.009305	-0.003579	-0.007091
85.8000	1094.384	128.261	49.304	97.863	-0.801	35.315	2083.426	-0.008978	-0.003451	-0.006850
86.0000	1046.774	122.311	46.674	93.541	-0.787	35.313	1992.788	-0.008562	-0.003267	-0.006548
86.2000	1021.075	118.925	44.843	90.897	-0.805	35.313	1943.865	-0.008325	-0.003139	-0.006363
86.4000	971.271	112.210	41.529	86.441	-0.791	35.313	1849.051	-0.007855	-0.002907	-0.006051
86.6000	913.517	105.055	37.569	81.130	-0.787	35.312	1739.101	-0.007354	-0.002630	-0.005679
86.8000	868.116	98.193	35.090	76.658	-0.788	35.313	1652.670	-0.006873	-0.002456	-0.005366
87.0000	803.494	89.683	31.017	71.073	-0.778	35.312	1529.646	-0.006278	-0.002171	-0.004975
87.2000	723.077	79.360	26.269	63.574	-0.786	35.313	1376.553	-0.005555	-0.001839	-0.004450
87.4000	682.395	72.871	22.882	58.987	-0.778	35.312	1299.105	-0.005101	-0.001602	-0.004129
87.6000	616.555	63.521	18.537	52.661	-0.798	35.313	1173.763	-0.004446	-0.001298	-0.003686
87.8000	553.797	54.559	14.326	46.727	-0.780	35.312	1054.287	-0.003819	-0.001003	-0.003271
88.0000	504.699	47.038	10.650	41.748	-0.803	35.312	960.817	-0.003293	-0.000745	-0.002922
88.2000	459.328	40.285	7.583	36.958	-0.776	35.312	874.443	-0.002820	-0.000531	-0.002587
88.4000	412.289	33.614	4.129	31.550	-0.797	35.311	784.893	-0.002353	-0.000289	-0.002209
88.6000	364.950	26.515	0.399	26.627	-0.780	35.312	694.771	-0.001856	-0.000028	-0.001864
88.8000	307.526	18.093	-3.466	20.929	-0.797	35.311	585.451	-0.001267	0.000243	-0.001465
89.0000	284.307	13.605	-4.942	17.915	-0.797	35.311	541.248	-0.000952	0.000346	-0.001254
89.2000	267.010	10.784	-6.384	15.589	-0.788	35.311	508.318	-0.000755	0.000447	-0.001091
89.4000	252.943	8.408	-7.995	13.280	-0.782	35.310	481.539	-0.000589	0.000560	-0.000930
89.6000	243.355	6.376	-9.151	11.973	-0.793	35.311	463.285	-0.000446	0.000641	-0.000838
89.8000	238.260	4.727	-9.700	10.527	-0.812	35.312	453.587	-0.000331	0.000679	-0.000737
90.0000	259.631	6.682	-9.067	11.837	-0.807	35.311	494.270	-0.000468	0.000635	-0.000829
90.2000	261.630	6.529	-8.930	11.519	-0.816	35.311	498.075	-0.000457	0.000625	-0.000806
90.4000	274.659	8.297	-8.104	12.978	-0.794	35.311	522.881	-0.000581	0.000567	-0.000908
90.6000	296.541	11.102	-7.196	14.723	-0.825	35.311	564.537	-0.000777	0.000504	-0.001031
90.8000	330.234	15.397	-5.285	17.628	-0.780	35.312	628.681	-0.001078	0.000370	-0.001234
91.0000	386.456	22.593	-1.952	22.458	-0.817	35.312	735.712	-0.001581	0.000137	-0.001572
91.2000	425.334	27.777	0.194	26.214	-0.787	35.312	809.727	-0.001944	-0.000014	-0.001835
91.4000	482.156	35.493	4.498	32.089	-0.817	35.312	917.902	-0.002485	-0.000315	-0.002246
91.6000	511.747	39.784	6.812	35.186	-0.794	35.312	974.236	-0.002785	-0.000477	-0.002463
91.8000	572.177	48.069	11.488	40.731	-0.799	35.312	1089.277	-0.003365	-0.000804	-0.002851
92.0000	639.008	57.490	15.303	47.018	-0.804	35.313	1216.507	-0.004024	-0.001071	-0.003291
92.2000	693.306	65.229	18.716	52.441	-0.788	35.312	1319.876	-0.004566	-0.001310	-0.003671
92.4000	738.481	71.705	22.511	57.341	-0.819	35.313	1405.878	-0.005019	-0.001576	-0.004014
92.6000	815.441	82.003	27.095	64.658	-0.801	35.313	1552.391	-0.005740	-0.001897	-0.004526
92.8000	881.551	91.411	30.893	70.853	-0.815	35.314	1678.247	-0.006399	-0.002163	-0.004960
93.0000	935.233	98.818	34.566	76.094	-0.788	35.314	1780.443	-0.006917	-0.002420	-0.005327
93.2000	963.126	103.948	37.868	79.674	-0.802	35.315	1833.544	-0.007276	-0.002651	-0.005577
93.4000	1027.552	112.726	41.654	85.877	-0.805	35.316	1956.196	-0.007891	-0.002916	-0.006011
93.6000	1069.181	119.052	44.721	90.432	-0.788	35.316	2035.446	-0.008334	-0.003130	-0.006330
93.8000	1107.023	124.540	46.728	94.383	-0.802	35.316	2107.487	-0.008718	-0.003271	-0.006607
94.0000	1142.971	130.291	49.317	98.357	-0.809	35.318	2175.922	-0.009120	-0.003452	-0.006885
94.2000	1165.814	133.767	51.257	100.602	-0.789	35.318	2219.410	-0.009364	-0.003588	-0.007042
94.4000	1180.346	136.059	52.152	102.529	-0.797	35.318	2247.076	-0.009524	-0.003651	-0.007177
94.6000	1197.494	138.712	53.350	104.482	-0.783	35.319	2279.720	-0.009710	-0.003735	-0.007314
94.8000	1221.299	141.755	54.535	106.588	-0.805	35.319	2325.039	-0.009923	-0.003817	-0.007461
95.0000	1197.073	139.797	54.561	105.459	-0.809	35.320	2278.919	-0.009786	-0.003819	-0.007382
95.2000	1191.527	139.561	54.273	105.156	-0.787	35.320	2268.362	-0.009769	-0.003799	-0.007361
95.4000	1169.330	137.518	53.778	103.451	-0.824	35.321	2226.105	-0.009626	-0.003764	-0.007242
95.6000	1127.672	132.168	51.258	100.023	-0.771	35.321	2146.797	-0.009252	-0.003588	-0.007002
95.8000	1104.648	129.583	50.200	98.096	-0.813	35.322	2102.966	-0.009071	-0.003514	-0.006867
96.0000	1054.468	123.162	46.606	93.831	-0.788	35.323	2007.437	-0.008621	-0.003262	-0.006568
96.2000	1008.917	117.213	44.127	89.813	-0.815	35.323	1920.719	-0.008205	-0.003089	-0.006287
96.4000	971.376	112.293	41.226	86.222	-0.806	35.325	1849.251	-0.007861	-0.002886	-0.006036
96.6000	910.165	104.375	37.719	80.568	-0.799	35.324	1732.721	-0.007306	-0.002640	-0.005640
96.8000	855.838	96.845	34.524	75.417	-0.831	35.325	1629.295	-0.006779	-0.002417	-0.005279
97.0000	789.442	87.592	30.551	69.101	-0.801	35.326	1502.895	-0.006131	-0.002139	-0.004837
97.2000	743.245	81.448	27.491	64.768	-0.813	35.325	1414.948	-0.005701	-0.001924	-0.004534
97.4000	672.446	71.674	22.705	58.069	-0.791	35.328	1280.165	-0.005017	-0.001589	-0.004065
97.6000	633.928	65.949	19.979	53.994	-0.804	35.327	1206.837	-0.004616	-0.001399	-0.003780
97.8000	563.490	56.056	14.504	46.797	-0.810	35.328	1072.741	-0.003924	-0.001015	-0.003276
98.0000	503.331	47.149	10.636	40.813	-0.787	35.328	958.214	-0.003300	-0.000745	-0.002857
98.2000	452.085	39.629	6.895	35.323	-0.819	35.329	860.653	-0.002774	-0.000483	-0.002473
98.4000	404.730	32.254	3.538	30.147	-0.784	35.330	770.502	-0.002258	-0.000248	-0.002110
98.6000	349.260	24.235	-0.275	24.492	-0.797	35.329	664.902	-0.001696	0.000019	-0.001714
98.8000	303.394	17.493	-3.245	19.842	-0.800	35.331	577.583	-0.001225	0.000227	-0.001389
99.0000	304.506	16.227	-4.543	18.276	-0.794	35.330	579.700	-0.001136	0.000318	-0.001279
99.2000	277.394	11.586	-7.127	14.697	-0.798	35.332	528.088	-0.000811	0.000499	-0.001029
99.4000	256.279	8.701	-7.732	13.047	-0.790	35.332	487.890	-0.000609	0.000541	-0.000913
99.6000	229.063	4.199	-10.430	9.949	-0.804	35.332	436.077	-0.000294	0.000730	-0.000696
99.8000	435.794	30.392	2.050	27.936	-0.787	35.333	829.639	-0.002127	-0.000144	-0.001956
