# Supplementary material for: Evaluation of a Cold-Mixed High-Performance Polyurethane Mixture
Source: Hindawi journal article supplement (doi:10.1155/2019/1507971), 2019-11-07
Supplement: f1 [file 1507971.f1.zip › 1507971.f1/dynamic modulus data/PUM/specimen2/temp35/zhs-2-35_0.2Hz.csv]

Test Information
****************
Project name	zhs
Operator name	1
Target test temperature	35
Target confining stress	0
Average dynamic strain range from 75 to 125 micro-strain
Contact stress	5
Initial modulus	1000
Axial gauge length	70
Comments
Specimen information
********************
Identification	zhs-2-35
Dimensions	Point 1	Point 2	Point 3	Point 4	Point 5	Point 6	Average	Std Dev.
Diameter (mm)	49.2	49.3	49.2				49.23	0.058
Height (mm)	100.8	101.0	100.8				100.87	0.115
Cross-sectional area (mm�)	1903.7
Conditioning time
Properties/Comments
Test Data	0.2Hz
*********
Test date and time	Tue	Apr 2	2019	12:59 PM
Dynamic modulus (MPa)	10007
Phase angle (Degrees)	4.49
Average temperature (�C)	35.4
Average confining pressure (kPa)	-0.7
Average micro-strain	98
Load drift (%)	0.9
Load standard error (%)	2.8
Average deformation drift (%)	-3.2
Average deformation standard error (%)	2.4
Deformation uniformity (%)	29.7
Phase uniformity (Degrees)	0.5
Conditioning Cycles
Time (sec)	Axial stress (kPa)	Axial micro-strain #1	Axial micro-strain #2	Axial micro-strain #3	Confining pressure (kPa)	Temperature (�C)	Load (N)	Displacement #1 (mm)	Displacement #2 (mm)	Displacement #3 (mm)
0.0000	240.800	3.809	-5.534	7.320	-0.677	35.427	458.422	-0.000267	0.000387	-0.000512
0.1000	243.130	3.433	-5.864	6.247	-0.680	35.426	462.856	-0.000240	0.000410	-0.000437
0.2000	250.614	3.850	-5.616	6.167	-0.673	35.426	477.104	-0.000269	0.000393	-0.000432
0.3000	269.775	5.834	-4.349	7.941	-0.668	35.426	513.582	-0.000408	0.000304	-0.000556
0.4000	308.729	10.564	-2.998	10.884	-0.688	35.426	587.740	-0.000739	0.000210	-0.000762
0.5000	328.341	13.231	-1.898	12.398	-0.671	35.426	625.076	-0.000926	0.000133	-0.000868
0.6000	356.128	16.868	-0.701	15.948	-0.665	35.427	677.977	-0.001181	0.000049	-0.001116
0.7000	407.631	23.208	2.836	19.760	-0.679	35.426	776.024	-0.001625	-0.000199	-0.001383
0.8000	422.944	25.848	5.186	21.616	-0.691	35.426	805.178	-0.001809	-0.000363	-0.001513
0.9000	478.775	33.474	7.829	27.135	-0.660	35.426	911.465	-0.002343	-0.000548	-0.001899
1.0000	533.073	40.203	10.966	31.579	-0.663	35.426	1014.833	-0.002814	-0.000768	-0.002210
1.1000	571.951	45.536	13.869	35.530	-0.678	35.426	1088.848	-0.003188	-0.000971	-0.002487
1.2000	636.303	54.238	18.097	42.024	-0.676	35.425	1211.357	-0.003797	-0.001267	-0.002942
1.3000	710.122	64.203	22.909	48.161	-0.663	35.426	1351.891	-0.004494	-0.001604	-0.003371
1.4000	737.399	68.327	24.218	50.887	-0.666	35.427	1403.818	-0.004783	-0.001695	-0.003562
1.5000	763.233	71.953	26.378	53.322	-0.665	35.425	1452.999	-0.005037	-0.001846	-0.003733
1.6000	822.279	80.320	30.674	59.307	-0.648	35.426	1565.409	-0.005622	-0.002147	-0.004151
1.7000	843.394	84.002	32.173	61.812	-0.659	35.426	1605.606	-0.005880	-0.002252	-0.004327
1.8000	894.912	90.757	34.979	66.587	-0.676	35.427	1703.682	-0.006353	-0.002449	-0.004661
1.9000	911.488	93.162	36.369	68.798	-0.667	35.425	1735.239	-0.006521	-0.002546	-0.004816
2.0000	950.697	99.010	39.216	72.435	-0.641	35.426	1809.883	-0.006931	-0.002745	-0.005070
2.1000	952.816	100.246	39.601	72.959	-0.655	35.426	1813.917	-0.007017	-0.002772	-0.005107
2.2000	968.461	102.347	40.456	74.992	-0.671	35.426	1843.700	-0.007164	-0.002832	-0.005249
2.3000	981.806	104.458	41.819	76.508	-0.657	35.425	1869.106	-0.007312	-0.002927	-0.005356
2.4000	985.728	105.611	42.366	77.015	-0.652	35.426	1876.574	-0.007393	-0.002966	-0.005391
2.5000	983.835	105.501	42.244	77.042	-0.676	35.426	1872.969	-0.007385	-0.002957	-0.005393
2.6000	969.002	104.335	41.764	76.521	-0.677	35.426	1844.730	-0.007303	-0.002923	-0.005356
2.7000	944.791	100.998	41.158	74.483	-0.665	35.425	1798.639	-0.007070	-0.002881	-0.005214
2.8000	930.799	99.593	40.701	73.275	-0.648	35.426	1772.003	-0.006971	-0.002849	-0.005129
2.9000	919.288	98.109	39.890	72.284	-0.683	35.426	1750.088	-0.006868	-0.002792	-0.005060
3.0000	882.183	93.244	37.911	69.088	-0.660	35.425	1679.449	-0.006527	-0.002654	-0.004836
3.1000	849.751	89.170	36.450	66.462	-0.657	35.425	1617.708	-0.006242	-0.002551	-0.004652
3.2000	778.261	80.766	32.118	60.643	-0.655	35.426	1481.609	-0.005654	-0.002248	-0.004245
3.3000	746.130	75.821	29.858	57.326	-0.677	35.425	1420.441	-0.005307	-0.002090	-0.004013
3.4000	732.785	73.928	28.428	55.895	-0.653	35.425	1395.035	-0.005175	-0.001990	-0.003913
3.5000	682.200	67.189	25.773	51.576	-0.648	35.425	1298.733	-0.004703	-0.001804	-0.003610
3.6000	638.181	61.005	22.609	47.182	-0.660	35.426	1214.933	-0.004270	-0.001583	-0.003303
3.7000	576.249	53.013	18.673	41.708	-0.673	35.424	1097.031	-0.003711	-0.001307	-0.002920
3.8000	529.391	46.024	15.387	37.083	-0.659	35.425	1007.824	-0.003222	-0.001077	-0.002596
3.9000	463.717	37.493	11.266	31.014	-0.665	35.425	882.797	-0.002625	-0.000789	-0.002171
4.0000	450.206	35.073	10.156	28.953	-0.667	35.425	857.077	-0.002455	-0.000711	-0.002027
4.1000	404.940	28.557	6.276	24.588	-0.652	35.424	770.903	-0.001999	-0.000439	-0.001721
4.2000	368.316	22.579	3.346	20.642	-0.644	35.425	701.180	-0.001581	-0.000234	-0.001445
4.3000	301.530	13.842	-0.125	14.944	-0.667	35.425	574.036	-0.000969	0.000009	-0.001046
4.4000	290.755	11.936	-1.373	12.715	-0.663	35.424	553.522	-0.000836	0.000096	-0.000890
4.5000	285.480	9.757	-3.231	10.404	-0.651	35.424	543.480	-0.000683	0.000226	-0.000728
4.6000	225.862	1.751	-5.768	6.469	-0.648	35.426	429.983	-0.000123	0.000404	-0.000453
4.7000	239.959	2.974	-5.519	6.951	-0.663	35.424	456.820	-0.000208	0.000386	-0.000487
4.8000	234.037	1.403	-6.410	5.864	-0.655	35.424	445.547	-0.000098	0.000449	-0.000410
4.9000	226.373	-0.152	-7.333	4.721	-0.654	35.425	430.956	0.000011	0.000513	-0.000330
5.0000	229.995	-0.264	-6.949	4.816	-0.661	35.425	437.851	0.000018	0.000486	-0.000337
5.1000	234.503	0.444	-6.754	3.936	-0.672	35.423	446.434	-0.000031	0.000473	-0.000276
5.2000	283.316	6.542	-4.596	7.762	-0.643	35.425	539.360	-0.000458	0.000322	-0.000543
5.3000	271.879	4.752	-5.327	6.882	-0.675	35.425	517.588	-0.000333	0.000373	-0.000482
5.4000	289.447	7.001	-4.308	9.646	-0.661	35.424	551.033	-0.000490	0.000302	-0.000675
5.5000	331.421	12.657	-1.872	12.177	-0.656	35.425	630.941	-0.000886	0.000131	-0.000852
5.6000	360.667	16.243	-0.399	15.081	-0.670	35.424	686.617	-0.001137	0.000028	-0.001056
5.7000	409.344	22.579	2.572	19.222	-0.666	35.424	779.285	-0.001581	-0.000180	-0.001346
5.8000	450.371	28.460	5.932	24.259	-0.650	35.424	857.391	-0.001992	-0.000415	-0.001698
5.9000	507.149	35.950	9.290	28.950	-0.656	35.425	965.481	-0.002517	-0.000650	-0.002026
6.0000	530.007	39.228	10.553	30.630	-0.663	35.423	1008.997	-0.002746	-0.000739	-0.002144
6.1000	606.967	49.081	15.551	38.007	-0.652	35.423	1155.510	-0.003436	-0.001089	-0.002661
6.2000	629.525	52.874	17.502	40.840	-0.647	35.424	1198.454	-0.003701	-0.001225	-0.002859
6.3000	686.828	60.741	21.109	45.889	-0.675	35.425	1307.545	-0.004252	-0.001478	-0.003212
6.4000	712.211	64.729	23.047	48.879	-0.667	35.424	1355.867	-0.004531	-0.001613	-0.003422
6.5000	767.200	72.050	26.791	54.163	-0.652	35.423	1460.552	-0.005044	-0.001875	-0.003791
6.6000	799.286	76.973	29.269	57.108	-0.655	35.424	1521.635	-0.005388	-0.002049	-0.003998
6.7000	867.395	86.214	33.298	63.556	-0.663	35.423	1651.297	-0.006035	-0.002331	-0.004449
6.8000	888.735	89.546	34.441	66.325	-0.645	35.423	1691.923	-0.006268	-0.002411	-0.004643
6.9000	915.095	93.176	37.071	68.867	-0.641	35.424	1742.105	-0.006522	-0.002595	-0.004821
7.0000	949.856	98.498	39.603	72.326	-0.664	35.424	1808.281	-0.006895	-0.002772	-0.005063
7.1000	962.675	100.888	40.263	74.275	-0.661	35.423	1832.685	-0.007062	-0.002818	-0.005199
7.2000	985.864	103.876	41.573	76.287	-0.653	35.423	1876.831	-0.007271	-0.002910	-0.005340
7.3000	972.308	102.556	41.253	75.638	-0.653	35.424	1851.025	-0.007179	-0.002888	-0.005295
7.4000	990.041	105.905	42.575	77.099	-0.672	35.424	1884.785	-0.007413	-0.002980	-0.005397
7.5000	965.335	102.820	41.515	75.901	-0.653	35.423	1837.749	-0.007197	-0.002906	-0.005313
7.6000	968.476	103.334	41.817	75.984	-0.645	35.424	1843.729	-0.007233	-0.002927	-0.005319
7.7000	962.149	102.930	41.806	75.445	-0.668	35.424	1831.684	-0.007205	-0.002926	-0.005281
7.8000	929.582	99.110	40.332	72.903	-0.672	35.424	1769.686	-0.006938	-0.002823	-0.005103
7.9000	904.470	95.481	38.681	70.935	-0.661	35.423	1721.878	-0.006684	-0.002708	-0.004965
8.0000	893.364	94.383	38.267	69.752	-0.640	35.423	1700.735	-0.006607	-0.002679	-0.004883
8.1000	818.162	85.490	34.413	63.946	-0.659	35.424	1557.570	-0.005984	-0.002409	-0.004476
8.2000	812.300	83.975	33.132	62.679	-0.665	35.423	1546.412	-0.005878	-0.002319	-0.004387
8.3000	774.534	78.612	30.798	59.361	-0.637	35.423	1474.514	-0.005503	-0.002156	-0.004155
8.4000	733.582	73.803	28.030	55.192	-0.647	35.424	1396.551	-0.005166	-0.001962	-0.003863
8.5000	630.772	60.964	22.485	47.320	-0.660	35.424	1200.829	-0.004268	-0.001574	-0.003312
8.6000	637.610	60.603	22.278	46.607	-0.660	35.422	1213.846	-0.004242	-0.001559	-0.003262
8.7000	584.936	53.585	19.265	42.011	-0.643	35.424	1113.567	-0.003751	-0.001349	-0.002941
8.8000	530.608	46.289	15.302	37.537	-0.655	35.424	1010.141	-0.003240	-0.001071	-0.002628
8.9000	492.782	40.578	12.273	33.025	-0.675	35.423	938.129	-0.002840	-0.000859	-0.002312
9.0000	447.185	33.588	9.262	28.580	-0.650	35.422	851.326	-0.002351	-0.000648	-0.002001
9.1000	413.401	28.989	6.593	24.521	-0.643	35.423	787.010	-0.002029	-0.000462	-0.001716
9.2000	362.876	21.970	3.085	19.553	-0.661	35.424	690.823	-0.001538	-0.000216	-0.001369
9.3000	327.108	15.926	0.717	16.390	-0.676	35.423	622.730	-0.001115	-0.000050	-0.001147
9.4000	299.095	12.227	-0.948	13.021	-0.656	35.422	569.401	-0.000856	0.000066	-0.000911
9.5000	284.473	10.214	-2.667	11.599	-0.661	35.424	541.563	-0.000715	0.000187	-0.000812
9.6000	245.775	4.254	-5.175	7.624	-0.664	35.423	467.892	-0.000298	0.000362	-0.000534
9.7000	237.779	1.932	-5.876	6.000	-0.672	35.422	452.671	-0.000135	0.000411	-0.000420
9.8000	239.297	1.806	-6.000	5.724	-0.647	35.423	455.561	-0.000126	0.000420	-0.000401
9.9000	229.664	0.208	-6.784	4.253	-0.659	35.423	437.222	-0.000015	0.000475	-0.000298
10.0000	225.937	-0.791	-7.291	4.321	-0.680	35.423	430.126	0.000055	0.000510	-0.000302
10.1000	237.509	0.944	-6.385	4.927	-0.656	35.422	452.156	-0.000066	0.000447	-0.000345
10.2000	251.666	2.487	-6.355	5.849	-0.647	35.423	479.107	-0.000174	0.000445	-0.000409
10.3000	263.989	3.879	-5.876	6.951	-0.652	35.423	502.567	-0.000271	0.000411	-0.000487
10.4000	296.571	7.560	-4.431	8.750	-0.666	35.422	564.594	-0.000529	0.000310	-0.000612
10.5000	320.691	11.004	-2.916	11.532	-0.651	35.422	610.514	-0.000770	0.000204	-0.000807
10.6000	369.894	17.467	0.097	16.665	-0.660	35.423	704.184	-0.001223	-0.000007	-0.001167
10.7000	396.329	21.205	1.719	18.369	-0.668	35.422	754.509	-0.001484	-0.000120	-0.001286
10.8000	415.821	23.846	3.757	20.735	-0.664	35.421	791.616	-0.001669	-0.000263	-0.001451
10.9000	496.088	34.658	8.795	28.127	-0.663	35.422	944.424	-0.002426	-0.000616	-0.001969
11.0000	539.640	40.549	11.422	31.980	-0.673	35.422	1027.336	-0.002838	-0.000800	-0.002239
11.1000	587.295	47.303	15.013	37.332	-0.668	35.422	1118.059	-0.003311	-0.001051	-0.002613
11.2000	623.484	52.222	17.130	40.441	-0.653	35.421	1186.953	-0.003656	-0.001199	-0.002831
11.3000	669.095	59.045	20.199	45.450	-0.660	35.423	1273.785	-0.004133	-0.001414	-0.003182
11.4000	740.104	67.938	24.176	51.216	-0.669	35.423	1408.968	-0.004756	-0.001692	-0.003585
11.5000	773.753	72.634	27.202	54.600	-0.659	35.421	1473.026	-0.005084	-0.001904	-0.003822
11.6000	802.051	77.137	29.270	57.587	-0.655	35.421	1526.899	-0.005400	-0.002049	-0.004031
11.7000	873.646	86.852	33.520	64.054	-0.668	35.422	1663.198	-0.006080	-0.002346	-0.004484
11.8000	878.606	88.256	34.096	66.212	-0.670	35.421	1672.640	-0.006178	-0.002387	-0.004635
11.9000	922.849	94.202	37.167	69.888	-0.653	35.421	1756.868	-0.006594	-0.002602	-0.004892
12.0000	940.027	97.358	38.625	71.291	-0.655	35.421	1789.570	-0.006815	-0.002704	-0.004990
12.1000	958.211	100.108	39.354	73.728	-0.664	35.421	1824.188	-0.007008	-0.002755	-0.005161
12.2000	983.699	103.625	41.405	76.012	-0.671	35.420	1872.711	-0.007254	-0.002898	-0.005321
12.3000	983.910	104.002	41.667	76.836	-0.645	35.420	1873.112	-0.007280	-0.002917	-0.005379
12.4000	984.346	104.960	42.217	76.988	-0.668	35.421	1873.941	-0.007347	-0.002955	-0.005389
12.5000	984.391	105.027	41.750	77.084	-0.667	35.420	1874.027	-0.007352	-0.002922	-0.005396
12.6000	976.546	104.293	41.695	76.632	-0.658	35.420	1859.093	-0.007300	-0.002919	-0.005364
12.7000	957.760	102.513	41.432	75.708	-0.649	35.421	1823.330	-0.007176	-0.002900	-0.005300
12.8000	944.085	100.888	40.759	74.181	-0.688	35.421	1797.295	-0.007062	-0.002853	-0.005193
12.9000	925.540	98.108	39.546	72.670	-0.683	35.420	1761.990	-0.006868	-0.002768	-0.005087
13.0000	879.508	92.454	37.582	69.021	-0.657	35.420	1674.356	-0.006472	-0.002631	-0.004831
13.1000	843.620	88.062	35.679	66.048	-0.664	35.421	1606.035	-0.006164	-0.002498	-0.004623
13.2000	794.672	82.182	32.651	61.826	-0.679	35.420	1512.852	-0.005753	-0.002286	-0.004328
13.3000	768.868	78.360	30.879	59.418	-0.656	35.420	1463.728	-0.005485	-0.002162	-0.004159
13.4000	709.882	70.927	27.423	53.762	-0.652	35.420	1351.433	-0.004965	-0.001920	-0.003763
13.5000	676.774	66.061	24.658	51.011	-0.674	35.421	1288.404	-0.004624	-0.001726	-0.003571
13.6000	628.157	59.396	21.424	46.879	-0.672	35.419	1195.850	-0.004158	-0.001500	-0.003282
13.7000	584.305	53.098	19.031	42.244	-0.640	35.420	1112.366	-0.003717	-0.001332	-0.002957
13.8000	527.873	45.771	14.394	36.686	-0.661	35.421	1004.934	-0.003204	-0.001008	-0.002568
13.9000	465.069	37.231	10.855	31.195	-0.684	35.420	885.372	-0.002606	-0.000760	-0.002184
14.0000	454.865	34.684	9.179	28.787	-0.665	35.419	865.946	-0.002428	-0.000643	-0.002015
14.1000	414.784	29.170	6.965	25.744	-0.659	35.420	789.642	-0.002042	-0.000488	-0.001802
14.2000	356.865	21.164	2.985	19.826	-0.679	35.420	679.379	-0.001481	-0.000209	-0.001388
14.3000	328.626	16.410	0.593	16.320	-0.660	35.419	625.620	-0.001149	-0.000041	-0.001142
14.4000	296.991	11.268	-1.691	12.674	-0.643	35.419	565.395	-0.000789	0.000118	-0.000887
14.5000	275.411	8.506	-3.026	10.112	-0.668	35.420	524.311	-0.000595	0.000212	-0.000708
14.6000	265.236	6.571	-4.019	9.110	-0.669	35.419	504.942	-0.000460	0.000281	-0.000638
14.7000	244.136	3.017	-5.863	6.482	-0.656	35.419	464.773	-0.000211	0.000410	-0.000454
14.8000	227.530	0.152	-7.030	4.500	-0.664	35.420	433.159	-0.000011	0.000492	-0.000315
14.9000	221.744	-0.874	-7.307	4.584	-0.679	35.419	422.144	0.000061	0.000511	-0.000321
15.0000	229.799	0.040	-7.279	3.936	-0.669	35.419	437.479	-0.000003	0.000510	-0.000275
15.1000	235.525	0.248	-7.360	4.528	-0.655	35.419	448.380	-0.000017	0.000515	-0.000317
15.2000	260.878	3.783	-5.726	6.455	-0.661	35.419	496.645	-0.000265	0.000401	-0.000452
15.3000	280.746	5.989	-4.885	8.339	-0.672	35.419	534.468	-0.000419	0.000342	-0.000584
15.4000	311.990	9.911	-3.922	10.843	-0.662	35.418	593.948	-0.000694	0.000275	-0.000759
15.5000	324.148	11.212	-2.984	11.258	-0.664	35.419	617.094	-0.000785	0.000209	-0.000788
15.6000	355.918	15.811	-0.509	14.133	-0.674	35.419	677.576	-0.001107	0.000036	-0.000989
15.7000	398.358	21.456	1.761	18.606	-0.651	35.418	758.371	-0.001502	-0.000123	-0.001302
15.8000	445.442	27.681	4.335	23.147	-0.644	35.418	848.007	-0.001938	-0.000303	-0.001620
15.9000	482.532	32.531	6.924	26.310	-0.669	35.419	918.617	-0.002277	-0.000485	-0.001842
16.0000	533.914	39.672	10.855	32.378	-0.672	35.418	1016.436	-0.002777	-0.000760	-0.002266
16.1000	568.359	44.841	12.881	35.682	-0.650	35.418	1082.010	-0.003139	-0.000902	-0.002498
16.2000	633.117	53.112	17.200	40.581	-0.657	35.419	1205.292	-0.003718	-0.001204	-0.002841
16.3000	666.405	57.865	20.282	44.252	-0.672	35.418	1268.663	-0.004051	-0.001420	-0.003098
16.4000	740.344	67.982	25.237	51.313	-0.655	35.418	1409.426	-0.004759	-0.001767	-0.003592
16.5000	755.057	70.884	25.857	53.017	-0.646	35.418	1437.435	-0.004962	-0.001810	-0.003711
16.6000	795.844	75.904	28.209	56.664	-0.681	35.419	1515.083	-0.005313	-0.001975	-0.003967
16.7000	860.166	84.628	32.626	62.526	-0.659	35.418	1637.535	-0.005924	-0.002284	-0.004377
16.8000	866.929	86.728	33.368	63.724	-0.649	35.418	1650.410	-0.006071	-0.002336	-0.004461
16.9000	907.325	92.676	36.258	68.482	-0.664	35.418	1727.314	-0.006487	-0.002538	-0.004794
17.0000	930.664	95.412	37.359	70.617	-0.671	35.418	1771.746	-0.006679	-0.002615	-0.004943
17.1000	956.573	99.372	39.698	73.055	-0.667	35.418	1821.070	-0.006956	-0.002779	-0.005114
17.2000	969.392	102.208	40.621	74.950	-0.657	35.418	1845.474	-0.007155	-0.002843	-0.005247
17.3000	974.592	103.124	40.430	75.459	-0.671	35.418	1855.373	-0.007219	-0.002830	-0.005282
17.4000	973.796	103.056	41.378	75.818	-0.676	35.417	1853.857	-0.007214	-0.002896	-0.005307
17.5000	981.355	104.513	42.135	76.962	-0.650	35.418	1868.248	-0.007316	-0.002949	-0.005387
17.6000	982.828	105.099	41.900	76.893	-0.664	35.418	1871.052	-0.007357	-0.002933	-0.005382
17.7000	958.016	101.764	40.924	75.115	-0.675	35.417	1823.816	-0.007123	-0.002865	-0.005258
17.8000	934.587	99.094	39.960	72.919	-0.638	35.417	1779.213	-0.006937	-0.002797	-0.005104
17.9000	912.119	96.413	39.080	71.484	-0.649	35.418	1736.441	-0.006749	-0.002736	-0.005004
18.0000	855.056	89.768	35.996	66.751	-0.673	35.418	1627.808	-0.006284	-0.002520	-0.004673
18.1000	853.869	89.102	35.323	66.422	-0.667	35.417	1625.547	-0.006237	-0.002473	-0.004650
18.2000	809.415	83.517	33.120	62.402	-0.641	35.417	1540.918	-0.005846	-0.002318	-0.004368
18.3000	770.461	78.096	30.839	59.127	-0.657	35.418	1466.761	-0.005467	-0.002159	-0.004139
18.4000	718.974	71.218	26.983	54.422	-0.684	35.417	1368.742	-0.004985	-0.001889	-0.003810
18.5000	644.478	62.088	22.993	48.671	-0.661	35.417	1226.921	-0.004346	-0.001610	-0.003407
18.6000	593.367	55.014	19.788	44.240	-0.654	35.417	1129.618	-0.003851	-0.001385	-0.003097
18.7000	584.695	53.111	18.081	42.421	-0.657	35.417	1113.110	-0.003718	-0.001266	-0.002969
18.8000	507.630	42.982	13.360	35.325	-0.666	35.417	966.396	-0.003009	-0.000935	-0.002473
18.9000	478.009	38.408	11.447	31.992	-0.647	35.416	910.006	-0.002689	-0.000801	-0.002239
19.0000	436.861	32.422	8.672	28.015	-0.657	35.417	831.671	-0.002270	-0.000607	-0.001961
19.1000	373.396	24.222	4.212	21.824	-0.677	35.417	710.850	-0.001696	-0.000295	-0.001528
19.2000	366.588	21.929	3.208	21.109	-0.660	35.416	697.889	-0.001535	-0.000225	-0.001478
19.3000	321.623	15.219	0.317	15.658	-0.638	35.416	612.288	-0.001065	-0.000022	-0.001096
19.4000	306.640	12.896	-0.948	13.693	-0.658	35.417	583.763	-0.000903	0.000066	-0.000959
19.5000	266.273	7.086	-3.632	10.363	-0.671	35.417	506.916	-0.000496	0.000254	-0.000725
19.6000	258.729	5.059	-4.706	8.162	-0.659	35.416	492.554	-0.000354	0.000329	-0.000571
19.7000	227.124	0.973	-5.985	5.781	-0.645	35.417	432.386	-0.000068	0.000419	-0.000405
19.8000	231.753	0.973	-6.826	5.146	-0.670	35.416	441.198	-0.000068	0.000478	-0.000360
19.9000	227.801	-0.444	-7.537	4.295	-0.672	35.416	433.674	0.000031	0.000528	-0.000301
20.0000	230.025	-0.389	-6.891	4.087	-0.650	35.416	437.908	0.000027	0.000482	-0.000286
20.1000	234.699	0.097	-7.265	4.527	-0.656	35.417	446.806	-0.000007	0.000509	-0.000317
20.2000	248.780	1.444	-6.895	5.957	-0.677	35.417	473.614	-0.000101	0.000483	-0.000417
20.3000	264.365	3.197	-6.150	6.718	-0.661	35.416	503.283	-0.000224	0.000431	-0.000470
20.4000	298.088	7.726	-4.403	9.950	-0.648	35.417	567.484	-0.000541	0.000308	-0.000696
20.5000	329.844	11.643	-2.984	11.958	-0.656	35.417	627.937	-0.000815	0.000209	-0.000837
20.6000	356.369	15.273	-1.086	14.681	-0.677	35.416	678.434	-0.001069	0.000076	-0.001028
20.7000	418.421	23.372	3.056	20.626	-0.653	35.416	796.566	-0.001636	-0.000214	-0.001444
20.8000	455.256	28.432	5.336	23.282	-0.647	35.416	866.690	-0.001990	-0.000374	-0.001630
20.9000	484.215	32.684	7.183	26.407	-0.674	35.417	921.822	-0.002288	-0.000503	-0.001848
21.0000	535.192	39.285	10.582	31.400	-0.662	35.416	1018.867	-0.002750	-0.000741	-0.002198
21.1000	578.759	45.523	13.910	36.699	-0.653	35.416	1101.809	-0.003187	-0.000974	-0.002569
21.2000	645.485	54.753	18.054	42.077	-0.650	35.417	1228.838	-0.003833	-0.001264	-0.002945
21.3000	667.772	57.977	20.010	45.065	-0.665	35.417	1271.267	-0.004058	-0.001401	-0.003155
21.4000	736.663	67.200	24.246	51.656	-0.656	35.416	1402.416	-0.004704	-0.001697	-0.003616
21.5000	758.950	71.205	25.897	53.099	-0.655	35.417	1444.845	-0.004984	-0.001813	-0.003717
21.6000	801.450	76.638	28.703	57.849	-0.657	35.417	1525.755	-0.005365	-0.002009	-0.004049
21.7000	843.199	82.283	31.251	61.316	-0.679	35.416	1605.234	-0.005760	-0.002188	-0.004292
21.8000	898.233	90.116	35.060	67.206	-0.653	35.417	1710.005	-0.006308	-0.002454	-0.004704
21.9000	932.798	95.397	37.071	70.358	-0.652	35.417	1775.808	-0.006678	-0.002595	-0.004925
22.0000	945.572	97.289	38.461	72.393	-0.668	35.417	1800.127	-0.006810	-0.002692	-0.005068
22.1000	956.408	99.456	39.451	73.633	-0.656	35.416	1820.755	-0.006962	-0.002762	-0.005154
22.2000	971.061	102.098	40.703	75.874	-0.640	35.417	1848.650	-0.007147	-0.002849	-0.005311
22.3000	981.896	103.418	41.047	76.245	-0.654	35.417	1869.278	-0.007239	-0.002873	-0.005337
22.4000	981.821	103.920	41.624	76.466	-0.678	35.417	1869.135	-0.007274	-0.002914	-0.005353
22.5000	974.171	103.433	41.392	76.466	-0.655	35.417	1854.572	-0.007240	-0.002897	-0.005353
22.6000	960.931	102.055	41.200	76.425	-0.647	35.418	1829.367	-0.007144	-0.002884	-0.005350
22.7000	953.823	101.361	41.129	75.130	-0.681	35.417	1815.834	-0.007095	-0.002879	-0.005259
22.8000	916.763	97.109	39.506	73.000	-0.663	35.417	1745.281	-0.006798	-0.002765	-0.005110
22.9000	900.547	94.646	38.197	70.758	-0.650	35.418	1714.411	-0.006625	-0.002674	-0.004953
23.0000	863.217	90.131	36.396	67.564	-0.666	35.418	1643.343	-0.006309	-0.002548	-0.004729
23.1000	844.326	87.825	35.184	65.815	-0.680	35.417	1607.380	-0.006148	-0.002463	-0.004607
23.2000	798.039	81.976	32.159	61.949	-0.654	35.417	1519.260	-0.005738	-0.002251	-0.004336
23.3000	758.228	76.279	29.736	57.780	-0.664	35.417	1443.472	-0.005340	-0.002082	-0.004045
23.4000	716.329	71.011	27.491	55.082	-0.669	35.418	1363.707	-0.004971	-0.001924	-0.003856
23.5000	670.733	65.242	24.578	50.543	-0.667	35.417	1276.903	-0.004567	-0.001720	-0.003538
23.6000	624.205	58.504	21.070	46.453	-0.647	35.418	1188.326	-0.004095	-0.001475	-0.003252
23.7000	573.544	51.472	17.779	41.364	-0.651	35.418	1091.881	-0.003603	-0.001245	-0.002895
23.8000	523.996	44.731	14.572	37.110	-0.675	35.418	997.553	-0.003131	-0.001020	-0.002598
23.9000	491.264	40.157	11.820	33.740	-0.655	35.418	935.240	-0.002811	-0.000827	-0.002362
24.0000	429.587	31.865	8.282	28.141	-0.651	35.419	817.823	-0.002231	-0.000580	-0.001970
24.1000	409.584	28.361	6.674	24.823	-0.671	35.419	779.743	-0.001985	-0.000467	-0.001738
24.2000	370.465	22.594	3.564	20.283	-0.659	35.418	705.271	-0.001582	-0.000250	-0.001420
24.3000	335.780	17.105	0.634	16.954	-0.653	35.418	639.238	-0.001197	-0.000044	-0.001187
24.4000	302.146	12.003	-1.471	13.900	-0.668	35.419	575.209	-0.000840	0.000103	-0.000973
24.5000	274.253	7.893	-3.465	9.990	-0.660	35.418	522.108	-0.000553	0.000243	-0.000699
24.6000	232.550	1.889	-6.632	6.233	-0.649	35.419	442.715	-0.000132	0.000464	-0.000436
24.7000	231.753	0.957	-6.574	6.096	-0.660	35.420	441.198	-0.000067	0.000460	-0.000427
24.8000	220.827	-1.041	-7.291	4.775	-0.665	35.419	420.399	0.000073	0.000510	-0.000334
24.9000	222.075	-0.513	-7.224	4.005	-0.649	35.418	422.773	0.000036	0.000506	-0.000280
25.0000	237.494	0.181	-7.101	4.939	-0.662	35.436	452.127	-0.000013	0.000497	-0.000346
25.1000	264.470	3.057	-5.932	5.986	-0.677	35.435	503.483	-0.000214	0.000415	-0.000419
25.2000	263.553	3.252	-5.822	6.167	-0.663	35.435	501.738	-0.000228	0.000408	-0.000432
25.3000	302.402	7.906	-4.144	9.962	-0.657	35.436	575.695	-0.000553	0.000290	-0.000697
25.4000	322.359	10.381	-2.668	11.779	-0.666	35.437	613.689	-0.000727	0.000187	-0.000825
25.5000	373.231	17.203	0.193	16.211	-0.666	35.435	710.535	-0.001204	-0.000014	-0.001135
25.6000	409.148	22.370	2.382	19.674	-0.653	35.437	778.913	-0.001566	-0.000167	-0.001377
25.7000	463.702	29.419	5.530	24.700	-0.673	35.437	882.769	-0.002059	-0.000387	-0.001729
25.8000	515.099	36.424	9.495	29.558	-0.674	35.435	980.616	-0.002550	-0.000665	-0.002069
25.9000	571.981	44.397	13.059	34.690	-0.641	35.436	1088.905	-0.003108	-0.000914	-0.002428
26.0000	636.243	53.000	17.338	41.061	-0.659	35.437	1211.243	-0.003710	-0.001214	-0.002874
26.1000	689.804	60.450	21.219	46.359	-0.659	35.436	1313.210	-0.004232	-0.001485	-0.003245
26.2000	760.933	70.471	26.006	53.154	-0.651	35.436	1448.622	-0.004933	-0.001820	-0.003721
26.3000	836.346	80.668	30.866	60.064	-0.664	35.437	1592.188	-0.005647	-0.002161	-0.004205
26.4000	887.352	87.867	34.207	65.140	-0.679	35.437	1689.291	-0.006151	-0.002394	-0.004560
26.5000	938.945	95.103	37.635	70.906	-0.661	35.437	1787.510	-0.006657	-0.002634	-0.004963
26.6000	985.353	102.333	40.719	75.006	-0.653	35.438	1875.858	-0.007163	-0.002850	-0.005250
26.7000	1058.691	111.976	45.189	82.135	-0.680	35.438	2015.476	-0.007838	-0.003163	-0.005749
26.8000	1076.064	115.424	47.101	84.846	-0.669	35.437	2048.550	-0.008080	-0.003297	-0.005939
26.9000	1128.168	122.717	50.721	89.979	-0.660	35.438	2147.741	-0.008590	-0.003550	-0.006299
27.0000	1162.658	127.803	52.662	93.379	-0.668	35.439	2213.402	-0.008946	-0.003686	-0.006537
27.1000	1183.487	131.154	54.313	95.839	-0.664	35.437	2253.056	-0.009181	-0.003802	-0.006709
27.2000	1185.140	132.765	55.482	97.230	-0.658	35.438	2256.203	-0.009294	-0.003884	-0.006806
27.3000	1240.730	139.171	57.696	101.715	-0.659	35.438	2362.032	-0.009742	-0.004039	-0.007120
27.4000	1215.197	136.881	57.709	100.008	-0.674	35.439	2313.423	-0.009582	-0.004040	-0.007001
27.5000	1242.188	140.546	58.740	102.815	-0.659	35.438	2364.807	-0.009838	-0.004112	-0.007197
27.6000	1205.819	136.991	57.339	99.749	-0.647	35.439	2295.570	-0.009589	-0.004014	-0.006982
27.7000	1183.743	134.241	56.430	98.633	-0.664	35.439	2253.542	-0.009397	-0.003950	-0.006904
27.8000	1161.110	131.794	55.660	96.761	-0.662	35.438	2210.455	-0.009226	-0.003896	-0.006773
27.9000	1132.120	128.680	53.998	94.656	-0.655	35.439	2155.266	-0.009008	-0.003780	-0.006626
28.0000	1086.719	122.815	51.710	90.417	-0.660	35.440	2068.834	-0.008597	-0.003620	-0.006329
28.1000	1046.879	117.354	49.440	87.254	-0.668	35.439	1992.989	-0.008215	-0.003461	-0.006108
28.2000	971.602	108.406	44.804	80.840	-0.652	35.439	1849.680	-0.007588	-0.003136	-0.005659
28.3000	946.068	105.139	43.127	78.267	-0.661	35.440	1801.071	-0.007360	-0.003019	-0.005479
28.4000	865.606	93.939	38.255	70.987	-0.673	35.439	1647.892	-0.006576	-0.002678	-0.004969
28.5000	830.410	89.157	36.120	67.850	-0.664	35.439	1580.887	-0.006241	-0.002528	-0.004749
28.6000	763.488	80.349	31.761	61.838	-0.650	35.440	1453.485	-0.005624	-0.002223	-0.004329
28.7000	680.531	69.163	26.351	54.558	-0.676	35.440	1295.557	-0.004841	-0.001845	-0.003819
28.8000	628.864	62.088	23.035	49.248	-0.677	35.440	1197.195	-0.004346	-0.001612	-0.003447
28.9000	572.492	54.335	18.783	43.000	-0.644	35.441	1089.878	-0.003803	-0.001315	-0.003010
29.0000	488.198	42.426	12.961	35.928	-0.658	35.441	929.403	-0.002970	-0.000907	-0.002515
29.1000	448.373	36.103	10.060	30.741	-0.672	35.441	853.586	-0.002527	-0.000704	-0.002152
29.2000	410.411	31.017	7.982	27.590	-0.653	35.440	781.317	-0.002171	-0.000559	-0.001931
29.3000	373.065	25.027	4.375	22.554	-0.650	35.441	710.220	-0.001752	-0.000306	-0.001579
29.4000	331.211	18.219	1.293	18.371	-0.688	35.442	630.541	-0.001275	-0.000090	-0.001286
29.5000	296.435	13.215	-0.837	14.160	-0.683	35.441	564.337	-0.000925	0.000059	-0.000991
29.6000	268.347	9.145	-2.543	11.326	-0.663	35.441	510.864	-0.000640	0.000178	-0.000793
29.7000	257.722	6.934	-4.142	9.851	-0.657	35.442	490.637	-0.000485	0.000290	-0.000690
29.8000	247.713	4.366	-5.148	7.486	-0.677	35.442	471.582	-0.000306	0.000360	-0.000524
29.9000	218.212	0.734	-6.547	5.572	-0.667	35.441	415.421	-0.000051	0.000458	-0.000390
30.0000	231.903	2.015	-6.591	6.357	-0.646	35.442	441.484	-0.000141	0.000461	-0.000445
30.1000	237.043	1.932	-6.412	6.399	-0.664	35.442	451.269	-0.000135	0.000449	-0.000448
30.2000	278.281	7.322	-4.473	8.766	-0.676	35.443	529.776	-0.000513	0.000313	-0.000614
30.3000	297.593	9.744	-3.824	11.118	-0.651	35.443	566.540	-0.000682	0.000268	-0.000778
30.4000	327.454	12.925	-2.394	13.460	-0.657	35.443	623.388	-0.000905	0.000168	-0.000942
30.5000	372.569	18.901	0.193	17.474	-0.673	35.443	709.276	-0.001323	-0.000014	-0.001223
30.6000	429.587	26.444	4.295	22.498	-0.657	35.442	817.823	-0.001851	-0.000301	-0.001575
30.7000	478.114	32.670	7.115	27.466	-0.644	35.443	910.206	-0.002287	-0.000498	-0.001923
30.8000	534.966	40.772	10.995	32.321	-0.667	35.444	1018.438	-0.002854	-0.000770	-0.002262
30.9000	561.897	44.577	13.361	35.133	-0.669	35.443	1069.708	-0.003120	-0.000935	-0.002459
31.0000	646.883	56.210	18.399	42.946	-0.659	35.443	1231.499	-0.003935	-0.001288	-0.003006
31.1000	690.886	61.991	21.615	47.693	-0.651	35.444	1315.269	-0.004339	-0.001513	-0.003339
31.2000	744.072	69.845	25.470	53.608	-0.669	35.444	1416.521	-0.004889	-0.001783	-0.003753
31.3000	820.296	80.208	30.492	60.036	-0.654	35.444	1561.632	-0.005615	-0.002134	-0.004203
31.4000	881.431	88.187	34.125	65.689	-0.646	35.444	1678.019	-0.006173	-0.002389	-0.004598
31.5000	969.738	100.651	40.181	75.064	-0.659	35.445	1846.132	-0.007046	-0.002813	-0.005254
31.6000	986.239	103.847	41.103	76.604	-0.672	35.444	1877.546	-0.007269	-0.002877	-0.005362
31.7000	1063.651	113.603	45.628	83.428	-0.659	35.445	2024.918	-0.007952	-0.003194	-0.005840
31.8000	1115.048	121.301	49.552	88.423	-0.645	35.445	2122.765	-0.008491	-0.003469	-0.006190
31.9000	1148.336	126.555	52.508	92.070	-0.677	35.446	2186.136	-0.008859	-0.003676	-0.006445
32.0000	1147.870	127.304	52.150	92.690	-0.655	35.445	2185.249	-0.008911	-0.003650	-0.006488
32.1000	1177.791	131.322	54.327	96.183	-0.648	35.446	2242.212	-0.009193	-0.003803	-0.006733
32.2000	1196.186	134.781	56.570	98.179	-0.649	35.446	2277.231	-0.009435	-0.003960	-0.006873
32.3000	1222.245	138.422	57.380	101.223	-0.668	35.446	2326.841	-0.009690	-0.004017	-0.007086
32.4000	1214.912	137.935	57.366	101.167	-0.661	35.445	2312.880	-0.009655	-0.004016	-0.007082
32.5000	1220.502	139.435	58.040	101.771	-0.647	35.446	2323.523	-0.009760	-0.004063	-0.007124
32.6000	1193.992	136.728	57.187	100.134	-0.660	35.446	2273.054	-0.009571	-0.004003	-0.007009
32.7000	1190.971	135.906	56.790	99.637	-0.657	35.446	2267.303	-0.009513	-0.003975	-0.006975
32.8000	1147.329	131.253	55.439	96.388	-0.658	35.446	2184.219	-0.009188	-0.003881	-0.006747
32.9000	1129.099	129.056	54.367	94.725	-0.660	35.447	2149.515	-0.009034	-0.003806	-0.006631
33.0000	1079.370	122.660	51.036	90.239	-0.671	35.446	2054.844	-0.008586	-0.003573	-0.006317
33.1000	1033.519	116.839	48.822	86.825	-0.650	35.446	1967.554	-0.008179	-0.003418	-0.006078
33.2000	966.101	108.849	44.956	81.363	-0.651	35.447	1839.209	-0.007619	-0.003147	-0.005695
33.3000	925.284	103.361	41.571	77.759	-0.668	35.447	1761.503	-0.007235	-0.002910	-0.005443
33.4000	864.810	94.716	38.226	71.747	-0.658	35.446	1646.376	-0.006630	-0.002676	-0.005022
33.5000	837.368	91.147	36.120	69.269	-0.647	35.447	1594.133	-0.006380	-0.002528	-0.004849
33.6000	733.386	77.736	29.749	59.953	-0.671	35.447	1396.179	-0.005442	-0.002082	-0.004197
33.7000	679.555	69.663	26.527	54.904	-0.675	35.447	1293.697	-0.004876	-0.001857	-0.003843
33.8000	634.304	63.258	22.705	49.800	-0.647	35.446	1207.552	-0.004428	-0.001589	-0.003486
33.9000	567.217	54.251	18.606	43.125	-0.653	35.448	1079.836	-0.003798	-0.001302	-0.003019
34.0000	519.998	46.873	14.960	39.079	-0.677	35.447	989.943	-0.003281	-0.001047	-0.002735
34.1000	457.510	38.256	11.116	32.338	-0.647	35.446	870.981	-0.002678	-0.000778	-0.002264
34.2000	405.436	30.988	7.570	27.286	-0.647	35.447	771.847	-0.002169	-0.000530	-0.001910
34.3000	319.474	18.942	1.623	19.264	-0.660	35.448	608.196	-0.001326	-0.000114	-0.001348
34.4000	328.746	18.927	1.293	18.891	-0.653	35.446	625.849	-0.001325	-0.000090	-0.001322
34.5000	295.985	13.842	-0.936	14.546	-0.644	35.447	563.478	-0.000969	0.000066	-0.001018
34.6000	267.836	9.383	-3.218	11.669	-0.666	35.447	509.892	-0.000657	0.000225	-0.000817
34.7000	244.362	5.309	-4.831	9.549	-0.664	35.448	465.202	-0.000372	0.000338	-0.000668
34.8000	241.912	4.366	-4.749	8.571	-0.648	35.447	460.539	-0.000306	0.000332	-0.000600
34.9000	246.105	4.449	-5.779	7.996	-0.645	35.449	468.521	-0.000311	0.000405	-0.000560
35.0000	219.685	0.305	-7.429	5.656	-0.669	35.448	418.224	-0.000021	0.000520	-0.000396
35.1000	254.521	4.865	-5.670	7.515	-0.658	35.447	484.543	-0.000341	0.000397	-0.000526
35.2000	270.376	6.698	-5.284	9.274	-0.633	35.447	514.727	-0.000469	0.000370	-0.000649
35.3000	294.226	9.244	-4.238	10.994	-0.655	35.448	560.131	-0.000647	0.000297	-0.000770
35.4000	339.447	15.065	-1.211	14.516	-0.668	35.447	646.219	-0.001055	0.000085	-0.001016
35.5000	358.698	17.886	-0.095	16.486	-0.643	35.448	682.869	-0.001252	0.000007	-0.001154
35.6000	420.480	26.000	3.332	21.808	-0.644	35.447	800.486	-0.001820	-0.000233	-0.001527
35.7000	458.907	31.252	7.114	27.411	-0.662	35.448	873.642	-0.002188	-0.000498	-0.001919
35.8000	543.337	42.134	11.669	33.962	-0.673	35.447	1034.374	-0.002949	-0.000817	-0.002377
35.9000	575.032	46.818	13.663	37.002	-0.644	35.447	1094.713	-0.003277	-0.000956	-0.002590
36.0000	651.481	56.710	18.316	44.500	-0.674	35.448	1240.253	-0.003970	-0.001282	-0.003115
36.1000	730.290	66.993	23.722	50.845	-0.673	35.446	1390.285	-0.004690	-0.001661	-0.003559
36.2000	772.956	73.401	26.832	55.247	-0.665	35.447	1471.510	-0.005138	-0.001878	-0.003867
36.3000	828.246	81.587	30.424	61.221	-0.654	35.447	1576.767	-0.005711	-0.002130	-0.004285
36.4000	889.892	89.935	34.939	66.998	-0.660	35.447	1694.126	-0.006295	-0.002446	-0.004690
36.5000	949.765	98.275	38.598	73.303	-0.653	35.446	1808.109	-0.006879	-0.002702	-0.005131
36.6000	1009.548	106.542	42.094	78.324	-0.647	35.447	1921.921	-0.007458	-0.002947	-0.005483
36.7000	1027.658	110.144	44.487	81.117	-0.656	35.448	1956.396	-0.007710	-0.003114	-0.005678
36.8000	1117.332	121.926	49.468	89.482	-0.656	35.446	2127.113	-0.008535	-0.003463	-0.006264
36.9000	1108.390	122.064	50.034	89.606	-0.640	35.447	2110.090	-0.008545	-0.003502	-0.006272
37.0000	1158.104	128.652	52.661	94.559	-0.655	35.448	2204.733	-0.009006	-0.003686	-0.006619
37.1000	1192.234	133.613	55.001	98.056	-0.675	35.446	2269.707	-0.009353	-0.003850	-0.006864
37.2000	1196.366	135.435	55.962	99.694	-0.648	35.446	2277.575	-0.009480	-0.003917	-0.006979
37.3000	1228.753	139.269	57.340	101.759	-0.651	35.447	2339.230	-0.009749	-0.004014	-0.007123
37.4000	1209.802	137.214	57.243	101.124	-0.664	35.447	2303.152	-0.009605	-0.004007	-0.007079
37.5000	1207.593	137.935	57.215	101.525	-0.653	35.446	2298.946	-0.009655	-0.004005	-0.007107
37.6000	1209.772	138.574	57.011	101.509	-0.656	35.447	2303.095	-0.009700	-0.003991	-0.007106
37.7000	1185.546	135.545	56.692	100.326	-0.661	35.446	2256.975	-0.009488	-0.003968	-0.007023
37.8000	1157.022	132.446	55.345	97.408	-0.655	35.446	2202.673	-0.009271	-0.003874	-0.006819
37.9000	1127.852	129.153	53.875	95.017	-0.651	35.446	2147.141	-0.009041	-0.003771	-0.006651
38.0000	1087.050	123.356	51.406	91.492	-0.668	35.447	2069.464	-0.008635	-0.003598	-0.006404
38.1000	1042.791	118.466	49.330	87.403	-0.660	35.446	1985.207	-0.008293	-0.003453	-0.006118
38.2000	967.544	109.353	44.665	80.911	-0.646	35.446	1841.955	-0.007655	-0.003127	-0.005664
38.3000	928.230	103.641	42.053	77.635	-0.663	35.446	1767.111	-0.007255	-0.002944	-0.005434
38.4000	877.013	96.496	38.362	73.496	-0.667	35.446	1669.607	-0.006755	-0.002685	-0.005145
38.5000	833.791	90.756	35.434	69.047	-0.643	35.446	1587.324	-0.006353	-0.002480	-0.004833
38.6000	751.000	80.001	30.701	61.922	-0.652	35.446	1429.710	-0.005600	-0.002149	-0.004335
38.7000	683.071	70.609	26.625	55.302	-0.670	35.446	1300.392	-0.004943	-0.001864	-0.003871
38.8000	617.923	61.449	21.616	48.396	-0.650	35.445	1176.367	-0.004301	-0.001513	-0.003388
38.9000	558.350	53.447	17.640	43.470	-0.641	35.446	1062.956	-0.003741	-0.001235	-0.003043
39.0000	485.568	43.274	12.976	36.589	-0.662	35.446	924.397	-0.003029	-0.000908	-0.002561
39.1000	457.871	38.935	10.843	33.175	-0.653	35.445	871.668	-0.002725	-0.000759	-0.002322
39.2000	389.431	28.974	5.891	26.419	-0.645	35.445	741.377	-0.002028	-0.000412	-0.001849
39.3000	368.707	24.876	4.363	23.612	-0.651	35.446	701.923	-0.001741	-0.000305	-0.001653
39.4000	304.656	16.410	0.195	17.118	-0.671	35.445	579.987	-0.001149	-0.000014	-0.001198
39.5000	297.893	14.300	-0.974	15.233	-0.669	35.444	567.112	-0.001001	0.000068	-0.001066
39.6000	275.095	10.020	-2.710	12.756	-0.646	35.445	523.710	-0.000701	0.000190	-0.000893
39.7000	246.631	5.765	-4.515	9.590	-0.665	35.445	469.522	-0.000404	0.000316	-0.000671
39.8000	226.944	3.071	-6.289	7.569	-0.661	35.445	432.043	-0.000215	0.000440	-0.000530
39.9000	227.891	2.182	-6.892	7.032	-0.638	35.444	433.846	-0.000153	0.000482	-0.000492
40.0000	243.851	3.644	-6.190	7.433	-0.652	35.445	464.230	-0.000255	0.000433	-0.000520
40.1000	262.892	6.044	-5.644	8.213	-0.668	35.444	500.479	-0.000423	0.000395	-0.000575
40.2000	263.673	5.696	-5.903	8.299	-0.642	35.444	501.966	-0.000399	0.000413	-0.000581
40.3000	304.115	10.314	-3.784	11.849	-0.646	35.445	578.957	-0.000722	0.000265	-0.000829
40.4000	332.008	14.717	-1.651	14.928	-0.659	35.444	632.057	-0.001030	0.000116	-0.001045
40.5000	362.305	18.328	-0.686	17.352	-0.653	35.443	689.735	-0.001283	0.000048	-0.001215
40.6000	407.375	24.027	2.932	21.438	-0.638	35.444	775.537	-0.001682	-0.000205	-0.001501
40.7000	471.080	32.531	6.647	26.738	-0.675	35.444	896.816	-0.002277	-0.000465	-0.001872
40.8000	538.333	41.342	10.417	33.299	-0.662	35.443	1024.847	-0.002894	-0.000729	-0.002331
40.9000	566.165	45.398	12.950	36.506	-0.639	35.443	1077.833	-0.003178	-0.000907	-0.002555
41.0000	625.317	53.933	17.284	42.311	-0.649	35.444	1190.443	-0.003775	-0.001210	-0.002962
41.1000	708.364	64.884	22.153	49.801	-0.653	35.442	1348.543	-0.004542	-0.001551	-0.003486
41.2000	750.504	70.731	25.484	53.830	-0.641	35.443	1428.766	-0.004951	-0.001784	-0.003768
41.3000	826.803	81.740	30.811	61.631	-0.653	35.443	1574.020	-0.005722	-0.002157	-0.004314
41.4000	882.724	89.462	34.179	66.588	-0.652	35.442	1680.479	-0.006262	-0.002393	-0.004661
41.5000	944.716	97.624	37.611	72.888	-0.638	35.441	1798.496	-0.006834	-0.002633	-0.005102
41.6000	991.559	105.069	41.240	77.498	-0.659	35.443	1887.674	-0.007355	-0.002887	-0.005425
41.7000	1049.870	112.990	44.762	83.361	-0.662	35.441	1998.682	-0.007909	-0.003133	-0.005835
41.8000	1084.209	117.811	47.308	86.798	-0.641	35.441	2064.056	-0.008247	-0.003312	-0.006076
41.9000	1142.640	126.180	51.011	91.864	-0.643	35.441	2175.293	-0.008833	-0.003571	-0.006431
42.0000	1156.421	129.362	53.046	95.429	-0.665	35.441	2201.529	-0.009055	-0.003713	-0.006680
42.1000	1184.073	132.807	54.176	97.905	-0.651	35.440	2254.171	-0.009296	-0.003792	-0.006853
42.2000	1197.388	135.227	55.303	99.032	-0.641	35.441	2279.520	-0.009466	-0.003871	-0.006932
42.3000	1220.202	138.533	56.653	101.633	-0.651	35.440	2322.950	-0.009697	-0.003966	-0.007114
42.4000	1217.136	138.532	56.871	101.318	-0.648	35.439	2317.114	-0.009697	-0.003981	-0.007092
42.5000	1213.439	138.353	57.025	101.869	-0.641	35.439	2310.076	-0.009685	-0.003992	-0.007131
42.6000	1220.592	139.962	57.490	102.955	-0.651	35.440	2323.694	-0.009797	-0.004024	-0.007207
42.7000	1185.306	135.711	55.989	99.954	-0.664	35.438	2256.517	-0.009500	-0.003919	-0.006997
42.8000	1161.335	133.196	54.806	98.166	-0.643	35.439	2210.884	-0.009324	-0.003836	-0.006872
42.9000	1096.773	125.416	52.301	93.102	-0.652	35.439	2087.975	-0.008779	-0.003661	-0.006517
43.0000	1083.458	123.705	51.245	91.326	-0.665	35.438	2062.626	-0.008659	-0.003587	-0.006393
43.1000	1025.388	116.061	48.422	87.169	-0.637	35.437	1952.076	-0.008124	-0.003390	-0.006102
43.2000	996.940	112.879	45.808	83.922	-0.636	35.438	1897.917	-0.007902	-0.003207	-0.005875
43.3000	927.298	104.180	41.873	78.143	-0.654	35.437	1765.337	-0.007293	-0.002931	-0.005470
43.4000	856.935	94.382	37.472	71.291	-0.643	35.436	1631.384	-0.006607	-0.002623	-0.004990
43.5000	830.274	90.771	35.569	68.566	-0.615	35.437	1580.629	-0.006354	-0.002490	-0.004800
43.6000	753.960	80.585	31.043	61.647	-0.655	35.438	1435.347	-0.005641	-0.002173	-0.004315
43.7000	685.836	71.053	26.254	54.710	-0.654	35.435	1305.656	-0.004974	-0.001838	-0.003830
43.8000	632.035	63.424	22.855	50.060	-0.633	35.436	1203.232	-0.004440	-0.001600	-0.003504
43.9000	572.718	55.319	18.302	44.570	-0.645	35.436	1090.307	-0.003872	-0.001281	-0.003120
44.0000	516.632	46.817	14.105	38.242	-0.655	35.436	983.534	-0.003277	-0.000987	-0.002677
44.1000	457.946	38.672	10.760	32.845	-0.635	35.435	871.811	-0.002707	-0.000753	-0.002299
44.2000	448.944	36.632	8.959	30.975	-0.611	35.435	854.673	-0.002564	-0.000627	-0.002168
44.3000	354.655	23.609	2.684	22.099	-0.646	35.435	675.173	-0.001653	-0.000188	-0.001547
44.4000	341.175	20.637	2.035	19.401	-0.647	35.434	649.509	-0.001445	-0.000142	-0.001358
44.5000	284.112	12.536	-1.843	14.228	-0.632	35.433	540.876	-0.000877	0.000129	-0.000996
44.6000	283.511	11.588	-2.861	13.376	-0.635	35.435	539.732	-0.000811	0.000200	-0.000936
44.7000	247.413	5.863	-4.982	10.031	-0.644	35.433	471.010	-0.000410	0.000349	-0.000702
44.8000	223.968	2.627	-6.646	7.004	-0.657	35.433	426.378	-0.000184	0.000465	-0.000490
44.9000	243.220	4.447	-6.247	7.913	-0.638	35.432	463.028	-0.000311	0.000437	-0.000554
45.0000	233.632	2.502	-6.726	6.815	-0.660	35.433	444.775	-0.000175	0.000471	-0.000477
45.1000	254.927	4.836	-5.561	7.995	-0.655	35.432	485.315	-0.000339	0.000389	-0.000560
45.2000	278.987	7.976	-4.733	10.446	-0.641	35.432	531.120	-0.000558	0.000331	-0.000731
45.3000	294.241	9.506	-4.734	11.200	-0.643	35.432	560.160	-0.000665	0.000331	-0.000784
45.4000	319.489	12.727	-2.476	13.678	-0.666	35.431	608.225	-0.000891	0.000173	-0.000957
45.5000	354.144	17.507	-0.878	17.353	-0.639	35.431	674.200	-0.001225	0.000061	-0.001215
45.6000	415.611	25.388	2.851	22.169	-0.640	35.432	791.216	-0.001777	-0.000200	-0.001552
45.7000	464.348	32.060	6.219	27.122	-0.659	35.430	883.999	-0.002244	-0.000435	-0.001899
45.8000	508.216	38.161	9.236	30.974	-0.637	35.430	967.512	-0.002671	-0.000647	-0.002168
45.9000	565.279	45.496	12.812	36.397	-0.653	35.430	1076.145	-0.003185	-0.000897	-0.002548
46.0000	631.494	54.571	18.124	43.248	-0.648	35.430	1202.202	-0.003820	-0.001269	-0.003027
46.1000	699.347	64.090	21.494	49.495	-0.652	35.429	1331.377	-0.004486	-0.001505	-0.003465
46.2000	754.591	71.801	26.256	54.562	-0.624	35.429	1436.548	-0.005026	-0.001838	-0.003819
46.3000	797.017	77.886	29.528	58.824	-0.666	35.429	1517.315	-0.005452	-0.002067	-0.004118
46.4000	874.037	88.616	33.506	66.572	-0.661	35.428	1663.942	-0.006203	-0.002345	-0.004660
46.5000	910.105	94.146	36.712	70.546	-0.631	35.428	1732.607	-0.006590	-0.002570	-0.004938
46.6000	979.672	103.167	41.077	77.306	-0.642	35.428	1865.044	-0.007222	-0.002875	-0.005411
46.7000	1055.505	113.629	45.254	84.146	-0.662	35.427	2009.411	-0.007954	-0.003168	-0.005890
46.8000	1107.759	121.054	48.217	88.727	-0.647	35.426	2108.889	-0.008474	-0.003375	-0.006211
46.9000	1130.572	124.666	50.638	91.369	-0.637	35.427	2152.319	-0.008727	-0.003545	-0.006396
47.0000	1153.385	128.319	52.676	93.791	-0.671	35.427	2195.749	-0.008982	-0.003687	-0.006565
47.1000	1180.632	132.918	54.189	97.230	-0.649	35.426	2247.620	-0.009304	-0.003793	-0.006806
47.2000	1210.493	136.450	55.701	99.857	-0.624	35.426	2304.468	-0.009551	-0.003899	-0.006990
47.3000	1214.611	138.061	56.885	100.972	-0.668	35.427	2312.307	-0.009664	-0.003982	-0.007068
47.4000	1223.267	139.714	58.193	102.405	-0.656	35.425	2328.787	-0.009780	-0.004074	-0.007168
47.5000	1212.041	138.268	57.297	101.468	-0.645	35.425	2307.415	-0.009679	-0.004011	-0.007103
47.6000	1212.327	139.254	57.972	102.774	-0.647	35.426	2307.959	-0.009748	-0.004058	-0.007194
47.7000	1235.966	141.397	58.000	103.492	-0.665	35.425	2352.962	-0.009898	-0.004060	-0.007244
47.8000	1152.288	132.335	55.578	97.930	-0.650	35.425	2193.661	-0.009263	-0.003890	-0.006855
47.9000	1098.306	125.596	52.301	92.978	-0.653	35.425	2090.893	-0.008792	-0.003661	-0.006508
48.0000	1084.179	124.205	50.569	91.657	-0.669	35.425	2063.999	-0.008694	-0.003540	-0.006416
48.1000	1041.273	118.201	48.575	88.383	-0.667	35.424	1982.317	-0.008274	-0.003400	-0.006187
48.2000	985.052	111.586	45.435	83.648	-0.645	35.425	1875.286	-0.007811	-0.003180	-0.005855
48.3000	924.938	103.863	42.216	78.504	-0.673	35.424	1760.845	-0.007270	-0.002955	-0.005495
48.4000	871.873	96.706	38.280	73.399	-0.659	35.423	1659.822	-0.006769	-0.002680	-0.005138
48.5000	812.977	89.031	34.952	67.480	-0.648	35.424	1547.699	-0.006232	-0.002447	-0.004724
48.6000	742.704	79.418	30.273	61.124	-0.659	35.423	1413.918	-0.005559	-0.002119	-0.004279
48.7000	693.441	72.134	26.847	56.403	-0.656	35.423	1320.133	-0.005049	-0.001879	-0.003948
48.8000	631.389	63.768	22.923	50.062	-0.645	35.423	1202.002	-0.004464	-0.001605	-0.003504
48.9000	572.086	55.459	18.810	44.762	-0.655	35.423	1089.106	-0.003882	-0.001317	-0.003133
49.0000	512.108	46.707	14.628	38.626	-0.659	35.421	974.922	-0.003269	-0.001024	-0.002704
49.1000	472.102	40.690	11.491	34.181	-0.640	35.422	898.762	-0.002848	-0.000804	-0.002393
49.2000	412.996	32.476	7.446	28.553	-0.640	35.422	786.238	-0.002273	-0.000521	-0.001999
49.3000	346.495	22.998	3.237	22.112	-0.661	35.421	659.637	-0.001610	-0.000227	-0.001548
49.4000	338.996	20.761	1.982	20.037	-0.637	35.421	645.361	-0.001453	-0.000139	-0.001403
49.5000	297.397	14.703	-0.714	16.279	-0.637	35.422	566.168	-0.001029	0.000050	-0.001140
49.6000	264.455	9.229	-3.809	12.383	-0.655	35.421	503.454	-0.000646	0.000267	-0.000867
49.7000	249.907	6.599	-4.569	10.306	-0.642	35.420	475.760	-0.000462	0.000320	-0.000721
49.8000	233.181	4.073	-5.781	8.586	-0.628	35.420	443.916	-0.000285	0.000405	-0.000601
49.9000	234.128	4.018	-6.437	8.022	-0.660	35.421	445.719	-0.000281	0.000451	-0.000562
Test Cycles
Time (sec)	Axial stress (kPa)	Axial micro-strain #1	Axial micro-strain #2	Axial micro-strain #3	Confining pressure (kPa)	Temperature (�C)	Load (N)	Displacement #1 (mm)	Displacement #2 (mm)	Displacement #3 (mm)
0.0000	240.560	3.809	-6.054	7.790	-0.635	35.419	457.964	-0.000267	0.000424	-0.000545
0.1000	252.342	5.240	-5.547	8.461	-0.624	35.420	480.394	-0.000367	0.000388	-0.000592
0.2000	265.883	6.920	-5.202	9.220	-0.650	35.420	506.172	-0.000484	0.000364	-0.000645
0.3000	285.885	8.937	-4.294	10.829	-0.650	35.419	544.252	-0.000626	0.000301	-0.000758
0.4000	318.151	13.047	-2.214	14.587	-0.635	35.419	605.679	-0.000913	0.000155	-0.001021
0.5000	383.630	21.483	0.867	19.442	-0.654	35.420	730.333	-0.001504	-0.000061	-0.001361
0.6000	416.693	25.737	2.821	22.678	-0.653	35.419	793.276	-0.001802	-0.000197	-0.001587
0.7000	466.602	32.752	6.647	27.355	-0.639	35.418	888.290	-0.002293	-0.000465	-0.001915
0.8000	526.190	40.397	10.593	33.081	-0.643	35.418	1001.730	-0.002828	-0.000742	-0.002316
0.9000	564.557	45.899	12.841	37.096	-0.665	35.418	1074.772	-0.003213	-0.000899	-0.002597
1.0000	633.192	55.166	17.709	42.973	-0.645	35.417	1205.435	-0.003862	-0.001240	-0.003008
1.1000	688.962	63.186	21.260	48.630	-0.651	35.418	1311.607	-0.004423	-0.001488	-0.003404
1.2000	772.400	73.761	26.035	56.154	-0.663	35.418	1470.451	-0.005163	-0.001822	-0.003931
1.3000	802.953	78.862	29.105	59.803	-0.652	35.416	1528.616	-0.005520	-0.002037	-0.004186
1.4000	870.611	88.312	33.533	66.243	-0.617	35.417	1657.419	-0.006182	-0.002347	-0.004637
1.5000	927.193	96.343	37.072	72.079	-0.649	35.418	1765.137	-0.006744	-0.002595	-0.005046
1.6000	977.493	103.404	40.650	76.959	-0.648	35.417	1860.895	-0.007238	-0.002845	-0.005387
1.7000	1050.426	113.381	45.089	83.553	-0.638	35.416	1999.741	-0.007937	-0.003156	-0.005849
1.8000	1116.761	122.118	48.931	89.496	-0.641	35.418	2126.026	-0.008548	-0.003425	-0.006265
1.9000	1120.172	123.706	49.706	91.382	-0.662	35.416	2132.521	-0.008659	-0.003479	-0.006397
2.0000	1175.492	131.670	54.122	97.133	-0.650	35.416	2237.835	-0.009217	-0.003789	-0.006799
2.1000	1190.956	134.768	54.930	98.906	-0.647	35.417	2267.275	-0.009434	-0.003845	-0.006923
2.2000	1210.298	136.795	56.003	100.201	-0.659	35.416	2304.096	-0.009576	-0.003920	-0.007014
2.3000	1208.404	137.436	57.036	101.043	-0.640	35.416	2300.491	-0.009621	-0.003992	-0.007073
2.4000	1220.397	140.018	57.365	103.037	-0.631	35.416	2323.322	-0.009801	-0.004016	-0.007213
2.5000	1208.329	138.547	57.063	101.798	-0.663	35.416	2300.348	-0.009698	-0.003994	-0.007126
2.6000	1205.128	138.256	57.475	101.730	-0.638	35.415	2294.254	-0.009678	-0.004023	-0.007121
2.7000	1183.202	136.352	57.023	101.125	-0.628	35.415	2252.512	-0.009545	-0.003992	-0.007079
2.8000	1151.371	132.792	55.758	97.821	-0.659	35.416	2191.916	-0.009295	-0.003903	-0.006847
2.9000	1126.154	129.555	53.860	95.648	-0.648	35.416	2143.908	-0.009069	-0.003770	-0.006695
3.0000	1100.230	126.235	52.052	93.488	-0.635	35.415	2094.555	-0.008836	-0.003644	-0.006544
3.1000	1012.509	115.590	47.528	86.153	-0.650	35.416	1927.557	-0.008091	-0.003327	-0.006031
3.2000	995.001	113.018	46.154	85.230	-0.652	35.415	1894.226	-0.007911	-0.003231	-0.005966
3.3000	946.805	106.611	43.195	79.918	-0.651	35.414	1802.473	-0.007463	-0.003024	-0.005594
3.4000	872.549	97.414	39.093	74.016	-0.623	35.415	1661.110	-0.006819	-0.002737	-0.005181
3.5000	814.029	89.145	34.457	68.418	-0.649	35.415	1549.702	-0.006240	-0.002412	-0.004789
3.6000	729.885	78.054	29.735	60.395	-0.648	35.414	1389.513	-0.005464	-0.002081	-0.004228
3.7000	688.722	71.939	27.093	56.955	-0.632	35.415	1311.150	-0.005036	-0.001897	-0.003987
3.8000	625.828	63.533	22.650	50.653	-0.648	35.415	1191.416	-0.004447	-0.001585	-0.003546
3.9000	580.863	56.528	19.045	45.684	-0.664	35.415	1105.814	-0.003957	-0.001333	-0.003198
4.0000	518.781	48.248	15.039	40.250	-0.650	35.414	987.625	-0.003377	-0.001053	-0.002818
4.1000	448.613	38.173	10.403	32.985	-0.641	35.415	854.044	-0.002672	-0.000728	-0.002309
4.2000	419.263	33.267	7.663	29.396	-0.658	35.415	798.168	-0.002329	-0.000536	-0.002058
4.3000	357.932	24.805	3.992	23.696	-0.655	35.414	681.410	-0.001736	-0.000279	-0.001659
4.4000	327.394	20.081	1.692	19.995	-0.643	35.414	623.274	-0.001406	-0.000118	-0.001400
4.5000	296.766	15.037	-0.905	16.390	-0.648	35.415	564.966	-0.001053	0.000063	-0.001147
4.6000	267.070	9.993	-3.012	13.183	-0.660	35.413	508.432	-0.000700	0.000211	-0.000923
4.7000	265.387	9.229	-3.507	12.083	-0.639	35.414	505.228	-0.000646	0.000246	-0.000846
4.8000	232.009	4.392	-5.932	8.764	-0.629	35.414	441.685	-0.000307	0.000415	-0.000613
4.9000	233.301	3.794	-6.055	8.283	-0.655	35.415	444.145	-0.000266	0.000424	-0.000580
5.0000	252.943	5.780	-5.382	9.205	-0.652	35.413	481.539	-0.000405	0.000377	-0.000644
5.1000	263.794	6.864	-5.037	10.058	-0.623	35.414	502.195	-0.000480	0.000353	-0.000704
5.2000	260.893	6.128	-5.547	9.303	-0.654	35.414	496.674	-0.000429	0.000388	-0.000651
5.3000	313.162	12.869	-2.709	13.678	-0.646	35.414	596.180	-0.000901	0.000190	-0.000957
5.4000	326.537	14.604	-1.994	15.192	-0.634	35.414	621.643	-0.001022	0.000140	-0.001063
5.5000	366.423	19.496	-0.083	18.662	-0.634	35.414	697.575	-0.001365	0.000006	-0.001306
5.6000	406.308	24.721	2.752	22.291	-0.672	35.414	773.506	-0.001730	-0.000193	-0.001560
5.7000	470.705	33.572	7.117	28.689	-0.641	35.413	896.101	-0.002350	-0.000498	-0.002008
5.8000	527.512	41.134	10.321	33.550	-0.642	35.414	1004.248	-0.002879	-0.000722	-0.002348
5.9000	573.108	47.568	13.510	38.226	-0.667	35.414	1091.051	-0.003330	-0.000946	-0.002676
6.0000	631.524	55.473	17.709	43.799	-0.657	35.413	1202.259	-0.003883	-0.001240	-0.003066
6.1000	708.078	65.867	22.015	50.654	-0.633	35.413	1348.000	-0.004611	-0.001541	-0.003546
6.2000	758.183	72.942	25.897	55.907	-0.647	35.415	1443.386	-0.005106	-0.001813	-0.003914
6.3000	819.965	81.559	29.996	62.112	-0.653	35.414	1561.003	-0.005709	-0.002100	-0.004348
6.4000	897.061	92.105	34.855	69.020	-0.655	35.413	1707.773	-0.006447	-0.002440	-0.004831
6.5000	945.482	98.916	38.199	74.376	-0.644	35.414	1799.955	-0.006924	-0.002674	-0.005206
6.6000	1040.161	111.155	44.017	82.467	-0.662	35.415	1980.200	-0.007781	-0.003081	-0.005773
6.7000	1039.801	112.769	44.678	83.538	-0.659	35.413	1979.513	-0.007894	-0.003127	-0.005848
6.8000	1089.965	119.398	47.927	88.451	-0.636	35.414	2075.014	-0.008358	-0.003355	-0.006192
6.9000	1138.718	126.137	51.257	93.723	-0.662	35.414	2167.826	-0.008830	-0.003588	-0.006561
7.0000	1157.518	130.042	53.251	96.553	-0.662	35.414	2203.617	-0.009103	-0.003728	-0.006759
7.1000	1185.035	134.099	55.000	99.100	-0.640	35.414	2256.002	-0.009387	-0.003850	-0.006937
7.2000	1204.256	136.797	56.582	101.304	-0.657	35.415	2292.595	-0.009576	-0.003961	-0.007091
7.3000	1223.267	139.615	57.930	103.119	-0.671	35.414	2328.787	-0.009773	-0.004055	-0.007218
7.4000	1217.662	139.783	57.271	103.050	-0.652	35.414	2318.115	-0.009785	-0.004009	-0.007213
7.5000	1216.580	139.922	57.668	103.448	-0.669	35.414	2316.055	-0.009795	-0.004037	-0.007241
7.6000	1199.327	138.200	57.310	102.555	-0.665	35.414	2283.211	-0.009674	-0.004012	-0.007179
7.7000	1196.682	138.420	57.187	102.101	-0.655	35.414	2278.175	-0.009689	-0.004003	-0.007147
7.8000	1166.776	134.932	55.744	100.078	-0.646	35.415	2221.241	-0.009445	-0.003902	-0.007005
7.9000	1117.663	128.749	53.817	96.033	-0.660	35.415	2127.743	-0.009012	-0.003767	-0.006722
8.0000	1095.511	126.125	52.094	94.149	-0.658	35.415	2085.571	-0.008829	-0.003647	-0.006590
8.1000	1036.299	118.828	48.958	88.934	-0.646	35.413	1972.847	-0.008318	-0.003427	-0.006225
8.2000	983.294	111.766	45.588	84.020	-0.651	35.415	1871.939	-0.007824	-0.003191	-0.005881
8.3000	942.281	106.068	42.699	80.361	-0.656	35.415	1793.861	-0.007425	-0.002989	-0.005625
8.4000	875.285	97.858	39.148	74.400	-0.645	35.414	1666.317	-0.006850	-0.002740	-0.005208
8.5000	817.320	89.880	34.924	68.706	-0.641	35.415	1555.967	-0.006292	-0.002445	-0.004809
8.6000	760.888	82.101	31.235	63.407	-0.655	35.416	1448.536	-0.005747	-0.002186	-0.004438
8.7000	695.845	73.498	27.313	57.753	-0.656	35.414	1324.711	-0.005145	-0.001912	-0.004043
8.8000	623.709	63.841	22.773	50.486	-0.631	35.415	1187.382	-0.004469	-0.001594	-0.003534
8.9000	564.768	54.752	18.317	45.024	-0.644	35.415	1075.172	-0.003833	-0.001282	-0.003152
9.0000	522.207	48.722	15.497	40.744	-0.663	35.415	994.148	-0.003411	-0.001085	-0.002852
9.1000	457.525	39.922	10.881	33.920	-0.662	35.414	871.010	-0.002795	-0.000762	-0.002374
9.2000	418.992	33.628	7.938	29.845	-0.656	35.416	797.653	-0.002354	-0.000556	-0.002089
9.3000	376.928	26.999	5.117	25.554	-0.656	35.416	717.573	-0.001890	-0.000358	-0.001789
9.4000	329.032	20.524	1.695	20.696	-0.647	35.415	626.392	-0.001437	-0.000119	-0.001449
9.5000	306.790	16.380	-0.056	17.849	-0.646	35.416	584.049	-0.001147	0.000004	-0.001249
9.6000	272.134	10.881	-2.626	13.596	-0.654	35.417	518.074	-0.000762	0.000184	-0.000952
9.7000	257.542	8.393	-3.728	11.875	-0.659	35.415	490.294	-0.000588	0.000261	-0.000831
9.8000	235.525	5.269	-5.175	9.865	-0.655	35.416	448.380	-0.000369	0.000362	-0.000691
9.9000	233.872	4.256	-6.000	9.246	-0.648	35.417	445.232	-0.000298	0.000420	-0.000647
10.0000	249.562	5.433	-5.258	9.796	-0.656	35.417	475.101	-0.000380	0.000368	-0.000686
10.1000	250.013	5.710	-5.299	9.398	-0.649	35.416	475.960	-0.000400	0.000371	-0.000658
10.2000	280.746	9.174	-4.060	11.352	-0.644	35.417	534.468	-0.000642	0.000284	-0.000795
10.3000	293.099	10.701	-3.809	12.469	-0.668	35.417	557.985	-0.000749	0.000267	-0.000873
10.4000	328.611	15.093	-1.734	15.687	-0.667	35.416	625.591	-0.001056	0.000121	-0.001098
10.5000	368.361	20.512	0.524	19.497	-0.636	35.417	701.265	-0.001436	-0.000037	-0.001365
10.6000	416.272	26.944	3.317	23.570	-0.649	35.417	792.475	-0.001886	-0.000232	-0.001650
10.7000	451.904	31.198	6.028	27.231	-0.654	35.417	860.310	-0.002184	-0.000422	-0.001906
10.8000	516.391	39.869	9.894	32.900	-0.637	35.416	983.076	-0.002791	-0.000693	-0.002303
10.9000	569.532	47.776	13.483	37.828	-0.630	35.417	1084.242	-0.003344	-0.000944	-0.002648
11.0000	646.026	57.141	17.942	44.818	-0.656	35.418	1229.868	-0.004000	-0.001256	-0.003137
11.1000	704.532	65.270	22.445	50.640	-0.653	35.416	1341.248	-0.004569	-0.001571	-0.003545
11.2000	776.954	75.751	27.219	57.643	-0.629	35.417	1479.120	-0.005303	-0.001905	-0.004035
11.3000	831.311	83.417	31.003	63.613	-0.642	35.417	1582.603	-0.005839	-0.002170	-0.004453
11.4000	876.081	89.587	33.946	67.575	-0.658	35.417	1667.833	-0.006271	-0.002376	-0.004730
11.5000	934.857	98.137	38.047	73.357	-0.631	35.417	1779.728	-0.006870	-0.002663	-0.005135
11.6000	999.013	106.863	41.764	79.548	-0.643	35.418	1901.865	-0.007480	-0.002923	-0.005568
11.7000	1041.379	113.226	44.805	84.060	-0.661	35.417	1982.517	-0.007926	-0.003136	-0.005884
11.8000	1079.971	118.732	47.638	88.105	-0.643	35.417	2055.988	-0.008311	-0.003335	-0.006167
11.9000	1142.430	127.622	51.520	94.245	-0.624	35.418	2174.892	-0.008934	-0.003606	-0.006597
12.0000	1172.697	132.030	53.445	96.677	-0.663	35.419	2232.513	-0.009242	-0.003741	-0.006767
12.1000	1197.043	135.587	55.096	99.554	-0.658	35.417	2278.862	-0.009491	-0.003857	-0.006969
12.2000	1205.173	137.243	56.113	101.359	-0.630	35.418	2294.340	-0.009607	-0.003928	-0.007095
12.3000	1212.146	138.909	56.955	102.815	-0.656	35.418	2307.615	-0.009724	-0.003987	-0.007197
12.4000	1218.353	140.284	57.092	103.792	-0.656	35.419	2319.431	-0.009820	-0.003996	-0.007265
12.5000	1210.012	139.408	57.586	103.297	-0.654	35.417	2303.553	-0.009759	-0.004031	-0.007231
12.6000	1201.762	139.213	57.283	103.037	-0.641	35.419	2287.846	-0.009745	-0.004010	-0.007213
12.7000	1185.982	137.476	56.472	101.703	-0.659	35.418	2257.805	-0.009623	-0.003953	-0.007119
12.8000	1159.126	134.154	55.290	99.430	-0.655	35.418	2206.678	-0.009391	-0.003870	-0.006960
12.9000	1135.547	131.310	54.244	97.065	-0.642	35.419	2161.789	-0.009192	-0.003797	-0.006795
13.0000	1094.279	126.235	52.344	93.747	-0.660	35.419	2083.225	-0.008836	-0.003664	-0.006562
13.1000	1026.891	117.979	48.396	88.838	-0.652	35.418	1954.937	-0.008259	-0.003388	-0.006219
13.2000	990.808	112.992	46.441	84.930	-0.640	35.418	1886.244	-0.007909	-0.003251	-0.005945
13.3000	941.259	107.003	43.373	80.208	-0.652	35.419	1791.916	-0.007490	-0.003036	-0.005615
13.4000	864.584	97.264	38.749	74.070	-0.652	35.418	1645.947	-0.006808	-0.002712	-0.005185
13.5000	810.151	89.380	34.733	68.472	-0.637	35.419	1542.320	-0.006257	-0.002431	-0.004793
13.6000	740.074	80.181	30.659	62.237	-0.650	35.420	1408.911	-0.005613	-0.002146	-0.004357
13.7000	647.259	68.091	24.727	54.022	-0.662	35.419	1232.214	-0.004766	-0.001731	-0.003782
13.8000	616.826	63.160	22.389	50.790	-0.647	35.419	1174.278	-0.004421	-0.001567	-0.003555
13.9000	575.062	56.640	19.690	45.931	-0.644	35.420	1094.770	-0.003965	-0.001378	-0.003215
14.0000	497.425	46.387	14.382	38.888	-0.659	35.420	946.970	-0.003247	-0.001007	-0.002722
14.1000	479.707	42.857	12.149	35.971	-0.649	35.419	913.239	-0.003000	-0.000850	-0.002518
14.2000	419.428	33.976	8.409	30.381	-0.647	35.420	798.483	-0.002378	-0.000589	-0.002127
14.3000	350.222	24.430	3.978	23.696	-0.673	35.420	666.733	-0.001710	-0.000278	-0.001659
14.4000	315.221	19.095	1.059	19.348	-0.659	35.419	600.100	-0.001337	-0.000074	-0.001354
14.5000	296.495	15.537	-1.224	16.969	-0.651	35.421	564.451	-0.001088	0.000086	-0.001188
14.6000	271.383	10.995	-2.944	13.540	-0.678	35.420	516.644	-0.000770	0.000206	-0.000948
14.7000	238.831	6.475	-4.679	10.473	-0.656	35.420	454.674	-0.000453	0.000328	-0.000733
14.8000	238.696	5.821	-5.161	10.240	-0.645	35.420	454.416	-0.000407	0.000361	-0.000717
14.9000	235.630	4.602	-5.492	9.744	-0.665	35.422	448.580	-0.000322	0.000384	-0.000682
15.0000	241.642	5.115	-5.301	9.785	-0.667	35.421	460.024	-0.000358	0.000371	-0.000685
15.1000	258.444	6.780	-5.051	10.115	-0.648	35.421	492.010	-0.000475	0.000354	-0.000708
15.2000	276.959	8.826	-4.418	11.683	-0.654	35.422	527.258	-0.000618	0.000309	-0.000818
15.3000	288.981	10.132	-3.935	12.439	-0.666	35.422	550.146	-0.000709	0.000275	-0.000871
15.4000	328.326	15.662	-1.651	15.618	-0.648	35.421	625.048	-0.001096	0.000116	-0.001093
15.5000	370.540	20.886	0.552	19.814	-0.645	35.422	705.414	-0.001462	-0.000039	-0.001387
15.6000	416.663	26.805	4.087	24.314	-0.657	35.422	793.219	-0.001876	-0.000286	-0.001702
15.7000	454.684	32.309	6.385	27.533	-0.667	35.422	865.602	-0.002262	-0.000447	-0.001927
15.8000	523.545	41.328	10.375	33.755	-0.648	35.422	996.695	-0.002893	-0.000726	-0.002363
15.9000	576.294	48.513	13.844	39.287	-0.656	35.423	1097.116	-0.003396	-0.000969	-0.002750
16.0000	657.688	59.074	19.321	46.662	-0.663	35.423	1252.069	-0.004135	-0.001352	-0.003266
16.1000	704.862	66.339	22.637	51.381	-0.650	35.422	1341.877	-0.004644	-0.001585	-0.003597
16.2000	747.378	72.188	25.828	55.507	-0.649	35.423	1422.815	-0.005053	-0.001808	-0.003886
16.3000	827.464	82.794	30.700	63.049	-0.659	35.423	1575.279	-0.005796	-0.002149	-0.004413
16.4000	890.148	92.178	35.213	69.296	-0.669	35.423	1694.613	-0.006452	-0.002465	-0.004851
16.5000	941.004	99.259	38.281	74.484	-0.647	35.422	1791.430	-0.006948	-0.002680	-0.005214
16.6000	991.199	106.223	41.682	79.548	-0.663	35.423	1886.988	-0.007436	-0.002918	-0.005568
16.7000	1042.070	113.588	45.173	84.599	-0.668	35.424	1983.833	-0.007951	-0.003162	-0.005922
16.8000	1091.558	120.636	48.712	89.248	-0.663	35.423	2078.047	-0.008445	-0.003410	-0.006247
16.9000	1120.638	125.123	50.707	92.110	-0.648	35.424	2133.408	-0.008759	-0.003549	-0.006448
17.0000	1179.986	132.986	54.164	98.509	-0.657	35.424	2246.389	-0.009309	-0.003791	-0.006896
17.1000	1200.875	136.796	56.362	100.682	-0.663	35.424	2286.158	-0.009576	-0.003945	-0.007048
17.2000	1215.768	139.365	56.777	102.815	-0.653	35.423	2314.510	-0.009756	-0.003974	-0.007197
17.3000	1219.706	139.893	57.461	103.049	-0.652	35.425	2322.006	-0.009793	-0.004022	-0.007213
17.4000	1225.672	140.910	58.138	104.207	-0.663	35.425	2333.364	-0.009864	-0.004070	-0.007294
17.5000	1222.351	141.675	58.700	103.986	-0.655	35.424	2327.042	-0.009917	-0.004109	-0.007279
17.6000	1190.551	138.007	57.106	102.732	-0.637	35.424	2266.502	-0.009660	-0.003997	-0.007191
17.7000	1185.756	137.478	57.146	102.059	-0.655	35.425	2257.376	-0.009623	-0.004000	-0.007144
17.8000	1154.963	134.059	56.279	99.073	-0.664	35.425	2198.753	-0.009384	-0.003940	-0.006935
17.9000	1133.067	131.433	54.368	97.450	-0.653	35.425	2157.068	-0.009200	-0.003806	-0.006822
18.0000	1070.188	123.817	51.395	92.525	-0.645	35.425	2037.363	-0.008667	-0.003598	-0.006477
18.1000	1039.139	119.719	50.021	89.305	-0.664	35.425	1978.254	-0.008380	-0.003501	-0.006251
18.2000	966.041	110.779	45.188	83.333	-0.664	35.424	1839.094	-0.007755	-0.003163	-0.005833
18.3000	939.441	106.835	42.961	80.964	-0.641	35.425	1788.454	-0.007478	-0.003007	-0.005667
18.4000	838.735	94.077	37.292	72.287	-0.660	35.426	1596.737	-0.006585	-0.002610	-0.005060
18.5000	806.680	89.519	35.418	68.911	-0.669	35.425	1535.711	-0.006266	-0.002479	-0.004824
18.6000	755.087	82.905	31.788	63.724	-0.649	35.424	1437.492	-0.005803	-0.002225	-0.004461
18.7000	687.219	73.051	27.079	57.231	-0.646	35.426	1308.289	-0.005114	-0.001896	-0.004006
18.8000	663.294	68.899	24.547	54.120	-0.655	35.426	1262.741	-0.004823	-0.001718	-0.003788
18.9000	562.889	55.710	18.838	45.421	-0.655	35.425	1071.596	-0.003900	-0.001319	-0.003179
19.0000	497.305	46.567	14.160	39.038	-0.647	35.426	946.741	-0.003260	-0.000991	-0.002733
19.1000	468.992	41.592	11.753	35.819	-0.661	35.427	892.839	-0.002911	-0.000823	-0.002507
19.2000	408.502	32.975	8.215	29.612	-0.660	35.426	777.683	-0.002308	-0.000575	-0.002073
19.3000	354.836	25.527	4.156	24.135	-0.649	35.426	675.516	-0.001787	-0.000291	-0.001689
19.4000	324.133	20.774	1.556	20.696	-0.660	35.427	617.065	-0.001454	-0.000109	-0.001449
19.5000	298.164	15.978	-0.316	17.779	-0.668	35.426	567.627	-0.001118	0.000022	-0.001245
19.6000	275.140	12.547	-1.899	14.793	-0.649	35.426	523.796	-0.000878	0.000133	-0.001036
19.7000	255.182	9.103	-4.018	12.097	-0.656	35.426	485.802	-0.000637	0.000281	-0.000847
19.8000	241.852	6.251	-5.120	10.529	-0.671	35.426	460.424	-0.000438	0.000358	-0.000737
19.9000	238.681	5.295	-5.355	9.977	-0.644	35.426	454.388	-0.000371	0.000375	-0.000698
20.0000	238.351	5.087	-5.560	9.548	-0.652	35.427	453.758	-0.000356	0.000389	-0.000668
20.1000	251.515	6.390	-5.384	10.088	-0.673	35.426	478.821	-0.000447	0.000377	-0.000706
20.2000	266.799	7.962	-4.541	10.898	-0.644	35.426	507.917	-0.000557	0.000318	-0.000763
20.3000	308.458	13.007	-2.724	14.188	-0.644	35.427	587.225	-0.000911	0.000191	-0.000993
20.4000	328.536	15.759	-1.637	16.362	-0.669	35.427	625.448	-0.001103	0.000115	-0.001145
20.5000	380.865	22.705	1.128	20.902	-0.650	35.426	725.069	-0.001589	-0.000079	-0.001463
20.6000	418.917	27.515	3.867	24.149	-0.656	35.427	797.510	-0.001926	-0.000271	-0.001690
20.7000	476.431	35.297	7.979	30.052	-0.659	35.426	907.001	-0.002471	-0.000559	-0.002104
20.8000	522.643	41.815	10.773	34.458	-0.653	35.426	994.978	-0.002927	-0.000754	-0.002412
20.9000	570.253	48.027	13.772	38.763	-0.645	35.426	1085.615	-0.003362	-0.000964	-0.002713
21.0000	688.271	62.657	20.943	48.849	-0.658	35.427	1310.291	-0.004386	-0.001466	-0.003419
21.1000	696.672	65.187	22.236	50.846	-0.658	35.426	1326.284	-0.004563	-0.001557	-0.003559
21.2000	744.582	72.094	25.595	55.633	-0.651	35.426	1417.494	-0.005047	-0.001792	-0.003894
21.3000	845.904	85.240	31.816	64.701	-0.670	35.426	1610.384	-0.005967	-0.002227	-0.004529
21.4000	876.141	90.366	34.357	68.252	-0.657	35.425	1667.948	-0.006326	-0.002405	-0.004778
21.5000	939.020	99.261	38.267	74.373	-0.645	35.426	1787.653	-0.006948	-0.002679	-0.005206
21.6000	992.160	106.974	42.106	79.823	-0.676	35.426	1888.819	-0.007488	-0.002947	-0.005588
21.7000	1045.962	114.064	45.065	85.202	-0.664	35.425	1991.243	-0.007984	-0.003155	-0.005964
21.8000	1083.984	119.830	48.409	88.727	-0.645	35.426	2063.627	-0.008388	-0.003389	-0.006211
21.9000	1126.800	126.362	51.052	93.379	-0.670	35.427	2145.138	-0.008845	-0.003574	-0.006537
22.0000	1169.375	131.863	53.362	97.683	-0.673	35.426	2226.191	-0.009230	-0.003735	-0.006838
22.1000	1182.796	135.017	55.013	99.320	-0.667	35.425	2251.740	-0.009451	-0.003851	-0.006952
22.2000	1214.040	139.213	57.229	102.789	-0.670	35.427	2311.220	-0.009745	-0.004006	-0.007195
22.3000	1225.206	141.075	57.725	103.614	-0.672	35.427	2332.478	-0.009875	-0.004041	-0.007253
22.4000	1221.975	140.882	58.328	103.920	-0.670	35.426	2326.326	-0.009862	-0.004083	-0.007274
22.5000	1215.964	140.715	58.770	104.276	-0.648	35.426	2314.882	-0.009850	-0.004114	-0.007299
22.6000	1195.495	138.935	58.206	102.500	-0.672	35.427	2275.915	-0.009725	-0.004074	-0.007175
22.7000	1185.261	137.809	57.092	102.554	-0.675	35.427	2256.432	-0.009647	-0.003996	-0.007179
22.8000	1170.653	135.974	56.514	101.207	-0.669	35.427	2228.622	-0.009518	-0.003956	-0.007084
22.9000	1119.436	130.321	54.368	96.884	-0.663	35.427	2131.119	-0.009122	-0.003806	-0.006782
23.0000	1088.823	126.346	52.261	93.844	-0.672	35.427	2072.840	-0.008844	-0.003658	-0.006569
23.1000	1041.198	120.162	49.482	90.006	-0.657	35.427	1982.174	-0.008411	-0.003464	-0.006300
23.2000	983.023	112.367	45.132	84.282	-0.651	35.428	1871.424	-0.007866	-0.003159	-0.005900
23.3000	943.814	108.171	43.689	81.325	-0.669	35.428	1796.780	-0.007572	-0.003058	-0.005693
23.4000	874.999	98.499	38.887	75.060	-0.675	35.427	1665.773	-0.006895	-0.002722	-0.005254
23.5000	821.062	91.201	35.419	69.944	-0.648	35.427	1563.091	-0.006384	-0.002479	-0.004896
23.6000	743.561	81.058	31.126	63.105	-0.662	35.428	1415.548	-0.005674	-0.002179	-0.004417
23.7000	697.243	74.664	27.893	58.290	-0.682	35.428	1327.372	-0.005226	-0.001953	-0.004080
23.8000	644.193	66.994	23.956	52.879	-0.667	35.427	1226.377	-0.004690	-0.001677	-0.003702
23.9000	542.886	53.321	17.792	44.378	-0.652	35.428	1033.516	-0.003732	-0.001245	-0.003106
24.0000	516.091	48.929	15.495	40.854	-0.673	35.428	982.504	-0.003425	-0.001085	-0.002860
24.1000	468.676	42.400	12.148	35.914	-0.667	35.428	892.239	-0.002968	-0.000850	-0.002514
24.2000	417.113	34.462	7.639	30.587	-0.653	35.428	794.077	-0.002412	-0.000535	-0.002141
24.3000	357.856	25.988	4.471	24.520	-0.673	35.428	681.267	-0.001819	-0.000313	-0.001716
24.4000	326.703	21.079	2.120	21.054	-0.682	35.428	621.958	-0.001476	-0.000148	-0.001474
24.5000	304.536	17.035	-0.068	18.164	-0.659	35.428	579.758	-0.001192	0.000005	-0.001271
24.6000	275.651	12.463	-2.297	14.957	-0.661	35.429	524.769	-0.000872	0.000161	-0.001047
24.7000	246.797	8.228	-4.210	11.711	-0.669	35.428	469.837	-0.000576	0.000295	-0.000820
24.8000	236.893	6.460	-5.161	10.375	-0.648	35.428	450.983	-0.000452	0.000361	-0.000726
24.9000	236.021	5.570	-5.794	9.756	-0.653	35.429	449.324	-0.000390	0.000406	-0.000683
25.0000	234.639	5.016	-5.368	9.467	-0.664	35.428	446.692	-0.000351	0.000376	-0.000663
25.1000	249.847	6.585	-5.134	10.223	-0.642	35.428	475.645	-0.000461	0.000359	-0.000716
25.2000	258.879	7.158	-5.230	10.609	-0.651	35.429	492.840	-0.000501	0.000366	-0.000743
25.3000	308.909	13.619	-3.122	14.435	-0.675	35.429	588.083	-0.000953	0.000219	-0.001010
25.4000	278.176	9.771	-3.810	12.482	-0.677	35.429	529.575	-0.000684	0.000267	-0.000874
25.5000	367.835	21.441	1.043	19.939	-0.654	35.430	700.264	-0.001501	-0.000073	-0.001396
25.6000	428.430	29.153	5.448	25.992	-0.675	35.430	815.620	-0.002041	-0.000381	-0.001819
25.7000	464.754	33.501	7.047	28.568	-0.678	35.429	884.771	-0.002345	-0.000493	-0.002000
25.8000	523.620	41.690	10.841	34.278	-0.651	35.429	996.838	-0.002918	-0.000759	-0.002399
25.9000	591.142	50.568	14.380	40.361	-0.656	35.431	1125.383	-0.003540	-0.001007	-0.002825
26.0000	636.754	56.986	17.999	45.106	-0.677	35.430	1212.215	-0.003989	-0.001260	-0.003157
26.1000	701.616	65.632	22.499	50.997	-0.663	35.430	1335.697	-0.004594	-0.001575	-0.003570
26.2000	775.376	76.182	27.107	58.056	-0.645	35.431	1476.116	-0.005333	-0.001898	-0.004064
26.3000	827.224	83.183	30.423	63.709	-0.671	35.431	1574.821	-0.005823	-0.002130	-0.004460
26.4000	878.425	90.923	34.787	68.664	-0.661	35.431	1672.297	-0.006365	-0.002435	-0.004806
26.5000	932.152	98.540	38.184	73.934	-0.648	35.431	1774.578	-0.006898	-0.002673	-0.005175
26.6000	1014.508	109.337	42.436	81.514	-0.651	35.431	1931.362	-0.007654	-0.002971	-0.005706
26.7000	1041.664	113.464	44.680	84.378	-0.661	35.432	1983.061	-0.007942	-0.003128	-0.005906
26.8000	1114.402	123.551	49.595	91.273	-0.656	35.431	2121.534	-0.008649	-0.003472	-0.006389
26.9000	1134.359	127.359	51.271	94.024	-0.656	35.433	2159.529	-0.008915	-0.003589	-0.006582
27.0000	1156.917	130.681	52.756	97.119	-0.671	35.432	2202.473	-0.009148	-0.003693	-0.006798
27.1000	1177.521	134.101	54.740	99.268	-0.662	35.432	2241.697	-0.009387	-0.003832	-0.006949
27.2000	1207.022	138.393	56.486	102.185	-0.651	35.432	2297.859	-0.009688	-0.003954	-0.007153
27.3000	1224.951	141.088	57.957	104.331	-0.659	35.433	2331.991	-0.009876	-0.004057	-0.007303
27.4000	1220.322	140.756	57.447	104.510	-0.677	35.433	2323.179	-0.009853	-0.004021	-0.007316
27.5000	1220.713	141.118	58.180	104.454	-0.665	35.433	2323.923	-0.009878	-0.004073	-0.007312
27.6000	1209.471	140.548	57.641	104.081	-0.661	35.433	2302.523	-0.009838	-0.004035	-0.007286
27.7000	1161.290	135.391	56.458	100.767	-0.672	35.433	2210.798	-0.009477	-0.003952	-0.007054
27.8000	1139.469	132.212	55.085	98.619	-0.655	35.434	2169.256	-0.009255	-0.003856	-0.006903
27.9000	1122.231	130.544	53.791	96.649	-0.669	35.435	2136.440	-0.009138	-0.003765	-0.006765
28.0000	1092.235	126.541	51.519	94.396	-0.680	35.434	2079.334	-0.008858	-0.003606	-0.006608
28.1000	1055.265	121.550	49.747	90.760	-0.661	35.433	2008.953	-0.008509	-0.003482	-0.006353
28.2000	974.036	111.378	45.078	83.951	-0.671	35.434	1854.315	-0.007796	-0.003155	-0.005877
28.3000	923.992	105.556	42.215	79.741	-0.663	35.434	1759.043	-0.007389	-0.002955	-0.005582
28.4000	877.975	98.915	38.888	75.253	-0.649	35.434	1671.438	-0.006924	-0.002722	-0.005268
28.5000	799.617	88.699	34.538	68.470	-0.677	35.435	1522.264	-0.006209	-0.002418	-0.004793
28.6000	755.974	82.932	31.334	63.861	-0.672	35.434	1439.180	-0.005805	-0.002193	-0.004470
28.7000	682.049	72.953	26.297	57.092	-0.652	35.435	1298.447	-0.005107	-0.001841	-0.003996
28.8000	632.756	65.506	23.295	52.248	-0.651	35.437	1204.605	-0.004585	-0.001631	-0.003657
28.9000	567.878	56.654	18.797	45.836	-0.672	35.436	1081.095	-0.003966	-0.001316	-0.003209
29.0000	515.354	49.292	15.151	40.581	-0.663	35.435	981.102	-0.003450	-0.001061	-0.002841
29.1000	414.859	35.017	8.367	31.097	-0.655	35.436	789.785	-0.002451	-0.000586	-0.002177
29.2000	362.320	27.764	4.844	25.982	-0.668	35.438	689.764	-0.001943	-0.000339	-0.001819
29.3000	344.331	23.944	2.835	22.664	-0.671	35.436	655.518	-0.001676	-0.000198	-0.001586
29.4000	312.260	19.481	0.579	20.008	-0.664	35.436	594.463	-0.001364	-0.000041	-0.001401
29.5000	311.719	17.062	-1.168	18.082	-0.664	35.438	593.433	-0.001194	0.000082	-0.001266
29.6000	276.913	12.382	-2.710	14.448	-0.673	35.438	527.172	-0.000867	0.000190	-0.001011
29.7000	254.491	9.408	-4.211	12.026	-0.659	35.437	484.486	-0.000659	0.000295	-0.000842
29.8000	194.903	0.486	-8.395	6.895	-0.651	35.438	371.046	-0.000034	0.000588	-0.000483
29.9000	255.378	7.559	-5.395	10.830	-0.672	35.438	486.174	-0.000529	0.000378	-0.000758
30.0000	237.569	5.200	-6.055	9.494	-0.684	35.438	452.271	-0.000364	0.000424	-0.000665
30.1000	280.520	10.173	-4.680	12.287	-0.652	35.438	534.039	-0.000712	0.000328	-0.000860
30.2000	270.226	8.449	-4.995	11.696	-0.665	35.439	514.441	-0.000591	0.000350	-0.000819
30.3000	271.188	8.841	-4.253	11.875	-0.680	35.439	516.272	-0.000619	0.000298	-0.000831
30.4000	352.446	19.025	-0.261	18.442	-0.660	35.438	670.967	-0.001332	0.000018	-0.001291
30.5000	356.880	19.664	-0.067	18.592	-0.657	35.439	679.407	-0.001377	0.000005	-0.001301
30.6000	415.175	27.208	3.672	24.520	-0.667	35.440	790.386	-0.001905	-0.000257	-0.001716
30.7000	460.140	33.238	6.578	28.209	-0.681	35.439	875.988	-0.002327	-0.000460	-0.001975
30.8000	501.919	39.310	10.075	32.873	-0.661	35.439	955.524	-0.002752	-0.000705	-0.002301
30.9000	580.502	49.677	14.173	39.411	-0.660	35.440	1105.127	-0.003477	-0.000992	-0.002759
31.0000	642.449	58.283	18.468	45.821	-0.675	35.440	1223.059	-0.004080	-0.001293	-0.003208
31.1000	697.589	65.922	22.319	51.135	-0.656	35.440	1328.030	-0.004615	-0.001562	-0.003579
31.2000	774.113	75.807	26.722	58.122	-0.653	35.441	1473.713	-0.005306	-0.001871	-0.004069
31.3000	842.087	85.031	31.223	64.645	-0.668	35.441	1603.117	-0.005952	-0.002186	-0.004525
31.4000	891.921	92.649	34.965	69.709	-0.653	35.440	1697.989	-0.006485	-0.002448	-0.004880
31.5000	977.703	103.862	40.068	77.318	-0.658	35.441	1861.296	-0.007270	-0.002805	-0.005412
31.6000	1007.414	108.976	42.313	81.254	-0.670	35.441	1917.858	-0.007628	-0.002962	-0.005688
31.7000	1035.217	113.102	44.749	84.613	-0.659	35.441	1970.787	-0.007917	-0.003132	-0.005923
31.8000	1094.699	121.481	48.809	90.281	-0.656	35.441	2084.026	-0.008504	-0.003417	-0.006320
31.9000	1135.096	127.693	51.452	94.642	-0.679	35.442	2160.931	-0.008938	-0.003602	-0.006625
32.0000	1156.105	130.335	52.578	96.733	-0.660	35.441	2200.928	-0.009123	-0.003680	-0.006771
32.1000	1174.245	133.989	54.573	99.335	-0.650	35.442	2235.460	-0.009379	-0.003820	-0.006953
32.2000	1192.083	136.977	56.044	101.098	-0.666	35.442	2269.421	-0.009588	-0.003923	-0.007077
32.3000	1215.783	140.382	57.751	103.946	-0.659	35.441	2314.539	-0.009827	-0.004043	-0.007276
32.4000	1221.013	141.142	58.358	104.592	-0.652	35.442	2324.495	-0.009880	-0.004085	-0.007321
32.5000	1196.442	138.726	57.668	102.913	-0.658	35.443	2277.718	-0.009711	-0.004037	-0.007204
32.6000	1197.689	139.421	57.462	103.215	-0.660	35.442	2280.092	-0.009759	-0.004022	-0.007225
32.7000	1194.518	138.700	57.243	103.447	-0.639	35.443	2274.055	-0.009709	-0.004007	-0.007241
32.8000	1186.508	137.713	56.874	102.595	-0.660	35.444	2258.806	-0.009640	-0.003981	-0.007182
32.9000	1126.124	130.918	53.997	97.051	-0.660	35.442	2143.850	-0.009164	-0.003780	-0.006794
33.0000	1071.901	124.596	51.297	93.089	-0.643	35.442	2040.625	-0.008722	-0.003591	-0.006516
33.1000	1082.932	125.222	50.076	93.681	-0.660	35.444	2061.625	-0.008766	-0.003505	-0.006558
33.2000	978.755	112.226	45.450	84.394	-0.677	35.443	1863.298	-0.007856	-0.003182	-0.005908
33.3000	936.450	107.071	42.672	81.033	-0.661	35.443	1782.761	-0.007495	-0.002987	-0.005672
33.4000	885.504	99.927	39.559	76.286	-0.647	35.444	1685.772	-0.006995	-0.002769	-0.005340
33.5000	826.217	92.176	35.417	70.617	-0.663	35.444	1572.905	-0.006452	-0.002479	-0.004943
33.6000	739.834	80.989	30.591	63.023	-0.656	35.443	1408.453	-0.005669	-0.002141	-0.004412
33.7000	674.730	72.051	26.075	56.749	-0.648	35.444	1284.513	-0.005044	-0.001825	-0.003972
33.8000	638.211	66.354	23.502	53.073	-0.667	35.444	1214.991	-0.004645	-0.001645	-0.003715
33.9000	544.179	53.528	17.391	44.199	-0.679	35.444	1035.976	-0.003747	-0.001217	-0.003094
34.0000	490.512	46.400	13.606	38.846	-0.667	35.444	933.809	-0.003248	-0.000952	-0.002719
34.1000	471.351	42.745	12.261	36.506	-0.657	35.445	897.331	-0.002992	-0.000858	-0.002555
34.2000	406.263	33.767	7.417	29.900	-0.676	35.445	773.420	-0.002364	-0.000519	-0.002093
34.3000	357.195	25.862	4.143	24.740	-0.672	35.444	680.008	-0.001810	-0.000290	-0.001732
34.4000	326.657	20.733	1.415	20.902	-0.644	35.444	621.872	-0.001451	-0.000099	-0.001463
34.5000	301.455	17.104	-0.508	18.303	-0.663	35.445	573.893	-0.001197	0.000036	-0.001281
34.6000	293.550	14.842	-2.021	16.003	-0.671	35.445	558.844	-0.001039	0.000142	-0.001120
34.7000	249.051	8.631	-4.269	12.357	-0.656	35.444	474.129	-0.000604	0.000299	-0.000865
34.8000	241.642	7.113	-5.218	10.996	-0.657	35.446	460.024	-0.000498	0.000365	-0.000770
34.9000	224.028	4.450	-6.382	9.066	-0.676	35.445	426.493	-0.000311	0.000447	-0.000635
35.0000	254.401	7.629	-5.395	10.844	-0.667	35.444	484.314	-0.000534	0.000378	-0.000759
35.1000	256.535	7.251	-5.383	10.609	-0.652	35.445	488.377	-0.000508	0.000377	-0.000743
35.2000	282.609	10.298	-4.377	12.412	-0.660	35.446	538.015	-0.000721	0.000306	-0.000869
35.3000	302.988	13.299	-3.095	14.835	-0.668	35.445	576.811	-0.000931	0.000217	-0.001038
35.4000	350.883	18.760	-1.208	18.357	-0.654	35.445	667.992	-0.001313	0.000085	-0.001285
35.5000	378.836	22.191	1.031	21.189	-0.671	35.446	721.207	-0.001553	-0.000072	-0.001483
35.6000	441.715	30.420	5.174	26.697	-0.665	35.445	840.912	-0.002129	-0.000362	-0.001869
35.7000	460.305	33.588	6.233	28.828	-0.656	35.445	876.303	-0.002351	-0.000436	-0.002018
35.8000	519.938	41.425	10.253	33.961	-0.667	35.445	989.828	-0.002900	-0.000718	-0.002377
35.9000	586.018	50.387	14.778	40.469	-0.679	35.445	1115.627	-0.003527	-0.001034	-0.002833
36.0000	637.941	57.684	19.348	45.862	-0.649	35.445	1214.476	-0.004038	-0.001354	-0.003210
36.1000	715.127	68.313	23.914	53.430	-0.673	35.446	1361.418	-0.004782	-0.001674	-0.003740
36.2000	758.138	73.970	26.200	57.520	-0.687	35.445	1443.300	-0.005178	-0.001834	-0.004026
36.3000	835.730	84.754	31.637	64.741	-0.667	35.445	1591.015	-0.005933	-0.002215	-0.004532
36.4000	879.793	91.606	34.592	69.226	-0.687	35.446	1674.900	-0.006412	-0.002421	-0.004846
36.5000	934.256	98.944	37.691	74.525	-0.676	35.445	1778.584	-0.006926	-0.002638	-0.005217
36.6000	1013.786	109.601	42.603	81.872	-0.667	35.445	1929.989	-0.007672	-0.002982	-0.005731
36.7000	1062.283	116.671	46.109	86.580	-0.677	35.446	2022.314	-0.008167	-0.003228	-0.006061
36.8000	1076.981	119.621	47.750	88.795	-0.678	35.445	2050.295	-0.008373	-0.003343	-0.006216
36.9000	1118.279	125.567	50.253	93.269	-0.668	35.445	2128.916	-0.008790	-0.003518	-0.006529
37.0000	1158.134	131.211	53.307	97.354	-0.677	35.446	2204.790	-0.009185	-0.003731	-0.006815
37.1000	1204.903	137.282	56.003	101.634	-0.675	35.444	2293.825	-0.009610	-0.003920	-0.007114
37.2000	1232.284	141.381	57.641	104.564	-0.665	35.445	2345.953	-0.009897	-0.004035	-0.007320
37.3000	1222.726	141.230	57.559	104.511	-0.679	35.446	2327.757	-0.009886	-0.004029	-0.007316
37.4000	1223.974	141.840	57.820	105.006	-0.687	35.445	2330.132	-0.009929	-0.004047	-0.007350
37.5000	1212.732	140.938	58.357	104.316	-0.667	35.445	2308.731	-0.009866	-0.004085	-0.007302
37.6000	1209.456	141.076	58.275	104.648	-0.676	35.446	2302.494	-0.009875	-0.004079	-0.007325
37.7000	1189.078	138.711	57.174	102.912	-0.684	35.446	2263.699	-0.009710	-0.004002	-0.007204
37.8000	1153.085	134.239	55.577	100.119	-0.681	35.445	2195.177	-0.009397	-0.003890	-0.007008
37.9000	1096.322	128.123	52.964	95.470	-0.666	35.447	2087.116	-0.008969	-0.003707	-0.006683
38.0000	1080.783	125.889	51.807	93.654	-0.695	35.446	2057.533	-0.008812	-0.003626	-0.006556
38.1000	1025.403	118.468	48.066	89.014	-0.674	35.446	1952.105	-0.008293	-0.003365	-0.006231
38.2000	974.953	112.462	45.409	84.873	-0.659	35.446	1856.060	-0.007872	-0.003179	-0.005941
38.3000	942.221	107.766	42.754	81.378	-0.674	35.447	1793.747	-0.007544	-0.002993	-0.005696
38.4000	876.111	99.428	38.997	75.680	-0.690	35.447	1667.891	-0.006960	-0.002730	-0.005298
38.5000	800.112	89.337	34.098	68.746	-0.682	35.446	1523.209	-0.006254	-0.002387	-0.004812
38.6000	756.876	82.865	31.056	64.055	-0.668	35.446	1440.897	-0.005801	-0.002174	-0.004484
38.7000	692.494	74.540	27.519	58.686	-0.680	35.447	1318.331	-0.005218	-0.001926	-0.004108
38.8000	643.682	67.313	23.844	53.528	-0.696	35.447	1225.405	-0.004712	-0.001669	-0.003747
38.9000	567.398	56.934	18.330	46.275	-0.667	35.446	1080.179	-0.003985	-0.001283	-0.003239
39.0000	510.966	48.526	15.164	40.744	-0.661	35.447	972.748	-0.003397	-0.001061	-0.002852
39.1000	456.037	40.704	11.048	34.731	-0.686	35.447	868.177	-0.002849	-0.000773	-0.002431
39.2000	400.492	32.657	7.295	29.585	-0.677	35.447	762.434	-0.002286	-0.000511	-0.002071
39.3000	364.484	27.083	4.184	25.583	-0.667	35.447	693.884	-0.001896	-0.000293	-0.001791
39.4000	335.795	22.246	2.050	22.071	-0.683	35.448	639.267	-0.001557	-0.000144	-0.001545
39.5000	292.348	16.270	-0.975	17.381	-0.685	35.446	556.555	-0.001139	0.000068	-0.001217
39.6000	275.997	12.422	-2.708	14.860	-0.661	35.447	525.427	-0.000870	0.000190	-0.001040
39.7000	258.203	9.492	-4.211	12.784	-0.679	35.447	491.552	-0.000664	0.000295	-0.000895
39.8000	246.015	7.085	-4.638	11.516	-0.677	35.447	468.349	-0.000496	0.000325	-0.000806
39.9000	235.074	6.029	-5.890	9.838	-0.657	35.446	447.521	-0.000422	0.000412	-0.000689
40.0000	251.876	7.557	-5.340	10.774	-0.687	35.447	479.507	-0.000529	0.000374	-0.000754
40.1000	251.170	7.016	-5.672	10.800	-0.679	35.446	478.163	-0.000491	0.000397	-0.000756
40.2000	261.720	7.766	-4.956	11.215	-0.673	35.447	498.247	-0.000544	0.000347	-0.000785
40.3000	315.957	14.661	-2.434	15.755	-0.680	35.447	601.501	-0.001026	0.000170	-0.001103
40.4000	323.652	15.633	-2.173	16.390	-0.665	35.447	616.150	-0.001094	0.000152	-0.001147
40.5000	389.837	23.720	1.198	21.685	-0.661	35.447	742.149	-0.001660	-0.000084	-0.001518
40.6000	419.503	27.764	3.783	25.098	-0.676	35.447	798.626	-0.001943	-0.000265	-0.001757
40.7000	461.207	34.156	7.060	29.228	-0.676	35.446	878.019	-0.002391	-0.000494	-0.002046
40.8000	510.335	40.382	9.303	33.230	-0.664	35.447	971.546	-0.002827	-0.000651	-0.002326
40.9000	582.591	50.123	14.462	40.484	-0.673	35.447	1109.104	-0.003509	-0.001012	-0.002834
41.0000	645.831	58.783	18.410	46.343	-0.682	35.446	1229.496	-0.004115	-0.001289	-0.003244
41.1000	695.500	65.451	22.374	50.858	-0.665	35.447	1324.053	-0.004582	-0.001566	-0.003560
41.2000	769.650	75.389	26.447	58.068	-0.673	35.447	1465.216	-0.005277	-0.001851	-0.004065
41.3000	830.530	84.044	30.385	63.792	-0.681	35.446	1581.116	-0.005883	-0.002127	-0.004465
41.4000	882.679	91.216	34.218	69.034	-0.663	35.446	1680.393	-0.006385	-0.002395	-0.004832
41.5000	946.264	100.109	38.144	75.240	-0.661	35.447	1801.443	-0.007008	-0.002670	-0.005267
41.6000	999.194	108.017	41.626	80.524	-0.684	35.447	1902.208	-0.007561	-0.002914	-0.005637
41.7000	1031.851	112.671	44.225	84.103	-0.676	35.446	1964.378	-0.007887	-0.003096	-0.005887
41.8000	1085.292	120.372	47.803	89.180	-0.655	35.446	2066.116	-0.008426	-0.003346	-0.006243
41.9000	1126.439	126.194	50.582	93.915	-0.675	35.447	2144.451	-0.008834	-0.003541	-0.006574
42.0000	1140.356	128.834	51.889	95.674	-0.683	35.445	2170.944	-0.009018	-0.003632	-0.006697
42.1000	1202.092	136.936	55.592	101.154	-0.655	35.445	2288.475	-0.009585	-0.003891	-0.007081
42.2000	1214.085	139.018	56.443	102.953	-0.660	35.446	2311.306	-0.009731	-0.003951	-0.007207
42.3000	1217.181	140.283	57.476	103.685	-0.680	35.445	2317.200	-0.009820	-0.004023	-0.007258
42.4000	1211.275	140.269	57.502	104.109	-0.673	35.444	2305.956	-0.009819	-0.004025	-0.007288
42.5000	1223.748	142.287	58.138	105.678	-0.658	35.445	2329.702	-0.009960	-0.004070	-0.007397
42.6000	1204.076	139.769	57.283	103.862	-0.670	35.445	2292.252	-0.009784	-0.004010	-0.007270
42.7000	1232.735	143.328	58.606	105.830	-0.676	35.444	2346.811	-0.010033	-0.004102	-0.007408
42.8000	1142.505	133.417	55.125	99.237	-0.665	35.444	2175.035	-0.009339	-0.003859	-0.006947
42.9000	1103.716	128.458	52.814	95.965	-0.671	35.444	2101.192	-0.008992	-0.003697	-0.006718
43.0000	1087.125	126.265	51.794	94.355	-0.677	35.444	2069.607	-0.008839	-0.003626	-0.006605
43.1000	1036.975	120.316	48.958	90.115	-0.666	35.443	1974.134	-0.008422	-0.003427	-0.006308
43.2000	1003.026	115.424	46.426	86.785	-0.653	35.443	1909.504	-0.008080	-0.003250	-0.006075
43.3000	925.374	105.473	41.956	80.292	-0.686	35.444	1761.675	-0.007383	-0.002937	-0.005620
43.4000	873.135	98.721	38.777	75.529	-0.681	35.442	1662.226	-0.006910	-0.002714	-0.005287
43.5000	821.528	91.772	35.419	70.673	-0.659	35.442	1563.978	-0.006424	-0.002479	-0.004947
43.6000	741.487	81.115	30.466	63.406	-0.671	35.443	1411.600	-0.005678	-0.002133	-0.004438
43.7000	692.178	73.802	26.930	58.482	-0.683	35.442	1317.730	-0.005166	-0.001885	-0.004094
43.8000	635.131	65.771	23.391	52.934	-0.669	35.441	1209.126	-0.004604	-0.001637	-0.003705
43.9000	561.792	55.515	18.122	45.533	-0.677	35.442	1069.508	-0.003886	-0.001269	-0.003187
44.0000	516.406	49.623	15.249	41.418	-0.687	35.442	983.105	-0.003474	-0.001067	-0.002899
44.1000	458.998	40.840	10.992	35.405	-0.671	35.441	873.814	-0.002859	-0.000769	-0.002478
44.2000	416.678	35.102	8.243	31.166	-0.668	35.441	793.247	-0.002457	-0.000577	-0.002182
44.3000	357.856	27.083	4.128	25.277	-0.692	35.441	681.267	-0.001896	-0.000289	-0.001769
44.4000	326.943	21.885	1.405	21.480	-0.686	35.439	622.416	-0.001532	-0.000098	-0.001504
44.5000	300.583	16.504	-1.138	17.834	-0.671	35.441	572.233	-0.001155	0.000080	-0.001248
44.6000	273.652	12.451	-2.200	15.243	-0.688	35.440	520.964	-0.000872	0.000154	-0.001067
44.7000	272.510	11.838	-3.506	13.953	-0.660	35.440	518.789	-0.000829	0.000245	-0.000977
44.8000	245.204	7.656	-5.423	11.366	-0.672	35.440	466.805	-0.000536	0.000380	-0.000796
44.9000	237.238	5.434	-6.069	10.129	-0.691	35.439	451.641	-0.000380	0.000425	-0.000709
45.0000	245.113	6.222	-5.645	10.417	-0.668	35.439	466.633	-0.000436	0.000395	-0.000729
45.1000	240.755	6.196	-5.754	10.087	-0.675	35.439	458.336	-0.000434	0.000403	-0.000706
45.2000	256.159	7.169	-5.410	11.256	-0.677	35.438	487.661	-0.000502	0.000379	-0.000788
45.3000	351.169	19.164	-1.043	18.675	-0.656	35.439	668.535	-0.001341	0.000073	-0.001307
45.4000	334.382	16.799	-1.222	17.560	-0.686	35.439	636.578	-0.001176	0.000086	-0.001229
45.5000	369.594	22.107	0.715	20.777	-0.686	35.438	703.611	-0.001547	-0.000050	-0.001454
45.6000	441.985	31.169	4.541	26.627	-0.663	35.438	841.427	-0.002182	-0.000318	-0.001864
45.7000	469.758	35.046	7.087	29.847	-0.677	35.438	894.299	-0.002453	-0.000496	-0.002089
45.8000	523.049	41.703	10.183	34.566	-0.681	35.437	995.750	-0.002919	-0.000713	-0.002420
45.9000	586.123	50.358	14.421	40.485	-0.667	35.436	1115.828	-0.003525	-0.001009	-0.002834
46.0000	644.223	58.643	17.997	46.220	-0.687	35.437	1226.435	-0.004105	-0.001260	-0.003235
46.1000	703.886	66.520	22.098	51.641	-0.697	35.437	1340.017	-0.004656	-0.001547	-0.003615
46.2000	757.116	74.595	25.991	57.312	-0.681	35.436	1441.355	-0.005222	-0.001819	-0.004012
46.3000	818.823	82.655	29.916	63.022	-0.673	35.436	1558.828	-0.005786	-0.002094	-0.004412
46.4000	875.134	90.786	33.494	68.855	-0.683	35.436	1666.031	-0.006355	-0.002345	-0.004820
46.5000	944.100	100.247	38.376	75.405	-0.686	35.435	1797.323	-0.007017	-0.002686	-0.005278
46.6000	1010.285	109.463	42.601	81.984	-0.667	35.435	1923.323	-0.007662	-0.002982	-0.005739
46.7000	1036.404	113.576	44.599	84.668	-0.683	35.436	1973.047	-0.007950	-0.003122	-0.005927
46.8000	1091.859	121.204	47.652	90.075	-0.695	35.435	2078.619	-0.008484	-0.003336	-0.006305
46.9000	1131.339	127.193	50.942	94.492	-0.680	35.434	2153.778	-0.008904	-0.003566	-0.006614
47.0000	1164.251	132.184	53.074	97.643	-0.666	35.434	2216.434	-0.009253	-0.003715	-0.006835
47.1000	1189.874	135.781	54.601	100.546	-0.678	35.435	2265.215	-0.009505	-0.003822	-0.007038
47.2000	1216.730	139.895	56.498	103.475	-0.685	35.433	2316.341	-0.009793	-0.003955	-0.007243
47.3000	1211.786	139.407	56.913	103.779	-0.665	35.433	2306.929	-0.009758	-0.003984	-0.007265
47.4000	1232.705	142.661	58.165	105.720	-0.662	35.434	2346.754	-0.009986	-0.004072	-0.007400
47.5000	1215.438	141.493	57.819	104.673	-0.684	35.433	2313.881	-0.009905	-0.004047	-0.007327
47.6000	1212.116	141.480	57.448	104.771	-0.659	35.432	2307.558	-0.009904	-0.004021	-0.007334
47.7000	1190.926	138.852	56.832	103.450	-0.679	35.433	2267.218	-0.009720	-0.003978	-0.007241
47.8000	1153.055	134.405	55.605	100.132	-0.687	35.433	2195.120	-0.009408	-0.003892	-0.007009
47.9000	1136.974	132.932	54.491	99.197	-0.669	35.432	2164.507	-0.009305	-0.003814	-0.006944
48.0000	1086.449	126.332	51.985	94.604	-0.673	35.432	2068.319	-0.008843	-0.003639	-0.006622
48.1000	1044.580	120.984	49.663	90.872	-0.694	35.433	1988.611	-0.008469	-0.003476	-0.006361
48.2000	991.379	114.493	46.454	86.304	-0.677	35.431	1887.331	-0.008015	-0.003252	-0.006041
48.3000	928.786	106.095	42.119	80.580	-0.660	35.432	1768.169	-0.007427	-0.002948	-0.005641
48.4000	861.128	97.081	38.047	74.360	-0.680	35.432	1639.366	-0.006796	-0.002663	-0.005205
48.5000	812.346	90.729	35.323	70.066	-0.671	35.431	1546.497	-0.006351	-0.002473	-0.004905
48.6000	758.995	83.598	31.513	64.823	-0.652	35.431	1444.931	-0.005852	-0.002206	-0.004538
48.7000	689.909	74.080	26.600	58.398	-0.667	35.431	1313.410	-0.005186	-0.001862	-0.004088
48.8000	628.157	65.700	22.924	52.576	-0.688	35.431	1195.850	-0.004599	-0.001605	-0.003680
48.9000	568.825	56.975	19.170	46.837	-0.653	35.430	1082.897	-0.003988	-0.001342	-0.003279
49.0000	515.910	49.262	15.249	41.498	-0.652	35.431	982.161	-0.003448	-0.001067	-0.002905
49.1000	459.614	41.745	10.965	35.817	-0.672	35.430	874.987	-0.002922	-0.000768	-0.002507
49.2000	414.153	34.421	8.076	31.179	-0.669	35.429	788.441	-0.002409	-0.000565	-0.002183
49.3000	370.120	28.488	4.735	26.338	-0.652	35.430	704.613	-0.001994	-0.000331	-0.001844
49.4000	331.692	22.247	1.788	21.989	-0.679	35.430	631.456	-0.001557	-0.000125	-0.001539
49.5000	303.424	17.189	-0.605	18.742	-0.674	35.429	577.641	-0.001203	0.000042	-0.001312
49.6000	276.508	13.161	-1.967	15.495	-0.659	35.429	526.400	-0.000921	0.000138	-0.001085
49.7000	242.153	7.683	-4.362	12.082	-0.680	35.430	460.997	-0.000538	0.000305	-0.000846
49.8000	234.909	6.586	-5.576	11.036	-0.698	35.429	447.206	-0.000461	0.000390	-0.000773
49.9000	375.470	22.178	0.427	21.273	-0.659	35.428	714.798	-0.001552	-0.000030	-0.001489
