# Supplementary material for: Evaluation of a Cold-Mixed High-Performance Polyurethane Mixture
Source: Hindawi journal article supplement (doi:10.1155/2019/1507971), 2019-11-07
Supplement: f1 [file 1507971.f1.zip › 1507971.f1/dynamic modulus data/PUM/specimen2/temp35/zhs-2-35_0.5Hz.csv]

Test Information
****************
Project name	zhs
Operator name	1
Target test temperature	35
Target confining stress	0
Average dynamic strain range from 75 to 125 micro-strain
Contact stress	5
Initial modulus	1000
Axial gauge length	70
Comments
Specimen information
********************
Identification	zhs-2-35
Dimensions	Point 1	Point 2	Point 3	Point 4	Point 5	Point 6	Average	Std Dev.
Diameter (mm)	49.2	49.3	49.2				49.23	0.058
Height (mm)	100.8	101.0	100.8				100.87	0.115
Cross-sectional area (mm�)	1903.7
Conditioning time
Properties/Comments
Test Data	0.5Hz
*********
Test date and time	Tue	Apr 2	2019	12:59 PM
Dynamic modulus (MPa)	10296
Phase angle (Degrees)	4.53
Average temperature (�C)	35.4
Average confining pressure (kPa)	-0.7
Average micro-strain	98
Load drift (%)	-0.1
Load standard error (%)	2.1
Average deformation drift (%)	-3.2
Average deformation standard error (%)	2.1
Deformation uniformity (%)	29.9
Phase uniformity (Degrees)	0.7
Conditioning Cycles
Time (sec)	Axial stress (kPa)	Axial micro-strain #1	Axial micro-strain #2	Axial micro-strain #3	Confining pressure (kPa)	Temperature (�C)	Load (N)	Displacement #1 (mm)	Displacement #2 (mm)	Displacement #3 (mm)
0.0000	217.176	-0.567	-5.850	3.495	-0.675	35.418	413.446	0.000040	0.000409	-0.000245
0.0400	227.034	-1.055	-6.604	2.682	-0.677	35.417	432.215	0.000074	0.000462	-0.000188
0.0800	257.256	2.960	-5.341	5.806	-0.706	35.418	489.750	-0.000207	0.000374	-0.000406
0.1200	269.580	4.240	-4.653	5.628	-0.676	35.418	513.210	-0.000297	0.000326	-0.000394
0.1600	290.199	6.419	-3.891	7.268	-0.677	35.417	552.464	-0.000449	0.000272	-0.000509
0.2000	318.076	10.160	-2.598	9.315	-0.705	35.417	605.536	-0.000711	0.000182	-0.000652
0.2400	357.992	15.178	-0.109	13.473	-0.678	35.418	681.524	-0.001062	0.000008	-0.000943
0.2800	396.615	19.845	2.242	16.831	-0.672	35.417	755.053	-0.001389	-0.000157	-0.001178
0.3200	443.458	26.376	5.133	21.274	-0.695	35.417	844.231	-0.001846	-0.000359	-0.001489
0.3600	484.516	32.076	8.173	25.001	-0.704	35.418	922.394	-0.002245	-0.000572	-0.001750
0.4000	537.536	38.674	11.022	29.448	-0.672	35.418	1023.331	-0.002707	-0.000772	-0.002061
0.4400	588.167	45.758	14.284	34.084	-0.688	35.417	1119.719	-0.003203	-0.001000	-0.002386
0.4800	654.036	54.502	18.688	40.580	-0.704	35.418	1245.117	-0.003815	-0.001308	-0.002841
0.5200	679.585	57.418	20.093	42.256	-0.668	35.418	1293.755	-0.004019	-0.001406	-0.002958
0.5600	718.989	63.047	22.964	46.537	-0.684	35.417	1368.771	-0.004413	-0.001607	-0.003258
0.6000	779.524	71.107	26.833	51.767	-0.719	35.418	1484.013	-0.004978	-0.001878	-0.003624
0.6400	820.957	76.679	29.434	55.908	-0.691	35.418	1562.891	-0.005368	-0.002060	-0.003914
0.6800	849.451	81.364	31.827	58.921	-0.684	35.418	1617.136	-0.005695	-0.002228	-0.004124
0.7200	903.448	88.213	34.979	64.259	-0.699	35.418	1719.933	-0.006175	-0.002448	-0.004498
0.7600	928.094	91.814	36.587	66.491	-0.694	35.419	1766.853	-0.006427	-0.002561	-0.004654
0.8000	952.726	96.094	38.489	69.173	-0.677	35.418	1813.745	-0.006727	-0.002694	-0.004842
0.8400	988.629	100.582	41.088	72.725	-0.692	35.418	1882.095	-0.007041	-0.002876	-0.005091
0.8800	990.988	101.500	41.006	73.234	-0.693	35.419	1886.587	-0.007105	-0.002870	-0.005126
0.9200	990.357	102.249	41.641	73.453	-0.672	35.418	1885.386	-0.007157	-0.002915	-0.005142
0.9600	1024.201	105.945	43.580	76.164	-0.689	35.417	1949.816	-0.007416	-0.003051	-0.005331
1.0000	978.409	101.305	41.749	73.468	-0.706	35.418	1862.640	-0.007091	-0.002922	-0.005143
1.0400	995.677	103.417	42.507	75.365	-0.671	35.419	1895.514	-0.007239	-0.002975	-0.005276
1.0800	975.734	101.095	42.245	73.865	-0.686	35.418	1857.548	-0.007077	-0.002957	-0.005171
1.1200	959.414	99.552	41.156	72.324	-0.701	35.418	1826.477	-0.006969	-0.002881	-0.005063
1.1600	925.284	95.660	40.041	69.447	-0.673	35.418	1761.503	-0.006696	-0.002803	-0.004861
1.2000	908.287	92.981	39.107	68.553	-0.672	35.418	1729.145	-0.006509	-0.002738	-0.004799
1.2400	875.420	88.935	36.726	65.388	-0.702	35.419	1666.574	-0.006225	-0.002571	-0.004577
1.2800	815.456	81.529	33.256	59.968	-0.688	35.418	1552.420	-0.005707	-0.002328	-0.004198
1.3200	789.337	77.679	32.063	57.781	-0.675	35.418	1502.695	-0.005438	-0.002244	-0.004045
1.3600	753.600	73.385	29.571	55.412	-0.718	35.418	1434.660	-0.005137	-0.002070	-0.003879
1.4000	651.046	61.031	23.557	46.275	-0.690	35.419	1239.424	-0.004272	-0.001649	-0.003239
1.4400	673.348	62.490	24.107	47.720	-0.672	35.418	1281.881	-0.004374	-0.001687	-0.003340
1.4800	634.364	57.863	21.330	43.962	-0.698	35.418	1207.666	-0.004050	-0.001493	-0.003077
1.5200	511.537	41.661	14.132	32.860	-0.707	35.419	973.835	-0.002916	-0.000989	-0.002300
1.5600	483.945	37.174	12.302	30.078	-0.682	35.418	921.307	-0.002602	-0.000861	-0.002105
1.6000	448.853	32.588	9.716	26.696	-0.702	35.418	854.502	-0.002281	-0.000680	-0.001869
1.6400	425.364	29.195	8.243	24.287	-0.698	35.419	809.784	-0.002044	-0.000577	-0.001700
1.6800	369.864	21.081	4.211	18.770	-0.661	35.419	704.126	-0.001476	-0.000295	-0.001314
1.7200	320.000	14.244	0.880	13.927	-0.691	35.418	609.198	-0.000997	-0.000062	-0.000975
1.7600	302.657	11.657	-0.002	12.011	-0.711	35.419	576.181	-0.000816	0.000000	-0.000841
1.8000	276.898	7.073	-2.284	9.164	-0.663	35.419	527.143	-0.000495	0.000160	-0.000641
1.8400	261.284	4.852	-3.742	6.909	-0.677	35.418	497.417	-0.000340	0.000262	-0.000484
1.8800	253.740	3.335	-4.348	6.247	-0.698	35.418	483.055	-0.000233	0.000304	-0.000437
1.9200	212.021	-2.752	-7.125	1.886	-0.679	35.419	403.633	0.000193	0.000499	-0.000132
1.9600	231.888	-0.403	-6.356	2.875	-0.683	35.418	441.456	0.000028	0.000445	-0.000201
2.0000	226.959	-1.444	-6.451	2.653	-0.717	35.418	432.072	0.000101	0.000452	-0.000186
2.0400	237.870	-0.304	-6.536	3.026	-0.686	35.420	452.843	0.000021	0.000458	-0.000212
2.0800	246.526	0.473	-6.619	3.179	-0.671	35.418	469.322	-0.000033	0.000463	-0.000223
2.1200	264.891	2.906	-5.272	4.239	-0.690	35.418	504.284	-0.000203	0.000369	-0.000297
2.1600	291.686	5.627	-4.321	6.399	-0.687	35.419	555.296	-0.000394	0.000302	-0.000448
2.2000	321.307	9.798	-2.929	9.206	-0.667	35.419	611.687	-0.000686	0.000205	-0.000644
2.2400	335.073	11.683	-1.511	11.793	-0.688	35.418	637.894	-0.000818	0.000106	-0.000826
2.2800	393.053	18.871	1.775	15.839	-0.699	35.419	748.272	-0.001321	-0.000124	-0.001109
2.3200	438.409	24.960	4.528	20.242	-0.665	35.419	834.618	-0.001747	-0.000317	-0.001417
2.3600	490.587	31.879	7.679	24.272	-0.675	35.419	933.952	-0.002232	-0.000538	-0.001699
2.4000	528.955	37.160	10.403	28.540	-0.715	35.419	1006.994	-0.002601	-0.000728	-0.001998
2.4400	581.224	44.216	14.186	33.383	-0.705	35.420	1106.501	-0.003095	-0.000993	-0.002337
2.4800	621.094	49.567	16.677	37.538	-0.692	35.419	1182.404	-0.003470	-0.001167	-0.002628
2.5200	704.742	60.006	21.315	44.556	-0.716	35.419	1341.648	-0.004200	-0.001492	-0.003119
2.5600	733.897	64.661	23.503	47.087	-0.694	35.420	1397.152	-0.004526	-0.001645	-0.003296
2.6000	778.366	70.677	26.474	51.355	-0.671	35.419	1481.810	-0.004947	-0.001853	-0.003595
2.6400	820.822	76.889	29.393	55.990	-0.708	35.419	1562.634	-0.005382	-0.002057	-0.003919
2.6800	885.850	85.460	33.711	61.469	-0.696	35.419	1686.430	-0.005982	-0.002360	-0.004303
2.7200	880.935	84.976	33.755	62.003	-0.684	35.419	1677.074	-0.005948	-0.002363	-0.004340
2.7600	928.154	91.828	36.769	66.200	-0.706	35.419	1766.968	-0.006428	-0.002574	-0.004634
2.8000	966.868	97.305	39.300	70.576	-0.710	35.420	1840.668	-0.006811	-0.002751	-0.004940
2.8400	969.618	98.096	39.864	70.934	-0.688	35.419	1845.903	-0.006867	-0.002790	-0.004965
2.8800	1011.397	103.653	42.134	75.131	-0.691	35.419	1925.440	-0.007256	-0.002949	-0.005259
2.9200	1009.834	103.836	42.519	74.883	-0.699	35.420	1922.464	-0.007268	-0.002976	-0.005242
2.9600	1004.604	103.778	42.810	75.241	-0.684	35.420	1912.508	-0.007264	-0.002997	-0.005267
3.0000	984.812	101.290	41.627	73.097	-0.676	35.419	1874.828	-0.007090	-0.002914	-0.005117
3.0400	985.172	102.124	42.093	73.743	-0.702	35.419	1875.515	-0.007149	-0.002946	-0.005162
3.0800	1008.166	104.293	42.822	75.694	-0.694	35.420	1919.289	-0.007300	-0.002998	-0.005299
3.1200	932.167	95.705	39.396	69.889	-0.675	35.419	1774.607	-0.006699	-0.002758	-0.004892
3.1600	952.921	98.373	40.786	71.125	-0.694	35.420	1814.117	-0.006886	-0.002855	-0.004979
3.2000	883.791	89.712	37.153	65.169	-0.696	35.420	1682.510	-0.006280	-0.002601	-0.004562
3.2400	843.514	85.225	35.130	62.609	-0.659	35.420	1605.835	-0.005966	-0.002459	-0.004383
3.2800	819.935	81.876	33.424	60.353	-0.676	35.419	1560.946	-0.005731	-0.002340	-0.004225
3.3200	785.926	77.292	31.401	57.752	-0.704	35.420	1496.201	-0.005410	-0.002198	-0.004043
3.3600	723.498	69.286	27.369	51.862	-0.676	35.420	1377.354	-0.004850	-0.001916	-0.003630
3.4000	697.108	66.269	26.296	50.060	-0.688	35.419	1327.114	-0.004639	-0.001841	-0.003504
3.4400	649.528	59.450	22.745	45.684	-0.707	35.420	1236.534	-0.004161	-0.001592	-0.003198
3.4800	600.550	52.570	19.073	40.194	-0.683	35.421	1143.293	-0.003680	-0.001335	-0.002814
3.5200	554.428	46.857	16.624	36.314	-0.675	35.420	1055.489	-0.003280	-0.001164	-0.002542
3.5600	497.861	38.924	12.715	31.194	-0.705	35.420	947.800	-0.002725	-0.000890	-0.002184
3.6000	461.072	33.850	10.360	27.700	-0.683	35.421	877.762	-0.002370	-0.000725	-0.001939
3.6400	410.396	26.890	6.414	22.456	-0.668	35.421	781.288	-0.001882	-0.000449	-0.001572
3.6800	369.053	20.846	4.073	18.742	-0.692	35.420	702.581	-0.001459	-0.000285	-0.001312
3.7200	322.269	14.119	0.455	14.229	-0.701	35.422	613.518	-0.000988	-0.000032	-0.000996
3.7600	332.594	15.037	1.197	13.857	-0.672	35.420	633.173	-0.001053	-0.000084	-0.000970
3.8000	273.818	6.475	-3.122	8.490	-0.684	35.420	521.278	-0.000453	0.000219	-0.000594
3.8400	277.695	6.418	-3.878	7.296	-0.708	35.422	528.660	-0.000449	0.000271	-0.000511
3.8800	243.190	1.599	-5.148	5.048	-0.683	35.422	462.971	-0.000112	0.000360	-0.000353
3.9200	201.862	-4.699	-8.435	1.116	-0.686	35.421	384.293	0.000329	0.000590	-0.000078
3.9600	230.521	-0.681	-7.016	2.340	-0.706	35.422	438.852	0.000048	0.000491	-0.000164
4.0000	226.253	-1.820	-7.265	2.065	-0.688	35.422	430.727	0.000127	0.000509	-0.000145
4.0400	230.581	-1.750	-7.417	2.078	-0.667	35.421	438.967	0.000122	0.000519	-0.000145
4.0800	255.077	1.820	-6.109	3.439	-0.695	35.421	485.601	-0.000127	0.000428	-0.000241
4.1200	277.229	3.867	-5.299	5.410	-0.688	35.422	527.773	-0.000271	0.000371	-0.000379
4.1600	291.581	5.335	-5.010	6.949	-0.663	35.421	555.096	-0.000373	0.000351	-0.000486
4.2000	340.363	12.242	-1.969	11.047	-0.685	35.421	647.964	-0.000857	0.000138	-0.000773
4.2400	353.513	13.425	-1.043	11.849	-0.702	35.422	672.998	-0.000940	0.000073	-0.000829
4.2800	404.610	19.942	1.790	15.977	-0.680	35.422	770.273	-0.001396	-0.000125	-0.001118
4.3200	450.988	26.390	5.352	20.652	-0.685	35.421	858.564	-0.001847	-0.000375	-0.001446
4.3600	510.755	34.254	8.644	25.883	-0.706	35.421	972.347	-0.002398	-0.000605	-0.001812
4.4000	541.744	38.339	10.553	29.271	-0.674	35.422	1031.342	-0.002684	-0.000739	-0.002049
4.4400	619.185	48.999	15.839	36.435	-0.671	35.421	1178.770	-0.003430	-0.001109	-0.002550
4.4800	613.850	48.611	15.771	35.942	-0.699	35.421	1168.613	-0.003403	-0.001104	-0.002516
4.5200	664.737	55.612	19.087	41.129	-0.685	35.422	1265.488	-0.003893	-0.001336	-0.002879
4.5600	741.231	65.756	24.026	47.724	-0.667	35.421	1411.114	-0.004603	-0.001682	-0.003341
4.6000	790.058	71.732	27.106	52.054	-0.677	35.421	1504.068	-0.005021	-0.001897	-0.003644
4.6400	810.407	75.026	28.278	54.299	-0.694	35.422	1542.807	-0.005252	-0.001979	-0.003801
4.6800	873.451	83.500	32.364	59.955	-0.675	35.422	1662.827	-0.005845	-0.002266	-0.004197
4.7200	895.242	86.422	33.889	62.693	-0.680	35.421	1704.311	-0.006050	-0.002372	-0.004389
4.7600	923.676	91.007	35.831	66.006	-0.702	35.422	1758.442	-0.006370	-0.002508	-0.004620
4.8000	939.140	93.549	37.746	67.933	-0.675	35.423	1787.882	-0.006548	-0.002642	-0.004755
4.8400	966.101	97.150	38.915	70.165	-0.673	35.422	1839.209	-0.006800	-0.002724	-0.004912
4.8800	959.098	97.066	39.010	70.453	-0.692	35.422	1825.876	-0.006795	-0.002731	-0.004932
4.9200	1040.853	106.986	43.866	76.439	-0.685	35.423	1981.516	-0.007489	-0.003071	-0.005351
4.9600	976.892	99.678	41.378	73.234	-0.666	35.423	1859.751	-0.006977	-0.002896	-0.005126
5.0000	999.254	103.056	42.216	74.060	-0.674	35.422	1902.323	-0.007214	-0.002955	-0.005184
5.0400	998.232	103.137	42.587	74.651	-0.689	35.423	1900.377	-0.007220	-0.002981	-0.005226
5.0800	978.560	100.552	41.599	73.603	-0.661	35.423	1862.926	-0.007039	-0.002912	-0.005152
5.1200	942.281	97.067	40.195	71.072	-0.668	35.422	1793.861	-0.006795	-0.002814	-0.004975
5.1600	942.687	97.025	40.042	70.042	-0.688	35.423	1794.634	-0.006792	-0.002803	-0.004903
5.2000	897.632	90.952	37.691	66.848	-0.660	35.423	1708.860	-0.006367	-0.002638	-0.004679
5.2400	873.571	88.435	36.394	64.192	-0.653	35.422	1663.055	-0.006190	-0.002548	-0.004493
5.2800	812.361	80.529	32.829	59.581	-0.689	35.422	1546.526	-0.005637	-0.002298	-0.004171
5.3200	778.907	76.266	30.620	56.916	-0.670	35.423	1482.840	-0.005339	-0.002143	-0.003984
5.3600	740.360	71.218	28.427	53.046	-0.656	35.422	1409.454	-0.004985	-0.001990	-0.003713
5.4000	709.852	67.036	26.213	50.349	-0.666	35.421	1351.376	-0.004692	-0.001835	-0.003524
5.4400	614.512	54.626	19.721	41.310	-0.682	35.423	1169.872	-0.003824	-0.001380	-0.002892
5.4800	605.419	53.487	19.499	40.676	-0.668	35.424	1152.563	-0.003744	-0.001365	-0.002847
5.5200	541.519	45.121	15.729	34.816	-0.671	35.422	1030.912	-0.003158	-0.001101	-0.002437
5.5600	493.563	38.161	12.330	30.298	-0.697	35.422	939.617	-0.002671	-0.000863	-0.002121
5.6000	424.673	29.446	8.063	24.589	-0.677	35.424	808.468	-0.002061	-0.000564	-0.001721
5.6400	392.752	24.402	5.834	21.080	-0.664	35.422	747.700	-0.001708	-0.000408	-0.001476
5.6800	365.641	20.111	3.332	18.206	-0.698	35.423	696.087	-0.001408	-0.000233	-0.001274
5.7200	316.498	13.228	0.055	12.758	-0.686	35.423	602.531	-0.000926	-0.000004	-0.000893
5.7600	317.039	12.840	0.028	12.550	-0.660	35.423	603.561	-0.000899	-0.000002	-0.000879
5.8000	234.789	1.570	-5.464	5.159	-0.673	35.422	446.978	-0.000110	0.000382	-0.000361
5.8400	253.995	3.477	-4.816	5.380	-0.684	35.424	483.541	-0.000243	0.000337	-0.000377
5.8800	237.299	0.904	-5.698	4.058	-0.668	35.423	451.756	-0.000063	0.000399	-0.000284
5.9200	201.621	-4.392	-8.366	0.840	-0.691	35.422	383.835	0.000307	0.000586	-0.000059
5.9600	233.391	-0.707	-6.877	2.216	-0.700	35.423	444.317	0.000049	0.000481	-0.000155
6.0000	216.815	-3.111	-7.499	1.402	-0.667	35.423	412.760	0.000218	0.000525	-0.000098
6.0400	231.873	-2.055	-7.567	2.188	-0.679	35.422	441.427	0.000144	0.000530	-0.000153
6.0800	258.864	1.959	-6.232	3.633	-0.707	35.423	492.811	-0.000137	0.000436	-0.000254
6.1200	267.265	2.752	-5.561	4.857	-0.668	35.423	508.804	-0.000193	0.000389	-0.000340
6.1600	309.225	7.766	-4.102	7.789	-0.671	35.423	588.684	-0.000544	0.000287	-0.000545
6.2000	316.093	9.284	-3.302	8.516	-0.692	35.422	601.759	-0.000650	0.000231	-0.000596
6.2400	347.517	12.451	-1.666	10.817	-0.679	35.423	661.583	-0.000872	0.000117	-0.000757
6.2800	387.492	17.953	1.140	15.000	-0.668	35.422	737.686	-0.001257	-0.000080	-0.001050
6.3200	453.738	26.944	5.185	20.846	-0.689	35.423	863.800	-0.001886	-0.000363	-0.001459
6.3600	496.118	31.934	8.007	25.210	-0.698	35.423	944.481	-0.002235	-0.000560	-0.001765
6.4000	540.286	38.257	10.430	29.199	-0.661	35.423	1028.566	-0.002678	-0.000730	-0.002044
6.4400	572.267	42.564	12.978	32.199	-0.669	35.422	1089.449	-0.002979	-0.000908	-0.002254
6.4800	638.993	51.347	17.626	39.011	-0.692	35.423	1216.478	-0.003594	-0.001234	-0.002731
6.5200	698.040	59.270	20.643	43.510	-0.675	35.423	1328.888	-0.004149	-0.001445	-0.003046
6.5600	696.822	60.187	21.755	44.394	-0.668	35.422	1326.571	-0.004213	-0.001523	-0.003108
6.6000	788.000	71.497	27.421	52.838	-0.693	35.423	1500.149	-0.005005	-0.001919	-0.003699
6.6400	786.181	72.832	28.345	53.940	-0.665	35.423	1496.687	-0.005098	-0.001984	-0.003776
6.6800	849.556	80.570	31.594	59.307	-0.655	35.423	1617.336	-0.005640	-0.002212	-0.004151
6.7200	887.593	85.574	33.892	62.196	-0.677	35.422	1689.749	-0.005990	-0.002372	-0.004354
6.7600	931.656	91.801	36.273	66.492	-0.689	35.423	1773.634	-0.006426	-0.002539	-0.004654
6.8000	948.247	94.646	38.308	68.952	-0.660	35.423	1805.220	-0.006625	-0.002682	-0.004827
6.8400	983.940	99.358	40.139	71.856	-0.668	35.422	1873.169	-0.006955	-0.002810	-0.005030
6.8800	991.770	100.816	40.593	72.296	-0.692	35.423	1888.075	-0.007057	-0.002842	-0.005061
6.9200	1001.132	102.430	41.819	73.893	-0.672	35.424	1905.899	-0.007170	-0.002927	-0.005172
6.9600	1000.396	102.334	41.942	74.786	-0.661	35.422	1904.497	-0.007163	-0.002936	-0.005235
7.0000	997.781	103.028	41.916	74.593	-0.692	35.423	1899.519	-0.007212	-0.002934	-0.005221
7.0400	991.169	102.416	42.051	74.029	-0.687	35.423	1886.930	-0.007169	-0.002944	-0.005182
7.0800	959.368	98.316	40.554	71.469	-0.660	35.423	1826.391	-0.006882	-0.002839	-0.005003
7.1200	953.207	98.040	40.346	71.485	-0.691	35.423	1814.661	-0.006863	-0.002824	-0.005004
7.1600	939.756	96.525	39.848	70.138	-0.687	35.423	1789.055	-0.006757	-0.002789	-0.004910
7.2000	894.867	90.797	37.567	66.574	-0.671	35.423	1703.596	-0.006356	-0.002630	-0.004660
7.2400	866.538	87.616	36.079	64.313	-0.669	35.423	1649.666	-0.006133	-0.002526	-0.004502
7.2800	815.126	81.056	33.437	59.513	-0.699	35.423	1551.790	-0.005674	-0.002341	-0.004166
7.3200	758.303	73.345	29.434	54.765	-0.661	35.424	1443.615	-0.005134	-0.002060	-0.003834
7.3600	745.665	72.080	28.620	53.871	-0.664	35.423	1419.554	-0.005046	-0.002003	-0.003771
7.4000	690.435	64.228	24.865	48.051	-0.690	35.423	1314.411	-0.004496	-0.001741	-0.003364
7.4400	644.448	58.252	22.279	44.736	-0.682	35.424	1226.864	-0.004078	-0.001560	-0.003132
7.4800	602.474	53.069	19.458	40.853	-0.661	35.423	1146.955	-0.003715	-0.001362	-0.002860
7.5200	539.159	44.341	15.304	34.371	-0.677	35.423	1026.421	-0.003104	-0.001071	-0.002406
7.5600	492.030	37.952	11.997	30.850	-0.681	35.424	936.699	-0.002657	-0.000840	-0.002159
7.6000	454.008	32.377	8.933	26.008	-0.671	35.424	864.315	-0.002266	-0.000625	-0.001821
7.6400	419.293	27.612	7.117	22.953	-0.673	35.423	798.225	-0.001933	-0.000498	-0.001607
7.6800	369.954	20.400	3.455	18.067	-0.681	35.423	704.298	-0.001428	-0.000242	-0.001265
7.7200	323.036	14.494	0.715	13.925	-0.677	35.424	614.977	-0.001015	-0.000050	-0.000975
7.7600	301.049	10.285	-1.138	10.815	-0.660	35.424	573.120	-0.000720	0.000080	-0.000757
7.8000	257.016	4.546	-4.129	7.005	-0.674	35.423	489.292	-0.000318	0.000289	-0.000490
7.8400	265.236	4.961	-3.866	7.006	-0.689	35.424	504.942	-0.000347	0.000271	-0.000490
7.8800	251.140	1.780	-5.878	4.088	-0.669	35.424	478.106	-0.000125	0.000411	-0.000286
7.9200	237.795	0.262	-6.784	3.110	-0.665	35.423	452.700	-0.000018	0.000475	-0.000218
7.9600	225.652	-1.652	-7.279	2.531	-0.689	35.424	429.583	0.000116	0.000510	-0.000177
8.0000	223.953	-2.389	-7.031	1.872	-0.663	35.424	426.350	0.000167	0.000492	-0.000131
8.0400	237.644	-1.222	-7.128	2.544	-0.661	35.423	452.414	0.000086	0.000499	-0.000178
8.0800	239.628	-0.429	-6.754	2.818	-0.690	35.423	456.190	0.000030	0.000473	-0.000197
8.1200	280.190	4.045	-5.024	4.982	-0.678	35.425	533.409	-0.000283	0.000352	-0.000349
8.1600	291.626	5.586	-5.107	6.127	-0.656	35.424	555.182	-0.000391	0.000358	-0.000429
8.2000	329.904	10.410	-2.861	10.016	-0.679	35.423	628.052	-0.000729	0.000200	-0.000701
8.2400	343.384	12.297	-1.541	11.076	-0.700	35.424	653.715	-0.000861	0.000108	-0.000775
8.2800	399.034	19.289	1.210	15.840	-0.664	35.424	759.659	-0.001350	-0.000085	-0.001109
8.3200	433.374	24.374	4.406	20.007	-0.672	35.423	825.033	-0.001706	-0.000308	-0.001400
8.3600	489.054	31.225	7.197	23.846	-0.692	35.423	931.034	-0.002186	-0.000504	-0.001669
8.4000	527.362	36.508	10.008	27.894	-0.684	35.425	1003.962	-0.002556	-0.000701	-0.001953
8.4400	587.986	44.786	13.775	33.576	-0.669	35.424	1119.375	-0.003135	-0.000964	-0.002350
8.4800	634.785	51.138	17.269	38.241	-0.677	35.423	1208.467	-0.003580	-0.001209	-0.002677
8.5200	710.092	60.478	21.315	44.818	-0.687	35.424	1351.833	-0.004233	-0.001492	-0.003137
8.5600	727.450	63.562	23.101	46.577	-0.659	35.425	1384.878	-0.004449	-0.001617	-0.003260
8.6000	769.605	69.231	26.090	50.474	-0.660	35.424	1465.130	-0.004846	-0.001826	-0.003533
8.6400	823.707	76.319	28.926	55.496	-0.694	35.424	1568.127	-0.005342	-0.002025	-0.003885
8.6800	852.471	81.212	31.607	58.784	-0.686	35.424	1622.887	-0.005685	-0.002213	-0.004115
8.7200	922.609	89.893	35.569	65.015	-0.663	35.424	1756.411	-0.006293	-0.002490	-0.004551
8.7600	903.944	88.603	35.130	64.152	-0.681	35.424	1720.877	-0.006202	-0.002459	-0.004491
8.8000	941.770	93.523	37.389	68.332	-0.691	35.425	1792.889	-0.006547	-0.002617	-0.004783
8.8400	967.829	97.456	39.491	70.564	-0.668	35.424	1842.499	-0.006822	-0.002764	-0.004939
8.8800	1006.483	102.723	41.696	74.372	-0.681	35.424	1916.084	-0.007191	-0.002919	-0.005206
8.9200	1000.306	102.781	41.874	73.934	-0.700	35.424	1904.325	-0.007195	-0.002931	-0.005175
8.9600	1010.375	103.917	42.203	74.994	-0.676	35.425	1923.494	-0.007274	-0.002954	-0.005250
9.0000	998.247	102.904	41.806	74.235	-0.660	35.424	1900.406	-0.007203	-0.002926	-0.005196
9.0400	980.934	101.247	41.572	73.509	-0.686	35.424	1867.447	-0.007087	-0.002910	-0.005146
9.0800	991.394	101.902	41.805	74.484	-0.684	35.425	1887.360	-0.007133	-0.002926	-0.005214
9.1200	962.524	98.957	40.346	72.063	-0.663	35.424	1832.399	-0.006927	-0.002824	-0.005044
9.1600	939.636	96.581	39.876	70.603	-0.671	35.424	1788.826	-0.006761	-0.002791	-0.004942
9.2000	907.070	92.203	38.130	67.548	-0.705	35.424	1726.828	-0.006454	-0.002669	-0.004728
9.2400	879.087	89.144	36.670	64.864	-0.683	35.425	1673.555	-0.006240	-0.002567	-0.004541
9.2800	831.086	83.129	34.109	61.468	-0.663	35.424	1582.174	-0.005819	-0.002388	-0.004303
9.3200	778.937	75.889	30.742	56.486	-0.684	35.424	1482.897	-0.005312	-0.002152	-0.003954
9.3600	732.800	70.121	27.933	52.577	-0.683	35.425	1395.063	-0.004908	-0.001955	-0.003680
9.4000	693.531	65.423	25.771	49.384	-0.671	35.424	1320.305	-0.004580	-0.001804	-0.003457
9.4400	636.273	57.421	21.835	44.984	-0.676	35.423	1211.300	-0.004019	-0.001528	-0.003149
9.4800	588.918	50.928	18.452	39.397	-0.690	35.425	1121.149	-0.003565	-0.001292	-0.002758
9.5200	526.986	43.508	15.083	34.262	-0.665	35.425	1003.246	-0.003046	-0.001056	-0.002398
9.5600	495.472	38.590	12.811	30.919	-0.684	35.424	943.251	-0.002701	-0.000897	-0.002164
9.6000	449.199	32.436	9.618	26.571	-0.690	35.424	855.160	-0.002271	-0.000673	-0.001860
9.6400	405.932	26.251	6.578	21.809	-0.671	35.425	772.791	-0.001838	-0.000460	-0.001527
9.6800	360.486	19.581	3.427	17.737	-0.661	35.425	686.274	-0.001371	-0.000240	-0.001242
9.7200	357.075	18.400	2.436	16.128	-0.677	35.424	679.779	-0.001288	-0.000171	-0.001129
9.7600	285.540	8.895	-1.664	9.661	-0.677	35.425	543.594	-0.000623	0.000116	-0.000676
9.8000	292.137	8.604	-1.995	9.658	-0.656	35.425	556.154	-0.000602	0.000140	-0.000676
9.8400	253.018	3.615	-4.309	6.180	-0.683	35.424	481.682	-0.000253	0.000302	-0.000433
9.8800	233.466	0.181	-5.711	3.854	-0.687	35.425	444.460	-0.000013	0.000400	-0.000270
9.9200	232.414	-0.471	-6.396	3.262	-0.668	35.426	442.457	0.000033	0.000448	-0.000228
9.9600	222.255	-1.931	-7.537	2.092	-0.666	35.424	423.117	0.000135	0.000528	-0.000146
10.0000	235.300	1.960	-5.766	5.148	-0.700	35.416	447.950	-0.000137	0.000404	-0.000360
10.0400	249.291	1.849	-5.712	4.499	-0.675	35.415	474.586	-0.000129	0.000400	-0.000315
10.0800	265.687	3.211	-5.698	5.078	-0.691	35.415	505.800	-0.000225	0.000399	-0.000355
10.1200	288.110	6.182	-4.734	6.482	-0.702	35.415	548.487	-0.000433	0.000331	-0.000454
10.1600	316.919	9.506	-2.916	8.945	-0.662	35.416	603.333	-0.000665	0.000204	-0.000626
10.2000	360.787	14.979	-0.784	12.456	-0.678	35.414	686.846	-0.001049	0.000055	-0.000872
10.2400	429.978	23.722	3.510	18.827	-0.696	35.416	818.567	-0.001661	-0.000246	-0.001318
10.2800	452.565	27.055	5.312	20.860	-0.676	35.415	861.568	-0.001894	-0.000372	-0.001460
10.3200	518.405	35.088	8.946	26.819	-0.673	35.415	986.910	-0.002456	-0.000626	-0.001877
10.3600	578.834	43.383	12.729	32.282	-0.696	35.415	1101.952	-0.003037	-0.000891	-0.002260
10.4000	634.379	50.929	17.310	37.842	-0.691	35.415	1207.695	-0.003565	-0.001212	-0.002649
10.4400	698.505	59.379	20.629	43.936	-0.664	35.415	1329.775	-0.004157	-0.001444	-0.003076
10.4800	750.909	66.506	24.465	48.629	-0.678	35.415	1429.539	-0.004655	-0.001713	-0.003404
10.5200	834.858	77.499	29.820	56.956	-0.706	35.415	1589.355	-0.005425	-0.002087	-0.003987
10.5600	890.854	84.850	33.051	61.813	-0.673	35.415	1695.957	-0.005939	-0.002314	-0.004327
10.6000	934.962	91.759	36.132	66.379	-0.680	35.414	1779.928	-0.006423	-0.002529	-0.004647
10.6400	1013.846	102.306	41.944	74.402	-0.702	35.415	1930.103	-0.007161	-0.002936	-0.005208
10.6800	1064.402	109.087	44.225	78.144	-0.680	35.416	2026.348	-0.007636	-0.003096	-0.005470
10.7200	1104.002	115.091	47.199	82.633	-0.679	35.415	2101.736	-0.008056	-0.003304	-0.005784
10.7600	1148.772	120.789	50.062	86.744	-0.698	35.414	2186.966	-0.008455	-0.003504	-0.006072
10.8000	1172.772	124.651	51.699	89.071	-0.686	35.416	2232.656	-0.008726	-0.003619	-0.006235
10.8400	1234.028	133.043	55.482	95.290	-0.663	35.415	2349.272	-0.009313	-0.003884	-0.006670
10.8800	1202.273	130.155	55.098	93.516	-0.688	35.414	2288.818	-0.009111	-0.003857	-0.006546
10.9200	1251.746	136.311	57.447	98.056	-0.708	35.415	2383.003	-0.009542	-0.004021	-0.006864
10.9600	1243.916	135.990	57.435	97.808	-0.675	35.415	2368.097	-0.009519	-0.004020	-0.006847
11.0000	1228.873	134.655	57.160	97.104	-0.683	35.414	2339.458	-0.009426	-0.004001	-0.006797
11.0400	1237.259	135.921	57.269	97.408	-0.695	35.415	2355.423	-0.009514	-0.004009	-0.006819
11.0800	1227.505	135.350	57.065	97.698	-0.677	35.415	2336.855	-0.009475	-0.003995	-0.006839
11.1200	1195.901	131.558	56.016	94.851	-0.659	35.415	2276.688	-0.009209	-0.003921	-0.006640
11.1600	1155.309	127.081	53.901	91.795	-0.694	35.415	2199.411	-0.008896	-0.003773	-0.006426
11.2000	1122.983	123.246	52.593	88.740	-0.688	35.415	2137.871	-0.008627	-0.003681	-0.006212
11.2400	1049.990	113.965	48.849	83.651	-0.665	35.414	1998.911	-0.007978	-0.003419	-0.005856
11.2800	1012.659	109.283	45.752	80.125	-0.688	35.414	1927.843	-0.007650	-0.003203	-0.005609
11.3200	942.447	100.803	42.106	73.948	-0.709	35.415	1794.176	-0.007056	-0.002947	-0.005176
11.3600	909.369	95.647	39.423	70.947	-0.679	35.415	1731.205	-0.006695	-0.002760	-0.004966
11.4000	797.903	81.907	32.776	60.697	-0.684	35.414	1519.003	-0.005733	-0.002294	-0.004249
11.4400	790.554	80.849	32.624	60.134	-0.696	35.415	1505.013	-0.005659	-0.002284	-0.004209
11.4800	714.977	70.345	27.671	53.019	-0.669	35.415	1361.132	-0.004924	-0.001937	-0.003711
11.5200	650.565	61.672	23.225	46.950	-0.667	35.415	1238.508	-0.004317	-0.001626	-0.003286
11.5600	588.377	53.459	19.529	41.253	-0.704	35.414	1120.119	-0.003742	-0.001367	-0.002888
11.6000	510.440	42.482	14.313	34.001	-0.679	35.415	971.746	-0.002974	-0.001002	-0.002380
11.6400	499.319	39.911	12.662	31.623	-0.674	35.415	950.575	-0.002794	-0.000886	-0.002214
11.6800	403.513	27.749	7.047	23.213	-0.683	35.414	768.185	-0.001942	-0.000493	-0.001625
11.7200	360.727	21.259	3.810	18.811	-0.686	35.415	686.731	-0.001488	-0.000267	-0.001317
11.7600	321.142	15.327	0.730	14.710	-0.674	35.415	611.372	-0.001073	-0.000051	-0.001030
11.8000	295.188	11.170	-0.865	11.559	-0.672	35.414	561.962	-0.000782	0.000061	-0.000809
11.8400	277.620	8.004	-2.104	9.714	-0.698	35.415	528.517	-0.000560	0.000147	-0.000680
11.8800	243.701	3.112	-4.871	5.781	-0.688	35.415	463.943	-0.000218	0.000341	-0.000405
11.9200	248.495	3.252	-4.473	5.961	-0.677	35.414	473.070	-0.000228	0.000313	-0.000417
11.9600	239.703	0.944	-5.492	4.859	-0.695	35.414	456.333	-0.000066	0.000384	-0.000340
12.0000	238.260	0.750	-6.000	4.556	-0.692	35.415	453.587	-0.000053	0.000420	-0.000319
12.0400	243.716	1.001	-5.492	4.487	-0.669	35.415	463.972	-0.000070	0.000384	-0.000314
12.0800	275.200	4.894	-4.514	6.263	-0.680	35.414	523.911	-0.000343	0.000316	-0.000438
12.1200	298.329	7.643	-3.742	7.940	-0.694	35.414	567.942	-0.000535	0.000262	-0.000556
12.1600	315.837	10.216	-2.722	9.550	-0.676	35.415	601.273	-0.000715	0.000191	-0.000668
12.2000	367.700	16.421	-0.141	14.188	-0.667	35.414	700.006	-0.001149	0.000010	-0.000993
12.2400	414.078	22.650	2.423	17.847	-0.677	35.414	788.298	-0.001585	-0.000170	-0.001249
12.2800	480.699	31.366	6.758	23.697	-0.675	35.416	915.127	-0.002196	-0.000473	-0.001659
12.3200	527.227	37.007	9.857	28.375	-0.671	35.414	1003.704	-0.002590	-0.000690	-0.001986
12.3600	585.597	44.787	13.293	33.478	-0.676	35.414	1114.826	-0.003135	-0.000930	-0.002343
12.4000	645.605	53.098	17.200	38.832	-0.698	35.415	1229.067	-0.003717	-0.001204	-0.002718
12.4400	708.499	61.478	22.139	45.604	-0.667	35.415	1348.801	-0.004303	-0.001550	-0.003192
12.4800	744.748	66.548	23.941	49.260	-0.677	35.414	1417.809	-0.004658	-0.001676	-0.003448
12.5200	865.261	82.323	31.442	60.077	-0.686	35.414	1647.234	-0.005763	-0.002201	-0.004205
12.5600	894.160	86.772	33.781	63.187	-0.679	35.415	1702.251	-0.006074	-0.002365	-0.004423
12.6000	958.542	95.204	37.471	68.995	-0.668	35.415	1824.818	-0.006664	-0.002623	-0.004830
12.6400	1005.851	102.290	41.143	73.523	-0.674	35.414	1914.883	-0.007160	-0.002880	-0.005147
12.6800	1056.587	108.948	44.240	78.794	-0.691	35.415	2011.471	-0.007626	-0.003097	-0.005516
12.7200	1089.710	114.120	46.412	82.039	-0.671	35.415	2074.528	-0.007988	-0.003249	-0.005743
12.7600	1126.980	119.316	49.180	85.518	-0.665	35.415	2145.481	-0.008352	-0.003443	-0.005986
12.8000	1178.588	126.180	52.110	90.378	-0.682	35.414	2243.729	-0.008833	-0.003648	-0.006326
12.8400	1193.075	128.958	53.431	92.484	-0.678	35.415	2271.309	-0.009027	-0.003740	-0.006474
12.8800	1214.280	132.336	55.398	94.988	-0.664	35.415	2311.678	-0.009264	-0.003878	-0.006649
12.9200	1231.473	134.724	56.375	96.141	-0.678	35.414	2344.408	-0.009431	-0.003946	-0.006730
12.9600	1246.426	137.298	57.834	99.115	-0.692	35.415	2372.875	-0.009611	-0.004048	-0.006938
13.0000	1239.949	136.880	57.972	98.495	-0.672	35.415	2360.544	-0.009582	-0.004058	-0.006895
13.0400	1234.794	136.631	57.862	98.413	-0.656	35.414	2350.731	-0.009564	-0.004050	-0.006889
13.0800	1213.604	134.393	56.968	96.514	-0.681	35.414	2310.390	-0.009408	-0.003988	-0.006756
13.1200	1192.324	131.724	56.429	95.458	-0.688	35.415	2269.878	-0.009221	-0.003950	-0.006682
13.1600	1124.906	124.095	53.376	90.718	-0.664	35.414	2141.533	-0.008687	-0.003736	-0.006350
13.2000	1125.327	124.123	52.990	89.799	-0.679	35.414	2142.334	-0.008689	-0.003709	-0.006286
13.2400	1077.943	117.855	49.829	85.837	-0.695	35.415	2052.126	-0.008250	-0.003488	-0.006009
13.2800	990.462	107.488	45.573	78.544	-0.680	35.415	1885.586	-0.007524	-0.003190	-0.005498
13.3200	954.289	102.904	42.574	75.173	-0.679	35.414	1816.721	-0.007203	-0.002980	-0.005262
13.3600	913.968	97.469	40.346	71.552	-0.700	35.414	1739.960	-0.006823	-0.002824	-0.005009
13.4000	839.382	87.409	35.776	64.836	-0.686	35.416	1597.967	-0.006119	-0.002504	-0.004539
13.4400	752.608	76.486	30.369	57.340	-0.664	35.415	1432.772	-0.005354	-0.002126	-0.004014
13.4800	699.437	69.231	27.354	53.017	-0.682	35.415	1331.549	-0.004846	-0.001915	-0.003711
13.5200	647.815	61.670	23.585	47.004	-0.683	35.415	1233.273	-0.004317	-0.001651	-0.003290
13.5600	587.506	53.863	19.336	41.377	-0.667	35.415	1118.460	-0.003770	-0.001354	-0.002896
13.6000	544.915	47.860	16.859	37.248	-0.668	35.414	1037.378	-0.003350	-0.001180	-0.002607
13.6400	482.202	39.076	12.247	31.125	-0.688	35.414	917.988	-0.002735	-0.000857	-0.002179
13.6800	440.438	32.614	8.671	26.751	-0.668	35.415	838.480	-0.002283	-0.000607	-0.001873
13.7200	386.155	25.293	5.821	21.824	-0.661	35.414	735.140	-0.001770	-0.000407	-0.001528
13.7600	353.769	19.928	3.277	18.013	-0.684	35.414	673.485	-0.001395	-0.000229	-0.001261
13.8000	287.298	11.310	-1.085	11.958	-0.672	35.414	546.942	-0.000792	0.000076	-0.000837
13.8400	267.070	8.114	-2.627	9.988	-0.653	35.415	508.432	-0.000568	0.000184	-0.000699
13.8800	232.429	2.516	-5.093	6.138	-0.669	35.414	442.486	-0.000176	0.000356	-0.000430
13.9200	254.010	4.851	-4.624	6.538	-0.694	35.415	483.570	-0.000340	0.000324	-0.000458
13.9600	228.838	0.903	-5.836	4.375	-0.684	35.415	435.648	-0.000063	0.000409	-0.000306
14.0000	231.107	-0.181	-6.810	3.399	-0.669	35.415	439.968	0.000013	0.000477	-0.000238
14.0400	248.780	2.489	-5.945	5.312	-0.686	35.414	473.614	-0.000174	0.000416	-0.000372
14.0800	256.475	3.614	-5.312	5.642	-0.692	35.415	488.262	-0.000253	0.000372	-0.000395
14.1200	286.096	6.683	-4.293	7.514	-0.667	35.415	544.653	-0.000468	0.000301	-0.000526
14.1600	319.354	10.880	-2.463	10.540	-0.674	35.413	607.967	-0.000762	0.000172	-0.000738
14.2000	385.043	18.913	1.127	15.593	-0.687	35.414	733.023	-0.001324	-0.000079	-0.001092
14.2400	423.200	23.874	3.401	19.276	-0.670	35.415	805.664	-0.001671	-0.000238	-0.001349
14.2800	460.230	29.348	5.877	22.871	-0.673	35.414	876.160	-0.002054	-0.000411	-0.001601
14.3200	524.612	37.410	9.964	29.006	-0.685	35.413	998.726	-0.002619	-0.000697	-0.002030
14.3600	576.339	43.826	13.196	33.299	-0.696	35.415	1097.202	-0.003068	-0.000924	-0.002331
14.4000	622.191	50.873	16.251	37.567	-0.673	35.415	1184.492	-0.003561	-0.001138	-0.002630
14.4400	699.167	60.976	21.575	45.092	-0.684	35.414	1331.034	-0.004268	-0.001510	-0.003156
14.4800	758.108	68.676	25.279	50.474	-0.701	35.415	1443.243	-0.004807	-0.001770	-0.003533
14.5200	817.155	77.123	29.105	56.334	-0.683	35.415	1555.653	-0.005399	-0.002037	-0.003943
14.5600	885.038	86.200	34.000	62.541	-0.666	35.414	1684.885	-0.006034	-0.002380	-0.004378
14.6000	945.377	93.968	37.265	68.469	-0.701	35.414	1799.755	-0.006578	-0.002609	-0.004793
14.6400	995.136	101.527	40.786	73.645	-0.691	35.415	1894.484	-0.007107	-0.002855	-0.005155
14.6800	1061.201	110.183	44.914	79.191	-0.677	35.414	2020.254	-0.007713	-0.003144	-0.005543
14.7200	1107.308	116.574	47.886	85.011	-0.688	35.413	2108.030	-0.008160	-0.003352	-0.005951
14.7600	1155.955	123.119	50.775	88.339	-0.691	35.415	2200.642	-0.008618	-0.003554	-0.006184
14.8000	1183.187	127.694	53.224	91.631	-0.676	35.415	2252.483	-0.008939	-0.003726	-0.006414
14.8400	1192.835	129.293	53.902	92.815	-0.666	35.414	2270.851	-0.009050	-0.003773	-0.006497
14.8800	1229.790	134.808	56.319	97.449	-0.697	35.414	2341.204	-0.009437	-0.003942	-0.006821
14.9200	1235.981	135.587	56.981	97.808	-0.686	35.415	2352.991	-0.009491	-0.003989	-0.006847
14.9600	1263.183	139.171	58.563	99.955	-0.673	35.415	2404.776	-0.009742	-0.004099	-0.006997
15.0000	1255.879	139.462	58.606	100.009	-0.686	35.414	2390.871	-0.009762	-0.004102	-0.007001
15.0400	1219.615	135.461	57.530	97.751	-0.703	35.415	2321.835	-0.009482	-0.004027	-0.006843
15.0800	1214.972	135.224	57.242	97.478	-0.679	35.415	2312.994	-0.009466	-0.004007	-0.006823
15.1200	1197.088	133.099	56.526	96.484	-0.667	35.414	2278.948	-0.009317	-0.003957	-0.006754
15.1600	1155.429	128.484	55.168	93.624	-0.687	35.414	2199.640	-0.008994	-0.003862	-0.006554
15.2000	1070.443	117.436	50.103	86.428	-0.680	35.415	2037.849	-0.008221	-0.003507	-0.006050
15.2400	1046.383	114.843	48.698	83.566	-0.675	35.415	1992.044	-0.008039	-0.003409	-0.005850
15.2800	1023.961	112.282	47.857	81.899	-0.684	35.414	1949.358	-0.007860	-0.003350	-0.005733
15.3200	952.531	103.000	43.179	75.665	-0.700	35.415	1813.374	-0.007210	-0.003023	-0.005297
15.3600	894.626	95.772	39.738	70.782	-0.663	35.415	1703.138	-0.006704	-0.002782	-0.004955
15.4000	839.848	88.325	36.657	65.870	-0.673	35.415	1598.854	-0.006183	-0.002566	-0.004611
15.4400	776.713	79.751	32.255	60.024	-0.706	35.415	1478.662	-0.005583	-0.002258	-0.004202
15.4800	702.413	70.564	27.394	53.361	-0.672	35.416	1337.214	-0.004939	-0.001918	-0.003735
15.5200	630.111	60.769	23.006	46.522	-0.660	35.414	1199.570	-0.004254	-0.001610	-0.003257
15.5600	583.839	54.278	19.664	42.559	-0.690	35.414	1111.479	-0.003799	-0.001376	-0.002979
15.6000	519.848	45.592	15.455	36.136	-0.688	35.416	989.656	-0.003191	-0.001082	-0.002530
15.6400	467.308	38.023	12.040	30.917	-0.668	35.415	889.635	-0.002662	-0.000843	-0.002164
15.6800	418.406	30.627	8.105	25.706	-0.684	35.414	796.537	-0.002144	-0.000567	-0.001799
15.7200	384.141	25.821	5.697	21.809	-0.699	35.415	731.306	-0.001807	-0.000399	-0.001527
15.7600	326.973	17.325	2.078	16.747	-0.672	35.416	622.473	-0.001213	-0.000145	-0.001172
15.8000	300.764	13.258	-0.082	13.732	-0.681	35.414	572.577	-0.000928	0.000006	-0.000961
15.8400	275.396	9.160	-1.886	10.542	-0.698	35.415	524.282	-0.000641	0.000132	-0.000738
15.8800	246.511	4.742	-3.837	8.119	-0.684	35.416	469.294	-0.000332	0.000269	-0.000568
15.9200	244.632	3.461	-4.555	6.522	-0.678	35.415	465.717	-0.000242	0.000319	-0.000457
15.9600	241.912	3.017	-4.912	6.223	-0.694	35.415	460.539	-0.000211	0.000344	-0.000436
16.0000	238.035	1.877	-5.161	5.588	-0.702	35.416	453.157	-0.000131	0.000361	-0.000391
16.0400	248.359	2.905	-5.243	5.739	-0.669	35.416	472.813	-0.000203	0.000367	-0.000402
16.0800	280.535	6.724	-3.851	7.776	-0.690	35.415	534.067	-0.000471	0.000270	-0.000544
16.1200	294.452	8.102	-3.316	8.724	-0.703	35.415	560.560	-0.000567	0.000232	-0.000611
16.1600	334.412	13.145	-1.749	12.233	-0.688	35.415	636.635	-0.000920	0.000122	-0.000856
16.2000	381.676	19.246	1.100	16.114	-0.666	35.415	726.614	-0.001347	-0.000077	-0.001128
16.2400	423.425	24.471	3.881	20.064	-0.692	35.415	806.093	-0.001713	-0.000272	-0.001404
16.2800	472.057	31.086	6.688	24.438	-0.693	35.416	898.676	-0.002176	-0.000468	-0.001711
16.3200	531.825	38.894	10.663	29.544	-0.661	35.416	1012.459	-0.002723	-0.000746	-0.002068
16.3600	583.643	45.760	14.118	34.606	-0.687	35.415	1111.107	-0.003203	-0.000988	-0.002422
16.4000	642.119	53.975	17.722	41.074	-0.700	35.416	1222.429	-0.003778	-0.001241	-0.002875
16.4400	701.226	62.143	21.946	45.795	-0.686	35.416	1334.953	-0.004350	-0.001536	-0.003206
16.4800	751.135	68.173	25.002	50.282	-0.683	35.415	1429.968	-0.004772	-0.001750	-0.003520
16.5200	838.345	79.625	30.205	58.510	-0.696	35.415	1595.993	-0.005574	-0.002114	-0.004096
16.5600	902.185	88.811	34.691	64.330	-0.687	35.416	1717.529	-0.006217	-0.002428	-0.004503
16.6000	941.470	94.157	37.636	68.676	-0.675	35.415	1792.316	-0.006591	-0.002635	-0.004807
16.6400	1005.836	103.126	41.338	74.263	-0.692	35.415	1914.854	-0.007219	-0.002894	-0.005198
16.6800	1059.863	110.889	45.132	79.616	-0.691	35.417	2017.708	-0.007762	-0.003159	-0.005573
16.7200	1097.374	116.158	47.816	83.743	-0.664	35.416	2089.119	-0.008131	-0.003347	-0.005862
16.7600	1156.286	123.887	51.022	89.289	-0.684	35.415	2201.271	-0.008672	-0.003572	-0.006250
16.8000	1172.907	127.082	52.855	91.669	-0.702	35.416	2232.914	-0.008896	-0.003700	-0.006417
16.8400	1212.582	132.238	55.388	95.278	-0.673	35.416	2308.445	-0.009257	-0.003877	-0.006669
16.8800	1247.208	136.784	57.119	98.400	-0.677	35.415	2374.363	-0.009575	-0.003998	-0.006888
16.9200	1239.633	137.145	57.407	98.634	-0.683	35.415	2359.943	-0.009600	-0.004018	-0.006904
16.9600	1248.861	137.699	57.861	99.499	-0.667	35.417	2377.510	-0.009639	-0.004050	-0.006965
17.0000	1234.809	137.213	57.819	98.866	-0.670	35.416	2350.760	-0.009605	-0.004047	-0.006921
17.0400	1234.599	137.700	58.424	98.947	-0.691	35.416	2350.359	-0.009639	-0.004090	-0.006926
17.0800	1207.683	134.475	57.201	97.258	-0.690	35.416	2299.118	-0.009413	-0.004004	-0.006808
17.1200	1180.391	131.642	56.100	94.876	-0.665	35.416	2247.162	-0.009215	-0.003927	-0.006641
17.1600	1147.494	127.608	54.753	91.988	-0.686	35.415	2184.534	-0.008933	-0.003833	-0.006439
17.2000	1120.849	124.179	53.293	90.884	-0.709	35.417	2133.808	-0.008693	-0.003730	-0.006362
17.2400	1058.526	116.575	49.344	85.105	-0.686	35.417	2015.162	-0.008160	-0.003454	-0.005957
17.2800	1010.104	110.975	46.731	81.446	-0.676	35.416	1922.979	-0.007768	-0.003271	-0.005701
17.3200	930.048	100.927	42.299	74.539	-0.687	35.416	1770.573	-0.007065	-0.002961	-0.005218
17.3600	883.189	94.548	38.901	69.862	-0.674	35.417	1681.366	-0.006618	-0.002723	-0.004890
17.4000	816.193	86.117	35.185	64.097	-0.659	35.416	1553.822	-0.006028	-0.002463	-0.004487
17.4400	754.141	77.347	31.320	58.674	-0.696	35.416	1435.690	-0.005414	-0.002192	-0.004107
17.4800	703.375	70.456	27.494	53.638	-0.695	35.417	1339.045	-0.004932	-0.001925	-0.003755
17.5200	677.090	66.882	25.923	50.158	-0.668	35.417	1289.005	-0.004682	-0.001815	-0.003511
17.5600	576.039	53.042	19.557	41.790	-0.681	35.416	1096.630	-0.003713	-0.001369	-0.002925
17.6000	522.042	45.982	15.289	36.382	-0.695	35.417	993.834	-0.003219	-0.001070	-0.002547
17.6400	464.017	37.966	11.971	30.615	-0.676	35.417	883.369	-0.002658	-0.000838	-0.002143
17.6800	428.129	32.240	9.055	26.916	-0.677	35.417	815.048	-0.002257	-0.000634	-0.001884
17.7200	366.813	23.610	4.885	21.011	-0.687	35.417	698.318	-0.001653	-0.000342	-0.001471
17.7600	329.483	18.219	2.585	16.941	-0.680	35.418	627.251	-0.001275	-0.000181	-0.001186
17.8000	290.063	11.935	-0.180	12.827	-0.660	35.417	552.206	-0.000835	0.000013	-0.000898
17.8400	263.117	7.976	-2.392	10.252	-0.682	35.416	500.908	-0.000558	0.000167	-0.000718
17.8800	253.409	6.266	-3.397	8.668	-0.692	35.417	482.426	-0.000439	0.000238	-0.000607
17.9200	265.026	6.543	-3.768	8.201	-0.666	35.418	504.541	-0.000458	0.000264	-0.000574
17.9600	234.729	2.474	-5.451	5.906	-0.674	35.417	446.863	-0.000173	0.000382	-0.000413
18.0000	252.748	4.269	-4.527	6.717	-0.688	35.417	481.167	-0.000299	0.000317	-0.000470
18.0400	245.309	2.794	-4.886	6.098	-0.677	35.418	467.005	-0.000196	0.000342	-0.000427
18.0800	269.745	5.335	-4.363	7.114	-0.661	35.417	513.525	-0.000373	0.000305	-0.000498
18.1200	293.144	8.673	-3.247	8.862	-0.685	35.417	558.071	-0.000607	0.000227	-0.000620
18.1600	330.129	13.090	-1.141	12.342	-0.679	35.418	628.481	-0.000916	0.000080	-0.000864
18.2000	368.421	17.855	0.358	15.065	-0.665	35.418	701.380	-0.001250	-0.000025	-0.001055
18.2400	403.858	23.208	2.921	18.632	-0.683	35.417	768.843	-0.001625	-0.000205	-0.001304
18.2800	459.418	29.600	6.250	23.296	-0.694	35.418	874.615	-0.002072	-0.000437	-0.001631
18.3200	509.869	36.897	9.359	28.416	-0.663	35.418	970.659	-0.002583	-0.000655	-0.001989
18.3600	601.993	48.331	15.164	36.091	-0.674	35.417	1146.040	-0.003383	-0.001061	-0.002526
18.4000	639.834	53.669	17.887	40.086	-0.718	35.418	1218.081	-0.003757	-0.001252	-0.002806
18.4400	687.835	60.129	20.890	44.915	-0.690	35.418	1309.462	-0.004209	-0.001462	-0.003144
18.4800	807.071	75.500	28.373	55.414	-0.672	35.417	1536.455	-0.005285	-0.001986	-0.003879
18.5200	827.194	78.445	29.944	58.523	-0.687	35.418	1574.764	-0.005491	-0.002096	-0.004097
18.5600	877.884	86.087	33.133	63.738	-0.700	35.419	1671.267	-0.006026	-0.002319	-0.004462
18.6000	946.143	95.384	37.678	69.075	-0.681	35.418	1801.214	-0.006677	-0.002637	-0.004835
18.6400	1009.037	103.668	41.819	74.637	-0.677	35.417	1920.948	-0.007257	-0.002927	-0.005225
18.6800	1059.638	110.946	44.776	80.731	-0.695	35.418	2017.279	-0.007766	-0.003134	-0.005651
18.7200	1092.746	115.867	47.375	83.320	-0.681	35.418	2080.307	-0.008111	-0.003316	-0.005832
18.7600	1134.720	121.579	51.105	88.604	-0.662	35.418	2160.215	-0.008511	-0.003577	-0.006202
18.8000	1191.392	129.473	54.053	93.545	-0.681	35.417	2268.105	-0.009063	-0.003784	-0.006548
18.8400	1218.278	133.766	56.530	96.347	-0.689	35.418	2319.288	-0.009364	-0.003957	-0.006744
18.8800	1235.170	135.947	57.392	98.357	-0.664	35.418	2351.446	-0.009516	-0.004017	-0.006885
18.9200	1233.066	136.019	56.942	98.469	-0.694	35.417	2347.441	-0.009521	-0.003986	-0.006893
18.9600	1241.467	137.796	58.370	99.390	-0.698	35.418	2363.434	-0.009646	-0.004086	-0.006957
19.0000	1237.124	137.702	58.221	99.363	-0.686	35.418	2355.165	-0.009639	-0.004075	-0.006955
19.0400	1230.902	137.254	57.655	99.197	-0.668	35.417	2343.321	-0.009608	-0.004036	-0.006944
19.0800	1219.661	136.393	57.517	98.179	-0.688	35.418	2321.920	-0.009548	-0.004026	-0.006873
19.1200	1158.104	129.304	55.139	94.327	-0.683	35.419	2204.733	-0.009051	-0.003860	-0.006603
19.1600	1115.754	124.247	53.060	90.541	-0.664	35.418	2124.109	-0.008697	-0.003714	-0.006338
19.2000	1125.027	125.153	53.336	90.637	-0.669	35.418	2141.762	-0.008761	-0.003734	-0.006345
19.2400	1066.296	117.798	50.021	85.752	-0.681	35.418	2029.953	-0.008246	-0.003501	-0.006003
19.2800	1007.399	110.766	46.522	80.952	-0.683	35.418	1917.830	-0.007754	-0.003257	-0.005667
19.3200	971.346	106.055	44.460	77.485	-0.667	35.418	1849.194	-0.007424	-0.003112	-0.005424
19.3600	883.024	94.438	39.354	70.660	-0.684	35.418	1681.051	-0.006611	-0.002755	-0.004946
19.4000	837.834	88.685	36.161	65.773	-0.692	35.419	1595.020	-0.006208	-0.002531	-0.004604
19.4400	773.542	80.446	32.146	60.478	-0.669	35.418	1472.626	-0.005631	-0.002250	-0.004233
19.4800	708.439	71.399	28.115	54.532	-0.675	35.418	1348.686	-0.004998	-0.001968	-0.003817
19.5200	639.819	62.466	23.268	47.625	-0.680	35.419	1218.052	-0.004373	-0.001629	-0.003334
19.5600	586.784	55.362	19.870	43.401	-0.661	35.419	1117.086	-0.003875	-0.001391	-0.003038
19.6000	530.773	47.179	16.264	37.402	-0.664	35.418	1010.456	-0.003303	-0.001139	-0.002618
19.6400	476.912	39.270	12.330	31.952	-0.687	35.418	907.917	-0.002749	-0.000863	-0.002237
19.6800	427.889	32.419	8.837	27.135	-0.672	35.419	814.590	-0.002269	-0.000619	-0.001899
19.7200	371.036	24.707	5.656	21.684	-0.673	35.419	706.358	-0.001729	-0.000396	-0.001518
19.7600	344.947	20.039	3.345	19.084	-0.693	35.418	656.691	-0.001403	-0.000234	-0.001336
19.8000	308.473	14.911	0.484	14.669	-0.689	35.419	587.254	-0.001044	-0.000034	-0.001027
19.8400	283.586	10.756	-0.894	11.918	-0.674	35.419	539.875	-0.000753	0.000063	-0.000834
19.8800	265.822	7.669	-2.804	9.424	-0.673	35.419	506.058	-0.000537	0.000196	-0.000660
19.9200	201.275	-0.695	-6.782	3.593	-0.686	35.419	383.177	0.000049	0.000475	-0.000252
19.9600	239.087	3.100	-5.354	6.195	-0.693	35.419	455.160	-0.000217	0.000375	-0.000434
Test Cycles
Time (sec)	Axial stress (kPa)	Axial micro-strain #1	Axial micro-strain #2	Axial micro-strain #3	Confining pressure (kPa)	Temperature (�C)	Load (N)	Displacement #1 (mm)	Displacement #2 (mm)	Displacement #3 (mm)
0.0000	244.272	3.209	-5.794	5.586	-0.674	35.419	465.031	-0.000225	0.000406	-0.000391
0.0400	256.505	4.851	-4.887	6.980	-0.681	35.418	488.319	-0.000340	0.000342	-0.000489
0.0800	257.061	4.573	-5.024	6.522	-0.678	35.419	489.378	-0.000320	0.000352	-0.000457
0.1200	293.835	8.548	-3.894	9.026	-0.663	35.420	559.387	-0.000598	0.000273	-0.000632
0.1600	322.239	12.338	-2.172	11.642	-0.663	35.418	613.461	-0.000864	0.000152	-0.000815
0.2000	356.534	16.535	-0.181	14.311	-0.686	35.419	678.749	-0.001157	0.000013	-0.001002
0.2400	400.327	22.706	2.628	18.661	-0.672	35.419	762.119	-0.001589	-0.000184	-0.001306
0.2800	468.315	31.740	7.061	24.891	-0.669	35.419	891.552	-0.002222	-0.000494	-0.001742
0.3200	531.239	39.686	10.828	30.037	-0.683	35.419	1011.343	-0.002778	-0.000758	-0.002103
0.3600	565.008	44.161	12.963	33.795	-0.687	35.419	1075.630	-0.003091	-0.000907	-0.002366
0.4000	637.911	54.141	17.502	40.181	-0.670	35.420	1214.418	-0.003790	-0.001225	-0.002813
0.4400	722.551	65.189	23.544	48.270	-0.671	35.419	1375.551	-0.004563	-0.001648	-0.003379
0.4800	781.838	72.676	27.119	53.498	-0.690	35.419	1488.419	-0.005087	-0.001898	-0.003745
0.5200	828.531	79.027	29.901	58.275	-0.684	35.420	1577.311	-0.005532	-0.002093	-0.004079
0.5600	898.158	88.784	35.294	64.726	-0.671	35.419	1709.862	-0.006215	-0.002471	-0.004531
0.6000	960.436	97.401	38.777	70.810	-0.696	35.419	1828.423	-0.006818	-0.002714	-0.004957
0.6400	984.165	101.444	40.471	73.496	-0.691	35.420	1873.598	-0.007101	-0.002833	-0.005145
0.6800	1059.593	111.129	45.367	80.704	-0.668	35.420	2017.193	-0.007779	-0.003176	-0.005649
0.7200	1123.313	119.691	49.123	86.182	-0.667	35.419	2138.500	-0.008378	-0.003439	-0.006033
0.7600	1136.869	122.509	50.940	88.892	-0.695	35.419	2164.307	-0.008576	-0.003566	-0.006222
0.8000	1178.768	128.401	53.571	92.208	-0.686	35.419	2244.072	-0.008988	-0.003750	-0.006455
0.8400	1201.386	131.112	54.806	95.415	-0.663	35.419	2287.130	-0.009178	-0.003836	-0.006679
0.8800	1233.532	136.547	57.118	98.346	-0.676	35.419	2348.328	-0.009558	-0.003998	-0.006884
0.9200	1268.833	140.658	59.183	101.882	-0.690	35.420	2415.533	-0.009846	-0.004143	-0.007132
0.9600	1245.870	138.351	58.536	100.367	-0.673	35.420	2371.817	-0.009685	-0.004098	-0.007026
1.0000	1231.157	137.380	58.194	99.142	-0.687	35.419	2343.807	-0.009617	-0.004074	-0.006940
1.0400	1246.697	139.503	58.933	101.193	-0.708	35.419	2373.390	-0.009765	-0.004125	-0.007084
1.0800	1207.683	135.059	57.298	98.165	-0.685	35.420	2299.118	-0.009454	-0.004011	-0.006872
1.1200	1185.922	132.751	56.486	95.923	-0.680	35.419	2257.690	-0.009293	-0.003954	-0.006715
1.1600	1119.406	124.858	53.349	90.486	-0.698	35.419	2131.062	-0.008740	-0.003734	-0.006334
1.2000	1121.841	124.929	53.348	91.519	-0.691	35.420	2135.696	-0.008745	-0.003734	-0.006406
1.2400	1071.961	118.800	50.405	87.184	-0.667	35.420	2040.739	-0.008316	-0.003528	-0.006103
1.2800	1004.529	110.738	46.840	81.114	-0.683	35.420	1912.365	-0.007752	-0.003279	-0.005678
1.3200	958.422	104.902	43.978	76.796	-0.686	35.420	1824.589	-0.007343	-0.003078	-0.005376
1.3600	893.153	96.732	39.739	72.052	-0.665	35.420	1700.335	-0.006771	-0.002782	-0.005044
1.4000	832.859	88.894	36.202	65.855	-0.673	35.420	1585.550	-0.006223	-0.002534	-0.004610
1.4400	781.778	81.544	32.995	61.208	-0.690	35.420	1488.304	-0.005708	-0.002310	-0.004285
1.4800	697.393	70.705	27.465	53.498	-0.687	35.421	1327.658	-0.004949	-0.001923	-0.003745
1.5200	633.282	62.128	23.420	47.681	-0.666	35.421	1205.606	-0.004349	-0.001639	-0.003338
1.5600	561.191	52.415	18.826	40.854	-0.673	35.420	1068.363	-0.003669	-0.001318	-0.002860
1.6000	528.714	46.942	15.689	36.780	-0.685	35.420	1006.536	-0.003286	-0.001098	-0.002575
1.6400	469.983	39.297	12.355	31.787	-0.674	35.421	894.728	-0.002751	-0.000865	-0.002225
1.6800	454.294	36.437	10.995	29.559	-0.655	35.420	864.859	-0.002551	-0.000770	-0.002069
1.7200	373.065	25.029	5.267	21.932	-0.678	35.420	710.220	-0.001752	-0.000369	-0.001535
1.7600	328.792	18.789	2.559	17.489	-0.691	35.421	625.935	-0.001315	-0.000179	-0.001224
1.8000	296.165	13.231	0.152	13.871	-0.671	35.421	563.822	-0.000926	-0.000011	-0.000971
1.8400	278.867	10.326	-1.705	11.381	-0.671	35.420	530.891	-0.000723	0.000119	-0.000797
1.8800	256.099	7.142	-2.944	9.054	-0.676	35.420	487.547	-0.000500	0.000206	-0.000634
1.9200	228.342	2.334	-4.871	6.250	-0.663	35.421	434.704	-0.000163	0.000341	-0.000437
1.9600	237.945	3.043	-5.148	6.138	-0.659	35.421	452.986	-0.000213	0.000360	-0.000430
2.0000	236.186	2.918	-5.023	7.434	-0.683	35.420	449.638	-0.000204	0.000352	-0.000520
2.0400	243.610	3.254	-4.831	6.646	-0.679	35.421	463.772	-0.000228	0.000338	-0.000465
2.0800	265.687	5.712	-4.309	7.571	-0.666	35.421	505.800	-0.000400	0.000302	-0.000530
2.1200	292.062	9.077	-3.178	9.658	-0.659	35.420	556.011	-0.000635	0.000222	-0.000676
2.1600	336.561	14.231	-1.043	13.185	-0.689	35.420	640.726	-0.000996	0.000073	-0.000923
2.2000	354.956	16.646	-0.124	14.861	-0.683	35.421	675.745	-0.001165	0.000009	-0.001040
2.2400	413.281	24.611	3.509	19.939	-0.659	35.421	786.781	-0.001723	-0.000246	-0.001396
2.2800	472.869	31.794	7.143	25.056	-0.677	35.420	900.221	-0.002226	-0.000500	-0.001754
2.3200	533.478	39.700	10.759	30.490	-0.693	35.421	1015.606	-0.002779	-0.000753	-0.002134
2.3600	583.508	46.774	14.216	35.105	-0.677	35.421	1110.849	-0.003274	-0.000995	-0.002457
2.4000	655.885	55.932	18.823	41.789	-0.673	35.420	1248.636	-0.003915	-0.001318	-0.002925
2.4400	710.588	63.311	22.335	47.031	-0.695	35.420	1352.777	-0.004432	-0.001563	-0.003292
2.4800	745.830	69.078	24.836	50.515	-0.687	35.422	1419.868	-0.004835	-0.001739	-0.003536
2.5200	850.608	82.586	31.995	60.147	-0.668	35.421	1619.339	-0.005781	-0.002240	-0.004210
2.5600	882.814	86.631	33.740	63.297	-0.664	35.420	1680.651	-0.006064	-0.002362	-0.004431
2.6000	958.317	97.456	38.571	70.934	-0.689	35.421	1824.389	-0.006822	-0.002700	-0.004965
2.6400	1017.934	105.583	42.851	76.411	-0.672	35.421	1937.885	-0.007391	-0.003000	-0.005349
2.6800	1052.830	110.461	45.008	80.086	-0.665	35.420	2004.318	-0.007732	-0.003151	-0.005606
2.7200	1102.845	117.562	48.105	85.036	-0.684	35.420	2099.533	-0.008229	-0.003367	-0.005953
2.7600	1138.793	122.677	50.720	88.629	-0.686	35.422	2167.969	-0.008587	-0.003550	-0.006204
2.8000	1185.276	128.959	53.625	93.390	-0.669	35.421	2256.460	-0.009027	-0.003754	-0.006537
2.8400	1198.005	131.808	55.249	95.250	-0.676	35.420	2280.693	-0.009227	-0.003867	-0.006667
2.8800	1239.904	136.784	57.310	98.496	-0.697	35.421	2360.458	-0.009575	-0.004012	-0.006895
2.9200	1241.271	137.644	57.310	99.154	-0.672	35.422	2363.062	-0.009635	-0.004012	-0.006941
2.9600	1230.045	136.755	57.393	98.756	-0.661	35.421	2341.690	-0.009573	-0.004018	-0.006913
3.0000	1264.626	141.131	59.583	102.486	-0.675	35.420	2407.522	-0.009879	-0.004171	-0.007174
3.0400	1218.669	135.962	57.639	98.675	-0.684	35.422	2320.032	-0.009517	-0.004035	-0.006907
3.0800	1212.432	136.214	57.627	98.907	-0.661	35.421	2308.159	-0.009535	-0.004034	-0.006923
3.1200	1181.383	132.280	56.497	96.059	-0.675	35.420	2249.050	-0.009260	-0.003955	-0.006724
3.1600	1159.382	129.654	55.511	94.232	-0.694	35.421	2207.165	-0.009076	-0.003886	-0.006596
3.2000	1110.675	124.110	53.087	90.897	-0.675	35.422	2114.439	-0.008688	-0.003716	-0.006363
3.2400	1078.935	120.108	51.174	87.913	-0.681	35.421	2054.014	-0.008408	-0.003582	-0.006154
3.2800	1002.169	110.517	46.316	80.911	-0.687	35.421	1907.873	-0.007736	-0.003242	-0.005664
3.3200	952.275	104.460	43.347	76.671	-0.671	35.422	1812.887	-0.007312	-0.003034	-0.005367
3.3600	890.974	96.482	39.878	71.306	-0.662	35.422	1696.186	-0.006754	-0.002791	-0.004991
3.4000	830.289	88.033	35.873	65.649	-0.681	35.421	1580.658	-0.006162	-0.002511	-0.004595
3.4400	786.842	82.740	33.049	61.359	-0.694	35.422	1497.946	-0.005792	-0.002313	-0.004295
3.4800	711.760	73.122	28.761	55.221	-0.668	35.422	1355.009	-0.005119	-0.002013	-0.003865
3.5200	643.306	63.034	23.945	49.111	-0.677	35.421	1224.689	-0.004412	-0.001676	-0.003438
3.5600	588.603	55.694	19.954	43.359	-0.695	35.422	1120.548	-0.003899	-0.001397	-0.003035
3.6000	525.513	47.331	16.142	37.427	-0.681	35.423	1000.443	-0.003313	-0.001130	-0.002620
3.6400	475.860	39.772	12.660	32.433	-0.655	35.421	905.914	-0.002784	-0.000886	-0.002270
3.6800	422.479	32.737	8.917	27.273	-0.679	35.421	804.291	-0.002292	-0.000624	-0.001909
3.7200	356.294	23.526	4.802	20.723	-0.685	35.423	678.291	-0.001647	-0.000336	-0.001451
3.7600	338.770	19.943	2.906	19.032	-0.669	35.422	644.932	-0.001396	-0.000203	-0.001332
3.8000	305.573	14.760	0.054	15.922	-0.678	35.421	581.732	-0.001033	-0.000004	-0.001115
3.8400	290.063	12.158	-1.001	12.702	-0.692	35.422	552.206	-0.000851	0.000070	-0.000889
3.8800	247.127	5.489	-4.017	9.068	-0.668	35.423	470.467	-0.000384	0.000281	-0.000635
3.9200	250.794	5.682	-4.266	9.150	-0.667	35.422	477.448	-0.000398	0.000299	-0.000641
3.9600	239.327	3.740	-4.832	7.227	-0.691	35.421	455.618	-0.000262	0.000338	-0.000506
4.0000	241.612	3.515	-4.957	7.061	-0.683	35.423	459.967	-0.000246	0.000347	-0.000494
4.0400	246.556	3.921	-5.162	7.130	-0.673	35.422	469.379	-0.000274	0.000361	-0.000499
4.0800	264.500	5.989	-4.143	7.789	-0.671	35.421	503.540	-0.000419	0.000290	-0.000545
4.1200	292.859	9.089	-3.219	9.991	-0.689	35.422	557.528	-0.000636	0.000225	-0.000699
4.1600	327.484	13.397	-1.458	12.826	-0.682	35.423	623.446	-0.000938	0.000102	-0.000898
4.2000	386.471	21.012	1.777	17.626	-0.658	35.422	735.741	-0.001471	-0.000124	-0.001234
4.2400	415.055	24.776	3.632	21.024	-0.683	35.421	790.157	-0.001734	-0.000254	-0.001472
4.2800	475.273	32.754	6.991	25.568	-0.677	35.423	904.799	-0.002293	-0.000489	-0.001790
4.3200	520.885	38.868	10.238	29.860	-0.658	35.422	991.631	-0.002721	-0.000717	-0.002090
4.3600	582.832	46.607	14.381	35.558	-0.671	35.421	1109.562	-0.003263	-0.001007	-0.002489
4.4000	650.640	55.918	18.248	41.833	-0.681	35.423	1238.651	-0.003914	-0.001277	-0.002928
4.4400	724.084	65.575	22.938	48.217	-0.665	35.423	1378.469	-0.004590	-0.001606	-0.003375
4.4800	765.848	71.635	26.212	52.646	-0.665	35.422	1457.977	-0.005014	-0.001835	-0.003685
4.5200	820.371	78.917	29.612	58.029	-0.681	35.423	1561.775	-0.005524	-0.002073	-0.004062
4.5600	889.817	88.032	33.987	64.330	-0.677	35.423	1693.983	-0.006162	-0.002379	-0.004503
4.6000	966.101	97.942	38.913	71.168	-0.663	35.422	1839.209	-0.006856	-0.002724	-0.004982
4.6400	1000.652	103.513	41.225	75.365	-0.676	35.422	1904.984	-0.007246	-0.002886	-0.005276
4.6800	1082.376	114.034	46.412	82.191	-0.690	35.423	2060.566	-0.007982	-0.003249	-0.005753
4.7200	1116.821	119.356	48.972	86.649	-0.663	35.423	2126.141	-0.008355	-0.003428	-0.006065
4.7600	1182.285	127.720	52.387	92.277	-0.659	35.421	2250.767	-0.008940	-0.003667	-0.006459
4.8000	1171.765	128.054	52.937	92.292	-0.690	35.422	2230.740	-0.008964	-0.003706	-0.006460
4.8400	1210.163	132.864	55.125	96.336	-0.667	35.423	2303.839	-0.009300	-0.003859	-0.006743
4.8800	1202.904	132.710	55.385	96.018	-0.651	35.422	2290.020	-0.009290	-0.003877	-0.006721
4.9200	1253.414	139.672	58.385	100.657	-0.686	35.422	2386.179	-0.009777	-0.004087	-0.007046
4.9600	1261.530	140.630	58.936	101.045	-0.679	35.423	2401.628	-0.009844	-0.004126	-0.007073
5.0000	1230.571	137.686	57.764	99.914	-0.664	35.422	2342.691	-0.009638	-0.004043	-0.006994
5.0400	1223.463	137.365	57.847	98.991	-0.668	35.422	2329.159	-0.009616	-0.004049	-0.006929
5.0800	1220.592	136.881	57.902	99.045	-0.683	35.423	2323.694	-0.009582	-0.004053	-0.006933
5.1200	1183.382	132.862	56.182	95.882	-0.663	35.423	2252.855	-0.009300	-0.003933	-0.006712
5.1600	1155.354	129.848	55.139	94.219	-0.668	35.422	2199.497	-0.009089	-0.003860	-0.006595
5.2000	1116.806	124.719	53.308	90.528	-0.675	35.422	2126.112	-0.008730	-0.003732	-0.006337
5.2400	1073.795	119.386	50.403	87.556	-0.655	35.424	2044.230	-0.008357	-0.003528	-0.006129
5.2800	1029.160	113.882	47.926	83.224	-0.651	35.422	1959.257	-0.007972	-0.003355	-0.005826
5.3200	969.287	106.250	44.140	77.940	-0.676	35.422	1845.274	-0.007437	-0.003090	-0.005456
5.3600	913.862	99.276	40.703	73.768	-0.673	35.423	1739.759	-0.006949	-0.002849	-0.005164
5.4000	801.886	85.628	34.455	63.695	-0.665	35.423	1526.585	-0.005994	-0.002412	-0.004459
5.4400	769.950	80.655	32.310	60.368	-0.675	35.422	1465.788	-0.005646	-0.002262	-0.004226
5.4800	715.863	73.109	28.429	55.399	-0.679	35.423	1362.820	-0.005118	-0.001990	-0.003878
5.5200	643.171	63.952	24.245	49.111	-0.669	35.423	1224.432	-0.004477	-0.001697	-0.003438
5.5600	591.218	56.070	20.642	43.992	-0.661	35.422	1125.526	-0.003925	-0.001445	-0.003079
5.6000	534.756	48.512	16.361	38.225	-0.675	35.422	1018.038	-0.003396	-0.001145	-0.002676
5.6400	469.397	40.062	12.344	32.212	-0.681	35.423	893.612	-0.002804	-0.000864	-0.002255
5.6800	428.159	33.101	9.414	27.824	-0.673	35.424	815.105	-0.002317	-0.000659	-0.001948
5.7200	372.254	25.140	5.324	23.447	-0.688	35.422	708.675	-0.001760	-0.000373	-0.001641
5.7600	348.524	21.649	3.467	19.195	-0.687	35.423	663.500	-0.001515	-0.000243	-0.001344
5.8000	309.074	15.258	1.101	15.730	-0.669	35.423	588.398	-0.001068	-0.000077	-0.001101
5.8400	274.749	10.243	-1.927	11.421	-0.663	35.422	523.052	-0.000717	0.000135	-0.000799
5.8800	235.495	4.962	-4.309	9.192	-0.687	35.423	448.322	-0.000347	0.000302	-0.000643
5.9200	240.004	4.435	-4.365	7.529	-0.678	35.423	456.905	-0.000310	0.000306	-0.000527
5.9600	236.036	3.126	-5.134	6.964	-0.654	35.422	449.352	-0.000219	0.000359	-0.000488
6.0000	247.112	4.199	-4.653	7.352	-0.674	35.422	470.438	-0.000294	0.000326	-0.000515
6.0400	250.959	4.614	-4.338	7.198	-0.679	35.423	477.762	-0.000323	0.000304	-0.000504
6.0800	293.550	9.161	-3.329	10.308	-0.655	35.423	558.844	-0.000641	0.000233	-0.000722
6.1200	287.674	8.994	-3.385	10.182	-0.666	35.422	547.657	-0.000630	0.000237	-0.000713
6.1600	341.400	15.215	-0.799	13.816	-0.696	35.423	649.939	-0.001065	0.000056	-0.000967
6.2000	377.393	19.538	1.046	16.789	-0.665	35.424	718.460	-0.001368	-0.000073	-0.001175
6.2400	414.183	24.890	3.564	20.352	-0.652	35.422	788.498	-0.001742	-0.000250	-0.001425
6.2800	475.258	32.642	7.705	25.910	-0.679	35.423	904.770	-0.002285	-0.000539	-0.001814
6.3200	574.686	45.412	13.417	34.457	-0.664	35.424	1094.055	-0.003179	-0.000939	-0.002412
6.3600	563.009	44.649	13.100	34.415	-0.645	35.423	1071.825	-0.003125	-0.000917	-0.002409
6.4000	642.224	54.973	18.013	40.827	-0.660	35.422	1222.630	-0.003848	-0.001261	-0.002858
6.4400	707.507	63.241	22.167	47.019	-0.677	35.424	1346.912	-0.004427	-0.001552	-0.003291
6.4800	757.868	70.455	25.594	51.972	-0.657	35.424	1442.785	-0.004932	-0.001792	-0.003638
6.5200	826.848	79.945	30.134	58.633	-0.670	35.423	1574.106	-0.005596	-0.002109	-0.004104
6.5600	907.145	90.117	34.993	65.855	-0.686	35.423	1726.971	-0.006308	-0.002450	-0.004610
6.6000	979.882	100.275	39.532	72.601	-0.666	35.424	1865.444	-0.007019	-0.002767	-0.005082
6.6400	1034.736	107.990	43.360	77.980	-0.659	35.423	1969.872	-0.007559	-0.003035	-0.005459
6.6800	1069.211	112.671	45.767	81.529	-0.677	35.423	2035.503	-0.007887	-0.003204	-0.005707
6.7200	1126.590	120.496	49.109	87.610	-0.682	35.424	2144.737	-0.008435	-0.003438	-0.006133
6.7600	1147.614	124.206	50.900	89.111	-0.660	35.424	2184.763	-0.008694	-0.003563	-0.006238
6.8000	1178.678	128.664	53.556	93.405	-0.666	35.423	2243.900	-0.009007	-0.003749	-0.006538
6.8400	1222.065	134.699	55.580	97.038	-0.695	35.424	2326.498	-0.009429	-0.003891	-0.006793
6.8800	1207.998	133.876	55.811	96.637	-0.660	35.424	2299.719	-0.009371	-0.003907	-0.006765
6.9200	1243.556	138.089	57.805	99.582	-0.661	35.422	2367.411	-0.009666	-0.004046	-0.006971
6.9600	1253.640	139.769	58.192	101.992	-0.691	35.423	2386.608	-0.009784	-0.004073	-0.007139
7.0000	1238.882	138.894	58.026	101.250	-0.680	35.423	2358.513	-0.009723	-0.004062	-0.007087
7.0400	1229.279	137.770	58.040	100.079	-0.656	35.423	2340.231	-0.009644	-0.004063	-0.007006
7.0800	1214.190	136.393	57.146	99.570	-0.663	35.422	2311.506	-0.009548	-0.004000	-0.006970
7.1200	1187.079	133.697	56.430	96.620	-0.688	35.424	2259.893	-0.009359	-0.003950	-0.006763
7.1600	1145.631	128.401	54.655	93.431	-0.665	35.424	2180.986	-0.008988	-0.003826	-0.006540
7.2000	1105.369	123.538	52.388	90.691	-0.664	35.422	2104.340	-0.008648	-0.003667	-0.006348
7.2400	1070.368	119.705	50.239	87.309	-0.687	35.423	2037.706	-0.008379	-0.003517	-0.006112
7.2800	987.321	109.115	45.931	81.005	-0.675	35.423	1879.606	-0.007638	-0.003215	-0.005670
7.3200	948.172	103.737	43.182	76.987	-0.662	35.423	1805.077	-0.007262	-0.003023	-0.005389
7.3600	901.704	98.040	40.195	72.175	-0.690	35.422	1716.614	-0.006863	-0.002814	-0.005052
7.4000	845.077	90.324	37.018	67.177	-0.694	35.424	1608.810	-0.006323	-0.002591	-0.004702
7.4400	764.029	79.806	31.594	60.463	-0.665	35.424	1454.515	-0.005586	-0.002212	-0.004232
7.4800	701.721	71.622	27.948	54.106	-0.672	35.422	1335.897	-0.005014	-0.001956	-0.003787
7.5200	644.298	63.675	24.341	49.056	-0.695	35.423	1226.578	-0.004457	-0.001704	-0.003434
7.5600	585.867	55.541	19.543	43.164	-0.664	35.424	1115.341	-0.003888	-0.001368	-0.003021
7.6000	521.741	47.180	16.045	37.427	-0.656	35.423	993.261	-0.003303	-0.001123	-0.002620
7.6400	478.429	40.467	12.909	33.795	-0.673	35.423	910.807	-0.002833	-0.000904	-0.002366
7.6800	417.564	31.894	8.712	27.382	-0.675	35.424	794.935	-0.002233	-0.000610	-0.001917
7.7200	363.988	24.540	4.762	21.849	-0.665	35.423	692.940	-0.001718	-0.000333	-0.001529
7.7600	329.468	19.193	2.683	17.956	-0.668	35.423	627.222	-0.001343	-0.000188	-0.001257
7.8000	299.411	13.953	-0.138	14.724	-0.676	35.423	570.002	-0.000977	0.000010	-0.001031
7.8400	277.379	10.756	-1.721	12.205	-0.665	35.424	528.059	-0.000753	0.000120	-0.000854
7.8800	254.566	7.350	-2.930	9.782	-0.666	35.423	484.629	-0.000515	0.000205	-0.000685
7.9200	250.193	5.973	-4.143	8.957	-0.684	35.423	476.303	-0.000418	0.000290	-0.000627
7.9600	241.431	4.560	-4.349	7.405	-0.680	35.424	459.623	-0.000319	0.000304	-0.000518
8.0000	241.026	3.740	-4.968	7.885	-0.659	35.424	458.851	-0.000262	0.000348	-0.000552
8.0400	248.495	4.309	-5.008	7.237	-0.673	35.422	473.070	-0.000302	0.000351	-0.000507
8.0800	260.037	5.988	-4.405	8.254	-0.690	35.423	495.043	-0.000419	0.000308	-0.000578
8.1200	296.556	9.882	-3.039	10.692	-0.675	35.424	564.566	-0.000692	0.000213	-0.000748
8.1600	333.240	14.578	-1.291	14.188	-0.662	35.424	634.403	-0.001020	0.000090	-0.000993
8.2000	378.220	20.220	1.157	16.845	-0.680	35.423	720.034	-0.001415	-0.000081	-0.001179
8.2400	419.518	25.555	4.115	21.519	-0.694	35.424	798.655	-0.001789	-0.000288	-0.001506
8.2800	472.163	32.503	7.130	25.730	-0.668	35.424	898.876	-0.002275	-0.000499	-0.001801
8.3200	515.174	38.284	10.048	29.983	-0.672	35.423	980.759	-0.002680	-0.000703	-0.002099
8.3600	588.137	48.040	14.767	36.506	-0.699	35.424	1119.661	-0.003363	-0.001034	-0.002555
8.4000	621.650	52.361	16.622	39.880	-0.688	35.425	1183.462	-0.003665	-0.001164	-0.002792
8.4400	715.487	65.203	22.691	48.270	-0.669	35.424	1362.104	-0.004564	-0.001588	-0.003379
8.4800	777.931	73.190	27.065	53.678	-0.686	35.423	1480.980	-0.005123	-0.001895	-0.003757
8.5200	820.220	79.221	29.694	58.359	-0.702	35.424	1561.489	-0.005545	-0.002079	-0.004085
8.5600	919.378	91.913	35.707	67.012	-0.672	35.424	1750.259	-0.006434	-0.002500	-0.004691
8.6000	958.196	98.040	39.025	72.243	-0.665	35.423	1824.160	-0.006863	-0.002732	-0.005057
8.6400	1016.071	105.556	42.353	76.904	-0.683	35.423	1934.338	-0.007389	-0.002965	-0.005383
8.6800	1069.978	113.131	45.614	82.302	-0.673	35.425	2036.963	-0.007919	-0.003193	-0.005761
8.7200	1102.544	118.009	48.121	85.546	-0.657	35.424	2098.961	-0.008261	-0.003368	-0.005988
8.7600	1173.478	127.013	52.344	91.699	-0.673	35.423	2234.001	-0.008891	-0.003664	-0.006419
8.8000	1164.431	127.344	52.275	91.657	-0.681	35.424	2216.778	-0.008914	-0.003659	-0.006416
8.8400	1217.046	134.030	55.852	96.415	-0.663	35.424	2316.942	-0.009382	-0.003910	-0.006749
8.8800	1232.149	136.478	57.571	98.498	-0.668	35.423	2345.695	-0.009553	-0.004030	-0.006895
8.9200	1235.245	137.658	57.668	100.035	-0.680	35.423	2351.589	-0.009636	-0.004037	-0.007002
8.9600	1244.533	139.448	58.426	100.478	-0.673	35.424	2369.270	-0.009761	-0.004090	-0.007033
9.0000	1244.653	139.517	58.633	101.812	-0.659	35.423	2369.499	-0.009766	-0.004104	-0.007127
9.0400	1226.123	137.700	57.696	99.391	-0.676	35.423	2334.223	-0.009639	-0.004039	-0.006957
9.0800	1207.157	136.254	57.366	99.004	-0.691	35.425	2298.117	-0.009538	-0.004016	-0.006930
9.1200	1167.091	131.099	55.620	95.664	-0.664	35.425	2221.842	-0.009177	-0.003893	-0.006696
9.1600	1164.987	131.056	55.193	95.456	-0.664	35.423	2217.836	-0.009174	-0.003864	-0.006682
9.2000	1089.905	122.216	51.794	89.331	-0.677	35.424	2074.900	-0.008555	-0.003626	-0.006253
9.2400	1052.394	117.213	49.775	86.152	-0.674	35.424	2003.489	-0.008205	-0.003484	-0.006031
9.2800	1001.057	111.101	46.452	81.375	-0.661	35.423	1905.756	-0.007777	-0.003252	-0.005696
9.3200	959.564	105.833	44.199	78.078	-0.684	35.423	1826.763	-0.007408	-0.003094	-0.005465
9.3600	890.749	96.803	39.713	71.870	-0.690	35.425	1695.757	-0.006776	-0.002780	-0.005031
9.4000	830.981	88.853	36.066	66.793	-0.666	35.424	1581.974	-0.006220	-0.002525	-0.004676
9.4400	774.279	81.641	32.556	61.222	-0.681	35.423	1474.028	-0.005715	-0.002279	-0.004286
9.4800	725.316	74.802	29.476	56.751	-0.677	35.424	1380.816	-0.005236	-0.002063	-0.003973
9.5200	655.209	65.133	24.577	49.896	-0.675	35.425	1247.349	-0.004559	-0.001720	-0.003493
9.5600	574.822	54.473	19.610	43.041	-0.655	35.424	1094.313	-0.003813	-0.001373	-0.003013
9.6000	538.107	48.987	16.953	39.039	-0.681	35.423	1024.418	-0.003429	-0.001187	-0.002733
9.6400	472.253	39.758	12.151	32.612	-0.676	35.425	899.048	-0.002783	-0.000851	-0.002283
9.6800	425.079	33.491	9.000	27.963	-0.661	35.425	809.240	-0.002344	-0.000630	-0.001957
9.7200	382.383	27.082	6.152	23.751	-0.673	35.424	727.959	-0.001896	-0.000431	-0.001663
9.7600	331.677	19.719	2.629	18.483	-0.690	35.425	631.428	-0.001380	-0.000184	-0.001294
9.8000	302.732	15.216	0.261	15.301	-0.669	35.425	576.324	-0.001065	-0.000018	-0.001071
9.8400	282.880	11.825	-0.973	13.610	-0.657	35.423	538.530	-0.000828	0.000068	-0.000953
9.8800	261.479	8.311	-3.094	10.719	-0.686	35.423	497.789	-0.000582	0.000217	-0.000750
9.9200	240.455	4.921	-4.584	8.049	-0.676	35.425	457.764	-0.000344	0.000321	-0.000563
9.9600	238.080	3.713	-4.625	7.418	-0.656	35.424	453.243	-0.000260	0.000324	-0.000519
10.0000	252.282	5.335	-4.542	7.817	-0.659	35.423	480.280	-0.000373	0.000318	-0.000547
10.0400	246.180	4.379	-4.748	7.239	-0.679	35.424	468.664	-0.000307	0.000332	-0.000507
10.0800	268.813	7.087	-3.976	9.108	-0.664	35.425	511.751	-0.000496	0.000278	-0.000638
10.1200	283.210	8.352	-3.590	9.741	-0.656	35.425	539.160	-0.000585	0.000251	-0.000682
10.1600	334.247	15.231	-1.113	14.106	-0.664	35.424	636.320	-0.001066	0.000078	-0.000987
10.2000	365.806	19.122	0.852	16.677	-0.678	35.425	696.402	-0.001339	-0.000060	-0.001167
10.2400	431.496	27.307	4.542	22.375	-0.643	35.424	821.457	-0.001911	-0.000318	-0.001566
10.2800	469.728	32.615	6.964	25.540	-0.670	35.423	894.241	-0.002283	-0.000487	-0.001788
10.3200	502.009	36.867	9.551	29.299	-0.673	35.425	955.696	-0.002581	-0.000669	-0.002051
10.3600	572.943	46.234	13.774	35.392	-0.659	35.425	1090.736	-0.003236	-0.000964	-0.002477
10.4000	621.199	52.849	16.913	39.835	-0.654	35.423	1182.604	-0.003699	-0.001184	-0.002788
10.4400	723.738	65.952	23.488	48.918	-0.686	35.424	1377.811	-0.004617	-0.001644	-0.003424
10.4800	773.963	72.899	26.627	53.747	-0.672	35.425	1473.427	-0.005103	-0.001864	-0.003762
10.5200	834.918	81.142	30.357	59.347	-0.663	35.424	1589.470	-0.005680	-0.002125	-0.004154
10.5600	890.073	88.894	34.484	64.949	-0.681	35.424	1694.469	-0.006223	-0.002414	-0.004546
10.6000	952.711	97.512	38.087	70.798	-0.683	35.425	1813.717	-0.006826	-0.002666	-0.004956
10.6400	1020.669	106.655	42.463	77.566	-0.673	35.425	1943.092	-0.007466	-0.002972	-0.005430
10.6800	1060.404	112.309	45.352	81.695	-0.660	35.423	2018.738	-0.007862	-0.003175	-0.005719
10.7200	1116.265	119.942	48.890	87.459	-0.668	35.424	2125.082	-0.008396	-0.003422	-0.006122
10.7600	1141.813	124.289	50.706	89.661	-0.670	35.425	2173.719	-0.008700	-0.003549	-0.006276
10.8000	1168.880	128.250	52.799	92.496	-0.650	35.424	2225.246	-0.008978	-0.003696	-0.006475
10.8400	1203.325	132.528	55.015	96.086	-0.670	35.424	2290.821	-0.009277	-0.003851	-0.006726
10.8800	1220.968	135.337	56.251	97.889	-0.681	35.425	2324.409	-0.009474	-0.003938	-0.006852
10.9200	1242.639	138.713	57.737	100.269	-0.656	35.426	2365.665	-0.009710	-0.004042	-0.007019
10.9600	1239.994	138.587	58.123	100.793	-0.659	35.424	2360.630	-0.009701	-0.004069	-0.007056
11.0000	1238.055	139.338	58.068	100.532	-0.686	35.424	2356.939	-0.009754	-0.004065	-0.007037
11.0400	1226.859	138.089	58.234	100.284	-0.684	35.425	2335.625	-0.009666	-0.004076	-0.007020
11.0800	1204.542	135.642	57.352	99.059	-0.655	35.424	2293.139	-0.009495	-0.004015	-0.006934
11.1200	1187.545	134.058	56.472	97.008	-0.679	35.424	2260.780	-0.009384	-0.003953	-0.006791
11.1600	1154.422	130.486	55.428	95.140	-0.682	35.425	2197.723	-0.009134	-0.003880	-0.006660
11.2000	1086.133	121.467	51.492	89.029	-0.659	35.425	2067.719	-0.008503	-0.003604	-0.006232
11.2400	1065.860	119.023	50.254	87.033	-0.659	35.424	2029.123	-0.008332	-0.003518	-0.006092
11.2800	1016.416	113.004	47.529	83.279	-0.681	35.424	1934.996	-0.007910	-0.003327	-0.005830
11.3200	941.620	103.752	43.292	76.427	-0.695	35.425	1792.603	-0.007263	-0.003030	-0.005350
11.3600	891.395	97.386	39.738	71.926	-0.657	35.425	1696.987	-0.006817	-0.002782	-0.005035
11.4000	830.425	89.631	36.368	66.617	-0.675	35.424	1580.915	-0.006274	-0.002546	-0.004663
11.4400	762.466	80.098	32.105	60.298	-0.693	35.424	1451.540	-0.005607	-0.002247	-0.004221
11.4800	707.823	72.927	28.043	55.522	-0.671	35.425	1347.513	-0.005105	-0.001963	-0.003887
11.5200	651.497	65.507	24.934	50.241	-0.666	35.425	1240.282	-0.004586	-0.001745	-0.003517
11.5600	576.941	55.141	19.899	43.248	-0.676	35.424	1098.347	-0.003860	-0.001393	-0.003027
11.6000	527.677	47.871	15.963	38.267	-0.694	35.425	1004.562	-0.003351	-0.001117	-0.002679
11.6400	464.979	40.048	12.358	32.268	-0.671	35.424	885.201	-0.002803	-0.000865	-0.002259
11.6800	407.826	31.269	8.449	26.862	-0.676	35.424	776.396	-0.002189	-0.000591	-0.001880
11.7200	360.426	24.333	4.773	21.987	-0.687	35.424	686.159	-0.001703	-0.000334	-0.001539
11.7600	331.932	20.151	2.807	18.454	-0.683	35.426	631.914	-0.001411	-0.000196	-0.001292
11.8000	282.985	12.825	-0.358	14.186	-0.667	35.425	538.731	-0.000898	0.000025	-0.000993
11.8400	274.073	10.811	-1.680	12.895	-0.677	35.424	521.765	-0.000757	0.000118	-0.000903
11.8800	258.233	8.186	-2.984	10.017	-0.696	35.424	491.610	-0.000573	0.000209	-0.000701
11.9200	230.506	4.115	-4.666	7.611	-0.672	35.425	438.824	-0.000288	0.000327	-0.000533
11.9600	240.289	4.616	-4.570	7.874	-0.663	35.424	457.449	-0.000323	0.000320	-0.000551
12.0000	238.982	4.089	-4.736	8.186	-0.677	35.424	454.960	-0.000286	0.000332	-0.000573
12.0400	246.781	4.714	-4.527	7.407	-0.687	35.425	469.809	-0.000330	0.000317	-0.000519
12.0800	277.950	8.311	-3.796	9.328	-0.652	35.425	529.146	-0.000582	0.000266	-0.000653
12.1200	292.227	10.285	-2.930	10.570	-0.671	35.425	556.326	-0.000720	0.000205	-0.000740
12.1600	334.532	15.272	-0.756	14.257	-0.686	35.424	636.864	-0.001069	0.000053	-0.000998
12.2000	350.508	16.979	-0.055	15.631	-0.675	35.425	667.276	-0.001189	0.000004	-0.001094
12.2400	420.330	26.486	4.309	21.866	-0.662	35.425	800.200	-0.001854	-0.000302	-0.001531
12.2800	475.213	33.433	7.746	26.559	-0.681	35.424	904.684	-0.002340	-0.000542	-0.001859
12.3200	517.714	38.964	10.390	30.699	-0.691	35.425	985.594	-0.002728	-0.000727	-0.002149
12.3600	582.155	47.512	14.215	36.451	-0.661	35.425	1108.274	-0.003326	-0.000995	-0.002552
12.4000	643.141	55.821	18.331	41.941	-0.667	35.424	1224.375	-0.003907	-0.001283	-0.002936
12.4400	697.829	62.851	21.685	46.868	-0.693	35.424	1328.487	-0.004400	-0.001518	-0.003281
12.4800	760.978	71.427	25.938	53.005	-0.681	35.426	1448.708	-0.005000	-0.001816	-0.003710
12.5200	831.131	81.169	30.575	59.636	-0.661	35.425	1582.260	-0.005682	-0.002140	-0.004175
12.5600	886.556	88.476	34.277	64.934	-0.686	35.424	1687.775	-0.006193	-0.002399	-0.004545
12.6000	955.717	97.956	38.337	71.485	-0.700	35.425	1819.439	-0.006857	-0.002684	-0.005004
12.6400	1001.147	104.626	41.763	76.601	-0.671	35.426	1905.928	-0.007324	-0.002923	-0.005362
12.6800	1055.280	111.614	45.202	81.281	-0.661	35.424	2008.982	-0.007813	-0.003164	-0.005690
12.7200	1095.496	117.381	47.501	85.384	-0.679	35.425	2085.543	-0.008217	-0.003325	-0.005977
12.7600	1136.884	123.706	50.707	89.440	-0.668	35.425	2164.335	-0.008659	-0.003550	-0.006261
12.8000	1183.713	129.763	53.762	93.555	-0.658	35.424	2253.485	-0.009083	-0.003763	-0.006549
12.8400	1198.666	132.430	54.463	95.910	-0.686	35.424	2281.952	-0.009270	-0.003812	-0.006714
12.8800	1222.756	135.920	56.568	98.137	-0.681	35.425	2327.814	-0.009514	-0.003960	-0.006870
12.9200	1250.273	139.533	58.468	100.781	-0.665	35.425	2380.199	-0.009767	-0.004093	-0.007055
12.9600	1236.417	138.978	57.860	100.325	-0.662	35.424	2353.821	-0.009728	-0.004050	-0.007023
13.0000	1239.543	139.574	58.468	101.100	-0.687	35.425	2359.772	-0.009770	-0.004093	-0.007077
13.0400	1227.430	138.130	58.123	101.055	-0.669	35.425	2336.712	-0.009669	-0.004069	-0.007074
13.0800	1220.202	137.757	57.806	99.733	-0.664	35.425	2322.950	-0.009643	-0.004046	-0.006981
13.1200	1180.647	133.501	56.208	97.559	-0.690	35.425	2247.648	-0.009345	-0.003935	-0.006829
13.1600	1150.289	129.680	55.069	94.932	-0.677	35.426	2189.856	-0.009078	-0.003855	-0.006645
13.2000	1108.060	124.707	52.759	91.023	-0.676	35.426	2109.461	-0.008729	-0.003693	-0.006372
13.2400	1057.173	118.649	49.978	87.031	-0.686	35.424	2012.587	-0.008305	-0.003498	-0.006092
13.2800	1029.085	114.674	48.547	84.295	-0.697	35.426	1959.114	-0.008027	-0.003398	-0.005901
13.3200	969.062	107.212	44.583	79.355	-0.669	35.426	1844.845	-0.007505	-0.003121	-0.005555
13.3600	891.395	97.959	40.154	72.491	-0.657	35.424	1696.987	-0.006857	-0.002811	-0.005074
13.4000	826.638	89.296	36.395	66.790	-0.691	35.425	1573.706	-0.006251	-0.002548	-0.004675
13.4400	768.297	81.280	32.364	61.551	-0.689	35.426	1462.641	-0.005690	-0.002266	-0.004309
13.4800	696.311	71.842	27.670	54.547	-0.676	35.425	1325.598	-0.005029	-0.001937	-0.003818
13.5200	645.004	64.784	24.742	49.800	-0.677	35.425	1227.922	-0.004535	-0.001732	-0.003486
13.5600	580.773	55.598	20.408	43.870	-0.690	35.426	1105.642	-0.003892	-0.001429	-0.003071
13.6000	524.131	48.276	16.252	38.585	-0.675	35.426	997.810	-0.003379	-0.001138	-0.002701
13.6400	468.240	40.453	12.948	33.299	-0.672	35.424	891.409	-0.002832	-0.000906	-0.002331
13.6800	411.343	31.810	8.545	27.342	-0.691	35.425	783.091	-0.002227	-0.000598	-0.001914
13.7200	380.685	27.208	6.262	24.012	-0.673	35.426	724.726	-0.001905	-0.000438	-0.001681
13.7600	332.038	20.541	3.401	19.457	-0.673	35.425	632.114	-0.001438	-0.000238	-0.001362
13.8000	313.027	16.813	1.540	16.776	-0.678	35.425	595.922	-0.001177	-0.000108	-0.001174
13.8400	278.416	11.617	-1.430	13.116	-0.699	35.426	530.033	-0.000813	0.000100	-0.000918
13.8800	259.270	8.909	-2.543	11.159	-0.677	35.426	493.584	-0.000624	0.000178	-0.000781
13.9200	251.035	6.709	-3.466	9.412	-0.681	35.426	477.905	-0.000470	0.000243	-0.000659
13.9600	241.567	5.127	-4.292	8.655	-0.706	35.425	459.881	-0.000359	0.000300	-0.000606
14.0000	240.785	4.809	-4.143	8.214	-0.683	35.426	458.393	-0.000337	0.000290	-0.000575
14.0400	246.301	4.907	-4.226	7.762	-0.661	35.425	468.893	-0.000344	0.000296	-0.000543
14.0800	281.888	9.229	-3.107	11.379	-0.685	35.425	536.642	-0.000646	0.000217	-0.000796
14.1200	283.796	9.298	-3.026	10.266	-0.682	35.427	540.276	-0.000651	0.000212	-0.000719
14.1600	310.367	12.519	-1.512	12.369	-0.673	35.426	590.858	-0.000876	0.000106	-0.000866
14.2000	361.103	18.927	0.485	16.940	-0.682	35.425	687.447	-0.001325	-0.000034	-0.001186
14.2400	434.531	28.737	5.214	23.831	-0.703	35.426	827.236	-0.002012	-0.000365	-0.001668
14.2800	484.095	34.602	8.215	27.588	-0.689	35.427	921.593	-0.002422	-0.000575	-0.001931
14.3200	528.339	40.592	10.966	31.539	-0.665	35.426	1005.821	-0.002841	-0.000768	-0.002208
14.3600	579.646	47.345	14.297	36.618	-0.685	35.425	1103.497	-0.003314	-0.001001	-0.002563
14.4000	646.868	56.474	18.824	43.124	-0.684	35.426	1231.470	-0.003953	-0.001318	-0.003019
14.4400	681.824	61.060	20.985	45.848	-0.659	35.426	1298.018	-0.004274	-0.001469	-0.003209
14.4800	770.011	72.731	26.475	53.952	-0.663	35.426	1465.902	-0.005091	-0.001853	-0.003777
14.5200	835.204	81.821	31.292	60.215	-0.686	35.427	1590.014	-0.005727	-0.002190	-0.004215
14.5600	917.259	92.482	36.479	68.114	-0.664	35.427	1746.225	-0.006474	-0.002554	-0.004768
14.6000	921.692	94.048	36.864	68.705	-0.675	35.426	1754.665	-0.006583	-0.002580	-0.004809
14.6400	1008.256	105.665	42.203	77.142	-0.698	35.426	1919.460	-0.007397	-0.002954	-0.005400
14.6800	1050.606	111.529	45.366	81.735	-0.675	35.427	2000.084	-0.007807	-0.003176	-0.005721
14.7200	1096.863	117.869	48.189	85.614	-0.668	35.427	2088.146	-0.008251	-0.003373	-0.005993
14.7600	1153.145	125.597	51.836	90.912	-0.683	35.426	2195.292	-0.008792	-0.003628	-0.006364
14.8000	1191.197	131.100	54.368	95.579	-0.696	35.427	2267.733	-0.009177	-0.003806	-0.006691
14.8400	1201.191	132.903	54.944	96.445	-0.668	35.427	2286.758	-0.009303	-0.003846	-0.006751
14.8800	1223.237	136.476	56.886	99.623	-0.675	35.426	2328.730	-0.009553	-0.003982	-0.006974
14.9200	1235.651	138.256	57.819	100.589	-0.693	35.427	2352.362	-0.009678	-0.004047	-0.007041
14.9600	1242.459	139.561	58.756	101.181	-0.672	35.427	2365.322	-0.009769	-0.004113	-0.007083
15.0000	1236.808	139.644	58.619	101.758	-0.672	35.426	2354.565	-0.009775	-0.004103	-0.007123
15.0400	1234.388	139.422	58.812	101.495	-0.691	35.426	2349.958	-0.009760	-0.004117	-0.007105
15.0800	1194.533	134.836	57.297	98.579	-0.680	35.428	2274.084	-0.009439	-0.004011	-0.006901
15.1200	1192.549	135.293	56.952	98.234	-0.656	35.427	2270.308	-0.009471	-0.003987	-0.006876
15.1600	1150.620	130.389	55.415	94.863	-0.668	35.427	2190.485	-0.009127	-0.003879	-0.006640
15.2000	1120.789	126.264	54.093	92.469	-0.707	35.427	2133.694	-0.008838	-0.003787	-0.006473
15.2400	1070.699	120.456	50.925	88.919	-0.669	35.428	2038.336	-0.008432	-0.003565	-0.006224
15.2800	1008.046	113.033	47.362	83.179	-0.669	35.427	1919.060	-0.007912	-0.003315	-0.005823
15.3200	955.732	105.764	44.336	78.544	-0.692	35.427	1819.468	-0.007403	-0.003103	-0.005498
15.3600	913.321	100.148	41.336	74.414	-0.677	35.428	1738.729	-0.007010	-0.002894	-0.005209
15.4000	837.563	91.091	37.139	67.948	-0.663	35.427	1594.505	-0.006376	-0.002600	-0.004756
15.4400	758.514	79.988	32.105	60.492	-0.670	35.427	1444.016	-0.005599	-0.002247	-0.004234
15.4800	705.584	73.123	28.388	55.894	-0.681	35.428	1343.250	-0.005119	-0.001987	-0.003913
15.5200	664.015	67.438	25.484	51.367	-0.655	35.428	1264.114	-0.004721	-0.001784	-0.003596
15.5600	572.041	55.390	19.955	43.551	-0.664	35.427	1089.020	-0.003877	-0.001397	-0.003049
15.6000	520.013	47.484	16.101	38.200	-0.689	35.427	989.971	-0.003324	-0.001127	-0.002674
15.6400	479.797	41.757	13.388	34.236	-0.675	35.428	913.410	-0.002923	-0.000937	-0.002397
15.6800	411.117	32.462	9.154	27.698	-0.660	35.427	782.661	-0.002272	-0.000641	-0.001939
15.7200	372.194	26.348	5.819	23.598	-0.672	35.427	708.561	-0.001844	-0.000407	-0.001652
15.7600	325.200	19.899	2.409	18.811	-0.684	35.428	619.097	-0.001393	-0.000169	-0.001317
15.8000	316.017	17.883	2.051	17.230	-0.659	35.428	601.616	-0.001252	-0.000144	-0.001206
15.8400	280.595	12.130	-0.742	13.417	-0.680	35.428	534.182	-0.000849	0.000052	-0.000939
15.8800	261.554	9.034	-2.268	11.546	-0.679	35.428	497.932	-0.000632	0.000159	-0.000808
15.9200	248.074	6.697	-3.506	9.991	-0.677	35.428	472.269	-0.000469	0.000245	-0.000699
15.9600	242.799	5.307	-3.964	9.647	-0.660	35.427	462.227	-0.000372	0.000277	-0.000675
16.0000	242.543	5.019	-4.390	8.532	-0.692	35.427	461.740	-0.000351	0.000307	-0.000597
16.0400	249.622	5.739	-4.417	9.247	-0.688	35.429	475.216	-0.000402	0.000309	-0.000647
16.0800	261.975	6.460	-3.548	9.151	-0.666	35.429	498.734	-0.000452	0.000248	-0.000641
16.1200	299.201	11.005	-2.365	12.124	-0.686	35.428	569.601	-0.000770	0.000166	-0.000849
16.1600	316.859	13.717	-1.485	13.680	-0.697	35.429	603.218	-0.000960	0.000104	-0.000958
16.2000	365.025	19.900	1.265	17.268	-0.689	35.429	694.914	-0.001393	-0.000089	-0.001209
16.2400	407.510	24.890	3.468	21.371	-0.686	35.428	775.795	-0.001742	-0.000243	-0.001496
16.2800	467.459	33.045	7.226	26.271	-0.696	35.428	889.921	-0.002313	-0.000506	-0.001839
16.3200	526.054	40.688	11.061	31.813	-0.687	35.429	1001.472	-0.002848	-0.000774	-0.002227
16.3600	575.032	46.663	14.228	35.901	-0.663	35.428	1094.713	-0.003266	-0.000996	-0.002513
16.4000	654.397	57.446	18.907	43.551	-0.681	35.428	1245.804	-0.004021	-0.001324	-0.003049
16.4400	705.959	64.869	22.689	48.189	-0.686	35.429	1343.966	-0.004541	-0.001588	-0.003373
16.4800	764.119	72.036	26.612	53.650	-0.671	35.429	1454.687	-0.005043	-0.001863	-0.003756
16.5200	843.424	82.670	31.155	60.888	-0.674	35.428	1605.663	-0.005787	-0.002181	-0.004262
16.5600	891.515	89.755	34.744	65.733	-0.691	35.429	1697.216	-0.006283	-0.002432	-0.004601
16.6000	943.108	97.220	38.335	70.658	-0.687	35.429	1795.435	-0.006805	-0.002683	-0.004946
16.6400	1000.907	104.627	41.817	76.535	-0.673	35.429	1905.470	-0.007324	-0.002927	-0.005357
16.6800	1063.230	113.508	45.724	83.113	-0.683	35.428	2024.117	-0.007946	-0.003201	-0.005818
16.7200	1111.020	119.455	48.796	86.854	-0.698	35.429	2115.097	-0.008362	-0.003416	-0.006080
16.7600	1149.448	125.180	51.204	90.638	-0.666	35.429	2188.253	-0.008763	-0.003584	-0.006345
16.8000	1171.314	129.041	53.144	93.295	-0.655	35.428	2229.881	-0.009033	-0.003720	-0.006531
16.8400	1197.539	133.098	55.165	96.568	-0.681	35.429	2279.806	-0.009317	-0.003862	-0.006760
16.8800	1229.700	136.895	56.871	99.499	-0.667	35.429	2341.032	-0.009583	-0.003981	-0.006965
16.9200	1234.599	138.131	57.394	100.783	-0.657	35.428	2350.359	-0.009669	-0.004018	-0.007055
16.9600	1237.139	139.434	58.273	100.906	-0.687	35.429	2355.194	-0.009760	-0.004079	-0.007063
17.0000	1240.625	140.144	58.439	101.619	-0.687	35.430	2361.832	-0.009810	-0.004091	-0.007113
17.0400	1242.729	140.228	58.398	101.468	-0.663	35.430	2365.837	-0.009816	-0.004088	-0.007103
17.0800	1220.622	138.281	57.832	100.354	-0.675	35.429	2323.751	-0.009680	-0.004048	-0.007025
17.1200	1178.768	133.488	56.539	97.036	-0.696	35.430	2244.072	-0.009344	-0.003958	-0.006792
17.1600	1145.480	129.807	54.806	94.672	-0.687	35.430	2180.700	-0.009086	-0.003836	-0.006627
17.2000	1100.200	124.289	52.731	90.858	-0.676	35.429	2094.498	-0.008700	-0.003691	-0.006360
17.2400	1059.683	119.160	50.557	87.749	-0.698	35.429	2017.365	-0.008341	-0.003539	-0.006142
17.2800	1020.053	113.993	47.983	84.005	-0.674	35.430	1941.919	-0.007980	-0.003359	-0.005880
17.3200	945.873	105.138	43.538	77.594	-0.656	35.430	1800.699	-0.007360	-0.003048	-0.005432
17.3600	906.063	99.760	41.322	73.715	-0.672	35.429	1724.911	-0.006983	-0.002893	-0.005160
17.4000	843.349	91.244	36.974	67.687	-0.680	35.430	1605.520	-0.006387	-0.002588	-0.004738
17.4400	780.831	83.127	33.214	62.706	-0.664	35.430	1486.502	-0.005819	-0.002325	-0.004389
17.4800	717.862	74.735	29.130	56.803	-0.664	35.430	1366.625	-0.005231	-0.002039	-0.003976
17.5200	659.672	66.910	25.527	51.340	-0.689	35.430	1255.846	-0.004684	-0.001787	-0.003594
17.5600	589.114	57.031	20.433	44.721	-0.688	35.431	1121.521	-0.003992	-0.001430	-0.003130
17.6000	528.865	49.246	16.857	39.216	-0.667	35.431	1006.823	-0.003447	-0.001180	-0.002745
17.6400	472.538	41.216	13.239	34.140	-0.677	35.430	899.591	-0.002885	-0.000927	-0.002390
17.6800	412.184	32.683	8.710	28.637	-0.695	35.430	784.693	-0.002288	-0.000610	-0.002005
17.7200	387.177	28.668	6.785	24.823	-0.669	35.431	737.085	-0.002007	-0.000475	-0.001738
17.7600	343.339	22.011	4.047	20.462	-0.657	35.430	653.629	-0.001541	-0.000283	-0.001432
17.8000	294.407	14.884	0.371	15.466	-0.668	35.430	560.474	-0.001042	-0.000026	-0.001083
17.8400	274.809	11.921	-1.196	13.775	-0.680	35.431	523.167	-0.000834	0.000084	-0.000964
17.8800	275.816	11.213	-1.417	12.702	-0.657	35.431	525.084	-0.000785	0.000099	-0.000889
17.9200	234.443	5.364	-3.962	9.784	-0.670	35.430	446.320	-0.000375	0.000277	-0.000685
17.9600	242.002	5.641	-4.515	9.673	-0.694	35.431	460.711	-0.000395	0.000316	-0.000677
18.0000	245.564	5.712	-3.854	8.460	-0.672	35.432	467.491	-0.000400	0.000270	-0.000592
18.0400	246.195	5.087	-4.211	8.974	-0.658	35.430	468.693	-0.000356	0.000295	-0.000628
18.0800	263.989	7.308	-3.907	10.030	-0.692	35.431	502.567	-0.000512	0.000273	-0.000702
18.1200	310.457	13.020	-1.706	12.715	-0.693	35.431	591.030	-0.000911	0.000119	-0.000890
18.1600	321.578	14.062	-1.167	13.389	-0.676	35.431	612.202	-0.000984	0.000082	-0.000937
18.2000	372.058	20.608	1.348	17.904	-0.687	35.430	708.303	-0.001443	-0.000094	-0.001253
18.2400	409.404	25.542	3.538	21.288	-0.692	35.431	779.400	-0.001788	-0.000248	-0.001490
18.2800	457.961	32.003	6.952	25.910	-0.675	35.431	871.840	-0.002240	-0.000487	-0.001814
18.3200	524.311	40.146	10.938	31.565	-0.677	35.431	998.154	-0.002810	-0.000766	-0.002210
18.3600	583.042	48.220	14.311	36.865	-0.691	35.430	1109.962	-0.003375	-0.001002	-0.002581
18.4000	641.908	56.557	18.785	42.284	-0.683	35.432	1222.029	-0.003959	-0.001315	-0.002960
18.4400	714.090	65.452	23.116	49.001	-0.659	35.432	1359.444	-0.004582	-0.001618	-0.003430
18.4800	776.082	74.108	26.985	54.725	-0.683	35.431	1477.461	-0.005188	-0.001889	-0.003831
18.5200	844.762	83.308	31.690	61.371	-0.697	35.431	1608.210	-0.005832	-0.002218	-0.004296
18.5600	888.434	89.505	34.566	65.526	-0.677	35.431	1691.351	-0.006265	-0.002420	-0.004587
18.6000	944.415	97.220	37.676	70.700	-0.667	35.432	1797.924	-0.006805	-0.002637	-0.004949
18.6400	1020.053	107.461	42.987	77.773	-0.696	35.431	1941.919	-0.007522	-0.003009	-0.005444
18.6800	1045.166	111.155	44.984	80.895	-0.697	35.433	1989.727	-0.007781	-0.003149	-0.005663
18.7200	1101.868	118.954	48.382	86.579	-0.669	35.432	2097.673	-0.008327	-0.003387	-0.006061
18.7600	1156.000	126.736	52.013	91.147	-0.680	35.431	2200.727	-0.008871	-0.003641	-0.006380
18.8000	1181.699	129.971	53.486	93.995	-0.694	35.432	2249.651	-0.009098	-0.003744	-0.006580
18.8400	1233.697	136.644	56.774	99.075	-0.675	35.432	2348.642	-0.009565	-0.003974	-0.006935
18.8800	1229.910	137.297	57.008	99.100	-0.660	35.431	2341.433	-0.009611	-0.003991	-0.006937
18.9200	1256.796	141.161	59.073	102.156	-0.690	35.431	2392.616	-0.009881	-0.004135	-0.007151
18.9600	1261.695	141.854	59.225	103.202	-0.700	35.432	2401.943	-0.009930	-0.004146	-0.007224
19.0000	1246.576	140.991	58.923	102.830	-0.678	35.432	2373.161	-0.009869	-0.004125	-0.007198
19.0400	1224.770	138.809	58.659	101.126	-0.688	35.431	2331.648	-0.009717	-0.004106	-0.007079
19.0800	1211.620	137.158	57.765	100.148	-0.697	35.432	2306.614	-0.009601	-0.004044	-0.007010
19.1200	1180.872	134.030	56.583	97.450	-0.692	35.432	2248.077	-0.009382	-0.003961	-0.006822
19.1600	1144.368	130.237	55.056	94.412	-0.679	35.432	2178.583	-0.009117	-0.003854	-0.006609
19.2000	1118.775	126.359	53.722	91.987	-0.695	35.432	2129.860	-0.008845	-0.003761	-0.006439
19.2400	1057.354	119.358	50.171	87.818	-0.696	35.433	2012.930	-0.008355	-0.003512	-0.006147
19.2800	1010.796	113.561	47.803	83.457	-0.681	35.433	1924.295	-0.007949	-0.003346	-0.005842
19.3200	974.021	108.405	45.256	79.783	-0.680	35.432	1854.286	-0.007588	-0.003168	-0.005585
19.3600	895.152	98.194	40.291	72.931	-0.700	35.433	1704.140	-0.006874	-0.002820	-0.005105
19.4000	844.702	91.633	37.346	68.306	-0.688	35.433	1608.095	-0.006414	-0.002614	-0.004781
19.4400	771.438	82.071	33.244	61.894	-0.669	35.433	1468.620	-0.005745	-0.002327	-0.004333
19.4800	706.546	73.469	28.265	55.784	-0.692	35.432	1345.081	-0.005143	-0.001979	-0.003905
19.5200	657.207	66.756	25.485	51.011	-0.701	35.433	1251.154	-0.004673	-0.001784	-0.003571
19.5600	579.721	56.806	20.641	44.322	-0.671	35.434	1103.640	-0.003976	-0.001445	-0.003103
19.6000	505.916	46.315	15.483	37.414	-0.676	35.433	963.135	-0.003242	-0.001084	-0.002619
19.6400	462.935	39.965	12.192	33.794	-0.705	35.433	881.310	-0.002798	-0.000853	-0.002366
19.6800	425.259	34.669	9.784	29.022	-0.699	35.433	809.584	-0.002427	-0.000685	-0.002032
19.7200	364.003	25.765	5.738	23.173	-0.677	35.434	692.968	-0.001804	-0.000402	-0.001622
19.7600	366.242	25.140	5.079	22.387	-0.704	35.432	697.231	-0.001760	-0.000356	-0.001567
19.8000	283.150	13.993	-0.029	14.723	-0.703	35.433	539.045	-0.000980	0.000002	-0.001031
19.8400	272.225	11.616	-1.207	13.459	-0.688	35.434	518.246	-0.000813	0.000085	-0.000942
19.8800	254.461	8.380	-2.641	11.545	-0.674	35.433	484.428	-0.000587	0.000185	-0.000808
19.9200	244.798	7.100	-3.562	9.837	-0.695	35.433	466.032	-0.000497	0.000249	-0.000689
19.9600	238.456	4.905	-4.238	9.274	-0.710	35.434	453.959	-0.000343	0.000297	-0.000649
