# Supplementary material for: Evaluation of a Cold-Mixed High-Performance Polyurethane Mixture
Source: Hindawi journal article supplement (doi:10.1155/2019/1507971), 2019-11-07
Supplement: f1 [file 1507971.f1.zip › 1507971.f1/dynamic modulus data/PUM/specimen2/temp35/zhs-2-35_1Hz.csv]

Test Information
****************
Project name	zhs
Operator name	1
Target test temperature	35
Target confining stress	0
Average dynamic strain range from 75 to 125 micro-strain
Contact stress	5
Initial modulus	1000
Axial gauge length	70
Comments
Specimen information
********************
Identification	zhs-2-35
Dimensions	Point 1	Point 2	Point 3	Point 4	Point 5	Point 6	Average	Std Dev.
Diameter (mm)	49.2	49.3	49.2				49.23	0.058
Height (mm)	100.8	101.0	100.8				100.87	0.115
Cross-sectional area (mm�)	1903.7
Conditioning time
Properties/Comments
Test Data	1Hz
*********
Test date and time	Tue	Apr 2	2019	12:59 PM
Dynamic modulus (MPa)	10513
Phase angle (Degrees)	4.56
Average temperature (�C)	35.4
Average confining pressure (kPa)	-0.7
Average micro-strain	99
Load drift (%)	-0.1
Load standard error (%)	4.0
Average deformation drift (%)	-3.0
Average deformation standard error (%)	3.8
Deformation uniformity (%)	30.0
Phase uniformity (Degrees)	0.8
Conditioning Cycles
Time (sec)	Axial stress (kPa)	Axial micro-strain #1	Axial micro-strain #2	Axial micro-strain #3	Confining pressure (kPa)	Temperature (�C)	Load (N)	Displacement #1 (mm)	Displacement #2 (mm)	Displacement #3 (mm)
0.0000	224.930	-2.722	-6.618	1.803	-0.670	35.388	428.209	0.000191	0.000463	-0.000126
0.0200	232.565	-2.319	-6.562	1.019	-0.668	35.388	442.743	0.000162	0.000459	-0.000071
0.0400	240.470	-1.860	-6.247	1.486	-0.659	35.388	457.792	0.000130	0.000437	-0.000104
0.0600	262.426	0.542	-5.547	2.519	-0.669	35.388	499.592	-0.000038	0.000388	-0.000176
0.0800	297.668	4.797	-4.046	4.681	-0.684	35.388	566.683	-0.000336	0.000283	-0.000328
0.1000	328.266	8.546	-2.943	7.967	-0.684	35.388	624.933	-0.000598	0.000206	-0.000558
0.1200	360.937	12.147	-1.320	10.089	-0.680	35.388	687.132	-0.000850	0.000092	-0.000706
0.1400	398.839	17.537	1.196	13.431	-0.684	35.388	759.287	-0.001228	-0.000084	-0.000940
0.1600	438.454	22.470	3.868	16.735	-0.685	35.389	834.703	-0.001573	-0.000271	-0.001171
0.1800	488.513	29.182	6.964	21.782	-0.678	35.388	930.004	-0.002043	-0.000488	-0.001525
0.2000	545.621	35.839	10.444	26.887	-0.683	35.389	1038.723	-0.002509	-0.000731	-0.001882
0.2200	584.876	41.439	12.867	30.575	-0.677	35.389	1113.453	-0.002901	-0.000901	-0.002140
0.2400	636.994	48.123	15.840	34.981	-0.676	35.389	1212.673	-0.003369	-0.001109	-0.002449
0.2600	676.338	53.766	18.756	39.092	-0.689	35.388	1287.575	-0.003764	-0.001313	-0.002736
0.2800	739.443	61.920	23.007	44.845	-0.677	35.389	1407.709	-0.004334	-0.001610	-0.003139
0.3000	779.388	67.287	25.526	48.614	-0.690	35.389	1483.755	-0.004710	-0.001787	-0.003403
0.3200	823.271	73.316	28.265	52.936	-0.679	35.389	1567.297	-0.005132	-0.001979	-0.003706
0.3400	861.549	78.180	30.562	56.251	-0.681	35.389	1640.167	-0.005473	-0.002139	-0.003938
0.3600	905.011	84.681	33.657	60.353	-0.686	35.389	1722.908	-0.005928	-0.002356	-0.004225
0.3800	947.135	90.366	36.107	64.313	-0.679	35.389	1803.102	-0.006326	-0.002527	-0.004502
0.4000	967.424	93.303	37.773	66.339	-0.670	35.390	1841.726	-0.006531	-0.002644	-0.004644
0.4200	987.006	96.080	39.121	68.183	-0.671	35.390	1879.005	-0.006726	-0.002738	-0.004773
0.4400	997.901	97.972	40.042	69.613	-0.668	35.389	1899.748	-0.006858	-0.002803	-0.004873
0.4600	1015.500	100.623	41.102	71.278	-0.676	35.389	1933.250	-0.007044	-0.002877	-0.004989
0.4800	1019.452	101.486	41.282	72.462	-0.679	35.389	1940.775	-0.007104	-0.002890	-0.005072
0.5000	1016.672	101.958	41.859	72.189	-0.661	35.389	1935.482	-0.007137	-0.002930	-0.005053
0.5200	1011.397	101.806	41.613	71.940	-0.674	35.390	1925.440	-0.007126	-0.002913	-0.005036
0.5400	984.030	98.317	40.925	70.370	-0.672	35.390	1873.341	-0.006882	-0.002865	-0.004926
0.5600	973.661	96.970	40.347	69.367	-0.678	35.390	1853.600	-0.006788	-0.002824	-0.004856
0.5800	941.064	93.106	39.177	67.424	-0.685	35.390	1791.544	-0.006517	-0.002742	-0.004720
0.6000	921.256	90.800	38.419	65.787	-0.676	35.390	1753.836	-0.006356	-0.002689	-0.004605
0.6200	908.257	89.559	37.883	64.961	-0.679	35.390	1729.088	-0.006269	-0.002652	-0.004547
0.6400	848.128	82.114	34.853	59.706	-0.677	35.390	1614.618	-0.005748	-0.002440	-0.004179
0.6600	796.566	75.207	31.401	55.578	-0.686	35.390	1516.457	-0.005264	-0.002198	-0.003890
0.6800	753.359	69.663	28.677	51.476	-0.678	35.390	1434.202	-0.004876	-0.002007	-0.003603
0.7000	709.807	64.438	25.965	47.886	-0.673	35.390	1351.290	-0.004511	-0.001818	-0.003352
0.7200	665.623	59.005	23.045	44.364	-0.672	35.390	1267.176	-0.004130	-0.001613	-0.003105
0.7400	607.734	51.040	19.665	38.849	-0.658	35.390	1156.969	-0.003573	-0.001377	-0.002719
0.7600	554.909	44.302	16.142	34.374	-0.675	35.390	1056.404	-0.003101	-0.001130	-0.002406
0.7800	512.844	38.283	13.442	30.412	-0.667	35.391	976.324	-0.002680	-0.000941	-0.002129
0.8000	466.151	32.018	10.403	25.885	-0.685	35.390	887.432	-0.002241	-0.000728	-0.001812
0.8200	411.282	24.819	6.524	20.627	-0.677	35.390	782.976	-0.001737	-0.000457	-0.001444
0.8400	378.821	19.679	4.693	17.766	-0.677	35.390	721.178	-0.001378	-0.000328	-0.001244
0.8600	334.277	13.577	1.610	13.708	-0.679	35.390	636.377	-0.000950	-0.000113	-0.000960
0.8800	308.308	9.743	-0.152	9.964	-0.683	35.390	586.939	-0.000682	0.000011	-0.000697
0.9000	280.941	5.502	-2.351	7.196	-0.680	35.390	534.840	-0.000385	0.000165	-0.000504
0.9200	258.023	2.418	-4.060	5.394	-0.680	35.390	491.209	-0.000169	0.000284	-0.000378
0.9400	252.312	0.834	-4.625	3.828	-0.680	35.391	480.337	-0.000058	0.000324	-0.000268
0.9600	234.654	-1.667	-5.673	2.806	-0.673	35.391	446.720	0.000117	0.000397	-0.000196
0.9800	227.695	-2.735	-6.190	1.018	-0.676	35.391	433.474	0.000191	0.000433	-0.000071
1.0000	230.596	-3.141	-6.426	1.816	-0.669	35.391	438.995	0.000220	0.000450	-0.000127
1.0200	232.940	-3.363	-6.671	1.253	-0.671	35.391	443.459	0.000235	0.000467	-0.000088
1.0400	242.709	-2.307	-6.398	2.284	-0.669	35.390	462.055	0.000161	0.000448	-0.000160
1.0600	268.002	0.820	-5.216	3.232	-0.666	35.390	510.206	-0.000057	0.000365	-0.000226
1.0800	294.106	4.073	-4.086	5.299	-0.673	35.391	559.902	-0.000285	0.000286	-0.000371
1.1000	314.710	6.752	-3.162	7.256	-0.663	35.391	599.127	-0.000473	0.000221	-0.000508
1.1200	361.704	12.436	-1.003	10.789	-0.669	35.391	688.591	-0.000871	0.000070	-0.000755
1.1400	394.045	16.465	0.934	13.856	-0.668	35.391	750.160	-0.001153	-0.000065	-0.000970
1.1600	445.968	23.459	4.117	18.011	-0.676	35.391	849.009	-0.001642	-0.000288	-0.001261
1.1800	493.743	29.572	7.254	22.376	-0.668	35.391	939.960	-0.002070	-0.000508	-0.001566
1.2000	535.011	35.006	10.020	26.253	-0.675	35.391	1018.524	-0.002450	-0.000701	-0.001838
1.2200	589.865	42.120	13.264	31.209	-0.677	35.392	1122.952	-0.002948	-0.000928	-0.002185
1.2400	638.241	48.277	16.059	35.942	-0.670	35.391	1215.048	-0.003379	-0.001124	-0.002516
1.2600	682.335	54.474	19.031	39.602	-0.671	35.391	1298.990	-0.003813	-0.001332	-0.002772
1.2800	737.113	61.990	22.650	44.515	-0.673	35.391	1403.275	-0.004339	-0.001585	-0.003116
1.3000	778.156	67.548	25.553	48.699	-0.668	35.391	1481.409	-0.004728	-0.001789	-0.003409
1.3200	825.285	74.038	28.786	52.688	-0.663	35.392	1571.131	-0.005183	-0.002015	-0.003688
1.3400	861.113	78.194	30.865	56.072	-0.670	35.392	1639.338	-0.005474	-0.002161	-0.003925
1.3600	906.333	84.571	33.617	60.713	-0.669	35.392	1725.426	-0.005920	-0.002353	-0.004250
1.3800	931.280	88.395	35.117	62.829	-0.674	35.391	1772.919	-0.006188	-0.002458	-0.004398
1.4000	961.352	92.939	37.403	66.118	-0.671	35.391	1830.168	-0.006506	-0.002618	-0.004628
1.4200	991.650	97.177	39.642	68.579	-0.673	35.391	1887.846	-0.006802	-0.002775	-0.004800
1.4400	994.460	97.749	40.014	69.295	-0.680	35.391	1893.196	-0.006842	-0.002801	-0.004851
1.4600	1014.102	100.315	41.048	71.333	-0.669	35.392	1930.590	-0.007022	-0.002873	-0.004993
1.4800	1015.214	101.334	41.531	71.871	-0.677	35.392	1932.707	-0.007093	-0.002907	-0.005031
1.5000	1018.911	102.374	41.900	72.408	-0.671	35.392	1939.745	-0.007166	-0.002933	-0.005069
1.5200	1014.372	102.110	42.037	72.639	-0.675	35.392	1931.105	-0.007148	-0.002943	-0.005085
1.5400	1001.643	100.149	41.888	71.940	-0.667	35.392	1906.872	-0.007010	-0.002932	-0.005036
1.5600	981.836	97.832	41.295	70.425	-0.667	35.392	1869.164	-0.006848	-0.002891	-0.004930
1.5800	947.977	93.911	39.409	68.197	-0.671	35.392	1804.705	-0.006574	-0.002759	-0.004774
1.6000	928.906	92.094	38.613	66.368	-0.670	35.391	1768.398	-0.006447	-0.002703	-0.004646
1.6200	890.343	87.144	37.069	63.201	-0.679	35.392	1694.984	-0.006100	-0.002595	-0.004424
1.6400	850.473	82.321	34.731	59.555	-0.672	35.392	1619.081	-0.005762	-0.002431	-0.004169
1.6600	795.920	75.291	31.485	55.315	-0.667	35.393	1515.226	-0.005270	-0.002204	-0.003872
1.6800	748.385	69.370	28.581	51.051	-0.671	35.392	1424.732	-0.004856	-0.002001	-0.003574
1.7000	717.682	65.186	26.393	48.631	-0.655	35.392	1366.282	-0.004563	-0.001848	-0.003404
1.7200	654.412	57.309	22.417	43.000	-0.665	35.392	1245.832	-0.004012	-0.001569	-0.003010
1.7400	609.192	51.388	19.718	39.314	-0.659	35.393	1159.744	-0.003597	-0.001380	-0.002752
1.7600	568.194	45.552	17.105	35.364	-0.664	35.393	1081.696	-0.003189	-0.001197	-0.002476
1.7800	520.719	39.465	14.175	31.457	-0.666	35.393	991.316	-0.002763	-0.000992	-0.002202
1.8000	467.278	32.156	10.458	26.450	-0.657	35.392	889.578	-0.002251	-0.000732	-0.001851
1.8200	421.998	25.848	7.377	21.808	-0.660	35.393	803.375	-0.001809	-0.000516	-0.001527
1.8400	385.764	20.471	4.569	17.834	-0.665	35.392	734.396	-0.001433	-0.000320	-0.001248
1.8600	343.970	15.134	2.118	13.748	-0.663	35.392	654.831	-0.001059	-0.000148	-0.000962
1.8800	314.560	10.645	0.096	11.242	-0.664	35.393	598.841	-0.000745	-0.000007	-0.000787
1.9000	284.157	5.907	-1.995	7.775	-0.658	35.393	540.962	-0.000413	0.000140	-0.000544
1.9200	262.832	2.794	-3.605	5.670	-0.656	35.393	500.364	-0.000196	0.000252	-0.000397
1.9400	249.862	0.695	-4.789	4.349	-0.654	35.393	475.674	-0.000049	0.000335	-0.000304
1.9600	230.776	-2.154	-6.041	1.967	-0.660	35.393	439.339	0.000151	0.000423	-0.000138
1.9800	235.165	-2.377	-5.903	1.912	-0.663	35.393	447.693	0.000166	0.000413	-0.000134
2.0000	236.156	-2.237	-5.987	2.243	-0.668	35.393	449.581	0.000157	0.000419	-0.000157
2.0200	234.654	-3.265	-6.218	1.777	-0.674	35.393	446.720	0.000229	0.000435	-0.000124
2.0400	241.356	-2.542	-6.231	1.844	-0.668	35.393	459.480	0.000178	0.000436	-0.000129
2.0600	261.058	0.027	-5.712	2.435	-0.666	35.393	496.988	-0.000002	0.000400	-0.000170
2.0800	299.020	5.046	-4.033	5.670	-0.676	35.393	569.258	-0.000353	0.000282	-0.000397
2.1000	330.054	8.505	-2.269	8.036	-0.674	35.393	628.338	-0.000595	0.000159	-0.000562
2.1200	358.367	11.798	-1.015	10.268	-0.671	35.393	682.240	-0.000826	0.000071	-0.000719
2.1400	403.468	17.716	1.814	14.395	-0.671	35.393	768.099	-0.001240	-0.000127	-0.001008
2.1600	445.923	23.179	4.074	17.751	-0.675	35.394	848.923	-0.001622	-0.000285	-0.001243
2.1800	494.750	29.807	7.116	22.431	-0.673	35.393	941.877	-0.002086	-0.000498	-0.001570
2.2000	540.797	35.809	10.169	26.627	-0.668	35.394	1029.539	-0.002507	-0.000712	-0.001864
2.2200	579.495	40.898	12.812	30.052	-0.671	35.393	1103.210	-0.002863	-0.000897	-0.002104
2.2400	630.863	47.234	15.963	35.062	-0.664	35.393	1201.000	-0.003306	-0.001117	-0.002454
2.2600	681.613	54.349	18.989	39.382	-0.667	35.393	1297.617	-0.003804	-0.001329	-0.002757
2.2800	728.262	60.630	22.265	44.170	-0.668	35.393	1386.423	-0.004244	-0.001559	-0.003092
2.3000	785.400	68.006	25.897	49.098	-0.665	35.393	1495.199	-0.004760	-0.001813	-0.003437
2.3200	819.755	73.206	28.141	52.590	-0.652	35.394	1560.602	-0.005124	-0.001970	-0.003681
2.3400	869.784	79.626	31.871	57.367	-0.670	35.394	1655.846	-0.005574	-0.002231	-0.004016
2.3600	910.060	85.407	34.274	61.122	-0.660	35.394	1732.521	-0.005978	-0.002399	-0.004279
2.3800	935.594	88.631	35.667	63.900	-0.652	35.394	1781.130	-0.006204	-0.002497	-0.004473
2.4000	970.940	94.077	37.896	66.821	-0.666	35.394	1848.421	-0.006585	-0.002653	-0.004677
2.4200	992.070	97.137	39.751	68.992	-0.667	35.394	1888.647	-0.006800	-0.002783	-0.004829
2.4400	1009.233	99.788	41.102	71.101	-0.657	35.394	1921.320	-0.006985	-0.002877	-0.004977
2.4600	1011.773	100.358	41.503	71.457	-0.669	35.394	1926.155	-0.007025	-0.002905	-0.005002
2.4800	1017.769	101.165	41.490	72.186	-0.671	35.394	1937.571	-0.007082	-0.002904	-0.005053
2.5000	1016.011	101.152	41.475	72.364	-0.669	35.394	1934.223	-0.007081	-0.002903	-0.005066
2.5200	1010.540	101.136	41.737	72.422	-0.671	35.394	1923.809	-0.007080	-0.002922	-0.005070
2.5400	1001.583	100.789	41.393	71.951	-0.678	35.394	1906.757	-0.007055	-0.002898	-0.005037
2.5600	977.117	97.792	40.854	70.345	-0.671	35.394	1860.180	-0.006845	-0.002860	-0.004924
2.5800	952.275	94.730	39.657	68.620	-0.676	35.394	1812.887	-0.006631	-0.002776	-0.004803
2.6000	925.104	90.979	38.046	66.036	-0.678	35.394	1761.160	-0.006369	-0.002663	-0.004623
2.6200	888.389	86.701	36.396	62.857	-0.671	35.394	1691.265	-0.006069	-0.002548	-0.004400
2.6400	849.255	82.156	34.385	59.678	-0.664	35.394	1616.764	-0.005751	-0.002407	-0.004177
2.6600	808.228	77.111	32.255	56.197	-0.659	35.394	1538.658	-0.005398	-0.002258	-0.003934
2.6800	735.881	68.077	27.727	50.255	-0.666	35.395	1400.928	-0.004765	-0.001941	-0.003518
2.7000	704.562	63.967	25.662	47.198	-0.671	35.394	1341.305	-0.004478	-0.001796	-0.003304
2.7200	661.400	57.907	22.691	43.580	-0.664	35.395	1259.136	-0.004053	-0.001588	-0.003051
2.7400	614.497	52.111	19.913	39.438	-0.668	35.395	1169.844	-0.003648	-0.001394	-0.002761
2.7600	551.077	43.618	16.005	34.288	-0.680	35.395	1049.109	-0.003053	-0.001120	-0.002400
2.7800	516.797	39.185	13.761	30.380	-0.676	35.395	983.849	-0.002743	-0.000963	-0.002127
2.8000	463.341	31.642	10.335	25.552	-0.668	35.395	882.082	-0.002215	-0.000723	-0.001789
2.8200	424.222	25.748	7.501	21.865	-0.681	35.395	807.610	-0.001802	-0.000525	-0.001531
2.8400	388.920	20.886	4.666	18.110	-0.668	35.395	740.404	-0.001462	-0.000327	-0.001268
2.8600	340.424	14.399	1.680	13.747	-0.676	35.395	648.079	-0.001008	-0.000118	-0.000962
2.8800	312.230	10.296	-0.027	11.228	-0.676	35.395	594.406	-0.000721	0.000002	-0.000786
2.9000	293.971	7.713	-1.650	8.833	-0.668	35.395	559.645	-0.000540	0.000116	-0.000618
2.9200	259.195	2.224	-3.727	5.299	-0.668	35.395	493.441	-0.000156	0.000261	-0.000371
2.9400	244.903	-0.374	-4.830	3.357	-0.671	35.395	466.232	0.000026	0.000338	-0.000235
2.9600	237.344	-1.458	-5.713	2.381	-0.672	35.395	451.841	0.000102	0.000400	-0.000167
2.9800	228.357	-3.042	-6.411	1.486	-0.680	35.395	434.732	0.000213	0.000449	-0.000104
3.0000	231.002	-2.792	-6.301	0.814	-0.677	35.395	439.768	0.000195	0.000441	-0.000057
3.0200	234.458	-3.058	-6.287	1.225	-0.672	35.395	446.348	0.000214	0.000440	-0.000086
3.0400	244.167	-2.041	-6.164	2.214	-0.679	35.395	464.830	0.000143	0.000431	-0.000155
3.0600	272.736	1.167	-5.230	3.386	-0.673	35.395	519.218	-0.000082	0.000366	-0.000237
3.0800	286.201	3.252	-4.749	4.280	-0.667	35.395	544.853	-0.000228	0.000332	-0.000300
3.1000	324.118	8.074	-3.010	7.692	-0.669	35.395	617.037	-0.000565	0.000211	-0.000538
3.1200	352.476	11.644	-1.402	9.949	-0.675	35.395	671.024	-0.000815	0.000098	-0.000696
3.1400	404.339	17.857	1.721	14.337	-0.669	35.396	769.758	-0.001250	-0.000120	-0.001004
3.1600	441.069	22.734	3.920	17.929	-0.680	35.395	839.682	-0.001591	-0.000274	-0.001255
3.1800	493.939	29.779	7.130	22.555	-0.675	35.396	940.332	-0.002085	-0.000499	-0.001579
3.2000	534.185	35.380	9.894	26.283	-0.679	35.395	1016.951	-0.002477	-0.000693	-0.001840
3.2200	583.448	41.592	13.075	30.423	-0.679	35.396	1110.735	-0.002911	-0.000915	-0.002130
3.2400	635.897	48.539	16.457	35.214	-0.694	35.396	1210.585	-0.003398	-0.001152	-0.002465
3.2600	669.185	52.710	18.468	38.833	-0.685	35.395	1273.956	-0.003690	-0.001293	-0.002718
3.2800	740.630	62.339	22.647	45.161	-0.687	35.396	1409.969	-0.004364	-0.001585	-0.003161
3.3000	766.434	65.741	24.698	47.651	-0.677	35.396	1459.093	-0.004602	-0.001729	-0.003336
3.3200	833.701	74.774	28.689	53.665	-0.685	35.396	1587.152	-0.005234	-0.002008	-0.003757
3.3400	862.165	78.944	30.988	56.653	-0.678	35.396	1641.340	-0.005526	-0.002169	-0.003966
3.3600	892.432	83.197	33.077	59.569	-0.678	35.396	1698.961	-0.005824	-0.002315	-0.004170
3.3800	933.399	88.476	35.707	63.820	-0.671	35.396	1776.953	-0.006193	-0.002499	-0.004467
3.4000	970.520	93.840	37.925	66.710	-0.666	35.396	1847.620	-0.006569	-0.002655	-0.004670
3.4200	990.327	96.818	39.257	68.978	-0.672	35.396	1885.328	-0.006777	-0.002748	-0.004828
3.4400	1005.370	99.398	40.415	71.098	-0.672	35.396	1913.967	-0.006958	-0.002829	-0.004977
3.4600	1015.470	101.012	41.199	71.841	-0.670	35.396	1933.193	-0.007071	-0.002884	-0.005029
3.4800	1026.500	102.500	42.147	72.984	-0.671	35.396	1954.193	-0.007175	-0.002950	-0.005109
3.5000	1018.535	101.443	42.215	73.220	-0.677	35.396	1939.030	-0.007101	-0.002955	-0.005125
3.5200	1014.568	101.540	41.723	72.392	-0.668	35.396	1931.477	-0.007108	-0.002921	-0.005067
3.5400	1006.798	101.444	41.750	72.202	-0.669	35.396	1916.685	-0.007101	-0.002923	-0.005054
3.5600	977.177	97.678	40.815	70.203	-0.671	35.397	1860.294	-0.006837	-0.002857	-0.004914
3.5800	949.269	94.145	39.835	68.332	-0.674	35.397	1807.165	-0.006590	-0.002788	-0.004783
3.6000	923.646	90.797	38.722	66.033	-0.665	35.396	1758.385	-0.006356	-0.002711	-0.004622
3.6200	885.023	86.075	36.657	63.091	-0.678	35.396	1684.856	-0.006025	-0.002566	-0.004416
3.6400	843.499	81.445	34.013	59.790	-0.677	35.396	1605.806	-0.005701	-0.002381	-0.004185
3.6600	797.798	75.568	31.292	55.620	-0.667	35.397	1518.803	-0.005290	-0.002190	-0.003893
3.6800	755.749	70.372	28.966	52.369	-0.672	35.396	1438.751	-0.004926	-0.002028	-0.003666
3.7000	713.038	64.868	26.544	48.381	-0.676	35.397	1357.441	-0.004541	-0.001858	-0.003387
3.7200	657.358	57.545	22.855	43.344	-0.663	35.397	1251.440	-0.004028	-0.001600	-0.003034
3.7400	610.679	51.291	19.639	39.067	-0.668	35.397	1162.577	-0.003590	-0.001375	-0.002735
3.7600	559.102	44.617	16.154	34.331	-0.676	35.397	1064.386	-0.003123	-0.001131	-0.002403
3.7800	516.526	39.048	13.705	30.794	-0.679	35.397	983.334	-0.002733	-0.000959	-0.002156
3.8000	467.353	32.295	10.335	26.159	-0.676	35.396	889.721	-0.002261	-0.000723	-0.001831
3.8200	412.229	24.876	6.951	21.191	-0.687	35.397	784.779	-0.001741	-0.000487	-0.001483
3.8400	378.866	20.066	4.484	18.165	-0.684	35.397	721.264	-0.001405	-0.000314	-0.001272
3.8600	343.519	14.870	2.009	14.175	-0.675	35.397	653.973	-0.001041	-0.000141	-0.000992
3.8800	310.848	10.506	-0.398	11.160	-0.675	35.396	591.774	-0.000735	0.000028	-0.000781
3.9000	278.296	5.836	-2.515	7.664	-0.675	35.397	529.804	-0.000409	0.000176	-0.000537
3.9200	263.268	3.446	-3.535	6.071	-0.673	35.397	501.194	-0.000241	0.000247	-0.000425
3.9400	242.994	0.112	-4.983	3.908	-0.679	35.397	462.599	-0.000008	0.000349	-0.000274
3.9600	235.946	-1.750	-5.671	2.545	-0.669	35.397	449.181	0.000122	0.000397	-0.000178
3.9800	228.101	-3.181	-6.629	1.803	-0.670	35.397	434.246	0.000223	0.000464	-0.000126
4.0000	229.469	-2.848	-6.727	1.666	-0.674	35.397	436.850	0.000199	0.000471	-0.000117
4.0200	234.022	-2.695	-6.328	1.954	-0.675	35.397	445.518	0.000189	0.000443	-0.000137
4.0400	245.669	-1.598	-5.972	1.789	-0.677	35.397	467.691	0.000112	0.000418	-0.000125
4.0600	265.176	0.833	-5.092	2.957	-0.676	35.397	504.827	-0.000058	0.000356	-0.000207
4.0800	300.343	5.046	-4.031	5.504	-0.668	35.397	571.775	-0.000353	0.000282	-0.000385
4.1000	320.346	7.463	-3.438	7.282	-0.669	35.398	609.856	-0.000522	0.000241	-0.000510
4.1200	373.170	14.287	-0.261	12.220	-0.677	35.398	710.421	-0.001000	0.000018	-0.000855
4.1400	401.063	17.633	1.624	14.695	-0.674	35.397	763.521	-0.001234	-0.000114	-0.001029
4.1600	444.315	23.540	4.392	17.861	-0.671	35.398	845.861	-0.001648	-0.000307	-0.001250
4.1800	488.589	28.987	6.979	21.935	-0.684	35.397	930.147	-0.002029	-0.000489	-0.001535
4.2000	533.493	34.823	9.524	26.422	-0.680	35.398	1015.635	-0.002438	-0.000667	-0.001850
4.2200	586.784	42.022	12.949	31.030	-0.676	35.398	1117.086	-0.002942	-0.000906	-0.002172
4.2400	636.047	48.887	16.017	35.556	-0.681	35.397	1210.871	-0.003422	-0.001121	-0.002489
4.2600	684.243	55.043	19.719	40.278	-0.673	35.397	1302.624	-0.003853	-0.001380	-0.002819
4.2800	734.694	61.463	23.022	45.051	-0.673	35.398	1398.668	-0.004302	-0.001612	-0.003154
4.3000	784.859	68.132	26.006	49.221	-0.669	35.398	1494.169	-0.004769	-0.001820	-0.003445
4.3200	835.294	74.707	28.704	54.201	-0.671	35.398	1590.185	-0.005229	-0.002009	-0.003794
4.3400	875.450	80.433	31.497	57.533	-0.679	35.399	1666.632	-0.005630	-0.002205	-0.004027
4.3600	909.790	85.058	34.055	60.849	-0.682	35.398	1732.006	-0.005954	-0.002384	-0.004259
4.3800	938.208	89.211	36.189	64.055	-0.677	35.398	1786.108	-0.006245	-0.002533	-0.004484
4.4000	966.462	93.579	37.622	66.821	-0.674	35.398	1839.895	-0.006551	-0.002634	-0.004677
4.4200	984.316	95.884	39.245	68.429	-0.687	35.398	1873.884	-0.006712	-0.002747	-0.004790
4.4400	1011.878	99.981	40.896	71.099	-0.678	35.398	1926.355	-0.006999	-0.002863	-0.004977
4.4600	1009.714	100.137	41.130	71.334	-0.676	35.398	1922.235	-0.007010	-0.002879	-0.004993
4.4800	1014.252	101.109	41.475	72.105	-0.679	35.398	1930.876	-0.007078	-0.002903	-0.005047
4.5000	1025.103	102.807	42.325	72.931	-0.676	35.398	1951.532	-0.007196	-0.002963	-0.005105
4.5200	1016.146	101.695	42.010	72.713	-0.672	35.399	1934.481	-0.007119	-0.002941	-0.005090
4.5400	1001.373	100.387	41.653	71.800	-0.676	35.398	1906.357	-0.007027	-0.002916	-0.005026
4.5600	977.733	97.484	40.210	70.080	-0.680	35.398	1861.353	-0.006824	-0.002815	-0.004906
4.5800	955.161	94.645	39.750	68.401	-0.681	35.398	1818.380	-0.006625	-0.002783	-0.004788
4.6000	918.566	90.671	38.102	65.884	-0.673	35.398	1748.714	-0.006347	-0.002667	-0.004612
4.6200	886.391	86.909	36.988	62.953	-0.674	35.399	1687.460	-0.006084	-0.002589	-0.004407
4.6400	843.394	80.933	34.125	59.472	-0.674	35.399	1605.606	-0.005665	-0.002389	-0.004163
4.6600	801.645	76.040	31.485	55.716	-0.680	35.399	1526.127	-0.005323	-0.002204	-0.003900
4.6800	756.079	70.150	28.718	51.823	-0.677	35.399	1439.381	-0.004910	-0.002010	-0.003628
4.7000	706.591	64.161	25.897	48.148	-0.675	35.399	1345.167	-0.004491	-0.001813	-0.003370
4.7200	650.580	57.045	22.361	42.519	-0.667	35.398	1238.537	-0.003993	-0.001565	-0.002976
4.7400	610.995	51.679	20.161	39.205	-0.671	35.399	1163.177	-0.003618	-0.001411	-0.002744
4.7600	555.375	44.037	16.305	34.677	-0.676	35.399	1057.291	-0.003083	-0.001141	-0.002427
4.7800	510.786	38.092	13.210	30.409	-0.679	35.399	972.404	-0.002666	-0.000925	-0.002129
4.8000	467.955	32.281	10.266	26.034	-0.664	35.399	890.865	-0.002260	-0.000719	-0.001822
4.8200	415.836	25.680	7.089	21.591	-0.687	35.399	791.645	-0.001798	-0.000496	-0.001511
4.8400	384.036	21.108	4.925	18.110	-0.678	35.399	731.106	-0.001478	-0.000345	-0.001268
4.8600	342.122	14.981	2.327	13.762	-0.671	35.399	651.312	-0.001049	-0.000163	-0.000963
4.8800	309.630	9.937	-0.237	10.556	-0.672	35.399	589.457	-0.000696	0.000017	-0.000739
4.9000	281.963	5.822	-2.309	7.638	-0.671	35.399	536.785	-0.000408	0.000162	-0.000535
4.9200	257.933	2.502	-4.072	5.725	-0.677	35.400	491.037	-0.000175	0.000285	-0.000401
4.9400	244.602	0.360	-4.887	3.455	-0.679	35.399	465.660	-0.000025	0.000342	-0.000242
4.9600	235.826	-1.570	-5.575	2.777	-0.674	35.400	448.952	0.000110	0.000390	-0.000194
4.9800	230.085	-2.626	-6.259	2.050	-0.671	35.400	438.023	0.000184	0.000438	-0.000143
5.0000	508.080	39.117	11.944	29.956	-0.675	35.396	967.255	-0.002738	-0.000836	-0.002097
5.0200	348.419	17.744	3.112	16.266	-0.681	35.396	663.300	-0.001242	-0.000218	-0.001139
5.0400	256.790	4.406	-3.178	6.993	-0.677	35.396	488.863	-0.000308	0.000222	-0.000490
5.0600	299.291	8.312	-1.995	8.846	-0.681	35.396	569.773	-0.000582	0.000140	-0.000619
5.0800	393.744	19.887	2.544	16.046	-0.677	35.396	749.588	-0.001392	-0.000178	-0.001123
5.1000	405.421	21.331	3.112	16.802	-0.679	35.396	771.818	-0.001493	-0.000218	-0.001176
5.1200	401.454	20.926	3.071	17.216	-0.686	35.396	764.265	-0.001465	-0.000215	-0.001205
5.1400	419.082	23.025	4.059	18.536	-0.672	35.395	797.825	-0.001612	-0.000284	-0.001298
5.1600	537.521	37.437	11.033	28.017	-0.672	35.396	1023.302	-0.002621	-0.000772	-0.001961
5.1800	551.528	39.368	12.191	29.723	-0.686	35.396	1049.967	-0.002756	-0.000853	-0.002081
5.2000	649.798	51.389	17.531	38.184	-0.676	35.396	1237.049	-0.003597	-0.001227	-0.002673
5.2200	496.178	35.061	11.296	27.369	-0.672	35.396	944.595	-0.002454	-0.000791	-0.001916
5.2400	876.878	80.515	32.091	57.697	-0.680	35.396	1669.350	-0.005636	-0.002246	-0.004039
5.2600	853.794	78.639	31.676	56.417	-0.680	35.396	1625.404	-0.005505	-0.002217	-0.003949
5.2800	869.078	80.390	32.145	58.042	-0.668	35.396	1654.501	-0.005627	-0.002250	-0.004063
5.3000	988.704	95.827	38.749	67.988	-0.679	35.396	1882.238	-0.006708	-0.002712	-0.004759
5.3200	1054.062	104.598	42.989	74.167	-0.676	35.397	2006.664	-0.007322	-0.003009	-0.005192
5.3400	1088.928	109.477	45.036	77.923	-0.674	35.396	2073.040	-0.007663	-0.003153	-0.005455
5.3600	1120.233	113.854	47.364	81.005	-0.678	35.396	2132.635	-0.007970	-0.003316	-0.005670
5.3800	1166.610	120.510	50.582	85.588	-0.680	35.396	2220.926	-0.008436	-0.003541	-0.005991
5.4000	1210.268	125.679	53.059	89.552	-0.667	35.397	2304.039	-0.008798	-0.003714	-0.006269
5.4200	1236.312	129.988	55.152	92.070	-0.677	35.397	2353.621	-0.009099	-0.003861	-0.006445
5.4400	1251.942	132.530	55.963	94.024	-0.680	35.396	2383.375	-0.009277	-0.003917	-0.006582
5.4600	1257.427	134.127	56.720	95.099	-0.679	35.397	2393.818	-0.009389	-0.003970	-0.006657
5.4800	1252.768	133.961	57.131	94.975	-0.682	35.396	2384.949	-0.009377	-0.003999	-0.006648
5.5000	1140.671	120.303	51.999	85.865	-0.684	35.397	2171.545	-0.008421	-0.003640	-0.006011
5.5200	1390.594	148.330	64.123	105.114	-0.684	35.396	2647.333	-0.010383	-0.004489	-0.007358
5.5400	1311.950	142.549	63.297	101.771	-0.689	35.396	2497.616	-0.009978	-0.004431	-0.007124
5.5600	1221.930	132.126	58.289	94.602	-0.680	35.396	2326.241	-0.009249	-0.004080	-0.006622
5.5800	1178.573	127.539	55.756	91.175	-0.674	35.397	2243.700	-0.008928	-0.003903	-0.006382
5.6000	1137.305	122.426	53.461	87.598	-0.668	35.397	2165.136	-0.008570	-0.003742	-0.006132
5.6200	1092.986	116.811	50.610	84.269	-0.680	35.397	2080.765	-0.008177	-0.003543	-0.005899
5.6400	1037.231	109.838	47.336	79.494	-0.675	35.397	1974.621	-0.007689	-0.003314	-0.005565
5.6600	976.726	102.236	43.893	74.440	-0.680	35.397	1859.436	-0.007157	-0.003073	-0.005211
5.6800	929.372	96.079	40.869	70.245	-0.677	35.397	1769.285	-0.006726	-0.002861	-0.004917
5.7000	872.339	88.881	37.608	64.948	-0.677	35.397	1660.709	-0.006222	-0.002633	-0.004546
5.7200	799.977	79.542	33.424	58.564	-0.664	35.397	1522.951	-0.005568	-0.002340	-0.004099
5.7400	733.161	70.609	29.337	53.100	-0.667	35.397	1395.750	-0.004943	-0.002054	-0.003717
5.7600	669.425	62.324	25.168	47.584	-0.659	35.397	1274.414	-0.004363	-0.001762	-0.003331
5.7800	612.723	54.669	20.793	42.133	-0.660	35.397	1166.468	-0.003827	-0.001455	-0.002949
5.8000	543.021	45.313	16.319	35.710	-0.660	35.397	1033.773	-0.003172	-0.001142	-0.002500
5.8200	498.026	39.243	13.402	31.305	-0.666	35.397	948.114	-0.002747	-0.000938	-0.002191
5.8400	431.375	30.140	9.387	24.646	-0.667	35.397	821.228	-0.002110	-0.000657	-0.001725
5.8600	369.368	21.069	5.145	19.000	-0.681	35.397	703.182	-0.001475	-0.000360	-0.001330
5.8800	345.969	17.271	3.139	16.721	-0.675	35.398	658.636	-0.001209	-0.000220	-0.001170
5.9000	303.574	11.143	0.123	11.780	-0.673	35.398	577.927	-0.000780	-0.000009	-0.000825
5.9200	293.174	9.049	-0.906	10.266	-0.665	35.397	558.128	-0.000633	0.000063	-0.000719
5.9400	264.229	4.795	-2.667	7.116	-0.674	35.397	503.025	-0.000336	0.000187	-0.000498
5.9600	249.487	2.364	-3.823	5.835	-0.659	35.397	474.958	-0.000165	0.000268	-0.000408
5.9800	246.797	1.264	-4.197	4.720	-0.668	35.398	469.837	-0.000089	0.000294	-0.000330
6.0000	250.524	0.902	-4.528	4.709	-0.669	35.398	476.933	-0.000063	0.000317	-0.000330
6.0200	247.488	0.404	-5.050	4.295	-0.673	35.398	471.153	-0.000028	0.000354	-0.000301
6.0400	251.921	0.818	-4.884	4.815	-0.668	35.398	479.593	-0.000057	0.000342	-0.000337
6.0600	292.438	5.392	-3.385	7.143	-0.669	35.397	556.726	-0.000377	0.000237	-0.000500
6.0800	327.153	9.924	-1.720	9.671	-0.670	35.397	622.816	-0.000695	0.000120	-0.000677
6.1000	355.106	12.951	-0.235	11.270	-0.673	35.398	676.031	-0.000907	0.000016	-0.000789
6.1200	411.222	20.276	2.973	16.774	-0.676	35.398	782.862	-0.001419	-0.000208	-0.001174
6.1400	462.785	27.387	5.878	21.258	-0.679	35.397	881.023	-0.001917	-0.000411	-0.001488
6.1600	505.586	32.796	8.546	25.211	-0.681	35.398	962.505	-0.002296	-0.000598	-0.001765
6.1800	589.850	43.494	13.788	32.515	-0.679	35.398	1122.923	-0.003045	-0.000965	-0.002276
6.2000	624.791	48.637	16.456	35.489	-0.667	35.398	1189.442	-0.003405	-0.001152	-0.002484
6.2200	704.066	58.546	21.384	42.573	-0.666	35.398	1340.361	-0.004098	-0.001497	-0.002980
6.2400	779.103	68.259	25.540	49.304	-0.677	35.398	1483.212	-0.004778	-0.001788	-0.003451
6.2600	842.132	76.847	29.626	55.124	-0.670	35.398	1603.203	-0.005379	-0.002074	-0.003859
6.2800	907.566	85.601	34.125	61.125	-0.666	35.398	1727.772	-0.005992	-0.002389	-0.004279
6.3000	953.177	92.274	37.375	66.161	-0.669	35.398	1814.604	-0.006459	-0.002616	-0.004631
6.3200	1022.894	100.971	41.653	71.924	-0.682	35.398	1947.327	-0.007068	-0.002916	-0.005035
6.3400	1078.619	108.572	45.229	76.962	-0.675	35.398	2053.413	-0.007600	-0.003166	-0.005387
6.3600	1110.945	113.255	46.937	80.718	-0.666	35.398	2114.954	-0.007928	-0.003286	-0.005650
6.3800	1160.719	119.856	50.131	84.915	-0.672	35.398	2209.711	-0.008390	-0.003509	-0.005944
6.4000	1197.328	125.400	52.676	88.934	-0.677	35.398	2279.406	-0.008778	-0.003687	-0.006225
6.4200	1225.687	129.500	54.587	91.546	-0.672	35.398	2333.393	-0.009065	-0.003821	-0.006408
6.4400	1252.633	133.167	56.762	94.754	-0.671	35.398	2384.691	-0.009322	-0.003973	-0.006633
6.4600	1266.684	135.087	57.736	96.238	-0.677	35.398	2411.442	-0.009456	-0.004042	-0.006737
6.4800	1287.303	138.421	58.674	98.140	-0.671	35.398	2450.695	-0.009689	-0.004107	-0.006870
6.5000	1275.266	138.046	58.648	97.711	-0.670	35.399	2427.778	-0.009663	-0.004105	-0.006840
6.5200	1263.168	136.755	58.453	97.202	-0.672	35.398	2404.747	-0.009573	-0.004092	-0.006804
6.5400	1249.537	135.546	58.413	96.679	-0.680	35.398	2378.798	-0.009488	-0.004089	-0.006768
6.5600	1216.550	131.560	57.050	94.066	-0.675	35.399	2315.998	-0.009209	-0.003994	-0.006585
6.5800	1179.069	127.264	55.880	90.996	-0.674	35.399	2244.644	-0.008908	-0.003912	-0.006370
6.6000	1142.986	122.787	53.321	88.561	-0.677	35.399	2175.951	-0.008595	-0.003733	-0.006199
6.6200	1108.601	118.509	51.518	85.797	-0.666	35.399	2110.491	-0.008296	-0.003606	-0.006006
6.6400	1030.543	109.765	47.266	79.096	-0.672	35.400	1961.889	-0.007684	-0.003309	-0.005537
6.6600	977.403	102.945	44.227	75.047	-0.667	35.399	1860.723	-0.007206	-0.003096	-0.005253
6.6800	934.737	97.553	41.570	70.852	-0.668	35.399	1779.499	-0.006829	-0.002910	-0.004960
6.7000	877.839	89.754	38.007	65.787	-0.669	35.399	1671.181	-0.006283	-0.002661	-0.004605
6.7200	796.145	79.570	32.846	58.714	-0.669	35.399	1515.656	-0.005570	-0.002299	-0.004110
6.7400	735.295	71.355	29.173	53.528	-0.672	35.399	1399.813	-0.004995	-0.002042	-0.003747
6.7600	681.283	64.175	25.622	48.396	-0.669	35.399	1296.988	-0.004492	-0.001794	-0.003388
6.7800	605.449	54.571	21.000	41.722	-0.661	35.399	1152.620	-0.003820	-0.001470	-0.002921
6.8000	562.558	47.777	17.984	38.130	-0.661	35.399	1070.967	-0.003344	-0.001259	-0.002669
6.8200	490.527	38.575	13.210	30.700	-0.666	35.400	933.838	-0.002700	-0.000925	-0.002149
6.8400	434.171	30.684	9.275	25.428	-0.673	35.399	826.550	-0.002148	-0.000649	-0.001780
6.8600	390.137	24.264	6.097	20.708	-0.666	35.400	742.722	-0.001698	-0.000427	-0.001450
6.8800	340.574	17.663	3.154	15.977	-0.679	35.400	648.365	-0.001236	-0.000221	-0.001118
6.9000	324.088	14.384	1.884	13.995	-0.684	35.400	616.980	-0.001007	-0.000132	-0.000980
6.9200	284.337	8.560	-1.166	9.673	-0.679	35.399	541.306	-0.000599	0.000082	-0.000677
6.9400	262.411	4.880	-3.137	7.749	-0.688	35.399	499.563	-0.000342	0.000220	-0.000542
6.9600	249.832	2.667	-3.990	5.835	-0.683	35.400	475.616	-0.000187	0.000279	-0.000408
6.9800	243.054	1.584	-4.653	5.325	-0.677	35.400	462.713	-0.000111	0.000326	-0.000373
7.0000	245.745	1.152	-4.458	4.859	-0.677	35.400	467.834	-0.000081	0.000312	-0.000340
7.0200	249.141	1.292	-4.542	4.831	-0.682	35.400	474.300	-0.000090	0.000318	-0.000338
7.0400	263.989	2.625	-4.004	6.027	-0.679	35.400	502.567	-0.000184	0.000280	-0.000422
7.0600	297.036	6.640	-3.384	7.157	-0.681	35.400	565.481	-0.000465	0.000237	-0.000501
7.0800	310.772	8.632	-2.447	7.898	-0.684	35.400	591.631	-0.000604	0.000171	-0.000553
7.1000	368.632	15.825	0.525	13.144	-0.676	35.400	701.780	-0.001108	-0.000037	-0.000920
7.1200	420.795	22.359	3.592	18.082	-0.674	35.400	801.086	-0.001565	-0.000251	-0.001266
7.1400	469.608	28.877	6.606	22.279	-0.671	35.400	894.012	-0.002021	-0.000462	-0.001560
7.1600	518.510	34.669	9.719	26.461	-0.671	35.400	987.110	-0.002427	-0.000680	-0.001852
7.1800	581.179	42.885	13.155	32.447	-0.672	35.400	1106.415	-0.003002	-0.000921	-0.002271
7.2000	645.741	51.234	17.256	37.760	-0.667	35.400	1229.324	-0.003586	-0.001208	-0.002643
7.2200	704.667	59.563	21.192	43.440	-0.652	35.400	1341.505	-0.004169	-0.001483	-0.003041
7.2400	761.985	66.965	25.101	48.356	-0.675	35.400	1450.624	-0.004688	-0.001757	-0.003385
7.2600	842.027	77.248	30.134	55.577	-0.671	35.400	1603.003	-0.005407	-0.002109	-0.003890
7.2800	906.273	86.019	34.274	61.263	-0.661	35.400	1725.311	-0.006021	-0.002399	-0.004288
7.3000	965.936	93.743	37.485	67.371	-0.656	35.401	1838.894	-0.006562	-0.002624	-0.004716
7.3200	1022.864	101.819	41.613	72.243	-0.660	35.400	1947.269	-0.007127	-0.002913	-0.005057
7.3400	1085.637	110.200	45.421	78.175	-0.676	35.400	2066.774	-0.007714	-0.003179	-0.005472
7.3600	1154.272	119.246	49.994	84.748	-0.679	35.400	2197.437	-0.008347	-0.003500	-0.005932
7.3800	1181.488	123.289	52.179	87.982	-0.671	35.400	2249.250	-0.008630	-0.003653	-0.006159
7.4000	1169.586	122.092	51.685	87.597	-0.682	35.400	2226.591	-0.008546	-0.003618	-0.006132
7.4200	1232.450	130.724	55.233	92.772	-0.676	35.401	2346.268	-0.009151	-0.003866	-0.006494
7.4400	1228.257	130.613	55.277	92.896	-0.686	35.401	2338.285	-0.009143	-0.003869	-0.006503
7.4600	1274.589	136.839	58.261	97.173	-0.671	35.401	2426.491	-0.009579	-0.004078	-0.006802
7.4800	1277.249	137.630	58.894	98.164	-0.671	35.401	2431.555	-0.009634	-0.004123	-0.006871
7.5000	1275.867	138.020	59.156	98.165	-0.688	35.401	2428.923	-0.009661	-0.004141	-0.006872
7.5200	1266.414	137.255	58.811	97.532	-0.676	35.401	2410.927	-0.009608	-0.004117	-0.006827
7.5400	1236.958	134.393	57.612	95.799	-0.672	35.401	2354.851	-0.009408	-0.004033	-0.006706
7.5600	1239.513	134.836	57.944	96.046	-0.681	35.401	2359.715	-0.009439	-0.004056	-0.006723
7.5800	1187.410	129.251	56.142	92.717	-0.672	35.401	2260.523	-0.009048	-0.003930	-0.006490
7.6000	1137.906	122.953	53.735	88.480	-0.680	35.402	2166.281	-0.008607	-0.003761	-0.006194
7.6200	1092.235	117.214	50.816	84.654	-0.677	35.401	2079.334	-0.008205	-0.003557	-0.005926
7.6400	1050.501	111.920	48.369	80.923	-0.672	35.402	1999.884	-0.007834	-0.003386	-0.005665
7.6600	986.360	104.584	44.473	75.997	-0.671	35.402	1877.775	-0.007321	-0.003113	-0.005320
7.6800	935.518	98.039	41.613	71.497	-0.671	35.402	1780.987	-0.006863	-0.002913	-0.005005
7.7000	868.973	89.019	37.663	65.375	-0.673	35.402	1654.301	-0.006231	-0.002636	-0.004576
7.7200	797.317	80.085	33.408	59.471	-0.668	35.401	1517.887	-0.005606	-0.002339	-0.004163
7.7400	730.561	71.136	29.091	53.416	-0.671	35.401	1390.800	-0.004980	-0.002036	-0.003739
7.7600	669.335	63.103	25.128	48.120	-0.669	35.401	1274.242	-0.004417	-0.001759	-0.003368
7.7800	603.556	54.556	20.711	41.736	-0.671	35.402	1149.015	-0.003819	-0.001450	-0.002922
7.8000	531.314	45.119	15.854	35.435	-0.668	35.402	1011.486	-0.003158	-0.001110	-0.002480
7.8200	479.827	37.620	12.728	30.449	-0.663	35.402	913.467	-0.002633	-0.000891	-0.002131
7.8400	429.016	30.628	9.401	25.964	-0.675	35.402	816.736	-0.002144	-0.000658	-0.001817
7.8600	394.466	25.168	6.826	21.810	-0.674	35.402	750.961	-0.001762	-0.000478	-0.001527
7.8800	344.196	17.746	3.057	16.734	-0.672	35.402	655.260	-0.001242	-0.000214	-0.001171
7.9000	305.002	12.339	0.235	12.990	-0.668	35.402	580.645	-0.000864	-0.000016	-0.000909
7.9200	270.812	7.628	-1.595	9.437	-0.673	35.402	515.556	-0.000534	0.000112	-0.000661
7.9400	264.545	5.754	-2.405	7.584	-0.667	35.401	503.626	-0.000403	0.000168	-0.000531
7.9600	253.184	3.600	-3.342	6.826	-0.661	35.402	481.997	-0.000252	0.000234	-0.000478
7.9800	248.435	2.362	-3.991	5.557	-0.665	35.402	472.956	-0.000165	0.000279	-0.000389
8.0000	242.559	1.111	-4.706	4.747	-0.662	35.402	461.769	-0.000078	0.000329	-0.000332
8.0200	248.029	1.500	-4.680	4.777	-0.673	35.402	472.183	-0.000105	0.000328	-0.000334
8.0400	260.172	2.682	-4.294	5.312	-0.669	35.402	495.300	-0.000188	0.000301	-0.000372
8.0600	298.449	7.715	-2.847	7.789	-0.687	35.402	568.171	-0.000540	0.000199	-0.000545
8.0800	319.354	9.578	-1.680	9.823	-0.682	35.403	607.967	-0.000670	0.000118	-0.000688
8.1000	357.826	14.274	-0.138	13.030	-0.682	35.403	681.210	-0.000999	0.000010	-0.000912
8.1200	420.330	22.204	3.373	17.709	-0.683	35.403	800.200	-0.001554	-0.000236	-0.001240
8.1400	457.254	27.333	6.041	22.072	-0.689	35.402	870.495	-0.001913	-0.000423	-0.001545
8.1600	518.480	35.254	9.829	27.053	-0.677	35.403	987.053	-0.002468	-0.000688	-0.001894
8.1800	571.786	42.135	13.347	31.250	-0.675	35.403	1088.533	-0.002949	-0.000934	-0.002187
8.2000	642.540	51.251	17.625	38.130	-0.677	35.403	1223.230	-0.003588	-0.001234	-0.002669
8.2200	705.313	59.602	21.370	44.170	-0.675	35.403	1342.735	-0.004172	-0.001496	-0.003092
8.2400	777.735	68.926	26.131	50.516	-0.671	35.402	1480.608	-0.004825	-0.001829	-0.003536
8.2600	839.938	77.581	30.023	55.729	-0.671	35.402	1599.026	-0.005431	-0.002102	-0.003901
8.2800	907.851	86.408	34.634	62.387	-0.683	35.402	1728.315	-0.006049	-0.002424	-0.004367
8.3000	962.960	93.869	38.047	67.149	-0.670	35.403	1833.229	-0.006571	-0.002663	-0.004700
8.3200	1026.455	102.014	41.915	72.988	-0.679	35.402	1954.107	-0.007141	-0.002934	-0.005109
8.3400	1078.168	109.477	44.955	77.856	-0.681	35.403	2052.555	-0.007663	-0.003147	-0.005450
8.3600	1124.410	115.549	48.217	82.727	-0.680	35.403	2140.589	-0.008088	-0.003375	-0.005791
8.3800	1166.385	121.674	51.051	86.580	-0.683	35.403	2220.497	-0.008517	-0.003574	-0.006061
8.4000	1199.673	126.709	53.502	90.046	-0.665	35.404	2283.869	-0.008870	-0.003745	-0.006303
8.4200	1245.089	132.625	56.389	94.271	-0.672	35.404	2370.329	-0.009284	-0.003947	-0.006599
8.4400	1241.106	132.794	56.498	94.355	-0.673	35.403	2362.747	-0.009296	-0.003955	-0.006605
8.4600	1266.519	136.088	57.434	96.886	-0.672	35.404	2411.127	-0.009526	-0.004020	-0.006782
8.4800	1268.758	137.367	57.805	97.862	-0.663	35.404	2415.390	-0.009616	-0.004046	-0.006850
8.5000	1274.950	138.338	58.852	98.387	-0.667	35.403	2427.177	-0.009684	-0.004120	-0.006887
8.5200	1270.216	137.840	59.044	98.095	-0.660	35.404	2418.165	-0.009649	-0.004133	-0.006867
8.5400	1242.233	134.933	58.235	96.897	-0.659	35.404	2364.893	-0.009445	-0.004076	-0.006783
8.5600	1222.801	132.933	57.352	95.427	-0.665	35.403	2327.900	-0.009305	-0.004015	-0.006680
8.5800	1182.841	128.332	55.607	92.167	-0.668	35.403	2251.825	-0.008983	-0.003892	-0.006452
8.6000	1151.432	124.470	54.217	89.454	-0.679	35.403	2192.030	-0.008713	-0.003795	-0.006262
8.6200	1107.068	119.233	51.834	86.359	-0.687	35.403	2107.573	-0.008346	-0.003628	-0.006045
8.6400	1047.705	112.268	48.726	81.378	-0.687	35.403	1994.562	-0.007859	-0.003411	-0.005696
8.6600	987.697	104.722	44.954	76.426	-0.698	35.403	1880.322	-0.007331	-0.003147	-0.005350
8.6800	913.878	95.455	40.374	69.835	-0.708	35.404	1739.788	-0.006682	-0.002826	-0.004888
8.7000	868.116	89.478	37.526	65.772	-0.687	35.405	1652.670	-0.006263	-0.002627	-0.004604
8.7200	792.643	79.820	33.173	59.210	-0.681	35.405	1508.989	-0.005587	-0.002322	-0.004145
8.7400	748.836	74.052	30.301	55.041	-0.662	35.405	1425.591	-0.005184	-0.002121	-0.003853
8.7600	664.737	62.881	25.086	47.487	-0.650	35.405	1265.488	-0.004402	-0.001756	-0.003324
8.7800	611.791	55.667	21.519	42.822	-0.642	35.404	1164.694	-0.003897	-0.001506	-0.002998
8.8000	550.235	47.066	17.049	36.905	-0.660	35.403	1047.506	-0.003295	-0.001193	-0.002583
8.8200	487.867	39.145	13.140	31.455	-0.678	35.404	928.774	-0.002740	-0.000920	-0.002202
8.8400	443.503	32.850	10.115	27.426	-0.680	35.405	844.316	-0.002299	-0.000708	-0.001920
8.8600	387.628	25.140	6.330	21.162	-0.681	35.405	737.944	-0.001760	-0.000443	-0.001481
8.8800	342.558	18.233	3.346	16.982	-0.655	35.405	652.142	-0.001276	-0.000234	-0.001189
8.9000	321.367	14.453	1.653	14.352	-0.638	35.405	611.801	-0.001012	-0.000116	-0.001005
8.9200	275.290	8.005	-1.472	9.701	-0.678	35.404	524.082	-0.000560	0.000103	-0.000679
8.9400	271.894	7.044	-2.021	8.943	-0.700	35.404	517.616	-0.000493	0.000142	-0.000626
8.9600	254.957	4.324	-3.644	7.323	-0.700	35.406	485.373	-0.000303	0.000255	-0.000513
8.9800	238.140	1.808	-4.269	4.847	-0.664	35.406	453.358	-0.000127	0.000299	-0.000339
9.0000	246.586	1.806	-4.308	4.722	-0.649	35.405	469.437	-0.000126	0.000302	-0.000331
9.0200	255.242	2.667	-4.378	5.753	-0.675	35.405	485.916	-0.000187	0.000306	-0.000403
9.0400	272.465	4.490	-3.977	5.960	-0.705	35.405	518.703	-0.000314	0.000278	-0.000417
9.0600	288.891	6.542	-3.288	7.061	-0.700	35.406	549.974	-0.000458	0.000230	-0.000494
9.0800	329.363	11.839	-1.333	10.498	-0.665	35.405	627.022	-0.000829	0.000093	-0.000735
9.1000	375.199	17.397	0.976	14.326	-0.655	35.404	714.283	-0.001218	-0.000068	-0.001003
9.1200	411.869	21.885	3.414	17.916	-0.676	35.404	784.092	-0.001532	-0.000239	-0.001254
9.1400	459.058	28.055	6.195	21.699	-0.694	35.405	873.928	-0.001964	-0.000434	-0.001519
9.1600	527.392	36.213	10.129	27.548	-0.693	35.406	1004.019	-0.002535	-0.000709	-0.001928
9.1800	585.717	44.093	13.760	33.050	-0.664	35.406	1115.055	-0.003087	-0.000963	-0.002313
9.2000	642.014	51.916	17.789	37.857	-0.652	35.405	1222.229	-0.003634	-0.001245	-0.002650
9.2200	710.122	60.755	22.125	44.279	-0.658	35.405	1351.891	-0.004253	-0.001549	-0.003100
9.2400	781.778	70.079	26.516	51.052	-0.672	35.405	1488.304	-0.004906	-0.001856	-0.003574
9.2600	819.815	74.804	28.884	54.422	-0.698	35.406	1560.717	-0.005236	-0.002022	-0.003810
9.2800	918.461	87.590	34.966	63.284	-0.677	35.406	1748.514	-0.006131	-0.002448	-0.004430
9.3000	968.310	94.855	38.116	67.783	-0.651	35.406	1843.414	-0.006640	-0.002668	-0.004745
9.3200	1022.202	102.139	41.969	72.959	-0.652	35.405	1946.011	-0.007150	-0.002938	-0.005107
9.3400	1058.902	107.558	44.348	77.071	-0.674	35.405	2015.877	-0.007529	-0.003104	-0.005395
9.3600	1115.093	114.870	47.982	81.805	-0.687	35.406	2122.850	-0.008041	-0.003359	-0.005726
9.3800	1164.085	121.425	50.995	86.278	-0.684	35.406	2216.120	-0.008500	-0.003570	-0.006039
9.4000	1191.918	125.680	52.908	89.868	-0.665	35.406	2269.106	-0.008798	-0.003704	-0.006291
9.4200	1229.850	131.128	55.384	93.006	-0.651	35.406	2341.318	-0.009179	-0.003877	-0.006510
9.4400	1245.194	133.806	56.968	95.401	-0.669	35.405	2370.529	-0.009366	-0.003988	-0.006678
9.4600	1276.258	137.479	58.384	97.890	-0.684	35.406	2429.667	-0.009624	-0.004087	-0.006852
9.4800	1276.227	138.284	59.044	98.688	-0.695	35.406	2429.609	-0.009680	-0.004133	-0.006908
9.5000	1273.778	138.130	58.549	98.785	-0.666	35.407	2424.946	-0.009669	-0.004098	-0.006915
9.5200	1266.158	137.728	58.879	98.591	-0.647	35.407	2410.440	-0.009641	-0.004122	-0.006901
9.5400	1243.225	135.781	58.193	96.955	-0.665	35.405	2366.781	-0.009505	-0.004074	-0.006787
9.5600	1221.178	133.237	57.516	95.237	-0.683	35.406	2324.810	-0.009327	-0.004026	-0.006667
9.5800	1183.652	129.054	56.182	92.512	-0.701	35.406	2253.370	-0.009034	-0.003933	-0.006476
9.6000	1136.418	123.051	53.584	88.713	-0.678	35.407	2163.448	-0.008614	-0.003751	-0.006210
9.6200	1083.082	117.034	50.529	84.488	-0.662	35.407	2061.911	-0.008192	-0.003537	-0.005914
9.6400	1039.725	111.836	47.748	81.033	-0.645	35.406	1979.370	-0.007829	-0.003342	-0.005672
9.6600	981.415	104.418	44.680	75.761	-0.681	35.406	1868.362	-0.007309	-0.003128	-0.005303
9.6800	932.618	98.360	41.777	71.731	-0.691	35.406	1775.465	-0.006885	-0.002924	-0.005021
9.7000	868.146	89.645	37.842	66.229	-0.695	35.408	1652.727	-0.006275	-0.002649	-0.004636
9.7200	799.842	80.626	33.519	59.802	-0.672	35.408	1522.694	-0.005644	-0.002346	-0.004186
9.7400	735.460	72.496	29.420	54.323	-0.647	35.407	1400.127	-0.005075	-0.002059	-0.003803
9.7600	678.427	64.979	25.965	49.304	-0.665	35.406	1291.552	-0.004549	-0.001818	-0.003451
9.7800	598.326	54.421	20.971	42.231	-0.694	35.407	1139.059	-0.003809	-0.001468	-0.002956
9.8000	539.866	46.526	17.242	36.794	-0.697	35.408	1027.765	-0.003257	-0.001207	-0.002576
9.8200	488.874	39.159	13.636	31.827	-0.676	35.408	930.691	-0.002741	-0.000955	-0.002228
9.8400	428.415	30.808	9.620	26.132	-0.660	35.407	815.592	-0.002157	-0.000673	-0.001829
9.8600	380.564	24.180	5.960	21.205	-0.656	35.407	724.497	-0.001693	-0.000417	-0.001484
9.8800	353.949	19.999	4.073	18.342	-0.681	35.406	673.828	-0.001400	-0.000285	-0.001284
9.9000	312.080	14.051	1.155	13.348	-0.701	35.407	594.120	-0.000984	-0.000081	-0.000934
9.9200	292.167	10.715	-0.140	11.489	-0.684	35.408	556.211	-0.000750	0.000010	-0.000804
9.9400	265.342	6.502	-2.132	8.420	-0.667	35.408	505.142	-0.000455	0.000149	-0.000589
9.9600	256.039	4.395	-3.508	7.692	-0.658	35.407	487.432	-0.000308	0.000246	-0.000538
9.9800	231.242	0.750	-4.871	4.640	-0.682	35.407	440.226	-0.000053	0.000341	-0.000325
Test Cycles
Time (sec)	Axial stress (kPa)	Axial micro-strain #1	Axial micro-strain #2	Axial micro-strain #3	Confining pressure (kPa)	Temperature (�C)	Load (N)	Displacement #1 (mm)	Displacement #2 (mm)	Displacement #3 (mm)
0.0000	240.950	1.638	-4.529	5.449	-0.695	35.408	458.708	-0.000115	0.000317	-0.000381
0.0200	247.323	1.765	-4.447	4.983	-0.702	35.408	470.839	-0.000124	0.000311	-0.000349
0.0400	267.566	4.297	-3.908	6.537	-0.670	35.408	509.377	-0.000301	0.000274	-0.000458
0.0600	302.462	8.535	-2.434	8.215	-0.653	35.408	575.809	-0.000597	0.000170	-0.000575
0.0800	327.770	11.185	-1.608	10.830	-0.658	35.407	623.989	-0.000783	0.000113	-0.000758
0.1000	370.480	16.839	0.702	14.504	-0.687	35.407	705.299	-0.001179	-0.000049	-0.001015
0.1200	408.036	21.595	2.933	17.244	-0.694	35.408	776.796	-0.001512	-0.000205	-0.001207
0.1400	461.838	28.431	6.304	22.595	-0.696	35.408	879.221	-0.001990	-0.000441	-0.001582
0.1600	513.626	35.283	9.758	27.149	-0.663	35.409	977.812	-0.002470	-0.000683	-0.001900
0.1800	576.610	43.412	13.512	32.324	-0.659	35.408	1097.717	-0.003039	-0.000946	-0.002263
0.2000	655.735	53.613	18.137	40.111	-0.670	35.407	1248.350	-0.003753	-0.001270	-0.002808
0.2200	715.007	61.392	22.125	45.078	-0.693	35.408	1361.189	-0.004297	-0.001549	-0.003155
0.2400	747.723	66.533	24.589	48.257	-0.698	35.409	1423.473	-0.004657	-0.001721	-0.003378
0.2600	836.812	77.636	30.081	56.280	-0.676	35.409	1593.075	-0.005435	-0.002106	-0.003940
0.2800	904.395	86.589	34.332	62.281	-0.666	35.409	1721.735	-0.006061	-0.002403	-0.004360
0.3000	967.003	94.507	38.116	68.155	-0.666	35.408	1840.925	-0.006616	-0.002668	-0.004771
0.3200	1004.589	100.705	40.415	72.106	-0.697	35.408	1912.479	-0.007049	-0.002829	-0.005047
0.3400	1078.363	109.948	45.118	78.269	-0.714	35.409	2052.927	-0.007696	-0.003158	-0.005479
0.3600	1128.228	116.572	48.808	83.608	-0.688	35.409	2147.856	-0.008160	-0.003417	-0.005853
0.3800	1157.954	121.288	50.900	86.055	-0.667	35.409	2204.447	-0.008490	-0.003563	-0.006024
0.4000	1199.507	126.722	53.307	90.184	-0.652	35.408	2283.554	-0.008871	-0.003731	-0.006313
0.4200	1223.688	130.364	55.235	92.579	-0.671	35.408	2329.588	-0.009125	-0.003866	-0.006481
0.4400	1254.000	134.962	56.997	96.047	-0.692	35.408	2387.295	-0.009447	-0.003990	-0.006723
0.4600	1281.608	138.867	58.906	98.387	-0.698	35.410	2439.852	-0.009721	-0.004123	-0.006887
0.4800	1271.448	137.783	58.989	98.717	-0.681	35.410	2420.511	-0.009645	-0.004129	-0.006910
0.5000	1269.435	138.393	58.769	98.426	-0.668	35.409	2416.677	-0.009687	-0.004114	-0.006890
0.5200	1265.918	137.659	58.975	98.426	-0.653	35.408	2409.983	-0.009636	-0.004128	-0.006890
0.5400	1242.399	135.546	57.958	97.160	-0.682	35.408	2365.208	-0.009488	-0.004057	-0.006801
0.5600	1201.551	131.365	56.459	93.665	-0.689	35.409	2287.445	-0.009196	-0.003952	-0.006557
0.5800	1198.696	131.501	56.446	94.010	-0.687	35.409	2282.009	-0.009205	-0.003951	-0.006581
0.6000	1139.830	124.400	53.984	89.084	-0.666	35.410	2169.943	-0.008708	-0.003779	-0.006236
0.6200	1082.947	116.852	50.774	84.737	-0.661	35.409	2061.653	-0.008180	-0.003554	-0.005932
0.6400	1055.235	113.435	49.164	82.025	-0.658	35.409	2008.896	-0.007940	-0.003442	-0.005742
0.6600	993.002	106.112	44.982	77.043	-0.686	35.409	1890.421	-0.007428	-0.003149	-0.005393
0.6800	936.931	99.009	41.806	72.049	-0.698	35.409	1783.676	-0.006931	-0.002926	-0.005043
0.7000	866.989	89.823	37.638	66.228	-0.682	35.410	1650.524	-0.006288	-0.002635	-0.004636
0.7200	804.756	82.086	34.166	61.425	-0.671	35.410	1532.049	-0.005746	-0.002392	-0.004300
0.7400	745.604	74.054	30.398	55.068	-0.660	35.410	1419.439	-0.005184	-0.002128	-0.003855
0.7600	675.422	64.523	25.689	48.630	-0.663	35.409	1285.830	-0.004517	-0.001798	-0.003404
0.7800	603.135	54.959	20.740	42.354	-0.682	35.409	1148.214	-0.003847	-0.001452	-0.002965
0.8000	540.361	46.761	16.816	36.727	-0.696	35.410	1028.709	-0.003273	-0.001177	-0.002571
0.8200	485.523	39.629	13.374	31.868	-0.673	35.410	924.311	-0.002774	-0.000936	-0.002231
0.8400	444.676	33.629	10.746	27.851	-0.658	35.410	846.548	-0.002354	-0.000752	-0.001950
0.8600	381.346	24.513	6.537	20.749	-0.659	35.409	725.985	-0.001716	-0.000458	-0.001452
0.8800	357.481	20.358	4.418	18.838	-0.672	35.409	680.552	-0.001425	-0.000309	-0.001319
0.9000	305.077	12.910	0.536	13.595	-0.699	35.410	580.788	-0.000904	-0.000038	-0.000952
0.9200	281.587	9.618	-0.892	11.160	-0.697	35.411	536.070	-0.000673	0.000062	-0.000781
0.9400	266.829	7.060	-1.994	9.590	-0.674	35.411	507.975	-0.000494	0.000140	-0.000671
0.9600	250.989	4.670	-3.302	7.061	-0.663	35.411	477.819	-0.000327	0.000231	-0.000494
0.9800	239.808	2.196	-3.991	5.697	-0.655	35.410	456.533	-0.000154	0.000279	-0.000399
1.0000	243.475	1.918	-4.431	5.973	-0.677	35.410	463.514	-0.000134	0.000310	-0.000418
1.0200	247.683	2.362	-4.624	5.283	-0.690	35.410	471.525	-0.000165	0.000324	-0.000370
1.0400	264.335	4.114	-3.878	6.563	-0.695	35.411	503.225	-0.000288	0.000271	-0.000459
1.0600	299.516	8.548	-2.281	8.268	-0.670	35.411	570.202	-0.000598	0.000160	-0.000579
1.0800	325.200	11.740	-1.057	10.843	-0.651	35.410	619.097	-0.000822	0.000074	-0.000759
1.1000	366.363	16.492	0.827	13.871	-0.650	35.410	697.460	-0.001154	-0.000058	-0.000971
1.1200	424.417	23.511	3.729	19.004	-0.683	35.410	807.981	-0.001646	-0.000261	-0.001330
1.1400	452.791	27.459	5.448	21.630	-0.691	35.411	861.998	-0.001922	-0.000381	-0.001514
1.1600	510.996	35.213	9.359	26.767	-0.675	35.411	972.805	-0.002465	-0.000655	-0.001874
1.1800	581.209	44.368	13.968	33.092	-0.659	35.411	1106.472	-0.003106	-0.000978	-0.002316
1.2000	644.403	52.430	18.024	39.177	-0.647	35.410	1226.778	-0.003670	-0.001262	-0.002742
1.2200	707.733	60.534	22.099	44.624	-0.675	35.410	1347.342	-0.004237	-0.001547	-0.003124
1.2400	778.502	70.121	26.324	51.228	-0.696	35.410	1482.067	-0.004908	-0.001843	-0.003586
1.2600	836.947	77.995	29.998	56.816	-0.709	35.411	1593.332	-0.005460	-0.002100	-0.003977
1.2800	898.879	86.521	34.288	61.824	-0.676	35.411	1711.235	-0.006056	-0.002400	-0.004328
1.3000	968.070	95.564	38.653	68.854	-0.663	35.412	1842.957	-0.006689	-0.002706	-0.004820
1.3200	1027.432	103.460	42.409	74.262	-0.645	35.411	1955.967	-0.007242	-0.002969	-0.005198
1.3400	1068.850	108.935	45.035	77.924	-0.673	35.410	2034.817	-0.007625	-0.003152	-0.005455
1.3600	1129.024	117.283	48.752	83.511	-0.687	35.411	2149.372	-0.008210	-0.003413	-0.005846
1.3800	1179.805	123.803	51.875	88.107	-0.692	35.412	2246.046	-0.008666	-0.003631	-0.006167
1.4000	1202.618	127.803	53.596	90.651	-0.669	35.412	2289.476	-0.008946	-0.003752	-0.006346
1.4200	1230.406	131.878	55.620	93.762	-0.641	35.412	2342.377	-0.009231	-0.003893	-0.006563
1.4400	1254.196	134.892	57.243	96.127	-0.655	35.411	2387.667	-0.009442	-0.004007	-0.006729
1.4600	1260.237	136.324	57.584	96.899	-0.678	35.411	2399.168	-0.009543	-0.004031	-0.006783
1.4800	1278.046	138.921	58.878	99.280	-0.685	35.412	2433.071	-0.009724	-0.004121	-0.006950
1.5000	1274.484	139.047	58.934	99.431	-0.677	35.413	2426.291	-0.009733	-0.004125	-0.006960
1.5200	1265.482	138.643	58.962	98.798	-0.664	35.412	2409.153	-0.009705	-0.004127	-0.006916
1.5400	1239.152	135.811	58.439	97.010	-0.659	35.412	2359.028	-0.009507	-0.004091	-0.006791
1.5600	1212.672	132.737	57.365	95.196	-0.667	35.411	2308.617	-0.009292	-0.004016	-0.006664
1.5800	1175.447	128.290	55.852	91.670	-0.688	35.411	2237.749	-0.008980	-0.003910	-0.006417
1.6000	1135.727	123.929	53.527	89.126	-0.704	35.412	2162.132	-0.008675	-0.003747	-0.006239
1.6200	1103.401	119.427	51.863	86.896	-0.686	35.413	2100.592	-0.008360	-0.003630	-0.006083
1.6400	1047.615	112.907	48.960	81.530	-0.656	35.412	1994.390	-0.007904	-0.003427	-0.005707
1.6600	985.623	105.473	45.147	76.508	-0.656	35.412	1876.373	-0.007383	-0.003160	-0.005356
1.6800	919.498	96.732	41.406	70.811	-0.680	35.412	1750.488	-0.006771	-0.002898	-0.004957
1.7000	864.584	89.715	37.760	65.964	-0.687	35.412	1645.947	-0.006280	-0.002643	-0.004618
1.7200	801.315	81.557	33.643	60.531	-0.686	35.412	1525.497	-0.005709	-0.002355	-0.004237
1.7400	736.061	72.954	29.652	54.450	-0.674	35.413	1401.272	-0.005107	-0.002076	-0.003811
1.7600	677.195	65.188	26.187	49.179	-0.652	35.413	1289.206	-0.004563	-0.001833	-0.003443
1.7800	604.743	55.863	21.548	42.782	-0.640	35.412	1151.276	-0.003910	-0.001508	-0.002995
1.8000	538.393	46.622	17.296	36.506	-0.657	35.412	1024.961	-0.003264	-0.001211	-0.002555
1.8200	496.614	40.759	14.051	32.955	-0.677	35.412	945.425	-0.002853	-0.000984	-0.002307
1.8400	429.843	31.713	9.441	26.862	-0.685	35.413	818.310	-0.002220	-0.000661	-0.001880
1.8600	386.200	25.721	6.523	22.429	-0.680	35.413	735.226	-0.001800	-0.000457	-0.001570
1.8800	339.311	18.789	3.688	17.216	-0.665	35.413	645.962	-0.001315	-0.000258	-0.001205
1.9000	307.090	13.646	1.167	13.800	-0.653	35.412	584.621	-0.000955	-0.000082	-0.000966
1.9200	286.381	10.216	-0.125	11.642	-0.681	35.412	545.197	-0.000715	0.000009	-0.000815
1.9400	249.727	4.936	-2.916	8.282	-0.702	35.413	475.416	-0.000346	0.000204	-0.000580
1.9600	239.057	3.018	-4.184	6.166	-0.684	35.413	455.103	-0.000211	0.000293	-0.000432
1.9800	225.501	0.542	-4.956	4.899	-0.667	35.414	429.296	-0.000038	0.000347	-0.000343
2.0000	181.994	-5.171	-7.731	0.992	-0.657	35.413	346.470	0.000362	0.000541	-0.000069
2.0200	187.479	-5.656	-7.677	0.894	-0.668	35.413	356.913	0.000396	0.000537	-0.000063
2.0400	241.491	0.554	-5.630	3.331	-0.686	35.413	459.738	-0.000039	0.000394	-0.000233
2.0600	294.226	7.449	-3.575	7.721	-0.704	35.413	560.131	-0.000521	0.000250	-0.000540
2.0800	326.507	11.047	-1.856	10.554	-0.684	35.414	621.586	-0.000773	0.000130	-0.000739
2.1000	375.004	17.941	1.251	14.875	-0.675	35.414	713.911	-0.001256	-0.000088	-0.001041
2.1200	435.118	25.415	4.802	20.446	-0.667	35.414	828.352	-0.001779	-0.000336	-0.001431
2.1400	470.960	30.265	7.100	22.720	-0.677	35.413	896.587	-0.002119	-0.000497	-0.001590
2.1600	519.742	36.062	10.293	28.127	-0.690	35.414	989.456	-0.002524	-0.000721	-0.001969
2.1800	591.278	45.329	14.738	34.042	-0.707	35.414	1125.641	-0.003173	-0.001032	-0.002383
2.2000	634.575	51.668	17.310	38.475	-0.703	35.414	1208.067	-0.003617	-0.001212	-0.002693
2.2200	737.354	64.438	23.916	47.403	-0.684	35.414	1403.732	-0.004511	-0.001674	-0.003318
2.2400	798.204	72.816	27.782	53.045	-0.671	35.413	1519.575	-0.005097	-0.001945	-0.003713
2.2600	842.973	78.833	30.742	56.637	-0.682	35.413	1604.805	-0.005518	-0.002152	-0.003965
2.2800	893.469	86.046	33.905	61.715	-0.689	35.413	1700.935	-0.006023	-0.002373	-0.004320
2.3000	946.895	92.968	37.266	67.329	-0.712	35.414	1802.645	-0.006508	-0.002609	-0.004713
2.3200	1024.111	102.597	41.859	73.688	-0.698	35.415	1949.644	-0.007182	-0.002930	-0.005158
2.3400	1075.553	110.212	45.312	78.573	-0.673	35.415	2047.577	-0.007715	-0.003172	-0.005500
2.3600	1139.319	118.593	49.469	84.777	-0.671	35.414	2168.970	-0.008301	-0.003463	-0.005934
2.3800	1156.616	121.856	51.094	86.482	-0.681	35.414	2201.900	-0.008530	-0.003577	-0.006054
2.4000	1198.050	127.469	53.944	90.803	-0.684	35.413	2280.779	-0.008923	-0.003776	-0.006356
2.4200	1243.946	132.763	56.652	94.946	-0.718	35.414	2368.155	-0.009293	-0.003966	-0.006646
2.4400	1251.220	135.115	57.407	96.499	-0.692	35.415	2382.002	-0.009458	-0.004018	-0.006755
2.4600	1254.842	136.032	57.406	97.379	-0.678	35.415	2388.897	-0.009522	-0.004018	-0.006817
2.4800	1276.107	139.101	59.197	99.212	-0.670	35.414	2429.380	-0.009737	-0.004144	-0.006945
2.5000	1274.199	138.908	59.129	99.169	-0.687	35.414	2425.747	-0.009724	-0.004139	-0.006942
2.5200	1273.222	139.339	59.211	99.652	-0.698	35.414	2423.887	-0.009754	-0.004145	-0.006976
2.5400	1252.603	136.994	58.741	98.470	-0.702	35.415	2384.634	-0.009590	-0.004112	-0.006893
2.5600	1230.150	134.893	57.749	96.567	-0.688	35.416	2341.890	-0.009443	-0.004042	-0.006760
2.5800	1180.647	129.736	56.196	92.827	-0.673	35.415	2247.648	-0.009082	-0.003934	-0.006498
2.6000	1117.843	121.633	52.608	88.261	-0.666	35.414	2128.086	-0.008514	-0.003683	-0.006178
2.6200	1130.377	123.204	53.143	88.133	-0.677	35.414	2151.947	-0.008624	-0.003720	-0.006169
2.6400	1033.444	111.156	47.842	81.088	-0.698	35.414	1967.411	-0.007781	-0.003349	-0.005676
2.6600	1003.477	107.142	46.124	78.351	-0.698	35.415	1910.362	-0.007500	-0.003229	-0.005485
2.6800	930.063	98.540	41.502	71.940	-0.678	35.415	1770.601	-0.006898	-0.002905	-0.005036
2.7000	884.948	92.537	38.696	68.183	-0.665	35.416	1684.713	-0.006478	-0.002709	-0.004773
2.7200	788.060	80.334	33.146	59.899	-0.663	35.415	1500.263	-0.005623	-0.002320	-0.004193
2.7400	730.245	73.120	29.876	54.353	-0.682	35.414	1390.200	-0.005118	-0.002091	-0.003805
2.7600	673.107	64.856	26.005	49.331	-0.691	35.414	1281.424	-0.004540	-0.001820	-0.003453
2.7800	583.027	52.805	20.089	41.061	-0.704	35.415	1109.934	-0.003696	-0.001406	-0.002874
2.8000	540.016	46.915	17.063	36.931	-0.688	35.416	1028.051	-0.003284	-0.001194	-0.002585
2.8200	525.634	44.370	15.593	35.215	-0.667	35.416	1000.671	-0.003106	-0.001091	-0.002465
2.8400	430.068	32.603	10.086	26.682	-0.661	35.415	818.739	-0.002282	-0.000706	-0.001868
2.8600	375.184	23.873	6.262	20.927	-0.681	35.415	714.254	-0.001671	-0.000438	-0.001465
2.8800	342.903	18.857	3.372	17.849	-0.684	35.415	652.800	-0.001320	-0.000236	-0.001249
2.9000	308.158	13.842	1.264	14.477	-0.694	35.416	586.653	-0.000969	-0.000089	-0.001013
2.9200	269.940	8.632	-1.319	10.156	-0.667	35.417	513.897	-0.000604	0.000092	-0.000711
2.9400	275.230	8.548	-1.733	10.252	-0.655	35.416	523.968	-0.000598	0.000121	-0.000718
2.9600	256.445	5.668	-2.750	7.599	-0.658	35.415	488.205	-0.000397	0.000193	-0.000532
2.9800	234.158	1.918	-4.129	5.189	-0.672	35.416	445.776	-0.000134	0.000289	-0.000363
3.0000	239.403	1.931	-4.183	5.311	-0.691	35.416	455.761	-0.000135	0.000293	-0.000372
3.0200	250.779	3.017	-4.128	5.987	-0.688	35.417	477.419	-0.000211	0.000289	-0.000419
3.0400	252.763	3.379	-4.309	6.124	-0.664	35.417	481.195	-0.000237	0.000302	-0.000429
3.0600	296.961	8.351	-2.628	8.433	-0.660	35.416	565.338	-0.000585	0.000184	-0.000590
3.0800	322.960	11.630	-1.278	11.147	-0.663	35.416	614.834	-0.000814	0.000089	-0.000780
3.1000	364.529	16.616	1.209	14.311	-0.677	35.415	693.970	-0.001163	-0.000085	-0.001002
3.1200	402.476	21.607	3.264	17.781	-0.694	35.416	766.211	-0.001512	-0.000228	-0.001245
3.1400	464.814	29.556	6.647	23.077	-0.691	35.417	884.886	-0.002069	-0.000465	-0.001615
3.1600	510.350	35.477	9.745	26.709	-0.671	35.417	971.575	-0.002483	-0.000682	-0.001870
3.1800	567.413	43.022	13.059	32.215	-0.657	35.416	1080.208	-0.003012	-0.000914	-0.002255
3.2000	634.139	51.998	17.821	38.377	-0.670	35.416	1207.237	-0.003640	-0.001247	-0.002686
3.2200	478.069	31.280	7.886	24.933	-0.683	35.416	910.120	-0.002190	-0.000552	-0.001745
3.2400	699.948	58.976	21.315	43.908	-0.693	35.416	1332.521	-0.004128	-0.001492	-0.003074
3.2600	853.704	78.876	30.630	56.899	-0.684	35.417	1625.233	-0.005521	-0.002144	-0.003983
3.2800	902.681	86.131	34.194	62.128	-0.665	35.417	1718.473	-0.006029	-0.002394	-0.004349
3.3000	979.477	96.732	39.161	69.116	-0.661	35.417	1864.672	-0.006771	-0.002741	-0.004838
3.3200	972.909	97.165	39.905	69.226	-0.677	35.417	1852.169	-0.006802	-0.002793	-0.004846
3.3400	1080.002	110.655	46.152	78.985	-0.692	35.416	2056.046	-0.007746	-0.003231	-0.005529
3.3600	1084.766	111.739	46.440	79.783	-0.694	35.417	2065.115	-0.007822	-0.003251	-0.005585
3.3800	1194.984	126.095	52.936	89.578	-0.681	35.417	2274.942	-0.008827	-0.003706	-0.006270
3.4000	1232.134	131.282	55.236	92.911	-0.666	35.418	2345.667	-0.009190	-0.003867	-0.006504
3.4200	1233.953	133.307	57.063	94.835	-0.660	35.417	2349.129	-0.009331	-0.003994	-0.006638
3.4400	1238.281	133.877	57.392	95.496	-0.672	35.416	2357.368	-0.009371	-0.004017	-0.006685
3.4600	1234.854	133.238	57.337	95.222	-0.679	35.417	2350.845	-0.009327	-0.004014	-0.006666
3.4800	1274.409	138.270	59.211	98.701	-0.691	35.417	2426.147	-0.009679	-0.004145	-0.006909
3.5000	1305.848	143.090	61.234	102.529	-0.670	35.418	2486.000	-0.010016	-0.004286	-0.007177
3.5200	1245.675	136.532	59.196	97.946	-0.656	35.418	2371.445	-0.009557	-0.004144	-0.006856
3.5400	1211.906	132.836	57.943	95.484	-0.662	35.417	2307.158	-0.009299	-0.004056	-0.006684
3.5600	1226.468	134.613	58.646	96.706	-0.681	35.417	2334.881	-0.009423	-0.004105	-0.006769
3.5800	1222.726	134.171	58.728	96.032	-0.691	35.417	2327.757	-0.009392	-0.004111	-0.006722
3.6000	1144.789	125.235	54.518	90.157	-0.692	35.418	2179.384	-0.008766	-0.003816	-0.006311
3.6200	1093.572	118.814	51.589	86.069	-0.677	35.419	2081.881	-0.008317	-0.003611	-0.006025
3.6400	1095.406	119.148	51.353	85.628	-0.669	35.418	2085.371	-0.008340	-0.003595	-0.005994
3.6600	977.312	105.042	44.845	76.056	-0.663	35.418	1860.552	-0.007353	-0.003139	-0.005324
3.6800	924.984	98.651	42.037	71.855	-0.677	35.418	1760.931	-0.006906	-0.002943	-0.005030
3.7000	851.465	88.684	37.472	65.594	-0.693	35.418	1620.970	-0.006208	-0.002623	-0.004592
3.7200	757.507	76.666	31.676	57.464	-0.696	35.418	1442.099	-0.005367	-0.002217	-0.004022
3.7400	710.017	69.648	27.797	52.370	-0.687	35.419	1351.690	-0.004875	-0.001946	-0.003666
3.7600	638.587	61.199	23.926	46.867	-0.671	35.419	1215.706	-0.004284	-0.001675	-0.003281
3.7800	629.976	59.172	23.089	44.955	-0.656	35.418	1199.312	-0.004142	-0.001616	-0.003147
3.8000	548.492	48.457	18.013	38.557	-0.680	35.418	1044.188	-0.003392	-0.001261	-0.002699
3.8200	499.845	41.799	14.806	33.439	-0.682	35.418	951.576	-0.002926	-0.001036	-0.002341
3.8400	443.699	33.977	10.953	28.196	-0.703	35.418	844.688	-0.002378	-0.000767	-0.001974
3.8600	391.866	25.765	6.798	22.513	-0.673	35.420	746.012	-0.001804	-0.000476	-0.001576
3.8800	369.038	22.816	5.228	20.269	-0.663	35.419	702.553	-0.001597	-0.000366	-0.001419
3.9000	333.525	17.453	2.862	16.665	-0.659	35.418	634.947	-0.001222	-0.000200	-0.001167
3.9200	310.472	14.367	1.707	14.188	-0.673	35.418	591.059	-0.001006	-0.000120	-0.000993
3.9400	266.168	6.974	-2.832	9.165	-0.686	35.418	506.716	-0.000488	0.000198	-0.000642
3.9600	254.356	5.514	-3.370	8.116	-0.697	35.419	484.228	-0.000386	0.000236	-0.000568
3.9800	214.906	-0.626	-5.740	4.226	-0.693	35.420	409.126	0.000044	0.000402	-0.000296
4.0000	216.093	-0.598	-5.823	3.647	-0.671	35.420	411.386	0.000042	0.000408	-0.000255
4.0200	223.352	-0.100	-5.741	3.277	-0.669	35.419	425.205	0.000007	0.000402	-0.000229
4.0400	278.296	6.296	-3.466	7.156	-0.680	35.418	529.804	-0.000441	0.000243	-0.000501
4.0600	300.418	8.616	-2.461	8.806	-0.702	35.419	571.918	-0.000603	0.000172	-0.000616
4.0800	347.291	14.453	-0.139	13.720	-0.705	35.419	661.154	-0.001012	0.000010	-0.000960
4.1000	379.347	18.538	1.721	15.563	-0.690	35.420	722.179	-0.001298	-0.000120	-0.001089
4.1200	410.606	23.289	3.880	19.566	-0.667	35.420	781.689	-0.001630	-0.000272	-0.001370
4.1400	487.071	32.060	8.271	24.631	-0.668	35.420	927.258	-0.002244	-0.000579	-0.001724
4.1600	552.369	41.176	12.591	31.499	-0.681	35.419	1051.569	-0.002882	-0.000881	-0.002205
4.1800	521.050	37.422	11.283	29.765	-0.688	35.419	991.945	-0.002620	-0.000790	-0.002084
4.2000	668.914	55.863	19.515	41.458	-0.703	35.420	1273.441	-0.003910	-0.001366	-0.002902
4.2200	635.266	52.570	18.838	39.219	-0.681	35.420	1209.383	-0.003680	-0.001319	-0.002745
4.2400	762.647	68.829	26.145	50.090	-0.664	35.420	1451.883	-0.004818	-0.001830	-0.003506
4.2600	826.983	76.749	29.846	56.223	-0.667	35.419	1574.364	-0.005372	-0.002089	-0.003936
4.2800	901.704	86.618	34.694	63.049	-0.683	35.419	1716.614	-0.006063	-0.002429	-0.004413
4.3000	987.802	98.123	40.015	70.921	-0.704	35.419	1880.522	-0.006869	-0.002801	-0.004964
4.3200	1018.971	103.113	42.215	74.002	-0.716	35.420	1939.859	-0.007218	-0.002955	-0.005180
4.3400	1070.158	110.072	45.627	78.710	-0.690	35.421	2037.306	-0.007705	-0.003194	-0.005510
4.3600	1117.633	116.215	48.176	83.003	-0.676	35.421	2127.686	-0.008135	-0.003372	-0.005810
4.3800	1142.039	120.205	50.501	85.808	-0.669	35.419	2174.149	-0.008414	-0.003535	-0.006007
4.4000	1231.924	131.877	56.361	94.216	-0.694	35.419	2345.266	-0.009231	-0.003945	-0.006595
4.4200	1201.536	128.625	55.387	92.538	-0.701	35.419	2287.416	-0.009004	-0.003877	-0.006478
4.4400	1304.887	141.160	60.466	100.807	-0.708	35.420	2484.169	-0.009881	-0.004233	-0.007056
4.4600	1245.675	135.364	58.398	96.804	-0.695	35.421	2371.445	-0.009475	-0.004088	-0.006776
4.4800	1299.942	141.993	60.823	100.962	-0.675	35.420	2474.756	-0.009939	-0.004258	-0.007067
4.5000	1278.782	140.686	60.244	100.464	-0.669	35.420	2434.473	-0.009848	-0.004217	-0.007032
4.5200	1270.306	139.658	59.982	99.790	-0.673	35.419	2418.337	-0.009776	-0.004199	-0.006985
4.5400	1221.073	133.627	58.027	95.977	-0.690	35.419	2324.610	-0.009354	-0.004062	-0.006718
4.5600	1178.438	129.445	56.416	92.869	-0.702	35.421	2243.443	-0.009061	-0.003949	-0.006501
4.5800	1185.471	130.139	56.277	93.115	-0.687	35.421	2256.832	-0.009110	-0.003939	-0.006518
4.6000	1151.732	126.124	55.001	91.369	-0.682	35.421	2192.602	-0.008829	-0.003850	-0.006396
4.6200	1088.733	118.772	51.395	85.671	-0.671	35.421	2072.668	-0.008314	-0.003598	-0.005997
4.6400	1033.474	111.989	48.424	81.254	-0.678	35.420	1967.468	-0.007839	-0.003390	-0.005688
4.6600	999.059	107.170	46.042	78.751	-0.687	35.421	1901.951	-0.007502	-0.003223	-0.005513
4.6800	940.628	99.650	42.203	73.053	-0.695	35.421	1790.714	-0.006975	-0.002954	-0.005114
4.7000	866.643	90.549	37.636	67.275	-0.678	35.421	1649.866	-0.006338	-0.002635	-0.004709
4.7200	785.850	80.598	33.051	59.995	-0.669	35.421	1496.058	-0.005642	-0.002314	-0.004200
4.7400	718.989	71.746	29.188	54.286	-0.666	35.420	1368.771	-0.005022	-0.002043	-0.003800
4.7600	666.284	64.535	25.952	49.247	-0.678	35.420	1268.435	-0.004517	-0.001817	-0.003447
4.7800	596.072	55.168	21.384	42.546	-0.685	35.420	1134.768	-0.003862	-0.001497	-0.002978
4.8000	538.092	47.721	17.339	37.057	-0.693	35.421	1024.389	-0.003340	-0.001214	-0.002594
4.8200	490.723	40.158	13.662	32.708	-0.691	35.422	934.210	-0.002811	-0.000956	-0.002290
4.8400	437.357	33.100	10.335	27.851	-0.675	35.422	832.615	-0.002317	-0.000723	-0.001950
4.8600	383.330	25.751	6.661	22.141	-0.668	35.421	729.761	-0.001803	-0.000466	-0.001550
4.8800	398.433	26.292	7.102	22.334	-0.677	35.420	758.514	-0.001840	-0.000497	-0.001563
4.9000	279.754	11.229	0.029	12.248	-0.690	35.421	532.579	-0.000786	-0.000002	-0.000857
4.9200	231.603	3.936	-3.853	7.143	-0.704	35.421	440.912	-0.000275	0.000270	-0.000500
4.9400	236.036	3.057	-4.309	6.911	-0.701	35.422	449.352	-0.000214	0.000302	-0.000484
4.9600	257.196	6.029	-3.535	7.870	-0.684	35.422	489.635	-0.000422	0.000247	-0.000551
4.9800	246.150	4.058	-3.922	7.005	-0.664	35.422	468.607	-0.000284	0.000275	-0.000490
5.0000	265.432	5.198	-3.744	6.867	-0.664	35.421	505.314	-0.000364	0.000262	-0.000481
5.0200	263.914	5.156	-3.810	7.062	-0.686	35.421	502.424	-0.000361	0.000267	-0.000494
5.0400	265.477	4.990	-4.103	7.503	-0.692	35.422	505.400	-0.000349	0.000287	-0.000525
5.0600	301.079	9.160	-2.654	9.934	-0.694	35.423	573.177	-0.000641	0.000186	-0.000695
5.0800	321.518	12.032	-1.278	10.802	-0.668	35.422	612.087	-0.000842	0.000089	-0.000756
5.1000	342.167	14.773	0.014	13.047	-0.660	35.422	651.398	-0.001034	-0.000001	-0.000913
5.1200	408.818	22.218	3.512	18.219	-0.661	35.421	778.284	-0.001555	-0.000246	-0.001275
5.1400	482.968	31.754	7.747	24.602	-0.674	35.421	919.447	-0.002223	-0.000542	-0.001722
5.1600	542.946	39.645	11.435	30.410	-0.687	35.422	1033.630	-0.002775	-0.000800	-0.002129
5.1800	572.838	43.566	13.498	33.107	-0.696	35.423	1090.536	-0.003050	-0.000945	-0.002317
5.2000	645.650	53.474	18.234	39.589	-0.677	35.423	1229.153	-0.003743	-0.001276	-0.002771
5.2200	739.172	65.243	24.039	47.721	-0.667	35.422	1407.194	-0.004567	-0.001683	-0.003340
5.2400	790.524	72.580	27.532	52.934	-0.671	35.422	1504.955	-0.005081	-0.001927	-0.003705
5.2600	825.105	77.028	29.888	56.375	-0.677	35.422	1570.787	-0.005392	-0.002092	-0.003946
5.2800	930.935	90.981	36.410	65.582	-0.696	35.422	1772.261	-0.006369	-0.002549	-0.004591
5.3000	926.592	91.312	36.589	65.981	-0.702	35.423	1763.992	-0.006392	-0.002561	-0.004619
5.3200	1019.167	103.222	42.188	73.756	-0.679	35.423	1940.231	-0.007226	-0.002953	-0.005163
5.3400	1071.030	109.962	45.628	78.682	-0.662	35.423	2038.965	-0.007697	-0.003194	-0.005508
5.3600	1144.113	119.288	50.007	85.038	-0.664	35.422	2178.097	-0.008350	-0.003501	-0.005953
5.3800	1157.969	122.145	51.135	87.254	-0.676	35.422	2204.475	-0.008550	-0.003579	-0.006108
5.4000	1199.883	128.402	54.040	91.354	-0.692	35.422	2284.269	-0.008988	-0.003783	-0.006395
5.4200	1236.658	133.307	56.513	94.672	-0.697	35.423	2354.279	-0.009331	-0.003956	-0.006627
5.4400	1270.772	137.659	58.412	97.933	-0.679	35.424	2419.224	-0.009636	-0.004089	-0.006855
5.4600	1257.277	136.934	58.782	97.615	-0.660	35.423	2393.532	-0.009585	-0.004115	-0.006833
5.4800	1293.014	141.438	60.244	100.710	-0.664	35.423	2461.567	-0.009901	-0.004217	-0.007050
5.5000	1279.804	140.478	60.287	100.270	-0.673	35.423	2436.419	-0.009833	-0.004220	-0.007019
5.5200	1249.868	137.311	59.004	98.936	-0.694	35.423	2379.427	-0.009612	-0.004130	-0.006926
5.5400	1253.039	138.017	59.170	98.537	-0.695	35.424	2385.464	-0.009661	-0.004142	-0.006898
5.5600	1182.991	129.890	56.291	93.530	-0.680	35.424	2252.111	-0.009092	-0.003940	-0.006547
5.5800	1192.519	130.946	56.693	94.191	-0.661	35.423	2270.250	-0.009166	-0.003968	-0.006593
5.6000	1144.894	125.680	54.533	90.457	-0.665	35.423	2179.585	-0.008798	-0.003817	-0.006332
5.6200	1083.744	117.700	51.049	85.163	-0.683	35.423	2063.169	-0.008239	-0.003573	-0.005961
5.6400	1014.583	109.991	46.772	79.920	-0.700	35.424	1931.505	-0.007699	-0.003274	-0.005594
5.6600	987.231	106.445	44.886	77.002	-0.705	35.424	1879.435	-0.007451	-0.003142	-0.005390
5.6800	959.008	102.279	43.715	75.196	-0.677	35.424	1825.705	-0.007160	-0.003060	-0.005264
5.7000	847.963	88.894	37.236	65.995	-0.664	35.424	1614.304	-0.006223	-0.002607	-0.004620
5.7200	825.766	84.905	34.679	62.733	-0.661	35.423	1572.046	-0.005943	-0.002428	-0.004391
5.7400	683.237	67.243	26.915	51.108	-0.686	35.423	1300.707	-0.004707	-0.001884	-0.003578
5.7600	616.706	58.727	22.429	44.778	-0.687	35.424	1174.049	-0.004111	-0.001570	-0.003134
5.7800	644.614	61.073	23.239	46.522	-0.694	35.424	1227.179	-0.004275	-0.001627	-0.003257
5.8000	571.786	51.747	19.224	40.306	-0.673	35.424	1088.533	-0.003622	-0.001346	-0.002821
5.8200	496.073	41.441	14.381	33.660	-0.664	35.424	944.395	-0.002901	-0.001007	-0.002356
5.8400	435.899	33.156	10.457	28.155	-0.665	35.424	829.840	-0.002321	-0.000732	-0.001971
5.8600	367.024	23.789	5.739	21.728	-0.669	35.423	698.719	-0.001665	-0.000402	-0.001521
5.8800	352.987	20.816	4.144	19.331	-0.695	35.423	671.997	-0.001457	-0.000290	-0.001353
5.9000	332.413	17.829	3.029	17.490	-0.698	35.424	632.830	-0.001248	-0.000212	-0.001224
5.9200	260.698	8.047	-1.790	10.210	-0.681	35.425	496.302	-0.000563	0.000125	-0.000715
5.9400	210.368	0.624	-4.941	5.464	-0.674	35.425	400.486	-0.000044	0.000346	-0.000382
5.9600	226.568	1.446	-4.858	5.341	-0.661	35.424	431.328	-0.000101	0.000340	-0.000374
5.9800	228.597	1.195	-5.160	4.995	-0.685	35.424	435.190	-0.000084	0.000361	-0.000350
6.0000	230.626	1.124	-5.106	4.748	-0.693	35.424	439.053	-0.000079	0.000357	-0.000332
6.0200	250.073	3.489	-4.240	5.697	-0.700	35.425	476.074	-0.000244	0.000297	-0.000399
6.0400	271.939	6.433	-3.603	7.925	-0.687	35.426	517.702	-0.000450	0.000252	-0.000555
6.0600	268.257	5.044	-3.727	6.592	-0.657	35.425	510.693	-0.000353	0.000261	-0.000461
6.0800	323.652	11.683	-1.500	11.187	-0.660	35.424	616.150	-0.000818	0.000105	-0.000783
6.1000	347.893	15.051	-0.333	13.074	-0.671	35.425	662.298	-0.001054	0.000023	-0.000915
6.1200	410.095	23.026	3.277	18.373	-0.687	35.425	780.716	-0.001612	-0.000229	-0.001286
6.1400	465.475	30.017	6.908	23.845	-0.697	35.425	886.145	-0.002101	-0.000484	-0.001669
6.1600	513.265	36.269	10.130	27.549	-0.687	35.425	977.125	-0.002539	-0.000709	-0.001928
6.1800	588.107	46.247	14.902	34.622	-0.670	35.425	1119.604	-0.003237	-0.001043	-0.002424
6.2000	631.358	51.137	17.421	38.269	-0.658	35.425	1201.944	-0.003580	-0.001219	-0.002679
6.2200	730.576	64.229	23.308	46.742	-0.657	35.424	1390.829	-0.004496	-0.001632	-0.003272
6.2400	764.540	69.511	25.744	50.926	-0.676	35.425	1455.488	-0.004866	-0.001802	-0.003565
6.2600	802.066	74.719	28.662	54.408	-0.697	35.426	1526.928	-0.005230	-0.002006	-0.003809
6.2800	916.988	89.171	35.432	64.644	-0.687	35.426	1745.710	-0.006242	-0.002480	-0.004525
6.3000	974.953	96.998	39.409	69.410	-0.661	35.426	1856.060	-0.006790	-0.002759	-0.004859
6.3200	1023.149	103.822	42.643	74.718	-0.659	35.426	1947.813	-0.007268	-0.002985	-0.005230
6.3400	1117.287	115.714	48.024	82.768	-0.664	35.425	2127.028	-0.008100	-0.003362	-0.005794
6.3600	1109.427	115.938	48.133	83.031	-0.679	35.425	2112.064	-0.008116	-0.003369	-0.005812
6.3800	1242.879	132.391	56.332	94.036	-0.697	35.425	2366.123	-0.009267	-0.003943	-0.006582
6.4000	1163.199	123.786	53.074	88.423	-0.694	35.426	2214.432	-0.008665	-0.003715	-0.006190
6.4200	1316.609	141.895	60.892	101.371	-0.680	35.427	2506.485	-0.009933	-0.004262	-0.007096
6.4400	1202.483	129.723	56.168	93.046	-0.672	35.426	2289.219	-0.009081	-0.003932	-0.006513
6.4600	1264.656	137.239	58.509	98.055	-0.661	35.425	2407.579	-0.009607	-0.004096	-0.006864
6.4800	1274.770	139.437	59.489	99.639	-0.685	35.426	2426.834	-0.009761	-0.004164	-0.006975
6.5000	1262.942	138.588	59.459	99.115	-0.694	35.426	2404.318	-0.009701	-0.004162	-0.006938
6.5200	1271.824	140.033	59.777	100.064	-0.695	35.426	2421.227	-0.009802	-0.004184	-0.007004
6.5400	1217.316	133.876	58.136	96.458	-0.677	35.427	2317.457	-0.009371	-0.004070	-0.006752
6.5600	1221.644	134.224	57.695	96.170	-0.669	35.426	2325.697	-0.009396	-0.004039	-0.006732
6.5800	1200.830	132.447	56.969	95.193	-0.666	35.426	2286.072	-0.009271	-0.003988	-0.006664
6.6000	1146.848	126.054	54.808	91.189	-0.675	35.425	2183.304	-0.008824	-0.003837	-0.006383
6.6200	1089.590	119.204	51.671	86.399	-0.690	35.426	2074.299	-0.008344	-0.003617	-0.006048
6.6400	1012.734	110.143	47.170	80.015	-0.690	35.427	1927.986	-0.007710	-0.003302	-0.005601
6.6600	989.666	106.193	45.489	77.609	-0.673	35.427	1884.069	-0.007434	-0.003184	-0.005433
6.6800	910.797	96.774	40.896	70.742	-0.664	35.427	1733.923	-0.006774	-0.002863	-0.004952
6.7000	847.181	88.907	36.879	65.470	-0.657	35.426	1612.816	-0.006223	-0.002582	-0.004583
6.7200	808.513	83.336	34.620	62.073	-0.667	35.426	1539.202	-0.005834	-0.002423	-0.004345
6.7400	746.777	75.748	30.797	56.846	-0.680	35.426	1421.671	-0.005302	-0.002156	-0.003979
6.7600	661.040	64.119	25.567	48.504	-0.695	35.427	1258.450	-0.004488	-0.001790	-0.003395
6.7800	625.678	58.768	22.691	45.709	-0.681	35.427	1191.130	-0.004114	-0.001588	-0.003200
6.8000	523.485	45.467	16.320	36.383	-0.660	35.427	996.580	-0.003183	-0.001142	-0.002547
6.8200	516.992	43.829	15.317	35.709	-0.655	35.427	984.221	-0.003068	-0.001072	-0.002500
6.8400	417.279	31.294	9.484	26.092	-0.660	35.426	794.392	-0.002191	-0.000664	-0.001826
6.8600	398.779	27.806	7.857	24.122	-0.672	35.426	759.172	-0.001946	-0.000550	-0.001689
6.8800	335.314	18.913	3.618	17.545	-0.683	35.427	638.351	-0.001324	-0.000253	-0.001228
6.9000	308.368	14.564	1.210	14.669	-0.695	35.427	587.053	-0.001019	-0.000085	-0.001027
6.9200	276.493	10.189	-0.701	11.419	-0.671	35.427	526.371	-0.000713	0.000049	-0.000799
6.9400	262.967	7.574	-2.241	9.301	-0.660	35.427	500.622	-0.000530	0.000157	-0.000651
6.9600	264.034	7.377	-1.995	9.125	-0.655	35.426	502.653	-0.000516	0.000140	-0.000639
6.9800	250.283	5.101	-3.026	8.063	-0.682	35.426	476.475	-0.000357	0.000212	-0.000564
7.0000	234.458	2.129	-4.267	5.903	-0.695	35.427	446.348	-0.000149	0.000299	-0.000413
7.0200	237.178	1.875	-4.543	5.671	-0.681	35.428	451.527	-0.000131	0.000318	-0.000397
7.0400	267.400	5.558	-3.769	7.308	-0.661	35.428	509.062	-0.000389	0.000264	-0.000512
7.0600	276.222	6.989	-3.232	7.871	-0.652	35.428	525.856	-0.000489	0.000226	-0.000551
7.0800	315.927	11.311	-1.473	11.215	-0.644	35.426	601.444	-0.000792	0.000103	-0.000785
7.1000	358.833	16.757	0.606	14.915	-0.661	35.426	683.126	-0.001173	-0.000042	-0.001044
7.1200	385.043	19.873	2.572	17.600	-0.675	35.427	733.023	-0.001391	-0.000180	-0.001232
7.1400	462.890	30.003	6.839	23.556	-0.681	35.428	881.224	-0.002100	-0.000479	-0.001649
7.1600	520.689	37.105	10.089	29.229	-0.671	35.427	991.259	-0.002597	-0.000706	-0.002046
7.1800	590.075	46.387	14.532	34.746	-0.660	35.428	1123.352	-0.003247	-0.001017	-0.002432
7.2000	649.152	54.778	18.798	40.484	-0.655	35.427	1235.819	-0.003834	-0.001316	-0.002834
7.2200	673.483	57.447	20.421	42.835	-0.679	35.427	1282.139	-0.004021	-0.001429	-0.002998
7.2400	770.506	70.024	26.558	50.886	-0.689	35.427	1466.846	-0.004902	-0.001859	-0.003562
7.2600	852.667	81.085	31.499	58.590	-0.683	35.428	1623.259	-0.005676	-0.002205	-0.004101
7.2800	897.346	87.200	34.262	63.436	-0.679	35.428	1708.317	-0.006104	-0.002398	-0.004440
7.3000	968.836	96.428	38.762	69.585	-0.668	35.429	1844.416	-0.006750	-0.002713	-0.004871
7.3200	1019.978	103.500	42.273	74.334	-0.652	35.428	1941.776	-0.007245	-0.002959	-0.005203
7.3400	1062.478	109.629	45.534	78.543	-0.662	35.427	2022.686	-0.007674	-0.003187	-0.005498
7.3600	1131.008	118.146	49.319	84.667	-0.690	35.427	2153.149	-0.008270	-0.003452	-0.005927
7.3800	1149.628	121.605	50.431	87.172	-0.691	35.428	2188.597	-0.008512	-0.003530	-0.006102
7.4000	1209.952	129.458	54.326	92.525	-0.681	35.428	2303.438	-0.009062	-0.003803	-0.006477
7.4200	1212.567	130.919	55.082	93.033	-0.671	35.429	2308.416	-0.009164	-0.003856	-0.006512
7.4400	1259.621	136.534	57.916	97.889	-0.665	35.429	2397.995	-0.009557	-0.004054	-0.006852
7.4600	1253.084	136.588	57.653	97.435	-0.672	35.428	2385.550	-0.009561	-0.004036	-0.006820
7.4800	1291.571	141.772	60.342	101.261	-0.684	35.428	2458.820	-0.009924	-0.004224	-0.007088
7.5000	1272.966	139.852	59.640	100.161	-0.694	35.428	2423.401	-0.009790	-0.004175	-0.007011
7.5200	1266.925	139.615	59.886	100.064	-0.692	35.429	2411.900	-0.009773	-0.004192	-0.007004
7.5400	1237.725	136.784	58.797	98.344	-0.668	35.429	2356.310	-0.009575	-0.004116	-0.006884
7.5600	1218.624	134.780	58.467	96.979	-0.654	35.428	2319.946	-0.009435	-0.004093	-0.006789
7.5800	1182.285	130.348	56.914	94.120	-0.659	35.428	2250.767	-0.009124	-0.003984	-0.006588
7.6000	1149.298	125.969	54.409	90.994	-0.669	35.428	2187.967	-0.008818	-0.003809	-0.006370
7.6200	1097.675	120.136	51.779	87.019	-0.684	35.428	2089.691	-0.008410	-0.003625	-0.006091
7.6400	1057.534	114.994	49.358	83.292	-0.687	35.429	2013.273	-0.008050	-0.003455	-0.005830
7.6600	984.511	106.267	44.912	77.388	-0.665	35.429	1874.256	-0.007439	-0.003144	-0.005417
7.6800	908.948	96.511	40.812	70.811	-0.665	35.429	1730.404	-0.006756	-0.002857	-0.004957
7.7000	866.628	91.370	38.460	67.508	-0.654	35.429	1649.837	-0.006396	-0.002692	-0.004726
7.7200	814.269	84.255	34.952	62.706	-0.664	35.428	1550.159	-0.005898	-0.002447	-0.004389
7.7400	732.154	73.900	29.888	56.005	-0.669	35.428	1393.833	-0.005173	-0.002092	-0.003920
7.7600	672.161	65.395	25.525	49.702	-0.692	35.429	1279.621	-0.004578	-0.001787	-0.003479
7.7800	621.710	58.866	22.842	45.230	-0.691	35.429	1183.577	-0.004121	-0.001599	-0.003166
7.8000	525.108	46.497	16.718	36.822	-0.671	35.430	999.670	-0.003255	-0.001170	-0.002578
7.8200	492.105	41.286	14.408	33.285	-0.650	35.429	936.842	-0.002890	-0.001009	-0.002330
7.8400	439.100	33.420	10.430	28.306	-0.661	35.429	835.934	-0.002339	-0.000730	-0.001981
7.8600	403.212	28.680	7.898	24.534	-0.665	35.429	767.612	-0.002008	-0.000553	-0.001717
7.8800	364.048	23.164	5.214	20.406	-0.686	35.429	693.054	-0.001621	-0.000365	-0.001428
7.9000	315.612	16.271	2.314	16.155	-0.688	35.430	600.843	-0.001139	-0.000162	-0.001131
7.9200	270.526	9.284	-1.042	11.641	-0.664	35.430	515.013	-0.000650	0.000073	-0.000815
7.9400	262.125	7.503	-1.790	9.535	-0.657	35.429	499.020	-0.000525	0.000125	-0.000667
7.9600	251.936	5.461	-3.081	8.063	-0.663	35.429	479.622	-0.000382	0.000216	-0.000564
7.9800	237.118	3.602	-4.154	6.442	-0.667	35.428	451.412	-0.000252	0.000291	-0.000451
8.0000	235.029	2.445	-4.542	6.016	-0.692	35.429	447.435	-0.000171	0.000318	-0.000421
8.0200	244.723	3.421	-4.378	6.482	-0.679	35.430	465.889	-0.000239	0.000306	-0.000454
8.0400	295.969	9.547	-2.296	9.452	-0.664	35.430	563.450	-0.000668	0.000161	-0.000662
8.0600	273.352	6.098	-3.260	8.187	-0.657	35.430	520.391	-0.000427	0.000228	-0.000573
8.0800	336.095	13.535	-0.619	12.853	-0.658	35.429	639.839	-0.000947	0.000043	-0.000900
8.1000	363.177	17.507	0.716	15.176	-0.670	35.429	691.395	-0.001225	-0.000050	-0.001062
8.1200	397.396	22.273	3.139	17.859	-0.671	35.429	756.540	-0.001559	-0.000220	-0.001250
8.1400	474.312	31.393	7.624	24.149	-0.678	35.430	902.967	-0.002198	-0.000534	-0.001690
8.1600	525.604	37.895	10.951	28.964	-0.661	35.430	1000.614	-0.002653	-0.000767	-0.002028
8.1800	593.096	46.888	14.971	35.242	-0.654	35.430	1129.103	-0.003282	-0.001048	-0.002467
8.2000	643.111	53.224	17.725	39.933	-0.643	35.430	1224.318	-0.003726	-0.001241	-0.002795
8.2200	696.161	61.019	21.712	45.012	-0.664	35.429	1325.312	-0.004271	-0.001520	-0.003151
8.2400	788.075	72.675	27.147	52.577	-0.677	35.429	1500.292	-0.005087	-0.001900	-0.003680
8.2600	849.721	81.170	31.374	58.427	-0.687	35.430	1617.651	-0.005682	-0.002196	-0.004090
8.2800	916.237	89.671	35.775	64.810	-0.673	35.430	1744.280	-0.006277	-0.002504	-0.004537
8.3000	987.351	98.693	39.973	71.004	-0.671	35.430	1879.663	-0.006908	-0.002798	-0.004970
8.3200	1013.982	102.905	41.584	73.810	-0.664	35.430	1930.361	-0.007203	-0.002911	-0.005167
8.3400	1057.579	109.726	44.955	78.570	-0.651	35.429	2013.359	-0.007681	-0.003147	-0.005500
8.3600	1123.509	117.966	49.001	84.226	-0.679	35.429	2138.872	-0.008258	-0.003430	-0.005896
8.3800	1168.714	124.472	52.415	88.934	-0.698	35.429	2224.932	-0.008713	-0.003669	-0.006225
8.4000	1203.911	128.834	54.327	92.221	-0.701	35.430	2291.937	-0.009018	-0.003803	-0.006455
8.4200	1250.213	135.114	56.859	96.360	-0.680	35.430	2380.085	-0.009458	-0.003980	-0.006745
8.4400	1242.338	135.377	57.531	97.339	-0.663	35.430	2365.093	-0.009476	-0.004027	-0.006814
8.4600	1251.491	136.392	58.193	97.654	-0.655	35.430	2382.517	-0.009547	-0.004074	-0.006836
8.4800	1271.989	139.518	59.418	99.803	-0.673	35.429	2421.541	-0.009766	-0.004159	-0.006986
8.5000	1286.071	141.547	60.078	101.290	-0.683	35.430	2448.349	-0.009908	-0.004205	-0.007090
8.5200	1238.882	136.031	59.336	98.206	-0.680	35.430	2358.513	-0.009522	-0.004154	-0.006874
8.5400	1229.279	135.517	58.797	97.572	-0.680	35.430	2340.231	-0.009486	-0.004116	-0.006830
8.5600	1203.280	132.861	57.352	95.155	-0.655	35.430	2290.735	-0.009300	-0.004015	-0.006661
8.5800	1165.934	129.277	56.142	92.647	-0.656	35.430	2219.639	-0.009049	-0.003930	-0.006485
8.6000	1133.683	124.916	54.094	89.702	-0.666	35.430	2158.241	-0.008744	-0.003787	-0.006279
8.6200	1089.695	119.259	51.697	86.495	-0.662	35.430	2074.499	-0.008348	-0.003619	-0.006055
8.6400	1033.684	112.700	48.380	82.232	-0.679	35.430	1967.869	-0.007889	-0.003387	-0.005756
8.6600	1000.246	108.157	45.796	78.642	-0.682	35.431	1904.211	-0.007571	-0.003206	-0.005505
8.6800	900.337	96.579	40.621	71.017	-0.654	35.430	1714.010	-0.006761	-0.002843	-0.004971
8.7000	826.292	86.644	36.355	64.576	-0.651	35.431	1573.048	-0.006065	-0.002545	-0.004520
8.7200	797.963	82.891	34.209	61.659	-0.667	35.431	1519.117	-0.005802	-0.002395	-0.004316
8.7400	750.970	76.123	31.168	56.941	-0.677	35.430	1429.653	-0.005329	-0.002182	-0.003986
8.7600	665.097	64.979	25.827	49.482	-0.689	35.430	1266.174	-0.004549	-0.001808	-0.003464
8.7800	590.571	55.140	20.821	42.767	-0.696	35.431	1124.296	-0.003860	-0.001457	-0.002994
8.8000	518.585	45.858	16.210	36.685	-0.671	35.431	987.253	-0.003210	-0.001135	-0.002568
8.8200	497.951	42.275	14.847	33.685	-0.652	35.431	947.971	-0.002959	-0.001039	-0.002358
8.8400	439.866	34.783	10.871	28.430	-0.652	35.431	837.393	-0.002435	-0.000761	-0.001990
8.8600	399.936	28.277	8.022	24.286	-0.665	35.430	761.375	-0.001979	-0.000562	-0.001700
8.8800	351.830	21.389	4.473	19.896	-0.687	35.431	669.794	-0.001497	-0.000313	-0.001393
8.9000	305.843	15.161	1.540	15.301	-0.695	35.431	582.247	-0.001061	-0.000108	-0.001071
8.9200	282.519	11.004	-0.278	12.151	-0.684	35.432	537.844	-0.000770	0.000019	-0.000851
8.9400	246.195	6.015	-2.558	8.556	-0.681	35.431	468.693	-0.000421	0.000179	-0.000599
8.9600	253.935	6.001	-2.515	8.736	-0.662	35.431	483.427	-0.000420	0.000176	-0.000612
8.9800	220.301	0.748	-4.914	5.366	-0.661	35.431	419.397	-0.000052	0.000344	-0.000376
9.0000	237.674	2.958	-4.721	6.015	-0.672	35.431	452.471	-0.000207	0.000330	-0.000421
9.0200	252.613	4.530	-4.419	6.441	-0.684	35.431	480.909	-0.000317	0.000309	-0.000451
9.0400	269.580	6.377	-3.438	7.898	-0.680	35.432	513.210	-0.000446	0.000241	-0.000553
9.0600	297.743	10.091	-1.871	10.432	-0.672	35.432	566.826	-0.000706	0.000131	-0.000730
9.0800	324.178	12.799	-0.948	11.574	-0.661	35.431	617.151	-0.000896	0.000066	-0.000810
9.1000	375.830	19.109	1.734	16.678	-0.661	35.431	715.485	-0.001338	-0.000121	-0.001167
9.1200	379.843	19.456	1.831	17.242	-0.675	35.430	723.124	-0.001362	-0.000128	-0.001207
9.1400	459.704	29.960	6.468	23.710	-0.680	35.431	875.158	-0.002097	-0.000453	-0.001660
9.1600	518.510	37.674	10.335	28.786	-0.702	35.432	987.110	-0.002637	-0.000723	-0.002015
9.1800	578.954	45.663	14.615	35.160	-0.694	35.432	1102.180	-0.003196	-0.001023	-0.002461
9.2000	669.996	56.848	19.885	42.793	-0.671	35.432	1275.501	-0.003979	-0.001392	-0.002995
9.2200	752.683	67.869	25.294	50.338	-0.665	35.431	1432.915	-0.004751	-0.001771	-0.003524
9.2400	739.187	67.298	24.991	49.797	-0.664	35.431	1407.223	-0.004711	-0.001749	-0.003486
9.2600	808.468	75.931	29.337	56.102	-0.680	35.431	1539.116	-0.005315	-0.002054	-0.003927
9.2800	888.149	85.977	33.931	62.472	-0.694	35.431	1690.807	-0.006018	-0.002375	-0.004373
9.3000	993.964	99.731	40.552	72.215	-0.690	35.432	1892.252	-0.006981	-0.002839	-0.005055
9.3200	1038.959	105.960	43.811	76.563	-0.664	35.432	1977.911	-0.007417	-0.003067	-0.005359
9.3400	1042.220	107.210	44.101	77.623	-0.656	35.432	1984.119	-0.007505	-0.003087	-0.005434
9.3600	1097.885	115.036	47.582	82.575	-0.664	35.431	2090.092	-0.008053	-0.003331	-0.005780
9.3800	1161.981	123.523	51.739	88.697	-0.677	35.431	2212.114	-0.008647	-0.003622	-0.006209
9.4000	1215.347	130.626	54.766	93.599	-0.689	35.431	2313.709	-0.009144	-0.003834	-0.006552
9.4200	1228.678	132.920	56.194	95.084	-0.688	35.432	2339.087	-0.009304	-0.003934	-0.006656
9.4400	1259.486	136.686	58.069	97.808	-0.673	35.432	2397.738	-0.009568	-0.004065	-0.006847
9.4600	1261.470	137.699	58.289	98.428	-0.669	35.432	2401.514	-0.009639	-0.004080	-0.006890
9.4800	1262.732	138.434	58.701	99.501	-0.667	35.431	2403.917	-0.009690	-0.004109	-0.006965
9.5000	1275.251	140.492	59.542	100.519	-0.660	35.431	2427.750	-0.009834	-0.004168	-0.007036
9.5200	1270.907	140.409	59.832	100.630	-0.695	35.431	2419.481	-0.009829	-0.004188	-0.007044
9.5400	1230.015	135.781	58.728	98.139	-0.701	35.431	2341.633	-0.009505	-0.004111	-0.006870
9.5600	1210.087	133.697	57.779	96.500	-0.696	35.432	2303.696	-0.009359	-0.004045	-0.006755
9.5800	1187.019	131.239	56.721	94.368	-0.672	35.433	2259.779	-0.009187	-0.003970	-0.006606
9.6000	1122.006	123.789	53.527	89.304	-0.661	35.432	2136.011	-0.008665	-0.003747	-0.006251
9.6200	1108.571	121.856	52.579	88.424	-0.657	35.431	2110.434	-0.008530	-0.003681	-0.006190
9.6400	1045.030	114.352	49.399	83.304	-0.671	35.431	1989.470	-0.008005	-0.003458	-0.005831
9.6600	987.983	107.296	45.849	78.322	-0.686	35.431	1880.865	-0.007511	-0.003209	-0.005483
9.6800	929.627	99.663	42.451	73.509	-0.688	35.432	1769.772	-0.006976	-0.002972	-0.005146
9.7000	857.341	90.465	37.966	67.563	-0.688	35.432	1632.156	-0.006333	-0.002658	-0.004729
9.7200	802.502	83.848	34.580	62.253	-0.675	35.433	1527.758	-0.005869	-0.002421	-0.004358
9.7400	723.453	73.802	29.778	55.151	-0.661	35.432	1377.268	-0.005166	-0.002084	-0.003861
9.7600	660.979	65.382	25.856	49.635	-0.665	35.432	1258.335	-0.004577	-0.001810	-0.003474
9.7800	604.773	57.045	22.347	44.998	-0.680	35.432	1151.333	-0.003993	-0.001564	-0.003150
9.8000	539.595	48.359	17.817	38.462	-0.683	35.432	1027.250	-0.003385	-0.001247	-0.002692
9.8200	498.958	42.593	14.973	34.141	-0.700	35.433	949.888	-0.002982	-0.001048	-0.002390
9.8400	442.376	34.587	10.800	28.981	-0.678	35.433	842.171	-0.002421	-0.000756	-0.002029
9.8600	374.478	25.861	6.566	23.199	-0.675	35.433	712.910	-0.001810	-0.000460	-0.001624
9.8800	346.705	21.136	4.609	19.086	-0.667	35.432	660.038	-0.001480	-0.000323	-0.001336
9.9000	323.201	17.147	2.917	16.554	-0.682	35.432	615.292	-0.001200	-0.000204	-0.001159
9.9200	274.855	10.522	-0.551	11.379	-0.698	35.432	523.252	-0.000737	0.000039	-0.000797
9.9400	262.832	8.337	-1.677	10.100	-0.708	35.432	500.364	-0.000584	0.000117	-0.000707
9.9600	251.906	6.222	-2.984	9.424	-0.705	35.433	479.565	-0.000436	0.000209	-0.000660
9.9800	244.918	5.170	-3.273	7.583	-0.676	35.433	466.261	-0.000362	0.000229	-0.000531
