# Supplementary material for: Evaluation of a Cold-Mixed High-Performance Polyurethane Mixture
Source: Hindawi journal article supplement (doi:10.1155/2019/1507971), 2019-11-07
Supplement: f1 [file 1507971.f1.zip › 1507971.f1/dynamic modulus data/PUM/specimen2/temp35/zhs-2-35_2Hz.csv]

Test Information
****************
Project name	zhs
Operator name	1
Target test temperature	35
Target confining stress	0
Average dynamic strain range from 75 to 125 micro-strain
Contact stress	5
Initial modulus	1000
Axial gauge length	70
Comments
Specimen information
********************
Identification	zhs-2-35
Dimensions	Point 1	Point 2	Point 3	Point 4	Point 5	Point 6	Average	Std Dev.
Diameter (mm)	49.2	49.3	49.2				49.23	0.058
Height (mm)	100.8	101.0	100.8				100.87	0.115
Cross-sectional area (mm�)	1903.7
Conditioning time
Properties/Comments
Test Data	2Hz
*********
Test date and time	Tue	Apr 2	2019	12:59 PM
Dynamic modulus (MPa)	10760
Phase angle (Degrees)	4.60
Average temperature (�C)	35.4
Average confining pressure (kPa)	-0.7
Average micro-strain	99
Load drift (%)	-0.1
Load standard error (%)	1.2
Average deformation drift (%)	-3.2
Average deformation standard error (%)	1.5
Deformation uniformity (%)	30.3
Phase uniformity (Degrees)	0.8
Conditioning Cycles
Time (sec)	Axial stress (kPa)	Axial micro-strain #1	Axial micro-strain #2	Axial micro-strain #3	Confining pressure (kPa)	Temperature (�C)	Load (N)	Displacement #1 (mm)	Displacement #2 (mm)	Displacement #3 (mm)
0.0000	276.598	1.737	-3.647	3.785	-0.679	35.382	526.571	-0.000122	0.000255	-0.000265
0.0100	232.084	-5.074	-7.209	-0.923	-0.671	35.386	441.828	0.000355	0.000505	0.000065
0.0200	239.763	-5.100	-7.169	-0.771	-0.669	35.382	456.448	0.000357	0.000502	0.000054
0.0300	250.418	-3.974	-6.602	-0.800	-0.676	35.386	476.732	0.000278	0.000462	0.000056
0.0400	281.708	-0.138	-5.850	1.308	-0.681	35.382	536.299	0.000010	0.000409	-0.000092
0.0500	319.639	4.045	-4.086	3.758	-0.672	35.386	608.511	-0.000283	0.000286	-0.000263
0.0600	355.828	8.812	-1.926	7.005	-0.680	35.381	677.404	-0.000617	0.000135	-0.000490
0.0700	396.840	13.771	-0.028	10.913	-0.677	35.386	755.482	-0.000964	0.000002	-0.000764
0.0800	430.879	18.315	2.586	13.926	-0.676	35.381	820.284	-0.001282	-0.000181	-0.000975
0.0900	480.233	24.779	5.311	17.711	-0.677	35.386	914.240	-0.001734	-0.000372	-0.001240
0.1000	534.080	31.032	8.725	22.898	-0.681	35.382	1016.750	-0.002172	-0.000611	-0.001603
0.1100	581.509	37.325	11.613	26.735	-0.676	35.386	1107.044	-0.002613	-0.000813	-0.001871
0.1200	628.473	43.731	14.339	31.041	-0.680	35.382	1196.451	-0.003061	-0.001004	-0.002173
0.1300	693.080	51.832	18.550	36.687	-0.673	35.386	1319.447	-0.003628	-0.001298	-0.002568
0.1400	724.925	56.348	20.669	40.099	-0.675	35.382	1380.072	-0.003944	-0.001447	-0.002807
0.1500	784.979	63.590	24.452	45.010	-0.681	35.386	1494.398	-0.004451	-0.001712	-0.003151
0.1600	825.961	69.998	27.064	48.809	-0.683	35.382	1572.418	-0.004900	-0.001894	-0.003417
0.1700	872.174	75.152	29.734	53.058	-0.676	35.386	1660.395	-0.005261	-0.002081	-0.003714
0.1800	917.890	81.793	32.902	57.353	-0.677	35.382	1747.427	-0.005726	-0.002303	-0.004015
0.1900	943.243	85.364	34.428	59.886	-0.668	35.386	1795.692	-0.005975	-0.002410	-0.004192
0.2000	977.177	89.700	36.795	63.103	-0.658	35.382	1860.294	-0.006279	-0.002576	-0.004417
0.2100	1004.799	93.744	38.267	65.952	-0.663	35.387	1912.880	-0.006562	-0.002679	-0.004617
0.2200	1021.421	96.316	39.724	67.452	-0.672	35.382	1944.523	-0.006742	-0.002781	-0.004722
0.2300	1039.229	99.277	41.284	69.118	-0.668	35.387	1978.426	-0.006949	-0.002890	-0.004838
0.2400	1042.400	99.869	41.349	69.889	-0.671	35.382	1984.463	-0.006991	-0.002894	-0.004892
0.2500	1044.655	100.539	41.968	70.454	-0.675	35.386	1988.754	-0.007038	-0.002938	-0.004932
0.2600	1041.409	100.719	41.764	70.192	-0.658	35.381	1982.574	-0.007050	-0.002923	-0.004913
0.2700	1029.236	99.040	41.432	69.570	-0.664	35.386	1959.400	-0.006933	-0.002900	-0.004870
0.2800	1018.791	98.680	41.529	69.187	-0.672	35.381	1939.516	-0.006908	-0.002907	-0.004843
0.2900	980.408	93.661	39.600	66.572	-0.661	35.386	1866.446	-0.006556	-0.002772	-0.004660
0.3000	951.073	90.660	38.846	64.536	-0.665	35.381	1810.598	-0.006346	-0.002719	-0.004517
0.3100	919.228	86.632	37.292	62.045	-0.666	35.386	1749.973	-0.006064	-0.002610	-0.004343
0.3200	880.139	81.698	34.966	58.634	-0.678	35.381	1675.558	-0.005719	-0.002448	-0.004104
0.3300	831.777	76.096	32.364	54.891	-0.668	35.386	1583.490	-0.005327	-0.002265	-0.003842
0.3400	790.104	70.496	29.353	51.258	-0.669	35.382	1504.154	-0.004935	-0.002055	-0.003588
0.3500	732.154	63.536	26.501	46.510	-0.674	35.386	1393.833	-0.004448	-0.001855	-0.003256
0.3600	687.114	57.336	23.530	42.231	-0.675	35.382	1308.088	-0.004014	-0.001647	-0.002956
0.3700	639.414	51.291	20.284	38.407	-0.675	35.386	1217.279	-0.003590	-0.001420	-0.002688
0.3800	591.864	45.663	17.751	34.265	-0.671	35.382	1126.757	-0.003196	-0.001243	-0.002399
0.3900	527.948	37.228	12.894	28.953	-0.668	35.387	1005.077	-0.002606	-0.000903	-0.002027
0.4000	495.517	32.669	11.298	25.416	-0.667	35.381	943.336	-0.002287	-0.000791	-0.001779
0.4100	440.257	25.944	7.610	20.555	-0.665	35.387	838.137	-0.001816	-0.000533	-0.001439
0.4200	404.490	20.135	5.421	17.229	-0.667	35.381	770.044	-0.001409	-0.000380	-0.001206
0.4300	361.042	14.622	2.381	13.211	-0.665	35.386	687.332	-0.001024	-0.000167	-0.000925
0.4400	317.731	8.811	-0.659	8.684	-0.671	35.381	604.877	-0.000617	0.000046	-0.000608
0.4500	299.246	5.544	-1.568	6.964	-0.667	35.387	569.687	-0.000388	0.000110	-0.000487
0.4600	270.331	1.557	-3.812	4.597	-0.676	35.381	514.641	-0.000109	0.000267	-0.000322
0.4700	257.286	-0.513	-4.941	3.248	-0.670	35.387	489.807	0.000036	0.000346	-0.000227
0.4800	238.411	-3.709	-5.905	0.646	-0.670	35.381	453.873	0.000260	0.000413	-0.000045
0.4900	232.565	-5.089	-6.671	-0.163	-0.665	35.386	442.743	0.000356	0.000467	0.000011
0.5000	232.024	-5.212	-6.630	-0.238	-0.673	35.381	441.713	0.000365	0.000464	0.000017
0.5100	232.580	-5.502	-7.018	-1.172	-0.674	35.387	442.772	0.000385	0.000491	0.000082
0.5200	236.547	-5.545	-6.810	-0.840	-0.678	35.381	450.325	0.000388	0.000477	0.000059
0.5300	243.565	-4.656	-6.810	-0.717	-0.679	35.387	463.686	0.000326	0.000477	0.000050
0.5400	269.910	-2.015	-5.987	1.253	-0.680	35.381	513.840	0.000141	0.000419	-0.000088
0.5500	321.277	4.809	-3.700	4.956	-0.675	35.387	611.629	-0.000337	0.000259	-0.000347
0.5600	345.939	7.809	-2.598	6.759	-0.679	35.381	658.579	-0.000547	0.000182	-0.000473
0.5700	389.085	13.034	0.054	10.790	-0.676	35.387	740.719	-0.000912	-0.000004	-0.000755
0.5800	427.663	18.303	2.406	14.051	-0.677	35.382	814.161	-0.001281	-0.000168	-0.000984
0.5900	467.368	23.055	4.377	17.697	-0.671	35.387	889.750	-0.001614	-0.000306	-0.001239
0.6000	527.617	30.919	8.449	22.319	-0.672	35.381	1004.448	-0.002164	-0.000591	-0.001562
0.6100	575.798	36.980	11.159	27.053	-0.666	35.387	1096.172	-0.002589	-0.000781	-0.001894
0.6200	619.787	42.717	14.049	30.933	-0.666	35.381	1179.914	-0.002990	-0.000983	-0.002165
0.6300	688.271	51.638	18.234	36.877	-0.666	35.386	1310.291	-0.003615	-0.001276	-0.002581
0.6400	733.777	57.668	21.012	41.321	-0.674	35.381	1396.923	-0.004037	-0.001471	-0.002892
0.6500	775.075	63.242	24.315	44.724	-0.666	35.386	1475.544	-0.004427	-0.001702	-0.003131
0.6600	830.079	70.427	27.119	49.537	-0.668	35.380	1580.257	-0.004930	-0.001898	-0.003468
0.6700	865.847	74.916	29.666	53.114	-0.672	35.386	1648.350	-0.005244	-0.002077	-0.003718
0.6800	912.239	81.697	32.801	57.149	-0.680	35.381	1736.670	-0.005719	-0.002296	-0.004000
0.6900	942.702	85.282	34.606	60.559	-0.667	35.387	1794.662	-0.005970	-0.002422	-0.004239
0.7000	983.609	91.382	37.623	64.095	-0.677	35.381	1872.540	-0.006397	-0.002634	-0.004487
0.7100	998.307	93.495	38.128	65.484	-0.677	35.387	1900.520	-0.006545	-0.002669	-0.004584
0.7200	1018.971	96.385	39.794	67.604	-0.666	35.381	1939.859	-0.006747	-0.002786	-0.004732
0.7300	1036.810	99.412	41.254	69.283	-0.663	35.387	1973.820	-0.006959	-0.002888	-0.004850
0.7400	1042.220	99.899	41.517	70.026	-0.677	35.381	1984.119	-0.006993	-0.002906	-0.004902
0.7500	1038.027	100.246	41.628	70.356	-0.678	35.387	1976.137	-0.007017	-0.002914	-0.004925
0.7600	1035.728	100.401	41.516	70.275	-0.679	35.381	1971.760	-0.007028	-0.002906	-0.004919
0.7700	1029.236	99.469	41.847	70.261	-0.672	35.387	1959.400	-0.006963	-0.002929	-0.004918
0.7800	1018.520	98.956	41.255	69.640	-0.686	35.381	1939.001	-0.006927	-0.002888	-0.004875
0.7900	990.477	95.342	39.974	67.920	-0.678	35.387	1885.614	-0.006674	-0.002798	-0.004754
0.8000	948.864	90.755	38.500	64.811	-0.681	35.381	1806.393	-0.006353	-0.002695	-0.004537
0.8100	923.751	87.673	37.057	62.375	-0.679	35.387	1758.585	-0.006137	-0.002594	-0.004366
0.8200	880.725	82.100	35.035	59.307	-0.678	35.381	1676.674	-0.005747	-0.002452	-0.004151
0.8300	840.614	77.582	32.694	56.016	-0.686	35.386	1600.313	-0.005431	-0.002289	-0.003921
0.8400	792.688	71.288	29.750	52.012	-0.669	35.381	1509.075	-0.004990	-0.002082	-0.003641
0.8500	744.011	65.327	27.052	47.515	-0.675	35.387	1416.407	-0.004573	-0.001894	-0.003326
0.8600	701.661	59.990	24.150	43.964	-0.677	35.381	1335.783	-0.004199	-0.001691	-0.003078
0.8700	643.291	52.805	20.974	39.260	-0.684	35.387	1224.661	-0.003696	-0.001468	-0.002748
0.8800	587.310	45.567	17.379	34.044	-0.681	35.380	1118.088	-0.003190	-0.001217	-0.002383
0.8900	538.798	38.922	14.160	29.885	-0.683	35.387	1025.734	-0.002725	-0.000991	-0.002092
0.9000	496.343	33.560	11.434	25.650	-0.675	35.381	944.910	-0.002349	-0.000800	-0.001796
0.9100	445.172	26.208	7.817	21.716	-0.672	35.387	847.492	-0.001835	-0.000547	-0.001520
0.9200	399.410	20.152	5.476	17.311	-0.678	35.381	760.374	-0.001411	-0.000383	-0.001212
0.9300	355.978	14.217	2.285	13.128	-0.692	35.387	677.691	-0.000995	-0.000160	-0.000919
0.9400	330.219	10.422	0.330	10.415	-0.688	35.381	628.653	-0.000730	-0.000023	-0.000729
0.9500	302.311	6.987	-1.361	7.268	-0.681	35.387	575.523	-0.000489	0.000095	-0.000509
0.9600	263.268	0.973	-4.114	3.428	-0.684	35.381	501.194	-0.000068	0.000288	-0.000240
0.9700	253.439	-1.236	-4.680	2.338	-0.682	35.387	482.483	0.000086	0.000328	-0.000164
0.9800	233.887	-3.682	-6.328	0.552	-0.690	35.381	445.261	0.000258	0.000443	-0.000039
0.9900	229.364	-5.141	-6.754	0.057	-0.683	35.387	436.649	0.000360	0.000473	-0.000004
1.0000	233.932	-4.601	-6.643	-0.110	-0.686	35.380	445.347	0.000322	0.000465	0.000008
1.0100	235.059	-4.865	-6.698	-0.301	-0.672	35.387	447.493	0.000341	0.000469	0.000021
1.0200	238.185	-4.699	-6.628	-0.358	-0.680	35.381	453.444	0.000329	0.000464	0.000025
1.0300	246.255	-4.060	-6.964	0.263	-0.681	35.387	468.807	0.000284	0.000487	-0.000018
1.0400	274.809	-1.041	-5.437	1.115	-0.686	35.380	523.167	0.000073	0.000381	-0.000078
1.0500	323.562	5.642	-3.575	4.887	-0.682	35.387	615.978	-0.000395	0.000250	-0.000342
1.0600	351.635	8.644	-2.131	7.528	-0.677	35.380	669.422	-0.000605	0.000149	-0.000527
1.0700	382.488	12.603	-0.440	10.595	-0.671	35.387	728.159	-0.000882	0.000031	-0.000742
1.0800	434.832	19.301	2.602	14.561	-0.671	35.381	827.808	-0.001351	-0.000182	-0.001019
1.0900	480.909	25.029	5.475	19.209	-0.671	35.387	915.527	-0.001752	-0.000383	-0.001345
1.1000	531.014	31.558	8.807	22.813	-0.675	35.380	1010.914	-0.002209	-0.000616	-0.001597
1.1100	573.694	36.923	11.187	27.039	-0.681	35.387	1092.167	-0.002585	-0.000783	-0.001893
1.1200	619.200	43.396	14.409	30.755	-0.672	35.381	1178.799	-0.003038	-0.001009	-0.002153
1.1300	688.061	51.638	18.218	37.109	-0.671	35.387	1309.891	-0.003615	-0.001275	-0.002598
1.1400	734.949	58.196	21.643	41.391	-0.673	35.380	1399.155	-0.004074	-0.001515	-0.002897
1.1500	785.941	65.313	24.812	45.931	-0.677	35.387	1496.229	-0.004572	-0.001737	-0.003215
1.1600	825.330	69.707	27.011	49.274	-0.675	35.381	1571.217	-0.004879	-0.001891	-0.003449
1.1700	870.671	75.972	30.122	53.321	-0.676	35.387	1657.534	-0.005318	-0.002109	-0.003732
1.1800	901.209	80.378	31.968	56.567	-0.670	35.381	1715.670	-0.005626	-0.002238	-0.003960
1.1900	951.944	86.548	35.721	61.096	-0.670	35.386	1812.258	-0.006058	-0.002500	-0.004277
1.2000	967.799	90.035	36.464	62.886	-0.672	35.380	1842.442	-0.006302	-0.002552	-0.004402
1.2100	1010.916	94.898	39.136	67.122	-0.672	35.387	1924.524	-0.006643	-0.002739	-0.004699
1.2200	1018.565	97.124	39.987	67.864	-0.676	35.380	1939.087	-0.006799	-0.002799	-0.004750
1.2300	1032.737	98.733	40.662	69.337	-0.682	35.387	1966.066	-0.006911	-0.002846	-0.004854
1.2400	1046.037	100.982	42.010	70.658	-0.681	35.380	1991.386	-0.007069	-0.002941	-0.004946
1.2500	1045.106	101.095	41.791	70.948	-0.681	35.387	1989.613	-0.007077	-0.002925	-0.004966
1.2600	1039.440	100.453	41.832	71.168	-0.683	35.380	1978.827	-0.007032	-0.002928	-0.004982
1.2700	1030.318	100.121	41.956	70.287	-0.680	35.387	1961.460	-0.007008	-0.002937	-0.004920
1.2800	1016.732	98.693	41.170	69.793	-0.687	35.381	1935.596	-0.006909	-0.002882	-0.004885
1.2900	987.276	95.438	40.128	67.727	-0.681	35.387	1879.520	-0.006681	-0.002809	-0.004741
1.3000	959.278	92.090	38.997	65.594	-0.684	35.380	1826.220	-0.006446	-0.002730	-0.004592
1.3100	920.189	86.852	37.430	62.869	-0.677	35.387	1751.804	-0.006080	-0.002620	-0.004401
1.3200	882.107	82.835	35.308	59.529	-0.690	35.380	1679.306	-0.005798	-0.002472	-0.004167
1.3300	842.838	77.637	32.789	56.059	-0.675	35.387	1604.548	-0.005435	-0.002295	-0.003924
1.3400	784.783	70.649	29.613	51.355	-0.687	35.381	1494.026	-0.004945	-0.002073	-0.003595
1.3500	747.528	65.772	27.285	47.926	-0.683	35.388	1423.101	-0.004604	-0.001910	-0.003355
1.3600	685.220	57.989	23.516	42.808	-0.681	35.381	1304.483	-0.004059	-0.001646	-0.002997
1.3700	655.735	54.002	22.057	40.277	-0.673	35.387	1248.350	-0.003780	-0.001544	-0.002819
1.3800	578.819	44.053	16.623	33.672	-0.681	35.381	1101.923	-0.003084	-0.001164	-0.002357
1.3900	544.179	39.687	14.766	30.672	-0.669	35.387	1035.976	-0.002778	-0.001034	-0.002147
1.4000	495.021	33.241	11.240	25.813	-0.676	35.380	942.392	-0.002327	-0.000787	-0.001807
1.4100	450.041	27.000	8.684	22.086	-0.675	35.387	856.762	-0.001890	-0.000608	-0.001546
1.4200	401.784	20.693	5.434	17.229	-0.674	35.380	764.894	-0.001449	-0.000380	-0.001206
1.4300	363.823	15.410	2.972	13.857	-0.672	35.387	692.625	-0.001079	-0.000208	-0.000970
1.4400	328.837	10.715	0.743	10.843	-0.673	35.380	626.020	-0.000750	-0.000052	-0.000759
1.4500	285.660	4.338	-2.737	6.498	-0.677	35.387	543.823	-0.000304	0.000192	-0.000455
1.4600	266.679	1.334	-3.991	4.294	-0.685	35.380	507.689	-0.000093	0.000279	-0.000301
1.4700	254.010	-0.806	-4.790	2.216	-0.676	35.387	483.570	0.000056	0.000335	-0.000155
1.4800	245.624	-2.182	-5.836	2.175	-0.672	35.380	467.606	0.000153	0.000409	-0.000152
1.4900	235.150	-3.919	-6.081	1.019	-0.680	35.388	447.664	0.000274	0.000426	-0.000071
1.5000	225.111	-5.462	-7.183	-1.117	-0.677	35.381	428.553	0.000382	0.000503	0.000078
1.5100	230.731	-5.433	-6.890	-0.854	-0.661	35.388	439.253	0.000380	0.000482	0.000060
1.5200	238.621	-4.599	-6.963	-0.372	-0.671	35.380	454.273	0.000322	0.000487	0.000026
1.5300	245.249	-4.170	-6.974	0.097	-0.669	35.387	466.890	0.000292	0.000488	-0.000007
1.5400	272.751	-0.905	-5.685	1.884	-0.676	35.380	519.247	0.000063	0.000398	-0.000132
1.5500	326.477	5.891	-3.699	5.586	-0.675	35.388	621.529	-0.000412	0.000259	-0.000391
1.5600	343.474	7.921	-2.311	6.787	-0.673	35.380	653.887	-0.000554	0.000162	-0.000475
1.5700	384.998	13.187	-0.385	10.623	-0.672	35.388	732.937	-0.000923	0.000027	-0.000744
1.5800	432.743	19.122	2.698	14.807	-0.679	35.380	823.832	-0.001339	-0.000189	-0.001036
1.5900	484.411	25.792	5.905	18.714	-0.673	35.388	922.194	-0.001805	-0.000413	-0.001310
1.6000	513.085	29.461	7.308	21.576	-0.676	35.380	976.782	-0.002062	-0.000512	-0.001510
1.6100	564.512	35.823	10.993	26.627	-0.666	35.388	1074.686	-0.002508	-0.000769	-0.001864
1.6200	640.977	45.925	15.249	33.218	-0.674	35.380	1220.255	-0.003215	-0.001067	-0.002325
1.6300	678.578	50.917	18.081	36.327	-0.665	35.388	1291.838	-0.003564	-0.001266	-0.002543
1.6400	724.820	57.100	21.011	40.444	-0.675	35.380	1379.871	-0.003997	-0.001471	-0.002831
1.6500	777.555	63.671	23.983	45.491	-0.680	35.388	1480.265	-0.004457	-0.001679	-0.003184
1.6600	838.104	71.899	28.126	50.886	-0.675	35.380	1595.535	-0.005033	-0.001969	-0.003562
1.6700	870.611	76.416	29.971	53.735	-0.677	35.388	1657.419	-0.005349	-0.002098	-0.003761
1.6800	912.104	81.987	32.666	57.588	-0.689	35.380	1736.412	-0.005739	-0.002287	-0.004031
1.6900	954.589	87.854	35.294	61.537	-0.682	35.387	1817.293	-0.006150	-0.002471	-0.004308
1.7000	978.199	90.896	36.988	63.753	-0.687	35.380	1862.240	-0.006363	-0.002589	-0.004463
1.7100	997.586	93.897	38.542	65.746	-0.681	35.387	1899.147	-0.006573	-0.002698	-0.004602
1.7200	1030.258	98.304	40.237	69.075	-0.699	35.380	1961.346	-0.006881	-0.002817	-0.004835
1.7300	1028.980	98.594	40.621	69.296	-0.696	35.388	1958.914	-0.006902	-0.002843	-0.004851
1.7400	1028.484	99.260	41.048	69.477	-0.692	35.380	1957.970	-0.006948	-0.002873	-0.004863
1.7500	1041.318	100.415	41.668	70.989	-0.691	35.388	1982.403	-0.007029	-0.002917	-0.004969
1.7600	1037.411	100.817	41.957	70.644	-0.687	35.380	1974.964	-0.007057	-0.002937	-0.004945
1.7700	1031.835	100.384	41.530	70.370	-0.680	35.388	1964.350	-0.007027	-0.002907	-0.004926
1.7800	1019.317	99.095	41.281	69.588	-0.680	35.380	1940.517	-0.006937	-0.002890	-0.004871
1.7900	998.878	96.803	40.358	68.677	-0.677	35.388	1901.608	-0.006776	-0.002825	-0.004807
1.8000	955.912	91.399	38.888	65.594	-0.674	35.380	1819.811	-0.006398	-0.002722	-0.004592
1.8100	914.584	87.116	37.278	62.280	-0.676	35.388	1741.133	-0.006098	-0.002609	-0.004360
1.8200	887.292	83.306	35.240	59.859	-0.672	35.380	1689.177	-0.005831	-0.002467	-0.004190
1.8300	840.133	77.333	32.996	56.088	-0.668	35.388	1599.398	-0.005413	-0.002310	-0.003926
1.8400	780.110	70.331	29.240	51.325	-0.680	35.380	1485.128	-0.004923	-0.002047	-0.003593
1.8500	749.211	66.300	27.410	48.477	-0.676	35.388	1426.306	-0.004641	-0.001919	-0.003393
1.8600	693.696	59.366	23.957	43.496	-0.667	35.380	1320.620	-0.004156	-0.001677	-0.003045
1.8700	625.693	50.484	19.664	37.732	-0.675	35.388	1191.158	-0.003534	-0.001377	-0.002641
1.8800	590.406	45.998	17.819	34.814	-0.669	35.380	1123.981	-0.003220	-0.001247	-0.002437
1.8900	534.455	38.742	13.762	29.916	-0.670	35.388	1017.466	-0.002712	-0.000963	-0.002094
1.9000	492.361	32.851	11.006	25.704	-0.675	35.380	937.328	-0.002300	-0.000770	-0.001799
1.9100	449.725	27.693	8.449	22.154	-0.673	35.388	856.161	-0.001939	-0.000591	-0.001551
1.9200	412.334	22.399	5.793	18.400	-0.668	35.380	784.979	-0.001568	-0.000405	-0.001288
1.9300	369.068	16.480	3.537	14.779	-0.672	35.388	702.610	-0.001154	-0.000248	-0.001034
1.9400	332.789	11.019	0.469	11.105	-0.673	35.380	633.545	-0.000771	-0.000033	-0.000777
1.9500	302.447	6.765	-1.293	8.076	-0.674	35.388	575.781	-0.000474	0.000090	-0.000565
1.9600	271.218	2.558	-3.357	5.133	-0.677	35.380	516.329	-0.000179	0.000235	-0.000359
1.9700	256.084	-0.348	-4.817	3.053	-0.670	35.388	487.518	0.000024	0.000337	-0.000214
1.9800	235.480	-3.086	-5.795	1.018	-0.680	35.380	448.294	0.000216	0.000406	-0.000071
1.9900	229.950	-4.559	-7.113	0.261	-0.669	35.388	437.765	0.000319	0.000498	-0.000018
2.0000	228.447	-5.490	-6.533	-0.181	-0.673	35.380	434.904	0.000384	0.000457	0.000013
2.0100	231.768	-4.878	-7.113	-0.080	-0.664	35.388	441.227	0.000341	0.000498	0.000006
2.0200	237.464	-4.768	-7.072	-0.330	-0.676	35.380	452.070	0.000334	0.000495	0.000023
2.0300	248.284	-3.418	-6.165	-0.068	-0.665	35.388	472.670	0.000239	0.000432	0.000005
2.0400	286.066	1.097	-5.093	2.311	-0.665	35.380	544.596	-0.000077	0.000356	-0.000162
2.0500	315.536	4.739	-3.796	4.338	-0.671	35.388	600.700	-0.000332	0.000266	-0.000304
2.0600	348.719	8.965	-2.105	7.610	-0.669	35.380	663.872	-0.000628	0.000147	-0.000533
2.0700	390.874	13.577	0.220	11.270	-0.669	35.388	744.123	-0.000950	-0.000015	-0.000789
2.0800	436.004	19.665	3.111	14.669	-0.674	35.380	830.040	-0.001377	-0.000218	-0.001027
2.0900	483.509	25.793	5.752	19.785	-0.672	35.388	920.477	-0.001805	-0.000403	-0.001385
2.1000	517.022	30.282	8.076	22.262	-0.673	35.379	984.278	-0.002120	-0.000565	-0.001558
2.1100	574.566	37.408	11.530	27.285	-0.667	35.388	1093.826	-0.002619	-0.000807	-0.001910
2.1200	629.239	44.216	14.985	32.060	-0.668	35.380	1197.910	-0.003095	-0.001049	-0.002244
2.1300	680.456	51.820	18.400	36.534	-0.680	35.388	1295.414	-0.003627	-0.001288	-0.002557
2.1400	730.726	57.753	20.973	41.375	-0.673	35.379	1391.115	-0.004043	-0.001468	-0.002896
2.1500	774.985	63.424	24.453	45.202	-0.679	35.388	1475.372	-0.004440	-0.001712	-0.003164
2.1600	824.008	70.080	26.888	49.468	-0.678	35.380	1568.699	-0.004906	-0.001882	-0.003463
2.1700	873.316	76.529	30.219	53.666	-0.676	35.389	1662.569	-0.005357	-0.002115	-0.003757
2.1800	902.261	80.626	32.323	56.832	-0.669	35.380	1717.672	-0.005644	-0.002263	-0.003978
2.1900	940.312	85.865	34.388	60.339	-0.671	35.389	1790.113	-0.006011	-0.002407	-0.004224
2.2000	966.312	89.199	36.602	63.200	-0.673	35.380	1839.609	-0.006244	-0.002562	-0.004424
2.2100	1006.498	95.021	38.832	66.710	-0.680	35.388	1916.113	-0.006651	-0.002718	-0.004670
2.2200	1028.033	97.929	40.361	69.048	-0.680	35.380	1957.111	-0.006855	-0.002825	-0.004833
2.2300	1035.397	99.482	41.020	70.122	-0.676	35.388	1971.130	-0.006964	-0.002871	-0.004909
2.2400	1045.331	100.928	41.737	71.016	-0.669	35.380	1990.042	-0.007065	-0.002922	-0.004971
2.2500	1046.999	101.611	42.341	71.593	-0.668	35.388	1993.217	-0.007113	-0.002964	-0.005011
2.2600	1044.099	102.166	41.819	71.526	-0.669	35.379	1987.696	-0.007152	-0.002927	-0.005007
2.2700	1036.765	100.955	42.121	70.989	-0.672	35.388	1973.734	-0.007067	-0.002948	-0.004969
2.2800	1020.324	99.275	41.475	70.178	-0.674	35.380	1942.434	-0.006949	-0.002903	-0.004912
2.2900	991.544	95.774	40.347	68.483	-0.676	35.388	1887.646	-0.006704	-0.002824	-0.004794
2.3000	952.425	91.201	39.286	64.961	-0.683	35.380	1813.173	-0.006384	-0.002750	-0.004547
2.3100	925.585	88.103	37.388	63.006	-0.674	35.388	1762.075	-0.006167	-0.002617	-0.004410
2.3200	882.724	82.794	35.461	59.871	-0.683	35.379	1680.479	-0.005796	-0.002482	-0.004191
2.3300	840.824	78.015	32.859	56.073	-0.680	35.389	1600.714	-0.005461	-0.002300	-0.003925
2.3400	784.032	70.718	29.626	51.560	-0.687	35.380	1492.596	-0.004950	-0.002074	-0.003609
2.3500	744.913	66.020	27.324	47.983	-0.679	35.389	1418.123	-0.004621	-0.001913	-0.003359
2.3600	692.975	59.311	23.847	43.909	-0.675	35.380	1319.246	-0.004152	-0.001669	-0.003074
2.3700	640.045	52.152	20.877	39.134	-0.671	35.388	1218.481	-0.003651	-0.001461	-0.002739
2.3800	587.776	45.662	17.558	34.580	-0.677	35.379	1118.975	-0.003196	-0.001229	-0.002421
2.3900	531.645	38.326	13.856	29.999	-0.681	35.388	1012.115	-0.002683	-0.000970	-0.002100
2.4000	492.331	33.254	11.047	25.830	-0.675	35.379	937.271	-0.002328	-0.000773	-0.001808
2.4100	447.020	27.319	8.147	21.838	-0.675	35.389	851.011	-0.001912	-0.000570	-0.001529
2.4200	405.857	21.469	5.947	17.778	-0.668	35.380	772.648	-0.001503	-0.000416	-0.001244
2.4300	359.855	15.382	2.588	14.008	-0.669	35.389	685.072	-0.001077	-0.000181	-0.000981
2.4400	332.939	10.910	0.687	11.547	-0.679	35.380	633.831	-0.000764	-0.000048	-0.000808
2.4500	305.377	7.629	-1.195	8.574	-0.675	35.389	581.360	-0.000534	0.000084	-0.000600
2.4600	263.238	1.237	-4.238	4.143	-0.675	35.380	501.137	-0.000087	0.000297	-0.000290
2.4700	247.112	-1.223	-4.954	2.353	-0.669	35.389	470.438	0.000086	0.000347	-0.000165
2.4800	243.580	-2.194	-5.713	1.568	-0.668	35.380	463.715	0.000154	0.000400	-0.000110
2.4900	242.183	-3.002	-5.877	0.785	-0.670	35.389	461.054	0.000210	0.000411	-0.000055
2.5000	229.484	-7.045	-8.062	-1.912	-0.671	35.383	436.878	0.000493	0.000564	0.000134
2.5100	239.433	-6.240	-7.843	-1.720	-0.673	35.385	455.818	0.000437	0.000549	0.000120
2.5200	260.893	-3.445	-6.809	-0.730	-0.670	35.383	496.674	0.000241	0.000477	0.000051
2.5300	282.399	-0.901	-6.232	0.647	-0.671	35.386	537.615	0.000063	0.000436	-0.000045
2.5400	331.797	5.322	-3.934	4.695	-0.675	35.383	631.657	-0.000373	0.000275	-0.000329
2.5500	344.646	7.239	-3.054	6.125	-0.674	35.386	656.118	-0.000507	0.000214	-0.000429
2.5600	384.141	11.673	-0.934	10.100	-0.678	35.383	731.306	-0.000817	0.000065	-0.000707
2.5700	443.744	19.148	2.945	14.490	-0.665	35.385	844.774	-0.001340	-0.000206	-0.001014
2.5800	501.258	27.027	6.042	19.607	-0.669	35.383	954.266	-0.001892	-0.000423	-0.001373
2.5900	579.916	36.841	11.144	27.039	-0.671	35.386	1104.012	-0.002579	-0.000780	-0.001893
2.6000	642.464	45.439	15.025	32.611	-0.669	35.383	1223.087	-0.003181	-0.001052	-0.002283
2.6100	697.198	52.402	18.618	37.235	-0.672	35.386	1327.286	-0.003668	-0.001303	-0.002606
2.6200	766.704	61.463	22.993	43.344	-0.672	35.382	1459.608	-0.004302	-0.001610	-0.003034
2.6300	846.235	71.982	27.671	50.294	-0.667	35.386	1611.013	-0.005039	-0.001937	-0.003521
2.6400	893.800	78.305	31.277	54.767	-0.672	35.383	1701.565	-0.005481	-0.002189	-0.003834
2.6500	989.771	90.644	36.602	63.229	-0.672	35.385	1884.270	-0.006345	-0.002562	-0.004426
2.6600	1016.612	94.593	38.831	66.490	-0.675	35.383	1935.368	-0.006621	-0.002718	-0.004654
2.6700	1080.633	103.210	42.739	71.801	-0.680	35.385	2057.247	-0.007225	-0.002992	-0.005026
2.6800	1128.934	109.739	45.765	76.823	-0.663	35.383	2149.200	-0.007682	-0.003204	-0.005378
2.6900	1175.462	115.770	48.973	80.952	-0.667	35.385	2237.778	-0.008104	-0.003428	-0.005667
2.7000	1211.290	121.481	51.355	84.615	-0.671	35.383	2305.984	-0.008504	-0.003595	-0.005923
2.7100	1237.559	124.945	53.101	87.323	-0.670	35.385	2355.995	-0.008746	-0.003717	-0.006113
2.7200	1269.900	129.821	55.208	90.488	-0.679	35.383	2417.564	-0.009087	-0.003865	-0.006334
2.7300	1265.061	129.528	55.098	90.666	-0.668	35.385	2408.352	-0.009067	-0.003857	-0.006347
2.7400	1288.040	132.556	57.064	92.815	-0.680	35.383	2452.097	-0.009279	-0.003994	-0.006497
2.7500	1293.465	133.961	57.406	93.720	-0.675	35.386	2462.425	-0.009377	-0.004018	-0.006560
2.7600	1289.347	133.474	57.227	93.957	-0.675	35.383	2454.586	-0.009343	-0.004006	-0.006577
2.7700	1279.218	133.446	57.312	93.268	-0.671	35.385	2435.303	-0.009341	-0.004012	-0.006529
2.7800	1258.058	130.764	56.250	92.154	-0.672	35.382	2395.020	-0.009153	-0.003937	-0.006451
2.7900	1215.949	126.429	55.235	89.207	-0.665	35.386	2314.854	-0.008850	-0.003866	-0.006244
2.8000	1173.598	121.330	53.212	85.986	-0.671	35.382	2234.230	-0.008493	-0.003725	-0.006019
2.8100	1133.833	116.353	51.354	82.825	-0.665	35.385	2158.527	-0.008145	-0.003595	-0.005798
2.8200	1083.834	110.573	48.213	79.053	-0.665	35.383	2063.341	-0.007740	-0.003375	-0.005534
2.8300	1022.172	103.320	44.817	73.881	-0.661	35.386	1945.953	-0.007232	-0.003137	-0.005172
2.8400	961.262	95.983	41.544	68.801	-0.663	35.382	1829.996	-0.006719	-0.002908	-0.004816
2.8500	896.414	87.450	37.362	63.241	-0.669	35.386	1706.543	-0.006122	-0.002615	-0.004427
2.8600	818.763	78.040	33.148	56.734	-0.675	35.382	1558.714	-0.005463	-0.002320	-0.003971
2.8700	772.340	72.147	29.834	52.592	-0.668	35.386	1470.337	-0.005050	-0.002088	-0.003681
2.8800	692.539	61.882	24.961	45.658	-0.671	35.382	1318.417	-0.004332	-0.001747	-0.003196
2.8900	638.482	54.361	21.932	40.662	-0.665	35.386	1215.506	-0.003805	-0.001535	-0.002846
2.9000	581.329	46.761	17.833	35.475	-0.666	35.383	1106.701	-0.003273	-0.001248	-0.002483
2.9100	521.531	38.549	14.201	30.106	-0.663	35.386	992.861	-0.002698	-0.000994	-0.002107
2.9200	469.818	31.962	10.855	25.140	-0.664	35.383	894.413	-0.002237	-0.000760	-0.001760
2.9300	415.370	24.193	7.170	20.006	-0.665	35.387	790.758	-0.001693	-0.000502	-0.001400
2.9400	367.249	17.482	3.673	15.647	-0.659	35.383	699.148	-0.001224	-0.000257	-0.001095
2.9500	327.800	11.879	0.755	11.793	-0.664	35.387	624.046	-0.000832	-0.000053	-0.000826
2.9600	295.669	7.254	-1.152	8.145	-0.668	35.383	562.878	-0.000508	0.000081	-0.000570
2.9700	270.346	3.476	-2.944	5.919	-0.673	35.387	514.669	-0.000243	0.000206	-0.000414
2.9800	248.991	-0.319	-4.652	3.276	-0.681	35.383	474.014	0.000022	0.000326	-0.000229
2.9900	246.255	-1.222	-4.871	2.422	-0.678	35.386	468.807	0.000086	0.000341	-0.000170
3.0000	248.480	-1.166	-5.714	2.256	-0.665	35.382	473.042	0.000082	0.000400	-0.000158
3.0100	249.847	-1.125	-5.092	2.421	-0.661	35.386	475.645	0.000079	0.000356	-0.000169
3.0200	253.665	-1.026	-5.493	2.409	-0.669	35.382	482.912	0.000072	0.000385	-0.000169
3.0300	267.010	0.014	-4.871	2.490	-0.664	35.386	508.318	-0.000001	0.000341	-0.000174
3.0400	315.822	6.267	-2.791	5.684	-0.668	35.382	601.244	-0.000439	0.000195	-0.000398
3.0500	360.261	11.450	-1.087	9.812	-0.671	35.386	685.844	-0.000802	0.000076	-0.000687
3.0600	402.070	16.590	1.789	12.978	-0.669	35.383	765.438	-0.001161	-0.000125	-0.000908
3.0700	439.386	21.483	3.221	16.694	-0.665	35.387	836.477	-0.001504	-0.000225	-0.001169
3.0800	507.374	29.725	7.733	21.961	-0.674	35.383	965.910	-0.002081	-0.000541	-0.001537
3.0900	574.942	38.644	11.930	28.292	-0.664	35.386	1094.542	-0.002705	-0.000835	-0.001980
3.1000	637.971	46.344	15.412	33.627	-0.666	35.383	1214.533	-0.003244	-0.001079	-0.002354
3.1100	704.351	55.529	19.981	39.411	-0.669	35.386	1340.904	-0.003887	-0.001399	-0.002759
3.1200	769.905	63.773	23.873	44.997	-0.675	35.383	1465.702	-0.004464	-0.001671	-0.003150
3.1300	838.750	72.731	27.989	51.602	-0.662	35.386	1596.766	-0.005091	-0.001959	-0.003612
3.1400	897.482	80.710	32.132	56.732	-0.665	35.383	1708.574	-0.005650	-0.002249	-0.003971
3.1500	959.323	88.630	35.914	62.471	-0.655	35.386	1826.305	-0.006204	-0.002514	-0.004373
3.1600	1019.933	96.775	39.808	67.892	-0.664	35.383	1941.690	-0.006774	-0.002787	-0.004752
3.1700	1076.605	103.833	43.113	72.957	-0.671	35.387	2049.580	-0.007268	-0.003018	-0.005107
3.1800	1135.156	111.880	46.908	78.583	-0.669	35.383	2161.045	-0.007832	-0.003284	-0.005501
3.1900	1175.597	117.895	49.525	82.247	-0.672	35.386	2238.035	-0.008253	-0.003467	-0.005757
3.2000	1211.741	122.077	51.848	85.644	-0.676	35.383	2306.843	-0.008545	-0.003629	-0.005995
3.2100	1244.427	127.136	54.231	88.836	-0.668	35.386	2369.070	-0.008900	-0.003796	-0.006219
3.2200	1267.872	130.196	55.139	91.380	-0.666	35.382	2413.702	-0.009114	-0.003860	-0.006397
3.2300	1280.826	132.557	56.941	92.745	-0.672	35.387	2438.364	-0.009279	-0.003986	-0.006492
3.2400	1293.360	134.683	57.543	94.134	-0.680	35.383	2462.225	-0.009428	-0.004028	-0.006589
3.2500	1297.748	135.156	57.640	95.224	-0.679	35.387	2470.579	-0.009461	-0.004035	-0.006666
3.2600	1294.487	135.337	58.357	95.262	-0.668	35.382	2464.371	-0.009474	-0.004085	-0.006668
3.2700	1283.156	134.752	57.818	94.755	-0.673	35.387	2442.799	-0.009433	-0.004047	-0.006633
3.2800	1260.372	132.376	57.312	93.418	-0.665	35.383	2399.426	-0.009266	-0.004012	-0.006539
3.2900	1210.208	126.733	55.442	89.650	-0.664	35.387	2303.925	-0.008871	-0.003881	-0.006275
3.3000	1173.538	122.327	53.597	87.225	-0.661	35.382	2234.116	-0.008563	-0.003752	-0.006106
3.3100	1132.315	117.769	51.352	83.693	-0.668	35.387	2155.638	-0.008244	-0.003595	-0.005859
3.3200	1087.891	111.947	49.042	79.864	-0.659	35.383	2071.066	-0.007836	-0.003433	-0.005590
3.3300	1020.910	104.140	45.324	74.802	-0.663	35.387	1943.550	-0.007290	-0.003173	-0.005236
3.3400	963.471	97.165	41.625	69.559	-0.669	35.383	1834.202	-0.006802	-0.002914	-0.004869
3.3500	896.745	88.784	37.855	64.301	-0.663	35.387	1707.172	-0.006215	-0.002650	-0.004501
3.3600	835.084	80.974	34.124	58.963	-0.663	35.383	1589.785	-0.005668	-0.002389	-0.004127
3.3700	768.974	72.039	30.054	53.100	-0.656	35.386	1463.928	-0.005043	-0.002104	-0.003717
3.3800	700.519	63.379	26.173	47.101	-0.659	35.382	1333.609	-0.004437	-0.001832	-0.003297
3.3900	636.288	55.362	21.797	41.377	-0.660	35.386	1211.329	-0.003875	-0.001526	-0.002896
3.4000	581.720	47.526	18.192	36.451	-0.663	35.382	1107.445	-0.003327	-0.001273	-0.002552
3.4100	517.037	39.228	14.202	30.712	-0.661	35.387	984.306	-0.002746	-0.000994	-0.002150
3.4200	460.756	31.531	10.211	25.291	-0.667	35.382	877.161	-0.002207	-0.000715	-0.001770
3.4300	410.456	24.473	7.116	20.297	-0.659	35.387	781.403	-0.001713	-0.000498	-0.001421
3.4400	361.854	17.536	3.523	15.549	-0.663	35.382	688.877	-0.001227	-0.000247	-0.001088
3.4500	320.616	11.768	0.921	11.943	-0.659	35.387	610.371	-0.000824	-0.000064	-0.000836
3.4600	297.337	8.255	-0.947	9.095	-0.668	35.382	566.053	-0.000578	0.000066	-0.000637
3.4700	261.810	3.268	-3.232	5.324	-0.668	35.387	498.419	-0.000229	0.000226	-0.000373
3.4800	258.158	2.002	-3.657	5.242	-0.671	35.383	491.467	-0.000140	0.000256	-0.000367
3.4900	244.542	-0.749	-5.369	2.765	-0.674	35.387	465.546	0.000052	0.000376	-0.000194
3.5000	239.267	-1.946	-5.382	2.641	-0.667	35.383	455.503	0.000136	0.000377	-0.000185
3.5100	243.821	-1.067	-5.479	2.037	-0.661	35.387	464.172	0.000075	0.000384	-0.000143
3.5200	251.275	-0.903	-5.368	2.807	-0.667	35.382	478.363	0.000063	0.000376	-0.000196
3.5300	268.257	0.666	-4.611	3.275	-0.657	35.387	510.693	-0.000047	0.000323	-0.000229
3.5400	320.436	7.085	-2.888	7.048	-0.659	35.383	610.027	-0.000496	0.000202	-0.000493
3.5500	352.191	10.992	-1.250	9.674	-0.656	35.387	670.481	-0.000769	0.000087	-0.000677
3.5600	392.287	15.952	1.019	12.784	-0.665	35.382	746.813	-0.001117	-0.000071	-0.000895
3.5700	447.396	22.193	4.430	17.735	-0.663	35.387	851.727	-0.001553	-0.000310	-0.001241
3.5800	503.166	29.946	7.842	22.238	-0.662	35.383	957.899	-0.002096	-0.000549	-0.001557
3.5900	567.653	37.994	11.407	28.058	-0.670	35.387	1080.666	-0.002660	-0.000798	-0.001964
3.6000	634.229	46.984	15.990	34.044	-0.677	35.383	1207.409	-0.003289	-0.001119	-0.002383
3.6100	690.150	53.904	19.114	38.900	-0.674	35.387	1313.868	-0.003773	-0.001338	-0.002723
3.6200	755.373	61.990	23.337	44.734	-0.673	35.382	1438.036	-0.004339	-0.001634	-0.003131
3.6300	836.256	73.108	28.001	52.111	-0.677	35.388	1592.016	-0.005118	-0.001960	-0.003648
3.6400	890.929	80.098	31.649	56.913	-0.678	35.383	1696.100	-0.005607	-0.002215	-0.003984
3.6500	959.113	88.990	36.561	62.638	-0.680	35.387	1825.905	-0.006229	-0.002559	-0.004385
3.6600	1010.014	95.661	38.998	67.412	-0.688	35.382	1922.808	-0.006696	-0.002730	-0.004719
3.6700	1075.057	104.335	43.400	73.315	-0.677	35.387	2046.633	-0.007303	-0.003038	-0.005132
3.6800	1124.591	111.155	46.659	78.186	-0.677	35.382	2140.932	-0.007781	-0.003266	-0.005473
3.6900	1169.706	117.269	49.583	82.133	-0.669	35.387	2226.820	-0.008209	-0.003471	-0.005749
3.7000	1199.703	121.456	51.476	85.065	-0.666	35.382	2283.926	-0.008502	-0.003603	-0.005955
3.7100	1256.660	129.041	54.546	90.417	-0.659	35.387	2392.359	-0.009033	-0.003818	-0.006329
3.7200	1273.432	131.669	56.653	92.194	-0.675	35.382	2424.288	-0.009217	-0.003966	-0.006454
3.7300	1279.684	133.196	56.914	93.544	-0.672	35.387	2436.190	-0.009324	-0.003984	-0.006548
3.7400	1302.557	135.920	58.659	95.867	-0.685	35.382	2479.734	-0.009514	-0.004106	-0.006711
3.7500	1301.084	136.715	59.003	96.101	-0.672	35.387	2476.931	-0.009570	-0.004130	-0.006727
3.7600	1292.984	136.101	58.426	95.648	-0.671	35.382	2461.510	-0.009527	-0.004090	-0.006695
3.7700	1276.768	134.614	58.289	95.000	-0.667	35.387	2430.639	-0.009423	-0.004080	-0.006650
3.7800	1252.092	131.920	57.380	93.321	-0.672	35.382	2383.661	-0.009234	-0.004017	-0.006532
3.7900	1211.951	126.970	55.579	90.488	-0.668	35.387	2307.243	-0.008888	-0.003891	-0.006334
3.8000	1180.572	123.761	54.258	88.039	-0.684	35.382	2247.505	-0.008663	-0.003798	-0.006163
3.8100	1133.954	118.161	51.546	84.075	-0.681	35.387	2158.756	-0.008271	-0.003608	-0.005885
3.8200	1083.353	112.475	49.248	80.455	-0.684	35.382	2062.426	-0.007873	-0.003447	-0.005632
3.8300	1029.491	106.168	45.807	75.752	-0.673	35.387	1959.887	-0.007432	-0.003206	-0.005303
3.8400	970.294	98.054	42.424	70.963	-0.676	35.382	1847.191	-0.006864	-0.002970	-0.004967
3.8500	906.003	90.311	38.832	65.760	-0.676	35.387	1724.796	-0.006322	-0.002718	-0.004603
3.8600	839.878	82.126	34.400	60.009	-0.677	35.382	1598.911	-0.005749	-0.002408	-0.004201
3.8700	778.261	74.055	31.211	54.409	-0.677	35.388	1481.609	-0.005184	-0.002185	-0.003809
3.8800	712.226	65.703	26.791	48.616	-0.675	35.382	1355.896	-0.004599	-0.001875	-0.003403
3.8900	644.178	56.263	22.689	42.960	-0.669	35.388	1226.349	-0.003938	-0.001588	-0.003007
3.9000	583.388	48.916	18.839	37.221	-0.680	35.382	1110.620	-0.003424	-0.001319	-0.002605
3.9100	523.860	40.256	14.640	31.415	-0.669	35.387	997.295	-0.002818	-0.001025	-0.002199
3.9200	464.663	32.960	11.063	26.186	-0.668	35.382	884.600	-0.002307	-0.000774	-0.001833
3.9300	423.726	26.681	7.639	21.854	-0.671	35.387	806.665	-0.001868	-0.000535	-0.001530
3.9400	371.397	19.539	4.667	17.257	-0.667	35.382	707.045	-0.001368	-0.000327	-0.001208
3.9500	336.291	14.424	2.338	13.583	-0.672	35.387	640.211	-0.001010	-0.000164	-0.000951
3.9600	292.242	8.242	-1.018	9.646	-0.670	35.382	556.355	-0.000577	0.000071	-0.000675
3.9700	272.450	4.877	-1.858	7.076	-0.680	35.387	518.675	-0.000341	0.000130	-0.000495
3.9800	256.986	2.225	-3.797	5.506	-0.684	35.382	489.235	-0.000156	0.000266	-0.000385
3.9900	238.952	-0.735	-4.664	3.000	-0.677	35.388	454.903	0.000051	0.000327	-0.000210
4.0000	241.867	-0.334	-5.010	3.235	-0.677	35.382	460.453	0.000023	0.000351	-0.000226
4.0100	244.933	-0.845	-5.272	2.709	-0.678	35.388	466.290	0.000059	0.000369	-0.000190
4.0200	252.252	-0.221	-4.749	3.136	-0.674	35.382	480.223	0.000015	0.000332	-0.000220
4.0300	272.705	1.542	-4.475	4.240	-0.674	35.387	519.161	-0.000108	0.000313	-0.000297
4.0400	314.214	6.989	-2.433	6.552	-0.679	35.382	598.183	-0.000489	0.000170	-0.000459
4.0500	351.004	11.130	-1.252	10.043	-0.682	35.388	668.221	-0.000779	0.000088	-0.000703
4.0600	403.423	17.579	1.803	13.830	-0.681	35.382	768.013	-0.001231	-0.000126	-0.000968
4.0700	449.830	23.832	4.831	18.261	-0.669	35.388	856.361	-0.001668	-0.000338	-0.001278
4.0800	502.836	30.197	7.787	22.637	-0.676	35.383	957.270	-0.002114	-0.000545	-0.001585
4.0900	562.498	38.048	11.725	28.223	-0.680	35.388	1070.852	-0.002663	-0.000821	-0.001976
4.1000	633.027	46.914	15.620	34.056	-0.679	35.383	1205.120	-0.003284	-0.001093	-0.002384
4.1100	695.229	54.877	19.927	39.438	-0.670	35.388	1323.538	-0.003841	-0.001395	-0.002761
4.1200	746.386	62.061	23.351	44.267	-0.672	35.383	1420.927	-0.004344	-0.001635	-0.003099
4.1300	834.618	72.970	28.209	51.686	-0.663	35.388	1588.898	-0.005108	-0.001975	-0.003618
4.1400	897.211	81.280	32.514	57.628	-0.671	35.382	1708.059	-0.005690	-0.002276	-0.004034
4.1500	951.328	88.506	35.652	62.388	-0.668	35.388	1811.085	-0.006195	-0.002496	-0.004367
4.1600	1014.568	96.622	39.919	68.540	-0.668	35.382	1931.477	-0.006764	-0.002794	-0.004798
4.1700	1073.073	104.734	43.481	73.508	-0.668	35.388	2042.856	-0.007331	-0.003044	-0.005146
4.1800	1124.621	111.295	46.689	78.393	-0.674	35.382	2140.989	-0.007791	-0.003268	-0.005488
4.1900	1171.540	117.672	49.855	82.825	-0.669	35.387	2230.310	-0.008237	-0.003490	-0.005798
4.2000	1212.026	123.456	51.903	86.607	-0.672	35.382	2307.386	-0.008642	-0.003633	-0.006063
4.2100	1243.992	127.817	54.600	89.923	-0.672	35.388	2368.240	-0.008947	-0.003822	-0.006295
4.2200	1269.375	131.557	56.127	92.495	-0.677	35.382	2416.563	-0.009209	-0.003929	-0.006475
4.2300	1286.582	133.877	57.392	94.134	-0.674	35.388	2449.322	-0.009371	-0.004017	-0.006589
4.2400	1294.592	135.545	58.261	95.291	-0.679	35.382	2464.571	-0.009488	-0.004078	-0.006670
4.2500	1293.089	135.822	57.888	95.526	-0.683	35.388	2461.710	-0.009508	-0.004052	-0.006687
4.2600	1289.452	135.824	58.507	95.881	-0.668	35.382	2454.786	-0.009508	-0.004095	-0.006712
4.2700	1279.894	135.254	58.013	95.304	-0.669	35.388	2436.590	-0.009468	-0.004061	-0.006671
4.2800	1257.727	132.973	57.433	93.997	-0.673	35.382	2394.390	-0.009308	-0.004020	-0.006580
4.2900	1214.025	128.220	56.016	90.981	-0.677	35.388	2311.192	-0.008975	-0.003921	-0.006369
4.3000	1187.981	124.971	54.685	88.618	-0.679	35.382	2261.610	-0.008748	-0.003828	-0.006203
4.3100	1132.496	118.439	52.054	84.406	-0.678	35.388	2155.981	-0.008291	-0.003644	-0.005908
4.3200	1094.324	114.019	49.704	81.378	-0.678	35.382	2083.311	-0.007981	-0.003479	-0.005696
4.3300	1025.779	106.015	46.029	75.819	-0.673	35.389	1952.820	-0.007421	-0.003222	-0.005307
4.3400	971.542	99.094	42.710	71.224	-0.671	35.382	1849.566	-0.006937	-0.002990	-0.004986
4.3500	901.704	90.074	38.225	65.208	-0.673	35.388	1716.614	-0.006305	-0.002676	-0.004565
4.3600	841.471	82.671	34.896	60.175	-0.679	35.382	1601.944	-0.005787	-0.002443	-0.004212
4.3700	784.513	75.428	31.263	55.357	-0.675	35.389	1493.511	-0.005280	-0.002188	-0.003875
4.3800	709.747	65.284	27.161	48.699	-0.676	35.382	1351.175	-0.004570	-0.001901	-0.003409
4.3900	645.530	57.238	23.089	42.948	-0.665	35.388	1228.924	-0.004007	-0.001616	-0.003006
4.4000	578.504	48.249	18.329	37.126	-0.673	35.382	1101.322	-0.003377	-0.001283	-0.002599
4.4100	527.061	41.523	15.386	32.118	-0.671	35.388	1003.389	-0.002907	-0.001077	-0.002248
4.4200	460.816	32.753	11.022	26.489	-0.671	35.382	877.275	-0.002293	-0.000772	-0.001854
4.4300	405.752	24.835	7.336	20.627	-0.671	35.389	772.448	-0.001738	-0.000514	-0.001444
4.4400	371.051	20.149	4.583	17.339	-0.672	35.383	706.387	-0.001410	-0.000321	-0.001214
4.4500	326.432	13.604	1.652	12.938	-0.671	35.389	621.443	-0.000952	-0.000116	-0.000906
4.4600	293.986	8.826	-0.495	9.908	-0.679	35.382	559.673	-0.000618	0.000035	-0.000694
4.4700	267.085	4.226	-2.818	6.619	-0.668	35.389	508.461	-0.000296	0.000197	-0.000463
4.4800	258.098	2.404	-3.522	5.559	-0.668	35.382	491.352	-0.000168	0.000247	-0.000389
4.4900	250.043	1.069	-4.363	4.680	-0.664	35.389	476.017	-0.000075	0.000305	-0.000328
4.5000	243.671	-0.626	-4.653	2.985	-0.672	35.383	463.886	0.000044	0.000326	-0.000209
4.5100	245.925	-0.153	-4.640	3.028	-0.662	35.389	468.178	0.000011	0.000325	-0.000212
4.5200	251.050	-0.278	-5.301	3.358	-0.665	35.382	477.934	0.000019	0.000371	-0.000235
4.5300	266.709	1.207	-4.280	3.813	-0.665	35.389	507.746	-0.000085	0.000300	-0.000267
4.5400	314.995	7.615	-2.557	7.393	-0.653	35.383	599.670	-0.000533	0.000179	-0.000517
4.5500	353.603	11.492	-0.496	10.141	-0.650	35.389	673.170	-0.000804	0.000035	-0.000710
4.5600	402.942	18.092	2.161	14.298	-0.651	35.383	767.097	-0.001266	-0.000151	-0.001001
4.5700	450.281	24.178	4.816	18.453	-0.657	35.389	857.220	-0.001692	-0.000337	-0.001292
4.5800	506.623	31.379	8.518	23.283	-0.660	35.382	964.479	-0.002197	-0.000596	-0.001630
4.5900	568.269	39.130	12.151	28.677	-0.663	35.389	1081.839	-0.002739	-0.000851	-0.002007
4.6000	626.925	46.247	15.661	34.042	-0.664	35.382	1193.504	-0.003237	-0.001096	-0.002383
4.6100	693.486	55.001	19.858	40.003	-0.662	35.389	1320.219	-0.003850	-0.001390	-0.002800
4.6200	765.487	64.492	24.123	46.277	-0.655	35.382	1457.291	-0.004514	-0.001689	-0.003239
4.6300	819.785	71.982	27.808	50.900	-0.657	35.390	1560.659	-0.005039	-0.001947	-0.003563
4.6400	893.890	80.781	32.021	57.862	-0.662	35.383	1701.736	-0.005655	-0.002241	-0.004050
4.6500	961.262	89.880	36.889	63.711	-0.655	35.389	1829.996	-0.006292	-0.002582	-0.004460
4.6600	1030.603	98.956	40.579	69.914	-0.659	35.383	1962.004	-0.006927	-0.002841	-0.004894
4.6700	1073.539	105.222	43.385	73.935	-0.669	35.389	2043.743	-0.007366	-0.003037	-0.005175
4.6800	1118.309	111.255	46.717	78.216	-0.671	35.383	2128.973	-0.007788	-0.003270	-0.005475
4.6900	1173.869	118.286	49.635	83.512	-0.669	35.389	2234.745	-0.008280	-0.003474	-0.005846
4.7000	1204.452	122.843	52.083	86.523	-0.675	35.383	2292.967	-0.008599	-0.003646	-0.006057
4.7100	1248.545	128.847	54.545	90.722	-0.664	35.390	2376.909	-0.009019	-0.003818	-0.006351
4.7200	1264.731	131.335	56.059	92.249	-0.676	35.383	2407.722	-0.009193	-0.003924	-0.006457
4.7300	1289.467	134.697	57.874	95.070	-0.653	35.389	2454.815	-0.009429	-0.004051	-0.006655
4.7400	1292.007	135.752	57.998	95.565	-0.661	35.383	2459.650	-0.009503	-0.004060	-0.006690
4.7500	1292.999	136.060	58.742	95.826	-0.662	35.389	2461.538	-0.009524	-0.004112	-0.006708
4.7600	1296.065	137.128	58.770	96.225	-0.670	35.382	2467.375	-0.009599	-0.004114	-0.006736
4.7700	1282.960	135.767	58.424	96.156	-0.669	35.389	2442.427	-0.009504	-0.004090	-0.006731
4.7800	1263.844	134.100	58.178	94.850	-0.671	35.382	2406.034	-0.009387	-0.004072	-0.006639
4.7900	1210.659	127.997	56.017	91.009	-0.667	35.389	2304.783	-0.008960	-0.003921	-0.006371
4.8000	1179.670	124.400	54.932	88.258	-0.664	35.382	2245.789	-0.008708	-0.003845	-0.006178
4.8100	1125.237	118.161	51.766	84.158	-0.670	35.389	2142.162	-0.008271	-0.003624	-0.005891
4.8200	1081.760	112.671	49.374	80.538	-0.672	35.382	2059.393	-0.007887	-0.003456	-0.005638
4.8300	1028.078	106.251	46.274	76.532	-0.668	35.390	1957.197	-0.007438	-0.003239	-0.005357
4.8400	969.392	98.871	42.658	71.251	-0.667	35.382	1845.474	-0.006921	-0.002986	-0.004988
4.8500	906.964	91.536	39.315	66.147	-0.669	35.390	1726.627	-0.006407	-0.002752	-0.004630
4.8600	849.811	83.947	35.200	61.165	-0.677	35.383	1617.823	-0.005876	-0.002464	-0.004282
4.8700	770.311	74.150	30.948	54.325	-0.666	35.390	1466.475	-0.005190	-0.002166	-0.003803
4.8800	711.775	66.298	27.148	49.290	-0.674	35.383	1355.038	-0.004641	-0.001900	-0.003450
4.8900	642.960	56.753	22.732	43.207	-0.665	35.390	1224.031	-0.003973	-0.001591	-0.003024
4.9000	571.996	47.734	18.412	37.263	-0.671	35.383	1088.934	-0.003341	-0.001289	-0.002608
4.9100	519.818	40.688	14.711	32.089	-0.669	35.390	989.599	-0.002848	-0.001030	-0.002246
4.9200	463.611	32.920	10.911	26.653	-0.663	35.383	882.597	-0.002304	-0.000764	-0.001866
4.9300	416.633	26.903	7.996	22.125	-0.663	35.390	793.161	-0.001883	-0.000560	-0.001549
4.9400	369.669	19.539	4.733	17.819	-0.671	35.383	703.754	-0.001368	-0.000331	-0.001247
4.9500	327.259	14.299	2.038	13.227	-0.668	35.390	623.016	-0.001001	-0.000143	-0.000926
4.9600	293.144	9.005	-0.768	10.114	-0.673	35.383	558.071	-0.000630	0.000054	-0.000708
4.9700	274.885	5.862	-1.954	7.475	-0.676	35.390	523.310	-0.000410	0.000137	-0.000523
4.9800	250.809	1.862	-3.936	5.146	-0.671	35.383	477.476	-0.000130	0.000275	-0.000360
4.9900	251.621	1.277	-3.908	4.543	-0.664	35.390	479.021	-0.000089	0.000274	-0.000318
Test Cycles
Time (sec)	Axial stress (kPa)	Axial micro-strain #1	Axial micro-strain #2	Axial micro-strain #3	Confining pressure (kPa)	Temperature (�C)	Load (N)	Displacement #1 (mm)	Displacement #2 (mm)	Displacement #3 (mm)
0.0000	246.842	0.874	-4.197	4.058	-0.677	35.383	469.923	-0.000061	0.000294	-0.000284
0.0100	244.482	-0.097	-4.624	3.332	-0.674	35.389	465.431	0.000007	0.000324	-0.000233
0.0200	252.582	0.526	-4.528	3.469	-0.684	35.383	480.852	-0.000037	0.000317	-0.000243
0.0300	265.236	2.154	-4.102	4.334	-0.683	35.390	504.942	-0.000151	0.000287	-0.000303
0.0400	317.520	8.116	-2.256	7.708	-0.675	35.382	604.477	-0.000568	0.000158	-0.000540
0.0500	351.845	12.242	-0.660	10.473	-0.672	35.390	669.823	-0.000857	0.000046	-0.000733
0.0600	395.443	17.549	1.568	13.816	-0.669	35.383	752.821	-0.001228	-0.000110	-0.000967
0.0700	452.626	24.443	5.461	19.417	-0.675	35.391	861.683	-0.001711	-0.000382	-0.001359
0.0800	505.120	31.212	8.257	23.999	-0.669	35.383	961.618	-0.002185	-0.000578	-0.001680
0.0900	560.620	38.423	11.791	28.843	-0.665	35.390	1067.276	-0.002690	-0.000825	-0.002019
0.1000	619.200	46.011	15.565	33.272	-0.673	35.383	1178.799	-0.003221	-0.001090	-0.002329
0.1100	688.466	54.363	19.580	39.577	-0.665	35.390	1310.663	-0.003805	-0.001371	-0.002770
0.1200	757.447	63.909	23.984	45.712	-0.665	35.383	1441.984	-0.004474	-0.001679	-0.003200
0.1300	826.773	72.706	28.002	51.848	-0.665	35.390	1573.963	-0.005089	-0.001960	-0.003629
0.1400	893.679	81.252	32.447	57.478	-0.670	35.382	1701.336	-0.005688	-0.002271	-0.004023
0.1500	966.086	90.964	36.947	64.370	-0.680	35.390	1839.180	-0.006368	-0.002586	-0.004506
0.1600	1017.769	97.928	40.139	68.965	-0.678	35.383	1937.571	-0.006855	-0.002810	-0.004828
0.1700	1079.686	105.917	44.267	74.651	-0.664	35.390	2055.445	-0.007414	-0.003099	-0.005226
0.1800	1124.906	112.018	46.757	78.957	-0.666	35.383	2141.533	-0.007841	-0.003273	-0.005527
0.1900	1174.951	118.759	50.213	83.402	-0.668	35.390	2236.805	-0.008313	-0.003515	-0.005838
0.2000	1211.049	124.302	52.690	86.964	-0.664	35.382	2305.527	-0.008701	-0.003688	-0.006087
0.2100	1241.046	127.887	54.354	90.004	-0.665	35.390	2362.633	-0.008952	-0.003805	-0.006300
0.2200	1274.409	132.919	57.024	93.392	-0.679	35.383	2426.147	-0.009304	-0.003992	-0.006537
0.2300	1277.099	133.988	56.928	94.092	-0.676	35.390	2431.269	-0.009379	-0.003985	-0.006586
0.2400	1297.117	136.422	58.482	96.168	-0.677	35.383	2469.378	-0.009550	-0.004094	-0.006732
0.2500	1295.599	136.965	58.604	96.182	-0.672	35.390	2466.488	-0.009588	-0.004102	-0.006733
0.2600	1291.466	136.462	58.605	96.541	-0.668	35.383	2458.620	-0.009552	-0.004102	-0.006758
0.2700	1281.337	136.031	58.854	95.950	-0.670	35.390	2439.337	-0.009522	-0.004120	-0.006716
0.2800	1266.624	134.364	57.874	95.042	-0.677	35.383	2411.327	-0.009405	-0.004051	-0.006653
0.2900	1208.074	127.860	56.208	90.896	-0.677	35.390	2299.862	-0.008950	-0.003935	-0.006363
0.3000	1185.907	125.583	54.793	88.962	-0.679	35.382	2257.662	-0.008791	-0.003835	-0.006227
0.3100	1132.962	118.828	52.508	84.914	-0.680	35.391	2156.868	-0.008318	-0.003676	-0.005944
0.3200	1076.425	112.672	49.375	80.511	-0.672	35.383	2049.236	-0.007887	-0.003456	-0.005636
0.3300	1028.244	106.459	45.848	76.411	-0.676	35.390	1957.512	-0.007452	-0.003209	-0.005349
0.3400	963.005	98.235	42.450	71.210	-0.673	35.382	1833.315	-0.006876	-0.002971	-0.004985
0.3500	908.407	91.675	38.777	66.284	-0.680	35.391	1729.374	-0.006417	-0.002714	-0.004640
0.3600	839.998	82.976	34.993	60.424	-0.673	35.383	1599.140	-0.005808	-0.002450	-0.004230
0.3700	770.852	74.289	30.782	54.479	-0.674	35.391	1467.505	-0.005200	-0.002155	-0.003814
0.3800	699.332	64.617	26.212	48.052	-0.678	35.383	1331.348	-0.004523	-0.001835	-0.003364
0.3900	633.913	56.070	22.498	42.479	-0.671	35.391	1206.808	-0.003925	-0.001575	-0.002974
0.4000	585.973	49.927	19.003	38.116	-0.675	35.383	1115.541	-0.003495	-0.001330	-0.002668
0.4100	521.666	41.342	15.111	32.597	-0.680	35.391	993.118	-0.002894	-0.001058	-0.002282
0.4200	468.616	34.461	11.434	27.492	-0.677	35.382	892.124	-0.002412	-0.000800	-0.001924
0.4300	413.867	26.308	7.679	21.906	-0.675	35.391	787.897	-0.001842	-0.000538	-0.001533
0.4400	372.344	20.553	5.173	18.095	-0.677	35.383	708.847	-0.001439	-0.000362	-0.001267
0.4500	328.190	14.161	1.762	13.968	-0.680	35.391	624.790	-0.000991	-0.000123	-0.000978
0.4600	298.088	9.701	0.054	10.582	-0.687	35.383	567.484	-0.000679	-0.000004	-0.000741
0.4700	276.628	6.670	-1.679	7.927	-0.669	35.391	526.628	-0.000467	0.000118	-0.000555
0.4800	263.794	4.254	-2.807	6.839	-0.676	35.382	502.195	-0.000298	0.000196	-0.000479
0.4900	245.234	1.639	-3.866	4.940	-0.675	35.391	466.862	-0.000115	0.000271	-0.000346
0.5000	242.378	0.402	-4.789	4.198	-0.684	35.383	461.426	-0.000028	0.000335	-0.000294
0.5100	248.885	0.249	-4.323	4.114	-0.679	35.391	473.814	-0.000017	0.000303	-0.000288
0.5200	254.551	1.194	-4.446	3.991	-0.672	35.382	484.600	-0.000084	0.000311	-0.000279
0.5300	268.032	2.363	-3.936	4.171	-0.663	35.391	510.263	-0.000165	0.000275	-0.000292
0.5400	317.731	8.506	-1.940	7.708	-0.667	35.383	604.877	-0.000595	0.000136	-0.000540
0.5500	348.133	11.881	-0.960	10.828	-0.665	35.392	662.756	-0.000832	0.000067	-0.000758
0.5600	396.404	18.120	1.914	14.268	-0.672	35.383	754.652	-0.001268	-0.000134	-0.000999
0.5700	454.715	25.598	5.284	19.635	-0.683	35.391	865.660	-0.001792	-0.000370	-0.001374
0.5800	505.450	31.392	8.449	24.067	-0.675	35.383	962.248	-0.002197	-0.000591	-0.001685
0.5900	562.002	39.170	11.984	28.816	-0.684	35.391	1069.908	-0.002742	-0.000839	-0.002017
0.6000	633.072	47.720	16.183	34.649	-0.672	35.383	1205.206	-0.003340	-0.001133	-0.002425
0.6100	686.663	54.821	19.622	40.196	-0.686	35.391	1307.230	-0.003837	-0.001374	-0.002814
0.6200	750.970	63.327	23.392	45.904	-0.686	35.383	1429.653	-0.004433	-0.001637	-0.003213
0.6300	823.301	72.440	28.360	51.985	-0.683	35.391	1567.354	-0.005071	-0.001985	-0.003639
0.6400	894.250	81.807	32.597	58.316	-0.684	35.382	1702.423	-0.005727	-0.002282	-0.004082
0.6500	961.217	90.326	36.797	64.108	-0.679	35.391	1829.910	-0.006323	-0.002576	-0.004488
0.6600	1012.840	97.858	40.056	69.132	-0.675	35.383	1928.186	-0.006850	-0.002804	-0.004839
0.6700	1078.814	106.126	43.963	74.882	-0.684	35.392	2053.785	-0.007429	-0.003077	-0.005242
0.6800	1126.244	112.936	47.088	79.534	-0.676	35.383	2144.079	-0.007906	-0.003296	-0.005567
0.6900	1174.741	119.468	50.116	83.924	-0.683	35.391	2236.404	-0.008363	-0.003508	-0.005875
0.7000	1212.206	124.013	52.442	87.541	-0.684	35.383	2307.730	-0.008681	-0.003671	-0.006128
0.7100	1246.366	129.642	54.890	90.762	-0.673	35.391	2372.761	-0.009075	-0.003842	-0.006353
0.7200	1263.904	131.948	56.166	92.730	-0.672	35.383	2406.149	-0.009236	-0.003932	-0.006491
0.7300	1285.966	134.571	57.818	94.712	-0.677	35.391	2448.149	-0.009420	-0.004047	-0.006630
0.7400	1287.874	135.713	58.164	95.730	-0.680	35.383	2451.782	-0.009500	-0.004071	-0.006701
0.7500	1295.359	136.629	58.675	96.512	-0.678	35.392	2466.030	-0.009564	-0.004107	-0.006756
0.7600	1293.991	137.672	59.088	96.595	-0.677	35.383	2463.427	-0.009637	-0.004136	-0.006762
0.7700	1283.156	136.143	58.605	96.416	-0.679	35.391	2442.799	-0.009530	-0.004102	-0.006749
0.7800	1256.931	133.793	57.874	95.014	-0.679	35.382	2392.874	-0.009365	-0.004051	-0.006651
0.7900	1209.576	128.206	56.100	91.022	-0.669	35.391	2302.723	-0.008974	-0.003927	-0.006372
0.8000	1184.374	125.429	55.140	89.264	-0.686	35.383	2254.744	-0.008780	-0.003860	-0.006248
0.8100	1141.122	120.510	52.924	86.000	-0.665	35.392	2172.403	-0.008436	-0.003705	-0.006020
0.8200	1079.941	112.991	49.194	80.650	-0.672	35.382	2055.931	-0.007909	-0.003444	-0.005646
0.8300	1026.951	106.668	46.468	76.629	-0.672	35.391	1955.051	-0.007467	-0.003253	-0.005364
0.8400	972.879	99.842	42.864	72.009	-0.673	35.382	1852.112	-0.006989	-0.003000	-0.005041
0.8500	906.934	91.690	39.257	66.807	-0.671	35.391	1726.570	-0.006418	-0.002748	-0.004676
0.8600	835.489	83.126	34.883	60.533	-0.668	35.382	1590.557	-0.005819	-0.002442	-0.004237
0.8700	774.940	74.430	31.044	55.067	-0.660	35.392	1475.286	-0.005210	-0.002173	-0.003855
0.8800	705.839	66.173	26.955	49.138	-0.663	35.382	1343.737	-0.004632	-0.001887	-0.003440
0.8900	643.967	57.864	22.744	43.482	-0.659	35.391	1225.948	-0.004050	-0.001592	-0.003044
0.9000	578.939	49.010	18.771	38.117	-0.672	35.383	1102.152	-0.003431	-0.001314	-0.002668
0.9100	515.309	41.161	14.726	32.103	-0.667	35.392	981.016	-0.002881	-0.001031	-0.002247
0.9200	469.067	34.071	11.461	27.342	-0.666	35.383	892.982	-0.002385	-0.000802	-0.001914
0.9300	417.504	27.557	8.092	23.047	-0.667	35.392	794.821	-0.001929	-0.000566	-0.001613
0.9400	375.319	21.204	5.228	18.303	-0.682	35.383	714.512	-0.001484	-0.000366	-0.001281
0.9500	337.298	15.451	2.724	14.655	-0.679	35.391	642.128	-0.001082	-0.000191	-0.001026
0.9600	290.935	9.187	-0.633	10.100	-0.683	35.383	553.865	-0.000643	0.000044	-0.000707
0.9700	271.999	5.503	-1.789	8.186	-0.682	35.391	517.817	-0.000385	0.000125	-0.000573
0.9800	247.758	2.153	-3.604	5.105	-0.687	35.383	471.668	-0.000151	0.000252	-0.000357
0.9900	244.587	1.069	-4.183	4.664	-0.694	35.392	465.631	-0.000075	0.000293	-0.000327
1.0000	240.289	-0.026	-4.365	4.197	-0.692	35.383	457.449	0.000002	0.000306	-0.000294
1.0100	242.994	-0.001	-4.749	4.034	-0.681	35.392	462.599	0.000000	0.000332	-0.000282
1.0200	250.118	0.305	-4.282	3.951	-0.675	35.383	476.160	-0.000021	0.000300	-0.000277
1.0300	266.799	2.377	-3.989	4.405	-0.678	35.392	507.917	-0.000166	0.000279	-0.000308
1.0400	312.982	7.949	-2.434	7.667	-0.671	35.383	595.837	-0.000556	0.000170	-0.000537
1.0500	361.433	13.383	0.277	11.519	-0.672	35.392	688.076	-0.000937	-0.000019	-0.000806
1.0600	394.646	18.079	1.981	14.738	-0.672	35.383	751.305	-0.001266	-0.000139	-0.001032
1.0700	450.386	24.750	5.243	19.073	-0.673	35.392	857.420	-0.001733	-0.000367	-0.001335
1.0800	508.516	32.086	8.727	24.342	-0.682	35.383	968.084	-0.002246	-0.000611	-0.001704
1.0900	563.806	38.979	12.011	29.474	-0.671	35.392	1073.341	-0.002729	-0.000841	-0.002063
1.1000	625.557	47.593	16.100	34.470	-0.676	35.382	1190.901	-0.003332	-0.001127	-0.002413
1.1100	689.248	55.500	19.514	40.307	-0.669	35.392	1312.151	-0.003885	-0.001366	-0.002822
1.1200	762.331	64.411	24.578	46.247	-0.664	35.383	1451.283	-0.004509	-0.001720	-0.003237
1.1300	827.810	73.456	28.511	52.576	-0.662	35.392	1575.937	-0.005142	-0.001996	-0.003680
1.1400	884.767	80.626	32.298	57.600	-0.662	35.383	1684.370	-0.005644	-0.002261	-0.004032
1.1500	968.070	91.690	37.209	64.991	-0.663	35.392	1842.957	-0.006418	-0.002605	-0.004549
1.1600	1014.192	98.179	40.070	69.351	-0.675	35.383	1930.761	-0.006873	-0.002805	-0.004855
1.1700	1077.101	106.072	44.170	74.909	-0.680	35.392	2050.524	-0.007425	-0.003092	-0.005244
1.1800	1122.156	112.573	46.662	79.536	-0.686	35.383	2136.297	-0.007880	-0.003266	-0.005567
1.1900	1169.856	118.061	49.938	83.595	-0.671	35.392	2227.106	-0.008264	-0.003496	-0.005852
1.2000	1206.405	124.290	52.553	87.282	-0.678	35.382	2296.686	-0.008700	-0.003679	-0.006110
1.2100	1241.347	128.736	54.670	90.485	-0.672	35.392	2363.205	-0.009012	-0.003827	-0.006334
1.2200	1264.535	131.976	56.361	92.869	-0.671	35.383	2407.351	-0.009238	-0.003945	-0.006501
1.2300	1282.494	134.712	57.503	95.029	-0.671	35.392	2441.540	-0.009430	-0.004025	-0.006652
1.2400	1302.106	137.367	58.879	97.061	-0.680	35.382	2478.876	-0.009616	-0.004122	-0.006794
1.2500	1293.360	137.436	58.934	96.720	-0.673	35.392	2462.225	-0.009621	-0.004125	-0.006770
1.2600	1287.484	136.671	58.742	96.636	-0.667	35.382	2451.038	-0.009567	-0.004112	-0.006765
1.2700	1280.706	136.212	58.866	96.596	-0.670	35.391	2438.135	-0.009535	-0.004121	-0.006762
1.2800	1260.703	134.113	57.958	95.237	-0.672	35.383	2400.055	-0.009388	-0.004057	-0.006667
1.2900	1226.544	130.195	56.914	92.965	-0.672	35.392	2335.024	-0.009114	-0.003984	-0.006508
1.3000	1185.741	125.846	55.167	89.772	-0.674	35.383	2257.347	-0.008809	-0.003862	-0.006284
1.3100	1133.037	118.980	52.277	85.644	-0.672	35.392	2157.011	-0.008329	-0.003659	-0.005995
1.3200	1069.061	111.989	48.903	80.264	-0.669	35.383	2035.217	-0.007839	-0.003423	-0.005619
1.3300	1026.861	106.711	46.193	76.493	-0.675	35.393	1954.880	-0.007470	-0.003233	-0.005355
1.3400	966.387	99.400	42.740	72.078	-0.671	35.383	1839.752	-0.006958	-0.002992	-0.005045
1.3500	911.834	92.203	39.520	67.522	-0.672	35.392	1735.897	-0.006454	-0.002766	-0.004727
1.3600	828.997	82.044	34.606	60.407	-0.678	35.383	1578.197	-0.005743	-0.002422	-0.004228
1.3700	783.972	76.208	31.843	56.199	-0.663	35.393	1492.481	-0.005335	-0.002229	-0.003934
1.3800	712.166	67.074	27.288	50.130	-0.672	35.383	1355.782	-0.004695	-0.001910	-0.003509
1.3900	645.951	58.281	23.419	44.143	-0.672	35.393	1229.725	-0.004080	-0.001639	-0.003090
1.4000	579.360	49.998	18.951	38.254	-0.679	35.383	1102.953	-0.003500	-0.001327	-0.002678
1.4100	514.468	40.982	14.836	32.488	-0.677	35.393	979.414	-0.002869	-0.001038	-0.002274
1.4200	459.614	33.351	11.324	27.355	-0.686	35.383	874.987	-0.002335	-0.000793	-0.001915
1.4300	410.245	26.209	7.514	22.635	-0.682	35.393	781.002	-0.001835	-0.000526	-0.001584
1.4400	366.919	20.649	5.077	18.013	-0.681	35.383	698.519	-0.001445	-0.000355	-0.001261
1.4500	326.853	14.592	2.065	14.354	-0.675	35.393	622.244	-0.001021	-0.000145	-0.001005
1.4600	293.926	9.756	-0.371	10.788	-0.680	35.384	559.559	-0.000683	0.000026	-0.000755
1.4700	279.468	7.266	-1.195	9.137	-0.672	35.393	532.036	-0.000509	0.000084	-0.000640
1.4800	250.644	2.724	-3.547	5.946	-0.679	35.383	477.161	-0.000191	0.000248	-0.000416
1.4900	242.829	1.458	-3.989	5.202	-0.677	35.393	462.284	-0.000102	0.000279	-0.000364
1.5000	241.717	0.528	-4.611	3.922	-0.680	35.383	460.167	-0.000037	0.000323	-0.000275
1.5100	245.549	0.960	-4.267	4.252	-0.675	35.393	467.463	-0.000067	0.000299	-0.000298
1.5200	249.772	0.888	-4.362	4.501	-0.676	35.383	475.502	-0.000062	0.000305	-0.000315
1.5300	263.568	2.073	-4.198	4.706	-0.676	35.393	501.766	-0.000145	0.000294	-0.000329
1.5400	323.892	9.423	-1.678	8.765	-0.679	35.383	616.608	-0.000660	0.000117	-0.000614
1.5500	355.467	13.506	-0.289	11.751	-0.674	35.394	676.718	-0.000945	0.000020	-0.000823
1.5600	389.972	17.508	1.653	14.160	-0.681	35.383	742.407	-0.001226	-0.000116	-0.000991
1.5700	445.923	24.569	5.049	19.045	-0.679	35.393	848.923	-0.001720	-0.000353	-0.001333
1.5800	511.101	32.740	8.738	24.451	-0.681	35.383	973.005	-0.002292	-0.000612	-0.001712
1.5900	563.986	39.686	12.288	29.393	-0.676	35.393	1073.685	-0.002778	-0.000860	-0.002057
1.6000	616.706	46.150	15.249	34.195	-0.684	35.383	1174.049	-0.003231	-0.001067	-0.002394
1.6100	694.853	56.377	20.572	41.088	-0.684	35.394	1322.823	-0.003946	-0.001440	-0.002876
1.6200	761.910	64.674	24.589	46.867	-0.679	35.383	1450.481	-0.004527	-0.001721	-0.003281
1.6300	818.853	72.302	28.083	51.780	-0.676	35.394	1558.886	-0.005061	-0.001966	-0.003625
1.6400	895.032	82.613	33.217	58.867	-0.688	35.383	1703.911	-0.005783	-0.002325	-0.004121
1.6500	961.998	91.144	36.989	64.796	-0.685	35.393	1831.398	-0.006380	-0.002589	-0.004536
1.6600	1018.220	98.386	40.744	69.765	-0.677	35.384	1938.429	-0.006887	-0.002852	-0.004884
1.6700	1064.177	104.903	43.469	74.057	-0.673	35.393	2025.919	-0.007343	-0.003043	-0.005184
1.6800	1124.501	112.475	47.144	79.646	-0.672	35.383	2140.760	-0.007873	-0.003300	-0.005575
1.6900	1178.017	120.051	50.363	84.379	-0.672	35.394	2242.641	-0.008404	-0.003525	-0.005907
1.7000	1213.784	124.665	52.799	87.942	-0.673	35.383	2310.734	-0.008727	-0.003696	-0.006156
1.7100	1248.245	129.528	55.248	91.353	-0.671	35.394	2376.337	-0.009067	-0.003867	-0.006395
1.7200	1268.413	132.653	56.680	93.419	-0.678	35.384	2414.732	-0.009286	-0.003968	-0.006539
1.7300	1293.991	135.851	58.316	95.952	-0.672	35.393	2463.427	-0.009510	-0.004082	-0.006717
1.7400	1297.793	137.492	58.906	96.857	-0.672	35.383	2470.665	-0.009624	-0.004123	-0.006780
1.7500	1295.419	137.311	58.839	96.928	-0.665	35.394	2466.145	-0.009612	-0.004119	-0.006785
1.7600	1291.376	137.851	58.866	96.995	-0.673	35.383	2458.448	-0.009650	-0.004121	-0.006790
1.7700	1282.329	136.880	58.618	96.709	-0.677	35.394	2441.225	-0.009582	-0.004103	-0.006770
1.7800	1264.641	135.169	58.193	95.648	-0.677	35.384	2407.551	-0.009462	-0.004074	-0.006695
1.7900	1217.286	130.183	56.694	91.959	-0.661	35.393	2317.400	-0.009113	-0.003969	-0.006437
1.8000	1176.769	124.803	54.834	89.153	-0.671	35.383	2240.267	-0.008736	-0.003838	-0.006241
1.8100	1142.685	121.052	53.115	86.304	-0.667	35.394	2175.379	-0.008474	-0.003718	-0.006041
1.8200	1078.950	113.437	49.263	81.172	-0.665	35.384	2054.043	-0.007941	-0.003448	-0.005682
1.8300	1028.710	107.156	46.813	77.084	-0.668	35.394	1958.399	-0.007501	-0.003277	-0.005396
1.8400	965.876	99.859	42.932	71.774	-0.663	35.383	1838.779	-0.006990	-0.003005	-0.005024
1.8500	907.520	92.383	39.314	67.055	-0.657	35.394	1727.686	-0.006467	-0.002752	-0.004694
1.8600	836.992	83.515	35.102	60.739	-0.659	35.384	1593.418	-0.005846	-0.002457	-0.004252
1.8700	775.195	75.611	31.361	55.494	-0.659	35.394	1475.773	-0.005293	-0.002195	-0.003885
1.8800	711.490	67.368	27.657	50.019	-0.654	35.383	1354.494	-0.004716	-0.001936	-0.003501
1.8900	644.057	58.518	23.132	44.335	-0.654	35.394	1226.120	-0.004096	-0.001619	-0.003103
1.9000	578.233	49.415	19.017	38.626	-0.663	35.383	1100.807	-0.003459	-0.001331	-0.002704
1.9100	523.274	42.800	15.538	33.258	-0.665	35.394	996.180	-0.002996	-0.001088	-0.002328
1.9200	467.639	34.268	11.724	27.741	-0.663	35.384	890.265	-0.002399	-0.000821	-0.001942
1.9300	408.848	26.890	8.022	22.456	-0.662	35.394	778.341	-0.001882	-0.000562	-0.001572
1.9400	371.142	20.886	5.158	18.372	-0.664	35.383	706.558	-0.001462	-0.000361	-0.001286
1.9500	327.740	14.855	2.325	14.572	-0.665	35.394	623.932	-0.001040	-0.000163	-0.001020
1.9600	297.893	10.673	0.290	11.298	-0.672	35.383	567.112	-0.000747	-0.000020	-0.000791
1.9700	277.124	7.031	-1.621	8.682	-0.664	35.394	527.573	-0.000492	0.000113	-0.000608
1.9800	252.808	3.725	-3.093	6.523	-0.676	35.384	481.281	-0.000261	0.000216	-0.000457
1.9900	244.587	1.904	-4.128	5.493	-0.676	35.394	465.631	-0.000133	0.000289	-0.000385
2.0000	240.094	0.347	-4.363	4.196	-0.674	35.384	457.077	-0.000024	0.000305	-0.000294
2.0100	244.768	1.084	-4.652	4.170	-0.674	35.394	465.975	-0.000076	0.000326	-0.000292
2.0200	253.920	1.377	-4.363	4.337	-0.671	35.384	483.398	-0.000096	0.000305	-0.000304
2.0300	274.073	4.158	-3.672	5.876	-0.670	35.395	521.765	-0.000291	0.000257	-0.000411
2.0400	318.933	9.047	-1.967	9.025	-0.674	35.383	607.166	-0.000633	0.000138	-0.000632
2.0500	359.660	14.272	0.151	12.109	-0.674	35.394	684.700	-0.000999	-0.000011	-0.000848
2.0600	394.977	18.648	1.900	15.205	-0.672	35.383	751.934	-0.001305	-0.000133	-0.001064
2.0700	451.438	25.625	5.379	19.500	-0.672	35.394	859.423	-0.001794	-0.000377	-0.001365
2.0800	507.419	32.779	8.892	24.876	-0.671	35.384	965.996	-0.002295	-0.000622	-0.001741
2.0900	564.467	40.218	12.190	29.588	-0.669	35.395	1074.600	-0.002815	-0.000853	-0.002071
2.1000	634.154	48.888	16.747	35.531	-0.673	35.384	1207.266	-0.003422	-0.001172	-0.002487
2.1100	704.682	57.863	20.806	41.748	-0.675	35.394	1341.534	-0.004050	-0.001456	-0.002922
2.1200	763.308	65.479	24.881	47.324	-0.675	35.384	1453.142	-0.004584	-0.001742	-0.003313
2.1300	832.965	74.677	29.104	52.989	-0.671	35.395	1585.751	-0.005227	-0.002037	-0.003709
2.1400	899.871	83.377	32.926	59.322	-0.670	35.384	1713.123	-0.005836	-0.002305	-0.004153
2.1500	960.466	91.285	37.250	64.589	-0.668	35.395	1828.480	-0.006390	-0.002608	-0.004521
2.1600	1013.711	99.024	40.331	69.640	-0.676	35.384	1929.846	-0.006932	-0.002823	-0.004875
2.1700	1084.675	107.517	44.761	76.040	-0.672	35.395	2064.943	-0.007526	-0.003133	-0.005323
2.1800	1129.971	113.855	47.638	80.251	-0.674	35.384	2151.175	-0.007970	-0.003335	-0.005618
2.1900	1178.964	120.203	50.544	84.858	-0.669	35.395	2244.444	-0.008414	-0.003538	-0.005940
2.2000	1221.118	126.180	53.666	88.893	-0.675	35.383	2324.696	-0.008833	-0.003757	-0.006222
2.2100	1244.112	129.418	54.972	91.175	-0.664	35.395	2368.469	-0.009059	-0.003848	-0.006382
2.2200	1275.912	133.626	57.174	94.301	-0.670	35.383	2429.008	-0.009354	-0.004002	-0.006601
2.2300	1284.193	135.545	57.846	95.648	-0.674	35.395	2444.773	-0.009488	-0.004049	-0.006695
2.2400	1291.346	136.520	58.411	96.580	-0.671	35.383	2458.391	-0.009556	-0.004089	-0.006761
2.2500	1296.771	138.131	59.212	96.899	-0.675	35.395	2468.719	-0.009669	-0.004145	-0.006783
2.2600	1290.519	137.587	59.032	97.296	-0.670	35.383	2456.818	-0.009631	-0.004132	-0.006811
2.2700	1277.775	136.381	58.852	96.442	-0.667	35.395	2432.556	-0.009547	-0.004120	-0.006751
2.2800	1253.670	134.016	57.779	95.279	-0.664	35.383	2386.665	-0.009381	-0.004045	-0.006670
2.2900	1209.607	128.847	56.555	91.712	-0.671	35.394	2302.780	-0.009019	-0.003959	-0.006420
2.3000	1182.420	126.112	55.508	89.730	-0.662	35.383	2251.024	-0.008828	-0.003886	-0.006281
2.3100	1122.878	118.453	51.943	84.997	-0.668	35.395	2137.671	-0.008292	-0.003636	-0.005950
2.3200	1073.584	112.990	49.400	81.172	-0.664	35.384	2043.829	-0.007909	-0.003458	-0.005682
2.3300	1020.820	106.668	45.684	76.604	-0.661	35.394	1943.378	-0.007467	-0.003198	-0.005362
2.3400	959.910	98.914	42.615	71.582	-0.666	35.384	1827.421	-0.006924	-0.002983	-0.005011
2.3500	900.893	91.857	39.161	66.668	-0.657	35.395	1715.069	-0.006430	-0.002741	-0.004667
2.3600	833.160	82.695	34.869	60.737	-0.654	35.384	1586.123	-0.005789	-0.002441	-0.004252
2.3700	764.044	74.427	30.907	54.750	-0.656	35.395	1454.544	-0.005210	-0.002163	-0.003833
2.3800	708.184	66.646	27.135	49.605	-0.660	35.384	1348.200	-0.004665	-0.001899	-0.003472
2.3900	634.169	57.392	22.800	43.619	-0.656	35.395	1207.294	-0.004017	-0.001596	-0.003053
2.4000	566.030	48.539	18.136	37.456	-0.661	35.383	1077.576	-0.003398	-0.001270	-0.002622
2.4100	516.632	41.759	14.767	32.379	-0.663	35.395	983.534	-0.002923	-0.001034	-0.002267
2.4200	459.599	33.879	11.119	27.467	-0.661	35.383	874.958	-0.002372	-0.000778	-0.001923
2.4300	406.503	26.280	7.473	22.074	-0.655	35.395	773.878	-0.001840	-0.000523	-0.001545
2.4400	368.151	20.706	5.364	18.426	-0.658	35.383	700.865	-0.001449	-0.000376	-0.001290
2.4500	321.803	14.384	1.858	13.624	-0.661	35.395	612.631	-0.001007	-0.000130	-0.000954
2.4600	291.356	9.797	-0.152	10.926	-0.669	35.383	554.667	-0.000686	0.000011	-0.000765
2.4700	268.978	6.516	-1.497	8.352	-0.668	35.395	512.066	-0.000456	0.000105	-0.000585
2.4800	252.613	3.142	-3.494	6.729	-0.663	35.384	480.909	-0.000220	0.000245	-0.000471
2.4900	241.281	1.500	-4.128	5.106	-0.656	35.395	459.337	-0.000105	0.000289	-0.000357
2.5000	242.273	1.137	-4.432	4.170	-0.659	35.384	461.226	-0.000080	0.000310	-0.000292
2.5100	244.106	0.720	-4.337	4.101	-0.664	35.395	464.716	-0.000050	0.000304	-0.000287
2.5200	253.154	1.514	-4.059	5.215	-0.672	35.384	481.939	-0.000106	0.000284	-0.000365
2.5300	270.481	3.392	-3.961	5.327	-0.668	35.395	514.927	-0.000237	0.000277	-0.000373
2.5400	319.940	9.326	-1.666	8.475	-0.665	35.384	609.083	-0.000653	0.000117	-0.000593
2.5500	353.964	13.621	-0.522	11.724	-0.667	35.395	673.857	-0.000953	0.000037	-0.000821
2.5600	396.900	18.466	2.410	15.658	-0.668	35.384	755.596	-0.001293	-0.000169	-0.001096
2.5700	447.576	25.456	5.490	19.580	-0.672	35.395	852.070	-0.001782	-0.000384	-0.001371
2.5800	515.715	33.462	9.151	25.787	-0.668	35.384	981.789	-0.002342	-0.000641	-0.001805
2.5900	563.490	40.452	12.330	29.737	-0.665	35.395	1072.741	-0.002832	-0.000863	-0.002082
2.6000	638.632	49.163	16.525	36.367	-0.668	35.384	1215.792	-0.003441	-0.001157	-0.002546
2.6100	707.447	58.533	21.287	42.573	-0.672	35.396	1346.798	-0.004097	-0.001490	-0.002980
2.6200	768.177	66.297	24.770	47.762	-0.667	35.384	1462.412	-0.004641	-0.001734	-0.003343
2.6300	831.657	74.040	28.994	53.364	-0.673	35.395	1583.261	-0.005183	-0.002030	-0.003735
2.6400	894.010	82.877	32.930	58.716	-0.664	35.384	1701.965	-0.005801	-0.002305	-0.004110
2.6500	960.811	91.508	37.017	64.810	-0.665	35.396	1829.138	-0.006406	-0.002591	-0.004537
2.6600	1016.687	98.624	40.689	69.943	-0.660	35.384	1935.511	-0.006904	-0.002848	-0.004896
2.6700	1069.016	105.889	43.715	74.538	-0.665	35.395	2035.131	-0.007412	-0.003060	-0.005218
2.6800	1130.662	113.297	47.419	80.400	-0.664	35.384	2152.491	-0.007931	-0.003319	-0.005628
2.6900	1178.964	120.704	50.856	85.178	-0.677	35.395	2244.444	-0.008449	-0.003560	-0.005962
2.7000	1209.607	124.276	52.677	88.105	-0.676	35.383	2302.780	-0.008699	-0.003687	-0.006167
2.7100	1247.944	130.042	55.196	91.670	-0.671	35.395	2375.765	-0.009103	-0.003864	-0.006417
2.7200	1265.452	133.098	56.581	93.295	-0.667	35.383	2409.096	-0.009317	-0.003961	-0.006531
2.7300	1291.076	136.213	58.234	96.143	-0.664	35.395	2457.876	-0.009535	-0.004076	-0.006730
2.7400	1292.338	137.338	58.647	96.567	-0.661	35.383	2460.279	-0.009614	-0.004105	-0.006760
2.7500	1289.723	136.977	58.426	96.870	-0.663	35.395	2455.301	-0.009588	-0.004090	-0.006781
2.7600	1286.161	137.284	58.866	96.857	-0.671	35.384	2448.521	-0.009610	-0.004121	-0.006780
2.7700	1274.319	136.047	58.205	96.611	-0.663	35.396	2425.976	-0.009523	-0.004074	-0.006763
2.7800	1254.707	134.266	57.736	95.251	-0.663	35.384	2388.639	-0.009399	-0.004042	-0.006668
2.7900	1204.812	128.847	56.084	91.959	-0.665	35.396	2293.653	-0.009019	-0.003926	-0.006437
2.8000	1185.276	126.305	55.263	90.403	-0.669	35.384	2256.460	-0.008841	-0.003868	-0.006328
2.8100	1121.119	118.718	52.331	85.012	-0.671	35.396	2134.323	-0.008310	-0.003663	-0.005951
2.8200	1072.547	113.145	49.278	81.061	-0.675	35.384	2041.855	-0.007920	-0.003449	-0.005674
2.8300	1024.216	107.169	46.632	77.195	-0.674	35.396	1949.844	-0.007502	-0.003264	-0.005404
2.8400	960.856	99.442	42.616	71.939	-0.674	35.384	1829.224	-0.006961	-0.002983	-0.005036
2.8500	898.323	91.244	38.914	66.875	-0.679	35.395	1710.176	-0.006387	-0.002724	-0.004681
2.8600	834.768	83.695	35.170	61.289	-0.675	35.384	1589.184	-0.005859	-0.002462	-0.004290
2.8700	768.778	75.026	30.920	55.563	-0.678	35.396	1463.556	-0.005252	-0.002164	-0.003889
2.8800	706.335	66.979	27.204	50.116	-0.679	35.384	1344.681	-0.004689	-0.001904	-0.003508
2.8900	631.975	57.544	22.428	43.731	-0.678	35.396	1203.117	-0.004028	-0.001570	-0.003061
2.9000	579.090	49.969	19.293	38.379	-0.673	35.384	1102.438	-0.003498	-0.001351	-0.002687
2.9100	515.970	41.911	14.946	32.860	-0.663	35.396	982.275	-0.002934	-0.001046	-0.002300
2.9200	456.623	33.378	11.090	26.997	-0.668	35.384	869.293	-0.002336	-0.000776	-0.001890
2.9300	406.654	26.709	8.214	22.610	-0.670	35.396	774.164	-0.001870	-0.000575	-0.001583
2.9400	363.823	20.608	4.762	18.729	-0.679	35.384	692.625	-0.001443	-0.000333	-0.001311
2.9500	319.850	14.204	2.146	13.706	-0.675	35.396	608.912	-0.000994	-0.000150	-0.000959
2.9600	294.361	10.298	-0.068	11.600	-0.670	35.384	560.389	-0.000721	0.000005	-0.000812
2.9700	274.148	7.114	-1.580	8.998	-0.673	35.396	521.908	-0.000498	0.000111	-0.000630
2.9800	249.547	3.684	-3.053	6.126	-0.671	35.384	475.073	-0.000258	0.000214	-0.000429
2.9900	240.740	1.697	-4.156	5.051	-0.666	35.396	458.307	-0.000119	0.000291	-0.000354
3.0000	242.483	1.167	-4.059	5.077	-0.671	35.385	461.626	-0.000082	0.000284	-0.000355
3.0100	247.518	1.557	-4.335	5.064	-0.672	35.397	471.210	-0.000109	0.000303	-0.000354
3.0200	255.543	2.128	-4.143	4.858	-0.671	35.385	486.488	-0.000149	0.000290	-0.000340
3.0300	269.775	3.838	-3.370	5.572	-0.668	35.397	513.582	-0.000269	0.000236	-0.000390
3.0400	313.553	8.797	-2.105	8.821	-0.669	35.384	596.924	-0.000616	0.000147	-0.000617
3.0500	353.889	13.731	0.167	11.559	-0.662	35.397	673.714	-0.000961	-0.000012	-0.000809
3.0600	401.334	19.456	2.425	16.278	-0.674	35.384	764.036	-0.001362	-0.000170	-0.001139
3.0700	447.501	24.890	5.395	20.377	-0.671	35.397	851.927	-0.001742	-0.000378	-0.001426
3.0800	507.735	33.241	9.275	24.876	-0.669	35.385	966.597	-0.002327	-0.000649	-0.001741
3.0900	568.765	40.439	12.564	30.494	-0.668	35.397	1082.783	-0.002831	-0.000879	-0.002135
3.1000	632.125	49.027	16.994	35.722	-0.665	35.385	1203.403	-0.003432	-0.001190	-0.002501
3.1100	696.942	57.045	20.639	41.914	-0.665	35.396	1326.799	-0.003993	-0.001445	-0.002934
3.1200	759.536	65.187	24.658	46.881	-0.672	35.385	1445.961	-0.004563	-0.001726	-0.003282
3.1300	837.293	75.276	29.268	53.665	-0.662	35.397	1593.990	-0.005269	-0.002049	-0.003757
3.1400	906.408	84.309	33.436	59.898	-0.663	35.384	1725.569	-0.005902	-0.002340	-0.004193
3.1500	976.155	93.549	37.952	66.422	-0.664	35.396	1858.349	-0.006548	-0.002657	-0.004650
3.1600	1033.113	100.998	41.378	71.484	-0.667	35.384	1966.782	-0.007070	-0.002896	-0.005004
3.1700	1071.811	106.653	44.268	75.404	-0.668	35.397	2040.453	-0.007466	-0.003099	-0.005278
3.1800	1144.008	115.756	48.615	81.887	-0.668	35.384	2177.897	-0.008103	-0.003403	-0.005732
3.1900	1176.920	120.051	50.942	85.289	-0.669	35.397	2240.553	-0.008404	-0.003566	-0.005970
3.2000	1220.562	126.680	53.722	89.083	-0.667	35.385	2323.637	-0.008868	-0.003761	-0.006236
3.2100	1249.116	130.126	55.414	91.766	-0.675	35.397	2377.996	-0.009109	-0.003879	-0.006424
3.2200	1260.327	132.254	56.584	93.322	-0.667	35.385	2399.340	-0.009258	-0.003961	-0.006533
3.2300	1288.340	136.100	57.997	96.348	-0.672	35.397	2452.669	-0.009527	-0.004060	-0.006744
3.2400	1294.818	137.310	58.715	97.395	-0.680	35.384	2465.000	-0.009612	-0.004110	-0.006818
3.2500	1295.644	138.199	59.156	97.862	-0.667	35.397	2466.574	-0.009674	-0.004141	-0.006850
3.2600	1289.062	137.686	58.906	97.531	-0.665	35.385	2454.042	-0.009638	-0.004123	-0.006827
3.2700	1265.227	135.462	58.604	96.170	-0.663	35.397	2408.667	-0.009482	-0.004102	-0.006732
3.2800	1229.399	131.432	56.816	93.280	-0.670	35.385	2340.460	-0.009200	-0.003977	-0.006530
3.2900	1218.939	130.653	56.955	92.663	-0.667	35.397	2320.547	-0.009146	-0.003987	-0.006486
3.3000	1162.057	124.093	54.204	88.521	-0.667	35.384	2212.257	-0.008687	-0.003794	-0.006196
3.3100	1134.780	120.189	52.743	85.863	-0.670	35.397	2160.330	-0.008413	-0.003692	-0.006010
3.3200	1081.219	114.283	49.829	81.847	-0.659	35.385	2058.363	-0.008000	-0.003488	-0.005729
3.3300	1028.664	107.947	46.636	77.607	-0.665	35.397	1958.313	-0.007556	-0.003264	-0.005432
3.3400	956.558	98.776	42.492	72.008	-0.657	35.384	1821.041	-0.006914	-0.002974	-0.005041
3.3500	898.233	91.882	39.038	66.778	-0.660	35.397	1710.005	-0.006432	-0.002733	-0.004674
3.3600	835.249	83.043	35.102	61.564	-0.663	35.385	1590.099	-0.005813	-0.002457	-0.004309
3.3700	762.647	74.456	31.169	55.070	-0.665	35.398	1451.883	-0.005212	-0.002182	-0.003855
3.3800	702.653	66.953	27.123	49.468	-0.663	35.385	1337.671	-0.004687	-0.001899	-0.003463
3.3900	636.814	58.032	22.910	43.757	-0.660	35.397	1212.330	-0.004062	-0.001604	-0.003063
3.4000	564.843	48.206	18.537	37.526	-0.664	35.385	1075.315	-0.003374	-0.001298	-0.002627
3.4100	514.272	41.273	15.261	32.653	-0.664	35.397	979.042	-0.002889	-0.001068	-0.002286
3.4200	463.176	34.352	12.083	27.989	-0.669	35.385	881.767	-0.002405	-0.000846	-0.001959
3.4300	405.451	26.542	7.583	22.951	-0.665	35.397	771.875	-0.001858	-0.000531	-0.001607
3.4400	363.537	20.553	5.296	18.246	-0.662	35.385	692.081	-0.001439	-0.000371	-0.001277
3.4500	328.205	15.646	2.394	14.916	-0.663	35.397	624.819	-0.001095	-0.000168	-0.001044
3.4600	292.994	10.381	-0.070	11.022	-0.662	35.385	557.785	-0.000727	0.000005	-0.000772
3.4700	263.613	6.086	-1.734	8.036	-0.662	35.398	501.852	-0.000426	0.000121	-0.000562
3.4800	254.341	4.101	-2.832	7.296	-0.674	35.384	484.200	-0.000287	0.000198	-0.000511
3.4900	246.301	2.835	-3.522	6.153	-0.668	35.397	468.893	-0.000198	0.000247	-0.000431
3.5000	246.511	1.947	-4.252	5.680	-0.674	35.384	469.294	-0.000136	0.000298	-0.000398
3.5100	249.261	2.001	-3.908	5.629	-0.668	35.397	474.529	-0.000140	0.000274	-0.000394
3.5200	253.409	2.517	-4.058	5.022	-0.667	35.385	482.426	-0.000176	0.000284	-0.000352
3.5300	266.454	3.392	-3.547	5.793	-0.668	35.398	507.259	-0.000237	0.000248	-0.000405
3.5400	317.550	9.688	-1.514	9.385	-0.669	35.385	604.534	-0.000678	0.000106	-0.000657
3.5500	354.144	13.689	-0.358	11.641	-0.678	35.398	674.200	-0.000958	0.000025	-0.000815
3.5600	395.728	19.206	2.407	15.604	-0.672	35.385	753.365	-0.001344	-0.000169	-0.001092
3.5700	455.827	26.500	5.823	20.255	-0.676	35.398	867.777	-0.001855	-0.000408	-0.001418
3.5800	505.601	32.574	8.671	25.387	-0.673	35.385	962.534	-0.002280	-0.000607	-0.001777
3.5900	566.721	40.912	12.826	30.244	-0.675	35.398	1078.892	-0.002864	-0.000898	-0.002117
3.6000	638.602	49.790	16.845	36.630	-0.676	35.385	1215.734	-0.003485	-0.001179	-0.002564
3.6100	703.435	58.269	21.342	42.202	-0.672	35.398	1339.159	-0.004079	-0.001494	-0.002954
3.6200	758.078	65.384	24.439	47.499	-0.676	35.385	1443.186	-0.004577	-0.001711	-0.003325
3.6300	831.357	74.777	29.158	53.542	-0.665	35.398	1582.689	-0.005234	-0.002041	-0.003748
3.6400	898.263	83.848	33.352	59.471	-0.659	35.385	1710.062	-0.005869	-0.002335	-0.004163
3.6500	958.106	91.577	36.986	65.043	-0.668	35.398	1823.988	-0.006410	-0.002589	-0.004553
3.6600	1024.021	100.483	41.324	70.714	-0.671	35.385	1949.472	-0.007034	-0.002893	-0.004950
3.6700	1077.552	107.448	44.557	75.928	-0.676	35.398	2051.382	-0.007521	-0.003119	-0.005315
3.6800	1130.512	114.174	48.079	80.677	-0.677	35.385	2152.205	-0.007992	-0.003366	-0.005647
3.6900	1171.900	120.260	50.777	84.448	-0.676	35.398	2230.997	-0.008418	-0.003554	-0.005911
3.7000	1213.093	125.469	52.867	89.016	-0.675	35.384	2309.418	-0.008783	-0.003701	-0.006231
3.7100	1245.840	130.334	55.495	91.975	-0.679	35.398	2371.759	-0.009123	-0.003885	-0.006438
3.7200	1265.632	133.294	56.761	93.777	-0.684	35.385	2409.439	-0.009331	-0.003973	-0.006564
3.7300	1285.620	135.699	58.260	96.198	-0.673	35.398	2447.491	-0.009499	-0.004078	-0.006734
3.7400	1298.980	138.297	59.293	97.562	-0.675	35.385	2472.925	-0.009681	-0.004151	-0.006829
3.7500	1295.419	138.072	59.199	97.531	-0.679	35.398	2466.145	-0.009665	-0.004144	-0.006827
3.7600	1289.768	138.116	59.227	97.724	-0.674	35.385	2455.387	-0.009668	-0.004146	-0.006841
3.7700	1279.053	137.242	58.811	97.188	-0.680	35.398	2434.988	-0.009607	-0.004117	-0.006803
3.7800	1261.800	135.252	58.603	96.196	-0.675	35.385	2402.143	-0.009468	-0.004102	-0.006734
3.7900	1216.129	130.555	56.886	93.033	-0.676	35.399	2315.197	-0.009139	-0.003982	-0.006512
3.8000	1176.078	125.624	55.303	90.074	-0.680	35.385	2238.951	-0.008794	-0.003871	-0.006305
3.8100	1127.476	120.051	52.745	85.946	-0.679	35.399	2146.425	-0.008404	-0.003692	-0.006016
3.8200	1084.435	114.383	49.923	82.190	-0.678	35.385	2064.486	-0.008007	-0.003495	-0.005753
3.8300	1028.950	108.254	47.185	77.717	-0.671	35.398	1958.857	-0.007578	-0.003303	-0.005440
3.8400	961.608	100.358	42.891	72.048	-0.671	35.385	1830.654	-0.007025	-0.003002	-0.005043
3.8500	900.728	92.064	39.383	66.737	-0.669	35.398	1714.754	-0.006445	-0.002757	-0.004672
3.8600	836.121	84.085	35.667	61.675	-0.673	35.385	1591.759	-0.005886	-0.002497	-0.004317
3.8700	762.256	74.539	30.851	55.262	-0.673	35.399	1451.139	-0.005218	-0.002160	-0.003868
3.8800	704.517	67.271	27.506	50.265	-0.672	35.385	1341.219	-0.004709	-0.001925	-0.003519
3.8900	631.464	57.392	22.539	43.248	-0.672	35.399	1202.145	-0.004017	-0.001578	-0.003027
3.9000	575.378	49.874	19.306	38.943	-0.663	35.385	1095.371	-0.003491	-0.001351	-0.002726
3.9100	514.197	41.870	15.454	32.696	-0.671	35.399	978.899	-0.002931	-0.001082	-0.002289
3.9200	468.886	35.116	12.012	29.088	-0.671	35.386	892.639	-0.002458	-0.000841	-0.002036
3.9300	412.650	28.140	8.504	23.159	-0.671	35.399	785.580	-0.001970	-0.000595	-0.001621
3.9400	363.763	20.985	4.721	18.633	-0.678	35.385	692.511	-0.001469	-0.000330	-0.001304
3.9500	331.211	15.980	2.877	15.206	-0.673	35.399	630.541	-0.001119	-0.000201	-0.001064
3.9600	292.994	11.103	0.248	11.063	-0.675	35.386	557.785	-0.000777	-0.000017	-0.000774
3.9700	267.821	6.683	-1.858	8.350	-0.677	35.398	509.863	-0.000468	0.000130	-0.000584
3.9800	250.388	4.157	-2.711	6.222	-0.672	35.385	476.675	-0.000291	0.000190	-0.000436
3.9900	246.571	2.892	-3.755	5.462	-0.671	35.399	469.408	-0.000202	0.000263	-0.000382
4.0000	239.357	1.334	-3.935	4.749	-0.675	35.386	455.675	-0.000093	0.000275	-0.000332
4.0100	243.626	1.807	-4.073	4.873	-0.672	35.399	463.800	-0.000126	0.000285	-0.000341
4.0200	251.530	1.833	-4.030	4.926	-0.671	35.386	478.849	-0.000128	0.000282	-0.000345
4.0300	272.029	4.823	-3.369	5.766	-0.675	35.399	517.874	-0.000338	0.000236	-0.000404
4.0400	314.785	9.229	-1.747	8.394	-0.673	35.385	599.270	-0.000646	0.000122	-0.000588
4.0500	356.218	14.619	0.482	12.205	-0.669	35.399	678.148	-0.001023	-0.000034	-0.000854
4.0600	403.438	20.499	2.849	16.803	-0.672	35.385	768.042	-0.001435	-0.000199	-0.001176
4.0700	449.905	25.819	5.807	20.351	-0.673	35.399	856.504	-0.001807	-0.000407	-0.001425
4.0800	504.834	33.018	9.113	25.058	-0.681	35.385	961.075	-0.002311	-0.000638	-0.001754
4.0900	570.899	41.174	13.030	30.905	-0.676	35.399	1086.845	-0.002882	-0.000912	-0.002163
4.1000	634.469	49.581	17.255	36.562	-0.688	35.386	1207.867	-0.003471	-0.001208	-0.002559
4.1100	698.761	57.920	20.738	42.174	-0.686	35.399	1330.261	-0.004054	-0.001452	-0.002952
4.1200	761.204	65.910	25.086	47.860	-0.688	35.386	1449.137	-0.004614	-0.001756	-0.003350
4.1300	838.240	76.181	29.571	54.820	-0.686	35.399	1595.793	-0.005333	-0.002070	-0.003837
4.1400	897.181	83.695	33.324	60.092	-0.680	35.385	1708.002	-0.005859	-0.002333	-0.004206
4.1500	969.137	92.828	38.156	66.558	-0.678	35.399	1844.988	-0.006498	-0.002671	-0.004659
4.1600	1019.933	99.900	40.936	71.045	-0.686	35.385	1941.690	-0.006993	-0.002866	-0.004973
4.1700	1081.895	107.919	45.133	76.549	-0.687	35.399	2059.650	-0.007554	-0.003159	-0.005358
4.1800	1119.226	113.395	47.073	79.961	-0.680	35.386	2130.718	-0.007938	-0.003295	-0.005597
4.1900	1181.684	121.190	51.355	85.850	-0.676	35.400	2249.622	-0.008483	-0.003595	-0.006010
4.2000	1210.749	125.818	53.376	88.988	-0.679	35.385	2304.955	-0.008807	-0.003736	-0.006229
4.2100	1251.671	131.238	55.429	92.318	-0.683	35.399	2382.860	-0.009187	-0.003880	-0.006462
4.2200	1266.143	133.697	56.899	94.203	-0.684	35.386	2410.412	-0.009359	-0.003983	-0.006594
4.2300	1278.752	135.823	57.640	95.771	-0.685	35.399	2434.416	-0.009508	-0.004035	-0.006704
4.2400	1294.607	137.519	59.031	97.451	-0.687	35.385	2464.600	-0.009626	-0.004132	-0.006822
4.2500	1297.222	138.700	59.352	98.385	-0.677	35.399	2469.578	-0.009709	-0.004155	-0.006887
4.2600	1295.449	138.685	59.144	98.440	-0.678	35.385	2466.202	-0.009708	-0.004140	-0.006891
4.2700	1284.147	138.169	59.598	97.806	-0.680	35.399	2444.687	-0.009672	-0.004172	-0.006846
4.2800	1257.637	135.643	58.550	96.250	-0.680	35.385	2394.218	-0.009495	-0.004098	-0.006738
4.2900	1211.726	130.515	56.721	92.868	-0.679	35.399	2306.814	-0.009136	-0.003970	-0.006501
4.3000	1170.518	125.527	54.930	89.291	-0.684	35.386	2228.365	-0.008787	-0.003845	-0.006250
4.3100	1132.541	120.398	52.799	86.399	-0.673	35.399	2156.067	-0.008428	-0.003696	-0.006048
4.3200	1082.677	114.647	50.268	82.770	-0.668	35.386	2061.138	-0.008025	-0.003519	-0.005794
4.3300	1024.742	108.059	46.592	77.746	-0.674	35.399	1950.846	-0.007564	-0.003261	-0.005442
4.3400	961.623	99.956	43.152	72.474	-0.686	35.385	1830.683	-0.006997	-0.003021	-0.005073
4.3500	901.043	92.397	39.424	67.839	-0.675	35.400	1715.355	-0.006468	-0.002760	-0.004749
4.3600	834.197	83.974	35.336	62.071	-0.683	35.385	1588.097	-0.005878	-0.002474	-0.004345
4.3700	762.767	75.179	31.031	55.178	-0.676	35.400	1452.112	-0.005263	-0.002172	-0.003862
4.3800	702.428	66.869	27.175	49.990	-0.681	35.386	1337.242	-0.004681	-0.001902	-0.003499
4.3900	640.511	59.130	23.460	44.885	-0.677	35.400	1219.368	-0.004139	-0.001642	-0.003142
4.4000	575.738	50.748	19.156	38.887	-0.679	35.386	1096.058	-0.003552	-0.001341	-0.002722
4.4100	524.131	43.272	15.853	33.974	-0.674	35.400	997.810	-0.003029	-0.001110	-0.002378
4.4200	461.162	35.407	12.095	28.031	-0.679	35.386	877.934	-0.002478	-0.000847	-0.001962
4.4300	410.456	27.778	8.188	23.296	-0.666	35.400	781.403	-0.001944	-0.000573	-0.001631
4.4400	365.326	21.565	5.339	19.444	-0.675	35.386	695.486	-0.001510	-0.000374	-0.001361
4.4500	322.284	15.190	2.409	15.345	-0.688	35.400	613.546	-0.001063	-0.000169	-0.001074
4.4600	295.774	10.950	0.511	12.012	-0.686	35.386	563.078	-0.000767	-0.000036	-0.000841
4.4700	274.825	7.977	-1.045	9.453	-0.687	35.399	523.195	-0.000558	0.000073	-0.000662
4.4800	251.200	4.531	-3.178	6.746	-0.688	35.386	478.220	-0.000317	0.000222	-0.000472
4.4900	239.463	2.322	-3.672	5.519	-0.683	35.400	455.875	-0.000163	0.000257	-0.000386
4.5000	236.126	1.209	-4.404	5.092	-0.681	35.386	449.524	-0.000085	0.000308	-0.000356
4.5100	239.388	1.263	-4.224	4.637	-0.683	35.400	455.732	-0.000088	0.000296	-0.000325
4.5200	247.007	1.752	-4.171	4.955	-0.683	35.386	470.238	-0.000123	0.000292	-0.000347
4.5300	261.374	3.140	-3.880	5.353	-0.686	35.400	497.589	-0.000220	0.000272	-0.000375
4.5400	313.432	9.437	-1.665	8.612	-0.683	35.385	596.695	-0.000661	0.000117	-0.000603
4.5500	350.523	13.883	-0.358	12.081	-0.688	35.400	667.305	-0.000972	0.000025	-0.000846
4.5600	392.046	18.956	2.462	15.411	-0.688	35.385	746.355	-0.001327	-0.000172	-0.001079
4.5700	449.740	26.223	5.669	20.418	-0.678	35.400	856.190	-0.001836	-0.000397	-0.001429
4.5800	506.127	33.004	9.125	25.760	-0.676	35.385	963.535	-0.002310	-0.000639	-0.001803
4.5900	570.163	42.051	13.374	30.850	-0.675	35.400	1085.443	-0.002944	-0.000936	-0.002159
4.6000	628.804	49.414	16.099	36.121	-0.673	35.385	1197.081	-0.003459	-0.001127	-0.002528
4.6100	687.970	56.989	20.492	41.446	-0.667	35.399	1309.719	-0.003989	-0.001434	-0.002901
4.6200	760.678	66.062	24.632	48.106	-0.678	35.385	1448.135	-0.004624	-0.001724	-0.003367
4.6300	824.338	74.040	29.159	53.278	-0.677	35.400	1569.328	-0.005183	-0.002041	-0.003729
4.6400	893.484	83.322	33.437	59.225	-0.679	35.386	1700.964	-0.005833	-0.002341	-0.004146
4.6500	952.155	90.882	36.672	64.742	-0.675	35.400	1812.658	-0.006362	-0.002567	-0.004532
4.6600	1013.771	98.940	41.021	70.219	-0.677	35.386	1929.960	-0.006926	-0.002871	-0.004915
4.6700	1077.447	107.767	44.322	76.164	-0.668	35.401	2051.182	-0.007544	-0.003103	-0.005331
4.6800	1124.681	114.048	47.777	80.675	-0.677	35.386	2141.104	-0.007983	-0.003344	-0.005647
4.6900	1168.414	120.065	50.557	84.982	-0.674	35.400	2224.360	-0.008405	-0.003539	-0.005949
4.7000	1208.810	125.387	52.937	88.618	-0.678	35.386	2301.264	-0.008777	-0.003706	-0.006203
4.7100	1241.226	130.113	55.398	91.531	-0.680	35.400	2362.976	-0.009108	-0.003878	-0.006407
4.7200	1263.273	133.418	56.567	94.518	-0.684	35.386	2404.947	-0.009339	-0.003960	-0.006616
4.7300	1289.317	136.880	58.825	96.760	-0.679	35.400	2454.529	-0.009582	-0.004118	-0.006773
4.7400	1290.775	137.757	58.757	97.490	-0.679	35.386	2457.304	-0.009643	-0.004113	-0.006824
4.7500	1297.418	138.601	59.501	98.538	-0.679	35.400	2469.950	-0.009702	-0.004165	-0.006898
4.7600	1294.066	139.115	59.583	98.494	-0.684	35.386	2463.570	-0.009738	-0.004171	-0.006895
4.7700	1281.623	137.908	59.142	97.820	-0.687	35.401	2439.880	-0.009654	-0.004140	-0.006847
4.7800	1262.972	136.229	58.854	96.954	-0.692	35.385	2404.375	-0.009536	-0.004120	-0.006787
4.7900	1216.309	130.987	56.819	93.846	-0.696	35.400	2315.540	-0.009169	-0.003977	-0.006569
4.8000	1175.988	126.234	55.372	90.391	-0.691	35.386	2238.779	-0.008836	-0.003876	-0.006327
4.8100	1135.607	121.674	53.283	87.034	-0.685	35.400	2161.903	-0.008517	-0.003730	-0.006092
4.8200	1083.909	114.978	50.184	82.728	-0.689	35.386	2063.484	-0.008048	-0.003513	-0.005791
4.8300	1022.879	107.945	46.827	78.089	-0.680	35.400	1947.298	-0.007556	-0.003278	-0.005466
4.8400	962.615	100.566	42.960	73.109	-0.676	35.386	1832.571	-0.007040	-0.003007	-0.005118
4.8500	900.607	92.551	39.575	67.960	-0.684	35.401	1714.525	-0.006479	-0.002770	-0.004757
4.8600	845.483	85.575	36.368	62.760	-0.680	35.386	1609.583	-0.005990	-0.002546	-0.004393
4.8700	775.165	76.262	31.623	56.444	-0.679	35.401	1475.716	-0.005338	-0.002214	-0.003951
4.8800	709.055	68.342	27.972	50.791	-0.673	35.386	1349.859	-0.004784	-0.001958	-0.003555
4.8900	643.501	59.575	23.487	44.984	-0.671	35.400	1225.061	-0.004170	-0.001644	-0.003149
4.9000	577.181	50.568	19.623	39.163	-0.669	35.386	1098.804	-0.003540	-0.001374	-0.002741
4.9100	517.714	42.926	15.535	33.438	-0.671	35.401	985.594	-0.003005	-0.001087	-0.002341
4.9200	460.606	34.893	11.378	28.543	-0.672	35.386	876.875	-0.002443	-0.000796	-0.001998
4.9300	411.613	28.472	8.670	23.474	-0.677	35.401	783.606	-0.001993	-0.000607	-0.001643
4.9400	371.788	22.373	5.598	20.089	-0.681	35.386	707.788	-0.001566	-0.000392	-0.001406
4.9500	329.633	15.966	3.055	15.908	-0.676	35.401	627.537	-0.001118	-0.000214	-0.001114
4.9600	299.952	12.074	0.674	12.508	-0.666	35.386	571.032	-0.000845	-0.000047	-0.000876
4.9700	272.736	7.796	-1.318	9.040	-0.674	35.401	519.218	-0.000546	0.000092	-0.000633
4.9800	256.009	5.404	-2.282	7.830	-0.680	35.386	487.375	-0.000378	0.000160	-0.000548
4.9900	240.545	2.460	-3.783	6.319	-0.669	35.401	457.935	-0.000172	0.000265	-0.000442
