# Supplementary material for: Evaluation of a Cold-Mixed High-Performance Polyurethane Mixture
Source: Hindawi journal article supplement (doi:10.1155/2019/1507971), 2019-11-07
Supplement: f1 [file 1507971.f1.zip › 1507971.f1/dynamic modulus data/PUM/specimen2/temp35/zhs-2-35_5Hz.csv]

Test Information
****************
Project name	zhs
Operator name	1
Target test temperature	35
Target confining stress	0
Average dynamic strain range from 75 to 125 micro-strain
Contact stress	5
Initial modulus	1000
Axial gauge length	70
Comments
Specimen information
********************
Identification	zhs-2-35
Dimensions	Point 1	Point 2	Point 3	Point 4	Point 5	Point 6	Average	Std Dev.
Diameter (mm)	49.2	49.3	49.2				49.23	0.058
Height (mm)	100.8	101.0	100.8				100.87	0.115
Cross-sectional area (mm�)	1903.7
Conditioning time
Properties/Comments
Test Data	5Hz
*********
Test date and time	Tue	Apr 2	2019	12:59 PM
Dynamic modulus (MPa)	11071
Phase angle (Degrees)	4.56
Average temperature (�C)	35.4
Average confining pressure (kPa)	-0.7
Average micro-strain	100
Load drift (%)	0.3
Load standard error (%)	2.2
Average deformation drift (%)	-3.5
Average deformation standard error (%)	2.3
Deformation uniformity (%)	30.5
Phase uniformity (Degrees)	0.8
Conditioning Cycles
Time (sec)	Axial stress (kPa)	Axial micro-strain #1	Axial micro-strain #2	Axial micro-strain #3	Confining pressure (kPa)	Temperature (�C)	Load (N)	Displacement #1 (mm)	Displacement #2 (mm)	Displacement #3 (mm)
0.0000	425.830	15.966	3.086	13.197	-0.663	35.383	810.671	-0.001118	-0.000216	-0.000924
0.0040	358.593	9.103	0.373	8.353	-0.673	35.379	682.669	-0.000637	-0.000026	-0.000585
0.0080	257.482	-3.195	-5.545	0.013	-0.674	35.388	490.179	0.000224	0.000388	-0.000001
0.0120	240.109	-6.433	-7.114	-2.341	-0.666	35.398	457.106	0.000450	0.000498	0.000164
0.0160	246.947	-6.046	-7.237	-1.871	-0.659	35.394	470.123	0.000423	0.000507	0.000131
0.0200	255.663	-5.530	-7.070	-1.707	-0.664	35.383	486.717	0.000387	0.000495	0.000120
0.0240	271.924	-3.239	-6.492	-0.799	-0.671	35.380	517.673	0.000227	0.000454	0.000056
0.0280	317.475	2.015	-4.266	2.147	-0.665	35.389	604.391	-0.000141	0.000299	-0.000150
0.0320	377.228	8.976	-1.389	6.951	-0.672	35.399	718.145	-0.000628	0.000097	-0.000487
0.0360	430.323	15.772	1.528	11.051	-0.672	35.394	819.225	-0.001104	-0.000107	-0.000774
0.0400	473.004	20.666	3.868	14.916	-0.667	35.383	900.478	-0.001447	-0.000271	-0.001044
0.0440	522.372	26.986	6.894	19.734	-0.676	35.380	994.463	-0.001889	-0.000483	-0.001381
0.0480	576.880	33.517	10.250	23.929	-0.670	35.389	1098.232	-0.002346	-0.000718	-0.001675
0.0520	631.479	40.424	13.403	28.388	-0.657	35.398	1202.173	-0.002830	-0.000938	-0.001987
0.0560	687.505	47.651	17.146	33.244	-0.660	35.395	1308.832	-0.003336	-0.001200	-0.002327
0.0600	734.694	53.723	19.857	37.414	-0.663	35.383	1398.668	-0.003761	-0.001390	-0.002619
0.0640	788.330	60.796	22.951	42.435	-0.671	35.380	1500.778	-0.004256	-0.001607	-0.002970
0.0680	844.221	67.411	26.309	47.307	-0.663	35.389	1607.180	-0.004719	-0.001842	-0.003312
0.0720	890.448	73.802	29.309	50.981	-0.661	35.399	1695.185	-0.005166	-0.002052	-0.003569
0.0760	928.756	79.223	32.118	54.875	-0.661	35.394	1768.112	-0.005546	-0.002248	-0.003841
0.0800	961.067	83.168	34.179	57.684	-0.664	35.383	1829.624	-0.005822	-0.002393	-0.004038
0.0840	993.032	87.908	36.230	61.248	-0.666	35.380	1890.478	-0.006154	-0.002536	-0.004287
0.0880	1023.254	91.647	37.924	63.669	-0.661	35.389	1948.013	-0.006415	-0.002655	-0.004457
0.0920	1036.524	94.049	39.067	64.743	-0.665	35.398	1973.276	-0.006583	-0.002735	-0.004532
0.0960	1049.779	95.773	39.684	66.378	-0.665	35.395	1998.510	-0.006704	-0.002778	-0.004646
0.1000	1068.234	98.275	41.378	68.072	-0.665	35.383	2033.644	-0.006879	-0.002896	-0.004765
0.1040	1075.583	100.330	42.285	69.405	-0.672	35.379	2047.634	-0.007023	-0.002960	-0.004858
0.1080	1072.006	99.885	42.037	69.255	-0.665	35.389	2040.825	-0.006992	-0.002943	-0.004848
0.1120	1064.673	99.692	41.804	69.034	-0.671	35.398	2026.863	-0.006978	-0.002926	-0.004832
0.1160	1053.612	98.249	41.421	68.470	-0.668	35.394	2005.806	-0.006877	-0.002899	-0.004793
0.1200	1030.994	95.981	40.856	67.372	-0.664	35.383	1962.748	-0.006719	-0.002860	-0.004716
0.1240	984.241	90.673	39.079	64.054	-0.664	35.379	1873.741	-0.006347	-0.002736	-0.004484
0.1280	937.652	84.977	37.209	60.367	-0.661	35.388	1785.049	-0.005948	-0.002605	-0.004226
0.1320	890.463	79.989	34.675	56.595	-0.660	35.398	1695.213	-0.005599	-0.002427	-0.003962
0.1360	839.607	73.359	31.541	52.330	-0.662	35.394	1598.396	-0.005135	-0.002208	-0.003663
0.1400	800.623	68.424	29.199	49.124	-0.659	35.383	1524.181	-0.004790	-0.002044	-0.003439
0.1440	755.223	62.827	26.613	45.698	-0.667	35.379	1437.750	-0.004398	-0.001863	-0.003199
0.1480	699.242	55.919	23.063	41.089	-0.664	35.388	1331.177	-0.003914	-0.001614	-0.002876
0.1520	642.750	48.968	19.690	36.122	-0.664	35.398	1223.631	-0.003428	-0.001378	-0.002529
0.1560	591.323	42.592	16.719	31.854	-0.668	35.394	1125.727	-0.002981	-0.001170	-0.002230
0.1600	549.454	37.370	14.007	28.347	-0.673	35.383	1046.019	-0.002616	-0.000980	-0.001984
0.1640	506.623	31.934	11.075	24.783	-0.669	35.380	964.479	-0.002235	-0.000775	-0.001735
0.1680	459.869	25.111	8.065	20.199	-0.667	35.388	875.473	-0.001758	-0.000565	-0.001414
0.1720	415.220	19.303	5.545	16.114	-0.661	35.398	790.472	-0.001351	-0.000388	-0.001128
0.1760	373.291	14.175	2.905	12.783	-0.656	35.394	710.649	-0.000992	-0.000203	-0.000895
0.1800	334.082	9.005	0.386	8.780	-0.663	35.383	636.005	-0.000630	-0.000027	-0.000615
0.1840	300.824	4.908	-1.828	6.206	-0.671	35.379	572.691	-0.000344	0.000128	-0.000434
0.1880	278.717	0.945	-3.770	3.454	-0.658	35.388	530.605	-0.000066	0.000264	-0.000242
0.1920	259.390	-2.081	-5.272	0.978	-0.668	35.398	493.813	0.000146	0.000369	-0.000068
0.1960	240.935	-4.739	-6.028	-0.647	-0.665	35.394	458.679	0.000332	0.000422	0.000045
0.2000	231.362	-6.629	-6.810	-1.625	-0.663	35.384	440.454	0.000464	0.000477	0.000114
0.2040	226.929	-7.030	-6.935	-2.437	-0.676	35.380	432.014	0.000492	0.000485	0.000171
0.2080	228.447	-7.517	-7.253	-2.587	-0.663	35.389	434.904	0.000526	0.000508	0.000181
0.2120	232.219	-7.477	-7.579	-2.753	-0.663	35.398	442.085	0.000523	0.000531	0.000193
0.2160	240.485	-6.545	-7.348	-1.803	-0.660	35.394	457.821	0.000458	0.000514	0.000126
0.2200	255.227	-5.116	-6.714	-1.155	-0.671	35.383	485.888	0.000358	0.000470	0.000081
0.2240	292.558	-0.708	-5.146	0.646	-0.672	35.380	556.955	0.000050	0.000360	-0.000045
0.2280	346.405	5.879	-2.586	5.340	-0.664	35.389	659.466	-0.000412	0.000181	-0.000374
0.2320	392.377	11.562	-0.164	9.123	-0.659	35.398	746.984	-0.000809	0.000012	-0.000639
0.2360	439.972	17.620	2.491	12.634	-0.658	35.394	837.593	-0.001233	-0.000174	-0.000884
0.2400	484.997	22.873	4.955	17.036	-0.661	35.383	923.309	-0.001601	-0.000347	-0.001193
0.2440	533.013	29.390	8.162	21.163	-0.668	35.379	1014.719	-0.002057	-0.000571	-0.001481
0.2480	587.370	35.478	11.324	25.608	-0.661	35.388	1118.202	-0.002483	-0.000793	-0.001793
0.2520	640.466	42.702	14.698	29.944	-0.663	35.399	1219.282	-0.002989	-0.001029	-0.002096
0.2560	694.057	49.442	17.971	34.869	-0.663	35.394	1321.306	-0.003461	-0.001258	-0.002441
0.2600	747.979	56.434	21.178	39.604	-0.661	35.383	1423.960	-0.003950	-0.001482	-0.002772
0.2640	795.589	62.686	24.178	43.911	-0.671	35.379	1514.597	-0.004388	-0.001692	-0.003074
0.2680	843.665	68.814	26.901	48.036	-0.665	35.388	1606.121	-0.004817	-0.001883	-0.003363
0.2720	897.497	75.665	30.245	52.550	-0.665	35.398	1708.603	-0.005297	-0.002117	-0.003679
0.2760	946.189	81.696	33.327	56.857	-0.662	35.394	1801.300	-0.005719	-0.002333	-0.003980
0.2800	975.795	86.004	35.472	59.760	-0.664	35.383	1857.662	-0.006020	-0.002483	-0.004183
0.2840	997.120	89.422	37.195	62.060	-0.669	35.379	1898.260	-0.006260	-0.002604	-0.004344
0.2880	1022.818	92.883	38.295	64.273	-0.661	35.388	1947.184	-0.006502	-0.002681	-0.004499
0.2920	1043.678	95.285	39.560	66.338	-0.661	35.398	1986.895	-0.006670	-0.002769	-0.004644
0.2960	1052.019	96.565	40.512	67.233	-0.657	35.394	2002.773	-0.006760	-0.002836	-0.004706
0.3000	1056.151	97.595	41.158	68.029	-0.657	35.383	2010.641	-0.006832	-0.002881	-0.004762
0.3040	1056.572	98.485	41.531	68.430	-0.654	35.379	2011.442	-0.006894	-0.002907	-0.004790
0.3080	1052.560	98.512	41.253	68.209	-0.658	35.388	2003.803	-0.006896	-0.002888	-0.004775
0.3120	1046.819	97.833	40.704	68.005	-0.653	35.397	1992.874	-0.006848	-0.002849	-0.004760
0.3160	1039.906	97.136	40.636	67.562	-0.650	35.394	1979.713	-0.006800	-0.002845	-0.004729
0.3200	1022.593	95.425	40.443	66.629	-0.657	35.383	1946.754	-0.006680	-0.002831	-0.004664
0.3240	982.227	90.840	39.229	64.176	-0.664	35.379	1869.907	-0.006359	-0.002746	-0.004492
0.3280	930.469	84.947	37.085	60.077	-0.657	35.388	1771.374	-0.005946	-0.002596	-0.004205
0.3320	889.336	79.820	34.495	56.597	-0.659	35.398	1693.068	-0.005587	-0.002415	-0.003962
0.3360	850.142	75.431	32.323	53.470	-0.652	35.394	1618.452	-0.005280	-0.002263	-0.003743
0.3400	802.968	69.510	29.353	49.883	-0.661	35.383	1528.645	-0.004866	-0.002055	-0.003492
0.3440	759.235	63.854	26.943	46.412	-0.669	35.379	1445.389	-0.004470	-0.001886	-0.003249
0.3480	712.963	58.031	24.384	42.919	-0.668	35.388	1357.298	-0.004062	-0.001707	-0.003004
0.3520	653.976	50.861	20.765	37.606	-0.669	35.398	1245.003	-0.003560	-0.001454	-0.002632
0.3560	590.060	43.342	16.938	32.200	-0.655	35.394	1123.323	-0.003034	-0.001186	-0.002254
0.3600	542.571	37.103	13.801	27.880	-0.659	35.383	1032.915	-0.002597	-0.000966	-0.001952
0.3640	498.312	31.516	10.979	24.285	-0.658	35.379	948.658	-0.002206	-0.000769	-0.001700
0.3680	448.343	24.736	7.458	19.979	-0.659	35.388	853.529	-0.001732	-0.000522	-0.001399
0.3720	400.958	18.272	4.995	15.220	-0.652	35.398	763.321	-0.001279	-0.000350	-0.001065
0.3760	361.012	12.812	2.272	11.492	-0.653	35.394	687.275	-0.000897	-0.000159	-0.000804
0.3800	334.277	9.173	0.536	8.710	-0.657	35.382	636.377	-0.000642	-0.000037	-0.000610
0.3840	306.459	5.836	-1.374	6.688	-0.669	35.379	583.420	-0.000409	0.000096	-0.000468
0.3880	281.407	1.585	-3.287	3.992	-0.665	35.388	535.727	-0.000111	0.000230	-0.000279
0.3920	260.532	-1.528	-4.900	1.433	-0.671	35.397	495.987	0.000107	0.000343	-0.000100
0.3960	237.464	-4.890	-6.096	-0.427	-0.671	35.393	452.070	0.000342	0.000427	0.000030
0.4000	222.631	-7.240	-7.263	-1.707	-0.674	35.383	423.832	0.000507	0.000508	0.000120
0.4040	220.497	-7.351	-7.704	-2.601	-0.674	35.379	419.769	0.000515	0.000539	0.000182
0.4080	222.901	-7.738	-7.637	-2.337	-0.665	35.387	424.347	0.000542	0.000535	0.000164
0.4120	226.719	-7.711	-8.076	-3.053	-0.664	35.398	431.614	0.000540	0.000565	0.000214
0.4160	234.143	-7.155	-7.895	-2.090	-0.657	35.394	445.747	0.000501	0.000553	0.000146
0.4200	247.954	-5.740	-7.400	-1.803	-0.667	35.383	472.040	0.000402	0.000518	0.000126
0.4240	287.448	-1.183	-5.863	0.895	-0.673	35.379	547.228	0.000083	0.000410	-0.000063
0.4280	342.047	5.919	-2.820	5.437	-0.664	35.388	651.169	-0.000414	0.000197	-0.000381
0.4320	390.603	11.631	-0.233	8.655	-0.664	35.398	743.608	-0.000814	0.000016	-0.000606
0.4360	438.845	17.773	2.381	13.238	-0.657	35.394	835.447	-0.001244	-0.000167	-0.000927
0.4400	485.568	23.316	5.049	17.284	-0.663	35.382	924.397	-0.001632	-0.000353	-0.001210
0.4440	530.202	29.068	7.900	20.860	-0.668	35.379	1009.369	-0.002035	-0.000553	-0.001460
0.4480	582.486	35.324	11.051	25.045	-0.665	35.388	1108.904	-0.002473	-0.000774	-0.001753
0.4520	632.425	41.661	14.337	29.652	-0.659	35.398	1203.976	-0.002916	-0.001004	-0.002076
0.4560	682.966	48.483	17.159	34.056	-0.664	35.394	1300.192	-0.003394	-0.001201	-0.002384
0.4600	743.215	56.043	20.957	39.190	-0.663	35.382	1414.890	-0.003923	-0.001467	-0.002743
0.4640	796.851	62.937	23.970	44.336	-0.664	35.379	1517.000	-0.004406	-0.001678	-0.003103
0.4680	846.746	68.912	27.148	48.147	-0.669	35.388	1611.986	-0.004824	-0.001900	-0.003370
0.4720	896.324	75.401	30.575	52.853	-0.667	35.398	1706.371	-0.005278	-0.002140	-0.003700
0.4760	938.750	81.142	33.437	56.803	-0.655	35.394	1787.138	-0.005680	-0.002341	-0.003976
0.4800	963.531	84.836	35.048	59.168	-0.670	35.383	1834.316	-0.005939	-0.002453	-0.004142
0.4840	993.723	89.255	36.879	62.019	-0.670	35.379	1891.794	-0.006248	-0.002582	-0.004341
0.4880	1022.368	92.732	37.952	64.563	-0.661	35.388	1946.325	-0.006491	-0.002657	-0.004519
0.4920	1041.228	95.608	39.630	66.325	-0.661	35.398	1982.231	-0.006693	-0.002774	-0.004643
0.4960	1049.253	96.984	40.456	67.564	-0.659	35.394	1997.509	-0.006789	-0.002832	-0.004729
0.5000	1054.949	98.235	41.268	68.388	-0.665	35.383	2008.352	-0.006876	-0.002889	-0.004787
0.5040	1058.631	99.260	41.708	68.799	-0.668	35.379	2015.362	-0.006948	-0.002920	-0.004816
0.5080	1056.317	99.136	41.490	68.924	-0.668	35.387	2010.956	-0.006940	-0.002904	-0.004825
0.5120	1050.441	98.928	41.338	68.828	-0.659	35.398	1999.769	-0.006925	-0.002894	-0.004818
0.5160	1041.424	97.665	40.992	68.539	-0.660	35.394	1982.603	-0.006837	-0.002869	-0.004798
0.5200	1026.260	95.830	40.759	67.575	-0.665	35.383	1953.735	-0.006708	-0.002853	-0.004730
0.5240	991.048	92.035	39.698	65.305	-0.664	35.378	1886.702	-0.006442	-0.002779	-0.004571
0.5280	933.444	85.753	37.125	60.684	-0.661	35.387	1777.039	-0.006003	-0.002599	-0.004248
0.5320	882.859	79.431	34.318	56.844	-0.660	35.397	1680.737	-0.005560	-0.002402	-0.003979
0.5360	844.416	75.067	31.951	53.198	-0.662	35.393	1607.552	-0.005255	-0.002237	-0.003724
0.5400	801.029	69.273	29.280	49.950	-0.668	35.382	1524.954	-0.004849	-0.002050	-0.003496
0.5440	755.613	63.491	26.791	46.371	-0.673	35.378	1438.494	-0.004444	-0.001875	-0.003246
0.5480	709.311	58.183	23.970	42.272	-0.665	35.387	1350.346	-0.004073	-0.001678	-0.002959
0.5520	655.299	51.484	20.778	38.156	-0.668	35.397	1247.520	-0.003604	-0.001454	-0.002671
0.5560	598.867	44.650	17.379	33.616	-0.664	35.394	1140.089	-0.003125	-0.001217	-0.002353
0.5600	548.011	38.145	14.050	28.455	-0.659	35.382	1043.272	-0.002670	-0.000983	-0.001992
0.5640	495.006	31.336	10.843	24.055	-0.666	35.378	942.364	-0.002194	-0.000759	-0.001684
0.5680	449.560	24.639	7.693	19.829	-0.654	35.387	855.846	-0.001725	-0.000539	-0.001388
0.5720	413.927	19.830	5.559	16.706	-0.654	35.397	788.012	-0.001388	-0.000389	-0.001169
0.5760	373.907	14.897	3.342	12.990	-0.657	35.394	711.823	-0.001043	-0.000234	-0.000909
0.5800	336.877	9.951	0.799	9.274	-0.669	35.383	641.327	-0.000697	-0.000056	-0.000649
0.5840	306.474	6.239	-1.347	7.045	-0.669	35.379	583.448	-0.000437	0.000094	-0.000493
0.5880	277.139	1.585	-3.507	3.785	-0.660	35.387	527.601	-0.000111	0.000246	-0.000265
0.5920	253.454	-2.125	-5.574	1.006	-0.659	35.397	482.512	0.000149	0.000390	-0.000070
0.5960	244.121	-4.127	-5.864	0.332	-0.660	35.393	464.745	0.000289	0.000410	-0.000023
0.6000	243.220	-4.391	-5.944	-0.538	-0.666	35.383	463.028	0.000307	0.000416	0.000038
0.6040	241.657	-4.810	-6.082	-0.083	-0.672	35.379	460.052	0.000337	0.000426	0.000006
0.6080	241.747	-4.921	-6.273	-0.772	-0.670	35.387	460.224	0.000344	0.000439	0.000054
0.6120	244.497	-4.978	-6.783	-1.209	-0.663	35.397	465.460	0.000348	0.000475	0.000085
0.6160	250.373	-4.739	-6.453	-0.536	-0.656	35.394	476.646	0.000332	0.000452	0.000037
0.6200	260.713	-3.598	-6.097	-0.454	-0.672	35.383	496.330	0.000252	0.000427	0.000032
0.6240	285.615	-0.347	-4.913	1.184	-0.671	35.378	543.737	0.000024	0.000344	-0.000083
0.6280	342.618	6.115	-2.763	5.738	-0.669	35.388	652.256	-0.000428	0.000193	-0.000402
0.6320	405.421	13.450	0.606	10.487	-0.671	35.398	771.818	-0.000942	-0.000042	-0.000734
0.6360	472.223	22.152	4.487	16.087	-0.667	35.394	898.991	-0.001551	-0.000314	-0.001126
0.6400	510.665	26.556	6.577	19.486	-0.669	35.382	972.176	-0.001859	-0.000460	-0.001364
0.6440	537.716	30.377	8.821	22.044	-0.672	35.378	1023.674	-0.002126	-0.000618	-0.001543
0.6480	586.965	36.617	11.573	26.159	-0.673	35.387	1117.430	-0.002563	-0.000810	-0.001831
0.6520	648.446	44.205	15.232	31.013	-0.671	35.397	1234.474	-0.003094	-0.001066	-0.002171
0.6560	701.992	51.319	18.758	36.177	-0.662	35.394	1336.412	-0.003592	-0.001313	-0.002532
0.6600	749.166	57.239	21.344	40.113	-0.669	35.383	1426.220	-0.004007	-0.001494	-0.002808
0.6640	800.428	63.699	24.452	44.638	-0.669	35.378	1523.809	-0.004459	-0.001712	-0.003125
0.6680	846.776	69.524	27.631	49.017	-0.659	35.387	1612.043	-0.004867	-0.001934	-0.003431
0.6720	890.027	74.817	30.094	52.507	-0.663	35.398	1694.384	-0.005237	-0.002107	-0.003675
0.6760	933.535	81.001	33.052	56.377	-0.667	35.394	1777.210	-0.005670	-0.002314	-0.003946
0.6800	971.451	85.920	35.352	59.610	-0.666	35.383	1849.394	-0.006014	-0.002475	-0.004173
0.6840	1008.466	91.035	37.730	63.435	-0.671	35.378	1919.861	-0.006372	-0.002641	-0.004440
0.6880	1032.587	94.507	38.996	65.527	-0.665	35.387	1965.780	-0.006615	-0.002730	-0.004587
0.6920	1041.874	96.233	39.697	66.268	-0.665	35.397	1983.461	-0.006736	-0.002779	-0.004639
0.6960	1053.537	97.680	40.772	67.770	-0.669	35.394	2005.663	-0.006838	-0.002854	-0.004744
0.7000	1063.726	99.330	41.584	68.952	-0.668	35.382	2025.061	-0.006953	-0.002911	-0.004827
0.7040	1062.238	99.621	41.791	69.296	-0.667	35.378	2022.228	-0.006973	-0.002925	-0.004851
0.7080	1059.292	99.735	41.778	69.171	-0.668	35.387	2016.621	-0.006981	-0.002924	-0.004842
0.7120	1053.672	99.164	41.406	68.678	-0.662	35.397	2005.920	-0.006941	-0.002898	-0.004807
0.7160	1043.948	97.818	41.186	68.787	-0.661	35.393	1987.410	-0.006847	-0.002883	-0.004815
0.7200	1029.085	96.454	40.897	67.644	-0.663	35.382	1959.114	-0.006752	-0.002863	-0.004735
0.7240	990.162	92.675	39.781	65.156	-0.667	35.378	1885.014	-0.006487	-0.002785	-0.004561
0.7280	936.781	86.436	37.262	61.166	-0.662	35.387	1783.390	-0.006051	-0.002608	-0.004282
0.7320	885.068	79.863	34.206	57.105	-0.664	35.397	1684.942	-0.005590	-0.002394	-0.003997
0.7360	832.784	74.083	31.154	53.184	-0.669	35.393	1585.407	-0.005186	-0.002181	-0.003723
0.7400	791.426	68.216	28.689	49.372	-0.665	35.382	1506.672	-0.004775	-0.002008	-0.003456
0.7440	749.331	63.062	26.556	45.793	-0.673	35.378	1426.535	-0.004414	-0.001859	-0.003206
0.7480	694.508	56.710	23.448	41.542	-0.667	35.387	1322.165	-0.003970	-0.001641	-0.002908
0.7520	638.737	49.788	19.914	36.740	-0.668	35.397	1215.992	-0.003485	-0.001394	-0.002572
0.7560	590.707	43.664	17.131	32.682	-0.667	35.393	1124.554	-0.003056	-0.001199	-0.002288
0.7600	552.504	38.673	14.449	29.214	-0.668	35.382	1051.826	-0.002707	-0.001011	-0.002045
0.7640	502.204	32.489	11.241	24.864	-0.673	35.378	956.068	-0.002274	-0.000787	-0.001740
0.7680	448.523	25.029	8.106	20.296	-0.665	35.387	853.872	-0.001752	-0.000567	-0.001421
0.7720	406.984	19.566	5.571	16.417	-0.669	35.397	774.794	-0.001370	-0.000390	-0.001149
0.7760	374.613	15.230	3.495	12.924	-0.655	35.394	713.167	-0.001066	-0.000245	-0.000905
0.7800	335.073	9.963	0.729	9.467	-0.657	35.383	637.894	-0.000697	-0.000051	-0.000663
0.7840	302.311	5.631	-1.691	6.372	-0.669	35.378	575.523	-0.000394	0.000118	-0.000446
0.7880	277.665	1.683	-3.549	4.293	-0.663	35.387	528.603	-0.000118	0.000248	-0.000301
0.7920	255.212	-1.654	-5.065	1.486	-0.672	35.397	485.859	0.000116	0.000355	-0.000104
0.7960	243.595	-4.071	-5.876	0.537	-0.675	35.394	463.743	0.000285	0.000411	-0.000038
0.8000	241.987	-4.210	-5.973	-0.538	-0.672	35.383	460.682	0.000295	0.000418	0.000038
0.8040	241.747	-4.073	-6.012	-0.220	-0.683	35.378	460.224	0.000285	0.000421	0.000015
0.8080	241.461	-4.990	-6.577	-1.020	-0.670	35.387	459.681	0.000349	0.000460	0.000071
0.8120	242.604	-4.963	-6.850	-0.730	-0.668	35.397	461.855	0.000347	0.000480	0.000051
0.8160	246.661	-4.934	-6.425	-0.702	-0.673	35.394	469.580	0.000345	0.000450	0.000049
0.8200	255.753	-4.058	-6.193	-0.221	-0.672	35.382	486.889	0.000284	0.000434	0.000015
0.8240	276.357	-1.679	-5.147	0.620	-0.675	35.378	526.114	0.000118	0.000360	-0.000043
0.8280	330.099	4.820	-3.234	4.664	-0.671	35.387	628.424	-0.000337	0.000226	-0.000326
0.8320	389.657	11.688	-0.288	9.111	-0.670	35.397	741.806	-0.000818	0.000020	-0.000638
0.8360	436.185	17.593	2.325	13.363	-0.671	35.393	830.383	-0.001231	-0.000163	-0.000935
0.8400	477.708	22.930	4.487	16.872	-0.673	35.382	909.433	-0.001605	-0.000314	-0.001181
0.8440	528.880	29.391	8.326	21.631	-0.674	35.377	1006.851	-0.002057	-0.000583	-0.001514
0.8480	592.149	37.145	12.039	26.323	-0.660	35.386	1127.300	-0.002600	-0.000843	-0.001843
0.8520	651.617	44.856	15.481	31.827	-0.662	35.397	1240.511	-0.003140	-0.001084	-0.002228
0.8560	701.361	51.251	18.854	36.341	-0.664	35.394	1335.211	-0.003588	-0.001320	-0.002544
0.8600	741.517	56.405	21.136	40.098	-0.672	35.382	1411.657	-0.003948	-0.001480	-0.002807
0.8640	782.845	62.033	23.282	43.523	-0.673	35.378	1490.335	-0.004342	-0.001630	-0.003047
0.8680	846.400	69.482	27.465	48.601	-0.667	35.387	1611.328	-0.004864	-0.001923	-0.003402
0.8720	896.956	76.456	30.273	53.335	-0.675	35.397	1707.573	-0.005352	-0.002119	-0.003733
0.8760	930.544	81.183	33.133	56.433	-0.665	35.394	1771.517	-0.005683	-0.002319	-0.003950
0.8800	971.902	86.547	35.530	59.858	-0.663	35.383	1850.252	-0.006058	-0.002487	-0.004190
0.8840	1001.523	90.659	37.265	63.186	-0.671	35.378	1906.643	-0.006346	-0.002609	-0.004423
0.8880	1029.762	94.021	38.872	65.403	-0.663	35.387	1960.402	-0.006581	-0.002721	-0.004578
0.8920	1059.337	97.957	40.663	68.279	-0.669	35.396	2016.706	-0.006857	-0.002846	-0.004780
0.8960	1068.505	99.637	41.956	69.295	-0.658	35.393	2034.159	-0.006975	-0.002937	-0.004851
0.9000	1067.408	100.162	42.229	69.227	-0.676	35.383	2032.070	-0.007011	-0.002956	-0.004846
0.9040	1066.341	100.678	42.232	69.930	-0.668	35.378	2030.039	-0.007047	-0.002956	-0.004895
0.9080	1064.823	100.734	42.216	69.930	-0.667	35.387	2027.149	-0.007051	-0.002955	-0.004895
0.9120	1060.900	99.815	41.557	69.600	-0.671	35.397	2019.682	-0.006987	-0.002909	-0.004872
0.9160	1048.247	98.721	41.516	69.008	-0.669	35.393	1995.592	-0.006910	-0.002906	-0.004831
0.9200	1030.678	96.763	41.296	68.101	-0.668	35.382	1962.147	-0.006773	-0.002891	-0.004767
0.9240	990.838	92.923	40.112	65.265	-0.677	35.378	1886.301	-0.006505	-0.002808	-0.004569
0.9280	931.100	85.684	37.511	60.724	-0.672	35.386	1772.575	-0.005998	-0.002626	-0.004251
0.9320	895.257	81.168	34.676	57.532	-0.673	35.396	1704.340	-0.005682	-0.002427	-0.004027
0.9360	859.685	76.971	32.886	55.095	-0.670	35.393	1636.620	-0.005388	-0.002302	-0.003857
0.9400	805.267	70.509	29.944	50.804	-0.680	35.383	1533.022	-0.004936	-0.002096	-0.003556
0.9440	755.643	64.562	27.219	47.101	-0.676	35.378	1438.551	-0.004519	-0.001905	-0.003297
0.9480	711.791	59.130	24.480	43.068	-0.665	35.386	1355.066	-0.004139	-0.001714	-0.003015
0.9520	653.510	51.859	21.203	37.870	-0.669	35.397	1244.116	-0.003630	-0.001484	-0.002651
0.9560	596.432	44.469	17.256	33.408	-0.670	35.394	1135.454	-0.003113	-0.001208	-0.002339
0.9600	551.197	38.631	14.257	29.643	-0.671	35.382	1049.337	-0.002704	-0.000998	-0.002075
0.9640	502.144	32.518	11.447	25.086	-0.683	35.378	955.954	-0.002276	-0.000801	-0.001756
0.9680	456.368	26.625	8.382	20.766	-0.677	35.386	868.807	-0.001864	-0.000587	-0.001454
0.9720	408.908	20.107	5.751	16.691	-0.676	35.397	778.456	-0.001408	-0.000403	-0.001168
0.9760	367.114	14.577	2.988	13.144	-0.669	35.394	698.891	-0.001020	-0.000209	-0.000920
0.9800	334.427	10.020	0.839	9.852	-0.680	35.383	636.663	-0.000701	-0.000059	-0.000690
0.9840	301.906	5.782	-1.304	6.455	-0.688	35.378	574.751	-0.000405	0.000091	-0.000452
0.9880	274.118	1.527	-3.632	4.582	-0.679	35.386	521.851	-0.000107	0.000254	-0.000321
0.9920	257.196	-1.111	-4.652	1.845	-0.673	35.397	489.635	0.000078	0.000326	-0.000129
0.9960	249.366	-2.848	-5.146	1.075	-0.680	35.393	474.730	0.000199	0.000360	-0.000075
1.0000	237.223	-11.188	-9.052	-5.367	-0.673	35.385	451.612	0.000783	0.000634	0.000376
1.0040	237.840	-10.868	-8.999	-5.709	-0.668	35.396	452.785	0.000761	0.000630	0.000400
1.0080	239.959	-10.326	-8.794	-4.814	-0.667	35.393	456.820	0.000723	0.000616	0.000337
1.0120	244.918	-9.840	-8.724	-5.282	-0.664	35.381	466.261	0.000689	0.000611	0.000370
1.0160	256.069	-8.213	-8.613	-4.223	-0.665	35.377	487.490	0.000575	0.000603	0.000296
1.0200	293.610	-4.224	-7.331	-2.323	-0.663	35.385	558.958	0.000296	0.000513	0.000163
1.0240	355.407	3.168	-4.528	2.932	-0.664	35.396	676.603	-0.000222	0.000317	-0.000205
1.0280	412.951	10.520	-0.868	8.202	-0.669	35.393	786.152	-0.000736	0.000061	-0.000574
1.0320	465.730	17.494	2.587	12.260	-0.666	35.381	886.631	-0.001225	-0.000181	-0.000858
1.0360	518.826	24.512	5.863	17.532	-0.672	35.376	987.711	-0.001716	-0.000410	-0.001227
1.0400	578.489	32.170	9.055	22.553	-0.676	35.385	1101.294	-0.002252	-0.000634	-0.001579
1.0440	644.749	39.895	13.030	27.494	-0.674	35.396	1227.436	-0.002793	-0.000912	-0.001925
1.0480	712.166	47.998	17.063	33.947	-0.676	35.392	1355.782	-0.003360	-0.001194	-0.002376
1.0520	780.019	57.043	21.466	39.728	-0.680	35.381	1484.957	-0.003993	-0.001503	-0.002781
1.0560	847.332	66.354	26.075	45.670	-0.688	35.377	1613.102	-0.004645	-0.001825	-0.003197
1.0600	912.510	74.678	30.040	51.490	-0.674	35.385	1737.185	-0.005227	-0.002103	-0.003604
1.0640	982.843	84.072	34.028	57.627	-0.671	35.396	1871.080	-0.005885	-0.002382	-0.004034
1.0680	1052.214	92.924	38.528	64.123	-0.665	35.392	2003.145	-0.006505	-0.002697	-0.004489
1.0720	1114.913	100.818	42.285	69.862	-0.675	35.382	2122.507	-0.007057	-0.002960	-0.004890
1.0760	1164.161	107.822	45.643	73.907	-0.669	35.377	2216.263	-0.007548	-0.003195	-0.005174
1.0800	1206.060	113.617	48.504	78.063	-0.671	35.385	2296.028	-0.007953	-0.003395	-0.005464
1.0840	1242.789	118.575	51.009	81.583	-0.669	35.396	2365.952	-0.008300	-0.003571	-0.005711
1.0880	1277.896	123.578	52.965	84.901	-0.670	35.392	2432.785	-0.008650	-0.003708	-0.005943
1.0920	1303.098	126.900	54.560	87.900	-0.670	35.382	2480.764	-0.008883	-0.003819	-0.006153
1.0960	1312.296	129.029	55.426	88.824	-0.675	35.377	2498.274	-0.009032	-0.003880	-0.006218
1.1000	1315.978	129.735	55.976	89.482	-0.670	35.385	2505.283	-0.009081	-0.003918	-0.006264
1.1040	1322.800	131.238	56.747	90.376	-0.667	35.396	2518.272	-0.009187	-0.003972	-0.006326
1.1080	1325.611	132.293	57.120	91.133	-0.659	35.392	2523.623	-0.009260	-0.003998	-0.006379
1.1120	1320.832	132.017	57.009	91.297	-0.661	35.381	2514.524	-0.009241	-0.003991	-0.006391
1.1160	1310.778	131.530	56.926	90.872	-0.668	35.377	2495.384	-0.009207	-0.003985	-0.006361
1.1200	1294.577	129.474	56.142	89.798	-0.669	35.385	2464.542	-0.009063	-0.003930	-0.006286
1.1240	1247.042	124.163	54.740	86.688	-0.656	35.396	2374.048	-0.008691	-0.003832	-0.006068
1.1280	1162.913	115.117	51.093	80.388	-0.653	35.393	2213.888	-0.008058	-0.003577	-0.005627
1.1320	1107.714	108.642	47.940	76.122	-0.654	35.381	2108.803	-0.007605	-0.003356	-0.005329
1.1360	1056.753	102.720	45.271	72.227	-0.667	35.377	2011.786	-0.007190	-0.003169	-0.005056
1.1400	988.283	94.593	40.923	66.502	-0.660	35.386	1881.437	-0.006621	-0.002865	-0.004655
1.1440	919.904	85.628	37.017	60.683	-0.657	35.397	1751.261	-0.005994	-0.002591	-0.004248
1.1480	854.666	77.860	33.122	55.191	-0.657	35.392	1627.064	-0.005450	-0.002319	-0.003863
1.1520	789.908	69.537	29.572	49.937	-0.656	35.382	1503.782	-0.004868	-0.002070	-0.003496
1.1560	719.756	61.407	25.595	44.500	-0.660	35.376	1370.230	-0.004299	-0.001792	-0.003115
1.1600	652.744	52.182	21.040	38.626	-0.661	35.385	1242.657	-0.003653	-0.001473	-0.002704
1.1640	590.000	44.232	17.022	32.928	-0.661	35.396	1123.209	-0.003096	-0.001192	-0.002305
1.1680	537.641	37.367	13.432	28.071	-0.663	35.393	1023.531	-0.002616	-0.000940	-0.001965
1.1720	481.405	29.446	9.922	23.090	-0.664	35.382	916.471	-0.002061	-0.000695	-0.001616
1.1760	421.216	21.567	6.580	18.273	-0.663	35.377	801.888	-0.001510	-0.000461	-0.001279
1.1800	368.542	14.785	3.056	12.607	-0.666	35.385	701.609	-0.001035	-0.000214	-0.000883
1.1840	329.182	9.618	0.302	9.108	-0.666	35.396	626.678	-0.000673	-0.000021	-0.000638
1.1880	305.257	5.503	-1.322	6.868	-0.656	35.393	581.131	-0.000385	0.000093	-0.000481
1.1920	283.075	2.126	-3.329	3.949	-0.655	35.382	538.902	-0.000149	0.000233	-0.000276
1.1960	262.952	-0.722	-4.581	1.884	-0.664	35.376	500.593	0.000051	0.000321	-0.000132
1.2000	250.734	-3.126	-5.341	0.662	-0.667	35.385	477.333	0.000219	0.000374	-0.000046
1.2040	247.082	-4.015	-5.795	-0.425	-0.664	35.396	470.381	0.000281	0.000406	0.000030
1.2080	246.060	-4.350	-5.945	-0.938	-0.663	35.393	468.435	0.000305	0.000416	0.000066
1.2120	250.959	-4.390	-6.000	-0.193	-0.665	35.382	477.762	0.000307	0.000420	0.000014
1.2160	260.788	-3.016	-6.027	0.054	-0.675	35.377	496.473	0.000211	0.000422	-0.000004
1.2200	284.337	-1.195	-5.218	1.350	-0.671	35.385	541.306	0.000084	0.000365	-0.000094
1.2240	348.028	6.574	-2.778	5.628	-0.667	35.396	662.556	-0.000460	0.000194	-0.000394
1.2280	411.884	14.383	1.183	10.707	-0.669	35.392	784.121	-0.001007	-0.000083	-0.000749
1.2320	459.208	20.398	3.689	15.014	-0.664	35.382	874.214	-0.001428	-0.000258	-0.001051
1.2360	505.405	26.348	6.813	18.879	-0.671	35.377	962.162	-0.001844	-0.000477	-0.001322
1.2400	568.044	34.115	9.977	24.190	-0.663	35.385	1081.409	-0.002388	-0.000698	-0.001693
1.2440	640.947	42.731	14.312	30.273	-0.669	35.396	1220.198	-0.002991	-0.001002	-0.002119
1.2480	713.158	51.903	18.880	36.905	-0.666	35.392	1357.670	-0.003633	-0.001322	-0.002583
1.2520	783.596	60.768	23.504	42.712	-0.673	35.382	1491.766	-0.004254	-0.001645	-0.002990
1.2560	853.659	70.050	27.617	48.849	-0.677	35.377	1625.147	-0.004903	-0.001933	-0.003419
1.2600	923.571	79.211	31.854	54.889	-0.675	35.385	1758.242	-0.005545	-0.002230	-0.003842
1.2640	990.703	87.422	35.914	60.463	-0.673	35.396	1886.044	-0.006120	-0.002514	-0.004232
1.2680	1049.283	95.023	39.093	66.171	-0.669	35.393	1997.566	-0.006652	-0.002737	-0.004632
1.2720	1095.571	100.929	42.438	70.301	-0.668	35.382	2085.686	-0.007065	-0.002971	-0.004921
1.2760	1148.756	108.253	45.902	75.186	-0.674	35.377	2186.937	-0.007578	-0.003213	-0.005263
1.2800	1205.549	115.437	49.565	80.113	-0.673	35.385	2295.055	-0.008081	-0.003470	-0.005608
1.2840	1248.710	121.371	52.304	83.897	-0.681	35.396	2377.224	-0.008496	-0.003661	-0.005873
1.2880	1276.107	125.291	53.927	86.881	-0.675	35.393	2429.380	-0.008770	-0.003775	-0.006082
1.2920	1301.941	129.053	55.592	89.208	-0.673	35.382	2478.561	-0.009034	-0.003891	-0.006245
1.2960	1322.275	131.764	56.898	91.410	-0.675	35.377	2517.271	-0.009223	-0.003983	-0.006399
1.3000	1331.622	133.682	57.861	92.580	-0.671	35.385	2535.067	-0.009358	-0.004050	-0.006481
1.3040	1331.983	134.293	58.165	92.813	-0.678	35.396	2535.753	-0.009400	-0.004072	-0.006497
1.3080	1327.790	134.293	58.137	93.021	-0.668	35.392	2527.771	-0.009400	-0.004070	-0.006511
1.3120	1321.583	134.100	58.027	93.032	-0.671	35.381	2515.955	-0.009387	-0.004062	-0.006512
1.3160	1310.041	133.321	57.380	92.552	-0.677	35.376	2493.982	-0.009332	-0.004017	-0.006479
1.3200	1285.846	130.210	56.721	91.038	-0.673	35.385	2447.920	-0.009115	-0.003970	-0.006373
1.3240	1227.716	123.830	54.451	86.496	-0.668	35.396	2337.255	-0.008668	-0.003812	-0.006055
1.3280	1162.402	116.592	51.710	81.709	-0.668	35.392	2212.915	-0.008161	-0.003620	-0.005720
1.3320	1115.018	110.821	49.358	77.856	-0.667	35.382	2122.707	-0.007757	-0.003455	-0.005450
1.3360	1051.793	103.861	45.601	73.040	-0.668	35.377	2002.344	-0.007270	-0.003192	-0.005113
1.3400	984.872	95.510	41.433	67.479	-0.669	35.385	1874.943	-0.006686	-0.002900	-0.004724
1.3440	921.587	87.394	37.854	62.045	-0.667	35.396	1754.465	-0.006118	-0.002650	-0.004343
1.3480	859.129	79.485	34.193	57.121	-0.665	35.392	1635.561	-0.005564	-0.002394	-0.003998
1.3520	789.412	71.024	30.300	50.940	-0.666	35.381	1502.838	-0.004972	-0.002121	-0.003566
1.3560	715.863	61.813	25.952	45.161	-0.668	35.376	1362.820	-0.004327	-0.001817	-0.003161
1.3600	649.723	53.459	21.549	39.617	-0.653	35.384	1236.906	-0.003742	-0.001508	-0.002773
1.3640	587.911	45.399	17.229	34.139	-0.653	35.396	1119.232	-0.003178	-0.001206	-0.002390
1.3680	530.653	37.935	13.690	28.651	-0.657	35.392	1010.227	-0.002655	-0.000958	-0.002006
1.3720	477.603	30.502	10.429	23.819	-0.661	35.381	909.233	-0.002135	-0.000730	-0.001667
1.3760	424.402	23.608	7.251	19.485	-0.668	35.376	807.953	-0.001653	-0.000508	-0.001364
1.3800	375.710	17.118	4.199	14.435	-0.664	35.385	715.256	-0.001198	-0.000294	-0.001010
1.3840	338.214	11.605	1.515	10.842	-0.664	35.396	643.873	-0.000812	-0.000106	-0.000759
1.3880	307.376	7.253	-0.756	7.980	-0.658	35.392	585.165	-0.000508	0.000053	-0.000559
1.3920	277.980	2.920	-2.958	4.681	-0.667	35.382	529.203	-0.000204	0.000207	-0.000328
1.3960	257.782	-0.416	-4.033	2.822	-0.677	35.377	490.751	0.000029	0.000282	-0.000198
1.4000	245.549	-2.641	-5.244	1.444	-0.668	35.385	467.463	0.000185	0.000367	-0.000101
1.4040	241.131	-3.667	-5.326	-0.123	-0.664	35.396	459.051	0.000257	0.000373	0.000009
1.4080	244.377	-3.196	-5.616	0.717	-0.665	35.393	465.231	0.000224	0.000393	-0.000050
1.4120	250.884	-2.766	-5.850	0.124	-0.671	35.382	477.619	0.000194	0.000409	-0.000009
1.4160	260.052	-2.389	-5.877	0.799	-0.685	35.377	495.071	0.000167	0.000411	-0.000056
1.4200	284.803	-0.026	-4.776	2.107	-0.671	35.385	542.192	0.000002	0.000334	-0.000147
1.4240	347.291	7.199	-2.269	6.525	-0.669	35.396	661.154	-0.000504	0.000159	-0.000457
1.4280	402.882	14.481	1.156	11.173	-0.660	35.392	766.983	-0.001014	-0.000081	-0.000782
1.4320	453.016	21.037	3.854	15.549	-0.665	35.382	862.427	-0.001473	-0.000270	-0.001088
1.4360	509.343	27.793	7.225	20.169	-0.678	35.376	969.658	-0.001945	-0.000506	-0.001412
1.4400	573.168	35.547	10.555	25.814	-0.673	35.385	1091.166	-0.002488	-0.000739	-0.001807
1.4440	644.193	44.620	14.739	31.372	-0.674	35.396	1226.377	-0.003123	-0.001032	-0.002196
1.4480	714.060	52.957	19.445	37.594	-0.670	35.393	1359.386	-0.003707	-0.001361	-0.002632
1.4520	783.326	61.811	23.985	43.358	-0.673	35.382	1491.251	-0.004327	-0.001679	-0.003035
1.4560	852.366	71.150	28.030	49.524	-0.673	35.377	1622.686	-0.004981	-0.001962	-0.003467
1.4600	921.963	79.709	32.364	55.443	-0.676	35.384	1755.180	-0.005580	-0.002265	-0.003881
1.4640	981.941	87.589	35.777	60.545	-0.680	35.396	1869.364	-0.006131	-0.002504	-0.004238
1.4680	1045.286	95.620	39.451	66.297	-0.678	35.393	1989.956	-0.006693	-0.002762	-0.004641
1.4720	1105.595	103.360	43.316	71.859	-0.678	35.382	2104.769	-0.007235	-0.003032	-0.005030
1.4760	1158.916	110.212	46.868	76.713	-0.681	35.377	2206.278	-0.007715	-0.003281	-0.005370
1.4800	1206.676	116.743	50.061	81.035	-0.675	35.385	2297.201	-0.008172	-0.003504	-0.005672
1.4840	1238.702	121.025	51.972	83.871	-0.675	35.396	2358.170	-0.008472	-0.003638	-0.005871
1.4880	1274.289	126.040	54.038	87.351	-0.668	35.392	2425.919	-0.008823	-0.003783	-0.006115
1.4920	1314.670	131.043	56.541	90.956	-0.670	35.382	2502.794	-0.009173	-0.003958	-0.006367
1.4960	1332.900	134.195	57.958	93.144	-0.679	35.376	2537.498	-0.009394	-0.004057	-0.006520
1.5000	1331.532	134.531	58.440	93.116	-0.675	35.384	2534.895	-0.009417	-0.004091	-0.006518
1.5040	1327.670	134.669	58.426	93.364	-0.674	35.395	2527.542	-0.009427	-0.004090	-0.006535
1.5080	1324.559	134.780	58.357	93.500	-0.676	35.392	2521.620	-0.009435	-0.004085	-0.006545
1.5120	1318.833	134.420	58.371	93.377	-0.676	35.381	2510.719	-0.009409	-0.004086	-0.006536
1.5160	1309.200	133.906	58.137	92.993	-0.682	35.376	2492.380	-0.009373	-0.004070	-0.006509
1.5200	1288.385	131.334	57.505	91.850	-0.680	35.384	2452.755	-0.009193	-0.004025	-0.006429
1.5240	1225.011	124.497	54.851	87.240	-0.681	35.396	2332.106	-0.008715	-0.003840	-0.006107
1.5280	1147.765	115.576	51.410	81.268	-0.676	35.393	2185.049	-0.008090	-0.003599	-0.005689
1.5320	1100.590	110.100	48.711	77.512	-0.680	35.382	2095.242	-0.007707	-0.003410	-0.005426
1.5360	1056.332	104.862	46.013	73.963	-0.677	35.376	2010.984	-0.007340	-0.003221	-0.005177
1.5400	989.140	96.732	41.957	68.361	-0.679	35.385	1883.068	-0.006771	-0.002937	-0.004785
1.5440	919.453	88.089	37.978	62.870	-0.677	35.396	1750.402	-0.006166	-0.002658	-0.004401
1.5480	859.054	80.557	34.595	57.519	-0.671	35.393	1635.418	-0.005639	-0.002422	-0.004026
1.5520	784.949	71.427	30.288	51.573	-0.668	35.382	1494.341	-0.005000	-0.002120	-0.003610
1.5560	713.639	62.673	26.363	45.546	-0.670	35.376	1358.585	-0.004387	-0.001845	-0.003188
1.5600	657.433	55.194	22.374	40.827	-0.667	35.384	1251.583	-0.003864	-0.001566	-0.002858
1.5640	592.931	46.926	17.984	35.229	-0.665	35.396	1128.788	-0.003285	-0.001259	-0.002466
1.5680	528.143	37.923	14.148	29.143	-0.665	35.393	1005.449	-0.002655	-0.000990	-0.002040
1.5720	472.944	30.851	10.636	24.260	-0.673	35.381	900.364	-0.002160	-0.000745	-0.001698
1.5760	420.299	23.694	7.527	19.856	-0.669	35.376	800.142	-0.001659	-0.000527	-0.001390
1.5800	371.923	17.065	4.333	15.191	-0.667	35.385	708.046	-0.001195	-0.000303	-0.001063
1.5840	338.244	12.285	1.884	11.282	-0.653	35.395	643.930	-0.000860	-0.000132	-0.000790
1.5880	311.794	8.644	-0.358	9.329	-0.655	35.392	593.576	-0.000605	0.000025	-0.000653
1.5920	282.143	4.321	-2.269	5.726	-0.663	35.382	537.128	-0.000302	0.000159	-0.000401
1.5960	261.885	0.861	-3.698	4.237	-0.670	35.376	498.562	-0.000060	0.000259	-0.000297
1.6000	258.879	0.165	-3.936	2.710	-0.659	35.385	492.840	-0.000012	0.000276	-0.000190
1.6040	255.874	-0.793	-4.307	2.036	-0.660	35.396	487.118	0.000055	0.000301	-0.000143
1.6080	251.711	-1.568	-4.968	2.202	-0.655	35.393	479.193	0.000110	0.000348	-0.000154
1.6120	255.423	-1.752	-4.997	1.472	-0.650	35.382	486.259	0.000123	0.000350	-0.000103
1.6160	262.922	-1.071	-4.817	1.803	-0.652	35.376	500.536	0.000075	0.000337	-0.000126
1.6200	278.176	0.221	-4.432	2.724	-0.652	35.384	529.575	-0.000015	0.000310	-0.000191
1.6240	328.987	6.018	-2.501	5.670	-0.641	35.396	626.307	-0.000421	0.000175	-0.000397
1.6280	400.717	14.994	1.047	11.670	-0.654	35.392	762.863	-0.001050	-0.000073	-0.000817
1.6320	460.531	22.580	4.595	16.460	-0.653	35.382	876.732	-0.001581	-0.000322	-0.001152
1.6360	513.310	29.446	7.816	21.026	-0.661	35.376	977.211	-0.002061	-0.000547	-0.001472
1.6400	583.854	37.617	11.614	26.819	-0.662	35.384	1111.507	-0.002633	-0.000813	-0.001877
1.6440	649.167	45.385	15.826	32.488	-0.661	35.395	1235.847	-0.003177	-0.001108	-0.002274
1.6480	712.827	53.666	19.624	38.075	-0.668	35.392	1357.040	-0.003757	-0.001374	-0.002665
1.6520	780.395	62.131	23.861	44.227	-0.665	35.381	1485.672	-0.004349	-0.001670	-0.003096
1.6560	845.889	70.997	28.236	49.317	-0.670	35.376	1610.355	-0.004970	-0.001977	-0.003452
1.6600	914.990	79.919	31.923	55.758	-0.666	35.384	1741.905	-0.005594	-0.002235	-0.003903
1.6640	992.581	89.507	36.341	61.813	-0.664	35.395	1889.620	-0.006266	-0.002544	-0.004327
1.6680	1054.679	97.051	40.402	67.699	-0.655	35.392	2007.837	-0.006794	-0.002828	-0.004739
1.6720	1103.822	103.778	43.677	72.407	-0.658	35.381	2101.393	-0.007264	-0.003057	-0.005068
1.6760	1154.377	110.795	47.060	76.713	-0.657	35.376	2197.638	-0.007756	-0.003294	-0.005370
1.6800	1205.353	117.075	50.199	81.021	-0.655	35.384	2294.683	-0.008195	-0.003514	-0.005671
1.6840	1244.953	122.328	52.415	84.859	-0.657	35.395	2370.071	-0.008563	-0.003669	-0.005940
1.6880	1275.025	126.677	54.231	87.901	-0.653	35.392	2427.320	-0.008867	-0.003796	-0.006153
1.6920	1305.247	130.626	56.295	90.677	-0.661	35.382	2484.856	-0.009144	-0.003941	-0.006347
1.6960	1323.988	133.613	57.779	92.800	-0.665	35.376	2520.533	-0.009353	-0.004045	-0.006496
1.7000	1330.931	134.740	58.604	93.584	-0.668	35.384	2533.751	-0.009432	-0.004102	-0.006551
1.7040	1332.584	135.629	58.811	94.008	-0.661	35.395	2536.898	-0.009494	-0.004117	-0.006581
1.7080	1330.134	136.100	58.550	94.616	-0.661	35.392	2532.234	-0.009527	-0.004098	-0.006623
1.7120	1326.257	135.836	58.618	94.507	-0.659	35.381	2524.853	-0.009509	-0.004103	-0.006615
1.7160	1316.263	135.099	58.482	94.010	-0.659	35.376	2505.827	-0.009457	-0.004094	-0.006581
1.7200	1292.278	132.402	57.806	92.608	-0.666	35.384	2460.165	-0.009268	-0.004046	-0.006483
1.7240	1226.829	125.471	55.426	87.913	-0.661	35.396	2335.567	-0.008783	-0.003880	-0.006154
1.7280	1152.499	117.147	51.875	82.218	-0.660	35.393	2194.061	-0.008200	-0.003631	-0.005755
1.7320	1104.257	111.228	49.097	78.338	-0.652	35.382	2102.222	-0.007786	-0.003437	-0.005484
1.7360	1048.216	104.679	45.862	73.838	-0.660	35.376	1995.535	-0.007328	-0.003210	-0.005169
1.7400	984.571	96.858	41.996	68.705	-0.652	35.385	1874.371	-0.006780	-0.002940	-0.004809
1.7440	921.482	88.853	38.088	63.450	-0.655	35.395	1754.265	-0.006220	-0.002666	-0.004441
1.7480	854.170	80.265	34.484	57.739	-0.663	35.392	1626.120	-0.005619	-0.002414	-0.004042
1.7520	789.773	72.317	30.741	52.632	-0.664	35.382	1503.525	-0.005062	-0.002152	-0.003684
1.7560	717.576	63.797	26.432	46.482	-0.668	35.376	1366.081	-0.004466	-0.001850	-0.003254
1.7600	650.805	55.393	22.044	40.400	-0.668	35.384	1238.966	-0.003878	-0.001543	-0.002828
1.7640	593.096	47.275	18.179	35.283	-0.665	35.396	1129.103	-0.003309	-0.001272	-0.002470
1.7680	538.768	40.259	14.930	31.015	-0.666	35.392	1025.677	-0.002818	-0.001045	-0.002171
1.7720	479.196	32.169	11.339	25.650	-0.659	35.382	912.266	-0.002252	-0.000794	-0.001796
1.7760	420.224	24.457	7.927	19.596	-0.655	35.376	799.999	-0.001712	-0.000555	-0.001372
1.7800	373.125	18.274	4.608	15.580	-0.656	35.384	710.335	-0.001279	-0.000323	-0.001091
1.7840	339.356	13.327	2.038	12.289	-0.651	35.395	646.048	-0.000933	-0.000143	-0.000860
1.7880	307.241	8.490	-0.204	8.792	-0.656	35.392	584.908	-0.000594	0.000014	-0.000615
1.7920	278.867	4.129	-2.008	5.877	-0.650	35.381	530.891	-0.000289	0.000141	-0.000411
1.7960	257.106	0.721	-3.632	4.019	-0.661	35.376	489.464	-0.000050	0.000254	-0.000281
1.8000	246.902	-0.945	-4.474	2.228	-0.660	35.384	470.037	0.000066	0.000313	-0.000156
1.8040	246.556	-1.735	-4.872	2.051	-0.653	35.396	469.379	0.000121	0.000341	-0.000144
1.8080	249.291	-1.516	-5.149	1.693	-0.652	35.393	474.586	0.000106	0.000360	-0.000118
1.8120	254.386	-1.832	-4.885	2.340	-0.661	35.382	484.285	0.000128	0.000342	-0.000164
1.8160	263.493	-0.555	-4.955	2.201	-0.668	35.376	501.623	0.000039	0.000347	-0.000154
1.8200	287.358	1.835	-3.977	3.535	-0.669	35.384	547.056	-0.000128	0.000278	-0.000247
1.8240	350.027	9.297	-1.223	7.501	-0.661	35.395	666.361	-0.000651	0.000086	-0.000525
1.8280	411.748	17.049	2.162	13.348	-0.660	35.392	783.863	-0.001193	-0.000151	-0.000934
1.8320	460.455	22.900	4.805	16.924	-0.666	35.382	876.589	-0.001603	-0.000336	-0.001185
1.8360	515.474	29.724	7.859	21.660	-0.670	35.376	981.331	-0.002081	-0.000550	-0.001516
1.8400	582.952	37.894	11.626	27.687	-0.669	35.384	1109.791	-0.002653	-0.000814	-0.001938
1.8440	652.624	46.065	16.102	33.356	-0.659	35.395	1242.428	-0.003225	-0.001127	-0.002335
1.8480	715.578	54.833	20.340	38.901	-0.660	35.392	1362.276	-0.003838	-0.001424	-0.002723
1.8520	782.349	63.201	24.314	44.157	-0.661	35.382	1489.391	-0.004424	-0.001702	-0.003091
1.8560	852.426	72.039	28.444	50.445	-0.665	35.376	1622.801	-0.005043	-0.001991	-0.003531
1.8600	930.078	81.875	32.708	57.133	-0.668	35.384	1770.630	-0.005731	-0.002290	-0.003999
1.8640	1006.873	91.340	37.208	63.902	-0.669	35.395	1916.828	-0.006394	-0.002605	-0.004473
1.8680	1068.159	99.596	41.447	69.352	-0.663	35.392	2033.501	-0.006972	-0.002901	-0.004855
1.8720	1115.754	105.722	44.708	73.603	-0.668	35.382	2124.109	-0.007401	-0.003130	-0.005152
1.8760	1162.883	112.211	47.913	77.855	-0.665	35.376	2213.831	-0.007855	-0.003354	-0.005450
1.8800	1219.270	119.342	50.942	83.223	-0.667	35.384	2321.177	-0.008354	-0.003566	-0.005826
1.8840	1259.050	125.041	53.281	86.663	-0.670	35.395	2396.908	-0.008753	-0.003730	-0.006066
1.8880	1280.676	128.054	54.821	89.084	-0.672	35.392	2438.078	-0.008964	-0.003837	-0.006236
1.8920	1300.408	130.987	56.142	91.038	-0.673	35.382	2475.643	-0.009169	-0.003930	-0.006373
1.8960	1313.363	132.821	57.283	92.248	-0.673	35.376	2500.305	-0.009297	-0.004010	-0.006457
1.9000	1325.430	134.657	58.110	93.776	-0.670	35.384	2523.279	-0.009426	-0.004068	-0.006564
1.9040	1330.931	135.726	58.619	94.467	-0.667	35.395	2533.751	-0.009501	-0.004103	-0.006613
1.9080	1326.678	135.948	58.687	94.561	-0.667	35.392	2525.654	-0.009516	-0.004108	-0.006619
1.9120	1320.456	135.476	58.275	94.356	-0.670	35.382	2513.809	-0.009483	-0.004079	-0.006605
1.9160	1309.621	134.697	58.136	93.997	-0.669	35.376	2493.181	-0.009429	-0.004070	-0.006580
1.9200	1284.688	131.863	57.529	92.290	-0.664	35.384	2445.717	-0.009230	-0.004027	-0.006460
1.9240	1217.542	124.357	54.849	87.404	-0.664	35.396	2317.886	-0.008705	-0.003839	-0.006118
1.9280	1148.125	116.730	51.561	81.957	-0.659	35.393	2185.736	-0.008171	-0.003609	-0.005737
1.9320	1099.238	110.894	48.628	78.459	-0.662	35.381	2092.667	-0.007763	-0.003404	-0.005492
1.9360	1043.558	104.335	45.503	73.713	-0.669	35.376	1986.666	-0.007303	-0.003185	-0.005160
1.9400	979.191	95.967	41.708	68.320	-0.663	35.384	1864.128	-0.006718	-0.002920	-0.004782
1.9440	909.895	87.754	37.882	62.735	-0.662	35.396	1732.206	-0.006143	-0.002652	-0.004391
1.9480	843.680	79.570	34.262	57.174	-0.664	35.393	1606.150	-0.005570	-0.002398	-0.004002
1.9520	782.274	71.704	30.672	52.083	-0.663	35.382	1489.248	-0.005019	-0.002147	-0.003646
1.9560	710.363	63.243	26.214	46.235	-0.665	35.376	1352.348	-0.004427	-0.001835	-0.003236
1.9600	643.562	54.391	21.892	40.621	-0.662	35.384	1225.176	-0.003807	-0.001532	-0.002843
1.9640	578.819	45.606	17.365	34.951	-0.655	35.396	1101.923	-0.003192	-0.001216	-0.002447
1.9680	520.223	37.839	13.981	29.502	-0.657	35.393	990.372	-0.002649	-0.000979	-0.002065
1.9720	472.959	31.654	10.967	24.823	-0.652	35.382	900.393	-0.002216	-0.000768	-0.001738
1.9760	427.618	25.791	8.242	20.970	-0.659	35.375	814.075	-0.001805	-0.000577	-0.001468
1.9800	381.391	19.343	4.926	16.487	-0.663	35.384	726.070	-0.001354	-0.000345	-0.001154
1.9840	338.605	13.313	1.970	11.959	-0.667	35.395	644.617	-0.000932	-0.000138	-0.000837
1.9880	304.911	8.575	-0.425	9.383	-0.671	35.392	580.473	-0.000600	0.000030	-0.000657
1.9920	278.401	4.252	-1.981	6.138	-0.662	35.382	530.005	-0.000298	0.000139	-0.000430
1.9960	256.851	1.555	-3.397	4.115	-0.670	35.375	488.977	-0.000109	0.000238	-0.000288
Test Cycles
Time (sec)	Axial stress (kPa)	Axial micro-strain #1	Axial micro-strain #2	Axial micro-strain #3	Confining pressure (kPa)	Temperature (�C)	Load (N)	Displacement #1 (mm)	Displacement #2 (mm)	Displacement #3 (mm)
0.0000	245.023	-0.693	-4.254	2.613	-0.665	35.384	466.461	0.000049	0.000298	-0.000183
0.0040	242.649	-1.807	-4.885	1.652	-0.665	35.395	461.941	0.000126	0.000342	-0.000116
0.0080	245.339	-1.529	-4.981	2.244	-0.669	35.392	467.062	0.000107	0.000349	-0.000157
0.0120	250.929	-1.723	-5.354	1.624	-0.661	35.382	477.705	0.000121	0.000375	-0.000114
0.0160	260.247	-0.834	-5.078	2.503	-0.671	35.376	495.443	0.000058	0.000355	-0.000175
0.0200	283.571	1.668	-3.810	2.942	-0.672	35.384	539.846	-0.000117	0.000267	-0.000206
0.0240	341.821	8.600	-1.622	7.348	-0.664	35.395	650.740	-0.000602	0.000114	-0.000514
0.0280	403.287	16.008	1.706	12.865	-0.669	35.393	767.756	-0.001121	-0.000119	-0.000901
0.0320	461.057	23.332	4.926	17.200	-0.668	35.382	877.733	-0.001633	-0.000345	-0.001204
0.0360	524.101	31.224	8.489	22.443	-0.671	35.376	997.753	-0.002186	-0.000594	-0.001571
0.0400	586.123	38.338	12.342	28.389	-0.665	35.384	1115.828	-0.002684	-0.000864	-0.001987
0.0440	644.674	45.426	15.675	32.819	-0.668	35.395	1227.293	-0.003180	-0.001097	-0.002297
0.0480	708.094	53.736	19.720	38.625	-0.664	35.392	1348.028	-0.003762	-0.001380	-0.002704
0.0520	776.037	62.450	23.916	44.170	-0.662	35.382	1477.375	-0.004372	-0.001674	-0.003092
0.0560	851.855	72.261	28.526	50.734	-0.665	35.376	1621.714	-0.005058	-0.001997	-0.003551
0.0600	918.762	81.057	32.378	56.611	-0.660	35.384	1749.086	-0.005674	-0.002266	-0.003963
0.0640	973.029	87.644	35.350	60.862	-0.660	35.395	1852.398	-0.006135	-0.002474	-0.004260
0.0680	1048.066	97.109	40.139	67.908	-0.662	35.393	1995.249	-0.006798	-0.002810	-0.004754
0.0720	1121.360	106.808	45.009	74.030	-0.661	35.382	2134.781	-0.007477	-0.003151	-0.005182
0.0760	1162.523	112.909	47.513	77.994	-0.659	35.376	2213.144	-0.007904	-0.003326	-0.005460
0.0800	1196.817	117.397	50.032	81.379	-0.665	35.384	2278.433	-0.008218	-0.003502	-0.005697
0.0840	1242.849	122.803	52.276	85.162	-0.660	35.395	2366.066	-0.008596	-0.003659	-0.005961
0.0880	1289.422	129.042	55.015	89.579	-0.663	35.392	2454.729	-0.009033	-0.003851	-0.006271
0.0920	1315.512	132.739	57.299	92.428	-0.660	35.382	2504.396	-0.009292	-0.004011	-0.006470
0.0960	1318.006	133.918	57.737	92.950	-0.672	35.376	2509.146	-0.009374	-0.004042	-0.006507
0.1000	1323.807	135.225	58.563	93.845	-0.669	35.384	2520.189	-0.009466	-0.004099	-0.006569
0.1040	1332.359	136.034	58.798	94.535	-0.660	35.395	2536.469	-0.009522	-0.004116	-0.006617
0.1080	1329.158	136.616	58.713	95.140	-0.656	35.392	2530.375	-0.009563	-0.004110	-0.006660
0.1120	1322.620	135.990	58.923	94.892	-0.664	35.382	2517.929	-0.009519	-0.004125	-0.006642
0.1160	1310.988	134.976	58.287	94.425	-0.661	35.376	2495.785	-0.009448	-0.004080	-0.006610
0.1200	1286.657	132.808	57.944	92.746	-0.663	35.384	2449.465	-0.009297	-0.004056	-0.006492
0.1240	1224.094	125.680	55.426	87.996	-0.659	35.395	2330.360	-0.008798	-0.003880	-0.006160
0.1280	1152.303	117.895	52.042	82.672	-0.658	35.393	2193.689	-0.008253	-0.003643	-0.005787
0.1320	1102.214	111.920	48.999	78.709	-0.659	35.381	2098.331	-0.007834	-0.003430	-0.005510
0.1360	1051.387	105.237	45.876	74.690	-0.661	35.375	2001.572	-0.007367	-0.003211	-0.005228
0.1400	990.928	97.661	42.398	70.052	-0.663	35.384	1886.473	-0.006836	-0.002968	-0.004904
0.1440	925.960	90.075	38.902	64.548	-0.656	35.395	1762.791	-0.006305	-0.002723	-0.004518
0.1480	857.175	81.377	35.529	58.743	-0.664	35.392	1631.842	-0.005696	-0.002487	-0.004112
0.1520	790.885	73.734	30.906	52.949	-0.661	35.382	1505.642	-0.005161	-0.002163	-0.003706
0.1560	719.635	64.437	26.598	47.130	-0.661	35.376	1370.001	-0.004511	-0.001862	-0.003299
0.1600	651.617	55.404	22.472	41.060	-0.667	35.384	1240.511	-0.003878	-0.001573	-0.002874
0.1640	589.730	47.304	18.317	35.833	-0.665	35.395	1122.694	-0.003311	-0.001282	-0.002508
0.1680	532.066	39.939	15.069	30.796	-0.665	35.392	1012.917	-0.002796	-0.001055	-0.002156
0.1720	477.197	32.892	11.669	25.813	-0.667	35.382	908.461	-0.002302	-0.000817	-0.001807
0.1760	425.124	26.279	8.367	21.245	-0.669	35.376	809.326	-0.001840	-0.000586	-0.001487
0.1800	375.996	19.358	4.898	16.444	-0.666	35.384	715.799	-0.001355	-0.000343	-0.001151
0.1840	335.584	12.978	1.858	11.904	-0.662	35.395	638.866	-0.000908	-0.000130	-0.000833
0.1880	302.807	8.810	-0.178	8.890	-0.663	35.392	576.468	-0.000617	0.000012	-0.000622
0.1920	282.294	5.072	-1.665	7.021	-0.653	35.382	537.415	-0.000355	0.000117	-0.000491
0.1960	266.724	2.738	-2.667	4.968	-0.664	35.376	507.774	-0.000192	0.000187	-0.000348
0.2000	254.882	0.611	-3.741	4.034	-0.652	35.384	485.229	-0.000043	0.000262	-0.000282
0.2040	250.899	-0.195	-4.308	2.546	-0.651	35.395	477.648	0.000014	0.000302	-0.000178
0.2080	250.899	-0.555	-4.514	3.136	-0.649	35.393	477.648	0.000039	0.000316	-0.000220
0.2120	255.212	-0.623	-4.583	2.434	-0.652	35.382	485.859	0.000044	0.000321	-0.000170
0.2160	264.996	0.404	-4.237	2.998	-0.659	35.376	504.484	-0.000028	0.000297	-0.000210
0.2200	285.405	2.100	-3.563	3.743	-0.647	35.383	543.337	-0.000147	0.000249	-0.000262
0.2240	346.450	9.632	-1.127	8.243	-0.655	35.395	659.552	-0.000674	0.000079	-0.000577
0.2280	411.042	17.871	2.354	13.541	-0.655	35.392	782.518	-0.001251	-0.000165	-0.000948
0.2320	466.722	24.207	5.368	17.737	-0.659	35.382	888.519	-0.001695	-0.000376	-0.001242
0.2360	527.302	31.391	8.947	23.544	-0.661	35.375	1003.847	-0.002197	-0.000626	-0.001648
0.2400	598.747	40.287	13.280	29.199	-0.663	35.383	1139.860	-0.002820	-0.000930	-0.002044
0.2440	664.120	48.498	17.351	34.772	-0.666	35.395	1264.315	-0.003395	-0.001215	-0.002434
0.2480	717.712	55.823	21.040	39.849	-0.667	35.392	1366.339	-0.003908	-0.001473	-0.002789
0.2520	785.024	64.270	24.492	45.065	-0.664	35.381	1494.484	-0.004499	-0.001714	-0.003155
0.2560	861.714	73.761	29.172	51.699	-0.669	35.375	1640.482	-0.005163	-0.002042	-0.003619
0.2600	936.991	83.379	33.601	58.398	-0.661	35.383	1783.791	-0.005837	-0.002352	-0.004088
0.2640	1000.095	91.077	37.345	63.969	-0.660	35.395	1903.925	-0.006375	-0.002614	-0.004478
0.2680	1049.885	98.164	41.117	68.760	-0.669	35.392	1998.711	-0.006871	-0.002878	-0.004813
0.2720	1103.266	104.985	44.076	73.217	-0.668	35.381	2100.334	-0.007349	-0.003085	-0.005125
0.2760	1176.409	114.283	48.753	79.589	-0.665	35.375	2239.580	-0.008000	-0.003413	-0.005571
0.2800	1221.524	120.678	51.534	83.607	-0.668	35.383	2325.468	-0.008447	-0.003607	-0.005853
0.2840	1238.777	122.981	52.179	85.109	-0.667	35.395	2358.313	-0.008609	-0.003653	-0.005958
0.2880	1271.689	127.067	54.588	88.629	-0.669	35.392	2420.969	-0.008895	-0.003821	-0.006204
0.2920	1307.051	131.919	57.160	91.766	-0.666	35.381	2488.289	-0.009234	-0.004001	-0.006424
0.2960	1322.350	134.697	58.302	93.570	-0.676	35.375	2517.414	-0.009429	-0.004081	-0.006550
0.3000	1326.783	135.614	58.881	94.163	-0.673	35.383	2525.854	-0.009493	-0.004122	-0.006591
0.3040	1330.675	136.574	58.755	94.575	-0.665	35.395	2533.264	-0.009560	-0.004113	-0.006620
0.3080	1328.857	136.658	58.934	95.141	-0.670	35.392	2529.802	-0.009566	-0.004125	-0.006660
0.3120	1322.079	136.157	58.866	94.973	-0.671	35.382	2516.899	-0.009531	-0.004121	-0.006648
0.3160	1310.507	135.126	58.523	94.670	-0.676	35.376	2494.869	-0.009459	-0.004097	-0.006627
0.3200	1288.866	133.405	58.204	93.418	-0.670	35.383	2453.671	-0.009338	-0.004074	-0.006539
0.3240	1221.870	125.970	55.717	88.311	-0.659	35.395	2326.126	-0.008818	-0.003900	-0.006182
0.3280	1140.491	116.160	51.284	82.025	-0.662	35.392	2171.202	-0.008131	-0.003590	-0.005742
0.3320	1095.706	110.946	48.795	78.461	-0.663	35.382	2085.943	-0.007766	-0.003416	-0.005492
0.3360	1044.309	105.000	45.490	74.441	-0.673	35.375	1988.096	-0.007350	-0.003184	-0.005211
0.3400	970.009	95.539	41.269	68.581	-0.665	35.383	1846.647	-0.006688	-0.002889	-0.004801
0.3440	900.006	87.034	37.553	62.498	-0.656	35.395	1713.381	-0.006092	-0.002629	-0.004375
0.3480	841.666	80.085	34.236	57.724	-0.655	35.392	1602.316	-0.005606	-0.002397	-0.004041
0.3520	784.227	72.900	30.713	52.470	-0.655	35.382	1492.968	-0.005103	-0.002150	-0.003673
0.3560	714.060	63.826	26.447	46.729	-0.659	35.375	1359.386	-0.004468	-0.001851	-0.003271
0.3600	649.633	55.487	21.975	41.103	-0.664	35.383	1236.734	-0.003884	-0.001538	-0.002877
0.3640	587.836	47.331	18.386	35.611	-0.655	35.395	1119.089	-0.003313	-0.001287	-0.002493
0.3680	531.645	39.953	15.111	31.140	-0.665	35.392	1012.115	-0.002797	-0.001058	-0.002180
0.3720	476.461	33.227	11.669	26.200	-0.665	35.382	907.059	-0.002326	-0.000817	-0.001834
0.3760	419.849	25.319	7.802	20.381	-0.672	35.375	799.284	-0.001772	-0.000546	-0.001427
0.3800	369.278	18.245	4.457	15.924	-0.672	35.383	703.011	-0.001277	-0.000312	-0.001115
0.3840	326.282	12.325	1.156	11.642	-0.660	35.394	621.157	-0.000863	-0.000081	-0.000815
0.3880	298.645	7.866	-0.480	8.776	-0.669	35.392	568.542	-0.000551	0.000034	-0.000614
0.3920	276.222	4.960	-1.883	6.511	-0.665	35.382	525.856	-0.000347	0.000132	-0.000456
0.3960	256.310	1.862	-3.466	4.458	-0.676	35.375	487.947	-0.000130	0.000243	-0.000312
0.4000	247.984	0.237	-4.002	3.386	-0.673	35.383	472.097	-0.000017	0.000280	-0.000237
0.4040	245.038	-0.805	-4.722	2.378	-0.671	35.395	466.490	0.000056	0.000331	-0.000166
0.4080	247.097	-1.110	-4.556	2.490	-0.675	35.392	470.409	0.000078	0.000319	-0.000174
0.4120	252.162	-1.443	-4.912	2.544	-0.667	35.382	480.051	0.000101	0.000344	-0.000178
0.4160	261.975	-0.430	-4.376	2.586	-0.668	35.376	498.734	0.000030	0.000306	-0.000181
0.4200	284.503	2.376	-3.645	4.059	-0.671	35.383	541.620	-0.000166	0.000255	-0.000284
0.4240	342.798	9.465	-1.252	7.969	-0.665	35.395	652.599	-0.000663	0.000088	-0.000558
0.4280	404.339	16.842	1.886	13.403	-0.667	35.392	769.758	-0.001179	-0.000132	-0.000938
0.4320	455.752	23.011	4.678	16.952	-0.662	35.382	867.634	-0.001611	-0.000327	-0.001187
0.4360	513.220	29.863	7.941	22.717	-0.663	35.376	977.039	-0.002090	-0.000556	-0.001590
0.4400	578.654	38.090	12.136	27.591	-0.665	35.383	1101.608	-0.002666	-0.000849	-0.001931
0.4440	645.305	46.581	16.499	33.245	-0.660	35.394	1228.495	-0.003261	-0.001155	-0.002327
0.4480	712.031	55.446	20.367	39.384	-0.661	35.392	1355.524	-0.003881	-0.001426	-0.002757
0.4520	783.581	64.284	24.439	45.271	-0.663	35.382	1491.737	-0.004500	-0.001711	-0.003169
0.4560	856.529	73.275	28.855	51.766	-0.675	35.376	1630.611	-0.005129	-0.002020	-0.003624
0.4600	929.823	82.905	33.217	58.027	-0.673	35.383	1770.144	-0.005803	-0.002325	-0.004062
0.4640	993.137	90.702	37.126	63.378	-0.668	35.394	1890.678	-0.006349	-0.002599	-0.004436
0.4680	1049.329	98.552	41.075	68.581	-0.677	35.392	1997.652	-0.006899	-0.002875	-0.004801
0.4720	1106.151	105.960	44.418	73.658	-0.676	35.382	2105.827	-0.007417	-0.003109	-0.005156
0.4760	1152.619	111.921	47.252	77.911	-0.676	35.375	2194.290	-0.007834	-0.003308	-0.005454
0.4800	1201.672	118.006	50.184	81.805	-0.673	35.383	2287.674	-0.008260	-0.003513	-0.005726
0.4840	1250.935	124.151	53.004	86.358	-0.673	35.395	2381.458	-0.008691	-0.003710	-0.006045
0.4880	1284.914	129.250	55.387	90.031	-0.679	35.392	2446.146	-0.009048	-0.003877	-0.006302
0.4920	1310.297	132.836	57.118	92.208	-0.671	35.382	2494.469	-0.009299	-0.003998	-0.006455
0.4960	1327.444	135.476	58.315	94.272	-0.683	35.375	2527.113	-0.009483	-0.004082	-0.006599
0.5000	1332.359	136.477	58.922	95.126	-0.678	35.383	2536.469	-0.009553	-0.004125	-0.006659
0.5040	1331.457	136.797	59.130	95.113	-0.668	35.395	2534.752	-0.009576	-0.004139	-0.006658
0.5080	1327.790	136.643	59.129	95.675	-0.674	35.392	2527.771	-0.009565	-0.004139	-0.006697
0.5120	1320.561	136.115	58.851	95.167	-0.675	35.382	2514.009	-0.009528	-0.004120	-0.006662
0.5160	1308.433	135.157	58.880	94.974	-0.672	35.375	2490.921	-0.009461	-0.004122	-0.006648
0.5200	1283.892	133.001	58.439	93.212	-0.669	35.383	2444.201	-0.009310	-0.004091	-0.006525
0.5240	1225.161	126.373	55.896	88.600	-0.667	35.395	2332.392	-0.008846	-0.003913	-0.006202
0.5280	1160.268	118.994	52.619	83.746	-0.667	35.392	2208.853	-0.008330	-0.003683	-0.005862
0.5320	1102.890	112.047	49.344	79.424	-0.671	35.381	2099.619	-0.007843	-0.003454	-0.005560
0.5360	1049.584	105.543	46.220	75.186	-0.673	35.375	1998.138	-0.007388	-0.003235	-0.005263
0.5400	988.614	97.886	43.111	70.328	-0.679	35.383	1882.067	-0.006852	-0.003018	-0.004923
0.5440	922.729	90.035	39.314	64.314	-0.674	35.395	1756.639	-0.006302	-0.002752	-0.004502
0.5480	857.852	82.391	35.515	59.320	-0.679	35.392	1633.129	-0.005767	-0.002486	-0.004152
0.5520	790.630	73.930	31.222	53.721	-0.677	35.382	1505.156	-0.005175	-0.002186	-0.003760
0.5560	718.102	64.994	26.654	47.639	-0.674	35.375	1367.083	-0.004550	-0.001866	-0.003335
0.5600	655.704	56.515	22.565	42.326	-0.669	35.383	1248.293	-0.003956	-0.001580	-0.002963
0.5640	596.312	48.888	19.211	36.630	-0.667	35.395	1135.225	-0.003422	-0.001345	-0.002564
0.5680	532.802	40.479	15.468	31.166	-0.667	35.392	1014.318	-0.002834	-0.001083	-0.002182
0.5720	471.351	32.503	11.544	26.050	-0.663	35.382	897.331	-0.002275	-0.000808	-0.001823
0.5760	423.981	26.320	8.135	21.246	-0.667	35.376	807.152	-0.001842	-0.000569	-0.001487
0.5800	378.851	20.150	4.926	16.913	-0.665	35.383	721.235	-0.001410	-0.000345	-0.001184
0.5840	333.330	13.453	2.065	12.659	-0.656	35.395	634.575	-0.000942	-0.000145	-0.000886
0.5880	305.257	9.355	0.109	9.836	-0.667	35.392	581.131	-0.000655	-0.000008	-0.000689
0.5920	281.903	5.393	-1.224	7.267	-0.664	35.382	536.671	-0.000377	0.000086	-0.000509
0.5960	264.275	3.323	-2.570	5.366	-0.673	35.375	503.111	-0.000233	0.000180	-0.000376
0.6000	251.681	0.723	-3.686	4.046	-0.672	35.383	479.136	-0.000051	0.000258	-0.000283
0.6040	244.933	-0.500	-4.446	3.040	-0.669	35.395	466.290	0.000035	0.000311	-0.000213
0.6080	246.872	-0.805	-4.707	2.847	-0.666	35.392	469.980	0.000056	0.000329	-0.000199
0.6120	253.304	-0.402	-4.693	3.176	-0.673	35.382	482.225	0.000028	0.000328	-0.000222
0.6160	263.553	0.639	-4.088	3.523	-0.685	35.376	501.738	-0.000045	0.000286	-0.000247
0.6200	291.701	3.821	-3.314	4.707	-0.670	35.383	555.325	-0.000267	0.000232	-0.000329
0.6240	349.410	10.464	-0.919	9.166	-0.667	35.394	665.188	-0.000732	0.000064	-0.000642
0.6280	407.495	17.260	2.077	13.720	-0.667	35.392	775.766	-0.001208	-0.000145	-0.000960
0.6320	459.418	23.692	4.884	18.494	-0.663	35.382	874.615	-0.001658	-0.000342	-0.001295
0.6360	522.072	31.378	8.810	23.075	-0.667	35.375	993.891	-0.002196	-0.000617	-0.001615
0.6400	584.740	39.576	12.728	28.647	-0.660	35.383	1113.195	-0.002770	-0.000891	-0.002005
0.6440	643.036	46.859	16.402	33.465	-0.664	35.394	1224.174	-0.003280	-0.001148	-0.002343
0.6480	709.191	54.906	20.518	39.284	-0.664	35.392	1350.117	-0.003843	-0.001436	-0.002750
0.6520	787.759	65.215	25.043	45.781	-0.669	35.382	1499.691	-0.004565	-0.001753	-0.003205
0.6560	856.198	73.650	28.951	51.586	-0.672	35.376	1629.982	-0.005156	-0.002027	-0.003611
0.6600	924.908	81.876	33.492	57.698	-0.673	35.383	1760.788	-0.005731	-0.002344	-0.004039
0.6640	1006.257	92.368	38.035	64.755	-0.672	35.394	1915.655	-0.006466	-0.002662	-0.004533
0.6680	1066.777	100.901	41.956	70.563	-0.674	35.392	2030.869	-0.007063	-0.002937	-0.004939
0.6720	1115.995	107.236	44.898	74.539	-0.669	35.382	2124.567	-0.007507	-0.003143	-0.005218
0.6760	1170.187	114.298	48.328	79.341	-0.681	35.375	2227.736	-0.008001	-0.003383	-0.005554
0.6800	1221.900	120.968	51.272	84.089	-0.679	35.383	2326.183	-0.008468	-0.003589	-0.005886
0.6840	1253.294	124.999	53.307	86.801	-0.674	35.394	2385.950	-0.008750	-0.003731	-0.006076
0.6880	1277.340	128.527	55.152	89.537	-0.676	35.392	2431.726	-0.008997	-0.003861	-0.006268
0.6920	1302.798	132.293	56.899	91.851	-0.673	35.382	2480.192	-0.009261	-0.003983	-0.006430
0.6960	1328.136	135.726	58.660	94.534	-0.681	35.375	2528.429	-0.009501	-0.004106	-0.006617
0.7000	1341.947	137.894	59.530	95.923	-0.684	35.382	2554.722	-0.009653	-0.004167	-0.006715
0.7040	1340.459	137.963	59.543	96.074	-0.682	35.395	2551.889	-0.009657	-0.004168	-0.006725
0.7080	1335.289	137.992	59.584	96.445	-0.685	35.392	2542.048	-0.009659	-0.004171	-0.006751
0.7120	1328.692	137.449	59.557	96.088	-0.682	35.382	2529.488	-0.009621	-0.004169	-0.006726
0.7160	1315.707	136.228	59.515	95.650	-0.691	35.375	2504.768	-0.009536	-0.004166	-0.006696
0.7200	1282.705	133.322	58.688	93.529	-0.685	35.383	2441.940	-0.009333	-0.004108	-0.006547
0.7240	1213.334	125.205	55.606	87.941	-0.671	35.395	2309.875	-0.008764	-0.003892	-0.006156
0.7280	1154.077	118.342	52.070	83.802	-0.681	35.392	2197.065	-0.008284	-0.003645	-0.005866
0.7320	1117.092	114.047	49.978	80.648	-0.676	35.382	2126.656	-0.007983	-0.003498	-0.005645
0.7360	1053.882	106.459	46.578	75.861	-0.687	35.375	2006.321	-0.007452	-0.003260	-0.005310
0.7400	971.797	96.551	42.232	68.870	-0.688	35.383	1850.052	-0.006759	-0.002956	-0.004821
0.7440	913.216	89.465	38.750	63.889	-0.681	35.395	1738.529	-0.006263	-0.002712	-0.004472
0.7480	861.879	83.308	35.653	59.623	-0.681	35.392	1640.797	-0.005832	-0.002496	-0.004174
0.7520	797.197	75.248	31.345	54.808	-0.679	35.382	1517.658	-0.005267	-0.002194	-0.003837
0.7560	724.775	65.839	27.107	48.504	-0.681	35.375	1379.786	-0.004609	-0.001898	-0.003395
0.7600	652.293	56.641	22.689	42.065	-0.674	35.383	1241.798	-0.003965	-0.001588	-0.002945
0.7640	587.611	47.972	18.701	36.508	-0.666	35.395	1118.660	-0.003358	-0.001309	-0.002556
0.7680	527.903	40.409	15.096	31.538	-0.672	35.392	1004.992	-0.002829	-0.001057	-0.002208
0.7720	471.366	33.226	11.447	25.965	-0.675	35.382	897.360	-0.002326	-0.000801	-0.001818
0.7760	413.687	25.388	7.594	20.971	-0.676	35.375	787.554	-0.001777	-0.000532	-0.001468
0.7800	363.222	18.091	4.156	15.948	-0.679	35.382	691.481	-0.001266	-0.000291	-0.001116
0.7840	323.291	12.077	1.474	11.709	-0.673	35.395	615.463	-0.000845	-0.000103	-0.000820
0.7880	291.296	7.698	-0.358	9.465	-0.668	35.392	554.552	-0.000539	0.000025	-0.000663
0.7920	269.504	4.490	-1.884	6.069	-0.672	35.382	513.067	-0.000314	0.000132	-0.000425
0.7960	258.248	2.445	-2.984	5.407	-0.676	35.375	491.638	-0.000171	0.000209	-0.000378
0.8000	254.837	1.666	-3.453	3.964	-0.668	35.383	485.144	-0.000117	0.000242	-0.000277
0.8040	248.931	0.029	-4.377	3.234	-0.668	35.394	473.900	-0.000002	0.000306	-0.000226
0.8080	245.083	-0.654	-4.735	2.613	-0.676	35.392	466.576	0.000046	0.000331	-0.000183
0.8120	249.231	-0.666	-4.487	3.124	-0.668	35.382	474.472	0.000047	0.000314	-0.000219
0.8160	257.392	0.278	-4.210	2.987	-0.674	35.375	490.007	-0.000019	0.000295	-0.000209
0.8200	276.342	2.044	-3.908	4.238	-0.672	35.383	526.085	-0.000143	0.000274	-0.000297
0.8240	332.008	8.727	-1.636	7.390	-0.671	35.394	632.057	-0.000611	0.000115	-0.000517
0.8280	397.907	16.717	1.527	13.459	-0.673	35.392	757.513	-0.001170	-0.000107	-0.000942
0.8320	449.470	22.735	4.404	17.175	-0.665	35.382	855.675	-0.001591	-0.000308	-0.001202
0.8360	504.068	29.420	7.914	21.756	-0.683	35.375	959.616	-0.002059	-0.000554	-0.001523
0.8400	564.948	36.878	11.668	27.066	-0.675	35.383	1075.516	-0.002581	-0.000817	-0.001895
0.8440	636.408	45.704	16.072	33.039	-0.673	35.394	1211.557	-0.003199	-0.001125	-0.002313
0.8480	703.810	54.862	20.269	38.763	-0.676	35.392	1339.874	-0.003840	-0.001419	-0.002713
0.8520	773.602	63.714	23.846	44.928	-0.662	35.382	1472.740	-0.004460	-0.001669	-0.003145
0.8560	851.645	72.954	28.431	51.681	-0.668	35.376	1621.313	-0.005107	-0.001990	-0.003618
0.8600	918.882	81.974	32.971	57.297	-0.668	35.382	1749.315	-0.005738	-0.002308	-0.004011
0.8640	974.487	88.853	36.658	62.128	-0.661	35.394	1855.173	-0.006220	-0.002566	-0.004349
0.8680	1036.630	97.233	40.455	67.700	-0.672	35.392	1973.476	-0.006806	-0.002832	-0.004739
0.8720	1103.897	106.071	44.554	73.425	-0.673	35.382	2101.536	-0.007425	-0.003119	-0.005140
0.8760	1155.474	112.519	47.609	78.214	-0.676	35.375	2199.726	-0.007876	-0.003333	-0.005475
0.8800	1206.330	118.522	50.472	82.893	-0.667	35.382	2296.543	-0.008297	-0.003533	-0.005803
0.8840	1248.831	124.498	52.965	86.689	-0.672	35.394	2377.453	-0.008715	-0.003708	-0.006068
0.8880	1278.677	129.014	55.481	90.032	-0.675	35.391	2434.273	-0.009031	-0.003884	-0.006302
0.8920	1297.748	131.808	56.789	91.947	-0.676	35.381	2470.579	-0.009227	-0.003975	-0.006436
0.8960	1314.505	134.558	57.807	93.225	-0.672	35.375	2502.480	-0.009419	-0.004046	-0.006526
0.9000	1325.310	136.116	58.536	94.864	-0.676	35.382	2523.050	-0.009528	-0.004098	-0.006640
0.9040	1329.563	136.617	58.826	95.346	-0.677	35.394	2531.147	-0.009563	-0.004118	-0.006674
0.9080	1328.947	137.132	59.363	95.649	-0.677	35.392	2529.974	-0.009599	-0.004155	-0.006695
0.9120	1323.702	136.856	59.268	95.498	-0.668	35.382	2519.989	-0.009580	-0.004149	-0.006685
0.9160	1314.249	136.380	59.114	95.235	-0.679	35.375	2501.993	-0.009547	-0.004138	-0.006666
0.9200	1292.819	134.571	58.535	93.970	-0.667	35.382	2461.195	-0.009420	-0.004097	-0.006578
0.9240	1228.392	127.208	56.073	89.276	-0.659	35.394	2338.543	-0.008905	-0.003925	-0.006249
0.9280	1155.399	119.077	52.385	84.173	-0.657	35.392	2199.583	-0.008335	-0.003667	-0.005892
0.9320	1112.643	113.423	49.704	80.456	-0.660	35.382	2118.187	-0.007940	-0.003479	-0.005632
0.9360	1061.246	107.391	46.951	76.286	-0.665	35.375	2020.340	-0.007517	-0.003287	-0.005340
0.9400	989.410	98.622	43.125	70.301	-0.667	35.382	1883.583	-0.006904	-0.003019	-0.004921
0.9440	925.675	91.091	39.231	65.306	-0.663	35.394	1762.247	-0.006376	-0.002746	-0.004571
0.9480	869.183	84.154	36.120	60.572	-0.659	35.392	1654.701	-0.005891	-0.002528	-0.004240
0.9520	802.216	75.415	31.854	54.960	-0.660	35.382	1527.214	-0.005279	-0.002230	-0.003847
0.9560	731.688	67.159	27.466	49.153	-0.662	35.375	1392.946	-0.004701	-0.001923	-0.003441
0.9600	664.286	57.989	23.502	43.234	-0.658	35.383	1264.629	-0.004059	-0.001645	-0.003026
0.9640	596.973	49.484	19.377	37.181	-0.662	35.394	1136.484	-0.003464	-0.001356	-0.002603
0.9680	536.229	42.007	15.771	32.048	-0.663	35.392	1020.842	-0.002940	-0.001104	-0.002243
0.9720	480.488	34.158	11.970	27.134	-0.657	35.382	914.726	-0.002391	-0.000838	-0.001899
0.9760	427.423	27.416	8.436	22.236	-0.663	35.375	813.704	-0.001919	-0.000591	-0.001557
0.9800	380.474	20.721	4.995	17.546	-0.656	35.383	724.325	-0.001450	-0.000350	-0.001228
0.9840	342.032	15.008	2.810	13.651	-0.658	35.394	651.140	-0.001051	-0.000197	-0.000956
0.9880	308.834	10.479	0.604	10.609	-0.665	35.392	587.940	-0.000734	-0.000042	-0.000743
0.9920	276.433	5.737	-1.514	7.348	-0.658	35.382	526.257	-0.000402	0.000106	-0.000514
0.9960	252.673	2.417	-3.452	4.817	-0.662	35.375	481.024	-0.000169	0.000242	-0.000337
1.0000	243.445	0.071	-4.143	3.564	-0.663	35.383	463.457	-0.000005	0.000290	-0.000249
1.0040	243.445	-0.278	-4.653	3.345	-0.660	35.394	463.457	0.000019	0.000326	-0.000234
1.0080	246.511	-0.555	-4.487	3.041	-0.662	35.392	469.294	0.000039	0.000314	-0.000213
1.0120	252.673	-0.391	-4.185	2.791	-0.660	35.382	481.024	0.000027	0.000293	-0.000195
1.0160	262.171	0.959	-3.949	3.594	-0.657	35.375	499.105	-0.000067	0.000276	-0.000252
1.0200	288.771	3.863	-3.177	4.748	-0.663	35.382	549.746	-0.000270	0.000222	-0.000332
1.0240	348.584	10.506	-1.058	9.206	-0.659	35.394	663.614	-0.000735	0.000074	-0.000644
1.0280	406.909	17.857	2.134	13.993	-0.664	35.392	774.651	-0.001250	-0.000149	-0.000979
1.0320	462.680	24.512	5.230	18.783	-0.663	35.382	880.823	-0.001716	-0.000366	-0.001315
1.0360	523.650	31.851	9.178	23.818	-0.666	35.375	996.895	-0.002230	-0.000642	-0.001667
1.0400	585.101	39.727	12.949	28.580	-0.663	35.382	1113.882	-0.002781	-0.000906	-0.002001
1.0440	643.441	47.428	16.624	33.934	-0.663	35.394	1224.947	-0.003320	-0.001164	-0.002375
1.0480	709.431	55.725	20.491	39.740	-0.661	35.392	1350.574	-0.003901	-0.001434	-0.002782
1.0520	781.297	64.591	24.231	45.615	-0.660	35.382	1487.389	-0.004521	-0.001696	-0.003193
1.0560	850.863	72.968	28.855	51.588	-0.663	35.375	1619.825	-0.005108	-0.002020	-0.003611
1.0600	918.040	81.739	32.927	57.794	-0.665	35.382	1747.713	-0.005722	-0.002305	-0.004046
1.0640	987.622	90.575	37.138	63.668	-0.667	35.394	1880.178	-0.006340	-0.002600	-0.004457
1.0680	1051.402	99.192	41.735	69.475	-0.671	35.392	2001.600	-0.006943	-0.002921	-0.004863
1.0720	1108.285	106.529	44.997	74.264	-0.671	35.382	2109.890	-0.007457	-0.003150	-0.005198
1.0760	1161.245	113.645	47.666	78.875	-0.675	35.375	2210.712	-0.007955	-0.003337	-0.005521
1.0800	1209.441	119.551	50.530	83.154	-0.670	35.382	2302.465	-0.008369	-0.003537	-0.005821
1.0840	1247.929	124.567	53.308	86.702	-0.676	35.394	2375.736	-0.008720	-0.003732	-0.006069
1.0880	1276.723	128.833	55.399	89.813	-0.685	35.392	2430.553	-0.009018	-0.003878	-0.006287
1.0920	1302.136	132.543	56.872	92.053	-0.676	35.382	2478.933	-0.009278	-0.003981	-0.006444
1.0960	1322.725	135.463	58.468	94.383	-0.679	35.374	2518.129	-0.009482	-0.004093	-0.006607
1.1000	1331.652	136.867	58.770	95.498	-0.674	35.382	2535.124	-0.009581	-0.004114	-0.006685
1.1040	1331.968	137.270	59.019	95.705	-0.670	35.394	2535.725	-0.009609	-0.004131	-0.006699
1.1080	1329.097	137.504	59.254	96.074	-0.680	35.391	2530.260	-0.009625	-0.004148	-0.006725
1.1120	1322.680	136.951	59.639	96.060	-0.669	35.382	2518.044	-0.009587	-0.004175	-0.006724
1.1160	1309.320	136.227	59.295	95.153	-0.680	35.375	2492.609	-0.009536	-0.004151	-0.006661
1.1200	1283.501	133.932	58.591	93.789	-0.673	35.382	2443.457	-0.009375	-0.004101	-0.006565
1.1240	1217.421	126.152	55.537	88.685	-0.670	35.394	2317.657	-0.008831	-0.003888	-0.006208
1.1280	1150.214	118.451	52.040	83.801	-0.667	35.392	2189.713	-0.008292	-0.003643	-0.005866
1.1320	1106.091	112.908	49.592	80.058	-0.666	35.382	2105.713	-0.007904	-0.003471	-0.005604
1.1360	1049.960	106.294	46.578	75.751	-0.674	35.375	1998.854	-0.007441	-0.003260	-0.005303
1.1400	980.544	98.039	42.904	69.847	-0.672	35.382	1866.703	-0.006863	-0.003003	-0.004889
1.1440	915.275	90.188	38.749	64.286	-0.667	35.394	1742.449	-0.006313	-0.002712	-0.004500
1.1480	860.106	83.101	35.764	59.900	-0.672	35.391	1637.421	-0.005817	-0.002504	-0.004193
1.1520	794.928	74.928	31.386	54.201	-0.656	35.382	1513.338	-0.005245	-0.002197	-0.003794
1.1560	719.395	65.507	27.011	48.080	-0.662	35.375	1369.543	-0.004586	-0.001891	-0.003366
1.1600	654.457	56.948	23.131	43.069	-0.657	35.381	1245.918	-0.003986	-0.001619	-0.003015
1.1640	588.603	48.651	19.100	36.547	-0.647	35.394	1120.548	-0.003406	-0.001337	-0.002558
1.1680	533.854	42.022	15.935	32.032	-0.659	35.392	1016.321	-0.002942	-0.001115	-0.002242
1.1720	479.406	34.630	12.054	26.889	-0.656	35.382	912.666	-0.002424	-0.000844	-0.001882
1.1760	423.486	27.056	8.368	21.699	-0.661	35.375	806.208	-0.001894	-0.000586	-0.001519
1.1800	381.301	20.913	5.188	17.984	-0.663	35.382	725.899	-0.001464	-0.000363	-0.001259
1.1840	344.045	15.507	2.918	13.789	-0.661	35.394	654.974	-0.001085	-0.000204	-0.000965
1.1880	308.954	11.103	0.908	10.527	-0.665	35.392	588.169	-0.000777	-0.000064	-0.000737
1.1920	289.237	7.726	-0.714	8.805	-0.667	35.382	550.632	-0.000541	0.000050	-0.000616
1.1960	280.911	6.167	-1.333	7.073	-0.675	35.375	534.782	-0.000432	0.000093	-0.000495
1.2000	268.407	3.893	-2.600	6.208	-0.668	35.382	510.979	-0.000273	0.000182	-0.000435
1.2040	252.793	1.264	-4.046	4.183	-0.665	35.394	481.253	-0.000089	0.000283	-0.000293
1.2080	247.142	0.222	-4.101	3.466	-0.672	35.392	470.495	-0.000016	0.000287	-0.000243
1.2120	250.779	0.307	-4.019	3.631	-0.680	35.383	477.419	-0.000021	0.000281	-0.000254
1.2160	258.924	0.889	-3.783	3.466	-0.682	35.375	492.926	-0.000062	0.000265	-0.000243
1.2200	276.372	2.946	-3.549	4.610	-0.675	35.382	526.142	-0.000206	0.000248	-0.000323
1.2240	328.160	8.617	-1.952	7.348	-0.676	35.393	624.733	-0.000603	0.000137	-0.000514
1.2280	398.689	16.941	1.981	13.692	-0.673	35.391	759.001	-0.001186	-0.000139	-0.000958
1.2320	466.031	25.166	5.848	19.044	-0.675	35.382	887.203	-0.001762	-0.000409	-0.001333
1.2360	527.963	32.920	9.796	24.592	-0.670	35.375	1005.106	-0.002304	-0.000686	-0.001721
1.2400	589.008	40.896	13.484	29.391	-0.671	35.382	1121.321	-0.002863	-0.000944	-0.002057
1.2440	649.964	48.108	17.023	34.551	-0.669	35.394	1237.364	-0.003368	-0.001192	-0.002419
1.2480	725.015	57.545	21.331	41.487	-0.678	35.392	1380.243	-0.004028	-0.001493	-0.002904
1.2520	799.857	66.868	26.007	47.638	-0.671	35.382	1522.722	-0.004681	-0.001821	-0.003335
1.2560	862.796	75.027	29.806	52.676	-0.676	35.375	1642.542	-0.005252	-0.002086	-0.003687
1.2600	930.228	83.545	33.986	58.799	-0.671	35.382	1770.916	-0.005848	-0.002379	-0.004116
1.2640	1001.223	92.340	38.224	64.782	-0.664	35.393	1906.071	-0.006464	-0.002676	-0.004535
1.2680	1059.413	100.596	41.803	70.219	-0.674	35.391	2016.850	-0.007042	-0.002926	-0.004915
1.2720	1112.042	107.406	45.093	75.296	-0.673	35.382	2117.043	-0.007518	-0.003156	-0.005271
1.2760	1164.085	113.826	48.300	79.451	-0.680	35.375	2216.120	-0.007968	-0.003381	-0.005562
1.2800	1212.537	119.953	51.243	84.130	-0.678	35.381	2308.359	-0.008397	-0.003587	-0.005889
1.2840	1254.030	125.624	53.722	87.378	-0.670	35.393	2387.352	-0.008794	-0.003761	-0.006116
1.2880	1287.394	130.751	56.679	91.244	-0.685	35.392	2450.867	-0.009153	-0.003968	-0.006387
1.2920	1308.989	133.487	57.821	93.212	-0.680	35.382	2491.980	-0.009344	-0.004047	-0.006525
1.2960	1322.846	135.713	58.646	94.629	-0.690	35.375	2518.358	-0.009500	-0.004105	-0.006624
1.3000	1331.171	137.062	58.893	95.690	-0.679	35.382	2534.208	-0.009594	-0.004122	-0.006698
1.3040	1332.990	137.200	59.405	95.951	-0.674	35.394	2537.670	-0.009604	-0.004158	-0.006717
1.3080	1328.406	137.687	59.818	96.485	-0.675	35.392	2528.944	-0.009638	-0.004187	-0.006754
1.3120	1318.713	137.394	59.557	95.937	-0.671	35.382	2510.490	-0.009618	-0.004169	-0.006716
1.3160	1303.534	135.642	59.005	95.125	-0.669	35.375	2481.594	-0.009495	-0.004130	-0.006659
1.3200	1274.800	132.792	57.805	93.145	-0.669	35.382	2426.891	-0.009295	-0.004046	-0.006520
1.3240	1207.638	125.512	55.041	87.831	-0.664	35.394	2299.032	-0.008786	-0.003853	-0.006148
1.3280	1148.336	118.103	51.806	83.416	-0.667	35.392	2186.136	-0.008267	-0.003626	-0.005839
1.3320	1105.941	113.074	49.525	80.001	-0.661	35.382	2105.427	-0.007915	-0.003467	-0.005600
1.3360	1052.590	107.140	46.729	75.777	-0.675	35.375	2003.860	-0.007500	-0.003271	-0.005304
1.3400	982.948	98.414	42.934	70.412	-0.668	35.382	1871.281	-0.006889	-0.003005	-0.004929
1.3440	912.916	90.216	38.984	64.342	-0.668	35.394	1737.957	-0.006315	-0.002729	-0.004504
1.3480	845.618	81.432	34.787	58.894	-0.675	35.392	1609.840	-0.005700	-0.002435	-0.004123
1.3520	781.928	73.761	30.879	54.009	-0.671	35.382	1488.590	-0.005163	-0.002162	-0.003781
1.3560	716.179	65.256	27.093	47.885	-0.668	35.374	1363.420	-0.004568	-0.001897	-0.003352
1.3600	646.447	56.295	22.800	41.872	-0.667	35.382	1230.669	-0.003941	-0.001596	-0.002931
1.3640	580.713	48.040	18.756	35.792	-0.663	35.394	1105.528	-0.003363	-0.001313	-0.002505
1.3680	524.266	40.689	15.054	31.182	-0.669	35.392	998.068	-0.002848	-0.001054	-0.002183
1.3720	471.697	33.488	11.557	26.435	-0.661	35.382	897.989	-0.002344	-0.000809	-0.001850
1.3760	417.384	26.265	7.679	21.918	-0.671	35.374	794.592	-0.001839	-0.000538	-0.001534
1.3800	370.841	19.609	4.871	16.788	-0.667	35.381	705.986	-0.001373	-0.000341	-0.001175
1.3840	333.646	14.133	2.710	13.417	-0.659	35.393	635.176	-0.000989	-0.000190	-0.000939
1.3880	304.806	10.687	0.826	10.444	-0.664	35.391	580.273	-0.000748	-0.000058	-0.000731
1.3920	279.543	6.793	-1.115	8.201	-0.659	35.382	532.179	-0.000476	0.000078	-0.000574
1.3960	259.120	3.421	-2.846	5.559	-0.672	35.375	493.298	-0.000239	0.000199	-0.000389
1.4000	247.488	1.086	-3.852	4.129	-0.669	35.382	471.153	-0.000076	0.000270	-0.000289
1.4040	247.713	0.528	-4.129	3.867	-0.667	35.394	471.582	-0.000037	0.000289	-0.000271
1.4080	250.463	0.459	-3.754	3.400	-0.669	35.392	476.818	-0.000032	0.000263	-0.000238
1.4120	255.919	0.875	-4.033	3.867	-0.656	35.382	487.204	-0.000061	0.000282	-0.000271
1.4160	264.365	1.736	-3.589	4.131	-0.664	35.375	503.283	-0.000122	0.000251	-0.000289
1.4200	281.858	3.627	-3.508	4.968	-0.662	35.382	536.585	-0.000254	0.000246	-0.000348
1.4240	330.850	8.798	-1.886	7.611	-0.657	35.394	629.854	-0.000616	0.000132	-0.000533
1.4280	393.880	16.161	1.749	13.598	-0.661	35.391	749.846	-0.001131	-0.000122	-0.000952
1.4320	454.098	23.498	5.243	18.701	-0.651	35.382	864.487	-0.001645	-0.000367	-0.001309
1.4360	508.727	30.615	8.518	23.213	-0.655	35.375	968.485	-0.002143	-0.000596	-0.001625
1.4400	571.530	38.578	12.385	28.058	-0.658	35.381	1088.047	-0.002700	-0.000867	-0.001964
1.4440	641.352	47.232	16.210	34.167	-0.660	35.393	1220.970	-0.003306	-0.001135	-0.002392
1.4480	707.988	55.975	20.421	40.126	-0.664	35.391	1347.828	-0.003918	-0.001429	-0.002809
1.4520	768.598	63.118	23.735	45.049	-0.664	35.382	1463.213	-0.004418	-0.001661	-0.003153
1.4560	837.668	71.664	28.236	51.092	-0.665	35.374	1594.706	-0.005016	-0.001976	-0.003576
1.4600	916.432	81.696	33.368	57.574	-0.664	35.382	1744.652	-0.005719	-0.002336	-0.004030
1.4640	983.790	90.562	37.290	63.406	-0.659	35.393	1872.883	-0.006339	-0.002610	-0.004438
1.4680	1041.784	98.290	40.635	69.077	-0.662	35.391	1983.290	-0.006880	-0.002844	-0.004835
1.4720	1104.994	106.307	44.131	74.126	-0.657	35.382	2103.624	-0.007441	-0.003089	-0.005189
1.4760	1164.251	113.867	48.024	79.410	-0.658	35.374	2216.434	-0.007971	-0.003362	-0.005559
1.4800	1213.138	120.204	51.188	83.786	-0.660	35.381	2309.504	-0.008414	-0.003583	-0.005865
1.4840	1254.617	125.762	53.777	87.612	-0.660	35.393	2388.468	-0.008803	-0.003764	-0.006133
1.4880	1287.348	130.766	56.184	91.063	-0.667	35.391	2450.781	-0.009154	-0.003933	-0.006374
1.4920	1312.145	134.364	57.573	93.377	-0.662	35.381	2497.988	-0.009405	-0.004030	-0.006536
1.4960	1324.288	136.185	58.262	94.780	-0.668	35.374	2521.105	-0.009533	-0.004078	-0.006635
1.5000	1331.382	137.283	59.003	95.635	-0.672	35.381	2534.609	-0.009610	-0.004130	-0.006694
1.5040	1334.703	137.920	59.183	96.154	-0.668	35.393	2540.932	-0.009654	-0.004143	-0.006731
1.5080	1330.074	138.116	59.748	96.815	-0.671	35.392	2532.120	-0.009668	-0.004182	-0.006777
1.5120	1321.568	137.658	59.736	96.169	-0.665	35.382	2515.926	-0.009636	-0.004182	-0.006732
1.5160	1308.749	136.852	59.487	95.744	-0.672	35.374	2491.522	-0.009580	-0.004164	-0.006702
1.5200	1282.855	133.806	58.396	93.971	-0.662	35.381	2442.226	-0.009366	-0.004088	-0.006578
1.5240	1219.555	126.486	55.566	89.028	-0.662	35.393	2321.720	-0.008854	-0.003890	-0.006232
1.5280	1160.043	119.689	52.592	84.806	-0.674	35.392	2208.424	-0.008378	-0.003681	-0.005936
1.5320	1119.015	114.783	50.379	81.364	-0.668	35.382	2130.318	-0.008035	-0.003527	-0.005695
1.5360	1059.563	108.128	47.474	76.536	-0.675	35.375	2017.136	-0.007569	-0.003323	-0.005358
1.5400	989.951	99.819	43.359	70.810	-0.670	35.382	1884.613	-0.006987	-0.003035	-0.004957
1.5440	920.700	91.131	38.943	65.196	-0.664	35.394	1752.777	-0.006379	-0.002726	-0.004564
1.5480	861.579	83.657	35.501	60.326	-0.659	35.392	1640.224	-0.005856	-0.002485	-0.004223
1.5520	800.052	75.567	31.785	55.317	-0.657	35.382	1523.094	-0.005290	-0.002225	-0.003872
1.5560	725.421	66.813	27.519	49.028	-0.660	35.374	1381.016	-0.004677	-0.001926	-0.003432
1.5600	659.522	58.308	23.598	43.689	-0.657	35.382	1255.560	-0.004082	-0.001652	-0.003058
1.5640	600.610	50.235	19.693	37.771	-0.665	35.394	1143.408	-0.003516	-0.001378	-0.002644
1.5680	543.247	43.536	16.251	33.040	-0.670	35.392	1034.203	-0.003048	-0.001138	-0.002313
1.5720	489.866	35.922	12.355	28.498	-0.657	35.382	932.579	-0.002515	-0.000865	-0.001995
1.5760	436.906	28.488	9.137	23.158	-0.665	35.375	831.757	-0.001994	-0.000640	-0.001621
1.5800	383.585	21.623	5.752	18.578	-0.657	35.382	730.247	-0.001514	-0.000403	-0.001300
1.5840	336.501	14.701	2.973	13.678	-0.653	35.393	640.612	-0.001029	-0.000208	-0.000957
1.5880	301.199	10.269	0.646	11.035	-0.660	35.391	573.406	-0.000719	-0.000045	-0.000772
1.5920	277.364	6.390	-1.362	7.789	-0.660	35.383	528.030	-0.000447	0.000095	-0.000545
1.5960	259.571	3.781	-2.915	6.152	-0.668	35.375	494.156	-0.000265	0.000204	-0.000431
1.6000	247.668	1.403	-3.991	4.225	-0.668	35.382	471.497	-0.000098	0.000279	-0.000296
1.6040	245.339	0.195	-4.334	4.005	-0.663	35.393	467.062	-0.000014	0.000303	-0.000280
1.6080	247.353	0.333	-3.852	3.882	-0.671	35.391	470.896	-0.000023	0.000270	-0.000272
1.6120	250.959	0.428	-3.963	3.742	-0.672	35.382	477.762	-0.000030	0.000277	-0.000262
1.6160	259.135	1.305	-4.047	3.936	-0.676	35.375	493.326	-0.000091	0.000283	-0.000276
1.6200	279.784	3.266	-3.577	4.501	-0.676	35.382	532.637	-0.000229	0.000250	-0.000315
1.6240	344.511	10.395	-1.168	9.481	-0.679	35.393	655.861	-0.000728	0.000082	-0.000664
1.6280	415.400	19.526	2.933	15.633	-0.679	35.391	790.815	-0.001367	-0.000205	-0.001094
1.6320	467.834	25.682	6.164	19.294	-0.672	35.382	890.636	-0.001798	-0.000431	-0.001351
1.6360	518.119	32.170	9.179	23.735	-0.674	35.375	986.366	-0.002252	-0.000643	-0.001661
1.6400	581.644	40.091	12.934	29.213	-0.669	35.381	1107.302	-0.002806	-0.000905	-0.002045
1.6440	646.733	48.261	16.568	34.620	-0.664	35.393	1231.213	-0.003378	-0.001160	-0.002423
1.6480	715.758	57.016	20.776	40.993	-0.674	35.391	1362.619	-0.003991	-0.001454	-0.002869
1.6520	780.530	64.658	24.577	46.263	-0.674	35.382	1485.929	-0.004526	-0.001720	-0.003238
1.6560	850.157	74.081	29.214	52.056	-0.680	35.375	1618.481	-0.005186	-0.002045	-0.003644
1.6600	924.397	83.045	33.328	58.385	-0.673	35.381	1759.815	-0.005813	-0.002333	-0.004087
1.6640	984.782	90.897	37.223	63.435	-0.673	35.393	1874.771	-0.006363	-0.002606	-0.004440
1.6680	1033.639	97.942	40.277	68.568	-0.674	35.391	1967.783	-0.006856	-0.002819	-0.004800
1.6720	1097.134	105.724	43.827	73.671	-0.667	35.382	2088.661	-0.007401	-0.003068	-0.005157
1.6760	1156.090	113.297	47.651	79.370	-0.676	35.375	2200.899	-0.007931	-0.003336	-0.005556
1.6800	1200.484	118.786	50.516	83.236	-0.680	35.381	2285.414	-0.008315	-0.003536	-0.005827
1.6840	1239.874	124.442	53.169	86.703	-0.675	35.393	2360.401	-0.008711	-0.003722	-0.006069
1.6880	1275.987	129.860	55.677	90.281	-0.682	35.391	2429.152	-0.009090	-0.003897	-0.006320
1.6920	1306.029	133.363	57.572	93.266	-0.677	35.382	2486.343	-0.009335	-0.004030	-0.006529
1.6960	1327.219	136.130	58.481	95.166	-0.686	35.374	2526.684	-0.009529	-0.004094	-0.006662
1.7000	1341.315	138.407	59.640	96.844	-0.687	35.381	2553.520	-0.009688	-0.004175	-0.006779
1.7040	1345.133	139.103	60.230	97.105	-0.681	35.393	2560.787	-0.009737	-0.004216	-0.006797
1.7080	1339.798	139.282	60.396	97.737	-0.677	35.392	2550.631	-0.009750	-0.004228	-0.006842
1.7120	1331.382	138.823	60.258	96.980	-0.677	35.382	2534.609	-0.009718	-0.004218	-0.006789
1.7160	1315.797	137.615	59.709	96.223	-0.681	35.375	2504.940	-0.009633	-0.004180	-0.006736
1.7200	1282.013	133.961	58.344	94.013	-0.684	35.381	2440.624	-0.009377	-0.004084	-0.006581
1.7240	1212.943	126.095	55.412	88.671	-0.680	35.393	2309.132	-0.008827	-0.003879	-0.006207
1.7280	1155.204	119.258	52.689	84.611	-0.691	35.392	2199.211	-0.008348	-0.003688	-0.005923
1.7320	1105.895	113.255	50.309	80.581	-0.679	35.383	2105.341	-0.007928	-0.003522	-0.005641
1.7360	1045.091	106.821	46.691	75.447	-0.682	35.375	1989.584	-0.007477	-0.003268	-0.005281
1.7400	983.684	99.108	43.043	70.342	-0.673	35.381	1872.683	-0.006938	-0.003013	-0.004924
1.7440	923.796	91.450	39.190	65.759	-0.682	35.393	1758.671	-0.006401	-0.002743	-0.004603
1.7480	858.753	83.239	35.461	60.724	-0.686	35.392	1634.846	-0.005827	-0.002482	-0.004251
1.7520	792.869	74.858	31.622	54.833	-0.676	35.383	1509.418	-0.005240	-0.002214	-0.003838
1.7560	724.865	66.882	27.699	48.851	-0.686	35.375	1379.957	-0.004682	-0.001939	-0.003420
1.7600	660.153	58.864	23.902	43.139	-0.680	35.382	1256.762	-0.004120	-0.001673	-0.003020
1.7640	589.564	49.386	19.277	37.471	-0.675	35.394	1122.379	-0.003457	-0.001349	-0.002623
1.7680	530.563	42.064	15.178	32.449	-0.691	35.392	1010.056	-0.002944	-0.001062	-0.002271
1.7720	475.844	34.337	11.916	26.805	-0.672	35.382	905.886	-0.002404	-0.000834	-0.001876
1.7760	425.094	27.432	8.684	22.388	-0.684	35.374	809.269	-0.001920	-0.000608	-0.001567
1.7800	377.799	21.095	5.712	17.821	-0.673	35.381	719.233	-0.001477	-0.000400	-0.001247
1.7840	339.206	15.702	2.822	14.394	-0.672	35.393	645.761	-0.001099	-0.000198	-0.001008
1.7880	310.547	11.951	0.976	11.214	-0.675	35.391	591.202	-0.000837	-0.000068	-0.000785
1.7920	283.887	7.518	-1.003	8.340	-0.663	35.383	540.447	-0.000526	0.000070	-0.000584
1.7960	259.360	4.227	-2.928	6.109	-0.683	35.375	493.755	-0.000296	0.000205	-0.000428
1.8000	247.518	1.278	-3.851	4.252	-0.672	35.382	471.210	-0.000089	0.000270	-0.000298
1.8040	246.210	0.291	-4.239	3.924	-0.675	35.393	468.721	-0.000020	0.000297	-0.000275
1.8080	247.849	0.902	-3.741	3.607	-0.679	35.392	471.840	-0.000063	0.000262	-0.000252
1.8120	252.988	1.305	-3.977	4.059	-0.675	35.383	481.625	-0.000091	0.000278	-0.000284
1.8160	264.049	2.209	-3.809	4.611	-0.675	35.375	502.682	-0.000155	0.000267	-0.000323
1.8200	295.564	5.293	-2.984	5.793	-0.668	35.381	562.677	-0.000371	0.000209	-0.000405
1.8240	361.674	12.978	0.084	11.062	-0.671	35.393	688.534	-0.000908	-0.000006	-0.000774
1.8280	413.131	19.039	3.179	15.137	-0.680	35.392	786.495	-0.001333	-0.000223	-0.001060
1.8320	446.599	23.679	5.158	18.318	-0.665	35.382	850.210	-0.001658	-0.000361	-0.001282
1.8360	501.303	30.501	8.258	22.719	-0.675	35.374	954.351	-0.002135	-0.000578	-0.001590
1.8400	585.807	40.632	13.031	29.461	-0.673	35.381	1115.227	-0.002844	-0.000912	-0.002062
1.8440	660.769	49.998	17.187	36.024	-0.674	35.393	1257.935	-0.003500	-0.001203	-0.002522
1.8480	716.119	57.100	21.026	41.159	-0.671	35.392	1363.306	-0.003997	-0.001472	-0.002881
1.8520	775.361	64.298	24.464	45.724	-0.675	35.382	1476.088	-0.004501	-0.001713	-0.003201
1.8560	850.563	73.719	29.255	52.372	-0.683	35.375	1619.253	-0.005160	-0.002048	-0.003666
1.8600	928.515	83.782	34.169	59.047	-0.680	35.381	1767.654	-0.005865	-0.002392	-0.004133
1.8640	995.542	92.689	37.729	65.031	-0.680	35.393	1895.256	-0.006488	-0.002641	-0.004552
1.8680	1056.542	100.527	41.749	70.342	-0.686	35.392	2011.385	-0.007037	-0.002922	-0.004924
1.8720	1133.172	109.961	45.987	76.795	-0.679	35.382	2157.269	-0.007697	-0.003219	-0.005376
1.8760	1174.380	115.438	48.864	80.746	-0.684	35.374	2235.718	-0.008081	-0.003420	-0.005652
1.8800	1207.533	120.078	51.176	83.581	-0.677	35.381	2298.832	-0.008405	-0.003582	-0.005851
1.8840	1249.973	125.776	53.734	87.294	-0.683	35.393	2379.627	-0.008804	-0.003761	-0.006111
1.8880	1284.072	130.945	56.319	90.954	-0.684	35.392	2444.544	-0.009166	-0.003942	-0.006367
1.8920	1303.324	133.334	57.049	92.884	-0.675	35.382	2481.194	-0.009333	-0.003993	-0.006502
1.8960	1329.368	136.560	58.812	95.427	-0.681	35.374	2530.775	-0.009559	-0.004117	-0.006680
1.9000	1339.662	138.533	59.571	96.968	-0.672	35.381	2550.373	-0.009697	-0.004170	-0.006788
1.9040	1334.733	138.255	59.900	96.664	-0.671	35.393	2540.989	-0.009678	-0.004193	-0.006766
1.9080	1327.790	138.644	60.257	96.829	-0.684	35.391	2527.771	-0.009705	-0.004218	-0.006778
1.9120	1317.916	137.546	59.570	96.402	-0.676	35.382	2508.974	-0.009628	-0.004170	-0.006748
1.9160	1304.781	136.477	59.308	95.550	-0.685	35.374	2483.969	-0.009553	-0.004152	-0.006688
1.9200	1278.271	133.392	58.178	94.037	-0.683	35.381	2433.500	-0.009337	-0.004072	-0.006583
1.9240	1215.858	126.277	55.717	89.207	-0.677	35.393	2314.682	-0.008839	-0.003900	-0.006244
1.9280	1157.338	119.455	53.046	85.038	-0.673	35.392	2203.274	-0.008362	-0.003713	-0.005953
1.9320	1110.269	113.977	50.101	80.924	-0.673	35.383	2113.667	-0.007978	-0.003507	-0.005665
1.9360	1047.555	107.128	46.688	75.791	-0.668	35.374	1994.276	-0.007499	-0.003268	-0.005305
1.9400	977.418	98.331	42.630	70.162	-0.665	35.381	1860.752	-0.006883	-0.002984	-0.004911
1.9440	918.581	90.786	39.038	64.837	-0.664	35.393	1748.743	-0.006355	-0.002733	-0.004539
1.9480	858.618	83.240	35.750	60.488	-0.677	35.392	1634.588	-0.005827	-0.002503	-0.004234
1.9520	790.464	75.095	31.760	54.753	-0.675	35.382	1504.841	-0.005257	-0.002223	-0.003833
1.9560	722.461	66.131	28.002	48.975	-0.678	35.375	1375.380	-0.004629	-0.001960	-0.003428
1.9600	647.424	56.934	22.924	42.947	-0.676	35.381	1232.529	-0.003985	-0.001605	-0.003006
1.9640	578.864	47.983	18.618	36.067	-0.673	35.393	1102.009	-0.003359	-0.001303	-0.002525
1.9680	527.242	41.285	15.330	31.786	-0.676	35.392	1003.733	-0.002890	-0.001073	-0.002225
1.9720	480.398	34.672	12.177	28.112	-0.669	35.383	914.555	-0.002427	-0.000852	-0.001968
1.9760	423.771	27.125	8.903	22.390	-0.673	35.375	806.751	-0.001899	-0.000623	-0.001567
1.9800	367.054	19.636	5.133	17.419	-0.672	35.381	698.776	-0.001375	-0.000359	-0.001219
1.9840	329.333	14.716	2.465	13.610	-0.666	35.392	626.965	-0.001030	-0.000173	-0.000953
1.9880	303.559	10.782	0.909	10.788	-0.668	35.391	577.898	-0.000755	-0.000064	-0.000755
1.9920	278.822	7.004	-1.540	8.477	-0.653	35.382	530.806	-0.000490	0.000108	-0.000593
1.9960	258.098	3.894	-2.970	5.575	-0.667	35.374	491.352	-0.000273	0.000208	-0.000390
