# Supplementary material for: Evaluation of a Cold-Mixed High-Performance Polyurethane Mixture
Source: Hindawi journal article supplement (doi:10.1155/2019/1507971), 2019-11-07
Supplement: f1 [file 1507971.f1.zip › 1507971.f1/dynamic modulus data/PUM/specimen2/temp35/zhs-2-35_10Hz.csv]

Test Information
****************
Project name	zhs
Operator name	1
Target test temperature	35
Target confining stress	0
Average dynamic strain range from 75 to 125 micro-strain
Contact stress	5
Initial modulus	1000
Axial gauge length	70
Comments
Specimen information
********************
Identification	zhs-2-35
Dimensions	Point 1	Point 2	Point 3	Point 4	Point 5	Point 6	Average	Std Dev.
Diameter (mm)	49.2	49.3	49.2				49.23	0.058
Height (mm)	100.8	101.0	100.8				100.87	0.115
Cross-sectional area (mm�)	1903.7
Conditioning time
Properties/Comments
Test Data	10Hz
*********
Test date and time	Tue	Apr 2	2019	12:59 PM
Dynamic modulus (MPa)	11299
Phase angle (Degrees)	4.56
Average temperature (�C)	35.4
Average confining pressure (kPa)	-0.7
Average micro-strain	101
Load drift (%)	0.5
Load standard error (%)	3.6
Average deformation drift (%)	-3.8
Average deformation standard error (%)	3.5
Deformation uniformity (%)	30.7
Phase uniformity (Degrees)	0.7
Conditioning Cycles
Time (sec)	Axial stress (kPa)	Axial micro-strain #1	Axial micro-strain #2	Axial micro-strain #3	Confining pressure (kPa)	Temperature (�C)	Load (N)	Displacement #1 (mm)	Displacement #2 (mm)	Displacement #3 (mm)
0.0000	439.536	16.119	3.014	11.849	-0.660	35.392	836.763	-0.001128	-0.000211	-0.000829
0.0020	434.516	15.633	2.849	11.558	-0.659	35.388	827.208	-0.001094	-0.000199	-0.000809
0.0040	407.405	12.979	2.189	10.390	-0.669	35.387	775.595	-0.000909	-0.000153	-0.000727
0.0060	342.708	5.210	-1.168	5.328	-0.667	35.390	652.428	-0.000365	0.000082	-0.000373
0.0080	276.222	-2.766	-5.077	-0.149	-0.669	35.395	525.856	0.000194	0.000355	0.000010
0.0100	242.799	-7.296	-7.485	-3.248	-0.674	35.401	462.227	0.000511	0.000524	0.000227
0.0120	239.267	-8.656	-8.269	-4.252	-0.664	35.406	455.503	0.000606	0.000579	0.000298
0.0140	247.518	-7.878	-7.857	-3.441	-0.668	35.406	471.210	0.000551	0.000550	0.000241
0.0160	262.141	-6.434	-7.417	-3.095	-0.661	35.403	499.048	0.000450	0.000519	0.000217
0.0180	294.076	-2.904	-6.302	-1.294	-0.659	35.397	559.845	0.000203	0.000441	0.000091
0.0200	353.573	3.907	-3.481	3.330	-0.661	35.392	673.113	-0.000273	0.000244	-0.000233
0.0220	427.754	12.661	0.413	9.057	-0.660	35.388	814.333	-0.000886	-0.000029	-0.000634
0.0240	496.524	21.192	4.567	15.521	-0.667	35.386	945.253	-0.001483	-0.000320	-0.001086
0.0260	553.391	28.126	8.160	19.732	-0.662	35.390	1053.514	-0.001969	-0.000571	-0.001381
0.0280	603.361	34.560	11.173	24.108	-0.665	35.395	1148.643	-0.002419	-0.000782	-0.001688
0.0300	653.150	40.965	14.010	28.551	-0.668	35.401	1243.429	-0.002868	-0.000981	-0.001999
0.0320	705.464	47.538	17.202	32.640	-0.669	35.406	1343.021	-0.003328	-0.001204	-0.002285
0.0340	761.189	54.333	20.531	37.924	-0.672	35.405	1449.108	-0.003803	-0.001437	-0.002655
0.0360	819.920	61.713	23.723	42.794	-0.668	35.402	1560.917	-0.004320	-0.001661	-0.002996
0.0380	875.270	68.315	27.204	47.266	-0.664	35.398	1666.288	-0.004782	-0.001904	-0.003309
0.0400	922.354	74.511	30.149	51.269	-0.665	35.392	1755.924	-0.005216	-0.002110	-0.003589
0.0420	959.759	79.570	32.089	54.312	-0.665	35.387	1827.135	-0.005570	-0.002246	-0.003802
0.0440	988.418	83.641	34.303	57.354	-0.674	35.386	1881.695	-0.005855	-0.002401	-0.004015
0.0460	1011.818	86.504	36.203	59.666	-0.672	35.390	1926.241	-0.006055	-0.002534	-0.004177
0.0480	1032.467	89.312	37.401	61.483	-0.675	35.395	1965.551	-0.006252	-0.002618	-0.004304
0.0500	1049.464	91.869	38.448	63.214	-0.677	35.400	1997.910	-0.006431	-0.002691	-0.004425
0.0520	1061.637	93.524	39.395	64.562	-0.671	35.406	2021.084	-0.006547	-0.002758	-0.004519
0.0540	1068.039	95.233	40.097	65.443	-0.672	35.405	2033.272	-0.006666	-0.002807	-0.004581
0.0560	1070.158	95.772	40.333	66.022	-0.662	35.403	2037.306	-0.006704	-0.002823	-0.004622
0.0580	1069.256	95.981	40.484	66.023	-0.665	35.398	2035.589	-0.006719	-0.002834	-0.004622
0.0600	1064.597	95.981	40.403	66.009	-0.675	35.392	2026.720	-0.006719	-0.002828	-0.004621
0.0620	1057.008	95.301	40.196	65.359	-0.666	35.388	2012.272	-0.006671	-0.002814	-0.004575
0.0640	1045.647	94.245	40.058	65.112	-0.675	35.386	1990.643	-0.006597	-0.002804	-0.004558
0.0660	1026.876	92.246	39.371	64.012	-0.671	35.390	1954.908	-0.006457	-0.002756	-0.004481
0.0680	988.103	87.895	37.828	61.108	-0.671	35.395	1881.094	-0.006153	-0.002648	-0.004278
0.0700	919.363	79.889	34.387	56.197	-0.669	35.401	1750.231	-0.005592	-0.002407	-0.003934
0.0720	840.464	70.413	30.219	49.577	-0.661	35.407	1600.027	-0.004929	-0.002115	-0.003470
0.0740	773.317	62.434	26.642	44.856	-0.666	35.406	1472.197	-0.004370	-0.001865	-0.003140
0.0760	723.002	56.154	23.379	40.509	-0.669	35.403	1376.410	-0.003931	-0.001637	-0.002836
0.0780	680.005	51.193	20.985	37.057	-0.671	35.398	1294.556	-0.003583	-0.001469	-0.002594
0.0800	634.575	45.593	18.494	33.175	-0.674	35.392	1208.067	-0.003192	-0.001295	-0.002322
0.0820	584.665	39.451	15.275	28.799	-0.668	35.387	1113.052	-0.002762	-0.001069	-0.002016
0.0840	531.480	33.100	12.067	24.659	-0.672	35.386	1011.801	-0.002317	-0.000845	-0.001726
0.0860	478.715	26.082	8.889	19.980	-0.669	35.390	911.350	-0.001826	-0.000622	-0.001399
0.0880	428.234	19.567	5.572	15.949	-0.665	35.395	815.248	-0.001370	-0.000390	-0.001116
0.0900	381.000	13.633	2.216	11.421	-0.664	35.400	725.327	-0.000954	-0.000155	-0.000799
0.0920	340.439	7.921	-0.371	7.321	-0.656	35.406	648.108	-0.000554	0.000026	-0.000512
0.0940	308.263	3.448	-2.228	4.872	-0.665	35.405	586.853	-0.000241	0.000156	-0.000341
0.0960	283.631	-0.376	-3.700	2.271	-0.653	35.403	539.961	0.000026	0.000259	-0.000159
0.0980	263.839	-3.239	-4.857	0.510	-0.655	35.398	502.281	0.000227	0.000340	-0.000036
0.1000	247.142	-5.878	-5.930	-1.169	-0.653	35.393	470.495	0.000411	0.000415	0.000082
0.1020	233.602	-7.571	-7.059	-3.192	-0.653	35.388	444.717	0.000530	0.000494	0.000223
0.1040	224.885	-8.280	-7.514	-3.866	-0.661	35.387	428.123	0.000580	0.000526	0.000271
0.1060	221.173	-9.464	-7.951	-4.139	-0.660	35.391	421.057	0.000662	0.000557	0.000290
0.1080	221.909	-9.646	-8.188	-4.842	-0.662	35.395	422.459	0.000675	0.000573	0.000339
0.1100	224.960	-9.422	-8.326	-4.541	-0.665	35.401	428.267	0.000660	0.000583	0.000318
0.1120	230.085	-9.366	-8.311	-4.692	-0.660	35.406	438.023	0.000656	0.000582	0.000328
0.1140	238.290	-8.546	-8.214	-4.512	-0.667	35.406	453.644	0.000598	0.000575	0.000316
0.1160	255.558	-6.920	-7.925	-3.167	-0.663	35.403	486.517	0.000484	0.000555	0.000222
0.1180	298.870	-1.723	-6.274	-0.442	-0.664	35.398	568.972	0.000121	0.000439	0.000031
0.1200	369.293	6.574	-2.396	5.133	-0.669	35.392	703.039	-0.000460	0.000168	-0.000359
0.1220	446.314	15.509	1.981	11.599	-0.665	35.388	849.667	-0.001086	-0.000139	-0.000812
0.1240	514.212	24.014	6.247	17.078	-0.666	35.387	978.928	-0.001681	-0.000437	-0.001195
0.1260	569.577	30.989	9.343	21.866	-0.663	35.390	1084.328	-0.002169	-0.000654	-0.001531
0.1280	616.646	36.687	12.508	26.075	-0.668	35.394	1173.935	-0.002568	-0.000876	-0.001825
0.1300	662.557	42.758	15.218	29.738	-0.670	35.400	1261.339	-0.002993	-0.001065	-0.002082
0.1320	711.821	49.069	18.068	34.113	-0.663	35.406	1355.124	-0.003435	-0.001265	-0.002388
0.1340	764.465	55.740	21.370	38.584	-0.666	35.405	1455.345	-0.003902	-0.001496	-0.002701
0.1360	821.047	62.702	24.576	43.551	-0.662	35.402	1563.063	-0.004389	-0.001720	-0.003049
0.1380	875.405	69.468	27.742	48.092	-0.660	35.398	1666.546	-0.004863	-0.001942	-0.003366
0.1400	922.519	75.514	30.563	51.890	-0.664	35.392	1756.239	-0.005286	-0.002139	-0.003632
0.1420	962.074	80.530	32.789	55.260	-0.661	35.387	1831.541	-0.005637	-0.002295	-0.003868
0.1440	995.016	84.920	35.267	58.632	-0.671	35.386	1894.255	-0.005944	-0.002469	-0.004104
0.1460	1023.314	88.574	37.072	61.178	-0.665	35.390	1948.128	-0.006200	-0.002595	-0.004282
0.1480	1046.834	91.771	38.543	63.518	-0.669	35.395	1992.903	-0.006424	-0.002698	-0.004446
0.1500	1063.966	94.467	40.098	65.098	-0.679	35.400	2025.518	-0.006613	-0.002807	-0.004557
0.1520	1073.494	96.178	40.937	66.021	-0.674	35.406	2043.657	-0.006732	-0.002866	-0.004621
0.1540	1076.094	97.389	41.280	66.819	-0.676	35.405	2048.607	-0.006817	-0.002890	-0.004677
0.1560	1074.712	97.748	41.171	66.862	-0.671	35.402	2045.975	-0.006842	-0.002882	-0.004680
0.1580	1071.946	97.317	41.281	66.958	-0.672	35.398	2040.710	-0.006812	-0.002890	-0.004687
0.1600	1067.122	97.040	41.143	66.615	-0.666	35.392	2031.527	-0.006793	-0.002880	-0.004663
0.1620	1059.758	96.497	40.661	66.212	-0.657	35.388	2017.508	-0.006755	-0.002846	-0.004635
0.1640	1047.285	95.106	40.483	65.746	-0.664	35.386	1993.761	-0.006657	-0.002834	-0.004602
0.1660	1020.459	92.146	39.520	64.083	-0.663	35.390	1942.692	-0.006450	-0.002766	-0.004486
0.1680	965.500	85.838	37.332	60.202	-0.663	35.394	1838.064	-0.006009	-0.002613	-0.004214
0.1700	891.921	77.360	33.562	54.408	-0.668	35.400	1697.989	-0.005415	-0.002349	-0.003809
0.1720	823.902	69.161	29.805	49.192	-0.666	35.406	1568.499	-0.004841	-0.002086	-0.003443
0.1740	770.476	63.048	26.709	44.693	-0.675	35.405	1466.789	-0.004413	-0.001870	-0.003129
0.1760	727.600	57.475	24.232	41.267	-0.664	35.402	1385.164	-0.004023	-0.001696	-0.002889
0.1780	684.739	52.124	21.562	37.841	-0.660	35.397	1303.568	-0.003649	-0.001509	-0.002649
0.1800	633.613	46.148	18.617	33.686	-0.667	35.392	1206.236	-0.003230	-0.001303	-0.002358
0.1820	575.633	39.021	15.206	28.484	-0.667	35.387	1095.858	-0.002731	-0.001064	-0.001994
0.1840	518.585	32.046	11.780	23.804	-0.675	35.386	987.253	-0.002243	-0.000825	-0.001666
0.1860	469.097	25.583	8.532	19.540	-0.672	35.389	893.040	-0.001791	-0.000597	-0.001368
0.1880	425.620	19.887	5.406	15.344	-0.673	35.394	810.270	-0.001392	-0.000378	-0.001074
0.1900	385.764	14.799	3.084	12.179	-0.673	35.400	734.396	-0.001036	-0.000216	-0.000853
0.1920	350.102	9.879	0.743	8.642	-0.663	35.406	666.504	-0.000692	-0.000052	-0.000605
0.1940	317.986	5.530	-1.389	5.628	-0.673	35.405	605.364	-0.000387	0.000097	-0.000394
0.1960	290.815	1.543	-3.053	3.274	-0.668	35.402	553.637	-0.000108	0.000214	-0.000229
0.1980	269.504	-1.582	-4.333	1.336	-0.667	35.397	513.067	0.000111	0.000303	-0.000094
0.2000	253.830	-3.779	-5.464	-0.687	-0.665	35.392	483.227	0.000265	0.000382	0.000048
0.2020	243.595	-5.601	-6.232	-1.733	-0.664	35.387	463.743	0.000392	0.000436	0.000121
0.2040	238.606	-6.379	-6.438	-2.078	-0.669	35.386	454.245	0.000446	0.000451	0.000145
0.2060	237.329	-6.975	-6.894	-2.684	-0.665	35.390	451.813	0.000488	0.000483	0.000188
0.2080	237.960	-7.490	-7.016	-2.532	-0.661	35.394	453.014	0.000524	0.000491	0.000177
0.2100	240.274	-7.295	-7.182	-2.945	-0.666	35.401	457.420	0.000511	0.000503	0.000206
0.2120	244.512	-7.239	-7.279	-2.834	-0.662	35.406	465.488	0.000507	0.000510	0.000198
0.2140	251.621	-6.487	-7.237	-2.230	-0.669	35.405	479.021	0.000454	0.000507	0.000156
0.2160	265.176	-5.210	-6.989	-2.133	-0.663	35.403	504.827	0.000365	0.000489	0.000149
0.2180	298.825	-1.322	-5.531	0.208	-0.663	35.398	568.886	0.000093	0.000387	-0.000015
0.2200	359.119	5.851	-2.547	5.050	-0.664	35.392	683.670	-0.000410	0.000178	-0.000354
0.2220	431.300	14.368	1.321	10.624	-0.654	35.387	821.085	-0.001006	-0.000092	-0.000744
0.2240	500.867	23.081	5.602	16.555	-0.661	35.386	953.522	-0.001616	-0.000392	-0.001159
0.2260	561.401	30.447	9.289	21.520	-0.660	35.390	1068.764	-0.002131	-0.000650	-0.001506
0.2280	612.573	37.033	12.302	25.719	-0.658	35.394	1166.182	-0.002592	-0.000861	-0.001800
0.2300	660.574	42.954	15.249	30.121	-0.661	35.400	1257.563	-0.003007	-0.001067	-0.002108
0.2320	713.368	49.331	18.248	34.014	-0.657	35.406	1358.070	-0.003453	-0.001277	-0.002381
0.2340	770.987	57.087	21.851	39.520	-0.662	35.405	1467.762	-0.003996	-0.001530	-0.002766
0.2360	829.794	64.284	25.237	44.391	-0.657	35.402	1579.714	-0.004500	-0.001767	-0.003107
0.2380	882.062	70.788	28.318	48.809	-0.658	35.397	1679.220	-0.004955	-0.001982	-0.003417
0.2400	923.090	76.027	30.853	52.646	-0.656	35.392	1757.326	-0.005322	-0.002160	-0.003685
0.2420	957.159	80.862	32.943	55.413	-0.652	35.387	1822.186	-0.005660	-0.002306	-0.003879
0.2440	988.569	84.849	35.186	58.564	-0.663	35.386	1881.981	-0.005939	-0.002463	-0.004099
0.2460	1018.956	88.867	37.015	60.946	-0.660	35.389	1939.831	-0.006221	-0.002591	-0.004266
0.2480	1047.164	92.883	38.723	64.026	-0.655	35.394	1993.532	-0.006502	-0.002711	-0.004482
0.2500	1068.865	95.663	40.235	65.814	-0.655	35.400	2034.845	-0.006696	-0.002816	-0.004607
0.2520	1080.212	97.236	41.156	66.887	-0.656	35.406	2056.446	-0.006806	-0.002881	-0.004682
0.2540	1082.286	98.054	41.695	67.769	-0.659	35.405	2060.394	-0.006864	-0.002919	-0.004744
0.2560	1080.062	98.290	41.680	67.645	-0.652	35.402	2056.160	-0.006880	-0.002918	-0.004735
0.2580	1075.703	98.330	41.750	67.631	-0.656	35.397	2047.863	-0.006883	-0.002923	-0.004734
0.2600	1069.151	97.789	41.586	67.151	-0.659	35.391	2035.389	-0.006845	-0.002911	-0.004701
0.2620	1059.653	96.914	40.855	66.613	-0.653	35.387	2017.307	-0.006784	-0.002860	-0.004663
0.2640	1043.693	95.232	40.398	65.965	-0.661	35.386	1986.923	-0.006666	-0.002828	-0.004618
0.2660	1009.789	91.383	39.066	63.821	-0.663	35.390	1922.379	-0.006397	-0.002735	-0.004467
0.2680	951.449	84.767	36.603	59.611	-0.663	35.395	1811.314	-0.005934	-0.002562	-0.004173
0.2700	882.513	76.916	32.926	54.024	-0.668	35.400	1680.079	-0.005384	-0.002305	-0.003782
0.2720	818.522	69.078	29.337	48.919	-0.660	35.405	1558.256	-0.004835	-0.002054	-0.003424
0.2740	763.984	62.673	26.669	44.626	-0.666	35.405	1454.430	-0.004387	-0.001867	-0.003124
0.2760	718.193	56.975	23.805	40.855	-0.660	35.402	1367.254	-0.003988	-0.001666	-0.002860
0.2780	674.745	51.611	21.315	37.153	-0.653	35.397	1284.542	-0.003613	-0.001492	-0.002601
0.2800	627.812	46.150	18.425	33.603	-0.659	35.392	1195.192	-0.003231	-0.001290	-0.002352
0.2820	577.091	39.701	15.096	29.117	-0.658	35.387	1098.633	-0.002779	-0.001057	-0.002038
0.2840	524.867	33.365	12.275	24.739	-0.663	35.386	999.212	-0.002336	-0.000859	-0.001732
0.2860	475.469	26.902	9.221	20.490	-0.661	35.389	905.170	-0.001883	-0.000645	-0.001434
0.2880	431.255	20.816	6.232	16.252	-0.657	35.394	820.999	-0.001457	-0.000436	-0.001138
0.2900	390.183	15.314	3.398	13.100	-0.657	35.400	742.807	-0.001072	-0.000238	-0.000917
0.2920	353.092	10.366	0.937	9.412	-0.651	35.405	672.197	-0.000726	-0.000066	-0.000659
0.2940	321.503	6.281	-0.948	6.413	-0.661	35.405	612.059	-0.000440	0.000066	-0.000449
0.2960	295.534	2.238	-2.625	4.265	-0.655	35.402	562.620	-0.000157	0.000184	-0.000299
0.2980	272.736	-0.903	-4.142	1.664	-0.655	35.398	519.218	0.000063	0.000290	-0.000116
0.3000	252.417	-3.904	-5.175	-0.495	-0.659	35.392	480.537	0.000273	0.000362	0.000035
0.3020	236.697	-6.155	-6.453	-1.662	-0.653	35.387	450.611	0.000431	0.000452	0.000116
0.3040	227.275	-7.489	-6.921	-2.474	-0.665	35.386	432.673	0.000524	0.000484	0.000173
0.3060	224.494	-8.518	-7.306	-3.231	-0.659	35.390	427.380	0.000596	0.000511	0.000226
0.3080	225.982	-8.323	-7.829	-3.273	-0.657	35.394	430.212	0.000583	0.000548	0.000229
0.3100	229.589	-8.072	-7.954	-3.300	-0.659	35.400	437.078	0.000565	0.000557	0.000231
0.3120	234.804	-8.115	-7.940	-3.824	-0.656	35.406	447.006	0.000568	0.000556	0.000268
0.3140	242.859	-7.336	-7.677	-2.807	-0.664	35.405	462.341	0.000513	0.000537	0.000196
0.3160	261.569	-5.433	-7.153	-1.776	-0.659	35.402	497.961	0.000380	0.000501	0.000124
0.3180	308.022	-0.084	-5.160	1.058	-0.655	35.397	586.395	0.000006	0.000361	-0.000074
0.3200	376.822	8.019	-1.581	6.576	-0.654	35.392	717.373	-0.000561	0.000111	-0.000460
0.3220	446.223	16.148	2.326	12.207	-0.655	35.387	849.495	-0.001130	-0.000163	-0.000854
0.3240	505.481	24.027	5.960	16.774	-0.661	35.386	962.305	-0.001682	-0.000417	-0.001174
0.3260	553.481	29.918	8.918	21.465	-0.653	35.389	1053.686	-0.002094	-0.000624	-0.001503
0.3280	597.439	35.267	11.615	24.934	-0.660	35.394	1137.371	-0.002469	-0.000813	-0.001745
0.3300	646.432	41.645	14.504	29.200	-0.662	35.399	1230.640	-0.002915	-0.001015	-0.002044
0.3320	704.502	48.608	17.709	33.769	-0.659	35.405	1341.190	-0.003403	-0.001240	-0.002364
0.3340	767.771	56.655	21.576	39.520	-0.664	35.404	1461.639	-0.003966	-0.001510	-0.002766
0.3360	829.628	64.423	25.195	44.623	-0.664	35.402	1579.399	-0.004510	-0.001764	-0.003124
0.3380	883.220	71.010	28.580	48.877	-0.669	35.397	1681.423	-0.004971	-0.002001	-0.003421
0.3400	925.179	76.250	31.154	52.854	-0.674	35.392	1761.303	-0.005337	-0.002181	-0.003700
0.3420	959.368	81.101	33.108	55.538	-0.667	35.387	1826.391	-0.005677	-0.002318	-0.003888
0.3440	989.831	85.087	35.308	58.977	-0.678	35.386	1884.384	-0.005956	-0.002472	-0.004128
0.3460	1020.098	88.908	37.125	61.813	-0.668	35.389	1942.005	-0.006224	-0.002599	-0.004327
0.3480	1049.238	93.272	38.913	64.330	-0.668	35.394	1997.480	-0.006529	-0.002724	-0.004503
0.3500	1069.963	95.967	40.510	66.144	-0.672	35.400	2036.934	-0.006718	-0.002836	-0.004630
0.3520	1080.032	97.498	41.309	66.874	-0.663	35.405	2056.103	-0.006825	-0.002892	-0.004681
0.3540	1081.249	98.249	41.571	67.646	-0.665	35.405	2058.420	-0.006877	-0.002910	-0.004735
0.3560	1078.514	98.442	41.600	67.948	-0.657	35.402	2053.213	-0.006891	-0.002912	-0.004756
0.3580	1074.155	98.428	41.599	67.796	-0.665	35.397	2044.916	-0.006890	-0.002912	-0.004746
0.3600	1068.249	97.943	41.545	67.358	-0.667	35.392	2033.672	-0.006856	-0.002908	-0.004715
0.3620	1059.984	96.843	41.008	66.601	-0.664	35.387	2017.937	-0.006779	-0.002871	-0.004662
0.3640	1046.097	95.745	40.621	66.366	-0.672	35.386	1991.501	-0.006702	-0.002843	-0.004646
0.3660	1016.582	92.202	39.601	64.246	-0.667	35.389	1935.310	-0.006454	-0.002772	-0.004497
0.3680	960.526	85.754	37.056	60.214	-0.665	35.394	1828.594	-0.006003	-0.002594	-0.004215
0.3700	889.922	77.612	33.562	54.875	-0.668	35.399	1694.183	-0.005433	-0.002349	-0.003841
0.3720	825.180	69.746	29.916	49.550	-0.665	35.405	1570.930	-0.004882	-0.002094	-0.003469
0.3740	772.415	63.547	27.164	45.684	-0.670	35.405	1470.480	-0.004448	-0.001901	-0.003198
0.3760	728.081	58.516	24.561	41.775	-0.670	35.402	1386.080	-0.004096	-0.001719	-0.002924
0.3780	685.506	53.207	22.003	38.282	-0.666	35.397	1305.027	-0.003725	-0.001540	-0.002680
0.3800	639.083	47.330	19.222	34.264	-0.672	35.391	1216.650	-0.003313	-0.001346	-0.002398
0.3820	586.168	40.938	15.796	29.710	-0.664	35.387	1115.913	-0.002866	-0.001106	-0.002080
0.3840	528.594	33.962	12.536	25.238	-0.666	35.386	1006.308	-0.002377	-0.000877	-0.001767
0.3860	472.493	26.707	9.194	20.449	-0.668	35.389	899.506	-0.001869	-0.000644	-0.001431
0.3880	422.839	20.203	5.628	16.404	-0.667	35.394	804.977	-0.001414	-0.000394	-0.001148
0.3900	380.685	14.548	3.096	12.055	-0.668	35.399	724.726	-0.001018	-0.000217	-0.000844
0.3920	344.932	9.601	0.400	8.752	-0.661	35.405	656.662	-0.000672	-0.000028	-0.000613
0.3940	314.860	5.545	-1.347	6.110	-0.667	35.405	599.413	-0.000388	0.000094	-0.000428
0.3960	289.056	1.767	-2.832	3.482	-0.659	35.402	550.289	-0.000124	0.000198	-0.000244
0.3980	265.792	-1.278	-4.335	1.568	-0.660	35.397	506.001	0.000089	0.000303	-0.000110
0.4000	245.354	-4.501	-5.534	-0.949	-0.660	35.391	467.091	0.000315	0.000387	0.000066
0.4020	230.671	-6.933	-6.688	-2.407	-0.661	35.387	439.138	0.000485	0.000468	0.000169
0.4040	222.826	-8.212	-7.278	-2.738	-0.670	35.386	424.204	0.000575	0.000509	0.000192
0.4060	220.166	-8.754	-7.787	-3.797	-0.665	35.389	419.140	0.000613	0.000545	0.000266
0.4080	220.752	-8.894	-7.954	-3.892	-0.664	35.394	420.256	0.000623	0.000557	0.000272
0.4100	223.758	-8.852	-8.173	-3.521	-0.670	35.399	425.978	0.000620	0.000572	0.000246
0.4120	229.424	-8.601	-8.199	-3.701	-0.667	35.405	436.764	0.000602	0.000574	0.000259
0.4140	238.862	-7.460	-7.883	-3.454	-0.671	35.405	454.731	0.000522	0.000552	0.000242
0.4160	259.075	-5.503	-7.319	-2.064	-0.661	35.402	493.212	0.000385	0.000512	0.000144
0.4180	303.514	-0.750	-5.352	1.087	-0.662	35.398	577.812	0.000053	0.000375	-0.000076
0.4200	370.180	7.199	-1.898	5.972	-0.657	35.392	704.727	-0.000504	0.000133	-0.000418
0.4220	442.677	15.953	2.176	11.918	-0.658	35.387	842.743	-0.001117	-0.000152	-0.000834
0.4240	507.464	24.276	6.235	17.202	-0.662	35.386	966.082	-0.001699	-0.000436	-0.001204
0.4260	563.069	31.296	9.607	22.196	-0.664	35.389	1071.939	-0.002191	-0.000672	-0.001554
0.4280	611.506	37.230	12.645	26.241	-0.665	35.394	1164.150	-0.002606	-0.000885	-0.001837
0.4300	658.094	43.495	15.192	29.996	-0.671	35.400	1252.842	-0.003045	-0.001063	-0.002100
0.4320	709.191	49.665	18.123	34.455	-0.666	35.406	1350.117	-0.003477	-0.001269	-0.002412
0.4340	764.961	56.836	21.534	39.011	-0.669	35.405	1456.289	-0.003978	-0.001507	-0.002731
0.4360	822.174	63.881	24.976	44.211	-0.675	35.402	1565.208	-0.004472	-0.001748	-0.003095
0.4380	875.780	70.580	28.196	48.560	-0.673	35.397	1667.261	-0.004941	-0.001974	-0.003399
0.4400	924.187	76.694	31.126	53.017	-0.675	35.392	1759.415	-0.005369	-0.002179	-0.003711
0.4420	966.372	81.876	33.685	56.417	-0.672	35.387	1839.724	-0.005731	-0.002358	-0.003949
0.4440	1000.231	86.629	36.080	59.623	-0.675	35.386	1904.182	-0.006064	-0.002526	-0.004174
0.4460	1026.275	90.145	37.718	62.183	-0.670	35.389	1953.764	-0.006310	-0.002640	-0.004353
0.4480	1047.074	92.869	39.162	63.971	-0.670	35.394	1993.361	-0.006501	-0.002741	-0.004478
0.4500	1062.523	94.982	40.277	65.746	-0.676	35.400	2022.772	-0.006649	-0.002819	-0.004602
0.4520	1072.668	96.565	41.006	66.543	-0.665	35.406	2042.084	-0.006760	-0.002870	-0.004658
0.4540	1077.372	98.039	41.475	67.384	-0.667	35.405	2051.039	-0.006863	-0.002903	-0.004717
0.4560	1077.056	98.304	41.763	67.811	-0.660	35.402	2050.438	-0.006881	-0.002923	-0.004747
0.4580	1074.035	98.276	41.541	67.851	-0.660	35.397	2044.687	-0.006879	-0.002908	-0.004750
0.4600	1068.219	97.956	41.336	67.369	-0.668	35.392	2033.615	-0.006857	-0.002894	-0.004716
0.4620	1060.389	97.065	41.103	67.178	-0.669	35.387	2018.709	-0.006795	-0.002877	-0.004702
0.4640	1048.021	96.037	41.046	66.779	-0.669	35.386	1995.163	-0.006723	-0.002873	-0.004675
0.4660	1020.865	92.842	39.960	65.141	-0.664	35.390	1943.464	-0.006499	-0.002797	-0.004560
0.4680	964.102	86.394	37.634	60.655	-0.664	35.394	1835.403	-0.006048	-0.002634	-0.004246
0.4700	887.518	77.596	33.630	55.344	-0.667	35.400	1689.606	-0.005432	-0.002354	-0.003874
0.4720	817.125	69.094	29.474	49.289	-0.656	35.405	1555.595	-0.004837	-0.002063	-0.003450
0.4740	764.931	63.241	26.790	45.092	-0.668	35.405	1456.232	-0.004427	-0.001875	-0.003156
0.4760	726.128	58.433	24.492	41.968	-0.665	35.402	1382.360	-0.004090	-0.001714	-0.002938
0.4780	687.129	53.584	22.112	38.858	-0.657	35.397	1308.117	-0.003751	-0.001548	-0.002720
0.4800	637.445	48.040	19.320	34.497	-0.660	35.392	1213.531	-0.003363	-0.001352	-0.002415
0.4820	577.001	40.258	15.398	29.489	-0.655	35.387	1098.461	-0.002818	-0.001078	-0.002064
0.4840	515.324	32.698	11.929	24.369	-0.667	35.386	981.045	-0.002289	-0.000835	-0.001706
0.4860	462.379	25.624	8.312	19.788	-0.664	35.389	880.251	-0.001794	-0.000582	-0.001385
0.4880	420.780	19.955	5.368	15.950	-0.663	35.393	801.058	-0.001397	-0.000376	-0.001117
0.4900	386.486	15.578	3.276	12.548	-0.666	35.399	735.769	-0.001090	-0.000229	-0.000878
0.4920	353.694	10.741	1.224	9.685	-0.663	35.405	673.342	-0.000752	-0.000086	-0.000678
0.4940	320.060	6.364	-0.648	6.605	-0.664	35.405	609.312	-0.000445	0.000045	-0.000462
0.4960	286.697	1.820	-2.641	3.550	-0.662	35.402	545.797	-0.000127	0.000185	-0.000248
0.4980	256.866	-2.432	-4.721	1.074	-0.664	35.397	489.006	0.000170	0.000330	-0.000075
0.5000	225.111	-15.329	-10.940	-8.750	-0.668	35.397	428.553	0.001073	0.000766	0.000612
0.5020	225.772	-15.175	-10.983	-9.068	-0.663	35.403	429.811	0.001062	0.000769	0.000635
0.5040	226.764	-14.911	-10.941	-9.065	-0.673	35.403	431.700	0.001044	0.000766	0.000635
0.5060	228.477	-14.995	-11.107	-8.502	-0.667	35.400	434.961	0.001050	0.000777	0.000595
0.5080	231.663	-14.481	-11.189	-8.449	-0.664	35.396	441.027	0.001014	0.000783	0.000591
0.5100	237.614	-13.867	-10.828	-8.242	-0.665	35.390	452.356	0.000971	0.000758	0.000577
0.5120	251.290	-12.436	-10.484	-7.774	-0.661	35.385	478.392	0.000871	0.000734	0.000544
0.5140	283.150	-8.296	-9.165	-5.215	-0.669	35.384	539.045	0.000581	0.000642	0.000365
0.5160	335.705	-2.224	-6.441	-1.101	-0.665	35.387	639.095	0.000156	0.000451	0.000077
0.5180	399.801	5.585	-2.861	4.059	-0.661	35.392	761.118	-0.000391	0.000200	-0.000284
0.5200	467.338	13.867	1.198	9.537	-0.664	35.397	889.692	-0.000971	-0.000084	-0.000668
0.5220	533.794	22.192	5.064	14.986	-0.662	35.403	1016.207	-0.001553	-0.000354	-0.001049
0.5240	599.138	30.711	9.095	21.162	-0.669	35.403	1140.604	-0.002150	-0.000637	-0.001481
0.5260	668.163	39.216	13.208	26.679	-0.668	35.399	1272.011	-0.002745	-0.000925	-0.001868
0.5280	742.509	48.664	17.683	33.024	-0.662	35.396	1413.546	-0.003406	-0.001238	-0.002312
0.5300	818.973	58.252	21.769	39.835	-0.669	35.390	1559.114	-0.004078	-0.001524	-0.002788
0.5320	894.160	67.562	26.308	45.793	-0.672	35.385	1702.251	-0.004729	-0.001842	-0.003206
0.5340	966.823	76.902	31.056	52.523	-0.673	35.383	1840.582	-0.005383	-0.002174	-0.003677
0.5360	1036.028	85.794	35.184	58.510	-0.670	35.387	1972.332	-0.006006	-0.002463	-0.004096
0.5380	1098.727	93.925	39.093	64.192	-0.666	35.391	2091.694	-0.006575	-0.002737	-0.004493
0.5400	1153.836	100.998	42.863	69.118	-0.664	35.396	2196.608	-0.007070	-0.003000	-0.004838
0.5420	1203.535	107.780	46.220	73.371	-0.662	35.402	2291.222	-0.007545	-0.003235	-0.005136
0.5440	1249.011	113.864	49.098	77.567	-0.661	35.402	2377.796	-0.007971	-0.003437	-0.005430
0.5460	1287.694	119.146	51.534	81.681	-0.661	35.399	2451.439	-0.008340	-0.003607	-0.005718
0.5480	1316.924	123.595	53.572	84.364	-0.663	35.395	2507.086	-0.008652	-0.003750	-0.005906
0.5500	1335.770	126.361	54.837	86.413	-0.661	35.389	2542.963	-0.008845	-0.003839	-0.006049
0.5520	1346.711	128.140	55.811	87.626	-0.660	35.385	2563.791	-0.008970	-0.003907	-0.006134
0.5540	1350.753	129.709	56.361	88.534	-0.668	35.383	2571.487	-0.009080	-0.003945	-0.006197
0.5560	1348.830	129.931	56.554	88.863	-0.664	35.386	2567.825	-0.009095	-0.003959	-0.006220
0.5580	1344.291	129.736	56.360	88.931	-0.662	35.391	2559.185	-0.009082	-0.003945	-0.006225
0.5600	1336.371	129.111	56.222	88.684	-0.672	35.396	2544.107	-0.009038	-0.003936	-0.006208
0.5620	1323.777	127.945	55.893	87.788	-0.667	35.402	2520.132	-0.008956	-0.003913	-0.006145
0.5640	1300.093	125.873	55.208	86.539	-0.674	35.402	2475.042	-0.008811	-0.003865	-0.006058
0.5660	1247.944	120.397	53.268	83.058	-0.675	35.399	2375.765	-0.008428	-0.003729	-0.005814
0.5680	1168.203	111.586	49.566	76.865	-0.667	35.395	2223.959	-0.007811	-0.003470	-0.005381
0.5700	1084.450	101.708	45.326	70.742	-0.667	35.389	2064.514	-0.007120	-0.003173	-0.004952
0.5720	1010.029	92.772	40.882	64.854	-0.666	35.385	1922.836	-0.006494	-0.002862	-0.004540
0.5740	946.865	85.420	37.209	59.955	-0.671	35.384	1802.588	-0.005979	-0.002605	-0.004197
0.5760	891.560	78.500	34.070	55.385	-0.676	35.387	1697.302	-0.005495	-0.002385	-0.003877
0.5780	835.504	71.651	30.782	50.692	-0.664	35.392	1590.586	-0.005016	-0.002155	-0.003548
0.5800	769.139	63.354	26.916	44.996	-0.665	35.397	1464.243	-0.004435	-0.001884	-0.003150
0.5820	693.801	54.042	21.894	38.888	-0.663	35.403	1320.820	-0.003783	-0.001533	-0.002722
0.5840	621.425	44.983	17.587	32.709	-0.668	35.402	1183.033	-0.003149	-0.001231	-0.002290
0.5860	558.245	36.923	13.940	27.742	-0.668	35.399	1062.756	-0.002585	-0.000976	-0.001942
0.5880	500.641	29.266	10.321	22.444	-0.664	35.396	953.093	-0.002049	-0.000722	-0.001571
0.5900	445.337	22.026	7.045	17.228	-0.667	35.390	847.807	-0.001542	-0.000493	-0.001206
0.5920	393.519	14.980	3.439	12.507	-0.666	35.385	749.159	-0.001049	-0.000241	-0.000875
0.5940	348.073	9.213	0.687	8.214	-0.668	35.384	662.642	-0.000645	-0.000048	-0.000575
0.5960	309.615	3.876	-1.746	5.025	-0.668	35.387	589.428	-0.000271	0.000122	-0.000352
0.5980	277.154	-1.001	-4.114	1.596	-0.669	35.391	527.630	0.000070	0.000288	-0.000112
0.6000	251.966	-4.447	-5.559	-1.253	-0.680	35.397	479.679	0.000311	0.000389	0.000088
0.6020	235.931	-7.224	-7.129	-2.725	-0.673	35.403	449.152	0.000506	0.000499	0.000191
0.6040	228.717	-8.225	-7.842	-4.017	-0.674	35.403	435.419	0.000576	0.000549	0.000281
0.6060	228.206	-9.171	-8.103	-4.016	-0.671	35.400	434.446	0.000642	0.000567	0.000281
0.6080	231.332	-9.534	-8.090	-3.988	-0.669	35.396	440.397	0.000667	0.000566	0.000279
0.6100	236.412	-9.396	-7.951	-4.195	-0.675	35.390	450.068	0.000658	0.000557	0.000294
0.6120	244.903	-8.587	-7.938	-3.562	-0.669	35.385	466.232	0.000601	0.000556	0.000249
0.6140	264.350	-6.420	-7.126	-2.544	-0.684	35.383	503.254	0.000449	0.000499	0.000178
0.6160	311.464	-0.681	-5.214	0.399	-0.675	35.386	592.947	0.000048	0.000365	-0.000028
0.6180	383.014	7.601	-1.623	6.331	-0.671	35.392	729.160	-0.000532	0.000114	-0.000443
0.6200	460.966	16.757	2.807	12.468	-0.674	35.397	877.562	-0.001173	-0.000197	-0.000873
0.6220	535.522	26.026	7.059	18.303	-0.669	35.404	1019.497	-0.001822	-0.000494	-0.001281
0.6240	603.165	34.629	11.172	24.176	-0.668	35.403	1148.272	-0.002424	-0.000782	-0.001692
0.6260	670.598	43.093	15.176	29.929	-0.667	35.400	1276.646	-0.003017	-0.001062	-0.002095
0.6280	743.831	52.029	19.388	36.301	-0.670	35.396	1416.063	-0.003642	-0.001357	-0.002541
0.6300	821.393	61.534	23.970	42.656	-0.673	35.390	1563.721	-0.004307	-0.001678	-0.002986
0.6320	897.331	70.953	28.565	49.055	-0.671	35.385	1708.288	-0.004967	-0.002000	-0.003434
0.6340	966.928	80.180	32.900	54.807	-0.678	35.383	1840.782	-0.005613	-0.002303	-0.003837
0.6360	1033.819	88.574	36.767	60.765	-0.672	35.386	1968.126	-0.006200	-0.002574	-0.004254
0.6380	1098.321	96.690	40.455	66.365	-0.669	35.391	2090.921	-0.006768	-0.002832	-0.004646
0.6400	1154.167	104.027	44.184	71.527	-0.675	35.397	2197.237	-0.007282	-0.003093	-0.005007
0.6420	1200.499	109.891	47.087	75.408	-0.671	35.403	2285.442	-0.007692	-0.003296	-0.005279
0.6440	1242.744	115.144	49.950	79.314	-0.678	35.403	2365.866	-0.008060	-0.003496	-0.005552
0.6460	1283.231	120.982	52.359	83.085	-0.673	35.399	2442.942	-0.008469	-0.003665	-0.005816
0.6480	1317.631	126.110	54.632	86.358	-0.669	35.395	2508.430	-0.008828	-0.003824	-0.006045
0.6500	1340.279	129.110	56.351	88.490	-0.671	35.390	2551.546	-0.009038	-0.003945	-0.006194
0.6520	1349.401	130.459	57.011	89.647	-0.666	35.385	2568.913	-0.009132	-0.003991	-0.006275
0.6540	1349.386	131.347	57.270	90.143	-0.665	35.383	2568.884	-0.009194	-0.004009	-0.006310
0.6560	1345.659	131.542	57.133	90.198	-0.659	35.387	2561.789	-0.009208	-0.003999	-0.006314
0.6580	1340.579	131.654	56.860	90.253	-0.658	35.391	2552.118	-0.009216	-0.003980	-0.006318
0.6600	1332.975	130.698	56.777	89.937	-0.665	35.397	2537.642	-0.009149	-0.003974	-0.006296
0.6620	1321.042	129.417	56.680	89.387	-0.661	35.403	2514.925	-0.009059	-0.003968	-0.006257
0.6640	1298.605	127.693	56.350	88.051	-0.664	35.403	2472.210	-0.008938	-0.003945	-0.006164
0.6660	1248.094	122.052	54.449	84.544	-0.661	35.400	2376.051	-0.008544	-0.003811	-0.005918
0.6680	1168.684	113.185	50.472	78.724	-0.658	35.396	2224.874	-0.007923	-0.003533	-0.005511
0.6700	1081.294	102.918	45.821	71.926	-0.663	35.390	2058.506	-0.007204	-0.003207	-0.005035
0.6720	1005.340	94.094	41.487	65.913	-0.660	35.385	1913.910	-0.006587	-0.002904	-0.004614
0.6740	945.888	86.990	38.061	60.821	-0.666	35.383	1800.728	-0.006089	-0.002664	-0.004258
0.6760	891.756	80.640	35.199	56.555	-0.662	35.386	1697.674	-0.005645	-0.002464	-0.003959
0.6780	830.891	73.275	31.387	51.531	-0.663	35.392	1581.802	-0.005129	-0.002197	-0.003607
0.6800	759.566	63.992	26.722	45.944	-0.664	35.397	1446.018	-0.004479	-0.001871	-0.003216
0.6820	684.484	54.348	22.334	39.479	-0.657	35.403	1303.082	-0.003804	-0.001563	-0.002764
0.6840	613.700	45.859	18.440	33.534	-0.665	35.402	1168.327	-0.003210	-0.001291	-0.002347
0.6860	551.002	37.785	14.447	28.223	-0.663	35.399	1048.965	-0.002645	-0.001011	-0.001976
0.6880	494.540	30.198	10.787	22.800	-0.661	35.396	941.477	-0.002114	-0.000755	-0.001596
0.6900	442.677	23.374	7.595	18.453	-0.661	35.390	842.743	-0.001636	-0.000532	-0.001292
0.6920	395.022	16.744	4.472	14.132	-0.660	35.385	752.020	-0.001172	-0.000313	-0.000989
0.6940	352.071	11.312	1.775	10.128	-0.665	35.384	670.252	-0.000792	-0.000124	-0.000709
0.6960	315.762	6.255	-0.496	6.977	-0.660	35.387	601.130	-0.000438	0.000035	-0.000488
0.6980	286.532	1.945	-2.434	3.730	-0.661	35.391	545.483	-0.000136	0.000170	-0.000261
0.7000	263.703	-1.292	-4.349	1.433	-0.662	35.396	502.024	0.000090	0.000304	-0.000100
0.7020	246.751	-4.236	-5.820	-0.315	-0.657	35.403	469.751	0.000297	0.000407	0.000022
0.7040	235.660	-6.184	-6.671	-1.678	-0.666	35.403	448.637	0.000433	0.000467	0.000117
0.7060	231.873	-7.240	-7.044	-1.994	-0.662	35.399	441.427	0.000507	0.000493	0.000140
0.7080	233.421	-7.685	-7.307	-2.600	-0.652	35.396	444.374	0.000538	0.000511	0.000182
0.7100	237.674	-7.072	-7.374	-2.876	-0.651	35.390	452.471	0.000495	0.000516	0.000201
0.7120	244.873	-6.821	-7.374	-2.356	-0.649	35.385	466.175	0.000477	0.000516	0.000165
0.7140	260.623	-4.988	-6.591	-1.681	-0.653	35.384	496.159	0.000349	0.000461	0.000118
0.7160	303.153	-0.194	-4.968	1.046	-0.656	35.387	577.126	0.000014	0.000348	-0.000073
0.7180	377.138	8.282	-1.390	6.786	-0.656	35.392	717.974	-0.000580	0.000097	-0.000475
0.7200	461.552	18.454	3.426	13.528	-0.658	35.397	878.677	-0.001292	-0.000240	-0.000947
0.7220	542.180	28.362	7.994	20.586	-0.656	35.402	1032.171	-0.001985	-0.000560	-0.001441
0.7240	615.233	37.436	12.371	26.722	-0.663	35.402	1171.246	-0.002621	-0.000866	-0.001871
0.7260	682.545	45.885	16.486	32.144	-0.657	35.399	1299.391	-0.003212	-0.001154	-0.002250
0.7280	750.864	54.279	20.600	37.992	-0.654	35.395	1429.453	-0.003800	-0.001442	-0.002659
0.7300	823.241	63.143	24.617	43.825	-0.655	35.390	1567.240	-0.004420	-0.001723	-0.003068
0.7320	896.129	72.301	28.787	50.100	-0.652	35.385	1705.999	-0.005061	-0.002015	-0.003507
0.7340	966.387	81.126	32.845	56.141	-0.660	35.384	1839.752	-0.005679	-0.002299	-0.003930
0.7360	1034.015	89.755	37.069	62.210	-0.667	35.386	1968.498	-0.006283	-0.002595	-0.004355
0.7380	1097.510	97.733	41.199	67.317	-0.666	35.391	2089.376	-0.006841	-0.002884	-0.004712
0.7400	1154.107	105.043	44.913	72.475	-0.661	35.396	2197.123	-0.007353	-0.003144	-0.005073
0.7420	1204.301	111.617	47.844	76.520	-0.662	35.402	2292.681	-0.007813	-0.003349	-0.005356
0.7440	1246.712	117.606	50.652	80.648	-0.672	35.402	2373.419	-0.008232	-0.003546	-0.005645
0.7460	1278.046	121.982	52.894	83.744	-0.669	35.399	2433.071	-0.008539	-0.003703	-0.005862
0.7480	1301.160	124.970	54.396	85.891	-0.665	35.395	2477.074	-0.008748	-0.003808	-0.006012
0.7500	1321.373	127.986	55.441	87.996	-0.667	35.390	2515.554	-0.008959	-0.003881	-0.006160
0.7520	1338.821	130.654	56.623	89.812	-0.665	35.385	2548.771	-0.009146	-0.003964	-0.006287
0.7540	1349.311	132.516	57.545	90.997	-0.667	35.383	2568.741	-0.009276	-0.004028	-0.006370
0.7560	1350.603	133.015	57.903	91.712	-0.658	35.386	2571.201	-0.009311	-0.004053	-0.006420
0.7580	1345.463	132.946	57.545	91.588	-0.657	35.391	2561.417	-0.009306	-0.004028	-0.006411
0.7600	1336.762	132.293	57.599	91.285	-0.667	35.396	2544.851	-0.009260	-0.004032	-0.006390
0.7620	1323.913	131.194	57.450	90.336	-0.663	35.402	2520.390	-0.009184	-0.004021	-0.006324
0.7640	1299.191	128.763	56.817	89.083	-0.664	35.402	2473.326	-0.009013	-0.003977	-0.006236
0.7660	1245.479	122.733	54.836	85.367	-0.660	35.399	2371.073	-0.008591	-0.003839	-0.005976
0.7680	1166.911	113.951	50.941	79.203	-0.657	35.395	2221.498	-0.007977	-0.003566	-0.005544
0.7700	1085.682	104.362	46.550	73.135	-0.659	35.389	2066.860	-0.007305	-0.003259	-0.005119
0.7720	1014.282	95.592	42.395	66.998	-0.657	35.385	1930.933	-0.006691	-0.002968	-0.004690
0.7740	953.778	88.935	39.147	62.500	-0.661	35.383	1815.748	-0.006225	-0.002740	-0.004375
0.7760	896.685	82.225	35.678	57.850	-0.662	35.386	1707.058	-0.005756	-0.002497	-0.004049
0.7780	835.204	74.207	31.992	52.716	-0.659	35.391	1590.014	-0.005194	-0.002239	-0.003690
0.7800	765.292	65.578	27.921	46.731	-0.662	35.396	1456.919	-0.004590	-0.001954	-0.003271
0.7820	689.729	56.363	23.145	40.799	-0.652	35.402	1313.066	-0.003945	-0.001620	-0.002856
0.7840	617.066	47.384	18.976	34.731	-0.652	35.402	1174.736	-0.003317	-0.001328	-0.002431
0.7860	554.939	39.158	15.166	29.461	-0.657	35.399	1056.461	-0.002741	-0.001062	-0.002062
0.7880	502.219	32.128	11.367	24.894	-0.657	35.395	956.097	-0.002249	-0.000796	-0.001743
0.7900	453.542	25.610	8.366	20.092	-0.664	35.389	863.428	-0.001793	-0.000586	-0.001406
0.7920	407.420	19.204	5.574	15.536	-0.662	35.384	775.623	-0.001344	-0.000390	-0.001088
0.7940	361.854	13.466	2.986	12.041	-0.669	35.383	688.877	-0.000943	-0.000209	-0.000843
0.7960	319.729	7.921	0.439	7.760	-0.666	35.386	608.683	-0.000554	-0.000031	-0.000543
0.7980	285.044	2.725	-2.050	4.403	-0.662	35.390	542.650	-0.000191	0.000143	-0.000308
0.8000	258.474	-1.181	-4.114	1.899	-0.666	35.396	492.067	0.000083	0.000288	-0.000133
0.8020	242.228	-3.821	-5.587	-0.647	-0.661	35.402	461.140	0.000267	0.000391	0.000045
0.8040	235.495	-5.169	-6.275	-0.896	-0.667	35.402	448.322	0.000362	0.000439	0.000063
0.8060	235.660	-5.546	-6.356	-1.088	-0.670	35.399	448.637	0.000388	0.000445	0.000076
0.8080	239.508	-5.491	-6.534	-1.610	-0.661	35.395	455.961	0.000384	0.000457	0.000113
0.8100	245.429	-5.434	-6.329	-1.513	-0.665	35.390	467.234	0.000380	0.000443	0.000106
0.8120	254.175	-5.045	-6.384	-0.922	-0.667	35.384	483.885	0.000353	0.000447	0.000065
0.8140	272.976	-2.752	-5.807	-0.027	-0.671	35.383	519.676	0.000193	0.000407	0.000002
0.8160	319.519	2.348	-3.923	2.767	-0.665	35.386	608.282	-0.000164	0.000275	-0.000194
0.8180	390.754	10.548	-0.055	8.890	-0.665	35.391	743.895	-0.000738	0.000004	-0.000622
0.8200	466.707	19.817	4.292	14.876	-0.664	35.396	888.491	-0.001387	-0.000300	-0.001041
0.8220	537.386	28.390	8.202	20.544	-0.659	35.403	1023.045	-0.001987	-0.000574	-0.001438
0.8240	603.255	37.089	12.331	26.282	-0.667	35.403	1148.443	-0.002596	-0.000863	-0.001840
0.8260	670.628	45.496	16.127	31.786	-0.666	35.399	1276.703	-0.003185	-0.001129	-0.002225
0.8280	744.102	54.195	20.199	38.200	-0.664	35.395	1416.578	-0.003794	-0.001414	-0.002674
0.8300	819.664	63.478	24.754	44.076	-0.664	35.389	1560.431	-0.004443	-0.001733	-0.003085
0.8320	894.401	72.581	29.075	50.460	-0.661	35.385	1702.709	-0.005081	-0.002035	-0.003532
0.8340	966.387	81.863	33.603	56.830	-0.659	35.383	1839.752	-0.005730	-0.002352	-0.003978
0.8360	1035.382	91.007	37.881	62.733	-0.664	35.386	1971.102	-0.006370	-0.002652	-0.004391
0.8380	1102.574	99.220	41.747	68.527	-0.663	35.391	2099.018	-0.006945	-0.002922	-0.004797
0.8400	1162.297	106.932	45.462	73.713	-0.660	35.396	2212.715	-0.007485	-0.003182	-0.005160
0.8420	1211.305	113.450	48.505	78.008	-0.657	35.403	2306.013	-0.007941	-0.003395	-0.005461
0.8440	1250.273	118.869	51.355	81.709	-0.663	35.403	2380.199	-0.008321	-0.003595	-0.005720
0.8460	1282.720	123.399	53.447	84.791	-0.667	35.399	2441.969	-0.008638	-0.003741	-0.005935
0.8480	1309.876	127.054	55.138	87.294	-0.663	35.395	2493.668	-0.008894	-0.003860	-0.006111
0.8500	1329.158	129.515	56.377	89.208	-0.664	35.389	2530.375	-0.009066	-0.003946	-0.006245
0.8520	1340.910	131.586	56.928	90.571	-0.663	35.384	2552.748	-0.009211	-0.003985	-0.006340
0.8540	1345.914	133.141	57.574	91.561	-0.669	35.383	2562.275	-0.009320	-0.004030	-0.006409
0.8560	1346.049	133.210	57.778	91.904	-0.668	35.386	2562.532	-0.009325	-0.004044	-0.006433
0.8580	1342.984	133.210	57.529	91.918	-0.666	35.390	2556.696	-0.009325	-0.004027	-0.006434
0.8600	1336.657	132.918	57.571	91.712	-0.671	35.396	2544.651	-0.009304	-0.004030	-0.006420
0.8620	1324.679	131.571	57.297	90.955	-0.666	35.402	2521.849	-0.009210	-0.004011	-0.006367
0.8640	1299.311	129.320	56.816	89.702	-0.669	35.402	2473.555	-0.009052	-0.003977	-0.006279
0.8660	1243.841	123.330	54.958	85.877	-0.672	35.400	2367.954	-0.008633	-0.003847	-0.006011
0.8680	1162.432	114.158	50.763	79.670	-0.672	35.395	2212.973	-0.007991	-0.003553	-0.005577
0.8700	1080.227	104.890	46.525	73.493	-0.669	35.390	2056.475	-0.007342	-0.003257	-0.005144
0.8720	1009.248	96.079	42.410	67.398	-0.669	35.385	1921.349	-0.006726	-0.002969	-0.004718
0.8740	950.141	89.283	39.025	62.953	-0.672	35.383	1808.825	-0.006250	-0.002732	-0.004407
0.8760	895.062	82.489	35.846	58.453	-0.672	35.386	1703.968	-0.005774	-0.002509	-0.004092
0.8780	834.377	74.916	32.296	53.513	-0.659	35.391	1588.440	-0.005244	-0.002261	-0.003746
0.8800	764.195	66.077	28.127	47.596	-0.668	35.396	1454.830	-0.004625	-0.001969	-0.003332
0.8820	688.752	56.641	23.379	41.349	-0.667	35.402	1311.207	-0.003965	-0.001637	-0.002894
0.8840	618.118	48.039	19.058	35.501	-0.669	35.402	1176.739	-0.003363	-0.001334	-0.002485
0.8860	557.208	39.867	15.317	29.943	-0.671	35.399	1060.781	-0.002791	-0.001072	-0.002096
0.8880	503.046	32.684	12.097	25.237	-0.662	35.395	957.670	-0.002288	-0.000847	-0.001767
0.8900	451.228	25.972	8.918	20.682	-0.660	35.390	859.022	-0.001818	-0.000624	-0.001448
0.8920	401.935	19.205	5.862	15.674	-0.659	35.385	765.181	-0.001344	-0.000410	-0.001097
0.8940	358.352	13.577	3.027	12.124	-0.666	35.383	682.211	-0.000950	-0.000212	-0.000849
0.8960	321.623	8.741	0.592	8.352	-0.666	35.385	612.288	-0.000612	-0.000041	-0.000585
0.8980	290.469	4.447	-1.678	5.382	-0.661	35.390	552.979	-0.000311	0.000117	-0.000377
0.9000	263.403	0.237	-3.659	3.137	-0.660	35.396	501.451	-0.000017	0.000256	-0.000220
0.9020	243.701	-3.015	-5.312	0.523	-0.658	35.402	463.943	0.000211	0.000372	-0.000037
0.9040	234.323	-4.530	-5.932	-0.205	-0.665	35.402	446.091	0.000317	0.000415	0.000014
0.9060	233.376	-5.364	-6.137	-0.647	-0.661	35.399	444.288	0.000375	0.000430	0.000045
0.9080	236.577	-5.530	-6.356	-1.213	-0.660	35.395	450.382	0.000387	0.000445	0.000085
0.9100	241.567	-5.490	-6.468	-0.716	-0.663	35.389	459.881	0.000384	0.000453	0.000050
0.9120	250.043	-4.754	-6.068	-0.827	-0.661	35.384	476.017	0.000333	0.000425	0.000058
0.9140	269.610	-2.738	-5.324	-0.000	-0.664	35.383	513.268	0.000192	0.000373	0.000000
0.9160	318.257	3.099	-3.287	3.386	-0.661	35.386	605.879	-0.000217	0.000230	-0.000237
0.9180	391.084	11.588	0.152	9.426	-0.661	35.390	744.524	-0.000811	-0.000011	-0.000660
0.9200	467.609	20.900	4.348	15.426	-0.664	35.396	890.207	-0.001463	-0.000304	-0.001080
0.9220	539.775	29.669	8.588	21.534	-0.657	35.402	1027.594	-0.002077	-0.000601	-0.001507
0.9240	606.471	37.937	12.523	27.204	-0.664	35.402	1154.566	-0.002656	-0.000877	-0.001904
0.9260	673.919	46.398	16.526	32.709	-0.665	35.399	1282.969	-0.003248	-0.001157	-0.002290
0.9280	745.665	55.362	20.695	38.804	-0.668	35.395	1419.554	-0.003875	-0.001449	-0.002716
0.9300	820.686	64.604	25.071	44.969	-0.668	35.389	1562.376	-0.004522	-0.001755	-0.003148
0.9320	895.828	73.607	29.280	51.381	-0.663	35.385	1705.427	-0.005153	-0.002050	-0.003597
0.9340	968.476	83.029	34.071	57.298	-0.661	35.383	1843.729	-0.005812	-0.002385	-0.004011
0.9360	1035.563	91.341	38.157	63.283	-0.658	35.386	1971.445	-0.006394	-0.002671	-0.004430
0.9380	1096.683	98.970	41.940	68.359	-0.656	35.390	2087.803	-0.006928	-0.002936	-0.004785
0.9400	1152.619	106.070	45.546	73.328	-0.661	35.396	2194.290	-0.007425	-0.003188	-0.005133
0.9420	1203.685	112.657	48.408	77.581	-0.649	35.402	2291.508	-0.007886	-0.003389	-0.005431
0.9440	1250.589	119.189	51.297	82.383	-0.653	35.402	2380.800	-0.008343	-0.003591	-0.005767
0.9460	1290.144	124.330	53.719	85.837	-0.659	35.399	2456.102	-0.008703	-0.003760	-0.006009
0.9480	1320.291	128.236	55.756	88.823	-0.661	35.395	2513.494	-0.008977	-0.003903	-0.006218
0.9500	1338.160	131.266	57.077	90.376	-0.666	35.389	2547.512	-0.009189	-0.003995	-0.006326
0.9520	1345.388	132.516	57.420	91.463	-0.662	35.384	2561.274	-0.009276	-0.004019	-0.006402
0.9540	1346.711	133.267	57.915	91.974	-0.667	35.383	2563.791	-0.009329	-0.004054	-0.006438
0.9560	1345.493	133.600	57.929	92.264	-0.663	35.385	2561.474	-0.009352	-0.004055	-0.006458
0.9580	1342.743	133.779	57.930	92.249	-0.658	35.390	2556.238	-0.009365	-0.004055	-0.006457
0.9600	1336.702	132.945	57.765	92.318	-0.663	35.395	2544.737	-0.009306	-0.004044	-0.006462
0.9620	1325.701	132.294	57.516	91.520	-0.657	35.401	2523.794	-0.009261	-0.004026	-0.006406
0.9640	1304.135	130.169	57.530	90.541	-0.664	35.401	2482.738	-0.009112	-0.004027	-0.006338
0.9660	1255.203	124.971	55.633	87.226	-0.663	35.398	2389.584	-0.008748	-0.003894	-0.006106
0.9680	1177.055	116.328	51.795	80.966	-0.661	35.395	2240.810	-0.008143	-0.003626	-0.005668
0.9700	1093.001	106.724	47.432	74.611	-0.663	35.389	2080.793	-0.007471	-0.003320	-0.005223
0.9720	1017.574	97.775	42.959	68.154	-0.663	35.384	1937.199	-0.006844	-0.003007	-0.004771
0.9740	953.387	90.285	39.507	63.379	-0.660	35.382	1815.004	-0.006320	-0.002765	-0.004437
0.9760	894.416	82.947	36.230	58.399	-0.662	35.385	1702.738	-0.005806	-0.002536	-0.004088
0.9780	831.958	75.109	32.377	53.392	-0.661	35.390	1583.834	-0.005258	-0.002266	-0.003737
0.9800	763.308	66.869	28.142	47.818	-0.667	35.395	1453.142	-0.004681	-0.001970	-0.003347
0.9820	690.435	57.295	23.709	42.078	-0.668	35.401	1314.411	-0.004011	-0.001660	-0.002945
0.9840	618.614	48.165	19.581	35.929	-0.669	35.401	1177.683	-0.003372	-0.001371	-0.002515
0.9860	554.984	40.285	15.633	30.617	-0.672	35.398	1056.547	-0.002820	-0.001094	-0.002143
0.9880	497.996	32.685	11.931	25.375	-0.663	35.395	948.057	-0.002288	-0.000835	-0.001776
0.9900	442.962	25.431	8.491	20.214	-0.663	35.390	843.287	-0.001780	-0.000594	-0.001415
0.9920	389.732	18.065	4.995	15.398	-0.658	35.385	741.949	-0.001265	-0.000350	-0.001078
0.9940	343.249	12.103	2.174	10.856	-0.660	35.383	653.458	-0.000847	-0.000152	-0.000760
0.9960	306.504	7.086	-0.315	7.733	-0.659	35.385	583.506	-0.000496	0.000022	-0.000541
0.9980	278.672	2.819	-2.239	5.119	-0.659	35.390	530.519	-0.000197	0.000157	-0.000358
Test Cycles
Time (sec)	Axial stress (kPa)	Axial micro-strain #1	Axial micro-strain #2	Axial micro-strain #3	Confining pressure (kPa)	Temperature (�C)	Load (N)	Displacement #1 (mm)	Displacement #2 (mm)	Displacement #3 (mm)
0.0000	258.188	0.013	-3.783	2.629	-0.667	35.396	491.524	-0.000001	0.000265	-0.000184
0.0020	242.919	-2.599	-5.024	0.578	-0.663	35.402	462.456	0.000182	0.000352	-0.000040
0.0040	233.421	-4.073	-5.765	-0.027	-0.664	35.402	444.374	0.000285	0.000404	0.000002
0.0060	231.092	-5.170	-6.451	-0.565	-0.665	35.399	439.939	0.000362	0.000452	0.000040
0.0080	234.173	-5.433	-6.688	-0.840	-0.658	35.395	445.805	0.000380	0.000468	0.000059
0.0100	239.974	-5.447	-6.397	-0.454	-0.662	35.389	456.848	0.000381	0.000448	0.000032
0.0120	249.727	-4.641	-6.301	-0.592	-0.660	35.384	475.416	0.000325	0.000441	0.000041
0.0140	271.819	-2.001	-5.256	0.318	-0.663	35.383	517.473	0.000140	0.000368	-0.000022
0.0160	320.631	3.864	-3.013	4.240	-0.661	35.386	610.399	-0.000270	0.000211	-0.000297
0.0180	389.627	11.688	0.374	9.413	-0.662	35.391	741.749	-0.000818	-0.000026	-0.000659
0.0200	462.078	20.455	4.487	14.985	-0.663	35.396	879.679	-0.001432	-0.000314	-0.001049
0.0220	533.088	29.085	8.477	20.971	-0.658	35.402	1014.862	-0.002036	-0.000593	-0.001468
0.0240	602.594	37.783	12.522	27.410	-0.661	35.402	1147.184	-0.002645	-0.000877	-0.001919
0.0260	671.815	46.441	16.773	32.779	-0.666	35.398	1278.963	-0.003251	-0.001174	-0.002295
0.0280	743.290	55.502	20.724	39.135	-0.664	35.395	1415.033	-0.003885	-0.001451	-0.002739
0.0300	815.667	64.479	24.851	44.968	-0.668	35.389	1552.820	-0.004514	-0.001740	-0.003148
0.0320	885.910	72.774	28.993	50.639	-0.665	35.384	1686.544	-0.005094	-0.002030	-0.003545
0.0340	954.770	81.389	33.342	56.734	-0.670	35.382	1817.636	-0.005697	-0.002334	-0.003971
0.0360	1024.201	90.367	37.771	62.677	-0.669	35.385	1949.816	-0.006326	-0.002644	-0.004387
0.0380	1091.288	98.526	41.695	68.292	-0.668	35.390	2077.532	-0.006897	-0.002919	-0.004780
0.0400	1149.733	106.514	45.381	73.411	-0.672	35.396	2188.797	-0.007456	-0.003177	-0.005139
0.0420	1196.742	112.602	48.354	77.580	-0.669	35.402	2278.290	-0.007882	-0.003385	-0.005431
0.0440	1235.260	118.022	50.927	81.560	-0.669	35.401	2351.618	-0.008262	-0.003565	-0.005709
0.0460	1267.301	122.247	53.101	84.516	-0.665	35.398	2412.615	-0.008557	-0.003717	-0.005916
0.0480	1296.396	125.943	54.782	87.226	-0.662	35.395	2468.004	-0.008816	-0.003835	-0.006106
0.0500	1324.333	129.710	56.418	89.593	-0.665	35.389	2521.191	-0.009080	-0.003949	-0.006271
0.0520	1345.989	132.808	57.364	91.506	-0.663	35.384	2562.418	-0.009297	-0.004016	-0.006405
0.0540	1357.381	135.002	58.479	92.883	-0.667	35.382	2584.105	-0.009450	-0.004094	-0.006502
0.0560	1357.636	135.321	59.059	93.514	-0.665	35.385	2584.591	-0.009472	-0.004134	-0.006546
0.0580	1350.678	134.963	58.812	93.254	-0.659	35.390	2571.344	-0.009447	-0.004117	-0.006528
0.0600	1339.031	134.071	58.414	92.498	-0.663	35.396	2549.171	-0.009385	-0.004089	-0.006475
0.0620	1319.885	132.030	57.986	91.244	-0.659	35.402	2512.722	-0.009242	-0.004059	-0.006387
0.0640	1278.407	127.792	56.896	88.779	-0.664	35.402	2433.758	-0.008945	-0.003983	-0.006215
0.0660	1208.945	120.022	53.816	84.004	-0.665	35.398	2301.521	-0.008402	-0.003767	-0.005880
0.0680	1134.495	111.519	49.909	78.101	-0.658	35.395	2159.786	-0.007806	-0.003494	-0.005467
0.0700	1070.684	104.306	46.234	73.259	-0.665	35.389	2038.307	-0.007301	-0.003236	-0.005128
0.0720	1017.123	98.079	42.878	68.567	-0.668	35.384	1936.340	-0.006866	-0.003001	-0.004800
0.0740	964.102	91.744	40.154	64.385	-0.671	35.382	1835.403	-0.006422	-0.002811	-0.004507
0.0760	899.315	83.824	36.286	59.226	-0.671	35.385	1712.065	-0.005868	-0.002540	-0.004146
0.0780	821.723	74.554	31.539	53.226	-0.664	35.390	1564.350	-0.005219	-0.002208	-0.003726
0.0800	743.515	64.507	26.833	46.841	-0.663	35.395	1415.462	-0.004515	-0.001878	-0.003279
0.0820	675.121	55.793	22.787	40.923	-0.660	35.401	1285.257	-0.003906	-0.001595	-0.002865
0.0840	615.789	48.179	19.417	35.995	-0.669	35.402	1172.304	-0.003373	-0.001359	-0.002520
0.0860	563.114	41.551	16.321	31.318	-0.669	35.398	1072.025	-0.002909	-0.001142	-0.002192
0.0880	511.372	34.449	13.005	26.557	-0.665	35.395	973.520	-0.002411	-0.000910	-0.001859
0.0900	454.865	27.070	9.550	21.535	-0.670	35.389	865.946	-0.001895	-0.000669	-0.001507
0.0920	396.209	19.802	5.711	16.279	-0.665	35.384	754.280	-0.001386	-0.000400	-0.001140
0.0940	343.760	12.714	2.588	11.448	-0.671	35.382	654.430	-0.000890	-0.000181	-0.000801
0.0960	305.452	7.503	-0.095	7.967	-0.666	35.385	581.503	-0.000525	0.000007	-0.000558
0.0980	282.459	3.948	-1.827	5.381	-0.663	35.390	537.729	-0.000276	0.000128	-0.000377
0.1000	269.099	1.667	-2.846	3.701	-0.664	35.395	512.295	-0.000117	0.000199	-0.000259
0.1020	259.661	-0.264	-4.002	2.587	-0.659	35.401	494.328	0.000018	0.000280	-0.000181
0.1040	252.357	-1.694	-4.694	1.488	-0.667	35.401	480.423	0.000119	0.000329	-0.000104
0.1060	248.931	-2.514	-5.025	1.033	-0.663	35.398	473.900	0.000176	0.000352	-0.000072
0.1080	250.163	-2.959	-5.231	1.265	-0.654	35.395	476.246	0.000207	0.000366	-0.000089
0.1100	254.596	-2.850	-5.008	1.211	-0.658	35.389	484.686	0.000199	0.000351	-0.000085
0.1120	262.005	-2.488	-5.037	0.869	-0.657	35.384	498.791	0.000174	0.000353	-0.000061
0.1140	276.598	-0.903	-4.349	1.899	-0.657	35.382	526.571	0.000063	0.000304	-0.000133
0.1160	314.499	3.405	-2.916	4.527	-0.657	35.385	598.726	-0.000238	0.000204	-0.000317
0.1180	383.615	11.450	0.248	9.151	-0.663	35.390	730.305	-0.000802	-0.000017	-0.000641
0.1200	466.016	21.568	4.638	16.196	-0.665	35.395	887.175	-0.001510	-0.000325	-0.001134
0.1220	546.117	31.393	8.959	22.775	-0.657	35.401	1039.667	-0.002198	-0.000627	-0.001594
0.1240	615.654	40.354	13.293	28.430	-0.663	35.401	1172.047	-0.002825	-0.000930	-0.001990
0.1260	678.322	48.108	17.229	34.128	-0.658	35.398	1291.351	-0.003368	-0.001206	-0.002389
0.1280	744.056	55.959	20.999	39.245	-0.660	35.395	1416.492	-0.003917	-0.001470	-0.002747
0.1300	815.652	64.576	25.084	45.298	-0.663	35.389	1552.792	-0.004520	-0.001756	-0.003171
0.1320	890.583	73.774	29.406	51.340	-0.668	35.384	1695.442	-0.005164	-0.002058	-0.003594
0.1340	963.486	82.986	33.893	57.465	-0.674	35.382	1834.230	-0.005809	-0.002373	-0.004023
0.1360	1032.226	91.868	38.212	63.546	-0.668	35.385	1965.094	-0.006431	-0.002675	-0.004448
0.1380	1095.075	99.260	41.942	68.827	-0.664	35.389	2084.742	-0.006948	-0.002936	-0.004818
0.1400	1150.440	106.682	45.396	74.113	-0.669	35.395	2190.142	-0.007468	-0.003178	-0.005188
0.1420	1200.875	113.172	48.450	77.705	-0.666	35.401	2286.158	-0.007922	-0.003392	-0.005439
0.1440	1246.471	119.175	51.284	82.273	-0.665	35.401	2372.961	-0.008342	-0.003590	-0.005759
0.1460	1285.440	124.456	53.734	85.960	-0.669	35.398	2447.147	-0.008712	-0.003761	-0.006017
0.1480	1313.483	128.598	55.647	88.850	-0.668	35.395	2500.534	-0.009002	-0.003895	-0.006220
0.1500	1330.781	131.279	56.693	90.638	-0.668	35.389	2533.464	-0.009190	-0.003969	-0.006345
0.1520	1340.279	132.585	57.312	91.561	-0.666	35.384	2551.546	-0.009281	-0.004012	-0.006409
0.1540	1344.261	133.961	57.847	92.566	-0.671	35.382	2559.128	-0.009377	-0.004049	-0.006480
0.1560	1343.840	134.225	57.723	92.855	-0.671	35.384	2558.327	-0.009396	-0.004041	-0.006500
0.1580	1340.519	134.001	57.929	92.718	-0.662	35.389	2552.004	-0.009380	-0.004055	-0.006490
0.1600	1334.478	133.625	58.219	92.704	-0.667	35.395	2540.503	-0.009354	-0.004075	-0.006489
0.1620	1324.063	132.571	57.834	92.154	-0.659	35.400	2520.676	-0.009280	-0.004048	-0.006451
0.1640	1304.316	131.307	57.612	91.135	-0.665	35.401	2483.082	-0.009192	-0.004033	-0.006379
0.1660	1257.156	126.304	55.965	87.790	-0.668	35.398	2393.303	-0.008841	-0.003918	-0.006145
0.1680	1176.243	117.244	52.030	81.445	-0.665	35.394	2239.265	-0.008207	-0.003642	-0.005701
0.1700	1087.621	107.071	47.294	74.731	-0.667	35.389	2070.551	-0.007495	-0.003311	-0.005231
0.1720	1010.495	97.705	42.835	68.430	-0.659	35.384	1923.723	-0.006839	-0.002998	-0.004790
0.1740	947.887	90.091	39.409	63.875	-0.664	35.382	1804.533	-0.006306	-0.002759	-0.004471
0.1760	893.439	83.350	36.120	59.307	-0.660	35.385	1700.878	-0.005835	-0.002528	-0.004152
0.1780	835.895	76.470	32.529	54.367	-0.656	35.389	1591.330	-0.005353	-0.002277	-0.003806
0.1800	764.736	67.661	28.374	48.560	-0.655	35.395	1455.860	-0.004736	-0.001986	-0.003399
0.1820	684.619	57.572	23.585	42.106	-0.656	35.400	1303.339	-0.004030	-0.001651	-0.002947
0.1840	609.718	48.289	19.224	35.749	-0.664	35.401	1160.746	-0.003380	-0.001346	-0.002502
0.1860	546.042	39.993	14.972	30.397	-0.665	35.398	1039.524	-0.002800	-0.001048	-0.002128
0.1880	490.317	32.447	11.600	25.223	-0.662	35.394	933.437	-0.002271	-0.000812	-0.001766
0.1900	437.943	25.222	8.601	20.173	-0.664	35.388	833.731	-0.001766	-0.000602	-0.001412
0.1920	388.620	18.773	5.368	15.768	-0.666	35.384	739.832	-0.001314	-0.000376	-0.001104
0.1940	345.984	13.368	2.740	12.095	-0.671	35.382	658.665	-0.000936	-0.000192	-0.000847
0.1960	311.148	8.559	0.443	8.613	-0.670	35.384	592.346	-0.000599	-0.000031	-0.000603
0.1980	282.384	4.224	-1.786	5.918	-0.664	35.389	537.586	-0.000296	0.000125	-0.000414
0.2000	260.548	0.767	-3.440	3.716	-0.667	35.395	496.016	-0.000054	0.000241	-0.000260
0.2020	246.661	-1.431	-4.541	1.431	-0.667	35.401	469.580	0.000100	0.000318	-0.000100
0.2040	239.282	-2.875	-5.216	0.897	-0.665	35.401	455.532	0.000201	0.000365	-0.000063
0.2060	237.058	-3.669	-5.533	0.675	-0.660	35.398	451.298	0.000257	0.000387	-0.000047
0.2080	238.486	-4.269	-5.767	0.152	-0.659	35.395	454.016	0.000299	0.000404	-0.000011
0.2100	241.987	-4.142	-5.891	0.152	-0.659	35.389	460.682	0.000290	0.000412	-0.000011
0.2120	249.021	-3.988	-5.904	0.525	-0.659	35.384	474.072	0.000279	0.000413	-0.000037
0.2140	263.974	-2.418	-5.051	1.087	-0.670	35.381	502.539	0.000169	0.000354	-0.000076
0.2160	304.220	2.515	-3.536	3.495	-0.675	35.384	579.157	-0.000176	0.000248	-0.000245
0.2180	376.386	10.813	-0.233	9.538	-0.666	35.390	716.543	-0.000757	0.000016	-0.000668
0.2200	458.141	20.734	4.129	15.881	-0.665	35.395	872.183	-0.001451	-0.000289	-0.001112
0.2220	532.577	29.738	8.353	21.480	-0.659	35.401	1013.889	-0.002082	-0.000585	-0.001504
0.2240	597.695	38.118	12.508	27.246	-0.661	35.401	1137.857	-0.002668	-0.000876	-0.001907
0.2260	660.499	46.052	16.209	32.584	-0.657	35.398	1257.420	-0.003224	-0.001135	-0.002281
0.2280	728.788	54.349	20.021	38.115	-0.655	35.395	1387.424	-0.003804	-0.001401	-0.002668
0.2300	803.674	63.216	24.617	44.321	-0.659	35.389	1529.989	-0.004425	-0.001723	-0.003102
0.2320	882.483	72.622	28.870	51.092	-0.659	35.384	1680.021	-0.005084	-0.002021	-0.003576
0.2340	959.894	82.418	33.796	57.463	-0.662	35.382	1827.393	-0.005769	-0.002366	-0.004022
0.2360	1030.032	91.297	38.185	63.600	-0.665	35.384	1960.917	-0.006391	-0.002673	-0.004452
0.2380	1093.933	99.803	42.091	69.119	-0.663	35.389	2082.567	-0.006986	-0.002946	-0.004838
0.2400	1155.309	107.460	45.862	74.636	-0.665	35.395	2199.411	-0.007522	-0.003210	-0.005225
0.2420	1214.340	114.811	49.318	79.288	-0.663	35.401	2311.792	-0.008037	-0.003452	-0.005550
0.2440	1264.024	121.772	52.524	84.446	-0.665	35.401	2406.378	-0.008524	-0.003677	-0.005911
0.2460	1301.145	127.207	55.152	87.639	-0.661	35.398	2477.045	-0.008904	-0.003861	-0.006135
0.2480	1326.347	130.431	56.666	89.993	-0.660	35.394	2525.024	-0.009130	-0.003967	-0.006299
0.2500	1340.474	132.835	57.339	91.547	-0.667	35.388	2551.918	-0.009298	-0.004014	-0.006408
0.2520	1349.671	134.016	57.862	92.483	-0.669	35.384	2569.427	-0.009381	-0.004050	-0.006474
0.2540	1355.698	135.294	58.674	93.378	-0.673	35.382	2580.900	-0.009471	-0.004107	-0.006536
0.2560	1357.170	136.101	59.072	94.232	-0.667	35.384	2583.704	-0.009527	-0.004135	-0.006596
0.2580	1354.255	135.851	58.962	93.929	-0.665	35.389	2578.154	-0.009510	-0.004127	-0.006575
0.2600	1346.936	135.253	58.975	93.624	-0.668	35.395	2564.220	-0.009468	-0.004128	-0.006554
0.2620	1333.937	134.071	58.535	92.978	-0.662	35.400	2539.473	-0.009385	-0.004097	-0.006508
0.2640	1306.495	131.903	57.985	91.697	-0.664	35.401	2487.230	-0.009233	-0.004059	-0.006419
0.2660	1244.352	125.275	55.688	87.226	-0.664	35.398	2368.927	-0.008769	-0.003898	-0.006106
0.2680	1156.481	115.131	51.066	80.374	-0.659	35.395	2201.643	-0.008059	-0.003575	-0.005626
0.2700	1074.636	105.750	46.772	73.989	-0.659	35.389	2045.832	-0.007402	-0.003274	-0.005179
0.2720	1009.067	97.787	43.139	68.622	-0.656	35.384	1921.005	-0.006845	-0.003020	-0.004804
0.2740	953.312	91.451	39.671	64.313	-0.660	35.382	1814.861	-0.006402	-0.002777	-0.004502
0.2760	894.280	84.211	36.189	60.118	-0.659	35.384	1702.480	-0.005895	-0.002533	-0.004208
0.2780	825.030	75.651	32.088	53.953	-0.660	35.389	1570.644	-0.005296	-0.002246	-0.003777
0.2800	750.293	65.881	27.811	47.899	-0.663	35.394	1428.366	-0.004612	-0.001947	-0.003353
0.2820	677.901	56.349	23.216	41.584	-0.664	35.400	1290.550	-0.003944	-0.001625	-0.002911
0.2840	613.550	48.777	19.526	36.204	-0.669	35.400	1168.041	-0.003414	-0.001367	-0.002534
0.2860	556.216	41.509	16.031	31.057	-0.674	35.397	1058.893	-0.002906	-0.001122	-0.002174
0.2880	502.565	34.228	12.811	26.256	-0.670	35.394	956.755	-0.002396	-0.000897	-0.001838
0.2900	451.273	27.459	9.482	21.907	-0.672	35.389	859.108	-0.001922	-0.000664	-0.001534
0.2920	402.461	20.898	6.097	16.843	-0.663	35.384	766.182	-0.001463	-0.000427	-0.001179
0.2940	355.302	14.967	3.302	12.990	-0.665	35.381	676.403	-0.001048	-0.000231	-0.000909
0.2960	311.629	9.200	0.662	9.331	-0.661	35.384	593.262	-0.000644	-0.000046	-0.000653
0.2980	275.411	4.031	-2.118	5.134	-0.661	35.389	524.311	-0.000282	0.000148	-0.000359
0.3000	250.929	0.236	-4.114	2.835	-0.670	35.395	477.705	-0.000017	0.000288	-0.000198
0.3020	238.756	-2.377	-5.135	1.445	-0.662	35.401	454.531	0.000166	0.000359	-0.000101
0.3040	234.323	-3.223	-5.507	0.427	-0.664	35.401	446.091	0.000226	0.000385	-0.000030
0.3060	234.428	-3.863	-5.547	0.304	-0.665	35.398	446.291	0.000270	0.000388	-0.000021
0.3080	236.953	-4.209	-5.631	0.496	-0.663	35.394	451.097	0.000295	0.000394	-0.000035
0.3100	241.056	-4.308	-5.657	0.124	-0.669	35.389	458.908	0.000302	0.000396	-0.000009
0.3120	248.329	-3.737	-5.766	-0.138	-0.664	35.384	472.755	0.000262	0.000404	0.000010
0.3140	263.824	-1.959	-4.927	1.513	-0.672	35.381	502.253	0.000137	0.000345	-0.000106
0.3160	306.730	3.002	-3.301	4.389	-0.672	35.384	583.935	-0.000210	0.000231	-0.000307
0.3180	379.768	11.672	0.057	9.425	-0.668	35.389	722.980	-0.000817	-0.000004	-0.000660
0.3200	460.906	21.678	4.637	15.867	-0.667	35.394	877.447	-0.001517	-0.000325	-0.001111
0.3220	537.837	30.891	8.931	22.319	-0.659	35.400	1023.903	-0.002162	-0.000625	-0.001562
0.3240	608.140	39.451	13.322	28.098	-0.660	35.401	1157.742	-0.002762	-0.000933	-0.001967
0.3260	675.332	47.581	17.367	34.125	-0.659	35.397	1285.658	-0.003331	-0.001216	-0.002389
0.3280	744.733	56.419	21.301	40.002	-0.653	35.394	1417.780	-0.003949	-0.001491	-0.002800
0.3300	818.522	65.758	25.524	45.698	-0.653	35.389	1558.256	-0.004603	-0.001787	-0.003199
0.3320	895.858	75.150	29.970	52.302	-0.656	35.384	1705.484	-0.005260	-0.002098	-0.003661
0.3340	971.421	84.599	34.731	58.659	-0.661	35.381	1849.337	-0.005922	-0.002431	-0.004106
0.3360	1037.321	92.923	38.831	64.453	-0.659	35.384	1974.792	-0.006505	-0.002718	-0.004512
0.3380	1091.002	99.760	42.163	69.008	-0.658	35.389	2076.988	-0.006983	-0.002951	-0.004831
0.3400	1136.448	105.668	45.203	73.177	-0.663	35.394	2163.506	-0.007397	-0.003164	-0.005122
0.3420	1180.512	111.282	47.542	76.714	-0.661	35.400	2247.391	-0.007790	-0.003328	-0.005370
0.3440	1227.175	117.979	50.487	81.268	-0.667	35.401	2336.226	-0.008259	-0.003534	-0.005689
0.3460	1271.298	123.759	53.184	85.506	-0.668	35.398	2420.225	-0.008663	-0.003723	-0.005985
0.3480	1303.790	128.124	55.167	88.092	-0.659	35.394	2482.080	-0.008969	-0.003862	-0.006166
0.3500	1322.831	130.682	56.555	90.017	-0.663	35.389	2518.330	-0.009148	-0.003959	-0.006301
0.3520	1333.696	132.556	57.201	91.202	-0.663	35.384	2539.015	-0.009279	-0.004004	-0.006384
0.3540	1339.903	133.945	57.888	92.331	-0.672	35.381	2550.831	-0.009376	-0.004052	-0.006463
0.3560	1340.279	134.017	58.164	92.882	-0.671	35.384	2551.546	-0.009381	-0.004071	-0.006502
0.3580	1336.657	133.837	58.192	92.870	-0.663	35.389	2544.651	-0.009369	-0.004073	-0.006501
0.3600	1329.353	133.586	58.109	92.455	-0.665	35.394	2530.746	-0.009351	-0.004068	-0.006472
0.3620	1317.766	132.780	57.490	91.670	-0.663	35.400	2508.688	-0.009295	-0.004024	-0.006417
0.3640	1296.080	130.738	57.366	90.722	-0.668	35.400	2467.403	-0.009152	-0.004016	-0.006351
0.3660	1245.870	125.332	55.714	87.266	-0.671	35.398	2371.817	-0.008773	-0.003900	-0.006109
0.3680	1165.979	116.284	51.821	81.253	-0.665	35.394	2219.725	-0.008140	-0.003627	-0.005688
0.3700	1080.482	106.431	47.405	74.566	-0.672	35.388	2056.961	-0.007450	-0.003318	-0.005220
0.3720	1005.340	97.440	42.932	68.732	-0.665	35.383	1913.910	-0.006821	-0.003005	-0.004811
0.3740	942.822	90.172	39.341	63.791	-0.666	35.381	1794.891	-0.006312	-0.002754	-0.004465
0.3760	885.519	83.197	35.914	59.141	-0.667	35.384	1685.801	-0.005824	-0.002514	-0.004140
0.3780	824.834	75.554	32.061	54.298	-0.665	35.389	1570.272	-0.005289	-0.002244	-0.003801
0.3800	756.335	66.632	27.921	48.339	-0.665	35.394	1439.867	-0.004664	-0.001954	-0.003384
0.3820	683.071	57.363	23.613	42.656	-0.664	35.400	1300.392	-0.004015	-0.001653	-0.002986
0.3840	613.384	48.790	19.664	36.300	-0.671	35.401	1167.727	-0.003415	-0.001376	-0.002541
0.3860	552.549	41.106	15.811	31.332	-0.668	35.398	1051.912	-0.002877	-0.001107	-0.002193
0.3880	499.710	34.325	12.536	26.585	-0.657	35.394	951.319	-0.002403	-0.000877	-0.001861
0.3900	451.634	27.724	9.687	22.209	-0.658	35.388	859.795	-0.001941	-0.000678	-0.001555
0.3920	404.790	21.303	6.373	18.231	-0.661	35.383	770.617	-0.001491	-0.000446	-0.001276
0.3940	359.510	15.686	3.770	13.540	-0.674	35.381	684.414	-0.001098	-0.000264	-0.000948
0.3960	318.978	10.284	1.088	9.757	-0.668	35.384	607.252	-0.000720	-0.000076	-0.000683
0.3980	286.231	5.518	-1.443	6.688	-0.664	35.389	544.910	-0.000386	0.000101	-0.000468
0.4000	262.456	1.878	-3.453	4.019	-0.663	35.395	499.649	-0.000131	0.000242	-0.000281
0.4020	247.368	-1.012	-4.610	2.025	-0.660	35.401	470.924	0.000071	0.000323	-0.000142
0.4040	239.929	-2.417	-5.162	1.528	-0.665	35.401	456.762	0.000169	0.000361	-0.000107
0.4060	238.531	-2.945	-5.507	1.129	-0.658	35.398	454.102	0.000206	0.000385	-0.000079
0.4080	241.176	-3.403	-5.466	0.909	-0.655	35.395	459.137	0.000238	0.000383	-0.000064
0.4100	245.835	-3.377	-5.450	1.019	-0.657	35.389	468.006	0.000236	0.000382	-0.000071
0.4120	253.199	-2.988	-5.382	0.703	-0.661	35.384	482.025	0.000209	0.000377	-0.000049
0.4140	267.446	-1.028	-4.583	1.624	-0.670	35.381	509.148	0.000072	0.000321	-0.000114
0.4160	305.287	3.612	-2.956	4.376	-0.670	35.384	581.188	-0.000253	0.000207	-0.000306
0.4180	373.200	11.325	0.029	9.438	-0.664	35.389	710.478	-0.000793	-0.000002	-0.000661
0.4200	453.497	20.773	4.418	15.522	-0.662	35.395	863.342	-0.001454	-0.000309	-0.001087
0.4220	532.472	30.363	8.697	22.266	-0.660	35.401	1013.689	-0.002125	-0.000609	-0.001559
0.4240	603.781	39.450	13.072	28.155	-0.660	35.401	1149.445	-0.002761	-0.000915	-0.001971
0.4260	672.551	47.691	17.172	33.825	-0.657	35.398	1280.365	-0.003338	-0.001202	-0.002368
0.4280	745.139	56.140	21.054	40.237	-0.652	35.394	1418.552	-0.003930	-0.001474	-0.002817
0.4300	823.166	65.924	25.785	46.291	-0.650	35.388	1567.097	-0.004615	-0.001805	-0.003240
0.4320	902.937	75.611	30.396	53.129	-0.650	35.383	1718.960	-0.005293	-0.002128	-0.003719
0.4340	978.545	85.352	35.365	59.486	-0.656	35.381	1862.898	-0.005975	-0.002476	-0.004164
0.4360	1048.352	94.410	39.755	65.624	-0.661	35.384	1995.792	-0.006609	-0.002783	-0.004594
0.4380	1108.465	101.901	43.234	70.563	-0.660	35.389	2110.233	-0.007133	-0.003026	-0.004939
0.4400	1155.369	108.391	46.275	75.130	-0.658	35.394	2199.526	-0.007587	-0.003239	-0.005259
0.4420	1195.901	113.770	48.780	78.405	-0.658	35.400	2276.688	-0.007964	-0.003415	-0.005488
0.4440	1239.228	119.454	51.491	82.713	-0.663	35.401	2359.171	-0.008362	-0.003604	-0.005790
0.4460	1284.508	125.456	54.050	86.910	-0.658	35.398	2445.374	-0.008782	-0.003784	-0.006084
0.4480	1322.680	130.527	56.266	90.296	-0.653	35.395	2518.044	-0.009137	-0.003939	-0.006321
0.4500	1347.207	133.850	58.040	92.194	-0.652	35.389	2564.735	-0.009369	-0.004063	-0.006454
0.4520	1357.456	135.254	58.700	93.390	-0.650	35.383	2584.248	-0.009468	-0.004109	-0.006537
0.4540	1358.027	136.131	59.086	94.313	-0.656	35.381	2585.335	-0.009529	-0.004136	-0.006602
0.4560	1354.510	136.143	59.114	94.576	-0.657	35.384	2578.640	-0.009530	-0.004138	-0.006620
0.4580	1349.551	135.934	58.976	93.928	-0.655	35.389	2569.199	-0.009515	-0.004128	-0.006575
0.4600	1341.992	135.281	58.975	93.971	-0.655	35.394	2554.808	-0.009470	-0.004128	-0.006578
0.4620	1330.074	134.253	58.866	93.295	-0.655	35.400	2532.120	-0.009398	-0.004121	-0.006531
0.4640	1304.180	131.807	58.179	91.807	-0.664	35.400	2482.824	-0.009227	-0.004073	-0.006427
0.4660	1243.646	125.387	56.128	87.749	-0.663	35.398	2367.582	-0.008777	-0.003929	-0.006142
0.4680	1156.646	115.771	51.753	80.992	-0.652	35.394	2201.958	-0.008104	-0.003623	-0.005669
0.4700	1072.262	105.875	47.117	74.376	-0.658	35.388	2041.311	-0.007411	-0.003298	-0.005206
0.4720	1003.868	97.789	42.864	68.831	-0.653	35.384	1911.106	-0.006845	-0.003000	-0.004818
0.4740	946.519	90.744	39.602	64.317	-0.657	35.381	1801.929	-0.006352	-0.002772	-0.004502
0.4760	891.831	83.768	36.548	60.051	-0.660	35.384	1697.817	-0.005864	-0.002558	-0.004204
0.4780	831.161	76.347	32.723	54.931	-0.655	35.388	1582.317	-0.005344	-0.002291	-0.003845
0.4800	759.010	67.577	28.415	48.974	-0.660	35.394	1444.960	-0.004730	-0.001989	-0.003428
0.4820	682.891	57.878	23.626	42.602	-0.659	35.400	1300.049	-0.004051	-0.001654	-0.002982
0.4840	614.331	49.262	19.815	36.864	-0.655	35.400	1169.529	-0.003448	-0.001387	-0.002580
0.4860	554.413	41.523	16.473	31.799	-0.657	35.397	1055.460	-0.002907	-0.001153	-0.002226
0.4880	497.245	33.949	12.674	26.336	-0.648	35.394	946.627	-0.002376	-0.000887	-0.001844
0.4900	443.143	26.971	9.275	21.988	-0.656	35.389	843.630	-0.001888	-0.000649	-0.001539
0.4920	393.384	20.163	5.960	16.883	-0.647	35.384	748.901	-0.001411	-0.000417	-0.001182
0.4940	349.936	14.951	3.346	12.963	-0.652	35.381	666.189	-0.001047	-0.000234	-0.000907
0.4960	314.890	9.671	0.828	10.019	-0.652	35.383	599.470	-0.000677	-0.000058	-0.000701
0.4980	286.892	5.433	-1.430	6.729	-0.648	35.388	546.169	-0.000380	0.000100	-0.000471
0.5000	264.786	2.378	-3.136	4.307	-0.645	35.394	504.084	-0.000166	0.000220	-0.000301
0.5020	248.540	-0.652	-4.306	2.669	-0.635	35.400	473.156	0.000046	0.000301	-0.000187
0.5040	239.342	-2.112	-4.803	1.666	-0.643	35.400	455.647	0.000148	0.000336	-0.000117
0.5060	237.434	-2.738	-5.135	1.459	-0.648	35.398	452.013	0.000192	0.000359	-0.000102
0.5080	240.154	-3.002	-5.326	1.224	-0.646	35.394	457.191	0.000210	0.000373	-0.000086
0.5100	245.234	-2.862	-5.202	0.800	-0.646	35.389	466.862	0.000200	0.000364	-0.000056
0.5120	253.214	-2.404	-5.024	1.309	-0.648	35.384	482.054	0.000168	0.000352	-0.000092
0.5140	270.361	-0.153	-4.349	2.285	-0.657	35.382	514.698	0.000011	0.000304	-0.000160
0.5160	313.763	4.655	-2.764	4.845	-0.668	35.384	597.324	-0.000326	0.000193	-0.000339
0.5180	385.434	12.964	0.827	10.375	-0.668	35.388	733.767	-0.000907	-0.000058	-0.000726
0.5200	465.941	22.413	5.271	17.078	-0.662	35.394	887.032	-0.001569	-0.000369	-0.001195
0.5220	542.210	31.476	9.495	22.733	-0.663	35.400	1032.228	-0.002203	-0.000665	-0.001591
0.5240	609.687	40.034	13.513	28.773	-0.671	35.401	1160.688	-0.002802	-0.000946	-0.002014
0.5260	671.169	47.913	17.243	33.947	-0.668	35.397	1277.733	-0.003354	-0.001207	-0.002376
0.5280	736.557	55.904	20.929	39.795	-0.662	35.394	1402.216	-0.003913	-0.001465	-0.002786
0.5300	809.490	64.744	25.208	45.713	-0.662	35.389	1541.061	-0.004532	-0.001765	-0.003200
0.5320	887.397	73.971	29.571	51.863	-0.665	35.384	1689.377	-0.005178	-0.002070	-0.003630
0.5340	962.600	83.545	34.291	58.441	-0.665	35.381	1832.542	-0.005848	-0.002400	-0.004091
0.5360	1034.315	92.884	38.982	64.879	-0.663	35.383	1969.070	-0.006502	-0.002729	-0.004542
0.5380	1102.003	101.429	42.890	70.410	-0.658	35.388	2097.931	-0.007100	-0.003002	-0.004929
0.5400	1158.510	108.543	46.329	75.200	-0.661	35.394	2205.505	-0.007598	-0.003243	-0.005264
0.5420	1204.978	114.686	49.098	79.466	-0.663	35.400	2293.968	-0.008028	-0.003437	-0.005563
0.5440	1246.381	120.301	51.794	83.290	-0.671	35.400	2372.789	-0.008421	-0.003626	-0.005830
0.5460	1282.930	125.346	54.285	86.800	-0.669	35.397	2442.369	-0.008774	-0.003800	-0.006076
0.5480	1310.387	129.057	55.910	89.347	-0.666	35.394	2494.640	-0.009034	-0.003914	-0.006254
0.5500	1327.790	131.794	56.940	90.997	-0.662	35.388	2527.771	-0.009226	-0.003986	-0.006370
0.5520	1337.889	133.696	57.407	91.960	-0.658	35.383	2546.997	-0.009359	-0.004018	-0.006437
0.5540	1342.668	134.640	57.875	92.965	-0.663	35.381	2556.095	-0.009425	-0.004051	-0.006508
0.5560	1342.548	134.669	58.509	93.487	-0.662	35.384	2555.866	-0.009427	-0.004096	-0.006544
0.5580	1339.151	134.752	58.385	93.501	-0.658	35.388	2549.400	-0.009433	-0.004087	-0.006545
0.5600	1332.839	134.196	58.495	93.005	-0.659	35.394	2537.384	-0.009394	-0.004095	-0.006510
0.5620	1321.809	132.946	58.027	92.580	-0.661	35.400	2516.384	-0.009306	-0.004062	-0.006481
0.5640	1301.370	131.558	57.655	91.410	-0.663	35.400	2477.474	-0.009209	-0.004036	-0.006399
0.5660	1251.010	126.221	56.156	88.025	-0.665	35.397	2381.601	-0.008835	-0.003931	-0.006162
0.5680	1167.662	116.979	52.222	81.984	-0.661	35.394	2222.929	-0.008189	-0.003656	-0.005739
0.5700	1080.092	106.989	47.377	75.159	-0.663	35.389	2056.217	-0.007489	-0.003316	-0.005261
0.5720	1007.189	97.982	42.960	68.801	-0.662	35.383	1917.429	-0.006859	-0.003007	-0.004816
0.5740	952.335	91.702	39.491	64.660	-0.666	35.381	1813.002	-0.006419	-0.002764	-0.004526
0.5760	903.523	85.672	36.795	60.698	-0.664	35.384	1720.076	-0.005997	-0.002576	-0.004249
0.5780	844.822	78.321	33.437	56.212	-0.660	35.388	1608.324	-0.005482	-0.002341	-0.003935
0.5800	767.967	68.895	29.088	49.649	-0.662	35.394	1462.011	-0.004823	-0.002036	-0.003475
0.5820	683.582	58.294	24.025	42.631	-0.660	35.400	1301.365	-0.004081	-0.001682	-0.002984
0.5840	606.426	48.526	19.417	36.302	-0.657	35.400	1154.480	-0.003397	-0.001359	-0.002541
0.5860	544.885	40.716	15.769	30.753	-0.665	35.397	1037.321	-0.002850	-0.001104	-0.002153
0.5880	496.869	34.337	12.617	26.778	-0.663	35.394	945.911	-0.002404	-0.000883	-0.001874
0.5900	453.978	28.750	9.798	22.566	-0.664	35.388	864.258	-0.002012	-0.000686	-0.001580
0.5920	410.967	23.012	7.073	18.316	-0.659	35.383	782.375	-0.001611	-0.000495	-0.001282
0.5940	364.995	16.912	4.141	14.544	-0.663	35.381	694.857	-0.001184	-0.000290	-0.001018
0.5960	321.022	10.937	1.348	10.278	-0.665	35.383	611.143	-0.000766	-0.000094	-0.000719
0.5980	284.142	5.559	-1.224	6.785	-0.663	35.388	540.934	-0.000389	0.000086	-0.000475
0.6000	257.662	1.654	-3.177	4.321	-0.668	35.394	490.522	-0.000116	0.000222	-0.000302
0.6020	243.265	-0.984	-4.487	2.104	-0.666	35.400	463.114	0.000069	0.000314	-0.000147
0.6040	238.351	-2.222	-4.721	1.624	-0.672	35.401	453.758	0.000156	0.000330	-0.000114
0.6060	238.696	-2.737	-5.188	1.885	-0.675	35.398	454.416	0.000192	0.000363	-0.000132
0.6080	241.056	-2.626	-5.630	1.471	-0.667	35.394	458.908	0.000184	0.000394	-0.000103
0.6100	245.083	-2.711	-5.494	1.143	-0.671	35.388	466.576	0.000190	0.000385	-0.000080
0.6120	251.440	-2.431	-5.273	1.445	-0.666	35.383	478.678	0.000170	0.000369	-0.000101
0.6140	264.019	-0.805	-4.707	1.884	-0.672	35.381	502.625	0.000056	0.000329	-0.000132
0.6160	298.975	3.197	-3.440	4.142	-0.669	35.384	569.172	-0.000224	0.000241	-0.000290
0.6180	368.467	10.867	-0.386	9.289	-0.666	35.388	701.466	-0.000761	0.000027	-0.000650
0.6200	453.708	20.983	4.403	15.950	-0.659	35.394	863.743	-0.001469	-0.000308	-0.001117
0.6220	534.455	30.432	8.890	22.623	-0.652	35.400	1017.466	-0.002130	-0.000622	-0.001584
0.6240	606.276	39.727	13.265	28.512	-0.657	35.401	1154.194	-0.002781	-0.000929	-0.001996
0.6260	675.091	48.496	17.215	34.552	-0.657	35.398	1285.200	-0.003395	-0.001205	-0.002419
0.6280	745.514	56.974	21.052	40.469	-0.655	35.394	1419.268	-0.003988	-0.001474	-0.002833
0.6300	815.547	65.825	25.373	46.123	-0.663	35.388	1552.591	-0.004608	-0.001776	-0.003229
0.6320	884.452	74.330	29.378	51.903	-0.659	35.383	1683.769	-0.005203	-0.002056	-0.003633
0.6340	955.251	83.113	34.084	58.218	-0.665	35.381	1818.552	-0.005818	-0.002386	-0.004075
0.6360	1027.357	92.160	38.544	64.577	-0.664	35.383	1955.824	-0.006451	-0.002698	-0.004520
0.6380	1094.985	101.027	42.534	69.891	-0.660	35.388	2084.570	-0.007072	-0.002977	-0.004892
0.6400	1150.695	107.960	45.974	75.242	-0.660	35.393	2190.628	-0.007557	-0.003218	-0.005267
0.6420	1197.403	113.990	48.767	78.901	-0.649	35.400	2279.549	-0.007979	-0.003414	-0.005523
0.6440	1240.866	119.772	51.725	82.837	-0.656	35.400	2362.289	-0.008384	-0.003621	-0.005799
0.6460	1279.819	125.387	53.953	86.648	-0.660	35.397	2436.447	-0.008777	-0.003777	-0.006065
0.6480	1313.618	129.764	55.880	89.538	-0.657	35.394	2500.792	-0.009083	-0.003912	-0.006268
0.6500	1339.106	133.085	57.504	91.989	-0.661	35.388	2549.314	-0.009316	-0.004025	-0.006439
0.6520	1353.473	135.364	58.563	93.542	-0.659	35.383	2576.666	-0.009475	-0.004099	-0.006548
0.6540	1357.336	136.338	59.114	94.672	-0.655	35.381	2584.019	-0.009544	-0.004138	-0.006627
0.6560	1354.751	136.353	59.045	94.645	-0.658	35.383	2579.098	-0.009545	-0.004133	-0.006625
0.6580	1349.371	135.978	59.143	94.397	-0.666	35.388	2568.855	-0.009518	-0.004140	-0.006608
0.6600	1341.285	135.461	59.170	93.899	-0.666	35.394	2553.463	-0.009482	-0.004142	-0.006573
0.6620	1328.722	134.475	58.619	93.349	-0.663	35.400	2529.545	-0.009413	-0.004103	-0.006534
0.6640	1301.415	131.752	58.151	91.821	-0.668	35.401	2477.560	-0.009223	-0.004071	-0.006427
0.6660	1242.113	125.498	55.976	87.789	-0.671	35.398	2364.664	-0.008785	-0.003918	-0.006145
0.6680	1160.914	116.548	51.850	81.749	-0.663	35.394	2210.083	-0.008158	-0.003630	-0.005722
0.6700	1083.653	107.793	47.666	75.612	-0.664	35.388	2062.998	-0.007546	-0.003337	-0.005293
0.6720	1021.286	100.081	44.061	70.507	-0.663	35.383	1944.265	-0.007006	-0.003084	-0.004936
0.6740	968.431	93.687	41.006	66.324	-0.664	35.381	1843.643	-0.006558	-0.002870	-0.004643
0.6760	913.352	87.199	37.635	62.004	-0.667	35.383	1738.787	-0.006104	-0.002634	-0.004340
0.6780	848.594	79.083	33.658	56.500	-0.664	35.388	1615.505	-0.005536	-0.002356	-0.003955
0.6800	772.265	69.843	29.215	50.583	-0.661	35.394	1470.194	-0.004889	-0.002045	-0.003541
0.6820	693.035	59.573	24.507	43.883	-0.656	35.400	1319.361	-0.004170	-0.001715	-0.003072
0.6840	620.658	50.512	20.351	37.787	-0.661	35.400	1181.574	-0.003536	-0.001425	-0.002645
0.6860	557.539	42.341	16.706	32.530	-0.665	35.398	1061.411	-0.002964	-0.001169	-0.002277
0.6880	501.753	35.268	13.127	27.258	-0.661	35.394	955.210	-0.002469	-0.000919	-0.001908
0.6900	450.792	28.488	9.935	22.979	-0.663	35.388	858.192	-0.001994	-0.000695	-0.001609
0.6920	403.092	22.082	6.813	18.150	-0.659	35.383	767.384	-0.001546	-0.000477	-0.001271
0.6940	357.962	16.273	3.989	13.915	-0.663	35.381	681.467	-0.001139	-0.000279	-0.000974
0.6960	317.565	10.616	1.196	10.681	-0.665	35.383	604.563	-0.000743	-0.000084	-0.000748
0.6980	285.074	6.018	-1.210	7.004	-0.663	35.389	542.707	-0.000421	0.000085	-0.000490
0.7000	261.600	2.667	-2.874	4.816	-0.670	35.394	498.018	-0.000187	0.000201	-0.000337
0.7020	245.609	-0.307	-4.280	2.698	-0.667	35.400	467.577	0.000021	0.000300	-0.000189
0.7040	235.390	-2.125	-4.775	1.418	-0.669	35.400	448.122	0.000149	0.000334	-0.000099
0.7060	231.948	-2.891	-5.066	1.035	-0.662	35.397	441.570	0.000202	0.000355	-0.000072
0.7080	234.128	-3.334	-5.381	0.964	-0.655	35.394	445.719	0.000233	0.000377	-0.000067
0.7100	238.666	-3.446	-5.244	0.609	-0.659	35.388	454.359	0.000241	0.000367	-0.000043
0.7120	246.210	-2.835	-5.051	0.429	-0.664	35.383	468.721	0.000198	0.000354	-0.000030
0.7140	261.329	-0.987	-4.610	1.928	-0.671	35.381	497.503	0.000069	0.000323	-0.000135
0.7160	300.688	3.737	-3.137	4.389	-0.671	35.383	572.433	-0.000262	0.000220	-0.000307
0.7180	371.112	11.686	0.028	9.467	-0.674	35.388	706.501	-0.000818	-0.000002	-0.000663
0.7200	455.030	21.595	4.542	16.457	-0.671	35.393	866.261	-0.001512	-0.000318	-0.001152
0.7220	537.341	31.601	9.193	22.663	-0.660	35.400	1022.959	-0.002212	-0.000643	-0.001586
0.7240	611.807	40.742	13.774	29.558	-0.664	35.400	1164.722	-0.002852	-0.000964	-0.002069
0.7260	680.456	49.249	17.766	35.516	-0.664	35.397	1295.414	-0.003447	-0.001244	-0.002486
0.7280	748.700	57.822	21.591	40.662	-0.659	35.394	1425.333	-0.004048	-0.001511	-0.002846
0.7300	819.394	66.467	25.704	46.676	-0.669	35.388	1559.916	-0.004653	-0.001799	-0.003267
0.7320	891.981	74.957	30.109	52.455	-0.672	35.383	1698.103	-0.005247	-0.002108	-0.003672
0.7340	963.261	84.364	34.731	59.060	-0.669	35.381	1833.801	-0.005905	-0.002431	-0.004134
0.7360	1028.604	92.799	38.737	64.674	-0.662	35.383	1958.199	-0.006496	-0.002712	-0.004527
0.7380	1087.651	100.318	42.342	69.600	-0.658	35.388	2070.608	-0.007022	-0.002964	-0.004872
0.7400	1143.662	107.431	45.890	74.499	-0.660	35.393	2177.238	-0.007520	-0.003212	-0.005215
0.7420	1196.111	114.130	48.807	78.901	-0.655	35.399	2277.088	-0.007989	-0.003416	-0.005523
0.7440	1243.691	120.314	51.849	83.248	-0.659	35.400	2367.668	-0.008422	-0.003629	-0.005827
0.7460	1285.410	126.011	54.697	87.255	-0.663	35.397	2447.090	-0.008821	-0.003829	-0.006108
0.7480	1318.623	130.349	56.624	90.116	-0.656	35.393	2510.319	-0.009124	-0.003964	-0.006308
0.7500	1338.385	133.280	57.779	92.027	-0.659	35.388	2547.941	-0.009330	-0.004045	-0.006442
0.7520	1346.681	134.460	58.385	93.019	-0.656	35.383	2563.734	-0.009412	-0.004087	-0.006511
0.7540	1348.649	135.158	58.605	93.751	-0.657	35.380	2567.482	-0.009461	-0.004102	-0.006563
0.7560	1347.342	135.866	58.976	94.342	-0.656	35.383	2564.993	-0.009511	-0.004128	-0.006604
0.7580	1343.795	135.600	59.017	93.955	-0.653	35.387	2558.241	-0.009492	-0.004131	-0.006577
0.7600	1337.047	135.099	58.935	93.816	-0.654	35.393	2545.395	-0.009457	-0.004125	-0.006567
0.7620	1325.566	134.434	58.768	93.114	-0.648	35.399	2523.537	-0.009410	-0.004114	-0.006518
0.7640	1301.956	132.418	58.275	91.781	-0.656	35.400	2478.590	-0.009269	-0.004079	-0.006425
0.7660	1247.027	126.345	56.293	88.340	-0.660	35.397	2374.020	-0.008844	-0.003941	-0.006184
0.7680	1161.741	116.535	51.891	81.833	-0.652	35.394	2211.657	-0.008157	-0.003632	-0.005728
0.7700	1073.720	106.348	47.226	75.227	-0.653	35.389	2044.086	-0.007444	-0.003306	-0.005266
0.7720	1000.111	97.428	42.532	68.896	-0.657	35.383	1903.954	-0.006820	-0.002977	-0.004823
0.7740	942.477	90.660	39.314	64.425	-0.664	35.381	1794.233	-0.006346	-0.002752	-0.004510
0.7760	891.590	84.394	36.562	60.298	-0.668	35.383	1697.359	-0.005908	-0.002559	-0.004221
0.7780	834.618	77.459	33.121	55.577	-0.659	35.388	1588.898	-0.005422	-0.002319	-0.003890
0.7800	763.684	68.939	28.704	49.757	-0.664	35.393	1453.857	-0.004826	-0.002009	-0.003483
0.7820	684.123	58.752	24.080	42.903	-0.661	35.399	1302.395	-0.004113	-0.001686	-0.003003
0.7840	608.726	49.304	19.980	37.180	-0.666	35.399	1158.857	-0.003451	-0.001399	-0.002603
0.7860	545.606	41.329	16.266	31.484	-0.665	35.397	1038.694	-0.002893	-0.001139	-0.002204
0.7880	491.188	34.188	12.441	26.792	-0.667	35.394	935.097	-0.002393	-0.000871	-0.001875
0.7900	440.888	27.267	9.385	21.962	-0.669	35.388	839.338	-0.001909	-0.000657	-0.001537
0.7920	392.993	20.887	6.317	17.463	-0.665	35.383	748.158	-0.001462	-0.000442	-0.001222
0.7940	349.741	15.453	3.647	13.651	-0.663	35.381	665.817	-0.001082	-0.000255	-0.000956
0.7960	313.883	10.298	1.184	9.990	-0.661	35.383	597.553	-0.000721	-0.000083	-0.000699
0.7980	285.389	6.058	-0.989	7.474	-0.661	35.388	543.308	-0.000424	0.000069	-0.000523
0.8000	262.486	2.779	-2.791	4.804	-0.664	35.394	499.706	-0.000195	0.000195	-0.000336
0.8020	246.827	-0.069	-4.126	2.683	-0.660	35.400	469.894	0.000005	0.000289	-0.000188
0.8040	238.711	-1.542	-4.887	1.994	-0.665	35.401	454.445	0.000108	0.000342	-0.000140
0.8060	235.510	-2.459	-5.314	1.240	-0.670	35.398	448.351	0.000172	0.000372	-0.000087
0.8080	236.697	-3.043	-5.341	1.101	-0.663	35.395	450.611	0.000213	0.000374	-0.000077
0.8100	241.251	-2.973	-5.216	1.390	-0.661	35.389	459.280	0.000208	0.000365	-0.000097
0.8120	249.832	-2.362	-5.232	1.059	-0.660	35.383	475.616	0.000165	0.000366	-0.000074
0.8140	268.798	-0.123	-4.377	2.120	-0.665	35.381	511.723	0.000009	0.000306	-0.000148
0.8160	316.934	5.657	-2.448	5.741	-0.676	35.383	603.361	-0.000396	0.000171	-0.000402
0.8180	392.422	14.647	1.253	11.617	-0.677	35.389	747.070	-0.001025	-0.000088	-0.000813
0.8200	470.434	23.804	5.450	17.519	-0.677	35.394	895.586	-0.001666	-0.000381	-0.001226
0.8220	541.789	32.351	9.481	23.144	-0.668	35.400	1031.427	-0.002265	-0.000664	-0.001620
0.8240	606.757	40.576	13.388	29.186	-0.672	35.401	1155.109	-0.002840	-0.000937	-0.002043
0.8260	670.267	48.568	16.925	34.304	-0.669	35.398	1276.016	-0.003400	-0.001185	-0.002401
0.8280	738.331	56.933	20.944	40.111	-0.661	35.394	1405.592	-0.003985	-0.001466	-0.002808
0.8300	812.887	65.883	25.650	46.139	-0.669	35.388	1547.527	-0.004612	-0.001796	-0.003230
0.8320	891.230	75.152	30.135	52.551	-0.664	35.383	1696.672	-0.005261	-0.002109	-0.003679
0.8340	968.401	84.962	34.827	59.045	-0.667	35.381	1843.586	-0.005947	-0.002438	-0.004133
0.8360	1040.402	94.286	39.492	65.526	-0.672	35.383	1980.658	-0.006600	-0.002764	-0.004587
0.8380	1104.333	102.527	43.057	71.170	-0.666	35.388	2102.365	-0.007177	-0.003014	-0.004982
0.8400	1157.668	109.420	46.469	75.752	-0.663	35.394	2203.903	-0.007659	-0.003253	-0.005303
0.8420	1203.400	115.117	49.277	79.754	-0.653	35.400	2290.964	-0.008058	-0.003449	-0.005583
0.8440	1245.104	121.133	51.946	83.799	-0.660	35.401	2370.358	-0.008479	-0.003636	-0.005866
0.8460	1282.449	126.027	54.354	87.225	-0.667	35.397	2441.454	-0.008822	-0.003805	-0.006106
0.8480	1311.905	129.946	56.142	89.784	-0.665	35.394	2497.530	-0.009096	-0.003930	-0.006285
0.8500	1331.818	132.459	57.324	91.918	-0.661	35.388	2535.439	-0.009272	-0.004013	-0.006434
0.8520	1343.600	134.182	58.055	93.104	-0.663	35.383	2557.869	-0.009393	-0.004064	-0.006517
0.8540	1348.890	135.476	58.564	93.997	-0.664	35.381	2567.940	-0.009483	-0.004099	-0.006580
0.8560	1348.108	136.046	58.850	94.561	-0.662	35.383	2566.452	-0.009523	-0.004120	-0.006619
0.8580	1343.465	135.836	58.865	94.492	-0.657	35.388	2557.611	-0.009509	-0.004121	-0.006614
0.8600	1336.025	135.349	58.921	94.024	-0.657	35.393	2543.449	-0.009474	-0.004124	-0.006582
0.8620	1324.288	134.684	58.769	93.225	-0.657	35.399	2521.105	-0.009428	-0.004114	-0.006526
0.8640	1300.063	132.321	58.425	91.835	-0.663	35.400	2474.985	-0.009262	-0.004090	-0.006428
0.8660	1244.022	126.431	56.128	88.313	-0.668	35.397	2368.298	-0.008850	-0.003929	-0.006182
0.8680	1160.449	117.035	51.782	81.736	-0.657	35.394	2209.196	-0.008192	-0.003625	-0.005722
0.8700	1077.131	107.112	47.323	75.350	-0.656	35.388	2050.581	-0.007498	-0.003313	-0.005275
0.8720	1010.405	99.079	43.316	69.750	-0.656	35.383	1923.552	-0.006936	-0.003032	-0.004883
0.8740	955.882	92.661	40.222	65.635	-0.657	35.381	1819.754	-0.006486	-0.002816	-0.004594
0.8760	898.428	85.407	36.753	60.766	-0.661	35.383	1710.377	-0.005978	-0.002573	-0.004254
0.8780	830.380	77.056	32.502	55.096	-0.656	35.388	1580.830	-0.005394	-0.002275	-0.003857
0.8800	756.260	67.688	28.633	48.987	-0.656	35.393	1439.724	-0.004738	-0.002004	-0.003429
0.8820	684.544	58.933	24.190	42.918	-0.657	35.399	1303.196	-0.004125	-0.001693	-0.003004
0.8840	619.546	50.887	20.146	37.401	-0.663	35.400	1179.457	-0.003562	-0.001410	-0.002618
0.8860	560.454	43.412	16.925	32.790	-0.662	35.397	1066.961	-0.003039	-0.001185	-0.002295
0.8880	502.385	35.770	12.961	27.506	-0.655	35.394	956.411	-0.002504	-0.000907	-0.001925
0.8900	445.382	28.306	9.412	22.456	-0.653	35.388	847.893	-0.001981	-0.000659	-0.001572
0.8920	392.632	21.373	6.194	17.462	-0.650	35.383	747.471	-0.001496	-0.000434	-0.001222
0.8940	347.261	15.230	3.483	13.073	-0.653	35.380	661.097	-0.001066	-0.000244	-0.000915
0.8960	311.794	10.075	0.758	10.348	-0.660	35.382	593.576	-0.000705	-0.000053	-0.000724
0.8980	285.480	6.171	-1.320	7.239	-0.657	35.388	543.480	-0.000432	0.000092	-0.000507
0.9000	266.454	3.364	-2.696	5.161	-0.664	35.394	507.259	-0.000235	0.000189	-0.000361
0.9020	253.048	0.972	-3.851	3.688	-0.664	35.399	481.739	-0.000068	0.000270	-0.000258
0.9040	243.821	-0.708	-4.431	2.572	-0.672	35.400	464.172	0.000050	0.000310	-0.000180
0.9060	239.583	-1.804	-4.816	2.421	-0.676	35.397	456.104	0.000126	0.000337	-0.000169
0.9080	240.695	-2.084	-5.009	1.583	-0.669	35.394	458.221	0.000146	0.000351	-0.000111
0.9100	245.474	-1.889	-4.831	1.734	-0.667	35.388	467.319	0.000132	0.000338	-0.000121
0.9120	253.589	-1.720	-4.624	2.036	-0.656	35.383	482.769	0.000120	0.000324	-0.000143
0.9140	270.076	0.266	-4.018	2.394	-0.664	35.381	514.154	-0.000019	0.000281	-0.000168
0.9160	311.779	5.158	-2.543	5.491	-0.676	35.383	593.548	-0.000361	0.000178	-0.000384
0.9180	381.616	13.024	0.743	10.734	-0.667	35.388	726.500	-0.000912	-0.000052	-0.000751
0.9200	459.148	22.680	4.954	16.637	-0.668	35.393	874.100	-0.001588	-0.000347	-0.001165
0.9220	534.260	31.434	8.945	23.063	-0.665	35.399	1017.094	-0.002200	-0.000626	-0.001614
0.9240	606.321	40.396	13.197	29.146	-0.671	35.400	1154.280	-0.002828	-0.000924	-0.002040
0.9260	677.811	49.469	17.545	35.241	-0.672	35.397	1290.379	-0.003463	-0.001228	-0.002467
0.9280	748.024	57.476	21.671	40.909	-0.667	35.394	1424.046	-0.004023	-0.001517	-0.002864
0.9300	816.208	66.161	25.950	46.633	-0.667	35.388	1553.850	-0.004631	-0.001817	-0.003264
0.9320	885.083	74.984	29.900	52.387	-0.663	35.383	1684.971	-0.005249	-0.002093	-0.003667
0.9340	956.603	83.614	34.373	58.524	-0.671	35.381	1821.127	-0.005853	-0.002406	-0.004097
0.9360	1029.356	92.743	38.941	64.906	-0.675	35.383	1959.629	-0.006492	-0.002726	-0.004543
0.9380	1099.779	101.582	42.932	70.852	-0.668	35.388	2093.697	-0.007111	-0.003005	-0.004960
0.9400	1159.682	109.740	46.577	76.137	-0.673	35.393	2207.737	-0.007682	-0.003260	-0.005330
0.9420	1203.655	115.436	49.261	79.879	-0.667	35.399	2291.451	-0.008081	-0.003448	-0.005592
0.9440	1237.559	120.175	51.588	83.181	-0.670	35.400	2355.995	-0.008412	-0.003611	-0.005823
0.9460	1269.961	124.692	53.665	86.400	-0.673	35.397	2417.679	-0.008728	-0.003757	-0.006048
0.9480	1303.895	128.708	55.400	88.987	-0.668	35.394	2482.281	-0.009010	-0.003878	-0.006229
0.9500	1335.665	133.084	57.367	92.027	-0.666	35.388	2542.763	-0.009316	-0.004016	-0.006442
0.9520	1355.848	135.921	58.522	94.243	-0.660	35.383	2581.186	-0.009514	-0.004097	-0.006597
0.9540	1362.085	137.464	59.611	95.277	-0.663	35.380	2593.060	-0.009622	-0.004173	-0.006669
0.9560	1359.830	137.422	59.887	95.579	-0.667	35.383	2588.768	-0.009620	-0.004192	-0.006691
0.9580	1353.639	137.144	59.571	95.484	-0.662	35.387	2576.981	-0.009600	-0.004170	-0.006684
0.9600	1344.336	136.214	59.735	94.865	-0.671	35.393	2559.271	-0.009535	-0.004181	-0.006641
0.9620	1329.759	134.991	59.432	94.080	-0.675	35.399	2531.519	-0.009449	-0.004160	-0.006586
0.9640	1298.860	132.389	58.563	92.289	-0.678	35.400	2472.696	-0.009267	-0.004099	-0.006460
0.9660	1235.831	125.428	56.005	87.984	-0.681	35.397	2352.705	-0.008780	-0.003920	-0.006159
0.9680	1152.799	116.174	51.573	81.283	-0.671	35.394	2194.633	-0.008132	-0.003610	-0.005690
0.9700	1073.344	107.002	47.183	75.064	-0.673	35.388	2043.371	-0.007490	-0.003303	-0.005254
0.9720	1007.730	98.790	43.330	69.807	-0.669	35.383	1918.459	-0.006915	-0.003033	-0.004887
0.9740	952.350	92.523	39.987	65.334	-0.675	35.380	1813.030	-0.006477	-0.002799	-0.004573
0.9760	895.257	85.560	36.629	61.001	-0.671	35.383	1704.340	-0.005989	-0.002564	-0.004270
0.9780	829.117	76.956	32.598	55.550	-0.669	35.387	1578.426	-0.005387	-0.002282	-0.003888
0.9800	755.794	67.633	28.731	49.137	-0.665	35.393	1438.837	-0.004734	-0.002011	-0.003440
0.9820	684.769	59.241	24.425	43.332	-0.666	35.399	1303.625	-0.004147	-0.001710	-0.003033
0.9840	625.257	51.722	20.740	38.184	-0.668	35.400	1190.329	-0.003621	-0.001452	-0.002673
0.9860	575.844	45.300	17.877	34.319	-0.673	35.396	1096.258	-0.003171	-0.001251	-0.002402
0.9880	523.650	38.590	14.434	29.434	-0.661	35.394	996.895	-0.002701	-0.001010	-0.002060
0.9900	460.876	30.768	10.513	23.930	-0.658	35.388	877.390	-0.002154	-0.000736	-0.001675
0.9920	394.586	22.082	6.483	18.055	-0.663	35.383	751.190	-0.001546	-0.000454	-0.001264
0.9940	337.343	14.634	3.002	12.910	-0.671	35.380	642.214	-0.001024	-0.000210	-0.000904
0.9960	298.599	8.991	0.427	9.577	-0.675	35.383	568.457	-0.000629	-0.000030	-0.000670
0.9980	277.860	5.337	-1.485	7.129	-0.672	35.387	528.975	-0.000374	0.000104	-0.000499
