# Supplementary material for: Evaluation of a Cold-Mixed High-Performance Polyurethane Mixture
Source: Hindawi journal article supplement (doi:10.1155/2019/1507971), 2019-11-07
Supplement: f1 [file 1507971.f1.zip › 1507971.f1/dynamic modulus data/PUM/specimen2/temp35/zhs-2-35_20Hz.csv]

Test Information
****************
Project name	zhs
Operator name	1
Target test temperature	35
Target confining stress	0
Average dynamic strain range from 75 to 125 micro-strain
Contact stress	5
Initial modulus	1000
Axial gauge length	70
Comments
Specimen information
********************
Identification	zhs-2-35
Dimensions	Point 1	Point 2	Point 3	Point 4	Point 5	Point 6	Average	Std Dev.
Diameter (mm)	49.2	49.3	49.2				49.23	0.058
Height (mm)	100.8	101.0	100.8				100.87	0.115
Cross-sectional area (mm�)	1903.7
Conditioning time
Properties/Comments
Test Data	20Hz
*********
Test date and time	Tue	Apr 2	2019	12:59 PM
Dynamic modulus (MPa)	11543
Phase angle (Degrees)	4.58
Average temperature (�C)	35.4
Average confining pressure (kPa)	-0.7
Average micro-strain	103
Load drift (%)	-1.5
Load standard error (%)	6.3
Average deformation drift (%)	-2.0
Average deformation standard error (%)	6.2
Deformation uniformity (%)	30.7
Phase uniformity (Degrees)	0.7
Conditioning Cycles
Time (sec)	Axial stress (kPa)	Axial micro-strain #1	Axial micro-strain #2	Axial micro-strain #3	Confining pressure (kPa)	Temperature (�C)	Load (N)	Displacement #1 (mm)	Displacement #2 (mm)	Displacement #3 (mm)
0.0000	443.263	15.659	3.647	11.366	-0.683	35.393	843.859	-0.001096	-0.000255	-0.000796
0.0010	443.233	15.714	3.607	11.641	-0.680	35.394	843.801	-0.001100	-0.000252	-0.000815
0.0020	442.527	15.604	3.552	11.780	-0.679	35.395	842.457	-0.001092	-0.000249	-0.000825
0.0030	440.107	15.286	3.124	11.285	-0.678	35.397	837.851	-0.001070	-0.000219	-0.000790
0.0040	434.667	14.871	2.890	10.639	-0.679	35.399	827.494	-0.001041	-0.000202	-0.000745
0.0050	423.576	13.676	2.503	9.797	-0.683	35.401	806.379	-0.000957	-0.000175	-0.000686
0.0060	404.685	11.201	1.733	8.531	-0.681	35.404	770.416	-0.000784	-0.000121	-0.000597
0.0070	378.851	8.102	0.439	6.770	-0.680	35.408	721.235	-0.000567	-0.000031	-0.000474
0.0080	350.928	4.531	-1.348	4.638	-0.673	35.411	668.077	-0.000317	0.000094	-0.000325
0.0090	327.289	1.752	-2.778	2.574	-0.669	35.412	623.074	-0.000123	0.000194	-0.000180
0.0100	312.426	0.098	-3.726	1.253	-0.676	35.412	594.778	-0.000007	0.000261	-0.000088
0.0110	306.955	-0.764	-4.017	0.429	-0.679	35.411	584.364	0.000053	0.000281	-0.000030
0.0120	309.660	-0.710	-3.893	0.621	-0.683	35.409	589.514	0.000050	0.000273	-0.000043
0.0130	319.865	-0.100	-3.728	1.128	-0.682	35.408	608.940	0.000007	0.000261	-0.000079
0.0140	342.558	2.388	-2.930	2.710	-0.682	35.407	652.142	-0.000167	0.000205	-0.000190
0.0150	384.397	7.183	-1.155	5.697	-0.683	35.404	731.792	-0.000503	0.000081	-0.000399
0.0160	446.674	14.465	2.106	10.169	-0.683	35.401	850.353	-0.001013	-0.000147	-0.000712
0.0170	524.747	23.553	6.385	16.293	-0.685	35.398	998.983	-0.001649	-0.000447	-0.001140
0.0180	609.267	33.309	11.091	23.063	-0.681	35.395	1159.887	-0.002332	-0.000776	-0.001614
0.0190	693.952	43.328	15.935	29.997	-0.683	35.394	1321.106	-0.003033	-0.001115	-0.002100
0.0200	773.677	53.236	20.640	37.070	-0.691	35.393	1472.883	-0.003727	-0.001445	-0.002595
0.0210	844.326	62.088	24.989	42.806	-0.695	35.393	1607.380	-0.004346	-0.001749	-0.002996
0.0220	903.989	69.508	28.758	47.761	-0.696	35.394	1720.963	-0.004866	-0.002013	-0.003343
0.0230	951.644	75.373	31.539	51.423	-0.690	35.397	1811.686	-0.005276	-0.002208	-0.003600
0.0240	988.283	79.918	33.864	54.740	-0.691	35.399	1881.437	-0.005594	-0.002370	-0.003832
0.0250	1015.124	83.712	35.392	57.287	-0.692	35.402	1932.535	-0.005860	-0.002477	-0.004010
0.0260	1034.856	86.699	36.658	59.020	-0.695	35.405	1970.100	-0.006069	-0.002566	-0.004131
0.0270	1049.674	89.076	37.704	60.451	-0.694	35.408	1998.310	-0.006235	-0.002639	-0.004232
0.0280	1061.502	90.784	38.571	61.606	-0.686	35.411	2020.826	-0.006355	-0.002700	-0.004312
0.0290	1071.105	92.312	39.411	62.925	-0.683	35.412	2039.108	-0.006462	-0.002759	-0.004405
0.0300	1078.439	93.632	40.056	63.942	-0.686	35.412	2053.070	-0.006554	-0.002804	-0.004476
0.0310	1082.947	94.632	40.428	64.465	-0.684	35.411	2061.653	-0.006624	-0.002830	-0.004513
0.0320	1084.240	95.147	40.634	65.043	-0.681	35.410	2064.114	-0.006660	-0.002844	-0.004553
0.0330	1082.421	94.966	40.387	64.961	-0.675	35.409	2060.652	-0.006648	-0.002827	-0.004547
0.0340	1077.702	94.605	40.401	64.947	-0.675	35.407	2051.668	-0.006622	-0.002828	-0.004546
0.0350	1069.857	93.966	40.180	64.398	-0.673	35.404	2036.734	-0.006578	-0.002813	-0.004508
0.0360	1057.128	92.897	39.878	63.697	-0.674	35.401	2012.501	-0.006503	-0.002791	-0.004459
0.0370	1034.601	90.563	39.094	62.514	-0.675	35.398	1969.614	-0.006339	-0.002737	-0.004376
0.0380	995.482	86.185	37.359	59.418	-0.673	35.396	1895.142	-0.006033	-0.002615	-0.004159
0.0390	936.871	79.529	34.785	55.057	-0.671	35.394	1783.562	-0.005567	-0.002435	-0.003854
0.0400	862.571	71.344	31.167	49.524	-0.677	35.393	1642.113	-0.004994	-0.002182	-0.003467
0.0410	781.267	61.965	26.819	43.442	-0.678	35.393	1487.331	-0.004338	-0.001877	-0.003041
0.0420	701.812	52.667	22.402	37.387	-0.677	35.395	1336.069	-0.003687	-0.001568	-0.002617
0.0430	629.720	43.869	18.081	31.222	-0.671	35.397	1198.826	-0.003071	-0.001266	-0.002186
0.0440	567.878	36.407	14.475	26.269	-0.671	35.399	1081.095	-0.002549	-0.001013	-0.001839
0.0450	516.331	30.071	11.366	21.947	-0.676	35.402	982.962	-0.002105	-0.000796	-0.001536
0.0460	473.605	24.457	8.793	18.068	-0.677	35.404	901.623	-0.001712	-0.000615	-0.001265
0.0470	437.312	19.733	6.604	14.779	-0.678	35.407	832.529	-0.001381	-0.000462	-0.001034
0.0480	405.211	15.451	4.348	11.670	-0.674	35.410	771.418	-0.001082	-0.000304	-0.000817
0.0490	375.380	11.491	2.339	9.110	-0.674	35.412	714.626	-0.000804	-0.000164	-0.000638
0.0500	346.961	8.059	0.565	6.702	-0.683	35.412	660.524	-0.000564	-0.000040	-0.000469
0.0510	319.835	4.460	-0.907	4.376	-0.681	35.411	608.883	-0.000312	0.000063	-0.000306
0.0520	294.782	1.042	-2.394	2.147	-0.688	35.410	561.190	-0.000073	0.000168	-0.000150
0.0530	272.871	-2.266	-3.976	-0.289	-0.679	35.409	519.476	0.000159	0.000278	0.000020
0.0540	254.867	-4.836	-5.325	-1.980	-0.680	35.407	485.201	0.000338	0.000373	0.000139
0.0550	241.071	-6.949	-6.385	-3.233	-0.676	35.404	458.937	0.000486	0.000447	0.000226
0.0560	231.648	-8.533	-7.319	-3.962	-0.680	35.401	440.998	0.000597	0.000512	0.000277
0.0570	226.764	-9.659	-7.898	-4.719	-0.683	35.398	431.700	0.000676	0.000553	0.000330
0.0580	225.922	-10.160	-8.395	-5.255	-0.682	35.395	430.098	0.000711	0.000588	0.000368
0.0590	228.221	-10.146	-8.382	-5.476	-0.687	35.394	434.475	0.000710	0.000587	0.000383
0.0600	233.196	-9.853	-8.147	-5.201	-0.692	35.393	443.945	0.000690	0.000570	0.000364
0.0610	241.371	-9.074	-7.761	-4.471	-0.698	35.393	459.509	0.000635	0.000543	0.000313
0.0620	256.640	-7.615	-7.127	-3.440	-0.696	35.395	488.577	0.000533	0.000499	0.000241
0.0630	285.284	-4.530	-6.137	-1.789	-0.692	35.397	543.108	0.000317	0.000430	0.000125
0.0640	332.413	0.737	-3.921	1.459	-0.690	35.399	632.830	-0.000052	0.000274	-0.000102
0.0650	397.066	8.449	-0.468	6.276	-0.692	35.402	755.911	-0.000591	0.000033	-0.000439
0.0660	473.365	17.176	3.757	12.481	-0.695	35.405	901.165	-0.001202	-0.000263	-0.000874
0.0670	553.767	26.763	8.352	19.307	-0.696	35.408	1054.230	-0.001873	-0.000585	-0.001351
0.0680	633.132	36.352	12.688	25.622	-0.691	35.411	1205.320	-0.002545	-0.000888	-0.001794
0.0690	707.928	45.704	17.078	31.664	-0.686	35.413	1347.713	-0.003199	-0.001195	-0.002216
0.0700	776.368	54.373	21.262	37.278	-0.691	35.413	1478.004	-0.003806	-0.001488	-0.002609
0.0710	837.518	61.947	25.045	42.534	-0.691	35.412	1594.419	-0.004336	-0.001753	-0.002977
0.0720	891.124	68.618	28.415	47.403	-0.694	35.410	1696.472	-0.004803	-0.001989	-0.003318
0.0730	936.886	74.205	31.028	51.063	-0.686	35.409	1783.590	-0.005194	-0.002172	-0.003574
0.0740	975.389	79.166	33.450	54.407	-0.680	35.407	1856.890	-0.005542	-0.002342	-0.003808
0.0750	1007.489	83.698	35.404	57.256	-0.674	35.404	1918.001	-0.005859	-0.002478	-0.004008
0.0760	1034.631	87.491	37.194	59.706	-0.676	35.401	1969.671	-0.006124	-0.002604	-0.004179
0.0770	1057.068	90.743	38.569	61.743	-0.677	35.398	2012.386	-0.006352	-0.002700	-0.004322
0.0780	1074.681	93.173	39.657	63.160	-0.678	35.395	2045.918	-0.006522	-0.002776	-0.004421
0.0790	1087.155	94.883	40.509	64.632	-0.680	35.394	2069.664	-0.006642	-0.002836	-0.004524
0.0800	1094.384	96.204	41.103	65.815	-0.687	35.393	2083.426	-0.006734	-0.002877	-0.004607
0.0810	1097.119	96.927	41.309	66.283	-0.689	35.393	2088.633	-0.006785	-0.002892	-0.004640
0.0820	1096.262	97.150	41.420	66.490	-0.690	35.394	2087.002	-0.006800	-0.002899	-0.004654
0.0830	1092.460	96.914	41.269	66.380	-0.681	35.397	2079.763	-0.006784	-0.002889	-0.004647
0.0840	1086.088	96.497	41.406	66.312	-0.680	35.399	2067.633	-0.006755	-0.002898	-0.004642
0.0850	1076.259	95.690	41.049	65.637	-0.678	35.402	2048.922	-0.006698	-0.002873	-0.004595
0.0860	1060.284	94.342	40.650	64.645	-0.677	35.405	2018.509	-0.006604	-0.002846	-0.004525
0.0870	1031.625	91.285	39.520	62.912	-0.676	35.408	1963.949	-0.006390	-0.002766	-0.004404
0.0880	984.316	85.740	37.565	59.693	-0.676	35.411	1873.884	-0.006002	-0.002630	-0.004179
0.0890	918.010	78.137	34.290	54.645	-0.675	35.413	1747.656	-0.005470	-0.002400	-0.003825
0.0900	838.931	69.203	30.287	48.452	-0.681	35.413	1597.109	-0.004844	-0.002120	-0.003392
0.0910	757.041	59.989	25.870	41.998	-0.682	35.412	1441.212	-0.004199	-0.001811	-0.002940
0.0920	680.516	50.944	21.562	36.052	-0.681	35.410	1295.528	-0.003566	-0.001509	-0.002524
0.0930	614.497	42.564	17.489	30.314	-0.676	35.409	1169.844	-0.002979	-0.001224	-0.002122
0.0940	561.116	35.825	14.269	25.937	-0.676	35.407	1068.220	-0.002508	-0.000999	-0.001816
0.0950	519.562	30.586	11.792	22.196	-0.676	35.404	989.113	-0.002141	-0.000825	-0.001554
0.0960	486.695	26.208	9.605	19.541	-0.677	35.401	926.542	-0.001835	-0.000672	-0.001368
0.0970	458.261	22.609	7.830	17.023	-0.677	35.398	872.412	-0.001583	-0.000548	-0.001192
0.0980	429.843	18.773	5.918	14.339	-0.676	35.395	818.310	-0.001314	-0.000414	-0.001004
0.0990	398.809	14.702	4.017	11.367	-0.675	35.394	759.230	-0.001029	-0.000281	-0.000796
0.1000	365.040	10.560	2.076	8.353	-0.680	35.393	694.942	-0.000739	-0.000145	-0.000585
0.1010	330.339	6.254	0.041	5.546	-0.677	35.393	628.881	-0.000438	-0.000003	-0.000388
0.1020	297.923	2.197	-1.969	3.055	-0.681	35.395	567.169	-0.000154	0.000138	-0.000214
0.1030	270.166	-1.763	-3.881	0.481	-0.680	35.397	514.326	0.000123	0.000272	-0.000034
0.1040	248.825	-5.043	-5.477	-1.611	-0.686	35.400	473.700	0.000353	0.000383	0.000113
0.1050	234.233	-7.296	-6.769	-3.330	-0.683	35.402	445.919	0.000511	0.000474	0.000233
0.1060	226.147	-8.797	-7.579	-4.238	-0.682	35.405	430.527	0.000616	0.000531	0.000297
0.1070	223.623	-9.729	-8.185	-4.650	-0.680	35.408	425.720	0.000681	0.000573	0.000326
0.1080	225.020	-9.867	-8.393	-4.842	-0.676	35.411	428.381	0.000691	0.000588	0.000339
0.1090	229.288	-9.700	-8.462	-4.952	-0.673	35.413	436.506	0.000679	0.000592	0.000347
0.1100	236.156	-9.004	-8.008	-4.758	-0.679	35.413	449.581	0.000630	0.000561	0.000333
0.1110	248.074	-7.879	-7.375	-3.988	-0.682	35.412	472.269	0.000552	0.000516	0.000279
0.1120	270.586	-5.627	-6.522	-2.212	-0.685	35.410	515.127	0.000394	0.000457	0.000155
0.1130	308.759	-1.305	-5.063	0.581	-0.680	35.409	587.797	0.000091	0.000354	-0.000041
0.1140	364.048	5.045	-2.422	4.735	-0.679	35.407	693.054	-0.000353	0.000170	-0.000331
0.1150	432.187	13.118	1.472	9.715	-0.679	35.404	822.773	-0.000918	-0.000103	-0.000680
0.1160	507.645	22.026	5.765	15.522	-0.678	35.401	966.425	-0.001542	-0.000404	-0.001087
0.1170	585.176	31.407	10.280	21.851	-0.680	35.398	1114.025	-0.002199	-0.000720	-0.001530
0.1180	660.994	40.483	14.476	28.278	-0.676	35.396	1258.364	-0.002834	-0.001013	-0.001979
0.1190	731.523	49.237	18.659	34.304	-0.677	35.394	1392.632	-0.003447	-0.001306	-0.002401
0.1200	793.996	57.156	22.552	39.616	-0.683	35.393	1511.564	-0.004001	-0.001579	-0.002773
0.1210	847.287	63.979	25.855	44.115	-0.684	35.393	1613.016	-0.004479	-0.001810	-0.003088
0.1220	891.906	69.829	28.759	47.900	-0.688	35.394	1697.960	-0.004888	-0.002013	-0.003353
0.1230	929.552	74.595	30.850	51.176	-0.685	35.397	1769.629	-0.005222	-0.002159	-0.003582
0.1240	962.254	78.778	32.817	53.998	-0.686	35.399	1831.884	-0.005514	-0.002297	-0.003780
0.1250	991.544	82.640	34.606	56.544	-0.686	35.401	1887.646	-0.005785	-0.002422	-0.003958
0.1260	1018.595	86.087	36.258	58.868	-0.689	35.404	1939.144	-0.006026	-0.002538	-0.004121
0.1270	1043.257	89.338	37.717	61.068	-0.692	35.408	1986.094	-0.006254	-0.002640	-0.004275
0.1280	1064.658	92.173	38.901	62.897	-0.688	35.411	2026.834	-0.006452	-0.002723	-0.004403
0.1290	1081.069	94.451	39.851	64.466	-0.681	35.413	2058.077	-0.006612	-0.002790	-0.004513
0.1300	1091.303	96.092	40.910	65.980	-0.688	35.412	2077.560	-0.006726	-0.002864	-0.004619
0.1310	1095.436	97.067	41.502	66.750	-0.692	35.411	2085.428	-0.006795	-0.002905	-0.004673
0.1320	1094.639	97.249	41.791	66.944	-0.694	35.410	2083.912	-0.006807	-0.002925	-0.004686
0.1330	1089.995	96.804	41.571	66.518	-0.681	35.409	2075.071	-0.006776	-0.002910	-0.004656
0.1340	1082.075	96.120	41.309	66.297	-0.677	35.407	2059.994	-0.006728	-0.002892	-0.004641
0.1350	1069.707	95.148	40.951	65.678	-0.676	35.404	2036.448	-0.006660	-0.002867	-0.004597
0.1360	1048.667	93.076	40.441	64.328	-0.675	35.401	1996.393	-0.006515	-0.002831	-0.004503
0.1370	1012.674	89.409	39.024	61.741	-0.678	35.398	1927.872	-0.006259	-0.002732	-0.004322
0.1380	958.392	83.182	36.327	57.917	-0.680	35.396	1824.532	-0.005823	-0.002543	-0.004054
0.1390	888.990	75.136	32.668	52.813	-0.681	35.394	1692.410	-0.005260	-0.002287	-0.003697
0.1400	812.706	66.368	28.690	46.966	-0.686	35.393	1547.184	-0.004646	-0.002008	-0.003288
0.1410	737.790	57.587	24.658	41.117	-0.684	35.393	1404.562	-0.004031	-0.001726	-0.002878
0.1420	669.831	49.555	20.846	35.736	-0.680	35.395	1275.187	-0.003469	-0.001459	-0.002501
0.1430	611.145	42.203	17.365	30.741	-0.673	35.397	1163.464	-0.002954	-0.001216	-0.002152
0.1440	561.687	36.087	14.446	26.613	-0.676	35.399	1069.307	-0.002526	-0.001011	-0.001863
0.1450	519.457	30.931	11.860	22.870	-0.680	35.401	988.913	-0.002165	-0.000830	-0.001601
0.1460	481.886	26.235	9.521	19.663	-0.681	35.404	917.387	-0.001836	-0.000666	-0.001376
0.1470	446.599	21.720	7.212	16.415	-0.679	35.407	850.210	-0.001520	-0.000505	-0.001149
0.1480	412.124	17.178	5.078	13.099	-0.675	35.411	784.578	-0.001202	-0.000355	-0.000917
0.1490	378.175	12.841	2.891	9.881	-0.673	35.412	719.948	-0.000899	-0.000202	-0.000692
0.1500	345.172	8.826	0.978	7.348	-0.681	35.412	657.120	-0.000618	-0.000068	-0.000514
0.1510	313.853	4.824	-0.976	4.928	-0.683	35.411	597.496	-0.000338	0.000068	-0.000345
0.1520	285.765	0.989	-2.682	2.505	-0.685	35.410	544.024	-0.000069	0.000188	-0.000175
0.1530	262.186	-2.583	-4.308	-0.151	-0.676	35.409	499.134	0.000181	0.000302	0.000011
0.1540	244.407	-5.169	-5.587	-2.215	-0.676	35.407	465.288	0.000362	0.000391	0.000155
0.1550	232.369	-7.157	-6.440	-3.563	-0.675	35.404	442.371	0.000501	0.000451	0.000249
0.1560	225.982	-8.476	-7.113	-4.168	-0.675	35.401	430.212	0.000593	0.000498	0.000292
0.1570	224.164	-9.269	-7.595	-4.334	-0.676	35.398	426.750	0.000649	0.000532	0.000303
0.1580	225.982	-9.617	-7.983	-4.211	-0.676	35.395	430.212	0.000673	0.000559	0.000295
0.1590	230.461	-9.478	-8.162	-4.224	-0.680	35.394	438.738	0.000663	0.000571	0.000296
0.1600	237.674	-8.713	-7.652	-4.085	-0.686	35.393	452.471	0.000610	0.000536	0.000286
0.1610	249.862	-7.657	-7.238	-3.577	-0.690	35.393	475.674	0.000536	0.000507	0.000250
0.1620	272.736	-5.072	-6.164	-2.009	-0.694	35.394	519.218	0.000355	0.000431	0.000141
0.1630	311.449	-0.708	-4.637	1.059	-0.687	35.396	592.918	0.000050	0.000325	-0.000074
0.1640	367.204	5.836	-1.872	5.255	-0.683	35.399	699.062	-0.000409	0.000131	-0.000368
0.1650	435.133	13.813	1.790	10.403	-0.683	35.401	828.381	-0.000967	-0.000125	-0.000728
0.1660	508.952	22.582	5.821	16.126	-0.687	35.404	968.914	-0.001581	-0.000407	-0.001129
0.1670	583.688	31.628	10.140	22.072	-0.688	35.407	1111.193	-0.002214	-0.000710	-0.001545
0.1680	656.080	40.382	14.186	28.318	-0.685	35.410	1249.008	-0.002827	-0.000993	-0.001982
0.1690	723.377	48.511	18.095	33.905	-0.681	35.412	1377.125	-0.003396	-0.001267	-0.002373
0.1700	783.867	56.279	21.797	39.050	-0.681	35.412	1492.281	-0.003940	-0.001526	-0.002734
0.1710	836.586	63.005	25.114	43.455	-0.680	35.411	1592.646	-0.004410	-0.001758	-0.003042
0.1720	882.198	68.953	28.099	47.391	-0.682	35.409	1679.478	-0.004827	-0.001967	-0.003317
0.1730	921.828	73.885	30.452	50.846	-0.676	35.409	1754.923	-0.005172	-0.002132	-0.003559
0.1740	957.445	78.429	32.668	53.682	-0.673	35.406	1822.729	-0.005490	-0.002287	-0.003758
0.1750	989.861	82.502	34.732	56.503	-0.675	35.404	1884.441	-0.005775	-0.002431	-0.003955
0.1760	1019.362	86.324	36.383	59.118	-0.677	35.401	1940.603	-0.006043	-0.002547	-0.004138
0.1770	1045.076	89.661	37.951	61.648	-0.680	35.398	1989.555	-0.006276	-0.002657	-0.004315
0.1780	1065.349	92.340	39.107	63.422	-0.680	35.395	2028.151	-0.006464	-0.002738	-0.004440
0.1790	1079.100	94.426	39.988	64.674	-0.679	35.394	2054.329	-0.006610	-0.002799	-0.004527
0.1800	1085.998	95.899	40.718	65.746	-0.684	35.392	2067.461	-0.006713	-0.002850	-0.004602
0.1810	1087.185	96.623	40.978	66.421	-0.683	35.393	2069.721	-0.006764	-0.002868	-0.004649
0.1820	1084.285	96.874	41.184	66.572	-0.681	35.394	2064.199	-0.006781	-0.002883	-0.004660
0.1830	1078.439	96.177	41.073	65.967	-0.674	35.397	2053.070	-0.006732	-0.002875	-0.004618
0.1840	1070.113	95.315	40.841	65.430	-0.676	35.399	2037.220	-0.006672	-0.002859	-0.004580
0.1850	1057.459	93.855	40.621	64.894	-0.680	35.401	2013.130	-0.006570	-0.002843	-0.004543
0.1860	1036.314	91.521	39.768	63.449	-0.682	35.404	1972.876	-0.006406	-0.002784	-0.004441
0.1870	1000.847	87.686	38.447	60.862	-0.683	35.407	1905.355	-0.006138	-0.002691	-0.004260
0.1880	948.939	81.807	35.998	57.022	-0.679	35.411	1806.536	-0.005727	-0.002520	-0.003992
0.1890	883.520	74.276	32.750	52.027	-0.680	35.412	1681.995	-0.005199	-0.002293	-0.003642
0.1900	811.699	66.271	29.199	46.866	-0.685	35.412	1545.267	-0.004639	-0.002044	-0.003281
0.1910	740.164	58.016	25.140	41.033	-0.688	35.411	1409.082	-0.004061	-0.001760	-0.002872
0.1920	673.573	50.136	21.467	35.858	-0.683	35.409	1282.310	-0.003510	-0.001503	-0.002510
0.1930	614.331	42.882	17.766	31.057	-0.675	35.408	1169.529	-0.003002	-0.001244	-0.002174
0.1940	562.754	36.518	14.710	26.722	-0.673	35.406	1071.339	-0.002556	-0.001030	-0.001871
0.1950	517.759	31.017	12.067	22.746	-0.677	35.404	985.680	-0.002171	-0.000845	-0.001592
0.1960	477.573	26.029	9.536	19.265	-0.676	35.401	909.176	-0.001822	-0.000668	-0.001349
0.1970	440.438	21.193	7.224	16.184	-0.679	35.398	838.480	-0.001484	-0.000506	-0.001133
0.1980	404.790	16.537	4.748	13.156	-0.676	35.395	770.617	-0.001158	-0.000332	-0.000921
0.1990	370.225	11.867	2.504	9.881	-0.672	35.394	704.813	-0.000831	-0.000175	-0.000692
0.2000	337.177	7.712	0.605	6.922	-0.679	35.392	641.899	-0.000540	-0.000042	-0.000485
0.2010	306.595	3.655	-1.280	4.005	-0.677	35.393	583.677	-0.000256	0.000090	-0.000280
0.2020	279.814	-0.042	-2.889	1.734	-0.679	35.394	532.694	0.000003	0.000202	-0.000121
0.2030	257.872	-3.265	-4.636	-0.330	-0.673	35.396	490.923	0.000229	0.000325	0.000023
0.2040	241.657	-5.504	-5.972	-1.899	-0.677	35.399	460.052	0.000385	0.000418	0.000133
0.2050	231.122	-7.311	-6.935	-2.972	-0.679	35.401	439.997	0.000512	0.000485	0.000208
0.2060	225.832	-8.491	-7.473	-3.976	-0.676	35.404	429.926	0.000594	0.000523	0.000278
0.2070	224.735	-9.005	-7.527	-4.277	-0.674	35.407	427.837	0.000630	0.000527	0.000299
0.2080	226.689	-9.491	-7.692	-4.415	-0.678	35.411	431.557	0.000664	0.000538	0.000309
0.2090	230.806	-9.255	-7.635	-4.166	-0.683	35.412	439.396	0.000648	0.000534	0.000292
0.2100	237.043	-8.476	-7.441	-3.959	-0.691	35.412	451.269	0.000593	0.000521	0.000277
0.2110	247.037	-7.531	-7.319	-3.631	-0.695	35.411	470.295	0.000527	0.000512	0.000254
0.2120	265.732	-5.627	-6.506	-2.600	-0.698	35.410	505.886	0.000394	0.000455	0.000182
0.2130	298.554	-2.320	-5.393	-0.234	-0.687	35.409	568.371	0.000162	0.000378	0.000016
0.2140	348.779	3.488	-2.876	3.564	-0.686	35.406	663.986	-0.000244	0.000201	-0.000250
0.2150	413.657	11.297	0.358	8.518	-0.689	35.404	787.497	-0.000791	-0.000025	-0.000596
0.2160	487.582	20.052	4.430	14.243	-0.690	35.401	928.230	-0.001404	-0.000310	-0.000997
0.2170	564.828	29.140	8.987	20.614	-0.690	35.398	1075.287	-0.002040	-0.000629	-0.001443
0.2180	641.578	38.270	13.265	27.191	-0.684	35.395	1221.399	-0.002679	-0.000929	-0.001903
0.2190	714.841	47.288	17.640	33.093	-0.683	35.393	1360.874	-0.003310	-0.001235	-0.002317
0.2200	782.123	56.154	21.865	38.817	-0.685	35.392	1488.962	-0.003931	-0.001531	-0.002717
0.2210	841.170	63.436	25.512	43.661	-0.687	35.393	1601.372	-0.004441	-0.001786	-0.003056
0.2220	891.470	69.801	28.677	48.354	-0.687	35.394	1697.130	-0.004886	-0.002007	-0.003385
0.2230	933.264	75.012	31.030	51.850	-0.683	35.397	1776.695	-0.005251	-0.002172	-0.003630
0.2240	967.965	79.570	33.163	54.753	-0.680	35.399	1842.756	-0.005570	-0.002321	-0.003833
0.2250	996.759	83.724	35.158	57.365	-0.680	35.401	1897.573	-0.005861	-0.002461	-0.004016
0.2260	1021.120	86.990	36.852	59.554	-0.681	35.404	1943.951	-0.006089	-0.002580	-0.004169
0.2270	1042.145	90.020	38.021	61.440	-0.685	35.407	1983.976	-0.006301	-0.002661	-0.004301
0.2280	1059.984	92.423	38.915	62.898	-0.685	35.411	2017.937	-0.006470	-0.002724	-0.004403
0.2290	1074.246	94.536	39.617	64.314	-0.684	35.412	2045.088	-0.006617	-0.002773	-0.004502
0.2300	1083.984	95.954	40.539	65.718	-0.687	35.412	2063.627	-0.006717	-0.002838	-0.004600
0.2310	1088.568	96.831	41.007	66.254	-0.683	35.411	2072.353	-0.006778	-0.002871	-0.004638
0.2320	1088.733	97.179	41.338	66.709	-0.683	35.409	2072.668	-0.006803	-0.002894	-0.004670
0.2330	1085.261	97.125	41.200	66.487	-0.676	35.408	2066.059	-0.006799	-0.002884	-0.004654
0.2340	1079.010	96.887	41.131	66.240	-0.674	35.407	2054.157	-0.006782	-0.002879	-0.004637
0.2350	1068.790	95.830	40.965	65.731	-0.678	35.404	2034.702	-0.006708	-0.002868	-0.004601
0.2360	1051.342	94.022	40.456	64.741	-0.680	35.401	2001.486	-0.006582	-0.002832	-0.004532
0.2370	1019.843	90.548	39.328	62.773	-0.683	35.398	1941.519	-0.006338	-0.002753	-0.004394
0.2380	969.783	84.920	36.919	58.853	-0.683	35.395	1846.218	-0.005944	-0.002584	-0.004120
0.2390	902.125	77.167	33.548	53.625	-0.683	35.394	1717.415	-0.005402	-0.002348	-0.003754
0.2400	824.894	68.384	29.462	48.121	-0.694	35.392	1570.387	-0.004787	-0.002062	-0.003368
0.2410	748.009	59.434	25.361	42.232	-0.693	35.393	1424.017	-0.004160	-0.001775	-0.002956
0.2420	678.893	51.222	21.562	36.685	-0.692	35.394	1292.439	-0.003586	-0.001509	-0.002568
0.2430	621.350	44.079	18.053	31.552	-0.686	35.396	1182.890	-0.003086	-0.001264	-0.002209
0.2440	575.107	38.189	15.330	27.781	-0.686	35.398	1094.856	-0.002673	-0.001073	-0.001945
0.2450	537.461	33.352	13.005	24.713	-0.685	35.401	1023.188	-0.002335	-0.000910	-0.001730
0.2460	504.774	29.391	10.927	21.726	-0.682	35.404	960.960	-0.002057	-0.000765	-0.001521
0.2470	473.966	25.500	8.987	18.796	-0.677	35.407	902.309	-0.001785	-0.000629	-0.001316
0.2480	442.316	21.511	6.949	15.936	-0.675	35.410	842.056	-0.001506	-0.000486	-0.001116
0.2490	408.788	16.981	4.898	13.308	-0.675	35.412	778.227	-0.001189	-0.000343	-0.000932
0.2500	225.351	-16.968	-11.285	-10.456	-0.655	35.398	429.010	0.001188	0.000790	0.000732
0.2510	225.411	-16.996	-11.285	-10.745	-0.661	35.395	429.125	0.001190	0.000790	0.000752
0.2520	225.516	-17.092	-11.477	-10.856	-0.659	35.393	429.325	0.001196	0.000803	0.000760
0.2530	225.817	-16.939	-11.531	-10.497	-0.661	35.391	429.897	0.001186	0.000807	0.000735
0.2540	226.253	-16.704	-11.407	-10.126	-0.665	35.390	430.727	0.001169	0.000798	0.000709
0.2550	226.854	-16.413	-11.339	-10.099	-0.668	35.391	431.871	0.001149	0.000794	0.000707
0.2560	228.266	-16.233	-11.174	-10.238	-0.668	35.392	434.561	0.001136	0.000782	0.000717
0.2570	230.731	-16.164	-11.245	-10.416	-0.663	35.395	439.253	0.001131	0.000787	0.000729
0.2580	235.465	-15.844	-11.149	-10.155	-0.665	35.396	448.265	0.001109	0.000780	0.000711
0.2590	245.068	-14.870	-10.928	-9.468	-0.667	35.399	466.547	0.001041	0.000765	0.000663
0.2600	265.056	-12.466	-10.252	-7.982	-0.664	35.402	504.599	0.000873	0.000718	0.000559
0.2610	300.779	-8.101	-8.779	-5.573	-0.662	35.405	572.605	0.000567	0.000615	0.000390
0.2620	354.776	-1.876	-6.149	-1.514	-0.658	35.408	675.402	0.000131	0.000430	0.000106
0.2630	424.417	6.254	-2.421	3.950	-0.659	35.410	807.981	-0.000438	0.000169	-0.000277
0.2640	505.015	15.913	2.230	10.927	-0.664	35.410	961.418	-0.001114	-0.000156	-0.000765
0.2650	591.804	26.252	7.361	18.192	-0.671	35.409	1126.642	-0.001838	-0.000515	-0.001273
0.2660	681.493	37.118	12.535	25.664	-0.670	35.407	1297.388	-0.002598	-0.000877	-0.001796
0.2670	771.498	48.109	17.709	32.984	-0.665	35.406	1468.735	-0.003368	-0.001240	-0.002309
0.2680	859.986	59.142	22.967	40.360	-0.665	35.404	1637.192	-0.004140	-0.001608	-0.002825
0.2690	944.806	69.509	28.114	47.460	-0.669	35.401	1798.668	-0.004866	-0.001968	-0.003322
0.2700	1024.156	79.432	32.930	54.203	-0.670	35.398	1949.730	-0.005560	-0.002305	-0.003794
0.2710	1096.247	88.770	37.222	60.490	-0.669	35.395	2086.973	-0.006214	-0.002606	-0.004234
0.2720	1160.419	97.081	41.143	65.911	-0.665	35.393	2209.139	-0.006796	-0.002880	-0.004614
0.2730	1216.294	104.460	44.762	71.002	-0.663	35.391	2315.512	-0.007312	-0.003133	-0.004970
0.2740	1263.904	111.115	48.065	75.213	-0.666	35.390	2406.149	-0.007778	-0.003365	-0.005265
0.2750	1302.753	116.604	50.749	79.259	-0.666	35.391	2480.106	-0.008162	-0.003552	-0.005548
0.2760	1332.689	121.037	52.704	82.039	-0.670	35.392	2537.098	-0.008473	-0.003689	-0.005743
0.2770	1353.819	123.790	54.231	84.075	-0.666	35.395	2577.324	-0.008665	-0.003796	-0.005885
0.2780	1366.984	125.790	55.372	85.451	-0.668	35.397	2602.386	-0.008805	-0.003876	-0.005982
0.2790	1373.266	127.194	56.127	86.620	-0.664	35.399	2614.346	-0.008904	-0.003929	-0.006063
0.2800	1374.318	128.207	56.444	87.046	-0.665	35.402	2616.348	-0.008974	-0.003951	-0.006093
0.2810	1371.793	128.666	56.430	87.254	-0.664	35.405	2611.542	-0.009007	-0.003950	-0.006108
0.2820	1366.623	128.596	56.349	87.019	-0.663	35.409	2601.700	-0.009002	-0.003944	-0.006091
0.2830	1359.109	128.222	56.236	86.868	-0.662	35.410	2587.395	-0.008976	-0.003937	-0.006081
0.2840	1348.229	127.262	56.182	86.468	-0.667	35.410	2566.681	-0.008908	-0.003933	-0.006053
0.2850	1330.104	125.747	55.674	85.534	-0.665	35.409	2532.177	-0.008802	-0.003897	-0.005987
0.2860	1296.546	122.315	54.438	83.388	-0.661	35.408	2468.290	-0.008562	-0.003811	-0.005837
0.2870	1240.956	116.368	51.768	79.495	-0.656	35.407	2362.461	-0.008146	-0.003624	-0.005565
0.2880	1162.327	107.669	47.887	73.538	-0.653	35.404	2212.772	-0.007537	-0.003352	-0.005148
0.2890	1067.904	96.898	42.947	66.507	-0.656	35.402	2033.014	-0.006783	-0.003006	-0.004655
0.2900	967.965	85.309	37.318	58.895	-0.657	35.398	1842.756	-0.005972	-0.002612	-0.004123
0.2910	871.377	73.831	31.774	51.257	-0.662	35.395	1658.878	-0.005168	-0.002224	-0.003588
0.2920	784.242	63.228	26.778	44.085	-0.656	35.393	1492.996	-0.004426	-0.001874	-0.003086
0.2930	709.942	54.083	22.361	37.825	-0.657	35.391	1351.547	-0.003786	-0.001565	-0.002648
0.2940	648.356	46.384	18.770	32.942	-0.663	35.390	1234.303	-0.003247	-0.001314	-0.002306
0.2950	596.988	39.909	15.564	28.704	-0.669	35.391	1136.513	-0.002794	-0.001089	-0.002009
0.2960	551.543	34.073	12.757	24.645	-0.669	35.392	1049.995	-0.002385	-0.000893	-0.001725
0.2970	508.291	28.182	10.129	20.599	-0.664	35.395	967.655	-0.001973	-0.000709	-0.001442
0.2980	465.024	22.554	7.486	16.608	-0.664	35.397	885.286	-0.001579	-0.000524	-0.001163
0.2990	421.036	16.732	4.790	13.031	-0.667	35.399	801.544	-0.001171	-0.000335	-0.000912
0.3000	377.198	11.285	2.051	9.247	-0.665	35.403	718.088	-0.000790	-0.000144	-0.000647
0.3010	335.659	5.616	-0.453	5.463	-0.663	35.406	639.009	-0.000393	0.000032	-0.000382
0.3020	299.186	0.516	-2.752	1.651	-0.661	35.409	569.572	-0.000036	0.000193	-0.000116
0.3030	269.865	-3.652	-4.774	-1.390	-0.662	35.411	513.754	0.000256	0.000334	0.000097
0.3040	249.021	-6.752	-6.177	-3.300	-0.667	35.411	474.072	0.000473	0.000432	0.000231
0.3050	236.697	-8.574	-7.195	-4.236	-0.669	35.409	450.611	0.000600	0.000504	0.000297
0.3060	232.009	-9.771	-7.676	-4.801	-0.671	35.408	441.685	0.000684	0.000537	0.000336
0.3070	232.955	-10.063	-8.049	-5.256	-0.665	35.407	443.487	0.000704	0.000563	0.000368
0.3080	237.900	-9.923	-8.116	-5.421	-0.668	35.404	452.900	0.000695	0.000568	0.000380
0.3090	246.376	-9.213	-7.979	-5.064	-0.667	35.401	469.036	0.000645	0.000558	0.000354
0.3100	262.261	-7.726	-7.524	-4.005	-0.671	35.398	499.277	0.000541	0.000527	0.000280
0.3110	292.453	-4.446	-6.506	-1.790	-0.672	35.395	556.755	0.000311	0.000455	0.000125
0.3120	342.392	0.959	-4.389	1.649	-0.672	35.393	651.827	-0.000067	0.000307	-0.000115
0.3130	411.823	9.045	-0.977	6.631	-0.672	35.391	784.006	-0.000633	0.000068	-0.000464
0.3140	495.351	19.190	3.852	13.291	-0.673	35.390	943.022	-0.001343	-0.000270	-0.000930
0.3150	586.378	29.960	9.108	20.956	-0.671	35.391	1116.314	-0.002097	-0.000638	-0.001467
0.3160	680.051	41.148	14.488	28.842	-0.673	35.392	1294.641	-0.002880	-0.001014	-0.002019
0.3170	771.859	52.139	19.594	36.134	-0.667	35.395	1469.421	-0.003650	-0.001372	-0.002529
0.3180	858.438	62.575	24.617	43.123	-0.671	35.397	1634.245	-0.004380	-0.001723	-0.003019
0.3190	937.412	72.372	29.377	49.908	-0.673	35.399	1784.592	-0.005066	-0.002056	-0.003494
0.3200	1008.166	81.378	33.766	55.989	-0.674	35.402	1919.289	-0.005696	-0.002364	-0.003919
0.3210	1071.105	89.549	37.701	61.164	-0.675	35.406	2039.108	-0.006268	-0.002639	-0.004281
0.3220	1127.341	96.678	41.114	65.870	-0.669	35.409	2146.168	-0.006767	-0.002878	-0.004611
0.3230	1178.227	103.208	44.059	70.206	-0.670	35.411	2243.042	-0.007225	-0.003084	-0.004914
0.3240	1225.221	108.962	47.060	74.513	-0.672	35.410	2332.506	-0.007627	-0.003294	-0.005216
0.3250	1268.999	114.729	49.770	78.504	-0.673	35.409	2415.848	-0.008031	-0.003484	-0.005495
0.3260	1308.839	119.844	52.344	82.066	-0.671	35.407	2491.693	-0.008389	-0.003664	-0.005745
0.3270	1342.503	124.707	54.477	85.121	-0.661	35.406	2555.780	-0.008730	-0.003813	-0.005958
0.3280	1367.540	128.168	56.198	87.515	-0.661	35.404	2603.445	-0.008972	-0.003934	-0.006126
0.3290	1382.493	130.738	57.393	89.139	-0.667	35.401	2631.912	-0.009152	-0.004018	-0.006240
0.3300	1388.399	131.973	57.916	89.950	-0.668	35.398	2643.156	-0.009238	-0.004054	-0.006297
0.3310	1387.408	132.459	58.040	90.363	-0.670	35.395	2641.268	-0.009272	-0.004063	-0.006325
0.3320	1381.817	132.223	57.847	90.227	-0.668	35.393	2630.625	-0.009256	-0.004049	-0.006316
0.3330	1372.650	131.654	57.490	90.062	-0.669	35.391	2613.173	-0.009216	-0.004024	-0.006304
0.3340	1358.072	130.599	57.394	89.360	-0.670	35.390	2585.421	-0.009142	-0.004018	-0.006255
0.3350	1331.968	128.084	56.678	87.611	-0.669	35.391	2535.725	-0.008966	-0.003967	-0.006133
0.3360	1286.672	123.164	55.054	84.555	-0.664	35.392	2449.493	-0.008621	-0.003854	-0.005919
0.3370	1219.600	115.881	51.725	79.601	-0.659	35.395	2321.806	-0.008112	-0.003621	-0.005572
0.3380	1135.291	106.486	47.309	73.327	-0.659	35.397	2161.303	-0.007454	-0.003312	-0.005133
0.3390	1043.558	96.064	42.425	66.008	-0.661	35.399	1986.666	-0.006724	-0.002970	-0.004621
0.3400	952.876	85.364	37.402	58.935	-0.661	35.402	1814.032	-0.005975	-0.002618	-0.004125
0.3410	868.792	75.290	32.709	52.193	-0.662	35.406	1653.957	-0.005270	-0.002290	-0.003654
0.3420	793.981	66.022	28.003	46.207	-0.659	35.409	1511.536	-0.004622	-0.001960	-0.003235
0.3430	728.923	57.989	24.040	40.828	-0.662	35.410	1387.682	-0.004059	-0.001683	-0.002858
0.3440	671.740	50.861	20.944	36.480	-0.667	35.410	1278.820	-0.003560	-0.001466	-0.002554
0.3450	619.877	44.261	17.889	32.036	-0.668	35.409	1180.086	-0.003098	-0.001252	-0.002243
0.3460	570.028	37.799	15.095	27.701	-0.667	35.408	1085.186	-0.002646	-0.001057	-0.001939
0.3470	520.509	31.170	11.779	22.939	-0.661	35.407	990.915	-0.002182	-0.000825	-0.001606
0.3480	471.126	24.763	8.945	18.687	-0.659	35.404	896.902	-0.001733	-0.000626	-0.001308
0.3490	422.975	18.844	5.932	14.516	-0.661	35.401	805.235	-0.001319	-0.000415	-0.001016
0.3500	378.010	13.147	3.097	10.542	-0.664	35.398	719.633	-0.000920	-0.000217	-0.000738
0.3510	338.184	7.824	0.427	6.785	-0.668	35.396	643.816	-0.000548	-0.000030	-0.000475
0.3520	304.987	2.917	-1.762	3.510	-0.666	35.393	580.616	-0.000204	0.000123	-0.000246
0.3530	279.363	-0.863	-3.385	1.060	-0.668	35.391	531.836	0.000060	0.000237	-0.000074
0.3540	261.449	-3.571	-4.431	-0.605	-0.671	35.391	497.732	0.000250	0.000310	0.000042
0.3550	250.809	-5.377	-5.339	-1.925	-0.671	35.391	477.476	0.000376	0.000374	0.000135
0.3560	246.376	-6.573	-5.861	-2.490	-0.670	35.393	469.036	0.000460	0.000410	0.000174
0.3570	246.646	-6.975	-6.300	-2.889	-0.664	35.395	469.551	0.000488	0.000441	0.000202
0.3580	250.448	-6.699	-6.327	-2.463	-0.665	35.397	476.789	0.000469	0.000443	0.000172
0.3590	257.091	-6.254	-6.273	-2.202	-0.664	35.399	489.435	0.000438	0.000439	0.000154
0.3600	268.798	-5.129	-6.232	-1.816	-0.664	35.403	511.723	0.000359	0.000436	0.000127
0.3610	291.731	-2.864	-5.681	-0.881	-0.663	35.406	555.382	0.000200	0.000398	0.000062
0.3620	332.654	1.431	-4.168	1.554	-0.665	35.409	633.287	-0.000100	0.000292	-0.000109
0.3630	394.045	8.656	-1.155	6.218	-0.667	35.411	750.160	-0.000606	0.000081	-0.000435
0.3640	472.613	18.300	3.096	12.974	-0.672	35.411	899.734	-0.001281	-0.000217	-0.000908
0.3650	562.062	28.861	8.090	20.186	-0.672	35.410	1070.023	-0.002020	-0.000566	-0.001413
0.3660	657.072	39.965	13.580	28.016	-0.676	35.408	1250.896	-0.002798	-0.000951	-0.001961
0.3670	752.638	51.041	18.905	35.569	-0.666	35.406	1432.829	-0.003573	-0.001323	-0.002490
0.3680	845.032	62.173	24.327	43.219	-0.665	35.404	1608.725	-0.004352	-0.001703	-0.003025
0.3690	930.604	72.720	29.474	50.554	-0.664	35.401	1771.631	-0.005090	-0.002063	-0.003539
0.3700	1007.760	82.420	34.181	56.761	-0.668	35.398	1918.516	-0.005769	-0.002393	-0.003973
0.3710	1075.433	90.952	38.406	62.541	-0.671	35.395	2047.348	-0.006367	-0.002688	-0.004378
0.3720	1134.404	98.622	41.956	67.480	-0.671	35.393	2159.615	-0.006904	-0.002937	-0.004724
0.3730	1185.771	105.488	45.065	71.979	-0.672	35.392	2257.404	-0.007384	-0.003155	-0.005038
0.3740	1230.586	111.353	48.092	76.107	-0.673	35.391	2342.720	-0.007795	-0.003366	-0.005327
0.3750	1269.480	116.369	50.473	79.684	-0.675	35.391	2416.763	-0.008146	-0.003533	-0.005578
0.3760	1303.098	120.856	52.718	82.891	-0.677	35.392	2480.764	-0.008460	-0.003690	-0.005802
0.3770	1331.697	124.787	54.244	85.712	-0.675	35.395	2535.210	-0.008735	-0.003797	-0.006000
0.3780	1354.961	128.153	55.840	87.639	-0.672	35.397	2579.498	-0.008971	-0.003909	-0.006135
0.3790	1372.049	130.584	57.174	89.331	-0.670	35.399	2612.028	-0.009141	-0.004002	-0.006253
0.3800	1382.208	132.183	58.096	90.336	-0.668	35.402	2631.369	-0.009253	-0.004067	-0.006324
0.3810	1385.845	132.932	58.536	91.022	-0.672	35.405	2638.292	-0.009305	-0.004098	-0.006372
0.3820	1383.891	133.335	58.494	91.050	-0.668	35.409	2634.573	-0.009333	-0.004095	-0.006374
0.3830	1377.669	133.390	58.480	90.885	-0.666	35.410	2622.728	-0.009337	-0.004094	-0.006362
0.3840	1367.179	132.695	58.356	90.638	-0.672	35.410	2602.758	-0.009289	-0.004085	-0.006345
0.3850	1348.965	131.111	57.861	89.703	-0.675	35.409	2568.083	-0.009178	-0.004050	-0.006279
0.3860	1314.129	127.304	56.596	87.489	-0.675	35.408	2501.764	-0.008911	-0.003962	-0.006124
0.3870	1254.917	120.884	53.734	83.209	-0.667	35.406	2389.040	-0.008462	-0.003761	-0.005825
0.3880	1171.224	111.865	49.607	77.264	-0.663	35.404	2229.710	-0.007831	-0.003473	-0.005408
0.3890	1072.187	100.734	44.364	69.654	-0.659	35.401	2041.168	-0.007051	-0.003105	-0.004876
0.3900	970.520	88.880	38.792	61.619	-0.658	35.398	1847.620	-0.006222	-0.002715	-0.004313
0.3910	875.525	77.332	33.452	54.065	-0.656	35.395	1666.775	-0.005413	-0.002342	-0.003785
0.3920	792.283	66.771	28.428	47.088	-0.651	35.393	1508.303	-0.004674	-0.001990	-0.003296
0.3930	722.566	58.140	24.370	41.239	-0.650	35.392	1375.580	-0.004070	-0.001706	-0.002887
0.3940	664.556	51.137	21.123	36.615	-0.654	35.391	1265.144	-0.003580	-0.001479	-0.002563
0.3950	615.113	44.954	18.260	32.557	-0.655	35.391	1171.017	-0.003147	-0.001278	-0.002279
0.3960	570.028	39.215	15.494	28.760	-0.653	35.392	1085.186	-0.002745	-0.001085	-0.002013
0.3970	526.099	33.155	12.577	24.631	-0.653	35.395	1001.558	-0.002321	-0.000880	-0.001724
0.3980	481.405	27.193	9.838	20.599	-0.652	35.397	916.471	-0.001904	-0.000689	-0.001442
0.3990	435.598	21.413	7.170	16.816	-0.655	35.399	829.268	-0.001499	-0.000502	-0.001177
0.4000	390.198	15.716	4.197	12.785	-0.652	35.402	742.836	-0.001100	-0.000294	-0.000895
0.4010	347.442	10.046	1.473	8.821	-0.655	35.405	661.440	-0.000703	-0.000103	-0.000618
0.4020	309.841	4.834	-1.032	5.037	-0.651	35.408	589.857	-0.000338	0.000072	-0.000353
0.4030	279.573	0.527	-2.891	1.955	-0.656	35.410	532.236	-0.000037	0.000202	-0.000137
0.4040	257.707	-2.322	-4.171	0.166	-0.666	35.410	490.608	0.000163	0.000292	-0.000012
0.4050	244.632	-4.336	-5.257	-1.251	-0.669	35.408	465.717	0.000304	0.000368	0.000088
0.4060	239.192	-5.572	-5.765	-2.090	-0.669	35.407	455.360	0.000390	0.000404	0.000146
0.4070	239.433	-6.447	-6.287	-2.834	-0.659	35.406	455.818	0.000451	0.000440	0.000198
0.4080	243.671	-6.615	-6.232	-2.794	-0.661	35.404	463.886	0.000463	0.000436	0.000196
0.4090	251.440	-6.129	-6.382	-2.257	-0.663	35.401	478.678	0.000429	0.000447	0.000158
0.4100	266.379	-4.823	-5.984	-1.239	-0.666	35.398	507.116	0.000338	0.000419	0.000087
0.4110	295.549	-1.541	-4.953	0.619	-0.667	35.395	562.649	0.000108	0.000347	-0.000043
0.4120	344.571	3.809	-2.972	3.688	-0.671	35.393	655.975	-0.000267	0.000208	-0.000258
0.4130	413.356	11.771	0.387	8.792	-0.672	35.392	786.924	-0.000824	-0.000027	-0.000615
0.4140	496.013	21.608	4.845	15.520	-0.677	35.391	944.281	-0.001513	-0.000339	-0.001086
0.4150	585.492	32.198	10.005	23.156	-0.679	35.391	1114.626	-0.002254	-0.000700	-0.001621
0.4160	677.195	43.327	15.343	30.711	-0.679	35.392	1289.206	-0.003033	-0.001074	-0.002150
0.4170	767.155	54.181	20.449	37.825	-0.676	35.395	1460.466	-0.003793	-0.001431	-0.002648
0.4180	852.727	64.577	25.443	44.734	-0.679	35.397	1623.373	-0.004520	-0.001781	-0.003131
0.4190	931.235	74.151	30.011	51.381	-0.677	35.399	1772.833	-0.005191	-0.002101	-0.003597
0.4200	1001.749	82.960	34.414	57.299	-0.671	35.401	1907.072	-0.005807	-0.002409	-0.004011
0.4210	1064.162	90.659	38.391	62.610	-0.667	35.405	2025.890	-0.006346	-0.002687	-0.004383
0.4220	1120.097	97.552	41.722	67.067	-0.664	35.408	2132.378	-0.006829	-0.002921	-0.004695
0.4230	1171.570	104.320	44.954	71.539	-0.663	35.410	2230.368	-0.007302	-0.003147	-0.005008
0.4240	1219.510	110.586	47.873	75.723	-0.668	35.410	2321.634	-0.007741	-0.003351	-0.005301
0.4250	1263.904	116.478	50.515	79.674	-0.669	35.409	2406.149	-0.008153	-0.003536	-0.005577
0.4260	1303.699	121.730	52.978	83.291	-0.669	35.407	2481.909	-0.008521	-0.003708	-0.005830
0.4270	1337.153	126.094	54.752	86.179	-0.663	35.406	2545.595	-0.008827	-0.003833	-0.006033
0.4280	1362.370	129.694	56.526	88.669	-0.663	35.404	2593.603	-0.009079	-0.003957	-0.006207
0.4290	1378.000	131.904	57.656	90.445	-0.666	35.402	2623.358	-0.009233	-0.004036	-0.006331
0.4300	1384.657	133.419	58.344	91.369	-0.667	35.398	2636.032	-0.009339	-0.004084	-0.006396
0.4310	1384.567	133.920	58.675	91.659	-0.665	35.395	2635.860	-0.009374	-0.004107	-0.006416
0.4320	1379.653	134.059	58.578	91.424	-0.663	35.393	2626.505	-0.009384	-0.004100	-0.006400
0.4330	1371.102	133.474	58.522	91.202	-0.663	35.391	2610.226	-0.009343	-0.004097	-0.006384
0.4340	1357.291	132.613	58.301	90.651	-0.667	35.390	2583.933	-0.009283	-0.004081	-0.006346
0.4350	1332.584	130.402	57.531	89.289	-0.667	35.391	2536.898	-0.009128	-0.004027	-0.006250
0.4360	1289.347	125.873	55.907	86.470	-0.667	35.392	2454.586	-0.008811	-0.003913	-0.006053
0.4370	1223.989	118.507	52.729	81.503	-0.660	35.395	2330.160	-0.008295	-0.003691	-0.005705
0.4380	1139.559	108.739	48.380	75.299	-0.663	35.397	2169.428	-0.007612	-0.003387	-0.005271
0.4390	1045.316	97.734	43.179	67.949	-0.663	35.399	1990.013	-0.006841	-0.003023	-0.004756
0.4400	949.901	86.672	37.827	60.504	-0.661	35.402	1808.367	-0.006067	-0.002648	-0.004235
0.4410	860.166	76.067	32.915	53.349	-0.658	35.405	1637.535	-0.005325	-0.002304	-0.003734
0.4420	779.719	66.299	28.167	46.702	-0.655	35.408	1484.385	-0.004641	-0.001972	-0.003269
0.4430	709.792	57.627	24.068	41.102	-0.656	35.410	1351.261	-0.004034	-0.001685	-0.002877
0.4440	649.227	50.248	20.423	35.970	-0.663	35.410	1235.962	-0.003517	-0.001430	-0.002518
0.4450	595.846	43.425	17.272	31.209	-0.667	35.409	1134.338	-0.003040	-0.001209	-0.002185
0.4460	547.290	37.004	14.339	27.026	-0.667	35.407	1041.899	-0.002590	-0.001004	-0.001892
0.4470	501.303	30.904	11.379	23.062	-0.662	35.406	954.351	-0.002163	-0.000797	-0.001614
0.4480	456.473	24.956	8.586	19.525	-0.660	35.404	869.007	-0.001747	-0.000601	-0.001367
0.4490	412.259	19.106	5.820	15.453	-0.661	35.401	784.836	-0.001337	-0.000407	-0.001082
0.4500	369.609	13.451	3.192	11.380	-0.660	35.398	703.640	-0.000942	-0.000223	-0.000797
0.4510	330.520	8.408	0.771	7.473	-0.661	35.395	629.225	-0.000589	-0.000054	-0.000523
0.4520	297.172	3.810	-1.485	4.225	-0.657	35.393	565.739	-0.000267	0.000104	-0.000296
0.4530	271.323	-0.013	-3.137	1.926	-0.660	35.391	516.529	0.000001	0.000220	-0.000135
0.4540	253.619	-2.556	-4.280	0.592	-0.663	35.390	482.826	0.000179	0.000300	-0.000041
0.4550	243.641	-4.335	-5.079	-0.633	-0.664	35.391	463.829	0.000303	0.000356	0.000044
0.4560	240.124	-5.391	-5.547	-1.305	-0.662	35.392	457.134	0.000377	0.000388	0.000091
0.4570	241.071	-5.933	-6.014	-2.075	-0.660	35.395	458.937	0.000415	0.000421	0.000145
0.4580	245.204	-5.768	-6.138	-1.897	-0.665	35.397	466.805	0.000404	0.000430	0.000133
0.4590	252.056	-5.143	-6.247	-1.746	-0.669	35.399	479.851	0.000360	0.000437	0.000122
0.4600	264.320	-4.045	-6.013	-0.949	-0.671	35.402	503.197	0.000283	0.000421	0.000066
0.4610	288.801	-1.557	-5.173	0.441	-0.668	35.405	549.803	0.000109	0.000362	-0.000031
0.4620	332.564	3.279	-3.439	3.413	-0.663	35.409	633.116	-0.000230	0.000241	-0.000239
0.4630	398.163	10.561	-0.273	8.148	-0.665	35.410	757.999	-0.000739	0.000019	-0.000570
0.4640	481.645	20.483	4.198	14.822	-0.669	35.410	916.929	-0.001434	-0.000294	-0.001038
0.4650	575.438	31.628	9.469	22.501	-0.669	35.408	1095.486	-0.002214	-0.000663	-0.001575
0.4660	673.243	43.274	14.945	30.783	-0.671	35.407	1281.681	-0.003029	-0.001046	-0.002155
0.4670	769.680	54.948	20.587	38.488	-0.667	35.406	1465.273	-0.003846	-0.001441	-0.002694
0.4680	860.978	66.245	25.966	45.973	-0.668	35.404	1639.080	-0.004637	-0.001818	-0.003218
0.4690	944.040	76.333	30.948	52.662	-0.668	35.401	1797.209	-0.005343	-0.002166	-0.003686
0.4700	1017.213	85.392	35.336	58.923	-0.669	35.398	1936.512	-0.005977	-0.002474	-0.004125
0.4710	1079.956	93.118	39.147	64.193	-0.671	35.395	2055.960	-0.006518	-0.002740	-0.004494
0.4720	1133.878	99.885	42.353	68.610	-0.667	35.393	2158.613	-0.006992	-0.002965	-0.004803
0.4730	1181.068	106.292	45.271	72.642	-0.667	35.391	2248.449	-0.007440	-0.003169	-0.005085
0.4740	1224.139	112.157	48.161	76.411	-0.669	35.390	2330.446	-0.007851	-0.003371	-0.005349
0.4750	1264.190	117.618	50.818	80.071	-0.669	35.390	2406.693	-0.008233	-0.003557	-0.005605
0.4760	1301.776	122.427	53.211	83.716	-0.668	35.391	2478.247	-0.008570	-0.003725	-0.005860
0.4770	1335.800	126.651	55.329	86.552	-0.661	35.394	2543.020	-0.008866	-0.003873	-0.006059
0.4780	1364.249	130.542	57.132	89.209	-0.663	35.396	2597.179	-0.009138	-0.003999	-0.006245
0.4790	1384.447	133.502	58.384	91.218	-0.663	35.399	2635.632	-0.009345	-0.004087	-0.006385
0.4800	1395.222	135.350	59.224	92.484	-0.663	35.402	2656.145	-0.009475	-0.004146	-0.006474
0.4810	1397.732	136.212	59.499	93.158	-0.660	35.405	2660.923	-0.009535	-0.004165	-0.006521
0.4820	1393.900	136.031	59.638	92.966	-0.655	35.408	2653.627	-0.009522	-0.004175	-0.006508
0.4830	1385.454	135.809	59.474	92.746	-0.652	35.410	2637.548	-0.009507	-0.004163	-0.006492
0.4840	1371.177	134.669	59.226	92.167	-0.653	35.410	2610.369	-0.009427	-0.004146	-0.006452
0.4850	1344.922	132.362	58.413	90.789	-0.653	35.409	2560.387	-0.009265	-0.004089	-0.006355
0.4860	1298.710	127.151	56.515	87.555	-0.653	35.407	2472.410	-0.008901	-0.003956	-0.006129
0.4870	1229.113	119.175	53.047	82.410	-0.649	35.406	2339.916	-0.008342	-0.003713	-0.005769
0.4880	1140.416	109.059	48.534	75.640	-0.649	35.404	2171.059	-0.007634	-0.003397	-0.005295
0.4890	1043.272	97.957	43.208	68.292	-0.647	35.401	1986.122	-0.006857	-0.003025	-0.004780
0.4900	947.376	86.866	38.131	60.901	-0.650	35.398	1803.560	-0.006081	-0.002669	-0.004263
0.4910	859.565	76.346	33.178	53.898	-0.647	35.395	1636.391	-0.005344	-0.002322	-0.003773
0.4920	783.025	66.953	28.801	47.445	-0.642	35.393	1490.679	-0.004687	-0.002016	-0.003321
0.4930	717.667	58.922	24.673	42.121	-0.647	35.391	1366.253	-0.004125	-0.001727	-0.002948
0.4940	661.415	52.043	21.287	37.401	-0.649	35.390	1259.165	-0.003643	-0.001490	-0.002618
0.4950	611.656	45.734	18.179	33.232	-0.649	35.391	1164.436	-0.003201	-0.001272	-0.002326
0.4960	565.233	39.743	15.358	29.296	-0.652	35.392	1076.059	-0.002782	-0.001075	-0.002051
0.4970	519.712	33.921	12.454	25.293	-0.649	35.394	989.399	-0.002374	-0.000872	-0.001770
0.4980	473.590	27.863	9.675	21.522	-0.653	35.397	901.594	-0.001950	-0.000677	-0.001507
0.4990	427.062	21.625	6.935	17.106	-0.655	35.399	813.017	-0.001514	-0.000485	-0.001197
Test Cycles
Time (sec)	Axial stress (kPa)	Axial micro-strain #1	Axial micro-strain #2	Axial micro-strain #3	Confining pressure (kPa)	Temperature (�C)	Load (N)	Displacement #1 (mm)	Displacement #2 (mm)	Displacement #3 (mm)
0.0000	381.857	15.914	4.307	12.976	-0.657	35.402	726.957	-0.001114	-0.000301	-0.000908
0.0010	340.273	10.285	1.748	8.916	-0.656	35.405	647.793	-0.000720	-0.000122	-0.000624
0.0020	304.596	5.295	-0.686	5.394	-0.651	35.409	579.872	-0.000371	0.000048	-0.000378
0.0030	276.613	1.250	-2.738	2.891	-0.649	35.410	526.600	-0.000087	0.000192	-0.000202
0.0040	257.121	-1.640	-4.033	1.020	-0.651	35.410	489.492	0.000115	0.000282	-0.000071
0.0050	245.624	-3.489	-4.819	-0.261	-0.655	35.409	467.606	0.000244	0.000337	0.000018
0.0060	241.101	-4.629	-5.410	-1.087	-0.655	35.408	458.994	0.000324	0.000379	0.000076
0.0070	241.537	-5.129	-5.808	-1.542	-0.651	35.406	459.824	0.000359	0.000407	0.000108
0.0080	245.414	-4.950	-5.863	-1.267	-0.656	35.404	467.205	0.000346	0.000410	0.000089
0.0090	252.327	-4.350	-5.768	-1.020	-0.661	35.401	480.366	0.000305	0.000404	0.000071
0.0100	265.131	-3.265	-5.534	-0.607	-0.664	35.398	504.742	0.000229	0.000387	0.000042
0.0110	290.740	-0.583	-4.872	0.714	-0.666	35.395	553.493	0.000041	0.000341	-0.000050
0.0120	335.404	4.113	-3.054	3.673	-0.667	35.393	638.523	-0.000288	0.000214	-0.000257
0.0130	400.763	11.505	0.165	8.682	-0.667	35.391	762.949	-0.000805	-0.000012	-0.000608
0.0140	482.547	21.330	4.650	15.467	-0.674	35.390	918.646	-0.001493	-0.000326	-0.001083
0.0150	573.890	32.059	9.796	22.965	-0.674	35.391	1092.539	-0.002244	-0.000686	-0.001608
0.0160	668.945	43.301	15.176	30.700	-0.672	35.392	1273.499	-0.003031	-0.001062	-0.002149
0.0170	762.271	54.487	20.489	38.323	-0.664	35.394	1451.168	-0.003814	-0.001434	-0.002683
0.0180	850.142	65.104	25.704	45.591	-0.665	35.396	1618.452	-0.004557	-0.001799	-0.003191
0.0190	930.138	75.054	30.466	52.126	-0.669	35.398	1770.744	-0.005254	-0.002133	-0.003649
0.0200	1002.124	83.934	34.772	58.000	-0.667	35.402	1907.787	-0.005875	-0.002434	-0.004060
0.0210	1066.491	92.147	38.817	63.338	-0.675	35.405	2030.325	-0.006450	-0.002717	-0.004434
0.0220	1124.876	99.358	42.298	68.389	-0.672	35.408	2141.476	-0.006955	-0.002961	-0.004787
0.0230	1178.513	106.250	45.422	72.944	-0.673	35.410	2243.586	-0.007438	-0.003180	-0.005106
0.0240	1228.122	112.629	48.602	77.457	-0.669	35.410	2338.028	-0.007884	-0.003402	-0.005422
0.0250	1273.237	118.633	51.436	81.530	-0.668	35.409	2423.916	-0.008304	-0.003601	-0.005707
0.0260	1312.927	123.748	54.037	85.175	-0.668	35.407	2499.475	-0.008662	-0.003783	-0.005962
0.0270	1345.974	128.125	56.183	87.901	-0.663	35.406	2562.389	-0.008969	-0.003933	-0.006153
0.0280	1371.117	131.613	57.684	90.075	-0.665	35.403	2610.254	-0.009213	-0.004038	-0.006305
0.0290	1387.332	134.268	58.785	91.727	-0.664	35.401	2641.125	-0.009399	-0.004115	-0.006421
0.0300	1394.847	135.601	59.239	92.800	-0.662	35.398	2655.430	-0.009492	-0.004147	-0.006496
0.0310	1395.373	136.157	59.570	93.253	-0.659	35.395	2656.431	-0.009531	-0.004170	-0.006528
0.0320	1390.894	135.879	59.625	93.102	-0.652	35.393	2647.905	-0.009512	-0.004174	-0.006517
0.0330	1382.674	135.559	59.625	92.675	-0.655	35.391	2632.256	-0.009489	-0.004174	-0.006487
0.0340	1369.193	134.767	59.405	92.179	-0.661	35.390	2606.592	-0.009434	-0.004158	-0.006453
0.0350	1344.697	132.626	58.716	90.858	-0.662	35.390	2559.958	-0.009284	-0.004110	-0.006360
0.0360	1301.656	127.971	56.899	88.080	-0.659	35.392	2478.018	-0.008958	-0.003983	-0.006166
0.0370	1236.372	120.551	53.720	83.307	-0.650	35.394	2353.735	-0.008439	-0.003760	-0.005831
0.0380	1152.288	110.949	49.372	76.964	-0.649	35.396	2193.661	-0.007766	-0.003456	-0.005387
0.0390	1058.316	100.262	44.389	69.985	-0.650	35.399	2014.761	-0.007018	-0.003107	-0.004899
0.0400	963.877	89.423	39.176	62.541	-0.651	35.402	1834.974	-0.006260	-0.002742	-0.004378
0.0410	876.036	78.903	34.388	55.426	-0.650	35.405	1667.747	-0.005523	-0.002407	-0.003880
0.0420	799.121	69.536	29.916	49.040	-0.643	35.409	1521.320	-0.004868	-0.002094	-0.003433
0.0430	733.582	61.268	25.981	43.744	-0.643	35.410	1396.551	-0.004289	-0.001819	-0.003062
0.0440	677.105	54.152	22.651	39.149	-0.648	35.410	1289.034	-0.003791	-0.001586	-0.002740
0.0450	625.993	47.843	19.513	34.801	-0.651	35.409	1191.730	-0.003349	-0.001366	-0.002436
0.0460	576.896	41.507	16.691	30.342	-0.647	35.407	1098.261	-0.002905	-0.001168	-0.002124
0.0470	527.542	35.198	13.540	26.200	-0.641	35.406	1004.305	-0.002464	-0.000948	-0.001834
0.0480	477.407	28.958	10.444	21.700	-0.643	35.404	908.861	-0.002027	-0.000731	-0.001519
0.0490	427.243	22.247	7.362	17.366	-0.649	35.401	813.360	-0.001557	-0.000515	-0.001216
0.0500	379.212	15.981	4.196	12.990	-0.652	35.398	721.922	-0.001119	-0.000294	-0.000909
0.0510	335.690	10.131	1.459	9.165	-0.653	35.395	639.067	-0.000709	-0.000102	-0.000642
0.0520	298.855	5.030	-1.073	5.629	-0.651	35.393	568.943	-0.000352	0.000075	-0.000394
0.0530	270.346	1.083	-2.862	2.615	-0.652	35.391	514.669	-0.000076	0.000200	-0.000183
0.0540	250.689	-1.821	-3.991	0.646	-0.658	35.390	477.247	0.000127	0.000279	-0.000045
0.0550	240.034	-3.696	-4.900	-0.441	-0.661	35.390	456.963	0.000259	0.000343	0.000031
0.0560	236.773	-4.670	-5.341	-0.729	-0.665	35.392	450.754	0.000327	0.000374	0.000051
0.0570	238.877	-4.893	-5.877	-0.949	-0.662	35.394	454.760	0.000342	0.000411	0.000066
0.0580	244.723	-4.629	-5.782	-1.019	-0.660	35.396	465.889	0.000324	0.000405	0.000071
0.0590	254.792	-3.863	-5.658	-1.021	-0.663	35.399	485.058	0.000270	0.000396	0.000071
0.0600	274.118	-2.056	-5.066	-0.056	-0.665	35.402	521.851	0.000144	0.000355	0.000004
0.0610	309.225	1.918	-3.786	2.338	-0.669	35.405	588.684	-0.000134	0.000265	-0.000164
0.0620	363.177	7.768	-1.418	6.482	-0.670	35.408	691.395	-0.000544	0.000099	-0.000454
0.0630	433.585	15.897	1.954	11.931	-0.669	35.410	825.434	-0.001113	-0.000137	-0.000835
0.0640	514.753	25.458	6.522	18.675	-0.672	35.410	979.958	-0.001782	-0.000457	-0.001307
0.0650	601.737	35.630	11.477	25.568	-0.669	35.409	1145.554	-0.002494	-0.000803	-0.001790
0.0660	691.172	46.400	16.816	33.191	-0.669	35.407	1315.813	-0.003248	-0.001177	-0.002323
0.0670	780.140	56.961	21.907	40.359	-0.661	35.406	1485.186	-0.003987	-0.001534	-0.002825
0.0680	866.252	67.314	27.038	47.310	-0.661	35.403	1649.122	-0.004712	-0.001893	-0.003312
0.0690	946.910	77.194	31.894	53.777	-0.661	35.401	1802.673	-0.005404	-0.002233	-0.003764
0.0700	1020.459	86.393	36.147	59.996	-0.664	35.398	1942.692	-0.006047	-0.002530	-0.004200
0.0710	1086.088	94.620	40.110	65.623	-0.657	35.395	2067.633	-0.006623	-0.002808	-0.004594
0.0720	1144.624	102.082	43.509	70.383	-0.651	35.393	2179.070	-0.007146	-0.003046	-0.004927
0.0730	1197.268	108.892	46.674	74.772	-0.649	35.391	2279.291	-0.007622	-0.003267	-0.005234
0.0740	1244.818	115.326	49.771	78.941	-0.656	35.390	2369.814	-0.008073	-0.003484	-0.005526
0.0750	1287.018	120.870	52.358	82.795	-0.660	35.390	2450.151	-0.008461	-0.003665	-0.005796
0.0760	1323.387	125.624	54.876	86.209	-0.662	35.391	2519.388	-0.008794	-0.003841	-0.006035
0.0770	1352.842	129.459	56.637	88.810	-0.658	35.394	2575.464	-0.009062	-0.003965	-0.006217
0.0780	1374.964	132.711	58.012	90.998	-0.657	35.396	2617.579	-0.009290	-0.004061	-0.006370
0.0790	1388.910	135.074	59.113	92.579	-0.659	35.398	2644.129	-0.009455	-0.004138	-0.006481
0.0800	1395.192	136.131	59.691	93.377	-0.657	35.401	2656.088	-0.009529	-0.004178	-0.006536
0.0810	1395.237	136.491	60.120	93.805	-0.659	35.404	2656.174	-0.009554	-0.004208	-0.006566
0.0820	1390.744	136.295	60.064	93.613	-0.656	35.408	2647.619	-0.009541	-0.004205	-0.006553
0.0830	1382.749	135.990	59.818	93.474	-0.657	35.410	2632.399	-0.009519	-0.004187	-0.006543
0.0840	1369.614	135.211	59.583	93.114	-0.656	35.410	2607.393	-0.009465	-0.004171	-0.006518
0.0850	1344.622	132.933	58.730	91.545	-0.653	35.409	2559.814	-0.009305	-0.004111	-0.006408
0.0860	1299.146	128.084	56.994	88.560	-0.654	35.407	2473.240	-0.008966	-0.003990	-0.006199
0.0870	1229.700	120.371	53.526	83.415	-0.648	35.406	2341.032	-0.008426	-0.003747	-0.005839
0.0880	1140.791	110.365	49.095	76.769	-0.645	35.403	2171.774	-0.007726	-0.003437	-0.005374
0.0890	1043.407	99.511	43.731	69.215	-0.645	35.401	1986.380	-0.006966	-0.003061	-0.004845
0.0900	947.421	88.213	38.379	61.467	-0.649	35.398	1803.646	-0.006175	-0.002687	-0.004303
0.0910	859.595	77.443	33.425	54.684	-0.657	35.395	1636.448	-0.005421	-0.002340	-0.003828
0.0920	782.815	67.813	28.882	48.383	-0.653	35.393	1490.278	-0.004747	-0.002022	-0.003387
0.0930	717.591	59.713	25.002	42.851	-0.656	35.391	1366.110	-0.004180	-0.001750	-0.003000
0.0940	661.746	53.070	21.782	38.351	-0.658	35.390	1259.794	-0.003715	-0.001525	-0.002685
0.0950	612.332	46.818	18.715	34.167	-0.660	35.390	1165.724	-0.003277	-0.001310	-0.002392
0.0960	565.699	40.702	16.017	30.203	-0.658	35.391	1076.946	-0.002849	-0.001121	-0.002114
0.0970	518.660	34.532	13.183	25.786	-0.651	35.394	987.396	-0.002417	-0.000923	-0.001805
0.0980	470.389	28.167	10.321	21.259	-0.654	35.396	895.500	-0.001972	-0.000722	-0.001488
0.0990	421.547	21.901	7.390	17.187	-0.656	35.398	802.517	-0.001533	-0.000517	-0.001203
0.1000	374.869	15.857	4.268	12.990	-0.657	35.401	713.654	-0.001110	-0.000299	-0.000909
0.1010	333.345	10.133	1.640	9.151	-0.653	35.404	634.604	-0.000709	-0.000115	-0.000641
0.1020	299.050	5.268	-0.961	5.710	-0.651	35.408	569.315	-0.000369	0.000067	-0.000400
0.1030	273.216	1.336	-2.806	3.260	-0.650	35.410	520.134	-0.000094	0.000196	-0.000228
0.1040	255.799	-1.013	-3.852	1.734	-0.652	35.409	486.975	0.000071	0.000270	-0.000121
0.1050	246.271	-2.596	-4.458	0.869	-0.651	35.408	468.836	0.000182	0.000312	-0.000061
0.1060	243.175	-3.543	-4.748	0.361	-0.655	35.407	462.942	0.000248	0.000332	-0.000025
0.1070	244.632	-4.072	-5.355	-0.066	-0.652	35.406	465.717	0.000285	0.000375	0.000005
0.1080	249.231	-3.807	-5.617	-0.370	-0.655	35.403	474.472	0.000266	0.000393	0.000026
0.1090	256.820	-3.374	-5.382	-0.439	-0.656	35.401	488.920	0.000236	0.000377	0.000031
0.1100	271.052	-2.041	-5.175	0.262	-0.656	35.398	516.014	0.000143	0.000362	-0.000018
0.1110	298.750	0.863	-4.170	2.216	-0.656	35.395	568.743	-0.000060	0.000292	-0.000155
0.1120	345.323	6.128	-2.258	5.546	-0.653	35.393	657.406	-0.000429	0.000158	-0.000388
0.1130	411.267	13.688	1.155	10.321	-0.653	35.391	782.948	-0.000958	-0.000081	-0.000722
0.1140	491.970	23.081	5.531	16.831	-0.655	35.390	936.584	-0.001616	-0.000387	-0.001178
0.1150	581.254	33.711	10.568	24.206	-0.656	35.390	1106.558	-0.002360	-0.000740	-0.001694
0.1160	674.400	44.939	15.810	32.062	-0.660	35.392	1283.884	-0.003146	-0.001107	-0.002244
0.1170	766.644	55.849	21.025	39.656	-0.658	35.394	1459.494	-0.003909	-0.001472	-0.002776
0.1180	854.590	66.618	26.295	46.716	-0.658	35.396	1626.921	-0.004663	-0.001841	-0.003270
0.1190	935.879	76.498	31.208	53.362	-0.659	35.399	1781.673	-0.005355	-0.002185	-0.003735
0.1200	1009.669	85.656	35.598	59.307	-0.657	35.402	1922.150	-0.005996	-0.002492	-0.004151
0.1210	1075.403	93.786	39.603	64.949	-0.659	35.405	2047.291	-0.006565	-0.002772	-0.004546
0.1220	1133.503	101.136	43.000	69.915	-0.653	35.408	2157.898	-0.007080	-0.003010	-0.004894
0.1230	1185.170	107.793	46.303	74.181	-0.652	35.410	2256.260	-0.007546	-0.003241	-0.005193
0.1240	1231.758	113.950	49.316	78.350	-0.658	35.409	2344.952	-0.007976	-0.003452	-0.005485
0.1250	1273.883	119.398	52.069	82.121	-0.661	35.408	2425.146	-0.008358	-0.003645	-0.005748
0.1260	1311.319	124.540	54.476	85.727	-0.664	35.407	2496.414	-0.008718	-0.003813	-0.006001
0.1270	1342.638	128.653	56.320	88.465	-0.652	35.405	2556.038	-0.009006	-0.003942	-0.006193
0.1280	1366.503	132.114	57.971	90.791	-0.652	35.403	2601.471	-0.009248	-0.004058	-0.006355
0.1290	1381.622	134.351	59.018	92.428	-0.651	35.400	2630.253	-0.009405	-0.004131	-0.006470
0.1300	1388.324	135.586	59.529	93.266	-0.655	35.398	2643.013	-0.009491	-0.004167	-0.006529
0.1310	1388.114	136.100	59.667	93.377	-0.656	35.395	2642.612	-0.009527	-0.004177	-0.006536
0.1320	1382.824	135.962	59.432	93.088	-0.657	35.393	2632.542	-0.009517	-0.004160	-0.006516
0.1330	1373.792	135.461	59.226	92.730	-0.658	35.391	2615.347	-0.009482	-0.004146	-0.006491
0.1340	1359.575	134.474	58.951	92.234	-0.668	35.390	2588.282	-0.009413	-0.004127	-0.006456
0.1350	1333.876	132.069	58.221	90.843	-0.667	35.390	2539.358	-0.009245	-0.004075	-0.006359
0.1360	1288.987	127.345	56.527	87.816	-0.665	35.391	2453.899	-0.008914	-0.003957	-0.006147
0.1370	1221.810	119.870	53.211	82.890	-0.659	35.394	2326.012	-0.008391	-0.003725	-0.005802
0.1380	1136.388	110.282	48.946	76.616	-0.661	35.396	2163.391	-0.007720	-0.003426	-0.005363
0.1390	1042.385	99.387	43.882	69.504	-0.664	35.398	1984.434	-0.006957	-0.003072	-0.004865
0.1400	948.247	88.269	38.694	61.867	-0.664	35.401	1805.220	-0.006179	-0.002709	-0.004331
0.1410	860.557	77.569	33.754	54.932	-0.665	35.404	1638.279	-0.005430	-0.002363	-0.003845
0.1420	782.634	67.911	29.172	48.258	-0.661	35.408	1489.935	-0.004754	-0.002042	-0.003378
0.1430	715.578	59.767	25.264	42.892	-0.660	35.409	1362.276	-0.004184	-0.001768	-0.003002
0.1440	658.004	52.625	21.781	38.379	-0.668	35.409	1252.670	-0.003684	-0.001525	-0.002687
0.1450	607.283	46.274	18.603	33.837	-0.665	35.408	1156.111	-0.003239	-0.001302	-0.002369
0.1460	560.304	40.354	15.713	30.053	-0.668	35.407	1066.675	-0.002825	-0.001100	-0.002104
0.1470	514.362	34.226	12.688	25.484	-0.659	35.406	979.214	-0.002396	-0.000888	-0.001784
0.1480	467.834	28.237	10.004	21.604	-0.661	35.403	890.636	-0.001977	-0.000700	-0.001512
0.1490	420.660	22.095	7.101	17.448	-0.660	35.400	800.829	-0.001547	-0.000497	-0.001221
0.1500	374.718	15.982	4.307	13.196	-0.663	35.398	713.367	-0.001119	-0.000301	-0.000924
0.1510	332.669	10.381	1.625	9.288	-0.663	35.395	633.316	-0.000727	-0.000114	-0.000650
0.1520	297.247	5.296	-0.892	5.683	-0.661	35.393	565.882	-0.000371	0.000062	-0.000398
0.1530	270.136	1.308	-2.641	3.192	-0.660	35.391	514.269	-0.000092	0.000185	-0.000223
0.1540	251.846	-1.500	-4.005	1.609	-0.668	35.390	479.450	0.000105	0.000280	-0.000113
0.1550	241.657	-3.210	-4.804	0.385	-0.669	35.390	460.052	0.000225	0.000336	-0.000027
0.1560	238.305	-3.960	-5.162	-0.276	-0.672	35.391	453.672	0.000277	0.000361	0.000019
0.1570	239.553	-4.294	-5.561	-0.826	-0.665	35.394	456.047	0.000301	0.000389	0.000058
0.1580	244.016	-4.308	-5.685	-0.784	-0.670	35.396	464.544	0.000302	0.000398	0.000055
0.1590	251.155	-4.045	-5.726	-0.232	-0.670	35.398	478.134	0.000283	0.000401	0.000016
0.1600	264.124	-2.877	-5.381	0.290	-0.669	35.401	502.825	0.000201	0.000377	-0.000020
0.1610	289.883	-0.390	-4.514	1.845	-0.669	35.404	551.863	0.000027	0.000316	-0.000129
0.1620	334.457	4.723	-2.766	4.651	-0.667	35.408	636.721	-0.000331	0.000194	-0.000326
0.1630	399.305	12.283	0.496	9.605	-0.667	35.410	760.174	-0.000860	-0.000035	-0.000672
0.1640	479.992	21.857	4.995	16.417	-0.676	35.409	913.782	-0.001530	-0.000350	-0.001149
0.1650	570.103	32.531	9.976	23.697	-0.679	35.408	1085.329	-0.002277	-0.000698	-0.001659
0.1660	664.346	43.786	15.260	31.458	-0.683	35.407	1264.744	-0.003065	-0.001068	-0.002202
0.1670	757.898	54.918	20.269	38.751	-0.673	35.406	1442.842	-0.003844	-0.001419	-0.002713
0.1680	846.776	65.883	25.663	46.208	-0.675	35.403	1612.043	-0.004612	-0.001796	-0.003235
0.1690	927.644	75.846	30.535	52.949	-0.674	35.401	1765.995	-0.005309	-0.002137	-0.003706
0.1700	999.840	84.837	35.131	58.853	-0.675	35.398	1903.439	-0.005939	-0.002459	-0.004120
0.1710	1064.117	92.813	39.135	64.109	-0.674	35.395	2025.805	-0.006497	-0.002739	-0.004488
0.1720	1122.126	100.039	42.616	69.078	-0.675	35.393	2136.240	-0.007003	-0.002983	-0.004835
0.1730	1175.462	107.070	45.916	73.673	-0.672	35.391	2237.778	-0.007495	-0.003214	-0.005157
0.1740	1224.905	113.560	48.917	78.131	-0.672	35.389	2331.905	-0.007949	-0.003424	-0.005469
0.1750	1270.532	119.397	51.767	82.121	-0.669	35.390	2418.766	-0.008358	-0.003624	-0.005748
0.1760	1311.214	124.636	54.382	85.796	-0.670	35.391	2496.214	-0.008725	-0.003807	-0.006006
0.1770	1345.178	128.929	56.529	88.602	-0.665	35.394	2560.873	-0.009025	-0.003957	-0.006202
0.1780	1370.591	132.293	58.194	91.107	-0.666	35.396	2609.253	-0.009261	-0.004074	-0.006377
0.1790	1386.431	134.698	59.198	92.826	-0.667	35.398	2639.408	-0.009429	-0.004144	-0.006498
0.1800	1393.088	135.978	59.638	93.651	-0.664	35.401	2652.082	-0.009518	-0.004175	-0.006556
0.1810	1392.743	136.534	59.708	94.025	-0.662	35.404	2651.424	-0.009557	-0.004180	-0.006582
0.1820	1387.077	136.478	59.639	93.888	-0.660	35.408	2640.638	-0.009553	-0.004175	-0.006572
0.1830	1377.399	136.019	59.529	93.572	-0.655	35.409	2622.213	-0.009521	-0.004167	-0.006550
0.1840	1361.559	134.725	59.308	92.635	-0.663	35.409	2592.058	-0.009431	-0.004152	-0.006484
0.1850	1333.320	132.043	58.482	90.900	-0.661	35.408	2538.300	-0.009243	-0.004094	-0.006363
0.1860	1286.312	127.055	56.445	88.010	-0.665	35.407	2448.807	-0.008894	-0.003951	-0.006161
0.1870	1218.894	119.454	53.059	83.070	-0.653	35.406	2320.461	-0.008362	-0.003714	-0.005815
0.1880	1136.133	110.310	48.835	76.934	-0.654	35.404	2162.905	-0.007722	-0.003418	-0.005385
0.1890	1046.458	99.999	43.992	70.083	-0.653	35.401	1992.188	-0.007000	-0.003079	-0.004906
0.1900	957.640	89.563	39.190	63.175	-0.659	35.398	1823.101	-0.006269	-0.002743	-0.004422
0.1910	875.420	79.724	34.469	56.458	-0.660	35.395	1666.574	-0.005581	-0.002413	-0.003952
0.1920	803.028	70.622	30.203	50.236	-0.655	35.393	1528.759	-0.004944	-0.002114	-0.003517
0.1930	740.720	63.063	26.501	45.133	-0.655	35.391	1410.141	-0.004414	-0.001855	-0.003159
0.1940	685.836	56.406	23.254	40.551	-0.661	35.390	1305.656	-0.003948	-0.001628	-0.002839
0.1950	635.386	50.026	20.297	36.189	-0.663	35.390	1209.612	-0.003502	-0.001421	-0.002533
0.1960	586.018	43.648	17.408	32.158	-0.664	35.391	1115.627	-0.003055	-0.001219	-0.002251
0.1970	536.108	36.965	14.257	27.533	-0.657	35.394	1020.613	-0.002588	-0.000998	-0.001927
0.1980	485.342	30.350	11.243	23.529	-0.657	35.396	923.967	-0.002124	-0.000787	-0.001647
0.1990	434.877	23.902	8.036	19.043	-0.663	35.398	827.894	-0.001673	-0.000563	-0.001333
0.2000	386.921	17.703	5.229	14.695	-0.662	35.401	736.599	-0.001239	-0.000366	-0.001029
0.2010	344.120	12.131	2.491	10.622	-0.665	35.404	655.117	-0.000849	-0.000174	-0.000744
0.2020	308.653	7.170	0.249	6.853	-0.659	35.408	587.597	-0.000502	-0.000017	-0.000480
0.2030	281.723	3.253	-1.554	4.184	-0.661	35.410	536.327	-0.000228	0.000109	-0.000293
0.2040	263.448	0.586	-2.861	2.712	-0.669	35.410	501.537	-0.000041	0.000200	-0.000190
0.2050	253.169	-0.985	-3.716	1.747	-0.672	35.409	481.968	0.000069	0.000260	-0.000122
0.2060	249.457	-1.902	-4.157	1.362	-0.673	35.407	474.901	0.000133	0.000291	-0.000095
0.2070	250.388	-2.474	-4.542	0.662	-0.666	35.406	476.675	0.000173	0.000318	-0.000046
0.2080	254.596	-2.348	-4.583	0.470	-0.667	35.404	484.686	0.000164	0.000321	-0.000033
0.2090	261.314	-2.000	-4.610	0.567	-0.672	35.401	497.475	0.000140	0.000323	-0.000040
0.2100	273.081	-1.096	-4.266	1.406	-0.677	35.398	519.876	0.000077	0.000299	-0.000098
0.2110	296.811	1.349	-3.481	2.945	-0.679	35.395	565.052	-0.000094	0.000244	-0.000206
0.2120	339.056	6.073	-1.954	5.724	-0.678	35.393	645.475	-0.000425	0.000137	-0.000401
0.2130	402.040	13.243	0.909	10.251	-0.673	35.391	765.381	-0.000927	-0.000064	-0.000718
0.2140	481.826	22.457	5.064	16.650	-0.679	35.390	917.273	-0.001572	-0.000354	-0.001166
0.2150	571.936	32.949	10.142	24.274	-0.677	35.390	1088.820	-0.002306	-0.000710	-0.001699
0.2160	667.517	44.232	15.619	31.923	-0.680	35.392	1270.781	-0.003096	-0.001093	-0.002235
0.2170	763.488	55.724	21.081	39.492	-0.673	35.394	1453.485	-0.003901	-0.001476	-0.002764
0.2180	855.943	67.174	26.517	47.032	-0.676	35.396	1629.496	-0.004702	-0.001856	-0.003292
0.2190	940.613	77.569	31.692	54.120	-0.677	35.398	1790.686	-0.005430	-0.002218	-0.003788
0.2200	1015.470	86.808	36.370	60.477	-0.678	35.401	1933.193	-0.006077	-0.002546	-0.004233
0.2210	1079.746	95.021	40.374	65.844	-0.676	35.404	2055.559	-0.006651	-0.002826	-0.004609
0.2220	1134.555	101.941	43.510	70.286	-0.674	35.408	2159.901	-0.007136	-0.003046	-0.004920
0.2230	1182.029	108.293	46.372	74.509	-0.672	35.410	2250.280	-0.007581	-0.003246	-0.005216
0.2240	1224.349	113.950	48.987	78.294	-0.676	35.410	2330.847	-0.007977	-0.003429	-0.005481
0.2250	1263.468	119.232	51.438	81.941	-0.674	35.409	2405.319	-0.008346	-0.003601	-0.005736
0.2260	1300.198	124.165	53.721	85.354	-0.674	35.407	2475.243	-0.008692	-0.003760	-0.005975
0.2270	1333.786	128.083	55.716	88.188	-0.667	35.406	2539.186	-0.008966	-0.003900	-0.006173
0.2280	1362.175	131.708	57.408	90.748	-0.665	35.404	2593.231	-0.009220	-0.004019	-0.006352
0.2290	1382.463	134.196	58.729	92.634	-0.669	35.401	2631.855	-0.009394	-0.004111	-0.006484
0.2300	1393.464	136.018	59.720	93.915	-0.671	35.398	2652.798	-0.009521	-0.004180	-0.006574
0.2310	1396.109	136.977	60.217	94.533	-0.673	35.395	2657.833	-0.009588	-0.004215	-0.006617
0.2320	1392.457	137.103	60.203	94.533	-0.671	35.393	2650.881	-0.009597	-0.004214	-0.006617
0.2330	1384.101	136.714	60.024	94.424	-0.668	35.391	2634.974	-0.009570	-0.004202	-0.006610
0.2340	1369.809	135.740	59.694	93.750	-0.672	35.389	2607.765	-0.009502	-0.004179	-0.006562
0.2350	1342.608	133.168	58.952	92.030	-0.669	35.389	2555.981	-0.009322	-0.004127	-0.006442
0.2360	1295.193	128.290	57.011	88.865	-0.667	35.391	2465.715	-0.008980	-0.003991	-0.006221
0.2370	1224.860	120.536	53.570	83.745	-0.659	35.394	2331.820	-0.008438	-0.003750	-0.005862
0.2380	1137.109	110.628	49.070	77.250	-0.656	35.396	2164.764	-0.007744	-0.003435	-0.005408
0.2390	1041.995	99.622	43.937	69.682	-0.659	35.398	1983.690	-0.006974	-0.003076	-0.004878
0.2400	947.827	88.616	38.709	62.267	-0.657	35.401	1804.419	-0.006203	-0.002710	-0.004359
0.2410	860.361	78.028	33.797	55.429	-0.660	35.404	1637.907	-0.005462	-0.002366	-0.003880
0.2420	782.649	68.426	29.366	49.168	-0.656	35.408	1489.964	-0.004790	-0.002056	-0.003442
0.2430	715.698	60.185	25.430	43.471	-0.657	35.410	1362.505	-0.004213	-0.001780	-0.003043
0.2440	657.884	53.069	22.155	38.364	-0.664	35.410	1252.441	-0.003715	-0.001551	-0.002685
0.2450	606.441	46.692	18.881	34.208	-0.667	35.409	1154.509	-0.003268	-0.001322	-0.002395
0.2460	558.125	40.536	15.923	30.245	-0.666	35.407	1062.527	-0.002838	-0.001115	-0.002117
0.2470	510.500	34.115	12.937	25.813	-0.658	35.406	971.861	-0.002388	-0.000906	-0.001807
0.2480	463.130	28.167	10.115	21.481	-0.656	35.403	881.681	-0.001972	-0.000708	-0.001504
0.2490	416.572	22.122	7.197	17.063	-0.656	35.400	793.047	-0.001549	-0.000504	-0.001194
0.2500	372.419	16.271	4.225	13.390	-0.659	35.397	708.990	-0.001139	-0.000296	-0.000937
0.2510	332.338	10.756	1.501	9.824	-0.663	35.395	632.687	-0.000753	-0.000105	-0.000688
0.2520	297.953	5.906	-0.810	6.522	-0.664	35.393	567.226	-0.000413	0.000057	-0.000457
0.2530	270.526	1.945	-2.627	3.564	-0.665	35.391	515.013	-0.000136	0.000184	-0.000250
0.2540	250.839	-0.960	-3.632	1.680	-0.672	35.389	477.533	0.000067	0.000254	-0.000118
0.2550	238.711	-2.781	-4.418	0.482	-0.672	35.390	454.445	0.000195	0.000309	-0.000034
0.2560	233.572	-3.865	-5.037	0.014	-0.675	35.391	444.660	0.000271	0.000353	-0.000001
0.2570	233.587	-4.657	-5.602	-0.482	-0.668	35.394	444.689	0.000326	0.000392	0.000034
0.2580	237.329	-4.809	-5.945	-0.372	-0.672	35.396	451.813	0.000337	0.000416	0.000026
0.2590	244.182	-4.265	-5.849	-0.207	-0.675	35.398	464.859	0.000299	0.000409	0.000014
0.2600	256.715	-3.293	-5.450	0.425	-0.680	35.401	488.720	0.000230	0.000381	-0.000030
0.2610	281.692	-0.569	-4.555	1.596	-0.682	35.404	536.270	0.000040	0.000319	-0.000112
0.2620	325.365	4.100	-2.751	4.527	-0.679	35.407	619.411	-0.000287	0.000193	-0.000317
0.2630	389.446	11.409	0.277	9.097	-0.681	35.409	741.405	-0.000799	-0.000019	-0.000637
0.2640	469.367	20.997	4.624	15.785	-0.683	35.409	893.555	-0.001470	-0.000324	-0.001105
0.2650	559.012	31.628	9.607	23.311	-0.681	35.409	1064.215	-0.002214	-0.000672	-0.001632
0.2660	653.616	42.927	15.000	31.031	-0.679	35.407	1244.316	-0.003005	-0.001050	-0.002172
0.2670	748.595	54.183	20.408	38.585	-0.676	35.406	1425.133	-0.003793	-0.001429	-0.002701
0.2680	839.682	65.202	25.690	45.836	-0.678	35.403	1598.539	-0.004564	-0.001798	-0.003209
0.2690	923.345	75.277	30.796	52.785	-0.678	35.400	1757.813	-0.005269	-0.002156	-0.003695
0.2700	997.886	84.547	35.240	58.935	-0.673	35.397	1899.719	-0.005918	-0.002467	-0.004125
0.2710	1063.816	92.843	39.313	64.371	-0.671	35.394	2025.232	-0.006499	-0.002752	-0.004506
0.2720	1122.201	100.388	42.684	69.284	-0.663	35.392	2136.383	-0.007027	-0.002988	-0.004850
0.2730	1174.590	107.307	45.781	73.797	-0.660	35.390	2236.118	-0.007511	-0.003205	-0.005166
0.2740	1222.140	113.240	48.890	78.131	-0.666	35.389	2326.641	-0.007927	-0.003422	-0.005469
0.2750	1265.407	118.939	51.505	81.927	-0.667	35.390	2409.010	-0.008326	-0.003605	-0.005735
0.2760	1304.646	124.082	54.010	85.436	-0.673	35.391	2483.711	-0.008686	-0.003781	-0.005980
0.2770	1338.535	128.556	55.978	88.642	-0.667	35.394	2548.227	-0.008999	-0.003918	-0.006205
0.2780	1365.496	132.225	57.809	91.093	-0.669	35.396	2599.554	-0.009256	-0.004047	-0.006377
0.2790	1383.395	134.713	59.143	92.813	-0.668	35.398	2633.629	-0.009430	-0.004140	-0.006497
0.2800	1392.081	136.228	59.942	93.736	-0.672	35.401	2650.166	-0.009536	-0.004196	-0.006562
0.2810	1393.103	137.006	60.162	94.163	-0.667	35.404	2652.111	-0.009590	-0.004211	-0.006591
0.2820	1388.550	137.060	60.080	94.080	-0.661	35.408	2643.442	-0.009594	-0.004206	-0.006586
0.2830	1379.698	136.643	59.721	93.695	-0.659	35.409	2626.591	-0.009565	-0.004180	-0.006559
0.2840	1364.895	135.546	59.515	93.337	-0.661	35.409	2598.410	-0.009488	-0.004166	-0.006534
0.2850	1338.099	132.877	58.744	91.755	-0.657	35.408	2547.398	-0.009301	-0.004112	-0.006423
0.2860	1292.518	128.222	57.092	88.782	-0.658	35.407	2460.623	-0.008976	-0.003996	-0.006215
0.2870	1225.597	120.717	53.830	83.719	-0.654	35.406	2333.221	-0.008450	-0.003768	-0.005860
0.2880	1141.919	111.309	49.481	77.527	-0.657	35.403	2173.920	-0.007792	-0.003464	-0.005427
0.2890	1050.531	100.887	44.418	70.633	-0.659	35.401	1999.941	-0.007062	-0.003109	-0.004944
0.2900	959.940	89.978	39.354	63.326	-0.659	35.398	1827.478	-0.006298	-0.002755	-0.004433
0.2910	876.036	79.793	34.731	56.459	-0.658	35.395	1667.747	-0.005585	-0.002431	-0.003952
0.2920	801.660	70.524	30.451	50.391	-0.656	35.392	1526.155	-0.004937	-0.002132	-0.003527
0.2930	736.813	62.603	26.584	45.024	-0.660	35.390	1402.702	-0.004382	-0.001861	-0.003152
0.2940	679.690	55.780	23.186	40.498	-0.666	35.389	1293.955	-0.003905	-0.001623	-0.002835
0.2950	627.541	49.346	19.995	36.286	-0.667	35.390	1194.677	-0.003454	-0.001400	-0.002540
0.2960	578.068	43.093	17.037	32.020	-0.665	35.392	1100.492	-0.003017	-0.001193	-0.002241
0.2970	529.270	36.827	14.022	27.508	-0.658	35.394	1007.595	-0.002578	-0.000982	-0.001926
0.2980	480.864	30.420	11.091	23.048	-0.655	35.396	915.442	-0.002129	-0.000776	-0.001613
0.2990	432.878	24.222	8.366	18.989	-0.655	35.398	824.089	-0.001696	-0.000586	-0.001329
0.3000	386.576	18.053	5.394	15.136	-0.657	35.401	735.941	-0.001264	-0.000378	-0.001060
0.3010	344.421	12.549	2.766	11.283	-0.659	35.404	655.689	-0.000878	-0.000194	-0.000790
0.3020	308.714	7.616	0.290	7.663	-0.656	35.408	587.711	-0.000533	-0.000020	-0.000536
0.3030	281.061	3.724	-1.609	4.651	-0.652	35.410	535.069	-0.000261	0.000113	-0.000326
0.3040	261.900	0.889	-2.889	2.807	-0.659	35.410	498.590	-0.000062	0.000202	-0.000196
0.3050	250.358	-1.098	-3.799	1.885	-0.659	35.409	476.618	0.000077	0.000266	-0.000132
0.3060	245.399	-1.973	-4.390	1.377	-0.661	35.407	467.176	0.000138	0.000307	-0.000096
0.3070	245.264	-2.738	-4.748	0.757	-0.652	35.406	466.919	0.000192	0.000332	-0.000053
0.3080	248.540	-2.780	-4.968	0.428	-0.656	35.404	473.156	0.000195	0.000348	-0.000030
0.3090	254.371	-2.585	-4.871	0.496	-0.660	35.401	484.257	0.000181	0.000341	-0.000035
0.3100	264.109	-1.667	-4.761	1.034	-0.665	35.398	502.796	0.000117	0.000333	-0.000072
0.3110	283.872	0.361	-4.072	2.272	-0.664	35.395	540.419	-0.000025	0.000285	-0.000159
0.3120	321.428	4.252	-2.738	4.569	-0.665	35.393	611.916	-0.000298	0.000192	-0.000320
0.3130	381.060	10.991	-0.000	8.753	-0.664	35.391	725.441	-0.000769	0.000000	-0.000613
0.3140	460.350	20.274	4.264	15.164	-0.668	35.389	876.389	-0.001419	-0.000299	-0.001061
0.3150	552.339	31.114	9.507	22.884	-0.667	35.390	1051.512	-0.002178	-0.000665	-0.001602
0.3160	650.520	42.717	15.218	31.317	-0.668	35.391	1238.422	-0.002990	-0.001065	-0.002192
0.3170	749.647	54.307	20.708	39.134	-0.663	35.394	1427.135	-0.003801	-0.001450	-0.002739
0.3180	844.867	65.854	26.241	46.426	-0.666	35.396	1608.410	-0.004610	-0.001837	-0.003250
0.3190	931.867	76.457	31.320	53.267	-0.667	35.398	1774.035	-0.005352	-0.002192	-0.003729
0.3200	1008.030	86.324	35.861	59.733	-0.670	35.401	1919.031	-0.006043	-0.002510	-0.004181
0.3210	1072.998	94.538	39.974	65.307	-0.668	35.404	2042.713	-0.006618	-0.002798	-0.004571
0.3220	1127.987	101.528	43.332	70.081	-0.667	35.407	2147.398	-0.007107	-0.003033	-0.004906
0.3230	1175.522	107.517	46.206	74.032	-0.664	35.409	2237.892	-0.007526	-0.003234	-0.005182
0.3240	1217.887	113.020	48.808	78.309	-0.669	35.409	2318.544	-0.007911	-0.003417	-0.005482
0.3250	1256.901	118.258	51.286	81.805	-0.671	35.408	2392.817	-0.008278	-0.003590	-0.005726
0.3260	1293.435	123.149	53.734	84.996	-0.672	35.406	2462.368	-0.008620	-0.003761	-0.005950
0.3270	1326.948	127.624	55.605	87.721	-0.663	35.406	2526.169	-0.008934	-0.003892	-0.006140
0.3280	1355.938	131.529	57.324	90.336	-0.663	35.403	2581.358	-0.009207	-0.004013	-0.006324
0.3290	1377.910	134.461	58.757	92.524	-0.663	35.401	2623.186	-0.009412	-0.004113	-0.006477
0.3300	1391.225	136.657	59.818	94.012	-0.668	35.398	2648.535	-0.009566	-0.004187	-0.006581
0.3310	1396.094	137.561	60.342	94.727	-0.668	35.394	2657.804	-0.009629	-0.004224	-0.006631
0.3320	1394.170	137.671	60.397	94.809	-0.666	35.392	2654.142	-0.009637	-0.004228	-0.006637
0.3330	1387.167	137.435	60.162	94.450	-0.658	35.390	2640.810	-0.009620	-0.004211	-0.006612
0.3340	1375.190	136.627	60.052	94.216	-0.661	35.389	2618.008	-0.009564	-0.004204	-0.006595
0.3350	1353.278	134.878	59.486	92.908	-0.656	35.390	2576.294	-0.009441	-0.004164	-0.006504
0.3360	1313.859	130.626	58.138	90.610	-0.662	35.391	2501.249	-0.009144	-0.004070	-0.006343
0.3370	1251.536	123.539	55.193	85.946	-0.650	35.394	2382.603	-0.008648	-0.003864	-0.006016
0.3380	1168.369	114.368	51.064	79.935	-0.648	35.395	2224.274	-0.008006	-0.003574	-0.005595
0.3390	1072.923	103.638	46.068	72.490	-0.650	35.398	2042.570	-0.007255	-0.003225	-0.005074
0.3400	975.389	92.229	40.674	64.688	-0.656	35.400	1856.890	-0.006456	-0.002847	-0.004528
0.3410	883.565	81.264	35.556	57.587	-0.659	35.404	1682.081	-0.005688	-0.002489	-0.004031
0.3420	802.292	71.234	30.520	51.009	-0.653	35.407	1527.357	-0.004986	-0.002136	-0.003571
0.3430	733.537	62.744	26.308	45.216	-0.655	35.409	1396.465	-0.004392	-0.001842	-0.003165
0.3440	676.338	55.726	22.869	40.564	-0.660	35.408	1287.575	-0.003901	-0.001601	-0.002840
0.3450	627.857	49.681	19.897	36.603	-0.661	35.408	1195.278	-0.003478	-0.001393	-0.002562
0.3460	583.944	43.844	17.352	33.038	-0.664	35.407	1111.679	-0.003069	-0.001215	-0.002313
0.3470	540.617	38.078	14.627	28.897	-0.660	35.406	1029.196	-0.002665	-0.001024	-0.002023
0.3480	495.877	32.297	11.943	24.701	-0.662	35.403	944.023	-0.002261	-0.000836	-0.001729
0.3490	449.169	26.363	9.165	20.794	-0.666	35.401	855.103	-0.001845	-0.000642	-0.001456
0.3500	402.055	20.485	6.329	16.734	-0.667	35.398	765.409	-0.001434	-0.000443	-0.001171
0.3510	356.714	14.496	3.591	12.591	-0.664	35.395	679.092	-0.001015	-0.000251	-0.000881
0.3520	315.942	8.936	0.880	8.573	-0.659	35.393	601.473	-0.000626	-0.000062	-0.000600
0.3530	282.249	4.168	-1.554	5.244	-0.657	35.391	537.329	-0.000292	0.000109	-0.000367
0.3540	257.271	0.861	-3.081	3.151	-0.667	35.390	489.779	-0.000060	0.000216	-0.000221
0.3550	241.371	-1.641	-4.389	1.540	-0.673	35.390	459.509	0.000115	0.000307	-0.000108
0.3560	233.857	-3.084	-4.831	0.550	-0.676	35.391	445.204	0.000216	0.000338	-0.000039
0.3570	232.595	-4.002	-5.410	-0.207	-0.669	35.394	442.801	0.000280	0.000379	0.000014
0.3580	235.991	-4.085	-5.327	-0.068	-0.668	35.395	449.266	0.000286	0.000373	0.000005
0.3590	242.724	-3.764	-5.396	0.248	-0.672	35.398	462.084	0.000264	0.000378	-0.000017
0.3600	254.807	-2.778	-5.218	0.716	-0.674	35.401	485.086	0.000194	0.000365	-0.000050
0.3610	278.416	-0.595	-4.611	1.790	-0.675	35.404	530.033	0.000042	0.000323	-0.000125
0.3620	320.075	3.990	-2.999	4.350	-0.673	35.407	609.341	-0.000279	0.000210	-0.000305
0.3630	382.187	11.243	-0.053	9.042	-0.669	35.409	727.587	-0.000787	0.000004	-0.000633
0.3640	460.981	20.636	4.171	15.714	-0.671	35.409	877.590	-0.001445	-0.000292	-0.001100
0.3650	549.859	31.044	9.179	22.938	-0.673	35.408	1046.791	-0.002173	-0.000643	-0.001606
0.3660	643.246	42.146	14.738	30.769	-0.677	35.406	1224.575	-0.002950	-0.001032	-0.002154
0.3670	736.287	53.028	20.089	38.021	-0.670	35.405	1401.701	-0.003712	-0.001406	-0.002661
0.3680	825.465	63.964	25.456	45.120	-0.674	35.403	1571.474	-0.004478	-0.001782	-0.003158
0.3690	908.557	74.178	30.397	51.999	-0.673	35.400	1729.660	-0.005192	-0.002128	-0.003640
0.3700	984.421	83.766	34.924	58.246	-0.673	35.397	1874.084	-0.005864	-0.002445	-0.004077
0.3710	1052.650	92.285	39.299	63.984	-0.673	35.394	2003.975	-0.006460	-0.002751	-0.004479
0.3720	1112.854	100.011	42.766	68.979	-0.671	35.392	2118.587	-0.007001	-0.002994	-0.004829
0.3730	1165.694	106.876	45.945	73.286	-0.667	35.390	2219.181	-0.007481	-0.003216	-0.005130
0.3740	1212.236	113.143	48.821	77.552	-0.668	35.388	2307.787	-0.007920	-0.003417	-0.005429
0.3750	1253.444	118.396	51.326	81.104	-0.667	35.389	2386.236	-0.008288	-0.003593	-0.005677
0.3760	1290.099	123.079	53.678	84.723	-0.671	35.390	2456.017	-0.008616	-0.003757	-0.005931
0.3770	1322.079	126.972	55.454	87.570	-0.666	35.393	2516.899	-0.008888	-0.003882	-0.006130
0.3780	1348.559	130.613	57.215	89.991	-0.667	35.395	2567.310	-0.009143	-0.004005	-0.006299
0.3790	1368.246	133.392	58.413	91.725	-0.667	35.398	2604.790	-0.009337	-0.004089	-0.006421
0.3800	1380.044	135.324	59.323	93.088	-0.668	35.400	2627.249	-0.009473	-0.004153	-0.006516
0.3810	1384.522	136.157	59.790	93.968	-0.673	35.403	2635.775	-0.009531	-0.004185	-0.006578
0.3820	1382.824	136.367	59.721	93.982	-0.668	35.407	2632.542	-0.009546	-0.004180	-0.006579
0.3830	1376.557	135.963	59.680	93.913	-0.665	35.409	2620.611	-0.009517	-0.004178	-0.006574
0.3840	1365.556	135.240	59.433	93.431	-0.668	35.409	2599.669	-0.009467	-0.004160	-0.006540
0.3850	1345.824	133.615	59.074	92.578	-0.665	35.409	2562.103	-0.009353	-0.004135	-0.006480
0.3860	1309.275	129.821	57.850	90.210	-0.667	35.407	2492.523	-0.009088	-0.004049	-0.006315
0.3870	1250.048	123.428	55.110	85.987	-0.658	35.406	2379.770	-0.008640	-0.003858	-0.006019
0.3880	1169.421	114.771	51.106	79.904	-0.660	35.403	2226.276	-0.008034	-0.003577	-0.005593
0.3890	1076.274	104.252	46.083	72.846	-0.659	35.400	2048.950	-0.007298	-0.003226	-0.005099
0.3900	981.145	93.440	40.855	65.293	-0.662	35.397	1867.847	-0.006541	-0.002860	-0.004570
0.3910	891.530	82.863	35.901	58.523	-0.661	35.394	1697.245	-0.005800	-0.002513	-0.004097
0.3920	811.850	73.009	31.277	51.918	-0.661	35.392	1545.553	-0.005111	-0.002189	-0.003634
0.3930	743.861	64.519	27.163	46.178	-0.658	35.390	1416.121	-0.004516	-0.001901	-0.003232
0.3940	686.603	57.224	23.695	41.403	-0.667	35.389	1307.116	-0.004006	-0.001659	-0.002898
0.3950	636.934	51.096	20.780	37.082	-0.667	35.390	1212.559	-0.003577	-0.001455	-0.002596
0.3960	591.082	45.412	18.179	33.546	-0.669	35.391	1125.269	-0.003179	-0.001272	-0.002348
0.3970	545.110	39.325	15.344	29.226	-0.660	35.394	1037.750	-0.002753	-0.001074	-0.002046
0.3980	497.561	33.045	12.522	25.099	-0.659	35.395	947.227	-0.002313	-0.000877	-0.001757
0.3990	448.343	26.556	9.412	20.656	-0.662	35.398	853.529	-0.001859	-0.000659	-0.001446
0.4000	399.711	20.122	6.427	16.239	-0.665	35.400	760.946	-0.001409	-0.000450	-0.001137
0.4010	354.385	14.368	3.468	12.483	-0.664	35.404	674.658	-0.001006	-0.000243	-0.000874
0.4020	315.131	9.171	0.800	8.753	-0.658	35.407	599.928	-0.000642	-0.000056	-0.000613
0.4030	283.917	4.557	-1.389	5.698	-0.657	35.409	540.504	-0.000319	0.000097	-0.000399
0.4040	261.675	1.405	-2.875	3.538	-0.666	35.409	498.161	-0.000098	0.000201	-0.000248
0.4050	248.179	-0.817	-3.853	2.107	-0.670	35.409	472.469	0.000057	0.000270	-0.000147
0.4060	242.679	-1.872	-4.268	1.639	-0.669	35.407	461.998	0.000131	0.000299	-0.000115
0.4070	242.784	-2.457	-4.667	0.911	-0.657	35.406	462.198	0.000172	0.000327	-0.000064
0.4080	246.947	-2.665	-4.750	0.870	-0.657	35.403	470.123	0.000187	0.000332	-0.000061
0.4090	254.160	-2.262	-4.900	0.869	-0.664	35.401	483.856	0.000158	0.000343	-0.000061
0.4100	267.415	-1.124	-4.666	1.474	-0.663	35.398	509.090	0.000079	0.000327	-0.000103
0.4110	293.234	1.390	-3.784	3.275	-0.664	35.395	558.243	-0.000097	0.000265	-0.000229
0.4120	337.448	6.156	-1.954	6.081	-0.664	35.392	642.414	-0.000431	0.000137	-0.000426
0.4130	401.319	13.563	1.060	10.966	-0.665	35.391	764.008	-0.000949	-0.000074	-0.000768
0.4140	480.608	22.944	5.407	17.324	-0.672	35.389	914.955	-0.001606	-0.000378	-0.001213
0.4150	569.336	33.629	10.443	24.892	-0.673	35.389	1083.870	-0.002354	-0.000731	-0.001742
0.4160	662.482	44.691	15.974	32.777	-0.677	35.390	1261.196	-0.003128	-0.001118	-0.002294
0.4170	755.854	55.667	21.301	39.960	-0.671	35.393	1438.951	-0.003897	-0.001491	-0.002797
0.4180	845.919	66.550	26.696	47.157	-0.667	35.395	1610.413	-0.004659	-0.001869	-0.003301
0.4190	929.462	77.042	31.566	53.886	-0.665	35.398	1769.457	-0.005393	-0.002210	-0.003772
0.4200	1004.859	86.409	36.120	60.230	-0.669	35.400	1912.994	-0.006049	-0.002528	-0.004216
0.4210	1071.510	94.719	40.178	65.815	-0.671	35.404	2039.881	-0.006630	-0.002812	-0.004607
0.4220	1129.911	102.070	43.646	70.575	-0.671	35.407	2151.060	-0.007145	-0.003055	-0.004940
0.4230	1181.188	108.767	46.784	74.978	-0.668	35.409	2248.678	-0.007614	-0.003275	-0.005248
0.4240	1226.438	114.810	49.523	79.189	-0.672	35.409	2334.824	-0.008037	-0.003467	-0.005543
0.4250	1266.895	119.840	52.111	82.753	-0.669	35.408	2411.842	-0.008389	-0.003648	-0.005793
0.4260	1303.188	124.579	54.437	86.179	-0.673	35.406	2480.936	-0.008721	-0.003811	-0.006033
0.4270	1334.808	128.513	56.267	88.670	-0.667	35.405	2541.132	-0.008996	-0.003939	-0.006207
0.4280	1360.687	132.140	57.971	91.270	-0.664	35.403	2590.399	-0.009250	-0.004058	-0.006389
0.4290	1379.052	134.907	59.060	92.840	-0.663	35.400	2625.360	-0.009443	-0.004134	-0.006499
0.4300	1389.226	136.464	59.886	94.160	-0.669	35.397	2644.730	-0.009552	-0.004192	-0.006591
0.4310	1392.021	137.312	60.161	94.684	-0.669	35.394	2650.051	-0.009612	-0.004211	-0.006628
0.4320	1389.016	137.424	60.106	94.766	-0.669	35.392	2644.329	-0.009620	-0.004207	-0.006634
0.4330	1381.727	137.382	59.900	94.630	-0.664	35.390	2630.453	-0.009617	-0.004193	-0.006624
0.4340	1369.509	136.756	59.791	94.108	-0.671	35.389	2607.193	-0.009573	-0.004185	-0.006588
0.4350	1347.192	134.753	59.253	93.143	-0.667	35.389	2564.707	-0.009433	-0.004148	-0.006520
0.4360	1306.555	130.264	57.848	90.459	-0.669	35.390	2487.345	-0.009118	-0.004049	-0.006332
0.4370	1242.579	123.080	54.806	85.946	-0.659	35.393	2365.551	-0.008616	-0.003836	-0.006016
0.4380	1157.894	113.477	50.638	79.768	-0.660	35.395	2204.332	-0.007943	-0.003545	-0.005584
0.4390	1061.456	102.651	45.409	72.159	-0.659	35.397	2020.741	-0.007186	-0.003179	-0.005051
0.4400	963.652	91.437	40.070	64.330	-0.664	35.400	1834.545	-0.006401	-0.002805	-0.004503
0.4410	872.114	80.431	34.841	56.858	-0.664	35.403	1660.280	-0.005630	-0.002439	-0.003980
0.4420	791.396	70.580	30.122	50.403	-0.662	35.407	1506.615	-0.004941	-0.002109	-0.003528
0.4430	722.581	61.949	25.843	44.761	-0.659	35.409	1375.608	-0.004336	-0.001809	-0.003133
0.4440	664.060	54.640	22.499	39.850	-0.669	35.409	1264.200	-0.003825	-0.001575	-0.002789
0.4450	613.249	48.067	19.555	35.295	-0.669	35.408	1167.469	-0.003365	-0.001369	-0.002471
0.4460	566.676	42.162	16.803	31.580	-0.672	35.407	1078.806	-0.002951	-0.001176	-0.002211
0.4470	520.734	36.214	13.871	27.507	-0.661	35.406	991.344	-0.002535	-0.000971	-0.001925
0.4480	473.184	30.128	10.939	23.503	-0.659	35.403	900.822	-0.002109	-0.000766	-0.001645
0.4490	423.846	23.915	7.911	18.754	-0.659	35.400	806.894	-0.001674	-0.000554	-0.001313
0.4500	375.154	17.523	4.912	14.269	-0.660	35.398	714.197	-0.001227	-0.000344	-0.000999
0.4510	330.294	11.548	1.995	9.975	-0.662	35.395	628.796	-0.000808	-0.000140	-0.000698
0.4520	292.333	5.962	-0.453	6.646	-0.660	35.392	556.526	-0.000417	0.000032	-0.000465
0.4530	263.253	1.766	-2.531	3.867	-0.661	35.390	501.165	-0.000124	0.000177	-0.000271
0.4540	243.836	-1.041	-3.797	2.078	-0.666	35.389	464.201	0.000073	0.000266	-0.000145
0.4550	233.286	-2.806	-4.665	0.770	-0.668	35.389	444.117	0.000196	0.000327	-0.000054
0.4560	229.965	-3.488	-5.202	0.178	-0.673	35.391	437.794	0.000244	0.000364	-0.000012
0.4570	231.047	-4.044	-5.574	-0.027	-0.667	35.394	439.854	0.000283	0.000390	0.000002
0.4580	235.134	-4.017	-5.588	0.249	-0.669	35.396	447.636	0.000281	0.000391	-0.000017
0.4590	241.627	-3.586	-5.617	0.388	-0.670	35.398	459.995	0.000251	0.000393	-0.000027
0.4600	252.988	-2.726	-5.288	0.718	-0.672	35.400	481.625	0.000191	0.000370	-0.000050
0.4610	275.967	-0.349	-4.750	1.667	-0.674	35.403	525.370	0.000024	0.000333	-0.000117
0.4620	317.400	4.001	-3.125	4.404	-0.672	35.407	604.248	-0.000280	0.000219	-0.000308
0.4630	380.174	11.088	-0.318	9.096	-0.670	35.409	723.753	-0.000776	0.000022	-0.000637
0.4640	460.891	20.469	4.128	15.797	-0.674	35.409	877.419	-0.001433	-0.000289	-0.001106
0.4650	552.670	31.309	9.315	23.131	-0.672	35.408	1052.141	-0.002192	-0.000652	-0.001619
0.4660	649.573	42.967	14.888	31.097	-0.673	35.407	1236.620	-0.003008	-0.001042	-0.002177
0.4670	746.296	54.571	20.476	38.762	-0.671	35.405	1420.755	-0.003820	-0.001433	-0.002713
0.4680	838.480	65.924	25.924	46.508	-0.670	35.403	1596.251	-0.004615	-0.001815	-0.003256
0.4690	922.293	76.236	31.029	53.374	-0.669	35.400	1755.810	-0.005337	-0.002172	-0.003736
0.4700	995.857	85.449	35.363	59.498	-0.667	35.398	1895.857	-0.005981	-0.002475	-0.004165
0.4710	1059.082	93.079	39.121	64.714	-0.671	35.394	2016.220	-0.006516	-0.002738	-0.004530
0.4720	1113.921	100.028	42.507	69.393	-0.665	35.392	2120.619	-0.007002	-0.002975	-0.004857
0.4730	1163.049	106.296	45.561	73.550	-0.668	35.390	2214.146	-0.007441	-0.003189	-0.005148
0.4740	1208.885	112.437	48.477	77.610	-0.678	35.388	2301.407	-0.007871	-0.003393	-0.005433
0.4750	1252.212	118.134	51.063	81.271	-0.678	35.389	2383.890	-0.008269	-0.003574	-0.005689
0.4760	1292.729	123.428	53.527	85.122	-0.680	35.390	2461.023	-0.008640	-0.003747	-0.005959
0.4770	1328.196	128.013	55.673	88.245	-0.671	35.393	2528.543	-0.008961	-0.003897	-0.006177
0.4780	1356.389	132.002	57.518	90.913	-0.674	35.395	2582.216	-0.009240	-0.004026	-0.006364
0.4790	1375.129	134.794	58.813	92.771	-0.673	35.397	2617.893	-0.009436	-0.004117	-0.006494
0.4800	1384.297	136.492	59.652	93.859	-0.674	35.400	2635.345	-0.009554	-0.004176	-0.006570
0.4810	1385.604	137.076	59.872	94.258	-0.674	35.403	2637.835	-0.009595	-0.004191	-0.006598
0.4820	1381.366	136.881	59.982	94.300	-0.673	35.407	2629.766	-0.009582	-0.004199	-0.006601
0.4830	1373.101	136.463	59.611	93.779	-0.667	35.409	2614.031	-0.009552	-0.004173	-0.006564
0.4840	1359.575	135.489	59.320	93.420	-0.671	35.409	2588.282	-0.009484	-0.004152	-0.006539
0.4850	1334.237	132.933	58.481	92.059	-0.667	35.408	2540.045	-0.009305	-0.004094	-0.006444
0.4860	1290.294	128.194	56.815	89.180	-0.669	35.407	2456.388	-0.008974	-0.003977	-0.006243
0.4870	1225.026	120.858	53.817	84.433	-0.662	35.406	2332.134	-0.008460	-0.003767	-0.005910
0.4880	1143.512	111.921	49.593	78.226	-0.660	35.403	2176.952	-0.007834	-0.003471	-0.005476
0.4890	1054.543	101.915	44.832	71.388	-0.660	35.401	2007.580	-0.007134	-0.003138	-0.004997
0.4900	965.816	91.480	39.919	64.481	-0.659	35.397	1838.665	-0.006404	-0.002794	-0.004514
0.4910	882.664	81.336	35.323	57.779	-0.656	35.395	1680.365	-0.005693	-0.002473	-0.004045
0.4920	808.183	72.011	31.058	51.752	-0.653	35.392	1538.572	-0.005041	-0.002174	-0.003623
0.4930	743.140	64.160	27.108	46.358	-0.653	35.391	1414.747	-0.004491	-0.001898	-0.003245
0.4940	685.521	57.211	23.764	41.501	-0.659	35.389	1305.056	-0.004005	-0.001663	-0.002905
0.4950	632.546	50.776	20.613	37.057	-0.661	35.390	1204.205	-0.003554	-0.001443	-0.002594
0.4960	581.629	44.411	17.709	32.792	-0.659	35.391	1107.273	-0.003109	-0.001240	-0.002295
0.4970	531.104	37.880	14.683	28.361	-0.656	35.393	1011.086	-0.002652	-0.001028	-0.001985
0.4980	480.744	31.406	11.670	23.834	-0.659	35.395	915.213	-0.002198	-0.000817	-0.001668
0.4990	431.090	24.735	8.669	19.348	-0.667	35.397	820.684	-0.001731	-0.000607	-0.001354
