# Supplementary material for: Evaluation of a Cold-Mixed High-Performance Polyurethane Mixture
Source: Hindawi journal article supplement (doi:10.1155/2019/1507971), 2019-11-07
Supplement: f1 [file 1507971.f1.zip › 1507971.f1/dynamic modulus data/PUM/specimen2/temp35/zhs-2-35_25Hz.csv]

Test Information
****************
Project name	zhs
Operator name	1
Target test temperature	35
Target confining stress	0
Average dynamic strain range from 75 to 125 micro-strain
Contact stress	5
Initial modulus	1000
Axial gauge length	70
Comments
Specimen information
********************
Identification	zhs-2-35
Dimensions	Point 1	Point 2	Point 3	Point 4	Point 5	Point 6	Average	Std Dev.
Diameter (mm)	49.2	49.3	49.2				49.23	0.058
Height (mm)	100.8	101.0	100.8				100.87	0.115
Cross-sectional area (mm�)	1903.7
Conditioning time
Properties/Comments
Test Data	25Hz
*********
Test date and time	Tue	Apr 2	2019	12:59 PM
Dynamic modulus (MPa)	11635
Phase angle (Degrees)	4.45
Average temperature (�C)	35.4
Average confining pressure (kPa)	-0.7
Average micro-strain	111
Load drift (%)	0.2
Load standard error (%)	8.6
Average deformation drift (%)	-4.5
Average deformation standard error (%)	8.4
Deformation uniformity (%)	30.6
Phase uniformity (Degrees)	0.5
Conditioning Cycles
Time (sec)	Axial stress (kPa)	Axial micro-strain #1	Axial micro-strain #2	Axial micro-strain #3	Confining pressure (kPa)	Temperature (�C)	Load (N)	Displacement #1 (mm)	Displacement #2 (mm)	Displacement #3 (mm)
0.0000	383.435	1.112	0.180	0.496	-0.670	35.412	729.961	-0.000078	-0.000013	-0.000035
0.0008	383.690	1.224	0.110	0.717	-0.670	35.410	730.448	-0.000086	-0.000008	-0.000050
0.0016	383.555	1.056	0.180	0.634	-0.672	35.407	730.190	-0.000074	-0.000013	-0.000044
0.0024	382.849	0.846	0.261	0.634	-0.669	35.405	728.846	-0.000059	-0.000018	-0.000044
0.0032	381.120	0.846	0.206	0.496	-0.668	35.402	725.555	-0.000059	-0.000014	-0.000035
0.0040	377.739	0.513	0.111	-0.068	-0.665	35.400	719.118	-0.000036	-0.000008	0.000005
0.0048	372.013	0.070	0.111	-0.385	-0.664	35.399	708.218	-0.000005	-0.000008	0.000027
0.0056	362.215	-0.889	-0.026	-0.660	-0.669	35.398	689.564	0.000062	0.000002	0.000046
0.0064	347.126	-2.709	-0.549	-1.720	-0.669	35.398	660.839	0.000190	0.000038	0.000120
0.0072	327.018	-5.002	-1.347	-3.082	-0.670	35.399	622.559	0.000350	0.000094	0.000216
0.0080	303.183	-7.823	-2.724	-4.982	-0.667	35.400	577.183	0.000548	0.000191	0.000349
0.0088	278.251	-10.977	-4.196	-7.266	-0.662	35.402	529.718	0.000768	0.000294	0.000509
0.0096	255.137	-13.729	-5.408	-8.999	-0.663	35.404	485.716	0.000961	0.000379	0.000630
0.0104	235.465	-16.230	-6.467	-10.513	-0.668	35.406	448.265	0.001136	0.000453	0.000736
0.0112	220.211	-18.357	-7.155	-11.392	-0.674	35.408	419.226	0.001285	0.000501	0.000797
0.0120	209.797	-19.581	-7.748	-12.067	-0.675	35.410	399.399	0.001371	0.000542	0.000845
0.0128	203.710	-20.471	-8.230	-12.755	-0.677	35.413	387.812	0.001433	0.000576	0.000893
0.0136	201.200	-20.861	-8.560	-13.181	-0.673	35.415	383.034	0.001460	0.000599	0.000923
0.0144	201.170	-21.042	-8.821	-13.636	-0.665	35.417	382.977	0.001473	0.000617	0.000955
0.0152	202.688	-21.085	-8.737	-13.650	-0.669	35.417	385.866	0.001476	0.000612	0.000956
0.0160	205.018	-20.904	-8.668	-13.458	-0.665	35.417	390.301	0.001463	0.000607	0.000942
0.0168	207.918	-20.709	-8.586	-13.197	-0.666	35.417	395.823	0.001450	0.000601	0.000924
0.0176	211.224	-20.375	-8.450	-12.976	-0.670	35.415	402.117	0.001426	0.000592	0.000908
0.0184	214.741	-20.110	-8.533	-12.769	-0.664	35.415	408.812	0.001408	0.000597	0.000894
0.0192	218.663	-19.775	-8.533	-12.521	-0.667	35.413	416.279	0.001384	0.000597	0.000876
0.0200	222.961	-19.274	-8.451	-12.218	-0.669	35.411	424.461	0.001349	0.000592	0.000855
0.0208	227.951	-18.772	-8.450	-12.041	-0.668	35.410	433.960	0.001314	0.000592	0.000843
0.0216	233.932	-18.035	-8.285	-11.932	-0.672	35.407	445.347	0.001262	0.000580	0.000835
0.0224	240.950	-17.285	-8.146	-11.726	-0.672	35.405	458.708	0.001210	0.000570	0.000821
0.0232	248.675	-16.341	-7.829	-11.148	-0.669	35.403	473.413	0.001144	0.000548	0.000780
0.0240	256.595	-15.508	-7.512	-10.528	-0.669	35.401	488.491	0.001086	0.000526	0.000737
0.0248	264.245	-14.731	-7.250	-10.003	-0.667	35.399	503.054	0.001031	0.000507	0.000700
0.0256	271.067	-13.744	-6.742	-9.493	-0.669	35.398	516.043	0.000962	0.000472	0.000665
0.0264	276.688	-13.036	-6.453	-9.259	-0.673	35.398	526.743	0.000912	0.000452	0.000648
0.0272	281.166	-12.201	-6.192	-8.902	-0.677	35.398	535.269	0.000854	0.000433	0.000623
0.0280	284.413	-11.590	-5.835	-8.420	-0.676	35.400	541.449	0.000811	0.000408	0.000589
0.0288	286.381	-11.451	-5.766	-8.324	-0.673	35.402	545.197	0.000802	0.000404	0.000583
0.0296	287.328	-11.450	-5.588	-8.283	-0.673	35.404	546.999	0.000802	0.000391	0.000580
0.0304	287.403	-11.604	-5.465	-8.283	-0.672	35.406	547.142	0.000812	0.000383	0.000580
0.0312	286.697	-11.715	-5.576	-8.546	-0.675	35.408	545.797	0.000820	0.000390	0.000598
0.0320	285.540	-11.770	-5.547	-8.518	-0.676	35.410	543.594	0.000824	0.000388	0.000596
0.0328	283.977	-11.798	-5.547	-8.518	-0.676	35.412	540.619	0.000826	0.000388	0.000596
0.0336	281.933	-11.825	-5.670	-8.380	-0.676	35.415	536.728	0.000828	0.000397	0.000587
0.0344	279.604	-12.269	-5.765	-8.489	-0.674	35.417	532.293	0.000859	0.000404	0.000594
0.0352	276.944	-12.450	-5.725	-8.517	-0.677	35.418	527.229	0.000871	0.000401	0.000596
0.0360	274.013	-12.659	-5.780	-8.668	-0.678	35.418	521.650	0.000886	0.000405	0.000607
0.0368	270.767	-13.007	-5.712	-9.039	-0.676	35.417	515.471	0.000910	0.000400	0.000633
0.0376	267.010	-13.284	-5.766	-9.108	-0.676	35.416	508.318	0.000930	0.000404	0.000638
0.0384	262.501	-13.813	-6.137	-9.465	-0.672	35.415	499.735	0.000967	0.000430	0.000663
0.0392	257.106	-14.466	-6.425	-9.671	-0.669	35.413	489.464	0.001013	0.000450	0.000677
0.0400	250.644	-15.287	-6.754	-10.098	-0.674	35.411	477.161	0.001070	0.000473	0.000707
0.0408	243.100	-16.302	-7.112	-10.703	-0.672	35.410	462.799	0.001141	0.000498	0.000749
0.0416	234.714	-17.496	-7.470	-11.406	-0.673	35.408	446.835	0.001225	0.000523	0.000798
0.0424	225.742	-18.705	-8.007	-12.259	-0.672	35.405	429.754	0.001309	0.000561	0.000858
0.0432	216.695	-19.859	-8.502	-12.879	-0.666	35.402	412.531	0.001390	0.000595	0.000902
0.0440	208.038	-20.721	-9.026	-13.801	-0.667	35.400	396.051	0.001450	0.000632	0.000966
0.0448	200.284	-21.681	-9.383	-14.282	-0.664	35.399	381.289	0.001518	0.000657	0.001000
0.0456	193.821	-22.473	-9.646	-14.420	-0.665	35.397	368.986	0.001573	0.000675	0.001009
0.0464	188.652	-23.082	-10.060	-14.792	-0.669	35.398	359.144	0.001616	0.000704	0.001035
0.0472	185.105	-23.679	-10.322	-14.806	-0.672	35.398	352.392	0.001658	0.000723	0.001036
0.0480	183.016	-24.013	-10.584	-15.094	-0.670	35.400	348.415	0.001681	0.000741	0.001057
0.0488	182.159	-24.222	-10.748	-15.588	-0.668	35.402	346.785	0.001696	0.000752	0.001091
0.0496	182.430	-24.403	-10.705	-15.669	-0.666	35.404	347.300	0.001708	0.000749	0.001097
0.0504	183.317	-24.389	-10.636	-15.546	-0.666	35.406	348.988	0.001707	0.000745	0.001088
0.0512	184.579	-24.291	-10.594	-15.478	-0.666	35.408	351.391	0.001700	0.000742	0.001083
0.0520	186.112	-24.165	-10.512	-15.106	-0.667	35.410	354.309	0.001692	0.000736	0.001057
0.0528	187.870	-23.984	-10.347	-14.805	-0.669	35.413	357.656	0.001679	0.000724	0.001036
0.0536	189.794	-24.053	-10.238	-14.943	-0.668	35.415	361.319	0.001684	0.000717	0.001046
0.0544	191.988	-23.998	-10.252	-15.039	-0.666	35.417	365.496	0.001680	0.000718	0.001053
0.0552	194.483	-23.748	-10.185	-15.040	-0.669	35.418	370.245	0.001662	0.000713	0.001053
0.0560	197.158	-23.580	-10.088	-15.107	-0.669	35.418	375.338	0.001651	0.000706	0.001058
0.0568	200.239	-23.108	-10.101	-14.887	-0.669	35.417	381.203	0.001618	0.000707	0.001042
0.0576	204.041	-22.554	-9.935	-14.324	-0.674	35.416	388.441	0.001579	0.000695	0.001003
0.0584	208.775	-22.123	-9.810	-14.049	-0.669	35.415	397.453	0.001549	0.000687	0.000983
0.0592	214.786	-21.344	-9.645	-13.871	-0.665	35.414	408.897	0.001494	0.000675	0.000971
0.0600	222.090	-20.428	-9.274	-13.444	-0.665	35.412	422.802	0.001430	0.000649	0.000941
0.0608	230.310	-19.385	-8.999	-13.155	-0.662	35.410	438.452	0.001357	0.000630	0.000921
0.0616	239.237	-18.315	-8.628	-12.755	-0.662	35.407	455.446	0.001282	0.000604	0.000893
0.0624	248.390	-17.288	-8.216	-12.067	-0.662	35.405	472.870	0.001210	0.000575	0.000845
0.0632	257.301	-16.162	-7.886	-11.488	-0.662	35.402	489.836	0.001131	0.000552	0.000804
0.0640	265.717	-15.134	-7.460	-10.772	-0.664	35.400	505.857	0.001059	0.000522	0.000754
0.0648	273.262	-14.106	-7.074	-10.043	-0.661	35.399	520.220	0.000987	0.000495	0.000703
0.0656	279.619	-13.049	-6.620	-9.369	-0.667	35.398	532.322	0.000913	0.000463	0.000656
0.0664	284.383	-12.216	-6.207	-8.956	-0.666	35.398	541.391	0.000855	0.000435	0.000627
0.0672	287.629	-11.896	-5.959	-8.817	-0.664	35.398	547.571	0.000833	0.000417	0.000617
0.0680	289.297	-11.716	-5.712	-8.790	-0.663	35.400	550.747	0.000820	0.000400	0.000615
0.0688	289.733	-11.619	-5.836	-8.900	-0.658	35.402	551.577	0.000813	0.000409	0.000623
0.0696	289.252	-11.701	-5.918	-8.722	-0.661	35.404	550.661	0.000819	0.000414	0.000611
0.0704	288.050	-11.674	-6.000	-8.489	-0.663	35.406	548.372	0.000817	0.000420	0.000594
0.0712	286.336	-11.701	-6.232	-8.475	-0.667	35.408	545.111	0.000819	0.000436	0.000593
0.0720	284.368	-11.908	-6.287	-8.489	-0.671	35.411	541.363	0.000834	0.000440	0.000594
0.0728	282.249	-12.172	-6.341	-8.777	-0.667	35.413	537.329	0.000852	0.000444	0.000614
0.0736	279.919	-12.407	-6.411	-9.232	-0.670	35.415	532.894	0.000868	0.000449	0.000646
0.0744	277.409	-12.824	-6.577	-9.575	-0.669	35.418	528.116	0.000898	0.000460	0.000670
0.0752	274.569	-13.269	-6.577	-9.589	-0.672	35.418	522.709	0.000929	0.000460	0.000671
0.0760	271.278	-13.561	-6.591	-9.575	-0.680	35.418	516.443	0.000949	0.000461	0.000670
0.0768	267.400	-13.993	-6.631	-9.423	-0.680	35.417	509.062	0.000979	0.000464	0.000660
0.0776	262.892	-14.397	-6.671	-9.618	-0.683	35.416	500.479	0.001008	0.000467	0.000673
0.0784	257.211	-15.106	-6.933	-10.333	-0.676	35.415	489.664	0.001057	0.000485	0.000723
0.0792	250.328	-16.231	-7.140	-10.966	-0.671	35.413	476.561	0.001136	0.000500	0.000768
0.0800	242.333	-17.259	-7.485	-11.654	-0.669	35.411	461.340	0.001208	0.000524	0.000816
0.0808	233.286	-18.357	-7.817	-12.148	-0.668	35.410	444.117	0.001285	0.000547	0.000850
0.0816	224.059	-19.497	-8.202	-12.507	-0.670	35.407	426.550	0.001365	0.000574	0.000875
0.0824	215.177	-20.402	-8.712	-12.976	-0.670	35.405	409.641	0.001428	0.000610	0.000908
0.0832	206.986	-21.487	-9.040	-13.677	-0.670	35.402	394.049	0.001504	0.000633	0.000957
0.0840	199.893	-22.457	-9.480	-14.488	-0.669	35.400	380.545	0.001572	0.000664	0.001014
0.0848	194.062	-23.067	-9.796	-15.106	-0.670	35.399	369.444	0.001615	0.000686	0.001057
0.0856	189.523	-23.567	-10.017	-15.284	-0.677	35.398	360.804	0.001650	0.000701	0.001070
0.0864	186.142	-23.872	-10.335	-15.616	-0.679	35.398	354.366	0.001671	0.000723	0.001093
0.0872	184.008	-24.193	-10.458	-15.369	-0.680	35.398	350.304	0.001693	0.000732	0.001076
0.0880	182.791	-24.527	-10.622	-15.232	-0.676	35.400	347.986	0.001717	0.000744	0.001066
0.0888	182.340	-24.749	-10.731	-15.563	-0.668	35.402	347.128	0.001732	0.000751	0.001089
0.0896	182.610	-24.860	-10.662	-15.534	-0.667	35.404	347.643	0.001740	0.000746	0.001087
0.0904	183.347	-24.651	-10.593	-15.837	-0.668	35.406	349.045	0.001726	0.000742	0.001109
0.0912	184.399	-24.498	-10.565	-16.140	-0.664	35.408	351.048	0.001715	0.000740	0.001130
0.0920	185.721	-24.442	-10.635	-16.154	-0.664	35.410	353.565	0.001711	0.000744	0.001131
0.0928	187.314	-24.192	-10.802	-16.085	-0.664	35.413	356.598	0.001693	0.000756	0.001126
0.0936	189.133	-24.178	-10.940	-15.838	-0.663	35.415	360.060	0.001692	0.000766	0.001109
0.0944	191.176	-24.053	-11.052	-15.536	-0.664	35.417	363.951	0.001684	0.000774	0.001087
0.0952	193.461	-23.623	-10.805	-15.232	-0.668	35.418	368.299	0.001654	0.000756	0.001066
0.0960	195.955	-23.455	-10.474	-15.067	-0.669	35.418	373.049	0.001642	0.000733	0.001055
0.0968	198.736	-23.205	-10.212	-15.026	-0.668	35.417	378.342	0.001624	0.000715	0.001052
0.0976	202.162	-22.775	-10.045	-14.984	-0.670	35.415	384.865	0.001594	0.000703	0.001049
0.0984	206.355	-22.525	-10.141	-14.916	-0.665	35.415	392.847	0.001577	0.000710	0.001044
0.0992	211.690	-21.887	-10.086	-14.490	-0.665	35.414	403.004	0.001532	0.000706	0.001014
0.1000	218.243	-20.984	-10.004	-13.856	-0.667	35.412	415.478	0.001469	0.000700	0.000970
0.1008	225.802	-20.177	-9.674	-13.389	-0.671	35.410	429.869	0.001412	0.000677	0.000937
0.1016	234.203	-18.968	-9.220	-12.894	-0.673	35.408	445.862	0.001328	0.000645	0.000903
0.1024	242.934	-18.009	-8.833	-12.495	-0.671	35.405	462.484	0.001261	0.000618	0.000875
0.1032	251.500	-17.050	-8.447	-12.233	-0.673	35.403	478.792	0.001194	0.000591	0.000856
0.1040	259.465	-15.967	-8.090	-11.738	-0.669	35.401	493.956	0.001118	0.000566	0.000822
0.1048	266.379	-15.259	-7.704	-11.077	-0.669	35.399	507.116	0.001068	0.000539	0.000775
0.1056	271.909	-14.521	-7.182	-10.360	-0.673	35.398	517.645	0.001016	0.000503	0.000725
0.1064	275.741	-13.896	-6.851	-9.851	-0.674	35.398	524.940	0.000973	0.000480	0.000690
0.1072	278.101	-13.408	-6.616	-9.479	-0.679	35.398	529.432	0.000939	0.000463	0.000664
0.1080	279.002	-13.185	-6.492	-9.630	-0.676	35.400	531.149	0.000923	0.000454	0.000674
0.1088	278.927	-13.145	-6.533	-9.796	-0.675	35.402	531.006	0.000920	0.000457	0.000686
0.1096	278.221	-13.381	-6.356	-10.044	-0.670	35.404	529.661	0.000937	0.000445	0.000703
0.1104	276.913	-13.701	-6.439	-9.976	-0.672	35.406	527.172	0.000959	0.000451	0.000698
0.1112	275.411	-13.841	-6.480	-9.743	-0.675	35.408	524.311	0.000969	0.000454	0.000682
0.1120	273.547	-13.856	-6.521	-9.785	-0.675	35.410	520.763	0.000970	0.000456	0.000685
0.1128	271.593	-13.967	-6.768	-9.853	-0.683	35.412	517.044	0.000978	0.000474	0.000690
0.1136	269.565	-14.189	-6.631	-10.320	-0.681	35.415	513.182	0.000993	0.000464	0.000722
0.1144	267.325	-14.481	-6.784	-10.816	-0.676	35.417	508.919	0.001014	0.000475	0.000757
0.1152	264.921	-14.759	-6.853	-11.035	-0.677	35.418	504.341	0.001033	0.000480	0.000772
0.1160	262.050	-14.953	-6.716	-10.884	-0.673	35.418	498.877	0.001047	0.000470	0.000762
0.1168	258.594	-15.302	-6.825	-10.662	-0.674	35.417	492.296	0.001071	0.000478	0.000746
0.1176	254.581	-15.663	-7.016	-10.594	-0.678	35.416	484.657	0.001096	0.000491	0.000742
0.1184	249.817	-16.358	-7.348	-10.842	-0.674	35.415	475.588	0.001145	0.000514	0.000759
0.1192	244.287	-17.107	-7.636	-11.367	-0.675	35.414	465.059	0.001198	0.000535	0.000796
0.1200	237.975	-17.758	-8.022	-11.986	-0.673	35.412	453.043	0.001243	0.000562	0.000839
0.1208	230.851	-18.842	-8.242	-12.647	-0.673	35.410	439.482	0.001319	0.000577	0.000885
0.1216	223.397	-19.607	-8.530	-13.185	-0.677	35.408	425.291	0.001372	0.000597	0.000923
0.1224	216.078	-20.415	-9.081	-13.719	-0.678	35.405	411.358	0.001429	0.000636	0.000960
0.1232	209.451	-21.319	-9.356	-14.077	-0.679	35.402	398.741	0.001492	0.000655	0.000985
0.1240	203.815	-21.874	-9.742	-14.282	-0.679	35.400	388.012	0.001531	0.000682	0.001000
0.1248	199.337	-22.679	-10.060	-14.681	-0.673	35.399	379.486	0.001588	0.000704	0.001028
0.1256	195.940	-23.164	-10.100	-14.873	-0.676	35.398	373.020	0.001621	0.000707	0.001041
0.1264	193.416	-23.441	-10.335	-15.079	-0.675	35.398	368.214	0.001641	0.000723	0.001056
0.1272	192.018	-23.719	-10.388	-15.120	-0.679	35.398	365.553	0.001660	0.000727	0.001058
0.1280	191.327	-23.747	-10.526	-15.120	-0.682	35.400	364.237	0.001662	0.000737	0.001058
0.1288	191.267	-23.955	-10.705	-15.052	-0.677	35.402	364.122	0.001677	0.000749	0.001054
0.1296	191.642	-24.123	-10.677	-15.025	-0.678	35.404	364.838	0.001689	0.000747	0.001052
0.1304	192.093	-24.136	-10.622	-15.232	-0.673	35.406	365.696	0.001689	0.000744	0.001066
0.1312	192.754	-24.205	-10.497	-15.285	-0.672	35.408	366.955	0.001694	0.000735	0.001070
0.1320	193.716	-24.053	-10.429	-15.410	-0.675	35.410	368.786	0.001684	0.000730	0.001079
0.1328	194.933	-23.941	-10.388	-15.643	-0.675	35.412	371.103	0.001676	0.000727	0.001095
0.1336	196.406	-23.956	-10.334	-15.601	-0.674	35.415	373.907	0.001677	0.000723	0.001092
0.1344	198.150	-23.761	-10.334	-15.562	-0.671	35.417	377.226	0.001663	0.000723	0.001089
0.1352	200.148	-23.511	-9.989	-15.232	-0.675	35.417	381.031	0.001646	0.000699	0.001066
0.1360	202.342	-23.123	-9.796	-14.819	-0.676	35.417	385.208	0.001619	0.000686	0.001037
0.1368	204.912	-22.624	-9.659	-14.558	-0.680	35.417	390.100	0.001584	0.000676	0.001019
0.1376	208.038	-22.041	-9.468	-14.322	-0.684	35.416	396.051	0.001543	0.000663	0.001003
0.1384	211.705	-21.680	-9.564	-14.500	-0.678	35.415	403.032	0.001518	0.000669	0.001015
0.1392	216.394	-21.264	-9.522	-14.405	-0.677	35.413	411.959	0.001488	0.000667	0.001008
0.1400	222.105	-20.456	-9.465	-14.212	-0.676	35.412	422.831	0.001432	0.000663	0.000995
0.1408	228.883	-19.900	-9.258	-13.745	-0.679	35.410	435.734	0.001393	0.000648	0.000962
0.1416	236.607	-18.982	-9.011	-12.990	-0.681	35.407	450.439	0.001329	0.000631	0.000909
0.1424	244.873	-17.911	-8.682	-12.451	-0.685	35.405	466.175	0.001254	0.000608	0.000872
0.1432	253.214	-17.009	-8.215	-11.818	-0.682	35.402	482.054	0.001191	0.000575	0.000827
0.1440	261.043	-16.052	-7.994	-11.419	-0.679	35.401	496.960	0.001124	0.000560	0.000799
0.1448	268.227	-15.037	-7.636	-10.937	-0.674	35.399	510.635	0.001053	0.000535	0.000766
0.1456	274.419	-13.856	-7.223	-10.043	-0.675	35.398	522.423	0.000970	0.000506	0.000703
0.1464	279.423	-13.159	-6.975	-9.562	-0.679	35.398	531.950	0.000921	0.000488	0.000669
0.1472	283.301	-12.547	-6.672	-9.149	-0.679	35.398	539.331	0.000878	0.000467	0.000640
0.1480	285.930	-12.339	-6.534	-9.122	-0.682	35.399	544.338	0.000864	0.000457	0.000639
0.1488	287.433	-12.548	-6.561	-9.396	-0.677	35.401	547.199	0.000878	0.000459	0.000658
0.1496	288.050	-12.450	-6.507	-9.507	-0.675	35.403	548.372	0.000871	0.000455	0.000665
0.1504	287.764	-12.464	-6.425	-9.328	-0.677	35.405	547.829	0.000872	0.000450	0.000653
0.1512	286.892	-12.533	-6.315	-9.094	-0.675	35.407	546.169	0.000877	0.000442	0.000637
0.1520	285.480	-12.657	-6.385	-9.080	-0.676	35.409	543.480	0.000886	0.000447	0.000636
0.1528	283.556	-12.826	-6.548	-9.204	-0.676	35.412	539.818	0.000898	0.000458	0.000644
0.1536	281.302	-12.978	-6.603	-9.548	-0.673	35.414	535.526	0.000908	0.000462	0.000668
0.1544	278.627	-13.271	-6.809	-9.824	-0.672	35.416	530.434	0.000929	0.000477	0.000688
0.1552	275.561	-13.633	-6.740	-10.058	-0.674	35.417	524.597	0.000954	0.000472	0.000704
0.1560	271.969	-14.064	-6.550	-9.921	-0.676	35.417	517.759	0.000984	0.000458	0.000694
0.1568	267.686	-14.578	-6.605	-9.756	-0.677	35.416	509.605	0.001020	0.000462	0.000683
0.1576	262.516	-15.037	-6.632	-9.810	-0.679	35.415	499.763	0.001053	0.000464	0.000687
0.1584	256.204	-15.731	-6.920	-9.838	-0.674	35.415	487.747	0.001101	0.000484	0.000689
0.1592	248.855	-16.660	-7.401	-10.361	-0.672	35.413	473.757	0.001166	0.000518	0.000725
0.1600	240.409	-17.759	-7.842	-11.282	-0.672	35.411	457.678	0.001243	0.000549	0.000790
0.1608	231.062	-18.829	-8.242	-12.232	-0.669	35.409	439.882	0.001318	0.000577	0.000856
0.1616	221.519	-19.997	-8.656	-13.277	-0.673	35.407	421.715	0.001400	0.000606	0.000929
0.1624	212.231	-21.137	-9.083	-14.087	-0.672	35.404	404.034	0.001480	0.000636	0.000986
0.1632	203.845	-22.206	-9.413	-14.597	-0.672	35.402	388.069	0.001554	0.000659	0.001022
0.1640	196.887	-23.304	-10.046	-14.955	-0.669	35.400	374.823	0.001631	0.000703	0.001047
0.1648	191.522	-23.956	-10.349	-15.162	-0.667	35.398	364.609	0.001677	0.000724	0.001061
0.1656	187.735	-24.303	-10.459	-15.217	-0.672	35.397	357.399	0.001701	0.000732	0.001065
0.1664	185.285	-24.416	-10.610	-15.465	-0.668	35.398	352.736	0.001709	0.000743	0.001083
0.1672	184.158	-24.429	-10.582	-15.727	-0.672	35.398	350.590	0.001710	0.000741	0.001101
0.1680	184.008	-24.512	-10.692	-15.906	-0.669	35.399	350.304	0.001716	0.000748	0.001113
0.1688	184.549	-24.637	-10.706	-16.209	-0.665	35.402	351.334	0.001725	0.000749	0.001135
0.1696	185.646	-24.566	-10.693	-16.154	-0.667	35.404	353.422	0.001720	0.000749	0.001131
0.1704	186.923	-24.469	-10.624	-16.085	-0.669	35.405	355.854	0.001713	0.000744	0.001126
0.1712	188.336	-24.316	-10.693	-16.182	-0.670	35.407	358.543	0.001702	0.000749	0.001133
0.1720	189.929	-24.150	-10.845	-16.045	-0.672	35.410	361.576	0.001691	0.000759	0.001123
0.1728	191.793	-24.039	-10.914	-15.811	-0.674	35.412	365.124	0.001683	0.000764	0.001107
0.1736	193.881	-24.012	-10.954	-15.508	-0.669	35.415	369.101	0.001681	0.000767	0.001086
0.1744	196.271	-24.027	-10.899	-15.383	-0.667	35.417	373.650	0.001682	0.000763	0.001077
0.1752	199.171	-23.666	-10.693	-15.382	-0.668	35.417	379.171	0.001657	0.000749	0.001077
0.1760	202.523	-23.318	-10.404	-15.285	-0.669	35.417	385.551	0.001632	0.000728	0.001070
0.1768	206.475	-22.806	-10.199	-15.258	-0.669	35.416	393.076	0.001596	0.000714	0.001068
0.1776	211.495	-22.112	-9.869	-14.915	-0.670	35.415	402.632	0.001548	0.000691	0.001044
0.1784	217.581	-21.585	-9.675	-14.366	-0.665	35.414	414.219	0.001511	0.000677	0.001006
0.1792	224.750	-20.765	-9.563	-13.830	-0.664	35.413	427.866	0.001454	0.000669	0.000968
0.1800	232.820	-19.831	-9.191	-13.197	-0.664	35.411	443.230	0.001388	0.000643	0.000924
0.1808	241.146	-18.816	-8.902	-12.455	-0.664	35.410	459.080	0.001317	0.000623	0.000872
0.1816	249.336	-17.718	-8.503	-12.027	-0.668	35.407	474.672	0.001240	0.000595	0.000842
0.1824	257.076	-16.857	-8.036	-11.833	-0.668	35.405	489.407	0.001180	0.000563	0.000828
0.1832	264.019	-15.788	-7.679	-11.461	-0.671	35.403	502.625	0.001105	0.000538	0.000802
0.1840	269.940	-15.163	-7.430	-11.351	-0.670	35.401	513.897	0.001061	0.000520	0.000795
0.1848	274.629	-14.648	-7.252	-10.814	-0.668	35.399	522.823	0.001025	0.000508	0.000757
0.1856	278.011	-14.035	-6.895	-10.044	-0.673	35.398	529.261	0.000982	0.000483	0.000703
0.1864	279.994	-13.632	-6.757	-9.741	-0.674	35.398	533.037	0.000954	0.000473	0.000682
0.1872	280.926	-13.157	-6.467	-9.534	-0.677	35.398	534.811	0.000921	0.000453	0.000667
0.1880	281.076	-12.864	-6.384	-9.727	-0.678	35.399	535.097	0.000901	0.000447	0.000681
0.1888	280.701	-12.851	-6.617	-10.125	-0.671	35.402	534.382	0.000900	0.000463	0.000709
0.1896	280.009	-12.976	-6.630	-10.126	-0.672	35.404	533.066	0.000908	0.000464	0.000709
0.1904	279.032	-13.074	-6.643	-10.057	-0.673	35.406	531.206	0.000915	0.000465	0.000704
0.1912	277.845	-13.227	-6.534	-10.043	-0.675	35.408	528.946	0.000926	0.000457	0.000703
0.1920	276.508	-13.326	-6.505	-9.852	-0.676	35.410	526.400	0.000933	0.000455	0.000690
0.1928	275.005	-13.466	-6.548	-10.016	-0.677	35.412	523.539	0.000943	0.000458	0.000701
0.1936	273.352	-13.661	-6.741	-10.264	-0.676	35.415	520.391	0.000956	0.000472	0.000718
0.1944	271.353	-14.022	-7.085	-10.540	-0.675	35.417	516.586	0.000982	0.000496	0.000738
0.1952	269.039	-14.257	-7.168	-10.773	-0.680	35.418	512.180	0.000998	0.000502	0.000754
0.1960	266.529	-14.605	-7.100	-10.746	-0.681	35.417	507.402	0.001022	0.000497	0.000752
0.1968	263.583	-14.799	-7.154	-10.705	-0.684	35.417	501.795	0.001036	0.000501	0.000749
0.1976	260.277	-14.967	-7.167	-10.691	-0.686	35.415	495.501	0.001048	0.000502	0.000748
0.1984	256.370	-15.481	-7.374	-10.980	-0.680	35.415	488.062	0.001084	0.000516	0.000769
0.1992	251.651	-16.064	-7.799	-11.421	-0.677	35.413	479.078	0.001125	0.000546	0.000799
0.2000	187.675	-26.613	-11.682	-17.931	-0.674	35.400	357.285	0.001863	0.000818	0.001255
0.2008	187.960	-26.600	-11.641	-17.751	-0.673	35.402	357.828	0.001862	0.000815	0.001243
0.2016	188.426	-26.433	-11.600	-17.737	-0.672	35.404	358.715	0.001850	0.000812	0.001242
0.2024	189.298	-26.460	-11.614	-17.352	-0.675	35.406	360.374	0.001852	0.000813	0.001215
0.2032	190.590	-26.252	-11.641	-17.049	-0.672	35.409	362.835	0.001838	0.000815	0.001193
0.2040	192.544	-26.028	-11.695	-16.954	-0.671	35.411	366.554	0.001822	0.000819	0.001187
0.2048	195.204	-25.862	-11.818	-16.857	-0.667	35.413	371.618	0.001810	0.000827	0.001180
0.2056	199.051	-25.222	-11.640	-16.939	-0.668	35.415	378.942	0.001766	0.000815	0.001186
0.2064	205.348	-24.597	-11.447	-16.636	-0.676	35.416	390.930	0.001722	0.000801	0.001164
0.2072	215.823	-23.346	-11.075	-16.140	-0.681	35.416	410.872	0.001634	0.000775	0.001130
0.2080	232.910	-21.235	-10.237	-14.819	-0.688	35.415	443.401	0.001486	0.000717	0.001037
0.2088	258.699	-18.260	-9.149	-12.989	-0.687	35.414	492.496	0.001278	0.000640	0.000909
0.2096	294.542	-13.993	-7.485	-10.524	-0.683	35.413	560.732	0.000979	0.000524	0.000737
0.2104	341.205	-8.461	-5.187	-6.837	-0.681	35.412	649.567	0.000592	0.000363	0.000479
0.2112	398.012	-1.776	-2.202	-2.379	-0.681	35.410	757.713	0.000124	0.000154	0.000167
0.2120	464.107	6.020	1.252	2.904	-0.681	35.408	883.541	-0.000421	-0.000088	-0.000203
0.2128	538.092	14.801	5.353	8.917	-0.681	35.405	1024.389	-0.001036	-0.000375	-0.000624
0.2136	618.058	24.416	9.881	15.480	-0.679	35.402	1176.624	-0.001709	-0.000692	-0.001084
0.2144	702.097	34.658	14.574	22.580	-0.681	35.400	1336.613	-0.002426	-0.001020	-0.001581
0.2152	788.240	45.246	19.624	29.943	-0.681	35.398	1500.607	-0.003167	-0.001374	-0.002096
0.2160	874.804	55.933	24.646	37.373	-0.680	35.397	1665.401	-0.003915	-0.001725	-0.002616
0.2168	960.315	66.732	29.819	44.652	-0.688	35.396	1828.194	-0.004671	-0.002087	-0.003126
0.2176	1043.498	77.376	34.784	51.533	-0.687	35.396	1986.551	-0.005416	-0.002435	-0.003607
0.2184	1123.148	87.617	39.614	58.427	-0.688	35.397	2138.186	-0.006133	-0.002773	-0.004090
0.2192	1197.418	97.345	44.197	65.032	-0.689	35.398	2279.577	-0.006814	-0.003094	-0.004552
0.2200	1264.656	105.863	48.230	70.811	-0.684	35.400	2407.579	-0.007410	-0.003376	-0.004957
0.2208	1323.236	113.602	52.056	76.067	-0.684	35.402	2519.102	-0.007952	-0.003644	-0.005325
0.2216	1371.838	120.328	55.153	80.511	-0.681	35.404	2611.628	-0.008423	-0.003861	-0.005636
0.2224	1409.965	125.692	57.809	84.006	-0.680	35.406	2684.212	-0.008798	-0.004047	-0.005880
0.2232	1437.557	130.110	59.859	86.772	-0.678	35.409	2736.740	-0.009108	-0.004190	-0.006074
0.2240	1455.306	133.140	61.207	88.808	-0.675	35.411	2770.529	-0.009320	-0.004285	-0.006217
0.2248	1464.338	134.905	62.088	90.047	-0.675	35.414	2787.724	-0.009443	-0.004346	-0.006303
0.2256	1466.412	135.878	62.472	90.665	-0.673	35.416	2791.672	-0.009511	-0.004373	-0.006347
0.2264	1463.331	136.461	62.845	91.093	-0.677	35.416	2785.807	-0.009552	-0.004399	-0.006377
0.2272	1456.328	136.434	62.804	91.025	-0.680	35.416	2772.474	-0.009550	-0.004396	-0.006372
0.2280	1446.063	136.059	62.610	90.831	-0.680	35.415	2752.934	-0.009524	-0.004383	-0.006358
0.2288	1431.125	135.016	62.321	90.281	-0.680	35.414	2724.495	-0.009451	-0.004362	-0.006320
0.2296	1408.267	132.599	61.480	88.781	-0.673	35.413	2680.979	-0.009282	-0.004304	-0.006215
0.2304	1374.153	128.930	60.283	86.443	-0.672	35.411	2616.034	-0.009025	-0.004220	-0.006051
0.2312	1325.250	123.720	58.248	82.782	-0.676	35.410	2522.936	-0.008660	-0.004077	-0.005795
0.2320	1260.493	116.646	55.194	77.953	-0.676	35.408	2399.654	-0.008165	-0.003864	-0.005457
0.2328	1181.398	108.128	51.162	72.132	-0.673	35.405	2249.079	-0.007569	-0.003581	-0.005049
0.2336	1091.017	97.859	46.318	65.196	-0.672	35.403	2077.017	-0.006850	-0.003242	-0.004564
0.2344	994.264	86.518	41.074	57.670	-0.665	35.400	1892.824	-0.006056	-0.002875	-0.004037
0.2352	895.934	74.970	35.584	49.798	-0.663	35.399	1705.627	-0.005248	-0.002491	-0.003486
0.2360	800.533	63.478	30.175	42.135	-0.669	35.397	1524.010	-0.004443	-0.002112	-0.002949
0.2368	711.760	52.625	25.139	34.938	-0.669	35.396	1355.009	-0.003684	-0.001760	-0.002446
0.2376	631.524	42.745	20.420	28.127	-0.672	35.396	1202.259	-0.002992	-0.001429	-0.001969
0.2384	561.311	33.657	16.250	22.059	-0.674	35.397	1068.592	-0.002356	-0.001137	-0.001544
0.2392	501.423	25.499	12.591	16.774	-0.669	35.398	954.580	-0.001785	-0.000881	-0.001174
0.2400	451.198	18.690	9.358	12.246	-0.668	35.400	858.965	-0.001308	-0.000655	-0.000857
0.2408	409.915	13.048	6.660	8.752	-0.669	35.402	780.373	-0.000913	-0.000466	-0.000613
0.2416	375.996	8.351	4.389	5.697	-0.670	35.404	715.799	-0.000585	-0.000307	-0.000399
0.2424	348.013	4.461	2.422	2.986	-0.672	35.407	662.527	-0.000312	-0.000170	-0.000209
0.2432	325.034	1.264	0.771	0.688	-0.673	35.409	618.782	-0.000088	-0.000054	-0.000048
0.2440	306.444	-1.696	-0.480	-1.280	-0.675	35.411	583.391	0.000119	0.000034	0.000090
0.2448	292.017	-4.127	-1.622	-3.055	-0.678	35.414	555.925	0.000289	0.000114	0.000214
0.2456	281.828	-5.949	-2.503	-4.142	-0.676	35.416	536.528	0.000416	0.000175	0.000290
0.2464	275.907	-7.004	-2.957	-4.514	-0.684	35.416	525.255	0.000490	0.000207	0.000316
0.2472	273.848	-7.419	-3.232	-4.940	-0.686	35.416	521.336	0.000519	0.000226	0.000346
0.2480	275.305	-7.517	-3.260	-4.912	-0.686	35.415	524.111	0.000526	0.000228	0.000344
0.2488	280.295	-7.183	-3.191	-4.884	-0.695	35.414	533.609	0.000503	0.000223	0.000342
0.2496	289.793	-6.530	-3.012	-4.829	-0.687	35.413	551.691	0.000457	0.000211	0.000338
0.2504	307.692	-4.974	-2.434	-3.825	-0.684	35.411	585.766	0.000348	0.000170	0.000268
0.2512	339.702	-1.305	-1.347	-1.555	-0.682	35.409	646.706	0.000091	0.000094	0.000109
0.2520	389.792	4.517	0.881	2.312	-0.677	35.408	742.064	-0.000316	-0.000062	-0.000162
0.2528	459.238	12.439	4.404	7.899	-0.677	35.405	874.271	-0.000871	-0.000308	-0.000553
0.2536	545.651	22.610	8.848	14.628	-0.677	35.402	1038.780	-0.001583	-0.000619	-0.001024
0.2544	643.877	34.102	14.256	22.485	-0.679	35.400	1225.777	-0.002387	-0.000998	-0.001574
0.2552	749.076	46.387	20.227	30.865	-0.678	35.398	1426.048	-0.003247	-0.001416	-0.002161
0.2560	857.386	59.352	26.089	39.726	-0.678	35.397	1632.242	-0.004155	-0.001826	-0.002781
0.2568	965.019	72.554	32.118	48.905	-0.685	35.396	1837.149	-0.005079	-0.002248	-0.003423
0.2576	1068.460	85.339	37.978	57.587	-0.686	35.396	2034.073	-0.005974	-0.002658	-0.004031
0.2584	1164.626	97.219	43.483	65.609	-0.684	35.397	2217.150	-0.006805	-0.003044	-0.004593
0.2592	1250.649	108.016	48.561	72.655	-0.685	35.398	2380.915	-0.007561	-0.003399	-0.005086
0.2600	1324.198	117.132	53.004	78.777	-0.680	35.400	2520.933	-0.008199	-0.003710	-0.005514
0.2608	1383.681	124.580	56.789	84.089	-0.679	35.403	2634.172	-0.008721	-0.003975	-0.005886
0.2616	1428.585	130.639	59.774	88.301	-0.679	35.405	2719.660	-0.009145	-0.004184	-0.006181
0.2624	1459.679	135.086	62.018	91.396	-0.679	35.407	2778.854	-0.009456	-0.004341	-0.006398
0.2632	1478.961	138.020	63.505	93.489	-0.677	35.409	2815.561	-0.009661	-0.004445	-0.006544
0.2640	1488.940	140.035	64.427	94.617	-0.675	35.411	2834.558	-0.009802	-0.004510	-0.006623
0.2648	1492.126	141.203	64.785	95.373	-0.675	35.414	2840.624	-0.009884	-0.004535	-0.006676
0.2656	1490.983	141.827	64.854	95.759	-0.668	35.416	2838.449	-0.009928	-0.004540	-0.006703
0.2664	1487.016	142.257	64.923	95.950	-0.674	35.416	2830.896	-0.009958	-0.004545	-0.006716
0.2672	1480.899	142.145	64.950	95.922	-0.676	35.416	2819.252	-0.009950	-0.004547	-0.006715
0.2680	1472.979	141.784	64.938	95.771	-0.681	35.415	2804.174	-0.009925	-0.004546	-0.006704
0.2688	1461.738	140.979	64.895	95.262	-0.684	35.414	2782.774	-0.009869	-0.004543	-0.006668
0.2696	1443.674	139.325	64.508	94.065	-0.679	35.413	2748.384	-0.009753	-0.004516	-0.006585
0.2704	1412.941	136.115	63.518	92.152	-0.676	35.411	2689.877	-0.009528	-0.004446	-0.006451
0.2712	1363.347	130.791	61.452	88.849	-0.672	35.409	2595.463	-0.009155	-0.004302	-0.006219
0.2720	1292.353	123.038	58.149	83.799	-0.669	35.407	2460.308	-0.008613	-0.004070	-0.005866
0.2728	1201.687	112.866	53.499	77.015	-0.663	35.405	2287.703	-0.007901	-0.003745	-0.005391
0.2736	1097.434	101.165	47.830	68.897	-0.660	35.402	2089.233	-0.007082	-0.003348	-0.004823
0.2744	987.727	88.576	41.762	59.898	-0.658	35.400	1880.379	-0.006200	-0.002923	-0.004193
0.2752	879.297	75.610	35.543	51.217	-0.655	35.398	1673.956	-0.005293	-0.002488	-0.003585
0.2760	777.570	63.450	29.708	43.112	-0.661	35.397	1480.293	-0.004441	-0.002080	-0.003018
0.2768	686.392	52.332	24.452	35.613	-0.668	35.396	1306.715	-0.003663	-0.001712	-0.002493
0.2776	607.568	42.354	19.704	29.103	-0.669	35.396	1156.654	-0.002965	-0.001379	-0.002037
0.2784	542.015	34.044	15.645	23.296	-0.673	35.396	1031.857	-0.002383	-0.001095	-0.001631
0.2792	489.085	26.902	12.220	18.548	-0.668	35.398	931.091	-0.001883	-0.000855	-0.001298
0.2800	447.035	20.844	9.343	14.806	-0.665	35.400	851.040	-0.001459	-0.000654	-0.001036
0.2808	413.672	16.106	7.101	11.629	-0.666	35.402	787.525	-0.001127	-0.000497	-0.000814
0.2816	386.440	12.229	5.257	8.904	-0.662	35.404	735.683	-0.000856	-0.000368	-0.000623
0.2824	363.192	8.936	3.675	6.497	-0.665	35.406	691.423	-0.000625	-0.000257	-0.000455
0.2832	342.858	6.060	2.120	4.184	-0.662	35.409	652.714	-0.000424	-0.000148	-0.000293
0.2840	324.899	3.461	0.690	2.147	-0.661	35.411	618.525	-0.000242	-0.000048	-0.000150
0.2848	309.540	0.947	-0.452	0.702	-0.661	35.414	589.285	-0.000066	0.000032	-0.000049
0.2856	297.517	-1.248	-1.484	-0.496	-0.656	35.416	566.397	0.000087	0.000104	0.000035
0.2864	289.372	-2.680	-1.979	-1.171	-0.664	35.416	550.890	0.000188	0.000139	0.000082
0.2872	285.344	-3.667	-2.199	-1.625	-0.667	35.416	543.222	0.000257	0.000154	0.000114
0.2880	285.435	-4.028	-2.474	-2.107	-0.672	35.415	543.394	0.000282	0.000173	0.000147
0.2888	289.462	-3.862	-2.474	-2.256	-0.677	35.413	551.062	0.000270	0.000173	0.000158
0.2896	298.284	-3.363	-2.433	-2.119	-0.672	35.412	567.856	0.000235	0.000170	0.000148
0.2904	316.017	-1.737	-2.076	-1.018	-0.673	35.411	601.616	0.000122	0.000145	0.000071
0.2912	348.359	1.626	-0.880	1.378	-0.675	35.409	663.185	-0.000114	0.000062	-0.000096
0.2920	399.530	7.309	1.390	5.340	-0.673	35.407	760.603	-0.000512	-0.000097	-0.000374
0.2928	470.855	15.536	4.844	10.871	-0.675	35.405	896.387	-0.001087	-0.000339	-0.000761
0.2936	559.523	25.721	9.495	17.862	-0.672	35.402	1065.187	-0.001800	-0.000665	-0.001250
0.2944	659.942	37.381	15.123	25.759	-0.672	35.400	1256.361	-0.002617	-0.001059	-0.001803
0.2952	766.885	49.998	21.219	34.305	-0.671	35.398	1459.951	-0.003500	-0.001485	-0.002401
0.2960	876.081	63.200	27.562	43.139	-0.671	35.397	1667.833	-0.004424	-0.001929	-0.003020
0.2968	983.669	76.457	34.002	51.973	-0.677	35.396	1872.654	-0.005352	-0.002380	-0.003638
0.2976	1086.058	89.338	39.892	60.574	-0.678	35.396	2067.575	-0.006254	-0.002792	-0.004240
0.2984	1180.166	101.108	45.355	68.608	-0.679	35.396	2246.733	-0.007078	-0.003175	-0.004803
0.2992	1263.063	111.378	50.172	75.667	-0.680	35.397	2404.547	-0.007796	-0.003512	-0.005297
0.3000	1332.629	120.175	54.259	81.639	-0.678	35.400	2536.983	-0.008412	-0.003798	-0.005715
0.3008	1387.708	127.137	57.767	86.496	-0.680	35.401	2641.840	-0.008900	-0.004044	-0.006055
0.3016	1428.330	132.654	60.436	90.185	-0.679	35.403	2719.173	-0.009286	-0.004230	-0.006313
0.3024	1456.042	136.713	62.472	92.938	-0.679	35.406	2771.931	-0.009570	-0.004373	-0.006506
0.3032	1473.100	139.451	63.655	94.754	-0.673	35.408	2804.403	-0.009762	-0.004456	-0.006633
0.3040	1481.996	141.259	64.399	95.979	-0.673	35.410	2821.341	-0.009888	-0.004508	-0.006719
0.3048	1485.228	142.063	64.743	96.529	-0.675	35.413	2827.492	-0.009944	-0.004532	-0.006757
0.3056	1484.687	142.508	64.714	96.749	-0.672	35.415	2826.462	-0.009976	-0.004530	-0.006772
0.3064	1481.516	142.716	64.977	96.872	-0.680	35.416	2820.425	-0.009990	-0.004548	-0.006781
0.3072	1476.210	142.743	64.879	96.803	-0.679	35.416	2810.326	-0.009992	-0.004542	-0.006776
0.3080	1468.501	142.493	64.754	96.568	-0.680	35.415	2795.649	-0.009975	-0.004533	-0.006760
0.3088	1457.034	141.770	64.673	96.279	-0.681	35.413	2773.819	-0.009924	-0.004527	-0.006740
0.3096	1437.512	139.977	63.985	95.097	-0.676	35.412	2736.654	-0.009798	-0.004479	-0.006657
0.3104	1403.127	136.448	62.719	92.675	-0.674	35.411	2671.194	-0.009551	-0.004390	-0.006487
0.3112	1348.394	130.668	60.327	88.712	-0.673	35.409	2566.996	-0.009147	-0.004223	-0.006210
0.3120	1271.554	122.373	56.530	83.070	-0.670	35.407	2420.712	-0.008566	-0.003957	-0.005815
0.3128	1176.319	111.826	51.562	75.970	-0.669	35.405	2239.408	-0.007828	-0.003609	-0.005318
0.3136	1070.804	99.679	45.893	67.838	-0.669	35.402	2038.536	-0.006978	-0.003213	-0.004749
0.3144	963.186	87.102	40.071	59.431	-0.667	35.399	1833.658	-0.006097	-0.002805	-0.004160
0.3152	859.580	74.485	34.139	50.968	-0.667	35.398	1636.419	-0.005214	-0.002390	-0.003568
0.3160	764.210	62.616	28.649	43.359	-0.665	35.396	1454.859	-0.004383	-0.002005	-0.003035
0.3168	679.645	52.041	23.779	36.576	-0.667	35.395	1293.869	-0.003643	-0.001665	-0.002560
0.3176	606.892	42.759	19.321	30.507	-0.666	35.396	1155.367	-0.002993	-0.001352	-0.002136
0.3184	546.072	34.933	15.689	25.114	-0.671	35.396	1039.581	-0.002445	-0.001098	-0.001758
0.3192	495.817	28.362	12.497	20.463	-0.667	35.397	943.909	-0.001985	-0.000875	-0.001432
0.3200	454.143	22.790	9.717	16.555	-0.667	35.399	864.573	-0.001595	-0.000680	-0.001159
0.3208	418.977	17.967	7.419	13.238	-0.667	35.401	797.625	-0.001258	-0.000519	-0.000927
0.3216	388.409	13.716	5.493	10.445	-0.665	35.403	739.431	-0.000960	-0.000385	-0.000731
0.3224	361.448	9.908	3.717	7.707	-0.668	35.406	688.105	-0.000694	-0.000260	-0.000539
0.3232	337.553	6.489	2.133	5.215	-0.668	35.408	642.614	-0.000454	-0.000149	-0.000365
0.3240	317.039	3.669	0.756	3.015	-0.670	35.411	603.561	-0.000257	-0.000053	-0.000211
0.3248	300.238	1.043	-0.565	1.253	-0.672	35.413	571.575	-0.000073	0.000040	-0.000088
0.3256	287.599	-1.000	-1.651	0.028	-0.672	35.415	547.514	0.000070	0.000116	-0.000002
0.3264	279.619	-2.306	-2.296	-0.660	-0.676	35.415	532.322	0.000161	0.000161	0.000046
0.3272	276.147	-3.334	-2.819	-1.184	-0.681	35.415	525.713	0.000233	0.000197	0.000083
0.3280	277.019	-3.613	-3.109	-1.569	-0.683	35.414	527.372	0.000253	0.000218	0.000110
0.3288	281.948	-3.349	-2.930	-1.610	-0.687	35.413	536.757	0.000234	0.000205	0.000113
0.3296	292.272	-2.792	-2.724	-1.403	-0.688	35.412	556.412	0.000195	0.000191	0.000098
0.3304	312.546	-0.874	-2.145	-0.083	-0.685	35.411	595.007	0.000061	0.000150	0.000006
0.3312	348.328	3.073	-0.809	2.696	-0.685	35.409	663.128	-0.000215	0.000057	-0.000189
0.3320	403.212	9.243	1.419	6.838	-0.684	35.407	767.612	-0.000647	-0.000099	-0.000479
0.3328	477.558	17.719	4.997	12.480	-0.684	35.405	909.147	-0.001240	-0.000350	-0.000874
0.3336	567.893	28.391	9.812	19.458	-0.680	35.402	1081.123	-0.001987	-0.000687	-0.001362
0.3344	668.494	40.077	15.645	27.452	-0.681	35.399	1272.640	-0.002805	-0.001095	-0.001922
0.3352	774.534	52.404	21.686	35.860	-0.679	35.398	1474.514	-0.003668	-0.001518	-0.002510
0.3360	882.077	65.286	27.837	44.514	-0.677	35.396	1679.249	-0.004570	-0.001949	-0.003116
0.3368	987.006	78.057	34.029	53.307	-0.688	35.395	1879.005	-0.005464	-0.002382	-0.003731
0.3376	1085.878	90.299	39.643	61.467	-0.690	35.396	2067.232	-0.006321	-0.002775	-0.004303
0.3384	1175.537	101.416	45.051	69.172	-0.692	35.396	2237.921	-0.007099	-0.003154	-0.004842
0.3392	1253.324	111.143	49.660	75.942	-0.689	35.398	2386.007	-0.007780	-0.003476	-0.005316
0.3400	1317.901	119.174	53.513	81.514	-0.680	35.400	2508.945	-0.008342	-0.003746	-0.005706
0.3408	1368.817	125.762	56.679	85.933	-0.676	35.402	2605.877	-0.008803	-0.003968	-0.006015
0.3416	1407.095	130.974	59.141	89.372	-0.672	35.404	2678.747	-0.009168	-0.004140	-0.006256
0.3424	1434.296	134.989	60.986	92.167	-0.676	35.406	2730.532	-0.009449	-0.004269	-0.006452
0.3432	1452.105	137.727	62.253	93.847	-0.676	35.408	2764.435	-0.009641	-0.004358	-0.006569
0.3440	1462.459	139.422	63.201	95.180	-0.673	35.411	2784.147	-0.009760	-0.004424	-0.006663
0.3448	1467.133	140.505	63.683	95.896	-0.675	35.413	2793.045	-0.009835	-0.004458	-0.006713
0.3456	1467.780	141.076	63.862	96.047	-0.672	35.415	2794.275	-0.009875	-0.004470	-0.006723
0.3464	1465.691	141.493	64.204	96.444	-0.675	35.416	2790.298	-0.009905	-0.004494	-0.006751
0.3472	1461.438	141.743	64.329	96.485	-0.680	35.416	2782.202	-0.009922	-0.004503	-0.006754
0.3480	1455.096	141.549	64.357	96.485	-0.676	35.415	2770.128	-0.009908	-0.004505	-0.006754
0.3488	1445.568	140.923	64.248	96.127	-0.675	35.413	2751.989	-0.009865	-0.004497	-0.006729
0.3496	1429.532	139.464	63.711	95.125	-0.671	35.413	2721.462	-0.009762	-0.004460	-0.006659
0.3504	1401.053	136.643	62.610	93.282	-0.665	35.411	2667.246	-0.009565	-0.004383	-0.006530
0.3512	1354.210	131.834	60.670	89.952	-0.669	35.409	2578.068	-0.009228	-0.004247	-0.006297
0.3520	1286.732	124.678	57.559	85.095	-0.665	35.407	2449.608	-0.008727	-0.004029	-0.005957
0.3528	1200.274	115.146	53.060	78.599	-0.663	35.404	2285.013	-0.008060	-0.003714	-0.005502
0.3536	1101.116	103.862	47.679	71.099	-0.664	35.402	2096.243	-0.007270	-0.003338	-0.004977
0.3544	996.759	91.772	41.886	63.075	-0.661	35.399	1897.573	-0.006424	-0.002932	-0.004415
0.3552	893.183	79.404	35.900	54.709	-0.664	35.398	1700.392	-0.005558	-0.002513	-0.003830
0.3560	795.484	67.634	30.313	46.894	-0.667	35.397	1514.397	-0.004734	-0.002122	-0.003283
0.3568	707.117	56.892	25.223	39.670	-0.670	35.396	1346.169	-0.003982	-0.001766	-0.002777
0.3576	629.931	47.192	20.476	33.218	-0.669	35.396	1199.226	-0.003303	-0.001433	-0.002325
0.3584	564.722	38.744	16.608	27.906	-0.669	35.396	1075.087	-0.002712	-0.001163	-0.001953
0.3592	510.635	31.573	13.237	23.187	-0.664	35.398	972.118	-0.002210	-0.000927	-0.001623
0.3600	465.941	25.362	10.169	18.907	-0.660	35.400	887.032	-0.001775	-0.000712	-0.001323
0.3608	428.881	20.234	7.692	15.219	-0.662	35.402	816.479	-0.001416	-0.000538	-0.001065
0.3616	397.441	15.981	5.519	12.137	-0.663	35.404	756.626	-0.001119	-0.000386	-0.000850
0.3624	370.195	12.089	3.675	9.495	-0.669	35.406	704.756	-0.000846	-0.000257	-0.000665
0.3632	346.420	8.560	2.147	7.225	-0.671	35.408	659.494	-0.000599	-0.000150	-0.000506
0.3640	325.906	5.490	0.827	5.284	-0.673	35.411	620.441	-0.000384	-0.000058	-0.000370
0.3648	308.744	2.752	-0.398	3.398	-0.671	35.413	587.769	-0.000193	0.000028	-0.000238
0.3656	295.489	0.487	-1.691	1.706	-0.667	35.416	562.534	-0.000034	0.000118	-0.000119
0.3664	286.622	-0.959	-2.365	0.770	-0.670	35.416	545.654	0.000067	0.000166	-0.000054
0.3672	282.158	-1.932	-2.778	0.042	-0.671	35.416	537.157	0.000135	0.000194	-0.000003
0.3680	282.038	-2.320	-2.942	-0.054	-0.675	35.415	536.928	0.000162	0.000206	0.000004
0.3688	286.231	-2.042	-2.612	0.125	-0.677	35.414	544.910	0.000143	0.000183	-0.000009
0.3696	295.684	-1.362	-2.489	0.331	-0.672	35.413	562.906	0.000095	0.000174	-0.000023
0.3704	315.146	0.542	-1.994	1.280	-0.669	35.411	599.957	-0.000038	0.000140	-0.000090
0.3712	350.402	4.098	-0.565	3.495	-0.666	35.409	667.076	-0.000287	0.000040	-0.000245
0.3720	405.106	10.198	1.719	7.389	-0.670	35.407	771.217	-0.000714	-0.000120	-0.000517
0.3728	479.812	18.800	5.476	13.169	-0.673	35.405	913.439	-0.001316	-0.000383	-0.000922
0.3736	570.538	29.264	10.415	20.655	-0.677	35.402	1086.159	-0.002048	-0.000729	-0.001446
0.3744	671.214	41.257	16.045	28.938	-0.683	35.400	1277.819	-0.002888	-0.001123	-0.002026
0.3752	776.879	53.528	22.141	37.414	-0.680	35.398	1478.977	-0.003747	-0.001550	-0.002619
0.3760	883.640	66.327	28.486	46.028	-0.680	35.397	1682.224	-0.004643	-0.001994	-0.003222
0.3768	987.847	79.238	34.732	54.462	-0.683	35.396	1880.608	-0.005547	-0.002431	-0.003812
0.3776	1086.148	91.384	40.346	62.541	-0.686	35.396	2067.747	-0.006397	-0.002824	-0.004378
0.3784	1175.477	102.641	45.506	70.095	-0.687	35.397	2237.806	-0.007185	-0.003185	-0.004907
0.3792	1253.474	112.214	49.908	76.728	-0.688	35.398	2386.293	-0.007855	-0.003494	-0.005371
0.3800	1318.397	120.370	53.487	82.343	-0.681	35.400	2509.890	-0.008426	-0.003744	-0.005764
0.3808	1369.659	126.941	56.776	86.855	-0.676	35.402	2607.479	-0.008886	-0.003974	-0.006080
0.3816	1407.876	132.068	59.239	90.308	-0.676	35.404	2680.235	-0.009245	-0.004147	-0.006322
0.3824	1434.522	135.876	60.974	92.880	-0.673	35.406	2730.961	-0.009511	-0.004268	-0.006502
0.3832	1451.684	138.281	62.282	94.504	-0.675	35.408	2763.634	-0.009680	-0.004360	-0.006615
0.3840	1461.663	140.144	63.079	95.825	-0.675	35.411	2782.631	-0.009810	-0.004416	-0.006708
0.3848	1466.096	141.118	63.546	96.513	-0.674	35.413	2791.071	-0.009878	-0.004448	-0.006756
0.3856	1466.667	141.645	63.698	96.760	-0.672	35.415	2792.158	-0.009915	-0.004459	-0.006773
0.3864	1464.714	142.063	63.889	97.283	-0.675	35.416	2788.439	-0.009944	-0.004472	-0.006810
0.3872	1460.611	142.009	63.834	97.339	-0.676	35.416	2780.628	-0.009941	-0.004468	-0.006814
0.3880	1454.660	141.813	63.876	97.353	-0.673	35.415	2769.299	-0.009927	-0.004471	-0.006815
0.3888	1446.063	141.425	63.876	97.148	-0.673	35.413	2752.934	-0.009900	-0.004471	-0.006800
0.3896	1432.027	140.090	63.449	96.281	-0.667	35.412	2726.212	-0.009806	-0.004441	-0.006740
0.3904	1406.960	137.574	62.666	94.494	-0.663	35.411	2678.490	-0.009630	-0.004387	-0.006615
0.3912	1364.234	133.198	60.959	91.522	-0.665	35.409	2597.151	-0.009324	-0.004267	-0.006407
0.3920	1299.807	126.207	58.001	86.939	-0.666	35.407	2474.499	-0.008834	-0.004060	-0.006086
0.3928	1213.799	116.757	53.777	80.402	-0.668	35.405	2310.762	-0.008173	-0.003764	-0.005628
0.3936	1111.651	105.320	48.451	72.627	-0.669	35.402	2116.299	-0.007372	-0.003392	-0.005084
0.3944	1001.688	92.603	42.423	64.041	-0.670	35.400	1906.958	-0.006482	-0.002970	-0.004483
0.3952	891.590	79.570	36.161	55.084	-0.666	35.398	1697.359	-0.005570	-0.002531	-0.003856
0.3960	787.834	67.147	30.203	46.731	-0.671	35.396	1499.834	-0.004700	-0.002114	-0.003271
0.3968	694.853	55.988	24.919	39.342	-0.676	35.395	1322.823	-0.003919	-0.001744	-0.002754
0.3976	614.902	46.248	20.146	32.833	-0.673	35.396	1170.616	-0.003237	-0.001410	-0.002298
0.3984	548.837	37.965	16.128	27.232	-0.677	35.396	1044.846	-0.002658	-0.001129	-0.001906
0.3992	495.532	30.891	12.634	22.360	-0.671	35.397	943.365	-0.002162	-0.000884	-0.001565
Test Cycles
Time (sec)	Axial stress (kPa)	Axial micro-strain #1	Axial micro-strain #2	Axial micro-strain #3	Confining pressure (kPa)	Temperature (�C)	Load (N)	Displacement #1 (mm)	Displacement #2 (mm)	Displacement #3 (mm)
0.0000	453.061	24.929	9.496	18.190	-0.669	35.400	862.513	-0.001745	-0.000665	-0.001273
0.0008	419.323	19.885	7.225	14.709	-0.670	35.402	798.283	-0.001392	-0.000506	-0.001030
0.0016	391.580	15.828	5.312	12.191	-0.668	35.404	745.468	-0.001108	-0.000372	-0.000853
0.0024	368.076	12.367	3.689	10.058	-0.670	35.406	700.722	-0.000866	-0.000258	-0.000704
0.0032	347.532	9.352	2.368	7.898	-0.669	35.408	661.612	-0.000655	-0.000166	-0.000553
0.0040	329.483	6.809	1.115	6.096	-0.668	35.411	627.251	-0.000477	-0.000078	-0.000427
0.0048	314.259	4.363	-0.041	4.252	-0.669	35.413	598.269	-0.000305	0.000003	-0.000298
0.0056	302.357	2.432	-1.018	2.684	-0.665	35.416	575.609	-0.000170	0.000071	-0.000188
0.0064	294.482	1.069	-1.623	1.969	-0.668	35.416	560.617	-0.000075	0.000114	-0.000138
0.0072	290.409	-0.014	-2.200	1.308	-0.672	35.416	552.864	0.000001	0.000154	-0.000092
0.0080	290.169	-0.416	-2.461	1.156	-0.672	35.415	552.406	0.000029	0.000172	-0.000081
0.0088	293.565	-0.361	-2.406	1.349	-0.675	35.413	558.872	0.000025	0.000168	-0.000094
0.0096	301.109	-0.137	-2.462	1.459	-0.671	35.412	573.235	0.000010	0.000172	-0.000102
0.0104	316.889	1.293	-2.050	2.201	-0.669	35.411	603.275	-0.000091	0.000143	-0.000154
0.0112	346.826	4.476	-0.949	4.059	-0.670	35.409	660.267	-0.000313	0.000066	-0.000284
0.0120	395.758	10.007	1.031	7.568	-0.673	35.407	753.422	-0.000700	-0.000072	-0.000530
0.0128	465.775	17.983	4.458	12.824	-0.674	35.404	886.717	-0.001259	-0.000312	-0.000898
0.0136	554.819	28.280	9.288	20.228	-0.677	35.402	1056.232	-0.001980	-0.000650	-0.001416
0.0144	657.117	40.174	15.178	28.609	-0.677	35.400	1250.982	-0.002812	-0.001062	-0.002003
0.0152	766.779	52.863	21.494	37.209	-0.670	35.398	1459.751	-0.003700	-0.001505	-0.002605
0.0160	878.967	66.202	28.058	46.125	-0.672	35.396	1673.326	-0.004634	-0.001964	-0.003229
0.0168	989.245	79.556	34.471	55.028	-0.675	35.395	1883.268	-0.005569	-0.002413	-0.003852
0.0176	1093.798	92.327	40.361	63.545	-0.677	35.396	2082.310	-0.006463	-0.002825	-0.004448
0.0184	1189.438	104.125	46.044	71.704	-0.679	35.396	2264.385	-0.007289	-0.003223	-0.005019
0.0192	1272.921	114.548	50.942	78.874	-0.676	35.397	2423.315	-0.008018	-0.003566	-0.005521
0.0200	1341.571	123.123	55.110	84.599	-0.669	35.400	2554.007	-0.008619	-0.003858	-0.005922
0.0208	1394.065	129.764	58.426	89.099	-0.668	35.401	2653.942	-0.009084	-0.004090	-0.006237
0.0216	1430.374	134.794	60.835	92.456	-0.667	35.403	2723.064	-0.009436	-0.004258	-0.006472
0.0224	1452.751	138.254	62.527	94.587	-0.668	35.406	2765.665	-0.009678	-0.004377	-0.006621
0.0232	1464.308	140.435	63.407	95.923	-0.667	35.408	2787.666	-0.009830	-0.004439	-0.006715
0.0240	1468.486	141.839	64.041	96.914	-0.667	35.410	2795.620	-0.009929	-0.004483	-0.006784
0.0248	1468.306	142.410	64.205	97.175	-0.668	35.413	2795.277	-0.009969	-0.004494	-0.006802
0.0256	1465.600	142.439	64.192	97.259	-0.668	35.415	2790.127	-0.009971	-0.004493	-0.006808
0.0264	1461.483	142.509	64.412	97.629	-0.670	35.415	2782.288	-0.009976	-0.004509	-0.006834
0.0272	1455.922	142.426	64.316	97.464	-0.676	35.415	2771.702	-0.009970	-0.004502	-0.006822
0.0280	1448.618	141.982	64.289	97.491	-0.676	35.415	2757.797	-0.009939	-0.004500	-0.006824
0.0288	1438.098	141.300	64.220	97.162	-0.677	35.413	2737.770	-0.009891	-0.004495	-0.006801
0.0296	1420.275	139.689	63.380	95.745	-0.675	35.412	2703.838	-0.009778	-0.004437	-0.006702
0.0304	1389.016	136.437	62.307	93.572	-0.666	35.411	2644.329	-0.009551	-0.004362	-0.006550
0.0312	1338.595	131.100	60.092	89.926	-0.665	35.409	2548.342	-0.009177	-0.004206	-0.006295
0.0320	1266.745	123.262	56.501	84.861	-0.662	35.407	2411.556	-0.008628	-0.003955	-0.005940
0.0328	1176.093	113.103	51.975	78.062	-0.663	35.405	2238.979	-0.007917	-0.003638	-0.005464
0.0336	1073.374	101.305	46.360	70.150	-0.665	35.402	2043.428	-0.007091	-0.003245	-0.004910
0.0344	966.372	88.909	40.374	61.618	-0.661	35.400	1839.724	-0.006224	-0.002826	-0.004313
0.0352	861.308	76.388	34.209	53.197	-0.657	35.398	1639.709	-0.005347	-0.002395	-0.003724
0.0360	763.143	64.533	28.442	45.630	-0.659	35.397	1452.827	-0.004517	-0.001991	-0.003194
0.0368	675.602	53.860	23.282	38.680	-0.661	35.396	1286.173	-0.003770	-0.001630	-0.002708
0.0376	600.460	44.467	18.769	32.295	-0.664	35.396	1143.122	-0.003113	-0.001314	-0.002261
0.0384	538.723	36.602	15.177	26.831	-0.671	35.396	1025.591	-0.002562	-0.001062	-0.001878
0.0392	489.175	29.877	11.998	22.125	-0.665	35.397	931.263	-0.002091	-0.000840	-0.001549
0.0400	449.605	24.348	9.343	18.150	-0.668	35.399	855.932	-0.001704	-0.000654	-0.001270
0.0408	417.639	19.650	7.170	15.438	-0.669	35.401	795.078	-0.001375	-0.000502	-0.001081
0.0416	390.724	15.716	5.299	12.892	-0.667	35.403	743.837	-0.001100	-0.000371	-0.000902
0.0424	367.580	12.479	3.702	10.429	-0.671	35.406	699.778	-0.000874	-0.000259	-0.000730
0.0432	347.322	9.394	2.408	8.336	-0.666	35.408	661.211	-0.000658	-0.000169	-0.000584
0.0440	329.889	6.920	1.266	6.315	-0.667	35.411	628.023	-0.000484	-0.000089	-0.000442
0.0448	315.296	4.768	0.179	4.582	-0.667	35.413	600.243	-0.000334	-0.000013	-0.000321
0.0456	303.904	2.697	-0.578	3.440	-0.666	35.415	578.556	-0.000189	0.000040	-0.000241
0.0464	296.195	1.501	-1.143	2.862	-0.677	35.416	563.879	-0.000105	0.000080	-0.000200
0.0472	292.303	0.682	-1.514	2.242	-0.679	35.415	556.469	-0.000048	0.000106	-0.000157
0.0480	292.393	0.181	-1.666	1.898	-0.681	35.415	556.641	-0.000013	0.000117	-0.000133
0.0488	296.360	0.500	-1.652	1.912	-0.685	35.413	564.194	-0.000035	0.000116	-0.000134
0.0496	305.212	1.014	-1.706	2.023	-0.673	35.412	581.045	-0.000071	0.000119	-0.000142
0.0504	323.216	2.543	-1.362	3.151	-0.672	35.411	615.320	-0.000178	0.000095	-0.000221
0.0512	356.459	6.059	-0.151	5.670	-0.669	35.409	678.606	-0.000424	0.000011	-0.000397
0.0520	408.893	11.993	2.078	9.426	-0.669	35.407	778.427	-0.000840	-0.000145	-0.000660
0.0528	481.706	20.456	5.781	14.916	-0.672	35.404	917.044	-0.001432	-0.000405	-0.001044
0.0536	571.801	31.031	10.639	21.934	-0.669	35.402	1088.562	-0.002172	-0.000745	-0.001535
0.0544	673.137	42.913	16.224	29.996	-0.673	35.399	1281.481	-0.003004	-0.001136	-0.002100
0.0552	780.530	55.363	22.238	38.790	-0.668	35.398	1485.929	-0.003875	-0.001557	-0.002715
0.0560	889.757	68.231	28.416	47.886	-0.672	35.396	1693.869	-0.004776	-0.001989	-0.003352
0.0568	996.624	81.182	34.566	56.721	-0.679	35.396	1897.316	-0.005683	-0.002420	-0.003970
0.0576	1097.540	93.508	40.442	64.840	-0.678	35.396	2089.434	-0.006546	-0.002831	-0.004539
0.0584	1189.303	104.847	45.906	72.449	-0.682	35.396	2264.128	-0.007339	-0.003213	-0.005071
0.0592	1268.909	114.895	50.556	78.998	-0.679	35.397	2415.676	-0.008043	-0.003539	-0.005530
0.0600	1334.538	123.136	54.547	84.350	-0.673	35.399	2540.617	-0.008620	-0.003818	-0.005904
0.0608	1385.484	129.834	57.685	88.876	-0.674	35.401	2637.606	-0.009088	-0.004038	-0.006221
0.0616	1422.514	134.934	59.955	92.165	-0.672	35.403	2708.101	-0.009445	-0.004197	-0.006452
0.0624	1447.401	138.491	61.771	94.642	-0.672	35.405	2755.480	-0.009694	-0.004324	-0.006625
0.0632	1462.550	140.908	62.925	96.665	-0.670	35.408	2784.319	-0.009864	-0.004405	-0.006767
0.0640	1470.500	142.339	63.764	97.780	-0.666	35.410	2799.454	-0.009964	-0.004463	-0.006845
0.0648	1473.415	143.132	64.301	98.234	-0.666	35.413	2805.004	-0.010019	-0.004501	-0.006876
0.0656	1473.130	143.508	64.439	98.482	-0.663	35.415	2804.461	-0.010046	-0.004511	-0.006894
0.0664	1470.936	143.812	64.645	98.607	-0.667	35.415	2800.283	-0.010067	-0.004525	-0.006902
0.0672	1466.968	143.869	64.714	98.565	-0.671	35.415	2792.730	-0.010071	-0.004530	-0.006900
0.0680	1461.182	143.480	64.714	98.619	-0.672	35.414	2781.715	-0.010044	-0.004530	-0.006903
0.0688	1452.526	142.981	64.603	98.537	-0.675	35.413	2765.236	-0.010009	-0.004522	-0.006898
0.0696	1437.512	141.648	64.095	97.587	-0.675	35.412	2736.654	-0.009915	-0.004487	-0.006831
0.0704	1409.770	138.882	63.092	95.731	-0.672	35.410	2683.840	-0.009722	-0.004416	-0.006701
0.0712	1362.656	134.171	61.247	92.580	-0.673	35.409	2594.147	-0.009392	-0.004287	-0.006481
0.0720	1293.044	126.693	58.097	87.365	-0.672	35.406	2461.624	-0.008869	-0.004067	-0.006116
0.0728	1202.378	116.646	53.584	80.636	-0.670	35.404	2289.019	-0.008165	-0.003751	-0.005645
0.0736	1097.600	104.932	48.092	72.984	-0.672	35.402	2089.548	-0.007345	-0.003366	-0.005109
0.0744	987.532	92.328	41.942	64.314	-0.671	35.399	1880.007	-0.006463	-0.002936	-0.004502
0.0752	879.342	79.559	35.696	55.439	-0.669	35.398	1674.042	-0.005569	-0.002499	-0.003881
0.0760	778.787	67.372	29.847	47.198	-0.670	35.396	1482.611	-0.004716	-0.002089	-0.003304
0.0768	689.609	56.449	24.468	39.987	-0.668	35.395	1312.838	-0.003951	-0.001713	-0.002799
0.0776	613.505	46.735	19.817	33.769	-0.666	35.396	1167.955	-0.003271	-0.001387	-0.002364
0.0784	550.716	38.550	15.949	28.622	-0.669	35.396	1048.422	-0.002698	-0.001116	-0.002004
0.0792	499.830	31.851	12.688	24.054	-0.668	35.397	951.548	-0.002230	-0.000888	-0.001684
0.0800	458.442	26.195	10.031	19.830	-0.668	35.399	872.755	-0.001834	-0.000702	-0.001388
0.0808	423.966	21.497	7.857	16.252	-0.668	35.401	807.123	-0.001505	-0.000550	-0.001138
0.0816	394.060	17.383	5.834	13.252	-0.665	35.403	750.189	-0.001217	-0.000408	-0.000928
0.0824	367.189	13.714	3.989	10.650	-0.664	35.406	699.034	-0.000960	-0.000279	-0.000746
0.0832	342.963	10.129	2.215	8.490	-0.663	35.408	652.914	-0.000709	-0.000155	-0.000594
0.0840	321.939	6.947	0.620	6.632	-0.663	35.410	612.888	-0.000486	-0.000043	-0.000464
0.0848	304.761	4.237	-0.727	4.693	-0.664	35.413	580.187	-0.000297	0.000051	-0.000328
0.0856	292.423	2.084	-1.758	3.206	-0.662	35.415	556.698	-0.000146	0.000123	-0.000224
0.0864	285.224	0.722	-2.240	2.174	-0.669	35.415	542.994	-0.000051	0.000157	-0.000152
0.0872	282.624	0.083	-2.640	1.527	-0.674	35.415	538.044	-0.000006	0.000185	-0.000107
0.0880	284.488	-0.083	-2.696	1.568	-0.677	35.414	541.592	0.000006	0.000189	-0.000110
0.0888	290.424	0.193	-2.737	1.884	-0.684	35.413	552.893	-0.000014	0.000192	-0.000132
0.0896	302.326	1.069	-2.640	2.215	-0.676	35.412	575.552	-0.000075	0.000185	-0.000155
0.0904	325.621	3.279	-1.843	3.523	-0.675	35.411	619.898	-0.000230	0.000129	-0.000247
0.0912	365.476	7.531	-0.247	6.220	-0.671	35.409	695.772	-0.000527	0.000017	-0.000435
0.0920	424.793	14.105	2.669	10.501	-0.670	35.407	808.697	-0.000987	-0.000187	-0.000735
0.0928	503.241	22.984	6.895	16.844	-0.671	35.404	958.042	-0.001609	-0.000483	-0.001179
0.0936	596.312	33.823	12.027	24.412	-0.665	35.402	1135.225	-0.002368	-0.000842	-0.001709
0.0944	698.400	45.926	17.846	32.697	-0.671	35.400	1329.575	-0.003215	-0.001249	-0.002289
0.0952	805.117	58.545	24.136	41.172	-0.664	35.398	1532.736	-0.004098	-0.001689	-0.002882
0.0960	912.525	71.594	30.260	49.814	-0.667	35.396	1737.213	-0.005012	-0.002118	-0.003487
0.0968	1016.717	84.337	36.424	58.441	-0.673	35.395	1935.568	-0.005904	-0.002550	-0.004091
0.0976	1114.372	96.205	42.288	66.601	-0.672	35.395	2121.477	-0.006734	-0.002960	-0.004662
0.0984	1202.408	107.183	47.364	74.238	-0.678	35.396	2289.076	-0.007503	-0.003316	-0.005197
0.0992	1278.467	116.660	51.821	80.594	-0.674	35.397	2433.872	-0.008166	-0.003627	-0.005642
0.1000	1340.895	124.512	55.455	85.671	-0.668	35.399	2552.719	-0.008716	-0.003882	-0.005997
0.1008	1389.226	130.904	58.344	89.978	-0.665	35.401	2644.730	-0.009163	-0.004084	-0.006298
0.1016	1424.197	135.795	60.463	93.143	-0.661	35.403	2711.306	-0.009506	-0.004232	-0.006520
0.1024	1447.356	139.227	62.060	95.495	-0.663	35.405	2755.394	-0.009746	-0.004344	-0.006685
0.1032	1461.212	141.353	63.076	97.174	-0.663	35.408	2781.773	-0.009895	-0.004415	-0.006802
0.1040	1467.975	142.772	63.737	98.055	-0.663	35.410	2794.647	-0.009994	-0.004462	-0.006864
0.1048	1469.884	143.370	64.191	98.522	-0.664	35.413	2798.281	-0.010036	-0.004493	-0.006897
0.1056	1468.651	143.675	64.287	98.619	-0.661	35.415	2795.935	-0.010057	-0.004500	-0.006903
0.1064	1465.225	143.952	64.467	98.771	-0.666	35.415	2789.412	-0.010077	-0.004513	-0.006914
0.1072	1459.965	143.730	64.453	98.703	-0.671	35.415	2779.398	-0.010061	-0.004512	-0.006909
0.1080	1452.436	143.411	64.342	98.509	-0.672	35.414	2765.064	-0.010039	-0.004504	-0.006896
0.1088	1440.864	142.550	64.081	98.194	-0.674	35.413	2743.034	-0.009978	-0.004486	-0.006874
0.1096	1420.350	140.480	63.269	96.790	-0.668	35.412	2703.981	-0.009834	-0.004429	-0.006775
0.1104	1384.297	136.741	61.867	94.422	-0.664	35.410	2635.345	-0.009572	-0.004331	-0.006610
0.1112	1327.805	130.694	59.392	90.294	-0.661	35.409	2527.800	-0.009149	-0.004157	-0.006321
0.1120	1249.372	122.134	55.553	84.419	-0.661	35.407	2378.483	-0.008549	-0.003889	-0.005909
0.1128	1152.904	111.295	50.668	77.346	-0.662	35.405	2194.834	-0.007791	-0.003547	-0.005414
0.1136	1046.097	98.927	44.765	69.132	-0.663	35.402	1991.501	-0.006925	-0.003134	-0.004839
0.1144	936.826	86.018	38.695	60.450	-0.664	35.400	1783.476	-0.006021	-0.002709	-0.004232
0.1152	831.943	73.260	32.820	51.960	-0.659	35.398	1583.805	-0.005128	-0.002297	-0.003637
0.1160	736.678	61.588	27.288	44.020	-0.658	35.397	1402.445	-0.004311	-0.001910	-0.003081
0.1168	654.202	51.569	22.623	37.152	-0.661	35.396	1245.432	-0.003610	-0.001584	-0.002601
0.1176	585.477	43.035	18.439	31.676	-0.660	35.396	1114.597	-0.003012	-0.001291	-0.002217
0.1184	530.202	36.019	15.025	27.066	-0.664	35.396	1009.369	-0.002521	-0.001052	-0.001895
0.1192	486.364	30.307	12.053	22.952	-0.660	35.397	925.913	-0.002122	-0.000844	-0.001607
0.1200	451.153	25.402	9.603	19.375	-0.657	35.399	858.879	-0.001778	-0.000672	-0.001356
0.1208	422.103	21.304	7.732	16.347	-0.660	35.401	803.576	-0.001491	-0.000541	-0.001144
0.1216	396.525	17.579	6.069	13.718	-0.662	35.403	754.881	-0.001231	-0.000425	-0.000960
0.1224	372.780	14.175	4.596	11.723	-0.666	35.405	709.677	-0.000992	-0.000322	-0.000821
0.1232	350.508	11.048	3.055	9.672	-0.664	35.408	667.276	-0.000773	-0.000214	-0.000677
0.1240	329.828	8.060	1.528	7.609	-0.661	35.410	627.909	-0.000564	-0.000107	-0.000533
0.1248	311.644	5.448	0.110	5.628	-0.660	35.413	593.290	-0.000381	-0.000008	-0.000394
0.1256	297.352	3.155	-0.949	3.839	-0.659	35.415	566.082	-0.000221	0.000066	-0.000269
0.1264	287.749	1.584	-1.541	2.724	-0.664	35.416	547.800	-0.000111	0.000108	-0.000191
0.1272	282.955	0.513	-1.940	2.242	-0.669	35.415	538.673	-0.000036	0.000136	-0.000157
0.1280	282.835	0.097	-2.091	2.021	-0.668	35.414	538.445	-0.000007	0.000146	-0.000142
0.1288	286.998	0.278	-2.187	2.063	-0.669	35.413	546.370	-0.000019	0.000153	-0.000144
0.1296	296.691	1.028	-2.172	2.339	-0.664	35.412	564.823	-0.000072	0.000152	-0.000164
0.1304	316.799	2.933	-1.581	3.371	-0.661	35.411	603.104	-0.000205	0.000111	-0.000236
0.1312	353.107	6.781	-0.248	5.863	-0.664	35.409	672.226	-0.000475	0.000017	-0.000410
0.1320	408.953	12.923	2.352	10.129	-0.664	35.407	778.542	-0.000905	-0.000165	-0.000709
0.1328	484.997	21.442	6.149	16.170	-0.665	35.404	923.309	-0.001501	-0.000430	-0.001132
0.1336	577.256	32.156	10.938	23.270	-0.665	35.402	1098.948	-0.002251	-0.000766	-0.001629
0.1344	679.795	44.203	16.650	31.319	-0.665	35.399	1294.155	-0.003094	-0.001166	-0.002192
0.1352	787.654	57.112	22.581	39.726	-0.663	35.398	1499.491	-0.003998	-0.001581	-0.002781
0.1360	896.294	70.077	28.718	48.476	-0.663	35.396	1706.314	-0.004905	-0.002010	-0.003393
0.1368	1001.734	82.918	35.047	57.518	-0.671	35.395	1907.043	-0.005804	-0.002453	-0.004026
0.1376	1100.530	94.870	40.811	65.898	-0.669	35.396	2095.127	-0.006641	-0.002857	-0.004613
0.1384	1189.949	105.654	46.206	73.357	-0.671	35.396	2265.358	-0.007396	-0.003234	-0.005135
0.1392	1267.706	115.314	50.967	79.687	-0.669	35.397	2413.387	-0.008072	-0.003568	-0.005578
0.1400	1332.073	123.359	54.752	85.039	-0.660	35.399	2535.925	-0.008635	-0.003833	-0.005953
0.1408	1382.223	130.085	57.862	89.359	-0.661	35.401	2631.397	-0.009106	-0.004050	-0.006255
0.1416	1418.562	135.017	60.147	92.702	-0.660	35.403	2700.577	-0.009451	-0.004210	-0.006489
0.1424	1442.487	138.588	61.784	95.275	-0.664	35.405	2746.124	-0.009701	-0.004325	-0.006669
0.1432	1456.478	140.909	62.857	96.858	-0.666	35.408	2772.760	-0.009864	-0.004400	-0.006780
0.1440	1463.211	142.160	63.627	97.767	-0.666	35.410	2785.578	-0.009951	-0.004454	-0.006844
0.1448	1464.984	143.037	64.108	98.234	-0.667	35.412	2788.954	-0.010013	-0.004488	-0.006876
0.1456	1463.782	143.357	64.328	98.303	-0.662	35.415	2786.665	-0.010035	-0.004503	-0.006881
0.1464	1460.791	143.454	64.588	98.440	-0.662	35.415	2780.972	-0.010042	-0.004521	-0.006891
0.1472	1456.253	143.454	64.701	98.564	-0.661	35.415	2772.331	-0.010042	-0.004529	-0.006899
0.1480	1449.896	143.287	64.591	98.481	-0.660	35.414	2760.229	-0.010030	-0.004521	-0.006894
0.1488	1440.248	142.731	64.427	98.151	-0.655	35.413	2741.861	-0.009991	-0.004510	-0.006871
0.1496	1423.326	141.313	63.865	96.968	-0.649	35.412	2709.646	-0.009892	-0.004471	-0.006788
0.1504	1392.277	138.352	62.639	94.849	-0.645	35.411	2650.537	-0.009685	-0.004385	-0.006639
0.1512	1341.180	132.918	60.519	91.299	-0.645	35.409	2553.263	-0.009304	-0.004236	-0.006391
0.1520	1267.962	124.969	56.996	86.029	-0.653	35.407	2413.874	-0.008748	-0.003990	-0.006022
0.1528	1175.267	114.588	52.138	79.175	-0.654	35.404	2237.406	-0.008021	-0.003650	-0.005542
0.1536	1070.774	102.568	46.496	71.291	-0.657	35.402	2038.479	-0.007180	-0.003255	-0.004990
0.1544	962.855	90.047	40.441	62.884	-0.657	35.399	1833.029	-0.006303	-0.002831	-0.004402
0.1552	857.761	77.527	34.400	54.187	-0.654	35.398	1632.957	-0.005427	-0.002408	-0.003793
0.1560	760.828	65.840	28.771	46.275	-0.657	35.396	1448.421	-0.004609	-0.002014	-0.003239
0.1568	675.482	55.266	23.804	39.299	-0.660	35.395	1285.944	-0.003869	-0.001666	-0.002751
0.1576	603.150	45.985	19.498	33.425	-0.658	35.395	1148.243	-0.003219	-0.001365	-0.002340
0.1584	544.329	38.230	15.894	28.567	-0.661	35.396	1036.263	-0.002676	-0.001113	-0.002000
0.1592	497.170	31.796	12.784	24.233	-0.656	35.397	946.484	-0.002226	-0.000895	-0.001696
0.1600	458.968	26.584	10.129	20.366	-0.652	35.399	873.756	-0.001861	-0.000709	-0.001426
0.1608	427.243	22.192	7.846	17.008	-0.657	35.400	813.360	-0.001553	-0.000549	-0.001191
0.1616	399.455	18.398	5.906	14.407	-0.655	35.402	760.460	-0.001288	-0.000413	-0.001009
0.1624	374.237	14.842	4.378	11.999	-0.659	35.404	712.452	-0.001039	-0.000306	-0.000840
0.1632	351.004	11.591	2.755	9.908	-0.661	35.407	668.221	-0.000811	-0.000193	-0.000694
0.1640	329.964	8.506	1.296	7.982	-0.657	35.410	628.166	-0.000595	-0.000091	-0.000559
0.1648	311.824	5.699	-0.081	6.124	-0.660	35.412	593.634	-0.000399	0.000006	-0.000429
0.1656	297.277	3.558	-1.402	4.363	-0.658	35.415	565.939	-0.000249	0.000098	-0.000305
0.1664	287.328	1.806	-2.062	3.055	-0.663	35.415	546.999	-0.000126	0.000144	-0.000214
0.1672	282.023	0.859	-2.447	2.243	-0.668	35.415	536.900	-0.000060	0.000171	-0.000157
0.1680	281.272	0.469	-2.681	1.899	-0.668	35.414	535.469	-0.000033	0.000188	-0.000133
0.1688	284.848	0.330	-2.585	2.174	-0.670	35.412	542.278	-0.000023	0.000181	-0.000152
0.1696	293.400	0.763	-2.530	2.600	-0.667	35.412	558.558	-0.000053	0.000177	-0.000182
0.1704	311.313	2.363	-2.132	3.550	-0.667	35.410	592.661	-0.000165	0.000149	-0.000248
0.1712	344.481	5.823	-0.674	5.599	-0.671	35.409	655.804	-0.000408	0.000047	-0.000392
0.1720	397.306	11.770	1.719	9.259	-0.673	35.407	756.369	-0.000824	-0.000120	-0.000648
0.1728	471.216	20.358	5.502	15.067	-0.676	35.404	897.074	-0.001425	-0.000385	-0.001055
0.1736	563.054	30.862	10.524	22.552	-0.677	35.402	1071.911	-0.002160	-0.000737	-0.001579
0.1744	666.931	42.841	16.359	31.015	-0.676	35.399	1269.665	-0.002999	-0.001145	-0.002171
0.1752	777.224	55.876	22.647	39.822	-0.673	35.397	1479.635	-0.003911	-0.001585	-0.002788
0.1760	889.066	69.119	29.074	48.683	-0.672	35.396	1692.553	-0.004838	-0.002035	-0.003408
0.1768	998.157	82.543	35.557	57.573	-0.680	35.395	1900.234	-0.005778	-0.002489	-0.004030
0.1776	1100.470	95.106	41.378	66.064	-0.681	35.395	2095.013	-0.006657	-0.002896	-0.004624
0.1784	1192.609	106.501	46.745	73.838	-0.684	35.396	2270.422	-0.007455	-0.003272	-0.005169
0.1792	1271.899	116.519	51.380	80.636	-0.685	35.397	2421.370	-0.008156	-0.003597	-0.005645
0.1800	1336.416	124.636	54.998	86.168	-0.676	35.399	2544.193	-0.008725	-0.003850	-0.006032
0.1808	1385.724	131.195	57.971	90.419	-0.679	35.401	2638.063	-0.009184	-0.004058	-0.006329
0.1816	1420.650	136.073	60.295	93.583	-0.677	35.403	2704.554	-0.009525	-0.004221	-0.006551
0.1824	1443.118	139.493	61.934	95.647	-0.676	35.405	2747.326	-0.009764	-0.004335	-0.006695
0.1832	1456.057	141.633	63.022	96.995	-0.677	35.408	2771.959	-0.009914	-0.004412	-0.006790
0.1840	1462.099	142.912	63.778	97.890	-0.675	35.410	2783.461	-0.010004	-0.004464	-0.006852
0.1848	1463.662	143.509	64.026	98.372	-0.676	35.413	2786.436	-0.010046	-0.004482	-0.006886
0.1856	1462.580	143.536	64.013	98.426	-0.674	35.415	2784.376	-0.010048	-0.004481	-0.006890
0.1864	1459.830	143.759	64.136	98.592	-0.679	35.415	2779.140	-0.010063	-0.004490	-0.006901
0.1872	1455.561	143.716	64.164	98.647	-0.683	35.414	2771.015	-0.010060	-0.004492	-0.006905
0.1880	1449.685	143.425	64.124	98.784	-0.680	35.414	2759.829	-0.010040	-0.004489	-0.006915
0.1888	1441.074	142.952	64.124	98.633	-0.682	35.412	2743.435	-0.010007	-0.004489	-0.006904
0.1896	1426.226	141.535	63.642	97.642	-0.677	35.411	2715.168	-0.009907	-0.004455	-0.006835
0.1904	1398.363	138.798	62.542	95.674	-0.672	35.410	2662.125	-0.009716	-0.004378	-0.006697
0.1912	1350.949	133.933	60.574	92.386	-0.674	35.409	2571.859	-0.009375	-0.004240	-0.006467
0.1920	1280.991	126.484	57.230	87.557	-0.672	35.407	2438.679	-0.008854	-0.004006	-0.006129
0.1928	1190.009	116.285	52.688	80.759	-0.672	35.404	2265.472	-0.008140	-0.003688	-0.005653
0.1936	1085.277	104.237	47.238	72.779	-0.671	35.401	2066.088	-0.007297	-0.003307	-0.005095
0.1944	975.584	91.520	41.212	64.179	-0.673	35.399	1857.262	-0.006406	-0.002885	-0.004493
0.1952	868.236	78.737	34.991	55.565	-0.670	35.397	1652.899	-0.005512	-0.002449	-0.003890
0.1960	769.139	66.799	29.323	47.529	-0.669	35.396	1464.243	-0.004676	-0.002053	-0.003327
0.1968	682.290	56.182	24.314	40.511	-0.675	35.395	1298.904	-0.003933	-0.001702	-0.002836
0.1976	609.252	46.900	19.926	34.347	-0.671	35.395	1159.859	-0.003283	-0.001395	-0.002404
0.1984	550.310	39.369	16.389	29.090	-0.675	35.396	1047.649	-0.002756	-0.001147	-0.002036
0.1992	503.722	33.269	13.403	25.017	-0.672	35.397	958.958	-0.002329	-0.000938	-0.001751
0.2000	466.797	28.196	10.886	21.426	-0.667	35.399	888.662	-0.001974	-0.000762	-0.001500
0.2008	436.530	23.957	8.835	18.371	-0.669	35.401	831.041	-0.001677	-0.000618	-0.001286
0.2016	409.719	20.092	7.170	15.825	-0.664	35.403	780.001	-0.001406	-0.000502	-0.001108
0.2024	384.457	16.576	5.449	13.362	-0.668	35.406	731.907	-0.001160	-0.000381	-0.000935
0.2032	360.021	13.283	3.672	11.187	-0.664	35.408	685.387	-0.000930	-0.000257	-0.000783
0.2040	337.042	10.088	2.102	9.027	-0.662	35.410	641.642	-0.000706	-0.000147	-0.000632
0.2048	316.573	7.143	0.589	6.894	-0.663	35.412	602.674	-0.000500	-0.000041	-0.000483
0.2056	300.057	4.447	-0.702	4.844	-0.657	35.415	571.232	-0.000311	0.000049	-0.000339
0.2064	288.621	2.529	-1.417	3.413	-0.664	35.415	549.459	-0.000177	0.000099	-0.000239
0.2072	282.444	1.390	-1.842	2.669	-0.667	35.415	537.701	-0.000097	0.000129	-0.000187
0.2080	281.482	0.777	-2.075	2.380	-0.665	35.414	535.870	-0.000054	0.000145	-0.000167
0.2088	285.239	1.014	-2.061	2.725	-0.670	35.413	543.022	-0.000071	0.000144	-0.000191
0.2096	294.407	1.515	-2.021	2.959	-0.666	35.412	560.474	-0.000106	0.000141	-0.000207
0.2104	313.357	3.099	-1.664	3.744	-0.663	35.410	596.552	-0.000217	0.000116	-0.000262
0.2112	347.802	6.851	-0.480	6.029	-0.669	35.409	662.127	-0.000480	0.000034	-0.000422
0.2120	401.724	12.743	1.968	9.991	-0.666	35.407	764.780	-0.000892	-0.000138	-0.000699
0.2128	475.844	21.290	5.642	15.770	-0.668	35.404	905.886	-0.001490	-0.000395	-0.001104
0.2136	566.586	31.781	10.610	23.186	-0.669	35.402	1078.634	-0.002225	-0.000743	-0.001623
0.2144	667.983	43.413	16.264	31.428	-0.667	35.399	1271.667	-0.003039	-0.001139	-0.002200
0.2152	774.684	55.835	22.168	39.739	-0.668	35.398	1474.800	-0.003908	-0.001552	-0.002782
0.2160	882.588	68.494	28.374	48.271	-0.669	35.396	1680.222	-0.004795	-0.001986	-0.003379
0.2168	987.787	81.335	34.607	56.954	-0.674	35.395	1880.493	-0.005693	-0.002423	-0.003987
0.2176	1086.644	93.494	40.511	64.977	-0.676	35.395	2068.691	-0.006545	-0.002836	-0.004548
0.2184	1176.424	104.681	45.904	72.709	-0.680	35.396	2239.609	-0.007328	-0.003213	-0.005090
0.2192	1254.917	114.590	50.652	79.410	-0.677	35.397	2389.040	-0.008021	-0.003546	-0.005559
0.2200	1320.681	122.844	54.395	84.790	-0.673	35.399	2514.238	-0.008599	-0.003808	-0.005935
0.2208	1373.341	129.765	57.643	89.277	-0.672	35.400	2614.489	-0.009084	-0.004035	-0.006249
0.2216	1413.211	135.060	60.273	92.827	-0.669	35.403	2690.392	-0.009454	-0.004219	-0.006498
0.2224	1441.360	138.965	62.102	95.607	-0.669	35.405	2743.979	-0.009728	-0.004347	-0.006692
0.2232	1459.559	141.673	63.449	97.340	-0.669	35.407	2778.625	-0.009917	-0.004441	-0.006814
0.2240	1469.884	143.341	64.302	98.675	-0.666	35.410	2798.281	-0.010034	-0.004501	-0.006907
0.2248	1474.332	144.424	64.686	99.349	-0.666	35.412	2806.749	-0.010110	-0.004528	-0.006954
0.2256	1474.798	144.908	64.839	99.501	-0.661	35.415	2807.636	-0.010144	-0.004539	-0.006965
0.2264	1472.619	145.228	65.142	99.886	-0.663	35.415	2803.488	-0.010166	-0.004560	-0.006992
0.2272	1468.260	145.354	65.155	99.983	-0.664	35.415	2795.191	-0.010175	-0.004561	-0.006999
0.2280	1461.813	145.173	65.142	100.052	-0.663	35.414	2782.917	-0.010162	-0.004560	-0.007004
0.2288	1451.849	144.758	65.087	99.817	-0.669	35.413	2763.948	-0.010133	-0.004556	-0.006987
0.2296	1434.101	143.284	64.482	98.689	-0.669	35.412	2730.160	-0.010030	-0.004514	-0.006908
0.2304	1401.715	140.089	63.285	96.418	-0.670	35.411	2668.505	-0.009806	-0.004430	-0.006749
0.2312	1348.634	134.573	61.110	92.592	-0.671	35.409	2567.453	-0.009420	-0.004278	-0.006481
0.2320	1272.906	126.180	57.436	86.951	-0.669	35.407	2423.286	-0.008833	-0.004021	-0.006087
0.2328	1177.806	115.521	52.413	79.795	-0.668	35.404	2242.241	-0.008087	-0.003669	-0.005586
0.2336	1071.180	103.389	46.647	71.635	-0.665	35.402	2039.251	-0.007237	-0.003265	-0.005014
0.2344	961.818	90.590	40.317	63.119	-0.664	35.399	1831.055	-0.006341	-0.002822	-0.004418
0.2352	856.484	78.124	34.193	54.615	-0.655	35.398	1630.526	-0.005469	-0.002393	-0.003823
0.2360	760.407	66.492	28.551	46.716	-0.655	35.397	1447.620	-0.004654	-0.001999	-0.003270
0.2368	677.105	56.097	23.611	40.084	-0.659	35.395	1289.034	-0.003927	-0.001653	-0.002806
0.2376	607.689	47.260	19.346	34.056	-0.660	35.396	1156.883	-0.003308	-0.001354	-0.002384
0.2384	552.114	39.950	15.962	29.377	-0.667	35.396	1051.083	-0.002797	-0.001117	-0.002056
0.2392	508.231	33.947	13.127	25.799	-0.667	35.397	967.541	-0.002376	-0.000919	-0.001806
0.2400	472.959	28.987	10.665	22.290	-0.665	35.399	900.393	-0.002029	-0.000747	-0.001560
0.2408	443.413	24.762	8.793	19.319	-0.665	35.401	844.145	-0.001733	-0.000615	-0.001352
0.2416	416.527	20.899	7.060	16.746	-0.666	35.403	792.961	-0.001463	-0.000494	-0.001172
0.2424	390.663	17.161	5.519	14.022	-0.666	35.405	743.723	-0.001201	-0.000386	-0.000982
0.2432	365.551	13.660	3.964	11.463	-0.663	35.408	695.915	-0.000956	-0.000277	-0.000802
0.2440	341.626	10.381	2.341	9.427	-0.661	35.410	650.368	-0.000727	-0.000164	-0.000660
0.2448	320.270	7.505	0.799	7.321	-0.659	35.413	609.713	-0.000525	-0.000056	-0.000512
0.2456	302.988	5.004	-0.509	5.312	-0.656	35.415	576.811	-0.000350	0.000036	-0.000372
0.2464	290.935	3.294	-1.279	4.005	-0.661	35.415	553.865	-0.000231	0.000090	-0.000280
0.2472	284.518	2.098	-1.650	3.027	-0.666	35.415	541.649	-0.000147	0.000116	-0.000212
0.2480	283.511	1.569	-1.829	2.681	-0.669	35.414	539.732	-0.000110	0.000128	-0.000188
0.2488	287.614	1.637	-1.718	2.984	-0.674	35.413	547.543	-0.000115	0.000120	-0.000209
0.2496	298.058	2.305	-1.608	3.521	-0.671	35.412	567.427	-0.000161	0.000113	-0.000246
0.2504	319.940	4.433	-1.099	4.816	-0.669	35.411	609.083	-0.000310	0.000077	-0.000337
0.2512	358.743	8.657	0.400	7.405	-0.666	35.409	682.955	-0.000606	-0.000028	-0.000518
0.2520	417.609	15.398	2.876	11.725	-0.667	35.407	795.021	-0.001078	-0.000201	-0.000821
0.2528	496.238	24.444	6.921	17.737	-0.671	35.405	944.710	-0.001711	-0.000484	-0.001242
0.2536	590.241	35.380	12.205	25.333	-0.672	35.402	1123.667	-0.002477	-0.000854	-0.001773
0.2544	693.411	47.554	18.040	33.657	-0.677	35.400	1320.076	-0.003329	-0.001263	-0.002356
0.2552	800.578	60.130	24.164	42.066	-0.673	35.398	1524.096	-0.004209	-0.001691	-0.002945
0.2560	907.761	72.887	30.176	50.624	-0.672	35.396	1728.144	-0.005102	-0.002112	-0.003544
0.2568	1010.706	85.407	36.107	59.018	-0.679	35.395	1924.124	-0.005978	-0.002527	-0.004131
0.2576	1106.361	96.869	41.543	66.985	-0.679	35.395	2106.228	-0.006781	-0.002908	-0.004689
0.2584	1192.189	107.501	46.592	74.374	-0.682	35.396	2269.621	-0.007525	-0.003261	-0.005206
0.2592	1266.249	116.605	50.995	80.731	-0.680	35.397	2410.612	-0.008162	-0.003570	-0.005651
0.2600	1327.444	124.277	54.504	85.712	-0.671	35.399	2527.113	-0.008699	-0.003815	-0.006000
0.2608	1375.430	130.628	57.532	89.868	-0.669	35.401	2618.465	-0.009144	-0.004027	-0.006291
0.2616	1411.273	135.463	59.803	93.266	-0.667	35.403	2686.701	-0.009482	-0.004186	-0.006529
0.2624	1436.716	139.104	61.497	95.703	-0.668	35.405	2735.138	-0.009737	-0.004305	-0.006699
0.2632	1453.938	141.702	62.789	97.519	-0.669	35.407	2767.925	-0.009919	-0.004395	-0.006826
0.2640	1465.029	143.536	63.724	98.882	-0.671	35.410	2789.040	-0.010047	-0.004461	-0.006922
0.2648	1471.266	144.674	64.370	99.708	-0.673	35.413	2800.913	-0.010127	-0.004506	-0.006980
0.2656	1473.686	145.452	64.645	100.080	-0.668	35.415	2805.519	-0.010182	-0.004525	-0.007006
0.2664	1473.085	146.049	65.003	100.505	-0.673	35.415	2804.375	-0.010223	-0.004550	-0.007035
0.2672	1469.763	146.064	65.100	100.478	-0.672	35.415	2798.052	-0.010224	-0.004557	-0.007033
0.2680	1463.857	145.814	65.211	100.340	-0.669	35.414	2786.808	-0.010207	-0.004565	-0.007024
0.2688	1454.404	145.162	65.226	100.147	-0.669	35.413	2768.812	-0.010161	-0.004566	-0.007010
0.2696	1437.618	143.579	64.648	99.101	-0.663	35.412	2736.855	-0.010051	-0.004525	-0.006937
0.2704	1406.734	140.522	63.656	96.871	-0.662	35.411	2678.061	-0.009837	-0.004456	-0.006781
0.2712	1355.547	135.298	61.523	93.280	-0.663	35.408	2580.614	-0.009471	-0.004307	-0.006530
0.2720	1281.532	127.390	57.917	88.037	-0.668	35.407	2439.709	-0.008917	-0.004054	-0.006163
0.2728	1187.455	116.911	53.197	80.964	-0.666	35.404	2260.609	-0.008184	-0.003724	-0.005668
0.2736	1081.008	104.876	47.348	72.888	-0.667	35.402	2057.962	-0.007341	-0.003314	-0.005102
0.2744	970.985	92.091	41.101	64.219	-0.662	35.400	1848.507	-0.006446	-0.002877	-0.004495
0.2752	864.073	79.237	35.006	55.482	-0.655	35.398	1644.974	-0.005547	-0.002450	-0.003884
0.2760	765.457	67.203	29.214	47.666	-0.656	35.397	1457.233	-0.004704	-0.002045	-0.003337
0.2768	678.638	56.628	24.234	40.855	-0.658	35.396	1291.952	-0.003964	-0.001696	-0.002860
0.2776	604.788	47.247	19.927	34.595	-0.663	35.396	1151.361	-0.003307	-0.001395	-0.002422
0.2784	544.524	39.590	16.210	29.379	-0.668	35.396	1036.634	-0.002771	-0.001135	-0.002057
0.2792	496.058	33.379	13.016	24.852	-0.666	35.397	944.366	-0.002337	-0.000911	-0.001740
0.2800	456.834	27.945	10.263	20.985	-0.664	35.399	869.694	-0.001956	-0.000718	-0.001469
0.2808	424.613	23.374	7.967	18.122	-0.665	35.401	808.353	-0.001636	-0.000558	-0.001269
0.2816	396.600	19.440	6.151	15.617	-0.662	35.403	755.024	-0.001361	-0.000431	-0.001093
0.2824	371.547	15.869	4.515	13.099	-0.663	35.405	707.331	-0.001111	-0.000316	-0.000917
0.2832	348.779	12.450	2.891	10.788	-0.663	35.407	663.986	-0.000871	-0.000202	-0.000755
0.2840	328.296	9.449	1.418	8.490	-0.661	35.410	624.990	-0.000661	-0.000099	-0.000594
0.2848	310.637	6.671	0.014	6.398	-0.664	35.413	591.373	-0.000467	-0.000001	-0.000448
0.2856	296.586	4.197	-1.059	4.842	-0.665	35.415	564.623	-0.000294	0.000074	-0.000339
0.2864	286.982	2.766	-1.665	4.072	-0.672	35.416	546.341	-0.000194	0.000117	-0.000285
0.2872	281.903	1.820	-2.146	3.370	-0.677	35.415	536.671	-0.000127	0.000150	-0.000236
0.2880	281.437	1.430	-2.324	3.094	-0.677	35.414	535.784	-0.000100	0.000163	-0.000217
0.2888	285.269	1.596	-2.324	3.150	-0.680	35.413	543.079	-0.000112	0.000163	-0.000220
0.2896	294.542	1.902	-2.296	3.026	-0.675	35.412	560.732	-0.000133	0.000161	-0.000212
0.2904	314.439	3.694	-1.567	4.101	-0.673	35.411	598.612	-0.000259	0.000110	-0.000287
0.2912	350.658	7.517	-0.107	6.688	-0.675	35.409	667.562	-0.000526	0.000008	-0.000468
0.2920	406.879	13.675	2.466	11.052	-0.675	35.407	774.593	-0.000957	-0.000173	-0.000774
0.2928	483.389	22.541	6.181	17.051	-0.676	35.404	920.248	-0.001578	-0.000433	-0.001194
0.2936	576.099	33.408	11.163	24.371	-0.674	35.402	1096.745	-0.002339	-0.000781	-0.001706
0.2944	679.089	45.303	17.038	32.612	-0.676	35.399	1292.810	-0.003171	-0.001193	-0.002283
0.2952	787.413	57.933	23.160	40.909	-0.671	35.398	1499.033	-0.004055	-0.001621	-0.002864
0.2960	896.971	70.912	29.696	49.866	-0.671	35.396	1707.602	-0.004964	-0.002079	-0.003491
0.2968	1003.672	83.781	35.860	58.824	-0.679	35.395	1910.734	-0.005865	-0.002510	-0.004118
0.2976	1103.761	96.065	41.652	66.819	-0.676	35.395	2101.278	-0.006725	-0.002916	-0.004677
0.2984	1194.007	107.350	47.060	74.635	-0.679	35.396	2273.083	-0.007514	-0.003294	-0.005224
0.2992	1271.989	117.173	51.697	81.268	-0.678	35.397	2421.541	-0.008202	-0.003619	-0.005689
0.3000	1335.980	125.163	55.550	86.579	-0.669	35.399	2543.364	-0.008761	-0.003888	-0.006061
0.3008	1385.694	131.793	58.591	91.066	-0.667	35.401	2638.006	-0.009225	-0.004101	-0.006375
0.3016	1421.868	136.712	60.848	94.231	-0.667	35.403	2706.871	-0.009570	-0.004259	-0.006596
0.3024	1446.424	140.270	62.582	96.626	-0.666	35.405	2753.620	-0.009819	-0.004381	-0.006764
0.3032	1461.813	142.814	63.806	98.332	-0.670	35.407	2782.917	-0.009997	-0.004466	-0.006883
0.3040	1470.334	144.453	64.591	99.432	-0.671	35.410	2799.139	-0.010112	-0.004521	-0.006960
0.3048	1473.956	145.453	65.004	99.969	-0.671	35.412	2806.034	-0.010182	-0.004550	-0.006998
0.3056	1474.031	145.912	65.101	100.065	-0.668	35.415	2806.177	-0.010214	-0.004557	-0.007005
0.3064	1471.612	146.274	65.143	100.340	-0.669	35.415	2801.571	-0.010239	-0.004560	-0.007024
0.3072	1467.103	146.289	65.142	100.355	-0.676	35.415	2792.988	-0.010240	-0.004560	-0.007025
0.3080	1460.581	146.122	65.072	100.300	-0.677	35.414	2780.571	-0.010229	-0.004555	-0.007021
0.3088	1450.707	145.469	64.823	100.025	-0.681	35.413	2761.774	-0.010183	-0.004538	-0.007002
0.3096	1433.500	143.870	64.273	98.869	-0.675	35.412	2729.015	-0.010071	-0.004499	-0.006921
0.3104	1402.105	140.673	62.981	96.735	-0.673	35.411	2669.249	-0.009847	-0.004409	-0.006771
0.3112	1350.768	135.114	60.807	93.240	-0.672	35.409	2571.516	-0.009458	-0.004256	-0.006527
0.3120	1277.535	127.152	57.270	87.914	-0.671	35.407	2432.098	-0.008901	-0.004009	-0.006154
0.3128	1185.005	116.604	52.564	81.130	-0.673	35.405	2255.945	-0.008162	-0.003679	-0.005679
0.3136	1080.618	104.626	46.991	73.205	-0.670	35.402	2057.219	-0.007324	-0.003289	-0.005124
0.3144	972.518	92.036	41.018	64.495	-0.670	35.400	1851.425	-0.006442	-0.002871	-0.004515
0.3152	867.184	79.486	35.088	55.867	-0.665	35.398	1650.896	-0.005564	-0.002456	-0.003911
0.3160	770.041	67.703	29.323	47.804	-0.668	35.397	1465.960	-0.004739	-0.002053	-0.003346
0.3168	684.544	57.253	24.423	40.979	-0.674	35.395	1303.196	-0.004008	-0.001710	-0.002869
0.3176	612.047	48.151	20.090	35.076	-0.673	35.396	1165.180	-0.003371	-0.001406	-0.002455
0.3184	552.685	40.495	16.430	30.163	-0.676	35.396	1052.170	-0.002835	-0.001150	-0.002111
0.3192	504.684	34.227	13.363	25.800	-0.672	35.397	960.789	-0.002396	-0.000935	-0.001806
0.3200	465.595	28.765	10.639	21.837	-0.665	35.399	886.374	-0.002014	-0.000745	-0.001529
0.3208	432.953	24.234	8.450	18.947	-0.665	35.401	824.232	-0.001696	-0.000592	-0.001326
0.3216	404.520	20.178	6.661	16.293	-0.665	35.403	770.102	-0.001412	-0.000466	-0.001140
0.3224	378.941	16.551	5.119	13.693	-0.666	35.405	721.407	-0.001159	-0.000358	-0.000959
0.3232	355.752	13.368	3.661	11.408	-0.667	35.407	677.261	-0.000936	-0.000256	-0.000799
0.3240	335.374	10.325	2.216	9.234	-0.666	35.410	638.466	-0.000723	-0.000155	-0.000646
0.3248	318.272	7.783	0.949	7.405	-0.667	35.412	605.907	-0.000545	-0.000066	-0.000518
0.3256	305.197	5.782	-0.151	6.001	-0.664	35.414	581.017	-0.000405	0.000011	-0.000420
0.3264	296.991	4.435	-0.769	5.079	-0.666	35.415	565.395	-0.000310	0.000054	-0.000356
0.3272	293.460	3.726	-1.070	4.363	-0.672	35.415	558.672	-0.000261	0.000075	-0.000305
0.3280	294.467	3.558	-1.207	4.197	-0.672	35.414	560.589	-0.000249	0.000085	-0.000294
0.3288	299.982	3.864	-1.124	4.472	-0.675	35.412	571.089	-0.000270	0.000079	-0.000313
0.3296	311.854	4.642	-0.960	5.051	-0.671	35.412	593.691	-0.000325	0.000067	-0.000354
0.3304	335.614	6.894	-0.301	6.579	-0.665	35.410	638.924	-0.000483	0.000021	-0.000461
0.3312	376.582	11.452	1.281	9.221	-0.667	35.409	716.915	-0.000802	-0.000090	-0.000645
0.3320	437.612	18.288	4.183	13.665	-0.670	35.407	833.101	-0.001280	-0.000293	-0.000957
0.3328	517.819	27.472	8.257	19.870	-0.673	35.404	985.794	-0.001923	-0.000578	-0.001391
0.3336	612.107	38.352	13.376	27.452	-0.675	35.401	1165.295	-0.002685	-0.000936	-0.001922
0.3344	714.330	50.206	19.154	35.749	-0.677	35.399	1359.901	-0.003514	-0.001341	-0.002502
0.3352	819.694	62.588	25.086	44.212	-0.672	35.397	1560.488	-0.004381	-0.001756	-0.003095
0.3360	924.217	75.012	31.098	52.577	-0.672	35.396	1759.472	-0.005251	-0.002177	-0.003680
0.3368	1024.216	87.326	37.029	60.807	-0.678	35.395	1949.844	-0.006113	-0.002592	-0.004256
0.3376	1116.581	98.638	42.328	68.596	-0.677	35.395	2125.683	-0.006905	-0.002963	-0.004802
0.3384	1198.981	108.866	47.212	75.517	-0.684	35.396	2282.553	-0.007621	-0.003305	-0.005286
0.3392	1270.246	117.746	51.518	81.517	-0.679	35.396	2418.222	-0.008242	-0.003606	-0.005706
0.3400	1329.864	125.110	54.972	86.373	-0.676	35.398	2531.719	-0.008758	-0.003848	-0.006046
0.3408	1378.361	131.293	57.998	90.597	-0.677	35.400	2624.044	-0.009190	-0.004060	-0.006342
0.3416	1416.593	136.392	60.420	93.913	-0.673	35.402	2696.829	-0.009547	-0.004229	-0.006574
0.3424	1445.312	140.450	62.347	96.680	-0.677	35.405	2751.503	-0.009831	-0.004364	-0.006768
0.3432	1465.856	143.480	63.847	98.854	-0.673	35.407	2790.613	-0.010044	-0.004469	-0.006920
0.3440	1479.502	145.525	64.921	100.368	-0.674	35.410	2816.591	-0.010187	-0.004544	-0.007026
0.3448	1487.301	146.914	65.597	101.428	-0.675	35.412	2831.440	-0.010284	-0.004592	-0.007100
0.3456	1490.472	147.846	65.887	101.772	-0.670	35.414	2837.477	-0.010349	-0.004612	-0.007124
0.3464	1489.841	148.470	66.232	102.116	-0.674	35.415	2836.275	-0.010393	-0.004636	-0.007148
0.3472	1485.738	148.650	66.438	102.047	-0.673	35.415	2828.465	-0.010405	-0.004651	-0.007143
0.3480	1478.224	148.316	66.395	101.909	-0.671	35.414	2814.159	-0.010382	-0.004648	-0.007134
0.3488	1465.510	147.274	66.119	101.605	-0.672	35.412	2789.955	-0.010309	-0.004628	-0.007112
0.3496	1442.036	144.925	65.308	100.134	-0.667	35.412	2745.266	-0.010145	-0.004572	-0.007009
0.3504	1401.038	140.729	63.740	97.368	-0.664	35.410	2667.217	-0.009851	-0.004462	-0.006816
0.3512	1338.535	134.239	60.933	92.867	-0.664	35.408	2548.227	-0.009397	-0.004265	-0.006501
0.3520	1255.052	125.164	56.998	86.538	-0.665	35.407	2389.297	-0.008761	-0.003990	-0.006058
0.3528	1156.616	114.060	51.850	79.052	-0.663	35.404	2201.900	-0.007984	-0.003630	-0.005534
0.3536	1051.733	102.080	45.947	70.851	-0.665	35.402	2002.230	-0.007146	-0.003216	-0.004960
0.3544	947.451	89.616	40.180	62.816	-0.663	35.399	1803.703	-0.006273	-0.002813	-0.004397
0.3552	848.309	77.623	34.319	54.792	-0.660	35.397	1614.962	-0.005434	-0.002402	-0.003835
0.3560	757.582	66.632	28.899	47.293	-0.662	35.396	1442.242	-0.004664	-0.002023	-0.003311
0.3568	677.270	56.975	24.248	40.661	-0.664	35.395	1289.349	-0.003988	-0.001697	-0.002846
0.3576	607.824	48.429	19.900	34.675	-0.665	35.395	1157.141	-0.003390	-0.001393	-0.002427
0.3584	549.409	40.870	16.362	30.011	-0.669	35.396	1045.933	-0.002861	-0.001145	-0.002101
0.3592	500.867	34.589	13.322	25.800	-0.667	35.397	953.522	-0.002421	-0.000933	-0.001806
0.3600	460.455	28.655	10.529	22.044	-0.663	35.399	876.589	-0.002006	-0.000737	-0.001543
0.3608	426.762	23.723	8.162	18.784	-0.665	35.401	812.445	-0.001661	-0.000571	-0.001315
0.3616	397.546	19.873	6.113	15.661	-0.663	35.403	756.826	-0.001391	-0.000428	-0.001096
0.3624	371.487	15.954	4.406	13.033	-0.665	35.405	707.216	-0.001117	-0.000308	-0.000912
0.3632	347.953	12.716	2.795	10.914	-0.664	35.408	662.413	-0.000890	-0.000196	-0.000764
0.3640	326.868	9.770	1.459	8.862	-0.666	35.410	622.272	-0.000684	-0.000102	-0.000620
0.3648	309.059	6.769	0.164	6.923	-0.666	35.412	588.369	-0.000474	-0.000012	-0.000485
0.3656	295.519	4.670	-1.005	5.367	-0.665	35.415	562.592	-0.000327	0.000070	-0.000376
0.3664	286.998	3.210	-1.679	4.170	-0.670	35.415	546.370	-0.000225	0.000118	-0.000292
0.3672	283.436	2.265	-2.010	3.579	-0.671	35.415	539.589	-0.000159	0.000141	-0.000251
0.3680	284.337	2.139	-2.064	3.702	-0.678	35.414	541.306	-0.000150	0.000144	-0.000259
0.3688	289.627	2.445	-1.927	3.992	-0.681	35.413	551.376	-0.000171	0.000135	-0.000279
0.3696	301.199	3.154	-1.555	4.280	-0.678	35.411	573.406	-0.000221	0.000109	-0.000300
0.3704	324.373	5.390	-0.908	5.641	-0.672	35.410	617.523	-0.000377	0.000064	-0.000395
0.3712	364.559	9.782	0.826	8.297	-0.668	35.408	694.027	-0.000685	-0.000058	-0.000581
0.3720	423.966	16.286	3.564	12.577	-0.669	35.407	807.123	-0.001140	-0.000250	-0.000880
0.3728	502.204	25.290	7.582	18.892	-0.669	35.405	956.068	-0.001770	-0.000531	-0.001322
0.3736	594.524	36.143	12.741	26.406	-0.671	35.402	1131.821	-0.002530	-0.000892	-0.001848
0.3744	695.274	47.732	18.423	34.496	-0.672	35.399	1323.624	-0.003341	-0.001290	-0.002415
0.3752	800.548	60.225	24.477	42.986	-0.668	35.398	1524.038	-0.004216	-0.001713	-0.003009
0.3760	906.544	73.094	30.409	51.532	-0.668	35.396	1725.826	-0.005117	-0.002129	-0.003607
0.3768	1009.804	85.713	36.437	60.133	-0.675	35.395	1922.407	-0.006000	-0.002551	-0.004209
0.3776	1107.278	97.721	42.135	68.031	-0.674	35.395	2107.973	-0.006840	-0.002949	-0.004762
0.3784	1196.126	108.783	47.405	75.309	-0.676	35.395	2277.117	-0.007615	-0.003318	-0.005272
0.3792	1273.913	118.412	52.000	81.844	-0.677	35.397	2425.203	-0.008289	-0.003640	-0.005729
0.3800	1338.941	126.472	55.784	87.116	-0.671	35.399	2549.000	-0.008853	-0.003905	-0.006098
0.3808	1390.278	133.155	58.879	91.753	-0.668	35.401	2646.732	-0.009321	-0.004122	-0.006423
0.3816	1428.300	138.296	61.260	95.332	-0.667	35.403	2719.116	-0.009681	-0.004288	-0.006673
0.3824	1454.224	141.938	63.077	97.754	-0.663	35.405	2768.469	-0.009936	-0.004415	-0.006843
0.3832	1470.139	144.371	64.273	99.392	-0.663	35.407	2798.767	-0.010106	-0.004499	-0.006957
0.3840	1478.329	146.039	64.908	100.437	-0.661	35.409	2814.360	-0.010223	-0.004544	-0.007031
0.3848	1481.050	146.914	65.252	101.015	-0.664	35.412	2819.538	-0.010284	-0.004568	-0.007071
0.3856	1480.118	147.303	65.197	101.208	-0.663	35.414	2817.764	-0.010311	-0.004564	-0.007085
0.3864	1476.736	147.413	65.335	101.483	-0.665	35.414	2811.327	-0.010319	-0.004573	-0.007104
0.3872	1471.552	147.218	65.390	101.442	-0.671	35.415	2801.456	-0.010305	-0.004577	-0.007101
0.3880	1464.053	146.606	65.169	101.180	-0.667	35.414	2787.180	-0.010262	-0.004562	-0.007083
0.3888	1452.481	145.717	65.127	100.684	-0.671	35.413	2765.150	-0.010200	-0.004559	-0.007048
0.3896	1431.832	143.869	64.480	99.487	-0.669	35.412	2725.840	-0.010071	-0.004514	-0.006964
0.3904	1395.207	140.062	63.035	97.065	-0.665	35.411	2656.116	-0.009804	-0.004412	-0.006795
0.3912	1337.634	134.018	60.587	92.897	-0.665	35.409	2546.511	-0.009381	-0.004241	-0.006503
0.3920	1257.893	125.430	56.817	87.049	-0.661	35.407	2394.705	-0.008780	-0.003977	-0.006093
0.3928	1160.238	114.493	51.794	79.507	-0.658	35.405	2208.796	-0.008015	-0.003626	-0.005566
0.3936	1052.950	102.402	46.000	71.265	-0.660	35.402	2004.547	-0.007168	-0.003220	-0.004989
0.3944	944.205	89.631	40.054	62.801	-0.660	35.399	1797.523	-0.006274	-0.002804	-0.004396
0.3952	840.404	77.027	34.000	54.353	-0.657	35.398	1599.913	-0.005392	-0.002380	-0.003805
0.3960	746.536	65.493	28.401	46.565	-0.659	35.396	1421.213	-0.004584	-0.001988	-0.003260
0.3968	665.533	55.376	23.764	39.835	-0.660	35.395	1267.004	-0.003876	-0.001664	-0.002788
0.3976	598.296	47.052	19.721	34.194	-0.661	35.395	1139.002	-0.003294	-0.001380	-0.002394
0.3984	544.359	40.201	16.431	29.694	-0.667	35.396	1036.320	-0.002814	-0.001150	-0.002079
0.3992	501.318	34.503	13.651	25.799	-0.667	35.397	954.380	-0.002415	-0.000956	-0.001806
