# Supplementary material for: Evaluation of a Cold-Mixed High-Performance Polyurethane Mixture
Source: Hindawi journal article supplement (doi:10.1155/2019/1507971), 2019-11-07
Supplement: f1 [file 1507971.f1.zip › 1507971.f1/dynamic modulus data/PUM/specimen2/temp35/zhs-2-35_Runtime.csv]

Time (sec)	Load (kN)	Confining Pressure (kPa)	Axial LVDT #1 (mm)	Axial LVDT #2 (mm)	Axial LVDT #3 (mm)	Temperature (�C)
0.0008	0.729961	-0.670	0.22038078	0.27660310	0.28865850	35.41
0.0016	0.730448	-0.670	0.22037297	0.27660799	0.28864300	35.41
0.0024	0.730190	-0.672	0.22038472	0.27660310	0.28864878	35.41
0.0032	0.728846	-0.669	0.22039938	0.27659744	0.28864884	35.40
0.0040	0.725555	-0.668	0.22039938	0.27660126	0.28865844	35.40
0.0048	0.719118	-0.665	0.22042269	0.27660793	0.28869796	35.40
0.0056	0.708218	-0.664	0.22045374	0.27660793	0.28872013	35.40
0.0064	0.689564	-0.669	0.22052085	0.27661753	0.28873938	35.40
0.0072	0.660839	-0.669	0.22064823	0.27665412	0.28881359	35.40
0.0080	0.622559	-0.670	0.22080874	0.27670997	0.28890896	35.40
0.0088	0.577183	-0.667	0.22100621	0.27680635	0.28904194	35.40
0.0096	0.529718	-0.662	0.22122699	0.27690941	0.28920180	35.40
0.0104	0.485716	-0.663	0.22141963	0.27699423	0.28932315	35.40
0.0112	0.448265	-0.668	0.22159475	0.27706838	0.28942907	35.41
0.0120	0.419226	-0.674	0.22174364	0.27711654	0.28949064	35.41
0.0128	0.399399	-0.675	0.22182930	0.27715802	0.28953785	35.41
0.0136	0.387812	-0.677	0.22189158	0.27719176	0.28958601	35.41
0.0144	0.383034	-0.673	0.22191888	0.27721488	0.28961587	35.41
0.0152	0.382977	-0.665	0.22193158	0.27723312	0.28964770	35.42
0.0160	0.385866	-0.669	0.22193456	0.27722728	0.28964871	35.42
0.0168	0.390301	-0.665	0.22192192	0.27722245	0.28963524	35.42
0.0176	0.395823	-0.666	0.22190827	0.27721673	0.28961700	35.42
0.0184	0.402117	-0.670	0.22188485	0.27720720	0.28960150	35.42
0.0192	0.408812	-0.664	0.22186631	0.27721298	0.28958702	35.41
0.0200	0.416279	-0.667	0.22184289	0.27721298	0.28956968	35.41
0.0208	0.424461	-0.669	0.22180778	0.27720726	0.28954846	35.41
0.0216	0.433960	-0.668	0.22177267	0.27720720	0.28953606	35.41
0.0224	0.445347	-0.672	0.22172105	0.27719563	0.28952843	35.41
0.0232	0.458708	-0.672	0.22166860	0.27718592	0.28951401	35.40
0.0240	0.473413	-0.669	0.22160250	0.27716368	0.28947353	35.40
0.0248	0.488491	-0.669	0.22154421	0.27714151	0.28943014	35.40
0.0256	0.503054	-0.667	0.22148979	0.27712315	0.28939343	35.40
0.0264	0.516043	-0.669	0.22142071	0.27708763	0.28935772	35.40
0.0272	0.526743	-0.673	0.22137111	0.27706742	0.28934133	35.40
0.0280	0.535269	-0.677	0.22131270	0.27704912	0.28931630	35.40
0.0288	0.541449	-0.676	0.22126991	0.27702415	0.28928256	35.40
0.0296	0.545197	-0.673	0.22126019	0.27701932	0.28927588	35.40
0.0304	0.546999	-0.673	0.22126013	0.27700681	0.28927302	35.40
0.0312	0.547142	-0.672	0.22127092	0.27699822	0.28927302	35.41
0.0320	0.545797	-0.675	0.22127867	0.27700597	0.28929138	35.41
0.0328	0.543594	-0.676	0.22128254	0.27700400	0.28928947	35.41
0.0336	0.540619	-0.676	0.22128451	0.27700400	0.28928947	35.41
0.0344	0.536728	-0.676	0.22128636	0.27701259	0.28927982	35.41
0.0352	0.532293	-0.674	0.22131747	0.27701926	0.28928745	35.42
0.0360	0.527229	-0.677	0.22133011	0.27701640	0.28928936	35.42
0.0368	0.521650	-0.678	0.22134477	0.27702028	0.28929996	35.42
0.0376	0.515471	-0.676	0.22136909	0.27701551	0.28932595	35.42
0.0384	0.508318	-0.676	0.22138852	0.27701932	0.28933078	35.42
0.0392	0.499735	-0.672	0.22142553	0.27704525	0.28935575	35.41
0.0400	0.489464	-0.669	0.22147125	0.27706540	0.28937018	35.41
0.0408	0.477161	-0.674	0.22152871	0.27708846	0.28940004	35.41
0.0416	0.462799	-0.672	0.22159976	0.27711350	0.28944242	35.41
0.0424	0.446835	-0.673	0.22168332	0.27713859	0.28949159	35.41
0.0432	0.429754	-0.672	0.22176796	0.27717620	0.28955132	35.41
0.0440	0.412531	-0.666	0.22184879	0.27721083	0.28959471	35.40
0.0448	0.396051	-0.667	0.22190911	0.27724749	0.28965926	35.40
0.0456	0.381289	-0.664	0.22197628	0.27727252	0.28969294	35.40
0.0464	0.368986	-0.665	0.22203171	0.27729088	0.28970259	35.40
0.0472	0.359144	-0.669	0.22207439	0.27731991	0.28972864	35.40
0.0480	0.352392	-0.672	0.22211617	0.27733821	0.28972960	35.40
0.0488	0.348415	-0.670	0.22213954	0.27735657	0.28974980	35.40
0.0496	0.346785	-0.668	0.22215414	0.27736801	0.28978437	35.40
0.0504	0.347300	-0.666	0.22216684	0.27736503	0.28979003	35.40
0.0512	0.348988	-0.666	0.22216588	0.27736020	0.28978139	35.41
0.0520	0.351391	-0.666	0.22215897	0.27735728	0.28977662	35.41
0.0528	0.354309	-0.667	0.22215015	0.27735150	0.28975064	35.41
0.0536	0.357656	-0.669	0.22213751	0.27733999	0.28972954	35.41
0.0544	0.361319	-0.668	0.22214234	0.27733231	0.28973919	35.42
0.0552	0.365496	-0.666	0.22213846	0.27733332	0.28974593	35.42
0.0560	0.370245	-0.669	0.22212100	0.27732861	0.28974599	35.42
0.0568	0.375338	-0.669	0.22210926	0.27732182	0.28975070	35.42
0.0576	0.381203	-0.669	0.22207618	0.27732277	0.28973526	35.42
0.0584	0.388441	-0.674	0.22203738	0.27731115	0.28969586	35.42
0.0592	0.397453	-0.669	0.22200722	0.27730238	0.28967661	35.41
0.0600	0.408897	-0.665	0.22195274	0.27729082	0.28966415	35.41
0.0608	0.422802	-0.665	0.22188860	0.27726483	0.28963429	35.41
0.0616	0.438452	-0.662	0.22181559	0.27724558	0.28961402	35.41
0.0624	0.455446	-0.662	0.22174066	0.27721965	0.28958601	35.41
0.0632	0.472870	-0.662	0.22166878	0.27719080	0.28953785	35.40
0.0640	0.489836	-0.662	0.22158998	0.27716768	0.28949738	35.40
0.0648	0.505857	-0.664	0.22151798	0.27713788	0.28944725	35.40
0.0656	0.520220	-0.661	0.22144604	0.27711087	0.28939623	35.40
0.0664	0.532322	-0.667	0.22137207	0.27707905	0.28934902	35.40
0.0672	0.541391	-0.666	0.22131372	0.27705020	0.28932011	35.40
0.0680	0.547571	-0.664	0.22129136	0.27703279	0.28931040	35.40
0.0688	0.550747	-0.663	0.22127873	0.27701551	0.28930849	35.40
0.0696	0.551577	-0.658	0.22127193	0.27702421	0.28931618	35.40
0.0704	0.550661	-0.661	0.22127771	0.27702993	0.28930372	35.40
0.0712	0.548372	-0.663	0.22127581	0.27703565	0.28928739	35.41
0.0720	0.545111	-0.667	0.22127771	0.27705193	0.28928643	35.41
0.0728	0.541363	-0.671	0.22129220	0.27705574	0.28928739	35.41
0.0736	0.537329	-0.667	0.22131068	0.27705956	0.28930759	35.41
0.0744	0.532894	-0.670	0.22132713	0.27706444	0.28933942	35.42
0.0752	0.528116	-0.669	0.22135627	0.27707607	0.28936344	35.42
0.0760	0.522709	-0.672	0.22138745	0.27707607	0.28936440	35.42
0.0768	0.516443	-0.680	0.22140789	0.27707702	0.28936344	35.42
0.0776	0.509062	-0.680	0.22143811	0.27707988	0.28935283	35.42
0.0784	0.500479	-0.683	0.22146642	0.27708268	0.28936642	35.42
0.0792	0.489664	-0.676	0.22151607	0.27710098	0.28941649	35.41
0.0800	0.476561	-0.671	0.22159481	0.27711546	0.28946078	35.41
0.0808	0.461340	-0.669	0.22166675	0.27713960	0.28950894	35.41
0.0816	0.444117	-0.668	0.22174358	0.27716285	0.28954357	35.41
0.0824	0.426550	-0.670	0.22182339	0.27718985	0.28956866	35.41
0.0832	0.409641	-0.670	0.22188675	0.27722549	0.28960150	35.40
0.0840	0.394049	-0.670	0.22196269	0.27724850	0.28965056	35.40
0.0848	0.380545	-0.669	0.22203064	0.27727926	0.28970736	35.40
0.0856	0.369444	-0.670	0.22207332	0.27730143	0.28975064	35.40
0.0864	0.360804	-0.677	0.22210830	0.27731687	0.28976309	35.40
0.0872	0.354366	-0.679	0.22212964	0.27733910	0.28978634	35.40
0.0880	0.350304	-0.680	0.22215211	0.27734774	0.28976899	35.40
0.0888	0.347986	-0.676	0.22217554	0.27735925	0.28975946	35.40
0.0896	0.347128	-0.668	0.22219104	0.27736688	0.28978258	35.40
0.0904	0.347643	-0.667	0.22219884	0.27736199	0.28978056	35.40
0.0912	0.349045	-0.668	0.22218418	0.27735722	0.28980178	35.41
0.0920	0.351048	-0.664	0.22217345	0.27735525	0.28982300	35.41
0.0928	0.353565	-0.664	0.22216958	0.27736014	0.28982395	35.41
0.0936	0.356598	-0.664	0.22215205	0.27737182	0.28981912	35.41
0.0944	0.360060	-0.663	0.22215110	0.27738148	0.28980184	35.42
0.0952	0.363951	-0.664	0.22214234	0.27738935	0.28978068	35.42
0.0960	0.368299	-0.668	0.22211224	0.27737200	0.28975940	35.42
0.0968	0.373049	-0.669	0.22210050	0.27734888	0.28974789	35.42
0.0976	0.378342	-0.668	0.22208297	0.27733052	0.28974503	35.42
0.0984	0.384865	-0.670	0.22205287	0.27731884	0.28974205	35.42
0.0992	0.392847	-0.665	0.22203535	0.27732557	0.28973728	35.41
0.1000	0.403004	-0.665	0.22199070	0.27732170	0.28970748	35.41
0.1008	0.415478	-0.667	0.22192752	0.27731597	0.28966314	35.41
0.1016	0.429869	-0.671	0.22187102	0.27729285	0.28963041	35.41
0.1024	0.445862	-0.673	0.22178638	0.27726108	0.28959578	35.41
0.1032	0.462484	-0.671	0.22171927	0.27723402	0.28956783	35.41
0.1040	0.478792	-0.673	0.22165215	0.27720696	0.28954947	35.40
0.1048	0.493956	-0.669	0.22157633	0.27718198	0.28951484	35.40
0.1056	0.507116	-0.669	0.22152674	0.27715498	0.28946859	35.40
0.1064	0.517645	-0.673	0.22147512	0.27711844	0.28941840	35.40
0.1072	0.524940	-0.674	0.22143131	0.27709526	0.28938276	35.40
0.1080	0.529432	-0.679	0.22139722	0.27707881	0.28935671	35.40
0.1088	0.531149	-0.676	0.22138160	0.27707011	0.28936726	35.40
0.1096	0.531006	-0.675	0.22137874	0.27707297	0.28937888	35.40
0.1104	0.529661	-0.670	0.22139531	0.27706057	0.28939629	35.40
0.1112	0.527172	-0.672	0.22141773	0.27706641	0.28939152	35.41
0.1120	0.524311	-0.675	0.22142750	0.27706927	0.28937519	35.41
0.1128	0.520763	-0.675	0.22142851	0.27707213	0.28937811	35.41
0.1136	0.517044	-0.683	0.22143632	0.27708942	0.28938288	35.41
0.1144	0.513182	-0.681	0.22145188	0.27707982	0.28941560	35.41
0.1152	0.508919	-0.676	0.22147232	0.27709055	0.28945029	35.42
0.1160	0.504341	-0.677	0.22149175	0.27709538	0.28946567	35.42
0.1168	0.498877	-0.673	0.22150534	0.27708578	0.28945506	35.42
0.1176	0.492296	-0.674	0.22152978	0.27709341	0.28943956	35.42
0.1184	0.484657	-0.678	0.22155505	0.27710682	0.28943479	35.42
0.1192	0.475588	-0.674	0.22160369	0.27713001	0.28945214	35.41
0.1200	0.465059	-0.675	0.22165614	0.27715021	0.28948885	35.41
0.1208	0.453043	-0.673	0.22170168	0.27717721	0.28953224	35.41
0.1216	0.439482	-0.673	0.22177756	0.27719265	0.28957850	35.41
0.1224	0.425291	-0.677	0.22183108	0.27721280	0.28961611	35.41
0.1232	0.411358	-0.678	0.22188765	0.27725136	0.28965354	35.40
0.1240	0.398741	-0.679	0.22195095	0.27727062	0.28967857	35.40
0.1248	0.388012	-0.679	0.22198981	0.27729762	0.28969294	35.40
0.1256	0.379486	-0.673	0.22204614	0.27731985	0.28972083	35.40
0.1264	0.373020	-0.676	0.22208011	0.27732271	0.28973430	35.40
0.1272	0.368214	-0.675	0.22209948	0.27733910	0.28974873	35.40
0.1280	0.365553	-0.679	0.22211897	0.27734286	0.28975159	35.40
0.1288	0.364237	-0.682	0.22212094	0.27735251	0.28975159	35.40
0.1296	0.364122	-0.677	0.22213548	0.27736503	0.28974682	35.40
0.1304	0.364838	-0.678	0.22214723	0.27736306	0.28974491	35.40
0.1312	0.365696	-0.673	0.22214812	0.27735925	0.28975940	35.41
0.1320	0.366955	-0.672	0.22215301	0.27735049	0.28976315	35.41
0.1328	0.368786	-0.675	0.22214234	0.27734572	0.28977185	35.41
0.1336	0.371103	-0.675	0.22213453	0.27734286	0.28978819	35.41
0.1344	0.373907	-0.674	0.22213554	0.27733904	0.28978527	35.41
0.1352	0.377226	-0.671	0.22212189	0.27733904	0.28978252	35.42
0.1360	0.381031	-0.675	0.22210443	0.27731490	0.28975940	35.42
0.1368	0.385208	-0.676	0.22207725	0.27730143	0.28973055	35.42
0.1376	0.390100	-0.680	0.22204232	0.27729183	0.28971225	35.42
0.1384	0.396051	-0.684	0.22200149	0.27727842	0.28969574	35.42
0.1392	0.403032	-0.678	0.22197622	0.27728516	0.28970820	35.41
0.1400	0.411959	-0.677	0.22194707	0.27728224	0.28970152	35.41
0.1408	0.422831	-0.676	0.22189057	0.27727824	0.28968805	35.41
0.1416	0.435734	-0.679	0.22185165	0.27726376	0.28965533	35.41
0.1424	0.450439	-0.681	0.22178733	0.27724648	0.28960246	35.41
0.1432	0.466175	-0.685	0.22171241	0.27722341	0.28956479	35.40
0.1440	0.482054	-0.682	0.22164929	0.27719074	0.28952044	35.40
0.1448	0.496960	-0.679	0.22158223	0.27717525	0.28949255	35.40
0.1456	0.510635	-0.674	0.22151124	0.27715021	0.28945875	35.40
0.1464	0.522423	-0.675	0.22142851	0.27712131	0.28939623	35.40
0.1472	0.531950	-0.679	0.22137976	0.27710390	0.28936255	35.40
0.1480	0.539331	-0.679	0.22133690	0.27708274	0.28933364	35.40
0.1488	0.544338	-0.682	0.22132236	0.27707309	0.28933173	35.40
0.1496	0.547199	-0.677	0.22133696	0.27707493	0.28935093	35.40
0.1504	0.548372	-0.675	0.22133011	0.27707118	0.28935868	35.40
0.1512	0.547829	-0.677	0.22133112	0.27706540	0.28934616	35.41
0.1520	0.546169	-0.675	0.22133595	0.27705771	0.28932977	35.41
0.1528	0.543480	-0.676	0.22134465	0.27706259	0.28932881	35.41
0.1536	0.539818	-0.676	0.22135645	0.27707404	0.28933746	35.41
0.1544	0.535526	-0.673	0.22136712	0.27707791	0.28936154	35.41
0.1552	0.530434	-0.672	0.22138757	0.27709234	0.28938085	35.42
0.1560	0.524597	-0.674	0.22141296	0.27708751	0.28939724	35.42
0.1568	0.517759	-0.676	0.22144312	0.27707416	0.28938764	35.42
0.1576	0.509605	-0.677	0.22147906	0.27707803	0.28937608	35.42
0.1584	0.499763	-0.679	0.22151119	0.27707994	0.28937989	35.42
0.1592	0.487747	-0.674	0.22155976	0.27710009	0.28938186	35.41
0.1600	0.473757	-0.672	0.22162485	0.27713376	0.28941846	35.41
0.1608	0.457678	-0.672	0.22170174	0.27716464	0.28948295	35.41
0.1616	0.439882	-0.669	0.22177666	0.27719265	0.28954941	35.41
0.1624	0.421715	-0.673	0.22185844	0.27722162	0.28962255	35.41
0.1632	0.404034	-0.672	0.22193819	0.27725148	0.28967929	35.40
0.1640	0.388069	-0.672	0.22201306	0.27727461	0.28971499	35.40
0.1648	0.374823	-0.669	0.22208989	0.27731889	0.28974003	35.40
0.1656	0.364609	-0.667	0.22213554	0.27734011	0.28975451	35.40
0.1664	0.357399	-0.672	0.22215986	0.27734780	0.28975838	35.40
0.1672	0.352736	-0.668	0.22216773	0.27735835	0.28977573	35.40
0.1680	0.350590	-0.672	0.22216862	0.27735639	0.28979409	35.40
0.1688	0.350304	-0.669	0.22217447	0.27736413	0.28980660	35.40
0.1696	0.351334	-0.665	0.22218323	0.27736509	0.28982782	35.40
0.1704	0.353422	-0.667	0.22217828	0.27736419	0.28982395	35.40
0.1712	0.355854	-0.669	0.22217149	0.27735937	0.28981912	35.41
0.1720	0.358543	-0.670	0.22216076	0.27736419	0.28982592	35.41
0.1728	0.361576	-0.672	0.22214913	0.27737486	0.28981632	35.41
0.1736	0.365124	-0.674	0.22214139	0.27737963	0.28979999	35.41
0.1744	0.369101	-0.669	0.22213948	0.27738249	0.28977877	35.41
0.1752	0.373650	-0.667	0.22214049	0.27737862	0.28977001	35.42
0.1760	0.379171	-0.668	0.22211522	0.27736419	0.28976995	35.42
0.1768	0.385551	-0.669	0.22209090	0.27734399	0.28976315	35.42
0.1776	0.393076	-0.669	0.22205502	0.27732962	0.28976125	35.42
0.1784	0.402632	-0.670	0.22200644	0.27730650	0.28973722	35.42
0.1792	0.414219	-0.665	0.22196954	0.27729291	0.28969878	35.41
0.1800	0.427866	-0.664	0.22191215	0.27728510	0.28966129	35.41
0.1808	0.443230	-0.664	0.22184682	0.27725905	0.28961700	35.41
0.1816	0.459080	-0.664	0.22177577	0.27723885	0.28956503	35.41
0.1824	0.474672	-0.668	0.22169888	0.27721089	0.28953511	35.41
0.1832	0.489407	-0.668	0.22163862	0.27717823	0.28952152	35.40
0.1840	0.502625	-0.671	0.22156376	0.27715319	0.28949547	35.40
0.1848	0.513897	-0.670	0.22152001	0.27713579	0.28948778	35.40
0.1856	0.522823	-0.668	0.22148401	0.27712333	0.28945017	35.40
0.1864	0.529261	-0.673	0.22144109	0.27709830	0.28939629	35.40
0.1872	0.533037	-0.674	0.22141284	0.27708864	0.28937507	35.40
0.1880	0.534811	-0.677	0.22137964	0.27706838	0.28936058	35.40
0.1888	0.535097	-0.678	0.22135913	0.27706254	0.28937405	35.40
0.1896	0.534382	-0.671	0.22135818	0.27707887	0.28940195	35.40
0.1904	0.533066	-0.672	0.22136694	0.27707976	0.28940201	35.40
0.1912	0.531206	-0.673	0.22137380	0.27708071	0.28939718	35.41
0.1920	0.528946	-0.675	0.22138453	0.27707303	0.28939623	35.41
0.1928	0.526400	-0.676	0.22139144	0.27707106	0.28938282	35.41
0.1936	0.523539	-0.677	0.22140121	0.27707404	0.28939432	35.41
0.1944	0.520391	-0.676	0.22141486	0.27708757	0.28941166	35.41
0.1952	0.516586	-0.675	0.22144014	0.27711165	0.28943098	35.42
0.1960	0.512180	-0.680	0.22145665	0.27711743	0.28944731	35.42
0.1968	0.507402	-0.681	0.22148097	0.27711266	0.28944540	35.42
0.1976	0.501795	-0.684	0.22149456	0.27711648	0.28944254	35.42
0.1984	0.495501	-0.686	0.22150630	0.27711737	0.28944159	35.42
0.1992	0.488062	-0.680	0.22154230	0.27713186	0.28946179	35.41
0.2000	0.479078	-0.677	0.22158313	0.27716160	0.28949267	35.41
0.2008	0.357285	-0.674	0.22232151	0.27743340	0.28994834	35.40
0.2016	0.357828	-0.673	0.22232062	0.27743053	0.28993577	35.40
0.2024	0.358715	-0.672	0.22230893	0.27742767	0.28993475	35.40
0.2032	0.360374	-0.675	0.22231084	0.27742863	0.28990781	35.41
0.2040	0.362835	-0.672	0.22229624	0.27743053	0.28988665	35.41
0.2048	0.366554	-0.671	0.22228062	0.27743435	0.28987998	35.41
0.2056	0.371618	-0.667	0.22226894	0.27744293	0.28987318	35.41
0.2064	0.378942	-0.668	0.22222418	0.27743047	0.28987890	35.42
0.2072	0.390930	-0.676	0.22218043	0.27741700	0.28985769	35.42
0.2080	0.410872	-0.681	0.22209287	0.27739096	0.28982300	35.42
0.2088	0.443401	-0.688	0.22194505	0.27733225	0.28973049	35.41
0.2096	0.492496	-0.687	0.22173685	0.27725613	0.28960240	35.41
0.2104	0.560732	-0.683	0.22143811	0.27713960	0.28942990	35.41
0.2112	0.649567	-0.681	0.22105092	0.27697879	0.28917176	35.41
0.2120	0.757713	-0.681	0.22058296	0.27676982	0.28885973	35.41
0.2128	0.883541	-0.681	0.22003722	0.27652806	0.28848988	35.41
0.2136	1.024389	-0.681	0.21942258	0.27624094	0.28806901	35.41
0.2144	1.176624	-0.679	0.21874952	0.27592403	0.28760958	35.40
0.2152	1.336613	-0.681	0.21803260	0.27559549	0.28711259	35.40
0.2160	1.500607	-0.681	0.21729141	0.27524197	0.28659719	35.40
0.2168	1.665401	-0.680	0.21654332	0.27489048	0.28607708	35.40
0.2176	1.828194	-0.688	0.21578741	0.27452838	0.28556752	35.40
0.2184	1.986551	-0.687	0.21504229	0.27418077	0.28508586	35.40
0.2192	2.138186	-0.688	0.21432543	0.27384269	0.28460330	35.40
0.2200	2.279577	-0.689	0.21364450	0.27352190	0.28414094	35.40
0.2208	2.407579	-0.684	0.21304822	0.27323961	0.28373641	35.40
0.2216	2.519102	-0.684	0.21250647	0.27297175	0.28336853	35.40
0.2224	2.611628	-0.681	0.21203566	0.27275497	0.28305745	35.40
0.2232	2.684212	-0.680	0.21166021	0.27256906	0.28281277	35.41
0.2240	2.736740	-0.678	0.21135092	0.27242553	0.28261918	35.41
0.2248	2.770529	-0.675	0.21113884	0.27233118	0.28247666	35.41
0.2256	2.787724	-0.675	0.21101528	0.27226955	0.28238988	35.41
0.2264	2.791672	-0.673	0.21094716	0.27224261	0.28234661	35.42
0.2272	2.785807	-0.677	0.21090633	0.27221656	0.28231668	35.42
0.2280	2.772474	-0.680	0.21090823	0.27221942	0.28232145	35.42
0.2288	2.752934	-0.680	0.21093452	0.27223301	0.28233504	35.41
0.2296	2.724495	-0.680	0.21100748	0.27225322	0.28237349	35.41
0.2304	2.680979	-0.673	0.21117669	0.27231205	0.28247851	35.41
0.2312	2.616034	-0.672	0.21143353	0.27239585	0.28264219	35.41
0.2320	2.522936	-0.676	0.21179825	0.27253830	0.28289843	35.41
0.2328	2.399654	-0.676	0.21229339	0.27275211	0.28323650	35.41
0.2336	2.249079	-0.673	0.21288967	0.27303433	0.28364396	35.41
0.2344	2.077017	-0.672	0.21360850	0.27337343	0.28412944	35.40
0.2352	1.892824	-0.665	0.21440238	0.27374047	0.28465629	35.40
0.2360	1.705627	-0.663	0.21521074	0.27412480	0.28520733	35.40
0.2368	1.524010	-0.669	0.21601516	0.27450341	0.28574377	35.40
0.2376	1.355009	-0.669	0.21677488	0.27485597	0.28624755	35.40
0.2384	1.202259	-0.672	0.21746647	0.27518630	0.28672433	35.40
0.2392	1.068592	-0.674	0.21810263	0.27547818	0.28714907	35.40
0.2400	0.954580	-0.669	0.21867371	0.27573431	0.28751904	35.40
0.2408	0.858965	-0.668	0.21915030	0.27596062	0.28783596	35.40
0.2416	0.780373	-0.669	0.21954525	0.27614945	0.28808057	35.40
0.2424	0.715799	-0.670	0.21987408	0.27630842	0.28829438	35.40
0.2432	0.662527	-0.672	0.22014636	0.27644616	0.28848416	35.41
0.2440	0.618782	-0.673	0.22037017	0.27656168	0.28864503	35.41
0.2448	0.583391	-0.675	0.22057736	0.27664930	0.28878278	35.41
0.2456	0.555925	-0.678	0.22074753	0.27672923	0.28890705	35.41
0.2464	0.536528	-0.676	0.22087502	0.27679086	0.28898311	35.42
0.2472	0.525255	-0.684	0.22094888	0.27682269	0.28900915	35.42
0.2480	0.521336	-0.686	0.22097796	0.27684194	0.28903902	35.42
0.2488	0.524111	-0.686	0.22098482	0.27684385	0.28903705	35.42
0.2496	0.533609	-0.695	0.22096145	0.27683902	0.28903508	35.41
0.2504	0.551691	-0.687	0.22091573	0.27682650	0.28903121	35.41
0.2512	0.585766	-0.684	0.22080684	0.27678609	0.28896093	35.41
0.2520	0.646706	-0.682	0.22055000	0.27670997	0.28880203	35.41
0.2528	0.742064	-0.677	0.22014242	0.27655399	0.28853136	35.41
0.2536	0.874271	-0.677	0.21958792	0.27630740	0.28814024	35.41
0.2544	1.038780	-0.677	0.21887594	0.27599633	0.28766924	35.40
0.2552	1.225777	-0.679	0.21807146	0.27561778	0.28711927	35.40
0.2560	1.426048	-0.678	0.21721154	0.27519977	0.28653264	35.40
0.2568	1.632242	-0.678	0.21630400	0.27478945	0.28591239	35.40
0.2576	1.837149	-0.685	0.21537983	0.27436745	0.28526986	35.40
0.2584	2.034073	-0.686	0.21448493	0.27395719	0.28466207	35.40
0.2592	2.217150	-0.684	0.21365327	0.27357185	0.28410059	35.40
0.2600	2.380915	-0.685	0.21289748	0.27321643	0.28360736	35.40
0.2608	2.520933	-0.680	0.21225941	0.27290541	0.28317881	35.40
0.2616	2.634172	-0.679	0.21173805	0.27264047	0.28280693	35.40
0.2624	2.719660	-0.679	0.21131390	0.27243149	0.28251213	35.40
0.2632	2.778854	-0.679	0.21100259	0.27227443	0.28229547	35.41
0.2640	2.815561	-0.677	0.21079725	0.27217031	0.28214896	35.41
0.2648	2.834558	-0.675	0.21065617	0.27210581	0.28206998	35.41
0.2656	2.840624	-0.675	0.21057445	0.27208072	0.28201705	35.41
0.2664	2.838449	-0.668	0.21053076	0.27207589	0.28199005	35.42
0.2672	2.830896	-0.674	0.21050066	0.27207106	0.28197670	35.42
0.2680	2.819252	-0.676	0.21050847	0.27206916	0.28197867	35.42
0.2688	2.804174	-0.681	0.21053374	0.27207005	0.28198922	35.42
0.2696	2.782774	-0.684	0.21059012	0.27207303	0.28202486	35.41
0.2704	2.748384	-0.679	0.21070588	0.27210009	0.28210860	35.41
0.2712	2.689877	-0.676	0.21093059	0.27216941	0.28224254	35.41
0.2720	2.595463	-0.672	0.21130323	0.27231401	0.28247374	35.41
0.2728	2.460308	-0.669	0.21184599	0.27254522	0.28282726	35.41
0.2736	2.287703	-0.663	0.21255803	0.27287072	0.28330213	35.40
0.2744	2.089233	-0.660	0.21337706	0.27326757	0.28387040	35.40
0.2752	1.880379	-0.658	0.21425831	0.27369231	0.28450030	35.40
0.2760	1.673956	-0.655	0.21516591	0.27412766	0.28510803	35.40
0.2768	1.480293	-0.661	0.21601713	0.27453613	0.28567535	35.40
0.2776	1.306715	-0.668	0.21679538	0.27490401	0.28620029	35.40
0.2784	1.156654	-0.669	0.21749383	0.27523637	0.28665596	35.40
0.2792	1.031857	-0.673	0.21807557	0.27552050	0.28706247	35.40
0.2800	0.931091	-0.668	0.21857548	0.27576029	0.28739482	35.40
0.2808	0.851040	-0.665	0.21899956	0.27596170	0.28765678	35.40
0.2816	0.787525	-0.666	0.21933120	0.27611864	0.28787917	35.40
0.2824	0.735683	-0.662	0.21960258	0.27624768	0.28806990	35.40
0.2832	0.691423	-0.665	0.21983314	0.27635843	0.28823841	35.41
0.2840	0.652714	-0.662	0.22003442	0.27646726	0.28840029	35.41
0.2848	0.618525	-0.661	0.22021633	0.27656740	0.28854293	35.41
0.2856	0.589285	-0.661	0.22039235	0.27664733	0.28864408	35.41
0.2864	0.566397	-0.656	0.22054601	0.27671957	0.28872794	35.42
0.2872	0.550890	-0.664	0.22064620	0.27675420	0.28877515	35.42
0.2880	0.543222	-0.667	0.22071528	0.27676964	0.28880692	35.42
0.2888	0.543394	-0.672	0.22074062	0.27678889	0.28884065	35.41
0.2896	0.551062	-0.677	0.22072899	0.27678889	0.28885114	35.41
0.2904	0.567856	-0.672	0.22069401	0.27678597	0.28884149	35.41
0.2912	0.601616	-0.673	0.22058022	0.27676100	0.28876442	35.41
0.2920	0.663185	-0.675	0.22034484	0.27667725	0.28859675	35.41
0.2928	0.760603	-0.673	0.21994698	0.27651834	0.28831941	35.41
0.2936	0.896387	-0.675	0.21937114	0.27627659	0.28793222	35.40
0.2944	1.065187	-0.672	0.21865815	0.27595103	0.28744286	35.40
0.2952	1.256361	-0.672	0.21784198	0.27555704	0.28689003	35.40
0.2960	1.459951	-0.671	0.21695876	0.27513033	0.28629184	35.40
0.2968	1.667833	-0.671	0.21603465	0.27468634	0.28567344	35.40
0.2976	1.872654	-0.677	0.21510667	0.27423555	0.28505510	35.40
0.2984	2.067575	-0.678	0.21420497	0.27382326	0.28445303	35.40
0.2992	2.246733	-0.679	0.21338105	0.27344084	0.28389061	35.40
0.3000	2.404547	-0.680	0.21266216	0.27310365	0.28339648	35.40
0.3008	2.536983	-0.678	0.21204638	0.27281755	0.28297848	35.40
0.3016	2.641840	-0.680	0.21155906	0.27257198	0.28263849	35.40
0.3024	2.719173	-0.679	0.21117282	0.27238518	0.28238022	35.40
0.3032	2.771931	-0.679	0.21088874	0.27224261	0.28218752	35.41
0.3040	2.804403	-0.673	0.21069705	0.27215981	0.28206038	35.41
0.3048	2.821341	-0.673	0.21057051	0.27210772	0.28197467	35.41
0.3056	2.827492	-0.675	0.21051419	0.27208364	0.28193617	35.41
0.3064	2.826462	-0.672	0.21048307	0.27208567	0.28192079	35.42
0.3072	2.820425	-0.680	0.21046853	0.27206731	0.28191215	35.42
0.3080	2.810326	-0.679	0.21046662	0.27207416	0.28191698	35.42
0.3088	2.795649	-0.680	0.21048409	0.27208287	0.28193343	35.41
0.3096	2.773819	-0.681	0.21053475	0.27208859	0.28195363	35.41
0.3104	2.736654	-0.676	0.21066022	0.27213675	0.28203642	35.41
0.3112	2.671194	-0.674	0.21090728	0.27222532	0.28220594	35.41
0.3120	2.566996	-0.673	0.21131188	0.27239281	0.28248334	35.41
0.3128	2.420712	-0.670	0.21189255	0.27265859	0.28287828	35.41
0.3136	2.239408	-0.669	0.21263081	0.27300632	0.28337532	35.40
0.3144	2.038536	-0.669	0.21348107	0.27340317	0.28394455	35.40
0.3152	1.833658	-0.667	0.21436149	0.27381068	0.28453302	35.40
0.3160	1.636419	-0.667	0.21524471	0.27422595	0.28512543	35.40
0.3168	1.454859	-0.665	0.21607554	0.27461022	0.28565806	35.40
0.3176	1.293869	-0.667	0.21681577	0.27495116	0.28613287	35.40
0.3184	1.155367	-0.666	0.21746552	0.27526319	0.28655767	35.40
0.3192	1.039581	-0.671	0.21801329	0.27551746	0.28693521	35.40
0.3200	0.943909	-0.667	0.21847332	0.27574092	0.28726077	35.40
0.3208	0.864573	-0.667	0.21886331	0.27593547	0.28753436	35.40
0.3216	0.797625	-0.667	0.21920091	0.27609634	0.28776652	35.40
0.3224	0.739431	-0.665	0.21949852	0.27623117	0.28796202	35.40
0.3232	0.688105	-0.668	0.21976507	0.27635551	0.28815371	35.41
0.3240	0.642614	-0.668	0.22000438	0.27646637	0.28832811	35.41
0.3248	0.603561	-0.670	0.22020179	0.27656275	0.28848213	35.41
0.3256	0.571575	-0.672	0.22038561	0.27665520	0.28860545	35.41
0.3264	0.547514	-0.672	0.22052860	0.27673125	0.28869122	35.42
0.3272	0.532322	-0.676	0.22062004	0.27677643	0.28873938	35.42
0.3280	0.525713	-0.681	0.22069204	0.27681303	0.28877604	35.42
0.3288	0.527372	-0.683	0.22071153	0.27683330	0.28880304	35.41
0.3296	0.536757	-0.687	0.22069305	0.27682078	0.28880590	35.41
0.3304	0.556412	-0.688	0.22065407	0.27680635	0.28879142	35.41
0.3312	0.595007	-0.685	0.22051984	0.27676582	0.28869903	35.41
0.3320	0.663128	-0.685	0.22024351	0.27667230	0.28850448	35.41
0.3328	0.767612	-0.684	0.21981162	0.27651632	0.28821450	35.41
0.3336	0.909147	-0.684	0.21921831	0.27626592	0.28781956	35.40
0.3344	1.081123	-0.680	0.21847123	0.27592886	0.28733116	35.40
0.3352	1.272640	-0.681	0.21765321	0.27552056	0.28677154	35.40
0.3360	1.474514	-0.679	0.21679038	0.27509767	0.28618300	35.40
0.3368	1.679249	-0.677	0.21588862	0.27466708	0.28557724	35.40
0.3376	1.879005	-0.688	0.21499461	0.27423364	0.28496170	35.40
0.3384	2.067232	-0.690	0.21413767	0.27384067	0.28439051	35.40
0.3392	2.237921	-0.692	0.21335948	0.27346212	0.28385115	35.40
0.3400	2.386007	-0.689	0.21267861	0.27313948	0.28337723	35.40
0.3408	2.508945	-0.680	0.21211642	0.27286977	0.28298718	35.40
0.3416	2.605877	-0.676	0.21165526	0.27264816	0.28267789	35.40
0.3424	2.678747	-0.672	0.21129048	0.27247578	0.28243715	35.40
0.3432	2.730532	-0.676	0.21100938	0.27234668	0.28224152	35.41
0.3440	2.764435	-0.676	0.21081775	0.27225798	0.28212392	35.41
0.3448	2.784147	-0.673	0.21069908	0.27219158	0.28203058	35.41
0.3456	2.793045	-0.675	0.21062326	0.27215785	0.28198045	35.41
0.3464	2.794275	-0.672	0.21058333	0.27214533	0.28196990	35.42
0.3472	2.790298	-0.675	0.21055412	0.27212137	0.28194213	35.42
0.3480	2.782202	-0.680	0.21053660	0.27211267	0.28193927	35.42
0.3488	2.770128	-0.676	0.21055019	0.27211070	0.28193921	35.41
0.3496	2.751989	-0.675	0.21059400	0.27211833	0.28196430	35.41
0.3504	2.721462	-0.671	0.21069616	0.27215588	0.28203446	35.41
0.3512	2.667246	-0.665	0.21089363	0.27223295	0.28216344	35.41
0.3520	2.578068	-0.669	0.21123022	0.27236879	0.28239656	35.41
0.3528	2.449608	-0.665	0.21173114	0.27258652	0.28273654	35.41
0.3536	2.285013	-0.663	0.21239841	0.27290148	0.28319126	35.40
0.3544	2.096243	-0.664	0.21318829	0.27327812	0.28371626	35.40
0.3552	1.897573	-0.661	0.21403456	0.27368367	0.28427792	35.40
0.3560	1.700392	-0.664	0.21490031	0.27410269	0.28486353	35.40
0.3568	1.514397	-0.667	0.21572423	0.27449375	0.28541064	35.40
0.3576	1.346169	-0.670	0.21647620	0.27485007	0.28591627	35.40
0.3584	1.199226	-0.669	0.21715516	0.27518237	0.28636795	35.40
0.3592	1.075087	-0.669	0.21774656	0.27545309	0.28673977	35.40
0.3600	0.972118	-0.664	0.21824849	0.27568907	0.28707010	35.40
0.3608	0.887032	-0.660	0.21868330	0.27590388	0.28736973	35.40
0.3616	0.816479	-0.662	0.21904224	0.27607721	0.28762788	35.40
0.3624	0.756626	-0.663	0.21933997	0.27622932	0.28784359	35.40
0.3632	0.704756	-0.669	0.21961242	0.27635843	0.28802854	35.41
0.3640	0.659494	-0.671	0.21985942	0.27646536	0.28818744	35.41
0.3648	0.620441	-0.673	0.22007436	0.27655780	0.28832328	35.41
0.3656	0.587769	-0.671	0.22026598	0.27664357	0.28845531	35.41
0.3664	0.562534	-0.667	0.22042453	0.27673405	0.28857380	35.42
0.3672	0.545654	-0.670	0.22052574	0.27678120	0.28863931	35.42
0.3680	0.537157	-0.671	0.22059387	0.27681011	0.28869027	35.42
0.3688	0.536928	-0.675	0.22062105	0.27682161	0.28869700	35.41
0.3696	0.544910	-0.677	0.22060156	0.27679849	0.28868443	35.41
0.3704	0.562906	-0.672	0.22055393	0.27678990	0.28867000	35.41
0.3712	0.599957	-0.669	0.22042072	0.27675527	0.28860360	35.41
0.3720	0.667076	-0.666	0.22017175	0.27665520	0.28844851	35.41
0.3728	0.771217	-0.670	0.21974474	0.27649534	0.28817594	35.41
0.3736	0.913439	-0.673	0.21914262	0.27623236	0.28777134	35.40
0.3744	1.086159	-0.677	0.21841013	0.27588660	0.28724736	35.40
0.3752	1.277819	-0.683	0.21757066	0.27549255	0.28666753	35.40
0.3760	1.478977	-0.680	0.21671170	0.27506578	0.28607422	35.40
0.3768	1.682224	-0.680	0.21581572	0.27462167	0.28547126	35.40
0.3776	1.880608	-0.683	0.21491200	0.27418441	0.28488082	35.40
0.3784	2.067747	-0.686	0.21406174	0.27379143	0.28431535	35.40
0.3792	2.237806	-0.687	0.21327376	0.27343029	0.28378654	35.40
0.3800	2.386293	-0.688	0.21260363	0.27312213	0.28332222	35.40
0.3808	2.509890	-0.681	0.21203274	0.27287161	0.28292918	35.40
0.3816	2.607479	-0.676	0.21157277	0.27264136	0.28261334	35.40
0.3824	2.680235	-0.676	0.21121389	0.27246892	0.28237164	35.40
0.3832	2.730961	-0.673	0.21094728	0.27234751	0.28219157	35.41
0.3840	2.763634	-0.675	0.21077895	0.27225596	0.28207791	35.41
0.3848	2.782631	-0.675	0.21064854	0.27220017	0.28198546	35.41
0.3856	2.791071	-0.674	0.21058035	0.27216744	0.28193730	35.41
0.3864	2.792158	-0.672	0.21054345	0.27215683	0.28192002	35.42
0.3872	2.788439	-0.675	0.21051419	0.27214342	0.28188336	35.42
0.3880	2.780628	-0.676	0.21051800	0.27214730	0.28187948	35.42
0.3888	2.769299	-0.673	0.21053171	0.27214438	0.28187847	35.41
0.3896	2.752934	-0.673	0.21055889	0.27214438	0.28189284	35.41
0.3904	2.726212	-0.667	0.21065229	0.27217424	0.28195351	35.41
0.3912	2.678490	-0.663	0.21082842	0.27222908	0.28207862	35.41
0.3920	2.597151	-0.665	0.21113479	0.27234852	0.28228664	35.41
0.3928	2.474499	-0.666	0.21162415	0.27255559	0.28260744	35.41
0.3936	2.310762	-0.668	0.21228564	0.27285129	0.28306502	35.40
0.3944	2.116299	-0.669	0.21308625	0.27322412	0.28360927	35.40
0.3952	1.906958	-0.670	0.21397638	0.27364606	0.28421032	35.40
0.3960	1.697359	-0.666	0.21488875	0.27408439	0.28483731	35.40
0.3968	1.499834	-0.671	0.21575832	0.27450150	0.28542203	35.40
0.3976	1.322823	-0.676	0.21653944	0.27487135	0.28593928	35.40
0.3984	1.170616	-0.673	0.21722126	0.27520549	0.28639489	35.40
0.3992	1.044846	-0.677	0.21780109	0.27548671	0.28678697	35.40
0.4000	0.943365	-0.671	0.21829629	0.27573133	0.28712797	35.40
0.4008	0.862513	-0.669	0.21871358	0.27595097	0.28741986	35.40
0.4016	0.798283	-0.670	0.21906668	0.27610993	0.28766358	35.40
0.4024	0.745468	-0.668	0.21935070	0.27624387	0.28783983	35.40
0.4032	0.700722	-0.670	0.21959293	0.27635747	0.28798914	35.41
0.4040	0.661612	-0.669	0.21980399	0.27644992	0.28814036	35.41
0.4048	0.627251	-0.668	0.21998203	0.27653760	0.28826648	35.41
0.4056	0.598269	-0.669	0.22015321	0.27661854	0.28839558	35.41
0.4064	0.575609	-0.665	0.22028840	0.27668691	0.28850532	35.42
0.4072	0.560617	-0.668	0.22038376	0.27672929	0.28855538	35.42
0.4080	0.552864	-0.672	0.22045958	0.27676970	0.28860164	35.42
0.4088	0.552406	-0.672	0.22048777	0.27678794	0.28861225	35.41
0.4096	0.558872	-0.675	0.22048390	0.27678412	0.28859878	35.41
0.4104	0.573235	-0.671	0.22046822	0.27678800	0.28859109	35.41
0.4112	0.603275	-0.669	0.22036809	0.27675915	0.28853911	35.41
0.4120	0.660267	-0.670	0.22014529	0.27668214	0.28840905	35.41
0.4128	0.753422	-0.673	0.21975815	0.27654350	0.28816342	35.41
0.4136	0.886717	-0.674	0.21919984	0.27630359	0.28779548	35.40
0.4144	1.056232	-0.677	0.21847904	0.27596551	0.28727722	35.40
0.4152	1.250982	-0.677	0.21764642	0.27555323	0.28669059	35.40
0.4160	1.459751	-0.670	0.21675825	0.27511108	0.28608859	35.40
0.4168	1.673326	-0.672	0.21582448	0.27465159	0.28546441	35.40
0.4176	1.883268	-0.675	0.21488971	0.27420270	0.28484124	35.40
0.4184	2.082310	-0.677	0.21399575	0.27379042	0.28424507	35.40
0.4192	2.264385	-0.679	0.21316987	0.27339262	0.28367388	35.40
0.4200	2.423315	-0.676	0.21244025	0.27304977	0.28317201	35.40
0.4208	2.554007	-0.669	0.21184003	0.27275795	0.28277129	35.40
0.4216	2.653942	-0.668	0.21137512	0.27252585	0.28245628	35.40
0.4224	2.723064	-0.667	0.21102303	0.27235723	0.28222126	35.40
0.4232	2.765665	-0.668	0.21078086	0.27223879	0.28207207	35.41
0.4240	2.787666	-0.667	0.21062815	0.27217716	0.28197861	35.41
0.4248	2.795620	-0.667	0.21052986	0.27213281	0.28190923	35.41
0.4256	2.795277	-0.668	0.21048993	0.27212131	0.28189093	35.41
0.4264	2.790127	-0.668	0.21048790	0.27212226	0.28188509	35.41
0.4272	2.782288	-0.670	0.21048301	0.27210683	0.28185916	35.42
0.4280	2.771702	-0.676	0.21048880	0.27211356	0.28187072	35.42
0.4288	2.757797	-0.676	0.21051991	0.27211547	0.28186882	35.41
0.4296	2.737770	-0.677	0.21056759	0.27212030	0.28189188	35.41
0.4304	2.703838	-0.675	0.21068043	0.27217907	0.28199101	35.41
0.4312	2.644329	-0.666	0.21090806	0.27225417	0.28214318	35.41
0.4320	2.548342	-0.665	0.21128166	0.27240926	0.28239840	35.41
0.4328	2.411556	-0.662	0.21183032	0.27266061	0.28275293	35.41
0.4336	2.238979	-0.663	0.21254140	0.27297741	0.28322887	35.40
0.4344	2.043428	-0.665	0.21336728	0.27337050	0.28378272	35.40
0.4352	1.839724	-0.661	0.21423501	0.27378953	0.28437996	35.40
0.4360	1.639709	-0.657	0.21511149	0.27422106	0.28496939	35.40
0.4368	1.452827	-0.659	0.21594131	0.27462471	0.28549910	35.40
0.4376	1.286173	-0.661	0.21668845	0.27498591	0.28598559	35.40
0.4384	1.143122	-0.664	0.21734595	0.27530187	0.28643250	35.40
0.4392	1.025591	-0.671	0.21789646	0.27555329	0.28681499	35.40
0.4400	0.931263	-0.665	0.21836722	0.27577579	0.28714442	35.40
0.4408	0.855932	-0.668	0.21875429	0.27596164	0.28742272	35.40
0.4416	0.795078	-0.669	0.21908313	0.27611381	0.28761250	35.40
0.4424	0.743837	-0.667	0.21935850	0.27624476	0.28779072	35.40
0.4432	0.699778	-0.671	0.21958512	0.27635652	0.28796315	35.41
0.4440	0.661211	-0.666	0.21980107	0.27644712	0.28810966	35.41
0.4448	0.628023	-0.667	0.21997422	0.27652705	0.28825116	35.41
0.4456	0.600243	-0.667	0.22012490	0.27660316	0.28837246	35.41
0.4464	0.578556	-0.666	0.22026986	0.27665615	0.28845239	35.42
0.4472	0.563879	-0.677	0.22035354	0.27669567	0.28849286	35.42
0.4480	0.556469	-0.679	0.22041088	0.27672166	0.28853625	35.42
0.4488	0.556641	-0.681	0.22044599	0.27673227	0.28856033	35.41
0.4496	0.564194	-0.685	0.22042364	0.27673131	0.28855932	35.41
0.4504	0.581045	-0.673	0.22038764	0.27673513	0.28855157	35.41
0.4512	0.615320	-0.672	0.22028065	0.27671105	0.28847259	35.41
0.4520	0.678606	-0.669	0.22003448	0.27662623	0.28829628	35.41
0.4528	0.778427	-0.669	0.21961910	0.27647018	0.28803337	35.41
0.4536	0.917044	-0.672	0.21902668	0.27621102	0.28764904	35.40
0.4544	1.088562	-0.669	0.21828645	0.27587098	0.28715783	35.40
0.4552	1.281481	-0.673	0.21745473	0.27547997	0.28659344	35.40
0.4560	1.485929	-0.668	0.21658319	0.27505904	0.28597790	35.40
0.4568	1.693869	-0.672	0.21568245	0.27462655	0.28534120	35.40
0.4576	1.897316	-0.679	0.21477586	0.27419603	0.28472275	35.40
0.4584	2.089434	-0.678	0.21391308	0.27378476	0.28415442	35.40
0.4592	2.264128	-0.682	0.21311933	0.27340227	0.28362179	35.40
0.4600	2.415676	-0.679	0.21241599	0.27307677	0.28316331	35.40
0.4608	2.540617	-0.673	0.21183908	0.27279741	0.28278869	35.40
0.4616	2.637606	-0.674	0.21137023	0.27257776	0.28247184	35.40
0.4624	2.708101	-0.672	0.21101326	0.27241886	0.28224164	35.40
0.4632	2.755480	-0.672	0.21076429	0.27229172	0.28206825	35.41
0.4640	2.784319	-0.670	0.21059507	0.27221090	0.28192663	35.41
0.4648	2.799454	-0.666	0.21049488	0.27215219	0.28184861	35.41
0.4656	2.805004	-0.666	0.21043938	0.27211463	0.28181678	35.41
0.4664	2.804461	-0.663	0.21041310	0.27210498	0.28179944	35.41
0.4672	2.800283	-0.667	0.21039176	0.27209049	0.28179073	35.42
0.4680	2.792730	-0.671	0.21038783	0.27208567	0.28179365	35.42
0.4688	2.781715	-0.672	0.21041501	0.27208573	0.28178984	35.41
0.4696	2.765236	-0.675	0.21044993	0.27209347	0.28179562	35.41
0.4704	2.736654	-0.675	0.21054327	0.27212906	0.28186208	35.41
0.4712	2.683840	-0.672	0.21073687	0.27219927	0.28199202	35.41
0.4720	2.594147	-0.673	0.21106666	0.27232838	0.28221256	35.41
0.4728	2.461624	-0.672	0.21159011	0.27254891	0.28257763	35.41
0.4736	2.289019	-0.670	0.21229339	0.27286482	0.28304869	35.40
0.4744	2.089548	-0.672	0.21311337	0.27324927	0.28358430	35.40
0.4752	1.880007	-0.671	0.21399564	0.27367973	0.28419119	35.40
0.4760	1.674042	-0.669	0.21488953	0.27411699	0.28481245	35.40
0.4768	1.482611	-0.670	0.21574259	0.27452642	0.28538936	35.40
0.4776	1.312838	-0.668	0.21650720	0.27490294	0.28589410	35.40
0.4784	1.167955	-0.666	0.21718717	0.27522850	0.28632939	35.40
0.4792	1.048422	-0.669	0.21776015	0.27549922	0.28668964	35.40
0.4800	0.951548	-0.668	0.21822906	0.27572751	0.28700942	35.40
0.4808	0.872755	-0.668	0.21862501	0.27591348	0.28730512	35.40
0.4816	0.807123	-0.668	0.21895385	0.27606571	0.28755558	35.40
0.4824	0.750189	-0.665	0.21924180	0.27620733	0.28776556	35.40
0.4832	0.699034	-0.664	0.21949863	0.27633643	0.28794765	35.41
0.4840	0.652914	-0.663	0.21974957	0.27646065	0.28809887	35.41
0.4848	0.612888	-0.663	0.21997231	0.27657229	0.28822893	35.41
0.4856	0.580187	-0.664	0.22016203	0.27666658	0.28836471	35.41
0.4864	0.556698	-0.662	0.22031271	0.27673876	0.28846878	35.41
0.4872	0.542994	-0.669	0.22040808	0.27677250	0.28854102	35.42
0.4880	0.538044	-0.674	0.22045285	0.27680051	0.28858632	35.41
0.4888	0.541592	-0.677	0.22046447	0.27680439	0.28858346	35.41
0.4896	0.552893	-0.684	0.22044510	0.27680725	0.28856128	35.41
0.4904	0.575552	-0.676	0.22038376	0.27680051	0.28853816	35.41
0.4912	0.619898	-0.675	0.22022909	0.27674466	0.28844655	35.41
0.4920	0.695772	-0.671	0.21993142	0.27663296	0.28825778	35.41
0.4928	0.808697	-0.670	0.21947128	0.27642882	0.28795815	35.41
0.4936	0.958042	-0.671	0.21884972	0.27613306	0.28751409	35.40
0.4944	1.135225	-0.665	0.21809101	0.27577382	0.28698432	35.40
0.4952	1.329575	-0.671	0.21724379	0.27536643	0.28640443	35.40
0.4960	1.532736	-0.664	0.21636051	0.27492619	0.28581113	35.40
0.4968	1.737213	-0.667	0.21544707	0.27449751	0.28520620	35.40
0.4976	1.935568	-0.673	0.21455503	0.27406597	0.28460234	35.40
0.4984	2.121477	-0.672	0.21372426	0.27365553	0.28403115	35.40
0.4992	2.289076	-0.678	0.21295583	0.27330017	0.28349656	35.40
0.5000	2.433872	-0.674	0.21229243	0.27298820	0.28305161	35.40
0.5008	2.552719	-0.668	0.21174276	0.27273381	0.28269619	35.40
0.5016	2.644730	-0.665	0.21129537	0.27253163	0.28239471	35.40
0.5024	2.711306	-0.661	0.21095300	0.27238327	0.28217316	35.40
0.5032	2.755394	-0.663	0.21071273	0.27227151	0.28200853	35.41
0.5040	2.781773	-0.663	0.21056390	0.27220035	0.28189099	35.41
0.5048	2.794647	-0.663	0.21046460	0.27215409	0.28182936	35.41
0.5056	2.798281	-0.664	0.21042275	0.27212232	0.28179663	35.41
0.5064	2.795935	-0.661	0.21040136	0.27211559	0.28178984	35.41
0.5072	2.789412	-0.666	0.21038198	0.27210301	0.28177923	35.42
0.5080	2.779398	-0.671	0.21039754	0.27210397	0.28178400	35.42
0.5088	2.765064	-0.672	0.21041983	0.27211171	0.28179753	35.41
0.5096	2.743034	-0.674	0.21048015	0.27213001	0.28181964	35.41
0.5104	2.703981	-0.668	0.21062505	0.27218682	0.28191787	35.41
0.5112	2.635345	-0.664	0.21088678	0.27228498	0.28208363	35.41
0.5120	2.527800	-0.661	0.21131003	0.27245826	0.28237259	35.41
0.5128	2.378483	-0.661	0.21190923	0.27272695	0.28278387	35.41
0.5136	2.194834	-0.662	0.21266800	0.27306890	0.28327900	35.40
0.5144	1.991501	-0.663	0.21353376	0.27348214	0.28385395	35.40
0.5152	1.783476	-0.664	0.21443737	0.27390701	0.28446168	35.40
0.5160	1.583805	-0.659	0.21533042	0.27431828	0.28505600	35.40
0.5168	1.402445	-0.658	0.21614748	0.27470553	0.28561181	35.40
0.5176	1.245432	-0.661	0.21684879	0.27503210	0.28609252	35.40
0.5184	1.114597	-0.660	0.21744615	0.27532494	0.28647590	35.40
0.5192	1.009369	-0.664	0.21793729	0.27556390	0.28679860	35.40
0.5200	0.925913	-0.660	0.21833712	0.27577198	0.28708655	35.40
0.5208	0.858879	-0.657	0.21868050	0.27594346	0.28733695	35.40
0.5216	0.803576	-0.660	0.21896738	0.27607441	0.28754890	35.40
0.5224	0.754881	-0.662	0.21922809	0.27619088	0.28773290	35.40
0.5232	0.709677	-0.666	0.21946639	0.27629393	0.28787261	35.41
0.5240	0.667276	-0.664	0.21968526	0.27640182	0.28801614	35.41
0.5248	0.627909	-0.661	0.21989441	0.27650875	0.28816056	35.41
0.5256	0.593290	-0.660	0.22007728	0.27660799	0.28829926	35.41
0.5264	0.566082	-0.659	0.22023779	0.27668214	0.28842443	35.42
0.5272	0.547800	-0.664	0.22034776	0.27672356	0.28850251	35.42
0.5280	0.538673	-0.669	0.22042269	0.27675146	0.28853625	35.42
0.5288	0.538445	-0.668	0.22045183	0.27676207	0.28855169	35.41
0.5296	0.546370	-0.669	0.22043920	0.27676874	0.28854877	35.41
0.5304	0.564823	-0.664	0.22038668	0.27676773	0.28852946	35.41
0.5312	0.603104	-0.661	0.22025335	0.27672637	0.28845721	35.41
0.5320	0.672226	-0.664	0.21998394	0.27663302	0.28828275	35.41
0.5328	0.778542	-0.664	0.21955401	0.27645105	0.28798419	35.41
0.5336	0.923309	-0.665	0.21895766	0.27618521	0.28756130	35.40
0.5344	1.098948	-0.665	0.21820772	0.27585000	0.28706431	35.40
0.5352	1.294155	-0.665	0.21736443	0.27545017	0.28650087	35.40
0.5360	1.499491	-0.663	0.21646076	0.27503502	0.28591239	35.40
0.5368	1.706314	-0.663	0.21555322	0.27460545	0.28529984	35.40
0.5376	1.907043	-0.671	0.21465439	0.27416241	0.28466690	35.40
0.5384	2.095127	-0.669	0.21381772	0.27375889	0.28408033	35.40
0.5392	2.265358	-0.671	0.21306282	0.27338129	0.28355819	35.40
0.5400	2.413387	-0.669	0.21238667	0.27304798	0.28311509	35.40
0.5408	2.535925	-0.660	0.21182346	0.27278304	0.28274047	35.40
0.5416	2.631397	-0.661	0.21135271	0.27256531	0.28243804	35.40
0.5424	2.700577	-0.660	0.21100742	0.27240539	0.28220403	35.40
0.5432	2.746124	-0.664	0.21075749	0.27229077	0.28202391	35.40
0.5440	2.772760	-0.666	0.21059501	0.27221566	0.28191310	35.41
0.5448	2.785578	-0.666	0.21050739	0.27216178	0.28184950	35.41
0.5456	2.788954	-0.667	0.21044606	0.27212811	0.28181678	35.41
0.5464	2.786665	-0.662	0.21042365	0.27211273	0.28181195	35.41
0.5472	2.780972	-0.662	0.21041685	0.27209449	0.28180236	35.42
0.5480	2.772331	-0.661	0.21041685	0.27208662	0.28179371	35.41
0.5488	2.760229	-0.660	0.21042854	0.27209431	0.28179950	35.41
0.5496	2.741861	-0.655	0.21046746	0.27210581	0.28182262	35.41
0.5504	2.709646	-0.649	0.21056670	0.27214515	0.28190541	35.41
0.5512	2.650537	-0.645	0.21077400	0.27223098	0.28205377	35.41
0.5520	2.553263	-0.645	0.21115440	0.27237934	0.28230226	35.41
0.5528	2.413874	-0.653	0.21171081	0.27262598	0.28267115	35.41
0.5536	2.237406	-0.654	0.21243745	0.27296603	0.28315091	35.40
0.5544	2.038479	-0.657	0.21327889	0.27336097	0.28370279	35.40
0.5552	1.833029	-0.657	0.21415532	0.27378482	0.28429133	35.40
0.5560	1.632957	-0.654	0.21503174	0.27420771	0.28490007	35.40
0.5568	1.448421	-0.657	0.21584982	0.27460170	0.28545392	35.40
0.5576	1.285944	-0.660	0.21658999	0.27494937	0.28594226	35.40
0.5584	1.148243	-0.658	0.21723968	0.27525085	0.28635347	35.40
0.5592	1.036263	-0.661	0.21778250	0.27550310	0.28669351	35.40
0.5600	0.946484	-0.656	0.21823293	0.27572078	0.28699690	35.40
0.5608	0.873756	-0.652	0.21859777	0.27590668	0.28726757	35.40
0.5616	0.813360	-0.657	0.21890521	0.27606648	0.28750265	35.40
0.5624	0.760460	-0.655	0.21917075	0.27620226	0.28768468	35.40
0.5632	0.712452	-0.659	0.21941972	0.27630919	0.28785324	35.40
0.5640	0.668221	-0.661	0.21964729	0.27642286	0.28799963	35.41
0.5648	0.628166	-0.657	0.21986324	0.27652496	0.28813446	35.41
0.5656	0.593634	-0.660	0.22005969	0.27662134	0.28826451	35.41
0.5664	0.565939	-0.658	0.22020954	0.27671379	0.28838778	35.41
0.5672	0.546999	-0.663	0.22033221	0.27676004	0.28847933	35.41
0.5680	0.536900	-0.668	0.22039849	0.27678698	0.28853619	35.41
0.5688	0.535469	-0.668	0.22042578	0.27680337	0.28856027	35.41
0.5696	0.542278	-0.670	0.22043550	0.27679664	0.28854102	35.41
0.5704	0.558558	-0.667	0.22040522	0.27679276	0.28851122	35.41
0.5712	0.592661	-0.667	0.22029322	0.27676493	0.28844470	35.41
0.5720	0.655804	-0.671	0.22005105	0.27666289	0.28830123	35.41
0.5728	0.756369	-0.673	0.21963471	0.27649534	0.28804505	35.41
0.5736	0.897074	-0.676	0.21903360	0.27623051	0.28763849	35.40
0.5744	1.071911	-0.677	0.21829826	0.27587897	0.28711456	35.40
0.5752	1.269665	-0.676	0.21745974	0.27547055	0.28652215	35.40
0.5760	1.479635	-0.673	0.21654731	0.27503037	0.28590566	35.40
0.5768	1.692553	-0.672	0.21562028	0.27458048	0.28528535	35.40
0.5776	1.900234	-0.680	0.21468061	0.27412671	0.28466308	35.40
0.5784	2.095013	-0.681	0.21380121	0.27371925	0.28406870	35.40
0.5792	2.270422	-0.684	0.21300358	0.27334356	0.28352451	35.40
0.5800	2.421370	-0.685	0.21230227	0.27301908	0.28304869	35.40
0.5808	2.544193	-0.676	0.21173412	0.27276582	0.28266144	35.40
0.5816	2.638063	-0.679	0.21127498	0.27255774	0.28236389	35.40
0.5824	2.704554	-0.677	0.21093351	0.27239501	0.28214240	35.40
0.5832	2.747326	-0.676	0.21069413	0.27228028	0.28199792	35.41
0.5840	2.771959	-0.677	0.21054435	0.27220416	0.28190356	35.41
0.5848	2.783461	-0.675	0.21045482	0.27215123	0.28184092	35.41
0.5856	2.786436	-0.676	0.21041298	0.27213383	0.28180718	35.41
0.5864	2.784376	-0.674	0.21041107	0.27213478	0.28180337	35.41
0.5872	2.779140	-0.679	0.21039552	0.27212614	0.28179175	35.41
0.5880	2.771015	-0.683	0.21039850	0.27212417	0.28178793	35.41
0.5888	2.759829	-0.680	0.21041888	0.27212703	0.28177834	35.41
0.5896	2.743435	-0.682	0.21045196	0.27212703	0.28178889	35.41
0.5904	2.715168	-0.677	0.21055120	0.27216071	0.28185827	35.41
0.5912	2.662125	-0.672	0.21074277	0.27223772	0.28199601	35.41
0.5920	2.571859	-0.674	0.21108329	0.27237552	0.28222615	35.41
0.5928	2.438679	-0.672	0.21160471	0.27260959	0.28256422	35.41
0.5936	2.265472	-0.672	0.21231866	0.27292752	0.28304005	35.40
0.5944	2.066088	-0.671	0.21316206	0.27330899	0.28359866	35.40
0.5952	1.857262	-0.673	0.21405220	0.27373087	0.28420067	35.40
0.5960	1.652899	-0.670	0.21494704	0.27416629	0.28480363	35.40
0.5968	1.464243	-0.669	0.21578270	0.27456307	0.28536618	35.40
0.5976	1.298904	-0.675	0.21652591	0.27491367	0.28585744	35.40
0.5984	1.159859	-0.671	0.21717560	0.27522087	0.28628892	35.40
0.5992	1.047649	-0.675	0.21770281	0.27546847	0.28665686	35.40
0.6000	0.958958	-0.672	0.21812981	0.27567744	0.28694201	35.40
0.6008	0.888662	-0.667	0.21848488	0.27585369	0.28719336	35.40
0.6016	0.831041	-0.669	0.21878165	0.27599722	0.28740722	35.40
0.6024	0.780001	-0.664	0.21905220	0.27611375	0.28758544	35.40
0.6032	0.731907	-0.668	0.21929830	0.27623427	0.28775787	35.41
0.6040	0.685387	-0.664	0.21952879	0.27635860	0.28791010	35.41
0.6048	0.641642	-0.662	0.21975249	0.27646852	0.28806132	35.41
0.6056	0.602674	-0.663	0.21995860	0.27657443	0.28821063	35.41
0.6064	0.571232	-0.657	0.22014731	0.27666485	0.28835410	35.41
0.6072	0.549459	-0.664	0.22028160	0.27671486	0.28845429	35.42
0.6080	0.537701	-0.667	0.22036135	0.27674460	0.28850633	35.41
0.6088	0.535870	-0.665	0.22040421	0.27676094	0.28852659	35.41
0.6096	0.543022	-0.670	0.22038764	0.27675998	0.28850245	35.41
0.6104	0.560474	-0.666	0.22035259	0.27675712	0.28848606	35.41
0.6112	0.596552	-0.663	0.22024167	0.27673215	0.28843111	35.41
0.6120	0.662127	-0.669	0.21997905	0.27664930	0.28827119	35.41
0.6128	0.764780	-0.666	0.21956658	0.27647793	0.28799385	35.41
0.6136	0.905886	-0.668	0.21896833	0.27622074	0.28758931	35.40
0.6144	1.078634	-0.669	0.21823394	0.27587301	0.28707016	35.40
0.6152	1.271667	-0.667	0.21741974	0.27547717	0.28649324	35.40
0.6160	1.474800	-0.668	0.21655017	0.27506393	0.28591144	35.40
0.6168	1.680222	-0.669	0.21566403	0.27462953	0.28531420	35.40
0.6176	1.880493	-0.674	0.21476519	0.27419317	0.28470641	35.40
0.6184	2.068691	-0.676	0.21391404	0.27377993	0.28414482	35.40
0.6192	2.239609	-0.680	0.21313095	0.27340239	0.28360355	35.40
0.6200	2.389040	-0.677	0.21243733	0.27307004	0.28313446	35.40
0.6208	2.514238	-0.673	0.21185952	0.27280802	0.28275788	35.40
0.6216	2.614489	-0.672	0.21137506	0.27258068	0.28244382	35.40
0.6224	2.690392	-0.669	0.21100444	0.27239656	0.28219527	35.40
0.6232	2.743979	-0.669	0.21073109	0.27226853	0.28200072	35.40
0.6240	2.778625	-0.669	0.21054149	0.27217424	0.28187937	35.41
0.6248	2.798281	-0.666	0.21042478	0.27211452	0.28178597	35.41
0.6256	2.806749	-0.666	0.21034896	0.27208763	0.28173876	35.41
0.6264	2.807636	-0.661	0.21031505	0.27207696	0.28172815	35.41
0.6272	2.803488	-0.663	0.21029264	0.27205575	0.28170115	35.41
0.6280	2.795191	-0.664	0.21028388	0.27205485	0.28169441	35.41
0.6288	2.782917	-0.663	0.21029651	0.27205575	0.28168958	35.41
0.6296	2.763948	-0.669	0.21032560	0.27205962	0.28170598	35.41
0.6304	2.730160	-0.669	0.21042871	0.27210194	0.28178495	35.41
0.6312	2.668505	-0.670	0.21065241	0.27218574	0.28194392	35.41
0.6320	2.567453	-0.671	0.21103853	0.27233797	0.28221172	35.41
0.6328	2.423286	-0.669	0.21162605	0.27259517	0.28260660	35.41
0.6336	2.242241	-0.668	0.21237212	0.27294678	0.28310752	35.40
0.6344	2.039251	-0.665	0.21322137	0.27335036	0.28367871	35.40
0.6352	1.831055	-0.664	0.21411735	0.27379346	0.28427488	35.40
0.6360	1.630526	-0.655	0.21498996	0.27422220	0.28487015	35.40
0.6368	1.447620	-0.655	0.21580416	0.27461714	0.28542304	35.40
0.6376	1.289034	-0.659	0.21653181	0.27496290	0.28588730	35.40
0.6384	1.156883	-0.660	0.21715045	0.27526146	0.28630930	35.40
0.6392	1.051083	-0.667	0.21766210	0.27549833	0.28663683	35.40
0.6400	0.967541	-0.667	0.21808231	0.27569675	0.28688723	35.40
0.6408	0.900393	-0.665	0.21842957	0.27586913	0.28713286	35.40
0.6416	0.844145	-0.665	0.21872526	0.27600020	0.28734088	35.40
0.6424	0.792961	-0.666	0.21899569	0.27612150	0.28752095	35.40
0.6432	0.743723	-0.666	0.21925735	0.27622932	0.28771168	35.41
0.6440	0.695915	-0.663	0.21950245	0.27633822	0.28789079	35.41
0.6448	0.650368	-0.661	0.21973199	0.27645183	0.28803331	35.41
0.6456	0.609713	-0.659	0.21993327	0.27655977	0.28818071	35.41
0.6464	0.576811	-0.656	0.22010833	0.27665132	0.28832132	35.41
0.6472	0.553865	-0.661	0.22022802	0.27670521	0.28841281	35.42
0.6480	0.541649	-0.666	0.22031176	0.27673119	0.28848130	35.41
0.6488	0.539732	-0.669	0.22034878	0.27674371	0.28850549	35.41
0.6496	0.547543	-0.674	0.22034401	0.27673596	0.28848434	35.41
0.6504	0.567427	-0.671	0.22029728	0.27672821	0.28844672	35.41
0.6512	0.609083	-0.669	0.22014833	0.27669263	0.28835607	35.41
0.6520	0.682955	-0.666	0.21985263	0.27658767	0.28817487	35.41
0.6528	0.795021	-0.667	0.21938080	0.27641433	0.28787243	35.41
0.6536	0.944710	-0.671	0.21874756	0.27613121	0.28745157	35.40
0.6544	1.123667	-0.672	0.21798205	0.27576131	0.28691989	35.40
0.6552	1.320076	-0.677	0.21712983	0.27535290	0.28633720	35.40
0.6560	1.524096	-0.673	0.21624953	0.27492422	0.28574860	35.40
0.6568	1.728144	-0.672	0.21535653	0.27450335	0.28514951	35.40
0.6576	1.924124	-0.679	0.21448016	0.27408820	0.28456193	35.40
0.6584	2.106228	-0.679	0.21367776	0.27370769	0.28400421	35.40
0.6592	2.269621	-0.682	0.21293354	0.27335423	0.28348702	35.40
0.6600	2.410612	-0.680	0.21229631	0.27304602	0.28304201	35.40
0.6608	2.527113	-0.671	0.21175927	0.27280039	0.28269333	35.40
0.6616	2.618465	-0.669	0.21131468	0.27258843	0.28240246	35.40
0.6624	2.686701	-0.667	0.21097618	0.27242947	0.28216457	35.40
0.6632	2.735138	-0.668	0.21072137	0.27231091	0.28199399	35.41
0.6640	2.767925	-0.669	0.21053952	0.27222043	0.28186685	35.41
0.6648	2.789040	-0.671	0.21041113	0.27215499	0.28177148	35.41
0.6656	2.800913	-0.673	0.21033144	0.27210975	0.28171360	35.41
0.6664	2.805519	-0.668	0.21027702	0.27209055	0.28168762	35.41
0.6672	2.804375	-0.673	0.21023518	0.27206546	0.28165782	35.42
0.6680	2.798052	-0.672	0.21023417	0.27205867	0.28165972	35.41
0.6688	2.786808	-0.669	0.21025163	0.27205092	0.28166938	35.41
0.6696	2.768812	-0.669	0.21029729	0.27204984	0.28168291	35.41
0.6704	2.736855	-0.663	0.21040809	0.27209032	0.28175610	35.41
0.6712	2.678061	-0.662	0.21062207	0.27215976	0.28191221	35.41
0.6720	2.580614	-0.663	0.21098775	0.27230906	0.28216362	35.41
0.6728	2.439709	-0.668	0.21154130	0.27256149	0.28253061	35.41
0.6736	2.260609	-0.666	0.21227485	0.27289188	0.28302568	35.40
0.6744	2.057962	-0.667	0.21311730	0.27330130	0.28359103	35.40
0.6752	1.848507	-0.662	0.21401227	0.27373862	0.28419787	35.40
0.6760	1.644974	-0.655	0.21491206	0.27416527	0.28480947	35.40
0.6768	1.457233	-0.656	0.21575445	0.27457070	0.28535658	35.40
0.6776	1.291952	-0.658	0.21649468	0.27491927	0.28583336	35.40
0.6784	1.151361	-0.663	0.21715134	0.27522081	0.28627157	35.40
0.6792	1.036634	-0.668	0.21768731	0.27548099	0.28663665	35.40
0.6800	0.944366	-0.666	0.21812212	0.27570456	0.28695357	35.40
0.6808	0.869694	-0.664	0.21850246	0.27589726	0.28722423	35.40
0.6816	0.808353	-0.665	0.21882248	0.27605802	0.28742468	35.40
0.6824	0.755024	-0.662	0.21909779	0.27618510	0.28759998	35.40
0.6832	0.707331	-0.663	0.21934778	0.27629966	0.28777623	35.41
0.6840	0.663986	-0.663	0.21958715	0.27641332	0.28793806	35.41
0.6848	0.624990	-0.661	0.21979719	0.27651644	0.28809887	35.41
0.6856	0.591373	-0.664	0.21999168	0.27661473	0.28824532	35.41
0.6864	0.564623	-0.665	0.22016484	0.27668983	0.28835422	35.41
0.6872	0.546341	-0.672	0.22026503	0.27673221	0.28840816	35.42
0.6880	0.536671	-0.677	0.22033119	0.27676588	0.28845727	35.42
0.6888	0.535784	-0.677	0.22035855	0.27677834	0.28847659	35.41
0.6896	0.543079	-0.680	0.22034693	0.27677834	0.28847271	35.41
0.6904	0.560732	-0.675	0.22032547	0.27677637	0.28848135	35.41
0.6912	0.598612	-0.673	0.22020006	0.27672535	0.28840613	35.41
0.6920	0.667562	-0.675	0.21993244	0.27662319	0.28822500	35.41
0.6928	0.774593	-0.675	0.21950138	0.27644306	0.28791958	35.41
0.6936	0.920248	-0.676	0.21888077	0.27618301	0.28749961	35.40
0.6944	1.096745	-0.674	0.21812004	0.27583426	0.28698725	35.40
0.6952	1.292810	-0.676	0.21728742	0.27542305	0.28641033	35.40
0.6960	1.499033	-0.671	0.21640331	0.27499449	0.28582954	35.40
0.6968	1.707602	-0.671	0.21549475	0.27453697	0.28520256	35.40
0.6976	1.910734	-0.679	0.21459395	0.27410549	0.28457552	35.40
0.6984	2.101278	-0.676	0.21373409	0.27370006	0.28401583	35.40
0.6992	2.273083	-0.679	0.21294415	0.27332145	0.28346872	35.40
0.7000	2.421541	-0.678	0.21225649	0.27299690	0.28300446	35.40
0.7008	2.543364	-0.669	0.21169722	0.27272719	0.28263265	35.40
0.7016	2.638006	-0.667	0.21123314	0.27251428	0.28231859	35.40
0.7024	2.706871	-0.667	0.21088880	0.27235633	0.28209704	35.40
0.7032	2.753620	-0.666	0.21063972	0.27223492	0.28192937	35.40
0.7040	2.782917	-0.670	0.21046168	0.27214926	0.28180993	35.41
0.7048	2.799139	-0.671	0.21034694	0.27209431	0.28173292	35.41
0.7056	2.806034	-0.671	0.21027690	0.27206540	0.28169537	35.41
0.7064	2.806177	-0.668	0.21024477	0.27205861	0.28168863	35.41
0.7072	2.801571	-0.669	0.21021944	0.27205569	0.28166938	35.41
0.7080	2.792988	-0.676	0.21021837	0.27205575	0.28166837	35.41
0.7088	2.780571	-0.677	0.21023005	0.27206063	0.28167218	35.41
0.7096	2.761774	-0.681	0.21027583	0.27207804	0.28169143	35.41
0.7104	2.729015	-0.675	0.21038771	0.27211654	0.28177238	35.41
0.7112	2.669249	-0.673	0.21061152	0.27220702	0.28192174	35.41
0.7120	2.571516	-0.672	0.21100062	0.27235919	0.28216642	35.41
0.7128	2.432098	-0.671	0.21155798	0.27260679	0.28253919	35.41
0.7136	2.255945	-0.673	0.21229637	0.27293623	0.28301406	35.40
0.7144	2.057219	-0.670	0.21313483	0.27332634	0.28356886	35.40
0.7152	1.851425	-0.670	0.21401614	0.27374440	0.28417856	35.40
0.7160	1.650896	-0.665	0.21489459	0.27415949	0.28478253	35.40
0.7168	1.465960	-0.668	0.21571940	0.27456307	0.28534693	35.40
0.7176	1.303196	-0.674	0.21645093	0.27490604	0.28582466	35.40
0.7184	1.165180	-0.673	0.21708804	0.27520937	0.28623790	35.40
0.7192	1.052170	-0.676	0.21762401	0.27546555	0.28658175	35.40
0.7200	0.960789	-0.672	0.21806276	0.27568030	0.28688717	35.40
0.7208	0.886374	-0.665	0.21844506	0.27587098	0.28716457	35.40
0.7216	0.824232	-0.665	0.21876222	0.27602416	0.28736687	35.40
0.7224	0.770102	-0.665	0.21904618	0.27614939	0.28755271	35.40
0.7232	0.721407	-0.666	0.21930003	0.27625734	0.28773469	35.41
0.7240	0.677261	-0.667	0.21952283	0.27635944	0.28789461	35.41
0.7248	0.638466	-0.666	0.21973586	0.27646059	0.28804678	35.41
0.7256	0.605907	-0.667	0.21991384	0.27654922	0.28817487	35.41
0.7264	0.581017	-0.664	0.22005391	0.27662623	0.28827310	35.41
0.7272	0.565395	-0.666	0.22014821	0.27666950	0.28833765	35.42
0.7280	0.558672	-0.672	0.22019780	0.27669060	0.28838778	35.41
0.7288	0.560589	-0.672	0.22020954	0.27670020	0.28839940	35.41
0.7296	0.571089	-0.675	0.22018814	0.27669436	0.28838015	35.41
0.7304	0.593691	-0.671	0.22013366	0.27668285	0.28833961	35.41
0.7312	0.638924	-0.665	0.21997607	0.27663672	0.28823268	35.41
0.7320	0.716915	-0.667	0.21965700	0.27652597	0.28804773	35.41
0.7328	0.833101	-0.670	0.21917850	0.27632284	0.28773665	35.41
0.7336	0.985794	-0.673	0.21853560	0.27603769	0.28730226	35.40
0.7344	1.165295	-0.675	0.21777397	0.27567935	0.28677154	35.40
0.7352	1.359901	-0.677	0.21694422	0.27527487	0.28619075	35.40
0.7360	1.560488	-0.672	0.21607745	0.27485967	0.28559834	35.40
0.7368	1.759472	-0.672	0.21520776	0.27443880	0.28501278	35.40
0.7376	1.949844	-0.678	0.21434581	0.27402365	0.28443670	35.40
0.7384	2.125683	-0.677	0.21355397	0.27365273	0.28389144	35.40
0.7392	2.282553	-0.684	0.21283799	0.27331084	0.28340697	35.40
0.7400	2.418222	-0.679	0.21221638	0.27300942	0.28298700	35.40
0.7408	2.531719	-0.676	0.21170092	0.27276766	0.28264707	35.40
0.7416	2.624044	-0.677	0.21126813	0.27255583	0.28235143	35.40
0.7424	2.696829	-0.673	0.21091115	0.27238631	0.28211927	35.40
0.7432	2.751503	-0.677	0.21062714	0.27225137	0.28192562	35.40
0.7440	2.790613	-0.673	0.21041501	0.27214640	0.28177339	35.41
0.7448	2.816591	-0.674	0.21027189	0.27207118	0.28166741	35.41
0.7456	2.831440	-0.675	0.21017462	0.27202386	0.28159320	35.41
0.7464	2.837477	-0.670	0.21010941	0.27200359	0.28156912	35.41
0.7472	2.836275	-0.674	0.21006572	0.27197945	0.28154510	35.41
0.7480	2.828465	-0.673	0.21005315	0.27196503	0.28154993	35.41
0.7488	2.814159	-0.671	0.21007651	0.27196801	0.28155959	35.41
0.7496	2.789955	-0.672	0.21014947	0.27198732	0.28158081	35.41
0.7504	2.745266	-0.667	0.21031386	0.27204412	0.28168380	35.41
0.7512	2.667217	-0.664	0.21060759	0.27215391	0.28187746	35.41
0.7520	2.548227	-0.664	0.21106189	0.27235037	0.28219247	35.41
0.7528	2.389297	-0.665	0.21169716	0.27262580	0.28263551	35.41
0.7536	2.201900	-0.663	0.21247441	0.27298617	0.28315955	35.40
0.7544	2.002230	-0.665	0.21331304	0.27339941	0.28373361	35.40
0.7552	1.803703	-0.663	0.21418554	0.27380306	0.28429610	35.40
0.7560	1.614962	-0.660	0.21502501	0.27421337	0.28485775	35.40
0.7568	1.442242	-0.662	0.21579438	0.27459276	0.28538269	35.40
0.7576	1.289349	-0.664	0.21647036	0.27491832	0.28584695	35.39
0.7584	1.157141	-0.665	0.21706861	0.27522266	0.28626597	35.40
0.7592	1.045933	-0.669	0.21759772	0.27547032	0.28659242	35.40
0.7600	0.953522	-0.667	0.21803743	0.27568316	0.28688717	35.40
0.7608	0.876589	-0.663	0.21845275	0.27587867	0.28715009	35.40
0.7616	0.812445	-0.665	0.21879804	0.27604437	0.28737831	35.40
0.7624	0.756826	-0.663	0.21906751	0.27618778	0.28759694	35.40
0.7632	0.707216	-0.665	0.21934181	0.27630728	0.28778088	35.41
0.7640	0.662413	-0.664	0.21956849	0.27642006	0.28792924	35.41
0.7648	0.622272	-0.666	0.21977472	0.27651352	0.28807282	35.41
0.7656	0.588369	-0.666	0.21998483	0.27660418	0.28820860	35.41
0.7664	0.562592	-0.665	0.22013175	0.27668601	0.28831750	35.41
0.7672	0.546370	-0.670	0.22023392	0.27673322	0.28840131	35.42
0.7680	0.539589	-0.671	0.22030008	0.27675635	0.28844267	35.41
0.7688	0.541306	-0.678	0.22030890	0.27676016	0.28843403	35.41
0.7696	0.551376	-0.681	0.22028750	0.27675056	0.28841376	35.41
0.7704	0.573406	-0.678	0.22023785	0.27672452	0.28839356	35.41
0.7712	0.617523	-0.672	0.22008133	0.27667922	0.28829831	35.41
0.7720	0.694027	-0.668	0.21977389	0.27655786	0.28811240	35.41
0.7728	0.807123	-0.669	0.21931863	0.27636617	0.28781283	35.41
0.7736	0.956068	-0.669	0.21868831	0.27608496	0.28737074	35.40
0.7744	1.131821	-0.671	0.21792859	0.27572382	0.28684479	35.40
0.7752	1.323624	-0.672	0.21711737	0.27532607	0.28627849	35.40
0.7760	1.524038	-0.668	0.21624285	0.27490228	0.28568417	35.40
0.7768	1.725826	-0.668	0.21534204	0.27448708	0.28508592	35.40
0.7776	1.922407	-0.675	0.21445870	0.27406508	0.28448391	35.39
0.7784	2.107973	-0.674	0.21361816	0.27366620	0.28393102	35.39
0.7792	2.277117	-0.676	0.21284384	0.27329731	0.28342158	35.40
0.7800	2.425203	-0.677	0.21216977	0.27297568	0.28296411	35.40
0.7808	2.549000	-0.671	0.21160561	0.27271080	0.28259510	35.40
0.7816	2.646732	-0.668	0.21113777	0.27249414	0.28227049	35.40
0.7824	2.719116	-0.667	0.21077788	0.27232748	0.28201997	35.40
0.7832	2.768469	-0.663	0.21052295	0.27220029	0.28185040	35.40
0.7840	2.798767	-0.663	0.21035266	0.27211654	0.28173578	35.41
0.7848	2.814360	-0.661	0.21023589	0.27207214	0.28166258	35.41
0.7856	2.819538	-0.664	0.21017462	0.27204806	0.28162211	35.41
0.7864	2.817764	-0.663	0.21014744	0.27205187	0.28160864	35.41
0.7872	2.811327	-0.665	0.21013969	0.27204221	0.28158939	35.41
0.7880	2.801456	-0.671	0.21015334	0.27203840	0.28159225	35.41
0.7888	2.787180	-0.667	0.21019620	0.27205384	0.28161061	35.41
0.7896	2.765150	-0.671	0.21025842	0.27205676	0.28164530	35.41
0.7904	2.725840	-0.669	0.21038777	0.27210206	0.28172910	35.41
0.7912	2.656116	-0.665	0.21065426	0.27220321	0.28189862	35.41
0.7920	2.546511	-0.665	0.21107733	0.27237457	0.28219038	35.41
0.7928	2.394705	-0.661	0.21167850	0.27263850	0.28259975	35.41
0.7936	2.208796	-0.658	0.21244413	0.27299011	0.28312767	35.40
0.7944	2.004547	-0.660	0.21329051	0.27339566	0.28370464	35.40
0.7952	1.797523	-0.660	0.21418446	0.27381188	0.28429711	35.40
0.7960	1.599913	-0.657	0.21506673	0.27423567	0.28488851	35.40
0.7968	1.421213	-0.659	0.21587414	0.27462763	0.28543365	35.40
0.7976	1.267004	-0.660	0.21658230	0.27495217	0.28590471	35.39
0.7984	1.139002	-0.661	0.21716499	0.27523524	0.28629959	35.40
0.7992	1.036320	-0.667	0.21764457	0.27546549	0.28661460	35.40
0.8000	0.954380	-0.667	0.21804339	0.27566010	0.28688723	35.40
0.8010	0.843859	-0.683	0.21936250	0.27636039	0.28789759	35.39
0.8020	0.843801	-0.680	0.21935862	0.27636319	0.28787833	35.39
0.8030	0.842457	-0.679	0.21936637	0.27636707	0.28786856	35.39
0.8040	0.837851	-0.678	0.21938860	0.27639699	0.28790325	35.40
0.8050	0.827494	-0.679	0.21941769	0.27641338	0.28794849	35.40
0.8060	0.806379	-0.683	0.21950132	0.27644044	0.28800738	35.40
0.8070	0.770416	-0.681	0.21967453	0.27649438	0.28809601	35.40
0.8080	0.721235	-0.680	0.21989149	0.27658492	0.28821927	35.41
0.8090	0.668077	-0.673	0.22014147	0.27671003	0.28836852	35.41
0.8100	0.623074	-0.669	0.22033596	0.27681011	0.28851300	35.41
0.8110	0.594778	-0.676	0.22045177	0.27687651	0.28860545	35.41
0.8120	0.584364	-0.679	0.22051209	0.27689683	0.28866315	35.41
0.8130	0.589514	-0.683	0.22050834	0.27688819	0.28864974	35.41
0.8140	0.608940	-0.682	0.22046560	0.27687663	0.28861421	35.41
0.8150	0.652142	-0.682	0.22029144	0.27682078	0.28850347	35.41
0.8160	0.731792	-0.683	0.21995580	0.27669650	0.28829443	35.40
0.8170	0.850353	-0.683	0.21944606	0.27646828	0.28798133	35.40
0.8180	0.998983	-0.685	0.21880990	0.27616870	0.28755271	35.40
0.8190	1.159887	-0.681	0.21812701	0.27583933	0.28707880	35.40
0.8200	1.321106	-0.683	0.21742564	0.27550024	0.28659338	35.39
0.8210	1.472883	-0.691	0.21673208	0.27517086	0.28609830	35.39
0.8220	1.607380	-0.695	0.21611249	0.27486646	0.28569674	35.39
0.8230	1.720963	-0.696	0.21559304	0.27460259	0.28534991	35.39
0.8240	1.811686	-0.690	0.21518248	0.27440798	0.28509361	35.40
0.8250	1.881437	-0.691	0.21486437	0.27424520	0.28486139	35.40
0.8260	1.932535	-0.692	0.21459877	0.27413827	0.28468311	35.40
0.8270	1.970100	-0.695	0.21438968	0.27404964	0.28456181	35.40
0.8280	1.998310	-0.694	0.21422333	0.27397639	0.28446162	35.41
0.8290	2.020826	-0.686	0.21410376	0.27391571	0.28438079	35.41
0.8300	2.039108	-0.683	0.21399677	0.27385694	0.28428841	35.41
0.8310	2.053070	-0.686	0.21390438	0.27381176	0.28421724	35.41
0.8320	2.061653	-0.684	0.21383440	0.27378571	0.28418064	35.41
0.8330	2.064114	-0.681	0.21379834	0.27377129	0.28414017	35.41
0.8340	2.060652	-0.675	0.21381098	0.27378857	0.28414595	35.41
0.8350	2.051668	-0.675	0.21383625	0.27378762	0.28414691	35.41
0.8360	2.036734	-0.673	0.21388102	0.27380306	0.28418535	35.40
0.8370	2.012501	-0.674	0.21395582	0.27382421	0.28423440	35.40
0.8380	1.969614	-0.675	0.21411920	0.27387911	0.28431720	35.40
0.8390	1.895142	-0.673	0.21442568	0.27400053	0.28453392	35.40
0.8400	1.783562	-0.671	0.21489161	0.27418071	0.28483921	35.39
0.8410	1.642113	-0.677	0.21546453	0.27443397	0.28522652	35.39
0.8420	1.487331	-0.678	0.21612108	0.27473837	0.28565228	35.39
0.8430	1.336069	-0.677	0.21677196	0.27504754	0.28607613	35.39
0.8440	1.198826	-0.671	0.21738780	0.27535003	0.28650767	35.40
0.8450	1.081095	-0.671	0.21791011	0.27560240	0.28685439	35.40
0.8460	0.982962	-0.676	0.21835363	0.27582008	0.28715688	35.40
0.8470	0.901623	-0.677	0.21874660	0.27600020	0.28742844	35.40
0.8480	0.832529	-0.678	0.21907735	0.27615339	0.28765869	35.41
0.8490	0.771418	-0.674	0.21937704	0.27631134	0.28787631	35.41
0.8500	0.714626	-0.674	0.21965426	0.27645195	0.28805548	35.41
0.8510	0.660524	-0.683	0.21989447	0.27657610	0.28822404	35.41
0.8520	0.608883	-0.681	0.22014642	0.27667916	0.28838688	35.41
0.8530	0.561190	-0.688	0.22038567	0.27678323	0.28854287	35.41
0.8540	0.519476	-0.679	0.22061723	0.27689403	0.28871340	35.41
0.8550	0.485201	-0.680	0.22079712	0.27698845	0.28883177	35.41
0.8560	0.458937	-0.676	0.22094506	0.27706259	0.28891951	35.40
0.8570	0.440998	-0.680	0.22105592	0.27712804	0.28897053	35.40
0.8580	0.431700	-0.683	0.22113478	0.27716857	0.28902352	35.40
0.8590	0.430098	-0.682	0.22116983	0.27720332	0.28906107	35.40
0.8600	0.434475	-0.687	0.22116882	0.27720243	0.28907651	35.39
0.8610	0.443945	-0.692	0.22114831	0.27718598	0.28905725	35.39
0.8620	0.459509	-0.698	0.22109383	0.27715898	0.28900617	35.39
0.8630	0.488577	-0.696	0.22099167	0.27711457	0.28893399	35.39
0.8640	0.543108	-0.692	0.22077572	0.27704525	0.28881842	35.40
0.8650	0.632830	-0.690	0.22040701	0.27689016	0.28859109	35.40
0.8660	0.755911	-0.692	0.21986723	0.27664846	0.28825390	35.40
0.8670	0.901165	-0.695	0.21925634	0.27635270	0.28781950	35.40
0.8680	1.054230	-0.696	0.21858519	0.27603102	0.28734171	35.41
0.8690	1.205320	-0.691	0.21791399	0.27572751	0.28689963	35.41
0.8700	1.347713	-0.686	0.21725935	0.27542025	0.28647673	35.41
0.8710	1.478004	-0.691	0.21665251	0.27512735	0.28608376	35.41
0.8720	1.594419	-0.691	0.21612233	0.27486253	0.28571582	35.41
0.8730	1.696472	-0.694	0.21565539	0.27462661	0.28537500	35.41
0.8740	1.783590	-0.686	0.21526426	0.27444369	0.28511876	35.41
0.8750	1.856890	-0.680	0.21491700	0.27427417	0.28488469	35.41
0.8760	1.918001	-0.674	0.21459979	0.27413738	0.28468525	35.40
0.8770	1.969671	-0.676	0.21433425	0.27401209	0.28451377	35.40
0.8780	2.012386	-0.677	0.21410662	0.27391583	0.28437120	35.40
0.8790	2.045918	-0.678	0.21393651	0.27383971	0.28427202	35.40
0.8800	2.069664	-0.680	0.21381682	0.27378005	0.28416896	35.39
0.8810	2.083426	-0.687	0.21372437	0.27373850	0.28408617	35.39
0.8820	2.088633	-0.689	0.21367377	0.27372408	0.28405339	35.39
0.8830	2.087002	-0.690	0.21365815	0.27371627	0.28403890	35.39
0.8840	2.079763	-0.681	0.21367466	0.27372688	0.28404659	35.40
0.8850	2.067633	-0.680	0.21370381	0.27371722	0.28405136	35.40
0.8860	2.048922	-0.678	0.21376032	0.27374226	0.28409863	35.40
0.8870	2.018509	-0.677	0.21385467	0.27377015	0.28416801	35.40
0.8880	1.963949	-0.676	0.21406871	0.27384925	0.28428936	35.41
0.8890	1.873884	-0.676	0.21445686	0.27398616	0.28451467	35.41
0.8900	1.747656	-0.675	0.21498901	0.27421540	0.28486806	35.41
0.8910	1.597109	-0.681	0.21561444	0.27449560	0.28530157	35.41
0.8920	1.441212	-0.682	0.21625942	0.27480477	0.28575331	35.41
0.8930	1.295528	-0.681	0.21689254	0.27510631	0.28616953	35.41
0.8940	1.169844	-0.676	0.21747917	0.27539146	0.28657120	35.41
0.8950	1.068220	-0.676	0.21795088	0.27561688	0.28687763	35.41
0.8960	0.989113	-0.676	0.21831763	0.27579021	0.28713948	35.40
0.8970	0.926542	-0.677	0.21862406	0.27594334	0.28732532	35.40
0.8980	0.872412	-0.677	0.21887600	0.27606756	0.28750157	35.40
0.8990	0.818310	-0.676	0.21914452	0.27620143	0.28768945	35.40
0.9000	0.759230	-0.675	0.21942949	0.27633446	0.28789753	35.39
0.9010	0.694942	-0.680	0.21971941	0.27647036	0.28810847	35.39
0.9020	0.628881	-0.677	0.22002083	0.27661282	0.28830498	35.39
0.9030	0.567169	-0.681	0.22030485	0.27675349	0.28847933	35.39
0.9040	0.514326	-0.680	0.22058207	0.27688736	0.28865951	35.40
0.9050	0.473700	-0.686	0.22081167	0.27699906	0.28880596	35.40
0.9060	0.445919	-0.683	0.22096932	0.27708948	0.28892630	35.40
0.9070	0.430527	-0.682	0.22107440	0.27714622	0.28898984	35.41
0.9080	0.425720	-0.680	0.22113967	0.27718866	0.28901869	35.41
0.9090	0.428381	-0.676	0.22114933	0.27720320	0.28903216	35.41
0.9100	0.436506	-0.673	0.22113764	0.27720803	0.28903985	35.41
0.9110	0.449581	-0.679	0.22108889	0.27717626	0.28902626	35.41
0.9120	0.472269	-0.682	0.22101015	0.27713192	0.28897232	35.41
0.9130	0.515127	-0.685	0.22085249	0.27707219	0.28884804	35.41
0.9140	0.587797	-0.680	0.22055000	0.27697009	0.28865254	35.41
0.9150	0.693054	-0.679	0.22010547	0.27678519	0.28836173	35.41
0.9160	0.822773	-0.679	0.21954036	0.27651262	0.28801316	35.40
0.9170	0.966425	-0.678	0.21891677	0.27621210	0.28760666	35.40
0.9180	1.114025	-0.680	0.21826011	0.27589607	0.28716362	35.40
0.9190	1.258364	-0.676	0.21762484	0.27560234	0.28671372	35.40
0.9200	1.392632	-0.677	0.21701205	0.27530956	0.28629190	35.39
0.9210	1.511564	-0.683	0.21645772	0.27503705	0.28592008	35.39
0.9220	1.613016	-0.684	0.21598011	0.27480584	0.28560513	35.39
0.9230	1.697960	-0.688	0.21557063	0.27460253	0.28534019	35.39
0.9240	1.769629	-0.685	0.21523696	0.27445620	0.28511089	35.40
0.9250	1.831884	-0.686	0.21494418	0.27431852	0.28491336	35.40
0.9260	1.887646	-0.686	0.21467382	0.27419329	0.28473514	35.40
0.9270	1.939144	-0.689	0.21443254	0.27407765	0.28457242	35.40
0.9280	1.986094	-0.692	0.21420497	0.27397549	0.28441840	35.41
0.9290	2.026834	-0.688	0.21400654	0.27389264	0.28429037	35.41
0.9300	2.058077	-0.681	0.21384704	0.27382612	0.28418058	35.41
0.9310	2.077560	-0.688	0.21373218	0.27375197	0.28407460	35.41
0.9320	2.085428	-0.692	0.21366394	0.27371055	0.28402066	35.41
0.9330	2.083912	-0.694	0.21365118	0.27369034	0.28400713	35.41
0.9340	2.075071	-0.681	0.21368235	0.27370572	0.28403693	35.41
0.9350	2.059994	-0.677	0.21373022	0.27372402	0.28405237	35.41
0.9360	2.036448	-0.676	0.21379828	0.27374911	0.28409576	35.40
0.9370	1.996393	-0.675	0.21394330	0.27378482	0.28419024	35.40
0.9380	1.927872	-0.678	0.21420002	0.27388400	0.28437132	35.40
0.9390	1.824532	-0.680	0.21463591	0.27407277	0.28463900	35.40
0.9400	1.692410	-0.681	0.21519911	0.27432895	0.28499627	35.39
0.9410	1.547184	-0.686	0.21581286	0.27460736	0.28540558	35.39
0.9420	1.404562	-0.684	0.21642756	0.27488959	0.28581500	35.39
0.9430	1.275187	-0.680	0.21698976	0.27515644	0.28619170	35.39
0.9440	1.163464	-0.673	0.21750438	0.27540010	0.28654134	35.40
0.9450	1.069307	-0.676	0.21793252	0.27560443	0.28683031	35.40
0.9460	0.988913	-0.680	0.21829349	0.27578545	0.28709227	35.40
0.9470	0.917387	-0.681	0.21862221	0.27594918	0.28731680	35.40
0.9480	0.850210	-0.679	0.21893823	0.27611083	0.28754413	35.41
0.9490	0.784578	-0.675	0.21925616	0.27626020	0.28777623	35.41
0.9500	0.719948	-0.673	0.21955973	0.27641332	0.28800154	35.41
0.9510	0.657120	-0.681	0.21984082	0.27654725	0.28817880	35.41
0.9520	0.597496	-0.683	0.22012097	0.27668399	0.28834826	35.41
0.9530	0.544024	-0.685	0.22038943	0.27680343	0.28851783	35.41
0.9540	0.499134	-0.676	0.22063947	0.27691722	0.28870374	35.41
0.9550	0.465288	-0.676	0.22082043	0.27700675	0.28884822	35.41
0.9560	0.442371	-0.675	0.22095960	0.27706647	0.28894258	35.40
0.9570	0.430212	-0.675	0.22105193	0.27711356	0.28898495	35.40
0.9580	0.426750	-0.676	0.22110742	0.27714735	0.28899658	35.40
0.9590	0.430212	-0.676	0.22113180	0.27717447	0.28898793	35.40
0.9600	0.438738	-0.680	0.22112209	0.27718705	0.28898889	35.39
0.9610	0.452471	-0.686	0.22106856	0.27715129	0.28897917	35.39
0.9620	0.475674	-0.690	0.22099459	0.27712232	0.28894359	35.39
0.9630	0.519218	-0.694	0.22081363	0.27704716	0.28883380	35.39
0.9640	0.592918	-0.687	0.22050822	0.27694029	0.28861904	35.40
0.9650	0.699062	-0.683	0.22005010	0.27674669	0.28832531	35.40
0.9660	0.828381	-0.683	0.21949172	0.27649039	0.28796500	35.40
0.9670	0.968914	-0.687	0.21887791	0.27620822	0.28756434	35.40
0.9680	1.111193	-0.688	0.21824467	0.27590585	0.28714818	35.41
0.9690	1.249008	-0.685	0.21763188	0.27562267	0.28671092	35.41
0.9700	1.377125	-0.681	0.21706289	0.27534902	0.28631985	35.41
0.9710	1.492281	-0.681	0.21651912	0.27508986	0.28595966	35.41
0.9720	1.592646	-0.680	0.21604830	0.27485770	0.28565133	35.41
0.9730	1.679478	-0.682	0.21563190	0.27464873	0.28537583	35.41
0.9740	1.754923	-0.676	0.21528667	0.27448404	0.28513396	35.41
0.9750	1.822729	-0.673	0.21496856	0.27432889	0.28493547	35.41
0.9760	1.884441	-0.675	0.21468347	0.27418447	0.28473800	35.40
0.9770	1.940603	-0.677	0.21441597	0.27406889	0.28455496	35.40
0.9780	1.989555	-0.680	0.21418238	0.27395910	0.28437781	35.40
0.9790	2.028151	-0.680	0.21399480	0.27387816	0.28425366	35.40
0.9800	2.054329	-0.679	0.21384883	0.27381653	0.28416604	35.39
0.9810	2.067461	-0.684	0.21374571	0.27376539	0.28409100	35.39
0.9820	2.069721	-0.683	0.21369505	0.27374721	0.28404373	35.39
0.9830	2.064199	-0.681	0.21367747	0.27373278	0.28403312	35.39
0.9840	2.053070	-0.674	0.21372622	0.27374059	0.28407550	35.40
0.9850	2.037220	-0.676	0.21378654	0.27375680	0.28411311	35.40
0.9860	2.013130	-0.680	0.21388876	0.27377224	0.28415060	35.40
0.9870	1.972876	-0.682	0.21405214	0.27383190	0.28425175	35.40
0.9880	1.905355	-0.683	0.21432060	0.27392441	0.28443283	35.41
0.9890	1.806536	-0.679	0.21473211	0.27409583	0.28470165	35.41
0.9900	1.681995	-0.680	0.21525931	0.27432317	0.28505129	35.41
0.9910	1.545267	-0.685	0.21581966	0.27457172	0.28541255	35.41
0.9920	1.409082	-0.688	0.21639752	0.27485585	0.28582090	35.41
0.9930	1.282310	-0.683	0.21694911	0.27511299	0.28618312	35.41
0.9940	1.169529	-0.675	0.21745688	0.27537209	0.28651923	35.41
0.9950	1.071339	-0.673	0.21790236	0.27558595	0.28682268	35.41
0.9960	0.985680	-0.677	0.21828747	0.27577096	0.28710097	35.40
0.9970	0.909176	-0.676	0.21863657	0.27594817	0.28734463	35.40
0.9980	0.838480	-0.679	0.21897513	0.27610999	0.28756034	35.40
0.9990	0.770617	-0.676	0.21930104	0.27628332	0.28777230	35.40
1.0000	0.704813	-0.672	0.21962792	0.27644038	0.28800154	35.39
1.0010	0.641899	-0.679	0.21991879	0.27657330	0.28820866	35.39
1.0020	0.583677	-0.677	0.22020280	0.27670527	0.28841281	35.39
1.0030	0.532694	-0.679	0.22046155	0.27681792	0.28857178	35.39
1.0040	0.490923	-0.673	0.22068721	0.27694023	0.28871626	35.40
1.0050	0.460052	-0.677	0.22084391	0.27703375	0.28882611	35.40
1.0060	0.439997	-0.679	0.22097039	0.27710116	0.28890121	35.40
1.0070	0.429926	-0.676	0.22105300	0.27713877	0.28897148	35.40
1.0080	0.427837	-0.674	0.22108895	0.27714258	0.28899258	35.41
1.0090	0.431557	-0.678	0.22112298	0.27715409	0.28900224	35.41
1.0100	0.439396	-0.683	0.22110647	0.27715015	0.28898484	35.41
1.0110	0.451269	-0.691	0.22105193	0.27713656	0.28897035	35.41
1.0120	0.470295	-0.695	0.22098577	0.27712798	0.28894734	35.41
1.0130	0.505886	-0.698	0.22085249	0.27707112	0.28887516	35.41
1.0140	0.568371	-0.687	0.22062105	0.27699322	0.28870958	35.41
1.0150	0.663986	-0.686	0.22021449	0.27681702	0.28844368	35.41
1.0160	0.787497	-0.689	0.21966785	0.27659065	0.28809690	35.40
1.0170	0.928230	-0.690	0.21905500	0.27630556	0.28769618	35.40
1.0180	1.075287	-0.690	0.21841884	0.27598661	0.28725022	35.40
1.0190	1.221399	-0.684	0.21777976	0.27568710	0.28678983	35.40
1.0200	1.360874	-0.683	0.21714848	0.27538085	0.28637666	35.39
1.0210	1.488962	-0.685	0.21652788	0.27508515	0.28597599	35.39
1.0220	1.601372	-0.687	0.21601808	0.27482986	0.28563690	35.39
1.0230	1.697130	-0.687	0.21557254	0.27460825	0.28530842	35.39
1.0240	1.776695	-0.683	0.21520776	0.27444357	0.28506368	35.40
1.0250	1.842756	-0.680	0.21488875	0.27429426	0.28486049	35.40
1.0260	1.897573	-0.680	0.21459794	0.27415460	0.28467762	35.40
1.0270	1.943951	-0.681	0.21436930	0.27403605	0.28452444	35.40
1.0280	1.983976	-0.685	0.21415722	0.27395421	0.28439242	35.41
1.0290	2.017937	-0.685	0.21398902	0.27389163	0.28429031	35.41
1.0300	2.045088	-0.684	0.21384114	0.27384251	0.28419119	35.41
1.0310	2.063627	-0.687	0.21374184	0.27377796	0.28409296	35.41
1.0320	2.072353	-0.683	0.21368045	0.27374518	0.28405541	35.41
1.0330	2.072668	-0.683	0.21365607	0.27372205	0.28402358	35.41
1.0340	2.066059	-0.676	0.21365988	0.27373171	0.28403908	35.41
1.0350	2.054157	-0.674	0.21367651	0.27373654	0.28405637	35.41
1.0360	2.034702	-0.678	0.21375054	0.27374810	0.28409201	35.40
1.0370	2.001486	-0.680	0.21387708	0.27378374	0.28416133	35.40
1.0380	1.941519	-0.683	0.21412027	0.27386272	0.28429908	35.40
1.0390	1.846218	-0.683	0.21451420	0.27403134	0.28457350	35.40
1.0400	1.717415	-0.683	0.21505696	0.27426732	0.28493947	35.39
1.0410	1.570387	-0.694	0.21567172	0.27455336	0.28532469	35.39
1.0420	1.424017	-0.693	0.21629822	0.27484041	0.28573698	35.39
1.0430	1.292439	-0.692	0.21687311	0.27510631	0.28612524	35.39
1.0440	1.182890	-0.686	0.21737307	0.27535194	0.28648454	35.40
1.0450	1.094856	-0.686	0.21778542	0.27554256	0.28674853	35.40
1.0460	1.023188	-0.685	0.21812397	0.27570534	0.28696328	35.40
1.0470	0.960960	-0.682	0.21840125	0.27585077	0.28717238	35.40
1.0480	0.902309	-0.677	0.21867365	0.27598661	0.28737748	35.41
1.0490	0.842056	-0.675	0.21895283	0.27612925	0.28757769	35.41
1.0500	0.778227	-0.675	0.21926993	0.27627283	0.28776163	35.41
1.0510	0.429010	-0.655	0.22164637	0.27740562	0.28942513	35.40
1.0520	0.429125	-0.661	0.22164834	0.27740562	0.28944534	35.40
1.0530	0.429325	-0.659	0.22165507	0.27741909	0.28945309	35.39
1.0540	0.429897	-0.661	0.22164434	0.27742285	0.28942800	35.39
1.0550	0.430727	-0.665	0.22162789	0.27741414	0.28940201	35.39
1.0560	0.431871	-0.668	0.22160751	0.27740937	0.28940010	35.39
1.0570	0.434561	-0.668	0.22159493	0.27739787	0.28940982	35.39
1.0580	0.439253	-0.663	0.22159010	0.27740282	0.28942233	35.39
1.0590	0.448265	-0.665	0.22156769	0.27739608	0.28940403	35.40
1.0600	0.466547	-0.667	0.22149950	0.27738065	0.28935593	35.40
1.0610	0.504599	-0.664	0.22133124	0.27733332	0.28925192	35.40
1.0620	0.572605	-0.662	0.22102571	0.27723020	0.28908330	35.41
1.0630	0.675402	-0.658	0.22058994	0.27704614	0.28879917	35.41
1.0640	0.807981	-0.659	0.22002083	0.27678514	0.28841668	35.41
1.0650	0.961418	-0.664	0.21934474	0.27645957	0.28792828	35.41
1.0660	1.126642	-0.671	0.21862102	0.27610040	0.28741974	35.41
1.0670	1.297388	-0.670	0.21786040	0.27573824	0.28689671	35.41
1.0680	1.468735	-0.665	0.21709102	0.27537608	0.28638434	35.41
1.0690	1.637192	-0.665	0.21631867	0.27500796	0.28586799	35.40
1.0700	1.798668	-0.669	0.21559298	0.27464771	0.28537101	35.40
1.0710	1.949730	-0.670	0.21489841	0.27431059	0.28489900	35.40
1.0720	2.086973	-0.669	0.21424472	0.27401012	0.28445888	35.40
1.0730	2.209139	-0.665	0.21366298	0.27373570	0.28407943	35.39
1.0740	2.315512	-0.663	0.21314645	0.27348232	0.28372306	35.39
1.0750	2.406149	-0.666	0.21268058	0.27325112	0.28342825	35.39
1.0760	2.480106	-0.666	0.21229637	0.27306324	0.28314507	35.39
1.0770	2.537098	-0.670	0.21198601	0.27292639	0.28295046	35.39
1.0780	2.577324	-0.666	0.21179330	0.27281952	0.28280795	35.39
1.0790	2.602386	-0.668	0.21165329	0.27273965	0.28271163	35.40
1.0800	2.614346	-0.664	0.21155506	0.27268678	0.28262979	35.40
1.0810	2.616348	-0.665	0.21148413	0.27266461	0.28259999	35.40
1.0820	2.611542	-0.664	0.21145201	0.27266556	0.28258544	35.41
1.0830	2.601700	-0.663	0.21145689	0.27267128	0.28260183	35.41
1.0840	2.587395	-0.662	0.21148312	0.27267915	0.28261244	35.41
1.0850	2.566681	-0.667	0.21155030	0.27268296	0.28264040	35.41
1.0860	2.532177	-0.665	0.21165633	0.27271849	0.28270584	35.41
1.0870	2.468290	-0.661	0.21189660	0.27280504	0.28285605	35.41
1.0880	2.362461	-0.656	0.21231288	0.27299190	0.28312856	35.41
1.0890	2.212772	-0.653	0.21292180	0.27326357	0.28354555	35.40
1.0900	2.033014	-0.656	0.21367574	0.27360940	0.28403771	35.40
1.0910	1.842756	-0.657	0.21448702	0.27400339	0.28457052	35.40
1.0920	1.658878	-0.662	0.21529043	0.27439153	0.28510523	35.40
1.0930	1.492996	-0.656	0.21603268	0.27474123	0.28560722	35.39
1.0940	1.351547	-0.657	0.21667284	0.27505040	0.28604543	35.39
1.0950	1.234303	-0.663	0.21721172	0.27530175	0.28638726	35.39
1.0960	1.136513	-0.669	0.21766502	0.27552623	0.28668392	35.39
1.0970	1.049995	-0.669	0.21807355	0.27572268	0.28696805	35.39
1.0980	0.967655	-0.664	0.21848589	0.27590668	0.28725123	35.40
1.0990	0.885286	-0.664	0.21887988	0.27609164	0.28753060	35.40
1.1000	0.801544	-0.667	0.21928740	0.27628040	0.28778100	35.40
1.1010	0.718088	-0.665	0.21966869	0.27647209	0.28804588	35.40
1.1020	0.639009	-0.663	0.22006553	0.27664739	0.28831077	35.41
1.1030	0.569572	-0.661	0.22042251	0.27680832	0.28857762	35.41
1.1040	0.513754	-0.662	0.22071427	0.27694988	0.28879046	35.41
1.1050	0.474072	-0.667	0.22093123	0.27704805	0.28892422	35.41
1.1060	0.450611	-0.669	0.22105879	0.27711934	0.28898972	35.41
1.1070	0.441685	-0.671	0.22114259	0.27715302	0.28902924	35.41
1.1080	0.443487	-0.665	0.22116303	0.27717912	0.28906113	35.41
1.1090	0.452900	-0.668	0.22115326	0.27718383	0.28907269	35.40
1.1100	0.469036	-0.667	0.22110355	0.27717417	0.28904766	35.40
1.1110	0.499277	-0.671	0.22099948	0.27714235	0.28897351	35.40
1.1120	0.556755	-0.672	0.22076982	0.27707112	0.28881848	35.40
1.1130	0.651827	-0.672	0.22039151	0.27692288	0.28857774	35.39
1.1140	0.784006	-0.672	0.21982545	0.27668405	0.28822905	35.39
1.1150	0.943022	-0.673	0.21911532	0.27634603	0.28776282	35.39
1.1160	1.116314	-0.671	0.21836144	0.27597809	0.28722626	35.39
1.1170	1.294641	-0.673	0.21757829	0.27560151	0.28667426	35.39
1.1180	1.469421	-0.667	0.21680892	0.27524412	0.28616381	35.39
1.1190	1.634245	-0.671	0.21607840	0.27489251	0.28567457	35.40
1.1200	1.784592	-0.673	0.21539259	0.27455926	0.28519964	35.40
1.1210	1.919289	-0.674	0.21476215	0.27425206	0.28477395	35.40
1.1220	2.039108	-0.675	0.21419019	0.27397662	0.28441173	35.41
1.1230	2.146168	-0.669	0.21369118	0.27373773	0.28408229	35.41
1.1240	2.243042	-0.670	0.21323407	0.27353156	0.28377879	35.41
1.1250	2.332506	-0.672	0.21283132	0.27332151	0.28347725	35.41
1.1260	2.415848	-0.673	0.21242762	0.27313179	0.28319794	35.41
1.1270	2.491693	-0.671	0.21206957	0.27295160	0.28294855	35.41
1.1280	2.555780	-0.661	0.21172911	0.27280229	0.28273469	35.41
1.1290	2.603445	-0.661	0.21148688	0.27268183	0.28256714	35.40
1.1300	2.631912	-0.667	0.21130699	0.27259815	0.28245348	35.40
1.1310	2.643156	-0.668	0.21122050	0.27256155	0.28239667	35.40
1.1320	2.641268	-0.670	0.21118647	0.27255291	0.28236777	35.40
1.1330	2.630625	-0.668	0.21120304	0.27256638	0.28237730	35.39
1.1340	2.613173	-0.669	0.21124285	0.27259141	0.28238887	35.39
1.1350	2.585421	-0.670	0.21131670	0.27259809	0.28243798	35.39
1.1360	2.535725	-0.669	0.21149278	0.27264822	0.28256041	35.39
1.1370	2.449493	-0.664	0.21183717	0.27276188	0.28277433	35.39
1.1380	2.321806	-0.659	0.21234697	0.27299494	0.28312111	35.39
1.1390	2.161303	-0.659	0.21300459	0.27330405	0.28356028	35.40
1.1400	1.986666	-0.661	0.21373415	0.27364594	0.28407264	35.40
1.1410	1.814032	-0.661	0.21448314	0.27399755	0.28456771	35.40
1.1420	1.653957	-0.662	0.21518832	0.27432603	0.28503966	35.41
1.1430	1.511536	-0.659	0.21583712	0.27465546	0.28545868	35.41
1.1440	1.387682	-0.662	0.21639937	0.27493286	0.28583521	35.41
1.1450	1.278820	-0.667	0.21689838	0.27514958	0.28613961	35.41
1.1460	1.180086	-0.668	0.21736038	0.27536345	0.28645068	35.41
1.1470	1.085186	-0.667	0.21781272	0.27555901	0.28675413	35.41
1.1480	0.990915	-0.661	0.21827674	0.27579117	0.28708744	35.41
1.1490	0.896902	-0.659	0.21872520	0.27598953	0.28738511	35.40
1.1500	0.805235	-0.661	0.21913952	0.27620047	0.28767705	35.40
1.1510	0.719633	-0.664	0.21953833	0.27639890	0.28795528	35.40
1.1520	0.643816	-0.668	0.21991098	0.27658582	0.28821826	35.40
1.1530	0.580616	-0.666	0.22025442	0.27673900	0.28844750	35.39
1.1540	0.531836	-0.668	0.22051901	0.27685261	0.28861898	35.39
1.1550	0.497732	-0.671	0.22070861	0.27692586	0.28873551	35.39
1.1560	0.477476	-0.671	0.22083503	0.27698940	0.28882796	35.39
1.1570	0.469036	-0.670	0.22091872	0.27702594	0.28886747	35.39
1.1580	0.469551	-0.664	0.22094691	0.27705669	0.28889543	35.40
1.1590	0.476789	-0.665	0.22092754	0.27705860	0.28886557	35.40
1.1600	0.489435	-0.664	0.22089642	0.27705479	0.28884733	35.40
1.1610	0.511723	-0.664	0.22081763	0.27705193	0.28882033	35.40
1.1620	0.555382	-0.663	0.22065908	0.27701336	0.28875488	35.41
1.1630	0.633287	-0.665	0.22035849	0.27690744	0.28858441	35.41
1.1640	0.750160	-0.667	0.21985269	0.27669656	0.28825796	35.41
1.1650	0.899734	-0.672	0.21917760	0.27639896	0.28778499	35.41
1.1660	1.070023	-0.672	0.21843839	0.27604938	0.28728020	35.41
1.1670	1.250896	-0.676	0.21766108	0.27566510	0.28673208	35.41
1.1680	1.432829	-0.666	0.21688575	0.27529234	0.28620332	35.41
1.1690	1.608725	-0.665	0.21610653	0.27491277	0.28566784	35.40
1.1700	1.771631	-0.664	0.21536821	0.27455252	0.28515440	35.40
1.1710	1.918516	-0.668	0.21468925	0.27422303	0.28471994	35.40
1.1720	2.047348	-0.671	0.21409202	0.27392727	0.28431529	35.40
1.1730	2.159615	-0.671	0.21355510	0.27367878	0.28396958	35.39
1.1740	2.257404	-0.672	0.21307445	0.27346110	0.28365469	35.39
1.1750	2.342720	-0.673	0.21266395	0.27324921	0.28336573	35.39
1.1760	2.416763	-0.675	0.21231282	0.27308255	0.28311533	35.39
1.1770	2.480764	-0.677	0.21199870	0.27292544	0.28289080	35.39
1.1780	2.535210	-0.675	0.21172351	0.27281857	0.28269333	35.39
1.1790	2.579498	-0.672	0.21148795	0.27270687	0.28255844	35.40
1.1800	2.612028	-0.670	0.21131772	0.27261347	0.28244001	35.40
1.1810	2.631369	-0.668	0.21120584	0.27254897	0.28236967	35.40
1.1820	2.638292	-0.672	0.21115339	0.27251816	0.28232163	35.41
1.1830	2.634573	-0.668	0.21112520	0.27252108	0.28231967	35.41
1.1840	2.622728	-0.666	0.21112132	0.27252209	0.28233123	35.41
1.1850	2.602758	-0.672	0.21116996	0.27253073	0.28234851	35.41
1.1860	2.568083	-0.675	0.21128082	0.27256542	0.28241396	35.41
1.1870	2.501764	-0.675	0.21154737	0.27265394	0.28256899	35.41
1.1880	2.389040	-0.667	0.21199673	0.27285427	0.28286856	35.41
1.1890	2.229710	-0.663	0.21262807	0.27314317	0.28328472	35.40
1.1900	2.041168	-0.659	0.21340728	0.27351022	0.28381741	35.40
1.1910	1.847620	-0.658	0.21423703	0.27390027	0.28437984	35.40
1.1920	1.666775	-0.656	0.21504539	0.27427405	0.28490865	35.39
1.1930	1.508303	-0.651	0.21578467	0.27462572	0.28539705	35.39
1.1940	1.375580	-0.650	0.21638882	0.27490979	0.28580648	35.39
1.1950	1.265144	-0.654	0.21687901	0.27513707	0.28613013	35.39
1.1960	1.171017	-0.655	0.21731186	0.27533746	0.28641421	35.39
1.1970	1.085186	-0.653	0.21771359	0.27553111	0.28667998	35.39
1.1980	1.001558	-0.653	0.21813780	0.27573532	0.28696901	35.39
1.1990	0.916471	-0.652	0.21855509	0.27592701	0.28725123	35.40
1.2000	0.829268	-0.655	0.21895969	0.27611375	0.28751606	35.40
1.2010	0.742836	-0.652	0.21935850	0.27632189	0.28779823	35.40
1.2020	0.661440	-0.655	0.21975541	0.27651256	0.28807569	35.41
1.2030	0.589857	-0.651	0.22012025	0.27668792	0.28834057	35.41
1.2040	0.532236	-0.656	0.22042173	0.27681804	0.28855634	35.41
1.2050	0.490608	-0.666	0.22062117	0.27690762	0.28868157	35.41
1.2060	0.465717	-0.669	0.22076213	0.27698368	0.28878075	35.41
1.2070	0.455360	-0.669	0.22084868	0.27701926	0.28883952	35.41
1.2080	0.455818	-0.659	0.22090989	0.27705574	0.28889155	35.41
1.2090	0.463886	-0.661	0.22092170	0.27705193	0.28888875	35.40
1.2100	0.478678	-0.663	0.22088766	0.27706242	0.28885120	35.40
1.2110	0.507116	-0.666	0.22079623	0.27703458	0.28877991	35.40
1.2120	0.562649	-0.667	0.22056651	0.27696240	0.28864986	35.40
1.2130	0.655975	-0.671	0.22019202	0.27682370	0.28843504	35.39
1.2140	0.786924	-0.672	0.21963465	0.27658862	0.28807777	35.39
1.2150	0.944281	-0.677	0.21894604	0.27627653	0.28760678	35.39
1.2160	1.114626	-0.679	0.21820480	0.27591532	0.28707224	35.39
1.2170	1.289206	-0.679	0.21742570	0.27554166	0.28654343	35.39
1.2180	1.460466	-0.676	0.21666598	0.27518427	0.28604543	35.39
1.2190	1.623373	-0.679	0.21593827	0.27483469	0.28556180	35.40
1.2200	1.772833	-0.677	0.21526808	0.27451491	0.28509653	35.40
1.2210	1.907072	-0.671	0.21465141	0.27420670	0.28468227	35.40
1.2220	2.025890	-0.667	0.21411252	0.27392834	0.28431052	35.40
1.2230	2.132378	-0.664	0.21363002	0.27369517	0.28399849	35.41
1.2240	2.230368	-0.663	0.21315622	0.27346891	0.28368545	35.41
1.2250	2.321634	-0.668	0.21271759	0.27326459	0.28339261	35.41
1.2260	2.406149	-0.669	0.21230519	0.27307963	0.28311604	35.41
1.2270	2.481909	-0.669	0.21193755	0.27290720	0.28286284	35.41
1.2280	2.545595	-0.663	0.21163201	0.27278304	0.28266066	35.41
1.2290	2.593603	-0.663	0.21138006	0.27265882	0.28248638	35.40
1.2300	2.623358	-0.666	0.21122533	0.27257979	0.28236204	35.40
1.2310	2.636032	-0.667	0.21111929	0.27253157	0.28229737	35.40
1.2320	2.635860	-0.665	0.21108425	0.27250844	0.28227705	35.40
1.2330	2.626505	-0.663	0.21107453	0.27251524	0.28229350	35.39
1.2340	2.610226	-0.663	0.21111548	0.27251911	0.28230906	35.39
1.2350	2.583933	-0.667	0.21117574	0.27253461	0.28234762	35.39
1.2360	2.536898	-0.667	0.21133047	0.27258849	0.28244299	35.39
1.2370	2.454586	-0.667	0.21164751	0.27270222	0.28264028	35.39
1.2380	2.330160	-0.660	0.21216315	0.27292466	0.28298795	35.39
1.2390	2.169428	-0.663	0.21284688	0.27322906	0.28342229	35.40
1.2400	1.990013	-0.663	0.21361727	0.27359313	0.28393674	35.40
1.2410	1.808367	-0.661	0.21439159	0.27396780	0.28445792	35.40
1.2420	1.637535	-0.658	0.21513391	0.27431166	0.28495878	35.41
1.2430	1.484385	-0.655	0.21581769	0.27464396	0.28542405	35.41
1.2440	1.351261	-0.656	0.21642470	0.27493089	0.28581607	35.41
1.2450	1.235962	-0.663	0.21694130	0.27518606	0.28617531	35.41
1.2460	1.134338	-0.667	0.21741891	0.27540666	0.28650856	35.41
1.2470	1.041899	-0.667	0.21786833	0.27561194	0.28680140	35.41
1.2480	0.954351	-0.662	0.21829534	0.27581912	0.28707886	35.41
1.2490	0.869007	-0.660	0.21871167	0.27601469	0.28732646	35.40
1.2500	0.784836	-0.661	0.21912122	0.27620828	0.28761148	35.40
1.2510	0.703640	-0.660	0.21951705	0.27639222	0.28789657	35.40
1.2520	0.629225	-0.661	0.21987009	0.27656168	0.28817010	35.40
1.2530	0.565739	-0.657	0.22019196	0.27671963	0.28839743	35.39
1.2540	0.516529	-0.660	0.22045952	0.27683526	0.28855836	35.39
1.2550	0.482826	-0.663	0.22063756	0.27691531	0.28865176	35.39
1.2560	0.463829	-0.664	0.22076207	0.27697122	0.28873748	35.39
1.2570	0.457134	-0.662	0.22083598	0.27700400	0.28878456	35.39
1.2580	0.458937	-0.660	0.22087395	0.27703667	0.28883845	35.39
1.2590	0.466805	-0.665	0.22086239	0.27704531	0.28882599	35.40
1.2600	0.479851	-0.669	0.22081864	0.27705294	0.28881544	35.40
1.2610	0.503197	-0.671	0.22074181	0.27703661	0.28875965	35.40
1.2620	0.549803	-0.668	0.22056758	0.27697778	0.28866231	35.41
1.2630	0.633116	-0.663	0.22022909	0.27685642	0.28845429	35.41
1.2640	0.757999	-0.665	0.21971935	0.27663481	0.28812283	35.41
1.2650	0.916929	-0.669	0.21902484	0.27632183	0.28765565	35.41
1.2660	1.095486	-0.669	0.21824467	0.27595288	0.28711814	35.41
1.2670	1.281681	-0.671	0.21742946	0.27556956	0.28653836	35.41
1.2680	1.465273	-0.667	0.21661228	0.27517462	0.28599906	35.41
1.2690	1.639080	-0.668	0.21582145	0.27479804	0.28547508	35.40
1.2700	1.797209	-0.668	0.21511531	0.27444935	0.28500688	35.40
1.2710	1.936512	-0.669	0.21448117	0.27414215	0.28456855	35.40
1.2720	2.055960	-0.671	0.21394038	0.27387542	0.28419966	35.39
1.2730	2.158613	-0.667	0.21346664	0.27365100	0.28389049	35.39
1.2740	2.248449	-0.667	0.21301818	0.27344668	0.28360826	35.39
1.2750	2.330446	-0.669	0.21260762	0.27324438	0.28334439	35.39
1.2760	2.406693	-0.669	0.21222538	0.27305841	0.28308821	35.39
1.2770	2.478247	-0.668	0.21188873	0.27289093	0.28283304	35.39
1.2780	2.543020	-0.661	0.21159303	0.27274263	0.28263456	35.39
1.2790	2.597179	-0.663	0.21132070	0.27261645	0.28244859	35.40
1.2800	2.635632	-0.663	0.21111351	0.27252877	0.28230792	35.40
1.2810	2.656145	-0.663	0.21098411	0.27247000	0.28221929	35.40
1.2820	2.660923	-0.660	0.21092379	0.27245075	0.28217214	35.40
1.2830	2.653627	-0.655	0.21093643	0.27244103	0.28218555	35.41
1.2840	2.637548	-0.652	0.21095198	0.27245253	0.28220099	35.41
1.2850	2.610369	-0.653	0.21103179	0.27246988	0.28224152	35.41
1.2860	2.560387	-0.653	0.21119326	0.27252674	0.28233796	35.41
1.2870	2.472410	-0.653	0.21155804	0.27265966	0.28256434	35.41
1.2880	2.339916	-0.649	0.21211636	0.27290237	0.28292447	35.41
1.2890	2.171059	-0.649	0.21282446	0.27321827	0.28339839	35.40
1.2900	1.986122	-0.647	0.21360165	0.27359110	0.28391272	35.40
1.2910	1.803560	-0.650	0.21437800	0.27394652	0.28443009	35.40
1.2920	1.636391	-0.647	0.21511441	0.27429324	0.28492033	35.39
1.2930	1.490679	-0.642	0.21577191	0.27459961	0.28537202	35.39
1.2940	1.366253	-0.647	0.21633410	0.27488858	0.28574473	35.39
1.2950	1.259165	-0.649	0.21681559	0.27512556	0.28607512	35.39
1.2960	1.164436	-0.649	0.21725726	0.27534318	0.28636694	35.39
1.2970	1.076059	-0.652	0.21767664	0.27554059	0.28664249	35.39
1.2980	0.989399	-0.649	0.21808416	0.27574390	0.28692269	35.39
1.2990	0.901594	-0.653	0.21850824	0.27593845	0.28718662	35.40
1.3000	0.813017	-0.655	0.21894491	0.27613020	0.28749579	35.40
1.3010	0.726957	-0.657	0.21934468	0.27631420	0.28778487	35.40
1.3020	0.647793	-0.656	0.21973866	0.27649331	0.28806907	35.41
1.3030	0.579872	-0.651	0.22008795	0.27666372	0.28831559	35.41
1.3040	0.526600	-0.649	0.22037113	0.27680731	0.28849083	35.41
1.3050	0.489492	-0.651	0.22057343	0.27689797	0.28862178	35.41
1.3060	0.467606	-0.655	0.22070283	0.27695298	0.28871143	35.41
1.3070	0.458994	-0.655	0.22078264	0.27699435	0.28876925	35.41
1.3080	0.459824	-0.651	0.22081769	0.27702224	0.28880113	35.41
1.3090	0.467205	-0.656	0.22080511	0.27702612	0.28878188	35.40
1.3100	0.480366	-0.661	0.22076315	0.27701944	0.28876460	35.40
1.3110	0.504742	-0.664	0.22068721	0.27700305	0.28873569	35.40
1.3120	0.553493	-0.666	0.22049946	0.27695674	0.28864324	35.40
1.3130	0.638523	-0.667	0.22017074	0.27682948	0.28843606	35.39
1.3140	0.762949	-0.667	0.21965325	0.27660412	0.28808546	35.39
1.3150	0.918646	-0.674	0.21896553	0.27629018	0.28761053	35.39
1.3160	1.092539	-0.674	0.21821451	0.27592999	0.28708565	35.39
1.3170	1.273499	-0.672	0.21742755	0.27555335	0.28654420	35.39
1.3180	1.451168	-0.664	0.21664453	0.27518147	0.28601056	35.39
1.3190	1.618452	-0.665	0.21590137	0.27481639	0.28550184	35.40
1.3200	1.770744	-0.669	0.21520483	0.27448303	0.28504437	35.40
1.3210	1.907787	-0.667	0.21458322	0.27418160	0.28463316	35.40
1.3220	2.030325	-0.675	0.21400833	0.27389848	0.28425950	35.40
1.3230	2.141476	-0.672	0.21350354	0.27365482	0.28390598	35.41
1.3240	2.243586	-0.673	0.21302110	0.27343613	0.28358710	35.41
1.3250	2.338028	-0.669	0.21257460	0.27321357	0.28327119	35.41
1.3260	2.423916	-0.668	0.21215433	0.27301514	0.28298610	35.41
1.3270	2.499475	-0.668	0.21179628	0.27283311	0.28273094	35.41
1.3280	2.562389	-0.663	0.21148986	0.27268285	0.28254014	35.41
1.3290	2.610254	-0.665	0.21124572	0.27257782	0.28238791	35.40
1.3300	2.641125	-0.664	0.21105987	0.27250075	0.28227228	35.40
1.3310	2.655430	-0.662	0.21096653	0.27246892	0.28219718	35.40
1.3320	2.656431	-0.659	0.21092761	0.27244580	0.28216547	35.40
1.3330	2.647905	-0.652	0.21094710	0.27244192	0.28217608	35.39
1.3340	2.632256	-0.655	0.21096951	0.27244192	0.28220594	35.39
1.3350	2.606592	-0.661	0.21102494	0.27245730	0.28224069	35.39
1.3360	2.559958	-0.662	0.21117479	0.27250558	0.28233314	35.39
1.3370	2.478018	-0.659	0.21150064	0.27263272	0.28252757	35.39
1.3380	2.353735	-0.650	0.21202004	0.27285528	0.28286171	35.39
1.3390	2.193661	-0.649	0.21269220	0.27315962	0.28330570	35.40
1.3400	2.014761	-0.650	0.21344030	0.27350843	0.28379422	35.40
1.3410	1.834974	-0.651	0.21419901	0.27387339	0.28431535	35.40
1.3420	1.667747	-0.650	0.21493542	0.27420855	0.28481340	35.41
1.3430	1.521320	-0.643	0.21559107	0.27452153	0.28526038	35.41
1.3440	1.396551	-0.643	0.21616989	0.27479702	0.28563112	35.41
1.3450	1.289034	-0.648	0.21666801	0.27503008	0.28595275	35.41
1.3460	1.191730	-0.651	0.21710962	0.27524978	0.28625709	35.41
1.3470	1.098261	-0.647	0.21755314	0.27544731	0.28656924	35.41
1.3480	1.004305	-0.641	0.21799475	0.27566785	0.28685915	35.41
1.3490	0.908861	-0.643	0.21843153	0.27588457	0.28717417	35.40
1.3500	0.813360	-0.649	0.21890134	0.27610034	0.28747755	35.40
1.3510	0.721922	-0.652	0.21933997	0.27632195	0.28778386	35.40
1.3520	0.639067	-0.653	0.21974945	0.27651358	0.28805166	35.40
1.3530	0.568943	-0.651	0.22010654	0.27669078	0.28829914	35.39
1.3540	0.514669	-0.652	0.22038281	0.27681601	0.28851014	35.39
1.3550	0.477247	-0.658	0.22058612	0.27689505	0.28864795	35.39
1.3560	0.456963	-0.661	0.22071737	0.27695870	0.28872406	35.39
1.3570	0.450754	-0.665	0.22078550	0.27698952	0.28874421	35.39
1.3580	0.454760	-0.662	0.22080112	0.27702707	0.28875965	35.39
1.3590	0.465889	-0.660	0.22078264	0.27702039	0.28876454	35.40
1.3600	0.485058	-0.663	0.22072905	0.27701175	0.28876466	35.40
1.3610	0.521851	-0.665	0.22060257	0.27697033	0.28869712	35.40
1.3620	0.588684	-0.669	0.22032434	0.27688068	0.28852952	35.40
1.3630	0.691395	-0.670	0.21991485	0.27671492	0.28823948	35.41
1.3640	0.825434	-0.669	0.21934581	0.27647889	0.28785801	35.41
1.3650	0.979958	-0.672	0.21867657	0.27615911	0.28738594	35.41
1.3660	1.145554	-0.669	0.21796453	0.27581227	0.28690344	35.41
1.3670	1.315813	-0.669	0.21721065	0.27543855	0.28636980	35.41
1.3680	1.485186	-0.661	0.21647137	0.27508217	0.28586805	35.41
1.3690	1.649122	-0.661	0.21574664	0.27472305	0.28538150	35.40
1.3700	1.802673	-0.661	0.21505505	0.27438307	0.28492880	35.40
1.3710	1.942692	-0.664	0.21441114	0.27408540	0.28449345	35.40
1.3720	2.067633	-0.657	0.21383524	0.27380800	0.28409958	35.39
1.3730	2.179070	-0.651	0.21331286	0.27357006	0.28376639	35.39
1.3740	2.279291	-0.649	0.21283621	0.27334851	0.28345913	35.39
1.3750	2.369814	-0.656	0.21238583	0.27313173	0.28316730	35.39
1.3760	2.450151	-0.660	0.21199775	0.27295059	0.28289753	35.39
1.3770	2.519388	-0.662	0.21166497	0.27277434	0.28265858	35.39
1.3780	2.575464	-0.658	0.21139652	0.27265108	0.28247648	35.39
1.3790	2.617579	-0.657	0.21116883	0.27255481	0.28232336	35.40
1.3800	2.644129	-0.659	0.21100342	0.27247775	0.28221267	35.40
1.3810	2.656088	-0.657	0.21092945	0.27243727	0.28215677	35.40
1.3820	2.656174	-0.659	0.21090424	0.27240729	0.28212684	35.40
1.3830	2.647619	-0.656	0.21091795	0.27241117	0.28214031	35.41
1.3840	2.632399	-0.657	0.21093935	0.27242845	0.28215003	35.41
1.3850	2.607393	-0.656	0.21099383	0.27244484	0.28217518	35.41
1.3860	2.559814	-0.653	0.21115333	0.27250457	0.28228503	35.41
1.3870	2.473240	-0.654	0.21149278	0.27262610	0.28249401	35.41
1.3880	2.341032	-0.648	0.21203268	0.27286887	0.28285414	35.41
1.3890	2.171774	-0.645	0.21273309	0.27317899	0.28331935	35.40
1.3900	1.986380	-0.645	0.21349287	0.27355450	0.28384817	35.40
1.3910	1.803646	-0.649	0.21428370	0.27392918	0.28439051	35.40
1.3920	1.636448	-0.657	0.21503758	0.27427596	0.28486532	35.39
1.3930	1.490278	-0.653	0.21571171	0.27459395	0.28530639	35.39
1.3940	1.366110	-0.656	0.21627873	0.27486557	0.28569359	35.39
1.3950	1.259794	-0.658	0.21674371	0.27509093	0.28600860	35.39
1.3960	1.165724	-0.660	0.21718138	0.27530563	0.28630149	35.39
1.3970	1.076946	-0.658	0.21760947	0.27549446	0.28657895	35.39
1.3980	0.987396	-0.651	0.21804136	0.27569288	0.28688818	35.39
1.3990	0.895500	-0.654	0.21848691	0.27589321	0.28720504	35.40
1.4000	0.802517	-0.656	0.21892554	0.27609837	0.28749007	35.40
1.4010	0.713654	-0.657	0.21934867	0.27631694	0.28778386	35.40
1.4020	0.634604	-0.653	0.21974933	0.27650088	0.28805262	35.40
1.4030	0.569315	-0.651	0.22008985	0.27668297	0.28829348	35.41
1.4040	0.520134	-0.650	0.22036511	0.27681208	0.28846496	35.41
1.4050	0.486975	-0.652	0.22052956	0.27688533	0.28857178	35.41
1.4060	0.468836	-0.651	0.22064036	0.27692771	0.28863233	35.41
1.4070	0.462942	-0.655	0.22070664	0.27694803	0.28866792	35.41
1.4080	0.465717	-0.652	0.22074366	0.27699053	0.28869778	35.41
1.4090	0.474472	-0.655	0.22072512	0.27700889	0.28871906	35.40
1.4100	0.488920	-0.656	0.22069484	0.27699244	0.28872395	35.40
1.4110	0.516014	-0.656	0.22060150	0.27697796	0.28867483	35.40
1.4120	0.568743	-0.656	0.22039825	0.27690756	0.28853810	35.39
1.4130	0.657406	-0.653	0.22002965	0.27677375	0.28830498	35.39
1.4140	0.782948	-0.653	0.21950048	0.27653480	0.28797072	35.39
1.4150	0.936584	-0.655	0.21884298	0.27622849	0.28751504	35.39
1.4160	1.106558	-0.656	0.21809888	0.27587593	0.28699875	35.39
1.4170	1.283884	-0.660	0.21731287	0.27550900	0.28644884	35.39
1.4180	1.459494	-0.658	0.21654922	0.27514392	0.28591728	35.39
1.4190	1.626921	-0.658	0.21579534	0.27477503	0.28542310	35.40
1.4200	1.781673	-0.659	0.21510375	0.27443111	0.28495783	35.40
1.4210	1.922150	-0.657	0.21446270	0.27412379	0.28454173	35.40
1.4220	2.047291	-0.659	0.21389359	0.27384347	0.28414679	35.40
1.4230	2.157898	-0.653	0.21337909	0.27360564	0.28379917	35.41
1.4240	2.256260	-0.652	0.21291310	0.27337444	0.28350049	35.41
1.4250	2.344952	-0.658	0.21248215	0.27316356	0.28320867	35.41
1.4260	2.425146	-0.661	0.21210074	0.27297086	0.28294474	35.41
1.4270	2.496414	-0.664	0.21174079	0.27280235	0.28269231	35.41
1.4280	2.556038	-0.652	0.21145290	0.27267331	0.28250062	35.41
1.4290	2.601471	-0.652	0.21121067	0.27255774	0.28233784	35.40
1.4300	2.630253	-0.651	0.21105409	0.27248442	0.28222322	35.40
1.4310	2.643013	-0.655	0.21096760	0.27244866	0.28216457	35.40
1.4320	2.642612	-0.656	0.21093160	0.27243900	0.28215683	35.39
1.4330	2.632542	-0.657	0.21094131	0.27245545	0.28217703	35.39
1.4340	2.615347	-0.658	0.21097636	0.27246988	0.28220207	35.39
1.4350	2.588282	-0.668	0.21104544	0.27248913	0.28223681	35.39
1.4360	2.539358	-0.667	0.21121383	0.27254021	0.28233415	35.39
1.4370	2.453899	-0.665	0.21154445	0.27265877	0.28254610	35.39
1.4380	2.326012	-0.659	0.21206772	0.27289093	0.28289086	35.39
1.4390	2.163391	-0.661	0.21273887	0.27318949	0.28333008	35.40
1.4400	1.984434	-0.664	0.21350151	0.27354395	0.28382790	35.40
1.4410	1.805220	-0.664	0.21427977	0.27390713	0.28436250	35.40
1.4420	1.638279	-0.665	0.21502882	0.27425289	0.28484797	35.40
1.4430	1.489935	-0.661	0.21570486	0.27457362	0.28531510	35.41
1.4440	1.362276	-0.660	0.21627492	0.27484721	0.28569078	35.41
1.4450	1.252670	-0.668	0.21677488	0.27509099	0.28600669	35.41
1.4460	1.156111	-0.665	0.21721947	0.27531350	0.28632462	35.41
1.4470	1.066675	-0.668	0.21763384	0.27551574	0.28658950	35.41
1.4480	0.979214	-0.659	0.21806282	0.27572751	0.28690934	35.41
1.4490	0.890636	-0.661	0.21848202	0.27591538	0.28718090	35.40
1.4500	0.800829	-0.660	0.21891195	0.27611864	0.28747183	35.40
1.4510	0.713367	-0.663	0.21933991	0.27631420	0.28776944	35.40
1.4520	0.633316	-0.663	0.21973193	0.27650195	0.28804302	35.39
1.4530	0.565882	-0.661	0.22008789	0.27667814	0.28829539	35.39
1.4540	0.514269	-0.660	0.22036707	0.27680057	0.28846973	35.39
1.4550	0.479450	-0.668	0.22056365	0.27689600	0.28858054	35.39
1.4560	0.460052	-0.669	0.22068334	0.27695197	0.28866625	35.39
1.4570	0.453672	-0.672	0.22073585	0.27697700	0.28871250	35.39
1.4580	0.456047	-0.665	0.22075921	0.27700496	0.28875101	35.39
1.4590	0.464544	-0.670	0.22076017	0.27701366	0.28874809	35.40
1.4600	0.478134	-0.670	0.22074175	0.27701652	0.28870940	35.40
1.4610	0.502825	-0.669	0.22066003	0.27699238	0.28867286	35.40
1.4620	0.551863	-0.669	0.22048593	0.27693164	0.28856403	35.40
1.4630	0.636721	-0.667	0.22012800	0.27680928	0.28836763	35.41
1.4640	0.760174	-0.667	0.21959883	0.27658099	0.28802085	35.41
1.4650	0.913782	-0.676	0.21892864	0.27626604	0.28754401	35.41
1.4660	1.085329	-0.679	0.21818149	0.27591735	0.28703439	35.41
1.4670	1.264744	-0.683	0.21739358	0.27554744	0.28649116	35.41
1.4680	1.442842	-0.673	0.21661437	0.27519685	0.28598064	35.41
1.4690	1.612043	-0.675	0.21584684	0.27481925	0.28545862	35.40
1.4700	1.765995	-0.674	0.21514940	0.27447826	0.28498673	35.40
1.4710	1.903439	-0.675	0.21452004	0.27415651	0.28457350	35.40
1.4720	2.025805	-0.674	0.21396172	0.27387625	0.28420556	35.39
1.4730	2.136240	-0.675	0.21345592	0.27363259	0.28385776	35.39
1.4740	2.237778	-0.672	0.21296370	0.27340156	0.28353608	35.39
1.4750	2.331905	-0.672	0.21250939	0.27319151	0.28322399	35.39
1.4760	2.418766	-0.669	0.21210086	0.27299201	0.28294474	35.39
1.4770	2.496214	-0.670	0.21173412	0.27280897	0.28268749	35.39
1.4780	2.560873	-0.665	0.21143359	0.27265865	0.28249103	35.39
1.4790	2.609253	-0.666	0.21119809	0.27254212	0.28231573	35.40
1.4800	2.639408	-0.667	0.21102977	0.27247179	0.28219539	35.40
1.4810	2.652082	-0.664	0.21094018	0.27244103	0.28213763	35.40
1.4820	2.651424	-0.662	0.21090126	0.27243614	0.28211147	35.40
1.4830	2.640638	-0.660	0.21090513	0.27244097	0.28212106	35.41
1.4840	2.622213	-0.655	0.21093732	0.27244866	0.28214312	35.41
1.4850	2.592058	-0.663	0.21102786	0.27246410	0.28220874	35.41
1.4860	2.538300	-0.661	0.21121562	0.27252191	0.28233016	35.41
1.4870	2.448807	-0.665	0.21156478	0.27266455	0.28253251	35.41
1.4880	2.320461	-0.653	0.21209687	0.27290154	0.28287828	35.41
1.4890	2.162905	-0.654	0.21273690	0.27319723	0.28330779	35.40
1.4900	1.992188	-0.653	0.21345872	0.27353621	0.28378737	35.40
1.4910	1.823101	-0.659	0.21418923	0.27387238	0.28427094	35.40
1.4920	1.666574	-0.660	0.21487796	0.27420282	0.28474110	35.39
1.4930	1.528759	-0.655	0.21551508	0.27450150	0.28517663	35.39
1.4940	1.410141	-0.655	0.21604425	0.27476060	0.28553391	35.39
1.4950	1.305656	-0.661	0.21651024	0.27498788	0.28585464	35.39
1.4960	1.209612	-0.663	0.21695679	0.27519488	0.28615993	35.39
1.4970	1.115627	-0.664	0.21740329	0.27539712	0.28644216	35.39
1.4980	1.020613	-0.657	0.21787107	0.27561766	0.28676587	35.39
1.4990	0.923967	-0.657	0.21833414	0.27582866	0.28704613	35.40
1.5000	0.827894	-0.663	0.21878546	0.27605313	0.28736019	35.40
1.5010	0.736599	-0.662	0.21921939	0.27624965	0.28766453	35.40
1.5020	0.655117	-0.665	0.21960944	0.27644134	0.28794962	35.40
1.5030	0.587597	-0.659	0.21995670	0.27659827	0.28821349	35.41
1.5040	0.536327	-0.661	0.22023094	0.27672446	0.28840029	35.41
1.5050	0.501537	-0.669	0.22041762	0.27681595	0.28850335	35.41
1.5060	0.481968	-0.672	0.22052759	0.27687579	0.28857088	35.41
1.5070	0.474901	-0.673	0.22059178	0.27690667	0.28859782	35.41
1.5080	0.476675	-0.666	0.22063184	0.27693361	0.28864688	35.41
1.5090	0.484686	-0.667	0.22062296	0.27693647	0.28866029	35.40
1.5100	0.497475	-0.672	0.22059864	0.27693838	0.28865349	35.40
1.5110	0.519876	-0.677	0.22053534	0.27691430	0.28859478	35.40
1.5120	0.565052	-0.679	0.22036421	0.27685934	0.28848702	35.40
1.5130	0.645475	-0.678	0.22003353	0.27675247	0.28829253	35.39
1.5140	0.765381	-0.673	0.21953160	0.27655208	0.28797561	35.39
1.5150	0.917273	-0.679	0.21888661	0.27626121	0.28752768	35.39
1.5160	1.088820	-0.677	0.21815223	0.27590573	0.28699404	35.39
1.5170	1.270781	-0.680	0.21736240	0.27552235	0.28645855	35.39
1.5180	1.453485	-0.673	0.21655792	0.27513999	0.28592873	35.39
1.5190	1.629496	-0.676	0.21575642	0.27475947	0.28540093	35.40
1.5200	1.790686	-0.677	0.21502882	0.27439725	0.28490478	35.40
1.5210	1.933193	-0.678	0.21438205	0.27406979	0.28445977	35.40
1.5220	2.055559	-0.676	0.21380717	0.27378953	0.28408414	35.40
1.5230	2.159901	-0.674	0.21332276	0.27357000	0.28377318	35.41
1.5240	2.250280	-0.672	0.21287811	0.27336961	0.28347754	35.41
1.5250	2.330847	-0.676	0.21248209	0.27318656	0.28321260	35.41
1.5260	2.405319	-0.674	0.21211237	0.27301502	0.28295732	35.41
1.5270	2.475243	-0.674	0.21176708	0.27285522	0.28271842	35.41
1.5280	2.539186	-0.667	0.21149284	0.27271557	0.28252006	35.41
1.5290	2.593231	-0.665	0.21123904	0.27259713	0.28234082	35.40
1.5300	2.631855	-0.669	0.21106488	0.27250463	0.28220880	35.40
1.5310	2.652798	-0.671	0.21093738	0.27243531	0.28211915	35.40
1.5320	2.657833	-0.673	0.21087021	0.27240050	0.28207588	35.39
1.5330	2.650881	-0.671	0.21086138	0.27240145	0.28207588	35.39
1.5340	2.634974	-0.668	0.21088862	0.27241397	0.28208351	35.39
1.5350	2.607765	-0.672	0.21095681	0.27243710	0.28213072	35.39
1.5360	2.555981	-0.669	0.21113688	0.27248907	0.28225106	35.39
1.5370	2.465715	-0.667	0.21147835	0.27262491	0.28247267	35.39
1.5380	2.331820	-0.659	0.21202111	0.27286577	0.28283101	35.39
1.5390	2.164764	-0.656	0.21271467	0.27318078	0.28328568	35.40
1.5400	1.983690	-0.659	0.21348512	0.27354008	0.28381544	35.40
1.5410	1.804419	-0.657	0.21425551	0.27390605	0.28433448	35.40
1.5420	1.637907	-0.660	0.21499664	0.27424991	0.28481317	35.40
1.5430	1.489964	-0.656	0.21566880	0.27456009	0.28525144	35.41
1.5440	1.362505	-0.657	0.21624571	0.27483559	0.28565025	35.41
1.5450	1.252441	-0.664	0.21674377	0.27506483	0.28600770	35.41
1.5460	1.154509	-0.667	0.21719021	0.27529401	0.28629863	35.41
1.5470	1.062527	-0.666	0.21762109	0.27550107	0.28657603	35.41
1.5480	0.971861	-0.658	0.21807057	0.27571011	0.28688627	35.41
1.5490	0.881681	-0.656	0.21848696	0.27590764	0.28718954	35.40
1.5500	0.793047	-0.656	0.21891010	0.27611190	0.28749877	35.40
1.5510	0.708990	-0.659	0.21931964	0.27631992	0.28775591	35.40
1.5520	0.632687	-0.663	0.21970570	0.27651060	0.28800553	35.39
1.5530	0.567226	-0.664	0.22004521	0.27667236	0.28823668	35.39
1.5540	0.515013	-0.665	0.22032249	0.27679956	0.28844368	35.39
1.5550	0.477533	-0.672	0.22052580	0.27686995	0.28857559	35.39
1.5560	0.454445	-0.672	0.22065330	0.27692491	0.28865945	35.39
1.5570	0.444660	-0.675	0.22072917	0.27696830	0.28869224	35.39
1.5580	0.444689	-0.668	0.22078460	0.27700782	0.28872693	35.39
1.5590	0.451813	-0.672	0.22079527	0.27703184	0.28871924	35.40
1.5600	0.464859	-0.675	0.22075719	0.27702510	0.28870767	35.40
1.5610	0.488720	-0.680	0.22068912	0.27699715	0.28866345	35.40
1.5620	0.536270	-0.682	0.22049844	0.27693450	0.28858149	35.40
1.5630	0.619411	-0.679	0.22017163	0.27680826	0.28837627	35.41
1.5640	0.741405	-0.681	0.21965998	0.27659631	0.28805643	35.41
1.5650	0.893555	-0.683	0.21898884	0.27629197	0.28758824	35.41
1.5660	1.064215	-0.681	0.21824467	0.27594322	0.28706145	35.41
1.5670	1.244316	-0.679	0.21745372	0.27556568	0.28652102	35.41
1.5680	1.425133	-0.676	0.21666580	0.27518713	0.28599226	35.41
1.5690	1.598539	-0.678	0.21589446	0.27481735	0.28548467	35.40
1.5700	1.757813	-0.678	0.21518922	0.27445996	0.28499824	35.40
1.5710	1.899719	-0.673	0.21454036	0.27414888	0.28456777	35.40
1.5720	2.025232	-0.671	0.21395963	0.27386379	0.28418720	35.39
1.5730	2.136383	-0.663	0.21343148	0.27362782	0.28384334	35.39
1.5740	2.236118	-0.660	0.21294713	0.27341104	0.28352737	35.39
1.5750	2.326641	-0.666	0.21253181	0.27319336	0.28322405	35.39
1.5760	2.409010	-0.667	0.21213293	0.27301031	0.28295833	35.39
1.5770	2.483711	-0.673	0.21177292	0.27283496	0.28271270	35.39
1.5780	2.548227	-0.667	0.21145970	0.27269721	0.28248823	35.39
1.5790	2.599554	-0.669	0.21120286	0.27256906	0.28231668	35.40
1.5800	2.633629	-0.668	0.21102870	0.27247566	0.28219628	35.40
1.5810	2.650166	-0.672	0.21092266	0.27241975	0.28213167	35.40
1.5820	2.652111	-0.667	0.21086824	0.27240437	0.28210181	35.40
1.5830	2.643442	-0.661	0.21086442	0.27241009	0.28210759	35.41
1.5840	2.626591	-0.659	0.21089363	0.27243519	0.28213453	35.41
1.5850	2.598410	-0.661	0.21097040	0.27244961	0.28215957	35.41
1.5860	2.547398	-0.657	0.21115720	0.27250361	0.28227037	35.41
1.5870	2.460623	-0.658	0.21148306	0.27261925	0.28247845	35.41
1.5880	2.333221	-0.654	0.21200842	0.27284759	0.28283286	35.41
1.5890	2.173920	-0.657	0.21266699	0.27315199	0.28326631	35.40
1.5900	1.999941	-0.659	0.21339655	0.27350640	0.28374887	35.40
1.5910	1.827478	-0.659	0.21416014	0.27386087	0.28426039	35.40
1.5920	1.667747	-0.658	0.21487314	0.27418453	0.28474104	35.39
1.5930	1.526155	-0.656	0.21552193	0.27448410	0.28516579	35.39
1.5940	1.402702	-0.660	0.21607643	0.27475482	0.28554147	35.39
1.5950	1.293955	-0.666	0.21655405	0.27499264	0.28585833	35.39
1.5960	1.194677	-0.667	0.21700442	0.27521604	0.28615314	35.39
1.5970	1.100492	-0.665	0.21744210	0.27542311	0.28645176	35.39
1.5980	1.007595	-0.658	0.21788073	0.27563411	0.28676766	35.39
1.5990	0.915442	-0.655	0.21832925	0.27583933	0.28707981	35.40
1.6000	0.824089	-0.655	0.21876305	0.27603006	0.28736395	35.40
1.6010	0.735941	-0.657	0.21919495	0.27623808	0.28763366	35.40
1.6020	0.655689	-0.659	0.21958017	0.27642208	0.28790337	35.40
1.6030	0.587711	-0.656	0.21992552	0.27659535	0.28815675	35.41
1.6040	0.535069	-0.652	0.22019798	0.27672833	0.28836763	35.41
1.6050	0.498590	-0.659	0.22039640	0.27681792	0.28849673	35.41
1.6060	0.476618	-0.659	0.22053552	0.27688158	0.28856123	35.41
1.6070	0.467176	-0.661	0.22059673	0.27692300	0.28859681	35.41
1.6080	0.466919	-0.652	0.22065032	0.27694803	0.28864020	35.41
1.6090	0.473156	-0.656	0.22065324	0.27696341	0.28866321	35.40
1.6100	0.484257	-0.660	0.22063959	0.27695668	0.28865844	35.40
1.6110	0.502796	-0.665	0.22057533	0.27694893	0.28862083	35.40
1.6120	0.540419	-0.664	0.22043335	0.27690071	0.28853416	35.40
1.6130	0.611916	-0.665	0.22016102	0.27680737	0.28837335	35.39
1.6140	0.725441	-0.664	0.21968925	0.27661568	0.28808051	35.39
1.6150	0.876389	-0.668	0.21903944	0.27631718	0.28763169	35.39
1.6160	1.051512	-0.667	0.21828067	0.27595019	0.28709131	35.39
1.6170	1.238422	-0.668	0.21746844	0.27555043	0.28650099	35.39
1.6180	1.427135	-0.663	0.21665716	0.27516609	0.28595382	35.39
1.6190	1.608410	-0.666	0.21584886	0.27477884	0.28544337	35.40
1.6200	1.774035	-0.667	0.21510667	0.27442330	0.28496450	35.40
1.6210	1.919031	-0.670	0.21441597	0.27410543	0.28451186	35.40
1.6220	2.042713	-0.668	0.21384096	0.27381748	0.28412169	35.40
1.6230	2.147398	-0.667	0.21335167	0.27358246	0.28378755	35.41
1.6240	2.237892	-0.664	0.21293247	0.27338123	0.28351098	35.41
1.6250	2.318544	-0.669	0.21254724	0.27319914	0.28321153	35.41
1.6260	2.392817	-0.671	0.21218055	0.27302569	0.28296685	35.41
1.6270	2.462368	-0.672	0.21183819	0.27285433	0.28274345	35.41
1.6280	2.526169	-0.663	0.21152496	0.27272332	0.28255272	35.41
1.6290	2.581358	-0.663	0.21125162	0.27260298	0.28236967	35.40
1.6300	2.623186	-0.663	0.21104634	0.27250266	0.28221649	35.40
1.6310	2.648535	-0.668	0.21089262	0.27242839	0.28211236	35.40
1.6320	2.657804	-0.668	0.21082938	0.27239174	0.28206229	35.39
1.6330	2.654142	-0.666	0.21082163	0.27238786	0.28205657	35.39
1.6340	2.640810	-0.658	0.21083820	0.27240431	0.28208166	35.39
1.6350	2.618008	-0.661	0.21089470	0.27241206	0.28209805	35.39
1.6360	2.576294	-0.656	0.21101719	0.27245164	0.28218961	35.39
1.6370	2.501249	-0.662	0.21131480	0.27254599	0.28235048	35.39
1.6380	2.382603	-0.650	0.21181089	0.27275217	0.28267694	35.39
1.6390	2.224274	-0.648	0.21245289	0.27304119	0.28309774	35.40
1.6400	2.042570	-0.650	0.21320397	0.27339089	0.28361887	35.40
1.6410	1.856890	-0.656	0.21400261	0.27376848	0.28416502	35.40
1.6420	1.682081	-0.659	0.21477014	0.27412677	0.28466213	35.40
1.6430	1.527357	-0.653	0.21547228	0.27447927	0.28512257	35.41
1.6440	1.396465	-0.655	0.21606654	0.27477413	0.28552806	35.41
1.6450	1.287575	-0.660	0.21655780	0.27501488	0.28585368	35.41
1.6460	1.195278	-0.661	0.21698093	0.27522290	0.28613096	35.41
1.6470	1.111679	-0.664	0.21738952	0.27540106	0.28638053	35.41
1.6480	1.029196	-0.660	0.21779317	0.27559179	0.28667039	35.41
1.6490	0.944023	-0.662	0.21819782	0.27577966	0.28696412	35.40
1.6500	0.855103	-0.666	0.21861321	0.27597415	0.28723764	35.40
1.6510	0.765409	-0.667	0.21902466	0.27617264	0.28752184	35.40
1.6520	0.679092	-0.664	0.21944392	0.27636433	0.28781182	35.39
1.6530	0.601473	-0.659	0.21983308	0.27655405	0.28809309	35.39
1.6540	0.537329	-0.657	0.22016686	0.27672446	0.28832614	35.39
1.6550	0.489779	-0.667	0.22039837	0.27683133	0.28847259	35.39
1.6560	0.459509	-0.673	0.22057348	0.27692294	0.28858536	35.39
1.6570	0.445204	-0.676	0.22067451	0.27695382	0.28865469	35.39
1.6580	0.442801	-0.669	0.22073877	0.27699435	0.28870767	35.39
1.6590	0.449266	-0.668	0.22074461	0.27698857	0.28869796	35.40
1.6600	0.462084	-0.672	0.22072214	0.27699339	0.28867584	35.40
1.6610	0.485086	-0.674	0.22065306	0.27698094	0.28864306	35.40
1.6620	0.530033	-0.675	0.22050029	0.27693844	0.28856790	35.40
1.6630	0.609341	-0.673	0.22017932	0.27682561	0.28838867	35.41
1.6640	0.727587	-0.669	0.21967161	0.27661937	0.28806025	35.41
1.6650	0.877590	-0.671	0.21901411	0.27632368	0.28759319	35.41
1.6660	1.046791	-0.673	0.21828556	0.27597314	0.28708750	35.41
1.6670	1.224575	-0.677	0.21750844	0.27558404	0.28653938	35.41
1.6680	1.401701	-0.670	0.21674669	0.27520943	0.28603172	35.41
1.6690	1.571474	-0.674	0.21598113	0.27483374	0.28553480	35.40
1.6700	1.729660	-0.673	0.21526617	0.27448791	0.28505325	35.40
1.6710	1.874084	-0.673	0.21459502	0.27417099	0.28461599	35.40
1.6720	2.003975	-0.673	0.21399868	0.27386475	0.28421432	35.39
1.6730	2.118587	-0.671	0.21345782	0.27362204	0.28386468	35.39
1.6740	2.219181	-0.667	0.21297729	0.27339953	0.28356314	35.39
1.6750	2.307787	-0.668	0.21253860	0.27319819	0.28326452	35.39
1.6760	2.386236	-0.667	0.21217090	0.27302289	0.28301591	35.39
1.6770	2.456017	-0.671	0.21184307	0.27285820	0.28276259	35.39
1.6780	2.516899	-0.666	0.21157062	0.27273393	0.28256327	35.39
1.6790	2.567310	-0.667	0.21131569	0.27261060	0.28239381	35.40
1.6800	2.604790	-0.667	0.21112120	0.27252674	0.28227246	35.40
1.6810	2.627249	-0.668	0.21098596	0.27246308	0.28217703	35.40
1.6820	2.635775	-0.673	0.21092761	0.27243036	0.28211540	35.40
1.6830	2.632542	-0.668	0.21091294	0.27243519	0.28211445	35.41
1.6840	2.620611	-0.665	0.21094120	0.27243805	0.28211927	35.41
1.6850	2.599669	-0.668	0.21099180	0.27245539	0.28215301	35.41
1.6860	2.562103	-0.665	0.21110559	0.27248049	0.28221273	35.41
1.6870	2.492523	-0.667	0.21137112	0.27256620	0.28237849	35.41
1.6880	2.379770	-0.658	0.21181864	0.27275795	0.28267413	35.41
1.6890	2.226276	-0.660	0.21242464	0.27303827	0.28309989	35.40
1.6900	2.048950	-0.659	0.21316099	0.27338988	0.28359395	35.40
1.6910	1.867847	-0.662	0.21391785	0.27375585	0.28412271	35.40
1.6920	1.697245	-0.661	0.21465820	0.27410263	0.28459656	35.39
1.6930	1.545553	-0.661	0.21534801	0.27442628	0.28505892	35.39
1.6940	1.416121	-0.658	0.21594232	0.27471429	0.28546071	35.39
1.6950	1.307116	-0.667	0.21645296	0.27495700	0.28579497	35.39
1.6960	1.212559	-0.667	0.21688193	0.27516109	0.28609747	35.39
1.6970	1.125269	-0.669	0.21727979	0.27534318	0.28634495	35.39
1.6980	1.037750	-0.660	0.21770591	0.27554160	0.28664738	35.39
1.6990	0.947227	-0.659	0.21814549	0.27573913	0.28693628	35.40
1.7000	0.853529	-0.662	0.21859974	0.27595681	0.28724730	35.40
1.7010	0.760946	-0.665	0.21905011	0.27616578	0.28755647	35.40
1.7020	0.674658	-0.664	0.21945286	0.27637291	0.28781939	35.40
1.7030	0.599928	-0.658	0.21981668	0.27655971	0.28808045	35.41
1.7040	0.540504	-0.657	0.22013962	0.27671289	0.28829432	35.41
1.7050	0.498161	-0.666	0.22036028	0.27681690	0.28844553	35.41
1.7060	0.472469	-0.670	0.22051585	0.27688539	0.28854573	35.41
1.7070	0.461998	-0.669	0.22058970	0.27691442	0.28857845	35.41
1.7080	0.462198	-0.657	0.22063059	0.27694237	0.28862941	35.41
1.7090	0.470123	-0.657	0.22064519	0.27694815	0.28863227	35.40
1.7100	0.483856	-0.664	0.22061700	0.27695870	0.28863233	35.40
1.7110	0.509090	-0.663	0.22053730	0.27694231	0.28859001	35.40
1.7120	0.558243	-0.664	0.22036129	0.27688056	0.28846395	35.39
1.7130	0.642414	-0.664	0.22002769	0.27675247	0.28826749	35.39
1.7140	0.764008	-0.665	0.21950918	0.27654147	0.28792554	35.39
1.7150	0.914955	-0.672	0.21885258	0.27623719	0.28748053	35.39
1.7160	1.083870	-0.673	0.21810460	0.27588469	0.28695077	35.39
1.7170	1.261196	-0.677	0.21733028	0.27549750	0.28639883	35.39
1.7180	1.438951	-0.671	0.21656191	0.27512461	0.28589600	35.39
1.7190	1.610413	-0.667	0.21580011	0.27474695	0.28539222	35.40
1.7200	1.769457	-0.665	0.21506572	0.27440608	0.28492117	35.40
1.7210	1.912994	-0.669	0.21441001	0.27408731	0.28447711	35.40
1.7220	2.039881	-0.671	0.21382827	0.27380323	0.28408611	35.40
1.7230	2.151060	-0.671	0.21331376	0.27356046	0.28375292	35.41
1.7240	2.248678	-0.668	0.21284491	0.27334082	0.28344470	35.41
1.7250	2.334824	-0.672	0.21242189	0.27314907	0.28314996	35.41
1.7260	2.411842	-0.669	0.21206981	0.27296788	0.28290045	35.41
1.7270	2.480936	-0.673	0.21173811	0.27280509	0.28266066	35.41
1.7280	2.541132	-0.667	0.21146274	0.27267700	0.28248632	35.41
1.7290	2.590399	-0.664	0.21120882	0.27255768	0.28230429	35.40
1.7300	2.625360	-0.663	0.21101516	0.27248150	0.28219438	35.40
1.7310	2.644730	-0.669	0.21090615	0.27242368	0.28210199	35.40
1.7320	2.650051	-0.669	0.21084678	0.27240443	0.28206533	35.39
1.7330	2.644329	-0.669	0.21083891	0.27240825	0.28205955	35.39
1.7340	2.630453	-0.664	0.21084189	0.27242267	0.28206909	35.39
1.7350	2.607193	-0.671	0.21088570	0.27243030	0.28210562	35.39
1.7360	2.564707	-0.667	0.21102589	0.27246797	0.28217316	35.39
1.7370	2.487345	-0.669	0.21134013	0.27256632	0.28236103	35.39
1.7380	2.365551	-0.659	0.21184301	0.27277923	0.28267699	35.39
1.7390	2.204332	-0.660	0.21251523	0.27307105	0.28310943	35.40
1.7400	2.020741	-0.659	0.21327305	0.27343702	0.28364205	35.40
1.7410	1.834545	-0.664	0.21405804	0.27381074	0.28419012	35.40
1.7420	1.660280	-0.664	0.21482849	0.27417678	0.28471315	35.40
1.7430	1.506615	-0.662	0.21551806	0.27450717	0.28516501	35.41
1.7440	1.375608	-0.659	0.21612221	0.27480668	0.28555989	35.41
1.7450	1.264200	-0.669	0.21663380	0.27504075	0.28590369	35.41
1.7460	1.167469	-0.669	0.21709394	0.27524686	0.28622252	35.41
1.7470	1.078806	-0.672	0.21750730	0.27543950	0.28648257	35.41
1.7480	0.991344	-0.661	0.21792364	0.27564472	0.28676772	35.41
1.7490	0.900822	-0.659	0.21834970	0.27584994	0.28704798	35.40
1.7500	0.806894	-0.659	0.21878457	0.27606189	0.28738040	35.40
1.7510	0.714197	-0.660	0.21923202	0.27627182	0.28769439	35.40
1.7520	0.628796	-0.662	0.21965027	0.27647603	0.28799492	35.39
1.7530	0.556526	-0.660	0.22004128	0.27664739	0.28822798	35.39
1.7540	0.501165	-0.661	0.22033501	0.27679288	0.28842252	35.39
1.7550	0.464201	-0.666	0.22053152	0.27688146	0.28854775	35.39
1.7560	0.444117	-0.668	0.22065502	0.27694225	0.28863931	35.39
1.7570	0.437794	-0.673	0.22070277	0.27697980	0.28868073	35.39
1.7580	0.439854	-0.667	0.22074169	0.27700585	0.28869510	35.39
1.7590	0.447636	-0.669	0.22073984	0.27700686	0.28867573	35.40
1.7600	0.459995	-0.670	0.22070968	0.27700889	0.28866601	35.40
1.7610	0.481625	-0.672	0.22064942	0.27698582	0.28864294	35.40
1.7620	0.525370	-0.674	0.22048306	0.27694821	0.28857648	35.40
1.7630	0.604248	-0.672	0.22017854	0.27683443	0.28838491	35.41
1.7640	0.723753	-0.670	0.21968246	0.27663791	0.28805649	35.41
1.7650	0.877419	-0.674	0.21902579	0.27632672	0.28758740	35.41
1.7660	1.052141	-0.672	0.21826702	0.27596360	0.28707403	35.41
1.7670	1.236620	-0.673	0.21745092	0.27557349	0.28651637	35.41
1.7680	1.420755	-0.671	0.21663862	0.27518237	0.28597987	35.41
1.7690	1.596251	-0.670	0.21584392	0.27480102	0.28543764	35.40
1.7700	1.755810	-0.669	0.21512210	0.27444363	0.28495699	35.40
1.7710	1.895857	-0.667	0.21447718	0.27414024	0.28452832	35.40
1.7720	2.016220	-0.671	0.21394312	0.27387720	0.28416324	35.39
1.7730	2.120619	-0.665	0.21345669	0.27364022	0.28383571	35.39
1.7740	2.214146	-0.668	0.21301794	0.27342641	0.28354472	35.39
1.7750	2.301407	-0.678	0.21258801	0.27322227	0.28326052	35.39
1.7760	2.383890	-0.678	0.21218926	0.27304125	0.28300422	35.39
1.7770	2.461023	-0.680	0.21181870	0.27286881	0.28273463	35.39
1.7780	2.528543	-0.671	0.21149772	0.27271855	0.28251606	35.39
1.7790	2.582216	-0.674	0.21121848	0.27258939	0.28232926	35.40
1.7800	2.617893	-0.673	0.21102303	0.27249879	0.28219920	35.40
1.7810	2.635345	-0.674	0.21090418	0.27244002	0.28212309	35.40
1.7820	2.637835	-0.674	0.21086329	0.27242464	0.28209513	35.40
1.7830	2.629766	-0.673	0.21087694	0.27241695	0.28209221	35.41
1.7840	2.614031	-0.667	0.21090621	0.27244294	0.28212869	35.41
1.7850	2.588282	-0.671	0.21097440	0.27246326	0.28215379	35.41
1.7860	2.540045	-0.667	0.21115333	0.27252203	0.28224909	35.41
1.7870	2.456388	-0.669	0.21148503	0.27263862	0.28245056	35.41
1.7880	2.332134	-0.662	0.21199858	0.27284849	0.28278291	35.41
1.7890	2.176952	-0.660	0.21262413	0.27314419	0.28321737	35.40
1.7900	2.007580	-0.660	0.21332455	0.27347744	0.28369600	35.40
1.7910	1.838665	-0.659	0.21405506	0.27382135	0.28417951	35.40
1.7920	1.680365	-0.656	0.21476513	0.27414304	0.28464866	35.39
1.7930	1.538572	-0.653	0.21541786	0.27444160	0.28507054	35.39
1.7940	1.414747	-0.653	0.21596742	0.27471811	0.28544813	35.39
1.7950	1.305056	-0.659	0.21645385	0.27495223	0.28578812	35.39
1.7960	1.204205	-0.661	0.21690428	0.27517277	0.28609920	35.39
1.7970	1.107273	-0.659	0.21734983	0.27537602	0.28639776	35.39
1.7980	1.011086	-0.656	0.21780705	0.27558786	0.28670794	35.39
1.7990	0.915213	-0.659	0.21826023	0.27579880	0.28702480	35.40
[truncated: 7,001 more rows]
