# Supplementary material for: Evaluation of a Cold-Mixed High-Performance Polyurethane Mixture
Source: Hindawi journal article supplement (doi:10.1155/2019/1507971), 2019-11-07
Supplement: f1 [file 1507971.f1.zip › 1507971.f1/dynamic modulus data/PUM/specimen2/temp35/zhs-2-35_Sum.csv]

Test Information
****************
Project name	zhs
Operator name	1
Target test temperature	35
Target confining stress	0
Average dynamic strain range from 75 to 125 micro-strain
Contact stress	5
Initial modulus	1000
Axial gauge length	70
Comments
Specimen information
********************
Identification	zhs-2-35
Dimensions	Point 1	Point 2	Point 3	Point 4	Point 5	Point 6	Average	Std Dev.
Diameter (mm)	49.2	49.3	49.2				49.23	0.058
Height (mm)	100.8	101.0	100.8				100.87	0.115
Cross-sectional area (mm�)	1903.7
Conditioning time
Properties/Comments
*********
Test date and time	Tue	Apr 2	2019	12:59 PM
Test results summary
	25 Hz	20 Hz	10 Hz	5 Hz	2 Hz	1 Hz	0.5 Hz	0.2 Hz	0.1 Hz
Dynamic modulus (MPa)	11635	11543	11299	11071	10760	10513	10296	10007	9787
Phase angle (Degrees)	4.45	4.58	4.56	4.56	4.60	4.56	4.53	4.49	4.33
Average temperature (�C)	35.4	35.4	35.4	35.4	35.4	35.4	35.4	35.4	35.3
Average confining pressure (kPa)	-0.7	-0.7	-0.7	-0.7	-0.7	-0.7	-0.7	-0.7	-0.8
Average micro-strain	111	103	101	100	99	99	98	98	98
Load drift (%)	0.2	-1.5	0.5	0.3	-0.1	-0.1	-0.1	0.9	0.2
Load standard error (%)	8.6	6.3	3.6	2.2	1.2	4.0	2.1	2.8	3.0
Average deformation drift (%)	-4.5	-2.0	-3.8	-3.5	-3.2	-3.0	-3.2	-3.2	0.8
Average deformation standard error (%)	8.4	6.2	3.5	2.3	1.5	3.8	2.1	2.4	2.6
Deformation uniformity (%)	30.6	30.7	30.7	30.5	30.3	30.0	29.9	29.7	29.6
Phase uniformity (Degrees)	0.5	0.7	0.7	0.8	0.8	0.8	0.7	0.5	0.3
