# Supplementary material for: Evaluation of a Cold-Mixed High-Performance Polyurethane Mixture
Source: Hindawi journal article supplement (doi:10.1155/2019/1507971), 2019-11-07
Supplement: f1 [file 1507971.f1.zip › 1507971.f1/dynamic modulus data/PUM/specimen2/temp50/zhs-2-50_0.1Hz.csv]

Test Information
****************
Project name	zhs
Operator name	2
Target test temperature	50
Target confining stress	0
Average dynamic strain range from 75 to 125 micro-strain
Contact stress	5
Initial modulus	1000
Axial gauge length	70
Comments
Specimen information
********************
Identification	zhs-2-50
Dimensions	Point 1	Point 2	Point 3	Point 4	Point 5	Point 6	Average	Std Dev.
Diameter (mm)	49.2	49.3	49.2				49.23	0.058
Height (mm)	100.8	101.0	100.8				100.87	0.115
Cross-sectional area (mm�)	1903.7
Conditioning time
Properties/Comments
Test Data	0.1Hz
*********
Test date and time	Wed	Apr 3	2019	1:28 PM
Dynamic modulus (MPa)	7772
Phase angle (Degrees)	4.48
Average temperature (�C)	50.3
Average confining pressure (kPa)	-0.7
Average micro-strain	98
Load drift (%)	0.7
Load standard error (%)	4.1
Average deformation drift (%)	-0.6
Average deformation standard error (%)	3.5
Deformation uniformity (%)	31.8
Phase uniformity (Degrees)	0.5
Conditioning Cycles
Time (sec)	Axial stress (kPa)	Axial micro-strain #1	Axial micro-strain #2	Axial micro-strain #3	Confining pressure (kPa)	Temperature (�C)	Load (N)	Displacement #1 (mm)	Displacement #2 (mm)	Displacement #3 (mm)
0.0000	213.163	1.854	-22.663	-5.364	-0.616	50.361	405.807	-0.000130	0.001586	0.000376
0.2000	218.182	1.585	-22.925	-5.447	-0.653	50.361	415.363	-0.000111	0.001605	0.000381
0.4000	230.295	2.444	-21.705	-4.823	-0.640	50.362	438.423	-0.000171	0.001519	0.000338
0.6000	249.457	4.758	-18.563	-3.865	-0.641	50.360	474.901	-0.000333	0.001299	0.000271
0.8000	288.470	9.068	-12.906	-1.444	-0.649	50.361	549.173	-0.000635	0.000903	0.000101
1.0000	308.218	11.001	-10.186	-0.291	-0.631	50.361	586.767	-0.000770	0.000713	0.000020
1.2000	323.216	13.261	-7.571	0.636	-0.632	50.359	615.320	-0.000928	0.000530	-0.000045
1.4000	351.379	16.757	-2.695	2.819	-0.644	50.361	668.936	-0.001173	0.000189	-0.000197
1.6000	364.770	18.735	-0.387	3.699	-0.624	50.360	694.427	-0.001311	0.000027	-0.000259
1.8000	516.932	36.541	22.180	13.048	-0.648	50.359	984.106	-0.002558	-0.001553	-0.000913
2.0000	464.603	31.700	16.012	10.755	-0.643	50.360	884.485	-0.002219	-0.001121	-0.000753
2.2000	492.105	36.192	20.499	12.409	-0.624	50.358	936.842	-0.002533	-0.001435	-0.000869
2.4000	519.652	39.853	26.102	14.802	-0.631	50.359	989.285	-0.002790	-0.001827	-0.001036
2.6000	593.472	49.452	36.856	19.287	-0.623	50.359	1129.818	-0.003462	-0.002580	-0.001350
2.8000	606.351	52.272	40.219	21.167	-0.634	50.358	1154.337	-0.003659	-0.002815	-0.001482
3.0000	641.953	57.367	46.582	23.706	-0.655	50.359	1222.115	-0.004016	-0.003261	-0.001659
3.2000	679.269	62.881	52.863	26.556	-0.623	50.358	1293.154	-0.004402	-0.003700	-0.001859
3.4000	694.643	65.872	55.949	27.737	-0.657	50.358	1322.422	-0.004611	-0.003916	-0.001942
3.6000	739.383	71.442	63.424	30.975	-0.633	50.358	1407.595	-0.005001	-0.004440	-0.002168
3.8000	760.468	74.878	66.910	32.531	-0.641	50.357	1447.735	-0.005241	-0.004684	-0.002277
4.0000	766.329	76.957	68.663	33.267	-0.640	50.357	1458.893	-0.005387	-0.004806	-0.002329
4.2000	787.534	79.270	72.011	34.990	-0.632	50.357	1499.262	-0.005549	-0.005041	-0.002449
4.4000	812.601	83.130	76.600	37.117	-0.642	50.358	1546.984	-0.005819	-0.005362	-0.002598
4.6000	847.632	88.223	83.157	39.868	-0.632	50.357	1613.674	-0.006176	-0.005821	-0.002791
4.8000	817.906	84.575	78.624	37.674	-0.652	50.356	1557.083	-0.005920	-0.005504	-0.002637
5.0000	802.502	83.339	76.530	36.687	-0.632	50.357	1527.758	-0.005834	-0.005357	-0.002568
5.2000	981.280	104.616	101.876	48.485	-0.626	50.356	1868.105	-0.007323	-0.007131	-0.003394
5.4000	831.236	86.553	80.711	38.618	-0.667	50.356	1582.460	-0.006059	-0.005650	-0.002703
5.6000	770.041	80.069	72.900	35.018	-0.629	50.356	1465.960	-0.005605	-0.005103	-0.002451
5.8000	750.955	77.477	69.746	33.712	-0.661	50.355	1429.625	-0.005423	-0.004882	-0.002360
6.0000	728.337	74.950	66.592	32.100	-0.634	50.356	1386.566	-0.005247	-0.004661	-0.002247
6.2000	696.657	70.671	61.769	30.031	-0.635	50.354	1326.256	-0.004947	-0.004324	-0.002102
6.4000	666.480	66.725	57.114	27.958	-0.661	50.355	1268.806	-0.004671	-0.003998	-0.001957
6.6000	627.000	61.420	51.362	25.042	-0.644	50.354	1193.647	-0.004299	-0.003595	-0.001753
6.8000	604.082	58.082	47.249	23.317	-0.640	50.354	1150.017	-0.004066	-0.003307	-0.001632
7.0000	571.455	53.608	41.384	20.917	-0.644	50.354	1087.904	-0.003753	-0.002897	-0.001464
7.2000	521.907	46.997	33.853	17.717	-0.610	50.354	993.576	-0.003290	-0.002370	-0.001240
7.4000	490.046	41.677	27.737	15.301	-0.648	50.353	932.922	-0.002917	-0.001942	-0.001071
7.6000	452.731	36.922	21.487	12.381	-0.644	50.354	861.883	-0.002585	-0.001504	-0.000867
7.8000	429.317	33.215	17.524	10.298	-0.628	50.352	817.308	-0.002325	-0.001227	-0.000721
8.0000	381.015	26.607	8.995	7.349	-0.658	50.354	725.355	-0.001862	-0.000630	-0.000514
8.2000	353.032	22.368	3.936	5.046	-0.629	50.354	672.083	-0.001566	-0.000276	-0.000353
8.4000	295.188	13.122	-7.820	0.163	-0.652	50.351	561.962	-0.000919	0.000547	-0.000011
8.6000	170.437	-6.118	-33.919	-9.869	-0.632	50.353	324.469	0.000428	0.002374	0.000691
8.8000	276.553	7.256	-12.697	-2.488	-0.625	50.351	526.485	-0.000508	0.000889	0.000174
9.0000	244.678	2.822	-18.826	-4.838	-0.642	50.352	465.803	-0.000198	0.001318	0.000339
9.2000	332.293	11.339	-6.875	-0.014	-0.609	50.351	632.601	-0.000794	0.000481	0.000001
9.4000	168.829	-6.102	-32.461	-9.409	-0.647	50.351	321.407	0.000427	0.002272	0.000659
9.6000	221.008	-1.389	-24.136	-6.655	-0.637	50.352	420.742	0.000097	0.001690	0.000466
9.8000	237.584	0.280	-21.996	-5.531	-0.639	50.350	452.299	-0.000020	0.001540	0.000387
10.0000	217.987	-2.187	-25.290	-6.878	-0.657	50.352	414.991	0.000153	0.001770	0.000481
10.2000	244.437	-0.811	-22.953	-6.169	-0.645	50.351	465.345	0.000057	0.001607	0.000432
10.4000	240.064	-0.169	-22.607	-5.601	-0.655	50.350	457.020	0.000012	0.001583	0.000392
10.6000	267.972	2.585	-18.507	-4.365	-0.636	50.351	510.149	-0.000181	0.001296	0.000306
10.8000	266.679	2.192	-18.437	-4.587	-0.640	50.349	507.689	-0.000153	0.001291	0.000321
11.0000	295.398	6.455	-13.239	-2.389	-0.652	50.350	562.363	-0.000452	0.000927	0.000167
11.2000	294.872	6.933	-11.810	-1.511	-0.640	50.349	561.361	-0.000485	0.000827	0.000106
11.4000	409.704	20.769	4.992	5.086	-0.649	50.348	779.972	-0.001454	-0.000349	-0.000356
11.6000	367.805	17.094	0.777	3.154	-0.649	50.349	700.207	-0.001197	-0.000054	-0.000221
11.8000	446.223	26.200	12.939	8.409	-0.641	50.349	849.495	-0.001834	-0.000906	-0.000589
12.0000	443.398	26.944	13.539	8.629	-0.643	50.348	844.116	-0.001886	-0.000948	-0.000604
12.2000	399.155	23.110	8.409	6.167	-0.649	50.349	759.888	-0.001618	-0.000589	-0.000432
12.4000	627.436	50.265	41.914	20.595	-0.652	50.347	1194.477	-0.003519	-0.002934	-0.001442
12.6000	603.225	48.975	39.729	19.622	-0.656	50.348	1148.386	-0.003428	-0.002781	-0.001374
12.8000	633.793	53.677	46.234	22.384	-0.619	50.348	1206.579	-0.003757	-0.003236	-0.001567
13.0000	626.670	53.254	45.374	22.249	-0.653	50.347	1193.018	-0.003728	-0.003176	-0.001557
13.2000	636.183	55.892	47.764	23.178	-0.651	50.348	1211.128	-0.003912	-0.003343	-0.001622
13.4000	732.139	67.748	62.423	29.322	-0.647	50.347	1393.805	-0.004742	-0.004370	-0.002053
13.6000	662.918	61.027	53.837	25.737	-0.661	50.348	1262.026	-0.004272	-0.003769	-0.001802
13.8000	730.125	69.910	64.370	29.960	-0.627	50.347	1389.971	-0.004894	-0.004506	-0.002097
14.0000	774.654	75.456	71.555	32.866	-0.656	50.347	1474.743	-0.005282	-0.005009	-0.002301
14.2000	776.127	76.003	71.651	33.335	-0.644	50.348	1477.547	-0.005320	-0.005016	-0.002333
14.4000	786.933	78.218	74.456	34.337	-0.648	50.346	1498.117	-0.005475	-0.005212	-0.002404
14.6000	876.983	88.981	87.009	40.089	-0.669	50.347	1669.550	-0.006229	-0.006091	-0.002806
14.8000	820.716	83.354	79.822	36.742	-0.633	50.347	1562.433	-0.005835	-0.005588	-0.002572
15.0000	798.099	80.773	77.306	35.587	-0.657	50.346	1519.375	-0.005654	-0.005411	-0.002491
15.2000	791.291	80.224	76.682	35.296	-0.633	50.347	1506.414	-0.005616	-0.005368	-0.002471
15.4000	786.557	80.057	75.862	35.073	-0.639	50.346	1497.402	-0.005604	-0.005310	-0.002455
15.6000	755.989	76.705	72.039	33.406	-0.652	50.347	1439.209	-0.005369	-0.005043	-0.002338
15.8000	741.998	74.599	69.984	32.185	-0.625	50.346	1412.573	-0.005222	-0.004899	-0.002253
16.0000	687.114	68.564	62.616	28.930	-0.667	50.346	1308.088	-0.004799	-0.004383	-0.002025
16.2000	677.270	66.543	60.230	27.612	-0.644	50.347	1289.349	-0.004658	-0.004216	-0.001933
16.4000	665.037	64.454	58.130	26.668	-0.637	50.346	1266.060	-0.004512	-0.004069	-0.001867
16.6000	643.772	61.435	54.240	25.055	-0.651	50.346	1225.576	-0.004300	-0.003797	-0.001754
16.8000	588.543	54.560	45.706	21.304	-0.641	50.346	1120.434	-0.003819	-0.003199	-0.001491
17.0000	565.053	50.714	41.497	19.247	-0.637	50.345	1075.716	-0.003550	-0.002905	-0.001347
17.2000	530.623	45.605	35.853	17.077	-0.643	50.346	1010.170	-0.003192	-0.002510	-0.001195
17.4000	468.586	38.211	26.099	12.840	-0.625	50.345	892.067	-0.002675	-0.001827	-0.000899
17.6000	391.761	28.318	14.234	7.797	-0.656	50.345	745.811	-0.001982	-0.000996	-0.000546
17.8000	451.844	33.273	20.721	10.590	-0.642	50.346	860.195	-0.002329	-0.001450	-0.000741
18.0000	393.654	26.089	11.147	6.488	-0.630	50.345	749.416	-0.001826	-0.000780	-0.000454
18.2000	352.897	20.601	4.768	3.963	-0.656	50.346	671.825	-0.001442	-0.000334	-0.000277
18.4000	323.532	15.705	-1.458	1.277	-0.620	50.344	615.921	-0.001099	0.000102	-0.000089
18.6000	284.307	9.939	-9.043	-1.597	-0.660	50.345	541.248	-0.000696	0.000633	0.000112
18.8000	233.827	3.734	-17.285	-4.254	-0.639	50.345	445.147	-0.000261	0.001210	0.000298
19.0000	255.528	5.011	-15.257	-3.615	-0.631	50.344	486.460	-0.000351	0.001068	0.000253
19.2000	239.072	2.245	-18.993	-4.822	-0.645	50.345	455.132	-0.000157	0.001330	0.000338
19.4000	225.471	0.588	-21.261	-5.920	-0.623	50.344	429.239	-0.000041	0.001488	0.000414
19.6000	211.149	-2.020	-24.274	-6.807	-0.666	50.343	401.974	0.000141	0.001699	0.000476
19.8000	227.380	-0.699	-22.924	-6.390	-0.640	50.344	432.873	0.000049	0.001605	0.000447
20.0000	221.399	-1.301	-24.247	-6.474	-0.639	50.342	421.486	0.000091	0.001697	0.000453
20.2000	229.258	-0.811	-22.787	-6.196	-0.657	50.343	436.449	0.000057	0.001595	0.000434
20.4000	234.578	-0.769	-22.468	-5.616	-0.628	50.342	446.577	0.000054	0.001573	0.000393
20.6000	251.981	1.714	-19.384	-4.977	-0.650	50.341	479.708	-0.000120	0.001357	0.000348
20.8000	265.312	3.678	-16.826	-3.739	-0.645	50.343	505.085	-0.000257	0.001178	0.000262
21.0000	297.052	6.948	-12.020	-1.694	-0.629	50.341	565.510	-0.000486	0.000841	0.000119
21.2000	327.199	10.931	-7.404	0.261	-0.661	50.341	622.902	-0.000765	0.000518	-0.000018
21.4000	373.020	16.936	0.100	2.737	-0.637	50.342	710.135	-0.001186	-0.000007	-0.000192
21.6000	371.051	17.444	0.972	3.392	-0.632	50.341	706.387	-0.001221	-0.000068	-0.000237
21.8000	313.478	11.731	-6.250	0.651	-0.661	50.342	596.781	-0.000821	0.000437	-0.000046
22.0000	468.646	30.128	17.038	9.853	-0.643	50.340	892.181	-0.002109	-0.001193	-0.000690
22.2000	470.434	30.719	17.943	10.257	-0.651	50.340	895.586	-0.002150	-0.001256	-0.000718
22.4000	546.703	40.499	30.210	15.427	-0.647	50.340	1040.783	-0.002835	-0.002115	-0.001080
22.6000	574.175	44.735	34.813	17.551	-0.643	50.339	1093.082	-0.003131	-0.002437	-0.001229
22.8000	611.746	50.544	41.621	20.456	-0.680	50.340	1164.608	-0.003538	-0.002913	-0.001432
23.0000	649.919	56.005	48.487	23.345	-0.648	50.340	1237.278	-0.003920	-0.003394	-0.001634
23.2000	669.455	59.121	51.988	24.680	-0.655	50.338	1274.471	-0.004138	-0.003639	-0.001728
23.4000	696.822	63.540	57.032	27.236	-0.658	50.339	1326.571	-0.004448	-0.003992	-0.001907
23.6000	738.842	68.915	63.912	30.252	-0.630	50.339	1406.565	-0.004824	-0.004474	-0.002118
23.8000	758.499	72.113	67.284	31.753	-0.643	50.338	1443.987	-0.005048	-0.004710	-0.002223
24.0000	740.510	71.316	66.217	31.113	-0.675	50.340	1409.740	-0.004992	-0.004635	-0.002178
24.2000	792.283	78.444	74.485	34.836	-0.644	50.338	1508.303	-0.005491	-0.005214	-0.002439
24.4000	803.674	79.803	76.266	35.727	-0.647	50.338	1529.989	-0.005586	-0.005339	-0.002501
24.6000	792.313	79.818	75.528	35.100	-0.633	50.339	1508.360	-0.005587	-0.005287	-0.002457
24.8000	805.012	81.124	77.805	35.698	-0.646	50.337	1532.536	-0.005679	-0.005446	-0.002499
25.0000	769.094	77.533	73.082	33.879	-0.657	50.338	1464.157	-0.005427	-0.005116	-0.002372
25.2000	764.600	77.448	73.026	34.100	-0.641	50.337	1455.603	-0.005421	-0.005112	-0.002387
25.4000	778.261	79.185	75.027	34.684	-0.655	50.338	1481.609	-0.005543	-0.005252	-0.002428
25.6000	768.778	77.575	73.291	33.892	-0.656	50.339	1463.556	-0.005430	-0.005130	-0.002372
25.8000	745.334	75.006	70.191	32.659	-0.661	50.337	1418.924	-0.005250	-0.004913	-0.002286
26.0000	727.465	72.968	67.869	30.794	-0.654	50.337	1384.907	-0.005108	-0.004751	-0.002156
26.2000	695.259	68.142	62.533	28.987	-0.651	50.339	1323.595	-0.004770	-0.004377	-0.002029
26.4000	659.492	63.891	56.933	26.197	-0.642	50.337	1255.503	-0.004472	-0.003985	-0.001834
26.6000	636.168	60.693	53.252	24.665	-0.663	50.337	1211.100	-0.004248	-0.003728	-0.001727
26.8000	599.889	55.795	47.692	22.344	-0.644	50.338	1142.035	-0.003906	-0.003338	-0.001564
27.0000	570.043	51.514	41.955	19.719	-0.664	50.337	1085.215	-0.003606	-0.002937	-0.001380
27.2000	536.845	46.897	36.493	17.647	-0.675	50.338	1022.015	-0.003283	-0.002554	-0.001235
27.4000	479.752	39.684	27.877	13.911	-0.640	50.337	913.324	-0.002778	-0.001951	-0.000974
27.6000	443.353	34.184	21.181	11.131	-0.673	50.337	844.030	-0.002393	-0.001483	-0.000779
27.8000	415.145	29.611	15.914	9.228	-0.667	50.338	790.329	-0.002073	-0.001114	-0.000646
28.0000	382.533	25.049	10.063	6.223	-0.661	50.337	728.245	-0.001753	-0.000704	-0.000436
28.2000	347.622	19.888	4.046	3.810	-0.669	50.339	661.783	-0.001392	-0.000283	-0.000267
28.4000	324.644	16.390	-1.192	2.139	-0.630	50.337	618.038	-0.001147	0.000083	-0.000150
28.6000	300.809	12.572	-5.723	-0.139	-0.678	50.337	572.662	-0.000880	0.000401	0.000010
28.8000	273.803	8.674	-10.825	-1.165	-0.655	50.338	521.250	-0.000607	0.000758	0.000082
29.0000	253.454	5.221	-15.412	-2.946	-0.659	50.337	482.512	-0.000365	0.001079	0.000206
29.2000	227.906	1.727	-20.567	-5.213	-0.673	50.338	433.874	-0.000121	0.001440	0.000365
29.4000	223.998	0.324	-21.734	-5.490	-0.640	50.338	426.435	-0.000023	0.001521	0.000384
29.6000	222.165	-0.756	-23.216	-5.946	-0.662	50.337	422.945	0.000053	0.001625	0.000416
29.8000	181.363	-5.724	-30.918	-9.006	-0.638	50.338	345.268	0.000401	0.002164	0.000630
30.0000	172.496	-6.242	-31.824	-8.741	-0.653	50.337	328.388	0.000437	0.002228	0.000612
30.2000	219.385	-2.075	-24.830	-6.627	-0.654	50.337	417.652	0.000145	0.001738	0.000464
30.4000	235.660	-0.099	-22.315	-5.865	-0.649	50.338	448.637	0.000007	0.001562	0.000411
30.6000	252.522	1.980	-19.425	-4.780	-0.648	50.337	480.738	-0.000139	0.001360	0.000335
30.8000	267.926	3.552	-16.910	-3.919	-0.656	50.338	510.063	-0.000249	0.001184	0.000274
31.0000	300.764	7.717	-11.657	-1.319	-0.643	50.337	572.577	-0.000540	0.000816	0.000092
31.2000	325.380	11.156	-7.000	0.166	-0.671	50.336	619.440	-0.000781	0.000490	-0.000012
31.4000	352.807	14.568	-2.597	1.652	-0.661	50.337	671.654	-0.001020	0.000182	-0.000116
31.6000	391.385	19.789	3.798	4.421	-0.635	50.337	745.096	-0.001385	-0.000266	-0.000309
31.8000	421.321	24.151	9.020	6.712	-0.651	50.337	802.088	-0.001691	-0.000631	-0.000470
32.0000	465.295	29.636	16.080	9.854	-0.665	50.337	885.801	-0.002075	-0.001126	-0.000690
32.2000	525.138	37.806	26.033	14.411	-0.641	50.337	999.727	-0.002646	-0.001822	-0.001009
32.4000	546.959	42.422	31.616	16.204	-0.659	50.337	1041.269	-0.002970	-0.002213	-0.001134
32.6000	585.882	46.675	36.659	18.384	-0.679	50.338	1115.370	-0.003267	-0.002566	-0.001287
32.8000	614.031	50.966	41.552	20.583	-0.616	50.337	1168.957	-0.003568	-0.002909	-0.001441
33.0000	647.409	56.285	47.749	22.844	-0.665	50.337	1232.500	-0.003940	-0.003342	-0.001599
33.2000	685.055	61.322	53.892	25.805	-0.649	50.338	1304.169	-0.004293	-0.003772	-0.001806
33.4000	710.137	65.129	58.728	27.791	-0.641	50.337	1351.919	-0.004559	-0.004111	-0.001945
33.6000	721.829	67.482	61.477	28.917	-0.655	50.338	1374.178	-0.004724	-0.004303	-0.002024
33.8000	745.935	71.581	65.913	30.866	-0.640	50.338	1420.069	-0.005011	-0.004614	-0.002161
34.0000	765.382	74.458	69.455	32.574	-0.639	50.337	1457.090	-0.005212	-0.004862	-0.002280
34.2000	789.307	78.204	73.749	34.516	-0.652	50.339	1502.638	-0.005474	-0.005162	-0.002416
34.4000	798.489	79.536	75.572	35.255	-0.644	50.338	1520.119	-0.005568	-0.005290	-0.002468
34.6000	799.812	80.267	76.446	35.450	-0.663	50.338	1522.636	-0.005619	-0.005351	-0.002482
34.8000	802.517	81.250	77.170	35.673	-0.646	50.339	1527.786	-0.005687	-0.005402	-0.002497
35.0000	794.191	80.506	76.586	35.504	-0.648	50.338	1511.936	-0.005635	-0.005361	-0.002485
35.2000	787.639	79.622	75.947	34.962	-0.653	50.339	1499.462	-0.005574	-0.005316	-0.002447
35.4000	780.560	79.341	74.930	34.727	-0.627	50.339	1485.987	-0.005554	-0.005245	-0.002431
35.6000	753.885	76.411	71.222	33.075	-0.648	50.339	1435.204	-0.005349	-0.004986	-0.002315
35.8000	745.695	75.327	69.971	32.714	-0.643	50.340	1419.611	-0.005273	-0.004898	-0.002290
36.0000	727.931	72.858	67.259	30.739	-0.643	50.340	1385.794	-0.005100	-0.004708	-0.002152
36.2000	701.000	69.771	63.285	29.377	-0.651	50.340	1334.524	-0.004884	-0.004430	-0.002056
36.4000	671.590	65.422	58.727	27.224	-0.637	50.340	1278.534	-0.004580	-0.004111	-0.001906
36.6000	640.195	61.182	53.461	24.861	-0.639	50.340	1218.767	-0.004283	-0.003742	-0.001740
36.8000	599.318	56.241	47.207	21.984	-0.664	50.341	1140.947	-0.003937	-0.003304	-0.001539
37.0000	557.930	50.407	40.690	19.009	-0.644	50.341	1062.155	-0.003528	-0.002848	-0.001331
37.2000	527.121	45.942	34.936	16.580	-0.647	50.340	1003.504	-0.003216	-0.002446	-0.001161
37.4000	491.624	40.821	28.990	14.326	-0.649	50.341	935.926	-0.002857	-0.002029	-0.001003
37.6000	456.533	35.741	23.152	11.795	-0.633	50.341	869.122	-0.002502	-0.001621	-0.000826
37.8000	417.970	30.409	16.234	9.074	-0.624	50.341	795.708	-0.002129	-0.001136	-0.000635
38.0000	375.830	24.417	8.966	6.071	-0.655	50.342	715.485	-0.001709	-0.000628	-0.000425
38.2000	352.071	20.645	4.520	3.713	-0.632	50.341	670.252	-0.001445	-0.000316	-0.000260
38.4000	279.498	9.712	-10.046	-1.861	-0.644	50.341	532.093	-0.000680	0.000703	0.000130
38.6000	297.502	11.212	-8.420	-0.541	-0.654	50.343	566.368	-0.000785	0.000589	0.000038
38.8000	298.825	11.157	-7.906	-0.415	-0.633	50.342	568.886	-0.000781	0.000553	0.000029
39.0000	231.453	2.767	-19.439	-4.934	-0.654	50.342	440.626	-0.000194	0.001361	0.000345
39.2000	251.065	4.015	-17.187	-4.241	-0.650	50.343	477.962	-0.000281	0.001203	0.000297
39.4000	233.181	1.671	-20.567	-5.543	-0.631	50.343	443.916	-0.000117	0.001440	0.000388
39.6000	220.873	-0.829	-23.773	-6.821	-0.668	50.342	420.485	0.000058	0.001664	0.000477
39.8000	194.783	-4.490	-28.694	-8.449	-0.647	50.343	370.817	0.000314	0.002009	0.000591
40.0000	216.619	-1.821	-25.471	-7.224	-0.616	50.344	412.388	0.000127	0.001783	0.000506
40.2000	235.330	-0.238	-22.565	-5.932	-0.653	50.343	448.008	0.000017	0.001580	0.000415
40.4000	279.724	4.324	-16.287	-4.294	-0.645	50.344	532.522	-0.000303	0.001140	0.000301
40.6000	253.710	1.924	-19.898	-5.448	-0.649	50.343	482.998	-0.000135	0.001393	0.000381
40.8000	272.330	3.692	-16.343	-4.226	-0.659	50.344	518.446	-0.000258	0.001144	0.000296
41.0000	304.851	8.043	-11.614	-1.860	-0.639	50.344	580.359	-0.000563	0.000813	0.000130
41.2000	321.473	10.624	-8.639	-1.276	-0.647	50.344	612.001	-0.000744	0.000605	0.000089
41.4000	349.967	14.386	-3.347	0.804	-0.652	50.345	666.246	-0.001007	0.000234	-0.000056
41.6000	389.491	19.143	2.531	3.655	-0.626	50.344	741.491	-0.001340	-0.000177	-0.000256
41.8000	441.354	25.710	10.742	7.004	-0.657	50.345	840.225	-0.001800	-0.000752	-0.000490
42.0000	471.426	30.410	16.484	9.353	-0.640	50.346	897.474	-0.002129	-0.001154	-0.000655
42.2000	472.929	30.776	17.497	10.007	-0.644	50.344	900.335	-0.002154	-0.001225	-0.000700
42.4000	534.981	39.711	27.655	14.062	-0.655	50.345	1018.467	-0.002780	-0.001936	-0.000984
42.6000	589.715	47.348	36.994	18.120	-0.646	50.346	1122.665	-0.003314	-0.002590	-0.001268
42.8000	599.618	49.003	39.549	19.440	-0.644	50.345	1141.520	-0.003430	-0.002768	-0.001361
43.0000	638.482	54.799	45.873	21.499	-0.648	50.346	1215.506	-0.003836	-0.003211	-0.001505
43.2000	670.583	59.514	51.584	24.067	-0.629	50.346	1276.617	-0.004166	-0.003611	-0.001685
43.4000	705.764	64.046	56.908	26.278	-0.647	50.345	1343.594	-0.004483	-0.003984	-0.001839
43.6000	727.165	67.735	61.337	28.598	-0.643	50.346	1384.335	-0.004741	-0.004294	-0.002002
43.8000	766.614	74.220	68.732	31.837	-0.625	50.346	1459.436	-0.005195	-0.004811	-0.002229
44.0000	772.851	75.202	70.511	32.686	-0.649	50.345	1471.310	-0.005264	-0.004936	-0.002288
44.2000	800.608	79.117	74.609	34.809	-0.639	50.346	1524.153	-0.005538	-0.005223	-0.002437
44.4000	795.394	79.242	74.791	34.629	-0.635	50.346	1514.225	-0.005547	-0.005235	-0.002424
44.6000	805.853	81.137	77.251	35.713	-0.652	50.346	1534.138	-0.005680	-0.005408	-0.002500
44.8000	804.922	80.956	76.945	35.575	-0.643	50.347	1532.364	-0.005667	-0.005386	-0.002490
45.0000	801.435	81.503	77.433	35.839	-0.633	50.346	1525.726	-0.005705	-0.005420	-0.002509
45.2000	797.513	81.110	76.696	35.158	-0.639	50.347	1518.259	-0.005678	-0.005369	-0.002461
45.4000	781.117	79.227	74.304	34.419	-0.636	50.346	1487.045	-0.005546	-0.005201	-0.002409
45.6000	807.236	82.458	78.263	35.753	-0.655	50.346	1536.770	-0.005772	-0.005478	-0.002503
45.8000	748.535	75.425	70.457	32.284	-0.643	50.347	1425.018	-0.005280	-0.004932	-0.002260
46.0000	722.160	72.197	66.328	30.572	-0.627	50.346	1374.807	-0.005054	-0.004643	-0.002140
46.2000	703.871	69.519	63.299	29.002	-0.641	50.346	1339.989	-0.004866	-0.004431	-0.002030
46.4000	664.646	64.582	57.601	26.401	-0.661	50.347	1265.316	-0.004521	-0.004032	-0.001848
46.6000	622.161	59.205	51.056	23.191	-0.619	50.347	1184.435	-0.004144	-0.003574	-0.001623
46.8000	605.359	56.479	47.721	22.496	-0.637	50.346	1152.449	-0.003954	-0.003340	-0.001575
47.0000	558.411	50.531	40.287	19.093	-0.625	50.347	1063.070	-0.003537	-0.002820	-0.001337
47.2000	522.493	45.142	34.337	16.550	-0.638	50.346	994.692	-0.003160	-0.002404	-0.001158
47.4000	474.823	38.786	26.239	13.259	-0.647	50.347	903.940	-0.002715	-0.001837	-0.000928
47.6000	431.405	32.740	19.512	9.966	-0.645	50.347	821.285	-0.002292	-0.001366	-0.000698
47.8000	435.538	32.233	18.580	10.050	-0.619	50.346	829.153	-0.002256	-0.001301	-0.000704
48.0000	388.214	25.514	10.495	6.281	-0.652	50.347	739.059	-0.001786	-0.000735	-0.000440
48.2000	338.214	18.959	2.015	2.847	-0.627	50.347	643.873	-0.001327	-0.000141	-0.000199
48.4000	309.660	14.148	-3.458	0.570	-0.638	50.346	589.514	-0.000990	0.000242	-0.000040
48.6000	294.677	11.563	-7.279	-0.679	-0.649	50.346	560.989	-0.000809	0.000510	0.000048
48.8000	272.435	8.620	-11.560	-2.766	-0.630	50.347	518.646	-0.000603	0.000809	0.000194
49.0000	254.566	5.333	-15.188	-3.865	-0.638	50.346	484.629	-0.000373	0.001063	0.000271
49.2000	221.233	0.420	-22.443	-5.878	-0.655	50.346	421.171	-0.000029	0.001571	0.000411
49.4000	221.368	-0.153	-22.787	-5.960	-0.643	50.347	421.429	0.000011	0.001595	0.000417
49.6000	187.720	-4.027	-28.541	-8.463	-0.637	50.346	357.370	0.000282	0.001998	0.000592
49.8000	208.249	-2.876	-26.568	-7.378	-0.648	50.346	396.452	0.000201	0.001860	0.000516
50.0000	200.885	-3.830	-28.248	-7.824	-0.671	50.358	382.433	0.000268	0.001977	0.000548
50.2000	241.296	-0.155	-22.510	-5.835	-0.647	50.357	459.366	0.000011	0.001576	0.000408
50.4000	252.117	1.488	-20.733	-5.656	-0.659	50.357	479.965	-0.000104	0.001451	0.000396
50.6000	266.394	3.271	-18.145	-4.475	-0.643	50.357	507.145	-0.000229	0.001270	0.000313
50.8000	296.090	6.315	-13.684	-2.654	-0.649	50.356	563.679	-0.000442	0.000958	0.000186
51.0000	329.257	10.989	-8.113	-0.403	-0.659	50.356	626.822	-0.000769	0.000568	0.000028
51.2000	365.416	15.928	-1.775	2.042	-0.644	50.357	695.658	-0.001115	0.000124	-0.000143
51.4000	414.949	21.904	6.350	5.391	-0.643	50.355	789.957	-0.001533	-0.000444	-0.000377
51.6000	462.199	28.683	14.509	8.770	-0.667	50.356	879.908	-0.002008	-0.001016	-0.000614
51.8000	489.054	32.753	19.568	10.743	-0.646	50.356	931.034	-0.002293	-0.001370	-0.000752
52.0000	531.344	38.590	26.308	13.897	-0.645	50.355	1011.543	-0.002701	-0.001842	-0.000973
52.2000	588.903	47.066	36.368	17.787	-0.654	50.356	1121.120	-0.003295	-0.002546	-0.001245
52.4000	634.529	53.493	44.371	21.568	-0.632	50.355	1207.981	-0.003745	-0.003106	-0.001510
52.6000	654.036	56.607	48.445	23.078	-0.657	50.354	1245.117	-0.003962	-0.003391	-0.001615
52.8000	714.977	65.383	58.562	27.169	-0.637	50.354	1361.132	-0.004577	-0.004099	-0.001902
53.0000	774.925	73.981	68.690	31.740	-0.650	50.353	1475.258	-0.005179	-0.004808	-0.002222
53.2000	825.991	80.591	77.099	35.742	-0.662	50.355	1572.475	-0.005641	-0.005397	-0.002502
53.4000	869.048	86.990	84.032	38.537	-0.659	50.353	1654.444	-0.006089	-0.005882	-0.002698
53.6000	880.680	89.724	87.800	40.021	-0.669	50.353	1676.588	-0.006281	-0.006146	-0.002801
53.8000	920.821	95.886	94.467	43.650	-0.651	50.352	1753.006	-0.006712	-0.006613	-0.003056
54.0000	942.732	99.732	98.429	44.956	-0.635	50.352	1794.720	-0.006981	-0.006890	-0.003147
54.2000	968.386	103.660	103.238	47.067	-0.645	50.352	1843.557	-0.007256	-0.007227	-0.003295
54.4000	960.541	103.633	103.141	47.302	-0.632	50.351	1828.623	-0.007254	-0.007220	-0.003311
54.6000	986.720	107.630	107.322	48.512	-0.636	50.351	1878.462	-0.007534	-0.007513	-0.003396
54.8000	980.018	107.420	107.255	49.014	-0.644	50.351	1865.702	-0.007519	-0.007508	-0.003431
55.0000	981.370	107.350	107.823	49.097	-0.620	50.351	1868.277	-0.007514	-0.007548	-0.003437
55.2000	980.513	108.051	107.838	49.249	-0.629	50.350	1866.646	-0.007564	-0.007549	-0.003447
55.4000	960.856	106.143	105.862	48.095	-0.650	50.350	1829.224	-0.007430	-0.007410	-0.003367
55.6000	942.537	103.619	103.377	46.984	-0.636	50.350	1794.348	-0.007253	-0.007236	-0.003289
55.8000	905.657	99.326	98.154	44.274	-0.625	50.349	1724.138	-0.006953	-0.006871	-0.003099
56.0000	891.094	97.500	95.914	43.136	-0.640	50.348	1696.415	-0.006825	-0.006714	-0.003020
56.2000	841.335	90.833	88.297	39.687	-0.635	50.349	1601.686	-0.006358	-0.006181	-0.002778
56.4000	808.604	86.639	83.296	37.049	-0.641	50.347	1539.373	-0.006065	-0.005831	-0.002593
56.6000	760.783	80.281	76.293	34.003	-0.637	50.348	1448.336	-0.005620	-0.005341	-0.002380
56.8000	713.714	74.796	68.830	30.614	-0.608	50.346	1358.728	-0.005236	-0.004818	-0.002143
57.0000	678.052	68.986	62.673	27.875	-0.655	50.346	1290.836	-0.004829	-0.004387	-0.001951
57.2000	632.260	62.866	55.265	25.111	-0.625	50.346	1203.661	-0.004401	-0.003869	-0.001758
57.4000	560.575	53.424	43.788	19.887	-0.640	50.345	1067.190	-0.003740	-0.003065	-0.001392
57.6000	528.895	48.205	38.035	17.649	-0.648	50.345	1006.880	-0.003374	-0.002662	-0.001235
57.8000	509.929	44.679	33.047	15.799	-0.631	50.344	970.774	-0.003128	-0.002313	-0.001106
58.0000	430.895	34.549	20.456	10.033	-0.648	50.343	820.313	-0.002418	-0.001432	-0.000702
58.2000	408.397	31.113	16.385	8.282	-0.642	50.344	777.483	-0.002178	-0.001147	-0.000580
58.4000	366.828	24.125	7.520	4.740	-0.632	50.342	698.347	-0.001689	-0.000526	-0.000332
58.6000	347.066	20.209	3.144	3.392	-0.661	50.342	660.725	-0.001415	-0.000220	-0.000237
58.8000	298.164	14.146	-5.198	0.261	-0.645	50.342	567.627	-0.000990	0.000364	-0.000018
59.0000	289.943	12.097	-7.474	-1.068	-0.633	50.341	551.977	-0.000847	0.000523	0.000075
59.2000	265.146	7.887	-12.532	-2.626	-0.634	50.341	504.770	-0.000552	0.000877	0.000184
59.4000	205.258	0.506	-23.162	-6.768	-0.629	50.340	390.759	-0.000035	0.001621	0.000474
59.6000	218.077	0.982	-22.026	-5.726	-0.644	50.339	415.163	-0.000069	0.001542	0.000401
59.8000	228.717	1.278	-21.527	-6.017	-0.643	50.340	435.419	-0.000089	0.001507	0.000421
60.0000	229.754	1.153	-21.637	-6.126	-0.607	50.339	437.393	-0.000081	0.001515	0.000429
60.2000	231.317	0.841	-21.762	-6.170	-0.644	50.338	440.369	-0.000059	0.001523	0.000432
60.4000	234.037	1.488	-20.791	-5.087	-0.630	50.338	445.547	-0.000104	0.001455	0.000356
60.6000	266.544	4.898	-16.300	-3.934	-0.640	50.338	507.431	-0.000343	0.001141	0.000275
60.8000	331.963	12.418	-5.959	0.082	-0.645	50.337	631.971	-0.000869	0.000417	-0.000006
61.0000	318.497	11.451	-7.612	-0.237	-0.641	50.337	606.337	-0.000802	0.000533	0.000017
61.2000	348.824	15.508	-2.346	1.597	-0.629	50.336	664.072	-0.001086	0.000164	-0.000112
61.4000	410.125	22.999	7.297	5.198	-0.647	50.335	780.773	-0.001610	-0.000511	-0.000364
61.6000	442.031	27.546	13.024	7.782	-0.651	50.336	841.513	-0.001928	-0.000912	-0.000545
61.8000	541.804	39.642	27.670	14.231	-0.617	50.335	1031.456	-0.002775	-0.001937	-0.000996
62.0000	535.913	41.131	29.210	14.621	-0.660	50.335	1020.241	-0.002879	-0.002045	-0.001023
62.2000	591.503	48.401	38.242	18.468	-0.649	50.334	1126.070	-0.003388	-0.002677	-0.001293
62.4000	634.139	54.699	45.358	21.515	-0.641	50.334	1207.237	-0.003829	-0.003175	-0.001506
62.6000	686.678	62.513	54.337	25.334	-0.664	50.335	1307.259	-0.004376	-0.003804	-0.001773
62.8000	728.487	68.816	61.949	28.457	-0.639	50.334	1386.852	-0.004817	-0.004336	-0.001992
63.0000	779.163	75.751	70.344	32.491	-0.652	50.333	1483.326	-0.005303	-0.004924	-0.002274
63.2000	822.941	81.881	77.790	35.590	-0.648	50.334	1566.668	-0.005732	-0.005445	-0.002491
63.4000	851.810	86.794	83.378	38.230	-0.627	50.332	1621.628	-0.006076	-0.005836	-0.002676
63.6000	885.895	92.084	89.659	40.910	-0.666	50.333	1686.516	-0.006446	-0.006276	-0.002864
63.8000	914.704	96.559	94.885	43.248	-0.638	50.333	1741.362	-0.006759	-0.006642	-0.003027
64.0000	948.879	101.301	100.275	46.023	-0.650	50.331	1806.421	-0.007091	-0.007019	-0.003222
64.2000	962.645	104.406	103.531	47.138	-0.656	50.332	1832.628	-0.007308	-0.007247	-0.003300
64.4000	970.054	106.241	106.016	48.152	-0.621	50.331	1846.733	-0.007437	-0.007421	-0.003371
64.6000	994.475	109.205	109.438	49.956	-0.653	50.331	1893.225	-0.007644	-0.007661	-0.003497
64.8000	998.908	110.328	110.602	50.317	-0.640	50.332	1901.665	-0.007723	-0.007742	-0.003522
65.0000	985.608	109.554	109.575	49.608	-0.630	50.330	1876.345	-0.007669	-0.007670	-0.003473
65.2000	964.448	107.447	106.989	48.652	-0.664	50.331	1836.061	-0.007521	-0.007489	-0.003406
65.4000	926.396	103.182	102.500	46.051	-0.633	50.331	1763.620	-0.007223	-0.007175	-0.003224
65.6000	925.795	102.706	102.294	46.065	-0.641	50.330	1762.476	-0.007189	-0.007161	-0.003225
65.8000	922.339	102.226	101.084	45.495	-0.648	50.330	1755.896	-0.007156	-0.007076	-0.003185
66.0000	870.415	95.954	93.871	42.342	-0.645	50.331	1657.047	-0.006717	-0.006571	-0.002964
66.2000	846.941	93.208	90.409	40.632	-0.625	50.329	1612.358	-0.006525	-0.006329	-0.002844
66.4000	799.451	86.975	83.196	37.259	-0.660	50.329	1521.950	-0.006088	-0.005824	-0.002608
66.6000	766.990	82.263	77.764	35.044	-0.626	50.330	1460.152	-0.005758	-0.005444	-0.002453
66.8000	698.310	73.854	67.564	30.391	-0.644	50.329	1329.403	-0.005170	-0.004729	-0.002127
67.0000	656.050	67.947	60.699	27.267	-0.649	50.329	1248.951	-0.004756	-0.004249	-0.001909
67.2000	624.686	62.655	54.352	24.165	-0.615	50.328	1189.241	-0.004386	-0.003805	-0.001692
67.4000	564.302	54.772	44.803	20.276	-0.639	50.328	1074.286	-0.003834	-0.003136	-0.001419
67.6000	526.776	48.751	37.980	17.439	-0.664	50.329	1002.846	-0.003413	-0.002659	-0.001221
67.8000	479.391	42.183	29.642	14.215	-0.634	50.329	912.638	-0.002953	-0.002075	-0.000995
68.0000	423.395	34.282	20.067	10.105	-0.640	50.327	806.036	-0.002400	-0.001405	-0.000707
68.2000	395.037	29.400	14.648	7.393	-0.644	50.328	752.048	-0.002058	-0.001025	-0.000517
68.4000	353.363	23.167	6.905	4.240	-0.636	50.327	672.712	-0.001622	-0.000483	-0.000297
68.6000	337.117	19.971	2.794	3.156	-0.667	50.328	641.785	-0.001398	-0.000196	-0.000221
68.8000	276.448	12.335	-7.503	-0.692	-0.625	50.327	526.285	-0.000863	0.000525	0.000048
69.0000	267.205	10.021	-10.352	-2.141	-0.656	50.326	508.690	-0.000701	0.000725	0.000150
69.2000	234.488	5.149	-17.104	-4.406	-0.642	50.327	446.405	-0.000360	0.001197	0.000308
69.4000	261.840	7.185	-14.117	-3.906	-0.648	50.326	498.476	-0.000503	0.000988	0.000273
69.6000	207.708	0.378	-22.925	-6.682	-0.666	50.327	395.422	-0.000026	0.001605	0.000468
69.8000	225.201	1.574	-21.415	-6.321	-0.635	50.326	428.724	-0.000110	0.001499	0.000443
70.0000	234.473	2.457	-20.289	-5.838	-0.645	50.326	446.377	-0.000172	0.001420	0.000409
70.2000	232.820	2.274	-20.538	-5.711	-0.666	50.327	443.230	-0.000159	0.001438	0.000400
70.4000	255.904	4.618	-17.049	-4.588	-0.636	50.326	487.175	-0.000323	0.001193	0.000321
70.6000	265.702	5.570	-15.564	-3.725	-0.641	50.326	505.829	-0.000390	0.001090	0.000261
70.8000	277.965	7.057	-13.255	-2.848	-0.661	50.327	529.175	-0.000494	0.000928	0.000199
71.0000	361.178	16.768	-1.344	2.042	-0.629	50.326	687.590	-0.001174	0.000094	-0.000143
71.2000	380.955	19.985	2.698	3.420	-0.659	50.325	725.241	-0.001399	-0.000189	-0.000239
71.4000	401.213	23.027	6.699	4.921	-0.659	50.327	763.807	-0.001612	-0.000469	-0.000344
71.6000	435.884	28.109	12.425	7.600	-0.639	50.325	829.811	-0.001968	-0.000870	-0.000532
71.8000	503.993	36.669	23.750	12.158	-0.662	50.325	959.473	-0.002567	-0.001662	-0.000851
72.0000	548.898	43.096	31.312	15.650	-0.637	50.326	1044.960	-0.003017	-0.002192	-0.001096
72.2000	564.377	45.760	34.352	16.593	-0.626	50.325	1074.429	-0.003203	-0.002405	-0.001162
72.4000	635.206	55.586	46.137	21.778	-0.653	50.325	1209.269	-0.003891	-0.003230	-0.001524
72.6000	681.899	62.683	54.740	25.320	-0.650	50.326	1298.161	-0.004388	-0.003832	-0.001772
72.8000	723.693	68.620	62.019	28.916	-0.651	50.325	1377.726	-0.004803	-0.004341	-0.002024
73.0000	778.441	76.102	70.763	32.519	-0.663	50.326	1481.953	-0.005327	-0.004953	-0.002276
73.2000	824.549	83.257	78.821	36.145	-0.633	50.325	1569.729	-0.005828	-0.005517	-0.002530
73.4000	837.097	85.809	81.840	37.313	-0.660	50.325	1593.618	-0.006007	-0.005729	-0.002612
73.6000	901.870	94.497	92.081	42.149	-0.652	50.326	1716.928	-0.006615	-0.006446	-0.002950
73.8000	896.655	94.902	92.817	42.245	-0.653	50.324	1707.001	-0.006643	-0.006497	-0.002957
74.0000	921.226	98.919	97.276	44.302	-0.656	50.325	1753.778	-0.006924	-0.006809	-0.003101
74.2000	959.759	104.294	103.697	46.969	-0.649	50.325	1827.135	-0.007301	-0.007259	-0.003288
74.4000	973.225	106.661	106.462	48.443	-0.673	50.325	1852.770	-0.007466	-0.007452	-0.003391
74.6000	993.633	110.172	109.855	50.221	-0.654	50.325	1891.623	-0.007712	-0.007690	-0.003515
74.8000	972.894	108.669	107.991	48.942	-0.635	50.325	1852.140	-0.007607	-0.007559	-0.003426
75.0000	978.199	109.653	109.226	49.278	-0.652	50.324	1862.240	-0.007676	-0.007646	-0.003449
75.2000	970.249	108.895	108.281	49.237	-0.654	50.325	1847.105	-0.007623	-0.007580	-0.003447
75.4000	959.173	107.586	106.961	48.291	-0.643	50.324	1826.019	-0.007531	-0.007487	-0.003380
75.6000	923.932	103.252	102.529	46.133	-0.668	50.325	1758.928	-0.007228	-0.007177	-0.003229
75.8000	913.306	102.016	100.443	45.186	-0.651	50.326	1738.701	-0.007141	-0.007031	-0.003163
76.0000	884.963	98.443	96.123	43.248	-0.644	50.324	1684.742	-0.006891	-0.006729	-0.003027
76.2000	854.395	94.680	91.914	40.912	-0.668	50.326	1626.549	-0.006628	-0.006434	-0.002864
76.4000	819.935	89.696	86.244	38.355	-0.649	50.325	1560.946	-0.006279	-0.006037	-0.002685
76.6000	755.839	81.812	76.656	34.212	-0.660	50.324	1438.923	-0.005727	-0.005366	-0.002395
76.8000	689.323	73.460	67.007	29.961	-0.659	50.325	1312.294	-0.005142	-0.004690	-0.002097
77.0000	678.608	71.064	63.927	28.695	-0.643	50.325	1291.895	-0.004974	-0.004475	-0.002009
77.2000	629.780	64.088	56.129	25.346	-0.651	50.325	1198.940	-0.004486	-0.003929	-0.001774
77.4000	570.764	55.976	46.054	20.736	-0.648	50.326	1086.588	-0.003918	-0.003224	-0.001451
77.6000	525.423	49.720	38.576	17.647	-0.660	50.325	1000.271	-0.003480	-0.002700	-0.001235
77.8000	476.325	43.125	30.406	14.383	-0.667	50.325	906.801	-0.003019	-0.002128	-0.001007
78.0000	458.712	39.753	25.933	12.298	-0.643	50.326	873.270	-0.002783	-0.001815	-0.000861
78.2000	394.706	30.366	15.345	8.019	-0.665	50.325	751.419	-0.002126	-0.001074	-0.000561
78.4000	374.959	26.719	10.591	6.084	-0.669	50.326	713.825	-0.001870	-0.000741	-0.000426
78.6000	336.727	20.827	2.961	3.253	-0.664	50.325	641.041	-0.001458	-0.000207	-0.000228
78.8000	328.912	19.114	0.473	2.000	-0.673	50.326	626.163	-0.001338	-0.000033	-0.000140
79.0000	262.125	10.247	-10.617	-2.180	-0.664	50.326	499.020	-0.000717	0.000743	0.000153
79.2000	258.909	9.026	-12.157	-2.820	-0.669	50.326	492.897	-0.000632	0.000851	0.000197
79.4000	227.891	4.297	-18.646	-5.031	-0.675	50.327	433.846	-0.000301	0.001305	0.000352
79.6000	231.663	3.806	-19.549	-5.601	-0.641	50.326	441.027	-0.000266	0.001368	0.000392
79.8000	236.848	3.539	-19.383	-5.658	-0.662	50.326	450.897	-0.000248	0.001357	0.000396
80.0000	229.334	2.107	-20.734	-5.877	-0.671	50.328	436.592	-0.000147	0.001451	0.000411
80.2000	232.309	2.148	-21.179	-6.101	-0.647	50.327	442.257	-0.000150	0.001483	0.000427
80.4000	255.002	4.968	-17.020	-4.338	-0.664	50.327	485.458	-0.000348	0.001191	0.000304
80.6000	269.970	6.664	-14.564	-3.475	-0.650	50.328	513.954	-0.000466	0.001019	0.000243
80.8000	277.319	7.537	-13.143	-2.834	-0.652	50.327	527.945	-0.000528	0.000920	0.000198
81.0000	333.405	14.679	-4.392	0.485	-0.665	50.328	634.718	-0.001028	0.000307	-0.000034
81.2000	366.498	18.975	1.599	3.101	-0.661	50.328	697.718	-0.001328	-0.000112	-0.000217
81.4000	421.772	25.822	10.247	6.655	-0.676	50.328	802.946	-0.001808	-0.000717	-0.000466
81.6000	437.086	28.135	13.343	7.796	-0.664	50.328	832.100	-0.001969	-0.000934	-0.000546
81.8000	503.422	37.273	23.612	12.436	-0.644	50.328	958.385	-0.002609	-0.001653	-0.000871
82.0000	532.907	41.973	29.322	14.732	-0.679	50.328	1014.519	-0.002938	-0.002053	-0.001031
82.2000	587.911	49.241	38.533	18.495	-0.639	50.329	1119.232	-0.003447	-0.002697	-0.001295
82.4000	633.748	56.046	46.791	22.095	-0.655	50.328	1206.493	-0.003923	-0.003275	-0.001547
82.6000	642.209	58.447	49.113	23.248	-0.680	50.329	1222.601	-0.004091	-0.003438	-0.001627
82.8000	697.123	65.830	58.338	27.112	-0.651	50.329	1327.143	-0.004608	-0.004084	-0.001898
83.0000	730.982	71.372	65.040	30.306	-0.650	50.329	1391.602	-0.004996	-0.004553	-0.002121
83.2000	813.954	82.249	77.598	35.697	-0.672	50.329	1549.559	-0.005757	-0.005432	-0.002499
83.4000	872.129	90.312	87.107	39.910	-0.658	50.329	1660.309	-0.006322	-0.006097	-0.002794
83.6000	884.662	93.279	90.480	41.452	-0.656	50.329	1684.170	-0.006530	-0.006334	-0.002902
83.8000	901.765	96.179	93.427	42.398	-0.663	50.330	1716.728	-0.006733	-0.006540	-0.002968
84.0000	965.064	104.153	103.293	46.620	-0.640	50.329	1837.234	-0.007291	-0.007231	-0.003263
84.2000	904.605	98.512	96.302	43.692	-0.662	50.330	1722.136	-0.006896	-0.006741	-0.003058
84.4000	991.063	109.568	109.507	49.791	-0.640	50.331	1886.730	-0.007670	-0.007665	-0.003485
84.6000	981.280	108.796	108.172	49.109	-0.660	50.329	1868.105	-0.007616	-0.007572	-0.003438
84.8000	984.797	109.949	109.283	49.501	-0.640	50.331	1874.800	-0.007696	-0.007650	-0.003465
85.0000	979.131	109.877	109.312	49.485	-0.653	50.330	1864.014	-0.007691	-0.007652	-0.003464
85.2000	976.937	109.554	108.671	49.166	-0.668	50.330	1859.837	-0.007669	-0.007607	-0.003442
85.4000	937.322	105.317	104.434	46.818	-0.652	50.331	1784.420	-0.007372	-0.007310	-0.003277
85.6000	996.068	112.329	111.992	50.497	-0.668	50.330	1896.257	-0.007863	-0.007839	-0.003535
85.8000	893.334	99.705	97.873	43.552	-0.670	50.331	1700.678	-0.006979	-0.006851	-0.003049
86.0000	874.097	97.317	95.104	42.801	-0.641	50.330	1664.057	-0.006812	-0.006657	-0.002996
86.2000	849.872	94.146	90.773	40.702	-0.657	50.331	1617.937	-0.006590	-0.006354	-0.002849
86.4000	808.979	89.249	84.962	37.869	-0.645	50.332	1540.089	-0.006247	-0.005947	-0.002651
86.6000	810.662	88.378	84.517	37.550	-0.651	50.331	1543.293	-0.006186	-0.005916	-0.002629
86.8000	825.075	88.675	85.129	37.857	-0.657	50.331	1570.730	-0.006207	-0.005959	-0.002650
87.0000	689.579	72.521	65.246	28.737	-0.643	50.333	1312.780	-0.005076	-0.004567	-0.002012
87.2000	590.692	59.754	50.109	22.509	-0.632	50.331	1124.525	-0.004183	-0.003508	-0.001576
87.4000	552.264	54.421	44.079	19.761	-0.664	50.332	1051.369	-0.003809	-0.003086	-0.001383
87.6000	523.064	49.565	37.771	17.217	-0.641	50.333	995.779	-0.003470	-0.002644	-0.001205
87.8000	485.989	44.330	31.451	14.549	-0.640	50.332	925.198	-0.003103	-0.002202	-0.001018
88.0000	426.762	35.758	20.902	9.924	-0.662	50.333	812.445	-0.002503	-0.001463	-0.000695
88.2000	389.942	30.198	14.622	7.251	-0.637	50.333	742.350	-0.002114	-0.001024	-0.000508
88.4000	363.071	26.076	9.160	5.086	-0.659	50.332	691.195	-0.001825	-0.000641	-0.000356
88.6000	355.858	23.041	5.851	3.670	-0.669	50.333	677.462	-0.001613	-0.000410	-0.000257
88.8000	290.003	14.384	-5.295	-0.595	-0.656	50.334	552.092	-0.001007	0.000371	0.000042
89.0000	271.819	11.003	-9.589	-1.750	-0.641	50.333	517.473	-0.000770	0.000671	0.000122
89.2000	250.599	7.803	-13.977	-3.669	-0.668	50.334	477.076	-0.000546	0.000978	0.000257
89.4000	226.388	4.183	-18.783	-5.212	-0.641	50.333	430.984	-0.000293	0.001315	0.000365
89.6000	227.215	3.538	-19.314	-5.420	-0.655	50.333	432.558	-0.000248	0.001352	0.000379
89.8000	215.132	1.264	-22.803	-7.141	-0.649	50.335	409.555	-0.000088	0.001596	0.000500
90.0000	233.526	3.342	-19.996	-5.920	-0.647	50.334	444.574	-0.000234	0.001400	0.000414
90.2000	238.005	3.216	-19.578	-5.920	-0.664	50.333	453.100	-0.000225	0.001370	0.000414
90.4000	256.670	5.318	-16.605	-4.489	-0.647	50.334	488.634	-0.000372	0.001162	0.000314
90.6000	271.458	7.003	-14.703	-3.976	-0.645	50.334	516.787	-0.000490	0.001029	0.000278
90.8000	298.314	10.203	-10.728	-2.305	-0.654	50.334	567.913	-0.000714	0.000751	0.000161
91.0000	335.584	14.864	-4.349	0.166	-0.650	50.335	638.866	-0.001040	0.000304	-0.000012
91.2000	358.097	18.271	-0.247	2.027	-0.640	50.334	681.725	-0.001279	0.000017	-0.000142
91.4000	393.459	22.689	5.547	4.407	-0.655	50.334	749.044	-0.001588	-0.000388	-0.000309
91.6000	445.247	29.905	14.455	7.906	-0.651	50.336	847.635	-0.002093	-0.001012	-0.000553
91.8000	503.903	37.695	24.013	12.047	-0.647	50.334	959.301	-0.002639	-0.001681	-0.000843
92.0000	547.755	43.235	31.269	15.107	-0.667	50.335	1042.786	-0.003026	-0.002189	-0.001058
92.2000	584.500	48.752	37.799	17.745	-0.651	50.336	1112.738	-0.003413	-0.002646	-0.001242
92.4000	625.648	54.910	45.316	21.055	-0.653	50.335	1191.072	-0.003844	-0.003172	-0.001474
92.6000	678.593	62.585	54.101	24.918	-0.652	50.336	1291.866	-0.004381	-0.003787	-0.001744
92.8000	723.903	69.113	61.658	28.362	-0.623	50.336	1378.126	-0.004838	-0.004316	-0.001985
93.0000	765.818	75.442	69.248	31.740	-0.638	50.336	1457.920	-0.005281	-0.004847	-0.002222
93.2000	816.809	82.893	78.003	35.225	-0.643	50.337	1554.995	-0.005803	-0.005460	-0.002466
93.4000	848.053	87.706	83.696	37.925	-0.629	50.336	1614.475	-0.006139	-0.005859	-0.002655
93.6000	884.332	93.207	89.950	40.674	-0.659	50.336	1683.540	-0.006525	-0.006297	-0.002847
93.8000	912.946	97.866	95.356	43.024	-0.649	50.337	1738.014	-0.006851	-0.006675	-0.003012
94.0000	933.460	101.007	99.332	44.898	-0.633	50.337	1777.067	-0.007070	-0.006953	-0.003143
94.2000	950.877	103.883	102.642	46.453	-0.648	50.337	1810.226	-0.007272	-0.007185	-0.003252
94.4000	991.574	109.597	109.130	49.597	-0.643	50.338	1887.703	-0.007672	-0.007639	-0.003472
94.6000	974.111	108.361	107.534	48.693	-0.650	50.337	1854.458	-0.007585	-0.007527	-0.003408
94.8000	977.583	109.948	108.743	49.361	-0.653	50.338	1861.067	-0.007696	-0.007612	-0.003455
95.0000	995.527	112.176	111.645	50.663	-0.626	50.338	1895.227	-0.007852	-0.007815	-0.003546
95.2000	980.814	110.565	109.757	49.596	-0.664	50.337	1867.218	-0.007740	-0.007683	-0.003472
95.4000	959.353	108.544	107.308	48.344	-0.656	50.339	1826.363	-0.007598	-0.007512	-0.003384
95.6000	938.224	106.281	104.696	46.944	-0.641	50.338	1786.137	-0.007440	-0.007329	-0.003286
95.8000	902.095	101.750	99.581	44.647	-0.647	50.339	1717.358	-0.007123	-0.006971	-0.003125
96.0000	892.432	100.097	97.973	43.928	-0.630	50.339	1698.961	-0.007007	-0.006858	-0.003075
96.2000	833.445	92.744	89.047	39.839	-0.657	50.339	1586.666	-0.006492	-0.006233	-0.002789
96.4000	804.215	88.716	84.267	37.675	-0.657	50.340	1531.019	-0.006210	-0.005899	-0.002637
96.6000	761.354	82.976	77.681	34.727	-0.625	50.340	1449.423	-0.005808	-0.005438	-0.002431
96.8000	710.318	76.453	69.968	31.197	-0.668	50.340	1352.262	-0.005352	-0.004898	-0.002184
97.0000	663.144	70.264	62.240	27.722	-0.645	50.342	1262.455	-0.004918	-0.004357	-0.001941
97.2000	626.324	64.875	56.017	24.749	-0.652	50.340	1192.360	-0.004541	-0.003921	-0.001732
97.4000	571.034	57.183	46.804	20.639	-0.673	50.343	1087.103	-0.004003	-0.003276	-0.001445
97.6000	524.341	50.630	39.036	17.551	-0.651	50.342	998.211	-0.003544	-0.002733	-0.001229
97.8000	476.776	43.728	30.575	14.007	-0.645	50.341	907.660	-0.003061	-0.002140	-0.000980
98.0000	432.337	36.671	22.346	10.492	-0.653	50.343	823.059	-0.002567	-0.001564	-0.000734
98.2000	409.404	32.502	17.386	8.449	-0.650	50.342	779.400	-0.002275	-0.001217	-0.000591
98.4000	372.464	27.043	10.091	5.583	-0.671	50.343	709.076	-0.001893	-0.000706	-0.000391
98.6000	327.724	20.279	1.654	2.153	-0.651	50.344	623.903	-0.001420	-0.000116	-0.000151
98.8000	306.264	16.979	-2.611	0.457	-0.646	50.343	583.048	-0.001189	0.000183	-0.000032
99.0000	273.532	12.250	-9.504	-2.001	-0.655	50.344	520.735	-0.000857	0.000665	0.000140
99.2000	250.148	8.311	-13.601	-3.947	-0.646	50.345	476.217	-0.000582	0.000952	0.000276
99.4000	243.115	6.932	-15.551	-4.336	-0.652	50.344	462.828	-0.000485	0.001089	0.000304
99.6000	229.814	4.365	-18.324	-5.324	-0.664	50.345	437.508	-0.000306	0.001283	0.000373
99.8000	222.120	3.300	-20.524	-6.142	-0.661	50.346	422.859	-0.000231	0.001437	0.000430
Test Cycles
Time (sec)	Axial stress (kPa)	Axial micro-strain #1	Axial micro-strain #2	Axial micro-strain #3	Confining pressure (kPa)	Temperature (�C)	Load (N)	Displacement #1 (mm)	Displacement #2 (mm)	Displacement #3 (mm)
0.0000	225.967	2.878	-20.524	-6.350	-0.653	50.345	430.183	-0.000201	0.001437	0.000444
0.2000	234.774	3.496	-19.550	-5.630	-0.675	50.346	446.949	-0.000245	0.001369	0.000394
0.4000	254.206	5.304	-17.174	-4.727	-0.655	50.346	483.942	-0.000371	0.001202	0.000331
0.6000	277.695	8.099	-13.297	-3.086	-0.661	50.345	528.660	-0.000567	0.000931	0.000216
0.8000	297.593	10.918	-10.228	-2.265	-0.672	50.347	566.540	-0.000764	0.000716	0.000159
1.0000	329.017	14.836	-5.157	0.066	-0.652	50.347	626.364	-0.001038	0.000361	-0.000005
1.2000	355.993	18.047	-0.108	2.250	-0.669	50.347	677.719	-0.001263	0.000008	-0.000157
1.4000	411.598	25.346	8.564	5.418	-0.652	50.348	783.577	-0.001774	-0.000600	-0.000379
1.6000	438.649	29.328	13.690	7.435	-0.653	50.347	835.075	-0.002053	-0.000958	-0.000520
1.8000	493.954	36.980	22.749	11.185	-0.676	50.347	940.361	-0.002589	-0.001592	-0.000783
2.0000	533.103	42.509	29.626	14.383	-0.656	50.348	1014.891	-0.002976	-0.002074	-0.001007
2.2000	569.066	47.362	36.118	16.731	-0.643	50.348	1083.355	-0.003315	-0.002528	-0.001171
2.4000	632.516	56.268	46.664	21.736	-0.665	50.348	1204.147	-0.003939	-0.003267	-0.001522
2.6000	680.622	63.120	54.657	25.140	-0.651	50.349	1295.729	-0.004418	-0.003826	-0.001760
2.8000	725.602	69.491	62.254	28.486	-0.636	50.348	1381.359	-0.004864	-0.004358	-0.001994
3.0000	767.696	76.159	69.553	31.796	-0.652	50.349	1461.496	-0.005331	-0.004869	-0.002226
3.2000	813.352	82.613	77.390	34.978	-0.663	50.350	1548.414	-0.005783	-0.005417	-0.002448
3.4000	853.313	88.504	84.254	38.134	-0.648	50.349	1624.489	-0.006195	-0.005898	-0.002669
3.6000	883.370	93.278	90.062	40.673	-0.657	50.349	1681.709	-0.006529	-0.006304	-0.002847
3.8000	915.050	98.301	95.734	43.179	-0.640	50.349	1742.020	-0.006881	-0.006701	-0.003023
4.0000	968.115	105.961	104.516	46.984	-0.630	50.349	1843.042	-0.007417	-0.007316	-0.003289
4.2000	962.479	105.540	104.072	46.495	-0.667	50.350	1832.314	-0.007388	-0.007285	-0.003255
4.4000	987.171	109.655	108.615	48.818	-0.643	50.350	1879.320	-0.007676	-0.007603	-0.003417
4.6000	975.554	109.302	108.199	48.778	-0.657	50.349	1857.204	-0.007651	-0.007574	-0.003414
4.8000	980.498	110.104	109.102	49.279	-0.665	50.350	1866.617	-0.007707	-0.007637	-0.003449
5.0000	977.373	110.313	109.132	48.832	-0.646	50.350	1860.666	-0.007722	-0.007639	-0.003418
5.2000	989.110	111.727	110.837	49.749	-0.676	50.350	1883.011	-0.007821	-0.007759	-0.003482
5.4000	957.400	108.657	106.976	48.040	-0.660	50.351	1822.643	-0.007606	-0.007488	-0.003363
5.6000	931.671	105.260	103.364	46.497	-0.655	50.350	1773.663	-0.007368	-0.007235	-0.003255
5.8000	904.830	102.143	99.958	44.551	-0.669	50.351	1722.565	-0.007150	-0.006997	-0.003119
6.0000	881.777	99.031	96.428	42.858	-0.657	50.351	1678.677	-0.006932	-0.006750	-0.003000
6.2000	845.528	94.455	90.954	40.466	-0.661	50.350	1609.669	-0.006612	-0.006367	-0.002833
6.4000	805.087	89.305	84.852	37.508	-0.659	50.352	1532.679	-0.006251	-0.005940	-0.002626
6.6000	770.612	84.785	79.112	35.130	-0.662	50.352	1467.047	-0.005935	-0.005538	-0.002459
6.8000	719.620	78.107	71.456	31.447	-0.645	50.351	1369.972	-0.005467	-0.005002	-0.002201
7.0000	672.717	71.736	63.829	27.931	-0.675	50.352	1280.680	-0.005022	-0.004468	-0.001955
7.2000	617.743	64.200	55.115	24.387	-0.661	50.353	1176.023	-0.004494	-0.003858	-0.001707
7.4000	561.506	56.452	45.497	19.859	-0.638	50.352	1068.964	-0.003952	-0.003185	-0.001390
7.6000	527.182	51.022	39.369	17.409	-0.669	50.352	1003.618	-0.003572	-0.002756	-0.001219
7.8000	488.934	45.283	32.339	14.648	-0.648	50.353	930.805	-0.003170	-0.002264	-0.001025
8.0000	442.767	38.322	23.930	11.116	-0.659	50.352	842.915	-0.002683	-0.001675	-0.000778
8.2000	398.929	32.026	16.041	7.796	-0.670	50.353	759.459	-0.002242	-0.001123	-0.000546
8.4000	363.507	26.370	9.397	5.002	-0.649	50.353	692.024	-0.001846	-0.000658	-0.000350
8.6000	324.749	20.223	1.889	2.126	-0.649	50.352	618.238	-0.001416	-0.000132	-0.000149
8.8000	286.607	15.313	-5.210	-0.417	-0.660	50.353	545.626	-0.001072	0.000365	0.000029
9.0000	259.000	10.345	-11.103	-2.529	-0.637	50.353	493.069	-0.000724	0.000777	0.000177
9.2000	247.818	8.127	-14.199	-3.850	-0.656	50.353	471.783	-0.000569	0.000994	0.000269
9.4000	264.831	9.012	-12.754	-3.586	-0.636	50.354	504.169	-0.000631	0.000893	0.000251
9.6000	250.073	6.737	-15.871	-4.558	-0.647	50.352	476.074	-0.000472	0.001111	0.000319
9.8000	208.264	1.376	-23.242	-7.503	-0.670	50.353	396.481	-0.000096	0.001627	0.000525
10.0000	258.023	6.919	-15.813	-4.533	-0.644	50.352	491.209	-0.000484	0.001107	0.000317
10.2000	242.243	4.676	-18.741	-5.450	-0.648	50.352	461.168	-0.000327	0.001312	0.000381
10.4000	248.750	5.038	-17.632	-4.977	-0.664	50.353	473.557	-0.000353	0.001234	0.000348
10.6000	278.597	8.619	-12.894	-3.420	-0.640	50.353	530.376	-0.000603	0.000903	0.000239
10.8000	298.675	11.099	-9.643	-2.014	-0.654	50.352	568.600	-0.000777	0.000675	0.000141
11.0000	332.008	15.144	-4.196	0.152	-0.673	50.353	632.057	-0.001060	0.000294	-0.000011
11.2000	360.982	19.311	0.501	1.750	-0.643	50.352	687.218	-0.001352	-0.000035	-0.000122
11.4000	395.412	23.758	6.643	4.574	-0.671	50.353	752.764	-0.001663	-0.000465	-0.000320
11.6000	436.275	29.442	13.843	7.643	-0.637	50.353	830.555	-0.002061	-0.000969	-0.000535
11.8000	490.617	36.727	22.277	11.031	-0.661	50.352	934.010	-0.002571	-0.001559	-0.000772
12.0000	526.175	41.945	28.447	13.784	-0.672	50.353	1001.701	-0.002936	-0.001991	-0.000965
12.2000	605.419	52.439	41.315	18.745	-0.648	50.353	1152.563	-0.003671	-0.002892	-0.001312
12.4000	618.900	54.996	44.703	20.303	-0.658	50.352	1178.226	-0.003850	-0.003129	-0.001421
12.6000	669.666	62.318	53.212	24.444	-0.657	50.353	1274.872	-0.004362	-0.003725	-0.001711
12.8000	718.328	69.308	61.463	27.806	-0.642	50.353	1367.512	-0.004852	-0.004302	-0.001946
13.0000	759.220	75.315	68.593	30.962	-0.641	50.352	1445.360	-0.005272	-0.004802	-0.002167
13.2000	815.156	82.963	77.764	35.142	-0.660	50.353	1551.847	-0.005807	-0.005444	-0.002460
13.4000	842.207	87.244	82.962	37.647	-0.635	50.353	1603.346	-0.006107	-0.005807	-0.002635
13.6000	880.590	93.096	89.352	40.297	-0.647	50.352	1676.416	-0.006517	-0.006255	-0.002821
13.8000	911.789	97.951	95.288	42.774	-0.651	50.353	1735.811	-0.006857	-0.006670	-0.002994
14.0000	935.308	101.934	99.801	44.967	-0.643	50.352	1780.586	-0.007135	-0.006986	-0.003148
14.2000	959.128	105.541	103.655	46.789	-0.664	50.351	1825.933	-0.007388	-0.007256	-0.003275
14.4000	981.686	108.939	107.572	48.470	-0.661	50.352	1868.877	-0.007626	-0.007530	-0.003393
14.6000	977.899	109.457	107.962	48.554	-0.659	50.351	1861.668	-0.007662	-0.007557	-0.003399
14.8000	988.028	110.930	109.896	49.348	-0.652	50.352	1880.951	-0.007765	-0.007693	-0.003454
15.0000	976.351	110.159	108.908	48.678	-0.639	50.352	1858.721	-0.007711	-0.007624	-0.003407
15.2000	973.540	110.060	108.825	48.694	-0.648	50.351	1853.371	-0.007704	-0.007618	-0.003409
15.4000	962.179	109.118	107.558	48.221	-0.664	50.352	1831.741	-0.007638	-0.007529	-0.003375
15.6000	935.473	106.059	103.754	46.483	-0.635	50.351	1780.901	-0.007424	-0.007263	-0.003254
15.8000	914.028	103.534	100.875	44.996	-0.683	50.351	1740.074	-0.007247	-0.007061	-0.003150
16.0000	872.625	98.159	95.163	42.148	-0.663	50.351	1661.253	-0.006871	-0.006661	-0.002950
16.2000	842.523	94.344	90.453	40.133	-0.664	50.350	1603.947	-0.006604	-0.006332	-0.002809
16.4000	797.047	88.451	83.492	36.951	-0.664	50.351	1517.372	-0.006192	-0.005844	-0.002587
16.6000	771.348	84.474	79.016	34.934	-0.645	50.350	1468.449	-0.005913	-0.005531	-0.002445
16.8000	720.898	78.220	71.207	31.113	-0.662	50.350	1372.404	-0.005475	-0.004984	-0.002178
17.0000	672.251	71.343	63.201	27.778	-0.655	50.350	1279.793	-0.004994	-0.004424	-0.001944
17.2000	627.015	65.257	56.113	24.513	-0.641	50.349	1193.676	-0.004568	-0.003928	-0.001716
17.4000	568.359	57.366	46.347	20.220	-0.655	50.349	1082.010	-0.004016	-0.003244	-0.001415
17.6000	540.031	52.764	41.260	17.923	-0.642	50.350	1028.080	-0.003693	-0.002888	-0.001255
17.8000	472.223	43.236	29.601	13.299	-0.649	50.348	898.991	-0.003026	-0.002072	-0.000931
18.0000	444.435	38.941	24.389	10.784	-0.667	50.349	846.090	-0.002726	-0.001707	-0.000755
18.2000	361.403	28.162	10.645	5.324	-0.647	50.349	688.019	-0.001971	-0.000745	-0.000373
18.4000	354.295	25.626	8.062	4.269	-0.667	50.347	674.486	-0.001794	-0.000564	-0.000299
18.6000	333.901	21.892	3.410	2.336	-0.657	50.349	635.662	-0.001532	-0.000239	-0.000163
18.8000	288.515	15.607	-5.186	-0.943	-0.647	50.347	549.259	-0.001092	0.000363	0.000066
19.0000	285.735	14.258	-6.668	-1.582	-0.659	50.348	543.966	-0.000998	0.000467	0.000111
19.2000	260.758	10.188	-11.935	-3.392	-0.639	50.348	496.416	-0.000713	0.000835	0.000237
19.4000	240.725	6.905	-16.134	-5.031	-0.660	50.346	458.279	-0.000483	0.001129	0.000352
19.6000	207.212	2.752	-21.969	-7.002	-0.652	50.348	394.478	-0.000193	0.001538	0.000490
19.8000	234.248	4.885	-18.549	-6.017	-0.637	50.346	445.948	-0.000342	0.001298	0.000421
20.0000	238.260	4.884	-18.728	-6.029	-0.649	50.346	453.587	-0.000342	0.001311	0.000422
20.2000	239.703	4.745	-18.730	-6.099	-0.649	50.347	456.333	-0.000332	0.001311	0.000427
20.4000	255.768	6.369	-16.578	-5.089	-0.655	50.346	486.917	-0.000446	0.001160	0.000356
20.6000	280.069	9.097	-12.727	-3.878	-0.652	50.345	533.180	-0.000637	0.000891	0.000271
20.8000	293.550	10.932	-10.408	-2.543	-0.639	50.346	558.844	-0.000765	0.000729	0.000178
21.0000	332.699	15.829	-4.125	-0.361	-0.648	50.345	633.373	-0.001108	0.000289	0.000025
21.2000	370.841	20.574	2.238	2.376	-0.654	50.345	705.986	-0.001440	-0.000157	-0.000166
21.4000	421.246	27.281	10.328	5.642	-0.633	50.345	801.945	-0.001910	-0.000723	-0.000395
21.6000	444.886	30.747	14.914	7.810	-0.652	50.344	846.949	-0.002152	-0.001044	-0.000547
21.8000	492.150	37.148	22.541	11.006	-0.661	50.345	936.928	-0.002600	-0.001578	-0.000770
22.0000	533.644	42.998	29.601	13.937	-0.635	50.344	1015.921	-0.003010	-0.002072	-0.000976
22.2000	585.281	49.861	38.311	17.633	-0.661	50.344	1114.225	-0.003490	-0.002682	-0.001234
22.4000	636.799	57.548	47.318	21.195	-0.651	50.345	1212.301	-0.004028	-0.003312	-0.001484
22.6000	699.272	65.718	56.947	25.640	-0.641	50.343	1331.234	-0.004600	-0.003986	-0.001795
22.8000	719.620	69.829	61.686	27.486	-0.660	50.343	1369.972	-0.004888	-0.004318	-0.001924
23.0000	774.203	77.574	71.251	31.697	-0.641	50.343	1473.885	-0.005430	-0.004988	-0.002219
23.2000	820.371	84.112	78.957	35.297	-0.647	50.342	1561.775	-0.005888	-0.005527	-0.002471
23.4000	839.802	87.581	82.629	36.965	-0.656	50.343	1598.768	-0.006131	-0.005784	-0.002588
23.6000	871.497	92.422	88.744	39.827	-0.636	50.342	1659.107	-0.006470	-0.006212	-0.002788
23.8000	908.663	97.864	94.757	42.452	-0.648	50.343	1729.860	-0.006850	-0.006633	-0.002972
24.0000	950.923	104.040	101.696	45.412	-0.633	50.343	1810.312	-0.007283	-0.007119	-0.003179
24.2000	963.486	106.310	104.642	46.818	-0.639	50.342	1834.230	-0.007442	-0.007325	-0.003277
24.4000	979.341	108.824	107.226	48.082	-0.661	50.342	1864.414	-0.007618	-0.007506	-0.003366
24.6000	999.299	112.163	110.839	49.667	-0.642	50.342	1902.409	-0.007851	-0.007759	-0.003477
24.8000	997.946	112.581	111.812	50.011	-0.636	50.341	1899.834	-0.007881	-0.007827	-0.003501
25.0000	981.881	111.267	109.952	49.083	-0.659	50.341	1869.249	-0.007789	-0.007697	-0.003436
25.2000	977.192	110.747	109.338	48.749	-0.650	50.342	1860.323	-0.007752	-0.007654	-0.003412
25.4000	944.581	107.153	105.390	46.760	-0.644	50.341	1798.239	-0.007501	-0.007377	-0.003273
25.6000	935.488	105.906	103.961	46.455	-0.659	50.341	1780.930	-0.007413	-0.007277	-0.003252
25.8000	911.593	102.916	100.429	44.648	-0.653	50.342	1735.439	-0.007204	-0.007030	-0.003125
26.0000	865.411	97.248	93.843	41.299	-0.661	50.340	1647.520	-0.006807	-0.006569	-0.002891
26.2000	839.742	94.119	89.881	39.560	-0.667	50.341	1598.654	-0.006588	-0.006292	-0.002769
26.4000	796.716	88.324	83.268	36.923	-0.641	50.341	1516.743	-0.006183	-0.005829	-0.002585
26.6000	762.992	84.223	78.235	34.505	-0.653	50.339	1452.541	-0.005896	-0.005476	-0.002415
26.8000	720.236	78.176	71.000	31.279	-0.656	50.340	1371.145	-0.005472	-0.004970	-0.002190
27.0000	666.901	71.135	62.451	27.348	-0.646	50.341	1269.608	-0.004979	-0.004372	-0.001914
27.2000	619.982	64.735	54.987	24.234	-0.645	50.339	1180.286	-0.004531	-0.003849	-0.001696
27.4000	499.665	49.789	36.630	16.218	-0.671	50.340	951.233	-0.003485	-0.002564	-0.001135
27.6000	524.221	50.855	38.327	16.952	-0.655	50.339	997.982	-0.003560	-0.002683	-0.001187
27.8000	480.128	44.804	30.824	13.855	-0.637	50.339	914.040	-0.003136	-0.002158	-0.000970
28.0000	443.323	38.801	23.958	10.784	-0.659	50.339	843.973	-0.002716	-0.001677	-0.000755
28.2000	394.421	31.871	15.136	7.352	-0.624	50.338	750.875	-0.002231	-0.001060	-0.000515
28.4000	358.458	26.385	8.187	4.699	-0.644	50.338	682.411	-0.001847	-0.000573	-0.000329
28.6000	319.910	20.420	1.279	1.667	-0.656	50.339	609.026	-0.001429	-0.000090	-0.000117
28.8000	285.104	15.620	-5.514	-0.846	-0.652	50.337	542.765	-0.001093	0.000386	0.000059
29.0000	281.662	14.205	-7.571	-1.748	-0.664	50.337	536.213	-0.000994	0.000530	0.000122
29.2000	244.242	8.761	-14.451	-4.184	-0.653	50.338	464.973	-0.000613	0.001012	0.000293
29.4000	232.865	6.257	-17.187	-5.323	-0.647	50.337	443.316	-0.000438	0.001203	0.000373
29.6000	230.431	5.599	-18.465	-5.794	-0.665	50.337	438.681	-0.000392	0.001293	0.000406
29.8000	226.689	4.310	-19.704	-6.000	-0.656	50.337	431.557	-0.000302	0.001379	0.000420
30.0000	234.954	4.842	-19.202	-5.932	-0.650	50.336	447.292	-0.000339	0.001344	0.000415
30.2000	247.849	6.104	-17.242	-5.088	-0.672	50.337	471.840	-0.000427	0.001207	0.000356
30.4000	249.426	6.159	-17.172	-5.185	-0.657	50.337	474.844	-0.000431	0.001202	0.000363
30.6000	276.613	9.335	-12.880	-3.739	-0.649	50.336	526.600	-0.000653	0.000902	0.000262
30.8000	308.999	12.882	-7.878	-1.473	-0.656	50.337	588.255	-0.000902	0.000551	0.000103
31.0000	330.415	16.082	-4.433	-0.290	-0.648	50.336	629.025	-0.001126	0.000310	0.000020
31.2000	364.589	20.209	1.403	1.987	-0.669	50.336	694.084	-0.001415	-0.000098	-0.000139
31.4000	402.701	25.291	7.743	4.836	-0.660	50.336	766.640	-0.001770	-0.000542	-0.000338
31.6000	436.305	30.270	13.578	6.919	-0.655	50.335	830.612	-0.002119	-0.000950	-0.000484
31.8000	495.321	38.241	23.515	11.171	-0.667	50.336	942.965	-0.002677	-0.001646	-0.000782
32.0000	544.599	44.832	31.605	14.731	-0.651	50.335	1036.777	-0.003138	-0.002212	-0.001031
32.2000	594.824	51.978	40.105	18.190	-0.675	50.335	1132.393	-0.003638	-0.002807	-0.001273
32.4000	659.837	60.860	50.638	23.023	-0.652	50.336	1256.161	-0.004260	-0.003545	-0.001612
32.6000	700.730	66.755	57.670	25.806	-0.661	50.335	1334.009	-0.004673	-0.004037	-0.001806
32.8000	705.388	69.156	60.382	27.279	-0.676	50.336	1342.878	-0.004841	-0.004227	-0.001910
33.0000	769.455	77.281	70.374	31.739	-0.660	50.336	1464.844	-0.005410	-0.004926	-0.002222
33.2000	825.030	85.334	79.807	35.810	-0.670	50.335	1570.644	-0.005973	-0.005587	-0.002507
33.4000	840.869	88.058	82.837	37.188	-0.663	50.335	1600.800	-0.006164	-0.005799	-0.002603
33.6000	886.285	94.931	90.786	40.549	-0.648	50.335	1687.260	-0.006645	-0.006355	-0.002838
33.8000	942.507	102.481	99.263	44.647	-0.675	50.334	1794.291	-0.007174	-0.006948	-0.003125
34.0000	941.966	103.647	100.973	45.134	-0.659	50.335	1793.261	-0.007255	-0.007068	-0.003159
34.2000	958.196	106.604	103.991	46.469	-0.658	50.335	1824.160	-0.007462	-0.007279	-0.003253
34.4000	982.377	110.158	107.990	48.250	-0.663	50.334	1870.193	-0.007711	-0.007559	-0.003377
34.6000	977.267	110.131	107.936	48.195	-0.662	50.335	1860.466	-0.007709	-0.007556	-0.003374
34.8000	1016.071	115.224	114.009	51.263	-0.648	50.334	1934.338	-0.008066	-0.007981	-0.003588
35.0000	991.409	112.809	110.809	49.707	-0.664	50.334	1887.388	-0.007897	-0.007757	-0.003479
35.2000	975.314	111.140	109.145	48.568	-0.661	50.335	1856.747	-0.007780	-0.007640	-0.003400
35.4000	968.671	110.607	108.589	48.360	-0.653	50.334	1844.101	-0.007743	-0.007601	-0.003385
35.6000	953.583	108.698	106.141	47.415	-0.653	50.334	1815.376	-0.007609	-0.007430	-0.003319
35.8000	896.775	101.877	98.679	43.829	-0.654	50.334	1707.230	-0.007131	-0.006908	-0.003068
36.0000	854.530	96.938	92.816	41.299	-0.645	50.334	1626.806	-0.006786	-0.006497	-0.002891
36.2000	834.122	94.120	89.186	39.589	-0.662	50.334	1587.954	-0.006588	-0.006243	-0.002771
36.4000	800.082	89.234	83.710	37.132	-0.669	50.334	1523.151	-0.006246	-0.005860	-0.002599
36.6000	757.732	83.452	76.973	33.976	-0.659	50.333	1442.528	-0.005842	-0.005388	-0.002378
36.8000	718.223	78.457	71.236	31.197	-0.654	50.333	1367.311	-0.005492	-0.004987	-0.002184
37.0000	664.526	71.148	62.324	27.278	-0.644	50.334	1265.087	-0.004980	-0.004363	-0.001909
37.2000	633.192	66.110	56.420	24.639	-0.639	50.333	1205.435	-0.004628	-0.003949	-0.001725
37.4000	542.030	54.827	42.871	18.747	-0.673	50.334	1031.885	-0.003838	-0.003001	-0.001312
37.6000	509.673	49.188	36.243	15.732	-0.643	50.334	970.287	-0.003443	-0.002537	-0.001101
37.8000	474.567	43.908	29.962	13.438	-0.656	50.334	903.454	-0.003074	-0.002097	-0.000941
38.0000	432.082	37.735	22.375	10.131	-0.660	50.334	822.573	-0.002641	-0.001566	-0.000709
38.2000	375.274	29.539	12.453	5.765	-0.656	50.333	714.426	-0.002068	-0.000872	-0.000404
38.4000	347.652	25.262	7.130	3.739	-0.672	50.333	661.840	-0.001768	-0.000499	-0.000262
38.6000	320.195	20.910	1.821	1.554	-0.669	50.334	609.570	-0.001464	-0.000127	-0.000109
38.8000	283.015	15.088	-5.764	-1.331	-0.657	50.333	538.788	-0.001056	0.000403	0.000093
39.0000	276.072	13.598	-8.391	-2.433	-0.681	50.333	525.570	-0.000952	0.000587	0.000170
39.2000	233.541	7.706	-15.954	-4.976	-0.645	50.334	444.603	-0.000539	0.001117	0.000348
39.4000	246.225	8.013	-15.146	-4.655	-0.669	50.333	468.750	-0.000561	0.001060	0.000326
39.6000	229.679	5.752	-18.770	-5.880	-0.671	50.334	437.250	-0.000403	0.001314	0.000412
39.8000	205.709	2.499	-23.272	-7.210	-0.644	50.334	391.617	-0.000175	0.001629	0.000505
40.0000	225.411	3.890	-20.469	-6.501	-0.651	50.332	429.125	-0.000272	0.001433	0.000455
40.2000	239.658	5.108	-19.175	-5.850	-0.656	50.333	456.247	-0.000358	0.001342	0.000409
40.4000	248.810	5.920	-17.714	-5.337	-0.644	50.333	473.671	-0.000414	0.001240	0.000374
40.6000	262.636	7.732	-15.606	-4.365	-0.659	50.333	499.992	-0.000541	0.001092	0.000306
40.8000	308.864	12.824	-8.823	-1.709	-0.649	50.334	587.997	-0.000898	0.000618	0.000120
41.0000	340.829	16.978	-3.180	0.153	-0.651	50.333	648.851	-0.001188	0.000223	-0.000011
41.2000	381.511	22.046	3.699	2.891	-0.672	50.333	726.299	-0.001543	-0.000259	-0.000202
41.4000	409.163	26.273	8.730	5.197	-0.647	50.333	778.942	-0.001839	-0.000611	-0.000364
41.6000	458.682	32.503	16.621	8.282	-0.663	50.333	873.213	-0.002275	-0.001163	-0.000580
41.8000	485.072	37.089	21.902	10.743	-0.643	50.333	923.452	-0.002596	-0.001533	-0.000752
42.0000	531.705	43.655	29.864	14.174	-0.663	50.333	1012.230	-0.003056	-0.002091	-0.000992
42.2000	569.051	48.964	36.467	16.634	-0.676	50.332	1083.326	-0.003427	-0.002553	-0.001164
42.4000	642.164	58.883	48.012	21.653	-0.648	50.334	1222.515	-0.004122	-0.003361	-0.001516
42.6000	684.243	64.635	55.074	24.777	-0.651	50.332	1302.624	-0.004524	-0.003855	-0.001734
42.8000	727.150	71.373	63.021	28.083	-0.673	50.333	1384.306	-0.004996	-0.004411	-0.001966
43.0000	764.375	76.691	69.316	31.087	-0.652	50.333	1455.173	-0.005368	-0.004852	-0.002176
43.2000	802.818	82.684	76.267	34.101	-0.668	50.332	1528.358	-0.005788	-0.005339	-0.002387
43.4000	849.992	89.374	83.946	37.839	-0.665	50.333	1618.166	-0.006256	-0.005876	-0.002649
43.6000	872.534	92.998	88.521	39.826	-0.641	50.332	1661.081	-0.006510	-0.006196	-0.002788
43.8000	903.598	98.176	93.955	42.370	-0.664	50.332	1720.219	-0.006872	-0.006577	-0.002966
44.0000	937.307	103.169	99.859	44.328	-0.645	50.333	1784.391	-0.007222	-0.006990	-0.003103
44.2000	957.896	106.143	103.712	46.372	-0.648	50.332	1823.587	-0.007430	-0.007260	-0.003246
44.4000	971.076	108.967	106.491	47.331	-0.661	50.332	1848.679	-0.007628	-0.007454	-0.003313
44.6000	977.658	110.230	108.088	48.138	-0.641	50.333	1861.210	-0.007716	-0.007566	-0.003370
44.8000	992.506	112.723	110.811	49.182	-0.676	50.332	1889.477	-0.007891	-0.007757	-0.003443
45.0000	983.760	112.373	110.188	48.930	-0.640	50.333	1872.826	-0.007866	-0.007713	-0.003425
45.2000	965.996	110.567	108.117	47.567	-0.647	50.332	1839.008	-0.007740	-0.007568	-0.003330
45.4000	951.959	108.601	106.267	46.942	-0.664	50.333	1812.286	-0.007602	-0.007439	-0.003286
45.6000	914.419	104.615	101.165	44.759	-0.649	50.333	1740.818	-0.007323	-0.007082	-0.003133
45.8000	903.839	102.902	99.512	43.762	-0.665	50.332	1720.676	-0.007203	-0.006966	-0.003063
46.0000	878.561	99.677	95.359	42.149	-0.657	50.334	1672.554	-0.006977	-0.006675	-0.002950
46.2000	845.588	95.340	90.605	39.924	-0.640	50.333	1609.783	-0.006674	-0.006342	-0.002795
46.4000	800.428	89.500	83.641	36.757	-0.672	50.334	1523.809	-0.006265	-0.005855	-0.002573
46.6000	759.881	84.210	77.584	34.101	-0.664	50.334	1446.619	-0.005895	-0.005431	-0.002387
46.8000	700.609	76.398	68.203	29.612	-0.662	50.334	1333.780	-0.005348	-0.004774	-0.002073
47.0000	640.240	68.608	58.868	25.459	-0.666	50.333	1218.853	-0.004803	-0.004121	-0.001782
47.2000	627.917	65.970	56.154	24.219	-0.652	50.334	1195.393	-0.004618	-0.003931	-0.001695
47.4000	566.586	57.828	46.305	19.815	-0.656	50.333	1078.634	-0.004048	-0.003241	-0.001387
47.6000	527.422	51.991	39.257	16.829	-0.661	50.334	1004.076	-0.003639	-0.002748	-0.001178
47.8000	476.972	44.831	30.200	13.477	-0.641	50.335	908.031	-0.003138	-0.002114	-0.000943
48.0000	431.360	38.267	22.124	9.854	-0.647	50.334	821.199	-0.002679	-0.001549	-0.000690
48.2000	400.793	33.089	16.387	7.420	-0.672	50.335	763.006	-0.002316	-0.001147	-0.000519
48.4000	359.299	27.127	8.743	4.601	-0.653	50.335	684.013	-0.001899	-0.000612	-0.000322
48.6000	330.565	21.861	2.670	2.196	-0.661	50.335	629.311	-0.001530	-0.000187	-0.000154
48.8000	293.189	16.544	-4.558	-0.873	-0.658	50.336	558.157	-0.001158	0.000319	0.000061
49.0000	274.915	13.052	-8.574	-2.459	-0.655	50.336	523.367	-0.000914	0.000600	0.000172
49.2000	254.656	9.573	-13.003	-4.086	-0.664	50.337	484.800	-0.000670	0.000910	0.000286
49.4000	236.953	6.764	-16.992	-5.614	-0.656	50.337	451.097	-0.000473	0.001189	0.000393
49.6000	230.416	5.443	-18.700	-6.045	-0.663	50.336	438.652	-0.000381	0.001309	0.000423
49.8000	234.624	5.192	-18.631	-6.378	-0.660	50.337	446.663	-0.000363	0.001304	0.000446
50.0000	213.163	2.570	-22.399	-7.642	-0.669	50.338	405.807	-0.000180	0.001568	0.000535
50.2000	240.034	5.249	-18.827	-6.264	-0.659	50.337	456.963	-0.000367	0.001318	0.000439
50.4000	250.614	6.580	-17.297	-5.754	-0.665	50.338	477.104	-0.000461	0.001211	0.000403
50.6000	274.644	9.167	-13.770	-4.421	-0.658	50.338	522.852	-0.000642	0.000964	0.000309
50.8000	294.797	11.521	-10.755	-2.960	-0.661	50.338	561.218	-0.000806	0.000753	0.000207
51.0000	336.967	16.671	-3.598	-0.278	-0.655	50.340	641.499	-0.001167	0.000252	0.000019
51.2000	372.930	21.036	2.098	2.125	-0.661	50.339	709.963	-0.001473	-0.000147	-0.000149
51.4000	406.218	26.160	7.992	4.283	-0.675	50.340	773.335	-0.001831	-0.000559	-0.000300
51.6000	448.959	31.872	15.233	7.434	-0.643	50.341	854.702	-0.002231	-0.001066	-0.000520
51.8000	491.760	37.862	22.388	10.452	-0.660	50.340	936.184	-0.002650	-0.001567	-0.000732
52.0000	539.745	44.356	30.669	13.811	-0.667	50.342	1027.536	-0.003105	-0.002147	-0.000967
52.2000	578.368	50.040	37.052	16.912	-0.637	50.341	1101.065	-0.003503	-0.002594	-0.001184
52.4000	638.287	58.280	47.444	21.292	-0.673	50.342	1215.134	-0.004080	-0.003321	-0.001490
52.6000	681.583	64.413	54.699	24.331	-0.651	50.343	1297.560	-0.004509	-0.003829	-0.001703
52.8000	721.739	70.685	61.645	27.472	-0.646	50.342	1374.006	-0.004948	-0.004315	-0.001923
53.0000	766.464	77.071	69.538	30.712	-0.661	50.344	1459.150	-0.005395	-0.004868	-0.002150
53.2000	806.409	82.835	76.584	34.239	-0.651	50.345	1535.196	-0.005798	-0.005361	-0.002397
53.4000	844.116	88.815	83.475	37.284	-0.657	50.344	1606.979	-0.006217	-0.005843	-0.002610
53.6000	884.677	94.708	90.272	40.090	-0.662	50.345	1684.198	-0.006630	-0.006319	-0.002806
53.8000	918.506	100.042	96.121	42.817	-0.647	50.345	1748.600	-0.007003	-0.006728	-0.002997
54.0000	926.456	102.270	98.526	43.512	-0.656	50.345	1763.735	-0.007159	-0.006897	-0.003046
54.2000	957.926	106.662	103.518	46.384	-0.658	50.348	1823.645	-0.007466	-0.007246	-0.003247
54.4000	975.223	109.455	106.644	47.609	-0.656	50.347	1856.575	-0.007662	-0.007465	-0.003333
54.6000	982.001	110.692	108.379	48.235	-0.651	50.347	1869.478	-0.007748	-0.007587	-0.003376
54.8000	994.896	112.907	110.697	49.360	-0.651	50.349	1894.026	-0.007903	-0.007749	-0.003455
55.0000	982.167	111.796	109.785	48.777	-0.642	50.348	1869.793	-0.007826	-0.007685	-0.003414
55.2000	990.177	113.637	111.227	49.319	-0.671	50.350	1885.042	-0.007955	-0.007786	-0.003452
55.4000	952.080	109.051	106.406	46.984	-0.645	50.350	1812.515	-0.007634	-0.007448	-0.003289
55.6000	934.797	106.972	104.142	45.759	-0.659	50.350	1779.613	-0.007488	-0.007290	-0.003203
55.8000	903.132	103.028	99.331	43.637	-0.660	50.351	1719.332	-0.007212	-0.006953	-0.003055
56.0000	879.673	100.015	95.746	42.023	-0.644	50.351	1674.671	-0.007001	-0.006702	-0.002942
56.2000	853.989	96.220	91.580	40.215	-0.672	50.352	1625.776	-0.006735	-0.006411	-0.002815
56.4000	809.851	90.804	85.310	37.299	-0.640	50.353	1541.748	-0.006356	-0.005972	-0.002611
56.6000	749.331	83.312	76.073	33.005	-0.639	50.352	1426.535	-0.005832	-0.005325	-0.002310
56.8000	734.438	80.590	73.247	32.072	-0.663	50.353	1398.182	-0.005641	-0.005127	-0.002245
57.0000	669.245	72.240	63.034	27.197	-0.636	50.353	1274.071	-0.005057	-0.004412	-0.001904
57.2000	603.841	63.202	52.362	22.204	-0.658	50.353	1149.559	-0.004424	-0.003665	-0.001554
57.4000	570.328	58.182	46.373	19.858	-0.669	50.354	1085.758	-0.004073	-0.003246	-0.001390
57.6000	507.900	49.537	35.757	15.330	-0.641	50.354	966.911	-0.003468	-0.002503	-0.001073
57.8000	482.848	45.211	31.061	13.133	-0.652	50.354	919.218	-0.003165	-0.002174	-0.000919
58.0000	425.890	37.106	21.057	8.906	-0.662	50.355	810.785	-0.002597	-0.001474	-0.000623
58.2000	396.164	32.615	15.455	7.031	-0.635	50.355	754.194	-0.002283	-0.001082	-0.000492
58.4000	357.060	26.454	8.426	3.671	-0.658	50.355	679.750	-0.001852	-0.000590	-0.000257
58.6000	314.995	20.532	0.764	1.150	-0.647	50.355	599.670	-0.001437	-0.000053	-0.000081
58.8000	282.143	15.607	-6.181	-1.597	-0.645	50.355	537.128	-0.001092	0.000433	0.000112
59.0000	267.791	12.673	-9.739	-2.738	-0.663	50.355	509.806	-0.000887	0.000682	0.000192
59.2000	239.012	8.492	-15.313	-4.934	-0.635	50.356	455.017	-0.000594	0.001072	0.000345
59.4000	230.175	6.426	-18.007	-5.975	-0.660	50.355	438.194	-0.000450	0.001260	0.000418
59.6000	232.099	5.949	-18.172	-6.169	-0.635	50.356	441.856	-0.000416	0.001272	0.000432
59.8000	229.288	4.964	-19.620	-6.599	-0.640	50.356	436.506	-0.000347	0.001373	0.000462
60.0000	229.559	4.464	-20.134	-6.655	-0.664	50.356	437.021	-0.000312	0.001409	0.000466
60.2000	241.131	5.795	-18.674	-6.281	-0.650	50.356	459.051	-0.000406	0.001307	0.000440
60.4000	245.098	6.103	-18.018	-5.865	-0.623	50.356	466.604	-0.000427	0.001261	0.000411
60.6000	282.234	10.344	-12.394	-3.891	-0.657	50.356	537.300	-0.000724	0.000868	0.000272
60.8000	297.623	12.405	-10.075	-2.627	-0.628	50.357	566.597	-0.000868	0.000705	0.000184
61.0000	336.155	16.879	-3.876	-0.389	-0.648	50.356	639.954	-0.001182	0.000271	0.000027
61.2000	358.172	19.831	-0.067	1.276	-0.643	50.357	681.868	-0.001388	0.000005	-0.000089
61.4000	409.915	26.384	8.383	4.699	-0.627	50.357	780.373	-0.001847	-0.000587	-0.000329
61.6000	450.717	31.954	15.011	7.308	-0.653	50.356	858.049	-0.002237	-0.001051	-0.000512
61.8000	481.330	36.401	20.777	9.671	-0.646	50.357	916.328	-0.002548	-0.001454	-0.000677
62.0000	541.158	44.357	30.559	13.953	-0.636	50.356	1030.226	-0.003105	-0.002139	-0.000977
62.2000	580.187	50.417	37.398	16.871	-0.653	50.356	1104.527	-0.003529	-0.002618	-0.001181
62.4000	635.476	58.492	46.805	20.456	-0.649	50.356	1209.784	-0.004094	-0.003276	-0.001432
62.6000	736.557	71.582	62.688	27.736	-0.649	50.356	1402.216	-0.005011	-0.004388	-0.001942
62.8000	718.463	70.599	61.659	27.086	-0.644	50.356	1367.769	-0.004942	-0.004316	-0.001896
63.0000	757.552	76.521	68.511	30.308	-0.644	50.356	1442.184	-0.005356	-0.004796	-0.002122
63.2000	812.616	83.607	77.113	34.227	-0.665	50.356	1547.012	-0.005852	-0.005398	-0.002396
63.4000	850.518	89.318	83.739	37.341	-0.644	50.356	1619.167	-0.006252	-0.005862	-0.002614
63.6000	877.238	93.687	88.742	39.491	-0.624	50.355	1670.036	-0.006558	-0.006212	-0.002764
63.8000	915.696	99.550	95.470	42.232	-0.655	50.355	1743.250	-0.006968	-0.006683	-0.002956
64.0000	927.523	101.932	98.569	43.443	-0.646	50.355	1765.766	-0.007135	-0.006900	-0.003041
64.2000	959.804	106.731	103.933	45.787	-0.648	50.353	1827.221	-0.007471	-0.007275	-0.003205
64.4000	962.675	108.251	105.098	46.497	-0.655	50.353	1832.685	-0.007578	-0.007357	-0.003255
64.6000	978.079	110.466	107.768	47.638	-0.637	50.353	1862.011	-0.007733	-0.007544	-0.003335
64.8000	975.028	110.608	107.893	47.818	-0.655	50.352	1856.203	-0.007743	-0.007553	-0.003347
65.0000	979.582	111.586	108.658	47.999	-0.652	50.353	1864.872	-0.007811	-0.007606	-0.003360
65.2000	970.279	110.791	108.297	47.831	-0.645	50.352	1847.162	-0.007755	-0.007581	-0.003348
65.4000	959.128	109.526	106.989	47.248	-0.647	50.351	1825.933	-0.007667	-0.007489	-0.003307
65.6000	942.131	107.926	105.072	46.203	-0.640	50.351	1793.575	-0.007555	-0.007355	-0.003234
65.8000	907.325	103.745	99.929	43.872	-0.635	50.350	1727.314	-0.007262	-0.006995	-0.003071
66.0000	875.450	100.026	95.580	41.759	-0.654	50.351	1666.632	-0.007002	-0.006691	-0.002923
66.2000	819.454	92.816	87.328	38.035	-0.631	50.349	1560.030	-0.006497	-0.006113	-0.002662
66.4000	812.902	91.548	85.436	37.286	-0.641	50.349	1547.556	-0.006408	-0.005980	-0.002610
66.6000	766.449	84.982	78.556	34.030	-0.649	50.350	1459.122	-0.005949	-0.005499	-0.002382
66.8000	745.018	81.673	74.221	32.380	-0.629	50.348	1418.324	-0.005717	-0.005195	-0.002267
67.0000	672.867	72.632	63.509	27.459	-0.652	50.348	1280.966	-0.005084	-0.004446	-0.001922
67.2000	624.701	66.221	55.641	23.663	-0.640	50.348	1189.270	-0.004635	-0.003895	-0.001656
67.4000	574.326	59.137	46.956	19.956	-0.629	50.347	1093.369	-0.004140	-0.003287	-0.001397
67.6000	527.377	52.020	38.909	16.565	-0.640	50.346	1003.990	-0.003641	-0.002724	-0.001160
67.8000	482.667	45.829	31.198	13.298	-0.654	50.347	918.875	-0.003208	-0.002184	-0.000931
68.0000	387.492	33.243	15.678	7.115	-0.643	50.345	737.686	-0.002327	-0.001097	-0.000498
68.2000	380.504	30.562	12.577	5.488	-0.655	50.346	724.382	-0.002139	-0.000880	-0.000384
68.4000	383.871	30.031	11.798	5.238	-0.643	50.346	730.791	-0.002102	-0.000826	-0.000367
68.6000	316.634	20.686	0.139	0.735	-0.647	50.344	602.789	-0.001448	-0.000010	-0.000051
68.8000	309.976	18.904	-2.027	0.137	-0.664	50.345	590.115	-0.001323	0.000142	-0.000010
69.0000	272.826	13.360	-8.767	-2.624	-0.619	50.344	519.390	-0.000935	0.000614	0.000184
69.2000	214.681	6.680	-18.952	-6.296	-0.651	50.344	408.697	-0.000468	0.001327	0.000441
69.4000	258.308	9.937	-14.046	-4.906	-0.633	50.344	491.753	-0.000696	0.000983	0.000343
69.6000	224.179	5.498	-19.885	-6.849	-0.647	50.342	426.779	-0.000385	0.001392	0.000479
69.8000	223.593	4.354	-20.818	-7.003	-0.656	50.343	425.663	-0.000305	0.001457	0.000490
70.0000	230.446	4.995	-20.163	-6.724	-0.623	50.343	438.709	-0.000350	0.001411	0.000471
70.2000	234.353	4.842	-20.121	-6.989	-0.623	50.342	446.148	-0.000339	0.001408	0.000489
70.4000	245.339	5.681	-18.605	-6.155	-0.645	50.343	467.062	-0.000398	0.001302	0.000431
70.6000	278.552	9.768	-13.142	-4.085	-0.628	50.341	530.291	-0.000684	0.000920	0.000286
70.8000	292.708	11.479	-11.018	-3.334	-0.652	50.342	557.241	-0.000804	0.000771	0.000233
71.0000	323.847	16.026	-4.877	-0.886	-0.627	50.341	616.522	-0.001122	0.000341	0.000062
71.2000	374.042	22.255	2.935	2.124	-0.649	50.340	712.080	-0.001558	-0.000205	-0.000149
71.4000	432.097	29.160	11.631	5.601	-0.649	50.341	822.601	-0.002041	-0.000814	-0.000392
71.6000	434.561	30.635	13.202	6.712	-0.648	50.341	827.293	-0.002144	-0.000924	-0.000470
71.8000	498.342	38.589	22.793	10.520	-0.631	50.339	948.715	-0.002701	-0.001595	-0.000736
72.0000	541.158	44.806	30.756	14.007	-0.648	50.340	1030.226	-0.003136	-0.002153	-0.000980
72.2000	577.391	50.224	36.926	16.813	-0.636	50.340	1099.205	-0.003516	-0.002585	-0.001177
72.4000	624.385	56.860	45.024	20.068	-0.649	50.339	1188.669	-0.003980	-0.003152	-0.001405
72.6000	677.661	64.594	53.991	23.873	-0.655	50.340	1290.092	-0.004522	-0.003779	-0.001671
72.8000	723.287	71.484	62.562	27.585	-0.644	50.339	1376.953	-0.005004	-0.004379	-0.001931
73.0000	754.441	76.692	68.259	30.086	-0.675	50.339	1436.262	-0.005368	-0.004778	-0.002106
73.2000	810.272	84.153	77.002	34.182	-0.647	50.339	1542.549	-0.005891	-0.005390	-0.002393
73.4000	904.710	96.462	91.288	40.855	-0.641	50.337	1722.336	-0.006752	-0.006390	-0.002860
73.6000	906.574	97.810	93.234	41.633	-0.649	50.339	1725.883	-0.006847	-0.006526	-0.002914
73.8000	901.179	98.428	93.815	41.995	-0.634	50.337	1715.612	-0.006890	-0.006567	-0.002940
74.0000	945.347	104.658	100.986	44.994	-0.651	50.337	1799.698	-0.007326	-0.007069	-0.003150
74.2000	977.177	109.569	106.601	47.303	-0.664	50.338	1860.294	-0.007670	-0.007462	-0.003311
74.4000	980.183	110.509	107.419	47.568	-0.613	50.337	1866.016	-0.007736	-0.007519	-0.003330
74.6000	978.560	111.267	108.212	48.014	-0.648	50.338	1862.926	-0.007789	-0.007575	-0.003361
74.8000	976.636	111.657	108.546	48.027	-0.647	50.338	1859.264	-0.007816	-0.007598	-0.003362
75.0000	980.363	112.218	109.589	48.291	-0.640	50.337	1866.360	-0.007855	-0.007671	-0.003380
75.2000	972.113	111.659	108.253	47.789	-0.660	50.338	1850.653	-0.007816	-0.007578	-0.003345
75.4000	956.348	109.961	106.503	46.718	-0.652	50.338	1820.641	-0.007697	-0.007455	-0.003270
75.6000	956.107	109.948	106.586	46.858	-0.643	50.338	1820.183	-0.007696	-0.007461	-0.003280
75.8000	897.301	102.887	98.584	43.093	-0.647	50.338	1708.231	-0.007202	-0.006901	-0.003017
76.0000	874.759	99.621	94.857	41.508	-0.637	50.339	1665.316	-0.006973	-0.006640	-0.002906
76.2000	830.485	94.330	88.395	38.424	-0.648	50.338	1581.030	-0.006603	-0.006188	-0.002690
76.4000	825.210	93.755	87.523	38.119	-0.650	50.339	1570.988	-0.006563	-0.006127	-0.002668
76.6000	771.604	86.374	79.083	33.629	-0.639	50.339	1468.935	-0.006046	-0.005536	-0.002354
76.8000	720.357	79.524	71.346	30.544	-0.649	50.339	1371.374	-0.005567	-0.004994	-0.002138
77.0000	677.526	73.699	63.938	27.336	-0.645	50.340	1289.835	-0.005159	-0.004476	-0.001913
77.2000	622.537	66.081	55.281	23.359	-0.659	50.340	1185.150	-0.004626	-0.003870	-0.001635
77.4000	583.072	59.922	48.333	20.290	-0.659	50.342	1110.020	-0.004195	-0.003383	-0.001420
77.6000	538.408	53.564	40.284	17.077	-0.633	50.342	1024.990	-0.003749	-0.002820	-0.001195
77.8000	477.422	45.407	30.380	12.924	-0.648	50.342	908.890	-0.003178	-0.002127	-0.000905
78.0000	412.710	36.418	19.275	8.144	-0.627	50.343	785.694	-0.002549	-0.001349	-0.000570
78.2000	410.005	34.562	17.051	7.419	-0.638	50.343	780.544	-0.002419	-0.001194	-0.000519
78.4000	353.709	26.931	7.700	3.085	-0.654	50.344	673.370	-0.001885	-0.000539	-0.000216
78.6000	332.203	23.069	2.781	1.694	-0.641	50.345	632.429	-0.001615	-0.000195	-0.000119
78.8000	287.463	16.361	-5.433	-1.666	-0.629	50.344	547.256	-0.001145	0.000380	0.000117
79.0000	281.151	14.613	-7.876	-2.586	-0.645	50.345	535.240	-0.001023	0.000551	0.000181
79.2000	248.660	9.798	-14.033	-4.919	-0.629	50.346	473.385	-0.000686	0.000982	0.000344
79.4000	246.316	8.760	-15.215	-5.338	-0.644	50.346	468.922	-0.000613	0.001065	0.000374
79.6000	225.035	5.795	-19.578	-7.017	-0.632	50.347	428.410	-0.000406	0.001370	0.000491
79.8000	224.254	5.024	-20.440	-7.141	-0.635	50.347	426.922	-0.000352	0.001431	0.000500
80.0000	228.011	5.008	-20.330	-7.044	-0.656	50.348	434.074	-0.000351	0.001423	0.000493
80.2000	238.245	5.837	-19.176	-6.613	-0.639	50.350	453.558	-0.000409	0.001342	0.000463
80.4000	246.391	6.639	-17.796	-5.809	-0.632	50.349	469.065	-0.000465	0.001246	0.000407
80.6000	272.360	9.391	-13.951	-4.460	-0.657	50.351	518.503	-0.000657	0.000977	0.000312
80.8000	303.544	13.192	-9.463	-2.809	-0.625	50.351	577.869	-0.000923	0.000662	0.000197
81.0000	353.618	19.338	-1.192	0.235	-0.664	50.352	673.199	-0.001354	0.000083	-0.000016
81.2000	366.543	21.554	1.347	1.415	-0.640	50.353	697.803	-0.001509	-0.000094	-0.000099
81.4000	393.744	25.106	6.168	3.600	-0.633	50.353	749.588	-0.001757	-0.000432	-0.000252
81.6000	444.330	31.913	14.231	7.060	-0.652	50.354	845.890	-0.002234	-0.000996	-0.000494
81.8000	489.250	37.944	21.793	10.007	-0.632	50.355	931.406	-0.002656	-0.001526	-0.000700
82.0000	531.389	43.853	29.043	13.145	-0.659	50.355	1011.629	-0.003070	-0.002033	-0.000920
82.2000	581.073	50.897	37.399	16.854	-0.649	50.357	1106.215	-0.003563	-0.002618	-0.001180
82.4000	636.107	58.843	46.985	20.847	-0.647	50.356	1210.985	-0.004119	-0.003289	-0.001459
82.6000	679.029	65.087	54.324	23.665	-0.651	50.358	1292.696	-0.004556	-0.003803	-0.001657
82.8000	729.915	72.421	63.104	27.861	-0.653	50.358	1389.570	-0.005069	-0.004417	-0.001950
83.0000	768.117	78.401	69.552	30.851	-0.646	50.358	1462.297	-0.005488	-0.004869	-0.002160
83.2000	811.790	84.489	77.307	34.183	-0.651	50.359	1545.439	-0.005914	-0.005412	-0.002393
83.4000	847.076	89.751	83.155	36.979	-0.623	50.360	1612.616	-0.006283	-0.005821	-0.002589
83.6000	878.861	94.734	88.910	39.365	-0.662	50.361	1673.126	-0.006631	-0.006224	-0.002756
83.8000	918.807	100.363	95.774	42.412	-0.620	50.361	1749.172	-0.007025	-0.006704	-0.002969
84.0000	934.361	103.634	99.470	43.957	-0.645	50.361	1778.784	-0.007254	-0.006963	-0.003077
84.2000	959.744	107.561	103.962	45.924	-0.641	50.363	1827.106	-0.007529	-0.007277	-0.003215
84.4000	972.999	109.765	106.364	47.163	-0.632	50.363	1852.341	-0.007684	-0.007446	-0.003301
84.6000	983.354	111.951	108.824	48.166	-0.635	50.364	1872.053	-0.007837	-0.007618	-0.003372
84.8000	981.641	111.965	108.824	47.972	-0.649	50.365	1868.792	-0.007838	-0.007618	-0.003358
85.0000	983.895	112.736	109.869	48.304	-0.627	50.364	1873.083	-0.007892	-0.007691	-0.003381
85.2000	973.706	111.881	108.478	47.748	-0.635	50.366	1853.685	-0.007832	-0.007593	-0.003342
85.4000	942.296	108.809	105.113	45.913	-0.631	50.366	1793.890	-0.007617	-0.007358	-0.003214
85.6000	945.437	109.203	105.183	46.177	-0.630	50.366	1799.870	-0.007644	-0.007363	-0.003232
85.8000	918.972	105.750	101.334	44.163	-0.632	50.368	1749.487	-0.007402	-0.007093	-0.003091
86.0000	868.356	99.255	94.106	41.077	-0.623	50.368	1653.128	-0.006948	-0.006587	-0.002875
86.2000	843.004	95.969	90.673	39.270	-0.653	50.369	1604.862	-0.006718	-0.006347	-0.002749
86.4000	806.815	91.339	85.088	36.589	-0.643	50.370	1535.969	-0.006394	-0.005956	-0.002561
86.6000	763.503	85.840	78.389	33.935	-0.634	50.370	1453.514	-0.006009	-0.005487	-0.002375
86.8000	714.315	79.101	70.679	30.197	-0.657	50.370	1359.873	-0.005537	-0.004948	-0.002114
87.0000	673.633	73.559	63.618	27.364	-0.655	50.371	1282.425	-0.005149	-0.004453	-0.001915
87.2000	638.752	68.396	57.754	24.652	-0.625	50.371	1216.021	-0.004788	-0.004043	-0.001726
87.4000	584.139	60.775	48.849	20.653	-0.647	50.372	1112.051	-0.004254	-0.003419	-0.001446
87.6000	522.327	52.763	38.757	16.413	-0.643	50.372	994.377	-0.003693	-0.002713	-0.001149
87.8000	485.568	46.842	31.658	13.478	-0.640	50.372	924.397	-0.003279	-0.002216	-0.000943
88.0000	442.557	40.133	23.902	10.368	-0.651	50.374	842.514	-0.002809	-0.001673	-0.000726
88.2000	387.988	32.459	14.356	6.640	-0.633	50.373	738.630	-0.002272	-0.001005	-0.000465
88.4000	361.253	28.178	9.217	4.073	-0.649	50.374	687.733	-0.001972	-0.000645	-0.000285
88.6000	347.006	25.346	5.226	2.556	-0.656	50.375	660.610	-0.001774	-0.000366	-0.000179
88.8000	289.026	17.428	-4.682	-1.304	-0.621	50.375	550.232	-0.001220	0.000328	0.000091
89.0000	275.967	14.710	-8.323	-2.306	-0.660	50.376	525.370	-0.001030	0.000583	0.000161
89.2000	250.253	10.650	-13.575	-4.282	-0.648	50.377	476.418	-0.000746	0.000950	0.000300
89.4000	308.593	15.829	-6.363	-2.070	-0.648	50.376	587.482	-0.001108	0.000445	0.000145
89.6000	225.171	5.766	-20.065	-7.084	-0.653	50.378	428.667	-0.000404	0.001405	0.000496
89.8000	221.233	5.054	-20.901	-7.394	-0.637	50.377	421.171	-0.000354	0.001463	0.000518
90.0000	235.961	6.510	-19.399	-6.878	-0.655	50.378	449.209	-0.000456	0.001358	0.000481
90.2000	239.372	6.313	-19.007	-6.683	-0.647	50.379	455.704	-0.000442	0.001330	0.000468
90.4000	249.156	7.199	-17.784	-6.127	-0.637	50.378	474.329	-0.000504	0.001245	0.000429
90.6000	294.722	12.587	-10.922	-3.476	-0.659	50.379	561.075	-0.000881	0.000765	0.000243
90.8000	293.700	12.799	-10.215	-3.434	-0.653	50.380	559.130	-0.000896	0.000715	0.000240
91.0000	336.696	18.060	-3.458	-0.624	-0.628	50.380	640.984	-0.001264	0.000242	0.000044
91.2000	355.888	20.658	-0.039	0.930	-0.666	50.381	677.519	-0.001446	0.000003	-0.000065
91.4000	405.572	27.405	8.076	4.196	-0.665	50.382	772.104	-0.001918	-0.000565	-0.000294
91.6000	450.717	32.909	15.246	7.324	-0.647	50.381	858.049	-0.002304	-0.001067	-0.000513
91.8000	493.338	38.872	22.777	10.173	-0.660	50.382	939.188	-0.002721	-0.001594	-0.000712
92.0000	538.663	45.690	30.686	13.550	-0.629	50.381	1025.476	-0.003198	-0.002148	-0.000948
92.2000	576.550	51.275	36.980	16.162	-0.657	50.382	1097.603	-0.003589	-0.002589	-0.001131
92.4000	644.223	60.146	47.916	20.845	-0.634	50.383	1226.435	-0.004210	-0.003354	-0.001459
92.6000	681.403	66.039	54.656	24.053	-0.627	50.382	1297.216	-0.004623	-0.003826	-0.001684
92.8000	713.925	70.740	60.560	26.570	-0.625	50.383	1359.129	-0.004952	-0.004239	-0.001860
93.0000	764.375	77.981	69.344	30.432	-0.620	50.383	1455.173	-0.005459	-0.004854	-0.002130
93.2000	819.785	86.036	78.696	34.547	-0.643	50.383	1560.659	-0.006023	-0.005509	-0.002418
93.4000	846.896	90.103	83.184	36.714	-0.641	50.385	1612.272	-0.006307	-0.005823	-0.002570
93.6000	880.184	95.158	89.199	39.505	-0.633	50.384	1675.644	-0.006661	-0.006244	-0.002765
93.8000	910.932	99.608	95.149	41.855	-0.643	50.386	1734.180	-0.006973	-0.006660	-0.002930
94.0000	942.371	104.728	100.610	43.873	-0.627	50.385	1794.033	-0.007331	-0.007043	-0.003071
94.2000	960.526	108.067	104.295	45.953	-0.637	50.384	1828.594	-0.007565	-0.007301	-0.003217
94.4000	972.248	110.411	106.433	46.831	-0.638	50.385	1850.910	-0.007729	-0.007450	-0.003278
94.6000	980.483	111.714	107.908	47.595	-0.631	50.385	1866.589	-0.007820	-0.007554	-0.003332
94.8000	976.741	111.979	108.228	47.720	-0.635	50.384	1859.465	-0.007839	-0.007576	-0.003340
95.0000	986.179	113.525	110.200	48.514	-0.654	50.385	1877.432	-0.007947	-0.007714	-0.003396
95.2000	973.119	112.414	108.937	47.805	-0.643	50.385	1852.570	-0.007869	-0.007626	-0.003346
95.4000	950.742	109.962	106.029	46.539	-0.663	50.384	1809.969	-0.007697	-0.007422	-0.003258
95.6000	941.860	108.557	104.727	45.496	-0.652	50.385	1793.060	-0.007599	-0.007331	-0.003185
95.8000	898.488	103.449	98.763	42.926	-0.635	50.384	1710.491	-0.007241	-0.006913	-0.003005
96.0000	879.928	100.991	96.053	41.814	-0.659	50.385	1675.158	-0.007069	-0.006724	-0.002927
96.2000	827.404	94.874	88.534	38.368	-0.647	50.384	1575.165	-0.006641	-0.006197	-0.002686
96.4000	795.679	90.608	83.561	35.798	-0.637	50.383	1514.769	-0.006343	-0.005849	-0.002506
96.6000	757.582	85.109	77.071	33.005	-0.657	50.385	1442.242	-0.005958	-0.005395	-0.002310
96.8000	690.315	76.973	67.411	28.820	-0.648	50.385	1314.182	-0.005388	-0.004719	-0.002017
97.0000	661.490	72.044	61.727	26.472	-0.646	50.384	1259.308	-0.005043	-0.004321	-0.001853
97.2000	633.222	67.750	56.559	23.942	-0.648	50.385	1205.492	-0.004743	-0.003959	-0.001676
97.4000	584.906	61.252	48.516	20.331	-0.634	50.384	1113.510	-0.004288	-0.003396	-0.001423
97.6000	495.682	50.278	35.089	14.955	-0.656	50.385	943.651	-0.003519	-0.002456	-0.001047
97.8000	585.687	59.487	47.040	19.789	-0.624	50.385	1114.998	-0.004164	-0.003293	-0.001385
98.0000	438.950	40.245	23.319	9.980	-0.653	50.384	835.648	-0.002817	-0.001632	-0.000699
98.2000	400.793	34.323	16.373	7.170	-0.648	50.385	763.006	-0.002403	-0.001146	-0.000502
98.4000	357.736	28.247	8.397	3.644	-0.632	50.384	681.038	-0.001977	-0.000588	-0.000255
98.6000	264.365	16.700	-6.780	-2.154	-0.660	50.385	503.283	-0.001169	0.000475	0.000151
98.8000	271.593	15.678	-7.710	-2.403	-0.644	50.385	517.044	-0.001097	0.000540	0.000168
99.0000	258.203	12.727	-10.757	-3.768	-0.635	50.384	491.552	-0.000891	0.000753	0.000264
99.2000	252.447	10.457	-14.117	-5.032	-0.649	50.385	480.595	-0.000732	0.000988	0.000352
99.4000	238.997	9.053	-16.385	-5.822	-0.623	50.385	454.988	-0.000634	0.001147	0.000408
99.6000	201.741	3.975	-23.663	-8.478	-0.659	50.385	384.064	-0.000278	0.001656	0.000593
99.8000	420.585	29.232	10.866	4.977	-0.639	50.386	800.686	-0.002046	-0.000761	-0.000348
