# Supplementary material for: Evaluation of a Cold-Mixed High-Performance Polyurethane Mixture
Source: Hindawi journal article supplement (doi:10.1155/2019/1507971), 2019-11-07
Supplement: f1 [file 1507971.f1.zip › 1507971.f1/dynamic modulus data/PUM/specimen2/temp50/zhs-2-50_0.2Hz.csv]

Test Information
****************
Project name	zhs
Operator name	2
Target test temperature	50
Target confining stress	0
Average dynamic strain range from 75 to 125 micro-strain
Contact stress	5
Initial modulus	1000
Axial gauge length	70
Comments
Specimen information
********************
Identification	zhs-2-50
Dimensions	Point 1	Point 2	Point 3	Point 4	Point 5	Point 6	Average	Std Dev.
Diameter (mm)	49.2	49.3	49.2				49.23	0.058
Height (mm)	100.8	101.0	100.8				100.87	0.115
Cross-sectional area (mm�)	1903.7
Conditioning time
Properties/Comments
Test Data	0.2Hz
*********
Test date and time	Wed	Apr 3	2019	1:28 PM
Dynamic modulus (MPa)	7995
Phase angle (Degrees)	4.33
Average temperature (�C)	50.4
Average confining pressure (kPa)	-0.7
Average micro-strain	98
Load drift (%)	-1.1
Load standard error (%)	13.7
Average deformation drift (%)	26.8
Average deformation standard error (%)	13.9
Deformation uniformity (%)	31.0
Phase uniformity (Degrees)	0.4
Conditioning Cycles
Time (sec)	Axial stress (kPa)	Axial micro-strain #1	Axial micro-strain #2	Axial micro-strain #3	Confining pressure (kPa)	Temperature (�C)	Load (N)	Displacement #1 (mm)	Displacement #2 (mm)	Displacement #3 (mm)
0.0000	225.111	6.172	10.676	-0.678	-0.731	50.281	428.553	-0.000432	-0.000747	0.000047
0.1000	230.220	5.190	10.397	-1.096	-0.714	50.282	438.280	-0.000363	-0.000728	0.000077
0.2000	245.188	6.679	11.506	-0.362	-0.706	50.282	466.776	-0.000468	-0.000805	0.000025
0.3000	253.048	7.341	13.051	0.041	-0.733	50.282	481.739	-0.000514	-0.000914	-0.000003
0.4000	272.119	9.336	15.998	1.569	-0.720	50.282	518.045	-0.000654	-0.001120	-0.000110
0.5000	290.935	11.409	18.719	2.389	-0.717	50.283	553.865	-0.000799	-0.001310	-0.000167
0.6000	329.618	15.901	24.598	4.853	-0.722	50.282	627.508	-0.001113	-0.001722	-0.000340
0.7000	379.152	21.639	32.115	7.866	-0.712	50.282	721.807	-0.001515	-0.002248	-0.000551
0.8000	374.192	21.668	32.464	8.031	-0.710	50.283	712.366	-0.001517	-0.002272	-0.000562
0.9000	431.992	28.850	41.441	12.131	-0.735	50.283	822.401	-0.002020	-0.002901	-0.000849
1.0000	484.050	35.587	49.542	15.510	-0.715	50.282	921.507	-0.002491	-0.003468	-0.001086
1.1000	532.502	41.481	56.836	18.453	-0.691	50.282	1013.746	-0.002904	-0.003979	-0.001292
1.2000	537.566	42.927	58.589	19.217	-0.719	50.283	1023.388	-0.003005	-0.004101	-0.001345
1.3000	579.871	48.387	65.190	21.819	-0.722	50.282	1103.926	-0.003387	-0.004563	-0.001527
1.4000	636.874	55.907	73.820	25.751	-0.677	50.282	1212.444	-0.003913	-0.005167	-0.001803
1.5000	672.176	60.778	80.183	28.542	-0.706	50.283	1279.650	-0.004254	-0.005613	-0.001998
1.6000	696.612	64.959	84.715	30.656	-0.732	50.283	1326.170	-0.004547	-0.005930	-0.002146
1.7000	681.659	63.668	83.766	30.237	-0.719	50.282	1297.703	-0.004457	-0.005864	-0.002117
1.8000	746.311	72.242	93.120	34.892	-0.707	50.283	1420.784	-0.005057	-0.006518	-0.002442
1.9000	760.798	74.963	96.331	36.019	-0.728	50.284	1448.364	-0.005247	-0.006743	-0.002521
2.0000	793.004	79.509	101.570	38.327	-0.722	50.282	1509.676	-0.005566	-0.007110	-0.002683
2.1000	782.875	78.247	101.083	37.897	-0.697	50.283	1490.393	-0.005477	-0.007076	-0.002653
2.2000	811.294	82.108	105.585	40.119	-0.711	50.284	1544.495	-0.005748	-0.007391	-0.002808
2.3000	824.534	84.111	107.754	41.299	-0.737	50.284	1569.700	-0.005888	-0.007543	-0.002891
2.4000	843.184	87.059	110.560	42.373	-0.711	50.283	1605.206	-0.006094	-0.007739	-0.002966
2.5000	824.398	85.544	108.532	41.479	-0.680	50.283	1569.443	-0.005988	-0.007597	-0.002904
2.6000	827.329	85.966	109.367	41.871	-0.693	50.284	1575.022	-0.006018	-0.007656	-0.002931
2.7000	821.197	85.236	108.715	41.510	-0.713	50.283	1563.349	-0.005967	-0.007610	-0.002906
2.8000	787.519	81.069	103.795	39.325	-0.692	50.283	1499.233	-0.005675	-0.007266	-0.002753
2.9000	775.150	79.383	101.958	38.396	-0.697	50.285	1475.687	-0.005557	-0.007137	-0.002688
3.0000	726.759	73.643	95.370	35.130	-0.722	50.284	1383.562	-0.005155	-0.006676	-0.002459
3.1000	712.482	72.128	93.039	34.337	-0.716	50.283	1356.382	-0.005049	-0.006513	-0.002404
3.2000	698.535	70.460	90.856	33.210	-0.711	50.284	1329.832	-0.004932	-0.006360	-0.002325
3.3000	647.093	63.879	83.613	29.753	-0.710	50.285	1231.899	-0.004472	-0.005853	-0.002083
3.4000	599.153	57.393	76.044	26.681	-0.722	50.284	1140.633	-0.004018	-0.005323	-0.001868
3.5000	613.820	58.631	77.375	27.238	-0.690	50.284	1168.556	-0.004104	-0.005416	-0.001907
3.6000	523.890	47.827	63.969	21.112	-0.706	50.285	997.353	-0.003348	-0.004478	-0.001478
3.7000	512.003	45.676	61.670	19.944	-0.722	50.285	974.722	-0.003197	-0.004317	-0.001396
3.8000	467.624	39.318	54.032	17.009	-0.708	50.284	890.236	-0.002752	-0.003782	-0.001191
3.9000	424.553	33.186	46.637	13.771	-0.681	50.286	808.239	-0.002323	-0.003265	-0.000964
4.0000	389.311	28.316	40.772	11.101	-0.710	50.285	741.148	-0.001982	-0.002854	-0.000777
4.1000	373.696	25.879	37.453	9.910	-0.691	50.284	711.422	-0.001812	-0.002622	-0.000694
4.2000	326.011	19.451	29.725	6.570	-0.700	50.284	620.642	-0.001362	-0.002081	-0.000460
4.3000	327.544	18.890	28.392	5.918	-0.710	50.285	623.560	-0.001322	-0.001987	-0.000414
4.4000	298.945	14.201	22.430	3.586	-0.719	50.284	569.115	-0.000994	-0.001570	-0.000251
4.5000	226.673	6.117	11.217	-0.512	-0.702	50.284	431.528	-0.000428	-0.000785	0.000036
4.6000	222.090	4.672	10.051	-1.206	-0.722	50.285	422.802	-0.000327	-0.000704	0.000084
4.7000	264.109	8.718	15.371	0.707	-0.728	50.285	502.796	-0.000610	-0.001076	-0.000049
4.8000	188.156	-0.322	2.587	-4.183	-0.702	50.284	358.200	0.000023	-0.000181	0.000293
4.9000	212.412	2.050	6.185	-2.724	-0.684	50.284	404.377	-0.000143	-0.000433	0.000191
5.0000	207.557	1.263	5.309	-2.990	-0.694	50.285	395.136	-0.000088	-0.000372	0.000209
5.1000	231.167	3.147	8.090	-2.265	-0.714	50.285	440.083	-0.000220	-0.000566	0.000159
5.2000	251.455	5.570	11.660	-1.094	-0.706	50.284	478.706	-0.000390	-0.000816	0.000077
5.3000	279.228	8.899	15.385	1.097	-0.693	50.285	531.578	-0.000623	-0.001077	-0.000077
5.4000	264.695	7.031	13.509	0.430	-0.708	50.286	503.912	-0.000492	-0.000946	-0.000030
5.5000	323.562	13.894	21.807	3.963	-0.716	50.285	615.978	-0.000973	-0.001526	-0.000277
5.6000	330.595	14.807	23.290	4.519	-0.688	50.284	629.368	-0.001037	-0.001630	-0.000316
5.7000	367.986	19.354	29.684	7.142	-0.699	50.286	700.550	-0.001355	-0.002078	-0.000500
5.8000	398.598	23.840	34.853	8.977	-0.730	50.286	758.829	-0.001669	-0.002440	-0.000628
5.9000	451.423	29.918	43.053	12.573	-0.725	50.285	859.394	-0.002094	-0.003014	-0.000880
6.0000	486.860	34.858	48.887	15.079	-0.705	50.286	926.857	-0.002440	-0.003422	-0.001056
6.1000	535.492	41.257	56.600	18.288	-0.716	50.287	1019.440	-0.002888	-0.003962	-0.001280
6.2000	567.052	45.942	62.270	20.749	-0.720	50.285	1079.521	-0.003216	-0.004359	-0.001452
6.3000	557.930	45.887	62.214	20.805	-0.703	50.286	1062.155	-0.003212	-0.004355	-0.001456
6.4000	692.208	60.999	80.962	29.306	-0.694	50.287	1317.787	-0.004270	-0.005667	-0.002051
6.5000	677.601	61.463	80.614	29.223	-0.702	50.286	1289.978	-0.004302	-0.005643	-0.002046
6.6000	675.392	61.490	81.061	29.596	-0.692	50.286	1285.772	-0.004304	-0.005674	-0.002072
6.7000	722.355	68.017	88.244	32.838	-0.692	50.287	1375.179	-0.004761	-0.006177	-0.002299
6.8000	759.446	73.501	95.358	35.727	-0.708	50.287	1445.789	-0.005145	-0.006675	-0.002501
6.9000	768.508	75.174	97.236	36.309	-0.684	50.287	1463.041	-0.005262	-0.006806	-0.002542
7.0000	775.045	76.775	98.845	37.327	-0.701	50.287	1475.487	-0.005374	-0.006919	-0.002613
7.1000	829.147	83.607	106.697	40.896	-0.714	50.287	1578.484	-0.005853	-0.007469	-0.002863
7.2000	810.572	82.036	104.906	40.368	-0.707	50.287	1543.121	-0.005743	-0.007343	-0.002826
7.3000	837.533	85.866	109.103	42.079	-0.701	50.288	1594.448	-0.006011	-0.007637	-0.002946
7.4000	840.133	86.248	110.271	42.315	-0.714	50.288	1599.398	-0.006037	-0.007719	-0.002962
7.5000	843.710	86.990	110.520	42.620	-0.727	50.287	1606.207	-0.006089	-0.007736	-0.002983
7.6000	807.792	82.921	106.002	40.299	-0.707	50.287	1537.828	-0.005804	-0.007420	-0.002821
7.7000	880.469	91.929	115.870	45.011	-0.723	50.288	1676.188	-0.006435	-0.008111	-0.003151
7.8000	763.593	77.981	100.376	37.757	-0.727	50.288	1453.686	-0.005459	-0.007026	-0.002643
7.9000	775.481	79.748	102.307	38.938	-0.707	50.288	1476.316	-0.005582	-0.007161	-0.002726
8.0000	746.972	76.299	98.125	36.700	-0.683	50.288	1422.043	-0.005341	-0.006869	-0.002569
8.1000	741.396	74.781	96.288	35.561	-0.686	50.289	1411.428	-0.005235	-0.006740	-0.002489
8.2000	679.254	67.751	87.577	31.727	-0.705	50.287	1293.125	-0.004743	-0.006130	-0.002221
8.3000	651.542	63.894	83.322	30.027	-0.675	50.289	1240.368	-0.004473	-0.005833	-0.002102
8.4000	612.077	59.095	77.693	27.140	-0.707	50.289	1165.237	-0.004137	-0.005439	-0.001900
8.5000	564.166	52.482	69.914	24.051	-0.734	50.289	1074.028	-0.003674	-0.004894	-0.001684
8.6000	516.406	46.475	62.661	20.306	-0.716	50.288	983.105	-0.003253	-0.004386	-0.001421
8.7000	489.460	42.690	57.755	18.383	-0.692	50.289	931.807	-0.002988	-0.004043	-0.001287
8.8000	472.102	39.851	54.101	16.785	-0.715	50.289	898.762	-0.002790	-0.003787	-0.001175
8.9000	416.843	32.641	45.676	13.286	-0.721	50.289	793.562	-0.002285	-0.003197	-0.000930
9.0000	371.487	26.973	38.481	10.286	-0.696	50.289	707.216	-0.001888	-0.002694	-0.000720
9.1000	348.734	23.224	33.546	8.115	-0.699	50.290	663.900	-0.001626	-0.002348	-0.000568
9.2000	332.774	20.139	29.879	6.725	-0.705	50.290	633.516	-0.001410	-0.002092	-0.000471
9.3000	286.216	14.118	22.180	3.476	-0.699	50.290	544.882	-0.000988	-0.001553	-0.000243
9.4000	258.684	10.639	17.454	1.903	-0.690	50.290	492.468	-0.000745	-0.001222	-0.000133
9.5000	268.843	10.722	17.829	2.140	-0.698	50.291	511.808	-0.000751	-0.001248	-0.000150
9.6000	245.444	7.115	13.218	-0.249	-0.711	50.290	467.262	-0.000498	-0.000925	0.000017
9.7000	224.615	4.197	9.286	-1.206	-0.688	50.290	427.608	-0.000294	-0.000650	0.000084
9.8000	220.256	2.822	7.895	-2.013	-0.705	50.291	419.312	-0.000198	-0.000553	0.000141
9.9000	222.405	3.033	7.715	-1.805	-0.728	50.291	423.403	-0.000212	-0.000540	0.000126
10.0000	228.026	3.469	8.062	-2.000	-0.704	50.291	434.103	-0.000243	-0.000564	0.000140
10.1000	209.661	1.348	5.005	-2.988	-0.684	50.291	399.141	-0.000094	-0.000350	0.000209
10.2000	253.033	5.515	11.563	-0.292	-0.700	50.292	481.710	-0.000386	-0.000809	0.000020
10.3000	246.361	4.562	10.577	-0.650	-0.707	50.291	469.007	-0.000319	-0.000740	0.000045
10.4000	272.375	7.591	14.232	0.472	-0.693	50.292	518.532	-0.000531	-0.000996	-0.000033
10.5000	299.351	11.365	18.400	2.612	-0.713	50.292	569.887	-0.000796	-0.001288	-0.000183
10.6000	309.149	12.813	20.513	3.016	-0.724	50.292	588.541	-0.000897	-0.001436	-0.000211
10.7000	374.057	20.530	30.449	7.419	-0.695	50.291	712.109	-0.001437	-0.002131	-0.000519
10.8000	387.868	22.732	33.879	9.075	-0.688	50.293	738.401	-0.001591	-0.002372	-0.000635
10.9000	443.624	29.146	41.691	12.353	-0.713	50.293	844.545	-0.002040	-0.002918	-0.000865
11.0000	469.217	33.540	46.581	14.578	-0.712	50.292	893.269	-0.002348	-0.003261	-0.001020
11.1000	515.429	39.093	54.089	17.423	-0.690	50.292	981.245	-0.002737	-0.003786	-0.001220
11.2000	537.281	42.507	57.852	19.092	-0.720	50.293	1022.844	-0.002975	-0.004050	-0.001336
11.3000	621.515	53.536	70.803	24.834	-0.731	50.293	1183.205	-0.003748	-0.004956	-0.001738
11.4000	674.580	60.074	79.391	28.403	-0.695	50.293	1284.227	-0.004205	-0.005557	-0.001988
11.5000	652.804	58.308	76.849	27.387	-0.684	50.294	1242.771	-0.004082	-0.005379	-0.001917
11.6000	684.213	62.923	81.978	29.947	-0.719	50.294	1302.567	-0.004405	-0.005738	-0.002096
11.7000	784.678	75.976	97.999	37.230	-0.706	50.293	1493.826	-0.005318	-0.006860	-0.002606
11.8000	725.046	70.025	90.897	33.975	-0.682	50.294	1380.301	-0.004902	-0.006363	-0.002378
11.9000	729.614	71.442	92.148	34.518	-0.691	50.294	1388.998	-0.005001	-0.006450	-0.002416
12.0000	776.353	76.595	98.764	37.605	-0.724	50.294	1477.976	-0.005362	-0.006913	-0.002632
12.1000	799.181	80.351	102.961	39.505	-0.699	50.294	1521.435	-0.005625	-0.007207	-0.002765
12.2000	841.741	85.811	108.867	42.148	-0.672	50.295	1602.459	-0.006007	-0.007621	-0.002950
12.3000	833.656	85.769	109.048	41.842	-0.705	50.295	1587.067	-0.006004	-0.007633	-0.002929
12.4000	821.017	84.743	107.630	41.217	-0.685	50.294	1563.005	-0.005932	-0.007534	-0.002885
12.5000	819.725	84.168	107.323	41.229	-0.680	50.295	1560.545	-0.005892	-0.007513	-0.002886
12.6000	820.251	84.463	107.296	41.341	-0.699	50.296	1561.546	-0.005912	-0.007511	-0.002894
12.7000	804.441	82.667	105.655	39.908	-0.692	50.295	1531.448	-0.005787	-0.007396	-0.002794
12.8000	803.419	82.753	105.432	39.980	-0.676	50.295	1529.503	-0.005793	-0.007380	-0.002799
12.9000	771.333	79.297	101.194	38.190	-0.678	50.296	1468.420	-0.005551	-0.007084	-0.002673
13.0000	711.159	72.661	93.290	34.782	-0.699	50.296	1353.865	-0.005086	-0.006530	-0.002435
13.1000	698.160	70.559	90.871	33.350	-0.683	50.295	1329.117	-0.004939	-0.006361	-0.002334
13.2000	706.155	70.853	91.162	33.668	-0.672	50.296	1344.337	-0.004960	-0.006381	-0.002357
13.3000	656.246	64.708	84.114	30.283	-0.690	50.297	1249.323	-0.004530	-0.005888	-0.002120
13.4000	625.858	60.721	79.627	28.012	-0.698	50.296	1191.473	-0.004250	-0.005574	-0.001961
13.5000	581.735	54.742	72.276	24.737	-0.660	50.296	1107.473	-0.003832	-0.005059	-0.001732
13.6000	509.042	45.647	61.449	20.316	-0.676	50.297	969.086	-0.003195	-0.004301	-0.001422
13.7000	521.892	46.238	62.228	20.151	-0.703	50.297	993.547	-0.003237	-0.004356	-0.001411
13.8000	457.735	38.505	52.473	16.164	-0.692	50.296	871.410	-0.002695	-0.003673	-0.001131
13.9000	418.196	33.160	45.443	13.230	-0.684	50.297	796.137	-0.002321	-0.003181	-0.000926
14.0000	393.714	29.160	40.495	10.977	-0.702	50.298	749.531	-0.002041	-0.002835	-0.000768
14.1000	352.521	23.266	33.797	8.240	-0.686	50.297	671.110	-0.001629	-0.002366	-0.000577
14.2000	316.844	18.145	27.903	6.169	-0.677	50.297	603.189	-0.001270	-0.001953	-0.000432
14.3000	286.532	14.090	22.054	3.698	-0.668	50.297	545.483	-0.000986	-0.001544	-0.000259
14.4000	269.414	11.633	18.720	2.222	-0.697	50.298	512.896	-0.000814	-0.001310	-0.000156
14.5000	246.751	8.155	14.484	0.623	-0.685	50.297	469.751	-0.000571	-0.001014	-0.000044
14.6000	244.933	7.101	13.288	-0.099	-0.670	50.299	466.290	-0.000497	-0.000930	0.000007
14.7000	229.394	4.870	9.938	-0.942	-0.694	50.298	436.707	-0.000341	-0.000696	0.000066
14.8000	222.195	3.764	8.006	-1.568	-0.699	50.297	423.002	-0.000263	-0.000560	0.000110
14.9000	206.956	1.462	4.965	-2.863	-0.671	50.298	393.991	-0.000102	-0.000348	0.000200
15.0000	213.464	1.798	5.657	-2.571	-0.689	50.299	406.380	-0.000126	-0.000396	0.000180
15.1000	269.129	7.847	14.191	0.638	-0.720	50.298	512.352	-0.000549	-0.000993	-0.000045
15.2000	252.192	5.668	11.022	-0.929	-0.702	50.298	480.108	-0.000397	-0.000772	0.000065
15.3000	250.824	5.249	11.035	-0.347	-0.667	50.299	477.505	-0.000367	-0.000772	0.000024
15.4000	266.514	7.440	13.300	0.374	-0.677	50.299	507.374	-0.000521	-0.000931	-0.000026
15.5000	300.207	11.506	19.027	2.585	-0.696	50.298	571.518	-0.000805	-0.001332	-0.000181
15.6000	316.949	13.444	21.417	4.240	-0.681	50.299	603.390	-0.000941	-0.001499	-0.000297
15.7000	357.691	18.875	28.197	6.266	-0.699	50.300	680.952	-0.001321	-0.001974	-0.000439
15.8000	392.437	22.369	33.630	8.254	-0.711	50.299	747.099	-0.001566	-0.002354	-0.000578
15.9000	434.546	28.150	40.565	11.532	-0.683	50.299	827.265	-0.001970	-0.002840	-0.000807
16.0000	455.842	31.645	44.748	13.563	-0.673	50.300	867.805	-0.002215	-0.003132	-0.000949
16.1000	508.937	38.352	52.571	17.272	-0.719	50.300	968.885	-0.002685	-0.003680	-0.001209
16.2000	553.707	44.384	60.035	20.069	-0.694	50.300	1054.115	-0.003107	-0.004202	-0.001405
16.3000	580.517	48.107	65.037	22.372	-0.697	50.301	1105.156	-0.003367	-0.004553	-0.001566
16.4000	613.625	53.072	70.110	24.887	-0.707	50.301	1168.184	-0.003715	-0.004908	-0.001742
16.5000	647.243	58.237	76.308	27.238	-0.680	50.299	1232.185	-0.004077	-0.005342	-0.001907
16.6000	723.407	67.607	87.897	32.770	-0.687	50.301	1377.182	-0.004732	-0.006153	-0.002294
16.7000	711.385	67.106	87.300	31.976	-0.721	50.301	1354.294	-0.004697	-0.006111	-0.002238
16.8000	705.509	67.496	88.034	32.630	-0.695	50.300	1343.107	-0.004725	-0.006162	-0.002284
16.9000	779.373	76.847	98.236	37.258	-0.676	50.301	1483.727	-0.005379	-0.006877	-0.002608
17.0000	800.984	79.566	101.445	38.300	-0.692	50.302	1524.868	-0.005570	-0.007101	-0.002681
17.1000	795.619	79.677	102.070	38.409	-0.695	50.301	1514.654	-0.005577	-0.007145	-0.002689
17.2000	820.822	83.607	106.350	40.866	-0.671	50.301	1562.634	-0.005852	-0.007445	-0.002861
17.3000	824.443	84.209	107.517	41.214	-0.688	50.302	1569.529	-0.005895	-0.007526	-0.002885
17.4000	823.617	84.560	107.463	41.453	-0.693	50.301	1567.955	-0.005919	-0.007522	-0.002902
17.5000	779.854	79.803	101.807	38.952	-0.674	50.301	1484.642	-0.005586	-0.007127	-0.002727
17.6000	794.597	81.841	104.558	39.742	-0.674	50.302	1512.709	-0.005729	-0.007319	-0.002782
17.7000	817.801	84.519	107.769	40.978	-0.699	50.303	1556.883	-0.005916	-0.007544	-0.002868
17.8000	793.004	81.334	104.572	39.673	-0.684	50.301	1509.676	-0.005693	-0.007320	-0.002777
17.9000	789.668	80.631	103.627	39.131	-0.685	50.303	1503.325	-0.005644	-0.007254	-0.002739
18.0000	702.879	71.595	92.079	34.184	-0.702	50.303	1338.100	-0.005012	-0.006446	-0.002393
18.1000	734.739	74.260	95.690	35.685	-0.681	50.303	1398.754	-0.005198	-0.006698	-0.002498
18.2000	691.848	69.772	89.548	32.823	-0.679	50.303	1317.101	-0.004884	-0.006268	-0.002298
18.3000	630.652	62.206	80.767	28.904	-0.706	50.304	1200.600	-0.004354	-0.005654	-0.002023
18.4000	626.068	60.174	79.156	27.846	-0.710	50.303	1191.874	-0.004212	-0.005541	-0.001949
18.5000	588.122	55.372	72.622	24.679	-0.686	50.304	1119.633	-0.003876	-0.005084	-0.001728
18.6000	536.649	49.145	65.288	21.805	-0.687	50.304	1021.643	-0.003440	-0.004570	-0.001526
18.7000	477.948	41.623	56.058	17.910	-0.705	50.304	909.891	-0.002914	-0.003924	-0.001254
18.8000	465.790	39.500	53.698	16.773	-0.669	50.304	886.745	-0.002765	-0.003759	-0.001174
18.9000	422.644	33.244	46.360	13.742	-0.679	50.305	804.605	-0.002327	-0.003245	-0.000962
19.0000	390.002	28.781	40.690	11.337	-0.701	50.304	742.464	-0.002015	-0.002848	-0.000794
19.1000	351.499	23.743	34.130	8.837	-0.687	50.304	669.165	-0.001662	-0.002389	-0.000619
19.2000	324.839	19.970	29.405	6.712	-0.675	50.305	618.410	-0.001398	-0.002058	-0.000470
19.3000	306.534	16.980	25.599	5.170	-0.700	50.306	583.563	-0.001189	-0.001792	-0.000362
19.4000	288.696	14.119	22.290	3.600	-0.691	50.304	549.603	-0.000988	-0.001560	-0.000252
19.5000	254.010	8.535	14.984	0.665	-0.664	50.306	483.570	-0.000597	-0.001049	-0.000047
19.6000	235.615	6.132	11.686	-0.333	-0.691	50.306	448.551	-0.000429	-0.000818	0.000023
19.7000	219.415	4.101	8.535	-1.651	-0.697	50.306	417.709	-0.000287	-0.000597	0.000116
19.8000	217.251	3.524	7.824	-1.736	-0.675	50.305	413.589	-0.000247	-0.000548	0.000122
19.9000	235.510	4.212	9.799	-1.192	-0.678	50.306	448.351	-0.000295	-0.000686	0.000083
20.0000	205.438	0.998	5.061	-2.808	-0.699	50.306	391.102	-0.000070	-0.000354	0.000197
20.1000	216.559	1.924	5.864	-2.252	-0.695	50.306	412.273	-0.000135	-0.000410	0.000158
20.2000	260.157	7.059	12.466	-0.195	-0.675	50.306	495.272	-0.000494	-0.000873	0.000014
20.3000	289.552	10.203	16.941	1.679	-0.685	50.307	551.233	-0.000714	-0.001186	-0.000118
20.4000	275.170	8.563	15.136	1.234	-0.711	50.306	523.853	-0.000599	-0.001060	-0.000086
20.5000	312.937	12.896	20.764	3.378	-0.691	50.306	595.751	-0.000903	-0.001453	-0.000236
20.6000	299.681	12.279	19.944	3.393	-0.677	50.307	570.517	-0.000859	-0.001396	-0.000238
20.7000	362.951	19.675	29.267	7.183	-0.704	50.308	690.966	-0.001377	-0.002049	-0.000503
20.8000	394.571	23.559	34.172	9.006	-0.683	50.307	751.162	-0.001649	-0.002392	-0.000630
20.9000	406.263	25.248	37.008	10.661	-0.671	50.308	773.420	-0.001767	-0.002591	-0.000746
21.0000	460.531	31.954	45.275	13.909	-0.691	50.307	876.732	-0.002237	-0.003169	-0.000974
21.1000	488.994	35.995	49.709	15.705	-0.711	50.308	930.920	-0.002520	-0.003480	-0.001099
21.2000	573.604	46.533	62.757	21.264	-0.691	50.307	1091.995	-0.003257	-0.004393	-0.001489
21.3000	594.343	50.279	67.186	23.469	-0.687	50.309	1131.477	-0.003520	-0.004703	-0.001643
21.4000	619.351	54.267	71.955	25.446	-0.699	50.308	1179.085	-0.003799	-0.005037	-0.001781
21.5000	643.817	57.619	76.016	27.364	-0.714	50.308	1225.662	-0.004033	-0.005321	-0.001915
21.6000	668.283	61.659	80.169	29.404	-0.669	50.308	1272.240	-0.004316	-0.005612	-0.002058
21.7000	711.971	67.848	87.787	32.254	-0.702	50.310	1355.410	-0.004749	-0.006145	-0.002258
21.8000	734.318	71.205	91.663	34.406	-0.704	50.309	1397.953	-0.004984	-0.006416	-0.002408
21.9000	750.383	73.979	95.078	35.533	-0.680	50.309	1428.537	-0.005179	-0.006655	-0.002487
22.0000	757.191	75.245	96.566	36.561	-0.680	50.310	1441.498	-0.005267	-0.006760	-0.002559
22.1000	804.937	81.292	103.670	39.880	-0.690	50.309	1532.393	-0.005690	-0.007257	-0.002792
22.2000	822.445	83.567	106.364	41.119	-0.673	50.308	1565.723	-0.005850	-0.007445	-0.002878
22.3000	828.666	85.333	107.920	41.494	-0.679	50.310	1577.568	-0.005973	-0.007554	-0.002905
22.4000	825.240	85.305	107.976	41.480	-0.714	50.309	1571.045	-0.005971	-0.007558	-0.002904
22.5000	821.017	84.996	107.767	41.521	-0.688	50.310	1563.005	-0.005950	-0.007544	-0.002907
22.6000	819.694	84.870	107.892	41.411	-0.681	50.310	1560.488	-0.005941	-0.007552	-0.002899
22.7000	803.268	83.077	105.822	40.423	-0.699	50.311	1529.217	-0.005815	-0.007408	-0.002830
22.8000	777.991	80.028	102.488	38.757	-0.688	50.310	1481.094	-0.005602	-0.007174	-0.002713
22.9000	765.006	78.597	100.751	37.912	-0.671	50.310	1456.375	-0.005502	-0.007053	-0.002654
23.0000	754.216	77.547	98.917	37.410	-0.681	50.311	1435.833	-0.005428	-0.006924	-0.002619
23.1000	724.054	73.488	94.481	35.352	-0.687	50.310	1378.412	-0.005144	-0.006614	-0.002475
23.2000	696.356	70.136	90.284	33.032	-0.665	50.310	1325.684	-0.004910	-0.006320	-0.002312
23.3000	623.228	61.954	79.863	28.499	-0.669	50.311	1186.466	-0.004337	-0.005590	-0.001995
23.4000	617.457	60.188	78.140	27.557	-0.690	50.311	1175.480	-0.004213	-0.005470	-0.001929
23.5000	573.679	54.296	71.346	24.304	-0.677	50.310	1092.138	-0.003801	-0.004994	-0.001701
23.6000	543.397	50.278	66.162	22.329	-0.671	50.311	1034.489	-0.003519	-0.004631	-0.001563
23.7000	493.548	44.077	58.589	19.288	-0.699	50.312	939.589	-0.003085	-0.004101	-0.001350
23.8000	472.959	40.597	54.919	17.356	-0.693	50.310	900.393	-0.002842	-0.003844	-0.001215
23.9000	433.359	35.490	48.432	14.662	-0.673	50.312	825.005	-0.002484	-0.003390	-0.001026
24.0000	386.110	28.263	40.302	11.324	-0.691	50.312	735.054	-0.001978	-0.002821	-0.000793
24.1000	369.699	25.822	36.911	9.841	-0.700	50.312	703.812	-0.001808	-0.002584	-0.000689
24.2000	330.204	20.672	30.017	7.004	-0.693	50.311	628.624	-0.001447	-0.002101	-0.000490
24.3000	304.415	17.035	24.958	4.894	-0.676	50.312	579.529	-0.001192	-0.001747	-0.000343
24.4000	289.823	14.611	22.096	3.713	-0.686	50.312	551.748	-0.001023	-0.001547	-0.000260
24.5000	241.717	7.957	13.523	0.069	-0.687	50.312	460.167	-0.000557	-0.000947	-0.000005
24.6000	222.405	5.023	9.787	-0.956	-0.668	50.312	423.403	-0.000352	-0.000685	0.000067
24.7000	249.306	7.242	12.285	0.013	-0.683	50.313	474.615	-0.000507	-0.000860	-0.000001
24.8000	223.773	4.240	8.270	-1.626	-0.714	50.312	426.006	-0.000297	-0.000579	0.000114
24.9000	208.579	2.050	5.796	-2.570	-0.676	50.312	397.081	-0.000143	-0.000406	0.000180
25.0000	230.821	3.695	8.548	-1.847	-0.675	50.306	439.425	-0.000259	-0.000598	0.000129
25.1000	244.678	4.618	9.550	-1.167	-0.690	50.305	465.803	-0.000323	-0.000668	0.000082
25.2000	236.667	3.677	8.702	-1.012	-0.670	50.306	450.554	-0.000257	-0.000609	0.000071
25.3000	291.777	10.134	16.886	1.958	-0.672	50.306	555.468	-0.000709	-0.001182	-0.000137
25.4000	292.829	10.383	17.426	1.931	-0.693	50.306	557.470	-0.000727	-0.001220	-0.000135
25.5000	305.227	12.181	20.056	3.181	-0.689	50.305	581.074	-0.000853	-0.001404	-0.000223
25.6000	362.861	18.990	28.960	6.821	-0.675	50.306	690.794	-0.001329	-0.002027	-0.000477
25.7000	419.819	25.978	37.259	10.674	-0.698	50.307	799.227	-0.001818	-0.002608	-0.000747
25.8000	504.233	36.360	50.236	15.913	-0.695	50.306	959.930	-0.002545	-0.003517	-0.001114
25.9000	509.343	38.366	52.389	17.313	-0.660	50.307	969.658	-0.002686	-0.003667	-0.001212
26.0000	531.735	42.058	56.822	18.439	-0.690	50.308	1012.287	-0.002944	-0.003978	-0.001291
26.1000	608.140	51.683	68.900	24.109	-0.692	50.307	1157.742	-0.003618	-0.004823	-0.001688
26.2000	722.521	65.199	85.199	31.754	-0.678	50.307	1375.494	-0.004564	-0.005964	-0.002223
26.3000	694.899	64.046	83.533	30.669	-0.692	50.308	1322.908	-0.004483	-0.005847	-0.002147
26.4000	728.968	68.872	89.548	33.504	-0.721	50.308	1387.768	-0.004821	-0.006268	-0.002345
26.5000	778.366	75.681	97.847	37.229	-0.702	50.307	1481.810	-0.005298	-0.006849	-0.002606
26.6000	814.254	81.070	103.974	39.881	-0.673	50.308	1550.131	-0.005675	-0.007278	-0.002792
26.7000	880.965	90.214	114.355	44.663	-0.687	50.309	1677.132	-0.006315	-0.008005	-0.003126
26.8000	910.135	94.849	119.386	46.982	-0.697	50.308	1732.664	-0.006639	-0.008357	-0.003289
26.9000	933.640	99.116	124.123	48.847	-0.688	50.308	1777.411	-0.006938	-0.008689	-0.003419
27.0000	980.844	104.771	131.365	52.138	-0.676	50.309	1867.275	-0.007334	-0.009196	-0.003650
27.1000	932.813	100.461	126.377	49.887	-0.703	50.308	1775.837	-0.007032	-0.008846	-0.003492
27.2000	1015.635	110.397	137.911	55.171	-0.680	50.309	1933.508	-0.007728	-0.009654	-0.003862
27.3000	1001.418	110.046	137.229	54.490	-0.667	50.309	1906.443	-0.007703	-0.009606	-0.003814
27.4000	979.987	107.899	135.352	53.667	-0.695	50.310	1865.644	-0.007553	-0.009475	-0.003757
27.5000	985.773	109.105	136.576	54.280	-0.686	50.309	1876.659	-0.007637	-0.009560	-0.003800
27.6000	1011.758	111.743	139.368	55.407	-0.669	50.310	1926.126	-0.007822	-0.009756	-0.003878
27.7000	946.264	104.782	131.936	52.293	-0.702	50.310	1801.443	-0.007335	-0.009236	-0.003661
27.8000	977.012	108.711	135.616	53.904	-0.684	50.310	1859.980	-0.007610	-0.009493	-0.003773
27.9000	961.457	107.434	133.906	52.903	-0.681	50.311	1830.368	-0.007520	-0.009373	-0.003703
28.0000	942.702	104.602	130.823	51.555	-0.699	50.311	1794.662	-0.007322	-0.009158	-0.003609
28.1000	895.438	97.949	123.137	47.887	-0.701	50.311	1704.683	-0.006856	-0.008620	-0.003352
28.2000	818.297	89.361	113.103	43.499	-0.676	50.311	1557.827	-0.006255	-0.007917	-0.003045
28.3000	781.102	84.308	107.268	41.062	-0.686	50.312	1487.017	-0.005902	-0.007509	-0.002874
28.4000	700.128	74.414	95.732	35.436	-0.708	50.311	1332.865	-0.005209	-0.006701	-0.002481
28.5000	714.886	75.891	96.887	35.908	-0.680	50.312	1360.960	-0.005312	-0.006782	-0.002514
28.6000	662.001	67.779	88.035	32.116	-0.680	50.312	1260.281	-0.004745	-0.006162	-0.002248
28.7000	589.970	58.617	76.697	26.639	-0.702	50.313	1123.152	-0.004103	-0.005369	-0.001865
28.8000	560.890	54.799	71.985	25.014	-0.685	50.312	1067.791	-0.003836	-0.005039	-0.001751
28.9000	498.973	46.238	61.394	20.053	-0.673	50.312	949.917	-0.003237	-0.004298	-0.001404
29.0000	442.632	39.024	52.586	16.230	-0.689	50.314	842.657	-0.002732	-0.003681	-0.001136
29.1000	397.231	32.542	44.774	13.005	-0.708	50.313	756.226	-0.002278	-0.003134	-0.000910
29.2000	381.631	29.357	40.842	11.421	-0.673	50.313	726.528	-0.002055	-0.002859	-0.000799
29.3000	322.059	21.332	30.394	7.476	-0.673	50.314	613.117	-0.001493	-0.002128	-0.000523
29.4000	287.088	16.657	24.388	4.754	-0.702	50.314	546.541	-0.001166	-0.001707	-0.000333
29.5000	276.613	14.400	21.655	3.699	-0.697	50.313	526.600	-0.001008	-0.001516	-0.000259
29.6000	256.941	10.888	17.650	1.777	-0.673	50.314	489.149	-0.000762	-0.001235	-0.000124
29.7000	253.289	9.517	16.080	1.362	-0.704	50.315	482.197	-0.000666	-0.001126	-0.000095
29.8000	235.134	7.142	12.397	-0.153	-0.690	50.314	447.636	-0.000500	-0.000868	0.000011
29.9000	243.550	7.509	12.508	-0.155	-0.675	50.314	463.657	-0.000526	-0.000876	0.000011
30.0000	242.559	7.144	12.368	-0.001	-0.683	50.316	461.769	-0.000500	-0.000866	0.000000
30.1000	236.051	6.047	11.382	-0.761	-0.690	50.315	449.381	-0.000423	-0.000797	0.000053
30.2000	251.020	7.298	13.050	0.207	-0.674	50.315	477.877	-0.000511	-0.000914	-0.000014
30.3000	287.884	11.198	17.968	2.210	-0.681	50.316	548.058	-0.000784	-0.001258	-0.000155
30.4000	303.935	13.502	20.973	3.601	-0.694	50.316	578.613	-0.000945	-0.001468	-0.000252
30.5000	362.290	20.126	29.975	6.865	-0.681	50.316	689.707	-0.001409	-0.002098	-0.000481
30.6000	352.491	19.773	29.211	6.906	-0.651	50.316	671.053	-0.001384	-0.002045	-0.000483
30.7000	399.771	26.034	37.009	10.410	-0.676	50.317	761.061	-0.001822	-0.002591	-0.000729
30.8000	477.693	35.138	48.821	15.204	-0.690	50.316	909.405	-0.002460	-0.003417	-0.001064
30.9000	493.112	38.142	51.863	16.952	-0.668	50.317	938.759	-0.002670	-0.003630	-0.001187
31.0000	573.229	47.981	64.357	21.913	-0.681	50.319	1091.280	-0.003359	-0.004505	-0.001534
31.1000	603.947	52.777	69.429	24.332	-0.693	50.318	1149.759	-0.003694	-0.004860	-0.001703
31.2000	649.197	59.121	77.473	27.571	-0.678	50.318	1235.905	-0.004138	-0.005423	-0.001930
31.3000	690.901	65.186	84.379	30.989	-0.681	50.317	1315.298	-0.004563	-0.005907	-0.002169
31.4000	750.338	73.081	94.288	35.323	-0.697	50.319	1428.452	-0.005116	-0.006600	-0.002473
31.5000	786.241	78.303	100.428	37.965	-0.687	50.318	1496.801	-0.005481	-0.007030	-0.002658
31.6000	835.925	85.194	108.394	41.577	-0.656	50.319	1591.387	-0.005964	-0.007588	-0.002910
31.7000	893.379	92.970	117.760	46.135	-0.667	50.319	1700.764	-0.006508	-0.008243	-0.003229
31.8000	932.242	98.848	124.374	49.110	-0.690	50.319	1774.750	-0.006919	-0.008706	-0.003438
31.9000	941.379	100.350	126.514	50.027	-0.661	50.318	1792.145	-0.007024	-0.008856	-0.003502
32.0000	949.570	102.749	128.500	50.718	-0.675	50.319	1807.737	-0.007192	-0.008995	-0.003550
32.1000	992.356	108.248	135.644	53.654	-0.692	50.320	1889.191	-0.007577	-0.009495	-0.003756
32.2000	1007.279	111.308	138.825	55.279	-0.687	50.319	1917.601	-0.007792	-0.009718	-0.003870
32.3000	1022.954	113.104	141.106	56.278	-0.668	50.320	1947.441	-0.007917	-0.009877	-0.003939
32.4000	1038.298	115.561	143.468	57.642	-0.686	50.321	1976.652	-0.008089	-0.010043	-0.004035
32.5000	995.993	111.476	138.798	54.961	-0.692	50.320	1896.114	-0.007803	-0.009716	-0.003847
32.6000	995.662	111.756	139.589	55.471	-0.676	50.320	1895.485	-0.007823	-0.009771	-0.003883
32.7000	995.542	112.163	139.603	55.308	-0.684	50.321	1895.256	-0.007851	-0.009772	-0.003872
32.8000	968.596	108.192	135.227	53.447	-0.697	50.320	1843.958	-0.007573	-0.009466	-0.003741
32.9000	929.913	104.250	130.613	51.234	-0.677	50.320	1770.315	-0.007298	-0.009143	-0.003586
33.0000	905.356	101.680	127.251	49.957	-0.683	50.321	1723.566	-0.007118	-0.008908	-0.003497
33.1000	849.646	94.147	118.618	46.025	-0.703	50.322	1617.508	-0.006590	-0.008303	-0.003222
33.2000	810.317	88.884	112.421	42.663	-0.686	50.320	1542.635	-0.006222	-0.007869	-0.002986
33.3000	787.293	86.204	109.438	41.508	-0.670	50.322	1498.804	-0.006034	-0.007661	-0.002906
33.4000	731.658	78.919	101.055	37.813	-0.676	50.322	1392.889	-0.005524	-0.007074	-0.002647
33.5000	678.097	72.185	92.317	33.603	-0.682	50.322	1290.922	-0.005053	-0.006462	-0.002352
33.6000	623.859	64.891	83.559	29.669	-0.669	50.322	1187.668	-0.004542	-0.005849	-0.002077
33.7000	580.713	59.278	76.863	26.736	-0.685	50.322	1105.528	-0.004149	-0.005380	-0.001872
33.8000	563.625	56.187	73.457	25.180	-0.695	50.323	1072.998	-0.003933	-0.005142	-0.001763
33.9000	516.301	49.073	64.662	21.294	-0.679	50.322	982.904	-0.003435	-0.004526	-0.001491
34.0000	433.119	38.379	51.638	16.108	-0.673	50.323	824.547	-0.002687	-0.003615	-0.001128
34.1000	414.198	34.858	47.665	13.896	-0.683	50.323	788.527	-0.002440	-0.003337	-0.000973
34.2000	375.936	29.583	41.148	10.990	-0.679	50.322	715.685	-0.002071	-0.002880	-0.000769
34.3000	322.675	22.676	32.354	7.837	-0.664	50.324	614.290	-0.001587	-0.002265	-0.000549
34.4000	307.616	19.492	28.015	6.127	-0.673	50.324	585.623	-0.001364	-0.001961	-0.000429
34.5000	298.058	17.302	25.226	4.686	-0.674	50.323	567.427	-0.001211	-0.001766	-0.000328
34.6000	244.302	10.834	16.262	1.833	-0.657	50.324	465.088	-0.000758	-0.001138	-0.000128
34.7000	244.001	9.923	15.400	0.761	-0.675	50.324	464.516	-0.000695	-0.001078	-0.000053
34.8000	290.259	13.839	20.862	3.238	-0.711	50.324	552.578	-0.000969	-0.001460	-0.000227
34.9000	229.980	6.313	11.312	-0.511	-0.677	50.323	437.822	-0.000442	-0.000792	0.000036
35.0000	251.320	8.717	14.274	0.556	-0.663	50.324	478.449	-0.000610	-0.000999	-0.000039
35.1000	234.879	6.413	11.187	-0.622	-0.684	50.325	447.149	-0.000449	-0.000783	0.000044
35.2000	263.358	9.601	15.329	1.025	-0.676	50.324	501.366	-0.000672	-0.001073	-0.000072
35.3000	253.965	8.240	14.149	0.499	-0.680	50.325	483.484	-0.000577	-0.000990	-0.000035
35.4000	322.780	16.462	24.641	5.183	-0.706	50.326	614.491	-0.001152	-0.001725	-0.000363
35.5000	334.021	17.412	26.183	5.640	-0.692	50.325	635.891	-0.001219	-0.001833	-0.000395
35.6000	387.838	24.473	34.810	9.312	-0.680	50.325	738.344	-0.001713	-0.002437	-0.000652
35.7000	448.508	31.913	44.094	13.272	-0.660	50.326	853.844	-0.002234	-0.003087	-0.000929
35.8000	447.832	32.796	45.150	13.741	-0.686	50.325	852.556	-0.002296	-0.003160	-0.000962
35.9000	486.575	37.455	51.709	16.054	-0.673	50.326	926.313	-0.002622	-0.003620	-0.001124
36.0000	577.963	49.381	65.759	22.344	-0.673	50.326	1100.292	-0.003457	-0.004603	-0.001564
36.1000	642.525	57.170	75.667	26.806	-0.683	50.326	1223.202	-0.004002	-0.005297	-0.001876
36.2000	664.015	61.631	80.198	29.168	-0.681	50.326	1264.114	-0.004314	-0.005614	-0.002042
36.3000	716.660	68.465	88.479	32.505	-0.672	50.327	1364.336	-0.004793	-0.006194	-0.002275
36.4000	776.037	76.438	98.236	37.034	-0.687	50.327	1477.375	-0.005351	-0.006877	-0.002592
36.5000	750.128	74.824	96.387	35.922	-0.689	50.326	1428.051	-0.005238	-0.006747	-0.002515
36.6000	845.168	86.302	110.018	42.440	-0.663	50.326	1608.982	-0.006041	-0.007701	-0.002971
36.7000	875.029	91.198	115.065	45.050	-0.677	50.327	1665.831	-0.006384	-0.008055	-0.003154
36.8000	909.895	96.869	121.414	47.499	-0.702	50.327	1732.206	-0.006781	-0.008499	-0.003325
36.9000	920.520	99.326	124.707	48.929	-0.667	50.326	1752.434	-0.006953	-0.008730	-0.003425
37.0000	941.650	101.526	127.930	50.219	-0.671	50.327	1792.660	-0.007107	-0.008955	-0.003515
37.1000	1056.422	115.251	143.828	57.725	-0.692	50.327	2011.156	-0.008068	-0.010068	-0.004041
37.2000	1005.070	111.001	138.437	55.236	-0.685	50.327	1913.395	-0.007770	-0.009691	-0.003867
37.3000	1027.432	114.790	142.315	56.711	-0.667	50.327	1955.967	-0.008035	-0.009962	-0.003970
37.4000	1036.975	115.785	143.815	57.420	-0.675	50.328	1974.134	-0.008105	-0.010067	-0.004019
37.5000	987.832	110.888	138.479	54.852	-0.693	50.328	1880.579	-0.007762	-0.009694	-0.003840
37.6000	1016.897	114.199	142.134	56.752	-0.679	50.327	1935.911	-0.007994	-0.009949	-0.003973
37.7000	958.271	107.742	134.476	53.334	-0.671	50.328	1824.303	-0.007542	-0.009413	-0.003733
37.8000	969.272	109.540	136.367	53.808	-0.684	50.328	1845.245	-0.007668	-0.009546	-0.003767
37.9000	947.211	106.621	133.099	52.167	-0.698	50.327	1803.246	-0.007463	-0.009317	-0.003652
38.0000	921.752	103.648	129.557	50.623	-0.668	50.327	1754.780	-0.007255	-0.009069	-0.003544
38.1000	879.417	97.921	123.732	47.902	-0.688	50.328	1674.185	-0.006854	-0.008661	-0.003353
38.2000	829.718	91.732	116.022	44.396	-0.692	50.328	1579.571	-0.006421	-0.008122	-0.003108
38.3000	785.084	86.722	109.726	41.856	-0.678	50.328	1494.598	-0.006071	-0.007681	-0.002930
38.4000	763.533	83.593	105.975	39.910	-0.668	50.328	1453.571	-0.005852	-0.007418	-0.002794
38.5000	738.421	78.877	100.470	37.229	-0.691	50.329	1405.764	-0.005521	-0.007033	-0.002606
38.6000	641.127	67.412	87.105	30.960	-0.676	50.328	1220.541	-0.004719	-0.006097	-0.002167
38.7000	592.811	60.930	79.351	27.514	-0.669	50.329	1128.559	-0.004265	-0.005555	-0.001926
38.8000	580.127	57.660	75.070	25.571	-0.699	50.329	1104.412	-0.004036	-0.005255	-0.001790
38.9000	468.781	44.721	59.143	18.858	-0.678	50.328	892.439	-0.003130	-0.004140	-0.001320
39.0000	443.609	40.146	54.072	16.550	-0.671	50.329	844.517	-0.002810	-0.003785	-0.001158
39.1000	389.191	32.823	44.856	12.951	-0.686	50.330	740.919	-0.002298	-0.003140	-0.000907
39.2000	362.711	28.752	39.452	10.562	-0.681	50.328	690.508	-0.002013	-0.002762	-0.000739
39.3000	344.902	25.317	35.409	8.727	-0.657	50.328	656.605	-0.001772	-0.002479	-0.000611
39.4000	274.809	16.406	23.945	4.171	-0.669	50.329	523.167	-0.001148	-0.001676	-0.000292
39.5000	309.360	19.016	27.473	5.599	-0.699	50.329	588.942	-0.001331	-0.001923	-0.000392
39.6000	241.416	10.468	16.165	1.096	-0.672	50.328	459.595	-0.000733	-0.001132	-0.000077
39.7000	165.328	2.247	3.840	-3.502	-0.671	50.330	314.741	-0.000157	-0.000269	0.000245
39.8000	227.230	6.877	11.814	-0.817	-0.698	50.329	432.587	-0.000481	-0.000827	0.000057
39.9000	244.933	8.619	13.787	0.206	-0.683	50.328	466.290	-0.000603	-0.000965	-0.000014
40.0000	226.869	5.921	10.868	-0.998	-0.690	50.330	431.900	-0.000414	-0.000761	0.000070
40.1000	274.223	11.422	17.830	1.555	-0.692	50.329	522.051	-0.000800	-0.001248	-0.000109
40.2000	232.204	6.060	11.147	-0.542	-0.686	50.329	442.057	-0.000424	-0.000780	0.000038
40.3000	267.656	10.048	16.470	1.582	-0.671	50.329	509.548	-0.000703	-0.001153	-0.000111
40.4000	296.045	13.443	20.611	3.100	-0.684	50.330	563.593	-0.000941	-0.001443	-0.000217
40.5000	331.902	17.724	26.573	5.294	-0.686	50.329	631.857	-0.001241	-0.001860	-0.000371
40.6000	344.286	19.944	29.406	7.059	-0.663	50.329	655.432	-0.001396	-0.002058	-0.000494
40.7000	398.283	26.636	37.522	10.688	-0.677	50.330	758.228	-0.001865	-0.002627	-0.000748
40.8000	475.093	36.109	49.680	15.219	-0.679	50.329	904.455	-0.002528	-0.003478	-0.001065
40.9000	513.205	40.976	55.891	18.231	-0.688	50.329	977.011	-0.002868	-0.003912	-0.001276
41.0000	574.040	49.397	65.802	22.511	-0.663	50.330	1092.825	-0.003458	-0.004606	-0.001576
41.1000	608.786	54.364	71.388	24.750	-0.680	50.330	1158.972	-0.003805	-0.004997	-0.001732
41.2000	678.307	63.132	82.145	29.655	-0.666	50.329	1291.323	-0.004419	-0.005750	-0.002076
41.3000	666.720	62.782	82.407	29.876	-0.659	50.329	1269.264	-0.004395	-0.005768	-0.002091
41.4000	743.410	73.250	94.219	35.212	-0.668	50.330	1415.262	-0.005127	-0.006595	-0.002465
41.5000	791.291	79.846	102.154	38.564	-0.673	50.329	1506.414	-0.005589	-0.007151	-0.002699
41.6000	830.154	85.783	108.574	41.786	-0.665	50.329	1580.400	-0.006005	-0.007600	-0.002925
41.7000	881.476	92.239	116.719	45.302	-0.651	50.330	1678.104	-0.006457	-0.008170	-0.003171
41.8000	916.417	98.006	123.164	48.555	-0.675	50.330	1744.623	-0.006860	-0.008622	-0.003399
41.9000	916.823	98.329	123.831	48.693	-0.673	50.329	1745.396	-0.006883	-0.008668	-0.003408
42.0000	968.581	105.932	132.227	52.362	-0.676	50.330	1843.929	-0.007415	-0.009256	-0.003665
42.1000	1013.741	111.938	139.383	55.321	-0.692	50.330	1929.903	-0.007836	-0.009757	-0.003872
42.2000	1048.352	116.235	144.355	57.627	-0.690	50.329	1995.792	-0.008136	-0.010105	-0.004034
42.3000	1022.758	114.017	141.913	56.418	-0.678	50.330	1947.069	-0.007981	-0.009934	-0.003949
42.4000	1025.734	114.971	142.884	56.890	-0.673	50.330	1952.734	-0.008048	-0.010002	-0.003982
42.5000	1017.874	114.860	142.163	56.571	-0.686	50.329	1937.771	-0.008040	-0.009951	-0.003960
42.6000	1016.071	114.999	142.468	56.934	-0.648	50.329	1934.338	-0.008050	-0.009973	-0.003985
42.7000	1042.325	117.846	145.719	58.044	-0.673	50.331	1984.320	-0.008249	-0.010200	-0.004063
42.8000	951.524	107.376	134.363	52.736	-0.689	50.330	1811.457	-0.007516	-0.009405	-0.003692
42.9000	952.410	107.408	134.241	53.042	-0.688	50.330	1813.145	-0.007519	-0.009397	-0.003713
43.0000	889.967	100.461	125.650	48.959	-0.671	50.330	1694.269	-0.007032	-0.008795	-0.003427
43.1000	866.899	97.317	122.260	47.345	-0.697	50.330	1650.352	-0.006812	-0.008558	-0.003314
43.2000	856.920	95.702	120.360	46.246	-0.683	50.329	1631.355	-0.006699	-0.008425	-0.003237
43.3000	812.586	89.768	113.285	43.221	-0.677	50.330	1546.955	-0.006284	-0.007930	-0.003025
43.4000	784.363	85.024	107.961	40.355	-0.685	50.330	1493.225	-0.005952	-0.007557	-0.002825
43.5000	696.972	75.303	95.358	35.018	-0.692	50.330	1326.857	-0.005271	-0.006675	-0.002451
43.6000	616.029	64.876	83.518	29.724	-0.658	50.330	1172.762	-0.004541	-0.005846	-0.002081
43.7000	607.538	63.328	81.421	28.529	-0.685	50.331	1156.597	-0.004433	-0.005699	-0.001997
43.8000	565.564	57.043	74.180	25.195	-0.704	50.330	1076.689	-0.003993	-0.005193	-0.001764
43.9000	481.390	46.223	61.228	19.832	-0.672	50.330	916.443	-0.003236	-0.004286	-0.001388
44.0000	437.883	40.301	53.435	16.592	-0.671	50.331	833.616	-0.002821	-0.003740	-0.001161
44.1000	437.372	38.982	52.125	15.941	-0.691	50.331	832.644	-0.002729	-0.003649	-0.001116
44.2000	350.703	27.731	38.147	9.325	-0.681	50.330	667.648	-0.001941	-0.002670	-0.000653
44.3000	302.492	20.616	29.418	6.127	-0.679	50.331	575.867	-0.001443	-0.002059	-0.000429
44.4000	312.215	20.658	29.350	6.195	-0.690	50.331	594.378	-0.001446	-0.002055	-0.000434
44.5000	248.855	12.670	18.915	2.306	-0.698	50.331	473.757	-0.000887	-0.001324	-0.000161
44.6000	226.809	9.435	14.136	0.262	-0.672	50.330	431.786	-0.000660	-0.000989	-0.000018
44.7000	257.647	11.731	17.845	1.597	-0.676	50.331	490.494	-0.000821	-0.001249	-0.000112
44.8000	237.434	9.025	14.386	0.164	-0.687	50.331	452.013	-0.000632	-0.001007	-0.000012
44.9000	215.733	5.794	10.479	-1.108	-0.668	50.331	410.700	-0.000406	-0.000734	0.000078
45.0000	231.332	6.934	12.117	-0.140	-0.658	50.331	440.397	-0.000485	-0.000848	0.000010
45.1000	231.873	6.973	12.063	-0.443	-0.678	50.332	441.427	-0.000488	-0.000844	0.000031
45.2000	253.018	9.364	14.844	0.791	-0.680	50.331	481.682	-0.000655	-0.001039	-0.000055
45.3000	300.613	14.637	22.127	3.614	-0.667	50.331	572.290	-0.001025	-0.001549	-0.000253
45.4000	291.897	13.093	20.471	3.225	-0.695	50.332	555.696	-0.000916	-0.001433	-0.000226
45.5000	369.804	22.564	32.604	8.185	-0.687	50.331	704.012	-0.001579	-0.002282	-0.000573
45.6000	382.879	24.714	35.033	8.963	-0.679	50.331	728.903	-0.001730	-0.002452	-0.000627
45.7000	432.518	30.803	43.081	12.464	-0.671	50.332	823.402	-0.002156	-0.003016	-0.000872
45.8000	448.763	33.494	46.138	13.977	-0.692	50.332	854.330	-0.002345	-0.003230	-0.000978
45.9000	494.750	39.429	53.350	17.116	-0.663	50.331	941.877	-0.002760	-0.003734	-0.001198
46.0000	569.907	48.767	65.094	22.248	-0.660	50.333	1084.957	-0.003414	-0.004557	-0.001557
46.1000	593.532	52.272	69.317	23.873	-0.696	50.331	1129.932	-0.003659	-0.004852	-0.001671
46.2000	617.683	56.664	74.555	25.931	-0.686	50.331	1175.909	-0.003966	-0.005219	-0.001815
46.3000	704.306	68.285	87.454	32.046	-0.660	50.332	1340.818	-0.004780	-0.006122	-0.002243
46.4000	737.143	72.591	93.981	34.922	-0.674	50.332	1403.332	-0.005081	-0.006579	-0.002445
46.5000	811.279	82.151	105.014	39.896	-0.684	50.331	1544.466	-0.005751	-0.007351	-0.002793
46.6000	794.958	81.743	104.543	39.755	-0.655	50.331	1513.395	-0.005722	-0.007318	-0.002783
46.7000	856.920	89.976	114.105	43.969	-0.676	50.333	1631.355	-0.006298	-0.007987	-0.003078
46.8000	913.051	97.599	122.706	47.776	-0.672	50.331	1738.214	-0.006832	-0.008589	-0.003344
46.9000	906.604	97.586	123.206	48.291	-0.658	50.332	1725.941	-0.006831	-0.008624	-0.003380
47.0000	972.563	106.058	132.699	52.306	-0.684	50.331	1851.511	-0.007424	-0.009289	-0.003661
47.1000	967.604	107.506	134.104	52.821	-0.695	50.331	1842.070	-0.007525	-0.009387	-0.003697
47.2000	1010.315	112.708	140.159	55.820	-0.669	50.331	1923.380	-0.007890	-0.009811	-0.003907
47.3000	971.827	109.919	136.686	54.003	-0.669	50.332	1850.109	-0.007694	-0.009568	-0.003780
47.4000	1027.522	115.057	143.204	56.713	-0.694	50.332	1956.139	-0.008054	-0.010024	-0.003970
47.5000	989.260	111.896	139.200	54.807	-0.674	50.331	1883.297	-0.007833	-0.009744	-0.003837
47.6000	1010.420	114.480	141.885	56.432	-0.673	50.332	1923.580	-0.008014	-0.009932	-0.003950
47.7000	973.465	110.509	137.618	54.212	-0.696	50.332	1853.228	-0.007736	-0.009633	-0.003795
47.8000	955.762	107.968	135.351	52.973	-0.670	50.331	1819.525	-0.007558	-0.009475	-0.003708
47.9000	968.716	109.161	136.548	53.304	-0.672	50.332	1844.187	-0.007641	-0.009558	-0.003731
48.0000	897.016	101.595	127.335	49.733	-0.686	50.332	1707.687	-0.007112	-0.008913	-0.003481
48.1000	877.073	98.230	123.164	47.402	-0.684	50.331	1669.722	-0.006876	-0.008622	-0.003318
48.2000	825.916	92.393	116.774	44.382	-0.658	50.331	1572.332	-0.006468	-0.008174	-0.003107
48.3000	797.978	89.065	112.324	42.247	-0.662	50.333	1519.146	-0.006235	-0.007863	-0.002957
48.4000	709.717	78.472	100.126	36.908	-0.690	50.332	1351.118	-0.005493	-0.007009	-0.002584
48.5000	644.508	69.800	89.701	31.974	-0.675	50.331	1226.978	-0.004886	-0.006279	-0.002238
48.6000	651.632	69.351	89.533	32.117	-0.664	50.332	1240.540	-0.004855	-0.006267	-0.002248
48.7000	592.029	61.532	79.973	27.556	-0.679	50.333	1127.071	-0.004307	-0.005598	-0.001929
48.8000	520.509	52.188	68.425	22.511	-0.694	50.331	990.915	-0.003653	-0.004790	-0.001576
48.9000	493.563	48.106	63.258	20.235	-0.671	50.332	939.617	-0.003367	-0.004428	-0.001416
49.0000	474.552	44.288	58.700	18.510	-0.675	50.332	903.425	-0.003100	-0.004109	-0.001296
49.1000	401.950	34.985	47.262	13.591	-0.684	50.333	765.209	-0.002449	-0.003308	-0.000951
49.2000	364.499	29.482	40.871	11.298	-0.667	50.332	693.913	-0.002064	-0.002861	-0.000791
49.3000	327.995	24.248	33.797	7.934	-0.656	50.333	624.418	-0.001697	-0.002366	-0.000555
49.4000	326.522	22.703	32.187	7.462	-0.690	50.332	621.614	-0.001589	-0.002253	-0.000522
49.5000	242.108	12.490	18.582	2.140	-0.672	50.332	460.911	-0.000874	-0.001301	-0.000150
49.6000	252.838	12.308	18.816	2.153	-0.660	50.333	481.339	-0.000862	-0.001317	-0.000151
49.7000	245.925	11.060	16.842	1.345	-0.684	50.334	468.178	-0.000774	-0.001179	-0.000094
49.8000	245.444	10.259	16.095	0.889	-0.674	50.333	467.262	-0.000718	-0.001127	-0.000062
49.9000	232.294	8.492	13.245	-0.181	-0.673	50.333	442.228	-0.000594	-0.000927	0.000013
Test Cycles
Time (sec)	Axial stress (kPa)	Axial micro-strain #1	Axial micro-strain #2	Axial micro-strain #3	Confining pressure (kPa)	Temperature (�C)	Load (N)	Displacement #1 (mm)	Displacement #2 (mm)	Displacement #3 (mm)
0.0000	243.430	8.604	14.359	0.263	-0.700	50.334	463.428	-0.000602	-0.001005	-0.000018
0.1000	242.709	8.254	13.718	0.304	-0.683	50.333	462.055	-0.000578	-0.000960	-0.000021
0.2000	233.406	7.199	12.437	-0.112	-0.677	50.333	444.345	-0.000504	-0.000871	0.000008
0.3000	282.324	12.698	19.595	2.404	-0.679	50.335	537.472	-0.000889	-0.001372	-0.000168
0.4000	307.632	16.052	24.097	4.449	-0.688	50.334	585.651	-0.001124	-0.001687	-0.000311
0.5000	361.568	21.862	31.866	7.310	-0.665	50.333	688.334	-0.001530	-0.002231	-0.000512
0.6000	382.533	24.320	35.145	8.755	-0.668	50.334	728.245	-0.001702	-0.002460	-0.000613
0.7000	403.919	27.714	39.189	10.824	-0.688	50.334	768.957	-0.001940	-0.002743	-0.000758
0.8000	448.147	33.735	46.472	14.103	-0.676	50.333	853.157	-0.002361	-0.003253	-0.000987
0.9000	477.543	38.055	51.819	16.191	-0.656	50.334	909.119	-0.002664	-0.003627	-0.001133
1.0000	539.039	45.915	61.825	20.651	-0.683	50.335	1026.192	-0.003214	-0.004328	-0.001446
1.1000	603.376	54.044	71.637	24.819	-0.688	50.334	1148.672	-0.003783	-0.005015	-0.001737
1.2000	691.953	65.410	85.062	31.071	-0.645	50.334	1317.301	-0.004579	-0.005954	-0.002175
1.3000	715.262	69.548	89.828	32.865	-0.663	50.335	1361.675	-0.004868	-0.006288	-0.002301
1.4000	770.912	76.734	98.612	36.952	-0.690	50.335	1467.619	-0.005371	-0.006903	-0.002587
1.5000	804.861	81.857	104.739	39.603	-0.660	50.334	1532.249	-0.005730	-0.007332	-0.002772
1.6000	840.704	86.850	110.546	42.246	-0.682	50.335	1600.485	-0.006079	-0.007738	-0.002957
1.7000	801.856	84.532	107.668	41.049	-0.680	50.335	1526.527	-0.005917	-0.007537	-0.002873
1.8000	915.816	98.327	123.749	48.443	-0.660	50.335	1743.479	-0.006883	-0.008662	-0.003391
1.9000	895.287	97.528	122.608	47.680	-0.660	50.336	1704.397	-0.006827	-0.008583	-0.003338
2.0000	1049.359	114.803	144.010	57.225	-0.681	50.336	1997.709	-0.008036	-0.010081	-0.004006
2.1000	1047.270	115.380	144.259	57.281	-0.677	50.335	1993.732	-0.008077	-0.010098	-0.004010
2.2000	1000.471	111.253	139.228	55.058	-0.665	50.335	1904.640	-0.007788	-0.009746	-0.003854
2.3000	1021.301	114.340	142.537	56.598	-0.685	50.336	1944.294	-0.008004	-0.009978	-0.003962
2.4000	991.033	111.869	139.299	54.907	-0.678	50.335	1886.673	-0.007831	-0.009751	-0.003843
2.5000	1014.673	114.691	143.023	56.710	-0.656	50.336	1931.677	-0.008028	-0.010012	-0.003970
2.6000	989.185	112.150	139.826	55.308	-0.661	50.337	1883.154	-0.007850	-0.009788	-0.003872
2.7000	986.946	112.231	139.839	54.961	-0.669	50.336	1878.891	-0.007856	-0.009789	-0.003847
2.8000	969.994	110.339	137.617	54.128	-0.667	50.336	1846.619	-0.007724	-0.009633	-0.003789
2.9000	963.682	109.934	136.826	53.877	-0.677	50.337	1834.602	-0.007695	-0.009578	-0.003771
3.0000	925.329	104.700	131.393	51.150	-0.692	50.336	1761.589	-0.007329	-0.009198	-0.003581
3.1000	877.223	97.950	124.010	47.427	-0.668	50.337	1670.008	-0.006857	-0.008681	-0.003320
3.2000	823.752	92.056	116.343	44.552	-0.680	50.337	1568.213	-0.006444	-0.008144	-0.003119
3.3000	796.355	88.797	112.284	42.467	-0.676	50.337	1516.056	-0.006216	-0.007860	-0.002973
3.4000	709.611	78.106	99.363	36.493	-0.679	50.336	1350.918	-0.005467	-0.006955	-0.002555
3.5000	686.528	74.865	96.054	34.990	-0.664	50.337	1306.973	-0.005241	-0.006724	-0.002449
3.6000	611.912	65.647	85.240	30.057	-0.681	50.338	1164.923	-0.004595	-0.005967	-0.002104
3.7000	566.361	58.997	77.083	26.514	-0.677	50.337	1078.205	-0.004130	-0.005396	-0.001856
3.8000	543.487	54.968	72.275	24.360	-0.659	50.337	1034.660	-0.003848	-0.005059	-0.001705
3.9000	464.243	45.282	60.202	18.910	-0.671	50.338	883.799	-0.003170	-0.004214	-0.001324
4.0000	463.236	43.951	58.282	18.410	-0.683	50.338	881.882	-0.003077	-0.004080	-0.001289
4.1000	397.456	35.153	47.459	13.811	-0.654	50.338	756.655	-0.002461	-0.003322	-0.000967
4.2000	356.143	28.752	39.966	10.161	-0.668	50.339	678.005	-0.002013	-0.002798	-0.000711
4.3000	343.970	26.244	36.744	9.088	-0.677	50.338	654.831	-0.001837	-0.002572	-0.000636
4.4000	305.813	20.546	29.838	6.195	-0.673	50.338	582.190	-0.001438	-0.002089	-0.000434
4.5000	282.639	17.342	24.986	4.628	-0.671	50.339	538.073	-0.001214	-0.001749	-0.000324
4.6000	268.392	15.130	21.792	3.363	-0.694	50.339	510.950	-0.001059	-0.001525	-0.000235
4.7000	232.369	9.572	15.150	0.304	-0.660	50.338	442.371	-0.000670	-0.001060	-0.000021
4.8000	231.678	8.507	14.300	0.318	-0.660	50.339	441.055	-0.000596	-0.001001	-0.000022
4.9000	228.221	8.449	13.495	0.277	-0.683	50.340	434.475	-0.000591	-0.000945	-0.000019
5.0000	213.403	5.922	10.564	-1.318	-0.673	50.339	406.265	-0.000415	-0.000739	0.000092
5.1000	234.128	7.522	12.606	-0.471	-0.659	50.340	445.719	-0.000527	-0.000882	0.000033
5.2000	266.003	11.310	18.108	1.860	-0.676	50.341	506.401	-0.000792	-0.001268	-0.000130
5.3000	271.578	11.451	18.414	1.998	-0.679	50.340	517.015	-0.000802	-0.001289	-0.000140
5.4000	297.067	15.016	22.751	3.990	-0.664	50.339	565.538	-0.001051	-0.001593	-0.000279
5.5000	355.482	21.836	31.880	7.518	-0.669	50.340	676.746	-0.001529	-0.002232	-0.000526
5.6000	380.730	25.065	36.021	9.199	-0.676	50.341	724.812	-0.001755	-0.002521	-0.000644
5.7000	393.819	27.198	38.659	10.436	-0.664	50.340	749.731	-0.001904	-0.002706	-0.000731
5.8000	463.491	35.656	49.042	14.997	-0.672	50.340	882.368	-0.002496	-0.003433	-0.001050
5.9000	519.171	42.409	57.783	18.495	-0.668	50.342	988.369	-0.002969	-0.004045	-0.001295
6.0000	514.468	43.053	58.534	18.995	-0.662	50.341	979.414	-0.003014	-0.004097	-0.001330
6.1000	641.743	58.980	77.543	27.321	-0.647	50.341	1221.714	-0.004129	-0.005428	-0.001912
6.2000	657.057	61.980	80.823	28.695	-0.665	50.342	1250.868	-0.004339	-0.005658	-0.002009
6.3000	717.441	70.038	90.312	33.059	-0.672	50.342	1365.824	-0.004903	-0.006322	-0.002314
6.4000	737.594	73.447	94.954	34.864	-0.663	50.341	1404.190	-0.005141	-0.006647	-0.002441
6.5000	759.100	77.281	99.251	37.161	-0.655	50.342	1445.131	-0.005410	-0.006948	-0.002601
6.6000	855.748	89.122	113.422	43.637	-0.675	50.342	1629.124	-0.006239	-0.007940	-0.003055
6.7000	890.749	94.444	119.512	46.412	-0.680	50.342	1695.757	-0.006611	-0.008366	-0.003249
6.8000	977.658	105.064	132.267	52.070	-0.665	50.343	1861.210	-0.007354	-0.009259	-0.003645
6.9000	922.519	100.883	127.195	50.041	-0.674	50.343	1756.239	-0.007062	-0.008904	-0.003503
7.0000	932.423	102.480	128.848	50.277	-0.666	50.342	1775.093	-0.007174	-0.009019	-0.003519
7.1000	1027.567	113.791	141.844	56.572	-0.648	50.343	1956.224	-0.007965	-0.009929	-0.003960
7.2000	961.758	107.658	135.089	53.459	-0.669	50.343	1830.940	-0.007536	-0.009456	-0.003742
7.3000	1007.189	112.877	141.717	55.987	-0.681	50.342	1917.429	-0.007901	-0.009920	-0.003919
7.4000	1003.868	112.935	141.564	56.057	-0.650	50.343	1911.106	-0.007905	-0.009910	-0.003924
7.5000	993.062	112.556	141.105	55.834	-0.660	50.344	1890.535	-0.007879	-0.009877	-0.003908
7.6000	1007.459	114.255	142.788	56.681	-0.676	50.344	1917.944	-0.007998	-0.009995	-0.003968
7.7000	1004.033	114.100	142.426	56.584	-0.654	50.344	1911.421	-0.007987	-0.009970	-0.003961
7.8000	931.341	105.260	133.168	51.905	-0.659	50.345	1773.033	-0.007368	-0.009322	-0.003633
7.9000	871.407	99.396	125.499	48.568	-0.691	50.345	1658.936	-0.006958	-0.008785	-0.003400
8.0000	879.703	99.060	125.487	49.013	-0.681	50.345	1674.728	-0.006934	-0.008784	-0.003431
8.1000	855.672	96.967	122.093	47.276	-0.664	50.345	1628.981	-0.006788	-0.008547	-0.003309
8.2000	818.327	91.282	115.829	44.189	-0.673	50.346	1557.884	-0.006390	-0.008108	-0.003093
8.3000	813.187	90.748	114.578	43.569	-0.689	50.345	1548.100	-0.006352	-0.008020	-0.003050
8.4000	735.626	81.238	103.629	38.661	-0.652	50.346	1400.442	-0.005687	-0.007254	-0.002706
8.5000	708.394	76.816	99.069	36.491	-0.670	50.346	1348.600	-0.005377	-0.006935	-0.002554
8.6000	634.379	67.456	87.856	31.363	-0.684	50.346	1207.695	-0.004722	-0.006150	-0.002195
8.7000	617.277	64.651	84.155	29.348	-0.667	50.346	1175.137	-0.004526	-0.005891	-0.002054
8.8000	565.414	57.576	75.737	25.583	-0.672	50.347	1076.403	-0.004030	-0.005302	-0.001791
8.9000	471.652	45.704	61.351	19.539	-0.681	50.347	897.903	-0.003199	-0.004295	-0.001368
9.0000	479.662	45.353	61.185	19.385	-0.652	50.346	913.153	-0.003175	-0.004283	-0.001357
9.1000	408.773	35.715	48.917	14.424	-0.664	50.348	778.198	-0.002500	-0.003424	-0.001010
9.2000	356.534	29.145	40.453	10.742	-0.686	50.347	678.749	-0.002040	-0.002832	-0.000752
9.3000	347.291	26.917	38.076	9.743	-0.669	50.347	661.154	-0.001884	-0.002665	-0.000682
9.4000	324.584	22.592	32.479	7.422	-0.663	50.348	617.924	-0.001581	-0.002273	-0.000520
9.5000	272.721	16.152	24.068	4.171	-0.671	50.348	519.190	-0.001131	-0.001685	-0.000292
9.6000	255.603	12.854	19.706	2.779	-0.672	50.348	486.603	-0.000900	-0.001379	-0.000195
9.7000	214.906	7.593	12.354	-0.803	-0.665	50.349	409.126	-0.000531	-0.000865	0.000056
9.8000	217.221	7.550	12.424	-0.112	-0.692	50.349	413.532	-0.000529	-0.000870	0.000008
9.9000	242.664	9.234	15.651	0.790	-0.668	50.348	461.969	-0.000646	-0.001096	-0.000055
10.0000	220.196	6.637	11.686	-0.735	-0.653	50.350	419.197	-0.000465	-0.000818	0.000051
10.1000	218.678	6.061	11.452	-0.444	-0.681	50.350	416.307	-0.000424	-0.000802	0.000031
10.2000	281.993	12.869	20.026	3.197	-0.663	50.349	536.842	-0.000901	-0.001402	-0.000224
10.3000	299.095	14.793	23.264	4.102	-0.657	50.350	569.401	-0.001036	-0.001628	-0.000287
10.4000	290.845	14.035	21.805	3.392	-0.672	50.351	553.694	-0.000982	-0.001526	-0.000237
10.5000	337.748	20.028	29.683	7.004	-0.692	50.350	642.986	-0.001402	-0.002078	-0.000490
10.6000	356.804	21.764	32.684	8.004	-0.663	50.350	679.264	-0.001523	-0.002288	-0.000560
10.7000	390.904	26.552	38.135	10.605	-0.677	50.352	744.181	-0.001859	-0.002669	-0.000742
10.8000	458.727	35.306	48.570	14.773	-0.688	50.351	873.299	-0.002471	-0.003400	-0.001034
10.9000	479.015	38.282	52.710	16.853	-0.669	50.352	911.922	-0.002680	-0.003690	-0.001180
11.0000	590.436	52.062	69.609	23.901	-0.676	50.352	1124.039	-0.003644	-0.004873	-0.001673
11.1000	606.877	54.757	72.552	25.180	-0.691	50.353	1155.338	-0.003833	-0.005079	-0.001763
11.2000	660.559	61.659	81.170	28.889	-0.686	50.352	1257.534	-0.004316	-0.005682	-0.002022
11.3000	690.165	66.852	86.745	31.487	-0.664	50.352	1313.896	-0.004680	-0.006072	-0.002204
11.4000	767.501	76.690	99.318	37.132	-0.673	50.353	1461.124	-0.005368	-0.006952	-0.002599
11.5000	793.755	81.027	104.434	39.296	-0.683	50.354	1511.106	-0.005672	-0.007310	-0.002751
11.6000	831.627	86.288	110.368	42.272	-0.661	50.353	1583.204	-0.006040	-0.007726	-0.002959
11.7000	887.473	93.767	119.370	46.426	-0.673	50.355	1689.520	-0.006564	-0.008356	-0.003250
11.8000	897.121	96.236	121.818	47.332	-0.690	50.354	1707.888	-0.006737	-0.008527	-0.003313
11.9000	933.204	101.122	128.279	50.136	-0.663	50.354	1776.581	-0.007079	-0.008979	-0.003510
12.0000	967.875	106.508	134.142	52.627	-0.655	50.355	1842.585	-0.007456	-0.009390	-0.003684
12.1000	979.401	108.319	136.688	54.156	-0.686	50.355	1864.529	-0.007582	-0.009568	-0.003791
12.2000	1006.858	112.751	141.243	56.347	-0.668	50.355	1916.800	-0.007893	-0.009887	-0.003944
12.3000	1045.632	117.620	146.815	58.545	-0.675	50.356	1990.614	-0.008233	-0.010277	-0.004098
12.4000	1008.647	114.326	142.773	56.668	-0.692	50.356	1920.204	-0.008003	-0.009994	-0.003967
12.5000	998.773	113.960	142.025	56.572	-0.685	50.356	1901.407	-0.007977	-0.009942	-0.003960
12.6000	991.154	112.414	141.064	55.585	-0.660	50.356	1886.902	-0.007869	-0.009874	-0.003891
12.7000	992.206	112.975	141.231	55.889	-0.679	50.357	1888.905	-0.007908	-0.009886	-0.003912
12.8000	968.205	110.185	138.215	54.642	-0.681	50.357	1843.214	-0.007713	-0.009675	-0.003825
12.9000	928.545	105.611	133.115	52.223	-0.664	50.356	1767.712	-0.007393	-0.009318	-0.003656
13.0000	862.210	98.246	124.013	47.763	-0.672	50.358	1641.426	-0.006877	-0.008681	-0.003343
13.1000	902.200	102.326	128.457	50.054	-0.679	50.357	1717.558	-0.007163	-0.008992	-0.003504
13.2000	832.965	93.179	118.580	45.286	-0.686	50.357	1585.751	-0.006523	-0.008301	-0.003170
13.3000	776.082	86.189	110.229	41.745	-0.672	50.358	1477.461	-0.006033	-0.007716	-0.002922
13.4000	736.948	80.829	103.725	38.754	-0.685	50.359	1402.960	-0.005658	-0.007261	-0.002713
13.5000	659.206	71.892	92.650	33.545	-0.673	50.359	1254.959	-0.005032	-0.006486	-0.002348
13.6000	619.216	67.161	86.870	30.658	-0.645	50.358	1178.827	-0.004701	-0.006081	-0.002146
13.7000	590.406	61.575	80.308	27.446	-0.657	50.360	1123.981	-0.004310	-0.005622	-0.001921
13.8000	541.233	55.064	72.942	24.887	-0.664	50.358	1030.369	-0.003854	-0.005106	-0.001742
13.9000	474.191	46.265	61.979	19.998	-0.660	50.359	902.739	-0.003239	-0.004339	-0.001400
14.0000	444.360	41.510	56.377	17.300	-0.668	50.360	845.947	-0.002906	-0.003946	-0.001211
14.1000	426.867	38.492	52.654	15.621	-0.681	50.360	812.645	-0.002694	-0.003686	-0.001093
14.2000	360.592	29.820	41.343	11.241	-0.637	50.360	686.474	-0.002087	-0.002894	-0.000787
14.3000	346.119	26.806	38.036	9.478	-0.668	50.361	658.922	-0.001876	-0.002663	-0.000663
14.4000	306.790	20.882	30.242	6.891	-0.705	50.360	584.049	-0.001462	-0.002117	-0.000482
14.5000	296.450	18.861	27.238	5.421	-0.669	50.361	564.365	-0.001320	-0.001907	-0.000380
14.6000	250.043	12.755	19.247	2.139	-0.659	50.361	476.017	-0.000893	-0.001347	-0.000150
14.7000	255.017	12.476	19.206	2.320	-0.681	50.362	485.487	-0.000873	-0.001344	-0.000162
14.8000	217.130	7.212	12.689	-0.193	-0.674	50.361	413.361	-0.000505	-0.000888	0.000014
14.9000	240.244	9.027	15.260	0.803	-0.673	50.361	457.363	-0.000632	-0.001068	-0.000056
15.0000	255.874	10.723	17.080	1.513	-0.687	50.362	487.118	-0.000751	-0.001196	-0.000106
15.1000	233.932	8.156	13.912	0.110	-0.673	50.362	445.347	-0.000571	-0.000974	-0.000008
15.2000	271.894	12.237	19.206	2.516	-0.655	50.362	517.616	-0.000857	-0.001344	-0.000176
15.3000	281.798	13.093	20.932	2.973	-0.667	50.364	536.470	-0.000917	-0.001465	-0.000208
15.4000	303.078	15.298	23.820	4.229	-0.675	50.363	576.982	-0.001071	-0.001667	-0.000296
15.5000	331.932	19.016	28.503	6.224	-0.654	50.363	631.914	-0.001331	-0.001995	-0.000436
15.6000	364.424	23.153	33.546	8.100	-0.655	50.364	693.769	-0.001621	-0.002348	-0.000567
15.7000	418.782	30.171	42.525	12.048	-0.680	50.364	797.253	-0.002112	-0.002977	-0.000843
15.8000	481.555	37.987	52.404	16.330	-0.675	50.363	916.758	-0.002659	-0.003668	-0.001143
15.9000	507.284	41.033	56.475	17.939	-0.659	50.364	965.738	-0.002872	-0.003953	-0.001256
16.0000	532.441	45.549	61.839	20.569	-0.671	50.365	1013.632	-0.003188	-0.004329	-0.001440
16.1000	595.621	53.382	71.541	24.414	-0.683	50.364	1133.909	-0.003737	-0.005008	-0.001709
16.2000	644.809	60.510	79.460	28.333	-0.650	50.364	1227.551	-0.004236	-0.005562	-0.001983
16.3000	684.529	66.657	86.632	31.628	-0.656	50.365	1303.167	-0.004666	-0.006064	-0.002214
16.4000	765.382	76.452	98.765	36.811	-0.683	50.365	1457.090	-0.005352	-0.006914	-0.002577
16.5000	799.316	81.646	105.239	39.549	-0.649	50.365	1521.692	-0.005715	-0.007367	-0.002768
16.6000	835.189	86.709	110.922	42.372	-0.657	50.366	1589.985	-0.006070	-0.007765	-0.002966
16.7000	883.625	94.050	119.094	46.482	-0.678	50.365	1682.196	-0.006584	-0.008337	-0.003254
16.8000	930.649	100.953	127.069	50.066	-0.668	50.365	1771.717	-0.007067	-0.008895	-0.003505
16.9000	928.380	101.120	127.751	50.068	-0.655	50.366	1767.397	-0.007078	-0.008943	-0.003505
17.0000	969.633	107.138	134.351	52.931	-0.686	50.367	1845.932	-0.007500	-0.009405	-0.003705
17.1000	989.576	109.851	138.009	54.462	-0.670	50.365	1883.898	-0.007690	-0.009661	-0.003812
17.2000	995.918	111.335	139.618	55.016	-0.654	50.366	1895.971	-0.007793	-0.009773	-0.003851
17.3000	1015.635	114.535	142.732	56.655	-0.681	50.367	1933.508	-0.008017	-0.009991	-0.003966
17.4000	989.936	112.737	140.342	55.239	-0.687	50.366	1884.584	-0.007892	-0.009824	-0.003867
17.5000	1017.288	115.604	144.342	57.155	-0.672	50.367	1936.655	-0.008092	-0.010104	-0.004001
17.6000	992.416	113.455	141.454	55.985	-0.679	50.368	1889.305	-0.007942	-0.009902	-0.003919
17.7000	966.071	110.341	137.910	54.113	-0.675	50.368	1839.151	-0.007724	-0.009654	-0.003788
17.8000	952.155	109.105	136.894	53.835	-0.653	50.367	1812.658	-0.007637	-0.009583	-0.003768
17.9000	896.986	102.636	129.155	50.192	-0.668	50.368	1707.630	-0.007185	-0.009041	-0.003513
18.0000	894.716	102.128	128.626	50.038	-0.683	50.368	1703.310	-0.007149	-0.009004	-0.003503
18.1000	868.747	98.610	124.500	48.123	-0.671	50.368	1653.872	-0.006903	-0.008715	-0.003369
18.2000	817.771	92.436	116.773	44.773	-0.664	50.369	1556.826	-0.006471	-0.008174	-0.003134
18.3000	797.002	89.037	113.008	42.745	-0.686	50.368	1517.286	-0.006233	-0.007911	-0.002992
18.4000	726.037	80.367	102.794	38.312	-0.667	50.368	1382.189	-0.005626	-0.007196	-0.002682
18.5000	732.710	80.574	103.004	38.203	-0.664	50.369	1394.892	-0.005640	-0.007210	-0.002674
18.6000	659.672	71.541	92.081	33.073	-0.682	50.370	1255.846	-0.005008	-0.006446	-0.002315
18.7000	578.218	60.902	79.863	27.847	-0.667	50.368	1100.779	-0.004263	-0.005590	-0.001949
18.8000	560.274	57.900	75.877	25.960	-0.644	50.370	1066.618	-0.004053	-0.005311	-0.001817
18.9000	476.100	46.561	62.117	19.859	-0.661	50.370	906.372	-0.003259	-0.004348	-0.001390
19.0000	463.987	44.961	59.604	18.981	-0.679	50.370	883.312	-0.003147	-0.004172	-0.001329
19.1000	368.361	32.150	43.775	12.020	-0.660	50.369	701.265	-0.002250	-0.003064	-0.000841
19.2000	365.040	30.326	41.956	11.365	-0.669	50.371	694.942	-0.002123	-0.002937	-0.000796
19.3000	312.756	22.928	32.851	7.698	-0.683	50.371	595.407	-0.001605	-0.002300	-0.000539
19.4000	266.694	17.176	24.794	4.588	-0.668	50.370	507.717	-0.001202	-0.001736	-0.000321
19.5000	268.783	16.516	24.000	4.171	-0.664	50.371	511.694	-0.001156	-0.001680	-0.000292
19.6000	262.171	15.016	21.597	3.156	-0.675	50.371	499.105	-0.001051	-0.001512	-0.000221
19.7000	248.991	11.888	18.247	1.626	-0.681	50.370	474.014	-0.000832	-0.001277	-0.000114
19.8000	228.943	8.787	14.566	0.679	-0.656	50.371	435.848	-0.000615	-0.001020	-0.000048
19.9000	219.249	7.452	12.690	0.123	-0.677	50.371	417.395	-0.000522	-0.000888	-0.000009
20.0000	223.217	8.029	12.815	0.096	-0.696	50.372	424.948	-0.000562	-0.000897	-0.000007
20.1000	229.829	7.944	13.524	0.207	-0.663	50.371	437.536	-0.000556	-0.000947	-0.000014
20.2000	262.907	11.198	17.846	2.056	-0.669	50.372	500.507	-0.000784	-0.001249	-0.000144
20.3000	292.798	14.707	22.777	3.769	-0.677	50.372	557.413	-0.001029	-0.001594	-0.000264
20.4000	299.381	15.326	23.346	4.352	-0.667	50.372	569.944	-0.001073	-0.001634	-0.000305
20.5000	333.991	19.871	29.337	6.920	-0.669	50.372	635.834	-0.001391	-0.002054	-0.000484
20.6000	388.815	26.215	37.549	9.909	-0.670	50.373	740.204	-0.001835	-0.002628	-0.000694
20.7000	400.327	28.036	40.466	11.144	-0.687	50.372	762.119	-0.001963	-0.002833	-0.000780
20.8000	481.751	38.253	52.571	16.384	-0.669	50.372	917.130	-0.002678	-0.003680	-0.001147
20.9000	560.620	47.824	64.204	21.776	-0.683	50.373	1067.276	-0.003348	-0.004494	-0.001524
21.0000	536.830	46.505	62.367	20.609	-0.690	50.373	1021.986	-0.003255	-0.004366	-0.001443
21.1000	638.241	59.009	77.626	27.319	-0.679	50.372	1215.048	-0.004131	-0.005434	-0.001912
21.2000	665.428	63.794	83.004	29.698	-0.666	50.374	1266.804	-0.004466	-0.005810	-0.002079
21.3000	706.080	69.307	89.604	32.770	-0.691	50.374	1344.194	-0.004852	-0.006272	-0.002294
21.4000	734.889	73.868	95.230	35.255	-0.684	50.373	1399.040	-0.005171	-0.006666	-0.002468
21.5000	780.004	80.043	102.530	38.647	-0.663	50.373	1484.928	-0.005603	-0.007177	-0.002705
21.6000	806.530	84.266	107.852	41.062	-0.680	50.374	1535.425	-0.005899	-0.007550	-0.002874
21.7000	875.600	93.109	117.840	45.899	-0.674	50.373	1666.918	-0.006518	-0.008249	-0.003213
21.8000	924.067	100.418	126.444	49.359	-0.655	50.374	1759.186	-0.007029	-0.008851	-0.003455
21.9000	953.823	104.140	131.616	51.890	-0.678	50.374	1815.834	-0.007290	-0.009213	-0.003632
22.0000	981.580	108.474	136.478	53.723	-0.687	50.375	1868.677	-0.007593	-0.009553	-0.003761
22.1000	992.671	111.000	138.743	54.724	-0.671	50.374	1889.791	-0.007770	-0.009712	-0.003831
22.2000	993.769	112.163	139.908	55.211	-0.656	50.374	1891.880	-0.007851	-0.009794	-0.003865
22.3000	997.961	112.569	140.561	55.668	-0.677	50.375	1899.862	-0.007880	-0.009839	-0.003897
22.4000	1016.101	115.983	144.299	57.209	-0.684	50.374	1934.395	-0.008119	-0.010101	-0.004005
22.5000	1021.902	116.950	144.980	57.963	-0.655	50.374	1945.438	-0.008187	-0.010149	-0.004057
22.6000	1017.213	116.179	144.342	57.254	-0.655	50.375	1936.512	-0.008133	-0.010104	-0.004008
22.7000	1004.995	115.028	143.049	56.598	-0.682	50.375	1913.252	-0.008052	-0.010013	-0.003962
22.8000	899.706	104.083	130.572	50.998	-0.669	50.374	1712.809	-0.007286	-0.009140	-0.003570
22.9000	1012.569	113.245	142.995	56.462	-0.654	50.375	1927.671	-0.007927	-0.010010	-0.003952
23.0000	904.845	102.775	129.445	50.219	-0.667	50.376	1722.593	-0.007194	-0.009061	-0.003515
23.1000	707.928	82.501	104.071	38.784	-0.668	50.375	1347.713	-0.005775	-0.007285	-0.002715
23.2000	806.439	91.495	115.493	44.372	-0.637	50.375	1535.254	-0.006405	-0.008084	-0.003106
23.3000	764.014	85.686	109.519	41.229	-0.671	50.375	1454.487	-0.005998	-0.007666	-0.002886
23.4000	740.570	81.994	105.503	38.866	-0.679	50.375	1409.855	-0.005740	-0.007385	-0.002721
23.5000	682.170	75.272	97.000	35.491	-0.649	50.375	1298.676	-0.005269	-0.006790	-0.002484
23.6000	656.666	71.035	91.498	32.963	-0.665	50.377	1250.124	-0.004972	-0.006405	-0.002307
23.7000	598.807	62.753	81.560	28.277	-0.677	50.376	1139.975	-0.004393	-0.005709	-0.001979
23.8000	551.543	56.648	74.430	25.042	-0.656	50.376	1049.995	-0.003965	-0.005210	-0.001753
23.9000	497.470	49.999	65.885	21.443	-0.661	50.377	947.056	-0.003500	-0.004612	-0.001501
24.0000	440.633	41.243	56.337	17.383	-0.681	50.377	838.852	-0.002887	-0.003944	-0.001217
24.1000	414.243	36.361	50.333	14.995	-0.660	50.376	788.612	-0.002545	-0.003523	-0.001050
24.2000	342.197	28.123	39.354	10.422	-0.653	50.377	651.455	-0.001969	-0.002755	-0.000730
24.3000	355.302	27.701	38.826	10.147	-0.667	50.377	676.403	-0.001939	-0.002718	-0.000710
24.4000	298.825	20.785	29.672	6.281	-0.648	50.376	568.886	-0.001455	-0.002077	-0.000440
24.5000	258.248	15.270	23.167	3.671	-0.653	50.377	491.638	-0.001069	-0.001622	-0.000257
24.6000	269.625	15.366	22.984	3.588	-0.673	50.377	513.296	-0.001076	-0.001609	-0.000251
24.7000	230.325	9.767	15.788	0.971	-0.655	50.377	438.480	-0.000684	-0.001105	-0.000068
24.8000	237.855	9.924	16.178	0.999	-0.659	50.377	452.814	-0.000695	-0.001132	-0.000070
24.9000	208.534	6.442	11.355	-0.903	-0.687	50.377	396.996	-0.000451	-0.000795	0.000063
25.0000	233.301	8.745	14.635	0.333	-0.660	50.376	444.145	-0.000612	-0.001024	-0.000023
25.1000	243.656	8.970	15.442	0.678	-0.653	50.378	463.858	-0.000628	-0.001081	-0.000047
25.2000	240.199	8.436	14.454	0.361	-0.680	50.378	457.277	-0.000591	-0.001012	-0.000025
25.3000	267.446	11.717	18.650	2.237	-0.653	50.376	509.148	-0.000820	-0.001306	-0.000157
25.4000	299.952	15.507	23.597	3.948	-0.657	50.378	571.032	-0.001086	-0.001652	-0.000276
25.5000	354.971	21.694	32.437	7.517	-0.686	50.377	675.774	-0.001519	-0.002271	-0.000526
25.6000	372.720	24.714	35.922	8.797	-0.673	50.376	709.562	-0.001730	-0.002515	-0.000616
25.7000	425.289	30.985	43.595	12.351	-0.667	50.378	809.641	-0.002169	-0.003052	-0.000865
25.8000	464.167	35.588	50.525	15.677	-0.668	50.378	883.656	-0.002491	-0.003537	-0.001097
25.9000	496.584	40.737	55.587	17.619	-0.681	50.377	945.368	-0.002852	-0.003891	-0.001233
26.0000	552.384	48.219	64.189	21.305	-0.667	50.377	1051.598	-0.003375	-0.004493	-0.001491
26.1000	614.887	56.550	74.930	25.985	-0.675	50.378	1170.588	-0.003959	-0.005245	-0.001819
26.2000	609.462	56.551	75.264	26.210	-0.681	50.377	1160.259	-0.003959	-0.005268	-0.001835
26.3000	710.573	69.111	90.466	33.005	-0.662	50.377	1352.749	-0.004838	-0.006333	-0.002310
26.4000	736.512	73.307	95.288	35.532	-0.651	50.377	1402.130	-0.005131	-0.006670	-0.002487
26.5000	780.050	79.774	102.948	38.856	-0.667	50.378	1485.014	-0.005584	-0.007206	-0.002720
26.6000	831.341	86.415	111.129	42.385	-0.653	50.376	1582.661	-0.006049	-0.007779	-0.002967
26.7000	839.276	89.347	114.313	43.941	-0.655	50.378	1597.767	-0.006254	-0.008002	-0.003076
26.8000	901.810	97.081	123.027	47.554	-0.669	50.378	1716.814	-0.006796	-0.008612	-0.003329
26.9000	960.856	105.009	132.364	52.015	-0.664	50.377	1829.224	-0.007351	-0.009265	-0.003641
27.0000	989.365	108.950	137.172	54.028	-0.657	50.378	1883.497	-0.007626	-0.009602	-0.003782
27.1000	977.974	110.002	137.466	54.362	-0.677	50.379	1861.811	-0.007700	-0.009623	-0.003805
27.2000	1092.445	122.828	153.792	61.797	-0.675	50.377	2079.735	-0.008598	-0.010765	-0.004326
27.3000	1019.482	114.422	144.120	56.989	-0.655	50.378	1940.832	-0.008010	-0.010088	-0.003989
27.4000	1036.299	117.356	146.999	58.323	-0.656	50.378	1972.847	-0.008215	-0.010290	-0.004083
27.5000	1001.959	113.680	142.954	56.446	-0.673	50.378	1907.473	-0.007958	-0.010007	-0.003951
27.6000	1025.448	116.444	145.733	57.656	-0.653	50.377	1952.190	-0.008151	-0.010201	-0.004036
27.7000	913.953	103.365	130.988	50.986	-0.657	50.378	1739.931	-0.007236	-0.009169	-0.003569
27.8000	973.165	111.124	139.784	54.892	-0.649	50.378	1852.655	-0.007779	-0.009785	-0.003842
27.9000	928.891	106.158	134.391	52.180	-0.650	50.377	1768.370	-0.007431	-0.009407	-0.003653
28.0000	844.987	96.208	122.275	46.887	-0.656	50.378	1608.639	-0.006735	-0.008559	-0.003282
28.1000	875.480	98.595	125.556	48.095	-0.678	50.378	1666.689	-0.006902	-0.008789	-0.003367
28.2000	844.116	94.231	120.594	46.023	-0.665	50.377	1606.979	-0.006596	-0.008442	-0.003222
28.3000	801.480	89.163	114.190	43.178	-0.641	50.378	1525.812	-0.006241	-0.007993	-0.003022
28.4000	746.416	82.107	106.072	39.408	-0.666	50.379	1420.984	-0.005747	-0.007425	-0.002759
28.5000	633.523	69.364	89.868	31.781	-0.669	50.378	1206.064	-0.004855	-0.006291	-0.002225
28.6000	660.559	71.175	92.205	33.127	-0.660	50.377	1257.534	-0.004982	-0.006454	-0.002319
28.7000	593.126	61.715	81.769	27.971	-0.660	50.379	1129.160	-0.004320	-0.005724	-0.001958
28.8000	553.421	56.061	74.723	25.347	-0.664	50.377	1053.572	-0.003924	-0.005231	-0.001774
28.9000	502.505	49.018	66.493	21.472	-0.644	50.378	956.640	-0.003431	-0.004655	-0.001503
29.0000	467.308	44.049	60.118	18.468	-0.657	50.378	889.635	-0.003083	-0.004208	-0.001293
29.1000	429.437	38.281	52.682	15.315	-0.663	50.377	817.537	-0.002680	-0.003688	-0.001072
29.2000	381.541	31.730	44.887	12.145	-0.657	50.377	726.357	-0.002221	-0.003142	-0.000850
29.3000	332.999	24.728	36.550	8.768	-0.652	50.378	633.945	-0.001731	-0.002559	-0.000614
29.4000	302.852	20.251	30.143	6.196	-0.677	50.378	576.553	-0.001418	-0.002110	-0.000434
29.5000	279.949	16.686	24.734	4.129	-0.653	50.377	532.951	-0.001168	-0.001731	-0.000289
29.6000	243.761	11.842	19.290	1.679	-0.654	50.378	464.058	-0.000829	-0.001350	-0.000118
29.7000	236.427	10.553	16.554	0.804	-0.674	50.378	450.096	-0.000739	-0.001159	-0.000056
29.8000	239.297	9.894	16.580	0.679	-0.665	50.377	455.561	-0.000693	-0.001161	-0.000048
29.9000	230.746	8.634	14.551	0.053	-0.644	50.378	439.281	-0.000604	-0.001019	-0.000004
30.0000	150.840	-0.966	0.471	-5.393	-0.674	50.378	287.161	0.000068	-0.000033	0.000377
30.1000	252.132	9.220	15.872	0.691	-0.676	50.378	479.994	-0.000645	-0.001111	-0.000048
30.2000	230.265	7.593	13.399	0.095	-0.647	50.376	438.366	-0.000531	-0.000938	-0.000007
30.3000	269.580	11.856	18.958	2.167	-0.651	50.378	513.210	-0.000830	-0.001327	-0.000152
30.4000	338.605	19.142	29.113	5.972	-0.667	50.377	644.617	-0.001340	-0.002038	-0.000418
30.5000	326.778	18.412	28.336	5.959	-0.647	50.377	622.101	-0.001289	-0.001984	-0.000417
30.6000	344.586	20.559	31.354	7.296	-0.657	50.377	656.004	-0.001439	-0.002195	-0.000511
30.7000	388.334	26.847	38.674	10.242	-0.665	50.377	739.288	-0.001879	-0.002707	-0.000717
30.8000	452.205	34.086	48.293	14.300	-0.658	50.376	860.882	-0.002386	-0.003381	-0.001001
30.9000	578.759	49.088	66.772	22.302	-0.640	50.377	1101.809	-0.003436	-0.004674	-0.001561
31.0000	549.138	47.306	64.328	21.182	-0.668	50.377	1045.418	-0.003311	-0.004503	-0.001483
31.1000	580.923	52.088	70.359	23.999	-0.661	50.377	1105.928	-0.003646	-0.004925	-0.001680
31.2000	647.574	60.690	80.559	28.612	-0.645	50.376	1232.815	-0.004248	-0.005639	-0.002003
31.3000	687.414	66.446	87.371	31.337	-0.665	50.377	1308.661	-0.004651	-0.006116	-0.002194
31.4000	894.671	89.362	116.410	44.745	-0.680	50.376	1703.224	-0.006255	-0.008149	-0.003132
31.5000	615.759	62.221	81.698	28.611	-0.655	50.376	1172.247	-0.004355	-0.005719	-0.002003
31.6000	805.327	84.604	109.074	41.355	-0.653	50.377	1533.136	-0.005922	-0.007635	-0.002895
31.7000	881.356	93.755	120.093	46.079	-0.671	50.377	1677.876	-0.006563	-0.008407	-0.003226
31.8000	897.662	96.600	123.485	47.540	-0.660	50.376	1708.918	-0.006762	-0.008644	-0.003328
31.9000	462.514	55.192	69.246	23.500	-0.645	50.377	880.508	-0.003863	-0.004847	-0.001645
32.0000	1113.154	127.150	161.450	64.840	-0.672	50.377	2119.160	-0.008901	-0.011302	-0.004539
32.1000	893.033	100.309	128.792	49.652	-0.671	50.376	1700.106	-0.007022	-0.009015	-0.003476
32.2000	1064.733	119.503	151.277	59.673	-0.664	50.376	2026.978	-0.008365	-0.010589	-0.004177
32.3000	959.549	109.077	139.465	54.197	-0.675	50.377	1826.735	-0.007635	-0.009763	-0.003794
32.4000	992.942	112.584	143.606	56.097	-0.668	50.376	1890.306	-0.007881	-0.010052	-0.003927
32.5000	1039.650	118.716	149.789	58.977	-0.631	50.376	1979.227	-0.008310	-0.010485	-0.004128
32.6000	1079.896	124.400	157.264	62.547	-0.650	50.376	2055.845	-0.008708	-0.011009	-0.004378
32.7000	1008.061	115.576	146.398	57.656	-0.653	50.376	1919.088	-0.008090	-0.010248	-0.004036
32.8000	966.236	111.166	141.105	55.196	-0.655	50.375	1839.466	-0.007782	-0.009877	-0.003864
32.9000	927.493	106.342	135.545	52.389	-0.673	50.377	1765.709	-0.007444	-0.009488	-0.003667
33.0000	974.637	111.434	141.481	55.127	-0.676	50.376	1855.459	-0.007800	-0.009904	-0.003859
33.1000	782.274	91.451	117.801	44.442	-0.664	50.376	1489.248	-0.006402	-0.008246	-0.003111
33.2000	923.977	106.678	136.604	52.834	-0.651	50.376	1759.014	-0.007467	-0.009562	-0.003698
33.3000	477.167	50.420	66.022	20.763	-0.664	50.376	908.403	-0.003529	-0.004622	-0.001453
33.4000	730.862	80.407	104.307	38.092	-0.670	50.376	1391.373	-0.005628	-0.007302	-0.002666
33.5000	705.253	77.756	100.986	36.423	-0.644	50.376	1342.621	-0.005443	-0.007069	-0.002550
33.6000	657.598	70.713	92.844	32.880	-0.661	50.376	1251.898	-0.004950	-0.006499	-0.002302
33.7000	591.127	62.375	82.948	28.431	-0.661	50.375	1125.355	-0.004366	-0.005806	-0.001990
33.8000	503.647	51.163	68.719	22.330	-0.644	50.376	958.815	-0.003581	-0.004810	-0.001563
33.9000	497.440	49.439	67.021	21.637	-0.645	50.376	946.999	-0.003461	-0.004691	-0.001515
34.0000	424.943	39.795	55.503	16.247	-0.664	50.375	808.983	-0.002786	-0.003885	-0.001137
34.1000	433.329	40.021	55.557	16.481	-0.640	50.375	824.947	-0.002801	-0.003889	-0.001154
34.2000	375.815	31.449	45.760	12.409	-0.652	50.376	715.456	-0.002201	-0.003203	-0.000869
34.3000	350.327	27.309	40.523	10.311	-0.663	50.375	666.933	-0.001912	-0.002837	-0.000722
34.4000	312.441	22.256	33.282	7.365	-0.651	50.375	594.807	-0.001558	-0.002330	-0.000516
34.5000	263.824	15.200	24.600	4.087	-0.635	50.376	502.253	-0.001064	-0.001722	-0.000286
34.6000	257.346	13.558	22.651	3.239	-0.653	50.376	489.922	-0.000949	-0.001586	-0.000227
34.7000	246.316	11.744	19.805	2.141	-0.646	50.374	468.922	-0.000822	-0.001386	-0.000150
34.8000	238.095	9.644	17.371	0.846	-0.655	50.376	453.272	-0.000675	-0.001216	-0.000059
34.9000	236.111	8.759	16.303	0.679	-0.674	50.376	449.495	-0.000613	-0.001141	-0.000048
35.0000	228.898	7.634	14.761	0.303	-0.660	50.375	435.762	-0.000534	-0.001033	-0.000021
35.1000	248.029	9.461	17.606	1.763	-0.649	50.375	472.183	-0.000662	-0.001232	-0.000123
35.2000	264.260	11.255	18.930	1.608	-0.668	50.376	503.082	-0.000788	-0.001325	-0.000113
35.3000	0.391	-24.162	-37.811	-15.065	-0.655	50.374	0.744	0.001691	0.002647	0.001055
35.4000	341.070	12.995	23.540	4.229	-0.643	50.375	649.309	-0.000910	-0.001648	-0.000296
35.5000	353.739	15.060	18.943	3.237	-0.643	50.375	673.428	-0.001054	-0.001326	-0.000227
35.6000	397.126	21.315	27.003	6.531	-0.671	50.375	756.025	-0.001492	-0.001890	-0.000457
35.7000	324.238	19.211	22.402	5.016	-0.652	50.374	617.266	-0.001345	-0.001568	-0.000351
35.8000	429.452	26.846	34.422	10.050	-0.658	50.375	817.566	-0.001879	-0.002410	-0.000704
35.9000	303.469	13.374	15.246	1.431	-0.675	50.375	577.726	-0.000936	-0.001067	-0.000100
36.0000	709.401	64.427	80.906	30.156	-0.649	50.375	1350.517	-0.004510	-0.005663	-0.002111
36.1000	601.587	51.093	64.080	22.192	-0.638	50.375	1145.267	-0.003577	-0.004486	-0.001553
36.2000	696.702	62.712	77.806	28.374	-0.656	50.376	1326.342	-0.004390	-0.005446	-0.001986
36.3000	251.861	10.792	11.035	-0.181	-0.676	50.374	479.479	-0.000755	-0.000772	0.000013
36.4000	533.629	45.325	56.449	18.954	-0.644	50.375	1015.892	-0.003173	-0.003951	-0.001327
36.5000	1010.375	105.625	129.892	51.848	-0.645	50.375	1923.494	-0.007394	-0.009092	-0.003629
36.6000	685.806	68.381	84.395	31.238	-0.661	50.375	1305.599	-0.004787	-0.005908	-0.002187
36.7000	778.411	75.988	95.052	35.547	-0.654	50.374	1481.895	-0.005319	-0.006654	-0.002488
36.8000	791.636	78.948	98.056	37.216	-0.662	50.375	1507.072	-0.005526	-0.006864	-0.002605
36.9000	935.684	96.336	118.856	46.665	-0.664	50.375	1781.301	-0.006744	-0.008320	-0.003267
37.0000	984.661	105.036	128.598	51.331	-0.665	50.375	1874.542	-0.007353	-0.009002	-0.003593
37.1000	912.931	97.979	120.024	47.527	-0.659	50.375	1737.986	-0.006859	-0.008402	-0.003327
37.2000	1094.774	121.636	124.388	58.837	-0.676	50.375	2084.169	-0.008515	-0.008707	-0.004119
37.3000	1002.951	111.588	111.615	52.834	-0.658	50.374	1909.361	-0.007811	-0.007813	-0.003698
37.4000	996.849	111.168	110.922	52.501	-0.643	50.374	1897.745	-0.007782	-0.007765	-0.003675
37.5000	1008.151	113.174	112.688	53.528	-0.666	50.375	1919.260	-0.007922	-0.007888	-0.003747
37.6000	1014.493	114.340	114.454	53.695	-0.676	50.374	1931.334	-0.008004	-0.008012	-0.003759
37.7000	978.560	110.452	109.478	51.372	-0.644	50.373	1862.926	-0.007732	-0.007663	-0.003596
37.8000	992.386	112.092	111.185	52.235	-0.643	50.375	1889.248	-0.007846	-0.007783	-0.003656
37.9000	915.891	102.972	101.250	48.014	-0.668	50.374	1743.622	-0.007208	-0.007087	-0.003361
38.0000	917.980	103.000	100.985	47.568	-0.657	50.374	1747.599	-0.007210	-0.007069	-0.003330
38.1000	888.765	99.172	96.347	45.509	-0.661	50.375	1691.980	-0.006942	-0.006744	-0.003186
38.2000	839.216	91.520	87.580	42.009	-0.662	50.374	1597.652	-0.006406	-0.006131	-0.002941
38.3000	784.137	85.543	80.042	38.093	-0.640	50.374	1492.796	-0.005988	-0.005603	-0.002667
38.4000	1180.496	127.712	131.698	61.504	-0.641	50.375	2247.362	-0.008940	-0.009219	-0.004305
38.5000	724.730	76.566	69.651	33.336	-0.672	50.373	1379.700	-0.005360	-0.004876	-0.002334
38.6000	638.752	64.891	55.934	27.112	-0.644	50.374	1216.021	-0.004542	-0.003915	-0.001898
38.7000	587.370	58.419	47.582	23.608	-0.642	50.375	1118.202	-0.004089	-0.003331	-0.001653
38.8000	532.381	50.869	39.160	19.859	-0.658	50.375	1013.517	-0.003561	-0.002741	-0.001390
38.9000	484.215	45.885	31.922	16.966	-0.640	50.373	921.822	-0.003212	-0.002235	-0.001188
39.0000	214.065	13.655	-11.407	-0.541	-0.638	50.374	407.524	-0.000956	0.000799	0.000038
39.1000	382.713	29.595	11.715	8.157	-0.665	50.374	728.588	-0.002072	-0.000820	-0.000571
39.2000	365.957	26.005	8.605	7.060	-0.653	50.374	696.688	-0.001820	-0.000602	-0.000494
39.3000	332.203	21.666	2.308	4.434	-0.643	50.374	632.429	-0.001517	-0.000162	-0.000310
39.4000	213.013	5.794	-18.868	-3.615	-0.643	50.375	405.521	-0.000406	0.001321	0.000253
39.5000	278.326	12.967	-9.003	0.013	-0.665	50.373	529.861	-0.000908	0.000630	-0.000001
39.6000	244.632	8.211	-14.353	-1.804	-0.649	50.373	465.717	-0.000575	0.001005	0.000126
39.7000	236.457	6.104	-17.338	-2.990	-0.647	50.374	450.153	-0.000427	0.001214	0.000209
39.8000	232.715	4.786	-18.868	-3.545	-0.666	50.374	443.029	-0.000335	0.001321	0.000248
39.9000	211.329	2.220	-22.619	-4.532	-0.647	50.373	402.317	-0.000155	0.001583	0.000317
40.0000	228.913	3.944	-20.301	-3.781	-0.643	50.374	435.791	-0.000276	0.001421	0.000265
40.1000	229.258	3.552	-20.580	-4.225	-0.658	50.374	436.449	-0.000249	0.001441	0.000296
40.2000	258.353	5.950	-16.439	-2.837	-0.653	50.374	491.838	-0.000417	0.001151	0.000199
40.3000	269.880	7.523	-14.923	-2.167	-0.648	50.374	513.783	-0.000527	0.001045	0.000152
40.4000	296.510	10.666	-10.576	-0.085	-0.649	50.375	564.480	-0.000747	0.000740	0.000006
40.5000	343.053	16.713	-3.389	2.347	-0.659	50.373	653.086	-0.001170	0.000237	-0.000164
40.6000	463.070	33.345	18.094	11.754	-0.642	50.373	881.567	-0.002334	-0.001267	-0.000823
40.7000	418.601	27.390	11.562	8.378	-0.651	50.374	796.909	-0.001917	-0.000809	-0.000586
40.8000	447.426	31.112	15.512	10.536	-0.671	50.373	851.784	-0.002178	-0.001086	-0.000737
40.9000	499.920	38.085	23.832	13.884	-0.647	50.373	951.719	-0.002666	-0.001668	-0.000972
41.0000	572.748	46.926	34.727	18.592	-0.641	50.374	1090.364	-0.003285	-0.002431	-0.001301
41.1000	589.249	50.238	38.673	20.346	-0.665	50.373	1121.778	-0.003517	-0.002707	-0.001424
41.2000	606.276	52.890	41.997	21.734	-0.646	50.373	1154.194	-0.003702	-0.002940	-0.001521
41.3000	696.492	64.763	55.962	28.126	-0.647	50.374	1325.941	-0.004533	-0.003917	-0.001969
41.4000	749.076	72.157	64.539	31.921	-0.659	50.374	1426.048	-0.005051	-0.004518	-0.002234
41.5000	799.857	79.116	72.746	35.548	-0.656	50.373	1522.722	-0.005538	-0.005092	-0.002488
41.6000	860.301	87.929	83.060	40.063	-0.636	50.373	1637.793	-0.006155	-0.005814	-0.002804
41.7000	859.430	88.660	84.198	40.480	-0.668	50.374	1636.133	-0.006206	-0.005894	-0.002834
41.8000	907.896	95.688	91.622	43.901	-0.654	50.372	1728.401	-0.006698	-0.006414	-0.003073
41.9000	942.897	100.462	97.777	46.760	-0.649	50.373	1795.034	-0.007032	-0.006844	-0.003273
42.0000	978.334	105.569	103.503	49.346	-0.670	50.373	1862.497	-0.007390	-0.007245	-0.003454
42.1000	1003.537	110.285	108.061	51.734	-0.657	50.373	1910.477	-0.007720	-0.007564	-0.003621
42.2000	995.241	109.976	108.060	51.123	-0.640	50.372	1894.684	-0.007698	-0.007564	-0.003579
42.3000	1016.191	113.074	111.323	52.794	-0.652	50.374	1934.566	-0.007915	-0.007793	-0.003696
42.4000	1036.269	115.716	115.049	54.296	-0.664	50.373	1972.790	-0.008100	-0.008053	-0.003801
42.5000	1020.279	114.466	113.342	53.431	-0.651	50.372	1942.348	-0.008013	-0.007934	-0.003740
42.6000	987.562	111.531	109.616	51.888	-0.630	50.373	1880.064	-0.007807	-0.007673	-0.003632
42.7000	983.158	111.055	108.658	51.333	-0.663	50.373	1871.681	-0.007774	-0.007606	-0.003593
42.8000	980.559	110.734	109.089	51.555	-0.644	50.371	1866.732	-0.007751	-0.007636	-0.003609
42.9000	948.894	106.382	103.683	49.181	-0.634	50.372	1806.450	-0.007447	-0.007258	-0.003443
43.0000	905.672	101.036	98.096	46.468	-0.644	50.373	1724.167	-0.007073	-0.006867	-0.003253
43.1000	875.555	97.403	93.581	44.521	-0.660	50.372	1666.832	-0.006818	-0.006551	-0.003116
43.2000	831.928	91.789	87.620	41.842	-0.637	50.372	1583.776	-0.006425	-0.006133	-0.002929
43.3000	756.996	82.683	76.599	36.575	-0.655	50.372	1441.126	-0.005788	-0.005362	-0.002560
43.4000	750.639	80.338	75.001	35.713	-0.656	50.371	1429.024	-0.005624	-0.005250	-0.002500
43.5000	688.481	73.307	65.012	31.406	-0.639	50.371	1310.692	-0.005131	-0.004551	-0.002198
43.6000	660.123	68.748	59.799	28.932	-0.651	50.372	1256.704	-0.004812	-0.004186	-0.002025
43.7000	596.688	60.623	49.848	24.471	-0.672	50.371	1135.941	-0.004244	-0.003489	-0.001713
43.8000	543.097	53.143	41.497	20.942	-0.653	50.370	1033.916	-0.003720	-0.002905	-0.001466
43.9000	487.672	45.620	32.103	17.091	-0.650	50.371	928.402	-0.003193	-0.002247	-0.001196
44.0000	457.795	40.793	26.282	14.841	-0.661	50.370	871.525	-0.002855	-0.001840	-0.001039
44.1000	414.198	34.477	18.609	11.089	-0.652	50.370	788.527	-0.002413	-0.001303	-0.000776
44.2000	382.789	29.539	13.024	8.867	-0.669	50.372	728.731	-0.002068	-0.000912	-0.000621
44.3000	312.591	20.601	0.387	3.879	-0.671	50.370	595.093	-0.001442	-0.000027	-0.000271
44.4000	284.172	15.591	-5.584	1.347	-0.652	50.370	540.991	-0.001091	0.000391	-0.000094
44.5000	253.093	11.072	-11.351	-0.458	-0.652	50.371	481.825	-0.000775	0.000795	0.000032
44.6000	236.833	8.267	-14.924	-1.959	-0.679	50.370	450.869	-0.000579	0.001045	0.000137
44.7000	242.348	8.323	-14.882	-1.889	-0.655	50.370	461.369	-0.000583	0.001042	0.000132
44.8000	234.263	6.398	-16.648	-2.656	-0.633	50.371	445.976	-0.000448	0.001165	0.000186
44.9000	219.760	3.915	-20.513	-4.406	-0.665	50.370	418.367	-0.000274	0.001436	0.000308
45.0000	226.463	3.804	-19.829	-3.947	-0.652	50.369	431.128	-0.000266	0.001388	0.000276
45.1000	240.530	5.542	-18.271	-3.155	-0.652	50.370	457.907	-0.000388	0.001279	0.000221
45.2000	255.453	7.018	-15.856	-2.501	-0.661	50.370	486.317	-0.000491	0.001110	0.000175
45.3000	280.550	10.162	-12.308	-0.791	-0.659	50.369	534.096	-0.000711	0.000862	0.000055
45.4000	306.685	12.967	-8.307	0.595	-0.643	50.369	583.849	-0.000908	0.000582	-0.000042
45.5000	336.140	16.518	-3.513	2.432	-0.664	50.370	639.925	-0.001156	0.000246	-0.000170
45.6000	366.363	20.349	1.362	4.740	-0.657	50.369	697.460	-0.001424	-0.000095	-0.000332
45.7000	413.672	26.790	9.160	7.810	-0.628	50.369	787.525	-0.001875	-0.000641	-0.000547
45.8000	460.771	32.432	16.802	11.393	-0.649	50.370	877.190	-0.002270	-0.001176	-0.000798
45.9000	493.007	37.091	22.056	13.035	-0.660	50.368	938.559	-0.002596	-0.001544	-0.000912
46.0000	550.671	44.652	31.242	17.022	-0.639	50.368	1048.336	-0.003126	-0.002187	-0.001192
46.1000	597.289	51.149	39.132	20.750	-0.649	50.369	1137.085	-0.003580	-0.002739	-0.001453
46.2000	648.581	58.153	47.444	24.124	-0.663	50.369	1234.732	-0.004071	-0.003321	-0.001689
46.3000	702.698	65.897	56.599	28.401	-0.652	50.367	1337.757	-0.004613	-0.003962	-0.001988
46.4000	723.678	69.519	61.032	30.197	-0.643	50.368	1377.697	-0.004866	-0.004272	-0.002114
46.5000	793.515	78.527	71.803	34.991	-0.655	50.369	1510.649	-0.005497	-0.005026	-0.002449
46.6000	847.227	85.838	80.143	38.979	-0.659	50.367	1612.902	-0.006009	-0.005610	-0.002729
46.7000	886.345	92.238	87.564	42.316	-0.653	50.367	1687.374	-0.006457	-0.006130	-0.002962
46.8000	907.806	96.039	91.690	43.816	-0.640	50.369	1728.230	-0.006723	-0.006418	-0.003067
46.9000	954.274	102.339	99.249	47.026	-0.662	50.368	1816.692	-0.007164	-0.006947	-0.003292
47.0000	985.293	106.606	104.432	49.750	-0.651	50.367	1875.744	-0.007462	-0.007310	-0.003483
47.1000	990.928	108.601	106.267	50.401	-0.632	50.367	1886.473	-0.007602	-0.007439	-0.003528
47.2000	1006.693	111.363	109.157	51.944	-0.663	50.368	1916.485	-0.007795	-0.007641	-0.003636
47.3000	1024.096	114.171	112.367	53.252	-0.667	50.366	1949.615	-0.007992	-0.007866	-0.003728
47.4000	1018.761	114.325	112.299	53.154	-0.641	50.366	1939.459	-0.008003	-0.007861	-0.003721
47.5000	1010.180	113.652	111.769	52.583	-0.643	50.367	1923.122	-0.007956	-0.007824	-0.003681
47.6000	1032.617	116.039	114.761	54.003	-0.668	50.367	1965.837	-0.008123	-0.008033	-0.003780
47.7000	973.345	109.667	107.252	51.055	-0.643	50.366	1852.999	-0.007677	-0.007508	-0.003574
47.8000	982.738	110.662	107.991	51.165	-0.651	50.366	1870.880	-0.007746	-0.007559	-0.003582
47.9000	949.465	106.747	104.087	49.013	-0.666	50.366	1807.537	-0.007472	-0.007286	-0.003431
48.0000	903.673	101.091	98.140	46.121	-0.660	50.366	1720.362	-0.007076	-0.006870	-0.003228
48.1000	855.718	94.749	90.758	42.676	-0.634	50.366	1629.066	-0.006632	-0.006353	-0.002987
48.2000	834.002	91.845	86.829	41.090	-0.653	50.367	1587.725	-0.006429	-0.006078	-0.002876
48.3000	788.180	86.442	80.433	37.910	-0.647	50.365	1500.492	-0.006051	-0.005630	-0.002654
48.4000	729.644	78.905	71.486	33.907	-0.621	50.366	1389.055	-0.005523	-0.005004	-0.002374
48.5000	704.276	74.976	66.772	31.962	-0.640	50.367	1340.761	-0.005248	-0.004674	-0.002237
48.6000	642.915	66.531	56.962	27.417	-0.655	50.365	1223.946	-0.004657	-0.003987	-0.001919
48.7000	582.712	59.120	47.859	23.582	-0.636	50.366	1109.333	-0.004138	-0.003350	-0.001651
48.8000	558.952	55.402	42.898	21.458	-0.641	50.366	1064.100	-0.003878	-0.003003	-0.001502
48.9000	491.083	45.733	31.782	16.481	-0.661	50.365	934.896	-0.003201	-0.002225	-0.001154
49.0000	456.879	40.723	26.016	14.062	-0.641	50.364	869.780	-0.002851	-0.001821	-0.000984
49.1000	401.905	32.907	16.567	10.228	-0.636	50.366	765.123	-0.002303	-0.001160	-0.000716
49.2000	368.376	27.392	9.784	7.308	-0.657	50.365	701.294	-0.001917	-0.000685	-0.000512
49.3000	318.031	20.642	0.986	3.490	-0.635	50.364	605.450	-0.001445	-0.000069	-0.000244
49.4000	303.904	18.258	-2.555	2.416	-0.649	50.365	578.556	-0.001278	0.000179	-0.000169
49.5000	279.393	13.993	-7.433	0.498	-0.651	50.365	531.893	-0.000979	0.000520	-0.000035
49.6000	253.274	9.965	-11.951	-1.152	-0.643	50.364	482.168	-0.000698	0.000837	0.000081
49.7000	245.414	7.860	-14.936	-2.141	-0.633	50.365	467.205	-0.000550	0.001046	0.000150
49.8000	243.160	6.890	-16.384	-2.947	-0.666	50.366	462.914	-0.000482	0.001147	0.000206
49.9000	389.116	22.325	4.225	5.336	-0.660	50.364	740.776	-0.001563	-0.000296	-0.000374
