# Supplementary material for: Evaluation of a Cold-Mixed High-Performance Polyurethane Mixture
Source: Hindawi journal article supplement (doi:10.1155/2019/1507971), 2019-11-07
Supplement: f1 [file 1507971.f1.zip › 1507971.f1/dynamic modulus data/PUM/specimen2/temp50/zhs-2-50_0.5Hz.csv]

Test Information
****************
Project name	zhs
Operator name	2
Target test temperature	50
Target confining stress	0
Average dynamic strain range from 75 to 125 micro-strain
Contact stress	5
Initial modulus	1000
Axial gauge length	70
Comments
Specimen information
********************
Identification	zhs-2-50
Dimensions	Point 1	Point 2	Point 3	Point 4	Point 5	Point 6	Average	Std Dev.
Diameter (mm)	49.2	49.3	49.2				49.23	0.058
Height (mm)	100.8	101.0	100.8				100.87	0.115
Cross-sectional area (mm�)	1903.7
Conditioning time
Properties/Comments
Test Data	0.5Hz
*********
Test date and time	Wed	Apr 3	2019	1:28 PM
Dynamic modulus (MPa)	8290
Phase angle (Degrees)	4.38
Average temperature (�C)	50.3
Average confining pressure (kPa)	-0.7
Average micro-strain	99
Load drift (%)	1.6
Load standard error (%)	8.2
Average deformation drift (%)	-4.4
Average deformation standard error (%)	7.7
Deformation uniformity (%)	30.8
Phase uniformity (Degrees)	0.3
Conditioning Cycles
Time (sec)	Axial stress (kPa)	Axial micro-strain #1	Axial micro-strain #2	Axial micro-strain #3	Confining pressure (kPa)	Temperature (�C)	Load (N)	Displacement #1 (mm)	Displacement #2 (mm)	Displacement #3 (mm)
0.0000	219.385	4.561	2.183	0.402	-0.744	50.329	417.652	-0.000319	-0.000153	-0.000028
0.0400	230.250	5.066	3.240	0.762	-0.740	50.328	438.337	-0.000355	-0.000227	-0.000053
0.0800	231.317	4.325	2.545	0.597	-0.742	50.329	440.369	-0.000303	-0.000178	-0.000042
0.1200	260.878	7.268	7.310	2.250	-0.740	50.328	496.645	-0.000509	-0.000512	-0.000157
0.1600	280.430	9.123	9.883	3.366	-0.727	50.328	533.867	-0.000639	-0.000692	-0.000236
0.2000	307.331	12.392	12.691	5.018	-0.738	50.328	585.079	-0.000867	-0.000888	-0.000351
0.2400	335.765	15.298	17.441	7.226	-0.744	50.329	639.210	-0.001071	-0.001221	-0.000506
0.2800	359.344	18.399	20.847	8.684	-0.733	50.329	684.099	-0.001288	-0.001459	-0.000608
0.3200	389.762	22.256	25.779	10.936	-0.742	50.329	742.006	-0.001558	-0.001805	-0.000766
0.3600	442.827	28.822	34.159	14.494	-0.735	50.329	843.029	-0.002018	-0.002391	-0.001015
0.4000	468.420	32.360	38.201	16.482	-0.749	50.329	891.752	-0.002265	-0.002674	-0.001154
0.4400	508.396	37.512	44.566	19.108	-0.743	50.329	967.855	-0.002626	-0.003120	-0.001338
0.4800	543.668	42.240	49.388	21.694	-0.744	50.329	1035.004	-0.002957	-0.003457	-0.001519
0.5200	578.293	47.221	55.739	24.054	-0.746	50.329	1100.922	-0.003305	-0.003902	-0.001684
0.5600	619.516	52.623	61.866	27.169	-0.744	50.328	1179.399	-0.003684	-0.004331	-0.001902
0.6000	656.546	57.800	68.065	29.765	-0.746	50.328	1249.895	-0.004046	-0.004765	-0.002084
0.6400	696.552	63.259	73.804	32.740	-0.751	50.328	1326.056	-0.004428	-0.005166	-0.002292
0.6800	744.237	69.829	81.824	36.086	-0.747	50.328	1416.836	-0.004888	-0.005728	-0.002526
0.7200	766.689	72.647	85.115	37.771	-0.756	50.329	1459.579	-0.005085	-0.005958	-0.002644
0.7600	786.677	75.990	89.215	39.589	-0.748	50.328	1497.631	-0.005319	-0.006245	-0.002771
0.8000	803.719	78.401	91.788	41.118	-0.750	50.328	1530.075	-0.005488	-0.006425	-0.002878
0.8400	829.583	82.220	96.024	42.760	-0.740	50.329	1579.313	-0.005755	-0.006722	-0.002993
0.8800	839.517	83.678	98.054	43.608	-0.750	50.329	1598.225	-0.005857	-0.006864	-0.003053
0.9200	838.450	84.420	98.154	43.801	-0.740	50.329	1596.193	-0.005909	-0.006871	-0.003066
0.9600	840.524	84.897	98.792	44.661	-0.752	50.329	1600.142	-0.005943	-0.006915	-0.003126
1.0000	843.064	85.712	99.553	44.759	-0.750	50.328	1604.977	-0.006000	-0.006969	-0.003133
1.0400	832.919	84.617	98.320	44.010	-0.749	50.329	1585.665	-0.005923	-0.006882	-0.003081
1.0800	840.704	85.698	100.028	44.384	-0.736	50.329	1600.485	-0.005999	-0.007002	-0.003107
1.1200	820.686	83.805	97.694	43.665	-0.750	50.329	1562.376	-0.005866	-0.006839	-0.003057
1.1600	786.346	79.774	92.484	41.578	-0.747	50.328	1497.002	-0.005584	-0.006474	-0.002910
1.2000	761.294	76.201	88.841	39.632	-0.751	50.328	1449.308	-0.005334	-0.006219	-0.002774
1.2400	738.376	73.924	86.815	38.146	-0.731	50.329	1405.678	-0.005175	-0.006077	-0.002670
1.2800	707.267	70.164	81.533	35.921	-0.726	50.329	1346.455	-0.004911	-0.005707	-0.002514
1.3200	660.408	64.283	75.348	32.850	-0.733	50.329	1257.248	-0.004500	-0.005274	-0.002299
1.3600	628.142	59.585	70.513	30.671	-0.747	50.328	1195.822	-0.004171	-0.004936	-0.002147
1.4000	622.762	59.276	69.594	30.224	-0.742	50.329	1185.579	-0.004149	-0.004872	-0.002116
1.4400	553.421	49.903	57.826	25.487	-0.741	50.329	1053.572	-0.003493	-0.004048	-0.001784
1.4800	525.138	46.252	53.797	23.399	-0.738	50.329	999.727	-0.003238	-0.003766	-0.001638
1.5200	474.041	39.249	45.624	19.718	-0.728	50.328	902.452	-0.002747	-0.003194	-0.001380
1.5600	438.153	34.659	40.383	17.245	-0.731	50.328	834.131	-0.002426	-0.002827	-0.001207
1.6000	397.336	29.301	33.479	14.340	-0.737	50.329	756.426	-0.002051	-0.002344	-0.001004
1.6400	336.907	21.623	24.154	10.118	-0.735	50.328	641.384	-0.001514	-0.001691	-0.000708
1.6800	339.326	20.420	23.652	9.951	-0.748	50.328	645.990	-0.001429	-0.001656	-0.000697
1.7200	307.872	16.671	17.830	7.448	-0.749	50.329	586.109	-0.001167	-0.001248	-0.000521
1.7600	249.727	9.463	9.242	3.558	-0.744	50.328	475.416	-0.000662	-0.000647	-0.000249
1.8000	286.967	12.853	13.468	5.364	-0.737	50.329	546.312	-0.000900	-0.000943	-0.000376
1.8400	247.037	6.988	5.588	1.918	-0.733	50.329	470.295	-0.000489	-0.000391	-0.000134
1.8800	218.949	4.015	1.780	0.401	-0.739	50.328	416.822	-0.000281	-0.000125	-0.000028
1.9200	216.695	2.978	0.542	-0.043	-0.721	50.328	412.531	-0.000208	-0.000038	0.000003
1.9600	219.580	2.992	0.640	0.026	-0.727	50.327	418.024	-0.000209	-0.000045	-0.000002
2.0000	225.441	2.835	1.459	0.359	-0.730	50.328	429.182	-0.000198	-0.000102	-0.000025
2.0400	230.551	3.959	1.599	0.541	-0.748	50.328	438.910	-0.000277	-0.000112	-0.000038
2.0800	217.852	1.643	-0.330	-0.333	-0.727	50.328	414.734	-0.000115	0.000023	0.000023
2.1200	246.781	5.149	3.575	1.249	-0.736	50.328	469.809	-0.000360	-0.000250	-0.000087
2.1600	273.277	7.635	7.576	2.904	-0.740	50.328	520.248	-0.000534	-0.000530	-0.000203
2.2000	295.549	10.357	11.369	4.393	-0.739	50.329	562.649	-0.000725	-0.000796	-0.000308
2.2400	317.941	13.235	15.178	6.321	-0.730	50.329	605.278	-0.000926	-0.001062	-0.000443
2.2800	352.597	17.218	19.859	8.059	-0.720	50.329	671.253	-0.001205	-0.001390	-0.000564
2.3200	382.984	20.910	23.930	10.838	-0.738	50.328	729.103	-0.001464	-0.001675	-0.000759
2.3600	414.468	25.345	29.253	12.784	-0.738	50.328	789.042	-0.001774	-0.002048	-0.000895
2.4000	488.288	33.958	40.021	17.549	-0.735	50.329	929.575	-0.002377	-0.002801	-0.001228
2.4400	522.402	38.602	45.898	19.706	-0.732	50.329	994.520	-0.002702	-0.003213	-0.001379
2.4800	582.050	45.915	53.975	23.914	-0.747	50.329	1108.074	-0.003214	-0.003778	-0.001674
2.5200	580.833	47.137	56.031	24.374	-0.738	50.328	1105.757	-0.003300	-0.003922	-0.001706
2.5600	600.460	49.815	59.021	26.111	-0.739	50.329	1143.122	-0.003487	-0.004131	-0.001828
2.6000	660.799	58.236	68.356	30.392	-0.730	50.329	1257.992	-0.004077	-0.004785	-0.002127
2.6400	688.647	61.686	72.998	32.352	-0.723	50.329	1311.007	-0.004318	-0.005110	-0.002265
2.6800	723.618	66.936	78.292	34.768	-0.743	50.328	1377.583	-0.004686	-0.005480	-0.002434
2.7200	754.321	71.778	83.724	37.521	-0.738	50.329	1436.033	-0.005024	-0.005861	-0.002626
2.7600	815.096	79.144	91.690	41.341	-0.738	50.328	1551.733	-0.005540	-0.006418	-0.002894
2.8000	852.817	83.535	97.833	43.996	-0.729	50.329	1623.545	-0.005847	-0.006848	-0.003080
2.8400	775.511	76.664	89.019	39.881	-0.738	50.329	1476.374	-0.005367	-0.006231	-0.002792
2.8800	832.664	83.326	97.125	43.496	-0.732	50.328	1585.178	-0.005833	-0.006799	-0.003045
2.9200	842.432	84.657	97.901	44.288	-0.732	50.329	1603.775	-0.005926	-0.006853	-0.003100
2.9600	842.523	85.066	98.791	44.677	-0.732	50.329	1603.947	-0.005955	-0.006915	-0.003127
3.0000	836.827	85.136	98.721	44.509	-0.732	50.328	1593.103	-0.005960	-0.006911	-0.003116
3.0400	847.377	85.880	100.235	45.036	-0.742	50.329	1613.188	-0.006012	-0.007016	-0.003153
3.0800	825.180	84.126	98.195	43.859	-0.744	50.328	1570.930	-0.005889	-0.006874	-0.003070
3.1200	817.200	83.117	96.790	43.428	-0.731	50.329	1555.738	-0.005818	-0.006775	-0.003040
3.1600	791.666	80.225	93.233	41.772	-0.735	50.328	1507.130	-0.005616	-0.006526	-0.002924
3.2000	763.278	76.509	88.962	39.980	-0.732	50.329	1453.085	-0.005356	-0.006227	-0.002799
3.2400	732.890	73.292	84.669	37.869	-0.730	50.329	1395.235	-0.005130	-0.005927	-0.002651
3.2800	702.954	69.154	80.489	35.656	-0.730	50.328	1338.243	-0.004841	-0.005634	-0.002496
3.3200	647.769	63.147	73.263	32.227	-0.738	50.328	1233.187	-0.004420	-0.005128	-0.002256
3.3600	626.083	59.795	69.427	30.822	-0.723	50.329	1191.902	-0.004186	-0.004860	-0.002158
3.4000	588.993	55.025	63.883	27.833	-0.758	50.328	1121.292	-0.003852	-0.004472	-0.001948
3.4400	552.384	49.984	58.102	25.625	-0.752	50.329	1051.598	-0.003499	-0.004067	-0.001794
3.4800	509.268	44.428	51.847	22.329	-0.750	50.328	969.515	-0.003110	-0.003629	-0.001563
3.5200	476.521	39.405	46.554	19.956	-0.737	50.329	907.173	-0.002758	-0.003259	-0.001397
3.5600	469.142	38.366	44.359	19.065	-0.732	50.329	893.126	-0.002686	-0.003105	-0.001335
3.6000	400.372	29.119	33.851	14.704	-0.742	50.329	762.205	-0.002038	-0.002370	-0.001029
3.6400	371.998	25.530	29.519	12.590	-0.743	50.329	708.189	-0.001787	-0.002066	-0.000881
3.6800	337.959	20.615	22.945	10.173	-0.753	50.329	643.387	-0.001443	-0.001606	-0.000712
3.7200	288.876	14.441	14.859	6.392	-0.754	50.329	549.946	-0.001011	-0.001040	-0.000447
3.7600	284.803	12.813	13.954	5.920	-0.751	50.329	542.192	-0.000897	-0.000977	-0.000414
3.8000	274.268	11.366	11.841	4.907	-0.740	50.329	522.137	-0.000796	-0.000829	-0.000344
3.8400	236.517	6.257	5.045	2.141	-0.758	50.329	450.268	-0.000438	-0.000353	-0.000150
3.8800	225.907	4.450	2.698	0.792	-0.754	50.329	430.069	-0.000311	-0.000189	-0.000055
3.9200	215.808	2.836	0.904	0.596	-0.752	50.329	410.843	-0.000199	-0.000063	-0.000042
3.9600	224.720	3.721	1.516	0.609	-0.754	50.329	427.809	-0.000260	-0.000106	-0.000043
4.0000	226.719	3.427	1.447	0.694	-0.744	50.329	431.614	-0.000240	-0.000101	-0.000049
4.0400	230.370	3.693	1.975	0.708	-0.742	50.329	438.566	-0.000259	-0.000138	-0.000050
4.0800	235.059	3.708	2.587	0.874	-0.737	50.329	447.493	-0.000260	-0.000181	-0.000061
4.1200	247.473	5.431	3.730	1.584	-0.742	50.329	471.125	-0.000380	-0.000261	-0.000111
4.1600	283.872	9.067	9.078	3.726	-0.742	50.329	540.419	-0.000635	-0.000635	-0.000261
4.2000	282.218	9.265	9.188	4.062	-0.731	50.330	537.271	-0.000649	-0.000643	-0.000284
4.2400	357.045	17.653	20.346	8.769	-0.726	50.329	679.722	-0.001236	-0.001424	-0.000614
4.2800	371.818	19.830	22.764	9.686	-0.718	50.329	707.846	-0.001388	-0.001593	-0.000678
4.3200	405.316	24.094	27.517	11.923	-0.740	50.329	771.618	-0.001687	-0.001926	-0.000835
4.3600	429.196	27.072	32.076	13.951	-0.726	50.328	817.080	-0.001895	-0.002245	-0.000977
4.4000	445.382	28.585	33.993	15.024	-0.722	50.330	847.893	-0.002001	-0.002379	-0.001052
4.4400	525.303	39.514	46.401	20.178	-0.738	50.329	1000.042	-0.002766	-0.003248	-0.001412
4.4800	568.870	44.932	52.613	23.332	-0.743	50.329	1082.983	-0.003145	-0.003683	-0.001633
4.5200	596.162	49.383	58.130	25.487	-0.741	50.329	1134.939	-0.003457	-0.004069	-0.001784
4.5600	624.070	53.214	62.617	27.863	-0.740	50.330	1188.068	-0.003725	-0.004383	-0.001950
4.6000	655.524	57.746	67.771	29.975	-0.740	50.330	1247.950	-0.004042	-0.004744	-0.002098
4.6400	705.990	64.187	74.973	33.643	-0.745	50.330	1344.023	-0.004493	-0.005248	-0.002355
4.6800	736.152	68.944	79.697	35.992	-0.754	50.329	1401.443	-0.004826	-0.005579	-0.002519
4.7200	776.292	74.049	86.187	38.648	-0.751	50.329	1477.861	-0.005183	-0.006033	-0.002705
4.7600	804.335	77.868	91.065	40.741	-0.748	50.329	1531.248	-0.005451	-0.006375	-0.002852
4.8000	787.744	76.944	89.589	40.299	-0.749	50.330	1499.662	-0.005386	-0.006271	-0.002821
4.8400	807.371	79.886	92.747	41.675	-0.745	50.330	1537.027	-0.005592	-0.006492	-0.002917
4.8800	849.346	85.108	99.318	44.661	-0.740	50.329	1616.936	-0.005958	-0.006952	-0.003126
4.9200	838.089	84.335	97.764	44.038	-0.735	50.329	1595.507	-0.005903	-0.006843	-0.003083
4.9600	857.281	86.893	100.889	45.549	-0.744	50.329	1632.042	-0.006082	-0.007062	-0.003188
5.0000	840.674	85.712	98.985	44.675	-0.734	50.330	1600.428	-0.006000	-0.006929	-0.003127
5.0400	841.636	85.585	99.083	44.676	-0.738	50.330	1602.259	-0.005991	-0.006936	-0.003127
5.0800	822.144	84.071	97.735	43.719	-0.737	50.330	1565.151	-0.005885	-0.006841	-0.003060
5.1200	791.216	79.916	93.482	41.687	-0.735	50.329	1506.271	-0.005594	-0.006544	-0.002918
5.1600	797.317	80.575	94.204	42.051	-0.746	50.329	1517.887	-0.005640	-0.006594	-0.002944
5.2000	767.816	76.804	89.616	40.145	-0.743	50.330	1461.725	-0.005376	-0.006273	-0.002810
5.2400	730.862	73.137	84.518	37.924	-0.723	50.330	1391.373	-0.005120	-0.005916	-0.002655
5.2800	694.267	68.354	79.530	35.226	-0.742	50.329	1321.707	-0.004785	-0.005567	-0.002466
5.3200	663.023	64.538	75.195	33.144	-0.735	50.330	1262.226	-0.004518	-0.005264	-0.002320
5.3600	625.633	59.277	69.510	30.629	-0.740	50.330	1191.044	-0.004149	-0.004866	-0.002144
5.4000	588.167	54.646	63.562	27.916	-0.736	50.330	1119.719	-0.003825	-0.004449	-0.001954
5.4400	542.946	48.641	56.795	24.693	-0.751	50.330	1033.630	-0.003405	-0.003976	-0.001728
5.4800	517.293	45.283	52.586	22.623	-0.741	50.330	984.793	-0.003170	-0.003681	-0.001584
5.5200	476.806	39.783	46.415	19.733	-0.727	50.330	907.717	-0.002785	-0.003249	-0.001381
5.5600	444.976	35.223	40.869	17.746	-0.746	50.330	847.120	-0.002466	-0.002861	-0.001242
5.6000	399.590	29.147	33.282	14.424	-0.720	50.331	760.717	-0.002040	-0.002330	-0.001010
5.6400	349.756	23.014	25.668	11.020	-0.718	50.330	665.846	-0.001611	-0.001797	-0.000771
5.6800	345.368	21.204	24.194	10.284	-0.742	50.331	657.492	-0.001484	-0.001694	-0.000720
5.7200	277.680	13.191	13.259	5.321	-0.732	50.330	528.631	-0.000923	-0.000928	-0.000372
5.7600	287.238	13.248	14.066	5.778	-0.734	50.331	546.827	-0.000927	-0.000985	-0.000404
5.8000	257.437	9.180	9.050	3.449	-0.724	50.330	490.093	-0.000643	-0.000633	-0.000241
5.8400	247.939	7.340	6.477	2.640	-0.731	50.330	472.012	-0.000514	-0.000453	-0.000185
5.8800	218.182	3.692	1.666	0.332	-0.740	50.330	415.363	-0.000258	-0.000117	-0.000023
5.9200	221.158	3.272	1.264	0.345	-0.734	50.330	421.028	-0.000229	-0.000089	-0.000024
5.9600	229.409	3.988	1.918	0.497	-0.740	50.330	436.735	-0.000279	-0.000134	-0.000035
6.0000	227.275	2.962	1.138	0.303	-0.736	50.330	432.673	-0.000207	-0.000080	-0.000021
6.0400	234.158	3.946	2.043	0.736	-0.750	50.330	445.776	-0.000276	-0.000143	-0.000051
6.0800	251.395	5.290	4.022	1.417	-0.744	50.330	478.592	-0.000370	-0.000282	-0.000099
6.1200	240.996	4.309	3.088	1.054	-0.747	50.330	458.794	-0.000302	-0.000216	-0.000074
6.1600	274.253	7.677	7.784	3.060	-0.739	50.331	522.108	-0.000537	-0.000545	-0.000214
6.2000	301.620	11.424	12.103	4.905	-0.724	50.331	574.207	-0.000800	-0.000847	-0.000343
6.2400	325.981	13.993	15.610	6.545	-0.732	50.330	620.584	-0.000979	-0.001093	-0.000458
6.2800	360.171	18.664	20.959	8.671	-0.728	50.330	685.673	-0.001306	-0.001467	-0.000607
6.3200	396.795	22.048	25.893	11.005	-0.727	50.330	755.396	-0.001543	-0.001813	-0.000770
6.3600	466.136	31.086	36.578	15.814	-0.738	50.331	887.403	-0.002176	-0.002560	-0.001107
6.4000	457.284	30.536	36.397	15.664	-0.741	50.330	870.552	-0.002138	-0.002548	-0.001096
6.4400	520.930	38.939	45.342	19.830	-0.737	50.330	991.716	-0.002726	-0.003174	-0.001388
6.4800	537.521	41.452	48.860	21.430	-0.732	50.330	1023.302	-0.002902	-0.003420	-0.001500
6.5200	615.413	51.399	60.202	26.627	-0.726	50.330	1171.589	-0.003598	-0.004214	-0.001864
6.5600	605.374	50.883	59.951	26.166	-0.720	50.330	1152.477	-0.003562	-0.004197	-0.001832
6.6000	658.770	58.026	67.952	29.892	-0.718	50.331	1254.129	-0.004062	-0.004757	-0.002092
6.6400	703.254	63.371	74.597	33.003	-0.727	50.331	1338.816	-0.004436	-0.005222	-0.002310
6.6800	719.560	66.614	78.209	34.476	-0.722	50.330	1369.858	-0.004663	-0.005475	-0.002413
6.7200	770.807	73.137	85.589	38.104	-0.729	50.330	1467.419	-0.005120	-0.005991	-0.002667
6.7600	780.786	75.484	87.938	39.129	-0.736	50.330	1486.416	-0.005284	-0.006156	-0.002739
6.8000	794.777	77.589	90.452	40.367	-0.736	50.331	1513.052	-0.005431	-0.006332	-0.002826
6.8400	830.906	82.375	95.857	42.829	-0.732	50.330	1581.831	-0.005766	-0.006710	-0.002998
6.8800	843.229	83.832	97.791	43.818	-0.723	50.330	1605.291	-0.005868	-0.006845	-0.003067
6.9200	840.073	84.322	97.708	43.872	-0.728	50.330	1599.283	-0.005903	-0.006840	-0.003071
6.9600	844.702	85.010	98.846	44.424	-0.730	50.330	1608.095	-0.005951	-0.006919	-0.003110
7.0000	846.490	86.049	99.788	44.772	-0.730	50.330	1611.500	-0.006023	-0.006985	-0.003134
7.0400	840.283	85.684	99.319	44.634	-0.735	50.330	1599.684	-0.005998	-0.006952	-0.003124
7.0800	822.475	83.692	97.041	43.207	-0.727	50.330	1565.781	-0.005858	-0.006793	-0.003025
7.1200	808.032	82.317	95.120	42.788	-0.743	50.330	1538.286	-0.005762	-0.006658	-0.002995
7.1600	790.675	80.071	93.177	41.370	-0.744	50.330	1505.241	-0.005605	-0.006522	-0.002896
7.2000	770.687	77.307	90.021	40.118	-0.736	50.330	1467.190	-0.005412	-0.006301	-0.002808
7.2400	710.288	70.574	82.060	36.477	-0.752	50.330	1352.205	-0.004940	-0.005744	-0.002553
7.2800	714.721	70.403	81.671	36.256	-0.742	50.330	1360.645	-0.004928	-0.005717	-0.002538
7.3200	675.362	65.759	76.073	33.489	-0.742	50.330	1285.715	-0.004603	-0.005325	-0.002344
7.3600	635.762	60.662	70.526	30.919	-0.735	50.330	1210.327	-0.004246	-0.004937	-0.002164
7.4000	602.850	56.565	65.649	28.848	-0.736	50.331	1147.671	-0.003960	-0.004595	-0.002019
7.4400	545.501	49.131	57.477	24.889	-0.736	50.330	1038.494	-0.003439	-0.004023	-0.001742
7.4800	514.287	44.835	52.195	22.387	-0.740	50.330	979.071	-0.003138	-0.003654	-0.001567
7.5200	481.104	40.048	46.802	20.150	-0.731	50.329	915.899	-0.002803	-0.003276	-0.001410
7.5600	436.801	34.815	40.024	17.175	-0.727	50.330	831.556	-0.002437	-0.002802	-0.001202
7.6000	404.369	29.581	34.436	14.816	-0.729	50.330	769.815	-0.002071	-0.002411	-0.001037
7.6400	383.540	26.314	30.283	13.034	-0.724	50.330	730.162	-0.001842	-0.002120	-0.000912
7.6800	321.398	18.706	21.042	8.630	-0.736	50.331	611.858	-0.001309	-0.001473	-0.000604
7.7200	272.781	12.827	12.938	5.307	-0.732	50.330	519.304	-0.000898	-0.000906	-0.000371
7.7600	277.725	12.027	12.454	4.823	-0.729	50.330	528.717	-0.000842	-0.000872	-0.000338
7.8000	272.375	11.002	11.075	4.436	-0.722	50.330	518.532	-0.000770	-0.000775	-0.000311
7.8400	236.818	6.103	5.170	1.888	-0.736	50.330	450.840	-0.000427	-0.000362	-0.000132
7.8800	230.536	4.744	3.435	1.235	-0.743	50.330	438.881	-0.000332	-0.000240	-0.000086
7.9200	222.000	3.413	1.612	0.441	-0.740	50.330	422.630	-0.000239	-0.000113	-0.000031
7.9600	224.975	3.133	1.322	0.305	-0.730	50.330	428.295	-0.000219	-0.000093	-0.000021
8.0000	219.790	2.597	0.585	-0.085	-0.699	50.330	418.425	-0.000182	-0.000041	0.000006
8.0400	229.935	3.132	1.140	0.540	-0.719	50.330	437.737	-0.000219	-0.000080	-0.000038
8.0800	240.560	4.420	2.767	1.000	-0.725	50.330	457.964	-0.000309	-0.000194	-0.000070
8.1200	249.532	5.488	3.908	1.444	-0.727	50.329	475.044	-0.000384	-0.000274	-0.000101
8.1600	279.138	8.730	8.577	3.085	-0.723	50.330	531.406	-0.000611	-0.000600	-0.000216
8.2000	303.318	11.436	12.132	5.088	-0.732	50.330	577.440	-0.000801	-0.000849	-0.000356
8.2400	326.748	14.259	15.678	6.529	-0.710	50.330	622.044	-0.000998	-0.001097	-0.000457
8.2800	365.341	19.058	21.182	9.115	-0.725	50.330	695.515	-0.001334	-0.001483	-0.000638
8.3200	396.585	22.929	27.305	11.631	-0.727	50.330	754.995	-0.001605	-0.001911	-0.000814
8.3600	441.009	27.869	32.853	14.397	-0.708	50.330	839.567	-0.001951	-0.002300	-0.001008
8.4000	475.769	33.369	38.575	17.133	-0.723	50.330	905.743	-0.002336	-0.002700	-0.001199
8.4400	507.735	36.908	43.453	19.010	-0.706	50.330	966.597	-0.002584	-0.003042	-0.001331
8.4800	553.917	43.320	51.041	22.275	-0.708	50.330	1054.516	-0.003032	-0.003573	-0.001559
8.5200	590.977	48.318	56.724	25.028	-0.704	50.330	1125.069	-0.003382	-0.003971	-0.001752
8.5600	632.816	54.000	63.633	27.750	-0.706	50.330	1204.720	-0.003780	-0.004454	-0.001943
8.6000	657.508	57.857	67.287	30.029	-0.713	50.330	1251.726	-0.004050	-0.004710	-0.002102
8.6400	711.460	64.708	75.779	33.795	-0.728	50.329	1354.437	-0.004530	-0.005305	-0.002366
8.6800	733.777	67.891	79.307	35.352	-0.746	50.330	1396.923	-0.004752	-0.005551	-0.002475
8.7200	767.907	73.124	85.381	38.231	-0.707	50.331	1461.897	-0.005119	-0.005977	-0.002676
8.7600	776.413	74.303	86.563	39.187	-0.690	50.330	1478.090	-0.005201	-0.006059	-0.002743
8.8000	802.066	78.890	91.843	41.270	-0.740	50.329	1526.928	-0.005522	-0.006429	-0.002889
8.8400	833.460	82.219	95.830	43.040	-0.716	50.330	1586.695	-0.005755	-0.006708	-0.003013
8.8800	832.439	83.216	96.818	42.997	-0.687	50.329	1584.749	-0.005825	-0.006777	-0.003010
8.9200	846.024	84.784	98.972	44.342	-0.752	50.330	1610.613	-0.005935	-0.006928	-0.003104
8.9600	838.600	84.868	98.513	44.233	-0.697	50.330	1596.479	-0.005941	-0.006896	-0.003096
9.0000	846.896	86.093	99.473	44.453	-0.731	50.329	1612.272	-0.006027	-0.006963	-0.003112
9.0400	836.962	85.235	99.097	44.189	-0.719	50.330	1593.361	-0.005966	-0.006937	-0.003093
9.0800	821.798	83.453	96.205	43.318	-0.699	50.329	1564.493	-0.005842	-0.006734	-0.003032
9.1200	798.024	81.038	94.051	42.092	-0.755	50.330	1519.232	-0.005673	-0.006584	-0.002946
9.1600	787.444	79.734	92.483	41.425	-0.715	50.329	1499.090	-0.005581	-0.006474	-0.002900
9.2000	753.825	75.834	88.241	38.950	-0.727	50.329	1435.089	-0.005308	-0.006177	-0.002726
9.2400	739.413	73.489	85.742	38.022	-0.759	50.329	1407.652	-0.005144	-0.006002	-0.002662
9.2800	693.306	68.493	79.655	35.143	-0.704	50.329	1319.876	-0.004795	-0.005576	-0.002460
9.3200	672.100	64.919	75.680	33.502	-0.738	50.329	1279.507	-0.004544	-0.005298	-0.002345
9.3600	635.356	60.721	70.526	31.127	-0.728	50.330	1209.555	-0.004250	-0.004937	-0.002179
9.4000	603.781	56.481	65.398	28.875	-0.711	50.330	1149.445	-0.003954	-0.004578	-0.002021
9.4400	560.424	51.038	59.173	25.584	-0.746	50.329	1066.904	-0.003573	-0.004142	-0.001791
9.4800	505.856	43.516	50.554	22.066	-0.728	50.331	963.020	-0.003046	-0.003539	-0.001545
9.5200	483.885	40.766	47.249	20.080	-0.698	50.329	921.192	-0.002854	-0.003307	-0.001406
9.5600	442.151	34.914	40.496	17.480	-0.755	50.330	841.742	-0.002444	-0.002835	-0.001224
9.6000	406.473	29.920	34.295	14.676	-0.698	50.330	773.821	-0.002094	-0.002401	-0.001027
9.6400	365.882	24.333	28.015	12.018	-0.704	50.328	696.545	-0.001703	-0.001961	-0.000841
9.6800	335.314	20.405	22.835	9.590	-0.740	50.329	638.351	-0.001428	-0.001598	-0.000671
9.7200	298.599	15.341	16.108	6.975	-0.695	50.329	568.457	-0.001074	-0.001128	-0.000488
9.7600	279.017	12.712	13.079	5.461	-0.719	50.329	531.178	-0.000890	-0.000916	-0.000382
9.8000	259.060	9.515	8.953	3.629	-0.725	50.330	493.183	-0.000666	-0.000627	-0.000254
9.8400	232.369	6.175	5.131	1.861	-0.695	50.329	442.371	-0.000432	-0.000359	-0.000130
9.8800	229.784	4.802	2.836	1.138	-0.740	50.329	437.450	-0.000336	-0.000199	-0.000080
9.9200	226.914	4.142	2.574	0.723	-0.733	50.329	431.986	-0.000290	-0.000180	-0.000051
9.9600	215.402	2.177	0.237	-0.140	-0.694	50.329	410.070	-0.000152	-0.000017	0.000010
10.0000	233.196	6.622	4.255	1.123	-0.723	50.334	443.945	-0.000464	-0.000298	-0.000079
10.0400	242.664	6.723	4.492	1.055	-0.753	50.335	461.969	-0.000471	-0.000314	-0.000074
10.0800	259.090	7.411	6.408	2.433	-0.725	50.335	493.240	-0.000519	-0.000449	-0.000170
10.1200	266.859	8.196	7.017	2.544	-0.695	50.334	508.032	-0.000574	-0.000491	-0.000178
10.1600	302.687	11.928	12.119	5.031	-0.753	50.335	576.239	-0.000835	-0.000848	-0.000352
10.2000	342.512	16.571	18.624	7.489	-0.726	50.336	652.056	-0.001160	-0.001304	-0.000524
10.2400	368.376	19.479	21.667	9.450	-0.726	50.334	701.294	-0.001364	-0.001517	-0.000661
10.2800	415.190	25.147	29.058	12.297	-0.766	50.335	790.415	-0.001760	-0.002034	-0.000861
10.3200	449.951	29.581	34.727	14.773	-0.738	50.336	856.590	-0.002071	-0.002431	-0.001034
10.3600	505.405	36.907	42.914	18.648	-0.723	50.335	962.162	-0.002584	-0.003004	-0.001305
10.4000	570.133	44.707	52.267	22.998	-0.759	50.335	1085.386	-0.003129	-0.003659	-0.001610
10.4400	607.283	50.503	58.799	26.028	-0.731	50.336	1156.111	-0.003535	-0.004116	-0.001822
10.4800	655.224	56.312	66.340	29.390	-0.708	50.336	1247.377	-0.003942	-0.004644	-0.002057
10.5200	708.394	63.977	74.556	33.033	-0.747	50.335	1348.600	-0.004478	-0.005219	-0.002312
10.5600	763.714	71.103	83.075	37.118	-0.746	50.336	1453.915	-0.004977	-0.005815	-0.002598
10.6000	814.299	78.359	91.470	40.924	-0.720	50.335	1550.217	-0.005485	-0.006403	-0.002865
10.6400	862.135	84.295	98.736	44.496	-0.752	50.336	1641.283	-0.005901	-0.006912	-0.003115
10.6800	902.516	90.791	105.169	47.595	-0.724	50.338	1718.159	-0.006355	-0.007362	-0.003332
10.7200	916.643	92.773	108.253	48.902	-0.704	50.336	1745.052	-0.006494	-0.007578	-0.003423
10.7600	963.441	99.648	115.968	52.155	-0.744	50.336	1834.145	-0.006975	-0.008118	-0.003651
10.8000	996.263	104.195	121.108	54.532	-0.744	50.337	1896.629	-0.007294	-0.008478	-0.003817
10.8400	1019.197	107.729	125.140	56.141	-0.714	50.336	1940.289	-0.007541	-0.008760	-0.003930
10.8800	1033.323	110.355	127.514	57.545	-0.757	50.336	1967.182	-0.007725	-0.008926	-0.004028
10.9200	1036.043	111.476	128.932	57.961	-0.733	50.337	1972.361	-0.007803	-0.009025	-0.004057
10.9600	1044.775	112.977	131.157	59.019	-0.710	50.336	1988.983	-0.007908	-0.009181	-0.004131
11.0000	1047.104	113.664	131.656	59.267	-0.759	50.336	1993.418	-0.007956	-0.009216	-0.004149
11.0400	1042.851	113.427	131.239	58.949	-0.738	50.338	1985.321	-0.007940	-0.009187	-0.004126
11.0800	1013.471	110.634	128.112	57.543	-0.719	50.337	1929.388	-0.007744	-0.008968	-0.004028
11.1200	1012.885	110.328	128.236	57.502	-0.751	50.337	1928.272	-0.007723	-0.008977	-0.004025
11.1600	978.725	106.971	123.692	55.211	-0.751	50.338	1863.241	-0.007488	-0.008658	-0.003865
11.2000	949.059	102.875	119.567	53.250	-0.717	50.337	1806.765	-0.007201	-0.008370	-0.003727
11.2400	895.753	96.840	112.729	50.206	-0.741	50.337	1705.284	-0.006779	-0.007891	-0.003514
11.2800	856.168	91.832	106.740	47.664	-0.734	50.338	1629.925	-0.006428	-0.007472	-0.003336
11.3200	814.359	86.161	100.220	44.606	-0.722	50.337	1550.331	-0.006031	-0.007015	-0.003122
11.3600	764.285	79.874	94.037	41.244	-0.740	50.337	1455.002	-0.005591	-0.006583	-0.002887
11.4000	726.067	75.260	87.856	38.619	-0.744	50.338	1382.246	-0.005268	-0.006150	-0.002703
11.4400	658.395	66.656	77.695	33.918	-0.699	50.338	1253.414	-0.004666	-0.005439	-0.002374
11.4800	620.343	61.028	71.012	30.794	-0.724	50.337	1180.973	-0.004272	-0.004971	-0.002156
11.5200	568.915	54.153	63.160	27.182	-0.754	50.338	1083.069	-0.003791	-0.004421	-0.001903
11.5600	515.294	46.942	54.531	23.164	-0.719	50.338	980.988	-0.003286	-0.003817	-0.001621
11.6000	467.444	40.160	46.788	19.857	-0.736	50.338	889.893	-0.002811	-0.003275	-0.001390
11.6400	414.904	33.468	37.938	16.217	-0.753	50.339	789.871	-0.002343	-0.002656	-0.001135
11.6800	377.769	27.754	31.742	13.326	-0.719	50.339	719.175	-0.001943	-0.002222	-0.000933
11.7200	343.309	23.070	25.862	10.618	-0.723	50.337	653.572	-0.001615	-0.001810	-0.000743
11.7600	314.244	18.482	19.916	8.325	-0.769	50.338	598.240	-0.001294	-0.001394	-0.000583
11.8000	271.518	13.262	13.272	5.074	-0.735	50.338	516.901	-0.000928	-0.000929	-0.000355
11.8400	265.792	11.619	11.716	4.560	-0.710	50.338	506.001	-0.000813	-0.000820	-0.000319
11.8800	247.082	8.619	7.533	2.835	-0.746	50.338	470.381	-0.000603	-0.000527	-0.000198
11.9200	231.798	6.104	4.339	1.484	-0.725	50.338	441.284	-0.000427	-0.000304	-0.000104
11.9600	237.329	6.259	5.155	1.820	-0.700	50.338	451.813	-0.000438	-0.000361	-0.000127
12.0000	224.795	4.547	2.530	0.458	-0.754	50.339	427.952	-0.000318	-0.000177	-0.000032
12.0400	243.686	6.426	4.353	1.415	-0.735	50.340	463.915	-0.000450	-0.000305	-0.000099
12.0800	251.891	6.946	6.073	1.792	-0.703	50.338	479.536	-0.000486	-0.000425	-0.000125
12.1200	278.476	9.544	9.050	3.366	-0.747	50.338	530.148	-0.000668	-0.000633	-0.000236
12.1600	300.147	12.350	13.231	4.893	-0.737	50.339	571.404	-0.000865	-0.000926	-0.000342
12.2000	337.042	16.629	18.221	7.072	-0.702	50.339	641.642	-0.001164	-0.001275	-0.000495
12.2400	355.362	18.792	21.195	8.976	-0.737	50.338	676.517	-0.001315	-0.001484	-0.000628
12.2800	400.387	24.487	28.361	12.158	-0.755	50.339	762.234	-0.001714	-0.001985	-0.000851
12.3200	448.733	30.960	35.393	15.273	-0.701	50.338	854.273	-0.002167	-0.002478	-0.001069
12.3600	494.375	36.220	42.664	18.119	-0.743	50.338	941.162	-0.002535	-0.002986	-0.001268
12.4000	543.893	43.054	50.751	21.583	-0.746	50.340	1035.433	-0.003014	-0.003553	-0.001511
12.4400	607.523	51.276	60.089	26.236	-0.708	50.340	1156.569	-0.003589	-0.004206	-0.001837
12.4800	649.949	57.352	66.729	29.348	-0.724	50.339	1237.335	-0.004015	-0.004671	-0.002054
12.5200	703.390	64.202	74.528	33.266	-0.746	50.339	1339.073	-0.004494	-0.005217	-0.002329
12.5600	765.141	72.773	84.932	37.743	-0.723	50.339	1456.633	-0.005094	-0.005945	-0.002642
12.6000	806.154	78.387	91.301	41.035	-0.715	50.339	1534.710	-0.005487	-0.006391	-0.002872
12.6400	852.757	85.023	99.039	44.287	-0.753	50.339	1623.430	-0.005952	-0.006933	-0.003100
12.6800	885.744	89.710	104.279	47.095	-0.709	50.340	1686.230	-0.006280	-0.007300	-0.003297
12.7200	932.858	96.181	112.019	50.330	-0.707	50.338	1775.923	-0.006733	-0.007841	-0.003523
12.7600	978.184	102.144	118.675	53.528	-0.748	50.338	1862.211	-0.007150	-0.008307	-0.003747
12.8000	997.210	105.387	122.580	55.057	-0.752	50.340	1898.432	-0.007377	-0.008581	-0.003854
12.8400	1004.198	107.180	124.082	55.764	-0.723	50.339	1911.736	-0.007503	-0.008686	-0.003904
12.8800	1026.019	110.621	128.375	57.545	-0.747	50.338	1953.278	-0.007743	-0.008986	-0.004028
12.9200	1052.169	113.819	131.752	59.394	-0.756	50.339	2003.059	-0.007967	-0.009223	-0.004158
12.9600	1037.907	113.286	131.126	58.615	-0.721	50.339	1975.908	-0.007930	-0.009179	-0.004103
13.0000	1045.045	114.353	132.240	59.521	-0.730	50.339	1989.498	-0.008005	-0.009257	-0.004166
13.0400	1030.167	113.805	130.670	58.797	-0.755	50.338	1961.174	-0.007966	-0.009147	-0.004116
13.0800	1018.220	112.064	129.628	58.129	-0.731	50.340	1938.429	-0.007844	-0.009074	-0.004069
13.1200	1008.406	111.307	128.709	57.893	-0.701	50.338	1919.746	-0.007791	-0.009010	-0.004053
13.1600	967.108	106.199	123.149	55.294	-0.744	50.338	1841.125	-0.007434	-0.008620	-0.003871
13.2000	932.738	102.031	118.023	52.917	-0.738	50.340	1775.694	-0.007142	-0.008262	-0.003704
13.2400	893.559	96.670	112.713	50.457	-0.734	50.338	1701.107	-0.006767	-0.007890	-0.003532
13.2800	862.811	93.263	108.519	48.527	-0.747	50.338	1642.570	-0.006528	-0.007596	-0.003397
13.3200	821.438	87.931	102.307	45.439	-0.758	50.339	1563.807	-0.006155	-0.007161	-0.003181
13.3600	761.474	80.744	93.676	41.509	-0.727	50.338	1449.652	-0.005652	-0.006557	-0.002906
13.4000	712.422	74.037	86.396	37.744	-0.729	50.338	1356.268	-0.005183	-0.006048	-0.002642
13.4400	670.267	68.748	80.017	35.115	-0.762	50.339	1276.016	-0.004812	-0.005601	-0.002458
13.4800	606.982	60.284	70.415	30.490	-0.731	50.339	1155.539	-0.004220	-0.004929	-0.002134
13.5200	564.888	54.661	63.160	27.277	-0.728	50.338	1075.401	-0.003826	-0.004421	-0.001909
13.5600	517.849	48.093	55.780	24.094	-0.753	50.338	985.851	-0.003367	-0.003905	-0.001687
13.6000	459.373	40.526	47.040	19.859	-0.732	50.340	874.529	-0.002837	-0.003293	-0.001390
13.6400	425.725	35.279	40.801	17.245	-0.719	50.339	810.471	-0.002470	-0.002856	-0.001207
13.6800	369.113	28.262	31.589	13.229	-0.739	50.338	702.696	-0.001978	-0.002211	-0.000926
13.7200	345.428	24.206	26.892	11.270	-0.753	50.338	657.606	-0.001694	-0.001882	-0.000789
13.7600	305.437	18.764	19.818	8.199	-0.743	50.339	581.474	-0.001314	-0.001387	-0.000574
13.8000	281.692	14.934	15.872	6.197	-0.750	50.338	536.270	-0.001045	-0.001111	-0.000434
13.8400	263.343	12.434	11.702	4.504	-0.759	50.339	501.337	-0.000870	-0.000819	-0.000315
13.8800	237.178	8.450	7.269	2.653	-0.728	50.339	451.527	-0.000592	-0.000509	-0.000186
13.9200	238.185	7.929	6.544	2.571	-0.728	50.338	453.444	-0.000555	-0.000458	-0.000180
13.9600	228.898	6.047	4.618	1.360	-0.759	50.338	435.762	-0.000423	-0.000323	-0.000095
14.0000	234.067	6.399	4.589	1.528	-0.753	50.339	445.604	-0.000448	-0.000321	-0.000107
14.0400	241.371	6.763	5.450	1.750	-0.714	50.338	459.509	-0.000473	-0.000381	-0.000122
14.0800	249.622	7.493	6.420	2.168	-0.750	50.338	475.216	-0.000525	-0.000449	-0.000152
14.1200	275.621	10.400	10.424	3.977	-0.754	50.339	524.712	-0.000728	-0.000730	-0.000278
14.1600	315.506	14.889	15.178	6.294	-0.715	50.338	600.643	-0.001042	-0.001062	-0.000441
14.2000	349.245	18.777	20.931	8.657	-0.738	50.338	664.873	-0.001314	-0.001465	-0.000606
14.2400	381.481	22.829	25.238	11.201	-0.767	50.338	726.242	-0.001598	-0.001767	-0.000784
14.2800	425.785	28.081	32.590	13.770	-0.723	50.339	810.585	-0.001966	-0.002281	-0.000964
14.3200	464.558	33.270	38.576	16.620	-0.748	50.337	884.399	-0.002329	-0.002700	-0.001163
14.3600	508.381	39.011	45.276	19.538	-0.768	50.338	967.827	-0.002731	-0.003169	-0.001368
14.4000	560.620	45.466	52.724	22.996	-0.734	50.338	1067.276	-0.003183	-0.003691	-0.001610
14.4400	615.143	53.228	62.327	27.320	-0.732	50.337	1171.074	-0.003726	-0.004363	-0.001912
14.4800	665.368	59.653	69.663	30.822	-0.752	50.337	1266.689	-0.004176	-0.004876	-0.002158
14.5200	691.592	64.243	74.443	33.034	-0.739	50.338	1316.614	-0.004497	-0.005211	-0.002312
14.5600	755.929	72.185	83.670	37.132	-0.722	50.338	1439.095	-0.005053	-0.005857	-0.002599
14.6000	808.588	79.383	92.565	41.188	-0.759	50.337	1539.345	-0.005557	-0.006480	-0.002883
14.6400	850.833	85.642	99.027	44.772	-0.752	50.338	1619.768	-0.005995	-0.006932	-0.003134
14.6800	899.360	92.042	106.947	48.069	-0.718	50.338	1712.151	-0.006443	-0.007486	-0.003365
14.7200	945.242	98.133	113.257	51.193	-0.746	50.337	1799.498	-0.006869	-0.007928	-0.003583
14.7600	970.054	102.242	118.871	53.334	-0.760	50.338	1846.733	-0.007157	-0.008321	-0.003733
14.8000	1002.425	106.802	123.525	55.807	-0.724	50.338	1908.360	-0.007476	-0.008647	-0.003906
14.8400	1028.199	111.169	128.474	57.891	-0.723	50.337	1957.426	-0.007782	-0.008993	-0.004052
14.8800	1030.468	111.630	129.933	58.170	-0.748	50.337	1961.746	-0.007814	-0.009095	-0.004072
14.9200	1042.851	113.833	132.183	59.214	-0.727	50.338	1985.321	-0.007968	-0.009253	-0.004145
14.9600	1045.887	114.662	132.336	59.575	-0.727	50.337	1991.100	-0.008026	-0.009264	-0.004170
15.0000	1042.400	114.971	133.072	59.660	-0.751	50.337	1984.463	-0.008048	-0.009315	-0.004176
15.0400	1035.788	114.352	132.241	59.367	-0.749	50.337	1971.874	-0.008005	-0.009257	-0.004156
15.0800	1019.347	113.130	130.475	58.532	-0.716	50.337	1940.575	-0.007919	-0.009133	-0.004097
15.1200	983.158	108.587	125.637	56.073	-0.743	50.336	1871.681	-0.007601	-0.008795	-0.003925
15.1600	969.618	107.207	123.692	55.433	-0.759	50.338	1845.903	-0.007505	-0.008658	-0.003880
15.2000	910.661	99.646	115.981	51.708	-0.741	50.337	1733.665	-0.006975	-0.008119	-0.003620
15.2400	898.323	98.611	114.076	50.943	-0.726	50.336	1710.176	-0.006903	-0.007985	-0.003566
15.2800	864.599	94.036	108.963	48.790	-0.759	50.337	1645.975	-0.006582	-0.007627	-0.003415
15.3200	795.063	85.671	99.375	44.508	-0.724	50.337	1513.596	-0.005997	-0.006956	-0.003116
15.3600	763.173	80.983	94.424	41.772	-0.709	50.337	1452.885	-0.005669	-0.006610	-0.002924
15.4000	717.126	75.554	87.577	38.507	-0.742	50.337	1365.223	-0.005289	-0.006130	-0.002696
15.4400	666.315	68.536	79.668	35.073	-0.740	50.337	1268.492	-0.004798	-0.005577	-0.002455
15.4800	610.123	61.056	71.192	30.849	-0.713	50.336	1161.518	-0.004274	-0.004983	-0.002159
15.5200	541.278	52.679	60.782	26.167	-0.732	50.336	1030.455	-0.003688	-0.004255	-0.001832
15.5600	522.192	49.313	56.711	24.430	-0.750	50.337	994.120	-0.003452	-0.003970	-0.001710
15.6000	465.730	41.130	47.944	20.165	-0.735	50.337	886.631	-0.002879	-0.003356	-0.001412
15.6400	427.378	36.108	40.869	17.468	-0.727	50.336	813.618	-0.002528	-0.002861	-0.001223
15.6800	373.336	28.541	32.561	13.839	-0.750	50.336	710.735	-0.001998	-0.002279	-0.000969
15.7200	344.616	24.657	27.198	11.617	-0.741	50.336	656.061	-0.001726	-0.001904	-0.000813
15.7600	306.519	19.156	20.555	8.436	-0.716	50.336	583.534	-0.001341	-0.001439	-0.000591
15.8000	277.244	14.694	15.164	5.904	-0.747	50.336	527.802	-0.001029	-0.001061	-0.000413
15.8400	263.162	12.419	12.367	4.866	-0.764	50.336	500.994	-0.000869	-0.000866	-0.000341
15.8800	237.043	8.970	7.366	2.823	-0.744	50.336	451.269	-0.000628	-0.000516	-0.000198
15.9200	248.615	9.335	8.382	2.947	-0.747	50.335	473.299	-0.000653	-0.000587	-0.000206
15.9600	243.385	8.676	6.725	2.750	-0.759	50.336	463.343	-0.000607	-0.000471	-0.000193
16.0000	213.118	4.619	2.348	0.430	-0.742	50.336	405.722	-0.000323	-0.000164	-0.000030
16.0400	246.872	7.958	6.405	2.263	-0.711	50.335	469.980	-0.000557	-0.000448	-0.000158
16.0800	255.799	8.816	8.008	2.906	-0.752	50.335	486.975	-0.000617	-0.000561	-0.000203
16.1200	287.193	12.096	11.854	4.658	-0.750	50.336	546.741	-0.000847	-0.000830	-0.000326
16.1600	307.812	14.527	15.524	6.168	-0.715	50.335	585.995	-0.001017	-0.001087	-0.000432
16.2000	341.581	18.287	19.681	8.255	-0.740	50.335	650.282	-0.001280	-0.001378	-0.000578
16.2400	385.539	23.435	26.877	11.187	-0.758	50.335	733.967	-0.001640	-0.001881	-0.000783
16.2800	414.619	27.210	30.684	13.328	-0.732	50.335	789.328	-0.001905	-0.002148	-0.000933
16.3200	460.350	33.161	38.437	16.286	-0.738	50.334	876.389	-0.002321	-0.002691	-0.001140
16.3600	501.543	38.520	44.789	19.204	-0.768	50.335	954.809	-0.002696	-0.003135	-0.001344
16.4000	558.801	46.083	53.866	23.109	-0.740	50.335	1063.814	-0.003226	-0.003771	-0.001618
16.4400	615.113	52.975	62.186	27.111	-0.722	50.334	1171.017	-0.003708	-0.004353	-0.001898
16.4800	656.351	59.416	68.857	30.544	-0.756	50.334	1249.523	-0.004159	-0.004820	-0.002138
16.5200	714.931	66.894	78.112	34.779	-0.744	50.335	1361.046	-0.004683	-0.005468	-0.002435
16.5600	755.523	72.787	84.559	37.745	-0.723	50.335	1438.322	-0.005095	-0.005919	-0.002642
16.6000	815.456	80.142	93.440	42.258	-0.738	50.334	1552.420	-0.005610	-0.006541	-0.002958
16.6400	851.404	85.978	99.985	44.855	-0.747	50.334	1620.855	-0.006018	-0.006999	-0.003140
16.6800	902.531	92.225	107.379	48.470	-0.723	50.334	1718.187	-0.006456	-0.007517	-0.003393
16.7200	939.937	98.049	113.576	51.568	-0.726	50.333	1789.398	-0.006863	-0.007950	-0.003610
16.7600	965.470	102.004	118.106	53.459	-0.738	50.334	1838.007	-0.007140	-0.008267	-0.003742
16.8000	1018.731	108.264	126.765	57.004	-0.734	50.334	1939.402	-0.007578	-0.008874	-0.003990
16.8400	1013.456	109.048	126.375	57.031	-0.716	50.334	1929.359	-0.007633	-0.008846	-0.003992
16.8800	1030.333	111.980	129.612	58.267	-0.754	50.333	1961.489	-0.007839	-0.009073	-0.004079
16.9200	1039.124	113.595	131.669	59.185	-0.761	50.334	1978.226	-0.007952	-0.009217	-0.004143
16.9600	1041.859	114.931	132.892	59.548	-0.717	50.333	1983.433	-0.008045	-0.009302	-0.004168
17.0000	1040.732	114.832	133.016	59.657	-0.712	50.332	1981.287	-0.008038	-0.009311	-0.004176
17.0400	1027.222	114.001	131.768	59.142	-0.744	50.333	1955.566	-0.007980	-0.009224	-0.004140
17.0800	1016.672	112.568	130.099	58.585	-0.723	50.334	1935.482	-0.007880	-0.009107	-0.004101
17.1200	994.866	110.846	128.015	57.335	-0.713	50.332	1893.969	-0.007759	-0.008961	-0.004013
17.1600	972.804	107.616	124.305	55.904	-0.758	50.333	1851.969	-0.007533	-0.008701	-0.003913
17.2000	933.730	103.365	119.678	53.473	-0.754	50.334	1777.582	-0.007236	-0.008377	-0.003743
17.2400	892.131	97.768	113.633	50.844	-0.727	50.333	1698.389	-0.006844	-0.007954	-0.003559
17.2800	844.536	92.112	106.976	47.721	-0.739	50.332	1607.780	-0.006448	-0.007488	-0.003340
17.3200	819.935	88.154	103.041	45.968	-0.756	50.333	1560.946	-0.006171	-0.007213	-0.003218
17.3600	754.336	80.772	93.857	41.564	-0.730	50.333	1436.062	-0.005654	-0.006570	-0.002909
17.4000	711.174	75.047	86.675	38.577	-0.733	50.332	1353.893	-0.005253	-0.006067	-0.002700
17.4400	656.666	68.057	79.197	34.600	-0.761	50.332	1250.124	-0.004764	-0.005544	-0.002422
17.4800	606.772	61.294	71.234	30.725	-0.750	50.332	1155.138	-0.004291	-0.004986	-0.002151
17.5200	556.051	54.701	63.327	27.224	-0.740	50.332	1058.578	-0.003829	-0.004433	-0.001906
17.5600	515.910	48.639	56.085	24.193	-0.756	50.332	982.161	-0.003405	-0.003926	-0.001693
17.6000	466.061	42.213	48.264	20.415	-0.758	50.332	887.260	-0.002955	-0.003378	-0.001429
17.6400	425.109	36.304	41.441	17.663	-0.727	50.332	809.298	-0.002541	-0.002901	-0.001236
17.6800	372.389	29.090	32.562	14.022	-0.734	50.330	708.933	-0.002036	-0.002279	-0.000982
17.7200	336.231	23.926	26.587	10.868	-0.754	50.331	640.097	-0.001675	-0.001861	-0.000761
17.7600	307.271	19.578	21.000	8.600	-0.732	50.332	584.965	-0.001370	-0.001470	-0.000602
17.8000	283.917	16.112	16.872	6.711	-0.725	50.331	540.504	-0.001128	-0.001181	-0.000470
17.8400	240.650	10.806	9.272	3.614	-0.742	50.330	458.136	-0.000756	-0.000649	-0.000253
17.8800	243.941	9.840	9.063	3.405	-0.750	50.331	464.401	-0.000689	-0.000634	-0.000238
17.9200	237.238	8.563	7.478	2.626	-0.728	50.331	451.641	-0.000599	-0.000523	-0.000184
17.9600	230.416	7.185	5.003	1.652	-0.738	50.330	438.652	-0.000503	-0.000350	-0.000116
18.0000	237.404	7.283	5.641	2.083	-0.751	50.331	451.956	-0.000510	-0.000395	-0.000146
18.0400	246.361	7.988	6.850	2.488	-0.740	50.331	469.007	-0.000559	-0.000480	-0.000174
18.0800	262.276	9.560	9.006	3.225	-0.736	50.330	499.306	-0.000669	-0.000630	-0.000226
18.1200	274.148	10.848	10.466	4.005	-0.768	50.330	521.908	-0.000759	-0.000733	-0.000280
18.1600	295.849	13.122	13.579	5.392	-0.746	50.331	563.221	-0.000919	-0.000951	-0.000377
18.2000	326.673	17.090	18.385	7.478	-0.716	50.330	621.901	-0.001196	-0.001287	-0.000523
18.2400	388.274	24.150	27.710	11.504	-0.748	50.329	739.174	-0.001691	-0.001940	-0.000805
18.2800	408.382	26.916	30.907	13.159	-0.754	50.330	777.454	-0.001884	-0.002163	-0.000921
18.3200	437.056	30.495	34.785	15.260	-0.712	50.330	832.043	-0.002135	-0.002435	-0.001068
18.3600	514.783	40.020	46.942	19.874	-0.724	50.329	980.015	-0.002801	-0.003286	-0.001391
18.4000	555.525	45.296	52.932	22.940	-0.746	50.330	1057.577	-0.003171	-0.003705	-0.001606
18.4400	634.905	55.682	65.620	28.655	-0.738	50.330	1208.696	-0.003898	-0.004593	-0.002006
18.4800	642.479	57.308	67.216	29.530	-0.720	50.329	1223.116	-0.004012	-0.004705	-0.002067
18.5200	707.733	66.165	77.112	34.087	-0.747	50.328	1347.342	-0.004632	-0.005398	-0.002386
18.5600	748.926	71.973	83.408	37.342	-0.738	50.330	1425.762	-0.005038	-0.005839	-0.002614
18.6000	802.878	78.975	92.427	41.147	-0.699	50.329	1528.473	-0.005528	-0.006470	-0.002880
18.6400	856.815	86.090	100.555	44.925	-0.733	50.328	1631.155	-0.006026	-0.007039	-0.003145
18.6800	890.508	91.550	106.185	47.555	-0.762	50.329	1695.299	-0.006409	-0.007433	-0.003329
18.7200	921.452	95.717	111.032	50.026	-0.725	50.330	1754.208	-0.006700	-0.007772	-0.003502
18.7600	952.576	100.336	116.495	52.125	-0.699	50.328	1813.459	-0.007024	-0.008155	-0.003649
18.8000	986.284	105.291	122.413	54.714	-0.739	50.328	1877.632	-0.007370	-0.008569	-0.003830
18.8400	955.236	101.525	117.871	52.736	-0.719	50.329	1818.523	-0.007107	-0.008251	-0.003692
18.8800	1045.121	112.514	130.865	58.628	-0.699	50.327	1989.641	-0.007876	-0.009161	-0.004104
18.9200	1061.817	115.294	133.628	60.021	-0.739	50.327	2021.427	-0.008071	-0.009354	-0.004201
18.9600	1029.206	112.107	130.391	58.281	-0.733	50.328	1959.343	-0.007847	-0.009127	-0.004080
19.0000	1024.502	113.342	131.100	59.005	-0.697	50.328	1950.388	-0.007934	-0.009177	-0.004130
19.0400	1032.647	113.847	132.101	59.157	-0.703	50.327	1965.895	-0.007969	-0.009247	-0.004141
19.0800	1002.605	110.354	128.348	57.447	-0.739	50.327	1908.703	-0.007725	-0.008984	-0.004021
19.1200	1001.643	110.060	128.084	56.920	-0.720	50.328	1906.872	-0.007704	-0.008966	-0.003984
19.1600	970.234	107.700	124.485	55.793	-0.698	50.327	1847.076	-0.007539	-0.008714	-0.003905
19.2000	934.587	102.620	118.609	53.250	-0.737	50.327	1779.213	-0.007183	-0.008303	-0.003727
19.2400	888.765	97.390	112.979	50.317	-0.721	50.328	1691.980	-0.006817	-0.007909	-0.003522
19.2800	828.892	89.765	104.351	46.469	-0.714	50.327	1577.997	-0.006284	-0.007305	-0.003253
19.3200	798.114	85.809	100.014	44.301	-0.740	50.326	1519.403	-0.006007	-0.007001	-0.003101
19.3600	778.396	82.766	96.205	42.552	-0.751	50.327	1481.867	-0.005794	-0.006734	-0.002979
19.4000	716.885	75.736	87.326	38.686	-0.729	50.327	1364.765	-0.005302	-0.006113	-0.002708
19.4400	661.190	67.974	79.196	34.851	-0.714	50.325	1258.736	-0.004758	-0.005544	-0.002440
19.4800	613.475	61.940	72.081	31.268	-0.760	50.326	1167.898	-0.004336	-0.005046	-0.002189
19.5200	535.567	51.529	59.659	25.432	-0.742	50.326	1019.583	-0.003607	-0.004176	-0.001780
19.5600	553.211	52.202	60.020	25.624	-0.731	50.326	1053.171	-0.003654	-0.004201	-0.001794
19.6000	459.088	40.877	46.901	19.816	-0.746	50.326	873.985	-0.002861	-0.003283	-0.001387
19.6400	457.134	40.245	46.150	19.331	-0.742	50.326	870.266	-0.002817	-0.003231	-0.001353
19.6800	376.732	29.329	33.310	13.798	-0.710	50.325	717.201	-0.002053	-0.002332	-0.000966
19.7200	337.162	23.926	25.379	10.701	-0.730	50.325	641.870	-0.001675	-0.001777	-0.000749
19.7600	243.806	12.982	12.132	4.655	-0.736	50.325	464.144	-0.000909	-0.000849	-0.000326
19.8000	289.763	16.501	16.094	6.098	-0.715	50.326	551.634	-0.001155	-0.001127	-0.000427
19.8400	238.666	9.811	8.632	2.960	-0.717	50.325	454.359	-0.000687	-0.000604	-0.000207
19.8800	233.406	8.254	6.614	2.543	-0.758	50.325	444.345	-0.000578	-0.000463	-0.000178
19.9200	246.135	9.025	7.643	2.642	-0.752	50.326	468.578	-0.000632	-0.000535	-0.000185
19.9600	232.219	7.551	5.629	2.141	-0.738	50.325	442.085	-0.000529	-0.000394	-0.000150
Test Cycles
Time (sec)	Axial stress (kPa)	Axial micro-strain #1	Axial micro-strain #2	Axial micro-strain #3	Confining pressure (kPa)	Temperature (�C)	Load (N)	Displacement #1 (mm)	Displacement #2 (mm)	Displacement #3 (mm)
0.0000	215.718	4.672	2.474	0.152	-0.752	50.324	410.671	-0.000327	-0.000173	-0.000011
0.0400	233.151	6.523	4.519	1.402	-0.762	50.325	443.859	-0.000457	-0.000316	-0.000098
0.0800	246.781	7.637	6.558	1.875	-0.731	50.325	469.809	-0.000535	-0.000459	-0.000131
0.1200	291.416	12.910	12.757	4.864	-0.727	50.324	554.781	-0.000904	-0.000893	-0.000340
0.1600	322.059	15.788	17.427	6.862	-0.748	50.324	613.117	-0.001105	-0.001220	-0.000480
0.2000	315.972	15.536	16.665	6.836	-0.730	50.324	601.530	-0.001087	-0.001167	-0.000479
0.2400	373.621	22.409	25.432	10.505	-0.691	50.323	711.279	-0.001569	-0.001780	-0.000735
0.2800	411.869	27.085	30.921	13.049	-0.736	50.322	784.092	-0.001896	-0.002164	-0.000913
0.3200	313.989	20.207	21.346	9.157	-0.750	50.324	597.754	-0.001414	-0.001494	-0.000641
0.3600	496.328	38.645	44.550	18.982	-0.702	50.323	944.881	-0.002705	-0.003119	-0.001329
0.4000	531.765	43.069	50.667	21.458	-0.698	50.322	1012.344	-0.003015	-0.003547	-0.001502
0.4400	593.592	51.094	59.717	25.891	-0.744	50.323	1130.047	-0.003577	-0.004180	-0.001812
0.4800	680.922	62.570	73.096	32.283	-0.728	50.323	1296.301	-0.004380	-0.005117	-0.002260
0.5200	680.862	63.498	73.790	32.240	-0.697	50.322	1296.186	-0.004445	-0.005165	-0.002257
0.5600	780.019	75.791	88.742	39.244	-0.724	50.322	1484.957	-0.005305	-0.006212	-0.002747
0.6000	823.181	81.210	95.192	42.230	-0.730	50.323	1567.125	-0.005685	-0.006663	-0.002956
0.6400	854.756	87.087	102.208	45.482	-0.706	50.322	1627.235	-0.006096	-0.007155	-0.003184
0.6800	887.232	91.002	105.919	47.122	-0.724	50.321	1689.062	-0.006370	-0.007414	-0.003299
0.7200	957.775	99.927	116.897	52.209	-0.742	50.322	1823.359	-0.006995	-0.008183	-0.003655
0.7600	950.051	99.914	116.660	52.415	-0.739	50.322	1808.653	-0.006994	-0.008166	-0.003669
0.8000	932.408	99.128	115.607	51.985	-0.714	50.321	1775.064	-0.006939	-0.008092	-0.003639
0.8400	1038.899	112.291	130.504	58.461	-0.735	50.321	1977.797	-0.007860	-0.009135	-0.004092
0.8800	1025.854	111.853	129.808	57.823	-0.736	50.322	1952.963	-0.007830	-0.009087	-0.004048
0.9200	1050.230	114.633	132.837	59.604	-0.721	50.321	1999.369	-0.008024	-0.009299	-0.004172
0.9600	1068.355	118.210	137.257	61.532	-0.730	50.321	2033.873	-0.008275	-0.009608	-0.004307
1.0000	1047.796	115.548	134.478	59.992	-0.743	50.321	1994.734	-0.008088	-0.009413	-0.004199
1.0400	1066.491	118.084	137.202	61.172	-0.704	50.321	2030.325	-0.008266	-0.009604	-0.004282
1.0800	990.297	109.709	127.040	57.002	-0.696	50.319	1885.271	-0.007680	-0.008893	-0.003990
1.1200	971.511	107.391	124.848	55.403	-0.722	50.320	1849.508	-0.007517	-0.008739	-0.003878
1.1600	1001.102	110.255	128.391	57.112	-0.723	50.320	1905.842	-0.007718	-0.008987	-0.003998
1.2000	736.617	80.985	93.426	41.160	-0.706	50.320	1402.330	-0.005669	-0.006540	-0.002881
1.2400	916.868	100.867	116.356	51.834	-0.735	50.319	1745.481	-0.007061	-0.008145	-0.003628
1.2800	813.833	89.038	103.237	45.732	-0.748	50.319	1549.330	-0.006233	-0.007227	-0.003201
1.3200	786.316	84.800	98.640	43.652	-0.731	50.320	1496.944	-0.005936	-0.006905	-0.003056
1.3600	774.549	83.215	96.653	42.565	-0.703	50.319	1474.543	-0.005825	-0.006766	-0.002980
1.4000	710.934	75.301	87.286	38.397	-0.740	50.318	1353.436	-0.005271	-0.006110	-0.002688
1.4400	645.936	67.314	78.180	34.085	-0.754	50.320	1229.696	-0.004712	-0.005473	-0.002386
1.4800	592.029	59.388	68.662	29.931	-0.719	50.319	1127.071	-0.004157	-0.004806	-0.002095
1.5200	594.434	59.333	68.454	29.933	-0.747	50.318	1131.649	-0.004153	-0.004792	-0.002095
1.5600	539.069	51.446	59.797	25.612	-0.761	50.319	1026.249	-0.003601	-0.004186	-0.001793
1.6000	438.499	39.430	45.012	18.773	-0.728	50.319	834.789	-0.002760	-0.003151	-0.001314
1.6400	403.062	34.198	38.633	16.372	-0.701	50.318	767.326	-0.002394	-0.002704	-0.001146
1.6800	386.471	31.295	35.076	14.634	-0.739	50.317	735.741	-0.002191	-0.002455	-0.001024
1.7200	353.002	26.313	29.419	12.102	-0.731	50.319	672.026	-0.001842	-0.002059	-0.000847
1.7600	272.495	16.291	16.246	6.502	-0.703	50.318	518.761	-0.001140	-0.001137	-0.000455
1.8000	302.883	18.188	18.901	7.574	-0.720	50.317	576.611	-0.001273	-0.001323	-0.000530
1.8400	242.919	11.409	10.023	3.713	-0.742	50.318	462.456	-0.000799	-0.000702	-0.000260
1.8800	210.803	6.765	4.421	1.305	-0.720	50.318	401.316	-0.000474	-0.000309	-0.000091
1.9200	235.630	8.998	7.240	2.321	-0.719	50.316	448.580	-0.000630	-0.000507	-0.000162
1.9600	200.178	4.126	1.069	-0.057	-0.744	50.317	381.088	-0.000289	-0.000075	0.000004
2.0000	195.249	3.257	-0.152	-0.846	-0.734	50.317	371.704	-0.000228	0.000011	0.000059
2.0400	202.583	0.984	-2.583	-2.294	-0.715	50.316	385.666	-0.000069	0.000181	0.000161
2.0800	253.980	7.493	6.906	1.861	-0.728	50.315	483.513	-0.000525	-0.000483	-0.000130
2.1200	262.561	8.661	8.354	2.374	-0.740	50.316	499.849	-0.000606	-0.000585	-0.000166
2.1600	317.655	15.453	16.149	5.850	-0.710	50.317	604.734	-0.001082	-0.001130	-0.000409
2.2000	303.003	13.219	14.607	5.252	-0.710	50.315	576.839	-0.000925	-0.001022	-0.000368
2.2400	373.937	22.130	25.347	9.686	-0.751	50.315	711.880	-0.001549	-0.001774	-0.000678
2.2800	420.525	27.548	32.783	13.132	-0.739	50.316	800.571	-0.001928	-0.002295	-0.000919
2.3200	499.394	37.259	44.566	17.841	-0.707	50.315	950.718	-0.002608	-0.003120	-0.001249
2.3600	514.197	39.433	47.221	18.911	-0.746	50.314	978.899	-0.002760	-0.003305	-0.001324
2.4000	536.800	43.012	51.514	21.262	-0.746	50.316	1021.929	-0.003011	-0.003606	-0.001488
2.4400	650.850	56.609	67.939	28.599	-0.719	50.315	1239.052	-0.003963	-0.004756	-0.002002
2.4800	640.811	57.604	68.373	29.001	-0.736	50.314	1219.940	-0.004032	-0.004786	-0.002030
2.5200	682.260	62.657	74.624	32.004	-0.747	50.314	1298.847	-0.004386	-0.005224	-0.002240
2.5600	738.045	70.277	83.558	36.074	-0.731	50.315	1405.048	-0.004919	-0.005849	-0.002525
2.6000	843.830	82.810	98.790	43.109	-0.710	50.313	1606.436	-0.005797	-0.006915	-0.003018
2.6400	847.242	85.124	100.722	43.734	-0.739	50.314	1612.930	-0.005959	-0.007051	-0.003061
2.6800	890.298	90.986	107.586	47.041	-0.737	50.314	1694.899	-0.006369	-0.007531	-0.003293
2.7200	911.293	94.595	111.408	48.846	-0.703	50.313	1734.867	-0.006622	-0.007799	-0.003419
2.7600	929.687	98.245	116.190	51.111	-0.729	50.313	1769.886	-0.006877	-0.008133	-0.003578
2.8000	976.441	104.684	122.678	54.348	-0.748	50.313	1858.892	-0.007328	-0.008587	-0.003804
2.8400	1041.604	112.121	132.017	58.252	-0.735	50.313	1982.946	-0.007848	-0.009241	-0.004078
2.8800	1022.638	110.719	130.379	57.404	-0.730	50.312	1946.840	-0.007750	-0.009127	-0.004018
2.9200	1061.952	115.661	136.060	59.949	-0.747	50.313	2021.685	-0.008096	-0.009524	-0.004196
2.9600	1071.931	118.154	138.450	61.324	-0.757	50.313	2040.682	-0.008271	-0.009691	-0.004293
3.0000	994.866	108.922	127.957	56.016	-0.728	50.312	1893.969	-0.007625	-0.008957	-0.003921
3.0400	1039.786	115.014	134.850	59.491	-0.739	50.311	1979.485	-0.008051	-0.009439	-0.004164
3.0800	999.885	110.215	129.904	56.988	-0.761	50.311	1903.524	-0.007715	-0.009093	-0.003989
3.1200	1000.080	110.677	130.058	57.404	-0.731	50.312	1903.896	-0.007747	-0.009104	-0.004018
3.1600	967.273	107.040	125.348	55.100	-0.715	50.311	1841.440	-0.007493	-0.008774	-0.003857
3.2000	937.878	103.393	121.123	53.098	-0.740	50.311	1785.479	-0.007237	-0.008479	-0.003717
3.2400	892.207	97.570	114.774	50.109	-0.740	50.312	1698.532	-0.006830	-0.008034	-0.003508
3.2800	867.425	94.231	110.966	48.665	-0.715	50.312	1651.354	-0.006596	-0.007768	-0.003407
3.3200	797.603	86.302	101.682	44.051	-0.730	50.311	1518.431	-0.006041	-0.007118	-0.003084
3.3600	779.734	83.539	98.125	42.510	-0.742	50.311	1484.413	-0.005848	-0.006869	-0.002976
3.4000	734.303	77.713	91.691	39.437	-0.723	50.311	1397.924	-0.005440	-0.006418	-0.002761
3.4400	671.244	70.038	81.741	34.921	-0.707	50.310	1277.876	-0.004903	-0.005722	-0.002444
3.4800	594.584	60.286	70.443	29.849	-0.747	50.310	1131.935	-0.004220	-0.004931	-0.002089
3.5200	573.349	56.988	66.591	28.221	-0.738	50.311	1091.509	-0.003989	-0.004661	-0.001975
3.5600	484.125	45.310	52.821	21.693	-0.698	50.310	921.650	-0.003172	-0.003697	-0.001518
3.6000	465.881	42.100	48.903	20.444	-0.718	50.309	886.917	-0.002947	-0.003423	-0.001431
3.6400	349.501	28.740	32.297	12.563	-0.749	50.310	665.359	-0.002012	-0.002261	-0.000879
3.6800	379.873	30.003	33.867	13.577	-0.731	50.310	723.181	-0.002100	-0.002371	-0.000950
3.7200	325.966	23.041	25.750	9.810	-0.704	50.309	620.556	-0.001613	-0.001803	-0.000687
3.7600	320.240	21.386	23.569	9.242	-0.722	50.309	609.655	-0.001497	-0.001650	-0.000647
3.8000	325.079	21.302	24.236	9.394	-0.746	50.309	618.868	-0.001491	-0.001697	-0.000658
3.8400	275.982	15.312	16.039	5.906	-0.714	50.309	525.398	-0.001072	-0.001123	-0.000413
3.8800	433.164	34.971	41.300	16.801	-0.707	50.308	824.633	-0.002448	-0.002891	-0.001176
3.9200	1.593	-18.745	-33.237	-13.395	-0.739	50.309	3.033	0.001312	0.002327	0.000938
3.9600	439.295	29.511	41.412	13.423	-0.717	50.309	836.306	-0.002066	-0.002899	-0.000940
4.0000	217.085	5.362	7.979	-0.679	-0.704	50.307	413.275	-0.000375	-0.000558	0.000048
4.0400	0.676	-23.378	-37.007	-15.983	-0.751	50.307	1.287	0.001636	0.002590	0.001119
4.0800	276.853	6.075	10.105	-0.182	-0.744	50.308	527.058	-0.000425	-0.000707	0.000013
4.1200	256.340	4.171	8.257	-0.621	-0.710	50.308	488.005	-0.000292	-0.000578	0.000043
4.1600	296.766	8.844	14.260	1.734	-0.720	50.307	564.966	-0.000619	-0.000998	-0.000121
4.2000	402.386	20.868	30.642	7.937	-0.746	50.307	766.039	-0.001461	-0.002145	-0.000556
4.2400	385.764	19.086	28.431	7.504	-0.743	50.308	734.396	-0.001336	-0.001990	-0.000525
4.2800	386.906	20.432	30.226	8.074	-0.722	50.307	736.570	-0.001430	-0.002116	-0.000565
4.3200	474.612	30.128	42.593	13.203	-0.747	50.306	903.540	-0.002109	-0.002982	-0.000924
4.3600	457.585	29.861	42.594	13.213	-0.760	50.307	871.124	-0.002090	-0.002982	-0.000925
4.4000	532.081	38.941	53.364	17.911	-0.738	50.307	1012.945	-0.002726	-0.003735	-0.001254
4.4400	616.029	49.396	66.674	23.955	-0.739	50.305	1172.762	-0.003458	-0.004667	-0.001677
4.4800	685.806	58.631	77.557	28.556	-0.756	50.306	1305.599	-0.004104	-0.005429	-0.001999
4.5200	710.949	61.703	81.295	30.378	-0.735	50.307	1353.464	-0.004319	-0.005691	-0.002126
4.5600	726.939	65.481	85.325	32.267	-0.719	50.306	1383.905	-0.004584	-0.005973	-0.002259
4.6000	818.432	77.827	99.971	38.881	-0.728	50.305	1558.084	-0.005448	-0.006998	-0.002722
4.6400	994.926	96.406	123.692	49.511	-0.745	50.306	1894.083	-0.006748	-0.008658	-0.003466
4.6800	885.278	86.061	110.881	43.872	-0.723	50.306	1685.343	-0.006024	-0.007762	-0.003071
4.7200	755.193	73.756	95.803	37.131	-0.719	50.305	1437.693	-0.005163	-0.006706	-0.002599
4.7600	945.227	96.321	122.693	49.138	-0.738	50.304	1799.469	-0.006742	-0.008588	-0.003440
4.8000	953.027	97.403	123.927	49.583	-0.736	50.305	1814.318	-0.006818	-0.008675	-0.003471
4.8400	1015.019	105.653	133.239	53.596	-0.705	50.304	1932.335	-0.007396	-0.009327	-0.003752
4.8800	1150.545	119.279	150.512	61.379	-0.726	50.304	2190.342	-0.008350	-0.010536	-0.004297
4.9200	1037.456	109.231	137.423	55.281	-0.751	50.305	1975.050	-0.007646	-0.009620	-0.003870
4.9600	1187.515	126.645	160.144	65.841	-0.716	50.304	2260.723	-0.008865	-0.011210	-0.004609
5.0000	943.468	102.256	129.501	51.208	-0.714	50.303	1796.122	-0.007158	-0.009065	-0.003585
5.0400	1041.754	111.926	142.245	56.962	-0.759	50.303	1983.232	-0.007835	-0.009957	-0.003987
5.0800	1028.710	111.602	140.257	56.182	-0.752	50.304	1958.399	-0.007812	-0.009818	-0.003933
5.1200	1008.647	108.684	137.799	54.893	-0.729	50.303	1920.204	-0.007608	-0.009646	-0.003843
5.1600	1015.124	109.358	137.895	54.807	-0.741	50.302	1932.535	-0.007655	-0.009653	-0.003837
5.2000	992.566	106.607	135.254	53.432	-0.763	50.303	1889.591	-0.007463	-0.009468	-0.003740
5.2400	891.470	95.070	121.468	47.596	-0.711	50.303	1697.130	-0.006655	-0.008503	-0.003332
5.2800	878.936	93.699	119.512	46.595	-0.689	50.302	1673.269	-0.006559	-0.008366	-0.003262
5.3200	814.254	85.684	110.535	42.622	-0.743	50.303	1550.131	-0.005998	-0.007737	-0.002984
5.3600	764.149	79.876	103.764	39.313	-0.715	50.303	1454.744	-0.005591	-0.007263	-0.002752
5.4000	672.657	68.928	89.951	33.006	-0.712	50.302	1280.565	-0.004825	-0.006297	-0.002310
5.4400	676.880	68.156	89.382	32.576	-0.731	50.302	1288.605	-0.004771	-0.006257	-0.002280
5.4800	638.978	62.866	82.588	30.072	-0.742	50.303	1216.450	-0.004401	-0.005781	-0.002105
5.5200	584.876	56.173	74.290	26.112	-0.726	50.302	1113.453	-0.003932	-0.005200	-0.001828
5.5600	470.464	42.620	57.545	18.801	-0.735	50.301	895.643	-0.002983	-0.004028	-0.001316
5.6000	433.930	36.108	50.208	15.568	-0.755	50.302	826.092	-0.002528	-0.003515	-0.001090
5.6400	414.949	33.116	46.346	14.326	-0.726	50.302	789.957	-0.002318	-0.003244	-0.001003
5.6800	379.362	28.259	40.468	11.424	-0.710	50.300	722.208	-0.001978	-0.002833	-0.000800
5.7200	371.607	26.132	37.300	9.951	-0.751	50.300	707.445	-0.001829	-0.002611	-0.000697
5.7600	312.711	19.001	28.265	6.864	-0.750	50.302	595.322	-0.001330	-0.001979	-0.000480
5.8000	250.524	10.344	16.871	2.084	-0.720	50.300	476.933	-0.000724	-0.001181	-0.000146
5.8400	226.163	7.086	12.577	-0.004	-0.751	50.299	430.555	-0.000496	-0.000880	0.000000
5.8800	236.201	7.454	13.078	0.568	-0.764	50.300	449.667	-0.000522	-0.000915	-0.000040
5.9200	224.960	4.886	10.328	-0.761	-0.706	50.301	428.267	-0.000342	-0.000723	0.000053
5.9600	238.215	6.398	11.604	-0.100	-0.723	50.299	453.501	-0.000448	-0.000812	0.000007
6.0000	241.116	6.090	12.229	-0.169	-0.755	50.300	459.023	-0.000426	-0.000856	0.000012
6.0400	234.909	5.053	10.687	-0.361	-0.719	50.300	447.206	-0.000354	-0.000748	0.000025
6.0800	201.065	1.319	5.144	-2.514	-0.711	50.299	382.776	-0.000092	-0.000360	0.000176
6.1200	297.848	11.969	19.554	2.988	-0.748	50.299	567.026	-0.000838	-0.001369	-0.000209
6.1600	329.137	15.338	24.084	4.823	-0.743	50.299	626.593	-0.001074	-0.001686	-0.000338
6.2000	349.876	17.444	26.683	6.183	-0.714	50.300	666.075	-0.001221	-0.001868	-0.000433
6.2400	388.935	22.340	33.115	8.463	-0.739	50.298	740.433	-0.001564	-0.002318	-0.000592
6.2800	400.312	23.899	35.173	9.575	-0.746	50.299	762.091	-0.001673	-0.002462	-0.000670
6.3200	489.445	34.437	48.499	15.358	-0.722	50.299	931.778	-0.002411	-0.003395	-0.001075
6.3600	506.007	37.162	51.555	16.786	-0.707	50.298	963.306	-0.002601	-0.003609	-0.001175
6.4000	588.723	47.418	64.314	22.289	-0.747	50.298	1120.777	-0.003319	-0.004502	-0.001560
6.4400	615.008	51.303	69.456	24.205	-0.738	50.298	1170.816	-0.003591	-0.004862	-0.001694
6.4800	662.061	57.999	76.960	27.750	-0.710	50.298	1260.395	-0.004060	-0.005387	-0.001943
6.5200	729.344	65.913	87.064	32.615	-0.723	50.297	1388.483	-0.004614	-0.006094	-0.002283
6.5600	753.013	70.305	91.537	34.321	-0.751	50.298	1433.544	-0.004921	-0.006408	-0.002402
6.6000	792.087	75.540	98.181	37.383	-0.723	50.298	1507.931	-0.005288	-0.006873	-0.002617
6.6400	849.481	83.103	107.309	41.452	-0.716	50.296	1617.193	-0.005817	-0.007512	-0.002902
6.6800	868.958	86.162	111.032	42.902	-0.745	50.296	1654.272	-0.006031	-0.007772	-0.003003
6.7200	937.202	95.688	122.039	47.803	-0.741	50.297	1784.191	-0.006698	-0.008543	-0.003346
6.7600	1027.763	106.578	135.366	54.240	-0.706	50.297	1956.596	-0.007460	-0.009476	-0.003797
6.8000	941.830	97.741	124.847	49.432	-0.743	50.296	1793.003	-0.006842	-0.008739	-0.003460
6.8400	1037.576	109.034	138.161	55.003	-0.742	50.297	1975.279	-0.007632	-0.009671	-0.003850
6.8800	989.035	105.092	132.699	52.680	-0.698	50.297	1882.868	-0.007356	-0.009289	-0.003688
6.9200	1067.678	114.452	143.649	57.586	-0.710	50.296	2032.585	-0.008012	-0.010055	-0.004031
6.9600	1047.450	112.487	141.648	56.543	-0.751	50.295	1994.076	-0.007874	-0.009915	-0.003958
7.0000	1000.156	107.097	135.544	53.850	-0.739	50.296	1904.039	-0.007497	-0.009488	-0.003770
7.0400	1024.712	110.342	138.910	55.279	-0.740	50.296	1950.788	-0.007724	-0.009724	-0.003870
7.0800	1031.820	111.181	140.229	55.793	-0.739	50.295	1964.321	-0.007783	-0.009816	-0.003906
7.1200	1012.419	109.190	137.660	54.794	-0.753	50.295	1927.385	-0.007643	-0.009636	-0.003836
7.1600	967.845	104.489	132.072	52.348	-0.729	50.296	1842.527	-0.007314	-0.009245	-0.003664
7.2000	953.838	102.284	129.945	51.082	-0.727	50.294	1815.863	-0.007160	-0.009096	-0.003576
7.2400	893.724	95.535	122.206	47.608	-0.760	50.295	1701.422	-0.006687	-0.008554	-0.003333
7.2800	899.901	95.829	121.829	47.553	-0.748	50.296	1713.181	-0.006708	-0.008528	-0.003329
7.3200	807.627	84.714	108.699	41.632	-0.713	50.294	1537.514	-0.005930	-0.007609	-0.002914
7.3600	760.603	78.918	101.513	38.022	-0.742	50.294	1447.992	-0.005524	-0.007106	-0.002662
7.4000	712.091	72.970	94.898	35.086	-0.755	50.294	1355.639	-0.005108	-0.006643	-0.002456
7.4400	656.185	66.125	86.103	31.142	-0.714	50.295	1249.208	-0.004629	-0.006027	-0.002180
7.4800	626.129	61.435	80.728	28.570	-0.700	50.294	1191.988	-0.004300	-0.005651	-0.002000
7.5200	560.980	52.904	70.040	24.122	-0.731	50.294	1067.963	-0.003703	-0.004903	-0.001689
7.5600	501.859	45.380	61.339	19.899	-0.717	50.295	955.410	-0.003177	-0.004294	-0.001393
7.6000	465.099	40.429	54.782	17.606	-0.710	50.294	885.429	-0.002830	-0.003835	-0.001232
7.6400	403.362	32.429	45.079	13.146	-0.734	50.293	767.899	-0.002270	-0.003156	-0.000920
7.6800	362.380	26.972	37.853	10.714	-0.747	50.294	689.878	-0.001888	-0.002650	-0.000750
7.7200	318.076	20.182	28.557	5.611	-0.724	50.294	605.536	-0.001413	-0.001999	-0.000393
7.7600	255.964	12.210	18.275	2.433	-0.728	50.292	487.289	-0.000855	-0.001279	-0.000170
7.8000	265.056	12.573	19.471	2.751	-0.751	50.292	504.599	-0.000880	-0.001363	-0.000193
7.8400	265.732	11.100	17.414	2.028	-0.743	50.293	505.886	-0.000777	-0.001219	-0.000142
7.8800	255.588	10.092	16.065	1.500	-0.707	50.292	486.574	-0.000706	-0.001125	-0.000105
7.9200	218.107	5.234	9.953	-0.888	-0.732	50.292	415.220	-0.000366	-0.000697	0.000062
7.9600	236.652	6.369	11.688	-0.318	-0.755	50.293	450.525	-0.000446	-0.000818	0.000022
8.0000	227.290	4.772	9.827	-0.817	-0.727	50.293	432.701	-0.000334	-0.000688	0.000057
8.0400	240.229	6.328	12.161	-0.140	-0.710	50.292	457.335	-0.000443	-0.000851	0.000010
8.0800	170.798	-0.897	0.875	-4.240	-0.740	50.291	325.155	0.000063	-0.000061	0.000297
8.1200	291.671	10.861	18.025	2.099	-0.746	50.292	555.267	-0.000760	-0.001262	-0.000147
8.1600	307.361	12.462	20.377	3.363	-0.719	50.293	585.136	-0.000872	-0.001426	-0.000235
8.2000	333.450	16.502	25.125	4.825	-0.733	50.292	634.804	-0.001155	-0.001759	-0.000338
8.2400	376.026	21.163	31.409	7.851	-0.761	50.291	715.857	-0.001481	-0.002199	-0.000550
8.2800	433.855	27.941	40.494	11.296	-0.745	50.292	825.949	-0.001956	-0.002835	-0.000791
8.3200	441.565	29.469	41.801	12.143	-0.707	50.291	840.626	-0.002063	-0.002926	-0.000850
8.3600	518.074	38.955	53.489	17.439	-0.726	50.291	986.280	-0.002727	-0.003744	-0.001221
8.4000	552.174	43.617	59.243	19.788	-0.733	50.291	1051.197	-0.003053	-0.004147	-0.001385
8.4400	646.372	55.456	73.734	25.833	-0.715	50.291	1230.526	-0.003882	-0.005161	-0.001808
8.4800	667.246	57.661	77.599	27.487	-0.698	50.291	1270.266	-0.004036	-0.005432	-0.001924
8.5200	732.545	67.174	88.355	32.754	-0.739	50.291	1394.577	-0.004702	-0.006185	-0.002293
8.5600	770.071	72.505	94.427	35.380	-0.741	50.291	1466.017	-0.005075	-0.006610	-0.002477
8.6000	770.116	73.377	95.384	35.963	-0.713	50.291	1466.103	-0.005136	-0.006677	-0.002517
8.6400	836.030	81.995	105.462	40.368	-0.726	50.290	1591.587	-0.005740	-0.007382	-0.002826
8.6800	951.779	95.255	121.663	47.680	-0.739	50.291	1811.943	-0.006668	-0.008516	-0.003338
8.7200	925.870	94.245	120.025	47.192	-0.692	50.291	1762.619	-0.006597	-0.008402	-0.003303
8.7600	918.521	94.749	120.787	47.248	-0.688	50.290	1748.629	-0.006632	-0.008455	-0.003307
8.8000	945.061	98.945	125.706	49.608	-0.731	50.289	1799.154	-0.006926	-0.008799	-0.003473
8.8400	996.684	105.093	132.516	52.474	-0.739	50.290	1897.430	-0.007357	-0.009276	-0.003673
8.8800	983.444	107.435	135.017	53.473	-0.712	50.290	1872.225	-0.007520	-0.009451	-0.003743
8.9200	1088.478	116.306	145.550	58.700	-0.730	50.289	2072.182	-0.008141	-0.010189	-0.004109
8.9600	1034.390	111.576	140.284	55.682	-0.747	50.290	1969.213	-0.007810	-0.009820	-0.003898
9.0000	1059.924	114.733	143.786	57.558	-0.731	50.289	2017.822	-0.008031	-0.010065	-0.004029
9.0400	1030.738	111.573	140.729	55.752	-0.710	50.289	1962.261	-0.007810	-0.009851	-0.003903
9.0800	1039.680	112.905	141.703	56.335	-0.751	50.289	1979.284	-0.007903	-0.009919	-0.003943
9.1200	1021.391	111.869	140.452	55.488	-0.735	50.289	1944.466	-0.007831	-0.009832	-0.003884
9.1600	992.326	107.715	136.047	53.849	-0.706	50.288	1889.133	-0.007540	-0.009523	-0.003769
9.2000	888.735	96.039	122.025	47.372	-0.749	50.288	1691.923	-0.006723	-0.008542	-0.003316
9.2400	905.912	97.767	123.762	48.430	-0.748	50.289	1724.625	-0.006844	-0.008663	-0.003390
9.2800	853.448	91.339	116.232	44.953	-0.725	50.289	1624.746	-0.006394	-0.008136	-0.003147
9.3200	782.484	82.346	106.072	40.090	-0.723	50.288	1489.649	-0.005764	-0.007425	-0.002806
9.3600	781.477	82.248	105.504	39.896	-0.753	50.289	1487.732	-0.005757	-0.007385	-0.002793
9.4000	743.410	77.071	99.650	37.215	-0.727	50.289	1415.262	-0.005395	-0.006975	-0.002605
9.4400	686.633	70.419	91.122	33.406	-0.708	50.288	1307.173	-0.004929	-0.006379	-0.002338
9.4800	590.256	57.759	76.127	26.625	-0.744	50.287	1123.695	-0.004043	-0.005329	-0.001864
9.5200	535.147	50.938	67.578	22.845	-0.740	50.288	1018.782	-0.003566	-0.004730	-0.001599
9.5600	487.612	44.386	60.021	19.566	-0.708	50.289	928.288	-0.003107	-0.004201	-0.001370
9.6000	462.259	40.456	54.617	17.370	-0.706	50.287	880.022	-0.002832	-0.003823	-0.001216
9.6400	436.260	36.711	50.181	15.358	-0.734	50.288	830.526	-0.002570	-0.003513	-0.001075
9.6800	361.584	27.446	38.118	10.245	-0.722	50.288	688.362	-0.001921	-0.002668	-0.000717
9.7200	362.275	26.146	36.953	9.785	-0.707	50.287	689.678	-0.001830	-0.002587	-0.000685
9.7600	305.032	18.621	26.808	5.879	-0.744	50.287	580.702	-0.001303	-0.001877	-0.000412
9.8000	271.143	13.557	20.528	3.029	-0.750	50.288	516.186	-0.000949	-0.001437	-0.000212
9.8400	260.953	11.774	18.081	2.361	-0.714	50.287	496.788	-0.000824	-0.001266	-0.000165
9.8800	216.680	6.442	11.230	-0.416	-0.722	50.286	412.502	-0.000451	-0.000786	0.000029
9.9200	240.710	8.437	13.731	0.457	-0.744	50.287	458.250	-0.000591	-0.000961	-0.000032
9.9600	221.203	5.486	9.967	-0.582	-0.723	50.287	421.114	-0.000384	-0.000698	0.000041
10.0000	204.176	3.607	7.268	-1.679	-0.694	50.286	388.699	-0.000252	-0.000509	0.000118
10.0400	247.939	7.720	13.009	0.345	-0.747	50.286	472.012	-0.000540	-0.000911	-0.000024
10.0800	279.964	11.101	17.095	1.904	-0.746	50.287	532.980	-0.000777	-0.001197	-0.000133
10.1200	280.385	11.241	17.651	1.902	-0.715	50.286	533.781	-0.000787	-0.001236	-0.000133
10.1600	305.017	13.795	21.223	3.615	-0.735	50.285	580.673	-0.000966	-0.001486	-0.000253
10.2000	360.306	20.278	29.905	6.960	-0.768	50.286	685.930	-0.001419	-0.002093	-0.000487
10.2400	339.867	18.371	27.668	6.349	-0.725	50.287	647.020	-0.001286	-0.001937	-0.000444
10.2800	394.661	24.320	35.089	9.269	-0.707	50.285	751.333	-0.001702	-0.002456	-0.000649
10.3200	481.255	34.478	48.097	15.286	-0.719	50.285	916.185	-0.002413	-0.003367	-0.001070
10.3600	533.629	41.523	56.780	18.649	-0.718	50.286	1015.892	-0.002907	-0.003975	-0.001305
10.4000	554.127	44.315	60.216	19.956	-0.714	50.286	1054.916	-0.003102	-0.004215	-0.001397
10.4400	607.208	51.318	68.858	23.735	-0.719	50.285	1155.968	-0.003592	-0.004820	-0.001661
10.4800	630.727	55.625	73.636	26.211	-0.738	50.285	1200.743	-0.003894	-0.005154	-0.001835
10.5200	707.733	65.183	85.643	31.240	-0.718	50.286	1347.342	-0.004563	-0.005995	-0.002187
10.5600	779.208	73.882	96.152	35.825	-0.698	50.285	1483.412	-0.005172	-0.006731	-0.002508
10.6000	838.570	82.023	105.823	40.602	-0.740	50.285	1596.422	-0.005742	-0.007408	-0.002842
10.6400	843.965	83.286	107.265	41.618	-0.736	50.286	1606.693	-0.005830	-0.007509	-0.002913
10.6800	960.375	97.359	123.651	48.999	-0.706	50.286	1828.308	-0.006815	-0.008656	-0.003430
10.7200	919.047	94.160	119.829	46.746	-0.734	50.284	1749.630	-0.006591	-0.008388	-0.003272
10.7600	970.174	101.484	128.154	50.764	-0.748	50.285	1846.962	-0.007104	-0.008971	-0.003553
10.8000	999.885	105.441	133.087	52.959	-0.732	50.285	1903.524	-0.007381	-0.009316	-0.003707
10.8400	1020.038	108.388	136.310	54.349	-0.701	50.285	1941.891	-0.007587	-0.009542	-0.003804
10.8800	1021.781	109.260	137.424	54.835	-0.744	50.285	1945.210	-0.007648	-0.009620	-0.003838
10.9200	1050.876	113.215	141.621	56.739	-0.741	50.285	2000.599	-0.007925	-0.009913	-0.003972
10.9600	1039.305	112.387	140.840	56.280	-0.714	50.284	1978.569	-0.007867	-0.009859	-0.003940
11.0000	1043.588	113.888	142.149	57.002	-0.722	50.283	1986.723	-0.007972	-0.009950	-0.003990
11.0400	1019.647	110.550	139.090	55.530	-0.739	50.284	1941.147	-0.007739	-0.009736	-0.003887
11.0800	1036.224	113.370	141.578	56.517	-0.704	50.284	1972.704	-0.007936	-0.009910	-0.003956
11.1200	985.593	106.899	135.061	53.389	-0.711	50.284	1876.316	-0.007483	-0.009454	-0.003737
11.1600	978.875	106.578	133.988	53.028	-0.755	50.283	1863.527	-0.007460	-0.009379	-0.003712
11.2000	933.309	101.106	127.723	50.373	-0.731	50.284	1776.781	-0.007077	-0.008941	-0.003526
11.2400	875.014	94.189	118.802	46.595	-0.710	50.284	1665.802	-0.006593	-0.008316	-0.003262
11.2800	838.826	89.880	114.524	44.178	-0.729	50.284	1596.909	-0.006292	-0.008017	-0.003092
11.3200	798.309	84.659	108.353	41.370	-0.736	50.284	1519.775	-0.005926	-0.007585	-0.002896
11.3600	761.850	80.169	103.044	38.703	-0.709	50.284	1450.367	-0.005612	-0.007213	-0.002709
11.4000	706.125	73.276	94.926	34.976	-0.707	50.283	1344.280	-0.005129	-0.006645	-0.002448
11.4400	660.393	67.357	87.229	31.643	-0.737	50.283	1257.219	-0.004715	-0.006106	-0.002215
11.4800	604.923	60.314	79.127	27.818	-0.738	50.284	1151.619	-0.004222	-0.005539	-0.001947
11.5200	526.836	50.322	67.161	22.553	-0.720	50.284	1002.960	-0.003523	-0.004701	-0.001579
11.5600	495.547	45.578	61.394	20.178	-0.731	50.283	943.394	-0.003190	-0.004298	-0.001412
11.6000	466.452	41.411	56.183	17.647	-0.734	50.283	888.004	-0.002899	-0.003933	-0.001235
11.6400	416.798	35.055	47.874	14.534	-0.727	50.284	793.476	-0.002454	-0.003351	-0.001017
11.6800	371.232	28.598	39.495	10.534	-0.707	50.283	706.730	-0.002002	-0.002765	-0.000737
11.7200	351.995	24.882	35.577	9.045	-0.724	50.283	670.109	-0.001742	-0.002490	-0.000633
11.7600	331.857	22.424	31.909	7.686	-0.739	50.284	631.771	-0.001570	-0.002234	-0.000538
11.8000	294.587	16.951	24.723	4.991	-0.722	50.284	560.818	-0.001187	-0.001731	-0.000349
11.8400	251.696	11.353	17.191	1.806	-0.714	50.283	479.164	-0.000795	-0.001203	-0.000126
11.8800	185.736	3.103	6.144	-2.723	-0.744	50.283	353.594	-0.000217	-0.000430	0.000191
11.9200	252.177	9.994	16.040	1.097	-0.723	50.284	480.080	-0.000700	-0.001123	-0.000077
11.9600	215.432	5.529	9.617	-0.694	-0.704	50.283	410.128	-0.000387	-0.000673	0.000049
12.0000	209.210	3.973	7.799	-1.596	-0.726	50.283	398.283	-0.000278	-0.000546	0.000112
12.0400	227.094	5.513	10.425	-1.138	-0.752	50.284	432.329	-0.000386	-0.000730	0.000080
12.0800	272.360	10.737	16.679	1.874	-0.723	50.284	518.503	-0.000752	-0.001168	-0.000131
12.1200	264.710	10.063	16.302	1.569	-0.719	50.282	503.941	-0.000704	-0.001141	-0.000110
12.1600	290.319	12.713	19.387	2.777	-0.738	50.283	552.692	-0.000890	-0.001357	-0.000194
12.2000	305.783	14.160	21.764	3.713	-0.719	50.284	582.132	-0.000991	-0.001523	-0.000260
12.2400	375.590	22.254	32.270	8.116	-0.710	50.283	715.027	-0.001558	-0.002259	-0.000568
12.2800	438.048	29.961	42.371	12.659	-0.716	50.283	833.931	-0.002097	-0.002966	-0.000886
12.3200	462.845	33.693	47.068	14.188	-0.748	50.283	881.138	-0.002358	-0.003295	-0.000993
12.3600	518.570	40.626	55.629	18.191	-0.712	50.283	987.225	-0.002844	-0.003894	-0.001273
12.4000	563.956	46.196	61.924	20.722	-0.715	50.282	1073.627	-0.003234	-0.004335	-0.001451
12.4400	561.882	46.813	63.270	21.512	-0.735	50.282	1069.679	-0.003277	-0.004429	-0.001506
12.4800	645.500	56.564	75.251	26.670	-0.729	50.284	1228.867	-0.003959	-0.005268	-0.001867
12.5200	710.739	65.732	85.839	31.739	-0.705	50.283	1353.064	-0.004601	-0.006009	-0.002222
12.5600	768.222	73.110	95.094	35.476	-0.718	50.282	1462.498	-0.005118	-0.006657	-0.002483
12.6000	814.480	79.634	102.780	38.882	-0.728	50.283	1550.560	-0.005574	-0.007195	-0.002722
12.6400	865.937	85.627	109.618	42.287	-0.708	50.283	1648.521	-0.005994	-0.007673	-0.002960
12.6800	899.555	91.339	115.994	45.259	-0.715	50.283	1712.523	-0.006394	-0.008120	-0.003168
12.7200	962.870	98.961	125.611	49.526	-0.740	50.282	1833.057	-0.006927	-0.008793	-0.003467
12.7600	939.982	98.819	124.652	49.110	-0.733	50.283	1789.484	-0.006917	-0.008726	-0.003438
12.8000	986.705	103.378	130.934	51.973	-0.711	50.282	1878.433	-0.007236	-0.009165	-0.003638
12.8400	1038.673	110.986	139.187	55.460	-0.713	50.282	1977.367	-0.007769	-0.009743	-0.003882
12.8800	1020.234	109.163	137.120	54.599	-0.732	50.283	1942.263	-0.007641	-0.009598	-0.003822
12.9200	1039.921	112.414	140.675	55.933	-0.720	50.283	1979.742	-0.007869	-0.009847	-0.003915
12.9600	1011.743	109.386	137.868	54.990	-0.702	50.282	1926.098	-0.007657	-0.009651	-0.003849
13.0000	1035.412	113.188	141.467	56.850	-0.721	50.282	1971.159	-0.007923	-0.009903	-0.003980
13.0400	1005.070	109.386	137.549	54.640	-0.732	50.283	1913.395	-0.007657	-0.009628	-0.003825
13.0800	1048.667	114.564	142.995	57.170	-0.702	50.282	1996.393	-0.008020	-0.010010	-0.004002
13.1200	1021.496	111.840	140.215	56.070	-0.716	50.281	1944.666	-0.007829	-0.009815	-0.003925
13.1600	916.432	100.531	126.388	49.748	-0.754	50.283	1744.652	-0.007037	-0.008847	-0.003482
13.2000	953.342	104.209	130.934	51.570	-0.730	50.283	1814.919	-0.007295	-0.009165	-0.003610
13.2400	858.317	92.716	117.730	45.926	-0.707	50.282	1634.016	-0.006490	-0.008241	-0.003215
13.2800	856.724	92.378	117.507	45.579	-0.752	50.282	1630.983	-0.006466	-0.008226	-0.003191
13.3200	829.628	88.898	113.451	43.511	-0.739	50.283	1579.399	-0.006223	-0.007942	-0.003046
13.3600	754.877	79.901	102.821	38.743	-0.700	50.282	1437.092	-0.005593	-0.007197	-0.002712
13.4000	712.647	74.851	96.428	35.770	-0.722	50.282	1356.697	-0.005240	-0.006750	-0.002504
13.4400	669.125	68.788	89.868	32.449	-0.748	50.283	1273.842	-0.004815	-0.006291	-0.002271
13.4800	609.748	61.252	79.556	28.557	-0.706	50.283	1160.803	-0.004288	-0.005569	-0.001999
13.5200	568.555	55.878	73.638	25.460	-0.710	50.281	1082.382	-0.003911	-0.005155	-0.001782
13.5600	516.286	48.247	64.205	21.016	-0.744	50.282	982.876	-0.003377	-0.004494	-0.001471
13.6000	479.316	43.487	58.171	19.023	-0.730	50.283	912.495	-0.003044	-0.004072	-0.001332
13.6400	435.809	36.949	50.638	15.439	-0.710	50.282	829.668	-0.002586	-0.003545	-0.001081
13.6800	359.194	27.377	38.686	10.409	-0.736	50.282	683.813	-0.001916	-0.002708	-0.000729
13.7200	337.929	23.982	33.922	8.616	-0.742	50.283	643.330	-0.001679	-0.002375	-0.000603
13.7600	314.454	20.937	30.060	7.282	-0.708	50.282	598.640	-0.001466	-0.002104	-0.000510
13.8000	259.465	13.162	19.806	3.127	-0.723	50.282	493.956	-0.000921	-0.001386	-0.000219
13.8400	260.638	13.473	19.804	3.128	-0.726	50.282	496.187	-0.000943	-0.001386	-0.000219
13.8800	220.482	7.438	12.062	-0.070	-0.722	50.283	419.741	-0.000521	-0.000844	0.000005
13.9200	239.974	8.799	14.274	0.567	-0.695	50.281	456.848	-0.000616	-0.000999	-0.000040
13.9600	219.821	5.823	10.508	-0.733	-0.714	50.281	418.482	-0.000408	-0.000736	0.000051
14.0000	233.752	7.283	12.563	0.082	-0.734	50.283	445.004	-0.000510	-0.000879	-0.000006
14.0400	239.252	7.183	12.646	0.165	-0.703	50.283	455.475	-0.000503	-0.000885	-0.000012
14.0800	243.776	7.745	13.300	0.469	-0.716	50.282	464.087	-0.000542	-0.000931	-0.000033
14.1200	285.525	11.927	18.930	2.501	-0.752	50.282	543.566	-0.000835	-0.001325	-0.000175
14.1600	294.211	13.445	20.555	3.573	-0.715	50.282	560.102	-0.000941	-0.001439	-0.000250
14.2000	350.162	19.634	28.989	6.642	-0.694	50.282	666.618	-0.001374	-0.002029	-0.000465
14.2400	366.032	21.539	31.825	7.656	-0.728	50.282	696.831	-0.001508	-0.002228	-0.000536
14.2800	412.395	26.889	38.631	10.727	-0.722	50.283	785.093	-0.001882	-0.002704	-0.000751
14.3200	453.467	32.781	45.592	14.326	-0.699	50.282	863.285	-0.002295	-0.003191	-0.001003
14.3600	502.069	38.395	52.947	16.912	-0.712	50.281	955.811	-0.002688	-0.003706	-0.001184
14.4000	551.738	45.127	60.993	20.624	-0.743	50.282	1050.367	-0.003159	-0.004269	-0.001444
14.4400	614.857	53.339	71.026	24.805	-0.707	50.282	1170.530	-0.003734	-0.004972	-0.001736
14.4800	702.278	63.512	83.282	30.529	-0.700	50.282	1336.956	-0.004446	-0.005830	-0.002137
14.5200	697.318	64.498	84.393	30.793	-0.727	50.282	1327.515	-0.004515	-0.005908	-0.002155
14.5600	753.509	71.762	93.135	34.864	-0.734	50.283	1434.488	-0.005023	-0.006519	-0.002441
14.6000	789.112	76.875	99.055	37.466	-0.703	50.282	1502.266	-0.005381	-0.006934	-0.002623
14.6400	849.406	84.828	108.673	41.925	-0.743	50.282	1617.050	-0.005938	-0.007607	-0.002935
14.6800	870.506	88.267	112.799	43.276	-0.760	50.282	1657.219	-0.006179	-0.007896	-0.003029
14.7200	928.966	95.366	121.414	47.735	-0.724	50.283	1768.513	-0.006676	-0.008499	-0.003341
14.7600	978.124	102.858	129.725	51.568	-0.715	50.281	1862.097	-0.007200	-0.009081	-0.003610
14.8000	1003.537	105.710	133.726	53.139	-0.737	50.283	1910.477	-0.007400	-0.009361	-0.003720
14.8400	1009.263	107.167	134.976	53.640	-0.719	50.283	1921.377	-0.007502	-0.009448	-0.003755
14.8800	1027.567	110.482	138.174	55.391	-0.700	50.282	1956.224	-0.007734	-0.009672	-0.003877
14.9200	1020.639	110.623	138.700	55.281	-0.742	50.282	1943.035	-0.007744	-0.009709	-0.003870
14.9600	1060.900	115.297	144.147	57.699	-0.728	50.283	2019.682	-0.008071	-0.010090	-0.004039
15.0000	1028.063	112.345	140.604	56.461	-0.707	50.283	1957.169	-0.007864	-0.009842	-0.003952
15.0400	1032.121	112.695	141.424	56.405	-0.712	50.281	1964.893	-0.007889	-0.009900	-0.003948
15.0800	995.422	109.259	137.217	54.462	-0.734	50.282	1895.027	-0.007648	-0.009605	-0.003812
15.1200	978.665	107.026	134.767	53.459	-0.712	50.283	1863.127	-0.007492	-0.009434	-0.003742
15.1600	961.638	105.135	132.614	51.916	-0.706	50.283	1830.711	-0.007359	-0.009283	-0.003634
15.2000	936.841	102.214	129.488	51.028	-0.736	50.282	1783.504	-0.007155	-0.009064	-0.003572
15.2400	910.361	98.766	125.265	48.944	-0.739	50.284	1733.093	-0.006914	-0.008769	-0.003426
15.2800	846.670	91.480	116.176	44.854	-0.704	50.283	1611.843	-0.006404	-0.008132	-0.003140
15.3200	805.538	86.582	110.255	42.146	-0.706	50.283	1533.537	-0.006061	-0.007718	-0.002950
15.3600	754.050	79.636	103.168	38.549	-0.720	50.283	1435.518	-0.005575	-0.007222	-0.002698
15.4000	707.808	74.009	95.357	35.171	-0.704	50.284	1347.485	-0.005181	-0.006675	-0.002462
15.4400	677.556	69.927	90.647	32.934	-0.702	50.282	1289.892	-0.004895	-0.006345	-0.002305
15.4800	610.033	61.603	80.293	28.541	-0.737	50.282	1161.346	-0.004312	-0.005621	-0.001998
15.5200	548.582	54.069	71.108	24.222	-0.742	50.284	1044.359	-0.003785	-0.004978	-0.001696
15.5600	516.662	48.934	65.288	21.818	-0.708	50.283	983.591	-0.003425	-0.004570	-0.001527
15.6000	466.181	42.002	56.934	18.050	-0.723	50.283	887.489	-0.002940	-0.003985	-0.001263
15.6400	424.237	36.109	49.263	14.940	-0.732	50.283	807.638	-0.002528	-0.003448	-0.001046
15.6800	384.156	30.860	43.010	12.033	-0.714	50.284	731.335	-0.002160	-0.003011	-0.000842
15.7200	350.177	25.416	36.048	9.659	-0.703	50.283	666.647	-0.001779	-0.002523	-0.000676
15.7600	294.662	18.917	27.571	5.711	-0.736	50.283	560.961	-0.001324	-0.001930	-0.000400
15.8000	274.163	15.272	22.431	4.130	-0.720	50.284	521.936	-0.001069	-0.001570	-0.000289
15.8400	254.641	12.110	18.470	2.278	-0.706	50.284	484.772	-0.000848	-0.001293	-0.000159
15.8800	233.707	9.068	14.580	0.692	-0.718	50.282	444.918	-0.000635	-0.001021	-0.000048
15.9200	227.801	7.651	12.704	0.221	-0.725	50.284	433.674	-0.000536	-0.000889	-0.000015
15.9600	218.738	5.768	10.619	-0.888	-0.718	50.284	416.422	-0.000404	-0.000743	0.000062
16.0000	238.907	8.030	13.092	0.095	-0.692	50.284	454.817	-0.000562	-0.000916	-0.000007
16.0400	254.281	8.644	14.440	0.457	-0.714	50.283	484.085	-0.000605	-0.001011	-0.000032
16.0800	247.142	8.520	14.510	0.764	-0.736	50.284	470.495	-0.000596	-0.001016	-0.000053
16.1200	260.067	9.559	15.900	1.581	-0.720	50.284	495.100	-0.000669	-0.001113	-0.000111
16.1600	316.348	16.012	23.834	4.393	-0.713	50.283	602.245	-0.001121	-0.001668	-0.000308
16.2000	345.714	19.058	28.681	6.418	-0.730	50.283	658.150	-0.001334	-0.002008	-0.000449
16.2400	339.356	18.903	27.906	6.781	-0.719	50.285	646.048	-0.001323	-0.001953	-0.000475
16.2800	405.527	26.734	38.257	10.465	-0.709	50.284	772.018	-0.001871	-0.002678	-0.000733
16.3200	479.872	35.659	49.624	15.468	-0.727	50.283	913.553	-0.002496	-0.003474	-0.001083
16.3600	516.887	40.596	55.517	17.940	-0.751	50.284	984.020	-0.002842	-0.003886	-0.001256
16.4000	543.547	43.993	60.242	19.998	-0.731	50.285	1034.775	-0.003080	-0.004217	-0.001400
16.4400	573.860	48.991	65.926	22.330	-0.709	50.284	1092.482	-0.003429	-0.004615	-0.001563
16.4800	659.086	58.856	77.391	27.572	-0.726	50.284	1254.730	-0.004120	-0.005417	-0.001930
16.5200	709.085	66.321	86.758	31.586	-0.729	50.285	1349.916	-0.004642	-0.006073	-0.002211
16.5600	738.992	70.571	91.983	33.977	-0.698	50.285	1406.851	-0.004940	-0.006439	-0.002378
16.6000	831.372	81.984	105.516	40.547	-0.696	50.284	1582.718	-0.005739	-0.007386	-0.002838
16.6400	844.131	84.999	108.948	42.288	-0.722	50.284	1607.008	-0.005950	-0.007626	-0.002960
16.6800	913.126	93.053	118.580	46.092	-0.725	50.285	1738.358	-0.006514	-0.008301	-0.003226
16.7200	938.584	96.882	123.316	48.304	-0.733	50.284	1786.823	-0.006782	-0.008632	-0.003381
16.7600	958.812	100.980	127.470	50.122	-0.724	50.284	1825.333	-0.007069	-0.008923	-0.003509
16.8000	1021.842	108.010	136.631	53.918	-0.746	50.285	1945.324	-0.007561	-0.009564	-0.003774
16.8400	1012.794	108.318	136.020	53.751	-0.723	50.285	1928.101	-0.007582	-0.009521	-0.003763
16.8800	1011.773	108.796	136.562	54.252	-0.691	50.284	1926.155	-0.007616	-0.009559	-0.003798
16.9200	1061.006	114.860	143.565	57.446	-0.718	50.284	2019.882	-0.008040	-0.010050	-0.004021
16.9600	1057.549	115.533	144.245	57.794	-0.740	50.285	2013.302	-0.008087	-0.010097	-0.004046
17.0000	1046.067	114.380	142.787	57.239	-0.713	50.285	1991.444	-0.008007	-0.009995	-0.004007
17.0400	1040.101	113.945	142.620	56.780	-0.711	50.284	1980.085	-0.007976	-0.009983	-0.003975
17.0800	1026.651	112.360	140.856	55.611	-0.744	50.284	1954.479	-0.007865	-0.009860	-0.003893
17.1200	1007.610	110.452	139.118	55.280	-0.693	50.285	1918.230	-0.007732	-0.009738	-0.003870
17.1600	989.215	108.753	136.841	53.737	-0.692	50.285	1883.211	-0.007613	-0.009579	-0.003762
17.2000	919.844	100.391	126.792	49.460	-0.736	50.284	1751.146	-0.007027	-0.008875	-0.003462
17.2400	886.706	96.236	122.122	47.387	-0.730	50.286	1688.061	-0.006737	-0.008549	-0.003317
17.2800	850.924	92.140	117.161	45.146	-0.707	50.285	1619.940	-0.006450	-0.008201	-0.003160
17.3200	787.519	84.251	108.115	40.868	-0.737	50.285	1499.233	-0.005898	-0.007568	-0.002861
17.3600	792.749	84.434	108.378	41.022	-0.754	50.286	1509.190	-0.005910	-0.007586	-0.002872
17.4000	736.738	77.603	99.249	36.993	-0.720	50.285	1402.559	-0.005432	-0.006947	-0.002590
17.4400	647.319	66.531	86.161	30.894	-0.706	50.285	1232.328	-0.004657	-0.006031	-0.002163
17.4800	631.358	63.975	82.852	29.292	-0.743	50.285	1201.944	-0.004478	-0.005800	-0.002050
17.5200	569.667	56.021	73.902	25.236	-0.731	50.286	1084.499	-0.003921	-0.005173	-0.001767
17.5600	495.021	46.366	62.032	20.249	-0.699	50.285	942.392	-0.003246	-0.004342	-0.001417
17.6000	495.427	44.861	61.228	19.635	-0.738	50.285	943.165	-0.003140	-0.004286	-0.001374
17.6400	379.738	31.701	43.357	12.312	-0.740	50.286	722.923	-0.002219	-0.003035	-0.000862
17.6800	392.993	31.871	43.844	12.699	-0.712	50.286	748.158	-0.002231	-0.003069	-0.000889
17.7200	322.570	22.607	32.812	7.669	-0.718	50.286	614.090	-0.001583	-0.002297	-0.000537
17.7600	282.594	17.680	25.419	4.963	-0.731	50.286	537.987	-0.001238	-0.001779	-0.000347
17.8000	284.773	16.474	24.251	4.282	-0.712	50.286	542.135	-0.001153	-0.001698	-0.000300
17.8400	262.020	13.460	20.027	2.850	-0.714	50.285	498.819	-0.000942	-0.001402	-0.000199
17.8800	244.257	10.188	16.274	1.235	-0.738	50.284	465.002	-0.000713	-0.001139	-0.000086
17.9200	243.656	9.672	15.484	1.207	-0.730	50.287	463.858	-0.000677	-0.001084	-0.000085
17.9600	224.449	6.876	12.089	-0.265	-0.689	50.286	427.294	-0.000481	-0.000846	0.000019
18.0000	236.697	7.803	13.202	0.164	-0.708	50.285	450.611	-0.000546	-0.000924	-0.000012
18.0400	240.515	7.749	13.730	0.192	-0.735	50.286	457.878	-0.000542	-0.000961	-0.000013
18.0800	253.199	8.814	14.859	0.902	-0.700	50.287	482.025	-0.000617	-0.001040	-0.000063
18.1200	275.576	11.199	17.996	1.861	-0.690	50.286	524.626	-0.000784	-0.001260	-0.000130
18.1600	305.798	15.002	22.626	4.018	-0.732	50.286	582.161	-0.001050	-0.001584	-0.000281
18.2000	332.654	18.018	26.876	5.447	-0.733	50.287	633.287	-0.001261	-0.001881	-0.000381
18.2400	365.822	21.946	32.256	7.989	-0.719	50.286	696.430	-0.001536	-0.002258	-0.000559
18.2800	407.961	27.043	38.409	10.439	-0.724	50.286	776.653	-0.001893	-0.002689	-0.000731
18.3200	464.543	33.876	47.153	14.481	-0.735	50.286	884.371	-0.002371	-0.003301	-0.001014
18.3600	498.252	38.786	53.169	16.799	-0.721	50.287	948.544	-0.002715	-0.003722	-0.001176
18.4000	543.322	44.160	59.967	19.845	-0.710	50.286	1034.346	-0.003091	-0.004198	-0.001389
18.4400	618.073	53.832	71.899	25.001	-0.751	50.286	1176.653	-0.003768	-0.005033	-0.001750
18.4800	655.329	59.009	77.890	27.556	-0.743	50.287	1247.578	-0.004131	-0.005452	-0.001929
18.5200	734.258	69.351	90.676	33.308	-0.709	50.287	1397.839	-0.004855	-0.006347	-0.002332
18.5600	755.839	72.115	94.065	35.130	-0.731	50.286	1438.923	-0.005048	-0.006585	-0.002459
18.6000	798.189	78.849	101.959	38.702	-0.749	50.286	1519.547	-0.005519	-0.007137	-0.002709
18.6400	875.450	87.651	112.284	43.345	-0.728	50.287	1666.632	-0.006136	-0.007860	-0.003034
18.6800	856.679	87.045	110.699	42.579	-0.724	50.286	1630.898	-0.006093	-0.007749	-0.002981
18.7200	978.289	101.946	129.030	50.832	-0.738	50.286	1862.411	-0.007136	-0.009032	-0.003558
18.7600	968.791	101.359	128.376	50.485	-0.737	50.287	1844.330	-0.007095	-0.008986	-0.003534
18.8000	980.934	104.166	131.476	51.916	-0.699	50.287	1867.447	-0.007292	-0.009203	-0.003634
18.8400	1020.173	109.329	137.342	54.474	-0.722	50.286	1942.148	-0.007653	-0.009614	-0.003813
18.8800	1022.803	110.214	138.618	54.961	-0.755	50.287	1947.155	-0.007715	-0.009703	-0.003847
18.9200	1064.071	115.842	144.635	57.879	-0.719	50.288	2025.719	-0.008109	-0.010124	-0.004052
18.9600	1031.144	112.385	141.065	55.960	-0.710	50.287	1963.034	-0.007867	-0.009875	-0.003917
19.0000	1040.642	113.904	142.301	56.891	-0.732	50.286	1981.115	-0.007973	-0.009961	-0.003982
19.0400	1023.029	112.694	140.730	55.805	-0.745	50.287	1947.584	-0.007889	-0.009851	-0.003906
19.0800	1046.218	114.804	142.994	57.113	-0.712	50.287	1991.730	-0.008036	-0.010010	-0.003998
19.1200	968.386	106.956	134.143	52.819	-0.709	50.287	1843.557	-0.007487	-0.009390	-0.003697
19.1600	978.409	107.519	134.866	52.931	-0.739	50.287	1862.640	-0.007526	-0.009441	-0.003705
19.2000	912.765	100.685	127.126	49.444	-0.722	50.288	1737.671	-0.007048	-0.008899	-0.003461
19.2400	910.797	99.283	125.486	49.221	-0.707	50.287	1733.923	-0.006950	-0.008784	-0.003445
19.2800	872.790	95.071	120.345	46.623	-0.730	50.287	1661.568	-0.006655	-0.008424	-0.003264
19.3200	826.127	88.617	113.269	43.066	-0.738	50.288	1572.733	-0.006203	-0.007929	-0.003015
19.3600	744.537	79.523	102.072	38.161	-0.709	50.288	1417.408	-0.005567	-0.007145	-0.002671
19.4000	709.521	74.556	96.025	35.436	-0.701	50.287	1350.746	-0.005219	-0.006722	-0.002481
19.4400	659.612	68.720	88.618	31.976	-0.728	50.287	1255.732	-0.004810	-0.006203	-0.002238
19.4800	628.473	63.514	82.615	29.307	-0.731	50.288	1196.451	-0.004446	-0.005783	-0.002051
19.5200	563.099	55.317	72.999	24.972	-0.714	50.288	1071.997	-0.003872	-0.005110	-0.001748
19.5600	542.901	51.725	68.846	23.218	-0.728	50.287	1033.545	-0.003621	-0.004819	-0.001625
19.6000	480.684	44.499	59.422	19.024	-0.738	50.287	915.098	-0.003115	-0.004160	-0.001332
19.6400	442.256	38.478	52.418	15.940	-0.734	50.288	841.942	-0.002693	-0.003669	-0.001116
19.6800	389.521	31.743	43.442	12.200	-0.716	50.287	741.549	-0.002222	-0.003041	-0.000854
19.7200	342.062	25.107	35.937	8.837	-0.732	50.287	651.197	-0.001758	-0.002516	-0.000619
19.7600	275.922	16.573	24.280	4.477	-0.732	50.288	525.284	-0.001160	-0.001700	-0.000313
19.8000	298.164	17.725	26.515	4.850	-0.702	50.288	567.627	-0.001241	-0.001856	-0.000340
19.8400	272.811	14.847	21.889	3.810	-0.710	50.287	519.361	-0.001039	-0.001532	-0.000267
19.8800	224.675	8.676	13.954	0.525	-0.743	50.288	427.723	-0.000607	-0.000977	-0.000037
19.9200	245.835	10.148	15.832	1.138	-0.719	50.288	468.006	-0.000710	-0.001108	-0.000080
19.9600	230.896	7.802	12.967	-0.182	-0.703	50.288	439.568	-0.000546	-0.000908	0.000013
