# Supplementary material for: Evaluation of a Cold-Mixed High-Performance Polyurethane Mixture
Source: Hindawi journal article supplement (doi:10.1155/2019/1507971), 2019-11-07
Supplement: f1 [file 1507971.f1.zip › 1507971.f1/dynamic modulus data/PUM/specimen2/temp50/zhs-2-50_1Hz.csv]

Test Information
****************
Project name	zhs
Operator name	2
Target test temperature	50
Target confining stress	0
Average dynamic strain range from 75 to 125 micro-strain
Contact stress	5
Initial modulus	1000
Axial gauge length	70
Comments
Specimen information
********************
Identification	zhs-2-50
Dimensions	Point 1	Point 2	Point 3	Point 4	Point 5	Point 6	Average	Std Dev.
Diameter (mm)	49.2	49.3	49.2				49.23	0.058
Height (mm)	100.8	101.0	100.8				100.87	0.115
Cross-sectional area (mm�)	1903.7
Conditioning time
Properties/Comments
Test Data	1Hz
*********
Test date and time	Wed	Apr 3	2019	1:28 PM
Dynamic modulus (MPa)	8492
Phase angle (Degrees)	4.26
Average temperature (�C)	50.3
Average confining pressure (kPa)	-0.7
Average micro-strain	98
Load drift (%)	-0.1
Load standard error (%)	2.3
Average deformation drift (%)	-3.6
Average deformation standard error (%)	2.2
Deformation uniformity (%)	29.9
Phase uniformity (Degrees)	0.2
Conditioning Cycles
Time (sec)	Axial stress (kPa)	Axial micro-strain #1	Axial micro-strain #2	Axial micro-strain #3	Confining pressure (kPa)	Temperature (�C)	Load (N)	Displacement #1 (mm)	Displacement #2 (mm)	Displacement #3 (mm)
0.0000	214.050	1.305	-1.276	-1.000	-0.729	50.322	407.495	-0.000091	0.000089	0.000070
0.0200	200.960	-1.654	-4.808	-2.474	-0.720	50.323	382.576	0.000116	0.000337	0.000173
0.0400	218.243	-0.336	-2.346	-1.750	-0.722	50.323	415.478	0.000024	0.000164	0.000122
0.0600	267.295	4.505	4.395	1.012	-0.730	50.323	508.862	-0.000315	-0.000308	-0.000071
0.0800	278.086	5.838	5.629	1.707	-0.729	50.323	529.404	-0.000409	-0.000394	-0.000120
0.1000	292.303	7.411	7.783	2.460	-0.721	50.323	556.469	-0.000519	-0.000545	-0.000172
0.1200	338.951	12.840	14.857	5.639	-0.735	50.323	645.275	-0.000899	-0.001040	-0.000395
0.1400	353.138	14.498	16.025	6.670	-0.740	50.324	672.283	-0.001015	-0.001122	-0.000467
0.1600	402.070	19.859	22.903	9.701	-0.728	50.323	765.438	-0.001390	-0.001603	-0.000679
0.1800	417.189	22.087	25.794	10.880	-0.740	50.323	794.220	-0.001546	-0.001806	-0.000762
0.2000	461.297	27.421	32.410	13.965	-0.741	50.323	878.191	-0.001919	-0.002269	-0.000978
0.2200	536.710	36.823	44.816	19.066	-0.732	50.323	1021.757	-0.002578	-0.003137	-0.001335
0.2400	560.424	40.090	47.595	20.734	-0.746	50.323	1066.904	-0.002806	-0.003332	-0.001451
0.2600	595.846	44.664	53.449	23.275	-0.746	50.322	1134.338	-0.003127	-0.003741	-0.001629
0.2800	620.147	48.177	58.172	24.820	-0.734	50.323	1180.601	-0.003372	-0.004072	-0.001737
0.3000	676.384	55.485	65.955	28.902	-0.743	50.323	1287.661	-0.003884	-0.004617	-0.002023
0.3200	690.360	57.548	68.383	30.056	-0.747	50.323	1314.268	-0.004028	-0.004787	-0.002104
0.3400	739.413	64.385	76.223	33.656	-0.748	50.322	1407.652	-0.004507	-0.005336	-0.002356
0.3600	761.790	67.594	79.626	35.394	-0.730	50.323	1450.253	-0.004732	-0.005574	-0.002478
0.3800	793.530	71.763	84.434	37.829	-0.746	50.323	1510.677	-0.005023	-0.005910	-0.002648
0.4000	792.824	72.047	85.032	37.899	-0.743	50.322	1509.333	-0.005043	-0.005952	-0.002653
0.4200	853.493	79.985	94.480	42.163	-0.739	50.322	1624.832	-0.005599	-0.006614	-0.002951
0.4400	843.034	79.622	93.079	41.911	-0.740	50.322	1604.919	-0.005574	-0.006516	-0.002934
0.4600	846.565	80.436	94.328	42.287	-0.761	50.322	1611.643	-0.005631	-0.006603	-0.002960
0.4800	837.548	79.353	93.843	41.522	-0.755	50.322	1594.477	-0.005555	-0.006569	-0.002907
0.5000	846.926	80.786	94.466	42.540	-0.748	50.322	1612.329	-0.005655	-0.006613	-0.002978
0.5200	879.222	85.346	99.375	44.662	-0.748	50.322	1673.813	-0.005974	-0.006956	-0.003126
0.5400	831.807	79.720	94.536	42.009	-0.742	50.322	1583.548	-0.005580	-0.006618	-0.002941
0.5600	825.811	79.060	92.345	41.522	-0.757	50.322	1572.132	-0.005534	-0.006464	-0.002907
0.5800	803.479	76.916	89.309	40.202	-0.748	50.323	1529.617	-0.005384	-0.006252	-0.002814
0.6000	767.741	72.898	86.034	37.841	-0.738	50.322	1461.582	-0.005103	-0.006022	-0.002649
0.6200	756.199	70.979	84.516	37.134	-0.745	50.322	1439.610	-0.004969	-0.005916	-0.002599
0.6400	747.498	69.574	83.225	36.408	-0.744	50.322	1423.044	-0.004870	-0.005826	-0.002549
0.6600	679.705	61.785	72.915	32.155	-0.743	50.322	1293.983	-0.004325	-0.005104	-0.002251
0.6800	649.122	57.745	68.957	29.822	-0.747	50.322	1235.762	-0.004042	-0.004827	-0.002088
0.7000	603.240	51.724	62.160	26.864	-0.746	50.322	1148.415	-0.003621	-0.004351	-0.001880
0.7200	575.723	48.389	57.253	24.875	-0.750	50.322	1096.029	-0.003387	-0.004008	-0.001741
0.7400	523.755	42.450	49.805	21.749	-0.747	50.322	997.095	-0.002971	-0.003486	-0.001522
0.7600	497.185	38.352	46.165	19.552	-0.747	50.322	946.512	-0.002685	-0.003232	-0.001369
0.7800	454.835	32.628	39.105	16.497	-0.751	50.323	865.889	-0.002284	-0.002737	-0.001155
0.8000	425.830	28.611	34.199	14.633	-0.743	50.323	810.671	-0.002003	-0.002394	-0.001024
0.8200	367.114	21.203	24.945	10.535	-0.745	50.322	698.891	-0.001484	-0.001746	-0.000737
0.8400	372.164	20.883	25.350	10.424	-0.749	50.322	708.504	-0.001462	-0.001774	-0.000730
0.8600	320.180	14.737	16.748	7.074	-0.747	50.322	609.541	-0.001032	-0.001172	-0.000495
0.8800	292.062	10.413	11.326	4.477	-0.742	50.322	556.011	-0.000729	-0.000793	-0.000313
0.9000	270.947	7.944	9.131	3.169	-0.756	50.322	515.814	-0.000556	-0.000639	-0.000222
0.9200	270.136	6.889	7.241	2.600	-0.755	50.322	514.269	-0.000482	-0.000507	-0.000182
0.9400	244.828	4.085	3.130	0.874	-0.748	50.322	466.089	-0.000286	-0.000219	-0.000061
0.9600	226.658	1.517	-0.208	-0.360	-0.732	50.322	431.499	-0.000106	0.000015	0.000025
0.9800	222.240	0.632	-1.247	-1.065	-0.740	50.322	423.088	-0.000044	0.000087	0.000075
1.0000	229.619	0.800	-0.722	-0.859	-0.738	50.322	437.136	-0.000056	0.000051	0.000060
1.0200	232.790	0.702	-0.760	-0.539	-0.740	50.322	443.172	-0.000049	0.000053	0.000038
1.0400	237.088	0.926	-0.067	-0.664	-0.748	50.322	451.355	-0.000065	0.000005	0.000046
1.0600	237.464	0.912	-0.275	-0.681	-0.754	50.322	452.070	-0.000064	0.000019	0.000048
1.0800	269.580	4.141	4.395	1.069	-0.756	50.322	513.210	-0.000290	-0.000308	-0.000075
1.1000	290.589	6.468	7.339	2.656	-0.754	50.322	553.207	-0.000453	-0.000514	-0.000186
1.1200	315.687	9.417	10.867	4.075	-0.751	50.322	600.986	-0.000659	-0.000761	-0.000285
1.1400	367.339	15.759	18.206	7.587	-0.756	50.322	699.320	-0.001103	-0.001274	-0.000531
1.1600	401.183	19.394	24.304	10.079	-0.751	50.322	763.750	-0.001358	-0.001701	-0.000706
1.1800	426.206	22.327	27.489	11.530	-0.747	50.322	811.386	-0.001563	-0.001924	-0.000807
1.2000	455.526	26.369	32.076	13.492	-0.762	50.322	867.205	-0.001846	-0.002245	-0.000944
1.2200	523.184	34.886	41.871	18.051	-0.746	50.321	996.008	-0.002442	-0.002931	-0.001264
1.2400	554.112	38.996	47.734	19.914	-0.746	50.322	1054.888	-0.002730	-0.003341	-0.001394
1.2600	597.319	44.692	53.155	23.163	-0.742	50.321	1137.142	-0.003128	-0.003721	-0.001621
1.2800	634.064	49.678	58.671	25.822	-0.739	50.322	1207.094	-0.003477	-0.004107	-0.001808
1.3000	662.948	53.916	64.426	27.999	-0.746	50.322	1262.083	-0.003774	-0.004510	-0.001960
1.3200	726.849	61.615	73.931	32.393	-0.751	50.322	1383.734	-0.004313	-0.005175	-0.002268
1.3400	726.037	62.570	74.485	32.880	-0.743	50.321	1382.189	-0.004380	-0.005214	-0.002302
1.3600	776.428	68.903	81.698	36.380	-0.743	50.322	1478.119	-0.004823	-0.005719	-0.002547
1.3800	799.436	72.647	85.951	37.980	-0.746	50.322	1521.921	-0.005085	-0.006017	-0.002659
1.4000	810.918	74.584	87.481	39.090	-0.738	50.322	1543.779	-0.005221	-0.006124	-0.002736
1.4200	838.961	77.951	91.900	41.202	-0.736	50.321	1597.166	-0.005457	-0.006433	-0.002884
1.4400	842.117	79.325	92.831	41.549	-0.743	50.322	1603.174	-0.005553	-0.006498	-0.002908
1.4600	857.776	81.516	95.622	42.733	-0.747	50.321	1632.986	-0.005706	-0.006694	-0.002991
1.4800	860.106	81.983	96.444	42.829	-0.739	50.322	1637.421	-0.005739	-0.006751	-0.002998
1.5000	856.770	82.009	96.886	42.830	-0.757	50.321	1631.069	-0.005741	-0.006782	-0.002998
1.5200	852.081	81.785	96.640	42.816	-0.757	50.321	1622.143	-0.005725	-0.006765	-0.002997
1.5400	844.987	81.490	95.746	42.635	-0.750	50.322	1608.639	-0.005704	-0.006702	-0.002984
1.5600	836.436	80.168	94.243	42.274	-0.744	50.322	1592.360	-0.005612	-0.006597	-0.002959
1.5800	799.827	76.256	90.035	39.924	-0.741	50.322	1522.665	-0.005338	-0.006302	-0.002795
1.6000	785.039	74.992	87.552	39.090	-0.736	50.322	1494.513	-0.005249	-0.006129	-0.002736
1.6200	759.581	72.003	83.933	37.481	-0.723	50.322	1446.047	-0.005040	-0.005875	-0.002624
1.6400	722.821	66.797	79.321	34.878	-0.736	50.321	1376.066	-0.004676	-0.005552	-0.002441
1.6600	676.639	61.014	71.983	31.852	-0.739	50.321	1288.147	-0.004271	-0.005039	-0.002230
1.6800	659.507	58.911	70.511	30.724	-0.747	50.321	1255.531	-0.004124	-0.004936	-0.002151
1.7000	610.830	52.918	63.786	27.253	-0.733	50.322	1162.863	-0.003704	-0.004465	-0.001908
1.7200	570.028	47.348	56.515	24.457	-0.732	50.321	1085.186	-0.003314	-0.003956	-0.001712
1.7400	534.380	42.912	50.833	22.468	-0.744	50.321	1017.323	-0.003004	-0.003558	-0.001573
1.7600	488.453	37.244	44.316	18.842	-0.735	50.321	929.890	-0.002607	-0.003102	-0.001319
1.7800	447.726	31.911	37.759	16.121	-0.727	50.321	852.356	-0.002234	-0.002643	-0.001128
1.8000	410.817	27.014	32.269	13.590	-0.738	50.321	782.089	-0.001891	-0.002259	-0.000951
1.8200	388.124	23.589	28.030	11.685	-0.740	50.322	738.888	-0.001651	-0.001962	-0.000818
1.8400	351.124	18.973	22.373	9.270	-0.739	50.321	668.449	-0.001328	-0.001566	-0.000649
1.8600	315.131	14.174	16.441	6.670	-0.740	50.321	599.928	-0.000992	-0.001151	-0.000467
1.8800	286.982	10.203	11.285	4.214	-0.759	50.321	546.341	-0.000714	-0.000790	-0.000295
1.9000	272.916	8.210	8.840	3.115	-0.752	50.321	519.562	-0.000575	-0.000619	-0.000218
1.9200	252.703	5.278	4.353	1.332	-0.750	50.321	481.081	-0.000369	-0.000305	-0.000093
1.9400	226.538	1.854	-0.082	-0.335	-0.749	50.321	431.271	-0.000130	0.000006	0.000023
1.9600	220.106	0.279	-1.066	-0.943	-0.745	50.321	419.025	-0.000020	0.000075	0.000066
1.9800	202.703	-2.145	-4.097	-2.530	-0.750	50.321	385.895	0.000150	0.000287	0.000177
2.0000	220.842	-0.435	-2.138	-1.820	-0.744	50.321	420.427	0.000030	0.000150	0.000127
2.0200	239.403	1.403	0.264	-0.679	-0.743	50.321	455.761	-0.000098	-0.000018	0.000048
2.0400	243.024	1.768	0.225	-0.734	-0.747	50.321	462.656	-0.000124	-0.000016	0.000051
2.0600	242.258	1.207	-0.291	-0.333	-0.746	50.321	461.197	-0.000085	0.000020	0.000023
2.0800	296.270	7.061	7.881	2.767	-0.742	50.320	564.022	-0.000494	-0.000552	-0.000194
2.1000	296.510	7.088	8.397	3.128	-0.750	50.321	564.480	-0.000496	-0.000588	-0.000219
2.1200	324.854	10.707	12.231	4.810	-0.750	50.321	618.439	-0.000749	-0.000856	-0.000337
2.1400	344.015	12.588	14.247	6.015	-0.732	50.321	654.917	-0.000881	-0.000997	-0.000421
2.1600	406.113	20.307	24.193	10.230	-0.741	50.321	773.134	-0.001422	-0.001693	-0.000716
2.1800	428.550	23.195	28.738	11.393	-0.752	50.321	815.849	-0.001624	-0.002012	-0.000798
2.2000	485.989	29.933	35.561	15.400	-0.739	50.321	925.198	-0.002095	-0.002489	-0.001078
2.2200	506.067	33.259	39.062	17.273	-0.740	50.321	963.421	-0.002328	-0.002734	-0.001209
2.2400	554.623	39.319	47.888	20.415	-0.736	50.321	1055.861	-0.002752	-0.003352	-0.001429
2.2600	586.243	43.598	52.695	22.873	-0.739	50.321	1116.056	-0.003052	-0.003689	-0.001601
2.2800	626.594	48.948	58.366	25.347	-0.744	50.321	1192.875	-0.003426	-0.004086	-0.001774
2.3000	679.960	55.976	66.634	29.361	-0.738	50.320	1294.470	-0.003918	-0.004664	-0.002055
2.3200	720.176	60.873	72.554	32.117	-0.738	50.321	1371.031	-0.004261	-0.005079	-0.002248
2.3400	720.417	62.375	73.610	32.547	-0.722	50.321	1371.489	-0.004366	-0.005153	-0.002278
2.3600	771.649	68.255	81.478	36.117	-0.731	50.320	1469.021	-0.004778	-0.005703	-0.002528
2.3800	798.655	72.519	86.285	38.161	-0.724	50.320	1520.433	-0.005076	-0.006040	-0.002671
2.4000	822.415	75.666	88.562	39.785	-0.726	50.321	1565.666	-0.005297	-0.006199	-0.002785
2.4200	831.867	77.658	91.677	40.853	-0.726	50.320	1583.662	-0.005436	-0.006417	-0.002860
2.4400	832.318	77.714	91.467	40.798	-0.729	50.320	1584.520	-0.005440	-0.006403	-0.002856
2.4600	863.938	82.038	97.054	43.137	-0.732	50.321	1644.716	-0.005743	-0.006794	-0.003020
2.4800	860.421	82.403	97.625	43.010	-0.738	50.320	1638.021	-0.005768	-0.006834	-0.003011
2.5000	861.233	82.683	96.608	43.193	-0.735	50.321	1639.566	-0.005788	-0.006763	-0.003024
2.5200	857.972	82.667	96.330	43.484	-0.739	50.321	1633.358	-0.005787	-0.006743	-0.003044
2.5400	847.557	81.784	96.026	42.704	-0.735	50.320	1613.531	-0.005725	-0.006722	-0.002989
2.5600	819.830	78.990	92.205	41.522	-0.735	50.321	1560.745	-0.005529	-0.006454	-0.002907
2.5800	816.794	78.512	92.443	40.923	-0.731	50.320	1554.966	-0.005496	-0.006471	-0.002865
2.6000	785.144	74.571	87.965	39.089	-0.720	50.320	1494.713	-0.005220	-0.006158	-0.002736
2.6200	753.990	71.034	83.503	37.021	-0.720	50.320	1435.404	-0.004972	-0.005845	-0.002591
2.6400	720.838	67.061	78.544	34.727	-0.736	50.320	1372.290	-0.004694	-0.005498	-0.002431
2.6600	682.350	62.180	73.692	32.200	-0.743	50.321	1299.019	-0.004353	-0.005158	-0.002254
2.6800	633.598	55.767	66.521	29.127	-0.734	50.320	1206.207	-0.003904	-0.004656	-0.002039
2.7000	620.703	54.267	64.858	28.221	-0.738	50.320	1181.660	-0.003799	-0.004540	-0.001975
2.7200	573.304	48.612	56.795	24.861	-0.747	50.321	1091.423	-0.003403	-0.003976	-0.001740
2.7400	541.699	44.132	52.140	22.525	-0.742	50.320	1031.256	-0.003089	-0.003650	-0.001577
2.7600	485.838	36.529	43.731	18.828	-0.740	50.320	924.911	-0.002557	-0.003061	-0.001318
2.7800	449.875	32.023	38.467	16.204	-0.751	50.320	856.447	-0.002242	-0.002693	-0.001134
2.8000	413.416	27.604	31.826	13.535	-0.743	50.320	787.039	-0.001932	-0.002228	-0.000947
2.8200	361.508	20.699	24.364	10.061	-0.746	50.321	688.219	-0.001449	-0.001705	-0.000704
2.8400	347.081	18.060	21.446	8.755	-0.758	50.320	660.753	-0.001264	-0.001501	-0.000613
2.8600	334.457	16.321	19.263	7.740	-0.742	50.320	636.721	-0.001143	-0.001348	-0.000542
2.8800	290.274	10.778	11.467	4.366	-0.750	50.320	552.607	-0.000754	-0.000803	-0.000306
2.9000	281.888	9.054	10.244	3.714	-0.750	50.320	536.642	-0.000634	-0.000717	-0.000260
2.9200	246.571	4.646	4.588	1.041	-0.748	50.320	469.408	-0.000325	-0.000321	-0.000073
2.9400	230.881	2.345	1.236	0.109	-0.746	50.320	439.539	-0.000164	-0.000087	-0.000008
2.9600	219.986	0.829	-0.997	-1.040	-0.740	50.320	418.797	-0.000058	0.000070	0.000073
2.9800	215.492	-0.785	-1.971	-1.639	-0.748	50.321	410.242	0.000055	0.000138	0.000115
3.0000	218.618	-0.531	-2.331	-1.457	-0.742	50.320	416.193	0.000037	0.000163	0.000102
3.0200	218.107	-0.701	-3.055	-1.819	-0.749	50.320	415.220	0.000049	0.000214	0.000127
3.0400	236.382	0.926	-0.375	-0.831	-0.747	50.320	450.010	-0.000065	0.000026	0.000058
3.0600	242.739	1.332	0.750	-0.596	-0.752	50.320	462.112	-0.000093	-0.000053	0.000042
3.0800	277.515	4.940	4.395	1.666	-0.760	50.320	528.316	-0.000346	-0.000308	-0.000117
3.1000	297.187	7.551	8.383	3.280	-0.755	50.320	565.767	-0.000529	-0.000587	-0.000230
3.1200	324.028	10.582	12.243	4.811	-0.740	50.320	616.865	-0.000741	-0.000857	-0.000337
3.1400	350.913	14.049	15.860	6.642	-0.758	50.320	668.049	-0.000983	-0.001110	-0.000465
3.1600	401.138	19.692	22.985	9.881	-0.750	50.320	763.664	-0.001378	-0.001609	-0.000692
3.1800	445.277	25.121	30.489	12.758	-0.752	50.320	847.692	-0.001758	-0.002134	-0.000893
3.2000	471.622	28.838	34.463	14.842	-0.755	50.320	897.846	-0.002019	-0.002412	-0.001039
3.2200	507.149	33.133	39.342	17.203	-0.748	50.320	965.481	-0.002319	-0.002754	-0.001204
3.2400	550.881	38.632	47.096	19.942	-0.759	50.320	1048.737	-0.002704	-0.003297	-0.001396
3.2600	583.463	43.418	51.640	22.732	-0.758	50.320	1110.764	-0.003039	-0.003615	-0.001591
3.2800	635.311	49.761	60.075	26.166	-0.751	50.320	1209.469	-0.003483	-0.004205	-0.001832
3.3000	670.342	54.617	65.592	28.555	-0.751	50.320	1276.159	-0.003823	-0.004591	-0.001999
3.3200	712.707	60.076	71.498	31.810	-0.746	50.320	1356.812	-0.004205	-0.005005	-0.002227
3.3400	743.500	64.579	76.445	33.891	-0.745	50.320	1415.434	-0.004521	-0.005351	-0.002372
3.3600	757.777	67.060	78.932	35.060	-0.754	50.319	1442.614	-0.004694	-0.005525	-0.002454
3.3800	810.933	73.756	86.841	38.896	-0.758	50.319	1543.808	-0.005163	-0.006079	-0.002723
3.4000	810.677	74.303	86.939	39.187	-0.743	50.320	1543.322	-0.005201	-0.006086	-0.002743
3.4200	830.876	77.210	91.593	40.424	-0.758	50.319	1581.774	-0.005405	-0.006411	-0.002830
3.4400	847.828	79.929	94.328	42.161	-0.750	50.320	1614.046	-0.005595	-0.006603	-0.002951
3.4600	861.308	81.447	96.387	42.886	-0.753	50.319	1639.709	-0.005701	-0.006747	-0.003002
3.4800	859.580	81.771	96.778	43.013	-0.752	50.319	1636.419	-0.005724	-0.006774	-0.003011
3.5000	875.435	84.295	99.402	44.176	-0.755	50.319	1666.603	-0.005901	-0.006958	-0.003092
3.5200	868.131	84.071	98.499	44.177	-0.744	50.320	1652.699	-0.005885	-0.006895	-0.003092
3.5400	838.270	80.310	94.399	42.314	-0.751	50.319	1595.850	-0.005622	-0.006608	-0.002962
3.5600	827.930	79.410	93.161	41.704	-0.749	50.319	1576.166	-0.005559	-0.006521	-0.002919
3.5800	804.846	77.168	90.814	40.243	-0.746	50.320	1532.221	-0.005402	-0.006357	-0.002817
3.6000	791.591	75.541	88.784	39.506	-0.751	50.319	1506.987	-0.005288	-0.006215	-0.002765
3.6200	745.950	69.759	82.741	36.784	-0.752	50.319	1420.097	-0.004883	-0.005792	-0.002575
3.6400	719.771	66.752	79.152	34.769	-0.755	50.319	1370.258	-0.004673	-0.005541	-0.002434
3.6600	684.529	62.640	73.345	32.698	-0.747	50.320	1303.167	-0.004385	-0.005134	-0.002289
3.6800	646.883	57.506	68.982	29.905	-0.747	50.320	1231.499	-0.004025	-0.004829	-0.002093
3.7000	620.583	53.790	63.774	28.111	-0.747	50.319	1181.431	-0.003765	-0.004464	-0.001968
3.7200	575.753	48.304	57.851	25.194	-0.747	50.320	1096.087	-0.003381	-0.004050	-0.001764
3.7400	536.244	43.139	51.402	22.233	-0.747	50.319	1020.870	-0.003020	-0.003598	-0.001556
3.7600	486.890	37.175	44.136	18.925	-0.751	50.319	926.914	-0.002602	-0.003089	-0.001325
3.7800	449.951	32.233	38.299	16.440	-0.748	50.319	856.590	-0.002256	-0.002681	-0.001151
3.8000	404.054	26.384	30.825	13.035	-0.751	50.319	769.215	-0.001847	-0.002158	-0.000912
3.8200	395.563	24.741	29.198	12.310	-0.746	50.319	753.050	-0.001732	-0.002044	-0.000862
3.8400	345.067	18.481	21.655	8.491	-0.747	50.319	656.919	-0.001294	-0.001516	-0.000594
3.8600	323.607	15.159	16.789	7.170	-0.751	50.319	616.064	-0.001061	-0.001175	-0.000502
3.8800	293.340	11.071	12.355	5.017	-0.747	50.319	558.443	-0.000775	-0.000865	-0.000351
3.9000	273.547	8.225	8.953	3.223	-0.747	50.319	520.763	-0.000576	-0.000627	-0.000226
3.9200	262.636	6.398	6.378	2.542	-0.743	50.319	499.992	-0.000448	-0.000446	-0.000178
3.9400	230.040	2.147	0.555	-0.140	-0.730	50.319	437.937	-0.000150	-0.000039	0.000010
3.9600	236.758	2.093	1.402	0.234	-0.724	50.319	450.726	-0.000147	-0.000098	-0.000016
3.9800	227.951	1.053	0.111	-0.789	-0.732	50.319	433.960	-0.000074	-0.000008	0.000055
4.0000	223.803	0.070	-1.095	-0.969	-0.730	50.319	426.064	-0.000005	0.000077	0.000068
4.0200	229.364	0.323	-0.538	-0.665	-0.727	50.319	436.649	-0.000023	0.000038	0.000047
4.0400	229.529	0.377	-0.997	-1.012	-0.732	50.319	436.964	-0.000026	0.000070	0.000071
4.0600	233.061	0.631	-0.736	-0.651	-0.736	50.319	443.687	-0.000044	0.000051	0.000046
4.0800	274.960	4.702	4.229	1.248	-0.743	50.319	523.453	-0.000329	-0.000296	-0.000087
4.1000	307.752	8.352	9.509	3.447	-0.747	50.319	585.880	-0.000585	-0.000666	-0.000241
4.1200	322.570	10.695	11.785	4.629	-0.735	50.319	614.090	-0.000749	-0.000825	-0.000324
4.1400	352.040	14.372	16.968	6.629	-0.745	50.319	670.195	-0.001006	-0.001188	-0.000464
4.1600	399.515	19.465	24.264	9.911	-0.750	50.319	760.574	-0.001363	-0.001698	-0.000694
4.1800	434.096	23.477	28.655	12.227	-0.741	50.319	826.406	-0.001643	-0.002006	-0.000856
4.2000	473.936	28.978	34.812	15.079	-0.727	50.318	902.252	-0.002028	-0.002437	-0.001056
4.2200	513.746	34.337	41.063	17.743	-0.746	50.319	978.041	-0.002404	-0.002874	-0.001242
4.2400	565.744	40.568	48.874	21.166	-0.739	50.319	1077.032	-0.002840	-0.003421	-0.001482
4.2600	592.465	44.680	52.334	23.429	-0.733	50.319	1127.901	-0.003128	-0.003663	-0.001640
4.2800	646.116	51.472	61.267	27.001	-0.742	50.319	1230.040	-0.003603	-0.004289	-0.001890
4.3000	675.692	55.598	65.689	28.961	-0.745	50.319	1286.345	-0.003892	-0.004598	-0.002027
4.3200	703.239	59.346	70.233	30.863	-0.749	50.318	1338.787	-0.004154	-0.004916	-0.002160
4.3400	737.684	64.116	75.154	33.766	-0.738	50.319	1404.362	-0.004488	-0.005261	-0.002364
4.3600	751.465	66.068	78.834	34.657	-0.738	50.319	1430.597	-0.004625	-0.005518	-0.002426
4.3800	787.474	71.485	84.211	37.230	-0.751	50.319	1499.147	-0.005004	-0.005895	-0.002606
4.4000	832.363	76.987	91.036	40.243	-0.753	50.319	1584.606	-0.005389	-0.006373	-0.002817
4.4200	832.634	77.744	91.425	40.771	-0.751	50.318	1585.121	-0.005442	-0.006400	-0.002854
4.4400	835.850	78.429	91.942	41.314	-0.763	50.318	1591.244	-0.005490	-0.006436	-0.002892
4.4600	861.038	82.289	97.001	43.024	-0.755	50.318	1639.194	-0.005760	-0.006790	-0.003012
4.4800	858.152	82.108	96.387	42.997	-0.758	50.319	1633.701	-0.005748	-0.006747	-0.003010
4.5000	870.340	83.649	98.332	44.218	-0.755	50.318	1656.904	-0.005855	-0.006883	-0.003095
4.5200	856.935	82.598	97.208	43.247	-0.752	50.319	1631.384	-0.005782	-0.006805	-0.003027
4.5400	840.599	81.166	94.869	42.512	-0.748	50.318	1600.285	-0.005682	-0.006641	-0.002976
4.5600	826.803	79.747	93.248	41.647	-0.745	50.319	1574.020	-0.005582	-0.006527	-0.002915
4.5800	801.465	76.537	90.271	40.189	-0.743	50.318	1525.784	-0.005358	-0.006319	-0.002813
4.6000	781.342	74.150	86.952	38.826	-0.748	50.319	1487.474	-0.005190	-0.006087	-0.002718
4.6200	740.044	69.336	81.073	36.103	-0.751	50.319	1408.854	-0.004854	-0.005675	-0.002527
4.6400	721.814	66.894	78.779	34.893	-0.742	50.318	1374.149	-0.004683	-0.005515	-0.002443
4.6600	689.443	63.022	73.707	32.823	-0.757	50.318	1312.523	-0.004412	-0.005159	-0.002298
4.6800	622.762	55.164	64.609	28.181	-0.750	50.318	1185.579	-0.003861	-0.004523	-0.001973
4.7000	602.113	52.161	61.478	27.044	-0.744	50.318	1146.269	-0.003651	-0.004303	-0.001893
4.7200	598.416	51.038	60.422	26.279	-0.733	50.318	1139.231	-0.003573	-0.004230	-0.001840
4.7400	520.870	41.566	48.820	21.304	-0.740	50.318	991.602	-0.002910	-0.003417	-0.001491
4.7600	497.290	38.366	46.207	19.539	-0.745	50.318	946.712	-0.002686	-0.003235	-0.001368
4.7800	449.349	32.180	38.284	16.455	-0.740	50.318	855.446	-0.002253	-0.002680	-0.001152
4.8000	406.233	26.565	30.755	13.215	-0.746	50.319	773.363	-0.001860	-0.002153	-0.000925
4.8200	406.864	25.613	30.921	13.145	-0.753	50.318	774.565	-0.001793	-0.002164	-0.000920
4.8400	364.123	21.260	24.777	10.271	-0.743	50.318	693.197	-0.001488	-0.001734	-0.000719
4.8600	323.261	15.719	17.176	7.170	-0.742	50.318	615.406	-0.001100	-0.001202	-0.000502
4.8800	277.920	9.559	10.619	3.657	-0.754	50.318	529.089	-0.000669	-0.000743	-0.000256
4.9000	272.450	8.029	8.187	3.183	-0.751	50.318	518.675	-0.000562	-0.000573	-0.000223
4.9200	219.114	1.699	0.153	-0.318	-0.750	50.318	417.137	-0.000119	-0.000011	0.000022
4.9400	200.975	-1.079	-3.876	-2.125	-0.752	50.318	382.605	0.000076	0.000271	0.000149
4.9600	214.230	-0.295	-2.624	-1.709	-0.749	50.318	407.839	0.000021	0.000184	0.000120
4.9800	216.334	-0.729	-2.888	-1.722	-0.738	50.318	411.844	0.000051	0.000202	0.000121
5.0000	172.211	1.627	-3.529	-2.405	-0.744	50.321	327.845	-0.000114	0.000247	0.000168
5.0200	229.814	5.726	2.572	0.138	-0.736	50.321	437.508	-0.000401	-0.000180	-0.000010
5.0400	251.245	6.539	4.769	1.278	-0.739	50.321	478.306	-0.000458	-0.000334	-0.000089
5.0600	276.493	8.395	7.882	2.933	-0.742	50.321	526.371	-0.000588	-0.000552	-0.000205
5.0800	303.439	11.198	11.063	4.228	-0.735	50.320	577.669	-0.000784	-0.000774	-0.000296
5.1000	331.421	14.693	15.594	5.806	-0.754	50.321	630.941	-0.001029	-0.001092	-0.000406
5.1200	391.235	20.853	24.320	9.937	-0.753	50.321	744.810	-0.001460	-0.001702	-0.000696
5.1400	409.719	23.069	26.794	11.033	-0.758	50.321	780.001	-0.001615	-0.001876	-0.000772
5.1600	470.810	30.157	35.493	15.216	-0.754	50.321	896.301	-0.002111	-0.002485	-0.001065
5.1800	500.070	34.339	40.189	17.356	-0.757	50.321	952.005	-0.002404	-0.002813	-0.001215
5.2000	549.664	40.680	48.347	20.513	-0.746	50.321	1046.419	-0.002848	-0.003384	-0.001436
5.2200	599.814	46.759	55.170	24.277	-0.754	50.321	1141.891	-0.003273	-0.003862	-0.001699
5.2400	655.073	53.860	63.521	28.000	-0.750	50.320	1247.091	-0.003770	-0.004446	-0.001960
5.2600	716.059	61.842	73.178	32.158	-0.742	50.321	1363.192	-0.004329	-0.005122	-0.002251
5.2800	761.144	68.283	80.390	35.547	-0.744	50.321	1449.022	-0.004780	-0.005627	-0.002488
5.3000	807.431	73.837	86.841	39.047	-0.739	50.321	1537.142	-0.005169	-0.006079	-0.002733
5.3200	860.527	81.292	95.884	42.691	-0.741	50.321	1638.222	-0.005690	-0.006712	-0.002988
5.3400	907.851	87.565	102.599	46.023	-0.746	50.321	1728.315	-0.006130	-0.007182	-0.003222
5.3600	944.205	92.407	107.657	48.734	-0.743	50.321	1797.523	-0.006468	-0.007536	-0.003411
5.3800	980.183	97.220	114.745	51.361	-0.748	50.321	1866.016	-0.006805	-0.008032	-0.003595
5.4000	1015.665	102.425	119.650	53.946	-0.742	50.321	1933.565	-0.007170	-0.008376	-0.003776
5.4200	1027.973	104.531	122.720	55.018	-0.742	50.321	1956.997	-0.007317	-0.008590	-0.003851
5.4400	1048.562	107.827	126.584	56.446	-0.741	50.321	1996.193	-0.007548	-0.008861	-0.003951
5.4600	1067.212	110.286	127.581	58.046	-0.749	50.321	2031.698	-0.007720	-0.008931	-0.004063
5.4800	1061.757	110.455	127.707	57.989	-0.748	50.321	2021.313	-0.007732	-0.008940	-0.004059
5.5000	1059.969	111.140	129.043	57.990	-0.745	50.321	2017.908	-0.007780	-0.009033	-0.004059
5.5200	1059.368	111.391	130.114	57.962	-0.751	50.320	2016.764	-0.007797	-0.009108	-0.004057
5.5400	1042.400	109.781	127.363	57.502	-0.757	50.321	1984.463	-0.007685	-0.008915	-0.004025
5.5600	1022.007	107.588	124.402	56.084	-0.736	50.321	1945.639	-0.007531	-0.008708	-0.003926
5.5800	987.682	103.464	120.705	54.253	-0.740	50.321	1880.293	-0.007243	-0.008449	-0.003798
5.6000	959.098	99.956	116.468	52.515	-0.732	50.321	1825.876	-0.006997	-0.008153	-0.003676
5.6200	920.625	95.563	111.476	49.984	-0.738	50.321	1752.634	-0.006689	-0.007803	-0.003499
5.6400	881.687	90.763	105.625	47.333	-0.744	50.321	1678.505	-0.006353	-0.007394	-0.003313
5.6600	843.545	86.091	100.625	44.828	-0.736	50.321	1605.892	-0.006026	-0.007044	-0.003138
5.6800	782.680	78.106	91.009	40.839	-0.747	50.321	1490.021	-0.005467	-0.006371	-0.002859
5.7000	747.934	74.146	86.869	38.505	-0.738	50.321	1423.874	-0.005190	-0.006081	-0.002695
5.7200	670.643	64.397	74.959	33.061	-0.728	50.321	1276.731	-0.004508	-0.005247	-0.002314
5.7400	628.308	59.051	69.011	30.156	-0.743	50.321	1196.136	-0.004134	-0.004831	-0.002111
5.7600	578.023	52.217	61.422	26.625	-0.760	50.321	1100.407	-0.003655	-0.004300	-0.001864
5.7800	531.359	45.368	53.614	23.219	-0.749	50.321	1011.572	-0.003176	-0.003753	-0.001625
5.8000	485.808	39.682	46.903	20.013	-0.744	50.321	924.854	-0.002778	-0.003283	-0.001401
5.8200	437.552	33.441	38.437	16.469	-0.740	50.321	832.987	-0.002341	-0.002691	-0.001153
5.8400	394.210	27.226	31.714	13.464	-0.734	50.321	750.475	-0.001906	-0.002220	-0.000942
5.8600	348.494	21.092	23.262	10.035	-0.733	50.321	663.443	-0.001476	-0.001628	-0.000702
5.8800	327.890	18.271	20.221	8.409	-0.741	50.321	624.218	-0.001279	-0.001415	-0.000589
5.9000	291.927	13.290	14.315	5.627	-0.747	50.321	555.754	-0.000930	-0.001002	-0.000394
5.9200	260.593	9.165	8.714	3.266	-0.739	50.321	496.101	-0.000642	-0.000610	-0.000229
5.9400	249.336	6.469	5.575	2.027	-0.751	50.321	474.672	-0.000453	-0.000390	-0.000142
5.9600	243.851	5.754	4.143	1.805	-0.737	50.321	464.230	-0.000403	-0.000290	-0.000126
5.9800	228.838	3.455	1.557	0.249	-0.739	50.321	435.648	-0.000242	-0.000109	-0.000017
6.0000	234.503	3.609	1.487	0.332	-0.739	50.321	446.434	-0.000253	-0.000104	-0.000023
6.0200	239.733	3.455	2.141	0.513	-0.734	50.321	456.390	-0.000242	-0.000150	-0.000036
6.0400	243.295	3.652	2.393	0.580	-0.742	50.321	463.171	-0.000256	-0.000167	-0.000041
6.0600	264.305	5.991	6.155	1.431	-0.718	50.321	503.168	-0.000419	-0.000431	-0.000100
6.0800	298.524	9.587	10.258	3.879	-0.733	50.321	568.314	-0.000671	-0.000718	-0.000272
6.1000	334.547	13.360	15.415	6.016	-0.738	50.321	636.892	-0.000935	-0.001079	-0.000421
6.1200	357.962	16.728	18.886	7.935	-0.745	50.321	681.467	-0.001171	-0.001322	-0.000555
6.1400	409.719	22.802	26.667	11.283	-0.752	50.322	780.001	-0.001596	-0.001867	-0.000790
6.1600	459.719	28.655	34.519	14.508	-0.753	50.320	875.187	-0.002006	-0.002416	-0.001016
6.1800	509.583	34.744	41.481	17.744	-0.758	50.321	970.116	-0.002432	-0.002904	-0.001242
6.2000	555.615	41.089	48.581	20.846	-0.748	50.321	1057.749	-0.002876	-0.003401	-0.001459
6.2200	597.890	46.643	55.668	23.957	-0.739	50.320	1138.229	-0.003265	-0.003897	-0.001677
6.2400	648.040	53.172	63.480	27.416	-0.749	50.321	1233.702	-0.003722	-0.004444	-0.001919
6.2600	703.269	60.048	71.095	31.335	-0.744	50.321	1338.844	-0.004203	-0.004977	-0.002193
6.2800	744.072	66.096	78.503	34.560	-0.747	50.321	1416.521	-0.004627	-0.005495	-0.002419
6.3000	816.433	75.048	88.646	39.410	-0.723	50.320	1554.279	-0.005253	-0.006205	-0.002759
6.3200	858.393	81.140	94.785	42.761	-0.724	50.321	1634.159	-0.005680	-0.006635	-0.002993
6.3400	895.272	85.825	100.848	45.427	-0.736	50.321	1704.369	-0.006008	-0.007059	-0.003180
6.3600	939.907	92.224	108.254	48.401	-0.734	50.321	1789.341	-0.006456	-0.007578	-0.003388
6.3800	975.960	97.303	113.897	51.346	-0.739	50.321	1857.977	-0.006811	-0.007973	-0.003594
6.4000	1001.178	101.078	118.509	52.988	-0.728	50.321	1905.985	-0.007075	-0.008296	-0.003709
6.4200	1034.045	105.457	123.663	55.349	-0.739	50.321	1968.555	-0.007382	-0.008656	-0.003874
6.4400	1065.664	109.989	128.042	57.794	-0.730	50.321	2028.751	-0.007699	-0.008963	-0.004046
6.4600	1064.778	110.971	130.240	57.835	-0.748	50.321	2027.063	-0.007768	-0.009117	-0.004048
6.4800	1063.350	111.378	130.059	58.074	-0.735	50.321	2024.345	-0.007796	-0.009104	-0.004065
6.5000	1067.798	111.995	130.336	58.531	-0.747	50.321	2032.814	-0.007840	-0.009124	-0.004097
6.5200	1055.175	111.490	130.074	57.976	-0.732	50.321	2008.781	-0.007804	-0.009105	-0.004058
6.5400	1046.443	110.705	128.514	57.795	-0.747	50.321	1992.159	-0.007749	-0.008996	-0.004046
6.5600	1018.806	107.617	125.875	56.210	-0.748	50.320	1939.545	-0.007533	-0.008811	-0.003935
6.5800	1007.805	106.227	123.873	55.768	-0.743	50.321	1918.602	-0.007436	-0.008671	-0.003904
6.6000	955.837	100.558	116.816	52.499	-0.740	50.321	1819.668	-0.007039	-0.008177	-0.003675
6.6200	917.184	95.631	111.242	50.122	-0.732	50.321	1746.082	-0.006694	-0.007787	-0.003509
6.6400	877.539	90.791	105.973	47.497	-0.734	50.320	1670.609	-0.006355	-0.007418	-0.003325
6.6600	829.598	84.728	99.318	44.231	-0.734	50.321	1579.342	-0.005931	-0.006952	-0.003096
6.6800	786.422	79.621	93.717	41.453	-0.737	50.321	1497.145	-0.005573	-0.006560	-0.002902
6.7000	743.110	74.192	86.619	38.272	-0.731	50.321	1414.690	-0.005193	-0.006063	-0.002679
6.7200	682.981	66.390	77.752	34.227	-0.736	50.321	1300.220	-0.004647	-0.005443	-0.002396
6.7400	633.387	59.669	69.803	30.628	-0.736	50.320	1205.807	-0.004177	-0.004886	-0.002144
6.7600	576.445	52.286	60.851	26.696	-0.736	50.321	1097.403	-0.003660	-0.004260	-0.001869
6.7800	524.416	45.789	53.989	22.874	-0.734	50.321	998.354	-0.003205	-0.003779	-0.001601
6.8000	479.481	39.517	46.580	20.151	-0.736	50.321	912.809	-0.002766	-0.003261	-0.001411
6.8200	437.898	33.663	39.465	16.843	-0.738	50.321	833.645	-0.002356	-0.002763	-0.001179
6.8400	402.731	29.328	33.171	14.537	-0.725	50.321	766.697	-0.002053	-0.002322	-0.001018
6.8600	355.407	22.732	25.821	10.715	-0.743	50.321	676.603	-0.001591	-0.001807	-0.000750
6.8800	322.149	17.920	20.194	8.185	-0.754	50.321	613.289	-0.001254	-0.001414	-0.000573
6.9000	300.433	14.625	15.415	6.155	-0.740	50.321	571.947	-0.001024	-0.001079	-0.000431
6.9200	269.730	10.751	10.772	4.074	-0.746	50.321	513.496	-0.000753	-0.000754	-0.000285
6.9400	248.209	7.663	6.574	2.432	-0.746	50.321	472.527	-0.000536	-0.000460	-0.000170
6.9600	234.578	5.052	3.895	1.193	-0.753	50.320	446.577	-0.000354	-0.000273	-0.000084
6.9800	234.774	4.561	3.005	0.652	-0.742	50.320	446.949	-0.000319	-0.000210	-0.000046
7.0000	239.388	4.800	2.906	0.915	-0.750	50.321	455.732	-0.000336	-0.000203	-0.000064
7.0200	242.784	4.659	2.948	0.888	-0.748	50.321	462.198	-0.000326	-0.000206	-0.000062
7.0400	254.175	5.472	4.726	1.387	-0.748	50.321	483.885	-0.000383	-0.000331	-0.000097
7.0600	255.663	5.220	4.756	1.513	-0.758	50.321	486.717	-0.000365	-0.000333	-0.000106
7.0800	300.538	10.356	11.008	4.157	-0.755	50.321	572.147	-0.000725	-0.000771	-0.000291
7.1000	353.258	16.474	18.665	7.770	-0.758	50.321	672.512	-0.001153	-0.001307	-0.000544
7.1200	374.192	18.862	22.331	9.074	-0.751	50.321	712.366	-0.001320	-0.001563	-0.000635
7.1400	422.028	24.222	28.488	12.325	-0.746	50.321	803.432	-0.001696	-0.001994	-0.000863
7.1600	451.994	28.444	33.282	14.494	-0.747	50.320	860.481	-0.001991	-0.002330	-0.001015
7.1800	508.757	35.673	42.247	18.077	-0.752	50.320	968.542	-0.002497	-0.002957	-0.001265
7.2000	573.469	43.419	51.583	22.511	-0.753	50.321	1091.738	-0.003039	-0.003611	-0.001576
7.2200	609.748	48.261	57.364	24.985	-0.747	50.321	1160.803	-0.003378	-0.004015	-0.001749
7.2400	663.594	55.584	65.953	28.986	-0.752	50.321	1263.313	-0.003891	-0.004617	-0.002029
7.2600	713.053	61.884	74.235	32.381	-0.755	50.321	1357.470	-0.004332	-0.005196	-0.002267
7.2800	765.337	68.929	81.310	36.046	-0.760	50.321	1457.005	-0.004825	-0.005692	-0.002523
7.3000	819.935	76.130	89.492	40.145	-0.759	50.321	1560.946	-0.005329	-0.006264	-0.002810
7.3200	875.270	83.552	98.082	44.149	-0.745	50.321	1666.288	-0.005849	-0.006866	-0.003090
7.3400	895.904	87.019	102.001	45.898	-0.746	50.321	1705.570	-0.006091	-0.007140	-0.003213
7.3600	950.066	93.950	109.782	49.610	-0.754	50.320	1808.681	-0.006576	-0.007685	-0.003473
7.3800	968.175	96.884	112.685	51.221	-0.757	50.321	1843.157	-0.006782	-0.007888	-0.003585
7.4000	1007.940	102.395	119.511	53.807	-0.751	50.321	1918.859	-0.007168	-0.008366	-0.003766
7.4200	1046.158	107.954	125.959	56.766	-0.750	50.321	1991.615	-0.007557	-0.008817	-0.003974
7.4400	1028.469	106.760	124.123	56.042	-0.754	50.321	1957.941	-0.007473	-0.008689	-0.003923
7.4600	1030.738	107.153	125.360	56.125	-0.750	50.321	1962.261	-0.007501	-0.008775	-0.003929
7.4800	1085.818	114.002	131.977	59.772	-0.760	50.321	2067.118	-0.007980	-0.009238	-0.004184
7.5000	1065.559	112.989	131.488	59.101	-0.743	50.321	2028.551	-0.007909	-0.009204	-0.004137
7.5200	1053.777	111.532	130.142	58.406	-0.746	50.321	2006.121	-0.007807	-0.009110	-0.004088
7.5400	1056.302	111.854	130.406	58.642	-0.739	50.320	2010.927	-0.007830	-0.009128	-0.004105
7.5600	1036.464	110.270	128.056	57.600	-0.741	50.320	1973.162	-0.007719	-0.008964	-0.004032
7.5800	967.394	102.510	119.621	53.459	-0.746	50.321	1841.669	-0.007176	-0.008373	-0.003742
7.6000	968.566	101.610	119.832	53.224	-0.750	50.321	1843.901	-0.007113	-0.008388	-0.003726
7.6200	917.574	95.674	111.686	50.316	-0.744	50.321	1746.826	-0.006697	-0.007818	-0.003522
7.6400	870.025	90.624	105.240	47.332	-0.740	50.321	1656.303	-0.006344	-0.007367	-0.003313
7.6600	846.881	87.283	102.792	45.286	-0.735	50.321	1612.244	-0.006110	-0.007195	-0.003170
7.6800	783.311	79.634	94.022	41.577	-0.730	50.321	1491.222	-0.005574	-0.006582	-0.002910
7.7000	734.438	73.361	85.699	38.132	-0.736	50.321	1398.182	-0.005135	-0.005999	-0.002669
7.7200	687.685	67.722	78.652	34.823	-0.731	50.321	1309.175	-0.004741	-0.005506	-0.002438
7.7400	645.440	62.206	72.553	31.920	-0.724	50.321	1228.752	-0.004354	-0.005079	-0.002234
7.7600	579.015	53.762	62.672	27.458	-0.735	50.320	1102.295	-0.003763	-0.004387	-0.001922
7.7800	533.178	47.644	55.557	23.746	-0.731	50.321	1015.034	-0.003335	-0.003889	-0.001662
7.8000	459.644	37.917	44.067	18.856	-0.733	50.320	875.044	-0.002654	-0.003085	-0.001320
7.8200	423.921	32.614	38.299	16.080	-0.746	50.321	807.037	-0.002283	-0.002681	-0.001126
7.8400	382.774	26.831	30.923	13.130	-0.742	50.321	728.703	-0.001878	-0.002165	-0.000919
7.8600	356.399	22.928	26.155	10.866	-0.740	50.321	678.492	-0.001605	-0.001831	-0.000761
7.8800	316.904	17.668	19.263	7.976	-0.750	50.320	603.304	-0.001237	-0.001348	-0.000558
7.9000	290.499	14.217	14.607	5.891	-0.744	50.321	553.036	-0.000995	-0.001023	-0.000412
7.9200	259.060	9.671	9.176	3.461	-0.751	50.321	493.183	-0.000677	-0.000642	-0.000242
7.9400	242.964	6.862	6.132	2.208	-0.746	50.321	462.542	-0.000480	-0.000429	-0.000155
7.9600	240.620	6.328	5.006	1.666	-0.743	50.321	458.078	-0.000443	-0.000350	-0.000117
7.9800	229.003	4.366	2.654	0.596	-0.749	50.321	435.963	-0.000306	-0.000186	-0.000042
8.0000	230.100	3.904	2.280	0.513	-0.744	50.321	438.051	-0.000273	-0.000160	-0.000036
8.0200	243.671	4.899	3.324	0.971	-0.744	50.321	463.886	-0.000343	-0.000233	-0.000068
8.0400	251.545	5.836	4.755	1.513	-0.758	50.321	478.878	-0.000409	-0.000333	-0.000106
8.0600	269.685	7.678	6.838	2.362	-0.751	50.321	513.411	-0.000537	-0.000479	-0.000165
8.0800	299.276	10.231	11.564	4.185	-0.746	50.321	569.744	-0.000716	-0.000809	-0.000293
8.1000	334.968	14.511	16.425	6.685	-0.758	50.321	637.693	-0.001016	-0.001150	-0.000468
8.1200	380.745	20.124	22.929	9.700	-0.751	50.320	724.840	-0.001409	-0.001605	-0.000679
8.1400	409.299	23.420	27.724	11.462	-0.744	50.321	779.200	-0.001639	-0.001941	-0.000802
8.1600	448.042	27.632	33.367	13.897	-0.751	50.321	852.957	-0.001934	-0.002336	-0.000973
8.1800	499.108	34.492	40.677	17.772	-0.758	50.321	950.174	-0.002414	-0.002847	-0.001244
8.2000	553.511	41.596	49.098	21.000	-0.751	50.321	1053.743	-0.002912	-0.003437	-0.001470
8.2200	613.956	48.978	58.310	25.389	-0.758	50.321	1168.814	-0.003428	-0.004082	-0.001777
8.2400	660.799	55.149	65.551	28.973	-0.746	50.321	1257.992	-0.003860	-0.004589	-0.002028
8.2600	704.472	61.448	72.025	32.073	-0.758	50.321	1341.133	-0.004301	-0.005042	-0.002245
8.2800	758.123	68.537	81.004	36.048	-0.762	50.321	1443.272	-0.004798	-0.005670	-0.002523
8.3000	796.461	74.037	86.425	38.674	-0.754	50.320	1516.256	-0.005183	-0.006050	-0.002707
8.3200	853.358	80.955	94.954	42.662	-0.746	50.320	1624.575	-0.005667	-0.006647	-0.002986
8.3400	888.840	86.120	100.499	45.162	-0.750	50.321	1692.123	-0.006028	-0.007035	-0.003161
8.3600	939.215	92.997	108.895	48.886	-0.739	50.321	1788.025	-0.006510	-0.007623	-0.003422
8.3800	978.139	98.626	115.326	51.597	-0.755	50.321	1862.125	-0.006904	-0.008073	-0.003612
8.4000	1011.156	103.099	120.720	54.085	-0.744	50.321	1924.982	-0.007217	-0.008450	-0.003786
8.4200	1022.518	105.413	122.816	55.142	-0.744	50.321	1946.611	-0.007379	-0.008597	-0.003860
8.4400	1057.188	110.090	127.986	57.725	-0.744	50.321	2012.615	-0.007706	-0.008959	-0.004041
8.4600	1058.210	111.153	129.346	57.921	-0.747	50.321	2014.561	-0.007781	-0.009054	-0.004054
8.4800	1057.955	111.251	129.515	58.100	-0.741	50.321	2014.074	-0.007788	-0.009066	-0.004067
8.5000	1075.688	113.736	131.960	59.380	-0.746	50.321	2047.834	-0.007962	-0.009237	-0.004157
8.5200	1061.276	112.920	131.143	58.935	-0.738	50.320	2020.397	-0.007904	-0.009180	-0.004125
8.5400	1052.590	112.583	130.433	58.602	-0.735	50.321	2003.860	-0.007881	-0.009130	-0.004102
8.5600	1031.219	110.062	127.959	57.209	-0.738	50.320	1963.177	-0.007704	-0.008957	-0.004005
8.5800	993.603	105.444	122.466	54.975	-0.730	50.321	1891.565	-0.007381	-0.008573	-0.003848
8.6000	955.221	101.329	117.689	52.750	-0.733	50.321	1818.495	-0.007093	-0.008238	-0.003693
8.6200	940.057	99.002	115.703	51.653	-0.722	50.321	1789.627	-0.006930	-0.008099	-0.003616
8.6400	865.095	90.213	105.017	47.192	-0.724	50.321	1646.919	-0.006315	-0.007351	-0.003303
8.6600	833.911	86.162	100.527	45.021	-0.735	50.321	1587.553	-0.006031	-0.007037	-0.003151
8.6800	779.569	79.340	92.901	41.257	-0.740	50.321	1484.098	-0.005554	-0.006503	-0.002888
8.7000	739.803	74.542	87.925	38.369	-0.744	50.321	1408.396	-0.005218	-0.006155	-0.002686
8.7200	678.382	66.459	77.794	34.504	-0.745	50.321	1291.466	-0.004652	-0.005446	-0.002415
8.7400	629.405	60.635	71.123	31.072	-0.740	50.321	1198.225	-0.004244	-0.004979	-0.002175
8.7600	560.409	51.514	59.936	26.168	-0.748	50.321	1066.875	-0.003606	-0.004196	-0.001832
8.7800	529.301	47.473	55.254	23.844	-0.750	50.321	1007.652	-0.003323	-0.003868	-0.001669
8.8000	479.662	40.398	46.748	19.956	-0.746	50.321	913.153	-0.002828	-0.003272	-0.001397
8.8200	418.301	32.514	37.354	15.926	-0.735	50.321	796.337	-0.002276	-0.002615	-0.001115
8.8400	375.830	26.860	30.353	12.922	-0.750	50.321	715.485	-0.001880	-0.002125	-0.000905
8.8600	360.336	23.770	26.489	11.185	-0.747	50.321	685.987	-0.001664	-0.001854	-0.000783
8.8800	308.548	17.092	18.484	7.560	-0.743	50.321	587.397	-0.001196	-0.001294	-0.000529
8.9000	294.902	14.625	14.843	6.433	-0.736	50.321	561.419	-0.001024	-0.001039	-0.000450
8.9200	271.984	11.619	11.952	4.616	-0.738	50.321	517.788	-0.000813	-0.000837	-0.000323
8.9400	240.229	7.453	5.797	2.472	-0.736	50.321	457.335	-0.000522	-0.000406	-0.000173
8.9600	229.514	5.221	3.270	0.972	-0.742	50.321	436.935	-0.000365	-0.000229	-0.000068
8.9800	221.579	3.608	1.431	0.277	-0.751	50.322	421.829	-0.000253	-0.000100	-0.000019
9.0000	232.865	4.448	3.101	0.652	-0.749	50.321	443.316	-0.000311	-0.000217	-0.000046
9.0200	245.068	5.416	4.171	1.178	-0.748	50.321	466.547	-0.000379	-0.000292	-0.000082
9.0400	246.255	5.193	4.491	1.109	-0.756	50.321	468.807	-0.000364	-0.000314	-0.000078
9.0600	275.546	8.492	7.395	2.877	-0.756	50.321	524.569	-0.000594	-0.000518	-0.000201
9.0800	301.785	11.578	12.076	4.586	-0.752	50.321	574.522	-0.000810	-0.000845	-0.000321
9.1000	321.428	13.682	14.664	5.973	-0.750	50.321	611.916	-0.000958	-0.001027	-0.000418
9.1200	369.699	18.849	21.694	8.936	-0.747	50.321	703.812	-0.001319	-0.001519	-0.000626
9.1400	417.850	24.389	28.586	12.159	-0.747	50.321	795.479	-0.001707	-0.002001	-0.000851
9.1600	460.981	30.296	35.172	15.300	-0.747	50.321	877.590	-0.002121	-0.002462	-0.001071
9.1800	510.906	36.572	43.426	18.594	-0.755	50.321	972.633	-0.002560	-0.003040	-0.001302
9.2000	546.177	40.751	49.168	21.013	-0.743	50.321	1039.782	-0.002853	-0.003442	-0.001471
9.2200	599.423	47.700	56.795	24.735	-0.740	50.321	1141.148	-0.003339	-0.003976	-0.001731
9.2400	673.167	57.366	67.745	29.946	-0.736	50.321	1281.538	-0.004016	-0.004742	-0.002096
9.2600	716.329	63.259	74.611	32.823	-0.747	50.321	1363.707	-0.004428	-0.005223	-0.002298
9.2800	744.582	67.468	79.863	35.101	-0.739	50.321	1417.494	-0.004723	-0.005590	-0.002457
9.3000	822.084	77.014	91.107	40.437	-0.739	50.321	1565.037	-0.005391	-0.006377	-0.002831
9.3200	862.375	82.669	96.956	43.596	-0.751	50.321	1641.741	-0.005787	-0.006787	-0.003052
9.3400	908.347	89.123	104.944	46.955	-0.754	50.321	1729.259	-0.006239	-0.007346	-0.003287
9.3600	954.920	95.408	111.950	50.179	-0.745	50.321	1817.923	-0.006679	-0.007837	-0.003513
9.3800	992.070	100.138	116.550	53.000	-0.750	50.321	1888.647	-0.007010	-0.008159	-0.003710
9.4000	1007.550	103.325	120.384	54.099	-0.734	50.321	1918.116	-0.007233	-0.008427	-0.003787
9.4200	1026.726	106.312	124.346	55.625	-0.752	50.321	1954.622	-0.007442	-0.008704	-0.003894
9.4400	1047.044	109.415	127.501	57.295	-0.740	50.321	1993.303	-0.007659	-0.008925	-0.004011
9.4600	1069.241	112.554	130.824	58.907	-0.749	50.321	2035.561	-0.007879	-0.009158	-0.004124
9.4800	1060.074	112.330	130.280	58.545	-0.745	50.321	2018.108	-0.007863	-0.009120	-0.004098
9.5000	1057.489	112.316	129.836	58.585	-0.754	50.321	2013.187	-0.007862	-0.009089	-0.004101
9.5200	1047.826	111.406	129.961	58.198	-0.751	50.320	1994.791	-0.007798	-0.009097	-0.004074
9.5400	1042.190	111.153	128.375	57.795	-0.742	50.321	1984.062	-0.007781	-0.008986	-0.004046
9.5600	1028.559	109.921	127.542	57.059	-0.746	50.321	1958.113	-0.007694	-0.008928	-0.003994
9.5800	981.550	104.670	121.497	54.586	-0.750	50.321	1868.620	-0.007327	-0.008505	-0.003821
9.6000	962.840	101.959	118.675	53.430	-0.742	50.321	1833.000	-0.007137	-0.008307	-0.003740
9.6200	916.988	96.714	112.186	50.317	-0.736	50.321	1745.710	-0.006770	-0.007853	-0.003522
9.6400	871.182	91.253	106.502	47.597	-0.745	50.321	1658.506	-0.006388	-0.007455	-0.003332
9.6600	824.083	85.348	100.485	44.481	-0.744	50.321	1568.842	-0.005974	-0.007034	-0.003114
9.6800	786.286	80.365	94.356	41.995	-0.743	50.321	1496.887	-0.005626	-0.006605	-0.002940
9.7000	723.317	72.982	84.866	37.618	-0.736	50.321	1377.010	-0.005109	-0.005941	-0.002633
9.7200	678.743	67.148	78.640	34.614	-0.751	50.321	1292.152	-0.004700	-0.005505	-0.002423
9.7400	637.941	61.968	72.789	31.628	-0.744	50.321	1214.476	-0.004338	-0.005095	-0.002214
9.7600	575.152	53.396	62.409	27.112	-0.746	50.321	1094.942	-0.003738	-0.004369	-0.001898
9.7800	558.065	50.322	59.591	25.695	-0.733	50.321	1062.412	-0.003523	-0.004171	-0.001799
9.8000	495.727	43.012	49.654	21.487	-0.728	50.321	943.737	-0.003011	-0.003476	-0.001504
9.8200	440.588	35.252	41.773	17.467	-0.730	50.321	838.766	-0.002468	-0.002924	-0.001223
9.8400	398.463	29.848	34.227	14.479	-0.712	50.321	758.572	-0.002089	-0.002396	-0.001014
9.8600	342.828	22.114	25.112	10.411	-0.740	50.321	652.657	-0.001548	-0.001758	-0.000729
9.8800	292.814	16.110	16.330	6.696	-0.734	50.321	557.442	-0.001128	-0.001143	-0.000469
9.9000	295.023	15.524	15.901	6.418	-0.732	50.321	561.647	-0.001087	-0.001113	-0.000449
9.9200	257.842	10.285	10.050	3.850	-0.725	50.321	490.866	-0.000720	-0.000704	-0.000270
9.9400	236.622	6.722	5.794	1.903	-0.745	50.321	450.468	-0.000471	-0.000406	-0.000133
9.9600	237.689	6.596	4.561	1.749	-0.740	50.321	452.499	-0.000462	-0.000319	-0.000122
9.9800	214.546	3.538	1.181	-0.152	-0.736	50.321	408.440	-0.000248	-0.000083	0.000011
Test Cycles
Time (sec)	Axial stress (kPa)	Axial micro-strain #1	Axial micro-strain #2	Axial micro-strain #3	Confining pressure (kPa)	Temperature (�C)	Load (N)	Displacement #1 (mm)	Displacement #2 (mm)	Displacement #3 (mm)
0.0000	227.695	4.240	2.420	0.485	-0.720	50.321	433.474	-0.000297	-0.000169	-0.000034
0.0200	238.846	5.038	3.575	0.706	-0.743	50.321	454.702	-0.000353	-0.000250	-0.000049
0.0400	282.579	9.586	9.313	3.335	-0.730	50.321	537.958	-0.000671	-0.000652	-0.000233
0.0600	284.398	9.894	9.898	3.588	-0.727	50.321	541.420	-0.000693	-0.000693	-0.000251
0.0800	296.541	11.073	11.633	4.365	-0.736	50.321	564.537	-0.000775	-0.000814	-0.000306
0.1000	338.259	15.885	16.789	7.032	-0.748	50.320	643.959	-0.001112	-0.001175	-0.000492
0.1200	373.832	20.252	22.737	9.813	-0.744	50.320	711.679	-0.001418	-0.001592	-0.000687
0.1400	407.450	24.205	27.572	11.671	-0.738	50.320	775.681	-0.001694	-0.001930	-0.000817
0.1600	458.502	30.002	35.742	15.232	-0.750	50.321	872.869	-0.002100	-0.002502	-0.001066
0.1800	507.795	36.180	43.373	18.078	-0.747	50.321	966.711	-0.002533	-0.003036	-0.001265
0.2000	548.116	41.708	49.208	21.555	-0.744	50.321	1043.472	-0.002920	-0.003445	-0.001509
0.2200	597.244	48.275	57.226	24.484	-0.743	50.321	1136.999	-0.003379	-0.004006	-0.001714
0.2400	665.774	56.664	66.589	29.308	-0.754	50.321	1267.462	-0.003966	-0.004661	-0.002052
0.2600	739.563	66.209	77.723	34.738	-0.752	50.320	1407.938	-0.004635	-0.005441	-0.002432
0.2800	777.314	71.610	83.864	37.369	-0.746	50.321	1479.807	-0.005013	-0.005870	-0.002616
0.3000	821.708	77.672	91.274	40.549	-0.751	50.321	1564.322	-0.005437	-0.006389	-0.002838
0.3200	846.821	81.547	95.732	42.537	-0.746	50.321	1612.129	-0.005708	-0.006701	-0.002978
0.3400	903.237	88.198	103.586	46.678	-0.736	50.321	1719.532	-0.006174	-0.007251	-0.003267
0.3600	927.523	92.338	107.602	48.638	-0.741	50.321	1765.766	-0.006464	-0.007532	-0.003405
0.3800	973.871	98.694	115.202	51.625	-0.748	50.321	1854.000	-0.006909	-0.008064	-0.003614
0.4000	1010.841	103.870	121.010	54.406	-0.741	50.321	1924.381	-0.007271	-0.008471	-0.003808
0.4200	1029.837	107.041	124.290	55.655	-0.748	50.321	1960.545	-0.007493	-0.008700	-0.003896
0.4400	1060.029	111.055	129.334	58.168	-0.740	50.321	2018.023	-0.007774	-0.009053	-0.004072
0.4600	1055.625	111.406	130.213	58.071	-0.742	50.321	2009.640	-0.007798	-0.009115	-0.004065
0.4800	1055.671	111.518	129.947	58.100	-0.743	50.321	2009.726	-0.007806	-0.009096	-0.004067
0.5000	1055.761	112.007	130.364	58.475	-0.731	50.321	2009.897	-0.007841	-0.009125	-0.004093
0.5200	1059.067	113.354	131.240	58.810	-0.740	50.321	2016.191	-0.007935	-0.009187	-0.004117
0.5400	1043.452	112.107	130.029	58.170	-0.735	50.321	1986.465	-0.007847	-0.009102	-0.004072
0.5600	1022.999	109.568	127.624	57.155	-0.748	50.321	1947.527	-0.007670	-0.008934	-0.004001
0.5800	1021.075	109.287	126.679	56.933	-0.730	50.321	1943.865	-0.007650	-0.008868	-0.003985
0.6000	960.962	102.523	118.996	53.542	-0.740	50.321	1829.424	-0.007177	-0.008330	-0.003748
0.6200	915.200	97.206	113.007	50.609	-0.736	50.321	1742.306	-0.006804	-0.007910	-0.003543
0.6400	883.129	92.743	108.574	48.623	-0.744	50.321	1681.252	-0.006492	-0.007600	-0.003404
0.6600	844.657	88.099	102.084	45.997	-0.735	50.321	1608.009	-0.006167	-0.007146	-0.003220
0.6800	769.905	79.312	91.773	40.896	-0.744	50.321	1465.702	-0.005552	-0.006424	-0.002863
0.7000	743.921	75.581	87.912	39.159	-0.741	50.321	1416.235	-0.005291	-0.006154	-0.002741
0.7200	683.687	67.778	79.544	35.004	-0.735	50.321	1301.565	-0.004744	-0.005568	-0.002450
0.7400	639.083	61.954	72.956	31.795	-0.729	50.321	1216.650	-0.004337	-0.005107	-0.002226
0.7600	585.612	55.261	64.415	27.791	-0.737	50.321	1114.855	-0.003868	-0.004509	-0.001945
0.7800	528.835	47.868	55.613	24.332	-0.719	50.321	1006.765	-0.003351	-0.003893	-0.001703
0.8000	477.693	40.764	47.750	20.470	-0.739	50.321	909.405	-0.002854	-0.003343	-0.001433
0.8200	427.844	34.000	39.492	16.688	-0.733	50.321	814.505	-0.002380	-0.002764	-0.001168
0.8400	394.015	29.050	33.755	14.172	-0.734	50.321	750.103	-0.002033	-0.002363	-0.000992
0.8600	335.569	21.794	24.027	9.994	-0.744	50.321	638.838	-0.001526	-0.001682	-0.000700
0.8800	334.112	20.209	22.750	9.729	-0.728	50.321	636.063	-0.001415	-0.001593	-0.000681
0.9000	283.691	13.936	14.523	5.932	-0.739	50.321	540.075	-0.000976	-0.001017	-0.000415
0.9200	266.123	11.576	11.508	4.449	-0.744	50.321	506.630	-0.000810	-0.000806	-0.000311
0.9400	247.217	8.590	7.895	2.891	-0.750	50.321	470.638	-0.000601	-0.000553	-0.000202
0.9600	218.693	4.617	2.783	0.569	-0.730	50.321	416.336	-0.000323	-0.000195	-0.000040
0.9800	237.734	5.837	4.145	1.333	-0.735	50.321	452.585	-0.000409	-0.000290	-0.000093
1.0000	246.766	6.876	5.753	1.987	-0.735	50.321	469.780	-0.000481	-0.000403	-0.000139
1.0200	239.448	5.612	4.312	1.250	-0.731	50.321	455.847	-0.000393	-0.000302	-0.000087
1.0400	246.286	6.005	5.020	1.641	-0.740	50.321	468.864	-0.000420	-0.000351	-0.000115
1.0600	278.852	9.336	9.398	3.320	-0.735	50.321	530.863	-0.000654	-0.000658	-0.000232
1.0800	317.701	13.810	14.858	5.945	-0.746	50.321	604.820	-0.000967	-0.001040	-0.000416
1.1000	325.621	14.945	16.067	6.377	-0.748	50.321	619.898	-0.001046	-0.001125	-0.000446
1.1200	368.286	19.283	22.375	9.199	-0.742	50.321	701.122	-0.001350	-0.001566	-0.000644
1.1400	400.131	23.701	27.003	11.462	-0.749	50.321	761.747	-0.001659	-0.001890	-0.000802
1.1600	453.452	29.892	35.353	14.966	-0.758	50.321	863.256	-0.002092	-0.002475	-0.001048
1.1800	511.071	37.454	43.594	18.856	-0.764	50.321	972.948	-0.002622	-0.003052	-0.001320
1.2000	562.318	43.026	51.235	22.218	-0.751	50.322	1070.509	-0.003012	-0.003586	-0.001555
1.2200	612.047	50.139	58.963	25.875	-0.743	50.321	1165.180	-0.003510	-0.004127	-0.001811
1.2400	659.912	56.341	67.078	29.153	-0.745	50.321	1256.304	-0.003944	-0.004695	-0.002041
1.2600	712.452	63.233	74.903	32.936	-0.749	50.321	1356.325	-0.004426	-0.005243	-0.002306
1.2800	758.063	69.309	81.170	36.159	-0.746	50.321	1443.157	-0.004852	-0.005682	-0.002531
1.3000	804.801	75.525	88.394	39.659	-0.743	50.321	1532.135	-0.005287	-0.006188	-0.002776
1.3200	876.848	85.107	100.096	44.746	-0.744	50.321	1669.292	-0.005957	-0.007007	-0.003132
1.3400	897.466	88.392	103.432	46.497	-0.751	50.321	1708.546	-0.006187	-0.007240	-0.003255
1.3600	942.702	94.455	110.410	49.554	-0.734	50.321	1794.662	-0.006612	-0.007729	-0.003469
1.3800	979.176	99.285	115.510	52.403	-0.736	50.320	1864.100	-0.006950	-0.008086	-0.003668
1.4000	1018.190	105.036	122.634	54.835	-0.722	50.321	1938.372	-0.007353	-0.008584	-0.003838
1.4200	1039.801	108.460	125.723	56.850	-0.735	50.321	1979.513	-0.007592	-0.008801	-0.003980
1.4400	1054.558	110.805	128.735	57.948	-0.734	50.321	2007.608	-0.007756	-0.009011	-0.004056
1.4600	1067.753	112.947	131.114	58.963	-0.740	50.320	2032.728	-0.007906	-0.009178	-0.004127
1.4800	1068.430	113.680	131.323	59.519	-0.730	50.320	2034.016	-0.007958	-0.009193	-0.004166
1.5000	1046.293	112.219	129.849	58.225	-0.740	50.320	1991.873	-0.007855	-0.009089	-0.004076
1.5200	1048.908	111.870	130.142	58.630	-0.742	50.320	1996.851	-0.007831	-0.009110	-0.004104
1.5400	1042.235	111.826	130.155	58.239	-0.744	50.321	1984.148	-0.007828	-0.009111	-0.004077
1.5600	1022.443	109.990	127.582	57.364	-0.747	50.321	1946.468	-0.007699	-0.008931	-0.004016
1.5800	999.585	107.294	124.094	55.669	-0.745	50.321	1902.952	-0.007511	-0.008687	-0.003897
1.6000	964.598	102.875	119.873	53.723	-0.742	50.321	1836.348	-0.007201	-0.008391	-0.003761
1.6200	924.938	98.260	114.231	51.345	-0.744	50.321	1760.845	-0.006878	-0.007996	-0.003594
1.6400	878.831	92.816	108.352	48.208	-0.744	50.321	1673.069	-0.006497	-0.007585	-0.003375
1.6600	855.177	89.597	104.752	46.774	-0.743	50.321	1628.036	-0.006272	-0.007333	-0.003274
1.6800	791.501	81.602	95.496	42.412	-0.736	50.321	1506.815	-0.005712	-0.006685	-0.002969
1.7000	746.596	76.367	89.105	39.381	-0.738	50.321	1421.328	-0.005346	-0.006237	-0.002757
1.7200	683.537	68.284	79.433	34.893	-0.740	50.321	1301.279	-0.004780	-0.005560	-0.002443
1.7400	630.051	61.575	71.511	31.127	-0.722	50.321	1199.455	-0.004310	-0.005006	-0.002179
1.7600	581.825	54.715	63.496	27.749	-0.726	50.321	1107.645	-0.003830	-0.004445	-0.001942
1.7800	534.591	49.004	56.948	24.804	-0.719	50.321	1017.723	-0.003430	-0.003986	-0.001736
1.8000	473.560	40.948	47.220	20.027	-0.711	50.321	901.537	-0.002866	-0.003305	-0.001402
1.8200	426.356	34.126	39.450	16.954	-0.731	50.321	811.672	-0.002389	-0.002761	-0.001187
1.8400	419.052	32.360	37.106	16.023	-0.742	50.321	797.768	-0.002265	-0.002597	-0.001122
1.8600	315.010	19.902	21.334	9.159	-0.743	50.321	599.699	-0.001393	-0.001493	-0.000641
1.8800	306.790	17.623	19.221	7.669	-0.751	50.321	584.049	-0.001234	-0.001345	-0.000537
1.9000	282.113	14.005	14.483	5.918	-0.739	50.321	537.071	-0.000980	-0.001014	-0.000414
1.9200	274.915	12.322	12.508	5.212	-0.744	50.321	523.367	-0.000863	-0.000876	-0.000365
1.9400	232.039	6.834	5.227	2.155	-0.744	50.320	441.742	-0.000478	-0.000366	-0.000151
1.9600	233.511	6.495	5.004	1.875	-0.750	50.321	444.546	-0.000455	-0.000350	-0.000131
1.9800	238.561	6.482	4.949	1.734	-0.736	50.321	454.159	-0.000454	-0.000346	-0.000121
2.0000	237.404	5.640	4.338	1.290	-0.746	50.321	451.956	-0.000395	-0.000304	-0.000090
2.0200	237.840	5.556	3.992	1.457	-0.738	50.321	452.785	-0.000389	-0.000279	-0.000102
2.0400	245.143	6.161	4.643	1.777	-0.745	50.321	466.690	-0.000431	-0.000325	-0.000124
2.0600	269.204	8.621	8.341	2.709	-0.747	50.321	512.495	-0.000603	-0.000584	-0.000190
2.0800	313.808	13.107	14.456	5.724	-0.749	50.321	597.410	-0.000917	-0.001012	-0.000401
2.1000	321.488	14.751	15.802	6.155	-0.746	50.320	612.030	-0.001033	-0.001106	-0.000431
2.1200	404.700	23.912	27.279	11.589	-0.744	50.321	770.445	-0.001674	-0.001910	-0.000811
2.1400	422.193	26.454	31.005	13.062	-0.754	50.320	803.747	-0.001852	-0.002170	-0.000914
2.1600	461.011	31.154	36.439	15.577	-0.746	50.321	877.647	-0.002181	-0.002551	-0.001090
2.1800	493.142	35.293	41.399	17.910	-0.746	50.321	938.816	-0.002470	-0.002898	-0.001254
2.2000	549.123	42.464	49.902	21.832	-0.741	50.321	1045.389	-0.002972	-0.003493	-0.001528
2.2200	601.076	48.598	58.115	25.194	-0.743	50.321	1144.295	-0.003402	-0.004068	-0.001764
2.2400	664.481	56.636	67.174	29.612	-0.744	50.320	1265.001	-0.003965	-0.004702	-0.002073
2.2600	691.232	60.763	71.456	31.670	-0.739	50.320	1315.928	-0.004253	-0.005002	-0.002217
2.2800	755.478	69.927	81.548	36.227	-0.737	50.321	1438.236	-0.004895	-0.005708	-0.002536
2.3000	829.373	78.290	92.302	41.257	-0.747	50.320	1578.913	-0.005480	-0.006461	-0.002888
2.3200	868.973	83.958	98.652	44.274	-0.735	50.320	1654.301	-0.005877	-0.006906	-0.003099
2.3400	893.724	88.084	103.170	46.467	-0.740	50.321	1701.422	-0.006166	-0.007222	-0.003253
2.3600	952.546	95.928	111.617	50.122	-0.738	50.320	1813.402	-0.006715	-0.007813	-0.003509
2.3800	956.273	97.037	112.644	50.693	-0.738	50.320	1820.498	-0.006793	-0.007885	-0.003549
2.4000	1002.740	102.917	119.927	54.101	-0.737	50.321	1908.960	-0.007204	-0.008395	-0.003787
2.4200	1024.652	106.620	124.582	55.751	-0.743	50.321	1950.674	-0.007463	-0.008721	-0.003903
2.4400	1044.580	109.779	127.943	57.517	-0.748	50.320	1988.611	-0.007685	-0.008956	-0.004026
2.4600	1054.784	111.489	130.264	58.170	-0.734	50.320	2008.038	-0.007804	-0.009118	-0.004072
2.4800	1058.766	112.330	130.558	58.781	-0.736	50.320	2015.619	-0.007863	-0.009139	-0.004115
2.5000	1065.439	113.425	131.476	59.367	-0.732	50.320	2028.322	-0.007940	-0.009203	-0.004156
2.5200	1056.182	113.369	132.075	59.212	-0.731	50.320	2010.698	-0.007936	-0.009245	-0.004145
2.5400	1042.716	112.163	129.947	58.405	-0.732	50.320	1985.064	-0.007851	-0.009096	-0.004088
2.5600	1032.091	111.056	128.583	57.906	-0.735	50.320	1964.836	-0.007774	-0.009001	-0.004053
2.5800	980.679	105.261	122.109	54.795	-0.724	50.320	1866.961	-0.007368	-0.008548	-0.003836
2.6000	965.365	103.155	119.956	53.737	-0.738	50.320	1837.807	-0.007221	-0.008397	-0.003762
2.6200	948.398	100.810	117.689	52.598	-0.732	50.320	1805.506	-0.007057	-0.008238	-0.003682
2.6400	868.266	91.479	106.709	47.736	-0.738	50.321	1652.956	-0.006404	-0.007470	-0.003341
2.6600	834.993	87.495	101.834	45.704	-0.739	50.321	1589.613	-0.006125	-0.007128	-0.003199
2.6800	786.857	81.209	95.051	42.288	-0.736	50.320	1497.974	-0.005685	-0.006654	-0.002960
2.7000	735.130	75.063	86.869	38.689	-0.742	50.320	1399.498	-0.005254	-0.006081	-0.002708
2.7200	688.136	68.733	79.404	35.365	-0.751	50.320	1310.034	-0.004811	-0.005558	-0.002476
2.7400	636.318	62.207	72.871	31.630	-0.746	50.321	1211.386	-0.004354	-0.005101	-0.002214
2.7600	589.174	56.171	65.604	28.320	-0.746	50.320	1121.635	-0.003932	-0.004592	-0.001982
2.7800	529.195	48.178	55.797	24.290	-0.749	50.320	1007.452	-0.003372	-0.003906	-0.001700
2.8000	473.695	40.947	47.667	20.274	-0.738	50.320	901.794	-0.002866	-0.003337	-0.001419
2.8200	421.111	33.663	38.940	16.800	-0.737	50.320	801.687	-0.002356	-0.002726	-0.001176
2.8400	397.652	30.254	34.894	14.799	-0.745	50.320	757.027	-0.002118	-0.002443	-0.001036
2.8600	348.073	23.601	26.850	11.102	-0.735	50.320	662.642	-0.001652	-0.001880	-0.000777
2.8800	312.922	18.342	19.941	8.254	-0.751	50.320	595.722	-0.001284	-0.001396	-0.000578
2.9000	300.358	16.501	17.746	7.223	-0.743	50.320	571.804	-0.001155	-0.001242	-0.000506
2.9200	267.340	12.180	12.131	4.504	-0.744	50.320	508.947	-0.000853	-0.000849	-0.000315
2.9400	243.325	8.674	7.310	2.571	-0.735	50.320	463.228	-0.000607	-0.000512	-0.000180
2.9600	237.178	7.199	5.990	2.112	-0.749	50.321	451.527	-0.000504	-0.000419	-0.000148
2.9800	232.354	5.964	4.215	1.513	-0.742	50.320	442.343	-0.000417	-0.000295	-0.000106
3.0000	233.406	5.682	4.144	1.304	-0.746	50.321	444.345	-0.000398	-0.000290	-0.000091
3.0200	236.773	5.739	4.089	1.430	-0.742	50.320	450.754	-0.000402	-0.000286	-0.000100
3.0400	247.608	6.596	5.531	1.929	-0.746	50.321	471.382	-0.000462	-0.000387	-0.000135
3.0600	274.885	9.601	8.993	3.211	-0.739	50.320	523.310	-0.000672	-0.000630	-0.000225
3.0800	304.656	12.925	13.524	5.128	-0.738	50.320	579.987	-0.000905	-0.000947	-0.000359
3.1000	328.025	15.576	16.165	6.962	-0.750	50.320	624.475	-0.001090	-0.001132	-0.000487
3.1200	367.700	19.718	22.680	9.561	-0.738	50.320	700.006	-0.001380	-0.001588	-0.000669
3.1400	410.877	24.966	28.477	12.367	-0.752	50.320	782.204	-0.001748	-0.001993	-0.000866
3.1600	446.028	29.681	34.783	14.760	-0.753	50.320	849.123	-0.002078	-0.002435	-0.001033
3.1800	504.008	36.544	43.192	18.314	-0.751	50.320	959.501	-0.002558	-0.003023	-0.001282
3.2000	555.585	42.903	50.625	22.054	-0.756	50.320	1057.692	-0.003003	-0.003544	-0.001544
3.2200	602.714	49.270	57.421	25.099	-0.743	50.321	1147.413	-0.003449	-0.004019	-0.001757
3.2400	648.746	55.597	65.273	28.610	-0.730	50.320	1235.046	-0.003892	-0.004569	-0.002003
3.2600	710.799	63.470	74.680	32.894	-0.734	50.320	1353.178	-0.004443	-0.005228	-0.002303
3.2800	766.329	70.446	83.199	36.979	-0.739	50.320	1458.893	-0.004931	-0.005824	-0.002589
3.3000	815.231	76.916	89.811	40.328	-0.729	50.321	1551.991	-0.005384	-0.006287	-0.002823
3.3200	855.522	82.851	97.110	43.624	-0.747	50.320	1628.695	-0.005800	-0.006798	-0.003054
3.3400	897.917	88.562	104.031	46.734	-0.724	50.320	1709.404	-0.006199	-0.007282	-0.003271
3.3600	938.719	94.217	109.908	49.597	-0.729	50.320	1787.081	-0.006595	-0.007694	-0.003472
3.3800	968.310	98.556	114.620	51.889	-0.736	50.320	1843.414	-0.006899	-0.008023	-0.003632
3.4000	1016.071	105.190	122.482	54.921	-0.721	50.320	1934.338	-0.007363	-0.008574	-0.003844
3.4200	1028.304	107.322	125.541	56.126	-0.729	50.320	1957.626	-0.007513	-0.008788	-0.003929
3.4400	1058.811	111.295	130.308	58.476	-0.716	50.320	2015.705	-0.007791	-0.009122	-0.004093
3.4600	1058.165	112.023	130.350	58.461	-0.734	50.320	2014.475	-0.007842	-0.009125	-0.004092
3.4800	1081.399	115.422	134.268	60.423	-0.711	50.320	2058.706	-0.008080	-0.009399	-0.004230
3.5000	1066.837	114.720	132.601	59.698	-0.727	50.320	2030.983	-0.008030	-0.009282	-0.004179
3.5200	1063.966	114.495	132.712	59.561	-0.709	50.320	2025.518	-0.008015	-0.009290	-0.004169
3.5400	1051.808	113.383	131.140	59.074	-0.726	50.320	2002.373	-0.007937	-0.009180	-0.004135
3.5600	1014.222	109.374	126.793	57.197	-0.723	50.319	1930.819	-0.007656	-0.008875	-0.004004
3.5800	999.720	107.391	125.013	55.960	-0.726	50.320	1903.210	-0.007517	-0.008751	-0.003917
3.6000	963.306	102.902	120.747	53.962	-0.730	50.320	1833.887	-0.007203	-0.008452	-0.003777
3.6200	912.390	97.304	112.563	50.665	-0.738	50.320	1736.956	-0.006811	-0.007879	-0.003547
3.6400	891.801	94.806	110.298	49.359	-0.736	50.319	1697.760	-0.006636	-0.007721	-0.003455
3.6600	838.630	87.943	102.988	45.870	-0.737	50.320	1596.537	-0.006156	-0.007209	-0.003211
3.6800	791.591	82.093	95.873	42.622	-0.730	50.320	1506.987	-0.005747	-0.006711	-0.002984
3.7000	732.605	74.810	87.995	38.496	-0.738	50.320	1394.691	-0.005237	-0.006160	-0.002695
3.7200	683.056	68.957	79.668	35.407	-0.732	50.319	1300.364	-0.004827	-0.005577	-0.002478
3.7400	636.348	62.641	73.082	31.795	-0.732	50.319	1211.443	-0.004385	-0.005116	-0.002226
3.7600	604.097	57.857	67.689	29.698	-0.729	50.320	1150.045	-0.004050	-0.004738	-0.002079
3.7800	496.539	44.749	51.571	22.358	-0.723	50.320	945.282	-0.003132	-0.003610	-0.001565
3.8000	491.504	43.096	50.098	21.361	-0.730	50.320	935.698	-0.003017	-0.003507	-0.001495
3.8200	441.414	36.572	42.414	17.857	-0.724	50.320	840.340	-0.002560	-0.002969	-0.001250
3.8400	378.355	27.812	31.658	13.701	-0.735	50.320	720.291	-0.001947	-0.002216	-0.000959
3.8600	346.014	23.856	26.295	11.077	-0.743	50.320	658.722	-0.001670	-0.001841	-0.000775
3.8800	308.804	18.481	19.650	7.879	-0.739	50.320	587.883	-0.001294	-0.001375	-0.000552
3.9000	280.926	14.652	14.790	6.140	-0.743	50.320	534.811	-0.001026	-0.001035	-0.000430
3.9200	276.974	12.939	13.482	5.363	-0.732	50.319	527.287	-0.000906	-0.000944	-0.000375
3.9400	250.268	9.433	8.938	3.392	-0.750	50.320	476.446	-0.000660	-0.000626	-0.000237
3.9600	234.488	7.411	5.395	2.209	-0.736	50.320	446.405	-0.000519	-0.000378	-0.000155
3.9800	236.472	6.779	5.559	1.625	-0.734	50.320	450.182	-0.000475	-0.000389	-0.000114
4.0000	234.654	6.160	4.521	1.528	-0.752	50.319	446.720	-0.000431	-0.000316	-0.000107
4.0200	237.163	5.851	4.908	1.527	-0.746	50.319	451.498	-0.000410	-0.000344	-0.000107
4.0400	245.234	6.467	5.420	1.945	-0.742	50.320	466.862	-0.000453	-0.000379	-0.000136
4.0600	279.844	10.021	10.051	3.727	-0.746	50.319	532.751	-0.000701	-0.000704	-0.000261
4.0800	317.235	14.245	14.746	6.058	-0.742	50.319	603.933	-0.000997	-0.001032	-0.000424
4.1000	353.228	18.397	20.321	8.519	-0.740	50.320	672.455	-0.001288	-0.001422	-0.000596
4.1200	368.467	20.335	23.069	9.727	-0.726	50.319	701.466	-0.001423	-0.001615	-0.000681
4.1400	400.222	24.347	28.669	11.893	-0.742	50.320	761.919	-0.001704	-0.002007	-0.000832
4.1600	460.576	31.126	36.535	15.676	-0.736	50.319	876.818	-0.002179	-0.002557	-0.001097
4.1800	510.560	37.736	44.109	19.190	-0.729	50.320	971.975	-0.002641	-0.003088	-0.001343
4.2000	549.228	42.942	50.359	21.791	-0.734	50.320	1045.589	-0.003006	-0.003525	-0.001525
4.2200	611.431	50.854	59.519	26.015	-0.734	50.320	1164.007	-0.003560	-0.004166	-0.001821
4.2400	656.802	56.593	66.939	29.293	-0.725	50.320	1250.381	-0.003962	-0.004686	-0.002051
4.2600	714.811	64.118	74.917	33.338	-0.735	50.319	1360.817	-0.004488	-0.005244	-0.002334
4.2800	756.530	70.094	82.615	36.216	-0.727	50.320	1440.239	-0.004907	-0.005783	-0.002535
4.3000	808.213	77.182	90.242	40.188	-0.726	50.319	1538.630	-0.005403	-0.006317	-0.002813
4.3200	872.459	84.576	99.222	44.703	-0.737	50.320	1660.938	-0.005920	-0.006946	-0.003129
4.3400	907.250	89.822	105.086	47.137	-0.735	50.319	1727.171	-0.006288	-0.007356	-0.003300
4.3600	937.367	94.358	110.075	49.721	-0.736	50.319	1784.506	-0.006605	-0.007705	-0.003480
4.3800	980.198	100.336	117.689	52.418	-0.742	50.319	1866.045	-0.007024	-0.008238	-0.003669
4.4000	1006.242	104.179	121.358	54.628	-0.750	50.319	1915.627	-0.007293	-0.008495	-0.003824
4.4200	1043.227	109.092	127.609	57.182	-0.739	50.319	1986.036	-0.007636	-0.008933	-0.004003
4.4400	1039.575	109.891	127.596	57.364	-0.751	50.319	1979.084	-0.007692	-0.008932	-0.004015
4.4600	1059.788	112.849	130.628	58.822	-0.757	50.319	2017.565	-0.007899	-0.009144	-0.004118
4.4800	1054.123	112.610	130.987	58.781	-0.749	50.319	2006.779	-0.007883	-0.009169	-0.004115
4.5000	1078.859	115.871	134.420	60.423	-0.749	50.319	2053.871	-0.008111	-0.009409	-0.004230
4.5200	1067.287	115.309	133.516	60.021	-0.744	50.319	2031.841	-0.008072	-0.009346	-0.004201
4.5400	1045.121	113.315	130.779	58.991	-0.739	50.320	1989.641	-0.007932	-0.009155	-0.004129
4.5600	1022.503	110.103	128.083	57.767	-0.736	50.319	1946.583	-0.007707	-0.008966	-0.004044
4.5800	980.829	105.259	121.788	54.975	-0.738	50.319	1867.247	-0.007368	-0.008525	-0.003848
4.6000	959.925	103.268	119.634	53.975	-0.737	50.319	1827.450	-0.007229	-0.008374	-0.003778
4.6200	908.723	96.686	112.798	50.457	-0.739	50.319	1729.975	-0.006768	-0.007896	-0.003532
4.6400	885.970	94.215	109.645	49.209	-0.746	50.319	1686.659	-0.006595	-0.007675	-0.003445
4.6600	808.363	84.534	98.595	43.969	-0.752	50.319	1538.916	-0.005917	-0.006902	-0.003078
4.6800	763.413	79.101	92.497	40.842	-0.746	50.319	1453.342	-0.005537	-0.006475	-0.002859
4.7000	721.814	73.965	85.964	37.898	-0.750	50.319	1374.149	-0.005178	-0.006018	-0.002653
4.7200	679.269	68.157	79.683	35.006	-0.738	50.319	1293.154	-0.004771	-0.005578	-0.002450
4.7400	635.596	62.444	73.248	32.172	-0.735	50.319	1210.012	-0.004371	-0.005127	-0.002252
4.7600	573.078	54.660	63.660	27.514	-0.734	50.319	1090.994	-0.003826	-0.004456	-0.001926
4.7800	527.888	48.344	56.835	24.429	-0.731	50.319	1004.963	-0.003384	-0.003978	-0.001710
4.8000	476.746	41.678	48.167	20.834	-0.741	50.319	907.602	-0.002917	-0.003372	-0.001458
4.8200	435.839	35.828	41.230	17.647	-0.739	50.319	829.725	-0.002508	-0.002886	-0.001235
4.8400	389.822	29.905	33.809	14.493	-0.732	50.319	742.121	-0.002093	-0.002367	-0.001015
4.8600	354.490	24.854	28.084	11.851	-0.759	50.319	674.858	-0.001740	-0.001966	-0.000830
4.8800	312.906	19.227	20.458	8.698	-0.761	50.319	595.694	-0.001346	-0.001432	-0.000609
4.9000	298.224	16.657	17.217	7.337	-0.751	50.319	567.741	-0.001166	-0.001205	-0.000514
4.9200	276.448	13.626	13.467	5.404	-0.749	50.319	526.285	-0.000954	-0.000943	-0.000378
4.9400	233.046	8.155	6.559	2.530	-0.751	50.318	443.659	-0.000571	-0.000459	-0.000177
4.9600	236.652	7.382	5.880	2.054	-0.746	50.319	450.525	-0.000517	-0.000412	-0.000144
4.9800	237.494	7.072	5.102	2.070	-0.758	50.319	452.127	-0.000495	-0.000357	-0.000145
5.0000	229.288	5.753	4.144	1.234	-0.757	50.319	436.506	-0.000403	-0.000290	-0.000086
5.0200	230.265	5.643	3.575	0.916	-0.746	50.319	438.366	-0.000395	-0.000250	-0.000064
5.0400	241.446	6.105	4.950	1.583	-0.757	50.319	459.652	-0.000427	-0.000346	-0.000111
5.0600	280.686	10.526	10.689	3.950	-0.760	50.319	534.353	-0.000737	-0.000748	-0.000277
5.0800	311.674	14.274	14.872	5.947	-0.752	50.319	593.348	-0.000999	-0.001041	-0.000416
5.1000	320.300	15.340	15.775	6.475	-0.743	50.319	609.770	-0.001074	-0.001104	-0.000453
5.1200	369.549	21.037	23.387	9.978	-0.751	50.319	703.526	-0.001473	-0.001637	-0.000698
5.1400	412.334	25.711	29.404	12.563	-0.751	50.319	784.979	-0.001800	-0.002058	-0.000879
5.1600	463.431	31.997	37.645	15.843	-0.757	50.319	882.254	-0.002240	-0.002635	-0.001109
5.1800	513.972	38.366	45.442	19.148	-0.751	50.319	978.470	-0.002686	-0.003181	-0.001340
5.2000	552.595	43.039	50.513	22.055	-0.752	50.319	1051.998	-0.003013	-0.003536	-0.001544
5.2200	592.345	48.541	57.377	24.876	-0.751	50.319	1127.672	-0.003398	-0.004016	-0.001741
5.2400	673.814	58.700	68.746	30.226	-0.759	50.319	1282.768	-0.004109	-0.004812	-0.002116
5.2600	713.894	64.637	75.209	33.351	-0.766	50.319	1359.072	-0.004525	-0.005265	-0.002335
5.2800	788.541	73.337	86.159	38.398	-0.750	50.319	1501.179	-0.005134	-0.006031	-0.002688
5.3000	820.551	79.973	94.301	42.316	-0.750	50.319	1562.119	-0.005598	-0.006601	-0.002962
5.3200	846.340	83.019	97.515	43.653	-0.734	50.319	1611.214	-0.005811	-0.006826	-0.003056
5.3400	963.035	96.953	113.188	50.942	-0.745	50.319	1833.372	-0.006787	-0.007923	-0.003566
5.3600	973.856	99.941	116.619	52.585	-0.736	50.319	1853.971	-0.006996	-0.008163	-0.003681
5.3800	980.468	101.049	117.773	52.695	-0.731	50.319	1866.560	-0.007073	-0.008244	-0.003689
5.4000	1004.078	105.150	121.831	54.545	-0.733	50.319	1911.507	-0.007361	-0.008528	-0.003818
5.4200	1032.542	108.711	126.347	56.849	-0.742	50.319	1965.694	-0.007610	-0.008844	-0.003979
5.4400	1046.067	110.943	128.736	57.879	-0.739	50.319	1991.444	-0.007766	-0.009012	-0.004052
5.4600	1049.659	111.645	129.669	58.392	-0.734	50.319	1998.281	-0.007815	-0.009077	-0.004087
5.4800	1075.824	115.451	134.490	60.354	-0.729	50.319	2048.092	-0.008082	-0.009414	-0.004225
5.5000	1061.126	114.593	132.683	59.658	-0.735	50.319	2020.111	-0.008022	-0.009288	-0.004176
5.5200	1037.982	111.996	130.335	58.489	-0.744	50.319	1976.051	-0.007840	-0.009123	-0.004094
5.5400	1020.234	109.979	127.417	57.335	-0.744	50.319	1942.263	-0.007699	-0.008919	-0.004013
5.5600	994.355	107.251	124.831	55.877	-0.746	50.319	1892.996	-0.007508	-0.008738	-0.003911
5.5800	991.740	107.379	124.430	55.695	-0.741	50.319	1888.018	-0.007517	-0.008710	-0.003899
5.6000	947.346	101.876	119.149	53.056	-0.747	50.319	1803.503	-0.007131	-0.008340	-0.003714
5.6200	937.036	99.984	116.065	52.333	-0.744	50.319	1783.876	-0.006999	-0.008125	-0.003663
5.6400	886.345	94.497	109.978	49.027	-0.750	50.318	1687.374	-0.006615	-0.007698	-0.003432
5.6600	823.917	86.990	101.514	45.383	-0.738	50.319	1568.527	-0.006089	-0.007106	-0.003177
5.6800	760.437	78.821	91.996	40.718	-0.751	50.319	1447.678	-0.005517	-0.006440	-0.002850
5.7000	712.587	72.772	84.530	37.564	-0.738	50.319	1356.583	-0.005094	-0.005917	-0.002629
5.7200	670.598	67.469	78.487	34.658	-0.738	50.320	1276.646	-0.004723	-0.005494	-0.002426
5.7400	626.099	61.603	71.152	31.336	-0.737	50.319	1191.931	-0.004312	-0.004981	-0.002194
5.7600	576.550	55.136	63.869	27.817	-0.738	50.318	1097.603	-0.003860	-0.004471	-0.001947
5.7800	511.928	46.871	54.588	23.455	-0.735	50.319	974.579	-0.003281	-0.003821	-0.001642
5.8000	489.430	43.448	49.513	21.485	-0.748	50.319	931.749	-0.003041	-0.003466	-0.001504
5.8200	428.295	35.405	40.776	17.159	-0.745	50.319	815.363	-0.002478	-0.002854	-0.001201
5.8400	381.827	29.214	33.006	14.021	-0.753	50.319	726.900	-0.002045	-0.002310	-0.000981
5.8600	350.733	24.629	27.375	11.505	-0.756	50.319	667.706	-0.001724	-0.001916	-0.000805
5.8800	316.093	20.000	21.681	8.936	-0.748	50.318	601.759	-0.001400	-0.001518	-0.000625
5.9000	284.142	15.759	16.051	6.307	-0.752	50.319	540.934	-0.001103	-0.001124	-0.000441
5.9200	265.026	12.238	12.383	4.587	-0.743	50.319	504.541	-0.000857	-0.000867	-0.000321
5.9400	244.452	9.321	8.299	3.294	-0.736	50.319	465.374	-0.000652	-0.000581	-0.000231
5.9600	242.498	8.522	6.781	2.710	-0.742	50.319	461.655	-0.000597	-0.000475	-0.000190
5.9800	241.687	8.142	6.727	2.627	-0.752	50.319	460.110	-0.000570	-0.000471	-0.000184
6.0000	233.481	6.666	4.853	1.666	-0.746	50.319	444.489	-0.000467	-0.000340	-0.000117
6.0200	242.033	6.974	5.699	1.820	-0.742	50.319	460.768	-0.000488	-0.000399	-0.000127
6.0400	252.703	7.931	6.865	2.433	-0.746	50.319	481.081	-0.000555	-0.000481	-0.000170
6.0600	271.984	9.853	9.412	3.379	-0.758	50.319	517.788	-0.000690	-0.000659	-0.000237
6.0800	306.339	13.865	13.939	5.613	-0.756	50.319	583.191	-0.000971	-0.000976	-0.000393
6.1000	328.160	16.040	17.345	6.906	-0.739	50.319	624.733	-0.001123	-0.001214	-0.000483
6.1200	373.997	21.331	24.168	10.032	-0.746	50.319	711.994	-0.001493	-0.001692	-0.000702
6.1400	409.419	25.964	29.975	12.438	-0.754	50.319	779.428	-0.001817	-0.002098	-0.000871
6.1600	457.886	31.632	37.175	15.899	-0.753	50.319	871.696	-0.002214	-0.002602	-0.001113
6.1800	506.232	37.244	44.023	19.022	-0.748	50.319	963.736	-0.002607	-0.003082	-0.001332
6.2000	559.282	44.399	52.321	22.650	-0.749	50.319	1064.730	-0.003108	-0.003662	-0.001585
6.2200	605.855	50.447	59.647	25.681	-0.746	50.319	1153.393	-0.003531	-0.004175	-0.001798
6.2400	658.169	57.325	67.204	29.474	-0.748	50.319	1252.985	-0.004013	-0.004704	-0.002063
6.2600	721.183	65.030	76.667	33.879	-0.757	50.319	1372.948	-0.004552	-0.005367	-0.002372
6.2800	767.335	71.555	83.324	37.202	-0.754	50.319	1460.810	-0.005009	-0.005833	-0.002604
6.3000	808.814	77.603	90.575	40.214	-0.749	50.319	1539.774	-0.005432	-0.006340	-0.002815
6.3200	851.179	83.300	97.570	43.248	-0.758	50.319	1620.426	-0.005831	-0.006830	-0.003027
6.3400	905.927	90.245	105.751	47.401	-0.766	50.319	1724.653	-0.006317	-0.007403	-0.003318
6.3600	938.524	95.074	110.936	49.832	-0.755	50.319	1786.709	-0.006655	-0.007766	-0.003488
6.3800	991.108	102.340	119.149	53.363	-0.759	50.319	1886.816	-0.007164	-0.008340	-0.003735
6.4000	1001.238	104.336	121.594	54.655	-0.763	50.319	1906.099	-0.007304	-0.008512	-0.003826
6.4200	1031.174	108.416	126.279	56.668	-0.766	50.319	1963.091	-0.007589	-0.008840	-0.003967
6.4400	1052.755	111.629	129.474	58.253	-0.757	50.318	2004.175	-0.007814	-0.009063	-0.004078
6.4600	1064.748	114.001	132.057	59.296	-0.759	50.319	2027.006	-0.007980	-0.009244	-0.004151
6.4800	1066.626	114.552	133.256	59.590	-0.760	50.319	2030.582	-0.008019	-0.009328	-0.004171
6.5000	1060.269	114.100	132.532	59.602	-0.746	50.319	2018.480	-0.007987	-0.009277	-0.004172
6.5200	1059.247	114.552	132.643	59.686	-0.752	50.318	2016.535	-0.008019	-0.009285	-0.004178
6.5400	1048.923	113.973	131.794	58.892	-0.752	50.319	1996.880	-0.007978	-0.009226	-0.004122
6.5600	1002.665	108.249	126.264	56.404	-0.747	50.319	1908.817	-0.007577	-0.008838	-0.003948
6.5800	987.336	106.817	123.388	55.291	-0.749	50.319	1879.635	-0.007477	-0.008637	-0.003870
6.6000	968.581	104.363	121.302	54.266	-0.760	50.319	1843.929	-0.007305	-0.008491	-0.003799
6.6200	912.555	97.922	113.785	50.762	-0.751	50.319	1737.270	-0.006855	-0.007965	-0.003553
6.6400	888.690	95.212	110.810	49.555	-0.746	50.319	1691.837	-0.006665	-0.007757	-0.003469
6.6600	808.814	85.319	99.443	44.233	-0.749	50.319	1539.774	-0.005972	-0.006961	-0.003096
6.6800	785.234	81.841	95.482	42.427	-0.746	50.319	1494.884	-0.005729	-0.006684	-0.002970
6.7000	714.511	73.586	85.965	37.772	-0.736	50.319	1360.245	-0.005151	-0.006018	-0.002644
6.7200	684.003	69.364	81.075	35.518	-0.742	50.319	1302.166	-0.004855	-0.005675	-0.002486
6.7400	650.865	64.650	75.974	32.712	-0.742	50.319	1239.080	-0.004525	-0.005318	-0.002290
6.7600	574.506	55.064	64.330	27.777	-0.740	50.319	1093.712	-0.003855	-0.004503	-0.001944
6.7800	535.913	49.944	57.768	25.001	-0.732	50.319	1020.241	-0.003496	-0.004044	-0.001750
6.8000	483.269	43.167	50.265	21.222	-0.738	50.319	920.019	-0.003022	-0.003519	-0.001486
6.8200	429.782	35.770	41.080	17.605	-0.738	50.319	818.195	-0.002504	-0.002876	-0.001232
6.8400	387.492	30.030	34.256	14.564	-0.735	50.319	737.686	-0.002102	-0.002398	-0.001019
6.8600	340.363	24.010	26.391	10.825	-0.736	50.318	647.964	-0.001681	-0.001847	-0.000758
6.8800	325.095	20.771	22.848	9.355	-0.739	50.319	618.896	-0.001454	-0.001599	-0.000655
6.9000	280.295	14.905	15.291	6.379	-0.745	50.318	533.609	-0.001043	-0.001070	-0.000446
6.9200	280.671	14.314	14.455	5.960	-0.746	50.319	534.325	-0.001002	-0.001012	-0.000417
6.9400	245.925	10.119	9.329	3.141	-0.739	50.319	468.178	-0.000708	-0.000653	-0.000220
6.9600	236.081	8.112	7.130	2.390	-0.752	50.319	449.438	-0.000568	-0.000499	-0.000167
6.9800	218.769	5.401	3.017	0.845	-0.748	50.319	416.479	-0.000378	-0.000211	-0.000059
7.0000	228.597	5.768	4.395	1.125	-0.748	50.318	435.190	-0.000404	-0.000308	-0.000079
7.0200	236.758	6.468	5.186	1.360	-0.738	50.319	450.726	-0.000453	-0.000363	-0.000095
7.0400	263.373	9.265	8.633	2.695	-0.743	50.319	501.394	-0.000649	-0.000604	-0.000189
7.0600	264.350	9.141	8.797	3.030	-0.735	50.318	503.254	-0.000640	-0.000616	-0.000212
7.0800	292.498	12.350	12.203	4.755	-0.728	50.318	556.841	-0.000865	-0.000854	-0.000333
7.1000	329.528	16.713	17.761	7.142	-0.727	50.319	627.337	-0.001170	-0.001243	-0.000500
7.1200	353.198	19.507	21.221	8.976	-0.710	50.319	672.398	-0.001365	-0.001485	-0.000628
7.1400	408.427	25.472	29.294	12.422	-0.726	50.319	777.540	-0.001783	-0.002051	-0.000870
7.1600	465.790	32.558	38.062	16.565	-0.726	50.319	886.745	-0.002279	-0.002664	-0.001160
7.1800	504.323	37.861	43.955	18.745	-0.730	50.319	960.102	-0.002650	-0.003077	-0.001312
7.2000	559.508	44.707	52.266	22.720	-0.738	50.319	1065.159	-0.003129	-0.003659	-0.001590
7.2200	622.221	52.386	62.102	27.084	-0.742	50.319	1184.549	-0.003667	-0.004347	-0.001896
7.2400	666.570	58.700	68.580	30.377	-0.742	50.319	1268.978	-0.004109	-0.004801	-0.002126
7.2600	711.745	64.918	75.763	33.392	-0.742	50.319	1354.980	-0.004544	-0.005303	-0.002337
7.2800	766.659	71.988	84.546	37.493	-0.738	50.319	1459.522	-0.005039	-0.005918	-0.002625
7.3000	803.178	77.056	90.326	40.145	-0.740	50.318	1529.045	-0.005394	-0.006323	-0.002810
7.3200	859.971	84.433	98.624	44.383	-0.742	50.318	1637.163	-0.005910	-0.006904	-0.003107
7.3400	904.124	90.664	105.766	47.220	-0.747	50.319	1721.220	-0.006346	-0.007404	-0.003305
7.3600	942.447	95.690	111.728	50.081	-0.746	50.319	1794.176	-0.006698	-0.007821	-0.003506
7.3800	967.679	99.887	116.146	51.999	-0.743	50.319	1842.213	-0.006992	-0.008130	-0.003640
7.4000	1009.007	105.105	122.608	55.045	-0.740	50.319	1920.891	-0.007357	-0.008583	-0.003853
7.4200	1038.328	109.443	127.402	57.114	-0.736	50.318	1976.709	-0.007661	-0.008918	-0.003998
7.4400	1053.552	112.020	130.361	58.657	-0.734	50.318	2005.692	-0.007841	-0.009125	-0.004106
7.4600	1048.487	111.853	130.198	58.572	-0.729	50.319	1996.050	-0.007830	-0.009114	-0.004100
7.4800	1059.337	113.396	131.795	59.114	-0.735	50.319	2016.706	-0.007938	-0.009226	-0.004138
7.5000	1061.156	114.775	133.017	59.589	-0.730	50.319	2020.168	-0.008034	-0.009311	-0.004171
7.5200	1055.190	114.579	133.140	59.520	-0.732	50.318	2008.810	-0.008021	-0.009320	-0.004166
7.5400	1044.384	113.299	131.391	59.073	-0.731	50.318	1988.239	-0.007931	-0.009197	-0.004135
7.5600	1027.177	111.628	129.779	58.211	-0.730	50.318	1955.481	-0.007814	-0.009085	-0.004075
7.5800	984.902	106.703	124.373	55.278	-0.739	50.319	1875.000	-0.007469	-0.008706	-0.003869
7.6000	964.358	104.250	122.025	54.224	-0.738	50.318	1835.890	-0.007298	-0.008542	-0.003796
7.6200	933.460	100.168	116.760	52.167	-0.747	50.319	1777.067	-0.007012	-0.008173	-0.003652
7.6400	876.562	93.642	108.213	49.040	-0.750	50.318	1668.749	-0.006555	-0.007575	-0.003433
7.6600	827.825	88.211	102.265	45.787	-0.747	50.319	1575.966	-0.006175	-0.007159	-0.003205
7.6800	788.811	82.724	96.916	42.733	-0.750	50.319	1501.694	-0.005791	-0.006784	-0.002991
7.7000	730.426	75.414	88.506	39.241	-0.749	50.319	1390.543	-0.005279	-0.006195	-0.002747
7.7200	694.267	70.657	82.502	36.283	-0.752	50.318	1321.707	-0.004946	-0.005775	-0.002540
7.7400	626.174	62.389	71.790	31.837	-0.743	50.318	1192.074	-0.004367	-0.005025	-0.002229
7.7600	573.995	55.514	64.316	27.819	-0.739	50.318	1092.739	-0.003886	-0.004502	-0.001947
7.7800	522.883	48.628	56.334	24.193	-0.739	50.318	995.436	-0.003404	-0.003943	-0.001693
7.8000	478.399	42.676	48.999	21.207	-0.738	50.318	910.749	-0.002987	-0.003430	-0.001485
7.8200	434.141	36.739	42.094	17.718	-0.742	50.318	826.492	-0.002572	-0.002947	-0.001240
7.8400	382.653	29.566	33.727	14.201	-0.751	50.319	728.474	-0.002070	-0.002361	-0.000994
7.8600	355.016	25.456	28.252	12.048	-0.746	50.319	675.859	-0.001782	-0.001978	-0.000843
7.8800	327.093	21.191	23.265	9.757	-0.732	50.319	622.702	-0.001483	-0.001629	-0.000683
7.9000	305.392	18.469	19.901	7.961	-0.744	50.319	581.388	-0.001293	-0.001393	-0.000557
7.9200	261.269	12.601	12.297	4.780	-0.752	50.318	497.389	-0.000882	-0.000861	-0.000335
7.9400	229.589	8.282	7.005	2.529	-0.732	50.318	437.078	-0.000580	-0.000490	-0.000177
7.9600	231.573	7.440	5.837	2.183	-0.745	50.318	440.855	-0.000521	-0.000409	-0.000153
7.9800	238.230	7.651	6.102	2.503	-0.748	50.318	453.529	-0.000536	-0.000427	-0.000175
8.0000	238.095	7.721	6.103	2.335	-0.746	50.318	453.272	-0.000540	-0.000427	-0.000163
8.0200	243.656	7.761	6.392	2.447	-0.743	50.318	463.858	-0.000543	-0.000447	-0.000171
8.0400	251.756	8.269	6.935	2.667	-0.759	50.319	479.279	-0.000579	-0.000485	-0.000187
8.0600	278.567	10.948	11.133	3.963	-0.747	50.318	530.319	-0.000766	-0.000779	-0.000277
8.0800	309.149	14.749	15.582	5.903	-0.758	50.319	588.541	-0.001032	-0.001091	-0.000413
8.1000	326.883	16.727	17.426	7.128	-0.750	50.318	622.301	-0.001171	-0.001220	-0.000499
8.1200	369.564	21.106	24.042	9.922	-0.744	50.318	703.554	-0.001477	-0.001683	-0.000695
8.1400	410.832	26.468	30.295	12.825	-0.745	50.319	782.118	-0.001853	-0.002121	-0.000898
8.1600	448.778	31.183	36.230	15.245	-0.745	50.318	854.359	-0.002183	-0.002536	-0.001067
8.1800	515.459	39.150	45.705	19.453	-0.745	50.318	981.302	-0.002741	-0.003199	-0.001362
8.2000	569.787	46.153	54.490	23.371	-0.738	50.318	1084.728	-0.003231	-0.003814	-0.001636
8.2200	603.466	50.882	59.646	25.876	-0.742	50.318	1148.844	-0.003562	-0.004175	-0.001811
8.2400	659.056	58.110	68.245	29.849	-0.730	50.319	1254.673	-0.004068	-0.004777	-0.002089
8.2600	717.877	65.508	77.085	33.781	-0.738	50.318	1366.653	-0.004586	-0.005396	-0.002365
8.2800	765.337	71.723	84.504	37.535	-0.734	50.319	1457.005	-0.005021	-0.005915	-0.002627
8.3000	816.208	78.724	92.219	41.286	-0.724	50.318	1553.850	-0.005511	-0.006455	-0.002890
8.3200	842.523	82.542	96.651	43.232	-0.735	50.318	1603.947	-0.005778	-0.006766	-0.003026
8.3400	890.418	88.967	104.170	46.762	-0.735	50.318	1695.127	-0.006228	-0.007292	-0.003273
8.3600	939.306	95.395	111.074	49.887	-0.732	50.319	1788.197	-0.006678	-0.007775	-0.003492
8.3800	983.790	101.611	117.800	53.058	-0.737	50.318	1872.883	-0.007113	-0.008246	-0.003714
8.4000	994.490	103.843	121.135	54.267	-0.736	50.318	1893.253	-0.007269	-0.008479	-0.003799
8.4200	1040.131	110.368	128.181	57.585	-0.722	50.318	1980.143	-0.007726	-0.008973	-0.004031
8.4400	1034.571	110.019	128.124	57.434	-0.736	50.318	1969.557	-0.007701	-0.008969	-0.004020
8.4600	1066.581	114.381	132.852	59.646	-0.743	50.318	2030.497	-0.008007	-0.009300	-0.004175
8.4800	1059.533	114.340	132.894	59.353	-0.725	50.318	2017.078	-0.008004	-0.009303	-0.004155
8.5000	1061.697	114.747	133.461	59.798	-0.738	50.318	2021.198	-0.008032	-0.009342	-0.004186
8.5200	1057.835	114.564	132.379	59.825	-0.748	50.318	2013.845	-0.008019	-0.009267	-0.004188
8.5400	1054.934	114.832	132.948	59.617	-0.734	50.318	2008.324	-0.008038	-0.009306	-0.004173
8.5600	1020.309	111.448	129.070	57.614	-0.735	50.317	1942.406	-0.007801	-0.009035	-0.004033
8.5800	1001.102	109.048	126.692	56.570	-0.736	50.318	1905.842	-0.007633	-0.008868	-0.003960
8.6000	962.885	104.336	121.566	54.489	-0.732	50.318	1833.086	-0.007304	-0.008510	-0.003814
8.6200	952.501	103.016	119.580	53.334	-0.714	50.317	1813.316	-0.007211	-0.008371	-0.003733
8.6400	880.199	94.596	109.812	49.193	-0.731	50.318	1675.673	-0.006622	-0.007687	-0.003444
8.6600	832.919	88.464	103.154	46.204	-0.734	50.318	1585.665	-0.006193	-0.007221	-0.003234
8.6800	799.827	83.677	97.735	43.539	-0.738	50.318	1522.665	-0.005857	-0.006841	-0.003048
8.7000	723.392	75.006	87.149	38.521	-0.746	50.318	1377.153	-0.005250	-0.006100	-0.002696
8.7200	680.592	69.573	80.671	35.547	-0.743	50.318	1295.671	-0.004870	-0.005647	-0.002488
8.7400	627.436	62.656	72.955	31.964	-0.720	50.318	1194.477	-0.004386	-0.005107	-0.002237
8.7600	573.950	55.417	64.663	27.930	-0.749	50.319	1092.653	-0.003879	-0.004526	-0.001955
8.7800	534.185	50.194	58.227	25.207	-0.747	50.318	1016.951	-0.003514	-0.004076	-0.001764
8.8000	491.204	44.666	51.431	22.135	-0.739	50.318	935.125	-0.003127	-0.003600	-0.001549
8.8200	425.244	36.024	41.384	17.537	-0.739	50.318	809.555	-0.002522	-0.002897	-0.001228
8.8400	379.242	29.511	33.104	14.103	-0.736	50.318	721.979	-0.002066	-0.002317	-0.000987
8.8600	348.223	24.796	27.837	11.587	-0.741	50.318	662.928	-0.001736	-0.001949	-0.000811
8.8800	310.547	19.999	21.446	8.866	-0.735	50.318	591.202	-0.001400	-0.001501	-0.000621
8.9000	289.582	16.810	17.831	7.156	-0.723	50.318	551.291	-0.001177	-0.001248	-0.000501
8.9200	271.308	13.598	14.260	5.391	-0.729	50.318	516.500	-0.000952	-0.000998	-0.000377
8.9400	251.140	10.695	9.591	3.795	-0.729	50.318	478.106	-0.000749	-0.000671	-0.000266
8.9600	244.783	9.754	8.493	3.434	-0.720	50.318	466.003	-0.000683	-0.000594	-0.000240
8.9800	233.797	7.860	6.700	2.223	-0.722	50.318	445.089	-0.000550	-0.000469	-0.000156
9.0000	232.309	6.877	5.462	2.084	-0.738	50.318	442.257	-0.000481	-0.000382	-0.000146
9.0200	242.994	7.749	5.853	2.362	-0.724	50.318	462.599	-0.000542	-0.000410	-0.000165
9.0400	250.959	8.535	7.894	2.557	-0.726	50.318	477.762	-0.000597	-0.000553	-0.000179
9.0600	267.776	10.203	9.425	3.517	-0.730	50.318	509.777	-0.000714	-0.000660	-0.000246
9.0800	306.565	13.922	15.247	5.932	-0.738	50.317	583.620	-0.000975	-0.001067	-0.000415
9.1000	328.130	16.629	17.386	7.462	-0.750	50.318	624.676	-0.001164	-0.001217	-0.000522
9.1200	378.761	22.592	25.545	10.742	-0.742	50.317	721.064	-0.001581	-0.001788	-0.000752
9.1400	412.169	26.551	30.294	12.978	-0.761	50.318	784.664	-0.001859	-0.002121	-0.000908
9.1600	457.690	32.122	37.284	15.913	-0.751	50.318	871.325	-0.002249	-0.002610	-0.001114
9.1800	509.989	38.772	44.606	19.272	-0.745	50.318	970.888	-0.002714	-0.003122	-0.001349
9.2000	553.601	44.666	52.266	22.411	-0.747	50.318	1053.915	-0.003127	-0.003659	-0.001569
9.2200	609.477	51.682	60.214	26.292	-0.746	50.318	1160.288	-0.003618	-0.004215	-0.001840
9.2400	655.900	57.182	68.206	29.460	-0.738	50.318	1248.665	-0.004003	-0.004774	-0.002062
9.2600	728.592	66.782	77.944	34.809	-0.732	50.318	1387.053	-0.004675	-0.005456	-0.002437
9.2800	768.703	72.548	84.713	37.619	-0.722	50.318	1463.413	-0.005078	-0.005930	-0.002633
9.3000	807.672	77.587	90.731	40.563	-0.719	50.318	1537.600	-0.005431	-0.006351	-0.002839
9.3200	862.135	84.492	99.346	44.565	-0.731	50.318	1641.283	-0.005914	-0.006954	-0.003120
9.3400	894.882	89.487	105.000	47.164	-0.724	50.318	1703.625	-0.006264	-0.007350	-0.003302
9.3600	936.375	95.786	112.021	50.220	-0.719	50.318	1782.618	-0.006705	-0.007841	-0.003515
9.3800	984.947	101.890	119.080	53.321	-0.722	50.318	1875.086	-0.007132	-0.008336	-0.003733
9.4000	1001.433	104.377	121.760	54.422	-0.722	50.318	1906.471	-0.007306	-0.008523	-0.003810
9.4200	1032.241	108.627	126.654	56.862	-0.728	50.317	1965.122	-0.007604	-0.008866	-0.003980
9.4400	1052.770	112.190	130.170	58.545	-0.736	50.318	2004.204	-0.007853	-0.009112	-0.004098
9.4600	1051.808	112.569	131.365	58.754	-0.752	50.318	2002.373	-0.007880	-0.009196	-0.004113
9.4800	1067.528	114.942	133.433	60.007	-0.740	50.318	2032.299	-0.008046	-0.009340	-0.004200
9.5000	1062.899	115.195	133.462	59.922	-0.727	50.318	2023.487	-0.008064	-0.009342	-0.004195
9.5200	1058.706	114.873	133.961	59.812	-0.740	50.318	2015.505	-0.008041	-0.009377	-0.004187
9.5400	1048.352	114.579	132.864	59.519	-0.732	50.318	1995.792	-0.008021	-0.009300	-0.004166
9.5600	1020.083	111.126	128.738	57.656	-0.742	50.317	1941.977	-0.007779	-0.009012	-0.004036
9.5800	1001.298	109.204	127.250	56.974	-0.734	50.317	1906.214	-0.007644	-0.008907	-0.003988
9.6000	960.225	104.026	121.232	54.141	-0.735	50.318	1828.022	-0.007282	-0.008486	-0.003790
9.6200	925.104	99.704	115.719	51.959	-0.721	50.318	1761.160	-0.006979	-0.008100	-0.003637
9.6400	896.715	96.109	111.880	50.288	-0.731	50.318	1707.115	-0.006728	-0.007832	-0.003520
9.6600	829.433	87.860	102.891	45.634	-0.735	50.318	1579.027	-0.006150	-0.007202	-0.003194
9.6800	790.419	83.061	96.595	42.942	-0.737	50.317	1504.755	-0.005814	-0.006762	-0.003006
9.7000	739.262	77.125	89.714	39.629	-0.747	50.318	1407.366	-0.005399	-0.006280	-0.002774
9.7200	686.888	69.982	82.255	35.964	-0.730	50.318	1307.659	-0.004899	-0.005758	-0.002517
9.7400	628.894	62.937	72.484	31.934	-0.726	50.318	1197.252	-0.004406	-0.005074	-0.002235
9.7600	581.524	56.580	66.509	28.626	-0.724	50.318	1107.073	-0.003961	-0.004656	-0.002004
9.7800	536.093	50.364	58.408	25.444	-0.728	50.318	1020.584	-0.003525	-0.004089	-0.001781
9.8000	479.061	42.998	50.083	21.556	-0.723	50.317	912.008	-0.003010	-0.003506	-0.001509
9.8200	427.648	36.039	41.052	17.537	-0.736	50.318	814.133	-0.002523	-0.002874	-0.001228
9.8400	391.821	31.126	35.562	14.941	-0.724	50.318	745.926	-0.002179	-0.002489	-0.001046
9.8600	349.501	25.402	28.695	11.630	-0.730	50.318	665.359	-0.001778	-0.002009	-0.000814
9.8800	321.383	21.077	23.430	9.409	-0.721	50.318	611.830	-0.001475	-0.001640	-0.000659
9.9000	285.615	16.416	16.705	7.032	-0.727	50.318	543.737	-0.001149	-0.001169	-0.000492
9.9200	264.410	13.360	13.108	4.962	-0.723	50.318	503.368	-0.000935	-0.000918	-0.000347
9.9400	240.920	9.810	9.355	3.225	-0.723	50.317	458.651	-0.000687	-0.000655	-0.000226
9.9600	243.626	9.223	8.675	3.085	-0.721	50.317	463.800	-0.000646	-0.000607	-0.000216
9.9800	226.854	6.989	5.088	1.653	-0.730	50.317	431.871	-0.000489	-0.000356	-0.000116
