# Supplementary material for: Evaluation of a Cold-Mixed High-Performance Polyurethane Mixture
Source: Hindawi journal article supplement (doi:10.1155/2019/1507971), 2019-11-07
Supplement: f1 [file 1507971.f1.zip › 1507971.f1/dynamic modulus data/PUM/specimen2/temp50/zhs-2-50_2Hz.csv]

Test Information
****************
Project name	zhs
Operator name	2
Target test temperature	50
Target confining stress	0
Average dynamic strain range from 75 to 125 micro-strain
Contact stress	5
Initial modulus	1000
Axial gauge length	70
Comments
Specimen information
********************
Identification	zhs-2-50
Dimensions	Point 1	Point 2	Point 3	Point 4	Point 5	Point 6	Average	Std Dev.
Diameter (mm)	49.2	49.3	49.2				49.23	0.058
Height (mm)	100.8	101.0	100.8				100.87	0.115
Cross-sectional area (mm�)	1903.7
Conditioning time
Properties/Comments
Test Data	2Hz
*********
Test date and time	Wed	Apr 3	2019	1:28 PM
Dynamic modulus (MPa)	8700
Phase angle (Degrees)	4.24
Average temperature (�C)	50.3
Average confining pressure (kPa)	-0.7
Average micro-strain	99
Load drift (%)	-1.0
Load standard error (%)	2.0
Average deformation drift (%)	-2.4
Average deformation standard error (%)	2.0
Deformation uniformity (%)	29.9
Phase uniformity (Degrees)	0.2
Conditioning Cycles
Time (sec)	Axial stress (kPa)	Axial micro-strain #1	Axial micro-strain #2	Axial micro-strain #3	Confining pressure (kPa)	Temperature (�C)	Load (N)	Displacement #1 (mm)	Displacement #2 (mm)	Displacement #3 (mm)
0.0000	295.338	7.859	9.034	3.432	-0.742	50.314	562.248	-0.000550	-0.000632	-0.000240
0.0100	215.072	-2.469	-5.099	-2.431	-0.734	50.335	409.441	0.000173	0.000357	0.000170
0.0200	224.374	-2.454	-3.473	-2.195	-0.744	50.315	427.151	0.000172	0.000243	0.000154
0.0300	236.667	-1.557	-3.389	-1.986	-0.731	50.334	450.554	0.000109	0.000237	0.000139
0.0400	255.648	0.364	-0.290	-1.220	-0.738	50.315	486.689	-0.000025	0.000020	0.000085
0.0500	290.935	4.211	4.007	0.957	-0.728	50.335	553.865	-0.000295	-0.000280	-0.000067
0.0600	323.667	7.705	9.049	3.128	-0.738	50.315	616.179	-0.000539	-0.000633	-0.000219
0.0700	346.089	10.315	12.784	4.865	-0.750	50.335	658.865	-0.000722	-0.000895	-0.000341
0.0800	382.082	14.582	17.564	6.919	-0.749	50.315	727.386	-0.001021	-0.001229	-0.000484
0.0900	433.329	20.391	24.669	9.976	-0.740	50.335	824.947	-0.001427	-0.001727	-0.000698
0.1000	456.443	23.435	29.254	11.809	-0.744	50.314	868.950	-0.001640	-0.002048	-0.000827
0.1100	487.266	26.677	33.629	13.980	-0.729	50.336	927.629	-0.001867	-0.002354	-0.000979
0.1200	557.208	35.489	43.193	18.510	-0.740	50.314	1060.781	-0.002484	-0.003024	-0.001296
0.1300	596.493	40.414	48.625	21.236	-0.746	50.336	1135.569	-0.002829	-0.003404	-0.001487
0.1400	625.948	44.398	53.516	23.540	-0.751	50.314	1191.645	-0.003108	-0.003746	-0.001648
0.1500	675.858	50.813	60.852	26.613	-0.740	50.335	1286.659	-0.003557	-0.004260	-0.001863
0.1600	698.821	54.097	64.687	28.514	-0.738	50.314	1330.376	-0.003787	-0.004528	-0.001996
0.1700	748.640	60.483	72.012	31.949	-0.739	50.335	1425.219	-0.004234	-0.005041	-0.002236
0.1800	771.679	63.821	76.587	33.796	-0.752	50.315	1469.078	-0.004467	-0.005361	-0.002366
0.1900	806.650	68.241	81.478	36.089	-0.752	50.335	1535.654	-0.004777	-0.005703	-0.002526
0.2000	841.696	73.362	87.132	38.661	-0.751	50.314	1602.373	-0.005135	-0.006099	-0.002706
0.2100	855.432	75.821	89.922	40.075	-0.748	50.335	1628.523	-0.005307	-0.006295	-0.002805
0.2200	853.478	75.834	88.965	40.117	-0.751	50.315	1624.804	-0.005308	-0.006228	-0.002808
0.2300	892.537	80.648	94.746	42.552	-0.754	50.335	1699.162	-0.005645	-0.006632	-0.002979
0.2400	887.788	80.732	95.969	42.455	-0.759	50.315	1690.121	-0.005651	-0.006718	-0.002972
0.2500	882.543	80.591	95.928	42.537	-0.767	50.335	1680.136	-0.005641	-0.006715	-0.002978
0.2600	877.268	80.324	94.744	42.247	-0.761	50.315	1670.094	-0.005623	-0.006632	-0.002957
0.2700	870.851	79.760	94.523	41.980	-0.756	50.335	1657.877	-0.005583	-0.006617	-0.002939
0.2800	863.592	79.144	92.497	41.536	-0.758	50.314	1644.058	-0.005540	-0.006475	-0.002908
0.2900	847.527	77.687	91.983	40.773	-0.757	50.335	1613.474	-0.005438	-0.006439	-0.002854
0.3000	800.894	72.141	86.159	38.160	-0.758	50.314	1524.696	-0.005050	-0.006031	-0.002671
0.3100	787.714	70.936	83.407	36.937	-0.748	50.336	1499.605	-0.004966	-0.005839	-0.002586
0.3200	754.606	66.473	78.236	34.881	-0.754	50.314	1436.577	-0.004653	-0.005477	-0.002442
0.3300	715.683	62.065	73.872	32.547	-0.738	50.336	1362.476	-0.004345	-0.005171	-0.002278
0.3400	668.313	56.369	67.678	29.585	-0.739	50.315	1272.297	-0.003946	-0.004737	-0.002071
0.3500	651.947	53.634	64.620	28.167	-0.730	50.336	1241.140	-0.003754	-0.004523	-0.001972
0.3600	616.931	49.675	58.714	25.988	-0.733	50.315	1174.479	-0.003477	-0.004110	-0.001819
0.3700	569.592	44.119	52.766	22.829	-0.728	50.335	1084.356	-0.003088	-0.003694	-0.001598
0.3800	511.702	36.572	43.858	18.885	-0.732	50.314	974.150	-0.002560	-0.003070	-0.001322
0.3900	491.790	33.846	41.594	17.342	-0.735	50.336	936.241	-0.002369	-0.002912	-0.001214
0.4000	446.689	28.247	34.728	14.619	-0.743	50.315	850.382	-0.001977	-0.002431	-0.001023
0.4100	393.188	21.373	26.016	10.742	-0.748	50.335	748.529	-0.001496	-0.001821	-0.000752
0.4200	369.939	18.454	21.847	8.796	-0.756	50.314	704.269	-0.001292	-0.001529	-0.000616
0.4300	340.138	14.260	17.370	6.891	-0.757	50.335	647.535	-0.000998	-0.001216	-0.000482
0.4400	308.668	10.329	11.133	4.588	-0.757	50.314	587.626	-0.000723	-0.000779	-0.000321
0.4500	280.716	6.596	7.575	2.570	-0.752	50.335	534.410	-0.000462	-0.000530	-0.000180
0.4600	264.951	4.238	4.340	1.275	-0.759	50.315	504.398	-0.000297	-0.000304	-0.000089
0.4700	253.710	2.429	2.239	0.373	-0.752	50.336	482.998	-0.000170	-0.000157	-0.000026
0.4800	235.691	0.293	-0.580	-0.970	-0.767	50.314	448.694	-0.000021	0.000041	0.000068
0.4900	218.243	-2.327	-4.571	-2.543	-0.775	50.336	415.478	0.000163	0.000320	0.000178
0.5000	219.415	-2.480	-4.556	-2.431	-0.774	50.315	417.709	0.000174	0.000319	0.000170
0.5100	224.104	-2.624	-4.836	-2.319	-0.762	50.336	426.636	0.000184	0.000339	0.000162
0.5200	230.761	-2.272	-3.946	-2.055	-0.765	50.315	439.310	0.000159	0.000276	0.000144
0.5300	244.076	-0.954	-1.900	-1.528	-0.766	50.336	464.659	0.000067	0.000133	0.000107
0.5400	270.481	1.699	1.890	-0.318	-0.760	50.315	514.927	-0.000119	-0.000132	0.000022
0.5500	289.612	4.365	3.700	1.124	-0.763	50.336	551.348	-0.000306	-0.000259	-0.000079
0.5600	317.114	7.116	7.337	3.072	-0.766	50.315	603.704	-0.000498	-0.000514	-0.000215
0.5700	350.508	10.820	12.188	5.128	-0.759	50.337	667.276	-0.000757	-0.000853	-0.000359
0.5800	384.757	15.157	18.636	7.405	-0.762	50.315	732.479	-0.001061	-0.001305	-0.000518
0.5900	426.161	19.872	23.083	10.047	-0.764	50.336	811.300	-0.001391	-0.001616	-0.000703
0.6000	469.698	24.516	31.267	12.936	-0.759	50.315	894.184	-0.001716	-0.002189	-0.000906
0.6100	512.348	30.271	36.786	15.843	-0.762	50.336	975.380	-0.002119	-0.002575	-0.001109
0.6200	547.305	34.565	42.524	18.064	-0.758	50.315	1041.927	-0.002420	-0.002977	-0.001264
0.6300	588.828	40.091	49.500	21.000	-0.762	50.335	1120.977	-0.002806	-0.003465	-0.001470
0.6400	627.917	45.310	55.045	23.748	-0.762	50.315	1195.393	-0.003172	-0.003853	-0.001662
0.6500	669.606	50.350	60.811	26.486	-0.762	50.336	1274.757	-0.003524	-0.004257	-0.001854
0.6600	700.098	55.036	65.399	28.474	-0.758	50.315	1332.808	-0.003853	-0.004578	-0.001993
0.6700	746.686	60.578	73.275	32.129	-0.765	50.335	1421.499	-0.004240	-0.005129	-0.002249
0.6800	784.002	65.479	78.431	34.449	-0.759	50.315	1492.538	-0.004584	-0.005490	-0.002411
0.6900	801.315	68.410	81.228	36.090	-0.754	50.335	1525.497	-0.004789	-0.005686	-0.002526
0.7000	825.345	71.582	85.672	37.632	-0.751	50.315	1571.245	-0.005011	-0.005997	-0.002634
0.7100	864.103	76.549	90.453	40.423	-0.756	50.336	1645.031	-0.005358	-0.006332	-0.002830
0.7200	877.884	79.199	93.538	41.660	-0.762	50.315	1671.267	-0.005544	-0.006548	-0.002916
0.7300	879.598	79.522	95.120	42.121	-0.756	50.336	1674.528	-0.005567	-0.006658	-0.002948
0.7400	875.480	79.902	94.857	42.189	-0.759	50.315	1666.689	-0.005593	-0.006640	-0.002953
0.7500	876.712	79.985	94.830	42.232	-0.758	50.336	1669.035	-0.005599	-0.006638	-0.002956
0.7600	876.412	80.238	94.342	42.204	-0.764	50.315	1668.463	-0.005617	-0.006604	-0.002954
0.7700	875.375	80.367	95.900	42.315	-0.758	50.336	1666.489	-0.005626	-0.006713	-0.002962
0.7800	874.849	80.534	94.260	42.439	-0.760	50.315	1665.487	-0.005637	-0.006598	-0.002971
0.7900	859.174	78.962	92.649	41.801	-0.754	50.336	1635.647	-0.005527	-0.006485	-0.002926
0.8000	828.997	76.214	88.865	39.937	-0.766	50.315	1578.197	-0.005335	-0.006221	-0.002796
0.8100	784.543	70.628	84.252	37.146	-0.761	50.336	1493.568	-0.004944	-0.005898	-0.002600
0.8200	758.875	67.386	80.797	35.380	-0.763	50.314	1444.702	-0.004717	-0.005656	-0.002477
0.8300	720.988	63.077	74.708	33.335	-0.761	50.336	1372.576	-0.004415	-0.005230	-0.002333
0.8400	692.239	59.080	70.123	30.892	-0.750	50.315	1317.844	-0.004136	-0.004909	-0.002162
0.8500	639.850	53.073	64.008	27.834	-0.764	50.336	1218.109	-0.003715	-0.004481	-0.001948
0.8600	603.947	48.514	58.700	25.362	-0.763	50.314	1149.759	-0.003396	-0.004109	-0.001775
0.8700	576.024	44.763	52.863	23.483	-0.761	50.336	1096.601	-0.003133	-0.003700	-0.001644
0.8800	525.408	38.955	45.956	19.872	-0.752	50.315	1000.242	-0.002727	-0.003217	-0.001391
0.8900	469.427	31.714	37.508	16.493	-0.771	50.336	893.669	-0.002220	-0.002626	-0.001155
0.9000	429.347	26.412	31.865	13.285	-0.767	50.315	817.366	-0.001849	-0.002231	-0.000930
0.9100	396.900	22.101	25.447	11.241	-0.774	50.336	755.596	-0.001547	-0.001781	-0.000787
0.9200	351.680	16.153	19.582	7.878	-0.776	50.315	669.508	-0.001131	-0.001371	-0.000551
0.9300	321.924	12.601	14.246	5.919	-0.771	50.336	612.860	-0.000882	-0.000997	-0.000414
0.9400	307.406	10.077	11.035	4.531	-0.765	50.314	585.222	-0.000705	-0.000772	-0.000317
0.9500	284.879	7.216	7.477	2.726	-0.760	50.336	542.336	-0.000505	-0.000523	-0.000191
0.9600	254.792	3.313	2.212	0.609	-0.754	50.314	485.058	-0.000232	-0.000155	-0.000043
0.9700	250.539	2.078	1.086	0.027	-0.756	50.336	476.961	-0.000145	-0.000076	-0.000002
0.9800	233.692	-0.210	-1.944	-1.153	-0.754	50.315	444.889	0.000015	0.000136	0.000081
0.9900	229.649	-0.771	-2.528	-1.542	-0.759	50.336	437.193	0.000054	0.000177	0.000108
1.0000	220.782	-2.508	-5.209	-2.403	-0.765	50.315	420.313	0.000176	0.000365	0.000168
1.0100	223.127	-2.468	-3.529	-2.528	-0.748	50.335	424.776	0.000173	0.000247	0.000177
1.0200	228.597	-2.144	-4.323	-2.348	-0.746	50.315	435.190	0.000150	0.000303	0.000164
1.0300	240.470	-1.348	-2.680	-1.709	-0.756	50.335	457.792	0.000094	0.000188	0.000120
1.0400	266.243	1.713	1.207	-0.388	-0.745	50.315	506.859	-0.000120	-0.000085	0.000027
1.0500	290.740	4.269	4.074	1.319	-0.742	50.336	553.493	-0.000299	-0.000285	-0.000092
1.0600	322.149	7.721	9.464	3.127	-0.744	50.315	613.289	-0.000540	-0.000662	-0.000219
1.0700	352.266	11.200	13.454	5.185	-0.752	50.336	670.624	-0.000784	-0.000942	-0.000363
1.0800	382.112	14.792	16.677	7.059	-0.761	50.315	727.444	-0.001035	-0.001167	-0.000494
1.0900	420.284	18.708	24.263	9.367	-0.766	50.336	800.114	-0.001310	-0.001698	-0.000656
1.1000	447.471	22.874	27.516	11.437	-0.756	50.315	851.870	-0.001601	-0.001926	-0.000801
1.1100	491.038	27.757	34.435	14.343	-0.761	50.336	934.811	-0.001943	-0.002410	-0.001004
1.1200	542.781	34.239	42.733	18.036	-0.751	50.315	1033.316	-0.002397	-0.002991	-0.001262
1.1300	578.173	38.941	47.179	20.248	-0.748	50.336	1100.693	-0.002726	-0.003303	-0.001417
1.1400	630.502	45.439	54.445	23.775	-0.755	50.315	1200.314	-0.003181	-0.003811	-0.001664
1.1500	655.629	49.046	59.771	25.515	-0.758	50.336	1248.150	-0.003433	-0.004184	-0.001786
1.1600	706.470	55.471	66.649	29.266	-0.762	50.315	1344.938	-0.003883	-0.004665	-0.002049
1.1700	744.733	60.284	72.193	32.086	-0.751	50.336	1417.780	-0.004220	-0.005054	-0.002246
1.1800	767.997	64.018	75.972	33.600	-0.748	50.315	1462.069	-0.004481	-0.005318	-0.002352
1.1900	797.302	67.636	80.837	35.881	-0.751	50.336	1517.859	-0.004735	-0.005659	-0.002512
1.2000	806.500	69.279	83.477	36.603	-0.752	50.314	1535.368	-0.004850	-0.005843	-0.002562
1.2100	862.781	76.635	90.659	40.325	-0.759	50.336	1642.513	-0.005364	-0.006346	-0.002823
1.2200	860.181	76.579	91.468	40.689	-0.763	50.315	1637.564	-0.005361	-0.006403	-0.002848
1.2300	874.473	78.680	92.441	41.786	-0.760	50.336	1664.772	-0.005508	-0.006471	-0.002925
1.2400	885.940	80.477	94.799	42.370	-0.750	50.315	1686.602	-0.005633	-0.006636	-0.002966
1.2500	882.889	80.561	94.578	42.662	-0.751	50.336	1680.794	-0.005639	-0.006620	-0.002986
1.2600	880.199	80.775	95.679	42.678	-0.759	50.315	1675.673	-0.005654	-0.006698	-0.002987
1.2700	873.075	80.239	93.913	42.220	-0.759	50.336	1662.111	-0.005617	-0.006574	-0.002955
1.2800	868.071	79.929	93.484	42.164	-0.763	50.315	1652.584	-0.005595	-0.006544	-0.002952
1.2900	852.907	78.569	92.859	41.203	-0.753	50.336	1623.716	-0.005500	-0.006500	-0.002884
1.3000	818.387	74.430	88.174	39.477	-0.748	50.315	1557.999	-0.005210	-0.006172	-0.002763
1.3100	778.727	70.192	82.894	36.700	-0.752	50.336	1482.496	-0.004913	-0.005803	-0.002569
1.3200	747.949	66.376	77.337	34.838	-0.760	50.314	1423.903	-0.004646	-0.005414	-0.002439
1.3300	720.777	62.896	75.445	33.018	-0.747	50.336	1372.175	-0.004403	-0.005281	-0.002311
1.3400	675.963	57.589	68.899	30.279	-0.751	50.315	1286.860	-0.004031	-0.004823	-0.002120
1.3500	638.843	52.595	63.327	27.821	-0.754	50.336	1216.192	-0.003682	-0.004433	-0.001947
1.3600	600.731	48.178	57.753	25.027	-0.748	50.315	1143.637	-0.003372	-0.004043	-0.001752
1.3700	562.393	43.109	51.349	22.330	-0.743	50.336	1070.652	-0.003018	-0.003594	-0.001563
1.3800	520.073	37.497	45.664	19.649	-0.750	50.315	990.086	-0.002625	-0.003196	-0.001375
1.3900	485.553	33.369	39.491	17.119	-0.750	50.336	924.368	-0.002336	-0.002764	-0.001198
1.4000	440.438	27.814	33.032	14.131	-0.751	50.315	838.480	-0.001947	-0.002312	-0.000989
1.4100	388.725	21.175	24.585	10.438	-0.742	50.336	740.032	-0.001482	-0.001721	-0.000731
1.4200	370.240	18.596	22.653	9.212	-0.743	50.315	704.842	-0.001302	-0.001586	-0.000645
1.4300	338.830	14.359	17.537	7.099	-0.744	50.336	645.046	-0.001005	-0.001228	-0.000497
1.4400	299.847	9.209	10.286	4.033	-0.752	50.315	570.831	-0.000645	-0.000720	-0.000282
1.4500	276.327	6.680	6.769	2.251	-0.746	50.335	526.056	-0.000468	-0.000474	-0.000158
1.4600	251.846	2.822	1.307	0.456	-0.747	50.315	479.450	-0.000198	-0.000091	-0.000032
1.4700	234.022	0.380	-0.568	-0.984	-0.754	50.336	445.518	-0.000027	0.000040	0.000069
1.4800	229.619	-0.406	-2.040	-1.459	-0.747	50.315	437.136	0.000028	0.000143	0.000102
1.4900	228.732	-1.431	-2.638	-1.582	-0.744	50.336	435.448	0.000100	0.000185	0.000111
1.5000	230.070	-1.233	-2.973	-1.763	-0.751	50.315	437.994	0.000086	0.000208	0.000123
1.5100	233.647	-1.458	-3.069	-1.609	-0.746	50.337	444.803	0.000102	0.000215	0.000113
1.5200	238.877	-1.121	-2.472	-1.624	-0.744	50.315	454.760	0.000078	0.000173	0.000114
1.5300	243.821	-0.448	-1.429	-1.333	-0.726	50.337	464.172	0.000031	0.000100	0.000093
1.5400	257.993	0.814	-0.887	-0.514	-0.735	50.315	491.152	-0.000057	0.000062	0.000036
1.5500	288.560	3.819	3.433	1.209	-0.743	50.336	549.345	-0.000267	-0.000240	-0.000085
1.5600	312.305	6.651	8.174	2.543	-0.745	50.315	594.549	-0.000466	-0.000572	-0.000178
1.5700	346.720	10.443	12.159	4.823	-0.740	50.336	660.067	-0.000731	-0.000851	-0.000338
1.5800	390.258	15.999	19.846	7.683	-0.740	50.315	742.950	-0.001120	-0.001389	-0.000538
1.5900	419.653	19.211	23.750	9.743	-0.741	50.336	798.912	-0.001345	-0.001662	-0.000682
1.6000	455.947	23.321	28.835	11.978	-0.735	50.315	868.006	-0.001632	-0.002018	-0.000838
1.6100	511.402	30.523	36.648	15.843	-0.745	50.335	973.577	-0.002137	-0.002565	-0.001109
1.6200	558.200	36.177	44.219	18.870	-0.748	50.315	1062.670	-0.002532	-0.003095	-0.001321
1.6300	591.759	40.346	48.876	21.319	-0.753	50.336	1126.556	-0.002824	-0.003421	-0.001492
1.6400	628.713	45.366	55.433	23.718	-0.753	50.315	1196.909	-0.003176	-0.003880	-0.001660
1.6500	665.999	50.407	61.130	26.432	-0.746	50.336	1267.891	-0.003528	-0.004279	-0.001850
1.6600	702.353	55.081	66.522	29.169	-0.746	50.315	1337.099	-0.003856	-0.004657	-0.002042
1.6700	738.180	59.935	71.025	31.642	-0.742	50.336	1405.306	-0.004195	-0.004972	-0.002215
1.6800	776.368	64.945	78.154	34.224	-0.743	50.315	1478.004	-0.004546	-0.005471	-0.002396
1.6900	796.025	67.973	81.490	35.657	-0.751	50.336	1515.427	-0.004758	-0.005704	-0.002496
1.7000	828.546	72.170	86.395	37.910	-0.761	50.315	1577.339	-0.005052	-0.006048	-0.002654
1.7100	851.945	75.385	89.089	39.619	-0.752	50.337	1621.885	-0.005277	-0.006236	-0.002773
1.7200	887.653	80.436	94.925	42.330	-0.746	50.315	1689.863	-0.005630	-0.006645	-0.002963
1.7300	877.869	79.662	93.360	42.025	-0.738	50.336	1671.238	-0.005576	-0.006535	-0.002942
1.7400	875.465	79.734	93.455	42.163	-0.747	50.315	1666.660	-0.005581	-0.006542	-0.002951
1.7500	873.812	80.168	94.094	41.911	-0.742	50.336	1663.513	-0.005612	-0.006587	-0.002934
1.7600	875.239	80.069	95.162	42.301	-0.755	50.315	1666.231	-0.005605	-0.006661	-0.002961
1.7700	871.708	80.394	94.082	42.191	-0.748	50.336	1659.508	-0.005628	-0.006586	-0.002953
1.7800	864.299	79.508	93.330	41.911	-0.746	50.315	1645.403	-0.005566	-0.006533	-0.002934
1.7900	852.652	78.752	92.955	41.118	-0.742	50.335	1623.230	-0.005513	-0.006507	-0.002878
1.8000	828.952	76.313	89.576	39.923	-0.744	50.315	1578.112	-0.005342	-0.006270	-0.002795
1.8100	782.634	70.781	82.518	36.938	-0.739	50.336	1489.935	-0.004955	-0.005776	-0.002586
1.8200	746.236	65.984	78.934	34.893	-0.744	50.315	1420.641	-0.004619	-0.005525	-0.002442
1.8300	718.764	62.767	74.431	32.852	-0.735	50.336	1368.341	-0.004394	-0.005210	-0.002300
1.8400	677.781	57.520	69.080	30.099	-0.745	50.315	1290.321	-0.004026	-0.004836	-0.002107
1.8500	642.495	53.537	63.745	27.915	-0.742	50.336	1223.145	-0.003748	-0.004462	-0.001954
1.8600	594.178	47.475	56.922	24.749	-0.742	50.315	1131.163	-0.003323	-0.003985	-0.001732
1.8700	557.359	42.366	51.499	22.081	-0.749	50.336	1061.068	-0.002966	-0.003605	-0.001546
1.8800	512.424	37.313	44.080	19.064	-0.742	50.315	975.523	-0.002612	-0.003086	-0.001334
1.8900	478.820	32.615	38.812	16.856	-0.743	50.336	911.551	-0.002283	-0.002717	-0.001180
1.9000	449.334	28.683	35.423	14.688	-0.746	50.315	855.417	-0.002008	-0.002480	-0.001028
1.9100	394.992	22.424	26.350	11.105	-0.754	50.336	751.963	-0.001570	-0.001845	-0.000777
1.9200	368.421	18.385	20.652	8.976	-0.746	50.315	701.380	-0.001287	-0.001446	-0.000628
1.9300	329.182	13.571	16.304	6.336	-0.752	50.336	626.678	-0.000950	-0.001141	-0.000444
1.9400	310.502	10.554	11.993	4.754	-0.754	50.315	591.116	-0.000739	-0.000840	-0.000333
1.9500	282.143	6.960	7.492	2.779	-0.756	50.336	537.128	-0.000487	-0.000524	-0.000195
1.9600	257.452	3.846	3.019	1.056	-0.760	50.315	490.122	-0.000269	-0.000211	-0.000074
1.9700	236.803	0.856	-0.638	-0.541	-0.755	50.337	450.811	-0.000060	0.000045	0.000038
1.9800	235.811	0.307	-1.317	-1.028	-0.758	50.315	448.923	-0.000022	0.000092	0.000072
1.9900	230.791	-0.209	-2.625	-1.458	-0.750	50.336	439.367	0.000015	0.000184	0.000102
2.0000	221.594	-2.089	-3.848	-2.209	-0.757	50.315	421.858	0.000146	0.000269	0.000155
2.0100	220.873	-2.678	-3.975	-2.486	-0.762	50.336	420.485	0.000187	0.000278	0.000174
2.0200	228.627	-1.878	-4.627	-2.417	-0.750	50.315	435.247	0.000131	0.000324	0.000169
2.0300	240.575	-0.983	-2.471	-1.861	-0.749	50.336	457.993	0.000069	0.000173	0.000130
2.0400	269.925	2.147	1.099	-0.207	-0.750	50.315	513.868	-0.000150	-0.000077	0.000014
2.0500	290.875	4.197	5.227	1.235	-0.752	50.336	553.751	-0.000294	-0.000366	-0.000086
2.0600	317.475	7.325	8.814	3.003	-0.741	50.316	604.391	-0.000513	-0.000617	-0.000210
2.0700	350.207	11.341	14.162	4.878	-0.749	50.336	666.704	-0.000794	-0.000991	-0.000341
2.0800	372.689	13.754	16.995	6.725	-0.753	50.315	709.505	-0.000963	-0.001190	-0.000471
2.0900	428.024	19.745	24.821	10.199	-0.756	50.336	814.848	-0.001382	-0.001737	-0.000714
2.1000	461.688	24.081	29.794	12.590	-0.750	50.315	878.935	-0.001686	-0.002086	-0.000881
2.1100	496.088	28.333	34.312	14.869	-0.741	50.336	944.424	-0.001983	-0.002402	-0.001041
2.1200	552.640	35.544	42.969	18.594	-0.760	50.316	1052.084	-0.002488	-0.003008	-0.001302
2.1300	596.042	41.033	50.555	21.540	-0.746	50.336	1134.710	-0.002872	-0.003539	-0.001508
2.1400	629.315	45.241	55.643	23.832	-0.752	50.315	1198.053	-0.003167	-0.003895	-0.001668
2.1500	669.786	51.093	62.408	26.736	-0.759	50.337	1275.101	-0.003577	-0.004369	-0.001872
2.1600	710.243	55.809	67.897	29.377	-0.760	50.315	1352.119	-0.003907	-0.004753	-0.002056
2.1700	751.826	61.547	72.860	32.560	-0.753	50.336	1431.284	-0.004308	-0.005100	-0.002279
2.1800	767.576	63.963	76.738	33.781	-0.744	50.315	1461.267	-0.004477	-0.005372	-0.002365
2.1900	804.516	68.802	81.061	36.200	-0.752	50.336	1531.591	-0.004816	-0.005674	-0.002534
2.2000	829.448	72.312	85.240	38.133	-0.752	50.316	1579.056	-0.005062	-0.005967	-0.002669
2.2100	841.696	74.347	88.507	39.118	-0.751	50.336	1602.373	-0.005204	-0.006195	-0.002738
2.2200	860.782	76.607	91.871	40.673	-0.756	50.315	1638.708	-0.005363	-0.006431	-0.002847
2.2300	875.014	79.047	93.178	41.522	-0.752	50.336	1665.802	-0.005533	-0.006522	-0.002907
2.2400	883.235	80.253	95.510	42.511	-0.751	50.315	1681.452	-0.005618	-0.006686	-0.002976
2.2500	892.161	81.742	96.957	42.985	-0.745	50.336	1698.446	-0.005722	-0.006787	-0.003009
2.2600	889.276	81.995	96.818	43.093	-0.751	50.316	1692.953	-0.005740	-0.006777	-0.003017
2.2700	876.727	80.912	94.663	42.581	-0.743	50.336	1669.064	-0.005664	-0.006626	-0.002981
2.2800	857.882	78.891	93.177	41.799	-0.747	50.315	1633.186	-0.005522	-0.006522	-0.002926
2.2900	828.095	75.878	90.355	39.729	-0.739	50.336	1576.481	-0.005311	-0.006325	-0.002781
2.3000	819.184	74.416	87.161	39.476	-0.746	50.315	1559.515	-0.005209	-0.006101	-0.002763
2.3100	785.129	71.049	84.712	37.256	-0.753	50.337	1494.684	-0.004973	-0.005930	-0.002608
2.3200	756.124	67.203	80.406	35.240	-0.751	50.316	1439.466	-0.004704	-0.005628	-0.002467
2.3300	732.094	64.144	76.488	33.586	-0.749	50.336	1393.719	-0.004490	-0.005354	-0.002351
2.3400	684.679	58.770	70.859	30.697	-0.754	50.315	1303.453	-0.004114	-0.004960	-0.002149
2.3500	637.009	52.553	63.089	27.640	-0.751	50.337	1212.702	-0.003679	-0.004416	-0.001935
2.3600	592.345	47.123	55.810	24.499	-0.752	50.316	1127.672	-0.003299	-0.003907	-0.001715
2.3700	547.395	41.525	50.403	21.445	-0.755	50.336	1042.099	-0.002907	-0.003528	-0.001501
2.3800	523.319	38.016	46.178	19.693	-0.753	50.316	996.265	-0.002661	-0.003232	-0.001379
2.3900	467.564	31.814	38.811	16.010	-0.751	50.336	890.121	-0.002227	-0.002717	-0.001121
2.4000	446.013	28.389	33.854	14.549	-0.748	50.316	849.094	-0.001987	-0.002370	-0.001018
2.4100	401.514	22.747	27.514	11.712	-0.741	50.336	764.380	-0.001592	-0.001926	-0.000820
2.4200	373.621	19.423	23.082	9.685	-0.745	50.316	711.279	-0.001360	-0.001616	-0.000678
2.4300	333.946	14.118	16.664	6.585	-0.747	50.336	635.748	-0.000988	-0.001166	-0.000461
2.4400	313.222	11.058	12.061	4.961	-0.750	50.316	596.294	-0.000774	-0.000844	-0.000347
2.4500	270.647	5.781	5.865	2.027	-0.755	50.336	515.242	-0.000405	-0.000411	-0.000142
2.4600	259.450	3.538	2.418	0.985	-0.751	50.316	493.927	-0.000248	-0.000169	-0.000069
2.4700	246.556	1.924	0.361	0.012	-0.748	50.336	469.379	-0.000135	-0.000025	-0.000001
2.4800	234.428	0.492	-0.957	-1.278	-0.750	50.315	446.291	-0.000034	0.000067	0.000089
2.4900	230.070	-0.801	-2.445	-1.777	-0.752	50.336	437.994	0.000056	0.000171	0.000124
2.5000	220.301	-5.530	-8.237	-3.628	-0.749	50.319	419.397	0.000387	0.000577	0.000254
2.5100	225.877	-4.716	-6.112	-3.436	-0.759	50.332	430.012	0.000330	0.000428	0.000241
2.5200	234.894	-4.182	-6.402	-2.875	-0.753	50.319	447.178	0.000293	0.000448	0.000201
2.5300	263.673	-1.190	-2.042	-1.359	-0.759	50.333	501.966	0.000083	0.000143	0.000095
2.5400	290.740	2.458	3.007	0.399	-0.760	50.319	553.493	-0.000172	-0.000210	-0.000028
2.5500	332.519	6.693	8.325	3.045	-0.755	50.333	633.030	-0.000468	-0.000583	-0.000213
2.5600	354.731	9.671	12.216	4.739	-0.747	50.320	675.316	-0.000677	-0.000855	-0.000332
2.5700	400.793	15.060	19.094	7.671	-0.756	50.333	763.006	-0.001054	-0.001337	-0.000537
2.5800	442.902	20.153	24.137	10.451	-0.760	50.320	843.172	-0.001411	-0.001690	-0.000732
2.5900	498.628	27.141	34.199	14.550	-0.754	50.333	949.259	-0.001900	-0.002394	-0.001019
2.6000	556.457	34.127	41.495	18.079	-0.759	50.319	1059.351	-0.002389	-0.002905	-0.001266
2.6100	619.351	42.072	51.612	22.484	-0.752	50.333	1179.085	-0.002945	-0.003613	-0.001574
2.6200	652.248	47.069	56.627	24.831	-0.737	50.319	1241.713	-0.003295	-0.003964	-0.001738
2.6300	700.609	53.101	63.618	28.167	-0.738	50.333	1333.780	-0.003717	-0.004453	-0.001972
2.6400	776.428	62.628	75.765	33.324	-0.746	50.319	1478.119	-0.004384	-0.005304	-0.002333
2.6500	816.433	68.409	81.518	36.463	-0.747	50.332	1554.279	-0.004789	-0.005706	-0.002552
2.6600	860.346	74.205	88.659	39.521	-0.751	50.319	1637.878	-0.005194	-0.006206	-0.002766
2.6700	906.679	80.294	94.982	42.789	-0.747	50.333	1726.084	-0.005621	-0.006649	-0.002995
2.6800	959.459	87.369	104.199	46.664	-0.739	50.320	1826.563	-0.006116	-0.007294	-0.003266
2.6900	988.704	91.663	107.587	48.735	-0.745	50.332	1882.238	-0.006416	-0.007531	-0.003411
2.7000	1019.287	96.461	112.687	51.000	-0.738	50.320	1940.460	-0.006752	-0.007888	-0.003570
2.7100	1050.501	100.321	118.023	53.250	-0.745	50.332	1999.884	-0.007022	-0.008262	-0.003727
2.7200	1059.533	102.551	121.190	54.405	-0.751	50.319	2017.078	-0.007179	-0.008483	-0.003808
2.7300	1083.127	105.861	124.680	55.791	-0.756	50.333	2061.996	-0.007410	-0.008728	-0.003905
2.7400	1081.279	106.467	125.487	56.069	-0.757	50.319	2058.477	-0.007453	-0.008784	-0.003925
2.7500	1083.338	107.028	125.722	56.265	-0.755	50.333	2062.397	-0.007492	-0.008801	-0.003939
2.7600	1083.488	107.433	126.960	56.739	-0.755	50.320	2062.683	-0.007520	-0.008887	-0.003972
2.7700	1075.463	107.053	126.656	56.321	-0.762	50.332	2047.405	-0.007494	-0.008866	-0.003942
2.7800	1064.357	106.675	124.041	55.765	-0.760	50.320	2026.262	-0.007467	-0.008683	-0.003904
2.7900	1033.759	102.902	121.747	54.267	-0.755	50.333	1968.012	-0.007203	-0.008522	-0.003799
2.8000	981.641	96.995	115.077	51.332	-0.760	50.320	1868.792	-0.006790	-0.008055	-0.003593
2.8100	950.877	93.528	110.033	49.236	-0.757	50.332	1810.226	-0.006547	-0.007702	-0.003447
2.8200	909.715	88.323	103.668	46.593	-0.753	50.320	1731.863	-0.006183	-0.007257	-0.003262
2.8300	879.928	84.588	100.208	44.967	-0.748	50.332	1675.158	-0.005921	-0.007015	-0.003148
2.8400	832.348	79.257	93.471	41.634	-0.745	50.320	1584.578	-0.005548	-0.006543	-0.002914
2.8500	762.271	70.698	83.825	37.062	-0.752	50.332	1451.168	-0.004949	-0.005868	-0.002594
2.8600	714.661	64.931	77.099	33.851	-0.757	50.320	1360.531	-0.004545	-0.005397	-0.002370
2.8700	664.105	58.434	69.595	30.600	-0.747	50.332	1264.286	-0.004090	-0.004872	-0.002142
2.8800	591.263	48.920	58.784	25.680	-0.756	50.320	1125.612	-0.003424	-0.004115	-0.001798
2.8900	552.985	43.937	52.931	22.802	-0.745	50.332	1052.742	-0.003076	-0.003705	-0.001596
2.9000	513.100	38.772	46.484	19.788	-0.750	50.320	976.810	-0.002714	-0.003254	-0.001385
2.9100	460.065	31.870	37.549	16.535	-0.750	50.332	875.845	-0.002231	-0.002628	-0.001157
2.9200	412.139	25.794	30.879	12.965	-0.751	50.320	784.607	-0.001806	-0.002162	-0.000908
2.9300	356.203	18.594	21.166	8.867	-0.747	50.332	678.120	-0.001302	-0.001482	-0.000621
2.9400	327.529	14.611	17.204	7.015	-0.753	50.320	623.531	-0.001023	-0.001204	-0.000491
2.9500	306.805	11.648	12.772	5.198	-0.755	50.333	584.078	-0.000815	-0.000894	-0.000364
2.9600	281.963	7.944	8.588	2.974	-0.752	50.320	536.785	-0.000556	-0.000601	-0.000208
2.9700	264.229	5.725	5.823	1.889	-0.755	50.332	503.025	-0.000401	-0.000408	-0.000132
2.9800	260.397	4.296	3.713	1.443	-0.751	50.320	495.729	-0.000301	-0.000260	-0.000101
2.9900	229.379	0.675	-1.164	-0.748	-0.751	50.332	436.678	-0.000047	0.000081	0.000052
3.0000	226.869	-0.140	-2.833	-1.527	-0.759	50.320	431.900	0.000010	0.000198	0.000107
3.0100	232.940	-0.238	-1.289	-1.291	-0.755	50.333	443.459	0.000017	0.000090	0.000090
3.0200	243.280	0.800	-0.662	-0.984	-0.759	50.321	463.142	-0.000056	0.000046	0.000069
3.0300	252.853	1.784	-0.414	-0.431	-0.760	50.332	481.367	-0.000125	0.000029	0.000030
3.0400	284.833	4.408	4.212	1.333	-0.755	50.321	542.250	-0.000309	-0.000295	-0.000093
3.0500	331.782	10.203	11.145	4.338	-0.747	50.332	631.628	-0.000714	-0.000780	-0.000304
3.0600	368.542	13.949	17.178	6.834	-0.748	50.320	701.609	-0.000976	-0.001202	-0.000478
3.0700	408.172	18.708	21.904	9.561	-0.754	50.332	777.054	-0.001310	-0.001533	-0.000669
3.0800	434.832	22.199	25.876	11.215	-0.750	50.320	827.808	-0.001554	-0.001811	-0.000785
3.0900	507.569	30.690	37.563	16.160	-0.752	50.332	966.282	-0.002148	-0.002629	-0.001131
3.1000	543.532	35.237	42.232	18.246	-0.746	50.320	1034.746	-0.002467	-0.002956	-0.001277
3.1100	605.419	43.179	51.570	22.539	-0.742	50.332	1152.563	-0.003023	-0.003610	-0.001578
3.1200	650.445	48.737	58.700	25.681	-0.751	50.320	1238.279	-0.003412	-0.004109	-0.001798
3.1300	716.524	57.042	68.579	30.198	-0.743	50.332	1364.079	-0.003993	-0.004801	-0.002114
3.1400	761.024	63.032	76.098	33.335	-0.750	50.320	1448.793	-0.004412	-0.005327	-0.002333
3.1500	819.710	70.586	83.768	37.551	-0.756	50.332	1560.516	-0.004941	-0.005864	-0.002629
3.1600	855.763	75.765	90.271	39.921	-0.758	50.320	1629.152	-0.005304	-0.006319	-0.002795
3.1700	905.792	82.094	97.846	43.470	-0.752	50.332	1724.396	-0.005747	-0.006849	-0.003043
3.1800	954.289	88.490	104.307	46.955	-0.748	50.321	1816.721	-0.006194	-0.007302	-0.003287
3.1900	980.438	92.548	108.741	48.972	-0.752	50.333	1866.503	-0.006478	-0.007612	-0.003428
3.2000	1031.550	98.735	117.078	52.375	-0.744	50.320	1963.806	-0.006911	-0.008195	-0.003666
3.2100	1059.894	103.268	122.540	54.418	-0.745	50.332	2017.765	-0.007229	-0.008578	-0.003809
3.2200	1065.755	104.770	123.082	55.223	-0.750	50.321	2028.923	-0.007334	-0.008616	-0.003866
3.2300	1077.567	106.774	124.708	56.153	-0.756	50.332	2051.411	-0.007474	-0.008730	-0.003931
3.2400	1080.392	107.630	125.512	56.572	-0.747	50.320	2056.789	-0.007534	-0.008786	-0.003960
3.2500	1098.006	110.425	129.042	57.879	-0.751	50.331	2090.321	-0.007730	-0.009033	-0.004052
3.2600	1085.923	109.485	128.958	57.420	-0.753	50.320	2067.318	-0.007664	-0.009027	-0.004019
3.2700	1075.448	108.880	127.970	57.112	-0.764	50.331	2047.377	-0.007622	-0.008958	-0.003998
3.2800	1045.121	105.583	123.469	55.417	-0.763	50.320	1989.641	-0.007391	-0.008643	-0.003879
3.2900	1020.444	102.888	119.845	54.198	-0.757	50.332	1942.663	-0.007202	-0.008389	-0.003794
3.3000	990.718	99.186	116.704	52.319	-0.759	50.321	1886.072	-0.006943	-0.008169	-0.003662
3.3100	941.139	93.220	109.671	49.208	-0.759	50.332	1791.687	-0.006525	-0.007677	-0.003445
3.3200	921.903	91.156	106.545	48.012	-0.760	50.321	1755.066	-0.006381	-0.007458	-0.003361
3.3300	872.970	85.404	100.763	45.024	-0.768	50.332	1661.911	-0.005978	-0.007053	-0.003152
3.3400	818.582	78.625	92.735	41.355	-0.768	50.321	1558.371	-0.005504	-0.006491	-0.002895
3.3500	779.749	73.951	86.674	38.800	-0.763	50.332	1484.442	-0.005177	-0.006067	-0.002716
3.3600	711.851	65.296	77.781	34.476	-0.760	50.321	1355.181	-0.004571	-0.005445	-0.002413
3.3700	668.614	59.753	70.789	31.212	-0.750	50.332	1272.869	-0.004183	-0.004955	-0.002185
3.3800	602.850	51.880	62.146	26.848	-0.747	50.320	1147.671	-0.003632	-0.004350	-0.001879
3.3900	546.117	44.583	51.834	22.940	-0.755	50.332	1039.667	-0.003121	-0.003628	-0.001606
3.4000	514.588	40.512	47.555	20.513	-0.747	50.321	979.643	-0.002836	-0.003329	-0.001436
3.4100	460.621	33.313	39.884	16.939	-0.742	50.331	876.904	-0.002332	-0.002792	-0.001186
3.4200	424.387	28.361	33.686	14.202	-0.748	50.321	807.924	-0.001985	-0.002358	-0.000994
3.4300	367.490	21.682	24.653	10.174	-0.753	50.331	699.606	-0.001518	-0.001726	-0.000712
3.4400	332.849	16.462	18.985	7.825	-0.751	50.321	633.659	-0.001152	-0.001329	-0.000548
3.4500	298.990	12.041	13.579	5.018	-0.755	50.331	569.201	-0.000843	-0.000951	-0.000351
3.4600	268.392	7.860	7.617	2.681	-0.764	50.321	510.950	-0.000550	-0.000533	-0.000188
3.4700	246.240	4.463	2.546	0.860	-0.752	50.332	468.779	-0.000312	-0.000178	-0.000060
3.4800	233.902	2.514	1.362	-0.238	-0.759	50.321	445.290	-0.000176	-0.000095	0.000017
3.4900	220.136	0.367	-2.694	-1.233	-0.756	50.331	419.083	-0.000026	0.000189	0.000086
3.5000	223.938	0.054	-1.567	-1.402	-0.750	50.321	426.321	-0.000004	0.000110	0.000098
3.5100	234.533	1.236	-0.276	-1.386	-0.753	50.331	446.491	-0.000087	0.000019	0.000097
3.5200	248.525	2.065	0.860	-0.263	-0.749	50.321	473.127	-0.000145	-0.000060	0.000018
3.5300	268.603	4.296	2.572	0.721	-0.758	50.331	511.351	-0.000301	-0.000180	-0.000050
3.5400	286.607	6.090	5.976	2.167	-0.757	50.321	545.626	-0.000426	-0.000418	-0.000152
3.5500	328.386	10.512	11.937	4.297	-0.758	50.332	625.162	-0.000736	-0.000836	-0.000301
3.5600	369.519	15.648	18.400	7.129	-0.754	50.321	703.468	-0.001095	-0.001288	-0.000499
3.5700	403.663	19.296	22.388	9.382	-0.758	50.332	768.471	-0.001351	-0.001567	-0.000657
3.5800	451.964	24.741	29.864	12.548	-0.754	50.321	860.424	-0.001732	-0.002091	-0.000878
3.5900	497.576	30.718	36.937	15.509	-0.752	50.332	947.256	-0.002150	-0.002586	-0.001086
3.6000	551.993	36.939	44.453	18.996	-0.751	50.321	1050.854	-0.002586	-0.003112	-0.001330
3.6100	602.564	43.501	51.543	22.579	-0.751	50.332	1147.127	-0.003045	-0.003608	-0.001581
3.6200	654.487	50.460	60.827	26.264	-0.751	50.321	1245.975	-0.003532	-0.004258	-0.001839
3.6300	712.046	57.368	68.037	30.031	-0.750	50.331	1355.553	-0.004016	-0.004763	-0.002102
3.6400	767.831	64.581	76.876	34.073	-0.742	50.321	1461.754	-0.004521	-0.005381	-0.002385
3.6500	813.172	70.741	84.031	37.118	-0.750	50.331	1548.071	-0.004952	-0.005882	-0.002598
3.6600	866.343	77.756	91.315	40.895	-0.753	50.321	1649.294	-0.005443	-0.006392	-0.002863
3.6700	914.914	83.985	98.984	44.440	-0.748	50.331	1741.762	-0.005879	-0.006929	-0.003111
3.6800	949.705	89.164	105.806	47.221	-0.751	50.321	1807.995	-0.006242	-0.007406	-0.003305
3.6900	989.696	94.048	110.742	49.997	-0.751	50.331	1884.127	-0.006583	-0.007752	-0.003500
3.7000	1009.909	97.711	115.092	51.597	-0.752	50.321	1922.607	-0.006840	-0.008056	-0.003612
3.7100	1039.846	101.372	119.482	53.446	-0.754	50.331	1979.599	-0.007096	-0.008364	-0.003741
3.7200	1067.468	105.570	123.497	55.487	-0.751	50.321	2032.185	-0.007390	-0.008645	-0.003884
3.7300	1074.065	106.958	125.458	56.392	-0.756	50.331	2044.744	-0.007487	-0.008782	-0.003947
3.7400	1092.295	109.415	128.208	57.779	-0.764	50.321	2079.449	-0.007659	-0.008975	-0.004045
3.7500	1083.608	109.555	128.069	57.266	-0.764	50.331	2062.912	-0.007669	-0.008965	-0.004009
3.7600	1080.512	109.652	128.807	57.405	-0.756	50.321	2057.018	-0.007676	-0.009017	-0.004018
3.7700	1070.323	108.614	127.597	56.919	-0.759	50.331	2037.621	-0.007603	-0.008932	-0.003984
3.7800	1056.843	107.602	124.944	56.403	-0.757	50.321	2011.957	-0.007532	-0.008746	-0.003948
3.7900	1019.452	103.521	120.983	54.210	-0.755	50.331	1940.775	-0.007246	-0.008469	-0.003795
3.8000	995.812	100.573	118.605	52.931	-0.762	50.321	1895.771	-0.007040	-0.008302	-0.003705
3.8100	955.611	96.263	111.437	50.484	-0.764	50.331	1819.239	-0.006738	-0.007801	-0.003534
3.8200	918.431	91.157	107.477	48.069	-0.764	50.322	1748.457	-0.006381	-0.007523	-0.003365
3.8300	864.479	85.488	100.792	44.703	-0.763	50.331	1645.746	-0.005984	-0.007055	-0.003129
3.8400	825.330	79.622	94.037	42.232	-0.756	50.321	1571.217	-0.005574	-0.006583	-0.002956
3.8500	770.807	73.447	87.298	38.535	-0.756	50.331	1467.419	-0.005141	-0.006111	-0.002697
3.8600	706.846	65.732	77.891	33.962	-0.762	50.321	1345.654	-0.004601	-0.005452	-0.002377
3.8700	661.145	59.683	69.565	31.058	-0.764	50.331	1258.650	-0.004178	-0.004870	-0.002174
3.8800	614.406	53.819	63.453	27.903	-0.748	50.321	1169.672	-0.003767	-0.004442	-0.001953
3.8900	563.580	47.489	55.935	24.136	-0.746	50.331	1072.912	-0.003324	-0.003915	-0.001689
3.9000	510.650	40.400	47.721	20.708	-0.751	50.322	972.147	-0.002828	-0.003340	-0.001450
3.9100	451.604	32.978	39.520	16.619	-0.753	50.331	859.737	-0.002308	-0.002766	-0.001163
3.9200	421.757	28.444	33.047	14.369	-0.755	50.321	802.917	-0.001991	-0.002313	-0.001006
3.9300	371.818	22.255	25.614	10.909	-0.759	50.331	707.846	-0.001558	-0.001793	-0.000764
3.9400	339.101	17.948	21.110	8.364	-0.757	50.321	645.561	-0.001256	-0.001478	-0.000585
3.9500	301.229	12.532	13.050	5.544	-0.750	50.332	573.463	-0.000877	-0.000914	-0.000388
3.9600	288.530	10.484	10.576	4.200	-0.755	50.321	549.288	-0.000734	-0.000740	-0.000294
3.9700	265.357	7.241	6.671	2.835	-0.763	50.332	505.171	-0.000507	-0.000467	-0.000198
3.9800	247.022	4.338	3.282	1.026	-0.756	50.321	470.266	-0.000304	-0.000230	-0.000072
3.9900	243.821	3.581	2.641	0.624	-0.754	50.331	464.172	-0.000251	-0.000185	-0.000044
4.0000	236.036	2.009	0.223	-0.015	-0.750	50.322	449.352	-0.000141	-0.000016	0.000001
4.0100	238.681	2.318	1.514	-0.001	-0.747	50.331	454.388	-0.000162	-0.000106	0.000000
4.0200	246.376	2.809	0.639	0.236	-0.756	50.321	469.036	-0.000197	-0.000045	-0.000017
4.0300	260.743	3.944	2.100	0.637	-0.752	50.331	496.387	-0.000276	-0.000147	-0.000045
4.0400	287.704	6.637	6.586	2.042	-0.757	50.321	547.714	-0.000465	-0.000461	-0.000143
4.0500	324.734	11.045	11.967	4.590	-0.770	50.331	618.210	-0.000773	-0.000838	-0.000321
4.0600	362.771	14.989	17.746	6.935	-0.754	50.322	690.622	-0.001049	-0.001242	-0.000485
4.0700	396.059	19.171	22.389	9.172	-0.764	50.332	753.994	-0.001342	-0.001567	-0.000642
4.0800	453.542	25.656	31.130	13.034	-0.762	50.322	863.428	-0.001796	-0.002179	-0.000912
4.0900	490.557	30.340	36.982	15.469	-0.759	50.331	933.895	-0.002124	-0.002589	-0.001083
4.1000	541.534	36.473	44.482	18.701	-0.767	50.322	1030.941	-0.002553	-0.003114	-0.001309
4.1100	598.266	43.347	52.099	22.802	-0.758	50.331	1138.945	-0.003034	-0.003647	-0.001596
4.1200	636.724	48.414	57.768	25.305	-0.763	50.321	1212.158	-0.003389	-0.004044	-0.001771
4.1300	700.339	56.551	67.175	29.641	-0.765	50.331	1333.265	-0.003959	-0.004702	-0.002075
4.1400	776.307	66.010	78.876	34.642	-0.761	50.321	1477.890	-0.004621	-0.005521	-0.002425
4.1500	813.262	71.778	85.156	37.410	-0.768	50.331	1548.243	-0.005024	-0.005961	-0.002619
4.1600	834.452	74.373	88.328	39.256	-0.762	50.322	1588.583	-0.005206	-0.006183	-0.002748
4.1700	906.168	83.257	97.971	43.955	-0.761	50.332	1725.111	-0.005828	-0.006858	-0.003077
4.1800	950.968	89.261	104.850	47.305	-0.758	50.322	1810.398	-0.006248	-0.007339	-0.003311
4.1900	997.240	95.605	113.410	50.664	-0.755	50.331	1898.489	-0.006692	-0.007939	-0.003546
4.2000	1030.032	99.928	117.425	52.780	-0.758	50.322	1960.917	-0.006995	-0.008220	-0.003695
4.2100	1065.274	104.950	124.415	55.405	-0.758	50.331	2028.008	-0.007347	-0.008709	-0.003878
4.2200	1067.573	105.949	124.875	55.848	-0.756	50.323	2032.385	-0.007416	-0.008741	-0.003909
4.2300	1078.108	107.855	127.112	56.892	-0.768	50.331	2052.441	-0.007550	-0.008898	-0.003982
4.2400	1097.570	110.986	129.931	57.989	-0.762	50.322	2089.491	-0.007769	-0.009095	-0.004059
4.2500	1098.246	111.587	129.612	58.531	-0.766	50.331	2090.778	-0.007811	-0.009073	-0.004097
4.2600	1087.922	111.126	130.543	57.932	-0.753	50.322	2071.123	-0.007779	-0.009138	-0.004055
4.2700	1078.724	110.369	128.040	57.754	-0.757	50.331	2053.614	-0.007726	-0.008963	-0.004043
4.2800	1041.950	106.507	124.500	55.765	-0.753	50.322	1983.604	-0.007455	-0.008715	-0.003904
4.2900	1021.571	104.111	120.957	54.726	-0.755	50.331	1944.809	-0.007288	-0.008467	-0.003831
4.3000	1015.004	103.196	121.441	54.170	-0.760	50.322	1932.306	-0.007224	-0.008501	-0.003792
4.3100	964.253	97.193	115.176	51.362	-0.759	50.331	1835.690	-0.006804	-0.008062	-0.003595
4.3200	927.644	93.277	109.046	49.206	-0.750	50.322	1765.995	-0.006529	-0.007633	-0.003444
4.3300	864.750	85.417	100.262	45.009	-0.750	50.331	1646.261	-0.005979	-0.007018	-0.003151
4.3400	819.454	80.029	93.801	42.135	-0.752	50.322	1560.030	-0.005602	-0.006566	-0.002949
4.3500	778.126	74.640	87.397	39.256	-0.752	50.331	1481.352	-0.005225	-0.006118	-0.002748
4.3600	728.607	68.494	80.419	35.935	-0.756	50.322	1387.081	-0.004795	-0.005629	-0.002515
4.3700	680.381	62.796	73.928	32.630	-0.757	50.332	1295.271	-0.004396	-0.005175	-0.002284
4.3800	627.902	56.020	67.105	28.947	-0.757	50.323	1195.364	-0.003921	-0.004697	-0.002026
4.3900	565.399	48.190	57.336	24.651	-0.749	50.331	1076.374	-0.003373	-0.004014	-0.001726
4.4000	510.109	41.004	47.778	20.707	-0.754	50.323	971.117	-0.002870	-0.003344	-0.001449
4.4100	473.455	36.093	41.677	18.162	-0.746	50.331	901.337	-0.002527	-0.002917	-0.001271
4.4200	420.209	29.160	34.824	14.773	-0.752	50.322	799.971	-0.002041	-0.002438	-0.001034
4.4300	387.282	24.433	28.419	11.992	-0.752	50.330	737.286	-0.001710	-0.001989	-0.000839
4.4400	344.857	18.778	21.193	9.117	-0.742	50.322	656.519	-0.001314	-0.001484	-0.000638
4.4500	307.962	14.189	16.247	6.460	-0.738	50.331	586.281	-0.000993	-0.001137	-0.000452
4.4600	279.168	10.162	9.731	3.822	-0.743	50.322	531.464	-0.000711	-0.000681	-0.000268
4.4700	253.860	6.327	6.420	2.126	-0.751	50.331	483.284	-0.000443	-0.000449	-0.000149
4.4800	241.552	4.561	3.449	0.596	-0.750	50.322	459.852	-0.000319	-0.000241	-0.000042
4.4900	245.083	4.001	2.447	0.792	-0.753	50.331	466.576	-0.000280	-0.000171	-0.000055
4.5000	244.647	3.525	2.489	0.346	-0.759	50.322	465.746	-0.000247	-0.000174	-0.000024
4.5100	238.576	2.824	1.140	-0.057	-0.751	50.331	454.187	-0.000198	-0.000080	0.000004
4.5200	244.061	2.823	1.991	0.028	-0.759	50.322	464.630	-0.000198	-0.000139	-0.000002
4.5300	256.730	4.157	3.101	0.666	-0.747	50.331	488.749	-0.000291	-0.000217	-0.000047
4.5400	275.831	5.851	5.229	1.540	-0.748	50.322	525.112	-0.000410	-0.000366	-0.000108
4.5500	328.341	11.226	13.259	4.892	-0.740	50.331	625.076	-0.000786	-0.000928	-0.000342
4.5600	357.496	15.044	17.607	6.878	-0.742	50.322	680.580	-0.001053	-0.001233	-0.000481
4.5700	391.595	18.820	21.028	9.185	-0.746	50.331	745.497	-0.001317	-0.001472	-0.000643
4.5800	449.725	25.794	29.698	12.701	-0.738	50.322	856.161	-0.001806	-0.002079	-0.000889
4.5900	494.855	31.281	37.549	15.870	-0.747	50.331	942.078	-0.002190	-0.002628	-0.001111
4.6000	548.131	37.679	45.399	19.343	-0.745	50.322	1043.501	-0.002638	-0.003178	-0.001354
4.6100	608.305	45.212	53.516	23.495	-0.751	50.331	1158.056	-0.003165	-0.003746	-0.001645
4.6200	649.498	50.420	59.937	26.281	-0.740	50.322	1236.477	-0.003529	-0.004196	-0.001840
4.6300	721.709	59.445	71.125	31.464	-0.738	50.331	1373.949	-0.004161	-0.004979	-0.002202
4.6400	765.893	65.843	77.263	34.491	-0.739	50.322	1458.063	-0.004609	-0.005408	-0.002414
4.6500	831.672	73.743	87.091	38.939	-0.748	50.330	1583.290	-0.005162	-0.006096	-0.002726
4.6600	862.931	78.289	92.968	41.606	-0.750	50.322	1642.799	-0.005480	-0.006508	-0.002912
4.6700	924.623	86.021	101.375	45.619	-0.759	50.330	1760.244	-0.006021	-0.007096	-0.003193
4.6800	950.261	89.937	106.364	47.639	-0.758	50.322	1809.053	-0.006296	-0.007446	-0.003335
4.6900	985.608	95.002	111.297	50.163	-0.758	50.330	1876.345	-0.006650	-0.007791	-0.003511
4.7000	1011.758	98.399	114.898	51.848	-0.767	50.322	1926.126	-0.006888	-0.008043	-0.003629
4.7100	1043.648	102.761	119.829	54.323	-0.759	50.330	1986.837	-0.007193	-0.008388	-0.003803
4.7200	1067.287	106.592	124.610	56.239	-0.770	50.322	2031.841	-0.007461	-0.008723	-0.003937
4.7300	1091.183	109.682	129.404	57.864	-0.765	50.331	2077.332	-0.007678	-0.009058	-0.004050
4.7400	1091.814	110.480	129.112	58.198	-0.764	50.322	2078.533	-0.007734	-0.009038	-0.004074
4.7500	1090.657	111.140	129.042	58.143	-0.755	50.331	2076.330	-0.007780	-0.009033	-0.004070
4.7600	1086.223	111.042	130.281	58.210	-0.747	50.323	2067.890	-0.007773	-0.009120	-0.004075
4.7700	1079.355	110.717	128.584	57.946	-0.751	50.331	2054.815	-0.007750	-0.009001	-0.004056
4.7800	1063.876	109.233	126.610	57.197	-0.749	50.323	2025.347	-0.007646	-0.008863	-0.004004
4.7900	1048.893	107.828	126.155	56.515	-0.754	50.330	1996.822	-0.007548	-0.008831	-0.003956
4.8000	997.405	102.299	118.564	53.529	-0.751	50.322	1898.804	-0.007161	-0.008299	-0.003747
4.8100	960.526	97.289	114.370	51.068	-0.748	50.330	1828.594	-0.006810	-0.008006	-0.003575
4.8200	918.897	92.393	108.602	48.568	-0.751	50.323	1749.344	-0.006468	-0.007602	-0.003400
4.8300	884.106	88.464	102.793	46.317	-0.750	50.330	1683.111	-0.006192	-0.007196	-0.003242
4.8400	829.147	81.559	95.397	42.816	-0.749	50.323	1578.484	-0.005709	-0.006678	-0.002997
4.8500	780.305	75.765	89.755	39.423	-0.755	50.330	1485.500	-0.005304	-0.006283	-0.002760
4.8600	727.300	69.043	81.742	35.741	-0.746	50.323	1384.592	-0.004833	-0.005722	-0.002502
4.8700	685.356	63.639	74.806	33.114	-0.753	50.330	1304.741	-0.004455	-0.005236	-0.002318
4.8800	629.886	57.029	66.440	29.391	-0.758	50.323	1199.141	-0.003992	-0.004651	-0.002057
4.8900	571.891	49.480	57.073	25.290	-0.749	50.331	1088.734	-0.003464	-0.003995	-0.001770
4.9000	511.823	41.792	49.722	21.277	-0.751	50.323	974.379	-0.002925	-0.003481	-0.001489
4.9100	470.570	36.571	42.193	18.190	-0.753	50.330	895.844	-0.002560	-0.002954	-0.001273
4.9200	417.624	29.484	33.909	14.647	-0.754	50.322	795.050	-0.002064	-0.002374	-0.001025
4.9300	393.354	25.640	29.712	12.548	-0.755	50.331	748.844	-0.001795	-0.002080	-0.000878
4.9400	343.775	19.733	22.126	8.670	-0.750	50.323	654.459	-0.001381	-0.001549	-0.000607
4.9500	304.791	14.118	14.886	6.001	-0.751	50.331	580.244	-0.000988	-0.001042	-0.000420
4.9600	281.572	10.918	11.021	4.227	-0.751	50.323	536.041	-0.000764	-0.000771	-0.000296
4.9700	261.795	7.705	7.185	2.765	-0.749	50.331	498.390	-0.000539	-0.000503	-0.000194
4.9800	245.730	5.290	3.896	1.291	-0.744	50.323	467.806	-0.000370	-0.000273	-0.000090
4.9900	235.210	3.790	1.918	0.236	-0.751	50.330	447.779	-0.000265	-0.000134	-0.000017
Test Cycles
Time (sec)	Axial stress (kPa)	Axial micro-strain #1	Axial micro-strain #2	Axial micro-strain #3	Confining pressure (kPa)	Temperature (�C)	Load (N)	Displacement #1 (mm)	Displacement #2 (mm)	Displacement #3 (mm)
0.0000	237.359	3.356	1.098	0.220	-0.750	50.323	451.870	-0.000235	-0.000077	-0.000015
0.0100	239.042	2.807	0.929	0.236	-0.751	50.331	455.074	-0.000197	-0.000065	-0.000017
0.0200	246.075	3.524	2.183	0.429	-0.760	50.323	468.464	-0.000247	-0.000153	-0.000030
0.0300	260.142	4.448	2.950	0.861	-0.758	50.330	495.243	-0.000311	-0.000206	-0.000060
0.0400	307.887	9.754	10.688	3.643	-0.753	50.323	586.138	-0.000683	-0.000748	-0.000255
0.0500	336.441	13.093	14.258	5.697	-0.756	50.330	640.497	-0.000917	-0.000998	-0.000399
0.0600	365.536	16.335	19.319	7.642	-0.752	50.323	695.887	-0.001143	-0.001352	-0.000535
0.0700	411.523	21.486	25.640	10.368	-0.761	50.330	783.434	-0.001504	-0.001795	-0.000726
0.0800	446.569	25.822	29.906	12.674	-0.759	50.323	850.153	-0.001808	-0.002093	-0.000887
0.0900	495.126	31.730	38.396	16.081	-0.759	50.330	942.593	-0.002221	-0.002688	-0.001126
0.1000	552.219	38.730	46.485	19.720	-0.759	50.323	1051.283	-0.002711	-0.003254	-0.001380
0.1100	615.729	46.309	55.433	23.719	-0.758	50.330	1172.190	-0.003242	-0.003880	-0.001660
0.1200	658.891	52.384	62.408	27.168	-0.768	50.323	1254.358	-0.003667	-0.004369	-0.001902
0.1300	709.626	58.954	70.194	30.545	-0.762	50.330	1350.946	-0.004127	-0.004914	-0.002138
0.1400	764.405	65.477	78.112	34.490	-0.766	50.323	1455.231	-0.004583	-0.005468	-0.002414
0.1500	817.440	72.787	85.674	38.327	-0.767	50.330	1556.196	-0.005095	-0.005997	-0.002683
0.1600	875.570	79.889	95.523	42.400	-0.762	50.323	1666.861	-0.005592	-0.006687	-0.002968
0.1700	906.634	84.700	98.945	44.606	-0.765	50.330	1725.998	-0.005929	-0.006926	-0.003122
0.1800	937.202	88.674	104.934	46.579	-0.759	50.322	1784.191	-0.006207	-0.007345	-0.003261
0.1900	987.396	95.436	112.812	50.497	-0.762	50.330	1879.749	-0.006680	-0.007897	-0.003535
0.2000	1027.688	100.600	117.843	52.960	-0.763	50.323	1956.453	-0.007042	-0.008249	-0.003707
0.2100	1069.346	106.774	125.624	56.113	-0.764	50.330	2035.761	-0.007474	-0.008794	-0.003928
0.2200	1067.708	106.744	125.943	56.515	-0.758	50.323	2032.642	-0.007472	-0.008816	-0.003956
0.2300	1093.813	110.551	130.154	58.113	-0.758	50.330	2082.338	-0.007739	-0.009111	-0.004068
0.2400	1095.751	111.616	130.683	58.517	-0.763	50.324	2086.029	-0.007813	-0.009148	-0.004096
0.2500	1093.136	111.754	130.808	58.725	-0.767	50.330	2081.051	-0.007823	-0.009157	-0.004111
0.2600	1090.612	112.050	130.211	58.614	-0.760	50.323	2076.244	-0.007843	-0.009115	-0.004103
0.2700	1085.021	111.603	131.014	58.098	-0.759	50.330	2065.601	-0.007812	-0.009171	-0.004067
0.2800	1064.207	109.878	127.806	57.347	-0.759	50.323	2025.976	-0.007691	-0.008946	-0.004014
0.2900	1025.223	105.401	122.400	55.293	-0.760	50.330	1951.761	-0.007378	-0.008568	-0.003870
0.3000	996.970	101.820	118.884	53.403	-0.758	50.323	1897.974	-0.007127	-0.008322	-0.003738
0.3100	966.793	98.286	115.772	51.571	-0.758	50.330	1840.525	-0.006880	-0.008104	-0.003610
0.3200	934.151	94.918	111.187	49.680	-0.762	50.323	1778.383	-0.006644	-0.007783	-0.003478
0.3300	878.591	87.776	103.809	46.190	-0.752	50.330	1672.611	-0.006144	-0.007267	-0.003233
0.3400	831.056	82.342	95.871	43.232	-0.747	50.323	1582.117	-0.005764	-0.006711	-0.003026
0.3500	770.011	74.739	87.494	39.311	-0.737	50.330	1465.902	-0.005232	-0.006125	-0.002752
0.3600	723.077	68.803	80.891	35.839	-0.751	50.324	1376.553	-0.004816	-0.005662	-0.002509
0.3700	671.965	62.346	73.333	32.324	-0.749	50.330	1279.249	-0.004364	-0.005133	-0.002263
0.3800	622.973	55.879	65.965	28.696	-0.742	50.323	1185.980	-0.003911	-0.004618	-0.002009
0.3900	573.709	49.651	59.593	25.444	-0.745	50.330	1092.196	-0.003476	-0.004171	-0.001781
0.4000	517.578	42.676	49.819	21.693	-0.752	50.323	985.336	-0.002987	-0.003487	-0.001518
0.4100	464.047	35.406	41.636	17.744	-0.752	50.330	883.427	-0.002478	-0.002914	-0.001242
0.4200	428.926	30.958	36.702	15.398	-0.740	50.324	816.565	-0.002167	-0.002569	-0.001078
0.4300	371.442	23.362	27.071	11.310	-0.743	50.330	707.130	-0.001635	-0.001895	-0.000792
0.4400	341.100	19.285	21.445	8.936	-0.734	50.323	649.366	-0.001350	-0.001501	-0.000625
0.4500	316.603	15.971	16.872	7.490	-0.739	50.330	602.732	-0.001118	-0.001181	-0.000524
0.4600	288.891	11.534	11.799	5.003	-0.744	50.324	549.974	-0.000807	-0.000826	-0.000350
0.4700	277.244	10.077	10.119	3.948	-0.744	50.330	527.802	-0.000705	-0.000708	-0.000276
0.4800	254.461	7.087	6.116	2.142	-0.744	50.324	484.428	-0.000496	-0.000428	-0.000150
0.4900	246.616	5.123	4.603	1.166	-0.755	50.330	469.494	-0.000359	-0.000322	-0.000082
0.5000	247.803	5.009	3.393	1.069	-0.759	50.324	471.754	-0.000351	-0.000238	-0.000075
0.5100	238.651	3.678	2.142	0.429	-0.758	50.331	454.330	-0.000257	-0.000150	-0.000030
0.5200	240.154	3.118	1.277	0.304	-0.750	50.324	457.191	-0.000218	-0.000089	-0.000021
0.5300	251.771	4.619	3.283	0.528	-0.759	50.330	479.307	-0.000323	-0.000230	-0.000037
0.5400	274.359	6.442	5.130	1.987	-0.750	50.323	522.308	-0.000451	-0.000359	-0.000139
0.5500	335.599	13.162	14.899	5.612	-0.756	50.330	638.895	-0.000921	-0.001043	-0.000393
0.5600	374.538	17.655	19.778	8.255	-0.755	50.324	713.024	-0.001236	-0.001384	-0.000578
0.5700	401.349	20.574	23.528	9.796	-0.756	50.330	764.065	-0.001440	-0.001647	-0.000686
0.5800	453.377	26.929	31.645	13.174	-0.758	50.324	863.113	-0.001885	-0.002215	-0.000922
0.5900	499.860	32.599	37.924	16.538	-0.755	50.330	951.605	-0.002282	-0.002655	-0.001158
0.6000	554.248	39.151	47.192	19.887	-0.746	50.324	1055.145	-0.002741	-0.003303	-0.001392
0.6100	601.121	45.437	54.449	23.386	-0.754	50.330	1144.381	-0.003181	-0.003811	-0.001637
0.6200	658.365	52.215	61.713	27.389	-0.758	50.324	1253.357	-0.003655	-0.004320	-0.001917
0.6300	700.399	57.661	69.149	30.253	-0.763	50.329	1333.380	-0.004036	-0.004840	-0.002118
0.6400	753.960	65.087	77.432	34.309	-0.764	50.324	1435.347	-0.004556	-0.005420	-0.002402
0.6500	816.043	72.760	86.546	38.312	-0.763	50.329	1553.535	-0.005093	-0.006058	-0.002682
0.6600	870.295	79.874	94.301	42.177	-0.763	50.324	1656.818	-0.005591	-0.006601	-0.002952
0.6700	928.200	87.426	102.306	46.108	-0.764	50.330	1767.054	-0.006120	-0.007161	-0.003228
0.6800	956.303	91.578	108.561	48.329	-0.775	50.324	1820.555	-0.006410	-0.007599	-0.003383
0.6900	999.389	97.499	114.050	51.304	-0.771	50.330	1902.580	-0.006825	-0.007984	-0.003591
0.7000	1023.525	100.923	118.982	52.986	-0.767	50.323	1948.528	-0.007065	-0.008329	-0.003709
0.7100	1048.667	104.308	121.872	54.907	-0.766	50.330	1996.393	-0.007302	-0.008531	-0.003843
0.7200	1059.878	106.622	124.167	56.057	-0.767	50.323	2017.736	-0.007464	-0.008692	-0.003924
0.7300	1088.132	109.863	128.235	57.629	-0.773	50.330	2071.524	-0.007690	-0.008976	-0.004034
0.7400	1100.636	112.078	130.793	58.880	-0.770	50.324	2095.327	-0.007845	-0.009156	-0.004122
0.7500	1093.858	112.316	131.406	59.018	-0.768	50.330	2082.424	-0.007862	-0.009198	-0.004131
0.7600	1084.660	111.604	129.780	58.558	-0.767	50.324	2064.915	-0.007812	-0.009085	-0.004099
0.7700	1077.447	111.364	130.432	58.086	-0.767	50.330	2051.182	-0.007795	-0.009130	-0.004066
0.7800	1062.463	110.132	128.055	57.613	-0.759	50.324	2022.657	-0.007709	-0.008964	-0.004033
0.7900	1025.028	105.557	123.316	55.418	-0.760	50.330	1951.389	-0.007389	-0.008632	-0.003879
0.8000	997.390	102.410	119.191	53.487	-0.763	50.324	1898.775	-0.007169	-0.008343	-0.003744
0.8100	967.829	98.567	116.063	52.015	-0.760	50.330	1842.499	-0.006900	-0.008124	-0.003641
0.8200	917.409	92.983	108.520	48.860	-0.756	50.324	1746.511	-0.006509	-0.007596	-0.003420
0.8300	882.799	88.759	104.713	46.595	-0.755	50.329	1680.622	-0.006213	-0.007330	-0.003262
0.8400	838.796	83.062	98.612	43.663	-0.754	50.324	1596.851	-0.005814	-0.006903	-0.003056
0.8500	782.785	76.803	89.645	40.117	-0.761	50.329	1490.221	-0.005376	-0.006275	-0.002808
0.8600	729.900	70.249	81.420	36.630	-0.756	50.324	1389.542	-0.004917	-0.005699	-0.002564
0.8700	664.917	61.939	73.276	32.129	-0.763	50.329	1265.831	-0.004336	-0.005129	-0.002249
0.8800	618.524	56.173	65.969	28.947	-0.752	50.324	1177.511	-0.003932	-0.004618	-0.002026
0.8900	564.257	48.906	58.407	25.040	-0.748	50.329	1074.200	-0.003423	-0.004089	-0.001753
0.9000	513.070	42.519	50.444	21.470	-0.752	50.324	976.753	-0.002976	-0.003531	-0.001503
0.9100	468.736	36.627	42.885	18.356	-0.754	50.329	892.353	-0.002564	-0.003002	-0.001285
0.9200	426.356	30.942	35.380	15.427	-0.751	50.324	811.672	-0.002166	-0.002477	-0.001080
0.9300	364.213	23.196	26.321	11.269	-0.759	50.329	693.369	-0.001624	-0.001842	-0.000789
0.9400	320.270	17.135	18.720	7.824	-0.756	50.323	609.713	-0.001199	-0.001310	-0.000548
0.9500	296.901	13.444	14.607	5.766	-0.742	50.329	565.224	-0.000941	-0.001022	-0.000404
0.9600	283.060	11.688	11.757	4.408	-0.748	50.324	538.874	-0.000818	-0.000823	-0.000309
0.9700	276.703	9.785	9.812	3.769	-0.754	50.330	526.772	-0.000685	-0.000687	-0.000264
0.9800	257.752	7.185	6.545	2.503	-0.743	50.324	490.694	-0.000503	-0.000458	-0.000175
0.9900	250.388	5.894	4.922	1.472	-0.746	50.329	476.675	-0.000413	-0.000345	-0.000103
1.0000	240.530	4.365	3.866	0.943	-0.736	50.324	457.907	-0.000306	-0.000271	-0.000066
1.0100	235.916	3.776	2.600	0.290	-0.743	50.329	449.123	-0.000264	-0.000182	-0.000020
1.0200	245.609	4.013	3.505	0.541	-0.743	50.324	467.577	-0.000281	-0.000245	-0.000038
1.0300	262.817	5.473	5.324	1.347	-0.746	50.329	500.336	-0.000383	-0.000373	-0.000094
1.0400	300.027	9.965	9.423	3.685	-0.735	50.324	571.175	-0.000698	-0.000660	-0.000258
1.0500	328.401	12.896	13.191	5.240	-0.739	50.329	625.191	-0.000903	-0.000923	-0.000367
1.0600	362.786	16.628	19.664	7.711	-0.735	50.324	690.651	-0.001164	-0.001377	-0.000540
1.0700	406.398	21.457	25.071	10.312	-0.747	50.330	773.678	-0.001502	-0.001755	-0.000722
1.0800	453.362	27.098	32.840	13.673	-0.747	50.325	863.085	-0.001897	-0.002299	-0.000957
1.0900	489.445	31.364	38.297	16.133	-0.740	50.330	931.778	-0.002195	-0.002681	-0.001129
1.1000	540.963	38.099	45.024	19.233	-0.749	50.324	1029.854	-0.002667	-0.003152	-0.001346
1.1100	607.764	45.901	54.434	23.915	-0.742	50.329	1157.026	-0.003213	-0.003810	-0.001674
1.1200	638.707	50.309	60.714	25.874	-0.747	50.324	1215.935	-0.003522	-0.004250	-0.001811
1.1300	717.952	59.724	71.623	31.377	-0.751	50.329	1366.796	-0.004181	-0.005014	-0.002196
1.1400	759.686	65.870	77.099	34.545	-0.747	50.324	1446.247	-0.004611	-0.005397	-0.002418
1.1500	807.041	72.255	85.840	37.619	-0.752	50.329	1536.398	-0.005058	-0.006009	-0.002633
1.1600	876.306	80.506	94.760	42.581	-0.747	50.324	1668.262	-0.005635	-0.006633	-0.002981
1.1700	897.316	83.846	100.429	44.218	-0.744	50.330	1708.260	-0.005869	-0.007030	-0.003095
1.1800	965.094	92.506	109.395	48.804	-0.733	50.325	1837.292	-0.006475	-0.007658	-0.003416
1.1900	986.780	95.659	112.408	50.427	-0.747	50.330	1878.576	-0.006696	-0.007869	-0.003530
1.2000	1026.425	101.121	119.220	53.195	-0.751	50.325	1954.050	-0.007078	-0.008345	-0.003724
1.2100	1055.625	105.317	123.552	55.184	-0.755	50.329	2009.640	-0.007372	-0.008649	-0.003863
1.2200	1067.318	107.363	125.471	56.571	-0.756	50.325	2031.898	-0.007515	-0.008783	-0.003960
1.2300	1077.221	109.317	127.415	57.222	-0.750	50.329	2050.753	-0.007652	-0.008919	-0.004006
1.2400	1072.472	109.456	128.766	57.281	-0.744	50.324	2041.712	-0.007662	-0.009014	-0.004010
1.2500	1071.435	109.822	129.014	57.280	-0.754	50.328	2039.738	-0.007688	-0.009031	-0.004010
1.2600	1071.105	109.961	129.322	57.489	-0.748	50.324	2039.108	-0.007697	-0.009053	-0.004024
1.2700	1073.088	110.298	128.749	57.530	-0.755	50.329	2042.885	-0.007721	-0.009012	-0.004027
1.2800	1063.140	110.102	127.916	57.434	-0.748	50.325	2023.945	-0.007707	-0.008954	-0.004020
1.2900	1041.363	107.464	125.513	56.347	-0.756	50.329	1982.489	-0.007522	-0.008786	-0.003944
1.3000	997.556	102.720	119.831	53.920	-0.743	50.324	1899.090	-0.007190	-0.008388	-0.003774
1.3100	949.961	97.150	113.203	50.888	-0.748	50.329	1808.481	-0.006800	-0.007924	-0.003562
1.3200	914.659	92.322	108.367	48.417	-0.746	50.325	1741.276	-0.006463	-0.007586	-0.003389
1.3300	875.495	87.987	103.975	46.163	-0.743	50.329	1666.718	-0.006159	-0.007278	-0.003231
1.3400	819.439	81.405	94.968	42.537	-0.750	50.324	1560.001	-0.005698	-0.006648	-0.002978
1.3500	776.713	75.752	90.075	39.340	-0.743	50.329	1478.662	-0.005303	-0.006305	-0.002754
1.3600	719.861	69.027	82.019	35.838	-0.747	50.324	1370.430	-0.004832	-0.005741	-0.002509
1.3700	662.362	61.477	73.249	32.060	-0.753	50.329	1260.967	-0.004303	-0.005127	-0.002244
1.3800	614.467	55.739	65.981	28.778	-0.752	50.325	1169.786	-0.003902	-0.004619	-0.002014
1.3900	554.714	48.036	57.018	24.554	-0.743	50.329	1056.032	-0.003363	-0.003991	-0.001719
1.4000	495.321	40.260	47.110	20.150	-0.732	50.324	942.965	-0.002818	-0.003298	-0.001410
1.4100	471.261	36.600	42.747	18.369	-0.743	50.328	897.160	-0.002562	-0.002992	-0.001286
1.4200	412.380	29.216	33.966	14.618	-0.739	50.325	785.065	-0.002045	-0.002378	-0.001023
1.4300	379.678	24.446	29.308	12.061	-0.754	50.329	722.809	-0.001711	-0.002052	-0.000844
1.4400	343.625	20.082	22.485	9.395	-0.750	50.325	654.173	-0.001406	-0.001574	-0.000658
1.4500	302.462	15.129	15.009	6.307	-0.759	50.329	575.809	-0.001059	-0.001051	-0.000441
1.4600	281.753	11.520	11.728	4.520	-0.755	50.325	536.385	-0.000806	-0.000821	-0.000316
1.4700	257.933	8.155	8.548	2.708	-0.756	50.329	491.037	-0.000571	-0.000598	-0.000190
1.4800	246.751	6.216	5.629	1.666	-0.748	50.325	469.751	-0.000435	-0.000394	-0.000117
1.4900	240.455	4.927	4.548	1.027	-0.751	50.329	457.764	-0.000345	-0.000318	-0.000072
1.5000	237.900	4.154	3.435	0.679	-0.754	50.325	452.900	-0.000291	-0.000240	-0.000048
1.5100	229.228	2.681	0.097	-0.194	-0.756	50.329	436.392	-0.000188	-0.000007	0.000014
1.5200	234.984	3.131	1.668	0.014	-0.758	50.325	447.350	-0.000219	-0.000117	-0.000001
1.5300	253.815	4.632	4.366	1.027	-0.756	50.330	483.198	-0.000324	-0.000306	-0.000072
1.5400	295.744	8.928	9.160	3.140	-0.754	50.324	563.021	-0.000625	-0.000641	-0.000220
1.5500	323.021	12.293	13.551	5.213	-0.748	50.329	614.948	-0.000861	-0.000949	-0.000365
1.5600	365.025	16.909	18.428	8.071	-0.758	50.325	694.914	-0.001184	-0.001290	-0.000565
1.5700	408.457	21.639	25.294	10.560	-0.750	50.329	777.597	-0.001515	-0.001771	-0.000739
1.5800	455.571	27.686	33.517	13.993	-0.756	50.325	867.290	-0.001938	-0.002346	-0.000980
1.5900	491.895	31.883	37.298	16.258	-0.758	50.329	936.441	-0.002232	-0.002611	-0.001138
1.6000	547.169	38.703	46.791	19.888	-0.752	50.325	1041.670	-0.002709	-0.003275	-0.001392
1.6100	603.120	46.040	54.892	23.512	-0.757	50.329	1148.186	-0.003223	-0.003842	-0.001646
1.6200	652.774	51.569	61.756	26.890	-0.755	50.325	1242.714	-0.003610	-0.004323	-0.001882
1.6300	700.790	58.167	69.387	30.444	-0.755	50.329	1334.124	-0.004072	-0.004857	-0.002131
1.6400	766.434	66.502	78.710	34.864	-0.756	50.325	1459.093	-0.004655	-0.005510	-0.002441
1.6500	811.444	72.759	85.852	38.105	-0.757	50.328	1544.781	-0.005093	-0.006010	-0.002667
1.6600	860.572	79.089	93.843	41.481	-0.760	50.325	1638.308	-0.005536	-0.006569	-0.002904
1.6700	910.676	85.416	101.249	45.121	-0.749	50.329	1733.694	-0.005979	-0.007087	-0.003158
1.6800	954.394	91.340	107.461	48.151	-0.759	50.325	1816.921	-0.006394	-0.007522	-0.003371
1.6900	986.119	95.786	113.534	50.622	-0.762	50.329	1877.317	-0.006705	-0.007947	-0.003544
1.7000	1020.474	100.364	117.356	52.959	-0.761	50.325	1942.720	-0.007025	-0.008215	-0.003707
1.7100	1037.967	103.352	122.164	54.309	-0.751	50.329	1976.023	-0.007235	-0.008551	-0.003802
1.7200	1075.538	108.518	127.042	57.072	-0.752	50.325	2047.548	-0.007596	-0.008893	-0.003995
1.7300	1072.562	108.784	128.096	57.112	-0.755	50.329	2041.883	-0.007615	-0.008967	-0.003998
1.7400	1083.007	110.721	128.972	57.948	-0.750	50.325	2061.768	-0.007750	-0.009028	-0.004056
1.7500	1089.379	111.685	130.015	58.587	-0.749	50.329	2073.898	-0.007818	-0.009101	-0.004101
1.7600	1083.338	111.604	130.891	58.336	-0.751	50.325	2062.397	-0.007812	-0.009162	-0.004084
1.7700	1070.639	110.915	129.168	57.920	-0.760	50.329	2038.221	-0.007764	-0.009042	-0.004054
1.7800	1051.793	108.698	127.654	56.848	-0.744	50.325	2002.344	-0.007609	-0.008936	-0.003979
1.7900	1021.842	105.401	122.706	55.211	-0.752	50.329	1945.324	-0.007378	-0.008589	-0.003865
1.8000	989.275	101.737	118.315	53.431	-0.748	50.325	1883.326	-0.007122	-0.008282	-0.003740
1.8100	940.282	96.137	113.411	50.332	-0.740	50.328	1790.056	-0.006730	-0.007939	-0.003523
1.8200	917.169	92.899	108.170	48.876	-0.738	50.325	1746.054	-0.006503	-0.007572	-0.003421
1.8300	871.858	87.607	103.281	46.037	-0.748	50.328	1659.794	-0.006132	-0.007230	-0.003223
1.8400	818.567	80.997	95.440	42.650	-0.744	50.325	1558.342	-0.005670	-0.006681	-0.002985
1.8500	758.814	74.359	87.148	38.466	-0.751	50.328	1444.588	-0.005205	-0.006100	-0.002693
1.8600	722.190	68.916	80.908	36.005	-0.746	50.325	1374.865	-0.004824	-0.005664	-0.002520
1.8700	670.793	63.103	75.374	32.697	-0.747	50.328	1277.018	-0.004417	-0.005276	-0.002289
1.8800	611.716	55.639	66.091	28.346	-0.755	50.325	1164.551	-0.003895	-0.004626	-0.001984
1.8900	559.327	48.696	56.655	24.930	-0.746	50.329	1064.816	-0.003409	-0.003966	-0.001745
1.9000	500.566	41.467	47.736	20.582	-0.752	50.325	952.950	-0.002903	-0.003341	-0.001441
1.9100	458.938	35.602	41.315	17.592	-0.750	50.329	873.699	-0.002492	-0.002892	-0.001231
1.9200	410.020	29.427	34.089	14.509	-0.742	50.325	780.573	-0.002060	-0.002386	-0.001016
1.9300	376.537	24.756	28.294	11.866	-0.741	50.328	716.829	-0.001733	-0.001981	-0.000831
1.9400	335.344	19.212	21.169	8.713	-0.740	50.325	638.409	-0.001345	-0.001482	-0.000610
1.9500	305.633	15.240	15.831	6.725	-0.755	50.329	581.846	-0.001067	-0.001108	-0.000471
1.9600	278.356	11.521	11.493	4.464	-0.743	50.325	529.919	-0.000806	-0.000804	-0.000312
1.9700	260.337	8.421	7.855	3.128	-0.740	50.329	495.615	-0.000589	-0.000550	-0.000219
1.9800	239.267	5.473	5.032	1.362	-0.746	50.325	455.503	-0.000383	-0.000352	-0.000095
1.9900	232.775	4.254	2.990	0.497	-0.747	50.329	443.144	-0.000298	-0.000209	-0.000035
2.0000	235.781	3.933	2.378	0.789	-0.742	50.325	448.866	-0.000275	-0.000166	-0.000055
2.0100	234.819	3.692	2.197	0.247	-0.742	50.328	447.035	-0.000258	-0.000154	-0.000017
2.0200	239.643	3.285	2.726	0.303	-0.746	50.325	456.219	-0.000230	-0.000191	-0.000021
2.0300	251.455	4.156	3.658	0.762	-0.743	50.328	478.706	-0.000291	-0.000256	-0.000053
2.0400	281.753	7.874	7.853	2.474	-0.750	50.325	536.385	-0.000551	-0.000550	-0.000173
2.0500	329.318	12.869	14.163	5.392	-0.746	50.328	626.936	-0.000901	-0.000991	-0.000377
2.0600	347.111	15.508	17.996	6.991	-0.746	50.325	660.810	-0.001086	-0.001260	-0.000489
2.0700	393.925	20.392	24.307	9.728	-0.741	50.328	749.931	-0.001427	-0.001701	-0.000681
2.0800	450.852	26.805	31.034	13.548	-0.748	50.325	858.307	-0.001876	-0.002172	-0.000948
2.0900	501.874	33.384	39.299	16.897	-0.751	50.329	955.439	-0.002337	-0.002751	-0.001183
2.1000	550.896	39.192	47.206	20.095	-0.747	50.326	1048.765	-0.002743	-0.003304	-0.001407
2.1100	604.908	46.154	54.755	23.873	-0.742	50.328	1151.590	-0.003231	-0.003833	-0.001671
2.1200	658.830	53.157	63.522	27.432	-0.747	50.326	1254.244	-0.003721	-0.004447	-0.001920
2.1300	705.043	59.024	70.997	30.768	-0.742	50.328	1342.220	-0.004132	-0.004970	-0.002154
2.1400	757.973	66.027	78.085	34.601	-0.747	50.326	1442.986	-0.004622	-0.005466	-0.002422
2.1500	814.344	73.321	86.563	38.631	-0.755	50.329	1550.303	-0.005132	-0.006059	-0.002704
2.1600	862.646	79.353	94.468	41.954	-0.741	50.326	1642.256	-0.005555	-0.006613	-0.002937
2.1700	905.311	85.446	101.374	44.995	-0.740	50.328	1723.480	-0.005981	-0.007096	-0.003150
2.1800	951.614	90.917	107.098	48.014	-0.736	50.325	1811.628	-0.006364	-0.007497	-0.003361
2.1900	990.883	96.391	113.534	51.096	-0.743	50.329	1886.387	-0.006747	-0.007947	-0.003577
2.2000	1035.067	102.691	120.316	54.045	-0.738	50.326	1970.501	-0.007188	-0.008422	-0.003783
2.2100	1051.433	105.387	122.219	55.251	-0.742	50.329	2001.657	-0.007377	-0.008555	-0.003868
2.2200	1065.694	107.547	126.083	56.585	-0.739	50.326	2028.809	-0.007528	-0.008826	-0.003961
2.2300	1082.331	110.411	129.364	57.753	-0.744	50.329	2060.480	-0.007729	-0.009055	-0.004043
2.2400	1085.337	110.787	130.016	58.183	-0.741	50.326	2066.202	-0.007755	-0.009101	-0.004073
2.2500	1084.074	111.559	131.058	58.475	-0.745	50.328	2063.799	-0.007809	-0.009174	-0.004093
2.2600	1079.010	111.406	129.432	58.224	-0.741	50.325	2054.157	-0.007798	-0.009060	-0.004076
2.2700	1072.187	110.816	128.875	57.934	-0.742	50.328	2041.168	-0.007757	-0.009021	-0.004055
2.2800	1060.194	110.158	129.377	57.351	-0.745	50.325	2018.337	-0.007711	-0.009056	-0.004015
2.2900	1020.564	105.667	122.705	55.197	-0.752	50.329	1942.892	-0.007397	-0.008589	-0.003864
2.3000	988.524	102.101	118.814	53.208	-0.749	50.326	1881.895	-0.007147	-0.008317	-0.003725
2.3100	942.131	96.855	112.242	50.609	-0.755	50.328	1793.575	-0.006780	-0.007857	-0.003543
2.3200	926.561	94.020	110.258	49.651	-0.746	50.326	1763.935	-0.006581	-0.007718	-0.003476
2.3300	866.403	87.538	102.348	45.925	-0.748	50.328	1649.408	-0.006128	-0.007164	-0.003215
2.3400	810.677	80.731	94.121	42.218	-0.747	50.326	1543.322	-0.005651	-0.006588	-0.002955
2.3500	765.382	74.627	87.758	39.228	-0.744	50.328	1457.090	-0.005224	-0.006143	-0.002746
2.3600	715.833	68.888	81.060	35.824	-0.734	50.326	1362.762	-0.004822	-0.005674	-0.002508
2.3700	650.354	60.496	71.177	31.337	-0.748	50.328	1238.108	-0.004235	-0.004982	-0.002194
2.3800	606.006	55.010	64.607	28.057	-0.738	50.325	1153.679	-0.003851	-0.004523	-0.001964
2.3900	560.049	48.878	57.351	24.902	-0.735	50.328	1066.189	-0.003421	-0.004015	-0.001743
2.4000	508.621	42.085	49.374	21.347	-0.736	50.326	968.285	-0.002946	-0.003456	-0.001494
2.4100	464.648	36.514	43.039	18.259	-0.734	50.328	884.571	-0.002556	-0.003013	-0.001278
2.4200	413.401	29.707	34.560	14.965	-0.746	50.326	787.010	-0.002079	-0.002419	-0.001048
2.4300	364.033	23.209	26.572	11.212	-0.746	50.328	693.026	-0.001625	-0.001860	-0.000785
2.4400	338.936	19.746	23.139	9.171	-0.743	50.326	645.247	-0.001382	-0.001620	-0.000642
2.4500	300.809	14.723	15.622	6.306	-0.752	50.328	572.662	-0.001031	-0.001094	-0.000441
2.4600	284.383	12.083	13.092	4.962	-0.738	50.326	541.391	-0.000846	-0.000916	-0.000347
2.4700	254.461	8.421	8.116	2.724	-0.734	50.328	484.428	-0.000589	-0.000568	-0.000191
2.4800	244.422	6.217	5.158	1.861	-0.741	50.326	465.317	-0.000435	-0.000361	-0.000130
2.4900	230.355	4.225	3.353	0.570	-0.753	50.328	438.538	-0.000296	-0.000235	-0.000040
2.5000	234.819	4.085	2.001	0.469	-0.751	50.326	447.035	-0.000286	-0.000140	-0.000033
2.5100	238.696	3.916	2.630	0.680	-0.755	50.328	454.416	-0.000274	-0.000184	-0.000048
2.5200	242.994	4.353	2.893	0.777	-0.744	50.326	462.599	-0.000305	-0.000202	-0.000054
2.5300	250.433	4.731	3.073	0.873	-0.750	50.328	476.761	-0.000331	-0.000215	-0.000061
2.5400	283.857	8.085	8.132	2.863	-0.744	50.326	540.390	-0.000566	-0.000569	-0.000200
2.5500	329.603	13.403	14.761	5.709	-0.754	50.328	627.480	-0.000938	-0.001033	-0.000400
2.5600	353.889	16.112	18.802	7.253	-0.747	50.326	673.714	-0.001128	-0.001316	-0.000508
2.5700	403.137	21.694	25.821	10.257	-0.750	50.328	767.469	-0.001519	-0.001807	-0.000718
2.5800	450.807	27.224	31.867	13.353	-0.746	50.326	858.221	-0.001906	-0.002231	-0.000935
2.5900	505.195	33.539	40.856	17.355	-0.752	50.328	961.761	-0.002348	-0.002860	-0.001215
2.6000	543.623	39.023	46.441	19.955	-0.738	50.326	1034.918	-0.002732	-0.003251	-0.001397
2.6100	598.221	45.718	54.794	23.483	-0.746	50.328	1138.859	-0.003200	-0.003836	-0.001644
2.6200	659.251	53.185	64.064	27.445	-0.744	50.326	1255.045	-0.003723	-0.004484	-0.001921
2.6300	716.885	60.818	71.942	31.711	-0.740	50.328	1364.765	-0.004257	-0.005036	-0.002220
2.6400	766.479	66.937	78.642	35.242	-0.738	50.325	1459.179	-0.004686	-0.005505	-0.002467
2.6500	812.225	73.081	87.328	38.744	-0.748	50.327	1546.268	-0.005116	-0.006113	-0.002712
2.6600	852.727	78.569	93.217	41.174	-0.750	50.326	1623.373	-0.005500	-0.006525	-0.002882
2.6700	908.137	85.191	99.886	45.023	-0.752	50.327	1728.859	-0.005963	-0.006992	-0.003152
2.6800	958.241	92.097	109.464	48.639	-0.753	50.326	1824.245	-0.006447	-0.007662	-0.003405
2.6900	987.141	96.446	113.314	50.777	-0.755	50.328	1879.263	-0.006751	-0.007932	-0.003554
2.7000	1031.204	102.072	119.983	53.642	-0.756	50.326	1963.148	-0.007145	-0.008399	-0.003755
2.7100	1044.309	104.657	122.720	54.864	-0.746	50.327	1988.096	-0.007326	-0.008590	-0.003841
2.7200	1067.122	107.588	126.639	56.655	-0.746	50.326	2031.527	-0.007531	-0.008865	-0.003966
2.7300	1087.741	110.803	129.974	58.212	-0.748	50.328	2070.780	-0.007756	-0.009098	-0.004075
2.7400	1084.690	111.280	130.280	58.447	-0.751	50.326	2064.972	-0.007790	-0.009120	-0.004091
2.7500	1084.104	111.349	130.446	58.379	-0.739	50.328	2063.856	-0.007794	-0.009131	-0.004087
2.7600	1083.593	111.981	130.142	58.739	-0.746	50.326	2062.883	-0.007839	-0.009110	-0.004112
2.7700	1074.907	111.349	130.918	58.239	-0.742	50.328	2046.347	-0.007794	-0.009164	-0.004077
2.7800	1057.354	109.948	127.819	57.571	-0.749	50.326	2012.930	-0.007696	-0.008947	-0.004030
2.7900	1039.350	107.854	126.193	56.599	-0.741	50.328	1978.655	-0.007550	-0.008834	-0.003962
2.8000	985.954	101.651	118.160	53.418	-0.733	50.326	1877.003	-0.007116	-0.008271	-0.003739
2.8100	944.370	96.756	114.300	50.817	-0.741	50.327	1797.838	-0.006773	-0.008001	-0.003557
2.8200	906.213	92.252	108.212	48.207	-0.742	50.326	1725.197	-0.006458	-0.007575	-0.003375
2.8300	870.941	87.553	103.893	46.065	-0.746	50.327	1658.049	-0.006129	-0.007272	-0.003225
2.8400	816.058	81.109	95.064	42.412	-0.751	50.326	1553.564	-0.005678	-0.006655	-0.002969
2.8500	777.359	76.438	90.396	39.965	-0.755	50.327	1479.893	-0.005351	-0.006328	-0.002798
2.8600	714.646	68.774	81.852	35.713	-0.748	50.326	1360.502	-0.004814	-0.005730	-0.002500
2.8700	673.288	63.568	75.112	32.632	-0.741	50.327	1281.767	-0.004450	-0.005258	-0.002284
2.8800	613.234	56.005	66.563	28.527	-0.748	50.326	1167.440	-0.003920	-0.004659	-0.001997
2.8900	546.974	47.573	56.031	24.331	-0.754	50.328	1041.298	-0.003330	-0.003922	-0.001703
2.9000	501.092	41.805	48.612	21.029	-0.750	50.326	953.951	-0.002926	-0.003403	-0.001472
2.9100	459.749	36.149	41.928	18.231	-0.754	50.328	875.244	-0.002530	-0.002935	-0.001276
2.9200	410.170	29.819	35.300	14.799	-0.743	50.326	780.859	-0.002087	-0.002471	-0.001036
2.9300	360.907	23.097	25.460	11.129	-0.753	50.328	687.075	-0.001617	-0.001782	-0.000779
2.9400	338.049	19.522	22.638	9.337	-0.743	50.326	643.559	-0.001367	-0.001585	-0.000654
2.9500	302.822	15.352	15.748	6.488	-0.761	50.328	576.496	-0.001075	-0.001102	-0.000454
2.9600	272.871	10.931	11.216	4.241	-0.754	50.326	519.476	-0.000765	-0.000785	-0.000297
2.9700	263.523	8.999	8.411	3.309	-0.751	50.328	501.680	-0.000630	-0.000589	-0.000232
2.9800	243.656	6.217	5.144	2.043	-0.750	50.327	463.858	-0.000435	-0.000360	-0.000143
2.9900	231.062	4.323	3.408	0.721	-0.745	50.328	439.882	-0.000303	-0.000239	-0.000050
3.0000	233.797	4.351	3.171	0.513	-0.748	50.327	445.089	-0.000305	-0.000222	-0.000036
3.0100	234.052	3.664	2.516	0.513	-0.746	50.327	445.576	-0.000256	-0.000176	-0.000036
3.0200	238.681	3.622	2.085	0.485	-0.743	50.326	454.388	-0.000254	-0.000146	-0.000034
3.0300	251.455	4.885	4.562	1.443	-0.744	50.327	478.706	-0.000342	-0.000319	-0.000101
3.0400	289.688	8.773	8.535	3.322	-0.746	50.326	551.491	-0.000614	-0.000597	-0.000233
3.0500	332.654	13.470	16.178	5.931	-0.735	50.328	633.287	-0.000943	-0.001132	-0.000415
3.0600	370.255	18.298	20.888	8.546	-0.735	50.326	704.870	-0.001281	-0.001462	-0.000598
3.0700	408.066	22.198	26.307	11.035	-0.738	50.327	776.854	-0.001554	-0.001841	-0.000772
3.0800	451.874	27.784	32.090	13.853	-0.752	50.326	860.252	-0.001945	-0.002246	-0.000970
3.0900	495.772	32.852	39.287	16.703	-0.743	50.327	943.823	-0.002300	-0.002750	-0.001169
3.1000	544.795	39.010	46.122	19.859	-0.748	50.327	1037.149	-0.002731	-0.003229	-0.001390
3.1100	601.347	46.351	54.849	23.582	-0.751	50.327	1144.810	-0.003245	-0.003839	-0.001651
3.1200	655.464	52.653	63.479	27.514	-0.743	50.326	1247.835	-0.003686	-0.004444	-0.001926
3.1300	701.030	58.756	69.998	30.919	-0.747	50.327	1334.581	-0.004113	-0.004900	-0.002164
3.1400	761.940	66.698	79.251	35.019	-0.756	50.326	1450.539	-0.004669	-0.005548	-0.002451
3.1500	818.567	73.937	87.480	38.829	-0.756	50.327	1558.342	-0.005176	-0.006124	-0.002718
3.1600	870.055	80.477	96.456	42.441	-0.757	50.326	1656.361	-0.005633	-0.006752	-0.002971
3.1700	902.591	85.081	100.471	45.065	-0.755	50.327	1718.302	-0.005956	-0.007033	-0.003155
3.1800	953.342	91.365	107.227	48.305	-0.743	50.326	1814.919	-0.006396	-0.007506	-0.003381
3.1900	987.998	96.953	114.329	51.150	-0.752	50.327	1880.894	-0.006787	-0.008003	-0.003581
3.2000	1014.868	100.530	117.103	52.972	-0.756	50.327	1932.049	-0.007037	-0.008197	-0.003708
3.2100	1043.828	104.391	122.327	55.099	-0.751	50.327	1987.181	-0.007307	-0.008563	-0.003857
3.2200	1068.715	108.122	126.862	56.877	-0.754	50.326	2034.559	-0.007569	-0.008880	-0.003981
3.2300	1088.853	111.167	130.709	58.461	-0.759	50.327	2072.897	-0.007782	-0.009150	-0.004092
3.2400	1090.086	111.938	131.156	58.837	-0.745	50.326	2075.243	-0.007836	-0.009181	-0.004119
3.2500	1087.846	112.345	130.586	58.837	-0.755	50.327	2070.980	-0.007864	-0.009141	-0.004119
3.2600	1086.659	112.597	131.044	59.074	-0.753	50.326	2068.720	-0.007882	-0.009173	-0.004135
3.2700	1078.784	112.163	130.739	58.629	-0.764	50.327	2053.728	-0.007851	-0.009152	-0.004104
3.2800	1067.528	110.972	129.695	58.101	-0.764	50.326	2032.299	-0.007768	-0.009079	-0.004067
3.2900	1033.459	107.477	125.499	56.544	-0.766	50.327	1967.440	-0.007523	-0.008785	-0.003958
3.3000	977.493	100.993	117.480	52.864	-0.756	50.327	1860.895	-0.007070	-0.008224	-0.003700
3.3100	948.608	97.515	114.828	51.276	-0.758	50.327	1805.906	-0.006826	-0.008038	-0.003589
3.3200	911.112	93.023	108.382	48.985	-0.760	50.326	1734.524	-0.006512	-0.007587	-0.003429
3.3300	852.261	85.852	100.859	45.204	-0.765	50.327	1622.486	-0.006010	-0.007060	-0.003164
3.3400	823.091	81.882	96.303	42.998	-0.770	50.327	1566.954	-0.005732	-0.006741	-0.003010
3.3500	770.522	75.849	90.119	39.589	-0.764	50.327	1466.875	-0.005309	-0.006308	-0.002771
3.3600	720.056	69.378	81.184	36.129	-0.752	50.326	1370.802	-0.004856	-0.005683	-0.002529
3.3700	669.140	63.160	74.612	32.992	-0.758	50.327	1273.870	-0.004421	-0.005223	-0.002309
3.3800	610.394	55.540	66.051	28.890	-0.760	50.326	1162.033	-0.003888	-0.004624	-0.002022
3.3900	552.940	48.104	57.741	24.876	-0.757	50.327	1052.656	-0.003367	-0.004042	-0.001741
3.4000	507.645	42.212	50.876	21.541	-0.755	50.326	966.425	-0.002955	-0.003561	-0.001508
3.4100	460.125	36.628	42.788	18.162	-0.758	50.326	875.959	-0.002564	-0.002995	-0.001271
3.4200	402.611	28.655	32.769	14.565	-0.750	50.326	766.468	-0.002006	-0.002294	-0.001020
3.4300	368.902	24.235	27.725	11.643	-0.752	50.326	702.295	-0.001696	-0.001941	-0.000815
3.4400	324.298	18.609	20.625	8.449	-0.754	50.326	617.380	-0.001303	-0.001444	-0.000591
3.4500	291.085	13.850	14.177	5.808	-0.751	50.326	554.152	-0.000970	-0.000992	-0.000407
3.4600	272.450	11.156	11.381	4.325	-0.739	50.327	518.675	-0.000781	-0.000797	-0.000303
3.4700	264.635	9.390	8.953	3.351	-0.751	50.327	503.798	-0.000657	-0.000627	-0.000235
3.4800	247.743	6.833	6.518	2.404	-0.760	50.326	471.640	-0.000478	-0.000456	-0.000168
3.4900	232.880	5.094	3.436	0.817	-0.756	50.326	443.344	-0.000357	-0.000241	-0.000057
3.5000	237.524	4.702	3.185	0.971	-0.749	50.326	452.185	-0.000329	-0.000223	-0.000068
3.5100	237.464	4.183	3.157	0.887	-0.754	50.327	452.070	-0.000293	-0.000221	-0.000062
3.5200	238.877	4.000	2.977	0.611	-0.747	50.327	454.760	-0.000280	-0.000208	-0.000043
3.5300	248.420	4.786	3.407	0.971	-0.750	50.327	472.927	-0.000335	-0.000238	-0.000068
3.5400	268.362	7.017	6.601	2.142	-0.751	50.327	510.893	-0.000491	-0.000462	-0.000150
3.5500	334.051	13.895	15.301	6.085	-0.757	50.327	635.948	-0.000973	-0.001071	-0.000426
3.5600	356.714	16.489	19.553	7.851	-0.748	50.327	679.092	-0.001154	-0.001369	-0.000550
3.5700	405.797	22.227	26.864	10.909	-0.752	50.327	772.533	-0.001556	-0.001880	-0.000764
3.5800	448.929	27.379	32.422	13.672	-0.754	50.326	854.645	-0.001917	-0.002270	-0.000957
3.5900	500.055	33.523	40.190	17.008	-0.758	50.327	951.977	-0.002347	-0.002813	-0.001191
3.6000	534.455	38.142	45.039	19.412	-0.754	50.327	1017.466	-0.002670	-0.003153	-0.001359
3.6100	613.084	47.446	55.834	24.442	-0.764	50.327	1167.154	-0.003321	-0.003908	-0.001711
3.6200	653.135	53.144	62.311	27.667	-0.749	50.326	1243.401	-0.003720	-0.004362	-0.001937
3.6300	708.860	59.739	70.317	31.351	-0.753	50.326	1349.487	-0.004182	-0.004922	-0.002195
3.6400	773.212	67.973	81.046	35.810	-0.743	50.326	1471.996	-0.004758	-0.005673	-0.002507
3.6500	817.921	74.487	87.620	39.061	-0.752	50.326	1557.112	-0.005214	-0.006133	-0.002734
3.6600	875.585	81.011	95.636	43.094	-0.759	50.327	1666.889	-0.005671	-0.006694	-0.003017
3.6700	909.579	86.274	102.041	45.577	-0.761	50.327	1731.606	-0.006039	-0.007143	-0.003190
3.6800	950.652	91.829	108.463	48.414	-0.763	50.327	1809.797	-0.006428	-0.007592	-0.003389
3.6900	994.565	97.374	114.884	51.790	-0.761	50.327	1893.396	-0.006816	-0.008042	-0.003625
3.7000	1017.078	101.246	117.910	53.195	-0.760	50.327	1936.255	-0.007087	-0.008254	-0.003724
3.7100	1042.611	104.616	121.828	54.947	-0.753	50.326	1984.863	-0.007323	-0.008528	-0.003846
3.7200	1074.276	108.671	127.749	57.253	-0.754	50.326	2045.145	-0.007607	-0.008942	-0.004008
3.7300	1079.070	110.299	129.988	57.725	-0.759	50.326	2054.272	-0.007721	-0.009099	-0.004041
3.7400	1080.137	111.068	129.572	58.059	-0.755	50.326	2056.303	-0.007775	-0.009070	-0.004064
3.7500	1083.909	111.659	131.002	58.711	-0.747	50.327	2063.484	-0.007816	-0.009170	-0.004110
3.7600	1082.677	112.400	130.308	58.823	-0.752	50.326	2061.138	-0.007868	-0.009122	-0.004118
3.7700	1078.499	111.726	129.917	58.684	-0.752	50.326	2053.185	-0.007821	-0.009094	-0.004108
3.7800	1066.040	111.391	129.209	57.921	-0.750	50.327	2029.467	-0.007797	-0.009045	-0.004054
3.7900	1037.862	108.502	126.763	56.711	-0.749	50.326	1975.822	-0.007595	-0.008873	-0.003970
3.8000	988.629	102.454	120.372	53.628	-0.739	50.326	1882.095	-0.007172	-0.008426	-0.003754
3.8100	963.261	99.648	116.689	52.250	-0.744	50.326	1833.801	-0.006975	-0.008168	-0.003658
3.8200	887.533	90.298	106.295	47.542	-0.745	50.327	1689.634	-0.006321	-0.007441	-0.003328
3.8300	857.656	86.231	102.683	45.552	-0.741	50.326	1632.757	-0.006036	-0.007188	-0.003189
3.8400	802.081	79.874	94.066	41.759	-0.750	50.327	1526.957	-0.005591	-0.006585	-0.002923
3.8500	767.681	75.470	88.911	39.561	-0.750	50.326	1461.468	-0.005283	-0.006224	-0.002769
3.8600	713.263	69.112	80.448	35.673	-0.732	50.327	1357.870	-0.004838	-0.005631	-0.002497
3.8700	669.591	63.330	74.192	32.795	-0.750	50.326	1274.729	-0.004433	-0.005193	-0.002296
3.8800	595.801	53.958	64.273	27.917	-0.747	50.327	1134.253	-0.003777	-0.004499	-0.001954
3.8900	555.525	48.611	56.852	24.763	-0.747	50.327	1057.577	-0.003403	-0.003980	-0.001733
3.9000	507.299	42.633	49.541	21.831	-0.748	50.327	965.767	-0.002984	-0.003468	-0.001528
3.9100	456.969	36.122	42.275	17.940	-0.752	50.326	869.951	-0.002529	-0.002959	-0.001256
3.9200	412.049	30.381	34.714	15.023	-0.744	50.327	784.435	-0.002127	-0.002430	-0.001052
3.9300	380.730	25.640	29.696	12.659	-0.749	50.327	724.812	-0.001795	-0.002079	-0.000886
3.9400	331.091	19.815	21.447	9.131	-0.743	50.327	630.312	-0.001387	-0.001501	-0.000639
3.9500	296.781	14.779	16.527	6.154	-0.746	50.327	564.995	-0.001034	-0.001157	-0.000431
3.9600	290.770	13.009	13.911	5.780	-0.740	50.327	553.551	-0.000911	-0.000974	-0.000405
3.9700	257.422	9.082	8.270	3.155	-0.756	50.327	490.065	-0.000636	-0.000579	-0.000221
3.9800	242.799	6.707	5.380	2.000	-0.744	50.327	462.227	-0.000470	-0.000377	-0.000140
3.9900	245.143	6.161	4.326	1.749	-0.738	50.326	466.690	-0.000431	-0.000303	-0.000122
4.0000	240.740	5.361	4.382	1.082	-0.738	50.327	458.307	-0.000375	-0.000307	-0.000076
4.0100	230.686	3.834	2.267	0.471	-0.744	50.326	439.167	-0.000268	-0.000159	-0.000033
4.0200	236.487	4.337	2.865	0.805	-0.741	50.327	450.211	-0.000304	-0.000201	-0.000056
4.0300	264.816	7.073	5.823	1.903	-0.748	50.326	504.141	-0.000495	-0.000408	-0.000133
4.0400	317.866	12.306	13.802	5.281	-0.735	50.327	605.135	-0.000861	-0.000966	-0.000370
4.0500	338.830	15.002	16.497	6.864	-0.742	50.326	645.046	-0.001050	-0.001155	-0.000480
4.0600	355.632	16.810	19.609	7.977	-0.744	50.327	677.032	-0.001177	-0.001373	-0.000558
4.0700	408.713	23.167	26.378	11.200	-0.748	50.326	778.084	-0.001622	-0.001846	-0.000784
4.0800	439.401	27.042	32.144	13.063	-0.743	50.327	836.506	-0.001893	-0.002250	-0.000914
4.0900	498.372	33.778	40.120	17.216	-0.745	50.326	948.772	-0.002364	-0.002808	-0.001205
4.1000	542.541	39.108	47.403	20.025	-0.743	50.327	1032.858	-0.002738	-0.003318	-0.001402
4.1100	591.653	45.312	54.184	23.746	-0.743	50.327	1126.356	-0.003172	-0.003793	-0.001662
4.1200	653.766	52.736	63.339	27.472	-0.748	50.327	1244.602	-0.003692	-0.004434	-0.001923
4.1300	697.423	59.038	70.609	30.642	-0.750	50.326	1327.715	-0.004133	-0.004943	-0.002145
4.1400	766.870	67.413	79.989	35.311	-0.742	50.327	1459.923	-0.004719	-0.005599	-0.002472
4.1500	830.560	75.455	90.299	39.784	-0.752	50.326	1581.173	-0.005282	-0.006321	-0.002785
4.1600	854.590	79.243	93.511	42.135	-0.742	50.327	1626.921	-0.005547	-0.006546	-0.002949
4.1700	905.386	85.599	102.265	45.300	-0.740	50.326	1723.623	-0.005992	-0.007159	-0.003171
4.1800	941.800	90.804	107.741	48.152	-0.739	50.327	1792.946	-0.006356	-0.007542	-0.003371
4.1900	995.151	98.232	115.370	51.514	-0.735	50.326	1894.512	-0.006876	-0.008076	-0.003606
4.2000	1011.998	100.307	118.677	52.849	-0.740	50.327	1926.584	-0.007021	-0.008307	-0.003699
4.2100	1061.952	107.306	126.251	56.166	-0.748	50.326	2021.685	-0.007511	-0.008838	-0.003932
4.2200	1070.338	108.964	127.957	57.128	-0.736	50.327	2037.649	-0.007627	-0.008957	-0.003999
4.2300	1085.893	111.154	130.181	58.350	-0.745	50.326	2067.261	-0.007781	-0.009113	-0.004085
4.2400	1091.874	112.624	131.559	59.032	-0.740	50.327	2078.648	-0.007884	-0.009209	-0.004132
4.2500	1090.957	112.976	132.614	59.422	-0.760	50.326	2076.902	-0.007908	-0.009283	-0.004160
4.2600	1085.472	112.597	130.930	59.227	-0.748	50.326	2066.460	-0.007882	-0.009165	-0.004146
4.2700	1069.331	111.644	130.793	58.308	-0.731	50.326	2035.732	-0.007815	-0.009156	-0.004082
4.2800	1057.008	110.214	129.013	57.697	-0.738	50.327	2012.272	-0.007715	-0.009031	-0.004039
4.2900	1049.223	109.766	127.875	57.545	-0.741	50.326	1997.452	-0.007684	-0.008951	-0.004028
4.3000	995.737	103.687	121.815	54.419	-0.743	50.327	1895.628	-0.007258	-0.008527	-0.003809
4.3100	945.362	97.612	114.188	51.110	-0.742	50.326	1799.726	-0.006833	-0.007993	-0.003578
4.3200	922.940	95.045	110.742	49.639	-0.746	50.327	1757.040	-0.006653	-0.007752	-0.003475
4.3300	856.709	86.583	101.334	45.592	-0.736	50.326	1630.955	-0.006061	-0.007093	-0.003191
4.3400	819.574	82.305	97.444	42.927	-0.732	50.327	1560.259	-0.005761	-0.006821	-0.003005
4.3500	764.270	75.778	89.326	39.423	-0.740	50.326	1454.973	-0.005304	-0.006253	-0.002760
4.3600	716.359	69.759	81.823	36.310	-0.723	50.327	1363.764	-0.004883	-0.005728	-0.002542
4.3700	645.966	60.959	71.844	31.474	-0.733	50.326	1229.753	-0.004267	-0.005029	-0.002203
4.3800	603.887	55.304	66.051	28.431	-0.744	50.327	1149.645	-0.003871	-0.004624	-0.001990
4.3900	558.997	49.159	58.158	25.305	-0.747	50.326	1064.186	-0.003441	-0.004071	-0.001771
4.4000	531.855	45.691	54.572	23.316	-0.742	50.327	1012.516	-0.003198	-0.003820	-0.001632
4.4100	468.601	37.635	44.720	18.912	-0.738	50.325	892.096	-0.002634	-0.003130	-0.001324
4.4200	420.976	31.436	37.176	15.719	-0.736	50.327	801.430	-0.002201	-0.002602	-0.001100
4.4300	373.696	25.289	28.891	12.214	-0.730	50.325	711.422	-0.001770	-0.002022	-0.000855
4.4400	343.760	20.699	24.210	10.284	-0.740	50.327	654.430	-0.001449	-0.001695	-0.000720
4.4500	305.798	16.307	17.399	7.377	-0.743	50.325	582.161	-0.001141	-0.001218	-0.000516
4.4600	276.823	11.998	11.533	4.699	-0.728	50.327	527.000	-0.000840	-0.000807	-0.000329
4.4700	265.792	9.769	9.898	3.741	-0.745	50.326	506.001	-0.000684	-0.000693	-0.000262
4.4800	251.320	8.100	7.922	2.862	-0.751	50.327	478.449	-0.000567	-0.000555	-0.000200
4.4900	241.416	6.327	3.923	1.736	-0.746	50.326	459.595	-0.000443	-0.000275	-0.000122
4.5000	227.560	4.001	3.225	0.416	-0.744	50.327	433.216	-0.000280	-0.000226	-0.000029
4.5100	227.305	3.889	1.806	0.107	-0.740	50.326	432.730	-0.000272	-0.000126	-0.000008
4.5200	236.968	4.129	2.197	0.443	-0.743	50.327	451.126	-0.000289	-0.000154	-0.000031
4.5300	248.555	5.555	4.604	0.943	-0.748	50.326	473.185	-0.000389	-0.000322	-0.000066
4.5400	288.080	9.475	9.466	3.392	-0.736	50.327	548.429	-0.000663	-0.000663	-0.000237
4.5500	320.857	12.882	13.899	5.543	-0.740	50.326	610.828	-0.000902	-0.000973	-0.000388
4.5600	363.838	17.821	20.318	8.295	-0.743	50.327	692.654	-0.001247	-0.001422	-0.000581
4.5700	407.225	22.830	26.751	11.103	-0.744	50.326	775.251	-0.001598	-0.001873	-0.000777
4.5800	440.633	26.692	31.534	13.187	-0.738	50.327	838.852	-0.001868	-0.002207	-0.000923
4.5900	500.431	33.918	40.910	17.343	-0.750	50.325	952.692	-0.002374	-0.002864	-0.001214
4.6000	562.123	41.244	50.388	21.195	-0.748	50.327	1070.137	-0.002887	-0.003527	-0.001484
4.6100	598.942	46.532	55.947	24.109	-0.746	50.326	1140.232	-0.003257	-0.003916	-0.001688
4.6200	648.626	52.792	62.714	27.305	-0.744	50.327	1234.818	-0.003695	-0.004390	-0.001911
4.6300	710.784	60.368	71.360	31.503	-0.747	50.326	1353.149	-0.004226	-0.004995	-0.002205
4.6400	767.260	67.889	80.435	35.547	-0.749	50.327	1460.667	-0.004752	-0.005630	-0.002488
4.6500	813.292	73.728	88.452	38.769	-0.744	50.325	1548.300	-0.005161	-0.006192	-0.002714
4.6600	863.202	80.310	94.536	42.161	-0.748	50.327	1643.314	-0.005622	-0.006618	-0.002951
4.6700	911.533	86.667	103.462	45.551	-0.739	50.326	1735.325	-0.006067	-0.007242	-0.003189
4.6800	961.352	93.137	109.576	49.401	-0.735	50.328	1830.168	-0.006520	-0.007670	-0.003458
4.6900	979.702	96.361	112.825	50.720	-0.744	50.326	1865.101	-0.006745	-0.007898	-0.003550
4.7000	1031.775	103.126	120.872	54.197	-0.748	50.327	1964.235	-0.007219	-0.008461	-0.003794
4.7100	1049.644	105.948	123.094	55.751	-0.756	50.326	1998.253	-0.007416	-0.008617	-0.003903
4.7200	1065.018	108.234	127.305	57.086	-0.748	50.328	2027.521	-0.007576	-0.008911	-0.003996
4.7300	1074.606	110.061	128.167	57.712	-0.747	50.326	2045.774	-0.007704	-0.008972	-0.004040
4.7400	1104.558	113.988	133.891	59.950	-0.739	50.327	2102.795	-0.007979	-0.009372	-0.004197
4.7500	1101.177	114.522	134.545	59.938	-0.737	50.326	2096.357	-0.008017	-0.009418	-0.004196
4.7600	1092.625	113.777	132.448	59.895	-0.739	50.327	2080.078	-0.007964	-0.009271	-0.004193
4.7700	1076.680	112.654	131.323	59.018	-0.742	50.326	2049.723	-0.007886	-0.009193	-0.004131
4.7800	1055.265	110.341	128.960	57.601	-0.740	50.327	2008.953	-0.007724	-0.009027	-0.004032
4.7900	1021.887	106.651	124.415	55.821	-0.740	50.325	1945.410	-0.007466	-0.008709	-0.003908
4.8000	1001.989	104.436	121.928	54.753	-0.734	50.327	1907.530	-0.007311	-0.008535	-0.003833
4.8100	952.425	98.721	116.122	51.804	-0.740	50.325	1813.173	-0.006911	-0.008129	-0.003626
4.8200	918.476	93.881	109.795	49.665	-0.738	50.327	1748.543	-0.006572	-0.007686	-0.003477
4.8300	865.396	88.114	103.893	46.067	-0.731	50.325	1647.491	-0.006168	-0.007272	-0.003225
4.8400	817.726	82.079	97.151	43.136	-0.739	50.327	1556.740	-0.005746	-0.006801	-0.003020
4.8500	760.753	75.244	88.854	39.105	-0.742	50.325	1448.278	-0.005267	-0.006220	-0.002737
4.8600	712.482	69.336	81.724	35.824	-0.739	50.326	1356.382	-0.004853	-0.005721	-0.002508
4.8700	657.989	62.346	72.622	32.449	-0.744	50.325	1252.642	-0.004364	-0.005084	-0.002271
4.8800	616.571	57.254	67.814	29.362	-0.747	50.327	1173.792	-0.004008	-0.004747	-0.002055
4.8900	574.777	51.796	61.018	26.321	-0.744	50.325	1094.227	-0.003626	-0.004271	-0.001842
4.9000	502.896	42.436	51.041	21.665	-0.732	50.327	957.384	-0.002971	-0.003573	-0.001517
4.9100	457.254	36.852	42.651	18.190	-0.736	50.325	870.495	-0.002580	-0.002986	-0.001273
4.9200	416.663	30.918	36.867	15.371	-0.743	50.327	793.219	-0.002164	-0.002581	-0.001076
4.9300	380.730	26.186	30.364	12.687	-0.745	50.325	724.812	-0.001833	-0.002126	-0.000888
4.9400	336.321	20.404	23.846	9.727	-0.740	50.328	640.268	-0.001428	-0.001669	-0.000681
4.9500	302.161	15.760	17.176	7.073	-0.746	50.325	575.237	-0.001103	-0.001202	-0.000495
4.9600	283.210	13.036	13.870	5.238	-0.737	50.328	539.160	-0.000913	-0.000971	-0.000367
4.9700	269.565	10.765	11.425	4.281	-0.746	50.325	513.182	-0.000754	-0.000800	-0.000300
4.9800	246.691	7.508	6.603	2.376	-0.747	50.327	469.637	-0.000526	-0.000462	-0.000166
4.9900	229.784	5.347	3.227	0.776	-0.748	50.325	437.450	-0.000374	-0.000226	-0.000054
