# Supplementary material for: Evaluation of a Cold-Mixed High-Performance Polyurethane Mixture
Source: Hindawi journal article supplement (doi:10.1155/2019/1507971), 2019-11-07
Supplement: f1 [file 1507971.f1.zip › 1507971.f1/dynamic modulus data/PUM/specimen2/temp50/zhs-2-50_5Hz.csv]

Test Information
****************
Project name	zhs
Operator name	2
Target test temperature	50
Target confining stress	0
Average dynamic strain range from 75 to 125 micro-strain
Contact stress	5
Initial modulus	1000
Axial gauge length	70
Comments
Specimen information
********************
Identification	zhs-2-50
Dimensions	Point 1	Point 2	Point 3	Point 4	Point 5	Point 6	Average	Std Dev.
Diameter (mm)	49.2	49.3	49.2				49.23	0.058
Height (mm)	100.8	101.0	100.8				100.87	0.115
Cross-sectional area (mm�)	1903.7
Conditioning time
Properties/Comments
Test Data	5Hz
*********
Test date and time	Wed	Apr 3	2019	1:28 PM
Dynamic modulus (MPa)	8974
Phase angle (Degrees)	4.25
Average temperature (�C)	50.3
Average confining pressure (kPa)	-0.7
Average micro-strain	101
Load drift (%)	0.9
Load standard error (%)	2.9
Average deformation drift (%)	-5.0
Average deformation standard error (%)	2.9
Deformation uniformity (%)	30.0
Phase uniformity (Degrees)	0.2
Conditioning Cycles
Time (sec)	Axial stress (kPa)	Axial micro-strain #1	Axial micro-strain #2	Axial micro-strain #3	Confining pressure (kPa)	Temperature (�C)	Load (N)	Displacement #1 (mm)	Displacement #2 (mm)	Displacement #3 (mm)
0.0000	434.516	19.199	24.611	10.090	-0.755	50.335	827.208	-0.001344	-0.001723	-0.000706
0.0040	384.382	14.049	17.359	7.419	-0.755	50.329	731.764	-0.000983	-0.001215	-0.000519
0.0080	281.302	2.441	3.032	0.848	-0.750	50.317	535.526	-0.000171	-0.000212	-0.000059
0.0120	242.844	-2.146	-2.472	-1.403	-0.764	50.316	462.313	0.000150	0.000173	0.000098
0.0160	244.422	-2.765	-3.667	-1.957	-0.751	50.327	465.317	0.000194	0.000257	0.000137
0.0200	251.846	-2.173	-2.887	-1.833	-0.751	50.336	479.450	0.000152	0.000202	0.000128
0.0240	261.945	-1.431	-2.887	-1.277	-0.747	50.329	498.676	0.000100	0.000202	0.000089
0.0280	285.344	0.843	-0.083	-0.542	-0.747	50.318	543.222	-0.000059	0.000006	0.000038
0.0320	335.915	6.274	8.478	3.017	-0.754	50.316	639.496	-0.000439	-0.000593	-0.000211
0.0360	389.822	11.969	15.536	6.379	-0.751	50.327	742.121	-0.000838	-0.001088	-0.000446
0.0400	440.813	17.934	22.470	9.229	-0.746	50.336	839.195	-0.001255	-0.001573	-0.000646
0.0440	483.644	23.350	29.058	12.310	-0.744	50.329	920.734	-0.001634	-0.002034	-0.000862
0.0480	522.327	27.853	35.214	14.523	-0.743	50.318	994.377	-0.001950	-0.002465	-0.001017
0.0520	563.370	32.977	40.703	17.592	-0.752	50.317	1072.512	-0.002308	-0.002849	-0.001231
0.0560	604.202	37.764	47.374	19.970	-0.742	50.327	1150.246	-0.002643	-0.003316	-0.001398
0.0600	646.537	42.828	52.820	22.858	-0.746	50.336	1230.841	-0.002998	-0.003697	-0.001600
0.0640	687.775	48.037	58.049	25.737	-0.752	50.329	1309.347	-0.003363	-0.004063	-0.001802
0.0680	721.138	52.301	62.993	27.653	-0.753	50.318	1372.862	-0.003661	-0.004409	-0.001936
0.0720	760.498	57.564	70.358	30.753	-0.752	50.317	1447.792	-0.004029	-0.004925	-0.002153
0.0760	799.121	62.361	75.570	33.157	-0.746	50.328	1521.320	-0.004365	-0.005290	-0.002321
0.0800	832.649	66.630	79.448	35.589	-0.740	50.336	1585.150	-0.004664	-0.005561	-0.002491
0.0840	862.856	70.529	83.977	37.620	-0.734	50.329	1642.656	-0.004937	-0.005878	-0.002633
0.0880	872.249	72.240	86.117	38.563	-0.743	50.318	1660.538	-0.005057	-0.006028	-0.002699
0.0920	880.995	73.937	88.146	39.700	-0.759	50.317	1677.189	-0.005176	-0.006170	-0.002779
0.0960	895.182	76.172	90.968	40.604	-0.751	50.327	1704.197	-0.005332	-0.006368	-0.002842
0.1000	903.914	77.476	92.426	41.257	-0.752	50.336	1720.819	-0.005423	-0.006470	-0.002888
0.1040	908.302	78.359	93.219	41.746	-0.751	50.329	1729.174	-0.005485	-0.006525	-0.002922
0.1080	907.250	78.512	92.886	41.703	-0.754	50.318	1727.171	-0.005496	-0.006502	-0.002919
0.1120	902.937	78.569	93.346	41.842	-0.761	50.316	1718.960	-0.005500	-0.006534	-0.002929
0.1160	896.850	77.868	91.983	41.493	-0.757	50.327	1707.373	-0.005451	-0.006439	-0.002905
0.1200	887.593	77.405	91.065	41.006	-0.754	50.335	1689.749	-0.005418	-0.006375	-0.002870
0.1240	871.933	75.891	89.674	40.352	-0.747	50.329	1659.937	-0.005312	-0.006277	-0.002825
0.1280	837.518	72.042	86.700	38.521	-0.745	50.318	1594.419	-0.005043	-0.006069	-0.002696
0.1320	782.259	66.052	79.210	35.225	-0.755	50.316	1489.220	-0.004624	-0.005545	-0.002466
0.1360	732.064	59.990	71.497	31.947	-0.743	50.326	1393.661	-0.004199	-0.005005	-0.002236
0.1400	689.203	54.589	65.996	29.320	-0.748	50.335	1312.065	-0.003821	-0.004620	-0.002052
0.1440	653.796	49.972	61.340	26.793	-0.742	50.329	1244.659	-0.003498	-0.004294	-0.001876
0.1480	615.534	45.593	55.474	24.194	-0.744	50.318	1171.818	-0.003192	-0.003883	-0.001694
0.1520	572.101	40.976	49.554	21.652	-0.748	50.316	1089.134	-0.002868	-0.003469	-0.001516
0.1560	524.867	34.971	42.496	18.495	-0.754	50.326	999.212	-0.002448	-0.002975	-0.001295
0.1600	486.274	29.848	37.399	15.927	-0.752	50.336	925.741	-0.002089	-0.002618	-0.001115
0.1640	454.158	25.837	32.394	13.854	-0.747	50.328	864.601	-0.001809	-0.002268	-0.000970
0.1680	417.174	20.980	26.528	10.811	-0.748	50.318	794.191	-0.001469	-0.001857	-0.000757
0.1720	382.819	17.330	21.638	8.978	-0.756	50.316	728.788	-0.001213	-0.001515	-0.000628
0.1760	354.731	13.431	16.844	6.685	-0.756	50.327	675.316	-0.000940	-0.001179	-0.000468
0.1800	325.891	9.770	11.007	4.822	-0.764	50.336	620.413	-0.000684	-0.000771	-0.000338
0.1840	298.765	6.471	6.421	3.042	-0.748	50.329	568.771	-0.000453	-0.000449	-0.000213
0.1880	274.509	3.173	3.741	0.846	-0.755	50.317	522.594	-0.000222	-0.000262	-0.000059
0.1920	257.677	0.591	0.347	0.083	-0.759	50.317	490.551	-0.000041	-0.000024	-0.000006
0.1960	247.413	-1.092	-1.471	-1.026	-0.756	50.326	471.010	0.000076	0.000103	0.000072
0.2000	238.816	-2.173	-3.139	-1.918	-0.758	50.335	454.645	0.000152	0.000220	0.000134
0.2040	232.880	-2.974	-5.585	-2.389	-0.745	50.329	443.344	0.000208	0.000391	0.000167
0.2080	233.136	-3.479	-4.613	-2.823	-0.752	50.318	443.830	0.000244	0.000323	0.000198
0.2120	235.044	-2.861	-4.806	-2.487	-0.755	50.316	447.464	0.000200	0.000336	0.000174
0.2160	238.366	-3.537	-5.336	-2.531	-0.758	50.327	453.787	0.000248	0.000374	0.000177
0.2200	245.173	-2.960	-3.862	-2.460	-0.760	50.336	466.747	0.000207	0.000270	0.000172
0.2240	258.113	-2.088	-3.057	-1.806	-0.754	50.329	491.381	0.000146	0.000214	0.000126
0.2280	291.220	1.517	2.642	-0.057	-0.760	50.318	554.409	-0.000106	-0.000185	0.000004
0.2320	344.887	7.719	8.979	3.768	-0.761	50.317	656.576	-0.000540	-0.000629	-0.000264
0.2360	395.187	13.137	16.121	6.919	-0.760	50.327	752.335	-0.000920	-0.001128	-0.000484
0.2400	434.772	18.145	23.320	9.185	-0.763	50.336	827.694	-0.001270	-0.001632	-0.000643
0.2440	472.719	22.382	28.698	11.701	-0.756	50.329	899.935	-0.001567	-0.002009	-0.000819
0.2480	517.894	27.450	35.187	14.745	-0.759	50.318	985.937	-0.001922	-0.002463	-0.001032
0.2520	566.556	33.385	41.942	18.203	-0.757	50.316	1078.577	-0.002337	-0.002936	-0.001274
0.2560	615.023	39.193	48.000	21.025	-0.751	50.326	1170.845	-0.002744	-0.003360	-0.001472
0.2600	651.031	44.233	53.557	23.497	-0.745	50.335	1239.395	-0.003096	-0.003749	-0.001645
0.2640	683.312	48.401	58.185	25.778	-0.733	50.329	1300.850	-0.003388	-0.004073	-0.001804
0.2680	722.551	53.115	64.258	28.443	-0.744	50.318	1375.551	-0.003718	-0.004498	-0.001991
0.2720	762.602	58.475	70.942	31.433	-0.746	50.316	1451.797	-0.004093	-0.004966	-0.002200
0.2760	798.354	62.641	76.682	33.598	-0.738	50.326	1519.861	-0.004385	-0.005368	-0.002352
0.2800	831.597	67.077	80.639	36.047	-0.740	50.336	1583.147	-0.004695	-0.005645	-0.002523
0.2840	857.897	70.756	84.880	37.827	-0.734	50.330	1633.215	-0.004953	-0.005942	-0.002648
0.2880	872.940	73.277	87.645	38.907	-0.736	50.318	1661.854	-0.005129	-0.006135	-0.002724
0.2920	886.090	75.301	90.840	40.438	-0.744	50.316	1686.888	-0.005271	-0.006359	-0.002831
0.2960	901.644	77.335	92.900	41.103	-0.750	50.326	1716.499	-0.005413	-0.006503	-0.002877
0.3000	911.458	78.808	94.773	42.106	-0.743	50.336	1735.182	-0.005517	-0.006634	-0.002947
0.3040	915.410	79.592	94.008	42.496	-0.738	50.329	1742.706	-0.005571	-0.006581	-0.002975
0.3080	914.043	79.760	94.815	42.426	-0.739	50.318	1740.103	-0.005583	-0.006637	-0.002970
0.3120	910.301	79.860	95.065	42.579	-0.740	50.316	1732.979	-0.005590	-0.006655	-0.002981
0.3160	902.877	79.452	93.746	42.093	-0.746	50.327	1718.845	-0.005562	-0.006562	-0.002946
0.3200	888.314	78.514	92.499	41.605	-0.748	50.336	1691.122	-0.005496	-0.006475	-0.002912
0.3240	860.316	75.076	88.674	40.118	-0.739	50.329	1637.821	-0.005255	-0.006207	-0.002808
0.3280	810.888	69.476	82.477	37.061	-0.748	50.318	1543.722	-0.004863	-0.005773	-0.002594
0.3320	766.223	64.102	77.681	34.573	-0.752	50.316	1458.693	-0.004487	-0.005438	-0.002420
0.3360	742.749	61.239	72.637	32.783	-0.743	50.326	1414.003	-0.004287	-0.005085	-0.002295
0.3400	715.863	58.013	69.581	31.087	-0.744	50.335	1362.820	-0.004061	-0.004871	-0.002176
0.3440	665.728	52.513	63.202	27.973	-0.735	50.329	1267.376	-0.003676	-0.004424	-0.001958
0.3480	616.736	46.422	56.449	24.624	-0.740	50.318	1174.107	-0.003250	-0.003951	-0.001724
0.3520	572.597	41.355	49.584	21.873	-0.748	50.316	1090.078	-0.002895	-0.003471	-0.001531
0.3560	525.063	34.971	43.469	18.551	-0.735	50.326	999.584	-0.002448	-0.003043	-0.001299
0.3600	482.622	30.113	37.383	15.815	-0.745	50.335	918.789	-0.002108	-0.002617	-0.001107
0.3640	438.379	24.237	29.962	12.853	-0.738	50.329	834.560	-0.001697	-0.002097	-0.000900
0.3680	399.094	19.382	24.110	9.825	-0.743	50.318	759.773	-0.001357	-0.001688	-0.000688
0.3720	372.780	16.476	20.609	8.421	-0.750	50.316	709.677	-0.001153	-0.001443	-0.000589
0.3760	349.350	13.374	15.762	6.726	-0.741	50.325	665.073	-0.000936	-0.001103	-0.000471
0.3800	324.538	10.051	12.256	4.781	-0.752	50.335	617.838	-0.000704	-0.000858	-0.000335
0.3840	304.100	7.085	7.211	3.157	-0.747	50.329	578.928	-0.000496	-0.000505	-0.000221
0.3880	290.544	5.093	6.241	2.069	-0.744	50.318	553.122	-0.000356	-0.000437	-0.000145
0.3920	269.595	2.387	2.946	0.943	-0.750	50.316	513.239	-0.000167	-0.000206	-0.000066
0.3960	251.380	0.126	-1.025	-0.611	-0.746	50.326	478.563	-0.000009	0.000072	0.000043
0.4000	238.215	-1.484	-4.085	-1.792	-0.744	50.336	453.501	0.000104	0.000286	0.000125
0.4040	232.114	-2.762	-4.349	-2.600	-0.740	50.329	441.885	0.000193	0.000304	0.000182
0.4080	234.248	-2.805	-5.557	-2.488	-0.743	50.318	445.948	0.000196	0.000389	0.000174
0.4120	237.749	-2.775	-3.430	-2.098	-0.755	50.315	452.614	0.000194	0.000240	0.000147
0.4160	242.814	-2.537	-4.487	-2.070	-0.748	50.326	462.255	0.000178	0.000314	0.000145
0.4200	250.524	-1.835	-3.749	-1.945	-0.739	50.335	476.933	0.000128	0.000262	0.000136
0.4240	262.576	-0.701	-2.484	-1.389	-0.742	50.329	499.878	0.000049	0.000174	0.000097
0.4280	293.309	2.401	2.183	0.235	-0.746	50.318	558.386	-0.000168	-0.000153	-0.000016
0.4320	344.556	8.182	9.160	3.741	-0.754	50.316	655.947	-0.000573	-0.000641	-0.000262
0.4360	390.002	12.812	15.593	6.294	-0.748	50.326	742.464	-0.000897	-0.001092	-0.000441
0.4400	427.979	17.052	22.195	8.851	-0.747	50.336	814.762	-0.001194	-0.001554	-0.000620
0.4440	464.288	21.639	27.765	11.230	-0.745	50.329	883.884	-0.001515	-0.001944	-0.000786
0.4480	508.937	26.860	32.825	14.062	-0.744	50.318	968.885	-0.001880	-0.002298	-0.000984
0.4520	556.607	32.879	40.939	17.439	-0.752	50.316	1059.637	-0.002302	-0.002866	-0.001221
0.4560	609.733	38.997	48.847	20.512	-0.743	50.327	1160.774	-0.002730	-0.003419	-0.001436
0.4600	657.027	45.185	54.849	23.691	-0.746	50.335	1250.811	-0.003163	-0.003839	-0.001658
0.4640	695.875	49.774	60.326	26.545	-0.740	50.329	1324.768	-0.003484	-0.004223	-0.001858
0.4680	734.739	54.757	67.066	29.153	-0.745	50.318	1398.754	-0.003833	-0.004695	-0.002041
0.4720	769.996	59.569	72.511	32.158	-0.758	50.316	1465.874	-0.004170	-0.005076	-0.002251
0.4760	802.712	63.935	77.350	34.031	-0.751	50.326	1528.158	-0.004475	-0.005414	-0.002382
0.4800	831.928	67.793	81.365	35.965	-0.754	50.336	1583.776	-0.004746	-0.005696	-0.002518
0.4840	860.376	71.706	85.031	38.242	-0.743	50.329	1637.936	-0.005019	-0.005952	-0.002677
0.4880	892.973	75.863	89.854	40.075	-0.749	50.318	1699.991	-0.005310	-0.006290	-0.002805
0.4920	911.233	78.345	93.621	42.120	-0.746	50.315	1734.753	-0.005484	-0.006553	-0.002948
0.4960	913.066	78.934	94.787	42.120	-0.742	50.326	1738.243	-0.005525	-0.006635	-0.002948
0.5000	911.383	79.019	94.996	42.164	-0.737	50.336	1735.039	-0.005531	-0.006650	-0.002952
0.5040	909.880	79.438	94.078	42.469	-0.737	50.329	1732.178	-0.005561	-0.006585	-0.002973
0.5080	906.679	79.524	94.092	42.009	-0.742	50.317	1726.084	-0.005567	-0.006586	-0.002941
0.5120	901.043	79.634	94.355	42.189	-0.751	50.315	1715.355	-0.005574	-0.006605	-0.002953
0.5160	892.507	78.681	92.733	41.592	-0.751	50.326	1699.104	-0.005508	-0.006491	-0.002911
0.5200	879.342	77.126	90.898	40.908	-0.751	50.336	1674.042	-0.005399	-0.006363	-0.002864
0.5240	853.644	74.275	87.896	39.812	-0.743	50.329	1625.118	-0.005199	-0.006153	-0.002787
0.5280	807.672	69.167	81.963	37.063	-0.747	50.318	1537.600	-0.004842	-0.005737	-0.002594
0.5320	761.174	64.104	76.040	34.435	-0.754	50.315	1449.080	-0.004487	-0.005323	-0.002410
0.5360	724.384	59.611	70.789	31.711	-0.751	50.325	1379.042	-0.004173	-0.004955	-0.002220
0.5400	694.433	56.005	66.688	29.654	-0.754	50.335	1322.021	-0.003920	-0.004668	-0.002076
0.5440	664.526	52.259	62.909	27.917	-0.758	50.329	1265.087	-0.003658	-0.004404	-0.001954
0.5480	626.083	47.418	57.130	25.140	-0.754	50.318	1191.902	-0.003319	-0.003999	-0.001760
0.5520	583.027	42.604	51.515	22.594	-0.759	50.316	1109.934	-0.002982	-0.003606	-0.001582
0.5560	538.859	37.258	45.998	19.608	-0.758	50.326	1025.848	-0.002608	-0.003220	-0.001373
0.5600	497.591	32.038	38.897	16.855	-0.758	50.335	947.285	-0.002243	-0.002723	-0.001180
0.5640	451.664	26.718	32.797	13.982	-0.740	50.329	859.852	-0.001870	-0.002296	-0.000979
0.5680	404.279	20.461	25.307	10.740	-0.740	50.318	769.644	-0.001432	-0.001772	-0.000752
0.5720	369.083	16.447	18.263	8.337	-0.750	50.316	702.639	-0.001151	-0.001278	-0.000584
0.5760	342.197	12.672	14.940	6.113	-0.744	50.326	651.455	-0.000887	-0.001046	-0.000428
0.5800	312.606	8.858	11.077	4.059	-0.741	50.335	595.121	-0.000620	-0.000775	-0.000284
0.5840	285.885	5.583	6.658	2.001	-0.739	50.329	544.252	-0.000391	-0.000466	-0.000140
0.5880	267.581	2.976	2.488	0.582	-0.740	50.318	509.405	-0.000208	-0.000174	-0.000041
0.5920	252.011	0.786	-0.414	-0.261	-0.751	50.316	479.765	-0.000055	0.000029	0.000018
0.5960	242.153	-0.913	-1.497	-1.233	-0.747	50.326	460.997	0.000064	0.000105	0.000086
0.6000	236.923	-1.920	-3.752	-1.958	-0.746	50.336	451.040	0.000134	0.000263	0.000137
0.6040	235.420	-2.578	-4.041	-2.014	-0.739	50.329	448.179	0.000180	0.000283	0.000141
0.6080	235.285	-2.903	-4.502	-2.556	-0.742	50.318	447.922	0.000203	0.000315	0.000179
0.6120	237.464	-2.776	-3.293	-2.529	-0.749	50.315	452.070	0.000194	0.000230	0.000177
0.6160	243.355	-2.215	-3.460	-2.084	-0.744	50.325	463.285	0.000155	0.000242	0.000146
0.6200	251.215	-1.234	-2.376	-1.764	-0.743	50.335	478.249	0.000086	0.000166	0.000124
0.6240	262.576	-0.421	-1.222	-1.249	-0.739	50.329	499.878	0.000030	0.000086	0.000087
0.6280	292.107	2.331	2.153	0.402	-0.736	50.318	556.097	-0.000163	-0.000151	-0.000028
0.6320	343.594	7.930	10.160	3.753	-0.750	50.316	654.116	-0.000555	-0.000711	-0.000263
0.6360	392.707	13.557	15.956	6.488	-0.742	50.326	747.614	-0.000949	-0.001117	-0.000454
0.6400	430.970	18.018	21.346	8.976	-0.744	50.335	820.456	-0.001261	-0.001494	-0.000628
0.6440	470.074	22.621	27.614	11.687	-0.746	50.330	894.899	-0.001583	-0.001933	-0.000818
0.6480	508.802	27.365	34.423	14.132	-0.751	50.318	968.628	-0.001916	-0.002410	-0.000989
0.6520	551.633	32.653	40.467	17.092	-0.756	50.316	1050.167	-0.002286	-0.002833	-0.001196
0.6560	593.261	37.330	46.554	19.706	-0.752	50.325	1129.417	-0.002613	-0.003259	-0.001379
0.6600	628.353	41.789	51.764	22.261	-0.750	50.335	1196.222	-0.002925	-0.003623	-0.001558
0.6640	677.195	47.727	58.658	25.168	-0.747	50.329	1289.206	-0.003341	-0.004106	-0.001762
0.6680	723.753	53.817	65.440	28.195	-0.746	50.318	1377.840	-0.003767	-0.004581	-0.001974
0.6720	763.804	58.883	70.483	31.323	-0.746	50.316	1454.086	-0.004122	-0.004934	-0.002193
0.6760	800.278	63.736	75.946	33.683	-0.743	50.326	1523.523	-0.004462	-0.005316	-0.002358
0.6800	830.981	67.624	80.573	35.896	-0.741	50.335	1581.974	-0.004734	-0.005640	-0.002513
0.6840	853.779	70.740	85.255	37.592	-0.744	50.330	1625.376	-0.004952	-0.005968	-0.002631
0.6880	862.961	72.409	86.591	38.631	-0.742	50.318	1642.857	-0.005069	-0.006061	-0.002704
0.6920	873.857	74.261	88.979	39.548	-0.749	50.316	1663.599	-0.005198	-0.006229	-0.002768
0.6960	896.745	77.111	92.913	41.203	-0.745	50.326	1707.172	-0.005398	-0.006504	-0.002884
0.7000	912.991	79.482	95.287	42.009	-0.747	50.336	1738.100	-0.005564	-0.006670	-0.002941
0.7040	914.509	80.086	95.593	42.426	-0.746	50.330	1740.990	-0.005606	-0.006692	-0.002970
0.7080	910.902	79.873	94.828	42.272	-0.741	50.318	1734.123	-0.005591	-0.006638	-0.002959
0.7120	904.755	79.690	95.066	42.341	-0.751	50.316	1722.422	-0.005578	-0.006655	-0.002964
0.7160	896.219	79.003	94.634	41.912	-0.751	50.326	1706.171	-0.005530	-0.006624	-0.002934
0.7200	883.956	77.588	92.122	41.272	-0.749	50.335	1682.825	-0.005431	-0.006449	-0.002889
0.7240	857.852	75.230	90.092	39.813	-0.742	50.329	1633.129	-0.005266	-0.006306	-0.002787
0.7280	806.274	69.433	83.602	36.630	-0.746	50.318	1534.939	-0.004860	-0.005852	-0.002564
0.7320	759.340	64.256	76.947	34.130	-0.755	50.316	1445.589	-0.004498	-0.005386	-0.002389
0.7360	726.353	59.779	72.163	31.782	-0.747	50.325	1382.790	-0.004185	-0.005051	-0.002225
0.7400	693.260	55.388	67.564	29.750	-0.750	50.335	1319.790	-0.003877	-0.004730	-0.002082
0.7440	654.457	51.246	61.298	26.960	-0.737	50.330	1245.918	-0.003587	-0.004291	-0.001887
0.7480	614.376	46.351	56.223	24.652	-0.742	50.318	1169.615	-0.003245	-0.003936	-0.001726
0.7520	580.592	42.364	51.347	22.290	-0.758	50.316	1105.299	-0.002966	-0.003594	-0.001560
0.7560	552.835	38.857	47.638	20.386	-0.757	50.325	1052.456	-0.002720	-0.003335	-0.001427
0.7600	508.576	33.482	40.842	17.425	-0.754	50.335	968.199	-0.002344	-0.002859	-0.001220
0.7640	461.943	27.687	34.380	14.507	-0.751	50.329	879.421	-0.001938	-0.002407	-0.001015
0.7680	418.616	22.438	27.432	11.616	-0.754	50.318	796.938	-0.001571	-0.001920	-0.000813
0.7720	372.870	16.952	20.222	8.588	-0.758	50.316	709.848	-0.001187	-0.001416	-0.000601
0.7760	338.259	12.420	15.150	6.112	-0.746	50.326	643.959	-0.000869	-0.001060	-0.000428
0.7800	312.786	9.082	10.284	4.143	-0.754	50.336	595.465	-0.000636	-0.000720	-0.000290
0.7840	288.921	5.795	6.212	2.363	-0.750	50.330	550.032	-0.000406	-0.000435	-0.000165
0.7880	264.124	2.936	2.851	0.487	-0.755	50.318	502.825	-0.000206	-0.000200	-0.000034
0.7920	247.999	0.463	0.098	-0.347	-0.760	50.316	472.126	-0.000032	-0.000007	0.000024
0.7960	240.590	-1.065	-3.167	-1.360	-0.748	50.326	458.021	0.000075	0.000222	0.000095
0.8000	234.037	-2.116	-2.764	-2.182	-0.746	50.335	445.547	0.000148	0.000193	0.000153
0.8040	233.421	-2.509	-4.015	-2.139	-0.743	50.330	444.374	0.000176	0.000281	0.000150
0.8080	235.240	-2.692	-4.698	-2.250	-0.744	50.318	447.836	0.000188	0.000329	0.000157
0.8120	237.058	-2.454	-3.627	-2.113	-0.750	50.316	451.298	0.000172	0.000254	0.000148
0.8160	240.139	-2.778	-3.320	-2.210	-0.748	50.326	457.163	0.000194	0.000232	0.000155
0.8200	247.428	-2.033	-3.682	-1.945	-0.754	50.336	471.039	0.000142	0.000258	0.000136
0.8240	261.058	-1.178	-1.302	-1.290	-0.736	50.330	496.988	0.000082	0.000091	0.000090
0.8280	296.165	2.919	3.948	0.610	-0.743	50.318	563.822	-0.000204	-0.000276	-0.000043
0.8320	347.081	8.689	10.800	3.991	-0.750	50.315	660.753	-0.000608	-0.000756	-0.000279
0.8360	395.187	14.188	17.290	6.627	-0.748	50.325	752.335	-0.000993	-0.001210	-0.000464
0.8400	436.861	18.847	23.223	9.297	-0.751	50.336	831.671	-0.001319	-0.001626	-0.000651
0.8440	480.473	23.745	29.184	12.324	-0.736	50.329	914.698	-0.001662	-0.002043	-0.000863
0.8480	522.838	28.949	36.590	15.177	-0.740	50.318	995.350	-0.002026	-0.002561	-0.001062
0.8520	563.565	33.778	42.926	18.078	-0.747	50.315	1072.884	-0.002364	-0.003005	-0.001265
0.8560	606.892	39.389	47.666	20.817	-0.749	50.325	1155.367	-0.002757	-0.003337	-0.001457
0.8600	647.394	44.189	53.974	23.429	-0.750	50.335	1232.471	-0.003093	-0.003778	-0.001640
0.8640	685.010	49.382	59.462	26.043	-0.748	50.330	1304.083	-0.003457	-0.004162	-0.001823
0.8680	725.331	54.350	65.133	28.681	-0.747	50.318	1380.844	-0.003805	-0.004559	-0.002008
0.8720	760.002	58.854	70.471	31.419	-0.744	50.316	1446.848	-0.004120	-0.004933	-0.002199
0.8760	787.308	62.332	74.806	33.335	-0.740	50.325	1498.833	-0.004363	-0.005236	-0.002333
0.8800	811.639	65.704	78.739	34.934	-0.737	50.335	1545.153	-0.004599	-0.005512	-0.002445
0.8840	840.328	69.182	83.519	36.841	-0.735	50.330	1599.770	-0.004843	-0.005846	-0.002579
0.8880	876.517	73.951	89.036	39.313	-0.744	50.318	1668.663	-0.005177	-0.006233	-0.002752
0.8920	899.706	77.546	91.734	41.341	-0.751	50.315	1712.809	-0.005428	-0.006421	-0.002894
0.8960	902.802	78.036	93.538	41.578	-0.747	50.325	1718.702	-0.005463	-0.006548	-0.002910
0.9000	902.411	78.471	93.511	41.508	-0.755	50.335	1717.958	-0.005493	-0.006546	-0.002906
0.9040	903.628	78.779	93.316	42.232	-0.742	50.329	1720.276	-0.005515	-0.006532	-0.002956
0.9080	903.538	78.765	95.119	42.052	-0.746	50.318	1720.104	-0.005514	-0.006658	-0.002944
0.9120	900.487	79.396	95.301	42.078	-0.754	50.315	1714.296	-0.005558	-0.006671	-0.002945
0.9160	894.837	78.891	93.177	42.037	-0.748	50.325	1703.539	-0.005522	-0.006522	-0.002943
0.9200	884.918	78.105	92.693	41.481	-0.751	50.335	1684.656	-0.005467	-0.006489	-0.002904
0.9240	867.770	76.732	90.774	40.618	-0.747	50.329	1652.012	-0.005371	-0.006354	-0.002843
0.9280	827.855	72.015	85.786	38.091	-0.748	50.318	1576.023	-0.005041	-0.006005	-0.002666
0.9320	777.870	66.124	78.669	35.447	-0.748	50.315	1480.865	-0.004629	-0.005507	-0.002481
0.9360	734.138	60.818	72.539	32.436	-0.749	50.325	1397.610	-0.004257	-0.005078	-0.002271
0.9400	694.312	56.398	67.021	29.985	-0.748	50.335	1321.793	-0.003948	-0.004691	-0.002099
0.9440	656.711	51.824	62.994	27.388	-0.739	50.329	1250.210	-0.003628	-0.004410	-0.001917
0.9480	619.561	47.235	57.380	24.915	-0.744	50.318	1179.485	-0.003306	-0.004017	-0.001744
0.9520	583.493	42.828	51.361	22.829	-0.753	50.315	1110.821	-0.002998	-0.003595	-0.001598
0.9560	538.378	37.117	45.540	19.649	-0.740	50.325	1024.933	-0.002598	-0.003188	-0.001375
0.9600	487.476	31.195	38.175	16.412	-0.748	50.335	928.030	-0.002184	-0.002672	-0.001149
0.9640	448.403	26.384	31.784	13.590	-0.742	50.329	853.643	-0.001847	-0.002225	-0.000951
0.9680	416.137	21.974	25.904	11.351	-0.745	50.318	792.217	-0.001538	-0.001813	-0.000795
0.9720	383.795	18.369	21.987	9.242	-0.752	50.315	730.648	-0.001286	-0.001539	-0.000647
0.9760	355.001	14.554	17.040	7.268	-0.748	50.325	675.831	-0.001019	-0.001193	-0.000509
0.9800	324.058	10.722	12.216	4.921	-0.744	50.335	616.922	-0.000751	-0.000855	-0.000344
0.9840	295.834	6.722	7.004	3.002	-0.745	50.330	563.192	-0.000471	-0.000490	-0.000210
0.9880	268.077	3.160	3.645	0.804	-0.744	50.319	510.349	-0.000221	-0.000255	-0.000056
0.9920	247.653	0.464	0.057	-0.417	-0.750	50.315	471.468	-0.000032	-0.000004	0.000029
0.9960	236.983	-1.023	-3.181	-1.597	-0.753	50.325	451.155	0.000072	0.000223	0.000112
1.0000	234.744	-8.037	-8.697	-4.226	-0.751	50.324	446.892	0.000563	0.000609	0.000296
1.0040	236.232	-7.996	-8.892	-4.338	-0.752	50.335	449.724	0.000560	0.000622	0.000304
1.0080	236.743	-8.236	-10.158	-4.240	-0.744	50.329	450.697	0.000576	0.000711	0.000297
1.0120	237.464	-7.871	-10.268	-4.239	-0.745	50.318	452.070	0.000551	0.000719	0.000297
1.0160	242.348	-7.124	-7.571	-3.864	-0.753	50.315	461.369	0.000499	0.000530	0.000270
1.0200	254.070	-6.217	-6.126	-3.739	-0.743	50.325	483.685	0.000435	0.000429	0.000262
1.0240	289.462	-2.245	-1.513	-1.500	-0.746	50.335	551.062	0.000157	0.000106	0.000105
1.0280	346.570	3.844	6.700	2.098	-0.746	50.329	659.781	-0.000269	-0.000469	-0.000147
1.0320	404.550	10.370	14.884	5.766	-0.750	50.318	770.159	-0.000726	-0.001042	-0.000404
1.0360	457.615	16.741	22.542	9.408	-0.762	50.314	871.181	-0.001172	-0.001578	-0.000659
1.0400	507.119	22.087	30.240	12.590	-0.753	50.324	965.424	-0.001546	-0.002117	-0.000881
1.0440	555.210	28.474	37.327	15.746	-0.753	50.334	1056.976	-0.001993	-0.002613	-0.001102
1.0480	605.945	34.845	44.093	19.205	-0.746	50.329	1153.564	-0.002439	-0.003087	-0.001344
1.0520	659.071	41.844	52.640	22.914	-0.745	50.318	1254.702	-0.002929	-0.003685	-0.001604
1.0560	723.062	49.747	60.948	27.223	-0.757	50.314	1376.524	-0.003482	-0.004266	-0.001906
1.0600	786.752	57.408	69.801	31.281	-0.751	50.324	1497.774	-0.004019	-0.004886	-0.002190
1.0640	849.451	65.098	79.656	35.742	-0.743	50.334	1617.136	-0.004557	-0.005576	-0.002502
1.0680	898.503	71.988	87.841	39.259	-0.730	50.329	1710.520	-0.005039	-0.006149	-0.002748
1.0720	942.777	77.855	95.411	42.384	-0.743	50.318	1794.806	-0.005450	-0.006679	-0.002967
1.0760	984.000	83.931	102.001	45.260	-0.754	50.314	1873.283	-0.005875	-0.007140	-0.003168
1.0800	1022.428	89.009	107.294	47.957	-0.744	50.324	1946.440	-0.006231	-0.007511	-0.003357
1.0840	1053.987	93.278	112.700	50.109	-0.752	50.335	2006.521	-0.006529	-0.007889	-0.003508
1.0880	1083.458	97.248	116.357	52.444	-0.747	50.330	2062.626	-0.006807	-0.008145	-0.003671
1.0920	1106.722	100.490	121.262	54.169	-0.752	50.319	2106.915	-0.007034	-0.008488	-0.003792
1.0960	1121.014	103.266	123.902	55.321	-0.752	50.315	2134.123	-0.007229	-0.008673	-0.003872
1.1000	1126.139	104.546	125.332	55.794	-0.744	50.325	2143.879	-0.007318	-0.008773	-0.003906
1.1040	1126.650	105.162	125.332	55.961	-0.741	50.335	2144.852	-0.007361	-0.008773	-0.003917
1.1080	1123.253	105.387	125.250	56.194	-0.739	50.330	2138.386	-0.007377	-0.008767	-0.003934
1.1120	1118.625	105.163	124.609	56.056	-0.733	50.318	2129.574	-0.007361	-0.008723	-0.003924
1.1160	1111.651	105.161	124.026	55.946	-0.748	50.315	2116.299	-0.007361	-0.008682	-0.003916
1.1200	1100.049	104.082	123.566	55.501	-0.744	50.324	2094.212	-0.007286	-0.008650	-0.003885
1.1240	1071.826	101.189	119.609	53.918	-0.746	50.335	2040.482	-0.007083	-0.008373	-0.003774
1.1280	1004.138	93.865	110.838	50.082	-0.744	50.329	1911.621	-0.006571	-0.007759	-0.003506
1.1320	935.999	85.978	103.321	46.051	-0.749	50.318	1781.902	-0.006018	-0.007232	-0.003224
1.1360	886.871	80.506	95.762	42.970	-0.748	50.314	1688.375	-0.005635	-0.006703	-0.003008
1.1400	846.640	75.202	90.564	40.229	-0.744	50.324	1611.786	-0.005264	-0.006339	-0.002816
1.1440	802.066	70.066	84.033	37.283	-0.746	50.335	1526.928	-0.004905	-0.005882	-0.002610
1.1480	745.905	62.909	76.973	33.840	-0.738	50.330	1420.012	-0.004404	-0.005388	-0.002369
1.1520	686.182	55.822	68.316	29.849	-0.744	50.318	1306.314	-0.003908	-0.004782	-0.002089
1.1560	631.764	49.929	60.658	26.544	-0.755	50.315	1202.717	-0.003495	-0.004246	-0.001858
1.1600	580.367	43.082	53.128	22.719	-0.753	50.324	1104.870	-0.003016	-0.003719	-0.001590
1.1640	532.321	36.881	44.663	19.357	-0.753	50.335	1013.403	-0.002582	-0.003126	-0.001355
1.1680	483.253	30.930	38.314	16.080	-0.748	50.330	919.991	-0.002165	-0.002682	-0.001126
1.1720	434.306	24.516	28.878	12.895	-0.748	50.318	826.807	-0.001716	-0.002021	-0.000903
1.1760	389.491	19.114	22.876	10.048	-0.752	50.314	741.491	-0.001338	-0.001601	-0.000703
1.1800	350.478	13.992	17.081	7.015	-0.742	50.324	667.219	-0.000979	-0.001196	-0.000491
1.1840	317.610	9.937	11.355	4.365	-0.746	50.335	604.649	-0.000696	-0.000795	-0.000306
1.1880	288.215	5.907	6.671	2.472	-0.735	50.330	548.687	-0.000413	-0.000467	-0.000173
1.1920	263.854	2.556	2.253	0.181	-0.741	50.318	502.310	-0.000179	-0.000158	-0.000013
1.1960	251.591	0.519	-1.568	-0.388	-0.762	50.315	478.964	-0.000036	0.000110	0.000027
1.2000	249.126	-0.408	-1.887	-0.887	-0.760	50.325	474.272	0.000029	0.000132	0.000062
1.2040	248.495	-0.996	-2.109	-1.179	-0.754	50.335	473.070	0.000070	0.000148	0.000083
1.2080	250.328	-1.120	-1.276	-1.290	-0.748	50.329	476.561	0.000078	0.000089	0.000090
1.2120	253.920	-0.700	-1.664	-1.221	-0.745	50.318	483.398	0.000049	0.000116	0.000085
1.2160	259.631	-0.197	-1.721	-0.789	-0.750	50.315	494.270	0.000014	0.000120	0.000055
1.2200	268.828	0.209	-0.043	-0.611	-0.752	50.324	511.780	-0.000015	0.000003	0.000043
1.2240	291.506	2.133	2.781	0.401	-0.743	50.335	554.953	-0.000149	-0.000195	-0.000028
1.2280	350.207	8.421	10.978	4.017	-0.744	50.329	666.704	-0.000589	-0.000768	-0.000281
1.2320	411.959	15.547	18.316	8.060	-0.754	50.319	784.264	-0.001088	-0.001282	-0.000564
1.2360	465.370	21.709	27.739	11.618	-0.759	50.314	885.944	-0.001520	-0.001942	-0.000813
1.2400	515.685	27.872	33.811	14.926	-0.755	50.324	981.731	-0.001951	-0.002367	-0.001045
1.2440	563.099	33.636	40.455	17.524	-0.748	50.335	1071.997	-0.002355	-0.002832	-0.001227
1.2480	619.216	40.358	49.792	21.304	-0.746	50.329	1178.827	-0.002825	-0.003485	-0.001491
1.2520	681.478	47.628	59.144	25.624	-0.748	50.318	1297.359	-0.003334	-0.004140	-0.001794
1.2560	735.776	54.657	66.370	29.516	-0.746	50.315	1400.728	-0.003826	-0.004646	-0.002066
1.2600	784.483	60.620	74.181	32.683	-0.749	50.324	1493.454	-0.004243	-0.005193	-0.002288
1.2640	833.445	67.162	81.171	35.616	-0.750	50.335	1586.666	-0.004701	-0.005682	-0.002493
1.2680	892.492	74.850	90.398	39.797	-0.749	50.330	1699.076	-0.005239	-0.006328	-0.002786
1.2720	950.156	81.602	99.026	43.969	-0.757	50.319	1808.853	-0.005712	-0.006932	-0.003078
1.2760	993.904	87.580	105.224	47.177	-0.762	50.315	1892.138	-0.006131	-0.007366	-0.003302
1.2800	1025.433	92.082	110.062	49.554	-0.756	50.324	1952.162	-0.006446	-0.007704	-0.003469
1.2840	1054.378	95.788	114.158	51.374	-0.755	50.335	2007.265	-0.006705	-0.007991	-0.003596
1.2880	1082.556	99.914	119.441	53.195	-0.753	50.330	2060.909	-0.006994	-0.008361	-0.003724
1.2920	1106.437	103.240	121.941	55.111	-0.754	50.319	2106.371	-0.007227	-0.008536	-0.003858
1.2960	1124.801	106.282	124.958	56.750	-0.755	50.315	2141.333	-0.007440	-0.008747	-0.003972
1.3000	1134.930	108.052	127.124	57.254	-0.752	50.324	2160.616	-0.007564	-0.008899	-0.004008
1.3040	1133.683	108.250	128.208	57.613	-0.745	50.335	2158.241	-0.007577	-0.008975	-0.004033
1.3080	1127.897	108.208	128.876	57.420	-0.748	50.330	2147.226	-0.007575	-0.009021	-0.004019
1.3120	1118.880	107.322	127.918	57.180	-0.746	50.318	2130.060	-0.007513	-0.008954	-0.004003
1.3160	1107.669	106.872	126.945	56.821	-0.755	50.315	2108.717	-0.007481	-0.008886	-0.003977
1.3200	1083.443	104.629	124.512	55.434	-0.753	50.324	2062.597	-0.007324	-0.008716	-0.003880
1.3240	1026.140	98.174	116.424	52.180	-0.747	50.335	1953.506	-0.006872	-0.008150	-0.003653
1.3280	970.985	91.901	109.380	49.012	-0.743	50.330	1848.507	-0.006433	-0.007657	-0.003431
1.3320	932.182	86.947	104.251	46.676	-0.734	50.319	1774.635	-0.006086	-0.007298	-0.003267
1.3360	890.779	82.078	98.651	43.982	-0.739	50.314	1695.814	-0.005745	-0.006906	-0.003079
1.3400	847.542	76.731	91.912	41.132	-0.748	50.324	1613.503	-0.005371	-0.006434	-0.002879
1.3440	801.720	71.329	84.505	38.119	-0.740	50.335	1526.270	-0.004993	-0.005915	-0.002668
1.3480	750.278	65.562	78.710	34.699	-0.740	50.330	1428.337	-0.004589	-0.005510	-0.002429
1.3520	688.211	58.362	70.220	30.822	-0.742	50.319	1310.177	-0.004085	-0.004915	-0.002158
1.3560	624.536	50.631	60.422	26.792	-0.740	50.314	1188.955	-0.003544	-0.004230	-0.001875
1.3600	570.448	43.544	53.112	22.845	-0.746	50.324	1085.987	-0.003048	-0.003718	-0.001599
1.3640	521.245	37.159	45.525	19.245	-0.743	50.335	992.317	-0.002601	-0.003187	-0.001347
1.3680	472.884	31.195	37.439	16.204	-0.747	50.330	900.249	-0.002184	-0.002621	-0.001134
1.3720	424.628	25.343	29.546	12.951	-0.751	50.319	808.382	-0.001774	-0.002068	-0.000907
1.3760	380.414	19.633	22.958	10.089	-0.754	50.315	724.211	-0.001374	-0.001607	-0.000706
1.3800	346.660	14.987	18.151	7.310	-0.748	50.324	659.952	-0.001049	-0.001271	-0.000512
1.3840	315.567	11.086	12.273	4.933	-0.747	50.335	600.758	-0.000776	-0.000859	-0.000345
1.3880	287.779	7.130	6.574	3.002	-0.743	50.330	547.857	-0.000499	-0.000460	-0.000210
1.3920	264.560	3.974	2.321	1.193	-0.740	50.319	503.654	-0.000278	-0.000162	-0.000084
1.3960	247.713	1.742	1.083	-0.097	-0.749	50.314	471.582	-0.000122	-0.000076	0.000007
1.4000	240.064	-0.014	-1.302	-0.956	-0.747	50.324	457.020	0.000001	0.000091	0.000067
1.4040	234.158	-1.037	-3.542	-1.776	-0.753	50.335	445.776	0.000073	0.000248	0.000124
1.4080	234.248	-1.122	-2.457	-1.834	-0.747	50.330	445.948	0.000079	0.000172	0.000128
1.4120	238.155	-1.443	-3.694	-1.735	-0.746	50.319	453.386	0.000101	0.000259	0.000121
1.4160	245.654	-0.869	-2.624	-1.124	-0.748	50.315	467.663	0.000061	0.000184	0.000079
1.4200	258.248	0.125	-1.889	-0.873	-0.742	50.324	491.638	-0.000009	0.000132	0.000061
1.4240	294.001	3.481	4.477	0.862	-0.746	50.335	559.702	-0.000244	-0.000313	-0.000060
1.4280	360.637	10.903	12.940	5.088	-0.750	50.330	686.560	-0.000763	-0.000906	-0.000356
1.4320	420.420	17.513	21.570	8.949	-0.744	50.319	800.371	-0.001226	-0.001510	-0.000626
1.4360	466.647	23.478	28.767	11.908	-0.756	50.315	888.376	-0.001643	-0.002014	-0.000834
1.4400	511.777	28.236	34.368	14.801	-0.748	50.324	974.293	-0.001976	-0.002406	-0.001036
1.4440	567.743	35.237	42.995	18.037	-0.742	50.334	1080.837	-0.002467	-0.003010	-0.001263
1.4480	626.444	42.029	52.517	22.319	-0.742	50.329	1192.589	-0.002942	-0.003676	-0.001562
1.4520	675.782	48.499	59.658	25.597	-0.744	50.319	1286.516	-0.003395	-0.004176	-0.001792
1.4560	725.917	55.078	66.510	29.112	-0.741	50.314	1381.960	-0.003855	-0.004656	-0.002038
1.4600	789.502	62.601	76.585	33.087	-0.735	50.323	1503.010	-0.004382	-0.005361	-0.002316
1.4640	848.880	70.123	84.867	37.284	-0.748	50.334	1616.049	-0.004909	-0.005941	-0.002610
1.4680	893.544	75.735	91.413	40.645	-0.748	50.330	1701.078	-0.005301	-0.006399	-0.002845
1.4720	936.029	81.265	97.500	43.234	-0.747	50.319	1781.960	-0.005689	-0.006825	-0.003026
1.4760	982.978	87.187	105.210	46.957	-0.753	50.314	1871.338	-0.006103	-0.007365	-0.003287
1.4800	1026.741	92.924	111.437	49.831	-0.748	50.323	1954.651	-0.006505	-0.007801	-0.003488
1.4840	1055.265	97.150	115.120	51.971	-0.746	50.334	2008.953	-0.006800	-0.008058	-0.003638
1.4880	1078.769	100.728	118.927	53.309	-0.742	50.330	2053.699	-0.007051	-0.008325	-0.003732
1.4920	1105.895	103.968	123.721	55.544	-0.748	50.319	2105.341	-0.007278	-0.008660	-0.003888
1.4960	1118.730	106.548	126.503	56.779	-0.756	50.314	2129.774	-0.007458	-0.008855	-0.003974
1.5000	1121.390	107.012	127.320	57.003	-0.755	50.323	2134.838	-0.007491	-0.008912	-0.003990
1.5040	1124.065	107.870	128.086	57.143	-0.756	50.335	2139.931	-0.007551	-0.008966	-0.004000
1.5080	1123.599	108.474	129.017	57.531	-0.753	50.330	2139.044	-0.007593	-0.009031	-0.004027
1.5120	1116.701	108.207	127.722	57.335	-0.747	50.318	2125.912	-0.007574	-0.008941	-0.004013
1.5160	1106.617	107.546	127.722	57.058	-0.749	50.314	2106.714	-0.007528	-0.008941	-0.003994
1.5200	1091.468	106.117	125.763	56.388	-0.752	50.324	2077.875	-0.007428	-0.008803	-0.003947
1.5240	1042.671	100.826	119.927	53.447	-0.746	50.335	1984.978	-0.007058	-0.008395	-0.003741
1.5280	967.724	92.125	109.824	49.374	-0.748	50.330	1842.299	-0.006449	-0.007688	-0.003456
1.5320	925.540	86.878	104.337	46.677	-0.745	50.319	1761.990	-0.006081	-0.007304	-0.003267
1.5360	897.677	83.804	99.583	45.176	-0.744	50.315	1708.946	-0.005866	-0.006971	-0.003162
1.5400	849.210	78.401	92.803	41.495	-0.742	50.324	1616.678	-0.005488	-0.006496	-0.002905
1.5440	789.397	71.597	84.409	37.800	-0.742	50.335	1502.810	-0.005012	-0.005909	-0.002646
1.5480	731.793	64.356	75.834	34.225	-0.744	50.330	1393.147	-0.004505	-0.005308	-0.002396
1.5520	676.278	57.394	68.942	30.529	-0.744	50.319	1287.460	-0.004018	-0.004826	-0.002137
1.5560	625.452	51.233	61.117	26.874	-0.747	50.315	1190.701	-0.003586	-0.004278	-0.001881
1.5600	582.486	45.606	54.864	24.068	-0.758	50.325	1108.904	-0.003192	-0.003841	-0.001685
1.5640	529.857	39.306	46.152	20.137	-0.759	50.336	1008.711	-0.002751	-0.003231	-0.001410
1.5680	472.583	32.374	37.326	16.663	-0.748	50.330	899.677	-0.002266	-0.002613	-0.001166
1.5720	421.141	25.765	29.434	12.841	-0.749	50.318	801.744	-0.001804	-0.002060	-0.000899
1.5760	377.739	20.447	22.737	10.284	-0.755	50.314	719.118	-0.001431	-0.001592	-0.000720
1.5800	341.551	15.185	17.565	7.268	-0.752	50.324	650.225	-0.001063	-0.001230	-0.000509
1.5840	314.334	11.509	12.271	5.143	-0.749	50.335	598.412	-0.000806	-0.000859	-0.000360
1.5880	290.935	8.295	8.730	3.462	-0.743	50.330	553.865	-0.000581	-0.000611	-0.000242
1.5920	274.163	5.908	6.073	2.279	-0.755	50.319	521.936	-0.000414	-0.000425	-0.000160
1.5960	259.465	4.099	3.711	0.984	-0.753	50.314	493.956	-0.000287	-0.000260	-0.000069
1.6000	246.571	1.883	0.071	-0.181	-0.752	50.324	469.408	-0.000132	-0.000005	0.000013
1.6040	237.479	0.352	-2.833	-1.165	-0.745	50.335	452.099	-0.000025	0.000198	0.000082
1.6080	237.223	-0.294	-2.096	-1.415	-0.747	50.330	451.612	0.000021	0.000147	0.000099
1.6120	241.341	-0.351	-1.484	-1.054	-0.747	50.319	459.452	0.000025	0.000104	0.000074
1.6160	248.465	0.070	-1.527	-0.611	-0.747	50.315	473.013	-0.000005	0.000107	0.000043
1.6200	261.419	1.473	1.125	-0.291	-0.754	50.324	497.675	-0.000103	-0.000079	0.000020
1.6240	294.722	4.688	5.477	1.612	-0.753	50.335	561.075	-0.000328	-0.000383	-0.000113
1.6280	356.263	11.298	13.592	5.114	-0.750	50.330	678.234	-0.000791	-0.000951	-0.000358
1.6320	418.135	17.961	21.069	9.075	-0.754	50.319	796.022	-0.001257	-0.001475	-0.000635
1.6360	470.690	24.262	28.863	12.701	-0.759	50.314	896.072	-0.001698	-0.002020	-0.000889
1.6400	521.200	29.917	36.395	15.926	-0.757	50.323	992.231	-0.002094	-0.002548	-0.001115
1.6440	575.062	36.570	45.483	19.121	-0.755	50.335	1094.770	-0.002560	-0.003184	-0.001338
1.6480	627.722	43.193	53.209	22.747	-0.753	50.330	1195.021	-0.003024	-0.003725	-0.001592
1.6520	689.098	50.982	62.327	26.780	-0.748	50.319	1311.865	-0.003569	-0.004363	-0.001875
1.6560	754.486	58.924	70.886	31.184	-0.753	50.314	1436.348	-0.004125	-0.004962	-0.002183
1.6600	808.754	65.688	77.780	34.990	-0.750	50.324	1539.660	-0.004598	-0.005445	-0.002449
1.6640	850.367	71.118	85.367	37.674	-0.750	50.335	1618.881	-0.004978	-0.005976	-0.002637
1.6680	891.215	76.508	92.066	40.730	-0.753	50.330	1696.644	-0.005356	-0.006445	-0.002851
1.6720	938.344	82.248	98.973	43.745	-0.745	50.319	1786.366	-0.005757	-0.006928	-0.003062
1.6760	987.381	88.703	106.447	47.496	-0.751	50.315	1879.721	-0.006209	-0.007451	-0.003325
1.6800	1026.831	94.231	112.494	49.970	-0.752	50.324	1954.823	-0.006596	-0.007875	-0.003498
1.6840	1060.705	98.132	116.370	52.139	-0.745	50.335	2019.310	-0.006869	-0.008146	-0.003650
1.6880	1089.064	102.451	121.734	54.489	-0.752	50.330	2073.298	-0.007172	-0.008521	-0.003814
1.6920	1103.356	104.517	123.566	55.488	-0.752	50.319	2100.506	-0.007316	-0.008650	-0.003884
1.6960	1111.351	106.382	124.833	56.391	-0.753	50.314	2115.726	-0.007447	-0.008738	-0.003947
1.7000	1117.888	107.813	127.333	56.961	-0.753	50.324	2128.172	-0.007547	-0.008913	-0.003987
1.7040	1118.760	108.320	128.292	57.140	-0.751	50.335	2129.831	-0.007582	-0.008980	-0.004000
1.7080	1115.123	108.207	128.193	57.155	-0.743	50.330	2122.908	-0.007574	-0.008974	-0.004001
1.7120	1108.255	108.165	127.639	56.823	-0.742	50.319	2109.833	-0.007572	-0.008935	-0.003978
1.7160	1097.810	107.391	125.153	56.544	-0.742	50.315	2089.949	-0.007517	-0.008761	-0.003958
1.7200	1080.452	105.374	123.107	55.946	-0.740	50.324	2056.904	-0.007376	-0.008617	-0.003916
1.7240	1031.264	100.069	118.912	52.989	-0.736	50.335	1963.263	-0.007005	-0.008324	-0.003709
1.7280	969.828	93.375	109.340	49.596	-0.735	50.330	1846.304	-0.006536	-0.007654	-0.003472
1.7320	925.194	87.761	103.750	46.915	-0.737	50.319	1761.332	-0.006143	-0.007262	-0.003284
1.7360	881.461	82.934	97.347	44.163	-0.738	50.314	1678.076	-0.005805	-0.006814	-0.003091
1.7400	829.748	76.438	90.438	40.757	-0.739	50.324	1579.628	-0.005351	-0.006331	-0.002853
1.7440	776.803	69.843	82.572	36.993	-0.745	50.336	1478.834	-0.004889	-0.005780	-0.002590
1.7480	730.486	64.327	77.431	34.075	-0.740	50.331	1390.657	-0.004503	-0.005420	-0.002385
1.7520	681.313	58.392	70.219	31.114	-0.747	50.319	1297.045	-0.004087	-0.004915	-0.002178
1.7560	621.410	51.318	62.257	27.139	-0.742	50.314	1183.004	-0.003592	-0.004358	-0.001900
1.7600	565.369	44.570	52.725	23.191	-0.727	50.324	1076.317	-0.003120	-0.003691	-0.001623
1.7640	519.096	38.101	46.025	19.663	-0.731	50.335	988.226	-0.002667	-0.003222	-0.001376
1.7680	475.003	32.795	39.480	17.122	-0.732	50.330	904.284	-0.002296	-0.002764	-0.001199
1.7720	427.167	26.382	32.089	13.728	-0.733	50.319	813.217	-0.001847	-0.002246	-0.000961
1.7760	385.599	21.428	25.111	10.755	-0.740	50.314	734.081	-0.001500	-0.001758	-0.000753
1.7800	354.565	17.192	19.695	8.254	-0.732	50.324	675.001	-0.001203	-0.001379	-0.000578
1.7840	323.667	13.037	15.525	6.058	-0.736	50.335	616.179	-0.000913	-0.001087	-0.000424
1.7880	291.716	9.165	9.785	3.863	-0.742	50.331	555.353	-0.000642	-0.000685	-0.000270
1.7920	268.558	5.488	5.893	1.918	-0.737	50.320	511.265	-0.000384	-0.000413	-0.000134
1.7960	254.912	4.142	2.169	1.027	-0.754	50.314	485.287	-0.000290	-0.000152	-0.000072
1.8000	246.301	1.981	1.458	0.026	-0.747	50.324	468.893	-0.000139	-0.000102	-0.000002
1.8040	240.034	0.913	-1.624	-0.832	-0.743	50.335	456.963	-0.000064	0.000114	0.000058
1.8080	240.650	0.731	-1.094	-0.610	-0.744	50.330	458.136	-0.000051	0.000077	0.000043
1.8120	245.234	0.926	-0.496	-0.651	-0.746	50.319	466.862	-0.000065	0.000035	0.000046
1.8160	252.357	1.614	-0.456	-0.265	-0.753	50.315	480.423	-0.000113	0.000032	0.000019
1.8200	267.596	2.527	1.599	0.278	-0.748	50.324	509.434	-0.000177	-0.000112	-0.000019
1.8240	309.255	6.567	7.840	2.000	-0.743	50.334	588.741	-0.000460	-0.000549	-0.000140
1.8280	366.197	12.967	15.954	5.795	-0.740	50.330	697.145	-0.000908	-0.001117	-0.000406
1.8320	414.514	18.439	22.902	9.005	-0.744	50.319	789.127	-0.001291	-0.001603	-0.000630
1.8360	453.001	23.239	28.710	11.643	-0.746	50.314	862.398	-0.001627	-0.002010	-0.000815
1.8400	504.398	29.301	35.839	15.049	-0.738	50.324	960.245	-0.002051	-0.002509	-0.001053
1.8440	554.759	35.180	41.496	17.927	-0.737	50.335	1056.118	-0.002463	-0.002905	-0.001255
1.8480	607.614	41.371	50.959	21.623	-0.728	50.329	1156.740	-0.002896	-0.003567	-0.001514
1.8520	663.955	48.063	58.505	25.419	-0.736	50.319	1264.000	-0.003364	-0.004095	-0.001779
1.8560	725.662	55.892	66.844	29.516	-0.739	50.314	1381.474	-0.003912	-0.004679	-0.002066
1.8600	789.097	63.527	75.943	33.629	-0.740	50.323	1502.237	-0.004447	-0.005316	-0.002354
1.8640	849.436	71.188	85.504	37.660	-0.746	50.335	1617.107	-0.004983	-0.005985	-0.002636
1.8680	903.373	78.360	94.371	41.745	-0.742	50.330	1719.790	-0.005485	-0.006606	-0.002922
1.8720	948.999	83.819	101.236	44.676	-0.741	50.319	1806.650	-0.005867	-0.007087	-0.003127
1.8760	987.847	89.303	106.157	47.497	-0.742	50.315	1880.608	-0.006251	-0.007431	-0.003325
1.8800	1022.533	93.824	112.214	49.973	-0.739	50.323	1946.640	-0.006568	-0.007855	-0.003498
1.8840	1056.452	98.147	117.538	52.305	-0.730	50.335	2011.213	-0.006870	-0.008228	-0.003661
1.8880	1079.190	101.541	121.456	54.072	-0.735	50.330	2054.501	-0.007108	-0.008502	-0.003785
1.8920	1096.127	104.280	122.593	55.210	-0.739	50.319	2086.744	-0.007300	-0.008582	-0.003865
1.8960	1111.681	106.903	125.778	56.751	-0.739	50.314	2116.356	-0.007483	-0.008804	-0.003973
1.9000	1121.044	108.374	127.568	57.211	-0.745	50.323	2134.180	-0.007586	-0.008930	-0.004005
1.9040	1122.622	108.840	127.638	57.765	-0.737	50.334	2137.184	-0.007619	-0.008935	-0.004044
1.9080	1121.465	109.245	128.041	57.628	-0.747	50.330	2134.981	-0.007647	-0.008963	-0.004034
1.9120	1116.295	108.922	128.668	57.586	-0.747	50.319	2125.139	-0.007625	-0.009007	-0.004031
1.9160	1106.767	108.531	127.250	57.669	-0.747	50.313	2107.000	-0.007597	-0.008907	-0.004037
1.9200	1091.303	107.419	126.014	56.488	-0.738	50.323	2077.560	-0.007519	-0.008821	-0.003954
1.9240	1054.964	103.336	121.985	54.390	-0.740	50.335	2008.381	-0.007234	-0.008539	-0.003807
1.9280	992.942	96.546	112.604	51.039	-0.736	50.330	1890.306	-0.006758	-0.007882	-0.003573
1.9320	938.539	89.558	105.392	47.694	-0.742	50.319	1786.737	-0.006269	-0.007377	-0.003339
1.9360	890.433	84.180	98.998	45.065	-0.746	50.314	1695.156	-0.005893	-0.006930	-0.003155
1.9400	842.327	78.347	92.287	41.593	-0.745	50.323	1603.575	-0.005484	-0.006460	-0.002912
1.9440	788.450	71.962	86.408	37.993	-0.735	50.335	1501.007	-0.005037	-0.006049	-0.002659
1.9480	734.513	65.957	77.973	34.711	-0.742	50.330	1398.325	-0.004617	-0.005458	-0.002430
1.9520	686.257	59.879	71.136	31.435	-0.751	50.320	1306.458	-0.004192	-0.004980	-0.002200
1.9560	635.070	53.592	63.452	28.305	-0.749	50.314	1209.011	-0.003751	-0.004442	-0.001981
1.9600	582.201	46.728	55.338	24.290	-0.753	50.323	1108.360	-0.003271	-0.003874	-0.001700
1.9640	526.265	39.585	47.482	20.414	-0.735	50.335	1001.873	-0.002771	-0.003324	-0.001429
1.9680	472.974	33.258	38.537	17.244	-0.737	50.331	900.421	-0.002328	-0.002698	-0.001207
1.9720	428.129	27.395	31.393	13.841	-0.736	50.319	815.048	-0.001918	-0.002198	-0.000969
1.9760	387.538	22.313	25.157	11.060	-0.745	50.314	737.772	-0.001562	-0.001761	-0.000774
1.9800	347.998	17.302	20.110	8.226	-0.743	50.323	662.498	-0.001211	-0.001408	-0.000576
1.9840	321.533	13.472	13.705	5.990	-0.740	50.335	612.116	-0.000943	-0.000959	-0.000419
1.9880	300.703	10.441	11.633	4.448	-0.738	50.330	572.462	-0.000731	-0.000814	-0.000311
1.9920	276.793	7.269	7.157	2.931	-0.737	50.319	526.943	-0.000509	-0.000501	-0.000205
1.9960	254.130	4.408	2.281	1.013	-0.747	50.314	483.799	-0.000309	-0.000160	-0.000071
Test Cycles
Time (sec)	Axial stress (kPa)	Axial micro-strain #1	Axial micro-strain #2	Axial micro-strain #3	Confining pressure (kPa)	Temperature (�C)	Load (N)	Displacement #1 (mm)	Displacement #2 (mm)	Displacement #3 (mm)
0.0000	240.950	2.276	-0.374	-0.084	-0.740	50.323	458.708	-0.000159	0.000026	0.000006
0.0040	232.715	1.138	-1.720	-1.083	-0.740	50.335	443.029	-0.000080	0.000120	0.000076
0.0080	231.663	0.100	-1.847	-1.081	-0.738	50.330	441.027	-0.000007	0.000129	0.000076
0.0120	235.450	0.225	-2.540	-1.083	-0.740	50.320	448.236	-0.000016	0.000178	0.000076
0.0160	242.063	0.449	-0.579	-0.998	-0.747	50.315	460.825	-0.000031	0.000041	0.000070
0.0200	255.047	1.559	-0.415	-0.444	-0.743	50.323	485.544	-0.000109	0.000029	0.000031
0.0240	298.284	5.796	5.449	1.707	-0.741	50.335	567.856	-0.000406	-0.000381	-0.000120
0.0280	361.463	13.150	16.121	5.697	-0.744	50.331	688.133	-0.000921	-0.001128	-0.000399
0.0320	410.426	18.581	22.140	9.130	-0.739	50.320	781.345	-0.001301	-0.001550	-0.000639
0.0360	456.803	23.787	28.072	12.076	-0.743	50.314	869.637	-0.001665	-0.001965	-0.000845
0.0400	513.746	30.131	35.993	15.815	-0.739	50.323	978.041	-0.002109	-0.002519	-0.001107
0.0440	574.761	37.244	44.761	19.440	-0.735	50.334	1094.198	-0.002607	-0.003133	-0.001361
0.0480	627.541	43.965	52.724	23.013	-0.733	50.330	1194.677	-0.003078	-0.003691	-0.001611
0.0520	676.579	50.028	60.853	26.208	-0.730	50.319	1288.033	-0.003502	-0.004260	-0.001835
0.0560	726.909	57.042	69.025	29.945	-0.733	50.314	1383.848	-0.003993	-0.004832	-0.002096
0.0600	785.550	64.004	77.014	33.740	-0.742	50.323	1495.485	-0.004480	-0.005391	-0.002362
0.0640	848.669	71.440	85.352	37.938	-0.742	50.335	1615.648	-0.005001	-0.005975	-0.002656
0.0680	900.202	78.024	93.190	41.663	-0.740	50.330	1713.753	-0.005462	-0.006523	-0.002916
0.0720	947.496	83.958	100.848	44.565	-0.752	50.319	1803.789	-0.005877	-0.007059	-0.003120
0.0760	992.972	89.963	107.976	48.165	-0.752	50.314	1890.364	-0.006297	-0.007558	-0.003372
0.0800	1030.829	95.337	113.743	50.361	-0.743	50.323	1962.433	-0.006674	-0.007962	-0.003525
0.0840	1059.518	99.101	116.662	52.473	-0.745	50.334	2017.050	-0.006937	-0.008166	-0.003673
0.0880	1082.827	102.747	121.011	54.292	-0.743	50.330	2061.424	-0.007192	-0.008471	-0.003800
0.0920	1104.904	105.332	125.332	55.738	-0.751	50.319	2103.453	-0.007373	-0.008773	-0.003902
0.0960	1121.465	108.166	127.056	57.238	-0.751	50.314	2134.981	-0.007572	-0.008894	-0.004007
0.1000	1127.566	109.415	128.319	57.684	-0.747	50.323	2146.597	-0.007659	-0.008982	-0.004038
0.1040	1125.553	109.429	129.377	57.807	-0.737	50.334	2142.763	-0.007660	-0.009056	-0.004046
0.1080	1120.653	109.862	130.391	57.975	-0.737	50.331	2133.436	-0.007690	-0.009127	-0.004058
0.1120	1114.642	109.851	130.031	57.546	-0.744	50.319	2121.992	-0.007690	-0.009102	-0.004028
0.1160	1108.210	109.470	129.196	57.530	-0.759	50.314	2109.747	-0.007663	-0.009044	-0.004027
0.1200	1093.422	107.575	127.180	56.947	-0.746	50.323	2081.594	-0.007530	-0.008903	-0.003986
0.1240	1053.401	103.309	121.957	54.557	-0.742	50.335	2005.405	-0.007232	-0.008537	-0.003819
0.1280	987.938	96.153	113.007	51.067	-0.740	50.330	1880.779	-0.006731	-0.007910	-0.003575
0.1320	924.863	88.589	104.224	47.179	-0.743	50.319	1760.702	-0.006201	-0.007296	-0.003303
0.1360	875.946	82.992	97.637	43.981	-0.756	50.314	1667.576	-0.005809	-0.006835	-0.003079
0.1400	834.137	77.840	91.662	41.367	-0.751	50.323	1587.982	-0.005449	-0.006416	-0.002896
0.1440	788.571	72.438	85.437	38.188	-0.753	50.335	1501.236	-0.005071	-0.005981	-0.002673
0.1480	735.024	65.871	77.821	34.936	-0.743	50.330	1399.298	-0.004611	-0.005447	-0.002446
0.1520	676.729	58.687	70.498	31.030	-0.741	50.319	1288.319	-0.004108	-0.004935	-0.002172
0.1560	620.598	51.922	60.993	27.208	-0.740	50.314	1181.459	-0.003635	-0.004269	-0.001905
0.1600	574.686	45.930	54.169	23.997	-0.739	50.323	1094.055	-0.003215	-0.003792	-0.001680
0.1640	525.769	40.189	48.124	20.387	-0.731	50.335	1000.929	-0.002813	-0.003369	-0.001427
0.1680	475.664	33.932	40.008	17.396	-0.734	50.331	905.542	-0.002375	-0.002801	-0.001218
0.1720	431.030	28.095	32.714	14.508	-0.747	50.319	820.570	-0.001967	-0.002290	-0.001016
0.1760	385.358	22.158	26.139	11.035	-0.751	50.314	733.624	-0.001551	-0.001830	-0.000772
0.1800	342.137	16.600	18.953	8.019	-0.750	50.323	651.340	-0.001162	-0.001327	-0.000561
0.1840	310.322	12.377	13.897	5.601	-0.742	50.335	590.773	-0.000866	-0.000973	-0.000392
0.1880	287.929	9.489	10.077	3.795	-0.735	50.330	548.143	-0.000664	-0.000705	-0.000266
0.1920	268.858	6.792	6.713	2.307	-0.739	50.320	511.837	-0.000475	-0.000470	-0.000161
0.1960	247.939	4.280	1.499	0.888	-0.742	50.314	472.012	-0.000300	-0.000105	-0.000062
0.2000	235.916	1.938	-0.804	-0.252	-0.743	50.323	449.123	-0.000136	0.000056	0.000018
0.2040	234.037	0.758	-1.347	-0.708	-0.740	50.335	445.547	-0.000053	0.000094	0.000050
0.2080	235.465	0.617	-0.637	-0.499	-0.740	50.331	448.265	-0.000043	0.000045	0.000035
0.2120	239.222	0.758	-1.528	-0.513	-0.740	50.320	455.418	-0.000053	0.000107	0.000036
0.2160	247.262	1.360	0.085	-0.181	-0.743	50.314	470.724	-0.000095	-0.000006	0.000013
0.2200	262.997	2.683	0.708	0.123	-0.741	50.323	500.679	-0.000188	-0.000050	-0.000009
0.2240	304.731	6.918	7.964	2.363	-0.730	50.334	580.130	-0.000484	-0.000557	-0.000165
0.2280	360.862	13.052	14.175	6.196	-0.731	50.330	686.989	-0.000914	-0.000992	-0.000434
0.2320	412.154	18.609	22.501	9.200	-0.735	50.320	784.636	-0.001303	-0.001575	-0.000644
0.2360	460.591	24.263	30.200	12.506	-0.736	50.314	876.846	-0.001698	-0.002114	-0.000875
0.2400	502.550	29.259	35.604	15.245	-0.739	50.323	956.726	-0.002048	-0.002492	-0.001067
0.2440	548.041	35.082	41.953	17.884	-0.725	50.334	1043.329	-0.002456	-0.002937	-0.001252
0.2480	611.807	42.519	50.834	22.221	-0.728	50.330	1164.722	-0.002976	-0.003558	-0.001555
0.2520	680.276	50.673	61.939	26.723	-0.732	50.320	1295.071	-0.003547	-0.004336	-0.001871
0.2560	737.835	57.942	69.802	30.640	-0.731	50.314	1404.648	-0.004056	-0.004886	-0.002145
0.2600	782.740	63.695	76.628	33.838	-0.735	50.323	1490.135	-0.004459	-0.005364	-0.002369
0.2640	830.906	69.646	84.060	37.186	-0.735	50.334	1581.831	-0.004875	-0.005884	-0.002603
0.2680	886.360	76.732	91.370	40.936	-0.736	50.330	1687.403	-0.005371	-0.006396	-0.002866
0.2720	935.699	83.228	99.472	44.038	-0.739	50.319	1781.330	-0.005826	-0.006963	-0.003083
0.2760	984.406	89.358	106.364	47.597	-0.742	50.314	1874.056	-0.006255	-0.007446	-0.003332
0.2800	1028.589	95.409	112.380	50.499	-0.739	50.322	1958.170	-0.006679	-0.007867	-0.003535
0.2840	1060.705	99.300	117.037	52.486	-0.728	50.334	2019.310	-0.006951	-0.008193	-0.003674
0.2880	1082.556	102.746	120.538	54.420	-0.736	50.331	2060.909	-0.007192	-0.008438	-0.003809
0.2920	1100.696	105.345	124.290	55.931	-0.751	50.320	2095.442	-0.007374	-0.008700	-0.003915
0.2960	1114.432	107.729	126.931	56.919	-0.743	50.314	2121.592	-0.007541	-0.008885	-0.003984
0.3000	1131.068	110.229	130.266	58.240	-0.748	50.323	2153.263	-0.007716	-0.009119	-0.004077
0.3040	1135.937	111.167	130.921	58.573	-0.739	50.335	2162.533	-0.007782	-0.009164	-0.004100
0.3080	1130.602	111.307	130.000	58.532	-0.736	50.331	2152.376	-0.007792	-0.009100	-0.004097
0.3120	1122.772	110.564	130.962	58.350	-0.732	50.320	2137.470	-0.007739	-0.009167	-0.004085
0.3160	1111.471	109.905	129.696	57.989	-0.744	50.314	2115.955	-0.007693	-0.009079	-0.004059
0.3200	1090.101	107.941	126.014	56.933	-0.738	50.323	2075.272	-0.007556	-0.008821	-0.003985
0.3240	1040.973	102.425	120.399	53.751	-0.739	50.335	1981.745	-0.007170	-0.008428	-0.003763
0.3280	985.593	96.377	114.243	50.999	-0.734	50.331	1876.316	-0.006746	-0.007997	-0.003570
0.3320	943.754	91.254	108.506	48.331	-0.736	50.320	1796.665	-0.006388	-0.007595	-0.003383
0.3360	902.711	86.203	103.016	45.773	-0.743	50.314	1718.531	-0.006034	-0.007211	-0.003204
0.3400	852.096	80.115	95.496	42.454	-0.739	50.323	1622.171	-0.005608	-0.006685	-0.002972
0.3440	792.027	72.943	87.436	38.437	-0.735	50.334	1507.816	-0.005106	-0.006121	-0.002691
0.3480	733.612	66.222	78.989	34.867	-0.737	50.330	1396.608	-0.004636	-0.005529	-0.002441
0.3520	678.623	59.512	71.776	31.363	-0.745	50.320	1291.924	-0.004166	-0.005024	-0.002195
0.3560	621.620	52.708	62.742	27.332	-0.746	50.314	1183.405	-0.003690	-0.004392	-0.001913
0.3600	565.759	45.775	54.657	23.388	-0.744	50.323	1077.061	-0.003204	-0.003826	-0.001637
0.3640	510.380	38.253	45.610	19.747	-0.746	50.335	971.632	-0.002678	-0.003193	-0.001382
0.3680	470.765	33.427	38.606	17.079	-0.747	50.331	896.215	-0.002340	-0.002702	-0.001196
0.3720	433.555	28.586	34.562	14.537	-0.747	50.320	825.377	-0.002001	-0.002419	-0.001018
0.3760	388.094	23.127	26.808	11.395	-0.746	50.314	738.831	-0.001619	-0.001877	-0.000798
0.3800	349.410	18.059	20.984	8.337	-0.746	50.323	665.188	-0.001264	-0.001469	-0.000584
0.3840	314.965	13.459	14.774	5.863	-0.737	50.335	599.613	-0.000942	-0.001034	-0.000410
0.3880	286.757	9.894	10.423	3.963	-0.735	50.331	545.912	-0.000693	-0.000730	-0.000277
0.3920	266.799	6.876	6.240	2.517	-0.736	50.320	507.917	-0.000481	-0.000437	-0.000176
0.3960	244.572	3.664	2.142	0.958	-0.737	50.314	465.603	-0.000256	-0.000150	-0.000067
0.4000	237.749	2.584	0.084	-0.181	-0.734	50.322	452.614	-0.000181	-0.000006	0.000013
0.4040	238.185	1.939	0.225	-0.402	-0.727	50.334	453.444	-0.000136	-0.000016	0.000028
0.4080	240.575	2.023	0.694	-0.320	-0.735	50.331	457.993	-0.000142	-0.000049	0.000022
0.4120	242.859	1.867	-0.344	-0.293	-0.738	50.320	462.341	-0.000131	0.000024	0.000021
0.4160	247.788	1.784	-0.247	-0.154	-0.737	50.314	471.725	-0.000125	0.000017	0.000011
0.4200	258.970	2.738	0.416	0.373	-0.736	50.322	493.011	-0.000192	-0.000029	-0.000026
0.4240	293.460	5.712	5.796	1.707	-0.740	50.334	558.672	-0.000400	-0.000406	-0.000120
0.4280	368.436	14.230	15.593	6.491	-0.735	50.330	701.408	-0.000996	-0.001091	-0.000454
0.4320	431.360	21.387	25.156	10.435	-0.746	50.320	821.199	-0.001497	-0.001761	-0.000730
0.4360	466.662	25.934	31.017	12.909	-0.753	50.314	888.405	-0.001815	-0.002171	-0.000904
0.4400	510.530	30.579	37.952	15.717	-0.743	50.323	971.918	-0.002141	-0.002657	-0.001100
0.4440	569.862	37.483	44.871	19.219	-0.742	50.334	1084.871	-0.002624	-0.003141	-0.001345
0.4480	625.437	44.456	53.114	23.221	-0.739	50.330	1190.672	-0.003112	-0.003718	-0.001625
0.4520	674.219	50.575	60.701	26.682	-0.732	50.320	1283.541	-0.003540	-0.004249	-0.001868
0.4560	724.625	57.085	67.733	29.876	-0.738	50.314	1379.499	-0.003996	-0.004741	-0.002091
0.4600	790.089	64.775	76.903	34.253	-0.734	50.323	1504.126	-0.004534	-0.005383	-0.002398
0.4640	855.131	72.984	86.811	38.785	-0.737	50.334	1627.951	-0.005109	-0.006077	-0.002715
0.4680	914.494	80.337	95.718	42.787	-0.744	50.330	1740.961	-0.005624	-0.006700	-0.002995
0.4720	964.012	86.990	103.445	46.247	-0.749	50.320	1835.232	-0.006089	-0.007241	-0.003237
0.4760	1002.004	91.872	109.296	48.973	-0.752	50.314	1907.558	-0.006431	-0.007651	-0.003428
0.4800	1036.795	96.616	114.913	51.498	-0.737	50.322	1973.791	-0.006763	-0.008044	-0.003605
0.4840	1065.875	100.559	118.286	53.154	-0.736	50.334	2029.152	-0.007039	-0.008280	-0.003721
0.4880	1089.274	104.168	122.164	55.002	-0.740	50.331	2073.698	-0.007292	-0.008551	-0.003850
0.4920	1111.576	107.364	125.888	56.653	-0.743	50.320	2116.156	-0.007515	-0.008812	-0.003966
0.4960	1122.607	109.371	128.834	57.878	-0.747	50.313	2137.156	-0.007656	-0.009018	-0.004051
0.5000	1130.272	110.340	129.669	58.100	-0.751	50.323	2151.747	-0.007724	-0.009077	-0.004067
0.5040	1131.985	111.071	129.932	58.588	-0.735	50.335	2155.008	-0.007775	-0.009095	-0.004101
0.5080	1126.394	111.013	130.475	58.656	-0.748	50.331	2144.365	-0.007771	-0.009133	-0.004106
0.5120	1117.918	110.746	130.209	58.448	-0.742	50.320	2128.229	-0.007752	-0.009115	-0.004091
0.5160	1105.460	110.215	128.695	57.808	-0.748	50.314	2104.511	-0.007715	-0.009009	-0.004047
0.5200	1080.137	107.351	126.820	56.670	-0.746	50.322	2056.303	-0.007515	-0.008877	-0.003967
0.5240	1028.785	101.175	119.995	53.473	-0.741	50.334	1958.542	-0.007082	-0.008400	-0.003743
0.5280	977.613	95.254	112.340	50.763	-0.742	50.330	1861.124	-0.006668	-0.007864	-0.003553
0.5320	930.905	89.584	106.753	47.930	-0.756	50.320	1772.203	-0.006271	-0.007473	-0.003355
0.5360	881.807	84.351	99.943	44.818	-0.750	50.314	1678.734	-0.005905	-0.006996	-0.003137
0.5400	828.892	77.786	92.329	41.273	-0.755	50.323	1577.997	-0.005445	-0.006463	-0.002889
0.5440	779.313	71.763	84.435	37.771	-0.746	50.335	1483.612	-0.005023	-0.005910	-0.002644
0.5480	727.871	65.871	77.542	34.727	-0.746	50.331	1385.679	-0.004611	-0.005428	-0.002431
0.5520	676.293	59.331	69.744	31.197	-0.748	50.320	1287.489	-0.004153	-0.004882	-0.002184
0.5560	617.803	52.483	61.367	27.347	-0.750	50.314	1176.138	-0.003674	-0.004296	-0.001914
0.5600	559.673	45.003	54.227	23.275	-0.753	50.322	1065.474	-0.003150	-0.003796	-0.001629
0.5640	506.232	38.199	46.332	19.193	-0.738	50.334	963.736	-0.002674	-0.003243	-0.001343
0.5680	457.134	32.219	38.036	16.411	-0.736	50.330	870.266	-0.002255	-0.002663	-0.001149
0.5720	412.199	26.720	30.199	13.284	-0.740	50.320	784.721	-0.001870	-0.002114	-0.000930
0.5760	372.659	21.568	25.113	10.493	-0.737	50.314	709.448	-0.001510	-0.001758	-0.000735
0.5800	338.981	16.701	19.152	7.935	-0.740	50.323	645.332	-0.001169	-0.001341	-0.000555
0.5840	311.208	13.008	13.037	5.738	-0.728	50.334	592.461	-0.000911	-0.000913	-0.000402
0.5880	287.554	9.685	10.187	4.199	-0.745	50.330	547.428	-0.000678	-0.000713	-0.000294
0.5920	269.760	7.411	7.062	2.557	-0.750	50.320	513.554	-0.000519	-0.000494	-0.000179
0.5960	252.913	5.163	2.920	1.150	-0.750	50.314	481.482	-0.000361	-0.000204	-0.000081
0.6000	242.078	3.174	2.127	0.456	-0.754	50.322	460.854	-0.000222	-0.000149	-0.000032
0.6040	235.570	1.852	0.279	-0.473	-0.753	50.334	448.465	-0.000130	-0.000020	0.000033
0.6080	233.076	1.277	-0.692	-0.472	-0.756	50.331	443.716	-0.000089	0.000048	0.000033
0.6120	236.442	1.138	-0.444	-0.623	-0.752	50.320	450.125	-0.000080	0.000031	0.000044
0.6160	242.784	1.377	0.444	-0.473	-0.754	50.314	462.198	-0.000096	-0.000031	0.000033
0.6200	253.634	2.527	0.765	0.054	-0.750	50.322	482.855	-0.000177	-0.000054	-0.000004
0.6240	284.668	5.418	5.756	1.263	-0.745	50.334	541.935	-0.000379	-0.000403	-0.000088
0.6280	349.606	12.392	14.009	5.460	-0.748	50.331	665.560	-0.000867	-0.000981	-0.000382
0.6320	409.975	18.833	22.500	9.409	-0.753	50.321	780.487	-0.001318	-0.001575	-0.000659
0.6360	453.813	24.291	28.488	12.214	-0.758	50.314	863.943	-0.001700	-0.001994	-0.000855
0.6400	503.812	29.708	36.521	15.412	-0.753	50.323	959.129	-0.002080	-0.002556	-0.001079
0.6440	562.964	36.863	45.470	19.107	-0.748	50.334	1071.739	-0.002580	-0.003183	-0.001337
0.6480	614.256	43.502	51.763	22.610	-0.748	50.331	1169.386	-0.003045	-0.003623	-0.001583
0.6520	663.549	49.986	58.825	25.765	-0.747	50.321	1263.227	-0.003499	-0.004118	-0.001804
0.6560	721.514	56.777	67.995	29.807	-0.744	50.315	1373.577	-0.003974	-0.004760	-0.002086
0.6600	782.123	64.115	77.239	33.878	-0.752	50.323	1488.962	-0.004488	-0.005407	-0.002371
0.6640	833.220	70.164	83.836	37.287	-0.755	50.334	1586.237	-0.004911	-0.005869	-0.002610
0.6680	887.713	77.209	93.412	41.189	-0.755	50.331	1689.978	-0.005405	-0.006539	-0.002883
0.6720	941.425	84.028	100.805	44.830	-0.750	50.320	1792.231	-0.005882	-0.007056	-0.003138
0.6760	980.228	89.544	106.028	47.708	-0.755	50.314	1866.102	-0.006268	-0.007422	-0.003340
0.6800	1027.177	95.606	113.077	50.833	-0.752	50.322	1955.481	-0.006692	-0.007915	-0.003558
0.6840	1066.897	100.825	119.873	53.126	-0.744	50.335	2031.097	-0.007058	-0.008391	-0.003719
0.6880	1084.480	103.701	123.152	54.823	-0.748	50.331	2064.571	-0.007259	-0.008621	-0.003838
0.6920	1100.395	105.878	125.943	56.042	-0.744	50.321	2094.870	-0.007411	-0.008816	-0.003923
0.6960	1116.220	108.165	127.374	57.404	-0.743	50.314	2124.996	-0.007572	-0.008916	-0.004018
0.7000	1126.003	110.073	129.515	58.141	-0.751	50.323	2143.621	-0.007705	-0.009066	-0.004070
0.7040	1123.915	110.479	129.292	58.059	-0.748	50.334	2139.645	-0.007734	-0.009050	-0.004064
0.7080	1120.488	110.549	130.975	58.337	-0.748	50.331	2133.121	-0.007738	-0.009168	-0.004084
0.7120	1117.227	110.494	130.753	58.143	-0.750	50.320	2126.913	-0.007735	-0.009153	-0.004070
0.7160	1109.427	110.256	129.849	57.960	-0.758	50.314	2112.064	-0.007718	-0.009089	-0.004057
0.7200	1093.452	108.571	127.347	57.100	-0.748	50.322	2081.652	-0.007600	-0.008914	-0.003997
0.7240	1053.807	103.997	122.053	54.932	-0.752	50.335	2006.178	-0.007280	-0.008544	-0.003845
0.7280	988.689	97.231	115.383	51.346	-0.749	50.331	1882.210	-0.006806	-0.008077	-0.003594
0.7320	937.307	90.905	107.823	48.125	-0.751	50.321	1784.391	-0.006363	-0.007548	-0.003369
0.7360	898.999	86.807	102.265	45.787	-0.749	50.314	1711.464	-0.006077	-0.007159	-0.003205
0.7400	852.186	81.026	96.135	42.872	-0.759	50.324	1622.343	-0.005672	-0.006729	-0.003001
0.7440	796.746	74.332	88.201	39.090	-0.748	50.335	1516.800	-0.005203	-0.006174	-0.002736
0.7480	741.156	67.569	79.530	35.588	-0.743	50.331	1410.971	-0.004730	-0.005567	-0.002491
0.7520	688.842	60.972	72.094	32.171	-0.734	50.321	1311.378	-0.004268	-0.005047	-0.002252
0.7560	637.550	55.177	65.965	28.806	-0.741	50.314	1213.732	-0.003862	-0.004618	-0.002016
0.7600	583.328	48.287	57.977	24.931	-0.736	50.323	1110.506	-0.003380	-0.004058	-0.001745
0.7640	527.167	41.116	49.735	21.067	-0.726	50.335	1003.590	-0.002878	-0.003481	-0.001475
0.7680	473.350	34.618	40.065	17.705	-0.737	50.331	901.136	-0.002423	-0.002805	-0.001239
0.7720	432.653	29.132	34.812	14.814	-0.738	50.321	823.660	-0.002039	-0.002437	-0.001037
0.7760	395.412	24.306	27.807	11.893	-0.744	50.314	752.764	-0.001701	-0.001947	-0.000832
0.7800	352.702	18.973	22.140	9.270	-0.738	50.323	671.453	-0.001328	-0.001550	-0.000649
0.7840	315.086	14.147	15.510	6.099	-0.738	50.334	599.842	-0.000990	-0.001086	-0.000427
0.7880	288.395	10.750	11.677	4.475	-0.739	50.331	549.030	-0.000753	-0.000817	-0.000313
0.7920	265.312	7.228	7.049	2.432	-0.742	50.321	505.085	-0.000506	-0.000493	-0.000170
0.7960	246.526	4.659	3.533	0.915	-0.749	50.314	469.322	-0.000326	-0.000247	-0.000064
0.8000	240.860	3.398	1.865	0.402	-0.745	50.323	458.536	-0.000238	-0.000131	-0.000028
0.8040	242.949	2.766	1.181	-0.098	-0.739	50.334	462.513	-0.000194	-0.000083	0.000007
0.8080	244.482	2.822	1.779	0.193	-0.738	50.331	465.431	-0.000198	-0.000125	-0.000014
0.8120	247.683	2.793	1.904	0.180	-0.736	50.321	471.525	-0.000196	-0.000133	-0.000013
0.8160	253.063	3.439	1.864	0.427	-0.740	50.314	481.768	-0.000241	-0.000130	-0.000030
0.8200	263.177	3.791	2.641	0.526	-0.723	50.323	501.022	-0.000265	-0.000185	-0.000037
0.8240	290.980	6.273	5.851	2.000	-0.723	50.334	553.951	-0.000439	-0.000410	-0.000140
0.8280	348.539	12.745	14.148	5.754	-0.728	50.331	663.528	-0.000892	-0.000990	-0.000403
0.8320	404.189	18.413	21.458	8.921	-0.740	50.320	769.472	-0.001289	-0.001502	-0.000624
0.8360	449.605	23.999	29.338	12.049	-0.740	50.314	855.932	-0.001680	-0.002054	-0.000843
0.8400	501.273	30.145	37.118	15.203	-0.735	50.322	954.294	-0.002110	-0.002598	-0.001064
0.8440	554.668	36.541	44.789	18.467	-0.730	50.334	1055.946	-0.002558	-0.003135	-0.001293
0.8480	614.962	43.797	53.196	22.818	-0.735	50.331	1170.731	-0.003066	-0.003724	-0.001597
0.8520	683.717	51.752	63.439	27.181	-0.735	50.321	1301.622	-0.003623	-0.004441	-0.001903
0.8560	750.143	60.173	72.942	31.836	-0.738	50.315	1428.080	-0.004212	-0.005106	-0.002228
0.8600	795.905	66.038	78.584	34.935	-0.739	50.322	1515.198	-0.004623	-0.005501	-0.002445
0.8640	832.829	71.033	84.310	37.341	-0.734	50.334	1585.493	-0.004972	-0.005902	-0.002614
0.8680	880.995	77.126	92.607	40.898	-0.736	50.331	1677.189	-0.005399	-0.006482	-0.002863
0.8720	934.421	83.903	99.124	44.342	-0.733	50.321	1778.898	-0.005873	-0.006939	-0.003104
0.8760	984.391	90.132	106.682	47.900	-0.739	50.314	1874.027	-0.006309	-0.007468	-0.003353
0.8800	1031.370	96.181	113.910	51.097	-0.734	50.322	1963.463	-0.006733	-0.007974	-0.003577
0.8840	1062.719	100.097	119.177	52.849	-0.735	50.334	2023.144	-0.007007	-0.008342	-0.003699
0.8880	1090.326	104.308	123.232	55.362	-0.734	50.331	2075.701	-0.007302	-0.008626	-0.003875
0.8920	1110.389	107.405	125.888	56.726	-0.741	50.321	2113.895	-0.007518	-0.008812	-0.003971
0.8960	1120.518	109.500	128.458	57.613	-0.743	50.314	2133.179	-0.007665	-0.008992	-0.004033
0.9000	1131.639	111.181	130.171	58.642	-0.740	50.322	2154.350	-0.007783	-0.009112	-0.004105
0.9040	1137.545	112.149	132.309	58.990	-0.728	50.334	2165.594	-0.007850	-0.009262	-0.004129
0.9080	1134.449	112.219	132.338	59.269	-0.739	50.331	2159.700	-0.007855	-0.009264	-0.004149
0.9120	1127.566	111.926	132.656	59.256	-0.739	50.321	2146.597	-0.007835	-0.009286	-0.004148
0.9160	1114.266	111.069	130.114	58.628	-0.750	50.314	2121.277	-0.007775	-0.009108	-0.004104
0.9200	1092.520	108.993	128.431	57.696	-0.739	50.322	2079.878	-0.007630	-0.008990	-0.004039
0.9240	1037.832	102.678	120.969	54.486	-0.733	50.335	1975.765	-0.007187	-0.008468	-0.003814
0.9280	971.196	95.521	112.006	50.750	-0.734	50.331	1848.907	-0.006686	-0.007840	-0.003552
0.9320	922.083	89.220	104.767	47.428	-0.722	50.321	1755.409	-0.006245	-0.007334	-0.003320
0.9360	885.654	84.814	100.264	44.899	-0.728	50.314	1686.058	-0.005937	-0.007018	-0.003143
0.9400	841.305	79.243	95.261	42.384	-0.734	50.322	1601.629	-0.005547	-0.006668	-0.002967
0.9440	787.819	73.167	86.785	38.491	-0.720	50.335	1499.805	-0.005122	-0.006075	-0.002694
0.9480	740.916	67.806	81.421	35.644	-0.737	50.331	1410.513	-0.004746	-0.005699	-0.002495
0.9520	694.613	62.179	74.331	32.587	-0.738	50.321	1322.365	-0.004353	-0.005203	-0.002281
0.9560	631.839	54.686	64.022	28.569	-0.741	50.314	1202.860	-0.003828	-0.004482	-0.002000
0.9600	566.932	46.463	54.502	24.096	-0.741	50.322	1079.292	-0.003252	-0.003815	-0.001687
0.9640	507.299	38.983	46.721	19.815	-0.740	50.335	965.767	-0.002729	-0.003270	-0.001387
0.9680	461.297	33.161	39.356	16.871	-0.732	50.331	878.191	-0.002321	-0.002755	-0.001181
0.9720	423.996	28.557	33.713	14.285	-0.737	50.321	807.180	-0.001999	-0.002360	-0.001000
0.9760	391.445	24.025	28.112	11.896	-0.746	50.314	745.211	-0.001682	-0.001968	-0.000833
0.9800	357.706	19.732	22.056	9.407	-0.748	50.322	680.981	-0.001381	-0.001544	-0.000659
0.9840	329.257	15.788	16.956	7.252	-0.751	50.334	626.822	-0.001105	-0.001187	-0.000508
0.9880	303.198	12.419	12.411	5.517	-0.755	50.331	577.211	-0.000869	-0.000869	-0.000386
0.9920	273.742	8.352	8.103	3.045	-0.750	50.321	521.135	-0.000585	-0.000567	-0.000213
0.9960	247.924	5.010	3.296	1.042	-0.750	50.314	471.983	-0.000351	-0.000231	-0.000073
1.0000	238.366	3.315	0.834	0.404	-0.747	50.322	453.787	-0.000232	-0.000058	-0.000028
1.0040	237.253	2.697	-0.067	-0.292	-0.743	50.334	451.670	-0.000189	0.000005	0.000020
1.0080	240.304	2.851	1.473	0.012	-0.743	50.331	457.478	-0.000200	-0.000103	-0.000001
1.0120	245.294	2.893	1.335	0.152	-0.747	50.321	466.976	-0.000203	-0.000093	-0.000011
1.0160	253.319	3.383	2.224	0.583	-0.747	50.314	482.254	-0.000237	-0.000156	-0.000041
1.0200	268.528	4.549	4.034	0.902	-0.747	50.322	511.208	-0.000318	-0.000282	-0.000063
1.0240	310.126	8.687	9.102	2.905	-0.751	50.334	590.401	-0.000608	-0.000637	-0.000203
1.0280	365.972	15.369	17.026	6.877	-0.755	50.331	696.716	-0.001076	-0.001192	-0.000481
1.0320	415.250	20.656	23.930	9.923	-0.750	50.320	790.529	-0.001446	-0.001675	-0.000695
1.0360	459.358	25.556	30.587	12.715	-0.744	50.314	874.500	-0.001789	-0.002141	-0.000890
1.0400	508.050	31.182	37.078	16.120	-0.742	50.322	967.197	-0.002183	-0.002595	-0.001128
1.0440	563.595	37.651	45.776	19.218	-0.743	50.334	1072.941	-0.002636	-0.003204	-0.001345
1.0480	621.229	44.566	55.001	23.623	-0.747	50.330	1182.661	-0.003120	-0.003850	-0.001654
1.0520	671.469	50.772	62.272	26.682	-0.749	50.321	1278.305	-0.003554	-0.004359	-0.001868
1.0560	729.825	58.335	70.678	30.472	-0.750	50.314	1389.399	-0.004083	-0.004947	-0.002133
1.0600	796.385	66.404	80.017	34.810	-0.751	50.322	1516.113	-0.004648	-0.005601	-0.002437
1.0640	853.764	73.604	87.368	38.702	-0.759	50.334	1625.347	-0.005152	-0.006116	-0.002709
1.0680	901.118	79.342	94.216	42.219	-0.753	50.331	1715.498	-0.005554	-0.006595	-0.002955
1.0720	941.229	84.702	100.987	44.926	-0.759	50.321	1791.859	-0.005929	-0.007069	-0.003145
1.0760	983.684	90.103	108.199	47.873	-0.760	50.314	1872.683	-0.006307	-0.007574	-0.003351
1.0800	1029.476	96.449	115.202	51.193	-0.765	50.322	1959.858	-0.006751	-0.008064	-0.003583
1.0840	1064.943	101.077	120.331	53.237	-0.760	50.334	2027.378	-0.007075	-0.008423	-0.003727
1.0880	1087.320	104.630	123.038	55.337	-0.758	50.332	2069.979	-0.007324	-0.008613	-0.003874
1.0920	1108.961	107.490	126.277	56.808	-0.764	50.321	2111.177	-0.007524	-0.008839	-0.003977
1.0960	1123.253	109.862	130.209	57.989	-0.767	50.314	2138.386	-0.007690	-0.009115	-0.004059
1.1000	1123.539	110.314	129.738	58.378	-0.770	50.322	2138.929	-0.007722	-0.009082	-0.004086
1.1040	1121.600	110.592	130.682	58.156	-0.767	50.334	2135.239	-0.007741	-0.009148	-0.004071
1.1080	1117.197	110.943	131.128	58.504	-0.760	50.331	2126.856	-0.007766	-0.009179	-0.004095
1.1120	1111.050	110.480	129.582	57.962	-0.761	50.321	2115.154	-0.007734	-0.009071	-0.004057
1.1160	1100.966	110.115	129.265	57.572	-0.760	50.314	2095.957	-0.007708	-0.009049	-0.004030
1.1200	1080.062	107.758	125.639	56.363	-0.761	50.322	2056.160	-0.007543	-0.008795	-0.003945
1.1240	1033.188	102.116	121.217	53.751	-0.758	50.334	1966.925	-0.007148	-0.008485	-0.003763
1.1280	983.775	96.742	114.564	51.442	-0.754	50.332	1872.854	-0.006772	-0.008019	-0.003601
1.1320	931.716	90.763	107.212	48.012	-0.747	50.321	1773.748	-0.006353	-0.007505	-0.003361
1.1360	878.846	84.588	99.693	44.621	-0.754	50.314	1673.098	-0.005921	-0.006979	-0.003123
1.1400	840.223	79.916	95.607	42.136	-0.759	50.323	1599.569	-0.005594	-0.006692	-0.002950
1.1440	790.885	73.953	88.257	38.591	-0.762	50.334	1505.642	-0.005177	-0.006178	-0.002701
1.1480	732.409	67.317	79.738	35.310	-0.761	50.332	1394.320	-0.004712	-0.005582	-0.002472
1.1520	678.848	60.370	71.345	31.545	-0.754	50.321	1292.353	-0.004226	-0.004994	-0.002208
1.1560	621.861	53.634	62.662	27.848	-0.754	50.314	1183.863	-0.003754	-0.004386	-0.001949
1.1600	566.721	46.577	55.391	24.041	-0.753	50.322	1078.892	-0.003260	-0.003877	-0.001683
1.1640	521.140	40.724	49.346	20.874	-0.752	50.334	992.117	-0.002851	-0.003454	-0.001461
1.1680	475.634	35.419	42.536	17.941	-0.755	50.332	905.485	-0.002479	-0.002978	-0.001256
1.1720	429.226	29.512	33.380	14.633	-0.751	50.322	817.137	-0.002066	-0.002337	-0.001024
1.1760	382.443	23.393	25.725	11.408	-0.752	50.314	728.073	-0.001638	-0.001801	-0.000799
1.1800	344.586	18.426	21.389	8.630	-0.754	50.322	656.004	-0.001290	-0.001497	-0.000604
1.1840	316.664	14.427	15.288	6.183	-0.747	50.334	602.846	-0.001010	-0.001070	-0.000433
1.1880	290.740	11.255	10.715	4.782	-0.752	50.331	553.493	-0.000788	-0.000750	-0.000335
1.1920	270.301	8.492	7.142	3.002	-0.750	50.321	514.584	-0.000594	-0.000500	-0.000210
1.1960	254.611	6.230	5.199	1.737	-0.756	50.314	484.715	-0.000436	-0.000364	-0.000122
1.2000	242.243	4.196	1.682	0.444	-0.760	50.322	461.168	-0.000294	-0.000118	-0.000031
1.2040	235.405	2.697	-0.249	-0.278	-0.755	50.334	448.151	-0.000189	0.000017	0.000019
1.2080	234.098	2.247	0.417	-0.402	-0.767	50.331	445.662	-0.000157	-0.000029	0.000028
1.2120	237.930	1.868	0.002	-0.182	-0.767	50.322	452.957	-0.000131	-0.000000	0.000013
1.2160	242.799	2.247	0.388	-0.001	-0.760	50.314	462.227	-0.000157	-0.000027	0.000000
1.2200	253.770	3.231	2.418	0.234	-0.763	50.322	483.112	-0.000226	-0.000169	-0.000016
1.2240	284.954	6.552	5.477	1.611	-0.761	50.334	542.479	-0.000459	-0.000383	-0.000113
1.2280	351.545	13.360	15.776	5.948	-0.764	50.332	669.250	-0.000935	-0.001104	-0.000416
1.2320	417.189	20.545	25.265	10.076	-0.764	50.321	794.220	-0.001438	-0.001769	-0.000705
1.2360	461.282	25.765	31.602	12.783	-0.765	50.314	878.162	-0.001804	-0.002212	-0.000895
1.2400	503.467	30.914	36.104	15.690	-0.767	50.322	958.471	-0.002164	-0.002527	-0.001098
1.2440	553.406	36.780	43.969	18.537	-0.763	50.334	1053.543	-0.002575	-0.003078	-0.001298
1.2480	605.660	43.700	51.863	22.402	-0.762	50.331	1153.021	-0.003059	-0.003630	-0.001568
1.2520	659.432	49.887	60.492	25.931	-0.756	50.322	1255.388	-0.003492	-0.004234	-0.001815
1.2560	715.518	56.848	68.469	29.752	-0.766	50.314	1362.162	-0.003979	-0.004793	-0.002083
1.2600	779.749	64.410	78.044	33.935	-0.759	50.322	1484.442	-0.004509	-0.005463	-0.002375
1.2640	841.305	72.087	86.979	37.966	-0.760	50.335	1601.629	-0.005046	-0.006089	-0.002658
1.2680	891.380	78.794	93.509	41.856	-0.764	50.331	1696.959	-0.005516	-0.006546	-0.002930
1.2720	935.428	84.491	101.152	44.869	-0.763	50.321	1780.815	-0.005914	-0.007081	-0.003141
1.2760	978.364	89.937	107.419	48.013	-0.759	50.314	1862.555	-0.006296	-0.007519	-0.003361
1.2800	1019.617	95.646	112.536	50.568	-0.759	50.322	1941.090	-0.006695	-0.007878	-0.003540
1.2840	1057.790	100.040	119.511	52.861	-0.750	50.335	2013.760	-0.007003	-0.008366	-0.003700
1.2880	1083.653	104.306	123.665	55.114	-0.756	50.332	2062.998	-0.007301	-0.008657	-0.003858
1.2920	1091.739	105.525	124.918	55.933	-0.752	50.321	2078.390	-0.007387	-0.008744	-0.003915
1.2960	1105.911	107.729	127.833	56.807	-0.749	50.314	2105.370	-0.007541	-0.008948	-0.003976
1.3000	1126.770	110.917	129.988	58.545	-0.755	50.322	2145.081	-0.007764	-0.009099	-0.004098
1.3040	1137.756	112.766	131.586	59.198	-0.759	50.334	2165.995	-0.007894	-0.009211	-0.004144
1.3080	1134.585	112.821	132.558	59.812	-0.760	50.332	2159.958	-0.007897	-0.009279	-0.004187
1.3120	1126.349	112.513	131.893	59.241	-0.751	50.321	2144.279	-0.007876	-0.009233	-0.004147
1.3160	1114.101	111.422	131.476	58.740	-0.759	50.314	2120.962	-0.007800	-0.009203	-0.004112
1.3200	1096.653	109.962	129.222	57.697	-0.762	50.322	2087.746	-0.007697	-0.009046	-0.004039
1.3240	1054.138	105.048	123.165	55.211	-0.760	50.334	2006.807	-0.007353	-0.008622	-0.003865
1.3280	992.506	98.693	116.786	51.972	-0.758	50.331	1889.477	-0.006908	-0.008175	-0.003638
1.3320	939.802	92.085	108.504	48.916	-0.758	50.322	1789.141	-0.006446	-0.007595	-0.003424
1.3360	893.529	86.483	102.447	45.633	-0.759	50.314	1701.050	-0.006054	-0.007171	-0.003194
1.3400	845.077	80.645	95.068	42.664	-0.758	50.322	1608.810	-0.005645	-0.006655	-0.002986
1.3440	792.087	74.023	87.449	39.119	-0.752	50.334	1507.931	-0.005182	-0.006121	-0.002738
1.3480	737.579	67.962	80.545	35.935	-0.749	50.332	1404.161	-0.004757	-0.005638	-0.002515
1.3520	686.423	61.605	72.457	32.213	-0.744	50.322	1306.772	-0.004312	-0.005072	-0.002255
1.3560	646.477	56.595	67.494	29.557	-0.748	50.314	1230.726	-0.003962	-0.004725	-0.002069
1.3600	602.714	51.345	60.062	26.641	-0.743	50.322	1147.413	-0.003594	-0.004204	-0.001865
1.3640	540.933	43.585	51.878	22.290	-0.750	50.334	1029.797	-0.003051	-0.003631	-0.001560
1.3680	481.886	36.387	42.650	18.676	-0.747	50.332	917.387	-0.002547	-0.002985	-0.001307
1.3720	432.397	29.862	34.199	15.106	-0.751	50.322	823.174	-0.002090	-0.002394	-0.001057
1.3760	386.365	24.079	28.057	11.853	-0.750	50.314	735.540	-0.001686	-0.001964	-0.000830
1.3800	350.117	19.281	20.931	9.047	-0.747	50.322	666.533	-0.001350	-0.001465	-0.000633
1.3840	315.882	14.903	15.468	6.488	-0.741	50.334	601.358	-0.001043	-0.001083	-0.000454
1.3880	287.539	11.438	11.328	4.755	-0.748	50.331	547.400	-0.000801	-0.000793	-0.000333
1.3920	261.690	7.580	7.269	2.696	-0.747	50.322	498.190	-0.000531	-0.000509	-0.000189
1.3960	246.030	4.896	3.296	1.276	-0.754	50.314	468.378	-0.000343	-0.000231	-0.000089
1.4000	239.658	3.776	1.767	0.542	-0.754	50.322	456.247	-0.000264	-0.000124	-0.000038
1.4040	236.036	2.794	0.250	-0.181	-0.756	50.334	449.352	-0.000196	-0.000018	0.000013
1.4080	235.420	2.612	1.152	0.179	-0.756	50.331	448.179	-0.000183	-0.000081	-0.000013
1.4120	239.733	2.681	0.640	0.345	-0.749	50.322	456.390	-0.000188	-0.000045	-0.000024
1.4160	249.937	3.344	1.179	0.372	-0.751	50.315	475.817	-0.000234	-0.000083	-0.000026
1.4200	274.434	5.683	4.059	1.362	-0.747	50.322	522.451	-0.000398	-0.000284	-0.000095
1.4240	327.724	11.075	11.855	4.420	-0.742	50.334	623.903	-0.000775	-0.000830	-0.000309
1.4280	382.683	17.023	20.667	8.116	-0.744	50.331	728.531	-0.001192	-0.001447	-0.000568
1.4320	429.572	22.410	26.820	10.935	-0.750	50.322	817.795	-0.001569	-0.001877	-0.000765
1.4360	463.371	26.831	32.574	13.298	-0.746	50.314	882.139	-0.001878	-0.002280	-0.000931
1.4400	505.060	31.800	37.774	16.177	-0.746	50.322	961.504	-0.002226	-0.002644	-0.001132
1.4440	564.918	38.479	47.014	19.496	-0.746	50.333	1075.459	-0.002694	-0.003291	-0.001365
1.4480	626.264	45.942	55.504	23.901	-0.747	50.332	1192.245	-0.003216	-0.003885	-0.001673
1.4520	682.786	52.639	62.616	27.557	-0.742	50.322	1299.849	-0.003685	-0.004383	-0.001929
1.4560	733.882	59.233	70.095	31.016	-0.748	50.314	1397.123	-0.004146	-0.004907	-0.002171
1.4600	788.871	66.123	79.254	34.783	-0.753	50.322	1501.808	-0.004629	-0.005548	-0.002435
1.4640	848.504	73.644	87.881	38.743	-0.747	50.334	1615.334	-0.005155	-0.006152	-0.002712
1.4680	898.503	80.072	96.081	42.370	-0.748	50.331	1710.520	-0.005605	-0.006726	-0.002966
1.4720	935.518	85.138	100.721	44.927	-0.750	50.322	1780.987	-0.005960	-0.007050	-0.003145
1.4760	978.394	90.202	107.364	47.831	-0.752	50.314	1862.612	-0.006314	-0.007515	-0.003348
1.4800	1027.718	96.377	115.217	51.027	-0.745	50.322	1956.511	-0.006746	-0.008065	-0.003572
1.4840	1067.753	101.582	120.928	53.722	-0.744	50.334	2032.728	-0.007111	-0.008465	-0.003761
1.4880	1096.007	106.157	125.109	56.183	-0.740	50.333	2086.515	-0.007431	-0.008758	-0.003933
1.4920	1111.155	108.473	128.611	57.211	-0.738	50.322	2115.355	-0.007593	-0.009003	-0.004005
1.4960	1125.372	110.760	130.655	58.364	-0.742	50.314	2142.420	-0.007753	-0.009146	-0.004085
1.5000	1139.304	112.609	132.616	59.504	-0.747	50.322	2168.941	-0.007883	-0.009283	-0.004165
1.5040	1141.438	113.243	133.378	59.645	-0.731	50.333	2173.004	-0.007927	-0.009336	-0.004175
1.5080	1136.027	113.566	133.072	59.855	-0.730	50.332	2162.704	-0.007950	-0.009315	-0.004190
1.5120	1127.401	113.105	133.089	59.520	-0.724	50.322	2146.282	-0.007917	-0.009316	-0.004166
1.5160	1113.800	112.023	130.949	59.086	-0.742	50.314	2120.390	-0.007842	-0.009166	-0.004136
1.5200	1076.320	108.305	126.693	56.863	-0.741	50.322	2049.036	-0.007581	-0.008869	-0.003980
1.5240	1013.846	100.982	117.774	53.113	-0.733	50.334	1930.103	-0.007069	-0.008244	-0.003718
1.5280	973.285	95.969	113.146	50.861	-0.734	50.331	1852.884	-0.006718	-0.007920	-0.003560
1.5320	943.108	92.126	107.893	49.027	-0.736	50.322	1795.435	-0.006449	-0.007553	-0.003432
1.5360	890.719	86.132	102.404	45.773	-0.747	50.313	1695.700	-0.006029	-0.007168	-0.003204
1.5400	832.589	79.509	95.052	42.134	-0.736	50.321	1585.035	-0.005566	-0.006654	-0.002949
1.5440	789.698	73.982	88.285	38.783	-0.727	50.334	1503.382	-0.005179	-0.006180	-0.002715
1.5480	751.571	69.955	81.864	36.590	-0.736	50.332	1430.798	-0.004897	-0.005731	-0.002561
1.5520	701.316	63.484	74.652	33.421	-0.732	50.321	1335.125	-0.004444	-0.005226	-0.002339
1.5560	639.068	56.087	65.954	29.474	-0.736	50.314	1216.621	-0.003926	-0.004617	-0.002063
1.5600	579.901	48.750	57.768	25.237	-0.737	50.322	1103.983	-0.003412	-0.004044	-0.001767
1.5640	522.898	41.158	48.331	21.094	-0.722	50.334	995.464	-0.002881	-0.003383	-0.001477
1.5680	469.187	35.124	41.995	18.038	-0.732	50.331	893.211	-0.002459	-0.002940	-0.001263
1.5720	423.651	29.483	33.116	14.856	-0.726	50.322	806.522	-0.002064	-0.002318	-0.001040
1.5760	385.494	24.307	26.642	12.034	-0.729	50.314	733.881	-0.001701	-0.001865	-0.000842
1.5800	360.081	20.561	23.056	9.978	-0.731	50.321	685.501	-0.001439	-0.001614	-0.000698
1.5840	331.301	16.489	18.761	7.547	-0.739	50.333	630.713	-0.001154	-0.001313	-0.000528
1.5880	301.515	12.798	13.731	5.878	-0.746	50.331	574.007	-0.000896	-0.000961	-0.000411
1.5920	273.307	8.999	9.495	3.545	-0.736	50.322	520.306	-0.000630	-0.000665	-0.000248
1.5960	250.569	6.131	5.643	1.874	-0.737	50.314	477.018	-0.000429	-0.000395	-0.000131
1.6000	243.626	4.869	2.641	1.082	-0.743	50.321	463.800	-0.000341	-0.000185	-0.000076
1.6040	242.393	3.888	2.812	0.374	-0.732	50.334	461.454	-0.000272	-0.000197	-0.000026
1.6080	240.950	3.804	1.597	0.624	-0.729	50.332	458.708	-0.000266	-0.000112	-0.000044
1.6120	241.311	2.935	0.903	0.304	-0.726	50.322	459.394	-0.000205	-0.000063	-0.000021
1.6160	246.781	3.200	1.835	0.542	-0.731	50.314	469.809	-0.000224	-0.000128	-0.000038
1.6200	258.594	4.254	3.991	0.749	-0.739	50.321	492.296	-0.000298	-0.000279	-0.000052
1.6240	291.581	7.411	7.477	2.335	-0.736	50.333	555.096	-0.000519	-0.000523	-0.000163
1.6280	360.501	15.016	17.565	6.935	-0.742	50.331	686.302	-0.001051	-0.001230	-0.000485
1.6320	426.747	22.327	27.140	10.924	-0.737	50.322	812.416	-0.001563	-0.001900	-0.000765
1.6360	472.583	27.771	32.312	14.049	-0.739	50.314	899.677	-0.001944	-0.002262	-0.000983
1.6400	512.799	32.500	38.244	16.660	-0.736	50.322	976.238	-0.002275	-0.002677	-0.001166
1.6440	560.830	38.182	46.066	19.343	-0.732	50.334	1067.677	-0.002673	-0.003225	-0.001354
1.6480	616.525	44.908	54.364	23.275	-0.750	50.331	1173.706	-0.003144	-0.003805	-0.001629
1.6520	675.422	52.146	63.481	27.183	-0.751	50.322	1285.830	-0.003650	-0.004444	-0.001903
1.6560	732.755	59.332	71.553	31.323	-0.751	50.314	1394.978	-0.004153	-0.005009	-0.002193
1.6600	796.716	67.301	81.029	35.588	-0.754	50.321	1516.743	-0.004711	-0.005672	-0.002491
1.6640	850.623	73.615	87.213	38.827	-0.751	50.333	1619.368	-0.005153	-0.006105	-0.002718
1.6680	896.865	79.805	94.372	42.748	-0.756	50.331	1707.401	-0.005586	-0.006606	-0.002992
1.6720	948.758	86.078	101.806	45.621	-0.750	50.322	1806.192	-0.006025	-0.007126	-0.003193
1.6760	994.505	92.013	108.601	49.082	-0.750	50.314	1893.282	-0.006441	-0.007602	-0.003436
1.6800	1030.242	97.443	114.661	51.457	-0.740	50.322	1961.317	-0.006821	-0.008026	-0.003602
1.6840	1063.410	101.891	119.317	53.682	-0.744	50.334	2024.460	-0.007132	-0.008352	-0.003758
1.6880	1093.662	105.906	125.512	56.073	-0.747	50.332	2082.052	-0.007413	-0.008786	-0.003925
1.6920	1118.264	109.147	129.029	57.808	-0.743	50.322	2128.887	-0.007640	-0.009032	-0.004047
1.6960	1128.754	110.860	129.947	58.976	-0.752	50.314	2148.857	-0.007760	-0.009096	-0.004128
1.7000	1129.731	111.702	130.822	58.782	-0.748	50.322	2150.717	-0.007819	-0.009158	-0.004115
1.7040	1129.370	112.234	131.699	59.061	-0.750	50.334	2150.030	-0.007856	-0.009219	-0.004134
1.7080	1126.830	112.651	131.448	59.213	-0.740	50.331	2145.195	-0.007886	-0.009201	-0.004145
1.7120	1120.969	112.457	132.350	59.130	-0.742	50.322	2134.037	-0.007872	-0.009265	-0.004139
1.7160	1110.464	111.673	131.630	58.698	-0.752	50.314	2114.038	-0.007817	-0.009214	-0.004109
1.7200	1092.791	109.653	129.473	58.045	-0.744	50.321	2080.393	-0.007676	-0.009063	-0.004063
1.7240	1044.820	104.518	123.512	55.072	-0.742	50.334	1989.069	-0.007316	-0.008646	-0.003855
1.7280	981.460	97.389	115.508	51.513	-0.739	50.332	1868.448	-0.006817	-0.008086	-0.003606
1.7320	922.714	90.892	105.987	47.999	-0.736	50.322	1756.611	-0.006362	-0.007419	-0.003360
1.7360	875.059	84.870	100.320	44.940	-0.733	50.314	1665.888	-0.005941	-0.007022	-0.003146
1.7400	829.117	79.328	92.996	42.051	-0.731	50.322	1578.426	-0.005553	-0.006510	-0.002944
1.7440	780.380	73.391	85.562	38.479	-0.727	50.334	1485.643	-0.005137	-0.005989	-0.002694
1.7480	737.519	68.411	80.890	35.993	-0.740	50.332	1404.047	-0.004789	-0.005662	-0.002519
1.7520	689.984	62.249	73.638	32.504	-0.742	50.322	1313.553	-0.004357	-0.005155	-0.002275
1.7560	639.023	56.047	66.870	29.336	-0.747	50.314	1216.536	-0.003923	-0.004681	-0.002053
1.7600	582.666	49.184	59.005	25.611	-0.743	50.322	1109.247	-0.003443	-0.004130	-0.001793
1.7640	518.255	41.593	48.555	21.080	-0.734	50.334	986.624	-0.002912	-0.003399	-0.001476
1.7680	464.273	34.942	40.175	17.897	-0.738	50.332	883.856	-0.002446	-0.002812	-0.001253
1.7720	424.553	29.371	34.034	14.856	-0.742	50.322	808.239	-0.002056	-0.002382	-0.001040
1.7760	385.884	24.335	28.281	11.839	-0.744	50.314	734.625	-0.001703	-0.001980	-0.000829
1.7800	348.058	19.450	21.653	9.478	-0.735	50.321	662.613	-0.001361	-0.001516	-0.000663
1.7840	313.868	14.821	16.219	6.627	-0.736	50.334	597.525	-0.001037	-0.001135	-0.000464
1.7880	280.761	11.086	11.272	4.461	-0.740	50.332	534.496	-0.000776	-0.000789	-0.000312
1.7920	255.618	7.171	6.033	2.319	-0.730	50.323	486.631	-0.000502	-0.000422	-0.000162
1.7960	239.898	4.968	3.921	1.040	-0.730	50.314	456.705	-0.000348	-0.000274	-0.000073
1.8000	232.820	3.453	1.559	0.359	-0.723	50.322	443.230	-0.000242	-0.000109	-0.000025
1.8040	229.108	2.205	0.362	-0.486	-0.724	50.334	436.163	-0.000154	-0.000025	0.000034
1.8080	229.318	2.135	-0.346	-0.293	-0.722	50.332	436.563	-0.000149	0.000024	0.000021
1.8120	233.136	2.121	0.017	-0.307	-0.735	50.323	443.830	-0.000148	-0.000001	0.000021
1.8160	241.206	2.739	1.459	-0.056	-0.742	50.314	459.194	-0.000192	-0.000102	0.000004
1.8200	256.580	4.240	3.770	0.511	-0.741	50.322	488.462	-0.000297	-0.000264	-0.000036
1.8240	296.300	8.168	7.451	2.529	-0.746	50.333	564.079	-0.000572	-0.000522	-0.000177
1.8280	355.031	14.412	15.970	6.571	-0.743	50.332	675.888	-0.001009	-0.001118	-0.000460
1.8320	415.791	21.204	24.542	10.326	-0.742	50.322	791.559	-0.001484	-0.001718	-0.000723
1.8360	461.357	26.341	32.436	13.312	-0.743	50.314	878.305	-0.001844	-0.002271	-0.000932
1.8400	501.874	31.363	38.201	16.079	-0.748	50.321	955.439	-0.002195	-0.002674	-0.001126
1.8440	565.233	38.746	46.680	19.622	-0.746	50.333	1076.059	-0.002712	-0.003268	-0.001374
1.8480	632.666	46.841	56.267	24.595	-0.744	50.332	1204.433	-0.003279	-0.003939	-0.001722
1.8520	686.723	53.606	65.162	27.876	-0.740	50.322	1307.344	-0.003752	-0.004561	-0.001951
1.8560	737.173	59.990	72.166	31.503	-0.746	50.314	1403.389	-0.004199	-0.005052	-0.002205
1.8600	794.161	66.867	80.406	35.408	-0.739	50.321	1511.879	-0.004681	-0.005628	-0.002479
1.8640	852.486	73.757	87.409	38.924	-0.743	50.333	1622.915	-0.005163	-0.006119	-0.002725
1.8680	905.131	81.067	96.315	43.053	-0.748	50.332	1723.137	-0.005675	-0.006742	-0.003014
1.8720	950.351	86.582	103.029	46.135	-0.739	50.323	1809.225	-0.006061	-0.007212	-0.003229
1.8760	985.638	91.649	109.450	48.387	-0.741	50.314	1876.402	-0.006415	-0.007662	-0.003387
1.8800	1020.203	96.194	114.494	50.985	-0.748	50.322	1942.205	-0.006734	-0.008015	-0.003569
1.8840	1053.521	100.333	119.719	52.875	-0.739	50.334	2005.634	-0.007023	-0.008380	-0.003701
1.8880	1084.796	104.869	123.733	55.625	-0.742	50.332	2065.172	-0.007341	-0.008661	-0.003894
1.8920	1108.540	108.320	127.043	57.016	-0.746	50.322	2110.376	-0.007582	-0.008893	-0.003991
1.8960	1114.522	109.694	129.570	57.989	-0.745	50.314	2121.763	-0.007679	-0.009070	-0.004059
1.9000	1117.843	110.579	129.835	58.129	-0.751	50.322	2128.086	-0.007740	-0.009088	-0.004069
1.9040	1122.622	111.433	131.559	58.434	-0.748	50.333	2137.184	-0.007800	-0.009209	-0.004090
1.9080	1121.435	112.036	130.794	59.142	-0.751	50.332	2134.924	-0.007843	-0.009156	-0.004140
1.9120	1118.444	111.783	130.613	58.963	-0.742	50.322	2129.230	-0.007825	-0.009143	-0.004127
1.9160	1111.080	111.519	131.267	58.852	-0.748	50.314	2115.211	-0.007806	-0.009189	-0.004120
1.9200	1095.511	110.061	129.919	58.184	-0.748	50.321	2085.571	-0.007704	-0.009094	-0.004073
1.9240	1061.532	106.592	124.776	55.890	-0.740	50.333	2020.884	-0.007461	-0.008734	-0.003912
1.9280	1000.652	100.166	116.622	52.863	-0.740	50.332	1904.984	-0.007012	-0.008164	-0.003700
1.9320	942.822	93.207	109.587	49.304	-0.742	50.323	1794.891	-0.006525	-0.007671	-0.003451
1.9360	894.205	87.117	103.323	46.317	-0.739	50.314	1702.337	-0.006098	-0.007233	-0.003242
1.9400	848.910	81.784	97.121	43.235	-0.735	50.322	1616.106	-0.005725	-0.006798	-0.003026
1.9440	792.403	74.965	87.923	39.426	-0.722	50.333	1508.532	-0.005248	-0.006155	-0.002760
1.9480	737.309	68.788	81.379	36.103	-0.728	50.332	1403.646	-0.004815	-0.005697	-0.002527
1.9520	691.202	62.530	75.249	32.655	-0.731	50.322	1315.870	-0.004377	-0.005267	-0.002286
1.9560	635.536	56.187	65.801	29.127	-0.730	50.314	1209.898	-0.003933	-0.004606	-0.002039
1.9600	574.416	48.639	57.379	25.042	-0.738	50.321	1093.540	-0.003405	-0.004017	-0.001753
1.9640	516.211	41.299	48.069	20.998	-0.736	50.333	982.733	-0.002891	-0.003365	-0.001470
1.9680	467.609	35.040	41.731	17.732	-0.738	50.331	890.207	-0.002453	-0.002921	-0.001241
1.9720	427.874	29.961	34.186	14.954	-0.742	50.322	814.562	-0.002097	-0.002393	-0.001047
1.9760	385.584	24.560	28.572	12.049	-0.743	50.314	734.053	-0.001719	-0.002000	-0.000843
1.9800	348.764	19.773	22.238	9.436	-0.738	50.321	663.958	-0.001384	-0.001557	-0.000661
1.9840	317.400	15.577	16.274	6.685	-0.742	50.333	604.248	-0.001090	-0.001139	-0.000468
1.9880	286.066	11.900	12.078	5.045	-0.749	50.331	544.596	-0.000833	-0.000845	-0.000353
1.9920	264.470	8.169	7.686	2.889	-0.756	50.323	503.483	-0.000572	-0.000538	-0.000202
1.9960	251.290	6.385	5.145	1.917	-0.756	50.314	478.392	-0.000447	-0.000360	-0.000134
