# Supplementary material for: Evaluation of a Cold-Mixed High-Performance Polyurethane Mixture
Source: Hindawi journal article supplement (doi:10.1155/2019/1507971), 2019-11-07
Supplement: f1 [file 1507971.f1.zip › 1507971.f1/dynamic modulus data/PUM/specimen2/temp50/zhs-2-50_10Hz.csv]

Test Information
****************
Project name	zhs
Operator name	2
Target test temperature	50
Target confining stress	0
Average dynamic strain range from 75 to 125 micro-strain
Contact stress	5
Initial modulus	1000
Axial gauge length	70
Comments
Specimen information
********************
Identification	zhs-2-50
Dimensions	Point 1	Point 2	Point 3	Point 4	Point 5	Point 6	Average	Std Dev.
Diameter (mm)	49.2	49.3	49.2				49.23	0.058
Height (mm)	100.8	101.0	100.8				100.87	0.115
Cross-sectional area (mm�)	1903.7
Conditioning time
Properties/Comments
Test Data	10Hz
*********
Test date and time	Wed	Apr 3	2019	1:28 PM
Dynamic modulus (MPa)	9173
Phase angle (Degrees)	4.26
Average temperature (�C)	50.3
Average confining pressure (kPa)	-0.7
Average micro-strain	104
Load drift (%)	0.5
Load standard error (%)	4.5
Average deformation drift (%)	-4.6
Average deformation standard error (%)	4.4
Deformation uniformity (%)	30.2
Phase uniformity (Degrees)	0.3
Conditioning Cycles
Time (sec)	Axial stress (kPa)	Axial micro-strain #1	Axial micro-strain #2	Axial micro-strain #3	Confining pressure (kPa)	Temperature (�C)	Load (N)	Displacement #1 (mm)	Displacement #2 (mm)	Displacement #3 (mm)
0.0000	436.695	17.135	20.596	8.769	-0.760	50.318	831.356	-0.001199	-0.001442	-0.000614
0.0020	433.524	16.980	20.931	8.546	-0.760	50.322	825.319	-0.001189	-0.001465	-0.000598
0.0040	420.780	15.604	19.708	8.046	-0.762	50.326	801.058	-0.001092	-0.001380	-0.000563
0.0060	384.036	11.803	14.954	5.962	-0.759	50.332	731.106	-0.000826	-0.001047	-0.000417
0.0080	322.044	4.620	5.366	2.000	-0.750	50.338	613.089	-0.000323	-0.000376	-0.000140
0.0100	268.723	-1.822	-2.932	-1.001	-0.761	50.337	511.580	0.000128	0.000205	0.000070
0.0120	243.130	-5.107	-6.919	-2.767	-0.762	50.334	462.856	0.000358	0.000484	0.000194
0.0140	239.944	-5.681	-6.889	-3.461	-0.764	50.330	456.791	0.000398	0.000482	0.000242
0.0160	247.037	-5.135	-6.402	-3.156	-0.766	50.324	470.295	0.000359	0.000448	0.000221
0.0180	259.375	-4.168	-5.222	-2.935	-0.763	50.319	493.784	0.000292	0.000366	0.000205
0.0200	283.180	-1.825	-1.401	-1.364	-0.767	50.318	539.103	0.000128	0.000098	0.000095
0.0220	331.001	2.892	5.157	1.277	-0.763	50.322	630.140	-0.000202	-0.000361	-0.000089
0.0240	397.156	10.105	14.551	5.335	-0.766	50.326	756.083	-0.000707	-0.001019	-0.000373
0.0260	462.379	17.428	23.141	9.616	-0.763	50.332	880.251	-0.001220	-0.001620	-0.000673
0.0280	518.916	24.081	31.213	12.841	-0.754	50.338	987.883	-0.001686	-0.002185	-0.000899
0.0300	568.690	29.947	38.313	16.119	-0.759	50.338	1082.640	-0.002096	-0.002682	-0.001128
0.0320	613.715	35.180	43.858	18.788	-0.754	50.335	1168.356	-0.002463	-0.003070	-0.001315
0.0340	656.726	40.329	49.652	21.746	-0.757	50.330	1250.238	-0.002823	-0.003476	-0.001522
0.0360	698.145	45.466	55.808	24.567	-0.761	50.324	1329.088	-0.003183	-0.003907	-0.001720
0.0380	739.398	50.223	62.159	27.195	-0.762	50.320	1407.623	-0.003516	-0.004351	-0.001904
0.0400	779.914	55.540	69.066	30.084	-0.760	50.319	1484.756	-0.003888	-0.004835	-0.002106
0.0420	816.839	60.201	74.430	32.502	-0.756	50.322	1555.052	-0.004214	-0.005210	-0.002275
0.0440	849.421	64.341	78.808	34.767	-0.758	50.326	1617.079	-0.004504	-0.005517	-0.002434
0.0460	878.230	68.550	82.351	37.007	-0.761	50.333	1671.925	-0.004799	-0.005765	-0.002590
0.0480	901.043	71.439	85.786	38.438	-0.758	50.338	1715.355	-0.005001	-0.006005	-0.002691
0.0500	914.464	73.882	88.298	39.658	-0.768	50.338	1740.904	-0.005172	-0.006181	-0.002776
0.0520	919.784	74.823	89.825	40.006	-0.767	50.335	1751.032	-0.005238	-0.006288	-0.002800
0.0540	920.235	75.273	90.689	40.271	-0.766	50.330	1751.890	-0.005269	-0.006348	-0.002819
0.0560	918.206	75.442	91.009	40.368	-0.764	50.324	1748.028	-0.005281	-0.006371	-0.002826
0.0580	914.223	75.230	91.135	40.243	-0.762	50.319	1740.446	-0.005266	-0.006379	-0.002817
0.0600	908.242	75.104	90.842	40.228	-0.770	50.318	1729.059	-0.005257	-0.006359	-0.002816
0.0620	900.908	74.458	89.883	39.714	-0.764	50.322	1715.097	-0.005212	-0.006292	-0.002780
0.0640	891.470	73.447	88.437	39.534	-0.769	50.326	1697.130	-0.005141	-0.006191	-0.002767
0.0660	876.186	71.975	85.896	38.730	-0.770	50.332	1668.034	-0.005038	-0.006013	-0.002711
0.0680	846.595	68.790	82.143	37.049	-0.771	50.338	1611.700	-0.004815	-0.005750	-0.002593
0.0700	795.484	63.442	76.362	34.393	-0.774	50.338	1514.397	-0.004441	-0.005345	-0.002407
0.0720	732.049	56.355	68.385	30.404	-0.771	50.334	1393.633	-0.003945	-0.004787	-0.002128
0.0740	670.928	49.367	60.270	26.527	-0.762	50.329	1277.275	-0.003456	-0.004219	-0.001857
0.0760	618.058	43.038	52.196	23.191	-0.764	50.324	1176.624	-0.003013	-0.003654	-0.001623
0.0780	574.972	37.692	46.291	20.094	-0.762	50.319	1094.599	-0.002638	-0.003240	-0.001407
0.0800	540.151	33.792	41.441	18.008	-0.764	50.318	1028.309	-0.002365	-0.002901	-0.001261
0.0820	509.643	29.988	36.047	16.161	-0.761	50.322	970.230	-0.002099	-0.002523	-0.001131
0.0840	478.580	25.890	31.226	14.064	-0.763	50.326	911.093	-0.001812	-0.002186	-0.000984
0.0860	443.984	21.821	26.253	11.617	-0.762	50.332	845.232	-0.001527	-0.001838	-0.000813
0.0880	407.435	17.303	20.805	8.907	-0.759	50.338	775.652	-0.001211	-0.001456	-0.000623
0.0900	371.337	13.403	16.246	6.892	-0.762	50.338	706.930	-0.000938	-0.001137	-0.000482
0.0920	337.102	9.165	11.591	4.419	-0.758	50.335	641.756	-0.000642	-0.000811	-0.000309
0.0940	304.476	5.024	6.046	2.236	-0.759	50.330	579.643	-0.000352	-0.000423	-0.000157
0.0960	274.584	1.207	0.112	0.153	-0.763	50.324	522.738	-0.000084	-0.000008	-0.000011
0.0980	249.667	-2.132	-3.488	-1.834	-0.764	50.320	475.302	0.000149	0.000244	0.000128
0.1000	230.010	-4.490	-6.795	-3.141	-0.769	50.318	437.880	0.000314	0.000476	0.000220
0.1020	216.815	-6.172	-9.449	-4.169	-0.760	50.322	412.760	0.000432	0.000661	0.000292
0.1040	209.511	-7.420	-10.131	-4.836	-0.764	50.327	398.855	0.000519	0.000709	0.000339
0.1060	206.716	-7.841	-10.548	-5.115	-0.768	50.333	393.534	0.000549	0.000738	0.000358
0.1080	207.497	-8.234	-10.924	-5.378	-0.761	50.339	395.021	0.000576	0.000765	0.000376
0.1100	210.533	-7.981	-11.493	-5.268	-0.767	50.339	400.801	0.000559	0.000804	0.000369
0.1120	215.162	-7.983	-11.311	-5.171	-0.764	50.336	409.613	0.000559	0.000792	0.000362
0.1140	221.729	-7.731	-9.784	-4.685	-0.766	50.331	422.115	0.000541	0.000685	0.000328
0.1160	232.099	-6.957	-8.476	-4.309	-0.769	50.324	441.856	0.000487	0.000593	0.000302
0.1180	253.995	-5.051	-5.779	-3.655	-0.770	50.319	483.541	0.000354	0.000405	0.000256
0.1200	297.352	-0.294	-0.375	-0.919	-0.773	50.318	566.082	0.000021	0.000026	0.000064
0.1220	356.053	5.544	8.353	2.737	-0.769	50.322	677.834	-0.000388	-0.000585	-0.000192
0.1240	418.992	12.279	17.676	6.740	-0.766	50.326	797.653	-0.000860	-0.001237	-0.000472
0.1260	478.429	19.437	25.959	10.272	-0.765	50.333	910.807	-0.001361	-0.001817	-0.000719
0.1280	533.118	25.807	32.949	13.771	-0.763	50.339	1014.919	-0.001806	-0.002306	-0.000964
0.1300	584.079	31.925	40.495	17.384	-0.772	50.338	1111.937	-0.002235	-0.002835	-0.001217
0.1320	630.787	37.537	47.331	20.358	-0.770	50.335	1200.857	-0.002628	-0.003313	-0.001425
0.1340	674.174	43.291	53.764	23.193	-0.766	50.330	1283.455	-0.003030	-0.003763	-0.001624
0.1360	712.617	48.063	59.352	25.665	-0.771	50.324	1356.640	-0.003364	-0.004155	-0.001797
0.1380	748.460	52.259	63.980	27.861	-0.772	50.319	1424.875	-0.003658	-0.004479	-0.001950
0.1400	782.935	56.918	69.038	30.516	-0.775	50.318	1490.507	-0.003984	-0.004833	-0.002136
0.1420	815.051	61.101	73.666	32.950	-0.763	50.322	1551.647	-0.004277	-0.005157	-0.002307
0.1440	844.807	64.889	78.031	34.880	-0.760	50.326	1608.295	-0.004542	-0.005462	-0.002442
0.1460	870.956	68.158	82.867	36.785	-0.764	50.333	1658.077	-0.004771	-0.005801	-0.002575
0.1480	892.026	70.572	86.269	38.134	-0.758	50.338	1698.189	-0.004940	-0.006039	-0.002669
0.1500	907.295	73.124	88.798	39.549	-0.766	50.338	1727.257	-0.005119	-0.006216	-0.002768
0.1520	918.100	75.118	91.023	40.284	-0.758	50.335	1747.828	-0.005258	-0.006372	-0.002820
0.1540	923.646	75.919	92.414	40.867	-0.759	50.330	1758.385	-0.005314	-0.006469	-0.002861
0.1560	924.157	76.691	92.455	41.022	-0.761	50.324	1759.357	-0.005368	-0.006472	-0.002872
0.1580	920.896	76.564	91.635	40.799	-0.761	50.319	1753.149	-0.005359	-0.006414	-0.002856
0.1600	914.839	76.579	91.022	40.840	-0.762	50.318	1741.619	-0.005361	-0.006372	-0.002859
0.1620	906.348	76.114	90.897	40.589	-0.758	50.322	1725.454	-0.005328	-0.006363	-0.002841
0.1640	894.100	74.766	89.853	39.979	-0.748	50.326	1702.137	-0.005234	-0.006290	-0.002798
0.1660	874.218	73.011	86.840	39.200	-0.750	50.332	1664.286	-0.005111	-0.006079	-0.002744
0.1680	837.819	68.875	82.240	36.923	-0.749	50.338	1594.992	-0.004821	-0.005757	-0.002585
0.1700	785.189	63.050	75.224	33.919	-0.755	50.338	1494.799	-0.004413	-0.005266	-0.002374
0.1720	729.389	56.481	68.484	30.544	-0.750	50.335	1388.569	-0.003954	-0.004794	-0.002138
0.1740	678.187	50.183	61.465	27.459	-0.753	50.330	1291.094	-0.003513	-0.004303	-0.001922
0.1760	631.704	44.835	54.307	24.262	-0.755	50.324	1202.602	-0.003138	-0.003802	-0.001698
0.1780	588.317	39.629	48.027	21.399	-0.755	50.319	1120.005	-0.002774	-0.003362	-0.001498
0.1800	546.192	34.773	42.191	18.760	-0.756	50.318	1039.810	-0.002434	-0.002953	-0.001313
0.1820	505.616	29.791	36.604	16.190	-0.758	50.321	962.563	-0.002085	-0.002562	-0.001133
0.1840	467.233	25.175	31.450	13.563	-0.755	50.326	889.492	-0.001762	-0.002201	-0.000949
0.1860	429.948	20.671	25.237	10.908	-0.754	50.332	818.510	-0.001447	-0.001767	-0.000764
0.1880	391.685	16.208	18.818	8.141	-0.754	50.338	745.668	-0.001135	-0.001317	-0.000570
0.1900	354.670	11.971	13.454	6.127	-0.756	50.337	675.201	-0.000838	-0.000942	-0.000429
0.1920	322.991	7.888	8.604	4.003	-0.752	50.334	614.891	-0.000552	-0.000602	-0.000280
0.1940	296.015	4.435	4.659	1.958	-0.748	50.330	563.536	-0.000310	-0.000326	-0.000137
0.1960	270.842	1.194	0.920	0.208	-0.746	50.324	515.614	-0.000084	-0.000064	-0.000015
0.1980	248.149	-2.119	-3.414	-1.723	-0.745	50.320	472.412	0.000148	0.000239	0.000121
0.2000	229.634	-4.462	-6.569	-2.836	-0.754	50.318	437.164	0.000312	0.000460	0.000199
0.2020	216.650	-6.132	-8.808	-3.963	-0.752	50.322	412.445	0.000429	0.000617	0.000277
0.2040	208.880	-7.393	-9.934	-4.726	-0.747	50.326	397.654	0.000517	0.000695	0.000331
0.2060	205.574	-8.163	-10.908	-5.158	-0.743	50.332	391.359	0.000571	0.000764	0.000361
0.2080	205.904	-8.430	-11.588	-5.713	-0.740	50.338	391.989	0.000590	0.000811	0.000400
0.2100	208.158	-8.107	-10.770	-5.198	-0.745	50.338	396.280	0.000567	0.000754	0.000364
0.2120	211.855	-7.854	-10.297	-4.908	-0.743	50.335	403.318	0.000550	0.000721	0.000344
0.2140	217.912	-7.629	-10.005	-4.850	-0.747	50.330	414.848	0.000534	0.000700	0.000340
0.2160	227.861	-6.874	-9.782	-4.699	-0.748	50.324	433.788	0.000481	0.000685	0.000329
0.2180	249.081	-5.079	-7.711	-3.753	-0.742	50.319	474.186	0.000356	0.000540	0.000263
0.2200	291.807	-0.504	-1.417	-1.027	-0.752	50.318	555.525	0.000035	0.000099	0.000072
0.2220	349.831	5.629	7.991	2.307	-0.751	50.322	665.989	-0.000394	-0.000559	-0.000161
0.2240	412.530	12.462	17.218	6.407	-0.754	50.325	785.351	-0.000872	-0.001205	-0.000448
0.2260	472.749	19.140	25.350	10.493	-0.759	50.332	899.992	-0.001340	-0.001774	-0.000735
0.2280	527.527	25.330	32.129	13.924	-0.752	50.338	1004.276	-0.001773	-0.002249	-0.000975
0.2300	577.542	31.505	39.131	17.328	-0.758	50.338	1099.491	-0.002205	-0.002739	-0.001213
0.2320	623.649	36.880	45.830	19.984	-0.754	50.335	1187.267	-0.002582	-0.003208	-0.001399
0.2340	667.186	42.408	52.750	22.916	-0.754	50.330	1270.151	-0.002969	-0.003693	-0.001604
0.2360	707.357	47.557	59.031	26.015	-0.749	50.324	1346.626	-0.003329	-0.004132	-0.001821
0.2380	744.658	52.146	65.062	28.070	-0.744	50.319	1417.637	-0.003650	-0.004554	-0.001965
0.2400	778.366	56.778	69.608	30.516	-0.751	50.318	1481.810	-0.003974	-0.004873	-0.002136
0.2420	808.093	60.692	73.500	32.364	-0.750	50.321	1538.401	-0.004248	-0.005145	-0.002266
0.2440	836.361	64.370	77.403	34.421	-0.752	50.325	1592.216	-0.004506	-0.005418	-0.002409
0.2460	863.698	67.862	81.502	36.507	-0.750	50.331	1644.258	-0.004750	-0.005705	-0.002555
0.2480	888.735	71.019	85.171	37.884	-0.743	50.337	1691.923	-0.004971	-0.005962	-0.002652
0.2500	908.407	73.939	88.131	39.687	-0.753	50.337	1729.374	-0.005176	-0.006169	-0.002778
0.2520	921.076	75.752	90.215	40.869	-0.750	50.334	1753.492	-0.005303	-0.006315	-0.002861
0.2540	926.847	76.552	91.842	41.286	-0.746	50.330	1764.479	-0.005359	-0.006429	-0.002890
0.2560	926.832	77.098	92.526	41.536	-0.750	50.324	1764.450	-0.005397	-0.006477	-0.002908
0.2580	924.518	77.070	91.650	41.368	-0.752	50.319	1760.044	-0.005395	-0.006415	-0.002896
0.2600	919.784	76.915	92.468	41.492	-0.754	50.318	1751.032	-0.005384	-0.006473	-0.002904
0.2620	912.300	76.635	92.844	41.160	-0.751	50.321	1736.784	-0.005364	-0.006499	-0.002881
0.2640	901.389	75.680	91.357	40.300	-0.756	50.325	1716.013	-0.005298	-0.006395	-0.002821
0.2660	882.528	73.981	89.368	39.423	-0.758	50.332	1680.107	-0.005179	-0.006256	-0.002760
0.2680	846.430	70.109	84.893	37.340	-0.749	50.338	1611.385	-0.004908	-0.005943	-0.002614
0.2700	790.389	63.934	77.056	34.198	-0.748	50.338	1504.698	-0.004475	-0.005394	-0.002394
0.2720	728.833	56.904	68.384	30.585	-0.744	50.334	1387.510	-0.003983	-0.004787	-0.002141
0.2740	674.235	50.506	61.465	27.043	-0.743	50.330	1283.569	-0.003535	-0.004303	-0.001893
0.2760	628.428	44.991	55.281	24.027	-0.743	50.324	1196.365	-0.003149	-0.003870	-0.001682
0.2780	588.062	39.853	49.444	21.359	-0.743	50.319	1119.518	-0.002790	-0.003461	-0.001495
0.2800	550.626	35.433	44.036	19.287	-0.744	50.318	1048.250	-0.002480	-0.003083	-0.001350
0.2820	514.437	31.293	38.925	16.758	-0.740	50.321	979.357	-0.002191	-0.002725	-0.001173
0.2840	477.092	26.452	33.201	14.215	-0.745	50.326	908.260	-0.001852	-0.002324	-0.000995
0.2860	436.756	21.499	27.543	11.241	-0.750	50.332	831.470	-0.001505	-0.001928	-0.000787
0.2880	394.781	16.363	20.944	8.434	-0.747	50.338	751.562	-0.001145	-0.001466	-0.000590
0.2900	355.166	12.068	14.148	6.265	-0.744	50.337	676.146	-0.000845	-0.000990	-0.000439
0.2920	320.300	7.943	8.521	3.834	-0.739	50.335	609.770	-0.000556	-0.000596	-0.000268
0.2940	290.514	4.126	3.435	1.778	-0.746	50.330	553.064	-0.000289	-0.000240	-0.000124
0.2960	265.417	0.687	-0.777	-0.029	-0.747	50.324	505.285	-0.000048	0.000054	0.000002
0.2980	245.730	-1.766	-3.306	-1.820	-0.745	50.319	467.806	0.000124	0.000231	0.000127
0.3000	231.513	-3.423	-5.184	-2.767	-0.745	50.318	440.741	0.000240	0.000363	0.000194
0.3020	221.970	-4.954	-7.433	-3.433	-0.744	50.322	422.573	0.000347	0.000520	0.000240
0.3040	215.958	-6.102	-9.558	-4.087	-0.748	50.326	411.129	0.000427	0.000669	0.000286
0.3060	211.976	-7.027	-10.172	-4.892	-0.747	50.332	403.547	0.000492	0.000712	0.000342
0.3080	210.052	-7.630	-11.602	-5.266	-0.742	50.338	399.885	0.000534	0.000812	0.000369
0.3100	210.518	-7.575	-11.574	-5.046	-0.743	50.338	400.772	0.000530	0.000810	0.000353
0.3120	213.734	-7.744	-11.005	-4.714	-0.739	50.335	406.895	0.000542	0.000770	0.000330
0.3140	219.565	-7.378	-10.825	-4.642	-0.739	50.331	417.995	0.000516	0.000758	0.000325
0.3160	228.747	-6.564	-10.004	-4.461	-0.739	50.324	435.476	0.000459	0.000700	0.000312
0.3180	248.059	-5.163	-7.725	-3.891	-0.744	50.319	472.240	0.000361	0.000541	0.000272
0.3200	290.860	-0.378	-1.722	-1.180	-0.747	50.318	553.722	0.000026	0.000121	0.000083
0.3220	353.739	6.316	8.395	2.890	-0.744	50.321	673.428	-0.000442	-0.000588	-0.000202
0.3240	419.789	13.570	18.428	7.101	-0.742	50.326	799.170	-0.000950	-0.001290	-0.000497
0.3260	478.655	20.206	26.669	10.964	-0.744	50.332	911.236	-0.001414	-0.001867	-0.000767
0.3280	528.324	26.171	33.545	13.938	-0.732	50.338	1005.793	-0.001832	-0.002348	-0.000976
0.3300	571.575	31.475	40.077	16.883	-0.738	50.338	1088.133	-0.002203	-0.002805	-0.001182
0.3320	613.249	36.639	46.247	19.428	-0.738	50.335	1167.469	-0.002565	-0.003237	-0.001360
0.3340	653.646	41.257	51.613	22.039	-0.736	50.331	1244.373	-0.002888	-0.003613	-0.001543
0.3360	691.773	46.126	56.517	24.707	-0.739	50.324	1316.957	-0.003229	-0.003956	-0.001729
0.3380	728.607	50.574	61.644	27.041	-0.737	50.319	1387.081	-0.003540	-0.004315	-0.001893
0.3400	766.193	55.345	67.732	29.681	-0.739	50.317	1458.635	-0.003874	-0.004741	-0.002078
0.3420	805.192	60.004	74.111	32.323	-0.736	50.321	1532.879	-0.004200	-0.005188	-0.002263
0.3440	842.973	64.791	79.517	35.045	-0.740	50.325	1604.805	-0.004535	-0.005566	-0.002453
0.3460	875.735	69.114	84.504	37.368	-0.741	50.331	1667.175	-0.004838	-0.005915	-0.002616
0.3480	901.479	72.493	88.853	38.911	-0.740	50.338	1716.185	-0.005075	-0.006220	-0.002724
0.3500	918.837	75.609	91.455	40.369	-0.748	50.338	1749.229	-0.005293	-0.006402	-0.002826
0.3520	927.298	76.790	92.858	41.328	-0.746	50.335	1765.337	-0.005375	-0.006500	-0.002893
0.3540	929.672	77.379	93.163	41.495	-0.740	50.330	1769.857	-0.005417	-0.006521	-0.002905
0.3560	928.215	77.588	93.039	41.732	-0.743	50.324	1767.082	-0.005431	-0.006513	-0.002921
0.3580	924.728	77.392	92.957	41.424	-0.744	50.319	1760.445	-0.005417	-0.006507	-0.002900
0.3600	918.897	77.378	93.138	41.356	-0.746	50.318	1749.344	-0.005416	-0.006520	-0.002895
0.3620	909.369	76.720	92.038	40.925	-0.740	50.321	1731.205	-0.005370	-0.006443	-0.002865
0.3640	895.919	75.303	90.075	40.451	-0.744	50.326	1705.599	-0.005271	-0.006305	-0.002832
0.3660	873.511	72.719	88.158	39.381	-0.748	50.332	1662.941	-0.005090	-0.006171	-0.002757
0.3680	833.746	68.367	82.879	36.769	-0.746	50.338	1587.238	-0.004786	-0.005802	-0.002574
0.3700	778.411	62.545	74.943	33.851	-0.752	50.338	1481.895	-0.004378	-0.005246	-0.002370
0.3720	721.213	56.091	67.857	30.376	-0.750	50.335	1373.005	-0.003926	-0.004750	-0.002126
0.3740	671.109	50.112	60.883	27.027	-0.744	50.330	1277.618	-0.003508	-0.004262	-0.001892
0.3760	627.541	44.974	55.225	24.040	-0.747	50.324	1194.677	-0.003148	-0.003866	-0.001683
0.3780	587.866	40.048	49.903	21.166	-0.749	50.319	1119.146	-0.002803	-0.003493	-0.001482
0.3800	550.987	35.854	44.720	19.150	-0.752	50.317	1048.937	-0.002510	-0.003130	-0.001341
0.3820	515.369	31.587	39.537	16.885	-0.756	50.321	981.131	-0.002211	-0.002768	-0.001182
0.3840	478.895	27.055	33.797	14.453	-0.755	50.325	911.694	-0.001894	-0.002366	-0.001012
0.3860	440.167	22.269	27.027	11.907	-0.758	50.331	837.965	-0.001559	-0.001892	-0.000834
0.3880	399.094	17.233	20.650	8.879	-0.752	50.337	759.773	-0.001206	-0.001446	-0.000622
0.3900	357.646	12.657	14.773	6.435	-0.755	50.337	680.866	-0.000886	-0.001034	-0.000450
0.3920	320.210	7.901	9.520	3.894	-0.751	50.334	609.598	-0.000553	-0.000666	-0.000273
0.3940	289.417	3.718	5.156	1.597	-0.746	50.330	550.976	-0.000260	-0.000361	-0.000112
0.3960	265.236	0.771	1.139	-0.056	-0.746	50.324	504.942	-0.000054	-0.000080	0.000004
0.3980	247.007	-1.557	-2.251	-1.695	-0.742	50.319	470.238	0.000109	0.000158	0.000119
0.4000	232.865	-3.368	-4.946	-2.446	-0.747	50.317	443.316	0.000236	0.000346	0.000171
0.4020	222.676	-4.869	-6.639	-3.379	-0.740	50.321	423.918	0.000341	0.000465	0.000237
0.4040	216.965	-5.865	-8.112	-4.085	-0.736	50.325	413.046	0.000411	0.000568	0.000286
0.4060	214.831	-6.412	-9.504	-4.167	-0.739	50.331	408.983	0.000449	0.000665	0.000292
0.4080	215.222	-6.903	-9.907	-4.530	-0.742	50.338	409.727	0.000483	0.000694	0.000317
0.4100	217.191	-6.663	-9.711	-4.351	-0.746	50.338	413.475	0.000466	0.000680	0.000305
0.4120	220.572	-6.677	-8.753	-4.309	-0.752	50.335	419.912	0.000467	0.000613	0.000302
0.4140	226.358	-6.453	-8.864	-4.309	-0.748	50.330	430.927	0.000452	0.000620	0.000302
0.4160	234.789	-5.794	-7.906	-3.893	-0.744	50.324	446.978	0.000406	0.000553	0.000273
0.4180	250.133	-4.533	-5.972	-3.433	-0.747	50.319	476.189	0.000317	0.000418	0.000240
0.4200	282.865	-1.123	-0.997	-1.487	-0.755	50.317	538.502	0.000079	0.000070	0.000104
0.4220	335.509	4.505	6.518	1.905	-0.755	50.320	638.723	-0.000315	-0.000456	-0.000133
0.4240	398.523	11.058	14.496	5.795	-0.752	50.325	758.686	-0.000774	-0.001015	-0.000406
0.4260	462.484	17.922	22.792	9.727	-0.752	50.331	880.451	-0.001255	-0.001595	-0.000681
0.4280	523.860	25.289	32.088	13.466	-0.748	50.337	997.295	-0.001770	-0.002246	-0.000943
0.4300	579.556	32.276	41.119	17.399	-0.755	50.337	1103.325	-0.002259	-0.002878	-0.001218
0.4320	627.722	38.535	48.541	20.816	-0.759	50.334	1195.021	-0.002697	-0.003398	-0.001457
0.4340	670.252	43.391	54.848	23.511	-0.761	50.330	1275.988	-0.003037	-0.003839	-0.001646
0.4360	709.912	48.415	60.504	26.195	-0.764	50.324	1351.490	-0.003389	-0.004235	-0.001834
0.4380	748.430	52.920	65.577	28.432	-0.762	50.319	1424.818	-0.003704	-0.004590	-0.001990
0.4400	785.234	57.914	71.526	31.172	-0.764	50.318	1494.884	-0.004054	-0.005007	-0.002182
0.4420	819.725	62.278	75.639	33.631	-0.760	50.321	1560.545	-0.004359	-0.005295	-0.002354
0.4440	851.104	66.248	80.018	35.547	-0.751	50.325	1620.283	-0.004637	-0.005601	-0.002488
0.4460	878.080	69.756	84.868	37.453	-0.756	50.331	1671.638	-0.004883	-0.005941	-0.002622
0.4480	898.248	72.605	88.035	38.604	-0.760	50.337	1710.033	-0.005082	-0.006162	-0.002702
0.4500	909.730	74.584	89.853	39.894	-0.764	50.338	1731.892	-0.005221	-0.006290	-0.002793
0.4520	913.712	75.540	90.481	40.466	-0.761	50.335	1739.473	-0.005288	-0.006334	-0.002833
0.4540	913.817	75.933	91.720	40.660	-0.759	50.330	1739.674	-0.005315	-0.006420	-0.002846
0.4560	912.510	76.102	91.524	40.688	-0.758	50.325	1737.185	-0.005327	-0.006407	-0.002848
0.4580	910.241	76.103	91.746	40.397	-0.757	50.319	1732.864	-0.005327	-0.006422	-0.002828
0.4600	906.318	76.314	92.026	40.537	-0.762	50.318	1725.397	-0.005342	-0.006442	-0.002838
0.4620	899.631	75.821	90.898	40.300	-0.752	50.321	1712.666	-0.005307	-0.006363	-0.002821
0.4640	890.704	75.074	89.868	40.049	-0.747	50.325	1695.671	-0.005255	-0.006291	-0.002803
0.4660	876.382	73.628	88.549	39.327	-0.750	50.331	1668.406	-0.005154	-0.006198	-0.002753
0.4680	847.121	70.528	84.367	37.494	-0.747	50.337	1612.701	-0.004937	-0.005906	-0.002625
0.4700	796.566	65.001	76.876	34.795	-0.750	50.337	1516.457	-0.004550	-0.005381	-0.002436
0.4720	735.971	58.012	69.012	31.128	-0.750	50.334	1401.100	-0.004061	-0.004831	-0.002179
0.4740	678.999	51.516	61.201	27.542	-0.749	50.330	1292.639	-0.003606	-0.004284	-0.001928
0.4760	629.600	45.593	54.614	24.457	-0.752	50.324	1198.597	-0.003192	-0.003823	-0.001712
0.4780	586.499	40.415	49.068	21.358	-0.750	50.319	1116.543	-0.002829	-0.003435	-0.001495
0.4800	546.463	35.602	43.913	18.968	-0.754	50.317	1040.325	-0.002492	-0.003074	-0.001328
0.4820	507.329	30.563	38.174	16.773	-0.754	50.321	965.824	-0.002139	-0.002672	-0.001174
0.4840	467.684	25.906	32.839	14.215	-0.748	50.326	890.350	-0.001813	-0.002299	-0.000995
0.4860	427.423	20.951	26.641	11.284	-0.748	50.331	813.704	-0.001467	-0.001865	-0.000790
0.4880	387.883	16.237	19.750	8.575	-0.736	50.338	738.430	-0.001137	-0.001382	-0.000600
0.4900	351.830	12.029	14.733	6.294	-0.738	50.338	669.794	-0.000842	-0.001031	-0.000441
0.4920	320.616	8.282	10.341	3.989	-0.744	50.335	610.371	-0.000580	-0.000724	-0.000279
0.4940	293.580	4.743	5.852	1.986	-0.744	50.330	558.901	-0.000332	-0.000410	-0.000139
0.4960	271.128	1.627	1.739	0.303	-0.742	50.324	516.157	-0.000114	-0.000122	-0.000021
0.4980	253.334	-0.927	-2.276	-1.195	-0.734	50.319	482.283	0.000065	0.000159	0.000084
0.5000	220.993	-13.804	-15.161	-6.863	-0.762	50.317	420.713	0.000966	0.001061	0.000480
0.5020	220.933	-13.665	-15.020	-6.572	-0.763	50.318	420.599	0.000957	0.001051	0.000460
0.5040	221.383	-13.301	-15.522	-6.975	-0.754	50.322	421.457	0.000931	0.001087	0.000488
0.5060	222.496	-12.867	-16.079	-6.780	-0.753	50.327	423.574	0.000901	0.001126	0.000475
0.5080	224.600	-13.021	-15.926	-6.571	-0.755	50.333	427.580	0.000911	0.001115	0.000460
0.5100	228.071	-13.007	-15.549	-6.309	-0.755	50.338	434.189	0.000911	0.001088	0.000442
0.5120	234.488	-12.280	-14.382	-6.003	-0.764	50.336	446.405	0.000860	0.001007	0.000420
0.5140	249.667	-10.722	-12.185	-5.628	-0.756	50.332	475.302	0.000751	0.000853	0.000394
0.5160	282.068	-7.310	-7.835	-3.404	-0.751	50.327	536.985	0.000512	0.000548	0.000238
0.5180	330.249	-2.483	-0.276	-0.402	-0.756	50.321	628.710	0.000174	0.000019	0.000028
0.5200	388.154	3.873	7.256	2.960	-0.762	50.317	738.945	-0.000271	-0.000508	-0.000207
0.5220	450.912	11.367	16.151	7.214	-0.765	50.317	858.421	-0.000796	-0.001131	-0.000505
0.5240	513.957	18.188	26.099	11.062	-0.758	50.322	978.441	-0.001273	-0.001827	-0.000774
0.5260	576.385	25.639	35.465	15.202	-0.756	50.326	1097.288	-0.001795	-0.002483	-0.001064
0.5280	638.226	33.314	44.051	19.164	-0.755	50.333	1215.019	-0.002332	-0.003084	-0.001341
0.5300	698.986	40.765	52.863	23.249	-0.752	50.337	1330.690	-0.002854	-0.003700	-0.001627
0.5320	759.085	48.360	62.158	27.571	-0.755	50.335	1445.103	-0.003385	-0.004351	-0.001930
0.5340	818.928	55.879	69.955	31.391	-0.755	50.332	1559.029	-0.003911	-0.004897	-0.002197
0.5360	875.525	63.274	77.862	35.158	-0.755	50.327	1666.775	-0.004429	-0.005450	-0.002461
0.5380	928.515	70.023	86.047	38.715	-0.758	50.320	1767.654	-0.004902	-0.006023	-0.002710
0.5400	978.214	76.479	93.551	42.077	-0.762	50.316	1862.268	-0.005354	-0.006549	-0.002945
0.5420	1023.916	82.302	100.903	45.662	-0.763	50.317	1949.272	-0.005761	-0.007063	-0.003196
0.5440	1063.004	87.482	107.337	48.178	-0.759	50.322	2023.687	-0.006124	-0.007514	-0.003372
0.5460	1092.926	91.579	112.034	50.428	-0.755	50.326	2080.650	-0.006411	-0.007842	-0.003530
0.5480	1114.882	95.044	115.619	51.778	-0.755	50.333	2122.450	-0.006653	-0.008093	-0.003624
0.5500	1131.699	97.641	118.858	53.266	-0.758	50.337	2154.465	-0.006835	-0.008320	-0.003729
0.5520	1144.954	99.745	121.776	54.740	-0.765	50.335	2179.699	-0.006982	-0.008524	-0.003832
0.5540	1154.603	101.175	123.833	55.363	-0.752	50.332	2198.067	-0.007082	-0.008668	-0.003875
0.5560	1157.653	102.636	124.820	55.848	-0.752	50.327	2203.875	-0.007185	-0.008737	-0.003909
0.5580	1153.986	103.211	124.332	55.848	-0.754	50.320	2196.894	-0.007225	-0.008703	-0.003909
0.5600	1145.450	102.832	123.970	55.419	-0.762	50.316	2180.643	-0.007198	-0.008678	-0.003879
0.5620	1132.811	102.103	123.150	55.099	-0.763	50.317	2156.582	-0.007147	-0.008621	-0.003857
0.5640	1113.800	100.208	121.207	54.336	-0.755	50.322	2120.390	-0.007015	-0.008484	-0.003803
0.5660	1077.928	96.729	116.120	52.319	-0.753	50.326	2052.097	-0.006771	-0.008128	-0.003662
0.5680	1018.851	90.118	107.741	49.068	-0.752	50.333	1939.631	-0.006308	-0.007542	-0.003435
0.5700	948.773	82.092	99.110	44.816	-0.748	50.337	1806.221	-0.005746	-0.006938	-0.003137
0.5720	881.401	74.486	90.729	40.856	-0.750	50.336	1677.961	-0.005214	-0.006351	-0.002860
0.5740	821.212	67.301	81.837	37.020	-0.742	50.332	1563.377	-0.004711	-0.005729	-0.002591
0.5760	766.103	60.622	74.417	33.614	-0.748	50.327	1458.464	-0.004244	-0.005209	-0.002353
0.5780	711.655	54.042	66.761	29.877	-0.749	50.321	1354.809	-0.003783	-0.004673	-0.002091
0.5800	655.840	47.486	58.020	26.057	-0.749	50.316	1248.550	-0.003324	-0.004061	-0.001824
0.5820	599.904	41.059	50.474	22.623	-0.744	50.317	1142.063	-0.002874	-0.003533	-0.001584
0.5840	545.261	34.214	42.234	18.815	-0.741	50.322	1038.036	-0.002395	-0.002956	-0.001317
0.5860	492.872	28.037	34.285	15.675	-0.748	50.326	938.301	-0.001963	-0.002400	-0.001097
0.5880	443.098	22.073	26.765	12.228	-0.740	50.333	843.544	-0.001545	-0.001874	-0.000856
0.5900	396.194	16.574	19.526	8.866	-0.741	50.337	754.251	-0.001160	-0.001367	-0.000621
0.5920	355.061	11.550	13.343	6.142	-0.751	50.336	675.945	-0.000808	-0.000934	-0.000430
0.5940	321.473	7.016	8.340	3.404	-0.747	50.332	612.001	-0.000491	-0.000584	-0.000238
0.5960	293.820	3.453	4.086	1.360	-0.748	50.327	559.359	-0.000242	-0.000286	-0.000095
0.5980	270.586	0.169	-0.944	-0.209	-0.751	50.321	515.127	-0.000012	0.000066	0.000015
0.6000	252.537	-2.778	-5.054	-1.584	-0.750	50.317	480.766	0.000194	0.000354	0.000111
0.6020	238.471	-4.716	-7.417	-2.738	-0.760	50.317	453.987	0.000330	0.000519	0.000192
0.6040	227.816	-6.398	-9.352	-3.766	-0.751	50.322	433.702	0.000448	0.000655	0.000264
0.6060	221.098	-7.462	-10.117	-4.269	-0.756	50.327	420.914	0.000522	0.000708	0.000299
0.6080	219.219	-8.262	-10.228	-4.533	-0.758	50.334	417.337	0.000578	0.000716	0.000317
0.6100	221.699	-8.137	-10.075	-4.725	-0.756	50.338	422.058	0.000570	0.000705	0.000331
0.6120	227.275	-7.575	-10.297	-4.280	-0.755	50.336	432.673	0.000530	0.000721	0.000300
0.6140	237.269	-6.917	-9.713	-3.975	-0.748	50.332	451.698	0.000484	0.000680	0.000278
0.6160	257.872	-5.037	-6.502	-2.973	-0.748	50.327	490.923	0.000353	0.000455	0.000208
0.6180	302.687	-0.588	-0.945	-0.623	-0.750	50.321	576.239	0.000041	0.000066	0.000044
0.6200	368.647	6.247	8.518	3.460	-0.742	50.317	701.809	-0.000437	-0.000596	-0.000242
0.6220	443.518	14.554	20.150	8.407	-0.746	50.317	844.345	-0.001019	-0.001410	-0.000588
0.6240	520.479	23.156	30.599	13.354	-0.746	50.322	990.858	-0.001621	-0.002142	-0.000935
0.6260	592.615	31.646	41.078	17.816	-0.746	50.326	1128.187	-0.002215	-0.002875	-0.001247
0.6280	655.689	38.998	50.709	21.664	-0.747	50.333	1248.264	-0.002730	-0.003550	-0.001516
0.6300	711.039	45.732	58.561	25.249	-0.743	50.338	1353.636	-0.003201	-0.004099	-0.001767
0.6320	762.481	52.777	65.646	29.056	-0.754	50.336	1451.569	-0.003694	-0.004595	-0.002034
0.6340	812.556	58.533	72.276	32.282	-0.748	50.332	1546.898	-0.004097	-0.005059	-0.002260
0.6360	861.819	64.931	80.364	35.437	-0.753	50.327	1640.682	-0.004545	-0.005625	-0.002481
0.6380	911.578	71.483	88.313	38.784	-0.758	50.321	1735.411	-0.005004	-0.006182	-0.002715
0.6400	962.780	77.827	94.761	42.175	-0.755	50.316	1832.886	-0.005448	-0.006633	-0.002952
0.6420	1012.614	84.379	101.586	45.997	-0.755	50.317	1927.757	-0.005907	-0.007111	-0.003220
0.6440	1057.429	90.232	107.949	48.916	-0.752	50.322	2013.073	-0.006316	-0.007556	-0.003424
0.6460	1095.376	95.172	113.728	51.263	-0.754	50.326	2085.314	-0.006662	-0.007961	-0.003588
0.6480	1122.652	98.638	118.260	53.391	-0.756	50.333	2137.241	-0.006905	-0.008278	-0.003737
0.6500	1136.448	101.107	121.456	54.226	-0.759	50.338	2163.506	-0.007077	-0.008502	-0.003796
0.6520	1139.213	102.172	122.371	55.100	-0.758	50.336	2168.770	-0.007152	-0.008566	-0.003857
0.6540	1137.861	102.242	122.553	54.974	-0.751	50.332	2166.195	-0.007157	-0.008579	-0.003848
0.6560	1135.381	102.353	122.580	55.059	-0.753	50.327	2161.474	-0.007165	-0.008581	-0.003854
0.6580	1131.955	102.353	123.204	55.183	-0.758	50.321	2154.951	-0.007165	-0.008624	-0.003863
0.6600	1126.710	102.311	123.457	55.086	-0.757	50.316	2144.966	-0.007162	-0.008642	-0.003856
0.6620	1118.008	102.425	122.957	54.976	-0.756	50.317	2128.401	-0.007170	-0.008607	-0.003848
0.6640	1104.678	100.923	120.551	54.337	-0.752	50.322	2103.024	-0.007065	-0.008439	-0.003804
0.6660	1078.829	98.384	116.757	52.987	-0.748	50.326	2053.814	-0.006887	-0.008173	-0.003709
0.6680	1028.499	93.165	110.963	50.358	-0.747	50.333	1957.998	-0.006522	-0.007767	-0.003525
0.6700	960.901	85.769	103.210	46.121	-0.748	50.337	1829.309	-0.006004	-0.007225	-0.003228
0.6720	890.899	77.910	94.328	42.092	-0.751	50.336	1696.043	-0.005454	-0.006603	-0.002946
0.6740	826.021	70.235	85.086	37.854	-0.746	50.333	1572.533	-0.004916	-0.005956	-0.002650
0.6760	767.381	63.022	76.209	34.102	-0.739	50.327	1460.896	-0.004412	-0.005335	-0.002387
0.6780	714.796	56.734	68.218	30.600	-0.742	50.321	1360.788	-0.003971	-0.004775	-0.002142
0.6800	666.795	50.798	60.798	27.405	-0.747	50.317	1269.407	-0.003556	-0.004256	-0.001918
0.6820	619.546	45.313	54.169	24.694	-0.749	50.317	1179.457	-0.003172	-0.003792	-0.001729
0.6840	568.344	38.886	47.278	20.969	-0.746	50.321	1081.982	-0.002722	-0.003309	-0.001468
0.6860	512.784	32.064	40.065	17.231	-0.748	50.326	976.210	-0.002244	-0.002805	-0.001206
0.6880	457.510	25.316	31.947	13.588	-0.749	50.333	870.981	-0.001772	-0.002236	-0.000951
0.6900	406.083	19.071	24.154	10.020	-0.750	50.337	773.077	-0.001335	-0.001691	-0.000701
0.6920	361.839	13.921	17.554	7.420	-0.750	50.335	688.848	-0.000974	-0.001229	-0.000519
0.6940	325.260	9.235	10.785	4.821	-0.748	50.332	619.211	-0.000646	-0.000755	-0.000337
0.6960	294.452	4.969	4.656	2.376	-0.750	50.327	560.560	-0.000348	-0.000326	-0.000166
0.6980	267.987	1.166	-0.042	0.347	-0.755	50.321	510.178	-0.000082	0.000003	-0.000024
0.7000	246.887	-1.487	-3.836	-1.360	-0.755	50.317	470.009	0.000104	0.000269	0.000095
0.7020	231.963	-3.337	-6.488	-2.405	-0.758	50.317	441.599	0.000234	0.000454	0.000168
0.7040	223.472	-4.895	-7.738	-3.338	-0.758	50.322	425.434	0.000343	0.000542	0.000234
0.7060	220.647	-5.473	-8.655	-3.781	-0.756	50.326	420.055	0.000383	0.000606	0.000265
0.7080	221.459	-6.103	-9.616	-4.030	-0.758	50.332	421.600	0.000427	0.000673	0.000282
0.7100	225.156	-6.160	-8.601	-3.739	-0.755	50.337	428.638	0.000431	0.000602	0.000262
0.7120	231.167	-5.824	-7.430	-3.378	-0.756	50.336	440.083	0.000408	0.000520	0.000236
0.7140	241.446	-5.234	-6.266	-3.308	-0.747	50.332	459.652	0.000366	0.000439	0.000232
0.7160	265.522	-3.156	-3.375	-2.112	-0.748	50.327	505.486	0.000221	0.000236	0.000148
0.7180	314.484	2.050	3.142	0.612	-0.754	50.321	598.698	-0.000144	-0.000220	-0.000043
0.7200	380.790	9.123	12.619	4.711	-0.749	50.317	724.926	-0.000639	-0.000883	-0.000330
0.7220	452.145	17.274	23.293	9.685	-0.753	50.317	860.767	-0.001209	-0.001630	-0.000678
0.7240	523.635	25.077	33.102	13.952	-0.752	50.322	996.866	-0.001755	-0.002317	-0.000977
0.7260	593.021	33.286	42.787	18.192	-0.754	50.326	1128.960	-0.002330	-0.002995	-0.001273
0.7280	657.658	41.174	52.183	22.304	-0.751	50.333	1252.012	-0.002882	-0.003653	-0.001561
0.7300	713.744	47.978	60.216	25.959	-0.751	50.337	1358.786	-0.003358	-0.004215	-0.001817
0.7320	763.879	54.459	67.552	29.780	-0.758	50.335	1454.229	-0.003812	-0.004729	-0.002085
0.7340	813.863	60.229	74.208	32.796	-0.748	50.332	1549.387	-0.004216	-0.005195	-0.002296
0.7360	865.396	66.615	81.296	36.089	-0.747	50.327	1647.491	-0.004663	-0.005691	-0.002526
0.7380	918.882	73.645	89.785	39.841	-0.750	50.321	1749.315	-0.005155	-0.006285	-0.002789
0.7400	971.136	79.875	97.942	43.247	-0.747	50.317	1848.793	-0.005591	-0.006856	-0.003027
0.7420	1019.272	86.216	105.085	46.761	-0.751	50.317	1940.432	-0.006035	-0.007356	-0.003273
0.7440	1062.313	91.803	111.160	49.525	-0.747	50.321	2022.371	-0.006426	-0.007781	-0.003467
0.7460	1097.960	96.351	116.968	52.166	-0.746	50.326	2090.235	-0.006745	-0.008188	-0.003652
0.7480	1123.464	100.138	121.079	54.098	-0.744	50.332	2138.786	-0.007010	-0.008476	-0.003787
0.7500	1138.176	102.494	123.830	55.084	-0.742	50.337	2166.796	-0.007175	-0.008668	-0.003856
0.7520	1143.662	104.096	125.444	55.987	-0.750	50.335	2177.238	-0.007287	-0.008781	-0.003919
0.7540	1143.226	104.461	125.153	56.029	-0.739	50.332	2176.409	-0.007312	-0.008761	-0.003922
0.7560	1140.716	104.573	124.455	56.085	-0.741	50.327	2171.631	-0.007320	-0.008712	-0.003926
0.7580	1137.079	104.728	124.304	55.931	-0.748	50.321	2164.707	-0.007331	-0.008701	-0.003915
0.7600	1132.135	104.518	124.289	55.684	-0.744	50.317	2155.294	-0.007316	-0.008700	-0.003898
0.7620	1124.035	104.125	123.290	55.683	-0.747	50.317	2139.874	-0.007289	-0.008630	-0.003898
0.7640	1109.878	102.663	121.788	55.042	-0.746	50.321	2112.923	-0.007186	-0.008525	-0.003853
0.7660	1079.340	99.450	117.968	53.792	-0.743	50.326	2054.787	-0.006962	-0.008258	-0.003765
0.7680	1019.106	93.122	110.422	50.292	-0.744	50.333	1940.117	-0.006519	-0.007730	-0.003520
0.7700	943.198	84.323	100.485	45.623	-0.748	50.337	1795.607	-0.005903	-0.007034	-0.003194
0.7720	872.249	76.646	91.120	41.468	-0.755	50.336	1660.538	-0.005365	-0.006378	-0.002903
0.7740	816.674	69.951	83.367	37.978	-0.754	50.332	1554.737	-0.004897	-0.005836	-0.002658
0.7760	773.182	64.648	77.474	35.102	-0.751	50.327	1471.939	-0.004525	-0.005423	-0.002457
0.7780	729.659	59.415	71.721	32.060	-0.758	50.321	1389.084	-0.004159	-0.005020	-0.002244
0.7800	676.819	53.379	64.814	28.460	-0.758	50.316	1288.490	-0.003737	-0.004537	-0.001992
0.7820	616.631	46.590	55.587	24.958	-0.758	50.317	1173.906	-0.003261	-0.003891	-0.001747
0.7840	557.704	39.377	46.651	20.776	-0.756	50.322	1061.726	-0.002756	-0.003266	-0.001454
0.7860	503.046	32.444	38.465	17.244	-0.751	50.327	957.670	-0.002271	-0.002693	-0.001207
0.7880	451.724	26.157	30.850	13.798	-0.752	50.333	859.966	-0.001831	-0.002159	-0.000966
0.7900	404.414	20.108	23.874	10.450	-0.748	50.338	769.901	-0.001408	-0.001671	-0.000731
0.7920	363.086	14.904	16.997	7.544	-0.750	50.336	691.223	-0.001043	-0.001190	-0.000528
0.7940	328.506	10.472	11.494	4.960	-0.746	50.332	625.391	-0.000733	-0.000805	-0.000347
0.7960	299.501	6.682	6.575	3.029	-0.748	50.327	570.173	-0.000468	-0.000460	-0.000212
0.7980	275.396	3.174	2.212	1.303	-0.743	50.321	524.282	-0.000222	-0.000155	-0.000091
0.8000	256.099	0.659	-1.332	-0.431	-0.742	50.317	487.547	-0.000046	0.000093	0.000030
0.8020	240.981	-1.291	-3.248	-1.374	-0.748	50.317	458.765	0.000090	0.000227	0.000096
0.8040	231.317	-2.944	-4.958	-2.376	-0.744	50.321	440.369	0.000206	0.000347	0.000166
0.8060	227.079	-3.886	-5.848	-3.031	-0.744	50.327	432.301	0.000272	0.000409	0.000212
0.8080	226.809	-4.210	-6.680	-3.099	-0.743	50.333	431.786	0.000295	0.000468	0.000217
0.8100	229.544	-4.393	-7.749	-3.279	-0.743	50.337	436.993	0.000308	0.000542	0.000230
0.8120	234.729	-4.336	-6.791	-2.696	-0.746	50.336	446.863	0.000304	0.000475	0.000189
0.8140	243.265	-3.816	-5.083	-2.653	-0.743	50.333	463.114	0.000267	0.000356	0.000186
0.8160	260.442	-2.228	-2.903	-1.764	-0.748	50.327	495.815	0.000156	0.000203	0.000124
0.8180	301.710	1.910	2.113	0.444	-0.756	50.321	574.379	-0.000134	-0.000148	-0.000031
0.8200	369.804	9.108	10.589	4.280	-0.753	50.317	704.012	-0.000638	-0.000741	-0.000300
0.8220	447.651	17.627	21.957	9.450	-0.754	50.317	852.213	-0.001234	-0.001537	-0.000661
0.8240	523.800	25.835	33.686	14.217	-0.740	50.321	997.181	-0.001808	-0.002358	-0.000995
0.8260	594.599	34.128	43.955	18.775	-0.744	50.326	1131.964	-0.002389	-0.003077	-0.001314
0.8280	656.726	41.762	52.891	22.665	-0.746	50.333	1250.238	-0.002923	-0.003702	-0.001587
0.8300	712.256	48.609	61.158	26.319	-0.746	50.337	1355.953	-0.003403	-0.004281	-0.001842
0.8320	766.193	55.794	69.330	30.239	-0.754	50.335	1458.635	-0.003906	-0.004853	-0.002117
0.8340	821.363	62.363	76.962	33.685	-0.750	50.333	1563.663	-0.004365	-0.005387	-0.002358
0.8360	875.946	68.860	85.104	37.534	-0.752	50.327	1667.576	-0.004820	-0.005957	-0.002627
0.8380	928.726	75.609	92.704	41.036	-0.758	50.321	1768.055	-0.005293	-0.006489	-0.002873
0.8400	978.019	81.797	99.040	44.177	-0.754	50.316	1861.897	-0.005726	-0.006933	-0.003092
0.8420	1021.436	87.790	104.669	47.497	-0.755	50.317	1944.551	-0.006145	-0.007327	-0.003325
0.8440	1058.481	92.195	110.200	49.777	-0.756	50.321	2015.076	-0.006454	-0.007714	-0.003484
0.8460	1089.860	96.420	114.827	52.042	-0.757	50.326	2074.814	-0.006749	-0.008038	-0.003643
0.8480	1116.355	100.195	119.454	53.960	-0.760	50.333	2125.254	-0.007014	-0.008362	-0.003777
0.8500	1137.125	102.916	123.359	55.351	-0.759	50.338	2164.793	-0.007204	-0.008635	-0.003875
0.8520	1150.214	105.329	125.223	56.767	-0.758	50.336	2189.713	-0.007373	-0.008766	-0.003974
0.8540	1155.805	106.479	126.598	57.100	-0.744	50.332	2200.356	-0.007454	-0.008862	-0.003997
0.8560	1155.189	106.858	127.098	57.350	-0.748	50.326	2199.183	-0.007480	-0.008897	-0.004014
0.8580	1150.154	106.872	126.739	57.266	-0.748	50.321	2189.598	-0.007481	-0.008872	-0.004009
0.8600	1141.798	106.731	125.848	56.919	-0.748	50.317	2173.691	-0.007471	-0.008809	-0.003984
0.8620	1130.302	106.186	125.167	56.654	-0.742	50.317	2151.804	-0.007433	-0.008762	-0.003966
0.8640	1112.733	104.237	123.567	55.500	-0.726	50.321	2118.359	-0.007297	-0.008650	-0.003885
0.8660	1075.478	100.195	118.621	53.640	-0.738	50.326	2047.434	-0.007014	-0.008303	-0.003755
0.8680	1011.667	93.165	110.310	50.097	-0.736	50.333	1925.955	-0.006522	-0.007722	-0.003507
0.8700	939.471	85.166	101.903	45.525	-0.734	50.337	1788.511	-0.005962	-0.007133	-0.003187
0.8720	872.955	77.643	93.914	41.759	-0.744	50.336	1661.882	-0.005435	-0.006574	-0.002923
0.8740	817.590	70.752	85.716	38.118	-0.742	50.332	1556.482	-0.004953	-0.006000	-0.002668
0.8760	770.176	64.888	79.044	34.979	-0.742	50.327	1466.217	-0.004542	-0.005533	-0.002448
0.8780	723.528	59.079	72.637	31.725	-0.745	50.321	1377.411	-0.004136	-0.005085	-0.002221
0.8800	673.167	53.172	65.356	28.391	-0.746	50.316	1281.538	-0.003722	-0.004575	-0.001987
0.8820	617.908	46.940	57.423	25.125	-0.754	50.317	1176.338	-0.003286	-0.004020	-0.001759
0.8840	560.830	40.260	48.987	21.301	-0.755	50.321	1067.677	-0.002818	-0.003429	-0.001491
0.8860	502.279	33.159	39.994	17.480	-0.754	50.326	956.211	-0.002321	-0.002800	-0.001224
0.8880	446.389	26.452	31.143	13.744	-0.751	50.332	849.810	-0.001852	-0.002180	-0.000962
0.8900	399.034	20.600	24.515	10.352	-0.749	50.337	759.659	-0.001442	-0.001716	-0.000725
0.8920	359.344	15.549	18.345	7.739	-0.756	50.336	684.099	-0.001088	-0.001284	-0.000542
0.8940	325.801	10.904	11.787	5.073	-0.752	50.333	620.241	-0.000763	-0.000825	-0.000355
0.8960	297.036	7.158	6.785	3.029	-0.745	50.327	565.481	-0.000501	-0.000475	-0.000212
0.8980	271.548	3.523	2.670	0.956	-0.746	50.321	516.958	-0.000247	-0.000187	-0.000067
0.9000	248.946	0.492	-0.402	-0.735	-0.750	50.316	473.928	-0.000034	0.000028	0.000051
0.9020	231.362	-1.654	-3.236	-1.832	-0.757	50.317	440.454	0.000116	0.000226	0.000128
0.9040	220.662	-3.365	-6.112	-3.016	-0.755	50.322	420.084	0.000236	0.000428	0.000211
0.9060	217.446	-4.447	-7.445	-3.363	-0.754	50.326	413.961	0.000311	0.000521	0.000235
0.9080	219.234	-4.842	-7.084	-3.615	-0.752	50.333	417.366	0.000339	0.000496	0.000253
0.9100	223.352	-4.673	-6.765	-3.684	-0.748	50.337	425.205	0.000327	0.000474	0.000258
0.9120	229.784	-3.999	-6.113	-2.849	-0.750	50.335	437.450	0.000280	0.000428	0.000199
0.9140	240.620	-3.184	-4.710	-2.709	-0.750	50.332	458.078	0.000223	0.000330	0.000190
0.9160	264.004	-1.235	-1.680	-1.804	-0.748	50.328	502.596	0.000086	0.000118	0.000126
0.9180	310.442	3.495	3.851	0.959	-0.745	50.322	591.002	-0.000245	-0.000270	-0.000067
0.9200	374.222	10.090	12.189	4.961	-0.738	50.317	712.423	-0.000706	-0.000853	-0.000347
0.9220	443.548	17.655	22.903	9.448	-0.736	50.317	844.402	-0.001236	-0.001603	-0.000661
0.9240	510.710	25.161	32.560	13.494	-0.732	50.321	972.261	-0.001761	-0.002279	-0.000945
0.9260	575.272	32.851	41.940	17.703	-0.741	50.326	1095.171	-0.002300	-0.002936	-0.001239
0.9280	636.513	40.049	50.681	21.608	-0.744	50.332	1211.758	-0.002803	-0.003548	-0.001513
0.9300	694.748	47.054	58.768	25.124	-0.742	50.337	1322.622	-0.003294	-0.004114	-0.001759
0.9320	751.646	54.141	67.662	29.238	-0.743	50.335	1430.941	-0.003790	-0.004736	-0.002047
0.9340	809.054	61.005	75.848	32.976	-0.736	50.332	1540.232	-0.004270	-0.005309	-0.002308
0.9360	865.531	68.257	83.922	36.728	-0.737	50.327	1647.749	-0.004778	-0.005875	-0.002571
0.9380	919.107	75.034	91.997	40.384	-0.740	50.321	1749.744	-0.005252	-0.006440	-0.002827
0.9400	969.603	81.054	99.166	43.690	-0.739	50.316	1845.875	-0.005674	-0.006942	-0.003058
0.9420	1016.206	87.439	106.101	47.094	-0.748	50.317	1934.595	-0.006121	-0.007427	-0.003297
0.9440	1059.548	93.276	111.394	50.150	-0.749	50.321	2017.107	-0.006529	-0.007798	-0.003511
0.9460	1096.112	98.005	116.493	52.736	-0.753	50.325	2086.716	-0.006860	-0.008155	-0.003692
0.9480	1120.969	101.303	120.455	54.239	-0.753	50.331	2134.037	-0.007091	-0.008432	-0.003797
0.9500	1134.359	103.379	122.803	54.960	-0.747	50.337	2159.529	-0.007237	-0.008596	-0.003847
0.9520	1139.679	104.531	125.166	55.916	-0.755	50.335	2169.657	-0.007317	-0.008762	-0.003914
0.9540	1141.137	105.133	126.682	56.279	-0.749	50.332	2172.432	-0.007359	-0.008868	-0.003940
0.9560	1140.175	105.736	126.931	56.446	-0.747	50.327	2170.601	-0.007402	-0.008885	-0.003951
0.9580	1137.936	105.610	126.083	56.531	-0.750	50.321	2166.338	-0.007393	-0.008826	-0.003957
0.9600	1134.029	105.623	125.876	56.308	-0.751	50.316	2158.899	-0.007394	-0.008811	-0.003942
0.9620	1127.341	105.470	126.294	56.016	-0.749	50.316	2146.168	-0.007383	-0.008841	-0.003921
0.9640	1115.408	104.700	124.430	55.362	-0.747	50.321	2123.451	-0.007329	-0.008710	-0.003875
0.9660	1091.423	102.495	121.704	54.431	-0.750	50.326	2077.789	-0.007175	-0.008519	-0.003810
0.9680	1036.915	96.714	115.270	51.582	-0.752	50.332	1974.020	-0.006770	-0.008069	-0.003611
0.9700	953.087	87.439	103.932	46.704	-0.747	50.337	1814.432	-0.006121	-0.007275	-0.003269
0.9720	868.221	78.036	93.315	41.745	-0.750	50.335	1652.870	-0.005463	-0.006532	-0.002922
0.9740	801.179	69.559	84.712	37.257	-0.744	50.332	1525.240	-0.004869	-0.005930	-0.002608
0.9760	752.908	63.414	77.292	34.103	-0.741	50.327	1433.344	-0.004439	-0.005410	-0.002387
0.9780	713.594	58.812	71.081	31.504	-0.744	50.321	1358.500	-0.004117	-0.004976	-0.002205
0.9800	672.251	53.943	65.591	28.668	-0.736	50.316	1279.793	-0.003776	-0.004591	-0.002007
0.9820	622.371	47.909	58.476	25.582	-0.736	50.316	1184.835	-0.003354	-0.004093	-0.001791
0.9840	564.076	40.891	48.819	21.678	-0.741	50.321	1073.856	-0.002862	-0.003417	-0.001517
0.9860	502.655	33.707	39.646	17.773	-0.746	50.326	956.926	-0.002360	-0.002775	-0.001244
0.9880	443.924	26.509	31.630	13.756	-0.741	50.331	845.118	-0.001856	-0.002214	-0.000963
0.9900	393.354	19.899	23.502	9.963	-0.735	50.337	748.844	-0.001393	-0.001645	-0.000697
0.9920	351.845	15.100	17.566	7.365	-0.738	50.336	669.823	-0.001057	-0.001230	-0.000516
0.9940	317.836	10.553	11.647	4.615	-0.730	50.332	605.078	-0.000739	-0.000815	-0.000323
0.9960	288.906	6.683	7.479	2.445	-0.728	50.327	550.003	-0.000468	-0.000524	-0.000171
0.9980	264.079	3.425	3.129	0.806	-0.734	50.321	502.739	-0.000240	-0.000219	-0.000056
Test Cycles
Time (sec)	Axial stress (kPa)	Axial micro-strain #1	Axial micro-strain #2	Axial micro-strain #3	Confining pressure (kPa)	Temperature (�C)	Load (N)	Displacement #1 (mm)	Displacement #2 (mm)	Displacement #3 (mm)
0.0000	244.302	0.645	-1.331	-0.692	-0.734	50.317	465.088	-0.000045	0.000093	0.000048
0.0020	229.589	-1.289	-4.542	-1.764	-0.739	50.317	437.078	0.000090	0.000318	0.000124
0.0040	219.715	-3.128	-5.738	-2.697	-0.732	50.321	418.282	0.000219	0.000402	0.000189
0.0060	214.861	-4.238	-7.266	-3.254	-0.736	50.326	409.040	0.000297	0.000509	0.000228
0.0080	214.711	-4.533	-8.447	-3.559	-0.736	50.332	408.754	0.000317	0.000591	0.000249
0.0100	217.927	-4.616	-8.835	-3.712	-0.727	50.337	414.877	0.000323	0.000618	0.000260
0.0120	223.457	-4.320	-8.070	-3.142	-0.726	50.336	425.406	0.000302	0.000565	0.000220
0.0140	232.910	-4.137	-6.252	-3.071	-0.720	50.332	443.401	0.000290	0.000438	0.000215
0.0160	252.868	-2.384	-3.083	-2.251	-0.725	50.327	481.396	0.000167	0.000216	0.000158
0.0180	296.075	2.330	2.948	0.151	-0.732	50.321	563.650	-0.000163	-0.000206	-0.000011
0.0200	359.164	8.899	11.744	3.945	-0.726	50.316	683.756	-0.000623	-0.000822	-0.000276
0.0220	429.617	16.684	21.610	8.769	-0.728	50.317	817.881	-0.001168	-0.001513	-0.000614
0.0240	501.378	24.446	31.283	13.174	-0.726	50.322	954.494	-0.001711	-0.002190	-0.000922
0.0260	571.155	32.880	40.997	17.634	-0.732	50.326	1087.332	-0.002302	-0.002870	-0.001234
0.0280	636.904	41.088	50.527	21.705	-0.736	50.332	1212.502	-0.002876	-0.003537	-0.001519
0.0300	698.024	48.104	59.158	25.472	-0.727	50.337	1328.859	-0.003367	-0.004141	-0.001783
0.0320	756.335	55.527	67.843	29.572	-0.735	50.336	1439.867	-0.003887	-0.004749	-0.002070
0.0340	814.420	62.558	75.806	33.352	-0.728	50.332	1550.446	-0.004379	-0.005306	-0.002335
0.0360	872.625	69.546	83.519	37.271	-0.731	50.327	1661.253	-0.004868	-0.005846	-0.002609
0.0380	928.109	76.228	91.800	41.106	-0.736	50.321	1766.882	-0.005336	-0.006426	-0.002877
0.0400	978.259	82.639	99.122	44.399	-0.730	50.316	1862.354	-0.005785	-0.006939	-0.003108
0.0420	1023.029	88.349	105.642	47.929	-0.734	50.317	1947.584	-0.006184	-0.007395	-0.003355
0.0440	1060.404	93.149	111.396	50.416	-0.723	50.321	2018.738	-0.006520	-0.007798	-0.003529
0.0460	1089.139	97.291	116.912	52.111	-0.727	50.326	2073.441	-0.006810	-0.008184	-0.003648
0.0480	1109.412	100.336	121.106	53.711	-0.734	50.332	2112.036	-0.007024	-0.008477	-0.003760
0.0500	1124.380	102.972	122.969	54.685	-0.734	50.337	2140.532	-0.007208	-0.008608	-0.003828
0.0520	1136.253	105.051	125.068	55.904	-0.733	50.336	2163.134	-0.007354	-0.008755	-0.003913
0.0540	1144.173	106.158	126.459	56.626	-0.726	50.332	2178.211	-0.007431	-0.008852	-0.003964
0.0560	1146.307	106.971	127.292	57.098	-0.733	50.327	2182.274	-0.007488	-0.008910	-0.003997
0.0580	1143.286	107.083	127.901	57.183	-0.739	50.321	2176.523	-0.007496	-0.008953	-0.004003
0.0600	1136.583	106.620	127.554	56.753	-0.742	50.317	2163.763	-0.007463	-0.008929	-0.003973
0.0620	1125.988	106.200	126.778	56.503	-0.747	50.317	2143.593	-0.007434	-0.008874	-0.003955
0.0640	1109.623	104.587	124.860	55.501	-0.744	50.321	2112.436	-0.007321	-0.008740	-0.003885
0.0660	1076.710	101.148	120.121	54.112	-0.745	50.326	2049.780	-0.007080	-0.008408	-0.003788
0.0680	1020.113	94.764	112.381	50.860	-0.745	50.332	1942.034	-0.006633	-0.007867	-0.003560
0.0700	952.305	86.989	104.404	46.552	-0.745	50.337	1812.944	-0.006089	-0.007308	-0.003259
0.0720	884.828	79.790	95.373	42.800	-0.748	50.336	1684.484	-0.005585	-0.006676	-0.002996
0.0740	824.053	72.522	87.159	38.952	-0.746	50.333	1568.785	-0.005077	-0.006101	-0.002727
0.0760	769.905	66.207	79.391	35.380	-0.739	50.327	1465.702	-0.004634	-0.005557	-0.002477
0.0780	717.546	59.962	72.040	31.934	-0.736	50.321	1366.024	-0.004197	-0.005043	-0.002235
0.0800	664.316	53.773	64.882	28.391	-0.740	50.317	1264.687	-0.003764	-0.004542	-0.001987
0.0820	611.791	47.571	56.851	25.181	-0.749	50.317	1164.694	-0.003330	-0.003980	-0.001763
0.0840	563.084	41.367	49.611	21.718	-0.742	50.321	1071.968	-0.002896	-0.003473	-0.001520
0.0860	516.256	35.644	43.482	18.632	-0.740	50.326	982.819	-0.002495	-0.003044	-0.001304
0.0880	468.075	29.807	36.340	15.369	-0.750	50.332	891.094	-0.002087	-0.002544	-0.001076
0.0900	419.638	23.689	27.627	11.855	-0.747	50.337	798.883	-0.001658	-0.001934	-0.000830
0.0920	374.433	18.244	20.193	9.020	-0.750	50.336	712.824	-0.001277	-0.001414	-0.000631
0.0940	333.976	12.912	13.814	6.058	-0.745	50.332	635.805	-0.000904	-0.000967	-0.000424
0.0960	298.855	8.464	8.019	3.724	-0.751	50.327	568.943	-0.000592	-0.000561	-0.000261
0.0980	269.069	4.520	3.364	1.527	-0.746	50.321	512.238	-0.000316	-0.000235	-0.000107
0.1000	245.730	1.179	-0.262	-0.403	-0.748	50.317	467.806	-0.000083	0.000018	0.000028
0.1020	229.905	-1.081	-2.736	-1.596	-0.754	50.317	437.679	0.000076	0.000192	0.000112
0.1040	222.360	-2.467	-5.029	-2.431	-0.750	50.321	423.317	0.000173	0.000352	0.000170
0.1060	221.624	-2.873	-5.891	-2.753	-0.748	50.326	421.915	0.000201	0.000412	0.000193
0.1080	223.743	-3.140	-5.226	-2.793	-0.747	50.332	425.949	0.000220	0.000366	0.000196
0.1100	227.094	-3.225	-5.377	-2.904	-0.743	50.337	432.329	0.000226	0.000376	0.000203
0.1120	231.362	-2.790	-5.279	-2.514	-0.745	50.335	440.454	0.000195	0.000370	0.000176
0.1140	238.877	-2.354	-5.391	-2.182	-0.745	50.332	454.760	0.000165	0.000377	0.000153
0.1160	256.054	-0.811	-3.334	-1.208	-0.751	50.327	487.461	0.000057	0.000233	0.000085
0.1180	297.983	3.088	2.645	0.808	-0.755	50.321	567.284	-0.000216	-0.000185	-0.000057
0.1200	365.641	9.881	11.926	4.532	-0.743	50.316	696.087	-0.000692	-0.000835	-0.000317
0.1220	442.166	18.497	22.515	9.630	-0.741	50.316	841.770	-0.001295	-0.001576	-0.000674
0.1240	517.293	26.846	33.741	14.480	-0.736	50.321	984.793	-0.001879	-0.002362	-0.001014
0.1260	585.176	35.011	42.746	18.621	-0.735	50.325	1114.025	-0.002451	-0.002992	-0.001303
0.1280	646.357	42.154	51.835	22.416	-0.741	50.332	1230.497	-0.002951	-0.003628	-0.001569
0.1300	702.758	48.932	61.103	25.958	-0.736	50.337	1337.872	-0.003425	-0.004277	-0.001817
0.1320	755.117	55.991	68.302	29.836	-0.747	50.335	1437.550	-0.003919	-0.004781	-0.002088
0.1340	805.387	62.194	75.167	33.239	-0.746	50.332	1533.251	-0.004354	-0.005262	-0.002327
0.1360	856.063	68.354	82.492	36.464	-0.749	50.327	1629.725	-0.004785	-0.005774	-0.002552
0.1380	907.626	74.766	89.953	40.022	-0.752	50.321	1727.886	-0.005234	-0.006297	-0.002802
0.1400	959.053	81.040	96.929	43.427	-0.755	50.317	1825.790	-0.005673	-0.006785	-0.003040
0.1420	1006.858	87.158	103.891	46.816	-0.760	50.317	1916.800	-0.006101	-0.007272	-0.003277
0.1440	1046.789	92.069	110.505	49.540	-0.756	50.321	1992.817	-0.006445	-0.007735	-0.003468
0.1460	1077.447	96.266	116.064	51.583	-0.754	50.325	2051.182	-0.006739	-0.008124	-0.003611
0.1480	1100.831	99.493	118.883	53.304	-0.750	50.331	2095.699	-0.006965	-0.008322	-0.003731
0.1500	1120.759	102.369	121.468	54.654	-0.746	50.337	2133.636	-0.007166	-0.008503	-0.003826
0.1520	1137.651	105.217	125.319	56.378	-0.747	50.335	2165.794	-0.007365	-0.008772	-0.003946
0.1540	1148.681	106.775	127.819	56.947	-0.743	50.332	2186.794	-0.007474	-0.008947	-0.003986
0.1560	1152.108	107.644	128.821	57.365	-0.743	50.327	2193.317	-0.007535	-0.009017	-0.004016
0.1580	1149.553	107.982	129.319	57.461	-0.747	50.321	2188.454	-0.007559	-0.009052	-0.004022
0.1600	1143.466	107.731	129.140	57.197	-0.752	50.316	2176.867	-0.007541	-0.009040	-0.004004
0.1620	1133.307	107.408	128.529	57.364	-0.754	50.316	2157.526	-0.007519	-0.008997	-0.004015
0.1640	1117.723	106.003	125.985	56.349	-0.751	50.320	2127.857	-0.007420	-0.008819	-0.003944
0.1660	1086.734	102.551	121.441	54.515	-0.752	50.325	2068.863	-0.007179	-0.008501	-0.003816
0.1680	1028.965	96.336	113.882	51.402	-0.753	50.332	1958.885	-0.006743	-0.007972	-0.003598
0.1700	956.648	88.097	104.321	47.079	-0.748	50.337	1821.213	-0.006167	-0.007302	-0.003296
0.1720	885.369	80.170	94.969	43.301	-0.753	50.336	1685.514	-0.005612	-0.006648	-0.003031
0.1740	824.368	73.012	86.799	39.160	-0.751	50.333	1569.386	-0.005111	-0.006076	-0.002741
0.1760	771.694	66.586	80.405	35.699	-0.752	50.327	1469.107	-0.004661	-0.005628	-0.002499
0.1780	720.342	60.579	73.429	32.336	-0.752	50.321	1371.346	-0.004241	-0.005140	-0.002263
0.1800	666.991	54.208	65.534	28.724	-0.750	50.317	1269.779	-0.003795	-0.004587	-0.002011
0.1820	611.957	47.811	58.200	25.473	-0.755	50.317	1165.009	-0.003347	-0.004074	-0.001783
0.1840	557.719	40.850	50.001	21.526	-0.750	50.321	1061.754	-0.002859	-0.003500	-0.001507
0.1860	505.541	34.660	42.122	17.995	-0.747	50.326	962.420	-0.002426	-0.002949	-0.001260
0.1880	456.819	28.937	35.062	14.925	-0.747	50.332	869.665	-0.002026	-0.002454	-0.001045
0.1900	412.620	23.073	27.933	11.869	-0.744	50.337	785.522	-0.001615	-0.001955	-0.000831
0.1920	373.456	18.496	20.943	9.021	-0.745	50.336	710.964	-0.001295	-0.001466	-0.000631
0.1940	338.154	14.018	15.371	6.393	-0.742	50.332	643.759	-0.000981	-0.001076	-0.000448
0.1960	305.437	9.881	10.897	4.141	-0.748	50.327	581.474	-0.000692	-0.000763	-0.000290
0.1980	276.658	5.979	6.063	2.027	-0.751	50.321	526.686	-0.000419	-0.000424	-0.000142
0.2000	254.476	2.835	2.073	0.099	-0.748	50.317	484.457	-0.000198	-0.000145	-0.000007
0.2020	239.342	0.686	-1.069	-0.720	-0.751	50.316	455.647	-0.000048	0.000075	0.000050
0.2040	231.167	-0.967	-2.873	-1.512	-0.747	50.321	440.083	0.000068	0.000201	0.000106
0.2060	228.732	-2.004	-3.848	-2.000	-0.747	50.325	435.448	0.000140	0.000269	0.000140
0.2080	229.784	-2.623	-4.751	-2.196	-0.752	50.332	437.450	0.000184	0.000333	0.000154
0.2100	232.835	-2.637	-3.707	-2.265	-0.753	50.337	443.258	0.000185	0.000260	0.000159
0.2120	238.005	-1.893	-2.861	-1.916	-0.755	50.335	453.100	0.000133	0.000200	0.000134
0.2140	246.992	-1.205	-2.098	-1.819	-0.752	50.332	470.209	0.000084	0.000147	0.000127
0.2160	266.739	0.829	0.083	-0.887	-0.751	50.327	507.803	-0.000058	-0.000006	0.000062
0.2180	311.163	5.223	5.060	1.639	-0.754	50.321	592.375	-0.000366	-0.000354	-0.000115
0.2200	377.033	12.055	13.454	5.502	-0.756	50.317	717.773	-0.000844	-0.000942	-0.000385
0.2220	448.403	19.660	23.585	10.380	-0.758	50.316	853.643	-0.001376	-0.001651	-0.000727
0.2240	517.007	27.463	33.756	14.564	-0.750	50.321	984.249	-0.001922	-0.002363	-0.001019
0.2260	579.676	34.818	42.691	18.317	-0.750	50.325	1103.554	-0.002437	-0.002988	-0.001282
0.2280	636.288	41.749	51.389	21.956	-0.749	50.332	1211.329	-0.002922	-0.003597	-0.001537
0.2300	690.811	48.090	59.841	25.415	-0.744	50.337	1315.126	-0.003366	-0.004189	-0.001779
0.2320	744.718	55.008	67.553	29.515	-0.746	50.336	1417.751	-0.003851	-0.004729	-0.002066
0.2340	800.338	61.899	74.668	33.017	-0.743	50.333	1523.638	-0.004333	-0.005227	-0.002311
0.2360	857.311	68.634	83.157	36.742	-0.751	50.327	1632.099	-0.004804	-0.005821	-0.002572
0.2380	912.720	75.496	92.162	40.328	-0.758	50.321	1737.585	-0.005285	-0.006451	-0.002823
0.2400	963.712	82.007	98.612	43.691	-0.760	50.316	1834.660	-0.005741	-0.006903	-0.003058
0.2420	1009.488	88.026	105.058	47.317	-0.755	50.316	1921.806	-0.006162	-0.007354	-0.003312
0.2440	1050.350	93.275	112.006	49.958	-0.750	50.321	1999.598	-0.006529	-0.007840	-0.003497
0.2460	1083.653	97.625	117.456	52.250	-0.750	50.325	2062.998	-0.006834	-0.008222	-0.003658
0.2480	1107.864	100.868	121.469	53.974	-0.750	50.332	2109.089	-0.007061	-0.008503	-0.003778
0.2500	1123.208	103.351	123.677	54.849	-0.748	50.337	2138.300	-0.007235	-0.008657	-0.003839
0.2520	1132.376	105.275	124.915	56.001	-0.752	50.336	2155.752	-0.007369	-0.008744	-0.003920
0.2540	1137.380	106.201	125.430	56.404	-0.740	50.333	2165.279	-0.007434	-0.008780	-0.003948
0.2560	1138.207	106.775	125.723	56.641	-0.738	50.327	2166.853	-0.007474	-0.008801	-0.003965
0.2580	1135.261	106.761	127.095	56.836	-0.747	50.321	2161.245	-0.007473	-0.008897	-0.003979
0.2600	1129.716	106.481	127.320	56.433	-0.745	50.316	2150.688	-0.007454	-0.008912	-0.003950
0.2620	1120.849	105.976	126.653	56.196	-0.748	50.316	2133.808	-0.007418	-0.008866	-0.003934
0.2640	1106.091	104.685	124.874	55.584	-0.744	50.321	2105.713	-0.007328	-0.008741	-0.003891
0.2660	1075.253	101.667	121.262	54.057	-0.752	50.325	2047.005	-0.007117	-0.008488	-0.003784
0.2680	1015.184	95.256	113.313	50.735	-0.750	50.331	1932.650	-0.006668	-0.007932	-0.003551
0.2700	939.501	86.765	102.334	46.261	-0.742	50.337	1788.568	-0.006074	-0.007163	-0.003238
0.2720	866.147	78.583	92.760	41.829	-0.747	50.337	1648.922	-0.005501	-0.006493	-0.002928
0.2740	804.245	71.119	84.492	37.826	-0.746	50.333	1531.076	-0.004978	-0.005914	-0.002648
0.2760	754.907	65.252	77.335	34.447	-0.747	50.328	1437.149	-0.004568	-0.005413	-0.002411
0.2780	711.685	59.920	72.027	31.613	-0.746	50.322	1354.866	-0.004194	-0.005042	-0.002213
0.2800	665.864	54.306	65.798	28.668	-0.750	50.317	1267.633	-0.003801	-0.004606	-0.002007
0.2820	613.986	48.342	58.447	25.360	-0.754	50.317	1168.871	-0.003384	-0.004091	-0.001775
0.2840	557.509	41.551	50.070	21.595	-0.748	50.321	1061.354	-0.002909	-0.003505	-0.001512
0.2860	499.409	34.213	41.482	17.843	-0.744	50.325	950.747	-0.002395	-0.002904	-0.001249
0.2880	445.352	27.435	33.672	14.243	-0.749	50.331	847.836	-0.001920	-0.002357	-0.000997
0.2900	399.275	21.682	26.364	10.881	-0.748	50.336	760.117	-0.001518	-0.001845	-0.000762
0.2920	360.937	17.317	19.847	8.449	-0.754	50.335	687.132	-0.001212	-0.001389	-0.000591
0.2940	327.319	12.938	13.928	5.879	-0.750	50.332	623.131	-0.000906	-0.000975	-0.000412
0.2960	296.736	8.758	9.338	3.560	-0.753	50.327	564.909	-0.000613	-0.000654	-0.000249
0.2980	270.812	5.515	4.934	1.848	-0.758	50.321	515.556	-0.000386	-0.000345	-0.000129
0.3000	249.697	2.738	1.197	0.207	-0.756	50.316	475.359	-0.000192	-0.000084	-0.000014
0.3020	232.339	0.507	-1.957	-1.012	-0.763	50.316	442.314	-0.000036	0.000137	0.000071
0.3040	219.971	-1.486	-5.417	-2.179	-0.754	50.321	418.768	0.000104	0.000379	0.000153
0.3060	212.998	-2.821	-7.084	-2.819	-0.753	50.325	405.493	0.000197	0.000496	0.000197
0.3080	211.104	-3.930	-8.030	-3.141	-0.752	50.331	401.888	0.000275	0.000562	0.000220
0.3100	213.959	-4.027	-7.947	-3.615	-0.752	50.336	407.324	0.000282	0.000556	0.000253
0.3120	220.362	-3.535	-7.308	-3.140	-0.757	50.335	419.512	0.000247	0.000512	0.000220
0.3140	231.738	-3.141	-5.794	-2.738	-0.750	50.332	441.170	0.000220	0.000406	0.000192
0.3160	258.970	-0.406	-1.292	-1.390	-0.746	50.327	493.011	0.000028	0.000090	0.000097
0.3180	312.546	4.997	5.934	1.640	-0.749	50.321	595.007	-0.000350	-0.000415	-0.000115
0.3200	381.361	12.267	14.566	5.740	-0.747	50.317	726.013	-0.000859	-0.001020	-0.000402
0.3220	452.490	20.154	24.933	10.561	-0.751	50.316	861.425	-0.001411	-0.001745	-0.000739
0.3240	520.268	27.954	35.535	14.619	-0.748	50.320	990.458	-0.001957	-0.002487	-0.001023
0.3260	584.425	35.841	44.858	18.607	-0.749	50.325	1112.595	-0.002509	-0.003140	-0.001302
0.3280	645.515	43.066	53.487	22.541	-0.751	50.331	1228.895	-0.003015	-0.003744	-0.001578
0.3300	706.320	50.181	62.076	26.527	-0.744	50.336	1344.652	-0.003513	-0.004345	-0.001857
0.3320	767.275	57.998	71.581	30.919	-0.744	50.335	1460.695	-0.004060	-0.005011	-0.002164
0.3340	825.811	65.322	79.350	34.797	-0.738	50.332	1572.132	-0.004573	-0.005554	-0.002436
0.3360	878.876	71.721	86.925	38.298	-0.736	50.327	1673.155	-0.005020	-0.006085	-0.002681
0.3380	926.847	77.544	94.260	41.620	-0.740	50.321	1764.479	-0.005428	-0.006598	-0.002913
0.3400	972.383	83.059	101.069	44.663	-0.737	50.317	1851.168	-0.005814	-0.007075	-0.003126
0.3420	1015.545	88.687	107.505	47.998	-0.742	50.316	1933.336	-0.006208	-0.007525	-0.003360
0.3440	1054.198	93.767	113.064	50.540	-0.748	50.320	2006.922	-0.006564	-0.007914	-0.003538
0.3460	1084.811	97.851	117.342	52.416	-0.746	50.325	2065.201	-0.006850	-0.008214	-0.003669
0.3480	1108.525	101.444	120.300	54.003	-0.748	50.331	2110.348	-0.007101	-0.008421	-0.003780
0.3500	1126.725	104.111	123.203	55.407	-0.744	50.336	2144.995	-0.007288	-0.008624	-0.003878
0.3520	1140.055	106.593	126.152	56.696	-0.751	50.335	2170.372	-0.007461	-0.008831	-0.003969
0.3540	1148.276	108.136	128.069	57.391	-0.747	50.332	2186.022	-0.007570	-0.008965	-0.004017
0.3560	1149.944	108.782	128.333	57.558	-0.746	50.328	2189.198	-0.007615	-0.008983	-0.004029
0.3580	1146.051	108.654	127.778	57.542	-0.755	50.321	2181.787	-0.007606	-0.008944	-0.004028
0.3600	1138.086	108.108	127.208	57.015	-0.750	50.317	2166.624	-0.007568	-0.008905	-0.003991
0.3620	1126.635	107.407	126.598	57.016	-0.752	50.316	2144.823	-0.007518	-0.008862	-0.003991
0.3640	1108.525	105.625	125.011	56.084	-0.743	50.320	2110.348	-0.007394	-0.008751	-0.003926
0.3660	1073.825	101.864	121.190	54.307	-0.743	50.325	2044.287	-0.007131	-0.008483	-0.003801
0.3680	1017.904	95.396	113.841	51.222	-0.741	50.331	1937.828	-0.006678	-0.007969	-0.003586
0.3700	953.282	88.125	104.931	46.871	-0.741	50.337	1814.804	-0.006169	-0.007345	-0.003281
0.3720	888.044	81.278	97.471	43.092	-0.750	50.336	1690.607	-0.005689	-0.006823	-0.003016
0.3740	825.826	74.120	88.744	39.368	-0.743	50.333	1572.161	-0.005188	-0.006212	-0.002756
0.3760	767.200	67.217	80.780	35.935	-0.739	50.328	1460.552	-0.004705	-0.005655	-0.002515
0.3780	710.348	60.413	72.636	32.017	-0.738	50.322	1352.320	-0.004229	-0.005085	-0.002241
0.3800	656.366	53.972	63.659	28.349	-0.735	50.317	1249.552	-0.003778	-0.004456	-0.001984
0.3820	608.575	48.190	57.032	25.542	-0.738	50.316	1158.571	-0.003373	-0.003992	-0.001788
0.3840	564.437	42.590	51.460	22.165	-0.735	50.321	1074.543	-0.002981	-0.003602	-0.001552
0.3860	518.405	37.105	44.706	19.026	-0.732	50.325	986.910	-0.002597	-0.003129	-0.001332
0.3880	468.992	30.943	37.133	16.036	-0.735	50.331	892.839	-0.002166	-0.002599	-0.001123
0.3900	419.278	24.515	28.891	12.340	-0.731	50.337	798.197	-0.001716	-0.002022	-0.000864
0.3920	373.005	18.930	21.179	9.394	-0.735	50.336	710.106	-0.001325	-0.001483	-0.000658
0.3940	332.954	13.806	14.885	6.405	-0.734	50.332	633.860	-0.000966	-0.001042	-0.000448
0.3960	299.246	9.458	9.561	3.947	-0.738	50.327	569.687	-0.000662	-0.000669	-0.000276
0.3980	272.164	5.950	5.016	1.876	-0.743	50.321	518.131	-0.000417	-0.000351	-0.000131
0.4000	251.921	3.286	1.569	-0.069	-0.735	50.317	479.593	-0.000230	-0.000110	0.000005
0.4020	238.170	1.235	-0.014	-0.707	-0.744	50.316	453.415	-0.000086	0.000001	0.000049
0.4040	230.596	-0.197	-2.082	-1.361	-0.743	50.321	438.995	0.000014	0.000146	0.000095
0.4060	228.086	-0.995	-3.054	-1.818	-0.747	50.325	434.217	0.000070	0.000214	0.000127
0.4080	229.033	-1.362	-3.097	-1.888	-0.743	50.331	436.020	0.000095	0.000217	0.000132
0.4100	232.294	-1.695	-3.459	-2.166	-0.740	50.337	442.228	0.000119	0.000242	0.000152
0.4120	237.644	-1.092	-3.889	-1.651	-0.744	50.336	452.414	0.000076	0.000272	0.000116
0.4140	246.301	-0.645	-3.529	-1.555	-0.739	50.333	468.893	0.000045	0.000247	0.000109
0.4160	263.673	0.954	-1.166	-0.791	-0.737	50.327	501.966	-0.000067	0.000082	0.000055
0.4180	302.447	4.925	4.491	1.293	-0.743	50.321	575.781	-0.000345	-0.000314	-0.000090
0.4200	362.320	10.919	12.911	4.670	-0.742	50.317	689.764	-0.000764	-0.000904	-0.000327
0.4220	431.330	18.467	23.096	9.325	-0.742	50.316	821.142	-0.001293	-0.001617	-0.000653
0.4240	501.558	26.214	33.408	13.590	-0.740	50.321	954.838	-0.001835	-0.002339	-0.000951
0.4260	569.697	34.368	42.748	17.996	-0.742	50.325	1084.557	-0.002406	-0.002992	-0.001260
0.4280	636.047	42.239	51.934	22.319	-0.748	50.331	1210.871	-0.002957	-0.003635	-0.001562
0.4300	702.443	50.014	61.507	26.584	-0.746	50.337	1337.271	-0.003501	-0.004305	-0.001861
0.4320	766.524	58.250	71.635	30.864	-0.743	50.336	1459.265	-0.004077	-0.005014	-0.002160
0.4340	825.120	65.309	80.042	34.728	-0.736	50.333	1570.816	-0.004572	-0.005603	-0.002431
0.4360	877.088	71.820	87.660	38.352	-0.740	50.327	1669.750	-0.005027	-0.006136	-0.002685
0.4380	924.187	77.741	94.747	41.408	-0.746	50.322	1759.415	-0.005442	-0.006632	-0.002899
0.4400	968.536	83.441	101.139	44.245	-0.749	50.317	1843.843	-0.005841	-0.007080	-0.003097
0.4420	1008.722	88.743	107.046	47.274	-0.744	50.317	1920.347	-0.006212	-0.007493	-0.003309
0.4440	1045.196	93.121	112.258	49.804	-0.737	50.321	1989.784	-0.006518	-0.007858	-0.003486
0.4460	1080.843	97.767	116.467	52.153	-0.738	50.325	2057.648	-0.006844	-0.008153	-0.003651
0.4480	1114.026	101.951	120.647	54.502	-0.742	50.331	2120.819	-0.007137	-0.008445	-0.003815
0.4500	1138.131	105.303	124.442	56.028	-0.746	50.337	2166.710	-0.007371	-0.008711	-0.003922
0.4520	1150.530	107.210	127.084	57.461	-0.743	50.336	2190.313	-0.007505	-0.008896	-0.004022
0.4540	1155.234	108.405	128.375	57.880	-0.735	50.332	2199.268	-0.007588	-0.008986	-0.004052
0.4560	1154.723	109.077	129.738	58.170	-0.736	50.327	2198.296	-0.007635	-0.009082	-0.004072
0.4580	1150.665	109.624	130.114	58.155	-0.742	50.321	2190.571	-0.007674	-0.009108	-0.004071
0.4600	1143.722	109.330	128.514	57.738	-0.741	50.316	2177.353	-0.007653	-0.008996	-0.004042
0.4620	1133.082	108.866	128.015	57.571	-0.743	50.316	2157.097	-0.007621	-0.008961	-0.004030
0.4640	1116.551	106.846	126.777	56.724	-0.732	50.320	2125.626	-0.007479	-0.008874	-0.003971
0.4660	1081.625	103.535	122.289	54.808	-0.736	50.325	2059.135	-0.007247	-0.008560	-0.003837
0.4680	1019.738	96.686	113.869	51.348	-0.736	50.331	1941.319	-0.006768	-0.007971	-0.003594
0.4700	945.092	87.748	103.682	46.828	-0.732	50.336	1799.212	-0.006142	-0.007258	-0.003278
0.4720	873.586	79.763	94.732	42.549	-0.738	50.336	1663.084	-0.005583	-0.006631	-0.002978
0.4740	812.481	72.521	87.284	38.604	-0.730	50.333	1546.755	-0.005076	-0.006110	-0.002702
0.4760	760.768	65.954	79.850	35.354	-0.734	50.327	1448.307	-0.004617	-0.005589	-0.002475
0.4780	714.405	60.679	72.651	32.173	-0.739	50.322	1360.044	-0.004248	-0.005086	-0.002252
0.4800	670.102	55.361	65.660	29.100	-0.740	50.317	1275.702	-0.003875	-0.004596	-0.002037
0.4820	623.919	49.985	59.129	26.418	-0.747	50.316	1187.782	-0.003499	-0.004139	-0.001849
0.4840	572.883	43.839	52.321	22.970	-0.742	50.320	1090.622	-0.003069	-0.003662	-0.001608
0.4860	519.322	37.215	44.093	19.328	-0.746	50.325	988.655	-0.002605	-0.003087	-0.001353
0.4880	466.993	30.959	35.907	15.896	-0.744	50.331	889.034	-0.002167	-0.002513	-0.001113
0.4900	417.429	24.981	28.196	12.410	-0.740	50.336	794.678	-0.001749	-0.001974	-0.000869
0.4920	371.983	19.561	21.389	9.450	-0.744	50.335	708.160	-0.001369	-0.001497	-0.000661
0.4940	331.647	14.257	15.788	6.418	-0.741	50.333	631.371	-0.000998	-0.001105	-0.000449
0.4960	297.532	9.739	10.632	4.113	-0.739	50.328	566.425	-0.000682	-0.000744	-0.000288
0.4980	269.114	5.796	5.463	1.918	-0.741	50.321	512.323	-0.000406	-0.000382	-0.000134
0.5000	247.007	2.863	0.975	0.127	-0.744	50.317	470.238	-0.000200	-0.000068	-0.000009
0.5020	230.596	0.492	-2.348	-0.777	-0.750	50.316	438.995	-0.000034	0.000164	0.000054
0.5040	221.338	-1.191	-4.057	-1.695	-0.740	50.321	421.371	0.000083	0.000284	0.000119
0.5060	219.084	-1.991	-4.111	-2.251	-0.741	50.324	417.080	0.000139	0.000288	0.000158
0.5080	220.963	-2.244	-4.835	-2.458	-0.746	50.331	420.656	0.000157	0.000338	0.000172
0.5100	224.840	-2.145	-5.598	-2.445	-0.740	50.337	428.038	0.000150	0.000392	0.000171
0.5120	230.461	-1.878	-4.625	-1.902	-0.746	50.336	438.738	0.000131	0.000324	0.000133
0.5140	239.823	-1.220	-2.664	-1.792	-0.740	50.332	456.562	0.000085	0.000187	0.000125
0.5160	261.043	0.997	0.128	-0.958	-0.741	50.327	496.960	-0.000070	-0.000009	0.000067
0.5180	307.196	5.796	5.797	1.667	-0.741	50.321	584.822	-0.000406	-0.000406	-0.000117
0.5200	371.998	12.503	13.732	5.391	-0.737	50.317	708.189	-0.000875	-0.000961	-0.000377
0.5220	442.677	20.249	24.405	10.131	-0.738	50.316	842.743	-0.001417	-0.001708	-0.000709
0.5240	512.829	27.757	34.575	14.618	-0.733	50.320	976.295	-0.001943	-0.002420	-0.001023
0.5260	577.932	35.210	43.399	18.731	-0.729	50.325	1100.235	-0.002465	-0.003038	-0.001311
0.5280	636.949	42.688	52.627	22.623	-0.734	50.330	1212.587	-0.002988	-0.003684	-0.001584
0.5300	693.065	49.508	60.936	25.986	-0.732	50.336	1319.418	-0.003466	-0.004266	-0.001819
0.5320	749.001	56.173	68.802	29.752	-0.736	50.335	1425.905	-0.003932	-0.004816	-0.002083
0.5340	805.928	63.034	77.446	33.627	-0.735	50.332	1534.281	-0.004412	-0.005421	-0.002354
0.5360	862.255	70.051	85.561	37.435	-0.733	50.327	1641.512	-0.004904	-0.005989	-0.002620
0.5380	916.568	76.871	93.469	41.091	-0.745	50.321	1744.909	-0.005381	-0.006543	-0.002876
0.5400	968.355	83.160	100.528	44.371	-0.746	50.316	1843.500	-0.005821	-0.007037	-0.003106
0.5420	1015.695	89.725	107.338	47.860	-0.751	50.316	1933.622	-0.006281	-0.007514	-0.003350
0.5440	1055.009	94.667	112.937	50.570	-0.745	50.320	2008.467	-0.006627	-0.007906	-0.003540
0.5460	1084.119	98.750	117.216	52.473	-0.743	50.324	2063.885	-0.006913	-0.008205	-0.003673
0.5480	1101.372	101.343	119.969	53.905	-0.742	50.331	2096.729	-0.007094	-0.008398	-0.003773
0.5500	1110.374	103.182	121.953	54.433	-0.741	50.337	2113.867	-0.007223	-0.008537	-0.003810
0.5520	1116.430	104.292	124.371	55.266	-0.748	50.336	2125.397	-0.007300	-0.008706	-0.003869
0.5540	1121.811	105.009	125.360	55.779	-0.744	50.332	2135.639	-0.007351	-0.008775	-0.003905
0.5560	1125.387	105.780	125.346	56.223	-0.743	50.327	2142.448	-0.007405	-0.008774	-0.003936
0.5580	1125.493	106.508	125.152	56.446	-0.747	50.321	2142.649	-0.007456	-0.008761	-0.003951
0.5600	1122.141	106.370	125.098	56.322	-0.743	50.316	2136.269	-0.007446	-0.008757	-0.003943
0.5620	1115.183	106.047	125.709	56.391	-0.747	50.316	2123.022	-0.007423	-0.008800	-0.003947
0.5640	1105.039	105.178	125.624	55.794	-0.743	50.320	2103.710	-0.007362	-0.008794	-0.003906
0.5660	1088.027	103.802	123.274	54.920	-0.743	50.325	2071.323	-0.007266	-0.008629	-0.003844
0.5680	1048.818	99.759	117.453	53.085	-0.747	50.331	1996.679	-0.006983	-0.008222	-0.003716
0.5700	977.883	91.732	108.255	48.803	-0.744	50.337	1861.639	-0.006421	-0.007578	-0.003416
0.5720	894.521	82.864	97.514	43.925	-0.748	50.336	1702.938	-0.005800	-0.006826	-0.003075
0.5740	820.972	74.235	87.549	39.326	-0.741	50.333	1562.920	-0.005196	-0.006128	-0.002753
0.5760	763.128	66.939	79.100	35.531	-0.740	50.328	1452.799	-0.004686	-0.005537	-0.002487
0.5780	713.714	60.959	72.138	32.474	-0.743	50.322	1358.728	-0.004267	-0.005050	-0.002273
0.5800	662.603	54.657	65.259	28.724	-0.738	50.316	1261.425	-0.003826	-0.004568	-0.002011
0.5820	607.974	48.398	57.255	25.222	-0.737	50.316	1157.427	-0.003388	-0.004008	-0.001766
0.5840	553.451	41.775	49.223	21.721	-0.730	50.320	1053.629	-0.002924	-0.003446	-0.001520
0.5860	501.423	35.181	41.994	18.233	-0.734	50.325	954.580	-0.002463	-0.002940	-0.001276
0.5880	452.445	29.260	35.076	14.841	-0.735	50.331	861.340	-0.002048	-0.002455	-0.001039
0.5900	406.218	23.479	26.989	11.478	-0.735	50.337	773.335	-0.001644	-0.001889	-0.000803
0.5920	363.237	18.469	20.165	8.922	-0.744	50.336	691.509	-0.001293	-0.001412	-0.000625
0.5940	325.545	13.389	13.996	6.264	-0.743	50.333	619.755	-0.000937	-0.000980	-0.000439
0.5960	294.452	9.278	8.729	3.987	-0.742	50.327	560.560	-0.000649	-0.000611	-0.000279
0.5980	269.565	5.924	4.545	1.848	-0.743	50.321	513.182	-0.000415	-0.000318	-0.000129
0.6000	252.312	3.510	1.278	0.306	-0.745	50.317	480.337	-0.000246	-0.000089	-0.000021
0.6020	241.011	2.078	-0.984	-0.221	-0.751	50.316	458.822	-0.000145	0.000069	0.000015
0.6040	234.368	0.772	-2.111	-0.846	-0.747	50.320	446.177	-0.000054	0.000148	0.000059
0.6060	231.287	0.099	-2.195	-1.374	-0.750	50.325	440.311	-0.000007	0.000154	0.000096
0.6080	230.896	-0.644	-2.556	-1.680	-0.756	50.331	439.568	0.000045	0.000179	0.000118
0.6100	233.256	-0.995	-2.778	-1.625	-0.754	50.336	444.059	0.000070	0.000194	0.000114
0.6120	237.178	-0.897	-2.375	-1.220	-0.756	50.336	451.527	0.000063	0.000166	0.000085
0.6140	244.693	-0.477	-1.582	-1.219	-0.755	50.333	465.832	0.000033	0.000111	0.000085
0.6160	260.247	0.701	0.100	-0.708	-0.749	50.327	495.443	-0.000049	-0.000007	0.000050
0.6180	299.020	4.616	4.519	1.250	-0.756	50.321	569.258	-0.000323	-0.000316	-0.000087
0.6200	365.656	11.843	12.939	5.155	-0.750	50.316	696.115	-0.000829	-0.000906	-0.000361
0.6220	445.096	20.290	24.349	10.283	-0.752	50.316	847.349	-0.001420	-0.001704	-0.000720
0.6240	525.934	29.526	35.758	15.328	-0.752	50.320	1001.244	-0.002067	-0.002503	-0.001073
0.6260	598.506	38.212	46.402	19.968	-0.753	50.325	1139.402	-0.002675	-0.003248	-0.001398
0.6280	656.922	45.214	55.810	23.608	-0.754	50.331	1250.610	-0.003165	-0.003907	-0.001653
0.6300	703.856	50.799	63.214	26.764	-0.747	50.336	1339.960	-0.003556	-0.004425	-0.001873
0.6320	745.589	56.453	69.537	29.738	-0.748	50.336	1419.411	-0.003952	-0.004868	-0.002082
0.6340	791.516	61.801	75.958	32.754	-0.747	50.333	1506.844	-0.004326	-0.005317	-0.002293
0.6360	846.881	68.270	83.713	36.647	-0.746	50.327	1612.244	-0.004779	-0.005860	-0.002565
0.6380	908.572	75.861	92.106	40.552	-0.749	50.321	1729.689	-0.005310	-0.006447	-0.002839
0.6400	970.279	83.145	100.443	44.552	-0.740	50.316	1847.162	-0.005820	-0.007031	-0.003119
0.6420	1026.050	90.329	107.964	48.719	-0.740	50.315	1953.335	-0.006323	-0.007558	-0.003410
0.6440	1070.023	96.040	114.787	51.527	-0.738	50.320	2037.048	-0.006723	-0.008035	-0.003607
0.6460	1100.726	100.349	120.149	53.640	-0.734	50.324	2095.499	-0.007024	-0.008410	-0.003755
0.6480	1122.291	103.590	123.468	55.240	-0.736	50.330	2136.555	-0.007251	-0.008643	-0.003867
0.6500	1136.373	105.680	126.237	56.294	-0.731	50.336	2163.363	-0.007398	-0.008837	-0.003941
0.6520	1143.782	107.630	127.890	57.156	-0.733	50.335	2177.467	-0.007534	-0.008952	-0.004001
0.6540	1146.758	108.277	128.055	57.530	-0.726	50.332	2183.132	-0.007579	-0.008964	-0.004027
0.6560	1145.961	108.767	128.166	57.932	-0.726	50.327	2181.616	-0.007614	-0.008972	-0.004055
0.6580	1142.039	108.924	128.278	57.685	-0.734	50.321	2174.149	-0.007625	-0.008979	-0.004038
0.6600	1135.727	108.432	127.529	57.058	-0.734	50.316	2162.132	-0.007590	-0.008927	-0.003994
0.6620	1126.139	107.954	127.281	57.211	-0.732	50.315	2143.879	-0.007557	-0.008910	-0.004005
0.6640	1111.216	106.565	125.206	56.529	-0.734	50.320	2115.469	-0.007460	-0.008764	-0.003957
0.6660	1082.601	103.591	121.883	55.042	-0.739	50.324	2060.995	-0.007251	-0.008532	-0.003853
0.6680	1029.311	97.641	115.494	52.030	-0.738	50.331	1959.543	-0.006835	-0.008085	-0.003642
0.6700	960.180	90.050	106.614	47.915	-0.727	50.336	1827.936	-0.006303	-0.007463	-0.003354
0.6720	887.157	81.672	98.111	43.536	-0.731	50.336	1688.919	-0.005717	-0.006868	-0.003048
0.6740	820.190	73.899	88.771	39.243	-0.736	50.332	1561.432	-0.005173	-0.006214	-0.002747
0.6760	763.669	67.148	79.989	35.518	-0.734	50.327	1453.829	-0.004700	-0.005599	-0.002486
0.6780	714.451	61.310	73.068	32.087	-0.733	50.321	1360.130	-0.004292	-0.005115	-0.002246
0.6800	667.442	55.613	65.856	29.070	-0.733	50.316	1270.638	-0.003893	-0.004610	-0.002035
0.6820	617.487	49.901	59.657	26.250	-0.740	50.315	1175.537	-0.003493	-0.004176	-0.001837
0.6840	563.114	43.375	52.403	22.387	-0.740	50.319	1072.025	-0.003036	-0.003668	-0.001567
0.6860	506.968	36.386	43.551	18.759	-0.743	50.324	965.137	-0.002547	-0.003049	-0.001313
0.6880	455.586	30.366	34.784	15.258	-0.732	50.330	867.319	-0.002126	-0.002435	-0.001068
0.6900	411.087	24.726	27.643	11.895	-0.734	50.336	782.604	-0.001731	-0.001935	-0.000833
0.6920	373.170	19.759	21.487	9.547	-0.744	50.335	710.421	-0.001383	-0.001504	-0.000668
0.6940	340.799	15.365	16.344	7.210	-0.739	50.332	648.794	-0.001076	-0.001144	-0.000505
0.6960	311.464	11.296	12.022	4.990	-0.732	50.327	592.947	-0.000791	-0.000842	-0.000349
0.6980	284.217	7.845	8.076	3.141	-0.731	50.321	541.077	-0.000549	-0.000565	-0.000220
0.7000	260.728	4.602	3.378	1.025	-0.739	50.316	496.359	-0.000322	-0.000236	-0.000072
0.7020	241.657	2.274	0.293	-0.043	-0.742	50.315	460.052	-0.000159	-0.000021	0.000003
0.7040	227.380	0.141	-2.013	-1.291	-0.739	50.319	432.873	-0.000010	0.000141	0.000090
0.7060	219.700	-1.274	-3.708	-2.056	-0.739	50.324	418.253	0.000089	0.000260	0.000144
0.7080	218.678	-1.568	-3.624	-2.251	-0.741	50.330	416.307	0.000110	0.000254	0.000158
0.7100	221.849	-1.919	-3.861	-2.667	-0.735	50.335	422.344	0.000134	0.000270	0.000187
0.7120	227.846	-1.458	-3.347	-2.112	-0.738	50.335	433.760	0.000102	0.000234	0.000148
0.7140	237.960	-0.700	-3.014	-1.750	-0.729	50.332	453.014	0.000049	0.000211	0.000122
0.7160	259.841	1.194	-1.150	-0.626	-0.730	50.327	494.671	-0.000084	0.000081	0.000044
0.7180	305.317	5.796	5.283	1.903	-0.736	50.321	581.245	-0.000406	-0.000370	-0.000133
0.7200	369.909	12.251	13.994	5.559	-0.732	50.316	704.212	-0.000858	-0.000980	-0.000389
0.7220	441.535	19.955	24.890	10.338	-0.727	50.316	840.569	-0.001397	-0.001742	-0.000724
0.7240	513.671	28.121	34.826	14.758	-0.724	50.320	977.898	-0.001968	-0.002438	-0.001033
0.7260	582.020	36.373	43.956	19.039	-0.728	50.324	1108.017	-0.002546	-0.003077	-0.001333
0.7280	645.410	44.133	53.502	23.179	-0.730	50.330	1228.695	-0.003089	-0.003745	-0.001623
0.7300	705.418	51.332	62.841	26.877	-0.724	50.336	1342.936	-0.003593	-0.004399	-0.001881
0.7320	762.331	58.308	71.568	31.031	-0.728	50.335	1451.283	-0.004082	-0.005010	-0.002172
0.7340	818.763	65.323	80.183	34.783	-0.731	50.332	1558.714	-0.004573	-0.005613	-0.002435
0.7360	872.940	72.128	87.882	38.534	-0.731	50.328	1661.854	-0.005049	-0.006152	-0.002697
0.7380	922.774	78.192	95.067	41.870	-0.735	50.321	1756.725	-0.005473	-0.006655	-0.002931
0.7400	968.040	83.763	101.682	44.872	-0.736	50.316	1842.899	-0.005863	-0.007118	-0.003141
0.7420	1008.572	89.121	107.490	47.956	-0.739	50.316	1920.061	-0.006238	-0.007524	-0.003357
0.7440	1044.790	93.765	112.619	50.332	-0.739	50.319	1989.012	-0.006564	-0.007883	-0.003523
0.7460	1077.627	98.284	117.246	52.223	-0.739	50.324	2051.525	-0.006880	-0.008207	-0.003656
0.7480	1108.721	102.397	122.289	54.307	-0.739	50.331	2110.720	-0.007168	-0.008560	-0.003801
0.7500	1133.758	105.400	126.110	55.890	-0.737	50.336	2158.384	-0.007378	-0.008828	-0.003912
0.7520	1147.674	107.981	128.250	57.335	-0.740	50.335	2184.877	-0.007559	-0.008977	-0.004013
0.7540	1150.936	108.854	129.154	57.851	-0.734	50.332	2191.086	-0.007620	-0.009041	-0.004050
0.7560	1147.810	109.204	129.696	57.779	-0.736	50.327	2185.135	-0.007644	-0.009079	-0.004045
0.7580	1141.843	109.176	129.557	57.711	-0.744	50.321	2173.777	-0.007642	-0.009069	-0.004040
0.7600	1134.344	108.811	127.931	57.294	-0.747	50.316	2159.500	-0.007617	-0.008955	-0.004011
0.7620	1124.260	108.235	127.390	57.266	-0.747	50.315	2140.303	-0.007576	-0.008917	-0.004009
0.7640	1107.984	106.424	125.513	56.573	-0.744	50.319	2109.318	-0.007450	-0.008786	-0.003960
0.7660	1075.794	103.099	121.357	54.836	-0.743	50.324	2048.035	-0.007217	-0.008495	-0.003839
0.7680	1020.654	97.051	114.479	51.762	-0.750	50.331	1943.064	-0.006794	-0.008014	-0.003623
0.7700	953.507	89.571	105.309	47.690	-0.746	50.336	1815.233	-0.006270	-0.007372	-0.003338
0.7720	885.068	81.895	97.555	43.551	-0.740	50.336	1684.942	-0.005733	-0.006829	-0.003049
0.7740	820.145	74.317	89.424	39.369	-0.740	50.333	1561.346	-0.005202	-0.006260	-0.002756
0.7760	758.829	66.882	80.740	35.520	-0.741	50.328	1444.616	-0.004682	-0.005652	-0.002486
0.7780	700.895	60.061	72.111	31.824	-0.738	50.322	1334.324	-0.004204	-0.005048	-0.002228
0.7800	647.950	53.536	63.286	28.127	-0.739	50.316	1233.530	-0.003748	-0.004430	-0.001969
0.7820	600.776	47.684	56.572	25.472	-0.743	50.316	1143.723	-0.003338	-0.003960	-0.001783
0.7840	556.908	42.352	50.069	22.150	-0.746	50.320	1060.209	-0.002965	-0.003505	-0.001550
0.7860	512.228	36.905	43.413	19.163	-0.744	50.324	975.151	-0.002583	-0.003039	-0.001341
0.7880	464.678	30.997	37.258	16.231	-0.746	50.330	884.628	-0.002170	-0.002608	-0.001136
0.7900	415.295	25.105	30.325	12.520	-0.743	50.336	790.615	-0.001757	-0.002123	-0.000876
0.7920	366.603	19.408	22.140	9.339	-0.746	50.336	697.918	-0.001359	-0.001550	-0.000654
0.7940	323.126	13.921	15.065	6.405	-0.745	50.333	615.149	-0.000974	-0.001055	-0.000448
0.7960	288.065	9.262	9.508	3.794	-0.742	50.327	548.401	-0.000648	-0.000666	-0.000266
0.7980	262.110	5.725	4.087	1.638	-0.748	50.321	498.991	-0.000401	-0.000286	-0.000115
0.8000	244.437	3.003	0.015	0.194	-0.745	50.317	465.345	-0.000210	-0.000001	-0.000014
0.8020	232.730	1.222	-1.971	-0.526	-0.751	50.316	443.058	-0.000086	0.000138	0.000037
0.8040	224.539	-0.014	-3.029	-1.402	-0.746	50.319	427.465	0.000001	0.000212	0.000098
0.8060	220.226	-1.276	-3.113	-2.168	-0.742	50.324	419.254	0.000089	0.000218	0.000152
0.8080	220.797	-1.837	-4.072	-2.403	-0.749	50.331	420.341	0.000129	0.000285	0.000168
0.8100	224.900	-1.597	-4.795	-2.485	-0.743	50.337	428.152	0.000112	0.000336	0.000174
0.8120	232.099	-0.797	-2.888	-1.929	-0.745	50.336	441.856	0.000056	0.000202	0.000135
0.8140	245.053	0.114	-0.733	-1.499	-0.743	50.332	466.518	-0.000008	0.000051	0.000105
0.8160	275.471	2.892	3.116	0.137	-0.738	50.327	524.426	-0.000202	-0.000218	-0.000010
0.8180	328.852	8.520	9.799	3.209	-0.737	50.321	626.049	-0.000596	-0.000686	-0.000225
0.8200	392.828	15.523	18.788	6.866	-0.744	50.317	747.843	-0.001087	-0.001315	-0.000481
0.8220	456.383	22.383	28.057	11.200	-0.746	50.315	868.835	-0.001567	-0.001964	-0.000784
0.8240	516.316	29.119	36.326	14.938	-0.747	50.319	982.933	-0.002038	-0.002543	-0.001046
0.8260	574.596	35.911	43.997	18.719	-0.744	50.324	1093.884	-0.002514	-0.003080	-0.001310
0.8280	632.185	42.689	51.819	22.345	-0.750	50.330	1203.518	-0.002988	-0.003627	-0.001564
0.8300	691.698	49.593	60.922	26.123	-0.748	50.336	1316.814	-0.003471	-0.004265	-0.001829
0.8320	752.578	57.100	70.093	30.572	-0.750	50.336	1432.714	-0.003997	-0.004907	-0.002140
0.8340	812.706	64.479	77.640	34.394	-0.748	50.333	1547.184	-0.004514	-0.005435	-0.002408
0.8360	869.799	71.832	85.895	38.258	-0.746	50.327	1655.874	-0.005028	-0.006013	-0.002678
0.8380	922.203	78.190	94.039	41.829	-0.749	50.321	1755.638	-0.005473	-0.006583	-0.002928
0.8400	970.955	84.056	102.070	44.899	-0.750	50.316	1848.450	-0.005884	-0.007145	-0.003143
0.8420	1016.206	90.288	109.045	48.373	-0.755	50.316	1934.595	-0.006320	-0.007633	-0.003386
0.8440	1056.662	95.591	114.036	50.833	-0.757	50.319	2011.614	-0.006691	-0.007982	-0.003558
0.8460	1089.605	99.799	118.371	53.044	-0.755	50.324	2074.327	-0.006986	-0.008286	-0.003713
0.8480	1113.815	103.294	122.568	54.710	-0.757	50.330	2120.419	-0.007231	-0.008580	-0.003830
0.8500	1129.190	105.499	126.111	55.765	-0.748	50.336	2149.687	-0.007385	-0.008828	-0.003904
0.8520	1136.358	106.999	127.677	56.877	-0.752	50.335	2163.334	-0.007490	-0.008937	-0.003981
0.8540	1138.793	107.843	127.720	57.335	-0.750	50.333	2167.969	-0.007549	-0.008940	-0.004013
0.8560	1138.597	108.221	128.040	57.391	-0.751	50.328	2167.597	-0.007575	-0.008963	-0.004017
0.8580	1136.057	108.389	127.734	57.349	-0.755	50.322	2162.762	-0.007587	-0.008941	-0.004014
0.8600	1131.173	107.995	127.097	57.168	-0.754	50.317	2153.463	-0.007560	-0.008897	-0.004002
0.8620	1123.779	107.687	126.735	57.209	-0.763	50.315	2139.387	-0.007538	-0.008871	-0.004005
0.8640	1112.448	106.774	125.721	56.932	-0.761	50.319	2117.815	-0.007474	-0.008800	-0.003985
0.8660	1090.972	104.908	123.247	55.794	-0.766	50.324	2076.931	-0.007344	-0.008627	-0.003906
0.8680	1042.491	99.745	117.452	53.070	-0.761	50.330	1984.634	-0.006982	-0.008222	-0.003715
0.8700	967.604	91.382	107.533	48.373	-0.757	50.336	1842.070	-0.006397	-0.007527	-0.003386
0.8720	886.691	82.484	96.762	43.855	-0.761	50.336	1688.032	-0.005774	-0.006773	-0.003070
0.8740	815.171	73.994	87.116	39.189	-0.758	50.333	1551.876	-0.005180	-0.006098	-0.002743
0.8760	758.333	67.287	79.252	35.531	-0.752	50.327	1443.672	-0.004710	-0.005548	-0.002487
0.8780	711.069	61.392	72.569	32.363	-0.754	50.322	1353.693	-0.004297	-0.005080	-0.002265
0.8800	664.301	55.640	66.760	29.016	-0.758	50.316	1264.658	-0.003895	-0.004673	-0.002031
0.8820	614.737	49.746	60.062	25.986	-0.755	50.315	1170.301	-0.003482	-0.004204	-0.001819
0.8840	562.438	43.319	51.848	22.443	-0.754	50.319	1070.738	-0.003032	-0.003629	-0.001571
0.8860	507.825	36.894	44.399	18.871	-0.751	50.324	966.768	-0.002583	-0.003108	-0.001321
0.8880	452.565	30.045	36.048	15.188	-0.755	50.330	861.568	-0.002103	-0.002523	-0.001063
0.8900	401.063	23.449	26.862	11.574	-0.751	50.336	763.521	-0.001641	-0.001880	-0.000810
0.8920	356.895	18.314	20.748	8.823	-0.752	50.335	679.436	-0.001282	-0.001452	-0.000618
0.8940	321.909	13.835	15.746	6.224	-0.751	50.332	612.831	-0.000968	-0.001102	-0.000436
0.8960	294.181	10.159	10.715	4.086	-0.749	50.327	560.045	-0.000711	-0.000750	-0.000286
0.8980	271.293	7.030	6.755	2.376	-0.750	50.322	516.472	-0.000492	-0.000473	-0.000166
0.9000	253.830	4.588	3.282	0.901	-0.746	50.316	483.227	-0.000321	-0.000230	-0.000063
0.9020	241.642	2.682	0.169	-0.001	-0.752	50.315	460.024	-0.000188	-0.000012	0.000000
0.9040	234.308	1.600	-1.415	-0.803	-0.752	50.319	446.062	-0.000112	0.000099	0.000056
0.9060	230.626	0.433	-1.942	-1.026	-0.758	50.324	439.053	-0.000030	0.000136	0.000072
0.9080	230.416	-0.239	-2.471	-1.722	-0.755	50.329	438.652	0.000017	0.000173	0.000121
0.9100	233.406	-0.138	-2.445	-1.889	-0.748	50.335	444.345	0.000010	0.000171	0.000132
0.9120	239.132	0.099	-1.445	-1.097	-0.751	50.335	455.246	-0.000007	0.000101	0.000077
0.9140	248.465	0.266	-1.417	-0.790	-0.754	50.332	473.013	-0.000019	0.000099	0.000055
0.9160	268.062	2.049	1.237	0.026	-0.752	50.327	510.321	-0.000143	-0.000087	-0.000002
0.9180	310.292	6.624	6.450	2.514	-0.752	50.321	590.715	-0.000464	-0.000452	-0.000176
0.9200	370.841	12.895	14.858	6.003	-0.750	50.316	705.986	-0.000903	-0.001040	-0.000420
0.9220	438.168	20.404	24.862	10.269	-0.754	50.315	834.160	-0.001428	-0.001740	-0.000719
0.9240	506.758	28.208	34.882	14.466	-0.750	50.319	964.737	-0.001975	-0.002442	-0.001013
0.9260	574.220	36.080	43.677	18.734	-0.756	50.324	1093.168	-0.002526	-0.003057	-0.001311
0.9280	638.512	43.966	52.530	22.944	-0.760	50.330	1215.563	-0.003078	-0.003677	-0.001606
0.9300	700.564	51.177	61.256	26.682	-0.756	50.336	1333.694	-0.003582	-0.004288	-0.001868
0.9320	759.100	58.433	70.149	30.879	-0.762	50.335	1445.131	-0.004090	-0.004910	-0.002162
0.9340	814.134	65.057	79.154	34.506	-0.760	50.332	1549.902	-0.004554	-0.005541	-0.002415
0.9360	868.702	71.695	87.395	38.215	-0.758	50.327	1653.786	-0.005019	-0.006118	-0.002675
0.9380	921.181	78.165	94.802	41.814	-0.766	50.321	1753.693	-0.005472	-0.006636	-0.002927
0.9400	966.657	83.636	101.514	44.858	-0.763	50.316	1840.267	-0.005855	-0.007106	-0.003140
0.9420	1004.484	88.715	107.226	47.761	-0.762	50.315	1912.279	-0.006210	-0.007506	-0.003343
0.9440	1037.667	93.346	112.285	49.984	-0.762	50.319	1975.451	-0.006534	-0.007860	-0.003499
0.9460	1070.984	97.668	117.163	52.152	-0.761	50.324	2038.879	-0.006837	-0.008201	-0.003651
0.9480	1103.040	101.920	121.706	54.445	-0.767	50.330	2099.905	-0.007134	-0.008519	-0.003811
0.9500	1127.521	105.261	125.416	56.001	-0.765	50.336	2146.511	-0.007368	-0.008779	-0.003920
0.9520	1141.092	107.660	128.027	57.239	-0.770	50.335	2172.346	-0.007536	-0.008962	-0.004007
0.9540	1146.863	108.938	128.902	57.864	-0.763	50.332	2183.332	-0.007626	-0.009023	-0.004050
0.9560	1147.855	109.415	130.362	58.044	-0.759	50.327	2185.221	-0.007659	-0.009125	-0.004063
0.9580	1145.420	109.555	130.516	58.170	-0.765	50.321	2180.586	-0.007669	-0.009136	-0.004072
0.9600	1140.175	109.498	130.101	57.726	-0.759	50.316	2170.601	-0.007665	-0.009107	-0.004041
0.9620	1130.993	109.188	129.432	57.587	-0.763	50.315	2153.120	-0.007643	-0.009060	-0.004031
0.9640	1116.250	107.770	127.750	57.002	-0.761	50.319	2125.053	-0.007544	-0.008942	-0.003990
0.9660	1087.320	104.656	124.277	55.557	-0.762	50.324	2069.979	-0.007326	-0.008699	-0.003889
0.9680	1030.483	98.567	116.926	52.487	-0.760	50.330	1961.775	-0.006900	-0.008185	-0.003674
0.9700	956.303	90.202	107.712	47.622	-0.756	50.336	1820.555	-0.006314	-0.007540	-0.003334
0.9720	883.385	82.022	98.528	43.606	-0.762	50.336	1681.738	-0.005742	-0.006897	-0.003052
0.9740	819.484	74.501	89.370	39.589	-0.763	50.333	1560.087	-0.005215	-0.006256	-0.002771
0.9760	764.300	67.879	80.561	35.851	-0.759	50.327	1455.030	-0.004752	-0.005639	-0.002510
0.9780	712.061	61.929	72.959	32.558	-0.756	50.321	1355.581	-0.004335	-0.005107	-0.002279
0.9800	658.425	55.374	66.273	28.892	-0.754	50.316	1253.471	-0.003876	-0.004639	-0.002022
0.9820	605.825	48.946	59.033	25.694	-0.762	50.315	1153.336	-0.003426	-0.004132	-0.001799
0.9840	556.141	42.700	51.737	22.025	-0.756	50.319	1058.750	-0.002989	-0.003622	-0.001542
0.9860	508.937	36.808	43.787	18.732	-0.758	50.323	968.885	-0.002577	-0.003065	-0.001311
0.9880	461.973	31.195	36.061	15.953	-0.758	50.329	879.478	-0.002184	-0.002524	-0.001117
0.9900	416.302	25.567	29.462	12.591	-0.757	50.336	792.532	-0.001790	-0.002062	-0.000881
0.9920	372.825	20.264	23.835	9.840	-0.758	50.336	709.763	-0.001418	-0.001668	-0.000689
0.9940	333.961	15.381	17.373	7.184	-0.756	50.333	635.777	-0.001077	-0.001216	-0.000503
0.9960	301.259	11.199	10.800	4.710	-0.751	50.328	573.521	-0.000784	-0.000756	-0.000330
0.9980	274.238	7.480	6.075	2.795	-0.758	50.322	522.079	-0.000524	-0.000425	-0.000196
