# Supplementary material for: Evaluation of a Cold-Mixed High-Performance Polyurethane Mixture
Source: Hindawi journal article supplement (doi:10.1155/2019/1507971), 2019-11-07
Supplement: f1 [file 1507971.f1.zip › 1507971.f1/dynamic modulus data/PUM/specimen2/temp50/zhs-2-50_20Hz.csv]

Test Information
****************
Project name	zhs
Operator name	2
Target test temperature	50
Target confining stress	0
Average dynamic strain range from 75 to 125 micro-strain
Contact stress	5
Initial modulus	1000
Axial gauge length	70
Comments
Specimen information
********************
Identification	zhs-2-50
Dimensions	Point 1	Point 2	Point 3	Point 4	Point 5	Point 6	Average	Std Dev.
Diameter (mm)	49.2	49.3	49.2				49.23	0.058
Height (mm)	100.8	101.0	100.8				100.87	0.115
Cross-sectional area (mm�)	1903.7
Conditioning time
Properties/Comments
Test Data	20Hz
*********
Test date and time	Wed	Apr 3	2019	1:28 PM
Dynamic modulus (MPa)	9380
Phase angle (Degrees)	4.32
Average temperature (�C)	50.3
Average confining pressure (kPa)	-0.8
Average micro-strain	108
Load drift (%)	-0.5
Load standard error (%)	8.0
Average deformation drift (%)	-4.2
Average deformation standard error (%)	7.8
Deformation uniformity (%)	30.4
Phase uniformity (Degrees)	0.4
Conditioning Cycles
Time (sec)	Axial stress (kPa)	Axial micro-strain #1	Axial micro-strain #2	Axial micro-strain #3	Confining pressure (kPa)	Temperature (�C)	Load (N)	Displacement #1 (mm)	Displacement #2 (mm)	Displacement #3 (mm)
0.0000	429.136	12.967	17.426	7.434	-0.760	50.334	816.965	-0.000908	-0.001220	-0.000520
0.0010	429.061	13.162	17.247	7.308	-0.759	50.331	816.822	-0.000921	-0.001207	-0.000512
0.0020	428.340	13.007	16.790	7.226	-0.763	50.327	815.449	-0.000911	-0.001175	-0.000506
0.0030	426.146	12.825	16.539	7.101	-0.761	50.324	811.272	-0.000898	-0.001158	-0.000497
0.0040	420.886	12.349	15.496	6.766	-0.758	50.323	801.258	-0.000864	-0.001085	-0.000474
0.0050	410.606	11.438	14.217	6.390	-0.760	50.321	781.689	-0.000801	-0.000995	-0.000447
0.0060	393.759	9.713	11.605	5.487	-0.758	50.321	749.617	-0.000680	-0.000812	-0.000384
0.0070	371.247	7.397	9.075	4.431	-0.761	50.322	706.758	-0.000518	-0.000635	-0.000310
0.0080	346.014	4.395	6.102	2.792	-0.755	50.324	658.722	-0.000308	-0.000427	-0.000195
0.0090	322.630	1.587	3.169	1.346	-0.755	50.326	614.204	-0.000111	-0.000222	-0.000094
0.0100	304.521	-0.672	0.600	0.111	-0.751	50.329	579.729	0.000047	-0.000042	-0.000008
0.0110	293.640	-2.076	-1.569	-0.820	-0.753	50.332	559.015	0.000145	0.000110	0.000057
0.0120	289.853	-2.848	-2.709	-1.166	-0.757	50.335	551.805	0.000199	0.000190	0.000082
0.0130	291.912	-2.932	-3.181	-1.264	-0.763	50.338	555.725	0.000205	0.000223	0.000088
0.0140	298.645	-2.426	-2.804	-0.972	-0.762	50.341	568.542	0.000170	0.000196	0.000068
0.0150	310.833	-1.374	-1.290	-0.264	-0.771	50.341	591.745	0.000096	0.000090	0.000018
0.0160	333.060	0.772	1.683	0.848	-0.769	50.341	634.060	-0.000054	-0.000118	-0.000059
0.0170	370.450	4.715	6.991	3.224	-0.771	50.339	705.242	-0.000330	-0.000489	-0.000226
0.0180	423.110	10.105	14.286	6.032	-0.762	50.338	805.492	-0.000707	-0.001000	-0.000422
0.0190	486.966	16.896	23.346	9.894	-0.762	50.336	927.057	-0.001183	-0.001634	-0.000693
0.0200	555.856	24.643	33.128	13.953	-0.764	50.334	1058.207	-0.001725	-0.002319	-0.000977
0.0210	626.625	32.599	42.760	18.274	-0.764	50.330	1192.932	-0.002282	-0.002993	-0.001279
0.0220	696.582	40.681	52.030	22.735	-0.762	50.327	1326.113	-0.002848	-0.003642	-0.001591
0.0230	762.106	48.315	60.410	26.765	-0.759	50.324	1450.853	-0.003382	-0.004229	-0.001874
0.0240	819.875	55.177	68.108	30.405	-0.753	50.323	1560.831	-0.003862	-0.004768	-0.002128
0.0250	867.530	61.380	74.930	33.810	-0.758	50.321	1651.554	-0.004297	-0.005245	-0.002367
0.0260	903.854	66.306	80.642	36.395	-0.761	50.321	1720.705	-0.004641	-0.005645	-0.002548
0.0270	929.357	70.108	84.853	38.562	-0.760	50.322	1769.257	-0.004908	-0.005940	-0.002699
0.0280	944.971	72.409	87.327	39.618	-0.754	50.324	1798.983	-0.005069	-0.006113	-0.002773
0.0290	952.936	73.743	88.952	40.214	-0.750	50.326	1814.146	-0.005162	-0.006227	-0.002815
0.0300	955.251	74.515	90.217	40.577	-0.753	50.329	1818.552	-0.005216	-0.006315	-0.002840
0.0310	954.169	74.965	90.855	40.478	-0.755	50.331	1816.492	-0.005248	-0.006360	-0.002833
0.0320	950.938	75.035	91.050	40.548	-0.759	50.335	1810.341	-0.005252	-0.006373	-0.002838
0.0330	946.189	74.767	90.340	40.255	-0.756	50.338	1801.300	-0.005234	-0.006324	-0.002818
0.0340	939.907	74.513	89.520	39.895	-0.751	50.341	1789.341	-0.005216	-0.006266	-0.002793
0.0350	931.972	74.120	88.659	39.826	-0.750	50.341	1774.235	-0.005188	-0.006206	-0.002788
0.0360	921.211	73.488	87.812	39.632	-0.751	50.340	1753.750	-0.005144	-0.006147	-0.002774
0.0370	905.341	71.904	86.480	39.202	-0.748	50.339	1723.537	-0.005033	-0.006054	-0.002744
0.0380	880.575	69.279	83.868	37.743	-0.747	50.338	1676.388	-0.004850	-0.005871	-0.002642
0.0390	843.935	65.266	79.310	35.588	-0.744	50.336	1606.636	-0.004569	-0.005552	-0.002491
0.0400	795.078	59.794	72.764	32.682	-0.748	50.333	1513.624	-0.004186	-0.005093	-0.002288
0.0410	736.738	53.353	65.078	29.263	-0.752	50.330	1402.559	-0.003735	-0.004555	-0.002048
0.0420	673.062	46.282	56.406	25.444	-0.754	50.327	1281.338	-0.003240	-0.003948	-0.001781
0.0430	608.034	38.901	47.387	21.359	-0.754	50.325	1157.541	-0.002723	-0.003317	-0.001495
0.0440	544.840	31.758	38.396	17.273	-0.748	50.323	1037.235	-0.002223	-0.002688	-0.001209
0.0450	486.274	25.063	30.143	13.604	-0.752	50.321	925.741	-0.001754	-0.002110	-0.000952
0.0460	433.600	18.663	22.542	10.198	-0.748	50.321	825.462	-0.001306	-0.001578	-0.000714
0.0470	388.079	13.246	15.762	7.267	-0.757	50.322	738.802	-0.000927	-0.001103	-0.000509
0.0480	349.441	8.405	9.801	4.488	-0.757	50.324	665.245	-0.000588	-0.000686	-0.000314
0.0490	317.670	4.575	5.187	2.376	-0.754	50.326	604.763	-0.000320	-0.000363	-0.000166
0.0500	291.521	1.502	0.863	0.583	-0.752	50.328	554.981	-0.000105	-0.000060	-0.000041
0.0510	269.910	-1.319	-2.694	-0.932	-0.750	50.331	513.840	0.000092	0.000189	0.000065
0.0520	251.951	-3.607	-5.682	-2.445	-0.752	50.335	479.650	0.000252	0.000398	0.000171
0.0530	237.148	-5.656	-7.948	-3.724	-0.754	50.338	451.469	0.000396	0.000556	0.000261
0.0540	225.321	-7.113	-10.131	-4.739	-0.751	50.341	428.953	0.000498	0.000709	0.000332
0.0550	216.544	-8.139	-11.964	-5.253	-0.760	50.341	412.245	0.000570	0.000838	0.000368
0.0560	210.743	-9.022	-13.394	-5.738	-0.756	50.341	401.201	0.000632	0.000938	0.000402
0.0570	208.083	-9.473	-13.810	-5.973	-0.759	50.339	396.137	0.000663	0.000967	0.000418
0.0580	208.158	-9.894	-13.851	-6.210	-0.755	50.338	396.280	0.000693	0.000970	0.000435
0.0590	210.247	-10.428	-13.505	-6.156	-0.753	50.336	400.257	0.000730	0.000945	0.000431
0.0600	214.095	-10.302	-13.143	-5.977	-0.755	50.333	407.581	0.000721	0.000920	0.000418
0.0610	219.580	-9.923	-12.879	-5.671	-0.759	50.330	418.024	0.000695	0.000902	0.000397
0.0620	227.786	-9.234	-12.502	-5.379	-0.764	50.327	433.645	0.000646	0.000875	0.000377
0.0630	241.086	-8.139	-11.419	-4.865	-0.763	50.324	458.965	0.000570	0.000799	0.000341
0.0640	263.764	-6.075	-8.975	-3.794	-0.762	50.322	502.138	0.000425	0.000628	0.000266
0.0650	299.306	-2.314	-3.944	-1.641	-0.766	50.321	569.801	0.000162	0.000276	0.000115
0.0660	347.908	2.583	3.212	1.278	-0.771	50.321	662.327	-0.000181	-0.000225	-0.000089
0.0670	406.473	8.798	11.396	4.824	-0.776	50.322	773.821	-0.000616	-0.000798	-0.000338
0.0680	470.464	15.604	20.346	8.561	-0.771	50.324	895.643	-0.001092	-0.001424	-0.000599
0.0690	536.559	22.776	29.558	12.645	-0.766	50.326	1021.471	-0.001594	-0.002069	-0.000885
0.0700	602.068	30.128	39.091	16.868	-0.767	50.328	1146.183	-0.002109	-0.002736	-0.001181
0.0710	665.473	37.776	48.192	20.884	-0.767	50.331	1266.890	-0.002644	-0.003373	-0.001462
0.0720	725.015	44.610	56.599	24.664	-0.766	50.335	1380.243	-0.003123	-0.003962	-0.001727
0.0730	779.148	51.220	64.312	28.139	-0.763	50.338	1483.297	-0.003585	-0.004502	-0.001970
0.0740	825.691	56.734	71.163	31.225	-0.759	50.341	1571.903	-0.003971	-0.004981	-0.002186
0.0750	863.427	61.688	77.001	33.921	-0.763	50.341	1643.744	-0.004318	-0.005390	-0.002374
0.0760	891.635	65.506	81.489	35.965	-0.764	50.341	1697.445	-0.004585	-0.005704	-0.002518
0.0770	911.293	68.579	84.839	37.355	-0.767	50.339	1734.867	-0.004801	-0.005939	-0.002615
0.0780	923.886	70.431	86.701	38.424	-0.763	50.338	1758.842	-0.004930	-0.006069	-0.002690
0.0790	931.356	71.721	87.730	39.103	-0.768	50.336	1773.062	-0.005020	-0.006141	-0.002737
0.0800	935.022	72.745	88.521	39.630	-0.767	50.333	1780.043	-0.005092	-0.006196	-0.002774
0.0810	935.954	73.434	89.244	39.783	-0.765	50.330	1781.816	-0.005140	-0.006247	-0.002785
0.0820	934.827	73.770	89.632	39.811	-0.762	50.327	1779.671	-0.005164	-0.006274	-0.002787
0.0830	931.987	73.743	89.563	39.839	-0.767	50.324	1774.263	-0.005162	-0.006269	-0.002789
0.0840	927.313	73.560	88.951	39.603	-0.764	50.322	1765.366	-0.005149	-0.006227	-0.002772
0.0850	920.776	73.292	88.245	39.505	-0.768	50.321	1752.920	-0.005130	-0.006177	-0.002765
0.0860	911.458	72.634	87.036	39.226	-0.764	50.321	1735.182	-0.005084	-0.006092	-0.002746
0.0870	897.797	71.624	85.283	38.754	-0.764	50.321	1709.175	-0.005014	-0.005970	-0.002713
0.0880	876.051	69.493	82.558	37.602	-0.759	50.324	1667.776	-0.004865	-0.005779	-0.002632
0.0890	842.327	65.535	78.222	35.630	-0.756	50.326	1603.575	-0.004587	-0.005476	-0.002494
0.0900	794.928	60.454	72.261	32.794	-0.756	50.328	1513.338	-0.004232	-0.005058	-0.002296
0.0910	735.836	53.984	64.744	29.236	-0.759	50.332	1400.843	-0.003779	-0.004532	-0.002047
0.0920	669.936	46.826	56.102	25.193	-0.761	50.335	1275.387	-0.003278	-0.003927	-0.001764
0.0930	602.339	39.038	47.027	21.149	-0.762	50.339	1146.698	-0.002733	-0.003292	-0.001480
0.0940	537.205	31.321	37.606	16.829	-0.759	50.342	1022.701	-0.002192	-0.002632	-0.001178
0.0950	477.453	24.348	29.227	13.202	-0.761	50.342	908.947	-0.001704	-0.002046	-0.000924
0.0960	424.402	18.104	21.638	9.687	-0.759	50.341	807.953	-0.001267	-0.001515	-0.000678
0.0970	378.986	12.884	15.232	6.796	-0.760	50.340	721.493	-0.000902	-0.001066	-0.000476
0.0980	340.949	8.112	9.882	4.154	-0.756	50.338	649.080	-0.000568	-0.000692	-0.000291
0.0990	309.826	4.295	5.116	1.792	-0.753	50.336	589.828	-0.000301	-0.000358	-0.000125
0.1000	284.097	0.969	1.098	-0.070	-0.756	50.333	540.848	-0.000068	-0.000077	0.000005
0.1010	262.667	-1.809	-2.807	-1.376	-0.755	50.330	500.050	0.000127	0.000196	0.000096
0.1020	244.693	-4.194	-6.003	-2.697	-0.758	50.327	465.832	0.000294	0.000420	0.000189
0.1030	230.085	-6.158	-8.977	-3.726	-0.757	50.325	438.023	0.000431	0.000628	0.000261
0.1040	218.678	-7.645	-11.465	-5.045	-0.751	50.323	416.307	0.000535	0.000803	0.000353
0.1050	210.443	-8.782	-13.215	-5.461	-0.754	50.321	400.629	0.000615	0.000925	0.000382
0.1060	204.927	-9.640	-14.438	-5.877	-0.754	50.321	390.129	0.000675	0.001011	0.000411
0.1070	202.147	-10.258	-15.008	-6.058	-0.759	50.322	384.836	0.000718	0.001051	0.000424
0.1080	201.726	-10.638	-15.496	-6.488	-0.759	50.324	384.035	0.000745	0.001085	0.000454
0.1090	203.394	-10.736	-15.495	-6.683	-0.765	50.326	387.211	0.000751	0.001085	0.000468
0.1100	206.851	-10.582	-15.243	-6.531	-0.768	50.329	393.791	0.000741	0.001067	0.000457
0.1110	211.976	-10.203	-14.548	-6.350	-0.769	50.332	403.547	0.000714	0.001018	0.000445
0.1120	219.640	-9.584	-13.575	-6.128	-0.766	50.335	418.139	0.000671	0.000950	0.000429
0.1130	232.715	-8.586	-11.699	-5.518	-0.764	50.339	443.029	0.000601	0.000819	0.000386
0.1140	255.934	-6.803	-8.684	-4.310	-0.760	50.341	487.232	0.000476	0.000608	0.000302
0.1150	293.159	-3.112	-3.194	-1.837	-0.771	50.342	558.100	0.000218	0.000224	0.000129
0.1160	344.511	2.247	3.962	1.347	-0.775	50.342	655.861	-0.000157	-0.000277	-0.000094
0.1170	406.218	8.884	12.883	5.308	-0.775	50.340	773.335	-0.000622	-0.000902	-0.000372
0.1180	473.064	16.027	22.152	9.337	-0.767	50.338	900.593	-0.001122	-0.001551	-0.000654
0.1190	541.428	23.675	31.684	13.464	-0.764	50.336	1030.741	-0.001657	-0.002218	-0.000942
0.1200	608.605	31.211	40.911	17.801	-0.764	50.333	1158.628	-0.002185	-0.002864	-0.001246
0.1210	672.792	38.522	49.776	21.803	-0.766	50.330	1280.823	-0.002697	-0.003484	-0.001526
0.1220	732.184	45.538	57.879	25.610	-0.764	50.327	1393.890	-0.003188	-0.004052	-0.001793
0.1230	785.309	52.091	65.202	28.918	-0.765	50.324	1495.028	-0.003646	-0.004564	-0.002024
0.1240	831.026	57.689	71.192	31.795	-0.762	50.322	1582.060	-0.004038	-0.004983	-0.002226
0.1250	868.687	62.699	76.709	34.505	-0.763	50.321	1653.757	-0.004389	-0.005370	-0.002415
0.1260	897.842	66.587	80.892	36.576	-0.760	50.321	1709.261	-0.004661	-0.005662	-0.002560
0.1270	919.062	69.760	84.505	38.299	-0.759	50.322	1749.659	-0.004883	-0.005915	-0.002681
0.1280	932.558	71.724	87.214	39.298	-0.755	50.324	1775.351	-0.005021	-0.006105	-0.002751
0.1290	939.366	73.083	89.102	39.797	-0.754	50.326	1788.311	-0.005116	-0.006237	-0.002786
0.1300	940.763	73.656	90.213	40.201	-0.758	50.329	1790.972	-0.005156	-0.006315	-0.002814
0.1310	938.449	73.993	90.436	40.117	-0.759	50.331	1786.566	-0.005180	-0.006331	-0.002808
0.1320	934.061	73.741	90.270	40.020	-0.760	50.335	1778.212	-0.005162	-0.006319	-0.002801
0.1330	928.185	73.714	89.811	39.770	-0.759	50.338	1767.025	-0.005160	-0.006287	-0.002784
0.1340	920.776	72.984	89.021	39.340	-0.755	50.341	1752.920	-0.005109	-0.006231	-0.002754
0.1350	911.127	72.535	88.063	39.244	-0.756	50.342	1734.552	-0.005077	-0.006164	-0.002747
0.1360	897.226	71.582	86.494	38.620	-0.754	50.341	1708.088	-0.005011	-0.006055	-0.002703
0.1370	876.171	69.686	84.228	37.840	-0.755	50.339	1668.005	-0.004878	-0.005896	-0.002649
0.1380	844.657	66.235	79.975	36.103	-0.754	50.338	1608.009	-0.004636	-0.005598	-0.002527
0.1390	802.096	61.478	74.305	33.572	-0.749	50.336	1526.985	-0.004303	-0.005201	-0.002350
0.1400	750.714	55.767	67.440	30.627	-0.748	50.334	1429.167	-0.003904	-0.004721	-0.002144
0.1410	694.643	49.480	59.991	27.319	-0.751	50.331	1322.422	-0.003464	-0.004199	-0.001912
0.1420	637.475	43.236	52.599	23.735	-0.754	50.328	1213.589	-0.003027	-0.003682	-0.001661
0.1430	581.389	36.909	44.984	20.013	-0.756	50.325	1106.815	-0.002584	-0.003149	-0.001401
0.1440	527.798	30.832	37.717	16.218	-0.750	50.323	1004.791	-0.002158	-0.002640	-0.001135
0.1450	478.024	24.980	30.685	13.134	-0.755	50.321	910.034	-0.001749	-0.002148	-0.000919
0.1460	432.668	19.716	23.959	10.312	-0.755	50.322	823.689	-0.001380	-0.001677	-0.000722
0.1470	392.557	14.973	17.941	7.990	-0.763	50.323	747.328	-0.001048	-0.001256	-0.000559
0.1480	357.391	10.285	12.466	5.488	-0.762	50.324	680.380	-0.000720	-0.000873	-0.000384
0.1490	327.078	6.287	7.853	3.251	-0.758	50.326	622.673	-0.000440	-0.000550	-0.000228
0.1500	301.034	3.074	3.795	1.362	-0.756	50.329	573.092	-0.000215	-0.000266	-0.000095
0.1510	278.852	0.438	0.057	-0.262	-0.755	50.332	530.863	-0.000031	-0.000004	0.000018
0.1520	260.292	-1.977	-3.389	-1.471	-0.756	50.335	495.529	0.000138	0.000237	0.000103
0.1530	245.188	-3.941	-6.112	-2.499	-0.758	50.338	466.776	0.000276	0.000428	0.000175
0.1540	233.346	-5.624	-8.239	-3.614	-0.750	50.342	444.231	0.000394	0.000577	0.000253
0.1550	224.524	-6.831	-9.575	-4.102	-0.751	50.342	427.437	0.000478	0.000670	0.000287
0.1560	218.378	-7.827	-10.910	-4.644	-0.751	50.342	415.735	0.000548	0.000764	0.000325
0.1570	215.026	-8.375	-11.951	-4.659	-0.757	50.340	409.355	0.000586	0.000837	0.000326
0.1580	214.170	-8.965	-12.936	-4.991	-0.752	50.338	407.724	0.000628	0.000906	0.000349
0.1590	215.673	-9.189	-13.504	-5.214	-0.749	50.336	410.585	0.000643	0.000945	0.000365
0.1600	218.874	-9.329	-13.282	-5.297	-0.748	50.333	416.679	0.000653	0.000930	0.000371
0.1610	223.788	-8.964	-12.836	-5.172	-0.755	50.330	426.035	0.000627	0.000899	0.000362
0.1620	231.002	-8.360	-11.864	-4.880	-0.759	50.327	439.768	0.000585	0.000830	0.000342
0.1630	243.175	-7.393	-10.545	-4.295	-0.762	50.324	462.942	0.000517	0.000738	0.000301
0.1640	265.116	-5.330	-7.669	-3.322	-0.759	50.323	504.713	0.000373	0.000537	0.000233
0.1650	300.989	-1.725	-2.889	-1.194	-0.762	50.321	573.006	0.000121	0.000202	0.000084
0.1660	351.289	3.439	4.031	1.766	-0.762	50.321	668.764	-0.000241	-0.000282	-0.000124
0.1670	412.545	10.190	12.591	5.685	-0.764	50.322	785.379	-0.000713	-0.000881	-0.000398
0.1680	479.842	17.164	21.888	9.812	-0.760	50.324	913.496	-0.001202	-0.001532	-0.000687
0.1690	549.213	24.910	31.448	13.911	-0.758	50.326	1045.561	-0.001744	-0.002201	-0.000974
0.1700	617.908	32.641	40.968	18.260	-0.759	50.328	1176.338	-0.002285	-0.002868	-0.001278
0.1710	683.206	40.501	50.056	22.431	-0.759	50.331	1300.650	-0.002835	-0.003504	-0.001570
0.1720	742.824	47.587	58.782	26.376	-0.755	50.335	1414.146	-0.003331	-0.004115	-0.001846
0.1730	794.672	53.986	66.078	29.696	-0.753	50.338	1512.852	-0.003779	-0.004625	-0.002079
0.1740	837.263	59.304	72.303	32.474	-0.750	50.341	1593.933	-0.004151	-0.005061	-0.002273
0.1750	870.400	63.654	77.237	34.907	-0.756	50.342	1657.019	-0.004456	-0.005407	-0.002443
0.1760	894.461	66.854	81.239	36.561	-0.756	50.341	1702.824	-0.004680	-0.005687	-0.002559
0.1770	911.172	69.351	84.519	38.007	-0.758	50.339	1734.638	-0.004855	-0.005916	-0.002661
0.1780	921.888	71.175	86.784	38.645	-0.752	50.338	1755.037	-0.004982	-0.006075	-0.002705
0.1790	928.154	72.437	88.381	39.285	-0.748	50.336	1766.968	-0.005071	-0.006187	-0.002750
0.1800	930.950	73.209	89.186	39.603	-0.752	50.333	1772.289	-0.005125	-0.006243	-0.002772
0.1810	931.100	73.602	89.478	39.784	-0.757	50.330	1772.575	-0.005152	-0.006263	-0.002785
0.1820	929.312	73.685	89.436	39.895	-0.758	50.327	1769.171	-0.005158	-0.006261	-0.002793
0.1830	925.945	73.458	89.297	39.617	-0.755	50.324	1762.762	-0.005142	-0.006251	-0.002773
0.1840	920.986	73.137	88.922	39.338	-0.749	50.322	1753.321	-0.005120	-0.006225	-0.002754
0.1850	914.358	72.730	88.727	39.242	-0.748	50.321	1740.704	-0.005091	-0.006211	-0.002747
0.1860	905.041	72.269	87.756	38.978	-0.747	50.321	1722.965	-0.005059	-0.006143	-0.002728
0.1870	891.004	71.371	86.520	38.478	-0.751	50.321	1696.243	-0.004996	-0.006056	-0.002693
0.1880	867.665	68.999	83.240	37.241	-0.752	50.323	1651.812	-0.004830	-0.005827	-0.002607
0.1890	830.876	65.028	78.307	35.088	-0.748	50.326	1581.774	-0.004552	-0.005481	-0.002456
0.1900	779.914	59.359	71.331	32.350	-0.746	50.328	1484.756	-0.004155	-0.004993	-0.002264
0.1910	718.358	52.482	63.021	28.585	-0.746	50.331	1367.569	-0.003674	-0.004411	-0.002001
0.1920	652.488	45.354	54.252	24.652	-0.748	50.334	1242.170	-0.003175	-0.003798	-0.001726
0.1930	587.385	38.098	45.552	20.524	-0.748	50.338	1118.231	-0.002667	-0.003189	-0.001437
0.1940	526.746	31.055	37.452	16.537	-0.746	50.341	1002.789	-0.002174	-0.002622	-0.001158
0.1950	473.049	24.964	30.380	13.272	-0.753	50.341	900.564	-0.001747	-0.002127	-0.000929
0.1960	427.122	19.421	23.627	10.271	-0.755	50.341	813.131	-0.001359	-0.001654	-0.000719
0.1970	389.040	14.763	17.748	7.796	-0.759	50.339	740.633	-0.001033	-0.001242	-0.000546
0.1980	357.511	10.736	12.550	5.530	-0.752	50.338	680.609	-0.000752	-0.000879	-0.000387
0.1990	331.557	7.201	8.202	3.627	-0.747	50.336	631.199	-0.000504	-0.000574	-0.000254
0.2000	309.690	4.435	4.561	2.126	-0.743	50.334	589.571	-0.000310	-0.000319	-0.000149
0.2010	290.725	2.034	1.142	0.722	-0.741	50.330	553.465	-0.000142	-0.000080	-0.000051
0.2020	273.803	-0.212	-1.556	-0.542	-0.743	50.327	521.250	0.000015	0.000109	0.000038
0.2030	258.338	-2.374	-4.001	-1.736	-0.740	50.325	491.810	0.000166	0.000280	0.000122
0.2040	244.557	-4.338	-6.391	-2.834	-0.735	50.323	465.574	0.000304	0.000447	0.000198
0.2050	233.015	-5.713	-8.268	-3.627	-0.741	50.321	443.602	0.000400	0.000579	0.000254
0.2060	223.998	-6.749	-9.907	-4.296	-0.743	50.321	426.435	0.000472	0.000694	0.000301
0.2070	218.062	-7.520	-10.823	-4.670	-0.747	50.322	415.134	0.000526	0.000758	0.000327
0.2080	215.147	-8.333	-11.962	-5.060	-0.741	50.324	409.584	0.000583	0.000837	0.000354
0.2090	215.237	-8.838	-12.574	-5.157	-0.738	50.326	409.756	0.000619	0.000880	0.000361
0.2100	217.852	-8.922	-12.908	-5.184	-0.740	50.328	414.734	0.000625	0.000904	0.000363
0.2110	222.766	-8.839	-12.630	-5.004	-0.744	50.331	424.089	0.000619	0.000884	0.000350
0.2120	230.175	-8.347	-11.950	-4.796	-0.746	50.334	438.194	0.000584	0.000836	0.000336
0.2130	242.423	-7.380	-10.491	-4.419	-0.748	50.337	461.512	0.000517	0.000734	0.000309
0.2140	263.734	-5.626	-7.755	-3.390	-0.748	50.341	502.081	0.000394	0.000543	0.000237
0.2150	297.938	-1.894	-3.015	-1.291	-0.756	50.341	567.198	0.000133	0.000211	0.000090
0.2160	345.668	2.906	3.726	1.655	-0.754	50.341	658.064	-0.000203	-0.000261	-0.000116
0.2170	403.813	9.234	11.939	5.462	-0.755	50.339	768.757	-0.000646	-0.000836	-0.000382
0.2180	467.985	16.180	20.708	9.173	-0.747	50.337	890.923	-0.001133	-0.001450	-0.000642
0.2190	534.636	23.518	29.781	13.175	-0.746	50.336	1017.809	-0.001646	-0.002085	-0.000922
0.2200	600.836	31.126	38.910	17.358	-0.745	50.333	1143.837	-0.002179	-0.002724	-0.001215
0.2210	663.775	38.646	47.860	21.304	-0.744	50.330	1263.657	-0.002705	-0.003350	-0.001491
0.2220	721.469	45.396	55.962	25.110	-0.744	50.327	1373.491	-0.003178	-0.003917	-0.001758
0.2230	772.535	51.710	63.674	28.264	-0.748	50.324	1470.709	-0.003620	-0.004457	-0.001978
0.2240	816.463	57.154	70.330	31.017	-0.741	50.323	1554.337	-0.004001	-0.004923	-0.002171
0.2250	852.667	61.856	76.305	33.629	-0.746	50.321	1623.259	-0.004330	-0.005341	-0.002354
0.2260	881.251	65.562	80.768	35.978	-0.746	50.321	1677.675	-0.004589	-0.005654	-0.002518
0.2270	903.072	68.592	84.199	37.702	-0.754	50.322	1719.217	-0.004801	-0.005894	-0.002639
0.2280	919.047	70.963	86.743	38.744	-0.744	50.323	1749.630	-0.004967	-0.006072	-0.002712
0.2290	930.018	72.534	88.799	39.272	-0.743	50.326	1770.515	-0.005077	-0.006216	-0.002749
0.2300	936.435	73.769	90.036	39.758	-0.746	50.328	1782.732	-0.005164	-0.006303	-0.002783
0.2310	939.065	74.430	90.759	40.174	-0.746	50.331	1787.739	-0.005210	-0.006353	-0.002812
0.2320	938.614	74.809	90.993	40.381	-0.751	50.335	1786.880	-0.005237	-0.006370	-0.002827
0.2330	935.939	74.992	90.937	40.491	-0.748	50.338	1781.788	-0.005249	-0.006366	-0.002834
0.2340	931.250	74.611	90.645	40.157	-0.744	50.341	1772.861	-0.005223	-0.006345	-0.002811
0.2350	924.458	74.345	90.089	40.019	-0.743	50.341	1759.930	-0.005204	-0.006306	-0.002801
0.2360	914.764	73.532	89.243	39.812	-0.744	50.340	1741.476	-0.005147	-0.006247	-0.002787
0.2370	900.142	72.381	87.590	39.299	-0.744	50.339	1713.638	-0.005067	-0.006131	-0.002751
0.2380	875.991	70.122	84.798	38.006	-0.740	50.337	1667.662	-0.004909	-0.005936	-0.002660
0.2390	837.894	65.955	80.044	35.892	-0.734	50.336	1595.135	-0.004617	-0.005603	-0.002512
0.2400	785.294	60.133	73.360	32.794	-0.736	50.334	1494.999	-0.004209	-0.005135	-0.002296
0.2410	722.611	53.243	65.258	29.126	-0.736	50.331	1375.666	-0.003727	-0.004568	-0.002039
0.2420	656.817	45.988	56.434	25.042	-0.740	50.328	1250.410	-0.003219	-0.003950	-0.001753
0.2430	593.397	38.732	47.707	21.025	-0.738	50.324	1129.675	-0.002711	-0.003339	-0.001472
0.2440	535.357	31.785	39.009	17.036	-0.736	50.322	1019.182	-0.002225	-0.002731	-0.001193
0.2450	484.516	25.878	31.338	13.825	-0.744	50.321	922.394	-0.001811	-0.002194	-0.000968
0.2460	441.024	20.700	24.502	11.241	-0.746	50.321	839.596	-0.001449	-0.001715	-0.000787
0.2470	404.505	16.491	18.873	9.156	-0.750	50.321	770.073	-0.001154	-0.001321	-0.000641
0.2480	373.411	12.815	13.994	6.920	-0.746	50.324	710.878	-0.000897	-0.000980	-0.000484
0.2490	346.300	9.363	9.604	4.877	-0.742	50.326	659.266	-0.000655	-0.000672	-0.000341
0.2500	217.461	-16.964	-19.439	-8.576	-0.746	50.321	413.990	0.001188	0.001361	0.000600
0.2510	217.160	-16.642	-19.383	-8.340	-0.750	50.320	413.418	0.001165	0.001357	0.000584
0.2520	216.845	-16.627	-19.314	-8.283	-0.749	50.320	412.817	0.001164	0.001352	0.000580
0.2530	216.785	-16.390	-19.190	-8.034	-0.754	50.320	412.703	0.001147	0.001343	0.000562
0.2540	216.800	-16.559	-19.246	-8.159	-0.748	50.323	412.731	0.001159	0.001347	0.000571
0.2550	217.115	-16.601	-19.469	-8.381	-0.746	50.325	413.332	0.001162	0.001363	0.000587
0.2560	217.912	-16.405	-19.842	-8.298	-0.743	50.328	414.848	0.001148	0.001389	0.000581
0.2570	219.325	-16.264	-20.093	-8.297	-0.746	50.330	417.538	0.001138	0.001406	0.000581
0.2580	221.654	-16.081	-20.177	-7.977	-0.750	50.333	421.972	0.001126	0.001412	0.000558
0.2590	225.141	-15.815	-19.606	-7.810	-0.752	50.336	428.610	0.001107	0.001372	0.000547
0.2600	231.077	-15.463	-18.620	-7.600	-0.751	50.339	439.911	0.001082	0.001303	0.000532
0.2610	242.333	-14.439	-16.590	-6.935	-0.752	50.340	461.340	0.001011	0.001161	0.000485
0.2620	263.734	-12.572	-13.491	-5.921	-0.755	50.340	502.081	0.000880	0.000944	0.000414
0.2630	299.291	-8.953	-8.489	-3.768	-0.758	50.338	569.773	0.000627	0.000594	0.000264
0.2640	350.012	-4.028	-1.651	-0.683	-0.753	50.336	666.332	0.000282	0.000116	0.000048
0.2650	413.401	2.792	7.131	3.265	-0.750	50.334	787.010	-0.000195	-0.000499	-0.000229
0.2660	485.433	10.622	17.359	7.781	-0.751	50.332	924.139	-0.000744	-0.001215	-0.000545
0.2670	562.664	19.224	28.294	12.672	-0.752	50.329	1071.167	-0.001346	-0.001981	-0.000887
0.2680	642.525	28.316	39.703	17.565	-0.753	50.326	1223.202	-0.001982	-0.002779	-0.001230
0.2690	723.182	37.943	51.056	22.777	-0.753	50.324	1376.753	-0.002656	-0.003574	-0.001594
0.2700	802.953	47.599	62.117	27.726	-0.751	50.321	1528.616	-0.003332	-0.004348	-0.001941
0.2710	879.943	57.128	72.915	33.006	-0.759	50.320	1675.186	-0.003999	-0.005104	-0.002310
0.2720	951.854	66.236	83.184	37.827	-0.760	50.320	1812.086	-0.004637	-0.005823	-0.002648
0.2730	1017.393	74.262	92.815	42.398	-0.757	50.321	1936.855	-0.005198	-0.006497	-0.002968
0.2740	1074.832	81.685	101.235	46.192	-0.751	50.323	2046.204	-0.005718	-0.007086	-0.003233
0.2750	1122.727	87.816	108.239	49.443	-0.748	50.325	2137.384	-0.006147	-0.007577	-0.003461
0.2760	1159.742	93.164	113.979	51.959	-0.747	50.327	2207.851	-0.006521	-0.007979	-0.003637
0.2770	1185.711	96.982	118.217	53.835	-0.746	50.330	2257.290	-0.006789	-0.008275	-0.003768
0.2780	1201.687	99.816	121.691	55.072	-0.743	50.334	2287.703	-0.006987	-0.008518	-0.003855
0.2790	1209.261	101.330	123.748	55.864	-0.741	50.337	2302.122	-0.007093	-0.008662	-0.003910
0.2800	1210.613	102.129	124.638	56.098	-0.739	50.340	2304.697	-0.007149	-0.008725	-0.003927
0.2810	1207.878	102.845	125.194	56.404	-0.742	50.341	2299.490	-0.007199	-0.008764	-0.003948
0.2820	1202.438	103.126	125.473	56.305	-0.744	50.340	2289.133	-0.007219	-0.008783	-0.003941
0.2830	1194.819	103.125	125.570	56.251	-0.749	50.338	2274.628	-0.007219	-0.008790	-0.003938
0.2840	1184.344	102.368	124.889	55.765	-0.748	50.337	2254.686	-0.007166	-0.008742	-0.003904
0.2850	1168.639	100.923	122.915	54.932	-0.750	50.335	2224.789	-0.007065	-0.008604	-0.003845
0.2860	1141.873	98.426	119.357	53.890	-0.751	50.332	2173.834	-0.006890	-0.008355	-0.003772
0.2870	1097.870	94.007	113.520	51.472	-0.756	50.329	2090.063	-0.006580	-0.007946	-0.003603
0.2880	1035.037	87.300	105.196	47.915	-0.755	50.326	1970.444	-0.006111	-0.007364	-0.003354
0.2890	957.520	78.880	95.287	43.454	-0.755	50.323	1822.872	-0.005522	-0.006670	-0.003042
0.2900	873.586	69.449	84.087	38.231	-0.754	50.321	1663.084	-0.004861	-0.005886	-0.002676
0.2910	790.509	60.271	73.206	33.242	-0.754	50.320	1504.927	-0.004219	-0.005124	-0.002327
0.2920	712.632	51.274	62.394	28.351	-0.748	50.320	1356.668	-0.003589	-0.004368	-0.001985
0.2930	642.915	43.093	52.750	24.056	-0.755	50.320	1223.946	-0.003017	-0.003693	-0.001684
0.2940	581.885	35.755	43.898	20.276	-0.748	50.323	1107.759	-0.002503	-0.003073	-0.001419
0.2950	529.316	29.160	36.130	16.648	-0.746	50.325	1007.681	-0.002041	-0.002529	-0.001165
0.2960	484.080	23.574	29.308	13.577	-0.748	50.328	921.564	-0.001650	-0.002052	-0.000950
0.2970	444.510	18.818	23.250	10.798	-0.752	50.330	846.233	-0.001317	-0.001628	-0.000756
0.2980	409.148	14.455	18.095	8.227	-0.756	50.334	778.913	-0.001012	-0.001267	-0.000576
0.2990	376.642	10.399	13.301	6.059	-0.755	50.337	717.030	-0.000728	-0.000931	-0.000424
0.3000	346.285	6.259	8.312	3.641	-0.753	50.340	659.237	-0.000438	-0.000582	-0.000255
0.3010	317.926	2.919	3.699	2.002	-0.754	50.340	605.249	-0.000204	-0.000259	-0.000140
0.3020	291.686	-0.407	-0.943	0.167	-0.751	50.340	555.296	0.000028	0.000066	-0.000012
0.3030	268.603	-3.073	-4.848	-1.293	-0.756	50.338	511.351	0.000215	0.000339	0.000090
0.3040	249.291	-5.639	-8.406	-2.835	-0.755	50.337	474.586	0.000395	0.000588	0.000198
0.3050	234.518	-7.729	-11.086	-4.060	-0.752	50.335	446.463	0.000541	0.000776	0.000284
0.3060	224.660	-9.259	-12.935	-4.935	-0.751	50.333	427.694	0.000648	0.000905	0.000345
0.3070	219.445	-10.103	-13.963	-5.450	-0.749	50.330	417.767	0.000707	0.000977	0.000382
0.3080	218.423	-10.454	-14.005	-5.823	-0.750	50.326	415.821	0.000732	0.000980	0.000408
0.3090	220.677	-10.665	-13.380	-5.810	-0.751	50.324	420.113	0.000747	0.000937	0.000407
0.3100	225.742	-10.609	-12.795	-5.879	-0.751	50.322	429.754	0.000743	0.000896	0.000412
0.3110	234.488	-10.047	-12.032	-5.379	-0.755	50.320	446.405	0.000703	0.000842	0.000377
0.3120	250.599	-8.741	-10.754	-4.530	-0.755	50.320	477.076	0.000612	0.000753	0.000317
0.3130	280.295	-5.879	-6.906	-2.780	-0.755	50.321	533.609	0.000412	0.000483	0.000195
0.3140	327.559	-1.304	-0.553	-0.250	-0.748	50.323	623.589	0.000091	0.000039	0.000018
0.3150	391.580	5.346	8.632	3.487	-0.744	50.325	745.468	-0.000374	-0.000604	-0.000244
0.3160	467.173	13.444	19.360	8.115	-0.747	50.327	889.378	-0.000941	-0.001355	-0.000568
0.3170	548.777	22.439	30.866	13.173	-0.751	50.330	1044.731	-0.001571	-0.002161	-0.000922
0.3180	632.982	32.023	42.622	18.468	-0.750	50.333	1205.034	-0.002242	-0.002984	-0.001293
0.3190	717.216	41.538	54.365	23.776	-0.749	50.336	1365.395	-0.002908	-0.003806	-0.001664
0.3200	799.677	51.011	65.453	28.862	-0.747	50.339	1522.379	-0.003571	-0.004582	-0.002020
0.3210	878.140	60.623	76.236	34.308	-0.754	50.340	1671.753	-0.004244	-0.005337	-0.002402
0.3220	950.577	69.505	86.103	39.033	-0.751	50.340	1809.654	-0.004865	-0.006027	-0.002732
0.3230	1015.515	77.504	95.539	43.633	-0.751	50.338	1933.279	-0.005425	-0.006688	-0.003054
0.3240	1071.691	84.760	103.738	47.204	-0.747	50.337	2040.224	-0.005933	-0.007262	-0.003304
0.3250	1118.144	90.666	110.852	50.220	-0.741	50.335	2128.658	-0.006347	-0.007760	-0.003515
0.3260	1153.686	95.704	116.731	52.834	-0.743	50.332	2196.321	-0.006699	-0.008171	-0.003698
0.3270	1178.062	99.281	121.148	54.515	-0.740	50.329	2242.727	-0.006950	-0.008480	-0.003816
0.3280	1192.204	101.668	124.053	55.586	-0.745	50.326	2269.650	-0.007117	-0.008684	-0.003891
0.3290	1198.140	103.057	125.777	56.239	-0.748	50.323	2280.951	-0.007214	-0.008804	-0.003937
0.3300	1198.305	103.732	126.264	56.419	-0.750	50.321	2281.265	-0.007261	-0.008838	-0.003949
0.3310	1194.879	103.943	126.626	56.738	-0.752	50.319	2274.742	-0.007276	-0.008864	-0.003972
0.3320	1189.108	104.042	126.348	56.598	-0.755	50.320	2263.756	-0.007283	-0.008844	-0.003962
0.3330	1181.564	103.873	125.779	56.694	-0.759	50.321	2249.393	-0.007271	-0.008805	-0.003969
0.3340	1171.630	103.283	124.472	56.195	-0.750	50.323	2230.482	-0.007230	-0.008713	-0.003934
0.3350	1157.323	102.286	122.638	55.641	-0.744	50.325	2203.245	-0.007160	-0.008585	-0.003895
0.3360	1133.052	100.111	119.678	54.543	-0.746	50.327	2157.040	-0.007008	-0.008377	-0.003818
0.3370	1092.956	95.970	114.716	52.377	-0.744	50.330	2080.708	-0.006718	-0.008030	-0.003666
0.3380	1035.006	89.698	107.266	49.027	-0.740	50.334	1970.387	-0.006279	-0.007509	-0.003432
0.3390	962.555	81.685	97.788	44.718	-0.736	50.337	1832.457	-0.005718	-0.006845	-0.003130
0.3400	882.679	72.705	87.158	39.770	-0.739	50.340	1680.393	-0.005089	-0.006101	-0.002784
0.3410	802.216	63.822	76.695	35.018	-0.745	50.341	1527.214	-0.004468	-0.005369	-0.002451
0.3420	726.143	55.080	66.843	30.113	-0.747	50.340	1382.389	-0.003856	-0.004679	-0.002108
0.3430	657.914	47.333	57.948	25.943	-0.751	50.338	1252.499	-0.003313	-0.004056	-0.001816
0.3440	598.251	39.938	49.638	21.955	-0.747	50.337	1138.916	-0.002796	-0.003475	-0.001537
0.3450	546.673	33.442	42.065	18.579	-0.741	50.335	1040.726	-0.002341	-0.002945	-0.001301
0.3460	501.438	27.744	35.117	15.633	-0.740	50.332	954.609	-0.001942	-0.002458	-0.001094
0.3470	461.042	22.763	28.906	12.881	-0.742	50.329	877.705	-0.001593	-0.002023	-0.000902
0.3480	423.981	18.315	22.902	10.283	-0.742	50.326	807.152	-0.001282	-0.001603	-0.000720
0.3490	389.341	14.049	17.470	7.754	-0.742	50.324	741.205	-0.000983	-0.001223	-0.000543
0.3500	356.669	9.783	12.273	5.281	-0.740	50.322	679.007	-0.000685	-0.000859	-0.000370
0.3510	326.297	5.966	7.673	3.447	-0.748	50.320	621.185	-0.000418	-0.000537	-0.000241
0.3520	298.720	2.556	3.170	1.516	-0.746	50.320	568.686	-0.000179	-0.000222	-0.000106
0.3530	275.005	-0.292	-0.555	0.099	-0.752	50.321	523.539	0.000020	0.000039	-0.000007
0.3540	255.738	-2.847	-4.057	-1.542	-0.748	50.323	486.860	0.000199	0.000284	0.000108
0.3550	241.371	-4.854	-6.725	-2.849	-0.743	50.325	459.509	0.000340	0.000471	0.000199
0.3560	231.948	-6.356	-9.059	-3.740	-0.744	50.328	441.570	0.000445	0.000634	0.000262
0.3570	227.124	-7.450	-10.670	-4.184	-0.746	50.331	432.386	0.000521	0.000747	0.000293
0.3580	226.283	-7.871	-11.587	-4.349	-0.753	50.334	430.784	0.000551	0.000811	0.000304
0.3590	228.582	-7.982	-11.795	-4.461	-0.755	50.337	435.162	0.000559	0.000826	0.000312
0.3600	233.376	-7.925	-11.281	-4.544	-0.754	50.340	444.288	0.000555	0.000790	0.000318
0.3610	241.431	-7.477	-9.947	-4.225	-0.755	50.341	459.623	0.000523	0.000696	0.000296
0.3620	256.279	-6.173	-7.863	-3.419	-0.757	50.340	487.890	0.000432	0.000550	0.000239
0.3630	284.383	-3.509	-4.138	-1.794	-0.758	50.339	541.391	0.000246	0.000290	0.000126
0.3640	330.189	0.996	1.378	0.832	-0.759	50.337	628.595	-0.000070	-0.000096	-0.000058
0.3650	393.579	7.396	9.563	4.572	-0.753	50.335	749.273	-0.000518	-0.000669	-0.000320
0.3660	469.277	15.353	19.805	9.075	-0.754	50.332	893.383	-0.001075	-0.001386	-0.000635
0.3670	551.272	24.503	31.297	14.008	-0.755	50.330	1049.480	-0.001715	-0.002191	-0.000981
0.3680	635.867	33.765	43.246	19.177	-0.758	50.326	1210.527	-0.002364	-0.003027	-0.001342
0.3690	720.251	43.728	54.975	24.457	-0.761	50.323	1371.174	-0.003061	-0.003848	-0.001712
0.3700	802.307	53.158	66.634	29.640	-0.760	50.321	1527.386	-0.003721	-0.004664	-0.002075
0.3710	879.703	62.616	77.515	34.767	-0.764	50.319	1674.728	-0.004383	-0.005426	-0.002434
0.3720	950.487	71.302	87.534	39.407	-0.762	50.319	1809.483	-0.004991	-0.006127	-0.002759
0.3730	1012.794	79.231	96.414	43.799	-0.760	50.320	1928.101	-0.005546	-0.006749	-0.003066
0.3740	1065.063	85.517	104.197	47.315	-0.754	50.322	2027.607	-0.005986	-0.007294	-0.003312
0.3750	1106.301	90.835	110.741	50.179	-0.750	50.325	2106.113	-0.006358	-0.007752	-0.003513
0.3760	1136.088	94.891	115.771	52.237	-0.750	50.327	2162.819	-0.006642	-0.008104	-0.003657
0.3770	1155.850	97.838	119.342	53.668	-0.752	50.330	2200.441	-0.006849	-0.008354	-0.003757
0.3780	1167.527	100.012	121.427	54.724	-0.754	50.333	2222.672	-0.007001	-0.008500	-0.003831
0.3790	1173.388	101.261	122.400	55.224	-0.758	50.336	2233.829	-0.007088	-0.008568	-0.003866
0.3800	1174.951	102.046	122.802	55.404	-0.757	50.340	2236.805	-0.007143	-0.008596	-0.003878
0.3810	1173.659	102.734	123.233	55.752	-0.764	50.340	2234.344	-0.007191	-0.008626	-0.003903
0.3820	1170.037	102.903	123.219	55.945	-0.767	50.340	2227.449	-0.007203	-0.008625	-0.003916
0.3830	1164.611	102.889	123.539	56.140	-0.769	50.338	2217.121	-0.007202	-0.008648	-0.003930
0.3840	1157.157	102.439	123.468	55.695	-0.762	50.337	2202.930	-0.007171	-0.008643	-0.003899
0.3850	1147.088	101.779	122.996	55.253	-0.757	50.335	2183.762	-0.007125	-0.008610	-0.003868
0.3860	1130.948	100.475	121.398	54.571	-0.758	50.332	2153.034	-0.007033	-0.008498	-0.003820
0.3870	1102.214	97.739	117.898	53.210	-0.758	50.330	2098.331	-0.006842	-0.008253	-0.003725
0.3880	1055.385	92.871	112.256	50.500	-0.759	50.326	2009.182	-0.006501	-0.007858	-0.003535
0.3890	990.192	85.938	104.043	46.679	-0.756	50.323	1885.071	-0.006016	-0.007283	-0.003268
0.3900	911.864	77.111	93.884	41.857	-0.751	50.321	1735.954	-0.005398	-0.006572	-0.002930
0.3910	828.351	67.934	82.822	36.951	-0.751	50.319	1576.967	-0.004755	-0.005798	-0.002587
0.3920	745.589	58.700	71.247	31.811	-0.750	50.320	1419.411	-0.004109	-0.004987	-0.002227
0.3930	668.644	49.930	60.103	27.086	-0.759	50.320	1272.926	-0.003495	-0.004207	-0.001896
0.3940	599.979	41.651	49.959	22.555	-0.754	50.323	1142.206	-0.002916	-0.003497	-0.001579
0.3950	540.782	34.256	41.024	18.706	-0.752	50.325	1029.510	-0.002398	-0.002872	-0.001309
0.3960	490.542	27.885	33.409	15.272	-0.752	50.327	933.867	-0.001952	-0.002339	-0.001069
0.3970	447.892	22.426	26.669	12.353	-0.755	50.330	852.671	-0.001570	-0.001867	-0.000865
0.3980	411.508	17.935	20.874	9.865	-0.752	50.333	783.405	-0.001255	-0.001461	-0.000691
0.3990	379.603	14.019	15.845	7.573	-0.749	50.337	722.666	-0.000981	-0.001109	-0.000530
0.4000	351.109	10.159	10.982	5.378	-0.744	50.340	668.421	-0.000711	-0.000769	-0.000376
0.4010	325.230	6.974	6.964	3.641	-0.748	50.341	619.154	-0.000488	-0.000488	-0.000255
0.4020	301.515	3.888	3.559	2.057	-0.753	50.341	574.007	-0.000272	-0.000249	-0.000144
0.4030	280.550	1.362	0.279	0.611	-0.754	50.339	534.096	-0.000095	-0.000020	-0.000043
0.4040	262.712	-1.122	-2.931	-0.819	-0.752	50.337	500.135	0.000079	0.000205	0.000057
0.4050	248.931	-3.228	-5.849	-1.930	-0.750	50.336	473.900	0.000226	0.000409	0.000135
0.4060	239.658	-4.631	-7.864	-2.820	-0.754	50.333	456.247	0.000324	0.000551	0.000197
0.4070	235.195	-5.445	-8.892	-3.225	-0.751	50.330	447.750	0.000381	0.000622	0.000226
0.4080	234.804	-5.739	-9.392	-3.559	-0.752	50.326	447.006	0.000402	0.000657	0.000249
0.4090	237.795	-6.173	-9.171	-3.657	-0.759	50.323	452.700	0.000432	0.000642	0.000256
0.4100	243.280	-6.201	-8.294	-3.711	-0.761	50.321	463.142	0.000434	0.000581	0.000260
0.4110	252.447	-5.387	-6.780	-3.224	-0.764	50.320	480.595	0.000377	0.000475	0.000226
0.4120	269.114	-3.816	-4.445	-2.403	-0.764	50.320	512.323	0.000267	0.000311	0.000168
0.4130	299.606	-0.855	-0.429	-0.513	-0.768	50.321	570.374	0.000060	0.000030	0.000036
0.4140	347.382	3.818	5.754	2.085	-0.767	50.323	661.325	-0.000267	-0.000403	-0.000146
0.4150	411.388	10.414	14.189	5.863	-0.766	50.325	783.176	-0.000729	-0.000993	-0.000410
0.4160	486.755	18.748	24.390	10.450	-0.761	50.327	926.657	-0.001312	-0.001707	-0.000731
0.4170	568.600	27.812	35.827	15.605	-0.758	50.330	1082.468	-0.001947	-0.002508	-0.001092
0.4180	653.661	37.383	47.874	20.942	-0.752	50.333	1244.402	-0.002617	-0.003351	-0.001466
0.4190	738.691	47.066	60.145	26.235	-0.751	50.337	1406.279	-0.003295	-0.004210	-0.001836
0.4200	821.017	56.721	71.360	31.392	-0.750	50.340	1563.005	-0.003971	-0.004995	-0.002197
0.4210	897.692	66.067	81.795	36.423	-0.759	50.340	1708.975	-0.004625	-0.005726	-0.002550
0.4220	966.327	74.303	91.078	41.022	-0.762	50.340	1839.638	-0.005201	-0.006375	-0.002872
0.4230	1025.328	81.713	99.361	45.079	-0.764	50.338	1951.962	-0.005720	-0.006955	-0.003156
0.4240	1073.088	87.817	106.407	48.302	-0.760	50.337	2042.885	-0.006147	-0.007448	-0.003381
0.4250	1109.127	92.729	111.925	50.652	-0.756	50.335	2111.492	-0.006491	-0.007835	-0.003546
0.4260	1133.322	96.238	115.884	52.486	-0.754	50.332	2157.555	-0.006737	-0.008112	-0.003674
0.4270	1147.284	98.664	118.635	53.557	-0.755	50.329	2184.134	-0.006907	-0.008304	-0.003749
0.4280	1153.460	99.942	120.621	54.141	-0.757	50.326	2195.892	-0.006996	-0.008443	-0.003790
0.4290	1154.407	100.671	121.746	54.378	-0.758	50.324	2197.695	-0.007047	-0.008522	-0.003806
0.4300	1152.574	100.854	122.065	54.378	-0.754	50.322	2194.204	-0.007060	-0.008545	-0.003806
0.4310	1149.177	100.965	122.176	54.614	-0.760	50.320	2187.738	-0.007068	-0.008552	-0.003823
0.4320	1144.428	100.952	122.163	54.710	-0.757	50.320	2178.698	-0.007067	-0.008551	-0.003830
0.4330	1138.282	100.895	121.928	54.627	-0.760	50.321	2166.996	-0.007063	-0.008535	-0.003824
0.4340	1130.061	100.321	121.177	54.251	-0.752	50.323	2151.346	-0.007022	-0.008482	-0.003798
0.4350	1118.579	99.369	119.899	53.697	-0.754	50.325	2129.488	-0.006956	-0.008393	-0.003759
0.4360	1099.629	97.712	117.884	52.750	-0.753	50.326	2093.410	-0.006840	-0.008252	-0.003693
0.4370	1067.648	94.694	114.201	51.263	-0.755	50.329	2032.528	-0.006629	-0.007994	-0.003588
0.4380	1019.061	89.515	108.169	48.400	-0.751	50.333	1940.031	-0.006266	-0.007572	-0.003388
0.4390	954.604	82.598	99.651	44.746	-0.749	50.336	1817.322	-0.005782	-0.006976	-0.003132
0.4400	879.327	74.234	89.410	39.910	-0.744	50.340	1674.013	-0.005196	-0.006259	-0.002794
0.4410	799.752	65.575	78.974	35.297	-0.749	50.340	1522.522	-0.004590	-0.005528	-0.002471
0.4420	721.033	56.692	68.648	30.502	-0.747	50.340	1372.662	-0.003968	-0.004805	-0.002135
0.4430	647.830	48.328	58.906	26.069	-0.758	50.338	1233.301	-0.003383	-0.004123	-0.001825
0.4440	582.441	40.402	49.513	21.830	-0.755	50.337	1108.818	-0.002828	-0.003466	-0.001528
0.4450	525.859	33.456	40.661	17.967	-0.759	50.335	1001.101	-0.002342	-0.002846	-0.001258
0.4460	477.963	27.618	33.338	14.813	-0.759	50.332	909.920	-0.001933	-0.002334	-0.001037
0.4470	437.567	22.495	27.127	12.008	-0.762	50.329	833.015	-0.001575	-0.001899	-0.000841
0.4480	403.423	18.312	22.000	9.464	-0.762	50.326	768.013	-0.001282	-0.001540	-0.000662
0.4490	373.636	14.343	17.456	7.338	-0.755	50.324	711.308	-0.001004	-0.001222	-0.000514
0.4500	346.886	10.805	12.954	5.212	-0.750	50.322	660.381	-0.000756	-0.000907	-0.000365
0.4510	322.480	7.537	8.897	3.684	-0.750	50.320	613.918	-0.000528	-0.000623	-0.000258
0.4520	300.057	4.547	4.603	2.015	-0.751	50.320	571.232	-0.000318	-0.000322	-0.000141
0.4530	280.069	2.036	0.628	0.737	-0.759	50.320	533.180	-0.000143	-0.000044	-0.000052
0.4540	262.772	-0.278	-2.640	-0.624	-0.756	50.323	500.250	0.000019	0.000185	0.000044
0.4550	249.036	-2.397	-5.127	-1.860	-0.755	50.325	474.100	0.000168	0.000359	0.000130
0.4560	239.177	-3.942	-6.502	-2.640	-0.754	50.327	455.332	0.000276	0.000455	0.000185
0.4570	233.587	-5.078	-7.335	-3.141	-0.757	50.330	444.689	0.000355	0.000513	0.000220
0.4580	232.024	-5.627	-7.668	-3.531	-0.755	50.333	441.713	0.000394	0.000537	0.000247
0.4590	233.827	-5.963	-7.876	-3.629	-0.755	50.336	445.147	0.000417	0.000551	0.000254
0.4600	238.561	-5.936	-7.738	-3.796	-0.747	50.339	454.159	0.000416	0.000542	0.000266
0.4610	246.751	-5.305	-6.794	-3.197	-0.756	50.340	469.751	0.000371	0.000476	0.000224
0.4620	262.020	-3.985	-5.266	-2.319	-0.760	50.340	498.819	0.000279	0.000369	0.000162
0.4630	290.935	-1.277	-1.805	-0.513	-0.765	50.338	553.865	0.000089	0.000126	0.000036
0.4640	338.079	3.452	4.282	2.057	-0.757	50.337	643.616	-0.000242	-0.000300	-0.000144
0.4650	403.257	10.076	13.288	5.697	-0.751	50.335	767.698	-0.000705	-0.000930	-0.000399
0.4660	481.315	18.511	24.515	10.339	-0.750	50.332	916.300	-0.001296	-0.001716	-0.000724
0.4670	566.255	27.744	36.465	15.620	-0.751	50.329	1078.005	-0.001942	-0.002553	-0.001093
0.4680	654.066	37.706	48.818	20.998	-0.747	50.326	1245.174	-0.002639	-0.003417	-0.001470
0.4690	741.111	47.851	60.839	26.640	-0.747	50.323	1410.885	-0.003350	-0.004259	-0.001865
0.4700	824.458	57.507	71.971	32.017	-0.742	50.322	1569.557	-0.004025	-0.005038	-0.002241
0.4710	901.088	66.683	82.560	37.117	-0.751	50.320	1715.441	-0.004668	-0.005779	-0.002598
0.4720	968.446	74.990	92.258	41.607	-0.754	50.320	1843.672	-0.005249	-0.006458	-0.002912
0.4730	1025.133	82.202	100.901	45.373	-0.762	50.320	1951.590	-0.005754	-0.007063	-0.003176
0.4740	1070.308	88.097	108.044	48.459	-0.759	50.322	2037.592	-0.006167	-0.007563	-0.003392
0.4750	1104.618	92.742	113.450	50.765	-0.759	50.325	2102.909	-0.006492	-0.007941	-0.003554
0.4760	1129.144	96.476	117.606	52.613	-0.758	50.327	2149.601	-0.006753	-0.008232	-0.003683
0.4770	1145.540	99.170	120.052	53.849	-0.761	50.330	2180.815	-0.006942	-0.008404	-0.003769
0.4780	1155.624	101.036	121.622	54.738	-0.760	50.333	2200.012	-0.007073	-0.008514	-0.003832
0.4790	1160.779	101.850	122.274	55.127	-0.760	50.336	2209.826	-0.007129	-0.008559	-0.003859
0.4800	1162.222	102.299	122.593	55.224	-0.756	50.340	2212.572	-0.007161	-0.008582	-0.003866
0.4810	1161.155	102.902	122.954	55.557	-0.757	50.340	2210.541	-0.007203	-0.008607	-0.003889
0.4820	1158.104	103.070	123.511	55.611	-0.752	50.340	2204.733	-0.007215	-0.008646	-0.003893
0.4830	1153.340	103.070	123.887	55.695	-0.757	50.338	2195.663	-0.007215	-0.008672	-0.003899
0.4840	1146.307	102.481	123.874	55.418	-0.754	50.337	2182.274	-0.007174	-0.008671	-0.003879
0.4850	1136.223	101.583	122.803	54.876	-0.752	50.335	2163.076	-0.007111	-0.008596	-0.003841
0.4860	1119.376	100.390	120.968	54.237	-0.748	50.333	2131.004	-0.007027	-0.008468	-0.003797
0.4870	1089.244	97.430	117.522	52.667	-0.753	50.330	2073.641	-0.006820	-0.008227	-0.003687
0.4880	1040.552	92.322	111.727	50.095	-0.756	50.326	1980.944	-0.006463	-0.007821	-0.003507
0.4890	973.661	85.038	103.097	46.037	-0.752	50.323	1853.600	-0.005953	-0.007217	-0.003223
0.4900	895.182	76.407	92.300	41.132	-0.754	50.322	1704.197	-0.005349	-0.006461	-0.002879
0.4910	813.668	67.525	81.378	36.366	-0.756	50.320	1549.015	-0.004727	-0.005696	-0.002546
0.4920	735.295	58.517	70.913	31.503	-0.756	50.319	1399.813	-0.004096	-0.004964	-0.002205
0.4930	664.361	50.351	61.589	27.250	-0.759	50.320	1264.772	-0.003525	-0.004311	-0.001908
0.4940	602.699	42.675	52.681	23.110	-0.763	50.322	1147.385	-0.002987	-0.003688	-0.001618
0.4950	550.476	36.374	44.720	19.693	-0.760	50.324	1047.964	-0.002546	-0.003130	-0.001378
0.4960	506.202	31.167	37.925	16.677	-0.763	50.326	963.678	-0.002182	-0.002655	-0.001167
0.4970	467.564	26.620	31.923	14.160	-0.762	50.330	890.121	-0.001863	-0.002235	-0.000991
0.4980	432.653	22.088	26.671	11.700	-0.762	50.333	823.660	-0.001546	-0.001867	-0.000819
0.4990	399.620	18.074	21.403	9.351	-0.762	50.336	760.775	-0.001265	-0.001498	-0.000655
Test Cycles
Time (sec)	Axial stress (kPa)	Axial micro-strain #1	Axial micro-strain #2	Axial micro-strain #3	Confining pressure (kPa)	Temperature (�C)	Load (N)	Displacement #1 (mm)	Displacement #2 (mm)	Displacement #3 (mm)
0.0000	367.535	14.047	15.872	6.921	-0.758	50.339	699.692	-0.000983	-0.001111	-0.000484
0.0010	336.727	10.483	10.785	4.949	-0.762	50.340	641.041	-0.000734	-0.000755	-0.000346
0.0020	307.767	6.849	5.783	3.016	-0.763	50.339	585.909	-0.000479	-0.000405	-0.000211
0.0030	281.993	3.621	1.766	1.433	-0.766	50.338	536.842	-0.000253	-0.000124	-0.000100
0.0040	260.427	0.646	-1.861	-0.347	-0.762	50.336	495.787	-0.000045	0.000130	0.000024
0.0050	244.061	-1.838	-4.766	-1.666	-0.757	50.335	464.630	0.000129	0.000334	0.000117
0.0060	233.346	-3.564	-6.655	-2.599	-0.759	50.332	444.231	0.000250	0.000466	0.000182
0.0070	227.846	-4.757	-7.571	-3.252	-0.763	50.330	433.760	0.000333	0.000530	0.000228
0.0080	226.974	-5.361	-7.946	-3.405	-0.768	50.326	432.100	0.000375	0.000556	0.000238
0.0090	229.634	-5.306	-8.030	-3.641	-0.772	50.324	437.164	0.000371	0.000562	0.000255
0.0100	235.495	-5.109	-7.793	-3.586	-0.768	50.321	448.322	0.000358	0.000546	0.000251
0.0110	245.459	-4.463	-6.543	-3.281	-0.772	50.320	467.291	0.000312	0.000458	0.000230
0.0120	263.839	-3.184	-4.166	-2.432	-0.771	50.320	502.281	0.000223	0.000292	0.000170
0.0130	296.736	0.170	0.336	-0.318	-0.777	50.320	564.909	-0.000012	-0.000024	0.000022
0.0140	347.412	5.124	6.672	2.517	-0.772	50.323	661.383	-0.000359	-0.000467	-0.000176
0.0150	414.048	12.197	15.094	6.574	-0.772	50.325	788.240	-0.000854	-0.001057	-0.000460
0.0160	491.173	20.266	25.390	11.298	-0.770	50.327	935.068	-0.001419	-0.001777	-0.000791
0.0170	573.574	29.359	36.562	16.495	-0.770	50.330	1091.938	-0.002055	-0.002559	-0.001155
0.0180	657.628	38.886	48.360	21.832	-0.771	50.333	1251.955	-0.002722	-0.003385	-0.001528
0.0190	740.329	48.583	59.937	26.876	-0.771	50.335	1409.397	-0.003401	-0.004196	-0.001881
0.0200	818.943	57.843	70.847	31.808	-0.763	50.339	1559.057	-0.004049	-0.004959	-0.002227
0.0210	891.155	66.895	81.353	36.728	-0.768	50.339	1696.529	-0.004683	-0.005695	-0.002571
0.0220	954.860	74.556	90.578	41.049	-0.763	50.339	1817.808	-0.005219	-0.006340	-0.002873
0.0230	1009.263	81.587	98.888	44.871	-0.770	50.338	1921.377	-0.005711	-0.006922	-0.003141
0.0240	1053.882	87.073	105.447	47.789	-0.761	50.337	2006.321	-0.006095	-0.007381	-0.003345
0.0250	1089.079	91.928	110.812	50.028	-0.757	50.335	2073.326	-0.006435	-0.007757	-0.003502
0.0260	1115.439	95.480	114.743	51.820	-0.756	50.332	2123.508	-0.006684	-0.008032	-0.003627
0.0270	1134.344	98.455	117.787	53.306	-0.760	50.329	2159.500	-0.006892	-0.008245	-0.003731
0.0280	1147.194	100.419	119.982	54.224	-0.762	50.326	2183.962	-0.007029	-0.008399	-0.003796
0.0290	1155.144	101.962	121.609	55.016	-0.762	50.324	2199.097	-0.007137	-0.008513	-0.003851
0.0300	1158.856	102.608	122.288	55.212	-0.762	50.322	2206.163	-0.007183	-0.008560	-0.003865
0.0310	1159.336	103.296	122.844	55.586	-0.767	50.320	2207.079	-0.007231	-0.008599	-0.003891
0.0320	1156.977	103.479	122.929	55.738	-0.763	50.320	2202.587	-0.007244	-0.008605	-0.003902
0.0330	1152.514	103.618	122.929	55.737	-0.760	50.320	2194.090	-0.007253	-0.008605	-0.003902
0.0340	1145.405	103.099	122.457	55.486	-0.751	50.322	2180.557	-0.007217	-0.008572	-0.003884
0.0350	1134.975	102.410	121.401	55.029	-0.750	50.325	2160.702	-0.007169	-0.008498	-0.003852
0.0360	1117.648	101.077	119.621	54.307	-0.753	50.327	2127.714	-0.007075	-0.008373	-0.003801
0.0370	1086.779	98.143	116.564	52.765	-0.756	50.330	2068.949	-0.006870	-0.008159	-0.003694
0.0380	1037.847	92.981	111.157	50.123	-0.754	50.333	1975.794	-0.006509	-0.007781	-0.003509
0.0390	971.406	85.529	103.209	46.371	-0.751	50.336	1849.308	-0.005987	-0.007225	-0.003246
0.0400	893.845	76.943	93.064	41.730	-0.746	50.339	1701.651	-0.005386	-0.006514	-0.002921
0.0410	812.661	67.891	82.239	36.811	-0.751	50.340	1547.098	-0.004752	-0.005757	-0.002577
0.0420	732.860	58.938	71.261	31.878	-0.750	50.340	1395.178	-0.004126	-0.004988	-0.002231
0.0430	658.334	50.462	60.757	27.195	-0.755	50.338	1253.300	-0.003532	-0.004253	-0.001904
0.0440	591.293	42.421	50.753	22.818	-0.750	50.337	1125.669	-0.002969	-0.003553	-0.001597
0.0450	532.727	35.194	41.776	18.982	-0.749	50.335	1014.175	-0.002464	-0.002924	-0.001329
0.0460	482.532	28.978	34.035	15.564	-0.750	50.333	918.617	-0.002028	-0.002382	-0.001089
0.0470	439.340	23.717	27.405	12.702	-0.752	50.330	836.391	-0.001660	-0.001918	-0.000889
0.0480	401.935	19.002	21.485	10.145	-0.754	50.326	765.181	-0.001330	-0.001504	-0.000710
0.0490	368.542	14.989	16.287	7.686	-0.756	50.323	701.609	-0.001049	-0.001140	-0.000538
0.0500	338.545	10.947	11.341	5.408	-0.756	50.321	644.503	-0.000766	-0.000794	-0.000379
0.0510	311.599	7.719	7.172	3.489	-0.759	50.320	593.204	-0.000540	-0.000502	-0.000244
0.0520	287.644	4.476	3.310	1.919	-0.758	50.319	547.600	-0.000313	-0.000232	-0.000134
0.0530	267.205	1.949	0.377	0.709	-0.760	50.320	508.690	-0.000136	-0.000026	-0.000050
0.0540	250.629	-0.394	-2.291	-0.846	-0.754	50.322	477.133	0.000028	0.000160	0.000059
0.0550	238.351	-2.415	-4.375	-1.930	-0.750	50.325	453.758	0.000169	0.000306	0.000135
0.0560	230.461	-3.958	-6.168	-2.738	-0.750	50.327	438.738	0.000277	0.000432	0.000192
0.0570	226.523	-4.785	-7.460	-3.113	-0.748	50.330	431.242	0.000335	0.000522	0.000218
0.0580	226.418	-5.164	-8.503	-3.392	-0.749	50.333	431.042	0.000362	0.000595	0.000237
0.0590	229.379	-5.164	-8.890	-3.433	-0.752	50.337	436.678	0.000362	0.000622	0.000240
0.0600	235.255	-4.813	-8.848	-3.530	-0.751	50.340	447.865	0.000337	0.000619	0.000247
0.0610	244.963	-4.068	-7.708	-3.057	-0.754	50.340	466.347	0.000285	0.000540	0.000214
0.0620	262.636	-2.678	-5.263	-2.153	-0.756	50.340	499.992	0.000187	0.000368	0.000151
0.0630	294.286	0.410	-0.915	-0.360	-0.759	50.339	560.246	-0.000029	0.000064	0.000025
0.0640	343.038	5.083	5.656	2.418	-0.760	50.337	653.057	-0.000356	-0.000396	-0.000169
0.0650	407.796	12.014	14.119	6.100	-0.759	50.335	776.339	-0.000841	-0.000988	-0.000427
0.0660	483.674	20.012	24.611	10.713	-0.758	50.333	920.792	-0.001401	-0.001723	-0.000750
0.0670	565.940	29.035	36.382	15.896	-0.760	50.329	1077.404	-0.002032	-0.002547	-0.001113
0.0680	651.241	38.298	48.916	21.329	-0.759	50.326	1239.796	-0.002681	-0.003424	-0.001493
0.0690	736.287	48.205	61.076	26.638	-0.759	50.323	1401.701	-0.003374	-0.004275	-0.001865
0.0700	817.936	57.732	72.248	31.906	-0.755	50.322	1557.140	-0.004041	-0.005057	-0.002233
0.0710	893.123	66.994	82.810	36.895	-0.754	50.320	1700.277	-0.004690	-0.005797	-0.002583
0.0720	959.669	75.230	92.370	41.537	-0.757	50.320	1826.963	-0.005266	-0.006466	-0.002908
0.0730	1016.552	82.401	100.667	45.483	-0.760	50.321	1935.253	-0.005768	-0.007047	-0.003184
0.0740	1063.095	88.365	107.657	48.484	-0.762	50.322	2023.859	-0.006186	-0.007536	-0.003394
0.0750	1099.343	92.982	113.299	50.861	-0.760	50.325	2092.867	-0.006509	-0.007931	-0.003560
0.0760	1125.868	96.645	117.704	52.738	-0.762	50.327	2143.364	-0.006765	-0.008239	-0.003692
0.0770	1143.992	99.478	120.497	54.073	-0.762	50.330	2177.868	-0.006963	-0.008435	-0.003785
0.0780	1155.564	101.681	122.163	55.018	-0.766	50.333	2199.898	-0.007118	-0.008551	-0.003851
0.0790	1161.936	103.254	123.178	55.530	-0.765	50.337	2212.029	-0.007228	-0.008622	-0.003887
0.0800	1164.221	104.082	123.734	55.641	-0.760	50.340	2216.377	-0.007286	-0.008661	-0.003895
0.0810	1163.605	104.434	124.151	55.976	-0.763	50.341	2215.204	-0.007310	-0.008691	-0.003918
0.0820	1160.659	104.602	124.513	56.044	-0.762	50.340	2209.597	-0.007322	-0.008716	-0.003923
0.0830	1155.895	104.742	124.847	56.043	-0.764	50.338	2200.527	-0.007332	-0.008739	-0.003923
0.0840	1148.817	104.362	124.833	55.778	-0.758	50.337	2187.052	-0.007305	-0.008738	-0.003904
0.0850	1138.146	103.308	123.790	55.294	-0.754	50.335	2166.739	-0.007232	-0.008665	-0.003871
0.0860	1119.962	101.752	121.442	54.545	-0.752	50.332	2132.120	-0.007123	-0.008501	-0.003818
0.0870	1086.960	98.426	117.064	52.893	-0.755	50.329	2069.292	-0.006890	-0.008195	-0.003703
0.0880	1034.541	92.981	110.381	50.029	-0.751	50.326	1969.500	-0.006509	-0.007727	-0.003502
0.0890	963.561	85.290	101.237	46.040	-0.752	50.324	1834.373	-0.005970	-0.007087	-0.003223
0.0900	881.822	76.267	90.397	40.912	-0.751	50.321	1678.762	-0.005339	-0.006328	-0.002864
0.0910	798.069	66.950	79.155	35.909	-0.753	50.319	1519.318	-0.004687	-0.005541	-0.002514
0.0920	717.922	57.844	68.245	30.822	-0.748	50.319	1366.739	-0.004049	-0.004777	-0.002158
0.0930	645.395	49.423	58.142	26.292	-0.750	50.320	1228.666	-0.003460	-0.004070	-0.001840
0.0940	581.885	41.607	49.387	22.247	-0.747	50.322	1107.759	-0.002912	-0.003457	-0.001557
0.0950	528.489	34.744	41.688	18.609	-0.747	50.324	1006.107	-0.002432	-0.002918	-0.001303
0.0960	484.501	29.314	35.185	15.731	-0.752	50.326	922.365	-0.002052	-0.002463	-0.001101
0.0970	448.312	24.853	29.336	13.273	-0.756	50.329	853.472	-0.001740	-0.002053	-0.000929
0.0980	417.534	21.064	24.320	11.035	-0.757	50.333	794.878	-0.001474	-0.001702	-0.000772
0.0990	389.551	17.514	19.664	9.145	-0.758	50.336	741.606	-0.001226	-0.001377	-0.000640
0.1000	362.756	14.005	15.357	7.005	-0.757	50.339	690.594	-0.000980	-0.001075	-0.000490
0.1010	336.516	10.806	11.272	5.254	-0.761	50.340	640.640	-0.000756	-0.000789	-0.000368
0.1020	311.028	7.804	7.200	3.406	-0.759	50.340	592.117	-0.000546	-0.000504	-0.000238
0.1030	287.448	4.802	3.449	1.889	-0.764	50.338	547.228	-0.000336	-0.000241	-0.000132
0.1040	267.055	1.855	0.044	0.361	-0.763	50.337	508.404	-0.000130	-0.000003	-0.000025
0.1050	251.155	-0.307	-2.903	-0.931	-0.764	50.335	478.134	0.000021	0.000203	0.000065
0.1060	240.274	-1.893	-5.084	-1.735	-0.766	50.333	457.420	0.000133	0.000356	0.000121
0.1070	234.533	-2.778	-6.585	-2.153	-0.770	50.330	446.491	0.000194	0.000461	0.000151
0.1080	233.376	-3.592	-7.391	-2.459	-0.772	50.327	444.288	0.000251	0.000517	0.000172
0.1090	236.006	-3.887	-7.350	-2.571	-0.774	50.324	449.295	0.000272	0.000515	0.000180
0.1100	241.642	-3.789	-7.100	-2.681	-0.768	50.322	460.024	0.000265	0.000497	0.000188
0.1110	251.470	-2.890	-5.891	-2.222	-0.767	50.320	478.735	0.000202	0.000412	0.000156
0.1120	269.610	-1.178	-3.514	-1.402	-0.774	50.320	513.268	0.000082	0.000246	0.000098
0.1130	302.251	2.050	0.877	0.488	-0.776	50.320	575.409	-0.000143	-0.000061	-0.000034
0.1140	352.597	7.044	7.409	3.349	-0.776	50.322	671.253	-0.000493	-0.000519	-0.000234
0.1150	418.842	13.794	16.121	7.128	-0.770	50.325	797.367	-0.000966	-0.001128	-0.000499
0.1160	495.652	21.975	26.975	11.838	-0.774	50.327	943.594	-0.001538	-0.001888	-0.000829
0.1170	577.902	30.928	38.509	16.855	-0.776	50.329	1100.178	-0.002165	-0.002696	-0.001180
0.1180	662.107	40.386	50.265	22.094	-0.775	50.332	1260.481	-0.002827	-0.003519	-0.001547
0.1190	745.439	49.984	61.646	27.500	-0.768	50.336	1419.125	-0.003499	-0.004315	-0.001925
0.1200	825.465	59.191	72.763	32.545	-0.763	50.339	1571.474	-0.004143	-0.005093	-0.002278
0.1210	900.127	68.327	83.935	37.784	-0.770	50.340	1713.610	-0.004783	-0.005875	-0.002645
0.1220	967.814	76.481	94.260	42.078	-0.773	50.340	1842.470	-0.005354	-0.006598	-0.002945
0.1230	1027.387	84.003	103.335	46.067	-0.776	50.338	1955.881	-0.005880	-0.007233	-0.003225
0.1240	1077.883	90.303	110.784	49.347	-0.774	50.336	2052.011	-0.006321	-0.007755	-0.003454
0.1250	1118.234	95.606	116.787	51.918	-0.766	50.335	2128.830	-0.006692	-0.008175	-0.003634
0.1260	1148.050	99.801	121.692	54.362	-0.768	50.332	2185.593	-0.006986	-0.008518	-0.003805
0.1270	1167.813	102.818	125.109	55.835	-0.771	50.329	2223.215	-0.007197	-0.008758	-0.003908
0.1280	1179.324	104.838	127.348	56.681	-0.769	50.326	2245.131	-0.007339	-0.008914	-0.003968
0.1290	1184.584	106.044	128.695	57.169	-0.769	50.324	2255.144	-0.007423	-0.009009	-0.004002
0.1300	1185.336	106.605	128.944	57.225	-0.768	50.322	2256.575	-0.007462	-0.009026	-0.004006
0.1310	1183.382	107.223	129.222	57.449	-0.774	50.320	2252.855	-0.007506	-0.009046	-0.004021
0.1320	1179.414	107.363	128.903	57.379	-0.771	50.319	2245.302	-0.007515	-0.009023	-0.004017
0.1330	1174.200	107.377	128.945	57.267	-0.770	50.320	2235.374	-0.007516	-0.009026	-0.004009
0.1340	1167.046	107.180	128.210	57.169	-0.762	50.322	2221.756	-0.007503	-0.008975	-0.004002
0.1350	1156.977	106.184	126.777	56.821	-0.757	50.325	2202.587	-0.007433	-0.008874	-0.003977
0.1360	1140.431	104.739	124.484	56.154	-0.757	50.327	2171.087	-0.007332	-0.008714	-0.003931
0.1370	1110.990	101.779	120.537	54.722	-0.761	50.329	2115.040	-0.007125	-0.008438	-0.003831
0.1380	1063.591	96.727	114.868	52.040	-0.760	50.332	2024.803	-0.006771	-0.008041	-0.003643
0.1390	997.901	89.628	106.712	48.190	-0.760	50.335	1899.748	-0.006274	-0.007470	-0.003373
0.1400	919.724	80.984	96.388	43.342	-0.756	50.339	1750.917	-0.005669	-0.006747	-0.003034
0.1410	836.917	71.611	85.409	38.409	-0.759	50.340	1593.275	-0.005013	-0.005979	-0.002689
0.1420	755.658	62.559	74.181	33.338	-0.754	50.340	1438.580	-0.004379	-0.005193	-0.002334
0.1430	680.216	53.985	63.855	28.905	-0.762	50.338	1294.956	-0.003779	-0.004470	-0.002023
0.1440	612.302	46.043	54.044	24.597	-0.764	50.336	1165.667	-0.003223	-0.003783	-0.001722
0.1450	552.369	38.619	45.178	20.498	-0.760	50.335	1051.569	-0.002703	-0.003162	-0.001435
0.1460	499.740	32.009	37.271	16.925	-0.759	50.332	951.376	-0.002241	-0.002609	-0.001185
0.1470	453.031	26.227	30.128	13.701	-0.759	50.329	862.455	-0.001836	-0.002109	-0.000959
0.1480	411.177	21.190	23.639	10.838	-0.759	50.326	782.776	-0.001483	-0.001655	-0.000759
0.1490	373.140	16.671	17.663	8.212	-0.759	50.323	710.363	-0.001167	-0.001236	-0.000575
0.1500	338.876	12.223	12.173	5.628	-0.755	50.321	645.132	-0.000856	-0.000852	-0.000394
0.1510	308.353	8.462	7.310	3.639	-0.759	50.319	587.025	-0.000592	-0.000512	-0.000255
0.1520	281.768	4.928	3.321	1.764	-0.760	50.319	536.413	-0.000345	-0.000232	-0.000124
0.1530	259.405	1.924	0.112	0.347	-0.765	50.320	493.841	-0.000135	-0.000008	-0.000024
0.1540	241.807	-0.670	-2.640	-0.985	-0.763	50.322	460.339	0.000047	0.000185	0.000069
0.1550	229.258	-2.482	-5.209	-2.320	-0.758	50.324	436.449	0.000174	0.000365	0.000162
0.1560	221.804	-3.633	-7.294	-3.058	-0.758	50.327	422.258	0.000254	0.000511	0.000214
0.1570	218.633	-4.447	-8.753	-3.558	-0.760	50.329	416.222	0.000311	0.000613	0.000249
0.1580	218.844	-4.981	-9.337	-3.684	-0.767	50.333	416.622	0.000349	0.000654	0.000258
0.1590	221.699	-4.982	-9.337	-3.642	-0.774	50.336	422.058	0.000349	0.000654	0.000255
0.1600	226.899	-4.940	-8.961	-3.822	-0.774	50.339	431.957	0.000346	0.000627	0.000268
0.1610	235.240	-4.379	-8.114	-3.309	-0.778	50.340	447.836	0.000307	0.000568	0.000232
0.1620	250.163	-3.116	-6.237	-2.503	-0.783	50.339	476.246	0.000218	0.000437	0.000175
0.1630	277.515	-0.533	-2.193	-0.682	-0.788	50.338	528.316	0.000037	0.000153	0.000048
0.1640	321.863	3.635	4.338	1.805	-0.788	50.337	612.745	-0.000254	-0.000304	-0.000126
0.1650	383.179	10.160	13.008	5.224	-0.783	50.335	729.475	-0.000711	-0.000911	-0.000366
0.1660	457.299	18.173	23.500	9.630	-0.781	50.332	870.581	-0.001272	-0.001645	-0.000674
0.1670	538.979	27.043	34.784	14.563	-0.781	50.329	1026.077	-0.001893	-0.002435	-0.001019
0.1680	624.761	36.459	46.554	20.163	-0.780	50.327	1189.384	-0.002552	-0.003259	-0.001411
0.1690	711.355	46.338	58.532	25.596	-0.781	50.324	1354.237	-0.003244	-0.004097	-0.001792
0.1700	795.724	56.217	70.247	30.933	-0.780	50.322	1514.854	-0.003935	-0.004917	-0.002165
0.1710	874.939	65.800	81.754	36.047	-0.779	50.320	1665.659	-0.004606	-0.005723	-0.002523
0.1720	946.219	74.668	92.079	40.757	-0.780	50.320	1801.357	-0.005227	-0.006446	-0.002853
0.1730	1007.790	82.092	100.848	45.093	-0.781	50.321	1918.573	-0.005746	-0.007059	-0.003157
0.1740	1058.361	88.477	107.824	48.457	-0.780	50.323	2014.847	-0.006193	-0.007548	-0.003392
0.1750	1097.585	93.474	113.159	50.972	-0.773	50.325	2089.520	-0.006543	-0.007921	-0.003568
0.1760	1125.943	97.627	117.231	52.959	-0.773	50.327	2143.507	-0.006834	-0.008206	-0.003707
0.1770	1144.714	100.391	120.343	54.403	-0.773	50.329	2179.241	-0.007027	-0.008424	-0.003808
0.1780	1155.940	102.243	122.942	55.334	-0.772	50.333	2200.613	-0.007157	-0.008606	-0.003873
0.1790	1161.501	103.337	124.804	55.778	-0.770	50.336	2211.199	-0.007234	-0.008736	-0.003904
0.1800	1163.033	103.983	125.876	55.862	-0.767	50.339	2214.117	-0.007279	-0.008811	-0.003910
0.1810	1161.846	104.460	126.293	56.251	-0.772	50.340	2211.857	-0.007312	-0.008841	-0.003938
0.1820	1158.660	104.755	126.542	56.446	-0.772	50.339	2205.791	-0.007333	-0.008858	-0.003951
0.1830	1153.986	104.952	126.430	56.722	-0.774	50.338	2196.894	-0.007347	-0.008850	-0.003971
0.1840	1147.103	104.685	125.777	56.237	-0.767	50.337	2183.790	-0.007328	-0.008804	-0.003937
0.1850	1137.079	103.857	124.611	55.571	-0.762	50.335	2164.707	-0.007270	-0.008723	-0.003890
0.1860	1120.443	102.412	122.416	54.835	-0.759	50.333	2133.036	-0.007169	-0.008569	-0.003838
0.1870	1090.987	99.478	118.664	53.445	-0.763	50.330	2076.960	-0.006963	-0.008307	-0.003741
0.1880	1044.129	94.946	112.965	51.068	-0.763	50.327	1987.753	-0.006646	-0.007908	-0.003575
0.1890	979.852	88.069	105.240	47.413	-0.764	50.324	1865.387	-0.006165	-0.007367	-0.003319
0.1900	903.929	79.679	95.344	42.619	-0.764	50.322	1720.848	-0.005578	-0.006674	-0.002983
0.1910	824.218	70.922	84.909	37.825	-0.770	50.320	1569.099	-0.004965	-0.005944	-0.002648
0.1920	746.491	62.123	74.290	33.005	-0.770	50.320	1421.127	-0.004349	-0.005200	-0.002310
0.1930	674.956	53.647	64.854	28.655	-0.771	50.320	1284.943	-0.003755	-0.004540	-0.002006
0.1940	611.491	45.956	55.821	24.389	-0.766	50.322	1164.122	-0.003217	-0.003908	-0.001707
0.1950	556.231	39.122	47.777	20.608	-0.765	50.324	1058.922	-0.002739	-0.003344	-0.001443
0.1960	508.050	33.314	40.606	17.427	-0.767	50.326	967.197	-0.002332	-0.002842	-0.001220
0.1970	464.784	28.093	33.894	14.675	-0.767	50.329	884.829	-0.001967	-0.002373	-0.001027
0.1980	424.628	23.155	27.682	11.966	-0.764	50.332	808.382	-0.001621	-0.001938	-0.000838
0.1990	386.741	18.341	21.722	9.269	-0.763	50.336	736.256	-0.001284	-0.001521	-0.000649
0.2000	350.898	13.796	15.900	6.699	-0.760	50.339	668.020	-0.000966	-0.001113	-0.000469
0.2010	317.941	9.712	10.522	4.336	-0.763	50.340	605.278	-0.000680	-0.000737	-0.000304
0.2020	288.515	6.105	5.714	2.348	-0.759	50.340	549.259	-0.000427	-0.000400	-0.000164
0.2030	263.734	2.878	1.697	0.834	-0.757	50.338	502.081	-0.000201	-0.000119	-0.000058
0.2040	244.332	-0.012	-1.708	-0.750	-0.752	50.337	465.145	0.000001	0.000120	0.000053
0.2050	230.866	-2.130	-4.487	-1.904	-0.748	50.335	439.510	0.000149	0.000314	0.000133
0.2060	223.352	-3.450	-6.168	-2.724	-0.749	50.333	425.205	0.000242	0.000432	0.000191
0.2070	221.068	-4.110	-6.946	-3.156	-0.757	50.330	420.856	0.000288	0.000486	0.000221
0.2080	222.781	-4.448	-6.959	-3.323	-0.759	50.327	424.118	0.000311	0.000487	0.000233
0.2090	227.500	-4.419	-6.974	-3.475	-0.766	50.324	433.102	0.000309	0.000488	0.000243
0.2100	235.315	-4.027	-6.862	-3.350	-0.760	50.322	447.979	0.000282	0.000480	0.000234
0.2110	249.396	-2.960	-5.697	-2.599	-0.769	50.320	474.787	0.000207	0.000399	0.000182
0.2120	274.930	-0.687	-2.278	-1.155	-0.772	50.320	523.396	0.000048	0.000159	0.000081
0.2130	316.318	3.691	3.919	1.444	-0.773	50.320	602.188	-0.000258	-0.000274	-0.000101
0.2140	373.847	9.571	12.257	4.738	-0.768	50.322	711.708	-0.000670	-0.000858	-0.000332
0.2150	443.909	16.839	22.165	9.074	-0.763	50.324	845.089	-0.001179	-0.001552	-0.000635
0.2160	522.012	25.512	32.644	13.924	-0.766	50.326	993.776	-0.001786	-0.002285	-0.000975
0.2170	604.127	34.534	43.649	19.134	-0.768	50.329	1150.103	-0.002417	-0.003055	-0.001339
0.2180	687.309	44.035	54.754	24.429	-0.773	50.332	1308.460	-0.003082	-0.003833	-0.001710
0.2190	768.538	53.522	65.968	29.626	-0.771	50.336	1463.099	-0.003747	-0.004618	-0.002074
0.2200	845.168	62.658	76.974	34.353	-0.764	50.339	1608.982	-0.004386	-0.005388	-0.002405
0.2210	914.569	71.079	87.437	38.912	-0.771	50.340	1741.104	-0.004975	-0.006121	-0.002724
0.2220	974.412	78.473	96.610	43.024	-0.776	50.340	1855.030	-0.005493	-0.006763	-0.003012
0.2230	1023.870	84.604	103.877	46.498	-0.779	50.339	1949.186	-0.005922	-0.007271	-0.003255
0.2240	1063.065	89.711	109.423	49.137	-0.773	50.337	2023.802	-0.006280	-0.007660	-0.003440
0.2250	1092.881	93.725	113.786	50.985	-0.766	50.335	2080.564	-0.006561	-0.007965	-0.003569
0.2260	1115.048	97.093	117.398	52.499	-0.764	50.333	2122.765	-0.006797	-0.008218	-0.003675
0.2270	1131.444	99.604	120.275	53.778	-0.763	50.330	2153.978	-0.006972	-0.008419	-0.003764
0.2280	1144.038	101.415	122.498	54.557	-0.762	50.327	2177.954	-0.007099	-0.008575	-0.003819
0.2290	1153.851	102.930	124.082	55.447	-0.763	50.324	2196.636	-0.007205	-0.008686	-0.003881
0.2300	1160.704	104.151	125.041	55.878	-0.758	50.322	2209.682	-0.007291	-0.008753	-0.003911
0.2310	1164.521	105.428	125.681	56.515	-0.760	50.320	2216.949	-0.007380	-0.008798	-0.003956
0.2320	1164.927	105.961	126.000	56.920	-0.758	50.319	2217.722	-0.007417	-0.008820	-0.003984
0.2330	1162.387	106.186	126.083	57.002	-0.764	50.320	2212.887	-0.007433	-0.008826	-0.003990
0.2340	1156.917	105.963	125.611	56.905	-0.761	50.322	2202.473	-0.007417	-0.008793	-0.003983
0.2350	1147.900	105.150	124.679	56.460	-0.756	50.325	2185.307	-0.007361	-0.008728	-0.003952
0.2360	1132.496	103.731	123.108	55.821	-0.756	50.327	2155.981	-0.007261	-0.008618	-0.003908
0.2370	1103.551	101.134	119.732	54.363	-0.757	50.330	2100.878	-0.007079	-0.008381	-0.003805
0.2380	1055.054	96.179	113.924	51.541	-0.753	50.333	2008.553	-0.006733	-0.007975	-0.003608
0.2390	986.059	88.925	105.656	47.637	-0.749	50.336	1877.203	-0.006225	-0.007396	-0.003335
0.2400	902.892	79.748	95.401	42.593	-0.747	50.339	1718.874	-0.005582	-0.006678	-0.002981
0.2410	815.366	69.883	84.326	37.395	-0.749	50.340	1552.248	-0.004892	-0.005903	-0.002618
0.2420	730.922	60.314	72.931	32.184	-0.748	50.340	1391.487	-0.004222	-0.005105	-0.002253
0.2430	654.998	51.781	62.523	27.375	-0.752	50.339	1246.948	-0.003625	-0.004377	-0.001916
0.2440	589.955	43.908	53.239	23.012	-0.749	50.337	1123.123	-0.003074	-0.003727	-0.001611
0.2450	535.688	37.116	45.067	19.398	-0.745	50.335	1019.812	-0.002598	-0.003155	-0.001358
0.2460	490.422	31.363	38.287	16.397	-0.747	50.333	933.638	-0.002195	-0.002680	-0.001148
0.2470	451.604	26.354	31.894	13.936	-0.748	50.330	859.737	-0.001845	-0.002233	-0.000976
0.2480	417.294	22.327	26.030	11.561	-0.750	50.327	794.420	-0.001563	-0.001822	-0.000809
0.2490	385.689	18.383	20.387	9.283	-0.750	50.324	734.253	-0.001287	-0.001427	-0.000650
0.2500	355.843	14.608	15.301	7.088	-0.747	50.322	677.433	-0.001023	-0.001071	-0.000496
0.2510	327.755	11.198	11.339	5.115	-0.754	50.319	623.960	-0.000784	-0.000794	-0.000358
0.2520	301.575	8.113	7.532	3.322	-0.756	50.319	574.121	-0.000568	-0.000527	-0.000233
0.2530	278.191	5.083	3.990	1.612	-0.760	50.320	529.604	-0.000356	-0.000279	-0.000113
0.2540	258.338	2.304	0.198	0.222	-0.756	50.322	491.810	-0.000161	-0.000014	-0.000016
0.2550	242.964	-0.405	-2.805	-1.098	-0.754	50.324	462.542	0.000028	0.000196	0.000077
0.2560	232.685	-2.033	-4.806	-1.848	-0.756	50.326	442.972	0.000142	0.000336	0.000129
0.2570	227.395	-3.128	-5.764	-2.223	-0.756	50.329	432.901	0.000219	0.000403	0.000156
0.2580	226.538	-3.394	-6.292	-2.641	-0.753	50.333	431.271	0.000238	0.000440	0.000185
0.2590	229.078	-3.521	-6.264	-2.682	-0.755	50.336	436.106	0.000246	0.000439	0.000188
0.2600	234.323	-3.535	-5.947	-3.016	-0.752	50.339	446.091	0.000247	0.000416	0.000211
0.2610	243.205	-2.960	-4.724	-2.542	-0.756	50.340	462.999	0.000207	0.000331	0.000178
0.2620	259.751	-1.499	-2.849	-1.723	-0.760	50.340	494.499	0.000105	0.000199	0.000121
0.2630	290.244	1.404	1.224	0.152	-0.766	50.338	552.549	-0.000098	-0.000086	-0.000011
0.2640	338.846	6.133	7.743	2.916	-0.761	50.337	645.075	-0.000429	-0.000542	-0.000204
0.2650	404.369	12.953	16.928	6.654	-0.755	50.335	769.815	-0.000907	-0.001185	-0.000466
0.2660	481.300	21.219	27.683	11.296	-0.753	50.332	916.271	-0.001485	-0.001938	-0.000791
0.2670	563.956	30.438	39.023	16.314	-0.758	50.329	1073.627	-0.002131	-0.002732	-0.001142
0.2680	648.536	39.868	50.682	21.567	-0.756	50.326	1234.646	-0.002791	-0.003548	-0.001510
0.2690	732.064	49.550	62.453	26.946	-0.759	50.324	1393.661	-0.003469	-0.004372	-0.001886
0.2700	811.910	58.798	73.638	32.032	-0.752	50.321	1545.668	-0.004116	-0.005155	-0.002242
0.2710	885.774	67.653	84.186	37.008	-0.756	50.320	1686.287	-0.004736	-0.005893	-0.002591
0.2720	951.614	75.778	93.148	41.384	-0.755	50.319	1811.628	-0.005304	-0.006520	-0.002897
0.2730	1008.091	82.822	101.000	45.371	-0.755	50.320	1919.146	-0.005798	-0.007070	-0.003176
0.2740	1054.799	88.870	107.392	48.469	-0.751	50.322	2008.066	-0.006221	-0.007517	-0.003393
0.2750	1092.069	93.809	112.757	50.845	-0.750	50.324	2079.020	-0.006567	-0.007893	-0.003559
0.2760	1120.683	97.935	117.454	52.749	-0.754	50.326	2133.493	-0.006855	-0.008222	-0.003692
0.2770	1141.107	100.728	121.233	54.140	-0.756	50.329	2172.375	-0.007051	-0.008486	-0.003790
0.2780	1154.452	102.876	124.013	55.280	-0.755	50.332	2197.781	-0.007201	-0.008681	-0.003870
0.2790	1161.726	104.152	125.985	55.821	-0.754	50.336	2211.628	-0.007291	-0.008819	-0.003908
0.2800	1164.536	104.966	126.819	56.211	-0.752	50.339	2216.978	-0.007348	-0.008877	-0.003935
0.2810	1164.191	105.611	127.167	56.474	-0.755	50.340	2216.320	-0.007393	-0.008902	-0.003953
0.2820	1161.365	105.865	127.057	56.739	-0.758	50.340	2210.941	-0.007411	-0.008894	-0.003972
0.2830	1156.676	105.948	126.556	56.864	-0.759	50.338	2202.015	-0.007416	-0.008859	-0.003980
0.2840	1149.899	105.514	126.014	56.640	-0.756	50.337	2189.112	-0.007386	-0.008821	-0.003965
0.2850	1140.190	104.811	125.097	55.916	-0.748	50.335	2170.630	-0.007337	-0.008757	-0.003914
0.2860	1123.764	103.296	123.652	55.250	-0.749	50.333	2139.359	-0.007231	-0.008656	-0.003868
0.2870	1093.392	100.137	120.330	53.862	-0.749	50.330	2081.537	-0.007010	-0.008423	-0.003770
0.2880	1043.558	94.931	114.298	51.237	-0.746	50.326	1986.666	-0.006645	-0.008001	-0.003587
0.2890	974.262	87.536	105.336	47.345	-0.746	50.323	1854.744	-0.006128	-0.007374	-0.003314
0.2900	892.041	78.429	94.317	42.022	-0.743	50.321	1698.217	-0.005490	-0.006602	-0.002942
0.2910	805.808	68.732	82.798	36.826	-0.747	50.319	1534.052	-0.004811	-0.005796	-0.002578
0.2920	722.265	59.512	71.125	31.601	-0.745	50.319	1375.008	-0.004166	-0.004979	-0.002212
0.2930	646.417	50.728	60.715	26.875	-0.752	50.319	1230.612	-0.003551	-0.004250	-0.001881
0.2940	580.592	42.926	51.598	22.677	-0.751	50.321	1105.299	-0.003005	-0.003612	-0.001587
0.2950	525.348	35.980	43.677	18.913	-0.750	50.324	1000.128	-0.002519	-0.003057	-0.001324
0.2960	479.526	30.368	37.174	15.966	-0.749	50.326	912.895	-0.002126	-0.002602	-0.001118
0.2970	440.873	25.427	30.782	13.201	-0.754	50.329	839.310	-0.001780	-0.002155	-0.000924
0.2980	407.285	21.247	25.002	10.726	-0.753	50.332	775.366	-0.001487	-0.001750	-0.000751
0.2990	376.807	17.529	19.470	8.531	-0.752	50.335	717.344	-0.001227	-0.001363	-0.000597
0.3000	348.178	13.741	14.413	6.420	-0.751	50.339	662.842	-0.000962	-0.001009	-0.000449
0.3010	321.052	10.513	10.174	4.753	-0.753	50.340	611.200	-0.000736	-0.000712	-0.000333
0.3020	295.564	7.354	6.310	3.059	-0.756	50.340	562.677	-0.000515	-0.000442	-0.000214
0.3030	272.660	4.632	3.128	1.654	-0.756	50.338	519.075	-0.000324	-0.000219	-0.000116
0.3040	253.169	1.951	0.112	0.334	-0.752	50.337	481.968	-0.000137	-0.000008	-0.000023
0.3050	237.810	-0.420	-2.625	-1.111	-0.746	50.335	452.728	0.000029	0.000184	0.000078
0.3060	227.139	-1.978	-4.640	-2.056	-0.748	50.332	432.415	0.000138	0.000325	0.000144
0.3070	221.083	-3.101	-6.321	-2.821	-0.748	50.330	420.885	0.000217	0.000442	0.000197
0.3080	219.430	-3.832	-7.141	-3.253	-0.750	50.326	417.738	0.000268	0.000500	0.000228
0.3090	221.098	-4.182	-7.531	-3.461	-0.753	50.324	420.914	0.000293	0.000527	0.000242
0.3100	225.682	-4.322	-7.449	-3.531	-0.755	50.322	429.640	0.000303	0.000521	0.000247
0.3110	233.872	-3.577	-6.753	-2.989	-0.756	50.320	445.232	0.000250	0.000473	0.000209
0.3120	249.622	-2.539	-5.099	-2.251	-0.760	50.319	475.216	0.000178	0.000357	0.000158
0.3130	279.634	0.365	-1.333	-0.542	-0.760	50.320	532.351	-0.000026	0.000093	0.000038
0.3140	328.190	5.123	5.198	2.238	-0.757	50.322	624.790	-0.000359	-0.000364	-0.000157
0.3150	394.826	12.026	14.634	6.127	-0.753	50.324	751.648	-0.000842	-0.001024	-0.000429
0.3160	473.710	20.516	26.016	11.034	-0.754	50.326	901.823	-0.001436	-0.001821	-0.000772
0.3170	558.561	29.806	38.133	16.230	-0.756	50.329	1063.356	-0.002086	-0.002669	-0.001136
0.3180	645.275	39.461	50.292	21.650	-0.752	50.332	1228.437	-0.002762	-0.003520	-0.001516
0.3190	730.726	49.212	62.228	27.083	-0.752	50.335	1391.115	-0.003445	-0.004356	-0.001896
0.3200	812.240	58.783	73.678	32.129	-0.744	50.339	1546.297	-0.004115	-0.005157	-0.002249
0.3210	887.653	68.017	84.448	37.423	-0.750	50.340	1689.863	-0.004761	-0.005911	-0.002620
0.3220	954.770	76.269	94.286	41.800	-0.754	50.339	1817.636	-0.005339	-0.006600	-0.002926
0.3230	1012.419	83.412	102.916	45.968	-0.758	50.338	1927.385	-0.005839	-0.007204	-0.003218
0.3240	1060.059	89.628	110.004	49.109	-0.754	50.337	2018.080	-0.006274	-0.007700	-0.003438
0.3250	1098.096	94.666	115.549	51.612	-0.744	50.335	2090.492	-0.006627	-0.008088	-0.003613
0.3260	1127.161	98.762	119.481	53.461	-0.741	50.333	2145.824	-0.006913	-0.008364	-0.003742
0.3270	1148.351	101.780	122.330	54.920	-0.739	50.330	2186.165	-0.007125	-0.008563	-0.003844
0.3280	1162.868	104.150	124.317	55.879	-0.744	50.326	2213.802	-0.007290	-0.008702	-0.003911
0.3290	1171.825	105.665	125.929	56.670	-0.745	50.323	2230.854	-0.007397	-0.008815	-0.003967
0.3300	1176.289	106.845	127.040	56.989	-0.743	50.321	2239.351	-0.007479	-0.008893	-0.003989
0.3310	1177.326	107.520	128.207	57.392	-0.743	50.319	2241.325	-0.007526	-0.008974	-0.004017
0.3320	1175.297	107.857	129.000	57.641	-0.745	50.319	2237.463	-0.007550	-0.009030	-0.004035
0.3330	1170.863	107.828	129.194	57.739	-0.739	50.320	2229.023	-0.007548	-0.009044	-0.004042
0.3340	1163.860	107.561	128.334	57.516	-0.737	50.321	2215.691	-0.007529	-0.008983	-0.004026
0.3350	1154.031	106.901	126.778	57.058	-0.731	50.324	2196.980	-0.007483	-0.008874	-0.003994
0.3360	1137.711	105.386	124.695	56.417	-0.737	50.326	2165.909	-0.007377	-0.008729	-0.003949
0.3370	1107.789	102.368	121.261	54.821	-0.740	50.328	2108.946	-0.007166	-0.008488	-0.003837
0.3380	1058.827	97.121	115.452	52.278	-0.744	50.332	2015.734	-0.006798	-0.008082	-0.003659
0.3390	991.229	89.964	107.267	48.346	-0.746	50.335	1887.045	-0.006297	-0.007509	-0.003384
0.3400	911.593	81.165	97.150	43.440	-0.742	50.338	1735.439	-0.005682	-0.006801	-0.003041
0.3410	828.005	71.961	86.423	38.327	-0.742	50.340	1576.309	-0.005037	-0.006050	-0.002683
0.3420	746.010	62.671	75.584	33.158	-0.743	50.339	1420.212	-0.004387	-0.005291	-0.002321
0.3430	669.786	53.957	65.079	28.586	-0.751	50.338	1275.101	-0.003777	-0.004556	-0.002001
0.3440	601.843	45.818	54.754	23.985	-0.752	50.336	1145.754	-0.003207	-0.003833	-0.001679
0.3450	543.006	38.396	45.569	20.010	-0.751	50.335	1033.745	-0.002688	-0.003190	-0.001401
0.3460	492.661	32.236	37.480	16.661	-0.748	50.333	937.901	-0.002257	-0.002624	-0.001166
0.3470	449.169	26.623	30.950	13.812	-0.748	50.329	855.103	-0.001864	-0.002167	-0.000967
0.3480	411.117	21.948	25.086	11.366	-0.750	50.326	782.661	-0.001536	-0.001756	-0.000796
0.3490	377.363	17.709	19.736	9.003	-0.758	50.323	718.403	-0.001240	-0.001382	-0.000630
0.3500	347.126	13.725	14.621	6.656	-0.756	50.321	660.839	-0.000961	-0.001023	-0.000466
0.3510	319.639	10.357	10.174	4.642	-0.758	50.319	608.511	-0.000725	-0.000712	-0.000325
0.3520	294.692	7.313	6.448	2.933	-0.755	50.319	561.018	-0.000512	-0.000451	-0.000205
0.3530	272.480	4.842	3.004	1.571	-0.759	50.320	518.732	-0.000339	-0.000210	-0.000110
0.3540	254.070	2.430	-0.192	0.125	-0.759	50.321	483.685	-0.000170	0.000013	-0.000009
0.3550	240.139	0.396	-3.124	-1.194	-0.758	50.324	457.163	-0.000028	0.000219	0.000084
0.3560	231.212	-1.092	-4.710	-2.027	-0.760	50.326	440.168	0.000076	0.000330	0.000142
0.3570	227.124	-2.004	-5.432	-2.405	-0.760	50.328	432.386	0.000140	0.000380	0.000168
0.3580	227.245	-2.608	-5.529	-2.572	-0.765	50.332	432.615	0.000183	0.000387	0.000180
0.3590	230.656	-2.664	-5.292	-2.600	-0.767	50.335	439.110	0.000187	0.000370	0.000182
0.3600	236.848	-2.608	-4.848	-2.557	-0.765	50.338	450.897	0.000183	0.000339	0.000179
0.3610	247.518	-1.794	-3.403	-2.042	-0.766	50.339	471.210	0.000126	0.000238	0.000143
0.3620	267.806	-0.013	-0.721	-0.889	-0.770	50.339	509.834	0.000001	0.000050	0.000062
0.3630	303.243	3.285	3.893	1.224	-0.775	50.338	577.297	-0.000230	-0.000273	-0.000086
0.3640	355.918	8.463	10.897	4.224	-0.771	50.337	677.576	-0.000592	-0.000763	-0.000296
0.3650	423.290	15.242	19.972	8.227	-0.767	50.335	805.836	-0.001067	-0.001398	-0.000576
0.3660	500.025	23.507	30.365	12.937	-0.766	50.333	951.920	-0.001646	-0.002126	-0.000906
0.3670	581.539	32.474	41.662	18.078	-0.766	50.330	1107.101	-0.002273	-0.002916	-0.001265
0.3680	664.541	41.932	53.209	23.220	-0.761	50.327	1265.116	-0.002935	-0.003725	-0.001625
0.3690	745.830	51.389	64.743	28.278	-0.757	50.324	1419.868	-0.003597	-0.004532	-0.001979
0.3700	822.339	60.537	75.514	33.004	-0.751	50.322	1565.523	-0.004238	-0.005286	-0.002310
0.3710	891.921	69.027	85.437	37.590	-0.753	50.320	1697.989	-0.004832	-0.005981	-0.002631
0.3720	952.846	76.717	94.430	41.913	-0.759	50.320	1813.974	-0.005370	-0.006610	-0.002934
0.3730	1005.701	83.341	102.405	45.637	-0.764	50.320	1914.597	-0.005834	-0.007168	-0.003195
0.3740	1050.681	89.038	109.186	48.637	-0.765	50.321	2000.227	-0.006233	-0.007643	-0.003405
0.3750	1088.297	93.796	114.730	51.028	-0.762	50.324	2071.838	-0.006566	-0.008031	-0.003572
0.3760	1118.745	97.936	119.302	53.015	-0.765	50.326	2129.803	-0.006855	-0.008351	-0.003711
0.3770	1142.234	101.276	123.054	54.585	-0.763	50.328	2174.520	-0.007089	-0.008614	-0.003821
0.3780	1159.276	103.828	125.957	55.892	-0.765	50.331	2206.964	-0.007268	-0.008817	-0.003912
0.3790	1170.112	105.637	127.485	56.766	-0.763	50.334	2227.592	-0.007395	-0.008924	-0.003974
0.3800	1175.282	106.915	127.970	57.224	-0.763	50.338	2237.434	-0.007484	-0.008958	-0.004006
0.3810	1175.853	107.743	127.986	57.432	-0.766	50.339	2238.522	-0.007542	-0.008959	-0.004020
0.3820	1172.802	108.010	128.194	57.571	-0.764	50.339	2232.714	-0.007561	-0.008974	-0.004030
0.3830	1166.986	107.841	128.152	57.599	-0.762	50.338	2221.642	-0.007549	-0.008971	-0.004032
0.3840	1158.435	107.251	127.957	57.279	-0.757	50.336	2205.362	-0.007508	-0.008957	-0.004010
0.3850	1145.976	106.086	126.678	56.653	-0.754	50.335	2181.644	-0.007426	-0.008867	-0.003966
0.3860	1125.402	104.304	124.372	55.611	-0.758	50.333	2142.477	-0.007301	-0.008706	-0.003893
0.3870	1090.582	100.951	119.913	53.916	-0.759	50.330	2076.187	-0.007067	-0.008394	-0.003774
0.3880	1038.313	95.337	113.090	51.041	-0.760	50.327	1976.681	-0.006674	-0.007916	-0.003573
0.3890	970.054	88.068	104.225	47.192	-0.760	50.324	1846.733	-0.006165	-0.007296	-0.003303
0.3900	891.711	79.229	94.136	42.425	-0.760	50.322	1697.588	-0.005546	-0.006590	-0.002970
0.3910	809.776	70.151	83.687	37.408	-0.764	50.320	1541.605	-0.004911	-0.005858	-0.002619
0.3920	729.780	60.961	72.890	32.502	-0.760	50.319	1389.313	-0.004267	-0.005102	-0.002275
0.3930	656.110	52.218	62.565	27.861	-0.763	50.319	1249.065	-0.003655	-0.004380	-0.001950
0.3940	591.263	44.570	53.198	23.832	-0.757	50.321	1125.612	-0.003120	-0.003724	-0.001668
0.3950	535.522	37.651	45.069	19.956	-0.757	50.324	1019.497	-0.002636	-0.003155	-0.001397
0.3960	488.048	31.870	38.287	16.746	-0.756	50.326	929.117	-0.002231	-0.002680	-0.001172
0.3970	447.020	26.579	32.200	13.953	-0.760	50.328	851.011	-0.001860	-0.002254	-0.000977
0.3980	411.433	21.961	26.753	11.451	-0.761	50.331	783.262	-0.001537	-0.001873	-0.000802
0.3990	380.008	17.948	21.764	9.241	-0.757	50.335	723.438	-0.001256	-0.001523	-0.000647
0.4000	351.710	14.441	17.108	7.116	-0.752	50.338	669.565	-0.001011	-0.001198	-0.000498
0.4010	325.741	11.285	12.910	5.254	-0.753	50.340	620.127	-0.000790	-0.000904	-0.000368
0.4020	301.560	8.380	8.796	3.740	-0.759	50.339	574.093	-0.000587	-0.000616	-0.000262
0.4030	279.784	5.517	4.697	2.224	-0.763	50.338	532.637	-0.000386	-0.000329	-0.000156
0.4040	261.043	3.102	0.876	0.751	-0.763	50.337	496.960	-0.000217	-0.000061	-0.000053
0.4050	246.255	0.857	-2.279	-0.541	-0.759	50.335	468.807	-0.000060	0.000160	0.000038
0.4060	235.976	-0.910	-4.292	-1.499	-0.762	50.333	449.238	0.000064	0.000300	0.000105
0.4070	230.265	-2.019	-5.389	-1.958	-0.763	50.330	438.366	0.000141	0.000377	0.000137
0.4080	228.913	-2.411	-5.792	-2.251	-0.764	50.327	435.791	0.000169	0.000405	0.000158
0.4090	231.227	-2.440	-5.863	-2.210	-0.764	50.324	440.197	0.000171	0.000410	0.000155
0.4100	236.547	-2.299	-5.724	-2.377	-0.764	50.322	450.325	0.000161	0.000401	0.000166
0.4110	245.594	-1.416	-4.794	-2.030	-0.771	50.319	467.548	0.000099	0.000336	0.000142
0.4120	262.426	0.030	-2.765	-1.182	-0.775	50.319	499.592	-0.000002	0.000194	0.000083
0.4130	293.204	2.878	1.155	0.583	-0.776	50.320	558.186	-0.000201	-0.000081	-0.000041
0.4140	341.475	7.607	7.575	3.417	-0.775	50.322	650.082	-0.000533	-0.000530	-0.000239
0.4150	405.872	13.851	16.288	7.156	-0.771	50.324	772.676	-0.000970	-0.001140	-0.000501
0.4160	481.270	21.933	26.863	11.880	-0.769	50.326	916.214	-0.001535	-0.001880	-0.000832
0.4170	562.919	30.773	38.356	16.953	-0.771	50.329	1071.653	-0.002154	-0.002685	-0.001187
0.4180	647.559	40.553	50.250	22.220	-0.774	50.332	1232.786	-0.002839	-0.003518	-0.001555
0.4190	732.214	50.334	61.964	27.585	-0.778	50.335	1393.948	-0.003523	-0.004337	-0.001931
0.4200	813.668	59.737	72.983	32.490	-0.768	50.338	1549.015	-0.004182	-0.005109	-0.002274
0.4210	889.126	68.929	83.559	37.521	-0.765	50.340	1692.667	-0.004825	-0.005849	-0.002626
0.4220	956.423	77.069	93.147	42.064	-0.766	50.340	1820.784	-0.005395	-0.006520	-0.002944
0.4230	1014.342	84.352	101.709	46.177	-0.770	50.338	1931.047	-0.005905	-0.007120	-0.003232
0.4240	1062.448	90.499	108.948	49.527	-0.766	50.337	2022.629	-0.006335	-0.007626	-0.003467
0.4250	1100.921	95.368	114.868	51.877	-0.762	50.335	2095.871	-0.006676	-0.008041	-0.003631
0.4260	1130.121	99.478	119.703	53.893	-0.760	50.332	2151.461	-0.006963	-0.008379	-0.003772
0.4270	1150.860	102.691	123.345	55.448	-0.760	50.329	2190.943	-0.007188	-0.008634	-0.003881
0.4280	1164.476	104.978	125.804	56.434	-0.760	50.326	2216.864	-0.007348	-0.008806	-0.003950
0.4290	1172.276	106.480	127.221	57.183	-0.764	50.323	2231.712	-0.007454	-0.008905	-0.004003
0.4300	1175.507	107.252	127.888	57.308	-0.766	50.321	2237.864	-0.007508	-0.008952	-0.004012
0.4310	1175.612	107.813	128.708	57.600	-0.766	50.320	2238.064	-0.007547	-0.009010	-0.004032
0.4320	1173.118	108.136	129.321	57.712	-0.766	50.319	2233.315	-0.007569	-0.009052	-0.004040
0.4330	1168.639	108.108	129.724	57.726	-0.768	50.320	2224.789	-0.007568	-0.009081	-0.004041
0.4340	1161.756	107.855	129.446	57.490	-0.759	50.321	2211.685	-0.007550	-0.009061	-0.004024
0.4350	1151.401	107.154	128.139	57.004	-0.754	50.324	2191.973	-0.007501	-0.008970	-0.003990
0.4360	1133.157	105.372	125.777	56.268	-0.752	50.326	2157.240	-0.007376	-0.008804	-0.003939
0.4370	1099.223	102.117	121.678	54.530	-0.754	50.329	2092.638	-0.007148	-0.008517	-0.003817
0.4380	1044.745	96.139	115.022	51.472	-0.751	50.332	1988.926	-0.006730	-0.008052	-0.003603
0.4390	971.361	88.225	105.837	47.274	-0.748	50.335	1849.222	-0.006176	-0.007409	-0.003309
0.4400	887.548	78.613	94.441	42.105	-0.745	50.338	1689.663	-0.005503	-0.006611	-0.002947
0.4410	802.397	69.280	82.880	36.935	-0.748	50.340	1527.557	-0.004850	-0.005802	-0.002585
0.4420	721.950	60.257	71.999	32.017	-0.751	50.340	1374.407	-0.004218	-0.005040	-0.002241
0.4430	650.099	52.104	61.979	27.598	-0.755	50.339	1237.621	-0.003647	-0.004339	-0.001932
0.4440	588.377	44.779	52.849	23.666	-0.754	50.337	1120.119	-0.003135	-0.003699	-0.001657
0.4450	536.634	38.185	44.719	20.065	-0.746	50.335	1021.614	-0.002673	-0.003130	-0.001405
0.4460	493.247	32.473	38.189	17.189	-0.752	50.333	939.016	-0.002273	-0.002673	-0.001203
0.4470	455.736	27.604	32.825	14.548	-0.756	50.330	867.605	-0.001932	-0.002298	-0.001018
0.4480	421.817	23.519	28.225	12.173	-0.756	50.327	803.032	-0.001646	-0.001976	-0.000852
0.4490	389.702	19.549	23.557	9.852	-0.754	50.324	741.892	-0.001368	-0.001649	-0.000690
0.4500	358.382	15.747	18.540	7.422	-0.754	50.322	682.268	-0.001102	-0.001298	-0.000520
0.4510	328.100	12.015	13.774	5.435	-0.754	50.320	624.619	-0.000841	-0.000964	-0.000380
0.4520	299.411	8.365	9.188	3.586	-0.755	50.319	570.002	-0.000586	-0.000643	-0.000251
0.4530	273.983	5.081	5.129	1.934	-0.757	50.320	521.593	-0.000356	-0.000359	-0.000135
0.4540	252.913	2.232	1.377	0.321	-0.757	50.322	481.482	-0.000156	-0.000096	-0.000022
0.4550	237.269	-0.069	-1.681	-1.264	-0.751	50.324	451.698	0.000005	0.000118	0.000088
0.4560	227.380	-1.767	-3.793	-2.028	-0.752	50.326	432.873	0.000124	0.000266	0.000142
0.4570	222.691	-2.580	-5.266	-2.585	-0.752	50.329	423.946	0.000181	0.000369	0.000181
0.4580	222.345	-3.042	-5.877	-2.738	-0.752	50.332	423.288	0.000213	0.000411	0.000192
0.4590	225.471	-2.958	-5.806	-2.669	-0.757	50.336	429.239	0.000207	0.000406	0.000187
0.4600	231.437	-2.847	-5.237	-2.683	-0.752	50.339	440.598	0.000199	0.000367	0.000188
0.4610	241.491	-2.004	-3.778	-2.224	-0.754	50.340	459.738	0.000140	0.000264	0.000156
0.4620	260.067	-0.377	-1.541	-1.252	-0.757	50.340	495.100	0.000026	0.000108	0.000088
0.4630	292.949	2.878	2.684	0.624	-0.764	50.339	557.699	-0.000201	-0.000188	-0.000044
0.4640	343.159	8.042	9.286	3.459	-0.762	50.337	653.286	-0.000563	-0.000650	-0.000242
0.4650	408.472	14.623	18.235	7.282	-0.758	50.336	777.626	-0.001024	-0.001276	-0.000510
0.4660	483.629	22.495	28.961	11.840	-0.757	50.333	920.706	-0.001575	-0.002027	-0.000829
0.4670	563.565	31.335	40.286	16.843	-0.761	50.330	1072.884	-0.002193	-0.002820	-0.001179
0.4680	645.094	40.569	51.486	22.054	-0.759	50.326	1228.094	-0.002840	-0.003604	-0.001544
0.4690	725.316	50.054	62.062	27.154	-0.762	50.323	1380.816	-0.003504	-0.004344	-0.001901
0.4700	802.307	59.022	72.109	31.991	-0.755	50.321	1527.386	-0.004132	-0.005048	-0.002239
0.4710	874.127	67.624	81.767	36.590	-0.760	50.320	1664.114	-0.004734	-0.005724	-0.002561
0.4720	939.351	75.539	91.176	40.856	-0.762	50.319	1788.282	-0.005288	-0.006382	-0.002860
0.4730	996.924	82.541	99.694	44.872	-0.764	50.320	1897.888	-0.005778	-0.006979	-0.003141
0.4740	1046.218	88.617	107.420	48.137	-0.759	50.321	1991.730	-0.006203	-0.007519	-0.003370
0.4750	1087.020	93.740	113.937	50.749	-0.756	50.324	2069.407	-0.006562	-0.007976	-0.003552
0.4760	1119.887	98.175	119.537	52.931	-0.758	50.326	2131.977	-0.006872	-0.008368	-0.003705
0.4770	1145.285	101.906	123.748	54.723	-0.758	50.328	2180.328	-0.007133	-0.008662	-0.003831
0.4780	1163.830	104.853	126.959	56.294	-0.759	50.331	2215.633	-0.007340	-0.008887	-0.003941
0.4790	1175.732	106.944	129.056	57.238	-0.763	50.335	2238.293	-0.007486	-0.009034	-0.004007
0.4800	1181.654	107.674	130.154	57.822	-0.760	50.339	2249.565	-0.007537	-0.009111	-0.004048
0.4810	1182.796	108.460	130.835	58.126	-0.760	50.340	2251.740	-0.007592	-0.009158	-0.004069
0.4820	1180.316	108.642	130.766	58.196	-0.759	50.340	2247.019	-0.007605	-0.009154	-0.004074
0.4830	1175.267	108.614	130.432	58.183	-0.757	50.338	2237.406	-0.007603	-0.009130	-0.004073
0.4840	1167.422	108.362	129.640	57.962	-0.752	50.337	2222.471	-0.007585	-0.009075	-0.004057
0.4850	1155.670	107.548	128.543	57.352	-0.743	50.335	2200.098	-0.007528	-0.008998	-0.004015
0.4860	1135.907	105.780	126.721	56.614	-0.743	50.332	2162.476	-0.007405	-0.008870	-0.003963
0.4870	1101.883	102.398	122.831	54.835	-0.748	50.329	2097.702	-0.007168	-0.008598	-0.003838
0.4880	1049.749	96.770	116.036	52.124	-0.748	50.327	1998.453	-0.006774	-0.008123	-0.003649
0.4890	981.355	89.389	106.740	48.122	-0.747	50.323	1868.248	-0.006257	-0.007472	-0.003369
0.4900	903.237	80.619	95.943	43.327	-0.742	50.322	1719.532	-0.005643	-0.006716	-0.003033
0.4910	822.745	71.764	85.465	38.436	-0.743	50.320	1566.296	-0.005023	-0.005983	-0.002690
0.4920	744.958	63.092	75.585	33.669	-0.744	50.319	1418.209	-0.004416	-0.005291	-0.002357
0.4930	673.453	54.910	66.135	29.195	-0.750	50.320	1282.082	-0.003844	-0.004629	-0.002044
0.4940	609.913	47.359	57.018	24.985	-0.747	50.321	1161.118	-0.003315	-0.003991	-0.001749
0.4950	554.398	40.512	48.887	21.220	-0.740	50.324	1055.431	-0.002836	-0.003422	-0.001485
0.4960	506.082	34.478	41.368	17.912	-0.738	50.326	963.449	-0.002413	-0.002896	-0.001254
0.4970	463.281	29.343	34.449	15.160	-0.739	50.329	881.968	-0.002054	-0.002411	-0.001061
0.4980	424.357	24.529	27.961	12.590	-0.740	50.332	807.867	-0.001717	-0.001957	-0.000881
0.4990	388.184	19.955	22.389	10.019	-0.739	50.335	739.002	-0.001397	-0.001567	-0.000701
