# Supplementary material for: Evaluation of a Cold-Mixed High-Performance Polyurethane Mixture
Source: Hindawi journal article supplement (doi:10.1155/2019/1507971), 2019-11-07
Supplement: f1 [file 1507971.f1.zip › 1507971.f1/dynamic modulus data/PUM/specimen2/temp50/zhs-2-50_25Hz.csv]

Test Information
****************
Project name	zhs
Operator name	2
Target test temperature	50
Target confining stress	0
Average dynamic strain range from 75 to 125 micro-strain
Contact stress	5
Initial modulus	1000
Axial gauge length	70
Comments
Specimen information
********************
Identification	zhs-2-50
Dimensions	Point 1	Point 2	Point 3	Point 4	Point 5	Point 6	Average	Std Dev.
Diameter (mm)	49.2	49.3	49.2				49.23	0.058
Height (mm)	100.8	101.0	100.8				100.87	0.115
Cross-sectional area (mm�)	1903.7
Conditioning time
Properties/Comments
Test Data	25Hz
*********
Test date and time	Wed	Apr 3	2019	1:28 PM
Dynamic modulus (MPa)	9442
Phase angle (Degrees)	4.49
Average temperature (�C)	50.3
Average confining pressure (kPa)	-0.7
Average micro-strain	109
Load drift (%)	-2.0
Load standard error (%)	8.6
Average deformation drift (%)	-4.4
Average deformation standard error (%)	8.3
Deformation uniformity (%)	30.4
Phase uniformity (Degrees)	0.4
Conditioning Cycles
Time (sec)	Axial stress (kPa)	Axial micro-strain #1	Axial micro-strain #2	Axial micro-strain #3	Confining pressure (kPa)	Temperature (�C)	Load (N)	Displacement #1 (mm)	Displacement #2 (mm)	Displacement #3 (mm)
0.0000	381.782	-0.617	-1.262	-0.347	-0.735	50.334	726.814	0.000043	0.000088	0.000024
0.0008	382.187	-0.728	-0.955	-0.238	-0.737	50.336	727.587	0.000051	0.000067	0.000017
0.0016	382.413	-0.897	-0.679	-0.196	-0.736	50.339	728.016	0.000063	0.000048	0.000014
0.0024	382.142	-0.924	-0.331	-0.223	-0.736	50.342	727.501	0.000065	0.000023	0.000016
0.0032	380.655	-1.134	-0.526	-0.347	-0.733	50.344	724.669	0.000079	0.000037	0.000024
0.0040	377.604	-1.359	-1.069	-0.430	-0.730	50.345	718.861	0.000095	0.000075	0.000030
0.0048	372.239	-1.540	-1.723	-0.473	-0.736	50.345	708.647	0.000108	0.000121	0.000033
0.0056	363.507	-2.300	-2.917	-0.778	-0.735	50.345	692.024	0.000161	0.000204	0.000054
0.0064	350.973	-3.352	-4.571	-1.377	-0.735	50.344	668.163	0.000235	0.000320	0.000096
0.0072	334.337	-5.163	-6.754	-2.503	-0.737	50.343	636.492	0.000361	0.000473	0.000175
0.0080	314.289	-7.536	-9.435	-3.878	-0.730	50.342	598.326	0.000528	0.000660	0.000271
0.0088	292.483	-9.934	-12.422	-5.170	-0.733	50.340	556.812	0.000695	0.000870	0.000362
0.0096	270.421	-12.306	-15.633	-6.587	-0.737	50.338	514.812	0.000861	0.001094	0.000461
0.0104	249.472	-14.635	-18.729	-7.783	-0.736	50.335	474.930	0.001024	0.001311	0.000545
0.0112	230.881	-16.627	-21.759	-8.908	-0.738	50.333	439.539	0.001164	0.001523	0.000624
0.0120	215.267	-18.439	-24.331	-9.992	-0.735	50.330	409.813	0.001291	0.001703	0.000699
0.0128	203.124	-19.856	-26.276	-10.923	-0.731	50.328	386.696	0.001390	0.001839	0.000765
0.0136	194.828	-20.825	-27.903	-11.589	-0.727	50.326	370.903	0.001458	0.001953	0.000811
0.0144	190.049	-21.358	-29.043	-11.838	-0.731	50.325	361.805	0.001495	0.002033	0.000829
0.0152	188.201	-21.694	-29.807	-12.032	-0.734	50.324	358.286	0.001519	0.002087	0.000842
0.0160	188.607	-21.848	-30.238	-11.850	-0.737	50.325	359.058	0.001529	0.002117	0.000830
0.0168	190.650	-21.959	-30.181	-11.740	-0.741	50.326	362.949	0.001537	0.002113	0.000822
0.0176	193.596	-21.918	-29.653	-11.934	-0.739	50.328	368.557	0.001534	0.002076	0.000835
0.0184	197.353	-21.680	-28.874	-11.878	-0.737	50.330	375.710	0.001518	0.002021	0.000831
0.0192	201.696	-21.385	-28.012	-11.823	-0.740	50.332	383.978	0.001497	0.001961	0.000828
0.0200	206.400	-20.965	-27.097	-11.684	-0.742	50.334	392.933	0.001468	0.001897	0.000818
0.0208	211.855	-20.670	-26.347	-11.282	-0.746	50.337	403.318	0.001447	0.001844	0.000790
0.0216	218.092	-20.249	-25.499	-10.950	-0.748	50.339	415.192	0.001417	0.001785	0.000767
0.0224	225.126	-19.716	-24.623	-10.604	-0.746	50.342	428.581	0.001380	0.001724	0.000742
0.0232	232.985	-18.985	-23.900	-10.340	-0.742	50.344	443.544	0.001329	0.001673	0.000724
0.0240	241.386	-18.087	-23.053	-9.979	-0.739	50.346	459.538	0.001266	0.001614	0.000699
0.0248	249.742	-17.036	-21.871	-9.380	-0.745	50.346	475.445	0.001193	0.001531	0.000657
0.0256	257.602	-16.207	-20.746	-8.783	-0.740	50.345	490.408	0.001135	0.001452	0.000615
0.0264	264.665	-15.436	-19.578	-8.200	-0.743	50.344	503.855	0.001081	0.001370	0.000574
0.0272	270.556	-14.804	-18.534	-7.768	-0.742	50.343	515.070	0.001036	0.001297	0.000544
0.0280	275.245	-14.410	-18.242	-7.616	-0.735	50.341	523.996	0.001009	0.001277	0.000533
0.0288	278.807	-13.960	-18.200	-7.476	-0.738	50.339	530.777	0.000977	0.001274	0.000523
0.0296	281.016	-13.735	-18.117	-7.351	-0.739	50.337	534.983	0.000961	0.001268	0.000515
0.0304	281.993	-13.496	-18.229	-7.296	-0.740	50.335	536.842	0.000945	0.001276	0.000511
0.0312	281.918	-13.440	-18.256	-7.282	-0.743	50.333	536.699	0.000941	0.001278	0.000510
0.0320	281.121	-13.496	-18.228	-7.296	-0.746	50.330	535.183	0.000945	0.001276	0.000511
0.0328	279.664	-13.426	-18.380	-7.448	-0.746	50.328	532.408	0.000940	0.001287	0.000521
0.0336	277.845	-13.580	-18.589	-7.601	-0.743	50.326	528.946	0.000951	0.001301	0.000532
0.0344	275.756	-13.594	-18.340	-7.600	-0.747	50.325	524.969	0.000952	0.001284	0.000532
0.0352	273.171	-13.735	-18.133	-7.587	-0.747	50.325	520.048	0.000961	0.001269	0.000531
0.0360	270.436	-14.057	-18.064	-7.601	-0.750	50.325	514.841	0.000984	0.001264	0.000532
0.0368	267.611	-14.409	-17.980	-7.670	-0.754	50.326	509.462	0.001009	0.001259	0.000537
0.0376	264.680	-14.985	-18.354	-7.991	-0.751	50.328	503.883	0.001049	0.001285	0.000559
0.0384	261.690	-15.266	-18.924	-8.200	-0.752	50.330	498.190	0.001069	0.001325	0.000574
0.0392	258.459	-15.478	-19.827	-8.339	-0.751	50.332	492.039	0.001083	0.001388	0.000584
0.0400	254.852	-15.955	-20.759	-8.450	-0.752	50.334	485.172	0.001117	0.001453	0.000592
0.0408	250.689	-16.264	-21.843	-8.490	-0.754	50.337	477.247	0.001138	0.001529	0.000594
0.0416	246.105	-16.909	-22.858	-8.851	-0.754	50.339	468.521	0.001184	0.001600	0.000620
0.0424	240.935	-17.553	-23.637	-9.199	-0.752	50.341	458.679	0.001229	0.001655	0.000644
0.0432	235.134	-18.113	-24.596	-9.796	-0.748	50.344	447.636	0.001268	0.001722	0.000686
0.0440	228.973	-18.689	-25.541	-10.215	-0.743	50.345	435.905	0.001308	0.001788	0.000715
0.0448	222.330	-19.137	-26.333	-10.325	-0.746	50.345	423.260	0.001340	0.001843	0.000723
0.0456	215.507	-19.910	-27.263	-10.686	-0.746	50.345	410.271	0.001394	0.001908	0.000748
0.0464	209.030	-20.472	-28.207	-10.977	-0.745	50.344	397.940	0.001433	0.001975	0.000768
0.0472	202.959	-21.203	-29.125	-11.366	-0.746	50.343	386.381	0.001484	0.002039	0.000796
0.0480	197.714	-21.934	-29.847	-11.964	-0.740	50.342	376.396	0.001535	0.002089	0.000837
0.0488	193.536	-22.383	-30.223	-12.158	-0.744	50.340	368.443	0.001567	0.002116	0.000851
0.0496	190.305	-22.832	-30.403	-12.227	-0.749	50.338	362.291	0.001598	0.002128	0.000856
0.0504	188.186	-23.098	-30.418	-12.367	-0.752	50.335	358.257	0.001617	0.002129	0.000866
0.0512	187.059	-23.308	-30.738	-12.409	-0.754	50.333	356.112	0.001632	0.002152	0.000869
0.0520	186.803	-23.391	-31.114	-12.464	-0.751	50.330	355.625	0.001637	0.002178	0.000872
0.0528	187.194	-23.503	-31.504	-12.715	-0.744	50.328	356.369	0.001645	0.002205	0.000890
0.0536	188.261	-23.671	-32.005	-12.881	-0.739	50.326	358.400	0.001657	0.002240	0.000902
0.0544	190.004	-23.460	-31.991	-12.715	-0.740	50.325	361.719	0.001642	0.002239	0.000890
0.0552	192.243	-23.405	-31.795	-12.480	-0.740	50.325	365.982	0.001638	0.002226	0.000874
0.0560	195.069	-23.280	-31.475	-12.228	-0.742	50.325	371.361	0.001630	0.002203	0.000856
0.0568	198.450	-22.888	-30.612	-11.991	-0.746	50.326	377.798	0.001602	0.002143	0.000839
0.0576	202.267	-22.776	-30.042	-11.963	-0.744	50.328	385.065	0.001594	0.002103	0.000837
0.0584	206.641	-22.383	-29.487	-12.017	-0.746	50.330	393.391	0.001567	0.002064	0.000841
0.0592	211.645	-21.891	-28.792	-11.782	-0.744	50.332	402.918	0.001532	0.002015	0.000825
0.0600	217.311	-21.428	-28.152	-11.380	-0.744	50.334	413.704	0.001500	0.001971	0.000797
0.0608	223.893	-20.922	-27.180	-11.118	-0.743	50.336	426.235	0.001465	0.001903	0.000778
0.0616	231.287	-20.235	-26.040	-10.688	-0.742	50.339	440.311	0.001416	0.001823	0.000748
0.0624	239.388	-19.421	-24.595	-10.284	-0.746	50.341	455.732	0.001359	0.001722	0.000720
0.0632	247.728	-18.635	-23.248	-9.979	-0.741	50.344	471.611	0.001304	0.001627	0.000699
0.0640	255.874	-17.584	-21.802	-9.506	-0.739	50.345	487.118	0.001231	0.001526	0.000665
0.0648	263.734	-16.488	-20.147	-8.895	-0.743	50.345	502.081	0.001154	0.001410	0.000623
0.0656	270.797	-15.604	-18.965	-8.340	-0.740	50.345	515.528	0.001092	0.001328	0.000584
0.0664	277.139	-14.762	-17.799	-7.838	-0.742	50.344	527.601	0.001033	0.001246	0.000549
0.0672	282.579	-14.003	-16.938	-7.364	-0.744	50.343	537.958	0.000980	0.001186	0.000515
0.0680	286.742	-13.680	-16.439	-7.224	-0.739	50.342	545.883	0.000958	0.001151	0.000506
0.0688	289.793	-13.274	-15.801	-7.084	-0.741	50.340	551.691	0.000929	0.001106	0.000496
0.0696	291.416	-12.950	-15.481	-7.072	-0.744	50.338	554.781	0.000907	0.001084	0.000495
0.0704	291.852	-12.893	-15.356	-7.003	-0.742	50.336	555.611	0.000903	0.001075	0.000490
0.0712	291.341	-12.726	-15.328	-7.142	-0.741	50.333	554.638	0.000891	0.001073	0.000500
0.0720	289.988	-12.795	-15.439	-7.101	-0.743	50.330	552.063	0.000896	0.001081	0.000497
0.0728	288.170	-13.006	-16.023	-7.184	-0.739	50.328	548.601	0.000910	0.001122	0.000503
0.0736	285.961	-13.202	-16.827	-7.449	-0.742	50.327	544.395	0.000924	0.001178	0.000521
0.0744	283.466	-13.384	-17.341	-7.421	-0.745	50.325	539.646	0.000937	0.001214	0.000519
0.0752	280.535	-13.580	-17.812	-7.531	-0.747	50.325	534.067	0.000951	0.001247	0.000527
0.0760	277.274	-13.919	-17.882	-7.601	-0.750	50.325	527.859	0.000974	0.001252	0.000532
0.0768	273.607	-14.213	-17.897	-7.572	-0.746	50.326	520.878	0.000995	0.001253	0.000530
0.0776	269.414	-14.790	-18.355	-7.726	-0.742	50.328	512.896	0.001035	0.001285	0.000541
0.0784	264.770	-15.295	-19.078	-7.949	-0.738	50.330	504.055	0.001071	0.001335	0.000556
0.0792	259.285	-15.772	-19.996	-8.129	-0.736	50.332	493.612	0.001104	0.001400	0.000569
0.0800	252.778	-16.684	-21.288	-8.561	-0.740	50.334	481.224	0.001168	0.001490	0.000599
0.0808	245.234	-17.498	-22.887	-9.034	-0.741	50.336	466.862	0.001225	0.001602	0.000632
0.0816	236.727	-18.452	-24.555	-9.533	-0.743	50.338	450.668	0.001292	0.001719	0.000667
0.0824	227.590	-19.490	-26.346	-10.159	-0.744	50.341	433.273	0.001364	0.001844	0.000711
0.0832	218.212	-20.472	-27.944	-10.937	-0.735	50.344	415.421	0.001433	0.001956	0.000766
0.0840	209.060	-21.315	-29.263	-11.451	-0.735	50.345	397.997	0.001492	0.002048	0.000802
0.0848	200.479	-22.045	-30.027	-11.855	-0.739	50.345	381.660	0.001543	0.002102	0.000830
0.0856	192.754	-22.886	-30.778	-12.341	-0.735	50.345	366.955	0.001602	0.002154	0.000864
0.0864	186.247	-23.561	-31.390	-12.577	-0.739	50.344	354.567	0.001649	0.002197	0.000880
0.0872	181.032	-24.388	-32.057	-13.064	-0.738	50.342	344.639	0.001707	0.002244	0.000914
0.0880	177.320	-25.117	-33.126	-13.592	-0.729	50.341	337.572	0.001758	0.002319	0.000951
0.0888	175.051	-25.482	-33.834	-13.856	-0.728	50.339	333.252	0.001784	0.002368	0.000970
0.0896	173.879	-25.593	-34.375	-13.980	-0.735	50.337	331.020	0.001792	0.002406	0.000979
0.0904	173.623	-25.510	-34.653	-14.035	-0.736	50.335	330.534	0.001786	0.002426	0.000982
0.0912	174.029	-25.467	-34.654	-14.062	-0.743	50.332	331.306	0.001783	0.002426	0.000984
0.0920	174.886	-25.384	-34.640	-13.965	-0.750	50.330	332.937	0.001777	0.002425	0.000978
0.0928	176.238	-25.454	-34.709	-13.978	-0.746	50.328	335.512	0.001782	0.002430	0.000978
0.0936	178.042	-25.481	-34.653	-13.924	-0.747	50.326	338.945	0.001784	0.002426	0.000975
0.0944	180.161	-25.243	-34.153	-13.618	-0.747	50.324	342.979	0.001767	0.002391	0.000953
0.0952	182.565	-24.974	-33.848	-13.507	-0.745	50.324	347.557	0.001748	0.002369	0.000946
0.0960	185.210	-24.456	-33.307	-13.355	-0.747	50.325	352.592	0.001712	0.002331	0.000935
0.0968	188.261	-24.176	-32.682	-13.034	-0.744	50.326	358.400	0.001692	0.002288	0.000912
0.0976	191.808	-23.937	-32.571	-12.910	-0.742	50.328	365.152	0.001676	0.002280	0.000904
0.0984	196.076	-23.490	-31.989	-12.672	-0.743	50.330	373.278	0.001644	0.002239	0.000887
0.0992	201.306	-23.224	-31.196	-12.338	-0.742	50.332	383.234	0.001626	0.002184	0.000864
0.1000	207.512	-22.480	-30.141	-12.130	-0.744	50.334	395.050	0.001574	0.002110	0.000849
0.1008	214.756	-21.751	-28.696	-11.866	-0.748	50.337	408.840	0.001523	0.002009	0.000831
0.1016	222.871	-21.062	-27.278	-11.395	-0.745	50.339	424.290	0.001474	0.001909	0.000798
0.1024	231.483	-20.191	-26.000	-10.909	-0.750	50.342	440.683	0.001413	0.001820	0.000764
0.1032	240.079	-19.419	-24.762	-10.521	-0.747	50.344	457.048	0.001359	0.001733	0.000736
0.1040	248.435	-18.620	-23.595	-9.992	-0.745	50.346	472.956	0.001303	0.001652	0.000699
0.1048	256.174	-17.639	-22.331	-9.310	-0.754	50.345	487.690	0.001235	0.001563	0.000652
0.1056	263.238	-16.727	-21.039	-8.921	-0.751	50.345	501.137	0.001171	0.001473	0.000624
0.1064	269.730	-15.913	-19.802	-8.310	-0.752	50.344	513.496	0.001114	0.001386	0.000582
0.1072	275.381	-15.309	-18.953	-7.949	-0.755	50.342	524.254	0.001072	0.001327	0.000556
0.1080	280.145	-14.760	-18.451	-7.950	-0.748	50.341	533.323	0.001033	0.001292	0.000556
0.1088	283.811	-14.352	-18.201	-7.532	-0.752	50.339	540.304	0.001005	0.001274	0.000527
0.1096	286.201	-14.156	-18.353	-7.463	-0.756	50.337	544.853	0.000991	0.001285	0.000522
0.1104	287.493	-14.001	-18.437	-7.394	-0.758	50.335	547.314	0.000980	0.001291	0.000518
0.1112	287.869	-14.001	-18.535	-7.309	-0.759	50.333	548.029	0.000980	0.001297	0.000512
0.1120	287.388	-13.959	-18.660	-7.393	-0.758	50.330	547.113	0.000977	0.001306	0.000517
0.1128	286.291	-14.043	-18.646	-7.531	-0.756	50.328	545.025	0.000983	0.001305	0.000527
0.1136	284.593	-14.142	-18.603	-7.726	-0.751	50.326	541.792	0.000990	0.001302	0.000541
0.1144	282.504	-14.170	-18.269	-7.684	-0.752	50.325	537.815	0.000992	0.001279	0.000538
0.1152	280.099	-14.408	-18.130	-7.823	-0.752	50.325	533.237	0.001009	0.001269	0.000548
0.1160	277.470	-14.521	-18.201	-7.739	-0.750	50.325	528.231	0.001016	0.001274	0.000542
0.1168	274.689	-14.618	-18.771	-7.669	-0.750	50.326	522.938	0.001023	0.001314	0.000537
0.1176	271.684	-14.886	-19.773	-7.906	-0.746	50.328	517.216	0.001042	0.001384	0.000553
0.1184	268.392	-15.294	-20.484	-8.059	-0.743	50.330	510.950	0.001071	0.001434	0.000564
0.1192	264.650	-15.673	-21.318	-8.199	-0.745	50.332	503.826	0.001097	0.001492	0.000574
0.1200	260.187	-16.080	-21.971	-8.491	-0.744	50.334	495.329	0.001126	0.001538	0.000594
0.1208	254.777	-16.698	-22.720	-8.867	-0.744	50.336	485.029	0.001169	0.001590	0.000621
0.1216	248.314	-17.328	-23.749	-9.257	-0.744	50.339	472.727	0.001213	0.001662	0.000648
0.1224	240.740	-18.115	-24.666	-9.715	-0.744	50.342	458.307	0.001268	0.001727	0.000680
0.1232	232.384	-19.364	-25.626	-10.382	-0.743	50.344	442.400	0.001355	0.001794	0.000727
0.1240	223.638	-20.416	-26.598	-10.757	-0.745	50.346	425.749	0.001429	0.001862	0.000753
0.1248	214.906	-21.049	-27.501	-11.090	-0.750	50.346	409.126	0.001473	0.001925	0.000776
0.1256	206.565	-21.918	-28.667	-11.645	-0.748	50.345	393.248	0.001534	0.002007	0.000815
0.1264	199.081	-22.465	-29.667	-11.797	-0.752	50.344	379.000	0.001573	0.002077	0.000826
0.1272	192.529	-22.914	-30.668	-12.271	-0.752	50.343	366.526	0.001604	0.002147	0.000859
0.1280	187.164	-23.629	-31.932	-12.827	-0.748	50.342	356.312	0.001654	0.002235	0.000898
0.1288	183.076	-24.106	-32.834	-13.105	-0.748	50.340	348.530	0.001687	0.002298	0.000917
0.1296	180.100	-24.457	-33.696	-13.438	-0.748	50.337	342.865	0.001712	0.002359	0.000941
0.1304	178.282	-24.865	-34.308	-13.521	-0.746	50.335	339.403	0.001741	0.002402	0.000946
0.1312	177.425	-25.076	-34.405	-13.520	-0.746	50.333	337.772	0.001755	0.002408	0.000946
0.1320	177.486	-25.146	-34.349	-13.673	-0.749	50.330	337.887	0.001760	0.002404	0.000957
0.1328	178.237	-25.146	-34.211	-13.771	-0.749	50.327	339.317	0.001760	0.002395	0.000964
0.1336	179.725	-25.188	-33.793	-13.799	-0.750	50.326	342.150	0.001763	0.002366	0.000966
0.1344	181.889	-25.005	-33.322	-13.661	-0.755	50.325	346.270	0.001750	0.002333	0.000956
0.1352	184.353	-24.780	-33.044	-13.383	-0.757	50.324	350.962	0.001735	0.002313	0.000937
0.1360	187.314	-24.640	-32.849	-13.161	-0.758	50.325	356.598	0.001725	0.002299	0.000921
0.1368	190.605	-24.303	-32.599	-12.994	-0.760	50.326	362.864	0.001701	0.002282	0.000910
0.1376	194.317	-24.220	-32.279	-13.035	-0.756	50.328	369.930	0.001695	0.002260	0.000912
0.1384	198.796	-23.911	-31.751	-12.951	-0.755	50.330	378.456	0.001674	0.002223	0.000907
0.1392	204.086	-23.433	-31.001	-12.659	-0.754	50.332	388.527	0.001640	0.002170	0.000886
0.1400	210.308	-23.069	-30.084	-12.298	-0.754	50.334	400.372	0.001615	0.002106	0.000861
0.1408	217.626	-22.394	-28.973	-11.771	-0.752	50.336	414.305	0.001568	0.002028	0.000824
0.1416	225.877	-21.636	-27.793	-11.244	-0.750	50.339	430.012	0.001515	0.001945	0.000787
0.1424	234.939	-20.725	-26.569	-10.800	-0.752	50.341	447.264	0.001451	0.001860	0.000756
0.1432	244.557	-19.672	-25.540	-10.410	-0.747	50.344	465.574	0.001377	0.001788	0.000729
0.1440	254.115	-18.577	-24.413	-9.868	-0.748	50.346	483.770	0.001300	0.001709	0.000691
0.1448	263.268	-17.511	-23.121	-9.186	-0.752	50.346	501.194	0.001226	0.001619	0.000643
0.1456	271.338	-16.473	-21.733	-8.658	-0.748	50.345	516.558	0.001153	0.001521	0.000606
0.1464	278.131	-15.518	-20.121	-8.171	-0.746	50.344	529.490	0.001086	0.001408	0.000572
0.1472	283.466	-14.929	-18.801	-7.766	-0.742	50.343	539.646	0.001045	0.001316	0.000544
0.1480	287.193	-14.340	-17.980	-7.641	-0.735	50.341	546.741	0.001004	0.001259	0.000535
0.1488	289.492	-14.045	-17.687	-7.349	-0.733	50.339	551.119	0.000983	0.001238	0.000514
0.1496	290.364	-13.861	-17.938	-7.127	-0.736	50.337	552.778	0.000970	0.001256	0.000499
0.1504	290.018	-13.764	-18.256	-7.141	-0.738	50.335	552.120	0.000963	0.001278	0.000500
0.1512	288.801	-13.764	-18.575	-7.182	-0.740	50.333	549.803	0.000963	0.001300	0.000503
0.1520	286.998	-13.820	-18.645	-7.307	-0.744	50.330	546.370	0.000967	0.001305	0.000511
0.1528	284.683	-13.861	-18.645	-7.613	-0.744	50.328	541.964	0.000970	0.001305	0.000533
0.1536	282.038	-14.058	-18.993	-7.975	-0.745	50.326	536.928	0.000984	0.001330	0.000558
0.1544	279.138	-14.366	-19.062	-7.990	-0.748	50.325	531.406	0.001006	0.001334	0.000559
0.1552	275.846	-14.563	-18.979	-8.019	-0.749	50.324	525.141	0.001019	0.001329	0.000561
0.1560	272.195	-14.859	-19.202	-7.990	-0.752	50.325	518.188	0.001040	0.001344	0.000559
0.1568	268.302	-15.168	-19.412	-7.921	-0.752	50.326	510.778	0.001062	0.001359	0.000555
0.1576	263.824	-15.618	-20.010	-8.227	-0.750	50.328	502.253	0.001093	0.001401	0.000576
0.1584	258.684	-16.278	-21.011	-8.616	-0.750	50.330	492.468	0.001139	0.001471	0.000603
0.1592	252.718	-17.105	-21.969	-8.991	-0.746	50.332	481.110	0.001197	0.001538	0.000629
0.1600	245.639	-17.876	-22.969	-9.324	-0.747	50.334	467.634	0.001251	0.001608	0.000653
0.1608	237.795	-18.758	-24.275	-9.784	-0.743	50.336	452.700	0.001313	0.001699	0.000685
0.1616	229.424	-19.642	-25.901	-10.202	-0.741	50.339	436.764	0.001375	0.001813	0.000714
0.1624	220.978	-20.430	-27.598	-10.883	-0.736	50.342	420.685	0.001430	0.001932	0.000762
0.1632	212.922	-21.301	-29.363	-11.522	-0.735	50.344	405.350	0.001491	0.002055	0.000807
0.1640	205.634	-22.117	-30.656	-11.965	-0.736	50.345	391.474	0.001548	0.002146	0.000838
0.1648	199.217	-22.679	-31.378	-12.144	-0.739	50.346	379.257	0.001588	0.002196	0.000850
0.1656	193.881	-23.294	-32.058	-12.284	-0.744	50.345	369.101	0.001631	0.002244	0.000860
0.1664	189.854	-23.700	-32.599	-12.548	-0.742	50.344	361.433	0.001659	0.002282	0.000878
0.1672	186.863	-24.204	-33.196	-12.869	-0.744	50.343	355.740	0.001694	0.002324	0.000901
0.1680	185.105	-24.539	-33.654	-13.313	-0.743	50.342	352.392	0.001718	0.002356	0.000932
0.1688	184.203	-24.736	-33.960	-13.437	-0.740	50.340	350.676	0.001732	0.002377	0.000941
0.1696	183.843	-25.074	-33.891	-13.465	-0.742	50.338	349.989	0.001755	0.002372	0.000943
0.1704	184.173	-25.158	-33.696	-13.409	-0.739	50.335	350.618	0.001761	0.002359	0.000939
0.1712	184.864	-25.243	-33.862	-13.396	-0.735	50.333	351.934	0.001767	0.002370	0.000938
0.1720	185.916	-25.299	-33.696	-13.466	-0.738	50.330	353.937	0.001771	0.002359	0.000943
0.1728	187.254	-25.144	-33.640	-13.355	-0.734	50.327	356.483	0.001760	0.002355	0.000935
0.1736	188.742	-24.947	-33.571	-13.396	-0.734	50.326	359.316	0.001746	0.002350	0.000938
0.1744	190.560	-24.710	-33.156	-13.229	-0.740	50.325	362.778	0.001730	0.002321	0.000926
0.1752	192.574	-24.359	-32.892	-13.076	-0.742	50.324	366.611	0.001705	0.002302	0.000915
0.1760	194.933	-23.937	-32.712	-12.964	-0.745	50.325	371.103	0.001676	0.002290	0.000907
0.1768	197.654	-23.530	-32.434	-12.686	-0.746	50.326	376.282	0.001647	0.002270	0.000888
0.1776	200.704	-23.235	-32.073	-12.561	-0.743	50.327	382.090	0.001626	0.002245	0.000879
0.1784	204.356	-22.955	-31.447	-12.436	-0.740	50.329	389.042	0.001607	0.002201	0.000871
0.1792	208.609	-22.605	-30.765	-12.352	-0.740	50.332	397.139	0.001582	0.002154	0.000865
0.1800	213.629	-22.227	-30.000	-12.102	-0.739	50.333	406.694	0.001556	0.002100	0.000847
0.1808	219.295	-21.792	-29.220	-11.825	-0.740	50.336	417.480	0.001525	0.002045	0.000828
0.1816	225.591	-21.189	-28.290	-11.547	-0.739	50.339	429.468	0.001483	0.001980	0.000808
0.1824	232.399	-20.627	-26.929	-10.979	-0.742	50.341	442.429	0.001444	0.001885	0.000769
0.1832	239.568	-20.079	-25.525	-10.756	-0.742	50.344	456.076	0.001406	0.001787	0.000753
0.1840	247.007	-19.320	-24.039	-10.381	-0.745	50.346	470.238	0.001352	0.001683	0.000727
0.1848	254.506	-18.366	-22.439	-9.520	-0.754	50.346	484.514	0.001286	0.001571	0.000666
0.1856	261.735	-17.510	-21.245	-9.144	-0.751	50.346	498.276	0.001226	0.001487	0.000640
0.1864	268.467	-16.585	-20.162	-8.603	-0.751	50.344	511.093	0.001161	0.001411	0.000602
0.1872	274.419	-15.856	-19.135	-8.199	-0.747	50.343	522.423	0.001110	0.001339	0.000574
0.1880	279.363	-15.518	-18.551	-8.059	-0.741	50.342	531.836	0.001086	0.001299	0.000564
0.1888	283.301	-15.098	-18.091	-7.878	-0.741	50.340	539.331	0.001057	0.001266	0.000551
0.1896	286.141	-14.607	-17.590	-7.530	-0.744	50.338	544.739	0.001022	0.001231	0.000527
0.1904	288.080	-14.452	-17.353	-7.432	-0.744	50.335	548.429	0.001012	0.001215	0.000520
0.1912	288.996	-14.325	-17.340	-7.460	-0.745	50.333	550.175	0.001003	0.001214	0.000522
0.1920	289.026	-14.240	-17.437	-7.460	-0.749	50.330	550.232	0.000997	0.001221	0.000522
0.1928	288.230	-14.437	-17.603	-7.738	-0.747	50.327	548.716	0.001011	0.001232	0.000542
0.1936	286.742	-14.367	-17.824	-7.990	-0.748	50.326	545.883	0.001006	0.001248	0.000559
0.1944	284.848	-14.396	-17.796	-7.990	-0.749	50.324	542.278	0.001008	0.001246	0.000559
0.1952	282.459	-14.368	-17.783	-7.851	-0.751	50.324	537.729	0.001006	0.001245	0.000550
0.1960	279.589	-14.452	-18.007	-7.851	-0.753	50.325	532.265	0.001012	0.001260	0.000550
0.1968	276.357	-14.817	-18.425	-7.781	-0.752	50.326	526.114	0.001037	0.001290	0.000545
0.1976	272.736	-15.153	-19.037	-7.949	-0.752	50.328	519.218	0.001061	0.001333	0.000556
0.1984	268.618	-15.673	-19.843	-8.296	-0.748	50.330	511.379	0.001097	0.001389	0.000581
0.1992	263.944	-16.221	-20.816	-8.534	-0.751	50.332	502.481	0.001135	0.001457	0.000597
0.2000	191.327	-26.438	-34.585	-13.896	-0.759	50.325	364.237	0.001851	0.002421	0.000973
0.2008	191.417	-26.691	-34.696	-14.063	-0.752	50.327	364.408	0.001868	0.002429	0.000984
0.2016	191.552	-26.803	-34.779	-14.091	-0.756	50.329	364.666	0.001876	0.002435	0.000986
0.2024	191.823	-26.860	-34.850	-14.119	-0.756	50.331	365.181	0.001880	0.002439	0.000988
0.2032	192.168	-26.915	-35.002	-14.022	-0.758	50.333	365.839	0.001884	0.002450	0.000982
0.2040	192.965	-26.633	-35.100	-14.050	-0.757	50.335	367.355	0.001864	0.002457	0.000983
0.2048	194.182	-26.338	-35.169	-14.078	-0.758	50.338	369.673	0.001844	0.002462	0.000985
0.2056	196.091	-26.086	-34.919	-14.092	-0.758	50.340	373.306	0.001826	0.002444	0.000986
0.2064	198.946	-25.847	-34.586	-14.189	-0.752	50.343	378.742	0.001809	0.002421	0.000993
0.2072	203.500	-25.398	-33.988	-13.966	-0.760	50.344	387.411	0.001778	0.002379	0.000978
0.2080	211.104	-24.698	-32.766	-13.409	-0.765	50.344	401.888	0.001729	0.002294	0.000939
0.2088	223.172	-23.771	-30.765	-12.631	-0.767	50.344	424.862	0.001664	0.002154	0.000884
0.2096	241.491	-22.017	-28.000	-11.310	-0.771	50.342	459.738	0.001541	0.001960	0.000792
0.2104	266.859	-19.533	-24.345	-9.642	-0.767	50.341	508.032	0.001367	0.001704	0.000675
0.2112	299.621	-16.347	-19.954	-7.808	-0.761	50.340	570.402	0.001144	0.001397	0.000547
0.2120	339.642	-12.137	-14.687	-5.515	-0.760	50.338	646.591	0.000850	0.001028	0.000386
0.2128	385.914	-7.141	-8.530	-2.626	-0.761	50.336	734.682	0.000500	0.000597	0.000184
0.2136	437.552	-1.556	-1.151	0.582	-0.762	50.334	832.987	0.000109	0.000081	-0.000041
0.2144	493.443	4.716	6.714	4.084	-0.761	50.331	939.388	-0.000330	-0.000470	-0.000286
0.2152	552.294	11.409	15.094	8.017	-0.760	50.328	1051.426	-0.000799	-0.001057	-0.000561
0.2160	613.039	18.228	23.807	11.769	-0.756	50.326	1167.068	-0.001276	-0.001666	-0.000824
0.2168	674.911	25.035	32.658	15.674	-0.751	50.325	1284.857	-0.001752	-0.002286	-0.001097
0.2176	736.948	32.318	42.066	19.816	-0.755	50.323	1402.960	-0.002262	-0.002945	-0.001387
0.2184	798.264	39.727	51.320	23.999	-0.759	50.323	1519.690	-0.002781	-0.003592	-0.001680
0.2192	858.408	47.052	60.462	28.224	-0.762	50.324	1634.188	-0.003294	-0.004232	-0.001976
0.2200	916.523	54.460	69.398	32.267	-0.762	50.324	1744.823	-0.003812	-0.004858	-0.002259
0.2208	971.511	61.224	77.695	36.018	-0.756	50.326	1849.508	-0.004286	-0.005439	-0.002521
0.2216	1022.413	67.595	85.269	39.451	-0.751	50.328	1946.411	-0.004732	-0.005969	-0.002762
0.2224	1067.663	73.616	92.245	42.565	-0.752	50.330	2032.557	-0.005153	-0.006457	-0.002980
0.2232	1105.895	78.949	98.180	45.357	-0.754	50.332	2105.341	-0.005526	-0.006873	-0.003175
0.2240	1136.148	83.607	103.015	47.622	-0.755	50.335	2162.933	-0.005852	-0.007211	-0.003334
0.2248	1157.398	87.128	106.808	49.163	-0.754	50.338	2203.388	-0.006099	-0.007477	-0.003441
0.2256	1169.661	89.570	109.268	50.260	-0.751	50.340	2226.734	-0.006270	-0.007649	-0.003518
0.2264	1173.704	90.917	110.406	50.706	-0.747	50.343	2234.430	-0.006364	-0.007728	-0.003549
0.2272	1171.089	91.577	110.808	50.719	-0.750	50.344	2229.452	-0.006410	-0.007757	-0.003550
0.2280	1163.484	91.719	110.684	50.887	-0.756	50.344	2214.975	-0.006420	-0.007748	-0.003562
0.2288	1151.462	91.382	109.809	50.553	-0.757	50.343	2192.087	-0.006397	-0.007687	-0.003539
0.2296	1134.209	90.499	108.711	49.858	-0.759	50.342	2159.243	-0.006335	-0.007610	-0.003490
0.2304	1109.142	88.450	106.488	48.832	-0.756	50.341	2111.521	-0.006191	-0.007454	-0.003418
0.2312	1073.750	85.096	102.680	46.608	-0.748	50.339	2044.144	-0.005957	-0.007188	-0.003263
0.2320	1027.011	80.465	97.246	43.871	-0.745	50.338	1955.166	-0.005633	-0.006807	-0.003071
0.2328	969.738	74.641	89.924	40.591	-0.745	50.336	1846.132	-0.005225	-0.006295	-0.002841
0.2336	904.635	67.807	81.100	36.574	-0.743	50.333	1722.193	-0.004746	-0.005677	-0.002560
0.2344	835.084	60.313	71.510	32.376	-0.742	50.331	1589.785	-0.004222	-0.005006	-0.002266
0.2352	763.879	52.427	61.701	28.001	-0.743	50.328	1454.229	-0.003670	-0.004319	-0.001960
0.2360	693.291	44.246	51.750	23.345	-0.738	50.326	1319.847	-0.003097	-0.003623	-0.001634
0.2368	625.137	36.290	42.232	18.969	-0.732	50.325	1190.100	-0.002540	-0.002956	-0.001328
0.2376	560.905	28.952	33.228	14.996	-0.736	50.324	1067.820	-0.002027	-0.002326	-0.001050
0.2384	501.738	21.949	24.640	11.145	-0.739	50.323	955.181	-0.001536	-0.001725	-0.000780
0.2392	448.358	15.675	16.663	7.741	-0.743	50.324	853.558	-0.001097	-0.001166	-0.000542
0.2400	401.394	9.893	9.451	4.697	-0.751	50.325	764.151	-0.000692	-0.000662	-0.000329
0.2408	360.787	4.573	2.947	2.015	-0.750	50.326	686.846	-0.000320	-0.000206	-0.000141
0.2416	326.462	0.014	-2.793	-0.389	-0.747	50.328	621.500	-0.000001	0.000196	0.000027
0.2424	297.998	-3.760	-7.629	-2.308	-0.747	50.331	567.312	0.000263	0.000534	0.000162
0.2432	274.779	-6.805	-11.658	-3.919	-0.744	50.333	523.109	0.000476	0.000816	0.000274
0.2440	256.610	-9.457	-15.007	-5.517	-0.743	50.335	488.520	0.000662	0.001050	0.000386
0.2448	242.979	-11.379	-17.326	-6.476	-0.743	50.338	462.570	0.000796	0.001213	0.000453
0.2456	233.752	-12.852	-18.911	-7.199	-0.740	50.341	445.004	0.000900	0.001324	0.000504
0.2464	228.582	-14.086	-20.107	-7.963	-0.738	50.343	435.162	0.000986	0.001408	0.000557
0.2472	226.899	-14.492	-20.636	-8.076	-0.741	50.345	431.957	0.001014	0.001445	0.000565
0.2480	228.161	-14.563	-20.706	-7.950	-0.750	50.345	434.361	0.001019	0.001449	0.000557
0.2488	231.828	-14.605	-20.594	-7.880	-0.755	50.344	441.341	0.001022	0.001442	0.000552
0.2496	238.275	-14.283	-19.662	-7.462	-0.760	50.343	453.615	0.001000	0.001376	0.000522
0.2504	248.916	-13.639	-18.119	-7.016	-0.760	50.342	473.871	0.000955	0.001268	0.000491
0.2512	267.115	-12.376	-15.730	-6.280	-0.754	50.340	508.518	0.000866	0.001101	0.000440
0.2520	296.480	-9.739	-11.838	-4.669	-0.755	50.338	564.423	0.000682	0.000829	0.000327
0.2528	339.026	-5.374	-6.502	-2.153	-0.754	50.336	645.418	0.000376	0.000455	0.000151
0.2536	394.766	0.493	0.655	1.182	-0.753	50.334	751.534	-0.000035	-0.000046	-0.000083
0.2544	461.327	7.538	9.298	5.129	-0.756	50.331	878.248	-0.000528	-0.000651	-0.000359
0.2552	535.147	15.452	19.263	9.645	-0.758	50.328	1018.782	-0.001082	-0.001348	-0.000675
0.2560	613.339	24.011	30.059	14.411	-0.757	50.326	1167.641	-0.001681	-0.002104	-0.001009
0.2568	693.606	32.964	41.203	19.331	-0.758	50.325	1320.448	-0.002307	-0.002884	-0.001353
0.2576	773.978	42.364	52.696	24.611	-0.761	50.324	1473.455	-0.002966	-0.003689	-0.001723
0.2584	852.652	51.894	64.175	29.891	-0.759	50.323	1623.230	-0.003633	-0.004492	-0.002092
0.2592	927.598	61.002	75.098	34.893	-0.762	50.324	1765.909	-0.004270	-0.005257	-0.002443
0.2600	996.834	69.506	85.507	39.617	-0.761	50.325	1897.717	-0.004865	-0.005985	-0.002773
0.2608	1058.000	77.197	94.804	43.577	-0.755	50.327	2014.160	-0.005404	-0.006636	-0.003050
0.2616	1109.262	83.861	102.488	46.802	-0.752	50.329	2111.750	-0.005870	-0.007174	-0.003276
0.2624	1149.388	89.291	108.784	49.471	-0.751	50.331	2188.139	-0.006250	-0.007615	-0.003463
0.2632	1177.867	93.403	113.452	51.473	-0.748	50.333	2242.355	-0.006538	-0.007942	-0.003603
0.2640	1195.510	96.140	116.356	52.822	-0.749	50.335	2275.944	-0.006730	-0.008145	-0.003698
0.2648	1203.911	97.936	117.925	53.752	-0.750	50.338	2291.937	-0.006855	-0.008255	-0.003763
0.2656	1205.293	98.721	118.509	54.182	-0.748	50.341	2294.569	-0.006911	-0.008296	-0.003793
0.2664	1201.656	98.946	118.398	54.015	-0.747	50.343	2287.645	-0.006926	-0.008288	-0.003781
0.2672	1194.653	98.960	118.259	53.918	-0.747	50.345	2274.313	-0.006927	-0.008278	-0.003774
0.2680	1184.930	98.624	117.871	53.779	-0.752	50.344	2255.802	-0.006904	-0.008251	-0.003765
0.2688	1171.585	97.978	116.995	53.307	-0.751	50.344	2230.396	-0.006858	-0.008190	-0.003731
0.2696	1153.085	96.701	115.300	52.696	-0.754	50.342	2195.177	-0.006769	-0.008071	-0.003689
0.2704	1126.815	94.245	112.284	51.404	-0.750	50.341	2145.166	-0.006597	-0.007860	-0.003598
0.2712	1090.446	90.400	107.907	49.180	-0.746	50.340	2075.930	-0.006328	-0.007553	-0.003443
0.2720	1043.242	85.431	102.042	46.552	-0.742	50.338	1986.065	-0.005980	-0.007143	-0.003259
0.2728	985.563	79.214	94.690	43.273	-0.744	50.336	1876.259	-0.005545	-0.006628	-0.003029
0.2736	919.724	72.085	85.922	39.256	-0.749	50.333	1750.917	-0.005046	-0.006015	-0.002748
0.2744	849.060	64.353	76.333	34.977	-0.748	50.331	1616.392	-0.004505	-0.005343	-0.002448
0.2752	776.488	56.243	66.272	30.448	-0.754	50.328	1478.233	-0.003937	-0.004639	-0.002131
0.2760	704.923	47.979	56.016	25.778	-0.751	50.326	1341.991	-0.003359	-0.003921	-0.001804
0.2768	636.573	39.967	46.414	21.332	-0.747	50.324	1211.872	-0.002798	-0.003249	-0.001493
0.2776	572.853	32.572	37.743	17.426	-0.752	50.323	1090.565	-0.002280	-0.002642	-0.001220
0.2784	515.084	25.640	29.726	13.798	-0.753	50.323	980.587	-0.001795	-0.002081	-0.000966
0.2792	464.002	19.605	22.528	10.491	-0.753	50.323	883.341	-0.001372	-0.001577	-0.000734
0.2800	419.879	14.144	15.887	7.698	-0.758	50.324	799.341	-0.000990	-0.001112	-0.000539
0.2808	382.503	9.218	9.605	4.989	-0.751	50.326	728.188	-0.000645	-0.000672	-0.000349
0.2816	351.214	5.248	4.227	2.697	-0.750	50.328	668.621	-0.000367	-0.000296	-0.000189
0.2824	325.245	1.642	-0.358	0.891	-0.751	50.331	619.183	-0.000115	0.000025	-0.000062
0.2832	303.904	-1.122	-3.917	-0.639	-0.750	50.333	578.556	0.000079	0.000274	0.000045
0.2840	286.577	-3.493	-6.682	-2.028	-0.753	50.335	545.568	0.000244	0.000468	0.000142
0.2848	272.811	-5.626	-8.794	-3.155	-0.755	50.338	519.361	0.000394	0.000616	0.000221
0.2856	262.411	-7.169	-10.282	-4.073	-0.754	50.341	499.563	0.000502	0.000720	0.000285
0.2864	255.062	-8.573	-11.755	-4.948	-0.751	50.343	485.573	0.000600	0.000823	0.000346
0.2872	250.839	-9.233	-12.602	-5.336	-0.752	50.345	477.533	0.000646	0.000882	0.000374
0.2880	249.547	-9.640	-12.977	-5.335	-0.754	50.345	475.073	0.000675	0.000908	0.000373
0.2888	250.704	-9.795	-13.144	-5.280	-0.754	50.344	477.276	0.000686	0.000920	0.000370
0.2896	254.476	-9.653	-12.852	-4.990	-0.756	50.343	484.457	0.000676	0.000900	0.000349
0.2904	260.728	-9.499	-12.573	-4.810	-0.751	50.342	496.359	0.000665	0.000880	0.000337
0.2912	270.842	-8.910	-12.032	-4.671	-0.748	50.341	515.614	0.000624	0.000842	0.000327
0.2920	288.335	-7.577	-10.490	-3.850	-0.751	50.339	548.916	0.000530	0.000734	0.000270
0.2928	317.114	-5.022	-7.141	-2.307	-0.752	50.336	603.704	0.000352	0.000500	0.000161
0.2936	360.261	-0.785	-1.750	0.098	-0.752	50.334	685.844	0.000055	0.000122	-0.000007
0.2944	418.421	5.277	5.838	3.684	-0.748	50.332	796.566	-0.000369	-0.000409	-0.000258
0.2952	489.100	12.755	15.538	7.894	-0.747	50.329	931.120	-0.000893	-0.001088	-0.000553
0.2960	568.480	21.469	26.309	12.606	-0.746	50.327	1082.239	-0.001503	-0.001842	-0.000882
0.2968	652.999	30.759	37.897	17.900	-0.746	50.325	1243.143	-0.002153	-0.002653	-0.001253
0.2976	739.743	40.667	50.181	23.486	-0.749	50.324	1408.281	-0.002847	-0.003513	-0.001644
0.2984	826.277	50.896	62.244	29.142	-0.750	50.324	1573.019	-0.003563	-0.004357	-0.002040
0.2992	910.241	60.791	74.167	34.867	-0.748	50.324	1732.864	-0.004255	-0.005192	-0.002441
0.3000	988.974	70.346	85.521	40.120	-0.746	50.325	1882.753	-0.004924	-0.005986	-0.002808
0.3008	1059.608	78.906	95.623	44.414	-0.740	50.327	2017.221	-0.005523	-0.006694	-0.003109
0.3016	1119.511	86.400	104.780	48.318	-0.735	50.328	2131.262	-0.006048	-0.007335	-0.003382
0.3024	1166.325	92.560	112.326	51.416	-0.735	50.330	2220.383	-0.006479	-0.007863	-0.003599
0.3032	1199.192	97.051	117.745	53.638	-0.738	50.333	2282.953	-0.006794	-0.008242	-0.003755
0.3040	1218.759	100.068	121.149	55.389	-0.742	50.335	2320.204	-0.007005	-0.008480	-0.003877
0.3048	1227.340	101.850	122.928	56.292	-0.744	50.338	2336.540	-0.007129	-0.008605	-0.003940
0.3056	1227.986	102.635	123.317	56.557	-0.746	50.340	2337.770	-0.007184	-0.008632	-0.003959
0.3064	1223.312	102.832	123.081	56.503	-0.739	50.343	2328.873	-0.007198	-0.008616	-0.003955
0.3072	1215.347	102.747	122.775	56.309	-0.737	50.344	2313.709	-0.007192	-0.008594	-0.003942
0.3080	1204.241	102.368	121.858	56.073	-0.740	50.344	2292.566	-0.007166	-0.008530	-0.003925
0.3088	1188.582	101.485	120.510	55.447	-0.739	50.343	2262.754	-0.007104	-0.008436	-0.003881
0.3096	1166.024	99.730	118.205	54.585	-0.740	50.342	2219.810	-0.006981	-0.008274	-0.003821
0.3104	1133.578	96.699	114.329	52.918	-0.742	50.341	2158.041	-0.006769	-0.008003	-0.003704
0.3112	1089.349	92.041	108.881	50.278	-0.738	50.340	2073.841	-0.006443	-0.007622	-0.003519
0.3120	1033.939	86.105	101.863	47.166	-0.737	50.338	1968.355	-0.006027	-0.007130	-0.003302
0.3128	969.678	79.032	93.705	43.303	-0.740	50.336	1846.018	-0.005532	-0.006559	-0.003031
0.3136	900.111	71.315	85.116	39.105	-0.738	50.334	1713.581	-0.004992	-0.005958	-0.002737
0.3144	828.967	63.287	76.042	34.782	-0.736	50.332	1578.140	-0.004430	-0.005323	-0.002435
0.3152	758.859	55.373	66.801	30.279	-0.735	50.329	1444.674	-0.003876	-0.004676	-0.002120
0.3160	691.758	47.795	57.434	25.930	-0.734	50.327	1316.929	-0.003346	-0.004020	-0.001815
0.3168	628.849	40.415	48.304	21.775	-0.730	50.325	1197.166	-0.002829	-0.003381	-0.001524
0.3176	570.764	33.708	40.106	18.107	-0.738	50.324	1086.588	-0.002360	-0.002807	-0.001267
0.3184	517.774	27.311	32.519	14.772	-0.739	50.324	985.708	-0.001912	-0.002276	-0.001034
0.3192	469.998	21.600	25.836	11.742	-0.738	50.324	894.756	-0.001512	-0.001809	-0.000822
0.3200	427.603	16.520	19.638	8.964	-0.742	50.325	814.047	-0.001156	-0.001375	-0.000627
0.3208	390.423	11.747	13.746	6.240	-0.737	50.326	743.265	-0.000822	-0.000962	-0.000437
0.3216	358.157	7.550	8.547	4.016	-0.735	50.328	681.839	-0.000529	-0.000598	-0.000281
0.3224	330.159	3.761	3.879	1.959	-0.738	50.331	628.538	-0.000263	-0.000271	-0.000137
0.3232	306.189	0.462	-0.276	0.278	-0.740	50.333	582.905	-0.000032	0.000019	-0.000019
0.3240	286.081	-2.287	-3.805	-1.210	-0.740	50.335	544.624	0.000160	0.000266	0.000085
0.3248	269.865	-4.434	-6.792	-2.543	-0.744	50.338	513.754	0.000310	0.000475	0.000178
0.3256	257.827	-6.258	-9.114	-3.489	-0.743	50.340	490.837	0.000438	0.000638	0.000244
0.3264	249.772	-7.632	-10.810	-4.337	-0.740	50.343	475.502	0.000534	0.000757	0.000304
0.3272	245.669	-8.586	-11.907	-4.753	-0.741	50.344	467.691	0.000601	0.000834	0.000333
0.3280	244.993	-9.049	-12.310	-4.823	-0.744	50.344	466.404	0.000633	0.000862	0.000338
0.3288	247.217	-9.232	-12.227	-4.754	-0.746	50.344	470.638	0.000646	0.000856	0.000333
0.3296	252.372	-8.993	-11.671	-4.490	-0.748	50.342	480.452	0.000630	0.000817	0.000314
0.3304	260.863	-8.460	-10.909	-4.212	-0.748	50.341	496.616	0.000592	0.000764	0.000295
0.3312	275.080	-7.688	-9.297	-3.684	-0.743	50.340	523.682	0.000538	0.000651	0.000258
0.3320	298.645	-5.737	-6.448	-2.529	-0.745	50.338	568.542	0.000402	0.000451	0.000177
0.3328	334.592	-2.525	-1.833	-0.542	-0.746	50.336	636.978	0.000177	0.000128	0.000038
0.3336	384.186	2.610	4.935	2.434	-0.743	50.334	731.392	-0.000183	-0.000345	-0.000170
0.3344	446.133	9.374	13.274	6.200	-0.744	50.332	849.323	-0.000656	-0.000929	-0.000434
0.3352	517.158	17.120	22.945	10.451	-0.744	50.329	984.535	-0.001198	-0.001606	-0.000732
0.3360	593.682	25.569	33.382	15.162	-0.743	50.327	1130.219	-0.001790	-0.002337	-0.001061
0.3368	673.198	34.396	44.012	20.038	-0.748	50.325	1281.595	-0.002408	-0.003081	-0.001403
0.3376	753.479	43.601	54.879	25.166	-0.751	50.324	1434.431	-0.003052	-0.003842	-0.001762
0.3384	832.363	52.891	65.718	30.308	-0.756	50.324	1584.606	-0.003702	-0.004600	-0.002122
0.3392	907.641	62.040	76.070	35.227	-0.755	50.324	1727.915	-0.004343	-0.005325	-0.002466
0.3400	977.252	70.486	85.936	39.729	-0.752	50.325	1860.437	-0.004934	-0.006016	-0.002781
0.3408	1038.884	78.176	95.067	43.676	-0.747	50.326	1977.768	-0.005472	-0.006655	-0.003057
0.3416	1090.972	84.827	102.891	47.135	-0.738	50.328	2076.931	-0.005938	-0.007202	-0.003299
0.3424	1132.376	90.327	109.478	49.943	-0.742	50.330	2155.752	-0.006323	-0.007663	-0.003496
0.3432	1162.327	94.608	114.718	52.126	-0.744	50.332	2212.772	-0.006623	-0.008030	-0.003649
0.3440	1181.579	97.486	118.163	53.572	-0.748	50.335	2249.422	-0.006824	-0.008271	-0.003750
0.3448	1191.633	99.312	120.412	54.474	-0.752	50.338	2268.562	-0.006952	-0.008429	-0.003813
0.3456	1194.473	100.182	121.580	54.836	-0.750	50.340	2273.970	-0.007013	-0.008511	-0.003839
0.3464	1192.429	100.281	121.718	54.878	-0.744	50.343	2270.079	-0.007020	-0.008520	-0.003841
0.3472	1187.289	100.364	121.288	54.766	-0.744	50.344	2260.294	-0.007025	-0.008490	-0.003834
0.3480	1179.610	100.166	120.692	54.712	-0.748	50.344	2245.674	-0.007012	-0.008448	-0.003830
0.3488	1169.105	99.747	119.441	54.406	-0.751	50.344	2225.676	-0.006982	-0.008361	-0.003808
0.3496	1154.212	98.806	117.690	53.947	-0.756	50.343	2197.323	-0.006916	-0.008238	-0.003776
0.3504	1131.324	96.714	115.147	52.960	-0.754	50.342	2153.749	-0.006770	-0.008060	-0.003707
0.3512	1096.788	93.277	110.769	50.987	-0.748	50.340	2088.003	-0.006529	-0.007754	-0.003569
0.3520	1048.487	88.098	104.808	48.249	-0.748	50.338	1996.050	-0.006167	-0.007337	-0.003377
0.3528	986.149	81.601	96.873	44.691	-0.747	50.336	1877.375	-0.005712	-0.006781	-0.003128
0.3536	913.111	73.659	87.382	40.369	-0.751	50.334	1738.329	-0.005156	-0.006117	-0.002826
0.3544	834.137	64.916	76.863	35.547	-0.752	50.331	1587.982	-0.004544	-0.005380	-0.002488
0.3552	753.810	55.865	66.024	30.587	-0.755	50.328	1435.061	-0.003911	-0.004622	-0.002141
0.3560	676.098	46.871	55.394	25.584	-0.756	50.326	1287.117	-0.003281	-0.003878	-0.001791
0.3568	603.601	38.282	45.042	20.790	-0.750	50.325	1149.101	-0.002680	-0.003153	-0.001455
0.3576	538.077	30.621	35.787	16.619	-0.754	50.324	1024.361	-0.002143	-0.002505	-0.001163
0.3584	480.203	23.829	27.157	12.978	-0.752	50.323	914.183	-0.001668	-0.001901	-0.000908
0.3592	430.293	17.683	19.513	9.727	-0.750	50.323	819.168	-0.001238	-0.001366	-0.000681
0.3600	388.214	12.463	13.217	6.822	-0.754	50.324	739.059	-0.000872	-0.000925	-0.000478
0.3608	353.438	7.791	7.727	4.252	-0.746	50.326	672.855	-0.000545	-0.000541	-0.000298
0.3616	325.350	3.877	3.322	2.112	-0.746	50.328	619.383	-0.000271	-0.000233	-0.000148
0.3624	302.913	0.844	-0.054	0.389	-0.747	50.330	576.668	-0.000059	0.000004	-0.000027
0.3632	285.389	-1.712	-3.028	-0.818	-0.748	50.332	543.308	0.000120	0.000212	0.000057
0.3640	271.954	-3.633	-5.432	-1.805	-0.752	50.335	517.731	0.000254	0.000380	0.000126
0.3648	262.201	-4.884	-7.322	-2.652	-0.748	50.338	499.163	0.000342	0.000513	0.000186
0.3656	255.784	-6.006	-8.768	-3.278	-0.746	50.340	486.946	0.000420	0.000614	0.000229
0.3664	252.252	-6.692	-9.685	-3.711	-0.739	50.343	480.223	0.000468	0.000678	0.000260
0.3672	251.410	-7.183	-10.075	-3.933	-0.742	50.344	478.621	0.000503	0.000705	0.000275
0.3680	252.733	-7.365	-9.879	-3.822	-0.750	50.344	481.138	0.000516	0.000692	0.000268
0.3688	255.919	-7.378	-9.753	-3.808	-0.754	50.344	487.204	0.000516	0.000683	0.000267
0.3696	261.179	-7.042	-9.239	-3.488	-0.760	50.343	497.217	0.000493	0.000647	0.000244
0.3704	269.249	-6.496	-8.515	-3.140	-0.759	50.341	512.581	0.000455	0.000596	0.000220
0.3712	282.489	-5.682	-7.223	-2.751	-0.752	50.340	537.786	0.000398	0.000506	0.000193
0.3720	304.866	-3.704	-4.667	-1.626	-0.752	50.338	580.387	0.000259	0.000327	0.000114
0.3728	339.627	-0.449	-0.553	0.153	-0.756	50.336	646.563	0.000031	0.000039	-0.000011
0.3736	388.154	4.505	5.825	2.890	-0.755	50.334	738.945	-0.000315	-0.000408	-0.000202
0.3744	449.635	10.820	14.024	6.600	-0.756	50.331	855.989	-0.000757	-0.000982	-0.000462
0.3752	520.900	18.552	23.878	10.977	-0.757	50.328	991.659	-0.001299	-0.001671	-0.000768
0.3760	598.386	27.084	34.716	15.659	-0.750	50.326	1139.174	-0.001896	-0.002430	-0.001096
0.3768	679.299	36.051	45.749	20.649	-0.749	50.325	1293.211	-0.002524	-0.003202	-0.001445
0.3776	761.204	45.678	57.157	25.930	-0.752	50.323	1449.137	-0.003197	-0.004001	-0.001815
0.3784	841.891	55.192	68.330	31.237	-0.755	50.323	1602.745	-0.003863	-0.004783	-0.002187
0.3792	919.363	64.313	78.960	36.296	-0.756	50.324	1750.231	-0.004502	-0.005527	-0.002541
0.3800	991.845	73.097	89.049	41.187	-0.759	50.325	1888.218	-0.005117	-0.006233	-0.002883
0.3808	1057.083	80.969	98.110	45.383	-0.756	50.326	2012.415	-0.005668	-0.006868	-0.003177
0.3816	1113.214	87.901	106.280	48.858	-0.754	50.328	2119.274	-0.006153	-0.007440	-0.003420
0.3824	1158.254	93.697	113.145	52.027	-0.758	50.330	2205.019	-0.006559	-0.007920	-0.003642
0.3832	1191.197	98.258	118.523	54.363	-0.756	50.332	2267.733	-0.006878	-0.008297	-0.003805
0.3840	1212.582	101.500	122.650	55.891	-0.754	50.335	2308.445	-0.007105	-0.008586	-0.003912
0.3848	1223.628	103.520	125.151	56.975	-0.752	50.337	2329.473	-0.007246	-0.008761	-0.003988
0.3856	1226.814	104.657	126.611	57.447	-0.747	50.340	2335.539	-0.007326	-0.008863	-0.004021
0.3864	1224.364	104.938	126.722	57.376	-0.744	50.343	2330.875	-0.007346	-0.008871	-0.004016
0.3872	1217.962	104.770	125.930	57.279	-0.746	50.344	2318.687	-0.007334	-0.008815	-0.004010
0.3880	1208.509	104.392	124.944	57.224	-0.754	50.344	2300.692	-0.007307	-0.008746	-0.004006
0.3888	1195.284	103.717	123.332	56.681	-0.756	50.344	2275.515	-0.007260	-0.008633	-0.003968
0.3896	1176.274	102.328	121.400	55.877	-0.758	50.342	2239.323	-0.007163	-0.008498	-0.003911
0.3904	1147.900	99.675	118.329	54.515	-0.756	50.341	2185.307	-0.006977	-0.008283	-0.003816
0.3912	1107.488	95.452	113.410	52.139	-0.748	50.340	2108.374	-0.006682	-0.007939	-0.003650
0.3920	1054.844	89.782	107.017	49.151	-0.746	50.338	2008.152	-0.006285	-0.007491	-0.003441
0.3928	991.514	82.990	99.431	45.621	-0.741	50.336	1887.589	-0.005809	-0.006960	-0.003193
0.3936	921.527	75.482	90.717	41.535	-0.741	50.333	1754.351	-0.005284	-0.006350	-0.002907
0.3944	848.910	67.610	81.546	37.060	-0.741	50.331	1616.106	-0.004733	-0.005708	-0.002594
0.3952	776.503	59.514	72.082	32.573	-0.738	50.328	1478.262	-0.004166	-0.005046	-0.002280
0.3960	706.846	51.389	62.493	27.918	-0.740	50.326	1345.654	-0.003597	-0.004375	-0.001954
0.3968	641.412	43.629	53.155	23.610	-0.735	50.325	1221.085	-0.003054	-0.003721	-0.001653
0.3976	581.254	36.473	44.483	19.942	-0.740	50.323	1106.558	-0.002553	-0.003114	-0.001396
0.3984	526.896	30.116	36.534	16.426	-0.746	50.323	1003.075	-0.002108	-0.002557	-0.001150
0.3992	478.414	24.362	29.308	13.438	-0.747	50.323	910.778	-0.001705	-0.002052	-0.000941
Test Cycles
Time (sec)	Axial stress (kPa)	Axial micro-strain #1	Axial micro-strain #2	Axial micro-strain #3	Confining pressure (kPa)	Temperature (�C)	Load (N)	Displacement #1 (mm)	Displacement #2 (mm)	Displacement #3 (mm)
0.0000	435.914	19.380	23.041	10.520	-0.750	50.324	829.868	-0.001357	-0.001613	-0.000736
0.0008	399.004	14.819	17.343	7.811	-0.745	50.325	759.602	-0.001037	-0.001214	-0.000547
0.0016	367.460	10.568	12.285	5.545	-0.738	50.327	699.549	-0.000740	-0.000860	-0.000388
0.0024	340.919	7.228	7.479	3.613	-0.740	50.330	649.023	-0.000506	-0.000524	-0.000253
0.0032	318.858	4.044	3.171	2.069	-0.741	50.332	607.023	-0.000283	-0.000222	-0.000145
0.0040	301.064	1.574	-0.470	0.708	-0.739	50.334	573.149	-0.000110	0.000033	-0.000050
0.0048	287.238	-0.250	-3.360	-0.291	-0.746	50.337	546.827	0.000018	0.000235	0.000020
0.0056	277.244	-2.061	-5.001	-1.097	-0.741	50.340	527.802	0.000144	0.000350	0.000077
0.0064	270.947	-3.394	-6.043	-1.819	-0.737	50.342	515.814	0.000238	0.000423	0.000127
0.0072	268.077	-4.194	-6.514	-2.320	-0.738	50.344	510.349	0.000294	0.000456	0.000162
0.0080	268.152	-4.574	-6.528	-2.223	-0.742	50.344	510.492	0.000320	0.000457	0.000156
0.0088	270.647	-4.687	-6.540	-2.334	-0.746	50.344	515.242	0.000328	0.000458	0.000163
0.0096	275.396	-4.422	-6.304	-2.166	-0.750	50.342	524.282	0.000310	0.000441	0.000152
0.0104	283.000	-4.099	-5.486	-1.734	-0.750	50.341	538.759	0.000287	0.000384	0.000121
0.0112	295.248	-3.495	-4.098	-1.569	-0.744	50.340	562.077	0.000245	0.000287	0.000110
0.0120	316.123	-1.908	-1.598	-0.541	-0.744	50.338	601.816	0.000134	0.000112	0.000038
0.0128	349.305	1.293	2.779	1.446	-0.747	50.336	664.988	-0.000090	-0.000195	-0.000101
0.0136	396.434	6.023	8.867	4.224	-0.750	50.333	754.709	-0.000422	-0.000621	-0.000296
0.0144	457.314	12.394	17.067	7.879	-0.756	50.331	870.609	-0.000868	-0.001195	-0.000552
0.0152	528.775	20.392	26.989	12.269	-0.757	50.328	1006.651	-0.001427	-0.001889	-0.000859
0.0160	607.253	29.076	37.912	16.800	-0.755	50.326	1156.054	-0.002035	-0.002654	-0.001176
0.0168	689.954	38.365	49.417	21.719	-0.752	50.325	1313.496	-0.002686	-0.003459	-0.001520
0.0176	774.264	48.187	61.257	27.181	-0.752	50.323	1473.999	-0.003373	-0.004288	-0.001903
0.0184	857.761	57.939	72.944	32.713	-0.751	50.323	1632.957	-0.004056	-0.005106	-0.002290
0.0192	937.803	67.286	84.228	38.091	-0.750	50.323	1785.336	-0.004710	-0.005896	-0.002666
0.0200	1011.953	76.113	94.859	43.108	-0.750	50.324	1926.498	-0.005328	-0.006640	-0.003018
0.0208	1077.567	84.195	103.794	47.263	-0.743	50.326	2051.411	-0.005894	-0.007266	-0.003308
0.0216	1132.376	91.127	111.381	50.639	-0.741	50.328	2155.752	-0.006379	-0.007797	-0.003545
0.0224	1174.620	96.852	117.787	53.516	-0.742	50.330	2236.176	-0.006780	-0.008245	-0.003746
0.0232	1203.700	101.175	122.373	55.545	-0.741	50.332	2291.536	-0.007082	-0.008566	-0.003888
0.0240	1220.442	103.884	125.790	56.878	-0.741	50.334	2323.408	-0.007272	-0.008805	-0.003981
0.0248	1227.265	105.428	127.859	57.587	-0.746	50.337	2336.397	-0.007380	-0.008950	-0.004031
0.0256	1227.055	106.143	128.316	57.808	-0.746	50.339	2335.997	-0.007430	-0.008982	-0.004047
0.0264	1222.200	106.144	127.955	57.543	-0.737	50.342	2326.756	-0.007430	-0.008957	-0.004028
0.0272	1214.566	105.793	127.457	57.321	-0.741	50.343	2312.222	-0.007406	-0.008922	-0.004012
0.0280	1204.091	105.331	126.541	57.294	-0.743	50.344	2292.280	-0.007373	-0.008858	-0.004011
0.0288	1189.559	104.194	124.902	56.725	-0.742	50.343	2264.614	-0.007294	-0.008743	-0.003971
0.0296	1168.714	102.495	122.652	56.058	-0.747	50.342	2224.932	-0.007175	-0.008586	-0.003924
0.0304	1138.116	99.633	118.732	54.502	-0.743	50.341	2166.681	-0.006974	-0.008311	-0.003815
0.0312	1095.496	95.156	113.188	51.917	-0.736	50.340	2085.543	-0.006661	-0.007923	-0.003634
0.0320	1040.702	89.473	106.323	48.929	-0.733	50.338	1981.230	-0.006263	-0.007443	-0.003425
0.0328	975.314	82.345	97.901	45.066	-0.736	50.335	1856.747	-0.005764	-0.006853	-0.003155
0.0336	903.267	74.402	88.480	40.730	-0.738	50.333	1719.589	-0.005208	-0.006194	-0.002851
0.0344	828.546	66.052	78.544	36.241	-0.738	50.331	1577.339	-0.004624	-0.005498	-0.002537
0.0352	754.231	57.534	68.372	31.573	-0.740	50.328	1435.862	-0.004027	-0.004786	-0.002210
0.0360	683.116	49.353	58.283	26.946	-0.740	50.326	1300.478	-0.003455	-0.004080	-0.001886
0.0368	616.706	41.438	48.722	22.569	-0.736	50.325	1174.049	-0.002901	-0.003411	-0.001580
0.0376	556.262	34.352	39.980	18.761	-0.743	50.323	1058.979	-0.002405	-0.002799	-0.001313
0.0384	502.445	27.995	32.157	15.258	-0.747	50.323	956.526	-0.001960	-0.002251	-0.001068
0.0392	455.286	22.228	25.180	12.256	-0.746	50.323	866.747	-0.001556	-0.001763	-0.000858
0.0400	414.694	17.359	19.177	9.587	-0.749	50.324	789.471	-0.001215	-0.001342	-0.000671
0.0408	379.873	12.742	13.661	6.975	-0.746	50.326	723.181	-0.000892	-0.000956	-0.000488
0.0416	350.312	8.814	8.811	4.737	-0.744	50.328	666.904	-0.000617	-0.000617	-0.000332
0.0424	325.290	5.572	4.836	2.958	-0.743	50.330	619.268	-0.000390	-0.000339	-0.000207
0.0432	304.295	2.751	1.335	1.305	-0.744	50.333	579.300	-0.000193	-0.000093	-0.000091
0.0440	287.313	0.296	-1.333	-0.056	-0.741	50.335	546.970	-0.000021	0.000093	0.000004
0.0448	274.013	-1.627	-3.349	-1.111	-0.739	50.338	521.650	0.000114	0.000234	0.000078
0.0456	264.395	-3.311	-4.987	-2.042	-0.738	50.340	503.340	0.000232	0.000349	0.000143
0.0464	258.398	-4.561	-6.293	-2.681	-0.732	50.343	491.924	0.000319	0.000441	0.000188
0.0472	255.513	-5.179	-7.030	-3.029	-0.736	50.344	486.431	0.000363	0.000492	0.000212
0.0480	255.528	-5.390	-7.335	-3.029	-0.740	50.344	486.460	0.000377	0.000513	0.000212
0.0488	257.872	-5.333	-7.322	-3.042	-0.740	50.344	490.923	0.000373	0.000513	0.000213
0.0496	262.441	-5.192	-6.793	-2.612	-0.748	50.342	499.620	0.000363	0.000476	0.000183
0.0504	269.730	-4.727	-6.210	-2.376	-0.743	50.341	513.496	0.000331	0.000435	0.000166
0.0512	281.482	-4.109	-5.321	-2.084	-0.739	50.340	535.870	0.000288	0.000372	0.000146
0.0520	301.485	-2.539	-3.055	-1.083	-0.741	50.338	573.950	0.000178	0.000214	0.000076
0.0528	333.450	0.449	0.946	0.639	-0.740	50.336	634.804	-0.000031	-0.000066	-0.000045
0.0536	379.588	4.995	6.853	3.335	-0.745	50.334	722.637	-0.000350	-0.000480	-0.000233
0.0544	439.521	11.253	15.053	6.850	-0.747	50.331	836.735	-0.000788	-0.001054	-0.000480
0.0552	510.395	19.000	24.960	11.214	-0.747	50.328	971.661	-0.001330	-0.001747	-0.000785
0.0560	588.242	27.757	35.744	15.842	-0.746	50.326	1119.862	-0.001943	-0.002502	-0.001109
0.0568	670.087	36.963	47.361	20.845	-0.745	50.324	1275.673	-0.002587	-0.003315	-0.001459
0.0576	753.554	46.604	59.214	26.362	-0.749	50.323	1434.574	-0.003262	-0.004145	-0.001845
0.0584	836.211	56.245	70.706	31.587	-0.754	50.323	1591.930	-0.003937	-0.004949	-0.002211
0.0592	915.786	65.479	81.711	36.895	-0.752	50.323	1743.422	-0.004584	-0.005720	-0.002583
0.0600	989.636	74.290	91.814	41.773	-0.755	50.324	1884.012	-0.005200	-0.006427	-0.002924
0.0608	1054.994	82.276	100.999	45.816	-0.750	50.326	2008.438	-0.005759	-0.007070	-0.003207
0.0616	1109.818	89.068	109.144	49.471	-0.748	50.328	2112.808	-0.006235	-0.007640	-0.003463
0.0624	1152.664	94.779	115.591	52.181	-0.753	50.330	2194.376	-0.006635	-0.008091	-0.003653
0.0632	1183.021	99.088	120.316	54.307	-0.754	50.332	2252.169	-0.006936	-0.008422	-0.003802
0.0640	1201.837	101.824	123.166	55.780	-0.753	50.334	2287.989	-0.007128	-0.008622	-0.003905
0.0648	1210.929	103.536	124.459	56.641	-0.752	50.337	2305.298	-0.007248	-0.008712	-0.003965
0.0656	1212.672	104.323	125.085	57.031	-0.751	50.340	2308.617	-0.007303	-0.008756	-0.003992
0.0664	1209.501	104.490	125.125	57.002	-0.746	50.342	2302.580	-0.007314	-0.008759	-0.003990
0.0672	1203.024	104.547	124.736	56.823	-0.748	50.344	2290.249	-0.007318	-0.008732	-0.003978
0.0680	1193.827	104.238	124.151	56.613	-0.753	50.344	2272.739	-0.007297	-0.008691	-0.003963
0.0688	1180.827	103.423	122.941	56.099	-0.752	50.344	2247.992	-0.007240	-0.008606	-0.003927
0.0696	1161.501	101.850	121.288	55.391	-0.753	50.343	2211.199	-0.007129	-0.008490	-0.003877
0.0704	1132.511	98.987	118.452	54.042	-0.750	50.341	2156.010	-0.006929	-0.008292	-0.003783
0.0712	1091.664	94.776	113.979	51.694	-0.745	50.340	2078.247	-0.006634	-0.007978	-0.003619
0.0720	1038.989	89.262	107.851	48.859	-0.741	50.338	1977.968	-0.006248	-0.007550	-0.003420
0.0728	976.275	82.668	99.764	45.219	-0.741	50.336	1858.578	-0.005787	-0.006983	-0.003165
0.0736	907.115	75.104	90.384	41.036	-0.744	50.333	1726.913	-0.005257	-0.006327	-0.002873
0.0744	834.723	67.077	80.281	36.644	-0.743	50.331	1589.098	-0.004695	-0.005620	-0.002565
0.0752	761.670	58.853	69.969	32.128	-0.748	50.328	1450.024	-0.004120	-0.004898	-0.002249
0.0760	690.405	50.503	60.020	27.430	-0.748	50.326	1314.354	-0.003535	-0.004201	-0.001920
0.0768	622.837	42.548	50.529	22.997	-0.746	50.325	1185.722	-0.002978	-0.003537	-0.001610
0.0776	560.439	35.336	41.636	19.148	-0.751	50.324	1066.933	-0.002474	-0.002915	-0.001340
0.0784	504.143	28.727	33.438	15.593	-0.749	50.323	959.759	-0.002011	-0.002341	-0.001091
0.0792	454.219	22.904	25.933	12.467	-0.748	50.324	864.716	-0.001603	-0.001815	-0.000873
0.0800	410.696	17.766	19.360	9.730	-0.750	50.324	781.860	-0.001244	-0.001355	-0.000681
0.0808	373.396	12.967	13.704	6.937	-0.743	50.326	710.850	-0.000908	-0.000959	-0.000486
0.0816	341.821	8.813	8.855	4.518	-0.742	50.328	650.740	-0.000617	-0.000620	-0.000316
0.0824	315.506	5.179	4.575	2.558	-0.741	50.330	600.643	-0.000363	-0.000320	-0.000179
0.0832	293.730	2.176	0.975	0.848	-0.741	50.332	559.187	-0.000152	-0.000068	-0.000059
0.0840	276.117	-0.351	-2.124	-0.403	-0.743	50.334	525.656	0.000025	0.000149	0.000028
0.0848	262.561	-2.456	-4.542	-1.557	-0.744	50.337	499.849	0.000172	0.000318	0.000109
0.0856	252.853	-3.930	-6.264	-2.446	-0.745	50.340	481.367	0.000275	0.000439	0.000171
0.0864	246.887	-5.107	-7.653	-3.225	-0.737	50.343	470.009	0.000358	0.000536	0.000226
0.0872	244.272	-5.836	-8.432	-3.684	-0.735	50.344	465.031	0.000409	0.000590	0.000258
0.0880	244.422	-5.920	-8.724	-3.613	-0.740	50.344	465.317	0.000414	0.000611	0.000253
0.0888	246.797	-5.948	-8.710	-3.529	-0.742	50.344	469.837	0.000416	0.000610	0.000247
0.0896	251.440	-5.697	-8.307	-3.127	-0.751	50.342	478.678	0.000399	0.000582	0.000219
0.0904	258.759	-5.290	-7.904	-2.918	-0.752	50.341	492.611	0.000370	0.000553	0.000204
0.0912	271.022	-4.827	-6.890	-2.613	-0.745	50.340	515.957	0.000338	0.000482	0.000183
0.0920	292.197	-3.143	-4.459	-1.516	-0.746	50.338	556.269	0.000220	0.000312	0.000106
0.0928	325.801	-0.013	-0.054	0.291	-0.744	50.336	620.241	0.000001	0.000004	-0.000020
0.0936	373.666	4.842	6.685	3.209	-0.744	50.334	711.365	-0.000339	-0.000468	-0.000225
0.0944	435.072	11.326	15.315	6.892	-0.744	50.331	828.266	-0.000793	-0.001072	-0.000482
0.0952	506.908	19.000	25.432	11.103	-0.746	50.328	965.023	-0.001330	-0.001780	-0.000777
0.0960	585.341	27.504	36.188	15.759	-0.742	50.326	1114.340	-0.001925	-0.002533	-0.001103
0.0968	667.442	36.542	47.249	20.762	-0.741	50.324	1270.638	-0.002558	-0.003307	-0.001453
0.0976	750.654	46.182	58.645	26.126	-0.746	50.323	1429.052	-0.003233	-0.004105	-0.001829
0.0984	832.559	55.865	70.138	31.504	-0.747	50.322	1584.978	-0.003911	-0.004910	-0.002205
0.0992	911.097	65.266	81.170	36.770	-0.750	50.323	1734.495	-0.004569	-0.005682	-0.002574
0.1000	983.985	74.135	91.301	41.662	-0.751	50.324	1873.255	-0.005189	-0.006391	-0.002916
0.1008	1048.818	81.980	100.263	45.747	-0.746	50.326	1996.679	-0.005739	-0.007018	-0.003202
0.1016	1103.566	88.716	107.795	49.348	-0.740	50.328	2100.906	-0.006210	-0.007546	-0.003454
0.1024	1146.607	94.217	114.048	52.169	-0.743	50.330	2182.846	-0.006595	-0.007983	-0.003652
0.1032	1177.371	98.595	118.996	54.224	-0.744	50.332	2241.411	-0.006902	-0.008330	-0.003796
0.1040	1196.742	101.571	122.651	55.781	-0.747	50.334	2278.290	-0.007110	-0.008586	-0.003905
0.1048	1206.526	103.479	124.958	56.683	-0.750	50.337	2296.915	-0.007244	-0.008747	-0.003968
0.1056	1209.005	104.546	126.251	57.113	-0.747	50.339	2301.636	-0.007318	-0.008838	-0.003998
0.1064	1206.375	104.756	126.765	57.017	-0.744	50.342	2296.629	-0.007333	-0.008874	-0.003991
0.1072	1200.229	104.672	126.598	56.864	-0.743	50.343	2284.927	-0.007327	-0.008862	-0.003980
0.1080	1191.332	104.489	126.111	56.878	-0.751	50.343	2267.990	-0.007314	-0.008828	-0.003981
0.1088	1178.768	103.675	125.026	56.406	-0.753	50.343	2244.072	-0.007257	-0.008752	-0.003948
0.1096	1160.238	102.160	123.248	55.671	-0.756	50.342	2208.796	-0.007151	-0.008627	-0.003897
0.1104	1132.075	99.563	120.148	54.239	-0.755	50.340	2155.180	-0.006969	-0.008410	-0.003797
0.1112	1091.709	95.338	115.355	51.793	-0.748	50.340	2078.333	-0.006674	-0.008075	-0.003626
0.1120	1038.899	89.950	108.685	48.833	-0.747	50.338	1977.797	-0.006297	-0.007608	-0.003418
0.1128	975.719	83.298	100.541	45.289	-0.745	50.335	1857.519	-0.005831	-0.007038	-0.003170
0.1136	906.213	75.832	91.328	41.273	-0.747	50.333	1725.197	-0.005308	-0.006393	-0.002889
0.1144	834.242	67.666	81.405	36.771	-0.747	50.331	1588.182	-0.004737	-0.005698	-0.002574
0.1152	762.782	59.497	71.456	32.353	-0.750	50.328	1452.141	-0.004165	-0.005002	-0.002265
0.1160	694.177	51.555	61.450	28.001	-0.753	50.326	1321.535	-0.003609	-0.004301	-0.001960
0.1168	629.961	43.880	52.001	23.611	-0.752	50.325	1199.284	-0.003072	-0.003640	-0.001653
0.1176	570.899	37.004	43.718	19.915	-0.756	50.323	1086.845	-0.002590	-0.003060	-0.001394
0.1184	517.248	30.606	36.061	16.482	-0.758	50.323	984.707	-0.002142	-0.002524	-0.001154
0.1192	468.766	24.811	29.253	13.314	-0.759	50.323	892.410	-0.001737	-0.002048	-0.000932
0.1200	425.154	19.548	23.139	10.547	-0.761	50.324	809.383	-0.001368	-0.001620	-0.000738
0.1208	386.185	14.607	17.136	7.837	-0.759	50.326	735.197	-0.001023	-0.001200	-0.000549
0.1216	351.590	10.243	11.676	5.294	-0.757	50.327	669.336	-0.000717	-0.000817	-0.000371
0.1224	321.247	6.230	6.381	3.027	-0.756	50.329	611.572	-0.000436	-0.000447	-0.000212
0.1232	295.098	2.835	1.531	1.041	-0.755	50.331	561.790	-0.000198	-0.000107	-0.000073
0.1240	273.262	-0.168	-2.708	-0.473	-0.753	50.334	520.220	0.000012	0.000190	0.000033
0.1248	256.114	-2.749	-6.084	-1.738	-0.754	50.337	487.576	0.000192	0.000426	0.000122
0.1256	243.671	-4.558	-8.072	-2.709	-0.750	50.340	463.886	0.000319	0.000565	0.000190
0.1264	235.781	-5.906	-9.420	-3.489	-0.748	50.342	448.866	0.000413	0.000659	0.000244
0.1272	231.948	-6.482	-10.046	-4.045	-0.748	50.343	441.570	0.000454	0.000703	0.000283
0.1280	231.468	-6.650	-9.991	-4.087	-0.754	50.343	440.655	0.000466	0.000699	0.000286
0.1288	233.617	-6.721	-9.922	-4.184	-0.756	50.343	444.746	0.000470	0.000695	0.000293
0.1296	238.396	-6.692	-9.422	-3.810	-0.755	50.342	453.844	0.000468	0.000660	0.000267
0.1304	246.210	-6.313	-8.546	-3.574	-0.755	50.340	468.721	0.000442	0.000598	0.000250
0.1312	259.751	-5.611	-7.170	-3.128	-0.748	50.339	494.499	0.000393	0.000502	0.000219
0.1320	283.075	-3.717	-4.349	-1.723	-0.751	50.338	538.902	0.000260	0.000304	0.000121
0.1328	319.489	-0.252	0.404	0.306	-0.756	50.336	608.225	0.000018	-0.000028	-0.000021
0.1336	370.676	4.828	7.047	3.363	-0.755	50.334	705.671	-0.000338	-0.000493	-0.000235
0.1344	435.133	11.690	15.524	7.310	-0.762	50.331	828.381	-0.000818	-0.001087	-0.000512
0.1352	509.583	19.647	25.515	11.770	-0.760	50.329	970.116	-0.001375	-0.001786	-0.000824
0.1360	590.451	28.573	36.396	16.634	-0.762	50.326	1124.067	-0.002000	-0.002548	-0.001164
0.1368	674.911	37.960	47.679	21.873	-0.760	50.324	1284.857	-0.002657	-0.003338	-0.001531
0.1376	760.528	47.881	59.589	27.250	-0.759	50.323	1447.849	-0.003352	-0.004171	-0.001908
0.1384	844.807	57.872	71.319	32.740	-0.764	50.323	1608.295	-0.004051	-0.004992	-0.002292
0.1392	925.434	67.623	82.449	38.077	-0.760	50.323	1761.789	-0.004734	-0.005771	-0.002665
0.1400	1000.246	76.590	93.303	42.983	-0.762	50.324	1904.211	-0.005361	-0.006531	-0.003009
0.1408	1066.867	84.659	102.835	47.264	-0.760	50.326	2031.040	-0.005926	-0.007198	-0.003308
0.1416	1123.133	91.508	111.187	50.765	-0.753	50.327	2138.157	-0.006406	-0.007783	-0.003554
0.1424	1167.347	97.108	117.829	53.766	-0.757	50.329	2222.328	-0.006798	-0.008248	-0.003764
0.1432	1198.606	101.514	122.582	55.850	-0.756	50.332	2281.837	-0.007106	-0.008581	-0.003909
0.1440	1217.752	104.348	125.764	57.224	-0.752	50.334	2318.287	-0.007304	-0.008803	-0.004006
0.1448	1226.874	106.255	127.570	58.197	-0.752	50.337	2335.653	-0.007438	-0.008930	-0.004074
0.1456	1228.648	107.041	128.738	58.433	-0.750	50.340	2339.029	-0.007493	-0.009012	-0.004090
0.1464	1225.416	107.238	129.294	58.391	-0.747	50.342	2332.878	-0.007507	-0.009051	-0.004087
0.1472	1218.789	107.181	129.419	58.240	-0.749	50.344	2320.261	-0.007503	-0.009059	-0.004077
0.1480	1209.171	106.873	129.209	58.142	-0.754	50.344	2301.950	-0.007481	-0.009045	-0.004070
0.1488	1195.269	106.129	128.112	57.600	-0.752	50.344	2275.486	-0.007429	-0.008968	-0.004032
0.1496	1174.335	104.418	125.874	56.780	-0.755	50.342	2235.632	-0.007309	-0.008811	-0.003975
0.1504	1142.475	101.403	122.178	55.277	-0.754	50.341	2174.978	-0.007098	-0.008552	-0.003869
0.1512	1097.014	96.604	116.371	52.679	-0.748	50.340	2088.432	-0.006762	-0.008146	-0.003688
0.1520	1038.132	90.345	108.784	49.428	-0.749	50.338	1976.337	-0.006324	-0.007615	-0.003460
0.1528	968.746	82.991	100.029	45.398	-0.744	50.336	1844.244	-0.005809	-0.007002	-0.003178
0.1536	893.950	74.711	90.314	40.911	-0.744	50.334	1701.851	-0.005230	-0.006322	-0.002864
0.1544	818.447	66.347	80.350	36.115	-0.743	50.331	1558.113	-0.004644	-0.005624	-0.002528
0.1552	745.214	58.011	70.594	31.502	-0.741	50.328	1418.695	-0.004061	-0.004942	-0.002205
0.1560	676.293	49.930	60.937	27.153	-0.744	50.326	1287.489	-0.003495	-0.004266	-0.001901
0.1568	612.633	42.296	51.725	22.915	-0.739	50.324	1166.296	-0.002961	-0.003621	-0.001604
0.1576	554.939	35.308	43.263	19.372	-0.746	50.323	1056.461	-0.002472	-0.003028	-0.001356
0.1584	503.482	29.077	35.634	16.162	-0.750	50.323	958.500	-0.002035	-0.002494	-0.001131
0.1592	458.171	23.589	28.755	13.187	-0.751	50.323	872.240	-0.001651	-0.002013	-0.000923
0.1600	418.722	18.775	22.850	10.685	-0.756	50.324	797.138	-0.001314	-0.001599	-0.000748
0.1608	384.502	14.482	17.721	8.198	-0.750	50.326	731.993	-0.001014	-0.001240	-0.000574
0.1616	355.046	10.624	12.982	5.975	-0.745	50.328	675.917	-0.000744	-0.000909	-0.000418
0.1624	329.994	7.285	8.952	4.154	-0.743	50.330	628.223	-0.000510	-0.000627	-0.000291
0.1632	308.939	4.676	5.282	2.542	-0.744	50.332	588.140	-0.000327	-0.000370	-0.000178
0.1640	291.626	2.332	1.724	1.180	-0.746	50.334	555.182	-0.000163	-0.000121	-0.000083
0.1648	278.131	0.493	-1.222	-0.001	-0.751	50.337	529.490	-0.000035	0.000086	0.000000
0.1656	268.167	-1.036	-3.557	-0.861	-0.750	50.340	510.521	0.000073	0.000249	0.000060
0.1664	261.765	-2.285	-5.433	-1.568	-0.747	50.342	498.333	0.000160	0.000380	0.000110
0.1672	258.864	-2.917	-6.321	-1.929	-0.746	50.344	492.811	0.000204	0.000442	0.000135
0.1680	258.789	-3.310	-6.445	-1.929	-0.751	50.344	492.668	0.000232	0.000451	0.000135
0.1688	261.224	-3.296	-6.223	-1.985	-0.754	50.344	497.303	0.000231	0.000436	0.000139
0.1696	266.213	-2.987	-5.333	-1.720	-0.760	50.343	506.802	0.000209	0.000373	0.000120
0.1704	274.118	-2.622	-4.487	-1.470	-0.763	50.341	521.851	0.000184	0.000314	0.000103
0.1712	287.614	-1.696	-3.250	-1.041	-0.756	50.340	547.543	0.000119	0.000228	0.000073
0.1720	310.772	0.141	-0.610	0.154	-0.754	50.338	591.631	-0.000010	0.000043	-0.000011
0.1728	346.901	3.439	3.656	2.098	-0.750	50.336	660.410	-0.000241	-0.000256	-0.000147
0.1736	397.246	8.462	10.243	5.071	-0.750	50.334	756.254	-0.000592	-0.000717	-0.000355
0.1744	460.591	15.114	18.915	8.865	-0.751	50.331	876.846	-0.001058	-0.001324	-0.000621
0.1752	533.088	22.917	28.878	13.270	-0.754	50.328	1014.862	-0.001604	-0.002021	-0.000929
0.1760	611.010	31.337	39.924	18.050	-0.755	50.326	1163.206	-0.002194	-0.002795	-0.001263
0.1768	691.833	40.290	51.430	22.914	-0.754	50.325	1317.072	-0.002820	-0.003600	-0.001604
0.1776	773.257	49.720	63.006	28.362	-0.758	50.324	1472.082	-0.003480	-0.004410	-0.001985
0.1784	853.373	59.037	74.457	33.643	-0.758	50.323	1624.603	-0.004133	-0.005212	-0.002355
0.1792	929.823	68.298	85.325	38.660	-0.759	50.323	1770.144	-0.004781	-0.005973	-0.002706
0.1800	1000.501	76.815	95.205	43.440	-0.759	50.324	1904.697	-0.005377	-0.006664	-0.003041
0.1808	1063.215	84.378	103.959	47.302	-0.757	50.326	2024.088	-0.005906	-0.007277	-0.003311
0.1816	1116.235	91.283	111.741	50.623	-0.755	50.327	2125.025	-0.006390	-0.007822	-0.003544
0.1824	1158.570	96.770	118.050	53.415	-0.757	50.329	2205.620	-0.006774	-0.008263	-0.003739
0.1832	1189.649	101.175	122.816	55.556	-0.754	50.332	2264.786	-0.007082	-0.008597	-0.003889
0.1840	1209.982	104.249	126.179	56.918	-0.755	50.334	2303.495	-0.007297	-0.008833	-0.003984
0.1848	1220.938	106.129	128.068	57.835	-0.755	50.337	2324.352	-0.007429	-0.008965	-0.004048
0.1856	1224.530	107.378	128.749	58.295	-0.752	50.339	2331.190	-0.007516	-0.009012	-0.004081
0.1864	1222.877	107.855	128.943	58.225	-0.750	50.342	2328.043	-0.007550	-0.009026	-0.004076
0.1872	1217.602	108.066	128.833	58.196	-0.748	50.344	2318.001	-0.007565	-0.009018	-0.004074
0.1880	1209.486	108.025	128.666	58.142	-0.754	50.344	2302.551	-0.007562	-0.009007	-0.004070
0.1888	1197.434	107.281	128.181	57.738	-0.755	50.343	2279.606	-0.007510	-0.008973	-0.004042
0.1896	1179.189	105.976	126.904	57.085	-0.759	50.342	2244.873	-0.007418	-0.008883	-0.003996
0.1904	1150.891	103.253	123.903	55.822	-0.758	50.341	2191.000	-0.007228	-0.008673	-0.003908
0.1912	1109.547	98.945	118.692	53.584	-0.754	50.340	2112.293	-0.006926	-0.008308	-0.003751
0.1920	1055.114	93.107	111.813	50.527	-0.753	50.338	2008.667	-0.006517	-0.007827	-0.003537
0.1928	989.320	85.936	103.405	46.762	-0.755	50.336	1883.411	-0.006016	-0.007238	-0.003273
0.1936	916.357	78.050	93.775	42.357	-0.758	50.334	1744.509	-0.005463	-0.006564	-0.002965
0.1944	840.809	69.629	83.713	37.605	-0.756	50.331	1600.685	-0.004874	-0.005860	-0.002632
0.1952	765.637	61.154	73.206	32.797	-0.756	50.328	1457.577	-0.004281	-0.005124	-0.002296
0.1960	693.546	52.748	62.743	28.127	-0.754	50.326	1320.333	-0.003692	-0.004392	-0.001969
0.1968	626.309	44.847	52.987	23.804	-0.750	50.324	1192.331	-0.003139	-0.003709	-0.001666
0.1976	564.753	37.510	43.983	19.939	-0.755	50.323	1075.144	-0.002626	-0.003079	-0.001396
0.1984	509.523	30.971	35.771	16.549	-0.757	50.323	970.001	-0.002168	-0.002504	-0.001158
0.1992	460.606	25.232	28.476	13.409	-0.760	50.323	876.875	-0.001766	-0.001993	-0.000939
0.2000	417.850	19.956	22.055	10.491	-0.764	50.324	795.479	-0.001397	-0.001544	-0.000734
0.2008	380.835	15.325	16.108	7.768	-0.762	50.325	725.012	-0.001073	-0.001128	-0.000544
0.2016	349.050	11.143	10.966	5.364	-0.758	50.327	664.501	-0.000780	-0.000768	-0.000375
0.2024	321.818	7.467	6.463	3.514	-0.757	50.329	612.659	-0.000523	-0.000452	-0.000246
0.2032	298.765	4.366	2.739	1.889	-0.754	50.331	568.771	-0.000306	-0.000192	-0.000132
0.2040	279.754	1.559	-0.318	0.499	-0.749	50.334	532.579	-0.000109	0.000022	-0.000035
0.2048	264.695	-0.629	-2.874	-0.556	-0.750	50.337	503.912	0.000044	0.000201	0.000039
0.2056	253.740	-2.412	-4.903	-1.653	-0.746	50.340	483.055	0.000169	0.000343	0.000116
0.2064	246.661	-3.928	-6.585	-2.487	-0.744	50.342	469.580	0.000275	0.000461	0.000174
0.2072	243.175	-4.617	-7.794	-2.835	-0.748	50.344	462.942	0.000323	0.000546	0.000198
0.2080	242.739	-4.856	-8.239	-2.835	-0.755	50.344	462.112	0.000340	0.000577	0.000198
0.2088	244.798	-4.982	-8.460	-2.877	-0.759	50.344	466.032	0.000349	0.000592	0.000201
0.2096	249.321	-4.590	-8.128	-2.557	-0.760	50.342	474.644	0.000321	0.000569	0.000179
0.2104	256.595	-4.167	-6.962	-2.348	-0.759	50.341	488.491	0.000292	0.000487	0.000164
0.2112	268.783	-3.464	-5.336	-2.056	-0.750	50.340	511.694	0.000242	0.000374	0.000144
0.2120	289.703	-1.555	-2.239	-0.861	-0.749	50.338	551.519	0.000109	0.000157	0.000060
0.2128	322.840	1.561	2.487	1.140	-0.750	50.336	614.605	-0.000109	-0.000174	-0.000080
0.2136	369.909	6.261	8.741	3.822	-0.752	50.334	704.212	-0.000438	-0.000612	-0.000268
0.2144	429.948	12.393	16.760	7.324	-0.754	50.331	818.510	-0.000867	-0.001173	-0.000513
0.2152	499.725	19.830	26.043	11.577	-0.756	50.328	951.347	-0.001388	-0.001823	-0.000810
0.2160	575.708	28.081	36.117	15.954	-0.754	50.326	1096.001	-0.001966	-0.002528	-0.001117
0.2168	655.178	36.824	46.929	20.747	-0.751	50.324	1247.292	-0.002578	-0.003285	-0.001452
0.2176	736.317	46.309	58.407	26.069	-0.755	50.323	1401.758	-0.003242	-0.004089	-0.001825
0.2184	817.095	55.752	69.831	31.294	-0.751	50.323	1555.538	-0.003903	-0.004888	-0.002191
0.2192	895.408	65.027	81.019	36.353	-0.750	50.323	1704.626	-0.004552	-0.005671	-0.002545
0.2200	969.197	74.078	91.385	41.286	-0.750	50.324	1845.102	-0.005185	-0.006397	-0.002890
0.2208	1035.758	82.105	100.516	45.524	-0.744	50.325	1971.817	-0.005747	-0.007036	-0.003187
0.2216	1093.076	89.067	108.547	49.206	-0.743	50.327	2080.936	-0.006235	-0.007598	-0.003444
0.2224	1139.319	94.989	115.063	52.430	-0.744	50.329	2168.970	-0.006649	-0.008054	-0.003670
0.2232	1173.403	99.409	120.010	54.931	-0.743	50.331	2233.858	-0.006959	-0.008401	-0.003845
0.2240	1195.585	102.665	123.594	56.598	-0.744	50.334	2276.087	-0.007187	-0.008652	-0.003962
0.2248	1207.247	104.769	126.012	57.473	-0.746	50.336	2298.288	-0.007334	-0.008821	-0.004023
0.2256	1210.568	105.766	127.416	57.835	-0.746	50.339	2304.611	-0.007404	-0.008919	-0.004048
0.2264	1207.908	106.131	127.971	57.739	-0.742	50.342	2299.547	-0.007429	-0.008958	-0.004042
0.2272	1201.596	106.020	127.944	57.461	-0.742	50.343	2287.531	-0.007421	-0.008956	-0.004022
0.2280	1192.354	105.823	127.527	57.392	-0.746	50.344	2269.936	-0.007408	-0.008927	-0.004017
0.2288	1179.580	105.051	126.430	56.947	-0.743	50.344	2245.617	-0.007354	-0.008850	-0.003986
0.2296	1161.230	103.577	124.666	56.307	-0.747	50.342	2210.684	-0.007250	-0.008727	-0.003941
0.2304	1133.638	101.049	121.622	55.057	-0.746	50.341	2158.155	-0.007073	-0.008514	-0.003854
0.2312	1094.444	96.825	116.745	52.778	-0.741	50.340	2083.540	-0.006778	-0.008172	-0.003694
0.2320	1043.257	91.366	110.407	49.999	-0.742	50.338	1986.094	-0.006396	-0.007729	-0.003500
0.2328	981.400	84.799	102.543	46.331	-0.740	50.336	1868.334	-0.005936	-0.007178	-0.003243
0.2336	912.239	77.151	93.622	42.092	-0.742	50.333	1736.670	-0.005401	-0.006554	-0.002946
0.2344	839.487	69.125	84.089	37.742	-0.740	50.331	1598.167	-0.004839	-0.005886	-0.002642
0.2352	766.314	60.832	74.278	33.059	-0.740	50.328	1458.864	-0.004258	-0.005199	-0.002314
0.2360	695.485	52.708	64.549	28.544	-0.744	50.326	1324.024	-0.003690	-0.004518	-0.001998
0.2368	629.209	45.003	55.182	24.347	-0.737	50.325	1197.853	-0.003150	-0.003863	-0.001704
0.2376	568.735	37.931	46.551	20.622	-0.743	50.323	1082.726	-0.002655	-0.003259	-0.001444
0.2384	514.573	31.615	38.729	17.134	-0.747	50.323	979.614	-0.002213	-0.002711	-0.001199
0.2392	466.903	25.875	31.517	14.034	-0.744	50.323	888.863	-0.001811	-0.002206	-0.000982
0.2400	425.620	20.894	24.988	11.310	-0.752	50.324	810.270	-0.001463	-0.001749	-0.000792
0.2408	390.153	16.333	19.041	8.601	-0.748	50.325	742.750	-0.001143	-0.001333	-0.000602
0.2416	359.840	12.589	13.733	6.490	-0.740	50.327	685.043	-0.000881	-0.000961	-0.000454
0.2424	334.066	9.178	9.132	4.725	-0.742	50.329	635.977	-0.000642	-0.000639	-0.000331
0.2432	312.035	6.063	5.198	3.015	-0.741	50.331	594.034	-0.000424	-0.000364	-0.000211
0.2440	293.520	3.552	1.835	1.626	-0.740	50.334	558.786	-0.000249	-0.000128	-0.000114
0.2448	278.356	1.236	-0.944	0.346	-0.744	50.337	529.919	-0.000087	0.000066	-0.000024
0.2456	266.829	-0.461	-3.070	-0.668	-0.745	50.339	507.975	0.000032	0.000215	0.000047
0.2464	258.939	-1.723	-4.779	-1.444	-0.743	50.342	492.954	0.000121	0.000335	0.000101
0.2472	254.762	-2.480	-5.904	-1.861	-0.747	50.344	485.001	0.000174	0.000413	0.000130
0.2480	253.890	-2.761	-6.446	-1.832	-0.755	50.344	483.341	0.000193	0.000451	0.000128
0.2488	255.603	-2.817	-6.459	-1.916	-0.758	50.344	486.603	0.000197	0.000452	0.000134
0.2496	259.946	-2.649	-5.765	-1.734	-0.761	50.342	494.871	0.000185	0.000404	0.000121
0.2504	267.160	-2.313	-4.625	-1.485	-0.760	50.341	508.604	0.000162	0.000324	0.000104
0.2512	279.468	-1.597	-2.889	-1.111	-0.753	50.340	532.036	0.000112	0.000202	0.000078
0.2520	300.884	0.100	-0.123	-0.014	-0.752	50.338	572.805	-0.000007	0.000009	0.000001
0.2528	334.833	3.258	4.171	1.861	-0.754	50.335	637.436	-0.000228	-0.000292	-0.000130
0.2536	383.044	8.169	10.576	4.724	-0.753	50.333	729.218	-0.000572	-0.000740	-0.000331
0.2544	444.781	14.568	18.720	8.311	-0.758	50.331	846.748	-0.001020	-0.001310	-0.000582
0.2552	516.977	22.272	28.364	12.564	-0.758	50.328	984.192	-0.001559	-0.001985	-0.000879
0.2560	596.027	31.027	38.939	17.399	-0.755	50.326	1134.682	-0.002172	-0.002726	-0.001218
0.2568	679.284	40.134	49.973	22.359	-0.756	50.325	1293.182	-0.002809	-0.003498	-0.001565
0.2576	764.285	49.901	61.631	27.889	-0.754	50.323	1455.002	-0.003493	-0.004314	-0.001952
0.2584	848.294	59.682	73.443	33.434	-0.757	50.322	1614.933	-0.004178	-0.005141	-0.002340
0.2592	928.650	69.071	84.644	38.660	-0.758	50.323	1767.912	-0.004835	-0.005925	-0.002706
0.2600	1002.500	77.967	95.121	43.565	-0.756	50.324	1908.503	-0.005458	-0.006658	-0.003050
0.2608	1067.092	85.811	104.224	47.651	-0.751	50.325	2031.469	-0.006007	-0.007296	-0.003336
0.2616	1120.308	92.575	111.824	51.110	-0.745	50.327	2132.778	-0.006480	-0.007828	-0.003578
0.2624	1160.809	97.850	118.370	53.875	-0.744	50.329	2209.883	-0.006850	-0.008286	-0.003771
0.2632	1188.371	101.807	123.317	55.835	-0.743	50.331	2262.354	-0.007127	-0.008632	-0.003908
0.2640	1204.332	104.432	126.374	57.140	-0.744	50.334	2292.738	-0.007310	-0.008846	-0.004000
0.2648	1211.034	105.793	127.833	57.808	-0.744	50.337	2305.498	-0.007406	-0.008948	-0.004047
0.2656	1211.154	106.663	128.417	58.074	-0.743	50.339	2305.727	-0.007466	-0.008989	-0.004065
0.2664	1206.901	106.802	127.972	57.907	-0.738	50.342	2297.630	-0.007476	-0.008958	-0.004053
0.2672	1199.718	106.662	127.292	57.629	-0.735	50.343	2283.955	-0.007466	-0.008910	-0.004034
0.2680	1189.844	106.493	126.722	57.449	-0.740	50.343	2265.158	-0.007455	-0.008871	-0.004021
0.2688	1175.958	105.666	125.124	56.893	-0.744	50.343	2238.722	-0.007397	-0.008759	-0.003982
0.2696	1155.534	104.194	122.970	56.073	-0.746	50.342	2199.841	-0.007294	-0.008608	-0.003925
0.2704	1125.192	101.177	119.996	54.571	-0.745	50.341	2142.076	-0.007082	-0.008400	-0.003820
0.2712	1082.827	96.532	115.216	52.209	-0.740	50.340	2061.424	-0.006757	-0.008065	-0.003655
0.2720	1028.529	90.610	108.810	49.108	-0.735	50.338	1958.055	-0.006343	-0.007617	-0.003438
0.2728	964.493	83.509	100.917	45.509	-0.736	50.336	1836.147	-0.005846	-0.007064	-0.003186
0.2736	894.581	75.861	91.703	41.327	-0.736	50.333	1703.053	-0.005310	-0.006419	-0.002893
0.2744	822.475	67.988	81.809	36.839	-0.731	50.331	1565.781	-0.004759	-0.005727	-0.002579
0.2752	750.909	59.990	71.943	32.323	-0.728	50.328	1429.539	-0.004199	-0.005036	-0.002263
0.2760	682.124	52.174	62.243	27.807	-0.723	50.326	1298.590	-0.003652	-0.004357	-0.001947
0.2768	617.517	44.597	52.849	23.471	-0.719	50.324	1175.594	-0.003122	-0.003699	-0.001643
0.2776	558.065	37.636	44.247	19.719	-0.724	50.323	1062.412	-0.002635	-0.003097	-0.001380
0.2784	504.474	31.349	36.270	16.425	-0.730	50.322	960.388	-0.002194	-0.002539	-0.001150
0.2792	456.788	25.426	28.850	13.270	-0.732	50.323	869.608	-0.001780	-0.002020	-0.000929
0.2800	415.085	20.431	22.445	10.657	-0.734	50.323	790.215	-0.001430	-0.001571	-0.000746
0.2808	378.836	15.689	16.720	8.100	-0.729	50.325	721.207	-0.001098	-0.001170	-0.000567
0.2816	347.682	11.424	11.551	5.711	-0.720	50.327	661.898	-0.000800	-0.000809	-0.000400
0.2824	321.172	7.931	7.186	3.933	-0.719	50.329	611.429	-0.000555	-0.000503	-0.000275
0.2832	298.810	4.900	3.238	2.348	-0.720	50.331	568.857	-0.000343	-0.000227	-0.000164
0.2840	280.415	2.290	-0.167	0.973	-0.718	50.333	533.838	-0.000160	0.000012	-0.000068
0.2848	265.702	0.199	-2.835	-0.083	-0.720	50.336	505.829	-0.000014	0.000198	0.000006
0.2856	254.792	-1.513	-4.877	-0.931	-0.722	50.339	485.058	0.000106	0.000341	0.000065
0.2864	247.653	-2.818	-6.322	-1.806	-0.719	50.342	471.468	0.000197	0.000443	0.000126
0.2872	244.001	-3.661	-7.003	-2.488	-0.724	50.343	464.516	0.000256	0.000490	0.000174
0.2880	243.490	-4.042	-7.058	-2.530	-0.734	50.343	463.543	0.000283	0.000494	0.000177
0.2888	245.534	-4.070	-7.085	-2.599	-0.728	50.343	467.434	0.000285	0.000496	0.000182
0.2896	250.058	-4.014	-6.764	-2.334	-0.733	50.342	476.046	0.000281	0.000473	0.000163
0.2904	257.587	-3.592	-6.153	-1.833	-0.731	50.340	490.379	0.000251	0.000431	0.000128
0.2912	270.451	-2.778	-5.125	-1.417	-0.724	50.339	514.870	0.000194	0.000359	0.000099
0.2920	292.543	-0.953	-2.388	-0.347	-0.731	50.338	556.927	0.000067	0.000167	0.000024
0.2928	327.514	2.443	2.184	1.639	-0.732	50.336	623.503	-0.000171	-0.000153	-0.000115
0.2936	376.867	7.451	8.687	4.529	-0.734	50.334	717.459	-0.000522	-0.000608	-0.000317
0.2944	439.656	14.131	17.650	8.240	-0.739	50.331	836.992	-0.000989	-0.001235	-0.000577
0.2952	512.514	21.948	28.127	12.576	-0.739	50.328	975.695	-0.001536	-0.001969	-0.000880
0.2960	591.638	30.551	39.090	17.273	-0.743	50.326	1126.328	-0.002139	-0.002736	-0.001209
0.2968	674.325	39.939	50.347	22.249	-0.743	50.325	1283.741	-0.002796	-0.003524	-0.001557
0.2976	758.108	49.663	61.854	27.529	-0.742	50.323	1443.243	-0.003476	-0.004330	-0.001927
0.2984	840.674	59.445	73.430	32.921	-0.747	50.322	1600.428	-0.004161	-0.005140	-0.002304
0.2992	919.288	68.944	84.964	38.076	-0.740	50.323	1750.088	-0.004826	-0.005947	-0.002665
0.3000	991.589	77.518	95.900	42.774	-0.744	50.324	1887.732	-0.005426	-0.006713	-0.002994
0.3008	1055.039	85.053	104.946	46.888	-0.740	50.325	2008.524	-0.005954	-0.007346	-0.003282
0.3016	1107.894	91.577	112.075	50.278	-0.734	50.327	2109.146	-0.006410	-0.007845	-0.003519
0.3024	1149.042	96.952	117.703	53.016	-0.735	50.329	2187.481	-0.006787	-0.008239	-0.003711
0.3032	1178.227	101.064	121.886	55.127	-0.734	50.330	2243.042	-0.007074	-0.008532	-0.003859
0.3040	1196.487	103.968	124.789	56.489	-0.734	50.333	2277.803	-0.007278	-0.008735	-0.003954
0.3048	1205.624	105.722	126.679	57.364	-0.737	50.336	2295.198	-0.007401	-0.008868	-0.004015
0.3056	1208.044	106.621	127.652	57.891	-0.741	50.338	2299.805	-0.007463	-0.008936	-0.004052
0.3064	1205.774	106.888	127.750	57.891	-0.732	50.341	2295.485	-0.007482	-0.008942	-0.004052
0.3072	1200.484	106.916	127.583	57.766	-0.736	50.342	2285.414	-0.007484	-0.008931	-0.004044
0.3080	1192.624	106.789	127.154	57.683	-0.740	50.342	2270.451	-0.007475	-0.008901	-0.004038
0.3088	1181.458	106.004	126.014	57.169	-0.737	50.342	2249.193	-0.007420	-0.008821	-0.004002
0.3096	1165.047	104.937	124.373	56.669	-0.746	50.341	2217.951	-0.007346	-0.008706	-0.003967
0.3104	1139.709	102.538	121.413	55.654	-0.744	50.340	2169.714	-0.007178	-0.008499	-0.003896
0.3112	1102.334	98.554	116.812	53.555	-0.741	50.339	2098.560	-0.006899	-0.008177	-0.003749
0.3120	1052.034	93.291	110.782	50.788	-0.742	50.337	2002.802	-0.006530	-0.007755	-0.003555
0.3128	989.801	86.528	103.085	47.176	-0.742	50.336	1884.327	-0.006057	-0.007216	-0.003302
0.3136	919.348	78.963	94.163	42.854	-0.742	50.334	1750.202	-0.005527	-0.006591	-0.003000
0.3144	844.987	70.727	84.603	38.297	-0.739	50.331	1608.639	-0.004951	-0.005922	-0.002681
0.3152	769.935	62.363	74.818	33.726	-0.741	50.328	1465.759	-0.004365	-0.005237	-0.002361
0.3160	697.063	53.986	64.980	29.126	-0.739	50.326	1327.028	-0.003779	-0.004549	-0.002039
0.3168	628.293	45.917	55.558	24.513	-0.737	50.324	1196.108	-0.003214	-0.003889	-0.001716
0.3176	564.903	38.604	46.734	20.484	-0.741	50.323	1075.430	-0.002702	-0.003271	-0.001434
0.3184	507.870	31.728	38.259	16.898	-0.744	50.322	966.854	-0.002221	-0.002678	-0.001183
0.3192	457.239	25.567	30.364	13.521	-0.746	50.323	870.466	-0.001790	-0.002126	-0.000946
0.3200	413.176	20.123	23.471	10.783	-0.751	50.323	786.581	-0.001409	-0.001643	-0.000755
0.3208	375.395	15.310	17.121	8.116	-0.747	50.325	714.655	-0.001072	-0.001198	-0.000568
0.3216	343.264	11.213	11.799	5.530	-0.744	50.327	653.486	-0.000785	-0.000826	-0.000387
0.3224	316.634	7.747	7.589	3.571	-0.744	50.329	602.789	-0.000542	-0.000531	-0.000250
0.3232	294.887	4.842	3.795	1.974	-0.742	50.331	561.390	-0.000339	-0.000266	-0.000138
0.3240	277.980	2.485	0.627	0.681	-0.742	50.333	529.203	-0.000174	-0.000044	-0.000048
0.3248	265.657	0.659	-1.792	-0.263	-0.741	50.335	505.743	-0.000046	0.000125	0.000018
0.3256	257.602	-0.548	-3.501	-0.944	-0.740	50.338	490.408	0.000038	0.000245	0.000066
0.3264	253.499	-1.698	-4.405	-1.626	-0.737	50.341	482.597	0.000119	0.000308	0.000114
0.3272	252.552	-2.273	-4.767	-2.001	-0.737	50.343	480.795	0.000159	0.000334	0.000140
0.3280	254.206	-2.258	-4.682	-1.806	-0.744	50.343	483.942	0.000158	0.000328	0.000126
0.3288	258.053	-2.201	-4.697	-1.763	-0.748	50.343	491.266	0.000154	0.000329	0.000123
0.3296	264.169	-1.682	-4.447	-1.386	-0.754	50.341	502.911	0.000118	0.000311	0.000097
0.3304	273.727	-1.037	-3.515	-0.983	-0.755	50.340	521.107	0.000073	0.000246	0.000069
0.3312	289.477	0.156	-1.903	-0.513	-0.748	50.339	551.090	-0.000011	0.000133	0.000036
0.3320	315.025	2.457	1.614	0.932	-0.746	50.337	599.728	-0.000172	-0.000113	-0.000065
0.3328	352.642	6.076	6.853	3.057	-0.743	50.335	671.339	-0.000425	-0.000480	-0.000214
0.3336	402.791	11.143	13.592	6.017	-0.743	50.333	766.811	-0.000780	-0.000951	-0.000421
0.3344	463.897	17.499	21.763	9.756	-0.746	50.330	883.141	-0.001225	-0.001523	-0.000683
0.3352	533.013	24.711	30.921	13.813	-0.747	50.328	1014.719	-0.001730	-0.002164	-0.000967
0.3360	607.508	32.794	40.885	18.314	-0.750	50.325	1156.540	-0.002296	-0.002862	-0.001282
0.3368	685.325	41.381	51.474	23.025	-0.748	50.324	1304.684	-0.002897	-0.003603	-0.001612
0.3376	764.630	50.405	62.535	28.293	-0.748	50.323	1455.660	-0.003528	-0.004377	-0.001980
0.3384	843.289	59.723	73.471	33.490	-0.751	50.322	1605.406	-0.004181	-0.005143	-0.002344
0.3392	919.228	68.816	84.060	38.438	-0.750	50.323	1749.973	-0.004817	-0.005884	-0.002691
0.3400	990.522	77.629	94.357	43.315	-0.750	50.323	1885.700	-0.005434	-0.006605	-0.003032
0.3408	1054.724	85.388	103.653	47.192	-0.747	50.325	2007.923	-0.005977	-0.007256	-0.003303
0.3416	1109.577	92.151	111.769	50.569	-0.741	50.327	2112.350	-0.006451	-0.007824	-0.003540
0.3424	1153.445	97.709	118.356	53.668	-0.737	50.328	2195.864	-0.006840	-0.008285	-0.003757
0.3432	1184.975	101.820	123.136	55.738	-0.740	50.331	2255.888	-0.007127	-0.008619	-0.003902
0.3440	1204.587	104.753	126.665	57.225	-0.740	50.333	2293.224	-0.007333	-0.008867	-0.004006
0.3448	1214.025	106.663	128.888	58.224	-0.740	50.336	2311.192	-0.007466	-0.009022	-0.004076
0.3456	1215.798	107.659	130.056	58.404	-0.744	50.339	2314.568	-0.007536	-0.009104	-0.004088
0.3464	1212.492	108.024	130.570	58.281	-0.738	50.341	2308.273	-0.007562	-0.009140	-0.004080
0.3472	1205.879	108.025	130.362	58.058	-0.739	50.343	2295.685	-0.007562	-0.009125	-0.004064
0.3480	1196.517	107.659	129.779	57.864	-0.743	50.343	2277.861	-0.007536	-0.009085	-0.004050
0.3488	1182.901	106.859	128.529	57.433	-0.743	50.343	2251.940	-0.007480	-0.008997	-0.004020
0.3496	1162.252	105.063	126.488	56.682	-0.748	50.342	2212.629	-0.007354	-0.008854	-0.003968
0.3504	1131.128	102.060	122.777	55.182	-0.746	50.340	2153.378	-0.007144	-0.008594	-0.003863
0.3512	1087.335	97.472	117.010	52.722	-0.742	50.339	2070.007	-0.006823	-0.008191	-0.003691
0.3520	1031.355	91.522	109.686	49.526	-0.743	50.337	1963.434	-0.006407	-0.007678	-0.003467
0.3528	965.665	84.576	100.861	45.788	-0.742	50.335	1838.379	-0.005920	-0.007060	-0.003205
0.3536	894.220	76.732	91.566	41.633	-0.746	50.333	1702.366	-0.005371	-0.006410	-0.002914
0.3544	820.882	68.495	82.227	37.158	-0.744	50.330	1562.748	-0.004795	-0.005756	-0.002601
0.3552	748.640	60.257	72.777	32.587	-0.746	50.328	1425.219	-0.004218	-0.005094	-0.002281
0.3560	679.720	52.398	63.453	28.001	-0.747	50.325	1294.012	-0.003668	-0.004442	-0.001960
0.3568	615.609	44.806	54.170	23.735	-0.743	50.324	1171.961	-0.003136	-0.003792	-0.001661
0.3576	557.028	37.957	45.471	19.997	-0.747	50.323	1060.438	-0.002657	-0.003183	-0.001400
0.3584	504.218	31.643	37.662	16.759	-0.748	50.322	959.902	-0.002215	-0.002636	-0.001173
0.3592	457.149	25.848	30.240	13.842	-0.744	50.323	870.295	-0.001809	-0.002117	-0.000969
0.3600	415.866	20.824	23.695	11.104	-0.747	50.323	791.702	-0.001458	-0.001659	-0.000777
0.3608	379.948	16.348	17.789	8.465	-0.747	50.325	723.324	-0.001144	-0.001245	-0.000593
0.3616	348.945	12.279	12.411	6.117	-0.743	50.327	664.301	-0.000860	-0.000869	-0.000428
0.3624	322.344	8.758	7.951	4.199	-0.748	50.329	613.661	-0.000613	-0.000557	-0.000294
0.3632	299.636	5.685	4.240	2.406	-0.748	50.331	570.431	-0.000398	-0.000297	-0.000168
0.3640	280.671	3.048	1.043	1.044	-0.743	50.334	534.325	-0.000213	-0.000073	-0.000073
0.3648	265.567	0.955	-1.333	-0.179	-0.744	50.336	505.571	-0.000067	0.000093	0.000013
0.3656	254.491	-0.730	-3.237	-1.234	-0.744	50.339	484.486	0.000051	0.000227	0.000086
0.3664	247.383	-2.161	-4.750	-2.068	-0.742	50.342	470.953	0.000151	0.000333	0.000145
0.3672	244.152	-2.863	-5.765	-2.458	-0.742	50.343	464.802	0.000200	0.000404	0.000172
0.3680	244.106	-3.226	-6.265	-2.459	-0.750	50.343	464.716	0.000226	0.000439	0.000172
0.3688	246.691	-3.437	-6.210	-2.445	-0.750	50.343	469.637	0.000241	0.000435	0.000171
0.3696	252.011	-3.128	-5.516	-2.042	-0.753	50.341	479.765	0.000219	0.000386	0.000143
0.3704	260.773	-2.637	-4.321	-1.861	-0.751	50.340	496.445	0.000185	0.000302	0.000130
0.3712	275.922	-1.725	-2.430	-1.402	-0.743	50.339	525.284	0.000121	0.000170	0.000098
0.3720	301.169	0.564	0.906	-0.083	-0.742	50.338	573.349	-0.000039	-0.000063	0.000006
0.3728	339.492	4.253	5.853	2.140	-0.743	50.336	646.305	-0.000298	-0.000410	-0.000150
0.3736	391.640	9.389	12.940	5.253	-0.743	50.333	745.583	-0.000657	-0.000906	-0.000368
0.3744	455.932	16.419	21.722	9.185	-0.746	50.331	867.977	-0.001149	-0.001521	-0.000643
0.3752	529.255	24.502	31.643	13.729	-0.748	50.328	1007.566	-0.001715	-0.002215	-0.000961
0.3760	608.049	33.316	42.232	18.593	-0.747	50.326	1157.570	-0.002332	-0.002956	-0.001302
0.3768	689.969	42.436	53.072	23.540	-0.750	50.324	1313.524	-0.002971	-0.003715	-0.001648
0.3776	772.701	52.048	64.188	28.932	-0.748	50.323	1471.024	-0.003643	-0.004493	-0.002025
0.3784	854.049	61.520	75.361	34.240	-0.747	50.322	1625.891	-0.004306	-0.005275	-0.002397
0.3792	931.746	70.738	86.255	39.104	-0.742	50.323	1773.806	-0.004952	-0.006038	-0.002737
0.3800	1003.552	79.622	96.720	44.037	-0.742	50.323	1910.505	-0.005574	-0.006770	-0.003083
0.3808	1066.927	87.340	106.114	47.983	-0.742	50.325	2031.155	-0.006114	-0.007428	-0.003359
0.3816	1119.707	93.795	114.189	51.221	-0.740	50.327	2131.634	-0.006566	-0.007993	-0.003585
0.3824	1160.434	99.002	120.734	54.084	-0.745	50.329	2209.167	-0.006930	-0.008451	-0.003786
0.3832	1188.582	102.847	125.277	55.947	-0.745	50.331	2262.754	-0.007199	-0.008769	-0.003916
0.3840	1205.263	105.598	128.153	57.253	-0.744	50.333	2294.512	-0.007392	-0.008971	-0.004008
0.3848	1212.657	107.197	129.764	58.086	-0.743	50.336	2308.588	-0.007504	-0.009084	-0.004066
0.3856	1213.334	108.277	130.501	58.337	-0.742	50.338	2309.875	-0.007579	-0.009135	-0.004084
0.3864	1209.546	108.445	130.613	58.239	-0.739	50.341	2302.666	-0.007591	-0.009143	-0.004077
0.3872	1202.859	108.051	130.238	58.003	-0.735	50.343	2289.934	-0.007564	-0.009117	-0.004060
0.3880	1193.586	107.939	129.390	57.753	-0.742	50.343	2272.282	-0.007556	-0.009057	-0.004043
0.3888	1180.632	106.873	127.792	57.266	-0.742	50.343	2247.620	-0.007481	-0.008945	-0.004009
0.3896	1161.561	105.372	125.512	56.517	-0.744	50.342	2211.313	-0.007376	-0.008786	-0.003956
0.3904	1132.676	102.593	121.926	55.156	-0.748	50.340	2156.324	-0.007182	-0.008535	-0.003861
0.3912	1091.333	98.062	116.744	52.975	-0.740	50.339	2077.618	-0.006864	-0.008172	-0.003708
0.3920	1037.291	92.196	110.046	49.973	-0.738	50.337	1974.735	-0.006454	-0.007703	-0.003498
0.3928	972.443	85.321	101.681	46.263	-0.735	50.335	1851.282	-0.005973	-0.007118	-0.003238
0.3936	900.998	77.547	92.385	42.051	-0.736	50.333	1715.269	-0.005428	-0.006467	-0.002944
0.3944	826.983	69.408	82.546	37.423	-0.736	50.330	1574.364	-0.004859	-0.005778	-0.002620
0.3952	753.344	61.099	72.514	32.837	-0.737	50.328	1434.174	-0.004277	-0.005076	-0.002299
0.3960	682.455	52.735	63.078	28.180	-0.739	50.325	1299.219	-0.003691	-0.004415	-0.001973
0.3968	616.014	44.791	53.892	23.844	-0.736	50.324	1172.733	-0.003135	-0.003772	-0.001669
0.3976	555.074	37.523	45.110	19.983	-0.740	50.322	1056.719	-0.002627	-0.003158	-0.001399
0.3984	500.401	31.068	37.175	16.579	-0.741	50.322	952.635	-0.002175	-0.002602	-0.001161
0.3992	452.235	25.258	29.587	13.550	-0.740	50.322	860.939	-0.001768	-0.002071	-0.000948
