# Supplementary material for: Evaluation of a Cold-Mixed High-Performance Polyurethane Mixture
Source: Hindawi journal article supplement (doi:10.1155/2019/1507971), 2019-11-07
Supplement: f1 [file 1507971.f1.zip › 1507971.f1/dynamic modulus data/PUM/specimen2/temp50/zhs-2-50_Runtime.csv]

Time (sec)	Load (kN)	Confining Pressure (kPa)	Axial LVDT #1 (mm)	Axial LVDT #2 (mm)	Axial LVDT #3 (mm)	Temperature (�C)
0.0008	0.726814	-0.735	0.01451725	0.07143849	0.08341599	50.33
0.0016	0.727587	-0.737	0.01452500	0.07141703	0.08340830	50.34
0.0024	0.728016	-0.736	0.01453680	0.07139766	0.08340538	50.34
0.0032	0.727501	-0.736	0.01453871	0.07137334	0.08340728	50.34
0.0040	0.724669	-0.733	0.01455343	0.07138699	0.08341599	50.34
0.0048	0.718861	-0.730	0.01456916	0.07142496	0.08342177	50.35
0.0056	0.708647	-0.736	0.01458186	0.07147074	0.08342475	50.35
0.0064	0.692024	-0.735	0.01463503	0.07155436	0.08344615	50.35
0.0072	0.668163	-0.735	0.01470870	0.07167012	0.08348805	50.34
0.0080	0.636492	-0.737	0.01483542	0.07182294	0.08356684	50.34
0.0088	0.598326	-0.730	0.01500154	0.07201058	0.08366311	50.34
0.0096	0.556812	-0.733	0.01516938	0.07221967	0.08375359	50.34
0.0104	0.514812	-0.737	0.01533544	0.07244444	0.08385277	50.34
0.0112	0.474930	-0.736	0.01549852	0.07266122	0.08393645	50.34
0.0120	0.439539	-0.738	0.01563793	0.07287329	0.08401525	50.33
0.0128	0.409813	-0.735	0.01576477	0.07305336	0.08409113	50.33
0.0136	0.386696	-0.731	0.01586396	0.07318950	0.08415627	50.33
0.0144	0.370903	-0.727	0.01593179	0.07330340	0.08420289	50.33
0.0152	0.361805	-0.731	0.01596910	0.07338315	0.08422035	50.32
0.0160	0.358286	-0.734	0.01599258	0.07343668	0.08423388	50.32
0.0168	0.359058	-0.737	0.01600337	0.07346684	0.08422118	50.32
0.0176	0.362949	-0.741	0.01601118	0.07346284	0.08421344	50.33
0.0184	0.368557	-0.739	0.01600832	0.07342589	0.08422703	50.33
0.0192	0.375710	-0.737	0.01599163	0.07337135	0.08422315	50.33
0.0200	0.383978	-0.740	0.01597100	0.07331103	0.08421928	50.33
0.0208	0.392933	-0.742	0.01594156	0.07324696	0.08420956	50.33
0.0216	0.403318	-0.746	0.01592094	0.07319444	0.08418143	50.34
0.0224	0.415192	-0.748	0.01589143	0.07313508	0.08415818	50.34
0.0232	0.428581	-0.746	0.01585412	0.07307374	0.08413392	50.34
0.0240	0.443544	-0.742	0.01580298	0.07302314	0.08411545	50.34
0.0248	0.459538	-0.739	0.01574010	0.07296383	0.08409017	50.35
0.0256	0.475445	-0.745	0.01566654	0.07288116	0.08404827	50.35
0.0264	0.490408	-0.740	0.01560855	0.07280236	0.08400649	50.35
0.0272	0.503855	-0.743	0.01555455	0.07272059	0.08396566	50.34
0.0280	0.515070	-0.742	0.01551032	0.07264751	0.08393544	50.34
0.0288	0.523996	-0.735	0.01548272	0.07262707	0.08392477	50.34
0.0296	0.530777	-0.738	0.01545125	0.07262415	0.08391500	50.34
0.0304	0.534983	-0.739	0.01543552	0.07261837	0.08390623	50.34
0.0312	0.536842	-0.740	0.01541877	0.07262617	0.08390236	50.33
0.0320	0.536699	-0.743	0.01541483	0.07262808	0.08390141	50.33
0.0328	0.535183	-0.746	0.01541877	0.07262611	0.08390236	50.33
0.0336	0.532408	-0.746	0.01541382	0.07263678	0.08391303	50.33
0.0344	0.528946	-0.743	0.01542467	0.07265139	0.08392376	50.33
0.0352	0.524969	-0.747	0.01542562	0.07263398	0.08392370	50.32
0.0360	0.520048	-0.747	0.01543546	0.07261950	0.08392274	50.32
0.0368	0.514841	-0.750	0.01545805	0.07261461	0.08392376	50.33
0.0376	0.509462	-0.754	0.01548266	0.07260877	0.08392859	50.33
0.0384	0.503883	-0.751	0.01552302	0.07263494	0.08395106	50.33
0.0392	0.498190	-0.752	0.01554269	0.07267481	0.08396566	50.33
0.0400	0.492039	-0.751	0.01555753	0.07273805	0.08397537	50.33
0.0408	0.485172	-0.752	0.01559091	0.07280326	0.08398318	50.33
0.0416	0.477247	-0.754	0.01561248	0.07287920	0.08398598	50.34
0.0424	0.468521	-0.754	0.01565766	0.07295018	0.08401126	50.34
0.0432	0.458679	-0.752	0.01570272	0.07300472	0.08403558	50.34
0.0440	0.447636	-0.748	0.01574194	0.07307190	0.08407742	50.34
0.0448	0.435905	-0.743	0.01578224	0.07313800	0.08410668	50.35
0.0456	0.423260	-0.746	0.01581365	0.07319349	0.08411443	50.35
0.0464	0.410271	-0.746	0.01586771	0.07325858	0.08413970	50.35
0.0472	0.397940	-0.745	0.01590711	0.07332468	0.08416009	50.34
0.0480	0.386381	-0.746	0.01595825	0.07338893	0.08418727	50.34
0.0488	0.376396	-0.740	0.01600939	0.07343948	0.08422911	50.34
0.0496	0.368443	-0.744	0.01604086	0.07346576	0.08424270	50.34
0.0504	0.362291	-0.749	0.01607227	0.07347840	0.08424759	50.34
0.0512	0.358257	-0.752	0.01609087	0.07347941	0.08425736	50.34
0.0520	0.356112	-0.754	0.01610559	0.07350183	0.08426028	50.33
0.0528	0.355625	-0.751	0.01611143	0.07352817	0.08426416	50.33
0.0536	0.356369	-0.744	0.01611924	0.07355547	0.08428168	50.33
0.0544	0.358400	-0.739	0.01613098	0.07359052	0.08429337	50.33
0.0552	0.361719	-0.740	0.01611626	0.07358950	0.08428168	50.33
0.0560	0.365982	-0.740	0.01611239	0.07357579	0.08426523	50.32
0.0568	0.371361	-0.742	0.01610363	0.07355338	0.08424765	50.33
0.0576	0.377798	-0.746	0.01607621	0.07349300	0.08423102	50.33
0.0584	0.385065	-0.744	0.01606834	0.07345313	0.08422905	50.33
0.0592	0.393391	-0.746	0.01604086	0.07341427	0.08423287	50.33
0.0600	0.402918	-0.744	0.01600641	0.07336557	0.08421642	50.33
0.0608	0.413704	-0.744	0.01597399	0.07332081	0.08418828	50.33
0.0616	0.426235	-0.743	0.01593858	0.07325274	0.08416992	50.34
0.0624	0.440311	-0.742	0.01589048	0.07317299	0.08413982	50.34
0.0632	0.455732	-0.746	0.01583350	0.07307184	0.08411157	50.34
0.0640	0.471611	-0.741	0.01577848	0.07297748	0.08409017	50.34
0.0648	0.487118	-0.739	0.01570493	0.07287627	0.08405709	50.35
0.0656	0.502081	-0.743	0.01562822	0.07276046	0.08401430	50.35
0.0664	0.515528	-0.740	0.01556629	0.07267773	0.08397543	50.34
0.0672	0.527601	-0.742	0.01550734	0.07259607	0.08394033	50.34
0.0680	0.537958	-0.744	0.01545423	0.07253581	0.08390713	50.34
0.0688	0.545883	-0.739	0.01543164	0.07250088	0.08389735	50.34
0.0696	0.551691	-0.741	0.01540321	0.07245624	0.08388758	50.34
0.0704	0.554781	-0.744	0.01538056	0.07243383	0.08388668	50.34
0.0712	0.555611	-0.742	0.01537657	0.07242507	0.08388186	50.34
0.0720	0.554638	-0.741	0.01536483	0.07242310	0.08389163	50.33
0.0728	0.552063	-0.743	0.01536971	0.07243091	0.08388871	50.33
0.0736	0.548601	-0.739	0.01538444	0.07247174	0.08389455	50.33
0.0744	0.544395	-0.742	0.01539820	0.07252806	0.08391309	50.33
0.0752	0.539646	-0.745	0.01541090	0.07256401	0.08391112	50.33
0.0760	0.534067	-0.747	0.01542467	0.07259703	0.08391887	50.33
0.0768	0.527859	-0.750	0.01544833	0.07260191	0.08392376	50.33
0.0776	0.520878	-0.746	0.01546896	0.07260293	0.08392173	50.33
0.0784	0.512896	-0.742	0.01550931	0.07263500	0.08393246	50.33
0.0792	0.504055	-0.738	0.01554471	0.07268560	0.08394808	50.33
0.0800	0.493612	-0.736	0.01557809	0.07274985	0.08396071	50.33
0.0808	0.481224	-0.740	0.01564193	0.07284033	0.08399093	50.33
0.0816	0.466862	-0.741	0.01569891	0.07295227	0.08402401	50.34
0.0824	0.450668	-0.743	0.01576567	0.07306904	0.08405900	50.34
0.0832	0.433273	-0.744	0.01583833	0.07319438	0.08410281	50.34
0.0840	0.415421	-0.735	0.01590711	0.07330626	0.08415729	50.34
0.0848	0.397997	-0.735	0.01596606	0.07339859	0.08419323	50.35
0.0856	0.381660	-0.739	0.01601720	0.07345206	0.08422148	50.35
0.0864	0.366955	-0.735	0.01607609	0.07350463	0.08425552	50.35
0.0872	0.354567	-0.739	0.01612329	0.07354748	0.08427209	50.34
0.0880	0.344639	-0.738	0.01618117	0.07359415	0.08430612	50.34
0.0888	0.337572	-0.729	0.01623219	0.07366896	0.08434314	50.34
0.0896	0.333252	-0.728	0.01625776	0.07371855	0.08436155	50.34
0.0904	0.331020	-0.735	0.01626557	0.07375640	0.08437026	50.34
0.0912	0.330534	-0.736	0.01625973	0.07377589	0.08437413	50.34
0.0920	0.331306	-0.743	0.01625675	0.07377595	0.08437598	50.33
0.0928	0.332937	-0.750	0.01625091	0.07377493	0.08436918	50.33
0.0936	0.335512	-0.746	0.01625580	0.07377976	0.08437014	50.33
0.0944	0.338945	-0.747	0.01625770	0.07377589	0.08436632	50.33
0.0952	0.342979	-0.747	0.01624101	0.07374090	0.08434492	50.32
0.0960	0.347557	-0.745	0.01622224	0.07371950	0.08433717	50.32
0.0968	0.352592	-0.747	0.01618594	0.07368165	0.08432651	50.32
0.0976	0.358400	-0.744	0.01616633	0.07363790	0.08430403	50.33
0.0984	0.365152	-0.742	0.01614964	0.07363015	0.08429533	50.33
0.0992	0.373278	-0.743	0.01611835	0.07358938	0.08427870	50.33
0.1000	0.383234	-0.742	0.01609969	0.07353389	0.08425534	50.33
0.1008	0.395050	-0.744	0.01604766	0.07346004	0.08424073	50.33
0.1016	0.408840	-0.748	0.01599658	0.07335889	0.08422226	50.34
0.1024	0.424290	-0.745	0.01594836	0.07325965	0.08418930	50.34
0.1032	0.440683	-0.750	0.01588744	0.07317019	0.08415526	50.34
0.1040	0.457048	-0.747	0.01583338	0.07308352	0.08412814	50.34
0.1048	0.472956	-0.745	0.01577741	0.07300180	0.08409113	50.35
0.1056	0.487690	-0.754	0.01570874	0.07291335	0.08404338	50.35
0.1064	0.501137	-0.751	0.01564491	0.07282287	0.08401614	50.35
0.1072	0.513496	-0.752	0.01558793	0.07273626	0.08397335	50.34
0.1080	0.524254	-0.755	0.01554567	0.07267684	0.08394808	50.34
0.1088	0.533323	-0.748	0.01550722	0.07264173	0.08394814	50.34
0.1096	0.540304	-0.752	0.01547867	0.07262421	0.08391893	50.34
0.1104	0.544853	-0.756	0.01546496	0.07263488	0.08391404	50.34
0.1112	0.547314	-0.758	0.01545411	0.07264078	0.08390921	50.34
0.1120	0.548029	-0.759	0.01545411	0.07264763	0.08390331	50.33
0.1128	0.547113	-0.758	0.01545119	0.07265633	0.08390915	50.33
0.1136	0.545025	-0.756	0.01545703	0.07265538	0.08391887	50.33
0.1144	0.541792	-0.751	0.01546395	0.07265240	0.08393246	50.33
0.1152	0.537815	-0.752	0.01546592	0.07262897	0.08392954	50.32
0.1160	0.533237	-0.752	0.01548260	0.07261926	0.08393925	50.32
0.1168	0.528231	-0.750	0.01549047	0.07262421	0.08393341	50.33
0.1176	0.522938	-0.750	0.01549733	0.07266414	0.08392853	50.33
0.1184	0.517216	-0.746	0.01551604	0.07273430	0.08394510	50.33
0.1192	0.510950	-0.743	0.01554459	0.07278401	0.08395582	50.33
0.1200	0.503826	-0.745	0.01557112	0.07284242	0.08396560	50.33
0.1208	0.495329	-0.744	0.01559961	0.07288814	0.08398604	50.33
0.1216	0.485029	-0.744	0.01564288	0.07294059	0.08401233	50.34
0.1224	0.472727	-0.744	0.01568699	0.07301259	0.08403963	50.34
0.1232	0.458307	-0.744	0.01574206	0.07307678	0.08407170	50.34
0.1240	0.442400	-0.743	0.01582950	0.07314396	0.08411843	50.34
0.1248	0.425749	-0.745	0.01590317	0.07321203	0.08414465	50.35
0.1256	0.409126	-0.750	0.01594746	0.07327521	0.08416796	50.35
0.1264	0.393248	-0.748	0.01600832	0.07335687	0.08420682	50.35
0.1272	0.379000	-0.752	0.01604658	0.07342684	0.08421749	50.34
0.1280	0.366526	-0.752	0.01607800	0.07349694	0.08425063	50.34
0.1288	0.356312	-0.748	0.01612806	0.07358539	0.08428955	50.34
0.1296	0.348530	-0.748	0.01616144	0.07364857	0.08430904	50.34
0.1304	0.342865	-0.748	0.01618606	0.07370889	0.08433235	50.34
0.1312	0.339403	-0.746	0.01621455	0.07375169	0.08433813	50.34
0.1320	0.337772	-0.746	0.01622933	0.07375848	0.08433807	50.33
0.1328	0.337887	-0.749	0.01623428	0.07375461	0.08434880	50.33
0.1336	0.339317	-0.749	0.01623428	0.07374489	0.08435565	50.33
0.1344	0.342150	-0.750	0.01623720	0.07371569	0.08435762	50.33
0.1352	0.346270	-0.755	0.01622438	0.07368273	0.08434796	50.32
0.1360	0.350962	-0.757	0.01620865	0.07366323	0.08432847	50.32
0.1368	0.356598	-0.758	0.01619881	0.07364959	0.08431292	50.32
0.1376	0.362864	-0.760	0.01617527	0.07363212	0.08430123	50.33
0.1384	0.369930	-0.756	0.01616943	0.07360971	0.08430409	50.33
0.1392	0.378456	-0.755	0.01614779	0.07357275	0.08429825	50.33
0.1400	0.388527	-0.754	0.01611435	0.07352024	0.08427781	50.33
0.1408	0.400372	-0.754	0.01608884	0.07345605	0.08425254	50.33
0.1416	0.414305	-0.752	0.01604164	0.07337826	0.08421564	50.34
0.1424	0.430012	-0.750	0.01598859	0.07329565	0.08417875	50.34
0.1432	0.447264	-0.752	0.01592475	0.07321000	0.08414763	50.34
0.1440	0.465574	-0.747	0.01585108	0.07313794	0.08412039	50.34
0.1448	0.483770	-0.748	0.01577443	0.07305908	0.08408242	50.35
0.1456	0.501194	-0.752	0.01569980	0.07296866	0.08403468	50.35
0.1464	0.516558	-0.748	0.01562715	0.07287145	0.08399773	50.35
0.1472	0.529490	-0.746	0.01556033	0.07275862	0.08396363	50.34
0.1480	0.539646	-0.742	0.01551908	0.07266623	0.08393532	50.34
0.1488	0.546741	-0.735	0.01547784	0.07260877	0.08392656	50.34
0.1496	0.551119	-0.733	0.01545715	0.07258826	0.08390611	50.34
0.1504	0.552778	-0.736	0.01544434	0.07260579	0.08389056	50.34
0.1512	0.552120	-0.738	0.01543748	0.07262808	0.08389157	50.33
0.1520	0.549803	-0.740	0.01543748	0.07265043	0.08389443	50.33
0.1528	0.546370	-0.744	0.01544142	0.07265532	0.08390313	50.33
0.1536	0.541964	-0.744	0.01544434	0.07265532	0.08392459	50.33
0.1544	0.536928	-0.745	0.01545811	0.07267970	0.08394992	50.33
0.1552	0.531406	-0.748	0.01547968	0.07268453	0.08395094	50.32
0.1560	0.525141	-0.749	0.01549345	0.07267869	0.08395296	50.32
0.1568	0.518188	-0.752	0.01551414	0.07269430	0.08395100	50.32
0.1576	0.510778	-0.752	0.01553577	0.07270896	0.08394617	50.33
0.1584	0.502253	-0.750	0.01556730	0.07275087	0.08396757	50.33
0.1592	0.492468	-0.750	0.01561350	0.07282096	0.08399481	50.33
0.1600	0.481110	-0.746	0.01567137	0.07288802	0.08402103	50.33
0.1608	0.467634	-0.747	0.01572537	0.07295799	0.08404434	50.33
0.1616	0.452700	-0.743	0.01578712	0.07304943	0.08407652	50.34
0.1624	0.436764	-0.741	0.01584899	0.07316321	0.08410579	50.34
0.1632	0.420685	-0.736	0.01590413	0.07328200	0.08415347	50.34
0.1640	0.405350	-0.735	0.01596510	0.07340556	0.08419818	50.34
0.1648	0.391474	-0.736	0.01602221	0.07349604	0.08422923	50.35
0.1656	0.379257	-0.739	0.01606154	0.07354665	0.08424175	50.35
0.1664	0.369101	-0.744	0.01610464	0.07359421	0.08425152	50.35
0.1672	0.361433	-0.742	0.01613301	0.07363212	0.08427006	50.34
0.1680	0.355740	-0.744	0.01616830	0.07367390	0.08429247	50.34
0.1688	0.352392	-0.743	0.01619178	0.07370597	0.08432359	50.34
0.1696	0.350676	-0.740	0.01620555	0.07372737	0.08433229	50.34
0.1704	0.349989	-0.742	0.01622921	0.07372254	0.08433419	50.34
0.1712	0.350618	-0.739	0.01623511	0.07370889	0.08433032	50.34
0.1720	0.351934	-0.735	0.01624101	0.07372051	0.08432937	50.33
0.1728	0.353937	-0.738	0.01624495	0.07370889	0.08433425	50.33
0.1736	0.356483	-0.734	0.01623410	0.07370496	0.08432651	50.33
0.1744	0.359316	-0.734	0.01622033	0.07370013	0.08432937	50.33
0.1752	0.362778	-0.740	0.01620370	0.07367104	0.08431768	50.32
0.1760	0.366611	-0.742	0.01617914	0.07365257	0.08430696	50.32
0.1768	0.371103	-0.745	0.01614964	0.07363999	0.08429915	50.32
0.1776	0.376282	-0.746	0.01612115	0.07362056	0.08427972	50.33
0.1784	0.382090	-0.743	0.01610047	0.07359529	0.08427095	50.33
0.1792	0.389042	-0.740	0.01608086	0.07355148	0.08426219	50.33
0.1800	0.397139	-0.740	0.01605636	0.07350373	0.08425629	50.33
0.1808	0.406694	-0.739	0.01602989	0.07345015	0.08423883	50.33
0.1816	0.417480	-0.740	0.01599950	0.07339555	0.08421940	50.34
0.1824	0.429468	-0.739	0.01595730	0.07333046	0.08419997	50.34
0.1832	0.442429	-0.742	0.01591796	0.07323515	0.08416021	50.34
0.1840	0.456076	-0.742	0.01587957	0.07313693	0.08414459	50.34
0.1848	0.470238	-0.745	0.01582646	0.07303286	0.08411837	50.35
0.1856	0.484514	-0.754	0.01575965	0.07292092	0.08405805	50.35
0.1864	0.498276	-0.751	0.01569974	0.07283729	0.08403176	50.35
0.1872	0.511093	-0.751	0.01563495	0.07276148	0.08399385	50.34
0.1880	0.522423	-0.747	0.01558393	0.07268959	0.08396560	50.34
0.1888	0.531836	-0.741	0.01556033	0.07264870	0.08395582	50.34
0.1896	0.539331	-0.741	0.01553088	0.07261652	0.08394313	50.34
0.1904	0.544739	-0.744	0.01549649	0.07258147	0.08391875	50.34
0.1912	0.548429	-0.744	0.01548564	0.07256490	0.08391190	50.34
0.1920	0.550175	-0.745	0.01547676	0.07256395	0.08391386	50.33
0.1928	0.550232	-0.749	0.01547080	0.07257074	0.08391386	50.33
0.1936	0.548716	-0.747	0.01548463	0.07258236	0.08393335	50.33
0.1944	0.545883	-0.748	0.01547974	0.07259786	0.08395094	50.33
0.1952	0.542278	-0.749	0.01548177	0.07259589	0.08395094	50.32
0.1960	0.537729	-0.751	0.01547980	0.07259500	0.08394122	50.32
0.1968	0.532265	-0.753	0.01548564	0.07261062	0.08394122	50.32
0.1976	0.526114	-0.752	0.01551121	0.07263988	0.08393633	50.33
0.1984	0.519218	-0.752	0.01553476	0.07268274	0.08394808	50.33
0.1992	0.511379	-0.748	0.01557118	0.07273918	0.08397239	50.33
0.2000	0.502481	-0.751	0.01560950	0.07280731	0.08398902	50.33
0.2008	0.364237	-0.759	0.01632470	0.07377112	0.08436441	50.32
0.2016	0.364408	-0.752	0.01634240	0.07377887	0.08437610	50.33
0.2024	0.364666	-0.756	0.01635027	0.07378471	0.08437806	50.33
0.2032	0.365181	-0.756	0.01635420	0.07378966	0.08437997	50.33
0.2040	0.365839	-0.758	0.01635808	0.07380033	0.08437318	50.33
0.2048	0.367355	-0.757	0.01633835	0.07380718	0.08437514	50.34
0.2056	0.369673	-0.758	0.01631773	0.07381201	0.08437711	50.34
0.2064	0.373306	-0.758	0.01630002	0.07379448	0.08437812	50.34
0.2072	0.378742	-0.752	0.01628333	0.07377118	0.08438492	50.34
0.2080	0.387411	-0.760	0.01625192	0.07372934	0.08436930	50.34
0.2088	0.401888	-0.765	0.01620287	0.07364374	0.08433032	50.34
0.2096	0.424862	-0.767	0.01613802	0.07350367	0.08427584	50.34
0.2104	0.459738	-0.771	0.01601523	0.07331014	0.08418339	50.34
0.2112	0.508032	-0.767	0.01584136	0.07305431	0.08406663	50.34
0.2120	0.570402	-0.761	0.01561832	0.07274693	0.08393824	50.34
0.2128	0.646591	-0.760	0.01532364	0.07237822	0.08377773	50.34
0.2136	0.734682	-0.761	0.01497388	0.07194728	0.08357549	50.34
0.2144	0.832987	-0.762	0.01458293	0.07143074	0.08335090	50.33
0.2152	0.939388	-0.761	0.01414388	0.07088017	0.08310580	50.33
0.2160	1.051426	-0.760	0.01367539	0.07029361	0.08283049	50.33
0.2168	1.167068	-0.756	0.01319808	0.06968367	0.08256787	50.33
0.2176	1.284857	-0.751	0.01272160	0.06906408	0.08229446	50.32
0.2184	1.402960	-0.755	0.01221180	0.06840557	0.08200455	50.32
0.2192	1.519690	-0.759	0.01169312	0.06775779	0.08171177	50.32
0.2200	1.634188	-0.762	0.01118040	0.06711781	0.08141601	50.32
0.2208	1.744823	-0.762	0.01066184	0.06649232	0.08113295	50.32
0.2216	1.849508	-0.756	0.01018834	0.06591153	0.08087039	50.33
0.2224	1.946411	-0.751	0.00974238	0.06538135	0.08063006	50.33
0.2232	2.032557	-0.752	0.00932091	0.06489301	0.08041215	50.33
0.2240	2.105341	-0.754	0.00894761	0.06447756	0.08021665	50.33
0.2248	2.162933	-0.755	0.00862157	0.06413913	0.08005810	50.33
0.2256	2.203388	-0.754	0.00837505	0.06387359	0.07995027	50.34
0.2264	2.226734	-0.751	0.00820416	0.06370139	0.07987344	50.34
0.2272	2.234430	-0.747	0.00810987	0.06362176	0.07984227	50.34
0.2280	2.229452	-0.750	0.00806361	0.06359357	0.07984132	50.34
0.2288	2.214975	-0.756	0.00805372	0.06360227	0.07982957	50.34
0.2296	2.192087	-0.757	0.00807726	0.06366354	0.07985294	50.34
0.2304	2.159243	-0.759	0.00813913	0.06374037	0.07990158	50.34
0.2312	2.111521	-0.756	0.00828254	0.06389600	0.07997346	50.34
0.2320	2.044144	-0.748	0.00851732	0.06416255	0.08012909	50.34
0.2328	1.955166	-0.745	0.00884151	0.06454295	0.08032072	50.34
0.2336	1.846132	-0.745	0.00924915	0.06505549	0.08055031	50.34
0.2344	1.722193	-0.743	0.00972754	0.06567317	0.08083147	50.33
0.2352	1.589785	-0.742	0.01025212	0.06634444	0.08112532	50.33
0.2360	1.454229	-0.743	0.01080418	0.06703109	0.08143163	50.33
0.2368	1.319847	-0.738	0.01137680	0.06772763	0.08175749	50.33
0.2376	1.190100	-0.732	0.01193374	0.06839395	0.08206385	50.32
0.2384	1.067820	-0.736	0.01244742	0.06902421	0.08234197	50.32
0.2392	0.955181	-0.739	0.01293761	0.06962538	0.08261150	50.32
0.2400	0.853558	-0.743	0.01337677	0.07018375	0.08284980	50.32
0.2408	0.764151	-0.751	0.01378155	0.07068861	0.08306289	50.32
0.2416	0.686846	-0.750	0.01415390	0.07114387	0.08325064	50.33
0.2424	0.621500	-0.747	0.01447308	0.07154566	0.08341891	50.33
0.2432	0.567312	-0.747	0.01473725	0.07188416	0.08355320	50.33
0.2440	0.523109	-0.744	0.01495039	0.07216620	0.08366603	50.33
0.2448	0.488520	-0.743	0.01513600	0.07240063	0.08377784	50.34
0.2456	0.462570	-0.743	0.01527053	0.07256299	0.08384496	50.34
0.2464	0.445004	-0.740	0.01537371	0.07267392	0.08389556	50.34
0.2472	0.435162	-0.738	0.01546007	0.07275766	0.08394909	50.34
0.2480	0.431957	-0.741	0.01548851	0.07279468	0.08395696	50.34
0.2488	0.434361	-0.750	0.01549345	0.07279956	0.08394820	50.34
0.2496	0.441341	-0.755	0.01549637	0.07279176	0.08394325	50.34
0.2504	0.453615	-0.760	0.01547384	0.07272649	0.08391398	50.34
0.2512	0.473871	-0.760	0.01542878	0.07261848	0.08388281	50.34
0.2520	0.508518	-0.754	0.01534039	0.07245123	0.08383125	50.34
0.2528	0.564423	-0.755	0.01515573	0.07217884	0.08371848	50.34
0.2536	0.645418	-0.754	0.01485020	0.07180530	0.08354241	50.34
0.2544	0.751534	-0.753	0.01443952	0.07130432	0.08330894	50.33
0.2552	0.878248	-0.756	0.01394635	0.07069927	0.08303267	50.33
0.2560	1.018782	-0.758	0.01339239	0.07000178	0.08271652	50.33
0.2568	1.167641	-0.757	0.01279324	0.06924605	0.08238292	50.33
0.2576	1.320448	-0.758	0.01216656	0.06846595	0.08203852	50.33
0.2584	1.473455	-0.761	0.01150852	0.06766140	0.08166891	50.32
0.2592	1.623230	-0.759	0.01084149	0.06685793	0.08129930	50.32
0.2600	1.765909	-0.762	0.01020390	0.06609333	0.08094913	50.32
0.2608	1.897717	-0.761	0.00960863	0.06536466	0.08061850	50.33
0.2616	2.014160	-0.755	0.00907028	0.06471390	0.08034128	50.33
0.2624	2.111750	-0.752	0.00860375	0.06417596	0.08011550	50.33
0.2632	2.188139	-0.751	0.00822365	0.06373531	0.07992870	50.33
0.2640	2.242355	-0.748	0.00793582	0.06340849	0.07978857	50.33
0.2648	2.275944	-0.749	0.00774425	0.06320524	0.07969415	50.33
0.2656	2.291937	-0.750	0.00761855	0.06309539	0.07962900	50.34
0.2664	2.294569	-0.748	0.00756353	0.06305450	0.07959890	50.34
0.2672	2.287645	-0.747	0.00754780	0.06306231	0.07961059	50.34
0.2680	2.274313	-0.747	0.00754684	0.06307203	0.07961744	50.34
0.2688	2.255802	-0.752	0.00757039	0.06309921	0.07962716	50.34
0.2696	2.230396	-0.751	0.00761557	0.06316048	0.07966018	50.34
0.2704	2.195177	-0.754	0.00770497	0.06327915	0.07970297	50.34
0.2712	2.145166	-0.750	0.00787687	0.06349027	0.07979339	50.34
0.2720	2.075930	-0.746	0.00814605	0.06379670	0.07994908	50.34
0.2728	1.986065	-0.742	0.00849384	0.06420720	0.08013302	50.34
0.2736	1.876259	-0.744	0.00892907	0.06472182	0.08036256	50.34
0.2744	1.750917	-0.749	0.00942808	0.06533563	0.08064371	50.33
0.2752	1.616392	-0.748	0.00996929	0.06600684	0.08094329	50.33
0.2760	1.478233	-0.754	0.01053703	0.06671113	0.08126032	50.33
0.2768	1.341991	-0.751	0.01111549	0.06742901	0.08158720	50.33
0.2776	1.211872	-0.747	0.01167631	0.06810117	0.08189845	50.32
0.2784	1.090565	-0.752	0.01219398	0.06870812	0.08217186	50.32
0.2792	0.980587	-0.753	0.01267922	0.06926936	0.08242577	50.32
0.2800	0.883341	-0.753	0.01310170	0.06977320	0.08265728	50.32
0.2808	0.799341	-0.758	0.01348394	0.07023805	0.08285278	50.32
0.2816	0.728188	-0.751	0.01382875	0.07067782	0.08304244	50.33
0.2824	0.668621	-0.750	0.01410669	0.07105428	0.08320290	50.33
0.2832	0.619183	-0.751	0.01435912	0.07137525	0.08332932	50.33
0.2840	0.578556	-0.750	0.01455259	0.07162434	0.08343637	50.33
0.2848	0.545568	-0.753	0.01471853	0.07181787	0.08353364	50.34
0.2856	0.519361	-0.755	0.01486784	0.07196575	0.08361250	50.34
0.2864	0.499563	-0.754	0.01497585	0.07206988	0.08367676	50.34
0.2872	0.485573	-0.751	0.01507413	0.07217300	0.08373803	50.34
0.2880	0.477533	-0.752	0.01512033	0.07223231	0.08376521	50.34
0.2888	0.475073	-0.754	0.01514882	0.07225853	0.08376515	50.34
0.2896	0.477276	-0.754	0.01515967	0.07227021	0.08376127	50.34
0.2904	0.484457	-0.756	0.01514977	0.07224977	0.08374095	50.34
0.2912	0.496359	-0.751	0.01513898	0.07223028	0.08372837	50.34
0.2920	0.515614	-0.748	0.01509774	0.07219237	0.08371866	50.34
0.2928	0.548916	-0.751	0.01500440	0.07208443	0.08366120	50.34
0.2936	0.603704	-0.752	0.01482558	0.07185006	0.08355314	50.34
0.2944	0.685844	-0.752	0.01452899	0.07147264	0.08338481	50.33
0.2952	0.796566	-0.748	0.01410466	0.07094151	0.08313382	50.33
0.2960	0.931120	-0.747	0.01358116	0.07026249	0.08283907	50.33
0.2968	1.082239	-0.746	0.01297122	0.06950855	0.08250928	50.33
0.2976	1.243143	-0.746	0.01232088	0.06869739	0.08213866	50.33
0.2984	1.408281	-0.749	0.01162738	0.06783748	0.08174765	50.32
0.2992	1.573019	-0.750	0.01091129	0.06699306	0.08135176	50.32
0.3000	1.732864	-0.748	0.01021868	0.06615847	0.08095098	50.32
0.3008	1.882753	-0.746	0.00954980	0.06536371	0.08058327	50.32
0.3016	2.017221	-0.740	0.00895059	0.06465656	0.08028269	50.33
0.3024	2.131262	-0.735	0.00842601	0.06401557	0.08000940	50.33
0.3032	2.220383	-0.735	0.00799483	0.06348735	0.07979256	50.33
0.3040	2.282953	-0.738	0.00768048	0.06310803	0.07963699	50.33
0.3048	2.320204	-0.742	0.00746930	0.06286973	0.07951444	50.33
0.3056	2.336540	-0.744	0.00734454	0.06274521	0.07945120	50.34
0.3064	2.337770	-0.746	0.00728959	0.06271797	0.07943267	50.34
0.3072	2.328873	-0.739	0.00727582	0.06273448	0.07943648	50.34
0.3080	2.313709	-0.737	0.00728172	0.06275588	0.07945007	50.34
0.3088	2.292566	-0.740	0.00730830	0.06282008	0.07946658	50.34
0.3096	2.262754	-0.739	0.00737011	0.06291443	0.07951039	50.34
0.3104	2.219810	-0.740	0.00749290	0.06307584	0.07957071	50.34
0.3112	2.158041	-0.742	0.00770509	0.06334716	0.07968742	50.34
0.3120	2.073841	-0.738	0.00803113	0.06372851	0.07987219	50.34
0.3128	1.968355	-0.737	0.00844669	0.06421977	0.08009005	50.34
0.3136	1.846018	-0.740	0.00894177	0.06479079	0.08036047	50.34
0.3144	1.713581	-0.738	0.00948197	0.06539202	0.08065432	50.33
0.3152	1.578140	-0.736	0.01004392	0.06602722	0.08095694	50.33
0.3160	1.444674	-0.735	0.01059794	0.06667411	0.08127213	50.33
0.3168	1.316929	-0.734	0.01112837	0.06732976	0.08157659	50.33
0.3176	1.197166	-0.730	0.01164502	0.06796885	0.08186740	50.33
0.3184	1.086588	-0.738	0.01211447	0.06854272	0.08212417	50.32
0.3192	0.985708	-0.739	0.01256227	0.06907380	0.08235765	50.32
0.3200	0.894756	-0.738	0.01296204	0.06954163	0.08256972	50.32
0.3208	0.814047	-0.742	0.01331764	0.06997550	0.08276421	50.32
0.3216	0.743265	-0.737	0.01365173	0.07038796	0.08295488	50.33
0.3224	0.681839	-0.735	0.01394552	0.07075185	0.08311057	50.33
0.3232	0.628538	-0.738	0.01421076	0.07107866	0.08325452	50.33
0.3240	0.582905	-0.740	0.01444167	0.07136947	0.08337224	50.33
0.3248	0.544624	-0.740	0.01463413	0.07161653	0.08347636	50.34
0.3256	0.513754	-0.744	0.01478440	0.07182562	0.08356971	50.34
0.3264	0.490837	-0.743	0.01491207	0.07198811	0.08363587	50.34
0.3272	0.475502	-0.740	0.01500827	0.07210684	0.08369523	50.34
0.3280	0.467691	-0.741	0.01507503	0.07218367	0.08372438	50.34
0.3288	0.466404	-0.744	0.01510745	0.07221186	0.08372927	50.34
0.3296	0.470638	-0.746	0.01512027	0.07220608	0.08372444	50.34
0.3304	0.480452	-0.748	0.01510358	0.07216716	0.08370596	50.34
0.3312	0.496616	-0.748	0.01506621	0.07211375	0.08368653	50.34
0.3320	0.523682	-0.743	0.01501220	0.07200098	0.08364952	50.34
0.3328	0.568542	-0.745	0.01487565	0.07180148	0.08356869	50.34
0.3336	0.636978	-0.746	0.01465076	0.07147849	0.08342957	50.34
0.3344	0.731392	-0.743	0.01429135	0.07100469	0.08322132	50.33
0.3352	0.849323	-0.744	0.01381785	0.07042098	0.08295769	50.33
0.3360	0.984535	-0.744	0.01327562	0.06974399	0.08266008	50.33
0.3368	1.130219	-0.743	0.01268423	0.06901342	0.08233035	50.33
0.3376	1.281595	-0.748	0.01206630	0.06826931	0.08198899	50.33
0.3384	1.434431	-0.751	0.01142198	0.06750864	0.08163005	50.32
0.3392	1.584606	-0.756	0.01077169	0.06674993	0.08127010	50.32
0.3400	1.727915	-0.755	0.01013124	0.06602526	0.08092576	50.32
0.3408	1.860437	-0.752	0.00954002	0.06533462	0.08061063	50.32
0.3416	1.977768	-0.747	0.00900173	0.06469548	0.08033437	50.33
0.3424	2.076931	-0.738	0.00853616	0.06414777	0.08009219	50.33
0.3432	2.155752	-0.742	0.00815117	0.06368673	0.07989568	50.33
0.3440	2.212772	-0.744	0.00785148	0.06331992	0.07974285	50.33
0.3448	2.249422	-0.748	0.00765002	0.06307876	0.07964164	50.33
0.3456	2.268562	-0.752	0.00752223	0.06292129	0.07957846	50.34
0.3464	2.273970	-0.750	0.00746131	0.06283957	0.07955313	50.34
0.3472	2.270079	-0.744	0.00745440	0.06282991	0.07955021	50.34
0.3480	2.260294	-0.744	0.00744855	0.06286001	0.07955801	50.34
0.3488	2.245674	-0.748	0.00746238	0.06290174	0.07956183	50.34
0.3496	2.225676	-0.751	0.00749177	0.06298929	0.07958323	50.34
0.3504	2.197323	-0.756	0.00755763	0.06311184	0.07961535	50.34
0.3512	2.153749	-0.754	0.00770402	0.06328988	0.07968444	50.34
0.3520	2.088003	-0.748	0.00794464	0.06359631	0.07982260	50.34
0.3528	1.996050	-0.748	0.00830716	0.06401360	0.08001423	50.34
0.3536	1.877375	-0.747	0.00876194	0.06456906	0.08026332	50.34
0.3544	1.738329	-0.751	0.00931787	0.06523341	0.08056587	50.33
0.3552	1.587982	-0.752	0.00992990	0.06596977	0.08090335	50.33
0.3560	1.435061	-0.755	0.01056349	0.06672847	0.08125061	50.33
0.3568	1.287117	-0.756	0.01119310	0.06747258	0.08160079	50.33
0.3576	1.149101	-0.750	0.01179427	0.06819725	0.08193636	50.32
0.3584	1.024361	-0.754	0.01233059	0.06884509	0.08222830	50.32
0.3592	0.914183	-0.752	0.01280600	0.06944919	0.08248317	50.32
0.3600	0.819168	-0.750	0.01323622	0.06998426	0.08271074	50.32
0.3608	0.739059	-0.754	0.01360160	0.07042497	0.08291411	50.32
0.3616	0.672855	-0.746	0.01392865	0.07080925	0.08309400	50.33
0.3624	0.619383	-0.746	0.01420265	0.07111764	0.08324385	50.33
0.3632	0.576668	-0.747	0.01441497	0.07135397	0.08336443	50.33
0.3640	0.543308	-0.748	0.01459384	0.07156211	0.08344895	50.33
0.3648	0.517731	-0.752	0.01472837	0.07173038	0.08351803	50.34
0.3656	0.499163	-0.748	0.01481593	0.07186270	0.08357733	50.34
0.3664	0.486946	-0.746	0.01489443	0.07196391	0.08362114	50.34
0.3672	0.480223	-0.739	0.01494247	0.07202810	0.08365142	50.34
0.3680	0.478621	-0.742	0.01497686	0.07205540	0.08366698	50.34
0.3688	0.481138	-0.750	0.01498955	0.07204169	0.08365923	50.34
0.3696	0.487204	-0.754	0.01499051	0.07203287	0.08365822	50.34
0.3704	0.497217	-0.760	0.01496696	0.07199687	0.08363581	50.34
0.3712	0.512581	-0.759	0.01492876	0.07194620	0.08361149	50.34
0.3720	0.537786	-0.752	0.01487178	0.07185578	0.08358425	50.34
0.3728	0.580387	-0.752	0.01473331	0.07167685	0.08350551	50.34
0.3736	0.646563	-0.756	0.01450545	0.07138890	0.08338094	50.34
0.3744	0.738945	-0.755	0.01415867	0.07094240	0.08318937	50.33
0.3752	0.855989	-0.756	0.01371664	0.07036847	0.08292967	50.33
0.3760	0.991659	-0.757	0.01317543	0.06967872	0.08262324	50.33
0.3768	1.139174	-0.750	0.01257813	0.06892002	0.08229554	50.33
0.3776	1.293211	-0.749	0.01195043	0.06814772	0.08194625	50.32
0.3784	1.449137	-0.752	0.01127660	0.06734914	0.08157659	50.32
0.3792	1.602745	-0.755	0.01061058	0.06656706	0.08120507	50.32
0.3800	1.750231	-0.756	0.00997216	0.06582296	0.08085096	50.32
0.3808	1.888218	-0.759	0.00935727	0.06511670	0.08050859	50.32
0.3816	2.012415	-0.756	0.00880623	0.06448245	0.08021486	50.33
0.3824	2.119274	-0.754	0.00832099	0.06391054	0.07997161	50.33
0.3832	2.205019	-0.758	0.00791526	0.06343001	0.07974976	50.33
0.3840	2.267733	-0.756	0.00759596	0.06305355	0.07958627	50.33
0.3848	2.308445	-0.754	0.00736904	0.06276464	0.07947928	50.33
0.3856	2.329473	-0.752	0.00722760	0.06258959	0.07940340	50.34
0.3864	2.335539	-0.747	0.00714803	0.06248736	0.07937038	50.34
0.3872	2.330875	-0.744	0.00712836	0.06247962	0.07937533	50.34
0.3880	2.318687	-0.746	0.00714010	0.06253505	0.07938212	50.34
0.3888	2.300692	-0.754	0.00716662	0.06260407	0.07938600	50.34
0.3896	2.275515	-0.756	0.00721383	0.06271690	0.07942396	50.34
0.3904	2.239323	-0.758	0.00731111	0.06285214	0.07948029	50.34
0.3912	2.185307	-0.756	0.00749677	0.06306714	0.07957560	50.34
0.3920	2.108374	-0.748	0.00779241	0.06341147	0.07974195	50.34
0.3928	2.008152	-0.746	0.00818926	0.06385899	0.07995111	50.34
0.3936	1.887589	-0.741	0.00866473	0.06439000	0.08019823	50.34
0.3944	1.754351	-0.741	0.00919026	0.06499994	0.08048421	50.33
0.3952	1.616106	-0.741	0.00974137	0.06564194	0.08079743	50.33
0.3960	1.478262	-0.738	0.01030809	0.06630439	0.08111155	50.33
0.3968	1.345654	-0.740	0.01087683	0.06697565	0.08143741	50.33
0.3976	1.221085	-0.735	0.01142001	0.06762934	0.08173895	50.32
0.3984	1.106558	-0.740	0.01192093	0.06823635	0.08199573	50.32
0.3992	1.003075	-0.746	0.01236594	0.06879276	0.08224183	50.32
0.4000	0.910778	-0.747	0.01276869	0.06929863	0.08245099	50.32
0.4008	0.829868	-0.750	0.01311743	0.06973732	0.08265525	50.32
0.4016	0.759602	-0.745	0.01343668	0.07013613	0.08284491	50.33
0.4024	0.699549	-0.738	0.01373428	0.07049018	0.08300352	50.33
0.4032	0.649023	-0.740	0.01396805	0.07082665	0.08313876	50.33
0.4040	0.607023	-0.741	0.01419097	0.07112819	0.08324683	50.33
0.4048	0.573149	-0.739	0.01436388	0.07138306	0.08334213	50.33
0.4056	0.546827	-0.746	0.01449156	0.07158536	0.08341205	50.34
0.4064	0.527802	-0.741	0.01461828	0.07170022	0.08346844	50.34
0.4072	0.515814	-0.737	0.01471162	0.07177317	0.08351898	50.34
0.4080	0.510349	-0.738	0.01476765	0.07180613	0.08355409	50.34
0.4088	0.510492	-0.742	0.01479423	0.07180709	0.08354729	50.34
0.4096	0.515242	-0.746	0.01480216	0.07180798	0.08355504	50.34
0.4104	0.524282	-0.750	0.01478356	0.07179147	0.08354330	50.34
0.4112	0.538759	-0.750	0.01476097	0.07173419	0.08351308	50.34
0.4120	0.562077	-0.744	0.01471871	0.07163703	0.08350152	50.34
0.4128	0.601816	-0.744	0.01460761	0.07146204	0.08342952	50.34
0.4136	0.664988	-0.747	0.01438355	0.07115561	0.08329046	50.34
0.4144	0.754709	-0.750	0.01405245	0.07072949	0.08309597	50.33
0.4152	0.870609	-0.756	0.01360649	0.07015550	0.08284014	50.33
0.4160	1.006651	-0.757	0.01304662	0.06946093	0.08253282	50.33
0.4168	1.156054	-0.755	0.01243871	0.06869632	0.08221567	50.33
0.4176	1.313496	-0.752	0.01178849	0.06789094	0.08187133	50.32
0.4184	1.473999	-0.752	0.01110095	0.06706214	0.08148897	50.32
0.4192	1.632957	-0.751	0.01041830	0.06624407	0.08110178	50.32
0.4200	1.785336	-0.750	0.00976402	0.06545419	0.08072531	50.32
0.4208	1.926498	-0.750	0.00914615	0.06471002	0.08037412	50.32
0.4216	2.051411	-0.743	0.00858039	0.06408459	0.08008325	50.33
0.4224	2.155752	-0.741	0.00809515	0.06355345	0.07984692	50.33
0.4232	2.236176	-0.742	0.00769436	0.06310505	0.07964557	50.33
0.4240	2.291536	-0.741	0.00739181	0.06278408	0.07950354	50.33
0.4248	2.323408	-0.741	0.00720215	0.06254488	0.07941020	50.33
0.4256	2.336397	-0.746	0.00709409	0.06240004	0.07936060	50.34
0.4264	2.335997	-0.746	0.00704402	0.06236804	0.07934511	50.34
0.4272	2.326756	-0.737	0.00704396	0.06239331	0.07936364	50.34
0.4280	2.312222	-0.741	0.00706851	0.06242818	0.07937920	50.34
0.4288	2.292280	-0.743	0.00710088	0.06249231	0.07938111	50.34
0.4296	2.264614	-0.742	0.00718045	0.06260699	0.07942092	50.34
0.4304	2.224932	-0.747	0.00729936	0.06276453	0.07946759	50.34
0.4312	2.166681	-0.743	0.00749975	0.06303889	0.07957655	50.34
0.4320	2.085543	-0.736	0.00781310	0.06342697	0.07975745	50.34
0.4328	1.981230	-0.733	0.00821090	0.06390756	0.07996666	50.34
0.4336	1.856747	-0.736	0.00870991	0.06449705	0.08023703	50.34
0.4344	1.719589	-0.738	0.00926590	0.06515658	0.08054054	50.33
0.4352	1.577339	-0.738	0.00985038	0.06585211	0.08085477	50.33
0.4360	1.435862	-0.740	0.01044667	0.06656414	0.08118153	50.33
0.4368	1.300478	-0.740	0.01101935	0.06727034	0.08150548	50.33
0.4376	1.174049	-0.736	0.01157337	0.06793964	0.08181185	50.32
0.4384	1.058979	-0.743	0.01206940	0.06855154	0.08207840	50.32
0.4392	0.956526	-0.747	0.01251435	0.06909919	0.08232361	50.32
0.4400	0.866747	-0.746	0.01291806	0.06958753	0.08253378	50.32
0.4408	0.789471	-0.749	0.01325887	0.07000774	0.08272058	50.32
0.4416	0.723181	-0.746	0.01358211	0.07039386	0.08290344	50.33
0.4424	0.666904	-0.744	0.01385707	0.07073337	0.08306009	50.33
0.4432	0.619268	-0.743	0.01408398	0.07101160	0.08318460	50.33
0.4440	0.579300	-0.744	0.01428145	0.07125670	0.08330029	50.33
0.4448	0.546970	-0.741	0.01445329	0.07144350	0.08339560	50.33
0.4456	0.521650	-0.739	0.01458794	0.07158458	0.08346945	50.34
0.4464	0.503340	-0.738	0.01470584	0.07169926	0.08353460	50.34
0.4472	0.491924	-0.732	0.01479328	0.07179070	0.08357936	50.34
0.4480	0.486431	-0.736	0.01483655	0.07184225	0.08360368	50.34
0.4488	0.486460	-0.740	0.01485133	0.07186359	0.08360368	50.34
0.4496	0.490923	-0.740	0.01484734	0.07186270	0.08360463	50.34
0.4504	0.499620	-0.748	0.01483744	0.07182568	0.08357447	50.34
0.4512	0.513496	-0.743	0.01480496	0.07178485	0.08355796	50.34
0.4520	0.535870	-0.739	0.01476169	0.07172263	0.08353752	50.34
0.4528	0.573950	-0.741	0.01465178	0.07156402	0.08346748	50.34
0.4536	0.634804	-0.740	0.01444262	0.07128394	0.08334696	50.34
0.4544	0.722637	-0.745	0.01412439	0.07087046	0.08315820	50.33
0.4552	0.836735	-0.747	0.01368630	0.07029647	0.08291215	50.33
0.4560	0.971661	-0.747	0.01314402	0.06960297	0.08260667	50.33
0.4568	1.119862	-0.746	0.01253104	0.06884807	0.08228272	50.33
0.4576	1.275673	-0.745	0.01188660	0.06803489	0.08193254	50.32
0.4584	1.434574	-0.749	0.01121175	0.06720519	0.08154631	50.32
0.4592	1.591930	-0.754	0.01053691	0.06640077	0.08118057	50.32
0.4600	1.743422	-0.752	0.00989050	0.06563038	0.08080900	50.32
0.4608	1.884012	-0.755	0.00927371	0.06492317	0.08046758	50.32
0.4616	2.008438	-0.750	0.00871474	0.06428021	0.08018452	50.33
0.4624	2.112808	-0.748	0.00823927	0.06371009	0.07992870	50.33
0.4632	2.194376	-0.753	0.00783950	0.06325877	0.07973897	50.33
0.4640	2.252169	-0.754	0.00753784	0.06292802	0.07959014	50.33
0.4648	2.287989	-0.753	0.00734633	0.06272852	0.07948709	50.33
0.4656	2.305298	-0.752	0.00722653	0.06263804	0.07942677	50.34
0.4664	2.308617	-0.751	0.00717145	0.06259423	0.07939953	50.34
0.4672	2.302580	-0.746	0.00715971	0.06259137	0.07940149	50.34
0.4680	2.290249	-0.748	0.00715578	0.06261861	0.07941407	50.34
0.4688	2.272739	-0.753	0.00717735	0.06265956	0.07942873	50.34
0.4696	2.247992	-0.752	0.00723445	0.06274426	0.07946473	50.34
0.4704	2.211199	-0.753	0.00734454	0.06286001	0.07951432	50.34
0.4712	2.156010	-0.750	0.00754493	0.06305850	0.07960874	50.34
0.4720	2.078247	-0.745	0.00783968	0.06337166	0.07977307	50.34
0.4728	1.977968	-0.741	0.00822568	0.06380057	0.07997155	50.34
0.4736	1.858578	-0.741	0.00868726	0.06436670	0.08022636	50.34
0.4744	1.726913	-0.744	0.00921679	0.06502324	0.08051914	50.33
0.4752	1.589098	-0.743	0.00977868	0.06573051	0.08082658	50.33
0.4760	1.450024	-0.748	0.01035434	0.06645232	0.08114272	50.33
0.4768	1.314354	-0.748	0.01093882	0.06714875	0.08147156	50.33
0.4776	1.185722	-0.746	0.01149565	0.06781316	0.08178186	50.32
0.4784	1.066933	-0.751	0.01200050	0.06843561	0.08205128	50.32
0.4792	0.959759	-0.749	0.01246315	0.06900948	0.08230019	50.32
0.4800	0.864716	-0.748	0.01287079	0.06953484	0.08251899	50.32
0.4808	0.781860	-0.750	0.01323038	0.06999493	0.08271056	50.32
0.4816	0.710850	-0.743	0.01356632	0.07039088	0.08290607	50.33
0.4824	0.650740	-0.742	0.01385713	0.07073033	0.08307540	50.33
0.4832	0.600643	-0.741	0.01411152	0.07102990	0.08321261	50.33
0.4840	0.559187	-0.741	0.01432174	0.07128191	0.08333230	50.33
0.4848	0.525656	-0.743	0.01449859	0.07149881	0.08341986	50.33
0.4856	0.499849	-0.744	0.01464593	0.07166809	0.08350062	50.34
0.4864	0.481367	-0.745	0.01474911	0.07178867	0.08356291	50.34
0.4872	0.470009	-0.737	0.01483154	0.07188588	0.08361739	50.34
0.4880	0.465031	-0.735	0.01488256	0.07194036	0.08364952	50.34
0.4888	0.465317	-0.740	0.01488841	0.07196081	0.08364457	50.34
0.4896	0.469837	-0.742	0.01489037	0.07195985	0.08363873	50.34
0.4904	0.478678	-0.751	0.01487279	0.07193166	0.08361053	50.34
0.4912	0.492611	-0.752	0.01484436	0.07190347	0.08359593	50.34
0.4920	0.515957	-0.745	0.01481193	0.07183248	0.08357459	50.34
0.4928	0.556269	-0.746	0.01469404	0.07166231	0.08349776	50.34
0.4936	0.620241	-0.744	0.01447493	0.07135397	0.08337128	50.34
0.4944	0.711365	-0.744	0.01413506	0.07088220	0.08316702	50.33
0.4952	0.828266	-0.744	0.01368123	0.07027811	0.08290923	50.33
0.4960	0.965023	-0.746	0.01314402	0.06956995	0.08261442	50.33
0.4968	1.114340	-0.742	0.01254874	0.06881702	0.08228856	50.33
0.4976	1.270638	-0.741	0.01191610	0.06804270	0.08193833	50.32
0.4984	1.429052	-0.746	0.01124132	0.06724501	0.08156282	50.32
0.4992	1.584978	-0.747	0.01056349	0.06644052	0.08118641	50.32
0.5000	1.734495	-0.750	0.00990540	0.06566823	0.08081776	50.32
0.5008	1.873255	-0.751	0.00928456	0.06495911	0.08047533	50.32
0.5016	1.996679	-0.746	0.00873542	0.06433177	0.08018935	50.33
0.5024	2.100906	-0.740	0.00826389	0.06380451	0.07993734	50.33
0.5032	2.182846	-0.743	0.00787884	0.06336677	0.07973987	50.33
0.5040	2.241411	-0.744	0.00757241	0.06302047	0.07959598	50.33
0.5048	2.278290	-0.747	0.00736409	0.06276459	0.07948703	50.33
0.5056	2.296915	-0.750	0.00723052	0.06260312	0.07942384	50.34
0.5064	2.301636	-0.747	0.00715584	0.06251258	0.07939374	50.34
0.5072	2.296629	-0.744	0.00714111	0.06247663	0.07940048	50.34
0.5080	2.284927	-0.743	0.00714701	0.06248832	0.07941121	50.34
0.5088	2.267990	-0.751	0.00715977	0.06252241	0.07941020	50.34
0.5096	2.244072	-0.753	0.00721675	0.06259835	0.07944322	50.34
0.5104	2.208796	-0.756	0.00732285	0.06272280	0.07949471	50.34
0.5112	2.155180	-0.755	0.00750464	0.06293976	0.07959491	50.34
0.5120	2.078333	-0.748	0.00780034	0.06327534	0.07976615	50.34
0.5128	1.977797	-0.747	0.00817752	0.06374222	0.07997334	50.34
0.5136	1.857519	-0.745	0.00864315	0.06431228	0.08022141	50.34
0.5144	1.725197	-0.747	0.00916576	0.06495720	0.08050257	50.33
0.5152	1.588182	-0.747	0.00973743	0.06565177	0.08081770	50.33
0.5160	1.452141	-0.750	0.01030922	0.06634825	0.08112699	50.33
0.5168	1.321535	-0.753	0.01086521	0.06704867	0.08143157	50.33
0.5176	1.199284	-0.752	0.01140243	0.06771010	0.08173889	50.32
0.5184	1.086845	-0.756	0.01188374	0.06828988	0.08199763	50.32
0.5192	0.984707	-0.758	0.01233160	0.06882590	0.08223796	50.32
0.5200	0.892410	-0.759	0.01273727	0.06930244	0.08245969	50.32
0.5208	0.809383	-0.761	0.01310569	0.06973046	0.08265334	50.32
0.5216	0.735197	-0.759	0.01345152	0.07015061	0.08284307	50.33
0.5224	0.669336	-0.757	0.01375699	0.07053286	0.08302110	50.33
0.5232	0.611572	-0.756	0.01403797	0.07090348	0.08317977	50.33
0.5240	0.561790	-0.755	0.01427561	0.07124299	0.08331877	50.33
0.5248	0.520220	-0.753	0.01448578	0.07153970	0.08342481	50.33
0.5256	0.487576	-0.754	0.01466650	0.07177603	0.08351332	50.34
0.5264	0.463886	-0.750	0.01479310	0.07191521	0.08358133	50.34
0.5272	0.448866	-0.748	0.01488745	0.07200956	0.08363587	50.34
0.5280	0.441570	-0.748	0.01492774	0.07205337	0.08367479	50.34
0.5288	0.440655	-0.754	0.01493955	0.07204956	0.08367777	50.34
0.5296	0.444746	-0.756	0.01494449	0.07204467	0.08368456	50.34
0.5304	0.453844	-0.755	0.01494247	0.07200968	0.08365834	50.34
0.5312	0.468721	-0.755	0.01491594	0.07194835	0.08364183	50.34
0.5320	0.494499	-0.748	0.01486683	0.07185203	0.08361059	50.34
0.5328	0.538902	-0.751	0.01473421	0.07165456	0.08351231	50.34
0.5336	0.608225	-0.756	0.01449168	0.07132185	0.08337027	50.34
0.5344	0.705671	-0.755	0.01413608	0.07085687	0.08315623	50.33
0.5352	0.828381	-0.762	0.01365572	0.07026350	0.08287996	50.33
0.5360	0.970116	-0.760	0.01309878	0.06956410	0.08256775	50.33
0.5368	1.124067	-0.762	0.01247394	0.06880242	0.08222729	50.33
0.5376	1.284857	-0.760	0.01181680	0.06801260	0.08186054	50.32
0.5384	1.447849	-0.759	0.01112235	0.06717891	0.08148414	50.32
0.5392	1.608295	-0.764	0.01042300	0.06635785	0.08109987	50.32
0.5400	1.761789	-0.760	0.00974041	0.06557870	0.08072627	50.32
0.5408	1.904211	-0.762	0.00911272	0.06481898	0.08038288	50.32
0.5416	2.031040	-0.760	0.00854790	0.06415170	0.08008319	50.33
0.5424	2.138157	-0.753	0.00806844	0.06356710	0.07983810	50.33
0.5432	2.222328	-0.757	0.00767648	0.06310213	0.07962805	50.33
0.5440	2.281837	-0.756	0.00736809	0.06276941	0.07948220	50.33
0.5448	2.318287	-0.752	0.00716966	0.06254667	0.07938600	50.33
0.5456	2.335653	-0.752	0.00703615	0.06242025	0.07931787	50.34
0.5464	2.339029	-0.750	0.00698113	0.06233853	0.07930136	50.34
0.5472	2.332878	-0.747	0.00696737	0.06229961	0.07930428	50.34
0.5480	2.320261	-0.749	0.00697136	0.06229085	0.07931489	50.34
0.5488	2.301950	-0.754	0.00699294	0.06230551	0.07932174	50.34
0.5496	2.275486	-0.752	0.00704497	0.06238234	0.07935965	50.34
0.5504	2.235632	-0.755	0.00716478	0.06253898	0.07941705	50.34
0.5512	2.174978	-0.754	0.00737584	0.06279767	0.07952225	50.34
0.5520	2.088432	-0.748	0.00771177	0.06320417	0.07970411	50.34
0.5528	1.976337	-0.749	0.00814986	0.06373531	0.07993174	50.34
0.5536	1.844244	-0.744	0.00866467	0.06434816	0.08021379	50.34
0.5544	1.701851	-0.744	0.00924426	0.06502819	0.08052790	50.33
0.5552	1.558113	-0.743	0.00982976	0.06572568	0.08086360	50.33
0.5560	1.418695	-0.741	0.01041323	0.06640857	0.08118653	50.33
0.5568	1.287489	-0.744	0.01097894	0.06708455	0.08149093	50.33
0.5576	1.166296	-0.739	0.01151329	0.06772941	0.08178759	50.32
0.5584	1.056461	-0.746	0.01200247	0.06832176	0.08203560	50.32
0.5592	0.958500	-0.750	0.01243865	0.06885576	0.08226031	50.32
0.5600	0.872240	-0.751	0.01282281	0.06933731	0.08246857	50.32
0.5608	0.797138	-0.756	0.01315975	0.06975067	0.08264369	50.32
0.5616	0.731993	-0.750	0.01346028	0.07010967	0.08281779	50.33
0.5624	0.675917	-0.745	0.01373035	0.07044142	0.08297342	50.33
0.5632	0.628223	-0.743	0.01396406	0.07072353	0.08310086	50.33
0.5640	0.588140	-0.744	0.01414675	0.07098043	0.08321375	50.33
0.5648	0.555182	-0.746	0.01431078	0.07122946	0.08330905	50.33
0.5656	0.529490	-0.751	0.01443952	0.07143569	0.08339173	50.34
0.5664	0.510521	-0.750	0.01454657	0.07159913	0.08345193	50.34
0.5672	0.498333	-0.747	0.01463401	0.07173043	0.08350146	50.34
0.5680	0.492811	-0.746	0.01467824	0.07179260	0.08352673	50.34
0.5688	0.492668	-0.751	0.01470572	0.07180130	0.08352667	50.34
0.5696	0.497303	-0.754	0.01470476	0.07178575	0.08353060	50.34
0.5704	0.506802	-0.760	0.01468313	0.07172346	0.08351207	50.34
0.5712	0.521851	-0.763	0.01465756	0.07166421	0.08349454	50.34
0.5720	0.547543	-0.756	0.01459277	0.07157767	0.08346450	50.34
0.5728	0.591631	-0.754	0.01446414	0.07139283	0.08338088	50.34
0.5736	0.660410	-0.750	0.01423329	0.07109421	0.08324480	50.34
0.5744	0.756254	-0.750	0.01388168	0.07063311	0.08303672	50.33
0.5752	0.876846	-0.751	0.01341605	0.07002610	0.08277112	50.33
0.5760	1.014862	-0.754	0.01286983	0.06932873	0.08246279	50.33
0.5768	1.163206	-0.755	0.01228046	0.06855547	0.08212817	50.33
0.5776	1.317072	-0.754	0.01165372	0.06775004	0.08178771	50.32
0.5784	1.472082	-0.758	0.01099360	0.06693977	0.08140635	50.32
0.5792	1.624603	-0.758	0.01034147	0.06613815	0.08103669	50.32
0.5800	1.770144	-0.759	0.00969321	0.06537741	0.08068550	50.32
0.5808	1.904697	-0.759	0.00909698	0.06468582	0.08035088	50.32
0.5816	2.024088	-0.757	0.00856757	0.06407303	0.08008051	50.33
0.5824	2.125025	-0.755	0.00808424	0.06352830	0.07984805	50.33
0.5832	2.205620	-0.757	0.00770015	0.06308669	0.07965261	50.33
0.5840	2.264786	-0.754	0.00739175	0.06275302	0.07950276	50.33
0.5848	2.303495	-0.755	0.00717664	0.06251764	0.07940739	50.33
0.5856	2.324352	-0.755	0.00704503	0.06238538	0.07934320	50.34
0.5864	2.331190	-0.752	0.00695759	0.06233776	0.07931101	50.34
0.5872	2.328043	-0.750	0.00692421	0.06232417	0.07931590	50.34
0.5880	2.318001	-0.748	0.00690943	0.06233186	0.07931793	50.34
0.5888	2.302551	-0.754	0.00691229	0.06234354	0.07932174	50.34
0.5896	2.279606	-0.755	0.00696439	0.06237745	0.07934999	50.34
0.5904	2.244873	-0.759	0.00705570	0.06246686	0.07939571	50.34
0.5912	2.191000	-0.758	0.00724632	0.06267697	0.07948411	50.34
0.5920	2.112293	-0.754	0.00754791	0.06304169	0.07964081	50.34
0.5928	2.008667	-0.753	0.00795656	0.06352323	0.07985479	50.34
0.5936	1.883411	-0.755	0.00845850	0.06411183	0.08011836	50.34
0.5944	1.744509	-0.758	0.00901055	0.06478590	0.08042669	50.33
0.5952	1.600685	-0.756	0.00959998	0.06549025	0.08075929	50.33
0.5960	1.457577	-0.756	0.01019329	0.06622571	0.08109587	50.33
0.5968	1.320333	-0.754	0.01078171	0.06695813	0.08142281	50.33
0.5976	1.192331	-0.750	0.01133472	0.06764108	0.08172542	50.32
0.5984	1.075144	-0.755	0.01184833	0.06827134	0.08199590	50.32
0.5992	0.970001	-0.757	0.01230603	0.06884617	0.08223325	50.32
0.6000	0.876875	-0.760	0.01270777	0.06935686	0.08245301	50.32
0.6008	0.795479	-0.764	0.01307708	0.06980628	0.08265728	50.32
0.6016	0.725012	-0.762	0.01340127	0.07022262	0.08284789	50.33
0.6024	0.664501	-0.758	0.01369405	0.07058257	0.08301622	50.33
0.6032	0.612659	-0.757	0.01395136	0.07089776	0.08314568	50.33
0.6040	0.568771	-0.754	0.01416844	0.07115841	0.08325946	50.33
0.6048	0.532579	-0.749	0.01436490	0.07137239	0.08335674	50.33
0.6056	0.503912	-0.750	0.01451808	0.07155132	0.08343059	50.34
0.6064	0.483055	-0.746	0.01464289	0.07169336	0.08350736	50.34
0.6072	0.469580	-0.744	0.01474899	0.07181108	0.08356577	50.34
0.6080	0.462942	-0.748	0.01479721	0.07189572	0.08359015	50.34
0.6088	0.462112	-0.755	0.01481396	0.07192689	0.08359015	50.34
0.6096	0.466032	-0.759	0.01482278	0.07194239	0.08359307	50.34
0.6104	0.474644	-0.760	0.01479530	0.07191908	0.08357066	50.34
0.6112	0.488491	-0.759	0.01476574	0.07183748	0.08355600	50.34
0.6120	0.511694	-0.750	0.01471651	0.07172370	0.08353555	50.34
0.6128	0.551519	-0.749	0.01458287	0.07150686	0.08345193	50.34
0.6136	0.614605	-0.750	0.01436478	0.07117605	0.08331186	50.34
0.6144	0.704212	-0.752	0.01403576	0.07073826	0.08312410	50.33
0.6152	0.818510	-0.754	0.01360655	0.07017696	0.08287901	50.33
0.6160	0.951347	-0.756	0.01308596	0.06952715	0.08258128	50.33
0.6168	1.096001	-0.754	0.01250833	0.06882197	0.08227491	50.33
0.6176	1.247292	-0.751	0.01189637	0.06806511	0.08193940	50.32
0.6184	1.401758	-0.755	0.01123238	0.06726164	0.08156681	50.32
0.6192	1.555538	-0.751	0.01057136	0.06646198	0.08120108	50.32
0.6200	1.704626	-0.750	0.00992215	0.06567883	0.08084697	50.32
0.6208	1.845102	-0.750	0.00928855	0.06495321	0.08050162	50.32
0.6216	1.971817	-0.744	0.00872666	0.06431407	0.08020496	50.33
0.6224	2.080936	-0.743	0.00823933	0.06375188	0.07994723	50.33
0.6232	2.168970	-0.744	0.00782478	0.06329578	0.07972157	50.33
0.6240	2.233858	-0.743	0.00751537	0.06294948	0.07954651	50.33
0.6248	2.276087	-0.744	0.00728750	0.06269860	0.07942981	50.33
0.6256	2.298288	-0.746	0.00714022	0.06252933	0.07936853	50.34
0.6264	2.304611	-0.746	0.00707042	0.06243104	0.07934320	50.34
0.6272	2.299547	-0.742	0.00704485	0.06239218	0.07934994	50.34
0.6280	2.287531	-0.742	0.00705266	0.06239408	0.07936937	50.34
0.6288	2.269936	-0.746	0.00706643	0.06242329	0.07937419	50.34
0.6296	2.245617	-0.743	0.00712049	0.06250006	0.07940537	50.34
0.6304	2.210684	-0.747	0.00722367	0.06262356	0.07945019	50.34
0.6312	2.158155	-0.746	0.00740057	0.06283659	0.07953769	50.34
0.6320	2.083540	-0.741	0.00769627	0.06317800	0.07969719	50.34
0.6328	1.986094	-0.742	0.00807840	0.06362164	0.07989174	50.34
0.6336	1.868334	-0.740	0.00853813	0.06417215	0.08014852	50.34
0.6344	1.736670	-0.742	0.00907344	0.06479663	0.08044523	50.33
0.6352	1.598167	-0.740	0.00963527	0.06546390	0.08074975	50.33
0.6360	1.458864	-0.740	0.01021582	0.06615072	0.08107752	50.33
0.6368	1.324024	-0.744	0.01078451	0.06683171	0.08139360	50.33
0.6376	1.197853	-0.737	0.01132381	0.06748742	0.08168739	50.32
0.6384	1.082726	-0.743	0.01181889	0.06809157	0.08194810	50.32
0.6392	0.979614	-0.747	0.01226097	0.06863916	0.08219230	50.32
0.6400	0.888863	-0.744	0.01266277	0.06914395	0.08240926	50.32
0.6408	0.810270	-0.752	0.01301146	0.06960100	0.08259994	50.32
0.6416	0.742750	-0.748	0.01333070	0.07001728	0.08278960	50.33
0.6424	0.685043	-0.740	0.01359284	0.07038885	0.08293736	50.33
0.6432	0.635977	-0.742	0.01383156	0.07071090	0.08306092	50.33
0.6440	0.594034	-0.741	0.01404959	0.07098627	0.08318061	50.33
0.6448	0.558786	-0.740	0.01422542	0.07122171	0.08327788	50.33
0.6456	0.529919	-0.744	0.01438749	0.07141626	0.08336747	50.34
0.6464	0.507975	-0.745	0.01450628	0.07156509	0.08343840	50.34
0.6472	0.492954	-0.743	0.01459467	0.07168472	0.08349276	50.34
0.6480	0.485001	-0.747	0.01464766	0.07176346	0.08352190	50.34
0.6488	0.483341	-0.755	0.01466733	0.07180136	0.08351994	50.34
0.6496	0.486603	-0.758	0.01467121	0.07180232	0.08352578	50.34
0.6504	0.494871	-0.761	0.01465946	0.07175368	0.08351308	50.34
0.6512	0.508604	-0.760	0.01463592	0.07167393	0.08349562	50.34
0.6520	0.532036	-0.753	0.01458585	0.07155240	0.08346945	50.34
0.6528	0.572805	-0.752	0.01446706	0.07135880	0.08339268	50.34
0.6536	0.637436	-0.754	0.01424599	0.07105821	0.08326143	50.34
0.6544	0.729218	-0.753	0.01390219	0.07060981	0.08306098	50.33
0.6552	0.846748	-0.758	0.01345426	0.07003975	0.08280987	50.33
0.6560	0.984192	-0.758	0.01291502	0.06936467	0.08251220	50.33
0.6568	1.134682	-0.755	0.01230216	0.06862444	0.08217376	50.33
0.6576	1.293182	-0.756	0.01166463	0.06785208	0.08182657	50.32
0.6584	1.455002	-0.754	0.01098096	0.06703597	0.08143944	50.32
0.6592	1.614933	-0.757	0.01029629	0.06620914	0.08105129	50.32
0.6600	1.767912	-0.758	0.00963908	0.06542510	0.08068550	50.32
0.6608	1.908503	-0.756	0.00901634	0.06469166	0.08034211	50.32
0.6616	2.031469	-0.751	0.00846726	0.06405449	0.08005613	50.33
0.6624	2.132778	-0.745	0.00799382	0.06352246	0.07981396	50.33
0.6632	2.209883	-0.744	0.00762451	0.06306428	0.07962042	50.33
0.6640	2.262354	-0.743	0.00734752	0.06271797	0.07948321	50.33
0.6648	2.292738	-0.744	0.00716382	0.06250399	0.07939184	50.33
0.6656	2.305498	-0.744	0.00706851	0.06240183	0.07934511	50.34
0.6664	2.305727	-0.743	0.00700766	0.06236100	0.07932651	50.34
0.6672	2.297630	-0.738	0.00699788	0.06239212	0.07933819	50.34
0.6680	2.283955	-0.735	0.00700772	0.06243974	0.07935762	50.34
0.6688	2.265158	-0.740	0.00701952	0.06247962	0.07937026	50.34
0.6696	2.238722	-0.744	0.00707740	0.06259149	0.07940918	50.34
0.6704	2.199841	-0.746	0.00718045	0.06274223	0.07946658	50.34
0.6712	2.142076	-0.745	0.00739163	0.06295043	0.07957166	50.34
0.6720	2.061424	-0.740	0.00771677	0.06328505	0.07973707	50.34
0.6728	1.958055	-0.735	0.00813133	0.06373346	0.07995409	50.34
0.6736	1.836147	-0.736	0.00862843	0.06428599	0.08020604	50.34
0.6744	1.703053	-0.736	0.00916380	0.06493092	0.08049875	50.33
0.6752	1.565781	-0.731	0.00971484	0.06562352	0.08081293	50.33
0.6760	1.429539	-0.728	0.01027471	0.06631416	0.08112907	50.33
0.6768	1.298590	-0.723	0.01082188	0.06699318	0.08144516	50.33
0.6776	1.175594	-0.719	0.01135224	0.06765074	0.08174872	50.32
0.6784	1.062412	-0.724	0.01183951	0.06825286	0.08201134	50.32
0.6792	0.960388	-0.730	0.01227963	0.06881124	0.08224189	50.32
0.6800	0.869608	-0.732	0.01269418	0.06933063	0.08246279	50.32
0.6808	0.790215	-0.734	0.01304388	0.06977904	0.08264565	50.32
0.6816	0.721207	-0.729	0.01337582	0.07017976	0.08282465	50.33
0.6824	0.661898	-0.720	0.01367438	0.07054162	0.08299190	50.33
0.6832	0.611429	-0.719	0.01391888	0.07084715	0.08311635	50.33
0.6840	0.568857	-0.720	0.01413107	0.07112348	0.08322728	50.33
0.6848	0.533838	-0.718	0.01431376	0.07136184	0.08332354	50.33
0.6856	0.505829	-0.720	0.01446009	0.07154858	0.08339745	50.34
0.6864	0.485058	-0.722	0.01457995	0.07169151	0.08345681	50.34
0.6872	0.471468	-0.719	0.01467133	0.07179272	0.08351809	50.34
0.6880	0.464516	-0.724	0.01473033	0.07184035	0.08356583	50.34
0.6888	0.463543	-0.734	0.01475698	0.07184422	0.08356875	50.34
0.6896	0.467434	-0.728	0.01475894	0.07184613	0.08357358	50.34
0.6904	0.476046	-0.733	0.01475501	0.07182366	0.08355504	50.34
0.6912	0.490379	-0.731	0.01472545	0.07178086	0.08352000	50.34
0.6920	0.514870	-0.724	0.01466846	0.07170892	0.08349085	50.34
0.6928	0.556927	-0.731	0.01454073	0.07151729	0.08341599	50.34
0.6936	0.623503	-0.732	0.01430303	0.07119727	0.08327693	50.34
0.6944	0.717459	-0.734	0.01395243	0.07074207	0.08307463	50.33
0.6952	0.836992	-0.739	0.01348484	0.07011467	0.08281487	50.33
0.6960	0.975695	-0.739	0.01293766	0.06938130	0.08251137	50.33
0.6968	1.126328	-0.743	0.01233548	0.06861383	0.08218253	50.33
0.6976	1.283741	-0.743	0.01167834	0.06782585	0.08183426	50.32
0.6984	1.443243	-0.742	0.01099759	0.06702036	0.08146465	50.32
0.6992	1.600428	-0.747	0.01031291	0.06621003	0.08108717	50.32
0.7000	1.750088	-0.740	0.00964797	0.06540269	0.08072633	50.32
0.7008	1.887732	-0.744	0.00904781	0.06463718	0.08039749	50.32
0.7016	2.008524	-0.740	0.00852031	0.06400394	0.08010954	50.33
0.7024	2.109146	-0.734	0.00806361	0.06350493	0.07987219	50.33
0.7032	2.187481	-0.735	0.00768739	0.06311095	0.07968056	50.33
0.7040	2.243042	-0.734	0.00739956	0.06281817	0.07953274	50.33
0.7048	2.277803	-0.734	0.00719625	0.06261492	0.07943743	50.33
0.7056	2.295198	-0.737	0.00707346	0.06248266	0.07937622	50.34
0.7064	2.299805	-0.741	0.00701058	0.06241453	0.07933927	50.34
0.7072	2.295485	-0.732	0.00699186	0.06240767	0.07933933	50.34
0.7080	2.285414	-0.736	0.00698990	0.06241935	0.07934803	50.34
0.7088	2.270451	-0.740	0.00699878	0.06244940	0.07935387	50.34
0.7096	2.249193	-0.737	0.00705373	0.06252921	0.07938981	50.34
0.7104	2.217951	-0.746	0.00712848	0.06264406	0.07942486	50.34
0.7112	2.169714	-0.744	0.00729638	0.06285125	0.07949591	50.34
0.7120	2.098560	-0.741	0.00757527	0.06317329	0.07964283	50.34
0.7128	2.002802	-0.742	0.00794369	0.06359541	0.07983649	50.34
0.7136	1.884327	-0.742	0.00841707	0.06413424	0.08008933	50.34
0.7144	1.750202	-0.742	0.00894660	0.06475872	0.08039188	50.33
0.7152	1.608639	-0.739	0.00952315	0.06542796	0.08071089	50.33
0.7160	1.465759	-0.741	0.01010859	0.06611288	0.08103085	50.33
0.7168	1.327028	-0.739	0.01069504	0.06680155	0.08135283	50.33
0.7176	1.196108	-0.737	0.01125985	0.06746107	0.08167577	50.32
0.7184	1.075430	-0.741	0.01177174	0.06807876	0.08195782	50.32
0.7192	0.966854	-0.744	0.01225311	0.06867206	0.08220881	50.32
0.7200	0.870466	-0.746	0.01268435	0.06922466	0.08244520	50.32
0.7208	0.786581	-0.751	0.01306546	0.06970716	0.08263683	50.32
0.7216	0.714655	-0.747	0.01340234	0.07015169	0.08282357	50.32
0.7224	0.653486	-0.744	0.01368910	0.07052422	0.08300453	50.33
0.7232	0.602789	-0.744	0.01393175	0.07081896	0.08314168	50.33
0.7240	0.561390	-0.742	0.01413506	0.07108450	0.08325350	50.33
0.7248	0.529203	-0.742	0.01430011	0.07130629	0.08334398	50.33
0.7256	0.505743	-0.741	0.01442790	0.07147563	0.08341008	50.34
0.7264	0.490408	-0.740	0.01451236	0.07159525	0.08345777	50.34
0.7272	0.482597	-0.737	0.01459289	0.07165849	0.08350545	50.34
0.7280	0.480795	-0.737	0.01463312	0.07168382	0.08353174	50.34
0.7288	0.483942	-0.744	0.01463211	0.07167792	0.08351809	50.34
0.7296	0.491266	-0.748	0.01462811	0.07167894	0.08351505	50.34
0.7304	0.502911	-0.754	0.01459175	0.07166141	0.08348870	50.34
0.7312	0.521107	-0.755	0.01454663	0.07159621	0.08346051	50.34
0.7320	0.551090	-0.748	0.01446313	0.07148337	0.08342755	50.34
0.7328	0.599728	-0.746	0.01430207	0.07123721	0.08332646	50.34
0.7336	0.671339	-0.743	0.01404870	0.07087046	0.08317769	50.34
0.7344	0.766811	-0.743	0.01369405	0.07039869	0.08297050	50.33
0.7352	0.883141	-0.746	0.01324910	0.06982672	0.08270878	50.33
0.7360	1.014719	-0.747	0.01274425	0.06918567	0.08242476	50.33
0.7368	1.156540	-0.750	0.01217848	0.06848824	0.08210969	50.33
0.7376	1.304684	-0.748	0.01157737	0.06774700	0.08177990	50.32
0.7384	1.455660	-0.748	0.01094568	0.06697267	0.08141118	50.32
0.7392	1.605406	-0.751	0.01029342	0.06620717	0.08104736	50.32
0.7400	1.749973	-0.750	0.00965691	0.06546599	0.08070099	50.32
0.7408	1.885700	-0.750	0.00904000	0.06474519	0.08035964	50.32
0.7416	2.007923	-0.747	0.00849688	0.06409442	0.08008826	50.33
0.7424	2.112350	-0.741	0.00802344	0.06352633	0.07985181	50.33
0.7432	2.195864	-0.737	0.00763440	0.06306523	0.07963490	50.33
0.7440	2.255888	-0.740	0.00734663	0.06273067	0.07949001	50.33
0.7448	2.293224	-0.740	0.00714129	0.06248361	0.07938594	50.33
0.7456	2.311192	-0.740	0.00700766	0.06232798	0.07931602	50.34
0.7464	2.314568	-0.744	0.00693792	0.06224626	0.07930338	50.34
0.7472	2.308273	-0.738	0.00691235	0.06221026	0.07931203	50.34
0.7480	2.295685	-0.739	0.00691229	0.06222481	0.07932758	50.34
0.7488	2.277861	-0.743	0.00693792	0.06226563	0.07934117	50.34
0.7496	2.251940	-0.743	0.00699389	0.06235313	0.07937133	50.34
0.7504	2.212629	-0.748	0.00711960	0.06249601	0.07942390	50.34
0.7512	2.153378	-0.746	0.00732982	0.06275576	0.07952893	50.34
0.7520	2.070007	-0.742	0.00765097	0.06315947	0.07970113	50.34
0.7528	1.963434	-0.743	0.00806749	0.06367213	0.07992482	50.34
0.7536	1.838379	-0.742	0.00855368	0.06428987	0.08018649	50.34
0.7544	1.702366	-0.746	0.00910282	0.06494057	0.08047736	50.33
0.7552	1.562748	-0.744	0.00967938	0.06559426	0.08079058	50.33
0.7560	1.425219	-0.746	0.01025605	0.06625575	0.08111060	50.33
0.7568	1.294012	-0.747	0.01080620	0.06690848	0.08143163	50.33
0.7576	1.171961	-0.743	0.01133764	0.06755829	0.08173025	50.32
0.7584	1.060438	-0.747	0.01181704	0.06816721	0.08199185	50.32
0.7592	0.959902	-0.748	0.01225901	0.06871384	0.08221853	50.32
0.7600	0.870295	-0.744	0.01266468	0.06923336	0.08242273	50.32
0.7608	0.791702	-0.747	0.01301634	0.06969148	0.08261436	50.32
0.7616	0.723324	-0.747	0.01332968	0.07010490	0.08279914	50.33
0.7624	0.664301	-0.743	0.01361448	0.07048136	0.08296347	50.33
0.7632	0.613661	-0.748	0.01386100	0.07079357	0.08309776	50.33
0.7640	0.570431	-0.748	0.01407611	0.07105339	0.08322322	50.33
0.7648	0.534325	-0.743	0.01426071	0.07127714	0.08331859	50.33
0.7656	0.505571	-0.744	0.01440722	0.07144350	0.08340418	50.34
0.7664	0.484486	-0.744	0.01452512	0.07157671	0.08347803	50.34
0.7672	0.470953	-0.742	0.01462531	0.07168269	0.08353645	50.34
0.7680	0.464802	-0.742	0.01467443	0.07175368	0.08356375	50.34
0.7688	0.464716	-0.750	0.01469988	0.07178873	0.08356380	50.34
0.7696	0.469637	-0.750	0.01471466	0.07178485	0.08356285	50.34
0.7704	0.479765	-0.753	0.01469302	0.07173628	0.08353460	50.34
0.7712	0.496445	-0.751	0.01465863	0.07165265	0.08352196	50.34
0.7720	0.525284	-0.743	0.01459479	0.07152027	0.08348984	50.34
0.7728	0.573349	-0.742	0.01443458	0.07128674	0.08339745	50.34
0.7736	0.646305	-0.743	0.01417631	0.07094043	0.08324188	50.34
0.7744	0.745583	-0.743	0.01381683	0.07044435	0.08302397	50.33
0.7752	0.867977	-0.746	0.01332468	0.06982958	0.08274871	50.33
0.7760	1.007566	-0.748	0.01275891	0.06913513	0.08243066	50.33
0.7768	1.157570	-0.747	0.01214194	0.06839389	0.08209014	50.33
0.7776	1.313524	-0.750	0.01150352	0.06763512	0.08174384	50.32
0.7784	1.471024	-0.748	0.01083070	0.06685698	0.08136642	50.32
0.7792	1.625891	-0.747	0.01016766	0.06607491	0.08099484	50.32
0.7800	1.773806	-0.742	0.00952238	0.06531233	0.08065438	50.32
0.7808	1.910505	-0.742	0.00890052	0.06457978	0.08030909	50.32
0.7816	2.031155	-0.742	0.00836027	0.06392217	0.08003289	50.33
0.7824	2.131634	-0.740	0.00790840	0.06335694	0.07980621	50.33
0.7832	2.209167	-0.745	0.00754386	0.06289876	0.07960582	50.33
0.7840	2.262754	-0.745	0.00727475	0.06258076	0.07947540	50.33
0.7848	2.294512	-0.744	0.00708216	0.06237942	0.07938397	50.33
0.7856	2.308588	-0.743	0.00697023	0.06226665	0.07932562	50.34
0.7864	2.309875	-0.742	0.00689465	0.06221509	0.07930809	50.34
0.7872	2.302666	-0.739	0.00688291	0.06220722	0.07931495	50.34
0.7880	2.289934	-0.735	0.00691044	0.06223351	0.07933146	50.34
0.7888	2.272282	-0.742	0.00691831	0.06229287	0.07934898	50.34
0.7896	2.247620	-0.742	0.00699294	0.06240469	0.07938308	50.34
0.7904	2.211313	-0.744	0.00709802	0.06256431	0.07943547	50.34
0.7912	2.156324	-0.748	0.00729251	0.06281531	0.07953072	50.34
0.7920	2.077618	-0.740	0.00760973	0.06317806	0.07968342	50.34
0.7928	1.974735	-0.738	0.00802028	0.06364697	0.07989353	50.34
0.7936	1.851282	-0.735	0.00850153	0.06423247	0.08015329	50.34
0.7944	1.715269	-0.736	0.00904572	0.06488317	0.08044809	50.33
0.7952	1.574364	-0.736	0.00961548	0.06557190	0.08077204	50.33
0.7960	1.434174	-0.737	0.01019710	0.06627417	0.08109307	50.33
0.7968	1.299219	-0.739	0.01078260	0.06693470	0.08141905	50.33
0.7976	1.172733	-0.736	0.01133865	0.06757772	0.08172256	50.32
0.7984	1.056719	-0.740	0.01184744	0.06819248	0.08199286	50.32
0.7992	0.952635	-0.741	0.01229930	0.06874794	0.08223116	50.32
0.8000	0.860939	-0.740	0.01270598	0.06927907	0.08244318	50.32
0.8010	0.816965	-0.760	0.01356637	0.07013035	0.08287132	50.33
0.8020	0.816822	-0.759	0.01355267	0.07014287	0.08288008	50.33
0.8030	0.815449	-0.763	0.01356351	0.07017487	0.08288586	50.33
0.8040	0.811272	-0.761	0.01357627	0.07019246	0.08289462	50.32
0.8050	0.801258	-0.758	0.01360959	0.07026541	0.08291805	50.32
0.8060	0.781689	-0.760	0.01367337	0.07035494	0.08294439	50.32
0.8070	0.749617	-0.758	0.01379412	0.07053781	0.08300757	50.32
0.8080	0.706758	-0.761	0.01395625	0.07071489	0.08308148	50.32
0.8090	0.658722	-0.755	0.01416641	0.07092303	0.08319622	50.32
0.8100	0.614204	-0.755	0.01436293	0.07112831	0.08329743	50.33
0.8110	0.579729	-0.751	0.01452106	0.07130814	0.08338392	50.33
0.8120	0.559015	-0.753	0.01461935	0.07146001	0.08344907	50.33
0.8130	0.551805	-0.757	0.01467341	0.07153976	0.08347327	50.33
0.8140	0.555725	-0.763	0.01467925	0.07157284	0.08348012	50.34
0.8150	0.568542	-0.762	0.01464385	0.07154644	0.08345968	50.34
0.8160	0.591745	-0.771	0.01457024	0.07144046	0.08341014	50.34
0.8170	0.634060	-0.769	0.01441997	0.07123238	0.08333230	50.34
0.8180	0.705242	-0.771	0.01414400	0.07086080	0.08316600	50.34
0.8190	0.805492	-0.762	0.01376671	0.07035011	0.08296943	50.34
0.8200	0.927057	-0.762	0.01329130	0.06971592	0.08269906	50.34
0.8210	1.058207	-0.764	0.01274902	0.06903118	0.08241498	50.33
0.8220	1.192932	-0.764	0.01219207	0.06835699	0.08211249	50.33
0.8230	1.326113	-0.762	0.01162636	0.06770808	0.08180022	50.33
0.8240	1.450853	-0.759	0.01109201	0.06712145	0.08151811	50.32
0.8250	1.560831	-0.753	0.01061165	0.06658262	0.08126330	50.32
0.8260	1.651554	-0.758	0.01017743	0.06610507	0.08102494	50.32
0.8270	1.720705	-0.761	0.00983262	0.06570524	0.08084404	50.32
0.8280	1.769257	-0.760	0.00956649	0.06541044	0.08069235	50.32
0.8290	1.798983	-0.754	0.00940537	0.06523728	0.08061844	50.32
0.8300	1.814146	-0.750	0.00931203	0.06512350	0.08057666	50.33
0.8310	1.818552	-0.753	0.00925797	0.06503499	0.08055127	50.33
0.8320	1.816492	-0.755	0.00922650	0.06499028	0.08055818	50.33
0.8330	1.810341	-0.759	0.00922161	0.06497669	0.08055329	50.33
0.8340	1.801300	-0.756	0.00924033	0.06502634	0.08057380	50.34
0.8350	1.789341	-0.751	0.00925809	0.06508374	0.08059901	50.34
0.8360	1.774235	-0.750	0.00928563	0.06514406	0.08060384	50.34
0.8370	1.753750	-0.751	0.00932986	0.06520331	0.08061743	50.34
0.8380	1.723537	-0.748	0.00944072	0.06529659	0.08064753	50.34
0.8390	1.676388	-0.747	0.00962448	0.06547940	0.08074969	50.34
0.8400	1.606636	-0.744	0.00990540	0.06579846	0.08090049	50.34
0.8410	1.513624	-0.748	0.01028848	0.06625670	0.08110392	50.33
0.8420	1.402559	-0.752	0.01073933	0.06679469	0.08134323	50.33
0.8430	1.281338	-0.754	0.01123428	0.06740171	0.08161062	50.33
0.8440	1.157541	-0.754	0.01175100	0.06803304	0.08189654	50.32
0.8450	1.037235	-0.748	0.01225096	0.06866241	0.08218259	50.32
0.8460	0.925741	-0.752	0.01271963	0.06924015	0.08243936	50.32
0.8470	0.825462	-0.748	0.01316762	0.06977224	0.08267778	50.32
0.8480	0.738802	-0.757	0.01354682	0.07024682	0.08288300	50.32
0.8490	0.665245	-0.757	0.01388568	0.07066411	0.08307749	50.32
0.8500	0.604763	-0.754	0.01415378	0.07098705	0.08322537	50.33
0.8510	0.554981	-0.752	0.01436889	0.07128972	0.08335084	50.33
0.8520	0.513840	-0.750	0.01456636	0.07153875	0.08345693	50.33
0.8530	0.479650	-0.752	0.01472652	0.07174790	0.08356285	50.33
0.8540	0.451469	-0.754	0.01486993	0.07190651	0.08365238	50.34
0.8550	0.428953	-0.751	0.01497197	0.07205933	0.08372337	50.34
0.8560	0.412245	-0.760	0.01504374	0.07218766	0.08375937	50.34
0.8570	0.401201	-0.756	0.01510561	0.07228774	0.08379334	50.34
0.8580	0.396137	-0.759	0.01513714	0.07231689	0.08380979	50.34
0.8590	0.396280	-0.755	0.01516658	0.07231975	0.08382636	50.34
0.8600	0.400257	-0.753	0.01520401	0.07229549	0.08382261	50.34
0.8610	0.407581	-0.755	0.01519519	0.07227015	0.08381003	50.33
0.8620	0.418024	-0.759	0.01516867	0.07225168	0.08378863	50.33
0.8630	0.433645	-0.764	0.01512045	0.07222533	0.08376819	50.33
0.8640	0.458965	-0.763	0.01504374	0.07214952	0.08373219	50.32
0.8650	0.502138	-0.762	0.01489925	0.07197839	0.08365726	50.32
0.8660	0.569801	-0.766	0.01463604	0.07162625	0.08350652	50.32
0.8670	0.662327	-0.771	0.01429325	0.07112533	0.08330220	50.32
0.8680	0.773821	-0.776	0.01385814	0.07055241	0.08305401	50.32
0.8690	0.895643	-0.771	0.01338172	0.06992596	0.08279240	50.32
0.8700	1.021471	-0.766	0.01287973	0.06928110	0.08250654	50.33
0.8710	1.146183	-0.767	0.01236504	0.06861377	0.08221090	50.33
0.8720	1.266890	-0.767	0.01182973	0.06797671	0.08192980	50.33
0.8730	1.380243	-0.766	0.01135135	0.06738824	0.08166516	50.33
0.8740	1.483297	-0.763	0.01088864	0.06684834	0.08142197	50.34
0.8750	1.571903	-0.759	0.01050264	0.06636876	0.08120590	50.34
0.8760	1.643744	-0.763	0.01015586	0.06596011	0.08101720	50.34
0.8770	1.697445	-0.764	0.00988865	0.06564593	0.08087409	50.34
0.8780	1.734867	-0.767	0.00967348	0.06541145	0.08077681	50.34
0.8790	1.758842	-0.763	0.00954390	0.06528109	0.08070201	50.34
0.8800	1.773062	-0.768	0.00945354	0.06520903	0.08065444	50.34
0.8810	1.780043	-0.767	0.00938189	0.06515366	0.08061755	50.33
0.8820	1.781816	-0.765	0.00933367	0.06510305	0.08060688	50.33
0.8830	1.779671	-0.762	0.00931013	0.06507593	0.08060491	50.33
0.8840	1.774263	-0.767	0.00931203	0.06508076	0.08060294	50.32
0.8850	1.765366	-0.764	0.00932485	0.06512356	0.08061945	50.32
0.8860	1.752920	-0.768	0.00934356	0.06517303	0.08062631	50.32
0.8870	1.735182	-0.764	0.00938964	0.06525767	0.08064586	50.32
0.8880	1.709175	-0.764	0.00946033	0.06538033	0.08067888	50.32
0.8890	1.667776	-0.759	0.00960952	0.06557113	0.08075953	50.32
0.8900	1.603575	-0.756	0.00988656	0.06587464	0.08089757	50.33
0.8910	1.513338	-0.756	0.01024222	0.06629187	0.08109611	50.33
0.8920	1.400843	-0.759	0.01069516	0.06681806	0.08134514	50.33
0.8930	1.275387	-0.761	0.01119620	0.06742305	0.08162814	50.34
0.8940	1.146698	-0.762	0.01174134	0.06805825	0.08191121	50.34
0.8950	1.022701	-0.759	0.01228154	0.06871772	0.08221364	50.34
0.8960	0.908947	-0.761	0.01276970	0.06930429	0.08246750	50.34
0.8970	0.807953	-0.759	0.01320678	0.06983548	0.08271360	50.34
0.8980	0.721493	-0.760	0.01357216	0.07028389	0.08291596	50.34
0.8990	0.649080	-0.756	0.01390618	0.07065845	0.08310086	50.34
0.9000	0.589828	-0.753	0.01417339	0.07099205	0.08326620	50.34
0.9010	0.540848	-0.756	0.01440620	0.07127327	0.08339655	50.33
0.9020	0.500050	-0.755	0.01460069	0.07154661	0.08348799	50.33
0.9030	0.465832	-0.758	0.01476759	0.07177037	0.08358043	50.33
0.9040	0.438023	-0.757	0.01490510	0.07197857	0.08365250	50.32
0.9050	0.416307	-0.751	0.01500916	0.07215267	0.08374482	50.32
0.9060	0.400629	-0.754	0.01508880	0.07227522	0.08377391	50.32
0.9070	0.390129	-0.754	0.01514882	0.07236081	0.08380306	50.32
0.9080	0.384836	-0.759	0.01519209	0.07240075	0.08381569	50.32
0.9090	0.384035	-0.759	0.01521868	0.07243484	0.08384585	50.32
0.9100	0.387211	-0.765	0.01522553	0.07243478	0.08385944	50.33
0.9110	0.393791	-0.768	0.01521474	0.07241720	0.08384883	50.33
0.9120	0.403547	-0.769	0.01518822	0.07236850	0.08383620	50.33
0.9130	0.418139	-0.766	0.01514494	0.07230043	0.08382064	50.34
0.9140	0.443029	-0.764	0.01507509	0.07216907	0.08377790	50.34
0.9150	0.487232	-0.760	0.01495028	0.07195801	0.08369339	50.34
0.9160	0.558100	-0.771	0.01469189	0.07157373	0.08352023	50.34
0.9170	0.655861	-0.775	0.01431674	0.07107282	0.08329737	50.34
0.9180	0.773335	-0.775	0.01385212	0.07044834	0.08302009	50.34
0.9190	0.900593	-0.767	0.01335216	0.06979954	0.08273804	50.34
0.9200	1.030741	-0.764	0.01281679	0.06913227	0.08244920	50.34
0.9210	1.158628	-0.764	0.01228929	0.06848639	0.08214563	50.33
0.9220	1.280823	-0.766	0.01177752	0.06786585	0.08186549	50.33
0.9230	1.393890	-0.764	0.01128638	0.06729865	0.08159894	50.33
0.9240	1.495028	-0.765	0.01082766	0.06678605	0.08136737	50.32
0.9250	1.582060	-0.762	0.01043582	0.06636673	0.08116603	50.32
0.9260	1.653757	-0.763	0.01008511	0.06598055	0.08097631	50.32
0.9270	1.709261	-0.760	0.00981295	0.06568772	0.08083135	50.32
0.9280	1.749659	-0.759	0.00959080	0.06543481	0.08071077	50.32
0.9290	1.775351	-0.755	0.00945336	0.06524521	0.08064079	50.32
0.9300	1.788311	-0.754	0.00935823	0.06511301	0.08060586	50.33
0.9310	1.790972	-0.758	0.00931811	0.06503522	0.08057761	50.33
0.9320	1.786566	-0.759	0.00929451	0.06501961	0.08058345	50.33
0.9330	1.778212	-0.760	0.00931215	0.06503123	0.08059025	50.33
0.9340	1.767025	-0.759	0.00931406	0.06506336	0.08060777	50.34
0.9350	1.752920	-0.755	0.00936514	0.06511867	0.08063787	50.34
0.9360	1.734552	-0.756	0.00939655	0.06518573	0.08064461	50.34
0.9370	1.708088	-0.754	0.00946331	0.06529558	0.08068830	50.34
0.9380	1.668005	-0.755	0.00959599	0.06545419	0.08074284	50.34
0.9390	1.608009	-0.754	0.00983757	0.06575191	0.08086449	50.34
0.9400	1.526985	-0.749	0.01017058	0.06614882	0.08104163	50.34
0.9410	1.429167	-0.748	0.01057035	0.06662935	0.08124781	50.33
0.9420	1.322422	-0.751	0.01101041	0.06715077	0.08147931	50.33
0.9430	1.213589	-0.754	0.01144749	0.06766826	0.08173025	50.33
0.9440	1.106815	-0.756	0.01189041	0.06820130	0.08199078	50.32
0.9450	1.004791	-0.750	0.01231581	0.06870997	0.08225638	50.32
0.9460	0.910034	-0.755	0.01272541	0.06920218	0.08247226	50.32
0.9470	0.823689	-0.755	0.01309395	0.06967306	0.08266985	50.32
0.9480	0.747328	-0.763	0.01342595	0.07009429	0.08283234	50.32
0.9490	0.680380	-0.762	0.01375407	0.07047755	0.08300751	50.32
0.9500	0.622673	-0.758	0.01403391	0.07080042	0.08316410	50.33
0.9510	0.573092	-0.756	0.01425886	0.07108450	0.08329630	50.33
0.9520	0.530863	-0.755	0.01444340	0.07134616	0.08341002	50.33
0.9530	0.495529	-0.756	0.01461244	0.07158738	0.08349460	50.33
0.9540	0.466776	-0.758	0.01474988	0.07177800	0.08356661	50.34
0.9550	0.444231	-0.750	0.01486772	0.07192689	0.08364463	50.34
0.9560	0.427437	-0.751	0.01495218	0.07202041	0.08367878	50.34
0.9570	0.415735	-0.751	0.01502192	0.07211387	0.08371675	50.34
0.9580	0.409355	-0.757	0.01506031	0.07218671	0.08371776	50.34
0.9590	0.407724	-0.752	0.01510155	0.07225567	0.08374107	50.34
0.9600	0.410585	-0.749	0.01511729	0.07229543	0.08375663	50.34
0.9610	0.416679	-0.748	0.01512706	0.07227987	0.08376247	50.33
0.9620	0.426035	-0.755	0.01510149	0.07224870	0.08375371	50.33
0.9630	0.439768	-0.759	0.01505923	0.07218063	0.08373326	50.33
0.9640	0.462942	-0.762	0.01499152	0.07208830	0.08369231	50.32
0.9650	0.504713	-0.759	0.01484716	0.07188702	0.08362418	50.32
0.9660	0.573006	-0.762	0.01459479	0.07155240	0.08347523	50.32
0.9670	0.668764	-0.762	0.01423329	0.07106799	0.08326805	50.32
0.9680	0.785379	-0.764	0.01376075	0.07046878	0.08299369	50.32
0.9690	0.913496	-0.760	0.01327252	0.06981802	0.08270484	50.32
0.9700	1.045561	-0.758	0.01273036	0.06914878	0.08241791	50.33
0.9710	1.176338	-0.759	0.01218915	0.06848240	0.08211344	50.33
0.9720	1.300650	-0.759	0.01163900	0.06784624	0.08182150	50.33
0.9730	1.414146	-0.755	0.01114291	0.06723541	0.08154535	50.33
0.9740	1.512852	-0.753	0.01069504	0.06672472	0.08131295	50.34
0.9750	1.593933	-0.750	0.01032275	0.06628895	0.08111846	50.34
0.9760	1.657019	-0.756	0.01001823	0.06594360	0.08094817	50.34
0.9770	1.702824	-0.756	0.00979424	0.06566340	0.08083236	50.34
0.9780	1.734638	-0.758	0.00961947	0.06543380	0.08073115	50.34
0.9790	1.755037	-0.752	0.00949180	0.06527525	0.08068651	50.34
0.9800	1.766968	-0.748	0.00940347	0.06516349	0.08064175	50.34
0.9810	1.772289	-0.752	0.00934941	0.06510711	0.08061945	50.33
0.9820	1.772575	-0.757	0.00932193	0.06508672	0.08060676	50.33
0.9830	1.769171	-0.758	0.00931609	0.06508964	0.08059901	50.33
0.9840	1.762762	-0.755	0.00933194	0.06509936	0.08061850	50.32
0.9850	1.753321	-0.749	0.00935447	0.06512564	0.08063799	50.32
0.9860	1.740704	-0.748	0.00938290	0.06513923	0.08064473	50.32
0.9870	1.722965	-0.747	0.00941521	0.06520724	0.08066320	50.32
0.9880	1.696243	-0.751	0.00947809	0.06529379	0.08069819	50.32
0.9890	1.651812	-0.752	0.00964409	0.06552333	0.08078480	50.32
0.9900	1.581774	-0.748	0.00992209	0.06586868	0.08093548	50.33
0.9910	1.484756	-0.746	0.01031893	0.06635696	0.08112717	50.33
0.9920	1.367569	-0.746	0.01080030	0.06693870	0.08139074	50.33
0.9930	1.242170	-0.748	0.01129925	0.06755251	0.08166605	50.33
0.9940	1.118231	-0.748	0.01180714	0.06816149	0.08195496	50.34
0.9950	1.002789	-0.746	0.01230019	0.06872851	0.08223408	50.34
0.9960	0.900564	-0.753	0.01272655	0.06922358	0.08246261	50.34
0.9970	0.813131	-0.755	0.01311457	0.06969625	0.08267272	50.34
0.9980	0.740633	-0.759	0.01344061	0.07010782	0.08284593	50.34
0.9990	0.680609	-0.752	0.01372248	0.07047164	0.08300453	50.34
1.0000	0.631199	-0.747	0.01396996	0.07077599	0.08313775	50.34
1.0010	0.589571	-0.743	0.01416355	0.07103086	0.08324283	50.33
1.0020	0.553465	-0.741	0.01433164	0.07127023	0.08334112	50.33
1.0030	0.521250	-0.743	0.01448888	0.07145905	0.08342957	50.33
1.0040	0.491810	-0.740	0.01464021	0.07163024	0.08351320	50.32
1.0050	0.465574	-0.735	0.01477766	0.07179755	0.08359003	50.32
1.0060	0.443602	-0.741	0.01487392	0.07192892	0.08364558	50.32
1.0070	0.426435	-0.743	0.01494646	0.07204366	0.08369237	50.32
1.0080	0.415134	-0.747	0.01500040	0.07210779	0.08371860	50.32
1.0090	0.409584	-0.741	0.01505733	0.07218748	0.08374584	50.32
1.0100	0.409756	-0.738	0.01509267	0.07223034	0.08375263	50.33
1.0110	0.414734	-0.740	0.01509857	0.07225370	0.08375454	50.33
1.0120	0.424089	-0.744	0.01509273	0.07223427	0.08374196	50.33
1.0130	0.438194	-0.746	0.01505834	0.07218665	0.08372736	50.33
1.0140	0.461512	-0.748	0.01499063	0.07208455	0.08370101	50.34
1.0150	0.502081	-0.748	0.01486784	0.07189298	0.08362895	50.34
1.0160	0.567198	-0.756	0.01460660	0.07156122	0.08348203	50.34
1.0170	0.658064	-0.754	0.01427060	0.07108933	0.08327580	50.34
1.0180	0.768757	-0.755	0.01382762	0.07051444	0.08300930	50.34
1.0190	0.890923	-0.747	0.01334143	0.06990063	0.08274955	50.34
1.0200	1.017809	-0.746	0.01282775	0.06926548	0.08246940	50.34
1.0210	1.143837	-0.745	0.01229525	0.06862646	0.08217663	50.33
1.0220	1.263657	-0.744	0.01176882	0.06799996	0.08190042	50.33
1.0230	1.373491	-0.744	0.01129633	0.06743282	0.08163399	50.33
1.0240	1.470709	-0.748	0.01085436	0.06689298	0.08141321	50.32
1.0250	1.554337	-0.741	0.01047325	0.06642705	0.08122051	50.32
1.0260	1.623259	-0.746	0.01014411	0.06600881	0.08103764	50.32
1.0270	1.677675	-0.746	0.00988472	0.06569642	0.08087319	50.32
1.0280	1.719217	-0.754	0.00967258	0.06545621	0.08075255	50.32
1.0290	1.749630	-0.744	0.00950664	0.06527817	0.08067960	50.32
1.0300	1.770515	-0.743	0.00939667	0.06513423	0.08064264	50.33
1.0310	1.782732	-0.746	0.00931019	0.06504762	0.08060861	50.33
1.0320	1.787739	-0.746	0.00926393	0.06499702	0.08057946	50.33
1.0330	1.786880	-0.751	0.00923741	0.06498063	0.08056498	50.33
1.0340	1.781788	-0.748	0.00922459	0.06498456	0.08055729	50.34
1.0350	1.772861	-0.744	0.00925124	0.06500500	0.08058065	50.34
1.0360	1.759930	-0.743	0.00926989	0.06504393	0.08059031	50.34
1.0370	1.741476	-0.744	0.00932682	0.06510311	0.08060485	50.34
1.0380	1.713638	-0.744	0.00940734	0.06521887	0.08064073	50.34
1.0390	1.667662	-0.740	0.00956547	0.06541431	0.08073127	50.34
1.0400	1.595135	-0.734	0.00985718	0.06574708	0.08087921	50.34
1.0410	1.494999	-0.736	0.01026475	0.06621498	0.08109611	50.33
1.0420	1.375666	-0.736	0.01074702	0.06678212	0.08135283	50.33
1.0430	1.250410	-0.740	0.01125491	0.06739980	0.08163869	50.33
1.0440	1.129675	-0.738	0.01176280	0.06801069	0.08191991	50.32
1.0450	1.019182	-0.736	0.01224905	0.06861955	0.08219916	50.32
1.0460	0.922394	-0.744	0.01266259	0.06915647	0.08242393	50.32
1.0470	0.839596	-0.746	0.01302505	0.06963503	0.08260483	50.32
1.0480	0.770073	-0.750	0.01331967	0.07002908	0.08275074	50.32
1.0490	0.710878	-0.746	0.01357698	0.07037055	0.08290726	50.32
1.0500	0.659266	-0.742	0.01381862	0.07067788	0.08305025	50.33
1.0510	0.413990	-0.746	0.01566154	0.07271087	0.08399200	50.32
1.0520	0.413418	-0.750	0.01563895	0.07270694	0.08397543	50.32
1.0530	0.412817	-0.749	0.01563793	0.07270211	0.08397150	50.32
1.0540	0.412703	-0.754	0.01562130	0.07269347	0.08395404	50.32
1.0550	0.412731	-0.748	0.01563317	0.07269740	0.08396280	50.32
1.0560	0.413332	-0.746	0.01563609	0.07271296	0.08397835	50.33
1.0570	0.414848	-0.743	0.01562238	0.07273912	0.08397251	50.33
1.0580	0.417538	-0.746	0.01561248	0.07275665	0.08397245	50.33
1.0590	0.421972	-0.750	0.01559973	0.07276255	0.08395004	50.33
1.0600	0.428610	-0.752	0.01558107	0.07272255	0.08393836	50.34
1.0610	0.439911	-0.751	0.01555645	0.07265353	0.08392370	50.34
1.0620	0.461340	-0.752	0.01548475	0.07251143	0.08387709	50.34
1.0630	0.502081	-0.755	0.01535410	0.07229453	0.08380616	50.34
1.0640	0.569773	-0.758	0.01510072	0.07194442	0.08365542	50.34
1.0650	0.666332	-0.753	0.01475602	0.07146573	0.08343947	50.34
1.0660	0.787010	-0.750	0.01427859	0.07085097	0.08316314	50.33
1.0670	0.924139	-0.751	0.01373047	0.07013506	0.08284700	50.33
1.0680	1.071167	-0.752	0.01312834	0.06936955	0.08250463	50.33
1.0690	1.223202	-0.753	0.01249188	0.06857097	0.08216208	50.33
1.0700	1.376753	-0.753	0.01181799	0.06777620	0.08179724	50.32
1.0710	1.528616	-0.751	0.01114213	0.06700194	0.08145088	50.32
1.0720	1.675186	-0.759	0.01047504	0.06624609	0.08108127	50.32
1.0730	1.812086	-0.760	0.00983751	0.06552726	0.08074379	50.32
1.0740	1.936855	-0.757	0.00927567	0.06485313	0.08042377	50.32
1.0750	2.046204	-0.751	0.00875610	0.06426370	0.08015823	50.32
1.0760	2.137384	-0.748	0.00832689	0.06377339	0.07993066	50.32
1.0770	2.207851	-0.747	0.00795257	0.06337160	0.07975453	50.33
1.0780	2.257290	-0.746	0.00768530	0.06307495	0.07962322	50.33
1.0790	2.287703	-0.743	0.00748694	0.06283182	0.07953662	50.33
1.0800	2.302122	-0.741	0.00738090	0.06268781	0.07948118	50.34
1.0810	2.304697	-0.739	0.00732499	0.06262553	0.07946479	50.34
1.0820	2.299490	-0.742	0.00727487	0.06258655	0.07944340	50.34
1.0830	2.289133	-0.744	0.00725520	0.06256706	0.07945031	50.34
1.0840	2.274628	-0.749	0.00725526	0.06256026	0.07945406	50.34
1.0850	2.254686	-0.748	0.00730830	0.06260794	0.07948810	50.34
1.0860	2.224789	-0.750	0.00740945	0.06274611	0.07954639	50.33
1.0870	2.173834	-0.751	0.00758421	0.06299514	0.07961935	50.33
1.0880	2.090063	-0.756	0.00789356	0.06340373	0.07978863	50.33
1.0890	1.970444	-0.755	0.00836307	0.06398642	0.08003759	50.33
1.0900	1.822872	-0.755	0.00895244	0.06468004	0.08034986	50.32
1.0910	1.663084	-0.754	0.00961262	0.06546408	0.08071548	50.32
1.0920	1.504927	-0.754	0.01025510	0.06622577	0.08106476	50.32
1.0930	1.356668	-0.748	0.01088482	0.06698257	0.08140713	50.32
1.0940	1.223946	-0.755	0.01145750	0.06765765	0.08170772	50.32
1.0950	1.107759	-0.748	0.01197118	0.06827730	0.08197236	50.32
1.0960	1.007681	-0.746	0.01243281	0.06882107	0.08222628	50.33
1.0970	0.921564	-0.748	0.01282382	0.06929863	0.08244127	50.33
1.0980	0.846233	-0.752	0.01315677	0.06972265	0.08263582	50.33
1.0990	0.778913	-0.756	0.01346219	0.07008350	0.08281577	50.33
1.1000	0.717030	-0.755	0.01374608	0.07041907	0.08296752	50.34
1.1010	0.659237	-0.753	0.01403588	0.07076830	0.08313680	50.34
1.1020	0.605249	-0.754	0.01426971	0.07109123	0.08325154	50.34
1.1030	0.555296	-0.751	0.01450253	0.07141614	0.08337998	50.34
1.1040	0.511351	-0.756	0.01468915	0.07168955	0.08348215	50.34
1.1050	0.474586	-0.755	0.01486880	0.07193857	0.08359015	50.34
1.1060	0.446463	-0.752	0.01501507	0.07212621	0.08367586	50.34
1.1070	0.427694	-0.751	0.01512218	0.07225561	0.08373713	50.33
1.1080	0.417767	-0.749	0.01518124	0.07232755	0.08377320	50.33
1.1090	0.415821	-0.750	0.01520580	0.07233053	0.08379930	50.33
1.1100	0.420113	-0.751	0.01522058	0.07228673	0.08379835	50.32
1.1110	0.429754	-0.751	0.01521665	0.07224584	0.08380318	50.32
1.1120	0.446405	-0.755	0.01517731	0.07219243	0.08376819	50.32
1.1130	0.477076	-0.755	0.01508594	0.07210296	0.08370876	50.32
1.1140	0.533609	-0.755	0.01488554	0.07183355	0.08358628	50.32
1.1150	0.623589	-0.748	0.01456535	0.07138890	0.08340919	50.32
1.1160	0.745468	-0.744	0.01409984	0.07074594	0.08314759	50.33
1.1170	0.889378	-0.747	0.01353294	0.06999499	0.08282363	50.33
1.1180	1.044731	-0.751	0.01290333	0.06918955	0.08246958	50.33
1.1190	1.205034	-0.750	0.01223242	0.06836659	0.08209890	50.33
1.1200	1.365395	-0.749	0.01156640	0.06754464	0.08172733	50.34
1.1210	1.522379	-0.747	0.01090330	0.06676847	0.08137131	50.34
1.1220	1.671753	-0.754	0.01023042	0.06601363	0.08099008	50.34
1.1230	1.809654	-0.751	0.00960869	0.06532294	0.08065939	50.34
1.1240	1.933279	-0.751	0.00904876	0.06466240	0.08033735	50.34
1.1250	2.040224	-0.747	0.00854087	0.06408846	0.08008736	50.34
1.1260	2.128658	-0.741	0.00812739	0.06359053	0.07987624	50.33
1.1270	2.196321	-0.743	0.00777477	0.06317902	0.07969332	50.33
1.1280	2.242727	-0.740	0.00752437	0.06286979	0.07957560	50.33
1.1290	2.269650	-0.745	0.00735730	0.06266642	0.07950068	50.33
1.1300	2.280951	-0.748	0.00726002	0.06254578	0.07945496	50.32
1.1310	2.281265	-0.750	0.00721282	0.06251168	0.07944232	50.32
1.1320	2.274742	-0.752	0.00719804	0.06248635	0.07942003	50.32
1.1330	2.263756	-0.755	0.00719112	0.06250578	0.07942981	50.32
1.1340	2.249393	-0.759	0.00720292	0.06254566	0.07942307	50.32
1.1350	2.230482	-0.750	0.00724423	0.06263709	0.07945800	50.32
1.1360	2.203245	-0.744	0.00731403	0.06276548	0.07949680	50.33
1.1370	2.157040	-0.746	0.00746626	0.06297266	0.07957363	50.33
1.1380	2.080708	-0.744	0.00775611	0.06332004	0.07972527	50.33
1.1390	1.970387	-0.740	0.00819516	0.06384152	0.07995975	50.33
1.1400	1.832457	-0.736	0.00875610	0.06450498	0.08026141	50.34
1.1410	1.680393	-0.739	0.00938469	0.06524909	0.08060777	50.34
1.1420	1.527214	-0.745	0.01000649	0.06598151	0.08094043	50.34
1.1430	1.382389	-0.747	0.01061845	0.06667113	0.08128375	50.34
1.1440	1.252499	-0.751	0.01116073	0.06729376	0.08157563	50.34
1.1450	1.138916	-0.747	0.01167840	0.06787550	0.08185482	50.34
1.1460	1.040726	-0.741	0.01213312	0.06840563	0.08209115	50.33
1.1470	0.954609	-0.740	0.01253194	0.06889200	0.08229733	50.33
1.1480	0.877705	-0.742	0.01288062	0.06932676	0.08248997	50.33
1.1490	0.807152	-0.742	0.01319200	0.06974703	0.08267188	50.33
1.1500	0.741205	-0.742	0.01349062	0.07012725	0.08284891	50.32
1.1510	0.679007	-0.740	0.01378924	0.07049108	0.08302200	50.32
1.1520	0.621185	-0.748	0.01405644	0.07081306	0.08315039	50.32
1.1530	0.568686	-0.746	0.01429510	0.07112825	0.08328557	50.32
1.1540	0.523539	-0.752	0.01449448	0.07138902	0.08338475	50.32
1.1550	0.486860	-0.748	0.01467329	0.07163411	0.08349961	50.32
1.1560	0.459509	-0.743	0.01481378	0.07182091	0.08359110	50.33
1.1570	0.441570	-0.744	0.01491892	0.07198429	0.08365345	50.33
1.1580	0.432386	-0.746	0.01499552	0.07209706	0.08368456	50.33
1.1590	0.430784	-0.753	0.01502502	0.07216126	0.08369613	50.33
1.1600	0.435162	-0.755	0.01503277	0.07217580	0.08370394	50.34
1.1610	0.444288	-0.754	0.01502877	0.07213986	0.08370972	50.34
1.1620	0.459623	-0.755	0.01499742	0.07204646	0.08368742	50.34
1.1630	0.487890	-0.757	0.01490617	0.07190055	0.08363098	50.34
1.1640	0.541391	-0.758	0.01471967	0.07163984	0.08351725	50.34
1.1650	0.628595	-0.759	0.01440430	0.07125372	0.08333343	50.34
1.1660	0.749273	-0.753	0.01395631	0.07068074	0.08307165	50.33
1.1670	0.893383	-0.754	0.01339930	0.06996381	0.08275640	50.33
1.1680	1.049480	-0.755	0.01275885	0.06915939	0.08241111	50.33
1.1690	1.210527	-0.758	0.01211047	0.06832296	0.08204931	50.33
1.1700	1.371174	-0.761	0.01141310	0.06750190	0.08167970	50.32
1.1710	1.527386	-0.760	0.01075298	0.06668580	0.08131689	50.32
1.1720	1.674728	-0.764	0.01009089	0.06592411	0.08095801	50.32
1.1730	1.809483	-0.762	0.00948286	0.06522280	0.08063316	50.32
1.1740	1.928101	-0.760	0.00892788	0.06460118	0.08032572	50.32
1.1750	2.027607	-0.754	0.00848782	0.06405640	0.08007962	50.32
1.1760	2.106113	-0.750	0.00811559	0.06359828	0.07987916	50.32
1.1770	2.162819	-0.750	0.00783169	0.06324619	0.07973510	50.33
1.1780	2.200441	-0.752	0.00762540	0.06299621	0.07963490	50.33
1.1790	2.222672	-0.754	0.00747317	0.06285030	0.07956100	50.33
1.1800	2.233829	-0.758	0.00738579	0.06278217	0.07952601	50.34
1.1810	2.236805	-0.757	0.00733083	0.06275404	0.07951337	50.34
1.1820	2.234344	-0.764	0.00728267	0.06272382	0.07948905	50.34
1.1830	2.227449	-0.767	0.00727081	0.06272483	0.07947552	50.34
1.1840	2.217121	-0.769	0.00727183	0.06270242	0.07946187	50.34
1.1850	2.202930	-0.762	0.00730330	0.06270736	0.07949299	50.34
1.1860	2.183762	-0.757	0.00734949	0.06274045	0.07952398	50.33
1.1870	2.153034	-0.758	0.00744081	0.06285232	0.07957172	50.33
1.1880	2.098331	-0.758	0.00763232	0.06309730	0.07966697	50.33
1.1890	2.009182	-0.759	0.00797307	0.06349224	0.07985663	50.33
1.1900	1.885071	-0.756	0.00845838	0.06406713	0.08012414	50.32
1.1910	1.735954	-0.751	0.00907624	0.06477827	0.08046168	50.32
1.1920	1.576967	-0.751	0.00971866	0.06555259	0.08080506	50.32
1.1930	1.419411	-0.750	0.01036501	0.06636286	0.08116490	50.32
1.1940	1.272926	-0.759	0.01097894	0.06714296	0.08149564	50.32
1.1950	1.142206	-0.754	0.01155847	0.06785303	0.08181280	50.32
1.1960	1.029510	-0.752	0.01207614	0.06847847	0.08208227	50.33
1.1970	0.933867	-0.752	0.01252210	0.06901151	0.08232260	50.33
1.1980	0.852671	-0.755	0.01290423	0.06948334	0.08252692	50.33
1.1990	0.783405	-0.752	0.01321858	0.06988895	0.08270109	50.33
1.2000	0.722666	-0.749	0.01349270	0.07024103	0.08286154	50.34
1.2010	0.668421	-0.744	0.01376289	0.07058144	0.08301520	50.34
1.2020	0.619154	-0.748	0.01398587	0.07086265	0.08313680	50.34
1.2030	0.574007	-0.753	0.01420188	0.07110101	0.08324766	50.34
1.2040	0.534096	-0.754	0.01437867	0.07133061	0.08334887	50.34
1.2050	0.500135	-0.752	0.01455259	0.07155532	0.08344901	50.34
1.2060	0.473900	-0.750	0.01470000	0.07175958	0.08352679	50.34
1.2070	0.456247	-0.754	0.01479822	0.07190067	0.08358908	50.33
1.2080	0.447750	-0.751	0.01485521	0.07197261	0.08361739	50.33
1.2090	0.447006	-0.752	0.01487577	0.07200760	0.08364081	50.33
1.2100	0.452700	-0.759	0.01490617	0.07199210	0.08364767	50.32
1.2110	0.463142	-0.761	0.01490813	0.07193077	0.08365142	50.32
1.2120	0.480595	-0.764	0.01485115	0.07182479	0.08361733	50.32
1.2130	0.512323	-0.764	0.01474118	0.07166129	0.08355987	50.32
1.2140	0.570374	-0.768	0.01453388	0.07138020	0.08342761	50.32
1.2150	0.661325	-0.767	0.01420677	0.07094741	0.08324569	50.32
1.2160	0.783176	-0.766	0.01374507	0.07035691	0.08298123	50.33
1.2170	0.926657	-0.761	0.01316166	0.06964284	0.08266020	50.33
1.2180	1.082468	-0.758	0.01252717	0.06884229	0.08229929	50.33
1.2190	1.244402	-0.752	0.01185721	0.06799895	0.08192575	50.33
1.2200	1.406279	-0.751	0.01117939	0.06713998	0.08155519	50.34
1.2210	1.563005	-0.750	0.01050353	0.06635499	0.08119422	50.34
1.2220	1.708975	-0.759	0.00984937	0.06562448	0.08084208	50.34
1.2230	1.839638	-0.762	0.00927281	0.06497473	0.08052015	50.34
1.2240	1.951962	-0.764	0.00875413	0.06439489	0.08023614	50.34
1.2250	2.042885	-0.760	0.00832683	0.06390166	0.08001053	50.34
1.2260	2.111492	-0.756	0.00798303	0.06351542	0.07984602	50.33
1.2270	2.157555	-0.754	0.00773740	0.06323826	0.07971764	50.33
1.2280	2.184134	-0.755	0.00756752	0.06304574	0.07964265	50.33
1.2290	2.195892	-0.757	0.00747812	0.06290668	0.07960182	50.33
1.2300	2.197695	-0.758	0.00742704	0.06282794	0.07958519	50.32
1.2310	2.194204	-0.754	0.00741428	0.06280559	0.07958519	50.32
1.2320	2.187738	-0.760	0.00740647	0.06279784	0.07956868	50.32
1.2330	2.178698	-0.757	0.00740743	0.06279874	0.07956195	50.32
1.2340	2.166996	-0.760	0.00741136	0.06281519	0.07956779	50.32
1.2350	2.151346	-0.752	0.00745159	0.06286776	0.07959408	50.32
1.2360	2.129488	-0.754	0.00751823	0.06295723	0.07963288	50.32
1.2370	2.093410	-0.753	0.00763422	0.06309831	0.07969916	50.33
1.2380	2.032528	-0.755	0.00784546	0.06335610	0.07980323	50.33
1.2390	1.940031	-0.751	0.00820798	0.06377834	0.08000368	50.33
1.2400	1.817322	-0.749	0.00869215	0.06437457	0.08025944	50.34
1.2410	1.674013	-0.744	0.00927764	0.06509149	0.08059794	50.34
1.2420	1.522522	-0.749	0.00988376	0.06582201	0.08092088	50.34
1.2430	1.372662	-0.747	0.01050562	0.06654477	0.08125651	50.34
1.2440	1.233301	-0.758	0.01109105	0.06722671	0.08156687	50.34
1.2450	1.108818	-0.755	0.01164591	0.06788427	0.08186358	50.34
1.2460	1.001101	-0.759	0.01213211	0.06850386	0.08213401	50.33
1.2470	0.909920	-0.759	0.01254076	0.06901652	0.08235478	50.33
1.2480	0.833015	-0.762	0.01289940	0.06945127	0.08255112	50.33
1.2490	0.768013	-0.762	0.01319218	0.06981015	0.08272922	50.33
1.2500	0.711308	-0.755	0.01347005	0.07012820	0.08287799	50.32
1.2510	0.660381	-0.750	0.01371765	0.07044339	0.08302683	50.32
1.2520	0.613918	-0.750	0.01394647	0.07072735	0.08313382	50.32
1.2530	0.571232	-0.751	0.01415575	0.07102793	0.08325058	50.32
1.2540	0.533180	-0.759	0.01433152	0.07130617	0.08334005	50.32
1.2550	0.500250	-0.756	0.01449353	0.07153493	0.08343536	50.32
1.2560	0.474100	-0.755	0.01464182	0.07170904	0.08352184	50.32
1.2570	0.455332	-0.754	0.01474994	0.07180530	0.08357644	50.33
1.2580	0.444689	-0.757	0.01482952	0.07186359	0.08361155	50.33
1.2590	0.441713	-0.755	0.01486790	0.07188690	0.08363885	50.33
1.2600	0.445147	-0.755	0.01489145	0.07190150	0.08364570	50.34
1.2610	0.454159	-0.747	0.01488954	0.07189178	0.08365738	50.34
1.2620	0.469751	-0.756	0.01484537	0.07182574	0.08361542	50.34
1.2630	0.498819	-0.760	0.01475298	0.07171875	0.08355403	50.34
1.2640	0.553865	-0.765	0.01456344	0.07147652	0.08342755	50.34
1.2650	0.643616	-0.757	0.01423240	0.07105041	0.08324766	50.34
1.2660	0.767698	-0.751	0.01376873	0.07042003	0.08299285	50.33
1.2670	0.916300	-0.750	0.01317829	0.06963408	0.08266795	50.33
1.2680	1.078005	-0.751	0.01253194	0.06879759	0.08229828	50.33
1.2690	1.245174	-0.747	0.01183462	0.06793290	0.08192182	50.33
1.2700	1.410885	-0.747	0.01112443	0.06709141	0.08152688	50.32
1.2710	1.569557	-0.742	0.01044858	0.06631219	0.08115047	50.32
1.2720	1.715441	-0.751	0.00980622	0.06557095	0.08079350	50.32
1.2730	1.843672	-0.754	0.00922471	0.06489211	0.08047920	50.32
1.2740	1.951590	-0.762	0.00871986	0.06428707	0.08021557	50.32
1.2750	2.037592	-0.759	0.00830722	0.06378710	0.07999957	50.32
1.2760	2.102909	-0.759	0.00798208	0.06340867	0.07983810	50.32
1.2770	2.149601	-0.758	0.00772071	0.06311774	0.07970876	50.33
1.2780	2.180815	-0.761	0.00753212	0.06294650	0.07962221	50.33
1.2790	2.200012	-0.760	0.00740153	0.06283659	0.07955998	50.33
1.2800	2.209826	-0.760	0.00734454	0.06279099	0.07953274	50.34
1.2810	2.212572	-0.756	0.00731313	0.06276864	0.07952601	50.34
1.2820	2.210541	-0.757	0.00727087	0.06274337	0.07950270	50.34
1.2830	2.204733	-0.752	0.00725913	0.06270438	0.07949889	50.34
1.2840	2.195663	-0.757	0.00725913	0.06267804	0.07949299	50.34
1.2850	2.182274	-0.754	0.00730038	0.06267899	0.07951242	50.34
1.2860	2.163076	-0.752	0.00736320	0.06275398	0.07955033	50.34
1.2870	2.131004	-0.748	0.00744671	0.06288236	0.07959509	50.33
1.2880	2.073641	-0.753	0.00765395	0.06312364	0.07970500	50.33
1.2890	1.980944	-0.756	0.00801152	0.06352925	0.07988501	50.33
1.2900	1.853600	-0.752	0.00852138	0.06413335	0.08016908	50.32
1.2910	1.704197	-0.754	0.00912553	0.06488913	0.08051240	50.32
1.2920	1.549015	-0.756	0.00974727	0.06565368	0.08084607	50.32
1.2930	1.399813	-0.756	0.01037782	0.06638622	0.08118647	50.32
1.2940	1.264772	-0.759	0.01094943	0.06703889	0.08148414	50.32
1.2950	1.147385	-0.763	0.01148677	0.06766248	0.08177394	50.32
1.2960	1.047964	-0.760	0.01192784	0.06821978	0.08201319	50.32
1.2970	0.963678	-0.763	0.01229233	0.06869543	0.08222431	50.33
1.2980	0.890121	-0.762	0.01261061	0.06911558	0.08240050	50.33
1.2990	0.823660	-0.762	0.01292789	0.06948322	0.08257270	50.33
1.3000	0.760775	-0.762	0.01320887	0.06985193	0.08273709	50.34
1.3010	0.699692	-0.758	0.01349074	0.07023913	0.08290720	50.34
1.3020	0.641041	-0.762	0.01374024	0.07059520	0.08304524	50.34
1.3030	0.585909	-0.763	0.01399463	0.07094538	0.08318055	50.34
1.3040	0.536842	-0.766	0.01422060	0.07122654	0.08329135	50.34
1.3050	0.495787	-0.762	0.01442879	0.07148045	0.08341593	50.34
1.3060	0.464630	-0.757	0.01460266	0.07168376	0.08350831	50.33
1.3070	0.444231	-0.759	0.01472354	0.07181603	0.08357358	50.33
1.3080	0.433760	-0.763	0.01480705	0.07188016	0.08361930	50.33
1.3090	0.432100	-0.768	0.01484931	0.07190639	0.08363003	50.33
1.3100	0.437164	-0.772	0.01484543	0.07191223	0.08364654	50.32
1.3110	0.448322	-0.768	0.01483166	0.07189566	0.08364272	50.32
1.3120	0.467291	-0.772	0.01478642	0.07180816	0.08362132	50.32
1.3130	0.502281	-0.771	0.01469690	0.07164180	0.08356190	50.32
1.3140	0.564909	-0.777	0.01446211	0.07132661	0.08341396	50.32
1.3150	0.661383	-0.772	0.01411533	0.07088310	0.08321548	50.32
1.3160	0.788240	-0.772	0.01362026	0.07029361	0.08293152	50.32
1.3170	0.935068	-0.770	0.01305544	0.06957287	0.08260077	50.33
1.3180	1.091938	-0.770	0.01241893	0.06879079	0.08223701	50.33
1.3190	1.251955	-0.771	0.01175201	0.06796497	0.08186340	50.33
1.3200	1.409397	-0.771	0.01107323	0.06715459	0.08151037	50.34
1.3210	1.559057	-0.763	0.01042503	0.06639087	0.08116508	50.34
1.3220	1.696529	-0.768	0.00979137	0.06565547	0.08082068	50.34
1.3230	1.817808	-0.763	0.00925511	0.06500971	0.08051825	50.34
1.3240	1.921377	-0.770	0.00876296	0.06442803	0.08025068	50.34
1.3250	2.006321	-0.761	0.00837892	0.06396890	0.08004642	50.34
1.3260	2.073326	-0.757	0.00803906	0.06359333	0.07988971	50.33
1.3270	2.123508	-0.756	0.00779045	0.06331813	0.07976425	50.33
1.3280	2.159500	-0.760	0.00758219	0.06310505	0.07966024	50.33
1.3290	2.183962	-0.762	0.00744468	0.06295139	0.07959598	50.33
1.3300	2.199097	-0.762	0.00733668	0.06283754	0.07954055	50.32
1.3310	2.206163	-0.762	0.00729150	0.06278998	0.07952684	50.32
1.3320	2.207079	-0.767	0.00724334	0.06275105	0.07950068	50.32
1.3330	2.202587	-0.763	0.00723052	0.06274515	0.07949001	50.32
1.3340	2.194090	-0.760	0.00722075	0.06274515	0.07949007	50.32
1.3350	2.180557	-0.751	0.00725710	0.06277817	0.07950765	50.32
1.3360	2.160702	-0.750	0.00730532	0.06285208	0.07953966	50.32
1.3370	2.127714	-0.753	0.00739866	0.06297666	0.07959020	50.33
1.3380	2.068949	-0.756	0.00760400	0.06319070	0.07969815	50.33
1.3390	1.975794	-0.754	0.00796539	0.06356919	0.07988304	50.33
1.3400	1.849308	-0.751	0.00848699	0.06412554	0.08014572	50.34
1.3410	1.701651	-0.746	0.00908804	0.06483567	0.08047056	50.34
1.3420	1.547098	-0.751	0.00972164	0.06559342	0.08081490	50.34
1.3430	1.395178	-0.750	0.01034838	0.06636190	0.08116019	50.34
1.3440	1.253300	-0.755	0.01094168	0.06709719	0.08148801	50.34
1.3450	1.125669	-0.750	0.01150459	0.06779742	0.08179444	50.34
1.3460	1.014175	-0.749	0.01201046	0.06842583	0.08206290	50.34
1.3470	0.918617	-0.750	0.01244557	0.06896770	0.08230221	50.33
1.3480	0.836391	-0.752	0.01281387	0.06943184	0.08250254	50.33
1.3490	0.765181	-0.754	0.01314390	0.06984621	0.08268154	50.33
1.3500	0.701609	-0.756	0.01342481	0.07021004	0.08285367	50.32
1.3510	0.644503	-0.756	0.01370776	0.07055628	0.08301312	50.32
1.3520	0.593204	-0.759	0.01393372	0.07084811	0.08314747	50.32
1.3530	0.547600	-0.758	0.01416069	0.07111847	0.08325732	50.32
1.3540	0.508690	-0.760	0.01433760	0.07132375	0.08334202	50.32
1.3550	0.477133	-0.754	0.01450163	0.07151055	0.08345091	50.32
1.3560	0.453758	-0.750	0.01464307	0.07165641	0.08352679	50.32
1.3570	0.438738	-0.750	0.01475108	0.07178193	0.08358330	50.33
1.3580	0.431242	-0.748	0.01480901	0.07187235	0.08360958	50.33
1.3590	0.431042	-0.749	0.01483554	0.07194537	0.08362907	50.33
1.3600	0.436678	-0.752	0.01483554	0.07197249	0.08363199	50.34
1.3610	0.447865	-0.751	0.01481092	0.07196951	0.08363879	50.34
1.3620	0.466347	-0.754	0.01475883	0.07188970	0.08360565	50.34
1.3630	0.499992	-0.756	0.01466149	0.07171857	0.08354235	50.34
1.3640	0.560246	-0.759	0.01444536	0.07141417	0.08341688	50.34
1.3650	0.653057	-0.760	0.01411825	0.07095420	0.08322239	50.34
1.3660	0.776339	-0.759	0.01363307	0.07036179	0.08296466	50.34
1.3670	0.920792	-0.758	0.01307321	0.06962740	0.08264178	50.33
1.3680	1.077404	-0.760	0.01244158	0.06880343	0.08227897	50.33
1.3690	1.239796	-0.759	0.01179320	0.06792605	0.08189863	50.33
1.3700	1.401701	-0.759	0.01109970	0.06707484	0.08152699	50.32
1.3710	1.557140	-0.755	0.01043278	0.06629276	0.08115822	50.32
1.3720	1.700277	-0.754	0.00978446	0.06555349	0.08080900	50.32
1.3730	1.826963	-0.757	0.00920790	0.06488425	0.08048409	50.32
1.3740	1.935253	-0.760	0.00870597	0.06430346	0.08020788	50.32
1.3750	2.023859	-0.762	0.00828850	0.06381416	0.07999778	50.32
1.3760	2.092867	-0.760	0.00796533	0.06341922	0.07983142	50.33
1.3770	2.143364	-0.762	0.00770891	0.06311089	0.07969999	50.33
1.3780	2.177868	-0.762	0.00751054	0.06291538	0.07960653	50.33
1.3790	2.199898	-0.766	0.00735635	0.06279874	0.07954043	50.33
1.3800	2.212029	-0.765	0.00724626	0.06272769	0.07950455	50.34
1.3810	2.216377	-0.760	0.00718826	0.06268877	0.07949680	50.34
1.3820	2.215204	-0.763	0.00716364	0.06265956	0.07947338	50.34
1.3830	2.209597	-0.762	0.00715190	0.06263423	0.07946861	50.34
1.3840	2.200527	-0.764	0.00714213	0.06261086	0.07946867	50.34
1.3850	2.187052	-0.758	0.00716871	0.06261188	0.07948720	50.34
1.3860	2.166739	-0.754	0.00724244	0.06268483	0.07952112	50.34
1.3870	2.132120	-0.752	0.00735140	0.06284922	0.07957351	50.33
1.3880	2.069292	-0.755	0.00758421	0.06315565	0.07968915	50.33
1.3890	1.969500	-0.751	0.00796539	0.06362349	0.07988966	50.33
1.3900	1.834373	-0.752	0.00850374	0.06426358	0.08016884	50.32
1.3910	1.678762	-0.751	0.00913537	0.06502235	0.08052784	50.32
1.3920	1.519318	-0.753	0.00978750	0.06580931	0.08087802	50.32
1.3930	1.366739	-0.748	0.01042497	0.06657302	0.08123416	50.32
1.3940	1.228666	-0.750	0.01101440	0.06728023	0.08155125	50.32
1.3950	1.107759	-0.747	0.01156157	0.06789309	0.08183438	50.32
1.3960	1.006107	-0.747	0.01204199	0.06843197	0.08208907	50.32
1.3970	0.922365	-0.752	0.01242203	0.06888717	0.08229047	50.33
1.3980	0.853472	-0.756	0.01273435	0.06929666	0.08246255	50.33
1.3990	0.794878	-0.757	0.01299953	0.06964779	0.08261925	50.33
1.4000	0.741606	-0.758	0.01324809	0.06997365	0.08275151	50.34
1.4010	0.690594	-0.757	0.01349366	0.07027519	0.08290130	50.34
1.4020	0.640640	-0.761	0.01371759	0.07056111	0.08302391	50.34
1.4030	0.592117	-0.759	0.01392776	0.07084614	0.08315325	50.34
1.4040	0.547228	-0.764	0.01413792	0.07110870	0.08325940	50.34
1.4050	0.508404	-0.763	0.01434422	0.07134706	0.08336639	50.34
1.4060	0.478134	-0.764	0.01449549	0.07155335	0.08345681	50.34
1.4070	0.457420	-0.766	0.01460654	0.07170606	0.08351314	50.33
1.4080	0.446491	-0.770	0.01466846	0.07181108	0.08354235	50.33
1.4090	0.444288	-0.772	0.01472551	0.07186753	0.08356380	50.33
1.4100	0.449295	-0.774	0.01474613	0.07186466	0.08357161	50.32
1.4110	0.460024	-0.768	0.01473927	0.07184714	0.08357936	50.32
1.4120	0.478735	-0.767	0.01467633	0.07176250	0.08354717	50.32
1.4130	0.513268	-0.774	0.01455647	0.07159615	0.08348984	50.32
1.4140	0.575409	-0.776	0.01433057	0.07128876	0.08335751	50.32
1.4150	0.671253	-0.776	0.01398093	0.07083154	0.08315724	50.32
1.4160	0.797367	-0.770	0.01350844	0.07022166	0.08289272	50.32
1.4170	0.943594	-0.774	0.01293576	0.06946194	0.08256298	50.33
1.4180	1.100178	-0.776	0.01230907	0.06865454	0.08221179	50.33
1.4190	1.260481	-0.775	0.01164699	0.06783158	0.08184510	50.33
1.4200	1.419125	-0.768	0.01097512	0.06703496	0.08146667	50.34
1.4210	1.571474	-0.763	0.01033068	0.06625676	0.08111352	50.34
1.4220	1.713610	-0.770	0.00969118	0.06547469	0.08074677	50.34
1.4230	1.842470	-0.773	0.00912035	0.06475198	0.08044618	50.34
1.4240	1.955881	-0.776	0.00859386	0.06411672	0.08016700	50.34
1.4250	2.052011	-0.774	0.00815284	0.06359529	0.07993740	50.34
1.4260	2.128830	-0.766	0.00778162	0.06317508	0.07975739	50.33
1.4270	2.185593	-0.768	0.00748795	0.06283170	0.07958633	50.33
1.4280	2.223215	-0.771	0.00727677	0.06259251	0.07948321	50.33
1.4290	2.245131	-0.769	0.00713539	0.06243581	0.07942402	50.33
1.4300	2.255144	-0.769	0.00705093	0.06234151	0.07938981	50.32
1.4310	2.256575	-0.768	0.00701171	0.06232405	0.07938594	50.32
1.4320	2.252855	-0.774	0.00696844	0.06230462	0.07937026	50.32
1.4330	2.245302	-0.771	0.00695860	0.06232697	0.07937515	50.32
1.4340	2.235374	-0.770	0.00695765	0.06232399	0.07938296	50.32
1.4350	2.221756	-0.762	0.00697142	0.06237549	0.07938981	50.32
1.4360	2.202587	-0.757	0.00704116	0.06247574	0.07941419	50.32
1.4370	2.171087	-0.757	0.00714231	0.06263626	0.07946092	50.33
1.4380	2.115040	-0.761	0.00734949	0.06291258	0.07956111	50.33
1.4390	2.024803	-0.760	0.00770313	0.06330937	0.07974887	50.33
1.4400	1.899748	-0.760	0.00820011	0.06388032	0.08001834	50.34
1.4410	1.750917	-0.756	0.00880516	0.06460297	0.08035773	50.34
1.4420	1.593275	-0.759	0.00946128	0.06537151	0.08070302	50.34
1.4430	1.438580	-0.754	0.01009488	0.06615752	0.08105803	50.34
1.4440	1.294956	-0.762	0.01069510	0.06688029	0.08136833	50.34
1.4450	1.165667	-0.764	0.01125103	0.06756705	0.08166987	50.34
1.4460	1.051569	-0.760	0.01177073	0.06818771	0.08195680	50.33
1.4470	0.951376	-0.759	0.01223338	0.06874120	0.08220690	50.33
1.4480	0.862455	-0.759	0.01263815	0.06924117	0.08243263	50.33
1.4490	0.782776	-0.759	0.01299071	0.06969541	0.08263302	50.33
1.4500	0.710363	-0.759	0.01330709	0.07011372	0.08281684	50.32
1.4510	0.645132	-0.755	0.01361841	0.07049805	0.08299774	50.32
1.4520	0.587025	-0.759	0.01388168	0.07083845	0.08313692	50.32
1.4530	0.536413	-0.760	0.01412910	0.07111770	0.08326817	50.32
1.4540	0.493841	-0.765	0.01433933	0.07134229	0.08336735	50.32
1.4550	0.460339	-0.763	0.01452094	0.07153493	0.08346063	50.32
1.4560	0.436449	-0.758	0.01464778	0.07171482	0.08355409	50.32
1.4570	0.422258	-0.758	0.01472837	0.07186073	0.08360571	50.33
1.4580	0.416222	-0.760	0.01478535	0.07196289	0.08364075	50.33
1.4590	0.416622	-0.767	0.01482272	0.07200372	0.08364952	50.33
1.4600	0.422058	-0.774	0.01482278	0.07200378	0.08364660	50.34
1.4610	0.431957	-0.774	0.01481986	0.07197744	0.08365923	50.34
1.4620	0.447836	-0.778	0.01478058	0.07191813	0.08362329	50.34
1.4630	0.476246	-0.783	0.01469213	0.07178676	0.08356684	50.34
1.4640	0.528316	-0.788	0.01451135	0.07150364	0.08343941	50.34
1.4650	0.612745	-0.788	0.01421958	0.07104653	0.08326530	50.34
1.4660	0.729475	-0.783	0.01376283	0.07043958	0.08302599	50.34
1.4670	0.870581	-0.781	0.01320189	0.06970519	0.08271754	50.33
1.4680	1.026077	-0.781	0.01258105	0.06891531	0.08237225	50.33
1.4690	1.189384	-0.780	0.01192188	0.06809139	0.08198029	50.33
1.4700	1.354237	-0.781	0.01123035	0.06725293	0.08159995	50.32
1.4710	1.514854	-0.780	0.01053888	0.06643283	0.08122635	50.32
1.4720	1.665659	-0.779	0.00986803	0.06562740	0.08086836	50.32
1.4730	1.801357	-0.780	0.00924724	0.06490463	0.08053869	50.32
1.4740	1.918573	-0.781	0.00872761	0.06429082	0.08023512	50.32
1.4750	2.014847	-0.780	0.00828063	0.06380248	0.07999969	50.32
1.4760	2.089520	-0.773	0.00793087	0.06342900	0.07982361	50.32
1.4770	2.143507	-0.773	0.00764012	0.06314397	0.07968456	50.33
1.4780	2.179241	-0.773	0.00744665	0.06292617	0.07958347	50.33
1.4790	2.200613	-0.772	0.00731701	0.06274420	0.07951832	50.33
1.4800	2.211199	-0.770	0.00724041	0.06261384	0.07948720	50.34
1.4810	2.214117	-0.767	0.00719523	0.06253886	0.07948130	50.34
1.4820	2.211857	-0.772	0.00716186	0.06250966	0.07945406	50.34
1.4830	2.205791	-0.772	0.00714117	0.06249225	0.07944047	50.34
1.4840	2.196894	-0.774	0.00712740	0.06250006	0.07942110	50.34
1.4850	2.183790	-0.767	0.00714606	0.06254578	0.07945508	50.34
1.4860	2.164707	-0.762	0.00720406	0.06262738	0.07950169	50.34
1.4870	2.133036	-0.759	0.00730520	0.06278104	0.07955319	50.33
1.4880	2.076960	-0.763	0.00751054	0.06304365	0.07965052	50.33
1.4890	1.987753	-0.763	0.00782782	0.06344259	0.07981688	50.33
1.4900	1.865387	-0.764	0.00830919	0.06398338	0.08007276	50.32
1.4910	1.720848	-0.764	0.00889653	0.06467605	0.08040833	50.32
1.4920	1.569099	-0.770	0.00950950	0.06540656	0.08074391	50.32
1.4930	1.421127	-0.770	0.01012540	0.06614983	0.08108133	50.32
1.4940	1.284943	-0.771	0.01071876	0.06681037	0.08138579	50.32
1.4950	1.164122	-0.766	0.01125711	0.06744266	0.08168441	50.32
1.4960	1.058922	-0.765	0.01173550	0.06800580	0.08194911	50.32
1.4970	0.967197	-0.767	0.01214206	0.06850773	0.08217180	50.33
1.4980	0.884829	-0.767	0.01250750	0.06897759	0.08236444	50.33
1.4990	0.808382	-0.764	0.01285321	0.06941241	0.08255404	50.33
1.5000	0.736256	-0.763	0.01319015	0.06982964	0.08274281	50.34
1.5010	0.668020	-0.760	0.01350832	0.07023716	0.08292276	50.34
1.5020	0.605278	-0.763	0.01379418	0.07061362	0.08308816	50.34
1.5030	0.549259	-0.759	0.01404667	0.07095021	0.08322728	50.34
1.5040	0.502081	-0.757	0.01427257	0.07123137	0.08333325	50.34
1.5050	0.465145	-0.752	0.01447487	0.07146972	0.08344418	50.34
1.5060	0.439510	-0.748	0.01462317	0.07166421	0.08352494	50.34
1.5070	0.425205	-0.749	0.01471555	0.07178193	0.08358234	50.33
1.5080	0.420856	-0.757	0.01476175	0.07183635	0.08361262	50.33
1.5090	0.424118	-0.759	0.01478541	0.07183731	0.08362424	50.33
1.5100	0.433102	-0.766	0.01478338	0.07183832	0.08363491	50.32
1.5110	0.447979	-0.760	0.01475590	0.07183051	0.08362615	50.32
1.5120	0.474787	-0.769	0.01468122	0.07174891	0.08357358	50.32
1.5130	0.523396	-0.772	0.01452214	0.07150960	0.08347249	50.32
1.5140	0.602188	-0.773	0.01421565	0.07107580	0.08329058	50.32
1.5150	0.711708	-0.768	0.01380408	0.07049215	0.08306003	50.32
1.5160	0.845089	-0.763	0.01329529	0.06979859	0.08275646	50.32
1.5170	0.993776	-0.766	0.01268816	0.06906509	0.08241701	50.33
1.5180	1.150103	-0.768	0.01205665	0.06829470	0.08205229	50.33
1.5190	1.308460	-0.773	0.01139158	0.06751740	0.08168167	50.33
1.5200	1.463099	-0.771	0.01072752	0.06673241	0.08131784	50.34
1.5210	1.608982	-0.764	0.01008797	0.06596196	0.08098698	50.34
1.5220	1.741104	-0.771	0.00949854	0.06522954	0.08066785	50.34
1.5230	1.855030	-0.776	0.00898093	0.06458747	0.08037996	50.34
1.5240	1.949186	-0.779	0.00855178	0.06407875	0.08013684	50.34
1.5250	2.023802	-0.773	0.00819427	0.06369054	0.07995206	50.34
1.5260	2.080564	-0.766	0.00791329	0.06338513	0.07982272	50.34
1.5270	2.122765	-0.764	0.00767750	0.06313229	0.07971674	50.33
1.5280	2.153978	-0.763	0.00750172	0.06293094	0.07962722	50.33
1.5290	2.177954	-0.762	0.00737500	0.06277531	0.07957268	50.33
1.5300	2.196636	-0.763	0.00726891	0.06266439	0.07951039	50.32
1.5310	2.209682	-0.758	0.00718343	0.06259727	0.07948023	50.32
1.5320	2.216949	-0.760	0.00709409	0.06255251	0.07943559	50.32
1.5330	2.217722	-0.758	0.00705677	0.06253016	0.07940727	50.32
1.5340	2.212887	-0.764	0.00704104	0.06252432	0.07940155	50.32
1.5350	2.202473	-0.761	0.00705665	0.06255740	0.07940835	50.32
1.5360	2.185307	-0.756	0.00711352	0.06262261	0.07943946	50.32
1.5370	2.155981	-0.756	0.00721288	0.06273258	0.07948416	50.33
1.5380	2.100878	-0.757	0.00739467	0.06296891	0.07958627	50.33
1.5390	2.008553	-0.753	0.00774151	0.06337547	0.07978380	50.33
1.5400	1.877203	-0.749	0.00824928	0.06395423	0.08005708	50.34
1.5410	1.718874	-0.747	0.00889170	0.06467211	0.08041018	50.34
1.5420	1.552248	-0.749	0.00958222	0.06544733	0.08077401	50.34
1.5430	1.391487	-0.748	0.01025206	0.06624496	0.08113879	50.34
1.5440	1.246948	-0.752	0.01084936	0.06697357	0.08147544	50.34
1.5450	1.123123	-0.749	0.01140046	0.06762344	0.08178085	50.34
1.5460	1.019812	-0.745	0.01187593	0.06819546	0.08203381	50.34
1.5470	0.933638	-0.747	0.01227862	0.06867009	0.08224386	50.33
1.5480	0.859737	-0.748	0.01262927	0.06911755	0.08241612	50.33
1.5490	0.794420	-0.750	0.01291114	0.06952804	0.08258241	50.33
1.5500	0.734253	-0.750	0.01318723	0.06992304	0.08274186	50.32
1.5510	0.677433	-0.747	0.01345146	0.07027912	0.08289552	50.32
1.5520	0.623960	-0.754	0.01369017	0.07055646	0.08303362	50.32
1.5530	0.574121	-0.756	0.01390612	0.07082289	0.08315915	50.32
1.5540	0.529604	-0.760	0.01411819	0.07107085	0.08327883	50.32
1.5550	0.491810	-0.756	0.01431274	0.07133633	0.08337611	50.32
1.5560	0.462542	-0.754	0.01450241	0.07154649	0.08346850	50.32
1.5570	0.442972	-0.756	0.01461637	0.07168657	0.08352101	50.33
1.5580	0.432901	-0.756	0.01469296	0.07175362	0.08354729	50.33
1.5590	0.431271	-0.753	0.01471162	0.07179058	0.08357656	50.33
1.5600	0.436106	-0.755	0.01472050	0.07178867	0.08357942	50.34
1.5610	0.446091	-0.752	0.01472145	0.07176644	0.08360279	50.34
1.5620	0.462999	-0.756	0.01468122	0.07168084	0.08356959	50.34
1.5630	0.494499	-0.760	0.01457900	0.07154959	0.08351231	50.34
1.5640	0.552549	-0.766	0.01437575	0.07126451	0.08338106	50.34
1.5650	0.645075	-0.761	0.01404470	0.07080817	0.08318758	50.34
1.5660	0.769815	-0.755	0.01356733	0.07016522	0.08292592	50.34
1.5670	0.916271	-0.753	0.01298869	0.06941235	0.08260095	50.33
1.5680	1.073627	-0.758	0.01234335	0.06861854	0.08224970	50.33
1.5690	1.234646	-0.756	0.01168329	0.06780243	0.08188200	50.33
1.5700	1.393661	-0.759	0.01100552	0.06697845	0.08150542	50.32
1.5710	1.545668	-0.752	0.01035815	0.06619549	0.08114940	50.32
1.5720	1.686287	-0.756	0.00973833	0.06545717	0.08080113	50.32
1.5730	1.811628	-0.755	0.00916958	0.06482977	0.08049482	50.32
1.5740	1.919146	-0.755	0.00867653	0.06428015	0.08021569	50.32
1.5750	2.008066	-0.751	0.00825316	0.06383270	0.07999885	50.32
1.5760	2.079020	-0.750	0.00790739	0.06345719	0.07983249	50.32
1.5770	2.133493	-0.754	0.00761861	0.06312841	0.07969922	50.33
1.5780	2.172375	-0.756	0.00742310	0.06286383	0.07960188	50.33
1.5790	2.197781	-0.755	0.00727272	0.06266928	0.07952207	50.33
1.5800	2.211628	-0.754	0.00718337	0.06253123	0.07948416	50.34
1.5810	2.216978	-0.752	0.00712639	0.06247282	0.07945693	50.34
1.5820	2.216320	-0.755	0.00708127	0.06244850	0.07943851	50.34
1.5830	2.210941	-0.758	0.00706351	0.06245619	0.07941997	50.34
1.5840	2.202015	-0.759	0.00705767	0.06249124	0.07941121	50.34
1.5850	2.189112	-0.756	0.00708807	0.06252921	0.07942688	50.34
1.5860	2.170630	-0.748	0.00713724	0.06259340	0.07947755	50.34
1.5870	2.139359	-0.749	0.00724334	0.06269455	0.07952416	50.33
1.5880	2.081537	-0.749	0.00746447	0.06292707	0.07962132	50.33
1.5890	1.986666	-0.746	0.00782883	0.06334931	0.07980508	50.33
1.5900	1.854744	-0.746	0.00834650	0.06397665	0.08007753	50.32
1.5910	1.698217	-0.743	0.00898403	0.06474799	0.08045012	50.32
1.5920	1.534052	-0.747	0.00966281	0.06555432	0.08081383	50.32
1.5930	1.375008	-0.745	0.01030821	0.06637144	0.08117962	50.32
1.5940	1.230612	-0.752	0.01092309	0.06710011	0.08151042	50.32
1.5950	1.105299	-0.751	0.01146919	0.06773829	0.08180428	50.32
1.5960	1.000128	-0.750	0.01195544	0.06829274	0.08206779	50.32
1.5970	0.912895	-0.749	0.01234829	0.06874800	0.08227402	50.33
1.5980	0.839310	-0.754	0.01269412	0.06919545	0.08246762	50.33
1.5990	0.775366	-0.753	0.01298672	0.06960005	0.08264083	50.33
1.6000	0.717344	-0.752	0.01324701	0.06998724	0.08279449	50.34
1.6010	0.662842	-0.751	0.01351219	0.07034123	0.08294225	50.34
1.6020	0.611200	-0.753	0.01373816	0.07063800	0.08305895	50.34
1.6030	0.562677	-0.756	0.01395923	0.07090843	0.08317757	50.34
1.6040	0.519075	-0.756	0.01414979	0.07113123	0.08327585	50.34
1.6050	0.481968	-0.752	0.01433748	0.07134229	0.08336830	50.34
1.6060	0.452728	-0.746	0.01450342	0.07153392	0.08346945	50.34
1.6070	0.432415	-0.748	0.01461250	0.07167494	0.08353561	50.33
1.6080	0.420885	-0.748	0.01469111	0.07179260	0.08358914	50.33
1.6090	0.417738	-0.750	0.01474226	0.07185006	0.08361936	50.33
1.6100	0.420914	-0.753	0.01476675	0.07187736	0.08363396	50.32
1.6110	0.429640	-0.755	0.01477659	0.07187158	0.08363885	50.32
1.6120	0.445232	-0.756	0.01472443	0.07182288	0.08360088	50.32
1.6130	0.475216	-0.760	0.01465178	0.07170707	0.08354920	50.32
1.6140	0.532351	-0.760	0.01444846	0.07144344	0.08342957	50.32
1.6150	0.624790	-0.757	0.01411545	0.07098627	0.08323503	50.32
1.6160	0.751648	-0.753	0.01363224	0.07032579	0.08296275	50.32
1.6170	0.901823	-0.754	0.01303792	0.06952906	0.08261931	50.33
1.6180	1.063356	-0.756	0.01238763	0.06868082	0.08225554	50.33
1.6190	1.228437	-0.752	0.01171178	0.06782973	0.08187616	50.33
1.6200	1.391115	-0.752	0.01102918	0.06699419	0.08149582	50.34
1.6210	1.546297	-0.744	0.01035923	0.06619269	0.08114266	50.34
1.6220	1.689863	-0.750	0.00971287	0.06543881	0.08077204	50.34
1.6230	1.817636	-0.754	0.00913519	0.06475013	0.08046567	50.34
1.6240	1.927385	-0.758	0.00863522	0.06414604	0.08017391	50.34
1.6250	2.018080	-0.754	0.00820011	0.06364989	0.07995403	50.34
1.6260	2.090492	-0.744	0.00784743	0.06326175	0.07977885	50.34
1.6270	2.145824	-0.741	0.00756067	0.06298649	0.07964939	50.33
1.6280	2.186165	-0.739	0.00734943	0.06278706	0.07954729	50.33
1.6290	2.213802	-0.744	0.00718355	0.06264794	0.07948017	50.33
1.6300	2.230854	-0.745	0.00707746	0.06253511	0.07942480	50.32
1.6310	2.239351	-0.743	0.00699490	0.06245732	0.07940245	50.32
1.6320	2.241325	-0.743	0.00694764	0.06237566	0.07937425	50.32
1.6330	2.237463	-0.745	0.00692403	0.06232017	0.07935679	50.32
1.6340	2.229023	-0.739	0.00692606	0.06230658	0.07934994	50.32
1.6350	2.215691	-0.737	0.00694478	0.06236678	0.07936555	50.32
1.6360	2.196980	-0.731	0.00699097	0.06247568	0.07939762	50.32
1.6370	2.165909	-0.737	0.00709701	0.06262153	0.07944244	50.33
1.6380	2.108946	-0.740	0.00730824	0.06286186	0.07955420	50.33
1.6390	2.015734	-0.744	0.00767559	0.06326854	0.07973218	50.33
1.6400	1.887045	-0.746	0.00817657	0.06384146	0.08000743	50.33
1.6410	1.735439	-0.742	0.00879246	0.06454962	0.08035088	50.34
1.6420	1.576309	-0.742	0.00943679	0.06530052	0.08070880	50.34
1.6430	1.420212	-0.743	0.01008707	0.06605929	0.08107060	50.34
1.6440	1.275101	-0.751	0.01069707	0.06679463	0.08139068	50.34
1.6450	1.145754	-0.752	0.01126677	0.06751740	0.08171272	50.34
1.6460	1.033745	-0.751	0.01178634	0.06816036	0.08199096	50.33
1.6470	0.937901	-0.748	0.01221752	0.06872654	0.08222538	50.33
1.6480	0.855103	-0.748	0.01261044	0.06918365	0.08242482	50.33
1.6490	0.782661	-0.750	0.01293766	0.06959414	0.08259606	50.33
1.6500	0.718403	-0.758	0.01323438	0.06996864	0.08276147	50.32
1.6510	0.660839	-0.756	0.01351327	0.07032669	0.08292574	50.32
1.6520	0.608511	-0.758	0.01374906	0.07063800	0.08306670	50.32
1.6530	0.561018	-0.755	0.01396215	0.07089877	0.08318639	50.32
1.6540	0.518732	-0.759	0.01413506	0.07113987	0.08328170	50.32
1.6550	0.483685	-0.759	0.01430392	0.07136363	0.08338290	50.32
1.6560	0.457163	-0.758	0.01444632	0.07156885	0.08347523	50.32
1.6570	0.440168	-0.760	0.01455045	0.07167983	0.08353359	50.33
1.6580	0.432386	-0.760	0.01461434	0.07173038	0.08355999	50.33
1.6590	0.432615	-0.765	0.01465660	0.07173717	0.08357167	50.33
1.6600	0.439110	-0.767	0.01466054	0.07172060	0.08357364	50.33
1.6610	0.450897	-0.765	0.01465660	0.07168949	0.08357066	50.34
1.6620	0.471210	-0.766	0.01459962	0.07158840	0.08353460	50.34
1.6630	0.509834	-0.770	0.01447493	0.07140064	0.08345389	50.34
1.6640	0.577297	-0.775	0.01424408	0.07107764	0.08330601	50.34
1.6650	0.677576	-0.771	0.01388162	0.07058734	0.08309597	50.34
1.6660	0.805836	-0.767	0.01340711	0.06995213	0.08281577	50.34
1.6670	0.951920	-0.766	0.01282853	0.06922460	0.08248609	50.33
1.6680	1.107101	-0.766	0.01220083	0.06843382	0.08212620	50.33
1.6690	1.265116	-0.761	0.01153880	0.06762552	0.08176625	50.33
1.6700	1.419868	-0.757	0.01087683	0.06681812	0.08141220	50.32
1.6710	1.565523	-0.751	0.01023644	0.06606418	0.08108139	50.32
1.6720	1.697989	-0.753	0.00964212	0.06536955	0.08076036	50.32
1.6730	1.813974	-0.759	0.00910383	0.06474006	0.08045775	50.32
1.6740	1.914597	-0.764	0.00864017	0.06418180	0.08019710	50.32
1.6750	2.000227	-0.765	0.00824136	0.06370711	0.07998705	50.32
1.6760	2.071838	-0.762	0.00790828	0.06331903	0.07981974	50.32
1.6770	2.129803	-0.765	0.00761855	0.06299901	0.07968062	50.33
1.6780	2.174520	-0.763	0.00738472	0.06273639	0.07957071	50.33
1.6790	2.206964	-0.765	0.00720608	0.06253320	0.07947922	50.33
1.6800	2.227592	-0.763	0.00707942	0.06242621	0.07941806	50.33
1.6810	2.237434	-0.763	0.00699002	0.06239223	0.07938600	50.34
1.6820	2.238522	-0.766	0.00693202	0.06239116	0.07937139	50.34
1.6830	2.232714	-0.764	0.00691330	0.06237656	0.07936168	50.34
1.6840	2.221642	-0.762	0.00692517	0.06237954	0.07935971	50.34
1.6850	2.205362	-0.757	0.00696647	0.06239319	0.07938212	50.34
1.6860	2.181644	-0.754	0.00704801	0.06248271	0.07942593	50.33
1.6870	2.142477	-0.758	0.00717276	0.06264412	0.07949889	50.33
1.6880	2.076187	-0.759	0.00740749	0.06295627	0.07961756	50.33
1.6890	1.976681	-0.760	0.00780046	0.06343389	0.07981879	50.33
1.6900	1.846733	-0.760	0.00830925	0.06405443	0.08008826	50.32
1.6910	1.697588	-0.760	0.00892800	0.06476063	0.08042192	50.32
1.6920	1.541605	-0.764	0.00956345	0.06549209	0.08077312	50.32
1.6930	1.389313	-0.760	0.01020676	0.06624788	0.08111650	50.32
1.6940	1.249065	-0.763	0.01081878	0.06697059	0.08144140	50.32
1.6950	1.125612	-0.757	0.01135415	0.06762630	0.08172345	50.32
1.6960	1.019497	-0.757	0.01183844	0.06819534	0.08199477	50.32
1.6970	0.929117	-0.756	0.01224315	0.06867009	0.08221942	50.33
1.6980	0.851011	-0.760	0.01261353	0.06909615	0.08241498	50.33
1.6990	0.783262	-0.761	0.01293677	0.06947744	0.08259010	50.33
1.7000	0.723438	-0.757	0.01321769	0.06982666	0.08274478	50.33
1.7010	0.669565	-0.752	0.01346320	0.07015258	0.08289355	50.34
1.7020	0.620127	-0.753	0.01368409	0.07044649	0.08302391	50.34
1.7030	0.574093	-0.759	0.01388747	0.07073444	0.08312988	50.34
1.7040	0.532637	-0.763	0.01408786	0.07102138	0.08323598	50.34
1.7050	0.496960	-0.763	0.01425689	0.07128882	0.08333910	50.34
1.7060	0.468807	-0.759	0.01441407	0.07150966	0.08342952	50.34
1.7070	0.449238	-0.762	0.01453775	0.07165062	0.08349663	50.33
1.7080	0.438366	-0.763	0.01461536	0.07172740	0.08352870	50.33
1.7090	0.435791	-0.764	0.01464283	0.07175559	0.08354926	50.33
1.7100	0.440197	-0.764	0.01464480	0.07176054	0.08354640	50.32
1.7110	0.450325	-0.764	0.01463497	0.07175082	0.08355808	50.32
1.7120	0.467548	-0.771	0.01457316	0.07168573	0.08353376	50.32
1.7130	0.499592	-0.775	0.01447195	0.07154369	0.08347440	50.32
1.7140	0.558186	-0.776	0.01427257	0.07126933	0.08335084	50.32
1.7150	0.650082	-0.775	0.01394153	0.07081991	0.08315247	50.32
1.7160	0.772676	-0.771	0.01350445	0.07020998	0.08289075	50.32
1.7170	0.916214	-0.769	0.01293874	0.06946975	0.08256006	50.33
1.7180	1.071653	-0.771	0.01231992	0.06866527	0.08220494	50.33
1.7190	1.232786	-0.774	0.01163530	0.06783265	0.08183628	50.33
1.7200	1.393948	-0.778	0.01095062	0.06701267	0.08146071	50.33
1.7210	1.549015	-0.768	0.01029247	0.06624132	0.08111733	50.34
1.7220	1.692667	-0.765	0.00964898	0.06550103	0.08076519	50.34
1.7230	1.820784	-0.766	0.00907922	0.06482989	0.08044720	50.34
1.7240	1.931047	-0.770	0.00856936	0.06423056	0.08015925	50.34
1.7250	2.022629	-0.766	0.00813907	0.06372380	0.07992476	50.34
1.7260	2.095871	-0.762	0.00779825	0.06330937	0.07976025	50.33
1.7270	2.151461	-0.760	0.00751060	0.06297094	0.07961917	50.33
1.7280	2.190943	-0.760	0.00728565	0.06271601	0.07951027	50.33
1.7290	2.216864	-0.760	0.00712556	0.06254387	0.07944131	50.33
1.7300	2.231712	-0.764	0.00702041	0.06244469	0.07938886	50.32
1.7310	2.237864	-0.766	0.00696641	0.06239802	0.07938010	50.32
1.7320	2.238064	-0.766	0.00692713	0.06234062	0.07935965	50.32
1.7330	2.233315	-0.766	0.00690454	0.06229770	0.07935184	50.32
1.7340	2.224789	-0.768	0.00690645	0.06226951	0.07935083	50.32
1.7350	2.211685	-0.759	0.00692415	0.06228894	0.07936734	50.32
1.7360	2.191973	-0.754	0.00697327	0.06238043	0.07940137	50.32
1.7370	2.157240	-0.752	0.00709802	0.06254578	0.07945293	50.33
1.7380	2.092638	-0.754	0.00732583	0.06283271	0.07957458	50.33
1.7390	1.988926	-0.751	0.00774431	0.06329864	0.07978863	50.33
1.7400	1.849222	-0.748	0.00829828	0.06394160	0.08008248	50.34
1.7410	1.689663	-0.745	0.00897115	0.06473929	0.08044434	50.34
1.7420	1.527557	-0.748	0.00962442	0.06554854	0.08080620	50.34
1.7430	1.374407	-0.751	0.01025605	0.06631023	0.08115047	50.34
1.7440	1.237621	-0.755	0.01082677	0.06701159	0.08145982	50.34
1.7450	1.120119	-0.754	0.01133949	0.06765074	0.08173501	50.34
1.7460	1.021614	-0.746	0.01180106	0.06821984	0.08198708	50.33
1.7470	0.939016	-0.752	0.01220089	0.06867695	0.08218843	50.33
1.7480	0.867605	-0.756	0.01254177	0.06905240	0.08237332	50.33
1.7490	0.803032	-0.756	0.01282769	0.06937438	0.08253956	50.33
1.7500	0.741892	-0.754	0.01310557	0.06970119	0.08270204	50.32
1.7510	0.682268	-0.754	0.01337177	0.07005239	0.08287215	50.32
1.7520	0.624619	-0.754	0.01363301	0.07038599	0.08301121	50.32
1.7530	0.570002	-0.755	0.01388848	0.07070702	0.08314061	50.32
1.7540	0.521593	-0.757	0.01411837	0.07099110	0.08325630	50.32
1.7550	0.481482	-0.757	0.01431781	0.07125378	0.08336920	50.32
1.7560	0.451698	-0.751	0.01447886	0.07146782	0.08348012	50.32
1.7570	0.432873	-0.752	0.01459771	0.07161570	0.08353364	50.33
1.7580	0.423946	-0.752	0.01465464	0.07171875	0.08357263	50.33
1.7590	0.423288	-0.752	0.01468700	0.07176155	0.08358330	50.33
1.7600	0.429239	-0.757	0.01468110	0.07175660	0.08357853	50.34
1.7610	0.440598	-0.752	0.01467329	0.07171673	0.08357948	50.34
1.7620	0.459738	-0.754	0.01461434	0.07161462	0.08354735	50.34
1.7630	0.495100	-0.757	0.01450044	0.07145804	0.08347929	50.34
1.7640	0.557699	-0.764	0.01427257	0.07116228	0.08334798	50.34
1.7650	0.653286	-0.762	0.01391113	0.07070017	0.08314955	50.34
1.7660	0.777626	-0.758	0.01345044	0.07007372	0.08288193	50.34
1.7670	0.920706	-0.757	0.01289940	0.06932288	0.08256286	50.33
1.7680	1.072884	-0.761	0.01228058	0.06853014	0.08221269	50.33
1.7690	1.228094	-0.759	0.01163423	0.06774610	0.08184791	50.33
1.7700	1.380816	-0.762	0.01097023	0.06700581	0.08149087	50.32
1.7710	1.527386	-0.755	0.01034248	0.06630254	0.08115232	50.32
1.7720	1.664114	-0.760	0.00974035	0.06562650	0.08083034	50.32
1.7730	1.788282	-0.762	0.00918633	0.06496787	0.08053178	50.32
1.7740	1.897888	-0.764	0.00869620	0.06437159	0.08025062	50.32
1.7750	1.991730	-0.759	0.00827086	0.06383073	0.08002210	50.32
1.7760	2.069407	-0.756	0.00791222	0.06337458	0.07983923	50.32
1.7770	2.131977	-0.758	0.00760180	0.06298256	0.07968652	50.33
1.7780	2.180328	-0.758	0.00734061	0.06268781	0.07956105	50.33
1.7790	2.215633	-0.759	0.00713432	0.06246305	0.07945108	50.33
1.7800	2.238293	-0.763	0.00698799	0.06231624	0.07938498	50.33
1.7810	2.249565	-0.760	0.00693685	0.06223935	0.07934415	50.34
1.7820	2.251740	-0.760	0.00688183	0.06219172	0.07932281	50.34
1.7830	2.247019	-0.759	0.00686908	0.06219655	0.07931793	50.34
1.7840	2.237406	-0.757	0.00687104	0.06221992	0.07931882	50.34
1.7850	2.222471	-0.752	0.00688869	0.06227535	0.07933432	50.34
1.7860	2.200098	-0.743	0.00694567	0.06235218	0.07937706	50.33
1.7870	2.162476	-0.743	0.00706941	0.06247967	0.07942867	50.33
1.7880	2.097702	-0.748	0.00730616	0.06275201	0.07955325	50.33
1.7890	1.998453	-0.748	0.00770015	0.06322765	0.07974297	50.33
1.7900	1.868248	-0.747	0.00821680	0.06387836	0.08002311	50.32
1.7910	1.719532	-0.742	0.00883073	0.06463414	0.08035874	50.32
1.7920	1.566296	-0.743	0.00945055	0.06536758	0.08070117	50.32
1.7930	1.418209	-0.744	0.01005763	0.06605923	0.08103484	50.32
1.7940	1.282082	-0.750	0.01063037	0.06672072	0.08134800	50.32
1.7950	1.161118	-0.747	0.01115888	0.06735891	0.08164269	50.32
1.7960	1.055431	-0.740	0.01163822	0.06792808	0.08190626	50.32
1.7970	0.963449	-0.738	0.01206058	0.06845438	0.08213782	50.33
1.7980	0.881968	-0.739	0.01242006	0.06893873	0.08233047	50.33
1.7990	0.807867	-0.740	0.01275700	0.06939292	0.08251035	50.33
[truncated: 7,001 more rows]
