# Supplementary material for: Evaluation of a Cold-Mixed High-Performance Polyurethane Mixture
Source: Hindawi journal article supplement (doi:10.1155/2019/1507971), 2019-11-07
Supplement: f1 [file 1507971.f1.zip › 1507971.f1/dynamic modulus data/PUM/specimen2/temp50/zhs-2-50_Sum.csv]

Test Information
****************
Project name	zhs
Operator name	2
Target test temperature	50
Target confining stress	0
Average dynamic strain range from 75 to 125 micro-strain
Contact stress	5
Initial modulus	1000
Axial gauge length	70
Comments
Specimen information
********************
Identification	zhs-2-50
Dimensions	Point 1	Point 2	Point 3	Point 4	Point 5	Point 6	Average	Std Dev.
Diameter (mm)	49.2	49.3	49.2				49.23	0.058
Height (mm)	100.8	101.0	100.8				100.87	0.115
Cross-sectional area (mm�)	1903.7
Conditioning time
Properties/Comments
*********
Test date and time	Wed	Apr 3	2019	1:28 PM
Test results summary
	25 Hz	20 Hz	10 Hz	5 Hz	2 Hz	1 Hz	0.5 Hz	0.2 Hz	0.1 Hz
Dynamic modulus (MPa)	9442	9380	9173	8974	8700	8492	8290	7995	7772
Phase angle (Degrees)	4.49	4.32	4.26	4.25	4.24	4.26	4.38	4.33	4.48
Average temperature (�C)	50.3	50.3	50.3	50.3	50.3	50.3	50.3	50.4	50.3
Average confining pressure (kPa)	-0.7	-0.8	-0.7	-0.7	-0.7	-0.7	-0.7	-0.7	-0.7
Average micro-strain	109	108	104	101	99	98	99	98	98
Load drift (%)	-2.0	-0.5	0.5	0.9	-1.0	-0.1	1.6	-1.1	0.7
Load standard error (%)	8.6	8.0	4.5	2.9	2.0	2.3	8.2	13.7	4.1
Average deformation drift (%)	-4.4	-4.2	-4.6	-5.0	-2.4	-3.6	-4.4	26.8	-0.6
Average deformation standard error (%)	8.3	7.8	4.4	2.9	2.0	2.2	7.7	13.9	3.5
Deformation uniformity (%)	30.4	30.4	30.2	30.0	29.9	29.9	30.8	31.0	31.8
Phase uniformity (Degrees)	0.4	0.4	0.3	0.2	0.2	0.2	0.3	0.4	0.5
