# Supplementary material for: Evaluation of a Cold-Mixed High-Performance Polyurethane Mixture
Source: Hindawi journal article supplement (doi:10.1155/2019/1507971), 2019-11-07
Supplement: f1 [file 1507971.f1.zip › 1507971.f1/dynamic modulus data/PUM/volume index.xlsx]

## Sheet: Sheet1
		h1（㎜）	h2（㎜）	h3（㎜）	d1（㎜）	d2（㎜）	d3（㎜）	空气中重(g)	水中重(g)	表干重(g)
	1	101.3	101.2	101.3	49.2	49.2	49.3	438.68	256.72	446.83
	2	100.8	101	100.8	49.2	49.3	49.2	436.91	255.89	444.69
