# Supplementary material for: Evaluation of a Cold-Mixed High-Performance Polyurethane Mixture
Source: Hindawi journal article supplement (doi:10.1155/2019/1507971), 2019-11-07
Supplement: f1 [file 1507971.f1.zip › 1507971.f1/dynamic modulus data/SMA/106/1_Sum.xls]

## Sheet: 1_Sum
Test Information
****************
Project name	TPA课题
Operator name	王圣玉
Target test temperature	10
Target confining stress	0
Average dynamic strain range from 85 to 115 micro-strain
Contact stress	5
Initial modulus	8000
Axial gauge length	70
Comments
Specimen Information
********************
Identification	1
Dimensions	Point 1	Point 2	Point 3	Point 4	Point 5	Point 6	Average	Std Dev.
Diameter (mm)	99.7	99.7	99.6	99.6	99.8	99.7	99.7	0.075
Height (mm)	148.6	148.8	148.4	148.8	149.2	149.3	148.8	0.345
Cross-sectional area (mm?	7804.3
Conditioning time	5h
Comments/Properties	SMA-13，SBS沥青，沥青用量5.8%，旋转压实次数80次。
*********
Test date and time	星期二	十一月 22	2011	10:01 AM
Test results summary
	25 Hz	10 Hz	5 Hz	1 Hz	0.5 Hz	0.1 Hz	0.01 Hz
Dynamic modulus (MPa)	11486	9372	7940	5063	4045	2303	1044
Phase angle (Degrees)	19.58	22.03	23.76	27.95	29.69	30.99	28.71
Average temperature (癈)	15	15	15	15	15	14.9	14.9
Average confining pressure (kPa)	0	0.1	0	0	0	0	0
Average micro-strain	95	96	94	96	104	101	105
Load drift (%)	0.1	0.3	0.8	0	0	0	0
Load standard error (%)	2.8	1.5	0.9	0.5	0.2	0.6	0.6
Average deformation drift (%)	-188	-202.3	-180.9	-167.1	-208.6	-97.1	-42.3
Average deformation standard error (%)	4.5	4.5	3.4	2.3	5.4	2	3.2
Deformation uniformity (%)	6.2	6.3	7	9	10.4	12.4	15
Phase uniformity (Degrees)	0.7	0.7	0.7	0.9	1	1.1	1.1
