# Supplementary material for: Evaluation of a Cold-Mixed High-Performance Polyurethane Mixture
Source: Hindawi journal article supplement (doi:10.1155/2019/1507971), 2019-11-07
Supplement: f1 [file 1507971.f1.zip › 1507971.f1/dynamic modulus data/SMA/106/3_Sum.xls]

## Sheet: 3_Sum
Test Information
****************
Project name	TPA课题
Operator name	王圣玉
Target test temperature	10
Target confining stress	0
Average dynamic strain range from 85 to 115 micro-strain
Contact stress	5
Initial modulus	8000
Axial gauge length	70
Comments
Specimen Information
********************
Identification	3
Dimensions	Point 1	Point 2	Point 3	Point 4	Point 5	Point 6	Average	Std Dev.
Diameter (mm)	99.7	99.9	99.9	99	99.8	99.9	99.7	0.352
Height (mm)	148.1	148.8	149.1	148.6	148.7	149	148.7	0.354
Cross-sectional area (mm?	7806.9
Conditioning time	5h
Comments/Properties	SMA-13，SBS沥青，沥青用量5.8%，旋转压实次数80次。
*********
Test date and time	星期二	十一月 22	2011	2:18 PM
Test results summary
	25 Hz	10 Hz	5 Hz	1 Hz	0.5 Hz	0.1 Hz	0.01 Hz
Dynamic modulus (MPa)	11925	9726	8180	5099	4026	2206	982.5
Phase angle (Degrees)	20.14	22.71	24.56	28.88	30.14	32.05	30.42
Average temperature (癈)	15.1	15.1	15.1	15.1	15.1	15.1	15
Average confining pressure (kPa)	0	0	0	0	0	0	0
Average micro-strain	93	94	94	96	99	102	104
Load drift (%)	0.4	0.5	0.7	0.1	0	0	0
Load standard error (%)	2.8	1.5	0.9	0.5	0.2	0.6	0.6
Average deformation drift (%)	-211.7	-223	-197.9	-178.8	-134.6	-87.3	-24.5
Average deformation standard error (%)	4.9	4.8	3.7	2.4	1.9	2.3	3.2
Deformation uniformity (%)	11.1	8.1	7.2	7.2	7	6.5	4.5
Phase uniformity (Degrees)	0	0.1	0.1	0.2	0.1	0.4	0.8
