# Supplementary material for: Evaluation of a Cold-Mixed High-Performance Polyurethane Mixture
Source: Hindawi journal article supplement (doi:10.1155/2019/1507971), 2019-11-07
Supplement: f1 [file 1507971.f1.zip › 1507971.f1/dynamic modulus data/SMA/206/1_Sum.xls]

## Sheet: 1_Sum
Test Information
****************
Project name	TPA课题
Operator name	王圣玉
Target test temperature	20
Target confining stress	0
Average dynamic strain range from 85 to 115 micro-strain
Contact stress	5
Initial modulus	8000
Axial gauge length	70
Comments	SMA-13，玄武岩，SBS沥青，沥青用量5.8%，旋转压实次数80次，成型温度175度。
Specimen Information
********************
Identification	1
Dimensions	Point 1	Point 2	Point 3	Point 4	Point 5	Point 6	Average	Std Dev.
Diameter (mm)	100	100.3	100	100.2	100.1	100.1	100.1	0.117
Height (mm)	148.2	149.7	148.7	147.6	149.7	149.1	148.8	0.838
Cross-sectional area (mm?	7872.3
Conditioning time	5h
Comments/Properties	SMA-13，玄武岩，SBS沥青，沥青用量5.8%，旋转压实次
	数80次。
*********
Test date and time	星期一	十二月 5	2011	3:14 PM
Test results summary
	25 Hz	20 Hz	10 Hz	5 Hz	2 Hz	1 Hz	0.5 Hz	0.2 Hz	0.1 Hz	0.01 Hz
Dynamic modulus (MPa)	6381	5899	4635	3543	2395	1743	1271	854.4	649.3	329.2
Phase angle (Degrees)	28.71	29.3	31.61	33.51	35.28	35.88	35.65	34.28	32.55	25.83
Average temperature (癈)	25.1	25.1	25.1	25.1	25.1	25.1	25.1	25.1	25	25
Average confining pressure (kPa)	0	0	0	0	0	0	0	0	0	0
Average micro-strain	92	92	91	90	94	99	99	101	101	101
Load drift (%)	-0.4	-0.3	0.6	1.1	0.1	0.2	0.1	0	0.1	-0.1
Load standard error (%)	3.9	3.5	2.3	1.6	1	0.7	0.3	0.4	0.5	0.7
Average deformation drift (%)	-325	-305.7	-254.9	-183.1	-89.2	-51.1	-27.2	-9.7	-5.2	7.8
Average deformation standard error (%)	7.9	8.1	6.7	4.3	2	2	2.1	2.3	2.5	3
Deformation uniformity (%)	5.7	6.6	7.4	7.6	7.3	6.9	6.2	5.4	5	5.3
Phase uniformity (Degrees)	0.2	0.2	0.2	0.2	0.3	0.4	0.6	0.7	0.7	0.5
