# Supplementary material for: Evaluation of a Cold-Mixed High-Performance Polyurethane Mixture
Source: Hindawi journal article supplement (doi:10.1155/2019/1507971), 2019-11-07
Supplement: f1 [file 1507971.f1.zip › 1507971.f1/dynamic modulus data/SMA/206/6_Sum.xls]

## Sheet: 6_Sum
Test Information
****************
Project name	TPA课题
Operator name	王圣玉
Target test temperature	20
Target confining stress	0
Average dynamic strain range from 85 to 115 micro-strain
Contact stress	5
Initial modulus	8000
Axial gauge length	70
Comments	SMA-13，玄武岩，SBS沥青，沥青用量5.8%，旋转压实次数80次，成型温度175度。
Specimen Information
********************
Identification	6
Dimensions	Point 1	Point 2	Point 3	Point 4	Point 5	Point 6	Average	Std Dev.
Diameter (mm)	100	100.1	99.9	99.9	100	99.9	100	0.082
Height (mm)	150.2	150.1	149.6	150.2	149.7	149.4	149.9	0.344
Cross-sectional area (mm?	7848.7
Conditioning time	5h
Comments/Properties	SMA-13，玄武岩，SBS沥青，沥青用量5.8%，旋转压实次
	数80次。
*********
Test date and time	星期三	十二月 7	2011	1:58 PM
Test results summary
	25 Hz	20 Hz	10 Hz	5 Hz	2 Hz	1 Hz	0.5 Hz	0.2 Hz	0.1 Hz	0.01 Hz
Dynamic modulus (MPa)	7426	6993	5665	4470	3131	2319	1696	1122	825.1	356.9
Phase angle (Degrees)	26.18	26.67	28.87	30.97	33.29	35.08	34.86	34.19	32.92	26.63
Average temperature (癈)	25	25	25	25	25	25	25	25.1	25	25
Average confining pressure (kPa)	0	0	0	0	0	0	0	0	0	0
Average micro-strain	91	92	92	92	95	104	99	102	101	109
Load drift (%)	-0.1	-0.1	0.5	0.9	0.1	0.2	0.1	0	0	-0.1
Load standard error (%)	3.4	3.1	1.9	1.2	0.8	0.5	0.3	0.3	0.5	0.7
Average deformation drift (%)	-317.5	-277.1	-245.4	-202.9	-136.3	-181.1	-57.6	-17.4	0.2	53.2
Average deformation standard error (%)	6.9	6.5	5.3	4	2.3	5.6	2	2.4	2.7	3.7
Deformation uniformity (%)	10.4	8.7	8.4	8.7	9.9	10.4	11.9	14.2	16.2	23.9
Phase uniformity (Degrees)	0.3	0.2	0.3	0.5	0.7	0.8	0.9	0.9	1	1.4
