# Supplementary material for: Evaluation of a Cold-Mixed High-Performance Polyurethane Mixture
Source: Hindawi journal article supplement (doi:10.1155/2019/1507971), 2019-11-07
Supplement: f1 [file 1507971.f1.zip › 1507971.f1/dynamic modulus data/SMA/356/3_Sum.xls]

## Sheet: 3_Sum
Test Information
****************
Project name	TPA课题
Operator name	王圣玉
Target test temperature	35
Target confining stress	0
Average dynamic strain range from 85 to 115 micro-strain
Contact stress	5
Initial modulus	2000
Axial gauge length	70
Comments	SMA-13，玄武岩，SBS沥青，沥青含量5.8%	，旋转压实80次。委托编号：TPA-H-022
Specimen Information
********************
Identification	3
Dimensions	Point 1	Point 2	Point 3	Point 4	Point 5	Point 6	Average	Std Dev.
Diameter (mm)	100	100	100.1	99.9	99.8	99.8	99.9	0.121
Height (mm)	151.4	150.9	149.1	150.7	151	149.1	150.4	1.007
Cross-sectional area (mm?	7843.5
Conditioning time	5h
Comments/Properties	SMA-13，玄武岩，SBS沥青，沥青含量5.8%	，旋转压实80
	次。
*********
Test date and time	星期二	十二月 6	2011	9:37 AM
Test results summary
	25 Hz	20 Hz	10 Hz	5 Hz	2 Hz	1 Hz	0.5 Hz	0.2 Hz	0.1 Hz	0.01 Hz
Dynamic modulus (MPa)	2007	1799	1312	965.5	656.6	518.5	426.1	344.6	302.5	222.3
Phase angle (Degrees)	37.35	36.81	36	34.48	32.04	29.37	26.6	23.46	21.19	16.39
Average temperature (癈)	40.1	40.1	40.1	40.1	40	40	40	40.1	40.1	39.9
Average confining pressure (kPa)	0	0	0	0	0	0	0	0	0	0
Average micro-strain	90	86	87	89	96	96	97	98	98	99
Load drift (%)	-0.2	0.1	0.7	0.3	0.1	-0.2	-0.2	0	0.2	0
Load standard error (%)	5.2	4.5	3.1	2.2	1.3	0.8	0.5	0.6	0.6	0.9
Average deformation drift (%)	-311.2	-201.6	-106.8	-51.8	-16.3	-9.4	-5.8	-5.1	-2.4	14.2
Average deformation standard error (%)	8.9	6.8	4.6	3.7	3.6	3.6	3.6	3.8	4.2	5.4
Deformation uniformity (%)	6.8	5.1	4.5	4.7	6.3	7.2	8.1	9.2	9.9	11.9
Phase uniformity (Degrees)	1.2	1.1	1.4	1.7	1.8	1.7	1.5	1.2	0.9	0.6
