# Supplementary material for: Evaluation of a Cold-Mixed High-Performance Polyurethane Mixture
Source: Hindawi journal article supplement (doi:10.1155/2019/1507971), 2019-11-07
Supplement: f1 [file 1507971.f1.zip › 1507971.f1/dynamic modulus data/SMA/506/7_Sum.xls]

## Sheet: 7_Sum
Test Information
****************
Project name	TPA课题
Operator name	王圣玉
Target test temperature	50
Target confining stress	0
Average dynamic strain range from 85 to 115 micro-strain
Contact stress	5
Initial modulus	2000
Axial gauge length	70
Comments	SMA-13，玄武岩，SBS沥青，沥青含量5.8%	，旋转压实80次。委托编号：TPA-H-022
Specimen Information
********************
Identification	7
Dimensions	Point 1	Point 2	Point 3	Point 4	Point 5	Point 6	Average	Std Dev.
Diameter (mm)	100.3	100.4	100.3	100.4	100	100.2	100.3	0.151
Height (mm)	149.9	149.6	149.6	149.4	149.8	149.2	149.6	0.256
Cross-sectional area (mm?	7895.9
Conditioning time	5h
Comments/Properties	SMA-13，玄武岩，SBS沥青，沥青含量5.8%	，旋转压实80
	次。
*********
Test date and time	星期二	十二月 6	2011	1:11 PM
Test results summary
	25 Hz	20 Hz	10 Hz	5 Hz	2 Hz	1 Hz	0.5 Hz	0.2 Hz	0.1 Hz	0.01 Hz
Dynamic modulus (MPa)	521.1	472	370.3	299.3	225.5	204.6	182.1	166	158.1	134.7
Phase angle (Degrees)	32.84	32.17	29.18	26.57	23.78	21.13	20.26	17.25	15.46	13
Average temperature (癈)	54.9	54.9	54.9	54.9	54.9	54.9	54.8	54.9	55.1	54.9
Average confining pressure (kPa)	0	0	0	0	0	0	0	0	0	0
Average micro-strain	81	70	77	84	100	96	110	97	98	97
Load drift (%)	0.6	0.5	-0.2	-0.3	0.4	1.5	-0.4	0.3	0.3	-0.3
Load standard error (%)	6.6	7.1	6.3	4.6	3	1.4	0.7	0.7	0.7	1
Average deformation drift (%)	-58.5	-64.1	-26.4	-11.9	-3.9	-5.4	3.3	-2.7	0.9	29.9
Average deformation standard error (%)	5.3	6.4	4.8	4	4.1	4.8	4.6	4.4	4.7	7.3
Deformation uniformity (%)	27.7	26.5	26.7	27.9	31.6	33	32.7	34.6	34.8	34.6
Phase uniformity (Degrees)	3.8	2.8	2.1	1.9	2.2	2	1.7	1.9	1.7	0.9
