# Supplementary material for: Evaluation of a Cold-Mixed High-Performance Polyurethane Mixture
Source: Hindawi journal article supplement (doi:10.1155/2019/1507971), 2019-11-07
Supplement: f1 [file 1507971.f1.zip › 1507971.f1/HWTD data.xls]

## Sheet: PUM-4.0
TESTNUM	PROJECT	PROJECTNUM	JOBNUM	LABNUM	ENGINEER	ASPHALTGRADE	MIXTYPE	PITSOURCE	SUBMITTEDBY	SPEEDSET	TEMPSET	MAXDEPTH	STEP1FREQ	STEP1DUR	STEP2FREQ	STEP2DUR	STEP3FREQ	STEP3DUR	STEP4FREQ	STEP4DUR	STEP5FREQ	STEP5DUR	MAXPASS	TESTDATE	COMMENTS	PASSNUM	TEMP	L1	L2	L3	L4	L5	L6	L7	L8	L9	L10	L11	Depth/mm	R1	R2	R3	R4	R5	R6	R7	R8	R9	R10
17	Project Name	JAZ	2	Lab Number	Project Engineer	Asphalt Grade	PU	Pit Source	xuxiuquan	52	50		20	4000	50	16000	50	0	50	0	50	0	20000	2019-02-18	3.5% & 4.0%Void Percent(Left Back) : 0.0000 Void Percent(Left Front) : 0.0000 Void Percent(Right Back) : 0.0000 Void Percent(Right Front) : 0.0000	5	49.9	0	0	0	0	0	0	0	0	0	0	0		0	0	0	0	0	0	0	0	0	0
17	Project Name	JAZ	2	Lab Number	Project Engineer	Asphalt Grade	PU	Pit Source	xuxiuquan	52	50		20	4000	50	16000	50	0	50	0	50	0	20000	2019-02-18	3.5% & 4.0%Void Percent(Left Back) : 0.0000 Void Percent(Left Front) : 0.0000 Void Percent(Right Back) : 0.0000 Void Percent(Right Front) : 0.0000	20	49.9	-0.208737	-0.175311	-0.229895	-0.273736	-0.295326	-0.249072	-0.224257	-0.125552	-0.122682	-0.0998728	-0.091948	-0.187966	-0.289001	-0.205461	-0.244983	-0.216865	-0.241732	-0.185979	-0.219735	-0.251612	-0.271069	-0.279781
17	Project Name	JAZ	2	Lab Number	Project Engineer	Asphalt Grade	PU	Pit Source	xuxiuquan	52	50		20	4000	50	16000	50	0	50	0	50	0	20000	2019-02-18	3.5% & 4.0%Void Percent(Left Back) : 0.0000 Void Percent(Left Front) : 0.0000 Void Percent(Right Back) : 0.0000 Void Percent(Right Front) : 0.0000	40	50	-0.208737	-0.230251	-0.295808	-0.350723	-0.372237	-0.325247	-0.29939	-0.18857	-0.194589	-0.129921	-0.143205	-0.257423	-0.289001	-0.240208	-0.255854	-0.267614	-0.2794	-0.219812	-0.274828	-0.31181	-0.357099	-0.383007
17	Project Name	JAZ	2	Lab Number	Project Engineer	Asphalt Grade	PU	Pit Source	xuxiuquan	52	50		20	4000	50	16000	50	0	50	0	50	0	20000	2019-02-18	3.5% & 4.0%Void Percent(Left Back) : 0.0000 Void Percent(Left Front) : 0.0000 Void Percent(Right Back) : 0.0000 Void Percent(Right Front) : 0.0000	60	50	-0.230759	-0.263246	-0.328803	-0.40579	-0.471348	-0.347015	-0.320904	-0.230683	-0.184302	-0.129921	-0.163754	-0.287395	-0.289001	-0.251816	-0.244983	-0.277851	-0.349072	-0.254102	-0.321412	-0.342214	-0.367944	-0.406146
17	Project Name	JAZ	2	Lab Number	Project Engineer	Asphalt Grade	PU	Pit Source	xuxiuquan	52	50		20	4000	50	16000	50	0	50	0	50	0	20000	2019-02-18	3.5% & 4.0%Void Percent(Left Back) : 0.0000 Void Percent(Left Front) : 0.0000 Void Percent(Right Back) : 0.0000 Void Percent(Right Front) : 0.0000	80	50.1	-0.252806	-0.285267	-0.339827	-0.427838	-0.504444	-0.37973	-0.353187	-0.230683	-0.194589	-0.119913	-0.163754	-0.298234	-0.289001	-0.263449	-0.255854	-0.277851	-0.388798	-0.271399	-0.33081	-0.342214	-0.367944	-0.417703
17	Project Name	JAZ	2	Lab Number	Project Engineer	Asphalt Grade	PU	Pit Source	xuxiuquan	52	50		20	4000	50	16000	50	0	50	0	50	0	20000	2019-02-18	3.5% & 4.0%Void Percent(Left Back) : 0.0000 Void Percent(Left Front) : 0.0000 Void Percent(Right Back) : 0.0000 Void Percent(Right Front) : 0.0000	100	50	-0.241783	-0.296291	-0.350825	-0.44991	-0.493395	-0.401549	-0.353187	-0.241224	-0.204876	-0.129921	-0.163754	-0.311709	-0.264643	-0.251816	-0.255854	-0.277851	-0.388798	-0.288798	-0.33081	-0.372796	-0.389687	-0.429311
17	Project Name	JAZ	2	Lab Number	Project Engineer	Asphalt Grade	PU	Pit Source	xuxiuquan	52	50		20	4000	50	16000	50	0	50	0	50	0	20000	2019-02-18	3.5% & 4.0%Void Percent(Left Back) : 0.0000 Void Percent(Left Front) : 0.0000 Void Percent(Right Back) : 0.0000 Void Percent(Right Front) : 0.0000	120	49.8	-0.252806	-0.296291	-0.361848	-0.44991	-0.548589	-0.445237	-0.385496	-0.251765	-0.215189	-0.160045	-0.194589	-0.319678	-0.289001	-0.263449	-0.299542	-0.277851	-0.404876	-0.297536	-0.340208	-0.393268	-0.444348	-0.452552
17	Project Name	JAZ	2	Lab Number	Project Engineer	Asphalt Grade	PU	Pit Source	xuxiuquan	52	50		20	4000	50	16000	50	0	50	0	50	0	20000	2019-02-18	3.5% & 4.0%Void Percent(Left Back) : 0.0000 Void Percent(Left Front) : 0.0000 Void Percent(Right Back) : 0.0000 Void Percent(Right Front) : 0.0000	140	49.6	-0.26383	-0.318313	-0.38387	-0.44991	-0.504444	-0.445237	-0.363931	-0.262306	-0.204876	-0.160045	-0.194589	-0.325241	-0.289001	-0.251816	-0.255854	-0.267614	-0.396824	-0.315087	-0.340208	-0.413842	-0.444348	-0.475844
17	Project Name	JAZ	2	Lab Number	Project Engineer	Asphalt Grade	PU	Pit Source	xuxiuquan	52	50		20	4000	50	16000	50	0	50	0	50	0	20000	2019-02-18	3.5% & 4.0%Void Percent(Left Back) : 0.0000 Void Percent(Left Front) : 0.0000 Void Percent(Right Back) : 0.0000 Void Percent(Right Front) : 0.0000	160	49.5	-0.26383	-0.318313	-0.394894	-0.494055	-0.53754	-0.423393	-0.363931	-0.262306	-0.215189	-0.150012	-0.194589	-0.341611	-0.276809	-0.251816	-0.299542	-0.277851	-0.412979	-0.315087	-0.349656	-0.403555	-0.45532	-0.487502
17	Project Name	JAZ	2	Lab Number	Project Engineer	Asphalt Grade	PU	Pit Source	xuxiuquan	52	50		20	4000	50	16000	50	0	50	0	50	0	20000	2019-02-18	3.5% & 4.0%Void Percent(Left Back) : 0.0000 Void Percent(Left Front) : 0.0000 Void Percent(Right Back) : 0.0000 Void Percent(Right Front) : 0.0000	180	49.5	-0.26383	-0.318313	-0.405917	-0.494055	-0.548589	-0.423393	-0.407035	-0.283413	-0.215189	-0.150012	-0.204876	-0.349644	-0.264643	-0.251816	-0.255854	-0.277851	-0.437413	-0.297536	-0.368605	-0.434492	-0.466319	-0.487502
17	Project Name	JAZ	2	Lab Number	Project Engineer	Asphalt Grade	PU	Pit Source	xuxiuquan	52	50		20	4000	50	16000	50	0	50	0	50	0	20000	2019-02-18	3.5% & 4.0%Void Percent(Left Back) : 0.0000 Void Percent(Left Front) : 0.0000 Void Percent(Right Back) : 0.0000 Void Percent(Right Front) : 0.0000	200	49.6	-0.285902	-0.329336	-0.405917	-0.505104	-0.548589	-0.456159	-0.385496	-0.272847	-0.235788	-0.150012	-0.204876	-0.354914	-0.289001	-0.251816	-0.299542	-0.288061	-0.421081	-0.33274	-0.349656	-0.444856	-0.49944	-0.499212
17	Project Name	JAZ	2	Lab Number	Project Engineer	Asphalt Grade	PU	Pit Source	xuxiuquan	52	50		20	4000	50	16000	50	0	50	0	50	0	20000	2019-02-18	3.5% & 4.0%Void Percent(Left Back) : 0.0000 Void Percent(Left Front) : 0.0000 Void Percent(Right Back) : 0.0000 Void Percent(Right Front) : 0.0000	220	49.7	-0.274853	-0.318313	-0.405917	-0.516153	-0.592785	-0.456159	-0.363931	-0.262306	-0.194589	-0.119913	-0.194589	-0.344742	-0.276809	-0.251816	-0.310515	-0.288061	-0.470357	-0.33274	-0.359105	-0.434492	-0.510515	-0.510896
17	Project Name	JAZ	2	Lab Number	Project Engineer	Asphalt Grade	PU	Pit Source	xuxiuquan	52	50		20	4000	50	16000	50	0	50	0	50	0	20000	2019-02-18	3.5% & 4.0%Void Percent(Left Back) : 0.0000 Void Percent(Left Front) : 0.0000 Void Percent(Right Back) : 0.0000 Void Percent(Right Front) : 0.0000	240	49.7	-0.274853	-0.329336	-0.416941	-0.527202	-0.570687	-0.456159	-0.407035	-0.272847	-0.225501	-0.150012	-0.204876	-0.360623	-0.264643	-0.240208	-0.299542	-0.277851	-0.453822	-0.323901	-0.368605	-0.444856	-0.510515	-0.499212
17	Project Name	JAZ	2	Lab Number	Project Engineer	Asphalt Grade	PU	Pit Source	xuxiuquan	52	50		20	4000	50	16000	50	0	50	0	50	0	20000	2019-02-18	3.5% & 4.0%Void Percent(Left Back) : 0.0000 Void Percent(Left Front) : 0.0000 Void Percent(Right Back) : 0.0000 Void Percent(Right Front) : 0.0000	260	49.8	-0.274853	-0.329336	-0.416941	-0.516153	-0.592785	-0.456159	-0.396265	-0.283413	-0.225501	-0.150012	-0.204876	-0.360502	-0.276809	-0.251816	-0.299542	-0.267614	-0.470357	-0.323901	-0.368605	-0.465633	-0.510515	-0.510896
17	Project Name	JAZ	2	Lab Number	Project Engineer	Asphalt Grade	PU	Pit Source	xuxiuquan	52	50		20	4000	50	16000	50	0	50	0	50	0	20000	2019-02-18	3.5% & 4.0%Void Percent(Left Back) : 0.0000 Void Percent(Left Front) : 0.0000 Void Percent(Right Back) : 0.0000 Void Percent(Right Front) : 0.0000	280	49.8	-0.285902	-0.329336	-0.416941	-0.538251	-0.581736	-0.456159	-0.407035	-0.293954	-0.235788	-0.150012	-0.215189	-0.371234	-0.276809	-0.251816	-0.299542	-0.277851	-0.48702	-0.323901	-0.368605	-0.444856	-0.510515	-0.522605
17	Project Name	JAZ	2	Lab Number	Project Engineer	Asphalt Grade	PU	Pit Source	xuxiuquan	52	50		20	4000	50	16000	50	0	50	0	50	0	20000	2019-02-18	3.5% & 4.0%Void Percent(Left Back) : 0.0000 Void Percent(Left Front) : 0.0000 Void Percent(Right Back) : 0.0000 Void Percent(Right Front) : 0.0000	300	50	-0.30795	-0.34036	-0.427965	-0.516153	-0.614909	-0.478028	-0.41783	-0.283413	-0.235788	-0.160045	-0.215189	-0.36583	-0.264643	-0.251816	-0.310515	-0.247269	-0.48702	-0.341605	-0.368605	-0.465633	-0.521614	-0.522605
17	Project Name	JAZ	2	Lab Number	Project Engineer	Asphalt Grade	PU	Pit Source	xuxiuquan	52	50		20	4000	50	16000	50	0	50	0	50	0	20000	2019-02-18	3.5% & 4.0%Void Percent(Left Back) : 0.0000 Void Percent(Left Front) : 0.0000 Void Percent(Right Back) : 0.0000 Void Percent(Right Front) : 0.0000	320	50	-0.285902	-0.34036	-0.427965	-0.571424	-0.592785	-0.467106	-0.407035	-0.283413	-0.235788	-0.150012	-0.225501	-0.379647	-0.276809	-0.240208	-0.310515	-0.277851	-0.503784	-0.341605	-0.368605	-0.476047	-0.532714	-0.522605
17	Project Name	JAZ	2	Lab Number	Project Engineer	Asphalt Grade	PU	Pit Source	xuxiuquan	52	50		20	4000	50	16000	50	0	50	0	50	0	20000	2019-02-18	3.5% & 4.0%Void Percent(Left Back) : 0.0000 Void Percent(Left Front) : 0.0000 Void Percent(Right Back) : 0.0000 Void Percent(Right Front) : 0.0000	340	50	-0.285902	-0.34036	-0.439014	-0.560375	-0.592785	-0.478028	-0.396265	-0.283413	-0.215189	-0.129921	-0.215189	-0.374498	-0.264643	-0.251816	-0.299542	-0.277851	-0.503784	-0.341605	-0.387629	-0.465633	-0.532714	-0.53434
17	Project Name	JAZ	2	Lab Number	Project Engineer	Asphalt Grade	PU	Pit Source	xuxiuquan	52	50		20	4000	50	16000	50	0	50	0	50	0	20000	2019-02-18	3.5% & 4.0%Void Percent(Left Back) : 0.0000 Void Percent(Left Front) : 0.0000 Void Percent(Right Back) : 0.0000 Void Percent(Right Front) : 0.0000	360	50	-0.30795	-0.34036	-0.427965	-0.571424	-0.637032	-0.467106	-0.41783	-0.272847	-0.235788	-0.160045	-0.235788	-0.377006	-0.276809	-0.251816	-0.310515	-0.298323	-0.546151	-0.33274	-0.39718	-0.455244	-0.543839	-0.53434
17	Project Name	JAZ	2	Lab Number	Project Engineer	Asphalt Grade	PU	Pit Source	xuxiuquan	52	50		20	4000	50	16000	50	0	50	0	50	0	20000	2019-02-18	3.5% & 4.0%Void Percent(Left Back) : 0.0000 Void Percent(Left Front) : 0.0000 Void Percent(Right Back) : 0.0000 Void Percent(Right Front) : 0.0000	380	49.9	-0.285902	-0.351384	-0.439014	-0.538251	-0.581736	-0.456159	-0.407035	-0.293954	-0.235788	-0.129921	-0.225501	-0.376752	-0.264643	-0.251816	-0.277647	-0.277851	-0.529133	-0.33274	-0.416357	-0.486486	-0.577317	-0.53434
17	Project Name	JAZ	2	Lab Number	Project Engineer	Asphalt Grade	PU	Pit Source	xuxiuquan	52	50		20	4000	50	16000	50	0	50	0	50	0	20000	2019-02-18	3.5% & 4.0%Void Percent(Left Back) : 0.0000 Void Percent(Left Front) : 0.0000 Void Percent(Right Back) : 0.0000 Void Percent(Right Front) : 0.0000	400	49.8	-0.285902	-0.362407	-0.461061	-0.582498	-0.625958	-0.467106	-0.396265	-0.293954	-0.235788	-0.150012	-0.235788	-0.393325	-0.276809	-0.251816	-0.277647	-0.288061	-0.571906	-0.341605	-0.39718	-0.476047	-0.55499	-0.522605
17	Project Name	JAZ	2	Lab Number	Project Engineer	Asphalt Grade	PU	Pit Source	xuxiuquan	52	50		20	4000	50	16000	50	0	50	0	50	0	20000	2019-02-18	3.5% & 4.0%Void Percent(Left Back) : 0.0000 Void Percent(Left Front) : 0.0000 Void Percent(Right Back) : 0.0000 Void Percent(Right Front) : 0.0000	420	49.7	-0.30795	-0.351384	-0.439014	-0.560375	-0.614909	-0.478028	-0.41783	-0.283413	-0.235788	-0.160045	-0.246101	-0.379647	-0.276809	-0.251816	-0.310515	-0.288061	-0.537616	-0.35052	-0.39718	-0.476047	-0.55499	-0.55786
17	Project Name	JAZ	2	Lab Number	Project Engineer	Asphalt Grade	PU	Pit Source	xuxiuquan	52	50		20	4000	50	16000	50	0	50	0	50	0	20000	2019-02-18	3.5% & 4.0%Void Percent(Left Back) : 0.0000 Void Percent(Left Front) : 0.0000 Void Percent(Right Back) : 0.0000 Void Percent(Right Front) : 0.0000	440	49.6	-0.318999	-0.362407	-0.439014	-0.582498	-0.625958	-0.467106	-0.41783	-0.315087	-0.235788	-0.150012	-0.246101	-0.393097	-0.276809	-0.251816	-0.299542	-0.267614	-0.546151	-0.35052	-0.406756	-0.486486	-0.577317	-0.53434
17	Project Name	JAZ	2	Lab Number	Project Engineer	Asphalt Grade	PU	Pit Source	xuxiuquan	52	50		20	4000	50	16000	50	0	50	0	50	0	20000	2019-02-18	3.5% & 4.0%Void Percent(Left Back) : 0.0000 Void Percent(Left Front) : 0.0000 Void Percent(Right Back) : 0.0000 Void Percent(Right Front) : 0.0000	460	49.7	-0.274853	-0.362407	-0.461061	-0.560375	-0.625958	-0.456159	-0.385496	-0.293954	-0.225501	-0.119913	-0.246101	-0.385223	-0.240309	-0.263449	-0.288595	-0.267614	-0.571906	-0.35052	-0.416357	-0.476047	-0.577317	-0.55786
17	Project Name	JAZ	2	Lab Number	Project Engineer	Asphalt Grade	PU	Pit Source	xuxiuquan	52	50		20	4000	50	16000	50	0	50	0	50	0	20000	2019-02-18	3.5% & 4.0%Void Percent(Left Back) : 0.0000 Void Percent(Left Front) : 0.0000 Void Percent(Right Back) : 0.0000 Void Percent(Right Front) : 0.0000	480	49.7	-0.285902	-0.362407	-0.461061	-0.593547	-0.637032	-0.478028	-0.407035	-0.283413	-0.235788	-0.150012	-0.266751	-0.393452	-0.264643	-0.251816	-0.299542	-0.288061	-0.563296	-0.359435	-0.406756	-0.476047	-0.577317	-0.55786
17	Project Name	JAZ	2	Lab Number	Project Engineer	Asphalt Grade	PU	Pit Source	xuxiuquan	52	50		20	4000	50	16000	50	0	50	0	50	0	20000	2019-02-18	3.5% & 4.0%Void Percent(Left Back) : 0.0000 Void Percent(Left Front) : 0.0000 Void Percent(Right Back) : 0.0000 Void Percent(Right Front) : 0.0000	500	49.8	-0.30795	-0.362407	-0.461061	-0.571424	-0.625958	-0.445237	-0.407035	-0.262306	-0.215189	-0.0998728	-0.235788	-0.377495	-0.264643	-0.240208	-0.310515	-0.298323	-0.580542	-0.35052	-0.416357	-0.476047	-0.610946	-0.56962
17	Project Name	JAZ	2	Lab Number	Project Engineer	Asphalt Grade	PU	Pit Source	xuxiuquan	52	50		20	4000	50	16000	50	0	50	0	50	0	20000	2019-02-18	3.5% & 4.0%Void Percent(Left Back) : 0.0000 Void Percent(Left Front) : 0.0000 Void Percent(Right Back) : 0.0000 Void Percent(Right Front) : 0.0000	520	50	-0.330048	-0.373456	-0.439014	-0.593547	-0.592785	-0.478028	-0.41783	-0.293954	-0.246101	-0.129921	-0.266751	-0.393154	-0.276809	-0.240208	-0.310515	-0.288061	-0.546151	-0.359435	-0.416357	-0.507416	-0.599719	-0.55786
17	Project Name	JAZ	2	Lab Number	Project Engineer	Asphalt Grade	PU	Pit Source	xuxiuquan	52	50		20	4000	50	16000	50	0	50	0	50	0	20000	2019-02-18	3.5% & 4.0%Void Percent(Left Back) : 0.0000 Void Percent(Left Front) : 0.0000 Void Percent(Right Back) : 0.0000 Void Percent(Right Front) : 0.0000	540	49.9	-0.318999	-0.362407	-0.461061	-0.593547	-0.659155	-0.467106	-0.407035	-0.283413	-0.266751	-0.119913	-0.287401	-0.401193	-0.276809	-0.240208	-0.299542	-0.298323	-0.580542	-0.377342	-0.416357	-0.486486	-0.610946	-0.55786
17	Project Name	JAZ	2	Lab Number	Project Engineer	Asphalt Grade	PU	Pit Source	xuxiuquan	52	50		20	4000	50	16000	50	0	50	0	50	0	20000	2019-02-18	3.5% & 4.0%Void Percent(Left Back) : 0.0000 Void Percent(Left Front) : 0.0000 Void Percent(Right Back) : 0.0000 Void Percent(Right Front) : 0.0000	560	49.8	-0.318999	-0.373456	-0.47211	-0.637845	-0.625958	-0.488975	-0.428625	-0.283413	-0.266751	-0.119913	-0.287401	-0.41503	-0.276809	-0.240208	-0.321488	-0.30861	-0.563296	-0.359435	-0.425983	-0.476047	-0.588518	-0.55786
17	Project Name	JAZ	2	Lab Number	Project Engineer	Asphalt Grade	PU	Pit Source	xuxiuquan	52	50		20	4000	50	16000	50	0	50	0	50	0	20000	2019-02-18	3.5% & 4.0%Void Percent(Left Back) : 0.0000 Void Percent(Left Front) : 0.0000 Void Percent(Right Back) : 0.0000 Void Percent(Right Front) : 0.0000	580	50	-0.30795	-0.373456	-0.47211	-0.637845	-0.659155	-0.478028	-0.43942	-0.315087	-0.266751	-0.119913	-0.287401	-0.422948	-0.276809	-0.2286	-0.332486	-0.318897	-0.597891	-0.377342	-0.425983	-0.517906	-0.610946	-0.55786
17	Project Name	JAZ	2	Lab Number	Project Engineer	Asphalt Grade	PU	Pit Source	xuxiuquan	52	50		20	4000	50	16000	50	0	50	0	50	0	20000	2019-02-18	3.5% & 4.0%Void Percent(Left Back) : 0.0000 Void Percent(Left Front) : 0.0000 Void Percent(Right Back) : 0.0000 Void Percent(Right Front) : 0.0000	600	50	-0.330048	-0.373456	-0.483159	-0.615696	-0.637032	-0.478028	-0.41783	-0.325653	-0.235788	-0.150012	-0.297739	-0.415074	-0.289001	-0.2286	-0.310515	-0.298323	-0.589204	-0.377342	-0.425983	-0.517906	-0.610946	-0.56962
17	Project Name	JAZ	2	Lab Number	Project Engineer	Asphalt Grade	PU	Pit Source	xuxiuquan	52	50		20	4000	50	16000	50	0	50	0	50	0	20000	2019-02-18	3.5% & 4.0%Void Percent(Left Back) : 0.0000 Void Percent(Left Front) : 0.0000 Void Percent(Right Back) : 0.0000 Void Percent(Right Front) : 0.0000	620	50	-0.330048	-0.373456	-0.483159	-0.615696	-0.659155	-0.467106	-0.41783	-0.293954	-0.246101	-0.119913	-0.287401	-0.409727	-0.289001	-0.2286	-0.310515	-0.318897	-0.632892	-0.35052	-0.425983	-0.486486	-0.599719	-0.55786
17	Project Name	JAZ	2	Lab Number	Project Engineer	Asphalt Grade	PU	Pit Source	xuxiuquan	52	50		20	4000	50	16000	50	0	50	0	50	0	20000	2019-02-18	3.5% & 4.0%Void Percent(Left Back) : 0.0000 Void Percent(Left Front) : 0.0000 Void Percent(Right Back) : 0.0000 Void Percent(Right Front) : 0.0000	640	49.8	-0.330048	-0.395503	-0.494208	-0.648945	-0.614909	-0.488975	-0.43942	-0.315087	-0.277089	-0.119913	-0.297739	-0.433832	-0.289001	-0.240208	-0.310515	-0.318897	-0.563296	-0.359435	-0.435635	-0.486486	-0.622198	-0.56962
17	Project Name	JAZ	2	Lab Number	Project Engineer	Asphalt Grade	PU	Pit Source	xuxiuquan	52	50		20	4000	50	16000	50	0	50	0	50	0	20000	2019-02-18	3.5% & 4.0%Void Percent(Left Back) : 0.0000 Void Percent(Left Front) : 0.0000 Void Percent(Right Back) : 0.0000 Void Percent(Right Front) : 0.0000	660	49.7	-0.318999	-0.395503	-0.494208	-0.615696	-0.648081	-0.488975	-0.41783	-0.325653	-0.246101	-0.119913	-0.31844	-0.420414	-0.276809	-0.240208	-0.321488	-0.339547	-0.641706	-0.359435	-0.45499	-0.517906	-0.622198	-0.55786
17	Project Name	JAZ	2	Lab Number	Project Engineer	Asphalt Grade	PU	Pit Source	xuxiuquan	52	50		20	4000	50	16000	50	0	50	0	50	0	20000	2019-02-18	3.5% & 4.0%Void Percent(Left Back) : 0.0000 Void Percent(Left Front) : 0.0000 Void Percent(Right Back) : 0.0000 Void Percent(Right Front) : 0.0000	680	49.8	-0.318999	-0.395503	-0.483159	-0.648945	-0.637032	-0.499923	-0.428625	-0.315087	-0.277089	-0.129921	-0.308102	-0.43107	-0.264643	-0.240208	-0.321488	-0.34991	-0.606603	-0.359435	-0.435635	-0.517906	-0.610946	-0.56962
17	Project Name	JAZ	2	Lab Number	Project Engineer	Asphalt Grade	PU	Pit Source	xuxiuquan	52	50		20	4000	50	16000	50	0	50	0	50	0	20000	2019-02-18	3.5% & 4.0%Void Percent(Left Back) : 0.0000 Void Percent(Left Front) : 0.0000 Void Percent(Right Back) : 0.0000 Void Percent(Right Front) : 0.0000	700	49.8	-0.318999	-0.395503	-0.483159	-0.637845	-0.659155	-0.488975	-0.43942	-0.315087	-0.266751	-0.129921	-0.297739	-0.42571	-0.276809	-0.240208	-0.332486	-0.318897	-0.650545	-0.377342	-0.464693	-0.507416	-0.633451	-0.581406
17	Project Name	JAZ	2	Lab Number	Project Engineer	Asphalt Grade	PU	Pit Source	xuxiuquan	52	50		20	4000	50	16000	50	0	50	0	50	0	20000	2019-02-18	3.5% & 4.0%Void Percent(Left Back) : 0.0000 Void Percent(Left Front) : 0.0000 Void Percent(Right Back) : 0.0000 Void Percent(Right Front) : 0.0000	720	49.7	-0.30795	-0.395503	-0.494208	-0.648945	-0.659155	-0.467106	-0.407035	-0.315087	-0.266751	-0.0998728	-0.308102	-0.431248	-0.264643	-0.251816	-0.310515	-0.339547	-0.641706	-0.386334	-0.464693	-0.517906	-0.633451	-0.56962
17	Project Name	JAZ	2	Lab Number	Project Engineer	Asphalt Grade	PU	Pit Source	xuxiuquan	52	50		20	4000	50	16000	50	0	50	0	50	0	20000	2019-02-18	3.5% & 4.0%Void Percent(Left Back) : 0.0000 Void Percent(Left Front) : 0.0000 Void Percent(Right Back) : 0.0000 Void Percent(Right Front) : 0.0000	740	49.9	-0.318999	-0.406552	-0.494208	-0.615696	-0.625958	-0.499923	-0.428625	-0.293954	-0.235788	-0.119913	-0.308102	-0.409912	-0.264643	-0.240208	-0.321488	-0.298323	-0.606603	-0.377342	-0.464693	-0.517906	-0.622198	-0.581406
17	Project Name	JAZ	2	Lab Number	Project Engineer	Asphalt Grade	PU	Pit Source	xuxiuquan	52	50		20	4000	50	16000	50	0	50	0	50	0	20000	2019-02-18	3.5% & 4.0%Void Percent(Left Back) : 0.0000 Void Percent(Left Front) : 0.0000 Void Percent(Right Back) : 0.0000 Void Percent(Right Front) : 0.0000	760	49.9	-0.318999	-0.406552	-0.505257	-0.648945	-0.692379	-0.488975	-0.46101	-0.325653	-0.266751	-0.119913	-0.339141	-0.436651	-0.264643	-0.240208	-0.332486	-0.318897	-0.704139	-0.359435	-0.4842	-0.486486	-0.622198	-0.593217
17	Project Name	JAZ	2	Lab Number	Project Engineer	Asphalt Grade	PU	Pit Source	xuxiuquan	52	50		20	4000	50	16000	50	0	50	0	50	0	20000	2019-02-18	3.5% & 4.0%Void Percent(Left Back) : 0.0000 Void Percent(Left Front) : 0.0000 Void Percent(Right Back) : 0.0000 Void Percent(Right Front) : 0.0000	780	50	-0.330048	-0.417601	-0.505257	-0.682193	-0.692379	-0.499923	-0.46101	-0.325653	-0.287401	-0.129921	-0.339141	-0.450126	-0.289001	-0.251816	-0.354559	-0.360299	-0.659409	-0.377342	-0.474447	-0.538963	-0.622198	-0.593217
17	Project Name	JAZ	2	Lab Number	Project Engineer	Asphalt Grade	PU	Pit Source	xuxiuquan	52	50		20	4000	50	16000	50	0	50	0	50	0	20000	2019-02-18	3.5% & 4.0%Void Percent(Left Back) : 0.0000 Void Percent(Left Front) : 0.0000 Void Percent(Right Back) : 0.0000 Void Percent(Right Front) : 0.0000	800	50.1	-0.341097	-0.417601	-0.505257	-0.660019	-0.67023	-0.478028	-0.41783	-0.283413	-0.225501	-0.0998728	-0.308102	-0.418548	-0.289001	-0.263449	-0.332486	-0.339547	-0.695147	-0.395376	-0.4842	-0.517906	-0.622198	-0.605028
17	Project Name	JAZ	2	Lab Number	Project Engineer	Asphalt Grade	PU	Pit Source	xuxiuquan	52	50		20	4000	50	16000	50	0	50	0	50	0	20000	2019-02-18	3.5% & 4.0%Void Percent(Left Back) : 0.0000 Void Percent(Left Front) : 0.0000 Void Percent(Right Back) : 0.0000 Void Percent(Right Front) : 0.0000	820	50.2	-0.341097	-0.417601	-0.505257	-0.671093	-0.659155	-0.478028	-0.428625	-0.293954	-0.235788	-0.10988	-0.308102	-0.426523	-0.289001	-0.251816	-0.332486	-0.34991	-0.668325	-0.386334	-0.474447	-0.517906	-0.622198	-0.605028
17	Project Name	JAZ	2	Lab Number	Project Engineer	Asphalt Grade	PU	Pit Source	xuxiuquan	52	50		20	4000	50	16000	50	0	50	0	50	0	20000	2019-02-18	3.5% & 4.0%Void Percent(Left Back) : 0.0000 Void Percent(Left Front) : 0.0000 Void Percent(Right Back) : 0.0000 Void Percent(Right Front) : 0.0000	840	50.1	-0.341097	-0.417601	-0.516306	-0.682193	-0.67023	-0.499923	-0.46101	-0.325653	-0.287401	-0.129921	-0.349504	-0.452888	-0.289001	-0.251816	-0.365608	-0.34991	-0.67724	-0.395376	-0.4842	-0.538963	-0.656031	-0.605028
17	Project Name	JAZ	2	Lab Number	Project Engineer	Asphalt Grade	PU	Pit Source	xuxiuquan	52	50		20	4000	50	16000	50	0	50	0	50	0	20000	2019-02-18	3.5% & 4.0%Void Percent(Left Back) : 0.0000 Void Percent(Left Front) : 0.0000 Void Percent(Right Back) : 0.0000 Void Percent(Right Front) : 0.0000	860	50	-0.352146	-0.439699	-0.516306	-0.671093	-0.659155	-0.478028	-0.41783	-0.315087	-0.235788	-0.10988	-0.31844	-0.434569	-0.289001	-0.263449	-0.354559	-0.34991	-0.668325	-0.386334	-0.4842	-0.528447	-0.667334	-0.605028
17	Project Name	JAZ	2	Lab Number	Project Engineer	Asphalt Grade	PU	Pit Source	xuxiuquan	52	50		20	4000	50	16000	50	0	50	0	50	0	20000	2019-02-18	3.5% & 4.0%Void Percent(Left Back) : 0.0000 Void Percent(Left Front) : 0.0000 Void Percent(Right Back) : 0.0000 Void Percent(Right Front) : 0.0000	880	50	-0.352146	-0.417601	-0.516306	-0.682193	-0.67023	-0.53274	-0.46101	-0.293954	-0.266751	-0.150012	-0.349504	-0.439801	-0.289001	-0.251816	-0.365608	-0.339547	-0.67724	-0.404419	-0.4842	-0.517906	-0.656031	-0.616864
17	Project Name	JAZ	2	Lab Number	Project Engineer	Asphalt Grade	PU	Pit Source	xuxiuquan	52	50		20	4000	50	16000	50	0	50	0	50	0	20000	2019-02-18	3.5% & 4.0%Void Percent(Left Back) : 0.0000 Void Percent(Left Front) : 0.0000 Void Percent(Right Back) : 0.0000 Void Percent(Right Front) : 0.0000	900	49.8	-0.330048	-0.42865	-0.527355	-0.671093	-0.67023	-0.488975	-0.428625	-0.325653	-0.266751	-0.119913	-0.31844	-0.447713	-0.301219	-0.251816	-0.365608	-0.339547	-0.67724	-0.395376	-0.493979	-0.528447	-0.667334	-0.616864
17	Project Name	JAZ	2	Lab Number	Project Engineer	Asphalt Grade	PU	Pit Source	xuxiuquan	52	50		20	4000	50	16000	50	0	50	0	50	0	20000	2019-02-18	3.5% & 4.0%Void Percent(Left Back) : 0.0000 Void Percent(Left Front) : 0.0000 Void Percent(Right Back) : 0.0000 Void Percent(Right Front) : 0.0000	920	49.8	-0.341097	-0.42865	-0.516306	-0.693293	-0.67023	-0.488975	-0.46101	-0.293954	-0.266751	-0.10988	-0.339141	-0.442576	-0.289001	-0.286741	-0.332486	-0.360299	-0.67724	-0.404419	-0.493979	-0.538963	-0.678663	-0.605028
17	Project Name	JAZ	2	Lab Number	Project Engineer	Asphalt Grade	PU	Pit Source	xuxiuquan	52	50		20	4000	50	16000	50	0	50	0	50	0	20000	2019-02-18	3.5% & 4.0%Void Percent(Left Back) : 0.0000 Void Percent(Left Front) : 0.0000 Void Percent(Right Back) : 0.0000 Void Percent(Right Front) : 0.0000	940	49.7	-0.341097	-0.42865	-0.527355	-0.682193	-0.67023	-0.499923	-0.46101	-0.325653	-0.277089	-0.150012	-0.359867	-0.453073	-0.289001	-0.251816	-0.332486	-0.34991	-0.695147	-0.386334	-0.4842	-0.528447	-0.656031	-0.628701
17	Project Name	JAZ	2	Lab Number	Project Engineer	Asphalt Grade	PU	Pit Source	xuxiuquan	52	50		20	4000	50	16000	50	0	50	0	50	0	20000	2019-02-18	3.5% & 4.0%Void Percent(Left Back) : 0.0000 Void Percent(Left Front) : 0.0000 Void Percent(Right Back) : 0.0000 Void Percent(Right Front) : 0.0000	960	49.6	-0.341097	-0.42865	-0.527355	-0.671093	-0.67023	-0.478028	-0.43942	-0.315087	-0.266751	-0.10988	-0.339141	-0.445071	-0.264643	-0.263449	-0.354559	-0.339547	-0.67724	-0.404419	-0.4842	-0.538963	-0.667334	-0.616864
17	Project Name	JAZ	2	Lab Number	Project Engineer	Asphalt Grade	PU	Pit Source	xuxiuquan	52	50		20	4000	50	16000	50	0	50	0	50	0	20000	2019-02-18	3.5% & 4.0%Void Percent(Left Back) : 0.0000 Void Percent(Left Front) : 0.0000 Void Percent(Right Back) : 0.0000 Void Percent(Right Front) : 0.0000	980	49.6	-0.341097	-0.42865	-0.549478	-0.660019	-0.659155	-0.488975	-0.428625	-0.346812	-0.287401	-0.160045	-0.370256	-0.460927	-0.276809	-0.286741	-0.354559	-0.30861	-0.67724	-0.386334	-0.503784	-0.538963	-0.689991	-0.628701
17	Project Name	JAZ	2	Lab Number	Project Engineer	Asphalt Grade	PU	Pit Source	xuxiuquan	52	50		20	4000	50	16000	50	0	50	0	50	0	20000	2019-02-18	3.5% & 4.0%Void Percent(Left Back) : 0.0000 Void Percent(Left Front) : 0.0000 Void Percent(Right Back) : 0.0000 Void Percent(Right Front) : 0.0000	1000	50	-0.352146	-0.439699	-0.527355	-0.682193	-0.67023	-0.488975	-0.471805	-0.325653	-0.246101	-0.129921	-0.339141	-0.445326	-0.301219	-0.286741	-0.332486	-0.34991	-0.695147	-0.404419	-0.493979	-0.549529	-0.667334	-0.628701
17	Project Name	JAZ	2	Lab Number	Project Engineer	Asphalt Grade	PU	Pit Source	xuxiuquan	52	50		20	4000	50	16000	50	0	50	0	50	0	20000	2019-02-18	3.5% & 4.0%Void Percent(Left Back) : 0.0000 Void Percent(Left Front) : 0.0000 Void Percent(Right Back) : 0.0000 Void Percent(Right Front) : 0.0000	1020	50	-0.352146	-0.42865	-0.549478	-0.682193	-0.659155	-0.488975	-0.46101	-0.293954	-0.246101	-0.119913	-0.31844	-0.442932	-0.289001	-0.286741	-0.354559	-0.30861	-0.67724	-0.395376	-0.493979	-0.538963	-0.667334	-0.65245
17	Project Name	JAZ	2	Lab Number	Project Engineer	Asphalt Grade	PU	Pit Source	xuxiuquan	52	50		20	4000	50	16000	50	0	50	0	50	0	20000	2019-02-18	3.5% & 4.0%Void Percent(Left Back) : 0.0000 Void Percent(Left Front) : 0.0000 Void Percent(Right Back) : 0.0000 Void Percent(Right Front) : 0.0000	1040	50	-0.352146	-0.439699	-0.549478	-0.671093	-0.659155	-0.499923	-0.43942	-0.325653	-0.235788	-0.119913	-0.308102	-0.445503	-0.289001	-0.298399	-0.365608	-0.318897	-0.668325	-0.413487	-0.503784	-0.560095	-0.689991	-0.628701
17	Project Name	JAZ	2	Lab Number	Project Engineer	Asphalt Grade	PU	Pit Source	xuxiuquan	52	50		20	4000	50	16000	50	0	50	0	50	0	20000	2019-02-18	3.5% & 4.0%Void Percent(Left Back) : 0.0000 Void Percent(Left Front) : 0.0000 Void Percent(Right Back) : 0.0000 Void Percent(Right Front) : 0.0000	1060	50	-0.341097	-0.439699	-0.549478	-0.693293	-0.703478	-0.499923	-0.4826	-0.357403	-0.266751	-0.160045	-0.370256	-0.466731	-0.289001	-0.321793	-0.365608	-0.34991	-0.722224	-0.404419	-0.503784	-0.560095	-0.70137	-0.65245
17	Project Name	JAZ	2	Lab Number	Project Engineer	Asphalt Grade	PU	Pit Source	xuxiuquan	52	50		20	4000	50	16000	50	0	50	0	50	0	20000	2019-02-18	3.5% & 4.0%Void Percent(Left Back) : 0.0000 Void Percent(Left Front) : 0.0000 Void Percent(Right Back) : 0.0000 Void Percent(Right Front) : 0.0000	1080	49.8	-0.352146	-0.439699	-0.560527	-0.682193	-0.67023	-0.53274	-0.471805	-0.33622	-0.297739	-0.180162	-0.380619	-0.46917	-0.301219	-0.298399	-0.387782	-0.34991	-0.722224	-0.413487	-0.533324	-0.549529	-0.689991	-0.664337
17	Project Name	JAZ	2	Lab Number	Project Engineer	Asphalt Grade	PU	Pit Source	xuxiuquan	52	50		20	4000	50	16000	50	0	50	0	50	0	20000	2019-02-18	3.5% & 4.0%Void Percent(Left Back) : 0.0000 Void Percent(Left Front) : 0.0000 Void Percent(Right Back) : 0.0000 Void Percent(Right Front) : 0.0000	1100	49.8	-0.352146	-0.439699	-0.549478	-0.682193	-0.67023	-0.53274	-0.49342	-0.33622	-0.277089	-0.150012	-0.339141	-0.461245	-0.289001	-0.310109	-0.365608	-0.318897	-0.704139	-0.404419	-0.513613	-0.549529	-0.667334	-0.65245
17	Project Name	JAZ	2	Lab Number	Project Engineer	Asphalt Grade	PU	Pit Source	xuxiuquan	52	50		20	4000	50	16000	50	0	50	0	50	0	20000	2019-02-18	3.5% & 4.0%Void Percent(Left Back) : 0.0000 Void Percent(Left Front) : 0.0000 Void Percent(Right Back) : 0.0000 Void Percent(Right Front) : 0.0000	1120	49.8	-0.341097	-0.439699	-0.560527	-0.682193	-0.703478	-0.53274	-0.4826	-0.33622	-0.308102	-0.180162	-0.380619	-0.471761	-0.276809	-0.298399	-0.354559	-0.360299	-0.722224	-0.42258	-0.513613	-0.560095	-0.70137	-0.65245
17	Project Name	JAZ	2	Lab Number	Project Engineer	Asphalt Grade	PU	Pit Source	xuxiuquan	52	50		20	4000	50	16000	50	0	50	0	50	0	20000	2019-02-18	3.5% & 4.0%Void Percent(Left Back) : 0.0000 Void Percent(Left Front) : 0.0000 Void Percent(Right Back) : 0.0000 Void Percent(Right Front) : 0.0000	1140	49.8	-0.341097	-0.439699	-0.560527	-0.693293	-0.714553	-0.543712	-0.4826	-0.33622	-0.266751	-0.160045	-0.31844	-0.464198	-0.289001	-0.310109	-0.354559	-0.34991	-0.731291	-0.413487	-0.503784	-0.560095	-0.678663	-0.664337
17	Project Name	JAZ	2	Lab Number	Project Engineer	Asphalt Grade	PU	Pit Source	xuxiuquan	52	50		20	4000	50	16000	50	0	50	0	50	0	20000	2019-02-18	3.5% & 4.0%Void Percent(Left Back) : 0.0000 Void Percent(Left Front) : 0.0000 Void Percent(Right Back) : 0.0000 Void Percent(Right Front) : 0.0000	1160	49.8	-0.352146	-0.439699	-0.560527	-0.671093	-0.692379	-0.53274	-0.49342	-0.357403	-0.287401	-0.170104	-0.359867	-0.469106	-0.276809	-0.310109	-0.365608	-0.318897	-0.731291	-0.42258	-0.513613	-0.549529	-0.689991	-0.664337
17	Project Name	JAZ	2	Lab Number	Project Engineer	Asphalt Grade	PU	Pit Source	xuxiuquan	52	50		20	4000	50	16000	50	0	50	0	50	0	20000	2019-02-18	3.5% & 4.0%Void Percent(Left Back) : 0.0000 Void Percent(Left Front) : 0.0000 Void Percent(Right Back) : 0.0000 Void Percent(Right Front) : 0.0000	1180	50	-0.352146	-0.450748	-0.571602	-0.704367	-0.692379	-0.488975	-0.428625	-0.325653	-0.235788	-0.10988	-0.287401	-0.459353	-0.301219	-0.310109	-0.354559	-0.34991	-0.731291	-0.42258	-0.503784	-0.591947	-0.689991	-0.664337
17	Project Name	JAZ	2	Lab Number	Project Engineer	Asphalt Grade	PU	Pit Source	xuxiuquan	52	50		20	4000	50	16000	50	0	50	0	50	0	20000	2019-02-18	3.5% & 4.0%Void Percent(Left Back) : 0.0000 Void Percent(Left Front) : 0.0000 Void Percent(Right Back) : 0.0000 Void Percent(Right Front) : 0.0000	1200	50.1	-0.363195	-0.450748	-0.560527	-0.704367	-0.692379	-0.499923	-0.43942	-0.315087	-0.235788	-0.10988	-0.297739	-0.453942	-0.301219	-0.298399	-0.332486	-0.360299	-0.740385	-0.42258	-0.533324	-0.560095	-0.689991	-0.664337
17	Project Name	JAZ	2	Lab Number	Project Engineer	Asphalt Grade	PU	Pit Source	xuxiuquan	52	50		20	4000	50	16000	50	0	50	0	50	0	20000	2019-02-18	3.5% & 4.0%Void Percent(Left Back) : 0.0000 Void Percent(Left Front) : 0.0000 Void Percent(Right Back) : 0.0000 Void Percent(Right Front) : 0.0000	1220	50.1	-0.363195	-0.461797	-0.571602	-0.693293	-0.659155	-0.53274	-0.4826	-0.293954	-0.235788	-0.119913	-0.287401	-0.448659	-0.301219	-0.310109	-0.365608	-0.318897	-0.695147	-0.42258	-0.513613	-0.560095	-0.689991	-0.664337
17	Project Name	JAZ	2	Lab Number	Project Engineer	Asphalt Grade	PU	Pit Source	xuxiuquan	52	50		20	4000	50	16000	50	0	50	0	50	0	20000	2019-02-18	3.5% & 4.0%Void Percent(Left Back) : 0.0000 Void Percent(Left Front) : 0.0000 Void Percent(Right Back) : 0.0000 Void Percent(Right Front) : 0.0000	1240	50	-0.363195	-0.461797	-0.571602	-0.726567	-0.725627	-0.510845	-0.46101	-0.325653	-0.266751	-0.10988	-0.287401	-0.472643	-0.301219	-0.310109	-0.365608	-0.34991	-0.749503	-0.42258	-0.533324	-0.570687	-0.712724	-0.664337
17	Project Name	JAZ	2	Lab Number	Project Engineer	Asphalt Grade	PU	Pit Source	xuxiuquan	52	50		20	4000	50	16000	50	0	50	0	50	0	20000	2019-02-18	3.5% & 4.0%Void Percent(Left Back) : 0.0000 Void Percent(Left Front) : 0.0000 Void Percent(Right Back) : 0.0000 Void Percent(Right Front) : 0.0000	1260	50	-0.352146	-0.483921	-0.582651	-0.693293	-0.659155	-0.53274	-0.471805	-0.33622	-0.225501	-0.119913	-0.297739	-0.459416	-0.313411	-0.333502	-0.354559	-0.318897	-0.722224	-0.431698	-0.513613	-0.591947	-0.689991	-0.676224
17	Project Name	JAZ	2	Lab Number	Project Engineer	Asphalt Grade	PU	Pit Source	xuxiuquan	52	50		20	4000	50	16000	50	0	50	0	50	0	20000	2019-02-18	3.5% & 4.0%Void Percent(Left Back) : 0.0000 Void Percent(Left Front) : 0.0000 Void Percent(Right Back) : 0.0000 Void Percent(Right Front) : 0.0000	1280	50	-0.363195	-0.483921	-0.582651	-0.682193	-0.703478	-0.543712	-0.4826	-0.325653	-0.266751	-0.119913	-0.308102	-0.464312	-0.301219	-0.321793	-0.332486	-0.339547	-0.777011	-0.431698	-0.54323	-0.560095	-0.70137	-0.664337
17	Project Name	JAZ	2	Lab Number	Project Engineer	Asphalt Grade	PU	Pit Source	xuxiuquan	52	50		20	4000	50	16000	50	0	50	0	50	0	20000	2019-02-18	3.5% & 4.0%Void Percent(Left Back) : 0.0000 Void Percent(Left Front) : 0.0000 Void Percent(Right Back) : 0.0000 Void Percent(Right Front) : 0.0000	1300	49.9	-0.363195	-0.483921	-0.593725	-0.737667	-0.725627	-0.53274	-0.471805	-0.346812	-0.266751	-0.129921	-0.308102	-0.486239	-0.313411	-0.333502	-0.365608	-0.370688	-0.767817	-0.450012	-0.54323	-0.591947	-0.724129	-0.676224
17	Project Name	JAZ	2	Lab Number	Project Engineer	Asphalt Grade	PU	Pit Source	xuxiuquan	52	50		20	4000	50	16000	50	0	50	0	50	0	20000	2019-02-18	3.5% & 4.0%Void Percent(Left Back) : 0.0000 Void Percent(Left Front) : 0.0000 Void Percent(Right Back) : 0.0000 Void Percent(Right Front) : 0.0000	1320	49.8	-0.374244	-0.49497	-0.604799	-0.726567	-0.703478	-0.53274	-0.471805	-0.346812	-0.235788	-0.150012	-0.31844	-0.478492	-0.313411	-0.333502	-0.354559	-0.34991	-0.740385	-0.450012	-0.513613	-0.591947	-0.712724	-0.688137
17	Project Name	JAZ	2	Lab Number	Project Engineer	Asphalt Grade	PU	Pit Source	xuxiuquan	52	50		20	4000	50	16000	50	0	50	0	50	0	20000	2019-02-18	3.5% & 4.0%Void Percent(Left Back) : 0.0000 Void Percent(Left Front) : 0.0000 Void Percent(Right Back) : 0.0000 Void Percent(Right Front) : 0.0000	1340	49.7	-0.374244	-0.483921	-0.582651	-0.693293	-0.714553	-0.53274	-0.4826	-0.325653	-0.266751	-0.150012	-0.31844	-0.467087	-0.301219	-0.321793	-0.354559	-0.318897	-0.777011	-0.431698	-0.54323	-0.570687	-0.724129	-0.688137
17	Project Name	JAZ	2	Lab Number	Project Engineer	Asphalt Grade	PU	Pit Source	xuxiuquan	52	50		20	4000	50	16000	50	0	50	0	50	0	20000	2019-02-18	3.5% & 4.0%Void Percent(Left Back) : 0.0000 Void Percent(Left Front) : 0.0000 Void Percent(Right Back) : 0.0000 Void Percent(Right Front) : 0.0000	1360	49.7	-0.374244	-0.483921	-0.593725	-0.726567	-0.703478	-0.55466	-0.471805	-0.346812	-0.266751	-0.150012	-0.308102	-0.483464	-0.289001	-0.333502	-0.365608	-0.34991	-0.740385	-0.459207	-0.513613	-0.591947	-0.70137	-0.676224
17	Project Name	JAZ	2	Lab Number	Project Engineer	Asphalt Grade	PU	Pit Source	xuxiuquan	52	50		20	4000	50	16000	50	0	50	0	50	0	20000	2019-02-18	3.5% & 4.0%Void Percent(Left Back) : 0.0000 Void Percent(Left Front) : 0.0000 Void Percent(Right Back) : 0.0000 Void Percent(Right Front) : 0.0000	1380	49.6	-0.352146	-0.483921	-0.582651	-0.693293	-0.725627	-0.55466	-0.49342	-0.389179	-0.297739	-0.190221	-0.370256	-0.490715	-0.276809	-0.333502	-0.365608	-0.34991	-0.767817	-0.431698	-0.54323	-0.591947	-0.712724	-0.688137
17	Project Name	JAZ	2	Lab Number	Project Engineer	Asphalt Grade	PU	Pit Source	xuxiuquan	52	50		20	4000	50	16000	50	0	50	0	50	0	20000	2019-02-18	3.5% & 4.0%Void Percent(Left Back) : 0.0000 Void Percent(Left Front) : 0.0000 Void Percent(Right Back) : 0.0000 Void Percent(Right Front) : 0.0000	1400	49.8	-0.352146	-0.483921	-0.582651	-0.726567	-0.714553	-0.55466	-0.4826	-0.357403	-0.287401	-0.180162	-0.349504	-0.488505	-0.276809	-0.310109	-0.332486	-0.360299	-0.777011	-0.431698	-0.54323	-0.570687	-0.70137	-0.688137
17	Project Name	JAZ	2	Lab Number	Project Engineer	Asphalt Grade	PU	Pit Source	xuxiuquan	52	50		20	4000	50	16000	50	0	50	0	50	0	20000	2019-02-18	3.5% & 4.0%Void Percent(Left Back) : 0.0000 Void Percent(Left Front) : 0.0000 Void Percent(Right Back) : 0.0000 Void Percent(Right Front) : 0.0000	1420	50	-0.352146	-0.483921	-0.593725	-0.737667	-0.725627	-0.565607	-0.515036	-0.36797	-0.31844	-0.200304	-0.380619	-0.50445	-0.276809	-0.333502	-0.354559	-0.34991	-0.777011	-0.450012	-0.54323	-0.591947	-0.724129	-0.700075
17	Project Name	JAZ	2	Lab Number	Project Engineer	Asphalt Grade	PU	Pit Source	xuxiuquan	52	50		20	4000	50	16000	50	0	50	0	50	0	20000	2019-02-18	3.5% & 4.0%Void Percent(Left Back) : 0.0000 Void Percent(Left Front) : 0.0000 Void Percent(Right Back) : 0.0000 Void Percent(Right Front) : 0.0000	1440	50	-0.341097	-0.483921	-0.604799	-0.726567	-0.725627	-0.565607	-0.515036	-0.389179	-0.308102	-0.190221	-0.370256	-0.507162	-0.289001	-0.333502	-0.321488	-0.339547	-0.777011	-0.431698	-0.553136	-0.60259	-0.712724	-0.688137
17	Project Name	JAZ	2	Lab Number	Project Engineer	Asphalt Grade	PU	Pit Source	xuxiuquan	52	50		20	4000	50	16000	50	0	50	0	50	0	20000	2019-02-18	3.5% & 4.0%Void Percent(Left Back) : 0.0000 Void Percent(Left Front) : 0.0000 Void Percent(Right Back) : 0.0000 Void Percent(Right Front) : 0.0000	1460	50	-0.363195	-0.49497	-0.604799	-0.737667	-0.747827	-0.565607	-0.49342	-0.357403	-0.287401	-0.170104	-0.359867	-0.496818	-0.289001	-0.333502	-0.365608	-0.339547	-0.777011	-0.450012	-0.533324	-0.591947	-0.724129	-0.688137
17	Project Name	JAZ	2	Lab Number	Project Engineer	Asphalt Grade	PU	Pit Source	xuxiuquan	52	50		20	4000	50	16000	50	0	50	0	50	0	20000	2019-02-18	3.5% & 4.0%Void Percent(Left Back) : 0.0000 Void Percent(Left Front) : 0.0000 Void Percent(Right Back) : 0.0000 Void Percent(Right Front) : 0.0000	1480	50	-0.374244	-0.49497	-0.626948	-0.704367	-0.703478	-0.565607	-0.471805	-0.33622	-0.246101	-0.150012	-0.31844	-0.478409	-0.313411	-0.333502	-0.354559	-0.30861	-0.749503	-0.459207	-0.533324	-0.60259	-0.712724	-0.700075
17	Project Name	JAZ	2	Lab Number	Project Engineer	Asphalt Grade	PU	Pit Source	xuxiuquan	52	50		20	4000	50	16000	50	0	50	0	50	0	20000	2019-02-18	3.5% & 4.0%Void Percent(Left Back) : 0.0000 Void Percent(Left Front) : 0.0000 Void Percent(Right Back) : 0.0000 Void Percent(Right Front) : 0.0000	1500	50	-0.363195	-0.49497	-0.604799	-0.737667	-0.736727	-0.55466	-0.49342	-0.36797	-0.297739	-0.180162	-0.359867	-0.502044	-0.289001	-0.333502	-0.365608	-0.34991	-0.777011	-0.450012	-0.54323	-0.613283	-0.724129	-0.688137
17	Project Name	JAZ	2	Lab Number	Project Engineer	Asphalt Grade	PU	Pit Source	xuxiuquan	52	50		20	4000	50	16000	50	0	50	0	50	0	20000	2019-02-18	3.5% & 4.0%Void Percent(Left Back) : 0.0000 Void Percent(Left Front) : 0.0000 Void Percent(Right Back) : 0.0000 Void Percent(Right Front) : 0.0000	1520	49.9	-0.374244	-0.49497	-0.604799	-0.726567	-0.736727	-0.57658	-0.49342	-0.389179	-0.31844	-0.180162	-0.370256	-0.509746	-0.301219	-0.368757	-0.365608	-0.339547	-0.786232	-0.459207	-0.533324	-0.623951	-0.746963	-0.688137
17	Project Name	JAZ	2	Lab Number	Project Engineer	Asphalt Grade	PU	Pit Source	xuxiuquan	52	50		20	4000	50	16000	50	0	50	0	50	0	20000	2019-02-18	3.5% & 4.0%Void Percent(Left Back) : 0.0000 Void Percent(Left Front) : 0.0000 Void Percent(Right Back) : 0.0000 Void Percent(Right Front) : 0.0000	1540	49.8	-0.374244	-0.49497	-0.626948	-0.748767	-0.736727	-0.609473	-0.525856	-0.389179	-0.308102	-0.190221	-0.370256	-0.518249	-0.289001	-0.345237	-0.376682	-0.339547	-0.804748	-0.468427	-0.553136	-0.613283	-0.746963	-0.712013
17	Project Name	JAZ	2	Lab Number	Project Engineer	Asphalt Grade	PU	Pit Source	xuxiuquan	52	50		20	4000	50	16000	50	0	50	0	50	0	20000	2019-02-18	3.5% & 4.0%Void Percent(Left Back) : 0.0000 Void Percent(Left Front) : 0.0000 Void Percent(Right Back) : 0.0000 Void Percent(Right Front) : 0.0000	1560	49.8	-0.363195	-0.49497	-0.604799	-0.748767	-0.747827	-0.57658	-0.504241	-0.399771	-0.308102	-0.180162	-0.370256	-0.51536	-0.289001	-0.333502	-0.365608	-0.360299	-0.804748	-0.431698	-0.563067	-0.613283	-0.758393	-0.712013
17	Project Name	JAZ	2	Lab Number	Project Engineer	Asphalt Grade	PU	Pit Source	xuxiuquan	52	50		20	4000	50	16000	50	0	50	0	50	0	20000	2019-02-18	3.5% & 4.0%Void Percent(Left Back) : 0.0000 Void Percent(Left Front) : 0.0000 Void Percent(Right Back) : 0.0000 Void Percent(Right Front) : 0.0000	1580	49.8	-0.352146	-0.49497	-0.604799	-0.737667	-0.747827	-0.587553	-0.504241	-0.389179	-0.297739	-0.190221	-0.380619	-0.507346	-0.289001	-0.345237	-0.332486	-0.360299	-0.804748	-0.468427	-0.553136	-0.613283	-0.758393	-0.712013
17	Project Name	JAZ	2	Lab Number	Project Engineer	Asphalt Grade	PU	Pit Source	xuxiuquan	52	50		20	4000	50	16000	50	0	50	0	50	0	20000	2019-02-18	3.5% & 4.0%Void Percent(Left Back) : 0.0000 Void Percent(Left Front) : 0.0000 Void Percent(Right Back) : 0.0000 Void Percent(Right Front) : 0.0000	1600	49.8	-0.374244	-0.49497	-0.626948	-0.737667	-0.725627	-0.55466	-0.4826	-0.389179	-0.31844	-0.200304	-0.391008	-0.518058	-0.301219	-0.345237	-0.376682	-0.34991	-0.786232	-0.468427	-0.553136	-0.613283	-0.746963	-0.700075
17	Project Name	JAZ	2	Lab Number	Project Engineer	Asphalt Grade	PU	Pit Source	xuxiuquan	52	50		20	4000	50	16000	50	0	50	0	50	0	20000	2019-02-18	3.5% & 4.0%Void Percent(Left Back) : 0.0000 Void Percent(Left Front) : 0.0000 Void Percent(Right Back) : 0.0000 Void Percent(Right Front) : 0.0000	1620	50	-0.363195	-0.506044	-0.626948	-0.748767	-0.736727	-0.587553	-0.547522	-0.389179	-0.31844	-0.220447	-0.401396	-0.520833	-0.301219	-0.345237	-0.365608	-0.360299	-0.795477	-0.459207	-0.563067	-0.613283	-0.758393	-0.700075
17	Project Name	JAZ	2	Lab Number	Project Engineer	Asphalt Grade	PU	Pit Source	xuxiuquan	52	50		20	4000	50	16000	50	0	50	0	50	0	20000	2019-02-18	3.5% & 4.0%Void Percent(Left Back) : 0.0000 Void Percent(Left Front) : 0.0000 Void Percent(Right Back) : 0.0000 Void Percent(Right Front) : 0.0000	1640	50	-0.363195	-0.517093	-0.626948	-0.759892	-0.747827	-0.565607	-0.504241	-0.410362	-0.31844	-0.220447	-0.401396	-0.528911	-0.301219	-0.368757	-0.365608	-0.360299	-0.804748	-0.468427	-0.553136	-0.63467	-0.746963	-0.712013
17	Project Name	JAZ	2	Lab Number	Project Engineer	Asphalt Grade	PU	Pit Source	xuxiuquan	52	50		20	4000	50	16000	50	0	50	0	50	0	20000	2019-02-18	3.5% & 4.0%Void Percent(Left Back) : 0.0000 Void Percent(Left Front) : 0.0000 Void Percent(Right Back) : 0.0000 Void Percent(Right Front) : 0.0000	1660	50.1	-0.363195	-0.506044	-0.604799	-0.704367	-0.747827	-0.609473	-0.515036	-0.399771	-0.31844	-0.220447	-0.391008	-0.506844	-0.289001	-0.368757	-0.332486	-0.34991	-0.832688	-0.477672	-0.563067	-0.623951	-0.758393	-0.712013
17	Project Name	JAZ	2	Lab Number	Project Engineer	Asphalt Grade	PU	Pit Source	xuxiuquan	52	50		20	4000	50	16000	50	0	50	0	50	0	20000	2019-02-18	3.5% & 4.0%Void Percent(Left Back) : 0.0000 Void Percent(Left Front) : 0.0000 Void Percent(Right Back) : 0.0000 Void Percent(Right Front) : 0.0000	1680	50	-0.396367	-0.506044	-0.638048	-0.748767	-0.725627	-0.565607	-0.515036	-0.399771	-0.31844	-0.220447	-0.401396	-0.526256	-0.301219	-0.380517	-0.387782	-0.34991	-0.786232	-0.486943	-0.553136	-0.623951	-0.746963	-0.712013
17	Project Name	JAZ	2	Lab Number	Project Engineer	Asphalt Grade	PU	Pit Source	xuxiuquan	52	50		20	4000	50	16000	50	0	50	0	50	0	20000	2019-02-18	3.5% & 4.0%Void Percent(Left Back) : 0.0000 Void Percent(Left Front) : 0.0000 Void Percent(Right Back) : 0.0000 Void Percent(Right Front) : 0.0000	1700	50	-0.396367	-0.517093	-0.638048	-0.737667	-0.758901	-0.565607	-0.504241	-0.410362	-0.339141	-0.220447	-0.401396	-0.531304	-0.301219	-0.392303	-0.365608	-0.34991	-0.795477	-0.477672	-0.563067	-0.645389	-0.769849	-0.73594
17	Project Name	JAZ	2	Lab Number	Project Engineer	Asphalt Grade	PU	Pit Source	xuxiuquan	52	50		20	4000	50	16000	50	0	50	0	50	0	20000	2019-02-18	3.5% & 4.0%Void Percent(Left Back) : 0.0000 Void Percent(Left Front) : 0.0000 Void Percent(Right Back) : 0.0000 Void Percent(Right Front) : 0.0000	1720	50	-0.374244	-0.517093	-0.638048	-0.770992	-0.758901	-0.57658	-0.515036	-0.389179	-0.297739	-0.190221	-0.391008	-0.523989	-0.325653	-0.368757	-0.365608	-0.381102	-0.814045	-0.477672	-0.563067	-0.63467	-0.758393	-0.712013
17	Project Name	JAZ	2	Lab Number	Project Engineer	Asphalt Grade	PU	Pit Source	xuxiuquan	52	50		20	4000	50	16000	50	0	50	0	50	0	20000	2019-02-18	3.5% & 4.0%Void Percent(Left Back) : 0.0000 Void Percent(Left Front) : 0.0000 Void Percent(Right Back) : 0.0000 Void Percent(Right Front) : 0.0000	1740	49.8	-0.374244	-0.517093	-0.638048	-0.759892	-0.747827	-0.57658	-0.525856	-0.389179	-0.349504	-0.23053	-0.422173	-0.534156	-0.301219	-0.368757	-0.387782	-0.360299	-0.832688	-0.477672	-0.573024	-0.63467	-0.781329	-0.712013
17	Project Name	JAZ	2	Lab Number	Project Engineer	Asphalt Grade	PU	Pit Source	xuxiuquan	52	50		20	4000	50	16000	50	0	50	0	50	0	20000	2019-02-18	3.5% & 4.0%Void Percent(Left Back) : 0.0000 Void Percent(Left Front) : 0.0000 Void Percent(Right Back) : 0.0000 Void Percent(Right Front) : 0.0000	1760	49.7	-0.363195	-0.517093	-0.649122	-0.759892	-0.747827	-0.57658	-0.515036	-0.399771	-0.349504	-0.220447	-0.401396	-0.539572	-0.289001	-0.380517	-0.387782	-0.370688	-0.814045	-0.486943	-0.563067	-0.623951	-0.769849	-0.712013
17	Project Name	JAZ	2	Lab Number	Project Engineer	Asphalt Grade	PU	Pit Source	xuxiuquan	52	50		20	4000	50	16000	50	0	50	0	50	0	20000	2019-02-18	3.5% & 4.0%Void Percent(Left Back) : 0.0000 Void Percent(Left Front) : 0.0000 Void Percent(Right Back) : 0.0000 Void Percent(Right Front) : 0.0000	1780	49.6	-0.363195	-0.506044	-0.649122	-0.726567	-0.736727	-0.57658	-0.547522	-0.399771	-0.31844	-0.220447	-0.422173	-0.523475	-0.301219	-0.368757	-0.365608	-0.34991	-0.804748	-0.477672	-0.583006	-0.63467	-0.769849	-0.712013
17	Project Name	JAZ	2	Lab Number	Project Engineer	Asphalt Grade	PU	Pit Source	xuxiuquan	52	50		20	4000	50	16000	50	0	50	0	50	0	20000	2019-02-18	3.5% & 4.0%Void Percent(Left Back) : 0.0000 Void Percent(Left Front) : 0.0000 Void Percent(Right Back) : 0.0000 Void Percent(Right Front) : 0.0000	1800	49.7	-0.396367	-0.517093	-0.649122	-0.759892	-0.725627	-0.57658	-0.515036	-0.399771	-0.31844	-0.220447	-0.422173	-0.531806	-0.313411	-0.368757	-0.365608	-0.370688	-0.795477	-0.486943	-0.553136	-0.63467	-0.758393	-0.712013
17	Project Name	JAZ	2	Lab Number	Project Engineer	Asphalt Grade	PU	Pit Source	xuxiuquan	52	50		20	4000	50	16000	50	0	50	0	50	0	20000	2019-02-18	3.5% & 4.0%Void Percent(Left Back) : 0.0000 Void Percent(Left Front) : 0.0000 Void Percent(Right Back) : 0.0000 Void Percent(Right Front) : 0.0000	1820	49.8	-0.396367	-0.528168	-0.649122	-0.782091	-0.736727	-0.587553	-0.525856	-0.410362	-0.349504	-0.23053	-0.432587	-0.54777	-0.313411	-0.368757	-0.387782	-0.370688	-0.814045	-0.486943	-0.583006	-0.645389	-0.79281	-0.73594
17	Project Name	JAZ	2	Lab Number	Project Engineer	Asphalt Grade	PU	Pit Source	xuxiuquan	52	50		20	4000	50	16000	50	0	50	0	50	0	20000	2019-02-18	3.5% & 4.0%Void Percent(Left Back) : 0.0000 Void Percent(Left Front) : 0.0000 Void Percent(Right Back) : 0.0000 Void Percent(Right Front) : 0.0000	1840	49.8	-0.363195	-0.528168	-0.660197	-0.770992	-0.747827	-0.587553	-0.504241	-0.399771	-0.31844	-0.23053	-0.432587	-0.53735	-0.289001	-0.392303	-0.376682	-0.370688	-0.804748	-0.486943	-0.563067	-0.666902	-0.781329	-0.73594
17	Project Name	JAZ	2	Lab Number	Project Engineer	Asphalt Grade	PU	Pit Source	xuxiuquan	52	50		20	4000	50	16000	50	0	50	0	50	0	20000	2019-02-18	3.5% & 4.0%Void Percent(Left Back) : 0.0000 Void Percent(Left Front) : 0.0000 Void Percent(Right Back) : 0.0000 Void Percent(Right Front) : 0.0000	1860	50.1	-0.374244	-0.528168	-0.649122	-0.782091	-0.758901	-0.587553	-0.504241	-0.410362	-0.339141	-0.23053	-0.432587	-0.545179	-0.301219	-0.380517	-0.387782	-0.381102	-0.842061	-0.477672	-0.573024	-0.666902	-0.781329	-0.747928
17	Project Name	JAZ	2	Lab Number	Project Engineer	Asphalt Grade	PU	Pit Source	xuxiuquan	52	50		20	4000	50	16000	50	0	50	0	50	0	20000	2019-02-18	3.5% & 4.0%Void Percent(Left Back) : 0.0000 Void Percent(Left Front) : 0.0000 Void Percent(Right Back) : 0.0000 Void Percent(Right Front) : 0.0000	1880	50	-0.396367	-0.528168	-0.649122	-0.748767	-0.758901	-0.587553	-0.558343	-0.399771	-0.339141	-0.23053	-0.432587	-0.5342	-0.301219	-0.380517	-0.398882	-0.370688	-0.842061	-0.486943	-0.573024	-0.63467	-0.781329	-0.747928
17	Project Name	JAZ	2	Lab Number	Project Engineer	Asphalt Grade	PU	Pit Source	xuxiuquan	52	50		20	4000	50	16000	50	0	50	0	50	0	20000	2019-02-18	3.5% & 4.0%Void Percent(Left Back) : 0.0000 Void Percent(Left Front) : 0.0000 Void Percent(Right Back) : 0.0000 Void Percent(Right Front) : 0.0000	1900	50	-0.374244	-0.528168	-0.660197	-0.782091	-0.747827	-0.609473	-0.515036	-0.410362	-0.359867	-0.23053	-0.432587	-0.553129	-0.301219	-0.415925	-0.387782	-0.381102	-0.804748	-0.514883	-0.573024	-0.666902	-0.804316	-0.73594
17	Project Name	JAZ	2	Lab Number	Project Engineer	Asphalt Grade	PU	Pit Source	xuxiuquan	52	50		20	4000	50	16000	50	0	50	0	50	0	20000	2019-02-18	3.5% & 4.0%Void Percent(Left Back) : 0.0000 Void Percent(Left Front) : 0.0000 Void Percent(Right Back) : 0.0000 Void Percent(Right Front) : 0.0000	1920	50	-0.374244	-0.528168	-0.649122	-0.770992	-0.736727	-0.587553	-0.504241	-0.410362	-0.349504	-0.23053	-0.432587	-0.544995	-0.301219	-0.380517	-0.398882	-0.360299	-0.786232	-0.524256	-0.563067	-0.666902	-0.781329	-0.712013
17	Project Name	JAZ	2	Lab Number	Project Engineer	Asphalt Grade	PU	Pit Source	xuxiuquan	52	50		20	4000	50	16000	50	0	50	0	50	0	20000	2019-02-18	3.5% & 4.0%Void Percent(Left Back) : 0.0000 Void Percent(Left Front) : 0.0000 Void Percent(Right Back) : 0.0000 Void Percent(Right Front) : 0.0000	1940	50	-0.396367	-0.528168	-0.649122	-0.759892	-0.747827	-0.587553	-0.547522	-0.410362	-0.349504	-0.23053	-0.432587	-0.54222	-0.313411	-0.368757	-0.387782	-0.370688	-0.842061	-0.468427	-0.603021	-0.63467	-0.79281	-0.73594
17	Project Name	JAZ	2	Lab Number	Project Engineer	Asphalt Grade	PU	Pit Source	xuxiuquan	52	50		20	4000	50	16000	50	0	50	0	50	0	20000	2019-02-18	3.5% & 4.0%Void Percent(Left Back) : 0.0000 Void Percent(Left Front) : 0.0000 Void Percent(Right Back) : 0.0000 Void Percent(Right Front) : 0.0000	1960	49.9	-0.396367	-0.528168	-0.660197	-0.782091	-0.747827	-0.57658	-0.558343	-0.42098	-0.339141	-0.24064	-0.442976	-0.550602	-0.313411	-0.380517	-0.398882	-0.370688	-0.804748	-0.49624	-0.583006	-0.677697	-0.804316	-0.747928
17	Project Name	JAZ	2	Lab Number	Project Engineer	Asphalt Grade	PU	Pit Source	xuxiuquan	52	50		20	4000	50	16000	50	0	50	0	50	0	20000	2019-02-18	3.5% & 4.0%Void Percent(Left Back) : 0.0000 Void Percent(Left Front) : 0.0000 Void Percent(Right Back) : 0.0000 Void Percent(Right Front) : 0.0000	1980	49.7	-0.363195	-0.517093	-0.660197	-0.770992	-0.747827	-0.57658	-0.49342	-0.36797	-0.287401	-0.180162	-0.380619	-0.52164	-0.289001	-0.392303	-0.398882	-0.391541	-0.842061	-0.49624	-0.573024	-0.677697	-0.804316	-0.747928
17	Project Name	JAZ	2	Lab Number	Project Engineer	Asphalt Grade	PU	Pit Source	xuxiuquan	52	50		20	4000	50	16000	50	0	50	0	50	0	20000	2019-02-18	3.5% & 4.0%Void Percent(Left Back) : 0.0000 Void Percent(Left Front) : 0.0000 Void Percent(Right Back) : 0.0000 Void Percent(Right Front) : 0.0000	2000	49.7	-0.396367	-0.528168	-0.660197	-0.770992	-0.736727	-0.57658	-0.515036	-0.36797	-0.297739	-0.180162	-0.380619	-0.524224	-0.301219	-0.392303	-0.410007	-0.370688	-0.832688	-0.486943	-0.61308	-0.677697	-0.781329	-0.759917
17	Project Name	JAZ	2	Lab Number	Project Engineer	Asphalt Grade	PU	Pit Source	xuxiuquan	52	50		20	4000	50	16000	50	0	50	0	50	0	20000	2019-02-18	3.5% & 4.0%Void Percent(Left Back) : 0.0000 Void Percent(Left Front) : 0.0000 Void Percent(Right Back) : 0.0000 Void Percent(Right Front) : 0.0000	2020	49.7	-0.374244	-0.528168	-0.660197	-0.782091	-0.747827	-0.57658	-0.569189	-0.410362	-0.339141	-0.23053	-0.432587	-0.547948	-0.301219	-0.404114	-0.410007	-0.391541	-0.804748	-0.49624	-0.603021	-0.677697	-0.804316	-0.747928
17	Project Name	JAZ	2	Lab Number	Project Engineer	Asphalt Grade	PU	Pit Source	xuxiuquan	52	50		20	4000	50	16000	50	0	50	0	50	0	20000	2019-02-18	3.5% & 4.0%Void Percent(Left Back) : 0.0000 Void Percent(Left Front) : 0.0000 Void Percent(Right Back) : 0.0000 Void Percent(Right Front) : 0.0000	2040	49.6	-0.374244	-0.528168	-0.671297	-0.804342	-0.736727	-0.587553	-0.547522	-0.399771	-0.339141	-0.23053	-0.442976	-0.553637	-0.301219	-0.392303	-0.387782	-0.391541	-0.804748	-0.49624	-0.583006	-0.677697	-0.804316	-0.747928
17	Project Name	JAZ	2	Lab Number	Project Engineer	Asphalt Grade	PU	Pit Source	xuxiuquan	52	50		20	4000	50	16000	50	0	50	0	50	0	20000	2019-02-18	3.5% & 4.0%Void Percent(Left Back) : 0.0000 Void Percent(Left Front) : 0.0000 Void Percent(Right Back) : 0.0000 Void Percent(Right Front) : 0.0000	2060	49.8	-0.363195	-0.539242	-0.660197	-0.782091	-0.747827	-0.587553	-0.547522	-0.410362	-0.31844	-0.23053	-0.442976	-0.542773	-0.289001	-0.392303	-0.410007	-0.381102	-0.832688	-0.486943	-0.603021	-0.677697	-0.79281	-0.759917
17	Project Name	JAZ	2	Lab Number	Project Engineer	Asphalt Grade	PU	Pit Source	xuxiuquan	52	50		20	4000	50	16000	50	0	50	0	50	0	20000	2019-02-18	3.5% & 4.0%Void Percent(Left Back) : 0.0000 Void Percent(Left Front) : 0.0000 Void Percent(Right Back) : 0.0000 Void Percent(Right Front) : 0.0000	2080	49.9	-0.363195	-0.528168	-0.660197	-0.770992	-0.736727	-0.587553	-0.547522	-0.431597	-0.339141	-0.23053	-0.442976	-0.550481	-0.289001	-0.404114	-0.421157	-0.360299	-0.832688	-0.486943	-0.603021	-0.677697	-0.804316	-0.759917
17	Project Name	JAZ	2	Lab Number	Project Engineer	Asphalt Grade	PU	Pit Source	xuxiuquan	52	50		20	4000	50	16000	50	0	50	0	50	0	20000	2019-02-18	3.5% & 4.0%Void Percent(Left Back) : 0.0000 Void Percent(Left Front) : 0.0000 Void Percent(Right Back) : 0.0000 Void Percent(Right Front) : 0.0000	2100	50	-0.341097	-0.528168	-0.682396	-0.804342	-0.781101	-0.609473	-0.558343	-0.42098	-0.31844	-0.23053	-0.432587	-0.556539	-0.289001	-0.404114	-0.443484	-0.391541	-0.832688	-0.486943	-0.603021	-0.677697	-0.804316	-0.747928
17	Project Name	JAZ	2	Lab Number	Project Engineer	Asphalt Grade	PU	Pit Source	xuxiuquan	52	50		20	4000	50	16000	50	0	50	0	50	0	20000	2019-02-18	3.5% & 4.0%Void Percent(Left Back) : 0.0000 Void Percent(Left Front) : 0.0000 Void Percent(Right Back) : 0.0000 Void Percent(Right Front) : 0.0000	2120	50	-0.352146	-0.528168	-0.649122	-0.804342	-0.758901	-0.587553	-0.558343	-0.399771	-0.339141	-0.23053	-0.442976	-0.548094	-0.289001	-0.392303	-0.443484	-0.381102	-0.832688	-0.49624	-0.61308	-0.666902	-0.79281	-0.747928
17	Project Name	JAZ	2	Lab Number	Project Engineer	Asphalt Grade	PU	Pit Source	xuxiuquan	52	50		20	4000	50	16000	50	0	50	0	50	0	20000	2019-02-18	3.5% & 4.0%Void Percent(Left Back) : 0.0000 Void Percent(Left Front) : 0.0000 Void Percent(Right Back) : 0.0000 Void Percent(Right Front) : 0.0000	2140	50	-0.341097	-0.539242	-0.682396	-0.782091	-0.747827	-0.57658	-0.580009	-0.42098	-0.31844	-0.23053	-0.45339	-0.550977	-0.240309	-0.392303	-0.443484	-0.391541	-0.832688	-0.486943	-0.623138	-0.666902	-0.79281	-0.771931
17	Project Name	JAZ	2	Lab Number	Project Engineer	Asphalt Grade	PU	Pit Source	xuxiuquan	52	50		20	4000	50	16000	50	0	50	0	50	0	20000	2019-02-18	3.5% & 4.0%Void Percent(Left Back) : 0.0000 Void Percent(Left Front) : 0.0000 Void Percent(Right Back) : 0.0000 Void Percent(Right Front) : 0.0000	2160	50.1	-0.341097	-0.561391	-0.649122	-0.770992	-0.758901	-0.565607	-0.525856	-0.399771	-0.277089	-0.170104	-0.391008	-0.524243	-0.228168	-0.392303	-0.354559	-0.381102	-0.851459	-0.486943	-0.61308	-0.677697	-0.804316	-0.771931
17	Project Name	JAZ	2	Lab Number	Project Engineer	Asphalt Grade	PU	Pit Source	xuxiuquan	52	50		20	4000	50	16000	50	0	50	0	50	0	20000	2019-02-18	3.5% & 4.0%Void Percent(Left Back) : 0.0000 Void Percent(Left Front) : 0.0000 Void Percent(Right Back) : 0.0000 Void Percent(Right Front) : 0.0000	2180	50	-0.330048	-0.539242	-0.671297	-0.804342	-0.781101	-0.587553	-0.558343	-0.399771	-0.31844	-0.220447	-0.45339	-0.548462	-0.216052	-0.404114	-0.421157	-0.391541	-0.832688	-0.49624	-0.623138	-0.677697	-0.804316	-0.771931
17	Project Name	JAZ	2	Lab Number	Project Engineer	Asphalt Grade	PU	Pit Source	xuxiuquan	52	50		20	4000	50	16000	50	0	50	0	50	0	20000	2019-02-18	3.5% & 4.0%Void Percent(Left Back) : 0.0000 Void Percent(Left Front) : 0.0000 Void Percent(Right Back) : 0.0000 Void Percent(Right Front) : 0.0000	2200	49.9	-0.330048	-0.528168	-0.682396	-0.782091	-0.781101	-0.565607	-0.580009	-0.399771	-0.339141	-0.23053	-0.45339	-0.55085	-0.216052	-0.392303	-0.410007	-0.391541	-0.842061	-0.486943	-0.633222	-0.63467	-0.79281	-0.771931
17	Project Name	JAZ	2	Lab Number	Project Engineer	Asphalt Grade	PU	Pit Source	xuxiuquan	52	50		20	4000	50	16000	50	0	50	0	50	0	20000	2019-02-18	3.5% & 4.0%Void Percent(Left Back) : 0.0000 Void Percent(Left Front) : 0.0000 Void Percent(Right Back) : 0.0000 Void Percent(Right Front) : 0.0000	2220	49.8	-0.330048	-0.539242	-0.682396	-0.804342	-0.758901	-0.565607	-0.580009	-0.410362	-0.31844	-0.23053	-0.45339	-0.553885	-0.203937	-0.392303	-0.410007	-0.381102	-0.814045	-0.49624	-0.623138	-0.688492	-0.781329	-0.771931
17	Project Name	JAZ	2	Lab Number	Project Engineer	Asphalt Grade	PU	Pit Source	xuxiuquan	52	50		20	4000	50	16000	50	0	50	0	50	0	20000	2019-02-18	3.5% & 4.0%Void Percent(Left Back) : 0.0000 Void Percent(Left Front) : 0.0000 Void Percent(Right Back) : 0.0000 Void Percent(Right Front) : 0.0000	2240	49.8	-0.318999	-0.539242	-0.660197	-0.759892	-0.747827	-0.57658	-0.580009	-0.399771	-0.31844	-0.23053	-0.45339	-0.534575	-0.203937	-0.368757	-0.365608	-0.360299	-0.832688	-0.514883	-0.623138	-0.666902	-0.79281	-0.771931
17	Project Name	JAZ	2	Lab Number	Project Engineer	Asphalt Grade	PU	Pit Source	xuxiuquan	52	50		20	4000	50	16000	50	0	50	0	50	0	20000	2019-02-18	3.5% & 4.0%Void Percent(Left Back) : 0.0000 Void Percent(Left Front) : 0.0000 Void Percent(Right Back) : 0.0000 Void Percent(Right Front) : 0.0000	2260	49.8	-0.318999	-0.528168	-0.682396	-0.804342	-0.758901	-0.55466	-0.601701	-0.389179	-0.31844	-0.220447	-0.442976	-0.548589	-0.203937	-0.345237	-0.421157	-0.391541	-0.832688	-0.468427	-0.633222	-0.63467	-0.769849	-0.771931
17	Project Name	JAZ	2	Lab Number	Project Engineer	Asphalt Grade	PU	Pit Source	xuxiuquan	52	50		20	4000	50	16000	50	0	50	0	50	0	20000	2019-02-18	3.5% & 4.0%Void Percent(Left Back) : 0.0000 Void Percent(Left Front) : 0.0000 Void Percent(Right Back) : 0.0000 Void Percent(Right Front) : 0.0000	2280	49.8	-0.330048	-0.561391	-0.693471	-0.782091	-0.747827	-0.565607	-0.601701	-0.42098	-0.308102	-0.23053	-0.45339	-0.551161	-0.203937	-0.404114	-0.454685	-0.370688	-0.804748	-0.477672	-0.643331	-0.677697	-0.79281	-0.783946
17	Project Name	JAZ	2	Lab Number	Project Engineer	Asphalt Grade	PU	Pit Source	xuxiuquan	52	50		20	4000	50	16000	50	0	50	0	50	0	20000	2019-02-18	3.5% & 4.0%Void Percent(Left Back) : 0.0000 Void Percent(Left Front) : 0.0000 Void Percent(Right Back) : 0.0000 Void Percent(Right Front) : 0.0000	2300	49.8	-0.30795	-0.528168	-0.682396	-0.804342	-0.747827	-0.55466	-0.601701	-0.399771	-0.308102	-0.220447	-0.45339	-0.548653	-0.191821	-0.380517	-0.398882	-0.370688	-0.842061	-0.468427	-0.643331	-0.63467	-0.781329	-0.783946
17	Project Name	JAZ	2	Lab Number	Project Engineer	Asphalt Grade	PU	Pit Source	xuxiuquan	52	50		20	4000	50	16000	50	0	50	0	50	0	20000	2019-02-18	3.5% & 4.0%Void Percent(Left Back) : 0.0000 Void Percent(Left Front) : 0.0000 Void Percent(Right Back) : 0.0000 Void Percent(Right Front) : 0.0000	2320	50.1	-0.318999	-0.528168	-0.682396	-0.804342	-0.725627	-0.565607	-0.612546	-0.389179	-0.297739	-0.23053	-0.45339	-0.543414	-0.203937	-0.380517	-0.421157	-0.370688	-0.795477	-0.468427	-0.663626	-0.645389	-0.804316	-0.783946
17	Project Name	JAZ	2	Lab Number	Project Engineer	Asphalt Grade	PU	Pit Source	xuxiuquan	52	50		20	4000	50	16000	50	0	50	0	50	0	20000	2019-02-18	3.5% & 4.0%Void Percent(Left Back) : 0.0000 Void Percent(Left Front) : 0.0000 Void Percent(Right Back) : 0.0000 Void Percent(Right Front) : 0.0000	2340	50.1	-0.318999	-0.561391	-0.682396	-0.782091	-0.758901	-0.565607	-0.601701	-0.410362	-0.297739	-0.23053	-0.45339	-0.543147	-0.191821	-0.380517	-0.398882	-0.370688	-0.842061	-0.477672	-0.653466	-0.63467	-0.781329	-0.783946
17	Project Name	JAZ	2	Lab Number	Project Engineer	Asphalt Grade	PU	Pit Source	xuxiuquan	52	50		20	4000	50	16000	50	0	50	0	50	0	20000	2019-02-18	3.5% & 4.0%Void Percent(Left Back) : 0.0000 Void Percent(Left Front) : 0.0000 Void Percent(Right Back) : 0.0000 Void Percent(Right Front) : 0.0000	2360	50.1	-0.318999	-0.561391	-0.682396	-0.770992	-0.714553	-0.565607	-0.634263	-0.410362	-0.297739	-0.200304	-0.463804	-0.540372	-0.191821	-0.404114	-0.410007	-0.339547	-0.767817	-0.468427	-0.663626	-0.63467	-0.781329	-0.80805
17	Project Name	JAZ	2	Lab Number	Project Engineer	Asphalt Grade	PU	Pit Source	xuxiuquan	52	50		20	4000	50	16000	50	0	50	0	50	0	20000	2019-02-18	3.5% & 4.0%Void Percent(Left Back) : 0.0000 Void Percent(Left Front) : 0.0000 Void Percent(Right Back) : 0.0000 Void Percent(Right Front) : 0.0000	2380	50	-0.318999	-0.539242	-0.682396	-0.770992	-0.725627	-0.587553	-0.634263	-0.410362	-0.297739	-0.23053	-0.442976	-0.540372	-0.191821	-0.368757	-0.410007	-0.318897	-0.777011	-0.486943	-0.653466	-0.666902	-0.781329	-0.783946
17	Project Name	JAZ	2	Lab Number	Project Engineer	Asphalt Grade	PU	Pit Source	xuxiuquan	52	50		20	4000	50	16000	50	0	50	0	50	0	20000	2019-02-18	3.5% & 4.0%Void Percent(Left Back) : 0.0000 Void Percent(Left Front) : 0.0000 Void Percent(Right Back) : 0.0000 Void Percent(Right Front) : 0.0000	2400	50	-0.330048	-0.539242	-0.638048	-0.737667	-0.725627	-0.55466	-0.601701	-0.399771	-0.308102	-0.24064	-0.45339	-0.520897	-0.203937	-0.368757	-0.332486	-0.298323	-0.804748	-0.486943	-0.643331	-0.645389	-0.804316	-0.795985
17	Project Name	JAZ	2	Lab Number	Project Engineer	Asphalt Grade	PU	Pit Source	xuxiuquan	52	50		20	4000	50	16000	50	0	50	0	50	0	20000	2019-02-18	3.5% & 4.0%Void Percent(Left Back) : 0.0000 Void Percent(Left Front) : 0.0000 Void Percent(Right Back) : 0.0000 Void Percent(Right Front) : 0.0000	2420	49.9	-0.318999	-0.539242	-0.638048	-0.737667	-0.736727	-0.587553	-0.590855	-0.431597	-0.308102	-0.24064	-0.463804	-0.528853	-0.191821	-0.368757	-0.321488	-0.288061	-0.804748	-0.514883	-0.61308	-0.677697	-0.804316	-0.771931
17	Project Name	JAZ	2	Lab Number	Project Engineer	Asphalt Grade	PU	Pit Source	xuxiuquan	52	50		20	4000	50	16000	50	0	50	0	50	0	20000	2019-02-18	3.5% & 4.0%Void Percent(Left Back) : 0.0000 Void Percent(Left Front) : 0.0000 Void Percent(Right Back) : 0.0000 Void Percent(Right Front) : 0.0000	2440	49.8	-0.318999	-0.528168	-0.593725	-0.682193	-0.736727	-0.65339	-0.515036	-0.431597	-0.349504	-0.24064	-0.474243	-0.514255	-0.191821	-0.321793	-0.244983	-0.226974	-0.832688	-0.533654	-0.553136	-0.688492	-0.804316	-0.759917
17	Project Name	JAZ	2	Lab Number	Project Engineer	Asphalt Grade	PU	Pit Source	xuxiuquan	52	50		20	4000	50	16000	50	0	50	0	50	0	20000	2019-02-18	3.5% & 4.0%Void Percent(Left Back) : 0.0000 Void Percent(Left Front) : 0.0000 Void Percent(Right Back) : 0.0000 Void Percent(Right Front) : 0.0000	2460	49.8	-0.30795	-0.561391	-0.626948	-0.726567	-0.725627	-0.620471	-0.558343	-0.474066	-0.339141	-0.250723	-0.463804	-0.54168	-0.191821	-0.380517	-0.310515	-0.267614	-0.795477	-0.533654	-0.61308	-0.710159	-0.827354	-0.771931
17	Project Name	JAZ	2	Lab Number	Project Engineer	Asphalt Grade	PU	Pit Source	xuxiuquan	52	50		20	4000	50	16000	50	0	50	0	50	0	20000	2019-02-18	3.5% & 4.0%Void Percent(Left Back) : 0.0000 Void Percent(Left Front) : 0.0000 Void Percent(Right Back) : 0.0000 Void Percent(Right Front) : 0.0000	2480	49.7	-0.30795	-0.561391	-0.626948	-0.693293	-0.747827	-0.631444	-0.558343	-0.431597	-0.359867	-0.24064	-0.474243	-0.527926	-0.143535	-0.368757	-0.299542	-0.247269	-0.814045	-0.533654	-0.603021	-0.677697	-0.804316	-0.771931
17	Project Name	JAZ	2	Lab Number	Project Engineer	Asphalt Grade	PU	Pit Source	xuxiuquan	52	50		20	4000	50	16000	50	0	50	0	50	0	20000	2019-02-18	3.5% & 4.0%Void Percent(Left Back) : 0.0000 Void Percent(Left Front) : 0.0000 Void Percent(Right Back) : 0.0000 Void Percent(Right Front) : 0.0000	2500	49.8	-0.285902	-0.539242	-0.626948	-0.726567	-0.747827	-0.631444	-0.558343	-0.431597	-0.349504	-0.24064	-0.463804	-0.533654	-0.1556	-0.368757	-0.299542	-0.267614	-0.842061	-0.543052	-0.603021	-0.688492	-0.804316	-0.771931
17	Project Name	JAZ	2	Lab Number	Project Engineer	Asphalt Grade	PU	Pit Source	xuxiuquan	52	50		20	4000	50	16000	50	0	50	0	50	0	20000	2019-02-18	3.5% & 4.0%Void Percent(Left Back) : 0.0000 Void Percent(Left Front) : 0.0000 Void Percent(Right Back) : 0.0000 Void Percent(Right Front) : 0.0000	2520	49.9	-0.30795	-0.528168	-0.582651	-0.693293	-0.725627	-0.664388	-0.49342	-0.484708	-0.391008	-0.23053	-0.45339	-0.537915	-0.143535	-0.286741	-0.212446	-0.216865	-0.842061	-0.56195	-0.533324	-0.72103	-0.862051	-0.759917
17	Project Name	JAZ	2	Lab Number	Project Engineer	Asphalt Grade	PU	Pit Source	xuxiuquan	52	50		20	4000	50	16000	50	0	50	0	50	0	20000	2019-02-18	3.5% & 4.0%Void Percent(Left Back) : 0.0000 Void Percent(Left Front) : 0.0000 Void Percent(Right Back) : 0.0000 Void Percent(Right Front) : 0.0000	2540	50	-0.285902	-0.561391	-0.626948	-0.737667	-0.747827	-0.609473	-0.547522	-0.442214	-0.349504	-0.250723	-0.463804	-0.539083	-0.131496	-0.333502	-0.299542	-0.277851	-0.851459	-0.533654	-0.61308	-0.688492	-0.827354	-0.771931
17	Project Name	JAZ	2	Lab Number	Project Engineer	Asphalt Grade	PU	Pit Source	xuxiuquan	52	50		20	4000	50	16000	50	0	50	0	50	0	20000	2019-02-18	3.5% & 4.0%Void Percent(Left Back) : 0.0000 Void Percent(Left Front) : 0.0000 Void Percent(Right Back) : 0.0000 Void Percent(Right Front) : 0.0000	2560	50	-0.274853	-0.572491	-0.582651	-0.704367	-0.747827	-0.664388	-0.525856	-0.474066	-0.391008	-0.24064	-0.463804	-0.538023	-0.119482	-0.380517	-0.234112	-0.206781	-0.814045	-0.552501	-0.54323	-0.710159	-0.862051	-0.771931
17	Project Name	JAZ	2	Lab Number	Project Engineer	Asphalt Grade	PU	Pit Source	xuxiuquan	52	50		20	4000	50	16000	50	0	50	0	50	0	20000	2019-02-18	3.5% & 4.0%Void Percent(Left Back) : 0.0000 Void Percent(Left Front) : 0.0000 Void Percent(Right Back) : 0.0000 Void Percent(Right Front) : 0.0000	2580	50	-0.274853	-0.561391	-0.560527	-0.671093	-0.758901	-0.664388	-0.504241	-0.452831	-0.391008	-0.24064	-0.463804	-0.518865	-0.119482	-0.345237	-0.137236	-0.186665	-0.879754	-0.56195	-0.54323	-0.677697	-0.838911	-0.783946
17	Project Name	JAZ	2	Lab Number	Project Engineer	Asphalt Grade	PU	Pit Source	xuxiuquan	52	50		20	4000	50	16000	50	0	50	0	50	0	20000	2019-02-18	3.5% & 4.0%Void Percent(Left Back) : 0.0000 Void Percent(Left Front) : 0.0000 Void Percent(Right Back) : 0.0000 Void Percent(Right Front) : 0.0000	2600	50	-0.285902	-0.572491	-0.593725	-0.704367	-0.781101	-0.631444	-0.547522	-0.410362	-0.359867	-0.23053	-0.45339	-0.517081	-0.131496	-0.368757	-0.234112	-0.226974	-0.889254	-0.533654	-0.573024	-0.623951	-0.827354	-0.771931
17	Project Name	JAZ	2	Lab Number	Project Engineer	Asphalt Grade	PU	Pit Source	xuxiuquan	52	50		20	4000	50	16000	50	0	50	0	50	0	20000	2019-02-18	3.5% & 4.0%Void Percent(Left Back) : 0.0000 Void Percent(Left Front) : 0.0000 Void Percent(Right Back) : 0.0000 Void Percent(Right Front) : 0.0000	2620	49.7	-0.26383	-0.583565	-0.638048	-0.737667	-0.747827	-0.664388	-0.525856	-0.474066	-0.401396	-0.250723	-0.45339	-0.562794	-0.131496	-0.392303	-0.277647	-0.237109	-0.804748	-0.590474	-0.563067	-0.72103	-0.885266	-0.771931
17	Project Name	JAZ	2	Lab Number	Project Engineer	Asphalt Grade	PU	Pit Source	xuxiuquan	52	50		20	4000	50	16000	50	0	50	0	50	0	20000	2019-02-18	3.5% & 4.0%Void Percent(Left Back) : 0.0000 Void Percent(Left Front) : 0.0000 Void Percent(Right Back) : 0.0000 Void Percent(Right Front) : 0.0000	2640	49.8	-0.252806	-0.583565	-0.560527	-0.682193	-0.781101	-0.65339	-0.515036	-0.431597	-0.380619	-0.24064	-0.463804	-0.513734	-0.107467	-0.392303	-0.137236	-0.206781	-0.870306	-0.56195	-0.563067	-0.677697	-0.838911	-0.771931
17	Project Name	JAZ	2	Lab Number	Project Engineer	Asphalt Grade	PU	Pit Source	xuxiuquan	52	50		20	4000	50	16000	50	0	50	0	50	0	20000	2019-02-18	3.5% & 4.0%Void Percent(Left Back) : 0.0000 Void Percent(Left Front) : 0.0000 Void Percent(Right Back) : 0.0000 Void Percent(Right Front) : 0.0000	2660	49.6	-0.274853	-0.583565	-0.582651	-0.704367	-0.747827	-0.642417	-0.515036	-0.431597	-0.370256	-0.23053	-0.463804	-0.522218	-0.131496	-0.368757	-0.190856	-0.206781	-0.860857	-0.571449	-0.553136	-0.677697	-0.838911	-0.783946
17	Project Name	JAZ	2	Lab Number	Project Engineer	Asphalt Grade	PU	Pit Source	xuxiuquan	52	50		20	4000	50	16000	50	0	50	0	50	0	20000	2019-02-18	3.5% & 4.0%Void Percent(Left Back) : 0.0000 Void Percent(Left Front) : 0.0000 Void Percent(Right Back) : 0.0000 Void Percent(Right Front) : 0.0000	2680	49.6	-0.285902	-0.561391	-0.560527	-0.693293	-0.758901	-0.642417	-0.525856	-0.442214	-0.370256	-0.24064	-0.45339	-0.516572	-0.131496	-0.368757	-0.137236	-0.216865	-0.870306	-0.552501	-0.603021	-0.688492	-0.838911	-0.783946
17	Project Name	JAZ	2	Lab Number	Project Engineer	Asphalt Grade	PU	Pit Source	xuxiuquan	52	50		20	4000	50	16000	50	0	50	0	50	0	20000	2019-02-18	3.5% & 4.0%Void Percent(Left Back) : 0.0000 Void Percent(Left Front) : 0.0000 Void Percent(Right Back) : 0.0000 Void Percent(Right Front) : 0.0000	2700	49.7	-0.274853	-0.572491	-0.593725	-0.737667	-0.792201	-0.642417	-0.547522	-0.431597	-0.349504	-0.24064	-0.474243	-0.528123	-0.143535	-0.380517	-0.212446	-0.247269	-0.870306	-0.56195	-0.583006	-0.688492	-0.838911	-0.783946
17	Project Name	JAZ	2	Lab Number	Project Engineer	Asphalt Grade	PU	Pit Source	xuxiuquan	52	50		20	4000	50	16000	50	0	50	0	50	0	20000	2019-02-18	3.5% & 4.0%Void Percent(Left Back) : 0.0000 Void Percent(Left Front) : 0.0000 Void Percent(Right Back) : 0.0000 Void Percent(Right Front) : 0.0000	2720	50	-0.285902	-0.572491	-0.604799	-0.737667	-0.781101	-0.65339	-0.525856	-0.42098	-0.349504	-0.24064	-0.463804	-0.528237	-0.131496	-0.368757	-0.234112	-0.247269	-0.860857	-0.552501	-0.583006	-0.688492	-0.838911	-0.783946
17	Project Name	JAZ	2	Lab Number	Project Engineer	Asphalt Grade	PU	Pit Source	xuxiuquan	52	50		20	4000	50	16000	50	0	50	0	50	0	20000	2019-02-18	3.5% & 4.0%Void Percent(Left Back) : 0.0000 Void Percent(Left Front) : 0.0000 Void Percent(Right Back) : 0.0000 Void Percent(Right Front) : 0.0000	2740	49.8	-0.30795	-0.539242	-0.571602	-0.726567	-0.747827	-0.620471	-0.558343	-0.452831	-0.359867	-0.24064	-0.463804	-0.527717	-0.131496	-0.298399	-0.223266	-0.247269	-0.851459	-0.552501	-0.583006	-0.710159	-0.850494	-0.771931
17	Project Name	JAZ	2	Lab Number	Project Engineer	Asphalt Grade	PU	Pit Source	xuxiuquan	52	50		20	4000	50	16000	50	0	50	0	50	0	20000	2019-02-18	3.5% & 4.0%Void Percent(Left Back) : 0.0000 Void Percent(Left Front) : 0.0000 Void Percent(Right Back) : 0.0000 Void Percent(Right Front) : 0.0000	2760	49.9	-0.285902	-0.517093	-0.571602	-0.759892	-0.792201	-0.65339	-0.547522	-0.431597	-0.31844	-0.24064	-0.45339	-0.520383	-0.143535	-0.263449	-0.169342	-0.277851	-0.889254	-0.552501	-0.573024	-0.677697	-0.827354	-0.783946
17	Project Name	JAZ	2	Lab Number	Project Engineer	Asphalt Grade	PU	Pit Source	xuxiuquan	52	50		20	4000	50	16000	50	0	50	0	50	0	20000	2019-02-18	3.5% & 4.0%Void Percent(Left Back) : 0.0000 Void Percent(Left Front) : 0.0000 Void Percent(Right Back) : 0.0000 Void Percent(Right Front) : 0.0000	2780	49.9	-0.30795	-0.539242	-0.593725	-0.804342	-0.8033	-0.620471	-0.580009	-0.42098	-0.339141	-0.24064	-0.45339	-0.539547	-0.143535	-0.310109	-0.201651	-0.298323	-0.889254	-0.533654	-0.623138	-0.688492	-0.804316	-0.783946
17	Project Name	JAZ	2	Lab Number	Project Engineer	Asphalt Grade	PU	Pit Source	xuxiuquan	52	50		20	4000	50	16000	50	0	50	0	50	0	20000	2019-02-18	3.5% & 4.0%Void Percent(Left Back) : 0.0000 Void Percent(Left Front) : 0.0000 Void Percent(Right Back) : 0.0000 Void Percent(Right Front) : 0.0000	2800	50	-0.285902	-0.583565	-0.593725	-0.737667	-0.781101	-0.642417	-0.558343	-0.452831	-0.370256	-0.23053	-0.45339	-0.53862	-0.17973	-0.345237	-0.212446	-0.237109	-0.879754	-0.552501	-0.583006	-0.710159	-0.862051	-0.783946
17	Project Name	JAZ	2	Lab Number	Project Engineer	Asphalt Grade	PU	Pit Source	xuxiuquan	52	50		20	4000	50	16000	50	0	50	0	50	0	20000	2019-02-18	3.5% & 4.0%Void Percent(Left Back) : 0.0000 Void Percent(Left Front) : 0.0000 Void Percent(Right Back) : 0.0000 Void Percent(Right Front) : 0.0000	2820	50	-0.285902	-0.539242	-0.582651	-0.770992	-0.8033	-0.620471	-0.590855	-0.42098	-0.339141	-0.24064	-0.463804	-0.528441	-0.191821	-0.310109	-0.201651	-0.298323	-0.917829	-0.514883	-0.643331	-0.677697	-0.827354	-0.783946
17	Project Name	JAZ	2	Lab Number	Project Engineer	Asphalt Grade	PU	Pit Source	xuxiuquan	52	50		20	4000	50	16000	50	0	50	0	50	0	20000	2019-02-18	3.5% & 4.0%Void Percent(Left Back) : 0.0000 Void Percent(Left Front) : 0.0000 Void Percent(Right Back) : 0.0000 Void Percent(Right Front) : 0.0000	2840	49.9	-0.285902	-0.539242	-0.593725	-0.770992	-0.8033	-0.642417	-0.580009	-0.410362	-0.339141	-0.24064	-0.463804	-0.528555	-0.17973	-0.298399	-0.201651	-0.298323	-0.908279	-0.533654	-0.633222	-0.688492	-0.827354	-0.783946
17	Project Name	JAZ	2	Lab Number	Project Engineer	Asphalt Grade	PU	Pit Source	xuxiuquan	52	50		20	4000	50	16000	50	0	50	0	50	0	20000	2019-02-18	3.5% & 4.0%Void Percent(Left Back) : 0.0000 Void Percent(Left Front) : 0.0000 Void Percent(Right Back) : 0.0000 Void Percent(Right Front) : 0.0000	2860	50	-0.285902	-0.517093	-0.593725	-0.782091	-0.781101	-0.65339	-0.558343	-0.431597	-0.370256	-0.24064	-0.45339	-0.544417	-0.17973	-0.251816	-0.201651	-0.30861	-0.908279	-0.552501	-0.61308	-0.677697	-0.862051	-0.795985
17	Project Name	JAZ	2	Lab Number	Project Engineer	Asphalt Grade	PU	Pit Source	xuxiuquan	52	50		20	4000	50	16000	50	0	50	0	50	0	20000	2019-02-18	3.5% & 4.0%Void Percent(Left Back) : 0.0000 Void Percent(Left Front) : 0.0000 Void Percent(Right Back) : 0.0000 Void Percent(Right Front) : 0.0000	2880	49.8	-0.285902	-0.506044	-0.582651	-0.759892	-0.814426	-0.631444	-0.601701	-0.442214	-0.359867	-0.250723	-0.474243	-0.536156	-0.17973	-0.2286	-0.158623	-0.298323	-0.917829	-0.533654	-0.633222	-0.699313	-0.862051	-0.80805
17	Project Name	JAZ	2	Lab Number	Project Engineer	Asphalt Grade	PU	Pit Source	xuxiuquan	52	50		20	4000	50	16000	50	0	50	0	50	0	20000	2019-02-18	3.5% & 4.0%Void Percent(Left Back) : 0.0000 Void Percent(Left Front) : 0.0000 Void Percent(Right Back) : 0.0000 Void Percent(Right Front) : 0.0000	2900	49.8	-0.285902	-0.572491	-0.604799	-0.726567	-0.725627	-0.65339	-0.525856	-0.484708	-0.391008	-0.260833	-0.463804	-0.551771	-0.143535	-0.345237	-0.234112	-0.237109	-0.842061	-0.600024	-0.583006	-0.753694	-0.885266	-0.795985
17	Project Name	JAZ	2	Lab Number	Project Engineer	Asphalt Grade	PU	Pit Source	xuxiuquan	52	50		20	4000	50	16000	50	0	50	0	50	0	20000	2019-02-18	3.5% & 4.0%Void Percent(Left Back) : 0.0000 Void Percent(Left Front) : 0.0000 Void Percent(Right Back) : 0.0000 Void Percent(Right Front) : 0.0000	2920	49.7	-0.285902	-0.539242	-0.593725	-0.770992	-0.8033	-0.631444	-0.590855	-0.442214	-0.370256	-0.270942	-0.45339	-0.544297	-0.143535	-0.310109	-0.201651	-0.298323	-0.917829	-0.533654	-0.633222	-0.699313	-0.862051	-0.83218
17	Project Name	JAZ	2	Lab Number	Project Engineer	Asphalt Grade	PU	Pit Source	xuxiuquan	52	50		20	4000	50	16000	50	0	50	0	50	0	20000	2019-02-18	3.5% & 4.0%Void Percent(Left Back) : 0.0000 Void Percent(Left Front) : 0.0000 Void Percent(Right Back) : 0.0000 Void Percent(Right Front) : 0.0000	2940	49.7	-0.30795	-0.528168	-0.593725	-0.737667	-0.758901	-0.664388	-0.504241	-0.505993	-0.401396	-0.250723	-0.463804	-0.559695	-0.17973	-0.286741	-0.212446	-0.247269	-0.870306	-0.600024	-0.553136	-0.764642	-0.896899	-0.80805
17	Project Name	JAZ	2	Lab Number	Project Engineer	Asphalt Grade	PU	Pit Source	xuxiuquan	52	50		20	4000	50	16000	50	0	50	0	50	0	20000	2019-02-18	3.5% & 4.0%Void Percent(Left Back) : 0.0000 Void Percent(Left Front) : 0.0000 Void Percent(Right Back) : 0.0000 Void Percent(Right Front) : 0.0000	2960	49.7	-0.274853	-0.561391	-0.604799	-0.770992	-0.781101	-0.620471	-0.590855	-0.442214	-0.349504	-0.260833	-0.463804	-0.541877	-0.1556	-0.321793	-0.223266	-0.298323	-0.879754	-0.552501	-0.633222	-0.710159	-0.862051	-0.83218
17	Project Name	JAZ	2	Lab Number	Project Engineer	Asphalt Grade	PU	Pit Source	xuxiuquan	52	50		20	4000	50	16000	50	0	50	0	50	0	20000	2019-02-18	3.5% & 4.0%Void Percent(Left Back) : 0.0000 Void Percent(Left Front) : 0.0000 Void Percent(Right Back) : 0.0000 Void Percent(Right Front) : 0.0000	2980	49.9	-0.285902	-0.572491	-0.604799	-0.748767	-0.758901	-0.65339	-0.558343	-0.442214	-0.370256	-0.260833	-0.463804	-0.541509	-0.143535	-0.345237	-0.223266	-0.277851	-0.879754	-0.552501	-0.61308	-0.710159	-0.862051	-0.83218
17	Project Name	JAZ	2	Lab Number	Project Engineer	Asphalt Grade	PU	Pit Source	xuxiuquan	52	50		20	4000	50	16000	50	0	50	0	50	0	20000	2019-02-18	3.5% & 4.0%Void Percent(Left Back) : 0.0000 Void Percent(Left Front) : 0.0000 Void Percent(Right Back) : 0.0000 Void Percent(Right Front) : 0.0000	3000	50	-0.30795	-0.594639	-0.626948	-0.737667	-0.736727	-0.642417	-0.580009	-0.505993	-0.380619	-0.270942	-0.45339	-0.562807	-0.143535	-0.380517	-0.244983	-0.247269	-0.832688	-0.56195	-0.603021	-0.731901	-0.885266	-0.83218
17	Project Name	JAZ	2	Lab Number	Project Engineer	Asphalt Grade	PU	Pit Source	xuxiuquan	52	50		20	4000	50	16000	50	0	50	0	50	0	20000	2019-02-18	3.5% & 4.0%Void Percent(Left Back) : 0.0000 Void Percent(Left Front) : 0.0000 Void Percent(Right Back) : 0.0000 Void Percent(Right Front) : 0.0000	3020	50	-0.30795	-0.583565	-0.626948	-0.770992	-0.781101	-0.675386	-0.558343	-0.484708	-0.380619	-0.260833	-0.474243	-0.565817	-0.1556	-0.380517	-0.255854	-0.288061	-0.870306	-0.571449	-0.603021	-0.753694	-0.885266	-0.80805
17	Project Name	JAZ	2	Lab Number	Project Engineer	Asphalt Grade	PU	Pit Source	xuxiuquan	52	50		20	4000	50	16000	50	0	50	0	50	0	20000	2019-02-18	3.5% & 4.0%Void Percent(Left Back) : 0.0000 Void Percent(Left Front) : 0.0000 Void Percent(Right Back) : 0.0000 Void Percent(Right Front) : 0.0000	3040	50	-0.30795	-0.572491	-0.626948	-0.770992	-0.792201	-0.65339	-0.580009	-0.431597	-0.359867	-0.250723	-0.463804	-0.547351	-0.1556	-0.345237	-0.244983	-0.298323	-0.908279	-0.571449	-0.633222	-0.710159	-0.838911	-0.83218
17	Project Name	JAZ	2	Lab Number	Project Engineer	Asphalt Grade	PU	Pit Source	xuxiuquan	52	50		20	4000	50	16000	50	0	50	0	50	0	20000	2019-02-18	3.5% & 4.0%Void Percent(Left Back) : 0.0000 Void Percent(Left Front) : 0.0000 Void Percent(Right Back) : 0.0000 Void Percent(Right Front) : 0.0000	3060	50	-0.30795	-0.594639	-0.604799	-0.770992	-0.781101	-0.65339	-0.601701	-0.484708	-0.380619	-0.270942	-0.474243	-0.56028	-0.143535	-0.368757	-0.244983	-0.288061	-0.879754	-0.56195	-0.633222	-0.731901	-0.862051	-0.83218
17	Project Name	JAZ	2	Lab Number	Project Engineer	Asphalt Grade	PU	Pit Source	xuxiuquan	52	50		20	4000	50	16000	50	0	50	0	50	0	20000	2019-02-18	3.5% & 4.0%Void Percent(Left Back) : 0.0000 Void Percent(Left Front) : 0.0000 Void Percent(Right Back) : 0.0000 Void Percent(Right Front) : 0.0000	3080	50	-0.30795	-0.572491	-0.604799	-0.770992	-0.8033	-0.664388	-0.580009	-0.452831	-0.370256	-0.250723	-0.474243	-0.54972	-0.143535	-0.333502	-0.201651	-0.288061	-0.908279	-0.56195	-0.623138	-0.710159	-0.862051	-0.83218
17	Project Name	JAZ	2	Lab Number	Project Engineer	Asphalt Grade	PU	Pit Source	xuxiuquan	52	50		20	4000	50	16000	50	0	50	0	50	0	20000	2019-02-18	3.5% & 4.0%Void Percent(Left Back) : 0.0000 Void Percent(Left Front) : 0.0000 Void Percent(Right Back) : 0.0000 Void Percent(Right Front) : 0.0000	3100	49.8	-0.30795	-0.572491	-0.626948	-0.770992	-0.792201	-0.664388	-0.580009	-0.474066	-0.370256	-0.260833	-0.474243	-0.560565	-0.17973	-0.345237	-0.244983	-0.298323	-0.889254	-0.56195	-0.633222	-0.731901	-0.862051	-0.80805
17	Project Name	JAZ	2	Lab Number	Project Engineer	Asphalt Grade	PU	Pit Source	xuxiuquan	52	50		20	4000	50	16000	50	0	50	0	50	0	20000	2019-02-18	3.5% & 4.0%Void Percent(Left Back) : 0.0000 Void Percent(Left Front) : 0.0000 Void Percent(Right Back) : 0.0000 Void Percent(Right Front) : 0.0000	3120	49.8	-0.30795	-0.528168	-0.604799	-0.770992	-0.792201	-0.697357	-0.590855	-0.442214	-0.359867	-0.250723	-0.463804	-0.544468	-0.1556	-0.286741	-0.223266	-0.298323	-0.917829	-0.56195	-0.623138	-0.688492	-0.850494	-0.83218
17	Project Name	JAZ	2	Lab Number	Project Engineer	Asphalt Grade	PU	Pit Source	xuxiuquan	52	50		20	4000	50	16000	50	0	50	0	50	0	20000	2019-02-18	3.5% & 4.0%Void Percent(Left Back) : 0.0000 Void Percent(Left Front) : 0.0000 Void Percent(Right Back) : 0.0000 Void Percent(Right Front) : 0.0000	3140	49.7	-0.30795	-0.572491	-0.593725	-0.759892	-0.792201	-0.675386	-0.590855	-0.410362	-0.297739	-0.200304	-0.474243	-0.51543	-0.143535	-0.333502	-0.201651	-0.277851	-0.917829	-0.571449	-0.61308	-0.666902	-0.838911	-0.80805
17	Project Name	JAZ	2	Lab Number	Project Engineer	Asphalt Grade	PU	Pit Source	xuxiuquan	52	50		20	4000	50	16000	50	0	50	0	50	0	20000	2019-02-18	3.5% & 4.0%Void Percent(Left Back) : 0.0000 Void Percent(Left Front) : 0.0000 Void Percent(Right Back) : 0.0000 Void Percent(Right Front) : 0.0000	3160	49.8	-0.285902	-0.572491	-0.604799	-0.737667	-0.814426	-0.675386	-0.569189	-0.431597	-0.349504	-0.250723	-0.505511	-0.530892	-0.131496	-0.333502	-0.212446	-0.277851	-0.917829	-0.56195	-0.623138	-0.710159	-0.838911	-0.83218
17	Project Name	JAZ	2	Lab Number	Project Engineer	Asphalt Grade	PU	Pit Source	xuxiuquan	52	50		20	4000	50	16000	50	0	50	0	50	0	20000	2019-02-18	3.5% & 4.0%Void Percent(Left Back) : 0.0000 Void Percent(Left Front) : 0.0000 Void Percent(Right Back) : 0.0000 Void Percent(Right Front) : 0.0000	3180	49.7	-0.318999	-0.572491	-0.626948	-0.804342	-0.8033	-0.697357	-0.590855	-0.442214	-0.359867	-0.260833	-0.484657	-0.558343	-0.1556	-0.310109	-0.212446	-0.298323	-0.917829	-0.552501	-0.633222	-0.699313	-0.850494	-0.80805
17	Project Name	JAZ	2	Lab Number	Project Engineer	Asphalt Grade	PU	Pit Source	xuxiuquan	52	50		20	4000	50	16000	50	0	50	0	50	0	20000	2019-02-18	3.5% & 4.0%Void Percent(Left Back) : 0.0000 Void Percent(Left Front) : 0.0000 Void Percent(Right Back) : 0.0000 Void Percent(Right Front) : 0.0000	3200	49.9	-0.285902	-0.594639	-0.582651	-0.748767	-0.792201	-0.65339	-0.580009	-0.431597	-0.349504	-0.220447	-0.474243	-0.528129	-0.131496	-0.368757	-0.190856	-0.267614	-0.927405	-0.56195	-0.633222	-0.688492	-0.850494	-0.80805
17	Project Name	JAZ	2	Lab Number	Project Engineer	Asphalt Grade	PU	Pit Source	xuxiuquan	52	50		20	4000	50	16000	50	0	50	0	50	0	20000	2019-02-18	3.5% & 4.0%Void Percent(Left Back) : 0.0000 Void Percent(Left Front) : 0.0000 Void Percent(Right Back) : 0.0000 Void Percent(Right Front) : 0.0000	3220	50	-0.285902	-0.605739	-0.604799	-0.726567	-0.747827	-0.675386	-0.547522	-0.452831	-0.359867	-0.24064	-0.484657	-0.536016	-0.143535	-0.415925	-0.234112	-0.226974	-0.879754	-0.600024	-0.603021	-0.72103	-0.873658	-0.80805
17	Project Name	JAZ	2	Lab Number	Project Engineer	Asphalt Grade	PU	Pit Source	xuxiuquan	52	50		20	4000	50	16000	50	0	50	0	50	0	20000	2019-02-18	3.5% & 4.0%Void Percent(Left Back) : 0.0000 Void Percent(Left Front) : 0.0000 Void Percent(Right Back) : 0.0000 Void Percent(Right Front) : 0.0000	3240	50	-0.30795	-0.616839	-0.604799	-0.737667	-0.781101	-0.675386	-0.580009	-0.474066	-0.359867	-0.250723	-0.484657	-0.5441	-0.131496	-0.392303	-0.234112	-0.237109	-0.908279	-0.600024	-0.623138	-0.72103	-0.873658	-0.80805
17	Project Name	JAZ	2	Lab Number	Project Engineer	Asphalt Grade	PU	Pit Source	xuxiuquan	52	50		20	4000	50	16000	50	0	50	0	50	0	20000	2019-02-18	3.5% & 4.0%Void Percent(Left Back) : 0.0000 Void Percent(Left Front) : 0.0000 Void Percent(Right Back) : 0.0000 Void Percent(Right Front) : 0.0000	3260	50	-0.30795	-0.616839	-0.604799	-0.759892	-0.781101	-0.697357	-0.569189	-0.484708	-0.370256	-0.250723	-0.474243	-0.554914	-0.131496	-0.404114	-0.212446	-0.267614	-0.908279	-0.590474	-0.623138	-0.731901	-0.873658	-0.83218
17	Project Name	JAZ	2	Lab Number	Project Engineer	Asphalt Grade	PU	Pit Source	xuxiuquan	52	50		20	4000	50	16000	50	0	50	0	50	0	20000	2019-02-18	3.5% & 4.0%Void Percent(Left Back) : 0.0000 Void Percent(Left Front) : 0.0000 Void Percent(Right Back) : 0.0000 Void Percent(Right Front) : 0.0000	3280	50	-0.274853	-0.594639	-0.582651	-0.737667	-0.781101	-0.708355	-0.580009	-0.357403	-0.277089	-0.160045	-0.484657	-0.488702	-0.119482	-0.333502	-0.190856	-0.237109	-0.937006	-0.590474	-0.603021	-0.623951	-0.781329	-0.771931
17	Project Name	JAZ	2	Lab Number	Project Engineer	Asphalt Grade	PU	Pit Source	xuxiuquan	52	50		20	4000	50	16000	50	0	50	0	50	0	20000	2019-02-18	3.5% & 4.0%Void Percent(Left Back) : 0.0000 Void Percent(Left Front) : 0.0000 Void Percent(Right Back) : 0.0000 Void Percent(Right Front) : 0.0000	3300	50	-0.274853	-0.605739	-0.638048	-0.759892	-0.758901	-0.697357	-0.547522	-0.505993	-0.380619	-0.24064	-0.484657	-0.571138	-0.131496	-0.380517	-0.244983	-0.247269	-0.870306	-0.6096	-0.603021	-0.753694	-0.885266	-0.83218
17	Project Name	JAZ	2	Lab Number	Project Engineer	Asphalt Grade	PU	Pit Source	xuxiuquan	52	50		20	4000	50	16000	50	0	50	0	50	0	20000	2019-02-18	3.5% & 4.0%Void Percent(Left Back) : 0.0000 Void Percent(Left Front) : 0.0000 Void Percent(Right Back) : 0.0000 Void Percent(Right Front) : 0.0000	3320	50	-0.30795	-0.605739	-0.626948	-0.737667	-0.758901	-0.697357	-0.569189	-0.527279	-0.391008	-0.270942	-0.484657	-0.570725	-0.119482	-0.380517	-0.223266	-0.237109	-0.860857	-0.600024	-0.603021	-0.775589	-0.896899	-0.83218
17	Project Name	JAZ	2	Lab Number	Project Engineer	Asphalt Grade	PU	Pit Source	xuxiuquan	52	50		20	4000	50	16000	50	0	50	0	50	0	20000	2019-02-18	3.5% & 4.0%Void Percent(Left Back) : 0.0000 Void Percent(Left Front) : 0.0000 Void Percent(Right Back) : 0.0000 Void Percent(Right Front) : 0.0000	3340	49.8	-0.30795	-0.616839	-0.593725	-0.737667	-0.736727	-0.675386	-0.504241	-0.559257	-0.422173	-0.260833	-0.505511	-0.578206	-0.1556	-0.392303	-0.201651	-0.226974	-0.860857	-0.600024	-0.61308	-0.797535	-0.943559	-0.856386
17	Project Name	JAZ	2	Lab Number	Project Engineer	Asphalt Grade	PU	Pit Source	xuxiuquan	52	50		20	4000	50	16000	50	0	50	0	50	0	20000	2019-02-18	3.5% & 4.0%Void Percent(Left Back) : 0.0000 Void Percent(Left Front) : 0.0000 Void Percent(Right Back) : 0.0000 Void Percent(Right Front) : 0.0000	3360	49.8	-0.30795	-0.605739	-0.604799	-0.748767	-0.781101	-0.664388	-0.558343	-0.484708	-0.380619	-0.260833	-0.505511	-0.554723	-0.143535	-0.380517	-0.212446	-0.277851	-0.889254	-0.6096	-0.633222	-0.753694	-0.885266	-0.83218
17	Project Name	JAZ	2	Lab Number	Project Engineer	Asphalt Grade	PU	Pit Source	xuxiuquan	52	50		20	4000	50	16000	50	0	50	0	50	0	20000	2019-02-18	3.5% & 4.0%Void Percent(Left Back) : 0.0000 Void Percent(Left Front) : 0.0000 Void Percent(Right Back) : 0.0000 Void Percent(Right Front) : 0.0000	3380	49.7	-0.285902	-0.572491	-0.604799	-0.704367	-0.758901	-0.697357	-0.558343	-0.410362	-0.31844	-0.200304	-0.484657	-0.509492	-0.143535	-0.333502	-0.190856	-0.206781	-0.917829	-0.6096	-0.603021	-0.666902	-0.804316	-0.80805
17	Project Name	JAZ	2	Lab Number	Project Engineer	Asphalt Grade	PU	Pit Source	xuxiuquan	52	50		20	4000	50	16000	50	0	50	0	50	0	20000	2019-02-18	3.5% & 4.0%Void Percent(Left Back) : 0.0000 Void Percent(Left Front) : 0.0000 Void Percent(Right Back) : 0.0000 Void Percent(Right Front) : 0.0000	3400	49.8	-0.285902	-0.572491	-0.604799	-0.737667	-0.792201	-0.664388	-0.580009	-0.442214	-0.349504	-0.24064	-0.484657	-0.533546	-0.143535	-0.333502	-0.201651	-0.247269	-0.917829	-0.590474	-0.623138	-0.699313	-0.873658	-0.844271
17	Project Name	JAZ	2	Lab Number	Project Engineer	Asphalt Grade	PU	Pit Source	xuxiuquan	52	50		20	4000	50	16000	50	0	50	0	50	0	20000	2019-02-18	3.5% & 4.0%Void Percent(Left Back) : 0.0000 Void Percent(Left Front) : 0.0000 Void Percent(Right Back) : 0.0000 Void Percent(Right Front) : 0.0000	3420	49.9	-0.274853	-0.616839	-0.626948	-0.748767	-0.8033	-0.675386	-0.569189	-0.452831	-0.370256	-0.260833	-0.484657	-0.5497	-0.131496	-0.415925	-0.234112	-0.247269	-0.917829	-0.600024	-0.633222	-0.72103	-0.873658	-0.844271
17	Project Name	JAZ	2	Lab Number	Project Engineer	Asphalt Grade	PU	Pit Source	xuxiuquan	52	50		20	4000	50	16000	50	0	50	0	50	0	20000	2019-02-18	3.5% & 4.0%Void Percent(Left Back) : 0.0000 Void Percent(Left Front) : 0.0000 Void Percent(Right Back) : 0.0000 Void Percent(Right Front) : 0.0000	3440	50	-0.30795	-0.594639	-0.582651	-0.726567	-0.792201	-0.65339	-0.580009	-0.389179	-0.287401	-0.220447	-0.474243	-0.496449	-0.131496	-0.333502	-0.147904	-0.216865	-0.937006	-0.571449	-0.623138	-0.645389	-0.838911	-0.83218
17	Project Name	JAZ	2	Lab Number	Project Engineer	Asphalt Grade	PU	Pit Source	xuxiuquan	52	50		20	4000	50	16000	50	0	50	0	50	0	20000	2019-02-18	3.5% & 4.0%Void Percent(Left Back) : 0.0000 Void Percent(Left Front) : 0.0000 Void Percent(Right Back) : 0.0000 Void Percent(Right Front) : 0.0000	3460	50.1	-0.26383	-0.594639	-0.560527	-0.748767	-0.8033	-0.620471	-0.601701	-0.357403	-0.308102	-0.180162	-0.484657	-0.4937	-0.107467	-0.345237	-0.137236	-0.226974	-0.956285	-0.552501	-0.663626	-0.623951	-0.804316	-0.795985
17	Project Name	JAZ	2	Lab Number	Project Engineer	Asphalt Grade	PU	Pit Source	xuxiuquan	52	50		20	4000	50	16000	50	0	50	0	50	0	20000	2019-02-18	3.5% & 4.0%Void Percent(Left Back) : 0.0000 Void Percent(Left Front) : 0.0000 Void Percent(Right Back) : 0.0000 Void Percent(Right Front) : 0.0000	3480	50	-0.26383	-0.605739	-0.560527	-0.737667	-0.792201	-0.664388	-0.580009	-0.357403	-0.287401	-0.190221	-0.484657	-0.48575	-0.119482	-0.345237	-0.137236	-0.226974	-0.956285	-0.571449	-0.623138	-0.623951	-0.804316	-0.844271
17	Project Name	JAZ	2	Lab Number	Project Engineer	Asphalt Grade	PU	Pit Source	xuxiuquan	52	50		20	4000	50	16000	50	0	50	0	50	0	20000	2019-02-18	3.5% & 4.0%Void Percent(Left Back) : 0.0000 Void Percent(Left Front) : 0.0000 Void Percent(Right Back) : 0.0000 Void Percent(Right Front) : 0.0000	3500	50	-0.26383	-0.594639	-0.582651	-0.759892	-0.814426	-0.675386	-0.634263	-0.389179	-0.297739	-0.24064	-0.505511	-0.507365	-0.119482	-0.345237	-0.169342	-0.267614	-0.995096	-0.552501	-0.663626	-0.63467	-0.838911	-0.880618
17	Project Name	JAZ	2	Lab Number	Project Engineer	Asphalt Grade	PU	Pit Source	xuxiuquan	52	50		20	4000	50	16000	50	0	50	0	50	0	20000	2019-02-18	3.5% & 4.0%Void Percent(Left Back) : 0.0000 Void Percent(Left Front) : 0.0000 Void Percent(Right Back) : 0.0000 Void Percent(Right Front) : 0.0000	3520	50	-0.274853	-0.605739	-0.582651	-0.737667	-0.792201	-0.65339	-0.601701	-0.389179	-0.297739	-0.23053	-0.484657	-0.501809	-0.131496	-0.368757	-0.190856	-0.216865	-0.956285	-0.571449	-0.683971	-0.666902	-0.838911	-0.83218
17	Project Name	JAZ	2	Lab Number	Project Engineer	Asphalt Grade	PU	Pit Source	xuxiuquan	52	50		20	4000	50	16000	50	0	50	0	50	0	20000	2019-02-18	3.5% & 4.0%Void Percent(Left Back) : 0.0000 Void Percent(Left Front) : 0.0000 Void Percent(Right Back) : 0.0000 Void Percent(Right Front) : 0.0000	3540	50	-0.252806	-0.605739	-0.560527	-0.726567	-0.8033	-0.675386	-0.580009	-0.346812	-0.215189	-0.10988	-0.474243	-0.462274	-0.119482	-0.345237	-0.126543	-0.196723	-0.975639	-0.56195	-0.623138	-0.60259	-0.758393	-0.747928
17	Project Name	JAZ	2	Lab Number	Project Engineer	Asphalt Grade	PU	Pit Source	xuxiuquan	52	50		20	4000	50	16000	50	0	50	0	50	0	20000	2019-02-18	3.5% & 4.0%Void Percent(Left Back) : 0.0000 Void Percent(Left Front) : 0.0000 Void Percent(Right Back) : 0.0000 Void Percent(Right Front) : 0.0000	3560	49.8	-0.274853	-0.616839	-0.571602	-0.726567	-0.792201	-0.65339	-0.569189	-0.357403	-0.266751	-0.160045	-0.474243	-0.480581	-0.131496	-0.380517	-0.147904	-0.206781	-0.956285	-0.571449	-0.643331	-0.613283	-0.79281	-0.795985
17	Project Name	JAZ	2	Lab Number	Project Engineer	Asphalt Grade	PU	Pit Source	xuxiuquan	52	50		20	4000	50	16000	50	0	50	0	50	0	20000	2019-02-18	3.5% & 4.0%Void Percent(Left Back) : 0.0000 Void Percent(Left Front) : 0.0000 Void Percent(Right Back) : 0.0000 Void Percent(Right Front) : 0.0000	3580	49.9	-0.285902	-0.616839	-0.560527	-0.748767	-0.814426	-0.620471	-0.612546	-0.357403	-0.308102	-0.23053	-0.484657	-0.4937	-0.119482	-0.333502	-0.1159	-0.206781	-0.975639	-0.533654	-0.643331	-0.623951	-0.804316	-0.880618
17	Project Name	JAZ	2	Lab Number	Project Engineer	Asphalt Grade	PU	Pit Source	xuxiuquan	52	50		20	4000	50	16000	50	0	50	0	50	0	20000	2019-02-18	3.5% & 4.0%Void Percent(Left Back) : 0.0000 Void Percent(Left Front) : 0.0000 Void Percent(Right Back) : 0.0000 Void Percent(Right Front) : 0.0000	3600	49.8	-0.274853	-0.594639	-0.571602	-0.770992	-0.836625	-0.675386	-0.612546	-0.410362	-0.349504	-0.250723	-0.484657	-0.525615	-0.119482	-0.321793	-0.158623	-0.267614	-0.985342	-0.56195	-0.663626	-0.666902	-0.850494	-0.856386
17	Project Name	JAZ	2	Lab Number	Project Engineer	Asphalt Grade	PU	Pit Source	xuxiuquan	52	50		20	4000	50	16000	50	0	50	0	50	0	20000	2019-02-18	3.5% & 4.0%Void Percent(Left Back) : 0.0000 Void Percent(Left Front) : 0.0000 Void Percent(Right Back) : 0.0000 Void Percent(Right Front) : 0.0000	3620	49.8	-0.274853	-0.572491	-0.593725	-0.748767	-0.814426	-0.65339	-0.634263	-0.410362	-0.339141	-0.250723	-0.484657	-0.522999	-0.131496	-0.310109	-0.169342	-0.247269	-0.956285	-0.552501	-0.663626	-0.688492	-0.862051	-0.856386
17	Project Name	JAZ	2	Lab Number	Project Engineer	Asphalt Grade	PU	Pit Source	xuxiuquan	52	50		20	4000	50	16000	50	0	50	0	50	0	20000	2019-02-18	3.5% & 4.0%Void Percent(Left Back) : 0.0000 Void Percent(Left Front) : 0.0000 Void Percent(Right Back) : 0.0000 Void Percent(Right Front) : 0.0000	3640	50	-0.285902	-0.627913	-0.582651	-0.748767	-0.8033	-0.697357	-0.590855	-0.36797	-0.31844	-0.24064	-0.474243	-0.504457	-0.119482	-0.368757	-0.137236	-0.216865	-0.956285	-0.571449	-0.633222	-0.63467	-0.850494	-0.844271
17	Project Name	JAZ	2	Lab Number	Project Engineer	Asphalt Grade	PU	Pit Source	xuxiuquan	52	50		20	4000	50	16000	50	0	50	0	50	0	20000	2019-02-18	3.5% & 4.0%Void Percent(Left Back) : 0.0000 Void Percent(Left Front) : 0.0000 Void Percent(Right Back) : 0.0000 Void Percent(Right Front) : 0.0000	3660	50	-0.30795	-0.594639	-0.560527	-0.704367	-0.814426	-0.664388	-0.547522	-0.33622	-0.235788	-0.0498602	-0.474243	-0.459226	-0.119482	-0.310109	-0.126543	-0.186665	-0.956285	-0.56195	-0.623138	-0.60259	-0.746963	-0.700075
17	Project Name	JAZ	2	Lab Number	Project Engineer	Asphalt Grade	PU	Pit Source	xuxiuquan	52	50		20	4000	50	16000	50	0	50	0	50	0	20000	2019-02-18	3.5% & 4.0%Void Percent(Left Back) : 0.0000 Void Percent(Left Front) : 0.0000 Void Percent(Right Back) : 0.0000 Void Percent(Right Front) : 0.0000	3680	50	-0.274853	-0.616839	-0.571602	-0.704367	-0.792201	-0.675386	-0.569189	-0.389179	-0.31844	-0.190221	-0.474243	-0.495897	-0.107467	-0.368757	-0.1159	-0.156667	-0.956285	-0.600024	-0.623138	-0.666902	-0.850494	-0.795985
17	Project Name	JAZ	2	Lab Number	Project Engineer	Asphalt Grade	PU	Pit Source	xuxiuquan	52	50		20	4000	50	16000	50	0	50	0	50	0	20000	2019-02-18	3.5% & 4.0%Void Percent(Left Back) : 0.0000 Void Percent(Left Front) : 0.0000 Void Percent(Right Back) : 0.0000 Void Percent(Right Front) : 0.0000	3700	50	-0.26383	-0.594639	-0.560527	-0.737667	-0.814426	-0.664388	-0.580009	-0.346812	-0.277089	-0.190221	-0.484657	-0.480524	-0.0954786	-0.321793	-0.126543	-0.206781	-0.975639	-0.56195	-0.653466	-0.613283	-0.804316	-0.83218
17	Project Name	JAZ	2	Lab Number	Project Engineer	Asphalt Grade	PU	Pit Source	xuxiuquan	52	50		20	4000	50	16000	50	0	50	0	50	0	20000	2019-02-18	3.5% & 4.0%Void Percent(Left Back) : 0.0000 Void Percent(Left Front) : 0.0000 Void Percent(Right Back) : 0.0000 Void Percent(Right Front) : 0.0000	3720	49.8	-0.274853	-0.572491	-0.582651	-0.770992	-0.836625	-0.65339	-0.634263	-0.357403	-0.297739	-0.23053	-0.484657	-0.502196	-0.119482	-0.298399	-0.158623	-0.247269	-1.00485	-0.524256	-0.704418	-0.623951	-0.804316	-0.868502
17	Project Name	JAZ	2	Lab Number	Project Engineer	Asphalt Grade	PU	Pit Source	xuxiuquan	52	50		20	4000	50	16000	50	0	50	0	50	0	20000	2019-02-18	3.5% & 4.0%Void Percent(Left Back) : 0.0000 Void Percent(Left Front) : 0.0000 Void Percent(Right Back) : 0.0000 Void Percent(Right Front) : 0.0000	3740	49.8	-0.274853	-0.605739	-0.571602	-0.759892	-0.825525	-0.664388	-0.601701	-0.346812	-0.246101	-0.180162	-0.463804	-0.481101	-0.119482	-0.310109	-0.137236	-0.226974	-0.985342	-0.552501	-0.663626	-0.613283	-0.781329	-0.844271
17	Project Name	JAZ	2	Lab Number	Project Engineer	Asphalt Grade	PU	Pit Source	xuxiuquan	52	50		20	4000	50	16000	50	0	50	0	50	0	20000	2019-02-18	3.5% & 4.0%Void Percent(Left Back) : 0.0000 Void Percent(Left Front) : 0.0000 Void Percent(Right Back) : 0.0000 Void Percent(Right Front) : 0.0000	3760	49.8	-0.285902	-0.605739	-0.593725	-0.737667	-0.8033	-0.697357	-0.580009	-0.389179	-0.349504	-0.24064	-0.484657	-0.517519	-0.0954786	-0.333502	-0.158623	-0.196723	-0.946633	-0.571449	-0.643331	-0.677697	-0.850494	-0.83218
17	Project Name	JAZ	2	Lab Number	Project Engineer	Asphalt Grade	PU	Pit Source	xuxiuquan	52	50		20	4000	50	16000	50	0	50	0	50	0	20000	2019-02-18	3.5% & 4.0%Void Percent(Left Back) : 0.0000 Void Percent(Left Front) : 0.0000 Void Percent(Right Back) : 0.0000 Void Percent(Right Front) : 0.0000	3780	49.8	-0.274853	-0.616839	-0.560527	-0.737667	-0.814426	-0.642417	-0.590855	-0.346812	-0.297739	-0.180162	-0.484657	-0.485686	-0.0954786	-0.333502	-0.1159	-0.186665	-0.995096	-0.543052	-0.653466	-0.613283	-0.804316	-0.795985
17	Project Name	JAZ	2	Lab Number	Project Engineer	Asphalt Grade	PU	Pit Source	xuxiuquan	52	50		20	4000	50	16000	50	0	50	0	50	0	20000	2019-02-18	3.5% & 4.0%Void Percent(Left Back) : 0.0000 Void Percent(Left Front) : 0.0000 Void Percent(Right Back) : 0.0000 Void Percent(Right Front) : 0.0000	3800	49.8	-0.285902	-0.616839	-0.582651	-0.782091	-0.836625	-0.65339	-0.645109	-0.399771	-0.297739	-0.200304	-0.474243	-0.515563	-0.107467	-0.333502	-0.1159	-0.247269	-0.995096	-0.514883	-0.663626	-0.63467	-0.827354	-0.844271
17	Project Name	JAZ	2	Lab Number	Project Engineer	Asphalt Grade	PU	Pit Source	xuxiuquan	52	50		20	4000	50	16000	50	0	50	0	50	0	20000	2019-02-18	3.5% & 4.0%Void Percent(Left Back) : 0.0000 Void Percent(Left Front) : 0.0000 Void Percent(Right Back) : 0.0000 Void Percent(Right Front) : 0.0000	3820	49.9	-0.26383	-0.572491	-0.582651	-0.748767	-0.836625	-0.565607	-0.634263	-0.325653	-0.277089	-0.200304	-0.484657	-0.48354	-0.107467	-0.298399	-0.137236	-0.226974	-1.01463	-0.486943	-0.735254	-0.613283	-0.804316	-0.856386
17	Project Name	JAZ	2	Lab Number	Project Engineer	Asphalt Grade	PU	Pit Source	xuxiuquan	52	50		20	4000	50	16000	50	0	50	0	50	0	20000	2019-02-18	3.5% & 4.0%Void Percent(Left Back) : 0.0000 Void Percent(Left Front) : 0.0000 Void Percent(Right Back) : 0.0000 Void Percent(Right Front) : 0.0000	3840	50	-0.285902	-0.594639	-0.571602	-0.782091	-0.825525	-0.609473	-0.612546	-0.357403	-0.287401	-0.24064	-0.484657	-0.499624	-0.107467	-0.333502	-0.137236	-0.247269	-1.00485	-0.486943	-0.71468	-0.623951	-0.804316	-0.880618
17	Project Name	JAZ	2	Lab Number	Project Engineer	Asphalt Grade	PU	Pit Source	xuxiuquan	52	50		20	4000	50	16000	50	0	50	0	50	0	20000	2019-02-18	3.5% & 4.0%Void Percent(Left Back) : 0.0000 Void Percent(Left Front) : 0.0000 Void Percent(Right Back) : 0.0000 Void Percent(Right Front) : 0.0000	3860	50	-0.285902	-0.616839	-0.571602	-0.737667	-0.825525	-0.620471	-0.612546	-0.33622	-0.246101	-0.190221	-0.484657	-0.472897	-0.119482	-0.345237	-0.126543	-0.206781	-1.00485	-0.514883	-0.71468	-0.613283	-0.79281	-0.856386
17	Project Name	JAZ	2	Lab Number	Project Engineer	Asphalt Grade	PU	Pit Source	xuxiuquan	52	50		20	4000	50	16000	50	0	50	0	50	0	20000	2019-02-18	3.5% & 4.0%Void Percent(Left Back) : 0.0000 Void Percent(Left Front) : 0.0000 Void Percent(Right Back) : 0.0000 Void Percent(Right Front) : 0.0000	3880	50	-0.285902	-0.594639	-0.593725	-0.782091	-0.825525	-0.631444	-0.634263	-0.357403	-0.287401	-0.250723	-0.505511	-0.505155	-0.119482	-0.333502	-0.158623	-0.267614	-0.995096	-0.524256	-0.694207	-0.677697	-0.850494	-0.856386
17	Project Name	JAZ	2	Lab Number	Project Engineer	Asphalt Grade	PU	Pit Source	xuxiuquan	52	50		20	4000	50	16000	50	0	50	0	50	0	20000	2019-02-18	3.5% & 4.0%Void Percent(Left Back) : 0.0000 Void Percent(Left Front) : 0.0000 Void Percent(Right Back) : 0.0000 Void Percent(Right Front) : 0.0000	3900	49.9	-0.30795	-0.616839	-0.593725	-0.748767	-0.814426	-0.675386	-0.612546	-0.389179	-0.308102	-0.24064	-0.505511	-0.509943	-0.131496	-0.345237	-0.137236	-0.206781	-0.985342	-0.56195	-0.663626	-0.666902	-0.838911	-0.856386
17	Project Name	JAZ	2	Lab Number	Project Engineer	Asphalt Grade	PU	Pit Source	xuxiuquan	52	50		20	4000	50	16000	50	0	50	0	50	0	20000	2019-02-18	3.5% & 4.0%Void Percent(Left Back) : 0.0000 Void Percent(Left Front) : 0.0000 Void Percent(Right Back) : 0.0000 Void Percent(Right Front) : 0.0000	3920	49.7	-0.318999	-0.616839	-0.593725	-0.826567	-0.825525	-0.609473	-0.634263	-0.389179	-0.297739	-0.220447	-0.463804	-0.526802	-0.131496	-0.333502	-0.147904	-0.288061	-1.00485	-0.514883	-0.724967	-0.677697	-0.862051	-0.880618
17	Project Name	JAZ	2	Lab Number	Project Engineer	Asphalt Grade	PU	Pit Source	xuxiuquan	52	50		20	4000	50	16000	50	0	50	0	50	0	20000	2019-02-18	3.5% & 4.0%Void Percent(Left Back) : 0.0000 Void Percent(Left Front) : 0.0000 Void Percent(Right Back) : 0.0000 Void Percent(Right Front) : 0.0000	3940	49.8	-0.30795	-0.650113	-0.604799	-0.759892	-0.814426	-0.65339	-0.601701	-0.389179	-0.308102	-0.220447	-0.474243	-0.515493	-0.1556	-0.404114	-0.169342	-0.226974	-0.975639	-0.552501	-0.683971	-0.677697	-0.873658	-0.868502
17	Project Name	JAZ	2	Lab Number	Project Engineer	Asphalt Grade	PU	Pit Source	xuxiuquan	52	50		20	4000	50	16000	50	0	50	0	50	0	20000	2019-02-18	3.5% & 4.0%Void Percent(Left Back) : 0.0000 Void Percent(Left Front) : 0.0000 Void Percent(Right Back) : 0.0000 Void Percent(Right Front) : 0.0000	3960	49.6	-0.30795	-0.583565	-0.582651	-0.737667	-0.825525	-0.631444	-0.634263	-0.315087	-0.287401	-0.24064	-0.474243	-0.480701	-0.119482	-0.298399	-0.147904	-0.206781	-1.00485	-0.49624	-0.735254	-0.623951	-0.827354	-0.917092
17	Project Name	JAZ	2	Lab Number	Project Engineer	Asphalt Grade	PU	Pit Source	xuxiuquan	52	50		20	4000	50	16000	50	0	50	0	50	0	20000	2019-02-18	3.5% & 4.0%Void Percent(Left Back) : 0.0000 Void Percent(Left Front) : 0.0000 Void Percent(Right Back) : 0.0000 Void Percent(Right Front) : 0.0000	3980	49.6	-0.30795	-0.561391	-0.582651	-0.815442	-0.881101	-0.57658	-0.677697	-0.33622	-0.277089	-0.281051	-0.474243	-0.50285	-0.131496	-0.251816	-0.158623	-0.298323	-1.06388	-0.450012	-0.787044	-0.63467	-0.850494	-0.978103
17	Project Name	JAZ	2	Lab Number	Project Engineer	Asphalt Grade	PU	Pit Source	xuxiuquan	52	50		20	4000	50	16000	50	0	50	0	50	0	20000	2019-02-18	3.5% & 4.0%Void Percent(Left Back) : 0.0000 Void Percent(Left Front) : 0.0000 Void Percent(Right Back) : 0.0000 Void Percent(Right Front) : 0.0000	4000	49.8	-0.274853	-0.572491	-0.560527	-0.826567	-0.881101	-0.609473	-0.65598	-0.315087	-0.235788	-0.200304	-0.474243	-0.484492	-0.107467	-0.286741	-0.0946404	-0.298323	-1.06388	-0.468427	-0.755904	-0.613283	-0.804316	-0.917092
17	Project Name	JAZ	2	Lab Number	Project Engineer	Asphalt Grade	PU	Pit Source	xuxiuquan	52	50		20	4000	50	16000	50	0	50	0	50	0	20000	2019-02-18	3.5% & 4.0%Void Percent(Left Back) : 0.0000 Void Percent(Left Front) : 0.0000 Void Percent(Right Back) : 0.0000 Void Percent(Right Front) : 0.0000	4050	50	-0.30795	-0.605739	-0.582651	-0.748767	-0.836625	-0.642417	-0.634263	-0.410362	-0.339141	-0.220447	-0.51595	-0.52023	-0.119482	-0.345237	-0.147904	-0.237109	-1.01463	-0.533654	-0.694207	-0.677697	-0.850494	-0.868502
17	Project Name	JAZ	2	Lab Number	Project Engineer	Asphalt Grade	PU	Pit Source	xuxiuquan	52	50		20	4000	50	16000	50	0	50	0	50	0	20000	2019-02-18	3.5% & 4.0%Void Percent(Left Back) : 0.0000 Void Percent(Left Front) : 0.0000 Void Percent(Right Back) : 0.0000 Void Percent(Right Front) : 0.0000	4100	50	-0.30795	-0.572491	-0.582651	-0.804342	-0.881101	-0.609473	-0.688569	-0.357403	-0.31844	-0.301295	-0.484657	-0.515709	-0.119482	-0.263449	-0.147904	-0.277851	-1.05397	-0.450012	-0.766267	-0.688492	-0.885266	-0.953668
17	Project Name	JAZ	2	Lab Number	Project Engineer	Asphalt Grade	PU	Pit Source	xuxiuquan	52	50		20	4000	50	16000	50	0	50	0	50	0	20000	2019-02-18	3.5% & 4.0%Void Percent(Left Back) : 0.0000 Void Percent(Left Front) : 0.0000 Void Percent(Right Back) : 0.0000 Void Percent(Right Front) : 0.0000	4150	49.8	-0.318999	-0.561391	-0.571602	-0.848817	-0.892226	-0.55466	-0.710311	-0.389179	-0.308102	-0.281051	-0.484657	-0.529425	-0.131496	-0.2286	-0.147904	-0.318897	-1.07378	-0.450012	-0.787044	-0.677697	-0.896899	-0.96586
17	Project Name	JAZ	2	Lab Number	Project Engineer	Asphalt Grade	PU	Pit Source	xuxiuquan	52	50		20	4000	50	16000	50	0	50	0	50	0	20000	2019-02-18	3.5% & 4.0%Void Percent(Left Back) : 0.0000 Void Percent(Left Front) : 0.0000 Void Percent(Right Back) : 0.0000 Void Percent(Right Front) : 0.0000	4200	49.6	-0.318999	-0.572491	-0.593725	-0.859942	-0.892226	-0.565607	-0.710311	-0.42098	-0.359867	-0.270942	-0.505511	-0.558629	-0.17973	-0.251816	-0.158623	-0.360299	-1.03426	-0.477672	-0.766267	-0.731901	-0.920191	-0.892759
17	Project Name	JAZ	2	Lab Number	Project Engineer	Asphalt Grade	PU	Pit Source	xuxiuquan	52	50		20	4000	50	16000	50	0	50	0	50	0	20000	2019-02-18	3.5% & 4.0%Void Percent(Left Back) : 0.0000 Void Percent(Left Front) : 0.0000 Void Percent(Right Back) : 0.0000 Void Percent(Right Front) : 0.0000	4250	50	-0.330048	-0.561391	-0.604799	-0.859942	-0.869975	-0.565607	-0.688569	-0.410362	-0.349504	-0.260833	-0.474243	-0.556152	-0.17973	-0.251816	-0.201651	-0.34991	-1.03426	-0.468427	-0.776656	-0.731901	-0.943559	-0.941451
17	Project Name	JAZ	2	Lab Number	Project Engineer	Asphalt Grade	PU	Pit Source	xuxiuquan	52	50		20	4000	50	16000	50	0	50	0	50	0	20000	2019-02-18	3.5% & 4.0%Void Percent(Left Back) : 0.0000 Void Percent(Left Front) : 0.0000 Void Percent(Right Back) : 0.0000 Void Percent(Right Front) : 0.0000	4300	50	-0.330048	-0.594639	-0.593725	-0.826567	-0.881101	-0.620471	-0.688569	-0.346812	-0.308102	-0.250723	-0.474243	-0.518801	-0.143535	-0.286741	-0.147904	-0.298323	-1.07378	-0.486943	-0.797458	-0.677697	-0.850494	-0.941451
17	Project Name	JAZ	2	Lab Number	Project Engineer	Asphalt Grade	PU	Pit Source	xuxiuquan	52	50		20	4000	50	16000	50	0	50	0	50	0	20000	2019-02-18	3.5% & 4.0%Void Percent(Left Back) : 0.0000 Void Percent(Left Front) : 0.0000 Void Percent(Right Back) : 0.0000 Void Percent(Right Front) : 0.0000	4350	50	-0.352146	-0.594639	-0.638048	-0.848817	-0.869975	-0.631444	-0.677697	-0.452831	-0.391008	-0.281051	-0.505511	-0.582676	-0.17973	-0.321793	-0.201651	-0.34991	-1.02443	-0.543052	-0.724967	-0.764642	-0.93185	-0.917092
17	Project Name	JAZ	2	Lab Number	Project Engineer	Asphalt Grade	PU	Pit Source	xuxiuquan	52	50		20	4000	50	16000	50	0	50	0	50	0	20000	2019-02-18	3.5% & 4.0%Void Percent(Left Back) : 0.0000 Void Percent(Left Front) : 0.0000 Void Percent(Right Back) : 0.0000 Void Percent(Right Front) : 0.0000	4400	49.8	-0.363195	-0.583565	-0.649122	-0.859942	-0.858876	-0.620471	-0.677697	-0.410362	-0.349504	-0.281051	-0.484657	-0.567233	-0.191821	-0.321793	-0.244983	-0.34991	-1.03426	-0.533654	-0.776656	-0.731901	-0.920191	-0.953668
17	Project Name	JAZ	2	Lab Number	Project Engineer	Asphalt Grade	PU	Pit Source	xuxiuquan	52	50		20	4000	50	16000	50	0	50	0	50	0	20000	2019-02-18	3.5% & 4.0%Void Percent(Left Back) : 0.0000 Void Percent(Left Front) : 0.0000 Void Percent(Right Back) : 0.0000 Void Percent(Right Front) : 0.0000	4450	50	-0.407416	-0.572491	-0.682396	-0.871093	-0.814426	-0.631444	-0.612546	-0.442214	-0.349504	-0.24064	-0.432587	-0.586302	-0.264643	-0.286741	-0.299542	-0.370688	-0.995096	-0.552501	-0.724967	-0.764642	-0.955243	-0.941451
17	Project Name	JAZ	2	Lab Number	Project Engineer	Asphalt Grade	PU	Pit Source	xuxiuquan	52	50		20	4000	50	16000	50	0	50	0	50	0	20000	2019-02-18	3.5% & 4.0%Void Percent(Left Back) : 0.0000 Void Percent(Left Front) : 0.0000 Void Percent(Right Back) : 0.0000 Void Percent(Right Front) : 0.0000	4500	50	-0.407416	-0.583565	-0.649122	-0.848817	-0.869975	-0.65339	-0.710311	-0.442214	-0.380619	-0.281051	-0.484657	-0.580193	-0.240309	-0.298399	-0.223266	-0.30861	-1.02443	-0.56195	-0.735254	-0.764642	-0.93185	-0.941451
17	Project Name	JAZ	2	Lab Number	Project Engineer	Asphalt Grade	PU	Pit Source	xuxiuquan	52	50		20	4000	50	16000	50	0	50	0	50	0	20000	2019-02-18	3.5% & 4.0%Void Percent(Left Back) : 0.0000 Void Percent(Left Front) : 0.0000 Void Percent(Right Back) : 0.0000 Void Percent(Right Front) : 0.0000	4550	49.8	-0.396367	-0.583565	-0.638048	-0.837692	-0.903351	-0.55466	-0.688569	-0.410362	-0.349504	-0.281051	-0.484657	-0.558902	-0.240309	-0.298399	-0.234112	-0.30861	-1.07378	-0.524256	-0.807898	-0.72103	-0.93185	-0.990346
17	Project Name	JAZ	2	Lab Number	Project Engineer	Asphalt Grade	PU	Pit Source	xuxiuquan	52	50		20	4000	50	16000	50	0	50	0	50	0	20000	2019-02-18	3.5% & 4.0%Void Percent(Left Back) : 0.0000 Void Percent(Left Front) : 0.0000 Void Percent(Right Back) : 0.0000 Void Percent(Right Front) : 0.0000	4600	49.9	-0.41849	-0.572491	-0.649122	-0.837692	-0.881101	-0.631444	-0.666826	-0.410362	-0.349504	-0.260833	-0.474243	-0.56167	-0.276809	-0.298399	-0.255854	-0.30861	-1.03426	-0.56195	-0.766267	-0.72103	-0.896899	-0.96586
17	Project Name	JAZ	2	Lab Number	Project Engineer	Asphalt Grade	PU	Pit Source	xuxiuquan	52	50		20	4000	50	16000	50	0	50	0	50	0	20000	2019-02-18	3.5% & 4.0%Void Percent(Left Back) : 0.0000 Void Percent(Left Front) : 0.0000 Void Percent(Right Back) : 0.0000 Void Percent(Right Front) : 0.0000	4650	50	-0.429539	-0.594639	-0.660197	-0.826567	-0.836625	-0.719353	-0.65598	-0.442214	-0.391008	-0.301295	-0.51595	-0.579996	-0.264643	-0.321793	-0.234112	-0.298323	-1.03426	-0.590474	-0.724967	-0.731901	-0.93185	-0.941451
17	Project Name	JAZ	2	Lab Number	Project Engineer	Asphalt Grade	PU	Pit Source	xuxiuquan	52	50		20	4000	50	16000	50	0	50	0	50	0	20000	2019-02-18	3.5% & 4.0%Void Percent(Left Back) : 0.0000 Void Percent(Left Front) : 0.0000 Void Percent(Right Back) : 0.0000 Void Percent(Right Front) : 0.0000	4700	50	-0.440614	-0.627913	-0.671297	-0.804342	-0.825525	-0.730352	-0.612546	-0.484708	-0.391008	-0.270942	-0.51595	-0.587839	-0.276809	-0.368757	-0.288595	-0.277851	-0.985342	-0.657835	-0.694207	-0.786562	-0.943559	-0.929259
17	Project Name	JAZ	2	Lab Number	Project Engineer	Asphalt Grade	PU	Pit Source	xuxiuquan	52	50		20	4000	50	16000	50	0	50	0	50	0	20000	2019-02-18	3.5% & 4.0%Void Percent(Left Back) : 0.0000 Void Percent(Left Front) : 0.0000 Void Percent(Right Back) : 0.0000 Void Percent(Right Front) : 0.0000	4750	49.8	-0.41849	-0.605739	-0.671297	-0.837692	-0.869975	-0.708355	-0.666826	-0.452831	-0.391008	-0.281051	-0.52639	-0.588207	-0.301219	-0.333502	-0.244983	-0.30861	-1.02443	-0.6096	-0.724967	-0.753694	-0.955243	-0.941451
17	Project Name	JAZ	2	Lab Number	Project Engineer	Asphalt Grade	PU	Pit Source	xuxiuquan	52	50		20	4000	50	16000	50	0	50	0	50	0	20000	2019-02-18	3.5% & 4.0%Void Percent(Left Back) : 0.0000 Void Percent(Left Front) : 0.0000 Void Percent(Right Back) : 0.0000 Void Percent(Right Front) : 0.0000	4800	49.7	-0.451688	-0.650113	-0.693471	-0.815442	-0.814426	-0.741375	-0.590855	-0.484708	-0.422173	-0.301295	-0.52639	-0.603948	-0.301219	-0.392303	-0.288595	-0.298323	-0.956285	-0.687045	-0.694207	-0.797535	-0.966953	-0.929259
17	Project Name	JAZ	2	Lab Number	Project Engineer	Asphalt Grade	PU	Pit Source	xuxiuquan	52	50		20	4000	50	16000	50	0	50	0	50	0	20000	2019-02-18	3.5% & 4.0%Void Percent(Left Back) : 0.0000 Void Percent(Left Front) : 0.0000 Void Percent(Right Back) : 0.0000 Void Percent(Right Front) : 0.0000	4850	50	-0.451688	-0.661213	-0.73787	-0.837692	-0.814426	-0.752373	-0.612546	-0.505993	-0.463804	-0.281051	-0.51595	-0.63634	-0.301219	-0.415925	-0.354559	-0.298323	-0.946633	-0.667537	-0.694207	-0.830605	-1.00221	-0.929259
17	Project Name	JAZ	2	Lab Number	Project Engineer	Asphalt Grade	PU	Pit Source	xuxiuquan	52	50		20	4000	50	16000	50	0	50	0	50	0	20000	2019-02-18	3.5% & 4.0%Void Percent(Left Back) : 0.0000 Void Percent(Left Front) : 0.0000 Void Percent(Right Back) : 0.0000 Void Percent(Right Front) : 0.0000	4900	50	-0.429539	-0.650113	-0.72677	-0.837692	-0.8033	-0.697357	-0.612546	-0.452831	-0.380619	-0.24064	-0.45339	-0.599478	-0.313411	-0.392303	-0.310515	-0.339547	-0.975639	-0.63848	-0.704418	-0.797535	-0.966953	-0.941451
17	Project Name	JAZ	2	Lab Number	Project Engineer	Asphalt Grade	PU	Pit Source	xuxiuquan	52	50		20	4000	50	16000	50	0	50	0	50	0	20000	2019-02-18	3.5% & 4.0%Void Percent(Left Back) : 0.0000 Void Percent(Left Front) : 0.0000 Void Percent(Right Back) : 0.0000 Void Percent(Right Front) : 0.0000	4950	49.8	-0.451688	-0.661213	-0.71567	-0.837692	-0.8033	-0.708355	-0.612546	-0.516636	-0.422173	-0.281051	-0.505511	-0.623043	-0.313411	-0.404114	-0.332486	-0.339547	-0.975639	-0.677291	-0.704418	-0.808533	-0.978687	-0.929259
17	Project Name	JAZ	2	Lab Number	Project Engineer	Asphalt Grade	PU	Pit Source	xuxiuquan	52	50		20	4000	50	16000	50	0	50	0	50	0	20000	2019-02-18	3.5% & 4.0%Void Percent(Left Back) : 0.0000 Void Percent(Left Front) : 0.0000 Void Percent(Right Back) : 0.0000 Void Percent(Right Front) : 0.0000	5000	49.8	-0.484937	-0.650113	-0.748995	-0.848817	-0.858876	-0.708355	-0.645109	-0.505993	-0.432587	-0.301295	-0.484657	-0.634098	-0.325653	-0.404114	-0.365608	-0.34991	-0.985342	-0.628828	-0.71468	-0.797535	-1.00221	-0.941451
17	Project Name	JAZ	2	Lab Number	Project Engineer	Asphalt Grade	PU	Pit Source	xuxiuquan	52	50		20	4000	50	16000	50	0	50	0	50	0	20000	2019-02-18	3.5% & 4.0%Void Percent(Left Back) : 0.0000 Void Percent(Left Front) : 0.0000 Void Percent(Right Back) : 0.0000 Void Percent(Right Front) : 0.0000	5050	50	-0.484937	-0.661213	-0.748995	-0.859942	-0.858876	-0.719353	-0.65598	-0.516636	-0.45339	-0.301295	-0.505511	-0.644741	-0.325653	-0.415925	-0.365608	-0.34991	-0.995096	-0.63848	-0.704418	-0.841654	-1.01397	-0.941451
17	Project Name	JAZ	2	Lab Number	Project Engineer	Asphalt Grade	PU	Pit Source	xuxiuquan	52	50		20	4000	50	16000	50	0	50	0	50	0	20000	2019-02-18	3.5% & 4.0%Void Percent(Left Back) : 0.0000 Void Percent(Left Front) : 0.0000 Void Percent(Right Back) : 0.0000 Void Percent(Right Front) : 0.0000	5100	50	-0.473837	-0.672313	-0.748995	-0.837692	-0.825525	-0.741375	-0.612546	-0.527279	-0.442976	-0.301295	-0.505511	-0.639235	-0.325653	-0.439598	-0.376682	-0.30861	-0.985342	-0.657835	-0.694207	-0.830605	-1.01397	-0.941451
17	Project Name	JAZ	2	Lab Number	Project Engineer	Asphalt Grade	PU	Pit Source	xuxiuquan	52	50		20	4000	50	16000	50	0	50	0	50	0	20000	2019-02-18	3.5% & 4.0%Void Percent(Left Back) : 0.0000 Void Percent(Left Front) : 0.0000 Void Percent(Right Back) : 0.0000 Void Percent(Right Front) : 0.0000	5150	49.8	-0.473837	-0.661213	-0.748995	-0.859942	-0.825525	-0.719353	-0.634263	-0.527279	-0.45339	-0.311429	-0.51595	-0.647402	-0.313411	-0.415925	-0.354559	-0.34991	-0.985342	-0.657835	-0.694207	-0.830605	-1.02575	-0.941451
17	Project Name	JAZ	2	Lab Number	Project Engineer	Asphalt Grade	PU	Pit Source	xuxiuquan	52	50		20	4000	50	16000	50	0	50	0	50	0	20000	2019-02-18	3.5% & 4.0%Void Percent(Left Back) : 0.0000 Void Percent(Left Front) : 0.0000 Void Percent(Right Back) : 0.0000 Void Percent(Right Front) : 0.0000	5200	50	-0.473837	-0.661213	-0.760095	-0.859942	-0.825525	-0.730352	-0.65598	-0.516636	-0.442976	-0.321564	-0.505511	-0.644912	-0.325653	-0.404114	-0.376682	-0.360299	-0.985342	-0.628828	-0.704418	-0.830605	-1.00221	-0.941451
17	Project Name	JAZ	2	Lab Number	Project Engineer	Asphalt Grade	PU	Pit Source	xuxiuquan	52	50		20	4000	50	16000	50	0	50	0	50	0	20000	2019-02-18	3.5% & 4.0%Void Percent(Left Back) : 0.0000 Void Percent(Left Front) : 0.0000 Void Percent(Right Back) : 0.0000 Void Percent(Right Front) : 0.0000	5250	50.1	-0.473837	-0.661213	-0.748995	-0.871093	-0.836625	-0.730352	-0.666826	-0.537921	-0.45339	-0.301295	-0.505511	-0.65285	-0.313411	-0.415925	-0.332486	-0.370688	-0.995096	-0.628828	-0.71468	-0.841654	-1.03756	-0.953668
17	Project Name	JAZ	2	Lab Number	Project Engineer	Asphalt Grade	PU	Pit Source	xuxiuquan	52	50		20	4000	50	16000	50	0	50	0	50	0	20000	2019-02-18	3.5% & 4.0%Void Percent(Left Back) : 0.0000 Void Percent(Left Front) : 0.0000 Void Percent(Right Back) : 0.0000 Void Percent(Right Front) : 0.0000	5300	50	-0.473837	-0.672313	-0.748995	-0.871093	-0.858876	-0.730352	-0.65598	-0.527279	-0.463804	-0.321564	-0.505511	-0.652793	-0.313411	-0.415925	-0.354559	-0.370688	-1.00485	-0.63848	-0.724967	-0.841654	-1.02575	-0.953668
17	Project Name	JAZ	2	Lab Number	Project Engineer	Asphalt Grade	PU	Pit Source	xuxiuquan	52	50		20	4000	50	16000	50	0	50	0	50	0	20000	2019-02-18	3.5% & 4.0%Void Percent(Left Back) : 0.0000 Void Percent(Left Front) : 0.0000 Void Percent(Right Back) : 0.0000 Void Percent(Right Front) : 0.0000	5350	49.7	-0.484937	-0.661213	-0.760095	-0.893343	-0.869975	-0.741375	-0.634263	-0.527279	-0.463804	-0.311429	-0.52639	-0.66113	-0.337896	-0.415925	-0.387782	-0.381102	-0.995096	-0.667537	-0.724967	-0.841654	-1.02575	-0.953668
17	Project Name	JAZ	2	Lab Number	Project Engineer	Asphalt Grade	PU	Pit Source	xuxiuquan	52	50		20	4000	50	16000	50	0	50	0	50	0	20000	2019-02-18	3.5% & 4.0%Void Percent(Left Back) : 0.0000 Void Percent(Left Front) : 0.0000 Void Percent(Right Back) : 0.0000 Void Percent(Right Front) : 0.0000	5400	49.8	-0.496011	-0.661213	-0.760095	-0.871093	-0.836625	-0.730352	-0.666826	-0.505993	-0.442976	-0.311429	-0.505511	-0.645039	-0.362407	-0.404114	-0.365608	-0.370688	-1.01463	-0.63848	-0.735254	-0.830605	-1.01397	-0.953668
17	Project Name	JAZ	2	Lab Number	Project Engineer	Asphalt Grade	PU	Pit Source	xuxiuquan	52	50		20	4000	50	16000	50	0	50	0	50	0	20000	2019-02-18	3.5% & 4.0%Void Percent(Left Back) : 0.0000 Void Percent(Left Front) : 0.0000 Void Percent(Right Back) : 0.0000 Void Percent(Right Front) : 0.0000	5450	50	-0.496011	-0.661213	-0.771195	-0.904494	-0.858876	-0.741375	-0.666826	-0.527279	-0.463804	-0.311429	-0.505511	-0.666693	-0.337896	-0.415925	-0.376682	-0.381102	-1.00485	-0.657835	-0.724967	-0.841654	-1.02575	-0.953668
17	Project Name	JAZ	2	Lab Number	Project Engineer	Asphalt Grade	PU	Pit Source	xuxiuquan	52	50		20	4000	50	16000	50	0	50	0	50	0	20000	2019-02-18	3.5% & 4.0%Void Percent(Left Back) : 0.0000 Void Percent(Left Front) : 0.0000 Void Percent(Right Back) : 0.0000 Void Percent(Right Front) : 0.0000	5500	50	-0.484937	-0.672313	-0.771195	-0.904494	-0.858876	-0.708355	-0.645109	-0.559257	-0.463804	-0.311429	-0.51595	-0.674688	-0.325653	-0.427761	-0.354559	-0.381102	-1.00485	-0.657835	-0.71468	-0.852729	-1.01397	-0.941451
17	Project Name	JAZ	2	Lab Number	Project Engineer	Asphalt Grade	PU	Pit Source	xuxiuquan	52	50		20	4000	50	16000	50	0	50	0	50	0	20000	2019-02-18	3.5% & 4.0%Void Percent(Left Back) : 0.0000 Void Percent(Left Front) : 0.0000 Void Percent(Right Back) : 0.0000 Void Percent(Right Front) : 0.0000	5550	49.8	-0.484937	-0.661213	-0.771195	-0.859942	-0.869975	-0.730352	-0.65598	-0.505993	-0.442976	-0.301295	-0.484657	-0.645027	-0.325653	-0.380517	-0.365608	-0.370688	-1.00485	-0.63848	-0.735254	-0.808533	-1.01397	-0.96586
17	Project Name	JAZ	2	Lab Number	Project Engineer	Asphalt Grade	PU	Pit Source	xuxiuquan	52	50		20	4000	50	16000	50	0	50	0	50	0	20000	2019-02-18	3.5% & 4.0%Void Percent(Left Back) : 0.0000 Void Percent(Left Front) : 0.0000 Void Percent(Right Back) : 0.0000 Void Percent(Right Front) : 0.0000	5600	49.7	-0.496011	-0.661213	-0.771195	-0.904494	-0.858876	-0.719353	-0.666826	-0.516636	-0.463804	-0.311429	-0.484657	-0.664032	-0.325653	-0.404114	-0.387782	-0.370688	-1.01463	-0.63848	-0.724967	-0.830605	-1.01397	-0.953668
17	Project Name	JAZ	2	Lab Number	Project Engineer	Asphalt Grade	PU	Pit Source	xuxiuquan	52	50		20	4000	50	16000	50	0	50	0	50	0	20000	2019-02-18	3.5% & 4.0%Void Percent(Left Back) : 0.0000 Void Percent(Left Front) : 0.0000 Void Percent(Right Back) : 0.0000 Void Percent(Right Front) : 0.0000	5650	50	-0.451688	-0.661213	-0.760095	-0.871093	-0.858876	-0.741375	-0.677697	-0.505993	-0.45339	-0.311429	-0.505511	-0.647643	-0.313411	-0.392303	-0.365608	-0.370688	-1.01463	-0.63848	-0.755904	-0.830605	-1.01397	-0.96586
17	Project Name	JAZ	2	Lab Number	Project Engineer	Asphalt Grade	PU	Pit Source	xuxiuquan	52	50		20	4000	50	16000	50	0	50	0	50	0	20000	2019-02-18	3.5% & 4.0%Void Percent(Left Back) : 0.0000 Void Percent(Left Front) : 0.0000 Void Percent(Right Back) : 0.0000 Void Percent(Right Front) : 0.0000	5700	50.1	-0.484937	-0.683438	-0.771195	-0.904494	-0.858876	-0.719353	-0.645109	-0.527279	-0.45339	-0.281051	-0.505511	-0.664089	-0.313411	-0.463347	-0.376682	-0.381102	-1.00485	-0.657835	-0.724967	-0.852729	-1.02575	-0.941451
17	Project Name	JAZ	2	Lab Number	Project Engineer	Asphalt Grade	PU	Pit Source	xuxiuquan	52	50		20	4000	50	16000	50	0	50	0	50	0	20000	2019-02-18	3.5% & 4.0%Void Percent(Left Back) : 0.0000 Void Percent(Left Front) : 0.0000 Void Percent(Right Back) : 0.0000 Void Percent(Right Front) : 0.0000	5750	49.9	-0.484937	-0.672313	-0.793445	-0.915619	-0.858876	-0.752373	-0.677697	-0.505993	-0.463804	-0.311429	-0.505511	-0.669715	-0.325653	-0.427761	-0.365608	-0.381102	-1.00485	-0.63848	-0.71468	-0.841654	-1.02575	-0.941451
17	Project Name	JAZ	2	Lab Number	Project Engineer	Asphalt Grade	PU	Pit Source	xuxiuquan	52	50		20	4000	50	16000	50	0	50	0	50	0	20000	2019-02-18	3.5% & 4.0%Void Percent(Left Back) : 0.0000 Void Percent(Left Front) : 0.0000 Void Percent(Right Back) : 0.0000 Void Percent(Right Front) : 0.0000	5800	49.8	-0.473837	-0.672313	-0.771195	-0.871093	-0.836625	-0.730352	-0.677697	-0.505993	-0.432587	-0.301295	-0.484657	-0.645217	-0.313411	-0.392303	-0.365608	-0.370688	-1.00485	-0.628828	-0.724967	-0.808533	-1.00221	-0.941451
17	Project Name	JAZ	2	Lab Number	Project Engineer	Asphalt Grade	PU	Pit Source	xuxiuquan	52	50		20	4000	50	16000	50	0	50	0	50	0	20000	2019-02-18	3.5% & 4.0%Void Percent(Left Back) : 0.0000 Void Percent(Left Front) : 0.0000 Void Percent(Right Back) : 0.0000 Void Percent(Right Front) : 0.0000	5850	49.8	-0.473837	-0.672313	-0.771195	-0.904494	-0.858876	-0.730352	-0.65598	-0.516636	-0.432587	-0.281051	-0.474243	-0.656228	-0.289001	-0.404114	-0.354559	-0.370688	-1.00485	-0.628828	-0.735254	-0.830605	-1.02575	-0.941451
17	Project Name	JAZ	2	Lab Number	Project Engineer	Asphalt Grade	PU	Pit Source	xuxiuquan	52	50		20	4000	50	16000	50	0	50	0	50	0	20000	2019-02-18	3.5% & 4.0%Void Percent(Left Back) : 0.0000 Void Percent(Left Front) : 0.0000 Void Percent(Right Back) : 0.0000 Void Percent(Right Front) : 0.0000	5900	50	-0.473837	-0.661213	-0.771195	-0.904494	-0.858876	-0.708355	-0.65598	-0.516636	-0.432587	-0.281051	-0.484657	-0.656228	-0.301219	-0.404114	-0.354559	-0.381102	-1.00485	-0.619201	-0.724967	-0.808533	-0.978687	-0.941451
17	Project Name	JAZ	2	Lab Number	Project Engineer	Asphalt Grade	PU	Pit Source	xuxiuquan	52	50		20	4000	50	16000	50	0	50	0	50	0	20000	2019-02-18	3.5% & 4.0%Void Percent(Left Back) : 0.0000 Void Percent(Left Front) : 0.0000 Void Percent(Right Back) : 0.0000 Void Percent(Right Front) : 0.0000	5950	50	-0.451688	-0.661213	-0.771195	-0.893343	-0.858876	-0.708355	-0.65598	-0.505993	-0.432587	-0.301295	-0.505511	-0.65078	-0.289001	-0.368757	-0.365608	-0.370688	-1.01463	-0.628828	-0.71468	-0.797535	-0.978687	-0.941451
17	Project Name	JAZ	2	Lab Number	Project Engineer	Asphalt Grade	PU	Pit Source	xuxiuquan	52	50		20	4000	50	16000	50	0	50	0	50	0	20000	2019-02-18	3.5% & 4.0%Void Percent(Left Back) : 0.0000 Void Percent(Left Front) : 0.0000 Void Percent(Right Back) : 0.0000 Void Percent(Right Front) : 0.0000	6000	49.8	-0.484937	-0.661213	-0.793445	-0.893343	-0.825525	-0.719353	-0.65598	-0.516636	-0.432587	-0.301295	-0.474243	-0.659003	-0.289001	-0.404114	-0.365608	-0.360299	-0.995096	-0.63848	-0.71468	-0.797535	-1.00221	-0.941451
17	Project Name	JAZ	2	Lab Number	Project Engineer	Asphalt Grade	PU	Pit Source	xuxiuquan	52	50		20	4000	50	16000	50	0	50	0	50	0	20000	2019-02-18	3.5% & 4.0%Void Percent(Left Back) : 0.0000 Void Percent(Left Front) : 0.0000 Void Percent(Right Back) : 0.0000 Void Percent(Right Front) : 0.0000	6050	49.8	-0.473837	-0.650113	-0.748995	-0.871093	-0.814426	-0.719353	-0.645109	-0.474066	-0.422173	-0.301295	-0.505511	-0.629082	-0.289001	-0.333502	-0.354559	-0.339547	-0.995096	-0.619201	-0.71468	-0.797535	-1.01397	-0.941451
17	Project Name	JAZ	2	Lab Number	Project Engineer	Asphalt Grade	PU	Pit Source	xuxiuquan	52	50		20	4000	50	16000	50	0	50	0	50	0	20000	2019-02-18	3.5% & 4.0%Void Percent(Left Back) : 0.0000 Void Percent(Left Front) : 0.0000 Void Percent(Right Back) : 0.0000 Void Percent(Right Front) : 0.0000	6100	50	-0.440614	-0.650113	-0.760095	-0.904494	-0.836625	-0.708355	-0.65598	-0.505993	-0.432587	-0.301295	-0.505511	-0.650792	-0.276809	-0.368757	-0.332486	-0.370688	-0.995096	-0.619201	-0.704418	-0.808533	-1.00221	-0.929259
17	Project Name	JAZ	2	Lab Number	Project Engineer	Asphalt Grade	PU	Pit Source	xuxiuquan	52	50		20	4000	50	16000	50	0	50	0	50	0	20000	2019-02-18	3.5% & 4.0%Void Percent(Left Back) : 0.0000 Void Percent(Left Front) : 0.0000 Void Percent(Right Back) : 0.0000 Void Percent(Right Front) : 0.0000	6150	49.9	-0.451688	-0.672313	-0.771195	-0.893343	-0.836625	-0.719353	-0.65598	-0.495351	-0.432587	-0.281051	-0.484657	-0.648119	-0.264643	-0.380517	-0.332486	-0.360299	-0.985342	-0.628828	-0.694207	-0.808533	-1.00221	-0.929259
17	Project Name	JAZ	2	Lab Number	Project Engineer	Asphalt Grade	PU	Pit Source	xuxiuquan	52	50		20	4000	50	16000	50	0	50	0	50	0	20000	2019-02-18	3.5% & 4.0%Void Percent(Left Back) : 0.0000 Void Percent(Left Front) : 0.0000 Void Percent(Right Back) : 0.0000 Void Percent(Right Front) : 0.0000	6200	49.8	-0.451688	-0.661213	-0.760095	-0.871093	-0.858876	-0.697357	-0.65598	-0.505993	-0.422173	-0.281051	-0.484657	-0.639839	-0.240309	-0.380517	-0.332486	-0.34991	-1.00485	-0.6096	-0.71468	-0.797535	-1.01397	-0.917092
17	Project Name	JAZ	2	Lab Number	Project Engineer	Asphalt Grade	PU	Pit Source	xuxiuquan	52	50		20	4000	50	16000	50	0	50	0	50	0	20000	2019-02-18	3.5% & 4.0%Void Percent(Left Back) : 0.0000 Void Percent(Left Front) : 0.0000 Void Percent(Right Back) : 0.0000 Void Percent(Right Front) : 0.0000	6250	49.8	-0.429539	-0.650113	-0.748995	-0.893343	-0.869975	-0.697357	-0.645109	-0.495351	-0.422173	-0.281051	-0.505511	-0.639966	-0.264643	-0.368757	-0.332486	-0.34991	-1.00485	-0.6096	-0.71468	-0.797535	-1.01397	-0.929259
17	Project Name	JAZ	2	Lab Number	Project Engineer	Asphalt Grade	PU	Pit Source	xuxiuquan	52	50		20	4000	50	16000	50	0	50	0	50	0	20000	2019-02-18	3.5% & 4.0%Void Percent(Left Back) : 0.0000 Void Percent(Left Front) : 0.0000 Void Percent(Right Back) : 0.0000 Void Percent(Right Front) : 0.0000	6300	49.8	-0.451688	-0.650113	-0.73787	-0.871093	-0.858876	-0.697357	-0.612546	-0.474066	-0.422173	-0.270942	-0.484657	-0.6263	-0.276809	-0.368757	-0.332486	-0.34991	-1.00485	-0.6096	-0.724967	-0.797535	-1.00221	-0.929259
17	Project Name	JAZ	2	Lab Number	Project Engineer	Asphalt Grade	PU	Pit Source	xuxiuquan	52	50		20	4000	50	16000	50	0	50	0	50	0	20000	2019-02-18	3.5% & 4.0%Void Percent(Left Back) : 0.0000 Void Percent(Left Front) : 0.0000 Void Percent(Right Back) : 0.0000 Void Percent(Right Front) : 0.0000	6350	50	-0.473837	-0.650113	-0.771195	-0.871093	-0.825525	-0.708355	-0.645109	-0.484708	-0.422173	-0.281051	-0.484657	-0.637292	-0.264643	-0.380517	-0.354559	-0.34991	-1.00485	-0.619201	-0.704418	-0.808533	-1.01397	-0.929259
17	Project Name	JAZ	2	Lab Number	Project Engineer	Asphalt Grade	PU	Pit Source	xuxiuquan	52	50		20	4000	50	16000	50	0	50	0	50	0	20000	2019-02-18	3.5% & 4.0%Void Percent(Left Back) : 0.0000 Void Percent(Left Front) : 0.0000 Void Percent(Right Back) : 0.0000 Void Percent(Right Front) : 0.0000	6400	49.8	-0.451688	-0.661213	-0.760095	-0.893343	-0.836625	-0.708355	-0.645109	-0.484708	-0.432587	-0.281051	-0.474243	-0.642683	-0.276809	-0.392303	-0.365608	-0.34991	-0.995096	-0.619201	-0.71468	-0.808533	-1.01397	-0.917092
17	Project Name	JAZ	2	Lab Number	Project Engineer	Asphalt Grade	PU	Pit Source	xuxiuquan	52	50		20	4000	50	16000	50	0	50	0	50	0	20000	2019-02-18	3.5% & 4.0%Void Percent(Left Back) : 0.0000 Void Percent(Left Front) : 0.0000 Void Percent(Right Back) : 0.0000 Void Percent(Right Front) : 0.0000	6450	49.6	-0.473837	-0.661213	-0.771195	-0.904494	-0.814426	-0.708355	-0.645109	-0.505993	-0.432587	-0.281051	-0.505511	-0.653567	-0.289001	-0.380517	-0.365608	-0.360299	-0.985342	-0.628828	-0.694207	-0.808533	-1.01397	-0.929259
17	Project Name	JAZ	2	Lab Number	Project Engineer	Asphalt Grade	PU	Pit Source	xuxiuquan	52	50		20	4000	50	16000	50	0	50	0	50	0	20000	2019-02-18	3.5% & 4.0%Void Percent(Left Back) : 0.0000 Void Percent(Left Front) : 0.0000 Void Percent(Right Back) : 0.0000 Void Percent(Right Front) : 0.0000	6500	49.6	-0.484937	-0.650113	-0.748995	-0.871093	-0.858876	-0.697357	-0.645109	-0.484708	-0.401396	-0.270942	-0.484657	-0.626548	-0.289001	-0.368757	-0.365608	-0.370688	-1.00485	-0.619201	-0.71468	-0.797535	-0.978687	-0.929259
17	Project Name	JAZ	2	Lab Number	Project Engineer	Asphalt Grade	PU	Pit Source	xuxiuquan	52	50		20	4000	50	16000	50	0	50	0	50	0	20000	2019-02-18	3.5% & 4.0%Void Percent(Left Back) : 0.0000 Void Percent(Left Front) : 0.0000 Void Percent(Right Back) : 0.0000 Void Percent(Right Front) : 0.0000	6550	49.8	-0.484937	-0.650113	-0.760095	-0.871093	-0.814426	-0.697357	-0.645109	-0.495351	-0.391008	-0.250723	-0.463804	-0.629387	-0.301219	-0.368757	-0.365608	-0.360299	-1.00485	-0.619201	-0.704418	-0.797535	-1.01397	-0.929259
17	Project Name	JAZ	2	Lab Number	Project Engineer	Asphalt Grade	PU	Pit Source	xuxiuquan	52	50		20	4000	50	16000	50	0	50	0	50	0	20000	2019-02-18	3.5% & 4.0%Void Percent(Left Back) : 0.0000 Void Percent(Left Front) : 0.0000 Void Percent(Right Back) : 0.0000 Void Percent(Right Front) : 0.0000	6600	50.1	-0.473837	-0.661213	-0.760095	-0.859942	-0.836625	-0.697357	-0.645109	-0.505993	-0.401396	-0.260833	-0.474243	-0.631857	-0.276809	-0.380517	-0.354559	-0.360299	-1.00485	-0.619201	-0.71468	-0.808533	-1.00221	-0.929259
17	Project Name	JAZ	2	Lab Number	Project Engineer	Asphalt Grade	PU	Pit Source	xuxiuquan	52	50		20	4000	50	16000	50	0	50	0	50	0	20000	2019-02-18	3.5% & 4.0%Void Percent(Left Back) : 0.0000 Void Percent(Left Front) : 0.0000 Void Percent(Right Back) : 0.0000 Void Percent(Right Front) : 0.0000	6650	49.9	-0.473837	-0.661213	-0.771195	-0.893343	-0.825525	-0.697357	-0.634263	-0.495351	-0.401396	-0.270942	-0.505511	-0.640321	-0.289001	-0.392303	-0.365608	-0.360299	-0.985342	-0.628828	-0.71468	-0.808533	-1.00221	-0.929259
17	Project Name	JAZ	2	Lab Number	Project Engineer	Asphalt Grade	PU	Pit Source	xuxiuquan	52	50		20	4000	50	16000	50	0	50	0	50	0	20000	2019-02-18	3.5% & 4.0%Void Percent(Left Back) : 0.0000 Void Percent(Left Front) : 0.0000 Void Percent(Right Back) : 0.0000 Void Percent(Right Front) : 0.0000	6700	49.7	-0.484937	-0.650113	-0.760095	-0.848817	-0.825525	-0.675386	-0.634263	-0.484708	-0.370256	-0.260833	-0.474243	-0.615969	-0.289001	-0.368757	-0.354559	-0.339547	-1.01463	-0.619201	-0.71468	-0.797535	-1.00221	-0.929259
17	Project Name	JAZ	2	Lab Number	Project Engineer	Asphalt Grade	PU	Pit Source	xuxiuquan	52	50		20	4000	50	16000	50	0	50	0	50	0	20000	2019-02-18	3.5% & 4.0%Void Percent(Left Back) : 0.0000 Void Percent(Left Front) : 0.0000 Void Percent(Right Back) : 0.0000 Void Percent(Right Front) : 0.0000	6750	49.8	-0.484937	-0.650113	-0.760095	-0.837692	-0.814426	-0.675386	-0.612546	-0.452831	-0.359867	-0.23053	-0.45339	-0.602621	-0.301219	-0.380517	-0.354559	-0.318897	-1.00485	-0.619201	-0.71468	-0.797535	-1.00221	-0.929259
17	Project Name	JAZ	2	Lab Number	Project Engineer	Asphalt Grade	PU	Pit Source	xuxiuquan	52	50		20	4000	50	16000	50	0	50	0	50	0	20000	2019-02-18	3.5% & 4.0%Void Percent(Left Back) : 0.0000 Void Percent(Left Front) : 0.0000 Void Percent(Right Back) : 0.0000 Void Percent(Right Front) : 0.0000	6800	50	-0.484937	-0.661213	-0.760095	-0.893343	-0.836625	-0.697357	-0.612546	-0.495351	-0.401396	-0.250723	-0.484657	-0.637546	-0.301219	-0.404114	-0.376682	-0.370688	-1.02443	-0.619201	-0.704418	-0.830605	-1.00221	-0.929259
17	Project Name	JAZ	2	Lab Number	Project Engineer	Asphalt Grade	PU	Pit Source	xuxiuquan	52	50		20	4000	50	16000	50	0	50	0	50	0	20000	2019-02-18	3.5% & 4.0%Void Percent(Left Back) : 0.0000 Void Percent(Left Front) : 0.0000 Void Percent(Right Back) : 0.0000 Void Percent(Right Front) : 0.0000	6850	50.1	-0.473837	-0.661213	-0.748995	-0.871093	-0.858876	-0.708355	-0.645109	-0.474066	-0.391008	-0.250723	-0.505511	-0.62129	-0.289001	-0.380517	-0.354559	-0.360299	-1.01463	-0.619201	-0.71468	-0.797535	-1.00221	-0.917092
17	Project Name	JAZ	2	Lab Number	Project Engineer	Asphalt Grade	PU	Pit Source	xuxiuquan	52	50		20	4000	50	16000	50	0	50	0	50	0	20000	2019-02-18	3.5% & 4.0%Void Percent(Left Back) : 0.0000 Void Percent(Left Front) : 0.0000 Void Percent(Right Back) : 0.0000 Void Percent(Right Front) : 0.0000	6900	49.8	-0.484937	-0.661213	-0.771195	-0.893343	-0.814426	-0.708355	-0.634263	-0.495351	-0.401396	-0.270942	-0.505511	-0.640321	-0.289001	-0.392303	-0.365608	-0.370688	-0.995096	-0.619201	-0.694207	-0.808533	-0.978687	-0.929259
17	Project Name	JAZ	2	Lab Number	Project Engineer	Asphalt Grade	PU	Pit Source	xuxiuquan	52	50		20	4000	50	16000	50	0	50	0	50	0	20000	2019-02-18	3.5% & 4.0%Void Percent(Left Back) : 0.0000 Void Percent(Left Front) : 0.0000 Void Percent(Right Back) : 0.0000 Void Percent(Right Front) : 0.0000	6950	49.9	-0.507086	-0.661213	-0.771195	-0.871093	-0.825525	-0.697357	-0.634263	-0.495351	-0.391008	-0.260833	-0.505511	-0.632162	-0.313411	-0.380517	-0.365608	-0.339547	-1.00485	-0.619201	-0.724967	-0.830605	-1.01397	-0.941451
17	Project Name	JAZ	2	Lab Number	Project Engineer	Asphalt Grade	PU	Pit Source	xuxiuquan	52	50		20	4000	50	16000	50	0	50	0	50	0	20000	2019-02-18	3.5% & 4.0%Void Percent(Left Back) : 0.0000 Void Percent(Left Front) : 0.0000 Void Percent(Right Back) : 0.0000 Void Percent(Right Front) : 0.0000	7000	49.9	-0.507086	-0.661213	-0.793445	-0.904494	-0.869975	-0.697357	-0.634263	-0.505993	-0.401396	-0.260833	-0.484657	-0.651332	-0.325653	-0.404114	-0.365608	-0.381102	-1.02443	-0.628828	-0.71468	-0.830605	-1.02575	-0.929259
17	Project Name	JAZ	2	Lab Number	Project Engineer	Asphalt Grade	PU	Pit Source	xuxiuquan	52	50		20	4000	50	16000	50	0	50	0	50	0	20000	2019-02-18	3.5% & 4.0%Void Percent(Left Back) : 0.0000 Void Percent(Left Front) : 0.0000 Void Percent(Right Back) : 0.0000 Void Percent(Right Front) : 0.0000	7050	50.2	-0.507086	-0.672313	-0.793445	-0.893343	-0.836625	-0.719353	-0.612546	-0.516636	-0.422173	-0.250723	-0.484657	-0.6564	-0.362407	-0.404114	-0.387782	-0.360299	-1.01463	-0.63848	-0.71468	-0.841654	-1.00221	-0.941451
17	Project Name	JAZ	2	Lab Number	Project Engineer	Asphalt Grade	PU	Pit Source	xuxiuquan	52	50		20	4000	50	16000	50	0	50	0	50	0	20000	2019-02-18	3.5% & 4.0%Void Percent(Left Back) : 0.0000 Void Percent(Left Front) : 0.0000 Void Percent(Right Back) : 0.0000 Void Percent(Right Front) : 0.0000	7100	50	-0.496011	-0.672313	-0.793445	-0.871093	-0.836625	-0.730352	-0.65598	-0.495351	-0.401396	-0.281051	-0.484657	-0.640321	-0.337896	-0.404114	-0.387782	-0.360299	-1.02443	-0.628828	-0.735254	-0.830605	-1.01397	-0.953668
17	Project Name	JAZ	2	Lab Number	Project Engineer	Asphalt Grade	PU	Pit Source	xuxiuquan	52	50		20	4000	50	16000	50	0	50	0	50	0	20000	2019-02-18	3.5% & 4.0%Void Percent(Left Back) : 0.0000 Void Percent(Left Front) : 0.0000 Void Percent(Right Back) : 0.0000 Void Percent(Right Front) : 0.0000	7150	49.8	-0.507086	-0.672313	-0.793445	-0.92677	-0.836625	-0.708355	-0.666826	-0.527279	-0.432587	-0.281051	-0.484657	-0.67002	-0.337896	-0.415925	-0.376682	-0.391541	-1.02443	-0.63848	-0.755904	-0.852729	-1.03756	-0.941451
17	Project Name	JAZ	2	Lab Number	Project Engineer	Asphalt Grade	PU	Pit Source	xuxiuquan	52	50		20	4000	50	16000	50	0	50	0	50	0	20000	2019-02-18	3.5% & 4.0%Void Percent(Left Back) : 0.0000 Void Percent(Left Front) : 0.0000 Void Percent(Right Back) : 0.0000 Void Percent(Right Front) : 0.0000	7200	49.8	-0.507086	-0.672313	-0.793445	-0.915619	-0.869975	-0.719353	-0.677697	-0.527279	-0.432587	-0.281051	-0.51595	-0.667233	-0.362407	-0.415925	-0.387782	-0.391541	-1.02443	-0.63848	-0.735254	-0.841654	-1.03756	-0.941451
17	Project Name	JAZ	2	Lab Number	Project Engineer	Asphalt Grade	PU	Pit Source	xuxiuquan	52	50		20	4000	50	16000	50	0	50	0	50	0	20000	2019-02-18	3.5% & 4.0%Void Percent(Left Back) : 0.0000 Void Percent(Left Front) : 0.0000 Void Percent(Right Back) : 0.0000 Void Percent(Right Front) : 0.0000	7250	49.9	-0.507086	-0.672313	-0.793445	-0.904494	-0.836625	-0.741375	-0.65598	-0.495351	-0.432587	-0.281051	-0.52639	-0.656469	-0.362407	-0.415925	-0.387782	-0.381102	-1.02443	-0.628828	-0.735254	-0.830605	-1.03756	-0.96586
17	Project Name	JAZ	2	Lab Number	Project Engineer	Asphalt Grade	PU	Pit Source	xuxiuquan	52	50		20	4000	50	16000	50	0	50	0	50	0	20000	2019-02-18	3.5% & 4.0%Void Percent(Left Back) : 0.0000 Void Percent(Left Front) : 0.0000 Void Percent(Right Back) : 0.0000 Void Percent(Right Front) : 0.0000	7300	50.1	-0.529285	-0.672313	-0.804545	-0.904494	-0.869975	-0.763397	-0.666826	-0.505993	-0.432587	-0.301295	-0.51595	-0.661905	-0.374701	-0.415925	-0.410007	-0.381102	-1.03426	-0.657835	-0.755904	-0.841654	-1.02575	-0.96586
17	Project Name	JAZ	2	Lab Number	Project Engineer	Asphalt Grade	PU	Pit Source	xuxiuquan	52	50		20	4000	50	16000	50	0	50	0	50	0	20000	2019-02-18	3.5% & 4.0%Void Percent(Left Back) : 0.0000 Void Percent(Left Front) : 0.0000 Void Percent(Right Back) : 0.0000 Void Percent(Right Front) : 0.0000	7350	50	-0.54036	-0.672313	-0.81567	-0.92677	-0.836625	-0.741375	-0.666826	-0.537921	-0.45339	-0.311429	-0.51595	-0.683438	-0.386969	-0.427761	-0.410007	-0.391541	-1.01463	-0.657835	-0.735254	-0.863829	-1.06121	-0.96586
17	Project Name	JAZ	2	Lab Number	Project Engineer	Asphalt Grade	PU	Pit Source	xuxiuquan	52	50		20	4000	50	16000	50	0	50	0	50	0	20000	2019-02-18	3.5% & 4.0%Void Percent(Left Back) : 0.0000 Void Percent(Left Front) : 0.0000 Void Percent(Right Back) : 0.0000 Void Percent(Right Front) : 0.0000	7400	49.8	-0.529285	-0.683438	-0.804545	-0.92677	-0.881101	-0.719353	-0.65598	-0.505993	-0.422173	-0.301295	-0.51595	-0.66487	-0.374701	-0.415925	-0.398882	-0.412471	-1.05397	-0.667537	-0.755904	-0.863829	-1.03756	-0.96586
17	Project Name	JAZ	2	Lab Number	Project Engineer	Asphalt Grade	PU	Pit Source	xuxiuquan	52	50		20	4000	50	16000	50	0	50	0	50	0	20000	2019-02-18	3.5% & 4.0%Void Percent(Left Back) : 0.0000 Void Percent(Left Front) : 0.0000 Void Percent(Right Back) : 0.0000 Void Percent(Right Front) : 0.0000	7450	49.7	-0.562559	-0.683438	-0.81567	-0.93792	-0.881101	-0.763397	-0.677697	-0.516636	-0.45339	-0.321564	-0.536854	-0.680904	-0.399288	-0.427761	-0.443484	-0.422961	-1.06388	-0.667537	-0.755904	-0.863829	-1.02575	-0.978103
17	Project Name	JAZ	2	Lab Number	Project Engineer	Asphalt Grade	PU	Pit Source	xuxiuquan	52	50		20	4000	50	16000	50	0	50	0	50	0	20000	2019-02-18	3.5% & 4.0%Void Percent(Left Back) : 0.0000 Void Percent(Left Front) : 0.0000 Void Percent(Right Back) : 0.0000 Void Percent(Right Front) : 0.0000	7500	49.8	-0.562559	-0.683438	-0.81567	-0.93792	-0.858876	-0.741375	-0.65598	-0.527279	-0.463804	-0.321564	-0.52639	-0.686168	-0.399288	-0.439598	-0.443484	-0.412471	-1.03426	-0.667537	-0.735254	-0.863829	-1.04938	-0.96586
17	Project Name	JAZ	2	Lab Number	Project Engineer	Asphalt Grade	PU	Pit Source	xuxiuquan	52	50		20	4000	50	16000	50	0	50	0	50	0	20000	2019-02-18	3.5% & 4.0%Void Percent(Left Back) : 0.0000 Void Percent(Left Front) : 0.0000 Void Percent(Right Back) : 0.0000 Void Percent(Right Front) : 0.0000	7550	50	-0.573659	-0.694538	-0.81567	-0.93792	-0.881101	-0.741375	-0.677697	-0.559257	-0.442976	-0.321564	-0.536854	-0.688956	-0.399288	-0.439598	-0.410007	-0.422961	-1.06388	-0.667537	-0.766267	-0.863829	-1.07305	-1.01486
17	Project Name	JAZ	2	Lab Number	Project Engineer	Asphalt Grade	PU	Pit Source	xuxiuquan	52	50		20	4000	50	16000	50	0	50	0	50	0	20000	2019-02-18	3.5% & 4.0%Void Percent(Left Back) : 0.0000 Void Percent(Left Front) : 0.0000 Void Percent(Right Back) : 0.0000 Void Percent(Right Front) : 0.0000	7600	50.1	-0.562559	-0.694538	-0.826795	-0.93792	-0.881101	-0.730352	-0.65598	-0.527279	-0.432587	-0.321564	-0.52639	-0.681145	-0.399288	-0.463347	-0.443484	-0.412471	-1.06388	-0.687045	-0.766267	-0.863829	-1.06121	-0.990346
17	Project Name	JAZ	2	Lab Number	Project Engineer	Asphalt Grade	PU	Pit Source	xuxiuquan	52	50		20	4000	50	16000	50	0	50	0	50	0	20000	2019-02-18	3.5% & 4.0%Void Percent(Left Back) : 0.0000 Void Percent(Left Front) : 0.0000 Void Percent(Right Back) : 0.0000 Void Percent(Right Front) : 0.0000	7650	49.9	-0.573659	-0.694538	-0.81567	-0.93792	-0.836625	-0.708355	-0.634263	-0.505993	-0.391008	-0.250723	-0.474243	-0.662648	-0.423926	-0.427761	-0.443484	-0.422961	-1.06388	-0.687045	-0.755904	-0.863829	-1.06121	-0.990346
17	Project Name	JAZ	2	Lab Number	Project Engineer	Asphalt Grade	PU	Pit Source	xuxiuquan	52	50		20	4000	50	16000	50	0	50	0	50	0	20000	2019-02-18	3.5% & 4.0%Void Percent(Left Back) : 0.0000 Void Percent(Left Front) : 0.0000 Void Percent(Right Back) : 0.0000 Void Percent(Right Front) : 0.0000	7700	49.8	-0.584759	-0.694538	-0.826795	-0.92677	-0.869975	-0.719353	-0.645109	-0.484708	-0.391008	-0.250723	-0.484657	-0.65732	-0.423926	-0.439598	-0.421157	-0.412471	-1.06388	-0.677291	-0.766267	-0.852729	-1.04938	-0.990346
17	Project Name	JAZ	2	Lab Number	Project Engineer	Asphalt Grade	PU	Pit Source	xuxiuquan	52	50		20	4000	50	16000	50	0	50	0	50	0	20000	2019-02-18	3.5% & 4.0%Void Percent(Left Back) : 0.0000 Void Percent(Left Front) : 0.0000 Void Percent(Right Back) : 0.0000 Void Percent(Right Front) : 0.0000	7750	49.9	-0.562559	-0.694538	-0.826795	-0.93792	-0.869975	-0.708355	-0.634263	-0.505993	-0.401396	-0.24064	-0.484657	-0.668026	-0.423926	-0.439598	-0.421157	-0.422961	-1.07378	-0.687045	-0.766267	-0.863829	-1.07305	-0.990346
17	Project Name	JAZ	2	Lab Number	Project Engineer	Asphalt Grade	PU	Pit Source	xuxiuquan	52	50		20	4000	50	16000	50	0	50	0	50	0	20000	2019-02-18	3.5% & 4.0%Void Percent(Left Back) : 0.0000 Void Percent(Left Front) : 0.0000 Void Percent(Right Back) : 0.0000 Void Percent(Right Front) : 0.0000	7800	50.1	-0.584759	-0.694538	-0.826795	-0.93792	-0.869975	-0.708355	-0.645109	-0.505993	-0.380619	-0.250723	-0.484657	-0.662832	-0.460959	-0.427761	-0.443484	-0.422961	-1.07378	-0.677291	-0.755904	-0.874928	-1.04938	-0.990346
17	Project Name	JAZ	2	Lab Number	Project Engineer	Asphalt Grade	PU	Pit Source	xuxiuquan	52	50		20	4000	50	16000	50	0	50	0	50	0	20000	2019-02-18	3.5% & 4.0%Void Percent(Left Back) : 0.0000 Void Percent(Left Front) : 0.0000 Void Percent(Right Back) : 0.0000 Void Percent(Right Front) : 0.0000	7850	50	-0.573659	-0.705637	-0.826795	-0.915619	-0.858876	-0.752373	-0.634263	-0.495351	-0.391008	-0.270942	-0.484657	-0.657193	-0.423926	-0.439598	-0.421157	-0.370688	-1.05397	-0.677291	-0.766267	-0.852729	-1.06121	-1.01486
17	Project Name	JAZ	2	Lab Number	Project Engineer	Asphalt Grade	PU	Pit Source	xuxiuquan	52	50		20	4000	50	16000	50	0	50	0	50	0	20000	2019-02-18	3.5% & 4.0%Void Percent(Left Back) : 0.0000 Void Percent(Left Front) : 0.0000 Void Percent(Right Back) : 0.0000 Void Percent(Right Front) : 0.0000	7900	49.7	-0.584759	-0.694538	-0.837921	-0.92677	-0.869975	-0.730352	-0.645109	-0.516636	-0.432587	-0.260833	-0.484657	-0.678478	-0.423926	-0.439598	-0.443484	-0.391541	-1.06388	-0.667537	-0.766267	-0.874928	-1.06121	-0.990346
17	Project Name	JAZ	2	Lab Number	Project Engineer	Asphalt Grade	PU	Pit Source	xuxiuquan	52	50		20	4000	50	16000	50	0	50	0	50	0	20000	2019-02-18	3.5% & 4.0%Void Percent(Left Back) : 0.0000 Void Percent(Left Front) : 0.0000 Void Percent(Right Back) : 0.0000 Void Percent(Right Front) : 0.0000	7950	49.8	-0.573659	-0.694538	-0.81567	-0.92677	-0.869975	-0.752373	-0.677697	-0.537921	-0.463804	-0.321564	-0.557759	-0.686041	-0.448615	-0.463347	-0.410007	-0.391541	-1.05397	-0.667537	-0.776656	-0.863829	-1.06121	-0.990346
17	Project Name	JAZ	2	Lab Number	Project Engineer	Asphalt Grade	PU	Pit Source	xuxiuquan	52	50		20	4000	50	16000	50	0	50	0	50	0	20000	2019-02-18	3.5% & 4.0%Void Percent(Left Back) : 0.0000 Void Percent(Left Front) : 0.0000 Void Percent(Right Back) : 0.0000 Void Percent(Right Front) : 0.0000	8000	50	-0.573659	-0.705637	-0.826795	-0.949071	-0.892226	-0.752373	-0.677697	-0.527279	-0.45339	-0.321564	-0.557759	-0.689134	-0.448615	-0.463347	-0.421157	-0.422961	-1.07378	-0.677291	-0.755904	-0.874928	-1.04938	-0.990346
17	Project Name	JAZ	2	Lab Number	Project Engineer	Asphalt Grade	PU	Pit Source	xuxiuquan	52	50		20	4000	50	16000	50	0	50	0	50	0	20000	2019-02-18	3.5% & 4.0%Void Percent(Left Back) : 0.0000 Void Percent(Left Front) : 0.0000 Void Percent(Right Back) : 0.0000 Void Percent(Right Front) : 0.0000	8050	50.1	-0.595884	-0.705637	-0.837921	-0.915619	-0.836625	-0.752373	-0.677697	-0.537921	-0.474243	-0.321564	-0.557759	-0.691426	-0.460959	-0.463347	-0.443484	-0.381102	-1.03426	-0.687045	-0.755904	-0.886054	-1.06121	-1.01486
17	Project Name	JAZ	2	Lab Number	Project Engineer	Asphalt Grade	PU	Pit Source	xuxiuquan	52	50		20	4000	50	16000	50	0	50	0	50	0	20000	2019-02-18	3.5% & 4.0%Void Percent(Left Back) : 0.0000 Void Percent(Left Front) : 0.0000 Void Percent(Right Back) : 0.0000 Void Percent(Right Front) : 0.0000	8100	50	-0.573659	-0.694538	-0.837921	-0.93792	-0.858876	-0.763397	-0.688569	-0.559257	-0.463804	-0.321564	-0.557759	-0.699726	-0.411607	-0.475234	-0.421157	-0.381102	-1.06388	-0.687045	-0.776656	-0.874928	-1.0968	-1.01486
17	Project Name	JAZ	2	Lab Number	Project Engineer	Asphalt Grade	PU	Pit Source	xuxiuquan	52	50		20	4000	50	16000	50	0	50	0	50	0	20000	2019-02-18	3.5% & 4.0%Void Percent(Left Back) : 0.0000 Void Percent(Left Front) : 0.0000 Void Percent(Right Back) : 0.0000 Void Percent(Right Front) : 0.0000	8150	49.8	-0.573659	-0.727888	-0.837921	-0.982523	-0.903351	-0.752373	-0.688569	-0.5699	-0.474243	-0.321564	-0.578688	-0.716147	-0.423926	-0.475234	-0.443484	-0.433502	-1.07378	-0.687045	-0.776656	-0.897204	-1.0968	-0.990346
17	Project Name	JAZ	2	Lab Number	Project Engineer	Asphalt Grade	PU	Pit Source	xuxiuquan	52	50		20	4000	50	16000	50	0	50	0	50	0	20000	2019-02-18	3.5% & 4.0%Void Percent(Left Back) : 0.0000 Void Percent(Left Front) : 0.0000 Void Percent(Right Back) : 0.0000 Void Percent(Right Front) : 0.0000	8200	49.8	-0.562559	-0.705637	-0.826795	-0.93792	-0.881101	-0.763397	-0.710311	-0.516636	-0.45339	-0.321564	-0.578688	-0.683685	-0.399288	-0.427761	-0.421157	-0.412471	-1.05397	-0.667537	-0.776656	-0.863829	-1.06121	-1.01486
17	Project Name	JAZ	2	Lab Number	Project Engineer	Asphalt Grade	PU	Pit Source	xuxiuquan	52	50		20	4000	50	16000	50	0	50	0	50	0	20000	2019-02-18	3.5% & 4.0%Void Percent(Left Back) : 0.0000 Void Percent(Left Front) : 0.0000 Void Percent(Right Back) : 0.0000 Void Percent(Right Front) : 0.0000	8250	50	-0.573659	-0.727888	-0.849046	-0.949071	-0.892226	-0.785419	-0.688569	-0.559257	-0.45339	-0.321564	-0.547294	-0.702691	-0.386969	-0.439598	-0.421157	-0.422961	-1.07378	-0.687045	-0.787044	-0.874928	-1.0968	-0.990346
17	Project Name	JAZ	2	Lab Number	Project Engineer	Asphalt Grade	PU	Pit Source	xuxiuquan	52	50		20	4000	50	16000	50	0	50	0	50	0	20000	2019-02-18	3.5% & 4.0%Void Percent(Left Back) : 0.0000 Void Percent(Left Front) : 0.0000 Void Percent(Right Back) : 0.0000 Void Percent(Right Front) : 0.0000	8300	50	-0.573659	-0.727888	-0.849046	-0.949071	-0.892226	-0.752373	-0.688569	-0.559257	-0.474243	-0.321564	-0.578688	-0.707904	-0.399288	-0.475234	-0.454685	-0.412471	-1.06388	-0.687045	-0.776656	-0.897204	-1.0968	-1.01486
17	Project Name	JAZ	2	Lab Number	Project Engineer	Asphalt Grade	PU	Pit Source	xuxiuquan	52	50		20	4000	50	16000	50	0	50	0	50	0	20000	2019-02-18	3.5% & 4.0%Void Percent(Left Back) : 0.0000 Void Percent(Left Front) : 0.0000 Void Percent(Right Back) : 0.0000 Void Percent(Right Front) : 0.0000	8350	50	-0.562559	-0.727888	-0.826795	-0.915619	-0.858876	-0.785419	-0.677697	-0.559257	-0.463804	-0.311429	-0.578688	-0.691369	-0.399288	-0.475234	-0.443484	-0.370688	-1.02443	-0.687045	-0.776656	-0.886054	-1.0968	-0.990346
17	Project Name	JAZ	2	Lab Number	Project Engineer	Asphalt Grade	PU	Pit Source	xuxiuquan	52	50		20	4000	50	16000	50	0	50	0	50	0	20000	2019-02-18	3.5% & 4.0%Void Percent(Left Back) : 0.0000 Void Percent(Left Front) : 0.0000 Void Percent(Right Back) : 0.0000 Void Percent(Right Front) : 0.0000	8400	49.8	-0.573659	-0.727888	-0.837921	-0.949071	-0.892226	-0.785419	-0.688569	-0.527279	-0.463804	-0.321564	-0.557759	-0.694519	-0.423926	-0.463347	-0.454685	-0.422961	-1.08372	-0.677291	-0.787044	-0.886054	-1.07305	-0.990346
17	Project Name	JAZ	2	Lab Number	Project Engineer	Asphalt Grade	PU	Pit Source	xuxiuquan	52	50		20	4000	50	16000	50	0	50	0	50	0	20000	2019-02-18	3.5% & 4.0%Void Percent(Left Back) : 0.0000 Void Percent(Left Front) : 0.0000 Void Percent(Right Back) : 0.0000 Void Percent(Right Front) : 0.0000	8450	49.8	-0.595884	-0.705637	-0.849046	-0.949071	-0.892226	-0.785419	-0.688569	-0.537921	-0.45339	-0.311429	-0.547294	-0.697357	-0.448615	-0.463347	-0.421157	-0.422961	-1.07378	-0.687045	-0.776656	-0.874928	-1.10868	-0.990346
17	Project Name	JAZ	2	Lab Number	Project Engineer	Asphalt Grade	PU	Pit Source	xuxiuquan	52	50		20	4000	50	16000	50	0	50	0	50	0	20000	2019-02-18	3.5% & 4.0%Void Percent(Left Back) : 0.0000 Void Percent(Left Front) : 0.0000 Void Percent(Right Back) : 0.0000 Void Percent(Right Front) : 0.0000	8500	50	-0.573659	-0.727888	-0.826795	-0.92677	-0.869975	-0.752373	-0.688569	-0.537921	-0.45339	-0.321564	-0.578688	-0.686219	-0.423926	-0.439598	-0.443484	-0.370688	-1.03426	-0.677291	-0.787044	-0.886054	-1.07305	-1.01486
17	Project Name	JAZ	2	Lab Number	Project Engineer	Asphalt Grade	PU	Pit Source	xuxiuquan	52	50		20	4000	50	16000	50	0	50	0	50	0	20000	2019-02-18	3.5% & 4.0%Void Percent(Left Back) : 0.0000 Void Percent(Left Front) : 0.0000 Void Percent(Right Back) : 0.0000 Void Percent(Right Front) : 0.0000	8550	50.1	-0.584759	-0.727888	-0.837921	-0.93792	-0.903351	-0.763397	-0.688569	-0.559257	-0.442976	-0.311429	-0.557759	-0.694519	-0.423926	-0.439598	-0.410007	-0.422961	-1.07378	-0.687045	-0.787044	-0.874928	-1.0968	-0.990346
17	Project Name	JAZ	2	Lab Number	Project Engineer	Asphalt Grade	PU	Pit Source	xuxiuquan	52	50		20	4000	50	16000	50	0	50	0	50	0	20000	2019-02-18	3.5% & 4.0%Void Percent(Left Back) : 0.0000 Void Percent(Left Front) : 0.0000 Void Percent(Right Back) : 0.0000 Void Percent(Right Front) : 0.0000	8600	49.8	-0.595884	-0.727888	-0.837921	-0.949071	-0.892226	-0.785419	-0.688569	-0.559257	-0.45339	-0.321564	-0.557759	-0.69991	-0.448615	-0.463347	-0.454685	-0.422961	-1.08372	-0.696824	-0.787044	-0.886054	-1.07305	-1.02715
17	Project Name	JAZ	2	Lab Number	Project Engineer	Asphalt Grade	PU	Pit Source	xuxiuquan	52	50		20	4000	50	16000	50	0	50	0	50	0	20000	2019-02-18	3.5% & 4.0%Void Percent(Left Back) : 0.0000 Void Percent(Left Front) : 0.0000 Void Percent(Right Back) : 0.0000 Void Percent(Right Front) : 0.0000	8650	49.7	-0.595884	-0.727888	-0.849046	-0.971372	-0.903351	-0.796442	-0.732079	-0.559257	-0.45339	-0.311429	-0.557759	-0.708266	-0.460959	-0.475234	-0.443484	-0.422961	-1.09367	-0.696824	-0.787044	-0.886054	-1.0968	-1.01486
17	Project Name	JAZ	2	Lab Number	Project Engineer	Asphalt Grade	PU	Pit Source	xuxiuquan	52	50		20	4000	50	16000	50	0	50	0	50	0	20000	2019-02-18	3.5% & 4.0%Void Percent(Left Back) : 0.0000 Void Percent(Left Front) : 0.0000 Void Percent(Right Back) : 0.0000 Void Percent(Right Front) : 0.0000	8700	49.8	-0.584759	-0.705637	-0.849046	-0.949071	-0.892226	-0.752373	-0.688569	-0.5699	-0.463804	-0.311429	-0.547294	-0.707955	-0.423926	-0.439598	-0.421157	-0.422961	-1.06388	-0.687045	-0.787044	-0.886054	-1.07305	-1.01486
17	Project Name	JAZ	2	Lab Number	Project Engineer	Asphalt Grade	PU	Pit Source	xuxiuquan	52	50		20	4000	50	16000	50	0	50	0	50	0	20000	2019-02-18	3.5% & 4.0%Void Percent(Left Back) : 0.0000 Void Percent(Left Front) : 0.0000 Void Percent(Right Back) : 0.0000 Void Percent(Right Front) : 0.0000	8750	50.1	-0.606984	-0.727888	-0.837921	-0.971372	-0.914476	-0.785419	-0.710311	-0.537921	-0.45339	-0.311429	-0.578688	-0.700151	-0.460959	-0.439598	-0.454685	-0.422961	-1.08372	-0.687045	-0.787044	-0.886054	-1.0968	-1.02715
17	Project Name	JAZ	2	Lab Number	Project Engineer	Asphalt Grade	PU	Pit Source	xuxiuquan	52	50		20	4000	50	16000	50	0	50	0	50	0	20000	2019-02-18	3.5% & 4.0%Void Percent(Left Back) : 0.0000 Void Percent(Left Front) : 0.0000 Void Percent(Right Back) : 0.0000 Void Percent(Right Front) : 0.0000	8800	50	-0.606984	-0.727888	-0.860196	-0.982523	-0.892226	-0.796442	-0.666826	-0.537921	-0.463804	-0.321564	-0.557759	-0.711111	-0.460959	-0.463347	-0.477114	-0.422961	-1.08372	-0.677291	-0.776656	-0.874928	-1.0968	-1.02715
17	Project Name	JAZ	2	Lab Number	Project Engineer	Asphalt Grade	PU	Pit Source	xuxiuquan	52	50		20	4000	50	16000	50	0	50	0	50	0	20000	2019-02-18	3.5% & 4.0%Void Percent(Left Back) : 0.0000 Void Percent(Left Front) : 0.0000 Void Percent(Right Back) : 0.0000 Void Percent(Right Front) : 0.0000	8850	49.8	-0.606984	-0.727888	-0.860196	-0.982523	-0.881101	-0.763397	-0.688569	-0.537921	-0.474243	-0.311429	-0.547294	-0.713721	-0.460959	-0.487121	-0.465887	-0.422961	-1.08372	-0.696824	-0.787044	-0.886054	-1.10868	-1.01486
17	Project Name	JAZ	2	Lab Number	Project Engineer	Asphalt Grade	PU	Pit Source	xuxiuquan	52	50		20	4000	50	16000	50	0	50	0	50	0	20000	2019-02-18	3.5% & 4.0%Void Percent(Left Back) : 0.0000 Void Percent(Left Front) : 0.0000 Void Percent(Right Back) : 0.0000 Void Percent(Right Front) : 0.0000	8900	49.7	-0.595884	-0.727888	-0.849046	-0.949071	-0.892226	-0.741375	-0.688569	-0.559257	-0.474243	-0.311429	-0.578688	-0.707904	-0.448615	-0.475234	-0.443484	-0.422961	-1.07378	-0.696824	-0.776656	-0.897204	-1.10868	-1.01486
17	Project Name	JAZ	2	Lab Number	Project Engineer	Asphalt Grade	PU	Pit Source	xuxiuquan	52	50		20	4000	50	16000	50	0	50	0	50	0	20000	2019-02-18	3.5% & 4.0%Void Percent(Left Back) : 0.0000 Void Percent(Left Front) : 0.0000 Void Percent(Right Back) : 0.0000 Void Percent(Right Front) : 0.0000	8950	49.7	-0.595884	-0.738988	-0.849046	-0.949071	-0.892226	-0.796442	-0.710311	-0.537921	-0.45339	-0.321564	-0.589153	-0.697357	-0.448615	-0.475234	-0.454685	-0.422961	-1.08372	-0.696824	-0.787044	-0.886054	-1.10868	-1.02715
17	Project Name	JAZ	2	Lab Number	Project Engineer	Asphalt Grade	PU	Pit Source	xuxiuquan	52	50		20	4000	50	16000	50	0	50	0	50	0	20000	2019-02-18	3.5% & 4.0%Void Percent(Left Back) : 0.0000 Void Percent(Left Front) : 0.0000 Void Percent(Right Back) : 0.0000 Void Percent(Right Front) : 0.0000	9000	50.1	-0.595884	-0.727888	-0.849046	-0.971372	-0.892226	-0.763397	-0.710311	-0.527279	-0.442976	-0.311429	-0.557759	-0.697668	-0.460959	-0.463347	-0.443484	-0.422961	-1.09367	-0.687045	-0.797458	-0.874928	-1.07305	-1.02715
17	Project Name	JAZ	2	Lab Number	Project Engineer	Asphalt Grade	PU	Pit Source	xuxiuquan	52	50		20	4000	50	16000	50	0	50	0	50	0	20000	2019-02-18	3.5% & 4.0%Void Percent(Left Back) : 0.0000 Void Percent(Left Front) : 0.0000 Void Percent(Right Back) : 0.0000 Void Percent(Right Front) : 0.0000	9050	50.1	-0.606984	-0.738988	-0.860196	-0.971372	-0.903351	-0.785419	-0.688569	-0.559257	-0.45339	-0.311429	-0.557759	-0.711054	-0.460959	-0.475234	-0.443484	-0.422961	-1.08372	-0.687045	-0.797458	-0.897204	-1.10868	-1.02715
17	Project Name	JAZ	2	Lab Number	Project Engineer	Asphalt Grade	PU	Pit Source	xuxiuquan	52	50		20	4000	50	16000	50	0	50	0	50	0	20000	2019-02-18	3.5% & 4.0%Void Percent(Left Back) : 0.0000 Void Percent(Left Front) : 0.0000 Void Percent(Right Back) : 0.0000 Void Percent(Right Front) : 0.0000	9100	49.9	-0.584759	-0.738988	-0.849046	-0.971372	-0.881101	-0.763397	-0.710311	-0.559257	-0.45339	-0.311429	-0.589153	-0.708266	-0.448615	-0.475234	-0.421157	-0.422961	-1.08372	-0.696824	-0.776656	-0.897204	-1.12057	-1.01486
17	Project Name	JAZ	2	Lab Number	Project Engineer	Asphalt Grade	PU	Pit Source	xuxiuquan	52	50		20	4000	50	16000	50	0	50	0	50	0	20000	2019-02-18	3.5% & 4.0%Void Percent(Left Back) : 0.0000 Void Percent(Left Front) : 0.0000 Void Percent(Right Back) : 0.0000 Void Percent(Right Front) : 0.0000	9150	49.7	-0.606984	-0.727888	-0.860196	-0.949071	-0.903351	-0.752373	-0.677697	-0.537921	-0.45339	-0.321564	-0.589153	-0.700145	-0.448615	-0.463347	-0.465887	-0.422961	-1.09367	-0.706628	-0.797458	-0.886054	-1.10868	-1.02715
17	Project Name	JAZ	2	Lab Number	Project Engineer	Asphalt Grade	PU	Pit Source	xuxiuquan	52	50		20	4000	50	16000	50	0	50	0	50	0	20000	2019-02-18	3.5% & 4.0%Void Percent(Left Back) : 0.0000 Void Percent(Left Front) : 0.0000 Void Percent(Right Back) : 0.0000 Void Percent(Right Front) : 0.0000	9200	50	-0.595884	-0.727888	-0.849046	-0.915619	-0.858876	-0.763397	-0.688569	-0.559257	-0.45339	-0.311429	-0.578688	-0.694328	-0.460959	-0.427761	-0.421157	-0.370688	-1.07378	-0.687045	-0.776656	-0.886054	-1.10868	-1.02715
17	Project Name	JAZ	2	Lab Number	Project Engineer	Asphalt Grade	PU	Pit Source	xuxiuquan	52	50		20	4000	50	16000	50	0	50	0	50	0	20000	2019-02-18	3.5% & 4.0%Void Percent(Left Back) : 0.0000 Void Percent(Left Front) : 0.0000 Void Percent(Right Back) : 0.0000 Void Percent(Right Front) : 0.0000	9250	50	-0.606984	-0.738988	-0.849046	-0.982523	-0.892226	-0.752373	-0.688569	-0.580568	-0.463804	-0.311429	-0.578688	-0.718985	-0.460959	-0.439598	-0.465887	-0.454584	-1.09367	-0.706628	-0.787044	-0.919531	-1.10868	-1.02715
17	Project Name	JAZ	2	Lab Number	Project Engineer	Asphalt Grade	PU	Pit Source	xuxiuquan	52	50		20	4000	50	16000	50	0	50	0	50	0	20000	2019-02-18	3.5% & 4.0%Void Percent(Left Back) : 0.0000 Void Percent(Left Front) : 0.0000 Void Percent(Right Back) : 0.0000 Void Percent(Right Front) : 0.0000	9300	49.9	-0.606984	-0.738988	-0.849046	-0.971372	-0.914476	-0.752373	-0.710311	-0.537921	-0.45339	-0.321564	-0.589153	-0.702932	-0.460959	-0.463347	-0.443484	-0.444017	-1.08372	-0.696824	-0.787044	-0.886054	-1.10868	-1.02715
17	Project Name	JAZ	2	Lab Number	Project Engineer	Asphalt Grade	PU	Pit Source	xuxiuquan	52	50		20	4000	50	16000	50	0	50	0	50	0	20000	2019-02-18	3.5% & 4.0%Void Percent(Left Back) : 0.0000 Void Percent(Left Front) : 0.0000 Void Percent(Right Back) : 0.0000 Void Percent(Right Front) : 0.0000	9350	49.8	-0.606984	-0.738988	-0.837921	-0.971372	-0.903351	-0.752373	-0.65598	-0.495351	-0.401396	-0.260833	-0.536854	-0.67651	-0.485724	-0.439598	-0.443484	-0.444017	-1.10366	-0.687045	-0.787044	-0.886054	-1.10868	-1.02715
17	Project Name	JAZ	2	Lab Number	Project Engineer	Asphalt Grade	PU	Pit Source	xuxiuquan	52	50		20	4000	50	16000	50	0	50	0	50	0	20000	2019-02-18	3.5% & 4.0%Void Percent(Left Back) : 0.0000 Void Percent(Left Front) : 0.0000 Void Percent(Right Back) : 0.0000 Void Percent(Right Front) : 0.0000	9400	49.9	-0.640334	-0.738988	-0.849046	-0.949071	-0.892226	-0.752373	-0.65598	-0.516636	-0.422173	-0.260833	-0.52639	-0.684232	-0.473354	-0.427761	-0.465887	-0.422961	-1.09367	-0.696824	-0.797458	-0.897204	-1.10868	-1.02715
17	Project Name	JAZ	2	Lab Number	Project Engineer	Asphalt Grade	PU	Pit Source	xuxiuquan	52	50		20	4000	50	16000	50	0	50	0	50	0	20000	2019-02-18	3.5% & 4.0%Void Percent(Left Back) : 0.0000 Void Percent(Left Front) : 0.0000 Void Percent(Right Back) : 0.0000 Void Percent(Right Front) : 0.0000	9450	50.1	-0.606984	-0.738988	-0.849046	-0.93792	-0.858876	-0.730352	-0.65598	-0.516636	-0.401396	-0.260833	-0.536854	-0.67625	-0.460959	-0.439598	-0.454685	-0.391541	-1.07378	-0.706628	-0.797458	-0.886054	-1.10868	-1.03942
17	Project Name	JAZ	2	Lab Number	Project Engineer	Asphalt Grade	PU	Pit Source	xuxiuquan	52	50		20	4000	50	16000	50	0	50	0	50	0	20000	2019-02-18	3.5% & 4.0%Void Percent(Left Back) : 0.0000 Void Percent(Left Front) : 0.0000 Void Percent(Right Back) : 0.0000 Void Percent(Right Front) : 0.0000	9500	50	-0.618084	-0.750113	-0.849046	-0.971372	-0.881101	-0.730352	-0.645109	-0.527279	-0.401396	-0.250723	-0.547294	-0.687273	-0.473354	-0.475234	-0.443484	-0.433502	-1.09367	-0.706628	-0.787044	-0.919531	-1.10868	-1.02715
17	Project Name	JAZ	2	Lab Number	Project Engineer	Asphalt Grade	PU	Pit Source	xuxiuquan	52	50		20	4000	50	16000	50	0	50	0	50	0	20000	2019-02-18	3.5% & 4.0%Void Percent(Left Back) : 0.0000 Void Percent(Left Front) : 0.0000 Void Percent(Right Back) : 0.0000 Void Percent(Right Front) : 0.0000	9550	49.7	-0.618084	-0.738988	-0.860196	-0.92677	-0.869975	-0.752373	-0.666826	-0.527279	-0.422173	-0.281051	-0.547294	-0.684105	-0.485724	-0.439598	-0.465887	-0.381102	-1.07378	-0.706628	-0.787044	-0.897204	-1.12057	-1.02715
17	Project Name	JAZ	2	Lab Number	Project Engineer	Asphalt Grade	PU	Pit Source	xuxiuquan	52	50		20	4000	50	16000	50	0	50	0	50	0	20000	2019-02-18	3.5% & 4.0%Void Percent(Left Back) : 0.0000 Void Percent(Left Front) : 0.0000 Void Percent(Right Back) : 0.0000 Void Percent(Right Front) : 0.0000	9600	49.8	-0.606984	-0.738988	-0.860196	-0.971372	-0.903351	-0.752373	-0.721208	-0.559257	-0.463804	-0.331699	-0.589153	-0.713657	-0.423926	-0.475234	-0.443484	-0.422961	-1.09367	-0.696824	-0.787044	-0.919531	-1.0968	-1.03942
17	Project Name	JAZ	2	Lab Number	Project Engineer	Asphalt Grade	PU	Pit Source	xuxiuquan	52	50		20	4000	50	16000	50	0	50	0	50	0	20000	2019-02-18	3.5% & 4.0%Void Percent(Left Back) : 0.0000 Void Percent(Left Front) : 0.0000 Void Percent(Right Back) : 0.0000 Void Percent(Right Front) : 0.0000	9650	50	-0.584759	-0.750113	-0.849046	-0.982523	-0.892226	-0.752373	-0.666826	-0.591261	-0.474243	-0.321564	-0.599618	-0.724268	-0.448615	-0.487121	-0.443484	-0.433502	-1.09367	-0.716458	-0.797458	-0.919531	-1.10868	-1.02715
17	Project Name	JAZ	2	Lab Number	Project Engineer	Asphalt Grade	PU	Pit Source	xuxiuquan	52	50		20	4000	50	16000	50	0	50	0	50	0	20000	2019-02-18	3.5% & 4.0%Void Percent(Left Back) : 0.0000 Void Percent(Left Front) : 0.0000 Void Percent(Right Back) : 0.0000 Void Percent(Right Front) : 0.0000	9700	50	-0.606984	-0.738988	-0.849046	-0.982523	-0.903351	-0.752373	-0.710311	-0.537921	-0.442976	-0.321564	-0.599618	-0.703116	-0.460959	-0.475234	-0.454685	-0.422961	-1.10366	-0.696824	-0.797458	-0.897204	-1.10868	-1.03942
17	Project Name	JAZ	2	Lab Number	Project Engineer	Asphalt Grade	PU	Pit Source	xuxiuquan	52	50		20	4000	50	16000	50	0	50	0	50	0	20000	2019-02-18	3.5% & 4.0%Void Percent(Left Back) : 0.0000 Void Percent(Left Front) : 0.0000 Void Percent(Right Back) : 0.0000 Void Percent(Right Front) : 0.0000	9750	49.8	-0.606984	-0.750113	-0.860196	-0.93792	-0.892226	-0.785419	-0.688569	-0.527279	-0.45339	-0.331699	-0.599618	-0.694696	-0.460959	-0.475234	-0.443484	-0.412471	-1.08372	-0.696824	-0.807898	-0.897204	-1.10868	-1.05174
17	Project Name	JAZ	2	Lab Number	Project Engineer	Asphalt Grade	PU	Pit Source	xuxiuquan	52	50		20	4000	50	16000	50	0	50	0	50	0	20000	2019-02-18	3.5% & 4.0%Void Percent(Left Back) : 0.0000 Void Percent(Left Front) : 0.0000 Void Percent(Right Back) : 0.0000 Void Percent(Right Front) : 0.0000	9800	49.8	-0.618084	-0.738988	-0.860196	-0.982523	-0.881101	-0.719353	-0.65598	-0.527279	-0.432587	-0.250723	-0.52639	-0.700646	-0.485724	-0.475234	-0.488366	-0.433502	-1.09367	-0.716458	-0.787044	-0.919531	-1.14442	-1.03942
17	Project Name	JAZ	2	Lab Number	Project Engineer	Asphalt Grade	PU	Pit Source	xuxiuquan	52	50		20	4000	50	16000	50	0	50	0	50	0	20000	2019-02-18	3.5% & 4.0%Void Percent(Left Back) : 0.0000 Void Percent(Left Front) : 0.0000 Void Percent(Right Back) : 0.0000 Void Percent(Right Front) : 0.0000	9850	49.8	-0.606984	-0.750113	-0.849046	-0.92677	-0.858876	-0.752373	-0.65598	-0.527279	-0.401396	-0.260833	-0.547294	-0.676123	-0.473354	-0.439598	-0.443484	-0.412471	-1.08372	-0.706628	-0.807898	-0.919531	-1.12057	-1.05174
17	Project Name	JAZ	2	Lab Number	Project Engineer	Asphalt Grade	PU	Pit Source	xuxiuquan	52	50		20	4000	50	16000	50	0	50	0	50	0	20000	2019-02-18	3.5% & 4.0%Void Percent(Left Back) : 0.0000 Void Percent(Left Front) : 0.0000 Void Percent(Right Back) : 0.0000 Void Percent(Right Front) : 0.0000	9900	50.1	-0.618084	-0.738988	-0.849046	-0.982523	-0.892226	-0.741375	-0.634263	-0.516636	-0.391008	-0.260833	-0.536854	-0.684803	-0.498119	-0.463347	-0.454685	-0.454584	-1.12367	-0.706628	-0.828827	-0.919531	-1.10868	-1.05174
17	Project Name	JAZ	2	Lab Number	Project Engineer	Asphalt Grade	PU	Pit Source	xuxiuquan	52	50		20	4000	50	16000	50	0	50	0	50	0	20000	2019-02-18	3.5% & 4.0%Void Percent(Left Back) : 0.0000 Void Percent(Left Front) : 0.0000 Void Percent(Right Back) : 0.0000 Void Percent(Right Front) : 0.0000	9950	50	-0.606984	-0.750113	-0.860196	-0.982523	-0.892226	-0.730352	-0.677697	-0.505993	-0.432587	-0.260833	-0.536854	-0.695325	-0.473354	-0.475234	-0.454685	-0.444017	-1.12367	-0.706628	-0.797458	-0.919531	-1.13248	-1.03942
17	Project Name	JAZ	2	Lab Number	Project Engineer	Asphalt Grade	PU	Pit Source	xuxiuquan	52	50		20	4000	50	16000	50	0	50	0	50	0	20000	2019-02-18	3.5% & 4.0%Void Percent(Left Back) : 0.0000 Void Percent(Left Front) : 0.0000 Void Percent(Right Back) : 0.0000 Void Percent(Right Front) : 0.0000	10000	49.8	-0.606984	-0.750113	-0.849046	-0.982523	-0.892226	-0.752373	-0.710311	-0.580568	-0.484657	-0.321564	-0.599618	-0.724198	-0.460959	-0.475234	-0.465887	-0.444017	-1.10366	-0.716458	-0.797458	-0.919531	-1.13248	-1.05174
17	Project Name	JAZ	2	Lab Number	Project Engineer	Asphalt Grade	PU	Pit Source	xuxiuquan	52	50		20	4000	50	16000	50	0	50	0	50	0	20000	2019-02-18	3.5% & 4.0%Void Percent(Left Back) : 0.0000 Void Percent(Left Front) : 0.0000 Void Percent(Right Back) : 0.0000 Void Percent(Right Front) : 0.0000	10050	49.8	-0.595884	-0.750113	-0.860196	-0.982523	-0.914476	-0.752373	-0.710311	-0.559257	-0.463804	-0.321564	-0.599618	-0.716445	-0.460959	-0.487121	-0.454685	-0.444017	-1.09367	-0.706628	-0.797458	-0.919531	-1.10868	-1.05174
17	Project Name	JAZ	2	Lab Number	Project Engineer	Asphalt Grade	PU	Pit Source	xuxiuquan	52	50		20	4000	50	16000	50	0	50	0	50	0	20000	2019-02-18	3.5% & 4.0%Void Percent(Left Back) : 0.0000 Void Percent(Left Front) : 0.0000 Void Percent(Right Back) : 0.0000 Void Percent(Right Front) : 0.0000	10100	50.1	-0.606984	-0.738988	-0.860196	-0.982523	-0.914476	-0.763397	-0.688569	-0.537921	-0.45339	-0.321564	-0.589153	-0.708508	-0.460959	-0.475234	-0.477114	-0.444017	-1.12367	-0.706628	-0.797458	-0.919531	-1.10868	-1.05174
17	Project Name	JAZ	2	Lab Number	Project Engineer	Asphalt Grade	PU	Pit Source	xuxiuquan	52	50		20	4000	50	16000	50	0	50	0	50	0	20000	2019-02-18	3.5% & 4.0%Void Percent(Left Back) : 0.0000 Void Percent(Left Front) : 0.0000 Void Percent(Right Back) : 0.0000 Void Percent(Right Front) : 0.0000	10150	50.1	-0.618084	-0.750113	-0.849046	-0.949071	-0.892226	-0.785419	-0.710311	-0.559257	-0.463804	-0.321564	-0.578688	-0.705295	-0.460959	-0.499034	-0.465887	-0.422961	-1.09367	-0.706628	-0.797458	-0.919531	-1.12057	-1.05174
17	Project Name	JAZ	2	Lab Number	Project Engineer	Asphalt Grade	PU	Pit Source	xuxiuquan	52	50		20	4000	50	16000	50	0	50	0	50	0	20000	2019-02-18	3.5% & 4.0%Void Percent(Left Back) : 0.0000 Void Percent(Left Front) : 0.0000 Void Percent(Right Back) : 0.0000 Void Percent(Right Front) : 0.0000	10200	50	-0.606984	-0.750113	-0.860196	-0.993673	-0.869975	-0.785419	-0.688569	-0.580568	-0.474243	-0.321564	-0.578688	-0.72717	-0.460959	-0.499034	-0.454685	-0.444017	-1.09367	-0.706628	-0.797458	-0.930732	-1.13248	-1.05174
17	Project Name	JAZ	2	Lab Number	Project Engineer	Asphalt Grade	PU	Pit Source	xuxiuquan	52	50		20	4000	50	16000	50	0	50	0	50	0	20000	2019-02-18	3.5% & 4.0%Void Percent(Left Back) : 0.0000 Void Percent(Left Front) : 0.0000 Void Percent(Right Back) : 0.0000 Void Percent(Right Front) : 0.0000	10250	49.8	-0.606984	-0.750113	-0.860196	-0.982523	-0.892226	-0.785419	-0.710311	-0.5699	-0.463804	-0.321564	-0.599618	-0.719106	-0.460959	-0.475234	-0.465887	-0.454584	-1.12367	-0.706628	-0.807898	-0.919531	-1.13248	-1.05174
17	Project Name	JAZ	2	Lab Number	Project Engineer	Asphalt Grade	PU	Pit Source	xuxiuquan	52	50		20	4000	50	16000	50	0	50	0	50	0	20000	2019-02-18	3.5% & 4.0%Void Percent(Left Back) : 0.0000 Void Percent(Left Front) : 0.0000 Void Percent(Right Back) : 0.0000 Void Percent(Right Front) : 0.0000	10300	49.9	-0.606984	-0.738988	-0.860196	-0.982523	-0.914476	-0.785419	-0.710311	-0.559257	-0.45339	-0.321564	-0.578688	-0.713842	-0.460959	-0.487121	-0.465887	-0.454584	-1.12367	-0.706628	-0.797458	-0.919531	-1.13248	-1.05174
17	Project Name	JAZ	2	Lab Number	Project Engineer	Asphalt Grade	PU	Pit Source	xuxiuquan	52	50		20	4000	50	16000	50	0	50	0	50	0	20000	2019-02-18	3.5% & 4.0%Void Percent(Left Back) : 0.0000 Void Percent(Left Front) : 0.0000 Void Percent(Right Back) : 0.0000 Void Percent(Right Front) : 0.0000	10350	50.1	-0.618084	-0.750113	-0.860196	-0.971372	-0.881101	-0.752373	-0.65598	-0.527279	-0.432587	-0.260833	-0.536854	-0.697859	-0.473354	-0.487121	-0.477114	-0.444017	-1.10366	-0.706628	-0.807898	-0.919531	-1.14442	-1.05174
17	Project Name	JAZ	2	Lab Number	Project Engineer	Asphalt Grade	PU	Pit Source	xuxiuquan	52	50		20	4000	50	16000	50	0	50	0	50	0	20000	2019-02-18	3.5% & 4.0%Void Percent(Left Back) : 0.0000 Void Percent(Left Front) : 0.0000 Void Percent(Right Back) : 0.0000 Void Percent(Right Front) : 0.0000	10400	49.8	-0.606984	-0.750113	-0.860196	-0.982523	-0.881101	-0.741375	-0.65598	-0.516636	-0.401396	-0.260833	-0.536854	-0.690188	-0.473354	-0.475234	-0.477114	-0.454584	-1.13373	-0.716458	-0.807898	-0.919531	-1.13248	-1.05174
17	Project Name	JAZ	2	Lab Number	Project Engineer	Asphalt Grade	PU	Pit Source	xuxiuquan	52	50		20	4000	50	16000	50	0	50	0	50	0	20000	2019-02-18	3.5% & 4.0%Void Percent(Left Back) : 0.0000 Void Percent(Left Front) : 0.0000 Void Percent(Right Back) : 0.0000 Void Percent(Right Front) : 0.0000	10450	49.8	-0.618084	-0.750113	-0.860196	-0.993673	-0.892226	-0.752373	-0.645109	-0.516636	-0.422173	-0.270942	-0.536854	-0.69817	-0.485724	-0.475234	-0.477114	-0.46515	-1.12367	-0.706628	-0.807898	-0.919531	-1.14442	-1.06406
17	Project Name	JAZ	2	Lab Number	Project Engineer	Asphalt Grade	PU	Pit Source	xuxiuquan	52	50		20	4000	50	16000	50	0	50	0	50	0	20000	2019-02-18	3.5% & 4.0%Void Percent(Left Back) : 0.0000 Void Percent(Left Front) : 0.0000 Void Percent(Right Back) : 0.0000 Void Percent(Right Front) : 0.0000	10500	49.9	-0.651434	-0.738988	-0.849046	-0.982523	-0.881101	-0.741375	-0.666826	-0.516636	-0.401396	-0.260833	-0.547294	-0.6874	-0.498119	-0.475234	-0.488366	-0.444017	-1.12367	-0.696824	-0.807898	-0.919531	-1.13248	-1.05174
17	Project Name	JAZ	2	Lab Number	Project Engineer	Asphalt Grade	PU	Pit Source	xuxiuquan	52	50		20	4000	50	16000	50	0	50	0	50	0	20000	2019-02-18	3.5% & 4.0%Void Percent(Left Back) : 0.0000 Void Percent(Left Front) : 0.0000 Void Percent(Right Back) : 0.0000 Void Percent(Right Front) : 0.0000	10550	50.1	-0.618084	-0.750113	-0.860196	-0.982523	-0.903351	-0.752373	-0.710311	-0.559257	-0.463804	-0.331699	-0.599618	-0.716445	-0.460959	-0.475234	-0.465887	-0.444017	-1.12367	-0.696824	-0.807898	-0.930732	-1.14442	-1.05174
17	Project Name	JAZ	2	Lab Number	Project Engineer	Asphalt Grade	PU	Pit Source	xuxiuquan	52	50		20	4000	50	16000	50	0	50	0	50	0	20000	2019-02-18	3.5% & 4.0%Void Percent(Left Back) : 0.0000 Void Percent(Left Front) : 0.0000 Void Percent(Right Back) : 0.0000 Void Percent(Right Front) : 0.0000	10600	50	-0.606984	-0.738988	-0.882447	-0.993673	-0.881101	-0.752373	-0.710311	-0.580568	-0.474243	-0.321564	-0.599618	-0.732733	-0.473354	-0.475234	-0.477114	-0.444017	-1.09367	-0.706628	-0.797458	-0.930732	-1.10868	-1.05174
17	Project Name	JAZ	2	Lab Number	Project Engineer	Asphalt Grade	PU	Pit Source	xuxiuquan	52	50		20	4000	50	16000	50	0	50	0	50	0	20000	2019-02-18	3.5% & 4.0%Void Percent(Left Back) : 0.0000 Void Percent(Left Front) : 0.0000 Void Percent(Right Back) : 0.0000 Void Percent(Right Front) : 0.0000	10650	49.8	-0.640334	-0.750113	-0.882447	-0.982523	-0.881101	-0.763397	-0.677697	-0.537921	-0.45339	-0.321564	-0.599618	-0.71407	-0.485724	-0.463347	-0.465887	-0.444017	-1.10366	-0.706628	-0.797458	-0.919531	-1.14442	-1.05174
17	Project Name	JAZ	2	Lab Number	Project Engineer	Asphalt Grade	PU	Pit Source	xuxiuquan	52	50		20	4000	50	16000	50	0	50	0	50	0	20000	2019-02-18	3.5% & 4.0%Void Percent(Left Back) : 0.0000 Void Percent(Left Front) : 0.0000 Void Percent(Right Back) : 0.0000 Void Percent(Right Front) : 0.0000	10700	49.8	-0.640334	-0.750113	-0.849046	-0.949071	-0.881101	-0.752373	-0.666826	-0.516636	-0.401396	-0.250723	-0.547294	-0.679037	-0.498119	-0.427761	-0.465887	-0.444017	-1.10366	-0.706628	-0.797458	-0.897204	-1.13248	-1.03942
17	Project Name	JAZ	2	Lab Number	Project Engineer	Asphalt Grade	PU	Pit Source	xuxiuquan	52	50		20	4000	50	16000	50	0	50	0	50	0	20000	2019-02-18	3.5% & 4.0%Void Percent(Left Back) : 0.0000 Void Percent(Left Front) : 0.0000 Void Percent(Right Back) : 0.0000 Void Percent(Right Front) : 0.0000	10750	49.8	-0.618084	-0.738988	-0.849046	-0.971372	-0.881101	-0.730352	-0.65598	-0.527279	-0.401396	-0.250723	-0.536854	-0.687273	-0.473354	-0.427761	-0.454685	-0.444017	-1.10366	-0.706628	-0.807898	-0.919531	-1.10868	-1.05174
17	Project Name	JAZ	2	Lab Number	Project Engineer	Asphalt Grade	PU	Pit Source	xuxiuquan	52	50		20	4000	50	16000	50	0	50	0	50	0	20000	2019-02-18	3.5% & 4.0%Void Percent(Left Back) : 0.0000 Void Percent(Left Front) : 0.0000 Void Percent(Right Back) : 0.0000 Void Percent(Right Front) : 0.0000	10800	50.1	-0.618084	-0.750113	-0.860196	-0.949071	-0.869975	-0.730352	-0.666826	-0.516636	-0.401396	-0.24064	-0.52639	-0.681825	-0.473354	-0.439598	-0.454685	-0.433502	-1.10366	-0.696824	-0.807898	-0.919531	-1.13248	-1.05174
17	Project Name	JAZ	2	Lab Number	Project Engineer	Asphalt Grade	PU	Pit Source	xuxiuquan	52	50		20	4000	50	16000	50	0	50	0	50	0	20000	2019-02-18	3.5% & 4.0%Void Percent(Left Back) : 0.0000 Void Percent(Left Front) : 0.0000 Void Percent(Right Back) : 0.0000 Void Percent(Right Front) : 0.0000	10850	50	-0.640334	-0.738988	-0.849046	-0.971372	-0.881101	-0.730352	-0.65598	-0.516636	-0.391008	-0.260833	-0.547294	-0.682015	-0.485724	-0.463347	-0.465887	-0.433502	-1.12367	-0.706628	-0.797458	-0.919531	-1.12057	-1.05174
17	Project Name	JAZ	2	Lab Number	Project Engineer	Asphalt Grade	PU	Pit Source	xuxiuquan	52	50		20	4000	50	16000	50	0	50	0	50	0	20000	2019-02-18	3.5% & 4.0%Void Percent(Left Back) : 0.0000 Void Percent(Left Front) : 0.0000 Void Percent(Right Back) : 0.0000 Void Percent(Right Front) : 0.0000	10900	49.6	-0.618084	-0.738988	-0.849046	-0.949071	-0.869975	-0.763397	-0.677697	-0.527279	-0.401396	-0.270942	-0.536854	-0.681698	-0.473354	-0.427761	-0.454685	-0.422961	-1.09367	-0.696824	-0.807898	-0.897204	-1.13248	-1.05174
17	Project Name	JAZ	2	Lab Number	Project Engineer	Asphalt Grade	PU	Pit Source	xuxiuquan	52	50		20	4000	50	16000	50	0	50	0	50	0	20000	2019-02-18	3.5% & 4.0%Void Percent(Left Back) : 0.0000 Void Percent(Left Front) : 0.0000 Void Percent(Right Back) : 0.0000 Void Percent(Right Front) : 0.0000	10950	49.8	-0.595884	-0.738988	-0.849046	-0.93792	-0.903351	-0.752373	-0.677697	-0.559257	-0.45339	-0.301295	-0.578688	-0.699903	-0.460959	-0.439598	-0.443484	-0.433502	-1.09367	-0.706628	-0.807898	-0.930732	-1.13248	-1.05174
17	Project Name	JAZ	2	Lab Number	Project Engineer	Asphalt Grade	PU	Pit Source	xuxiuquan	52	50		20	4000	50	16000	50	0	50	0	50	0	20000	2019-02-18	3.5% & 4.0%Void Percent(Left Back) : 0.0000 Void Percent(Left Front) : 0.0000 Void Percent(Right Back) : 0.0000 Void Percent(Right Front) : 0.0000	11000	50	-0.595884	-0.727888	-0.849046	-0.949071	-0.903351	-0.741375	-0.677697	-0.537921	-0.45339	-0.321564	-0.589153	-0.697357	-0.460959	-0.463347	-0.465887	-0.422961	-1.10366	-0.716458	-0.797458	-0.897204	-1.13248	-1.05174
17	Project Name	JAZ	2	Lab Number	Project Engineer	Asphalt Grade	PU	Pit Source	xuxiuquan	52	50		20	4000	50	16000	50	0	50	0	50	0	20000	2019-02-18	3.5% & 4.0%Void Percent(Left Back) : 0.0000 Void Percent(Left Front) : 0.0000 Void Percent(Right Back) : 0.0000 Void Percent(Right Front) : 0.0000	11050	50.1	-0.606984	-0.750113	-0.860196	-0.949071	-0.869975	-0.796442	-0.677697	-0.537921	-0.45339	-0.321564	-0.578688	-0.700145	-0.460959	-0.439598	-0.465887	-0.422961	-1.08372	-0.706628	-0.797458	-0.919531	-1.13248	-1.03942
17	Project Name	JAZ	2	Lab Number	Project Engineer	Asphalt Grade	PU	Pit Source	xuxiuquan	52	50		20	4000	50	16000	50	0	50	0	50	0	20000	2019-02-18	3.5% & 4.0%Void Percent(Left Back) : 0.0000 Void Percent(Left Front) : 0.0000 Void Percent(Right Back) : 0.0000 Void Percent(Right Front) : 0.0000	11100	49.8	-0.640334	-0.738988	-0.860196	-0.982523	-0.903351	-0.785419	-0.710311	-0.559257	-0.474243	-0.311429	-0.557759	-0.719055	-0.460959	-0.475234	-0.465887	-0.422961	-1.12367	-0.716458	-0.807898	-0.930732	-1.14442	-1.05174
17	Project Name	JAZ	2	Lab Number	Project Engineer	Asphalt Grade	PU	Pit Source	xuxiuquan	52	50		20	4000	50	16000	50	0	50	0	50	0	20000	2019-02-18	3.5% & 4.0%Void Percent(Left Back) : 0.0000 Void Percent(Left Front) : 0.0000 Void Percent(Right Back) : 0.0000 Void Percent(Right Front) : 0.0000	11150	49.7	-0.606984	-0.738988	-0.849046	-0.93792	-0.869975	-0.785419	-0.677697	-0.559257	-0.463804	-0.321564	-0.557759	-0.702507	-0.460959	-0.463347	-0.421157	-0.391541	-1.08372	-0.716458	-0.807898	-0.941934	-1.14442	-1.05174
17	Project Name	JAZ	2	Lab Number	Project Engineer	Asphalt Grade	PU	Pit Source	xuxiuquan	52	50		20	4000	50	16000	50	0	50	0	50	0	20000	2019-02-18	3.5% & 4.0%Void Percent(Left Back) : 0.0000 Void Percent(Left Front) : 0.0000 Void Percent(Right Back) : 0.0000 Void Percent(Right Front) : 0.0000	11200	50.1	-0.606984	-0.738988	-0.849046	-0.971372	-0.892226	-0.785419	-0.666826	-0.527279	-0.45339	-0.311429	-0.557759	-0.700272	-0.473354	-0.439598	-0.465887	-0.444017	-1.10366	-0.716458	-0.828827	-0.919531	-1.18029	-1.06406
17	Project Name	JAZ	2	Lab Number	Project Engineer	Asphalt Grade	PU	Pit Source	xuxiuquan	52	50		20	4000	50	16000	50	0	50	0	50	0	20000	2019-02-18	3.5% & 4.0%Void Percent(Left Back) : 0.0000 Void Percent(Left Front) : 0.0000 Void Percent(Right Back) : 0.0000 Void Percent(Right Front) : 0.0000	11250	50.1	-0.606984	-0.738988	-0.849046	-0.971372	-0.881101	-0.763397	-0.677697	-0.559257	-0.463804	-0.321564	-0.578688	-0.71087	-0.473354	-0.463347	-0.454685	-0.422961	-1.12367	-0.736168	-0.807898	-0.930732	-1.14442	-1.05174
17	Project Name	JAZ	2	Lab Number	Project Engineer	Asphalt Grade	PU	Pit Source	xuxiuquan	52	50		20	4000	50	16000	50	0	50	0	50	0	20000	2019-02-18	3.5% & 4.0%Void Percent(Left Back) : 0.0000 Void Percent(Left Front) : 0.0000 Void Percent(Right Back) : 0.0000 Void Percent(Right Front) : 0.0000	11300	49.9	-0.618084	-0.738988	-0.849046	-0.971372	-0.892226	-0.785419	-0.710311	-0.559257	-0.45339	-0.321564	-0.557759	-0.708266	-0.460959	-0.475234	-0.477114	-0.433502	-1.12367	-0.736168	-0.828827	-0.930732	-1.15636	-1.06406
17	Project Name	JAZ	2	Lab Number	Project Engineer	Asphalt Grade	PU	Pit Source	xuxiuquan	52	50		20	4000	50	16000	50	0	50	0	50	0	20000	2019-02-18	3.5% & 4.0%Void Percent(Left Back) : 0.0000 Void Percent(Left Front) : 0.0000 Void Percent(Right Back) : 0.0000 Void Percent(Right Front) : 0.0000	11350	49.8	-0.618084	-0.738988	-0.849046	-0.982523	-0.881101	-0.763397	-0.710311	-0.559257	-0.463804	-0.311429	-0.557759	-0.713657	-0.460959	-0.487121	-0.477114	-0.433502	-1.12367	-0.746074	-0.839318	-0.941934	-1.18029	-1.06406
17	Project Name	JAZ	2	Lab Number	Project Engineer	Asphalt Grade	PU	Pit Source	xuxiuquan	52	50		20	4000	50	16000	50	0	50	0	50	0	20000	2019-02-18	3.5% & 4.0%Void Percent(Left Back) : 0.0000 Void Percent(Left Front) : 0.0000 Void Percent(Right Back) : 0.0000 Void Percent(Right Front) : 0.0000	11400	49.8	-0.618084	-0.750113	-0.849046	-0.93792	-0.869975	-0.796442	-0.688569	-0.559257	-0.45339	-0.321564	-0.557759	-0.699903	-0.460959	-0.475234	-0.465887	-0.412471	-1.08372	-0.736168	-0.828827	-0.941934	-1.14442	-1.06406
17	Project Name	JAZ	2	Lab Number	Project Engineer	Asphalt Grade	PU	Pit Source	xuxiuquan	52	50		20	4000	50	16000	50	0	50	0	50	0	20000	2019-02-18	3.5% & 4.0%Void Percent(Left Back) : 0.0000 Void Percent(Left Front) : 0.0000 Void Percent(Right Back) : 0.0000 Void Percent(Right Front) : 0.0000	11450	50.1	-0.618084	-0.750113	-0.860196	-0.92677	-0.836625	-0.796442	-0.688569	-0.537921	-0.463804	-0.331699	-0.578688	-0.697173	-0.460959	-0.463347	-0.454685	-0.391541	-1.08372	-0.736168	-0.828827	-0.930732	-1.14442	-1.06406
17	Project Name	JAZ	2	Lab Number	Project Engineer	Asphalt Grade	PU	Pit Source	xuxiuquan	52	50		20	4000	50	16000	50	0	50	0	50	0	20000	2019-02-18	3.5% & 4.0%Void Percent(Left Back) : 0.0000 Void Percent(Left Front) : 0.0000 Void Percent(Right Back) : 0.0000 Void Percent(Right Front) : 0.0000	11500	50	-0.606984	-0.738988	-0.849046	-0.915619	-0.858876	-0.785419	-0.677697	-0.580568	-0.474243	-0.331699	-0.557759	-0.704869	-0.473354	-0.463347	-0.454685	-0.381102	-1.07378	-0.736168	-0.807898	-0.930732	-1.15636	-1.07638
17	Project Name	JAZ	2	Lab Number	Project Engineer	Asphalt Grade	PU	Pit Source	xuxiuquan	52	50		20	4000	50	16000	50	0	50	0	50	0	20000	2019-02-18	3.5% & 4.0%Void Percent(Left Back) : 0.0000 Void Percent(Left Front) : 0.0000 Void Percent(Right Back) : 0.0000 Void Percent(Right Front) : 0.0000	11550	49.7	-0.606984	-0.738988	-0.860196	-0.971372	-0.903351	-0.785419	-0.688569	-0.580568	-0.45339	-0.301295	-0.547294	-0.716382	-0.460959	-0.499034	-0.488366	-0.444017	-1.12367	-0.736168	-0.807898	-0.95316	-1.19228	-1.07638
17	Project Name	JAZ	2	Lab Number	Project Engineer	Asphalt Grade	PU	Pit Source	xuxiuquan	52	50		20	4000	50	16000	50	0	50	0	50	0	20000	2019-02-18	3.5% & 4.0%Void Percent(Left Back) : 0.0000 Void Percent(Left Front) : 0.0000 Void Percent(Right Back) : 0.0000 Void Percent(Right Front) : 0.0000	11600	49.8	-0.618084	-0.738988	-0.882447	-0.993673	-0.903351	-0.785419	-0.688569	-0.559257	-0.45339	-0.331699	-0.547294	-0.722192	-0.473354	-0.487121	-0.488366	-0.454584	-1.13373	-0.736168	-0.839318	-0.95316	-1.14442	-1.07638
17	Project Name	JAZ	2	Lab Number	Project Engineer	Asphalt Grade	PU	Pit Source	xuxiuquan	52	50		20	4000	50	16000	50	0	50	0	50	0	20000	2019-02-18	3.5% & 4.0%Void Percent(Left Back) : 0.0000 Void Percent(Left Front) : 0.0000 Void Percent(Right Back) : 0.0000 Void Percent(Right Front) : 0.0000	11650	49.9	-0.606984	-0.727888	-0.860196	-0.92677	-0.903351	-0.796442	-0.677697	-0.559257	-0.463804	-0.321564	-0.547294	-0.702507	-0.473354	-0.475234	-0.454685	-0.422961	-1.10366	-0.716458	-0.839318	-0.930732	-1.15636	-1.07638
17	Project Name	JAZ	2	Lab Number	Project Engineer	Asphalt Grade	PU	Pit Source	xuxiuquan	52	50		20	4000	50	16000	50	0	50	0	50	0	20000	2019-02-18	3.5% & 4.0%Void Percent(Left Back) : 0.0000 Void Percent(Left Front) : 0.0000 Void Percent(Right Back) : 0.0000 Void Percent(Right Front) : 0.0000	11700	50.1	-0.618084	-0.750113	-0.860196	-0.982523	-0.914476	-0.796442	-0.688569	-0.5699	-0.484657	-0.321564	-0.547294	-0.724319	-0.473354	-0.487121	-0.454685	-0.444017	-1.13373	-0.746074	-0.839318	-0.941934	-1.15636	-1.06406
17	Project Name	JAZ	2	Lab Number	Project Engineer	Asphalt Grade	PU	Pit Source	xuxiuquan	52	50		20	4000	50	16000	50	0	50	0	50	0	20000	2019-02-18	3.5% & 4.0%Void Percent(Left Back) : 0.0000 Void Percent(Left Front) : 0.0000 Void Percent(Right Back) : 0.0000 Void Percent(Right Front) : 0.0000	11750	49.8	-0.618084	-0.761238	-0.860196	-0.993673	-0.903351	-0.785419	-0.666826	-0.559257	-0.442976	-0.281051	-0.547294	-0.714026	-0.473354	-0.499034	-0.465887	-0.454584	-1.12367	-0.746074	-0.828827	-0.941934	-1.18029	-1.10106
17	Project Name	JAZ	2	Lab Number	Project Engineer	Asphalt Grade	PU	Pit Source	xuxiuquan	52	50		20	4000	50	16000	50	0	50	0	50	0	20000	2019-02-18	3.5% & 4.0%Void Percent(Left Back) : 0.0000 Void Percent(Left Front) : 0.0000 Void Percent(Right Back) : 0.0000 Void Percent(Right Front) : 0.0000	11800	49.8	-0.618084	-0.738988	-0.860196	-0.982523	-0.914476	-0.796442	-0.710311	-0.537921	-0.45339	-0.331699	-0.547294	-0.708508	-0.460959	-0.475234	-0.477114	-0.454584	-1.13373	-0.746074	-0.839318	-0.930732	-1.15636	-1.10106
17	Project Name	JAZ	2	Lab Number	Project Engineer	Asphalt Grade	PU	Pit Source	xuxiuquan	52	50		20	4000	50	16000	50	0	50	0	50	0	20000	2019-02-18	3.5% & 4.0%Void Percent(Left Back) : 0.0000 Void Percent(Left Front) : 0.0000 Void Percent(Right Back) : 0.0000 Void Percent(Right Front) : 0.0000	11850	50	-0.618084	-0.750113	-0.882447	-0.971372	-0.892226	-0.785419	-0.721208	-0.5699	-0.45339	-0.311429	-0.536854	-0.719277	-0.460959	-0.487121	-0.477114	-0.444017	-1.12367	-0.746074	-0.839318	-0.95316	-1.18029	-1.07638
17	Project Name	JAZ	2	Lab Number	Project Engineer	Asphalt Grade	PU	Pit Source	xuxiuquan	52	50		20	4000	50	16000	50	0	50	0	50	0	20000	2019-02-18	3.5% & 4.0%Void Percent(Left Back) : 0.0000 Void Percent(Left Front) : 0.0000 Void Percent(Right Back) : 0.0000 Void Percent(Right Front) : 0.0000	11900	50	-0.640334	-0.761238	-0.860196	-0.982523	-0.903351	-0.785419	-0.688569	-0.5699	-0.474243	-0.321564	-0.578688	-0.721716	-0.473354	-0.499034	-0.488366	-0.444017	-1.10366	-0.736168	-0.839318	-0.95316	-1.18029	-1.07638
17	Project Name	JAZ	2	Lab Number	Project Engineer	Asphalt Grade	PU	Pit Source	xuxiuquan	52	50		20	4000	50	16000	50	0	50	0	50	0	20000	2019-02-18	3.5% & 4.0%Void Percent(Left Back) : 0.0000 Void Percent(Left Front) : 0.0000 Void Percent(Right Back) : 0.0000 Void Percent(Right Front) : 0.0000	11950	49.8	-0.651434	-0.750113	-0.882447	-0.993673	-0.892226	-0.785419	-0.677697	-0.580568	-0.474243	-0.331699	-0.557759	-0.732733	-0.485724	-0.487121	-0.477114	-0.454584	-1.12367	-0.746074	-0.839318	-0.964413	-1.15636	-1.07638
17	Project Name	JAZ	2	Lab Number	Project Engineer	Asphalt Grade	PU	Pit Source	xuxiuquan	52	50		20	4000	50	16000	50	0	50	0	50	0	20000	2019-02-18	3.5% & 4.0%Void Percent(Left Back) : 0.0000 Void Percent(Left Front) : 0.0000 Void Percent(Right Back) : 0.0000 Void Percent(Right Front) : 0.0000	12000	49.9	-0.640334	-0.750113	-0.882447	-0.993673	-0.892226	-0.763397	-0.688569	-0.537921	-0.45339	-0.321564	-0.557759	-0.716858	-0.498119	-0.475234	-0.488366	-0.444017	-1.12367	-0.746074	-0.839318	-0.941934	-1.18029	-1.06406
17	Project Name	JAZ	2	Lab Number	Project Engineer	Asphalt Grade	PU	Pit Source	xuxiuquan	52	50		20	4000	50	16000	50	0	50	0	50	0	20000	2019-02-18	3.5% & 4.0%Void Percent(Left Back) : 0.0000 Void Percent(Left Front) : 0.0000 Void Percent(Right Back) : 0.0000 Void Percent(Right Front) : 0.0000	12050	50	-0.651434	-0.761238	-0.882447	-0.993673	-0.892226	-0.763397	-0.721208	-0.5699	-0.484657	-0.341859	-0.578688	-0.732669	-0.51054	-0.475234	-0.477114	-0.444017	-1.12367	-0.746074	-0.828827	-0.95316	-1.19228	-1.07638
17	Project Name	JAZ	2	Lab Number	Project Engineer	Asphalt Grade	PU	Pit Source	xuxiuquan	52	50		20	4000	50	16000	50	0	50	0	50	0	20000	2019-02-18	3.5% & 4.0%Void Percent(Left Back) : 0.0000 Void Percent(Left Front) : 0.0000 Void Percent(Right Back) : 0.0000 Void Percent(Right Front) : 0.0000	12100	50	-0.651434	-0.761238	-0.860196	-0.971372	-0.892226	-0.785419	-0.688569	-0.559257	-0.463804	-0.301295	-0.547294	-0.713657	-0.51054	-0.499034	-0.477114	-0.433502	-1.10366	-0.75598	-0.828827	-0.941934	-1.18029	-1.07638
17	Project Name	JAZ	2	Lab Number	Project Engineer	Asphalt Grade	PU	Pit Source	xuxiuquan	52	50		20	4000	50	16000	50	0	50	0	50	0	20000	2019-02-18	3.5% & 4.0%Void Percent(Left Back) : 0.0000 Void Percent(Left Front) : 0.0000 Void Percent(Right Back) : 0.0000 Void Percent(Right Front) : 0.0000	12150	49.8	-0.662559	-0.761238	-0.893597	-0.993673	-0.892226	-0.763397	-0.677697	-0.5699	-0.474243	-0.321564	-0.578688	-0.732854	-0.51054	-0.499034	-0.488366	-0.46515	-1.12367	-0.75598	-0.839318	-0.95316	-1.19228	-1.07638
17	Project Name	JAZ	2	Lab Number	Project Engineer	Asphalt Grade	PU	Pit Source	xuxiuquan	52	50		20	4000	50	16000	50	0	50	0	50	0	20000	2019-02-18	3.5% & 4.0%Void Percent(Left Back) : 0.0000 Void Percent(Left Front) : 0.0000 Void Percent(Right Back) : 0.0000 Void Percent(Right Front) : 0.0000	12200	49.8	-0.662559	-0.761238	-0.893597	-0.993673	-0.892226	-0.796442	-0.688569	-0.559257	-0.484657	-0.311429	-0.578688	-0.732796	-0.51054	-0.499034	-0.533502	-0.444017	-1.12367	-0.746074	-0.828827	-0.941934	-1.19228	-1.06406
17	Project Name	JAZ	2	Lab Number	Project Engineer	Asphalt Grade	PU	Pit Source	xuxiuquan	52	50		20	4000	50	16000	50	0	50	0	50	0	20000	2019-02-18	3.5% & 4.0%Void Percent(Left Back) : 0.0000 Void Percent(Left Front) : 0.0000 Void Percent(Right Back) : 0.0000 Void Percent(Right Front) : 0.0000	12250	49.9	-0.651434	-0.761238	-0.882447	-0.971372	-0.881101	-0.785419	-0.710311	-0.559257	-0.45339	-0.311429	-0.557759	-0.716617	-0.498119	-0.475234	-0.499618	-0.433502	-1.12367	-0.75598	-0.839318	-0.964413	-1.18029	-1.10106
17	Project Name	JAZ	2	Lab Number	Project Engineer	Asphalt Grade	PU	Pit Source	xuxiuquan	52	50		20	4000	50	16000	50	0	50	0	50	0	20000	2019-02-18	3.5% & 4.0%Void Percent(Left Back) : 0.0000 Void Percent(Left Front) : 0.0000 Void Percent(Right Back) : 0.0000 Void Percent(Right Front) : 0.0000	12300	49.9	-0.651434	-0.761238	-0.904723	-0.993673	-0.881101	-0.785419	-0.710311	-0.537921	-0.463804	-0.311429	-0.599618	-0.72503	-0.522961	-0.499034	-0.499618	-0.454584	-1.13373	-0.75598	-0.849859	-0.95316	-1.19228	-1.07638
17	Project Name	JAZ	2	Lab Number	Project Engineer	Asphalt Grade	PU	Pit Source	xuxiuquan	52	50		20	4000	50	16000	50	0	50	0	50	0	20000	2019-02-18	3.5% & 4.0%Void Percent(Left Back) : 0.0000 Void Percent(Left Front) : 0.0000 Void Percent(Right Back) : 0.0000 Void Percent(Right Front) : 0.0000	12350	49.9	-0.662559	-0.761238	-0.893597	-0.971372	-0.914476	-0.796442	-0.677697	-0.559257	-0.463804	-0.311429	-0.589153	-0.722008	-0.522961	-0.499034	-0.477114	-0.454584	-1.13373	-0.746074	-0.839318	-0.941934	-1.19228	-1.07638
17	Project Name	JAZ	2	Lab Number	Project Engineer	Asphalt Grade	PU	Pit Source	xuxiuquan	52	50		20	4000	50	16000	50	0	50	0	50	0	20000	2019-02-18	3.5% & 4.0%Void Percent(Left Back) : 0.0000 Void Percent(Left Front) : 0.0000 Void Percent(Right Back) : 0.0000 Void Percent(Right Front) : 0.0000	12400	49.8	-0.662559	-0.761238	-0.893597	-0.993673	-0.903351	-0.785419	-0.677697	-0.559257	-0.474243	-0.311429	-0.589153	-0.730193	-0.522961	-0.487121	-0.522199	-0.444017	-1.13373	-0.75598	-0.839318	-0.95316	-1.19228	-1.06406
17	Project Name	JAZ	2	Lab Number	Project Engineer	Asphalt Grade	PU	Pit Source	xuxiuquan	52	50		20	4000	50	16000	50	0	50	0	50	0	20000	2019-02-18	3.5% & 4.0%Void Percent(Left Back) : 0.0000 Void Percent(Left Front) : 0.0000 Void Percent(Right Back) : 0.0000 Void Percent(Right Front) : 0.0000	12450	49.9	-0.673684	-0.761238	-0.893597	-0.993673	-0.903351	-0.796442	-0.721208	-0.5699	-0.463804	-0.311429	-0.578688	-0.730244	-0.547827	-0.487121	-0.499618	-0.46515	-1.13373	-0.75598	-0.849859	-0.95316	-1.19228	-1.07638
17	Project Name	JAZ	2	Lab Number	Project Engineer	Asphalt Grade	PU	Pit Source	xuxiuquan	52	50		20	4000	50	16000	50	0	50	0	50	0	20000	2019-02-18	3.5% & 4.0%Void Percent(Left Back) : 0.0000 Void Percent(Left Front) : 0.0000 Void Percent(Right Back) : 0.0000 Void Percent(Right Front) : 0.0000	12500	49.8	-0.662559	-0.761238	-0.882447	-0.982523	-0.903351	-0.763397	-0.666826	-0.559257	-0.442976	-0.281051	-0.578688	-0.716801	-0.522961	-0.499034	-0.488366	-0.444017	-1.14379	-0.746074	-0.849859	-0.95316	-1.15636	-1.07638
17	Project Name	JAZ	2	Lab Number	Project Engineer	Asphalt Grade	PU	Pit Source	xuxiuquan	52	50		20	4000	50	16000	50	0	50	0	50	0	20000	2019-02-18	3.5% & 4.0%Void Percent(Left Back) : 0.0000 Void Percent(Left Front) : 0.0000 Void Percent(Right Back) : 0.0000 Void Percent(Right Front) : 0.0000	12550	50	-0.651434	-0.761238	-0.882447	-0.971372	-0.914476	-0.807466	-0.688569	-0.559257	-0.432587	-0.311429	-0.589153	-0.711416	-0.51054	-0.487121	-0.522199	-0.444017	-1.14379	-0.746074	-0.839318	-0.95316	-1.15636	-1.06406
17	Project Name	JAZ	2	Lab Number	Project Engineer	Asphalt Grade	PU	Pit Source	xuxiuquan	52	50		20	4000	50	16000	50	0	50	0	50	0	20000	2019-02-18	3.5% & 4.0%Void Percent(Left Back) : 0.0000 Void Percent(Left Front) : 0.0000 Void Percent(Right Back) : 0.0000 Void Percent(Right Front) : 0.0000	12600	49.8	-0.673684	-0.772363	-0.893597	-1.00485	-0.903351	-0.752373	-0.677697	-0.537921	-0.432587	-0.281051	-0.557759	-0.717239	-0.547827	-0.475234	-0.522199	-0.46515	-1.14379	-0.75598	-0.849859	-0.941934	-1.18029	-1.06406
17	Project Name	JAZ	2	Lab Number	Project Engineer	Asphalt Grade	PU	Pit Source	xuxiuquan	52	50		20	4000	50	16000	50	0	50	0	50	0	20000	2019-02-18	3.5% & 4.0%Void Percent(Left Back) : 0.0000 Void Percent(Left Front) : 0.0000 Void Percent(Right Back) : 0.0000 Void Percent(Right Front) : 0.0000	12650	49.8	-0.651434	-0.761238	-0.860196	-0.971372	-0.892226	-0.763397	-0.688569	-0.5699	-0.442976	-0.281051	-0.589153	-0.711111	-0.51054	-0.499034	-0.499618	-0.433502	-1.12367	-0.746074	-0.839318	-0.95316	-1.18029	-1.07638
17	Project Name	JAZ	2	Lab Number	Project Engineer	Asphalt Grade	PU	Pit Source	xuxiuquan	52	50		20	4000	50	16000	50	0	50	0	50	0	20000	2019-02-18	3.5% & 4.0%Void Percent(Left Back) : 0.0000 Void Percent(Left Front) : 0.0000 Void Percent(Right Back) : 0.0000 Void Percent(Right Front) : 0.0000	12700	49.8	-0.651434	-0.761238	-0.882447	-0.949071	-0.892226	-0.763397	-0.688569	-0.559257	-0.442976	-0.281051	-0.599618	-0.708438	-0.522961	-0.510972	-0.522199	-0.454584	-1.13373	-0.75598	-0.839318	-0.964413	-1.18029	-1.07638
17	Project Name	JAZ	2	Lab Number	Project Engineer	Asphalt Grade	PU	Pit Source	xuxiuquan	52	50		20	4000	50	16000	50	0	50	0	50	0	20000	2019-02-18	3.5% & 4.0%Void Percent(Left Back) : 0.0000 Void Percent(Left Front) : 0.0000 Void Percent(Right Back) : 0.0000 Void Percent(Right Front) : 0.0000	12750	50	-0.651434	-0.761238	-0.882447	-0.949071	-0.869975	-0.796442	-0.677697	-0.537921	-0.442976	-0.311429	-0.599618	-0.703104	-0.522961	-0.475234	-0.522199	-0.433502	-1.12367	-0.746074	-0.839318	-0.941934	-1.18029	-1.07638
17	Project Name	JAZ	2	Lab Number	Project Engineer	Asphalt Grade	PU	Pit Source	xuxiuquan	52	50		20	4000	50	16000	50	0	50	0	50	0	20000	2019-02-18	3.5% & 4.0%Void Percent(Left Back) : 0.0000 Void Percent(Left Front) : 0.0000 Void Percent(Right Back) : 0.0000 Void Percent(Right Front) : 0.0000	12800	49.9	-0.673684	-0.761238	-0.882447	-1.00485	-0.892226	-0.752373	-0.677697	-0.580568	-0.45339	-0.311429	-0.589153	-0.730314	-0.547827	-0.487121	-0.54483	-0.454584	-1.14379	-0.75598	-0.849859	-0.964413	-1.19228	-1.07638
17	Project Name	JAZ	2	Lab Number	Project Engineer	Asphalt Grade	PU	Pit Source	xuxiuquan	52	50		20	4000	50	16000	50	0	50	0	50	0	20000	2019-02-18	3.5% & 4.0%Void Percent(Left Back) : 0.0000 Void Percent(Left Front) : 0.0000 Void Percent(Right Back) : 0.0000 Void Percent(Right Front) : 0.0000	12850	49.8	-0.673684	-0.761238	-0.893597	-0.982523	-0.881101	-0.763397	-0.688569	-0.537921	-0.45339	-0.301295	-0.599618	-0.716858	-0.547827	-0.499034	-0.522199	-0.454584	-1.14379	-0.75598	-0.849859	-0.95316	-1.21628	-1.07638
17	Project Name	JAZ	2	Lab Number	Project Engineer	Asphalt Grade	PU	Pit Source	xuxiuquan	52	50		20	4000	50	16000	50	0	50	0	50	0	20000	2019-02-18	3.5% & 4.0%Void Percent(Left Back) : 0.0000 Void Percent(Left Front) : 0.0000 Void Percent(Right Back) : 0.0000 Void Percent(Right Front) : 0.0000	12900	49.8	-0.651434	-0.761238	-0.882447	-0.982523	-0.903351	-0.785419	-0.710311	-0.5699	-0.463804	-0.311429	-0.599618	-0.724668	-0.51054	-0.510972	-0.522199	-0.46515	-1.14379	-0.75598	-0.839318	-0.964413	-1.19228	-1.07638
17	Project Name	JAZ	2	Lab Number	Project Engineer	Asphalt Grade	PU	Pit Source	xuxiuquan	52	50		20	4000	50	16000	50	0	50	0	50	0	20000	2019-02-18	3.5% & 4.0%Void Percent(Left Back) : 0.0000 Void Percent(Left Front) : 0.0000 Void Percent(Right Back) : 0.0000 Void Percent(Right Front) : 0.0000	12950	50	-0.662559	-0.750113	-0.882447	-0.93792	-0.892226	-0.807466	-0.688569	-0.559257	-0.45339	-0.321564	-0.589153	-0.708254	-0.51054	-0.499034	-0.488366	-0.433502	-1.13373	-0.775868	-0.849859	-0.964413	-1.19228	-1.11341
17	Project Name	JAZ	2	Lab Number	Project Engineer	Asphalt Grade	PU	Pit Source	xuxiuquan	52	50		20	4000	50	16000	50	0	50	0	50	0	20000	2019-02-18	3.5% & 4.0%Void Percent(Left Back) : 0.0000 Void Percent(Left Front) : 0.0000 Void Percent(Right Back) : 0.0000 Void Percent(Right Front) : 0.0000	13000	50	-0.673684	-0.761238	-0.882447	-0.982523	-0.892226	-0.785419	-0.65598	-0.559257	-0.442976	-0.321564	-0.599618	-0.716801	-0.522961	-0.499034	-0.522199	-0.454584	-1.14379	-0.765912	-0.849859	-0.964413	-1.19228	-1.11341
17	Project Name	JAZ	2	Lab Number	Project Engineer	Asphalt Grade	PU	Pit Source	xuxiuquan	52	50		20	4000	50	16000	50	0	50	0	50	0	20000	2019-02-18	3.5% & 4.0%Void Percent(Left Back) : 0.0000 Void Percent(Left Front) : 0.0000 Void Percent(Right Back) : 0.0000 Void Percent(Right Front) : 0.0000	13050	49.9	-0.662559	-0.761238	-0.893597	-1.016	-0.903351	-0.763397	-0.688569	-0.559257	-0.45339	-0.311429	-0.599618	-0.730561	-0.51054	-0.510972	-0.488366	-0.454584	-1.14379	-0.765912	-0.849859	-0.975665	-1.19228	-1.07638
17	Project Name	JAZ	2	Lab Number	Project Engineer	Asphalt Grade	PU	Pit Source	xuxiuquan	52	50		20	4000	50	16000	50	0	50	0	50	0	20000	2019-02-18	3.5% & 4.0%Void Percent(Left Back) : 0.0000 Void Percent(Left Front) : 0.0000 Void Percent(Right Back) : 0.0000 Void Percent(Right Front) : 0.0000	13100	49.6	-0.651434	-0.761238	-0.893597	-0.971372	-0.892226	-0.785419	-0.710311	-0.559257	-0.45339	-0.311429	-0.620573	-0.719404	-0.51054	-0.499034	-0.522199	-0.433502	-1.13373	-0.75598	-0.860374	-0.95316	-1.18029	-1.10106
17	Project Name	JAZ	2	Lab Number	Project Engineer	Asphalt Grade	PU	Pit Source	xuxiuquan	52	50		20	4000	50	16000	50	0	50	0	50	0	20000	2019-02-18	3.5% & 4.0%Void Percent(Left Back) : 0.0000 Void Percent(Left Front) : 0.0000 Void Percent(Right Back) : 0.0000 Void Percent(Right Front) : 0.0000	13150	49.7	-0.673684	-0.772363	-0.893597	-0.982523	-0.881101	-0.752373	-0.688569	-0.559257	-0.432587	-0.301295	-0.557759	-0.716991	-0.522961	-0.499034	-0.533502	-0.433502	-1.13373	-0.765912	-0.849859	-0.964413	-1.19228	-1.10106
17	Project Name	JAZ	2	Lab Number	Project Engineer	Asphalt Grade	PU	Pit Source	xuxiuquan	52	50		20	4000	50	16000	50	0	50	0	50	0	20000	2019-02-18	3.5% & 4.0%Void Percent(Left Back) : 0.0000 Void Percent(Left Front) : 0.0000 Void Percent(Right Back) : 0.0000 Void Percent(Right Front) : 0.0000	13200	50	-0.662559	-0.772363	-0.893597	-0.993673	-0.903351	-0.785419	-0.677697	-0.559257	-0.442976	-0.281051	-0.599618	-0.722376	-0.498119	-0.510972	-0.533502	-0.444017	-1.14379	-0.75598	-0.849859	-0.964413	-1.21628	-1.11341
17	Project Name	JAZ	2	Lab Number	Project Engineer	Asphalt Grade	PU	Pit Source	xuxiuquan	52	50		20	4000	50	16000	50	0	50	0	50	0	20000	2019-02-18	3.5% & 4.0%Void Percent(Left Back) : 0.0000 Void Percent(Left Front) : 0.0000 Void Percent(Right Back) : 0.0000 Void Percent(Right Front) : 0.0000	13250	50.1	-0.651434	-0.772363	-0.893597	-0.993673	-0.903351	-0.785419	-0.688569	-0.580568	-0.463804	-0.311429	-0.599618	-0.732911	-0.51054	-0.52291	-0.54483	-0.46515	-1.14379	-0.775868	-0.849859	-0.975665	-1.20426	-1.11341
17	Project Name	JAZ	2	Lab Number	Project Engineer	Asphalt Grade	PU	Pit Source	xuxiuquan	52	50		20	4000	50	16000	50	0	50	0	50	0	20000	2019-02-18	3.5% & 4.0%Void Percent(Left Back) : 0.0000 Void Percent(Left Front) : 0.0000 Void Percent(Right Back) : 0.0000 Void Percent(Right Front) : 0.0000	13300	49.9	-0.662559	-0.772363	-0.893597	-1.00485	-0.903351	-0.785419	-0.666826	-0.537921	-0.442976	-0.301295	-0.589153	-0.719836	-0.498119	-0.52291	-0.54483	-0.46515	-1.14379	-0.765912	-0.849859	-0.964413	-1.19228	-1.10106
17	Project Name	JAZ	2	Lab Number	Project Engineer	Asphalt Grade	PU	Pit Source	xuxiuquan	52	50		20	4000	50	16000	50	0	50	0	50	0	20000	2019-02-18	3.5% & 4.0%Void Percent(Left Back) : 0.0000 Void Percent(Left Front) : 0.0000 Void Percent(Right Back) : 0.0000 Void Percent(Right Front) : 0.0000	13350	49.7	-0.673684	-0.772363	-0.904723	-1.00485	-0.903351	-0.796442	-0.710311	-0.5699	-0.442976	-0.311429	-0.599618	-0.730612	-0.522961	-0.510972	-0.556158	-0.46515	-1.15387	-0.75598	-0.849859	-0.964413	-1.19228	-1.11341
17	Project Name	JAZ	2	Lab Number	Project Engineer	Asphalt Grade	PU	Pit Source	xuxiuquan	52	50		20	4000	50	16000	50	0	50	0	50	0	20000	2019-02-18	3.5% & 4.0%Void Percent(Left Back) : 0.0000 Void Percent(Left Front) : 0.0000 Void Percent(Right Back) : 0.0000 Void Percent(Right Front) : 0.0000	13400	49.8	-0.673684	-0.772363	-0.893597	-1.00485	-0.892226	-0.785419	-0.710311	-0.580568	-0.463804	-0.321564	-0.599618	-0.735705	-0.51054	-0.510972	-0.54483	-0.454584	-1.14379	-0.75598	-0.839318	-0.975665	-1.20426	-1.07638
17	Project Name	JAZ	2	Lab Number	Project Engineer	Asphalt Grade	PU	Pit Source	xuxiuquan	52	50		20	4000	50	16000	50	0	50	0	50	0	20000	2019-02-18	3.5% & 4.0%Void Percent(Left Back) : 0.0000 Void Percent(Left Front) : 0.0000 Void Percent(Right Back) : 0.0000 Void Percent(Right Front) : 0.0000	13450	49.9	-0.662559	-0.772363	-0.882447	-0.993673	-0.892226	-0.785419	-0.688569	-0.601929	-0.474243	-0.331699	-0.599618	-0.738073	-0.498119	-0.510972	-0.533502	-0.46515	-1.13373	-0.75598	-0.849859	-1.00955	-1.20426	-1.10106
17	Project Name	JAZ	2	Lab Number	Project Engineer	Asphalt Grade	PU	Pit Source	xuxiuquan	52	50		20	4000	50	16000	50	0	50	0	50	0	20000	2019-02-18	3.5% & 4.0%Void Percent(Left Back) : 0.0000 Void Percent(Left Front) : 0.0000 Void Percent(Right Back) : 0.0000 Void Percent(Right Front) : 0.0000	13500	50.1	-0.651434	-0.772363	-0.893597	-1.00485	-0.925627	-0.785419	-0.688569	-0.5699	-0.442976	-0.321564	-0.610108	-0.727831	-0.51054	-0.499034	-0.522199	-0.46515	-1.14379	-0.75598	-0.839318	-0.95316	-1.20426	-1.10106
17	Project Name	JAZ	2	Lab Number	Project Engineer	Asphalt Grade	PU	Pit Source	xuxiuquan	52	50		20	4000	50	16000	50	0	50	0	50	0	20000	2019-02-18	3.5% & 4.0%Void Percent(Left Back) : 0.0000 Void Percent(Left Front) : 0.0000 Void Percent(Right Back) : 0.0000 Void Percent(Right Front) : 0.0000	13550	50	-0.673684	-0.772363	-0.904723	-1.00485	-0.914476	-0.763397	-0.688569	-0.559257	-0.463804	-0.321564	-0.610108	-0.733158	-0.498119	-0.510972	-0.54483	-0.475742	-1.15387	-0.775868	-0.849859	-0.964413	-1.21628	-1.11341
17	Project Name	JAZ	2	Lab Number	Project Engineer	Asphalt Grade	PU	Pit Source	xuxiuquan	52	50		20	4000	50	16000	50	0	50	0	50	0	20000	2019-02-18	3.5% & 4.0%Void Percent(Left Back) : 0.0000 Void Percent(Left Front) : 0.0000 Void Percent(Right Back) : 0.0000 Void Percent(Right Front) : 0.0000	13600	49.8	-0.662559	-0.772363	-0.882447	-0.949071	-0.858876	-0.785419	-0.688569	-0.591261	-0.463804	-0.311429	-0.610108	-0.721646	-0.51054	-0.510972	-0.488366	-0.412471	-1.10366	-0.765912	-0.860374	-0.964413	-1.21628	-1.11341
17	Project Name	JAZ	2	Lab Number	Project Engineer	Asphalt Grade	PU	Pit Source	xuxiuquan	52	50		20	4000	50	16000	50	0	50	0	50	0	20000	2019-02-18	3.5% & 4.0%Void Percent(Left Back) : 0.0000 Void Percent(Left Front) : 0.0000 Void Percent(Right Back) : 0.0000 Void Percent(Right Front) : 0.0000	13650	49.8	-0.640334	-0.761238	-0.904723	-0.993673	-0.903351	-0.763397	-0.677697	-0.5699	-0.45339	-0.311429	-0.610108	-0.730421	-0.485724	-0.510972	-0.522199	-0.46515	-1.13373	-0.765912	-0.849859	-0.95316	-1.19228	-1.11341
17	Project Name	JAZ	2	Lab Number	Project Engineer	Asphalt Grade	PU	Pit Source	xuxiuquan	52	50		20	4000	50	16000	50	0	50	0	50	0	20000	2019-02-18	3.5% & 4.0%Void Percent(Left Back) : 0.0000 Void Percent(Left Front) : 0.0000 Void Percent(Right Back) : 0.0000 Void Percent(Right Front) : 0.0000	13700	50	-0.673684	-0.772363	-0.893597	-0.993673	-0.892226	-0.763397	-0.677697	-0.5699	-0.45339	-0.321564	-0.599618	-0.72764	-0.51054	-0.499034	-0.533502	-0.475742	-1.15387	-0.765912	-0.839318	-0.95316	-1.18029	-1.11341
17	Project Name	JAZ	2	Lab Number	Project Engineer	Asphalt Grade	PU	Pit Source	xuxiuquan	52	50		20	4000	50	16000	50	0	50	0	50	0	20000	2019-02-18	3.5% & 4.0%Void Percent(Left Back) : 0.0000 Void Percent(Left Front) : 0.0000 Void Percent(Right Back) : 0.0000 Void Percent(Right Front) : 0.0000	13750	50	-0.673684	-0.783488	-0.893597	-1.00485	-0.892226	-0.785419	-0.666826	-0.537921	-0.442976	-0.311429	-0.589153	-0.719836	-0.51054	-0.52291	-0.54483	-0.475742	-1.14379	-0.765912	-0.839318	-0.964413	-1.20426	-1.11341
17	Project Name	JAZ	2	Lab Number	Project Engineer	Asphalt Grade	PU	Pit Source	xuxiuquan	52	50		20	4000	50	16000	50	0	50	0	50	0	20000	2019-02-18	3.5% & 4.0%Void Percent(Left Back) : 0.0000 Void Percent(Left Front) : 0.0000 Void Percent(Right Back) : 0.0000 Void Percent(Right Front) : 0.0000	13800	49.8	-0.662559	-0.772363	-0.893597	-1.00485	-0.914476	-0.796442	-0.710311	-0.5699	-0.45339	-0.321564	-0.599618	-0.730434	-0.498119	-0.510972	-0.533502	-0.46515	-1.15387	-0.775868	-0.849859	-0.964413	-1.21628	-1.11341
17	Project Name	JAZ	2	Lab Number	Project Engineer	Asphalt Grade	PU	Pit Source	xuxiuquan	52	50		20	4000	50	16000	50	0	50	0	50	0	20000	2019-02-18	3.5% & 4.0%Void Percent(Left Back) : 0.0000 Void Percent(Left Front) : 0.0000 Void Percent(Right Back) : 0.0000 Void Percent(Right Front) : 0.0000	13850	49.7	-0.651434	-0.772363	-0.893597	-0.971372	-0.903351	-0.785419	-0.688569	-0.580568	-0.45339	-0.321564	-0.610108	-0.724732	-0.51054	-0.499034	-0.522199	-0.454584	-1.14379	-0.765912	-0.849859	-0.964413	-1.20426	-1.11341
17	Project Name	JAZ	2	Lab Number	Project Engineer	Asphalt Grade	PU	Pit Source	xuxiuquan	52	50		20	4000	50	16000	50	0	50	0	50	0	20000	2019-02-18	3.5% & 4.0%Void Percent(Left Back) : 0.0000 Void Percent(Left Front) : 0.0000 Void Percent(Right Back) : 0.0000 Void Percent(Right Front) : 0.0000	13900	49.9	-0.662559	-0.772363	-0.904723	-1.00485	-0.892226	-0.741375	-0.677697	-0.559257	-0.463804	-0.331699	-0.599618	-0.733158	-0.51054	-0.499034	-0.556158	-0.475742	-1.14379	-0.775868	-0.839318	-0.964413	-1.20426	-1.11341
17	Project Name	JAZ	2	Lab Number	Project Engineer	Asphalt Grade	PU	Pit Source	xuxiuquan	52	50		20	4000	50	16000	50	0	50	0	50	0	20000	2019-02-18	3.5% & 4.0%Void Percent(Left Back) : 0.0000 Void Percent(Left Front) : 0.0000 Void Percent(Right Back) : 0.0000 Void Percent(Right Front) : 0.0000	13950	50.1	-0.673684	-0.772363	-0.893597	-0.93792	-0.858876	-0.763397	-0.688569	-0.580568	-0.45339	-0.321564	-0.620573	-0.716369	-0.51054	-0.487121	-0.533502	-0.422961	-1.09367	-0.765912	-0.839318	-0.975665	-1.21628	-1.11341
17	Project Name	JAZ	2	Lab Number	Project Engineer	Asphalt Grade	PU	Pit Source	xuxiuquan	52	50		20	4000	50	16000	50	0	50	0	50	0	20000	2019-02-18	3.5% & 4.0%Void Percent(Left Back) : 0.0000 Void Percent(Left Front) : 0.0000 Void Percent(Right Back) : 0.0000 Void Percent(Right Front) : 0.0000	14000	50	-0.673684	-0.761238	-0.882447	-0.93792	-0.858876	-0.763397	-0.666826	-0.559257	-0.422173	-0.301295	-0.599618	-0.700449	-0.522961	-0.52291	-0.522199	-0.444017	-1.12367	-0.775868	-0.849859	-0.964413	-1.20426	-1.11341
17	Project Name	JAZ	2	Lab Number	Project Engineer	Asphalt Grade	PU	Pit Source	xuxiuquan	52	50		20	4000	50	16000	50	0	50	0	50	0	20000	2019-02-18	3.5% & 4.0%Void Percent(Left Back) : 0.0000 Void Percent(Left Front) : 0.0000 Void Percent(Right Back) : 0.0000 Void Percent(Right Front) : 0.0000	14050	49.8	-0.651434	-0.772363	-0.893597	-1.00485	-0.914476	-0.807466	-0.688569	-0.559257	-0.474243	-0.321564	-0.610108	-0.732987	-0.51054	-0.52291	-0.556158	-0.507644	-1.16398	-0.765912	-0.860374	-0.95316	-1.21628	-1.11341
17	Project Name	JAZ	2	Lab Number	Project Engineer	Asphalt Grade	PU	Pit Source	xuxiuquan	52	50		20	4000	50	16000	50	0	50	0	50	0	20000	2019-02-18	3.5% & 4.0%Void Percent(Left Back) : 0.0000 Void Percent(Left Front) : 0.0000 Void Percent(Right Back) : 0.0000 Void Percent(Right Front) : 0.0000	14100	50	-0.662559	-0.772363	-0.904723	-1.00485	-0.892226	-0.785419	-0.666826	-0.559257	-0.45339	-0.321564	-0.610108	-0.730555	-0.522961	-0.52291	-0.567538	-0.475742	-1.15387	-0.785851	-0.849859	-0.964413	-1.19228	-1.10106
17	Project Name	JAZ	2	Lab Number	Project Engineer	Asphalt Grade	PU	Pit Source	xuxiuquan	52	50		20	4000	50	16000	50	0	50	0	50	0	20000	2019-02-18	3.5% & 4.0%Void Percent(Left Back) : 0.0000 Void Percent(Left Front) : 0.0000 Void Percent(Right Back) : 0.0000 Void Percent(Right Front) : 0.0000	14150	50	-0.695935	-0.761238	-0.893597	-1.00485	-0.892226	-0.763397	-0.677697	-0.537921	-0.45339	-0.311429	-0.599618	-0.72244	-0.547827	-0.52291	-0.54483	-0.497002	-1.15387	-0.765912	-0.860374	-0.975665	-1.21628	-1.07638
17	Project Name	JAZ	2	Lab Number	Project Engineer	Asphalt Grade	PU	Pit Source	xuxiuquan	52	50		20	4000	50	16000	50	0	50	0	50	0	20000	2019-02-18	3.5% & 4.0%Void Percent(Left Back) : 0.0000 Void Percent(Left Front) : 0.0000 Void Percent(Right Back) : 0.0000 Void Percent(Right Front) : 0.0000	14200	49.9	-0.673684	-0.761238	-0.904723	-1.016	-0.892226	-0.796442	-0.688569	-0.5699	-0.463804	-0.321564	-0.620573	-0.738607	-0.522961	-0.546837	-0.54483	-0.497002	-1.15387	-0.765912	-0.860374	-0.975665	-1.21628	-1.11341
17	Project Name	JAZ	2	Lab Number	Project Engineer	Asphalt Grade	PU	Pit Source	xuxiuquan	52	50		20	4000	50	16000	50	0	50	0	50	0	20000	2019-02-18	3.5% & 4.0%Void Percent(Left Back) : 0.0000 Void Percent(Left Front) : 0.0000 Void Percent(Right Back) : 0.0000 Void Percent(Right Front) : 0.0000	14250	49.8	-0.684809	-0.772363	-0.882447	-0.993673	-0.869975	-0.741375	-0.645109	-0.537921	-0.442976	-0.270942	-0.578688	-0.714254	-0.522961	-0.52291	-0.54483	-0.475742	-1.14379	-0.765912	-0.849859	-0.975665	-1.21628	-1.10106
17	Project Name	JAZ	2	Lab Number	Project Engineer	Asphalt Grade	PU	Pit Source	xuxiuquan	52	50		20	4000	50	16000	50	0	50	0	50	0	20000	2019-02-18	3.5% & 4.0%Void Percent(Left Back) : 0.0000 Void Percent(Left Front) : 0.0000 Void Percent(Right Back) : 0.0000 Void Percent(Right Front) : 0.0000	14300	49.8	-0.662559	-0.761238	-0.904723	-0.949071	-0.858876	-0.785419	-0.666826	-0.559257	-0.45339	-0.311429	-0.610108	-0.71661	-0.522961	-0.52291	-0.54483	-0.433502	-1.12367	-0.775868	-0.849859	-0.975665	-1.21628	-1.11341
17	Project Name	JAZ	2	Lab Number	Project Engineer	Asphalt Grade	PU	Pit Source	xuxiuquan	52	50		20	4000	50	16000	50	0	50	0	50	0	20000	2019-02-18	3.5% & 4.0%Void Percent(Left Back) : 0.0000 Void Percent(Left Front) : 0.0000 Void Percent(Right Back) : 0.0000 Void Percent(Right Front) : 0.0000	14350	50.1	-0.673684	-0.761238	-0.893597	-1.00485	-0.903351	-0.796442	-0.710311	-0.591261	-0.463804	-0.311429	-0.610108	-0.738378	-0.522961	-0.52291	-0.567538	-0.497002	-1.14379	-0.775868	-0.849859	-1.00955	-1.21628	-1.10106
17	Project Name	JAZ	2	Lab Number	Project Engineer	Asphalt Grade	PU	Pit Source	xuxiuquan	52	50		20	4000	50	16000	50	0	50	0	50	0	20000	2019-02-18	3.5% & 4.0%Void Percent(Left Back) : 0.0000 Void Percent(Left Front) : 0.0000 Void Percent(Right Back) : 0.0000 Void Percent(Right Front) : 0.0000	14400	50	-0.662559	-0.761238	-0.893597	-1.016	-0.903351	-0.796442	-0.666826	-0.5699	-0.463804	-0.301295	-0.610108	-0.735825	-0.547827	-0.558825	-0.556158	-0.507644	-1.14379	-0.775868	-0.860374	-0.998245	-1.21628	-1.11341
17	Project Name	JAZ	2	Lab Number	Project Engineer	Asphalt Grade	PU	Pit Source	xuxiuquan	52	50		20	4000	50	16000	50	0	50	0	50	0	20000	2019-02-18	3.5% & 4.0%Void Percent(Left Back) : 0.0000 Void Percent(Left Front) : 0.0000 Void Percent(Right Back) : 0.0000 Void Percent(Right Front) : 0.0000	14450	49.7	-0.662559	-0.772363	-0.915873	-1.016	-0.892226	-0.807466	-0.677697	-0.537921	-0.442976	-0.301295	-0.599618	-0.728193	-0.522961	-0.52291	-0.522199	-0.475742	-1.15387	-0.765912	-0.860374	-0.964413	-1.21628	-1.11341
17	Project Name	JAZ	2	Lab Number	Project Engineer	Asphalt Grade	PU	Pit Source	xuxiuquan	52	50		20	4000	50	16000	50	0	50	0	50	0	20000	2019-02-18	3.5% & 4.0%Void Percent(Left Back) : 0.0000 Void Percent(Left Front) : 0.0000 Void Percent(Right Back) : 0.0000 Void Percent(Right Front) : 0.0000	14500	49.7	-0.673684	-0.761238	-0.915873	-0.993673	-0.903351	-0.807466	-0.688569	-0.5699	-0.474243	-0.281051	-0.610108	-0.738422	-0.522961	-0.546837	-0.533502	-0.475742	-1.15387	-0.775868	-0.860374	-0.975665	-1.22829	-1.11341
17	Project Name	JAZ	2	Lab Number	Project Engineer	Asphalt Grade	PU	Pit Source	xuxiuquan	52	50		20	4000	50	16000	50	0	50	0	50	0	20000	2019-02-18	3.5% & 4.0%Void Percent(Left Back) : 0.0000 Void Percent(Left Front) : 0.0000 Void Percent(Right Back) : 0.0000 Void Percent(Right Front) : 0.0000	14550	49.9	-0.673684	-0.772363	-0.893597	-1.00485	-0.892226	-0.752373	-0.677697	-0.580568	-0.474243	-0.321564	-0.610108	-0.738315	-0.547827	-0.546837	-0.54483	-0.475742	-1.15387	-0.775868	-0.870941	-1.00955	-1.22829	-1.11341
17	Project Name	JAZ	2	Lab Number	Project Engineer	Asphalt Grade	PU	Pit Source	xuxiuquan	52	50		20	4000	50	16000	50	0	50	0	50	0	20000	2019-02-18	3.5% & 4.0%Void Percent(Left Back) : 0.0000 Void Percent(Left Front) : 0.0000 Void Percent(Right Back) : 0.0000 Void Percent(Right Front) : 0.0000	14600	50	-0.673684	-0.772363	-0.904723	-1.00485	-0.903351	-0.763397	-0.688569	-0.559257	-0.45339	-0.311429	-0.610108	-0.730555	-0.547827	-0.52291	-0.556158	-0.497002	-1.16398	-0.785851	-0.860374	-0.998245	-1.21628	-1.11341
17	Project Name	JAZ	2	Lab Number	Project Engineer	Asphalt Grade	PU	Pit Source	xuxiuquan	52	50		20	4000	50	16000	50	0	50	0	50	0	20000	2019-02-18	3.5% & 4.0%Void Percent(Left Back) : 0.0000 Void Percent(Left Front) : 0.0000 Void Percent(Right Back) : 0.0000 Void Percent(Right Front) : 0.0000	14650	50	-0.673684	-0.783488	-0.904723	-0.993673	-0.892226	-0.763397	-0.710311	-0.559257	-0.463804	-0.331699	-0.610108	-0.730364	-0.522961	-0.510972	-0.54483	-0.46515	-1.15387	-0.775868	-0.870941	-0.998245	-1.22829	-1.1258
17	Project Name	JAZ	2	Lab Number	Project Engineer	Asphalt Grade	PU	Pit Source	xuxiuquan	52	50		20	4000	50	16000	50	0	50	0	50	0	20000	2019-02-18	3.5% & 4.0%Void Percent(Left Back) : 0.0000 Void Percent(Left Front) : 0.0000 Void Percent(Right Back) : 0.0000 Void Percent(Right Front) : 0.0000	14700	49.9	-0.695935	-0.783488	-0.915873	-1.016	-0.903351	-0.785419	-0.721208	-0.5699	-0.474243	-0.301295	-0.610108	-0.744004	-0.560273	-0.52291	-0.567538	-0.475742	-1.16398	-0.775868	-0.860374	-0.998245	-1.21628	-1.11341
17	Project Name	JAZ	2	Lab Number	Project Engineer	Asphalt Grade	PU	Pit Source	xuxiuquan	52	50		20	4000	50	16000	50	0	50	0	50	0	20000	2019-02-18	3.5% & 4.0%Void Percent(Left Back) : 0.0000 Void Percent(Left Front) : 0.0000 Void Percent(Right Back) : 0.0000 Void Percent(Right Front) : 0.0000	14750	49.8	-0.673684	-0.772363	-0.904723	-1.016	-0.869975	-0.752373	-0.710311	-0.5699	-0.463804	-0.301295	-0.610108	-0.738607	-0.547827	-0.52291	-0.522199	-0.475742	-1.15387	-0.785851	-0.881507	-1.00955	-1.22829	-1.11341
17	Project Name	JAZ	2	Lab Number	Project Engineer	Asphalt Grade	PU	Pit Source	xuxiuquan	52	50		20	4000	50	16000	50	0	50	0	50	0	20000	2019-02-18	3.5% & 4.0%Void Percent(Left Back) : 0.0000 Void Percent(Left Front) : 0.0000 Void Percent(Right Back) : 0.0000 Void Percent(Right Front) : 0.0000	14800	49.9	-0.673684	-0.761238	-0.893597	-1.016	-0.903351	-0.785419	-0.688569	-0.559257	-0.474243	-0.331699	-0.610108	-0.735775	-0.522961	-0.510972	-0.533502	-0.507644	-1.16398	-0.785851	-0.860374	-1.00955	-1.21628	-1.11341
17	Project Name	JAZ	2	Lab Number	Project Engineer	Asphalt Grade	PU	Pit Source	xuxiuquan	52	50		20	4000	50	16000	50	0	50	0	50	0	20000	2019-02-18	3.5% & 4.0%Void Percent(Left Back) : 0.0000 Void Percent(Left Front) : 0.0000 Void Percent(Right Back) : 0.0000 Void Percent(Right Front) : 0.0000	14850	50	-0.662559	-0.772363	-0.893597	-0.982523	-0.903351	-0.763397	-0.710311	-0.5699	-0.45339	-0.311429	-0.599618	-0.724853	-0.51054	-0.546837	-0.522199	-0.46515	-1.16398	-0.785851	-0.870941	-0.975665	-1.24033	-1.11341
17	Project Name	JAZ	2	Lab Number	Project Engineer	Asphalt Grade	PU	Pit Source	xuxiuquan	52	50		20	4000	50	16000	50	0	50	0	50	0	20000	2019-02-18	3.5% & 4.0%Void Percent(Left Back) : 0.0000 Void Percent(Left Front) : 0.0000 Void Percent(Right Back) : 0.0000 Void Percent(Right Front) : 0.0000	14900	50	-0.684809	-0.761238	-0.893597	-1.00485	-0.903351	-0.785419	-0.710311	-0.5699	-0.45339	-0.281051	-0.589153	-0.730434	-0.547827	-0.510972	-0.556158	-0.497002	-1.17411	-0.805866	-0.892099	-0.975665	-1.22829	-1.11341
17	Project Name	JAZ	2	Lab Number	Project Engineer	Asphalt Grade	PU	Pit Source	xuxiuquan	52	50		20	4000	50	16000	50	0	50	0	50	0	20000	2019-02-18	3.5% & 4.0%Void Percent(Left Back) : 0.0000 Void Percent(Left Front) : 0.0000 Void Percent(Right Back) : 0.0000 Void Percent(Right Front) : 0.0000	14950	49.8	-0.662559	-0.783488	-0.882447	-1.00485	-0.892226	-0.785419	-0.688569	-0.580568	-0.463804	-0.311429	-0.620573	-0.732917	-0.51054	-0.546837	-0.522199	-0.497002	-1.16398	-0.775868	-0.881507	-1.00955	-1.24033	-1.1258
17	Project Name	JAZ	2	Lab Number	Project Engineer	Asphalt Grade	PU	Pit Source	xuxiuquan	52	50		20	4000	50	16000	50	0	50	0	50	0	20000	2019-02-18	3.5% & 4.0%Void Percent(Left Back) : 0.0000 Void Percent(Left Front) : 0.0000 Void Percent(Right Back) : 0.0000 Void Percent(Right Front) : 0.0000	15000	49.8	-0.662559	-0.772363	-0.893597	-0.982523	-0.892226	-0.763397	-0.666826	-0.559257	-0.432587	-0.270942	-0.578688	-0.716991	-0.522961	-0.52291	-0.522199	-0.46515	-1.15387	-0.785851	-0.881507	-0.998245	-1.21628	-1.11341
17	Project Name	JAZ	2	Lab Number	Project Engineer	Asphalt Grade	PU	Pit Source	xuxiuquan	52	50		20	4000	50	16000	50	0	50	0	50	0	20000	2019-02-18	3.5% & 4.0%Void Percent(Left Back) : 0.0000 Void Percent(Left Front) : 0.0000 Void Percent(Right Back) : 0.0000 Void Percent(Right Front) : 0.0000	15050	50	-0.673684	-0.772363	-0.904723	-0.971372	-0.881101	-0.785419	-0.677697	-0.537921	-0.45339	-0.301295	-0.599618	-0.716851	-0.51054	-0.52291	-0.54483	-0.444017	-1.14379	-0.805866	-0.881507	-0.975665	-1.22829	-1.13817
17	Project Name	JAZ	2	Lab Number	Project Engineer	Asphalt Grade	PU	Pit Source	xuxiuquan	52	50		20	4000	50	16000	50	0	50	0	50	0	20000	2019-02-18	3.5% & 4.0%Void Percent(Left Back) : 0.0000 Void Percent(Left Front) : 0.0000 Void Percent(Right Back) : 0.0000 Void Percent(Right Front) : 0.0000	15100	50	-0.695935	-0.761238	-0.893597	-0.982523	-0.903351	-0.796442	-0.688569	-0.580568	-0.442976	-0.281051	-0.599618	-0.724916	-0.547827	-0.52291	-0.499618	-0.46515	-1.16398	-0.785851	-0.892099	-0.998245	-1.24033	-1.1258
17	Project Name	JAZ	2	Lab Number	Project Engineer	Asphalt Grade	PU	Pit Source	xuxiuquan	52	50		20	4000	50	16000	50	0	50	0	50	0	20000	2019-02-18	3.5% & 4.0%Void Percent(Left Back) : 0.0000 Void Percent(Left Front) : 0.0000 Void Percent(Right Back) : 0.0000 Void Percent(Right Front) : 0.0000	15150	50	-0.662559	-0.772363	-0.904723	-0.949071	-0.869975	-0.785419	-0.688569	-0.5699	-0.45339	-0.281051	-0.599618	-0.719271	-0.522961	-0.52291	-0.522199	-0.454584	-1.15387	-0.815924	-0.892099	-1.00955	-1.21628	-1.1258
17	Project Name	JAZ	2	Lab Number	Project Engineer	Asphalt Grade	PU	Pit Source	xuxiuquan	52	50		20	4000	50	16000	50	0	50	0	50	0	20000	2019-02-18	3.5% & 4.0%Void Percent(Left Back) : 0.0000 Void Percent(Left Front) : 0.0000 Void Percent(Right Back) : 0.0000 Void Percent(Right Front) : 0.0000	15200	49.7	-0.684809	-0.783488	-0.882447	-0.993673	-0.892226	-0.796442	-0.677697	-0.580568	-0.474243	-0.321564	-0.610108	-0.732733	-0.547827	-0.510972	-0.522199	-0.454584	-1.15387	-0.805866	-0.881507	-1.00955	-1.21628	-1.1258
17	Project Name	JAZ	2	Lab Number	Project Engineer	Asphalt Grade	PU	Pit Source	xuxiuquan	52	50		20	4000	50	16000	50	0	50	0	50	0	20000	2019-02-18	3.5% & 4.0%Void Percent(Left Back) : 0.0000 Void Percent(Left Front) : 0.0000 Void Percent(Right Back) : 0.0000 Void Percent(Right Front) : 0.0000	15250	49.8	-0.695935	-0.772363	-0.893597	-1.00485	-0.892226	-0.796442	-0.710311	-0.580568	-0.45339	-0.301295	-0.578688	-0.733101	-0.547827	-0.510972	-0.54483	-0.475742	-1.16398	-0.805866	-0.870941	-1.00955	-1.22829	-1.10106
17	Project Name	JAZ	2	Lab Number	Project Engineer	Asphalt Grade	PU	Pit Source	xuxiuquan	52	50		20	4000	50	16000	50	0	50	0	50	0	20000	2019-02-18	3.5% & 4.0%Void Percent(Left Back) : 0.0000 Void Percent(Left Front) : 0.0000 Void Percent(Right Back) : 0.0000 Void Percent(Right Front) : 0.0000	15300	50.1	-0.684809	-0.783488	-0.882447	-0.982523	-0.881101	-0.763397	-0.710311	-0.580568	-0.463804	-0.311429	-0.610108	-0.727335	-0.547827	-0.52291	-0.54483	-0.475742	-1.15387	-0.805866	-0.881507	-0.998245	-1.22829	-1.1258
17	Project Name	JAZ	2	Lab Number	Project Engineer	Asphalt Grade	PU	Pit Source	xuxiuquan	52	50		20	4000	50	16000	50	0	50	0	50	0	20000	2019-02-18	3.5% & 4.0%Void Percent(Left Back) : 0.0000 Void Percent(Left Front) : 0.0000 Void Percent(Right Back) : 0.0000 Void Percent(Right Front) : 0.0000	15350	50	-0.684809	-0.783488	-0.882447	-0.993673	-0.892226	-0.741375	-0.677697	-0.527279	-0.432587	-0.260833	-0.578688	-0.708997	-0.547827	-0.499034	-0.522199	-0.497002	-1.17411	-0.785851	-0.892099	-1.02088	-1.2524	-1.1258
17	Project Name	JAZ	2	Lab Number	Project Engineer	Asphalt Grade	PU	Pit Source	xuxiuquan	52	50		20	4000	50	16000	50	0	50	0	50	0	20000	2019-02-18	3.5% & 4.0%Void Percent(Left Back) : 0.0000 Void Percent(Left Front) : 0.0000 Void Percent(Right Back) : 0.0000 Void Percent(Right Front) : 0.0000	15400	49.8	-0.684809	-0.772363	-0.904723	-0.993673	-0.914476	-0.785419	-0.688569	-0.5699	-0.463804	-0.311429	-0.599618	-0.733025	-0.547827	-0.52291	-0.54483	-0.46515	-1.17411	-0.785851	-0.892099	-1.00955	-1.24033	-1.13817
17	Project Name	JAZ	2	Lab Number	Project Engineer	Asphalt Grade	PU	Pit Source	xuxiuquan	52	50		20	4000	50	16000	50	0	50	0	50	0	20000	2019-02-18	3.5% & 4.0%Void Percent(Left Back) : 0.0000 Void Percent(Left Front) : 0.0000 Void Percent(Right Back) : 0.0000 Void Percent(Right Front) : 0.0000	15450	49.7	-0.684809	-0.772363	-0.893597	-1.00485	-0.892226	-0.785419	-0.710311	-0.591261	-0.474243	-0.311429	-0.599618	-0.740988	-0.547827	-0.52291	-0.54483	-0.475742	-1.16398	-0.805866	-0.881507	-1.02088	-1.22829	-1.1258
17	Project Name	JAZ	2	Lab Number	Project Engineer	Asphalt Grade	PU	Pit Source	xuxiuquan	52	50		20	4000	50	16000	50	0	50	0	50	0	20000	2019-02-18	3.5% & 4.0%Void Percent(Left Back) : 0.0000 Void Percent(Left Front) : 0.0000 Void Percent(Right Back) : 0.0000 Void Percent(Right Front) : 0.0000	15500	49.7	-0.673684	-0.783488	-0.893597	-0.949071	-0.881101	-0.785419	-0.688569	-0.591261	-0.474243	-0.301295	-0.620573	-0.727043	-0.547827	-0.546837	-0.54483	-0.433502	-1.15387	-0.785851	-0.892099	-1.02088	-1.2524	-1.13817
17	Project Name	JAZ	2	Lab Number	Project Engineer	Asphalt Grade	PU	Pit Source	xuxiuquan	52	50		20	4000	50	16000	50	0	50	0	50	0	20000	2019-02-18	3.5% & 4.0%Void Percent(Left Back) : 0.0000 Void Percent(Left Front) : 0.0000 Void Percent(Right Back) : 0.0000 Void Percent(Right Front) : 0.0000	15550	50	-0.662559	-0.783488	-0.893597	-0.993673	-0.892226	-0.752373	-0.666826	-0.559257	-0.422173	-0.281051	-0.589153	-0.717175	-0.522961	-0.52291	-0.54483	-0.497002	-1.17411	-0.805866	-0.881507	-1.02088	-1.2524	-1.1258
17	Project Name	JAZ	2	Lab Number	Project Engineer	Asphalt Grade	PU	Pit Source	xuxiuquan	52	50		20	4000	50	16000	50	0	50	0	50	0	20000	2019-02-18	3.5% & 4.0%Void Percent(Left Back) : 0.0000 Void Percent(Left Front) : 0.0000 Void Percent(Right Back) : 0.0000 Void Percent(Right Front) : 0.0000	15600	49.8	-0.684809	-0.783488	-0.893597	-1.00485	-0.903351	-0.785419	-0.688569	-0.559257	-0.463804	-0.311429	-0.610108	-0.730377	-0.560273	-0.52291	-0.54483	-0.46515	-1.16398	-0.815924	-0.892099	-1.02088	-1.27653	-1.1258
17	Project Name	JAZ	2	Lab Number	Project Engineer	Asphalt Grade	PU	Pit Source	xuxiuquan	52	50		20	4000	50	16000	50	0	50	0	50	0	20000	2019-02-18	3.5% & 4.0%Void Percent(Left Back) : 0.0000 Void Percent(Left Front) : 0.0000 Void Percent(Right Back) : 0.0000 Void Percent(Right Front) : 0.0000	15650	49.9	-0.673684	-0.772363	-0.893597	-0.982523	-0.914476	-0.785419	-0.732079	-0.580568	-0.463804	-0.281051	-0.620573	-0.730123	-0.547827	-0.52291	-0.499618	-0.475742	-1.17411	-0.805866	-0.913359	-1.02088	-1.28862	-1.1258
17	Project Name	JAZ	2	Lab Number	Project Engineer	Asphalt Grade	PU	Pit Source	xuxiuquan	52	50		20	4000	50	16000	50	0	50	0	50	0	20000	2019-02-18	3.5% & 4.0%Void Percent(Left Back) : 0.0000 Void Percent(Left Front) : 0.0000 Void Percent(Right Back) : 0.0000 Void Percent(Right Front) : 0.0000	15700	49.8	-0.684809	-0.772363	-0.893597	-0.971372	-0.903351	-0.796442	-0.721208	-0.580568	-0.45339	-0.281051	-0.631063	-0.724732	-0.547827	-0.52291	-0.522199	-0.46515	-1.16398	-0.805866	-0.892099	-1.02088	-1.2524	-1.1258
17	Project Name	JAZ	2	Lab Number	Project Engineer	Asphalt Grade	PU	Pit Source	xuxiuquan	52	50		20	4000	50	16000	50	0	50	0	50	0	20000	2019-02-18	3.5% & 4.0%Void Percent(Left Back) : 0.0000 Void Percent(Left Front) : 0.0000 Void Percent(Right Back) : 0.0000 Void Percent(Right Front) : 0.0000	15750	50	-0.684809	-0.783488	-0.893597	-1.016	-0.892226	-0.752373	-0.666826	-0.5699	-0.432587	-0.281051	-0.599618	-0.728021	-0.547827	-0.52291	-0.556158	-0.497002	-1.16398	-0.825983	-0.913359	-1.02088	-1.2524	-1.13817
17	Project Name	JAZ	2	Lab Number	Project Engineer	Asphalt Grade	PU	Pit Source	xuxiuquan	52	50		20	4000	50	16000	50	0	50	0	50	0	20000	2019-02-18	3.5% & 4.0%Void Percent(Left Back) : 0.0000 Void Percent(Left Front) : 0.0000 Void Percent(Right Back) : 0.0000 Void Percent(Right Front) : 0.0000	15800	50	-0.684809	-0.772363	-0.904723	-0.949071	-0.881101	-0.796442	-0.688569	-0.580568	-0.463804	-0.311429	-0.610108	-0.724541	-0.547827	-0.546837	-0.522199	-0.433502	-1.15387	-0.805866	-0.881507	-1.02088	-1.27653	-1.13817
17	Project Name	JAZ	2	Lab Number	Project Engineer	Asphalt Grade	PU	Pit Source	xuxiuquan	52	50		20	4000	50	16000	50	0	50	0	50	0	20000	2019-02-18	3.5% & 4.0%Void Percent(Left Back) : 0.0000 Void Percent(Left Front) : 0.0000 Void Percent(Right Back) : 0.0000 Void Percent(Right Front) : 0.0000	15850	49.8	-0.684809	-0.772363	-0.904723	-0.92677	-0.836625	-0.763397	-0.666826	-0.580568	-0.432587	-0.270942	-0.599618	-0.711162	-0.547827	-0.52291	-0.54483	-0.422961	-1.13373	-0.805866	-0.881507	-1.03221	-1.24033	-1.13817
17	Project Name	JAZ	2	Lab Number	Project Engineer	Asphalt Grade	PU	Pit Source	xuxiuquan	52	50		20	4000	50	16000	50	0	50	0	50	0	20000	2019-02-18	3.5% & 4.0%Void Percent(Left Back) : 0.0000 Void Percent(Left Front) : 0.0000 Void Percent(Right Back) : 0.0000 Void Percent(Right Front) : 0.0000	15900	49.8	-0.695935	-0.772363	-0.893597	-0.971372	-0.892226	-0.785419	-0.688569	-0.580568	-0.442976	-0.281051	-0.620573	-0.722128	-0.560273	-0.52291	-0.533502	-0.46515	-1.16398	-0.805866	-0.924001	-1.02088	-1.27653	-1.13817
17	Project Name	JAZ	2	Lab Number	Project Engineer	Asphalt Grade	PU	Pit Source	xuxiuquan	52	50		20	4000	50	16000	50	0	50	0	50	0	20000	2019-02-18	3.5% & 4.0%Void Percent(Left Back) : 0.0000 Void Percent(Left Front) : 0.0000 Void Percent(Right Back) : 0.0000 Void Percent(Right Front) : 0.0000	15950	50	-0.684809	-0.772363	-0.893597	-1.00485	-0.914476	-0.807466	-0.721208	-0.580568	-0.45339	-0.311429	-0.599618	-0.733101	-0.547827	-0.52291	-0.54483	-0.46515	-1.18428	-0.805866	-0.892099	-1.03221	-1.2524	-1.1258
17	Project Name	JAZ	2	Lab Number	Project Engineer	Asphalt Grade	PU	Pit Source	xuxiuquan	52	50		20	4000	50	16000	50	0	50	0	50	0	20000	2019-02-18	3.5% & 4.0%Void Percent(Left Back) : 0.0000 Void Percent(Left Front) : 0.0000 Void Percent(Right Back) : 0.0000 Void Percent(Right Front) : 0.0000	16000	50	-0.684809	-0.794639	-0.893597	-0.949071	-0.869975	-0.796442	-0.721208	-0.580568	-0.463804	-0.321564	-0.610108	-0.72176	-0.547827	-0.52291	-0.54483	-0.444017	-1.14379	-0.805866	-0.892099	-1.02088	-1.2524	-1.15057
17	Project Name	JAZ	2	Lab Number	Project Engineer	Asphalt Grade	PU	Pit Source	xuxiuquan	52	50		20	4000	50	16000	50	0	50	0	50	0	20000	2019-02-18	3.5% & 4.0%Void Percent(Left Back) : 0.0000 Void Percent(Left Front) : 0.0000 Void Percent(Right Back) : 0.0000 Void Percent(Right Front) : 0.0000	16050	49.9	-0.684809	-0.772363	-0.904723	-1.00485	-0.947877	-0.807466	-0.721208	-0.591261	-0.463804	-0.311429	-0.599618	-0.741159	-0.547827	-0.558825	-0.54483	-0.475742	-1.17411	-0.805866	-0.913359	-1.03221	-1.2524	-1.1258
17	Project Name	JAZ	2	Lab Number	Project Engineer	Asphalt Grade	PU	Pit Source	xuxiuquan	52	50		20	4000	50	16000	50	0	50	0	50	0	20000	2019-02-18	3.5% & 4.0%Void Percent(Left Back) : 0.0000 Void Percent(Left Front) : 0.0000 Void Percent(Right Back) : 0.0000 Void Percent(Right Front) : 0.0000	16100	49.7	-0.684809	-0.794639	-0.893597	-1.00485	-0.925627	-0.807466	-0.710311	-0.580568	-0.463804	-0.301295	-0.599618	-0.735705	-0.547827	-0.546837	-0.556158	-0.497002	-1.17411	-0.815924	-0.913359	-1.02088	-1.27653	-1.1258
17	Project Name	JAZ	2	Lab Number	Project Engineer	Asphalt Grade	PU	Pit Source	xuxiuquan	52	50		20	4000	50	16000	50	0	50	0	50	0	20000	2019-02-18	3.5% & 4.0%Void Percent(Left Back) : 0.0000 Void Percent(Left Front) : 0.0000 Void Percent(Right Back) : 0.0000 Void Percent(Right Front) : 0.0000	16150	49.8	-0.673684	-0.783488	-0.893597	-1.00485	-0.925627	-0.785419	-0.710311	-0.5699	-0.45339	-0.311429	-0.589153	-0.730434	-0.522961	-0.52291	-0.556158	-0.475742	-1.17411	-0.815924	-0.913359	-1.02088	-1.2524	-1.13817
17	Project Name	JAZ	2	Lab Number	Project Engineer	Asphalt Grade	PU	Pit Source	xuxiuquan	52	50		20	4000	50	16000	50	0	50	0	50	0	20000	2019-02-18	3.5% & 4.0%Void Percent(Left Back) : 0.0000 Void Percent(Left Front) : 0.0000 Void Percent(Right Back) : 0.0000 Void Percent(Right Front) : 0.0000	16200	50	-0.662559	-0.772363	-0.904723	-1.016	-0.903351	-0.785419	-0.721208	-0.580568	-0.474243	-0.311429	-0.589153	-0.743883	-0.522961	-0.52291	-0.578891	-0.497002	-1.16398	-0.805866	-0.913359	-1.02088	-1.2524	-1.13817
17	Project Name	JAZ	2	Lab Number	Project Engineer	Asphalt Grade	PU	Pit Source	xuxiuquan	52	50		20	4000	50	16000	50	0	50	0	50	0	20000	2019-02-18	3.5% & 4.0%Void Percent(Left Back) : 0.0000 Void Percent(Left Front) : 0.0000 Void Percent(Right Back) : 0.0000 Void Percent(Right Front) : 0.0000	16250	50	-0.673684	-0.783488	-0.904723	-1.016	-0.892226	-0.785419	-0.666826	-0.580568	-0.463804	-0.270942	-0.557759	-0.741274	-0.522961	-0.558825	-0.54483	-0.497002	-1.16398	-0.815924	-0.913359	-1.03221	-1.28862	-1.1258
17	Project Name	JAZ	2	Lab Number	Project Engineer	Asphalt Grade	PU	Pit Source	xuxiuquan	52	50		20	4000	50	16000	50	0	50	0	50	0	20000	2019-02-18	3.5% & 4.0%Void Percent(Left Back) : 0.0000 Void Percent(Left Front) : 0.0000 Void Percent(Right Back) : 0.0000 Void Percent(Right Front) : 0.0000	16300	49.9	-0.673684	-0.772363	-0.893597	-0.993673	-0.903351	-0.785419	-0.732079	-0.580568	-0.442976	-0.311429	-0.589153	-0.727704	-0.522961	-0.546837	-0.533502	-0.46515	-1.17411	-0.805866	-0.924001	-1.00955	-1.2524	-1.13817
17	Project Name	JAZ	2	Lab Number	Project Engineer	Asphalt Grade	PU	Pit Source	xuxiuquan	52	50		20	4000	50	16000	50	0	50	0	50	0	20000	2019-02-18	3.5% & 4.0%Void Percent(Left Back) : 0.0000 Void Percent(Left Front) : 0.0000 Void Percent(Right Back) : 0.0000 Void Percent(Right Front) : 0.0000	16350	49.8	-0.684809	-0.772363	-0.893597	-1.00485	-0.903351	-0.81849	-0.721208	-0.580568	-0.463804	-0.311429	-0.589153	-0.735705	-0.522961	-0.52291	-0.556158	-0.507644	-1.17411	-0.805866	-0.892099	-1.02088	-1.2524	-1.1258
17	Project Name	JAZ	2	Lab Number	Project Engineer	Asphalt Grade	PU	Pit Source	xuxiuquan	52	50		20	4000	50	16000	50	0	50	0	50	0	20000	2019-02-18	3.5% & 4.0%Void Percent(Left Back) : 0.0000 Void Percent(Left Front) : 0.0000 Void Percent(Right Back) : 0.0000 Void Percent(Right Front) : 0.0000	16400	50	-0.673684	-0.783488	-0.904723	-1.00485	-0.892226	-0.785419	-0.732079	-0.5699	-0.463804	-0.301295	-0.578688	-0.735819	-0.522961	-0.546837	-0.567538	-0.46515	-1.15387	-0.805866	-0.881507	-1.02088	-1.2524	-1.1258
17	Project Name	JAZ	2	Lab Number	Project Engineer	Asphalt Grade	PU	Pit Source	xuxiuquan	52	50		20	4000	50	16000	50	0	50	0	50	0	20000	2019-02-18	3.5% & 4.0%Void Percent(Left Back) : 0.0000 Void Percent(Left Front) : 0.0000 Void Percent(Right Back) : 0.0000 Void Percent(Right Front) : 0.0000	16450	50	-0.684809	-0.794639	-0.893597	-1.016	-0.914476	-0.785419	-0.732079	-0.591261	-0.484657	-0.311429	-0.589153	-0.746379	-0.522961	-0.52291	-0.567538	-0.507644	-1.18428	-0.815924	-0.913359	-1.03221	-1.27653	-1.1258
17	Project Name	JAZ	2	Lab Number	Project Engineer	Asphalt Grade	PU	Pit Source	xuxiuquan	52	50		20	4000	50	16000	50	0	50	0	50	0	20000	2019-02-18	3.5% & 4.0%Void Percent(Left Back) : 0.0000 Void Percent(Left Front) : 0.0000 Void Percent(Right Back) : 0.0000 Void Percent(Right Front) : 0.0000	16500	49.9	-0.684809	-0.783488	-0.915873	-0.971372	-0.914476	-0.807466	-0.721208	-0.559257	-0.45339	-0.311429	-0.599618	-0.724973	-0.547827	-0.558825	-0.54483	-0.475742	-1.17411	-0.805866	-0.913359	-1.02088	-1.2524	-1.13817
17	Project Name	JAZ	2	Lab Number	Project Engineer	Asphalt Grade	PU	Pit Source	xuxiuquan	52	50		20	4000	50	16000	50	0	50	0	50	0	20000	2019-02-18	3.5% & 4.0%Void Percent(Left Back) : 0.0000 Void Percent(Left Front) : 0.0000 Void Percent(Right Back) : 0.0000 Void Percent(Right Front) : 0.0000	16550	49.8	-0.673684	-0.783488	-0.904723	-1.02718	-0.914476	-0.785419	-0.721208	-0.5699	-0.474243	-0.311429	-0.589153	-0.74401	-0.522961	-0.52291	-0.567538	-0.518338	-1.17411	-0.815924	-0.913359	-1.02088	-1.2524	-1.11341
17	Project Name	JAZ	2	Lab Number	Project Engineer	Asphalt Grade	PU	Pit Source	xuxiuquan	52	50		20	4000	50	16000	50	0	50	0	50	0	20000	2019-02-18	3.5% & 4.0%Void Percent(Left Back) : 0.0000 Void Percent(Left Front) : 0.0000 Void Percent(Right Back) : 0.0000 Void Percent(Right Front) : 0.0000	16600	49.8	-0.662559	-0.772363	-0.893597	-0.982523	-0.925627	-0.785419	-0.732079	-0.5699	-0.45339	-0.311429	-0.578688	-0.724853	-0.51054	-0.546837	-0.54483	-0.46515	-1.18428	-0.805866	-0.913359	-1.02088	-1.2524	-1.13817
17	Project Name	JAZ	2	Lab Number	Project Engineer	Asphalt Grade	PU	Pit Source	xuxiuquan	52	50		20	4000	50	16000	50	0	50	0	50	0	20000	2019-02-18	3.5% & 4.0%Void Percent(Left Back) : 0.0000 Void Percent(Left Front) : 0.0000 Void Percent(Right Back) : 0.0000 Void Percent(Right Front) : 0.0000	16650	50	-0.673684	-0.794639	-0.893597	-1.00485	-0.914476	-0.807466	-0.710311	-0.591261	-0.463804	-0.311429	-0.589153	-0.738378	-0.522961	-0.546837	-0.54483	-0.497002	-1.18428	-0.805866	-0.913359	-1.03221	-1.27653	-1.1258
17	Project Name	JAZ	2	Lab Number	Project Engineer	Asphalt Grade	PU	Pit Source	xuxiuquan	52	50		20	4000	50	16000	50	0	50	0	50	0	20000	2019-02-18	3.5% & 4.0%Void Percent(Left Back) : 0.0000 Void Percent(Left Front) : 0.0000 Void Percent(Right Back) : 0.0000 Void Percent(Right Front) : 0.0000	16700	49.9	-0.673684	-0.772363	-0.893597	-0.993673	-0.914476	-0.807466	-0.721208	-0.5699	-0.45339	-0.311429	-0.589153	-0.72764	-0.522961	-0.546837	-0.533502	-0.475742	-1.18428	-0.815924	-0.913359	-1.00955	-1.24033	-1.13817
17	Project Name	JAZ	2	Lab Number	Project Engineer	Asphalt Grade	PU	Pit Source	xuxiuquan	52	50		20	4000	50	16000	50	0	50	0	50	0	20000	2019-02-18	3.5% & 4.0%Void Percent(Left Back) : 0.0000 Void Percent(Left Front) : 0.0000 Void Percent(Right Back) : 0.0000 Void Percent(Right Front) : 0.0000	16750	49.7	-0.673684	-0.772363	-0.893597	-0.949071	-0.892226	-0.785419	-0.721208	-0.5699	-0.45339	-0.301295	-0.578688	-0.71649	-0.547827	-0.52291	-0.522199	-0.444017	-1.17411	-0.815924	-0.913359	-1.02088	-1.27653	-1.13817
17	Project Name	JAZ	2	Lab Number	Project Engineer	Asphalt Grade	PU	Pit Source	xuxiuquan	52	50		20	4000	50	16000	50	0	50	0	50	0	20000	2019-02-18	3.5% & 4.0%Void Percent(Left Back) : 0.0000 Void Percent(Left Front) : 0.0000 Void Percent(Right Back) : 0.0000 Void Percent(Right Front) : 0.0000	16800	49.9	-0.673684	-0.783488	-0.904723	-0.993673	-0.892226	-0.752373	-0.688569	-0.580568	-0.45339	-0.301295	-0.578688	-0.733088	-0.547827	-0.546837	-0.556158	-0.475742	-1.17411	-0.825983	-0.913359	-1.03221	-1.27653	-1.1258
17	Project Name	JAZ	2	Lab Number	Project Engineer	Asphalt Grade	PU	Pit Source	xuxiuquan	52	50		20	4000	50	16000	50	0	50	0	50	0	20000	2019-02-18	3.5% & 4.0%Void Percent(Left Back) : 0.0000 Void Percent(Left Front) : 0.0000 Void Percent(Right Back) : 0.0000 Void Percent(Right Front) : 0.0000	16850	50	-0.662559	-0.783488	-0.904723	-1.016	-0.914476	-0.785419	-0.721208	-0.5699	-0.474243	-0.311429	-0.578688	-0.741216	-0.522961	-0.546837	-0.533502	-0.497002	-1.18428	-0.815924	-0.913359	-1.03221	-1.27653	-1.13817
17	Project Name	JAZ	2	Lab Number	Project Engineer	Asphalt Grade	PU	Pit Source	xuxiuquan	52	50		20	4000	50	16000	50	0	50	0	50	0	20000	2019-02-18	3.5% & 4.0%Void Percent(Left Back) : 0.0000 Void Percent(Left Front) : 0.0000 Void Percent(Right Back) : 0.0000 Void Percent(Right Front) : 0.0000	16900	49.9	-0.673684	-0.772363	-0.904723	-0.993673	-0.914476	-0.81849	-0.710311	-0.5699	-0.45339	-0.321564	-0.589153	-0.730421	-0.522961	-0.558825	-0.499618	-0.46515	-1.18428	-0.805866	-0.913359	-1.00955	-1.28862	-1.13817
17	Project Name	JAZ	2	Lab Number	Project Engineer	Asphalt Grade	PU	Pit Source	xuxiuquan	52	50		20	4000	50	16000	50	0	50	0	50	0	20000	2019-02-18	3.5% & 4.0%Void Percent(Left Back) : 0.0000 Void Percent(Left Front) : 0.0000 Void Percent(Right Back) : 0.0000 Void Percent(Right Front) : 0.0000	16950	49.7	-0.673684	-0.772363	-0.904723	-0.982523	-0.881101	-0.81849	-0.732079	-0.5699	-0.45339	-0.311429	-0.589153	-0.727634	-0.51054	-0.546837	-0.556158	-0.46515	-1.18428	-0.815924	-0.913359	-1.02088	-1.27653	-1.13817
17	Project Name	JAZ	2	Lab Number	Project Engineer	Asphalt Grade	PU	Pit Source	xuxiuquan	52	50		20	4000	50	16000	50	0	50	0	50	0	20000	2019-02-18	3.5% & 4.0%Void Percent(Left Back) : 0.0000 Void Percent(Left Front) : 0.0000 Void Percent(Right Back) : 0.0000 Void Percent(Right Front) : 0.0000	17000	49.9	-0.673684	-0.772363	-0.882447	-0.949071	-0.881101	-0.796442	-0.710311	-0.580568	-0.45339	-0.311429	-0.599618	-0.716369	-0.522961	-0.558825	-0.522199	-0.444017	-1.16398	-0.805866	-0.913359	-1.02088	-1.24033	-1.13817
17	Project Name	JAZ	2	Lab Number	Project Engineer	Asphalt Grade	PU	Pit Source	xuxiuquan	52	50		20	4000	50	16000	50	0	50	0	50	0	20000	2019-02-18	3.5% & 4.0%Void Percent(Left Back) : 0.0000 Void Percent(Left Front) : 0.0000 Void Percent(Right Back) : 0.0000 Void Percent(Right Front) : 0.0000	17050	50	-0.662559	-0.772363	-0.893597	-1.00485	-0.925627	-0.807466	-0.721208	-0.580568	-0.474243	-0.321564	-0.589153	-0.738315	-0.522961	-0.52291	-0.54483	-0.497002	-1.18428	-0.815924	-0.892099	-1.04358	-1.2524	-1.13817
17	Project Name	JAZ	2	Lab Number	Project Engineer	Asphalt Grade	PU	Pit Source	xuxiuquan	52	50		20	4000	50	16000	50	0	50	0	50	0	20000	2019-02-18	3.5% & 4.0%Void Percent(Left Back) : 0.0000 Void Percent(Left Front) : 0.0000 Void Percent(Right Back) : 0.0000 Void Percent(Right Front) : 0.0000	17100	49.9	-0.684809	-0.783488	-0.893597	-1.00485	-0.914476	-0.807466	-0.710311	-0.5699	-0.45339	-0.311429	-0.557759	-0.730434	-0.560273	-0.52291	-0.567538	-0.497002	-1.18428	-0.805866	-0.881507	-1.02088	-1.2524	-1.13817
17	Project Name	JAZ	2	Lab Number	Project Engineer	Asphalt Grade	PU	Pit Source	xuxiuquan	52	50		20	4000	50	16000	50	0	50	0	50	0	20000	2019-02-18	3.5% & 4.0%Void Percent(Left Back) : 0.0000 Void Percent(Left Front) : 0.0000 Void Percent(Right Back) : 0.0000 Void Percent(Right Front) : 0.0000	17150	49.7	-0.673684	-0.772363	-0.893597	-0.982523	-0.903351	-0.796442	-0.688569	-0.537921	-0.432587	-0.260833	-0.610108	-0.711657	-0.547827	-0.52291	-0.533502	-0.46515	-1.18428	-0.805866	-0.924001	-1.02088	-1.27653	-1.13817
17	Project Name	JAZ	2	Lab Number	Project Engineer	Asphalt Grade	PU	Pit Source	xuxiuquan	52	50		20	4000	50	16000	50	0	50	0	50	0	20000	2019-02-18	3.5% & 4.0%Void Percent(Left Back) : 0.0000 Void Percent(Left Front) : 0.0000 Void Percent(Right Back) : 0.0000 Void Percent(Right Front) : 0.0000	17200	49.8	-0.673684	-0.772363	-0.882447	-1.00485	-0.914476	-0.796442	-0.710311	-0.591261	-0.463804	-0.301295	-0.589153	-0.73559	-0.522961	-0.52291	-0.54483	-0.497002	-1.17411	-0.805866	-0.892099	-1.05494	-1.28862	-1.13817
17	Project Name	JAZ	2	Lab Number	Project Engineer	Asphalt Grade	PU	Pit Source	xuxiuquan	52	50		20	4000	50	16000	50	0	50	0	50	0	20000	2019-02-18	3.5% & 4.0%Void Percent(Left Back) : 0.0000 Void Percent(Left Front) : 0.0000 Void Percent(Right Back) : 0.0000 Void Percent(Right Front) : 0.0000	17250	50	-0.684809	-0.783488	-0.904723	-0.982523	-0.903351	-0.807466	-0.688569	-0.580568	-0.474243	-0.321564	-0.599618	-0.735514	-0.547827	-0.52291	-0.54483	-0.46515	-1.17411	-0.825983	-0.881507	-1.03221	-1.27653	-1.13817
17	Project Name	JAZ	2	Lab Number	Project Engineer	Asphalt Grade	PU	Pit Source	xuxiuquan	52	50		20	4000	50	16000	50	0	50	0	50	0	20000	2019-02-18	3.5% & 4.0%Void Percent(Left Back) : 0.0000 Void Percent(Left Front) : 0.0000 Void Percent(Right Back) : 0.0000 Void Percent(Right Front) : 0.0000	17300	50	-0.684809	-0.772363	-0.904723	-0.982523	-0.892226	-0.807466	-0.721208	-0.559257	-0.474243	-0.321564	-0.610108	-0.730186	-0.547827	-0.546837	-0.54483	-0.475742	-1.18428	-0.815924	-0.913359	-1.02088	-1.24033	-1.13817
17	Project Name	JAZ	2	Lab Number	Project Engineer	Asphalt Grade	PU	Pit Source	xuxiuquan	52	50		20	4000	50	16000	50	0	50	0	50	0	20000	2019-02-18	3.5% & 4.0%Void Percent(Left Back) : 0.0000 Void Percent(Left Front) : 0.0000 Void Percent(Right Back) : 0.0000 Void Percent(Right Front) : 0.0000	17350	49.8	-0.684809	-0.772363	-0.893597	-1.00485	-0.903351	-0.807466	-0.710311	-0.591261	-0.474243	-0.311429	-0.589153	-0.740988	-0.547827	-0.52291	-0.54483	-0.497002	-1.17411	-0.815924	-0.913359	-1.03221	-1.27653	-1.13817
17	Project Name	JAZ	2	Lab Number	Project Engineer	Asphalt Grade	PU	Pit Source	xuxiuquan	52	50		20	4000	50	16000	50	0	50	0	50	0	20000	2019-02-18	3.5% & 4.0%Void Percent(Left Back) : 0.0000 Void Percent(Left Front) : 0.0000 Void Percent(Right Back) : 0.0000 Void Percent(Right Front) : 0.0000	17400	49.7	-0.651434	-0.772363	-0.904723	-0.971372	-0.903351	-0.785419	-0.721208	-0.580568	-0.442976	-0.301295	-0.599618	-0.72491	-0.498119	-0.558825	-0.499618	-0.46515	-1.18428	-0.805866	-0.924001	-1.03221	-1.27653	-1.13817
17	Project Name	JAZ	2	Lab Number	Project Engineer	Asphalt Grade	PU	Pit Source	xuxiuquan	52	50		20	4000	50	16000	50	0	50	0	50	0	20000	2019-02-18	3.5% & 4.0%Void Percent(Left Back) : 0.0000 Void Percent(Left Front) : 0.0000 Void Percent(Right Back) : 0.0000 Void Percent(Right Front) : 0.0000	17450	49.8	-0.662559	-0.783488	-0.893597	-1.02718	-0.914476	-0.785419	-0.710311	-0.580568	-0.45339	-0.321564	-0.589153	-0.738683	-0.522961	-0.558825	-0.54483	-0.497002	-1.18428	-0.815924	-0.892099	-1.04358	-1.27653	-1.15057
17	Project Name	JAZ	2	Lab Number	Project Engineer	Asphalt Grade	PU	Pit Source	xuxiuquan	52	50		20	4000	50	16000	50	0	50	0	50	0	20000	2019-02-18	3.5% & 4.0%Void Percent(Left Back) : 0.0000 Void Percent(Left Front) : 0.0000 Void Percent(Right Back) : 0.0000 Void Percent(Right Front) : 0.0000	17500	49.9	-0.673684	-0.772363	-0.904723	-0.982523	-0.914476	-0.807466	-0.721208	-0.580568	-0.474243	-0.311429	-0.589153	-0.735514	-0.51054	-0.558825	-0.522199	-0.46515	-1.18428	-0.805866	-0.913359	-1.03221	-1.27653	-1.15057
17	Project Name	JAZ	2	Lab Number	Project Engineer	Asphalt Grade	PU	Pit Source	xuxiuquan	52	50		20	4000	50	16000	50	0	50	0	50	0	20000	2019-02-18	3.5% & 4.0%Void Percent(Left Back) : 0.0000 Void Percent(Left Front) : 0.0000 Void Percent(Right Back) : 0.0000 Void Percent(Right Front) : 0.0000	17550	50	-0.662559	-0.772363	-0.893597	-0.982523	-0.925627	-0.807466	-0.732079	-0.580568	-0.474243	-0.321564	-0.599618	-0.732733	-0.51054	-0.558825	-0.522199	-0.475742	-1.18428	-0.825983	-0.913359	-1.04358	-1.27653	-1.15057
17	Project Name	JAZ	2	Lab Number	Project Engineer	Asphalt Grade	PU	Pit Source	xuxiuquan	52	50		20	4000	50	16000	50	0	50	0	50	0	20000	2019-02-18	3.5% & 4.0%Void Percent(Left Back) : 0.0000 Void Percent(Left Front) : 0.0000 Void Percent(Right Back) : 0.0000 Void Percent(Right Front) : 0.0000	17600	49.9	-0.662559	-0.772363	-0.904723	-1.016	-0.914476	-0.796442	-0.710311	-0.580568	-0.484657	-0.321564	-0.599618	-0.746487	-0.522961	-0.558825	-0.533502	-0.497002	-1.18428	-0.825983	-0.913359	-1.05494	-1.27653	-1.15057
17	Project Name	JAZ	2	Lab Number	Project Engineer	Asphalt Grade	PU	Pit Source	xuxiuquan	52	50		20	4000	50	16000	50	0	50	0	50	0	20000	2019-02-18	3.5% & 4.0%Void Percent(Left Back) : 0.0000 Void Percent(Left Front) : 0.0000 Void Percent(Right Back) : 0.0000 Void Percent(Right Front) : 0.0000	17650	49.9	-0.673684	-0.783488	-0.904723	-1.00485	-0.914476	-0.785419	-0.688569	-0.5699	-0.463804	-0.321564	-0.599618	-0.735819	-0.547827	-0.546837	-0.54483	-0.497002	-1.20462	-0.815924	-0.913359	-1.03221	-1.24033	-1.13817
17	Project Name	JAZ	2	Lab Number	Project Engineer	Asphalt Grade	PU	Pit Source	xuxiuquan	52	50		20	4000	50	16000	50	0	50	0	50	0	20000	2019-02-18	3.5% & 4.0%Void Percent(Left Back) : 0.0000 Void Percent(Left Front) : 0.0000 Void Percent(Right Back) : 0.0000 Void Percent(Right Front) : 0.0000	17700	49.9	-0.673684	-0.783488	-0.893597	-1.00485	-0.903351	-0.807466	-0.688569	-0.591261	-0.442976	-0.331699	-0.589153	-0.733171	-0.547827	-0.546837	-0.522199	-0.475742	-1.17411	-0.805866	-0.881507	-1.03221	-1.28862	-1.15057
17	Project Name	JAZ	2	Lab Number	Project Engineer	Asphalt Grade	PU	Pit Source	xuxiuquan	52	50		20	4000	50	16000	50	0	50	0	50	0	20000	2019-02-18	3.5% & 4.0%Void Percent(Left Back) : 0.0000 Void Percent(Left Front) : 0.0000 Void Percent(Right Back) : 0.0000 Void Percent(Right Front) : 0.0000	17750	50	-0.673684	-0.772363	-0.904723	-1.016	-0.914476	-0.796442	-0.732079	-0.591261	-0.463804	-0.331699	-0.610108	-0.743947	-0.51054	-0.558825	-0.556158	-0.497002	-1.18428	-0.805866	-0.881507	-1.02088	-1.27653	-1.16299
17	Project Name	JAZ	2	Lab Number	Project Engineer	Asphalt Grade	PU	Pit Source	xuxiuquan	52	50		20	4000	50	16000	50	0	50	0	50	0	20000	2019-02-18	3.5% & 4.0%Void Percent(Left Back) : 0.0000 Void Percent(Left Front) : 0.0000 Void Percent(Right Back) : 0.0000 Void Percent(Right Front) : 0.0000	17800	50	-0.662559	-0.783488	-0.904723	-1.016	-0.914476	-0.763397	-0.677697	-0.5699	-0.442976	-0.301295	-0.578688	-0.7334	-0.522961	-0.558825	-0.54483	-0.518338	-1.20462	-0.805866	-0.892099	-1.03221	-1.27653	-1.16299
17	Project Name	JAZ	2	Lab Number	Project Engineer	Asphalt Grade	PU	Pit Source	xuxiuquan	52	50		20	4000	50	16000	50	0	50	0	50	0	20000	2019-02-18	3.5% & 4.0%Void Percent(Left Back) : 0.0000 Void Percent(Left Front) : 0.0000 Void Percent(Right Back) : 0.0000 Void Percent(Right Front) : 0.0000	17850	49.8	-0.662559	-0.772363	-0.904723	-1.00485	-0.925627	-0.807466	-0.688569	-0.5699	-0.463804	-0.331699	-0.589153	-0.735819	-0.51054	-0.558825	-0.522199	-0.518338	-1.20462	-0.815924	-0.881507	-1.02088	-1.27653	-1.16299
17	Project Name	JAZ	2	Lab Number	Project Engineer	Asphalt Grade	PU	Pit Source	xuxiuquan	52	50		20	4000	50	16000	50	0	50	0	50	0	20000	2019-02-18	3.5% & 4.0%Void Percent(Left Back) : 0.0000 Void Percent(Left Front) : 0.0000 Void Percent(Right Back) : 0.0000 Void Percent(Right Front) : 0.0000	17900	49.9	-0.662559	-0.761238	-0.904723	-1.00485	-0.914476	-0.785419	-0.688569	-0.5699	-0.45339	-0.321564	-0.578688	-0.733215	-0.498119	-0.558825	-0.54483	-0.46515	-1.18428	-0.815924	-0.892099	-1.02088	-1.27653	-1.16299
17	Project Name	JAZ	2	Lab Number	Project Engineer	Asphalt Grade	PU	Pit Source	xuxiuquan	52	50		20	4000	50	16000	50	0	50	0	50	0	20000	2019-02-18	3.5% & 4.0%Void Percent(Left Back) : 0.0000 Void Percent(Left Front) : 0.0000 Void Percent(Right Back) : 0.0000 Void Percent(Right Front) : 0.0000	17950	50	-0.673684	-0.772363	-0.915873	-1.016	-0.914476	-0.785419	-0.721208	-0.591261	-0.474243	-0.331699	-0.589153	-0.749344	-0.51054	-0.582828	-0.556158	-0.497002	-1.20462	-0.825983	-0.913359	-1.03221	-1.27653	-1.16299
17	Project Name	JAZ	2	Lab Number	Project Engineer	Asphalt Grade	PU	Pit Source	xuxiuquan	52	50		20	4000	50	16000	50	0	50	0	50	0	20000	2019-02-18	3.5% & 4.0%Void Percent(Left Back) : 0.0000 Void Percent(Left Front) : 0.0000 Void Percent(Right Back) : 0.0000 Void Percent(Right Front) : 0.0000	18000	50	-0.662559	-0.783488	-0.904723	-0.993673	-0.903351	-0.785419	-0.677697	-0.591261	-0.484657	-0.341859	-0.599618	-0.743579	-0.547827	-0.570814	-0.54483	-0.475742	-1.18428	-0.825983	-0.881507	-1.05494	-1.28862	-1.16299
17	Project Name	JAZ	2	Lab Number	Project Engineer	Asphalt Grade	PU	Pit Source	xuxiuquan	52	50		20	4000	50	16000	50	0	50	0	50	0	20000	2019-02-18	3.5% & 4.0%Void Percent(Left Back) : 0.0000 Void Percent(Left Front) : 0.0000 Void Percent(Right Back) : 0.0000 Void Percent(Right Front) : 0.0000	18050	49.8	-0.651434	-0.772363	-0.893597	-0.971372	-0.881101	-0.796442	-0.721208	-0.580568	-0.463804	-0.331699	-0.578688	-0.727335	-0.522961	-0.52291	-0.499618	-0.454584	-1.18428	-0.805866	-0.924001	-1.03221	-1.28862	-1.16299
17	Project Name	JAZ	2	Lab Number	Project Engineer	Asphalt Grade	PU	Pit Source	xuxiuquan	52	50		20	4000	50	16000	50	0	50	0	50	0	20000	2019-02-18	3.5% & 4.0%Void Percent(Left Back) : 0.0000 Void Percent(Left Front) : 0.0000 Void Percent(Right Back) : 0.0000 Void Percent(Right Front) : 0.0000	18100	49.8	-0.684809	-0.772363	-0.904723	-0.993673	-0.881101	-0.785419	-0.721208	-0.580568	-0.474243	-0.341859	-0.589153	-0.738302	-0.522961	-0.546837	-0.54483	-0.46515	-1.20462	-0.825983	-0.924001	-1.04358	-1.27653	-1.16299
17	Project Name	JAZ	2	Lab Number	Project Engineer	Asphalt Grade	PU	Pit Source	xuxiuquan	52	50		20	4000	50	16000	50	0	50	0	50	0	20000	2019-02-18	3.5% & 4.0%Void Percent(Left Back) : 0.0000 Void Percent(Left Front) : 0.0000 Void Percent(Right Back) : 0.0000 Void Percent(Right Front) : 0.0000	18150	50	-0.651434	-0.783488	-0.893597	-1.00485	-0.925627	-0.81849	-0.721208	-0.580568	-0.484657	-0.331699	-0.599618	-0.740918	-0.522961	-0.546837	-0.522199	-0.497002	-1.21486	-0.825983	-0.913359	-1.04358	-1.28862	-1.20028
17	Project Name	JAZ	2	Lab Number	Project Engineer	Asphalt Grade	PU	Pit Source	xuxiuquan	52	50		20	4000	50	16000	50	0	50	0	50	0	20000	2019-02-18	3.5% & 4.0%Void Percent(Left Back) : 0.0000 Void Percent(Left Front) : 0.0000 Void Percent(Right Back) : 0.0000 Void Percent(Right Front) : 0.0000	18200	49.8	-0.651434	-0.772363	-0.904723	-0.971372	-0.903351	-0.785419	-0.721208	-0.580568	-0.45339	-0.331699	-0.610108	-0.727513	-0.522961	-0.52291	-0.522199	-0.444017	-1.18428	-0.825983	-0.934695	-1.03221	-1.27653	-1.17541
17	Project Name	JAZ	2	Lab Number	Project Engineer	Asphalt Grade	PU	Pit Source	xuxiuquan	52	50		20	4000	50	16000	50	0	50	0	50	0	20000	2019-02-18	3.5% & 4.0%Void Percent(Left Back) : 0.0000 Void Percent(Left Front) : 0.0000 Void Percent(Right Back) : 0.0000 Void Percent(Right Front) : 0.0000	18250	49.8	-0.662559	-0.783488	-0.915873	-0.993673	-0.903351	-0.81849	-0.721208	-0.580568	-0.474243	-0.341859	-0.578688	-0.741089	-0.522961	-0.546837	-0.533502	-0.475742	-1.21486	-0.805866	-0.934695	-1.04358	-1.28862	-1.20028
17	Project Name	JAZ	2	Lab Number	Project Engineer	Asphalt Grade	PU	Pit Source	xuxiuquan	52	50		20	4000	50	16000	50	0	50	0	50	0	20000	2019-02-18	3.5% & 4.0%Void Percent(Left Back) : 0.0000 Void Percent(Left Front) : 0.0000 Void Percent(Right Back) : 0.0000 Void Percent(Right Front) : 0.0000	18300	49.8	-0.662559	-0.783488	-0.904723	-1.00485	-0.903351	-0.807466	-0.732079	-0.591261	-0.484657	-0.341859	-0.599618	-0.746373	-0.51054	-0.558825	-0.54483	-0.497002	-1.20462	-0.825983	-0.913359	-1.04358	-1.27653	-1.17541
17	Project Name	JAZ	2	Lab Number	Project Engineer	Asphalt Grade	PU	Pit Source	xuxiuquan	52	50		20	4000	50	16000	50	0	50	0	50	0	20000	2019-02-18	3.5% & 4.0%Void Percent(Left Back) : 0.0000 Void Percent(Left Front) : 0.0000 Void Percent(Right Back) : 0.0000 Void Percent(Right Front) : 0.0000	18350	50	-0.640334	-0.783488	-0.904723	-1.00485	-0.947877	-0.796442	-0.732079	-0.591261	-0.484657	-0.341859	-0.610108	-0.746373	-0.522961	-0.558825	-0.522199	-0.497002	-1.20462	-0.825983	-0.924001	-1.04358	-1.28862	-1.17541
17	Project Name	JAZ	2	Lab Number	Project Engineer	Asphalt Grade	PU	Pit Source	xuxiuquan	52	50		20	4000	50	16000	50	0	50	0	50	0	20000	2019-02-18	3.5% & 4.0%Void Percent(Left Back) : 0.0000 Void Percent(Left Front) : 0.0000 Void Percent(Right Back) : 0.0000 Void Percent(Right Front) : 0.0000	18400	50	-0.662559	-0.794639	-0.904723	-1.016	-0.947877	-0.796442	-0.710311	-0.591261	-0.484657	-0.341859	-0.599618	-0.74916	-0.522961	-0.558825	-0.499618	-0.507644	-1.21486	-0.825983	-0.924001	-1.04358	-1.27653	-1.17541
17	Project Name	JAZ	2	Lab Number	Project Engineer	Asphalt Grade	PU	Pit Source	xuxiuquan	52	50		20	4000	50	16000	50	0	50	0	50	0	20000	2019-02-18	3.5% & 4.0%Void Percent(Left Back) : 0.0000 Void Percent(Left Front) : 0.0000 Void Percent(Right Back) : 0.0000 Void Percent(Right Front) : 0.0000	18450	49.8	-0.662559	-0.772363	-0.904723	-1.016	-0.914476	-0.807466	-0.721208	-0.591261	-0.474243	-0.351993	-0.599618	-0.746557	-0.522961	-0.558825	-0.533502	-0.497002	-1.20462	-0.815924	-0.924001	-1.04358	-1.28862	-1.16299
17	Project Name	JAZ	2	Lab Number	Project Engineer	Asphalt Grade	PU	Pit Source	xuxiuquan	52	50		20	4000	50	16000	50	0	50	0	50	0	20000	2019-02-18	3.5% & 4.0%Void Percent(Left Back) : 0.0000 Void Percent(Left Front) : 0.0000 Void Percent(Right Back) : 0.0000 Void Percent(Right Front) : 0.0000	18500	49.7	-0.673684	-0.794639	-0.904723	-0.971372	-0.881101	-0.785419	-0.721208	-0.601929	-0.505511	-0.351993	-0.620573	-0.745884	-0.547827	-0.558825	-0.499618	-0.454584	-1.20462	-0.815924	-0.934695	-1.05494	-1.28862	-1.20028
17	Project Name	JAZ	2	Lab Number	Project Engineer	Asphalt Grade	PU	Pit Source	xuxiuquan	52	50		20	4000	50	16000	50	0	50	0	50	0	20000	2019-02-18	3.5% & 4.0%Void Percent(Left Back) : 0.0000 Void Percent(Left Front) : 0.0000 Void Percent(Right Back) : 0.0000 Void Percent(Right Front) : 0.0000	18550	49.9	-0.662559	-0.783488	-0.904723	-1.00485	-0.892226	-0.796442	-0.710311	-0.601929	-0.474243	-0.351993	-0.620573	-0.746436	-0.547827	-0.558825	-0.54483	-0.497002	-1.20462	-0.815924	-0.924001	-1.04358	-1.28862	-1.17541
17	Project Name	JAZ	2	Lab Number	Project Engineer	Asphalt Grade	PU	Pit Source	xuxiuquan	52	50		20	4000	50	16000	50	0	50	0	50	0	20000	2019-02-18	3.5% & 4.0%Void Percent(Left Back) : 0.0000 Void Percent(Left Front) : 0.0000 Void Percent(Right Back) : 0.0000 Void Percent(Right Front) : 0.0000	18600	50	-0.673684	-0.783488	-0.915873	-1.016	-0.903351	-0.796442	-0.688569	-0.591261	-0.474243	-0.341859	-0.610108	-0.749344	-0.522961	-0.546837	-0.533502	-0.497002	-1.20462	-0.825983	-0.924001	-1.03221	-1.27653	-1.20028
17	Project Name	JAZ	2	Lab Number	Project Engineer	Asphalt Grade	PU	Pit Source	xuxiuquan	52	50		20	4000	50	16000	50	0	50	0	50	0	20000	2019-02-18	3.5% & 4.0%Void Percent(Left Back) : 0.0000 Void Percent(Left Front) : 0.0000 Void Percent(Right Back) : 0.0000 Void Percent(Right Front) : 0.0000	18650	50	-0.673684	-0.783488	-0.904723	-1.02718	-0.925627	-0.807466	-0.732079	-0.601929	-0.505511	-0.351993	-0.599618	-0.759835	-0.547827	-0.558825	-0.533502	-0.497002	-1.22507	-0.815924	-0.913359	-1.04358	-1.28862	-1.17541
17	Project Name	JAZ	2	Lab Number	Project Engineer	Asphalt Grade	PU	Pit Source	xuxiuquan	52	50		20	4000	50	16000	50	0	50	0	50	0	20000	2019-02-18	3.5% & 4.0%Void Percent(Left Back) : 0.0000 Void Percent(Left Front) : 0.0000 Void Percent(Right Back) : 0.0000 Void Percent(Right Front) : 0.0000	18700	50	-0.662559	-0.794639	-0.904723	-1.00485	-0.914476	-0.81849	-0.721208	-0.601929	-0.484657	-0.362153	-0.620573	-0.74904	-0.547827	-0.570814	-0.54483	-0.497002	-1.21486	-0.825983	-0.934695	-1.05494	-1.30073	-1.20028
17	Project Name	JAZ	2	Lab Number	Project Engineer	Asphalt Grade	PU	Pit Source	xuxiuquan	52	50		20	4000	50	16000	50	0	50	0	50	0	20000	2019-02-18	3.5% & 4.0%Void Percent(Left Back) : 0.0000 Void Percent(Left Front) : 0.0000 Void Percent(Right Back) : 0.0000 Void Percent(Right Front) : 0.0000	18750	49.6	-0.662559	-0.772363	-0.915873	-1.016	-0.914476	-0.807466	-0.721208	-0.601929	-0.484657	-0.341859	-0.610108	-0.754615	-0.522961	-0.570814	-0.522199	-0.497002	-1.21486	-0.825983	-0.913359	-1.04358	-1.27653	-1.17541
17	Project Name	JAZ	2	Lab Number	Project Engineer	Asphalt Grade	PU	Pit Source	xuxiuquan	52	50		20	4000	50	16000	50	0	50	0	50	0	20000	2019-02-18	3.5% & 4.0%Void Percent(Left Back) : 0.0000 Void Percent(Left Front) : 0.0000 Void Percent(Right Back) : 0.0000 Void Percent(Right Front) : 0.0000	18800	49.8	-0.673684	-0.794639	-0.904723	-1.00485	-0.892226	-0.796442	-0.710311	-0.591261	-0.474243	-0.341859	-0.610108	-0.743769	-0.547827	-0.558825	-0.533502	-0.475742	-1.21486	-0.815924	-0.924001	-1.03221	-1.27653	-1.16299
17	Project Name	JAZ	2	Lab Number	Project Engineer	Asphalt Grade	PU	Pit Source	xuxiuquan	52	50		20	4000	50	16000	50	0	50	0	50	0	20000	2019-02-18	3.5% & 4.0%Void Percent(Left Back) : 0.0000 Void Percent(Left Front) : 0.0000 Void Percent(Right Back) : 0.0000 Void Percent(Right Front) : 0.0000	18850	50	-0.662559	-0.783488	-0.904723	-0.982523	-0.892226	-0.81849	-0.732079	-0.601929	-0.484657	-0.351993	-0.610108	-0.743458	-0.51054	-0.570814	-0.533502	-0.444017	-1.20462	-0.825983	-0.934695	-1.05494	-1.30073	-1.17541
17	Project Name	JAZ	2	Lab Number	Project Engineer	Asphalt Grade	PU	Pit Source	xuxiuquan	52	50		20	4000	50	16000	50	0	50	0	50	0	20000	2019-02-18	3.5% & 4.0%Void Percent(Left Back) : 0.0000 Void Percent(Left Front) : 0.0000 Void Percent(Right Back) : 0.0000 Void Percent(Right Front) : 0.0000	18900	50	-0.651434	-0.816889	-0.904723	-0.993673	-0.903351	-0.785419	-0.710311	-0.591261	-0.432587	-0.321564	-0.599618	-0.730561	-0.51054	-0.582828	-0.522199	-0.46515	-1.20462	-0.836066	-0.945363	-1.04358	-1.32497	-1.21272
17	Project Name	JAZ	2	Lab Number	Project Engineer	Asphalt Grade	PU	Pit Source	xuxiuquan	52	50		20	4000	50	16000	50	0	50	0	50	0	20000	2019-02-18	3.5% & 4.0%Void Percent(Left Back) : 0.0000 Void Percent(Left Front) : 0.0000 Void Percent(Right Back) : 0.0000 Void Percent(Right Front) : 0.0000	18950	49.9	-0.673684	-0.794639	-0.915873	-1.02718	-0.947877	-0.807466	-0.710311	-0.591261	-0.463804	-0.331699	-0.599618	-0.749529	-0.522961	-0.558825	-0.533502	-0.507644	-1.21486	-0.836066	-0.934695	-1.03221	-1.30073	-1.17541
17	Project Name	JAZ	2	Lab Number	Project Engineer	Asphalt Grade	PU	Pit Source	xuxiuquan	52	50		20	4000	50	16000	50	0	50	0	50	0	20000	2019-02-18	3.5% & 4.0%Void Percent(Left Back) : 0.0000 Void Percent(Left Front) : 0.0000 Void Percent(Right Back) : 0.0000 Void Percent(Right Front) : 0.0000	19000	49.6	-0.662559	-0.783488	-0.915873	-1.00485	-0.914476	-0.796442	-0.710311	-0.5699	-0.432587	-0.321564	-0.589153	-0.730802	-0.522961	-0.558825	-0.54483	-0.475742	-1.22507	-0.825983	-0.934695	-1.04358	-1.27653	-1.17541
17	Project Name	JAZ	2	Lab Number	Project Engineer	Asphalt Grade	PU	Pit Source	xuxiuquan	52	50		20	4000	50	16000	50	0	50	0	50	0	20000	2019-02-18	3.5% & 4.0%Void Percent(Left Back) : 0.0000 Void Percent(Left Front) : 0.0000 Void Percent(Right Back) : 0.0000 Void Percent(Right Front) : 0.0000	19050	49.8	-0.651434	-0.783488	-0.904723	-0.993673	-0.914476	-0.807466	-0.721208	-0.591261	-0.474243	-0.341859	-0.610108	-0.740975	-0.51054	-0.570814	-0.522199	-0.46515	-1.20462	-0.825983	-0.945363	-1.04358	-1.30073	-1.20028
17	Project Name	JAZ	2	Lab Number	Project Engineer	Asphalt Grade	PU	Pit Source	xuxiuquan	52	50		20	4000	50	16000	50	0	50	0	50	0	20000	2019-02-18	3.5% & 4.0%Void Percent(Left Back) : 0.0000 Void Percent(Left Front) : 0.0000 Void Percent(Right Back) : 0.0000 Void Percent(Right Front) : 0.0000	19100	50	-0.651434	-0.794639	-0.915873	-0.993673	-0.914476	-0.796442	-0.742975	-0.601929	-0.484657	-0.341859	-0.620573	-0.749033	-0.51054	-0.570814	-0.533502	-0.497002	-1.22507	-0.825983	-0.945363	-1.05494	-1.28862	-1.20028
17	Project Name	JAZ	2	Lab Number	Project Engineer	Asphalt Grade	PU	Pit Source	xuxiuquan	52	50		20	4000	50	16000	50	0	50	0	50	0	20000	2019-02-18	3.5% & 4.0%Void Percent(Left Back) : 0.0000 Void Percent(Left Front) : 0.0000 Void Percent(Right Back) : 0.0000 Void Percent(Right Front) : 0.0000	19150	49.9	-0.651434	-0.794639	-0.915873	-0.993673	-0.925627	-0.81849	-0.721208	-0.580568	-0.45339	-0.331699	-0.620573	-0.735876	-0.498119	-0.582828	-0.533502	-0.475742	-1.21486	-0.825983	-0.934695	-1.04358	-1.32497	-1.20028
17	Project Name	JAZ	2	Lab Number	Project Engineer	Asphalt Grade	PU	Pit Source	xuxiuquan	52	50		20	4000	50	16000	50	0	50	0	50	0	20000	2019-02-18	3.5% & 4.0%Void Percent(Left Back) : 0.0000 Void Percent(Left Front) : 0.0000 Void Percent(Right Back) : 0.0000 Void Percent(Right Front) : 0.0000	19200	49.8	-0.662559	-0.794639	-0.915873	-1.016	-0.914476	-0.807466	-0.742975	-0.591261	-0.474243	-0.351993	-0.610108	-0.749344	-0.522961	-0.570814	-0.533502	-0.497002	-1.22507	-0.825983	-0.945363	-1.03221	-1.27653	-1.17541
17	Project Name	JAZ	2	Lab Number	Project Engineer	Asphalt Grade	PU	Pit Source	xuxiuquan	52	50		20	4000	50	16000	50	0	50	0	50	0	20000	2019-02-18	3.5% & 4.0%Void Percent(Left Back) : 0.0000 Void Percent(Left Front) : 0.0000 Void Percent(Right Back) : 0.0000 Void Percent(Right Front) : 0.0000	19250	49.9	-0.651434	-0.794639	-0.904723	-0.982523	-0.903351	-0.807466	-0.742975	-0.591261	-0.484657	-0.351993	-0.620573	-0.740791	-0.485724	-0.570814	-0.499618	-0.46515	-1.21486	-0.825983	-0.945363	-1.04358	-1.28862	-1.17541
17	Project Name	JAZ	2	Lab Number	Project Engineer	Asphalt Grade	PU	Pit Source	xuxiuquan	52	50		20	4000	50	16000	50	0	50	0	50	0	20000	2019-02-18	3.5% & 4.0%Void Percent(Left Back) : 0.0000 Void Percent(Left Front) : 0.0000 Void Percent(Right Back) : 0.0000 Void Percent(Right Front) : 0.0000	19300	50	-0.662559	-0.794639	-0.915873	-1.016	-0.947877	-0.796442	-0.732079	-0.601929	-0.484657	-0.341859	-0.631063	-0.754615	-0.51054	-0.582828	-0.54483	-0.497002	-1.21486	-0.815924	-0.913359	-1.06634	-1.28862	-1.17541
17	Project Name	JAZ	2	Lab Number	Project Engineer	Asphalt Grade	PU	Pit Source	xuxiuquan	52	50		20	4000	50	16000	50	0	50	0	50	0	20000	2019-02-18	3.5% & 4.0%Void Percent(Left Back) : 0.0000 Void Percent(Left Front) : 0.0000 Void Percent(Right Back) : 0.0000 Void Percent(Right Front) : 0.0000	19350	49.9	-0.662559	-0.794639	-0.915873	-1.00485	-0.925627	-0.81849	-0.742975	-0.591261	-0.463804	-0.341859	-0.631063	-0.743947	-0.51054	-0.582828	-0.499618	-0.507644	-1.21486	-0.836066	-0.934695	-1.04358	-1.28862	-1.17541
17	Project Name	JAZ	2	Lab Number	Project Engineer	Asphalt Grade	PU	Pit Source	xuxiuquan	52	50		20	4000	50	16000	50	0	50	0	50	0	20000	2019-02-18	3.5% & 4.0%Void Percent(Left Back) : 0.0000 Void Percent(Left Front) : 0.0000 Void Percent(Right Back) : 0.0000 Void Percent(Right Front) : 0.0000	19400	49.8	-0.662559	-0.783488	-0.915873	-0.982523	-0.925627	-0.807466	-0.732079	-0.580568	-0.474243	-0.341859	-0.620573	-0.738302	-0.51054	-0.558825	-0.522199	-0.454584	-1.21486	-0.836066	-0.945363	-1.04358	-1.30073	-1.20028
17	Project Name	JAZ	2	Lab Number	Project Engineer	Asphalt Grade	PU	Pit Source	xuxiuquan	52	50		20	4000	50	16000	50	0	50	0	50	0	20000	2019-02-18	3.5% & 4.0%Void Percent(Left Back) : 0.0000 Void Percent(Left Front) : 0.0000 Void Percent(Right Back) : 0.0000 Void Percent(Right Front) : 0.0000	19450	50	-0.662559	-0.783488	-0.915873	-1.00485	-0.925627	-0.796442	-0.742975	-0.601929	-0.463804	-0.331699	-0.631063	-0.746614	-0.51054	-0.570814	-0.499618	-0.475742	-1.21486	-0.825983	-0.945363	-1.04358	-1.30073	-1.20028
17	Project Name	JAZ	2	Lab Number	Project Engineer	Asphalt Grade	PU	Pit Source	xuxiuquan	52	50		20	4000	50	16000	50	0	50	0	50	0	20000	2019-02-18	3.5% & 4.0%Void Percent(Left Back) : 0.0000 Void Percent(Left Front) : 0.0000 Void Percent(Right Back) : 0.0000 Void Percent(Right Front) : 0.0000	19500	50	-0.651434	-0.794639	-0.904723	-1.016	-0.925627	-0.796442	-0.710311	-0.601929	-0.474243	-0.351993	-0.631063	-0.749224	-0.498119	-0.582828	-0.499618	-0.497002	-1.21486	-0.825983	-0.934695	-1.05494	-1.30073	-1.17541
17	Project Name	JAZ	2	Lab Number	Project Engineer	Asphalt Grade	PU	Pit Source	xuxiuquan	52	50		20	4000	50	16000	50	0	50	0	50	0	20000	2019-02-18	3.5% & 4.0%Void Percent(Left Back) : 0.0000 Void Percent(Left Front) : 0.0000 Void Percent(Right Back) : 0.0000 Void Percent(Right Front) : 0.0000	19550	49.9	-0.651434	-0.783488	-0.915873	-1.016	-0.947877	-0.81849	-0.721208	-0.591261	-0.474243	-0.341859	-0.631063	-0.749344	-0.485724	-0.558825	-0.499618	-0.507644	-1.21486	-0.815924	-0.934695	-1.04358	-1.30073	-1.17541
17	Project Name	JAZ	2	Lab Number	Project Engineer	Asphalt Grade	PU	Pit Source	xuxiuquan	52	50		20	4000	50	16000	50	0	50	0	50	0	20000	2019-02-18	3.5% & 4.0%Void Percent(Left Back) : 0.0000 Void Percent(Left Front) : 0.0000 Void Percent(Right Back) : 0.0000 Void Percent(Right Front) : 0.0000	19600	49.7	-0.651434	-0.783488	-0.904723	-0.993673	-0.903351	-0.81849	-0.732079	-0.591261	-0.484657	-0.362153	-0.662559	-0.743579	-0.51054	-0.558825	-0.522199	-0.454584	-1.21486	-0.825983	-0.934695	-1.05494	-1.31285	-1.17541
17	Project Name	JAZ	2	Lab Number	Project Engineer	Asphalt Grade	PU	Pit Source	xuxiuquan	52	50		20	4000	50	16000	50	0	50	0	50	0	20000	2019-02-18	3.5% & 4.0%Void Percent(Left Back) : 0.0000 Void Percent(Left Front) : 0.0000 Void Percent(Right Back) : 0.0000 Void Percent(Right Front) : 0.0000	19650	49.8	-0.651434	-0.794639	-0.904723	-1.02718	-0.925627	-0.796442	-0.721208	-0.601929	-0.474243	-0.351993	-0.631063	-0.752018	-0.498119	-0.582828	-0.533502	-0.497002	-1.21486	-0.825983	-0.934695	-1.06634	-1.32497	-1.17541
17	Project Name	JAZ	2	Lab Number	Project Engineer	Asphalt Grade	PU	Pit Source	xuxiuquan	52	50		20	4000	50	16000	50	0	50	0	50	0	20000	2019-02-18	3.5% & 4.0%Void Percent(Left Back) : 0.0000 Void Percent(Left Front) : 0.0000 Void Percent(Right Back) : 0.0000 Void Percent(Right Front) : 0.0000	19700	50	-0.651434	-0.783488	-0.904723	-0.993673	-0.903351	-0.796442	-0.732079	-0.591261	-0.463804	-0.341859	-0.662559	-0.738365	-0.485724	-0.570814	-0.522199	-0.46515	-1.21486	-0.825983	-0.945363	-1.04358	-1.30073	-1.20028
17	Project Name	JAZ	2	Lab Number	Project Engineer	Asphalt Grade	PU	Pit Source	xuxiuquan	52	50		20	4000	50	16000	50	0	50	0	50	0	20000	2019-02-18	3.5% & 4.0%Void Percent(Left Back) : 0.0000 Void Percent(Left Front) : 0.0000 Void Percent(Right Back) : 0.0000 Void Percent(Right Front) : 0.0000	19750	50	-0.651434	-0.783488	-0.915873	-0.982523	-0.914476	-0.81849	-0.732079	-0.591261	-0.474243	-0.351993	-0.631063	-0.740975	-0.498119	-0.52291	-0.522199	-0.475742	-1.22507	-0.815924	-0.934695	-1.04358	-1.30073	-1.17541
17	Project Name	JAZ	2	Lab Number	Project Engineer	Asphalt Grade	PU	Pit Source	xuxiuquan	52	50		20	4000	50	16000	50	0	50	0	50	0	20000	2019-02-18	3.5% & 4.0%Void Percent(Left Back) : 0.0000 Void Percent(Left Front) : 0.0000 Void Percent(Right Back) : 0.0000 Void Percent(Right Front) : 0.0000	19800	49.8	-0.662559	-0.794639	-0.915873	-0.993673	-0.925627	-0.829513	-0.742975	-0.601929	-0.474243	-0.351993	-0.631063	-0.74643	-0.51054	-0.558825	-0.522199	-0.475742	-1.22507	-0.815924	-0.934695	-1.04358	-1.31285	-1.17541
17	Project Name	JAZ	2	Lab Number	Project Engineer	Asphalt Grade	PU	Pit Source	xuxiuquan	52	50		20	4000	50	16000	50	0	50	0	50	0	20000	2019-02-18	3.5% & 4.0%Void Percent(Left Back) : 0.0000 Void Percent(Left Front) : 0.0000 Void Percent(Right Back) : 0.0000 Void Percent(Right Front) : 0.0000	19850	49.8	-0.640334	-0.794639	-0.893597	-0.993673	-0.914476	-0.807466	-0.710311	-0.591261	-0.463804	-0.331699	-0.631063	-0.735584	-0.485724	-0.558825	-0.488366	-0.475742	-1.21486	-0.815924	-0.934695	-1.04358	-1.32497	-1.20028
17	Project Name	JAZ	2	Lab Number	Project Engineer	Asphalt Grade	PU	Pit Source	xuxiuquan	52	50		20	4000	50	16000	50	0	50	0	50	0	20000	2019-02-18	3.5% & 4.0%Void Percent(Left Back) : 0.0000 Void Percent(Left Front) : 0.0000 Void Percent(Right Back) : 0.0000 Void Percent(Right Front) : 0.0000	19900	50	-0.662559	-0.783488	-0.893597	-1.016	-0.959028	-0.807466	-0.721208	-0.612597	-0.484657	-0.351993	-0.662559	-0.751713	-0.51054	-0.570814	-0.522199	-0.507644	-1.23533	-0.825983	-0.945363	-1.08918	-1.30073	-1.20028
17	Project Name	JAZ	2	Lab Number	Project Engineer	Asphalt Grade	PU	Pit Source	xuxiuquan	52	50		20	4000	50	16000	50	0	50	0	50	0	20000	2019-02-18	3.5% & 4.0%Void Percent(Left Back) : 0.0000 Void Percent(Left Front) : 0.0000 Void Percent(Right Back) : 0.0000 Void Percent(Right Front) : 0.0000	19950	49.9	-0.651434	-0.783488	-0.904723	-1.016	-0.947877	-0.807466	-0.721208	-0.5699	-0.45339	-0.331699	-0.610108	-0.736003	-0.498119	-0.558825	-0.533502	-0.497002	-1.23533	-0.836066	-0.934695	-1.04358	-1.33711	-1.21272
17	Project Name	JAZ	2	Lab Number	Project Engineer	Asphalt Grade	PU	Pit Source	xuxiuquan	52	50		20	4000	50	16000	50	0	50	0	50	0	20000	2019-02-18	3.5% & 4.0%Void Percent(Left Back) : 0.0000 Void Percent(Left Front) : 0.0000 Void Percent(Right Back) : 0.0000 Void Percent(Right Front) : 0.0000	20000	49.8	-0.640334	-0.794639	-0.904723	-1.00485	-0.903351	-0.785419	-0.688569	-0.5699	-0.442976	-0.301295	-0.589153	-0.730612	-0.485724	-0.570814	-0.533502	-0.497002	-1.22507	-0.836066	-0.934695	-1.04358	-1.32497	-1.20028
[truncated: 13 more columns]

## Sheet: SMA-5.8
TESTNUM	PROJECT	PROJECTNUM	JOBNUM	LABNUM	ENGINEER	ASPHALTGRADE	MIXTYPE	PITSOURCE	SUBMITTEDBY	SPEEDSET	TEMPSET	MAXDEPTH	STEP1FREQ	STEP1DUR	STEP2FREQ	STEP2DUR	STEP3FREQ	STEP3DUR	STEP4FREQ	STEP4DUR	STEP5FREQ	STEP5DUR	MAXPASS	TESTDATE	COMMENTS	PASSNUM	TEMP	L1	L2	L3	L4	L5	L6	L7	L8	L9	L10	L11	R1	R2	R3	R4	R5	R6	R7	R8	R9	R10	R11
7	Project Name	5.8	Job Number	Lab Number	Project Engineer	Asphalt Grade	GB5-10	Pit Source	Submitted By	52	50		20	4000	50	16000	50	0	50	0	50	0	20000	2018-07-30	CommentsVoid Percent(Left Back) : 0.0000 Void Percent(Left Front) : 0.0000 Void Percent(Right Back) : 0.0000 Void Percent(Right Front) : 0.0000 Left Avg Data @ Fail : Right Avg Data @ Fail : 0.0000	5	50	0	0	0	0	0	0	0	0	0	0	0	0	0	0	0	0	0	0	0	0	0	0
7	Project Name	5.8	Job Number	Lab Number	Project Engineer	Asphalt Grade	GB5-10	Pit Source	Submitted By	52	50		20	4000	50	16000	50	0	50	0	50	0	20000	2018-07-30	CommentsVoid Percent(Left Back) : 0.0000 Void Percent(Left Front) : 0.0000 Void Percent(Right Back) : 0.0000 Void Percent(Right Front) : 0.0000 Left Avg Data @ Fail : Right Avg Data @ Fail : 0.0000	20	50	-0.277012	-0.346024	-0.345846	-0.391871	-0.56581	-0.336194	-0.301346	-0.32446	-0.266598	-0.33561	-0.162458	-0.317373	-0.359461	-0.345796	-0.359613	-0.511759	-0.331927	-0.359537	-0.359486	-0.248895	-0.626339	-0.165989
7	Project Name	5.8	Job Number	Lab Number	Project Engineer	Asphalt Grade	GB5-10	Pit Source	Submitted By	52	50		20	4000	50	16000	50	0	50	0	50	0	20000	2018-07-30	CommentsVoid Percent(Left Back) : 0.0000 Void Percent(Left Front) : 0.0000 Void Percent(Right Back) : 0.0000 Void Percent(Right Front) : 0.0000 Left Avg Data @ Fail : Right Avg Data @ Fail : 0.0000	40	50	-0.427304	-0.484683	-0.484429	-0.553568	-0.843763	-0.475513	-0.452222	-0.463702	-0.394259	-0.42832	-0.266979	-0.44135	-0.511404	-0.497891	-0.511785	-0.705282	-0.497916	-0.470205	-0.511658	-0.359562	-0.73599	-0.262814
7	Project Name	5.8	Job Number	Lab Number	Project Engineer	Asphalt Grade	GB5-10	Pit Source	Submitted By	52	50		20	4000	50	16000	50	0	50	0	50	0	20000	2018-07-30	CommentsVoid Percent(Left Back) : 0.0000 Void Percent(Left Front) : 0.0000 Void Percent(Right Back) : 0.0000 Void Percent(Right Front) : 0.0000 Left Avg Data @ Fail : Right Avg Data @ Fail : 0.0000	60	49.9	-0.531444	-0.554076	-0.565353	-0.669188	-0.982904	-0.58006	-0.545135	-0.544982	-0.463931	-0.497891	-0.34831	-0.537693	-0.608	-0.608432	-0.608584	-0.829615	-0.594741	-0.525526	-0.553136	-0.414909	-0.763448	-0.31816
7	Project Name	5.8	Job Number	Lab Number	Project Engineer	Asphalt Grade	GB5-10	Pit Source	Submitted By	52	50		20	4000	50	16000	50	0	50	0	50	0	20000	2018-07-30	CommentsVoid Percent(Left Back) : 0.0000 Void Percent(Left Front) : 0.0000 Void Percent(Right Back) : 0.0000 Void Percent(Right Front) : 0.0000 Left Avg Data @ Fail : Right Avg Data @ Fail : 0.0000	80	50	-0.554584	-0.635051	-0.646303	-0.727024	-1.04092	-0.649808	-0.591617	-0.591439	-0.521995	-0.509499	-0.394818	-0.633959	-0.649402	-0.649884	-0.622402	-0.871042	-0.636245	-0.580847	-0.608482	-0.456387	-0.777164	-0.373482
7	Project Name	5.8	Job Number	Lab Number	Project Engineer	Asphalt Grade	GB5-10	Pit Source	Submitted By	52	50		20	4000	50	16000	50	0	50	0	50	0	20000	2018-07-30	CommentsVoid Percent(Left Back) : 0.0000 Void Percent(Left Front) : 0.0000 Void Percent(Right Back) : 0.0000 Void Percent(Right Front) : 0.0000 Left Avg Data @ Fail : Right Avg Data @ Fail : 0.0000	100	49.8	-0.635635	-0.681355	-0.65786	-0.773328	-1.157	-0.684682	-0.626466	-0.637921	-0.568477	-0.544297	-0.452933	-0.6477	-0.704571	-0.677494	-0.677723	-0.953846	-0.677723	-0.622351	-0.636143	-0.525551	-0.777164	-0.428803
7	Project Name	5.8	Job Number	Lab Number	Project Engineer	Asphalt Grade	GB5-10	Pit Source	Submitted By	52	50		20	4000	50	16000	50	0	50	0	50	0	20000	2018-07-30	CommentsVoid Percent(Left Back) : 0.0000 Void Percent(Left Front) : 0.0000 Void Percent(Right Back) : 0.0000 Void Percent(Right Front) : 0.0000 Left Avg Data @ Fail : Right Avg Data @ Fail : 0.0000	120	49.8	-0.670382	-0.716077	-0.727304	-0.796468	-1.20345	-0.742823	-0.684581	-0.67277	-0.591718	-0.579095	-0.452933	-0.661441	-0.73213	-0.718922	-0.733019	-1.00904	-0.733019	-0.622351	-0.663804	-0.539394	-0.818363	-0.414985
7	Project Name	5.8	Job Number	Lab Number	Project Engineer	Asphalt Grade	GB5-10	Pit Source	Submitted By	52	50		20	4000	50	16000	50	0	50	0	50	0	20000	2018-07-30	CommentsVoid Percent(Left Back) : 0.0000 Void Percent(Left Front) : 0.0000 Void Percent(Right Back) : 0.0000 Void Percent(Right Front) : 0.0000 Left Avg Data @ Fail : Right Avg Data @ Fail : 0.0000	140	49.8	-0.693547	-0.785571	-0.785165	-0.854354	-1.28478	-0.777697	-0.707847	-0.684403	-0.614959	-0.613893	-0.499466	-0.688924	-0.773481	-0.732739	-0.733019	-1.02283	-0.774497	-0.677672	-0.705307	-0.553237	-0.818363	-0.456463
7	Project Name	5.8	Job Number	Lab Number	Project Engineer	Asphalt Grade	GB5-10	Pit Source	Submitted By	52	50		20	4000	50	16000	50	0	50	0	50	0	20000	2018-07-30	CommentsVoid Percent(Left Back) : 0.0000 Void Percent(Left Front) : 0.0000 Void Percent(Right Back) : 0.0000 Void Percent(Right Front) : 0.0000 Left Avg Data @ Fail : Right Avg Data @ Fail : 0.0000	160	50	-0.751484	-0.808736	-0.796747	-0.900684	-1.37777	-0.800964	-0.742721	-0.730885	-0.661467	-0.6255	-0.53434	-0.743864	-0.80104	-0.787959	-0.788289	-1.05042	-0.815975	-0.691515	-0.732968	-0.594716	-0.804621	-0.470306
7	Project Name	5.8	Job Number	Lab Number	Project Engineer	Asphalt Grade	GB5-10	Pit Source	Submitted By	52	50		20	4000	50	16000	50	0	50	0	50	0	20000	2018-07-30	CommentsVoid Percent(Left Back) : 0.0000 Void Percent(Left Front) : 0.0000 Void Percent(Right Back) : 0.0000 Void Percent(Right Front) : 0.0000 Left Avg Data @ Fail : Right Avg Data @ Fail : 0.0000	180	50	-0.786282	-0.820318	-0.80833	-0.923849	-1.41265	-0.859155	-0.777621	-0.777392	-0.6731	-0.637108	-0.545973	-0.771322	-0.828599	-0.787959	-0.788289	-1.078	-0.829793	-0.732993	-0.732968	-0.622376	-0.79088	-0.484124
7	Project Name	5.8	Job Number	Lab Number	Project Engineer	Asphalt Grade	GB5-10	Pit Source	Submitted By	52	50		20	4000	50	16000	50	0	50	0	50	0	20000	2018-07-30	CommentsVoid Percent(Left Back) : 0.0000 Void Percent(Left Front) : 0.0000 Void Percent(Right Back) : 0.0000 Void Percent(Right Front) : 0.0000 Left Avg Data @ Fail : Right Avg Data @ Fail : 0.0000	200	50	-0.797865	-0.843509	-0.831494	-0.958621	-1.48242	-0.882421	-0.800862	-0.777392	-0.731241	-0.660324	-0.592531	-0.771322	-0.869925	-0.815569	-0.815924	-1.13312	-0.885063	-0.732993	-0.760628	-0.636219	-0.832079	-0.511785
7	Project Name	5.8	Job Number	Lab Number	Project Engineer	Asphalt Grade	GB5-10	Pit Source	Submitted By	52	50		20	4000	50	16000	50	0	50	0	50	0	20000	2018-07-30	CommentsVoid Percent(Left Back) : 0.0000 Void Percent(Left Front) : 0.0000 Void Percent(Right Back) : 0.0000 Void Percent(Right Front) : 0.0000 Left Avg Data @ Fail : Right Avg Data @ Fail : 0.0000	220	50	-0.832637	-0.889864	-0.877824	-0.970204	-1.50569	-0.870788	-0.812495	-0.812292	-0.731241	-0.660324	-0.627431	-0.826211	-0.883691	-0.856971	-0.829742	-1.14691	-0.885063	-0.774471	-0.774446	-0.650037	-0.832079	-0.539445
7	Project Name	5.8	Job Number	Lab Number	Project Engineer	Asphalt Grade	GB5-10	Pit Source	Submitted By	52	50		20	4000	50	16000	50	0	50	0	50	0	20000	2018-07-30	CommentsVoid Percent(Left Back) : 0.0000 Void Percent(Left Front) : 0.0000 Void Percent(Right Back) : 0.0000 Void Percent(Right Front) : 0.0000 Left Avg Data @ Fail : Right Avg Data @ Fail : 0.0000	240	50	-0.855853	-0.901446	-0.866242	-0.993369	-1.55224	-0.894055	-0.824128	-0.823925	-0.742874	-0.683539	-0.627431	-0.853643	-0.897458	-0.856971	-0.857377	-1.16068	-0.912698	-0.774471	-0.802107	-0.66388	-0.818363	-0.553263
7	Project Name	5.8	Job Number	Lab Number	Project Engineer	Asphalt Grade	GB5-10	Pit Source	Submitted By	52	50		20	4000	50	16000	50	0	50	0	50	0	20000	2018-07-30	CommentsVoid Percent(Left Back) : 0.0000 Void Percent(Left Front) : 0.0000 Void Percent(Right Back) : 0.0000 Void Percent(Right Front) : 0.0000 Left Avg Data @ Fail : Right Avg Data @ Fail : 0.0000	260	50	-0.879043	-0.913054	-0.901014	-1.02817	-1.62207	-0.940613	-0.859053	-0.847166	-0.766115	-0.683539	-0.639064	-0.839927	-0.924992	-0.898347	-0.871195	-1.2158	-0.940333	-0.788314	-0.815924	-0.66388	-0.832079	-0.553263
7	Project Name	5.8	Job Number	Lab Number	Project Engineer	Asphalt Grade	GB5-10	Pit Source	Submitted By	52	50		20	4000	50	16000	50	0	50	0	50	0	20000	2018-07-30	CommentsVoid Percent(Left Back) : 0.0000 Void Percent(Left Front) : 0.0000 Void Percent(Right Back) : 0.0000 Void Percent(Right Front) : 0.0000 Left Avg Data @ Fail : Right Avg Data @ Fail : 0.0000	280	50	-0.890651	-0.959409	-0.901014	-1.05133	-1.64534	-0.952271	-0.870687	-0.870433	-0.789381	-0.695147	-0.685622	-0.853643	-0.924992	-0.912139	-0.885012	-1.24333	-0.954151	-0.81595	-0.829767	-0.677697	-0.804621	-0.56708
7	Project Name	5.8	Job Number	Lab Number	Project Engineer	Asphalt Grade	GB5-10	Pit Source	Submitted By	52	50		20	4000	50	16000	50	0	50	0	50	0	20000	2018-07-30	CommentsVoid Percent(Left Back) : 0.0000 Void Percent(Left Front) : 0.0000 Void Percent(Right Back) : 0.0000 Void Percent(Right Front) : 0.0000 Left Avg Data @ Fail : Right Avg Data @ Fail : 0.0000	300	49.9	-0.937057	-0.971017	-0.947344	-1.07452	-1.71521	-0.963905	-0.893953	-0.893724	-0.824306	-0.695147	-0.697281	-0.894791	-0.938759	-0.912139	-0.92644	-1.2158	-0.981761	-0.81595	-0.857402	-0.719176	-0.832079	-0.580923
7	Project Name	5.8	Job Number	Lab Number	Project Engineer	Asphalt Grade	GB5-10	Pit Source	Submitted By	52	50		20	4000	50	16000	50	0	50	0	50	0	20000	2018-07-30	CommentsVoid Percent(Left Back) : 0.0000 Void Percent(Left Front) : 0.0000 Void Percent(Right Back) : 0.0000 Void Percent(Right Front) : 0.0000 Left Avg Data @ Fail : Right Avg Data @ Fail : 0.0000	320	49.9	-0.960247	-0.994207	-0.958952	-1.09774	-1.72684	-0.99883	-0.905586	-0.893724	-0.835939	-0.706755	-0.708914	-0.894791	-0.980034	-0.925932	-0.912622	-1.24333	-1.0094	-0.871271	-0.871245	-0.719176	-0.873303	-0.608559
7	Project Name	5.8	Job Number	Lab Number	Project Engineer	Asphalt Grade	GB5-10	Pit Source	Submitted By	52	50		20	4000	50	16000	50	0	50	0	50	0	20000	2018-07-30	CommentsVoid Percent(Left Back) : 0.0000 Void Percent(Left Front) : 0.0000 Void Percent(Right Back) : 0.0000 Void Percent(Right Front) : 0.0000 Left Avg Data @ Fail : Right Avg Data @ Fail : 0.0000	340	49.8	-0.971855	-1.00581	-0.982142	-1.10932	-1.75014	-1.01049	-0.917219	-0.928624	-0.859206	-0.706755	-0.743839	-0.908482	-0.980034	-0.953516	-0.940257	-1.27086	-1.02319	-0.857428	-0.871245	-0.746836	-0.832079	-0.622402
7	Project Name	5.8	Job Number	Lab Number	Project Engineer	Asphalt Grade	GB5-10	Pit Source	Submitted By	52	50		20	4000	50	16000	50	0	50	0	50	0	20000	2018-07-30	CommentsVoid Percent(Left Back) : 0.0000 Void Percent(Left Front) : 0.0000 Void Percent(Right Back) : 0.0000 Void Percent(Right Front) : 0.0000 Left Avg Data @ Fail : Right Avg Data @ Fail : 0.0000	360	49.8	-0.983463	-1.01742	-0.982142	-1.13254	-1.79675	-1.02212	-0.940511	-0.940257	-0.870839	-0.706755	-0.755498	-0.935888	-0.9938	-0.953516	-0.954049	-1.27086	-1.02319	-0.871271	-0.898881	-0.760654	-0.832079	-0.636219
7	Project Name	5.8	Job Number	Lab Number	Project Engineer	Asphalt Grade	GB5-10	Pit Source	Submitted By	52	50		20	4000	50	16000	50	0	50	0	50	0	20000	2018-07-30	CommentsVoid Percent(Left Back) : 0.0000 Void Percent(Left Front) : 0.0000 Void Percent(Right Back) : 0.0000 Void Percent(Right Front) : 0.0000 Left Avg Data @ Fail : Right Avg Data @ Fail : 0.0000	380	49.8	-1.00668	-1.029	-1.00531	-1.13254	-1.82004	-1.02212	-0.963778	-0.940257	-0.882472	-0.729971	-0.767131	-0.963295	-0.9938	-0.953516	-0.967867	-1.2984	-1.03701	-0.898906	-0.926541	-0.774497	-0.873303	-0.650037
7	Project Name	5.8	Job Number	Lab Number	Project Engineer	Asphalt Grade	GB5-10	Pit Source	Submitted By	52	50		20	4000	50	16000	50	0	50	0	50	0	20000	2018-07-30	CommentsVoid Percent(Left Back) : 0.0000 Void Percent(Left Front) : 0.0000 Void Percent(Right Back) : 0.0000 Void Percent(Right Front) : 0.0000 Left Avg Data @ Fail : Right Avg Data @ Fail : 0.0000	400	49.8	-1.01829	-1.06383	-1.00531	-1.16733	-1.85499	-1.04541	-0.975436	-0.963524	-0.882472	-0.729971	-0.778789	-0.963295	-0.9938	-0.953516	-0.954049	-1.2984	-1.05082	-0.912724	-0.898881	-0.774497	-0.859561	-0.650037
7	Project Name	5.8	Job Number	Lab Number	Project Engineer	Asphalt Grade	GB5-10	Pit Source	Submitted By	52	50		20	4000	50	16000	50	0	50	0	50	0	20000	2018-07-30	CommentsVoid Percent(Left Back) : 0.0000 Void Percent(Left Front) : 0.0000 Void Percent(Right Back) : 0.0000 Void Percent(Right Front) : 0.0000 Left Avg Data @ Fail : Right Avg Data @ Fail : 0.0000	420	50	-1.02989	-1.06383	-1.00531	-1.19052	-1.85499	-1.05707	-0.987069	-0.963524	-0.917397	-0.753212	-0.790423	-0.990676	-1.00757	-0.994867	-0.995477	-1.33967	-1.09223	-0.926541	-0.926541	-0.802132	-0.859561	-0.663854
7	Project Name	5.8	Job Number	Lab Number	Project Engineer	Asphalt Grade	GB5-10	Pit Source	Submitted By	52	50		20	4000	50	16000	50	0	50	0	50	0	20000	2018-07-30	CommentsVoid Percent(Left Back) : 0.0000 Void Percent(Left Front) : 0.0000 Void Percent(Right Back) : 0.0000 Void Percent(Right Front) : 0.0000 Left Avg Data @ Fail : Right Avg Data @ Fail : 0.0000	440	50	-1.05311	-1.08702	-1.05171	-1.19052	-1.85499	-1.06873	-0.975436	-0.986815	-0.92903	-0.764819	-0.81374	-0.990676	-1.02131	-1.00863	-0.995477	-1.33967	-1.06462	-0.898906	-0.954176	-0.774497	-0.873303	-0.663854
7	Project Name	5.8	Job Number	Lab Number	Project Engineer	Asphalt Grade	GB5-10	Pit Source	Submitted By	52	50		20	4000	50	16000	50	0	50	0	50	0	20000	2018-07-30	CommentsVoid Percent(Left Back) : 0.0000 Void Percent(Left Front) : 0.0000 Void Percent(Right Back) : 0.0000 Void Percent(Right Front) : 0.0000 Left Avg Data @ Fail : Right Avg Data @ Fail : 0.0000	460	50.1	-1.06472	-1.09863	-1.06329	-1.21374	-1.90162	-1.10366	-0.998728	-0.986815	-0.940689	-0.78806	-0.837032	-1.00437	-1.02131	-1.00863	-1.02309	-1.36721	-1.09223	-0.926541	-0.954176	-0.802132	-0.832079	-0.663854
7	Project Name	5.8	Job Number	Lab Number	Project Engineer	Asphalt Grade	GB5-10	Pit Source	Submitted By	52	50		20	4000	50	16000	50	0	50	0	50	0	20000	2018-07-30	CommentsVoid Percent(Left Back) : 0.0000 Void Percent(Left Front) : 0.0000 Void Percent(Right Back) : 0.0000 Void Percent(Right Front) : 0.0000 Left Avg Data @ Fail : Right Avg Data @ Fail : 0.0000	480	50	-1.06472	-1.09863	-1.06329	-1.22535	-1.91328	-1.10366	-1.02199	-0.998449	-0.952322	-0.753212	-0.81374	-0.990676	-1.06256	-0.994867	-1.02309	-1.36721	-1.10602	-0.926541	-0.954176	-0.815975	-0.859561	-0.663854
7	Project Name	5.8	Job Number	Lab Number	Project Engineer	Asphalt Grade	GB5-10	Pit Source	Submitted By	52	50		20	4000	50	16000	50	0	50	0	50	0	20000	2018-07-30	CommentsVoid Percent(Left Back) : 0.0000 Void Percent(Left Front) : 0.0000 Void Percent(Right Back) : 0.0000 Void Percent(Right Front) : 0.0000 Left Avg Data @ Fail : Right Avg Data @ Fail : 0.0000	500	50	-1.09957	-1.13345	-1.0749	-1.24856	-1.93657	-1.11531	-1.02199	-1.02174	-0.963981	-0.776427	-0.848665	-1.00437	-1.0763	-1.00863	-1.0507	-1.35344	-1.16124	-0.940359	-0.967994	-0.829793	-0.859561	-0.677672
7	Project Name	5.8	Job Number	Lab Number	Project Engineer	Asphalt Grade	GB5-10	Pit Source	Submitted By	52	50		20	4000	50	16000	50	0	50	0	50	0	20000	2018-07-30	CommentsVoid Percent(Left Back) : 0.0000 Void Percent(Left Front) : 0.0000 Void Percent(Right Back) : 0.0000 Void Percent(Right Front) : 0.0000 Left Avg Data @ Fail : Right Avg Data @ Fail : 0.0000	520	50	-1.12278	-1.13345	-1.08651	-1.27178	-1.94823	-1.13863	-1.03365	-1.01008	-0.963981	-0.776427	-0.871982	-1.03175	-1.0763	-1.00863	-1.0507	-1.38095	-1.13363	-0.940359	-0.981812	-0.829793	-0.887044	-0.719125
7	Project Name	5.8	Job Number	Lab Number	Project Engineer	Asphalt Grade	GB5-10	Pit Source	Submitted By	52	50		20	4000	50	16000	50	0	50	0	50	0	20000	2018-07-30	CommentsVoid Percent(Left Back) : 0.0000 Void Percent(Left Front) : 0.0000 Void Percent(Right Back) : 0.0000 Void Percent(Right Front) : 0.0000 Left Avg Data @ Fail : Right Avg Data @ Fail : 0.0000	540	50	-1.13441	-1.15667	-1.09809	-1.24856	-1.97155	-1.13863	-1.05694	-1.03337	-0.998906	-0.776427	-0.871982	-1.04544	-1.09004	-1.02243	-1.03688	-1.4222	-1.13363	-0.981812	-0.981812	-0.857428	-0.887044	-0.69149
7	Project Name	5.8	Job Number	Lab Number	Project Engineer	Asphalt Grade	GB5-10	Pit Source	Submitted By	52	50		20	4000	50	16000	50	0	50	0	50	0	20000	2018-07-30	CommentsVoid Percent(Left Back) : 0.0000 Void Percent(Left Front) : 0.0000 Void Percent(Right Back) : 0.0000 Void Percent(Right Front) : 0.0000 Left Avg Data @ Fail : Right Avg Data @ Fail : 0.0000	560	50	-1.14602	-1.15667	-1.09809	-1.28339	-1.99487	-1.16192	-1.04529	-1.04503	-1.01054	-0.776427	-0.883641	-1.0591	-1.09004	-1.03619	-1.06449	-1.38095	-1.16124	-0.981812	-0.981812	-0.857428	-0.859561	-0.719125
7	Project Name	5.8	Job Number	Lab Number	Project Engineer	Asphalt Grade	GB5-10	Pit Source	Submitted By	52	50		20	4000	50	16000	50	0	50	0	50	0	20000	2018-07-30	CommentsVoid Percent(Left Back) : 0.0000 Void Percent(Left Front) : 0.0000 Void Percent(Right Back) : 0.0000 Void Percent(Right Front) : 0.0000 Left Avg Data @ Fail : Right Avg Data @ Fail : 0.0000	580	49.8	-1.14602	-1.16827	-1.12131	-1.27178	-2.01821	-1.16192	-1.05694	-1.04503	-1.01054	-0.799668	-0.871982	-1.0591	-1.0763	-1.03619	-1.0507	-1.39469	-1.14742	-0.995629	-1.02326	-0.84361	-0.887044	-0.719125
7	Project Name	5.8	Job Number	Lab Number	Project Engineer	Asphalt Grade	GB5-10	Pit Source	Submitted By	52	50		20	4000	50	16000	50	0	50	0	50	0	20000	2018-07-30	CommentsVoid Percent(Left Back) : 0.0000 Void Percent(Left Front) : 0.0000 Void Percent(Right Back) : 0.0000 Void Percent(Right Front) : 0.0000 Left Avg Data @ Fail : Right Avg Data @ Fail : 0.0000	600	49.8	-1.1925	-1.19149	-1.1445	-1.31821	-2.02987	-1.18524	-1.06858	-1.0683	-1.0222	-0.776427	-0.895274	-1.07279	-1.11752	-1.09131	-1.07828	-1.4222	-1.18882	-1.00945	-1.02326	-0.857428	-0.873303	-0.732942
7	Project Name	5.8	Job Number	Lab Number	Project Engineer	Asphalt Grade	GB5-10	Pit Source	Submitted By	52	50		20	4000	50	16000	50	0	50	0	50	0	20000	2018-07-30	CommentsVoid Percent(Left Back) : 0.0000 Void Percent(Left Front) : 0.0000 Void Percent(Right Back) : 0.0000 Void Percent(Right Front) : 0.0000 Left Avg Data @ Fail : Right Avg Data @ Fail : 0.0000	620	49.8	-1.16926	-1.2031	-1.1445	-1.3066	-2.06484	-1.1969	-1.06858	-1.0683	-1.0222	-0.776427	-0.895274	-1.07279	-1.10378	-1.04999	-1.0921	-1.44968	-1.20261	-0.995629	-1.02326	-0.871245	-0.873303	-0.732942
7	Project Name	5.8	Job Number	Lab Number	Project Engineer	Asphalt Grade	GB5-10	Pit Source	Submitted By	52	50		20	4000	50	16000	50	0	50	0	50	0	20000	2018-07-30	CommentsVoid Percent(Left Back) : 0.0000 Void Percent(Left Front) : 0.0000 Void Percent(Right Back) : 0.0000 Void Percent(Right Front) : 0.0000 Left Avg Data @ Fail : Right Avg Data @ Fail : 0.0000	640	49.9	-1.1925	-1.19149	-1.15611	-1.31821	-2.0765	-1.18524	-1.08024	-1.07996	-1.04549	-0.799668	-0.93025	-1.08649	-1.13127	-1.06375	-1.11968	-1.43594	-1.21641	-1.00945	-1.03708	-0.885063	-0.900786	-0.732942
7	Project Name	5.8	Job Number	Lab Number	Project Engineer	Asphalt Grade	GB5-10	Pit Source	Submitted By	52	50		20	4000	50	16000	50	0	50	0	50	0	20000	2018-07-30	CommentsVoid Percent(Left Back) : 0.0000 Void Percent(Left Front) : 0.0000 Void Percent(Right Back) : 0.0000 Void Percent(Right Front) : 0.0000 Left Avg Data @ Fail : Right Avg Data @ Fail : 0.0000	660	50	-1.22735	-1.2031	-1.15611	-1.31821	-2.0765	-1.1969	-1.08024	-1.07996	-1.0222	-0.78806	-0.906932	-1.10015	-1.13127	-1.09131	-1.11968	-1.46342	-1.21641	-1.02326	-1.03708	-0.871245	-0.900786	-0.760578
7	Project Name	5.8	Job Number	Lab Number	Project Engineer	Asphalt Grade	GB5-10	Pit Source	Submitted By	52	50		20	4000	50	16000	50	0	50	0	50	0	20000	2018-07-30	CommentsVoid Percent(Left Back) : 0.0000 Void Percent(Left Front) : 0.0000 Void Percent(Right Back) : 0.0000 Void Percent(Right Front) : 0.0000 Left Avg Data @ Fail : Right Avg Data @ Fail : 0.0000	680	50	-1.22735	-1.23795	-1.16771	-1.34145	-2.09984	-1.22019	-1.0919	-1.07996	-1.04549	-0.799668	-0.93025	-1.08649	-1.11752	-1.09131	-1.13347	-1.47716	-1.2302	-1.03708	-1.0509	-0.912698	-0.887044	-0.774395
7	Project Name	5.8	Job Number	Lab Number	Project Engineer	Asphalt Grade	GB5-10	Pit Source	Submitted By	52	50		20	4000	50	16000	50	0	50	0	50	0	20000	2018-07-30	CommentsVoid Percent(Left Back) : 0.0000 Void Percent(Left Front) : 0.0000 Void Percent(Right Back) : 0.0000 Void Percent(Right Front) : 0.0000 Left Avg Data @ Fail : Right Avg Data @ Fail : 0.0000	700	50	-1.23899	-1.26119	-1.16771	-1.36467	-2.1115	-1.22019	-1.0919	-1.09159	-1.05715	-0.776427	-0.93025	-1.11382	-1.14501	-1.10508	-1.14727	-1.47716	-1.24399	-1.06469	-1.0509	-0.912698	-0.873303	-0.788213
7	Project Name	5.8	Job Number	Lab Number	Project Engineer	Asphalt Grade	GB5-10	Pit Source	Submitted By	52	50		20	4000	50	16000	50	0	50	0	50	0	20000	2018-07-30	CommentsVoid Percent(Left Back) : 0.0000 Void Percent(Left Front) : 0.0000 Void Percent(Right Back) : 0.0000 Void Percent(Right Front) : 0.0000 Left Avg Data @ Fail : Right Avg Data @ Fail : 0.0000	720	50.1	-1.25059	-1.26119	-1.21415	-1.36467	-2.1115	-1.23185	-1.11519	-1.10325	-1.05715	-0.799668	-0.953567	-1.14117	-1.17249	-1.11884	-1.16106	-1.50465	-1.2302	-1.06469	-1.06472	-0.940333	-0.900786	-0.760578
7	Project Name	5.8	Job Number	Lab Number	Project Engineer	Asphalt Grade	GB5-10	Pit Source	Submitted By	52	50		20	4000	50	16000	50	0	50	0	50	0	20000	2018-07-30	CommentsVoid Percent(Left Back) : 0.0000 Void Percent(Left Front) : 0.0000 Void Percent(Right Back) : 0.0000 Void Percent(Right Front) : 0.0000 Left Avg Data @ Fail : Right Avg Data @ Fail : 0.0000	740	50	-1.25059	-1.27279	-1.21415	-1.36467	-2.1115	-1.23185	-1.12682	-1.11488	-1.09207	-0.78806	-0.941908	-1.11382	-1.14501	-1.11884	-1.13347	-1.47716	-1.24399	-1.03708	-1.07853	-0.926516	-0.887044	-0.788213
7	Project Name	5.8	Job Number	Lab Number	Project Engineer	Asphalt Grade	GB5-10	Pit Source	Submitted By	52	50		20	4000	50	16000	50	0	50	0	50	0	20000	2018-07-30	CommentsVoid Percent(Left Back) : 0.0000 Void Percent(Left Front) : 0.0000 Void Percent(Right Back) : 0.0000 Void Percent(Right Front) : 0.0000 Left Avg Data @ Fail : Right Avg Data @ Fail : 0.0000	760	50	-1.27386	-1.2844	-1.21415	-1.38791	-2.1465	-1.26682	-1.12682	-1.10325	-1.10373	-0.799668	-0.953567	-1.16848	-1.19995	-1.10508	-1.16106	-1.4909	-1.27155	-1.07851	-1.06472	-0.926516	-0.900786	-0.788213
7	Project Name	5.8	Job Number	Lab Number	Project Engineer	Asphalt Grade	GB5-10	Pit Source	Submitted By	52	50		20	4000	50	16000	50	0	50	0	50	0	20000	2018-07-30	CommentsVoid Percent(Left Back) : 0.0000 Void Percent(Left Front) : 0.0000 Void Percent(Right Back) : 0.0000 Void Percent(Right Front) : 0.0000 Left Avg Data @ Fail : Right Avg Data @ Fail : 0.0000	780	49.9	-1.27386	-1.2844	-1.23736	-1.38791	-2.16985	-1.24351	-1.13848	-1.12654	-1.10373	-0.811276	-0.9652	-1.15484	-1.17249	-1.11884	-1.16106	-1.4909	-1.27155	-1.06469	-1.07853	-0.940333	-0.914552	-0.815823
7	Project Name	5.8	Job Number	Lab Number	Project Engineer	Asphalt Grade	GB5-10	Pit Source	Submitted By	52	50		20	4000	50	16000	50	0	50	0	50	0	20000	2018-07-30	CommentsVoid Percent(Left Back) : 0.0000 Void Percent(Left Front) : 0.0000 Void Percent(Right Back) : 0.0000 Void Percent(Right Front) : 0.0000 Left Avg Data @ Fail : Right Avg Data @ Fail : 0.0000	800	50	-1.28547	-1.29604	-1.23736	-1.38791	-2.19319	-1.24351	-1.13848	-1.11488	-1.10373	-0.822909	-0.9652	-1.15484	-1.19995	-1.13261	-1.16106	-1.53213	-1.27155	-1.07851	-1.07853	-0.954151	-0.914552	-0.815823
7	Project Name	5.8	Job Number	Lab Number	Project Engineer	Asphalt Grade	GB5-10	Pit Source	Submitted By	52	50		20	4000	50	16000	50	0	50	0	50	0	20000	2018-07-30	CommentsVoid Percent(Left Back) : 0.0000 Void Percent(Left Front) : 0.0000 Void Percent(Right Back) : 0.0000 Void Percent(Right Front) : 0.0000 Left Avg Data @ Fail : Right Avg Data @ Fail : 0.0000	820	50	-1.30874	-1.31928	-1.23736	-1.41115	-2.20485	-1.26682	-1.1618	-1.1382	-1.12705	-0.822909	-0.976859	-1.18214	-1.19995	-1.13261	-1.18864	-1.54584	-1.29913	-1.07851	-1.10614	-0.954151	-0.900786	-0.82964
7	Project Name	5.8	Job Number	Lab Number	Project Engineer	Asphalt Grade	GB5-10	Pit Source	Submitted By	52	50		20	4000	50	16000	50	0	50	0	50	0	20000	2018-07-30	CommentsVoid Percent(Left Back) : 0.0000 Void Percent(Left Front) : 0.0000 Void Percent(Right Back) : 0.0000 Void Percent(Right Front) : 0.0000 Left Avg Data @ Fail : Right Avg Data @ Fail : 0.0000	840	49.8	-1.30874	-1.33088	-1.24897	-1.446	-2.20485	-1.3018	-1.15014	-1.16149	-1.11539	-0.822909	-0.988517	-1.18214	-1.21366	-1.13261	-1.17485	-1.54584	-1.3129	-1.07851	-1.11996	-0.954151	-0.914552	-0.843458
7	Project Name	5.8	Job Number	Lab Number	Project Engineer	Asphalt Grade	GB5-10	Pit Source	Submitted By	52	50		20	4000	50	16000	50	0	50	0	50	0	20000	2018-07-30	CommentsVoid Percent(Left Back) : 0.0000 Void Percent(Left Front) : 0.0000 Void Percent(Right Back) : 0.0000 Void Percent(Right Front) : 0.0000 Left Avg Data @ Fail : Right Avg Data @ Fail : 0.0000	860	49.8	-1.30874	-1.33088	-1.27218	-1.46924	-2.23987	-1.31348	-1.1618	-1.1382	-1.13868	-0.84615	-1.01183	-1.18214	-1.19995	-1.16015	-1.18864	-1.54584	-1.3129	-1.09233	-1.11996	-0.967969	-0.900786	-0.85725
7	Project Name	5.8	Job Number	Lab Number	Project Engineer	Asphalt Grade	GB5-10	Pit Source	Submitted By	52	50		20	4000	50	16000	50	0	50	0	50	0	20000	2018-07-30	CommentsVoid Percent(Left Back) : 0.0000 Void Percent(Left Front) : 0.0000 Void Percent(Right Back) : 0.0000 Void Percent(Right Front) : 0.0000 Left Avg Data @ Fail : Right Avg Data @ Fail : 0.0000	880	49.8	-1.33198	-1.34252	-1.27218	-1.45763	-2.25153	-1.29014	-1.15014	-1.16149	-1.13868	-0.822909	-1.01183	-1.20947	-1.19995	-1.14638	-1.23	-1.54584	-1.34046	-1.10612	-1.11996	-0.967969	-0.900786	-0.82964
7	Project Name	5.8	Job Number	Lab Number	Project Engineer	Asphalt Grade	GB5-10	Pit Source	Submitted By	52	50		20	4000	50	16000	50	0	50	0	50	0	20000	2018-07-30	CommentsVoid Percent(Left Back) : 0.0000 Void Percent(Left Front) : 0.0000 Void Percent(Right Back) : 0.0000 Void Percent(Right Front) : 0.0000 Left Avg Data @ Fail : Right Avg Data @ Fail : 0.0000	900	49.8	-1.33198	-1.35412	-1.29543	-1.45763	-2.26322	-1.3018	-1.18509	-1.16149	-1.15034	-0.822909	-1.02349	-1.20947	-1.21366	-1.14638	-1.23	-1.54584	-1.3129	-1.10612	-1.14757	-0.954151	-0.900786	-0.843458
7	Project Name	5.8	Job Number	Lab Number	Project Engineer	Asphalt Grade	GB5-10	Pit Source	Submitted By	52	50		20	4000	50	16000	50	0	50	0	50	0	20000	2018-07-30	CommentsVoid Percent(Left Back) : 0.0000 Void Percent(Left Front) : 0.0000 Void Percent(Right Back) : 0.0000 Void Percent(Right Front) : 0.0000 Left Avg Data @ Fail : Right Avg Data @ Fail : 0.0000	920	49.8	-1.36688	-1.37737	-1.27218	-1.46924	-2.27487	-1.32514	-1.17343	-1.17312	-1.17366	-0.822909	-1.02349	-1.20947	-1.2274	-1.20145	-1.24376	-1.55959	-1.34046	-1.11994	-1.13378	-0.981786	-0.900786	-0.843458
7	Project Name	5.8	Job Number	Lab Number	Project Engineer	Asphalt Grade	GB5-10	Pit Source	Submitted By	52	50		20	4000	50	16000	50	0	50	0	50	0	20000	2018-07-30	CommentsVoid Percent(Left Back) : 0.0000 Void Percent(Left Front) : 0.0000 Void Percent(Right Back) : 0.0000 Void Percent(Right Front) : 0.0000 Left Avg Data @ Fail : Right Avg Data @ Fail : 0.0000	940	50	-1.36688	-1.37737	-1.30703	-1.48087	-2.26322	-1.32514	-1.20841	-1.18478	-1.17366	-0.857758	-1.02349	-1.23678	-1.2274	-1.16015	-1.24376	-1.5733	-1.34046	-1.10612	-1.14757	-1.0094	-0.928294	-0.843458
7	Project Name	5.8	Job Number	Lab Number	Project Engineer	Asphalt Grade	GB5-10	Pit Source	Submitted By	52	50		20	4000	50	16000	50	0	50	0	50	0	20000	2018-07-30	CommentsVoid Percent(Left Back) : 0.0000 Void Percent(Left Front) : 0.0000 Void Percent(Right Back) : 0.0000 Void Percent(Right Front) : 0.0000 Left Avg Data @ Fail : Right Avg Data @ Fail : 0.0000	960	50.1	-1.39014	-1.37737	-1.30703	-1.49248	-2.28656	-1.32514	-1.20841	-1.18478	-1.18532	-0.857758	-1.03515	-1.23678	-1.24112	-1.20145	-1.27132	-1.5733	-1.35425	-1.13375	-1.14757	-1.0094	-0.928294	-0.871068
7	Project Name	5.8	Job Number	Lab Number	Project Engineer	Asphalt Grade	GB5-10	Pit Source	Submitted By	52	50		20	4000	50	16000	50	0	50	0	50	0	20000	2018-07-30	CommentsVoid Percent(Left Back) : 0.0000 Void Percent(Left Front) : 0.0000 Void Percent(Right Back) : 0.0000 Void Percent(Right Front) : 0.0000 Left Avg Data @ Fail : Right Avg Data @ Fail : 0.0000	980	50.1	-1.39014	-1.41224	-1.31864	-1.51575	-2.29824	-1.37178	-1.20841	-1.19644	-1.19697	-0.857758	-1.04681	-1.23678	-1.26855	-1.16015	-1.24376	-1.58704	-1.35425	-1.11994	-1.14757	-1.02321	-0.942035	-0.85725
7	Project Name	5.8	Job Number	Lab Number	Project Engineer	Asphalt Grade	GB5-10	Pit Source	Submitted By	52	50		20	4000	50	16000	50	0	50	0	50	0	20000	2018-07-30	CommentsVoid Percent(Left Back) : 0.0000 Void Percent(Left Front) : 0.0000 Void Percent(Right Back) : 0.0000 Void Percent(Right Front) : 0.0000 Left Avg Data @ Fail : Right Avg Data @ Fail : 0.0000	1000	50.1	-1.40175	-1.41224	-1.31864	-1.52735	-2.29824	-1.36012	-1.23172	-1.19644	-1.19697	-0.84615	-1.04681	-1.25042	-1.26855	-1.20145	-1.25755	-1.58704	-1.35425	-1.11994	-1.17521	-1.03703	-0.914552	-0.871068
7	Project Name	5.8	Job Number	Lab Number	Project Engineer	Asphalt Grade	GB5-10	Pit Source	Submitted By	52	50		20	4000	50	16000	50	0	50	0	50	0	20000	2018-07-30	CommentsVoid Percent(Left Back) : 0.0000 Void Percent(Left Front) : 0.0000 Void Percent(Right Back) : 0.0000 Void Percent(Right Front) : 0.0000 Left Avg Data @ Fail : Right Avg Data @ Fail : 0.0000	1020	50.1	-1.41338	-1.42387	-1.33027	-1.52735	-2.32159	-1.37178	-1.20841	-1.2081	-1.20861	-0.857758	-1.05849	-1.23678	-1.26855	-1.21519	-1.28511	-1.58704	-1.39558	-1.13375	-1.16139	-1.0094	-0.942035	-0.871068
7	Project Name	5.8	Job Number	Lab Number	Project Engineer	Asphalt Grade	GB5-10	Pit Source	Submitted By	52	50		20	4000	50	16000	50	0	50	0	50	0	20000	2018-07-30	CommentsVoid Percent(Left Back) : 0.0000 Void Percent(Left Front) : 0.0000 Void Percent(Right Back) : 0.0000 Void Percent(Right Front) : 0.0000 Left Avg Data @ Fail : Right Avg Data @ Fail : 0.0000	1040	50	-1.41338	-1.43551	-1.35349	-1.51575	-2.33327	-1.37178	-1.22006	-1.2081	-1.20861	-0.880999	-1.08181	-1.26406	-1.26855	-1.21519	-1.28511	-1.62819	-1.36802	-1.13375	-1.17521	-1.03703	-0.942035	-0.871068
7	Project Name	5.8	Job Number	Lab Number	Project Engineer	Asphalt Grade	GB5-10	Pit Source	Submitted By	52	50		20	4000	50	16000	50	0	50	0	50	0	20000	2018-07-30	CommentsVoid Percent(Left Back) : 0.0000 Void Percent(Left Front) : 0.0000 Void Percent(Right Back) : 0.0000 Void Percent(Right Front) : 0.0000 Left Avg Data @ Fail : Right Avg Data @ Fail : 0.0000	1060	50	-1.42502	-1.43551	-1.34188	-1.53899	-2.3683	-1.38346	-1.24336	-1.2081	-1.22027	-0.880999	-1.07015	-1.25042	-1.24112	-1.20145	-1.28511	-1.64191	-1.36802	-1.14755	-1.17521	-1.03703	-0.928294	-0.871068
7	Project Name	5.8	Job Number	Lab Number	Project Engineer	Asphalt Grade	GB5-10	Pit Source	Submitted By	52	50		20	4000	50	16000	50	0	50	0	50	0	20000	2018-07-30	CommentsVoid Percent(Left Back) : 0.0000 Void Percent(Left Front) : 0.0000 Void Percent(Right Back) : 0.0000 Void Percent(Right Front) : 0.0000 Left Avg Data @ Fail : Right Avg Data @ Fail : 0.0000	1080	50	-1.41338	-1.43551	-1.36512	-1.52735	-2.35661	-1.37178	-1.24336	-1.21973	-1.22027	-0.869391	-1.07015	-1.26406	-1.24112	-1.21519	-1.28511	-1.62819	-1.36802	-1.17516	-1.17521	-1.03703	-0.942035	-0.884885
7	Project Name	5.8	Job Number	Lab Number	Project Engineer	Asphalt Grade	GB5-10	Pit Source	Submitted By	52	50		20	4000	50	16000	50	0	50	0	50	0	20000	2018-07-30	CommentsVoid Percent(Left Back) : 0.0000 Void Percent(Left Front) : 0.0000 Void Percent(Right Back) : 0.0000 Void Percent(Right Front) : 0.0000 Left Avg Data @ Fail : Right Avg Data @ Fail : 0.0000	1100	50	-1.45994	-1.45875	-1.36512	-1.55062	-2.35661	-1.38346	-1.23172	-1.21973	-1.23193	-0.869391	-1.08181	-1.2777	-1.28227	-1.21519	-1.29888	-1.60076	-1.39558	-1.14755	-1.189	-1.02321	-0.928294	-0.871068
7	Project Name	5.8	Job Number	Lab Number	Project Engineer	Asphalt Grade	GB5-10	Pit Source	Submitted By	52	50		20	4000	50	16000	50	0	50	0	50	0	20000	2018-07-30	CommentsVoid Percent(Left Back) : 0.0000 Void Percent(Left Front) : 0.0000 Void Percent(Right Back) : 0.0000 Void Percent(Right Front) : 0.0000 Left Avg Data @ Fail : Right Avg Data @ Fail : 0.0000	1120	50	-1.45994	-1.45875	-1.36512	-1.55062	-2.35661	-1.40678	-1.25501	-1.25471	-1.23193	-0.892632	-1.08181	-1.2777	-1.28227	-1.21519	-1.29888	-1.64191	-1.40934	-1.14755	-1.21661	-1.03703	-0.969569	-0.884885
7	Project Name	5.8	Job Number	Lab Number	Project Engineer	Asphalt Grade	GB5-10	Pit Source	Submitted By	52	50		20	4000	50	16000	50	0	50	0	50	0	20000	2018-07-30	CommentsVoid Percent(Left Back) : 0.0000 Void Percent(Left Front) : 0.0000 Void Percent(Right Back) : 0.0000 Void Percent(Right Front) : 0.0000 Left Avg Data @ Fail : Right Avg Data @ Fail : 0.0000	1140	49.8	-1.44831	-1.47038	-1.38836	-1.52735	-2.34493	-1.39512	-1.24336	-1.26637	-1.25524	-0.892632	-1.10513	-1.2777	-1.29598	-1.21519	-1.27132	-1.60076	-1.40934	-1.14755	-1.189	-1.05082	-0.928294	-0.898677
7	Project Name	5.8	Job Number	Lab Number	Project Engineer	Asphalt Grade	GB5-10	Pit Source	Submitted By	52	50		20	4000	50	16000	50	0	50	0	50	0	20000	2018-07-30	CommentsVoid Percent(Left Back) : 0.0000 Void Percent(Left Front) : 0.0000 Void Percent(Right Back) : 0.0000 Void Percent(Right Front) : 0.0000 Left Avg Data @ Fail : Right Avg Data @ Fail : 0.0000	1160	49.8	-1.44831	-1.47038	-1.41161	-1.53899	-2.35661	-1.40678	-1.24336	-1.25471	-1.25524	-0.880999	-1.12847	-1.2777	-1.3097	-1.21519	-1.29888	-1.62819	-1.42311	-1.14755	-1.21661	-1.05082	-0.98331	-0.898677
7	Project Name	5.8	Job Number	Lab Number	Project Engineer	Asphalt Grade	GB5-10	Pit Source	Submitted By	52	50		20	4000	50	16000	50	0	50	0	50	0	20000	2018-07-30	CommentsVoid Percent(Left Back) : 0.0000 Void Percent(Left Front) : 0.0000 Void Percent(Right Back) : 0.0000 Void Percent(Right Front) : 0.0000 Left Avg Data @ Fail : Right Avg Data @ Fail : 0.0000	1180	49.8	-1.48321	-1.49365	-1.41161	-1.57386	-2.39166	-1.44178	-1.26667	-1.25471	-1.2669	-0.880999	-1.11679	-1.29134	-1.32342	-1.22895	-1.35397	-1.65562	-1.40934	-1.18895	-1.2304	-1.06464	-0.969569	-0.898677
7	Project Name	5.8	Job Number	Lab Number	Project Engineer	Asphalt Grade	GB5-10	Pit Source	Submitted By	52	50		20	4000	50	16000	50	0	50	0	50	0	20000	2018-07-30	CommentsVoid Percent(Left Back) : 0.0000 Void Percent(Left Front) : 0.0000 Void Percent(Right Back) : 0.0000 Void Percent(Right Front) : 0.0000 Left Avg Data @ Fail : Right Avg Data @ Fail : 0.0000	1200	49.8	-1.49484	-1.51691	-1.39997	-1.58549	-2.43837	-1.45346	-1.30165	-1.27803	-1.27856	-0.892632	-1.12847	-1.29134	-1.32342	-1.22895	-1.34021	-1.68305	-1.45064	-1.17516	-1.21661	-1.05082	-0.928294	-0.884885
7	Project Name	5.8	Job Number	Lab Number	Project Engineer	Asphalt Grade	GB5-10	Pit Source	Submitted By	52	50		20	4000	50	16000	50	0	50	0	50	0	20000	2018-07-30	CommentsVoid Percent(Left Back) : 0.0000 Void Percent(Left Front) : 0.0000 Void Percent(Right Back) : 0.0000 Void Percent(Right Front) : 0.0000 Left Avg Data @ Fail : Right Avg Data @ Fail : 0.0000	1220	50	-1.49484	-1.50528	-1.42321	-1.58549	-2.43837	-1.41844	-1.28999	-1.27803	-1.29022	-0.892632	-1.14013	-1.30498	-1.3097	-1.22895	-1.38151	-1.66934	-1.43688	-1.18895	-1.24422	-1.07846	-0.942035	-0.898677
7	Project Name	5.8	Job Number	Lab Number	Project Engineer	Asphalt Grade	GB5-10	Pit Source	Submitted By	52	50		20	4000	50	16000	50	0	50	0	50	0	20000	2018-07-30	CommentsVoid Percent(Left Back) : 0.0000 Void Percent(Left Front) : 0.0000 Void Percent(Right Back) : 0.0000 Void Percent(Right Front) : 0.0000 Left Avg Data @ Fail : Right Avg Data @ Fail : 0.0000	1240	50	-1.50647	-1.51691	-1.41161	-1.62039	-2.42669	-1.46512	-1.28999	-1.28966	-1.29022	-0.90424	-1.14013	-1.29134	-1.29598	-1.24272	-1.35397	-1.66934	-1.43688	-1.20277	-1.24422	-1.07846	-0.969569	-0.926287
7	Project Name	5.8	Job Number	Lab Number	Project Engineer	Asphalt Grade	GB5-10	Pit Source	Submitted By	52	50		20	4000	50	16000	50	0	50	0	50	0	20000	2018-07-30	CommentsVoid Percent(Left Back) : 0.0000 Void Percent(Left Front) : 0.0000 Void Percent(Right Back) : 0.0000 Void Percent(Right Front) : 0.0000 Left Avg Data @ Fail : Right Avg Data @ Fail : 0.0000	1260	50.1	-1.51811	-1.52852	-1.43485	-1.60876	-2.46174	-1.46512	-1.30165	-1.28966	-1.29022	-0.90424	-1.15179	-1.30498	-1.3097	-1.24272	-1.36774	-1.68305	-1.45064	-1.20277	-1.2304	-1.07846	-0.900786	-0.926287
7	Project Name	5.8	Job Number	Lab Number	Project Engineer	Asphalt Grade	GB5-10	Pit Source	Submitted By	52	50		20	4000	50	16000	50	0	50	0	50	0	20000	2018-07-30	CommentsVoid Percent(Left Back) : 0.0000 Void Percent(Left Front) : 0.0000 Void Percent(Right Back) : 0.0000 Void Percent(Right Front) : 0.0000 Left Avg Data @ Fail : Right Avg Data @ Fail : 0.0000	1280	50.1	-1.50647	-1.54015	-1.44645	-1.62039	-2.45006	-1.45346	-1.30165	-1.28966	-1.3019	-0.950747	-1.18679	-1.30498	-1.35082	-1.25646	-1.35397	-1.65562	-1.46441	-1.18895	-1.24422	-1.09225	-0.997077	-0.940079
7	Project Name	5.8	Job Number	Lab Number	Project Engineer	Asphalt Grade	GB5-10	Pit Source	Submitted By	52	50		20	4000	50	16000	50	0	50	0	50	0	20000	2018-07-30	CommentsVoid Percent(Left Back) : 0.0000 Void Percent(Left Front) : 0.0000 Void Percent(Right Back) : 0.0000 Void Percent(Right Front) : 0.0000 Left Avg Data @ Fail : Right Avg Data @ Fail : 0.0000	1300	50	-1.51811	-1.55179	-1.46972	-1.62039	-2.46174	-1.46512	-1.30165	-1.30132	-1.31356	-0.927506	-1.16345	-1.3459	-1.33713	-1.2702	-1.36774	-1.68305	-1.46441	-1.21656	-1.2718	-1.09225	-0.98331	-0.953897
7	Project Name	5.8	Job Number	Lab Number	Project Engineer	Asphalt Grade	GB5-10	Pit Source	Submitted By	52	50		20	4000	50	16000	50	0	50	0	50	0	20000	2018-07-30	CommentsVoid Percent(Left Back) : 0.0000 Void Percent(Left Front) : 0.0000 Void Percent(Right Back) : 0.0000 Void Percent(Right Front) : 0.0000 Left Avg Data @ Fail : Right Avg Data @ Fail : 0.0000	1320	50.1	-1.55303	-1.55179	-1.46972	-1.63203	-2.48511	-1.48847	-1.32497	-1.31298	-1.32522	-0.939114	-1.18679	-1.3459	-1.3097	-1.2702	-1.39527	-1.66934	-1.46441	-1.20277	-1.24422	-1.09225	-0.98331	-0.953897
7	Project Name	5.8	Job Number	Lab Number	Project Engineer	Asphalt Grade	GB5-10	Pit Source	Submitted By	52	50		20	4000	50	16000	50	0	50	0	50	0	20000	2018-07-30	CommentsVoid Percent(Left Back) : 0.0000 Void Percent(Left Front) : 0.0000 Void Percent(Right Back) : 0.0000 Void Percent(Right Front) : 0.0000 Left Avg Data @ Fail : Right Avg Data @ Fail : 0.0000	1340	50	-1.55303	-1.57508	-1.46972	-1.64363	-2.50848	-1.47678	-1.32497	-1.30132	-1.34854	-0.939114	-1.19847	-1.31862	-1.33713	-1.2702	-1.38151	-1.68305	-1.50571	-1.21656	-1.25801	-1.09225	-0.969569	-0.940079
7	Project Name	5.8	Job Number	Lab Number	Project Engineer	Asphalt Grade	GB5-10	Pit Source	Submitted By	52	50		20	4000	50	16000	50	0	50	0	50	0	20000	2018-07-30	CommentsVoid Percent(Left Back) : 0.0000 Void Percent(Left Front) : 0.0000 Void Percent(Right Back) : 0.0000 Void Percent(Right Front) : 0.0000 Left Avg Data @ Fail : Right Avg Data @ Fail : 0.0000	1360	50	-1.55303	-1.55179	-1.44645	-1.65527	-2.48511	-1.47678	-1.32497	-1.30132	-1.31356	-0.927506	-1.19847	-1.35951	-1.33713	-1.25646	-1.38151	-1.71046	-1.47818	-1.23035	-1.2718	-1.09225	-0.98331	-0.940079
7	Project Name	5.8	Job Number	Lab Number	Project Engineer	Asphalt Grade	GB5-10	Pit Source	Submitted By	52	50		20	4000	50	16000	50	0	50	0	50	0	20000	2018-07-30	CommentsVoid Percent(Left Back) : 0.0000 Void Percent(Left Front) : 0.0000 Void Percent(Right Back) : 0.0000 Void Percent(Right Front) : 0.0000 Left Avg Data @ Fail : Right Avg Data @ Fail : 0.0000	1380	50	-1.56467	-1.57508	-1.49296	-1.65527	-2.48511	-1.50012	-1.33665	-1.31298	-1.32522	-0.927506	-1.18679	-1.35951	-1.35082	-1.29771	-1.39527	-1.69677	-1.47818	-1.23035	-1.25801	-1.09225	-0.969569	-0.940079
7	Project Name	5.8	Job Number	Lab Number	Project Engineer	Asphalt Grade	GB5-10	Pit Source	Submitted By	52	50		20	4000	50	16000	50	0	50	0	50	0	20000	2018-07-30	CommentsVoid Percent(Left Back) : 0.0000 Void Percent(Left Front) : 0.0000 Void Percent(Right Back) : 0.0000 Void Percent(Right Front) : 0.0000 Left Avg Data @ Fail : Right Avg Data @ Fail : 0.0000	1400	50	-1.56467	-1.58671	-1.48133	-1.65527	-2.52016	-1.48847	-1.34831	-1.33629	-1.31356	-0.950747	-1.18679	-1.37315	-1.37823	-1.2702	-1.38151	-1.73787	-1.47818	-1.23035	-1.2718	-1.11986	-0.98331	-0.953897
7	Project Name	5.8	Job Number	Lab Number	Project Engineer	Asphalt Grade	GB5-10	Pit Source	Submitted By	52	50		20	4000	50	16000	50	0	50	0	50	0	20000	2018-07-30	CommentsVoid Percent(Left Back) : 0.0000 Void Percent(Left Front) : 0.0000 Void Percent(Right Back) : 0.0000 Void Percent(Right Front) : 0.0000 Left Avg Data @ Fail : Right Avg Data @ Fail : 0.0000	1420	50	-1.56467	-1.59835	-1.49296	-1.6669	-2.52016	-1.48847	-1.33665	-1.30132	-1.32522	-0.927506	-1.19847	-1.37315	-1.37823	-1.25646	-1.40904	-1.69677	-1.50571	-1.24417	-1.28562	-1.13365	-0.98331	-0.953897
7	Project Name	5.8	Job Number	Lab Number	Project Engineer	Asphalt Grade	GB5-10	Pit Source	Submitted By	52	50		20	4000	50	16000	50	0	50	0	50	0	20000	2018-07-30	CommentsVoid Percent(Left Back) : 0.0000 Void Percent(Left Front) : 0.0000 Void Percent(Right Back) : 0.0000 Void Percent(Right Front) : 0.0000 Left Avg Data @ Fail : Right Avg Data @ Fail : 0.0000	1440	49.8	-1.57632	-1.59835	-1.49296	-1.64363	-2.52016	-1.48847	-1.34831	-1.31298	-1.34854	-0.939114	-1.21013	-1.38676	-1.35082	-1.25646	-1.38151	-1.73787	-1.50571	-1.23035	-1.28562	-1.13365	-0.969569	-0.967689
7	Project Name	5.8	Job Number	Lab Number	Project Engineer	Asphalt Grade	GB5-10	Pit Source	Submitted By	52	50		20	4000	50	16000	50	0	50	0	50	0	20000	2018-07-30	CommentsVoid Percent(Left Back) : 0.0000 Void Percent(Left Front) : 0.0000 Void Percent(Right Back) : 0.0000 Void Percent(Right Front) : 0.0000 Left Avg Data @ Fail : Right Avg Data @ Fail : 0.0000	1460	49.8	-1.58796	-1.60998	-1.5162	-1.65527	-2.52016	-1.50012	-1.34831	-1.31298	-1.34854	-0.939114	-1.21013	-1.38676	-1.37823	-1.29771	-1.39527	-1.71046	-1.50571	-1.23035	-1.2718	-1.11986	-0.942035	-0.967689
7	Project Name	5.8	Job Number	Lab Number	Project Engineer	Asphalt Grade	GB5-10	Pit Source	Submitted By	52	50		20	4000	50	16000	50	0	50	0	50	0	20000	2018-07-30	CommentsVoid Percent(Left Back) : 0.0000 Void Percent(Left Front) : 0.0000 Void Percent(Right Back) : 0.0000 Void Percent(Right Front) : 0.0000 Left Avg Data @ Fail : Right Avg Data @ Fail : 0.0000	1480	49.8	-1.57632	-1.62161	-1.5162	-1.6669	-2.52016	-1.48847	-1.34831	-1.31298	-1.34854	-0.962381	-1.21013	-1.37315	-1.35082	-1.31145	-1.39527	-1.71046	-1.47818	-1.27175	-1.31321	-1.13365	-0.997077	-0.967689
7	Project Name	5.8	Job Number	Lab Number	Project Engineer	Asphalt Grade	GB5-10	Pit Source	Submitted By	52	50		20	4000	50	16000	50	0	50	0	50	0	20000	2018-07-30	CommentsVoid Percent(Left Back) : 0.0000 Void Percent(Left Front) : 0.0000 Void Percent(Right Back) : 0.0000 Void Percent(Right Front) : 0.0000 Left Avg Data @ Fail : Right Avg Data @ Fail : 0.0000	1500	49.8	-1.59962	-1.62161	-1.5162	-1.65527	-2.54353	-1.51181	-1.34831	-1.33629	-1.3602	-0.973988	-1.23347	-1.37315	-1.37823	-1.31145	-1.40904	-1.71046	-1.50571	-1.27175	-1.28562	-1.13365	-0.997077	-0.967689
7	Project Name	5.8	Job Number	Lab Number	Project Engineer	Asphalt Grade	GB5-10	Pit Source	Submitted By	52	50		20	4000	50	16000	50	0	50	0	50	0	20000	2018-07-30	CommentsVoid Percent(Left Back) : 0.0000 Void Percent(Left Front) : 0.0000 Void Percent(Right Back) : 0.0000 Void Percent(Right Front) : 0.0000 Left Avg Data @ Fail : Right Avg Data @ Fail : 0.0000	1520	49.8	-1.59962	-1.63325	-1.53947	-1.70183	-2.5669	-1.51181	-1.38328	-1.34795	-1.37188	-0.939114	-1.23347	-1.40038	-1.37823	-1.31145	-1.40904	-1.73787	-1.51945	-1.27175	-1.31321	-1.13365	-0.942035	-0.967689
7	Project Name	5.8	Job Number	Lab Number	Project Engineer	Asphalt Grade	GB5-10	Pit Source	Submitted By	52	50		20	4000	50	16000	50	0	50	0	50	0	20000	2018-07-30	CommentsVoid Percent(Left Back) : 0.0000 Void Percent(Left Front) : 0.0000 Void Percent(Right Back) : 0.0000 Void Percent(Right Front) : 0.0000 Left Avg Data @ Fail : Right Avg Data @ Fail : 0.0000	1540	50	-1.59962	-1.63325	-1.53947	-1.69019	-2.5669	-1.53515	-1.38328	-1.35961	-1.37188	-0.950747	-1.23347	-1.37315	-1.39195	-1.29771	-1.40904	-1.75158	-1.51945	-1.28554	-1.327	-1.14747	-0.997077	-0.967689
7	Project Name	5.8	Job Number	Lab Number	Project Engineer	Asphalt Grade	GB5-10	Pit Source	Submitted By	52	50		20	4000	50	16000	50	0	50	0	50	0	20000	2018-07-30	CommentsVoid Percent(Left Back) : 0.0000 Void Percent(Left Front) : 0.0000 Void Percent(Right Back) : 0.0000 Void Percent(Right Front) : 0.0000 Left Avg Data @ Fail : Right Avg Data @ Fail : 0.0000	1560	50	-1.59962	-1.63325	-1.53947	-1.71346	-2.59029	-1.54681	-1.39494	-1.34795	-1.37188	-0.962381	-1.25682	-1.38676	-1.40564	-1.32519	-1.43657	-1.75158	-1.53322	-1.28554	-1.327	-1.14747	-0.98331	-0.981481
7	Project Name	5.8	Job Number	Lab Number	Project Engineer	Asphalt Grade	GB5-10	Pit Source	Submitted By	52	50		20	4000	50	16000	50	0	50	0	50	0	20000	2018-07-30	CommentsVoid Percent(Left Back) : 0.0000 Void Percent(Left Front) : 0.0000 Void Percent(Right Back) : 0.0000 Void Percent(Right Front) : 0.0000 Left Avg Data @ Fail : Right Avg Data @ Fail : 0.0000	1580	50.1	-1.62288	-1.64488	-1.52784	-1.73672	-2.59029	-1.55849	-1.39494	-1.35961	-1.38354	-0.939114	-1.24513	-1.40038	-1.40564	-1.31145	-1.43657	-1.73787	-1.56073	-1.27175	-1.327	-1.16126	-0.969569	-0.995299
7	Project Name	5.8	Job Number	Lab Number	Project Engineer	Asphalt Grade	GB5-10	Pit Source	Submitted By	52	50		20	4000	50	16000	50	0	50	0	50	0	20000	2018-07-30	CommentsVoid Percent(Left Back) : 0.0000 Void Percent(Left Front) : 0.0000 Void Percent(Right Back) : 0.0000 Void Percent(Right Front) : 0.0000 Left Avg Data @ Fail : Right Avg Data @ Fail : 0.0000	1600	50.1	-1.63454	-1.66817	-1.53947	-1.73672	-2.5669	-1.54681	-1.38328	-1.37127	-1.3952	-0.950747	-1.25682	-1.40038	-1.41933	-1.31145	-1.45031	-1.75158	-1.56073	-1.28554	-1.327	-1.16126	-0.997077	-1.03668
7	Project Name	5.8	Job Number	Lab Number	Project Engineer	Asphalt Grade	GB5-10	Pit Source	Submitted By	52	50		20	4000	50	16000	50	0	50	0	50	0	20000	2018-07-30	CommentsVoid Percent(Left Back) : 0.0000 Void Percent(Left Front) : 0.0000 Void Percent(Right Back) : 0.0000 Void Percent(Right Front) : 0.0000 Left Avg Data @ Fail : Right Avg Data @ Fail : 0.0000	1620	50.1	-1.64617	-1.66817	-1.57437	-1.71346	-2.59029	-1.54681	-1.39494	-1.37127	-1.38354	-0.962381	-1.24513	-1.44122	-1.40564	-1.31145	-1.45031	-1.76527	-1.53322	-1.29934	-1.34079	-1.17505	-1.02461	-0.995299
7	Project Name	5.8	Job Number	Lab Number	Project Engineer	Asphalt Grade	GB5-10	Pit Source	Submitted By	52	50		20	4000	50	16000	50	0	50	0	50	0	20000	2018-07-30	CommentsVoid Percent(Left Back) : 0.0000 Void Percent(Left Front) : 0.0000 Void Percent(Right Back) : 0.0000 Void Percent(Right Front) : 0.0000 Left Avg Data @ Fail : Right Avg Data @ Fail : 0.0000	1640	50.1	-1.63454	-1.69144	-1.56273	-1.71346	-2.61366	-1.55849	-1.39494	-1.37127	-1.3952	-0.962381	-1.25682	-1.44122	-1.43302	-1.33894	-1.43657	-1.76527	-1.57447	-1.31313	-1.327	-1.16126	-1.01084	-1.02288
7	Project Name	5.8	Job Number	Lab Number	Project Engineer	Asphalt Grade	GB5-10	Pit Source	Submitted By	52	50		20	4000	50	16000	50	0	50	0	50	0	20000	2018-07-30	CommentsVoid Percent(Left Back) : 0.0000 Void Percent(Left Front) : 0.0000 Void Percent(Right Back) : 0.0000 Void Percent(Right Front) : 0.0000 Left Avg Data @ Fail : Right Avg Data @ Fail : 0.0000	1660	50	-1.64617	-1.69144	-1.56273	-1.73672	-2.61366	-1.55849	-1.40663	-1.37127	-1.40686	-0.939114	-1.28016	-1.44122	-1.40564	-1.33894	-1.47785	-1.77897	-1.54699	-1.31313	-1.34079	-1.18887	-0.942035	-0.995299
7	Project Name	5.8	Job Number	Lab Number	Project Engineer	Asphalt Grade	GB5-10	Pit Source	Submitted By	52	50		20	4000	50	16000	50	0	50	0	50	0	20000	2018-07-30	CommentsVoid Percent(Left Back) : 0.0000 Void Percent(Left Front) : 0.0000 Void Percent(Right Back) : 0.0000 Void Percent(Right Front) : 0.0000 Left Avg Data @ Fail : Right Avg Data @ Fail : 0.0000	1680	50	-1.64617	-1.6798	-1.57437	-1.73672	-2.62534	-1.57015	-1.40663	-1.37127	-1.40686	-0.962381	-1.28016	-1.44122	-1.41933	-1.33894	-1.46408	-1.77897	-1.56073	-1.32692	-1.34079	-1.16126	-0.997077	-1.02288
7	Project Name	5.8	Job Number	Lab Number	Project Engineer	Asphalt Grade	GB5-10	Pit Source	Submitted By	52	50		20	4000	50	16000	50	0	50	0	50	0	20000	2018-07-30	CommentsVoid Percent(Left Back) : 0.0000 Void Percent(Left Front) : 0.0000 Void Percent(Right Back) : 0.0000 Void Percent(Right Front) : 0.0000 Left Avg Data @ Fail : Right Avg Data @ Fail : 0.0000	1700	49.8	-1.66947	-1.7031	-1.59761	-1.72509	-2.62534	-1.57015	-1.40663	-1.38295	-1.40686	-0.962381	-1.29182	-1.44122	-1.43302	-1.33894	-1.46408	-1.79266	-1.56073	-1.32692	-1.35458	-1.18887	-1.01084	-1.02288
7	Project Name	5.8	Job Number	Lab Number	Project Engineer	Asphalt Grade	GB5-10	Pit Source	Submitted By	52	50		20	4000	50	16000	50	0	50	0	50	0	20000	2018-07-30	CommentsVoid Percent(Left Back) : 0.0000 Void Percent(Left Front) : 0.0000 Void Percent(Right Back) : 0.0000 Void Percent(Right Front) : 0.0000 Left Avg Data @ Fail : Right Avg Data @ Fail : 0.0000	1720	49.9	-1.68112	-1.7031	-1.586	-1.74836	-2.63703	-1.57015	-1.41829	-1.38295	-1.4302	-0.962381	-1.25682	-1.44122	-1.43302	-1.33894	-1.46408	-1.80635	-1.54699	-1.31313	-1.34079	-1.17505	-0.997077	-1.02288
7	Project Name	5.8	Job Number	Lab Number	Project Engineer	Asphalt Grade	GB5-10	Pit Source	Submitted By	52	50		20	4000	50	16000	50	0	50	0	50	0	20000	2018-07-30	CommentsVoid Percent(Left Back) : 0.0000 Void Percent(Left Front) : 0.0000 Void Percent(Right Back) : 0.0000 Void Percent(Right Front) : 0.0000 Left Avg Data @ Fail : Right Avg Data @ Fail : 0.0000	1740	49.9	-1.66947	-1.7031	-1.586	-1.73672	-2.64874	-1.57015	-1.42994	-1.38295	-1.3952	-0.973988	-1.28016	-1.46845	-1.41933	-1.32519	-1.46408	-1.79266	-1.56073	-1.31313	-1.35458	-1.16126	-1.02461	-0.995299
7	Project Name	5.8	Job Number	Lab Number	Project Engineer	Asphalt Grade	GB5-10	Pit Source	Submitted By	52	50		20	4000	50	16000	50	0	50	0	50	0	20000	2018-07-30	CommentsVoid Percent(Left Back) : 0.0000 Void Percent(Left Front) : 0.0000 Void Percent(Right Back) : 0.0000 Void Percent(Right Front) : 0.0000 Left Avg Data @ Fail : Right Avg Data @ Fail : 0.0000	1760	49.9	-1.69278	-1.71473	-1.586	-1.78328	-2.62534	-1.58184	-1.40663	-1.37127	-1.4302	-0.950747	-1.28016	-1.46845	-1.41933	-1.32519	-1.47785	-1.76527	-1.57447	-1.32692	-1.34079	-1.18887	-0.997077	-1.03668
7	Project Name	5.8	Job Number	Lab Number	Project Engineer	Asphalt Grade	GB5-10	Pit Source	Submitted By	52	50		20	4000	50	16000	50	0	50	0	50	0	20000	2018-07-30	CommentsVoid Percent(Left Back) : 0.0000 Void Percent(Left Front) : 0.0000 Void Percent(Right Back) : 0.0000 Void Percent(Right Front) : 0.0000 Left Avg Data @ Fail : Right Avg Data @ Fail : 0.0000	1780	49.8	-1.68112	-1.72639	-1.60924	-1.78328	-2.66042	-1.59352	-1.42994	-1.38295	-1.44188	-0.962381	-1.29182	-1.46845	-1.43302	-1.35268	-1.49159	-1.80635	-1.57447	-1.32692	-1.35458	-1.21646	-1.02461	-1.03668
7	Project Name	5.8	Job Number	Lab Number	Project Engineer	Asphalt Grade	GB5-10	Pit Source	Submitted By	52	50		20	4000	50	16000	50	0	50	0	50	0	20000	2018-07-30	CommentsVoid Percent(Left Back) : 0.0000 Void Percent(Left Front) : 0.0000 Void Percent(Right Back) : 0.0000 Void Percent(Right Front) : 0.0000 Left Avg Data @ Fail : Right Avg Data @ Fail : 0.0000	1800	49.8	-1.69278	-1.72639	-1.60924	-1.73672	-2.64874	-1.58184	-1.42994	-1.39461	-1.44188	-0.973988	-1.3035	-1.46845	-1.43302	-1.33894	-1.46408	-1.79266	-1.56073	-1.31313	-1.35458	-1.17505	-1.03838	-1.05047
7	Project Name	5.8	Job Number	Lab Number	Project Engineer	Asphalt Grade	GB5-10	Pit Source	Submitted By	52	50		20	4000	50	16000	50	0	50	0	50	0	20000	2018-07-30	CommentsVoid Percent(Left Back) : 0.0000 Void Percent(Left Front) : 0.0000 Void Percent(Right Back) : 0.0000 Void Percent(Right Front) : 0.0000 Left Avg Data @ Fail : Right Avg Data @ Fail : 0.0000	1820	49.9	-1.71607	-1.72639	-1.60924	-1.79492	-2.66042	-1.61686	-1.42994	-1.39461	-1.44188	-0.950747	-1.28016	-1.46845	-1.43302	-1.33894	-1.49159	-1.79266	-1.60198	-1.32692	-1.36837	-1.18887	-1.01084	-1.02288
7	Project Name	5.8	Job Number	Lab Number	Project Engineer	Asphalt Grade	GB5-10	Pit Source	Submitted By	52	50		20	4000	50	16000	50	0	50	0	50	0	20000	2018-07-30	CommentsVoid Percent(Left Back) : 0.0000 Void Percent(Left Front) : 0.0000 Void Percent(Right Back) : 0.0000 Void Percent(Right Front) : 0.0000 Left Avg Data @ Fail : Right Avg Data @ Fail : 0.0000	1840	49.8	-1.71607	-1.74965	-1.60924	-1.79492	-2.68381	-1.61686	-1.4416	-1.39461	-1.44188	-0.973988	-1.3035	-1.48204	-1.41933	-1.33894	-1.50533	-1.80635	-1.57447	-1.34071	-1.36837	-1.17505	-0.997077	-1.05047
7	Project Name	5.8	Job Number	Lab Number	Project Engineer	Asphalt Grade	GB5-10	Pit Source	Submitted By	52	50		20	4000	50	16000	50	0	50	0	50	0	20000	2018-07-30	CommentsVoid Percent(Left Back) : 0.0000 Void Percent(Left Front) : 0.0000 Void Percent(Right Back) : 0.0000 Void Percent(Right Front) : 0.0000 Left Avg Data @ Fail : Right Avg Data @ Fail : 0.0000	1860	50	-1.71607	-1.76131	-1.60924	-1.79492	-2.6955	-1.59352	-1.46494	-1.39461	-1.44188	-0.962381	-1.3035	-1.46845	-1.43302	-1.35268	-1.50533	-1.84742	-1.60198	-1.38206	-1.36837	-1.21646	-0.997077	-1.05047
7	Project Name	5.8	Job Number	Lab Number	Project Engineer	Asphalt Grade	GB5-10	Pit Source	Submitted By	52	50		20	4000	50	16000	50	0	50	0	50	0	20000	2018-07-30	CommentsVoid Percent(Left Back) : 0.0000 Void Percent(Left Front) : 0.0000 Void Percent(Right Back) : 0.0000 Void Percent(Right Front) : 0.0000 Left Avg Data @ Fail : Right Avg Data @ Fail : 0.0000	1880	50	-1.71607	-1.76131	-1.64417	-1.79492	-2.6955	-1.59352	-1.47663	-1.39461	-1.45354	-0.962381	-1.3035	-1.48204	-1.44671	-1.36642	-1.50533	-1.83373	-1.61572	-1.38206	-1.38217	-1.21646	-1.01084	-1.05047
7	Project Name	5.8	Job Number	Lab Number	Project Engineer	Asphalt Grade	GB5-10	Pit Source	Submitted By	52	50		20	4000	50	16000	50	0	50	0	50	0	20000	2018-07-30	CommentsVoid Percent(Left Back) : 0.0000 Void Percent(Left Front) : 0.0000 Void Percent(Right Back) : 0.0000 Void Percent(Right Front) : 0.0000 Left Avg Data @ Fail : Right Avg Data @ Fail : 0.0000	1900	50	-1.73937	-1.7846	-1.64417	-1.81821	-2.70718	-1.61686	-1.46494	-1.40627	-1.45354	-0.962381	-1.31516	-1.50924	-1.47409	-1.36642	-1.54658	-1.84742	-1.62946	-1.39583	-1.38217	-1.23025	-1.02461	-1.06426
7	Project Name	5.8	Job Number	Lab Number	Project Engineer	Asphalt Grade	GB5-10	Pit Source	Submitted By	52	50		20	4000	50	16000	50	0	50	0	50	0	20000	2018-07-30	CommentsVoid Percent(Left Back) : 0.0000 Void Percent(Left Front) : 0.0000 Void Percent(Right Back) : 0.0000 Void Percent(Right Front) : 0.0000 Left Avg Data @ Fail : Right Avg Data @ Fail : 0.0000	1920	50	-1.72771	-1.79624	-1.6558	-1.79492	-2.71889	-1.62855	-1.46494	-1.42959	-1.48854	-0.973988	-1.32685	-1.52283	-1.48778	-1.36642	-1.50533	-1.84742	-1.61572	-1.38206	-1.38217	-1.23025	-1.01084	-1.07805
7	Project Name	5.8	Job Number	Lab Number	Project Engineer	Asphalt Grade	GB5-10	Pit Source	Submitted By	52	50		20	4000	50	16000	50	0	50	0	50	0	20000	2018-07-30	CommentsVoid Percent(Left Back) : 0.0000 Void Percent(Left Front) : 0.0000 Void Percent(Right Back) : 0.0000 Void Percent(Right Front) : 0.0000 Left Avg Data @ Fail : Right Avg Data @ Fail : 0.0000	1940	50	-1.73937	-1.7846	-1.64417	-1.79492	-2.71889	-1.61686	-1.48829	-1.42959	-1.4652	-0.985622	-1.32685	-1.50924	-1.50144	-1.35268	-1.54658	-1.84742	-1.61572	-1.40962	-1.39593	-1.23025	-1.01084	-1.06426
7	Project Name	5.8	Job Number	Lab Number	Project Engineer	Asphalt Grade	GB5-10	Pit Source	Submitted By	52	50		20	4000	50	16000	50	0	50	0	50	0	20000	2018-07-30	CommentsVoid Percent(Left Back) : 0.0000 Void Percent(Left Front) : 0.0000 Void Percent(Right Back) : 0.0000 Void Percent(Right Front) : 0.0000 Left Avg Data @ Fail : Right Avg Data @ Fail : 0.0000	1960	50	-1.75103	-1.7846	-1.66743	-1.82984	-2.71889	-1.64021	-1.46494	-1.42959	-1.48854	-0.962381	-1.32685	-1.50924	-1.50144	-1.40764	-1.56032	-1.84742	-1.62946	-1.39583	-1.38217	-1.24404	-0.98331	-1.07805
7	Project Name	5.8	Job Number	Lab Number	Project Engineer	Asphalt Grade	GB5-10	Pit Source	Submitted By	52	50		20	4000	50	16000	50	0	50	0	50	0	20000	2018-07-30	CommentsVoid Percent(Left Back) : 0.0000 Void Percent(Left Front) : 0.0000 Void Percent(Right Back) : 0.0000 Void Percent(Right Front) : 0.0000 Left Avg Data @ Fail : Right Avg Data @ Fail : 0.0000	1980	49.9	-1.75103	-1.7846	-1.66743	-1.80655	-2.74229	-1.64021	-1.49995	-1.42959	-1.47688	-0.997255	-1.32685	-1.52283	-1.50144	-1.38016	-1.53284	-1.90213	-1.6432	-1.39583	-1.36837	-1.23025	-1.02461	-1.07805
7	Project Name	5.8	Job Number	Lab Number	Project Engineer	Asphalt Grade	GB5-10	Pit Source	Submitted By	52	50		20	4000	50	16000	50	0	50	0	50	0	20000	2018-07-30	CommentsVoid Percent(Left Back) : 0.0000 Void Percent(Left Front) : 0.0000 Void Percent(Right Back) : 0.0000 Void Percent(Right Front) : 0.0000 Left Avg Data @ Fail : Right Avg Data @ Fail : 0.0000	2000	49.9	-1.77432	-1.8079	-1.67907	-1.81821	-2.77736	-1.64021	-1.51163	-1.44125	-1.48854	-0.997255	-1.33853	-1.5636	-1.52883	-1.38016	-1.56032	-1.86108	-1.62946	-1.40962	-1.42352	-1.24404	-1.02461	-1.07805
7	Project Name	5.8	Job Number	Lab Number	Project Engineer	Asphalt Grade	GB5-10	Pit Source	Submitted By	52	50		20	4000	50	16000	50	0	50	0	50	0	20000	2018-07-30	CommentsVoid Percent(Left Back) : 0.0000 Void Percent(Left Front) : 0.0000 Void Percent(Right Back) : 0.0000 Void Percent(Right Front) : 0.0000 Left Avg Data @ Fail : Right Avg Data @ Fail : 0.0000	2020	49.8	-1.77432	-1.81955	-1.6907	-1.82984	-2.76568	-1.64021	-1.49995	-1.44125	-1.48854	-0.997255	-1.32685	-1.5636	-1.50144	-1.40764	-1.56032	-1.86108	-1.6432	-1.39583	-1.43728	-1.25783	-1.01084	-1.07805
7	Project Name	5.8	Job Number	Lab Number	Project Engineer	Asphalt Grade	GB5-10	Pit Source	Submitted By	52	50		20	4000	50	16000	50	0	50	0	50	0	20000	2018-07-30	CommentsVoid Percent(Left Back) : 0.0000 Void Percent(Left Front) : 0.0000 Void Percent(Right Back) : 0.0000 Void Percent(Right Front) : 0.0000 Left Avg Data @ Fail : Right Avg Data @ Fail : 0.0000	2040	49.8	-1.80929	-1.8079	-1.66743	-1.87643	-2.76568	-1.67526	-1.52329	-1.45293	-1.52357	-0.973988	-1.36187	-1.5636	-1.50144	-1.38016	-1.54658	-1.87477	-1.65694	-1.42339	-1.43728	-1.25783	-0.98331	-1.10561
7	Project Name	5.8	Job Number	Lab Number	Project Engineer	Asphalt Grade	GB5-10	Pit Source	Submitted By	52	50		20	4000	50	16000	50	0	50	0	50	0	20000	2018-07-30	CommentsVoid Percent(Left Back) : 0.0000 Void Percent(Left Front) : 0.0000 Void Percent(Right Back) : 0.0000 Void Percent(Right Front) : 0.0000 Left Avg Data @ Fail : Right Avg Data @ Fail : 0.0000	2060	49.8	-1.78598	-1.81955	-1.67907	-1.8415	-2.78907	-1.66357	-1.51163	-1.46459	-1.52357	-1.02052	-1.37356	-1.55001	-1.52883	-1.38016	-1.57406	-1.90213	-1.65694	-1.42339	-1.43728	-1.25783	-0.997077	-1.09184
7	Project Name	5.8	Job Number	Lab Number	Project Engineer	Asphalt Grade	GB5-10	Pit Source	Submitted By	52	50		20	4000	50	16000	50	0	50	0	50	0	20000	2018-07-30	CommentsVoid Percent(Left Back) : 0.0000 Void Percent(Left Front) : 0.0000 Void Percent(Right Back) : 0.0000 Void Percent(Right Front) : 0.0000 Left Avg Data @ Fail : Right Avg Data @ Fail : 0.0000	2080	49.9	-1.77432	-1.84285	-1.6907	-1.82984	-2.81247	-1.64021	-1.51163	-1.46459	-1.48854	-0.997255	-1.33853	-1.5636	-1.52883	-1.40764	-1.5878	-1.87477	-1.62946	-1.43718	-1.43728	-1.25783	-1.02461	-1.09184
7	Project Name	5.8	Job Number	Lab Number	Project Engineer	Asphalt Grade	GB5-10	Pit Source	Submitted By	52	50		20	4000	50	16000	50	0	50	0	50	0	20000	2018-07-30	CommentsVoid Percent(Left Back) : 0.0000 Void Percent(Left Front) : 0.0000 Void Percent(Right Back) : 0.0000 Void Percent(Right Front) : 0.0000 Left Avg Data @ Fail : Right Avg Data @ Fail : 0.0000	2100	50	-1.80929	-1.84285	-1.6907	-1.86477	-2.77736	-1.67526	-1.52329	-1.46459	-1.53523	-1.02052	-1.38521	-1.5636	-1.52883	-1.42136	-1.5878	-1.91579	-1.67069	-1.45095	-1.43728	-1.27163	-1.02461	-1.10561
7	Project Name	5.8	Job Number	Lab Number	Project Engineer	Asphalt Grade	GB5-10	Pit Source	Submitted By	52	50		20	4000	50	16000	50	0	50	0	50	0	20000	2018-07-30	CommentsVoid Percent(Left Back) : 0.0000 Void Percent(Left Front) : 0.0000 Void Percent(Right Back) : 0.0000 Void Percent(Right Front) : 0.0000 Left Avg Data @ Fail : Right Avg Data @ Fail : 0.0000	2120	50	-1.78598	-1.84285	-1.6907	-1.86477	-2.81247	-1.68694	-1.52329	-1.47625	-1.52357	-1.03215	-1.37356	-1.59078	-1.50144	-1.42136	-1.5878	-1.90213	-1.67069	-1.45095	-1.43728	-1.27163	-1.01084	-1.10561
7	Project Name	5.8	Job Number	Lab Number	Project Engineer	Asphalt Grade	GB5-10	Pit Source	Submitted By	52	50		20	4000	50	16000	50	0	50	0	50	0	20000	2018-07-30	CommentsVoid Percent(Left Back) : 0.0000 Void Percent(Left Front) : 0.0000 Void Percent(Right Back) : 0.0000 Void Percent(Right Front) : 0.0000 Left Avg Data @ Fail : Right Avg Data @ Fail : 0.0000	2140	50.1	-1.78598	-1.85448	-1.6907	-1.87643	-2.83586	-1.67526	-1.52329	-1.46459	-1.52357	-0.997255	-1.37356	-1.59078	-1.52883	-1.42136	-1.5878	-1.90213	-1.67069	-1.45095	-1.45108	-1.27163	-1.02461	-1.10561
7	Project Name	5.8	Job Number	Lab Number	Project Engineer	Asphalt Grade	GB5-10	Pit Source	Submitted By	52	50		20	4000	50	16000	50	0	50	0	50	0	20000	2018-07-30	CommentsVoid Percent(Left Back) : 0.0000 Void Percent(Left Front) : 0.0000 Void Percent(Right Back) : 0.0000 Void Percent(Right Front) : 0.0000 Left Avg Data @ Fail : Right Avg Data @ Fail : 0.0000	2160	50.1	-1.80929	-1.85448	-1.70233	-1.8415	-2.80076	-1.71028	-1.52329	-1.46459	-1.50023	-0.997255	-1.38521	-1.59078	-1.52883	-1.42136	-1.5878	-1.91579	-1.67069	-1.43718	-1.43728	-1.27163	-1.02461	-1.10561
7	Project Name	5.8	Job Number	Lab Number	Project Engineer	Asphalt Grade	GB5-10	Pit Source	Submitted By	52	50		20	4000	50	16000	50	0	50	0	50	0	20000	2018-07-30	CommentsVoid Percent(Left Back) : 0.0000 Void Percent(Left Front) : 0.0000 Void Percent(Right Back) : 0.0000 Void Percent(Right Front) : 0.0000 Left Avg Data @ Fail : Right Avg Data @ Fail : 0.0000	2180	50	-1.78598	-1.86614	-1.71397	-1.88806	-2.83586	-1.68694	-1.53497	-1.47625	-1.53523	-0.985622	-1.37356	-1.57719	-1.52883	-1.42136	-1.60155	-1.94315	-1.68443	-1.45095	-1.42352	-1.27163	-1.02461	-1.10561
7	Project Name	5.8	Job Number	Lab Number	Project Engineer	Asphalt Grade	GB5-10	Pit Source	Submitted By	52	50		20	4000	50	16000	50	0	50	0	50	0	20000	2018-07-30	CommentsVoid Percent(Left Back) : 0.0000 Void Percent(Left Front) : 0.0000 Void Percent(Right Back) : 0.0000 Void Percent(Right Front) : 0.0000 Left Avg Data @ Fail : Right Avg Data @ Fail : 0.0000	2200	50	-1.83261	-1.8778	-1.71397	-1.88806	-2.83586	-1.68694	-1.52329	-1.47625	-1.53523	-0.985622	-1.37356	-1.59078	-1.55616	-1.44882	-1.64277	-1.94315	-1.71191	-1.43718	-1.45108	-1.28542	-1.02461	-1.10561
7	Project Name	5.8	Job Number	Lab Number	Project Engineer	Asphalt Grade	GB5-10	Pit Source	Submitted By	52	50		20	4000	50	16000	50	0	50	0	50	0	20000	2018-07-30	CommentsVoid Percent(Left Back) : 0.0000 Void Percent(Left Front) : 0.0000 Void Percent(Right Back) : 0.0000 Void Percent(Right Front) : 0.0000 Left Avg Data @ Fail : Right Avg Data @ Fail : 0.0000	2220	50	-1.83261	-1.8778	-1.71397	-1.89972	-2.81247	-1.71028	-1.53497	-1.48791	-1.53523	-1.02052	-1.3969	-1.60437	-1.55616	-1.44882	-1.60155	-1.95682	-1.71191	-1.45095	-1.43728	-1.28542	-1.07968	-1.14696
7	Project Name	5.8	Job Number	Lab Number	Project Engineer	Asphalt Grade	GB5-10	Pit Source	Submitted By	52	50		20	4000	50	16000	50	0	50	0	50	0	20000	2018-07-30	CommentsVoid Percent(Left Back) : 0.0000 Void Percent(Left Front) : 0.0000 Void Percent(Right Back) : 0.0000 Void Percent(Right Front) : 0.0000 Left Avg Data @ Fail : Right Avg Data @ Fail : 0.0000	2240	50	-1.8559	-1.88946	-1.73726	-1.87643	-2.83586	-1.72197	-1.55832	-1.48791	-1.55857	-1.02052	-1.38521	-1.61793	-1.58351	-1.46256	-1.61529	-1.95682	-1.71191	-1.45095	-1.45108	-1.29918	-1.03838	-1.16075
7	Project Name	5.8	Job Number	Lab Number	Project Engineer	Asphalt Grade	GB5-10	Pit Source	Submitted By	52	50		20	4000	50	16000	50	0	50	0	50	0	20000	2018-07-30	CommentsVoid Percent(Left Back) : 0.0000 Void Percent(Left Front) : 0.0000 Void Percent(Right Back) : 0.0000 Void Percent(Right Front) : 0.0000 Left Avg Data @ Fail : Right Avg Data @ Fail : 0.0000	2260	50	-1.8559	-1.88946	-1.74889	-1.88806	-2.85925	-1.68694	-1.55832	-1.47625	-1.55857	-1.02052	-1.3969	-1.61793	-1.58351	-1.44882	-1.60155	-1.97046	-1.71191	-1.45095	-1.45108	-1.29918	-1.06591	-1.1332
7	Project Name	5.8	Job Number	Lab Number	Project Engineer	Asphalt Grade	GB5-10	Pit Source	Submitted By	52	50		20	4000	50	16000	50	0	50	0	50	0	20000	2018-07-30	CommentsVoid Percent(Left Back) : 0.0000 Void Percent(Left Front) : 0.0000 Void Percent(Right Back) : 0.0000 Void Percent(Right Front) : 0.0000 Left Avg Data @ Fail : Right Avg Data @ Fail : 0.0000	2280	49.9	-1.8559	-1.88946	-1.76052	-1.88806	-2.85925	-1.72197	-1.53497	-1.47625	-1.54691	-1.02052	-1.38521	-1.64508	-1.58351	-1.44882	-1.64277	-1.95682	-1.71191	-1.47851	-1.46484	-1.29918	-1.06591	-1.1332
7	Project Name	5.8	Job Number	Lab Number	Project Engineer	Asphalt Grade	GB5-10	Pit Source	Submitted By	52	50		20	4000	50	16000	50	0	50	0	50	0	20000	2018-07-30	CommentsVoid Percent(Left Back) : 0.0000 Void Percent(Left Front) : 0.0000 Void Percent(Right Back) : 0.0000 Void Percent(Right Front) : 0.0000 Left Avg Data @ Fail : Right Avg Data @ Fail : 0.0000	2300	49.8	-1.86756	-1.88946	-1.73726	-1.92301	-2.87096	-1.74534	-1.56997	-1.51125	-1.55857	-0.997255	-1.40858	-1.64508	-1.58351	-1.46256	-1.61529	-1.95682	-1.72563	-1.47851	-1.46484	-1.28542	-1.02461	-1.14696
7	Project Name	5.8	Job Number	Lab Number	Project Engineer	Asphalt Grade	GB5-10	Pit Source	Submitted By	52	50		20	4000	50	16000	50	0	50	0	50	0	20000	2018-07-30	CommentsVoid Percent(Left Back) : 0.0000 Void Percent(Left Front) : 0.0000 Void Percent(Right Back) : 0.0000 Void Percent(Right Front) : 0.0000 Left Avg Data @ Fail : Right Avg Data @ Fail : 0.0000	2320	49.8	-1.86756	-1.88946	-1.77218	-1.92301	-2.87096	-1.74534	-1.56997	-1.48791	-1.57025	-1.02052	-1.42027	-1.61793	-1.59718	-1.47627	-1.61529	-1.98412	-1.73937	-1.49228	-1.47864	-1.32677	-1.02461	-1.14696
7	Project Name	5.8	Job Number	Lab Number	Project Engineer	Asphalt Grade	GB5-10	Pit Source	Submitted By	52	50		20	4000	50	16000	50	0	50	0	50	0	20000	2018-07-30	CommentsVoid Percent(Left Back) : 0.0000 Void Percent(Left Front) : 0.0000 Void Percent(Right Back) : 0.0000 Void Percent(Right Front) : 0.0000 Left Avg Data @ Fail : Right Avg Data @ Fail : 0.0000	2340	49.9	-1.86756	-1.90109	-1.76052	-1.91135	-2.89436	-1.73365	-1.58166	-1.51125	-1.57025	-1.04379	-1.42027	-1.65865	-1.58351	-1.46256	-1.65649	-1.98412	-1.73937	-1.50604	-1.46484	-1.32677	-1.07968	-1.14696
7	Project Name	5.8	Job Number	Lab Number	Project Engineer	Asphalt Grade	GB5-10	Pit Source	Submitted By	52	50		20	4000	50	16000	50	0	50	0	50	0	20000	2018-07-30	CommentsVoid Percent(Left Back) : 0.0000 Void Percent(Left Front) : 0.0000 Void Percent(Right Back) : 0.0000 Void Percent(Right Front) : 0.0000 Left Avg Data @ Fail : Right Avg Data @ Fail : 0.0000	2360	50	-1.89088	-1.91275	-1.76052	-1.92301	-2.89436	-1.75702	-1.58166	-1.52293	-1.57025	-1.03215	-1.40858	-1.65865	-1.58351	-1.50371	-1.65649	-1.98412	-1.73937	-1.50604	-1.4924	-1.32677	-1.06591	-1.16075
7	Project Name	5.8	Job Number	Lab Number	Project Engineer	Asphalt Grade	GB5-10	Pit Source	Submitted By	52	50		20	4000	50	16000	50	0	50	0	50	0	20000	2018-07-30	CommentsVoid Percent(Left Back) : 0.0000 Void Percent(Left Front) : 0.0000 Void Percent(Right Back) : 0.0000 Void Percent(Right Front) : 0.0000 Left Avg Data @ Fail : Right Avg Data @ Fail : 0.0000	2380	50	-1.89088	-1.91275	-1.76052	-1.92301	-2.90606	-1.74534	-1.59332	-1.52293	-1.58194	-1.03215	-1.42027	-1.65865	-1.61082	-1.47627	-1.64277	-1.99779	-1.73937	-1.53358	-1.4924	-1.34054	-1.06591	-1.17452
7	Project Name	5.8	Job Number	Lab Number	Project Engineer	Asphalt Grade	GB5-10	Pit Source	Submitted By	52	50		20	4000	50	16000	50	0	50	0	50	0	20000	2018-07-30	CommentsVoid Percent(Left Back) : 0.0000 Void Percent(Left Front) : 0.0000 Void Percent(Right Back) : 0.0000 Void Percent(Right Front) : 0.0000 Left Avg Data @ Fail : Right Avg Data @ Fail : 0.0000	2400	50	-1.89088	-1.91275	-1.77218	-1.95796	-2.89436	-1.74534	-1.58166	-1.52293	-1.57025	-1.02052	-1.40858	-1.64508	-1.59718	-1.46256	-1.69769	-1.99779	-1.73937	-1.51981	-1.4924	-1.32677	-1.03838	-1.16075
7	Project Name	5.8	Job Number	Lab Number	Project Engineer	Asphalt Grade	GB5-10	Pit Source	Submitted By	52	50		20	4000	50	16000	50	0	50	0	50	0	20000	2018-07-30	CommentsVoid Percent(Left Back) : 0.0000 Void Percent(Left Front) : 0.0000 Void Percent(Right Back) : 0.0000 Void Percent(Right Front) : 0.0000 Left Avg Data @ Fail : Right Avg Data @ Fail : 0.0000	2420	50	-1.89088	-1.93606	-1.78382	-1.92301	-2.91777	-1.7687	-1.59332	-1.53459	-1.58194	-1.04379	-1.45529	-1.67221	-1.59718	-1.50371	-1.67023	-2.01145	-1.75308	-1.51981	-1.4924	-1.34054	-1.06591	-1.17452
7	Project Name	5.8	Job Number	Lab Number	Project Engineer	Asphalt Grade	GB5-10	Pit Source	Submitted By	52	50		20	4000	50	16000	50	0	50	0	50	0	20000	2018-07-30	CommentsVoid Percent(Left Back) : 0.0000 Void Percent(Left Front) : 0.0000 Void Percent(Right Back) : 0.0000 Void Percent(Right Front) : 0.0000 Left Avg Data @ Fail : Right Avg Data @ Fail : 0.0000	2440	50	-1.89088	-1.93606	-1.78382	-1.93467	-2.91777	-1.7687	-1.605	-1.53459	-1.60528	-1.0554	-1.43195	-1.67221	-1.61082	-1.47627	-1.67023	-2.01145	-1.75308	-1.51981	-1.47864	-1.34054	-1.09347	-1.18831
7	Project Name	5.8	Job Number	Lab Number	Project Engineer	Asphalt Grade	GB5-10	Pit Source	Submitted By	52	50		20	4000	50	16000	50	0	50	0	50	0	20000	2018-07-30	CommentsVoid Percent(Left Back) : 0.0000 Void Percent(Left Front) : 0.0000 Void Percent(Right Back) : 0.0000 Void Percent(Right Front) : 0.0000 Left Avg Data @ Fail : Right Avg Data @ Fail : 0.0000	2460	50	-1.90254	-1.94772	-1.79548	-1.95796	-2.91777	-1.7687	-1.605	-1.53459	-1.60528	-1.03215	-1.43195	-1.67221	-1.61082	-1.47627	-1.7114	-2.03876	-1.76682	-1.54734	-1.51996	-1.34054	-1.06591	-1.16075
7	Project Name	5.8	Job Number	Lab Number	Project Engineer	Asphalt Grade	GB5-10	Pit Source	Submitted By	52	50		20	4000	50	16000	50	0	50	0	50	0	20000	2018-07-30	CommentsVoid Percent(Left Back) : 0.0000 Void Percent(Left Front) : 0.0000 Void Percent(Right Back) : 0.0000 Void Percent(Right Front) : 0.0000 Left Avg Data @ Fail : Right Avg Data @ Fail : 0.0000	2480	50	-1.90254	-1.94772	-1.81874	-1.93467	-2.94117	-1.78039	-1.605	-1.53459	-1.58194	-1.03215	-1.45529	-1.67221	-1.61082	-1.50371	-1.68394	-2.03876	-1.76682	-1.54734	-1.51996	-1.34054	-1.07968	-1.16075
7	Project Name	5.8	Job Number	Lab Number	Project Engineer	Asphalt Grade	GB5-10	Pit Source	Submitted By	52	50		20	4000	50	16000	50	0	50	0	50	0	20000	2018-07-30	CommentsVoid Percent(Left Back) : 0.0000 Void Percent(Left Front) : 0.0000 Void Percent(Right Back) : 0.0000 Void Percent(Right Front) : 0.0000 Left Avg Data @ Fail : Right Avg Data @ Fail : 0.0000	2500	49.9	-1.92585	-1.93606	-1.79548	-1.95796	-2.95288	-1.78039	-1.61668	-1.54625	-1.60528	-1.02052	-1.43195	-1.68577	-1.61082	-1.50371	-1.7114	-2.0524	-1.75308	-1.54734	-1.4924	-1.35433	-1.07968	-1.16075
7	Project Name	5.8	Job Number	Lab Number	Project Engineer	Asphalt Grade	GB5-10	Pit Source	Submitted By	52	50		20	4000	50	16000	50	0	50	0	50	0	20000	2018-07-30	CommentsVoid Percent(Left Back) : 0.0000 Void Percent(Left Front) : 0.0000 Void Percent(Right Back) : 0.0000 Void Percent(Right Front) : 0.0000 Left Avg Data @ Fail : Right Avg Data @ Fail : 0.0000	2520	50	-1.92585	-1.97101	-1.79548	-1.95796	-2.95288	-1.78039	-1.61668	-1.54625	-1.60528	-1.04379	-1.45529	-1.68577	-1.61082	-1.47627	-1.69769	-2.0524	-1.78054	-1.54734	-1.4924	-1.36809	-1.09347	-1.18831
7	Project Name	5.8	Job Number	Lab Number	Project Engineer	Asphalt Grade	GB5-10	Pit Source	Submitted By	52	50		20	4000	50	16000	50	0	50	0	50	0	20000	2018-07-30	CommentsVoid Percent(Left Back) : 0.0000 Void Percent(Left Front) : 0.0000 Void Percent(Right Back) : 0.0000 Void Percent(Right Front) : 0.0000 Left Avg Data @ Fail : Right Avg Data @ Fail : 0.0000	2540	49.8	-1.92585	-1.95938	-1.8304	-1.96959	-2.94117	-1.78039	-1.61668	-1.53459	-1.60528	-1.04379	-1.45529	-1.68577	-1.62448	-1.47627	-1.7114	-2.0524	-1.76682	-1.56111	-1.53373	-1.36809	-1.09347	-1.17452
7	Project Name	5.8	Job Number	Lab Number	Project Engineer	Asphalt Grade	GB5-10	Pit Source	Submitted By	52	50		20	4000	50	16000	50	0	50	0	50	0	20000	2018-07-30	CommentsVoid Percent(Left Back) : 0.0000 Void Percent(Left Front) : 0.0000 Void Percent(Right Back) : 0.0000 Void Percent(Right Front) : 0.0000 Left Avg Data @ Fail : Right Avg Data @ Fail : 0.0000	2560	49.9	-1.93754	-1.95938	-1.8304	-1.98125	-2.95288	-1.81544	-1.64003	-1.55793	-1.60528	-1.02052	-1.46698	-1.68577	-1.61082	-1.54485	-1.73883	-2.07968	-1.80797	-1.58864	-1.53373	-1.36809	-1.06591	-1.18831
7	Project Name	5.8	Job Number	Lab Number	Project Engineer	Asphalt Grade	GB5-10	Pit Source	Submitted By	52	50		20	4000	50	16000	50	0	50	0	50	0	20000	2018-07-30	CommentsVoid Percent(Left Back) : 0.0000 Void Percent(Left Front) : 0.0000 Void Percent(Right Back) : 0.0000 Void Percent(Right Front) : 0.0000 Left Avg Data @ Fail : Right Avg Data @ Fail : 0.0000	2580	49.8	-1.93754	-1.97101	-1.8304	-1.93467	-2.96459	-1.78039	-1.64003	-1.53459	-1.61696	-1.04379	-1.43195	-1.69934	-1.63815	-1.51742	-1.68394	-2.0524	-1.76682	-1.58864	-1.4924	-1.36809	-1.07968	-1.18831
7	Project Name	5.8	Job Number	Lab Number	Project Engineer	Asphalt Grade	GB5-10	Pit Source	Submitted By	52	50		20	4000	50	16000	50	0	50	0	50	0	20000	2018-07-30	CommentsVoid Percent(Left Back) : 0.0000 Void Percent(Left Front) : 0.0000 Void Percent(Right Back) : 0.0000 Void Percent(Right Front) : 0.0000 Left Avg Data @ Fail : Right Avg Data @ Fail : 0.0000	2600	49.9	-1.92585	-1.98267	-1.81874	-1.98125	-2.9763	-1.78039	-1.61668	-1.54625	-1.58194	-1.02052	-1.45529	-1.69934	-1.63815	-1.50371	-1.7114	-2.0524	-1.78054	-1.56111	-1.53373	-1.34054	-1.07968	-1.18831
7	Project Name	5.8	Job Number	Lab Number	Project Engineer	Asphalt Grade	GB5-10	Pit Source	Submitted By	52	50		20	4000	50	16000	50	0	50	0	50	0	20000	2018-07-30	CommentsVoid Percent(Left Back) : 0.0000 Void Percent(Left Front) : 0.0000 Void Percent(Right Back) : 0.0000 Void Percent(Right Front) : 0.0000 Left Avg Data @ Fail : Right Avg Data @ Fail : 0.0000	2620	49.9	-1.96085	-1.97101	-1.8304	-1.99291	-2.95288	-1.82712	-1.64003	-1.53459	-1.61696	-1.02052	-1.45529	-1.71287	-1.63815	-1.51742	-1.7114	-2.0524	-1.80797	-1.58864	-1.5475	-1.38189	-1.06591	-1.18831
7	Project Name	5.8	Job Number	Lab Number	Project Engineer	Asphalt Grade	GB5-10	Pit Source	Submitted By	52	50		20	4000	50	16000	50	0	50	0	50	0	20000	2018-07-30	CommentsVoid Percent(Left Back) : 0.0000 Void Percent(Left Front) : 0.0000 Void Percent(Right Back) : 0.0000 Void Percent(Right Front) : 0.0000 Left Avg Data @ Fail : Right Avg Data @ Fail : 0.0000	2640	50	-1.9492	-1.98267	-1.81874	-1.99291	-3.0114	-1.81544	-1.65171	-1.54625	-1.62862	-1.03215	-1.46698	-1.71287	-1.62448	-1.53114	-1.75255	-2.06604	-1.82169	-1.56111	-1.53373	-1.36809	-1.09347	-1.18831
7	Project Name	5.8	Job Number	Lab Number	Project Engineer	Asphalt Grade	GB5-10	Pit Source	Submitted By	52	50		20	4000	50	16000	50	0	50	0	50	0	20000	2018-07-30	CommentsVoid Percent(Left Back) : 0.0000 Void Percent(Left Front) : 0.0000 Void Percent(Right Back) : 0.0000 Void Percent(Right Front) : 0.0000 Left Avg Data @ Fail : Right Avg Data @ Fail : 0.0000	2660	50.1	-1.9492	-1.98267	-1.84203	-1.98125	-2.98798	-1.80376	-1.65171	-1.55793	-1.61696	-0.997255	-1.45529	-1.68577	-1.65181	-1.50371	-1.73883	-2.09332	-1.78054	-1.58864	-1.53373	-1.38189	-1.09347	-1.18831
7	Project Name	5.8	Job Number	Lab Number	Project Engineer	Asphalt Grade	GB5-10	Pit Source	Submitted By	52	50		20	4000	50	16000	50	0	50	0	50	0	20000	2018-07-30	CommentsVoid Percent(Left Back) : 0.0000 Void Percent(Left Front) : 0.0000 Void Percent(Right Back) : 0.0000 Void Percent(Right Front) : 0.0000 Left Avg Data @ Fail : Right Avg Data @ Fail : 0.0000	2680	50.1	-1.98417	-1.99433	-1.84203	-1.99291	-2.9763	-1.82712	-1.64003	-1.54625	-1.61696	-1.02052	-1.46698	-1.72644	-1.65181	-1.53114	-1.75255	-2.07968	-1.82169	-1.58864	-1.5475	-1.38189	-1.09347	-1.20208
7	Project Name	5.8	Job Number	Lab Number	Project Engineer	Asphalt Grade	GB5-10	Pit Source	Submitted By	52	50		20	4000	50	16000	50	0	50	0	50	0	20000	2018-07-30	CommentsVoid Percent(Left Back) : 0.0000 Void Percent(Left Front) : 0.0000 Void Percent(Right Back) : 0.0000 Void Percent(Right Front) : 0.0000 Left Avg Data @ Fail : Right Avg Data @ Fail : 0.0000	2700	50.1	-1.96085	-1.99433	-1.8304	-1.99291	-2.98798	-1.81544	-1.67505	-1.55793	-1.65199	-1.10195	-1.49035	-1.71287	-1.65181	-1.53114	-1.75255	-2.09332	-1.8354	-1.60238	-1.53373	-1.39565	-1.09347	-1.24341
7	Project Name	5.8	Job Number	Lab Number	Project Engineer	Asphalt Grade	GB5-10	Pit Source	Submitted By	52	50		20	4000	50	16000	50	0	50	0	50	0	20000	2018-07-30	CommentsVoid Percent(Left Back) : 0.0000 Void Percent(Left Front) : 0.0000 Void Percent(Right Back) : 0.0000 Void Percent(Right Front) : 0.0000 Left Avg Data @ Fail : Right Avg Data @ Fail : 0.0000	2720	50	-1.99583	-1.99433	-1.85369	-2.00457	-3.0114	-1.82712	-1.66337	-1.56959	-1.62862	-1.04379	-1.47866	-1.75354	-1.65181	-1.54485	-1.75255	-2.09332	-1.8354	-1.60238	-1.56126	-1.39565	-1.07968	-1.20208
7	Project Name	5.8	Job Number	Lab Number	Project Engineer	Asphalt Grade	GB5-10	Pit Source	Submitted By	52	50		20	4000	50	16000	50	0	50	0	50	0	20000	2018-07-30	CommentsVoid Percent(Left Back) : 0.0000 Void Percent(Left Front) : 0.0000 Void Percent(Right Back) : 0.0000 Void Percent(Right Front) : 0.0000 Left Avg Data @ Fail : Right Avg Data @ Fail : 0.0000	2740	49.9	-1.96085	-2.01765	-1.85369	-1.99291	-3.0114	-1.82712	-1.67505	-1.54625	-1.61696	-1.02052	-1.47866	-1.72644	-1.69276	-1.53114	-1.77998	-2.09332	-1.82169	-1.61615	-1.56126	-1.39565	-1.10724	-1.22964
7	Project Name	5.8	Job Number	Lab Number	Project Engineer	Asphalt Grade	GB5-10	Pit Source	Submitted By	52	50		20	4000	50	16000	50	0	50	0	50	0	20000	2018-07-30	CommentsVoid Percent(Left Back) : 0.0000 Void Percent(Left Front) : 0.0000 Void Percent(Right Back) : 0.0000 Void Percent(Right Front) : 0.0000 Left Avg Data @ Fail : Right Avg Data @ Fail : 0.0000	2760	50	-1.98417	-2.01765	-1.85369	-2.0162	-2.98798	-1.86218	-1.65171	-1.56959	-1.64031	-1.03215	-1.49035	-1.75354	-1.65181	-1.55857	-1.76627	-2.09332	-1.84912	-1.61615	-1.56126	-1.39565	-1.07968	-1.24341
7	Project Name	5.8	Job Number	Lab Number	Project Engineer	Asphalt Grade	GB5-10	Pit Source	Submitted By	52	50		20	4000	50	16000	50	0	50	0	50	0	20000	2018-07-30	CommentsVoid Percent(Left Back) : 0.0000 Void Percent(Left Front) : 0.0000 Void Percent(Right Back) : 0.0000 Void Percent(Right Front) : 0.0000 Left Avg Data @ Fail : Right Avg Data @ Fail : 0.0000	2780	49.9	-1.98417	-2.01765	-1.86533	-2.00457	-3.03482	-1.85049	-1.66337	-1.55793	-1.62862	-1.06703	-1.50203	-1.75354	-1.69276	-1.54485	-1.76627	-2.09332	-1.8354	-1.61615	-1.56126	-1.39565	-1.10724	-1.25717
7	Project Name	5.8	Job Number	Lab Number	Project Engineer	Asphalt Grade	GB5-10	Pit Source	Submitted By	52	50		20	4000	50	16000	50	0	50	0	50	0	20000	2018-07-30	CommentsVoid Percent(Left Back) : 0.0000 Void Percent(Left Front) : 0.0000 Void Percent(Right Back) : 0.0000 Void Percent(Right Front) : 0.0000 Left Avg Data @ Fail : Right Avg Data @ Fail : 0.0000	2800	49.9	-1.99583	-2.01765	-1.86533	-2.00457	-3.03482	-1.86218	-1.67505	-1.56959	-1.66367	-1.06703	-1.50203	-1.76708	-1.67912	-1.55857	-1.76627	-2.10696	-1.8354	-1.62992	-1.57503	-1.39565	-1.12103	-1.24341
7	Project Name	5.8	Job Number	Lab Number	Project Engineer	Asphalt Grade	GB5-10	Pit Source	Submitted By	52	50		20	4000	50	16000	50	0	50	0	50	0	20000	2018-07-30	CommentsVoid Percent(Left Back) : 0.0000 Void Percent(Left Front) : 0.0000 Void Percent(Right Back) : 0.0000 Void Percent(Right Front) : 0.0000 Left Avg Data @ Fail : Right Avg Data @ Fail : 0.0000	2820	49.9	-1.99583	-2.04097	-1.86533	-2.00457	-3.04653	-1.85049	-1.68674	-1.56959	-1.65199	-1.03215	-1.49035	-1.76708	-1.69276	-1.54485	-1.77998	-2.14787	-1.84912	-1.62992	-1.56126	-1.42321	-1.10724	-1.24341
7	Project Name	5.8	Job Number	Lab Number	Project Engineer	Asphalt Grade	GB5-10	Pit Source	Submitted By	52	50		20	4000	50	16000	50	0	50	0	50	0	20000	2018-07-30	CommentsVoid Percent(Left Back) : 0.0000 Void Percent(Left Front) : 0.0000 Void Percent(Right Back) : 0.0000 Void Percent(Right Front) : 0.0000 Left Avg Data @ Fail : Right Avg Data @ Fail : 0.0000	2840	49.8	-1.99583	-2.02931	-1.86533	-2.02786	-3.04653	-1.86218	-1.67505	-1.56959	-1.64031	-1.02052	-1.49035	-1.76708	-1.7064	-1.54485	-1.77998	-2.14787	-1.84912	-1.64366	-1.56126	-1.43698	-1.07968	-1.24341
7	Project Name	5.8	Job Number	Lab Number	Project Engineer	Asphalt Grade	GB5-10	Pit Source	Submitted By	52	50		20	4000	50	16000	50	0	50	0	50	0	20000	2018-07-30	CommentsVoid Percent(Left Back) : 0.0000 Void Percent(Left Front) : 0.0000 Void Percent(Right Back) : 0.0000 Void Percent(Right Front) : 0.0000 Left Avg Data @ Fail : Right Avg Data @ Fail : 0.0000	2860	50	-2.01917	-2.02931	-1.86533	-2.02786	-3.04653	-1.88557	-1.67505	-1.56959	-1.64031	-1.04379	-1.49035	-1.78062	-1.7064	-1.55857	-1.7937	-2.1206	-1.87655	-1.64366	-1.57503	-1.42321	-1.1348	-1.24341
7	Project Name	5.8	Job Number	Lab Number	Project Engineer	Asphalt Grade	GB5-10	Pit Source	Submitted By	52	50		20	4000	50	16000	50	0	50	0	50	0	20000	2018-07-30	CommentsVoid Percent(Left Back) : 0.0000 Void Percent(Left Front) : 0.0000 Void Percent(Right Back) : 0.0000 Void Percent(Right Front) : 0.0000 Left Avg Data @ Fail : Right Avg Data @ Fail : 0.0000	2880	50.1	-2.01917	-2.02931	-1.87698	-1.98125	-3.04653	-1.86218	-1.67505	-1.58128	-1.65199	-1.04379	-1.50203	-1.78062	-1.69276	-1.55857	-1.76627	-2.10696	-1.8354	-1.62992	-1.57503	-1.43698	-1.1348	-1.25717
7	Project Name	5.8	Job Number	Lab Number	Project Engineer	Asphalt Grade	GB5-10	Pit Source	Submitted By	52	50		20	4000	50	16000	50	0	50	0	50	0	20000	2018-07-30	CommentsVoid Percent(Left Back) : 0.0000 Void Percent(Left Front) : 0.0000 Void Percent(Right Back) : 0.0000 Void Percent(Right Front) : 0.0000 Left Avg Data @ Fail : Right Avg Data @ Fail : 0.0000	2900	50	-2.01917	-2.05262	-1.88864	-2.02786	-3.04653	-1.90894	-1.68674	-1.60462	-1.66367	-1.03215	-1.50203	-1.76708	-1.73368	-1.57229	-1.77998	-2.09332	-1.86284	-1.62992	-1.56126	-1.45075	-1.07968	-1.25717
7	Project Name	5.8	Job Number	Lab Number	Project Engineer	Asphalt Grade	GB5-10	Pit Source	Submitted By	52	50		20	4000	50	16000	50	0	50	0	50	0	20000	2018-07-30	CommentsVoid Percent(Left Back) : 0.0000 Void Percent(Left Front) : 0.0000 Void Percent(Right Back) : 0.0000 Void Percent(Right Front) : 0.0000 Left Avg Data @ Fail : Right Avg Data @ Fail : 0.0000	2920	50	-2.01917	-2.05262	-1.87698	-2.05118	-3.05824	-1.86218	-1.68674	-1.58128	-1.66367	-1.04379	-1.50203	-1.78062	-1.72004	-1.57229	-1.80741	-2.10696	-1.87655	-1.64366	-1.5888	-1.43698	-1.1348	-1.27094
7	Project Name	5.8	Job Number	Lab Number	Project Engineer	Asphalt Grade	GB5-10	Pit Source	Submitted By	52	50		20	4000	50	16000	50	0	50	0	50	0	20000	2018-07-30	CommentsVoid Percent(Left Back) : 0.0000 Void Percent(Left Front) : 0.0000 Void Percent(Right Back) : 0.0000 Void Percent(Right Front) : 0.0000 Left Avg Data @ Fail : Right Avg Data @ Fail : 0.0000	2940	50	-2.04249	-2.04097	-1.88864	-2.05118	-3.06995	-1.90894	-1.68674	-1.60462	-1.66367	-1.07866	-1.5254	-1.80769	-1.72004	-1.57229	-1.7937	-2.14787	-1.86284	-1.64366	-1.5888	-1.43698	-1.1348	-1.27094
7	Project Name	5.8	Job Number	Lab Number	Project Engineer	Asphalt Grade	GB5-10	Pit Source	Submitted By	52	50		20	4000	50	16000	50	0	50	0	50	0	20000	2018-07-30	CommentsVoid Percent(Left Back) : 0.0000 Void Percent(Left Front) : 0.0000 Void Percent(Right Back) : 0.0000 Void Percent(Right Front) : 0.0000 Left Avg Data @ Fail : Right Avg Data @ Fail : 0.0000	2960	50	-2.01917	-2.06431	-1.91193	-2.05118	-3.06995	-1.89725	-1.71011	-1.60462	-1.66367	-1.0554	-1.51371	-1.79415	-1.74732	-1.55857	-1.77998	-2.16149	-1.87655	-1.62992	-1.5888	-1.45075	-1.12103	-1.28471
7	Project Name	5.8	Job Number	Lab Number	Project Engineer	Asphalt Grade	GB5-10	Pit Source	Submitted By	52	50		20	4000	50	16000	50	0	50	0	50	0	20000	2018-07-30	CommentsVoid Percent(Left Back) : 0.0000 Void Percent(Left Front) : 0.0000 Void Percent(Right Back) : 0.0000 Void Percent(Right Front) : 0.0000 Left Avg Data @ Fail : Right Avg Data @ Fail : 0.0000	2980	49.9	-2.06583	-2.06431	-1.88864	-2.05118	-3.06995	-1.89725	-1.71011	-1.58128	-1.66367	-1.06703	-1.51371	-1.79415	-1.73368	-1.57229	-1.8211	-2.14787	-1.87655	-1.64366	-1.5888	-1.45075	-1.12103	-1.27094
7	Project Name	5.8	Job Number	Lab Number	Project Engineer	Asphalt Grade	GB5-10	Pit Source	Submitted By	52	50		20	4000	50	16000	50	0	50	0	50	0	20000	2018-07-30	CommentsVoid Percent(Left Back) : 0.0000 Void Percent(Left Front) : 0.0000 Void Percent(Right Back) : 0.0000 Void Percent(Right Front) : 0.0000 Left Avg Data @ Fail : Right Avg Data @ Fail : 0.0000	3000	49.9	-2.04249	-2.06431	-1.92357	-2.02786	-3.08166	-1.92062	-1.69842	-1.60462	-1.66367	-1.06703	-1.51371	-1.79415	-1.74732	-1.58598	-1.7937	-2.16149	-1.87655	-1.6574	-1.5888	-1.45075	-1.1348	-1.27094
7	Project Name	5.8	Job Number	Lab Number	Project Engineer	Asphalt Grade	GB5-10	Pit Source	Submitted By	52	50		20	4000	50	16000	50	0	50	0	50	0	20000	2018-07-30	CommentsVoid Percent(Left Back) : 0.0000 Void Percent(Left Front) : 0.0000 Void Percent(Right Back) : 0.0000 Void Percent(Right Front) : 0.0000 Left Avg Data @ Fail : Right Avg Data @ Fail : 0.0000	3020	49.8	-2.06583	-2.07597	-1.92357	-2.05118	-3.08166	-1.92062	-1.71011	-1.61628	-1.67536	-1.06703	-1.5254	-1.80769	-1.74732	-1.61338	-1.80741	-2.16149	-1.87655	-1.6574	-1.6301	-1.46451	-1.1348	-1.27094
7	Project Name	5.8	Job Number	Lab Number	Project Engineer	Asphalt Grade	GB5-10	Pit Source	Submitted By	52	50		20	4000	50	16000	50	0	50	0	50	0	20000	2018-07-30	CommentsVoid Percent(Left Back) : 0.0000 Void Percent(Left Front) : 0.0000 Void Percent(Right Back) : 0.0000 Void Percent(Right Front) : 0.0000 Left Avg Data @ Fail : Right Avg Data @ Fail : 0.0000	3040	49.9	-2.06583	-2.08763	-1.92357	-2.08613	-3.09336	-1.92062	-1.73345	-1.61628	-1.67536	-1.0554	-1.5254	-1.79415	-1.76096	-1.57229	-1.84851	-2.17513	-1.87655	-1.68491	-1.60256	-1.46451	-1.10724	-1.29847
7	Project Name	5.8	Job Number	Lab Number	Project Engineer	Asphalt Grade	GB5-10	Pit Source	Submitted By	52	50		20	4000	50	16000	50	0	50	0	50	0	20000	2018-07-30	CommentsVoid Percent(Left Back) : 0.0000 Void Percent(Left Front) : 0.0000 Void Percent(Right Back) : 0.0000 Void Percent(Right Front) : 0.0000 Left Avg Data @ Fail : Right Avg Data @ Fail : 0.0000	3060	49.9	-2.07752	-2.07597	-1.92357	-2.06284	-3.09336	-1.92062	-1.73345	-1.60462	-1.66367	-1.04379	-1.5254	-1.80769	-1.73368	-1.58598	-1.84851	-2.17513	-1.87655	-1.69865	-1.60256	-1.43698	-1.12103	-1.28471
7	Project Name	5.8	Job Number	Lab Number	Project Engineer	Asphalt Grade	GB5-10	Pit Source	Submitted By	52	50		20	4000	50	16000	50	0	50	0	50	0	20000	2018-07-30	CommentsVoid Percent(Left Back) : 0.0000 Void Percent(Left Front) : 0.0000 Void Percent(Right Back) : 0.0000 Void Percent(Right Front) : 0.0000 Left Avg Data @ Fail : Right Avg Data @ Fail : 0.0000	3080	49.9	-2.08918	-2.06431	-1.92357	-2.06284	-3.09336	-1.9323	-1.73345	-1.63962	-1.6987	-1.12522	-1.54876	-1.79415	-1.72004	-1.61338	-1.86223	-2.17513	-1.89024	-1.68491	-1.6301	-1.45075	-1.12103	-1.28471
7	Project Name	5.8	Job Number	Lab Number	Project Engineer	Asphalt Grade	GB5-10	Pit Source	Submitted By	52	50		20	4000	50	16000	50	0	50	0	50	0	20000	2018-07-30	CommentsVoid Percent(Left Back) : 0.0000 Void Percent(Left Front) : 0.0000 Void Percent(Right Back) : 0.0000 Void Percent(Right Front) : 0.0000 Left Avg Data @ Fail : Right Avg Data @ Fail : 0.0000	3100	50	-2.07752	-2.08763	-1.91193	-2.05118	-3.10507	-1.92062	-1.74513	-1.62796	-1.71039	-1.10195	-1.56045	-1.82123	-1.73368	-1.58598	-1.80741	-2.17513	-1.87655	-1.6574	-1.5888	-1.45075	-1.1348	-1.29847
7	Project Name	5.8	Job Number	Lab Number	Project Engineer	Asphalt Grade	GB5-10	Pit Source	Submitted By	52	50		20	4000	50	16000	50	0	50	0	50	0	20000	2018-07-30	CommentsVoid Percent(Left Back) : 0.0000 Void Percent(Left Front) : 0.0000 Void Percent(Right Back) : 0.0000 Void Percent(Right Front) : 0.0000 Left Avg Data @ Fail : Right Avg Data @ Fail : 0.0000	3120	50.1	-2.06583	-2.11094	-1.93523	-2.07449	-3.10507	-1.9323	-1.73345	-1.61628	-1.6987	-1.07866	-1.56045	-1.79415	-1.76096	-1.58598	-1.84851	-2.17513	-1.89024	-1.68491	-1.6576	-1.46451	-1.12103	-1.28471
7	Project Name	5.8	Job Number	Lab Number	Project Engineer	Asphalt Grade	GB5-10	Pit Source	Submitted By	52	50		20	4000	50	16000	50	0	50	0	50	0	20000	2018-07-30	CommentsVoid Percent(Left Back) : 0.0000 Void Percent(Left Front) : 0.0000 Void Percent(Right Back) : 0.0000 Void Percent(Right Front) : 0.0000 Left Avg Data @ Fail : Right Avg Data @ Fail : 0.0000	3140	50.1	-2.08918	-2.07597	-1.94688	-2.07449	-3.10507	-1.94401	-1.73345	-1.62796	-1.67536	-1.06703	-1.56045	-1.82123	-1.74732	-1.58598	-1.80741	-2.17513	-1.91765	-1.68491	-1.6301	-1.46451	-1.1348	-1.28471
7	Project Name	5.8	Job Number	Lab Number	Project Engineer	Asphalt Grade	GB5-10	Pit Source	Submitted By	52	50		20	4000	50	16000	50	0	50	0	50	0	20000	2018-07-30	CommentsVoid Percent(Left Back) : 0.0000 Void Percent(Left Front) : 0.0000 Void Percent(Right Back) : 0.0000 Void Percent(Right Front) : 0.0000 Left Avg Data @ Fail : Right Avg Data @ Fail : 0.0000	3160	50	-2.10083	-2.11094	-1.93523	-2.07449	-3.10507	-1.9323	-1.75682	-1.62796	-1.71039	-1.06703	-1.56045	-1.84828	-1.76096	-1.6271	-1.8211	-2.18874	-1.91765	-1.68491	-1.6301	-1.47828	-1.1348	-1.31224
7	Project Name	5.8	Job Number	Lab Number	Project Engineer	Asphalt Grade	GB5-10	Pit Source	Submitted By	52	50		20	4000	50	16000	50	0	50	0	50	0	20000	2018-07-30	CommentsVoid Percent(Left Back) : 0.0000 Void Percent(Left Front) : 0.0000 Void Percent(Right Back) : 0.0000 Void Percent(Right Front) : 0.0000 Left Avg Data @ Fail : Right Avg Data @ Fail : 0.0000	3180	50	-2.10083	-2.11094	-1.94688	-2.08613	-3.1402	-1.94401	-1.75682	-1.62796	-1.71039	-1.06703	-1.56045	-1.82123	-1.76096	-1.61338	-1.86223	-2.20236	-1.91765	-1.68491	-1.64384	-1.49205	-1.12103	-1.29847
7	Project Name	5.8	Job Number	Lab Number	Project Engineer	Asphalt Grade	GB5-10	Pit Source	Submitted By	52	50		20	4000	50	16000	50	0	50	0	50	0	20000	2018-07-30	CommentsVoid Percent(Left Back) : 0.0000 Void Percent(Left Front) : 0.0000 Void Percent(Right Back) : 0.0000 Void Percent(Right Front) : 0.0000 Left Avg Data @ Fail : Right Avg Data @ Fail : 0.0000	3200	50	-2.11252	-2.11094	-1.94688	-2.09779	-3.10507	-1.94401	-1.74513	-1.63962	-1.71039	-1.06703	-1.57213	-1.84828	-1.78824	-1.61338	-1.86223	-2.18874	-1.93137	-1.69865	-1.6576	-1.49205	-1.1348	-1.29847
7	Project Name	5.8	Job Number	Lab Number	Project Engineer	Asphalt Grade	GB5-10	Pit Source	Submitted By	52	50		20	4000	50	16000	50	0	50	0	50	0	20000	2018-07-30	CommentsVoid Percent(Left Back) : 0.0000 Void Percent(Left Front) : 0.0000 Void Percent(Right Back) : 0.0000 Void Percent(Right Front) : 0.0000 Left Avg Data @ Fail : Right Avg Data @ Fail : 0.0000	3220	50	-2.11252	-2.1226	-1.94688	-2.08613	-3.12849	-1.9557	-1.75682	-1.62796	-1.72207	-1.0554	-1.56045	-1.84828	-1.74732	-1.64079	-1.84851	-2.20236	-1.94506	-1.69865	-1.6301	-1.47828	-1.1348	-1.31224
7	Project Name	5.8	Job Number	Lab Number	Project Engineer	Asphalt Grade	GB5-10	Pit Source	Submitted By	52	50		20	4000	50	16000	50	0	50	0	50	0	20000	2018-07-30	CommentsVoid Percent(Left Back) : 0.0000 Void Percent(Left Front) : 0.0000 Void Percent(Right Back) : 0.0000 Void Percent(Right Front) : 0.0000 Left Avg Data @ Fail : Right Avg Data @ Fail : 0.0000	3240	49.9	-2.11252	-2.1226	-1.94688	-2.06284	-3.09336	-1.9557	-1.75682	-1.6513	-1.71039	-1.11359	-1.58382	-1.84828	-1.76096	-1.61338	-1.80741	-2.17513	-1.93137	-1.69865	-1.64384	-1.47828	-1.14859	-1.35352
7	Project Name	5.8	Job Number	Lab Number	Project Engineer	Asphalt Grade	GB5-10	Pit Source	Submitted By	52	50		20	4000	50	16000	50	0	50	0	50	0	20000	2018-07-30	CommentsVoid Percent(Left Back) : 0.0000 Void Percent(Left Front) : 0.0000 Void Percent(Right Back) : 0.0000 Void Percent(Right Front) : 0.0000 Left Avg Data @ Fail : Right Avg Data @ Fail : 0.0000	3260	49.9	-2.11252	-2.13429	-1.94688	-2.09779	-3.12849	-1.97909	-1.75682	-1.63962	-1.72207	-1.07866	-1.58382	-1.84828	-1.78824	-1.61338	-1.86223	-2.20236	-1.93137	-1.71239	-1.64384	-1.47828	-1.1348	-1.33977
7	Project Name	5.8	Job Number	Lab Number	Project Engineer	Asphalt Grade	GB5-10	Pit Source	Submitted By	52	50		20	4000	50	16000	50	0	50	0	50	0	20000	2018-07-30	CommentsVoid Percent(Left Back) : 0.0000 Void Percent(Left Front) : 0.0000 Void Percent(Right Back) : 0.0000 Void Percent(Right Front) : 0.0000 Left Avg Data @ Fail : Right Avg Data @ Fail : 0.0000	3280	49.8	-2.13586	-2.1226	-1.95854	-2.07449	-3.10507	-1.97909	-1.75682	-1.66299	-1.73375	-1.11359	-1.58382	-1.86179	-1.78824	-1.61338	-1.86223	-2.20236	-1.93137	-1.71239	-1.64384	-1.47828	-1.12103	-1.33977
7	Project Name	5.8	Job Number	Lab Number	Project Engineer	Asphalt Grade	GB5-10	Pit Source	Submitted By	52	50		20	4000	50	16000	50	0	50	0	50	0	20000	2018-07-30	CommentsVoid Percent(Left Back) : 0.0000 Void Percent(Left Front) : 0.0000 Void Percent(Right Back) : 0.0000 Void Percent(Right Front) : 0.0000 Left Avg Data @ Fail : Right Avg Data @ Fail : 0.0000	3300	49.8	-2.13586	-2.1226	-1.95854	-2.09779	-3.15191	-1.99078	-1.7685	-1.66299	-1.74544	-1.12522	-1.58382	-1.84828	-1.78824	-1.64079	-1.87592	-2.2432	-1.94506	-1.71239	-1.6576	-1.50581	-1.14859	-1.33977
7	Project Name	5.8	Job Number	Lab Number	Project Engineer	Asphalt Grade	GB5-10	Pit Source	Submitted By	52	50		20	4000	50	16000	50	0	50	0	50	0	20000	2018-07-30	CommentsVoid Percent(Left Back) : 0.0000 Void Percent(Left Front) : 0.0000 Void Percent(Right Back) : 0.0000 Void Percent(Right Front) : 0.0000 Left Avg Data @ Fail : Right Avg Data @ Fail : 0.0000	3320	49.9	-2.11252	-2.1226	-1.95854	-2.09779	-3.15191	-1.97909	-1.78018	-1.6513	-1.72207	-1.07866	-1.58382	-1.84828	-1.80185	-1.6271	-1.86223	-2.21597	-1.93137	-1.71239	-1.64384	-1.47828	-1.1348	-1.31224
7	Project Name	5.8	Job Number	Lab Number	Project Engineer	Asphalt Grade	GB5-10	Pit Source	Submitted By	52	50		20	4000	50	16000	50	0	50	0	50	0	20000	2018-07-30	CommentsVoid Percent(Left Back) : 0.0000 Void Percent(Left Front) : 0.0000 Void Percent(Right Back) : 0.0000 Void Percent(Right Front) : 0.0000 Left Avg Data @ Fail : Right Avg Data @ Fail : 0.0000	3340	50	-2.13586	-2.13429	-1.97018	-2.10944	-3.15191	-2.00246	-1.78018	-1.63962	-1.72207	-1.0554	-1.57213	-1.87533	-1.81549	-1.6271	-1.88961	-2.21597	-1.94506	-1.71239	-1.64384	-1.49205	-1.1348	-1.35352
7	Project Name	5.8	Job Number	Lab Number	Project Engineer	Asphalt Grade	GB5-10	Pit Source	Submitted By	52	50		20	4000	50	16000	50	0	50	0	50	0	20000	2018-07-30	CommentsVoid Percent(Left Back) : 0.0000 Void Percent(Left Front) : 0.0000 Void Percent(Right Back) : 0.0000 Void Percent(Right Front) : 0.0000 Left Avg Data @ Fail : Right Avg Data @ Fail : 0.0000	3360	50.1	-2.1592	-2.14594	-1.98184	-2.13276	-3.15191	-2.00246	-1.79187	-1.6513	-1.74544	-1.07866	-1.5955	-1.86179	-1.78824	-1.64079	-1.9033	-2.25682	-1.94506	-1.71239	-1.64384	-1.50581	-1.1348	-1.35352
7	Project Name	5.8	Job Number	Lab Number	Project Engineer	Asphalt Grade	GB5-10	Pit Source	Submitted By	52	50		20	4000	50	16000	50	0	50	0	50	0	20000	2018-07-30	CommentsVoid Percent(Left Back) : 0.0000 Void Percent(Left Front) : 0.0000 Void Percent(Right Back) : 0.0000 Void Percent(Right Front) : 0.0000 Left Avg Data @ Fail : Right Avg Data @ Fail : 0.0000	3380	50.1	-2.1592	-2.1576	-1.98184	-2.14442	-3.15191	-2.01417	-1.75682	-1.6513	-1.74544	-1.07866	-1.5955	-1.87533	-1.80185	-1.6271	-1.88961	-2.20236	-1.95875	-1.71239	-1.6576	-1.53335	-1.12103	-1.35352
7	Project Name	5.8	Job Number	Lab Number	Project Engineer	Asphalt Grade	GB5-10	Pit Source	Submitted By	52	50		20	4000	50	16000	50	0	50	0	50	0	20000	2018-07-30	CommentsVoid Percent(Left Back) : 0.0000 Void Percent(Left Front) : 0.0000 Void Percent(Right Back) : 0.0000 Void Percent(Right Front) : 0.0000 Left Avg Data @ Fail : Right Avg Data @ Fail : 0.0000	3400	50.1	-2.17086	-2.1576	-1.98184	-2.13276	-3.16362	-2.01417	-1.7685	-1.66299	-1.74544	-1.10195	-1.63058	-1.88885	-1.81549	-1.65448	-1.88961	-2.25682	-1.95875	-1.72613	-1.67137	-1.50581	-1.14859	-1.35352
7	Project Name	5.8	Job Number	Lab Number	Project Engineer	Asphalt Grade	GB5-10	Pit Source	Submitted By	52	50		20	4000	50	16000	50	0	50	0	50	0	20000	2018-07-30	CommentsVoid Percent(Left Back) : 0.0000 Void Percent(Left Front) : 0.0000 Void Percent(Right Back) : 0.0000 Void Percent(Right Front) : 0.0000 Left Avg Data @ Fail : Right Avg Data @ Fail : 0.0000	3420	50	-2.17086	-2.1576	-2.00515	-2.13276	-3.17536	-2.02585	-1.79187	-1.68633	-1.76881	-1.07866	-1.60719	-1.87533	-1.80185	-1.65448	-1.88961	-2.2432	-1.97244	-1.73987	-1.6576	-1.49205	-1.12103	-1.35352
7	Project Name	5.8	Job Number	Lab Number	Project Engineer	Asphalt Grade	GB5-10	Pit Source	Submitted By	52	50		20	4000	50	16000	50	0	50	0	50	0	20000	2018-07-30	CommentsVoid Percent(Left Back) : 0.0000 Void Percent(Left Front) : 0.0000 Void Percent(Right Back) : 0.0000 Void Percent(Right Front) : 0.0000 Left Avg Data @ Fail : Right Avg Data @ Fail : 0.0000	3440	50	-2.18255	-2.1576	-1.97018	-2.14442	-3.18706	-2.01417	-1.78018	-1.6513	-1.74544	-1.10195	-1.60719	-1.90236	-1.81549	-1.66817	-1.9033	-2.27043	-1.97244	-1.75362	-1.67137	-1.53335	-1.14859	-1.35352
7	Project Name	5.8	Job Number	Lab Number	Project Engineer	Asphalt Grade	GB5-10	Pit Source	Submitted By	52	50		20	4000	50	16000	50	0	50	0	50	0	20000	2018-07-30	CommentsVoid Percent(Left Back) : 0.0000 Void Percent(Left Front) : 0.0000 Void Percent(Right Back) : 0.0000 Void Percent(Right Front) : 0.0000 Left Avg Data @ Fail : Right Avg Data @ Fail : 0.0000	3460	50	-2.18255	-2.1576	-2.00515	-2.13276	-3.18706	-2.02585	-1.79187	-1.66299	-1.74544	-1.11359	-1.5955	-1.88885	-1.8291	-1.65448	-1.9033	-2.27043	-1.98613	-1.71239	-1.68511	-1.53335	-1.1348	-1.35352
7	Project Name	5.8	Job Number	Lab Number	Project Engineer	Asphalt Grade	GB5-10	Pit Source	Submitted By	52	50		20	4000	50	16000	50	0	50	0	50	0	20000	2018-07-30	CommentsVoid Percent(Left Back) : 0.0000 Void Percent(Left Front) : 0.0000 Void Percent(Right Back) : 0.0000 Void Percent(Right Front) : 0.0000 Left Avg Data @ Fail : Right Avg Data @ Fail : 0.0000	3480	50	-2.17086	-2.16926	-1.98184	-2.15608	-3.16362	-2.03756	-1.78018	-1.66299	-1.75712	-1.07866	-1.63058	-1.87533	-1.81549	-1.66817	-1.9033	-2.25682	-1.98613	-1.72613	-1.68511	-1.54709	-1.1348	-1.36728
7	Project Name	5.8	Job Number	Lab Number	Project Engineer	Asphalt Grade	GB5-10	Pit Source	Submitted By	52	50		20	4000	50	16000	50	0	50	0	50	0	20000	2018-07-30	CommentsVoid Percent(Left Back) : 0.0000 Void Percent(Left Front) : 0.0000 Void Percent(Right Back) : 0.0000 Void Percent(Right Front) : 0.0000 Left Avg Data @ Fail : Right Avg Data @ Fail : 0.0000	3500	49.8	-2.1942	-2.1576	-2.00515	-2.15608	-3.18706	-2.01417	-1.80355	-1.68633	-1.74544	-1.06703	-1.60719	-1.91587	-1.81549	-1.65448	-1.91699	-2.27043	-1.98613	-1.73987	-1.67137	-1.50581	-1.12103	-1.38105
7	Project Name	5.8	Job Number	Lab Number	Project Engineer	Asphalt Grade	GB5-10	Pit Source	Submitted By	52	50		20	4000	50	16000	50	0	50	0	50	0	20000	2018-07-30	CommentsVoid Percent(Left Back) : 0.0000 Void Percent(Left Front) : 0.0000 Void Percent(Right Back) : 0.0000 Void Percent(Right Front) : 0.0000 Left Avg Data @ Fail : Right Avg Data @ Fail : 0.0000	3520	49.8	-2.20589	-2.16926	-2.01681	-2.14442	-3.18706	-2.03756	-1.79187	-1.68633	-1.74544	-1.11359	-1.63058	-1.92938	-1.81549	-1.66817	-1.94437	-2.28402	-1.97244	-1.73987	-1.67137	-1.50581	-1.1348	-1.35352
7	Project Name	5.8	Job Number	Lab Number	Project Engineer	Asphalt Grade	GB5-10	Pit Source	Submitted By	52	50		20	4000	50	16000	50	0	50	0	50	0	20000	2018-07-30	CommentsVoid Percent(Left Back) : 0.0000 Void Percent(Left Front) : 0.0000 Void Percent(Right Back) : 0.0000 Void Percent(Right Front) : 0.0000 Left Avg Data @ Fail : Right Avg Data @ Fail : 0.0000	3540	49.7	-2.1942	-2.1576	-2.01681	-2.13276	-3.21048	-2.03756	-1.82692	-1.68633	-1.75712	-1.10195	-1.63058	-1.90236	-1.8291	-1.65448	-1.91699	-2.28402	-1.97244	-1.75362	-1.6576	-1.53335	-1.1348	-1.36728
7	Project Name	5.8	Job Number	Lab Number	Project Engineer	Asphalt Grade	GB5-10	Pit Source	Submitted By	52	50		20	4000	50	16000	50	0	50	0	50	0	20000	2018-07-30	CommentsVoid Percent(Left Back) : 0.0000 Void Percent(Left Front) : 0.0000 Void Percent(Right Back) : 0.0000 Void Percent(Right Front) : 0.0000 Left Avg Data @ Fail : Right Avg Data @ Fail : 0.0000	3560	49.9	-2.1942	-2.1926	-2.02847	-2.15608	-3.22219	-2.03756	-1.82692	-1.68633	-1.75712	-1.0554	-1.60719	-1.91587	-1.8291	-1.66817	-1.91699	-2.27043	-1.98613	-1.75362	-1.67137	-1.53335	-1.12103	-1.36728
7	Project Name	5.8	Job Number	Lab Number	Project Engineer	Asphalt Grade	GB5-10	Pit Source	Submitted By	52	50		20	4000	50	16000	50	0	50	0	50	0	20000	2018-07-30	CommentsVoid Percent(Left Back) : 0.0000 Void Percent(Left Front) : 0.0000 Void Percent(Right Back) : 0.0000 Void Percent(Right Front) : 0.0000 Left Avg Data @ Fail : Right Avg Data @ Fail : 0.0000	3580	49.9	-2.1942	-2.1576	-2.01681	-2.14442	-3.22219	-2.03756	-1.80355	-1.6513	-1.74544	-1.0554	-1.5955	-1.91587	-1.8291	-1.66817	-1.91699	-2.27043	-1.98613	-1.73987	-1.68511	-1.53335	-1.1348	-1.36728
7	Project Name	5.8	Job Number	Lab Number	Project Engineer	Asphalt Grade	GB5-10	Pit Source	Submitted By	52	50		20	4000	50	16000	50	0	50	0	50	0	20000	2018-07-30	CommentsVoid Percent(Left Back) : 0.0000 Void Percent(Left Front) : 0.0000 Void Percent(Right Back) : 0.0000 Void Percent(Right Front) : 0.0000 Left Avg Data @ Fail : Right Avg Data @ Fail : 0.0000	3600	50	-2.20589	-2.16926	-2.0401	-2.16774	-3.18706	-2.06096	-1.79187	-1.66299	-1.75712	-1.04379	-1.5955	-1.90236	-1.80185	-1.66817	-1.9033	-2.25682	-1.98613	-1.72613	-1.68511	-1.53335	-1.1348	-1.35352
7	Project Name	5.8	Job Number	Lab Number	Project Engineer	Asphalt Grade	GB5-10	Pit Source	Submitted By	52	50		20	4000	50	16000	50	0	50	0	50	0	20000	2018-07-30	CommentsVoid Percent(Left Back) : 0.0000 Void Percent(Left Front) : 0.0000 Void Percent(Right Back) : 0.0000 Void Percent(Right Front) : 0.0000 Left Avg Data @ Fail : Right Avg Data @ Fail : 0.0000	3620	50.1	-2.20589	-2.20429	-2.02847	-2.14442	-3.18706	-2.03756	-1.82692	-1.69802	-1.76881	-1.07866	-1.64226	-1.90236	-1.84272	-1.64079	-1.9033	-2.27043	-1.97244	-1.75362	-1.67137	-1.53335	-1.1348	-1.35352
7	Project Name	5.8	Job Number	Lab Number	Project Engineer	Asphalt Grade	GB5-10	Pit Source	Submitted By	52	50		20	4000	50	16000	50	0	50	0	50	0	20000	2018-07-30	CommentsVoid Percent(Left Back) : 0.0000 Void Percent(Left Front) : 0.0000 Void Percent(Right Back) : 0.0000 Void Percent(Right Front) : 0.0000 Left Avg Data @ Fail : Right Avg Data @ Fail : 0.0000	3640	50	-2.21757	-2.1926	-2.0401	-2.17942	-3.21048	-2.03756	-1.8386	-1.66299	-1.75712	-1.07866	-1.63058	-1.90236	-1.81549	-1.65448	-1.94437	-2.27043	-2.01351	-1.76736	-1.67137	-1.54709	-1.1348	-1.36728
7	Project Name	5.8	Job Number	Lab Number	Project Engineer	Asphalt Grade	GB5-10	Pit Source	Submitted By	52	50		20	4000	50	16000	50	0	50	0	50	0	20000	2018-07-30	CommentsVoid Percent(Left Back) : 0.0000 Void Percent(Left Front) : 0.0000 Void Percent(Right Back) : 0.0000 Void Percent(Right Front) : 0.0000 Left Avg Data @ Fail : Right Avg Data @ Fail : 0.0000	3660	50.1	-2.21757	-2.1926	-2.0401	-2.16774	-3.21048	-2.07264	-1.8386	-1.68633	-1.75712	-1.0554	-1.60719	-1.92938	-1.81549	-1.66817	-1.94437	-2.27043	-1.98613	-1.73987	-1.68511	-1.54709	-1.14859	-1.35352
7	Project Name	5.8	Job Number	Lab Number	Project Engineer	Asphalt Grade	GB5-10	Pit Source	Submitted By	52	50		20	4000	50	16000	50	0	50	0	50	0	20000	2018-07-30	CommentsVoid Percent(Left Back) : 0.0000 Void Percent(Left Front) : 0.0000 Void Percent(Right Back) : 0.0000 Void Percent(Right Front) : 0.0000 Left Avg Data @ Fail : Right Avg Data @ Fail : 0.0000	3680	50	-2.21757	-2.1926	-2.05176	-2.17942	-3.23393	-2.08435	-1.85029	-1.68633	-1.79217	-1.06703	-1.64226	-1.91587	-1.84272	-1.70924	-1.94437	-2.29763	-2.01351	-1.76736	-1.67137	-1.56086	-1.14859	-1.36728
7	Project Name	5.8	Job Number	Lab Number	Project Engineer	Asphalt Grade	GB5-10	Pit Source	Submitted By	52	50		20	4000	50	16000	50	0	50	0	50	0	20000	2018-07-30	CommentsVoid Percent(Left Back) : 0.0000 Void Percent(Left Front) : 0.0000 Void Percent(Right Back) : 0.0000 Void Percent(Right Front) : 0.0000 Left Avg Data @ Fail : Right Avg Data @ Fail : 0.0000	3700	50	-2.24092	-2.21595	-2.0401	-2.19108	-3.23393	-2.06096	-1.85029	-1.69802	-1.79217	-1.10195	-1.65395	-1.91587	-1.84272	-1.68186	-1.95806	-2.29763	-2.01351	-1.75362	-1.68511	-1.56086	-1.14859	-1.36728
7	Project Name	5.8	Job Number	Lab Number	Project Engineer	Asphalt Grade	GB5-10	Pit Source	Submitted By	52	50		20	4000	50	16000	50	0	50	0	50	0	20000	2018-07-30	CommentsVoid Percent(Left Back) : 0.0000 Void Percent(Left Front) : 0.0000 Void Percent(Right Back) : 0.0000 Void Percent(Right Front) : 0.0000 Left Avg Data @ Fail : Right Avg Data @ Fail : 0.0000	3720	50	-2.24092	-2.20429	-2.0401	-2.16774	-3.23393	-2.06096	-1.8386	-1.69802	-1.76881	-1.10195	-1.65395	-1.91587	-1.81549	-1.68186	-1.94437	-2.29763	-1.98613	-1.75362	-1.68511	-1.54709	-1.1348	-1.36728
7	Project Name	5.8	Job Number	Lab Number	Project Engineer	Asphalt Grade	GB5-10	Pit Source	Submitted By	52	50		20	4000	50	16000	50	0	50	0	50	0	20000	2018-07-30	CommentsVoid Percent(Left Back) : 0.0000 Void Percent(Left Front) : 0.0000 Void Percent(Right Back) : 0.0000 Void Percent(Right Front) : 0.0000 Left Avg Data @ Fail : Right Avg Data @ Fail : 0.0000	3740	50	-2.2526	-2.1926	-2.0401	-2.20274	-3.24564	-2.09603	-1.85029	-1.70967	-1.79217	-1.10195	-1.66563	-1.95638	-1.81549	-1.68186	-1.94437	-2.29763	-2.0272	-1.75362	-1.68511	-1.53335	-1.14859	-1.36728
7	Project Name	5.8	Job Number	Lab Number	Project Engineer	Asphalt Grade	GB5-10	Pit Source	Submitted By	52	50		20	4000	50	16000	50	0	50	0	50	0	20000	2018-07-30	CommentsVoid Percent(Left Back) : 0.0000 Void Percent(Left Front) : 0.0000 Void Percent(Right Back) : 0.0000 Void Percent(Right Front) : 0.0000 Left Avg Data @ Fail : Right Avg Data @ Fail : 0.0000	3760	50	-2.2526	-2.21595	-2.0401	-2.17942	-3.26906	-2.08435	-1.86197	-1.69802	-1.80386	-1.10195	-1.66563	-1.92938	-1.84272	-1.70924	-1.95806	-2.28402	-1.98613	-1.75362	-1.69885	-1.54709	-1.12103	-1.39479
7	Project Name	5.8	Job Number	Lab Number	Project Engineer	Asphalt Grade	GB5-10	Pit Source	Submitted By	52	50		20	4000	50	16000	50	0	50	0	50	0	20000	2018-07-30	CommentsVoid Percent(Left Back) : 0.0000 Void Percent(Left Front) : 0.0000 Void Percent(Right Back) : 0.0000 Void Percent(Right Front) : 0.0000 Left Avg Data @ Fail : Right Avg Data @ Fail : 0.0000	3780	49.8	-2.2526	-2.22761	-2.06342	-2.16774	-3.22219	-2.08435	-1.85029	-1.70967	-1.80386	-1.11359	-1.66563	-1.91587	-1.84272	-1.66817	-1.91699	-2.2432	-2.01351	-1.75362	-1.68511	-1.56086	-1.14859	-1.36728
7	Project Name	5.8	Job Number	Lab Number	Project Engineer	Asphalt Grade	GB5-10	Pit Source	Submitted By	52	50		20	4000	50	16000	50	0	50	0	50	0	20000	2018-07-30	CommentsVoid Percent(Left Back) : 0.0000 Void Percent(Left Front) : 0.0000 Void Percent(Right Back) : 0.0000 Void Percent(Right Front) : 0.0000 Left Avg Data @ Fail : Right Avg Data @ Fail : 0.0000	3800	49.8	-2.26426	-2.21595	-2.06342	-2.19108	-3.26906	-2.10774	-1.86197	-1.70967	-1.81554	-1.10195	-1.66563	-1.92938	-1.85633	-1.70924	-1.98542	-2.31122	-2.04086	-1.73987	-1.68511	-1.57462	-1.14859	-1.39479
7	Project Name	5.8	Job Number	Lab Number	Project Engineer	Asphalt Grade	GB5-10	Pit Source	Submitted By	52	50		20	4000	50	16000	50	0	50	0	50	0	20000	2018-07-30	CommentsVoid Percent(Left Back) : 0.0000 Void Percent(Left Front) : 0.0000 Void Percent(Right Back) : 0.0000 Void Percent(Right Front) : 0.0000 Left Avg Data @ Fail : Right Avg Data @ Fail : 0.0000	3820	49.8	-2.2526	-2.22761	-2.08674	-2.20274	-3.28079	-2.10774	-1.87366	-1.70967	-1.81554	-1.10195	-1.67731	-1.95638	-1.84272	-1.70924	-1.98542	-2.32481	-2.04086	-1.75362	-1.69885	-1.56086	-1.14859	-1.39479
7	Project Name	5.8	Job Number	Lab Number	Project Engineer	Asphalt Grade	GB5-10	Pit Source	Submitted By	52	50		20	4000	50	16000	50	0	50	0	50	0	20000	2018-07-30	CommentsVoid Percent(Left Back) : 0.0000 Void Percent(Left Front) : 0.0000 Void Percent(Right Back) : 0.0000 Void Percent(Right Front) : 0.0000 Left Avg Data @ Fail : Right Avg Data @ Fail : 0.0000	3840	49.8	-2.2526	-2.23929	-2.06342	-2.20274	-3.25735	-2.09603	-1.86197	-1.70967	-1.81554	-1.06703	-1.67731	-1.92938	-1.88356	-1.68186	-1.95806	-2.32481	-2.0272	-1.79484	-1.69885	-1.56086	-1.1348	-1.39479
7	Project Name	5.8	Job Number	Lab Number	Project Engineer	Asphalt Grade	GB5-10	Pit Source	Submitted By	52	50		20	4000	50	16000	50	0	50	0	50	0	20000	2018-07-30	CommentsVoid Percent(Left Back) : 0.0000 Void Percent(Left Front) : 0.0000 Void Percent(Right Back) : 0.0000 Void Percent(Right Front) : 0.0000 Left Avg Data @ Fail : Right Avg Data @ Fail : 0.0000	3860	50	-2.27594	-2.22761	-2.06342	-2.20274	-3.24564	-2.10774	-1.86197	-1.70967	-1.81554	-1.07866	-1.67731	-1.92938	-1.84272	-1.66817	-1.97173	-2.31122	-2.05456	-1.76736	-1.69885	-1.54709	-1.14859	-1.40853
7	Project Name	5.8	Job Number	Lab Number	Project Engineer	Asphalt Grade	GB5-10	Pit Source	Submitted By	52	50		20	4000	50	16000	50	0	50	0	50	0	20000	2018-07-30	CommentsVoid Percent(Left Back) : 0.0000 Void Percent(Left Front) : 0.0000 Void Percent(Right Back) : 0.0000 Void Percent(Right Front) : 0.0000 Left Avg Data @ Fail : Right Avg Data @ Fail : 0.0000	3880	50	-2.28763	-2.21595	-2.05176	-2.19108	-3.28079	-2.10774	-1.86197	-1.70967	-1.81554	-1.06703	-1.67731	-1.95638	-1.8291	-1.68186	-1.95806	-2.35199	-2.04086	-1.79484	-1.68511	-1.54709	-1.14859	-1.39479
7	Project Name	5.8	Job Number	Lab Number	Project Engineer	Asphalt Grade	GB5-10	Pit Source	Submitted By	52	50		20	4000	50	16000	50	0	50	0	50	0	20000	2018-07-30	CommentsVoid Percent(Left Back) : 0.0000 Void Percent(Left Front) : 0.0000 Void Percent(Right Back) : 0.0000 Void Percent(Right Front) : 0.0000 Left Avg Data @ Fail : Right Avg Data @ Fail : 0.0000	3900	50.1	-2.28763	-2.23929	-2.06342	-2.22606	-3.30421	-2.10774	-1.87366	-1.72136	-1.81554	-1.06703	-1.68902	-1.96987	-1.8291	-1.70924	-1.97173	-2.35199	-2.04086	-1.76736	-1.69885	-1.57462	-1.14859	-1.39479
7	Project Name	5.8	Job Number	Lab Number	Project Engineer	Asphalt Grade	GB5-10	Pit Source	Submitted By	52	50		20	4000	50	16000	50	0	50	0	50	0	20000	2018-07-30	CommentsVoid Percent(Left Back) : 0.0000 Void Percent(Left Front) : 0.0000 Void Percent(Right Back) : 0.0000 Void Percent(Right Front) : 0.0000 Left Avg Data @ Fail : Right Avg Data @ Fail : 0.0000	3920	50.1	-2.27594	-2.23929	-2.08674	-2.17942	-3.28079	-2.11943	-1.86197	-1.72136	-1.80386	-1.07866	-1.66563	-1.95638	-1.84272	-1.66817	-1.95806	-2.29763	-2.04086	-1.79484	-1.69885	-1.56086	-1.14859	-1.39479
7	Project Name	5.8	Job Number	Lab Number	Project Engineer	Asphalt Grade	GB5-10	Pit Source	Submitted By	52	50		20	4000	50	16000	50	0	50	0	50	0	20000	2018-07-30	CommentsVoid Percent(Left Back) : 0.0000 Void Percent(Left Front) : 0.0000 Void Percent(Right Back) : 0.0000 Void Percent(Right Front) : 0.0000 Left Avg Data @ Fail : Right Avg Data @ Fail : 0.0000	3940	50.1	-2.27594	-2.22761	-2.08674	-2.20274	-3.30421	-2.11943	-1.87366	-1.70967	-1.81554	-1.06703	-1.67731	-1.95638	-1.8291	-1.70924	-1.95806	-2.32481	-2.05456	-1.76736	-1.69885	-1.57462	-1.1348	-1.39479
7	Project Name	5.8	Job Number	Lab Number	Project Engineer	Asphalt Grade	GB5-10	Pit Source	Submitted By	52	50		20	4000	50	16000	50	0	50	0	50	0	20000	2018-07-30	CommentsVoid Percent(Left Back) : 0.0000 Void Percent(Left Front) : 0.0000 Void Percent(Right Back) : 0.0000 Void Percent(Right Front) : 0.0000 Left Avg Data @ Fail : Right Avg Data @ Fail : 0.0000	3960	50	-2.29931	-2.23929	-2.08674	-2.23771	-3.30421	-2.13114	-1.88534	-1.72136	-1.82723	-1.06703	-1.68902	-1.96987	-1.85633	-1.70924	-1.95806	-2.32481	-2.06825	-1.79484	-1.72636	-1.58836	-1.14859	-1.43604
7	Project Name	5.8	Job Number	Lab Number	Project Engineer	Asphalt Grade	GB5-10	Pit Source	Submitted By	52	50		20	4000	50	16000	50	0	50	0	50	0	20000	2018-07-30	CommentsVoid Percent(Left Back) : 0.0000 Void Percent(Left Front) : 0.0000 Void Percent(Right Back) : 0.0000 Void Percent(Right Front) : 0.0000 Left Avg Data @ Fail : Right Avg Data @ Fail : 0.0000	3980	50	-2.28763	-2.25095	-2.08674	-2.19108	-3.31594	-2.13114	-1.88534	-1.73304	-1.81554	-1.07866	-1.68902	-1.98338	-1.88356	-1.70924	-1.97173	-2.32481	-2.05456	-1.79484	-1.7401	-1.58836	-1.17615	-1.43604
7	Project Name	5.8	Job Number	Lab Number	Project Engineer	Asphalt Grade	GB5-10	Pit Source	Submitted By	52	50		20	4000	50	16000	50	0	50	0	50	0	20000	2018-07-30	CommentsVoid Percent(Left Back) : 0.0000 Void Percent(Left Front) : 0.0000 Void Percent(Right Back) : 0.0000 Void Percent(Right Front) : 0.0000 Left Avg Data @ Fail : Right Avg Data @ Fail : 0.0000	4000	50	-2.29931	-2.26263	-2.0984	-2.20274	-3.30421	-2.17792	-1.88534	-1.73304	-1.83891	-1.04379	-1.67731	-1.96987	-1.89718	-1.70924	-1.95806	-2.32481	-2.08191	-1.80856	-1.7401	-1.58836	-1.14859	-1.43604
7	Project Name	5.8	Job Number	Lab Number	Project Engineer	Asphalt Grade	GB5-10	Pit Source	Submitted By	52	50		20	4000	50	16000	50	0	50	0	50	0	20000	2018-07-30	CommentsVoid Percent(Left Back) : 0.0000 Void Percent(Left Front) : 0.0000 Void Percent(Right Back) : 0.0000 Void Percent(Right Front) : 0.0000 Left Avg Data @ Fail : Right Avg Data @ Fail : 0.0000	4050	49.9	-2.31099	-2.28597	-2.0984	-2.23771	-3.30421	-2.15453	-1.88534	-1.73304	-1.83891	-1.06703	-1.68902	-1.99687	-1.88356	-1.70924	-1.97173	-2.32481	-2.05456	-1.79484	-1.75384	-1.57462	-1.1348	-1.43604
7	Project Name	5.8	Job Number	Lab Number	Project Engineer	Asphalt Grade	GB5-10	Pit Source	Submitted By	52	50		20	4000	50	16000	50	0	50	0	50	0	20000	2018-07-30	CommentsVoid Percent(Left Back) : 0.0000 Void Percent(Left Front) : 0.0000 Void Percent(Right Back) : 0.0000 Void Percent(Right Front) : 0.0000 Left Avg Data @ Fail : Right Avg Data @ Fail : 0.0000	4100	49.8	-2.29931	-2.26263	-2.11005	-2.23771	-3.33939	-2.16624	-1.9321	-1.74473	-1.82723	-1.06703	-1.68902	-1.99687	-1.89718	-1.7366	-1.99911	-2.37917	-2.05456	-1.84976	-1.75384	-1.60211	-1.17615	-1.44978
7	Project Name	5.8	Job Number	Lab Number	Project Engineer	Asphalt Grade	GB5-10	Pit Source	Submitted By	52	50		20	4000	50	16000	50	0	50	0	50	0	20000	2018-07-30	CommentsVoid Percent(Left Back) : 0.0000 Void Percent(Left Front) : 0.0000 Void Percent(Right Back) : 0.0000 Void Percent(Right Front) : 0.0000 Left Avg Data @ Fail : Right Avg Data @ Fail : 0.0000	4150	50	-2.33434	-2.29763	-2.1334	-2.2494	-3.33939	-2.20134	-1.92042	-1.75641	-1.85059	-1.10195	-1.7241	-2.02385	-1.92438	-1.75029	-1.99911	-2.36558	-2.09558	-1.84976	-1.76759	-1.62961	-1.18994	-1.47726
7	Project Name	5.8	Job Number	Lab Number	Project Engineer	Asphalt Grade	GB5-10	Pit Source	Submitted By	52	50		20	4000	50	16000	50	0	50	0	50	0	20000	2018-07-30	CommentsVoid Percent(Left Back) : 0.0000 Void Percent(Left Front) : 0.0000 Void Percent(Right Back) : 0.0000 Void Percent(Right Front) : 0.0000 Left Avg Data @ Fail : Right Avg Data @ Fail : 0.0000	4200	50	-2.34602	-2.29763	-2.14506	-2.20274	-3.32765	-2.18963	-1.9321	-1.75641	-1.85059	-1.10195	-1.7241	-2.02385	-1.92438	-1.7366	-1.97173	-2.36558	-2.09558	-1.83601	-1.78133	-1.64335	-1.20373	-1.49101
7	Project Name	5.8	Job Number	Lab Number	Project Engineer	Asphalt Grade	GB5-10	Pit Source	Submitted By	52	50		20	4000	50	16000	50	0	50	0	50	0	20000	2018-07-30	CommentsVoid Percent(Left Back) : 0.0000 Void Percent(Left Front) : 0.0000 Void Percent(Right Back) : 0.0000 Void Percent(Right Front) : 0.0000 Left Avg Data @ Fail : Right Avg Data @ Fail : 0.0000	4250	49.8	-2.36939	-2.29763	-2.1334	-2.27272	-3.38625	-2.21305	-1.95547	-1.79144	-1.88567	-1.07866	-1.73579	-2.0508	-1.91079	-1.75029	-2.02644	-2.41991	-2.1366	-1.86347	-1.79507	-1.64335	-1.18994	-1.50475
7	Project Name	5.8	Job Number	Lab Number	Project Engineer	Asphalt Grade	GB5-10	Pit Source	Submitted By	52	50		20	4000	50	16000	50	0	50	0	50	0	20000	2018-07-30	CommentsVoid Percent(Left Back) : 0.0000 Void Percent(Left Front) : 0.0000 Void Percent(Right Back) : 0.0000 Void Percent(Right Front) : 0.0000 Left Avg Data @ Fail : Right Avg Data @ Fail : 0.0000	4300	50	-2.38107	-2.30932	-2.15671	-2.27272	-3.38625	-2.17792	-1.94379	-1.74473	-1.83891	-1.16012	-1.77086	-2.07775	-1.96517	-1.79131	-2.02644	-2.41991	-2.12293	-1.8909	-1.83629	-1.67084	-1.18994	-1.50475
7	Project Name	5.8	Job Number	Lab Number	Project Engineer	Asphalt Grade	GB5-10	Pit Source	Submitted By	52	50		20	4000	50	16000	50	0	50	0	50	0	20000	2018-07-30	CommentsVoid Percent(Left Back) : 0.0000 Void Percent(Left Front) : 0.0000 Void Percent(Right Back) : 0.0000 Void Percent(Right Front) : 0.0000 Left Avg Data @ Fail : Right Avg Data @ Fail : 0.0000	4350	50.1	-2.39276	-2.34434	-2.19169	-2.28437	-3.4097	-2.24815	-1.96718	-1.8148	-1.89735	-1.12522	-1.78257	-2.06428	-1.96517	-1.79131	-2.06746	-2.44706	-2.1366	-1.90462	-1.83629	-1.6571	-1.20373	-1.55969
7	Project Name	5.8	Job Number	Lab Number	Project Engineer	Asphalt Grade	GB5-10	Pit Source	Submitted By	52	50		20	4000	50	16000	50	0	50	0	50	0	20000	2018-07-30	CommentsVoid Percent(Left Back) : 0.0000 Void Percent(Left Front) : 0.0000 Void Percent(Right Back) : 0.0000 Void Percent(Right Front) : 0.0000 Left Avg Data @ Fail : Right Avg Data @ Fail : 0.0000	4400	50	-2.40444	-2.33266	-2.19169	-2.3194	-3.39799	-2.23644	-1.95547	-1.77975	-1.85059	-1.13685	-1.77086	-2.07775	-1.95158	-1.83233	-2.06746	-2.44706	-2.1639	-1.90462	-1.83629	-1.67084	-1.24511	-1.57343
7	Project Name	5.8	Job Number	Lab Number	Project Engineer	Asphalt Grade	GB5-10	Pit Source	Submitted By	52	50		20	4000	50	16000	50	0	50	0	50	0	20000	2018-07-30	CommentsVoid Percent(Left Back) : 0.0000 Void Percent(Left Front) : 0.0000 Void Percent(Right Back) : 0.0000 Void Percent(Right Front) : 0.0000 Left Avg Data @ Fail : Right Avg Data @ Fail : 0.0000	4450	50	-2.42781	-2.37937	-2.21503	-2.34272	-3.4097	-2.25986	-1.97886	-1.82649	-1.90904	-1.06703	-1.78257	-2.09123	-1.99235	-1.79131	-2.0811	-2.46062	-2.1639	-1.90462	-1.86375	-1.69832	-1.17615	-1.55969
7	Project Name	5.8	Job Number	Lab Number	Project Engineer	Asphalt Grade	GB5-10	Pit Source	Submitted By	52	50		20	4000	50	16000	50	0	50	0	50	0	20000	2018-07-30	CommentsVoid Percent(Left Back) : 0.0000 Void Percent(Left Front) : 0.0000 Void Percent(Right Back) : 0.0000 Void Percent(Right Front) : 0.0000 Left Avg Data @ Fail : Right Avg Data @ Fail : 0.0000	4500	49.8	-2.43949	-2.37937	-2.22669	-2.33106	-3.42143	-2.28326	-2.00226	-1.82649	-1.90904	-1.10195	-1.78257	-2.10469	-2.00594	-1.83233	-2.09476	-2.46062	-2.19123	-1.91833	-1.87747	-1.68458	-1.20373	-1.54597
7	Project Name	5.8	Job Number	Lab Number	Project Engineer	Asphalt Grade	GB5-10	Pit Source	Submitted By	52	50		20	4000	50	16000	50	0	50	0	50	0	20000	2018-07-30	CommentsVoid Percent(Left Back) : 0.0000 Void Percent(Left Front) : 0.0000 Void Percent(Right Back) : 0.0000 Void Percent(Right Front) : 0.0000 Left Avg Data @ Fail : Right Avg Data @ Fail : 0.0000	4550	49.9	-2.46286	-2.37937	-2.26169	-2.3544	-3.44488	-2.28326	-2.02562	-1.83817	-1.92072	-1.14849	-1.80597	-2.13162	-2.00594	-1.84597	-2.09476	-2.47419	-2.23218	-1.94577	-1.89121	-1.69832	-1.21752	-1.54597
7	Project Name	5.8	Job Number	Lab Number	Project Engineer	Asphalt Grade	GB5-10	Pit Source	Submitted By	52	50		20	4000	50	16000	50	0	50	0	50	0	20000	2018-07-30	CommentsVoid Percent(Left Back) : 0.0000 Void Percent(Left Front) : 0.0000 Void Percent(Right Back) : 0.0000 Void Percent(Right Front) : 0.0000 Left Avg Data @ Fail : Right Avg Data @ Fail : 0.0000	4600	50.1	-2.47454	-2.39103	-2.23835	-2.3544	-3.48005	-2.33009	-2.03733	-1.88491	-1.93243	-1.12522	-1.84104	-2.13162	-2.00594	-1.84597	-2.10843	-2.48775	-2.21854	-1.95948	-1.89121	-1.73954	-1.21752	-1.57343
7	Project Name	5.8	Job Number	Lab Number	Project Engineer	Asphalt Grade	GB5-10	Pit Source	Submitted By	52	50		20	4000	50	16000	50	0	50	0	50	0	20000	2018-07-30	CommentsVoid Percent(Left Back) : 0.0000 Void Percent(Left Front) : 0.0000 Void Percent(Right Back) : 0.0000 Void Percent(Right Front) : 0.0000 Left Avg Data @ Fail : Right Avg Data @ Fail : 0.0000	4650	50	-2.48623	-2.40271	-2.26169	-2.34272	-3.45661	-2.29497	-2.03733	-1.89659	-1.94412	-1.16012	-1.82936	-2.15852	-2.03312	-1.84597	-2.09476	-2.46062	-2.23218	-1.95948	-1.90492	-1.71206	-1.20373	-1.58714
7	Project Name	5.8	Job Number	Lab Number	Project Engineer	Asphalt Grade	GB5-10	Pit Source	Submitted By	52	50		20	4000	50	16000	50	0	50	0	50	0	20000	2018-07-30	CommentsVoid Percent(Left Back) : 0.0000 Void Percent(Left Front) : 0.0000 Void Percent(Right Back) : 0.0000 Void Percent(Right Front) : 0.0000 Left Avg Data @ Fail : Right Avg Data @ Fail : 0.0000	4700	50	-2.50962	-2.40271	-2.28503	-2.3544	-3.45661	-2.33009	-2.06073	-1.89659	-1.94412	-1.11359	-1.82936	-2.15852	-2.01953	-1.85964	-2.1494	-2.47419	-2.23218	-1.95948	-1.89121	-1.73954	-1.21752	-1.57343
7	Project Name	5.8	Job Number	Lab Number	Project Engineer	Asphalt Grade	GB5-10	Pit Source	Submitted By	52	50		20	4000	50	16000	50	0	50	0	50	0	20000	2018-07-30	CommentsVoid Percent(Left Back) : 0.0000 Void Percent(Left Front) : 0.0000 Void Percent(Right Back) : 0.0000 Void Percent(Right Front) : 0.0000 Left Avg Data @ Fail : Right Avg Data @ Fail : 0.0000	4750	49.8	-2.52131	-2.4144	-2.29669	-2.41275	-3.5035	-2.35351	-2.06073	-1.90828	-1.97919	-1.13685	-1.85275	-2.17198	-2.04671	-1.8733	-2.1494	-2.48775	-2.24582	-2.00058	-1.93236	-1.767	-1.23132	-1.60089
7	Project Name	5.8	Job Number	Lab Number	Project Engineer	Asphalt Grade	GB5-10	Pit Source	Submitted By	52	50		20	4000	50	16000	50	0	50	0	50	0	20000	2018-07-30	CommentsVoid Percent(Left Back) : 0.0000 Void Percent(Left Front) : 0.0000 Void Percent(Right Back) : 0.0000 Void Percent(Right Front) : 0.0000 Left Avg Data @ Fail : Right Avg Data @ Fail : 0.0000	4800	49.8	-2.54467	-2.46111	-2.28503	-2.41275	-3.5035	-2.35351	-2.08412	-1.90828	-1.97919	-1.13685	-1.84104	-2.13162	-2.03312	-1.8733	-2.1494	-2.50132	-2.25946	-1.97317	-1.93236	-1.767	-1.20373	-1.60089
7	Project Name	5.8	Job Number	Lab Number	Project Engineer	Asphalt Grade	GB5-10	Pit Source	Submitted By	52	50		20	4000	50	16000	50	0	50	0	50	0	20000	2018-07-30	CommentsVoid Percent(Left Back) : 0.0000 Void Percent(Left Front) : 0.0000 Void Percent(Right Back) : 0.0000 Void Percent(Right Front) : 0.0000 Left Avg Data @ Fail : Right Avg Data @ Fail : 0.0000	4850	50	-2.55636	-2.43776	-2.30838	-2.41275	-3.51523	-2.36522	-2.0958	-1.93164	-1.99088	-1.12522	-1.85275	-2.18542	-2.08742	-1.85964	-2.16304	-2.51485	-2.28674	-2.00058	-1.94607	-1.78072	-1.23132	-1.60089
7	Project Name	5.8	Job Number	Lab Number	Project Engineer	Asphalt Grade	GB5-10	Pit Source	Submitted By	52	50		20	4000	50	16000	50	0	50	0	50	0	20000	2018-07-30	CommentsVoid Percent(Left Back) : 0.0000 Void Percent(Left Front) : 0.0000 Void Percent(Right Back) : 0.0000 Void Percent(Right Front) : 0.0000 Left Avg Data @ Fail : Right Avg Data @ Fail : 0.0000	4900	50.1	-2.56807	-2.43776	-2.30838	-2.43609	-3.53868	-2.38864	-2.0958	-1.93164	-1.99088	-1.11359	-1.86444	-2.18542	-2.04671	-1.88697	-2.17668	-2.55552	-2.30038	-2.02799	-1.9735	-1.78072	-1.21752	-1.6146
7	Project Name	5.8	Job Number	Lab Number	Project Engineer	Asphalt Grade	GB5-10	Pit Source	Submitted By	52	50		20	4000	50	16000	50	0	50	0	50	0	20000	2018-07-30	CommentsVoid Percent(Left Back) : 0.0000 Void Percent(Left Front) : 0.0000 Void Percent(Right Back) : 0.0000 Void Percent(Right Front) : 0.0000 Left Avg Data @ Fail : Right Avg Data @ Fail : 0.0000	4950	50	-2.56807	-2.48448	-2.33172	-2.42443	-3.53868	-2.37693	-2.10751	-1.93164	-1.99088	-1.11359	-1.86444	-2.19888	-2.08742	-1.91427	-2.17668	-2.52842	-2.28674	-2.02799	-1.9735	-1.78072	-1.21752	-1.6146
7	Project Name	5.8	Job Number	Lab Number	Project Engineer	Asphalt Grade	GB5-10	Pit Source	Submitted By	52	50		20	4000	50	16000	50	0	50	0	50	0	20000	2018-07-30	CommentsVoid Percent(Left Back) : 0.0000 Void Percent(Left Front) : 0.0000 Void Percent(Right Back) : 0.0000 Void Percent(Right Front) : 0.0000 Left Avg Data @ Fail : Right Avg Data @ Fail : 0.0000	5000	49.9	-2.57975	-2.47279	-2.33172	-2.44777	-3.53868	-2.38864	-2.1192	-1.96672	-1.99088	-1.10195	-1.86444	-2.22575	-2.08742	-1.92791	-2.20396	-2.56906	-2.32766	-2.04168	-1.9735	-1.80818	-1.20373	-1.64203
7	Project Name	5.8	Job Number	Lab Number	Project Engineer	Asphalt Grade	GB5-10	Pit Source	Submitted By	52	50		20	4000	50	16000	50	0	50	0	50	0	20000	2018-07-30	CommentsVoid Percent(Left Back) : 0.0000 Void Percent(Left Front) : 0.0000 Void Percent(Right Back) : 0.0000 Void Percent(Right Front) : 0.0000 Left Avg Data @ Fail : Right Avg Data @ Fail : 0.0000	5050	49.8	-2.61483	-2.48448	-2.35506	-2.44777	-3.53868	-2.40035	-2.13091	-1.95504	-1.99088	-1.10195	-1.86444	-2.22575	-2.10099	-1.94155	-2.20396	-2.55552	-2.30038	-2.05537	-1.95979	-1.79446	-1.21752	-1.6146
7	Project Name	5.8	Job Number	Lab Number	Project Engineer	Asphalt Grade	GB5-10	Pit Source	Submitted By	52	50		20	4000	50	16000	50	0	50	0	50	0	20000	2018-07-30	CommentsVoid Percent(Left Back) : 0.0000 Void Percent(Left Front) : 0.0000 Void Percent(Right Back) : 0.0000 Void Percent(Right Front) : 0.0000 Left Avg Data @ Fail : Right Avg Data @ Fail : 0.0000	5100	50	-2.61483	-2.51953	-2.39006	-2.45946	-3.56215	-2.43548	-2.13091	-1.97841	-2.00259	-1.13685	-1.89954	-2.22575	-2.12811	-1.94155	-2.2176	-2.5826	-2.32766	-2.05537	-1.9735	-1.83561	-1.23132	-1.6146
7	Project Name	5.8	Job Number	Lab Number	Project Engineer	Asphalt Grade	GB5-10	Pit Source	Submitted By	52	50		20	4000	50	16000	50	0	50	0	50	0	20000	2018-07-30	CommentsVoid Percent(Left Back) : 0.0000 Void Percent(Left Front) : 0.0000 Void Percent(Right Back) : 0.0000 Void Percent(Right Front) : 0.0000 Left Avg Data @ Fail : Right Avg Data @ Fail : 0.0000	5150	50.2	-2.63822	-2.51953	-2.37841	-2.49448	-3.57388	-2.43548	-2.14259	-1.96672	-2.01427	-1.13685	-1.89954	-2.22575	-2.11455	-1.95519	-2.2176	-2.56906	-2.32766	-2.05537	-2.00094	-1.83561	-1.23132	-1.65575
[truncated: 297 more rows]
[truncated: 11 more columns]

## Sheet: SMA-5.5
TESTNUM	PROJECT	PROJECTNUM	JOBNUM	LABNUM	ENGINEER	ASPHALTGRADE	MIXTYPE	PITSOURCE	SUBMITTEDBY	SPEEDSET	TEMPSET	MAXDEPTH	STEP1FREQ	STEP1DUR	STEP2FREQ	STEP2DUR	STEP3FREQ	STEP3DUR	STEP4FREQ	STEP4DUR	STEP5FREQ	STEP5DUR	MAXPASS	TESTDATE	COMMENTS	PASSNUM	TEMP	L1	L2	L3	L4	L5	L6	L7	L8	L9	L10	L11	R1	R2	R3	R4	R5	R6	R7	R8	R9	R10	R11
[truncated: 521 more rows]
[truncated: 11 more columns]
